# Supplementary material
Source: PubMed Central journal article supplement (PMC6638658)
Supplement: MPP-13-454-s005.pdf [file MPP-13-454-s005.pdf]

**Table S1. Table showing the list of contigs formed by pooling six libraries. The table contains the**

| <b>Contig ID number</b> | <b>Contig leng</b> | <b>Coverage</b> | <b>P18 - Rep1</b> | <b>P18 - Rep2</b> | <b>T3 - Rep1</b> |
|-------------------------|--------------------|-----------------|-------------------|-------------------|------------------|
| CONTIG-000001           | 148                | 185             | 177               | 1076              | 2                |
| CONTIG-000002           | 91                 | 14              | 17                | 35                | 0                |
| CONTIG-000003           | 167                | 47              | 40                | 286               | 0                |
| CONTIG-000004           | 191                | 9               | 15                | 31                | 0                |
| CONTIG-000005           | 59                 | 327             | 1298              | 271               | 0                |
| CONTIG-000006           | 70                 | 865             | 5253              | 0                 | 0                |
| CONTIG-000007           | 186                | 323             | 840               | 1033              | 233              |
| CONTIG-000008           | 452                | 48              | 367               | 840               | 0                |
| CONTIG-000009           | 48                 | 1449            | 2102              | 212               | 26               |
| CONTIG-000010           | 208                | 385             | 2826              | 1152              | 160              |
| CONTIG-000015           | 613                | 18              | 79                | 360               | 0                |
| CONTIG-000016           | 791                | 26              | 1267              | 420               | 0                |
| CONTIG-000017           | 44                 | 1046            | 1594              | 73                | 375              |
| CONTIG-000018           | 127                | 165             | 2154              | 0                 | 0                |
| CONTIG-000019           | 114                | 549             | 943               | 1026              | 154              |
| CONTIG-000020           | 116                | 24              | 13                | 27                | 2                |
| CONTIG-000021           | 750                | 260             | 687               | 6725              | 636              |
| CONTIG-000030           | 354                | 208             | 2975              | 738               | 101              |
| CONTIG-000031           | 970                | 17              | 217               | 735               | 0                |
| CONTIG-000032           | 215                | 799             | 4688              | 1599              | 211              |
| CONTIG-000033           | 114                | 9               | 28                | 19                | 0                |
| CONTIG-000034           | 105                | 7               | 20                | 13                | 0                |
| CONTIG-000035           | 1310               | 26              | 613               | 720               | 10               |
| CONTIG-000036           | 369                | 10              | 11                | 0                 | 18               |
| CONTIG-000037           | 108                | 1324            | 5875              | 2021              | 223              |
| CONTIG-000038           | 192                | 698             | 4343              | 949               | 80               |
| CONTIG-000039           | 648                | 29              | 77                | 700               | 0                |
| CONTIG-000040           | 1092               | 137             | 10563             | 2174              | 22               |
| CONTIG-000041           | 449                | 348             | 13004             | 2416              | 0                |
| CONTIG-000042           | 117                | 7               | 0                 | 29                | 0                |
| CONTIG-000043           | 317                | 35              | 200               | 306               | 9                |
| CONTIG-000044           | 382                | 54              | 78                | 1035              | 0                |
| CONTIG-000045           | 135                | 29              | 322               | 54                | 0                |
| CONTIG-000046           | 114                | 7               | 27                | 14                | 0                |
| CONTIG-000056           | 1073               | 56              | 688               | 1353              | 44               |
| CONTIG-000057           | 177                | 207             | 437               | 1461              | 4                |
| CONTIG-000058           | 239                | 21              | 84                | 145               | 0                |
| CONTIG-000059           | 476                | 434             | 13051             | 4381              | 7                |
| CONTIG-000060           | 151                | 64              | 933               | 0                 | 0                |
| CONTIG-000061           | 785                | 70              | 4057              | 961               | 0                |
| CONTIG-000062           | 171                | 478             | 7013              | 0                 | 26               |
| CONTIG-000063           | 90                 | 324             | 2359              | 163               | 0                |
| CONTIG-000064           | 447                | 321             | 2951              | 3180              | 252              |
| CONTIG-000067           | 438                | 38              | 136               | 249               | 13               |
| CONTIG-000068           | 166                | 168             | 1172              | 285               | 0                |

|               |      |     |      |      |     |
|---------------|------|-----|------|------|-----|
| CONTIG-000069 | 911  | 77  | 673  | 2106 | 235 |
| CONTIG-000071 | 132  | 62  | 185  | 28   | 0   |
| CONTIG-000072 | 161  | 25  | 187  | 70   | 0   |
| CONTIG-000075 | 885  | 20  | 619  | 461  | 0   |
| CONTIG-000076 | 84   | 15  | 13   | 33   | 0   |
| CONTIG-000077 | 475  | 48  | 1473 | 405  | 0   |
| CONTIG-000078 | 96   | 5   | 6    | 8    | 0   |
| CONTIG-000079 | 129  | 874 | 540  | 4356 | 143 |
| CONTIG-000080 | 76   | 646 | 484  | 977  | 95  |
| CONTIG-000081 | 1240 | 54  | 2361 | 2751 | 0   |
| CONTIG-000082 | 110  | 14  | 42   | 31   | 0   |
| CONTIG-000083 | 85   | 9   | 2    | 23   | 0   |
| CONTIG-000090 | 176  | 15  | 17   | 82   | 0   |
| CONTIG-000091 | 262  | 113 | 2852 | 2    | 7   |
| CONTIG-000092 | 48   | 611 | 2486 | 42   | 0   |
| CONTIG-000093 | 458  | 88  | 3142 | 625  | 0   |
| CONTIG-000094 | 171  | 185 | 3377 | 162  | 0   |
| CONTIG-000095 | 413  | 13  | 126  | 55   | 0   |
| CONTIG-000096 | 258  | 17  | 129  | 113  | 0   |
| CONTIG-000097 | 580  | 14  | 40   | 308  | 2   |
| CONTIG-000101 | 1500 | 105 | 4779 | 4139 | 322 |
| CONTIG-000102 | 187  | 335 | 220  | 2049 | 112 |
| CONTIG-000103 | 525  | 12  | 49   | 126  | 0   |
| CONTIG-000111 | 92   | 10  | 15   | 23   | 0   |
| CONTIG-000112 | 569  | 14  | 102  | 189  | 2   |
| CONTIG-000118 | 156  | 16  | 12   | 56   | 0   |
| CONTIG-000119 | 119  | 59  | 694  | 0    | 2   |
| CONTIG-000130 | 592  | 87  | 1928 | 1918 | 12  |
| CONTIG-000133 | 396  | 54  | 101  | 1182 | 2   |
| CONTIG-000134 | 62   | 240 | 116  | 456  | 0   |
| CONTIG-000135 | 73   | 10  | 23   | 9    | 0   |
| CONTIG-000136 | 512  | 22  | 111  | 269  | 6   |
| CONTIG-000137 | 89   | 21  | 114  | 0    | 0   |
| CONTIG-000139 | 96   | 9   | 22   | 14   | 0   |
| CONTIG-000140 | 745  | 13  | 43   | 315  | 6   |
| CONTIG-000141 | 128  | 74  | 914  | 0    | 0   |
| CONTIG-000142 | 334  | 9   | 53   | 63   | 0   |
| CONTIG-000143 | 94   | 20  | 5    | 26   | 0   |
| CONTIG-000145 | 176  | 249 | 2173 | 329  | 40  |
| CONTIG-000147 | 273  | 392 | 2092 | 1737 | 101 |
| CONTIG-000149 | 641  | 64  | 617  | 1138 | 28  |
| CONTIG-000156 | 126  | 60  | 664  | 0    | 14  |
| CONTIG-000164 | 744  | 133 | 1965 | 3818 | 8   |
| CONTIG-000165 | 969  | 105 | 555  | 6009 | 2   |
| CONTIG-000166 | 685  | 40  | 193  | 697  | 27  |
| CONTIG-000167 | 191  | 416 | 4337 | 767  | 77  |
| CONTIG-000168 | 229  | 8   | 48   | 48   | 0   |

|               |      |     |      |       |      |
|---------------|------|-----|------|-------|------|
| CONTIG-000169 | 203  | 8   | 38   | 43    | 0    |
| CONTIG-000170 | 65   | 814 | 3982 | 865   | 0    |
| CONTIG-000171 | 51   | 757 | 3090 | 87    | 0    |
| CONTIG-000178 | 219  | 257 | 2148 | 157   | 8    |
| CONTIG-000179 | 1661 | 81  | 5891 | 5538  | 0    |
| CONTIG-000180 | 397  | 733 | 2408 | 13011 | 180  |
| CONTIG-000181 | 274  | 71  | 369  | 389   | 5    |
| CONTIG-000182 | 86   | 7   | 4    | 22    | 0    |
| CONTIG-000183 | 464  | 67  | 744  | 1210  | 0    |
| CONTIG-000184 | 243  | 102 | 1354 | 272   | 14   |
| CONTIG-000187 | 141  | 559 | 4514 | 2046  | 0    |
| CONTIG-000188 | 589  | 28  | 268  | 500   | 0    |
| CONTIG-000189 | 243  | 13  | 34   | 82    | 0    |
| CONTIG-000190 | 403  | 13  | 24   | 211   | 0    |
| CONTIG-000195 | 676  | 26  | 266  | 849   | 2    |
| CONTIG-000196 | 1747 | 94  | 1244 | 4070  | 399  |
| CONTIG-000197 | 596  | 317 | 2641 | 2728  | 904  |
| CONTIG-000201 | 594  | 112 | 1875 | 1930  | 25   |
| CONTIG-000202 | 330  | 28  | 249  | 423   | 0    |
| CONTIG-000205 | 976  | 63  | 4228 | 1071  | 2    |
| CONTIG-000210 | 243  | 675 | 3619 | 3941  | 153  |
| CONTIG-000211 | 363  | 13  | 82   | 139   | 0    |
| CONTIG-000212 | 1017 | 14  | 105  | 739   | 0    |
| CONTIG-000213 | 58   | 94  | 98   | 165   | 6    |
| CONTIG-000214 | 494  | 21  | 391  | 157   | 2    |
| CONTIG-000215 | 63   | 4   | 10   | 0     | 0    |
| CONTIG-000216 | 1027 | 173 | 3025 | 8269  | 161  |
| CONTIG-000217 | 116  | 62  | 456  | 48    | 0    |
| CONTIG-000218 | 969  | 56  | 164  | 3112  | 0    |
| CONTIG-000221 | 396  | 490 | 591  | 0     | 4631 |
| CONTIG-000222 | 852  | 32  | 382  | 653   | 2    |
| CONTIG-000223 | 652  | 137 | 2467 | 2352  | 35   |
| CONTIG-000224 | 415  | 93  | 350  | 1780  | 0    |
| CONTIG-000226 | 91   | 12  | 0    | 43    | 0    |
| CONTIG-000227 | 54   | 22  | 0    | 38    | 0    |
| CONTIG-000228 | 2041 | 225 | 7978 | 23012 | 61   |
| CONTIG-000229 | 172  | 571 | 2870 | 1403  | 179  |
| CONTIG-000230 | 69   | 5   | 5    | 0     | 0    |
| CONTIG-000231 | 179  | 166 | 1661 | 37    | 4    |
| CONTIG-000232 | 174  | 318 | 1745 | 546   | 84   |
| CONTIG-000234 | 329  | 517 | 2884 | 3868  | 342  |
| CONTIG-000235 | 71   | 6   | 10   | 9     | 0    |
| CONTIG-000236 | 275  | 476 | 689  | 3754  | 298  |
| CONTIG-000237 | 246  | 8   | 17   | 53    | 0    |
| CONTIG-000238 | 349  | 159 | 5412 | 323   | 6    |
| CONTIG-000239 | 224  | 30  | 114  | 240   | 0    |
| CONTIG-000240 | 185  | 29  | 508  | 0     | 0    |

|               |      |      |      |      |     |
|---------------|------|------|------|------|-----|
| CONTIG-000241 | 275  | 425  | 1669 | 1329 | 175 |
| CONTIG-000244 | 615  | 15   | 64   | 442  | 2   |
| CONTIG-000247 | 648  | 164  | 4588 | 3903 | 2   |
| CONTIG-000249 | 205  | 540  | 1944 | 2135 | 202 |
| CONTIG-000250 | 436  | 56   | 245  | 571  | 2   |
| CONTIG-000251 | 299  | 39   | 499  | 137  | 4   |
| CONTIG-000252 | 79   | 681  | 2667 | 20   | 20  |
| CONTIG-000253 | 159  | 439  | 1025 | 2720 | 12  |
| CONTIG-000254 | 471  | 9    | 24   | 95   | 3   |
| CONTIG-000255 | 166  | 3    | 22   | 2    | 0   |
| CONTIG-000264 | 356  | 187  | 2544 | 1114 | 25  |
| CONTIG-000265 | 190  | 37   | 209  | 214  | 0   |
| CONTIG-000266 | 187  | 443  | 4333 | 481  | 97  |
| CONTIG-000267 | 291  | 7    | 2    | 68   | 0   |
| CONTIG-000268 | 109  | 448  | 795  | 2037 | 2   |
| CONTIG-000271 | 946  | 20   | 259  | 573  | 7   |
| CONTIG-000272 | 1032 | 24   | 379  | 495  | 2   |
| CONTIG-000273 | 65   | 15   | 77   | 5    | 0   |
| CONTIG-000274 | 350  | 21   | 103  | 223  | 0   |
| CONTIG-000276 | 52   | 2001 | 245  | 1442 | 464 |
| CONTIG-000277 | 347  | 360  | 827  | 3016 | 240 |
| CONTIG-000278 | 160  | 4    | 15   | 6    | 0   |
| CONTIG-000279 | 36   | 1203 | 2777 | 569  | 2   |
| CONTIG-000287 | 63   | 749  | 461  | 729  | 61  |
| CONTIG-000289 | 145  | 5    | 3    | 27   | 0   |
| CONTIG-000291 | 444  | 188  | 521  | 3225 | 293 |
| CONTIG-000292 | 164  | 8    | 20   | 7    | 2   |
| CONTIG-000293 | 900  | 24   | 1455 | 341  | 2   |
| CONTIG-000294 | 454  | 21   | 10   | 439  | 0   |
| CONTIG-000295 | 49   | 85   | 86   | 61   | 2   |
| CONTIG-000296 | 256  | 8    | 74   | 18   | 0   |
| CONTIG-000297 | 120  | 16   | 179  | 2    | 0   |
| CONTIG-000298 | 663  | 22   | 481  | 385  | 0   |
| CONTIG-000299 | 389  | 135  | 497  | 1734 | 150 |
| CONTIG-000306 | 298  | 79   | 425  | 600  | 2   |
| CONTIG-000307 | 512  | 207  | 104  | 4534 | 521 |
| CONTIG-000308 | 88   | 7    | 7    | 27   | 0   |
| CONTIG-000309 | 812  | 48   | 2808 | 5    | 2   |
| CONTIG-000310 | 213  | 132  | 346  | 345  | 43  |
| CONTIG-000311 | 490  | 16   | 70   | 238  | 0   |
| CONTIG-000312 | 186  | 5    | 2    | 33   | 0   |
| CONTIG-000313 | 656  | 23   | 145  | 450  | 6   |
| CONTIG-000314 | 745  | 117  | 2116 | 3142 | 2   |
| CONTIG-000315 | 1038 | 19   | 122  | 1018 | 0   |
| CONTIG-000318 | 237  | 12   | 30   | 54   | 2   |
| CONTIG-000319 | 295  | 115  | 615  | 709  | 0   |
| CONTIG-000320 | 491  | 175  | 5672 | 1803 | 5   |

|               |      |      |       |      |     |
|---------------|------|------|-------|------|-----|
| CONTIG-000321 | 325  | 32   | 141   | 482  | 2   |
| CONTIG-000322 | 149  | 513  | 2114  | 475  | 84  |
| CONTIG-000323 | 124  | 4    | 3     | 14   | 0   |
| CONTIG-000324 | 214  | 11   | 21    | 45   | 0   |
| CONTIG-000325 | 193  | 603  | 6416  | 1263 | 58  |
| CONTIG-000326 | 694  | 10   | 10    | 174  | 10  |
| CONTIG-000327 | 701  | 20   | 85    | 446  | 10  |
| CONTIG-000328 | 43   | 505  | 151   | 499  | 23  |
| CONTIG-000329 | 119  | 408  | 378   | 982  | 64  |
| CONTIG-000330 | 1108 | 128  | 2387  | 2636 | 241 |
| CONTIG-000331 | 1362 | 189  | 4138  | 5320 | 838 |
| CONTIG-000341 | 574  | 74   | 4046  | 225  | 0   |
| CONTIG-000342 | 602  | 26   | 540   | 407  | 4   |
| CONTIG-000343 | 196  | 164  | 1201  | 348  | 100 |
| CONTIG-000344 | 1223 | 27   | 1176  | 1228 | 0   |
| CONTIG-000345 | 124  | 52   | 101   | 265  | 0   |
| CONTIG-000346 | 489  | 200  | 4400  | 1510 | 13  |
| CONTIG-000350 | 62   | 126  | 616   | 62   | 0   |
| CONTIG-000351 | 382  | 12   | 31    | 193  | 2   |
| CONTIG-000352 | 190  | 907  | 2924  | 3591 | 268 |
| CONTIG-000353 | 188  | 492  | 2312  | 1813 | 252 |
| CONTIG-000355 | 500  | 16   | 94    | 301  | 3   |
| CONTIG-000356 | 415  | 34   | 284   | 325  | 2   |
| CONTIG-000357 | 253  | 217  | 2177  | 482  | 69  |
| CONTIG-000360 | 2197 | 27   | 136   | 1774 | 91  |
| CONTIG-000361 | 62   | 18   | 105   | 2    | 0   |
| CONTIG-000362 | 748  | 34   | 333   | 1043 | 2   |
| CONTIG-000363 | 352  | 779  | 10580 | 5412 | 222 |
| CONTIG-000364 | 781  | 128  | 1864  | 3712 | 0   |
| CONTIG-000365 | 914  | 58   | 2512  | 950  | 28  |
| CONTIG-000366 | 277  | 49   | 610   | 400  | 2   |
| CONTIG-000367 | 333  | 64   | 464   | 469  | 0   |
| CONTIG-000368 | 529  | 13   | 168   | 159  | 0   |
| CONTIG-000369 | 613  | 39   | 644   | 796  | 14  |
| CONTIG-000370 | 215  | 46   | 35    | 130  | 0   |
| CONTIG-000371 | 49   | 777  | 168   | 1010 | 77  |
| CONTIG-000380 | 318  | 15   | 271   | 38   | 0   |
| CONTIG-000381 | 566  | 79   | 214   | 2015 | 43  |
| CONTIG-000384 | 149  | 1191 | 4500  | 760  | 291 |
| CONTIG-000385 | 199  | 13   | 8     | 76   | 0   |
| CONTIG-000386 | 87   | 825  | 558   | 932  | 166 |
| CONTIG-000388 | 60   | 224  | 47    | 391  | 26  |
| CONTIG-000389 | 265  | 530  | 3589  | 2508 | 217 |
| CONTIG-000390 | 1728 | 39   | 2174  | 1732 | 49  |
| CONTIG-000391 | 2109 | 26   | 63    | 2619 | 2   |
| CONTIG-000392 | 152  | 8    | 14    | 19   | 0   |
| CONTIG-000393 | 82   | 5    | 6     | 13   | 0   |

|               |      |      |       |      |     |
|---------------|------|------|-------|------|-----|
| CONTIG-000394 | 46   | 1056 | 1054  | 583  | 41  |
| CONTIG-000395 | 1227 | 43   | 608   | 2694 | 2   |
| CONTIG-000396 | 79   | 61   | 106   | 50   | 0   |
| CONTIG-000397 | 134  | 8    | 12    | 16   | 0   |
| CONTIG-000398 | 688  | 50   | 627   | 1416 | 0   |
| CONTIG-000399 | 652  | 125  | 2629  | 1884 | 61  |
| CONTIG-000400 | 273  | 310  | 3379  | 863  | 146 |
| CONTIG-000401 | 189  | 177  | 87    | 883  | 132 |
| CONTIG-000402 | 38   | 974  | 264   | 576  | 4   |
| CONTIG-000403 | 118  | 1101 | 1258  | 1954 | 183 |
| CONTIG-000404 | 580  | 68   | 127   | 1024 | 64  |
| CONTIG-000405 | 279  | 11   | 107   | 37   | 0   |
| CONTIG-000414 | 447  | 148  | 601   | 2158 | 5   |
| CONTIG-000415 | 1944 | 46   | 452   | 3002 | 118 |
| CONTIG-000416 | 1127 | 52   | 427   | 980  | 240 |
| CONTIG-000417 | 155  | 592  | 1060  | 2276 | 303 |
| CONTIG-000418 | 92   | 11   | 41    | 8    | 0   |
| CONTIG-000419 | 225  | 160  | 858   | 935  | 15  |
| CONTIG-000420 | 985  | 11   | 6     | 305  | 0   |
| CONTIG-000421 | 327  | 409  | 11825 | 903  | 23  |
| CONTIG-000422 | 83   | 153  | 995   | 0    | 0   |
| CONTIG-000423 | 231  | 11   | 31    | 67   | 0   |
| CONTIG-000427 | 172  | 19   | 118   | 34   | 0   |
| CONTIG-000428 | 514  | 71   | 306   | 1150 | 32  |
| CONTIG-000429 | 269  | 24   | 115   | 187  | 2   |
| CONTIG-000430 | 453  | 23   | 54    | 251  | 20  |
| CONTIG-000431 | 618  | 43   | 404   | 787  | 0   |
| CONTIG-000435 | 1936 | 63   | 574   | 2749 | 154 |
| CONTIG-000436 | 453  | 15   | 453   | 110  | 0   |
| CONTIG-000437 | 638  | 44   | 158   | 742  | 7   |
| CONTIG-000438 | 80   | 74   | 626   | 9    | 0   |
| CONTIG-000439 | 648  | 32   | 854   | 310  | 13  |
| CONTIG-000441 | 157  | 289  | 4523  | 116  | 0   |
| CONTIG-000442 | 60   | 828  | 1140  | 1337 | 35  |
| CONTIG-000443 | 77   | 376  | 102   | 869  | 139 |
| CONTIG-000445 | 450  | 156  | 898   | 1433 | 95  |
| CONTIG-000446 | 135  | 1076 | 3869  | 2320 | 171 |
| CONTIG-000450 | 121  | 103  | 1050  | 155  | 0   |
| CONTIG-000451 | 145  | 13   | 184   | 4    | 0   |
| CONTIG-000455 | 756  | 40   | 312   | 524  | 7   |
| CONTIG-000456 | 80   | 132  | 697   | 70   | 0   |
| CONTIG-000457 | 2122 | 43   | 1052  | 3574 | 32  |
| CONTIG-000458 | 77   | 29   | 91    | 46   | 0   |
| CONTIG-000459 | 395  | 61   | 1237  | 412  | 4   |
| CONTIG-000460 | 858  | 96   | 1499  | 1478 | 84  |
| CONTIG-000463 | 333  | 128  | 956   | 565  | 14  |
| CONTIG-000464 | 67   | 10   | 22    | 2    | 0   |

|               |      |      |      |      |      |
|---------------|------|------|------|------|------|
| CONTIG-000465 | 1201 | 70   | 574  | 2948 | 224  |
| CONTIG-000466 | 284  | 45   | 142  | 436  | 2    |
| CONTIG-000468 | 1085 | 75   | 1483 | 2004 | 216  |
| CONTIG-000469 | 730  | 15   | 204  | 219  | 2    |
| CONTIG-000470 | 1659 | 31   | 630  | 1836 | 6    |
| CONTIG-000471 | 302  | 416  | 4407 | 2319 | 198  |
| CONTIG-000472 | 705  | 45   | 703  | 1361 | 2    |
| CONTIG-000482 | 266  | 52   | 178  | 562  | 0    |
| CONTIG-000483 | 276  | 13   | 22   | 119  | 0    |
| CONTIG-000484 | 66   | 395  | 1248 | 592  | 0    |
| CONTIG-000485 | 68   | 4    | 9    | 4    | 0    |
| CONTIG-000486 | 138  | 14   | 32   | 52   | 0    |
| CONTIG-000487 | 187  | 31   | 58   | 137  | 0    |
| CONTIG-000488 | 205  | 6    | 6    | 13   | 0    |
| CONTIG-000489 | 100  | 809  | 1772 | 1687 | 145  |
| CONTIG-000490 | 73   | 1343 | 2905 | 3658 | 34   |
| CONTIG-000491 | 231  | 35   | 70   | 298  | 4    |
| CONTIG-000493 | 987  | 50   | 164  | 1637 | 137  |
| CONTIG-000494 | 179  | 84   | 233  | 172  | 8    |
| CONTIG-000496 | 111  | 149  | 928  | 11   | 2    |
| CONTIG-000497 | 132  | 880  | 3250 | 2324 | 212  |
| CONTIG-000499 | 521  | 24   | 229  | 342  | 2    |
| CONTIG-000500 | 41   | 2412 | 525  | 32   | 1372 |
| CONTIG-000501 | 320  | 12   | 57   | 37   | 0    |
| CONTIG-000502 | 92   | 119  | 362  | 3    | 0    |
| CONTIG-000506 | 133  | 9    | 35   | 30   | 0    |
| CONTIG-000507 | 262  | 527  | 1481 | 2678 | 549  |
| CONTIG-000508 | 469  | 230  | 3908 | 2045 | 24   |
| CONTIG-000509 | 110  | 122  | 152  | 209  | 14   |
| CONTIG-000510 | 816  | 43   | 595  | 56   | 168  |
| CONTIG-000511 | 279  | 6    | 26   | 43   | 0    |
| CONTIG-000512 | 897  | 15   | 380  | 409  | 0    |
| CONTIG-000513 | 567  | 28   | 577  | 647  | 0    |
| CONTIG-000514 | 179  | 30   | 92   | 67   | 0    |
| CONTIG-000515 | 1424 | 96   | 4612 | 4684 | 150  |
| CONTIG-000516 | 37   | 462  | 38   | 0    | 0    |
| CONTIG-000517 | 130  | 8    | 70   | 8    | 0    |
| CONTIG-000518 | 1061 | 27   | 506  | 1098 | 5    |
| CONTIG-000519 | 417  | 219  | 8839 | 0    | 15   |
| CONTIG-000520 | 70   | 7    | 5    | 18   | 0    |
| CONTIG-000521 | 78   | 11   | 4    | 33   | 0    |
| CONTIG-000522 | 312  | 16   | 52   | 139  | 2    |
| CONTIG-000523 | 654  | 89   | 4    | 0    | 428  |
| CONTIG-000524 | 273  | 10   | 48   | 76   | 0    |
| CONTIG-000525 | 523  | 43   | 545  | 554  | 2    |
| CONTIG-000526 | 251  | 16   | 80   | 72   | 0    |
| CONTIG-000527 | 826  | 24   | 101  | 310  | 0    |

|               |      |     |      |      |     |
|---------------|------|-----|------|------|-----|
| CONTIG-000528 | 125  | 368 | 1189 | 340  | 63  |
| CONTIG-000529 | 214  | 817 | 7939 | 2636 | 188 |
| CONTIG-000530 | 186  | 9   | 14   | 49   | 0   |
| CONTIG-000535 | 84   | 118 | 23   | 119  | 206 |
| CONTIG-000536 | 1200 | 37  | 1150 | 716  | 68  |
| CONTIG-000537 | 849  | 31  | 1052 | 723  | 0   |
| CONTIG-000538 | 64   | 10  | 9    | 0    | 0   |
| CONTIG-000539 | 596  | 180 | 7257 | 1877 | 3   |
| CONTIG-000540 | 110  | 9   | 9    | 13   | 0   |
| CONTIG-000541 | 1463 | 31  | 254  | 1272 | 60  |
| CONTIG-000542 | 339  | 284 | 2463 | 3211 | 38  |
| CONTIG-000543 | 794  | 18  | 70   | 648  | 0   |
| CONTIG-000544 | 270  | 404 | 1407 | 1889 | 243 |
| CONTIG-000545 | 681  | 54  | 260  | 1383 | 15  |
| CONTIG-000546 | 936  | 43  | 1976 | 801  | 6   |
| CONTIG-000547 | 136  | 7   | 28   | 26   | 0   |
| CONTIG-000548 | 141  | 28  | 119  | 25   | 0   |
| CONTIG-000549 | 351  | 8   | 23   | 91   | 0   |
| CONTIG-000550 | 335  | 550 | 2540 | 3807 | 297 |
| CONTIG-000551 | 1314 | 18  | 224  | 638  | 4   |
| CONTIG-000552 | 585  | 8   | 22   | 124  | 0   |
| CONTIG-000553 | 245  | 14  | 65   | 104  | 2   |
| CONTIG-000554 | 1372 | 55  | 873  | 3034 | 6   |
| CONTIG-000555 | 454  | 109 | 4548 | 0    | 44  |
| CONTIG-000556 | 178  | 11  | 116  | 26   | 0   |
| CONTIG-000557 | 146  | 15  | 65   | 44   | 0   |
| CONTIG-000558 | 1138 | 37  | 139  | 1051 | 46  |
| CONTIG-000559 | 485  | 110 | 974  | 1780 | 0   |
| CONTIG-000560 | 111  | 12  | 16   | 55   | 0   |
| CONTIG-000561 | 457  | 14  | 11   | 281  | 0   |
| CONTIG-000562 | 715  | 223 | 2756 | 6951 | 80  |
| CONTIG-000563 | 83   | 7   | 12   | 0    | 0   |
| CONTIG-000564 | 66   | 5   | 5    | 8    | 0   |
| CONTIG-000565 | 387  | 82  | 492  | 819  | 8   |
| CONTIG-000566 | 684  | 80  | 855  | 1224 | 0   |
| CONTIG-000567 | 567  | 34  | 98   | 809  | 0   |
| CONTIG-000568 | 71   | 232 | 497  | 345  | 9   |
| CONTIG-000570 | 54   | 639 | 214  | 661  | 89  |
| CONTIG-000571 | 116  | 28  | 111  | 54   | 0   |
| CONTIG-000572 | 118  | 18  | 121  | 34   | 0   |
| CONTIG-000573 | 334  | 18  | 54   | 189  | 0   |
| CONTIG-000574 | 192  | 160 | 691  | 414  | 16  |
| CONTIG-000575 | 1417 | 75  | 1814 | 5017 | 8   |
| CONTIG-000576 | 497  | 29  | 818  | 285  | 0   |
| CONTIG-000577 | 689  | 45  | 190  | 758  | 46  |
| CONTIG-000578 | 523  | 8   | 32   | 51   | 0   |
| CONTIG-000579 | 92   | 12  | 77   | 0    | 0   |



|               |      |     |      |      |     |
|---------------|------|-----|------|------|-----|
| CONTIG-000580 | 875  | 41  | 1100 | 589  | 18  |
| CONTIG-000581 | 98   | 25  | 54   | 12   | 0   |
| CONTIG-000588 | 1380 | 15  | 159  | 424  | 38  |
| CONTIG-000589 | 1968 | 51  | 401  | 5842 | 0   |
| CONTIG-000591 | 644  | 14  | 322  | 182  | 0   |
| CONTIG-000592 | 847  | 59  | 1900 | 0    | 50  |
| CONTIG-000601 | 186  | 17  | 38   | 88   | 0   |
| CONTIG-000602 | 2602 | 31  | 129  | 2690 | 33  |
| CONTIG-000603 | 190  | 40  | 134  | 241  | 2   |
| CONTIG-000604 | 201  | 317 | 17   | 15   | 0   |
| CONTIG-000605 | 150  | 19  | 44   | 117  | 0   |
| CONTIG-000608 | 43   | 40  | 75   | 17   | 0   |
| CONTIG-000609 | 97   | 650 | 1761 | 1079 | 126 |
| CONTIG-000610 | 841  | 25  | 116  | 589  | 8   |
| CONTIG-000611 | 879  | 67  | 177  | 2659 | 105 |
| CONTIG-000612 | 418  | 11  | 86   | 136  | 0   |
| CONTIG-000615 | 365  | 445 | 1697 | 3654 | 312 |
| CONTIG-000616 | 1062 | 35  | 509  | 1552 | 0   |
| CONTIG-000617 | 437  | 24  | 1038 | 54   | 0   |
| CONTIG-000618 | 37   | 460 | 298  | 129  | 25  |
| CONTIG-000619 | 285  | 78  | 1693 | 331  | 0   |
| CONTIG-000620 | 664  | 28  | 100  | 941  | 0   |
| CONTIG-000621 | 141  | 12  | 21   | 56   | 2   |
| CONTIG-000622 | 525  | 56  | 677  | 1108 | 5   |
| CONTIG-000623 | 259  | 113 | 676  | 604  | 27  |
| CONTIG-000626 | 222  | 708 | 1875 | 2810 | 401 |
| CONTIG-000627 | 271  | 244 | 2456 | 752  | 81  |
| CONTIG-000628 | 305  | 9   | 16   | 76   | 0   |
| CONTIG-000629 | 152  | 314 | 2983 | 98   | 11  |
| CONTIG-000630 | 351  | 6   | 60   | 26   | 0   |
| CONTIG-000631 | 67   | 4   | 2    | 0    | 0   |
| CONTIG-000632 | 76   | 349 | 329  | 738  | 0   |
| CONTIG-000635 | 587  | 59  | 216  | 999  | 27  |
| CONTIG-000636 | 2002 | 47  | 1111 | 4603 | 7   |
| CONTIG-000637 | 498  | 108 | 1040 | 805  | 69  |
| CONTIG-000638 | 101  | 122 | 590  | 186  | 0   |
| CONTIG-000640 | 477  | 30  | 159  | 193  | 0   |
| CONTIG-000641 | 544  | 94  | 639  | 1589 | 75  |
| CONTIG-000642 | 465  | 272 | 2173 | 4836 | 4   |
| CONTIG-000643 | 501  | 10  | 31   | 137  | 0   |
| CONTIG-000644 | 1383 | 83  | 2160 | 4644 | 21  |
| CONTIG-000645 | 149  | 6   | 4    | 26   | 0   |
| CONTIG-000647 | 315  | 6   | 6    | 55   | 2   |
| CONTIG-000649 | 58   | 26  | 44   | 72   | 0   |
| CONTIG-000650 | 523  | 37  | 125  | 1082 | 0   |
| CONTIG-000651 | 60   | 5   | 10   | 0    | 0   |
| CONTIG-000652 | 1210 | 34  | 838  | 1124 | 52  |

|               |      |     |      |      |     |
|---------------|------|-----|------|------|-----|
| CONTIG-000653 | 431  | 219 | 190  | 2377 | 281 |
| CONTIG-000654 | 160  | 60  | 405  | 78   | 2   |
| CONTIG-000655 | 64   | 4   | 4    | 13   | 0   |
| CONTIG-000656 | 701  | 16  | 84   | 536  | 0   |
| CONTIG-000657 | 1542 | 29  | 534  | 1549 | 7   |
| CONTIG-000658 | 303  | 27  | 105  | 307  | 2   |
| CONTIG-000659 | 1904 | 40  | 1496 | 3209 | 0   |
| CONTIG-000666 | 96   | 174 | 972  | 66   | 0   |
| CONTIG-000667 | 291  | 14  | 183  | 85   | 0   |
| CONTIG-000675 | 54   | 688 | 351  | 769  | 68  |
| CONTIG-000676 | 1539 | 90  | 1295 | 4387 | 189 |
| CONTIG-000677 | 1695 | 30  | 1447 | 1251 | 4   |
| CONTIG-000680 | 346  | 198 | 2625 | 502  | 46  |
| CONTIG-000681 | 718  | 21  | 57   | 26   | 244 |
| CONTIG-000682 | 69   | 9   | 2    | 5    | 0   |
| CONTIG-000683 | 1261 | 48  | 1377 | 1259 | 22  |
| CONTIG-000684 | 1210 | 55  | 943  | 2274 | 21  |
| CONTIG-000697 | 177  | 36  | 544  | 0    | 8   |
| CONTIG-000700 | 258  | 143 | 2525 | 100  | 4   |
| CONTIG-000701 | 369  | 18  | 171  | 182  | 0   |
| CONTIG-000703 | 89   | 15  | 45   | 8    | 0   |
| CONTIG-000704 | 374  | 509 | 4293 | 3262 | 495 |
| CONTIG-000705 | 114  | 15  | 10   | 36   | 0   |
| CONTIG-000706 | 546  | 19  | 85   | 218  | 2   |
| CONTIG-000707 | 151  | 571 | 946  | 1879 | 160 |
| CONTIG-000711 | 365  | 716 | 7839 | 3964 | 377 |
| CONTIG-000712 | 68   | 17  | 5    | 57   | 0   |
| CONTIG-000713 | 370  | 13  | 74   | 117  | 2   |
| CONTIG-000714 | 351  | 37  | 1077 | 109  | 0   |
| CONTIG-000715 | 1133 | 30  | 206  | 1065 | 104 |
| CONTIG-000722 | 804  | 16  | 87   | 496  | 0   |
| CONTIG-000723 | 88   | 492 | 3877 | 308  | 0   |
| CONTIG-000724 | 828  | 21  | 63   | 596  | 11  |
| CONTIG-000727 | 68   | 6   | 15   | 7    | 0   |
| CONTIG-000728 | 470  | 65  | 1082 | 647  | 11  |
| CONTIG-000729 | 101  | 10  | 21   | 18   | 0   |
| CONTIG-000731 | 1025 | 102 | 840  | 3136 | 139 |
| CONTIG-000732 | 300  | 43  | 584  | 202  | 2   |
| CONTIG-000733 | 351  | 30  | 104  | 299  | 2   |
| CONTIG-000734 | 1673 | 27  | 671  | 1830 | 8   |
| CONTIG-000735 | 682  | 31  | 459  | 666  | 10  |
| CONTIG-000736 | 356  | 14  | 98   | 118  | 0   |
| CONTIG-000737 | 1730 | 46  | 1757 | 1604 | 42  |
| CONTIG-000738 | 657  | 61  | 411  | 934  | 15  |
| CONTIG-000745 | 1608 | 50  | 567  | 2736 | 56  |
| CONTIG-000746 | 578  | 31  | 123  | 512  | 8   |
| CONTIG-000747 | 577  | 122 | 2851 | 1338 | 27  |

|               |      |     |      |      |     |
|---------------|------|-----|------|------|-----|
| CONTIG-000748 | 201  | 18  | 99   | 24   | 0   |
| CONTIG-000749 | 131  | 11  | 6    | 35   | 0   |
| CONTIG-000750 | 263  | 420 | 2056 | 2363 | 306 |
| CONTIG-000751 | 187  | 13  | 22   | 91   | 0   |
| CONTIG-000752 | 417  | 35  | 976  | 208  | 0   |
| CONTIG-000753 | 152  | 20  | 102  | 25   | 0   |
| CONTIG-000754 | 634  | 30  | 70   | 650  | 2   |
| CONTIG-000755 | 1803 | 50  | 2896 | 2298 | 30  |
| CONTIG-000758 | 530  | 27  | 195  | 523  | 2   |
| CONTIG-000759 | 187  | 83  | 230  | 603  | 9   |
| CONTIG-000760 | 557  | 80  | 607  | 715  | 110 |
| CONTIG-000761 | 1655 | 47  | 332  | 2418 | 12  |
| CONTIG-000763 | 85   | 160 | 912  | 68   | 0   |
| CONTIG-000764 | 171  | 104 | 1545 | 0    | 4   |
| CONTIG-000769 | 63   | 3   | 4    | 2    | 0   |
| CONTIG-000770 | 141  | 133 | 953  | 173  | 0   |
| CONTIG-000771 | 73   | 8   | 20   | 5    | 0   |
| CONTIG-000772 | 206  | 74  | 1464 | 0    | 2   |
| CONTIG-000774 | 168  | 4   | 4    | 0    | 3   |
| CONTIG-000775 | 282  | 23  | 40   | 216  | 0   |
| CONTIG-000776 | 356  | 184 | 648  | 1739 | 331 |
| CONTIG-000777 | 658  | 157 | 5579 | 3242 | 0   |
| CONTIG-000778 | 95   | 10  | 5    | 7    | 0   |
| CONTIG-000779 | 91   | 3   | 10   | 7    | 0   |
| CONTIG-000780 | 158  | 21  | 140  | 40   | 0   |
| CONTIG-000788 | 449  | 82  | 400  | 894  | 18  |
| CONTIG-000789 | 680  | 39  | 0    | 0    | 259 |
| CONTIG-000790 | 244  | 149 | 1102 | 1613 | 3   |
| CONTIG-000791 | 888  | 39  | 465  | 666  | 0   |
| CONTIG-000792 | 187  | 275 | 3014 | 911  | 0   |
| CONTIG-000793 | 492  | 711 | 9814 | 4434 | 743 |
| CONTIG-000794 | 108  | 77  | 174  | 38   | 4   |
| CONTIG-000795 | 1318 | 24  | 314  | 1075 | 0   |
| CONTIG-000797 | 128  | 466 | 1125 | 1176 | 111 |
| CONTIG-000798 | 305  | 116 | 563  | 1714 | 0   |
| CONTIG-000799 | 121  | 9   | 21   | 20   | 0   |
| CONTIG-000800 | 380  | 52  | 460  | 86   | 2   |
| CONTIG-000804 | 285  | 176 | 427  | 775  | 36  |
| CONTIG-000807 | 328  | 12  | 196  | 56   | 0   |
| CONTIG-000808 | 104  | 7   | 19   | 16   | 0   |
| CONTIG-000809 | 86   | 19  | 54   | 13   | 2   |
| CONTIG-000810 | 624  | 39  | 240  | 679  | 12  |
| CONTIG-000811 | 67   | 33  | 66   | 62   | 0   |
| CONTIG-000812 | 408  | 13  | 105  | 160  | 0   |
| CONTIG-000813 | 980  | 20  | 732  | 388  | 2   |
| CONTIG-000814 | 356  | 7   | 25   | 64   | 0   |
| CONTIG-000815 | 863  | 90  | 1329 | 2675 | 104 |

|               |      |      |      |      |     |
|---------------|------|------|------|------|-----|
| CONTIG-000816 | 840  | 18   | 303  | 337  | 8   |
| CONTIG-000817 | 419  | 45   | 883  | 506  | 2   |
| CONTIG-000818 | 55   | 1247 | 636  | 451  | 45  |
| CONTIG-000820 | 321  | 87   | 1475 | 677  | 0   |
| CONTIG-000821 | 1227 | 29   | 139  | 1016 | 44  |
| CONTIG-000822 | 65   | 690  | 363  | 1003 | 129 |
| CONTIG-000823 | 755  | 11   | 60   | 178  | 0   |
| CONTIG-000824 | 987  | 26   | 231  | 604  | 2   |
| CONTIG-000825 | 138  | 15   | 17   | 61   | 0   |
| CONTIG-000826 | 788  | 21   | 41   | 573  | 4   |
| CONTIG-000827 | 354  | 431  | 1558 | 2946 | 366 |
| CONTIG-000828 | 262  | 269  | 1245 | 1243 | 105 |
| CONTIG-000829 | 1766 | 43   | 3135 | 1878 | 9   |
| CONTIG-000830 | 771  | 26   | 240  | 750  | 2   |
| CONTIG-000831 | 141  | 67   | 79   | 193  | 4   |
| CONTIG-000833 | 496  | 13   | 77   | 156  | 0   |
| CONTIG-000843 | 660  | 92   | 2092 | 2370 | 19  |
| CONTIG-000844 | 1570 | 33   | 553  | 1623 | 47  |
| CONTIG-000848 | 631  | 16   | 488  | 126  | 6   |
| CONTIG-000849 | 4336 | 38   | 231  | 8750 | 86  |
| CONTIG-000850 | 316  | 295  | 1075 | 2015 | 301 |
| CONTIG-000851 | 565  | 32   | 916  | 382  | 0   |
| CONTIG-000854 | 89   | 324  | 1531 | 669  | 0   |
| CONTIG-000855 | 254  | 342  | 5096 | 949  | 0   |
| CONTIG-000856 | 95   | 44   | 90   | 38   | 0   |
| CONTIG-000857 | 68   | 3    | 2    | 3    | 0   |
| CONTIG-000858 | 175  | 33   | 133  | 257  | 0   |
| CONTIG-000859 | 492  | 26   | 581  | 334  | 0   |
| CONTIG-000860 | 489  | 17   | 110  | 114  | 2   |
| CONTIG-000863 | 983  | 108  | 1593 | 5195 | 24  |
| CONTIG-000864 | 196  | 159  | 2564 | 560  | 0   |
| CONTIG-000865 | 102  | 8    | 14   | 21   | 0   |
| CONTIG-000867 | 332  | 191  | 1037 | 1305 | 117 |
| CONTIG-000868 | 232  | 128  | 1057 | 278  | 8   |
| CONTIG-000869 | 1448 | 87   | 3133 | 2942 | 64  |
| CONTIG-000870 | 100  | 37   | 78   | 108  | 0   |
| CONTIG-000871 | 850  | 48   | 7    | 0    | 3   |
| CONTIG-000872 | 228  | 553  | 1069 | 2560 | 420 |
| CONTIG-000873 | 128  | 19   | 38   | 58   | 0   |
| CONTIG-000874 | 188  | 348  | 4723 | 1406 | 0   |
| CONTIG-000875 | 1183 | 16   | 349  | 546  | 2   |
| CONTIG-000876 | 453  | 14   | 76   | 185  | 2   |
| CONTIG-000877 | 241  | 7    | 32   | 34   | 0   |
| CONTIG-000878 | 343  | 12   | 91   | 64   | 3   |
| CONTIG-000879 | 1871 | 58   | 571  | 1472 | 516 |
| CONTIG-000880 | 885  | 25   | 49   | 895  | 6   |
| CONTIG-000881 | 1534 | 25   | 258  | 1941 | 0   |

|               |      |      |      |       |     |
|---------------|------|------|------|-------|-----|
| CONTIG-000882 | 194  | 245  | 2086 | 225   | 20  |
| CONTIG-000883 | 611  | 110  | 416  | 3098  | 14  |
| CONTIG-000884 | 741  | 97   | 283  | 4013  | 5   |
| CONTIG-000885 | 741  | 38   | 88   | 891   | 97  |
| CONTIG-000886 | 96   | 6    | 8    | 0     | 0   |
| CONTIG-000887 | 251  | 30   | 587  | 77    | 0   |
| CONTIG-000888 | 198  | 9    | 13   | 49    | 0   |
| CONTIG-000889 | 122  | 8    | 2    | 19    | 0   |
| CONTIG-000897 | 335  | 122  | 730  | 670   | 75  |
| CONTIG-000898 | 79   | 2    | 0    | 6     | 0   |
| CONTIG-000899 | 928  | 26   | 169  | 530   | 18  |
| CONTIG-000908 | 79   | 1164 | 3213 | 1194  | 187 |
| CONTIG-000909 | 1883 | 37   | 233  | 2778  | 3   |
| CONTIG-000910 | 187  | 13   | 27   | 99    | 0   |
| CONTIG-000911 | 122  | 1169 | 6228 | 804   | 255 |
| CONTIG-000912 | 149  | 254  | 895  | 297   | 96  |
| CONTIG-000916 | 465  | 27   | 522  | 260   | 0   |
| CONTIG-000917 | 99   | 33   | 44   | 24    | 0   |
| CONTIG-000921 | 183  | 22   | 78   | 136   | 0   |
| CONTIG-000922 | 697  | 20   | 99   | 419   | 7   |
| CONTIG-000923 | 185  | 20   | 4    | 150   | 0   |
| CONTIG-000924 | 119  | 9    | 3    | 21    | 0   |
| CONTIG-000925 | 333  | 17   | 208  | 48    | 4   |
| CONTIG-000926 | 1276 | 176  | 2837 | 9914  | 288 |
| CONTIG-000927 | 188  | 36   | 127  | 155   | 2   |
| CONTIG-000928 | 1184 | 24   | 169  | 926   | 4   |
| CONTIG-000930 | 245  | 500  | 3534 | 2346  | 201 |
| CONTIG-000931 | 510  | 15   | 200  | 312   | 0   |
| CONTIG-000932 | 107  | 262  | 1562 | 211   | 0   |
| CONTIG-000933 | 908  | 64   | 162  | 28    | 0   |
| CONTIG-000935 | 263  | 15   | 4    | 127   | 2   |
| CONTIG-000936 | 1246 | 41   | 599  | 1680  | 2   |
| CONTIG-000937 | 231  | 11   | 29   | 84    | 0   |
| CONTIG-000938 | 500  | 236  | 699  | 4202  | 390 |
| CONTIG-000939 | 989  | 23   | 56   | 591   | 31  |
| CONTIG-000943 | 468  | 29   | 191  | 195   | 38  |
| CONTIG-000944 | 463  | 193  | 4952 | 2803  | 0   |
| CONTIG-000945 | 42   | 925  | 2597 | 0     | 25  |
| CONTIG-000946 | 805  | 31   | 1356 | 602   | 0   |
| CONTIG-000947 | 2575 | 89   | 1457 | 6744  | 258 |
| CONTIG-000948 | 204  | 123  | 711  | 727   | 37  |
| CONTIG-000949 | 1784 | 129  | 385  | 15089 | 4   |
| CONTIG-000950 | 97   | 227  | 549  | 323   | 6   |
| CONTIG-000951 | 127  | 360  | 903  | 1546  | 36  |
| CONTIG-000952 | 220  | 20   | 153  | 22    | 0   |
| CONTIG-000953 | 814  | 20   | 363  | 463   | 4   |
| CONTIG-000954 | 44   | 559  | 2486 | 0     | 4   |

|               |      |      |      |      |     |
|---------------|------|------|------|------|-----|
| CONTIG-000955 | 829  | 25   | 1527 | 277  | 2   |
| CONTIG-000956 | 768  | 23   | 259  | 330  | 2   |
| CONTIG-000957 | 114  | 14   | 86   | 2    | 16  |
| CONTIG-000958 | 349  | 25   | 543  | 131  | 0   |
| CONTIG-000959 | 1733 | 70   | 2129 | 3902 | 148 |
| CONTIG-000961 | 284  | 322  | 1994 | 3363 | 86  |
| CONTIG-000962 | 801  | 62   | 844  | 1975 | 2   |
| CONTIG-000963 | 1178 | 32   | 346  | 1457 | 16  |
| CONTIG-000964 | 444  | 86   | 887  | 1384 | 0   |
| CONTIG-000965 | 171  | 149  | 1159 | 35   | 2   |
| CONTIG-000966 | 80   | 8    | 4    | 18   | 0   |
| CONTIG-000967 | 793  | 35   | 170  | 499  | 86  |
| CONTIG-000969 | 135  | 1405 | 1695 | 2640 | 874 |
| CONTIG-000970 | 252  | 413  | 4750 | 1157 | 99  |
| CONTIG-000971 | 43   | 498  | 43   | 0    | 40  |
| CONTIG-000972 | 75   | 10   | 59   | 0    | 0   |
| CONTIG-000973 | 57   | 902  | 461  | 159  | 288 |
| CONTIG-000974 | 393  | 17   | 83   | 229  | 0   |
| CONTIG-000975 | 252  | 7    | 23   | 41   | 0   |
| CONTIG-000976 | 965  | 22   | 68   | 746  | 0   |
| CONTIG-000977 | 487  | 17   | 581  | 80   | 2   |
| CONTIG-000978 | 477  | 21   | 126  | 255  | 33  |
| CONTIG-000979 | 205  | 37   | 126  | 247  | 2   |
| CONTIG-000981 | 236  | 12   | 66   | 72   | 0   |
| CONTIG-000982 | 1801 | 78   | 4170 | 3938 | 137 |
| CONTIG-000990 | 455  | 13   | 103  | 211  | 0   |
| CONTIG-000991 | 1266 | 53   | 2533 | 1472 | 75  |
| CONTIG-000997 | 182  | 86   | 793  | 95   | 5   |
| CONTIG-000998 | 202  | 295  | 588  | 2263 | 11  |
| CONTIG-000999 | 549  | 64   | 604  | 452  | 12  |
| CONTIG-001000 | 97   | 3    | 5    | 8    | 0   |
| CONTIG-001001 | 350  | 642  | 3048 | 4487 | 623 |
| CONTIG-001002 | 53   | 248  | 1026 | 59   | 0   |
| CONTIG-001003 | 540  | 306  | 2922 | 4194 | 395 |
| CONTIG-001004 | 829  | 61   | 148  | 1870 | 77  |
| CONTIG-001005 | 41   | 3    | 3    | 0    | 0   |
| CONTIG-001006 | 110  | 164  | 1328 | 206  | 0   |
| CONTIG-001007 | 73   | 498  | 570  | 579  | 56  |
| CONTIG-001008 | 90   | 31   | 0    | 69   | 0   |
| CONTIG-001010 | 762  | 18   | 211  | 322  | 0   |
| CONTIG-001011 | 1037 | 52   | 623  | 1378 | 51  |
| CONTIG-001012 | 77   | 73   | 53   | 335  | 0   |
| CONTIG-001013 | 238  | 409  | 536  | 3665 | 393 |
| CONTIG-001014 | 96   | 325  | 3056 | 196  | 0   |
| CONTIG-001016 | 207  | 7    | 4    | 65   | 0   |
| CONTIG-001017 | 239  | 223  | 1157 | 1966 | 8   |
| CONTIG-001018 | 188  | 131  | 1033 | 816  | 0   |

|               |      |      |      |      |      |
|---------------|------|------|------|------|------|
| CONTIG-001019 | 132  | 1156 | 2655 | 2249 | 362  |
| CONTIG-001020 | 357  | 11   | 33   | 132  | 0    |
| CONTIG-001021 | 65   | 92   | 4    | 95   | 0    |
| CONTIG-001022 | 137  | 286  | 2087 | 1249 | 0    |
| CONTIG-001023 | 412  | 105  | 921  | 842  | 47   |
| CONTIG-001024 | 202  | 21   | 141  | 79   | 0    |
| CONTIG-001025 | 275  | 475  | 5154 | 1799 | 170  |
| CONTIG-001026 | 154  | 31   | 170  | 111  | 0    |
| CONTIG-001027 | 112  | 12   | 4    | 47   | 0    |
| CONTIG-001028 | 357  | 186  | 515  | 3920 | 2    |
| CONTIG-001029 | 468  | 24   | 136  | 262  | 6    |
| CONTIG-001030 | 807  | 29   | 235  | 1013 | 0    |
| CONTIG-001031 | 836  | 115  | 7050 | 1647 | 0    |
| CONTIG-001032 | 249  | 9    | 16   | 90   | 0    |
| CONTIG-001033 | 67   | 8    | 2    | 14   | 0    |
| CONTIG-001034 | 649  | 22   | 678  | 358  | 0    |
| CONTIG-001035 | 1610 | 89   | 6028 | 3481 | 248  |
| CONTIG-001036 | 267  | 31   | 203  | 224  | 2    |
| CONTIG-001037 | 38   | 415  | 163  | 235  | 9    |
| CONTIG-001038 | 711  | 76   | 904  | 974  | 0    |
| CONTIG-001039 | 73   | 21   | 49   | 22   | 0    |
| CONTIG-001040 | 376  | 292  | 3147 | 1286 | 0    |
| CONTIG-001041 | 286  | 368  | 3095 | 0    | 1757 |
| CONTIG-001042 | 67   | 998  | 482  | 2073 | 58   |
| CONTIG-001043 | 1000 | 54   | 228  | 1515 | 95   |
| CONTIG-001044 | 127  | 247  | 2023 | 337  | 0    |
| CONTIG-001045 | 93   | 14   | 9    | 22   | 0    |
| CONTIG-001046 | 313  | 311  | 2200 | 1664 | 298  |
| CONTIG-001048 | 388  | 321  | 4559 | 2195 | 70   |
| CONTIG-001049 | 611  | 27   | 62   | 492  | 0    |
| CONTIG-001050 | 64   | 7    | 13   | 2    | 0    |
| CONTIG-001051 | 103  | 17   | 71   | 30   | 0    |
| CONTIG-001052 | 1146 | 52   | 2884 | 971  | 27   |
| CONTIG-001053 | 382  | 18   | 48   | 212  | 0    |
| CONTIG-001054 | 136  | 20   | 15   | 119  | 0    |
| CONTIG-001055 | 67   | 534  | 556  | 100  | 412  |
| CONTIG-001056 | 202  | 91   | 1428 | 225  | 2    |
| CONTIG-001057 | 198  | 468  | 5508 | 338  | 45   |
| CONTIG-001058 | 40   | 365  | 911  | 0    | 0    |
| CONTIG-001059 | 65   | 1819 | 283  | 44   | 1232 |
| CONTIG-001060 | 54   | 1673 | 202  | 28   | 987  |
| CONTIG-001061 | 298  | 13   | 45   | 51   | 0    |
| CONTIG-001065 | 166  | 77   | 47   | 778  | 0    |
| CONTIG-001066 | 60   | 4    | 18   | 0    | 0    |
| CONTIG-001067 | 104  | 8    | 28   | 11   | 0    |
| CONTIG-001068 | 181  | 35   | 76   | 152  | 7    |
| CONTIG-001069 | 221  | 42   | 882  | 27   | 0    |

|               |      |     |      |       |     |
|---------------|------|-----|------|-------|-----|
| CONTIG-001070 | 860  | 72  | 760  | 1580  | 72  |
| CONTIG-001071 | 63   | 10  | 21   | 12    | 0   |
| CONTIG-001072 | 343  | 249 | 2373 | 1946  | 72  |
| CONTIG-001073 | 81   | 9   | 34   | 11    | 0   |
| CONTIG-001074 | 53   | 358 | 126  | 255   | 35  |
| CONTIG-001082 | 75   | 19  | 8    | 23    | 0   |
| CONTIG-001083 | 600  | 130 | 6319 | 1087  | 3   |
| CONTIG-001084 | 615  | 63  | 3114 | 344   | 0   |
| CONTIG-001085 | 364  | 14  | 38   | 136   | 2   |
| CONTIG-001086 | 128  | 615 | 67   | 3868  | 42  |
| CONTIG-001087 | 821  | 232 | 175  | 10456 | 83  |
| CONTIG-001088 | 74   | 17  | 43   | 4     | 0   |
| CONTIG-001089 | 1297 | 61  | 112  | 539   | 7   |
| CONTIG-001090 | 257  | 210 | 2141 | 709   | 32  |
| CONTIG-001091 | 384  | 123 | 227  | 1892  | 31  |
| CONTIG-001099 | 225  | 111 | 390  | 441   | 18  |
| CONTIG-001100 | 1930 | 45  | 174  | 3870  | 38  |
| CONTIG-001101 | 966  | 56  | 349  | 1210  | 96  |
| CONTIG-001102 | 207  | 270 | 3483 | 861   | 0   |
| CONTIG-001103 | 49   | 31  | 2    | 59    | 0   |
| CONTIG-001104 | 256  | 15  | 31   | 106   | 0   |
| CONTIG-001105 | 961  | 113 | 1192 | 3267  | 6   |
| CONTIG-001106 | 449  | 22  | 81   | 228   | 4   |
| CONTIG-001107 | 1164 | 105 | 7603 | 2601  | 8   |
| CONTIG-001119 | 192  | 6   | 25   | 20    | 0   |
| CONTIG-001120 | 663  | 20  | 675  | 282   | 0   |
| CONTIG-001121 | 579  | 96  | 276  | 3178  | 4   |
| CONTIG-001122 | 606  | 22  | 202  | 154   | 8   |
| CONTIG-001123 | 64   | 14  | 10   | 14    | 0   |
| CONTIG-001125 | 155  | 550 | 4119 | 516   | 50  |
| CONTIG-001126 | 76   | 10  | 40   | 0     | 0   |
| CONTIG-001127 | 271  | 19  | 14   | 180   | 4   |
| CONTIG-001128 | 277  | 233 | 347  | 3118  | 95  |
| CONTIG-001129 | 1567 | 64  | 638  | 3828  | 4   |
| CONTIG-001130 | 209  | 16  | 0    | 0     | 19  |
| CONTIG-001131 | 140  | 11  | 109  | 8     | 0   |
| CONTIG-001132 | 60   | 12  | 2    | 0     | 0   |
| CONTIG-001133 | 243  | 53  | 548  | 137   | 0   |
| CONTIG-001134 | 265  | 424 | 1146 | 2496  | 391 |
| CONTIG-001135 | 1290 | 29  | 1317 | 992   | 6   |
| CONTIG-001136 | 374  | 182 | 2067 | 2286  | 54  |
| CONTIG-001138 | 1477 | 80  | 487  | 2680  | 360 |
| CONTIG-001139 | 402  | 75  | 222  | 1590  | 0   |
| CONTIG-001140 | 243  | 822 | 1422 | 6527  | 557 |
| CONTIG-001142 | 616  | 153 | 1243 | 1847  | 17  |
| CONTIG-001143 | 415  | 229 | 1002 | 3015  | 93  |
| CONTIG-001144 | 403  | 16  | 90   | 256   | 2   |



|               |      |     |      |      |     |
|---------------|------|-----|------|------|-----|
| CONTIG-001147 | 233  | 546 | 1210 | 5370 | 232 |
| CONTIG-001148 | 335  | 21  | 143  | 60   | 7   |
| CONTIG-001149 | 133  | 4   | 2    | 9    | 0   |
| CONTIG-001150 | 351  | 16  | 39   | 237  | 0   |
| CONTIG-001151 | 196  | 539 | 2390 | 3466 | 4   |
| CONTIG-001152 | 445  | 11  | 29   | 170  | 0   |
| CONTIG-001153 | 468  | 153 | 1627 | 1539 | 162 |
| CONTIG-001154 | 71   | 24  | 119  | 2    | 0   |
| CONTIG-001155 | 1133 | 46  | 106  | 1547 | 49  |
| CONTIG-001156 | 868  | 95  | 4333 | 2348 | 0   |
| CONTIG-001157 | 452  | 71  | 1446 | 604  | 2   |
| CONTIG-001158 | 1405 | 60  | 3276 | 1744 | 23  |
| CONTIG-001162 | 330  | 47  | 713  | 158  | 2   |
| CONTIG-001164 | 956  | 53  | 1731 | 998  | 46  |
| CONTIG-001165 | 423  | 40  | 232  | 400  | 6   |
| CONTIG-001166 | 1654 | 36  | 454  | 1355 | 116 |
| CONTIG-001167 | 627  | 72  | 501  | 1948 | 9   |
| CONTIG-001168 | 60   | 15  | 6    | 34   | 0   |
| CONTIG-001169 | 118  | 12  | 9    | 5    | 0   |
| CONTIG-001170 | 58   | 4   | 9    | 0    | 0   |
| CONTIG-001171 | 88   | 21  | 30   | 37   | 0   |
| CONTIG-001172 | 734  | 26  | 456  | 478  | 2   |
| CONTIG-001173 | 114  | 7   | 15   | 22   | 0   |
| CONTIG-001174 | 393  | 17  | 404  | 107  | 0   |
| CONTIG-001175 | 908  | 12  | 50   | 280  | 0   |
| CONTIG-001176 | 299  | 7   | 44   | 52   | 0   |
| CONTIG-001177 | 196  | 57  | 457  | 301  | 4   |
| CONTIG-001181 | 2975 | 26  | 183  | 2476 | 47  |
| CONTIG-001182 | 470  | 33  | 385  | 432  | 2   |
| CONTIG-001183 | 223  | 15  | 124  | 77   | 0   |
| CONTIG-001184 | 733  | 23  | 475  | 536  | 2   |
| CONTIG-001185 | 194  | 593 | 1110 | 5941 | 58  |
| CONTIG-001186 | 122  | 9   | 23   | 25   | 0   |
| CONTIG-001187 | 158  | 8   | 0    | 0    | 7   |
| CONTIG-001188 | 231  | 301 | 5575 | 1123 | 0   |
| CONTIG-001190 | 270  | 40  | 268  | 445  | 0   |
| CONTIG-001191 | 712  | 24  | 209  | 386  | 11  |
| CONTIG-001192 | 1062 | 63  | 2863 | 2490 | 2   |
| CONTIG-001193 | 152  | 9   | 25   | 41   | 0   |
| CONTIG-001194 | 155  | 20  | 72   | 87   | 2   |
| CONTIG-001195 | 380  | 27  | 190  | 124  | 2   |
| CONTIG-001196 | 533  | 9   | 36   | 159  | 2   |
| CONTIG-001197 | 78   | 824 | 1008 | 441  | 70  |
| CONTIG-001198 | 1298 | 56  | 1304 | 1879 | 33  |
| CONTIG-001199 | 292  | 599 | 1856 | 6843 | 103 |
| CONTIG-001200 | 537  | 42  | 66   | 1216 | 3   |
| CONTIG-001203 | 225  | 7   | 0    | 0    | 7   |

|               |      |      |      |      |     |
|---------------|------|------|------|------|-----|
| CONTIG-001204 | 226  | 12   | 21   | 73   | 2   |
| CONTIG-001205 | 473  | 70   | 208  | 1913 | 10  |
| CONTIG-001206 | 63   | 88   | 49   | 0    | 0   |
| CONTIG-001207 | 309  | 107  | 526  | 1009 | 25  |
| CONTIG-001208 | 464  | 22   | 106  | 479  | 0   |
| CONTIG-001209 | 156  | 7    | 33   | 21   | 0   |
| CONTIG-001210 | 115  | 11   | 46   | 0    | 2   |
| CONTIG-001211 | 748  | 18   | 480  | 316  | 0   |
| CONTIG-001212 | 206  | 7    | 17   | 17   | 0   |
| CONTIG-001213 | 78   | 417  | 362  | 397  | 66  |
| CONTIG-001214 | 139  | 304  | 3742 | 45   | 12  |
| CONTIG-001215 | 916  | 60   | 1598 | 912  | 27  |
| CONTIG-001216 | 532  | 76   | 271  | 1500 | 25  |
| CONTIG-001217 | 1237 | 22   | 149  | 773  | 42  |
| CONTIG-001218 | 698  | 24   | 292  | 720  | 0   |
| CONTIG-001219 | 1269 | 24   | 261  | 909  | 16  |
| CONTIG-001220 | 321  | 33   | 380  | 414  | 0   |
| CONTIG-001221 | 1052 | 88   | 325  | 5097 | 3   |
| CONTIG-001222 | 123  | 232  | 2050 | 12   | 2   |
| CONTIG-001223 | 547  | 32   | 92   | 504  | 11  |
| CONTIG-001224 | 390  | 52   | 416  | 320  | 2   |
| CONTIG-001225 | 707  | 14   | 13   | 282  | 2   |
| CONTIG-001226 | 489  | 579  | 5428 | 5771 | 591 |
| CONTIG-001227 | 665  | 15   | 65   | 472  | 4   |
| CONTIG-001228 | 104  | 1035 | 4493 | 49   | 4   |
| CONTIG-001229 | 1594 | 66   | 2992 | 4895 | 0   |
| CONTIG-001230 | 642  | 121  | 1267 | 2755 | 52  |
| CONTIG-001231 | 1262 | 87   | 653  | 2934 | 538 |
| CONTIG-001232 | 160  | 146  | 1702 | 23   | 0   |
| CONTIG-001234 | 726  | 65   | 859  | 1998 | 4   |
| CONTIG-001235 | 65   | 10   | 4    | 22   | 0   |
| CONTIG-001236 | 119  | 202  | 689  | 731  | 8   |
| CONTIG-001237 | 82   | 147  | 782  | 181  | 5   |
| CONTIG-001238 | 585  | 58   | 622  | 830  | 6   |
| CONTIG-001239 | 275  | 330  | 498  | 2868 | 6   |
| CONTIG-001240 | 1833 | 79   | 1032 | 6178 | 6   |
| CONTIG-001241 | 272  | 76   | 837  | 217  | 8   |
| CONTIG-001242 | 462  | 38   | 1202 | 179  | 0   |
| CONTIG-001243 | 422  | 63   | 55   | 683  | 29  |
| CONTIG-001244 | 308  | 12   | 71   | 105  | 0   |
| CONTIG-001245 | 63   | 13   | 15   | 11   | 0   |
| CONTIG-001246 | 158  | 390  | 554  | 2026 | 155 |
| CONTIG-001247 | 198  | 65   | 102  | 437  | 14  |
| CONTIG-001248 | 191  | 22   | 191  | 143  | 0   |
| CONTIG-001249 | 126  | 6    | 5    | 17   | 0   |
| CONTIG-001250 | 63   | 9    | 39   | 0    | 0   |
| CONTIG-001251 | 611  | 12   | 47   | 151  | 2   |

|               |      |      |      |      |     |
|---------------|------|------|------|------|-----|
| CONTIG-001252 | 762  | 146  | 294  | 2737 | 747 |
| CONTIG-001255 | 801  | 30   | 773  | 764  | 2   |
| CONTIG-001256 | 396  | 16   | 69   | 125  | 0   |
| CONTIG-001257 | 280  | 298  | 5031 | 746  | 42  |
| CONTIG-001258 | 309  | 18   | 80   | 116  | 2   |
| CONTIG-001266 | 184  | 8    | 10   | 28   | 0   |
| CONTIG-001267 | 693  | 108  | 1124 | 4035 | 0   |
| CONTIG-001271 | 234  | 8    | 12   | 55   | 2   |
| CONTIG-001272 | 191  | 44   | 116  | 168  | 0   |
| CONTIG-001273 | 785  | 48   | 395  | 2016 | 2   |
| CONTIG-001274 | 1272 | 29   | 182  | 1223 | 28  |
| CONTIG-001275 | 787  | 49   | 301  | 1000 | 44  |
| CONTIG-001283 | 247  | 270  | 2596 | 685  | 93  |
| CONTIG-001286 | 191  | 11   | 9    | 80   | 0   |
| CONTIG-001287 | 347  | 584  | 6764 | 3010 | 368 |
| CONTIG-001288 | 232  | 183  | 4022 | 2    | 19  |
| CONTIG-001290 | 129  | 6    | 7    | 8    | 2   |
| CONTIG-001291 | 104  | 676  | 422  | 2696 | 145 |
| CONTIG-001292 | 1132 | 16   | 130  | 437  | 8   |
| CONTIG-001293 | 149  | 6    | 2    | 2    | 0   |
| CONTIG-001294 | 55   | 1713 | 6519 | 132  | 0   |
| CONTIG-001297 | 1654 | 65   | 214  | 2432 | 168 |
| CONTIG-001298 | 163  | 8    | 52   | 13   | 0   |
| CONTIG-001301 | 129  | 21   | 99   | 39   | 0   |
| CONTIG-001302 | 692  | 157  | 2526 | 3107 | 100 |
| CONTIG-001303 | 476  | 12   | 28   | 223  | 2   |
| CONTIG-001304 | 187  | 13   | 102  | 60   | 0   |
| CONTIG-001305 | 91   | 9    | 15   | 21   | 0   |
| CONTIG-001307 | 1608 | 61   | 385  | 5465 | 0   |
| CONTIG-001308 | 242  | 23   | 86   | 144  | 0   |
| CONTIG-001309 | 1423 | 33   | 113  | 1519 | 28  |
| CONTIG-001310 | 163  | 11   | 18   | 83   | 0   |
| CONTIG-001311 | 63   | 1566 | 9097 | 626  | 0   |
| CONTIG-001318 | 93   | 3    | 0    | 6    | 0   |
| CONTIG-001319 | 758  | 39   | 124  | 1466 | 54  |
| CONTIG-001320 | 188  | 37   | 253  | 190  | 0   |
| CONTIG-001321 | 185  | 68   | 1186 | 0    | 0   |
| CONTIG-001322 | 441  | 422  | 4734 | 2831 | 391 |
| CONTIG-001323 | 539  | 16   | 22   | 213  | 4   |
| CONTIG-001330 | 621  | 98   | 952  | 1232 | 0   |
| CONTIG-001331 | 118  | 17   | 37   | 50   | 0   |
| CONTIG-001332 | 685  | 26   | 223  | 482  | 0   |
| CONTIG-001333 | 583  | 19   | 263  | 320  | 2   |
| CONTIG-001334 | 94   | 84   | 36   | 261  | 4   |
| CONTIG-001335 | 97   | 155  | 552  | 41   | 0   |
| CONTIG-001336 | 81   | 16   | 104  | 2    | 0   |
| CONTIG-001337 | 548  | 20   | 258  | 393  | 0   |

|               |      |     |      |       |     |
|---------------|------|-----|------|-------|-----|
| CONTIG-001339 | 988  | 82  | 2292 | 2787  | 2   |
| CONTIG-001340 | 1093 | 73  | 1193 | 4550  | 0   |
| CONTIG-001341 | 2224 | 38  | 768  | 2258  | 34  |
| CONTIG-001342 | 360  | 531 | 2288 | 4320  | 475 |
| CONTIG-001343 | 163  | 99  | 499  | 537   | 0   |
| CONTIG-001344 | 296  | 18  | 54   | 160   | 2   |
| CONTIG-001345 | 357  | 15  | 308  | 94    | 0   |
| CONTIG-001346 | 58   | 9   | 12   | 18    | 0   |
| CONTIG-001348 | 65   | 200 | 905  | 22    | 4   |
| CONTIG-001351 | 254  | 9   | 2    | 76    | 0   |
| CONTIG-001352 | 117  | 4   | 4    | 11    | 0   |
| CONTIG-001353 | 672  | 117 | 2599 | 1802  | 76  |
| CONTIG-001354 | 2035 | 27  | 438  | 2218  | 0   |
| CONTIG-001356 | 847  | 23  | 313  | 839   | 2   |
| CONTIG-001358 | 282  | 47  | 488  | 99    | 3   |
| CONTIG-001366 | 650  | 30  | 531  | 405   | 4   |
| CONTIG-001367 | 246  | 15  | 54   | 141   | 0   |
| CONTIG-001368 | 136  | 21  | 5    | 2     | 0   |
| CONTIG-001369 | 349  | 13  | 145  | 87    | 0   |
| CONTIG-001370 | 323  | 30  | 73   | 532   | 0   |
| CONTIG-001371 | 272  | 21  | 82   | 161   | 21  |
| CONTIG-001372 | 132  | 21  | 93   | 44    | 0   |
| CONTIG-001373 | 130  | 503 | 1529 | 1923  | 51  |
| CONTIG-001374 | 164  | 7   | 3    | 23    | 0   |
| CONTIG-001375 | 665  | 17  | 164  | 307   | 2   |
| CONTIG-001376 | 132  | 11  | 32   | 9     | 0   |
| CONTIG-001377 | 552  | 310 | 5475 | 2690  | 367 |
| CONTIG-001378 | 388  | 124 | 30   | 108   | 0   |
| CONTIG-001379 | 1249 | 212 | 1377 | 11583 | 503 |
| CONTIG-001380 | 217  | 6   | 26   | 46    | 0   |
| CONTIG-001381 | 949  | 31  | 241  | 1212  | 4   |
| CONTIG-001382 | 336  | 45  | 287  | 305   | 7   |
| CONTIG-001383 | 68   | 889 | 1708 | 843   | 59  |
| CONTIG-001385 | 109  | 635 | 784  | 1039  | 105 |
| CONTIG-001386 | 714  | 29  | 285  | 550   | 10  |
| CONTIG-001387 | 134  | 412 | 776  | 1563  | 173 |
| CONTIG-001388 | 170  | 10  | 22   | 67    | 2   |
| CONTIG-001389 | 310  | 61  | 528  | 226   | 4   |
| CONTIG-001390 | 591  | 15  | 184  | 159   | 4   |
| CONTIG-001392 | 384  | 34  | 830  | 226   | 0   |
| CONTIG-001393 | 244  | 503 | 1575 | 2562  | 239 |
| CONTIG-001394 | 722  | 12  | 31   | 199   | 6   |
| CONTIG-001395 | 1200 | 87  | 4655 | 3025  | 24  |
| CONTIG-001396 | 68   | 32  | 185  | 0     | 0   |
| CONTIG-001397 | 480  | 18  | 111  | 178   | 2   |
| CONTIG-001398 | 1018 | 59  | 2236 | 2216  | 4   |
| CONTIG-001399 | 678  | 48  | 470  | 965   | 20  |

|               |      |     |      |      |     |
|---------------|------|-----|------|------|-----|
| CONTIG-001400 | 818  | 60  | 483  | 1593 | 7   |
| CONTIG-001402 | 263  | 11  | 14   | 43   | 0   |
| CONTIG-001403 | 78   | 48  | 329  | 0    | 0   |
| CONTIG-001404 | 892  | 160 | 500  | 4071 | 249 |
| CONTIG-001405 | 709  | 132 | 2383 | 3323 | 2   |
| CONTIG-001407 | 535  | 21  | 469  | 231  | 0   |
| CONTIG-001408 | 163  | 117 | 1037 | 435  | 0   |
| CONTIG-001409 | 213  | 4   | 4    | 26   | 0   |
| CONTIG-001410 | 152  | 480 | 1131 | 1194 | 198 |
| CONTIG-001411 | 315  | 34  | 61   | 273  | 25  |
| CONTIG-001412 | 176  | 446 | 2916 | 501  | 95  |
| CONTIG-001413 | 113  | 11  | 5    | 39   | 0   |
| CONTIG-001414 | 275  | 338 | 1645 | 3571 | 84  |
| CONTIG-001415 | 991  | 32  | 107  | 1214 | 12  |
| CONTIG-001416 | 1074 | 71  | 622  | 3237 | 21  |
| CONTIG-001417 | 708  | 44  | 472  | 487  | 0   |
| CONTIG-001418 | 162  | 25  | 434  | 0    | 0   |
| CONTIG-001419 | 563  | 37  | 218  | 793  | 10  |
| CONTIG-001429 | 594  | 12  | 168  | 84   | 0   |
| CONTIG-001430 | 69   | 23  | 54   | 26   | 2   |
| CONTIG-001431 | 222  | 6   | 9    | 26   | 0   |
| CONTIG-001432 | 986  | 36  | 2163 | 855  | 0   |
| CONTIG-001433 | 232  | 11  | 24   | 37   | 0   |
| CONTIG-001434 | 218  | 47  | 257  | 124  | 2   |
| CONTIG-001435 | 381  | 44  | 190  | 526  | 4   |
| CONTIG-001436 | 375  | 166 | 1634 | 712  | 13  |
| CONTIG-001438 | 83   | 228 | 606  | 215  | 11  |
| CONTIG-001439 | 765  | 48  | 248  | 2072 | 0   |
| CONTIG-001440 | 128  | 276 | 1664 | 61   | 18  |
| CONTIG-001441 | 498  | 29  | 60   | 611  | 0   |
| CONTIG-001442 | 69   | 9   | 2    | 2    | 0   |
| CONTIG-001443 | 220  | 36  | 828  | 19   | 0   |
| CONTIG-001444 | 1369 | 108 | 4322 | 5126 | 159 |
| CONTIG-001445 | 186  | 24  | 161  | 28   | 0   |
| CONTIG-001446 | 92   | 670 | 327  | 2133 | 28  |
| CONTIG-001447 | 1616 | 18  | 143  | 1166 | 0   |
| CONTIG-001448 | 360  | 18  | 38   | 276  | 2   |
| CONTIG-001451 | 561  | 19  | 119  | 427  | 2   |
| CONTIG-001452 | 234  | 135 | 260  | 1299 | 88  |
| CONTIG-001453 | 169  | 15  | 34   | 51   | 0   |
| CONTIG-001454 | 448  | 432 | 4834 | 3523 | 383 |
| CONTIG-001456 | 205  | 40  | 441  | 131  | 0   |
| CONTIG-001457 | 502  | 16  | 105  | 219  | 0   |
| CONTIG-001458 | 122  | 6   | 9    | 0    | 0   |
| CONTIG-001459 | 123  | 7   | 6    | 32   | 0   |
| CONTIG-001460 | 534  | 20  | 515  | 221  | 0   |
| CONTIG-001461 | 1244 | 35  | 811  | 1327 | 34  |

|               |      |     |      |      |     |
|---------------|------|-----|------|------|-----|
| CONTIG-001462 | 218  | 11  | 69   | 25   | 0   |
| CONTIG-001468 | 325  | 232 | 4904 | 1133 | 14  |
| CONTIG-001471 | 48   | 942 | 1610 | 162  | 26  |
| CONTIG-001472 | 360  | 251 | 1207 | 1370 | 144 |
| CONTIG-001473 | 267  | 41  | 144  | 431  | 4   |
| CONTIG-001474 | 50   | 349 | 1434 | 38   | 0   |
| CONTIG-001475 | 682  | 47  | 1122 | 1241 | 0   |
| CONTIG-001477 | 67   | 61  | 89   | 154  | 0   |
| CONTIG-001478 | 886  | 37  | 1450 | 954  | 0   |
| CONTIG-001479 | 435  | 32  | 689  | 57   | 12  |
| CONTIG-001480 | 619  | 41  | 709  | 1028 | 0   |
| CONTIG-001481 | 890  | 81  | 1016 | 1510 | 33  |
| CONTIG-001482 | 81   | 4   | 2    | 0    | 0   |
| CONTIG-001489 | 338  | 40  | 806  | 136  | 0   |
| CONTIG-001490 | 118  | 6   | 20   | 9    | 0   |
| CONTIG-001494 | 212  | 31  | 94   | 37   | 0   |
| CONTIG-001495 | 353  | 10  | 4    | 164  | 2   |
| CONTIG-001496 | 287  | 417 | 709  | 2512 | 415 |
| CONTIG-001497 | 59   | 3   | 6    | 0    | 0   |
| CONTIG-001498 | 249  | 26  | 152  | 95   | 0   |
| CONTIG-001499 | 259  | 25  | 269  | 95   | 0   |
| CONTIG-001501 | 148  | 7   | 12   | 18   | 0   |
| CONTIG-001502 | 110  | 8   | 23   | 2    | 5   |
| CONTIG-001503 | 523  | 44  | 417  | 617  | 4   |
| CONTIG-001504 | 744  | 22  | 230  | 520  | 4   |
| CONTIG-001505 | 105  | 9   | 9    | 16   | 0   |
| CONTIG-001506 | 392  | 49  | 34   | 878  | 0   |
| CONTIG-001507 | 274  | 15  | 35   | 114  | 0   |
| CONTIG-001508 | 114  | 281 | 615  | 621  | 13  |
| CONTIG-001510 | 724  | 20  | 417  | 271  | 3   |
| CONTIG-001511 | 384  | 34  | 181  | 430  | 8   |
| CONTIG-001512 | 144  | 4   | 4    | 15   | 0   |
| CONTIG-001513 | 156  | 15  | 53   | 10   | 2   |
| CONTIG-001514 | 594  | 9   | 88   | 163  | 0   |
| CONTIG-001515 | 179  | 13  | 50   | 68   | 0   |
| CONTIG-001516 | 369  | 91  | 1594 | 311  | 4   |
| CONTIG-001517 | 1419 | 42  | 1578 | 1826 | 28  |
| CONTIG-001518 | 156  | 204 | 951  | 777  | 17  |
| CONTIG-001519 | 291  | 10  | 2    | 67   | 2   |
| CONTIG-001520 | 540  | 63  | 652  | 1809 | 0   |
| CONTIG-001521 | 91   | 29  | 112  | 27   | 0   |
| CONTIG-001522 | 162  | 46  | 195  | 199  | 0   |
| CONTIG-001523 | 346  | 73  | 453  | 721  | 12  |
| CONTIG-001524 | 155  | 367 | 5008 | 183  | 19  |
| CONTIG-001526 | 102  | 243 | 338  | 334  | 55  |
| CONTIG-001532 | 594  | 19  | 39   | 74   | 0   |
| CONTIG-001533 | 251  | 756 | 2741 | 4957 | 362 |

|               |      |     |      |      |     |
|---------------|------|-----|------|------|-----|
| CONTIG-001534 | 212  | 9   | 16   | 29   | 0   |
| CONTIG-001535 | 302  | 219 | 3172 | 385  | 0   |
| CONTIG-001536 | 179  | 476 | 1648 | 1604 | 258 |
| CONTIG-001537 | 547  | 55  | 1060 | 547  | 26  |
| CONTIG-001538 | 529  | 126 | 268  | 1614 | 99  |
| CONTIG-001539 | 1747 | 63  | 1271 | 4790 | 32  |
| CONTIG-001540 | 703  | 32  | 278  | 667  | 6   |
| CONTIG-001551 | 411  | 16  | 152  | 181  | 0   |
| CONTIG-001552 | 1007 | 64  | 96   | 2136 | 268 |
| CONTIG-001553 | 1829 | 39  | 141  | 2164 | 91  |
| CONTIG-001554 | 66   | 8   | 21   | 10   | 0   |
| CONTIG-001555 | 128  | 8   | 2    | 42   | 0   |
| CONTIG-001556 | 107  | 6   | 20   | 6    | 0   |
| CONTIG-001557 | 550  | 27  | 590  | 406  | 0   |
| CONTIG-001558 | 63   | 422 | 803  | 73   | 0   |
| CONTIG-001560 | 355  | 38  | 142  | 342  | 15  |
| CONTIG-001562 | 1361 | 24  | 1077 | 652  | 10  |
| CONTIG-001563 | 557  | 37  | 211  | 754  | 2   |
| CONTIG-001564 | 635  | 10  | 62   | 251  | 0   |
| CONTIG-001565 | 514  | 171 | 3738 | 1683 | 75  |
| CONTIG-001566 | 165  | 452 | 1128 | 1652 | 136 |
| CONTIG-001567 | 66   | 729 | 482  | 10   | 664 |
| CONTIG-001568 | 37   | 214 | 127  | 155  | 6   |
| CONTIG-001569 | 116  | 27  | 146  | 26   | 0   |
| CONTIG-001570 | 490  | 16  | 204  | 253  | 0   |
| CONTIG-001572 | 39   | 820 | 294  | 395  | 45  |
| CONTIG-001573 | 238  | 28  | 314  | 81   | 7   |
| CONTIG-001574 | 203  | 219 | 4102 | 2    | 28  |
| CONTIG-001575 | 860  | 38  | 1091 | 472  | 44  |
| CONTIG-001576 | 103  | 14  | 45   | 32   | 0   |
| CONTIG-001577 | 72   | 12  | 19   | 14   | 0   |
| CONTIG-001578 | 85   | 24  | 49   | 31   | 0   |
| CONTIG-001579 | 503  | 105 | 35   | 2818 | 2   |
| CONTIG-001580 | 153  | 16  | 49   | 18   | 0   |
| CONTIG-001581 | 252  | 71  | 332  | 233  | 8   |
| CONTIG-001582 | 253  | 12  | 23   | 114  | 0   |
| CONTIG-001584 | 1290 | 23  | 354  | 558  | 2   |
| CONTIG-001585 | 70   | 7   | 20   | 2    | 0   |
| CONTIG-001586 | 314  | 44  | 529  | 287  | 9   |
| CONTIG-001587 | 213  | 10  | 53   | 18   | 0   |
| CONTIG-001588 | 197  | 7   | 42   | 31   | 0   |
| CONTIG-001589 | 988  | 45  | 418  | 1094 | 180 |
| CONTIG-001590 | 62   | 490 | 421  | 453  | 38  |
| CONTIG-001591 | 89   | 8   | 6    | 7    | 0   |
| CONTIG-001592 | 1237 | 46  | 305  | 2460 | 13  |
| CONTIG-001594 | 265  | 14  | 68   | 118  | 0   |
| CONTIG-001595 | 503  | 16  | 39   | 211  | 0   |

|               |      |      |      |      |      |
|---------------|------|------|------|------|------|
| CONTIG-001596 | 516  | 47   | 261  | 605  | 12   |
| CONTIG-001597 | 1298 | 37   | 344  | 1120 | 98   |
| CONTIG-001598 | 583  | 99   | 177  | 3353 | 0    |
| CONTIG-001599 | 135  | 21   | 75   | 59   | 0    |
| CONTIG-001600 | 528  | 110  | 646  | 1922 | 88   |
| CONTIG-001601 | 113  | 7    | 25   | 0    | 0    |
| CONTIG-001602 | 341  | 16   | 129  | 188  | 0    |
| CONTIG-001603 | 58   | 2    | 0    | 2    | 0    |
| CONTIG-001604 | 115  | 21   | 7    | 14   | 0    |
| CONTIG-001605 | 229  | 22   | 174  | 51   | 2    |
| CONTIG-001606 | 890  | 99   | 5971 | 1604 | 12   |
| CONTIG-001608 | 41   | 1533 | 90   | 1013 | 0    |
| CONTIG-001609 | 174  | 128  | 1011 | 136  | 0    |
| CONTIG-001611 | 36   | 129  | 46   | 128  | 0    |
| CONTIG-001612 | 122  | 27   | 94   | 57   | 0    |
| CONTIG-001613 | 585  | 31   | 312  | 643  | 0    |
| CONTIG-001614 | 119  | 5    | 3    | 5    | 0    |
| CONTIG-001615 | 297  | 123  | 860  | 543  | 47   |
| CONTIG-001616 | 1366 | 32   | 638  | 1875 | 12   |
| CONTIG-001617 | 190  | 874  | 2754 | 1075 | 1470 |
| CONTIG-001618 | 335  | 172  | 393  | 2548 | 12   |
| CONTIG-001619 | 286  | 38   | 207  | 276  | 0    |
| CONTIG-001620 | 826  | 33   | 499  | 1197 | 7    |
| CONTIG-001621 | 1243 | 28   | 864  | 1175 | 4    |
| CONTIG-001622 | 65   | 4    | 3    | 6    | 0    |
| CONTIG-001623 | 709  | 13   | 32   | 393  | 11   |
| CONTIG-001624 | 574  | 20   | 63   | 100  | 0    |
| CONTIG-001625 | 927  | 43   | 174  | 1054 | 52   |
| CONTIG-001626 | 472  | 31   | 374  | 514  | 0    |
| CONTIG-001627 | 60   | 5    | 4    | 10   | 0    |
| CONTIG-001628 | 309  | 525  | 2343 | 4762 | 6    |
| CONTIG-001629 | 1211 | 76   | 366  | 4040 | 67   |
| CONTIG-001630 | 72   | 15   | 37   | 26   | 0    |
| CONTIG-001631 | 98   | 885  | 1458 | 1695 | 154  |
| CONTIG-001632 | 193  | 13   | 11   | 45   | 0    |
| CONTIG-001633 | 566  | 43   | 1629 | 556  | 0    |
| CONTIG-001634 | 40   | 55   | 59   | 8    | 0    |
| CONTIG-001635 | 151  | 15   | 14   | 106  | 0    |
| CONTIG-001636 | 383  | 67   | 969  | 891  | 3    |
| CONTIG-001637 | 241  | 8    | 68   | 19   | 0    |
| CONTIG-001638 | 2135 | 26   | 477  | 1817 | 13   |
| CONTIG-001639 | 86   | 20   | 73   | 17   | 0    |
| CONTIG-001640 | 163  | 5    | 10   | 17   | 0    |
| CONTIG-001641 | 66   | 7    | 36   | 0    | 0    |
| CONTIG-001642 | 649  | 66   | 452  | 999  | 35   |
| CONTIG-001643 | 444  | 8    | 21   | 119  | 0    |
| CONTIG-001644 | 103  | 69   | 431  | 54   | 3    |



|               |      |     |      |      |     |
|---------------|------|-----|------|------|-----|
| CONTIG-001645 | 177  | 8   | 15   | 39   | 0   |
| CONTIG-001646 | 954  | 112 | 1107 | 3622 | 19  |
| CONTIG-001647 | 526  | 57  | 324  | 1292 | 9   |
| CONTIG-001648 | 254  | 78  | 557  | 215  | 13  |
| CONTIG-001649 | 121  | 92  | 380  | 91   | 3   |
| CONTIG-001650 | 896  | 33  | 588  | 845  | 2   |
| CONTIG-001651 | 371  | 240 | 2589 | 1590 | 210 |
| CONTIG-001652 | 1119 | 59  | 899  | 2544 | 15  |
| CONTIG-001653 | 171  | 469 | 4101 | 795  | 60  |
| CONTIG-001654 | 51   | 309 | 510  | 553  | 4   |
| CONTIG-001656 | 67   | 30  | 163  | 0    | 0   |
| CONTIG-001657 | 101  | 4   | 14   | 4    | 0   |
| CONTIG-001660 | 784  | 27  | 186  | 517  | 7   |
| CONTIG-001661 | 197  | 185 | 1935 | 122  | 26  |
| CONTIG-001662 | 855  | 36  | 585  | 565  | 33  |
| CONTIG-001663 | 68   | 6   | 18   | 6    | 0   |
| CONTIG-001666 | 250  | 11  | 4    | 89   | 0   |
| CONTIG-001678 | 650  | 41  | 543  | 1095 | 0   |
| CONTIG-001679 | 317  | 39  | 44   | 589  | 0   |
| CONTIG-001680 | 126  | 160 | 2038 | 0    | 3   |
| CONTIG-001681 | 135  | 3   | 2    | 16   | 0   |
| CONTIG-001682 | 273  | 450 | 1756 | 1972 | 416 |
| CONTIG-001683 | 101  | 5   | 5    | 0    | 0   |
| CONTIG-001684 | 185  | 18  | 119  | 17   | 0   |
| CONTIG-001685 | 1423 | 16  | 179  | 763  | 2   |
| CONTIG-001686 | 939  | 18  | 206  | 661  | 4   |
| CONTIG-001687 | 129  | 200 | 684  | 216  | 8   |
| CONTIG-001688 | 959  | 148 | 6167 | 5227 | 0   |
| CONTIG-001689 | 109  | 79  | 289  | 4    | 0   |
| CONTIG-001690 | 302  | 72  | 682  | 495  | 16  |
| CONTIG-001691 | 303  | 8   | 39   | 72   | 0   |
| CONTIG-001692 | 251  | 20  | 93   | 119  | 0   |
| CONTIG-001693 | 793  | 132 | 324  | 5254 | 55  |
| CONTIG-001696 | 259  | 48  | 72   | 543  | 10  |
| CONTIG-001697 | 210  | 18  | 27   | 81   | 9   |
| CONTIG-001698 | 858  | 23  | 71   | 392  | 19  |
| CONTIG-001706 | 698  | 113 | 1515 | 1730 | 58  |
| CONTIG-001707 | 719  | 32  | 226  | 689  | 4   |
| CONTIG-001708 | 1019 | 30  | 244  | 1448 | 2   |
| CONTIG-001709 | 262  | 359 | 401  | 3653 | 85  |
| CONTIG-001710 | 754  | 31  | 183  | 848  | 33  |
| CONTIG-001711 | 496  | 17  | 94   | 306  | 2   |
| CONTIG-001712 | 648  | 142 | 546  | 1643 | 209 |
| CONTIG-001713 | 243  | 26  | 84   | 50   | 15  |
| CONTIG-001715 | 964  | 122 | 806  | 6284 | 0   |
| CONTIG-001716 | 250  | 54  | 298  | 253  | 36  |
| CONTIG-001718 | 461  | 104 | 1885 | 956  | 30  |

|               |      |     |      |      |     |
|---------------|------|-----|------|------|-----|
| CONTIG-001722 | 290  | 132 | 2621 | 567  | 0   |
| CONTIG-001723 | 465  | 73  | 439  | 655  | 16  |
| CONTIG-001724 | 196  | 6   | 40   | 13   | 0   |
| CONTIG-001725 | 1060 | 32  | 500  | 876  | 45  |
| CONTIG-001726 | 86   | 511 | 360  | 919  | 114 |
| CONTIG-001727 | 593  | 43  | 91   | 560  | 56  |
| CONTIG-001728 | 195  | 72  | 554  | 295  | 0   |
| CONTIG-001729 | 1526 | 41  | 621  | 2592 | 9   |
| CONTIG-001730 | 71   | 8   | 28   | 7    | 0   |
| CONTIG-001731 | 182  | 19  | 370  | 7    | 0   |
| CONTIG-001732 | 93   | 29  | 247  | 0    | 0   |
| CONTIG-001733 | 326  | 16  | 19   | 170  | 2   |
| CONTIG-001734 | 297  | 23  | 91   | 132  | 4   |
| CONTIG-001735 | 2847 | 39  | 87   | 5831 | 12  |
| CONTIG-001736 | 515  | 81  | 841  | 1555 | 0   |
| CONTIG-001737 | 407  | 43  | 89   | 670  | 0   |
| CONTIG-001740 | 888  | 33  | 71   | 839  | 35  |
| CONTIG-001741 | 193  | 159 | 1131 | 716  | 7   |
| CONTIG-001742 | 43   | 691 | 1961 | 17   | 0   |
| CONTIG-001743 | 55   | 127 | 59   | 136  | 0   |
| CONTIG-001744 | 144  | 6   | 19   | 18   | 0   |
| CONTIG-001747 | 137  | 8   | 7    | 37   | 0   |
| CONTIG-001748 | 467  | 114 | 491  | 1678 | 146 |
| CONTIG-001749 | 586  | 10  | 52   | 148  | 0   |
| CONTIG-001750 | 218  | 38  | 819  | 0    | 4   |
| CONTIG-001751 | 85   | 249 | 106  | 894  | 4   |
| CONTIG-001752 | 312  | 356 | 2770 | 3301 | 123 |
| CONTIG-001760 | 38   | 336 | 56   | 344  | 7   |
| CONTIG-001761 | 134  | 5   | 5    | 16   | 0   |
| CONTIG-001762 | 843  | 25  | 264  | 935  | 0   |
| CONTIG-001763 | 857  | 57  | 665  | 1825 | 11  |
| CONTIG-001764 | 190  | 25  | 184  | 103  | 0   |
| CONTIG-001766 | 204  | 135 | 2639 | 2    | 0   |
| CONTIG-001767 | 769  | 28  | 691  | 728  | 8   |
| CONTIG-001768 | 390  | 24  | 69   | 295  | 0   |
| CONTIG-001769 | 162  | 24  | 54   | 57   | 15  |
| CONTIG-001771 | 232  | 669 | 958  | 5838 | 465 |
| CONTIG-001772 | 556  | 220 | 6951 | 2663 | 83  |
| CONTIG-001773 | 299  | 29  | 150  | 358  | 0   |
| CONTIG-001774 | 62   | 38  | 80   | 39   | 0   |
| CONTIG-001783 | 134  | 276 | 805  | 29   | 0   |
| CONTIG-001784 | 960  | 29  | 256  | 1318 | 4   |
| CONTIG-001785 | 257  | 17  | 70   | 110  | 0   |
| CONTIG-001786 | 127  | 295 | 1775 | 106  | 2   |
| CONTIG-001787 | 92   | 24  | 111  | 8    | 6   |
| CONTIG-001788 | 117  | 21  | 98   | 32   | 0   |
| CONTIG-001789 | 293  | 36  | 385  | 184  | 2   |

|               |      |      |      |       |      |
|---------------|------|------|------|-------|------|
| CONTIG-001797 | 102  | 19   | 43   | 0     | 0    |
| CONTIG-001798 | 123  | 547  | 1111 | 2665  | 20   |
| CONTIG-001799 | 592  | 48   | 406  | 703   | 34   |
| CONTIG-001800 | 108  | 3    | 10   | 6     | 0    |
| CONTIG-001801 | 1222 | 213  | 1075 | 11141 | 537  |
| CONTIG-001802 | 91   | 132  | 551  | 85    | 4    |
| CONTIG-001804 | 93   | 25   | 249  | 0     | 0    |
| CONTIG-001813 | 969  | 17   | 71   | 379   | 6    |
| CONTIG-001814 | 66   | 1484 | 573  | 322   | 0    |
| CONTIG-001820 | 239  | 88   | 306  | 380   | 56   |
| CONTIG-001821 | 468  | 22   | 215  | 253   | 0    |
| CONTIG-001822 | 880  | 57   | 3975 | 849   | 2    |
| CONTIG-001823 | 733  | 17   | 140  | 340   | 4    |
| CONTIG-001824 | 68   | 9    | 20   | 0     | 0    |
| CONTIG-001830 | 281  | 456  | 3124 | 2457  | 224  |
| CONTIG-001831 | 200  | 10   | 49   | 6     | 0    |
| CONTIG-001832 | 405  | 41   | 97   | 661   | 0    |
| CONTIG-001833 | 1046 | 38   | 744  | 1305  | 12   |
| CONTIG-001835 | 475  | 16   | 75   | 162   | 30   |
| CONTIG-001836 | 823  | 15   | 285  | 316   | 0    |
| CONTIG-001837 | 299  | 18   | 165  | 117   | 0    |
| CONTIG-001838 | 1252 | 87   | 6356 | 2769  | 4    |
| CONTIG-001839 | 406  | 11   | 83   | 166   | 0    |
| CONTIG-001840 | 1058 | 143  | 764  | 5233  | 256  |
| CONTIG-001843 | 164  | 305  | 513  | 859   | 210  |
| CONTIG-001844 | 480  | 163  | 727  | 1350  | 342  |
| CONTIG-001845 | 69   | 120  | 281  | 274   | 0    |
| CONTIG-001846 | 58   | 15   | 7    | 8     | 0    |
| CONTIG-001847 | 165  | 16   | 14   | 74    | 0    |
| CONTIG-001848 | 168  | 15   | 20   | 61    | 4    |
| CONTIG-001849 | 90   | 440  | 497  | 938   | 34   |
| CONTIG-001850 | 121  | 7    | 21   | 5     | 0    |
| CONTIG-001851 | 382  | 48   | 523  | 198   | 0    |
| CONTIG-001852 | 149  | 11   | 4    | 73    | 0    |
| CONTIG-001853 | 764  | 49   | 69   | 1842  | 25   |
| CONTIG-001854 | 170  | 47   | 189  | 136   | 0    |
| CONTIG-001855 | 162  | 33   | 235  | 52    | 0    |
| CONTIG-001857 | 455  | 11   | 134  | 127   | 0    |
| CONTIG-001858 | 216  | 16   | 30   | 85    | 6    |
| CONTIG-001859 | 819  | 76   | 1113 | 2774  | 2    |
| CONTIG-001860 | 884  | 34   | 424  | 697   | 9    |
| CONTIG-001861 | 112  | 8    | 34   | 30    | 0    |
| CONTIG-001862 | 329  | 73   | 88   | 1321  | 0    |
| CONTIG-001863 | 258  | 109  | 635  | 1350  | 7    |
| CONTIG-001864 | 135  | 149  | 133  | 1146  | 0    |
| CONTIG-001865 | 54   | 1862 | 95   | 1112  | 1124 |
| CONTIG-001866 | 633  | 37   | 144  | 676   | 10   |

|               |      |      |      |      |     |
|---------------|------|------|------|------|-----|
| CONTIG-001867 | 615  | 21   | 255  | 500  | 0   |
| CONTIG-001868 | 160  | 156  | 336  | 1055 | 0   |
| CONTIG-001869 | 66   | 166  | 221  | 362  | 4   |
| CONTIG-001870 | 794  | 30   | 518  | 662  | 6   |
| CONTIG-001871 | 634  | 26   | 96   | 937  | 0   |
| CONTIG-001878 | 232  | 13   | 7    | 73   | 0   |
| CONTIG-001879 | 176  | 8    | 11   | 42   | 0   |
| CONTIG-001880 | 258  | 9    | 40   | 7    | 2   |
| CONTIG-001882 | 122  | 13   | 25   | 25   | 0   |
| CONTIG-001883 | 505  | 16   | 31   | 278  | 4   |
| CONTIG-001884 | 171  | 7    | 6    | 35   | 0   |
| CONTIG-001885 | 455  | 734  | 6878 | 6807 | 658 |
| CONTIG-001886 | 81   | 5    | 13   | 6    | 0   |
| CONTIG-001889 | 38   | 1024 | 436  | 1092 | 4   |
| CONTIG-001890 | 334  | 6    | 3    | 16   | 0   |
| CONTIG-001891 | 221  | 194  | 257  | 587  | 43  |
| CONTIG-001892 | 654  | 28   | 553  | 600  | 4   |
| CONTIG-001893 | 80   | 658  | 466  | 1209 | 29  |
| CONTIG-001894 | 428  | 268  | 169  | 7503 | 0   |
| CONTIG-001895 | 2132 | 43   | 1260 | 4121 | 2   |
| CONTIG-001904 | 60   | 100  | 108  | 180  | 0   |
| CONTIG-001906 | 92   | 5    | 22   | 2    | 0   |
| CONTIG-001907 | 1321 | 93   | 1445 | 5248 | 14  |
| CONTIG-001908 | 174  | 37   | 233  | 28   | 0   |
| CONTIG-001909 | 556  | 58   | 104  | 393  | 93  |
| CONTIG-001910 | 611  | 259  | 4654 | 1733 | 489 |
| CONTIG-001911 | 101  | 7    | 41   | 6    | 0   |
| CONTIG-001912 | 322  | 12   | 45   | 74   | 0   |
| CONTIG-001913 | 163  | 9    | 12   | 57   | 0   |
| CONTIG-001914 | 405  | 35   | 60   | 614  | 2   |
| CONTIG-001915 | 650  | 56   | 918  | 826  | 21  |
| CONTIG-001919 | 109  | 16   | 40   | 19   | 0   |
| CONTIG-001920 | 2297 | 67   | 2066 | 6643 | 14  |
| CONTIG-001921 | 739  | 50   | 511  | 1376 | 7   |
| CONTIG-001922 | 669  | 16   | 183  | 321  | 6   |
| CONTIG-001923 | 71   | 347  | 19   | 1372 | 0   |
| CONTIG-001924 | 149  | 9    | 37   | 17   | 0   |
| CONTIG-001925 | 84   | 9    | 7    | 13   | 0   |
| CONTIG-001926 | 541  | 17   | 471  | 193  | 0   |
| CONTIG-001927 | 213  | 53   | 77   | 351  | 15  |
| CONTIG-001928 | 70   | 9    | 29   | 7    | 0   |
| CONTIG-001929 | 117  | 36   | 284  | 23   | 0   |
| CONTIG-001930 | 85   | 6    | 6    | 17   | 0   |
| CONTIG-001931 | 1049 | 26   | 352  | 896  | 2   |
| CONTIG-001932 | 129  | 33   | 191  | 14   | 0   |
| CONTIG-001933 | 129  | 14   | 43   | 46   | 0   |
| CONTIG-001935 | 274  | 14   | 277  | 38   | 0   |

|               |      |     |      |      |     |
|---------------|------|-----|------|------|-----|
| CONTIG-001936 | 456  | 293 | 896  | 6011 | 48  |
| CONTIG-001937 | 118  | 31  | 97   | 48   | 0   |
| CONTIG-001938 | 242  | 29  | 665  | 45   | 0   |
| CONTIG-001939 | 258  | 27  | 140  | 164  | 0   |
| CONTIG-001940 | 542  | 46  | 1741 | 2    | 2   |
| CONTIG-001941 | 291  | 86  | 0    | 0    | 293 |
| CONTIG-001942 | 247  | 7   | 11   | 43   | 0   |
| CONTIG-001946 | 127  | 14  | 7    | 79   | 0   |
| CONTIG-001947 | 332  | 32  | 92   | 446  | 7   |
| CONTIG-001948 | 214  | 21  | 19   | 105  | 2   |
| CONTIG-001949 | 441  | 18  | 437  | 69   | 0   |
| CONTIG-001950 | 778  | 68  | 1579 | 1578 | 66  |
| CONTIG-001951 | 73   | 4   | 18   | 2    | 0   |
| CONTIG-001955 | 1124 | 123 | 1026 | 6251 | 65  |
| CONTIG-001956 | 681  | 115 | 787  | 4351 | 4   |
| CONTIG-001957 | 864  | 68  | 973  | 1626 | 17  |
| CONTIG-001958 | 195  | 456 | 897  | 1590 | 409 |
| CONTIG-001959 | 482  | 29  | 21   | 432  | 48  |
| CONTIG-001960 | 140  | 3   | 13   | 2    | 0   |
| CONTIG-001961 | 166  | 9   | 44   | 33   | 0   |
| CONTIG-001962 | 504  | 66  | 1385 | 782  | 2   |
| CONTIG-001963 | 380  | 18  | 43   | 239  | 2   |
| CONTIG-001964 | 414  | 29  | 565  | 262  | 0   |
| CONTIG-001965 | 251  | 27  | 21   | 328  | 0   |
| CONTIG-001966 | 150  | 9   | 29   | 42   | 0   |
| CONTIG-001967 | 156  | 94  | 1096 | 305  | 0   |
| CONTIG-001968 | 73   | 263 | 1084 | 398  | 2   |
| CONTIG-001969 | 905  | 23  | 376  | 937  | 2   |
| CONTIG-001978 | 65   | 6   | 2    | 15   | 0   |
| CONTIG-001979 | 737  | 18  | 217  | 177  | 4   |
| CONTIG-001980 | 144  | 145 | 1763 | 12   | 0   |
| CONTIG-001981 | 571  | 11  | 39   | 202  | 2   |
| CONTIG-001982 | 39   | 782 | 2607 | 276  | 0   |
| CONTIG-001983 | 58   | 23  | 2    | 18   | 0   |
| CONTIG-001984 | 60   | 5   | 16   | 4    | 0   |
| CONTIG-001985 | 123  | 834 | 867  | 2240 | 148 |
| CONTIG-001986 | 972  | 51  | 3718 | 1020 | 0   |
| CONTIG-001987 | 520  | 21  | 90   | 165  | 7   |
| CONTIG-001988 | 521  | 54  | 227  | 1021 | 29  |
| CONTIG-001990 | 375  | 8   | 17   | 118  | 0   |
| CONTIG-001991 | 113  | 65  | 210  | 147  | 0   |
| CONTIG-001993 | 432  | 22  | 70   | 226  | 2   |
| CONTIG-001994 | 71   | 10  | 24   | 5    | 0   |
| CONTIG-001995 | 220  | 62  | 519  | 62   | 6   |
| CONTIG-001996 | 122  | 225 | 2797 | 35   | 4   |
| CONTIG-001997 | 630  | 65  | 759  | 1649 | 2   |
| CONTIG-001998 | 962  | 15  | 161  | 105  | 78  |

|               |      |      |      |      |     |
|---------------|------|------|------|------|-----|
| CONTIG-001999 | 259  | 23   | 122  | 109  | 4   |
| CONTIG-002000 | 223  | 30   | 174  | 185  | 0   |
| CONTIG-002002 | 60   | 2346 | 1467 | 5994 | 52  |
| CONTIG-002003 | 74   | 70   | 176  | 52   | 0   |
| CONTIG-002010 | 359  | 12   | 29   | 151  | 0   |
| CONTIG-002011 | 498  | 17   | 161  | 115  | 0   |
| CONTIG-002012 | 637  | 20   | 246  | 305  | 0   |
| CONTIG-002013 | 209  | 295  | 1281 | 1114 | 185 |
| CONTIG-002014 | 891  | 17   | 94   | 251  | 2   |
| CONTIG-002015 | 350  | 54   | 145  | 954  | 0   |
| CONTIG-002020 | 574  | 13   | 161  | 207  | 6   |
| CONTIG-002021 | 88   | 6    | 4    | 15   | 0   |
| CONTIG-002022 | 307  | 68   | 331  | 458  | 2   |
| CONTIG-002023 | 98   | 6    | 0    | 16   | 0   |
| CONTIG-002024 | 312  | 221  | 5794 | 697  | 0   |
| CONTIG-002025 | 1069 | 23   | 584  | 684  | 0   |
| CONTIG-002031 | 60   | 13   | 51   | 3    | 0   |
| CONTIG-002032 | 114  | 5    | 20   | 4    | 0   |
| CONTIG-002039 | 578  | 17   | 495  | 199  | 0   |
| CONTIG-002040 | 187  | 20   | 41   | 127  | 0   |
| CONTIG-002041 | 218  | 8    | 20   | 52   | 0   |
| CONTIG-002042 | 230  | 330  | 1953 | 1002 | 285 |
| CONTIG-002043 | 205  | 32   | 40   | 114  | 2   |
| CONTIG-002047 | 960  | 95   | 667  | 3943 | 44  |
| CONTIG-002048 | 250  | 6    | 55   | 16   | 0   |
| CONTIG-002049 | 127  | 6    | 6    | 17   | 0   |
| CONTIG-002050 | 105  | 6    | 15   | 6    | 0   |
| CONTIG-002051 | 242  | 392  | 1105 | 2592 | 199 |
| CONTIG-002052 | 681  | 73   | 2891 | 985  | 0   |
| CONTIG-002053 | 108  | 6    | 13   | 17   | 0   |
| CONTIG-002054 | 794  | 17   | 242  | 354  | 9   |
| CONTIG-002055 | 1390 | 87   | 1851 | 4868 | 7   |
| CONTIG-002056 | 190  | 45   | 176  | 321  | 0   |
| CONTIG-002057 | 64   | 4    | 0    | 6    | 0   |
| CONTIG-002058 | 141  | 486  | 527  | 1481 | 139 |
| CONTIG-002060 | 364  | 35   | 229  | 220  | 4   |
| CONTIG-002061 | 113  | 8    | 7    | 38   | 0   |
| CONTIG-002066 | 175  | 5    | 4    | 27   | 0   |
| CONTIG-002067 | 73   | 394  | 525  | 612  | 57  |
| CONTIG-002068 | 465  | 39   | 275  | 303  | 10  |
| CONTIG-002069 | 338  | 164  | 739  | 1807 | 18  |
| CONTIG-002071 | 139  | 127  | 1155 | 37   | 2   |
| CONTIG-002072 | 1804 | 82   | 672  | 7240 | 13  |
| CONTIG-002073 | 116  | 4    | 13   | 4    | 0   |
| CONTIG-002074 | 208  | 24   | 36   | 51   | 0   |
| CONTIG-002075 | 163  | 470  | 4171 | 504  | 51  |
| CONTIG-002076 | 188  | 107  | 63   | 498  | 44  |

|               |      |      |      |      |     |
|---------------|------|------|------|------|-----|
| CONTIG-002077 | 317  | 38   | 349  | 414  | 3   |
| CONTIG-002081 | 1436 | 24   | 166  | 1134 | 5   |
| CONTIG-002082 | 105  | 24   | 197  | 4    | 0   |
| CONTIG-002083 | 558  | 80   | 1457 | 1348 | 11  |
| CONTIG-002084 | 1404 | 34   | 263  | 1694 | 43  |
| CONTIG-002085 | 682  | 44   | 96   | 1807 | 0   |
| CONTIG-002086 | 39   | 435  | 633  | 62   | 12  |
| CONTIG-002087 | 69   | 10   | 31   | 7    | 0   |
| CONTIG-002088 | 306  | 23   | 361  | 106  | 0   |
| CONTIG-002089 | 1193 | 18   | 78   | 802  | 4   |
| CONTIG-002090 | 657  | 16   | 106  | 307  | 0   |
| CONTIG-002091 | 55   | 580  | 408  | 630  | 29  |
| CONTIG-002092 | 934  | 25   | 569  | 644  | 0   |
| CONTIG-002093 | 223  | 15   | 68   | 73   | 0   |
| CONTIG-002094 | 1407 | 22   | 370  | 1214 | 6   |
| CONTIG-002095 | 407  | 14   | 111  | 92   | 9   |
| CONTIG-002096 | 235  | 321  | 3731 | 746  | 57  |
| CONTIG-002097 | 63   | 6    | 2    | 3    | 2   |
| CONTIG-002101 | 359  | 6    | 0    | 51   | 0   |
| CONTIG-002102 | 230  | 6    | 10   | 26   | 0   |
| CONTIG-002103 | 1598 | 60   | 1393 | 2892 | 146 |
| CONTIG-002104 | 304  | 501  | 2834 | 3010 | 294 |
| CONTIG-002105 | 443  | 489  | 2415 | 6216 | 501 |
| CONTIG-002106 | 165  | 7    | 11   | 29   | 0   |
| CONTIG-002107 | 42   | 391  | 263  | 456  | 0   |
| CONTIG-002108 | 111  | 530  | 551  | 2485 | 14  |
| CONTIG-002109 | 328  | 51   | 408  | 349  | 0   |
| CONTIG-002110 | 239  | 10   | 46   | 11   | 0   |
| CONTIG-002111 | 420  | 47   | 37   | 540  | 4   |
| CONTIG-002112 | 73   | 103  | 120  | 161  | 0   |
| CONTIG-002113 | 757  | 103  | 526  | 4229 | 9   |
| CONTIG-002114 | 186  | 6    | 7    | 18   | 0   |
| CONTIG-002115 | 54   | 1605 | 1862 | 1495 | 60  |
| CONTIG-002116 | 882  | 56   | 485  | 1433 | 19  |
| CONTIG-002117 | 130  | 57   | 128  | 207  | 2   |
| CONTIG-002118 | 96   | 577  | 1026 | 877  | 97  |
| CONTIG-002119 | 1107 | 44   | 1242 | 1530 | 5   |
| CONTIG-002120 | 918  | 46   | 1023 | 923  | 64  |
| CONTIG-002121 | 163  | 10   | 11   | 32   | 0   |
| CONTIG-002122 | 123  | 555  | 2370 | 453  | 81  |
| CONTIG-002123 | 395  | 45   | 280  | 512  | 7   |
| CONTIG-002124 | 383  | 28   | 102  | 289  | 18  |
| CONTIG-002125 | 596  | 27   | 204  | 610  | 2   |
| CONTIG-002126 | 494  | 17   | 240  | 308  | 0   |
| CONTIG-002127 | 324  | 182  | 584  | 2391 | 11  |
| CONTIG-002128 | 87   | 19   | 6    | 38   | 0   |
| CONTIG-002129 | 110  | 6    | 16   | 24   | 0   |

|               |      |     |      |      |     |
|---------------|------|-----|------|------|-----|
| CONTIG-002130 | 748  | 17  | 85   | 346  | 6   |
| CONTIG-002134 | 3503 | 53  | 3503 | 5974 | 98  |
| CONTIG-002135 | 115  | 10  | 6    | 46   | 0   |
| CONTIG-002136 | 539  | 39  | 246  | 251  | 0   |
| CONTIG-002137 | 500  | 221 | 431  | 2438 | 424 |
| CONTIG-002138 | 215  | 11  | 13   | 82   | 0   |
| CONTIG-002139 | 232  | 10  | 10   | 56   | 0   |
| CONTIG-002140 | 566  | 22  | 287  | 367  | 0   |
| CONTIG-002142 | 159  | 58  | 560  | 39   | 0   |
| CONTIG-002143 | 199  | 10  | 6    | 75   | 0   |
| CONTIG-002144 | 810  | 44  | 1387 | 1130 | 0   |
| CONTIG-002147 | 250  | 148 | 456  | 582  | 100 |
| CONTIG-002148 | 799  | 16  | 143  | 397  | 0   |
| CONTIG-002149 | 176  | 11  | 28   | 40   | 0   |
| CONTIG-002150 | 966  | 122 | 1284 | 4316 | 22  |
| CONTIG-002151 | 142  | 7   | 38   | 0    | 0   |
| CONTIG-002152 | 293  | 10  | 31   | 44   | 0   |
| CONTIG-002153 | 335  | 16  | 108  | 102  | 0   |
| CONTIG-002154 | 346  | 79  | 560  | 943  | 29  |
| CONTIG-002155 | 924  | 44  | 489  | 1328 | 9   |
| CONTIG-002156 | 116  | 4   | 4    | 7    | 2   |
| CONTIG-002157 | 587  | 28  | 293  | 578  | 0   |
| CONTIG-002158 | 771  | 28  | 503  | 796  | 0   |
| CONTIG-002162 | 403  | 43  | 367  | 281  | 15  |
| CONTIG-002163 | 110  | 13  | 16   | 45   | 0   |
| CONTIG-002164 | 726  | 79  | 496  | 3496 | 0   |
| CONTIG-002165 | 565  | 67  | 255  | 859  | 41  |
| CONTIG-002166 | 234  | 16  | 63   | 95   | 3   |
| CONTIG-002167 | 93   | 5   | 10   | 13   | 0   |
| CONTIG-002168 | 834  | 134 | 1645 | 3305 | 61  |
| CONTIG-002175 | 59   | 7   | 3    | 13   | 0   |
| CONTIG-002176 | 60   | 24  | 22   | 2    | 0   |
| CONTIG-002177 | 293  | 19  | 40   | 201  | 0   |
| CONTIG-002178 | 215  | 42  | 413  | 152  | 0   |
| CONTIG-002179 | 577  | 154 | 1268 | 2140 | 295 |
| CONTIG-002180 | 325  | 201 | 127  | 1809 | 154 |
| CONTIG-002181 | 58   | 145 | 16   | 218  | 18  |
| CONTIG-002182 | 79   | 507 | 778  | 768  | 63  |
| CONTIG-002183 | 431  | 18  | 31   | 263  | 0   |
| CONTIG-002184 | 635  | 29  | 879  | 397  | 2   |
| CONTIG-002185 | 559  | 30  | 495  | 439  | 0   |
| CONTIG-002186 | 579  | 22  | 118  | 160  | 2   |
| CONTIG-002189 | 97   | 5   | 15   | 10   | 0   |
| CONTIG-002190 | 156  | 54  | 65   | 285  | 0   |
| CONTIG-002191 | 629  | 14  | 67   | 220  | 0   |
| CONTIG-002192 | 480  | 89  | 530  | 2041 | 0   |
| CONTIG-002193 | 84   | 10  | 4    | 36   | 0   |



|               |      |      |      |      |     |
|---------------|------|------|------|------|-----|
| CONTIG-002194 | 345  | 359  | 1049 | 5687 | 19  |
| CONTIG-002195 | 241  | 20   | 160  | 133  | 2   |
| CONTIG-002196 | 483  | 534  | 6417 | 5052 | 490 |
| CONTIG-002197 | 386  | 38   | 250  | 146  | 0   |
| CONTIG-002198 | 464  | 15   | 38   | 294  | 0   |
| CONTIG-002207 | 76   | 51   | 51   | 84   | 0   |
| CONTIG-002209 | 61   | 1239 | 488  | 2373 | 18  |
| CONTIG-002210 | 880  | 48   | 252  | 828  | 83  |
| CONTIG-002211 | 912  | 21   | 75   | 563  | 2   |
| CONTIG-002212 | 71   | 4    | 4    | 6    | 0   |
| CONTIG-002213 | 49   | 1196 | 1202 | 324  | 17  |
| CONTIG-002214 | 94   | 196  | 279  | 27   | 2   |
| CONTIG-002215 | 283  | 73   | 427  | 926  | 0   |
| CONTIG-002217 | 192  | 8    | 4    | 6    | 0   |
| CONTIG-002218 | 473  | 24   | 77   | 206  | 3   |
| CONTIG-002219 | 99   | 15   | 29   | 49   | 0   |
| CONTIG-002220 | 1867 | 49   | 392  | 1302 | 24  |
| CONTIG-002221 | 719  | 53   | 1213 | 1238 | 4   |
| CONTIG-002223 | 76   | 702  | 2738 | 41   | 10  |
| CONTIG-002224 | 134  | 258  | 2170 | 32   | 9   |
| CONTIG-002225 | 584  | 18   | 198  | 244  | 0   |
| CONTIG-002226 | 79   | 6    | 6    | 11   | 0   |
| CONTIG-002227 | 346  | 24   | 139  | 258  | 0   |
| CONTIG-002228 | 235  | 9    | 16   | 56   | 0   |
| CONTIG-002229 | 371  | 10   | 18   | 79   | 0   |
| CONTIG-002230 | 492  | 292  | 770  | 7839 | 7   |
| CONTIG-002232 | 112  | 1402 | 57   | 212  | 0   |
| CONTIG-002233 | 789  | 27   | 331  | 551  | 11  |
| CONTIG-002234 | 193  | 39   | 205  | 349  | 0   |
| CONTIG-002235 | 133  | 17   | 24   | 94   | 0   |
| CONTIG-002236 | 305  | 601  | 1978 | 5194 | 387 |
| CONTIG-002237 | 109  | 13   | 121  | 6    | 0   |
| CONTIG-002238 | 385  | 14   | 109  | 60   | 0   |
| CONTIG-002239 | 637  | 137  | 2210 | 2648 | 35  |
| CONTIG-002242 | 195  | 25   | 6    | 39   | 0   |
| CONTIG-002243 | 72   | 416  | 429  | 382  | 58  |
| CONTIG-002244 | 334  | 14   | 58   | 98   | 4   |
| CONTIG-002245 | 179  | 12   | 61   | 86   | 0   |
| CONTIG-002246 | 793  | 38   | 724  | 697  | 27  |
| CONTIG-002249 | 964  | 50   | 509  | 1781 | 10  |
| CONTIG-002250 | 479  | 44   | 130  | 997  | 0   |
| CONTIG-002251 | 326  | 106  | 234  | 570  | 193 |
| CONTIG-002252 | 192  | 5    | 8    | 24   | 0   |
| CONTIG-002253 | 749  | 22   | 240  | 403  | 11  |
| CONTIG-002254 | 453  | 27   | 146  | 112  | 2   |
| CONTIG-002255 | 101  | 4    | 13   | 2    | 0   |
| CONTIG-002256 | 581  | 138  | 580  | 3312 | 31  |

|               |      |      |      |      |      |
|---------------|------|------|------|------|------|
| CONTIG-002257 | 490  | 14   | 40   | 241  | 0    |
| CONTIG-002258 | 124  | 407  | 287  | 1596 | 122  |
| CONTIG-002260 | 446  | 29   | 79   | 571  | 2    |
| CONTIG-002262 | 332  | 64   | 293  | 545  | 2    |
| CONTIG-002264 | 235  | 10   | 6    | 107  | 0    |
| CONTIG-002265 | 1350 | 28   | 5    | 35   | 0    |
| CONTIG-002267 | 324  | 437  | 3145 | 3218 | 46   |
| CONTIG-002268 | 1600 | 30   | 833  | 1464 | 23   |
| CONTIG-002274 | 227  | 10   | 15   | 93   | 0    |
| CONTIG-002275 | 127  | 904  | 1299 | 2043 | 145  |
| CONTIG-002276 | 867  | 50   | 414  | 1142 | 40   |
| CONTIG-002277 | 411  | 149  | 642  | 2724 | 2    |
| CONTIG-002278 | 36   | 194  | 186  | 130  | 0    |
| CONTIG-002281 | 668  | 37   | 1321 | 484  | 2    |
| CONTIG-002282 | 739  | 48   | 292  | 1276 | 0    |
| CONTIG-002285 | 1061 | 30   | 456  | 796  | 17   |
| CONTIG-002286 | 376  | 18   | 65   | 145  | 2    |
| CONTIG-002287 | 215  | 24   | 161  | 118  | 2    |
| CONTIG-002288 | 1430 | 26   | 693  | 1072 | 20   |
| CONTIG-002289 | 1084 | 32   | 152  | 1413 | 2    |
| CONTIG-002290 | 488  | 9    | 20   | 162  | 0    |
| CONTIG-002291 | 42   | 1916 | 410  | 19   | 1416 |
| CONTIG-002292 | 128  | 13   | 89   | 19   | 0    |
| CONTIG-002293 | 132  | 8    | 7    | 30   | 0    |
| CONTIG-002294 | 1387 | 27   | 679  | 941  | 27   |
| CONTIG-002295 | 58   | 2    | 2    | 0    | 0    |
| CONTIG-002296 | 187  | 443  | 4033 | 2111 | 2    |
| CONTIG-002297 | 52   | 246  | 131  | 16   | 0    |
| CONTIG-002298 | 144  | 21   | 73   | 5    | 0    |
| CONTIG-002299 | 161  | 10   | 0    | 34   | 2    |
| CONTIG-002300 | 485  | 131  | 300  | 1318 | 132  |
| CONTIG-002301 | 194  | 10   | 21   | 67   | 0    |
| CONTIG-002303 | 249  | 35   | 375  | 209  | 0    |
| CONTIG-002307 | 190  | 359  | 762  | 959  | 89   |
| CONTIG-002308 | 69   | 3    | 4    | 9    | 0    |
| CONTIG-002309 | 1212 | 21   | 304  | 828  | 0    |
| CONTIG-002310 | 1688 | 32   | 1195 | 1721 | 10   |
| CONTIG-002311 | 1280 | 18   | 98   | 1192 | 2    |
| CONTIG-002312 | 401  | 226  | 910  | 3424 | 14   |
| CONTIG-002313 | 87   | 15   | 20   | 0    | 0    |
| CONTIG-002314 | 118  | 40   | 167  | 184  | 0    |
| CONTIG-002315 | 259  | 88   | 1656 | 290  | 0    |
| CONTIG-002316 | 58   | 216  | 152  | 419  | 0    |
| CONTIG-002317 | 213  | 14   | 34   | 111  | 0    |
| CONTIG-002319 | 442  | 19   | 106  | 217  | 0    |
| CONTIG-002320 | 805  | 27   | 96   | 1194 | 0    |
| CONTIG-002321 | 92   | 7    | 9    | 13   | 2    |

|               |      |     |      |      |     |
|---------------|------|-----|------|------|-----|
| CONTIG-002322 | 401  | 72  | 229  | 722  | 8   |
| CONTIG-002328 | 1356 | 63  | 623  | 1700 | 313 |
| CONTIG-002329 | 105  | 28  | 26   | 74   | 0   |
| CONTIG-002330 | 503  | 71  | 303  | 1749 | 4   |
| CONTIG-002331 | 334  | 41  | 274  | 218  | 12  |
| CONTIG-002332 | 202  | 9   | 22   | 45   | 0   |
| CONTIG-002333 | 145  | 8   | 11   | 40   | 0   |
| CONTIG-002335 | 103  | 16  | 142  | 0    | 0   |
| CONTIG-002336 | 782  | 95  | 914  | 1190 | 243 |
| CONTIG-002337 | 915  | 55  | 241  | 987  | 5   |
| CONTIG-002338 | 180  | 29  | 21   | 202  | 0   |
| CONTIG-002339 | 1204 | 41  | 812  | 827  | 44  |
| CONTIG-002340 | 133  | 7   | 6    | 32   | 0   |
| CONTIG-002341 | 834  | 84  | 1495 | 881  | 42  |
| CONTIG-002342 | 246  | 406 | 825  | 2125 | 154 |
| CONTIG-002351 | 1109 | 27  | 102  | 647  | 30  |
| CONTIG-002352 | 487  | 21  | 77   | 281  | 2   |
| CONTIG-002353 | 457  | 83  | 569  | 1459 | 2   |
| CONTIG-002354 | 180  | 9   | 11   | 51   | 3   |
| CONTIG-002356 | 1462 | 38  | 453  | 2267 | 6   |
| CONTIG-002357 | 256  | 328 | 2150 | 1060 | 255 |
| CONTIG-002358 | 90   | 6   | 0    | 21   | 0   |
| CONTIG-002359 | 198  | 45  | 89   | 261  | 4   |
| CONTIG-002360 | 268  | 16  | 117  | 95   | 0   |
| CONTIG-002361 | 557  | 19  | 146  | 228  | 0   |
| CONTIG-002362 | 96   | 211 | 879  | 101  | 20  |
| CONTIG-002363 | 691  | 19  | 73   | 157  | 6   |
| CONTIG-002364 | 609  | 53  | 2198 | 608  | 2   |
| CONTIG-002365 | 68   | 4   | 2    | 0    | 0   |
| CONTIG-002366 | 332  | 313 | 1547 | 1977 | 260 |
| CONTIG-002367 | 462  | 60  | 228  | 459  | 0   |
| CONTIG-002368 | 93   | 581 | 707  | 824  | 41  |
| CONTIG-002370 | 99   | 566 | 1348 | 1876 | 52  |
| CONTIG-002371 | 593  | 130 | 1295 | 1874 | 238 |
| CONTIG-002372 | 832  | 41  | 339  | 802  | 60  |
| CONTIG-002373 | 61   | 32  | 148  | 10   | 0   |
| CONTIG-002374 | 333  | 15  | 12   | 79   | 0   |
| CONTIG-002375 | 1446 | 62  | 1980 | 3546 | 2   |
| CONTIG-002376 | 1097 | 36  | 947  | 641  | 31  |
| CONTIG-002377 | 800  | 45  | 290  | 658  | 28  |
| CONTIG-002378 | 206  | 123 | 292  | 265  | 2   |
| CONTIG-002379 | 1430 | 37  | 780  | 2075 | 13  |
| CONTIG-002380 | 364  | 27  | 434  | 162  | 4   |
| CONTIG-002381 | 409  | 31  | 141  | 364  | 9   |
| CONTIG-002382 | 217  | 329 | 4643 | 437  | 89  |
| CONTIG-002383 | 407  | 39  | 121  | 519  | 6   |
| CONTIG-002384 | 84   | 8   | 54   | 0    | 0   |

|               |      |      |      |      |     |
|---------------|------|------|------|------|-----|
| CONTIG-002385 | 175  | 19   | 11   | 89   | 0   |
| CONTIG-002386 | 94   | 593  | 1414 | 1825 | 40  |
| CONTIG-002387 | 326  | 10   | 3    | 138  | 0   |
| CONTIG-002388 | 220  | 181  | 1305 | 249  | 122 |
| CONTIG-002389 | 423  | 129  | 481  | 1467 | 19  |
| CONTIG-002392 | 66   | 5    | 6    | 12   | 0   |
| CONTIG-002393 | 126  | 32   | 106  | 39   | 0   |
| CONTIG-002394 | 265  | 44   | 144  | 126  | 20  |
| CONTIG-002395 | 1910 | 45   | 447  | 2710 | 156 |
| CONTIG-002396 | 1569 | 53   | 4119 | 2334 | 17  |
| CONTIG-002397 | 314  | 8    | 45   | 91   | 0   |
| CONTIG-002398 | 332  | 168  | 1379 | 1837 | 31  |
| CONTIG-002399 | 1506 | 22   | 417  | 963  | 35  |
| CONTIG-002400 | 190  | 21   | 78   | 91   | 0   |
| CONTIG-002401 | 203  | 12   | 44   | 61   | 0   |
| CONTIG-002402 | 537  | 19   | 32   | 480  | 0   |
| CONTIG-002403 | 129  | 14   | 49   | 49   | 0   |
| CONTIG-002404 | 490  | 52   | 1038 | 424  | 4   |
| CONTIG-002405 | 503  | 31   | 936  | 0    | 58  |
| CONTIG-002406 | 219  | 20   | 168  | 80   | 0   |
| CONTIG-002407 | 760  | 128  | 3724 | 2382 | 32  |
| CONTIG-002408 | 107  | 16   | 15   | 18   | 0   |
| CONTIG-002409 | 351  | 101  | 728  | 437  | 19  |
| CONTIG-002410 | 1198 | 65   | 217  | 5004 | 0   |
| CONTIG-002411 | 74   | 1200 | 814  | 1238 | 38  |
| CONTIG-002412 | 401  | 23   | 313  | 220  | 0   |
| CONTIG-002413 | 804  | 87   | 3282 | 1804 | 2   |
| CONTIG-002414 | 241  | 31   | 690  | 59   | 0   |
| CONTIG-002415 | 250  | 33   | 59   | 290  | 0   |
| CONTIG-002416 | 219  | 93   | 1792 | 271  | 0   |
| CONTIG-002417 | 80   | 91   | 141  | 249  | 0   |
| CONTIG-002418 | 118  | 8    | 5    | 21   | 0   |
| CONTIG-002420 | 325  | 10   | 119  | 53   | 0   |
| CONTIG-002421 | 1101 | 92   | 808  | 2333 | 259 |
| CONTIG-002423 | 1195 | 19   | 208  | 576  | 2   |
| CONTIG-002424 | 55   | 412  | 2484 | 5    | 0   |
| CONTIG-002425 | 531  | 71   | 703  | 1024 | 68  |
| CONTIG-002426 | 1071 | 81   | 1017 | 5001 | 0   |
| CONTIG-002427 | 763  | 11   | 264  | 144  | 3   |
| CONTIG-002428 | 327  | 25   | 190  | 45   | 0   |
| CONTIG-002429 | 1116 | 27   | 185  | 719  | 34  |
| CONTIG-002430 | 231  | 7    | 23   | 23   | 0   |
| CONTIG-002431 | 209  | 336  | 511  | 3545 | 2   |
| CONTIG-002432 | 72   | 34   | 216  | 22   | 0   |
| CONTIG-002435 | 71   | 11   | 34   | 11   | 0   |
| CONTIG-002436 | 1080 | 25   | 71   | 527  | 10  |
| CONTIG-002437 | 249  | 8    | 2    | 74   | 0   |

|               |      |     |      |      |     |
|---------------|------|-----|------|------|-----|
| CONTIG-002438 | 1375 | 45  | 587  | 2505 | 41  |
| CONTIG-002447 | 934  | 39  | 180  | 2037 | 0   |
| CONTIG-002448 | 429  | 30  | 168  | 552  | 0   |
| CONTIG-002449 | 821  | 36  | 273  | 1220 | 0   |
| CONTIG-002450 | 829  | 275 | 2688 | 5935 | 608 |
| CONTIG-002451 | 86   | 83  | 492  | 2    | 3   |
| CONTIG-002452 | 178  | 89  | 399  | 557  | 0   |
| CONTIG-002453 | 404  | 43  | 101  | 1002 | 0   |
| CONTIG-002456 | 108  | 339 | 2381 | 45   | 13  |
| CONTIG-002457 | 131  | 6   | 6    | 20   | 0   |
| CONTIG-002458 | 391  | 31  | 239  | 466  | 2   |
| CONTIG-002459 | 2309 | 66  | 948  | 8353 | 9   |
| CONTIG-002460 | 336  | 21  | 267  | 48   | 0   |
| CONTIG-002461 | 1386 | 23  | 189  | 799  | 53  |
| CONTIG-002462 | 2584 | 34  | 267  | 3456 | 170 |
| CONTIG-002463 | 143  | 4   | 2    | 18   | 0   |
| CONTIG-002464 | 697  | 35  | 443  | 750  | 2   |
| CONTIG-002465 | 661  | 88  | 713  | 2407 | 10  |
| CONTIG-002466 | 986  | 112 | 623  | 5038 | 0   |
| CONTIG-002467 | 657  | 19  | 131  | 196  | 4   |
| CONTIG-002468 | 317  | 17  | 146  | 205  | 0   |
| CONTIG-002472 | 269  | 60  | 756  | 114  | 2   |
| CONTIG-002473 | 253  | 12  | 75   | 69   | 4   |
| CONTIG-002474 | 83   | 16  | 43   | 0    | 0   |
| CONTIG-002475 | 70   | 704 | 1250 | 1779 | 19  |
| CONTIG-002476 | 295  | 32  | 434  | 218  | 0   |
| CONTIG-002477 | 162  | 22  | 119  | 82   | 2   |
| CONTIG-002478 | 132  | 18  | 139  | 29   | 0   |
| CONTIG-002479 | 532  | 60  | 293  | 1766 | 5   |
| CONTIG-002480 | 81   | 590 | 502  | 761  | 9   |
| CONTIG-002482 | 161  | 14  | 32   | 81   | 0   |
| CONTIG-002483 | 293  | 311 | 1910 | 848  | 262 |
| CONTIG-002484 | 856  | 15  | 54   | 404  | 4   |
| CONTIG-002485 | 195  | 388 | 1062 | 3401 | 44  |
| CONTIG-002487 | 237  | 12  | 20   | 32   | 0   |
| CONTIG-002488 | 71   | 89  | 67   | 67   | 4   |
| CONTIG-002489 | 131  | 10  | 27   | 52   | 0   |
| CONTIG-002490 | 397  | 18  | 69   | 163  | 15  |
| CONTIG-002491 | 1487 | 62  | 360  | 364  | 20  |
| CONTIG-002492 | 187  | 11  | 32   | 6    | 0   |
| CONTIG-002493 | 260  | 18  | 67   | 111  | 0   |
| CONTIG-002494 | 711  | 18  | 195  | 156  | 4   |
| CONTIG-002496 | 1016 | 46  | 988  | 1735 | 5   |
| CONTIG-002497 | 1101 | 78  | 476  | 3143 | 55  |
| CONTIG-002499 | 290  | 187 | 735  | 2597 | 0   |
| CONTIG-002500 | 176  | 5   | 3    | 2    | 0   |
| CONTIG-002502 | 37   | 515 | 596  | 338  | 0   |

|               |      |      |      |      |     |
|---------------|------|------|------|------|-----|
| CONTIG-002503 | 76   | 1038 | 73   | 2431 | 0   |
| CONTIG-002504 | 892  | 216  | 3077 | 4900 | 554 |
| CONTIG-002505 | 410  | 16   | 19   | 92   | 2   |
| CONTIG-002507 | 389  | 42   | 227  | 303  | 9   |
| CONTIG-002508 | 182  | 61   | 1279 | 14   | 0   |
| CONTIG-002509 | 1331 | 34   | 131  | 2058 | 18  |
| CONTIG-002510 | 50   | 423  | 526  | 678  | 5   |
| CONTIG-002511 | 1571 | 37   | 213  | 2529 | 8   |
| CONTIG-002512 | 436  | 13   | 157  | 106  | 0   |
| CONTIG-002513 | 72   | 13   | 33   | 13   | 0   |
| CONTIG-002514 | 176  | 8    | 3    | 59   | 0   |
| CONTIG-002515 | 101  | 22   | 69   | 37   | 0   |
| CONTIG-002516 | 384  | 11   | 12   | 122  | 0   |
| CONTIG-002517 | 638  | 21   | 392  | 336  | 2   |
| CONTIG-002518 | 442  | 10   | 67   | 115  | 0   |
| CONTIG-002519 | 86   | 4    | 11   | 11   | 0   |
| CONTIG-002520 | 67   | 6    | 24   | 7    | 0   |
| CONTIG-002521 | 832  | 26   | 69   | 453  | 26  |
| CONTIG-002522 | 199  | 46   | 261  | 275  | 0   |
| CONTIG-002523 | 711  | 36   | 258  | 1216 | 4   |
| CONTIG-002524 | 115  | 8    | 7    | 25   | 0   |
| CONTIG-002526 | 83   | 101  | 5    | 431  | 0   |
| CONTIG-002527 | 224  | 13   | 106  | 89   | 0   |
| CONTIG-002528 | 96   | 11   | 12   | 46   | 0   |
| CONTIG-002529 | 212  | 9    | 5    | 23   | 2   |
| CONTIG-002530 | 574  | 15   | 259  | 108  | 0   |
| CONTIG-002531 | 99   | 19   | 6    | 63   | 0   |
| CONTIG-002532 | 243  | 12   | 57   | 16   | 0   |
| CONTIG-002533 | 159  | 15   | 27   | 77   | 0   |
| CONTIG-002535 | 59   | 5    | 6    | 10   | 0   |
| CONTIG-002536 | 804  | 32   | 531  | 795  | 6   |
| CONTIG-002537 | 178  | 4    | 2    | 18   | 0   |
| CONTIG-002538 | 933  | 21   | 147  | 972  | 4   |
| CONTIG-002539 | 78   | 45   | 98   | 109  | 0   |
| CONTIG-002540 | 547  | 29   | 318  | 622  | 3   |
| CONTIG-002541 | 442  | 18   | 46   | 383  | 8   |
| CONTIG-002543 | 185  | 28   | 56   | 245  | 0   |
| CONTIG-002544 | 827  | 17   | 304  | 265  | 3   |
| CONTIG-002545 | 2529 | 36   | 281  | 5149 | 0   |
| CONTIG-002546 | 672  | 24   | 436  | 471  | 9   |
| CONTIG-002547 | 337  | 8    | 27   | 93   | 0   |
| CONTIG-002548 | 120  | 10   | 44   | 20   | 0   |
| CONTIG-002549 | 317  | 267  | 1463 | 1579 | 3   |
| CONTIG-002550 | 92   | 293  | 419  | 666  | 2   |
| CONTIG-002551 | 135  | 11   | 60   | 11   | 0   |
| CONTIG-002552 | 176  | 5    | 3    | 34   | 0   |
| CONTIG-002553 | 345  | 11   | 47   | 204  | 0   |

|               |      |     |      |      |     |
|---------------|------|-----|------|------|-----|
| CONTIG-002554 | 789  | 18  | 484  | 319  | 2   |
| CONTIG-002555 | 119  | 377 | 3143 | 805  | 0   |
| CONTIG-002556 | 190  | 12  | 29   | 26   | 0   |
| CONTIG-002563 | 890  | 45  | 381  | 2103 | 0   |
| CONTIG-002564 | 447  | 18  | 48   | 169  | 0   |
| CONTIG-002565 | 227  | 41  | 79   | 390  | 0   |
| CONTIG-002566 | 555  | 42  | 753  | 338  | 0   |
| CONTIG-002567 | 518  | 20  | 52   | 360  | 4   |
| CONTIG-002568 | 286  | 377 | 788  | 4511 | 195 |
| CONTIG-002569 | 635  | 16  | 80   | 438  | 0   |
| CONTIG-002570 | 575  | 46  | 107  | 1083 | 0   |
| CONTIG-002571 | 356  | 21  | 7    | 18   | 2   |
| CONTIG-002572 | 70   | 7   | 5    | 12   | 0   |
| CONTIG-002573 | 144  | 13  | 171  | 5    | 0   |
| CONTIG-002574 | 251  | 777 | 2704 | 4368 | 321 |
| CONTIG-002575 | 945  | 42  | 705  | 935  | 36  |
| CONTIG-002576 | 55   | 53  | 49   | 68   | 0   |
| CONTIG-002577 | 443  | 13  | 67   | 235  | 0   |
| CONTIG-002578 | 237  | 137 | 1004 | 286  | 0   |
| CONTIG-002579 | 174  | 240 | 1301 | 743  | 97  |
| CONTIG-002580 | 328  | 35  | 328  | 288  | 0   |
| CONTIG-002581 | 529  | 189 | 3637 | 4538 | 0   |
| CONTIG-002582 | 331  | 30  | 82   | 296  | 9   |
| CONTIG-002583 | 334  | 338 | 4380 | 1188 | 112 |
| CONTIG-002584 | 436  | 70  | 823  | 692  | 61  |
| CONTIG-002585 | 526  | 21  | 251  | 257  | 0   |
| CONTIG-002586 | 191  | 16  | 57   | 100  | 0   |
| CONTIG-002592 | 41   | 108 | 52   | 100  | 0   |
| CONTIG-002593 | 86   | 245 | 531  | 42   | 5   |
| CONTIG-002594 | 231  | 13  | 15   | 41   | 0   |
| CONTIG-002595 | 662  | 13  | 47   | 291  | 0   |
| CONTIG-002596 | 109  | 44  | 44   | 97   | 0   |
| CONTIG-002597 | 483  | 149 | 618  | 1462 | 132 |
| CONTIG-002598 | 167  | 20  | 115  | 99   | 0   |
| CONTIG-002599 | 1044 | 13  | 108  | 430  | 0   |
| CONTIG-002600 | 1143 | 30  | 302  | 1207 | 0   |
| CONTIG-002601 | 915  | 13  | 114  | 362  | 2   |
| CONTIG-002602 | 924  | 23  | 1303 | 344  | 0   |
| CONTIG-002603 | 2021 | 19  | 162  | 1277 | 27  |
| CONTIG-002604 | 183  | 627 | 1082 | 1486 | 334 |
| CONTIG-002608 | 151  | 22  | 37   | 140  | 0   |
| CONTIG-002609 | 442  | 17  | 44   | 249  | 0   |
| CONTIG-002616 | 995  | 61  | 376  | 1422 | 296 |
| CONTIG-002617 | 515  | 106 | 756  | 2443 | 11  |
| CONTIG-002618 | 1859 | 17  | 642  | 998  | 2   |
| CONTIG-002619 | 201  | 27  | 279  | 134  | 0   |
| CONTIG-002620 | 231  | 71  | 261  | 472  | 4   |

|               |      |     |      |      |     |
|---------------|------|-----|------|------|-----|
| CONTIG-002621 | 296  | 454 | 2067 | 2152 | 281 |
| CONTIG-002622 | 254  | 9   | 9    | 107  | 0   |
| CONTIG-002631 | 453  | 117 | 1498 | 751  | 51  |
| CONTIG-002632 | 563  | 11  | 70   | 114  | 0   |
| CONTIG-002633 | 940  | 75  | 358  | 1508 | 500 |
| CONTIG-002634 | 522  | 19  | 67   | 370  | 2   |
| CONTIG-002635 | 93   | 11  | 18   | 29   | 0   |
| CONTIG-002636 | 56   | 523 | 465  | 664  | 6   |
| CONTIG-002637 | 893  | 25  | 274  | 855  | 8   |
| CONTIG-002638 | 108  | 10  | 11   | 30   | 0   |
| CONTIG-002639 | 537  | 9   | 173  | 75   | 2   |
| CONTIG-002640 | 83   | 11  | 9    | 41   | 0   |
| CONTIG-002641 | 481  | 513 | 2281 | 8980 | 275 |
| CONTIG-002642 | 226  | 13  | 14   | 151  | 0   |
| CONTIG-002643 | 105  | 635 | 543  | 1106 | 165 |
| CONTIG-002644 | 452  | 23  | 189  | 158  | 4   |
| CONTIG-002645 | 1488 | 54  | 2223 | 3560 | 0   |
| CONTIG-002646 | 532  | 28  | 70   | 282  | 16  |
| CONTIG-002647 | 78   | 9   | 28   | 6    | 0   |
| CONTIG-002648 | 371  | 115 | 482  | 1671 | 8   |
| CONTIG-002649 | 372  | 46  | 153  | 485  | 8   |
| CONTIG-002650 | 284  | 445 | 925  | 3284 | 299 |
| CONTIG-002651 | 60   | 77  | 330  | 25   | 0   |
| CONTIG-002652 | 162  | 7   | 14   | 7    | 0   |
| CONTIG-002653 | 120  | 4   | 23   | 0    | 0   |
| CONTIG-002654 | 78   | 10  | 32   | 8    | 0   |
| CONTIG-002655 | 383  | 15  | 153  | 126  | 2   |
| CONTIG-002656 | 40   | 474 | 1239 | 118  | 0   |
| CONTIG-002657 | 671  | 30  | 360  | 766  | 6   |
| CONTIG-002658 | 890  | 79  | 1319 | 1343 | 97  |
| CONTIG-002659 | 60   | 322 | 598  | 573  | 4   |
| CONTIG-002660 | 538  | 123 | 745  | 1421 | 20  |
| CONTIG-002661 | 877  | 47  | 620  | 1260 | 47  |
| CONTIG-002662 | 280  | 7   | 64   | 43   | 0   |
| CONTIG-002663 | 772  | 30  | 279  | 991  | 2   |
| CONTIG-002664 | 293  | 39  | 376  | 274  | 4   |
| CONTIG-002671 | 106  | 15  | 0    | 56   | 2   |
| CONTIG-002672 | 332  | 27  | 166  | 336  | 0   |
| CONTIG-002673 | 429  | 10  | 15   | 136  | 6   |
| CONTIG-002674 | 280  | 8   | 86   | 55   | 0   |
| CONTIG-002675 | 474  | 89  | 505  | 1431 | 77  |
| CONTIG-002676 | 1098 | 42  | 786  | 2043 | 22  |
| CONTIG-002677 | 94   | 7   | 14   | 8    | 0   |
| CONTIG-002679 | 930  | 34  | 235  | 1569 | 2   |
| CONTIG-002680 | 214  | 815 | 1176 | 5790 | 562 |
| CONTIG-002684 | 494  | 18  | 111  | 244  | 2   |
| CONTIG-002685 | 63   | 6   | 11   | 0    | 0   |



|               |      |     |      |      |     |
|---------------|------|-----|------|------|-----|
| CONTIG-002686 | 223  | 136 | 276  | 485  | 18  |
| CONTIG-002687 | 142  | 9   | 10   | 36   | 2   |
| CONTIG-002688 | 1376 | 18  | 337  | 517  | 2   |
| CONTIG-002691 | 582  | 22  | 180  | 612  | 0   |
| CONTIG-002693 | 865  | 18  | 149  | 623  | 2   |
| CONTIG-002694 | 938  | 41  | 1915 | 783  | 0   |
| CONTIG-002695 | 1214 | 35  | 235  | 1393 | 57  |
| CONTIG-002696 | 755  | 15  | 78   | 384  | 0   |
| CONTIG-002697 | 270  | 166 | 1542 | 344  | 63  |
| CONTIG-002698 | 123  | 14  | 125  | 0    | 0   |
| CONTIG-002699 | 551  | 53  | 1013 | 506  | 12  |
| CONTIG-002700 | 410  | 11  | 95   | 146  | 0   |
| CONTIG-002701 | 338  | 13  | 42   | 139  | 0   |
| CONTIG-002704 | 60   | 17  | 30   | 4    | 0   |
| CONTIG-002706 | 164  | 9   | 4    | 45   | 0   |
| CONTIG-002709 | 532  | 16  | 403  | 252  | 0   |
| CONTIG-002710 | 258  | 52  | 251  | 563  | 2   |
| CONTIG-002711 | 1287 | 24  | 205  | 996  | 9   |
| CONTIG-002712 | 81   | 7   | 6    | 15   | 0   |
| CONTIG-002713 | 1671 | 42  | 1448 | 2124 | 31  |
| CONTIG-002714 | 861  | 45  | 1196 | 1304 | 2   |
| CONTIG-002717 | 147  | 15  | 7    | 75   | 2   |
| CONTIG-002718 | 286  | 7   | 21   | 84   | 0   |
| CONTIG-002719 | 126  | 9   | 2    | 38   | 0   |
| CONTIG-002724 | 113  | 457 | 937  | 1043 | 87  |
| CONTIG-002725 | 305  | 345 | 1265 | 4087 | 62  |
| CONTIG-002726 | 101  | 6   | 4    | 13   | 0   |
| CONTIG-002727 | 133  | 12  | 99   | 22   | 0   |
| CONTIG-002728 | 517  | 86  | 728  | 869  | 28  |
| CONTIG-002731 | 84   | 4   | 0    | 12   | 0   |
| CONTIG-002732 | 756  | 29  | 414  | 968  | 2   |
| CONTIG-002733 | 500  | 41  | 180  | 549  | 20  |
| CONTIG-002734 | 1252 | 28  | 1088 | 843  | 155 |
| CONTIG-002735 | 466  | 13  | 36   | 150  | 4   |
| CONTIG-002736 | 874  | 23  | 234  | 798  | 2   |
| CONTIG-002737 | 76   | 84  | 323  | 118  | 0   |
| CONTIG-002738 | 74   | 14  | 23   | 16   | 0   |
| CONTIG-002739 | 656  | 21  | 287  | 465  | 2   |
| CONTIG-002740 | 355  | 95  | 606  | 1204 | 7   |
| CONTIG-002741 | 275  | 18  | 82   | 184  | 0   |
| CONTIG-002745 | 188  | 8   | 38   | 12   | 0   |
| CONTIG-002746 | 1044 | 13  | 207  | 539  | 0   |
| CONTIG-002747 | 181  | 13  | 111  | 37   | 0   |
| CONTIG-002754 | 39   | 176 | 508  | 91   | 0   |
| CONTIG-002756 | 356  | 10  | 180  | 87   | 0   |
| CONTIG-002757 | 453  | 25  | 147  | 283  | 0   |
| CONTIG-002758 | 111  | 6   | 4    | 22   | 0   |

|               |      |     |      |      |     |
|---------------|------|-----|------|------|-----|
| CONTIG-002759 | 711  | 17  | 75   | 624  | 0   |
| CONTIG-002761 | 663  | 22  | 546  | 415  | 2   |
| CONTIG-002762 | 70   | 13  | 5    | 5    | 0   |
| CONTIG-002763 | 301  | 507 | 4639 | 4203 | 9   |
| CONTIG-002764 | 209  | 29  | 24   | 243  | 2   |
| CONTIG-002765 | 102  | 7   | 0    | 26   | 0   |
| CONTIG-002766 | 415  | 29  | 264  | 388  | 0   |
| CONTIG-002767 | 99   | 6   | 17   | 6    | 0   |
| CONTIG-002768 | 590  | 65  | 259  | 1945 | 0   |
| CONTIG-002769 | 433  | 10  | 16   | 237  | 0   |
| CONTIG-002770 | 1966 | 58  | 1040 | 4522 | 12  |
| CONTIG-002771 | 87   | 17  | 149  | 5    | 0   |
| CONTIG-002772 | 93   | 135 | 186  | 175  | 153 |
| CONTIG-002773 | 95   | 13  | 13   | 36   | 0   |
| CONTIG-002774 | 102  | 10  | 10   | 31   | 2   |
| CONTIG-002775 | 303  | 6   | 13   | 53   | 0   |
| CONTIG-002776 | 327  | 6   | 15   | 22   | 0   |
| CONTIG-002781 | 76   | 11  | 38   | 11   | 0   |
| CONTIG-002782 | 338  | 20  | 78   | 135  | 5   |
| CONTIG-002783 | 384  | 484 | 1963 | 4378 | 418 |
| CONTIG-002784 | 1151 | 95  | 908  | 2755 | 153 |
| CONTIG-002785 | 400  | 27  | 188  | 223  | 2   |
| CONTIG-002786 | 1207 | 49  | 808  | 2297 | 29  |
| CONTIG-002787 | 80   | 4   | 7    | 6    | 0   |
| CONTIG-002788 | 739  | 68  | 510  | 2455 | 13  |
| CONTIG-002789 | 68   | 16  | 35   | 13   | 0   |
| CONTIG-002790 | 59   | 4   | 11   | 4    | 0   |
| CONTIG-002804 | 762  | 128 | 403  | 5429 | 29  |
| CONTIG-002805 | 173  | 112 | 58   | 1200 | 2   |
| CONTIG-002806 | 225  | 10  | 14   | 63   | 0   |
| CONTIG-002807 | 1117 | 42  | 47   | 2497 | 4   |
| CONTIG-002813 | 106  | 7   | 29   | 15   | 0   |
| CONTIG-002814 | 358  | 575 | 1716 | 5255 | 492 |
| CONTIG-002815 | 60   | 6   | 11   | 0    | 0   |
| CONTIG-002816 | 414  | 19  | 25   | 149  | 2   |
| CONTIG-002817 | 287  | 16  | 38   | 176  | 0   |
| CONTIG-002818 | 371  | 14  | 27   | 177  | 0   |
| CONTIG-002819 | 805  | 50  | 611  | 1481 | 10  |
| CONTIG-002820 | 354  | 169 | 460  | 1125 | 172 |
| CONTIG-002821 | 119  | 8   | 10   | 9    | 0   |
| CONTIG-002822 | 198  | 43  | 304  | 143  | 2   |
| CONTIG-002826 | 90   | 232 | 205  | 347  | 47  |
| CONTIG-002827 | 125  | 8   | 12   | 28   | 0   |
| CONTIG-002828 | 629  | 77  | 87   | 2783 | 2   |
| CONTIG-002829 | 1159 | 82  | 529  | 3695 | 105 |
| CONTIG-002831 | 611  | 52  | 509  | 727  | 12  |
| CONTIG-002832 | 904  | 46  | 852  | 1438 | 6   |

|               |      |      |      |      |      |
|---------------|------|------|------|------|------|
| CONTIG-002833 | 136  | 392  | 550  | 2393 | 28   |
| CONTIG-002834 | 1654 | 24   | 248  | 1711 | 4    |
| CONTIG-002835 | 769  | 18   | 425  | 413  | 0    |
| CONTIG-002836 | 64   | 3    | 6    | 6    | 0    |
| CONTIG-002837 | 191  | 161  | 934  | 351  | 5    |
| CONTIG-002839 | 57   | 54   | 15   | 32   | 0    |
| CONTIG-002840 | 305  | 128  | 291  | 1508 | 209  |
| CONTIG-002841 | 241  | 19   | 8    | 154  | 0    |
| CONTIG-002842 | 405  | 377  | 4556 | 4771 | 126  |
| CONTIG-002843 | 1143 | 28   | 226  | 1197 | 0    |
| CONTIG-002844 | 426  | 7    | 9    | 95   | 0    |
| CONTIG-002845 | 555  | 87   | 288  | 1306 | 73   |
| CONTIG-002846 | 623  | 102  | 1327 | 806  | 146  |
| CONTIG-002847 | 1283 | 20   | 187  | 660  | 16   |
| CONTIG-002848 | 866  | 25   | 741  | 240  | 2    |
| CONTIG-002849 | 284  | 345  | 1715 | 4051 | 4    |
| CONTIG-002852 | 484  | 252  | 3535 | 849  | 2457 |
| CONTIG-002853 | 636  | 14   | 285  | 151  | 0    |
| CONTIG-002854 | 809  | 48   | 1673 | 1065 | 0    |
| CONTIG-002855 | 1798 | 55   | 1702 | 2811 | 160  |
| CONTIG-002856 | 171  | 12   | 9    | 58   | 6    |
| CONTIG-002857 | 1010 | 23   | 256  | 885  | 2    |
| CONTIG-002858 | 297  | 22   | 165  | 257  | 0    |
| CONTIG-002859 | 518  | 14   | 126  | 265  | 0    |
| CONTIG-002860 | 372  | 17   | 87   | 141  | 4    |
| CONTIG-002861 | 1270 | 54   | 143  | 1650 | 57   |
| CONTIG-002862 | 174  | 13   | 164  | 15   | 0    |
| CONTIG-002863 | 808  | 36   | 321  | 1096 | 10   |
| CONTIG-002864 | 87   | 8    | 19   | 7    | 0    |
| CONTIG-002865 | 95   | 3    | 0    | 9    | 0    |
| CONTIG-002866 | 329  | 119  | 853  | 1791 | 0    |
| CONTIG-002867 | 687  | 36   | 1215 | 554  | 0    |
| CONTIG-002869 | 653  | 78   | 271  | 957  | 64   |
| CONTIG-002870 | 94   | 640  | 1531 | 837  | 46   |
| CONTIG-002871 | 1274 | 36   | 551  | 2138 | 2    |
| CONTIG-002872 | 475  | 16   | 336  | 154  | 0    |
| CONTIG-002873 | 279  | 20   | 69   | 148  | 0    |
| CONTIG-002874 | 101  | 10   | 28   | 11   | 0    |
| CONTIG-002875 | 245  | 534  | 839  | 3293 | 229  |
| CONTIG-002876 | 291  | 8    | 59   | 69   | 0    |
| CONTIG-002877 | 129  | 26   | 268  | 31   | 0    |
| CONTIG-002878 | 133  | 9    | 34   | 5    | 0    |
| CONTIG-002879 | 74   | 1111 | 1527 | 1700 | 106  |
| CONTIG-002880 | 85   | 11   | 10   | 22   | 0    |
| CONTIG-002881 | 83   | 26   | 31   | 48   | 0    |
| CONTIG-002882 | 158  | 16   | 22   | 72   | 6    |
| CONTIG-002883 | 65   | 8    | 9    | 10   | 0    |

|               |      |     |      |      |     |
|---------------|------|-----|------|------|-----|
| CONTIG-002884 | 531  | 47  | 768  | 455  | 8   |
| CONTIG-002885 | 264  | 469 | 3037 | 3098 | 160 |
| CONTIG-002886 | 548  | 213 | 6094 | 1901 | 104 |
| CONTIG-002887 | 74   | 207 | 364  | 255  | 25  |
| CONTIG-002889 | 351  | 9   | 200  | 26   | 0   |
| CONTIG-002894 | 112  | 10  | 56   | 0    | 0   |
| CONTIG-002895 | 559  | 25  | 225  | 145  | 31  |
| CONTIG-002896 | 167  | 7   | 7    | 53   | 0   |
| CONTIG-002898 | 497  | 13  | 52   | 142  | 5   |
| CONTIG-002899 | 1022 | 18  | 254  | 496  | 16  |
| CONTIG-002902 | 60   | 32  | 7    | 98   | 0   |
| CONTIG-002903 | 79   | 625 | 904  | 519  | 111 |
| CONTIG-002904 | 1637 | 31  | 1337 | 1546 | 42  |
| CONTIG-002905 | 1882 | 17  | 241  | 907  | 34  |
| CONTIG-002906 | 524  | 23  | 756  | 135  | 0   |
| CONTIG-002907 | 229  | 138 | 401  | 619  | 80  |
| CONTIG-002908 | 220  | 151 | 298  | 557  | 71  |
| CONTIG-002909 | 216  | 33  | 22   | 15   | 0   |
| CONTIG-002910 | 95   | 27  | 97   | 0    | 0   |
| CONTIG-002911 | 62   | 149 | 697  | 52   | 0   |
| CONTIG-002912 | 1080 | 66  | 153  | 2499 | 299 |
| CONTIG-002913 | 248  | 14  | 57   | 118  | 0   |
| CONTIG-002914 | 190  | 340 | 685  | 1774 | 54  |
| CONTIG-002915 | 149  | 352 | 73   | 1834 | 148 |
| CONTIG-002916 | 207  | 52  | 395  | 235  | 2   |
| CONTIG-002917 | 389  | 16  | 18   | 179  | 0   |
| CONTIG-002921 | 797  | 31  | 140  | 1380 | 0   |
| CONTIG-002922 | 227  | 26  | 136  | 97   | 0   |
| CONTIG-002923 | 418  | 71  | 257  | 1386 | 0   |
| CONTIG-002924 | 472  | 24  | 65   | 268  | 2   |
| CONTIG-002926 | 186  | 63  | 675  | 318  | 0   |
| CONTIG-002927 | 485  | 23  | 30   | 590  | 0   |
| CONTIG-002928 | 267  | 473 | 7038 | 1672 | 140 |
| CONTIG-002929 | 257  | 23  | 171  | 194  | 0   |
| CONTIG-002930 | 441  | 208 | 1029 | 1786 | 177 |
| CONTIG-002931 | 69   | 58  | 59   | 0    | 0   |
| CONTIG-002932 | 580  | 128 | 2206 | 1746 | 47  |
| CONTIG-002935 | 217  | 274 | 3624 | 1170 | 8   |
| CONTIG-002936 | 156  | 4   | 5    | 17   | 0   |
| CONTIG-002937 | 75   | 151 | 318  | 69   | 4   |
| CONTIG-002940 | 87   | 9   | 48   | 0    | 0   |
| CONTIG-002941 | 296  | 37  | 121  | 238  | 16  |
| CONTIG-002942 | 93   | 407 | 616  | 1257 | 10  |
| CONTIG-002943 | 675  | 16  | 108  | 260  | 4   |
| CONTIG-002944 | 83   | 14  | 4    | 23   | 0   |
| CONTIG-002945 | 1108 | 27  | 159  | 1472 | 0   |
| CONTIG-002946 | 146  | 24  | 51   | 126  | 0   |

|               |      |     |      |      |     |
|---------------|------|-----|------|------|-----|
| CONTIG-002947 | 163  | 22  | 56   | 157  | 0   |
| CONTIG-002948 | 340  | 25  | 91   | 218  | 0   |
| CONTIG-002949 | 71   | 38  | 115  | 0    | 0   |
| CONTIG-002950 | 101  | 348 | 451  | 330  | 137 |
| CONTIG-002951 | 38   | 824 | 332  | 298  | 78  |
| CONTIG-002952 | 120  | 8   | 16   | 28   | 0   |
| CONTIG-002953 | 378  | 11  | 21   | 118  | 2   |
| CONTIG-002954 | 419  | 16  | 95   | 183  | 4   |
| CONTIG-002955 | 329  | 12  | 119  | 103  | 0   |
| CONTIG-002956 | 86   | 37  | 68   | 114  | 2   |
| CONTIG-002957 | 162  | 10  | 38   | 20   | 0   |
| CONTIG-002959 | 131  | 28  | 169  | 100  | 0   |
| CONTIG-002960 | 1682 | 31  | 106  | 1573 | 46  |
| CONTIG-002961 | 208  | 10  | 110  | 36   | 0   |
| CONTIG-002962 | 696  | 13  | 60   | 337  | 5   |
| CONTIG-002963 | 826  | 92  | 764  | 3351 | 29  |
| CONTIG-002964 | 472  | 16  | 18   | 119  | 0   |
| CONTIG-002965 | 1012 | 31  | 144  | 455  | 103 |
| CONTIG-002966 | 901  | 34  | 175  | 941  | 17  |
| CONTIG-002968 | 75   | 8   | 12   | 16   | 0   |
| CONTIG-002969 | 1295 | 91  | 1568 | 3525 | 139 |
| CONTIG-002970 | 1131 | 20  | 391  | 661  | 0   |
| CONTIG-002971 | 550  | 15  | 64   | 271  | 0   |
| CONTIG-002972 | 224  | 10  | 16   | 67   | 4   |
| CONTIG-002973 | 1606 | 64  | 159  | 6055 | 2   |
| CONTIG-002974 | 937  | 35  | 769  | 797  | 29  |
| CONTIG-002975 | 177  | 6   | 12   | 15   | 0   |
| CONTIG-002976 | 73   | 7   | 8    | 7    | 0   |
| CONTIG-002977 | 149  | 6   | 4    | 42   | 0   |
| CONTIG-002978 | 301  | 18  | 81   | 232  | 0   |
| CONTIG-002979 | 1322 | 39  | 1502 | 1367 | 12  |
| CONTIG-002980 | 174  | 8   | 21   | 50   | 0   |
| CONTIG-002981 | 495  | 60  | 631  | 991  | 2   |
| CONTIG-002982 | 642  | 29  | 487  | 506  | 2   |
| CONTIG-002983 | 828  | 18  | 126  | 568  | 4   |
| CONTIG-002984 | 587  | 19  | 127  | 284  | 9   |
| CONTIG-002985 | 77   | 478 | 576  | 269  | 32  |
| CONTIG-002986 | 354  | 10  | 28   | 143  | 0   |
| CONTIG-002987 | 73   | 8   | 9    | 15   | 0   |
| CONTIG-002988 | 319  | 100 | 292  | 714  | 58  |
| CONTIG-002991 | 204  | 10  | 8    | 70   | 0   |
| CONTIG-002996 | 268  | 42  | 229  | 155  | 0   |
| CONTIG-002997 | 490  | 29  | 114  | 251  | 29  |
| CONTIG-002998 | 79   | 204 | 612  | 526  | 0   |
| CONTIG-002999 | 860  | 76  | 231  | 1789 | 86  |
| CONTIG-003000 | 248  | 16  | 33   | 87   | 0   |
| CONTIG-003009 | 753  | 21  | 148  | 502  | 0   |

|               |      |      |      |       |     |
|---------------|------|------|------|-------|-----|
| CONTIG-003013 | 365  | 126  | 1358 | 1540  | 18  |
| CONTIG-003014 | 1007 | 84   | 1897 | 3165  | 2   |
| CONTIG-003015 | 116  | 913  | 602  | 2916  | 180 |
| CONTIG-003016 | 378  | 690  | 1542 | 12245 | 192 |
| CONTIG-003017 | 257  | 271  | 4588 | 1376  | 0   |
| CONTIG-003018 | 78   | 7    | 6    | 0     | 0   |
| CONTIG-003019 | 201  | 302  | 2091 | 908   | 88  |
| CONTIG-003020 | 97   | 94   | 182  | 92    | 0   |
| CONTIG-003021 | 501  | 53   | 547  | 757   | 16  |
| CONTIG-003023 | 232  | 17   | 445  | 0     | 0   |
| CONTIG-003024 | 115  | 15   | 25   | 40    | 0   |
| CONTIG-003025 | 166  | 50   | 23   | 263   | 3   |
| CONTIG-003026 | 179  | 502  | 1051 | 3190  | 249 |
| CONTIG-003027 | 70   | 7    | 5    | 14    | 0   |
| CONTIG-003032 | 66   | 4    | 9    | 4     | 0   |
| CONTIG-003033 | 523  | 67   | 189  | 645   | 7   |
| CONTIG-003034 | 1123 | 25   | 180  | 1026  | 5   |
| CONTIG-003035 | 140  | 62   | 470  | 64    | 0   |
| CONTIG-003036 | 856  | 43   | 121  | 718   | 0   |
| CONTIG-003037 | 58   | 4    | 11   | 0     | 0   |
| CONTIG-003038 | 728  | 19   | 440  | 395   | 0   |
| CONTIG-003039 | 319  | 12   | 44   | 177   | 0   |
| CONTIG-003041 | 2325 | 26   | 550  | 2437  | 14  |
| CONTIG-003042 | 861  | 36   | 198  | 925   | 0   |
| CONTIG-003043 | 1127 | 25   | 184  | 528   | 28  |
| CONTIG-003044 | 130  | 64   | 285  | 4     | 0   |
| CONTIG-003045 | 310  | 190  | 2939 | 1893  | 0   |
| CONTIG-003046 | 329  | 445  | 682  | 6127  | 268 |
| CONTIG-003047 | 137  | 8    | 5    | 23    | 0   |
| CONTIG-003048 | 112  | 1409 | 1196 | 4142  | 183 |
| CONTIG-003050 | 228  | 15   | 40   | 142   | 0   |
| CONTIG-003053 | 110  | 8    | 26   | 16    | 0   |
| CONTIG-003055 | 732  | 49   | 1749 | 718   | 2   |
| CONTIG-003056 | 369  | 16   | 48   | 148   | 0   |
| CONTIG-003057 | 171  | 8    | 44   | 2     | 4   |
| CONTIG-003058 | 1419 | 29   | 420  | 1935  | 0   |
| CONTIG-003059 | 457  | 47   | 205  | 836   | 8   |
| CONTIG-003060 | 734  | 25   | 383  | 495   | 8   |
| CONTIG-003061 | 236  | 396  | 1244 | 1835  | 123 |
| CONTIG-003062 | 128  | 93   | 619  | 13    | 7   |
| CONTIG-003063 | 904  | 12   | 85   | 369   | 2   |
| CONTIG-003064 | 76   | 7    | 18   | 4     | 0   |
| CONTIG-003065 | 73   | 16   | 29   | 30    | 0   |
| CONTIG-003066 | 399  | 28   | 154  | 242   | 4   |
| CONTIG-003067 | 51   | 591  | 182  | 957   | 0   |
| CONTIG-003068 | 62   | 30   | 160  | 2     | 0   |
| CONTIG-003069 | 76   | 14   | 39   | 20    | 0   |

|               |      |      |      |      |     |
|---------------|------|------|------|------|-----|
| CONTIG-003070 | 964  | 36   | 181  | 1380 | 15  |
| CONTIG-003071 | 462  | 17   | 37   | 176  | 0   |
| CONTIG-003072 | 1070 | 45   | 873  | 1964 | 2   |
| CONTIG-003073 | 1368 | 40   | 439  | 1363 | 2   |
| CONTIG-003074 | 208  | 8    | 11   | 44   | 2   |
| CONTIG-003075 | 297  | 17   | 37   | 153  | 0   |
| CONTIG-003076 | 858  | 72   | 1946 | 1515 | 8   |
| CONTIG-003077 | 1476 | 75   | 384  | 5557 | 19  |
| CONTIG-003081 | 641  | 18   | 108  | 350  | 4   |
| CONTIG-003082 | 192  | 946  | 61   | 9360 | 3   |
| CONTIG-003083 | 416  | 91   | 718  | 1021 | 16  |
| CONTIG-003084 | 799  | 18   | 51   | 613  | 14  |
| CONTIG-003085 | 1577 | 42   | 238  | 3909 | 2   |
| CONTIG-003086 | 1434 | 77   | 2938 | 2791 | 41  |
| CONTIG-003087 | 529  | 233  | 6954 | 2647 | 83  |
| CONTIG-003088 | 190  | 15   | 7    | 137  | 0   |
| CONTIG-003089 | 153  | 1249 | 4367 | 8785 | 39  |
| CONTIG-003090 | 303  | 23   | 184  | 153  | 2   |
| CONTIG-003091 | 1179 | 39   | 498  | 1754 | 53  |
| CONTIG-003092 | 109  | 11   | 9    | 39   | 0   |
| CONTIG-003094 | 179  | 11   | 29   | 59   | 0   |
| CONTIG-003095 | 348  | 21   | 62   | 304  | 0   |
| CONTIG-003096 | 181  | 6    | 10   | 28   | 0   |
| CONTIG-003097 | 1152 | 20   | 331  | 870  | 4   |
| CONTIG-003098 | 598  | 30   | 38   | 988  | 0   |
| CONTIG-003099 | 715  | 24   | 266  | 615  | 0   |
| CONTIG-003100 | 1335 | 11   | 243  | 415  | 0   |
| CONTIG-003101 | 92   | 9    | 28   | 9    | 0   |
| CONTIG-003102 | 320  | 341  | 988  | 3034 | 204 |
| CONTIG-003103 | 318  | 11   | 17   | 34   | 0   |
| CONTIG-003104 | 1021 | 102  | 599  | 2510 | 302 |
| CONTIG-003105 | 107  | 50   | 549  | 20   | 0   |
| CONTIG-003106 | 186  | 191  | 656  | 407  | 35  |
| CONTIG-003107 | 1037 | 38   | 445  | 1290 | 21  |
| CONTIG-003108 | 692  | 117  | 735  | 3166 | 30  |
| CONTIG-003109 | 93   | 148  | 291  | 531  | 2   |
| CONTIG-003110 | 82   | 6    | 9    | 9    | 0   |
| CONTIG-003111 | 505  | 62   | 106  | 1940 | 0   |
| CONTIG-003112 | 414  | 17   | 249  | 157  | 2   |
| CONTIG-003113 | 67   | 3    | 6    | 5    | 0   |
| CONTIG-003122 | 436  | 26   | 120  | 165  | 9   |
| CONTIG-003123 | 169  | 1014 | 1489 | 4299 | 376 |
| CONTIG-003124 | 134  | 73   | 734  | 0    | 3   |
| CONTIG-003125 | 335  | 17   | 42   | 145  | 4   |
| CONTIG-003126 | 339  | 15   | 55   | 151  | 0   |
| CONTIG-003127 | 89   | 20   | 4    | 95   | 0   |
| CONTIG-003129 | 268  | 15   | 86   | 89   | 0   |

|               |      |     |      |       |     |
|---------------|------|-----|------|-------|-----|
| CONTIG-003130 | 334  | 14  | 225  | 59    | 0   |
| CONTIG-003131 | 131  | 12  | 118  | 4     | 0   |
| CONTIG-003132 | 182  | 156 | 378  | 409   | 117 |
| CONTIG-003133 | 888  | 44  | 957  | 1223  | 11  |
| CONTIG-003134 | 1629 | 57  | 739  | 1968  | 98  |
| CONTIG-003135 | 1938 | 25  | 315  | 1532  | 51  |
| CONTIG-003136 | 72   | 17  | 16   | 33    | 0   |
| CONTIG-003137 | 502  | 176 | 853  | 4396  | 60  |
| CONTIG-003138 | 64   | 13  | 15   | 11    | 0   |
| CONTIG-003139 | 95   | 484 | 290  | 1498  | 10  |
| CONTIG-003140 | 189  | 474 | 1837 | 1989  | 147 |
| CONTIG-003141 | 143  | 31  | 59   | 105   | 0   |
| CONTIG-003142 | 984  | 52  | 396  | 1266  | 222 |
| CONTIG-003143 | 693  | 12  | 37   | 215   | 0   |
| CONTIG-003144 | 113  | 141 | 476  | 297   | 24  |
| CONTIG-003145 | 121  | 5   | 8    | 6     | 0   |
| CONTIG-003146 | 523  | 18  | 114  | 198   | 0   |
| CONTIG-003149 | 625  | 20  | 176  | 281   | 4   |
| CONTIG-003150 | 1099 | 21  | 412  | 609   | 0   |
| CONTIG-003151 | 202  | 382 | 828  | 364   | 118 |
| CONTIG-003152 | 70   | 125 | 467  | 14    | 0   |
| CONTIG-003153 | 319  | 31  | 309  | 112   | 0   |
| CONTIG-003154 | 551  | 100 | 270  | 1329  | 234 |
| CONTIG-003155 | 629  | 69  | 463  | 2492  | 0   |
| CONTIG-003156 | 362  | 13  | 232  | 101   | 0   |
| CONTIG-003157 | 278  | 28  | 129  | 141   | 6   |
| CONTIG-003158 | 579  | 15  | 83   | 344   | 0   |
| CONTIG-003162 | 103  | 7   | 8    | 27    | 0   |
| CONTIG-003163 | 429  | 21  | 128  | 300   | 6   |
| CONTIG-003164 | 1238 | 111 | 298  | 4678  | 171 |
| CONTIG-003165 | 197  | 7   | 27   | 37    | 0   |
| CONTIG-003166 | 62   | 14  | 22   | 12    | 0   |
| CONTIG-003167 | 249  | 305 | 1190 | 1145  | 115 |
| CONTIG-003168 | 120  | 19  | 49   | 75    | 0   |
| CONTIG-003169 | 1157 | 42  | 262  | 2017  | 19  |
| CONTIG-003173 | 1796 | 110 | 409  | 10217 | 136 |
| CONTIG-003174 | 395  | 19  | 87   | 342   | 2   |
| CONTIG-003175 | 408  | 8   | 12   | 96    | 0   |
| CONTIG-003176 | 310  | 33  | 40   | 436   | 0   |
| CONTIG-003177 | 304  | 60  | 367  | 560   | 17  |
| CONTIG-003178 | 1335 | 21  | 158  | 1129  | 2   |
| CONTIG-003180 | 64   | 6   | 14   | 0     | 0   |
| CONTIG-003181 | 555  | 15  | 63   | 239   | 0   |
| CONTIG-003182 | 570  | 10  | 71   | 221   | 2   |
| CONTIG-003183 | 132  | 19  | 132  | 31    | 0   |
| CONTIG-003184 | 181  | 14  | 78   | 58    | 2   |
| CONTIG-003187 | 103  | 4   | 2    | 12    | 0   |



|               |      |     |      |      |     |
|---------------|------|-----|------|------|-----|
| CONTIG-003188 | 740  | 60  | 262  | 2334 | 0   |
| CONTIG-003189 | 280  | 524 | 316  | 6036 | 37  |
| CONTIG-003190 | 1532 | 36  | 1874 | 1984 | 0   |
| CONTIG-003191 | 1145 | 46  | 568  | 1339 | 17  |
| CONTIG-003192 | 144  | 6   | 6    | 11   | 0   |
| CONTIG-003193 | 961  | 85  | 578  | 2208 | 114 |
| CONTIG-003194 | 439  | 66  | 413  | 704  | 19  |
| CONTIG-003195 | 284  | 18  | 240  | 140  | 0   |
| CONTIG-003196 | 1566 | 42  | 657  | 3328 | 4   |
| CONTIG-003197 | 1240 | 41  | 619  | 1395 | 84  |
| CONTIG-003198 | 1180 | 51  | 265  | 1721 | 72  |
| CONTIG-003202 | 1048 | 74  | 853  | 1701 | 152 |
| CONTIG-003203 | 106  | 7   | 7    | 21   | 0   |
| CONTIG-003204 | 221  | 466 | 1289 | 2705 | 250 |
| CONTIG-003205 | 54   | 893 | 1460 | 743  | 9   |
| CONTIG-003206 | 585  | 17  | 183  | 309  | 0   |
| CONTIG-003207 | 291  | 7   | 4    | 57   | 2   |
| CONTIG-003208 | 265  | 26  | 94   | 93   | 2   |
| CONTIG-003209 | 740  | 17  | 100  | 354  | 0   |
| CONTIG-003210 | 700  | 17  | 175  | 333  | 2   |
| CONTIG-003211 | 79   | 6   | 7    | 8    | 0   |
| CONTIG-003212 | 396  | 36  | 171  | 467  | 10  |
| CONTIG-003213 | 1342 | 23  | 210  | 1032 | 8   |
| CONTIG-003214 | 458  | 20  | 202  | 256  | 2   |
| CONTIG-003215 | 180  | 13  | 7    | 75   | 0   |
| CONTIG-003216 | 239  | 77  | 51   | 1067 | 0   |
| CONTIG-003217 | 183  | 17  | 109  | 64   | 0   |
| CONTIG-003218 | 150  | 16  | 3    | 2    | 0   |
| CONTIG-003219 | 1383 | 49  | 924  | 2812 | 8   |
| CONTIG-003220 | 1747 | 49  | 431  | 2262 | 135 |
| CONTIG-003221 | 447  | 17  | 69   | 255  | 0   |
| CONTIG-003222 | 170  | 5   | 16   | 26   | 0   |
| CONTIG-003223 | 841  | 47  | 599  | 1296 | 6   |
| CONTIG-003224 | 672  | 24  | 225  | 334  | 11  |
| CONTIG-003225 | 149  | 100 | 722  | 222  | 0   |
| CONTIG-003226 | 1140 | 118 | 1407 | 4355 | 109 |
| CONTIG-003227 | 177  | 25  | 169  | 66   | 0   |
| CONTIG-003228 | 214  | 13  | 9    | 122  | 0   |
| CONTIG-003229 | 818  | 25  | 728  | 501  | 0   |
| CONTIG-003230 | 219  | 8   | 12   | 74   | 0   |
| CONTIG-003231 | 283  | 77  | 561  | 737  | 3   |
| CONTIG-003233 | 1044 | 28  | 770  | 520  | 20  |
| CONTIG-003234 | 297  | 18  | 188  | 73   | 0   |
| CONTIG-003235 | 239  | 29  | 389  | 119  | 0   |
| CONTIG-003236 | 495  | 42  | 653  | 790  | 0   |
| CONTIG-003237 | 1103 | 35  | 452  | 1913 | 6   |
| CONTIG-003238 | 123  | 18  | 34   | 34   | 0   |

|               |      |     |      |      |     |
|---------------|------|-----|------|------|-----|
| CONTIG-003239 | 79   | 6   | 0    | 10   | 0   |
| CONTIG-003240 | 71   | 833 | 105  | 3506 | 0   |
| CONTIG-003241 | 658  | 52  | 114  | 993  | 47  |
| CONTIG-003242 | 1475 | 68  | 1113 | 5113 | 9   |
| CONTIG-003243 | 110  | 5   | 2    | 0    | 0   |
| CONTIG-003248 | 394  | 12  | 35   | 54   | 0   |
| CONTIG-003256 | 120  | 5   | 5    | 13   | 0   |
| CONTIG-003257 | 233  | 9   | 19   | 71   | 0   |
| CONTIG-003258 | 458  | 17  | 102  | 153  | 2   |
| CONTIG-003259 | 67   | 8   | 3    | 9    | 4   |
| CONTIG-003260 | 815  | 52  | 281  | 2384 | 0   |
| CONTIG-003261 | 37   | 912 | 249  | 451  | 165 |
| CONTIG-003262 | 134  | 407 | 1346 | 422  | 70  |
| CONTIG-003263 | 140  | 50  | 79   | 71   | 2   |
| CONTIG-003264 | 57   | 157 | 79   | 46   | 0   |
| CONTIG-003265 | 87   | 36  | 14   | 9    | 0   |
| CONTIG-003266 | 284  | 18  | 91   | 157  | 0   |
| CONTIG-003267 | 159  | 160 | 1733 | 23   | 0   |
| CONTIG-003268 | 514  | 27  | 201  | 543  | 0   |
| CONTIG-003270 | 176  | 50  | 211  | 326  | 3   |
| CONTIG-003273 | 1194 | 16  | 269  | 616  | 6   |
| CONTIG-003274 | 161  | 23  | 102  | 20   | 0   |
| CONTIG-003278 | 188  | 9   | 48   | 31   | 0   |
| CONTIG-003279 | 381  | 21  | 75   | 235  | 4   |
| CONTIG-003280 | 321  | 21  | 54   | 198  | 0   |
| CONTIG-003281 | 288  | 26  | 59   | 254  | 6   |
| CONTIG-003282 | 317  | 276 | 1634 | 2061 | 230 |
| CONTIG-003283 | 72   | 16  | 10   | 15   | 0   |
| CONTIG-003285 | 468  | 59  | 218  | 507  | 16  |
| CONTIG-003286 | 1532 | 40  | 192  | 1989 | 165 |
| CONTIG-003287 | 59   | 69  | 192  | 80   | 0   |
| CONTIG-003293 | 625  | 20  | 41   | 658  | 2   |
| CONTIG-003294 | 84   | 25  | 10   | 60   | 0   |
| CONTIG-003295 | 89   | 6   | 8    | 25   | 0   |
| CONTIG-003296 | 1127 | 37  | 515  | 1336 | 19  |
| CONTIG-003297 | 110  | 8   | 41   | 2    | 0   |
| CONTIG-003298 | 303  | 26  | 179  | 340  | 0   |
| CONTIG-003299 | 189  | 335 | 1225 | 641  | 248 |
| CONTIG-003300 | 177  | 24  | 153  | 151  | 0   |
| CONTIG-003304 | 117  | 469 | 74   | 251  | 0   |
| CONTIG-003305 | 118  | 7   | 15   | 14   | 0   |
| CONTIG-003310 | 116  | 834 | 840  | 1502 | 175 |
| CONTIG-003311 | 152  | 20  | 83   | 107  | 0   |
| CONTIG-003312 | 94   | 7   | 15   | 12   | 0   |
| CONTIG-003313 | 479  | 15  | 51   | 251  | 0   |
| CONTIG-003314 | 853  | 23  | 348  | 351  | 10  |
| CONTIG-003315 | 291  | 163 | 1166 | 626  | 53  |

|               |      |      |      |      |     |
|---------------|------|------|------|------|-----|
| CONTIG-003316 | 167  | 130  | 337  | 235  | 58  |
| CONTIG-003317 | 90   | 14   | 23   | 16   | 0   |
| CONTIG-003318 | 1518 | 94   | 1368 | 8537 | 6   |
| CONTIG-003319 | 109  | 10   | 26   | 17   | 0   |
| CONTIG-003320 | 949  | 25   | 111  | 649  | 23  |
| CONTIG-003321 | 97   | 12   | 44   | 14   | 0   |
| CONTIG-003322 | 65   | 250  | 276  | 126  | 17  |
| CONTIG-003323 | 609  | 25   | 91   | 449  | 29  |
| CONTIG-003331 | 1069 | 138  | 229  | 9666 | 8   |
| CONTIG-003332 | 66   | 4    | 3    | 9    | 0   |
| CONTIG-003333 | 177  | 1035 | 2209 | 2662 | 201 |
| CONTIG-003334 | 213  | 5    | 10   | 25   | 0   |
| CONTIG-003335 | 959  | 19   | 119  | 754  | 0   |
| CONTIG-003336 | 59   | 153  | 88   | 44   | 5   |
| CONTIG-003337 | 255  | 468  | 1020 | 3130 | 336 |
| CONTIG-003338 | 438  | 8    | 9    | 61   | 2   |
| CONTIG-003339 | 84   | 5    | 27   | 0    | 0   |
| CONTIG-003340 | 885  | 75   | 2715 | 2121 | 10  |
| CONTIG-003341 | 156  | 274  | 501  | 989  | 64  |
| CONTIG-003342 | 78   | 10   | 2    | 11   | 0   |
| CONTIG-003343 | 140  | 18   | 191  | 8    | 0   |
| CONTIG-003344 | 601  | 13   | 67   | 188  | 0   |
| CONTIG-003345 | 572  | 20   | 71   | 395  | 2   |
| CONTIG-003348 | 1279 | 37   | 746  | 1254 | 67  |
| CONTIG-003349 | 38   | 267  | 63   | 140  | 0   |
| CONTIG-003350 | 90   | 6    | 4    | 12   | 2   |
| CONTIG-003351 | 265  | 37   | 17   | 21   | 0   |
| CONTIG-003353 | 569  | 27   | 434  | 418  | 2   |
| CONTIG-003354 | 568  | 69   | 1158 | 877  | 39  |
| CONTIG-003355 | 852  | 74   | 379  | 1232 | 81  |
| CONTIG-003356 | 331  | 29   | 126  | 425  | 0   |
| CONTIG-003357 | 463  | 86   | 368  | 704  | 72  |
| CONTIG-003360 | 304  | 12   | 129  | 81   | 0   |
| CONTIG-003361 | 235  | 6    | 22   | 33   | 0   |
| CONTIG-003362 | 272  | 19   | 48   | 114  | 0   |
| CONTIG-003365 | 952  | 156  | 4716 | 5942 | 0   |
| CONTIG-003366 | 51   | 240  | 205  | 132  | 0   |
| CONTIG-003367 | 256  | 8    | 12   | 47   | 2   |
| CONTIG-003368 | 201  | 18   | 65   | 70   | 0   |
| CONTIG-003369 | 59   | 174  | 800  | 102  | 0   |
| CONTIG-003370 | 1136 | 72   | 120  | 2920 | 356 |
| CONTIG-003371 | 1020 | 21   | 156  | 336  | 21  |
| CONTIG-003372 | 101  | 132  | 235  | 127  | 7   |
| CONTIG-003373 | 274  | 761  | 3445 | 4550 | 440 |
| CONTIG-003374 | 329  | 23   | 127  | 323  | 2   |
| CONTIG-003375 | 1341 | 58   | 614  | 2769 | 34  |
| CONTIG-003376 | 79   | 10   | 7    | 22   | 0   |

|               |      |      |      |      |     |
|---------------|------|------|------|------|-----|
| CONTIG-003377 | 67   | 11   | 53   | 0    | 0   |
| CONTIG-003386 | 407  | 21   | 43   | 430  | 0   |
| CONTIG-003387 | 775  | 93   | 503  | 4377 | 0   |
| CONTIG-003391 | 399  | 17   | 65   | 189  | 10  |
| CONTIG-003392 | 208  | 379  | 1220 | 1756 | 60  |
| CONTIG-003393 | 121  | 7    | 16   | 24   | 0   |
| CONTIG-003394 | 722  | 25   | 261  | 377  | 2   |
| CONTIG-003395 | 219  | 16   | 5    | 101  | 0   |
| CONTIG-003396 | 883  | 77   | 1395 | 1588 | 15  |
| CONTIG-003403 | 392  | 18   | 209  | 199  | 2   |
| CONTIG-003404 | 209  | 30   | 209  | 174  | 0   |
| CONTIG-003405 | 253  | 9    | 23   | 68   | 2   |
| CONTIG-003406 | 1024 | 143  | 3662 | 5913 | 20  |
| CONTIG-003407 | 313  | 171  | 224  | 2556 | 4   |
| CONTIG-003408 | 438  | 66   | 476  | 1296 | 3   |
| CONTIG-003409 | 484  | 21   | 175  | 342  | 0   |
| CONTIG-003410 | 155  | 7    | 29   | 2    | 0   |
| CONTIG-003411 | 758  | 40   | 199  | 491  | 0   |
| CONTIG-003413 | 649  | 71   | 331  | 2140 | 2   |
| CONTIG-003414 | 98   | 12   | 5    | 20   | 2   |
| CONTIG-003415 | 803  | 150  | 313  | 5858 | 55  |
| CONTIG-003416 | 142  | 5    | 2    | 22   | 0   |
| CONTIG-003417 | 97   | 840  | 655  | 3242 | 75  |
| CONTIG-003419 | 81   | 607  | 636  | 474  | 148 |
| CONTIG-003420 | 2133 | 26   | 1807 | 1863 | 2   |
| CONTIG-003421 | 45   | 1588 | 237  | 855  | 364 |
| CONTIG-003422 | 468  | 14   | 28   | 333  | 0   |
| CONTIG-003423 | 196  | 9    | 75   | 21   | 0   |
| CONTIG-003424 | 518  | 13   | 45   | 185  | 0   |
| CONTIG-003425 | 532  | 18   | 134  | 272  | 0   |
| CONTIG-003426 | 611  | 39   | 252  | 745  | 26  |
| CONTIG-003427 | 595  | 16   | 270  | 306  | 0   |
| CONTIG-003428 | 162  | 70   | 86   | 38   | 3   |
| CONTIG-003429 | 624  | 61   | 316  | 2182 | 0   |
| CONTIG-003437 | 113  | 5    | 12   | 9    | 0   |
| CONTIG-003438 | 567  | 19   | 52   | 444  | 4   |
| CONTIG-003442 | 202  | 14   | 18   | 120  | 0   |
| CONTIG-003443 | 221  | 36   | 447  | 89   | 0   |
| CONTIG-003449 | 68   | 4    | 4    | 2    | 0   |
| CONTIG-003450 | 276  | 37   | 146  | 311  | 7   |
| CONTIG-003451 | 233  | 15   | 160  | 72   | 2   |
| CONTIG-003452 | 95   | 4    | 11   | 5    | 0   |
| CONTIG-003453 | 63   | 4    | 2    | 2    | 0   |
| CONTIG-003461 | 140  | 6    | 13   | 14   | 0   |
| CONTIG-003462 | 151  | 68   | 123  | 55   | 0   |
| CONTIG-003463 | 775  | 15   | 120  | 348  | 0   |
| CONTIG-003464 | 586  | 45   | 113  | 906  | 21  |

|               |      |     |      |       |     |
|---------------|------|-----|------|-------|-----|
| CONTIG-003465 | 315  | 30  | 411  | 289   | 0   |
| CONTIG-003468 | 1297 | 32  | 624  | 1469  | 12  |
| CONTIG-003469 | 75   | 51  | 100  | 141   | 0   |
| CONTIG-003470 | 118  | 11  | 24   | 35    | 0   |
| CONTIG-003471 | 276  | 32  | 300  | 148   | 0   |
| CONTIG-003472 | 892  | 27  | 624  | 782   | 7   |
| CONTIG-003473 | 954  | 32  | 773  | 1267  | 4   |
| CONTIG-003474 | 212  | 18  | 16   | 135   | 2   |
| CONTIG-003475 | 592  | 19  | 16   | 410   | 11  |
| CONTIG-003476 | 267  | 89  | 1058 | 759   | 0   |
| CONTIG-003477 | 126  | 21  | 97   | 55    | 0   |
| CONTIG-003479 | 36   | 325 | 969  | 0     | 0   |
| CONTIG-003480 | 398  | 15  | 193  | 57    | 0   |
| CONTIG-003489 | 282  | 8   | 63   | 28    | 0   |
| CONTIG-003490 | 206  | 15  | 65   | 20    | 0   |
| CONTIG-003491 | 147  | 21  | 43   | 110   | 2   |
| CONTIG-003492 | 883  | 86  | 507  | 3530  | 2   |
| CONTIG-003493 | 133  | 13  | 71   | 42    | 0   |
| CONTIG-003494 | 559  | 11  | 67   | 226   | 2   |
| CONTIG-003496 | 88   | 15  | 36   | 37    | 0   |
| CONTIG-003497 | 59   | 3   | 8    | 0     | 0   |
| CONTIG-003499 | 955  | 272 | 1054 | 12184 | 185 |
| CONTIG-003501 | 72   | 5   | 10   | 6     | 0   |
| CONTIG-003502 | 935  | 97  | 5207 | 2341  | 0   |
| CONTIG-003503 | 310  | 20  | 42   | 302   | 0   |
| CONTIG-003504 | 134  | 3   | 0    | 2     | 0   |
| CONTIG-003505 | 327  | 166 | 179  | 2122  | 33  |
| CONTIG-003506 | 354  | 23  | 245  | 123   | 2   |
| CONTIG-003507 | 1174 | 64  | 860  | 2419  | 96  |
| CONTIG-003508 | 922  | 26  | 305  | 683   | 12  |
| CONTIG-003509 | 640  | 44  | 180  | 907   | 18  |
| CONTIG-003510 | 606  | 22  | 243  | 224   | 3   |
| CONTIG-003511 | 238  | 23  | 238  | 78    | 0   |
| CONTIG-003512 | 686  | 19  | 195  | 337   | 2   |
| CONTIG-003513 | 218  | 88  | 1376 | 233   | 0   |
| CONTIG-003514 | 77   | 58  | 443  | 6     | 0   |
| CONTIG-003515 | 368  | 41  | 365  | 335   | 0   |
| CONTIG-003516 | 172  | 18  | 10   | 67    | 7   |
| CONTIG-003517 | 124  | 47  | 145  | 156   | 2   |
| CONTIG-003518 | 491  | 79  | 196  | 1054  | 31  |
| CONTIG-003519 | 322  | 58  | 755  | 506   | 2   |
| CONTIG-003520 | 1216 | 138 | 1031 | 9018  | 53  |
| CONTIG-003521 | 825  | 19  | 93   | 460   | 2   |
| CONTIG-003522 | 1230 | 22  | 167  | 1290  | 2   |
| CONTIG-003525 | 819  | 98  | 563  | 2592  | 9   |
| CONTIG-003526 | 68   | 23  | 25   | 14    | 0   |
| CONTIG-003527 | 168  | 218 | 82   | 1932  | 11  |

|               |      |     |      |      |     |
|---------------|------|-----|------|------|-----|
| CONTIG-003528 | 756  | 43  | 822  | 1481 | 0   |
| CONTIG-003529 | 383  | 60  | 248  | 1044 | 0   |
| CONTIG-003530 | 338  | 20  | 38   | 209  | 2   |
| CONTIG-003531 | 894  | 92  | 1184 | 2624 | 15  |
| CONTIG-003535 | 39   | 205 | 10   | 87   | 0   |
| CONTIG-003536 | 694  | 19  | 595  | 303  | 0   |
| CONTIG-003537 | 1059 | 54  | 499  | 1102 | 83  |
| CONTIG-003538 | 500  | 50  | 132  | 797  | 34  |
| CONTIG-003539 | 1291 | 21  | 364  | 946  | 0   |
| CONTIG-003540 | 742  | 51  | 2092 | 797  | 6   |
| CONTIG-003541 | 316  | 278 | 691  | 2530 | 219 |
| CONTIG-003542 | 74   | 6   | 15   | 18   | 0   |
| CONTIG-003543 | 198  | 9   | 34   | 26   | 0   |
| CONTIG-003544 | 305  | 19  | 73   | 215  | 0   |
| CONTIG-003545 | 280  | 574 | 1875 | 6855 | 107 |
| CONTIG-003546 | 131  | 170 | 625  | 230  | 27  |
| CONTIG-003547 | 584  | 22  | 93   | 273  | 4   |
| CONTIG-003548 | 442  | 60  | 858  | 193  | 0   |
| CONTIG-003549 | 222  | 223 | 1003 | 543  | 39  |
| CONTIG-003550 | 435  | 22  | 368  | 104  | 0   |
| CONTIG-003551 | 568  | 94  | 886  | 2946 | 0   |
| CONTIG-003554 | 67   | 7   | 17   | 7    | 0   |
| CONTIG-003555 | 1031 | 24  | 334  | 847  | 12  |
| CONTIG-003556 | 322  | 21  | 22   | 390  | 0   |
| CONTIG-003557 | 59   | 42  | 172  | 9    | 0   |
| CONTIG-003559 | 118  | 21  | 206  | 11   | 0   |
| CONTIG-003560 | 347  | 34  | 190  | 256  | 0   |
| CONTIG-003561 | 220  | 10  | 139  | 14   | 0   |
| CONTIG-003562 | 610  | 88  | 597  | 1106 | 44  |
| CONTIG-003568 | 93   | 5   | 7    | 20   | 0   |
| CONTIG-003569 | 83   | 6   | 14   | 10   | 0   |
| CONTIG-003570 | 287  | 13  | 31   | 125  | 0   |
| CONTIG-003571 | 109  | 39  | 75   | 22   | 2   |
| CONTIG-003572 | 976  | 41  | 368  | 882  | 7   |
| CONTIG-003573 | 959  | 57  | 864  | 2006 | 13  |
| CONTIG-003574 | 229  | 524 | 2575 | 2511 | 243 |
| CONTIG-003575 | 80   | 30  | 64   | 99   | 0   |
| CONTIG-003576 | 848  | 34  | 1419 | 775  | 0   |
| CONTIG-003577 | 71   | 23  | 74   | 0    | 0   |
| CONTIG-003579 | 233  | 76  | 80   | 851  | 2   |
| CONTIG-003587 | 78   | 54  | 53   | 119  | 0   |
| CONTIG-003588 | 114  | 30  | 38   | 28   | 0   |
| CONTIG-003591 | 80   | 9   | 4    | 19   | 0   |
| CONTIG-003598 | 349  | 38  | 36   | 840  | 0   |
| CONTIG-003599 | 407  | 18  | 108  | 245  | 5   |
| CONTIG-003600 | 228  | 14  | 86   | 61   | 0   |
| CONTIG-003601 | 103  | 6   | 0    | 19   | 0   |

|               |      |     |      |      |     |
|---------------|------|-----|------|------|-----|
| CONTIG-003602 | 308  | 7   | 16   | 40   | 0   |
| CONTIG-003603 | 557  | 34  | 122  | 301  | 2   |
| CONTIG-003604 | 575  | 36  | 190  | 289  | 6   |
| CONTIG-003605 | 347  | 51  | 940  | 380  | 0   |
| CONTIG-003606 | 468  | 31  | 73   | 770  | 0   |
| CONTIG-003607 | 601  | 49  | 569  | 527  | 0   |
| CONTIG-003608 | 773  | 29  | 159  | 796  | 2   |
| CONTIG-003609 | 100  | 346 | 113  | 1552 | 29  |
| CONTIG-003610 | 1743 | 39  | 1230 | 3502 | 0   |
| CONTIG-003611 | 154  | 12  | 19   | 29   | 0   |
| CONTIG-003612 | 88   | 11  | 35   | 5    | 0   |
| CONTIG-003613 | 988  | 34  | 500  | 1059 | 23  |
| CONTIG-003614 | 451  | 15  | 48   | 222  | 0   |
| CONTIG-003615 | 177  | 22  | 39   | 78   | 0   |
| CONTIG-003616 | 328  | 15  | 37   | 136  | 2   |
| CONTIG-003617 | 89   | 15  | 20   | 0    | 0   |
| CONTIG-003618 | 78   | 17  | 17   | 18   | 0   |
| CONTIG-003620 | 739  | 19  | 95   | 193  | 28  |
| CONTIG-003621 | 62   | 9   | 10   | 15   | 0   |
| CONTIG-003623 | 429  | 15  | 22   | 190  | 2   |
| CONTIG-003629 | 1277 | 24  | 129  | 1233 | 16  |
| CONTIG-003630 | 139  | 9   | 28   | 26   | 0   |
| CONTIG-003631 | 183  | 16  | 110  | 24   | 0   |
| CONTIG-003632 | 196  | 42  | 29   | 336  | 0   |
| CONTIG-003633 | 375  | 61  | 571  | 266  | 35  |
| CONTIG-003634 | 81   | 3   | 4    | 7    | 0   |
| CONTIG-003635 | 1293 | 25  | 250  | 1173 | 11  |
| CONTIG-003636 | 207  | 17  | 218  | 8    | 0   |
| CONTIG-003637 | 324  | 126 | 249  | 1174 | 35  |
| CONTIG-003638 | 647  | 22  | 146  | 384  | 4   |
| CONTIG-003639 | 105  | 12  | 0    | 52   | 0   |
| CONTIG-003640 | 90   | 73  | 86   | 157  | 2   |
| CONTIG-003641 | 112  | 92  | 815  | 20   | 0   |
| CONTIG-003642 | 1446 | 40  | 124  | 3288 | 2   |
| CONTIG-003645 | 239  | 13  | 23   | 94   | 4   |
| CONTIG-003646 | 369  | 61  | 64   | 428  | 0   |
| CONTIG-003647 | 1562 | 44  | 509  | 1974 | 28  |
| CONTIG-003648 | 1195 | 21  | 302  | 856  | 19  |
| CONTIG-003649 | 1122 | 37  | 169  | 1509 | 61  |
| CONTIG-003650 | 270  | 15  | 75   | 59   | 0   |
| CONTIG-003651 | 713  | 67  | 1908 | 945  | 17  |
| CONTIG-003652 | 274  | 13  | 75   | 88   | 0   |
| CONTIG-003653 | 163  | 396 | 484  | 1517 | 206 |
| CONTIG-003654 | 265  | 119 | 1077 | 678  | 6   |
| CONTIG-003655 | 948  | 41  | 1248 | 1134 | 2   |
| CONTIG-003656 | 379  | 24  | 208  | 341  | 0   |
| CONTIG-003657 | 994  | 23  | 195  | 659  | 0   |

|               |      |     |      |      |     |
|---------------|------|-----|------|------|-----|
| CONTIG-003658 | 92   | 10  | 5    | 22   | 0   |
| CONTIG-003659 | 204  | 20  | 24   | 156  | 0   |
| CONTIG-003668 | 1432 | 45  | 250  | 2467 | 9   |
| CONTIG-003669 | 160  | 595 | 5059 | 158  | 57  |
| CONTIG-003670 | 304  | 23  | 270  | 95   | 2   |
| CONTIG-003671 | 1853 | 35  | 1850 | 1567 | 26  |
| CONTIG-003672 | 562  | 22  | 39   | 594  | 11  |
| CONTIG-003673 | 610  | 16  | 206  | 285  | 0   |
| CONTIG-003674 | 571  | 34  | 282  | 670  | 17  |
| CONTIG-003675 | 402  | 91  | 355  | 547  | 13  |
| CONTIG-003681 | 110  | 4   | 7    | 13   | 0   |
| CONTIG-003682 | 131  | 35  | 19   | 262  | 0   |
| CONTIG-003683 | 93   | 7   | 0    | 18   | 0   |
| CONTIG-003684 | 247  | 47  | 9    | 325  | 0   |
| CONTIG-003685 | 499  | 52  | 340  | 1378 | 0   |
| CONTIG-003686 | 453  | 69  | 593  | 1506 | 0   |
| CONTIG-003687 | 53   | 165 | 673  | 18   | 0   |
| CONTIG-003688 | 134  | 476 | 1022 | 1438 | 169 |
| CONTIG-003689 | 848  | 21  | 199  | 450  | 4   |
| CONTIG-003690 | 326  | 12  | 27   | 65   | 6   |
| CONTIG-003691 | 621  | 16  | 26   | 308  | 6   |
| CONTIG-003692 | 268  | 22  | 46   | 217  | 2   |
| CONTIG-003693 | 1114 | 66  | 922  | 2330 | 56  |
| CONTIG-003694 | 363  | 128 | 178  | 1572 | 252 |
| CONTIG-003696 | 256  | 226 | 50   | 5    | 0   |
| CONTIG-003697 | 773  | 30  | 644  | 541  | 4   |
| CONTIG-003698 | 54   | 479 | 441  | 441  | 30  |
| CONTIG-003699 | 343  | 13  | 65   | 158  | 0   |
| CONTIG-003700 | 181  | 327 | 678  | 2843 | 39  |
| CONTIG-003701 | 100  | 23  | 61   | 22   | 4   |
| CONTIG-003702 | 87   | 513 | 403  | 813  | 145 |
| CONTIG-003703 | 278  | 22  | 147  | 64   | 0   |
| CONTIG-003704 | 319  | 95  | 2585 | 3    | 68  |
| CONTIG-003705 | 130  | 30  | 106  | 110  | 0   |
| CONTIG-003706 | 1342 | 63  | 1024 | 3418 | 10  |
| CONTIG-003707 | 170  | 61  | 117  | 97   | 2   |
| CONTIG-003708 | 888  | 32  | 217  | 587  | 67  |
| CONTIG-003709 | 198  | 7   | 0    | 29   | 0   |
| CONTIG-003710 | 102  | 789 | 1216 | 1223 | 184 |
| CONTIG-003711 | 544  | 20  | 87   | 562  | 0   |
| CONTIG-003712 | 184  | 49  | 1050 | 0    | 0   |
| CONTIG-003713 | 361  | 9   | 15   | 95   | 0   |
| CONTIG-003714 | 97   | 10  | 12   | 9    | 0   |
| CONTIG-003715 | 408  | 12  | 75   | 123  | 0   |
| CONTIG-003716 | 176  | 6   | 19   | 30   | 0   |
| CONTIG-003717 | 1848 | 45  | 196  | 1432 | 27  |
| CONTIG-003718 | 111  | 6   | 13   | 0    | 0   |



|               |      |     |      |      |     |
|---------------|------|-----|------|------|-----|
| CONTIG-003719 | 56   | 540 | 484  | 563  | 72  |
| CONTIG-003720 | 151  | 5   | 2    | 16   | 0   |
| CONTIG-003721 | 591  | 19  | 47   | 132  | 2   |
| CONTIG-003722 | 96   | 203 | 455  | 700  | 6   |
| CONTIG-003723 | 344  | 13  | 23   | 111  | 4   |
| CONTIG-003724 | 328  | 264 | 1986 | 3640 | 14  |
| CONTIG-003725 | 238  | 11  | 21   | 92   | 0   |
| CONTIG-003726 | 87   | 17  | 70   | 4    | 0   |
| CONTIG-003727 | 85   | 8   | 24   | 9    | 0   |
| CONTIG-003729 | 209  | 14  | 13   | 150  | 0   |
| CONTIG-003730 | 182  | 18  | 81   | 85   | 0   |
| CONTIG-003731 | 824  | 30  | 122  | 1170 | 0   |
| CONTIG-003737 | 139  | 8   | 0    | 44   | 0   |
| CONTIG-003738 | 760  | 18  | 392  | 375  | 2   |
| CONTIG-003739 | 142  | 369 | 165  | 1363 | 97  |
| CONTIG-003740 | 207  | 20  | 239  | 79   | 0   |
| CONTIG-003741 | 92   | 3   | 4    | 2    | 0   |
| CONTIG-003742 | 590  | 46  | 407  | 934  | 0   |
| CONTIG-003743 | 675  | 14  | 121  | 354  | 3   |
| CONTIG-003744 | 374  | 10  | 67   | 95   | 0   |
| CONTIG-003745 | 364  | 103 | 414  | 993  | 17  |
| CONTIG-003746 | 487  | 201 | 422  | 2092 | 2   |
| CONTIG-003747 | 99   | 115 | 1021 | 0    | 10  |
| CONTIG-003749 | 236  | 16  | 31   | 109  | 0   |
| CONTIG-003750 | 92   | 5   | 11   | 9    | 0   |
| CONTIG-003751 | 690  | 56  | 264  | 575  | 9   |
| CONTIG-003752 | 143  | 193 | 545  | 664  | 14  |
| CONTIG-003754 | 429  | 37  | 321  | 401  | 26  |
| CONTIG-003755 | 78   | 950 | 2221 | 1282 | 4   |
| CONTIG-003756 | 280  | 137 | 318  | 1430 | 26  |
| CONTIG-003757 | 59   | 465 | 227  | 586  | 89  |
| CONTIG-003758 | 61   | 3   | 0    | 0    | 0   |
| CONTIG-003759 | 916  | 32  | 122  | 1343 | 2   |
| CONTIG-003760 | 183  | 173 | 370  | 591  | 78  |
| CONTIG-003761 | 154  | 84  | 101  | 91   | 19  |
| CONTIG-003762 | 1163 | 76  | 1004 | 2483 | 381 |
| CONTIG-003763 | 66   | 23  | 34   | 12   | 0   |
| CONTIG-003764 | 777  | 32  | 451  | 800  | 9   |
| CONTIG-003765 | 336  | 29  | 43   | 366  | 0   |
| CONTIG-003766 | 182  | 18  | 41   | 56   | 0   |
| CONTIG-003774 | 529  | 69  | 382  | 696  | 44  |
| CONTIG-003775 | 169  | 18  | 41   | 67   | 0   |
| CONTIG-003776 | 549  | 12  | 311  | 147  | 0   |
| CONTIG-003777 | 91   | 20  | 178  | 4    | 0   |
| CONTIG-003778 | 454  | 14  | 254  | 137  | 0   |
| CONTIG-003779 | 100  | 4   | 2    | 7    | 0   |
| CONTIG-003780 | 187  | 525 | 1568 | 1787 | 157 |

|               |      |      |      |      |     |
|---------------|------|------|------|------|-----|
| CONTIG-003782 | 292  | 184  | 451  | 953  | 286 |
| CONTIG-003783 | 118  | 7    | 4    | 37   | 0   |
| CONTIG-003784 | 88   | 10   | 33   | 0    | 0   |
| CONTIG-003785 | 702  | 40   | 193  | 852  | 2   |
| CONTIG-003786 | 84   | 21   | 93   | 5    | 0   |
| CONTIG-003794 | 1068 | 30   | 71   | 1313 | 8   |
| CONTIG-003795 | 622  | 92   | 219  | 3496 | 20  |
| CONTIG-003796 | 318  | 15   | 51   | 160  | 0   |
| CONTIG-003797 | 1275 | 78   | 137  | 43   | 0   |
| CONTIG-003798 | 410  | 41   | 431  | 292  | 21  |
| CONTIG-003801 | 629  | 13   | 73   | 275  | 2   |
| CONTIG-003802 | 322  | 246  | 220  | 1615 | 16  |
| CONTIG-003803 | 838  | 29   | 511  | 911  | 8   |
| CONTIG-003804 | 1191 | 54   | 1262 | 2869 | 0   |
| CONTIG-003805 | 59   | 6    | 4    | 7    | 0   |
| CONTIG-003806 | 49   | 100  | 8    | 10   | 0   |
| CONTIG-003808 | 311  | 182  | 786  | 1052 | 69  |
| CONTIG-003809 | 166  | 23   | 296  | 13   | 0   |
| CONTIG-003810 | 549  | 22   | 234  | 358  | 0   |
| CONTIG-003811 | 294  | 16   | 49   | 52   | 0   |
| CONTIG-003812 | 60   | 11   | 29   | 4    | 0   |
| CONTIG-003813 | 127  | 5    | 0    | 19   | 0   |
| CONTIG-003814 | 100  | 4    | 10   | 5    | 0   |
| CONTIG-003816 | 133  | 14   | 3    | 73   | 0   |
| CONTIG-003817 | 376  | 26   | 63   | 449  | 2   |
| CONTIG-003818 | 218  | 20   | 93   | 137  | 0   |
| CONTIG-003819 | 179  | 167  | 279  | 746  | 17  |
| CONTIG-003826 | 878  | 24   | 125  | 906  | 5   |
| CONTIG-003827 | 51   | 108  | 299  | 101  | 2   |
| CONTIG-003828 | 209  | 28   | 206  | 67   | 0   |
| CONTIG-003829 | 207  | 7    | 11   | 50   | 2   |
| CONTIG-003830 | 1786 | 44   | 593  | 2542 | 143 |
| CONTIG-003831 | 182  | 11   | 85   | 32   | 0   |
| CONTIG-003832 | 409  | 38   | 685  | 465  | 0   |
| CONTIG-003833 | 63   | 61   | 25   | 45   | 0   |
| CONTIG-003834 | 124  | 5    | 2    | 0    | 2   |
| CONTIG-003835 | 238  | 83   | 369  | 438  | 0   |
| CONTIG-003838 | 135  | 7    | 3    | 36   | 0   |
| CONTIG-003840 | 125  | 7    | 8    | 16   | 0   |
| CONTIG-003841 | 526  | 16   | 101  | 217  | 2   |
| CONTIG-003842 | 106  | 12   | 80   | 4    | 0   |
| CONTIG-003847 | 785  | 44   | 160  | 936  | 74  |
| CONTIG-003848 | 509  | 13   | 117  | 225  | 8   |
| CONTIG-003849 | 66   | 12   | 54   | 2    | 0   |
| CONTIG-003856 | 85   | 1146 | 1523 | 760  | 75  |
| CONTIG-003857 | 423  | 262  | 1008 | 2353 | 383 |
| CONTIG-003858 | 356  | 183  | 298  | 1431 | 187 |

|               |      |     |      |       |     |
|---------------|------|-----|------|-------|-----|
| CONTIG-003859 | 192  | 10  | 4    | 52    | 0   |
| CONTIG-003860 | 402  | 14  | 81   | 141   | 0   |
| CONTIG-003861 | 764  | 19  | 146  | 451   | 2   |
| CONTIG-003864 | 64   | 555 | 399  | 623   | 81  |
| CONTIG-003865 | 289  | 22  | 160  | 33    | 0   |
| CONTIG-003866 | 576  | 97  | 806  | 2897  | 0   |
| CONTIG-003867 | 85   | 22  | 20   | 87    | 2   |
| CONTIG-003868 | 415  | 13  | 11   | 28    | 0   |
| CONTIG-003869 | 403  | 168 | 607  | 1983  | 62  |
| CONTIG-003870 | 212  | 18  | 87   | 129   | 0   |
| CONTIG-003871 | 221  | 12  | 28   | 71    | 0   |
| CONTIG-003872 | 820  | 61  | 788  | 865   | 151 |
| CONTIG-003873 | 257  | 28  | 361  | 177   | 0   |
| CONTIG-003877 | 177  | 295 | 1450 | 1033  | 107 |
| CONTIG-003878 | 449  | 25  | 873  | 86    | 0   |
| CONTIG-003882 | 368  | 26  | 162  | 318   | 0   |
| CONTIG-003888 | 88   | 10  | 11   | 0     | 0   |
| CONTIG-003889 | 534  | 19  | 21   | 23    | 0   |
| CONTIG-003890 | 51   | 662 | 73   | 642   | 11  |
| CONTIG-003891 | 466  | 97  | 902  | 1737  | 15  |
| CONTIG-003892 | 334  | 8   | 7    | 11    | 0   |
| CONTIG-003893 | 143  | 8   | 5    | 25    | 0   |
| CONTIG-003894 | 272  | 6   | 2    | 36    | 0   |
| CONTIG-003895 | 138  | 216 | 243  | 1333  | 22  |
| CONTIG-003896 | 802  | 58  | 139  | 1919  | 15  |
| CONTIG-003897 | 104  | 459 | 382  | 1030  | 108 |
| CONTIG-003898 | 180  | 78  | 1053 | 142   | 0   |
| CONTIG-003899 | 469  | 12  | 2    | 161   | 0   |
| CONTIG-003900 | 2078 | 118 | 389  | 15985 | 3   |
| CONTIG-003901 | 76   | 36  | 44   | 98    | 0   |
| CONTIG-003903 | 1386 | 54  | 1029 | 2719  | 38  |
| CONTIG-003904 | 595  | 15  | 67   | 335   | 0   |
| CONTIG-003906 | 112  | 23  | 30   | 118   | 0   |
| CONTIG-003907 | 1493 | 46  | 1394 | 2612  | 17  |
| CONTIG-003908 | 393  | 25  | 377  | 191   | 0   |
| CONTIG-003909 | 556  | 33  | 266  | 755   | 2   |
| CONTIG-003910 | 516  | 13  | 66   | 128   | 0   |
| CONTIG-003911 | 468  | 37  | 80   | 816   | 0   |
| CONTIG-003912 | 252  | 40  | 158  | 323   | 2   |
| CONTIG-003913 | 221  | 37  | 322  | 186   | 0   |
| CONTIG-003914 | 277  | 98  | 1273 | 650   | 0   |
| CONTIG-003915 | 88   | 4   | 2    | 2     | 0   |
| CONTIG-003916 | 797  | 46  | 277  | 1080  | 40  |
| CONTIG-003917 | 77   | 313 | 330  | 302   | 45  |
| CONTIG-003918 | 319  | 11  | 123  | 68    | 0   |
| CONTIG-003919 | 578  | 20  | 125  | 306   | 3   |
| CONTIG-003920 | 86   | 17  | 29   | 60    | 0   |

|               |      |     |      |      |     |
|---------------|------|-----|------|------|-----|
| CONTIG-003921 | 124  | 8   | 20   | 16   | 0   |
| CONTIG-003922 | 227  | 536 | 1573 | 2440 | 324 |
| CONTIG-003923 | 577  | 14  | 68   | 217  | 0   |
| CONTIG-003924 | 221  | 10  | 24   | 51   | 0   |
| CONTIG-003925 | 169  | 7   | 12   | 32   | 0   |
| CONTIG-003932 | 156  | 660 | 324  | 2030 | 185 |
| CONTIG-003933 | 384  | 41  | 1035 | 325  | 0   |
| CONTIG-003934 | 168  | 11  | 88   | 17   | 0   |
| CONTIG-003935 | 212  | 20  | 40   | 93   | 2   |
| CONTIG-003936 | 103  | 12  | 70   | 10   | 0   |
| CONTIG-003937 | 373  | 8   | 88   | 59   | 0   |
| CONTIG-003938 | 139  | 674 | 728  | 2498 | 190 |
| CONTIG-003939 | 436  | 112 | 46   | 2967 | 70  |
| CONTIG-003940 | 344  | 13  | 19   | 218  | 0   |
| CONTIG-003941 | 604  | 24  | 119  | 512  | 2   |
| CONTIG-003942 | 151  | 191 | 1015 | 1191 | 0   |
| CONTIG-003950 | 184  | 25  | 126  | 141  | 2   |
| CONTIG-003958 | 260  | 125 | 85   | 1092 | 31  |
| CONTIG-003959 | 82   | 8   | 31   | 3    | 0   |
| CONTIG-003960 | 389  | 17  | 95   | 229  | 2   |
| CONTIG-003965 | 96   | 27  | 144  | 0    | 0   |
| CONTIG-003966 | 316  | 16  | 7    | 131  | 0   |
| CONTIG-003969 | 275  | 115 | 111  | 1130 | 20  |
| CONTIG-003970 | 181  | 564 | 179  | 2205 | 28  |
| CONTIG-003972 | 110  | 9   | 22   | 16   | 0   |
| CONTIG-003973 | 328  | 9   | 30   | 96   | 0   |
| CONTIG-003974 | 276  | 18  | 46   | 182  | 0   |
| CONTIG-003975 | 1915 | 65  | 7326 | 2864 | 10  |
| CONTIG-003976 | 147  | 19  | 17   | 0    | 0   |
| CONTIG-003977 | 690  | 18  | 100  | 343  | 8   |
| CONTIG-003978 | 88   | 15  | 110  | 0    | 2   |
| CONTIG-003979 | 303  | 10  | 47   | 61   | 4   |
| CONTIG-003980 | 79   | 6   | 12   | 11   | 0   |
| CONTIG-003981 | 336  | 22  | 318  | 237  | 0   |
| CONTIG-003982 | 317  | 12  | 89   | 76   | 0   |
| CONTIG-003983 | 130  | 7   | 14   | 26   | 0   |
| CONTIG-003984 | 136  | 8   | 12   | 27   | 0   |
| CONTIG-003987 | 385  | 42  | 498  | 402  | 2   |
| CONTIG-003988 | 1485 | 44  | 1467 | 1867 | 39  |
| CONTIG-003989 | 643  | 22  | 644  | 368  | 0   |
| CONTIG-003990 | 2090 | 63  | 1240 | 7686 | 15  |
| CONTIG-003991 | 459  | 49  | 171  | 248  | 20  |
| CONTIG-003992 | 1715 | 25  | 314  | 2063 | 4   |
| CONTIG-003993 | 246  | 16  | 27   | 64   | 0   |
| CONTIG-003994 | 794  | 14  | 67   | 530  | 0   |
| CONTIG-003995 | 95   | 4   | 4    | 6    | 0   |
| CONTIG-003996 | 571  | 18  | 118  | 361  | 0   |

|               |      |      |      |      |     |
|---------------|------|------|------|------|-----|
| CONTIG-003997 | 907  | 43   | 303  | 1374 | 12  |
| CONTIG-003998 | 202  | 336  | 1962 | 1360 | 140 |
| CONTIG-003999 | 829  | 102  | 283  | 4586 | 17  |
| CONTIG-004000 | 200  | 17   | 117  | 58   | 0   |
| CONTIG-004001 | 87   | 5    | 14   | 8    | 0   |
| CONTIG-004002 | 142  | 20   | 53   | 98   | 0   |
| CONTIG-004003 | 351  | 11   | 161  | 47   | 0   |
| CONTIG-004006 | 58   | 49   | 274  | 0    | 0   |
| CONTIG-004007 | 1731 | 26   | 426  | 1307 | 12  |
| CONTIG-004008 | 751  | 40   | 813  | 727  | 6   |
| CONTIG-004010 | 182  | 13   | 14   | 21   | 0   |
| CONTIG-004011 | 61   | 18   | 96   | 0    | 0   |
| CONTIG-004013 | 297  | 17   | 24   | 156  | 0   |
| CONTIG-004014 | 1337 | 115  | 209  | 9650 | 2   |
| CONTIG-004015 | 351  | 28   | 414  | 133  | 0   |
| CONTIG-004016 | 1481 | 55   | 1044 | 2811 | 32  |
| CONTIG-004017 | 94   | 10   | 25   | 16   | 0   |
| CONTIG-004018 | 363  | 467  | 5162 | 2628 | 180 |
| CONTIG-004019 | 714  | 12   | 112  | 26   | 0   |
| CONTIG-004021 | 266  | 23   | 336  | 78   | 0   |
| CONTIG-004022 | 386  | 21   | 292  | 2    | 0   |
| CONTIG-004023 | 59   | 5    | 2    | 0    | 0   |
| CONTIG-004027 | 120  | 416  | 782  | 551  | 178 |
| CONTIG-004028 | 894  | 15   | 94   | 483  | 0   |
| CONTIG-004029 | 341  | 22   | 107  | 221  | 0   |
| CONTIG-004032 | 177  | 17   | 36   | 44   | 6   |
| CONTIG-004033 | 508  | 32   | 149  | 539  | 4   |
| CONTIG-004034 | 252  | 24   | 83   | 129  | 11  |
| CONTIG-004035 | 93   | 4    | 2    | 0    | 0   |
| CONTIG-004038 | 573  | 51   | 419  | 406  | 11  |
| CONTIG-004039 | 226  | 98   | 232  | 386  | 0   |
| CONTIG-004040 | 404  | 100  | 632  | 627  | 17  |
| CONTIG-004041 | 342  | 21   | 153  | 161  | 17  |
| CONTIG-004042 | 814  | 39   | 212  | 1019 | 28  |
| CONTIG-004043 | 455  | 17   | 201  | 125  | 4   |
| CONTIG-004045 | 125  | 1204 | 4830 | 1294 | 125 |
| CONTIG-004046 | 666  | 24   | 223  | 505  | 0   |
| CONTIG-004054 | 128  | 25   | 229  | 34   | 0   |
| CONTIG-004055 | 149  | 12   | 4    | 54   | 0   |
| CONTIG-004056 | 53   | 33   | 117  | 9    | 0   |
| CONTIG-004057 | 42   | 425  | 339  | 448  | 6   |
| CONTIG-004058 | 341  | 21   | 70   | 220  | 7   |
| CONTIG-004059 | 141  | 415  | 4456 | 53   | 12  |
| CONTIG-004060 | 165  | 154  | 90   | 563  | 62  |
| CONTIG-004061 | 1257 | 23   | 337  | 954  | 13  |
| CONTIG-004062 | 681  | 11   | 92   | 248  | 2   |
| CONTIG-004063 | 671  | 35   | 268  | 757  | 29  |

|               |      |     |      |      |     |
|---------------|------|-----|------|------|-----|
| CONTIG-004064 | 707  | 68  | 494  | 2523 | 0   |
| CONTIG-004067 | 207  | 19  | 9    | 199  | 2   |
| CONTIG-004070 | 1280 | 45  | 353  | 3069 | 5   |
| CONTIG-004071 | 254  | 24  | 358  | 131  | 0   |
| CONTIG-004072 | 417  | 18  | 156  | 174  | 2   |
| CONTIG-004080 | 166  | 27  | 150  | 190  | 0   |
| CONTIG-004081 | 483  | 11  | 33   | 96   | 0   |
| CONTIG-004082 | 208  | 13  | 106  | 43   | 0   |
| CONTIG-004083 | 253  | 10  | 22   | 67   | 0   |
| CONTIG-004084 | 197  | 17  | 58   | 103  | 0   |
| CONTIG-004085 | 313  | 27  | 87   | 71   | 0   |
| CONTIG-004086 | 1186 | 87  | 311  | 6096 | 0   |
| CONTIG-004087 | 331  | 19  | 30   | 123  | 2   |
| CONTIG-004088 | 365  | 27  | 89   | 341  | 4   |
| CONTIG-004089 | 285  | 162 | 1864 | 1088 | 39  |
| CONTIG-004090 | 100  | 40  | 428  | 6    | 0   |
| CONTIG-004091 | 350  | 13  | 97   | 149  | 0   |
| CONTIG-004092 | 574  | 23  | 104  | 548  | 0   |
| CONTIG-004093 | 147  | 218 | 260  | 994  | 77  |
| CONTIG-004094 | 618  | 32  | 79   | 616  | 17  |
| CONTIG-004095 | 442  | 24  | 124  | 349  | 2   |
| CONTIG-004096 | 1324 | 45  | 967  | 1652 | 35  |
| CONTIG-004097 | 867  | 19  | 413  | 491  | 0   |
| CONTIG-004099 | 54   | 163 | 186  | 336  | 0   |
| CONTIG-004100 | 934  | 80  | 1062 | 1433 | 105 |
| CONTIG-004101 | 1044 | 29  | 211  | 872  | 67  |
| CONTIG-004103 | 179  | 630 | 797  | 5313 | 96  |
| CONTIG-004104 | 769  | 232 | 1225 | 8161 | 188 |
| CONTIG-004105 | 491  | 18  | 109  | 286  | 0   |
| CONTIG-004106 | 409  | 13  | 136  | 153  | 0   |
| CONTIG-004107 | 635  | 17  | 106  | 257  | 2   |
| CONTIG-004108 | 315  | 258 | 1863 | 1853 | 130 |
| CONTIG-004109 | 213  | 17  | 94   | 154  | 0   |
| CONTIG-004110 | 1290 | 53  | 109  | 3849 | 0   |
| CONTIG-004111 | 639  | 42  | 182  | 968  | 20  |
| CONTIG-004112 | 283  | 5   | 8    | 33   | 0   |
| CONTIG-004113 | 127  | 28  | 35   | 99   | 0   |
| CONTIG-004119 | 179  | 8   | 7    | 55   | 0   |
| CONTIG-004120 | 378  | 45  | 695  | 517  | 0   |
| CONTIG-004121 | 567  | 20  | 101  | 214  | 0   |
| CONTIG-004124 | 490  | 37  | 749  | 532  | 0   |
| CONTIG-004125 | 259  | 10  | 31   | 117  | 0   |
| CONTIG-004131 | 92   | 8   | 0    | 11   | 0   |
| CONTIG-004132 | 60   | 5   | 15   | 4    | 0   |
| CONTIG-004133 | 46   | 183 | 74   | 208  | 9   |
| CONTIG-004134 | 152  | 364 | 761  | 1059 | 145 |
| CONTIG-004135 | 153  | 13  | 111  | 3    | 0   |

|               |      |     |      |      |     |
|---------------|------|-----|------|------|-----|
| CONTIG-004136 | 1708 | 31  | 767  | 717  | 7   |
| CONTIG-004137 | 165  | 148 | 1400 | 556  | 0   |
| CONTIG-004138 | 71   | 5   | 12   | 2    | 0   |
| CONTIG-004139 | 1322 | 19  | 247  | 838  | 2   |
| CONTIG-004140 | 58   | 5   | 8    | 0    | 0   |
| CONTIG-004141 | 74   | 54  | 6    | 247  | 0   |
| CONTIG-004144 | 123  | 5   | 7    | 4    | 0   |
| CONTIG-004145 | 1020 | 85  | 2403 | 2789 | 0   |
| CONTIG-004146 | 183  | 9   | 14   | 70   | 0   |
| CONTIG-004147 | 86   | 8   | 13   | 17   | 0   |
| CONTIG-004152 | 219  | 9   | 37   | 22   | 0   |
| CONTIG-004153 | 417  | 15  | 43   | 10   | 0   |
| CONTIG-004156 | 224  | 138 | 310  | 937  | 0   |
| CONTIG-004157 | 340  | 473 | 1172 | 3261 | 471 |
| CONTIG-004159 | 280  | 373 | 1059 | 2511 | 333 |
| CONTIG-004160 | 134  | 13  | 76   | 23   | 0   |
| CONTIG-004161 | 132  | 219 | 167  | 779  | 178 |
| CONTIG-004162 | 138  | 206 | 1604 | 8    | 13  |
| CONTIG-004163 | 463  | 16  | 98   | 178  | 0   |
| CONTIG-004164 | 653  | 9   | 45   | 267  | 0   |
| CONTIG-004165 | 338  | 62  | 10   | 10   | 0   |
| CONTIG-004166 | 171  | 18  | 20   | 120  | 0   |
| CONTIG-004167 | 227  | 16  | 17   | 205  | 0   |
| CONTIG-004168 | 348  | 9   | 60   | 93   | 0   |
| CONTIG-004169 | 231  | 655 | 1411 | 3332 | 242 |
| CONTIG-004170 | 160  | 13  | 31   | 52   | 2   |
| CONTIG-004171 | 767  | 22  | 431  | 388  | 7   |
| CONTIG-004172 | 69   | 6   | 2    | 3    | 0   |
| CONTIG-004174 | 1779 | 27  | 269  | 2416 | 4   |
| CONTIG-004175 | 594  | 145 | 563  | 1519 | 0   |
| CONTIG-004176 | 392  | 13  | 27   | 94   | 0   |
| CONTIG-004177 | 372  | 10  | 42   | 93   | 0   |
| CONTIG-004178 | 834  | 17  | 61   | 458  | 0   |
| CONTIG-004179 | 285  | 13  | 61   | 99   | 0   |
| CONTIG-004180 | 448  | 31  | 276  | 387  | 6   |
| CONTIG-004181 | 96   | 119 | 774  | 160  | 0   |
| CONTIG-004182 | 639  | 23  | 20   | 151  | 0   |
| CONTIG-004183 | 725  | 21  | 273  | 615  | 0   |
| CONTIG-004184 | 286  | 11  | 21   | 70   | 0   |
| CONTIG-004186 | 2213 | 26  | 377  | 1362 | 153 |
| CONTIG-004187 | 262  | 13  | 33   | 126  | 0   |
| CONTIG-004188 | 356  | 22  | 263  | 202  | 2   |
| CONTIG-004189 | 1116 | 48  | 432  | 1354 | 60  |
| CONTIG-004190 | 986  | 118 | 538  | 5425 | 0   |
| CONTIG-004191 | 327  | 55  | 165  | 668  | 8   |
| CONTIG-004192 | 64   | 11  | 22   | 9    | 0   |
| CONTIG-004193 | 304  | 176 | 1389 | 455  | 27  |

|               |      |     |      |      |     |
|---------------|------|-----|------|------|-----|
| CONTIG-004201 | 1674 | 90  | 492  | 6596 | 4   |
| CONTIG-004202 | 106  | 5   | 3    | 13   | 0   |
| CONTIG-004209 | 159  | 13  | 100  | 56   | 0   |
| CONTIG-004211 | 152  | 13  | 9    | 64   | 2   |
| CONTIG-004212 | 111  | 192 | 342  | 763  | 3   |
| CONTIG-004213 | 52   | 143 | 83   | 97   | 0   |
| CONTIG-004214 | 154  | 56  | 422  | 115  | 0   |
| CONTIG-004215 | 340  | 106 | 242  | 1216 | 20  |
| CONTIG-004216 | 78   | 4   | 13   | 2    | 0   |
| CONTIG-004217 | 428  | 59  | 425  | 1053 | 0   |
| CONTIG-004218 | 907  | 113 | 223  | 6424 | 0   |
| CONTIG-004219 | 293  | 11  | 34   | 62   | 15  |
| CONTIG-004220 | 90   | 7   | 7    | 16   | 0   |
| CONTIG-004221 | 613  | 19  | 129  | 157  | 4   |
| CONTIG-004222 | 287  | 323 | 1332 | 3258 | 178 |
| CONTIG-004223 | 395  | 13  | 179  | 98   | 2   |
| CONTIG-004224 | 414  | 13  | 21   | 210  | 0   |
| CONTIG-004225 | 1020 | 65  | 961  | 1351 | 142 |
| CONTIG-004226 | 58   | 65  | 373  | 16   | 0   |
| CONTIG-004227 | 287  | 18  | 86   | 83   | 0   |
| CONTIG-004228 | 38   | 867 | 479  | 695  | 32  |
| CONTIG-004229 | 246  | 224 | 1273 | 2050 | 53  |
| CONTIG-004230 | 509  | 22  | 255  | 256  | 2   |
| CONTIG-004231 | 78   | 34  | 221  | 4    | 0   |
| CONTIG-004232 | 1051 | 57  | 373  | 3046 | 14  |
| CONTIG-004237 | 66   | 489 | 221  | 1026 | 56  |
| CONTIG-004238 | 91   | 178 | 540  | 568  | 15  |
| CONTIG-004239 | 203  | 12  | 83   | 97   | 0   |
| CONTIG-004240 | 196  | 284 | 1019 | 1306 | 121 |
| CONTIG-004241 | 213  | 12  | 87   | 63   | 0   |
| CONTIG-004242 | 564  | 18  | 145  | 414  | 2   |
| CONTIG-004243 | 273  | 12  | 26   | 58   | 0   |
| CONTIG-004244 | 180  | 378 | 67   | 1217 | 307 |
| CONTIG-004245 | 178  | 8   | 29   | 33   | 0   |
| CONTIG-004246 | 204  | 9   | 6    | 50   | 0   |
| CONTIG-004247 | 271  | 40  | 91   | 385  | 2   |
| CONTIG-004248 | 149  | 704 | 1064 | 2300 | 261 |
| CONTIG-004249 | 155  | 9   | 14   | 57   | 0   |
| CONTIG-004250 | 406  | 29  | 467  | 285  | 0   |
| CONTIG-004251 | 145  | 15  | 35   | 53   | 0   |
| CONTIG-004252 | 573  | 11  | 182  | 154  | 0   |
| CONTIG-004255 | 51   | 722 | 226  | 922  | 65  |
| CONTIG-004256 | 475  | 35  | 97   | 594  | 9   |
| CONTIG-004257 | 239  | 20  | 127  | 99   | 0   |
| CONTIG-004266 | 314  | 42  | 177  | 396  | 2   |
| CONTIG-004267 | 110  | 101 | 125  | 351  | 0   |
| CONTIG-004268 | 868  | 28  | 1021 | 579  | 2   |



|               |      |     |      |      |     |
|---------------|------|-----|------|------|-----|
| CONTIG-004269 | 295  | 15  | 92   | 96   | 0   |
| CONTIG-004270 | 245  | 22  | 51   | 266  | 0   |
| CONTIG-004271 | 116  | 80  | 858  | 0    | 0   |
| CONTIG-004272 | 108  | 5   | 0    | 7    | 0   |
| CONTIG-004273 | 339  | 67  | 151  | 538  | 15  |
| CONTIG-004274 | 506  | 15  | 83   | 137  | 4   |
| CONTIG-004276 | 470  | 36  | 64   | 615  | 4   |
| CONTIG-004277 | 99   | 10  | 41   | 11   | 0   |
| CONTIG-004278 | 268  | 335 | 6467 | 629  | 90  |
| CONTIG-004279 | 145  | 9   | 18   | 53   | 0   |
| CONTIG-004280 | 97   | 42  | 29   | 148  | 5   |
| CONTIG-004281 | 856  | 58  | 393  | 1625 | 12  |
| CONTIG-004282 | 59   | 10  | 29   | 4    | 0   |
| CONTIG-004283 | 593  | 10  | 27   | 230  | 0   |
| CONTIG-004285 | 198  | 688 | 854  | 5587 | 2   |
| CONTIG-004286 | 484  | 18  | 26   | 193  | 2   |
| CONTIG-004287 | 303  | 79  | 289  | 491  | 16  |
| CONTIG-004288 | 208  | 29  | 82   | 281  | 0   |
| CONTIG-004289 | 76   | 5   | 2    | 7    | 2   |
| CONTIG-004290 | 74   | 183 | 610  | 478  | 0   |
| CONTIG-004291 | 343  | 13  | 55   | 169  | 0   |
| CONTIG-004292 | 584  | 23  | 432  | 532  | 0   |
| CONTIG-004293 | 108  | 15  | 2    | 53   | 0   |
| CONTIG-004294 | 1432 | 23  | 225  | 877  | 3   |
| CONTIG-004295 | 520  | 129 | 1311 | 1736 | 76  |
| CONTIG-004296 | 75   | 5   | 3    | 2    | 0   |
| CONTIG-004297 | 91   | 7   | 6    | 21   | 0   |
| CONTIG-004298 | 85   | 6   | 7    | 2    | 0   |
| CONTIG-004299 | 196  | 35  | 75   | 331  | 0   |
| CONTIG-004300 | 120  | 6   | 8    | 15   | 0   |
| CONTIG-004301 | 79   | 14  | 18   | 31   | 0   |
| CONTIG-004302 | 922  | 168 | 1067 | 3785 | 913 |
| CONTIG-004303 | 325  | 193 | 1637 | 3098 | 0   |
| CONTIG-004304 | 1104 | 48  | 637  | 1665 | 2   |
| CONTIG-004305 | 94   | 5   | 2    | 9    | 0   |
| CONTIG-004306 | 296  | 422 | 1607 | 3792 | 157 |
| CONTIG-004307 | 1348 | 34  | 345  | 1448 | 11  |
| CONTIG-004308 | 53   | 165 | 126  | 59   | 30  |
| CONTIG-004309 | 235  | 12  | 22   | 78   | 2   |
| CONTIG-004310 | 99   | 78  | 128  | 12   | 21  |
| CONTIG-004311 | 49   | 111 | 381  | 55   | 3   |
| CONTIG-004312 | 636  | 187 | 549  | 4072 | 156 |
| CONTIG-004313 | 80   | 8   | 4    | 23   | 0   |
| CONTIG-004314 | 259  | 8   | 79   | 32   | 3   |
| CONTIG-004315 | 128  | 198 | 21   | 1186 | 2   |
| CONTIG-004316 | 470  | 24  | 204  | 446  | 0   |
| CONTIG-004317 | 106  | 396 | 443  | 813  | 78  |

|               |      |     |      |      |      |
|---------------|------|-----|------|------|------|
| CONTIG-004318 | 94   | 976 | 488  | 3195 | 308  |
| CONTIG-004320 | 90   | 10  | 49   | 0    | 0    |
| CONTIG-004321 | 92   | 506 | 1955 | 915  | 39   |
| CONTIG-004322 | 68   | 4   | 6    | 5    | 0    |
| CONTIG-004323 | 312  | 24  | 373  | 173  | 0    |
| CONTIG-004324 | 97   | 12  | 6    | 11   | 0    |
| CONTIG-004325 | 188  | 250 | 191  | 2057 | 4    |
| CONTIG-004327 | 1098 | 44  | 940  | 1070 | 11   |
| CONTIG-004328 | 370  | 14  | 126  | 142  | 4    |
| CONTIG-004329 | 152  | 21  | 40   | 45   | 0    |
| CONTIG-004330 | 201  | 11  | 18   | 45   | 0    |
| CONTIG-004331 | 247  | 11  | 45   | 94   | 0    |
| CONTIG-004332 | 63   | 4   | 4    | 5    | 0    |
| CONTIG-004333 | 361  | 65  | 246  | 764  | 17   |
| CONTIG-004334 | 637  | 22  | 38   | 526  | 6    |
| CONTIG-004335 | 461  | 10  | 38   | 161  | 3    |
| CONTIG-004336 | 2013 | 71  | 1315 | 6479 | 17   |
| CONTIG-004337 | 221  | 10  | 81   | 70   | 0    |
| CONTIG-004339 | 1612 | 40  | 527  | 1940 | 119  |
| CONTIG-004340 | 528  | 40  | 224  | 275  | 2    |
| CONTIG-004341 | 58   | 91  | 493  | 35   | 0    |
| CONTIG-004342 | 180  | 16  | 55   | 62   | 0    |
| CONTIG-004343 | 87   | 271 | 645  | 12   | 10   |
| CONTIG-004349 | 1370 | 27  | 201  | 1760 | 6    |
| CONTIG-004350 | 234  | 14  | 43   | 163  | 0    |
| CONTIG-004351 | 1060 | 22  | 279  | 986  | 6    |
| CONTIG-004352 | 666  | 27  | 363  | 319  | 3    |
| CONTIG-004353 | 166  | 8   | 12   | 26   | 2    |
| CONTIG-004354 | 880  | 45  | 1653 | 1078 | 2    |
| CONTIG-004355 | 149  | 9   | 2    | 36   | 2    |
| CONTIG-004356 | 410  | 39  | 66   | 581  | 21   |
| CONTIG-004357 | 76   | 3   | 3    | 7    | 0    |
| CONTIG-004358 | 384  | 16  | 20   | 242  | 0    |
| CONTIG-004359 | 342  | 40  | 71   | 224  | 13   |
| CONTIG-004360 | 241  | 121 | 37   | 1323 | 0    |
| CONTIG-004368 | 337  | 178 | 1319 | 2549 | 28   |
| CONTIG-004369 | 864  | 122 | 562  | 3432 | 215  |
| CONTIG-004370 | 211  | 45  | 240  | 234  | 0    |
| CONTIG-004371 | 1738 | 174 | 1556 | 7760 | 1864 |
| CONTIG-004372 | 258  | 17  | 49   | 208  | 0    |
| CONTIG-004373 | 235  | 25  | 17   | 263  | 0    |
| CONTIG-004374 | 107  | 143 | 178  | 653  | 12   |
| CONTIG-004375 | 1589 | 57  | 1204 | 4074 | 6    |
| CONTIG-004376 | 159  | 135 | 352  | 884  | 9    |
| CONTIG-004377 | 369  | 62  | 664  | 725  | 0    |
| CONTIG-004378 | 639  | 106 | 1211 | 1556 | 21   |
| CONTIG-004379 | 344  | 20  | 107  | 199  | 0    |

|               |      |     |      |      |     |
|---------------|------|-----|------|------|-----|
| CONTIG-004380 | 271  | 9   | 91   | 45   | 0   |
| CONTIG-004381 | 158  | 58  | 207  | 158  | 2   |
| CONTIG-004382 | 283  | 18  | 27   | 154  | 0   |
| CONTIG-004383 | 128  | 457 | 436  | 2648 | 24  |
| CONTIG-004386 | 868  | 117 | 663  | 2832 | 682 |
| CONTIG-004387 | 100  | 10  | 8    | 44   | 0   |
| CONTIG-004388 | 859  | 75  | 711  | 2482 | 51  |
| CONTIG-004394 | 433  | 19  | 22   | 124  | 2   |
| CONTIG-004395 | 46   | 600 | 148  | 449  | 44  |
| CONTIG-004396 | 138  | 38  | 488  | 0    | 0   |
| CONTIG-004397 | 560  | 13  | 57   | 211  | 0   |
| CONTIG-004398 | 230  | 40  | 284  | 190  | 8   |
| CONTIG-004399 | 119  | 37  | 147  | 46   | 0   |
| CONTIG-004400 | 346  | 18  | 177  | 168  | 2   |
| CONTIG-004401 | 1703 | 34  | 1353 | 2275 | 6   |
| CONTIG-004402 | 572  | 29  | 336  | 466  | 13  |
| CONTIG-004403 | 260  | 10  | 60   | 85   | 0   |
| CONTIG-004404 | 117  | 379 | 556  | 1659 | 43  |
| CONTIG-004405 | 391  | 21  | 213  | 105  | 2   |
| CONTIG-004406 | 191  | 10  | 15   | 63   | 0   |
| CONTIG-004407 | 143  | 36  | 101  | 24   | 2   |
| CONTIG-004408 | 59   | 4   | 4    | 5    | 0   |
| CONTIG-004409 | 80   | 8   | 2    | 14   | 0   |
| CONTIG-004410 | 620  | 31  | 1180 | 298  | 0   |
| CONTIG-004411 | 91   | 7   | 7    | 18   | 0   |
| CONTIG-004412 | 1790 | 68  | 1857 | 5235 | 27  |
| CONTIG-004413 | 212  | 42  | 160  | 87   | 5   |
| CONTIG-004414 | 77   | 478 | 612  | 719  | 101 |
| CONTIG-004415 | 189  | 310 | 2768 | 200  | 22  |
| CONTIG-004416 | 77   | 10  | 11   | 24   | 0   |
| CONTIG-004417 | 394  | 12  | 17   | 216  | 0   |
| CONTIG-004426 | 102  | 312 | 937  | 368  | 25  |
| CONTIG-004427 | 911  | 17  | 276  | 240  | 2   |
| CONTIG-004428 | 373  | 71  | 1740 | 554  | 0   |
| CONTIG-004429 | 275  | 53  | 306  | 346  | 0   |
| CONTIG-004430 | 456  | 58  | 600  | 1044 | 2   |
| CONTIG-004431 | 840  | 68  | 875  | 2446 | 0   |
| CONTIG-004432 | 1002 | 36  | 1817 | 694  | 16  |
| CONTIG-004433 | 729  | 72  | 238  | 2707 | 4   |
| CONTIG-004434 | 408  | 99  | 455  | 1374 | 13  |
| CONTIG-004435 | 430  | 13  | 39   | 214  | 0   |
| CONTIG-004436 | 74   | 7   | 7    | 11   | 0   |
| CONTIG-004437 | 59   | 6   | 3    | 10   | 0   |
| CONTIG-004438 | 326  | 250 | 494  | 4248 | 23  |
| CONTIG-004439 | 617  | 26  | 294  | 310  | 6   |
| CONTIG-004440 | 75   | 5   | 5    | 2    | 0   |
| CONTIG-004441 | 435  | 8   | 24   | 106  | 0   |

|               |      |     |      |      |     |
|---------------|------|-----|------|------|-----|
| CONTIG-004442 | 391  | 14  | 33   | 73   | 2   |
| CONTIG-004444 | 1287 | 90  | 380  | 7389 | 2   |
| CONTIG-004445 | 85   | 10  | 31   | 12   | 0   |
| CONTIG-004446 | 507  | 29  | 147  | 300  | 11  |
| CONTIG-004447 | 475  | 152 | 431  | 1435 | 0   |
| CONTIG-004448 | 168  | 9   | 48   | 19   | 0   |
| CONTIG-004449 | 39   | 202 | 161  | 152  | 0   |
| CONTIG-004454 | 193  | 58  | 147  | 246  | 2   |
| CONTIG-004456 | 122  | 9   | 48   | 20   | 0   |
| CONTIG-004465 | 647  | 48  | 308  | 726  | 12  |
| CONTIG-004467 | 1184 | 44  | 437  | 2014 | 76  |
| CONTIG-004468 | 1364 | 109 | 1156 | 5693 | 469 |
| CONTIG-004469 | 982  | 24  | 279  | 572  | 10  |
| CONTIG-004470 | 456  | 38  | 973  | 415  | 0   |
| CONTIG-004471 | 783  | 22  | 178  | 696  | 2   |
| CONTIG-004477 | 336  | 120 | 390  | 1541 | 25  |
| CONTIG-004478 | 1213 | 108 | 1233 | 3030 | 287 |
| CONTIG-004479 | 130  | 694 | 2187 | 1690 | 112 |
| CONTIG-004480 | 53   | 300 | 8    | 0    | 98  |
| CONTIG-004481 | 106  | 472 | 1120 | 516  | 77  |
| CONTIG-004482 | 57   | 59  | 108  | 15   | 2   |
| CONTIG-004483 | 78   | 468 | 528  | 1159 | 2   |
| CONTIG-004484 | 216  | 180 | 686  | 920  | 99  |
| CONTIG-004485 | 1023 | 24  | 290  | 395  | 7   |
| CONTIG-004488 | 156  | 7   | 14   | 16   | 0   |
| CONTIG-004489 | 249  | 18  | 80   | 135  | 0   |
| CONTIG-004490 | 241  | 11  | 47   | 86   | 0   |
| CONTIG-004491 | 173  | 11  | 27   | 43   | 0   |
| CONTIG-004492 | 1692 | 61  | 2269 | 4172 | 15  |
| CONTIG-004493 | 1068 | 30  | 27   | 1425 | 35  |
| CONTIG-004494 | 257  | 215 | 2349 | 717  | 126 |
| CONTIG-004495 | 808  | 17  | 285  | 362  | 0   |
| CONTIG-004496 | 731  | 11  | 82   | 171  | 0   |
| CONTIG-004497 | 221  | 22  | 89   | 108  | 12  |
| CONTIG-004498 | 1182 | 21  | 445  | 996  | 4   |
| CONTIG-004499 | 85   | 196 | 686  | 574  | 0   |
| CONTIG-004500 | 443  | 36  | 274  | 268  | 0   |
| CONTIG-004501 | 191  | 252 | 1645 | 919  | 107 |
| CONTIG-004502 | 944  | 36  | 517  | 1504 | 6   |
| CONTIG-004513 | 311  | 404 | 4764 | 1257 | 155 |
| CONTIG-004514 | 124  | 14  | 3    | 49   | 2   |
| CONTIG-004515 | 581  | 151 | 741  | 3880 | 146 |
| CONTIG-004516 | 305  | 48  | 587  | 345  | 0   |
| CONTIG-004517 | 175  | 20  | 5    | 94   | 0   |
| CONTIG-004518 | 400  | 23  | 89   | 135  | 0   |
| CONTIG-004520 | 291  | 12  | 53   | 143  | 0   |
| CONTIG-004521 | 315  | 10  | 45   | 81   | 0   |

|               |      |     |      |      |     |
|---------------|------|-----|------|------|-----|
| CONTIG-004522 | 403  | 11  | 12   | 170  | 2   |
| CONTIG-004523 | 581  | 14  | 236  | 190  | 0   |
| CONTIG-004525 | 274  | 26  | 92   | 314  | 4   |
| CONTIG-004526 | 1099 | 46  | 840  | 2497 | 0   |
| CONTIG-004527 | 188  | 280 | 601  | 1904 | 9   |
| CONTIG-004528 | 295  | 10  | 43   | 76   | 2   |
| CONTIG-004529 | 1629 | 21  | 207  | 1293 | 8   |
| CONTIG-004530 | 101  | 181 | 160  | 371  | 58  |
| CONTIG-004531 | 623  | 14  | 106  | 273  | 4   |
| CONTIG-004533 | 724  | 15  | 163  | 258  | 4   |
| CONTIG-004536 | 434  | 113 | 470  | 1040 | 163 |
| CONTIG-004537 | 49   | 573 | 2191 | 0    | 13  |
| CONTIG-004538 | 105  | 14  | 36   | 48   | 0   |
| CONTIG-004539 | 1253 | 36  | 321  | 1482 | 25  |
| CONTIG-004540 | 289  | 51  | 30   | 882  | 0   |
| CONTIG-004542 | 176  | 15  | 13   | 53   | 0   |
| CONTIG-004543 | 1645 | 17  | 253  | 783  | 13  |
| CONTIG-004544 | 827  | 17  | 97   | 471  | 2   |
| CONTIG-004545 | 67   | 57  | 159  | 2    | 2   |
| CONTIG-004546 | 1027 | 25  | 259  | 904  | 8   |
| CONTIG-004547 | 265  | 27  | 467  | 95   | 0   |
| CONTIG-004548 | 254  | 23  | 100  | 59   | 0   |
| CONTIG-004551 | 159  | 13  | 26   | 77   | 0   |
| CONTIG-004552 | 373  | 8   | 42   | 97   | 0   |
| CONTIG-004558 | 357  | 15  | 164  | 83   | 0   |
| CONTIG-004559 | 121  | 9   | 10   | 43   | 0   |
| CONTIG-004560 | 132  | 24  | 60   | 151  | 0   |
| CONTIG-004561 | 474  | 18  | 123  | 202  | 0   |
| CONTIG-004562 | 167  | 12  | 10   | 87   | 2   |
| CONTIG-004564 | 95   | 4   | 3    | 5    | 0   |
| CONTIG-004565 | 140  | 4   | 3    | 2    | 0   |
| CONTIG-004566 | 72   | 30  | 132  | 21   | 0   |
| CONTIG-004567 | 141  | 9   | 19   | 4    | 0   |
| CONTIG-004568 | 66   | 17  | 68   | 12   | 0   |
| CONTIG-004569 | 155  | 8   | 19   | 30   | 0   |
| CONTIG-004570 | 76   | 8   | 14   | 8    | 0   |
| CONTIG-004576 | 411  | 33  | 205  | 385  | 3   |
| CONTIG-004577 | 294  | 17  | 229  | 140  | 0   |
| CONTIG-004578 | 742  | 62  | 353  | 1962 | 4   |
| CONTIG-004579 | 297  | 135 | 532  | 1838 | 19  |
| CONTIG-004580 | 108  | 659 | 449  | 1380 | 129 |
| CONTIG-004581 | 59   | 3   | 2    | 4    | 0   |
| CONTIG-004582 | 1190 | 88  | 1063 | 3367 | 59  |
| CONTIG-004583 | 55   | 247 | 1212 | 6    | 0   |
| CONTIG-004584 | 236  | 28  | 12   | 325  | 0   |
| CONTIG-004585 | 571  | 24  | 555  | 271  | 0   |
| CONTIG-004586 | 992  | 67  | 600  | 2180 | 15  |

|               |      |      |      |      |     |
|---------------|------|------|------|------|-----|
| CONTIG-004587 | 77   | 200  | 616  | 6    | 2   |
| CONTIG-004588 | 320  | 22   | 91   | 226  | 3   |
| CONTIG-004589 | 1089 | 18   | 1546 | 156  | 0   |
| CONTIG-004590 | 110  | 13   | 16   | 37   | 2   |
| CONTIG-004591 | 341  | 23   | 20   | 357  | 0   |
| CONTIG-004592 | 314  | 67   | 611  | 807  | 0   |
| CONTIG-004593 | 170  | 10   | 6    | 58   | 0   |
| CONTIG-004594 | 128  | 12   | 29   | 29   | 0   |
| CONTIG-004595 | 58   | 520  | 1393 | 226  | 53  |
| CONTIG-004596 | 165  | 581  | 257  | 47   | 0   |
| CONTIG-004597 | 212  | 225  | 320  | 2009 | 23  |
| CONTIG-004598 | 602  | 20   | 35   | 346  | 8   |
| CONTIG-004599 | 116  | 230  | 79   | 963  | 4   |
| CONTIG-004600 | 211  | 16   | 42   | 146  | 0   |
| CONTIG-004601 | 186  | 9    | 49   | 18   | 0   |
| CONTIG-004602 | 1146 | 50   | 525  | 2034 | 22  |
| CONTIG-004603 | 118  | 973  | 942  | 2360 | 209 |
| CONTIG-004604 | 73   | 47   | 333  | 0    | 0   |
| CONTIG-004605 | 78   | 6    | 4    | 0    | 0   |
| CONTIG-004606 | 500  | 32   | 267  | 418  | 10  |
| CONTIG-004607 | 1114 | 30   | 313  | 903  | 13  |
| CONTIG-004608 | 938  | 13   | 171  | 264  | 2   |
| CONTIG-004609 | 946  | 11   | 169  | 268  | 2   |
| CONTIG-004610 | 282  | 16   | 139  | 41   | 0   |
| CONTIG-004611 | 124  | 215  | 326  | 203  | 26  |
| CONTIG-004612 | 275  | 19   | 50   | 135  | 4   |
| CONTIG-004613 | 208  | 15   | 7    | 76   | 0   |
| CONTIG-004614 | 373  | 68   | 1034 | 662  | 7   |
| CONTIG-004615 | 80   | 11   | 7    | 31   | 0   |
| CONTIG-004616 | 706  | 15   | 108  | 554  | 0   |
| CONTIG-004617 | 477  | 38   | 205  | 954  | 0   |
| CONTIG-004618 | 192  | 16   | 89   | 64   | 0   |
| CONTIG-004619 | 1338 | 89   | 490  | 5573 | 60  |
| CONTIG-004620 | 469  | 25   | 62   | 531  | 6   |
| CONTIG-004621 | 367  | 115  | 442  | 891  | 23  |
| CONTIG-004622 | 379  | 71   | 656  | 720  | 12  |
| CONTIG-004623 | 38   | 1669 | 271  | 1103 | 2   |
| CONTIG-004624 | 60   | 3    | 2    | 0    | 0   |
| CONTIG-004625 | 1064 | 19   | 384  | 502  | 0   |
| CONTIG-004626 | 135  | 91   | 532  | 118  | 12  |
| CONTIG-004627 | 354  | 205  | 509  | 3169 | 30  |
| CONTIG-004628 | 397  | 51   | 382  | 346  | 8   |
| CONTIG-004629 | 767  | 200  | 476  | 3708 | 750 |
| CONTIG-004635 | 378  | 56   | 660  | 827  | 0   |
| CONTIG-004639 | 178  | 15   | 96   | 38   | 0   |
| CONTIG-004641 | 189  | 13   | 18   | 77   | 2   |
| CONTIG-004644 | 68   | 2    | 4    | 0    | 0   |

|               |      |     |      |      |     |
|---------------|------|-----|------|------|-----|
| CONTIG-004645 | 322  | 20  | 133  | 153  | 2   |
| CONTIG-004646 | 1193 | 55  | 406  | 1333 | 75  |
| CONTIG-004647 | 229  | 12  | 44   | 8    | 0   |
| CONTIG-004648 | 254  | 16  | 44   | 76   | 4   |
| CONTIG-004649 | 94   | 7   | 27   | 9    | 0   |
| CONTIG-004650 | 918  | 31  | 326  | 733  | 47  |
| CONTIG-004651 | 1093 | 48  | 465  | 1687 | 66  |
| CONTIG-004652 | 43   | 43  | 46   | 20   | 0   |
| CONTIG-004653 | 215  | 19  | 40   | 87   | 2   |
| CONTIG-004654 | 70   | 3   | 0    | 7    | 0   |
| CONTIG-004655 | 407  | 59  | 485  | 233  | 12  |
| CONTIG-004656 | 142  | 7   | 10   | 19   | 0   |
| CONTIG-004657 | 178  | 14  | 78   | 58   | 0   |
| CONTIG-004658 | 61   | 8   | 2    | 0    | 0   |
| CONTIG-004660 | 76   | 268 | 70   | 962  | 25  |
| CONTIG-004661 | 100  | 30  | 64   | 65   | 2   |
| CONTIG-004662 | 126  | 6   | 27   | 15   | 0   |
| CONTIG-004670 | 110  | 54  | 33   | 204  | 0   |
| CONTIG-004671 | 409  | 12  | 23   | 73   | 2   |
| CONTIG-004672 | 665  | 23  | 129  | 499  | 2   |
| CONTIG-004673 | 42   | 55  | 207  | 0    | 0   |
| CONTIG-004674 | 1408 | 122 | 1328 | 6856 | 18  |
| CONTIG-004675 | 191  | 8   | 69   | 13   | 0   |
| CONTIG-004678 | 64   | 168 | 102  | 258  | 30  |
| CONTIG-004679 | 1272 | 115 | 795  | 5394 | 447 |
| CONTIG-004680 | 1052 | 62  | 376  | 3203 | 26  |
| CONTIG-004681 | 634  | 18  | 370  | 316  | 0   |
| CONTIG-004682 | 53   | 133 | 21   | 130  | 0   |
| CONTIG-004683 | 163  | 11  | 14   | 30   | 0   |
| CONTIG-004684 | 59   | 140 | 6    | 231  | 0   |
| CONTIG-004685 | 93   | 143 | 216  | 70   | 5   |
| CONTIG-004686 | 907  | 41  | 642  | 1406 | 17  |
| CONTIG-004687 | 780  | 24  | 255  | 428  | 11  |
| CONTIG-004688 | 790  | 141 | 3475 | 1516 | 40  |
| CONTIG-004689 | 306  | 39  | 86   | 163  | 8   |
| CONTIG-004690 | 518  | 80  | 150  | 2467 | 0   |
| CONTIG-004691 | 294  | 47  | 107  | 672  | 0   |
| CONTIG-004692 | 285  | 31  | 161  | 87   | 0   |
| CONTIG-004693 | 504  | 103 | 560  | 1092 | 88  |
| CONTIG-004694 | 396  | 23  | 115  | 211  | 6   |
| CONTIG-004695 | 1063 | 26  | 289  | 693  | 30  |
| CONTIG-004696 | 71   | 35  | 80   | 55   | 6   |
| CONTIG-004697 | 857  | 33  | 1543 | 550  | 7   |
| CONTIG-004698 | 198  | 317 | 560  | 530  | 0   |
| CONTIG-004699 | 513  | 19  | 229  | 225  | 0   |
| CONTIG-004700 | 82   | 10  | 2    | 28   | 0   |
| CONTIG-004701 | 201  | 5   | 14   | 2    | 0   |

|               |      |     |      |       |      |
|---------------|------|-----|------|-------|------|
| CONTIG-004703 | 716  | 15  | 87   | 337   | 7    |
| CONTIG-004704 | 506  | 29  | 200  | 552   | 0    |
| CONTIG-004715 | 289  | 10  | 22   | 88    | 0    |
| CONTIG-004716 | 272  | 31  | 99   | 9     | 0    |
| CONTIG-004717 | 72   | 3   | 2    | 4     | 0    |
| CONTIG-004718 | 878  | 64  | 758  | 1645  | 8    |
| CONTIG-004719 | 1093 | 18  | 171  | 498   | 12   |
| CONTIG-004720 | 246  | 76  | 233  | 372   | 0    |
| CONTIG-004721 | 67   | 9   | 23   | 7     | 0    |
| CONTIG-004724 | 600  | 32  | 426  | 620   | 0    |
| CONTIG-004725 | 130  | 6   | 27   | 13    | 0    |
| CONTIG-004735 | 2127 | 19  | 150  | 1098  | 13   |
| CONTIG-004736 | 498  | 23  | 104  | 484   | 0    |
| CONTIG-004738 | 560  | 36  | 487  | 445   | 8    |
| CONTIG-004739 | 357  | 24  | 364  | 183   | 0    |
| CONTIG-004740 | 85   | 4   | 0    | 17    | 0    |
| CONTIG-004741 | 73   | 9   | 25   | 3     | 0    |
| CONTIG-004742 | 114  | 15  | 42   | 0     | 0    |
| CONTIG-004743 | 330  | 10  | 56   | 112   | 0    |
| CONTIG-004744 | 127  | 96  | 91   | 462   | 0    |
| CONTIG-004745 | 194  | 108 | 456  | 217   | 20   |
| CONTIG-004746 | 86   | 68  | 137  | 261   | 0    |
| CONTIG-004747 | 109  | 19  | 59   | 20    | 0    |
| CONTIG-004748 | 187  | 5   | 4    | 20    | 0    |
| CONTIG-004750 | 113  | 368 | 348  | 891   | 70   |
| CONTIG-004751 | 973  | 367 | 1091 | 12851 | 695  |
| CONTIG-004752 | 306  | 22  | 34   | 235   | 0    |
| CONTIG-004754 | 138  | 13  | 43   | 49    | 0    |
| CONTIG-004755 | 235  | 22  | 18   | 118   | 4    |
| CONTIG-004756 | 417  | 91  | 1096 | 656   | 4    |
| CONTIG-004757 | 507  | 22  | 103  | 344   | 2    |
| CONTIG-004758 | 403  | 28  | 90   | 119   | 3    |
| CONTIG-004759 | 545  | 93  | 703  | 1298  | 20   |
| CONTIG-004760 | 933  | 21  | 144  | 438   | 0    |
| CONTIG-004761 | 966  | 292 | 1036 | 9848  | 451  |
| CONTIG-004762 | 171  | 545 | 21   | 0     | 1788 |
| CONTIG-004763 | 171  | 15  | 63   | 94    | 0    |
| CONTIG-004764 | 133  | 159 | 398  | 412   | 61   |
| CONTIG-004765 | 509  | 15  | 238  | 205   | 0    |
| CONTIG-004766 | 42   | 597 | 130  | 359   | 35   |
| CONTIG-004767 | 2249 | 72  | 403  | 5790  | 198  |
| CONTIG-004768 | 524  | 14  | 36   | 252   | 0    |
| CONTIG-004769 | 89   | 108 | 242  | 219   | 5    |
| CONTIG-004770 | 372  | 15  | 192  | 118   | 0    |
| CONTIG-004771 | 1371 | 50  | 767  | 2133  | 15   |
| CONTIG-004772 | 713  | 16  | 131  | 338   | 2    |
| CONTIG-004773 | 107  | 4   | 6    | 2     | 0    |



|               |      |     |      |       |     |
|---------------|------|-----|------|-------|-----|
| CONTIG-004774 | 369  | 15  | 262  | 41    | 4   |
| CONTIG-004775 | 196  | 12  | 48   | 50    | 0   |
| CONTIG-004777 | 148  | 8   | 0    | 55    | 0   |
| CONTIG-004778 | 1048 | 46  | 865  | 1917  | 4   |
| CONTIG-004779 | 405  | 280 | 1853 | 1865  | 275 |
| CONTIG-004783 | 311  | 10  | 55   | 51    | 0   |
| CONTIG-004784 | 834  | 23  | 112  | 457   | 12  |
| CONTIG-004785 | 86   | 6   | 2    | 17    | 0   |
| CONTIG-004786 | 179  | 16  | 55   | 89    | 0   |
| CONTIG-004787 | 79   | 8   | 17   | 6     | 0   |
| CONTIG-004788 | 990  | 12  | 57   | 414   | 2   |
| CONTIG-004789 | 111  | 4   | 0    | 14    | 0   |
| CONTIG-004790 | 127  | 5   | 9    | 6     | 2   |
| CONTIG-004791 | 979  | 34  | 404  | 945   | 35  |
| CONTIG-004792 | 602  | 43  | 202  | 918   | 27  |
| CONTIG-004793 | 445  | 31  | 220  | 472   | 4   |
| CONTIG-004794 | 1258 | 46  | 446  | 1825  | 47  |
| CONTIG-004799 | 248  | 11  | 17   | 89    | 0   |
| CONTIG-004800 | 426  | 29  | 129  | 351   | 5   |
| CONTIG-004801 | 598  | 70  | 235  | 2489  | 0   |
| CONTIG-004802 | 601  | 13  | 44   | 211   | 0   |
| CONTIG-004803 | 85   | 3   | 8    | 4     | 0   |
| CONTIG-004804 | 89   | 55  | 54   | 156   | 2   |
| CONTIG-004805 | 2502 | 35  | 562  | 4848  | 0   |
| CONTIG-004806 | 335  | 88  | 555  | 443   | 9   |
| CONTIG-004807 | 152  | 9   | 33   | 25    | 0   |
| CONTIG-004808 | 455  | 22  | 152  | 273   | 2   |
| CONTIG-004810 | 156  | 5   | 7    | 16    | 2   |
| CONTIG-004811 | 701  | 76  | 1598 | 2462  | 0   |
| CONTIG-004812 | 139  | 8   | 4    | 33    | 0   |
| CONTIG-004813 | 90   | 9   | 50   | 8     | 0   |
| CONTIG-004814 | 1005 | 200 | 2294 | 9493  | 220 |
| CONTIG-004815 | 106  | 20  | 35   | 39    | 2   |
| CONTIG-004816 | 1315 | 60  | 38   | 3804  | 2   |
| CONTIG-004817 | 840  | 22  | 254  | 470   | 11  |
| CONTIG-004818 | 303  | 103 | 99   | 1071  | 90  |
| CONTIG-004819 | 118  | 9   | 18   | 18    | 0   |
| CONTIG-004820 | 1075 | 29  | 755  | 1198  | 2   |
| CONTIG-004821 | 51   | 845 | 653  | 604   | 22  |
| CONTIG-004822 | 965  | 208 | 266  | 12809 | 4   |
| CONTIG-004823 | 96   | 12  | 39   | 5     | 0   |
| CONTIG-004824 | 261  | 15  | 45   | 86    | 2   |
| CONTIG-004825 | 776  | 15  | 92   | 531   | 2   |
| CONTIG-004827 | 157  | 281 | 997  | 1760  | 33  |
| CONTIG-004828 | 1102 | 58  | 454  | 2130  | 136 |
| CONTIG-004829 | 128  | 44  | 215  | 146   | 0   |
| CONTIG-004836 | 75   | 59  | 137  | 26    | 8   |

|               |      |     |      |      |     |
|---------------|------|-----|------|------|-----|
| CONTIG-004837 | 1057 | 42  | 1159 | 947  | 33  |
| CONTIG-004838 | 112  | 12  | 20   | 51   | 0   |
| CONTIG-004839 | 358  | 132 | 557  | 1459 | 15  |
| CONTIG-004840 | 181  | 8   | 0    | 3    | 0   |
| CONTIG-004841 | 91   | 7   | 32   | 4    | 0   |
| CONTIG-004842 | 153  | 24  | 142  | 15   | 0   |
| CONTIG-004843 | 360  | 21  | 202  | 222  | 2   |
| CONTIG-004844 | 187  | 11  | 24   | 73   | 0   |
| CONTIG-004845 | 1760 | 26  | 328  | 1550 | 55  |
| CONTIG-004846 | 103  | 244 | 53   | 980  | 0   |
| CONTIG-004848 | 373  | 38  | 857  | 0    | 67  |
| CONTIG-004849 | 900  | 29  | 166  | 861  | 17  |
| CONTIG-004850 | 49   | 493 | 184  | 394  | 35  |
| CONTIG-004852 | 816  | 47  | 517  | 66   | 206 |
| CONTIG-004853 | 345  | 92  | 211  | 1231 | 9   |
| CONTIG-004854 | 165  | 15  | 57   | 82   | 0   |
| CONTIG-004867 | 197  | 18  | 136  | 64   | 2   |
| CONTIG-004868 | 425  | 11  | 57   | 181  | 0   |
| CONTIG-004870 | 618  | 17  | 474  | 213  | 0   |
| CONTIG-004871 | 90   | 7   | 0    | 14   | 0   |
| CONTIG-004872 | 1282 | 16  | 13   | 1211 | 0   |
| CONTIG-004873 | 1552 | 61  | 1123 | 3032 | 146 |
| CONTIG-004874 | 105  | 11  | 32   | 10   | 0   |
| CONTIG-004875 | 123  | 184 | 89   | 643  | 52  |
| CONTIG-004876 | 211  | 25  | 42   | 80   | 8   |
| CONTIG-004877 | 199  | 8   | 15   | 67   | 0   |
| CONTIG-004878 | 292  | 64  | 584  | 247  | 6   |
| CONTIG-004879 | 249  | 370 | 1945 | 1787 | 217 |
| CONTIG-004880 | 117  | 685 | 256  | 2373 | 207 |
| CONTIG-004885 | 131  | 255 | 231  | 775  | 108 |
| CONTIG-004886 | 139  | 69  | 260  | 83   | 18  |
| CONTIG-004887 | 505  | 206 | 371  | 2272 | 371 |
| CONTIG-004889 | 242  | 8   | 33   | 44   | 0   |
| CONTIG-004890 | 117  | 9   | 92   | 4    | 0   |
| CONTIG-004891 | 723  | 55  | 1275 | 937  | 62  |
| CONTIG-004892 | 435  | 67  | 507  | 1147 | 2   |
| CONTIG-004893 | 85   | 2   | 0    | 5    | 0   |
| CONTIG-004894 | 56   | 668 | 276  | 1369 | 0   |
| CONTIG-004895 | 121  | 7   | 29   | 14   | 0   |
| CONTIG-004896 | 93   | 22  | 54   | 33   | 2   |
| CONTIG-004897 | 251  | 13  | 117  | 39   | 0   |
| CONTIG-004898 | 723  | 71  | 350  | 1647 | 80  |
| CONTIG-004899 | 558  | 18  | 80   | 398  | 0   |
| CONTIG-004900 | 206  | 13  | 19   | 40   | 6   |
| CONTIG-004904 | 285  | 18  | 216  | 107  | 0   |
| CONTIG-004914 | 317  | 19  | 74   | 138  | 2   |
| CONTIG-004915 | 2108 | 81  | 1167 | 5142 | 227 |

|               |      |      |      |      |     |
|---------------|------|------|------|------|-----|
| CONTIG-004919 | 712  | 33   | 450  | 279  | 0   |
| CONTIG-004921 | 934  | 20   | 437  | 436  | 0   |
| CONTIG-004922 | 535  | 12   | 76   | 231  | 0   |
| CONTIG-004923 | 634  | 28   | 145  | 635  | 13  |
| CONTIG-004924 | 1754 | 33   | 1285 | 1765 | 20  |
| CONTIG-004925 | 98   | 52   | 544  | 0    | 0   |
| CONTIG-004926 | 940  | 22   | 364  | 932  | 0   |
| CONTIG-004927 | 631  | 15   | 149  | 173  | 2   |
| CONTIG-004928 | 411  | 75   | 1826 | 537  | 4   |
| CONTIG-004936 | 82   | 155  | 316  | 512  | 0   |
| CONTIG-004937 | 671  | 29   | 349  | 713  | 2   |
| CONTIG-004938 | 68   | 32   | 111  | 21   | 0   |
| CONTIG-004939 | 333  | 23   | 48   | 214  | 2   |
| CONTIG-004940 | 736  | 38   | 87   | 1429 | 12  |
| CONTIG-004941 | 332  | 26   | 95   | 365  | 2   |
| CONTIG-004942 | 708  | 25   | 479  | 452  | 2   |
| CONTIG-004943 | 541  | 336  | 2739 | 3647 | 486 |
| CONTIG-004944 | 152  | 6    | 2    | 30   | 0   |
| CONTIG-004945 | 140  | 11   | 20   | 48   | 3   |
| CONTIG-004946 | 1047 | 40   | 245  | 1893 | 16  |
| CONTIG-004947 | 76   | 1443 | 727  | 2352 | 203 |
| CONTIG-004948 | 1099 | 87   | 955  | 5426 | 17  |
| CONTIG-004949 | 801  | 8    | 84   | 92   | 0   |
| CONTIG-004953 | 265  | 31   | 338  | 142  | 2   |
| CONTIG-004954 | 134  | 5    | 0    | 11   | 0   |
| CONTIG-004956 | 75   | 5    | 0    | 8    | 0   |
| CONTIG-004957 | 82   | 4    | 16   | 6    | 0   |
| CONTIG-004958 | 293  | 35   | 142  | 386  | 2   |
| CONTIG-004959 | 698  | 26   | 425  | 552  | 4   |
| CONTIG-004960 | 491  | 24   | 663  | 98   | 0   |
| CONTIG-004961 | 331  | 27   | 64   | 255  | 10  |
| CONTIG-004962 | 94   | 579  | 685  | 725  | 121 |
| CONTIG-004967 | 1469 | 100  | 313  | 6186 | 213 |
| CONTIG-004968 | 321  | 17   | 53   | 142  | 4   |
| CONTIG-004969 | 242  | 5    | 20   | 11   | 0   |
| CONTIG-004972 | 292  | 5    | 5    | 31   | 0   |
| CONTIG-004973 | 733  | 26   | 246  | 686  | 31  |
| CONTIG-004975 | 543  | 14   | 159  | 113  | 2   |
| CONTIG-004976 | 346  | 42   | 1160 | 6    | 10  |
| CONTIG-004977 | 112  | 4    | 4    | 0    | 0   |
| CONTIG-004978 | 468  | 376  | 2005 | 3762 | 449 |
| CONTIG-004979 | 708  | 20   | 67   | 235  | 2   |
| CONTIG-004980 | 458  | 64   | 66   | 1256 | 0   |
| CONTIG-004981 | 193  | 12   | 7    | 6    | 0   |
| CONTIG-004982 | 79   | 11   | 2    | 26   | 0   |
| CONTIG-004984 | 384  | 10   | 29   | 131  | 6   |
| CONTIG-004985 | 624  | 33   | 858  | 532  | 0   |

|               |      |     |      |      |     |
|---------------|------|-----|------|------|-----|
| CONTIG-004986 | 1297 | 25  | 196  | 1439 | 0   |
| CONTIG-004991 | 1060 | 34  | 70   | 1915 | 0   |
| CONTIG-004993 | 1475 | 80  | 1167 | 5443 | 20  |
| CONTIG-004995 | 1473 | 96  | 1972 | 3710 | 650 |
| CONTIG-004996 | 254  | 9   | 15   | 66   | 0   |
| CONTIG-004997 | 182  | 16  | 74   | 83   | 0   |
| CONTIG-005003 | 312  | 157 | 232  | 1777 | 181 |
| CONTIG-005004 | 522  | 38  | 188  | 608  | 4   |
| CONTIG-005005 | 457  | 25  | 80   | 450  | 2   |
| CONTIG-005006 | 69   | 28  | 86   | 2    | 0   |
| CONTIG-005007 | 73   | 35  | 65   | 36   | 0   |
| CONTIG-005008 | 1863 | 20  | 250  | 1104 | 10  |
| CONTIG-005009 | 362  | 34  | 28   | 479  | 0   |
| CONTIG-005010 | 238  | 8   | 33   | 22   | 0   |
| CONTIG-005015 | 53   | 835 | 225  | 524  | 190 |
| CONTIG-005016 | 40   | 967 | 204  | 441  | 147 |
| CONTIG-005017 | 66   | 5   | 5    | 10   | 0   |
| CONTIG-005018 | 55   | 80  | 17   | 32   | 0   |
| CONTIG-005019 | 192  | 28  | 474  | 4    | 2   |
| CONTIG-005020 | 825  | 27  | 570  | 421  | 2   |
| CONTIG-005021 | 1050 | 25  | 114  | 960  | 4   |
| CONTIG-005026 | 365  | 14  | 311  | 90   | 0   |
| CONTIG-005029 | 248  | 15  | 137  | 100  | 4   |
| CONTIG-005034 | 389  | 32  | 180  | 140  | 8   |
| CONTIG-005046 | 327  | 18  | 40   | 118  | 2   |
| CONTIG-005048 | 129  | 39  | 539  | 0    | 0   |
| CONTIG-005049 | 1149 | 19  | 330  | 676  | 6   |
| CONTIG-005050 | 94   | 289 | 1499 | 23   | 0   |
| CONTIG-005051 | 66   | 4   | 10   | 2    | 0   |
| CONTIG-005052 | 170  | 5   | 8    | 32   | 0   |
| CONTIG-005053 | 89   | 6   | 4    | 0    | 2   |
| CONTIG-005054 | 170  | 262 | 1033 | 299  | 31  |
| CONTIG-005056 | 168  | 5   | 10   | 24   | 0   |
| CONTIG-005057 | 1062 | 22  | 280  | 578  | 30  |
| CONTIG-005058 | 130  | 9   | 30   | 24   | 0   |
| CONTIG-005059 | 192  | 7   | 12   | 25   | 0   |
| CONTIG-005060 | 374  | 18  | 43   | 132  | 0   |
| CONTIG-005061 | 1550 | 46  | 297  | 2321 | 27  |
| CONTIG-005062 | 688  | 25  | 156  | 735  | 0   |
| CONTIG-005063 | 179  | 71  | 370  | 462  | 5   |
| CONTIG-005064 | 1079 | 29  | 257  | 1240 | 33  |
| CONTIG-005065 | 431  | 57  | 243  | 1198 | 4   |
| CONTIG-005066 | 408  | 37  | 514  | 472  | 2   |
| CONTIG-005067 | 49   | 134 | 111  | 33   | 0   |
| CONTIG-005068 | 476  | 100 | 2672 | 1250 | 0   |
| CONTIG-005069 | 607  | 45  | 164  | 716  | 38  |
| CONTIG-005070 | 376  | 35  | 88   | 722  | 0   |

|               |      |      |      |      |     |
|---------------|------|------|------|------|-----|
| CONTIG-005071 | 208  | 75   | 142  | 242  | 0   |
| CONTIG-005072 | 414  | 45   | 555  | 321  | 5   |
| CONTIG-005073 | 777  | 40   | 1548 | 482  | 4   |
| CONTIG-005074 | 259  | 7    | 36   | 27   | 0   |
| CONTIG-005075 | 1660 | 23   | 454  | 1630 | 0   |
| CONTIG-005076 | 1538 | 22   | 10   | 34   | 0   |
| CONTIG-005078 | 47   | 96   | 265  | 23   | 0   |
| CONTIG-005079 | 168  | 13   | 77   | 4    | 2   |
| CONTIG-005080 | 495  | 140  | 1371 | 1801 | 208 |
| CONTIG-005081 | 199  | 30   | 79   | 138  | 0   |
| CONTIG-005082 | 94   | 3    | 3    | 8    | 0   |
| CONTIG-005083 | 1060 | 49   | 632  | 2459 | 18  |
| CONTIG-005084 | 155  | 17   | 16   | 51   | 0   |
| CONTIG-005085 | 126  | 13   | 25   | 27   | 0   |
| CONTIG-005086 | 226  | 14   | 41   | 102  | 0   |
| CONTIG-005089 | 101  | 162  | 439  | 698  | 0   |
| CONTIG-005090 | 55   | 802  | 755  | 661  | 51  |
| CONTIG-005091 | 224  | 5    | 16   | 34   | 0   |
| CONTIG-005092 | 64   | 110  | 13   | 284  | 0   |
| CONTIG-005093 | 1193 | 20   | 174  | 698  | 4   |
| CONTIG-005094 | 47   | 22   | 16   | 32   | 0   |
| CONTIG-005095 | 64   | 223  | 35   | 464  | 0   |
| CONTIG-005096 | 1010 | 49   | 1161 | 1065 | 6   |
| CONTIG-005098 | 289  | 10   | 53   | 41   | 0   |
| CONTIG-005101 | 175  | 4    | 12   | 15   | 0   |
| CONTIG-005102 | 443  | 27   | 69   | 259  | 0   |
| CONTIG-005103 | 94   | 604  | 1100 | 1092 | 99  |
| CONTIG-005104 | 185  | 1204 | 1461 | 6526 | 458 |
| CONTIG-005105 | 171  | 9    | 26   | 32   | 0   |
| CONTIG-005106 | 671  | 87   | 463  | 1500 | 2   |
| CONTIG-005107 | 438  | 15   | 181  | 198  | 0   |
| CONTIG-005108 | 171  | 159  | 352  | 1266 | 0   |
| CONTIG-005111 | 907  | 17   | 66   | 376  | 38  |
| CONTIG-005113 | 253  | 173  | 168  | 2286 | 0   |
| CONTIG-005114 | 620  | 24   | 139  | 393  | 170 |
| CONTIG-005115 | 80   | 129  | 143  | 190  | 0   |
| CONTIG-005117 | 259  | 64   | 293  | 766  | 0   |
| CONTIG-005119 | 180  | 4    | 9    | 25   | 0   |
| CONTIG-005120 | 90   | 6    | 5    | 8    | 0   |
| CONTIG-005121 | 93   | 37   | 124  | 0    | 0   |
| CONTIG-005123 | 239  | 63   | 1271 | 173  | 0   |
| CONTIG-005129 | 411  | 18   | 394  | 115  | 0   |
| CONTIG-005130 | 275  | 21   | 267  | 115  | 0   |
| CONTIG-005131 | 582  | 58   | 391  | 800  | 8   |
| CONTIG-005132 | 1064 | 23   | 686  | 950  | 0   |
| CONTIG-005133 | 880  | 38   | 935  | 1183 | 2   |
| CONTIG-005134 | 210  | 8    | 14   | 44   | 2   |

|               |      |     |      |      |      |
|---------------|------|-----|------|------|------|
| CONTIG-005135 | 212  | 7   | 16   | 66   | 0    |
| CONTIG-005136 | 371  | 49  | 90   | 595  | 18   |
| CONTIG-005137 | 2069 | 30  | 1320 | 1558 | 6    |
| CONTIG-005138 | 42   | 462 | 303  | 225  | 7    |
| CONTIG-005139 | 114  | 8   | 4    | 35   | 0    |
| CONTIG-005140 | 572  | 49  | 543  | 1226 | 0    |
| CONTIG-005141 | 169  | 420 | 550  | 1973 | 142  |
| CONTIG-005142 | 99   | 687 | 738  | 2011 | 105  |
| CONTIG-005144 | 76   | 15  | 60   | 26   | 0    |
| CONTIG-005146 | 493  | 14  | 85   | 227  | 0    |
| CONTIG-005147 | 929  | 27  | 259  | 545  | 20   |
| CONTIG-005150 | 59   | 125 | 498  | 155  | 0    |
| CONTIG-005151 | 950  | 135 | 4449 | 4480 | 17   |
| CONTIG-005154 | 342  | 35  | 186  | 140  | 2    |
| CONTIG-005155 | 190  | 17  | 6    | 6    | 0    |
| CONTIG-005156 | 579  | 17  | 93   | 238  | 2    |
| CONTIG-005157 | 636  | 52  | 189  | 876  | 35   |
| CONTIG-005158 | 109  | 3   | 4    | 4    | 0    |
| CONTIG-005159 | 1368 | 25  | 295  | 784  | 23   |
| CONTIG-005160 | 60   | 5   | 0    | 8    | 0    |
| CONTIG-005161 | 94   | 13  | 28   | 35   | 0    |
| CONTIG-005163 | 268  | 6   | 2    | 49   | 0    |
| CONTIG-005164 | 497  | 28  | 237  | 324  | 11   |
| CONTIG-005165 | 629  | 20  | 100  | 257  | 4    |
| CONTIG-005166 | 785  | 40  | 319  | 781  | 2    |
| CONTIG-005167 | 172  | 12  | 27   | 85   | 0    |
| CONTIG-005168 | 154  | 367 | 14   | 2    | 1287 |
| CONTIG-005169 | 88   | 31  | 67   | 66   | 0    |
| CONTIG-005170 | 87   | 521 | 555  | 1600 | 76   |
| CONTIG-005171 | 1504 | 29  | 529  | 1308 | 8    |
| CONTIG-005172 | 818  | 29  | 126  | 958  | 9    |
| CONTIG-005173 | 1010 | 16  | 179  | 758  | 0    |
| CONTIG-005174 | 331  | 8   | 2    | 73   | 0    |
| CONTIG-005175 | 116  | 31  | 75   | 72   | 0    |
| CONTIG-005176 | 564  | 15  | 158  | 146  | 4    |
| CONTIG-005178 | 291  | 29  | 57   | 302  | 8    |
| CONTIG-005179 | 94   | 34  | 74   | 75   | 0    |
| CONTIG-005180 | 810  | 24  | 70   | 602  | 6    |
| CONTIG-005186 | 102  | 4   | 4    | 4    | 0    |
| CONTIG-005187 | 180  | 202 | 384  | 728  | 107  |
| CONTIG-005188 | 587  | 266 | 862  | 6426 | 234  |
| CONTIG-005189 | 396  | 40  | 301  | 431  | 4    |
| CONTIG-005190 | 197  | 11  | 6    | 55   | 0    |
| CONTIG-005191 | 671  | 45  | 38   | 718  | 62   |
| CONTIG-005192 | 122  | 447 | 332  | 616  | 159  |
| CONTIG-005198 | 1921 | 41  | 918  | 4417 | 0    |
| CONTIG-005199 | 283  | 26  | 101  | 229  | 0    |

|               |      |     |      |      |     |
|---------------|------|-----|------|------|-----|
| CONTIG-005200 | 529  | 41  | 548  | 673  | 2   |
| CONTIG-005201 | 150  | 25  | 91   | 99   | 0   |
| CONTIG-005206 | 694  | 36  | 321  | 553  | 10  |
| CONTIG-005207 | 521  | 30  | 234  | 290  | 8   |
| CONTIG-005209 | 211  | 8   | 49   | 52   | 0   |
| CONTIG-005210 | 77   | 5   | 14   | 11   | 0   |
| CONTIG-005211 | 779  | 13  | 115  | 211  | 5   |
| CONTIG-005212 | 171  | 518 | 940  | 2054 | 146 |
| CONTIG-005213 | 752  | 21  | 118  | 408  | 7   |
| CONTIG-005214 | 85   | 3   | 6    | 7    | 2   |
| CONTIG-005215 | 2064 | 160 | 124  | 121  | 0   |
| CONTIG-005216 | 47   | 232 | 310  | 186  | 0   |
| CONTIG-005217 | 42   | 425 | 172  | 120  | 49  |
| CONTIG-005218 | 168  | 12  | 24   | 85   | 0   |
| CONTIG-005219 | 36   | 222 | 403  | 0    | 0   |
| CONTIG-005220 | 250  | 13  | 48   | 122  | 0   |
| CONTIG-005221 | 169  | 105 | 238  | 470  | 11  |
| CONTIG-005222 | 181  | 4   | 3    | 27   | 2   |
| CONTIG-005223 | 96   | 11  | 2    | 34   | 0   |
| CONTIG-005224 | 540  | 20  | 88   | 384  | 0   |
| CONTIG-005225 | 1134 | 93  | 1128 | 3801 | 74  |
| CONTIG-005226 | 1452 | 23  | 854  | 1079 | 0   |
| CONTIG-005227 | 611  | 24  | 174  | 342  | 0   |
| CONTIG-005228 | 172  | 65  | 75   | 269  | 13  |
| CONTIG-005229 | 143  | 10  | 30   | 25   | 0   |
| CONTIG-005230 | 699  | 49  | 38   | 2010 | 0   |
| CONTIG-005231 | 141  | 11  | 17   | 41   | 0   |
| CONTIG-005232 | 344  | 431 | 1824 | 2692 | 350 |
| CONTIG-005233 | 946  | 70  | 431  | 3964 | 0   |
| CONTIG-005234 | 668  | 24  | 133  | 916  | 4   |
| CONTIG-005235 | 319  | 99  | 190  | 1391 | 140 |
| CONTIG-005236 | 1228 | 38  | 390  | 1134 | 43  |
| CONTIG-005237 | 701  | 17  | 237  | 314  | 6   |
| CONTIG-005238 | 136  | 6   | 31   | 9    | 0   |
| CONTIG-005240 | 61   | 20  | 26   | 37   | 0   |
| CONTIG-005241 | 332  | 16  | 25   | 106  | 2   |
| CONTIG-005242 | 43   | 581 | 1945 | 0    | 16  |
| CONTIG-005243 | 899  | 38  | 214  | 844  | 14  |
| CONTIG-005244 | 609  | 15  | 25   | 280  | 0   |
| CONTIG-005252 | 351  | 22  | 156  | 142  | 2   |
| CONTIG-005253 | 165  | 65  | 431  | 129  | 0   |
| CONTIG-005255 | 89   | 58  | 300  | 111  | 0   |
| CONTIG-005256 | 224  | 7   | 14   | 46   | 0   |
| CONTIG-005257 | 304  | 9   | 9    | 40   | 0   |
| CONTIG-005258 | 60   | 24  | 139  | 0    | 0   |
| CONTIG-005259 | 755  | 16  | 202  | 212  | 14  |
| CONTIG-005260 | 156  | 8   | 15   | 13   | 0   |

|               |      |      |      |      |     |
|---------------|------|------|------|------|-----|
| CONTIG-005261 | 593  | 93   | 742  | 1198 | 41  |
| CONTIG-005262 | 484  | 39   | 213  | 821  | 6   |
| CONTIG-005263 | 610  | 18   | 148  | 384  | 0   |
| CONTIG-005264 | 844  | 37   | 653  | 1194 | 0   |
| CONTIG-005265 | 505  | 16   | 292  | 140  | 0   |
| CONTIG-005266 | 133  | 12   | 58   | 9    | 0   |
| CONTIG-005267 | 299  | 21   | 116  | 115  | 4   |
| CONTIG-005268 | 523  | 99   | 401  | 2669 | 14  |
| CONTIG-005269 | 197  | 11   | 45   | 28   | 0   |
| CONTIG-005270 | 794  | 20   | 102  | 441  | 9   |
| CONTIG-005271 | 2005 | 22   | 523  | 1596 | 9   |
| CONTIG-005272 | 145  | 6    | 9    | 12   | 0   |
| CONTIG-005273 | 954  | 46   | 510  | 1370 | 14  |
| CONTIG-005274 | 1956 | 82   | 651  | 9403 | 32  |
| CONTIG-005275 | 967  | 31   | 174  | 1095 | 32  |
| CONTIG-005276 | 353  | 40   | 256  | 208  | 0   |
| CONTIG-005277 | 1454 | 78   | 748  | 5168 | 9   |
| CONTIG-005278 | 369  | 51   | 171  | 743  | 0   |
| CONTIG-005279 | 1331 | 31   | 215  | 1286 | 34  |
| CONTIG-005280 | 315  | 28   | 284  | 278  | 0   |
| CONTIG-005281 | 74   | 1131 | 245  | 2810 | 232 |
| CONTIG-005282 | 175  | 22   | 174  | 83   | 2   |
| CONTIG-005283 | 47   | 555  | 159  | 724  | 55  |
| CONTIG-005284 | 1107 | 118  | 1128 | 6084 | 64  |
| CONTIG-005285 | 190  | 52   | 308  | 173  | 2   |
| CONTIG-005286 | 284  | 16   | 38   | 80   | 5   |
| CONTIG-005287 | 73   | 373  | 387  | 467  | 20  |
| CONTIG-005290 | 817  | 156  | 987  | 7022 | 27  |
| CONTIG-005291 | 48   | 65   | 16   | 41   | 0   |
| CONTIG-005292 | 73   | 26   | 19   | 40   | 0   |
| CONTIG-005293 | 235  | 12   | 8    | 9    | 0   |
| CONTIG-005294 | 512  | 23   | 132  | 302  | 0   |
| CONTIG-005295 | 582  | 20   | 48   | 342  | 0   |
| CONTIG-005296 | 361  | 21   | 46   | 272  | 2   |
| CONTIG-005297 | 985  | 19   | 64   | 783  | 2   |
| CONTIG-005298 | 557  | 23   | 371  | 462  | 0   |
| CONTIG-005299 | 688  | 18   | 449  | 182  | 2   |
| CONTIG-005300 | 116  | 346  | 1696 | 1002 | 0   |
| CONTIG-005301 | 63   | 5    | 4    | 8    | 0   |
| CONTIG-005302 | 879  | 34   | 636  | 1273 | 4   |
| CONTIG-005303 | 372  | 14   | 71   | 101  | 0   |
| CONTIG-005304 | 118  | 9    | 9    | 12   | 0   |
| CONTIG-005305 | 766  | 39   | 337  | 1122 | 8   |
| CONTIG-005306 | 148  | 11   | 29   | 20   | 0   |
| CONTIG-005307 | 448  | 16   | 94   | 247  | 0   |
| CONTIG-005308 | 219  | 10   | 28   | 75   | 0   |
| CONTIG-005309 | 73   | 36   | 81   | 0    | 0   |



|               |      |      |      |      |     |
|---------------|------|------|------|------|-----|
| CONTIG-005310 | 279  | 25   | 121  | 242  | 0   |
| CONTIG-005313 | 95   | 151  | 64   | 688  | 8   |
| CONTIG-005316 | 1223 | 25   | 250  | 1039 | 2   |
| CONTIG-005317 | 851  | 40   | 172  | 1794 | 6   |
| CONTIG-005318 | 345  | 48   | 80   | 677  | 4   |
| CONTIG-005319 | 328  | 9    | 91   | 41   | 0   |
| CONTIG-005320 | 145  | 30   | 155  | 11   | 0   |
| CONTIG-005321 | 66   | 1358 | 643  | 1833 | 124 |
| CONTIG-005322 | 812  | 15   | 150  | 309  | 2   |
| CONTIG-005323 | 205  | 50   | 92   | 212  | 2   |
| CONTIG-005324 | 410  | 40   | 195  | 323  | 46  |
| CONTIG-005325 | 598  | 30   | 68   | 213  | 47  |
| CONTIG-005326 | 101  | 128  | 674  | 60   | 11  |
| CONTIG-005327 | 484  | 22   | 95   | 255  | 7   |
| CONTIG-005328 | 404  | 19   | 77   | 198  | 9   |
| CONTIG-005329 | 1098 | 32   | 145  | 1018 | 9   |
| CONTIG-005330 | 473  | 13   | 219  | 164  | 0   |
| CONTIG-005331 | 498  | 13   | 51   | 153  | 0   |
| CONTIG-005332 | 66   | 3    | 4    | 3    | 0   |
| CONTIG-005333 | 923  | 44   | 360  | 1302 | 21  |
| CONTIG-005334 | 620  | 31   | 114  | 178  | 0   |
| CONTIG-005335 | 119  | 8    | 51   | 19   | 0   |
| CONTIG-005336 | 513  | 7    | 18   | 121  | 0   |
| CONTIG-005337 | 604  | 13   | 24   | 235  | 6   |
| CONTIG-005338 | 440  | 98   | 954  | 768  | 14  |
| CONTIG-005339 | 92   | 10   | 29   | 0    | 3   |
| CONTIG-005340 | 60   | 5    | 2    | 15   | 0   |
| CONTIG-005341 | 524  | 29   | 367  | 347  | 0   |
| CONTIG-005342 | 194  | 23   | 20   | 128  | 0   |
| CONTIG-005343 | 308  | 12   | 137  | 112  | 2   |
| CONTIG-005344 | 182  | 11   | 19   | 82   | 0   |
| CONTIG-005345 | 308  | 8    | 26   | 43   | 5   |
| CONTIG-005346 | 480  | 12   | 15   | 235  | 0   |
| CONTIG-005347 | 90   | 40   | 362  | 0    | 0   |
| CONTIG-005348 | 286  | 78   | 733  | 691  | 5   |
| CONTIG-005349 | 282  | 182  | 628  | 618  | 67  |
| CONTIG-005356 | 258  | 117  | 235  | 339  | 2   |
| CONTIG-005357 | 169  | 103  | 122  | 484  | 0   |
| CONTIG-005358 | 752  | 52   | 170  | 1653 | 6   |
| CONTIG-005359 | 75   | 6    | 29   | 2    | 0   |
| CONTIG-005360 | 198  | 121  | 88   | 1417 | 0   |
| CONTIG-005361 | 466  | 102  | 1607 | 978  | 23  |
| CONTIG-005362 | 179  | 11   | 23   | 44   | 0   |
| CONTIG-005363 | 369  | 9    | 32   | 98   | 0   |
| CONTIG-005364 | 276  | 22   | 36   | 226  | 2   |
| CONTIG-005365 | 69   | 17   | 10   | 49   | 2   |
| CONTIG-005369 | 623  | 16   | 95   | 375  | 2   |

|               |      |     |      |      |    |
|---------------|------|-----|------|------|----|
| CONTIG-005370 | 88   | 9   | 34   | 13   | 0  |
| CONTIG-005371 | 499  | 15  | 48   | 208  | 5  |
| CONTIG-005372 | 205  | 9   | 0    | 60   | 0  |
| CONTIG-005374 | 319  | 20  | 137  | 229  | 0  |
| CONTIG-005375 | 456  | 107 | 1153 | 442  | 20 |
| CONTIG-005377 | 588  | 22  | 117  | 576  | 0  |
| CONTIG-005378 | 518  | 17  | 156  | 53   | 0  |
| CONTIG-005379 | 100  | 9   | 9    | 22   | 0  |
| CONTIG-005380 | 723  | 19  | 105  | 215  | 0  |
| CONTIG-005381 | 202  | 6   | 16   | 24   | 0  |
| CONTIG-005382 | 1298 | 28  | 629  | 1375 | 11 |
| CONTIG-005383 | 91   | 71  | 208  | 176  | 0  |
| CONTIG-005384 | 142  | 7   | 11   | 13   | 0  |
| CONTIG-005385 | 509  | 18  | 447  | 156  | 0  |
| CONTIG-005386 | 789  | 26  | 655  | 504  | 2  |
| CONTIG-005387 | 378  | 12  | 33   | 205  | 0  |
| CONTIG-005388 | 50   | 278 | 164  | 280  | 13 |
| CONTIG-005389 | 815  | 26  | 69   | 967  | 0  |
| CONTIG-005390 | 85   | 324 | 614  | 471  | 69 |
| CONTIG-005391 | 410  | 10  | 23   | 98   | 0  |
| CONTIG-005393 | 251  | 28  | 95   | 225  | 0  |
| CONTIG-005398 | 1033 | 19  | 142  | 664  | 2  |
| CONTIG-005399 | 392  | 17  | 98   | 203  | 2  |
| CONTIG-005400 | 1782 | 39  | 514  | 4130 | 0  |
| CONTIG-005401 | 80   | 7   | 58   | 0    | 0  |
| CONTIG-005402 | 1219 | 27  | 317  | 660  | 58 |
| CONTIG-005403 | 178  | 16  | 73   | 116  | 0  |
| CONTIG-005404 | 204  | 183 | 1119 | 436  | 4  |
| CONTIG-005406 | 1325 | 22  | 530  | 996  | 4  |
| CONTIG-005407 | 197  | 11  | 25   | 61   | 0  |
| CONTIG-005408 | 299  | 5   | 43   | 0    | 17 |
| CONTIG-005409 | 741  | 93  | 444  | 3100 | 44 |
| CONTIG-005410 | 168  | 117 | 1082 | 233  | 15 |
| CONTIG-005415 | 122  | 31  | 37   | 179  | 0  |
| CONTIG-005416 | 630  | 25  | 193  | 638  | 9  |
| CONTIG-005418 | 653  | 31  | 293  | 588  | 0  |
| CONTIG-005419 | 39   | 85  | 31   | 4    | 0  |
| CONTIG-005420 | 140  | 103 | 775  | 300  | 0  |
| CONTIG-005421 | 144  | 7   | 5    | 38   | 0  |
| CONTIG-005422 | 165  | 11  | 14   | 54   | 0  |
| CONTIG-005423 | 186  | 10  | 3    | 37   | 4  |
| CONTIG-005424 | 282  | 37  | 260  | 406  | 0  |
| CONTIG-005425 | 217  | 19  | 10   | 98   | 0  |
| CONTIG-005427 | 466  | 52  | 1619 | 309  | 0  |
| CONTIG-005428 | 93   | 5   | 5    | 4    | 0  |
| CONTIG-005429 | 227  | 8   | 32   | 13   | 0  |
| CONTIG-005430 | 187  | 461 | 1001 | 2792 | 51 |

|               |      |     |      |      |      |
|---------------|------|-----|------|------|------|
| CONTIG-005431 | 80   | 201 | 228  | 76   | 16   |
| CONTIG-005432 | 96   | 11  | 71   | 9    | 0    |
| CONTIG-005433 | 743  | 27  | 34   | 874  | 14   |
| CONTIG-005434 | 907  | 17  | 61   | 580  | 5    |
| CONTIG-005435 | 636  | 38  | 671  | 768  | 0    |
| CONTIG-005436 | 172  | 7   | 102  | 9    | 0    |
| CONTIG-005437 | 563  | 16  | 148  | 106  | 17   |
| CONTIG-005438 | 142  | 14  | 8    | 76   | 0    |
| CONTIG-005440 | 137  | 6   | 4    | 13   | 0    |
| CONTIG-005441 | 164  | 57  | 147  | 271  | 11   |
| CONTIG-005442 | 95   | 4   | 4    | 6    | 0    |
| CONTIG-005443 | 552  | 25  | 41   | 662  | 2    |
| CONTIG-005444 | 583  | 11  | 109  | 92   | 5    |
| CONTIG-005445 | 942  | 21  | 142  | 666  | 6    |
| CONTIG-005446 | 75   | 3   | 4    | 2    | 0    |
| CONTIG-005447 | 764  | 19  | 183  | 550  | 0    |
| CONTIG-005448 | 208  | 254 | 800  | 1002 | 120  |
| CONTIG-005452 | 375  | 81  | 542  | 397  | 42   |
| CONTIG-005453 | 582  | 87  | 394  | 2130 | 24   |
| CONTIG-005454 | 1362 | 51  | 327  | 3357 | 6    |
| CONTIG-005455 | 345  | 16  | 182  | 142  | 2    |
| CONTIG-005456 | 128  | 697 | 837  | 1538 | 189  |
| CONTIG-005457 | 880  | 23  | 1630 | 205  | 2    |
| CONTIG-005458 | 1690 | 52  | 305  | 2393 | 125  |
| CONTIG-005459 | 600  | 26  | 109  | 390  | 0    |
| CONTIG-005461 | 384  | 9   | 13   | 120  | 0    |
| CONTIG-005462 | 229  | 388 | 5    | 0    | 1977 |
| CONTIG-005463 | 76   | 36  | 287  | 0    | 0    |
| CONTIG-005464 | 36   | 702 | 154  | 2    | 0    |
| CONTIG-005465 | 855  | 43  | 582  | 1593 | 0    |
| CONTIG-005466 | 171  | 5   | 4    | 20   | 0    |
| CONTIG-005467 | 163  | 6   | 14   | 12   | 0    |
| CONTIG-005468 | 698  | 40  | 260  | 576  | 4    |
| CONTIG-005469 | 79   | 3   | 4    | 2    | 0    |
| CONTIG-005470 | 552  | 105 | 324  | 2728 | 14   |
| CONTIG-005471 | 237  | 38  | 33   | 367  | 4    |
| CONTIG-005472 | 228  | 24  | 131  | 84   | 0    |
| CONTIG-005473 | 943  | 15  | 85   | 575  | 6    |
| CONTIG-005474 | 74   | 11  | 14   | 22   | 0    |
| CONTIG-005475 | 294  | 23  | 166  | 59   | 4    |
| CONTIG-005476 | 219  | 10  | 17   | 43   | 4    |
| CONTIG-005477 | 583  | 79  | 2043 | 1571 | 2    |
| CONTIG-005478 | 993  | 57  | 567  | 2002 | 15   |
| CONTIG-005480 | 79   | 4   | 10   | 7    | 0    |
| CONTIG-005482 | 531  | 44  | 419  | 391  | 4    |
| CONTIG-005483 | 66   | 12  | 15   | 9    | 2    |
| CONTIG-005484 | 280  | 21  | 65   | 163  | 0    |

|               |      |      |      |      |     |
|---------------|------|------|------|------|-----|
| CONTIG-005485 | 231  | 7    | 13   | 38   | 0   |
| CONTIG-005486 | 676  | 16   | 73   | 469  | 2   |
| CONTIG-005487 | 904  | 28   | 727  | 520  | 6   |
| CONTIG-005489 | 201  | 17   | 204  | 11   | 2   |
| CONTIG-005490 | 194  | 32   | 335  | 115  | 2   |
| CONTIG-005491 | 267  | 13   | 205  | 72   | 0   |
| CONTIG-005492 | 45   | 1093 | 249  | 1339 | 136 |
| CONTIG-005493 | 248  | 18   | 56   | 106  | 0   |
| CONTIG-005494 | 621  | 80   | 339  | 1428 | 79  |
| CONTIG-005500 | 317  | 8    | 13   | 94   | 0   |
| CONTIG-005501 | 397  | 23   | 185  | 215  | 0   |
| CONTIG-005502 | 66   | 33   | 0    | 106  | 0   |
| CONTIG-005503 | 1561 | 62   | 1154 | 3794 | 36  |
| CONTIG-005504 | 959  | 154  | 1845 | 5144 | 96  |
| CONTIG-005505 | 1442 | 26   | 1059 | 1292 | 8   |
| CONTIG-005506 | 473  | 33   | 30   | 974  | 0   |
| CONTIG-005507 | 399  | 10   | 177  | 52   | 0   |
| CONTIG-005508 | 703  | 79   | 377  | 3297 | 3   |
| CONTIG-005517 | 180  | 188  | 350  | 474  | 82  |
| CONTIG-005518 | 113  | 12   | 3    | 7    | 0   |
| CONTIG-005519 | 446  | 96   | 702  | 1156 | 57  |
| CONTIG-005520 | 227  | 7    | 28   | 38   | 0   |
| CONTIG-005521 | 460  | 11   | 45   | 160  | 2   |
| CONTIG-005522 | 62   | 8    | 6    | 7    | 0   |
| CONTIG-005524 | 68   | 1339 | 657  | 2332 | 177 |
| CONTIG-005525 | 92   | 18   | 14   | 22   | 0   |
| CONTIG-005526 | 579  | 20   | 59   | 315  | 30  |
| CONTIG-005527 | 171  | 9    | 38   | 21   | 0   |
| CONTIG-005528 | 212  | 120  | 692  | 455  | 4   |
| CONTIG-005529 | 325  | 14   | 116  | 105  | 2   |
| CONTIG-005530 | 848  | 35   | 372  | 1277 | 0   |
| CONTIG-005531 | 316  | 39   | 258  | 327  | 0   |
| CONTIG-005532 | 963  | 38   | 281  | 1381 | 51  |
| CONTIG-005533 | 174  | 46   | 221  | 162  | 8   |
| CONTIG-005534 | 1027 | 200  | 3288 | 9315 | 208 |
| CONTIG-005535 | 356  | 20   | 210  | 182  | 0   |
| CONTIG-005536 | 391  | 8    | 18   | 93   | 0   |
| CONTIG-005537 | 1443 | 15   | 194  | 852  | 5   |
| CONTIG-005538 | 410  | 31   | 158  | 394  | 0   |
| CONTIG-005539 | 533  | 32   | 116  | 770  | 2   |
| CONTIG-005540 | 42   | 1627 | 36   | 7    | 750 |
| CONTIG-005541 | 746  | 27   | 151  | 796  | 9   |
| CONTIG-005542 | 86   | 4    | 0    | 6    | 0   |
| CONTIG-005545 | 89   | 306  | 650  | 310  | 75  |
| CONTIG-005546 | 113  | 82   | 25   | 266  | 0   |
| CONTIG-005548 | 630  | 47   | 204  | 741  | 21  |
| CONTIG-005549 | 309  | 26   | 260  | 109  | 0   |

|               |      |      |      |      |     |
|---------------|------|------|------|------|-----|
| CONTIG-005550 | 457  | 35   | 760  | 361  | 2   |
| CONTIG-005551 | 631  | 71   | 322  | 883  | 41  |
| CONTIG-005552 | 67   | 5    | 2    | 7    | 0   |
| CONTIG-005553 | 1782 | 38   | 1691 | 1837 | 49  |
| CONTIG-005554 | 447  | 219  | 732  | 2146 | 330 |
| CONTIG-005555 | 53   | 471  | 585  | 612  | 9   |
| CONTIG-005556 | 149  | 510  | 466  | 1517 | 337 |
| CONTIG-005557 | 397  | 13   | 22   | 125  | 4   |
| CONTIG-005558 | 1590 | 36   | 341  | 1481 | 106 |
| CONTIG-005559 | 336  | 23   | 55   | 196  | 6   |
| CONTIG-005560 | 203  | 5    | 2    | 13   | 0   |
| CONTIG-005561 | 322  | 99   | 1249 | 321  | 9   |
| CONTIG-005562 | 754  | 14   | 64   | 537  | 0   |
| CONTIG-005563 | 232  | 243  | 1572 | 1347 | 49  |
| CONTIG-005564 | 154  | 9    | 64   | 22   | 0   |
| CONTIG-005565 | 286  | 52   | 218  | 83   | 0   |
| CONTIG-005566 | 2064 | 23   | 462  | 1441 | 26  |
| CONTIG-005567 | 83   | 17   | 12   | 57   | 0   |
| CONTIG-005568 | 444  | 23   | 61   | 253  | 0   |
| CONTIG-005569 | 200  | 146  | 714  | 694  | 18  |
| CONTIG-005570 | 1440 | 23   | 270  | 1122 | 33  |
| CONTIG-005571 | 397  | 8    | 44   | 66   | 3   |
| CONTIG-005572 | 472  | 33   | 165  | 365  | 4   |
| CONTIG-005573 | 69   | 3    | 2    | 6    | 0   |
| CONTIG-005574 | 278  | 14   | 42   | 78   | 0   |
| CONTIG-005575 | 348  | 18   | 28   | 141  | 2   |
| CONTIG-005576 | 564  | 27   | 46   | 219  | 24  |
| CONTIG-005577 | 476  | 36   | 30   | 242  | 14  |
| CONTIG-005578 | 70   | 13   | 44   | 14   | 0   |
| CONTIG-005579 | 1094 | 30   | 1447 | 1024 | 0   |
| CONTIG-005580 | 269  | 75   | 35   | 1148 | 0   |
| CONTIG-005581 | 143  | 43   | 40   | 60   | 0   |
| CONTIG-005582 | 735  | 42   | 743  | 629  | 37  |
| CONTIG-005583 | 70   | 6    | 22   | 2    | 0   |
| CONTIG-005584 | 372  | 26   | 655  | 93   | 0   |
| CONTIG-005585 | 163  | 26   | 53   | 172  | 0   |
| CONTIG-005586 | 101  | 257  | 294  | 201  | 7   |
| CONTIG-005587 | 62   | 56   | 283  | 20   | 0   |
| CONTIG-005588 | 68   | 1190 | 389  | 1314 | 165 |
| CONTIG-005589 | 95   | 6    | 17   | 4    | 0   |
| CONTIG-005590 | 123  | 157  | 335  | 468  | 0   |
| CONTIG-005591 | 343  | 34   | 138  | 315  | 3   |
| CONTIG-005592 | 179  | 7    | 3    | 27   | 0   |
| CONTIG-005596 | 242  | 27   | 82   | 253  | 0   |
| CONTIG-005597 | 623  | 19   | 41   | 333  | 2   |
| CONTIG-005598 | 625  | 17   | 22   | 164  | 7   |
| CONTIG-005599 | 227  | 32   | 2    | 115  | 14  |

|               |      |     |      |      |     |
|---------------|------|-----|------|------|-----|
| CONTIG-005600 | 215  | 59  | 104  | 329  | 2   |
| CONTIG-005601 | 927  | 152 | 1481 | 2992 | 423 |
| CONTIG-005602 | 254  | 8   | 25   | 56   | 0   |
| CONTIG-005603 | 1528 | 29  | 633  | 1100 | 12  |
| CONTIG-005604 | 124  | 5   | 6    | 19   | 0   |
| CONTIG-005605 | 660  | 37  | 274  | 797  | 2   |
| CONTIG-005606 | 147  | 9   | 61   | 14   | 0   |
| CONTIG-005607 | 676  | 60  | 679  | 1251 | 112 |
| CONTIG-005608 | 699  | 12  | 41   | 281  | 4   |
| CONTIG-005609 | 460  | 91  | 765  | 1713 | 8   |
| CONTIG-005610 | 629  | 15  | 44   | 349  | 2   |
| CONTIG-005611 | 588  | 48  | 841  | 143  | 4   |
| CONTIG-005612 | 913  | 27  | 400  | 873  | 2   |
| CONTIG-005613 | 387  | 21  | 14   | 369  | 4   |
| CONTIG-005614 | 1034 | 21  | 49   | 1303 | 0   |
| CONTIG-005615 | 278  | 70  | 83   | 690  | 2   |
| CONTIG-005616 | 504  | 16  | 97   | 315  | 0   |
| CONTIG-005617 | 139  | 247 | 417  | 655  | 100 |
| CONTIG-005618 | 157  | 4   | 2    | 12   | 0   |
| CONTIG-005621 | 879  | 57  | 191  | 1319 | 0   |
| CONTIG-005622 | 92   | 159 | 85   | 770  | 8   |
| CONTIG-005623 | 237  | 371 | 559  | 3047 | 25  |
| CONTIG-005624 | 1371 | 40  | 962  | 2020 | 4   |
| CONTIG-005625 | 1497 | 43  | 1491 | 2458 | 0   |
| CONTIG-005626 | 430  | 59  | 494  | 552  | 8   |
| CONTIG-005627 | 1094 | 35  | 1392 | 1200 | 0   |
| CONTIG-005629 | 82   | 21  | 6    | 55   | 0   |
| CONTIG-005630 | 157  | 23  | 43   | 170  | 0   |
| CONTIG-005631 | 175  | 24  | 5    | 18   | 0   |
| CONTIG-005632 | 112  | 313 | 203  | 1221 | 19  |
| CONTIG-005637 | 199  | 35  | 23   | 112  | 0   |
| CONTIG-005638 | 119  | 14  | 9    | 75   | 0   |
| CONTIG-005639 | 50   | 20  | 0    | 21   | 0   |
| CONTIG-005640 | 167  | 8   | 66   | 21   | 0   |
| CONTIG-005641 | 357  | 23  | 166  | 327  | 0   |
| CONTIG-005646 | 983  | 19  | 474  | 133  | 26  |
| CONTIG-005647 | 61   | 7   | 13   | 16   | 0   |
| CONTIG-005648 | 603  | 8   | 44   | 145  | 0   |
| CONTIG-005649 | 570  | 84  | 468  | 675  | 183 |
| CONTIG-005650 | 72   | 494 | 682  | 357  | 67  |
| CONTIG-005651 | 880  | 45  | 381  | 1764 | 2   |
| CONTIG-005652 | 44   | 409 | 26   | 808  | 5   |
| CONTIG-005653 | 535  | 19  | 60   | 195  | 25  |
| CONTIG-005654 | 183  | 17  | 60   | 86   | 0   |
| CONTIG-005655 | 1414 | 49  | 287  | 2199 | 12  |
| CONTIG-005657 | 50   | 568 | 174  | 917  | 23  |
| CONTIG-005658 | 295  | 14  | 47   | 158  | 0   |

|               |      |      |      |      |     |
|---------------|------|------|------|------|-----|
| CONTIG-005659 | 1701 | 54   | 305  | 1789 | 24  |
| CONTIG-005660 | 452  | 72   | 934  | 676  | 17  |
| CONTIG-005661 | 924  | 24   | 242  | 683  | 8   |
| CONTIG-005662 | 547  | 12   | 99   | 155  | 0   |
| CONTIG-005663 | 99   | 39   | 30   | 205  | 0   |
| CONTIG-005664 | 389  | 32   | 135  | 329  | 2   |
| CONTIG-005665 | 499  | 348  | 1273 | 6329 | 514 |
| CONTIG-005666 | 197  | 6    | 27   | 13   | 0   |
| CONTIG-005667 | 171  | 466  | 1166 | 1039 | 143 |
| CONTIG-005668 | 375  | 115  | 313  | 1011 | 30  |
| CONTIG-005670 | 889  | 24   | 110  | 950  | 4   |
| CONTIG-005671 | 622  | 34   | 266  | 547  | 34  |
| CONTIG-005672 | 449  | 41   | 81   | 577  | 6   |
| CONTIG-005673 | 153  | 16   | 29   | 86   | 0   |
| CONTIG-005674 | 242  | 9    | 11   | 58   | 2   |
| CONTIG-005675 | 240  | 341  | 697  | 1671 | 164 |
| CONTIG-005676 | 274  | 19   | 135  | 123  | 0   |
| CONTIG-005678 | 46   | 818  | 868  | 863  | 3   |
| CONTIG-005679 | 1083 | 34   | 158  | 2256 | 0   |
| CONTIG-005680 | 496  | 26   | 76   | 474  | 4   |
| CONTIG-005681 | 473  | 21   | 101  | 566  | 0   |
| CONTIG-005682 | 533  | 89   | 955  | 1742 | 23  |
| CONTIG-005683 | 107  | 100  | 939  | 0    | 0   |
| CONTIG-005684 | 62   | 56   | 143  | 30   | 0   |
| CONTIG-005685 | 721  | 19   | 257  | 491  | 4   |
| CONTIG-005686 | 73   | 9    | 20   | 8    | 0   |
| CONTIG-005687 | 136  | 9    | 12   | 49   | 0   |
| CONTIG-005688 | 160  | 23   | 28   | 82   | 0   |
| CONTIG-005691 | 776  | 76   | 306  | 2256 | 31  |
| CONTIG-005692 | 120  | 27   | 77   | 137  | 0   |
| CONTIG-005693 | 104  | 65   | 30   | 175  | 2   |
| CONTIG-005694 | 39   | 340  | 90   | 135  | 11  |
| CONTIG-005695 | 1056 | 22   | 222  | 402  | 10  |
| CONTIG-005703 | 605  | 244  | 1097 | 7051 | 134 |
| CONTIG-005704 | 525  | 9    | 114  | 130  | 0   |
| CONTIG-005705 | 155  | 14   | 16   | 73   | 0   |
| CONTIG-005706 | 413  | 13   | 238  | 91   | 2   |
| CONTIG-005707 | 151  | 16   | 19   | 73   | 0   |
| CONTIG-005711 | 74   | 1783 | 556  | 7177 | 0   |
| CONTIG-005712 | 502  | 8    | 4    | 69   | 2   |
| CONTIG-005713 | 636  | 79   | 563  | 1079 | 52  |
| CONTIG-005714 | 84   | 13   | 12   | 20   | 0   |
| CONTIG-005715 | 179  | 12   | 12   | 64   | 2   |
| CONTIG-005716 | 127  | 54   | 46   | 335  | 0   |
| CONTIG-005717 | 578  | 78   | 400  | 1184 | 44  |
| CONTIG-005718 | 290  | 37   | 50   | 291  | 2   |
| CONTIG-005719 | 457  | 42   | 73   | 1003 | 24  |

|               |      |     |      |      |     |
|---------------|------|-----|------|------|-----|
| CONTIG-005720 | 59   | 558 | 306  | 221  | 30  |
| CONTIG-005721 | 134  | 15  | 62   | 30   | 0   |
| CONTIG-005722 | 372  | 25  | 23   | 365  | 2   |
| CONTIG-005723 | 248  | 44  | 74   | 303  | 2   |
| CONTIG-005724 | 183  | 23  | 15   | 194  | 0   |
| CONTIG-005725 | 410  | 7   | 16   | 111  | 0   |
| CONTIG-005726 | 275  | 39  | 345  | 251  | 9   |
| CONTIG-005727 | 104  | 4   | 3    | 11   | 0   |
| CONTIG-005729 | 187  | 63  | 1264 | 18   | 0   |
| CONTIG-005735 | 368  | 13  | 64   | 110  | 0   |
| CONTIG-005736 | 85   | 9   | 4    | 16   | 0   |
| CONTIG-005737 | 613  | 51  | 396  | 703  | 35  |
| CONTIG-005738 | 58   | 99  | 408  | 63   | 0   |
| CONTIG-005739 | 321  | 18  | 257  | 55   | 0   |
| CONTIG-005740 | 109  | 9   | 5    | 39   | 0   |
| CONTIG-005741 | 361  | 17  | 234  | 108  | 0   |
| CONTIG-005744 | 175  | 99  | 544  | 529  | 5   |
| CONTIG-005745 | 93   | 10  | 5    | 32   | 4   |
| CONTIG-005746 | 1898 | 55  | 294  | 4050 | 249 |
| CONTIG-005750 | 179  | 15  | 6    | 144  | 0   |
| CONTIG-005752 | 39   | 506 | 555  | 104  | 4   |
| CONTIG-005753 | 387  | 14  | 32   | 126  | 2   |
| CONTIG-005760 | 87   | 78  | 177  | 6    | 7   |
| CONTIG-005761 | 126  | 24  | 33   | 75   | 6   |
| CONTIG-005762 | 71   | 786 | 413  | 929  | 157 |
| CONTIG-005763 | 521  | 15  | 217  | 162  | 0   |
| CONTIG-005764 | 37   | 897 | 803  | 473  | 0   |
| CONTIG-005765 | 162  | 50  | 187  | 362  | 0   |
| CONTIG-005766 | 406  | 10  | 36   | 66   | 0   |
| CONTIG-005767 | 84   | 15  | 77   | 7    | 0   |
| CONTIG-005768 | 196  | 44  | 98   | 303  | 0   |
| CONTIG-005769 | 116  | 7   | 18   | 21   | 0   |
| CONTIG-005770 | 145  | 35  | 107  | 101  | 0   |
| CONTIG-005771 | 844  | 25  | 989  | 456  | 2   |
| CONTIG-005772 | 858  | 73  | 334  | 3280 | 4   |
| CONTIG-005773 | 541  | 11  | 2    | 203  | 6   |
| CONTIG-005774 | 786  | 84  | 953  | 1909 | 87  |
| CONTIG-005775 | 660  | 14  | 104  | 300  | 0   |
| CONTIG-005776 | 592  | 27  | 574  | 616  | 0   |
| CONTIG-005780 | 994  | 145 | 642  | 3382 | 234 |
| CONTIG-005781 | 226  | 36  | 108  | 196  | 2   |
| CONTIG-005782 | 153  | 8   | 14   | 29   | 0   |
| CONTIG-005783 | 533  | 29  | 64   | 141  | 2   |
| CONTIG-005784 | 657  | 77  | 495  | 2288 | 15  |
| CONTIG-005786 | 159  | 324 | 680  | 1098 | 68  |
| CONTIG-005787 | 202  | 19  | 64   | 122  | 0   |
| CONTIG-005788 | 259  | 43  | 42   | 528  | 0   |



|               |      |      |      |      |     |
|---------------|------|------|------|------|-----|
| CONTIG-005789 | 381  | 15   | 75   | 173  | 0   |
| CONTIG-005790 | 382  | 15   | 20   | 182  | 0   |
| CONTIG-005791 | 68   | 6    | 6    | 6    | 0   |
| CONTIG-005792 | 95   | 97   | 90   | 389  | 2   |
| CONTIG-005793 | 319  | 86   | 857  | 1128 | 0   |
| CONTIG-005794 | 236  | 69   | 469  | 615  | 2   |
| CONTIG-005795 | 96   | 6    | 7    | 11   | 0   |
| CONTIG-005796 | 66   | 396  | 139  | 655  | 51  |
| CONTIG-005797 | 455  | 16   | 92   | 190  | 2   |
| CONTIG-005798 | 85   | 19   | 71   | 34   | 0   |
| CONTIG-005799 | 329  | 8    | 25   | 27   | 2   |
| CONTIG-005800 | 106  | 18   | 41   | 56   | 0   |
| CONTIG-005801 | 521  | 15   | 118  | 59   | 4   |
| CONTIG-005810 | 863  | 22   | 165  | 416  | 17  |
| CONTIG-005811 | 541  | 36   | 143  | 509  | 20  |
| CONTIG-005812 | 89   | 14   | 22   | 25   | 2   |
| CONTIG-005813 | 546  | 16   | 338  | 27   | 55  |
| CONTIG-005814 | 129  | 6    | 13   | 6    | 0   |
| CONTIG-005815 | 929  | 40   | 317  | 1075 | 2   |
| CONTIG-005816 | 195  | 27   | 55   | 85   | 0   |
| CONTIG-005818 | 39   | 3284 | 206  | 2225 | 0   |
| CONTIG-005819 | 781  | 33   | 471  | 938  | 4   |
| CONTIG-005820 | 1575 | 37   | 752  | 1949 | 48  |
| CONTIG-005821 | 87   | 7    | 30   | 5    | 0   |
| CONTIG-005822 | 846  | 17   | 147  | 231  | 2   |
| CONTIG-005827 | 114  | 21   | 10   | 109  | 0   |
| CONTIG-005828 | 96   | 4    | 5    | 7    | 0   |
| CONTIG-005829 | 144  | 8    | 2    | 4    | 0   |
| CONTIG-005830 | 54   | 67   | 108  | 54   | 0   |
| CONTIG-005831 | 639  | 57   | 259  | 1011 | 0   |
| CONTIG-005832 | 171  | 243  | 363  | 2443 | 2   |
| CONTIG-005833 | 540  | 57   | 2272 | 2    | 71  |
| CONTIG-005834 | 233  | 24   | 81   | 113  | 0   |
| CONTIG-005835 | 166  | 7    | 21   | 31   | 0   |
| CONTIG-005836 | 106  | 15   | 75   | 8    | 0   |
| CONTIG-005837 | 372  | 14   | 47   | 142  | 0   |
| CONTIG-005838 | 715  | 28   | 37   | 1239 | 0   |
| CONTIG-005839 | 432  | 59   | 1203 | 349  | 0   |
| CONTIG-005840 | 812  | 42   | 586  | 1092 | 24  |
| CONTIG-005841 | 147  | 196  | 178  | 1410 | 4   |
| CONTIG-005843 | 272  | 12   | 21   | 60   | 0   |
| CONTIG-005844 | 169  | 53   | 225  | 125  | 7   |
| CONTIG-005845 | 513  | 86   | 171  | 1057 | 96  |
| CONTIG-005846 | 938  | 13   | 63   | 302  | 4   |
| CONTIG-005847 | 104  | 5    | 0    | 14   | 0   |
| CONTIG-005849 | 96   | 456  | 353  | 923  | 113 |
| CONTIG-005856 | 154  | 13   | 12   | 10   | 0   |

|               |      |     |      |      |    |
|---------------|------|-----|------|------|----|
| CONTIG-005858 | 261  | 167 | 350  | 1226 | 18 |
| CONTIG-005859 | 242  | 15  | 90   | 109  | 0  |
| CONTIG-005861 | 197  | 231 | 2226 | 145  | 6  |
| CONTIG-005862 | 1016 | 37  | 90   | 1616 | 10 |
| CONTIG-005863 | 130  | 9   | 35   | 10   | 0  |
| CONTIG-005864 | 172  | 195 | 1560 | 325  | 39 |
| CONTIG-005865 | 73   | 277 | 139  | 972  | 0  |
| CONTIG-005866 | 956  | 27  | 431  | 846  | 19 |
| CONTIG-005868 | 571  | 23  | 340  | 356  | 0  |
| CONTIG-005869 | 205  | 36  | 86   | 90   | 0  |
| CONTIG-005871 | 61   | 682 | 815  | 1323 | 18 |
| CONTIG-005872 | 792  | 37  | 188  | 365  | 0  |
| CONTIG-005873 | 461  | 24  | 114  | 297  | 0  |
| CONTIG-005874 | 393  | 21  | 278  | 222  | 2  |
| CONTIG-005875 | 512  | 13  | 37   | 246  | 0  |
| CONTIG-005876 | 1250 | 30  | 296  | 1130 | 0  |
| CONTIG-005877 | 710  | 32  | 94   | 541  | 20 |
| CONTIG-005878 | 2942 | 37  | 497  | 3504 | 43 |
| CONTIG-005879 | 257  | 35  | 562  | 160  | 2  |
| CONTIG-005881 | 492  | 7   | 11   | 25   | 0  |
| CONTIG-005883 | 191  | 13  | 157  | 26   | 0  |
| CONTIG-005884 | 291  | 6   | 2    | 60   | 3  |
| CONTIG-005885 | 1507 | 28  | 160  | 2208 | 2  |
| CONTIG-005886 | 299  | 11  | 54   | 94   | 0  |
| CONTIG-005887 | 125  | 78  | 258  | 282  | 16 |
| CONTIG-005888 | 40   | 138 | 7    | 133  | 12 |
| CONTIG-005889 | 271  | 6   | 2    | 55   | 0  |
| CONTIG-005890 | 489  | 11  | 32   | 149  | 2  |
| CONTIG-005891 | 477  | 20  | 137  | 208  | 0  |
| CONTIG-005892 | 481  | 32  | 196  | 353  | 17 |
| CONTIG-005893 | 90   | 130 | 0    | 4    | 0  |
| CONTIG-005894 | 109  | 369 | 181  | 942  | 80 |
| CONTIG-005895 | 170  | 5   | 23   | 12   | 0  |
| CONTIG-005896 | 896  | 18  | 98   | 498  | 6  |
| CONTIG-005897 | 625  | 31  | 688  | 479  | 7  |
| CONTIG-005898 | 887  | 30  | 174  | 1315 | 0  |
| CONTIG-005899 | 117  | 10  | 21   | 16   | 0  |
| CONTIG-005900 | 597  | 24  | 78   | 436  | 11 |
| CONTIG-005901 | 98   | 8   | 11   | 11   | 0  |
| CONTIG-005902 | 88   | 55  | 380  | 22   | 0  |
| CONTIG-005903 | 265  | 7   | 13   | 30   | 0  |
| CONTIG-005904 | 850  | 60  | 1473 | 1242 | 23 |
| CONTIG-005905 | 718  | 71  | 735  | 1736 | 19 |
| CONTIG-005906 | 576  | 32  | 233  | 825  | 0  |
| CONTIG-005910 | 268  | 15  | 151  | 92   | 0  |
| CONTIG-005911 | 67   | 454 | 151  | 709  | 57 |
| CONTIG-005912 | 103  | 13  | 57   | 4    | 0  |

|               |      |     |      |      |     |
|---------------|------|-----|------|------|-----|
| CONTIG-005913 | 981  | 20  | 487  | 682  | 6   |
| CONTIG-005914 | 298  | 18  | 73   | 143  | 2   |
| CONTIG-005915 | 164  | 8   | 7    | 43   | 0   |
| CONTIG-005916 | 667  | 11  | 42   | 304  | 0   |
| CONTIG-005917 | 406  | 39  | 168  | 297  | 14  |
| CONTIG-005918 | 569  | 43  | 496  | 628  | 18  |
| CONTIG-005919 | 83   | 8   | 26   | 9    | 0   |
| CONTIG-005920 | 65   | 3   | 7    | 5    | 0   |
| CONTIG-005921 | 268  | 10  | 7    | 114  | 0   |
| CONTIG-005922 | 71   | 3   | 3    | 6    | 0   |
| CONTIG-005923 | 266  | 24  | 94   | 186  | 0   |
| CONTIG-005924 | 158  | 6   | 0    | 18   | 0   |
| CONTIG-005925 | 372  | 9   | 84   | 82   | 0   |
| CONTIG-005926 | 70   | 872 | 250  | 2028 | 88  |
| CONTIG-005927 | 169  | 22  | 113  | 76   | 0   |
| CONTIG-005928 | 176  | 8   | 6    | 33   | 0   |
| CONTIG-005929 | 75   | 520 | 521  | 1498 | 26  |
| CONTIG-005930 | 178  | 291 | 608  | 1026 | 75  |
| CONTIG-005931 | 385  | 12  | 276  | 51   | 0   |
| CONTIG-005932 | 66   | 7   | 11   | 11   | 0   |
| CONTIG-005933 | 1248 | 36  | 199  | 2115 | 11  |
| CONTIG-005934 | 294  | 12  | 111  | 0    | 8   |
| CONTIG-005935 | 647  | 29  | 198  | 643  | 12  |
| CONTIG-005936 | 80   | 10  | 10   | 21   | 0   |
| CONTIG-005937 | 208  | 38  | 2    | 0    | 2   |
| CONTIG-005938 | 226  | 34  | 857  | 0    | 2   |
| CONTIG-005939 | 61   | 106 | 271  | 93   | 2   |
| CONTIG-005940 | 708  | 123 | 364  | 2795 | 243 |
| CONTIG-005941 | 391  | 12  | 37   | 180  | 0   |
| CONTIG-005942 | 325  | 40  | 184  | 302  | 0   |
| CONTIG-005943 | 235  | 115 | 1121 | 99   | 5   |
| CONTIG-005944 | 255  | 12  | 12   | 99   | 0   |
| CONTIG-005945 | 201  | 11  | 18   | 84   | 0   |
| CONTIG-005946 | 528  | 17  | 19   | 217  | 9   |
| CONTIG-005947 | 310  | 336 | 538  | 4049 | 59  |
| CONTIG-005948 | 211  | 14  | 0    | 98   | 0   |
| CONTIG-005949 | 480  | 43  | 57   | 707  | 49  |
| CONTIG-005950 | 447  | 47  | 209  | 1278 | 0   |
| CONTIG-005951 | 88   | 12  | 2    | 24   | 0   |
| CONTIG-005952 | 298  | 17  | 77   | 133  | 0   |
| CONTIG-005953 | 243  | 13  | 8    | 74   | 0   |
| CONTIG-005954 | 962  | 17  | 26   | 474  | 11  |
| CONTIG-005957 | 201  | 10  | 47   | 45   | 0   |
| CONTIG-005958 | 601  | 20  | 184  | 255  | 4   |
| CONTIG-005959 | 159  | 17  | 14   | 92   | 0   |
| CONTIG-005960 | 427  | 19  | 80   | 158  | 6   |
| CONTIG-005961 | 2015 | 35  | 306  | 2025 | 51  |

|               |      |      |      |       |     |
|---------------|------|------|------|-------|-----|
| CONTIG-005969 | 325  | 19   | 270  | 63    | 0   |
| CONTIG-005970 | 80   | 8    | 10   | 16    | 2   |
| CONTIG-005971 | 72   | 535  | 221  | 1598  | 7   |
| CONTIG-005972 | 445  | 13   | 12   | 109   | 5   |
| CONTIG-005973 | 796  | 30   | 471  | 528   | 12  |
| CONTIG-005974 | 244  | 35   | 199  | 328   | 0   |
| CONTIG-005976 | 41   | 2429 | 532  | 25    | 906 |
| CONTIG-005977 | 337  | 6    | 19   | 67    | 0   |
| CONTIG-005978 | 421  | 12   | 10   | 184   | 2   |
| CONTIG-005979 | 2877 | 67   | 585  | 8672  | 92  |
| CONTIG-005980 | 142  | 263  | 563  | 567   | 90  |
| CONTIG-005981 | 127  | 8    | 0    | 35    | 0   |
| CONTIG-005982 | 283  | 26   | 100  | 274   | 0   |
| CONTIG-005986 | 1033 | 38   | 205  | 1090  | 29  |
| CONTIG-005987 | 729  | 20   | 365  | 234   | 0   |
| CONTIG-005988 | 82   | 6    | 13   | 12    | 0   |
| CONTIG-005989 | 369  | 246  | 439  | 3311  | 120 |
| CONTIG-005990 | 1263 | 23   | 274  | 931   | 0   |
| CONTIG-005991 | 974  | 23   | 238  | 565   | 16  |
| CONTIG-005992 | 252  | 235  | 608  | 2130  | 67  |
| CONTIG-005993 | 298  | 11   | 4    | 40    | 0   |
| CONTIG-005994 | 498  | 9    | 47   | 140   | 3   |
| CONTIG-005997 | 1587 | 130  | 2040 | 11094 | 215 |
| CONTIG-005998 | 184  | 6    | 9    | 11    | 0   |
| CONTIG-005999 | 71   | 5    | 3    | 6     | 0   |
| CONTIG-006000 | 571  | 23   | 43   | 387   | 19  |
| CONTIG-006002 | 1838 | 44   | 105  | 4041  | 9   |
| CONTIG-006003 | 760  | 220  | 528  | 7375  | 131 |
| CONTIG-006004 | 230  | 12   | 18   | 87    | 0   |
| CONTIG-006005 | 61   | 8    | 8    | 17    | 0   |
| CONTIG-006007 | 159  | 164  | 184  | 615   | 23  |
| CONTIG-006008 | 133  | 238  | 414  | 719   | 48  |
| CONTIG-006009 | 220  | 16   | 17   | 53    | 0   |
| CONTIG-006010 | 109  | 5    | 0    | 15    | 0   |
| CONTIG-006011 | 338  | 17   | 29   | 214   | 2   |
| CONTIG-006012 | 827  | 26   | 356  | 639   | 9   |
| CONTIG-006013 | 498  | 253  | 689  | 1185  | 113 |
| CONTIG-006014 | 86   | 10   | 8    | 24    | 0   |
| CONTIG-006015 | 498  | 16   | 76   | 203   | 0   |
| CONTIG-006017 | 145  | 15   | 22   | 79    | 2   |
| CONTIG-006024 | 959  | 20   | 52   | 638   | 23  |
| CONTIG-006025 | 287  | 7    | 21   | 67    | 0   |
| CONTIG-006026 | 199  | 5    | 7    | 14    | 0   |
| CONTIG-006027 | 118  | 22   | 33   | 63    | 0   |
| CONTIG-006028 | 545  | 28   | 1017 | 197   | 2   |
| CONTIG-006029 | 213  | 13   | 64   | 111   | 0   |
| CONTIG-006030 | 67   | 8    | 19   | 0     | 0   |

|               |      |      |      |      |      |
|---------------|------|------|------|------|------|
| CONTIG-006031 | 206  | 9    | 41   | 63   | 0    |
| CONTIG-006032 | 1092 | 42   | 218  | 1903 | 4    |
| CONTIG-006034 | 63   | 18   | 104  | 0    | 0    |
| CONTIG-006035 | 328  | 382  | 1574 | 2888 | 239  |
| CONTIG-006036 | 166  | 364  | 589  | 727  | 225  |
| CONTIG-006037 | 784  | 17   | 206  | 435  | 2    |
| CONTIG-006039 | 296  | 16   | 40   | 126  | 0    |
| CONTIG-006040 | 242  | 8    | 7    | 73   | 2    |
| CONTIG-006041 | 203  | 10   | 27   | 54   | 0    |
| CONTIG-006042 | 186  | 24   | 22   | 79   | 0    |
| CONTIG-006043 | 321  | 18   | 42   | 167  | 0    |
| CONTIG-006044 | 226  | 14   | 17   | 153  | 0    |
| CONTIG-006045 | 1274 | 21   | 271  | 686  | 2    |
| CONTIG-006046 | 134  | 26   | 115  | 46   | 0    |
| CONTIG-006047 | 542  | 22   | 443  | 402  | 0    |
| CONTIG-006048 | 995  | 36   | 283  | 1832 | 0    |
| CONTIG-006049 | 184  | 92   | 220  | 405  | 0    |
| CONTIG-006051 | 37   | 4962 | 9731 | 21   | 1186 |
| CONTIG-006052 | 386  | 48   | 353  | 249  | 0    |
| CONTIG-006053 | 319  | 20   | 306  | 67   | 0    |
| CONTIG-006054 | 63   | 130  | 454  | 2    | 0    |
| CONTIG-006055 | 194  | 9    | 13   | 46   | 13   |
| CONTIG-006056 | 440  | 14   | 65   | 175  | 2    |
| CONTIG-006057 | 223  | 28   | 158  | 149  | 0    |
| CONTIG-006058 | 444  | 62   | 445  | 703  | 10   |
| CONTIG-006059 | 58   | 5    | 28   | 0    | 0    |
| CONTIG-006061 | 268  | 392  | 737  | 2384 | 267  |
| CONTIG-006064 | 123  | 6    | 2    | 25   | 0    |
| CONTIG-006065 | 357  | 10   | 16   | 147  | 0    |
| CONTIG-006066 | 80   | 12   | 2    | 28   | 0    |
| CONTIG-006067 | 1034 | 54   | 250  | 1549 | 3    |
| CONTIG-006068 | 75   | 36   | 133  | 2    | 0    |
| CONTIG-006069 | 614  | 24   | 27   | 423  | 20   |
| CONTIG-006070 | 65   | 244  | 390  | 531  | 0    |
| CONTIG-006071 | 474  | 23   | 117  | 492  | 2    |
| CONTIG-006072 | 1159 | 31   | 494  | 1332 | 13   |
| CONTIG-006073 | 258  | 54   | 97   | 639  | 0    |
| CONTIG-006074 | 93   | 12   | 48   | 20   | 0    |
| CONTIG-006075 | 220  | 7    | 23   | 69   | 0    |
| CONTIG-006076 | 183  | 41   | 220  | 67   | 0    |
| CONTIG-006077 | 214  | 7    | 21   | 9    | 0    |
| CONTIG-006078 | 998  | 31   | 1031 | 852  | 6    |
| CONTIG-006079 | 138  | 4    | 0    | 18   | 0    |
| CONTIG-006080 | 219  | 5    | 10   | 16   | 0    |
| CONTIG-006081 | 344  | 17   | 5    | 0    | 54   |
| CONTIG-006082 | 409  | 22   | 82   | 183  | 8    |
| CONTIG-006083 | 205  | 27   | 177  | 177  | 0    |

|               |      |     |      |      |     |
|---------------|------|-----|------|------|-----|
| CONTIG-006085 | 64   | 6   | 5    | 2    | 5   |
| CONTIG-006086 | 1110 | 26  | 497  | 788  | 2   |
| CONTIG-006087 | 63   | 14  | 53   | 9    | 0   |
| CONTIG-006088 | 475  | 14  | 4    | 202  | 6   |
| CONTIG-006089 | 236  | 189 | 115  | 2202 | 109 |
| CONTIG-006090 | 339  | 24  | 195  | 125  | 16  |
| CONTIG-006092 | 96   | 8   | 7    | 0    | 0   |
| CONTIG-006094 | 542  | 28  | 111  | 716  | 2   |
| CONTIG-006095 | 421  | 30  | 147  | 314  | 0   |
| CONTIG-006097 | 490  | 53  | 683  | 686  | 23  |
| CONTIG-006098 | 144  | 223 | 1903 | 661  | 6   |
| CONTIG-006100 | 140  | 24  | 39   | 64   | 0   |
| CONTIG-006101 | 471  | 20  | 143  | 188  | 2   |
| CONTIG-006102 | 313  | 23  | 76   | 241  | 4   |
| CONTIG-006103 | 129  | 13  | 22   | 56   | 0   |
| CONTIG-006106 | 103  | 7   | 9    | 21   | 0   |
| CONTIG-006107 | 68   | 4   | 11   | 0    | 0   |
| CONTIG-006108 | 1342 | 34  | 388  | 1024 | 46  |
| CONTIG-006113 | 873  | 19  | 153  | 321  | 6   |
| CONTIG-006114 | 428  | 8   | 24   | 57   | 0   |
| CONTIG-006115 | 592  | 42  | 202  | 1384 | 2   |
| CONTIG-006116 | 271  | 83  | 233  | 708  | 20  |
| CONTIG-006117 | 45   | 177 | 791  | 0    | 0   |
| CONTIG-006118 | 358  | 22  | 69   | 260  | 0   |
| CONTIG-006119 | 859  | 31  | 293  | 787  | 22  |
| CONTIG-006122 | 515  | 23  | 75   | 232  | 21  |
| CONTIG-006123 | 79   | 96  | 428  | 11   | 2   |
| CONTIG-006124 | 512  | 107 | 231  | 1563 | 177 |
| CONTIG-006125 | 80   | 5   | 3    | 6    | 0   |
| CONTIG-006126 | 1063 | 30  | 157  | 1605 | 13  |
| CONTIG-006130 | 180  | 630 | 1679 | 1573 | 264 |
| CONTIG-006131 | 282  | 12  | 25   | 63   | 8   |
| CONTIG-006132 | 300  | 15  | 24   | 37   | 0   |
| CONTIG-006135 | 103  | 6   | 5    | 8    | 0   |
| CONTIG-006136 | 579  | 33  | 279  | 511  | 5   |
| CONTIG-006137 | 1553 | 46  | 212  | 1900 | 54  |
| CONTIG-006138 | 168  | 18  | 89   | 56   | 0   |
| CONTIG-006139 | 483  | 96  | 536  | 1439 | 37  |
| CONTIG-006140 | 232  | 16  | 98   | 67   | 3   |
| CONTIG-006141 | 155  | 77  | 578  | 37   | 8   |
| CONTIG-006142 | 456  | 10  | 6    | 164  | 0   |
| CONTIG-006143 | 1148 | 25  | 431  | 540  | 0   |
| CONTIG-006144 | 316  | 103 | 348  | 919  | 120 |
| CONTIG-006145 | 388  | 46  | 280  | 251  | 37  |
| CONTIG-006146 | 264  | 10  | 30   | 64   | 0   |
| CONTIG-006147 | 125  | 10  | 21   | 46   | 0   |
| CONTIG-006148 | 368  | 15  | 49   | 177  | 0   |

|               |      |     |      |      |     |
|---------------|------|-----|------|------|-----|
| CONTIG-006151 | 280  | 125 | 758  | 824  | 16  |
| CONTIG-006152 | 411  | 72  | 382  | 1291 | 6   |
| CONTIG-006153 | 145  | 12  | 34   | 29   | 0   |
| CONTIG-006154 | 75   | 3   | 2    | 5    | 0   |
| CONTIG-006155 | 462  | 16  | 33   | 291  | 0   |
| CONTIG-006156 | 187  | 19  | 25   | 166  | 0   |
| CONTIG-006157 | 344  | 19  | 163  | 130  | 2   |
| CONTIG-006160 | 189  | 8   | 3    | 39   | 0   |
| CONTIG-006162 | 81   | 731 | 671  | 1377 | 64  |
| CONTIG-006163 | 126  | 56  | 257  | 3    | 0   |
| CONTIG-006164 | 690  | 56  | 460  | 690  | 26  |
| CONTIG-006166 | 104  | 3   | 4    | 3    | 0   |
| CONTIG-006167 | 297  | 13  | 53   | 55   | 0   |
| CONTIG-006168 | 130  | 10  | 77   | 8    | 0   |
| CONTIG-006169 | 217  | 343 | 878  | 2833 | 47  |
| CONTIG-006170 | 488  | 14  | 338  | 78   | 0   |
| CONTIG-006171 | 70   | 6   | 15   | 6    | 0   |
| CONTIG-006172 | 375  | 51  | 1410 | 0    | 46  |
| CONTIG-006173 | 229  | 31  | 163  | 336  | 0   |
| CONTIG-006174 | 285  | 20  | 453  | 0    | 2   |
| CONTIG-006175 | 792  | 21  | 81   | 519  | 0   |
| CONTIG-006176 | 399  | 37  | 430  | 220  | 0   |
| CONTIG-006179 | 1138 | 27  | 712  | 840  | 8   |
| CONTIG-006180 | 566  | 126 | 901  | 1224 | 34  |
| CONTIG-006181 | 1065 | 63  | 1055 | 1929 | 52  |
| CONTIG-006185 | 166  | 5   | 2    | 31   | 0   |
| CONTIG-006186 | 612  | 112 | 395  | 2130 | 193 |
| CONTIG-006187 | 476  | 17  | 93   | 291  | 3   |
| CONTIG-006188 | 131  | 326 | 81   | 1408 | 27  |
| CONTIG-006189 | 80   | 500 | 38   | 1295 | 14  |
| CONTIG-006190 | 666  | 62  | 808  | 1738 | 5   |
| CONTIG-006191 | 138  | 36  | 510  | 0    | 14  |
| CONTIG-006197 | 46   | 646 | 1413 | 86   | 8   |
| CONTIG-006198 | 201  | 274 | 819  | 2232 | 61  |
| CONTIG-006199 | 146  | 13  | 4    | 17   | 2   |
| CONTIG-006200 | 71   | 6   | 7    | 7    | 0   |
| CONTIG-006201 | 173  | 6   | 5    | 24   | 0   |
| CONTIG-006202 | 1780 | 37  | 323  | 2531 | 0   |
| CONTIG-006205 | 332  | 18  | 116  | 129  | 0   |
| CONTIG-006206 | 940  | 27  | 316  | 1032 | 5   |
| CONTIG-006207 | 1503 | 32  | 609  | 1073 | 25  |
| CONTIG-006208 | 562  | 158 | 860  | 3778 | 12  |
| CONTIG-006209 | 154  | 6   | 13   | 31   | 0   |
| CONTIG-006211 | 400  | 36  | 199  | 391  | 4   |
| CONTIG-006212 | 98   | 195 | 772  | 13   | 0   |
| CONTIG-006213 | 84   | 94  | 80   | 289  | 2   |
| CONTIG-006214 | 1074 | 19  | 112  | 879  | 0   |

|               |      |     |      |      |     |
|---------------|------|-----|------|------|-----|
| CONTIG-006223 | 890  | 18  | 366  | 566  | 2   |
| CONTIG-006233 | 432  | 16  | 108  | 243  | 0   |
| CONTIG-006234 | 44   | 551 | 223  | 461  | 40  |
| CONTIG-006235 | 44   | 859 | 496  | 652  | 64  |
| CONTIG-006236 | 197  | 7   | 7    | 38   | 2   |
| CONTIG-006237 | 397  | 14  | 141  | 9    | 113 |
| CONTIG-006238 | 999  | 19  | 24   | 767  | 49  |
| CONTIG-006239 | 89   | 7   | 6    | 20   | 0   |
| CONTIG-006240 | 268  | 9   | 22   | 83   | 0   |
| CONTIG-006241 | 87   | 7   | 11   | 10   | 0   |
| CONTIG-006242 | 273  | 21  | 103  | 128  | 0   |
| CONTIG-006243 | 138  | 14  | 19   | 59   | 0   |
| CONTIG-006244 | 157  | 6   | 7    | 36   | 0   |
| CONTIG-006246 | 178  | 619 | 589  | 2926 | 273 |
| CONTIG-006247 | 62   | 337 | 298  | 32   | 0   |
| CONTIG-006248 | 84   | 46  | 59   | 127  | 0   |
| CONTIG-006249 | 397  | 24  | 89   | 274  | 4   |
| CONTIG-006250 | 434  | 26  | 154  | 250  | 0   |
| CONTIG-006251 | 357  | 21  | 67   | 207  | 2   |
| CONTIG-006252 | 249  | 144 | 45   | 1929 | 2   |
| CONTIG-006253 | 79   | 128 | 12   | 462  | 0   |
| CONTIG-006254 | 76   | 36  | 137  | 36   | 0   |
| CONTIG-006255 | 169  | 13  | 24   | 69   | 2   |
| CONTIG-006256 | 196  | 274 | 1108 | 551  | 100 |
| CONTIG-006257 | 769  | 26  | 615  | 633  | 0   |
| CONTIG-006258 | 913  | 41  | 1277 | 1226 | 0   |
| CONTIG-006259 | 113  | 5   | 5    | 17   | 0   |
| CONTIG-006261 | 168  | 9   | 14   | 14   | 0   |
| CONTIG-006262 | 149  | 7   | 33   | 4    | 0   |
| CONTIG-006263 | 103  | 5   | 5    | 0    | 0   |
| CONTIG-006264 | 95   | 12  | 2    | 50   | 0   |
| CONTIG-006265 | 684  | 91  | 868  | 1464 | 32  |
| CONTIG-006273 | 97   | 28  | 134  | 0    | 3   |
| CONTIG-006275 | 255  | 13  | 128  | 78   | 0   |
| CONTIG-006278 | 292  | 43  | 622  | 294  | 0   |
| CONTIG-006279 | 140  | 11  | 51   | 27   | 0   |
| CONTIG-006280 | 289  | 128 | 431  | 1745 | 8   |
| CONTIG-006281 | 762  | 112 | 60   | 4133 | 0   |
| CONTIG-006282 | 362  | 21  | 132  | 285  | 0   |
| CONTIG-006283 | 296  | 30  | 262  | 301  | 0   |
| CONTIG-006284 | 154  | 593 | 1536 | 1400 | 226 |
| CONTIG-006285 | 311  | 303 | 992  | 4163 | 27  |
| CONTIG-006286 | 127  | 785 | 1101 | 4155 | 47  |
| CONTIG-006288 | 1004 | 74  | 415  | 2438 | 2   |
| CONTIG-006289 | 396  | 15  | 26   | 160  | 8   |
| CONTIG-006291 | 186  | 17  | 73   | 80   | 3   |
| CONTIG-006292 | 742  | 38  | 214  | 1116 | 0   |



|               |      |     |     |      |     |
|---------------|------|-----|-----|------|-----|
| CONTIG-006294 | 106  | 61  | 76  | 13   | 2   |
| CONTIG-006295 | 584  | 100 | 718 | 1251 | 71  |
| CONTIG-006296 | 120  | 5   | 19  | 0    | 0   |
| CONTIG-006303 | 153  | 8   | 10  | 34   | 2   |
| CONTIG-006305 | 682  | 30  | 28  | 77   | 4   |
| CONTIG-006306 | 61   | 20  | 64  | 7    | 0   |
| CONTIG-006307 | 171  | 153 | 206 | 1513 | 0   |
| CONTIG-006308 | 295  | 8   | 56  | 54   | 0   |
| CONTIG-006309 | 278  | 21  | 73  | 216  | 0   |
| CONTIG-006310 | 513  | 29  | 42  | 718  | 2   |
| CONTIG-006311 | 1099 | 77  | 274 | 1652 | 318 |
| CONTIG-006312 | 945  | 98  | 610 | 1952 | 200 |
| CONTIG-006315 | 111  | 10  | 23  | 16   | 0   |
| CONTIG-006316 | 221  | 69  | 350 | 522  | 4   |
| CONTIG-006317 | 381  | 56  | 348 | 919  | 2   |
| CONTIG-006318 | 141  | 114 | 617 | 44   | 2   |
| CONTIG-006319 | 146  | 10  | 57  | 26   | 0   |
| CONTIG-006320 | 191  | 11  | 24  | 86   | 0   |
| CONTIG-006321 | 386  | 13  | 49  | 131  | 2   |
| CONTIG-006322 | 609  | 47  | 718 | 888  | 5   |
| CONTIG-006323 | 72   | 32  | 183 | 0    | 0   |
| CONTIG-006324 | 62   | 192 | 209 | 246  | 0   |
| CONTIG-006325 | 502  | 22  | 49  | 381  | 4   |
| CONTIG-006326 | 660  | 10  | 44  | 155  | 0   |
| CONTIG-006327 | 1790 | 40  | 529 | 2666 | 12  |
| CONTIG-006328 | 1071 | 46  | 867 | 1912 | 0   |
| CONTIG-006329 | 712  | 17  | 234 | 383  | 2   |
| CONTIG-006330 | 759  | 11  | 26  | 261  | 10  |
| CONTIG-006331 | 228  | 21  | 32  | 161  | 0   |
| CONTIG-006332 | 470  | 103 | 530 | 1366 | 48  |
| CONTIG-006333 | 159  | 4   | 0   | 18   | 0   |
| CONTIG-006334 | 550  | 19  | 43  | 391  | 10  |
| CONTIG-006335 | 743  | 20  | 25  | 800  | 4   |
| CONTIG-006336 | 103  | 23  | 142 | 16   | 0   |
| CONTIG-006337 | 1549 | 63  | 476 | 4077 | 4   |
| CONTIG-006338 | 638  | 43  | 430 | 1358 | 2   |
| CONTIG-006339 | 140  | 4   | 2   | 11   | 0   |
| CONTIG-006340 | 244  | 257 | 674 | 1602 | 135 |
| CONTIG-006341 | 216  | 638 | 353 | 2562 | 44  |
| CONTIG-006342 | 105  | 8   | 2   | 17   | 0   |
| CONTIG-006343 | 178  | 19  | 26  | 155  | 0   |
| CONTIG-006344 | 128  | 22  | 32  | 93   | 5   |
| CONTIG-006345 | 289  | 8   | 28  | 73   | 0   |
| CONTIG-006346 | 667  | 53  | 803 | 1475 | 0   |
| CONTIG-006347 | 302  | 11  | 37  | 29   | 0   |
| CONTIG-006348 | 974  | 44  | 545 | 1888 | 0   |
| CONTIG-006356 | 306  | 17  | 28  | 85   | 0   |

|               |      |     |      |       |     |
|---------------|------|-----|------|-------|-----|
| CONTIG-006357 | 418  | 36  | 368  | 431   | 0   |
| CONTIG-006364 | 471  | 31  | 381  | 328   | 0   |
| CONTIG-006365 | 455  | 260 | 742  | 5134  | 74  |
| CONTIG-006366 | 81   | 6   | 27   | 0     | 0   |
| CONTIG-006367 | 638  | 14  | 207  | 313   | 0   |
| CONTIG-006368 | 99   | 318 | 19   | 528   | 25  |
| CONTIG-006369 | 885  | 19  | 53   | 589   | 0   |
| CONTIG-006371 | 480  | 24  | 37   | 193   | 22  |
| CONTIG-006372 | 174  | 10  | 23   | 41    | 0   |
| CONTIG-006373 | 331  | 270 | 233  | 4031  | 10  |
| CONTIG-006374 | 126  | 59  | 399  | 115   | 2   |
| CONTIG-006378 | 234  | 25  | 38   | 237   | 3   |
| CONTIG-006379 | 42   | 180 | 357  | 169   | 0   |
| CONTIG-006380 | 81   | 21  | 15   | 45    | 0   |
| CONTIG-006381 | 599  | 33  | 1035 | 424   | 4   |
| CONTIG-006382 | 343  | 86  | 107  | 1480  | 8   |
| CONTIG-006384 | 64   | 434 | 104  | 1084  | 0   |
| CONTIG-006390 | 871  | 21  | 278  | 744   | 0   |
| CONTIG-006391 | 51   | 576 | 378  | 632   | 68  |
| CONTIG-006392 | 810  | 12  | 35   | 338   | 10  |
| CONTIG-006393 | 161  | 8   | 5    | 49    | 0   |
| CONTIG-006395 | 264  | 27  | 492  | 82    | 0   |
| CONTIG-006396 | 205  | 22  | 69   | 28    | 0   |
| CONTIG-006397 | 741  | 58  | 29   | 1509  | 47  |
| CONTIG-006398 | 301  | 22  | 109  | 105   | 0   |
| CONTIG-006399 | 341  | 46  | 1104 | 259   | 0   |
| CONTIG-006400 | 271  | 50  | 100  | 193   | 4   |
| CONTIG-006401 | 879  | 11  | 62   | 193   | 0   |
| CONTIG-006402 | 148  | 8   | 0    | 49    | 0   |
| CONTIG-006403 | 705  | 20  | 11   | 335   | 9   |
| CONTIG-006404 | 105  | 8   | 2    | 24    | 0   |
| CONTIG-006405 | 102  | 6   | 13   | 6     | 0   |
| CONTIG-006406 | 561  | 15  | 142  | 366   | 0   |
| CONTIG-006408 | 300  | 12  | 33   | 110   | 2   |
| CONTIG-006409 | 1307 | 37  | 914  | 1141  | 7   |
| CONTIG-006410 | 133  | 4   | 8    | 10    | 2   |
| CONTIG-006411 | 1779 | 38  | 302  | 3538  | 6   |
| CONTIG-006412 | 566  | 29  | 449  | 581   | 0   |
| CONTIG-006413 | 858  | 55  | 439  | 1178  | 10  |
| CONTIG-006414 | 485  | 16  | 86   | 339   | 2   |
| CONTIG-006415 | 444  | 11  | 73   | 68    | 0   |
| CONTIG-006416 | 297  | 61  | 338  | 449   | 10  |
| CONTIG-006419 | 66   | 16  | 98   | 0     | 0   |
| CONTIG-006420 | 1498 | 125 | 695  | 11305 | 21  |
| CONTIG-006421 | 312  | 242 | 603  | 1645  | 209 |
| CONTIG-006422 | 1630 | 15  | 281  | 598   | 2   |
| CONTIG-006423 | 1252 | 68  | 600  | 3818  | 41  |

|               |      |      |      |      |     |
|---------------|------|------|------|------|-----|
| CONTIG-006424 | 216  | 50   | 95   | 324  | 2   |
| CONTIG-006425 | 83   | 11   | 5    | 25   | 0   |
| CONTIG-006426 | 153  | 37   | 7    | 283  | 0   |
| CONTIG-006427 | 246  | 71   | 335  | 345  | 0   |
| CONTIG-006428 | 1056 | 48   | 249  | 1385 | 61  |
| CONTIG-006429 | 142  | 5    | 15   | 19   | 0   |
| CONTIG-006430 | 429  | 78   | 379  | 1825 | 0   |
| CONTIG-006431 | 175  | 19   | 6    | 61   | 4   |
| CONTIG-006432 | 111  | 16   | 72   | 0    | 0   |
| CONTIG-006439 | 187  | 7    | 4    | 41   | 0   |
| CONTIG-006440 | 102  | 15   | 33   | 45   | 0   |
| CONTIG-006441 | 267  | 48   | 125  | 397  | 2   |
| CONTIG-006442 | 176  | 6    | 9    | 29   | 0   |
| CONTIG-006443 | 306  | 13   | 101  | 107  | 0   |
| CONTIG-006444 | 581  | 96   | 682  | 2456 | 0   |
| CONTIG-006445 | 111  | 257  | 540  | 952  | 5   |
| CONTIG-006446 | 972  | 16   | 29   | 812  | 0   |
| CONTIG-006447 | 459  | 9    | 42   | 77   | 2   |
| CONTIG-006448 | 838  | 18   | 106  | 776  | 2   |
| CONTIG-006449 | 236  | 35   | 150  | 360  | 0   |
| CONTIG-006450 | 215  | 7    | 38   | 22   | 0   |
| CONTIG-006451 | 103  | 17   | 21   | 59   | 2   |
| CONTIG-006452 | 201  | 141  | 580  | 435  | 2   |
| CONTIG-006454 | 221  | 28   | 169  | 152  | 0   |
| CONTIG-006455 | 288  | 38   | 179  | 397  | 2   |
| CONTIG-006458 | 74   | 5    | 31   | 5    | 0   |
| CONTIG-006459 | 113  | 25   | 41   | 97   | 0   |
| CONTIG-006460 | 263  | 20   | 15   | 31   | 0   |
| CONTIG-006461 | 139  | 10   | 5    | 43   | 0   |
| CONTIG-006462 | 510  | 106  | 618  | 687  | 0   |
| CONTIG-006463 | 254  | 11   | 14   | 139  | 0   |
| CONTIG-006464 | 102  | 451  | 128  | 1651 | 99  |
| CONTIG-006466 | 266  | 7    | 30   | 65   | 0   |
| CONTIG-006467 | 332  | 65   | 660  | 485  | 6   |
| CONTIG-006468 | 480  | 162  | 771  | 2302 | 172 |
| CONTIG-006469 | 89   | 23   | 213  | 0    | 0   |
| CONTIG-006470 | 131  | 5    | 9    | 11   | 0   |
| CONTIG-006471 | 64   | 30   | 151  | 7    | 0   |
| CONTIG-006473 | 328  | 6    | 66   | 22   | 2   |
| CONTIG-006475 | 311  | 28   | 88   | 87   | 21  |
| CONTIG-006479 | 137  | 8    | 5    | 44   | 2   |
| CONTIG-006482 | 1526 | 58   | 1023 | 3221 | 69  |
| CONTIG-006485 | 58   | 1450 | 4386 | 1182 | 67  |
| CONTIG-006486 | 76   | 3    | 2    | 4    | 0   |
| CONTIG-006487 | 817  | 22   | 90   | 460  | 4   |
| CONTIG-006488 | 138  | 17   | 20   | 52   | 0   |
| CONTIG-006489 | 1744 | 28   | 126  | 2800 | 0   |

|               |      |     |     |      |      |
|---------------|------|-----|-----|------|------|
| CONTIG-006490 | 94   | 30  | 81  | 4    | 0    |
| CONTIG-006491 | 124  | 449 | 249 | 22   | 1425 |
| CONTIG-006492 | 196  | 6   | 21  | 8    | 0    |
| CONTIG-006493 | 525  | 99  | 743 | 1700 | 60   |
| CONTIG-006494 | 857  | 22  | 193 | 677  | 4    |
| CONTIG-006495 | 88   | 202 | 622 | 28   | 0    |
| CONTIG-006497 | 73   | 9   | 58  | 2    | 0    |
| CONTIG-006498 | 321  | 32  | 688 | 167  | 0    |
| CONTIG-006499 | 155  | 239 | 342 | 1219 | 4    |
| CONTIG-006500 | 214  | 12  | 116 | 15   | 0    |
| CONTIG-006501 | 970  | 43  | 88  | 671  | 131  |
| CONTIG-006502 | 64   | 5   | 4   | 5    | 0    |
| CONTIG-006503 | 1515 | 31  | 246 | 1718 | 4    |
| CONTIG-006504 | 212  | 17  | 6   | 193  | 0    |
| CONTIG-006505 | 169  | 8   | 21  | 37   | 0    |
| CONTIG-006506 | 42   | 109 | 260 | 35   | 0    |
| CONTIG-006507 | 282  | 33  | 16  | 548  | 0    |
| CONTIG-006508 | 165  | 5   | 8   | 21   | 0    |
| CONTIG-006509 | 112  | 15  | 8   | 72   | 0    |
| CONTIG-006510 | 1023 | 20  | 243 | 481  | 4    |
| CONTIG-006512 | 1050 | 29  | 444 | 766  | 34   |
| CONTIG-006513 | 95   | 13  | 41  | 27   | 0    |
| CONTIG-006514 | 115  | 13  | 24  | 50   | 0    |
| CONTIG-006515 | 616  | 24  | 63  | 585  | 0    |
| CONTIG-006516 | 83   | 9   | 10  | 15   | 0    |
| CONTIG-006517 | 256  | 34  | 117 | 56   | 8    |
| CONTIG-006518 | 87   | 5   | 0   | 2    | 0    |
| CONTIG-006519 | 443  | 25  | 93  | 252  | 5    |
| CONTIG-006523 | 837  | 42  | 503 | 1230 | 16   |
| CONTIG-006524 | 1658 | 30  | 384 | 1149 | 86   |
| CONTIG-006525 | 393  | 19  | 24  | 247  | 0    |
| CONTIG-006526 | 294  | 40  | 10  | 529  | 0    |
| CONTIG-006527 | 551  | 34  | 182 | 327  | 10   |
| CONTIG-006528 | 507  | 14  | 30  | 284  | 0    |
| CONTIG-006530 | 518  | 44  | 151 | 679  | 11   |
| CONTIG-006531 | 912  | 13  | 23  | 383  | 0    |
| CONTIG-006532 | 282  | 30  | 196 | 340  | 0    |
| CONTIG-006533 | 1402 | 21  | 126 | 1020 | 10   |
| CONTIG-006536 | 499  | 17  | 45  | 121  | 10   |
| CONTIG-006537 | 231  | 14  | 53  | 54   | 3    |
| CONTIG-006538 | 213  | 29  | 127 | 95   | 0    |
| CONTIG-006539 | 88   | 4   | 2   | 3    | 0    |
| CONTIG-006540 | 404  | 8   | 17  | 100  | 2    |
| CONTIG-006542 | 327  | 8   | 18  | 78   | 0    |
| CONTIG-006543 | 209  | 18  | 151 | 59   | 0    |
| CONTIG-006544 | 65   | 819 | 995 | 991  | 94   |
| CONTIG-006545 | 307  | 10  | 11  | 106  | 0    |

|               |      |     |      |      |     |
|---------------|------|-----|------|------|-----|
| CONTIG-006546 | 287  | 72  | 530  | 656  | 0   |
| CONTIG-006547 | 72   | 3   | 3    | 0    | 0   |
| CONTIG-006548 | 584  | 6   | 0    | 0    | 3   |
| CONTIG-006550 | 926  | 25  | 829  | 619  | 0   |
| CONTIG-006551 | 520  | 95  | 487  | 1659 | 5   |
| CONTIG-006554 | 297  | 38  | 185  | 93   | 0   |
| CONTIG-006555 | 183  | 10  | 125  | 7    | 0   |
| CONTIG-006556 | 222  | 8   | 8    | 35   | 0   |
| CONTIG-006558 | 202  | 5   | 9    | 22   | 0   |
| CONTIG-006559 | 1330 | 48  | 933  | 1911 | 51  |
| CONTIG-006560 | 277  | 9   | 24   | 32   | 0   |
| CONTIG-006561 | 1245 | 21  | 75   | 1101 | 6   |
| CONTIG-006562 | 250  | 14  | 168  | 45   | 0   |
| CONTIG-006569 | 249  | 7   | 8    | 59   | 0   |
| CONTIG-006570 | 106  | 31  | 30   | 123  | 0   |
| CONTIG-006571 | 426  | 15  | 32   | 188  | 6   |
| CONTIG-006572 | 308  | 37  | 11   | 278  | 30  |
| CONTIG-006575 | 59   | 28  | 101  | 9    | 0   |
| CONTIG-006576 | 111  | 10  | 5    | 43   | 0   |
| CONTIG-006577 | 390  | 11  | 63   | 114  | 0   |
| CONTIG-006578 | 110  | 14  | 43   | 27   | 0   |
| CONTIG-006579 | 377  | 36  | 110  | 314  | 2   |
| CONTIG-006580 | 255  | 10  | 24   | 53   | 0   |
| CONTIG-006581 | 474  | 15  | 166  | 217  | 2   |
| CONTIG-006582 | 271  | 9   | 134  | 65   | 0   |
| CONTIG-006583 | 87   | 16  | 8    | 59   | 0   |
| CONTIG-006584 | 141  | 26  | 342  | 5    | 0   |
| CONTIG-006585 | 75   | 4   | 4    | 6    | 0   |
| CONTIG-006588 | 209  | 20  | 37   | 92   | 0   |
| CONTIG-006589 | 218  | 12  | 35   | 11   | 0   |
| CONTIG-006590 | 220  | 39  | 190  | 343  | 0   |
| CONTIG-006591 | 66   | 2   | 3    | 0    | 0   |
| CONTIG-006592 | 493  | 22  | 447  | 248  | 2   |
| CONTIG-006593 | 898  | 30  | 36   | 1089 | 0   |
| CONTIG-006594 | 503  | 108 | 112  | 3229 | 14  |
| CONTIG-006595 | 187  | 7   | 19   | 33   | 0   |
| CONTIG-006596 | 657  | 38  | 741  | 1111 | 0   |
| CONTIG-006597 | 1048 | 14  | 240  | 546  | 0   |
| CONTIG-006598 | 249  | 224 | 1012 | 829  | 47  |
| CONTIG-006599 | 247  | 270 | 470  | 2313 | 205 |
| CONTIG-006600 | 108  | 3   | 8    | 6    | 0   |
| CONTIG-006601 | 619  | 18  | 159  | 297  | 0   |
| CONTIG-006602 | 120  | 4   | 6    | 0    | 0   |
| CONTIG-006603 | 1155 | 25  | 319  | 868  | 14  |
| CONTIG-006604 | 567  | 53  | 162  | 1448 | 0   |
| CONTIG-006605 | 96   | 354 | 214  | 664  | 83  |
| CONTIG-006606 | 110  | 81  | 434  | 221  | 2   |

|               |      |     |      |       |      |
|---------------|------|-----|------|-------|------|
| CONTIG-006607 | 165  | 10  | 49   | 29    | 2    |
| CONTIG-006608 | 578  | 17  | 330  | 96    | 5    |
| CONTIG-006609 | 1652 | 56  | 667  | 3368  | 30   |
| CONTIG-006610 | 588  | 12  | 198  | 138   | 4    |
| CONTIG-006611 | 266  | 52  | 263  | 649   | 2    |
| CONTIG-006613 | 300  | 12  | 63   | 30    | 0    |
| CONTIG-006614 | 409  | 20  | 65   | 162   | 10   |
| CONTIG-006615 | 98   | 4   | 3    | 7     | 0    |
| CONTIG-006616 | 764  | 23  | 269  | 471   | 2    |
| CONTIG-006618 | 334  | 23  | 21   | 193   | 4    |
| CONTIG-006619 | 134  | 23  | 260  | 0     | 0    |
| CONTIG-006621 | 690  | 154 | 899  | 5028  | 141  |
| CONTIG-006622 | 347  | 11  | 76   | 48    | 0    |
| CONTIG-006626 | 185  | 7   | 6    | 48    | 0    |
| CONTIG-006627 | 78   | 8   | 10   | 14    | 0    |
| CONTIG-006628 | 176  | 18  | 42   | 76    | 0    |
| CONTIG-006629 | 159  | 10  | 14   | 48    | 0    |
| CONTIG-006630 | 397  | 80  | 225  | 1646  | 6    |
| CONTIG-006631 | 288  | 18  | 30   | 92    | 2    |
| CONTIG-006632 | 717  | 16  | 64   | 456   | 2    |
| CONTIG-006633 | 181  | 50  | 753  | 2     | 30   |
| CONTIG-006634 | 1332 | 61  | 1169 | 2607  | 41   |
| CONTIG-006635 | 162  | 506 | 1001 | 1338  | 142  |
| CONTIG-006637 | 100  | 489 | 286  | 1179  | 77   |
| CONTIG-006638 | 497  | 24  | 351  | 398   | 0    |
| CONTIG-006639 | 63   | 10  | 14   | 2     | 0    |
| CONTIG-006645 | 148  | 13  | 31   | 67    | 0    |
| CONTIG-006646 | 282  | 17  | 100  | 156   | 0    |
| CONTIG-006647 | 154  | 470 | 943  | 831   | 209  |
| CONTIG-006651 | 173  | 6   | 8    | 30    | 0    |
| CONTIG-006652 | 197  | 291 | 1041 | 1179  | 103  |
| CONTIG-006653 | 1345 | 38  | 488  | 7     | 1708 |
| CONTIG-006654 | 876  | 32  | 759  | 785   | 6    |
| CONTIG-006657 | 531  | 13  | 79   | 34    | 0    |
| CONTIG-006658 | 814  | 16  | 88   | 686   | 2    |
| CONTIG-006659 | 179  | 228 | 1892 | 462   | 0    |
| CONTIG-006660 | 1565 | 26  | 448  | 2270  | 0    |
| CONTIG-006661 | 1278 | 205 | 562  | 13499 | 99   |
| CONTIG-006662 | 424  | 19  | 7    | 5     | 0    |
| CONTIG-006663 | 448  | 17  | 125  | 377   | 0    |
| CONTIG-006664 | 1044 | 89  | 325  | 2659  | 116  |
| CONTIG-006665 | 164  | 21  | 194  | 69    | 0    |
| CONTIG-006666 | 618  | 12  | 49   | 382   | 0    |
| CONTIG-006667 | 531  | 71  | 292  | 1090  | 75   |
| CONTIG-006668 | 87   | 9   | 81   | 0     | 0    |
| CONTIG-006669 | 459  | 47  | 463  | 577   | 2    |
| CONTIG-006670 | 1203 | 20  | 92   | 839   | 9    |

|               |      |      |      |      |     |
|---------------|------|------|------|------|-----|
| CONTIG-006671 | 589  | 43   | 181  | 594  | 32  |
| CONTIG-006672 | 908  | 25   | 172  | 669  | 11  |
| CONTIG-006673 | 277  | 10   | 18   | 81   | 0   |
| CONTIG-006674 | 181  | 12   | 46   | 30   | 0   |
| CONTIG-006675 | 519  | 19   | 106  | 343  | 0   |
| CONTIG-006676 | 1476 | 46   | 536  | 2151 | 2   |
| CONTIG-006677 | 1338 | 56   | 442  | 2285 | 40  |
| CONTIG-006678 | 112  | 12   | 35   | 44   | 0   |
| CONTIG-006679 | 384  | 235  | 708  | 3873 | 271 |
| CONTIG-006680 | 575  | 28   | 340  | 320  | 2   |
| CONTIG-006681 | 106  | 526  | 756  | 957  | 123 |
| CONTIG-006682 | 209  | 15   | 6    | 68   | 0   |
| CONTIG-006683 | 138  | 5    | 2    | 25   | 0   |
| CONTIG-006684 | 215  | 184  | 378  | 555  | 67  |
| CONTIG-006685 | 324  | 42   | 217  | 579  | 2   |
| CONTIG-006686 | 1296 | 17   | 3    | 572  | 48  |
| CONTIG-006687 | 130  | 311  | 491  | 1668 | 53  |
| CONTIG-006688 | 141  | 5    | 0    | 0    | 0   |
| CONTIG-006689 | 752  | 53   | 143  | 1738 | 7   |
| CONTIG-006690 | 203  | 9    | 24   | 23   | 0   |
| CONTIG-006691 | 94   | 12   | 35   | 5    | 0   |
| CONTIG-006692 | 138  | 14   | 81   | 44   | 0   |
| CONTIG-006693 | 80   | 6    | 3    | 14   | 0   |
| CONTIG-006694 | 319  | 62   | 1222 | 437  | 0   |
| CONTIG-006695 | 127  | 37   | 89   | 92   | 6   |
| CONTIG-006696 | 86   | 748  | 694  | 1273 | 162 |
| CONTIG-006697 | 1055 | 25   | 869  | 843  | 0   |
| CONTIG-006698 | 313  | 7    | 33   | 33   | 0   |
| CONTIG-006699 | 1503 | 34   | 270  | 1330 | 22  |
| CONTIG-006700 | 292  | 25   | 576  | 92   | 0   |
| CONTIG-006701 | 608  | 23   | 69   | 528  | 2   |
| CONTIG-006702 | 320  | 23   | 55   | 189  | 4   |
| CONTIG-006703 | 104  | 20   | 32   | 16   | 0   |
| CONTIG-006704 | 108  | 11   | 38   | 10   | 0   |
| CONTIG-006705 | 129  | 118  | 189  | 392  | 0   |
| CONTIG-006710 | 148  | 103  | 538  | 421  | 0   |
| CONTIG-006711 | 36   | 1279 | 277  | 1080 | 76  |
| CONTIG-006712 | 160  | 6    | 14   | 14   | 2   |
| CONTIG-006713 | 237  | 18   | 38   | 182  | 2   |
| CONTIG-006714 | 80   | 6    | 8    | 13   | 0   |
| CONTIG-006715 | 915  | 47   | 482  | 739  | 125 |
| CONTIG-006716 | 279  | 7    | 10   | 91   | 0   |
| CONTIG-006717 | 142  | 6    | 12   | 22   | 0   |
| CONTIG-006718 | 575  | 119  | 475  | 2855 | 4   |
| CONTIG-006719 | 152  | 13   | 52   | 19   | 0   |
| CONTIG-006720 | 673  | 67   | 171  | 1104 | 14  |
| CONTIG-006721 | 342  | 21   | 107  | 157  | 3   |

|               |     |     |      |      |     |
|---------------|-----|-----|------|------|-----|
| CONTIG-006723 | 79  | 8   | 44   | 5    | 0   |
| CONTIG-006724 | 121 | 7   | 20   | 28   | 0   |
| CONTIG-006725 | 297 | 14  | 57   | 67   | 0   |
| CONTIG-006726 | 395 | 89  | 268  | 857  | 601 |
| CONTIG-006727 | 217 | 7   | 0    | 52   | 0   |
| CONTIG-006728 | 365 | 7   | 14   | 87   | 4   |
| CONTIG-006729 | 572 | 280 | 505  | 6743 | 375 |
| CONTIG-006730 | 641 | 102 | 259  | 945  | 68  |
| CONTIG-006731 | 108 | 6   | 11   | 19   | 0   |
| CONTIG-006732 | 189 | 5   | 3    | 35   | 0   |
| CONTIG-006733 | 64  | 8   | 10   | 12   | 0   |
| CONTIG-006734 | 58  | 3   | 2    | 4    | 0   |
| CONTIG-006736 | 292 | 18  | 87   | 164  | 0   |
| CONTIG-006737 | 161 | 400 | 1681 | 1028 | 113 |
| CONTIG-006738 | 79  | 5   | 8    | 5    | 0   |
| CONTIG-006739 | 56  | 49  | 35   | 23   | 0   |
| CONTIG-006740 | 384 | 55  | 453  | 1001 | 0   |
| CONTIG-006741 | 251 | 13  | 20   | 128  | 0   |
| CONTIG-006742 | 321 | 9   | 85   | 41   | 0   |
| CONTIG-006743 | 65  | 15  | 11   | 23   | 0   |
| CONTIG-006744 | 678 | 18  | 120  | 261  | 10  |
| CONTIG-006747 | 494 | 23  | 334  | 471  | 0   |
| CONTIG-006748 | 141 | 9   | 86   | 7    | 0   |
| CONTIG-006752 | 559 | 9   | 31   | 114  | 2   |
| CONTIG-006753 | 460 | 18  | 104  | 241  | 4   |
| CONTIG-006755 | 735 | 18  | 190  | 539  | 0   |
| CONTIG-006756 | 76  | 5   | 5    | 11   | 0   |
| CONTIG-006757 | 347 | 22  | 105  | 131  | 0   |
| CONTIG-006758 | 524 | 17  | 38   | 334  | 6   |
| CONTIG-006765 | 433 | 23  | 124  | 433  | 2   |
| CONTIG-006766 | 374 | 15  | 18   | 151  | 0   |
| CONTIG-006767 | 702 | 24  | 347  | 443  | 9   |
| CONTIG-006768 | 61  | 9   | 55   | 0    | 0   |
| CONTIG-006769 | 169 | 9   | 19   | 45   | 0   |
| CONTIG-006770 | 654 | 20  | 89   | 250  | 11  |
| CONTIG-006773 | 89  | 6   | 3    | 8    | 0   |
| CONTIG-006775 | 609 | 25  | 138  | 395  | 6   |
| CONTIG-006777 | 63  | 65  | 193  | 5    | 0   |
| CONTIG-006778 | 60  | 3   | 2    | 2    | 0   |
| CONTIG-006779 | 741 | 30  | 210  | 608  | 3   |
| CONTIG-006780 | 161 | 64  | 273  | 255  | 0   |
| CONTIG-006781 | 143 | 10  | 13   | 60   | 0   |
| CONTIG-006782 | 631 | 38  | 191  | 919  | 2   |
| CONTIG-006783 | 471 | 48  | 462  | 753  | 3   |
| CONTIG-006784 | 164 | 11  | 3    | 8    | 0   |
| CONTIG-006785 | 226 | 15  | 51   | 20   | 0   |
| CONTIG-006786 | 128 | 7   | 4    | 27   | 0   |



|               |      |     |      |      |     |
|---------------|------|-----|------|------|-----|
| CONTIG-006787 | 189  | 24  | 89   | 103  | 0   |
| CONTIG-006790 | 687  | 24  | 156  | 220  | 11  |
| CONTIG-006791 | 1713 | 30  | 506  | 1059 | 73  |
| CONTIG-006792 | 558  | 13  | 15   | 356  | 4   |
| CONTIG-006793 | 691  | 54  | 459  | 804  | 26  |
| CONTIG-006794 | 235  | 16  | 207  | 5    | 0   |
| CONTIG-006795 | 194  | 8   | 13   | 51   | 0   |
| CONTIG-006796 | 130  | 18  | 6    | 6    | 0   |
| CONTIG-006797 | 118  | 4   | 10   | 14   | 0   |
| CONTIG-006801 | 191  | 8   | 9    | 56   | 0   |
| CONTIG-006803 | 37   | 956 | 213  | 446  | 120 |
| CONTIG-006804 | 519  | 18  | 98   | 286  | 10  |
| CONTIG-006805 | 267  | 22  | 272  | 63   | 0   |
| CONTIG-006806 | 117  | 333 | 328  | 921  | 113 |
| CONTIG-006807 | 452  | 8   | 49   | 101  | 0   |
| CONTIG-006808 | 385  | 57  | 279  | 571  | 24  |
| CONTIG-006809 | 124  | 8   | 7    | 4    | 2   |
| CONTIG-006810 | 172  | 7   | 21   | 36   | 0   |
| CONTIG-006815 | 259  | 30  | 438  | 94   | 0   |
| CONTIG-006817 | 70   | 528 | 352  | 4    | 516 |
| CONTIG-006818 | 236  | 19  | 28   | 38   | 0   |
| CONTIG-006820 | 177  | 259 | 429  | 1351 | 66  |
| CONTIG-006821 | 440  | 14  | 126  | 72   | 0   |
| CONTIG-006822 | 811  | 11  | 45   | 219  | 3   |
| CONTIG-006823 | 2224 | 40  | 1159 | 2939 | 16  |
| CONTIG-006824 | 927  | 46  | 774  | 1766 | 6   |
| CONTIG-006826 | 108  | 598 | 149  | 1715 | 132 |
| CONTIG-006830 | 653  | 45  | 602  | 931  | 2   |
| CONTIG-006831 | 65   | 8   | 4    | 11   | 0   |
| CONTIG-006832 | 42   | 815 | 392  | 776  | 43  |
| CONTIG-006833 | 400  | 13  | 85   | 144  | 2   |
| CONTIG-006834 | 78   | 3   | 3    | 3    | 0   |
| CONTIG-006835 | 158  | 401 | 505  | 1465 | 224 |
| CONTIG-006836 | 199  | 7   | 5    | 37   | 0   |
| CONTIG-006842 | 472  | 193 | 904  | 4663 | 2   |
| CONTIG-006843 | 181  | 12  | 42   | 58   | 0   |
| CONTIG-006844 | 65   | 50  | 7    | 83   | 0   |
| CONTIG-006845 | 125  | 57  | 272  | 80   | 0   |
| CONTIG-006846 | 582  | 21  | 33   | 369  | 38  |
| CONTIG-006847 | 420  | 13  | 68   | 131  | 0   |
| CONTIG-006848 | 126  | 8   | 70   | 0    | 0   |
| CONTIG-006851 | 150  | 127 | 640  | 197  | 19  |
| CONTIG-006852 | 1734 | 50  | 175  | 2455 | 12  |
| CONTIG-006853 | 797  | 22  | 183  | 500  | 10  |
| CONTIG-006854 | 203  | 7   | 0    | 52   | 0   |
| CONTIG-006855 | 74   | 4   | 0    | 6    | 0   |
| CONTIG-006858 | 160  | 22  | 193  | 45   | 0   |

|               |      |      |      |      |      |
|---------------|------|------|------|------|------|
| CONTIG-006860 | 206  | 7    | 0    | 0    | 4    |
| CONTIG-006861 | 86   | 5    | 7    | 8    | 0    |
| CONTIG-006862 | 398  | 11   | 15   | 126  | 0    |
| CONTIG-006863 | 1511 | 24   | 304  | 1299 | 11   |
| CONTIG-006864 | 314  | 6    | 48   | 27   | 0    |
| CONTIG-006865 | 1271 | 30   | 263  | 1298 | 8    |
| CONTIG-006866 | 120  | 7    | 5    | 23   | 0    |
| CONTIG-006867 | 877  | 18   | 73   | 786  | 2    |
| CONTIG-006868 | 107  | 59   | 553  | 48   | 0    |
| CONTIG-006870 | 792  | 36   | 711  | 949  | 2    |
| CONTIG-006877 | 1502 | 28   | 382  | 2080 | 14   |
| CONTIG-006878 | 213  | 5    | 20   | 15   | 0    |
| CONTIG-006879 | 603  | 15   | 112  | 120  | 0    |
| CONTIG-006880 | 106  | 6    | 7    | 4    | 0    |
| CONTIG-006881 | 77   | 8    | 29   | 6    | 0    |
| CONTIG-006882 | 355  | 423  | 2406 | 4654 | 365  |
| CONTIG-006883 | 209  | 22   | 69   | 71   | 0    |
| CONTIG-006884 | 506  | 21   | 84   | 416  | 2    |
| CONTIG-006888 | 955  | 14   | 35   | 486  | 3    |
| CONTIG-006889 | 494  | 100  | 653  | 1554 | 10   |
| CONTIG-006890 | 598  | 78   | 763  | 1783 | 0    |
| CONTIG-006891 | 154  | 10   | 22   | 33   | 0    |
| CONTIG-006892 | 420  | 11   | 55   | 108  | 0    |
| CONTIG-006893 | 431  | 11   | 17   | 151  | 0    |
| CONTIG-006894 | 99   | 46   | 84   | 142  | 0    |
| CONTIG-006896 | 110  | 5    | 18   | 4    | 0    |
| CONTIG-006897 | 505  | 46   | 622  | 573  | 0    |
| CONTIG-006898 | 42   | 1904 | 297  | 23   | 1297 |
| CONTIG-006901 | 243  | 121  | 238  | 872  | 109  |
| CONTIG-006905 | 412  | 34   | 81   | 354  | 10   |
| CONTIG-006906 | 664  | 164  | 57   | 104  | 0    |
| CONTIG-006907 | 95   | 7    | 7    | 14   | 0    |
| CONTIG-006908 | 408  | 31   | 373  | 348  | 0    |
| CONTIG-006909 | 95   | 3    | 0    | 8    | 0    |
| CONTIG-006910 | 342  | 23   | 264  | 150  | 0    |
| CONTIG-006911 | 91   | 5    | 4    | 13   | 0    |
| CONTIG-006912 | 193  | 21   | 267  | 40   | 0    |
| CONTIG-006913 | 1176 | 19   | 461  | 684  | 0    |
| CONTIG-006914 | 87   | 696  | 330  | 1547 | 114  |
| CONTIG-006915 | 489  | 53   | 169  | 592  | 41   |
| CONTIG-006922 | 59   | 16   | 52   | 0    | 0    |
| CONTIG-006923 | 348  | 11   | 218  | 94   | 0    |
| CONTIG-006924 | 87   | 17   | 23   | 40   | 2    |
| CONTIG-006925 | 149  | 33   | 104  | 0    | 70   |
| CONTIG-006926 | 175  | 5    | 4    | 10   | 4    |
| CONTIG-006927 | 53   | 662  | 99   | 11   | 1130 |
| CONTIG-006928 | 298  | 21   | 130  | 153  | 0    |

|               |      |     |      |      |     |
|---------------|------|-----|------|------|-----|
| CONTIG-006929 | 1456 | 38  | 256  | 1369 | 106 |
| CONTIG-006932 | 596  | 20  | 210  | 288  | 0   |
| CONTIG-006933 | 90   | 3   | 3    | 3    | 0   |
| CONTIG-006934 | 1702 | 30  | 693  | 1492 | 37  |
| CONTIG-006935 | 248  | 5   | 6    | 24   | 0   |
| CONTIG-006936 | 175  | 20  | 133  | 88   | 0   |
| CONTIG-006937 | 1564 | 43  | 916  | 2671 | 0   |
| CONTIG-006938 | 195  | 8   | 13   | 18   | 0   |
| CONTIG-006939 | 1095 | 30  | 440  | 670  | 22  |
| CONTIG-006940 | 113  | 619 | 182  | 2769 | 214 |
| CONTIG-006941 | 268  | 238 | 144  | 3460 | 35  |
| CONTIG-006942 | 446  | 21  | 112  | 226  | 2   |
| CONTIG-006944 | 444  | 33  | 166  | 745  | 0   |
| CONTIG-006945 | 886  | 17  | 79   | 462  | 15  |
| CONTIG-006946 | 187  | 312 | 110  | 1037 | 127 |
| CONTIG-006947 | 132  | 8   | 12   | 29   | 0   |
| CONTIG-006948 | 172  | 10  | 23   | 47   | 0   |
| CONTIG-006949 | 244  | 9   | 49   | 81   | 0   |
| CONTIG-006951 | 85   | 10  | 77   | 2    | 0   |
| CONTIG-006952 | 271  | 8   | 107  | 46   | 0   |
| CONTIG-006953 | 114  | 629 | 1290 | 1516 | 96  |
| CONTIG-006954 | 517  | 41  | 135  | 766  | 2   |
| CONTIG-006955 | 819  | 30  | 1090 | 488  | 4   |
| CONTIG-006956 | 69   | 7   | 42   | 4    | 0   |
| CONTIG-006957 | 318  | 75  | 426  | 1111 | 2   |
| CONTIG-006958 | 818  | 58  | 923  | 2043 | 10  |
| CONTIG-006959 | 113  | 4   | 0    | 11   | 0   |
| CONTIG-006960 | 455  | 26  | 32   | 374  | 30  |
| CONTIG-006961 | 169  | 133 | 2080 | 69   | 0   |
| CONTIG-006962 | 193  | 25  | 212  | 159  | 0   |
| CONTIG-006963 | 81   | 13  | 29   | 26   | 0   |
| CONTIG-006964 | 2114 | 114 | 291  | 8055 | 538 |
| CONTIG-006965 | 186  | 19  | 9    | 150  | 0   |
| CONTIG-006966 | 439  | 23  | 146  | 376  | 6   |
| CONTIG-006967 | 83   | 8   | 11   | 5    | 2   |
| CONTIG-006968 | 41   | 77  | 150  | 40   | 0   |
| CONTIG-006969 | 79   | 3   | 0    | 0    | 0   |
| CONTIG-006970 | 372  | 9   | 38   | 79   | 0   |
| CONTIG-006971 | 105  | 10  | 7    | 17   | 0   |
| CONTIG-006974 | 68   | 11  | 4    | 20   | 0   |
| CONTIG-006976 | 67   | 7   | 12   | 10   | 0   |
| CONTIG-006977 | 63   | 2   | 3    | 0    | 0   |
| CONTIG-006978 | 110  | 76  | 522  | 188  | 0   |
| CONTIG-006979 | 678  | 24  | 303  | 473  | 2   |
| CONTIG-006980 | 85   | 210 | 386  | 645  | 2   |
| CONTIG-006981 | 120  | 8   | 24   | 16   | 0   |
| CONTIG-006984 | 2568 | 40  | 356  | 5619 | 4   |

|               |      |     |      |      |     |
|---------------|------|-----|------|------|-----|
| CONTIG-006985 | 178  | 18  | 75   | 19   | 0   |
| CONTIG-006986 | 1574 | 31  | 435  | 2104 | 23  |
| CONTIG-006987 | 628  | 17  | 116  | 153  | 2   |
| CONTIG-006988 | 474  | 51  | 738  | 197  | 7   |
| CONTIG-006989 | 58   | 3   | 3    | 0    | 0   |
| CONTIG-006990 | 131  | 8   | 8    | 46   | 0   |
| CONTIG-006991 | 760  | 15  | 141  | 279  | 2   |
| CONTIG-006992 | 454  | 12  | 23   | 126  | 0   |
| CONTIG-006994 | 711  | 159 | 4579 | 3142 | 2   |
| CONTIG-006995 | 150  | 5   | 6    | 23   | 0   |
| CONTIG-006996 | 421  | 42  | 186  | 899  | 0   |
| CONTIG-006998 | 2554 | 35  | 797  | 4546 | 4   |
| CONTIG-006999 | 194  | 6   | 24   | 42   | 0   |
| CONTIG-007000 | 480  | 15  | 23   | 136  | 2   |
| CONTIG-007001 | 78   | 140 | 464  | 160  | 9   |
| CONTIG-007002 | 71   | 7   | 7    | 20   | 0   |
| CONTIG-007003 | 482  | 119 | 929  | 681  | 11  |
| CONTIG-007004 | 243  | 20  | 205  | 78   | 0   |
| CONTIG-007011 | 810  | 13  | 29   | 248  | 0   |
| CONTIG-007012 | 104  | 24  | 72   | 61   | 0   |
| CONTIG-007013 | 203  | 13  | 27   | 51   | 0   |
| CONTIG-007017 | 123  | 226 | 410  | 649  | 15  |
| CONTIG-007018 | 1269 | 48  | 208  | 1438 | 203 |
| CONTIG-007019 | 677  | 19  | 128  | 300  | 12  |
| CONTIG-007020 | 1267 | 32  | 38   | 1052 | 119 |
| CONTIG-007021 | 203  | 18  | 245  | 16   | 0   |
| CONTIG-007022 | 107  | 925 | 1120 | 2093 | 88  |
| CONTIG-007023 | 207  | 26  | 106  | 55   | 2   |
| CONTIG-007024 | 302  | 66  | 578  | 506  | 13  |
| CONTIG-007025 | 299  | 17  | 118  | 54   | 2   |
| CONTIG-007026 | 52   | 104 | 12   | 267  | 0   |
| CONTIG-007027 | 295  | 196 | 775  | 1069 | 276 |
| CONTIG-007028 | 914  | 15  | 81   | 435  | 4   |
| CONTIG-007029 | 710  | 15  | 176  | 70   | 53  |
| CONTIG-007030 | 465  | 20  | 78   | 272  | 8   |
| CONTIG-007031 | 166  | 6   | 47   | 5    | 0   |
| CONTIG-007032 | 718  | 36  | 236  | 1043 | 0   |
| CONTIG-007033 | 303  | 17  | 21   | 113  | 4   |
| CONTIG-007034 | 285  | 8   | 21   | 39   | 0   |
| CONTIG-007035 | 228  | 316 | 720  | 1560 | 223 |
| CONTIG-007036 | 228  | 21  | 155  | 58   | 0   |
| CONTIG-007037 | 52   | 129 | 351  | 3    | 0   |
| CONTIG-007038 | 483  | 10  | 0    | 0    | 17  |
| CONTIG-007039 | 289  | 9   | 6    | 49   | 4   |
| CONTIG-007040 | 605  | 18  | 232  | 399  | 0   |
| CONTIG-007041 | 812  | 30  | 331  | 921  | 2   |
| CONTIG-007042 | 99   | 119 | 245  | 263  | 0   |

|               |      |     |      |      |     |
|---------------|------|-----|------|------|-----|
| CONTIG-007043 | 107  | 605 | 1403 | 1141 | 140 |
| CONTIG-007044 | 237  | 14  | 56   | 39   | 0   |
| CONTIG-007045 | 803  | 15  | 93   | 375  | 0   |
| CONTIG-007046 | 110  | 221 | 176  | 675  | 76  |
| CONTIG-007047 | 161  | 48  | 0    | 0    | 43  |
| CONTIG-007048 | 159  | 4   | 2    | 8    | 0   |
| CONTIG-007049 | 670  | 18  | 106  | 293  | 0   |
| CONTIG-007050 | 133  | 11  | 110  | 0    | 0   |
| CONTIG-007057 | 158  | 66  | 0    | 0    | 187 |
| CONTIG-007058 | 288  | 71  | 0    | 0    | 325 |
| CONTIG-007059 | 599  | 42  | 292  | 592  | 0   |
| CONTIG-007060 | 176  | 18  | 73   | 109  | 0   |
| CONTIG-007061 | 728  | 11  | 38   | 276  | 4   |
| CONTIG-007062 | 370  | 67  | 515  | 310  | 17  |
| CONTIG-007063 | 312  | 18  | 38   | 153  | 2   |
| CONTIG-007064 | 112  | 3   | 2    | 8    | 0   |
| CONTIG-007065 | 490  | 25  | 151  | 444  | 2   |
| CONTIG-007066 | 653  | 21  | 52   | 718  | 0   |
| CONTIG-007067 | 201  | 19  | 294  | 0    | 8   |
| CONTIG-007068 | 196  | 23  | 64   | 70   | 4   |
| CONTIG-007069 | 931  | 24  | 263  | 1029 | 0   |
| CONTIG-007071 | 230  | 13  | 7    | 45   | 0   |
| CONTIG-007072 | 577  | 25  | 78   | 243  | 38  |
| CONTIG-007073 | 728  | 21  | 128  | 458  | 0   |
| CONTIG-007074 | 93   | 3   | 2    | 7    | 0   |
| CONTIG-007077 | 635  | 73  | 299  | 1428 | 27  |
| CONTIG-007078 | 539  | 17  | 98   | 384  | 0   |
| CONTIG-007081 | 239  | 4   | 13   | 21   | 0   |
| CONTIG-007082 | 71   | 16  | 58   | 19   | 0   |
| CONTIG-007087 | 148  | 152 | 200  | 387  | 20  |
| CONTIG-007090 | 279  | 65  | 884  | 541  | 0   |
| CONTIG-007091 | 924  | 33  | 261  | 649  | 6   |
| CONTIG-007092 | 770  | 32  | 399  | 482  | 8   |
| CONTIG-007093 | 385  | 13  | 95   | 111  | 0   |
| CONTIG-007094 | 166  | 33  | 237  | 92   | 2   |
| CONTIG-007095 | 244  | 10  | 65   | 53   | 2   |
| CONTIG-007096 | 436  | 141 | 614  | 1750 | 85  |
| CONTIG-007098 | 1022 | 36  | 87   | 1648 | 14  |
| CONTIG-007099 | 628  | 29  | 389  | 623  | 2   |
| CONTIG-007100 | 86   | 219 | 167  | 756  | 19  |
| CONTIG-007101 | 501  | 83  | 438  | 697  | 33  |
| CONTIG-007104 | 712  | 12  | 38   | 341  | 2   |
| CONTIG-007105 | 188  | 5   | 13   | 10   | 0   |
| CONTIG-007107 | 187  | 7   | 5    | 26   | 0   |
| CONTIG-007108 | 116  | 6   | 3    | 2    | 0   |
| CONTIG-007109 | 64   | 3   | 8    | 0    | 0   |
| CONTIG-007110 | 1096 | 47  | 110  | 2849 | 0   |

|               |      |      |      |      |     |
|---------------|------|------|------|------|-----|
| CONTIG-007111 | 126  | 33   | 6    | 0    | 0   |
| CONTIG-007112 | 1027 | 28   | 55   | 1623 | 0   |
| CONTIG-007113 | 792  | 23   | 319  | 504  | 10  |
| CONTIG-007114 | 1079 | 13   | 120  | 628  | 0   |
| CONTIG-007115 | 2186 | 29   | 261  | 1755 | 164 |
| CONTIG-007116 | 615  | 30   | 220  | 851  | 2   |
| CONTIG-007117 | 578  | 14   | 125  | 176  | 6   |
| CONTIG-007118 | 179  | 6    | 18   | 21   | 0   |
| CONTIG-007119 | 321  | 32   | 104  | 185  | 7   |
| CONTIG-007120 | 195  | 102  | 39   | 458  | 0   |
| CONTIG-007121 | 65   | 618  | 167  | 943  | 85  |
| CONTIG-007122 | 84   | 18   | 126  | 0    | 0   |
| CONTIG-007124 | 182  | 7    | 15   | 28   | 0   |
| CONTIG-007125 | 86   | 14   | 49   | 17   | 0   |
| CONTIG-007126 | 164  | 37   | 322  | 72   | 0   |
| CONTIG-007127 | 58   | 6    | 17   | 0    | 0   |
| CONTIG-007128 | 715  | 28   | 204  | 562  | 7   |
| CONTIG-007129 | 453  | 12   | 57   | 127  | 0   |
| CONTIG-007130 | 851  | 18   | 176  | 777  | 0   |
| CONTIG-007133 | 337  | 23   | 57   | 115  | 4   |
| CONTIG-007134 | 212  | 42   | 35   | 225  | 0   |
| CONTIG-007135 | 1097 | 14   | 95   | 473  | 0   |
| CONTIG-007136 | 541  | 34   | 4    | 178  | 138 |
| CONTIG-007137 | 120  | 4    | 12   | 7    | 0   |
| CONTIG-007138 | 694  | 24   | 32   | 172  | 0   |
| CONTIG-007139 | 74   | 39   | 20   | 63   | 0   |
| CONTIG-007140 | 812  | 24   | 104  | 858  | 4   |
| CONTIG-007141 | 536  | 37   | 510  | 155  | 0   |
| CONTIG-007142 | 294  | 24   | 8    | 65   | 0   |
| CONTIG-007143 | 148  | 9    | 31   | 17   | 2   |
| CONTIG-007144 | 620  | 24   | 55   | 491  | 2   |
| CONTIG-007145 | 880  | 38   | 1149 | 1135 | 2   |
| CONTIG-007148 | 468  | 43   | 298  | 718  | 11  |
| CONTIG-007149 | 378  | 52   | 66   | 813  | 13  |
| CONTIG-007150 | 771  | 38   | 79   | 781  | 64  |
| CONTIG-007151 | 208  | 25   | 46   | 162  | 0   |
| CONTIG-007153 | 1253 | 23   | 159  | 834  | 52  |
| CONTIG-007158 | 181  | 6    | 29   | 0    | 8   |
| CONTIG-007159 | 43   | 1010 | 1675 | 443  | 28  |
| CONTIG-007161 | 149  | 381  | 517  | 2396 | 71  |
| CONTIG-007166 | 120  | 8    | 28   | 17   | 0   |
| CONTIG-007169 | 244  | 16   | 102  | 85   | 0   |
| CONTIG-007170 | 271  | 8    | 27   | 66   | 0   |
| CONTIG-007171 | 81   | 11   | 5    | 16   | 0   |
| CONTIG-007172 | 321  | 37   | 266  | 173  | 9   |
| CONTIG-007173 | 201  | 249  | 483  | 1249 | 133 |
| CONTIG-007174 | 701  | 75   | 143  | 2057 | 73  |

|               |     |      |      |      |     |
|---------------|-----|------|------|------|-----|
| CONTIG-007176 | 345 | 239  | 1692 | 2344 | 89  |
| CONTIG-007179 | 77  | 3    | 2    | 6    | 0   |
| CONTIG-007180 | 856 | 16   | 3    | 20   | 0   |
| CONTIG-007181 | 51  | 500  | 86   | 540  | 42  |
| CONTIG-007182 | 746 | 26   | 31   | 533  | 12  |
| CONTIG-007184 | 332 | 14   | 59   | 67   | 0   |
| CONTIG-007185 | 985 | 34   | 212  | 915  | 32  |
| CONTIG-007187 | 325 | 18   | 106  | 74   | 4   |
| CONTIG-007188 | 545 | 22   | 117  | 274  | 15  |
| CONTIG-007190 | 117 | 181  | 486  | 169  | 0   |
| CONTIG-007191 | 372 | 31   | 31   | 520  | 0   |
| CONTIG-007192 | 203 | 12   | 26   | 47   | 0   |
| CONTIG-007193 | 68  | 211  | 85   | 465  | 0   |
| CONTIG-007194 | 104 | 4    | 0    | 5    | 0   |
| CONTIG-007195 | 640 | 39   | 597  | 509  | 20  |
| CONTIG-007196 | 58  | 4    | 2    | 6    | 0   |
| CONTIG-007197 | 358 | 13   | 5    | 123  | 10  |
| CONTIG-007198 | 277 | 10   | 2    | 59   | 0   |
| CONTIG-007206 | 141 | 36   | 242  | 10   | 0   |
| CONTIG-007207 | 119 | 495  | 1349 | 2170 | 20  |
| CONTIG-007208 | 90  | 4    | 2    | 14   | 0   |
| CONTIG-007209 | 474 | 63   | 46   | 639  | 45  |
| CONTIG-007210 | 104 | 7    | 23   | 13   | 0   |
| CONTIG-007211 | 159 | 18   | 7    | 77   | 0   |
| CONTIG-007212 | 179 | 581  | 714  | 2189 | 234 |
| CONTIG-007213 | 61  | 743  | 380  | 1759 | 30  |
| CONTIG-007215 | 963 | 32   | 23   | 39   | 0   |
| CONTIG-007216 | 149 | 15   | 75   | 86   | 0   |
| CONTIG-007217 | 478 | 37   | 380  | 593  | 0   |
| CONTIG-007218 | 246 | 10   | 16   | 111  | 0   |
| CONTIG-007222 | 228 | 10   | 64   | 56   | 0   |
| CONTIG-007224 | 187 | 6    | 6    | 37   | 0   |
| CONTIG-007225 | 779 | 71   | 824  | 1360 | 75  |
| CONTIG-007227 | 384 | 16   | 62   | 111  | 6   |
| CONTIG-007236 | 809 | 30   | 206  | 653  | 12  |
| CONTIG-007237 | 300 | 23   | 289  | 163  | 0   |
| CONTIG-007238 | 38  | 285  | 5    | 164  | 0   |
| CONTIG-007239 | 94  | 16   | 73   | 0    | 0   |
| CONTIG-007240 | 190 | 6    | 9    | 34   | 0   |
| CONTIG-007241 | 126 | 23   | 193  | 4    | 2   |
| CONTIG-007242 | 76  | 287  | 93   | 541  | 17  |
| CONTIG-007245 | 139 | 10   | 5    | 59   | 0   |
| CONTIG-007246 | 392 | 61   | 543  | 564  | 6   |
| CONTIG-007249 | 299 | 20   | 109  | 192  | 2   |
| CONTIG-007250 | 76  | 1572 | 1037 | 5842 | 0   |
| CONTIG-007251 | 95  | 19   | 33   | 24   | 0   |
| CONTIG-007252 | 762 | 44   | 321  | 1137 | 5   |

|               |      |     |      |      |     |
|---------------|------|-----|------|------|-----|
| CONTIG-007253 | 269  | 579 | 611  | 6077 | 108 |
| CONTIG-007255 | 78   | 4   | 4    | 0    | 0   |
| CONTIG-007257 | 60   | 416 | 224  | 260  | 70  |
| CONTIG-007258 | 434  | 91  | 955  | 1199 | 4   |
| CONTIG-007259 | 90   | 5   | 8    | 9    | 0   |
| CONTIG-007260 | 86   | 5   | 9    | 7    | 0   |
| CONTIG-007261 | 458  | 46  | 332  | 584  | 45  |
| CONTIG-007262 | 100  | 410 | 180  | 1271 | 103 |
| CONTIG-007263 | 84   | 8   | 5    | 16   | 0   |
| CONTIG-007264 | 335  | 7   | 51   | 51   | 0   |
| CONTIG-007265 | 101  | 9   | 19   | 10   | 0   |
| CONTIG-007266 | 788  | 17  | 154  | 272  | 12  |
| CONTIG-007267 | 101  | 122 | 954  | 228  | 0   |
| CONTIG-007268 | 954  | 17  | 444  | 396  | 0   |
| CONTIG-007269 | 264  | 224 | 980  | 769  | 138 |
| CONTIG-007270 | 397  | 46  | 189  | 369  | 9   |
| CONTIG-007271 | 1063 | 36  | 503  | 1537 | 0   |
| CONTIG-007272 | 108  | 6   | 16   | 0    | 0   |
| CONTIG-007274 | 1052 | 16  | 172  | 629  | 0   |
| CONTIG-007275 | 778  | 16  | 147  | 477  | 0   |
| CONTIG-007276 | 132  | 25  | 83   | 108  | 0   |
| CONTIG-007277 | 146  | 14  | 40   | 52   | 0   |
| CONTIG-007278 | 501  | 16  | 121  | 198  | 4   |
| CONTIG-007279 | 203  | 9   | 61   | 40   | 0   |
| CONTIG-007280 | 326  | 12  | 26   | 120  | 0   |
| CONTIG-007281 | 280  | 25  | 74   | 204  | 2   |
| CONTIG-007282 | 76   | 8   | 12   | 12   | 0   |
| CONTIG-007283 | 408  | 18  | 62   | 136  | 0   |
| CONTIG-007286 | 1197 | 17  | 176  | 825  | 0   |
| CONTIG-007287 | 180  | 15  | 63   | 73   | 0   |
| CONTIG-007288 | 167  | 11  | 45   | 15   | 0   |
| CONTIG-007289 | 294  | 19  | 35   | 191  | 2   |
| CONTIG-007290 | 549  | 10  | 127  | 151  | 4   |
| CONTIG-007291 | 477  | 12  | 73   | 164  | 8   |
| CONTIG-007294 | 755  | 31  | 549  | 454  | 29  |
| CONTIG-007295 | 1683 | 42  | 398  | 2776 | 15  |
| CONTIG-007296 | 1442 | 60  | 140  | 2646 | 8   |
| CONTIG-007297 | 68   | 19  | 15   | 35   | 2   |
| CONTIG-007298 | 240  | 22  | 34   | 238  | 0   |
| CONTIG-007299 | 104  | 31  | 12   | 147  | 0   |
| CONTIG-007300 | 66   | 3   | 0    | 2    | 0   |
| CONTIG-007301 | 464  | 22  | 97   | 528  | 0   |
| CONTIG-007302 | 114  | 5   | 8    | 9    | 0   |
| CONTIG-007303 | 364  | 9   | 101  | 25   | 0   |
| CONTIG-007305 | 458  | 107 | 1303 | 838  | 56  |
| CONTIG-007306 | 128  | 387 | 243  | 2088 | 0   |
| CONTIG-007307 | 295  | 18  | 143  | 2    | 5   |



|               |      |     |      |      |     |
|---------------|------|-----|------|------|-----|
| CONTIG-007308 | 357  | 14  | 38   | 52   | 0   |
| CONTIG-007309 | 473  | 44  | 805  | 652  | 0   |
| CONTIG-007310 | 686  | 27  | 90   | 666  | 7   |
| CONTIG-007311 | 278  | 21  | 251  | 97   | 0   |
| CONTIG-007312 | 847  | 68  | 128  | 3022 | 14  |
| CONTIG-007313 | 215  | 4   | 21   | 15   | 0   |
| CONTIG-007314 | 181  | 134 | 6    | 1531 | 0   |
| CONTIG-007315 | 214  | 10  | 2    | 53   | 0   |
| CONTIG-007316 | 77   | 618 | 285  | 888  | 0   |
| CONTIG-007317 | 261  | 9   | 20   | 62   | 0   |
| CONTIG-007318 | 1819 | 25  | 146  | 1664 | 37  |
| CONTIG-007319 | 62   | 916 | 243  | 2010 | 155 |
| CONTIG-007320 | 341  | 27  | 156  | 146  | 2   |
| CONTIG-007321 | 87   | 6   | 7    | 10   | 0   |
| CONTIG-007322 | 504  | 17  | 47   | 391  | 0   |
| CONTIG-007323 | 469  | 12  | 83   | 136  | 0   |
| CONTIG-007324 | 206  | 12  | 17   | 93   | 2   |
| CONTIG-007326 | 179  | 10  | 7    | 63   | 0   |
| CONTIG-007327 | 79   | 370 | 225  | 864  | 75  |
| CONTIG-007329 | 620  | 31  | 287  | 564  | 2   |
| CONTIG-007330 | 305  | 255 | 1247 | 1463 | 164 |
| CONTIG-007331 | 60   | 5   | 3    | 12   | 0   |
| CONTIG-007332 | 116  | 8   | 4    | 7    | 0   |
| CONTIG-007333 | 596  | 22  | 181  | 281  | 9   |
| CONTIG-007334 | 638  | 11  | 50   | 227  | 4   |
| CONTIG-007335 | 68   | 3   | 0    | 2    | 0   |
| CONTIG-007336 | 160  | 7   | 13   | 20   | 0   |
| CONTIG-007337 | 1559 | 15  | 104  | 1054 | 4   |
| CONTIG-007344 | 53   | 188 | 548  | 170  | 0   |
| CONTIG-007345 | 338  | 9   | 27   | 23   | 0   |
| CONTIG-007347 | 68   | 4   | 0    | 13   | 0   |
| CONTIG-007348 | 145  | 8   | 0    | 35   | 0   |
| CONTIG-007349 | 351  | 19  | 102  | 176  | 2   |
| CONTIG-007350 | 77   | 19  | 133  | 0    | 0   |
| CONTIG-007351 | 143  | 18  | 19   | 74   | 0   |
| CONTIG-007352 | 1021 | 25  | 386  | 593  | 5   |
| CONTIG-007353 | 180  | 81  | 1307 | 155  | 0   |
| CONTIG-007354 | 176  | 44  | 93   | 149  | 2   |
| CONTIG-007355 | 277  | 50  | 107  | 337  | 36  |
| CONTIG-007356 | 251  | 16  | 21   | 124  | 0   |
| CONTIG-007357 | 260  | 200 | 314  | 2463 | 4   |
| CONTIG-007362 | 221  | 17  | 24   | 170  | 2   |
| CONTIG-007363 | 225  | 10  | 120  | 22   | 0   |
| CONTIG-007364 | 1033 | 45  | 224  | 2518 | 0   |
| CONTIG-007365 | 177  | 25  | 85   | 178  | 0   |
| CONTIG-007366 | 64   | 3   | 4    | 2    | 0   |
| CONTIG-007367 | 41   | 89  | 4    | 96   | 2   |

|               |      |     |     |      |     |
|---------------|------|-----|-----|------|-----|
| CONTIG-007368 | 637  | 19  | 23  | 405  | 2   |
| CONTIG-007369 | 136  | 12  | 11  | 51   | 0   |
| CONTIG-007370 | 127  | 45  | 84  | 125  | 12  |
| CONTIG-007371 | 305  | 24  | 45  | 56   | 0   |
| CONTIG-007372 | 2361 | 48  | 494 | 5315 | 152 |
| CONTIG-007375 | 320  | 13  | 32  | 84   | 0   |
| CONTIG-007376 | 367  | 18  | 41  | 2    | 51  |
| CONTIG-007377 | 754  | 19  | 116 | 415  | 2   |
| CONTIG-007379 | 131  | 38  | 427 | 12   | 0   |
| CONTIG-007380 | 187  | 14  | 51  | 96   | 0   |
| CONTIG-007381 | 194  | 464 | 703 | 1867 | 398 |
| CONTIG-007382 | 664  | 69  | 154 | 1793 | 29  |
| CONTIG-007383 | 150  | 72  | 57  | 208  | 0   |
| CONTIG-007384 | 70   | 5   | 10  | 9    | 0   |
| CONTIG-007385 | 73   | 8   | 2   | 17   | 2   |
| CONTIG-007386 | 503  | 19  | 149 | 252  | 2   |
| CONTIG-007387 | 356  | 23  | 693 | 55   | 0   |
| CONTIG-007388 | 197  | 5   | 11  | 15   | 0   |
| CONTIG-007389 | 296  | 9   | 46  | 81   | 2   |
| CONTIG-007390 | 624  | 178 | 394 | 2804 | 571 |
| CONTIG-007392 | 287  | 21  | 27  | 123  | 0   |
| CONTIG-007393 | 164  | 23  | 27  | 69   | 0   |
| CONTIG-007394 | 741  | 63  | 568 | 1533 | 15  |
| CONTIG-007395 | 142  | 287 | 141 | 1509 | 127 |
| CONTIG-007396 | 172  | 7   | 36  | 14   | 0   |
| CONTIG-007397 | 44   | 263 | 112 | 148  | 14  |
| CONTIG-007398 | 83   | 6   | 3   | 9    | 0   |
| CONTIG-007399 | 140  | 9   | 32  | 10   | 0   |
| CONTIG-007401 | 101  | 31  | 42  | 17   | 11  |
| CONTIG-007402 | 115  | 12  | 36  | 33   | 0   |
| CONTIG-007403 | 175  | 290 | 71  | 0    | 0   |
| CONTIG-007404 | 228  | 8   | 19  | 46   | 2   |
| CONTIG-007405 | 60   | 3   | 7   | 0    | 0   |
| CONTIG-007406 | 85   | 10  | 63  | 3    | 0   |
| CONTIG-007407 | 182  | 14  | 11  | 66   | 0   |
| CONTIG-007408 | 262  | 34  | 99  | 199  | 16  |
| CONTIG-007409 | 444  | 22  | 236 | 390  | 0   |
| CONTIG-007410 | 118  | 6   | 4   | 12   | 0   |
| CONTIG-007411 | 455  | 30  | 58  | 399  | 2   |
| CONTIG-007412 | 790  | 90  | 681 | 1897 | 69  |
| CONTIG-007413 | 297  | 15  | 76  | 33   | 0   |
| CONTIG-007414 | 905  | 16  | 55  | 364  | 3   |
| CONTIG-007415 | 2896 | 33  | 234 | 3483 | 111 |
| CONTIG-007416 | 230  | 39  | 437 | 226  | 0   |
| CONTIG-007420 | 648  | 23  | 797 | 365  | 0   |
| CONTIG-007421 | 1774 | 101 | 396 | 9144 | 126 |
| CONTIG-007422 | 103  | 37  | 67  | 116  | 0   |

|               |      |     |      |      |     |
|---------------|------|-----|------|------|-----|
| CONTIG-007423 | 1188 | 58  | 210  | 4075 | 8   |
| CONTIG-007424 | 1112 | 51  | 88   | 371  | 2   |
| CONTIG-007425 | 113  | 12  | 12   | 48   | 0   |
| CONTIG-007426 | 767  | 120 | 169  | 1586 | 593 |
| CONTIG-007427 | 155  | 10  | 0    | 36   | 0   |
| CONTIG-007428 | 126  | 15  | 64   | 18   | 2   |
| CONTIG-007429 | 58   | 3   | 3    | 2    | 0   |
| CONTIG-007430 | 220  | 24  | 37   | 238  | 4   |
| CONTIG-007431 | 1363 | 26  | 311  | 1085 | 30  |
| CONTIG-007432 | 141  | 334 | 741  | 678  | 226 |
| CONTIG-007433 | 78   | 17  | 70   | 15   | 0   |
| CONTIG-007434 | 564  | 48  | 266  | 957  | 38  |
| CONTIG-007435 | 875  | 104 | 677  | 5305 | 4   |
| CONTIG-007436 | 200  | 24  | 49   | 118  | 0   |
| CONTIG-007438 | 417  | 20  | 31   | 153  | 0   |
| CONTIG-007439 | 117  | 67  | 160  | 0    | 0   |
| CONTIG-007440 | 393  | 101 | 26   | 2053 | 0   |
| CONTIG-007441 | 960  | 13  | 126  | 398  | 2   |
| CONTIG-007442 | 432  | 30  | 320  | 274  | 7   |
| CONTIG-007443 | 1457 | 27  | 150  | 887  | 59  |
| CONTIG-007444 | 246  | 27  | 30   | 349  | 0   |
| CONTIG-007446 | 51   | 572 | 37   | 23   | 683 |
| CONTIG-007447 | 78   | 25  | 173  | 0    | 0   |
| CONTIG-007448 | 94   | 832 | 1210 | 1544 | 85  |
| CONTIG-007449 | 70   | 6   | 4    | 9    | 0   |
| CONTIG-007450 | 360  | 88  | 86   | 1595 | 8   |
| CONTIG-007451 | 124  | 8   | 8    | 25   | 0   |
| CONTIG-007452 | 292  | 8   | 51   | 27   | 0   |
| CONTIG-007453 | 159  | 16  | 22   | 67   | 0   |
| CONTIG-007454 | 257  | 28  | 96   | 175  | 4   |
| CONTIG-007455 | 317  | 44  | 63   | 497  | 15  |
| CONTIG-007457 | 68   | 3   | 2    | 4    | 0   |
| CONTIG-007458 | 182  | 7   | 7    | 45   | 0   |
| CONTIG-007459 | 572  | 46  | 196  | 1170 | 8   |
| CONTIG-007461 | 437  | 28  | 78   | 426  | 12  |
| CONTIG-007462 | 431  | 10  | 73   | 116  | 4   |
| CONTIG-007463 | 178  | 18  | 128  | 76   | 3   |
| CONTIG-007468 | 212  | 27  | 102  | 160  | 0   |
| CONTIG-007469 | 646  | 16  | 173  | 307  | 0   |
| CONTIG-007470 | 72   | 11  | 25   | 15   | 0   |
| CONTIG-007473 | 417  | 17  | 21   | 158  | 7   |
| CONTIG-007474 | 90   | 8   | 27   | 10   | 0   |
| CONTIG-007475 | 71   | 7   | 0    | 11   | 0   |
| CONTIG-007476 | 71   | 17  | 11   | 29   | 0   |
| CONTIG-007477 | 385  | 11  | 106  | 110  | 0   |
| CONTIG-007480 | 44   | 475 | 367  | 220  | 38  |
| CONTIG-007481 | 91   | 12  | 91   | 0    | 0   |

|               |      |     |      |      |     |
|---------------|------|-----|------|------|-----|
| CONTIG-007482 | 286  | 18  | 68   | 146  | 0   |
| CONTIG-007484 | 251  | 20  | 106  | 140  | 0   |
| CONTIG-007485 | 591  | 11  | 43   | 176  | 0   |
| CONTIG-007486 | 479  | 497 | 1168 | 9586 | 837 |
| CONTIG-007487 | 66   | 7   | 13   | 17   | 0   |
| CONTIG-007488 | 413  | 47  | 49   | 251  | 50  |
| CONTIG-007489 | 385  | 8   | 98   | 81   | 0   |
| CONTIG-007491 | 816  | 50  | 240  | 600  | 0   |
| CONTIG-007492 | 158  | 6   | 9    | 31   | 0   |
| CONTIG-007494 | 455  | 26  | 13   | 714  | 0   |
| CONTIG-007495 | 1484 | 154 | 540  | 5628 | 843 |
| CONTIG-007496 | 93   | 6   | 30   | 2    | 0   |
| CONTIG-007498 | 64   | 13  | 17   | 11   | 0   |
| CONTIG-007499 | 401  | 88  | 0    | 0    | 501 |
| CONTIG-007500 | 213  | 72  | 27   | 685  | 84  |
| CONTIG-007501 | 754  | 36  | 955  | 580  | 0   |
| CONTIG-007502 | 48   | 231 | 438  | 429  | 0   |
| CONTIG-007503 | 247  | 11  | 92   | 40   | 0   |
| CONTIG-007504 | 292  | 16  | 178  | 161  | 0   |
| CONTIG-007509 | 293  | 28  | 269  | 130  | 0   |
| CONTIG-007510 | 58   | 4   | 0    | 0    | 0   |
| CONTIG-007511 | 225  | 5   | 14   | 39   | 0   |
| CONTIG-007512 | 301  | 258 | 1185 | 1352 | 71  |
| CONTIG-007513 | 147  | 7   | 30   | 16   | 0   |
| CONTIG-007514 | 350  | 36  | 178  | 635  | 0   |
| CONTIG-007515 | 935  | 24  | 367  | 580  | 2   |
| CONTIG-007516 | 576  | 49  | 256  | 1254 | 15  |
| CONTIG-007517 | 153  | 21  | 96   | 25   | 0   |
| CONTIG-007518 | 297  | 39  | 115  | 397  | 4   |
| CONTIG-007527 | 333  | 37  | 205  | 298  | 0   |
| CONTIG-007528 | 95   | 10  | 9    | 35   | 0   |
| CONTIG-007529 | 175  | 13  | 40   | 87   | 0   |
| CONTIG-007530 | 1375 | 48  | 198  | 3093 | 0   |
| CONTIG-007531 | 713  | 21  | 311  | 517  | 0   |
| CONTIG-007532 | 316  | 12  | 25   | 106  | 0   |
| CONTIG-007533 | 375  | 18  | 72   | 184  | 0   |
| CONTIG-007534 | 236  | 8   | 18   | 43   | 0   |
| CONTIG-007535 | 645  | 29  | 413  | 317  | 4   |
| CONTIG-007536 | 207  | 28  | 111  | 156  | 0   |
| CONTIG-007537 | 158  | 6   | 25   | 13   | 0   |
| CONTIG-007538 | 145  | 140 | 1049 | 146  | 0   |
| CONTIG-007539 | 123  | 6   | 9    | 19   | 0   |
| CONTIG-007540 | 108  | 8   | 13   | 26   | 2   |
| CONTIG-007541 | 243  | 14  | 41   | 139  | 0   |
| CONTIG-007542 | 684  | 52  | 940  | 1258 | 5   |
| CONTIG-007546 | 163  | 4   | 3    | 16   | 0   |
| CONTIG-007554 | 416  | 16  | 79   | 140  | 3   |

|               |     |      |      |      |     |
|---------------|-----|------|------|------|-----|
| CONTIG-007558 | 108 | 35   | 2    | 113  | 0   |
| CONTIG-007559 | 82  | 8    | 0    | 24   | 0   |
| CONTIG-007560 | 483 | 11   | 82   | 140  | 0   |
| CONTIG-007561 | 106 | 92   | 626  | 0    | 0   |
| CONTIG-007563 | 284 | 9    | 17   | 13   | 0   |
| CONTIG-007564 | 64  | 8    | 24   | 7    | 0   |
| CONTIG-007565 | 108 | 7    | 6    | 16   | 0   |
| CONTIG-007566 | 89  | 8    | 26   | 2    | 0   |
| CONTIG-007567 | 590 | 70   | 20   | 0    | 731 |
| CONTIG-007568 | 260 | 49   | 110  | 429  | 6   |
| CONTIG-007576 | 61  | 268  | 71   | 517  | 43  |
| CONTIG-007577 | 301 | 14   | 43   | 40   | 0   |
| CONTIG-007582 | 399 | 54   | 689  | 291  | 14  |
| CONTIG-007583 | 228 | 1107 | 1248 | 7276 | 667 |
| CONTIG-007584 | 850 | 53   | 170  | 2660 | 0   |
| CONTIG-007585 | 121 | 18   | 202  | 8    | 0   |
| CONTIG-007586 | 446 | 24   | 146  | 377  | 0   |
| CONTIG-007587 | 76  | 81   | 479  | 2    | 7   |
| CONTIG-007588 | 116 | 433  | 492  | 522  | 196 |
| CONTIG-007589 | 454 | 16   | 30   | 207  | 0   |
| CONTIG-007590 | 794 | 25   | 413  | 469  | 20  |
| CONTIG-007591 | 145 | 6    | 16   | 15   | 0   |
| CONTIG-007592 | 108 | 366  | 196  | 1612 | 21  |
| CONTIG-007595 | 136 | 5    | 6    | 22   | 0   |
| CONTIG-007599 | 401 | 102  | 423  | 1454 | 27  |
| CONTIG-007600 | 524 | 28   | 493  | 562  | 0   |
| CONTIG-007601 | 606 | 37   | 290  | 715  | 7   |
| CONTIG-007602 | 819 | 42   | 178  | 1848 | 3   |
| CONTIG-007603 | 89  | 5    | 6    | 13   | 0   |
| CONTIG-007604 | 243 | 9    | 37   | 45   | 0   |
| CONTIG-007605 | 97  | 13   | 10   | 32   | 0   |
| CONTIG-007606 | 156 | 422  | 1215 | 947  | 145 |
| CONTIG-007607 | 181 | 74   | 217  | 363  | 0   |
| CONTIG-007608 | 340 | 8    | 15   | 90   | 0   |
| CONTIG-007609 | 609 | 12   | 43   | 120  | 2   |
| CONTIG-007610 | 65  | 96   | 459  | 0    | 0   |
| CONTIG-007611 | 260 | 47   | 28   | 788  | 0   |
| CONTIG-007612 | 240 | 154  | 405  | 883  | 6   |
| CONTIG-007614 | 118 | 6    | 6    | 9    | 0   |
| CONTIG-007615 | 405 | 344  | 1058 | 2922 | 396 |
| CONTIG-007616 | 102 | 4    | 4    | 6    | 0   |
| CONTIG-007621 | 163 | 102  | 46   | 363  | 39  |
| CONTIG-007622 | 815 | 68   | 147  | 3329 | 4   |
| CONTIG-007623 | 331 | 31   | 280  | 358  | 0   |
| CONTIG-007624 | 573 | 28   | 378  | 686  | 0   |
| CONTIG-007625 | 321 | 26   | 75   | 269  | 4   |
| CONTIG-007626 | 513 | 14   | 38   | 238  | 2   |

|               |      |     |      |      |     |
|---------------|------|-----|------|------|-----|
| CONTIG-007628 | 339  | 160 | 404  | 1666 | 35  |
| CONTIG-007629 | 217  | 22  | 314  | 76   | 0   |
| CONTIG-007634 | 456  | 17  | 71   | 189  | 2   |
| CONTIG-007635 | 251  | 21  | 103  | 19   | 0   |
| CONTIG-007636 | 70   | 7   | 4    | 12   | 0   |
| CONTIG-007637 | 555  | 13  | 29   | 149  | 16  |
| CONTIG-007638 | 847  | 15  | 58   | 544  | 3   |
| CONTIG-007639 | 481  | 36  | 53   | 411  | 0   |
| CONTIG-007640 | 294  | 6   | 2    | 25   | 2   |
| CONTIG-007641 | 408  | 10  | 144  | 75   | 0   |
| CONTIG-007642 | 123  | 7   | 7    | 18   | 0   |
| CONTIG-007645 | 93   | 6   | 5    | 14   | 0   |
| CONTIG-007646 | 841  | 79  | 667  | 1818 | 235 |
| CONTIG-007648 | 483  | 25  | 440  | 344  | 0   |
| CONTIG-007649 | 275  | 23  | 101  | 3    | 0   |
| CONTIG-007650 | 1806 | 59  | 152  | 6265 | 2   |
| CONTIG-007651 | 66   | 7   | 25   | 2    | 0   |
| CONTIG-007652 | 550  | 77  | 65   | 1498 | 4   |
| CONTIG-007653 | 359  | 21  | 214  | 244  | 2   |
| CONTIG-007656 | 152  | 16  | 71   | 53   | 0   |
| CONTIG-007657 | 306  | 11  | 28   | 107  | 0   |
| CONTIG-007658 | 60   | 233 | 91   | 255  | 14  |
| CONTIG-007660 | 917  | 31  | 144  | 1245 | 2   |
| CONTIG-007661 | 124  | 6   | 3    | 0    | 0   |
| CONTIG-007663 | 580  | 26  | 298  | 394  | 6   |
| CONTIG-007664 | 836  | 17  | 45   | 322  | 30  |
| CONTIG-007665 | 571  | 116 | 949  | 932  | 264 |
| CONTIG-007676 | 60   | 196 | 26   | 0    | 0   |
| CONTIG-007677 | 695  | 29  | 324  | 749  | 2   |
| CONTIG-007678 | 155  | 114 | 213  | 267  | 8   |
| CONTIG-007679 | 705  | 17  | 139  | 428  | 4   |
| CONTIG-007681 | 443  | 101 | 159  | 1072 | 230 |
| CONTIG-007682 | 324  | 29  | 71   | 352  | 0   |
| CONTIG-007683 | 165  | 9   | 2    | 43   | 0   |
| CONTIG-007690 | 108  | 14  | 74   | 19   | 0   |
| CONTIG-007691 | 381  | 16  | 64   | 260  | 2   |
| CONTIG-007692 | 203  | 16  | 31   | 73   | 0   |
| CONTIG-007693 | 122  | 121 | 943  | 168  | 0   |
| CONTIG-007694 | 99   | 241 | 1004 | 586  | 2   |
| CONTIG-007695 | 64   | 12  | 0    | 20   | 0   |
| CONTIG-007696 | 141  | 41  | 31   | 61   | 0   |
| CONTIG-007697 | 44   | 421 | 73   | 224  | 0   |
| CONTIG-007698 | 405  | 54  | 399  | 365  | 14  |
| CONTIG-007699 | 1326 | 100 | 1004 | 4089 | 38  |
| CONTIG-007700 | 231  | 51  | 95   | 463  | 0   |
| CONTIG-007702 | 622  | 219 | 1178 | 2802 | 236 |
| CONTIG-007703 | 504  | 31  | 538  | 306  | 0   |

|               |      |     |      |      |     |
|---------------|------|-----|------|------|-----|
| CONTIG-007704 | 267  | 18  | 20   | 2    | 0   |
| CONTIG-007705 | 2061 | 14  | 137  | 816  | 0   |
| CONTIG-007706 | 228  | 17  | 92   | 90   | 2   |
| CONTIG-007709 | 172  | 148 | 813  | 647  | 13  |
| CONTIG-007710 | 37   | 286 | 725  | 0    | 2   |
| CONTIG-007711 | 844  | 18  | 111  | 803  | 0   |
| CONTIG-007712 | 80   | 8   | 16   | 12   | 0   |
| CONTIG-007713 | 1165 | 121 | 952  | 4464 | 39  |
| CONTIG-007714 | 93   | 3   | 4    | 6    | 0   |
| CONTIG-007715 | 74   | 77  | 89   | 2    | 0   |
| CONTIG-007719 | 337  | 35  | 126  | 401  | 0   |
| CONTIG-007720 | 423  | 19  | 81   | 472  | 0   |
| CONTIG-007721 | 104  | 5   | 27   | 4    | 0   |
| CONTIG-007722 | 148  | 29  | 180  | 35   | 0   |
| CONTIG-007723 | 76   | 408 | 199  | 722  | 108 |
| CONTIG-007726 | 104  | 7   | 2    | 21   | 0   |
| CONTIG-007727 | 500  | 7   | 13   | 103  | 0   |
| CONTIG-007729 | 215  | 39  | 234  | 224  | 0   |
| CONTIG-007730 | 381  | 13  | 114  | 102  | 2   |
| CONTIG-007731 | 606  | 106 | 755  | 2166 | 53  |
| CONTIG-007732 | 90   | 9   | 15   | 22   | 0   |
| CONTIG-007733 | 1197 | 45  | 335  | 1097 | 46  |
| CONTIG-007734 | 252  | 183 | 784  | 1469 | 10  |
| CONTIG-007735 | 816  | 37  | 211  | 618  | 52  |
| CONTIG-007736 | 81   | 4   | 4    | 11   | 0   |
| CONTIG-007737 | 455  | 46  | 372  | 611  | 4   |
| CONTIG-007738 | 227  | 6   | 21   | 12   | 0   |
| CONTIG-007740 | 74   | 552 | 219  | 675  | 80  |
| CONTIG-007741 | 186  | 21  | 270  | 0    | 0   |
| CONTIG-007742 | 86   | 5   | 0    | 14   | 0   |
| CONTIG-007744 | 101  | 728 | 0    | 0    | 294 |
| CONTIG-007745 | 322  | 8   | 60   | 55   | 2   |
| CONTIG-007747 | 79   | 27  | 31   | 50   | 0   |
| CONTIG-007748 | 47   | 457 | 85   | 302  | 67  |
| CONTIG-007749 | 93   | 368 | 320  | 1007 | 32  |
| CONTIG-007750 | 114  | 8   | 12   | 29   | 0   |
| CONTIG-007751 | 307  | 7   | 10   | 75   | 0   |
| CONTIG-007752 | 93   | 5   | 3    | 14   | 0   |
| CONTIG-007753 | 547  | 20  | 99   | 184  | 30  |
| CONTIG-007754 | 219  | 12  | 34   | 79   | 0   |
| CONTIG-007755 | 216  | 311 | 1166 | 1232 | 180 |
| CONTIG-007756 | 94   | 77  | 324  | 0    | 2   |
| CONTIG-007763 | 1388 | 71  | 572  | 2090 | 190 |
| CONTIG-007764 | 192  | 29  | 117  | 187  | 0   |
| CONTIG-007767 | 550  | 32  | 155  | 358  | 80  |
| CONTIG-007768 | 383  | 30  | 96   | 211  | 11  |
| CONTIG-007769 | 104  | 27  | 21   | 62   | 0   |

|               |      |     |     |      |     |
|---------------|------|-----|-----|------|-----|
| CONTIG-007770 | 657  | 15  | 31  | 269  | 6   |
| CONTIG-007771 | 973  | 39  | 866 | 1436 | 4   |
| CONTIG-007772 | 212  | 346 | 816 | 1421 | 176 |
| CONTIG-007774 | 309  | 7   | 16  | 43   | 2   |
| CONTIG-007775 | 182  | 323 | 165 | 3080 | 17  |
| CONTIG-007776 | 568  | 16  | 137 | 133  | 0   |
| CONTIG-007777 | 92   | 13  | 14  | 33   | 0   |
| CONTIG-007778 | 142  | 13  | 21  | 64   | 0   |
| CONTIG-007779 | 191  | 63  | 828 | 59   | 0   |
| CONTIG-007780 | 184  | 11  | 29  | 71   | 0   |
| CONTIG-007781 | 103  | 10  | 17  | 34   | 0   |
| CONTIG-007782 | 316  | 8   | 72  | 62   | 0   |
| CONTIG-007783 | 89   | 10  | 5   | 35   | 0   |
| CONTIG-007784 | 361  | 17  | 105 | 244  | 0   |
| CONTIG-007791 | 1166 | 22  | 88  | 289  | 2   |
| CONTIG-007792 | 87   | 5   | 25  | 0    | 0   |
| CONTIG-007793 | 342  | 12  | 55  | 145  | 0   |
| CONTIG-007794 | 522  | 22  | 159 | 249  | 4   |
| CONTIG-007796 | 442  | 11  | 129 | 84   | 0   |
| CONTIG-007798 | 89   | 411 | 256 | 0    | 0   |
| CONTIG-007799 | 59   | 146 | 89  | 103  | 12  |
| CONTIG-007800 | 89   | 4   | 4   | 4    | 0   |
| CONTIG-007801 | 189  | 22  | 57  | 138  | 0   |
| CONTIG-007803 | 279  | 22  | 54  | 219  | 2   |
| CONTIG-007804 | 163  | 6   | 25  | 14   | 0   |
| CONTIG-007806 | 73   | 5   | 7   | 11   | 0   |
| CONTIG-007808 | 79   | 40  | 22  | 11   | 20  |
| CONTIG-007809 | 135  | 24  | 45  | 84   | 0   |
| CONTIG-007811 | 134  | 63  | 252 | 130  | 0   |
| CONTIG-007812 | 205  | 527 | 662 | 2280 | 221 |
| CONTIG-007813 | 644  | 18  | 181 | 247  | 10  |
| CONTIG-007814 | 271  | 39  | 201 | 393  | 4   |
| CONTIG-007815 | 44   | 496 | 115 | 532  | 0   |
| CONTIG-007816 | 493  | 51  | 160 | 720  | 10  |
| CONTIG-007818 | 198  | 18  | 13  | 100  | 0   |
| CONTIG-007819 | 139  | 75  | 889 | 81   | 0   |
| CONTIG-007820 | 408  | 13  | 96  | 244  | 2   |
| CONTIG-007821 | 1756 | 31  | 315 | 1302 | 40  |
| CONTIG-007822 | 63   | 4   | 0   | 7    | 0   |
| CONTIG-007823 | 102  | 6   | 0   | 24   | 0   |
| CONTIG-007825 | 120  | 4   | 2   | 0    | 0   |
| CONTIG-007828 | 97   | 25  | 28  | 61   | 0   |
| CONTIG-007829 | 282  | 18  | 38  | 166  | 5   |
| CONTIG-007836 | 182  | 219 | 428 | 1725 | 8   |
| CONTIG-007837 | 66   | 8   | 10  | 22   | 0   |
| CONTIG-007838 | 572  | 25  | 333 | 447  | 0   |
| CONTIG-007839 | 236  | 83  | 279 | 960  | 0   |



|               |      |      |      |      |     |
|---------------|------|------|------|------|-----|
| CONTIG-007842 | 168  | 7    | 0    | 31   | 0   |
| CONTIG-007843 | 137  | 10   | 5    | 63   | 0   |
| CONTIG-007844 | 342  | 9    | 17   | 80   | 2   |
| CONTIG-007845 | 92   | 11   | 97   | 0    | 0   |
| CONTIG-007846 | 334  | 34   | 79   | 519  | 0   |
| CONTIG-007847 | 44   | 1177 | 122  | 962  | 86  |
| CONTIG-007848 | 285  | 19   | 298  | 112  | 0   |
| CONTIG-007849 | 320  | 41   | 297  | 129  | 6   |
| CONTIG-007850 | 181  | 11   | 5    | 11   | 0   |
| CONTIG-007851 | 1306 | 50   | 2214 | 1990 | 13  |
| CONTIG-007852 | 117  | 31   | 274  | 30   | 0   |
| CONTIG-007853 | 265  | 21   | 119  | 100  | 0   |
| CONTIG-007854 | 347  | 80   | 313  | 915  | 18  |
| CONTIG-007855 | 709  | 24   | 32   | 856  | 0   |
| CONTIG-007856 | 129  | 11   | 26   | 68   | 0   |
| CONTIG-007857 | 89   | 12   | 3    | 16   | 2   |
| CONTIG-007858 | 151  | 85   | 161  | 653  | 0   |
| CONTIG-007859 | 153  | 5    | 8    | 9    | 0   |
| CONTIG-007860 | 437  | 24   | 620  | 162  | 0   |
| CONTIG-007861 | 152  | 144  | 141  | 1259 | 0   |
| CONTIG-007862 | 934  | 22   | 1120 | 381  | 0   |
| CONTIG-007863 | 2173 | 58   | 212  | 8205 | 0   |
| CONTIG-007864 | 653  | 13   | 323  | 220  | 0   |
| CONTIG-007865 | 47   | 274  | 344  | 166  | 26  |
| CONTIG-007871 | 38   | 71   | 21   | 41   | 0   |
| CONTIG-007872 | 141  | 6    | 3    | 25   | 0   |
| CONTIG-007873 | 143  | 187  | 223  | 0    | 503 |
| CONTIG-007874 | 64   | 14   | 29   | 0    | 0   |
| CONTIG-007875 | 722  | 23   | 258  | 706  | 2   |
| CONTIG-007881 | 228  | 10   | 3    | 80   | 0   |
| CONTIG-007882 | 454  | 14   | 47   | 204  | 2   |
| CONTIG-007883 | 227  | 5    | 48   | 11   | 0   |
| CONTIG-007884 | 246  | 27   | 45   | 290  | 0   |
| CONTIG-007885 | 307  | 50   | 75   | 687  | 8   |
| CONTIG-007886 | 78   | 5    | 26   | 5    | 0   |
| CONTIG-007889 | 1114 | 46   | 185  | 1772 | 15  |
| CONTIG-007891 | 171  | 9    | 46   | 10   | 0   |
| CONTIG-007892 | 291  | 5    | 6    | 41   | 0   |
| CONTIG-007893 | 103  | 36   | 35   | 15   | 0   |
| CONTIG-007894 | 737  | 94   | 840  | 3075 | 164 |
| CONTIG-007895 | 576  | 26   | 16   | 757  | 0   |
| CONTIG-007897 | 263  | 29   | 544  | 0    | 0   |
| CONTIG-007898 | 158  | 12   | 188  | 0    | 0   |
| CONTIG-007899 | 87   | 5    | 0    | 3    | 0   |
| CONTIG-007901 | 487  | 29   | 193  | 516  | 0   |
| CONTIG-007903 | 408  | 19   | 184  | 109  | 4   |
| CONTIG-007904 | 968  | 33   | 93   | 368  | 0   |

|               |      |     |     |      |     |
|---------------|------|-----|-----|------|-----|
| CONTIG-007905 | 59   | 15  | 9   | 34   | 0   |
| CONTIG-007906 | 555  | 42  | 205 | 1334 | 0   |
| CONTIG-007907 | 497  | 30  | 136 | 432  | 4   |
| CONTIG-007908 | 145  | 12  | 0   | 66   | 0   |
| CONTIG-007909 | 732  | 24  | 134 | 351  | 17  |
| CONTIG-007910 | 67   | 959 | 350 | 1725 | 133 |
| CONTIG-007911 | 995  | 22  | 268 | 693  | 5   |
| CONTIG-007912 | 581  | 12  | 56  | 164  | 4   |
| CONTIG-007914 | 300  | 9   | 30  | 61   | 4   |
| CONTIG-007915 | 328  | 24  | 148 | 268  | 0   |
| CONTIG-007916 | 251  | 88  | 252 | 446  | 21  |
| CONTIG-007917 | 207  | 9   | 38  | 43   | 0   |
| CONTIG-007918 | 206  | 85  | 393 | 787  | 0   |
| CONTIG-007919 | 189  | 8   | 12  | 27   | 0   |
| CONTIG-007920 | 405  | 19  | 25  | 253  | 2   |
| CONTIG-007922 | 423  | 17  | 20  | 124  | 5   |
| CONTIG-007923 | 372  | 137 | 537 | 1600 | 0   |
| CONTIG-007924 | 411  | 13  | 72  | 96   | 0   |
| CONTIG-007925 | 158  | 8   | 8   | 31   | 2   |
| CONTIG-007926 | 799  | 25  | 434 | 798  | 0   |
| CONTIG-007927 | 108  | 5   | 9   | 6    | 0   |
| CONTIG-007928 | 143  | 72  | 215 | 203  | 0   |
| CONTIG-007929 | 171  | 23  | 89  | 92   | 0   |
| CONTIG-007930 | 492  | 14  | 109 | 129  | 2   |
| CONTIG-007931 | 811  | 89  | 286 | 2679 | 49  |
| CONTIG-007932 | 161  | 6   | 0   | 29   | 2   |
| CONTIG-007933 | 128  | 962 | 30  | 4071 | 0   |
| CONTIG-007934 | 192  | 7   | 8   | 43   | 0   |
| CONTIG-007935 | 93   | 319 | 317 | 209  | 71  |
| CONTIG-007936 | 567  | 22  | 260 | 237  | 4   |
| CONTIG-007937 | 194  | 32  | 217 | 76   | 0   |
| CONTIG-007938 | 333  | 24  | 90  | 193  | 2   |
| CONTIG-007939 | 604  | 67  | 713 | 1108 | 43  |
| CONTIG-007940 | 104  | 5   | 9   | 14   | 0   |
| CONTIG-007941 | 226  | 14  | 124 | 40   | 0   |
| CONTIG-007942 | 1198 | 37  | 169 | 965  | 0   |
| CONTIG-007943 | 331  | 5   | 9   | 39   | 0   |
| CONTIG-007944 | 76   | 10  | 12  | 7    | 0   |
| CONTIG-007952 | 317  | 22  | 112 | 239  | 4   |
| CONTIG-007953 | 82   | 4   | 6   | 2    | 0   |
| CONTIG-007954 | 698  | 26  | 79  | 684  | 2   |
| CONTIG-007955 | 66   | 10  | 38  | 7    | 0   |
| CONTIG-007956 | 45   | 14  | 0   | 6    | 0   |
| CONTIG-007958 | 284  | 148 | 41  | 216  | 0   |
| CONTIG-007959 | 583  | 16  | 186 | 278  | 2   |
| CONTIG-007960 | 50   | 464 | 149 | 438  | 78  |
| CONTIG-007961 | 103  | 3   | 0   | 12   | 0   |

|               |      |     |      |      |      |
|---------------|------|-----|------|------|------|
| CONTIG-007962 | 396  | 10  | 9    | 109  | 0    |
| CONTIG-007963 | 126  | 8   | 32   | 20   | 0    |
| CONTIG-007965 | 202  | 274 | 285  | 14   | 1008 |
| CONTIG-007966 | 290  | 16  | 62   | 137  | 4    |
| CONTIG-007967 | 215  | 164 | 159  | 1222 | 82   |
| CONTIG-007968 | 344  | 22  | 33   | 266  | 2    |
| CONTIG-007970 | 407  | 19  | 175  | 284  | 0    |
| CONTIG-007971 | 410  | 27  | 58   | 552  | 2    |
| CONTIG-007972 | 93   | 4   | 8    | 0    | 0    |
| CONTIG-007973 | 685  | 30  | 234  | 558  | 2    |
| CONTIG-007978 | 88   | 20  | 121  | 17   | 0    |
| CONTIG-007979 | 53   | 679 | 482  | 1135 | 21   |
| CONTIG-007980 | 439  | 14  | 61   | 239  | 0    |
| CONTIG-007981 | 843  | 33  | 201  | 804  | 16   |
| CONTIG-007982 | 401  | 24  | 14   | 354  | 2    |
| CONTIG-007983 | 654  | 54  | 225  | 761  | 47   |
| CONTIG-007984 | 209  | 22  | 284  | 50   | 0    |
| CONTIG-007986 | 72   | 348 | 479  | 762  | 82   |
| CONTIG-007987 | 279  | 11  | 29   | 64   | 0    |
| CONTIG-007988 | 1524 | 27  | 225  | 1874 | 3    |
| CONTIG-007989 | 374  | 59  | 242  | 964  | 4    |
| CONTIG-007990 | 1106 | 24  | 46   | 789  | 0    |
| CONTIG-007991 | 199  | 35  | 11   | 104  | 2    |
| CONTIG-008000 | 730  | 31  | 227  | 439  | 0    |
| CONTIG-008001 | 412  | 76  | 435  | 1115 | 7    |
| CONTIG-008003 | 525  | 23  | 122  | 324  | 0    |
| CONTIG-008004 | 186  | 3   | 8    | 13   | 0    |
| CONTIG-008005 | 135  | 5   | 4    | 12   | 0    |
| CONTIG-008006 | 987  | 70  | 801  | 3215 | 20   |
| CONTIG-008007 | 162  | 5   | 8    | 31   | 0    |
| CONTIG-008008 | 650  | 26  | 96   | 361  | 18   |
| CONTIG-008011 | 154  | 186 | 260  | 636  | 63   |
| CONTIG-008012 | 161  | 9   | 0    | 53   | 0    |
| CONTIG-008013 | 153  | 6   | 2    | 15   | 0    |
| CONTIG-008015 | 62   | 5   | 14   | 0    | 2    |
| CONTIG-008016 | 210  | 12  | 63   | 67   | 0    |
| CONTIG-008017 | 298  | 25  | 25   | 315  | 2    |
| CONTIG-008018 | 202  | 7   | 75   | 18   | 0    |
| CONTIG-008019 | 478  | 18  | 213  | 246  | 0    |
| CONTIG-008020 | 890  | 195 | 404  | 5178 | 937  |
| CONTIG-008021 | 296  | 11  | 0    | 88   | 0    |
| CONTIG-008022 | 241  | 623 | 2450 | 4398 | 111  |
| CONTIG-008023 | 403  | 15  | 38   | 188  | 2    |
| CONTIG-008024 | 129  | 7   | 26   | 27   | 0    |
| CONTIG-008026 | 83   | 46  | 80   | 74   | 0    |
| CONTIG-008027 | 55   | 199 | 42   | 287  | 0    |
| CONTIG-008028 | 84   | 10  | 47   | 11   | 0    |

|               |      |     |      |      |      |
|---------------|------|-----|------|------|------|
| CONTIG-008030 | 284  | 19  | 23   | 145  | 14   |
| CONTIG-008031 | 99   | 3   | 4    | 9    | 0    |
| CONTIG-008032 | 650  | 27  | 26   | 607  | 0    |
| CONTIG-008033 | 1606 | 64  | 689  | 2427 | 146  |
| CONTIG-008034 | 95   | 9   | 26   | 10   | 0    |
| CONTIG-008035 | 228  | 13  | 23   | 102  | 0    |
| CONTIG-008036 | 783  | 32  | 207  | 384  | 15   |
| CONTIG-008037 | 977  | 21  | 165  | 860  | 4    |
| CONTIG-008038 | 239  | 9   | 10   | 94   | 0    |
| CONTIG-008039 | 1307 | 20  | 215  | 815  | 26   |
| CONTIG-008043 | 379  | 15  | 179  | 127  | 0    |
| CONTIG-008044 | 615  | 17  | 75   | 287  | 0    |
| CONTIG-008045 | 1104 | 23  | 20   | 1081 | 5    |
| CONTIG-008046 | 547  | 14  | 52   | 318  | 0    |
| CONTIG-008047 | 335  | 19  | 9    | 215  | 0    |
| CONTIG-008048 | 138  | 8   | 4    | 32   | 0    |
| CONTIG-008049 | 297  | 30  | 206  | 251  | 4    |
| CONTIG-008050 | 170  | 209 | 1014 | 974  | 0    |
| CONTIG-008051 | 311  | 12  | 10   | 129  | 2    |
| CONTIG-008052 | 138  | 14  | 17   | 66   | 0    |
| CONTIG-008054 | 581  | 13  | 101  | 146  | 2    |
| CONTIG-008063 | 97   | 51  | 23   | 0    | 0    |
| CONTIG-008064 | 817  | 24  | 79   | 450  | 29   |
| CONTIG-008065 | 248  | 8   | 61   | 56   | 0    |
| CONTIG-008068 | 182  | 16  | 152  | 51   | 0    |
| CONTIG-008069 | 266  | 24  | 199  | 156  | 2    |
| CONTIG-008070 | 710  | 90  | 1139 | 2292 | 31   |
| CONTIG-008071 | 255  | 13  | 20   | 80   | 0    |
| CONTIG-008072 | 471  | 13  | 15   | 202  | 2    |
| CONTIG-008075 | 454  | 12  | 69   | 157  | 2    |
| CONTIG-008076 | 215  | 92  | 278  | 242  | 13   |
| CONTIG-008077 | 328  | 39  | 114  | 638  | 2    |
| CONTIG-008078 | 164  | 11  | 28   | 38   | 0    |
| CONTIG-008079 | 76   | 5   | 2    | 14   | 0    |
| CONTIG-008081 | 218  | 573 | 1496 | 1566 | 210  |
| CONTIG-008083 | 484  | 12  | 36   | 220  | 0    |
| CONTIG-008084 | 574  | 22  | 13   | 62   | 0    |
| CONTIG-008093 | 308  | 38  | 54   | 556  | 7    |
| CONTIG-008094 | 885  | 94  | 713  | 2052 | 1186 |
| CONTIG-008095 | 518  | 77  | 105  | 1257 | 26   |
| CONTIG-008096 | 370  | 207 | 326  | 1468 | 327  |
| CONTIG-008097 | 85   | 9   | 3    | 25   | 0    |
| CONTIG-008098 | 1442 | 14  | 117  | 422  | 10   |
| CONTIG-008099 | 119  | 7   | 13   | 28   | 0    |
| CONTIG-008102 | 172  | 33  | 53   | 214  | 0    |
| CONTIG-008105 | 110  | 110 | 928  | 24   | 0    |
| CONTIG-008106 | 1806 | 45  | 183  | 3802 | 17   |

|               |      |     |     |      |     |
|---------------|------|-----|-----|------|-----|
| CONTIG-008107 | 73   | 10  | 35  | 16   | 0   |
| CONTIG-008108 | 195  | 14  | 48  | 84   | 2   |
| CONTIG-008109 | 155  | 17  | 33  | 86   | 0   |
| CONTIG-008110 | 815  | 12  | 37  | 297  | 2   |
| CONTIG-008111 | 192  | 9   | 11  | 67   | 0   |
| CONTIG-008112 | 962  | 23  | 47  | 957  | 15  |
| CONTIG-008113 | 1477 | 24  | 112 | 1859 | 5   |
| CONTIG-008114 | 469  | 84  | 274 | 1916 | 2   |
| CONTIG-008116 | 134  | 8   | 6   | 38   | 0   |
| CONTIG-008117 | 743  | 53  | 441 | 752  | 31  |
| CONTIG-008119 | 248  | 7   | 5   | 36   | 0   |
| CONTIG-008122 | 374  | 20  | 188 | 167  | 11  |
| CONTIG-008123 | 48   | 245 | 80  | 307  | 4   |
| CONTIG-008124 | 280  | 11  | 2   | 64   | 2   |
| CONTIG-008125 | 54   | 564 | 174 | 491  | 115 |
| CONTIG-008126 | 114  | 8   | 30  | 17   | 0   |
| CONTIG-008127 | 164  | 31  | 37  | 36   | 2   |
| CONTIG-008128 | 657  | 52  | 288 | 1391 | 0   |
| CONTIG-008129 | 1134 | 18  | 192 | 398  | 2   |
| CONTIG-008130 | 79   | 9   | 5   | 24   | 0   |
| CONTIG-008131 | 1532 | 49  | 642 | 3775 | 4   |
| CONTIG-008132 | 106  | 189 | 55  | 480  | 0   |
| CONTIG-008133 | 555  | 57  | 590 | 1035 | 6   |
| CONTIG-008134 | 214  | 11  | 53  | 69   | 0   |
| CONTIG-008135 | 155  | 7   | 0   | 49   | 0   |
| CONTIG-008136 | 1900 | 56  | 835 | 3991 | 52  |
| CONTIG-008137 | 172  | 124 | 164 | 1123 | 0   |
| CONTIG-008146 | 62   | 481 | 284 | 426  | 34  |
| CONTIG-008147 | 492  | 10  | 9   | 112  | 16  |
| CONTIG-008148 | 477  | 20  | 68  | 205  | 0   |
| CONTIG-008149 | 145  | 8   | 45  | 16   | 0   |
| CONTIG-008150 | 61   | 5   | 13  | 5    | 0   |
| CONTIG-008151 | 102  | 225 | 363 | 260  | 119 |
| CONTIG-008152 | 327  | 8   | 2   | 82   | 0   |
| CONTIG-008153 | 3628 | 33  | 431 | 6198 | 11  |
| CONTIG-008154 | 300  | 15  | 69  | 148  | 0   |
| CONTIG-008155 | 169  | 109 | 514 | 273  | 6   |
| CONTIG-008156 | 112  | 4   | 0   | 2    | 0   |
| CONTIG-008157 | 268  | 16  | 54  | 65   | 0   |
| CONTIG-008158 | 406  | 19  | 183 | 183  | 0   |
| CONTIG-008159 | 69   | 3   | 2   | 2    | 0   |
| CONTIG-008160 | 264  | 18  | 111 | 132  | 0   |
| CONTIG-008161 | 313  | 31  | 114 | 297  | 6   |
| CONTIG-008162 | 424  | 87  | 280 | 1722 | 6   |
| CONTIG-008163 | 164  | 6   | 5   | 29   | 0   |
| CONTIG-008164 | 139  | 7   | 30  | 4    | 0   |
| CONTIG-008165 | 63   | 18  | 12  | 7    | 0   |

|               |      |     |     |      |     |
|---------------|------|-----|-----|------|-----|
| CONTIG-008166 | 96   | 9   | 15  | 21   | 0   |
| CONTIG-008167 | 75   | 32  | 19  | 75   | 6   |
| CONTIG-008168 | 285  | 21  | 76  | 137  | 13  |
| CONTIG-008170 | 108  | 17  | 147 | 0    | 0   |
| CONTIG-008171 | 917  | 50  | 611 | 786  | 61  |
| CONTIG-008172 | 136  | 5   | 14  | 19   | 2   |
| CONTIG-008173 | 1036 | 92  | 400 | 2295 | 187 |
| CONTIG-008174 | 109  | 242 | 19  | 687  | 40  |
| CONTIG-008175 | 63   | 7   | 2   | 4    | 0   |
| CONTIG-008176 | 709  | 25  | 113 | 369  | 2   |
| CONTIG-008177 | 98   | 99  | 79  | 242  | 4   |
| CONTIG-008178 | 179  | 80  | 63  | 869  | 0   |
| CONTIG-008179 | 247  | 6   | 4   | 13   | 2   |
| CONTIG-008180 | 110  | 407 | 70  | 2352 | 4   |
| CONTIG-008181 | 57   | 770 | 275 | 1042 | 93  |
| CONTIG-008182 | 93   | 13  | 0   | 49   | 2   |
| CONTIG-008183 | 400  | 102 | 130 | 1714 | 118 |
| CONTIG-008190 | 779  | 54  | 183 | 850  | 41  |
| CONTIG-008192 | 81   | 83  | 339 | 8    | 0   |
| CONTIG-008193 | 210  | 22  | 218 | 143  | 0   |
| CONTIG-008194 | 891  | 89  | 433 | 2092 | 201 |
| CONTIG-008195 | 534  | 88  | 440 | 1195 | 57  |
| CONTIG-008196 | 514  | 14  | 37  | 256  | 0   |
| CONTIG-008197 | 824  | 34  | 127 | 921  | 31  |
| CONTIG-008205 | 135  | 58  | 97  | 260  | 4   |
| CONTIG-008206 | 98   | 302 | 124 | 1212 | 56  |
| CONTIG-008207 | 219  | 148 | 215 | 892  | 16  |
| CONTIG-008208 | 215  | 109 | 155 | 715  | 28  |
| CONTIG-008209 | 427  | 19  | 70  | 329  | 0   |
| CONTIG-008210 | 164  | 14  | 39  | 67   | 3   |
| CONTIG-008211 | 509  | 74  | 425 | 974  | 85  |
| CONTIG-008212 | 105  | 29  | 6   | 61   | 0   |
| CONTIG-008213 | 38   | 41  | 24  | 21   | 0   |
| CONTIG-008214 | 139  | 31  | 102 | 105  | 0   |
| CONTIG-008215 | 199  | 9   | 64  | 20   | 0   |
| CONTIG-008216 | 64   | 3   | 4   | 0    | 0   |
| CONTIG-008217 | 808  | 20  | 128 | 620  | 2   |
| CONTIG-008218 | 107  | 5   | 8   | 14   | 0   |
| CONTIG-008219 | 1298 | 79  | 128 | 4896 | 21  |
| CONTIG-008220 | 436  | 21  | 508 | 142  | 0   |
| CONTIG-008221 | 293  | 13  | 81  | 114  | 0   |
| CONTIG-008222 | 443  | 34  | 576 | 160  | 10  |
| CONTIG-008223 | 214  | 10  | 28  | 47   | 0   |
| CONTIG-008224 | 63   | 2   | 2   | 0    | 0   |
| CONTIG-008225 | 96   | 3   | 10  | 2    | 0   |
| CONTIG-008227 | 534  | 25  | 41  | 506  | 0   |
| CONTIG-008230 | 155  | 12  | 56  | 7    | 0   |

|               |      |     |      |      |     |
|---------------|------|-----|------|------|-----|
| CONTIG-008231 | 147  | 91  | 59   | 470  | 8   |
| CONTIG-008235 | 1139 | 44  | 322  | 2035 | 42  |
| CONTIG-008238 | 854  | 25  | 465  | 639  | 6   |
| CONTIG-008239 | 796  | 114 | 1139 | 1750 | 179 |
| CONTIG-008240 | 365  | 12  | 8    | 96   | 0   |
| CONTIG-008241 | 349  | 12  | 2    | 107  | 2   |
| CONTIG-008242 | 88   | 17  | 58   | 0    | 0   |
| CONTIG-008243 | 482  | 32  | 37   | 417  | 0   |
| CONTIG-008244 | 265  | 6   | 9    | 40   | 0   |
| CONTIG-008246 | 113  | 11  | 88   | 2    | 0   |
| CONTIG-008247 | 870  | 36  | 247  | 635  | 57  |
| CONTIG-008248 | 103  | 10  | 17   | 22   | 0   |
| CONTIG-008249 | 249  | 33  | 43   | 192  | 0   |
| CONTIG-008250 | 272  | 19  | 61   | 157  | 6   |
| CONTIG-008251 | 533  | 50  | 287  | 516  | 15  |
| CONTIG-008252 | 797  | 17  | 9    | 78   | 0   |
| CONTIG-008253 | 908  | 41  | 609  | 1426 | 0   |
| CONTIG-008254 | 1890 | 27  | 165  | 2145 | 37  |
| CONTIG-008255 | 404  | 15  | 81   | 86   | 0   |
| CONTIG-008256 | 69   | 417 | 67   | 1060 | 0   |
| CONTIG-008257 | 268  | 17  | 223  | 73   | 2   |
| CONTIG-008258 | 78   | 477 | 110  | 1844 | 0   |
| CONTIG-008260 | 83   | 4   | 5    | 8    | 0   |
| CONTIG-008261 | 1350 | 32  | 220  | 2566 | 0   |
| CONTIG-008267 | 93   | 41  | 2    | 0    | 19  |
| CONTIG-008268 | 180  | 8   | 72   | 26   | 0   |
| CONTIG-008269 | 352  | 12  | 83   | 120  | 0   |
| CONTIG-008270 | 65   | 10  | 17   | 9    | 0   |
| CONTIG-008271 | 271  | 17  | 50   | 135  | 0   |
| CONTIG-008272 | 931  | 41  | 486  | 672  | 39  |
| CONTIG-008276 | 139  | 5   | 0    | 20   | 0   |
| CONTIG-008277 | 444  | 138 | 2104 | 722  | 57  |
| CONTIG-008278 | 305  | 24  | 220  | 280  | 0   |
| CONTIG-008279 | 328  | 18  | 105  | 179  | 0   |
| CONTIG-008280 | 131  | 176 | 52   | 979  | 4   |
| CONTIG-008281 | 276  | 32  | 162  | 333  | 2   |
| CONTIG-008282 | 1105 | 14  | 85   | 325  | 8   |
| CONTIG-008283 | 728  | 93  | 809  | 3342 | 4   |
| CONTIG-008285 | 127  | 6   | 6    | 20   | 0   |
| CONTIG-008286 | 62   | 376 | 442  | 662  | 7   |
| CONTIG-008287 | 223  | 12  | 54   | 90   | 0   |
| CONTIG-008288 | 163  | 25  | 27   | 123  | 0   |
| CONTIG-008290 | 384  | 25  | 130  | 284  | 0   |
| CONTIG-008291 | 59   | 819 | 816  | 1017 | 54  |
| CONTIG-008292 | 125  | 32  | 126  | 27   | 0   |
| CONTIG-008296 | 80   | 467 | 488  | 632  | 54  |
| CONTIG-008297 | 473  | 46  | 110  | 398  | 4   |

|               |      |     |      |      |     |
|---------------|------|-----|------|------|-----|
| CONTIG-008298 | 110  | 5   | 2    | 19   | 2   |
| CONTIG-008299 | 587  | 37  | 431  | 1107 | 0   |
| CONTIG-008300 | 211  | 19  | 53   | 93   | 0   |
| CONTIG-008301 | 92   | 6   | 7    | 9    | 0   |
| CONTIG-008306 | 997  | 81  | 340  | 1853 | 147 |
| CONTIG-008307 | 106  | 125 | 318  | 182  | 4   |
| CONTIG-008308 | 1082 | 53  | 1004 | 2251 | 8   |
| CONTIG-008309 | 543  | 20  | 522  | 232  | 0   |
| CONTIG-008310 | 168  | 148 | 732  | 945  | 6   |
| CONTIG-008311 | 903  | 19  | 198  | 547  | 8   |
| CONTIG-008312 | 638  | 16  | 26   | 273  | 0   |
| CONTIG-008313 | 532  | 21  | 144  | 285  | 11  |
| CONTIG-008314 | 410  | 17  | 48   | 239  | 0   |
| CONTIG-008315 | 519  | 53  | 36   | 1498 | 0   |
| CONTIG-008316 | 71   | 4   | 0    | 4    | 2   |
| CONTIG-008317 | 200  | 10  | 35   | 39   | 0   |
| CONTIG-008318 | 360  | 38  | 367  | 141  | 0   |
| CONTIG-008319 | 49   | 17  | 5    | 2    | 0   |
| CONTIG-008320 | 396  | 30  | 611  | 322  | 0   |
| CONTIG-008321 | 49   | 13  | 7    | 7    | 0   |
| CONTIG-008322 | 184  | 13  | 110  | 56   | 0   |
| CONTIG-008324 | 215  | 39  | 629  | 162  | 0   |
| CONTIG-008325 | 71   | 11  | 23   | 20   | 0   |
| CONTIG-008328 | 905  | 25  | 0    | 0    | 136 |
| CONTIG-008330 | 381  | 42  | 255  | 216  | 16  |
| CONTIG-008331 | 600  | 25  | 123  | 592  | 2   |
| CONTIG-008332 | 387  | 165 | 192  | 3046 | 13  |
| CONTIG-008340 | 688  | 48  | 779  | 1182 | 5   |
| CONTIG-008341 | 863  | 17  | 45   | 75   | 0   |
| CONTIG-008342 | 167  | 17  | 34   | 67   | 0   |
| CONTIG-008343 | 460  | 11  | 60   | 162  | 0   |
| CONTIG-008344 | 364  | 15  | 21   | 186  | 0   |
| CONTIG-008346 | 239  | 6   | 4    | 44   | 0   |
| CONTIG-008347 | 125  | 17  | 26   | 68   | 0   |
| CONTIG-008348 | 898  | 16  | 58   | 794  | 0   |
| CONTIG-008349 | 206  | 125 | 174  | 1287 | 0   |
| CONTIG-008350 | 183  | 6   | 13   | 38   | 0   |
| CONTIG-008352 | 58   | 376 | 70   | 695  | 68  |
| CONTIG-008353 | 454  | 27  | 262  | 243  | 4   |
| CONTIG-008354 | 403  | 27  | 360  | 208  | 0   |
| CONTIG-008355 | 740  | 60  | 446  | 1719 | 2   |
| CONTIG-008357 | 944  | 35  | 134  | 854  | 57  |
| CONTIG-008358 | 977  | 22  | 170  | 939  | 4   |
| CONTIG-008359 | 313  | 142 | 152  | 2089 | 2   |
| CONTIG-008360 | 720  | 75  | 333  | 1362 | 58  |
| CONTIG-008361 | 84   | 5   | 2    | 5    | 0   |
| CONTIG-008365 | 117  | 102 | 139  | 178  | 4   |



|               |      |     |      |      |     |
|---------------|------|-----|------|------|-----|
| CONTIG-008366 | 75   | 86  | 64   | 305  | 0   |
| CONTIG-008367 | 91   | 56  | 6    | 257  | 0   |
| CONTIG-008368 | 414  | 12  | 143  | 145  | 0   |
| CONTIG-008369 | 148  | 13  | 55   | 12   | 0   |
| CONTIG-008370 | 102  | 11  | 78   | 8    | 0   |
| CONTIG-008371 | 83   | 13  | 7    | 40   | 0   |
| CONTIG-008373 | 334  | 17  | 154  | 222  | 0   |
| CONTIG-008374 | 1441 | 47  | 365  | 2503 | 25  |
| CONTIG-008375 | 215  | 14  | 15   | 71   | 0   |
| CONTIG-008377 | 145  | 12  | 51   | 36   | 0   |
| CONTIG-008378 | 146  | 33  | 39   | 0    | 0   |
| CONTIG-008379 | 1729 | 38  | 337  | 2463 | 22  |
| CONTIG-008380 | 394  | 54  | 98   | 684  | 10  |
| CONTIG-008381 | 650  | 28  | 472  | 391  | 6   |
| CONTIG-008382 | 85   | 27  | 41   | 36   | 0   |
| CONTIG-008383 | 409  | 20  | 120  | 327  | 0   |
| CONTIG-008384 | 186  | 159 | 1312 | 548  | 0   |
| CONTIG-008385 | 243  | 9   | 17   | 72   | 0   |
| CONTIG-008387 | 76   | 5   | 10   | 4    | 0   |
| CONTIG-008388 | 222  | 15  | 106  | 109  | 0   |
| CONTIG-008389 | 209  | 36  | 72   | 222  | 0   |
| CONTIG-008390 | 1297 | 35  | 126  | 2308 | 2   |
| CONTIG-008392 | 157  | 12  | 18   | 58   | 0   |
| CONTIG-008393 | 164  | 6   | 18   | 10   | 2   |
| CONTIG-008394 | 482  | 44  | 114  | 501  | 21  |
| CONTIG-008395 | 97   | 7   | 2    | 31   | 0   |
| CONTIG-008396 | 481  | 120 | 266  | 1770 | 215 |
| CONTIG-008399 | 57   | 100 | 73   | 84   | 2   |
| CONTIG-008400 | 149  | 25  | 46   | 149  | 0   |
| CONTIG-008402 | 197  | 15  | 55   | 0    | 0   |
| CONTIG-008403 | 1553 | 84  | 419  | 5052 | 70  |
| CONTIG-008404 | 682  | 17  | 54   | 306  | 4   |
| CONTIG-008407 | 229  | 10  | 63   | 22   | 0   |
| CONTIG-008408 | 134  | 12  | 38   | 54   | 0   |
| CONTIG-008409 | 540  | 269 | 1831 | 2821 | 418 |
| CONTIG-008410 | 58   | 6   | 4    | 5    | 0   |
| CONTIG-008411 | 243  | 7   | 28   | 22   | 0   |
| CONTIG-008412 | 583  | 14  | 48   | 326  | 0   |
| CONTIG-008413 | 641  | 15  | 82   | 274  | 2   |
| CONTIG-008414 | 258  | 45  | 55   | 158  | 13  |
| CONTIG-008416 | 97   | 5   | 6    | 6    | 0   |
| CONTIG-008418 | 394  | 25  | 58   | 390  | 6   |
| CONTIG-008420 | 128  | 52  | 80   | 228  | 0   |
| CONTIG-008421 | 1507 | 27  | 512  | 1038 | 19  |
| CONTIG-008423 | 1207 | 58  | 366  | 2284 | 20  |
| CONTIG-008424 | 2180 | 32  | 193  | 2166 | 56  |
| CONTIG-008425 | 123  | 352 | 404  | 1772 | 5   |

|               |      |     |      |      |     |
|---------------|------|-----|------|------|-----|
| CONTIG-008426 | 214  | 6   | 10   | 46   | 0   |
| CONTIG-008428 | 133  | 39  | 12   | 141  | 2   |
| CONTIG-008430 | 133  | 342 | 584  | 1297 | 130 |
| CONTIG-008431 | 74   | 5   | 15   | 0    | 0   |
| CONTIG-008432 | 459  | 18  | 29   | 209  | 6   |
| CONTIG-008433 | 58   | 5   | 13   | 2    | 0   |
| CONTIG-008434 | 1735 | 74  | 700  | 2696 | 146 |
| CONTIG-008435 | 1082 | 16  | 462  | 455  | 2   |
| CONTIG-008436 | 377  | 26  | 216  | 0    | 48  |
| CONTIG-008437 | 78   | 2   | 0    | 4    | 0   |
| CONTIG-008438 | 371  | 13  | 28   | 19   | 2   |
| CONTIG-008439 | 84   | 10  | 52   | 10   | 0   |
| CONTIG-008440 | 288  | 22  | 11   | 79   | 0   |
| CONTIG-008441 | 1666 | 55  | 701  | 3437 | 24  |
| CONTIG-008442 | 647  | 48  | 375  | 1127 | 15  |
| CONTIG-008443 | 113  | 49  | 123  | 265  | 0   |
| CONTIG-008448 | 777  | 66  | 1644 | 1175 | 6   |
| CONTIG-008449 | 150  | 10  | 23   | 24   | 0   |
| CONTIG-008450 | 862  | 57  | 899  | 1723 | 4   |
| CONTIG-008451 | 695  | 21  | 259  | 449  | 0   |
| CONTIG-008452 | 100  | 17  | 82   | 2    | 0   |
| CONTIG-008458 | 205  | 18  | 27   | 157  | 0   |
| CONTIG-008460 | 104  | 8   | 0    | 33   | 0   |
| CONTIG-008461 | 148  | 7   | 21   | 9    | 0   |
| CONTIG-008462 | 1405 | 23  | 221  | 1165 | 14  |
| CONTIG-008463 | 133  | 15  | 32   | 12   | 0   |
| CONTIG-008464 | 150  | 10  | 55   | 21   | 0   |
| CONTIG-008465 | 181  | 9   | 42   | 49   | 0   |
| CONTIG-008466 | 193  | 7   | 30   | 25   | 0   |
| CONTIG-008467 | 107  | 41  | 11   | 100  | 0   |
| CONTIG-008468 | 597  | 12  | 38   | 161  | 4   |
| CONTIG-008469 | 77   | 5   | 0    | 14   | 0   |
| CONTIG-008470 | 523  | 13  | 16   | 377  | 0   |
| CONTIG-008471 | 777  | 53  | 1018 | 786  | 2   |
| CONTIG-008472 | 293  | 159 | 738  | 776  | 171 |
| CONTIG-008473 | 1395 | 28  | 276  | 1302 | 29  |
| CONTIG-008476 | 673  | 18  | 145  | 435  | 0   |
| CONTIG-008477 | 188  | 630 | 562  | 5074 | 50  |
| CONTIG-008478 | 134  | 14  | 62   | 30   | 2   |
| CONTIG-008479 | 448  | 63  | 95   | 644  | 18  |
| CONTIG-008480 | 68   | 6   | 0    | 14   | 2   |
| CONTIG-008481 | 526  | 63  | 574  | 1201 | 2   |
| CONTIG-008483 | 1064 | 144 | 342  | 3439 | 38  |
| CONTIG-008484 | 101  | 81  | 101  | 50   | 2   |
| CONTIG-008485 | 134  | 92  | 86   | 545  | 0   |
| CONTIG-008486 | 766  | 64  | 750  | 1877 | 7   |
| CONTIG-008487 | 206  | 14  | 15   | 105  | 0   |

|               |      |     |      |      |     |
|---------------|------|-----|------|------|-----|
| CONTIG-008488 | 174  | 158 | 162  | 1020 | 22  |
| CONTIG-008489 | 472  | 512 | 910  | 9309 | 63  |
| CONTIG-008490 | 142  | 10  | 12   | 35   | 0   |
| CONTIG-008493 | 219  | 27  | 70   | 247  | 0   |
| CONTIG-008494 | 341  | 23  | 260  | 186  | 7   |
| CONTIG-008495 | 128  | 7   | 19   | 21   | 0   |
| CONTIG-008496 | 1047 | 22  | 128  | 655  | 6   |
| CONTIG-008497 | 483  | 22  | 459  | 174  | 2   |
| CONTIG-008498 | 62   | 8   | 25   | 2    | 0   |
| CONTIG-008499 | 276  | 328 | 1768 | 2329 | 4   |
| CONTIG-008500 | 372  | 8   | 16   | 68   | 0   |
| CONTIG-008501 | 322  | 35  | 184  | 293  | 0   |
| CONTIG-008502 | 1154 | 32  | 386  | 926  | 54  |
| CONTIG-008503 | 80   | 10  | 13   | 2    | 0   |
| CONTIG-008504 | 95   | 12  | 88   | 2    | 0   |
| CONTIG-008505 | 68   | 4   | 2    | 2    | 0   |
| CONTIG-008507 | 181  | 17  | 58   | 110  | 2   |
| CONTIG-008508 | 602  | 295 | 1056 | 7489 | 86  |
| CONTIG-008509 | 555  | 16  | 27   | 393  | 0   |
| CONTIG-008510 | 824  | 20  | 44   | 294  | 0   |
| CONTIG-008511 | 146  | 161 | 2200 | 116  | 0   |
| CONTIG-008512 | 222  | 38  | 242  | 190  | 0   |
| CONTIG-008513 | 283  | 8   | 35   | 6    | 0   |
| CONTIG-008514 | 745  | 11  | 20   | 239  | 0   |
| CONTIG-008515 | 304  | 18  | 193  | 103  | 2   |
| CONTIG-008516 | 46   | 247 | 41   | 0    | 14  |
| CONTIG-008518 | 1175 | 35  | 535  | 876  | 76  |
| CONTIG-008519 | 176  | 90  | 304  | 499  | 0   |
| CONTIG-008520 | 457  | 19  | 250  | 197  | 0   |
| CONTIG-008521 | 327  | 30  | 100  | 446  | 0   |
| CONTIG-008522 | 484  | 15  | 110  | 77   | 0   |
| CONTIG-008524 | 511  | 28  | 191  | 567  | 4   |
| CONTIG-008526 | 219  | 7   | 21   | 28   | 2   |
| CONTIG-008527 | 701  | 76  | 436  | 3028 | 16  |
| CONTIG-008528 | 273  | 7   | 15   | 44   | 0   |
| CONTIG-008529 | 325  | 25  | 45   | 162  | 8   |
| CONTIG-008530 | 69   | 7   | 5    | 10   | 0   |
| CONTIG-008531 | 93   | 7   | 0    | 21   | 0   |
| CONTIG-008532 | 175  | 106 | 258  | 122  | 33  |
| CONTIG-008533 | 673  | 22  | 161  | 174  | 0   |
| CONTIG-008534 | 124  | 11  | 52   | 21   | 0   |
| CONTIG-008535 | 177  | 210 | 171  | 1386 | 142 |
| CONTIG-008536 | 149  | 17  | 49   | 108  | 0   |
| CONTIG-008541 | 441  | 13  | 30   | 187  | 2   |
| CONTIG-008542 | 114  | 9   | 49   | 18   | 0   |
| CONTIG-008543 | 147  | 15  | 95   | 38   | 0   |
| CONTIG-008544 | 536  | 8   | 12   | 158  | 2   |

|               |      |      |      |      |      |
|---------------|------|------|------|------|------|
| CONTIG-008546 | 506  | 19   | 223  | 271  | 0    |
| CONTIG-008547 | 362  | 42   | 488  | 482  | 0    |
| CONTIG-008548 | 877  | 24   | 314  | 986  | 2    |
| CONTIG-008549 | 424  | 28   | 151  | 341  | 2    |
| CONTIG-008550 | 2541 | 38   | 908  | 3384 | 32   |
| CONTIG-008551 | 934  | 38   | 469  | 1281 | 0    |
| CONTIG-008552 | 128  | 8    | 7    | 46   | 0    |
| CONTIG-008553 | 501  | 48   | 160  | 704  | 2    |
| CONTIG-008556 | 837  | 33   | 312  | 676  | 14   |
| CONTIG-008557 | 920  | 23   | 221  | 737  | 8    |
| CONTIG-008558 | 110  | 12   | 11   | 52   | 0    |
| CONTIG-008559 | 283  | 170  | 331  | 1466 | 53   |
| CONTIG-008560 | 255  | 9    | 23   | 63   | 0    |
| CONTIG-008561 | 245  | 11   | 16   | 99   | 0    |
| CONTIG-008562 | 204  | 8    | 15   | 39   | 0    |
| CONTIG-008563 | 500  | 25   | 206  | 265  | 2    |
| CONTIG-008564 | 160  | 6    | 16   | 10   | 0    |
| CONTIG-008565 | 592  | 24   | 66   | 279  | 6    |
| CONTIG-008566 | 147  | 5    | 9    | 24   | 0    |
| CONTIG-008567 | 725  | 74   | 681  | 1616 | 13   |
| CONTIG-008568 | 120  | 38   | 53   | 152  | 0    |
| CONTIG-008569 | 110  | 257  | 178  | 750  | 34   |
| CONTIG-008570 | 79   | 8    | 32   | 2    | 0    |
| CONTIG-008571 | 867  | 70   | 1848 | 1661 | 66   |
| CONTIG-008572 | 1552 | 14   | 3    | 0    | 0    |
| CONTIG-008573 | 265  | 20   | 25   | 109  | 0    |
| CONTIG-008574 | 49   | 2545 | 1720 | 672  | 1520 |
| CONTIG-008575 | 603  | 7    | 49   | 116  | 0    |
| CONTIG-008576 | 321  | 10   | 17   | 110  | 0    |
| CONTIG-008577 | 442  | 29   | 398  | 388  | 0    |
| CONTIG-008578 | 102  | 7    | 43   | 7    | 0    |
| CONTIG-008579 | 110  | 17   | 165  | 22   | 0    |
| CONTIG-008584 | 414  | 11   | 75   | 74   | 0    |
| CONTIG-008585 | 157  | 10   | 31   | 39   | 0    |
| CONTIG-008586 | 95   | 5    | 36   | 2    | 0    |
| CONTIG-008587 | 596  | 16   | 140  | 369  | 0    |
| CONTIG-008596 | 71   | 13   | 10   | 21   | 0    |
| CONTIG-008598 | 946  | 40   | 83   | 1187 | 17   |
| CONTIG-008599 | 159  | 14   | 93   | 16   | 0    |
| CONTIG-008600 | 457  | 15   | 7    | 278  | 2    |
| CONTIG-008601 | 81   | 8    | 7    | 15   | 0    |
| CONTIG-008602 | 800  | 27   | 94   | 900  | 4    |
| CONTIG-008603 | 754  | 19   | 69   | 414  | 0    |
| CONTIG-008604 | 81   | 3    | 3    | 0    | 0    |
| CONTIG-008606 | 539  | 17   | 595  | 192  | 0    |
| CONTIG-008608 | 380  | 11   | 88   | 96   | 0    |
| CONTIG-008609 | 192  | 42   | 54   | 440  | 0    |

|               |      |     |      |      |     |
|---------------|------|-----|------|------|-----|
| CONTIG-008610 | 406  | 18  | 117  | 226  | 2   |
| CONTIG-008611 | 517  | 24  | 501  | 161  | 0   |
| CONTIG-008612 | 212  | 7   | 14   | 40   | 0   |
| CONTIG-008613 | 142  | 8   | 12   | 11   | 0   |
| CONTIG-008614 | 154  | 9   | 4    | 19   | 0   |
| CONTIG-008615 | 247  | 9   | 18   | 108  | 0   |
| CONTIG-008616 | 670  | 35  | 228  | 1070 | 0   |
| CONTIG-008617 | 197  | 8   | 18   | 24   | 0   |
| CONTIG-008618 | 1031 | 47  | 530  | 1456 | 8   |
| CONTIG-008619 | 523  | 34  | 103  | 421  | 13  |
| CONTIG-008620 | 683  | 84  | 165  | 1464 | 167 |
| CONTIG-008621 | 321  | 9   | 87   | 76   | 2   |
| CONTIG-008622 | 823  | 23  | 141  | 719  | 0   |
| CONTIG-008623 | 575  | 14  | 125  | 228  | 0   |
| CONTIG-008624 | 677  | 19  | 148  | 241  | 12  |
| CONTIG-008625 | 674  | 11  | 22   | 308  | 0   |
| CONTIG-008626 | 1027 | 39  | 383  | 1322 | 21  |
| CONTIG-008631 | 73   | 9   | 21   | 6    | 0   |
| CONTIG-008632 | 116  | 6   | 21   | 19   | 0   |
| CONTIG-008633 | 252  | 20  | 100  | 107  | 0   |
| CONTIG-008637 | 145  | 33  | 431  | 10   | 0   |
| CONTIG-008638 | 234  | 10  | 8    | 75   | 0   |
| CONTIG-008639 | 281  | 28  | 84   | 338  | 0   |
| CONTIG-008640 | 177  | 9   | 57   | 37   | 0   |
| CONTIG-008641 | 121  | 36  | 320  | 31   | 0   |
| CONTIG-008642 | 507  | 52  | 535  | 1202 | 0   |
| CONTIG-008643 | 475  | 10  | 136  | 136  | 0   |
| CONTIG-008644 | 1641 | 17  | 206  | 705  | 4   |
| CONTIG-008645 | 635  | 54  | 375  | 633  | 34  |
| CONTIG-008646 | 311  | 16  | 30   | 209  | 0   |
| CONTIG-008647 | 180  | 10  | 6    | 50   | 0   |
| CONTIG-008648 | 52   | 149 | 116  | 344  | 0   |
| CONTIG-008650 | 71   | 296 | 0    | 1121 | 0   |
| CONTIG-008653 | 38   | 551 | 23   | 6    | 626 |
| CONTIG-008655 | 136  | 8   | 3    | 41   | 0   |
| CONTIG-008657 | 515  | 11  | 93   | 150  | 0   |
| CONTIG-008661 | 782  | 91  | 1024 | 2050 | 22  |
| CONTIG-008662 | 226  | 9   | 38   | 36   | 0   |
| CONTIG-008663 | 67   | 11  | 39   | 17   | 0   |
| CONTIG-008664 | 720  | 27  | 284  | 421  | 6   |
| CONTIG-008665 | 1316 | 27  | 57   | 755  | 78  |
| CONTIG-008666 | 96   | 24  | 174  | 17   | 0   |
| CONTIG-008667 | 526  | 42  | 221  | 815  | 0   |
| CONTIG-008668 | 390  | 40  | 451  | 376  | 0   |
| CONTIG-008677 | 454  | 94  | 22   | 0    | 949 |
| CONTIG-008678 | 143  | 14  | 32   | 69   | 0   |
| CONTIG-008680 | 248  | 27  | 50   | 88   | 0   |

|               |      |     |     |      |     |
|---------------|------|-----|-----|------|-----|
| CONTIG-008683 | 80   | 5   | 14  | 2    | 0   |
| CONTIG-008684 | 97   | 4   | 10  | 10   | 0   |
| CONTIG-008685 | 163  | 18  | 17  | 14   | 0   |
| CONTIG-008688 | 135  | 4   | 0   | 18   | 0   |
| CONTIG-008689 | 1847 | 46  | 736 | 4906 | 2   |
| CONTIG-008690 | 493  | 18  | 44  | 387  | 0   |
| CONTIG-008691 | 768  | 22  | 265 | 453  | 0   |
| CONTIG-008692 | 171  | 10  | 17  | 22   | 0   |
| CONTIG-008693 | 137  | 14  | 37  | 67   | 2   |
| CONTIG-008694 | 681  | 11  | 36  | 160  | 2   |
| CONTIG-008695 | 214  | 30  | 122 | 144  | 0   |
| CONTIG-008696 | 915  | 35  | 434 | 1477 | 0   |
| CONTIG-008697 | 50   | 92  | 9   | 53   | 0   |
| CONTIG-008699 | 345  | 49  | 340 | 559  | 4   |
| CONTIG-008700 | 58   | 3   | 2   | 0    | 0   |
| CONTIG-008701 | 156  | 7   | 7   | 12   | 0   |
| CONTIG-008702 | 165  | 42  | 101 | 272  | 2   |
| CONTIG-008705 | 614  | 17  | 280 | 308  | 0   |
| CONTIG-008706 | 102  | 8   | 20  | 0    | 0   |
| CONTIG-008707 | 320  | 49  | 350 | 308  | 6   |
| CONTIG-008708 | 186  | 227 | 220 | 1958 | 4   |
| CONTIG-008709 | 417  | 47  | 68  | 840  | 0   |
| CONTIG-008710 | 185  | 7   | 14  | 49   | 0   |
| CONTIG-008711 | 109  | 21  | 181 | 18   | 0   |
| CONTIG-008712 | 839  | 67  | 371 | 3366 | 0   |
| CONTIG-008713 | 102  | 80  | 894 | 0    | 7   |
| CONTIG-008714 | 172  | 7   | 51  | 4    | 0   |
| CONTIG-008716 | 53   | 64  | 8   | 95   | 0   |
| CONTIG-008717 | 345  | 7   | 29  | 61   | 0   |
| CONTIG-008718 | 575  | 16  | 33  | 196  | 0   |
| CONTIG-008719 | 455  | 14  | 56  | 296  | 0   |
| CONTIG-008720 | 85   | 7   | 8   | 6    | 0   |
| CONTIG-008721 | 137  | 668 | 239 | 1967 | 382 |
| CONTIG-008722 | 145  | 10  | 10  | 40   | 0   |
| CONTIG-008723 | 96   | 9   | 76  | 0    | 0   |
| CONTIG-008726 | 97   | 13  | 21  | 0    | 0   |
| CONTIG-008727 | 225  | 10  | 55  | 41   | 0   |
| CONTIG-008728 | 988  | 24  | 136 | 890  | 8   |
| CONTIG-008729 | 63   | 6   | 6   | 12   | 0   |
| CONTIG-008730 | 169  | 78  | 193 | 109  | 0   |
| CONTIG-008731 | 536  | 21  | 55  | 483  | 2   |
| CONTIG-008732 | 225  | 8   | 7   | 47   | 0   |
| CONTIG-008733 | 602  | 26  | 412 | 532  | 0   |
| CONTIG-008734 | 108  | 12  | 11  | 45   | 0   |
| CONTIG-008735 | 721  | 8   | 20  | 175  | 0   |
| CONTIG-008736 | 73   | 9   | 7   | 9    | 0   |
| CONTIG-008737 | 205  | 16  | 30  | 137  | 0   |

|               |      |     |      |      |    |
|---------------|------|-----|------|------|----|
| CONTIG-008738 | 64   | 115 | 453  | 2    | 5  |
| CONTIG-008739 | 75   | 12  | 28   | 0    | 0  |
| CONTIG-008740 | 79   | 11  | 2    | 41   | 0  |
| CONTIG-008741 | 361  | 24  | 221  | 216  | 6  |
| CONTIG-008742 | 883  | 17  | 192  | 448  | 2  |
| CONTIG-008743 | 316  | 9   | 33   | 80   | 3  |
| CONTIG-008744 | 71   | 6   | 16   | 2    | 0  |
| CONTIG-008745 | 171  | 11  | 10   | 16   | 0  |
| CONTIG-008748 | 2260 | 49  | 73   | 5947 | 11 |
| CONTIG-008749 | 464  | 24  | 163  | 232  | 4  |
| CONTIG-008750 | 252  | 6   | 17   | 12   | 0  |
| CONTIG-008751 | 657  | 21  | 173  | 399  | 4  |
| CONTIG-008752 | 189  | 8   | 23   | 60   | 0  |
| CONTIG-008754 | 891  | 15  | 137  | 343  | 7  |
| CONTIG-008755 | 63   | 12  | 55   | 0    | 0  |
| CONTIG-008756 | 203  | 311 | 871  | 3027 | 31 |
| CONTIG-008758 | 400  | 16  | 114  | 193  | 0  |
| CONTIG-008767 | 290  | 8   | 32   | 36   | 0  |
| CONTIG-008768 | 97   | 3   | 2    | 2    | 0  |
| CONTIG-008769 | 581  | 21  | 118  | 229  | 13 |
| CONTIG-008770 | 68   | 7   | 10   | 12   | 0  |
| CONTIG-008771 | 587  | 55  | 460  | 764  | 17 |
| CONTIG-008772 | 212  | 18  | 7    | 173  | 0  |
| CONTIG-008773 | 570  | 125 | 681  | 3524 | 8  |
| CONTIG-008774 | 238  | 17  | 7    | 0    | 38 |
| CONTIG-008775 | 141  | 14  | 61   | 22   | 0  |
| CONTIG-008776 | 687  | 41  | 156  | 899  | 6  |
| CONTIG-008777 | 150  | 24  | 238  | 23   | 0  |
| CONTIG-008778 | 1381 | 87  | 690  | 5624 | 5  |
| CONTIG-008779 | 76   | 35  | 124  | 4    | 0  |
| CONTIG-008780 | 501  | 13  | 229  | 122  | 0  |
| CONTIG-008781 | 261  | 43  | 204  | 471  | 4  |
| CONTIG-008782 | 156  | 8   | 20   | 22   | 0  |
| CONTIG-008791 | 338  | 14  | 86   | 145  | 0  |
| CONTIG-008792 | 480  | 119 | 1519 | 2358 | 41 |
| CONTIG-008793 | 553  | 15  | 84   | 132  | 4  |
| CONTIG-008794 | 97   | 9   | 4    | 35   | 0  |
| CONTIG-008795 | 84   | 686 | 126  | 1846 | 5  |
| CONTIG-008796 | 661  | 49  | 833  | 801  | 33 |
| CONTIG-008797 | 215  | 277 | 2391 | 375  | 52 |
| CONTIG-008798 | 665  | 30  | 115  | 635  | 0  |
| CONTIG-008799 | 216  | 25  | 149  | 100  | 0  |
| CONTIG-008800 | 126  | 12  | 22   | 28   | 0  |
| CONTIG-008801 | 187  | 6   | 7    | 23   | 2  |
| CONTIG-008802 | 117  | 10  | 14   | 32   | 0  |
| CONTIG-008804 | 55   | 252 | 435  | 86   | 8  |
| CONTIG-008806 | 353  | 75  | 82   | 605  | 32 |

|               |      |     |     |       |    |
|---------------|------|-----|-----|-------|----|
| CONTIG-008807 | 462  | 16  | 96  | 278   | 0  |
| CONTIG-008808 | 201  | 8   | 56  | 39    | 0  |
| CONTIG-008809 | 169  | 16  | 47  | 88    | 0  |
| CONTIG-008810 | 1048 | 14  | 61  | 710   | 0  |
| CONTIG-008812 | 178  | 5   | 2   | 14    | 0  |
| CONTIG-008813 | 581  | 65  | 718 | 1446  | 8  |
| CONTIG-008814 | 2312 | 85  | 341 | 12245 | 0  |
| CONTIG-008815 | 458  | 18  | 441 | 161   | 0  |
| CONTIG-008816 | 86   | 6   | 5   | 23    | 0  |
| CONTIG-008828 | 1146 | 99  | 187 | 6364  | 2  |
| CONTIG-008832 | 57   | 358 | 611 | 106   | 17 |
| CONTIG-008833 | 84   | 172 | 2   | 736   | 0  |
| CONTIG-008834 | 89   | 11  | 14  | 29    | 0  |
| CONTIG-008843 | 2865 | 60  | 820 | 7658  | 8  |
| CONTIG-008844 | 733  | 57  | 407 | 1438  | 11 |
| CONTIG-008845 | 1238 | 32  | 515 | 1463  | 15 |
| CONTIG-008846 | 1029 | 59  | 409 | 2782  | 17 |
| CONTIG-008847 | 97   | 85  | 300 | 25    | 4  |
| CONTIG-008848 | 92   | 11  | 47  | 2     | 0  |
| CONTIG-008849 | 383  | 19  | 72  | 184   | 4  |
| CONTIG-008850 | 182  | 6   | 16  | 12    | 0  |
| CONTIG-008851 | 1490 | 20  | 98  | 1113  | 6  |
| CONTIG-008852 | 102  | 5   | 0   | 11    | 0  |
| CONTIG-008854 | 70   | 7   | 12  | 15    | 0  |
| CONTIG-008855 | 214  | 18  | 21  | 171   | 0  |
| CONTIG-008856 | 860  | 22  | 128 | 507   | 5  |
| CONTIG-008857 | 686  | 20  | 92  | 548   | 0  |
| CONTIG-008864 | 697  | 10  | 84  | 253   | 0  |
| CONTIG-008865 | 289  | 32  | 46  | 206   | 23 |
| CONTIG-008868 | 61   | 4   | 6   | 6     | 0  |
| CONTIG-008869 | 244  | 8   | 14  | 55    | 0  |
| CONTIG-008870 | 148  | 19  | 119 | 39    | 0  |
| CONTIG-008871 | 226  | 22  | 83  | 108   | 0  |
| CONTIG-008872 | 121  | 14  | 2   | 63    | 0  |
| CONTIG-008873 | 274  | 11  | 15  | 95    | 0  |
| CONTIG-008874 | 75   | 3   | 10  | 0     | 0  |
| CONTIG-008877 | 376  | 53  | 180 | 673   | 9  |
| CONTIG-008886 | 598  | 18  | 151 | 372   | 4  |
| CONTIG-008887 | 414  | 17  | 56  | 193   | 9  |
| CONTIG-008888 | 482  | 9   | 44  | 120   | 0  |
| CONTIG-008889 | 150  | 19  | 58  | 108   | 0  |
| CONTIG-008890 | 1196 | 19  | 134 | 869   | 4  |
| CONTIG-008891 | 228  | 41  | 253 | 331   | 0  |
| CONTIG-008892 | 94   | 10  | 2   | 31    | 2  |
| CONTIG-008893 | 363  | 21  | 36  | 328   | 0  |
| CONTIG-008896 | 428  | 16  | 198 | 220   | 0  |
| CONTIG-008897 | 669  | 26  | 78  | 696   | 2  |



|               |      |     |      |      |     |
|---------------|------|-----|------|------|-----|
| CONTIG-008898 | 235  | 20  | 111  | 116  | 0   |
| CONTIG-008899 | 70   | 10  | 20   | 20   | 0   |
| CONTIG-008900 | 575  | 8   | 22   | 165  | 3   |
| CONTIG-008901 | 400  | 9   | 100  | 66   | 0   |
| CONTIG-008902 | 96   | 6   | 0    | 19   | 0   |
| CONTIG-008903 | 102  | 6   | 18   | 9    | 0   |
| CONTIG-008905 | 1154 | 47  | 79   | 3398 | 0   |
| CONTIG-008910 | 193  | 12  | 27   | 53   | 0   |
| CONTIG-008911 | 473  | 36  | 60   | 551  | 2   |
| CONTIG-008912 | 220  | 7   | 34   | 59   | 0   |
| CONTIG-008913 | 64   | 50  | 133  | 34   | 0   |
| CONTIG-008914 | 788  | 69  | 346  | 3197 | 2   |
| CONTIG-008915 | 43   | 386 | 869  | 57   | 70  |
| CONTIG-008916 | 131  | 35  | 315  | 0    | 24  |
| CONTIG-008917 | 137  | 713 | 810  | 2092 | 179 |
| CONTIG-008918 | 147  | 12  | 2    | 34   | 0   |
| CONTIG-008919 | 58   | 5   | 8    | 7    | 0   |
| CONTIG-008920 | 123  | 7   | 3    | 34   | 0   |
| CONTIG-008921 | 1029 | 46  | 393  | 1685 | 9   |
| CONTIG-008922 | 120  | 214 | 195  | 1378 | 0   |
| CONTIG-008923 | 50   | 537 | 143  | 559  | 64  |
| CONTIG-008925 | 437  | 40  | 268  | 364  | 0   |
| CONTIG-008926 | 568  | 16  | 74   | 246  | 2   |
| CONTIG-008927 | 1493 | 39  | 547  | 1057 | 198 |
| CONTIG-008928 | 92   | 6   | 7    | 17   | 2   |
| CONTIG-008929 | 707  | 15  | 18   | 2    | 65  |
| CONTIG-008930 | 1279 | 27  | 564  | 647  | 15  |
| CONTIG-008936 | 298  | 7   | 22   | 57   | 2   |
| CONTIG-008937 | 868  | 42  | 292  | 1946 | 0   |
| CONTIG-008938 | 60   | 8   | 6    | 4    | 0   |
| CONTIG-008945 | 92   | 32  | 25   | 65   | 2   |
| CONTIG-008946 | 379  | 63  | 285  | 1187 | 2   |
| CONTIG-008953 | 120  | 694 | 1832 | 1575 | 205 |
| CONTIG-008955 | 1295 | 40  | 362  | 1402 | 66  |
| CONTIG-008957 | 305  | 176 | 422  | 1243 | 184 |
| CONTIG-008958 | 182  | 8   | 28   | 11   | 0   |
| CONTIG-008959 | 636  | 12  | 141  | 198  | 0   |
| CONTIG-008960 | 624  | 28  | 500  | 448  | 0   |
| CONTIG-008963 | 192  | 8   | 10   | 43   | 0   |
| CONTIG-008964 | 1022 | 21  | 262  | 505  | 7   |
| CONTIG-008968 | 76   | 5   | 4    | 4    | 0   |
| CONTIG-008969 | 842  | 11  | 30   | 412  | 0   |
| CONTIG-008970 | 753  | 26  | 374  | 464  | 108 |
| CONTIG-008971 | 132  | 7   | 2    | 21   | 0   |
| CONTIG-008972 | 354  | 21  | 62   | 368  | 2   |
| CONTIG-008973 | 201  | 10  | 18   | 52   | 0   |
| CONTIG-008974 | 152  | 201 | 322  | 1673 | 18  |

|               |      |     |      |      |     |
|---------------|------|-----|------|------|-----|
| CONTIG-008975 | 1141 | 42  | 192  | 1262 | 37  |
| CONTIG-008976 | 779  | 15  | 112  | 450  | 4   |
| CONTIG-008977 | 973  | 15  | 128  | 553  | 0   |
| CONTIG-008978 | 1846 | 19  | 200  | 1186 | 8   |
| CONTIG-008979 | 71   | 19  | 81   | 2    | 0   |
| CONTIG-008980 | 92   | 10  | 5    | 17   | 2   |
| CONTIG-008981 | 66   | 6   | 13   | 7    | 0   |
| CONTIG-008982 | 111  | 17  | 22   | 53   | 0   |
| CONTIG-008984 | 784  | 43  | 233  | 824  | 29  |
| CONTIG-008985 | 118  | 46  | 26   | 282  | 0   |
| CONTIG-008986 | 235  | 9   | 41   | 58   | 0   |
| CONTIG-008987 | 246  | 143 | 1386 | 871  | 0   |
| CONTIG-008988 | 113  | 9   | 5    | 36   | 0   |
| CONTIG-008989 | 303  | 23  | 127  | 278  | 2   |
| CONTIG-008991 | 575  | 16  | 112  | 102  | 4   |
| CONTIG-008992 | 134  | 10  | 18   | 4    | 0   |
| CONTIG-008993 | 66   | 8   | 37   | 0    | 0   |
| CONTIG-008994 | 685  | 15  | 98   | 300  | 0   |
| CONTIG-008995 | 462  | 14  | 35   | 200  | 0   |
| CONTIG-008996 | 147  | 369 | 502  | 1372 | 84  |
| CONTIG-008997 | 105  | 7   | 2    | 24   | 0   |
| CONTIG-008999 | 646  | 95  | 235  | 994  | 61  |
| CONTIG-009000 | 957  | 39  | 686  | 1139 | 0   |
| CONTIG-009001 | 345  | 10  | 22   | 63   | 0   |
| CONTIG-009002 | 154  | 8   | 14   | 31   | 0   |
| CONTIG-009003 | 501  | 17  | 82   | 269  | 0   |
| CONTIG-009004 | 299  | 7   | 20   | 74   | 0   |
| CONTIG-009005 | 125  | 4   | 9    | 4    | 0   |
| CONTIG-009006 | 58   | 20  | 54   | 2    | 0   |
| CONTIG-009007 | 58   | 70  | 104  | 4    | 0   |
| CONTIG-009008 | 90   | 8   | 13   | 0    | 0   |
| CONTIG-009009 | 90   | 3   | 2    | 4    | 0   |
| CONTIG-009010 | 449  | 18  | 63   | 168  | 0   |
| CONTIG-009017 | 625  | 16  | 72   | 417  | 0   |
| CONTIG-009018 | 1239 | 40  | 497  | 2327 | 4   |
| CONTIG-009019 | 229  | 8   | 39   | 19   | 0   |
| CONTIG-009020 | 77   | 4   | 2    | 7    | 0   |
| CONTIG-009021 | 263  | 166 | 662  | 760  | 132 |
| CONTIG-009022 | 93   | 9   | 2    | 0    | 0   |
| CONTIG-009023 | 261  | 14  | 71   | 30   | 7   |
| CONTIG-009024 | 603  | 16  | 31   | 381  | 2   |
| CONTIG-009025 | 347  | 11  | 19   | 82   | 2   |
| CONTIG-009026 | 1057 | 49  | 625  | 1776 | 6   |
| CONTIG-009027 | 315  | 15  | 52   | 167  | 0   |
| CONTIG-009028 | 824  | 16  | 159  | 444  | 2   |
| CONTIG-009029 | 1266 | 23  | 351  | 724  | 4   |
| CONTIG-009031 | 45   | 230 | 36   | 288  | 28  |

|               |      |      |     |      |      |
|---------------|------|------|-----|------|------|
| CONTIG-009032 | 80   | 37   | 21  | 14   | 0    |
| CONTIG-009033 | 59   | 4    | 2   | 0    | 0    |
| CONTIG-009034 | 854  | 14   | 116 | 460  | 9    |
| CONTIG-009035 | 162  | 15   | 28  | 101  | 2    |
| CONTIG-009036 | 59   | 5    | 3   | 0    | 0    |
| CONTIG-009037 | 71   | 32   | 10  | 88   | 4    |
| CONTIG-009038 | 61   | 15   | 31  | 15   | 0    |
| CONTIG-009039 | 267  | 442  | 543 | 6932 | 0    |
| CONTIG-009040 | 293  | 8    | 34  | 83   | 0    |
| CONTIG-009044 | 774  | 98   | 678 | 2275 | 147  |
| CONTIG-009045 | 239  | 16   | 163 | 77   | 0    |
| CONTIG-009046 | 305  | 19   | 252 | 135  | 0    |
| CONTIG-009047 | 104  | 87   | 100 | 260  | 0    |
| CONTIG-009048 | 58   | 8    | 2   | 8    | 0    |
| CONTIG-009049 | 301  | 16   | 44  | 128  | 0    |
| CONTIG-009050 | 482  | 145  | 346 | 4062 | 10   |
| CONTIG-009051 | 97   | 7    | 2   | 19   | 0    |
| CONTIG-009052 | 286  | 12   | 34  | 73   | 2    |
| CONTIG-009053 | 90   | 13   | 73  | 2    | 0    |
| CONTIG-009056 | 73   | 8    | 10  | 19   | 0    |
| CONTIG-009057 | 1153 | 101  | 384 | 4998 | 210  |
| CONTIG-009058 | 139  | 10   | 107 | 10   | 0    |
| CONTIG-009059 | 655  | 19   | 299 | 457  | 0    |
| CONTIG-009060 | 87   | 4    | 8   | 9    | 0    |
| CONTIG-009061 | 37   | 4898 | 788 | 39   | 2442 |
| CONTIG-009062 | 914  | 21   | 58  | 627  | 0    |
| CONTIG-009063 | 102  | 30   | 39  | 25   | 2    |
| CONTIG-009064 | 482  | 30   | 348 | 484  | 6    |
| CONTIG-009065 | 869  | 34   | 509 | 1064 | 0    |
| CONTIG-009066 | 458  | 12   | 45  | 186  | 0    |
| CONTIG-009069 | 364  | 48   | 25  | 1022 | 0    |
| CONTIG-009070 | 99   | 8    | 2   | 32   | 0    |
| CONTIG-009083 | 94   | 10   | 51  | 20   | 0    |
| CONTIG-009084 | 1019 | 22   | 89  | 925  | 4    |
| CONTIG-009085 | 109  | 5    | 3   | 18   | 0    |
| CONTIG-009086 | 974  | 16   | 161 | 512  | 0    |
| CONTIG-009087 | 407  | 11   | 110 | 74   | 0    |
| CONTIG-009088 | 76   | 3    | 4   | 0    | 0    |
| CONTIG-009089 | 242  | 9    | 18  | 32   | 0    |
| CONTIG-009092 | 175  | 10   | 0   | 4    | 0    |
| CONTIG-009093 | 419  | 25   | 244 | 420  | 2    |
| CONTIG-009094 | 372  | 27   | 62  | 165  | 9    |
| CONTIG-009095 | 1278 | 27   | 139 | 1058 | 83   |
| CONTIG-009098 | 239  | 9    | 27  | 55   | 0    |
| CONTIG-009099 | 94   | 10   | 12  | 17   | 0    |
| CONTIG-009100 | 899  | 49   | 333 | 641  | 0    |
| CONTIG-009102 | 74   | 33   | 67  | 41   | 0    |

|               |      |     |      |      |     |
|---------------|------|-----|------|------|-----|
| CONTIG-009103 | 513  | 18  | 101  | 184  | 6   |
| CONTIG-009104 | 445  | 36  | 167  | 483  | 8   |
| CONTIG-009105 | 167  | 8   | 23   | 28   | 0   |
| CONTIG-009112 | 86   | 14  | 14   | 19   | 0   |
| CONTIG-009113 | 178  | 10  | 5    | 93   | 0   |
| CONTIG-009114 | 76   | 9   | 5    | 20   | 0   |
| CONTIG-009115 | 119  | 6   | 12   | 22   | 0   |
| CONTIG-009116 | 155  | 10  | 90   | 6    | 0   |
| CONTIG-009117 | 60   | 3   | 0    | 2    | 0   |
| CONTIG-009118 | 327  | 23  | 53   | 112  | 5   |
| CONTIG-009119 | 85   | 5   | 0    | 12   | 0   |
| CONTIG-009120 | 314  | 279 | 1072 | 1583 | 171 |
| CONTIG-009121 | 76   | 4   | 0    | 2    | 0   |
| CONTIG-009122 | 147  | 15  | 57   | 40   | 0   |
| CONTIG-009123 | 189  | 6   | 23   | 19   | 0   |
| CONTIG-009124 | 1447 | 48  | 113  | 2708 | 60  |
| CONTIG-009125 | 158  | 35  | 5    | 200  | 0   |
| CONTIG-009128 | 69   | 8   | 2    | 7    | 0   |
| CONTIG-009129 | 78   | 8   | 10   | 2    | 0   |
| CONTIG-009130 | 350  | 26  | 206  | 290  | 0   |
| CONTIG-009131 | 437  | 11  | 66   | 156  | 5   |
| CONTIG-009132 | 157  | 17  | 30   | 21   | 0   |
| CONTIG-009133 | 246  | 629 | 698  | 8970 | 0   |
| CONTIG-009135 | 96   | 78  | 254  | 0    | 2   |
| CONTIG-009136 | 377  | 24  | 79   | 311  | 2   |
| CONTIG-009138 | 869  | 19  | 81   | 837  | 0   |
| CONTIG-009139 | 444  | 22  | 69   | 142  | 5   |
| CONTIG-009140 | 974  | 18  | 187  | 683  | 0   |
| CONTIG-009141 | 627  | 16  | 27   | 245  | 4   |
| CONTIG-009142 | 1193 | 21  | 116  | 603  | 20  |
| CONTIG-009143 | 604  | 21  | 126  | 454  | 2   |
| CONTIG-009144 | 67   | 19  | 3    | 42   | 2   |
| CONTIG-009153 | 257  | 23  | 181  | 122  | 2   |
| CONTIG-009154 | 114  | 7   | 35   | 16   | 0   |
| CONTIG-009155 | 66   | 22  | 27   | 14   | 0   |
| CONTIG-009156 | 208  | 5   | 5    | 33   | 0   |
| CONTIG-009157 | 144  | 6   | 19   | 0    | 0   |
| CONTIG-009158 | 135  | 41  | 285  | 54   | 0   |
| CONTIG-009159 | 225  | 8   | 10   | 41   | 2   |
| CONTIG-009160 | 259  | 20  | 180  | 128  | 0   |
| CONTIG-009161 | 69   | 179 | 693  | 271  | 0   |
| CONTIG-009162 | 198  | 25  | 16   | 199  | 2   |
| CONTIG-009166 | 122  | 17  | 93   | 23   | 0   |
| CONTIG-009167 | 180  | 89  | 411  | 621  | 0   |
| CONTIG-009169 | 91   | 3   | 5    | 4    | 0   |
| CONTIG-009172 | 360  | 40  | 215  | 215  | 17  |
| CONTIG-009173 | 65   | 5   | 12   | 2    | 0   |

|               |      |      |      |      |      |
|---------------|------|------|------|------|------|
| CONTIG-009174 | 730  | 18   | 216  | 372  | 0    |
| CONTIG-009175 | 112  | 5    | 6    | 7    | 0    |
| CONTIG-009176 | 543  | 107  | 6    | 0    | 838  |
| CONTIG-009177 | 86   | 11   | 36   | 2    | 0    |
| CONTIG-009178 | 132  | 505  | 308  | 3442 | 0    |
| CONTIG-009179 | 172  | 448  | 312  | 1305 | 254  |
| CONTIG-009180 | 103  | 181  | 87   | 713  | 9    |
| CONTIG-009186 | 216  | 7    | 2    | 27   | 0    |
| CONTIG-009187 | 75   | 14   | 41   | 20   | 0    |
| CONTIG-009188 | 954  | 19   | 260  | 504  | 6    |
| CONTIG-009190 | 277  | 7    | 16   | 59   | 0    |
| CONTIG-009191 | 615  | 25   | 77   | 422  | 10   |
| CONTIG-009192 | 320  | 9    | 9    | 105  | 3    |
| CONTIG-009193 | 451  | 19   | 209  | 317  | 4    |
| CONTIG-009196 | 69   | 1424 | 589  | 2531 | 267  |
| CONTIG-009197 | 63   | 9    | 2    | 15   | 0    |
| CONTIG-009198 | 497  | 13   | 81   | 111  | 0    |
| CONTIG-009199 | 489  | 10   | 67   | 94   | 5    |
| CONTIG-009203 | 49   | 1683 | 88   | 164  | 1945 |
| CONTIG-009204 | 805  | 59   | 330  | 1909 | 4    |
| CONTIG-009205 | 339  | 15   | 33   | 213  | 0    |
| CONTIG-009210 | 219  | 23   | 21   | 169  | 0    |
| CONTIG-009211 | 424  | 43   | 377  | 606  | 6    |
| CONTIG-009212 | 61   | 4    | 11   | 0    | 0    |
| CONTIG-009213 | 277  | 26   | 116  | 243  | 2    |
| CONTIG-009214 | 50   | 11   | 24   | 0    | 0    |
| CONTIG-009215 | 174  | 39   | 612  | 2    | 22   |
| CONTIG-009216 | 190  | 416  | 955  | 2111 | 130  |
| CONTIG-009217 | 89   | 9    | 11   | 21   | 0    |
| CONTIG-009220 | 181  | 25   | 345  | 56   | 0    |
| CONTIG-009221 | 65   | 19   | 77   | 0    | 0    |
| CONTIG-009222 | 237  | 7    | 14   | 40   | 0    |
| CONTIG-009223 | 733  | 22   | 176  | 556  | 6    |
| CONTIG-009224 | 208  | 122  | 282  | 392  | 20   |
| CONTIG-009226 | 571  | 22   | 8    | 368  | 6    |
| CONTIG-009227 | 235  | 14   | 6    | 92   | 0    |
| CONTIG-009228 | 63   | 5    | 2    | 9    | 0    |
| CONTIG-009236 | 157  | 10   | 4    | 61   | 0    |
| CONTIG-009237 | 40   | 270  | 96   | 148  | 10   |
| CONTIG-009238 | 91   | 6    | 36   | 0    | 0    |
| CONTIG-009239 | 90   | 883  | 1292 | 970  | 85   |
| CONTIG-009240 | 914  | 26   | 251  | 1018 | 0    |
| CONTIG-009241 | 1479 | 18   | 204  | 595  | 32   |
| CONTIG-009242 | 292  | 173  | 361  | 1158 | 53   |
| CONTIG-009253 | 398  | 50   | 8    | 1058 | 0    |
| CONTIG-009254 | 322  | 15   | 61   | 154  | 0    |
| CONTIG-009255 | 438  | 9    | 19   | 116  | 2    |

|               |      |     |      |      |     |
|---------------|------|-----|------|------|-----|
| CONTIG-009256 | 319  | 37  | 103  | 248  | 45  |
| CONTIG-009257 | 363  | 42  | 50   | 50   | 6   |
| CONTIG-009258 | 583  | 34  | 257  | 608  | 6   |
| CONTIG-009259 | 65   | 80  | 22   | 155  | 0   |
| CONTIG-009260 | 172  | 12  | 58   | 51   | 0   |
| CONTIG-009261 | 771  | 25  | 652  | 709  | 0   |
| CONTIG-009267 | 259  | 16  | 27   | 82   | 0   |
| CONTIG-009268 | 192  | 7   | 10   | 26   | 0   |
| CONTIG-009269 | 170  | 22  | 232  | 54   | 0   |
| CONTIG-009270 | 52   | 780 | 1326 | 398  | 53  |
| CONTIG-009271 | 183  | 5   | 9    | 17   | 0   |
| CONTIG-009272 | 263  | 19  | 31   | 104  | 2   |
| CONTIG-009273 | 657  | 25  | 53   | 716  | 4   |
| CONTIG-009275 | 71   | 23  | 17   | 63   | 0   |
| CONTIG-009276 | 917  | 16  | 109  | 573  | 0   |
| CONTIG-009277 | 138  | 9   | 35   | 22   | 0   |
| CONTIG-009278 | 109  | 7   | 5    | 18   | 0   |
| CONTIG-009279 | 120  | 223 | 1049 | 78   | 8   |
| CONTIG-009280 | 520  | 120 | 808  | 717  | 74  |
| CONTIG-009281 | 619  | 105 | 252  | 2655 | 21  |
| CONTIG-009282 | 548  | 22  | 945  | 108  | 0   |
| CONTIG-009283 | 363  | 14  | 87   | 112  | 0   |
| CONTIG-009284 | 100  | 16  | 30   | 28   | 0   |
| CONTIG-009285 | 224  | 17  | 29   | 199  | 0   |
| CONTIG-009286 | 87   | 7   | 0    | 10   | 0   |
| CONTIG-009287 | 273  | 8   | 65   | 71   | 0   |
| CONTIG-009288 | 456  | 67  | 122  | 654  | 0   |
| CONTIG-009289 | 260  | 14  | 90   | 128  | 0   |
| CONTIG-009290 | 670  | 46  | 169  | 1198 | 0   |
| CONTIG-009291 | 615  | 15  | 83   | 229  | 2   |
| CONTIG-009292 | 77   | 573 | 400  | 1282 | 108 |
| CONTIG-009293 | 222  | 8   | 46   | 43   | 0   |
| CONTIG-009294 | 70   | 9   | 5    | 14   | 0   |
| CONTIG-009295 | 1444 | 25  | 120  | 1962 | 2   |
| CONTIG-009296 | 460  | 17  | 48   | 266  | 0   |
| CONTIG-009299 | 266  | 10  | 62   | 69   | 2   |
| CONTIG-009300 | 646  | 15  | 96   | 283  | 6   |
| CONTIG-009301 | 194  | 17  | 101  | 50   | 0   |
| CONTIG-009302 | 969  | 44  | 164  | 1238 | 69  |
| CONTIG-009303 | 224  | 197 | 457  | 2371 | 0   |
| CONTIG-009304 | 106  | 8   | 7    | 9    | 0   |
| CONTIG-009305 | 406  | 10  | 10   | 167  | 0   |
| CONTIG-009306 | 700  | 15  | 119  | 219  | 0   |
| CONTIG-009307 | 86   | 6   | 8    | 7    | 0   |
| CONTIG-009316 | 554  | 12  | 136  | 187  | 0   |
| CONTIG-009323 | 1324 | 18  | 293  | 390  | 6   |
| CONTIG-009324 | 58   | 15  | 6    | 14   | 0   |

|               |      |     |     |      |     |
|---------------|------|-----|-----|------|-----|
| CONTIG-009325 | 107  | 836 | 982 | 2715 | 279 |
| CONTIG-009326 | 123  | 15  | 29  | 75   | 0   |
| CONTIG-009327 | 756  | 21  | 154 | 416  | 2   |
| CONTIG-009328 | 103  | 67  | 165 | 201  | 0   |
| CONTIG-009329 | 325  | 7   | 9   | 67   | 0   |
| CONTIG-009330 | 59   | 862 | 58  | 709  | 295 |
| CONTIG-009331 | 231  | 48  | 173 | 402  | 0   |
| CONTIG-009332 | 455  | 92  | 88  | 1016 | 112 |
| CONTIG-009333 | 127  | 223 | 150 | 585  | 66  |
| CONTIG-009334 | 713  | 47  | 709 | 1562 | 0   |
| CONTIG-009336 | 1134 | 21  | 50  | 751  | 3   |
| CONTIG-009337 | 369  | 14  | 67  | 92   | 0   |
| CONTIG-009338 | 265  | 17  | 63  | 125  | 0   |
| CONTIG-009339 | 62   | 4   | 2   | 6    | 0   |
| CONTIG-009342 | 244  | 9   | 14  | 58   | 0   |
| CONTIG-009343 | 650  | 77  | 45  | 2924 | 5   |
| CONTIG-009344 | 765  | 14  | 234 | 258  | 0   |
| CONTIG-009345 | 608  | 18  | 43  | 292  | 16  |
| CONTIG-009346 | 196  | 8   | 14  | 58   | 0   |
| CONTIG-009348 | 1149 | 42  | 494 | 1616 | 39  |
| CONTIG-009349 | 98   | 21  | 43  | 61   | 0   |
| CONTIG-009350 | 165  | 12  | 0   | 74   | 0   |
| CONTIG-009351 | 484  | 13  | 83  | 131  | 6   |
| CONTIG-009352 | 98   | 6   | 3   | 18   | 0   |
| CONTIG-009353 | 440  | 10  | 11  | 83   | 0   |
| CONTIG-009354 | 73   | 5   | 3   | 10   | 0   |
| CONTIG-009355 | 520  | 61  | 441 | 1470 | 4   |
| CONTIG-009356 | 262  | 158 | 349 | 1304 | 63  |
| CONTIG-009358 | 233  | 8   | 44  | 38   | 0   |
| CONTIG-009359 | 87   | 338 | 10  | 1435 | 8   |
| CONTIG-009361 | 152  | 8   | 17  | 40   | 0   |
| CONTIG-009362 | 140  | 11  | 6   | 6    | 0   |
| CONTIG-009363 | 68   | 689 | 196 | 1322 | 146 |
| CONTIG-009365 | 979  | 22  | 177 | 391  | 12  |
| CONTIG-009366 | 562  | 54  | 325 | 687  | 25  |
| CONTIG-009367 | 216  | 10  | 61  | 56   | 0   |
| CONTIG-009368 | 210  | 542 | 415 | 3784 | 361 |
| CONTIG-009369 | 158  | 5   | 18  | 7    | 0   |
| CONTIG-009370 | 975  | 34  | 282 | 662  | 25  |
| CONTIG-009373 | 356  | 22  | 25  | 9    | 0   |
| CONTIG-009374 | 934  | 66  | 415 | 3190 | 8   |
| CONTIG-009375 | 398  | 12  | 20  | 143  | 2   |
| CONTIG-009376 | 144  | 54  | 117 | 253  | 0   |
| CONTIG-009377 | 249  | 23  | 44  | 88   | 0   |
| CONTIG-009378 | 132  | 29  | 36  | 166  | 0   |
| CONTIG-009379 | 1632 | 71  | 464 | 6510 | 0   |
| CONTIG-009380 | 2325 | 33  | 614 | 2689 | 161 |

|               |     |     |     |      |     |
|---------------|-----|-----|-----|------|-----|
| CONTIG-009382 | 223 | 11  | 104 | 19   | 0   |
| CONTIG-009383 | 230 | 42  | 151 | 212  | 0   |
| CONTIG-009384 | 86  | 6   | 2   | 18   | 0   |
| CONTIG-009385 | 687 | 10  | 31  | 317  | 0   |
| CONTIG-009386 | 65  | 3   | 0   | 0    | 0   |
| CONTIG-009387 | 128 | 16  | 54  | 34   | 0   |
| CONTIG-009388 | 119 | 35  | 22  | 74   | 0   |
| CONTIG-009389 | 821 | 22  | 166 | 595  | 2   |
| CONTIG-009390 | 95  | 48  | 246 | 98   | 2   |
| CONTIG-009391 | 292 | 44  | 107 | 553  | 0   |
| CONTIG-009392 | 123 | 10  | 8   | 36   | 0   |
| CONTIG-009393 | 230 | 8   | 4   | 46   | 0   |
| CONTIG-009394 | 324 | 20  | 510 | 59   | 0   |
| CONTIG-009395 | 256 | 11  | 7   | 110  | 0   |
| CONTIG-009400 | 435 | 11  | 25  | 109  | 0   |
| CONTIG-009401 | 37  | 756 | 155 | 484  | 10  |
| CONTIG-009403 | 385 | 360 | 568 | 5347 | 118 |
| CONTIG-009404 | 90  | 51  | 403 | 2    | 0   |
| CONTIG-009405 | 142 | 6   | 2   | 20   | 0   |
| CONTIG-009406 | 298 | 19  | 366 | 36   | 0   |
| CONTIG-009407 | 847 | 16  | 544 | 301  | 0   |
| CONTIG-009410 | 129 | 18  | 38  | 75   | 0   |
| CONTIG-009411 | 154 | 169 | 619 | 302  | 4   |
| CONTIG-009412 | 326 | 17  | 57  | 192  | 0   |
| CONTIG-009419 | 188 | 25  | 154 | 67   | 4   |
| CONTIG-009420 | 73  | 22  | 26  | 12   | 0   |
| CONTIG-009421 | 921 | 51  | 608 | 1113 | 12  |
| CONTIG-009422 | 431 | 11  | 28  | 93   | 0   |
| CONTIG-009423 | 465 | 17  | 26  | 464  | 0   |
| CONTIG-009424 | 88  | 10  | 8   | 12   | 0   |
| CONTIG-009426 | 144 | 8   | 32  | 30   | 0   |
| CONTIG-009427 | 692 | 21  | 164 | 612  | 0   |
| CONTIG-009428 | 94  | 8   | 7   | 23   | 0   |
| CONTIG-009430 | 159 | 600 | 318 | 2291 | 388 |
| CONTIG-009431 | 62  | 3   | 11  | 0    | 0   |
| CONTIG-009432 | 812 | 27  | 164 | 386  | 19  |
| CONTIG-009433 | 260 | 51  | 232 | 81   | 2   |
| CONTIG-009435 | 229 | 15  | 6   | 73   | 4   |
| CONTIG-009436 | 345 | 21  | 104 | 204  | 0   |
| CONTIG-009437 | 160 | 12  | 81  | 43   | 0   |
| CONTIG-009438 | 362 | 132 | 220 | 2527 | 2   |
| CONTIG-009439 | 611 | 42  | 750 | 516  | 2   |
| CONTIG-009447 | 891 | 18  | 124 | 711  | 0   |
| CONTIG-009448 | 205 | 8   | 10  | 38   | 0   |
| CONTIG-009450 | 684 | 20  | 74  | 354  | 6   |
| CONTIG-009451 | 158 | 20  | 92  | 69   | 0   |
| CONTIG-009452 | 109 | 10  | 35  | 17   | 0   |



|               |      |     |      |      |     |
|---------------|------|-----|------|------|-----|
| CONTIG-009458 | 300  | 13  | 38   | 169  | 0   |
| CONTIG-009459 | 369  | 89  | 222  | 1885 | 0   |
| CONTIG-009460 | 84   | 45  | 151  | 11   | 0   |
| CONTIG-009461 | 512  | 21  | 267  | 178  | 6   |
| CONTIG-009463 | 871  | 65  | 429  | 1403 | 59  |
| CONTIG-009464 | 96   | 3   | 0    | 5    | 0   |
| CONTIG-009465 | 1452 | 27  | 205  | 1068 | 47  |
| CONTIG-009466 | 624  | 16  | 42   | 272  | 2   |
| CONTIG-009467 | 123  | 9   | 4    | 36   | 0   |
| CONTIG-009468 | 131  | 8   | 6    | 16   | 2   |
| CONTIG-009469 | 645  | 21  | 618  | 347  | 0   |
| CONTIG-009470 | 60   | 7   | 6    | 18   | 0   |
| CONTIG-009471 | 635  | 48  | 261  | 1121 | 4   |
| CONTIG-009472 | 106  | 520 | 347  | 2695 | 0   |
| CONTIG-009473 | 211  | 5   | 3    | 27   | 0   |
| CONTIG-009474 | 672  | 71  | 239  | 1836 | 240 |
| CONTIG-009475 | 602  | 27  | 58   | 365  | 36  |
| CONTIG-009476 | 79   | 5   | 18   | 6    | 0   |
| CONTIG-009477 | 333  | 20  | 411  | 154  | 0   |
| CONTIG-009478 | 87   | 9   | 8    | 2    | 0   |
| CONTIG-009479 | 243  | 7   | 4    | 32   | 0   |
| CONTIG-009480 | 408  | 24  | 296  | 175  | 0   |
| CONTIG-009481 | 927  | 15  | 105  | 471  | 0   |
| CONTIG-009482 | 292  | 7   | 15   | 56   | 0   |
| CONTIG-009483 | 114  | 11  | 28   | 10   | 0   |
| CONTIG-009490 | 244  | 11  | 64   | 51   | 0   |
| CONTIG-009491 | 167  | 4   | 2    | 11   | 0   |
| CONTIG-009492 | 66   | 6   | 2    | 2    | 0   |
| CONTIG-009494 | 238  | 147 | 1473 | 790  | 18  |
| CONTIG-009495 | 112  | 13  | 2    | 18   | 0   |
| CONTIG-009504 | 518  | 70  | 600  | 1026 | 17  |
| CONTIG-009505 | 228  | 16  | 267  | 41   | 0   |
| CONTIG-009506 | 72   | 11  | 5    | 22   | 0   |
| CONTIG-009507 | 367  | 24  | 177  | 193  | 4   |
| CONTIG-009508 | 666  | 24  | 97   | 419  | 2   |
| CONTIG-009509 | 749  | 41  | 148  | 1473 | 10  |
| CONTIG-009510 | 731  | 16  | 40   | 396  | 7   |
| CONTIG-009511 | 238  | 24  | 80   | 151  | 12  |
| CONTIG-009512 | 83   | 7   | 4    | 18   | 0   |
| CONTIG-009513 | 1138 | 42  | 280  | 2352 | 0   |
| CONTIG-009514 | 1456 | 19  | 105  | 1458 | 2   |
| CONTIG-009515 | 92   | 21  | 16   | 60   | 0   |
| CONTIG-009516 | 300  | 14  | 77   | 161  | 0   |
| CONTIG-009517 | 191  | 13  | 32   | 65   | 2   |
| CONTIG-009518 | 1091 | 28  | 100  | 856  | 65  |
| CONTIG-009519 | 536  | 23  | 153  | 452  | 16  |
| CONTIG-009520 | 83   | 5   | 13   | 5    | 0   |

|               |      |     |      |       |     |
|---------------|------|-----|------|-------|-----|
| CONTIG-009521 | 146  | 13  | 47   | 31    | 0   |
| CONTIG-009522 | 1584 | 119 | 1955 | 10342 | 158 |
| CONTIG-009523 | 130  | 6   | 11   | 7     | 0   |
| CONTIG-009524 | 177  | 12  | 2    | 42    | 0   |
| CONTIG-009525 | 455  | 18  | 94   | 244   | 0   |
| CONTIG-009526 | 277  | 55  | 128  | 311   | 17  |
| CONTIG-009527 | 181  | 15  | 64   | 68    | 0   |
| CONTIG-009528 | 225  | 5   | 10   | 6     | 2   |
| CONTIG-009529 | 1220 | 62  | 260  | 4456  | 2   |
| CONTIG-009530 | 798  | 24  | 401  | 328   | 0   |
| CONTIG-009531 | 520  | 32  | 247  | 663   | 0   |
| CONTIG-009532 | 349  | 22  | 322  | 145   | 2   |
| CONTIG-009533 | 305  | 22  | 79   | 90    | 8   |
| CONTIG-009534 | 351  | 15  | 126  | 142   | 0   |
| CONTIG-009535 | 2080 | 39  | 536  | 3925  | 2   |
| CONTIG-009536 | 353  | 25  | 84   | 36    | 0   |
| CONTIG-009538 | 222  | 243 | 165  | 1864  | 179 |
| CONTIG-009539 | 169  | 7   | 6    | 18    | 0   |
| CONTIG-009540 | 120  | 239 | 84   | 1332  | 0   |
| CONTIG-009541 | 178  | 138 | 371  | 761   | 53  |
| CONTIG-009542 | 112  | 6   | 10   | 2     | 0   |
| CONTIG-009543 | 139  | 19  | 10   | 64    | 0   |
| CONTIG-009544 | 350  | 87  | 371  | 553   | 88  |
| CONTIG-009545 | 211  | 8   | 9    | 0     | 0   |
| CONTIG-009546 | 122  | 12  | 10   | 54    | 0   |
| CONTIG-009547 | 142  | 7   | 15   | 17    | 0   |
| CONTIG-009548 | 507  | 11  | 58   | 216   | 0   |
| CONTIG-009549 | 133  | 17  | 13   | 52    | 0   |
| CONTIG-009556 | 549  | 14  | 15   | 167   | 4   |
| CONTIG-009561 | 241  | 22  | 48   | 224   | 0   |
| CONTIG-009563 | 208  | 14  | 45   | 83    | 2   |
| CONTIG-009564 | 61   | 13  | 5    | 34    | 0   |
| CONTIG-009565 | 1069 | 40  | 644  | 1407  | 29  |
| CONTIG-009566 | 262  | 43  | 132  | 481   | 2   |
| CONTIG-009568 | 484  | 10  | 76   | 128   | 0   |
| CONTIG-009569 | 182  | 11  | 23   | 49    | 2   |
| CONTIG-009574 | 307  | 17  | 40   | 170   | 8   |
| CONTIG-009575 | 107  | 5   | 3    | 13    | 0   |
| CONTIG-009576 | 789  | 18  | 282  | 325   | 0   |
| CONTIG-009577 | 86   | 8   | 15   | 2     | 0   |
| CONTIG-009578 | 84   | 5   | 0    | 2     | 0   |
| CONTIG-009579 | 523  | 8   | 40   | 69    | 0   |
| CONTIG-009580 | 370  | 116 | 252  | 530   | 46  |
| CONTIG-009581 | 78   | 14  | 44   | 3     | 0   |
| CONTIG-009582 | 307  | 26  | 164  | 190   | 0   |
| CONTIG-009591 | 270  | 56  | 245  | 35    | 0   |
| CONTIG-009592 | 329  | 10  | 10   | 106   | 4   |

|               |      |     |     |      |     |
|---------------|------|-----|-----|------|-----|
| CONTIG-009593 | 830  | 18  | 115 | 460  | 0   |
| CONTIG-009597 | 105  | 6   | 4   | 15   | 0   |
| CONTIG-009598 | 281  | 8   | 21  | 31   | 0   |
| CONTIG-009599 | 169  | 5   | 10  | 25   | 0   |
| CONTIG-009600 | 220  | 9   | 43  | 28   | 0   |
| CONTIG-009601 | 738  | 35  | 275 | 600  | 101 |
| CONTIG-009602 | 547  | 11  | 60  | 168  | 4   |
| CONTIG-009603 | 314  | 32  | 109 | 406  | 4   |
| CONTIG-009604 | 688  | 15  | 233 | 300  | 0   |
| CONTIG-009605 | 126  | 279 | 792 | 596  | 85  |
| CONTIG-009606 | 188  | 7   | 14  | 30   | 2   |
| CONTIG-009607 | 770  | 13  | 73  | 265  | 7   |
| CONTIG-009608 | 624  | 28  | 677 | 292  | 2   |
| CONTIG-009615 | 116  | 8   | 46  | 21   | 0   |
| CONTIG-009616 | 341  | 17  | 69  | 122  | 0   |
| CONTIG-009617 | 101  | 7   | 15  | 17   | 0   |
| CONTIG-009618 | 1093 | 15  | 84  | 353  | 9   |
| CONTIG-009619 | 373  | 18  | 41  | 188  | 2   |
| CONTIG-009620 | 182  | 10  | 37  | 39   | 0   |
| CONTIG-009621 | 392  | 33  | 155 | 281  | 0   |
| CONTIG-009622 | 837  | 16  | 57  | 339  | 0   |
| CONTIG-009623 | 435  | 68  | 613 | 355  | 18  |
| CONTIG-009624 | 65   | 44  | 28  | 134  | 0   |
| CONTIG-009632 | 688  | 12  | 10  | 380  | 0   |
| CONTIG-009633 | 113  | 8   | 48  | 13   | 0   |
| CONTIG-009640 | 345  | 40  | 113 | 249  | 21  |
| CONTIG-009641 | 484  | 76  | 84  | 2142 | 2   |
| CONTIG-009642 | 65   | 19  | 79  | 23   | 0   |
| CONTIG-009651 | 248  | 14  | 75  | 89   | 0   |
| CONTIG-009653 | 332  | 12  | 30  | 151  | 0   |
| CONTIG-009654 | 246  | 9   | 21  | 53   | 0   |
| CONTIG-009655 | 160  | 8   | 4   | 37   | 0   |
| CONTIG-009656 | 144  | 7   | 7   | 16   | 0   |
| CONTIG-009657 | 544  | 65  | 256 | 2113 | 0   |
| CONTIG-009658 | 38   | 404 | 570 | 13   | 0   |
| CONTIG-009660 | 989  | 18  | 471 | 468  | 2   |
| CONTIG-009661 | 125  | 36  | 21  | 211  | 0   |
| CONTIG-009662 | 133  | 23  | 55  | 106  | 2   |
| CONTIG-009663 | 183  | 241 | 59  | 2287 | 14  |
| CONTIG-009664 | 115  | 393 | 68  | 1798 | 12  |
| CONTIG-009666 | 703  | 13  | 120 | 251  | 0   |
| CONTIG-009667 | 255  | 13  | 17  | 53   | 0   |
| CONTIG-009669 | 242  | 7   | 26  | 26   | 0   |
| CONTIG-009670 | 136  | 9   | 28  | 2    | 0   |
| CONTIG-009672 | 91   | 153 | 19  | 0    | 0   |
| CONTIG-009673 | 425  | 54  | 120 | 1108 | 0   |
| CONTIG-009674 | 475  | 25  | 47  | 264  | 14  |

|               |      |     |     |      |     |
|---------------|------|-----|-----|------|-----|
| CONTIG-009675 | 789  | 41  | 198 | 1761 | 3   |
| CONTIG-009676 | 340  | 12  | 67  | 90   | 0   |
| CONTIG-009677 | 128  | 13  | 10  | 27   | 0   |
| CONTIG-009678 | 247  | 28  | 609 | 0    | 0   |
| CONTIG-009687 | 229  | 11  | 5   | 28   | 0   |
| CONTIG-009688 | 404  | 18  | 17  | 398  | 0   |
| CONTIG-009689 | 322  | 10  | 36  | 131  | 0   |
| CONTIG-009690 | 893  | 29  | 252 | 604  | 10  |
| CONTIG-009691 | 1935 | 79  | 301 | 3807 | 899 |
| CONTIG-009692 | 100  | 5   | 14  | 20   | 0   |
| CONTIG-009693 | 320  | 281 | 217 | 5376 | 2   |
| CONTIG-009694 | 376  | 38  | 71  | 287  | 18  |
| CONTIG-009695 | 718  | 27  | 69  | 533  | 2   |
| CONTIG-009696 | 965  | 46  | 243 | 1715 | 33  |
| CONTIG-009703 | 92   | 10  | 61  | 3    | 0   |
| CONTIG-009704 | 364  | 444 | 329 | 8126 | 12  |
| CONTIG-009705 | 365  | 10  | 12  | 175  | 0   |
| CONTIG-009706 | 45   | 537 | 138 | 684  | 17  |
| CONTIG-009707 | 455  | 10  | 44  | 116  | 0   |
| CONTIG-009708 | 407  | 27  | 51  | 223  | 0   |
| CONTIG-009709 | 400  | 28  | 151 | 214  | 5   |
| CONTIG-009710 | 184  | 4   | 8   | 7    | 0   |
| CONTIG-009711 | 293  | 8   | 42  | 42   | 0   |
| CONTIG-009712 | 1222 | 31  | 192 | 1991 | 0   |
| CONTIG-009713 | 140  | 5   | 18  | 15   | 0   |
| CONTIG-009715 | 42   | 385 | 61  | 234  | 36  |
| CONTIG-009716 | 74   | 8   | 26  | 5    | 0   |
| CONTIG-009723 | 169  | 7   | 13  | 30   | 2   |
| CONTIG-009724 | 115  | 11  | 2   | 59   | 0   |
| CONTIG-009726 | 92   | 3   | 0   | 13   | 0   |
| CONTIG-009727 | 740  | 38  | 386 | 1058 | 8   |
| CONTIG-009728 | 370  | 24  | 121 | 285  | 0   |
| CONTIG-009731 | 2515 | 52  | 735 | 5542 | 107 |
| CONTIG-009734 | 210  | 23  | 64  | 156  | 4   |
| CONTIG-009735 | 88   | 44  | 210 | 0    | 0   |
| CONTIG-009736 | 536  | 14  | 70  | 247  | 2   |
| CONTIG-009737 | 250  | 7   | 6   | 46   | 0   |
| CONTIG-009738 | 201  | 57  | 81  | 443  | 0   |
| CONTIG-009739 | 191  | 5   | 23  | 7    | 0   |
| CONTIG-009740 | 103  | 27  | 51  | 85   | 0   |
| CONTIG-009741 | 59   | 100 | 18  | 70   | 6   |
| CONTIG-009742 | 296  | 44  | 496 | 153  | 2   |
| CONTIG-009743 | 86   | 4   | 8   | 5    | 0   |
| CONTIG-009744 | 1190 | 16  | 152 | 630  | 10  |
| CONTIG-009745 | 61   | 15  | 9   | 18   | 0   |
| CONTIG-009747 | 229  | 28  | 121 | 166  | 2   |
| CONTIG-009748 | 180  | 11  | 17  | 71   | 2   |

|               |      |     |     |      |     |
|---------------|------|-----|-----|------|-----|
| CONTIG-009749 | 479  | 14  | 50  | 276  | 0   |
| CONTIG-009750 | 502  | 14  | 22  | 278  | 0   |
| CONTIG-009751 | 267  | 205 | 606 | 1531 | 203 |
| CONTIG-009752 | 392  | 17  | 51  | 142  | 12  |
| CONTIG-009753 | 133  | 5   | 9   | 19   | 0   |
| CONTIG-009754 | 342  | 11  | 17  | 182  | 0   |
| CONTIG-009755 | 391  | 17  | 5   | 0    | 51  |
| CONTIG-009756 | 617  | 16  | 46  | 364  | 4   |
| CONTIG-009757 | 99   | 487 | 252 | 1673 | 2   |
| CONTIG-009758 | 195  | 8   | 43  | 32   | 0   |
| CONTIG-009759 | 107  | 7   | 5   | 31   | 0   |
| CONTIG-009760 | 59   | 190 | 463 | 342  | 0   |
| CONTIG-009761 | 1548 | 29  | 202 | 1859 | 27  |
| CONTIG-009762 | 603  | 44  | 299 | 1019 | 9   |
| CONTIG-009765 | 884  | 23  | 651 | 463  | 10  |
| CONTIG-009766 | 73   | 5   | 9   | 4    | 0   |
| CONTIG-009767 | 80   | 4   | 2   | 7    | 0   |
| CONTIG-009768 | 246  | 12  | 11  | 96   | 2   |
| CONTIG-009769 | 289  | 13  | 44  | 123  | 0   |
| CONTIG-009770 | 489  | 28  | 13  | 155  | 82  |
| CONTIG-009771 | 340  | 13  | 40  | 154  | 4   |
| CONTIG-009772 | 446  | 16  | 169 | 157  | 4   |
| CONTIG-009773 | 977  | 17  | 35  | 196  | 2   |
| CONTIG-009774 | 148  | 52  | 147 | 184  | 0   |
| CONTIG-009776 | 503  | 33  | 176 | 743  | 0   |
| CONTIG-009778 | 1032 | 28  | 163 | 836  | 30  |
| CONTIG-009779 | 520  | 12  | 51  | 161  | 2   |
| CONTIG-009780 | 197  | 20  | 23  | 119  | 0   |
| CONTIG-009781 | 514  | 25  | 101 | 381  | 17  |
| CONTIG-009782 | 40   | 64  | 25  | 60   | 2   |
| CONTIG-009783 | 79   | 58  | 106 | 37   | 0   |
| CONTIG-009784 | 76   | 4   | 4   | 4    | 0   |
| CONTIG-009785 | 667  | 32  | 165 | 587  | 30  |
| CONTIG-009786 | 143  | 16  | 27  | 88   | 0   |
| CONTIG-009787 | 537  | 27  | 311 | 383  | 2   |
| CONTIG-009788 | 590  | 12  | 17  | 117  | 4   |
| CONTIG-009789 | 320  | 14  | 34  | 168  | 3   |
| CONTIG-009790 | 997  | 45  | 816 | 717  | 90  |
| CONTIG-009791 | 241  | 11  | 48  | 16   | 2   |
| CONTIG-009792 | 358  | 9   | 10  | 83   | 0   |
| CONTIG-009793 | 714  | 55  | 355 | 633  | 24  |
| CONTIG-009794 | 64   | 15  | 60  | 0    | 0   |
| CONTIG-009795 | 283  | 67  | 80  | 89   | 0   |
| CONTIG-009796 | 266  | 227 | 164 | 1425 | 229 |
| CONTIG-009797 | 156  | 34  | 87  | 19   | 0   |
| CONTIG-009798 | 283  | 11  | 22  | 72   | 2   |
| CONTIG-009799 | 428  | 8   | 24  | 92   | 0   |

|               |      |     |     |      |     |
|---------------|------|-----|-----|------|-----|
| CONTIG-009800 | 204  | 17  | 48  | 135  | 0   |
| CONTIG-009801 | 476  | 16  | 128 | 99   | 2   |
| CONTIG-009802 | 81   | 42  | 63  | 54   | 3   |
| CONTIG-009803 | 106  | 3   | 3   | 9    | 0   |
| CONTIG-009804 | 368  | 85  | 154 | 1787 | 4   |
| CONTIG-009805 | 309  | 14  | 40  | 93   | 0   |
| CONTIG-009806 | 1333 | 25  | 379 | 1241 | 21  |
| CONTIG-009807 | 79   | 191 | 54  | 536  | 2   |
| CONTIG-009808 | 61   | 5   | 16  | 4    | 0   |
| CONTIG-009809 | 514  | 25  | 172 | 129  | 10  |
| CONTIG-009815 | 111  | 5   | 5   | 20   | 0   |
| CONTIG-009817 | 559  | 20  | 206 | 384  | 0   |
| CONTIG-009818 | 199  | 13  | 97  | 55   | 0   |
| CONTIG-009819 | 195  | 18  | 43  | 51   | 4   |
| CONTIG-009820 | 845  | 42  | 119 | 430  | 12  |
| CONTIG-009821 | 288  | 17  | 100 | 112  | 0   |
| CONTIG-009822 | 586  | 18  | 217 | 237  | 0   |
| CONTIG-009823 | 64   | 21  | 58  | 14   | 0   |
| CONTIG-009824 | 776  | 63  | 297 | 2225 | 8   |
| CONTIG-009825 | 760  | 26  | 201 | 663  | 10  |
| CONTIG-009826 | 82   | 5   | 16  | 6    | 0   |
| CONTIG-009827 | 237  | 32  | 32  | 177  | 0   |
| CONTIG-009829 | 1211 | 25  | 293 | 567  | 59  |
| CONTIG-009832 | 130  | 4   | 2   | 2    | 2   |
| CONTIG-009833 | 175  | 5   | 11  | 24   | 0   |
| CONTIG-009839 | 96   | 5   | 0   | 9    | 0   |
| CONTIG-009840 | 192  | 7   | 12  | 4    | 0   |
| CONTIG-009841 | 126  | 10  | 12  | 19   | 2   |
| CONTIG-009842 | 108  | 155 | 411 | 187  | 8   |
| CONTIG-009843 | 505  | 23  | 148 | 289  | 8   |
| CONTIG-009844 | 103  | 8   | 7   | 24   | 0   |
| CONTIG-009845 | 113  | 282 | 513 | 638  | 61  |
| CONTIG-009846 | 266  | 12  | 32  | 83   | 2   |
| CONTIG-009847 | 569  | 15  | 139 | 333  | 0   |
| CONTIG-009848 | 299  | 34  | 337 | 378  | 0   |
| CONTIG-009850 | 224  | 9   | 50  | 67   | 0   |
| CONTIG-009851 | 334  | 15  | 185 | 116  | 0   |
| CONTIG-009852 | 103  | 9   | 12  | 24   | 0   |
| CONTIG-009853 | 140  | 16  | 58  | 30   | 0   |
| CONTIG-009854 | 98   | 168 | 296 | 570  | 2   |
| CONTIG-009855 | 127  | 163 | 518 | 275  | 9   |
| CONTIG-009856 | 307  | 15  | 47  | 168  | 4   |
| CONTIG-009857 | 47   | 269 | 14  | 375  | 0   |
| CONTIG-009860 | 104  | 7   | 15  | 8    | 2   |
| CONTIG-009861 | 678  | 18  | 41  | 197  | 14  |
| CONTIG-009862 | 64   | 80  | 98  | 10   | 3   |
| CONTIG-009863 | 597  | 145 | 137 | 2484 | 647 |

|               |      |     |     |      |     |
|---------------|------|-----|-----|------|-----|
| CONTIG-009864 | 448  | 20  | 30  | 214  | 8   |
| CONTIG-009865 | 357  | 16  | 97  | 144  | 0   |
| CONTIG-009866 | 651  | 10  | 74  | 112  | 0   |
| CONTIG-009867 | 197  | 13  | 135 | 18   | 0   |
| CONTIG-009868 | 222  | 7   | 3   | 42   | 0   |
| CONTIG-009869 | 237  | 20  | 183 | 85   | 3   |
| CONTIG-009870 | 223  | 17  | 124 | 91   | 0   |
| CONTIG-009871 | 64   | 7   | 8   | 20   | 0   |
| CONTIG-009876 | 214  | 10  | 0   | 95   | 0   |
| CONTIG-009877 | 71   | 542 | 323 | 624  | 27  |
| CONTIG-009878 | 65   | 5   | 5   | 9    | 0   |
| CONTIG-009879 | 61   | 69  | 52  | 112  | 0   |
| CONTIG-009886 | 73   | 12  | 37  | 0    | 0   |
| CONTIG-009887 | 782  | 17  | 279 | 350  | 0   |
| CONTIG-009888 | 271  | 6   | 2   | 59   | 0   |
| CONTIG-009889 | 96   | 3   | 0   | 9    | 0   |
| CONTIG-009890 | 59   | 19  | 27  | 45   | 2   |
| CONTIG-009891 | 305  | 22  | 94  | 206  | 8   |
| CONTIG-009892 | 195  | 14  | 151 | 49   | 0   |
| CONTIG-009893 | 67   | 3   | 2   | 0    | 0   |
| CONTIG-009894 | 1339 | 22  | 308 | 785  | 40  |
| CONTIG-009895 | 104  | 10  | 12  | 19   | 0   |
| CONTIG-009896 | 271  | 16  | 9   | 127  | 2   |
| CONTIG-009897 | 598  | 15  | 40  | 301  | 0   |
| CONTIG-009900 | 655  | 43  | 538 | 989  | 7   |
| CONTIG-009901 | 261  | 14  | 129 | 91   | 0   |
| CONTIG-009902 | 1419 | 46  | 544 | 3876 | 0   |
| CONTIG-009903 | 1200 | 42  | 903 | 1391 | 27  |
| CONTIG-009904 | 69   | 130 | 60  | 229  | 4   |
| CONTIG-009905 | 328  | 7   | 2   | 87   | 0   |
| CONTIG-009909 | 123  | 99  | 24  | 64   | 0   |
| CONTIG-009910 | 384  | 34  | 592 | 467  | 0   |
| CONTIG-009911 | 100  | 12  | 16  | 30   | 0   |
| CONTIG-009912 | 713  | 18  | 197 | 316  | 2   |
| CONTIG-009913 | 214  | 10  | 26  | 75   | 0   |
| CONTIG-009914 | 114  | 59  | 12  | 310  | 3   |
| CONTIG-009915 | 105  | 114 | 251 | 349  | 2   |
| CONTIG-009916 | 488  | 12  | 86  | 145  | 0   |
| CONTIG-009917 | 1061 | 57  | 91  | 633  | 211 |
| CONTIG-009918 | 258  | 19  | 87  | 106  | 2   |
| CONTIG-009919 | 386  | 31  | 153 | 489  | 2   |
| CONTIG-009920 | 647  | 110 | 579 | 3907 | 0   |
| CONTIG-009921 | 381  | 95  | 976 | 1085 | 9   |
| CONTIG-009922 | 268  | 12  | 57  | 33   | 0   |
| CONTIG-009923 | 2045 | 28  | 503 | 2400 | 2   |
| CONTIG-009924 | 126  | 63  | 245 | 190  | 0   |
| CONTIG-009925 | 147  | 14  | 38  | 62   | 0   |

|               |      |     |      |      |     |
|---------------|------|-----|------|------|-----|
| CONTIG-009926 | 439  | 16  | 112  | 158  | 4   |
| CONTIG-009927 | 125  | 3   | 4    | 6    | 0   |
| CONTIG-009928 | 564  | 16  | 239  | 173  | 21  |
| CONTIG-009929 | 206  | 13  | 4    | 0    | 0   |
| CONTIG-009930 | 260  | 24  | 93   | 151  | 4   |
| CONTIG-009931 | 621  | 89  | 1223 | 1767 | 0   |
| CONTIG-009933 | 412  | 50  | 122  | 1016 | 0   |
| CONTIG-009934 | 127  | 93  | 59   | 489  | 4   |
| CONTIG-009935 | 317  | 8   | 22   | 92   | 2   |
| CONTIG-009936 | 285  | 47  | 163  | 263  | 4   |
| CONTIG-009937 | 246  | 13  | 126  | 75   | 0   |
| CONTIG-009938 | 1059 | 62  | 601  | 1256 | 165 |
| CONTIG-009939 | 284  | 8   | 12   | 78   | 0   |
| CONTIG-009940 | 58   | 3   | 6    | 0    | 0   |
| CONTIG-009941 | 263  | 5   | 7    | 25   | 2   |
| CONTIG-009942 | 72   | 638 | 289  | 1241 | 52  |
| CONTIG-009943 | 283  | 50  | 304  | 367  | 2   |
| CONTIG-009944 | 114  | 14  | 119  | 0    | 0   |
| CONTIG-009945 | 52   | 792 | 264  | 921  | 85  |
| CONTIG-009946 | 480  | 20  | 32   | 307  | 0   |
| CONTIG-009952 | 380  | 25  | 26   | 367  | 2   |
| CONTIG-009953 | 445  | 22  | 4    | 342  | 2   |
| CONTIG-009954 | 287  | 17  | 73   | 163  | 0   |
| CONTIG-009955 | 220  | 18  | 130  | 64   | 0   |
| CONTIG-009956 | 185  | 20  | 24   | 139  | 0   |
| CONTIG-009957 | 145  | 11  | 37   | 50   | 0   |
| CONTIG-009958 | 187  | 7   | 7    | 30   | 2   |
| CONTIG-009965 | 423  | 25  | 374  | 263  | 0   |
| CONTIG-009966 | 206  | 5   | 24   | 25   | 0   |
| CONTIG-009967 | 496  | 69  | 953  | 973  | 13  |
| CONTIG-009969 | 1132 | 14  | 60   | 451  | 9   |
| CONTIG-009970 | 374  | 13  | 280  | 112  | 0   |
| CONTIG-009971 | 160  | 16  | 16   | 128  | 0   |
| CONTIG-009972 | 45   | 524 | 52   | 368  | 39  |
| CONTIG-009973 | 202  | 31  | 50   | 250  | 0   |
| CONTIG-009974 | 106  | 17  | 8    | 66   | 0   |
| CONTIG-009976 | 371  | 136 | 480  | 1474 | 65  |
| CONTIG-009977 | 90   | 17  | 83   | 22   | 0   |
| CONTIG-009978 | 127  | 18  | 53   | 5    | 0   |
| CONTIG-009981 | 885  | 19  | 296  | 402  | 32  |
| CONTIG-009982 | 386  | 14  | 73   | 105  | 0   |
| CONTIG-009983 | 289  | 249 | 726  | 1686 | 281 |
| CONTIG-009984 | 121  | 11  | 16   | 10   | 0   |
| CONTIG-009985 | 569  | 22  | 33   | 211  | 0   |
| CONTIG-009986 | 69   | 3   | 7    | 2    | 0   |
| CONTIG-009987 | 133  | 69  | 516  | 60   | 0   |
| CONTIG-009988 | 192  | 31  | 163  | 70   | 8   |



|               |      |     |     |      |     |
|---------------|------|-----|-----|------|-----|
| CONTIG-009989 | 241  | 11  | 45  | 72   | 0   |
| CONTIG-009990 | 141  | 7   | 18  | 32   | 0   |
| CONTIG-009991 | 198  | 31  | 158 | 84   | 0   |
| CONTIG-009992 | 310  | 9   | 77  | 63   | 0   |
| CONTIG-009993 | 565  | 9   | 17  | 168  | 0   |
| CONTIG-009994 | 761  | 18  | 60  | 352  | 4   |
| CONTIG-009995 | 313  | 10  | 22  | 89   | 2   |
| CONTIG-009996 | 360  | 15  | 37  | 248  | 0   |
| CONTIG-009997 | 70   | 897 | 200 | 1696 | 183 |
| CONTIG-009998 | 167  | 11  | 7   | 60   | 0   |
| CONTIG-009999 | 1571 | 27  | 268 | 1427 | 8   |
| CONTIG-010000 | 1168 | 83  | 242 | 5293 | 6   |
| CONTIG-010001 | 77   | 18  | 112 | 3    | 0   |
| CONTIG-010003 | 123  | 9   | 21  | 11   | 0   |
| CONTIG-010005 | 432  | 21  | 103 | 290  | 2   |
| CONTIG-010008 | 667  | 18  | 54  | 632  | 0   |
| CONTIG-010009 | 416  | 11  | 58  | 87   | 0   |
| CONTIG-010010 | 226  | 20  | 246 | 67   | 0   |
| CONTIG-010011 | 61   | 595 | 294 | 917  | 90  |
| CONTIG-010012 | 80   | 140 | 213 | 122  | 20  |
| CONTIG-010013 | 138  | 15  | 153 | 24   | 0   |
| CONTIG-010014 | 147  | 6   | 23  | 5    | 0   |
| CONTIG-010015 | 176  | 40  | 204 | 137  | 0   |
| CONTIG-010016 | 391  | 9   | 60  | 28   | 21  |
| CONTIG-010017 | 107  | 10  | 44  | 0    | 0   |
| CONTIG-010018 | 81   | 66  | 79  | 92   | 12  |
| CONTIG-010019 | 84   | 33  | 113 | 22   | 0   |
| CONTIG-010020 | 393  | 11  | 87  | 98   | 0   |
| CONTIG-010021 | 798  | 31  | 217 | 1285 | 0   |
| CONTIG-010022 | 51   | 82  | 283 | 40   | 0   |
| CONTIG-010023 | 331  | 29  | 159 | 338  | 2   |
| CONTIG-010024 | 98   | 48  | 499 | 0    | 0   |
| CONTIG-010031 | 541  | 95  | 54  | 17   | 712 |
| CONTIG-010032 | 437  | 12  | 83  | 151  | 0   |
| CONTIG-010033 | 790  | 60  | 149 | 1117 | 16  |
| CONTIG-010034 | 875  | 46  | 285 | 1159 | 8   |
| CONTIG-010036 | 344  | 14  | 52  | 114  | 0   |
| CONTIG-010039 | 136  | 9   | 42  | 26   | 0   |
| CONTIG-010040 | 116  | 6   | 4   | 17   | 0   |
| CONTIG-010041 | 329  | 33  | 292 | 271  | 0   |
| CONTIG-010042 | 194  | 21  | 21  | 165  | 0   |
| CONTIG-010043 | 428  | 25  | 63  | 357  | 4   |
| CONTIG-010044 | 85   | 8   | 12  | 25   | 0   |
| CONTIG-010045 | 348  | 25  | 172 | 321  | 0   |
| CONTIG-010046 | 125  | 5   | 8   | 9    | 0   |
| CONTIG-010047 | 249  | 69  | 132 | 661  | 8   |
| CONTIG-010056 | 378  | 26  | 410 | 164  | 2   |

|               |      |     |     |      |    |
|---------------|------|-----|-----|------|----|
| CONTIG-010057 | 323  | 21  | 173 | 279  | 0  |
| CONTIG-010058 | 289  | 9   | 43  | 95   | 0  |
| CONTIG-010059 | 388  | 16  | 37  | 204  | 6  |
| CONTIG-010060 | 233  | 12  | 25  | 88   | 0  |
| CONTIG-010061 | 395  | 81  | 379 | 1817 | 0  |
| CONTIG-010062 | 1222 | 25  | 76  | 1669 | 2  |
| CONTIG-010063 | 181  | 17  | 71  | 96   | 3  |
| CONTIG-010064 | 95   | 5   | 6   | 20   | 0  |
| CONTIG-010065 | 68   | 5   | 25  | 0    | 0  |
| CONTIG-010067 | 826  | 33  | 284 | 1332 | 0  |
| CONTIG-010068 | 213  | 6   | 19  | 21   | 0  |
| CONTIG-010071 | 896  | 32  | 98  | 1211 | 0  |
| CONTIG-010072 | 155  | 6   | 3   | 29   | 0  |
| CONTIG-010073 | 473  | 15  | 23  | 233  | 2  |
| CONTIG-010075 | 429  | 10  | 63  | 188  | 0  |
| CONTIG-010076 | 1126 | 26  | 597 | 566  | 35 |
| CONTIG-010077 | 633  | 21  | 23  | 283  | 4  |
| CONTIG-010078 | 1158 | 12  | 112 | 454  | 4  |
| CONTIG-010081 | 110  | 21  | 68  | 2    | 0  |
| CONTIG-010082 | 879  | 15  | 71  | 419  | 3  |
| CONTIG-010083 | 440  | 20  | 62  | 195  | 0  |
| CONTIG-010084 | 251  | 76  | 198 | 235  | 42 |
| CONTIG-010085 | 94   | 6   | 2   | 17   | 0  |
| CONTIG-010086 | 117  | 7   | 0   | 15   | 0  |
| CONTIG-010087 | 99   | 7   | 2   | 16   | 0  |
| CONTIG-010088 | 113  | 8   | 42  | 0    | 2  |
| CONTIG-010089 | 201  | 28  | 197 | 207  | 0  |
| CONTIG-010090 | 871  | 16  | 39  | 542  | 2  |
| CONTIG-010094 | 175  | 6   | 0   | 30   | 0  |
| CONTIG-010097 | 360  | 29  | 379 | 234  | 0  |
| CONTIG-010098 | 304  | 60  | 400 | 235  | 13 |
| CONTIG-010101 | 213  | 30  | 3   | 331  | 0  |
| CONTIG-010102 | 157  | 17  | 0   | 134  | 0  |
| CONTIG-010103 | 483  | 39  | 168 | 748  | 0  |
| CONTIG-010104 | 398  | 29  | 105 | 305  | 13 |
| CONTIG-010105 | 241  | 16  | 19  | 120  | 0  |
| CONTIG-010106 | 64   | 7   | 0   | 10   | 0  |
| CONTIG-010108 | 226  | 29  | 172 | 115  | 8  |
| CONTIG-010109 | 776  | 11  | 53  | 246  | 2  |
| CONTIG-010110 | 137  | 6   | 12  | 22   | 0  |
| CONTIG-010111 | 59   | 5   | 0   | 0    | 0  |
| CONTIG-010112 | 70   | 10  | 24  | 0    | 0  |
| CONTIG-010113 | 92   | 5   | 4   | 7    | 0  |
| CONTIG-010114 | 1130 | 37  | 644 | 1503 | 10 |
| CONTIG-010115 | 1960 | 27  | 194 | 815  | 23 |
| CONTIG-010116 | 193  | 22  | 30  | 162  | 3  |
| CONTIG-010117 | 125  | 126 | 600 | 404  | 0  |

|               |      |     |     |      |    |
|---------------|------|-----|-----|------|----|
| CONTIG-010118 | 306  | 12  | 144 | 103  | 0  |
| CONTIG-010119 | 62   | 14  | 31  | 24   | 0  |
| CONTIG-010120 | 68   | 322 | 272 | 218  | 60 |
| CONTIG-010121 | 53   | 466 | 167 | 364  | 42 |
| CONTIG-010122 | 93   | 7   | 2   | 17   | 2  |
| CONTIG-010123 | 497  | 77  | 420 | 1296 | 38 |
| CONTIG-010124 | 1190 | 20  | 60  | 1154 | 2  |
| CONTIG-010125 | 61   | 5   | 2   | 11   | 0  |
| CONTIG-010126 | 68   | 8   | 5   | 22   | 0  |
| CONTIG-010127 | 144  | 9   | 14  | 19   | 0  |
| CONTIG-010128 | 282  | 31  | 190 | 212  | 5  |
| CONTIG-010129 | 131  | 11  | 18  | 41   | 0  |
| CONTIG-010130 | 91   | 6   | 7   | 12   | 0  |
| CONTIG-010131 | 347  | 18  | 118 | 242  | 0  |
| CONTIG-010132 | 225  | 20  | 71  | 8    | 0  |
| CONTIG-010133 | 1505 | 28  | 474 | 1943 | 4  |
| CONTIG-010134 | 316  | 13  | 35  | 125  | 4  |
| CONTIG-010135 | 207  | 7   | 2   | 47   | 0  |
| CONTIG-010136 | 82   | 208 | 109 | 448  | 39 |
| CONTIG-010137 | 158  | 9   | 58  | 6    | 0  |
| CONTIG-010138 | 238  | 17  | 24  | 100  | 3  |
| CONTIG-010139 | 150  | 6   | 0   | 31   | 0  |
| CONTIG-010141 | 90   | 18  | 73  | 6    | 0  |
| CONTIG-010142 | 483  | 38  | 193 | 460  | 22 |
| CONTIG-010143 | 252  | 11  | 56  | 30   | 4  |
| CONTIG-010144 | 191  | 17  | 75  | 81   | 0  |
| CONTIG-010145 | 143  | 74  | 158 | 345  | 4  |
| CONTIG-010146 | 508  | 13  | 25  | 139  | 0  |
| CONTIG-010147 | 212  | 4   | 0   | 23   | 0  |
| CONTIG-010148 | 64   | 120 | 12  | 237  | 0  |
| CONTIG-010150 | 579  | 13  | 86  | 170  | 3  |
| CONTIG-010151 | 460  | 38  | 138 | 753  | 8  |
| CONTIG-010152 | 125  | 12  | 6   | 44   | 0  |
| CONTIG-010153 | 62   | 25  | 46  | 28   | 0  |
| CONTIG-010154 | 370  | 6   | 10  | 61   | 0  |
| CONTIG-010155 | 338  | 13  | 13  | 141  | 0  |
| CONTIG-010156 | 59   | 292 | 115 | 202  | 28 |
| CONTIG-010157 | 47   | 39  | 14  | 12   | 0  |
| CONTIG-010158 | 292  | 5   | 13  | 36   | 0  |
| CONTIG-010159 | 176  | 8   | 11  | 37   | 0  |
| CONTIG-010162 | 83   | 5   | 9   | 0    | 2  |
| CONTIG-010163 | 432  | 14  | 6   | 124  | 0  |
| CONTIG-010164 | 148  | 11  | 14  | 74   | 0  |
| CONTIG-010166 | 874  | 67  | 384 | 1560 | 85 |
| CONTIG-010172 | 216  | 8   | 10  | 59   | 0  |
| CONTIG-010175 | 543  | 32  | 256 | 516  | 5  |
| CONTIG-010176 | 77   | 50  | 54  | 138  | 0  |

|               |      |     |     |      |     |
|---------------|------|-----|-----|------|-----|
| CONTIG-010177 | 59   | 36  | 120 | 0    | 0   |
| CONTIG-010178 | 67   | 7   | 0   | 13   | 0   |
| CONTIG-010179 | 190  | 7   | 2   | 39   | 0   |
| CONTIG-010180 | 258  | 40  | 284 | 346  | 0   |
| CONTIG-010181 | 357  | 114 | 18  | 2345 | 0   |
| CONTIG-010182 | 450  | 17  | 68  | 225  | 0   |
| CONTIG-010185 | 39   | 163 | 88  | 198  | 2   |
| CONTIG-010186 | 1064 | 24  | 192 | 1258 | 0   |
| CONTIG-010187 | 179  | 12  | 21  | 49   | 0   |
| CONTIG-010188 | 1822 | 36  | 330 | 1747 | 43  |
| CONTIG-010189 | 383  | 10  | 22  | 95   | 0   |
| CONTIG-010190 | 89   | 7   | 7   | 12   | 0   |
| CONTIG-010191 | 274  | 743 | 376 | 7403 | 580 |
| CONTIG-010192 | 206  | 11  | 29  | 74   | 0   |
| CONTIG-010193 | 366  | 40  | 333 | 561  | 6   |
| CONTIG-010194 | 44   | 262 | 238 | 130  | 21  |
| CONTIG-010197 | 217  | 11  | 66  | 52   | 0   |
| CONTIG-010198 | 224  | 8   | 45  | 38   | 0   |
| CONTIG-010199 | 160  | 28  | 235 | 113  | 0   |
| CONTIG-010200 | 86   | 10  | 74  | 0    | 0   |
| CONTIG-010201 | 1759 | 21  | 359 | 1365 | 4   |
| CONTIG-010205 | 103  | 46  | 267 | 31   | 0   |
| CONTIG-010206 | 157  | 12  | 80  | 49   | 0   |
| CONTIG-010207 | 660  | 35  | 537 | 952  | 0   |
| CONTIG-010208 | 54   | 9   | 4   | 5    | 0   |
| CONTIG-010209 | 330  | 44  | 59  | 865  | 0   |
| CONTIG-010210 | 129  | 18  | 24  | 66   | 0   |
| CONTIG-010211 | 76   | 5   | 2   | 16   | 0   |
| CONTIG-010212 | 84   | 250 | 139 | 801  | 2   |
| CONTIG-010213 | 798  | 10  | 79  | 269  | 0   |
| CONTIG-010214 | 71   | 28  | 107 | 0    | 0   |
| CONTIG-010215 | 399  | 11  | 25  | 172  | 0   |
| CONTIG-010216 | 160  | 8   | 12  | 26   | 2   |
| CONTIG-010217 | 334  | 10  | 3   | 0    | 2   |
| CONTIG-010220 | 404  | 13  | 73  | 188  | 4   |
| CONTIG-010221 | 177  | 17  | 3   | 183  | 0   |
| CONTIG-010222 | 416  | 18  | 23  | 189  | 6   |
| CONTIG-010223 | 73   | 4   | 27  | 0    | 0   |
| CONTIG-010224 | 175  | 10  | 19  | 67   | 0   |
| CONTIG-010225 | 389  | 17  | 179 | 183  | 0   |
| CONTIG-010226 | 945  | 27  | 216 | 786  | 21  |
| CONTIG-010227 | 82   | 5   | 0   | 10   | 0   |
| CONTIG-010228 | 378  | 29  | 164 | 462  | 0   |
| CONTIG-010229 | 435  | 7   | 35  | 74   | 0   |
| CONTIG-010230 | 173  | 16  | 141 | 58   | 0   |
| CONTIG-010231 | 65   | 4   | 2   | 0    | 0   |
| CONTIG-010232 | 95   | 17  | 62  | 28   | 0   |

|               |      |     |      |      |     |
|---------------|------|-----|------|------|-----|
| CONTIG-010233 | 503  | 27  | 787  | 268  | 0   |
| CONTIG-010234 | 147  | 6   | 3    | 25   | 0   |
| CONTIG-010235 | 696  | 13  | 38   | 343  | 2   |
| CONTIG-010236 | 279  | 9   | 5    | 71   | 2   |
| CONTIG-010237 | 72   | 5   | 4    | 7    | 0   |
| CONTIG-010238 | 70   | 7   | 11   | 0    | 0   |
| CONTIG-010239 | 624  | 20  | 69   | 484  | 0   |
| CONTIG-010240 | 133  | 5   | 8    | 8    | 0   |
| CONTIG-010241 | 343  | 10  | 2    | 6    | 20  |
| CONTIG-010242 | 481  | 11  | 77   | 57   | 0   |
| CONTIG-010243 | 1025 | 27  | 234  | 685  | 16  |
| CONTIG-010244 | 72   | 8   | 0    | 10   | 0   |
| CONTIG-010245 | 505  | 19  | 71   | 297  | 0   |
| CONTIG-010247 | 603  | 11  | 11   | 108  | 0   |
| CONTIG-010248 | 128  | 8   | 8    | 36   | 0   |
| CONTIG-010249 | 95   | 7   | 4    | 16   | 0   |
| CONTIG-010250 | 59   | 99  | 409  | 66   | 0   |
| CONTIG-010251 | 148  | 395 | 198  | 2209 | 98  |
| CONTIG-010252 | 187  | 7   | 2    | 42   | 0   |
| CONTIG-010253 | 461  | 19  | 365  | 64   | 0   |
| CONTIG-010254 | 164  | 451 | 1359 | 1507 | 107 |
| CONTIG-010262 | 399  | 17  | 99   | 186  | 0   |
| CONTIG-010263 | 88   | 6   | 6    | 20   | 0   |
| CONTIG-010264 | 635  | 12  | 53   | 175  | 6   |
| CONTIG-010265 | 394  | 10  | 14   | 115  | 0   |
| CONTIG-010266 | 476  | 15  | 196  | 230  | 0   |
| CONTIG-010267 | 103  | 124 | 227  | 107  | 9   |
| CONTIG-010268 | 178  | 189 | 209  | 1496 | 58  |
| CONTIG-010275 | 252  | 20  | 35   | 220  | 0   |
| CONTIG-010276 | 597  | 35  | 164  | 572  | 8   |
| CONTIG-010277 | 78   | 12  | 90   | 0    | 0   |
| CONTIG-010278 | 337  | 11  | 49   | 100  | 0   |
| CONTIG-010279 | 261  | 12  | 85   | 56   | 0   |
| CONTIG-010280 | 246  | 113 | 263  | 737  | 26  |
| CONTIG-010281 | 106  | 10  | 76   | 0    | 0   |
| CONTIG-010282 | 411  | 35  | 98   | 857  | 0   |
| CONTIG-010283 | 117  | 7   | 4    | 19   | 0   |
| CONTIG-010284 | 407  | 14  | 118  | 163  | 0   |
| CONTIG-010285 | 698  | 14  | 38   | 150  | 29  |
| CONTIG-010286 | 62   | 103 | 79   | 249  | 0   |
| CONTIG-010287 | 123  | 341 | 76   | 2463 | 2   |
| CONTIG-010288 | 106  | 12  | 41   | 0    | 2   |
| CONTIG-010289 | 644  | 54  | 482  | 1945 | 2   |
| CONTIG-010290 | 202  | 11  | 44   | 52   | 0   |
| CONTIG-010293 | 544  | 28  | 104  | 376  | 9   |
| CONTIG-010294 | 73   | 767 | 7    | 91   | 0   |
| CONTIG-010295 | 379  | 8   | 26   | 90   | 0   |

|               |      |      |     |      |      |
|---------------|------|------|-----|------|------|
| CONTIG-010296 | 111  | 10   | 5   | 44   | 0    |
| CONTIG-010297 | 307  | 18   | 80  | 161  | 4    |
| CONTIG-010298 | 1072 | 34   | 458 | 1257 | 0    |
| CONTIG-010299 | 762  | 14   | 223 | 314  | 3    |
| CONTIG-010301 | 708  | 75   | 180 | 938  | 307  |
| CONTIG-010302 | 365  | 24   | 42  | 289  | 4    |
| CONTIG-010303 | 595  | 13   | 60  | 190  | 0    |
| CONTIG-010304 | 405  | 11   | 39  | 98   | 0    |
| CONTIG-010305 | 69   | 7    | 0   | 15   | 0    |
| CONTIG-010306 | 514  | 89   | 339 | 2345 | 2    |
| CONTIG-010307 | 452  | 29   | 188 | 392  | 2    |
| CONTIG-010308 | 129  | 23   | 67  | 83   | 0    |
| CONTIG-010309 | 359  | 13   | 64  | 127  | 2    |
| CONTIG-010310 | 653  | 15   | 56  | 311  | 3    |
| CONTIG-010311 | 157  | 209  | 369 | 736  | 38   |
| CONTIG-010312 | 203  | 6    | 48  | 26   | 0    |
| CONTIG-010313 | 188  | 21   | 27  | 172  | 0    |
| CONTIG-010314 | 83   | 391  | 193 | 381  | 143  |
| CONTIG-010315 | 178  | 7    | 14  | 16   | 0    |
| CONTIG-010316 | 223  | 10   | 4   | 52   | 0    |
| CONTIG-010319 | 306  | 49   | 192 | 165  | 2    |
| CONTIG-010320 | 68   | 70   | 18  | 0    | 4    |
| CONTIG-010321 | 200  | 17   | 40  | 149  | 0    |
| CONTIG-010322 | 185  | 10   | 61  | 44   | 0    |
| CONTIG-010323 | 130  | 10   | 35  | 32   | 0    |
| CONTIG-010324 | 113  | 21   | 54  | 24   | 0    |
| CONTIG-010327 | 1451 | 97   | 309 | 5946 | 182  |
| CONTIG-010329 | 81   | 11   | 4   | 18   | 0    |
| CONTIG-010330 | 229  | 16   | 52  | 123  | 0    |
| CONTIG-010331 | 215  | 5    | 0   | 28   | 3    |
| CONTIG-010332 | 122  | 21   | 54  | 39   | 4    |
| CONTIG-010333 | 42   | 1400 | 9   | 0    | 1025 |
| CONTIG-010334 | 156  | 19   | 50  | 34   | 0    |
| CONTIG-010335 | 252  | 41   | 29  | 6    | 111  |
| CONTIG-010336 | 1506 | 28   | 519 | 1019 | 115  |
| CONTIG-010337 | 527  | 13   | 41  | 212  | 10   |
| CONTIG-010338 | 480  | 25   | 230 | 404  | 4    |
| CONTIG-010339 | 99   | 4    | 7   | 8    | 0    |
| CONTIG-010340 | 748  | 16   | 141 | 262  | 8    |
| CONTIG-010343 | 227  | 27   | 69  | 154  | 0    |
| CONTIG-010344 | 445  | 11   | 61  | 80   | 5    |
| CONTIG-010345 | 156  | 26   | 12  | 195  | 0    |
| CONTIG-010346 | 84   | 100  | 22  | 93   | 13   |
| CONTIG-010347 | 69   | 389  | 38  | 1516 | 0    |
| CONTIG-010348 | 197  | 27   | 32  | 136  | 6    |
| CONTIG-010349 | 61   | 733  | 391 | 949  | 123  |
| CONTIG-010350 | 966  | 19   | 365 | 710  | 2    |

|               |      |     |      |      |     |
|---------------|------|-----|------|------|-----|
| CONTIG-010351 | 886  | 33  | 480  | 1102 | 8   |
| CONTIG-010352 | 183  | 7   | 11   | 31   | 0   |
| CONTIG-010353 | 99   | 210 | 377  | 313  | 53  |
| CONTIG-010354 | 742  | 74  | 446  | 1221 | 29  |
| CONTIG-010357 | 365  | 43  | 184  | 253  | 18  |
| CONTIG-010358 | 166  | 8   | 7    | 4    | 0   |
| CONTIG-010359 | 66   | 12  | 36   | 9    | 0   |
| CONTIG-010360 | 336  | 34  | 292  | 232  | 0   |
| CONTIG-010361 | 469  | 19  | 46   | 309  | 2   |
| CONTIG-010362 | 72   | 4   | 9    | 2    | 0   |
| CONTIG-010363 | 434  | 17  | 75   | 293  | 0   |
| CONTIG-010364 | 256  | 30  | 135  | 92   | 2   |
| CONTIG-010365 | 54   | 27  | 52   | 24   | 0   |
| CONTIG-010366 | 705  | 28  | 543  | 554  | 2   |
| CONTIG-010367 | 755  | 21  | 174  | 372  | 10  |
| CONTIG-010368 | 203  | 8   | 15   | 59   | 0   |
| CONTIG-010369 | 513  | 40  | 281  | 643  | 0   |
| CONTIG-010370 | 655  | 41  | 325  | 754  | 19  |
| CONTIG-010371 | 613  | 22  | 87   | 576  | 0   |
| CONTIG-010372 | 70   | 12  | 10   | 26   | 0   |
| CONTIG-010373 | 75   | 77  | 50   | 115  | 0   |
| CONTIG-010374 | 568  | 15  | 84   | 164  | 0   |
| CONTIG-010375 | 61   | 14  | 33   | 2    | 0   |
| CONTIG-010376 | 301  | 32  | 258  | 329  | 0   |
| CONTIG-010377 | 139  | 435 | 388  | 564  | 13  |
| CONTIG-010378 | 86   | 16  | 29   | 6    | 0   |
| CONTIG-010379 | 626  | 14  | 163  | 175  | 2   |
| CONTIG-010380 | 879  | 111 | 1090 | 4778 | 0   |
| CONTIG-010382 | 62   | 109 | 24   | 2    | 49  |
| CONTIG-010383 | 246  | 24  | 35   | 94   | 4   |
| CONTIG-010387 | 438  | 31  | 174  | 331  | 0   |
| CONTIG-010388 | 1118 | 39  | 547  | 973  | 82  |
| CONTIG-010389 | 111  | 4   | 7    | 4    | 0   |
| CONTIG-010390 | 484  | 30  | 112  | 687  | 0   |
| CONTIG-010394 | 138  | 5   | 7    | 22   | 0   |
| CONTIG-010395 | 501  | 54  | 776  | 594  | 14  |
| CONTIG-010396 | 548  | 28  | 116  | 281  | 19  |
| CONTIG-010397 | 1005 | 23  | 394  | 855  | 4   |
| CONTIG-010398 | 130  | 6   | 17   | 26   | 0   |
| CONTIG-010400 | 209  | 8   | 0    | 44   | 0   |
| CONTIG-010401 | 179  | 18  | 125  | 65   | 0   |
| CONTIG-010402 | 261  | 25  | 114  | 332  | 0   |
| CONTIG-010403 | 600  | 53  | 189  | 895  | 6   |
| CONTIG-010404 | 733  | 47  | 403  | 538  | 15  |
| CONTIG-010406 | 842  | 41  | 6    | 3    | 318 |
| CONTIG-010407 | 910  | 11  | 54   | 240  | 0   |
| CONTIG-010410 | 531  | 23  | 281  | 269  | 8   |

|               |      |     |     |      |     |
|---------------|------|-----|-----|------|-----|
| CONTIG-010411 | 304  | 86  | 243 | 476  | 60  |
| CONTIG-010415 | 371  | 29  | 84  | 243  | 2   |
| CONTIG-010416 | 40   | 303 | 251 | 84   | 0   |
| CONTIG-010417 | 77   | 6   | 13  | 5    | 0   |
| CONTIG-010418 | 537  | 21  | 185 | 293  | 7   |
| CONTIG-010419 | 472  | 16  | 173 | 271  | 0   |
| CONTIG-010420 | 358  | 11  | 5   | 0    | 50  |
| CONTIG-010421 | 314  | 16  | 72  | 169  | 0   |
| CONTIG-010422 | 62   | 172 | 62  | 388  | 31  |
| CONTIG-010423 | 127  | 271 | 40  | 634  | 0   |
| CONTIG-010430 | 110  | 8   | 6   | 37   | 0   |
| CONTIG-010431 | 190  | 53  | 202 | 289  | 0   |
| CONTIG-010432 | 156  | 8   | 9   | 41   | 0   |
| CONTIG-010433 | 199  | 16  | 73  | 76   | 0   |
| CONTIG-010434 | 88   | 195 | 188 | 340  | 36  |
| CONTIG-010435 | 60   | 6   | 4   | 8    | 0   |
| CONTIG-010436 | 418  | 30  | 150 | 553  | 0   |
| CONTIG-010437 | 429  | 17  | 80  | 159  | 8   |
| CONTIG-010438 | 486  | 20  | 72  | 349  | 5   |
| CONTIG-010439 | 116  | 7   | 0   | 2    | 0   |
| CONTIG-010440 | 48   | 618 | 298 | 654  | 42  |
| CONTIG-010441 | 120  | 42  | 233 | 81   | 0   |
| CONTIG-010442 | 418  | 15  | 32  | 232  | 5   |
| CONTIG-010443 | 79   | 352 | 250 | 617  | 79  |
| CONTIG-010444 | 110  | 8   | 11  | 21   | 0   |
| CONTIG-010445 | 144  | 6   | 35  | 11   | 0   |
| CONTIG-010446 | 239  | 27  | 106 | 137  | 3   |
| CONTIG-010448 | 262  | 68  | 135 | 448  | 21  |
| CONTIG-010449 | 1027 | 49  | 10  | 281  | 0   |
| CONTIG-010450 | 61   | 9   | 5   | 7    | 0   |
| CONTIG-010451 | 442  | 69  | 288 | 567  | 39  |
| CONTIG-010452 | 595  | 55  | 235 | 943  | 68  |
| CONTIG-010454 | 86   | 4   | 4   | 7    | 0   |
| CONTIG-010455 | 69   | 11  | 18  | 10   | 0   |
| CONTIG-010456 | 393  | 10  | 0   | 168  | 0   |
| CONTIG-010457 | 100  | 6   | 10  | 20   | 0   |
| CONTIG-010461 | 579  | 19  | 32  | 175  | 4   |
| CONTIG-010462 | 130  | 20  | 19  | 86   | 0   |
| CONTIG-010463 | 213  | 11  | 29  | 106  | 0   |
| CONTIG-010464 | 459  | 110 | 307 | 733  | 28  |
| CONTIG-010465 | 1057 | 26  | 560 | 928  | 3   |
| CONTIG-010466 | 1536 | 30  | 219 | 1622 | 40  |
| CONTIG-010467 | 267  | 20  | 34  | 134  | 0   |
| CONTIG-010468 | 159  | 281 | 265 | 1345 | 118 |
| CONTIG-010469 | 79   | 8   | 4   | 20   | 0   |
| CONTIG-010470 | 361  | 20  | 28  | 218  | 0   |
| CONTIG-010471 | 135  | 14  | 145 | 21   | 0   |



|               |     |     |     |      |    |
|---------------|-----|-----|-----|------|----|
| CONTIG-010472 | 393 | 12  | 37  | 154  | 2  |
| CONTIG-010473 | 49  | 392 | 226 | 348  | 0  |
| CONTIG-010474 | 380 | 148 | 352 | 3053 | 30 |
| CONTIG-010475 | 653 | 21  | 101 | 227  | 20 |
| CONTIG-010476 | 115 | 6   | 12  | 4    | 0  |
| CONTIG-010477 | 261 | 7   | 38  | 39   | 0  |
| CONTIG-010478 | 690 | 31  | 58  | 391  | 0  |
| CONTIG-010479 | 425 | 45  | 630 | 325  | 8  |
| CONTIG-010480 | 61  | 778 | 551 | 866  | 76 |
| CONTIG-010481 | 657 | 26  | 219 | 696  | 2  |
| CONTIG-010482 | 533 | 10  | 105 | 147  | 0  |
| CONTIG-010483 | 514 | 151 | 235 | 4462 | 53 |
| CONTIG-010484 | 94  | 5   | 9   | 13   | 0  |
| CONTIG-010485 | 80  | 8   | 53  | 0    | 0  |
| CONTIG-010486 | 796 | 195 | 920 | 2723 | 0  |
| CONTIG-010487 | 123 | 8   | 2   | 22   | 2  |
| CONTIG-010488 | 76  | 18  | 81  | 2    | 5  |
| CONTIG-010489 | 419 | 10  | 7   | 166  | 0  |
| CONTIG-010490 | 215 | 12  | 30  | 101  | 0  |
| CONTIG-010491 | 157 | 32  | 101 | 156  | 2  |
| CONTIG-010493 | 737 | 25  | 109 | 757  | 2  |
| CONTIG-010494 | 374 | 34  | 195 | 211  | 0  |
| CONTIG-010495 | 476 | 20  | 188 | 205  | 4  |
| CONTIG-010496 | 115 | 49  | 28  | 114  | 2  |
| CONTIG-010498 | 92  | 13  | 71  | 4    | 0  |
| CONTIG-010499 | 479 | 7   | 14  | 27   | 0  |
| CONTIG-010500 | 340 | 17  | 9   | 170  | 4  |
| CONTIG-010502 | 142 | 33  | 40  | 121  | 2  |
| CONTIG-010503 | 290 | 11  | 2   | 2    | 0  |
| CONTIG-010504 | 280 | 8   | 9   | 58   | 0  |
| CONTIG-010505 | 200 | 71  | 192 | 288  | 6  |
| CONTIG-010506 | 205 | 70  | 138 | 535  | 2  |
| CONTIG-010507 | 162 | 13  | 64  | 56   | 0  |
| CONTIG-010508 | 144 | 13  | 8   | 65   | 0  |
| CONTIG-010509 | 807 | 21  | 179 | 588  | 0  |
| CONTIG-010510 | 328 | 17  | 21  | 170  | 6  |
| CONTIG-010511 | 769 | 28  | 282 | 834  | 6  |
| CONTIG-010512 | 685 | 38  | 94  | 897  | 5  |
| CONTIG-010513 | 71  | 6   | 12  | 8    | 0  |
| CONTIG-010514 | 960 | 49  | 586 | 1249 | 12 |
| CONTIG-010515 | 427 | 37  | 118 | 478  | 6  |
| CONTIG-010516 | 90  | 6   | 5   | 18   | 0  |
| CONTIG-010517 | 67  | 4   | 2   | 6    | 0  |
| CONTIG-010518 | 63  | 384 | 356 | 721  | 2  |
| CONTIG-010519 | 140 | 13  | 40  | 39   | 0  |
| CONTIG-010522 | 699 | 25  | 232 | 486  | 2  |
| CONTIG-010523 | 219 | 23  | 68  | 126  | 0  |

|               |      |     |      |      |    |
|---------------|------|-----|------|------|----|
| CONTIG-010524 | 122  | 6   | 2    | 21   | 0  |
| CONTIG-010525 | 446  | 18  | 57   | 337  | 0  |
| CONTIG-010527 | 113  | 8   | 28   | 13   | 0  |
| CONTIG-010528 | 208  | 10  | 71   | 7    | 0  |
| CONTIG-010529 | 106  | 37  | 67   | 51   | 6  |
| CONTIG-010530 | 490  | 15  | 59   | 87   | 2  |
| CONTIG-010531 | 608  | 20  | 113  | 192  | 4  |
| CONTIG-010532 | 83   | 2   | 4    | 2    | 0  |
| CONTIG-010533 | 732  | 32  | 182  | 709  | 14 |
| CONTIG-010534 | 138  | 7   | 2    | 10   | 0  |
| CONTIG-010535 | 306  | 12  | 56   | 116  | 0  |
| CONTIG-010536 | 61   | 9   | 21   | 0    | 0  |
| CONTIG-010537 | 80   | 8   | 31   | 2    | 0  |
| CONTIG-010538 | 240  | 19  | 121  | 121  | 2  |
| CONTIG-010539 | 111  | 87  | 35   | 509  | 7  |
| CONTIG-010540 | 193  | 12  | 72   | 62   | 0  |
| CONTIG-010541 | 575  | 24  | 737  | 309  | 2  |
| CONTIG-010542 | 135  | 10  | 7    | 38   | 0  |
| CONTIG-010543 | 146  | 7   | 7    | 17   | 0  |
| CONTIG-010544 | 228  | 39  | 572  | 146  | 0  |
| CONTIG-010545 | 129  | 420 | 202  | 2608 | 2  |
| CONTIG-010546 | 190  | 35  | 128  | 258  | 0  |
| CONTIG-010547 | 368  | 14  | 77   | 205  | 7  |
| CONTIG-010548 | 253  | 11  | 11   | 121  | 2  |
| CONTIG-010549 | 653  | 22  | 111  | 680  | 0  |
| CONTIG-010550 | 664  | 23  | 225  | 544  | 4  |
| CONTIG-010551 | 201  | 6   | 8    | 37   | 0  |
| CONTIG-010552 | 200  | 13  | 19   | 80   | 2  |
| CONTIG-010553 | 506  | 9   | 27   | 155  | 0  |
| CONTIG-010554 | 68   | 6   | 3    | 5    | 0  |
| CONTIG-010556 | 344  | 18  | 290  | 139  | 0  |
| CONTIG-010557 | 156  | 315 | 137  | 935  | 23 |
| CONTIG-010558 | 113  | 8   | 45   | 5    | 0  |
| CONTIG-010560 | 69   | 8   | 3    | 13   | 0  |
| CONTIG-010561 | 289  | 43  | 153  | 349  | 2  |
| CONTIG-010562 | 84   | 79  | 41   | 394  | 0  |
| CONTIG-010563 | 138  | 8   | 6    | 26   | 0  |
| CONTIG-010564 | 151  | 13  | 18   | 22   | 2  |
| CONTIG-010565 | 202  | 8   | 23   | 41   | 0  |
| CONTIG-010566 | 137  | 10  | 42   | 6    | 2  |
| CONTIG-010567 | 775  | 139 | 1009 | 5569 | 23 |
| CONTIG-010568 | 92   | 16  | 31   | 30   | 0  |
| CONTIG-010569 | 248  | 13  | 236  | 28   | 0  |
| CONTIG-010570 | 637  | 29  | 203  | 280  | 8  |
| CONTIG-010571 | 80   | 12  | 45   | 3    | 0  |
| CONTIG-010572 | 111  | 18  | 63   | 64   | 0  |
| CONTIG-010573 | 1623 | 125 | 319  | 4667 | 37 |

|               |      |      |     |      |     |
|---------------|------|------|-----|------|-----|
| CONTIG-010574 | 306  | 23   | 71  | 267  | 0   |
| CONTIG-010575 | 543  | 25   | 141 | 483  | 0   |
| CONTIG-010576 | 60   | 619  | 353 | 827  | 75  |
| CONTIG-010577 | 276  | 50   | 169 | 524  | 11  |
| CONTIG-010578 | 1344 | 27   | 257 | 1812 | 2   |
| CONTIG-010579 | 1272 | 18   | 308 | 416  | 0   |
| CONTIG-010580 | 498  | 15   | 154 | 81   | 2   |
| CONTIG-010581 | 659  | 79   | 289 | 1761 | 109 |
| CONTIG-010582 | 68   | 10   | 28  | 10   | 0   |
| CONTIG-010583 | 101  | 3    | 2   | 0    | 0   |
| CONTIG-010585 | 382  | 10   | 9   | 130  | 2   |
| CONTIG-010586 | 137  | 18   | 12  | 99   | 0   |
| CONTIG-010588 | 1352 | 26   | 172 | 1010 | 17  |
| CONTIG-010589 | 815  | 26   | 440 | 924  | 0   |
| CONTIG-010590 | 92   | 27   | 18  | 46   | 0   |
| CONTIG-010591 | 412  | 13   | 46  | 165  | 0   |
| CONTIG-010592 | 256  | 12   | 57  | 36   | 0   |
| CONTIG-010593 | 80   | 29   | 64  | 67   | 0   |
| CONTIG-010597 | 484  | 17   | 13  | 79   | 0   |
| CONTIG-010598 | 255  | 19   | 76  | 150  | 5   |
| CONTIG-010599 | 106  | 6    | 0   | 20   | 0   |
| CONTIG-010600 | 607  | 11   | 7   | 203  | 2   |
| CONTIG-010601 | 227  | 9    | 22  | 81   | 0   |
| CONTIG-010602 | 136  | 9    | 49  | 7    | 0   |
| CONTIG-010603 | 935  | 32   | 300 | 1343 | 8   |
| CONTIG-010605 | 356  | 26   | 117 | 351  | 0   |
| CONTIG-010607 | 144  | 6    | 29  | 17   | 2   |
| CONTIG-010608 | 69   | 6    | 2   | 0    | 0   |
| CONTIG-010609 | 156  | 7    | 17  | 10   | 0   |
| CONTIG-010610 | 120  | 1134 | 137 | 8237 | 2   |
| CONTIG-010611 | 144  | 21   | 13  | 2    | 0   |
| CONTIG-010612 | 665  | 27   | 209 | 414  | 32  |
| CONTIG-010613 | 217  | 7    | 20  | 20   | 0   |
| CONTIG-010615 | 47   | 117  | 23  | 211  | 2   |
| CONTIG-010616 | 97   | 9    | 47  | 6    | 0   |
| CONTIG-010617 | 355  | 8    | 18  | 111  | 0   |
| CONTIG-010618 | 1232 | 46   | 314 | 2816 | 22  |
| CONTIG-010619 | 183  | 6    | 23  | 29   | 0   |
| CONTIG-010620 | 258  | 7    | 19  | 33   | 2   |
| CONTIG-010621 | 120  | 8    | 25  | 19   | 0   |
| CONTIG-010622 | 106  | 7    | 12  | 20   | 0   |
| CONTIG-010623 | 206  | 7    | 24  | 68   | 0   |
| CONTIG-010624 | 148  | 255  | 160 | 2065 | 40  |
| CONTIG-010625 | 572  | 22   | 126 | 349  | 4   |
| CONTIG-010626 | 41   | 93   | 79  | 143  | 0   |
| CONTIG-010627 | 737  | 88   | 700 | 2876 | 21  |
| CONTIG-010628 | 612  | 30   | 163 | 268  | 31  |

|               |      |      |     |      |     |
|---------------|------|------|-----|------|-----|
| CONTIG-010629 | 133  | 8    | 5   | 55   | 0   |
| CONTIG-010630 | 110  | 146  | 224 | 342  | 0   |
| CONTIG-010637 | 40   | 57   | 4   | 12   | 2   |
| CONTIG-010639 | 1183 | 30   | 124 | 1187 | 0   |
| CONTIG-010640 | 582  | 14   | 45  | 143  | 0   |
| CONTIG-010643 | 277  | 10   | 20  | 83   | 2   |
| CONTIG-010644 | 108  | 8    | 7   | 9    | 0   |
| CONTIG-010645 | 770  | 22   | 83  | 747  | 2   |
| CONTIG-010646 | 253  | 8    | 60  | 32   | 2   |
| CONTIG-010647 | 544  | 22   | 243 | 281  | 2   |
| CONTIG-010648 | 309  | 30   | 11  | 420  | 0   |
| CONTIG-010649 | 298  | 7    | 34  | 44   | 0   |
| CONTIG-010650 | 559  | 19   | 48  | 395  | 0   |
| CONTIG-010651 | 279  | 10   | 50  | 55   | 0   |
| CONTIG-010652 | 1675 | 31   | 254 | 1151 | 86  |
| CONTIG-010654 | 503  | 13   | 24  | 178  | 2   |
| CONTIG-010655 | 280  | 8    | 2   | 58   | 4   |
| CONTIG-010657 | 260  | 9    | 25  | 56   | 2   |
| CONTIG-010658 | 781  | 26   | 145 | 580  | 8   |
| CONTIG-010659 | 38   | 1140 | 406 | 963  | 79  |
| CONTIG-010661 | 296  | 127  | 629 | 721  | 0   |
| CONTIG-010663 | 2303 | 29   | 450 | 1194 | 12  |
| CONTIG-010664 | 199  | 11   | 33  | 40   | 0   |
| CONTIG-010665 | 84   | 7    | 6   | 19   | 0   |
| CONTIG-010666 | 177  | 64   | 8   | 84   | 0   |
| CONTIG-010667 | 103  | 225  | 614 | 563  | 12  |
| CONTIG-010668 | 743  | 49   | 421 | 1234 | 18  |
| CONTIG-010670 | 137  | 337  | 160 | 2093 | 8   |
| CONTIG-010671 | 103  | 6    | 0   | 20   | 0   |
| CONTIG-010672 | 88   | 11   | 12  | 27   | 0   |
| CONTIG-010673 | 88   | 122  | 16  | 0    | 140 |
| CONTIG-010674 | 691  | 38   | 78  | 1423 | 2   |
| CONTIG-010675 | 368  | 94   | 351 | 617  | 41  |
| CONTIG-010676 | 139  | 53   | 276 | 23   | 20  |
| CONTIG-010677 | 1115 | 26   | 207 | 589  | 14  |
| CONTIG-010678 | 82   | 105  | 175 | 277  | 0   |
| CONTIG-010680 | 283  | 14   | 2   | 107  | 4   |
| CONTIG-010681 | 59   | 8    | 30  | 0    | 0   |
| CONTIG-010682 | 303  | 12   | 98  | 85   | 0   |
| CONTIG-010683 | 403  | 11   | 10  | 178  | 0   |
| CONTIG-010684 | 483  | 29   | 307 | 434  | 6   |
| CONTIG-010685 | 588  | 9    | 30  | 72   | 0   |
| CONTIG-010686 | 576  | 13   | 24  | 409  | 0   |
| CONTIG-010687 | 66   | 30   | 15  | 43   | 0   |
| CONTIG-010693 | 159  | 32   | 236 | 96   | 0   |
| CONTIG-010694 | 641  | 27   | 237 | 495  | 6   |
| CONTIG-010695 | 336  | 191  | 345 | 1762 | 401 |

|               |      |     |      |      |     |
|---------------|------|-----|------|------|-----|
| CONTIG-010696 | 98   | 4   | 0    | 0    | 0   |
| CONTIG-010697 | 993  | 86  | 477  | 2217 | 249 |
| CONTIG-010698 | 361  | 8   | 31   | 66   | 0   |
| CONTIG-010708 | 62   | 671 | 192  | 582  | 75  |
| CONTIG-010709 | 138  | 38  | 34   | 189  | 0   |
| CONTIG-010710 | 261  | 14  | 22   | 136  | 0   |
| CONTIG-010711 | 1136 | 25  | 574  | 572  | 14  |
| CONTIG-010712 | 124  | 299 | 610  | 503  | 104 |
| CONTIG-010713 | 81   | 77  | 184  | 156  | 0   |
| CONTIG-010715 | 290  | 27  | 52   | 311  | 2   |
| CONTIG-010716 | 74   | 875 | 193  | 2780 | 147 |
| CONTIG-010717 | 182  | 19  | 77   | 43   | 0   |
| CONTIG-010718 | 111  | 10  | 6    | 49   | 0   |
| CONTIG-010719 | 172  | 6   | 22   | 17   | 0   |
| CONTIG-010720 | 873  | 66  | 716  | 2257 | 5   |
| CONTIG-010722 | 80   | 92  | 24   | 101  | 0   |
| CONTIG-010723 | 62   | 7   | 15   | 0    | 0   |
| CONTIG-010724 | 296  | 12  | 63   | 108  | 0   |
| CONTIG-010725 | 706  | 170 | 386  | 7131 | 5   |
| CONTIG-010726 | 118  | 12  | 25   | 41   | 0   |
| CONTIG-010727 | 602  | 26  | 35   | 442  | 39  |
| CONTIG-010731 | 245  | 280 | 506  | 2067 | 36  |
| CONTIG-010732 | 828  | 22  | 62   | 509  | 6   |
| CONTIG-010733 | 238  | 7   | 4    | 52   | 0   |
| CONTIG-010734 | 125  | 12  | 17   | 65   | 0   |
| CONTIG-010740 | 81   | 8   | 19   | 22   | 0   |
| CONTIG-010741 | 270  | 14  | 34   | 174  | 2   |
| CONTIG-010742 | 128  | 4   | 3    | 12   | 0   |
| CONTIG-010743 | 574  | 13  | 90   | 351  | 0   |
| CONTIG-010744 | 269  | 11  | 8    | 87   | 0   |
| CONTIG-010745 | 247  | 7   | 0    | 75   | 0   |
| CONTIG-010746 | 659  | 77  | 228  | 1748 | 2   |
| CONTIG-010747 | 117  | 16  | 70   | 34   | 0   |
| CONTIG-010748 | 281  | 13  | 27   | 101  | 2   |
| CONTIG-010749 | 127  | 323 | 1399 | 511  | 98  |
| CONTIG-010750 | 85   | 39  | 74   | 33   | 0   |
| CONTIG-010751 | 128  | 12  | 2    | 51   | 0   |
| CONTIG-010752 | 437  | 15  | 51   | 174  | 0   |
| CONTIG-010753 | 138  | 33  | 432  | 0    | 0   |
| CONTIG-010754 | 99   | 3   | 3    | 9    | 0   |
| CONTIG-010759 | 141  | 36  | 66   | 151  | 2   |
| CONTIG-010760 | 633  | 10  | 40   | 228  | 2   |
| CONTIG-010761 | 515  | 17  | 147  | 221  | 0   |
| CONTIG-010762 | 63   | 52  | 201  | 57   | 0   |
| CONTIG-010763 | 89   | 16  | 74   | 3    | 0   |
| CONTIG-010764 | 69   | 194 | 54   | 434  | 0   |
| CONTIG-010766 | 189  | 213 | 548  | 425  | 65  |

|               |      |      |      |      |     |
|---------------|------|------|------|------|-----|
| CONTIG-010767 | 122  | 16   | 156  | 19   | 0   |
| CONTIG-010768 | 246  | 9    | 29   | 69   | 0   |
| CONTIG-010769 | 224  | 6    | 13   | 21   | 0   |
| CONTIG-010770 | 73   | 5    | 2    | 6    | 0   |
| CONTIG-010771 | 83   | 7    | 13   | 6    | 0   |
| CONTIG-010772 | 101  | 16   | 139  | 2    | 0   |
| CONTIG-010773 | 150  | 35   | 308  | 107  | 0   |
| CONTIG-010774 | 111  | 9    | 18   | 17   | 0   |
| CONTIG-010775 | 100  | 14   | 15   | 22   | 0   |
| CONTIG-010777 | 177  | 14   | 60   | 0    | 0   |
| CONTIG-010778 | 838  | 23   | 254  | 767  | 0   |
| CONTIG-010784 | 90   | 35   | 75   | 92   | 0   |
| CONTIG-010785 | 630  | 11   | 37   | 155  | 0   |
| CONTIG-010786 | 113  | 17   | 9    | 90   | 0   |
| CONTIG-010787 | 107  | 5    | 10   | 15   | 0   |
| CONTIG-010788 | 162  | 14   | 6    | 18   | 0   |
| CONTIG-010789 | 538  | 21   | 84   | 245  | 9   |
| CONTIG-010790 | 48   | 583  | 4    | 720  | 0   |
| CONTIG-010792 | 522  | 21   | 187  | 213  | 14  |
| CONTIG-010793 | 353  | 11   | 75   | 136  | 0   |
| CONTIG-010794 | 304  | 55   | 434  | 654  | 0   |
| CONTIG-010795 | 342  | 37   | 177  | 211  | 0   |
| CONTIG-010796 | 237  | 15   | 98   | 71   | 0   |
| CONTIG-010799 | 112  | 10   | 47   | 33   | 0   |
| CONTIG-010800 | 1368 | 25   | 483  | 1049 | 30  |
| CONTIG-010801 | 296  | 70   | 198  | 922  | 20  |
| CONTIG-010802 | 306  | 13   | 84   | 129  | 0   |
| CONTIG-010803 | 93   | 13   | 0    | 29   | 0   |
| CONTIG-010804 | 325  | 43   | 265  | 398  | 9   |
| CONTIG-010806 | 63   | 5    | 14   | 8    | 0   |
| CONTIG-010807 | 88   | 5    | 2    | 10   | 0   |
| CONTIG-010808 | 36   | 4153 | 46   | 51   | 0   |
| CONTIG-010812 | 549  | 33   | 106  | 510  | 6   |
| CONTIG-010813 | 76   | 7    | 0    | 14   | 0   |
| CONTIG-010814 | 274  | 11   | 30   | 78   | 0   |
| CONTIG-010816 | 169  | 245  | 287  | 1072 | 100 |
| CONTIG-010817 | 204  | 10   | 7    | 84   | 0   |
| CONTIG-010824 | 118  | 324  | 179  | 1813 | 7   |
| CONTIG-010826 | 333  | 18   | 142  | 119  | 2   |
| CONTIG-010833 | 112  | 58   | 223  | 199  | 0   |
| CONTIG-010834 | 353  | 40   | 1079 | 215  | 0   |
| CONTIG-010835 | 1019 | 42   | 59   | 1989 | 0   |
| CONTIG-010836 | 646  | 10   | 80   | 204  | 0   |
| CONTIG-010837 | 237  | 14   | 60   | 117  | 0   |
| CONTIG-010839 | 37   | 773  | 107  | 524  | 45  |
| CONTIG-010845 | 526  | 14   | 12   | 245  | 2   |
| CONTIG-010846 | 85   | 136  | 133  | 327  | 7   |

|               |      |      |     |      |     |
|---------------|------|------|-----|------|-----|
| CONTIG-010847 | 39   | 143  | 36  | 150  | 2   |
| CONTIG-010848 | 342  | 11   | 18  | 83   | 2   |
| CONTIG-010849 | 737  | 13   | 44  | 348  | 0   |
| CONTIG-010850 | 473  | 29   | 36  | 63   | 12  |
| CONTIG-010851 | 74   | 845  | 71  | 995  | 318 |
| CONTIG-010853 | 143  | 8    | 5   | 17   | 4   |
| CONTIG-010854 | 151  | 9    | 19  | 35   | 0   |
| CONTIG-010855 | 255  | 15   | 274 | 38   | 2   |
| CONTIG-010856 | 337  | 11   | 76  | 49   | 7   |
| CONTIG-010858 | 402  | 88   | 336 | 1118 | 63  |
| CONTIG-010859 | 635  | 18   | 30  | 353  | 8   |
| CONTIG-010860 | 274  | 9    | 27  | 44   | 0   |
| CONTIG-010861 | 877  | 37   | 230 | 1195 | 11  |
| CONTIG-010862 | 1232 | 25   | 317 | 848  | 9   |
| CONTIG-010864 | 82   | 51   | 14  | 92   | 0   |
| CONTIG-010865 | 80   | 7    | 19  | 8    | 0   |
| CONTIG-010866 | 882  | 41   | 211 | 1617 | 2   |
| CONTIG-010875 | 85   | 86   | 167 | 283  | 0   |
| CONTIG-010876 | 212  | 30   | 41  | 313  | 0   |
| CONTIG-010877 | 295  | 50   | 217 | 399  | 0   |
| CONTIG-010878 | 170  | 313  | 546 | 1176 | 131 |
| CONTIG-010880 | 193  | 104  | 92  | 967  | 6   |
| CONTIG-010882 | 623  | 166  | 261 | 6619 | 0   |
| CONTIG-010883 | 43   | 1802 | 139 | 1407 | 76  |
| CONTIG-010884 | 102  | 9    | 23  | 17   | 0   |
| CONTIG-010885 | 981  | 20   | 268 | 746  | 0   |
| CONTIG-010886 | 77   | 10   | 38  | 2    | 0   |
| CONTIG-010888 | 258  | 8    | 111 | 15   | 2   |
| CONTIG-010890 | 790  | 39   | 644 | 1362 | 2   |
| CONTIG-010891 | 329  | 41   | 245 | 348  | 0   |
| CONTIG-010892 | 445  | 12   | 32  | 130  | 18  |
| CONTIG-010895 | 119  | 8    | 4   | 32   | 0   |
| CONTIG-010896 | 848  | 14   | 223 | 457  | 2   |
| CONTIG-010897 | 58   | 86   | 16  | 53   | 6   |
| CONTIG-010898 | 385  | 12   | 10  | 192  | 0   |
| CONTIG-010899 | 98   | 285  | 313 | 423  | 75  |
| CONTIG-010900 | 695  | 10   | 40  | 67   | 2   |
| CONTIG-010901 | 190  | 5    | 2   | 21   | 0   |
| CONTIG-010902 | 246  | 23   | 215 | 91   | 0   |
| CONTIG-010903 | 728  | 75   | 412 | 2482 | 4   |
| CONTIG-010904 | 115  | 9    | 26  | 23   | 0   |
| CONTIG-010905 | 130  | 5    | 17  | 14   | 0   |
| CONTIG-010906 | 315  | 6    | 38  | 42   | 0   |
| CONTIG-010907 | 106  | 14   | 5   | 59   | 0   |
| CONTIG-010908 | 1847 | 24   | 548 | 1409 | 2   |
| CONTIG-010909 | 263  | 7    | 9   | 76   | 0   |
| CONTIG-010910 | 141  | 302  | 310 | 1160 | 95  |

|               |      |     |     |      |     |
|---------------|------|-----|-----|------|-----|
| CONTIG-010911 | 718  | 38  | 175 | 821  | 9   |
| CONTIG-010912 | 62   | 9   | 10  | 12   | 0   |
| CONTIG-010913 | 247  | 98  | 274 | 944  | 9   |
| CONTIG-010915 | 1112 | 20  | 289 | 840  | 2   |
| CONTIG-010916 | 73   | 5   | 4   | 0    | 0   |
| CONTIG-010917 | 486  | 11  | 44  | 192  | 0   |
| CONTIG-010918 | 641  | 40  | 840 | 413  | 0   |
| CONTIG-010919 | 96   | 13  | 11  | 17   | 0   |
| CONTIG-010920 | 956  | 17  | 82  | 469  | 0   |
| CONTIG-010921 | 178  | 4   | 12  | 16   | 0   |
| CONTIG-010922 | 366  | 8   | 7   | 83   | 0   |
| CONTIG-010926 | 70   | 260 | 71  | 911  | 23  |
| CONTIG-010927 | 394  | 19  | 75  | 162  | 4   |
| CONTIG-010928 | 383  | 9   | 11  | 55   | 10  |
| CONTIG-010929 | 191  | 60  | 293 | 451  | 0   |
| CONTIG-010930 | 287  | 129 | 440 | 399  | 66  |
| CONTIG-010931 | 296  | 11  | 8   | 134  | 0   |
| CONTIG-010933 | 164  | 73  | 36  | 559  | 2   |
| CONTIG-010934 | 144  | 17  | 0   | 47   | 0   |
| CONTIG-010935 | 389  | 10  | 71  | 137  | 0   |
| CONTIG-010937 | 143  | 5   | 19  | 8    | 0   |
| CONTIG-010938 | 183  | 17  | 49  | 118  | 2   |
| CONTIG-010939 | 782  | 43  | 398 | 1204 | 26  |
| CONTIG-010941 | 67   | 673 | 251 | 930  | 124 |
| CONTIG-010942 | 962  | 139 | 838 | 4551 | 230 |
| CONTIG-010943 | 64   | 7   | 25  | 4    | 0   |
| CONTIG-010944 | 112  | 17  | 55  | 34   | 2   |
| CONTIG-010945 | 947  | 19  | 151 | 898  | 5   |
| CONTIG-010946 | 75   | 4   | 0   | 4    | 0   |
| CONTIG-010947 | 199  | 17  | 154 | 66   | 0   |
| CONTIG-010948 | 77   | 6   | 4   | 13   | 0   |
| CONTIG-010949 | 84   | 9   | 5   | 7    | 0   |
| CONTIG-010950 | 196  | 10  | 31  | 43   | 0   |
| CONTIG-010951 | 432  | 120 | 350 | 2946 | 4   |
| CONTIG-010952 | 495  | 9   | 40  | 109  | 2   |
| CONTIG-010953 | 713  | 43  | 221 | 615  | 23  |
| CONTIG-010954 | 64   | 35  | 13  | 27   | 2   |
| CONTIG-010955 | 118  | 127 | 5   | 0    | 222 |
| CONTIG-010956 | 149  | 15  | 24  | 60   | 0   |
| CONTIG-010958 | 178  | 5   | 5   | 29   | 0   |
| CONTIG-010959 | 282  | 25  | 87  | 168  | 4   |
| CONTIG-010960 | 662  | 16  | 47  | 377  | 0   |
| CONTIG-010961 | 62   | 8   | 4   | 8    | 0   |
| CONTIG-010962 | 117  | 627 | 499 | 1515 | 133 |
| CONTIG-010963 | 593  | 12  | 24  | 338  | 0   |
| CONTIG-010964 | 105  | 9   | 8   | 13   | 0   |
| CONTIG-010965 | 625  | 39  | 197 | 511  | 4   |



|               |     |     |     |      |     |
|---------------|-----|-----|-----|------|-----|
| CONTIG-010966 | 39  | 714 | 216 | 635  | 78  |
| CONTIG-010967 | 155 | 9   | 8   | 47   | 0   |
| CONTIG-010968 | 147 | 12  | 47  | 25   | 0   |
| CONTIG-010969 | 154 | 7   | 28  | 28   | 0   |
| CONTIG-010970 | 650 | 16  | 31  | 339  | 12  |
| CONTIG-010971 | 148 | 7   | 30  | 25   | 0   |
| CONTIG-010972 | 180 | 6   | 7   | 14   | 0   |
| CONTIG-010973 | 65  | 9   | 12  | 12   | 0   |
| CONTIG-010974 | 170 | 21  | 49  | 117  | 0   |
| CONTIG-010975 | 124 | 17  | 148 | 2    | 0   |
| CONTIG-010982 | 390 | 125 | 114 | 2424 | 15  |
| CONTIG-010986 | 713 | 20  | 20  | 856  | 0   |
| CONTIG-010987 | 50  | 519 | 287 | 674  | 37  |
| CONTIG-010988 | 251 | 188 | 512 | 734  | 154 |
| CONTIG-010992 | 871 | 21  | 39  | 440  | 14  |
| CONTIG-010993 | 204 | 5   | 13  | 16   | 0   |
| CONTIG-010994 | 413 | 15  | 13  | 69   | 0   |
| CONTIG-010995 | 356 | 90  | 114 | 1663 | 13  |
| CONTIG-010996 | 576 | 15  | 33  | 279  | 0   |
| CONTIG-010997 | 546 | 21  | 174 | 331  | 0   |
| CONTIG-010998 | 107 | 8   | 6   | 4    | 0   |
| CONTIG-010999 | 684 | 47  | 337 | 354  | 6   |
| CONTIG-011000 | 109 | 7   | 7   | 20   | 0   |
| CONTIG-011002 | 249 | 8   | 21  | 58   | 0   |
| CONTIG-011003 | 75  | 9   | 53  | 9    | 0   |
| CONTIG-011004 | 215 | 49  | 85  | 404  | 15  |
| CONTIG-011005 | 141 | 6   | 5   | 13   | 0   |
| CONTIG-011008 | 348 | 12  | 7   | 137  | 0   |
| CONTIG-011010 | 511 | 15  | 25  | 299  | 6   |
| CONTIG-011011 | 41  | 467 | 190 | 540  | 47  |
| CONTIG-011012 | 201 | 19  | 88  | 56   | 0   |
| CONTIG-011013 | 264 | 24  | 154 | 114  | 2   |
| CONTIG-011014 | 96  | 12  | 7   | 51   | 0   |
| CONTIG-011016 | 251 | 10  | 41  | 20   | 0   |
| CONTIG-011017 | 156 | 47  | 115 | 354  | 0   |
| CONTIG-011018 | 795 | 43  | 296 | 755  | 21  |
| CONTIG-011019 | 159 | 41  | 82  | 136  | 0   |
| CONTIG-011020 | 617 | 262 | 212 | 2801 | 570 |
| CONTIG-011021 | 522 | 21  | 907 | 114  | 0   |
| CONTIG-011026 | 338 | 9   | 78  | 72   | 0   |
| CONTIG-011027 | 253 | 13  | 81  | 138  | 0   |
| CONTIG-011028 | 143 | 6   | 21  | 15   | 0   |
| CONTIG-011029 | 900 | 36  | 138 | 1873 | 0   |
| CONTIG-011038 | 67  | 4   | 7   | 2    | 0   |
| CONTIG-011041 | 240 | 11  | 8   | 85   | 0   |
| CONTIG-011042 | 94  | 3   | 3   | 2    | 0   |
| CONTIG-011043 | 300 | 29  | 93  | 305  | 0   |

|               |      |     |     |      |     |
|---------------|------|-----|-----|------|-----|
| CONTIG-011044 | 72   | 5   | 5   | 9    | 0   |
| CONTIG-011045 | 1003 | 52  | 248 | 2985 | 0   |
| CONTIG-011046 | 112  | 44  | 445 | 0    | 9   |
| CONTIG-011047 | 71   | 8   | 2   | 19   | 0   |
| CONTIG-011048 | 687  | 20  | 9   | 30   | 0   |
| CONTIG-011049 | 354  | 7   | 12  | 37   | 0   |
| CONTIG-011050 | 236  | 34  | 84  | 203  | 0   |
| CONTIG-011051 | 1277 | 67  | 887 | 2759 | 35  |
| CONTIG-011053 | 192  | 21  | 102 | 95   | 0   |
| CONTIG-011054 | 914  | 19  | 280 | 801  | 0   |
| CONTIG-011055 | 606  | 15  | 80  | 210  | 4   |
| CONTIG-011056 | 100  | 8   | 29  | 10   | 0   |
| CONTIG-011057 | 86   | 42  | 0   | 125  | 0   |
| CONTIG-011058 | 1078 | 21  | 475 | 687  | 2   |
| CONTIG-011060 | 223  | 15  | 13  | 143  | 0   |
| CONTIG-011061 | 58   | 6   | 11  | 0    | 0   |
| CONTIG-011062 | 214  | 8   | 27  | 62   | 0   |
| CONTIG-011064 | 797  | 18  | 105 | 300  | 14  |
| CONTIG-011065 | 133  | 21  | 23  | 36   | 2   |
| CONTIG-011066 | 513  | 27  | 212 | 193  | 8   |
| CONTIG-011067 | 2653 | 58  | 444 | 5990 | 97  |
| CONTIG-011068 | 122  | 5   | 2   | 11   | 0   |
| CONTIG-011069 | 580  | 16  | 164 | 275  | 4   |
| CONTIG-011070 | 73   | 10  | 2   | 12   | 2   |
| CONTIG-011072 | 365  | 17  | 74  | 154  | 2   |
| CONTIG-011080 | 95   | 6   | 2   | 16   | 0   |
| CONTIG-011081 | 239  | 7   | 21  | 40   | 0   |
| CONTIG-011082 | 49   | 952 | 101 | 1324 | 159 |
| CONTIG-011083 | 270  | 10  | 22  | 100  | 0   |
| CONTIG-011084 | 229  | 4   | 8   | 9    | 0   |
| CONTIG-011085 | 118  | 100 | 116 | 227  | 3   |
| CONTIG-011086 | 105  | 3   | 7   | 8    | 0   |
| CONTIG-011087 | 300  | 41  | 310 | 213  | 4   |
| CONTIG-011088 | 617  | 24  | 419 | 392  | 0   |
| CONTIG-011089 | 112  | 192 | 349 | 678  | 2   |
| CONTIG-011090 | 420  | 9   | 92  | 117  | 0   |
| CONTIG-011091 | 174  | 266 | 324 | 2147 | 4   |
| CONTIG-011093 | 727  | 49  | 139 | 1418 | 4   |
| CONTIG-011095 | 817  | 31  | 266 | 565  | 9   |
| CONTIG-011096 | 317  | 26  | 220 | 236  | 0   |
| CONTIG-011097 | 85   | 7   | 5   | 13   | 0   |
| CONTIG-011098 | 84   | 23  | 84  | 9    | 0   |
| CONTIG-011099 | 487  | 191 | 879 | 1611 | 333 |
| CONTIG-011100 | 491  | 19  | 91  | 207  | 2   |
| CONTIG-011102 | 106  | 15  | 27  | 43   | 0   |
| CONTIG-011110 | 130  | 5   | 19  | 12   | 0   |
| CONTIG-011111 | 234  | 14  | 51  | 165  | 0   |

|               |      |      |     |      |     |
|---------------|------|------|-----|------|-----|
| CONTIG-011112 | 617  | 47   | 72  | 781  | 105 |
| CONTIG-011113 | 288  | 175  | 135 | 1627 | 136 |
| CONTIG-011114 | 183  | 12   | 90  | 17   | 0   |
| CONTIG-011115 | 162  | 9    | 11  | 55   | 0   |
| CONTIG-011116 | 208  | 27   | 31  | 174  | 2   |
| CONTIG-011117 | 438  | 16   | 29  | 213  | 0   |
| CONTIG-011118 | 360  | 11   | 14  | 150  | 0   |
| CONTIG-011119 | 491  | 18   | 40  | 352  | 4   |
| CONTIG-011120 | 1048 | 40   | 118 | 1617 | 34  |
| CONTIG-011121 | 1004 | 17   | 121 | 685  | 0   |
| CONTIG-011122 | 194  | 15   | 24  | 104  | 0   |
| CONTIG-011131 | 293  | 42   | 177 | 378  | 0   |
| CONTIG-011132 | 143  | 15   | 51  | 71   | 0   |
| CONTIG-011133 | 190  | 9    | 23  | 55   | 0   |
| CONTIG-011134 | 1154 | 79   | 647 | 3028 | 68  |
| CONTIG-011135 | 693  | 44   | 227 | 445  | 20  |
| CONTIG-011136 | 66   | 5    | 0   | 9    | 0   |
| CONTIG-011137 | 121  | 27   | 234 | 43   | 0   |
| CONTIG-011138 | 255  | 13   | 68  | 85   | 0   |
| CONTIG-011139 | 233  | 8    | 34  | 42   | 0   |
| CONTIG-011140 | 61   | 16   | 46  | 4    | 0   |
| CONTIG-011141 | 433  | 26   | 161 | 318  | 5   |
| CONTIG-011142 | 87   | 95   | 61  | 179  | 0   |
| CONTIG-011143 | 129  | 448  | 527 | 1283 | 109 |
| CONTIG-011144 | 925  | 28   | 315 | 762  | 0   |
| CONTIG-011145 | 192  | 8    | 31  | 34   | 0   |
| CONTIG-011146 | 137  | 14   | 70  | 15   | 2   |
| CONTIG-011147 | 142  | 6    | 7   | 17   | 0   |
| CONTIG-011151 | 164  | 9    | 44  | 31   | 0   |
| CONTIG-011153 | 36   | 48   | 0   | 59   | 0   |
| CONTIG-011169 | 68   | 11   | 35  | 2    | 0   |
| CONTIG-011170 | 58   | 3    | 4   | 4    | 0   |
| CONTIG-011171 | 295  | 40   | 69  | 408  | 0   |
| CONTIG-011172 | 73   | 10   | 40  | 10   | 0   |
| CONTIG-011173 | 122  | 402  | 584 | 650  | 212 |
| CONTIG-011174 | 208  | 49   | 151 | 402  | 0   |
| CONTIG-011175 | 623  | 41   | 44  | 778  | 70  |
| CONTIG-011176 | 765  | 18   | 95  | 402  | 28  |
| CONTIG-011177 | 70   | 5    | 2   | 4    | 0   |
| CONTIG-011178 | 314  | 15   | 46  | 155  | 0   |
| CONTIG-011179 | 775  | 46   | 516 | 1191 | 23  |
| CONTIG-011180 | 373  | 14   | 31  | 112  | 0   |
| CONTIG-011181 | 588  | 57   | 179 | 1636 | 0   |
| CONTIG-011183 | 837  | 37   | 111 | 1008 | 11  |
| CONTIG-011184 | 604  | 39   | 213 | 940  | 5   |
| CONTIG-011185 | 48   | 1764 | 46  | 2744 | 0   |
| CONTIG-011186 | 609  | 23   | 118 | 476  | 2   |

|               |      |     |     |      |     |
|---------------|------|-----|-----|------|-----|
| CONTIG-011187 | 605  | 26  | 464 | 535  | 0   |
| CONTIG-011188 | 121  | 4   | 7   | 6    | 0   |
| CONTIG-011189 | 279  | 6   | 11  | 38   | 0   |
| CONTIG-011190 | 310  | 10  | 10  | 88   | 0   |
| CONTIG-011191 | 221  | 12  | 46  | 42   | 0   |
| CONTIG-011192 | 167  | 16  | 7   | 93   | 0   |
| CONTIG-011193 | 1377 | 47  | 179 | 1151 | 89  |
| CONTIG-011194 | 219  | 13  | 57  | 122  | 0   |
| CONTIG-011197 | 47   | 295 | 101 | 371  | 6   |
| CONTIG-011198 | 79   | 245 | 53  | 946  | 0   |
| CONTIG-011199 | 321  | 53  | 28  | 730  | 2   |
| CONTIG-011200 | 92   | 9   | 8   | 10   | 3   |
| CONTIG-011201 | 131  | 12  | 24  | 34   | 2   |
| CONTIG-011202 | 234  | 62  | 728 | 326  | 0   |
| CONTIG-011203 | 273  | 74  | 52  | 565  | 52  |
| CONTIG-011204 | 224  | 24  | 58  | 202  | 7   |
| CONTIG-011205 | 147  | 5   | 0   | 12   | 0   |
| CONTIG-011206 | 170  | 11  | 132 | 18   | 0   |
| CONTIG-011207 | 110  | 91  | 93  | 324  | 0   |
| CONTIG-011208 | 61   | 9   | 28  | 6    | 0   |
| CONTIG-011209 | 1413 | 28  | 49  | 157  | 10  |
| CONTIG-011210 | 820  | 30  | 296 | 577  | 18  |
| CONTIG-011211 | 344  | 7   | 19  | 80   | 0   |
| CONTIG-011212 | 92   | 8   | 6   | 20   | 0   |
| CONTIG-011214 | 448  | 24  | 107 | 382  | 0   |
| CONTIG-011215 | 343  | 25  | 110 | 305  | 0   |
| CONTIG-011216 | 64   | 11  | 58  | 5    | 0   |
| CONTIG-011221 | 294  | 11  | 10  | 143  | 2   |
| CONTIG-011222 | 172  | 8   | 3   | 42   | 0   |
| CONTIG-011228 | 81   | 37  | 59  | 147  | 2   |
| CONTIG-011229 | 169  | 12  | 11  | 90   | 0   |
| CONTIG-011230 | 107  | 9   | 49  | 11   | 0   |
| CONTIG-011231 | 183  | 10  | 4   | 67   | 0   |
| CONTIG-011233 | 398  | 21  | 175 | 273  | 2   |
| CONTIG-011234 | 139  | 14  | 20  | 44   | 2   |
| CONTIG-011235 | 63   | 19  | 11  | 59   | 0   |
| CONTIG-011236 | 86   | 8   | 15  | 18   | 0   |
| CONTIG-011243 | 174  | 15  | 8   | 47   | 0   |
| CONTIG-011250 | 417  | 55  | 813 | 672  | 0   |
| CONTIG-011251 | 36   | 721 | 49  | 298  | 108 |
| CONTIG-011262 | 417  | 18  | 29  | 252  | 0   |
| CONTIG-011263 | 90   | 17  | 7   | 78   | 0   |
| CONTIG-011264 | 629  | 10  | 15  | 168  | 4   |
| CONTIG-011267 | 787  | 43  | 73  | 431  | 5   |
| CONTIG-011271 | 120  | 6   | 4   | 21   | 0   |
| CONTIG-011272 | 403  | 40  | 740 | 329  | 4   |
| CONTIG-011273 | 829  | 16  | 68  | 256  | 5   |

|               |      |     |     |      |    |
|---------------|------|-----|-----|------|----|
| CONTIG-011274 | 86   | 5   | 0   | 12   | 0  |
| CONTIG-011275 | 492  | 23  | 150 | 464  | 0  |
| CONTIG-011277 | 90   | 49  | 19  | 206  | 0  |
| CONTIG-011278 | 63   | 4   | 3   | 13   | 0  |
| CONTIG-011280 | 203  | 6   | 15  | 29   | 0  |
| CONTIG-011281 | 320  | 19  | 156 | 170  | 0  |
| CONTIG-011282 | 61   | 7   | 9   | 6    | 0  |
| CONTIG-011284 | 93   | 7   | 7   | 22   | 0  |
| CONTIG-011285 | 286  | 11  | 2   | 134  | 0  |
| CONTIG-011286 | 209  | 40  | 210 | 170  | 0  |
| CONTIG-011289 | 823  | 16  | 96  | 566  | 0  |
| CONTIG-011290 | 318  | 52  | 166 | 589  | 17 |
| CONTIG-011303 | 257  | 11  | 67  | 93   | 0  |
| CONTIG-011369 | 324  | 181 | 329 | 1733 | 98 |
| CONTIG-011370 | 101  | 195 | 455 | 385  | 14 |
| CONTIG-011371 | 960  | 16  | 193 | 628  | 2  |
| CONTIG-011372 | 121  | 54  | 65  | 280  | 0  |
| CONTIG-011373 | 103  | 19  | 32  | 48   | 0  |
| CONTIG-011374 | 152  | 8   | 6   | 0    | 0  |
| CONTIG-011375 | 110  | 44  | 154 | 113  | 2  |
| CONTIG-011376 | 2109 | 29  | 242 | 3397 | 5  |
| CONTIG-011377 | 357  | 32  | 84  | 238  | 16 |
| CONTIG-011378 | 133  | 5   | 3   | 13   | 0  |
| CONTIG-011379 | 188  | 6   | 28  | 16   | 0  |
| CONTIG-011380 | 80   | 6   | 25  | 0    | 3  |
| CONTIG-011381 | 391  | 32  | 86  | 507  | 29 |
| CONTIG-011382 | 490  | 10  | 5   | 141  | 2  |
| CONTIG-011383 | 233  | 7   | 40  | 37   | 0  |
| CONTIG-011384 | 328  | 18  | 48  | 140  | 0  |
| CONTIG-011389 | 73   | 67  | 200 | 19   | 0  |
| CONTIG-011390 | 154  | 25  | 431 | 0    | 0  |
| CONTIG-011391 | 718  | 25  | 105 | 687  | 4  |
| CONTIG-011392 | 687  | 25  | 179 | 688  | 2  |
| CONTIG-011393 | 204  | 6   | 6   | 33   | 0  |
| CONTIG-011394 | 212  | 10  | 29  | 50   | 0  |
| CONTIG-011395 | 640  | 9   | 19  | 193  | 0  |
| CONTIG-011396 | 199  | 10  | 132 | 16   | 0  |
| CONTIG-011397 | 88   | 105 | 97  | 269  | 0  |
| CONTIG-011398 | 328  | 10  | 32  | 77   | 0  |
| CONTIG-011399 | 164  | 60  | 320 | 87   | 0  |
| CONTIG-011400 | 521  | 18  | 157 | 179  | 0  |
| CONTIG-011401 | 74   | 176 | 293 | 10   | 2  |
| CONTIG-011402 | 565  | 37  | 286 | 584  | 5  |
| CONTIG-011403 | 668  | 15  | 44  | 288  | 0  |
| CONTIG-011405 | 254  | 20  | 34  | 134  | 0  |
| CONTIG-011406 | 134  | 15  | 30  | 60   | 0  |
| CONTIG-011407 | 83   | 36  | 150 | 0    | 0  |

|               |      |     |      |      |     |
|---------------|------|-----|------|------|-----|
| CONTIG-011409 | 1200 | 62  | 1256 | 3271 | 0   |
| CONTIG-011410 | 228  | 18  | 94   | 72   | 0   |
| CONTIG-011411 | 67   | 6   | 4    | 12   | 0   |
| CONTIG-011412 | 128  | 402 | 103  | 2880 | 0   |
| CONTIG-011413 | 248  | 8   | 10   | 84   | 0   |
| CONTIG-011414 | 74   | 11  | 8    | 20   | 0   |
| CONTIG-011415 | 247  | 29  | 104  | 277  | 0   |
| CONTIG-011416 | 1268 | 32  | 136  | 1876 | 4   |
| CONTIG-011417 | 196  | 98  | 174  | 609  | 0   |
| CONTIG-011418 | 151  | 184 | 1247 | 112  | 26  |
| CONTIG-011419 | 200  | 10  | 70   | 45   | 0   |
| CONTIG-011426 | 93   | 9   | 33   | 8    | 0   |
| CONTIG-011427 | 166  | 537 | 1488 | 1637 | 206 |
| CONTIG-011428 | 182  | 16  | 3    | 123  | 0   |
| CONTIG-011429 | 227  | 21  | 104  | 82   | 0   |
| CONTIG-011430 | 569  | 18  | 194  | 186  | 0   |
| CONTIG-011431 | 526  | 48  | 478  | 1140 | 2   |
| CONTIG-011432 | 1112 | 35  | 180  | 2049 | 9   |
| CONTIG-011433 | 321  | 12  | 16   | 135  | 2   |
| CONTIG-011434 | 187  | 11  | 6    | 121  | 0   |
| CONTIG-011435 | 338  | 15  | 69   | 152  | 2   |
| CONTIG-011436 | 131  | 8   | 0    | 8    | 0   |
| CONTIG-011438 | 252  | 11  | 31   | 84   | 2   |
| CONTIG-011439 | 268  | 27  | 226  | 104  | 2   |
| CONTIG-011440 | 171  | 4   | 3    | 22   | 0   |
| CONTIG-011441 | 770  | 21  | 400  | 540  | 2   |
| CONTIG-011442 | 462  | 18  | 82   | 129  | 0   |
| CONTIG-011443 | 283  | 11  | 41   | 57   | 0   |
| CONTIG-011445 | 60   | 8   | 8    | 0    | 0   |
| CONTIG-011446 | 60   | 11  | 7    | 0    | 0   |
| CONTIG-011447 | 275  | 5   | 0    | 20   | 0   |
| CONTIG-011448 | 144  | 6   | 7    | 21   | 0   |
| CONTIG-011449 | 161  | 15  | 12   | 41   | 4   |
| CONTIG-011450 | 470  | 28  | 77   | 607  | 0   |
| CONTIG-011451 | 203  | 30  | 142  | 99   | 2   |
| CONTIG-011452 | 993  | 31  | 250  | 842  | 66  |
| CONTIG-011453 | 324  | 13  | 76   | 96   | 0   |
| CONTIG-011456 | 509  | 12  | 130  | 174  | 0   |
| CONTIG-011457 | 297  | 13  | 5    | 239  | 2   |
| CONTIG-011458 | 112  | 53  | 204  | 185  | 0   |
| CONTIG-011459 | 467  | 18  | 0    | 0    | 11  |
| CONTIG-011460 | 584  | 15  | 68   | 114  | 0   |
| CONTIG-011461 | 79   | 10  | 17   | 13   | 0   |
| CONTIG-011462 | 724  | 150 | 548  | 6437 | 11  |
| CONTIG-011463 | 277  | 12  | 24   | 107  | 2   |
| CONTIG-011465 | 334  | 24  | 10   | 109  | 0   |
| CONTIG-011466 | 198  | 11  | 6    | 45   | 0   |

|               |      |     |     |      |      |
|---------------|------|-----|-----|------|------|
| CONTIG-011467 | 958  | 73  | 7   | 0    | 502  |
| CONTIG-011468 | 138  | 85  | 56  | 597  | 7    |
| CONTIG-011469 | 266  | 123 | 99  | 892  | 149  |
| CONTIG-011470 | 140  | 51  | 157 | 291  | 0    |
| CONTIG-011471 | 568  | 15  | 104 | 198  | 4    |
| CONTIG-011476 | 275  | 4   | 13  | 17   | 0    |
| CONTIG-011477 | 223  | 4   | 4   | 20   | 3    |
| CONTIG-011478 | 1060 | 19  | 190 | 604  | 0    |
| CONTIG-011479 | 605  | 43  | 283 | 910  | 2    |
| CONTIG-011480 | 149  | 43  | 87  | 147  | 4    |
| CONTIG-011481 | 1140 | 31  | 123 | 954  | 55   |
| CONTIG-011482 | 367  | 29  | 367 | 287  | 0    |
| CONTIG-011483 | 215  | 13  | 44  | 28   | 2    |
| CONTIG-011484 | 42   | 507 | 259 | 309  | 7    |
| CONTIG-011489 | 482  | 32  | 300 | 460  | 26   |
| CONTIG-011490 | 60   | 81  | 20  | 97   | 0    |
| CONTIG-011491 | 850  | 98  | 0   | 0    | 1000 |
| CONTIG-011492 | 287  | 11  | 11  | 138  | 0    |
| CONTIG-011493 | 1041 | 19  | 162 | 670  | 8    |
| CONTIG-011494 | 96   | 6   | 3   | 15   | 0    |
| CONTIG-011495 | 149  | 8   | 18  | 25   | 2    |
| CONTIG-011496 | 59   | 5   | 3   | 0    | 0    |
| CONTIG-011497 | 1561 | 28  | 547 | 1719 | 0    |
| CONTIG-011498 | 90   | 6   | 14  | 8    | 0    |
| CONTIG-011499 | 103  | 3   | 8   | 5    | 0    |
| CONTIG-011500 | 766  | 17  | 372 | 461  | 2    |
| CONTIG-011501 | 456  | 16  | 35  | 152  | 2    |
| CONTIG-011502 | 458  | 26  | 37  | 411  | 16   |
| CONTIG-011503 | 640  | 36  | 128 | 716  | 6    |
| CONTIG-011507 | 235  | 12  | 79  | 66   | 0    |
| CONTIG-011508 | 106  | 9   | 25  | 16   | 0    |
| CONTIG-011509 | 99   | 159 | 106 | 9    | 240  |
| CONTIG-011510 | 93   | 72  | 105 | 144  | 8    |
| CONTIG-011511 | 72   | 10  | 37  | 0    | 0    |
| CONTIG-011512 | 85   | 10  | 20  | 28   | 0    |
| CONTIG-011513 | 185  | 21  | 139 | 33   | 0    |
| CONTIG-011514 | 96   | 4   | 7   | 15   | 0    |
| CONTIG-011515 | 72   | 7   | 6   | 21   | 0    |
| CONTIG-011516 | 168  | 7   | 2   | 32   | 0    |
| CONTIG-011517 | 143  | 8   | 4   | 22   | 0    |
| CONTIG-011518 | 65   | 14  | 38  | 0    | 0    |
| CONTIG-011519 | 352  | 9   | 118 | 75   | 0    |
| CONTIG-011520 | 77   | 3   | 3   | 7    | 0    |
| CONTIG-011521 | 141  | 7   | 19  | 13   | 0    |
| CONTIG-011522 | 323  | 13  | 100 | 104  | 10   |
| CONTIG-011523 | 284  | 25  | 117 | 54   | 0    |
| CONTIG-011525 | 432  | 19  | 222 | 127  | 2    |

|               |      |     |      |      |     |
|---------------|------|-----|------|------|-----|
| CONTIG-011527 | 220  | 57  | 560  | 340  | 2   |
| CONTIG-011528 | 281  | 10  | 41   | 64   | 0   |
| CONTIG-011529 | 168  | 12  | 10   | 90   | 0   |
| CONTIG-011530 | 524  | 23  | 100  | 244  | 0   |
| CONTIG-011531 | 372  | 31  | 66   | 507  | 0   |
| CONTIG-011532 | 1027 | 21  | 338  | 618  | 6   |
| CONTIG-011533 | 437  | 87  | 1469 | 1290 | 3   |
| CONTIG-011534 | 241  | 475 | 120  | 5701 | 2   |
| CONTIG-011535 | 272  | 52  | 302  | 609  | 2   |
| CONTIG-011536 | 332  | 9   | 34   | 49   | 2   |
| CONTIG-011537 | 59   | 24  | 49   | 0    | 0   |
| CONTIG-011538 | 260  | 9   | 39   | 64   | 0   |
| CONTIG-011539 | 441  | 39  | 45   | 183  | 0   |
| CONTIG-011540 | 1140 | 53  | 148  | 1100 | 126 |
| CONTIG-011546 | 130  | 13  | 4    | 52   | 2   |
| CONTIG-011547 | 129  | 31  | 390  | 11   | 0   |
| CONTIG-011548 | 568  | 47  | 121  | 1046 | 6   |
| CONTIG-011549 | 109  | 12  | 16   | 32   | 0   |
| CONTIG-011550 | 74   | 26  | 151  | 8    | 0   |
| CONTIG-011551 | 675  | 46  | 192  | 506  | 23  |
| CONTIG-011552 | 370  | 29  | 144  | 503  | 0   |
| CONTIG-011553 | 601  | 20  | 80   | 395  | 2   |
| CONTIG-011554 | 82   | 17  | 58   | 21   | 0   |
| CONTIG-011555 | 981  | 23  | 308  | 659  | 10  |
| CONTIG-011556 | 258  | 13  | 46   | 50   | 0   |
| CONTIG-011557 | 149  | 113 | 820  | 343  | 2   |
| CONTIG-011565 | 302  | 140 | 445  | 1046 | 5   |
| CONTIG-011566 | 61   | 246 | 301  | 73   | 3   |
| CONTIG-011573 | 886  | 15  | 122  | 357  | 0   |
| CONTIG-011575 | 884  | 38  | 149  | 920  | 0   |
| CONTIG-011576 | 68   | 36  | 45   | 32   | 0   |
| CONTIG-011577 | 42   | 138 | 88   | 142  | 0   |
| CONTIG-011578 | 264  | 14  | 279  | 23   | 0   |
| CONTIG-011579 | 125  | 7   | 2    | 19   | 2   |
| CONTIG-011580 | 321  | 11  | 63   | 63   | 8   |
| CONTIG-011581 | 239  | 10  | 2    | 79   | 0   |
| CONTIG-011582 | 89   | 7   | 4    | 0    | 0   |
| CONTIG-011583 | 205  | 11  | 20   | 43   | 0   |
| CONTIG-011584 | 943  | 13  | 80   | 301  | 11  |
| CONTIG-011589 | 719  | 22  | 194  | 810  | 0   |
| CONTIG-011590 | 68   | 8   | 8    | 6    | 0   |
| CONTIG-011591 | 509  | 18  | 102  | 184  | 11  |
| CONTIG-011592 | 245  | 8   | 39   | 69   | 0   |
| CONTIG-011593 | 155  | 556 | 1221 | 3336 | 85  |
| CONTIG-011594 | 172  | 151 | 105  | 814  | 10  |
| CONTIG-011595 | 1112 | 15  | 191  | 680  | 4   |
| CONTIG-011596 | 85   | 5   | 30   | 0    | 0   |



|               |      |     |     |      |     |
|---------------|------|-----|-----|------|-----|
| CONTIG-011597 | 352  | 14  | 191 | 49   | 0   |
| CONTIG-011598 | 395  | 23  | 29  | 491  | 2   |
| CONTIG-011599 | 830  | 33  | 190 | 669  | 52  |
| CONTIG-011600 | 106  | 5   | 9   | 10   | 0   |
| CONTIG-011602 | 42   | 299 | 81  | 81   | 2   |
| CONTIG-011603 | 144  | 3   | 0   | 7    | 0   |
| CONTIG-011604 | 61   | 6   | 4   | 3    | 0   |
| CONTIG-011605 | 81   | 13  | 27  | 12   | 0   |
| CONTIG-011606 | 303  | 14  | 91  | 98   | 2   |
| CONTIG-011607 | 245  | 5   | 6   | 31   | 0   |
| CONTIG-011608 | 504  | 18  | 265 | 206  | 0   |
| CONTIG-011609 | 228  | 103 | 437 | 413  | 62  |
| CONTIG-011610 | 243  | 28  | 2   | 0    | 56  |
| CONTIG-011611 | 149  | 51  | 309 | 27   | 0   |
| CONTIG-011612 | 634  | 18  | 103 | 469  | 2   |
| CONTIG-011613 | 71   | 15  | 11  | 33   | 0   |
| CONTIG-011615 | 58   | 4   | 7   | 4    | 0   |
| CONTIG-011616 | 548  | 19  | 71  | 539  | 0   |
| CONTIG-011617 | 59   | 8   | 2   | 14   | 0   |
| CONTIG-011618 | 212  | 348 | 417 | 1501 | 393 |
| CONTIG-011619 | 404  | 95  | 159 | 2180 | 2   |
| CONTIG-011620 | 147  | 24  | 142 | 3    | 0   |
| CONTIG-011621 | 193  | 20  | 27  | 142  | 0   |
| CONTIG-011623 | 693  | 19  | 194 | 350  | 2   |
| CONTIG-011625 | 593  | 22  | 49  | 419  | 0   |
| CONTIG-011633 | 245  | 32  | 107 | 271  | 3   |
| CONTIG-011634 | 88   | 462 | 186 | 1331 | 101 |
| CONTIG-011635 | 180  | 8   | 10  | 59   | 0   |
| CONTIG-011636 | 169  | 50  | 241 | 162  | 2   |
| CONTIG-011644 | 136  | 7   | 17  | 26   | 0   |
| CONTIG-011645 | 1344 | 55  | 228 | 1729 | 250 |
| CONTIG-011647 | 269  | 16  | 5   | 114  | 0   |
| CONTIG-011648 | 99   | 13  | 35  | 10   | 0   |
| CONTIG-011649 | 87   | 4   | 23  | 0    | 0   |
| CONTIG-011650 | 182  | 8   | 18  | 52   | 0   |
| CONTIG-011651 | 74   | 316 | 121 | 493  | 73  |
| CONTIG-011652 | 107  | 173 | 564 | 47   | 0   |
| CONTIG-011653 | 165  | 36  | 124 | 242  | 0   |
| CONTIG-011654 | 637  | 43  | 177 | 944  | 22  |
| CONTIG-011655 | 162  | 4   | 8   | 6    | 0   |
| CONTIG-011657 | 285  | 29  | 77  | 244  | 6   |
| CONTIG-011658 | 106  | 21  | 26  | 19   | 0   |
| CONTIG-011659 | 692  | 25  | 268 | 512  | 4   |
| CONTIG-011660 | 1353 | 15  | 68  | 627  | 4   |
| CONTIG-011665 | 109  | 6   | 2   | 20   | 0   |
| CONTIG-011666 | 186  | 19  | 45  | 33   | 0   |
| CONTIG-011667 | 207  | 23  | 122 | 106  | 0   |

|               |      |     |     |      |    |
|---------------|------|-----|-----|------|----|
| CONTIG-011668 | 346  | 15  | 144 | 26   | 0  |
| CONTIG-011669 | 104  | 19  | 36  | 7    | 0  |
| CONTIG-011670 | 119  | 9   | 29  | 11   | 0  |
| CONTIG-011679 | 258  | 91  | 779 | 682  | 2  |
| CONTIG-011680 | 88   | 86  | 153 | 9    | 0  |
| CONTIG-011681 | 278  | 13  | 113 | 67   | 0  |
| CONTIG-011682 | 751  | 12  | 130 | 227  | 0  |
| CONTIG-011683 | 113  | 8   | 30  | 24   | 0  |
| CONTIG-011684 | 784  | 44  | 502 | 1131 | 21 |
| CONTIG-011685 | 170  | 40  | 56  | 155  | 2  |
| CONTIG-011686 | 64   | 20  | 25  | 8    | 0  |
| CONTIG-011687 | 189  | 15  | 21  | 40   | 0  |
| CONTIG-011688 | 756  | 52  | 588 | 2058 | 0  |
| CONTIG-011689 | 62   | 4   | 6   | 6    | 0  |
| CONTIG-011690 | 789  | 33  | 299 | 505  | 16 |
| CONTIG-011691 | 96   | 14  | 36  | 41   | 0  |
| CONTIG-011692 | 356  | 21  | 77  | 361  | 0  |
| CONTIG-011694 | 117  | 6   | 22  | 6    | 0  |
| CONTIG-011695 | 65   | 71  | 73  | 8    | 0  |
| CONTIG-011696 | 730  | 53  | 747 | 1224 | 22 |
| CONTIG-011697 | 107  | 210 | 278 | 458  | 2  |
| CONTIG-011698 | 178  | 10  | 18  | 27   | 0  |
| CONTIG-011699 | 103  | 10  | 15  | 36   | 0  |
| CONTIG-011700 | 882  | 49  | 646 | 1490 | 10 |
| CONTIG-011701 | 473  | 14  | 154 | 96   | 2  |
| CONTIG-011703 | 214  | 28  | 211 | 0    | 0  |
| CONTIG-011704 | 242  | 6   | 15  | 36   | 0  |
| CONTIG-011705 | 2750 | 40  | 353 | 5580 | 14 |
| CONTIG-011706 | 414  | 14  | 210 | 111  | 2  |
| CONTIG-011714 | 695  | 94  | 624 | 2686 | 9  |
| CONTIG-011715 | 355  | 107 | 117 | 972  | 30 |
| CONTIG-011716 | 381  | 22  | 42  | 200  | 4  |
| CONTIG-011717 | 410  | 45  | 740 | 528  | 0  |
| CONTIG-011718 | 160  | 10  | 39  | 33   | 0  |
| CONTIG-011719 | 212  | 6   | 3   | 42   | 0  |
| CONTIG-011723 | 134  | 36  | 232 | 89   | 0  |
| CONTIG-011724 | 524  | 38  | 494 | 579  | 3  |
| CONTIG-011725 | 202  | 9   | 10  | 57   | 0  |
| CONTIG-011726 | 1135 | 15  | 87  | 298  | 4  |
| CONTIG-011727 | 286  | 13  | 2   | 4    | 0  |
| CONTIG-011728 | 175  | 34  | 108 | 174  | 0  |
| CONTIG-011735 | 76   | 5   | 3   | 6    | 0  |
| CONTIG-011736 | 326  | 19  | 99  | 247  | 0  |
| CONTIG-011743 | 353  | 13  | 21  | 149  | 2  |
| CONTIG-011745 | 1074 | 54  | 653 | 1297 | 12 |
| CONTIG-011746 | 467  | 25  | 337 | 215  | 0  |
| CONTIG-011747 | 600  | 169 | 159 | 5384 | 2  |

|               |      |     |     |       |      |
|---------------|------|-----|-----|-------|------|
| CONTIG-011748 | 913  | 61  | 339 | 3368  | 2    |
| CONTIG-011749 | 86   | 4   | 10  | 4     | 0    |
| CONTIG-011755 | 585  | 28  | 95  | 533   | 0    |
| CONTIG-011756 | 397  | 64  | 831 | 900   | 0    |
| CONTIG-011758 | 85   | 178 | 69  | 404   | 2    |
| CONTIG-011759 | 306  | 17  | 99  | 90    | 8    |
| CONTIG-011760 | 574  | 12  | 66  | 214   | 0    |
| CONTIG-011761 | 501  | 484 | 295 | 10566 | 1100 |
| CONTIG-011763 | 226  | 15  | 123 | 75    | 0    |
| CONTIG-011764 | 98   | 9   | 8   | 33    | 0    |
| CONTIG-011765 | 177  | 10  | 40  | 0     | 0    |
| CONTIG-011766 | 66   | 12  | 0   | 51    | 0    |
| CONTIG-011767 | 319  | 8   | 53  | 90    | 0    |
| CONTIG-011768 | 230  | 7   | 32  | 22    | 0    |
| CONTIG-011769 | 627  | 23  | 161 | 368   | 2    |
| CONTIG-011775 | 1637 | 27  | 485 | 1352  | 21   |
| CONTIG-011776 | 244  | 8   | 22  | 75    | 0    |
| CONTIG-011777 | 346  | 6   | 2   | 0     | 0    |
| CONTIG-011778 | 236  | 11  | 30  | 83    | 0    |
| CONTIG-011779 | 191  | 121 | 438 | 319   | 20   |
| CONTIG-011780 | 237  | 17  | 25  | 129   | 0    |
| CONTIG-011781 | 403  | 47  | 473 | 428   | 6    |
| CONTIG-011782 | 160  | 11  | 26  | 57    | 0    |
| CONTIG-011787 | 263  | 18  | 148 | 132   | 0    |
| CONTIG-011788 | 78   | 6   | 5   | 8     | 0    |
| CONTIG-011789 | 1072 | 41  | 260 | 1945  | 26   |
| CONTIG-011790 | 122  | 38  | 16  | 16    | 0    |
| CONTIG-011791 | 504  | 16  | 54  | 270   | 0    |
| CONTIG-011792 | 80   | 6   | 11  | 2     | 0    |
| CONTIG-011793 | 663  | 23  | 181 | 368   | 8    |
| CONTIG-011794 | 108  | 17  | 24  | 56    | 2    |
| CONTIG-011795 | 117  | 482 | 423 | 2043  | 50   |
| CONTIG-011796 | 81   | 12  | 23  | 20    | 0    |
| CONTIG-011797 | 326  | 14  | 113 | 106   | 0    |
| CONTIG-011798 | 588  | 13  | 138 | 218   | 2    |
| CONTIG-011799 | 895  | 40  | 234 | 919   | 8    |
| CONTIG-011800 | 446  | 18  | 69  | 211   | 2    |
| CONTIG-011803 | 158  | 49  | 161 | 98    | 2    |
| CONTIG-011804 | 373  | 323 | 418 | 3608  | 456  |
| CONTIG-011805 | 706  | 39  | 176 | 912   | 4    |
| CONTIG-011806 | 360  | 7   | 8   | 40    | 0    |
| CONTIG-011807 | 212  | 18  | 35  | 141   | 0    |
| CONTIG-011808 | 918  | 54  | 451 | 1721  | 17   |
| CONTIG-011809 | 206  | 39  | 323 | 0     | 0    |
| CONTIG-011810 | 204  | 10  | 20  | 62    | 2    |
| CONTIG-011811 | 65   | 10  | 11  | 9     | 0    |
| CONTIG-011812 | 1233 | 25  | 200 | 1150  | 9    |

|               |      |      |      |      |     |
|---------------|------|------|------|------|-----|
| CONTIG-011813 | 174  | 5    | 0    | 8    | 0   |
| CONTIG-011814 | 658  | 24   | 245  | 141  | 0   |
| CONTIG-011815 | 219  | 18   | 216  | 32   | 0   |
| CONTIG-011816 | 222  | 209  | 721  | 296  | 27  |
| CONTIG-011817 | 100  | 41   | 110  | 19   | 0   |
| CONTIG-011818 | 845  | 37   | 330  | 1074 | 15  |
| CONTIG-011819 | 678  | 39   | 153  | 1266 | 8   |
| CONTIG-011820 | 145  | 5    | 29   | 4    | 0   |
| CONTIG-011821 | 422  | 38   | 207  | 770  | 2   |
| CONTIG-011822 | 73   | 353  | 1211 | 585  | 0   |
| CONTIG-011823 | 356  | 14   | 32   | 210  | 0   |
| CONTIG-011824 | 204  | 66   | 217  | 300  | 0   |
| CONTIG-011825 | 411  | 21   | 72   | 233  | 11  |
| CONTIG-011826 | 111  | 10   | 17   | 33   | 0   |
| CONTIG-011827 | 235  | 20   | 78   | 156  | 0   |
| CONTIG-011828 | 191  | 12   | 171  | 19   | 0   |
| CONTIG-011829 | 581  | 31   | 496  | 489  | 6   |
| CONTIG-011830 | 155  | 23   | 17   | 4    | 0   |
| CONTIG-011831 | 54   | 222  | 747  | 184  | 7   |
| CONTIG-011832 | 284  | 33   | 40   | 76   | 16  |
| CONTIG-011837 | 296  | 71   | 240  | 227  | 11  |
| CONTIG-011838 | 89   | 40   | 134  | 13   | 5   |
| CONTIG-011839 | 106  | 11   | 12   | 27   | 0   |
| CONTIG-011840 | 570  | 15   | 19   | 338  | 0   |
| CONTIG-011841 | 229  | 11   | 20   | 87   | 0   |
| CONTIG-011843 | 391  | 13   | 3    | 3    | 0   |
| CONTIG-011844 | 123  | 661  | 1298 | 3271 | 21  |
| CONTIG-011845 | 1063 | 15   | 142  | 351  | 7   |
| CONTIG-011846 | 71   | 5    | 32   | 2    | 0   |
| CONTIG-011847 | 1049 | 27   | 359  | 1201 | 0   |
| CONTIG-011848 | 357  | 49   | 202  | 205  | 2   |
| CONTIG-011849 | 1087 | 15   | 25   | 585  | 2   |
| CONTIG-011850 | 298  | 313  | 293  | 4231 | 46  |
| CONTIG-011851 | 221  | 13   | 231  | 23   | 0   |
| CONTIG-011852 | 48   | 294  | 127  | 223  | 22  |
| CONTIG-011853 | 74   | 6    | 13   | 9    | 0   |
| CONTIG-011854 | 968  | 18   | 137  | 424  | 16  |
| CONTIG-011856 | 198  | 9    | 39   | 12   | 0   |
| CONTIG-011857 | 788  | 14   | 122  | 523  | 0   |
| CONTIG-011858 | 244  | 18   | 44   | 88   | 2   |
| CONTIG-011859 | 1226 | 89   | 503  | 3313 | 244 |
| CONTIG-011860 | 528  | 12   | 18   | 165  | 0   |
| CONTIG-011861 | 83   | 8    | 9    | 17   | 0   |
| CONTIG-011862 | 149  | 6    | 6    | 24   | 0   |
| CONTIG-011863 | 120  | 37   | 44   | 74   | 2   |
| CONTIG-011864 | 460  | 19   | 84   | 153  | 2   |
| CONTIG-011865 | 58   | 1122 | 1205 | 1077 | 82  |

|               |      |     |     |      |     |
|---------------|------|-----|-----|------|-----|
| CONTIG-011866 | 514  | 21  | 145 | 441  | 2   |
| CONTIG-011867 | 870  | 17  | 234 | 660  | 0   |
| CONTIG-011868 | 84   | 10  | 4   | 0    | 0   |
| CONTIG-011870 | 56   | 68  | 0   | 94   | 0   |
| CONTIG-011873 | 477  | 28  | 63  | 406  | 2   |
| CONTIG-011874 | 230  | 19  | 42  | 154  | 0   |
| CONTIG-011875 | 542  | 12  | 69  | 218  | 2   |
| CONTIG-011876 | 155  | 41  | 335 | 160  | 0   |
| CONTIG-011877 | 325  | 32  | 274 | 104  | 0   |
| CONTIG-011878 | 72   | 10  | 24  | 8    | 0   |
| CONTIG-011879 | 236  | 55  | 67  | 650  | 2   |
| CONTIG-011880 | 45   | 668 | 113 | 1242 | 9   |
| CONTIG-011881 | 168  | 11  | 21  | 31   | 0   |
| CONTIG-011882 | 116  | 7   | 16  | 18   | 0   |
| CONTIG-011883 | 56   | 358 | 122 | 479  | 58  |
| CONTIG-011884 | 86   | 632 | 431 | 2592 | 21  |
| CONTIG-011890 | 89   | 10  | 81  | 0    | 0   |
| CONTIG-011896 | 134  | 41  | 153 | 78   | 0   |
| CONTIG-011897 | 672  | 23  | 206 | 278  | 11  |
| CONTIG-011898 | 120  | 13  | 8   | 33   | 3   |
| CONTIG-011899 | 99   | 14  | 13  | 29   | 0   |
| CONTIG-011900 | 78   | 29  | 13  | 90   | 0   |
| CONTIG-011901 | 627  | 11  | 16  | 214  | 2   |
| CONTIG-011902 | 67   | 5   | 4   | 3    | 0   |
| CONTIG-011903 | 709  | 18  | 191 | 471  | 0   |
| CONTIG-011904 | 70   | 15  | 33  | 40   | 0   |
| CONTIG-011906 | 865  | 7   | 22  | 139  | 0   |
| CONTIG-011907 | 663  | 23  | 156 | 593  | 0   |
| CONTIG-011908 | 231  | 68  | 212 | 731  | 0   |
| CONTIG-011909 | 126  | 55  | 403 | 22   | 0   |
| CONTIG-011914 | 292  | 9   | 2   | 76   | 0   |
| CONTIG-011915 | 390  | 18  | 121 | 154  | 0   |
| CONTIG-011916 | 488  | 11  | 14  | 164  | 2   |
| CONTIG-011924 | 714  | 27  | 259 | 635  | 0   |
| CONTIG-011925 | 441  | 15  | 131 | 66   | 0   |
| CONTIG-011934 | 122  | 25  | 70  | 23   | 0   |
| CONTIG-011935 | 2688 | 60  | 289 | 3675 | 206 |
| CONTIG-011937 | 190  | 15  | 11  | 96   | 0   |
| CONTIG-011938 | 66   | 8   | 0   | 10   | 0   |
| CONTIG-011939 | 564  | 14  | 23  | 255  | 2   |
| CONTIG-011940 | 522  | 21  | 168 | 457  | 0   |
| CONTIG-011941 | 462  | 24  | 88  | 420  | 2   |
| CONTIG-011942 | 1062 | 28  | 234 | 468  | 10  |
| CONTIG-011943 | 881  | 28  | 234 | 1030 | 0   |
| CONTIG-011944 | 574  | 19  | 118 | 154  | 13  |
| CONTIG-011945 | 1484 | 54  | 205 | 2992 | 130 |
| CONTIG-011953 | 176  | 10  | 56  | 17   | 0   |

|               |      |     |      |      |     |
|---------------|------|-----|------|------|-----|
| CONTIG-011954 | 335  | 12  | 47   | 166  | 2   |
| CONTIG-011955 | 152  | 23  | 118  | 26   | 0   |
| CONTIG-011956 | 818  | 16  | 101  | 475  | 2   |
| CONTIG-011957 | 755  | 32  | 149  | 383  | 6   |
| CONTIG-011958 | 125  | 5   | 2    | 5    | 0   |
| CONTIG-011959 | 427  | 12  | 56   | 105  | 0   |
| CONTIG-011962 | 260  | 90  | 417  | 229  | 19  |
| CONTIG-011968 | 227  | 22  | 103  | 96   | 0   |
| CONTIG-011969 | 3342 | 38  | 274  | 6965 | 12  |
| CONTIG-011970 | 313  | 27  | 220  | 44   | 8   |
| CONTIG-011971 | 390  | 28  | 67   | 245  | 8   |
| CONTIG-011974 | 75   | 96  | 52   | 333  | 0   |
| CONTIG-011975 | 47   | 26  | 43   | 43   | 0   |
| CONTIG-011976 | 466  | 16  | 70   | 171  | 8   |
| CONTIG-011977 | 230  | 16  | 112  | 75   | 0   |
| CONTIG-011978 | 185  | 55  | 72   | 214  | 0   |
| CONTIG-011987 | 102  | 7   | 17   | 25   | 0   |
| CONTIG-011988 | 587  | 264 | 830  | 5980 | 233 |
| CONTIG-011989 | 87   | 7   | 0    | 14   | 0   |
| CONTIG-011990 | 71   | 30  | 236  | 4    | 0   |
| CONTIG-011991 | 109  | 278 | 303  | 653  | 67  |
| CONTIG-011992 | 410  | 19  | 90   | 245  | 2   |
| CONTIG-011993 | 154  | 31  | 16   | 292  | 0   |
| CONTIG-011994 | 1293 | 17  | 142  | 853  | 4   |
| CONTIG-011995 | 62   | 3   | 14   | 4    | 0   |
| CONTIG-011996 | 952  | 24  | 352  | 695  | 2   |
| CONTIG-011997 | 66   | 12  | 26   | 24   | 0   |
| CONTIG-011998 | 97   | 4   | 17   | 2    | 0   |
| CONTIG-011999 | 252  | 7   | 3    | 49   | 0   |
| CONTIG-012000 | 200  | 9   | 8    | 62   | 2   |
| CONTIG-012001 | 120  | 264 | 238  | 1763 | 0   |
| CONTIG-012002 | 92   | 4   | 4    | 3    | 0   |
| CONTIG-012003 | 155  | 557 | 542  | 2964 | 52  |
| CONTIG-012004 | 102  | 5   | 11   | 2    | 0   |
| CONTIG-012005 | 323  | 19  | 115  | 161  | 0   |
| CONTIG-012006 | 790  | 20  | 42   | 428  | 8   |
| CONTIG-012007 | 264  | 29  | 530  | 134  | 0   |
| CONTIG-012008 | 423  | 16  | 60   | 212  | 0   |
| CONTIG-012009 | 388  | 8   | 15   | 127  | 2   |
| CONTIG-012010 | 282  | 312 | 1005 | 1150 | 101 |
| CONTIG-012011 | 137  | 9   | 42   | 15   | 0   |
| CONTIG-012012 | 131  | 9   | 10   | 7    | 0   |
| CONTIG-012013 | 312  | 14  | 55   | 90   | 2   |
| CONTIG-012014 | 711  | 22  | 249  | 438  | 4   |
| CONTIG-012015 | 627  | 20  | 58   | 483  | 2   |
| CONTIG-012016 | 68   | 9   | 8    | 19   | 0   |
| CONTIG-012017 | 227  | 10  | 71   | 26   | 0   |

|               |      |     |     |      |     |
|---------------|------|-----|-----|------|-----|
| CONTIG-012018 | 345  | 273 | 201 | 1920 | 43  |
| CONTIG-012019 | 981  | 19  | 197 | 506  | 4   |
| CONTIG-012020 | 62   | 39  | 94  | 55   | 0   |
| CONTIG-012024 | 364  | 18  | 35  | 181  | 4   |
| CONTIG-012027 | 175  | 27  | 273 | 76   | 0   |
| CONTIG-012028 | 115  | 5   | 4   | 5    | 0   |
| CONTIG-012029 | 92   | 68  | 14  | 334  | 0   |
| CONTIG-012030 | 311  | 14  | 52  | 83   | 0   |
| CONTIG-012031 | 278  | 13  | 21  | 91   | 0   |
| CONTIG-012032 | 99   | 460 | 233 | 91   | 0   |
| CONTIG-012033 | 64   | 4   | 10  | 0    | 0   |
| CONTIG-012034 | 564  | 21  | 65  | 586  | 0   |
| CONTIG-012035 | 204  | 18  | 33  | 72   | 2   |
| CONTIG-012036 | 196  | 5   | 3   | 19   | 0   |
| CONTIG-012037 | 99   | 44  | 424 | 29   | 0   |
| CONTIG-012041 | 59   | 48  | 299 | 0    | 0   |
| CONTIG-012042 | 123  | 386 | 167 | 712  | 4   |
| CONTIG-012044 | 108  | 6   | 16  | 9    | 0   |
| CONTIG-012046 | 651  | 9   | 85  | 244  | 0   |
| CONTIG-012047 | 995  | 47  | 315 | 1964 | 10  |
| CONTIG-012048 | 113  | 33  | 37  | 149  | 0   |
| CONTIG-012049 | 329  | 15  | 81  | 160  | 4   |
| CONTIG-012050 | 82   | 29  | 62  | 58   | 0   |
| CONTIG-012051 | 316  | 12  | 41  | 63   | 2   |
| CONTIG-012053 | 70   | 6   | 5   | 15   | 0   |
| CONTIG-012054 | 68   | 9   | 34  | 2    | 0   |
| CONTIG-012055 | 211  | 34  | 33  | 298  | 0   |
| CONTIG-012056 | 64   | 184 | 121 | 448  | 0   |
| CONTIG-012057 | 102  | 7   | 8   | 9    | 0   |
| CONTIG-012058 | 489  | 17  | 38  | 192  | 6   |
| CONTIG-012059 | 188  | 6   | 7   | 37   | 2   |
| CONTIG-012060 | 1490 | 45  | 384 | 1585 | 128 |
| CONTIG-012061 | 532  | 35  | 75  | 749  | 10  |
| CONTIG-012062 | 110  | 21  | 107 | 53   | 0   |
| CONTIG-012063 | 36   | 209 | 26  | 79   | 0   |
| CONTIG-012064 | 169  | 7   | 13  | 38   | 0   |
| CONTIG-012065 | 65   | 42  | 48  | 81   | 2   |
| CONTIG-012066 | 511  | 15  | 132 | 194  | 0   |
| CONTIG-012067 | 594  | 13  | 24  | 176  | 0   |
| CONTIG-012068 | 293  | 23  | 166 | 143  | 0   |
| CONTIG-012069 | 341  | 26  | 56  | 430  | 0   |
| CONTIG-012071 | 252  | 18  | 118 | 101  | 0   |
| CONTIG-012072 | 277  | 10  | 19  | 31   | 2   |
| CONTIG-012074 | 223  | 6   | 58  | 11   | 0   |
| CONTIG-012075 | 497  | 20  | 46  | 369  | 0   |
| CONTIG-012084 | 143  | 6   | 31  | 18   | 0   |
| CONTIG-012085 | 112  | 13  | 59  | 47   | 0   |

|               |      |     |     |      |     |
|---------------|------|-----|-----|------|-----|
| CONTIG-012086 | 949  | 14  | 97  | 474  | 2   |
| CONTIG-012087 | 174  | 10  | 67  | 31   | 0   |
| CONTIG-012089 | 354  | 40  | 157 | 529  | 4   |
| CONTIG-012090 | 121  | 15  | 44  | 23   | 0   |
| CONTIG-012091 | 711  | 25  | 76  | 539  | 16  |
| CONTIG-012092 | 78   | 4   | 4   | 5    | 0   |
| CONTIG-012094 | 39   | 615 | 64  | 595  | 45  |
| CONTIG-012095 | 1969 | 49  | 397 | 3084 | 174 |
| CONTIG-012096 | 167  | 27  | 65  | 206  | 0   |
| CONTIG-012097 | 800  | 19  | 0   | 0    | 107 |
| CONTIG-012099 | 314  | 9   | 16  | 11   | 0   |
| CONTIG-012100 | 508  | 172 | 357 | 3476 | 56  |
| CONTIG-012101 | 46   | 789 | 757 | 328  | 36  |
| CONTIG-012102 | 1195 | 134 | 169 | 8828 | 64  |
| CONTIG-012103 | 153  | 6   | 23  | 21   | 0   |
| CONTIG-012107 | 79   | 11  | 57  | 7    | 0   |
| CONTIG-012108 | 844  | 29  | 210 | 977  | 0   |
| CONTIG-012110 | 173  | 9   | 19  | 15   | 0   |
| CONTIG-012111 | 116  | 5   | 4   | 19   | 0   |
| CONTIG-012116 | 1171 | 27  | 643 | 1060 | 10  |
| CONTIG-012117 | 173  | 11  | 30  | 39   | 0   |
| CONTIG-012118 | 246  | 12  | 22  | 11   | 0   |
| CONTIG-012119 | 435  | 25  | 82  | 131  | 28  |
| CONTIG-012120 | 146  | 24  | 395 | 0    | 0   |
| CONTIG-012121 | 443  | 13  | 37  | 151  | 0   |
| CONTIG-012122 | 809  | 24  | 421 | 552  | 4   |
| CONTIG-012123 | 151  | 346 | 527 | 1325 | 72  |
| CONTIG-012124 | 92   | 7   | 18  | 14   | 0   |
| CONTIG-012125 | 186  | 26  | 77  | 75   | 2   |
| CONTIG-012126 | 97   | 62  | 586 | 19   | 0   |
| CONTIG-012127 | 1632 | 41  | 495 | 1438 | 131 |
| CONTIG-012128 | 442  | 8   | 11  | 129  | 0   |
| CONTIG-012129 | 195  | 11  | 27  | 47   | 2   |
| CONTIG-012138 | 513  | 13  | 35  | 119  | 9   |
| CONTIG-012140 | 616  | 40  | 140 | 677  | 0   |
| CONTIG-012145 | 100  | 5   | 10  | 9    | 0   |
| CONTIG-012146 | 122  | 18  | 98  | 52   | 0   |
| CONTIG-012147 | 258  | 140 | 58  | 2072 | 41  |
| CONTIG-012149 | 1236 | 44  | 216 | 2202 | 4   |
| CONTIG-012150 | 146  | 18  | 8   | 75   | 0   |
| CONTIG-012154 | 157  | 10  | 10  | 43   | 0   |
| CONTIG-012155 | 67   | 19  | 18  | 20   | 0   |
| CONTIG-012156 | 160  | 217 | 731 | 1028 | 6   |
| CONTIG-012157 | 803  | 20  | 20  | 604  | 3   |
| CONTIG-012158 | 202  | 8   | 5   | 49   | 0   |
| CONTIG-012159 | 437  | 19  | 19  | 282  | 0   |
| CONTIG-012161 | 94   | 6   | 17  | 10   | 0   |



|               |      |      |     |      |      |
|---------------|------|------|-----|------|------|
| CONTIG-012162 | 274  | 7    | 22  | 22   | 0    |
| CONTIG-012165 | 473  | 20   | 158 | 327  | 0    |
| CONTIG-012166 | 213  | 6    | 24  | 29   | 0    |
| CONTIG-012167 | 242  | 14   | 71  | 122  | 0    |
| CONTIG-012171 | 122  | 7    | 14  | 18   | 0    |
| CONTIG-012172 | 168  | 26   | 77  | 144  | 0    |
| CONTIG-012176 | 204  | 8    | 0   | 57   | 0    |
| CONTIG-012177 | 434  | 18   | 219 | 206  | 2    |
| CONTIG-012178 | 38   | 48   | 2   | 54   | 5    |
| CONTIG-012179 | 277  | 14   | 18  | 103  | 0    |
| CONTIG-012180 | 427  | 11   | 48  | 140  | 0    |
| CONTIG-012181 | 189  | 87   | 332 | 574  | 0    |
| CONTIG-012183 | 505  | 14   | 199 | 81   | 0    |
| CONTIG-012190 | 141  | 9    | 13  | 18   | 0    |
| CONTIG-012191 | 467  | 8    | 33  | 49   | 3    |
| CONTIG-012192 | 71   | 6    | 11  | 4    | 0    |
| CONTIG-012193 | 900  | 21   | 108 | 832  | 2    |
| CONTIG-012194 | 100  | 5    | 12  | 17   | 0    |
| CONTIG-012195 | 90   | 86   | 69  | 159  | 2    |
| CONTIG-012196 | 129  | 30   | 109 | 94   | 5    |
| CONTIG-012197 | 507  | 9    | 69  | 124  | 0    |
| CONTIG-012198 | 1080 | 15   | 272 | 568  | 4    |
| CONTIG-012200 | 325  | 12   | 19  | 140  | 2    |
| CONTIG-012201 | 80   | 80   | 588 | 0    | 18   |
| CONTIG-012202 | 203  | 13   | 12  | 72   | 2    |
| CONTIG-012203 | 256  | 6    | 21  | 8    | 0    |
| CONTIG-012204 | 152  | 7    | 12  | 36   | 0    |
| CONTIG-012205 | 282  | 7    | 17  | 36   | 0    |
| CONTIG-012206 | 474  | 39   | 428 | 626  | 2    |
| CONTIG-012211 | 226  | 17   | 60  | 151  | 0    |
| CONTIG-012212 | 435  | 23   | 475 | 212  | 6    |
| CONTIG-012213 | 693  | 17   | 113 | 270  | 10   |
| CONTIG-012214 | 1242 | 27   | 127 | 1728 | 0    |
| CONTIG-012215 | 64   | 7    | 10  | 0    | 0    |
| CONTIG-012216 | 245  | 26   | 152 | 226  | 0    |
| CONTIG-012221 | 851  | 13   | 81  | 202  | 0    |
| CONTIG-012222 | 97   | 11   | 11  | 29   | 0    |
| CONTIG-012223 | 342  | 16   | 44  | 101  | 0    |
| CONTIG-012224 | 294  | 26   | 28  | 394  | 0    |
| CONTIG-012225 | 424  | 21   | 43  | 272  | 0    |
| CONTIG-012226 | 433  | 62   | 247 | 589  | 6    |
| CONTIG-012227 | 178  | 13   | 106 | 37   | 0    |
| CONTIG-012228 | 266  | 11   | 35  | 26   | 0    |
| CONTIG-012229 | 88   | 8    | 0   | 14   | 0    |
| CONTIG-012230 | 322  | 7    | 17  | 38   | 0    |
| CONTIG-012231 | 528  | 26   | 410 | 532  | 0    |
| CONTIG-012232 | 55   | 1889 | 368 | 24   | 2063 |

|               |      |     |     |      |     |
|---------------|------|-----|-----|------|-----|
| CONTIG-012238 | 936  | 36  | 146 | 2079 | 0   |
| CONTIG-012239 | 157  | 14  | 7   | 48   | 0   |
| CONTIG-012240 | 667  | 22  | 68  | 637  | 2   |
| CONTIG-012241 | 300  | 10  | 105 | 83   | 0   |
| CONTIG-012242 | 57   | 301 | 135 | 335  | 15  |
| CONTIG-012243 | 721  | 22  | 107 | 743  | 0   |
| CONTIG-012244 | 265  | 14  | 0   | 174  | 0   |
| CONTIG-012245 | 512  | 19  | 155 | 420  | 0   |
| CONTIG-012246 | 60   | 24  | 149 | 4    | 0   |
| CONTIG-012247 | 541  | 36  | 301 | 611  | 0   |
| CONTIG-012248 | 66   | 854 | 37  | 1872 | 0   |
| CONTIG-012249 | 170  | 11  | 31  | 24   | 0   |
| CONTIG-012250 | 302  | 11  | 19  | 18   | 0   |
| CONTIG-012251 | 122  | 61  | 108 | 71   | 2   |
| CONTIG-012252 | 61   | 18  | 68  | 14   | 0   |
| CONTIG-012253 | 131  | 18  | 33  | 67   | 0   |
| CONTIG-012254 | 201  | 8   | 0   | 68   | 0   |
| CONTIG-012255 | 43   | 19  | 7   | 23   | 0   |
| CONTIG-012256 | 86   | 20  | 174 | 0    | 0   |
| CONTIG-012257 | 382  | 23  | 306 | 150  | 0   |
| CONTIG-012258 | 149  | 8   | 14  | 45   | 0   |
| CONTIG-012259 | 138  | 5   | 12  | 8    | 0   |
| CONTIG-012260 | 164  | 7   | 15  | 35   | 0   |
| CONTIG-012261 | 63   | 28  | 92  | 40   | 0   |
| CONTIG-012262 | 443  | 27  | 281 | 526  | 0   |
| CONTIG-012263 | 48   | 316 | 755 | 321  | 0   |
| CONTIG-012264 | 220  | 6   | 12  | 32   | 0   |
| CONTIG-012265 | 150  | 14  | 158 | 0    | 6   |
| CONTIG-012266 | 429  | 13  | 36  | 72   | 0   |
| CONTIG-012270 | 193  | 65  | 331 | 494  | 4   |
| CONTIG-012271 | 129  | 6   | 32  | 15   | 0   |
| CONTIG-012272 | 390  | 15  | 176 | 147  | 2   |
| CONTIG-012274 | 236  | 13  | 14  | 70   | 4   |
| CONTIG-012275 | 1313 | 26  | 753 | 745  | 19  |
| CONTIG-012280 | 799  | 53  | 280 | 1278 | 66  |
| CONTIG-012281 | 69   | 13  | 34  | 7    | 0   |
| CONTIG-012282 | 745  | 41  | 312 | 636  | 18  |
| CONTIG-012283 | 65   | 17  | 11  | 50   | 0   |
| CONTIG-012284 | 542  | 285 | 810 | 7425 | 525 |
| CONTIG-012287 | 371  | 7   | 10  | 69   | 0   |
| CONTIG-012288 | 260  | 14  | 107 | 159  | 0   |
| CONTIG-012289 | 467  | 20  | 139 | 177  | 0   |
| CONTIG-012290 | 611  | 29  | 254 | 537  | 7   |
| CONTIG-012291 | 65   | 8   | 8   | 16   | 0   |
| CONTIG-012292 | 1107 | 21  | 162 | 1001 | 0   |
| CONTIG-012293 | 470  | 8   | 17  | 148  | 0   |
| CONTIG-012294 | 561  | 34  | 59  | 773  | 8   |

|               |      |     |     |      |     |
|---------------|------|-----|-----|------|-----|
| CONTIG-012295 | 1277 | 17  | 83  | 458  | 42  |
| CONTIG-012300 | 459  | 13  | 92  | 185  | 6   |
| CONTIG-012301 | 666  | 8   | 25  | 155  | 0   |
| CONTIG-012302 | 436  | 20  | 172 | 86   | 19  |
| CONTIG-012303 | 466  | 15  | 51  | 104  | 4   |
| CONTIG-012304 | 149  | 12  | 20  | 82   | 0   |
| CONTIG-012305 | 656  | 14  | 50  | 301  | 0   |
| CONTIG-012306 | 127  | 13  | 95  | 24   | 0   |
| CONTIG-012308 | 71   | 9   | 53  | 2    | 0   |
| CONTIG-012309 | 131  | 11  | 35  | 33   | 0   |
| CONTIG-012310 | 138  | 210 | 430 | 394  | 76  |
| CONTIG-012319 | 693  | 16  | 58  | 530  | 2   |
| CONTIG-012320 | 119  | 25  | 22  | 124  | 0   |
| CONTIG-012321 | 293  | 161 | 142 | 1539 | 239 |
| CONTIG-012322 | 327  | 96  | 171 | 473  | 25  |
| CONTIG-012323 | 430  | 17  | 63  | 283  | 0   |
| CONTIG-012324 | 981  | 42  | 480 | 1299 | 20  |
| CONTIG-012325 | 466  | 9   | 34  | 98   | 2   |
| CONTIG-012326 | 239  | 7   | 10  | 36   | 0   |
| CONTIG-012327 | 134  | 386 | 266 | 808  | 35  |
| CONTIG-012329 | 188  | 5   | 10  | 28   | 0   |
| CONTIG-012330 | 158  | 9   | 27  | 52   | 0   |
| CONTIG-012331 | 62   | 3   | 2   | 5    | 0   |
| CONTIG-012332 | 273  | 10  | 7   | 55   | 2   |
| CONTIG-012333 | 882  | 13  | 114 | 336  | 2   |
| CONTIG-012334 | 261  | 53  | 118 | 513  | 2   |
| CONTIG-012335 | 256  | 7   | 5   | 43   | 0   |
| CONTIG-012336 | 554  | 19  | 69  | 303  | 2   |
| CONTIG-012338 | 1202 | 22  | 85  | 1022 | 2   |
| CONTIG-012339 | 167  | 62  | 131 | 344  | 0   |
| CONTIG-012340 | 192  | 72  | 125 | 287  | 7   |
| CONTIG-012341 | 118  | 6   | 4   | 16   | 0   |
| CONTIG-012342 | 171  | 11  | 72  | 27   | 0   |
| CONTIG-012343 | 468  | 20  | 23  | 400  | 4   |
| CONTIG-012344 | 999  | 47  | 816 | 1181 | 4   |
| CONTIG-012345 | 615  | 31  | 136 | 794  | 0   |
| CONTIG-012346 | 101  | 11  | 13  | 12   | 0   |
| CONTIG-012347 | 228  | 9   | 38  | 28   | 0   |
| CONTIG-012348 | 396  | 22  | 68  | 169  | 5   |
| CONTIG-012349 | 296  | 16  | 126 | 120  | 0   |
| CONTIG-012350 | 285  | 88  | 168 | 953  | 91  |
| CONTIG-012351 | 283  | 12  | 31  | 73   | 0   |
| CONTIG-012352 | 135  | 7   | 27  | 31   | 0   |
| CONTIG-012353 | 606  | 36  | 199 | 598  | 23  |
| CONTIG-012354 | 280  | 134 | 156 | 1394 | 149 |
| CONTIG-012356 | 64   | 450 | 166 | 437  | 0   |
| CONTIG-012357 | 430  | 9   | 47  | 95   | 2   |

|               |      |     |     |      |    |
|---------------|------|-----|-----|------|----|
| CONTIG-012358 | 173  | 5   | 3   | 8    | 0  |
| CONTIG-012359 | 323  | 20  | 17  | 169  | 17 |
| CONTIG-012361 | 458  | 112 | 47  | 88   | 0  |
| CONTIG-012362 | 103  | 18  | 156 | 6    | 0  |
| CONTIG-012371 | 136  | 11  | 6   | 69   | 0  |
| CONTIG-012374 | 486  | 11  | 28  | 177  | 0  |
| CONTIG-012375 | 105  | 6   | 22  | 9    | 0  |
| CONTIG-012376 | 704  | 14  | 180 | 384  | 2  |
| CONTIG-012377 | 128  | 3   | 2   | 0    | 0  |
| CONTIG-012378 | 64   | 11  | 36  | 9    | 0  |
| CONTIG-012380 | 394  | 23  | 51  | 382  | 9  |
| CONTIG-012381 | 382  | 19  | 7   | 2    | 0  |
| CONTIG-012383 | 82   | 432 | 486 | 1256 | 57 |
| CONTIG-012384 | 542  | 32  | 400 | 462  | 2  |
| CONTIG-012385 | 819  | 17  | 59  | 589  | 2  |
| CONTIG-012390 | 112  | 3   | 3   | 2    | 0  |
| CONTIG-012391 | 144  | 10  | 11  | 51   | 0  |
| CONTIG-012392 | 373  | 28  | 106 | 276  | 9  |
| CONTIG-012393 | 355  | 19  | 503 | 19   | 0  |
| CONTIG-012396 | 59   | 18  | 75  | 0    | 0  |
| CONTIG-012397 | 307  | 22  | 327 | 214  | 0  |
| CONTIG-012401 | 444  | 34  | 163 | 765  | 0  |
| CONTIG-012402 | 383  | 34  | 42  | 372  | 25 |
| CONTIG-012403 | 106  | 4   | 4   | 8    | 0  |
| CONTIG-012404 | 203  | 11  | 36  | 99   | 0  |
| CONTIG-012405 | 295  | 12  | 135 | 47   | 0  |
| CONTIG-012406 | 80   | 296 | 222 | 327  | 67 |
| CONTIG-012407 | 125  | 13  | 3   | 49   | 0  |
| CONTIG-012409 | 155  | 14  | 22  | 49   | 2  |
| CONTIG-012410 | 71   | 426 | 124 | 562  | 3  |
| CONTIG-012411 | 1006 | 120 | 131 | 7712 | 2  |
| CONTIG-012412 | 853  | 23  | 110 | 1134 | 0  |
| CONTIG-012413 | 188  | 22  | 25  | 125  | 4  |
| CONTIG-012414 | 86   | 7   | 17  | 16   | 0  |
| CONTIG-012415 | 399  | 23  | 541 | 42   | 2  |
| CONTIG-012416 | 116  | 77  | 13  | 203  | 17 |
| CONTIG-012417 | 218  | 12  | 54  | 63   | 0  |
| CONTIG-012420 | 299  | 133 | 397 | 1372 | 0  |
| CONTIG-012421 | 259  | 13  | 55  | 27   | 0  |
| CONTIG-012422 | 817  | 21  | 161 | 611  | 2  |
| CONTIG-012423 | 947  | 32  | 48  | 1115 | 27 |
| CONTIG-012424 | 48   | 116 | 6   | 301  | 0  |
| CONTIG-012425 | 39   | 445 | 7   | 304  | 0  |
| CONTIG-012426 | 404  | 35  | 116 | 428  | 6  |
| CONTIG-012427 | 741  | 27  | 82  | 580  | 2  |
| CONTIG-012428 | 329  | 22  | 285 | 45   | 0  |
| CONTIG-012429 | 271  | 11  | 22  | 86   | 0  |

|               |      |     |     |      |     |
|---------------|------|-----|-----|------|-----|
| CONTIG-012430 | 149  | 9   | 70  | 19   | 0   |
| CONTIG-012431 | 460  | 10  | 16  | 120  | 0   |
| CONTIG-012435 | 99   | 20  | 26  | 62   | 0   |
| CONTIG-012436 | 252  | 22  | 92  | 201  | 0   |
| CONTIG-012437 | 186  | 7   | 23  | 32   | 0   |
| CONTIG-012438 | 335  | 19  | 27  | 159  | 4   |
| CONTIG-012439 | 209  | 47  | 481 | 221  | 0   |
| CONTIG-012440 | 672  | 18  | 65  | 234  | 2   |
| CONTIG-012441 | 412  | 22  | 121 | 289  | 4   |
| CONTIG-012442 | 118  | 125 | 72  | 625  | 0   |
| CONTIG-012444 | 1193 | 33  | 353 | 835  | 32  |
| CONTIG-012446 | 191  | 170 | 38  | 1590 | 2   |
| CONTIG-012447 | 342  | 11  | 22  | 118  | 2   |
| CONTIG-012449 | 41   | 363 | 135 | 182  | 36  |
| CONTIG-012450 | 84   | 10  | 14  | 5    | 2   |
| CONTIG-012451 | 294  | 30  | 74  | 331  | 10  |
| CONTIG-012452 | 61   | 6   | 3   | 10   | 0   |
| CONTIG-012453 | 97   | 4   | 3   | 12   | 0   |
| CONTIG-012454 | 440  | 48  | 365 | 556  | 6   |
| CONTIG-012455 | 283  | 17  | 96  | 127  | 0   |
| CONTIG-012456 | 399  | 9   | 29  | 133  | 0   |
| CONTIG-012457 | 497  | 22  | 90  | 284  | 12  |
| CONTIG-012458 | 194  | 16  | 68  | 54   | 2   |
| CONTIG-012459 | 284  | 21  | 84  | 195  | 0   |
| CONTIG-012460 | 786  | 38  | 263 | 1083 | 2   |
| CONTIG-012461 | 120  | 13  | 61  | 32   | 0   |
| CONTIG-012462 | 321  | 8   | 62  | 40   | 0   |
| CONTIG-012464 | 164  | 6   | 2   | 27   | 2   |
| CONTIG-012465 | 72   | 7   | 35  | 0    | 2   |
| CONTIG-012466 | 303  | 25  | 207 | 196  | 0   |
| CONTIG-012467 | 260  | 40  | 2   | 0    | 0   |
| CONTIG-012468 | 104  | 7   | 44  | 13   | 0   |
| CONTIG-012469 | 464  | 11  | 26  | 159  | 0   |
| CONTIG-012471 | 44   | 739 | 203 | 555  | 36  |
| CONTIG-012472 | 359  | 11  | 23  | 108  | 0   |
| CONTIG-012473 | 796  | 20  | 65  | 463  | 11  |
| CONTIG-012474 | 59   | 3   | 3   | 0    | 0   |
| CONTIG-012475 | 102  | 25  | 92  | 20   | 0   |
| CONTIG-012476 | 120  | 7   | 7   | 24   | 0   |
| CONTIG-012477 | 307  | 8   | 2   | 75   | 0   |
| CONTIG-012478 | 196  | 36  | 58  | 172  | 7   |
| CONTIG-012479 | 211  | 12  | 70  | 79   | 0   |
| CONTIG-012488 | 634  | 158 | 373 | 2366 | 437 |
| CONTIG-012489 | 700  | 53  | 390 | 824  | 25  |
| CONTIG-012490 | 339  | 58  | 193 | 249  | 13  |
| CONTIG-012491 | 524  | 10  | 43  | 133  | 2   |
| CONTIG-012492 | 81   | 351 | 75  | 1030 | 109 |

|               |      |     |     |      |     |
|---------------|------|-----|-----|------|-----|
| CONTIG-012493 | 310  | 11  | 18  | 86   | 2   |
| CONTIG-012494 | 75   | 700 | 204 | 1973 | 25  |
| CONTIG-012495 | 1186 | 18  | 116 | 560  | 4   |
| CONTIG-012496 | 538  | 28  | 103 | 383  | 0   |
| CONTIG-012497 | 61   | 10  | 41  | 0    | 0   |
| CONTIG-012498 | 121  | 8   | 2   | 30   | 0   |
| CONTIG-012499 | 453  | 20  | 40  | 279  | 2   |
| CONTIG-012500 | 675  | 20  | 353 | 457  | 0   |
| CONTIG-012501 | 93   | 834 | 237 | 1115 | 312 |
| CONTIG-012502 | 358  | 25  | 107 | 211  | 0   |
| CONTIG-012503 | 139  | 6   | 2   | 17   | 0   |
| CONTIG-012505 | 602  | 27  | 164 | 601  | 7   |
| CONTIG-012506 | 290  | 16  | 76  | 194  | 0   |
| CONTIG-012507 | 202  | 14  | 43  | 40   | 0   |
| CONTIG-012508 | 291  | 57  | 307 | 630  | 2   |
| CONTIG-012509 | 312  | 32  | 14  | 263  | 4   |
| CONTIG-012510 | 293  | 23  | 111 | 159  | 2   |
| CONTIG-012511 | 375  | 49  | 284 | 623  | 13  |
| CONTIG-012513 | 240  | 9   | 15  | 44   | 0   |
| CONTIG-012514 | 1298 | 27  | 109 | 852  | 20  |
| CONTIG-012515 | 145  | 4   | 4   | 15   | 0   |
| CONTIG-012516 | 79   | 13  | 48  | 27   | 0   |
| CONTIG-012517 | 467  | 16  | 62  | 224  | 0   |
| CONTIG-012518 | 815  | 29  | 212 | 379  | 12  |
| CONTIG-012519 | 461  | 13  | 50  | 88   | 2   |
| CONTIG-012520 | 748  | 19  | 314 | 394  | 2   |
| CONTIG-012521 | 450  | 23  | 138 | 242  | 14  |
| CONTIG-012524 | 152  | 7   | 16  | 33   | 0   |
| CONTIG-012527 | 107  | 6   | 28  | 0    | 0   |
| CONTIG-012528 | 82   | 17  | 60  | 7    | 0   |
| CONTIG-012529 | 363  | 15  | 169 | 168  | 0   |
| CONTIG-012530 | 952  | 30  | 29  | 1485 | 0   |
| CONTIG-012531 | 476  | 21  | 73  | 186  | 0   |
| CONTIG-012532 | 663  | 43  | 333 | 1037 | 6   |
| CONTIG-012533 | 84   | 13  | 62  | 15   | 0   |
| CONTIG-012534 | 640  | 24  | 136 | 343  | 28  |
| CONTIG-012535 | 219  | 16  | 20  | 132  | 4   |
| CONTIG-012536 | 391  | 51  | 101 | 605  | 0   |
| CONTIG-012537 | 1109 | 30  | 145 | 1946 | 0   |
| CONTIG-012538 | 46   | 634 | 321 | 570  | 56  |
| CONTIG-012539 | 75   | 63  | 40  | 52   | 77  |
| CONTIG-012541 | 70   | 8   | 8   | 9    | 0   |
| CONTIG-012542 | 518  | 23  | 118 | 316  | 0   |
| CONTIG-012544 | 74   | 19  | 62  | 11   | 0   |
| CONTIG-012549 | 823  | 23  | 325 | 621  | 4   |
| CONTIG-012551 | 110  | 103 | 703 | 190  | 0   |
| CONTIG-012552 | 891  | 44  | 365 | 1944 | 2   |

|               |      |      |     |      |     |
|---------------|------|------|-----|------|-----|
| CONTIG-012553 | 73   | 6    | 2   | 15   | 0   |
| CONTIG-012554 | 206  | 29   | 194 | 177  | 2   |
| CONTIG-012555 | 45   | 1097 | 203 | 319  | 185 |
| CONTIG-012556 | 261  | 16   | 27  | 118  | 0   |
| CONTIG-012565 | 103  | 7    | 11  | 7    | 0   |
| CONTIG-012567 | 229  | 16   | 27  | 74   | 2   |
| CONTIG-012568 | 152  | 8    | 9   | 4    | 0   |
| CONTIG-012569 | 101  | 44   | 21  | 202  | 0   |
| CONTIG-012570 | 383  | 14   | 9   | 0    | 48  |
| CONTIG-012571 | 343  | 50   | 23  | 621  | 42  |
| CONTIG-012572 | 324  | 46   | 15  | 504  | 0   |
| CONTIG-012573 | 280  | 15   | 8   | 220  | 0   |
| CONTIG-012574 | 342  | 20   | 59  | 136  | 8   |
| CONTIG-012575 | 394  | 10   | 40  | 158  | 0   |
| CONTIG-012576 | 319  | 7    | 11  | 98   | 0   |
| CONTIG-012577 | 461  | 28   | 19  | 31   | 0   |
| CONTIG-012578 | 1004 | 38   | 68  | 958  | 53  |
| CONTIG-012579 | 299  | 20   | 55  | 182  | 4   |
| CONTIG-012580 | 497  | 12   | 62  | 201  | 0   |
| CONTIG-012581 | 106  | 8    | 14  | 7    | 0   |
| CONTIG-012582 | 291  | 90   | 469 | 735  | 12  |
| CONTIG-012583 | 65   | 47   | 27  | 156  | 0   |
| CONTIG-012584 | 76   | 14   | 17  | 30   | 2   |
| CONTIG-012586 | 792  | 17   | 186 | 380  | 0   |
| CONTIG-012587 | 803  | 18   | 174 | 252  | 10  |
| CONTIG-012588 | 163  | 17   | 9   | 97   | 0   |
| CONTIG-012589 | 69   | 9    | 2   | 27   | 0   |
| CONTIG-012590 | 133  | 8    | 0   | 27   | 0   |
| CONTIG-012591 | 301  | 33   | 119 | 391  | 0   |
| CONTIG-012592 | 1025 | 15   | 117 | 325  | 6   |
| CONTIG-012593 | 114  | 10   | 15  | 26   | 2   |
| CONTIG-012594 | 715  | 20   | 57  | 321  | 5   |
| CONTIG-012595 | 122  | 13   | 38  | 26   | 0   |
| CONTIG-012596 | 106  | 17   | 134 | 3    | 0   |
| CONTIG-012611 | 382  | 20   | 8   | 23   | 0   |
| CONTIG-012612 | 72   | 5    | 9   | 14   | 0   |
| CONTIG-012613 | 221  | 7    | 13  | 43   | 0   |
| CONTIG-012615 | 540  | 18   | 53  | 108  | 11  |
| CONTIG-012616 | 964  | 26   | 170 | 864  | 18  |
| CONTIG-012617 | 69   | 10   | 8   | 27   | 0   |
| CONTIG-012618 | 379  | 20   | 235 | 216  | 0   |
| CONTIG-012619 | 1221 | 29   | 207 | 1007 | 12  |
| CONTIG-012620 | 357  | 13   | 118 | 137  | 0   |
| CONTIG-012621 | 199  | 22   | 28  | 177  | 0   |
| CONTIG-012622 | 488  | 37   | 231 | 530  | 9   |
| CONTIG-012624 | 273  | 7    | 11  | 22   | 0   |
| CONTIG-012625 | 345  | 13   | 11  | 117  | 6   |

|               |      |     |     |      |     |
|---------------|------|-----|-----|------|-----|
| CONTIG-012626 | 70   | 5   | 4   | 4    | 0   |
| CONTIG-012627 | 204  | 47  | 239 | 304  | 0   |
| CONTIG-012628 | 638  | 31  | 152 | 1063 | 0   |
| CONTIG-012629 | 180  | 13  | 6   | 100  | 0   |
| CONTIG-012630 | 171  | 163 | 558 | 1320 | 0   |
| CONTIG-012631 | 80   | 16  | 8   | 42   | 6   |
| CONTIG-012636 | 757  | 19  | 126 | 751  | 0   |
| CONTIG-012637 | 104  | 15  | 10  | 12   | 3   |
| CONTIG-012638 | 222  | 5   | 18  | 22   | 0   |
| CONTIG-012639 | 81   | 6   | 6   | 21   | 0   |
| CONTIG-012640 | 361  | 30  | 43  | 221  | 5   |
| CONTIG-012641 | 45   | 26  | 9   | 28   | 0   |
| CONTIG-012642 | 110  | 6   | 7   | 25   | 0   |
| CONTIG-012643 | 119  | 5   | 0   | 8    | 0   |
| CONTIG-012644 | 306  | 21  | 44  | 286  | 0   |
| CONTIG-012645 | 161  | 6   | 18  | 28   | 0   |
| CONTIG-012646 | 767  | 30  | 256 | 1196 | 0   |
| CONTIG-012647 | 363  | 53  | 291 | 855  | 6   |
| CONTIG-012648 | 137  | 70  | 96  | 518  | 4   |
| CONTIG-012649 | 399  | 23  | 69  | 261  | 0   |
| CONTIG-012650 | 236  | 8   | 14  | 40   | 0   |
| CONTIG-012651 | 220  | 11  | 51  | 15   | 0   |
| CONTIG-012652 | 352  | 54  | 100 | 809  | 23  |
| CONTIG-012653 | 159  | 24  | 18  | 94   | 0   |
| CONTIG-012654 | 189  | 15  | 167 | 48   | 0   |
| CONTIG-012655 | 88   | 7   | 9   | 12   | 0   |
| CONTIG-012656 | 484  | 39  | 467 | 363  | 6   |
| CONTIG-012657 | 152  | 69  | 118 | 82   | 4   |
| CONTIG-012658 | 79   | 4   | 2   | 4    | 0   |
| CONTIG-012659 | 1879 | 66  | 648 | 1523 | 601 |
| CONTIG-012660 | 77   | 5   | 9   | 2    | 0   |
| CONTIG-012662 | 84   | 8   | 9   | 0    | 0   |
| CONTIG-012663 | 993  | 75  | 324 | 3910 | 7   |
| CONTIG-012664 | 412  | 23  | 117 | 316  | 4   |
| CONTIG-012665 | 126  | 6   | 12  | 19   | 0   |
| CONTIG-012666 | 111  | 85  | 192 | 302  | 0   |
| CONTIG-012667 | 178  | 4   | 2   | 18   | 0   |
| CONTIG-012669 | 38   | 581 | 367 | 207  | 2   |
| CONTIG-012678 | 156  | 3   | 0   | 19   | 0   |
| CONTIG-012679 | 594  | 50  | 583 | 676  | 25  |
| CONTIG-012680 | 433  | 19  | 104 | 50   | 0   |
| CONTIG-012681 | 569  | 22  | 52  | 716  | 0   |
| CONTIG-012688 | 113  | 14  | 19  | 45   | 0   |
| CONTIG-012689 | 185  | 5   | 9   | 11   | 0   |
| CONTIG-012690 | 406  | 33  | 225 | 396  | 3   |
| CONTIG-012691 | 314  | 7   | 0   | 76   | 0   |
| CONTIG-012692 | 283  | 11  | 35  | 125  | 0   |



|               |      |     |     |      |      |
|---------------|------|-----|-----|------|------|
| CONTIG-012694 | 343  | 45  | 215 | 688  | 0    |
| CONTIG-012695 | 62   | 7   | 0   | 15   | 0    |
| CONTIG-012696 | 967  | 22  | 213 | 760  | 6    |
| CONTIG-012697 | 647  | 29  | 93  | 760  | 6    |
| CONTIG-012698 | 113  | 17  | 16  | 33   | 0    |
| CONTIG-012699 | 68   | 4   | 0   | 16   | 0    |
| CONTIG-012700 | 57   | 92  | 7   | 168  | 2    |
| CONTIG-012702 | 947  | 26  | 333 | 963  | 0    |
| CONTIG-012703 | 104  | 9   | 2   | 25   | 0    |
| CONTIG-012704 | 261  | 21  | 85  | 86   | 2    |
| CONTIG-012705 | 572  | 57  | 147 | 1367 | 2    |
| CONTIG-012706 | 357  | 12  | 47  | 119  | 0    |
| CONTIG-012707 | 149  | 35  | 108 | 127  | 0    |
| CONTIG-012708 | 1098 | 23  | 271 | 815  | 8    |
| CONTIG-012709 | 1310 | 33  | 55  | 939  | 65   |
| CONTIG-012710 | 605  | 15  | 357 | 309  | 0    |
| CONTIG-012712 | 411  | 11  | 20  | 199  | 0    |
| CONTIG-012713 | 325  | 42  | 169 | 324  | 6    |
| CONTIG-012714 | 150  | 27  | 28  | 225  | 0    |
| CONTIG-012715 | 380  | 101 | 393 | 889  | 52   |
| CONTIG-012716 | 464  | 25  | 303 | 250  | 0    |
| CONTIG-012717 | 442  | 75  | 52  | 1702 | 9    |
| CONTIG-012718 | 785  | 21  | 44  | 619  | 7    |
| CONTIG-012719 | 339  | 14  | 123 | 123  | 0    |
| CONTIG-012725 | 76   | 17  | 16  | 12   | 0    |
| CONTIG-012726 | 822  | 36  | 158 | 1284 | 0    |
| CONTIG-012727 | 300  | 12  | 165 | 61   | 2    |
| CONTIG-012728 | 709  | 16  | 75  | 375  | 0    |
| CONTIG-012729 | 60   | 4   | 3   | 3    | 0    |
| CONTIG-012730 | 513  | 8   | 42  | 91   | 0    |
| CONTIG-012731 | 189  | 20  | 63  | 167  | 0    |
| CONTIG-012733 | 73   | 3   | 5   | 4    | 0    |
| CONTIG-012734 | 90   | 8   | 9   | 21   | 0    |
| CONTIG-012735 | 1374 | 17  | 164 | 569  | 0    |
| CONTIG-012736 | 267  | 8   | 24  | 45   | 0    |
| CONTIG-012744 | 562  | 21  | 79  | 234  | 8    |
| CONTIG-012745 | 663  | 27  | 308 | 463  | 4    |
| CONTIG-012746 | 153  | 6   | 11  | 8    | 0    |
| CONTIG-012747 | 88   | 181 | 332 | 569  | 2    |
| CONTIG-012748 | 1201 | 27  | 357 | 1107 | 4    |
| CONTIG-012750 | 60   | 3   | 3   | 3    | 0    |
| CONTIG-012751 | 69   | 30  | 121 | 2    | 0    |
| CONTIG-012752 | 356  | 18  | 55  | 241  | 0    |
| CONTIG-012753 | 357  | 15  | 6   | 256  | 0    |
| CONTIG-012759 | 2318 | 76  | 259 | 3515 | 1024 |
| CONTIG-012760 | 241  | 73  | 320 | 189  | 58   |
| CONTIG-012761 | 365  | 61  | 72  | 369  | 2    |

|               |      |     |      |      |     |
|---------------|------|-----|------|------|-----|
| CONTIG-012766 | 202  | 11  | 49   | 57   | 0   |
| CONTIG-012767 | 373  | 15  | 221  | 116  | 0   |
| CONTIG-012768 | 199  | 37  | 302  | 220  | 0   |
| CONTIG-012769 | 69   | 8   | 35   | 0    | 0   |
| CONTIG-012770 | 79   | 61  | 93   | 75   | 0   |
| CONTIG-012771 | 61   | 11  | 57   | 0    | 0   |
| CONTIG-012772 | 888  | 19  | 237  | 824  | 0   |
| CONTIG-012773 | 896  | 18  | 123  | 479  | 10  |
| CONTIG-012778 | 114  | 9   | 16   | 37   | 0   |
| CONTIG-012779 | 287  | 12  | 30   | 87   | 0   |
| CONTIG-012780 | 96   | 11  | 17   | 5    | 0   |
| CONTIG-012782 | 676  | 34  | 29   | 287  | 120 |
| CONTIG-012783 | 144  | 10  | 19   | 16   | 0   |
| CONTIG-012784 | 242  | 15  | 102  | 74   | 4   |
| CONTIG-012785 | 528  | 6   | 9    | 115  | 0   |
| CONTIG-012786 | 281  | 91  | 18   | 9    | 0   |
| CONTIG-012787 | 927  | 85  | 249  | 33   | 0   |
| CONTIG-012788 | 147  | 379 | 64   | 2865 | 5   |
| CONTIG-012789 | 394  | 9   | 5    | 98   | 0   |
| CONTIG-012790 | 221  | 8   | 4    | 45   | 2   |
| CONTIG-012791 | 86   | 586 | 377  | 1547 | 155 |
| CONTIG-012793 | 41   | 708 | 299  | 556  | 34  |
| CONTIG-012794 | 107  | 9   | 12   | 33   | 0   |
| CONTIG-012795 | 465  | 9   | 27   | 121  | 2   |
| CONTIG-012796 | 262  | 19  | 17   | 180  | 2   |
| CONTIG-012797 | 234  | 28  | 162  | 20   | 0   |
| CONTIG-012798 | 90   | 6   | 2    | 17   | 0   |
| CONTIG-012799 | 170  | 186 | 1425 | 161  | 0   |
| CONTIG-012802 | 84   | 7   | 0    | 12   | 0   |
| CONTIG-012803 | 90   | 8   | 8    | 27   | 0   |
| CONTIG-012804 | 217  | 50  | 151  | 298  | 12  |
| CONTIG-012805 | 147  | 10  | 0    | 60   | 0   |
| CONTIG-012806 | 253  | 9   | 25   | 43   | 2   |
| CONTIG-012807 | 435  | 15  | 65   | 222  | 4   |
| CONTIG-012808 | 1173 | 34  | 87   | 1829 | 0   |
| CONTIG-012809 | 58   | 5   | 3    | 3    | 0   |
| CONTIG-012810 | 500  | 13  | 77   | 183  | 0   |
| CONTIG-012811 | 714  | 46  | 499  | 1144 | 6   |
| CONTIG-012812 | 91   | 53  | 43   | 241  | 0   |
| CONTIG-012813 | 1079 | 10  | 23   | 343  | 6   |
| CONTIG-012814 | 264  | 24  | 217  | 151  | 0   |
| CONTIG-012815 | 219  | 32  | 89   | 173  | 0   |
| CONTIG-012816 | 552  | 12  | 19   | 206  | 4   |
| CONTIG-012817 | 1101 | 27  | 155  | 1240 | 5   |
| CONTIG-012818 | 664  | 20  | 83   | 405  | 0   |
| CONTIG-012819 | 635  | 32  | 198  | 290  | 23  |
| CONTIG-012820 | 1079 | 26  | 423  | 959  | 54  |

|               |      |     |     |      |     |
|---------------|------|-----|-----|------|-----|
| CONTIG-012821 | 113  | 6   | 3   | 28   | 0   |
| CONTIG-012822 | 110  | 16  | 0   | 59   | 0   |
| CONTIG-012824 | 168  | 77  | 87  | 721  | 0   |
| CONTIG-012825 | 156  | 10  | 18  | 18   | 0   |
| CONTIG-012826 | 317  | 9   | 18  | 60   | 0   |
| CONTIG-012827 | 103  | 7   | 9   | 21   | 0   |
| CONTIG-012828 | 173  | 458 | 397 | 3419 | 26  |
| CONTIG-012829 | 192  | 9   | 21  | 8    | 0   |
| CONTIG-012831 | 209  | 11  | 24  | 70   | 2   |
| CONTIG-012832 | 374  | 10  | 19  | 75   | 7   |
| CONTIG-012833 | 110  | 9   | 2   | 36   | 0   |
| CONTIG-012834 | 161  | 11  | 27  | 31   | 3   |
| CONTIG-012835 | 782  | 17  | 131 | 405  | 0   |
| CONTIG-012836 | 74   | 18  | 33  | 19   | 0   |
| CONTIG-012837 | 68   | 129 | 350 | 85   | 4   |
| CONTIG-012838 | 61   | 13  | 15  | 0    | 0   |
| CONTIG-012840 | 323  | 13  | 40  | 122  | 2   |
| CONTIG-012841 | 150  | 26  | 97  | 130  | 0   |
| CONTIG-012842 | 431  | 14  | 16  | 25   | 0   |
| CONTIG-012843 | 79   | 13  | 33  | 0    | 0   |
| CONTIG-012844 | 87   | 5   | 0   | 4    | 0   |
| CONTIG-012846 | 163  | 97  | 71  | 405  | 27  |
| CONTIG-012847 | 1502 | 16  | 82  | 1241 | 0   |
| CONTIG-012848 | 613  | 19  | 216 | 435  | 0   |
| CONTIG-012849 | 104  | 3   | 3   | 8    | 0   |
| CONTIG-012850 | 412  | 13  | 27  | 145  | 2   |
| CONTIG-012851 | 470  | 14  | 146 | 202  | 0   |
| CONTIG-012853 | 159  | 8   | 16  | 32   | 0   |
| CONTIG-012854 | 739  | 14  | 101 | 273  | 0   |
| CONTIG-012855 | 775  | 46  | 301 | 1119 | 13  |
| CONTIG-012856 | 158  | 9   | 0   | 55   | 0   |
| CONTIG-012857 | 124  | 536 | 573 | 2039 | 141 |
| CONTIG-012858 | 84   | 8   | 26  | 10   | 0   |
| CONTIG-012859 | 91   | 26  | 107 | 29   | 0   |
| CONTIG-012864 | 41   | 331 | 22  | 156  | 0   |
| CONTIG-012866 | 113  | 5   | 18  | 13   | 0   |
| CONTIG-012867 | 265  | 22  | 79  | 219  | 0   |
| CONTIG-012868 | 129  | 17  | 69  | 8    | 2   |
| CONTIG-012869 | 65   | 11  | 10  | 9    | 0   |
| CONTIG-012870 | 344  | 24  | 2   | 0    | 23  |
| CONTIG-012871 | 236  | 35  | 59  | 408  | 0   |
| CONTIG-012872 | 100  | 547 | 413 | 968  | 112 |
| CONTIG-012874 | 81   | 115 | 216 | 250  | 6   |
| CONTIG-012876 | 204  | 59  | 38  | 512  | 5   |
| CONTIG-012877 | 403  | 25  | 243 | 269  | 0   |
| CONTIG-012878 | 107  | 12  | 11  | 37   | 0   |
| CONTIG-012879 | 165  | 18  | 24  | 102  | 2   |

|               |      |     |     |      |    |
|---------------|------|-----|-----|------|----|
| CONTIG-012880 | 386  | 19  | 101 | 159  | 0  |
| CONTIG-012881 | 325  | 15  | 25  | 124  | 0  |
| CONTIG-012882 | 180  | 6   | 9   | 40   | 0  |
| CONTIG-012883 | 322  | 35  | 300 | 174  | 11 |
| CONTIG-012884 | 182  | 6   | 0   | 30   | 0  |
| CONTIG-012885 | 266  | 19  | 112 | 17   | 48 |
| CONTIG-012888 | 156  | 87  | 332 | 502  | 0  |
| CONTIG-012889 | 381  | 19  | 196 | 197  | 0  |
| CONTIG-012891 | 55   | 884 | 506 | 367  | 62 |
| CONTIG-012892 | 675  | 13  | 122 | 322  | 0  |
| CONTIG-012893 | 571  | 14  | 209 | 256  | 2  |
| CONTIG-012895 | 247  | 6   | 2   | 23   | 0  |
| CONTIG-012896 | 81   | 9   | 54  | 0    | 0  |
| CONTIG-012897 | 75   | 9   | 16  | 0    | 0  |
| CONTIG-012898 | 870  | 27  | 131 | 1052 | 0  |
| CONTIG-012899 | 103  | 52  | 258 | 29   | 0  |
| CONTIG-012900 | 255  | 9   | 27  | 26   | 2  |
| CONTIG-012901 | 560  | 35  | 256 | 545  | 8  |
| CONTIG-012903 | 120  | 11  | 8   | 61   | 0  |
| CONTIG-012904 | 496  | 21  | 151 | 344  | 0  |
| CONTIG-012905 | 165  | 19  | 84  | 97   | 0  |
| CONTIG-012906 | 323  | 4   | 7   | 25   | 0  |
| CONTIG-012907 | 787  | 10  | 59  | 395  | 0  |
| CONTIG-012908 | 102  | 7   | 19  | 3    | 0  |
| CONTIG-012909 | 785  | 33  | 158 | 90   | 2  |
| CONTIG-012910 | 262  | 7   | 23  | 48   | 0  |
| CONTIG-012911 | 238  | 6   | 6   | 36   | 0  |
| CONTIG-012912 | 163  | 6   | 16  | 25   | 0  |
| CONTIG-012913 | 226  | 14  | 10  | 90   | 0  |
| CONTIG-012914 | 204  | 4   | 7   | 21   | 0  |
| CONTIG-012917 | 525  | 44  | 182 | 1138 | 2  |
| CONTIG-012918 | 91   | 6   | 4   | 10   | 0  |
| CONTIG-012919 | 548  | 23  | 145 | 206  | 0  |
| CONTIG-012920 | 286  | 13  | 58  | 99   | 5  |
| CONTIG-012921 | 109  | 10  | 23  | 37   | 0  |
| CONTIG-012922 | 346  | 11  | 13  | 52   | 6  |
| CONTIG-012923 | 583  | 17  | 49  | 492  | 0  |
| CONTIG-012924 | 119  | 7   | 30  | 13   | 0  |
| CONTIG-012925 | 55   | 608 | 111 | 1780 | 3  |
| CONTIG-012926 | 261  | 9   | 31  | 64   | 0  |
| CONTIG-012927 | 71   | 9   | 6   | 21   | 0  |
| CONTIG-012928 | 172  | 13  | 122 | 32   | 0  |
| CONTIG-012929 | 346  | 42  | 252 | 326  | 12 |
| CONTIG-012930 | 88   | 7   | 13  | 18   | 0  |
| CONTIG-012931 | 88   | 17  | 23  | 57   | 0  |
| CONTIG-012932 | 499  | 63  | 104 | 1181 | 12 |
| CONTIG-012933 | 1721 | 56  | 356 | 4769 | 4  |

|               |      |     |     |      |     |
|---------------|------|-----|-----|------|-----|
| CONTIG-012934 | 1203 | 22  | 88  | 566  | 16  |
| CONTIG-012935 | 520  | 33  | 166 | 621  | 6   |
| CONTIG-012936 | 89   | 4   | 0   | 6    | 0   |
| CONTIG-012937 | 100  | 6   | 13  | 4    | 0   |
| CONTIG-012938 | 282  | 447 | 780 | 2936 | 486 |
| CONTIG-012939 | 549  | 16  | 83  | 356  | 0   |
| CONTIG-012940 | 428  | 203 | 337 | 4994 | 0   |
| CONTIG-012941 | 360  | 277 | 573 | 3467 | 313 |
| CONTIG-012942 | 255  | 13  | 34  | 37   | 0   |
| CONTIG-012943 | 535  | 71  | 219 | 943  | 19  |
| CONTIG-012944 | 714  | 37  | 59  | 776  | 13  |
| CONTIG-012945 | 101  | 4   | 5   | 5    | 0   |
| CONTIG-012946 | 339  | 16  | 11  | 189  | 0   |
| CONTIG-012947 | 315  | 71  | 705 | 519  | 15  |
| CONTIG-012948 | 475  | 8   | 33  | 101  | 2   |
| CONTIG-012949 | 1379 | 36  | 593 | 1822 | 25  |
| CONTIG-012950 | 109  | 3   | 2   | 9    | 0   |
| CONTIG-012953 | 90   | 3   | 3   | 2    | 0   |
| CONTIG-012954 | 404  | 33  | 257 | 350  | 6   |
| CONTIG-012955 | 868  | 44  | 440 | 1332 | 6   |
| CONTIG-012956 | 116  | 9   | 16  | 40   | 0   |
| CONTIG-012957 | 243  | 8   | 18  | 18   | 6   |
| CONTIG-012959 | 482  | 19  | 31  | 161  | 0   |
| CONTIG-012960 | 50   | 595 | 189 | 814  | 91  |
| CONTIG-012968 | 136  | 25  | 0   | 61   | 0   |
| CONTIG-012969 | 75   | 6   | 4   | 22   | 0   |
| CONTIG-012970 | 333  | 76  | 427 | 367  | 22  |
| CONTIG-012971 | 384  | 9   | 34  | 103  | 0   |
| CONTIG-012972 | 364  | 11  | 85  | 82   | 0   |
| CONTIG-012973 | 326  | 9   | 21  | 28   | 2   |
| CONTIG-012974 | 173  | 13  | 12  | 32   | 0   |
| CONTIG-012975 | 82   | 3   | 4   | 8    | 0   |
| CONTIG-012976 | 555  | 17  | 48  | 226  | 0   |
| CONTIG-012977 | 1322 | 27  | 557 | 575  | 50  |
| CONTIG-012978 | 1401 | 23  | 210 | 1127 | 9   |
| CONTIG-012979 | 140  | 62  | 111 | 235  | 11  |
| CONTIG-012980 | 70   | 434 | 128 | 984  | 62  |
| CONTIG-012981 | 121  | 407 | 303 | 1338 | 75  |
| CONTIG-012982 | 583  | 19  | 78  | 484  | 0   |
| CONTIG-012983 | 177  | 105 | 85  | 1021 | 0   |
| CONTIG-012984 | 148  | 5   | 8   | 18   | 0   |
| CONTIG-012985 | 115  | 12  | 8   | 52   | 0   |
| CONTIG-012986 | 199  | 39  | 161 | 129  | 0   |
| CONTIG-012987 | 194  | 27  | 15  | 161  | 0   |
| CONTIG-012988 | 295  | 42  | 106 | 620  | 0   |
| CONTIG-012989 | 147  | 16  | 10  | 62   | 0   |
| CONTIG-012990 | 122  | 53  | 29  | 298  | 0   |

|               |      |     |     |      |     |
|---------------|------|-----|-----|------|-----|
| CONTIG-012991 | 376  | 11  | 38  | 68   | 2   |
| CONTIG-012992 | 303  | 16  | 61  | 151  | 0   |
| CONTIG-012993 | 366  | 13  | 98  | 74   | 2   |
| CONTIG-012994 | 283  | 11  | 21  | 110  | 0   |
| CONTIG-012995 | 107  | 40  | 23  | 76   | 0   |
| CONTIG-012996 | 996  | 116 | 533 | 4097 | 633 |
| CONTIG-012997 | 83   | 4   | 6   | 6    | 0   |
| CONTIG-012998 | 364  | 8   | 5   | 63   | 0   |
| CONTIG-012999 | 1284 | 17  | 152 | 650  | 4   |
| CONTIG-013000 | 194  | 9   | 10  | 42   | 0   |
| CONTIG-013001 | 643  | 17  | 36  | 515  | 0   |
| CONTIG-013002 | 109  | 10  | 4   | 54   | 0   |
| CONTIG-013003 | 66   | 23  | 51  | 15   | 0   |
| CONTIG-013004 | 91   | 6   | 4   | 4    | 0   |
| CONTIG-013005 | 104  | 6   | 4   | 13   | 2   |
| CONTIG-013006 | 221  | 12  | 5   | 73   | 0   |
| CONTIG-013007 | 170  | 50  | 32  | 530  | 0   |
| CONTIG-013008 | 193  | 54  | 405 | 172  | 0   |
| CONTIG-013009 | 391  | 20  | 36  | 246  | 0   |
| CONTIG-013010 | 144  | 7   | 8   | 21   | 0   |
| CONTIG-013011 | 238  | 22  | 25  | 243  | 0   |
| CONTIG-013012 | 421  | 22  | 156 | 295  | 2   |
| CONTIG-013013 | 1006 | 43  | 78  | 986  | 7   |
| CONTIG-013014 | 495  | 18  | 37  | 423  | 0   |
| CONTIG-013015 | 79   | 7   | 5   | 22   | 0   |
| CONTIG-013017 | 177  | 8   | 5   | 55   | 0   |
| CONTIG-013018 | 47   | 719 | 139 | 1144 | 91  |
| CONTIG-013019 | 522  | 146 | 63  | 3993 | 2   |
| CONTIG-013020 | 595  | 30  | 185 | 673  | 0   |
| CONTIG-013021 | 257  | 6   | 17  | 31   | 2   |
| CONTIG-013022 | 217  | 7   | 20  | 32   | 0   |
| CONTIG-013023 | 115  | 10  | 25  | 34   | 0   |
| CONTIG-013024 | 619  | 23  | 59  | 777  | 0   |
| CONTIG-013025 | 237  | 12  | 7   | 110  | 2   |
| CONTIG-013026 | 278  | 10  | 56  | 66   | 0   |
| CONTIG-013027 | 435  | 21  | 174 | 95   | 2   |
| CONTIG-013028 | 546  | 21  | 169 | 400  | 2   |
| CONTIG-013029 | 61   | 3   | 2   | 0    | 0   |
| CONTIG-013030 | 284  | 21  | 49  | 190  | 8   |
| CONTIG-013031 | 199  | 9   | 34  | 65   | 0   |
| CONTIG-013032 | 62   | 13  | 21  | 0    | 2   |
| CONTIG-013033 | 187  | 20  | 152 | 0    | 47  |
| CONTIG-013034 | 408  | 22  | 67  | 288  | 6   |
| CONTIG-013035 | 569  | 17  | 466 | 182  | 0   |
| CONTIG-013036 | 268  | 13  | 20  | 108  | 0   |
| CONTIG-013037 | 80   | 4   | 0   | 6    | 0   |
| CONTIG-013038 | 123  | 15  | 26  | 62   | 0   |

|               |      |      |     |      |     |
|---------------|------|------|-----|------|-----|
| CONTIG-013039 | 58   | 46   | 48  | 61   | 8   |
| CONTIG-013041 | 106  | 5    | 8   | 4    | 0   |
| CONTIG-013042 | 132  | 22   | 221 | 41   | 0   |
| CONTIG-013043 | 454  | 20   | 408 | 162  | 0   |
| CONTIG-013044 | 368  | 14   | 45  | 109  | 4   |
| CONTIG-013046 | 88   | 33   | 18  | 34   | 0   |
| CONTIG-013047 | 436  | 11   | 62  | 167  | 0   |
| CONTIG-013048 | 325  | 32   | 267 | 146  | 15  |
| CONTIG-013049 | 246  | 12   | 9   | 72   | 5   |
| CONTIG-013053 | 240  | 13   | 42  | 114  | 0   |
| CONTIG-013054 | 129  | 10   | 11  | 34   | 0   |
| CONTIG-013055 | 65   | 195  | 59  | 562  | 4   |
| CONTIG-013056 | 100  | 8    | 5   | 25   | 0   |
| CONTIG-013057 | 793  | 20   | 77  | 441  | 2   |
| CONTIG-013058 | 123  | 7    | 0   | 42   | 0   |
| CONTIG-013059 | 345  | 13   | 27  | 129  | 0   |
| CONTIG-013060 | 60   | 36   | 49  | 58   | 2   |
| CONTIG-013061 | 970  | 18   | 55  | 507  | 15  |
| CONTIG-013062 | 362  | 59   | 60  | 57   | 2   |
| CONTIG-013063 | 72   | 18   | 46  | 0    | 0   |
| CONTIG-013064 | 1323 | 35   | 423 | 2659 | 0   |
| CONTIG-013065 | 174  | 11   | 2   | 63   | 0   |
| CONTIG-013066 | 403  | 17   | 154 | 102  | 4   |
| CONTIG-013068 | 1482 | 34   | 309 | 1279 | 18  |
| CONTIG-013069 | 81   | 5    | 0   | 12   | 0   |
| CONTIG-013070 | 158  | 7    | 16  | 13   | 0   |
| CONTIG-013071 | 50   | 1633 | 200 | 1569 | 80  |
| CONTIG-013072 | 160  | 6    | 20  | 39   | 0   |
| CONTIG-013073 | 361  | 200  | 489 | 1725 | 250 |
| CONTIG-013074 | 60   | 10   | 6   | 13   | 2   |
| CONTIG-013075 | 374  | 16   | 141 | 143  | 0   |
| CONTIG-013076 | 746  | 17   | 113 | 363  | 2   |
| CONTIG-013077 | 123  | 8    | 7   | 23   | 0   |
| CONTIG-013079 | 107  | 18   | 8   | 80   | 0   |
| CONTIG-013080 | 237  | 46   | 126 | 328  | 0   |
| CONTIG-013081 | 1211 | 17   | 214 | 958  | 0   |
| CONTIG-013082 | 900  | 28   | 238 | 652  | 25  |
| CONTIG-013083 | 421  | 232  | 683 | 757  | 84  |
| CONTIG-013084 | 838  | 16   | 234 | 280  | 2   |
| CONTIG-013085 | 125  | 5    | 3   | 11   | 0   |
| CONTIG-013087 | 50   | 35   | 17  | 28   | 0   |
| CONTIG-013088 | 122  | 5    | 30  | 2    | 0   |
| CONTIG-013089 | 1739 | 45   | 392 | 2721 | 4   |
| CONTIG-013092 | 359  | 16   | 69  | 251  | 0   |
| CONTIG-013093 | 157  | 20   | 13  | 92   | 0   |
| CONTIG-013094 | 273  | 31   | 31  | 207  | 0   |
| CONTIG-013095 | 65   | 12   | 10  | 17   | 0   |

|               |      |     |      |      |    |
|---------------|------|-----|------|------|----|
| CONTIG-013096 | 1261 | 25  | 267  | 1203 | 0  |
| CONTIG-013097 | 543  | 188 | 193  | 5042 | 51 |
| CONTIG-013098 | 81   | 2   | 2    | 0    | 0  |
| CONTIG-013099 | 342  | 26  | 72   | 372  | 2  |
| CONTIG-013104 | 82   | 262 | 59   | 856  | 6  |
| CONTIG-013106 | 71   | 4   | 4    | 8    | 0  |
| CONTIG-013107 | 201  | 8   | 52   | 31   | 2  |
| CONTIG-013108 | 689  | 15  | 75   | 268  | 2  |
| CONTIG-013109 | 702  | 51  | 217  | 997  | 11 |
| CONTIG-013110 | 167  | 4   | 2    | 14   | 0  |
| CONTIG-013111 | 911  | 10  | 128  | 255  | 0  |
| CONTIG-013112 | 310  | 9   | 6    | 74   | 6  |
| CONTIG-013115 | 285  | 37  | 101  | 398  | 2  |
| CONTIG-013116 | 364  | 32  | 405  | 237  | 2  |
| CONTIG-013117 | 1942 | 20  | 113  | 1221 | 17 |
| CONTIG-013118 | 603  | 33  | 140  | 226  | 0  |
| CONTIG-013119 | 185  | 10  | 121  | 33   | 0  |
| CONTIG-013120 | 100  | 94  | 132  | 217  | 2  |
| CONTIG-013121 | 263  | 7   | 14   | 52   | 2  |
| CONTIG-013124 | 847  | 61  | 94   | 1671 | 56 |
| CONTIG-013125 | 649  | 24  | 123  | 399  | 17 |
| CONTIG-013126 | 581  | 20  | 199  | 313  | 4  |
| CONTIG-013127 | 339  | 13  | 10   | 178  | 0  |
| CONTIG-013128 | 59   | 5   | 7    | 5    | 0  |
| CONTIG-013129 | 175  | 9   | 4    | 37   | 2  |
| CONTIG-013130 | 653  | 14  | 155  | 307  | 0  |
| CONTIG-013131 | 251  | 14  | 189  | 51   | 0  |
| CONTIG-013132 | 96   | 11  | 12   | 32   | 0  |
| CONTIG-013133 | 287  | 13  | 25   | 163  | 0  |
| CONTIG-013134 | 1944 | 21  | 110  | 1530 | 7  |
| CONTIG-013135 | 126  | 3   | 2    | 5    | 0  |
| CONTIG-013136 | 336  | 12  | 13   | 183  | 0  |
| CONTIG-013137 | 68   | 8   | 0    | 15   | 0  |
| CONTIG-013138 | 679  | 14  | 69   | 122  | 2  |
| CONTIG-013139 | 55   | 132 | 16   | 137  | 7  |
| CONTIG-013140 | 298  | 27  | 447  | 133  | 0  |
| CONTIG-013141 | 401  | 56  | 388  | 858  | 0  |
| CONTIG-013142 | 72   | 4   | 9    | 2    | 2  |
| CONTIG-013143 | 167  | 6   | 4    | 24   | 0  |
| CONTIG-013144 | 1437 | 55  | 461  | 1753 | 78 |
| CONTIG-013145 | 99   | 24  | 54   | 18   | 0  |
| CONTIG-013146 | 80   | 24  | 5    | 19   | 0  |
| CONTIG-013147 | 392  | 15  | 200  | 161  | 0  |
| CONTIG-013148 | 446  | 23  | 220  | 190  | 2  |
| CONTIG-013149 | 68   | 11  | 10   | 14   | 0  |
| CONTIG-013151 | 236  | 100 | 1345 | 94   | 9  |
| CONTIG-013152 | 296  | 7   | 5    | 43   | 2  |



|               |      |     |      |      |     |
|---------------|------|-----|------|------|-----|
| CONTIG-013153 | 409  | 115 | 13   | 2    | 401 |
| CONTIG-013154 | 1050 | 26  | 84   | 477  | 2   |
| CONTIG-013155 | 396  | 25  | 52   | 234  | 6   |
| CONTIG-013156 | 907  | 40  | 97   | 886  | 28  |
| CONTIG-013157 | 48   | 514 | 292  | 188  | 2   |
| CONTIG-013158 | 295  | 5   | 2    | 30   | 0   |
| CONTIG-013161 | 481  | 17  | 72   | 275  | 2   |
| CONTIG-013162 | 220  | 19  | 15   | 24   | 0   |
| CONTIG-013163 | 391  | 20  | 191  | 228  | 0   |
| CONTIG-013164 | 488  | 29  | 31   | 202  | 0   |
| CONTIG-013165 | 185  | 6   | 31   | 31   | 0   |
| CONTIG-013166 | 104  | 6   | 2    | 25   | 0   |
| CONTIG-013167 | 75   | 4   | 0    | 9    | 0   |
| CONTIG-013168 | 210  | 53  | 12   | 628  | 0   |
| CONTIG-013169 | 180  | 10  | 36   | 48   | 0   |
| CONTIG-013171 | 106  | 381 | 102  | 2237 | 46  |
| CONTIG-013172 | 97   | 3   | 0    | 0    | 0   |
| CONTIG-013173 | 1816 | 26  | 205  | 1937 | 20  |
| CONTIG-013174 | 533  | 43  | 192  | 862  | 7   |
| CONTIG-013175 | 51   | 203 | 46   | 454  | 0   |
| CONTIG-013176 | 391  | 17  | 120  | 73   | 0   |
| CONTIG-013178 | 49   | 661 | 100  | 907  | 8   |
| CONTIG-013179 | 98   | 5   | 10   | 8    | 0   |
| CONTIG-013180 | 57   | 765 | 561  | 840  | 49  |
| CONTIG-013181 | 514  | 316 | 1191 | 6647 | 42  |
| CONTIG-013182 | 753  | 13  | 193  | 270  | 2   |
| CONTIG-013183 | 167  | 33  | 27   | 249  | 0   |
| CONTIG-013184 | 211  | 10  | 5    | 103  | 0   |
| CONTIG-013185 | 254  | 36  | 15   | 210  | 4   |
| CONTIG-013186 | 112  | 8   | 21   | 19   | 0   |
| CONTIG-013187 | 59   | 28  | 31   | 62   | 0   |
| CONTIG-013188 | 65   | 74  | 161  | 0    | 0   |
| CONTIG-013189 | 1004 | 24  | 217  | 1026 | 4   |
| CONTIG-013190 | 55   | 896 | 291  | 1488 | 132 |
| CONTIG-013191 | 143  | 6   | 13   | 27   | 0   |
| CONTIG-013192 | 452  | 32  | 211  | 520  | 0   |
| CONTIG-013193 | 345  | 10  | 31   | 61   | 2   |
| CONTIG-013194 | 229  | 16  | 9    | 135  | 3   |
| CONTIG-013195 | 424  | 29  | 66   | 357  | 9   |
| CONTIG-013197 | 97   | 4   | 6    | 3    | 0   |
| CONTIG-013198 | 364  | 7   | 12   | 47   | 0   |
| CONTIG-013203 | 96   | 57  | 114  | 185  | 0   |
| CONTIG-013204 | 88   | 525 | 24   | 2612 | 0   |
| CONTIG-013205 | 132  | 8   | 60   | 2    | 0   |
| CONTIG-013206 | 1145 | 58  | 399  | 2430 | 144 |
| CONTIG-013207 | 63   | 5   | 8    | 6    | 0   |
| CONTIG-013208 | 240  | 11  | 23   | 84   | 0   |

|               |      |     |     |       |     |
|---------------|------|-----|-----|-------|-----|
| CONTIG-013209 | 78   | 5   | 0   | 4     | 0   |
| CONTIG-013210 | 649  | 24  | 40  | 402   | 8   |
| CONTIG-013211 | 166  | 10  | 24  | 44    | 0   |
| CONTIG-013212 | 224  | 14  | 24  | 100   | 0   |
| CONTIG-013213 | 355  | 13  | 55  | 118   | 0   |
| CONTIG-013214 | 279  | 9   | 59  | 36    | 0   |
| CONTIG-013215 | 199  | 13  | 16  | 115   | 0   |
| CONTIG-013216 | 781  | 38  | 49  | 382   | 14  |
| CONTIG-013217 | 61   | 4   | 7   | 2     | 0   |
| CONTIG-013218 | 402  | 19  | 24  | 347   | 3   |
| CONTIG-013219 | 325  | 16  | 36  | 124   | 6   |
| CONTIG-013220 | 246  | 9   | 116 | 39    | 0   |
| CONTIG-013221 | 785  | 53  | 45  | 50    | 0   |
| CONTIG-013222 | 73   | 43  | 85  | 76    | 0   |
| CONTIG-013223 | 923  | 20  | 143 | 555   | 13  |
| CONTIG-013226 | 245  | 38  | 240 | 118   | 7   |
| CONTIG-013227 | 137  | 10  | 4   | 51    | 0   |
| CONTIG-013231 | 240  | 10  | 15  | 118   | 0   |
| CONTIG-013232 | 495  | 13  | 12  | 214   | 2   |
| CONTIG-013233 | 510  | 20  | 227 | 402   | 0   |
| CONTIG-013234 | 99   | 6   | 9   | 16    | 0   |
| CONTIG-013235 | 64   | 5   | 6   | 4     | 0   |
| CONTIG-013236 | 133  | 10  | 12  | 51    | 0   |
| CONTIG-013238 | 61   | 11  | 4   | 18    | 0   |
| CONTIG-013239 | 637  | 63  | 405 | 1808  | 2   |
| CONTIG-013242 | 866  | 86  | 872 | 1704  | 42  |
| CONTIG-013243 | 336  | 15  | 150 | 164   | 0   |
| CONTIG-013253 | 462  | 7   | 41  | 90    | 0   |
| CONTIG-013254 | 241  | 35  | 221 | 275   | 3   |
| CONTIG-013255 | 875  | 29  | 31  | 1602  | 0   |
| CONTIG-013256 | 678  | 14  | 75  | 280   | 2   |
| CONTIG-013257 | 114  | 54  | 187 | 128   | 0   |
| CONTIG-013258 | 280  | 134 | 280 | 1468  | 4   |
| CONTIG-013259 | 1482 | 32  | 156 | 2067  | 10  |
| CONTIG-013260 | 222  | 8   | 16  | 50    | 0   |
| CONTIG-013261 | 630  | 23  | 333 | 366   | 0   |
| CONTIG-013264 | 208  | 534 | 112 | 5781  | 0   |
| CONTIG-013265 | 462  | 16  | 71  | 297   | 3   |
| CONTIG-013266 | 231  | 12  | 56  | 86    | 0   |
| CONTIG-013267 | 72   | 181 | 76  | 491   | 0   |
| CONTIG-013268 | 647  | 27  | 354 | 552   | 12  |
| CONTIG-013269 | 148  | 14  | 8   | 59    | 0   |
| CONTIG-013270 | 66   | 4   | 4   | 2     | 0   |
| CONTIG-013271 | 1837 | 71  | 553 | 8231  | 2   |
| CONTIG-013272 | 878  | 280 | 257 | 13741 | 104 |
| CONTIG-013273 | 340  | 14  | 147 | 74    | 0   |
| CONTIG-013274 | 36   | 745 | 94  | 568   | 62  |

|               |      |     |     |      |     |
|---------------|------|-----|-----|------|-----|
| CONTIG-013275 | 86   | 8   | 11  | 17   | 0   |
| CONTIG-013276 | 529  | 80  | 451 | 608  | 130 |
| CONTIG-013279 | 44   | 18  | 0   | 13   | 0   |
| CONTIG-013280 | 145  | 11  | 36  | 36   | 0   |
| CONTIG-013281 | 921  | 37  | 167 | 939  | 31  |
| CONTIG-013282 | 72   | 5   | 2   | 7    | 0   |
| CONTIG-013283 | 728  | 228 | 220 | 2470 | 538 |
| CONTIG-013284 | 51   | 59  | 5   | 150  | 0   |
| CONTIG-013285 | 196  | 10  | 18  | 40   | 0   |
| CONTIG-013286 | 887  | 26  | 156 | 800  | 6   |
| CONTIG-013287 | 136  | 14  | 20  | 73   | 0   |
| CONTIG-013293 | 428  | 29  | 262 | 325  | 2   |
| CONTIG-013297 | 109  | 36  | 148 | 85   | 2   |
| CONTIG-013298 | 1029 | 65  | 41  | 4035 | 0   |
| CONTIG-013299 | 182  | 4   | 9   | 26   | 0   |
| CONTIG-013300 | 252  | 17  | 97  | 179  | 0   |
| CONTIG-013301 | 416  | 26  | 87  | 307  | 6   |
| CONTIG-013302 | 269  | 12  | 90  | 87   | 0   |
| CONTIG-013303 | 104  | 12  | 33  | 32   | 0   |
| CONTIG-013304 | 688  | 14  | 229 | 180  | 4   |
| CONTIG-013305 | 209  | 17  | 65  | 80   | 0   |
| CONTIG-013306 | 63   | 3   | 2   | 2    | 0   |
| CONTIG-013307 | 236  | 11  | 29  | 43   | 0   |
| CONTIG-013308 | 166  | 34  | 22  | 52   | 0   |
| CONTIG-013309 | 460  | 26  | 146 | 502  | 8   |
| CONTIG-013310 | 204  | 25  | 46  | 226  | 0   |
| CONTIG-013311 | 462  | 24  | 83  | 500  | 0   |
| CONTIG-013312 | 149  | 5   | 9   | 17   | 0   |
| CONTIG-013313 | 1008 | 46  | 251 | 1214 | 54  |
| CONTIG-013314 | 145  | 8   | 4   | 32   | 0   |
| CONTIG-013315 | 60   | 8   | 3   | 12   | 0   |
| CONTIG-013320 | 1020 | 41  | 200 | 1102 | 93  |
| CONTIG-013321 | 137  | 5   | 5   | 24   | 0   |
| CONTIG-013322 | 80   | 2   | 4   | 4    | 0   |
| CONTIG-013323 | 200  | 9   | 8   | 43   | 0   |
| CONTIG-013324 | 211  | 17  | 64  | 68   | 0   |
| CONTIG-013325 | 870  | 75  | 333 | 1756 | 77  |
| CONTIG-013326 | 237  | 14  | 6   | 169  | 0   |
| CONTIG-013327 | 183  | 20  | 112 | 105  | 0   |
| CONTIG-013328 | 332  | 16  | 74  | 71   | 0   |
| CONTIG-013329 | 872  | 17  | 139 | 234  | 13  |
| CONTIG-013330 | 323  | 23  | 67  | 404  | 0   |
| CONTIG-013331 | 1452 | 24  | 91  | 796  | 4   |
| CONTIG-013332 | 71   | 17  | 4   | 16   | 0   |
| CONTIG-013333 | 164  | 10  | 25  | 54   | 0   |
| CONTIG-013335 | 638  | 19  | 178 | 243  | 4   |
| CONTIG-013336 | 283  | 16  | 139 | 91   | 6   |

|               |      |     |     |      |    |
|---------------|------|-----|-----|------|----|
| CONTIG-013337 | 135  | 5   | 2   | 31   | 0  |
| CONTIG-013338 | 460  | 69  | 63  | 1257 | 22 |
| CONTIG-013339 | 280  | 20  | 88  | 132  | 0  |
| CONTIG-013340 | 245  | 374 | 72  | 1938 | 85 |
| CONTIG-013341 | 276  | 7   | 25  | 44   | 0  |
| CONTIG-013342 | 168  | 15  | 4   | 86   | 0  |
| CONTIG-013343 | 251  | 46  | 197 | 388  | 2  |
| CONTIG-013344 | 156  | 10  | 21  | 29   | 0  |
| CONTIG-013345 | 346  | 6   | 22  | 78   | 0  |
| CONTIG-013346 | 200  | 11  | 76  | 4    | 0  |
| CONTIG-013347 | 74   | 7   | 6   | 16   | 0  |
| CONTIG-013348 | 64   | 7   | 5   | 6    | 0  |
| CONTIG-013349 | 69   | 4   | 3   | 8    | 0  |
| CONTIG-013350 | 290  | 10  | 25  | 29   | 0  |
| CONTIG-013351 | 746  | 13  | 86  | 291  | 5  |
| CONTIG-013352 | 766  | 84  | 266 | 2007 | 66 |
| CONTIG-013353 | 295  | 11  | 24  | 44   | 0  |
| CONTIG-013354 | 61   | 5   | 0   | 2    | 0  |
| CONTIG-013355 | 97   | 10  | 19  | 37   | 0  |
| CONTIG-013358 | 141  | 6   | 0   | 0    | 0  |
| CONTIG-013361 | 140  | 7   | 18  | 19   | 0  |
| CONTIG-013363 | 499  | 29  | 166 | 141  | 33 |
| CONTIG-013364 | 1311 | 38  | 734 | 1470 | 11 |
| CONTIG-013365 | 160  | 9   | 27  | 27   | 0  |
| CONTIG-013366 | 643  | 17  | 136 | 271  | 21 |
| CONTIG-013375 | 145  | 6   | 7   | 18   | 0  |
| CONTIG-013376 | 62   | 293 | 110 | 816  | 2  |
| CONTIG-013377 | 87   | 4   | 11  | 6    | 0  |
| CONTIG-013378 | 196  | 7   | 40  | 34   | 0  |
| CONTIG-013379 | 72   | 4   | 2   | 8    | 0  |
| CONTIG-013380 | 1503 | 27  | 320 | 1770 | 15 |
| CONTIG-013381 | 202  | 19  | 123 | 17   | 0  |
| CONTIG-013382 | 271  | 6   | 16  | 14   | 2  |
| CONTIG-013383 | 253  | 8   | 2   | 64   | 0  |
| CONTIG-013384 | 225  | 11  | 41  | 117  | 0  |
| CONTIG-013385 | 317  | 12  | 17  | 111  | 0  |
| CONTIG-013386 | 332  | 33  | 10  | 477  | 0  |
| CONTIG-013387 | 899  | 29  | 29  | 61   | 0  |
| CONTIG-013389 | 353  | 318 | 30  | 0    | 2  |
| CONTIG-013390 | 789  | 47  | 521 | 1170 | 32 |
| CONTIG-013391 | 974  | 13  | 54  | 346  | 6  |
| CONTIG-013392 | 152  | 9   | 14  | 17   | 0  |
| CONTIG-013393 | 65   | 12  | 32  | 2    | 0  |
| CONTIG-013394 | 508  | 30  | 267 | 414  | 10 |
| CONTIG-013395 | 79   | 289 | 41  | 245  | 0  |
| CONTIG-013396 | 371  | 11  | 16  | 185  | 0  |
| CONTIG-013397 | 136  | 9   | 11  | 24   | 0  |

|               |      |     |     |      |     |
|---------------|------|-----|-----|------|-----|
| CONTIG-013398 | 202  | 10  | 65  | 32   | 2   |
| CONTIG-013399 | 65   | 135 | 141 | 177  | 33  |
| CONTIG-013400 | 259  | 14  | 122 | 49   | 0   |
| CONTIG-013401 | 645  | 29  | 49  | 617  | 19  |
| CONTIG-013404 | 456  | 9   | 83  | 83   | 0   |
| CONTIG-013405 | 82   | 10  | 8   | 0    | 0   |
| CONTIG-013406 | 152  | 8   | 6   | 36   | 0   |
| CONTIG-013407 | 174  | 44  | 555 | 40   | 2   |
| CONTIG-013408 | 96   | 6   | 3   | 13   | 0   |
| CONTIG-013409 | 477  | 9   | 26  | 87   | 2   |
| CONTIG-013410 | 74   | 16  | 58  | 25   | 0   |
| CONTIG-013411 | 379  | 42  | 224 | 498  | 2   |
| CONTIG-013412 | 53   | 158 | 28  | 419  | 2   |
| CONTIG-013413 | 93   | 5   | 0   | 0    | 0   |
| CONTIG-013414 | 643  | 32  | 164 | 322  | 46  |
| CONTIG-013415 | 191  | 9   | 13  | 56   | 0   |
| CONTIG-013416 | 408  | 42  | 165 | 619  | 0   |
| CONTIG-013417 | 635  | 11  | 48  | 235  | 4   |
| CONTIG-013418 | 175  | 38  | 136 | 144  | 0   |
| CONTIG-013419 | 620  | 14  | 77  | 259  | 4   |
| CONTIG-013420 | 1064 | 35  | 178 | 987  | 33  |
| CONTIG-013421 | 1001 | 48  | 184 | 2729 | 0   |
| CONTIG-013422 | 134  | 59  | 65  | 179  | 17  |
| CONTIG-013423 | 73   | 461 | 374 | 451  | 108 |
| CONTIG-013424 | 87   | 13  | 24  | 40   | 0   |
| CONTIG-013425 | 396  | 18  | 91  | 121  | 4   |
| CONTIG-013426 | 805  | 8   | 128 | 125  | 2   |
| CONTIG-013427 | 431  | 28  | 378 | 400  | 2   |
| CONTIG-013428 | 195  | 42  | 476 | 79   | 0   |
| CONTIG-013431 | 269  | 14  | 67  | 112  | 0   |
| CONTIG-013432 | 516  | 16  | 26  | 326  | 0   |
| CONTIG-013433 | 624  | 40  | 89  | 1436 | 0   |
| CONTIG-013434 | 260  | 10  | 22  | 73   | 0   |
| CONTIG-013436 | 264  | 17  | 49  | 140  | 0   |
| CONTIG-013437 | 193  | 13  | 18  | 63   | 3   |
| CONTIG-013438 | 86   | 5   | 8   | 7    | 0   |
| CONTIG-013439 | 52   | 16  | 0   | 27   | 0   |
| CONTIG-013440 | 298  | 16  | 84  | 94   | 0   |
| CONTIG-013441 | 606  | 28  | 264 | 577  | 8   |
| CONTIG-013442 | 66   | 19  | 22  | 39   | 0   |
| CONTIG-013443 | 411  | 20  | 84  | 142  | 4   |
| CONTIG-013444 | 227  | 29  | 138 | 190  | 0   |
| CONTIG-013445 | 320  | 18  | 33  | 167  | 7   |
| CONTIG-013446 | 109  | 7   | 29  | 8    | 0   |
| CONTIG-013447 | 96   | 54  | 112 | 31   | 0   |
| CONTIG-013448 | 180  | 13  | 14  | 41   | 0   |
| CONTIG-013449 | 170  | 4   | 0   | 0    | 0   |

|               |      |     |     |      |     |
|---------------|------|-----|-----|------|-----|
| CONTIG-013450 | 94   | 7   | 16  | 10   | 0   |
| CONTIG-013451 | 293  | 20  | 214 | 181  | 0   |
| CONTIG-013452 | 373  | 25  | 55  | 333  | 0   |
| CONTIG-013453 | 195  | 25  | 55  | 83   | 0   |
| CONTIG-013454 | 165  | 85  | 243 | 485  | 2   |
| CONTIG-013455 | 419  | 14  | 77  | 175  | 0   |
| CONTIG-013456 | 129  | 33  | 144 | 91   | 4   |
| CONTIG-013457 | 540  | 14  | 102 | 297  | 2   |
| CONTIG-013458 | 226  | 8   | 17  | 54   | 0   |
| CONTIG-013459 | 398  | 13  | 17  | 85   | 7   |
| CONTIG-013460 | 898  | 20  | 160 | 336  | 7   |
| CONTIG-013461 | 249  | 112 | 251 | 553  | 141 |
| CONTIG-013462 | 123  | 5   | 16  | 13   | 0   |
| CONTIG-013463 | 166  | 25  | 141 | 35   | 2   |
| CONTIG-013466 | 80   | 13  | 18  | 15   | 0   |
| CONTIG-013471 | 630  | 50  | 50  | 1089 | 100 |
| CONTIG-013472 | 552  | 42  | 157 | 705  | 9   |
| CONTIG-013476 | 196  | 9   | 4   | 43   | 5   |
| CONTIG-013477 | 251  | 10  | 52  | 42   | 2   |
| CONTIG-013478 | 202  | 22  | 409 | 23   | 0   |
| CONTIG-013479 | 135  | 10  | 39  | 36   | 0   |
| CONTIG-013484 | 85   | 7   | 15  | 6    | 0   |
| CONTIG-013485 | 347  | 19  | 164 | 190  | 0   |
| CONTIG-013486 | 802  | 23  | 396 | 596  | 5   |
| CONTIG-013487 | 100  | 20  | 123 | 0    | 0   |
| CONTIG-013488 | 237  | 73  | 135 | 384  | 9   |
| CONTIG-013489 | 1173 | 64  | 173 | 1174 | 266 |
| CONTIG-013490 | 112  | 22  | 160 | 22   | 0   |
| CONTIG-013491 | 95   | 16  | 19  | 49   | 0   |
| CONTIG-013492 | 117  | 6   | 0   | 34   | 0   |
| CONTIG-013493 | 202  | 32  | 31  | 97   | 0   |
| CONTIG-013494 | 295  | 12  | 19  | 66   | 0   |
| CONTIG-013495 | 683  | 8   | 24  | 59   | 0   |
| CONTIG-013496 | 577  | 14  | 58  | 357  | 2   |
| CONTIG-013498 | 230  | 17  | 46  | 76   | 0   |
| CONTIG-013499 | 142  | 21  | 45  | 70   | 4   |
| CONTIG-013500 | 321  | 10  | 20  | 73   | 2   |
| CONTIG-013503 | 508  | 199 | 269 | 6194 | 3   |
| CONTIG-013504 | 525  | 10  | 31  | 215  | 0   |
| CONTIG-013505 | 70   | 4   | 13  | 2    | 0   |
| CONTIG-013508 | 303  | 16  | 26  | 221  | 0   |
| CONTIG-013509 | 68   | 519 | 475 | 1391 | 8   |
| CONTIG-013510 | 803  | 17  | 175 | 361  | 12  |
| CONTIG-013512 | 315  | 22  | 43  | 107  | 2   |
| CONTIG-013513 | 422  | 7   | 20  | 2    | 0   |
| CONTIG-013514 | 279  | 6   | 14  | 51   | 0   |
| CONTIG-013515 | 326  | 24  | 320 | 199  | 0   |

|               |      |     |     |      |    |
|---------------|------|-----|-----|------|----|
| CONTIG-013516 | 346  | 15  | 22  | 189  | 7  |
| CONTIG-013517 | 588  | 30  | 142 | 602  | 50 |
| CONTIG-013518 | 147  | 12  | 36  | 48   | 0  |
| CONTIG-013519 | 568  | 17  | 204 | 344  | 0  |
| CONTIG-013520 | 389  | 11  | 6   | 216  | 0  |
| CONTIG-013521 | 97   | 4   | 6   | 9    | 0  |
| CONTIG-013522 | 667  | 41  | 280 | 1087 | 2  |
| CONTIG-013523 | 301  | 10  | 94  | 91   | 0  |
| CONTIG-013524 | 863  | 16  | 79  | 435  | 14 |
| CONTIG-013525 | 101  | 9   | 3   | 4    | 0  |
| CONTIG-013526 | 273  | 15  | 22  | 124  | 0  |
| CONTIG-013527 | 155  | 26  | 37  | 54   | 0  |
| CONTIG-013529 | 513  | 18  | 67  | 216  | 2  |
| CONTIG-013532 | 142  | 14  | 6   | 73   | 0  |
| CONTIG-013533 | 320  | 9   | 20  | 136  | 0  |
| CONTIG-013534 | 1876 | 48  | 138 | 4197 | 24 |
| CONTIG-013535 | 194  | 21  | 71  | 102  | 0  |
| CONTIG-013536 | 256  | 10  | 19  | 63   | 0  |
| CONTIG-013537 | 314  | 17  | 31  | 209  | 0  |
| CONTIG-013538 | 1114 | 38  | 165 | 1155 | 0  |
| CONTIG-013541 | 60   | 7   | 0   | 9    | 0  |
| CONTIG-013542 | 141  | 8   | 35  | 11   | 0  |
| CONTIG-013543 | 429  | 17  | 50  | 254  | 0  |
| CONTIG-013544 | 1220 | 23  | 360 | 725  | 18 |
| CONTIG-013546 | 1245 | 20  | 321 | 508  | 2  |
| CONTIG-013547 | 85   | 21  | 160 | 5    | 0  |
| CONTIG-013548 | 169  | 146 | 498 | 524  | 3  |
| CONTIG-013550 | 507  | 24  | 76  | 608  | 0  |
| CONTIG-013551 | 100  | 8   | 23  | 23   | 0  |
| CONTIG-013553 | 70   | 12  | 8   | 2    | 0  |
| CONTIG-013554 | 92   | 10  | 4   | 15   | 0  |
| CONTIG-013555 | 644  | 34  | 229 | 779  | 8  |
| CONTIG-013556 | 443  | 16  | 46  | 304  | 0  |
| CONTIG-013557 | 77   | 23  | 103 | 16   | 0  |
| CONTIG-013558 | 502  | 18  | 88  | 243  | 5  |
| CONTIG-013559 | 498  | 14  | 43  | 175  | 0  |
| CONTIG-013560 | 2260 | 21  | 365 | 1541 | 16 |
| CONTIG-013563 | 85   | 44  | 97  | 64   | 0  |
| CONTIG-013564 | 275  | 38  | 359 | 78   | 6  |
| CONTIG-013565 | 493  | 20  | 151 | 236  | 2  |
| CONTIG-013566 | 236  | 29  | 183 | 146  | 0  |
| CONTIG-013567 | 126  | 8   | 15  | 40   | 0  |
| CONTIG-013568 | 101  | 5   | 8   | 4    | 0  |
| CONTIG-013569 | 138  | 17  | 189 | 15   | 0  |
| CONTIG-013570 | 212  | 20  | 54  | 63   | 2  |
| CONTIG-013573 | 200  | 19  | 58  | 159  | 0  |
| CONTIG-013574 | 98   | 15  | 24  | 34   | 0  |

|               |      |     |     |      |     |
|---------------|------|-----|-----|------|-----|
| CONTIG-013576 | 858  | 16  | 37  | 654  | 0   |
| CONTIG-013577 | 602  | 16  | 131 | 339  | 0   |
| CONTIG-013578 | 79   | 13  | 97  | 2    | 0   |
| CONTIG-013580 | 236  | 9   | 35  | 24   | 0   |
| CONTIG-013581 | 239  | 16  | 58  | 106  | 0   |
| CONTIG-013582 | 490  | 14  | 266 | 156  | 0   |
| CONTIG-013583 | 457  | 15  | 19  | 352  | 0   |
| CONTIG-013584 | 226  | 14  | 16  | 84   | 0   |
| CONTIG-013585 | 600  | 62  | 118 | 1077 | 56  |
| CONTIG-013586 | 520  | 26  | 57  | 642  | 0   |
| CONTIG-013587 | 390  | 38  | 70  | 630  | 0   |
| CONTIG-013589 | 439  | 365 | 336 | 6810 | 758 |
| CONTIG-013590 | 170  | 153 | 64  | 1286 | 0   |
| CONTIG-013591 | 176  | 282 | 118 | 2506 | 6   |
| CONTIG-013592 | 145  | 60  | 159 | 51   | 5   |
| CONTIG-013593 | 337  | 14  | 22  | 138  | 0   |
| CONTIG-013594 | 456  | 20  | 28  | 417  | 2   |
| CONTIG-013595 | 74   | 8   | 3   | 19   | 0   |
| CONTIG-013596 | 82   | 16  | 35  | 41   | 0   |
| CONTIG-013597 | 345  | 10  | 34  | 75   | 0   |
| CONTIG-013598 | 93   | 3   | 3   | 6    | 0   |
| CONTIG-013599 | 824  | 23  | 24  | 18   | 0   |
| CONTIG-013600 | 138  | 9   | 16  | 4    | 0   |
| CONTIG-013602 | 633  | 24  | 519 | 301  | 2   |
| CONTIG-013603 | 600  | 26  | 318 | 345  | 4   |
| CONTIG-013604 | 401  | 39  | 137 | 670  | 6   |
| CONTIG-013606 | 160  | 14  | 10  | 78   | 0   |
| CONTIG-013607 | 139  | 11  | 5   | 34   | 0   |
| CONTIG-013608 | 60   | 2   | 0   | 0    | 0   |
| CONTIG-013610 | 227  | 7   | 10  | 68   | 0   |
| CONTIG-013611 | 67   | 9   | 33  | 2    | 0   |
| CONTIG-013613 | 167  | 7   | 17  | 33   | 0   |
| CONTIG-013614 | 472  | 18  | 69  | 435  | 0   |
| CONTIG-013616 | 272  | 20  | 20  | 109  | 4   |
| CONTIG-013617 | 947  | 31  | 361 | 886  | 8   |
| CONTIG-013618 | 469  | 35  | 262 | 447  | 4   |
| CONTIG-013624 | 253  | 11  | 21  | 72   | 3   |
| CONTIG-013625 | 211  | 13  | 11  | 143  | 0   |
| CONTIG-013626 | 94   | 5   | 31  | 2    | 0   |
| CONTIG-013629 | 368  | 27  | 293 | 268  | 2   |
| CONTIG-013630 | 574  | 12  | 191 | 214  | 0   |
| CONTIG-013631 | 186  | 281 | 279 | 1268 | 114 |
| CONTIG-013632 | 58   | 21  | 18  | 42   | 0   |
| CONTIG-013636 | 321  | 22  | 40  | 240  | 0   |
| CONTIG-013637 | 1827 | 37  | 205 | 2273 | 183 |
| CONTIG-013638 | 743  | 26  | 159 | 654  | 4   |
| CONTIG-013639 | 96   | 47  | 163 | 28   | 0   |



|               |      |     |      |      |    |
|---------------|------|-----|------|------|----|
| CONTIG-013640 | 61   | 7   | 14   | 3    | 0  |
| CONTIG-013641 | 331  | 7   | 25   | 80   | 0  |
| CONTIG-013642 | 83   | 54  | 23   | 160  | 0  |
| CONTIG-013643 | 379  | 17  | 43   | 126  | 0  |
| CONTIG-013644 | 490  | 23  | 143  | 364  | 4  |
| CONTIG-013645 | 419  | 12  | 9    | 228  | 0  |
| CONTIG-013646 | 414  | 26  | 173  | 233  | 15 |
| CONTIG-013647 | 58   | 14  | 53   | 0    | 0  |
| CONTIG-013648 | 229  | 8   | 6    | 45   | 0  |
| CONTIG-013649 | 562  | 30  | 178  | 924  | 0  |
| CONTIG-013651 | 83   | 8   | 21   | 16   | 0  |
| CONTIG-013652 | 93   | 4   | 11   | 12   | 0  |
| CONTIG-013653 | 93   | 5   | 0    | 13   | 2  |
| CONTIG-013654 | 208  | 18  | 24   | 125  | 0  |
| CONTIG-013655 | 126  | 8   | 0    | 27   | 0  |
| CONTIG-013656 | 108  | 157 | 261  | 458  | 12 |
| CONTIG-013657 | 715  | 16  | 94   | 259  | 2  |
| CONTIG-013661 | 84   | 7   | 7    | 20   | 0  |
| CONTIG-013662 | 432  | 35  | 146  | 439  | 0  |
| CONTIG-013663 | 160  | 5   | 2    | 29   | 0  |
| CONTIG-013664 | 517  | 65  | 335  | 737  | 31 |
| CONTIG-013665 | 155  | 12  | 0    | 77   | 0  |
| CONTIG-013666 | 365  | 9   | 21   | 89   | 0  |
| CONTIG-013667 | 202  | 12  | 9    | 70   | 0  |
| CONTIG-013668 | 495  | 59  | 561  | 731  | 13 |
| CONTIG-013669 | 268  | 6   | 2    | 57   | 0  |
| CONTIG-013675 | 219  | 10  | 45   | 28   | 0  |
| CONTIG-013676 | 87   | 6   | 15   | 6    | 2  |
| CONTIG-013677 | 213  | 253 | 1237 | 2053 | 41 |
| CONTIG-013678 | 231  | 9   | 9    | 17   | 0  |
| CONTIG-013679 | 58   | 6   | 17   | 2    | 0  |
| CONTIG-013680 | 106  | 32  | 362  | 0    | 0  |
| CONTIG-013681 | 95   | 24  | 98   | 12   | 0  |
| CONTIG-013682 | 626  | 9   | 29   | 169  | 2  |
| CONTIG-013683 | 92   | 5   | 19   | 3    | 0  |
| CONTIG-013684 | 277  | 22  | 93   | 188  | 6  |
| CONTIG-013685 | 70   | 6   | 2    | 8    | 0  |
| CONTIG-013686 | 851  | 53  | 397  | 994  | 10 |
| CONTIG-013687 | 375  | 15  | 22   | 112  | 5  |
| CONTIG-013690 | 147  | 8   | 42   | 23   | 0  |
| CONTIG-013691 | 80   | 6   | 14   | 11   | 0  |
| CONTIG-013692 | 678  | 24  | 84   | 469  | 4  |
| CONTIG-013693 | 85   | 18  | 37   | 0    | 0  |
| CONTIG-013694 | 115  | 4   | 4    | 12   | 0  |
| CONTIG-013696 | 1013 | 13  | 107  | 429  | 0  |
| CONTIG-013697 | 131  | 12  | 14   | 30   | 0  |
| CONTIG-013698 | 98   | 11  | 27   | 11   | 2  |

|               |      |     |     |      |     |
|---------------|------|-----|-----|------|-----|
| CONTIG-013699 | 546  | 8   | 0   | 99   | 0   |
| CONTIG-013700 | 111  | 20  | 110 | 13   | 0   |
| CONTIG-013701 | 114  | 8   | 7   | 17   | 2   |
| CONTIG-013702 | 1062 | 60  | 503 | 1925 | 285 |
| CONTIG-013703 | 115  | 11  | 51  | 30   | 0   |
| CONTIG-013704 | 370  | 275 | 415 | 6268 | 0   |
| CONTIG-013705 | 290  | 51  | 32  | 673  | 47  |
| CONTIG-013706 | 1285 | 80  | 446 | 4665 | 106 |
| CONTIG-013715 | 102  | 4   | 15  | 0    | 0   |
| CONTIG-013718 | 151  | 11  | 6   | 59   | 0   |
| CONTIG-013719 | 139  | 15  | 95  | 63   | 0   |
| CONTIG-013720 | 589  | 15  | 162 | 174  | 0   |
| CONTIG-013721 | 372  | 10  | 22  | 124  | 2   |
| CONTIG-013722 | 142  | 5   | 11  | 12   | 0   |
| CONTIG-013723 | 890  | 18  | 137 | 280  | 2   |
| CONTIG-013724 | 279  | 10  | 41  | 36   | 0   |
| CONTIG-013725 | 1391 | 42  | 177 | 2534 | 4   |
| CONTIG-013726 | 81   | 8   | 36  | 12   | 0   |
| CONTIG-013727 | 471  | 13  | 35  | 247  | 0   |
| CONTIG-013728 | 691  | 12  | 38  | 203  | 0   |
| CONTIG-013729 | 402  | 12  | 18  | 122  | 2   |
| CONTIG-013730 | 428  | 19  | 243 | 180  | 2   |
| CONTIG-013731 | 293  | 93  | 112 | 1519 | 2   |
| CONTIG-013732 | 69   | 9   | 7   | 0    | 0   |
| CONTIG-013733 | 482  | 144 | 214 | 2732 | 51  |
| CONTIG-013734 | 382  | 20  | 233 | 200  | 2   |
| CONTIG-013735 | 67   | 5   | 8   | 0    | 0   |
| CONTIG-013736 | 209  | 10  | 23  | 62   | 0   |
| CONTIG-013737 | 134  | 28  | 223 | 74   | 0   |
| CONTIG-013738 | 409  | 20  | 158 | 262  | 0   |
| CONTIG-013739 | 200  | 19  | 8   | 147  | 0   |
| CONTIG-013740 | 198  | 9   | 11  | 45   | 0   |
| CONTIG-013742 | 286  | 9   | 11  | 50   | 0   |
| CONTIG-013743 | 73   | 5   | 4   | 2    | 0   |
| CONTIG-013744 | 1561 | 25  | 69  | 925  | 143 |
| CONTIG-013753 | 424  | 16  | 31  | 242  | 4   |
| CONTIG-013754 | 76   | 38  | 107 | 32   | 0   |
| CONTIG-013755 | 511  | 33  | 92  | 240  | 73  |
| CONTIG-013756 | 518  | 36  | 772 | 304  | 4   |
| CONTIG-013757 | 1411 | 15  | 68  | 598  | 2   |
| CONTIG-013758 | 161  | 10  | 8   | 60   | 0   |
| CONTIG-013759 | 200  | 7   | 17  | 34   | 0   |
| CONTIG-013760 | 1425 | 9   | 27  | 331  | 22  |
| CONTIG-013761 | 362  | 11  | 8   | 92   | 0   |
| CONTIG-013762 | 877  | 22  | 46  | 731  | 0   |
| CONTIG-013763 | 283  | 8   | 24  | 60   | 0   |
| CONTIG-013764 | 412  | 12  | 26  | 142  | 2   |

|               |      |     |     |      |     |
|---------------|------|-----|-----|------|-----|
| CONTIG-013765 | 235  | 39  | 53  | 385  | 0   |
| CONTIG-013766 | 159  | 9   | 43  | 29   | 0   |
| CONTIG-013768 | 1029 | 87  | 478 | 2238 | 436 |
| CONTIG-013769 | 1154 | 16  | 128 | 484  | 0   |
| CONTIG-013770 | 127  | 10  | 95  | 11   | 0   |
| CONTIG-013771 | 279  | 7   | 11  | 57   | 0   |
| CONTIG-013772 | 140  | 43  | 164 | 140  | 2   |
| CONTIG-013773 | 66   | 4   | 8   | 3    | 0   |
| CONTIG-013774 | 1040 | 22  | 156 | 496  | 4   |
| CONTIG-013775 | 102  | 17  | 49  | 43   | 0   |
| CONTIG-013776 | 123  | 446 | 461 | 1721 | 208 |
| CONTIG-013777 | 186  | 14  | 4   | 82   | 0   |
| CONTIG-013778 | 217  | 25  | 3   | 6    | 0   |
| CONTIG-013779 | 610  | 36  | 190 | 719  | 6   |
| CONTIG-013780 | 675  | 29  | 269 | 752  | 10  |
| CONTIG-013783 | 324  | 12  | 14  | 158  | 0   |
| CONTIG-013787 | 615  | 11  | 139 | 241  | 4   |
| CONTIG-013788 | 245  | 25  | 90  | 240  | 0   |
| CONTIG-013796 | 331  | 7   | 20  | 43   | 0   |
| CONTIG-013797 | 656  | 12  | 151 | 210  | 4   |
| CONTIG-013798 | 728  | 22  | 222 | 607  | 2   |
| CONTIG-013799 | 264  | 10  | 103 | 58   | 0   |
| CONTIG-013800 | 58   | 20  | 23  | 55   | 0   |
| CONTIG-013801 | 133  | 8   | 18  | 20   | 0   |
| CONTIG-013802 | 558  | 18  | 138 | 314  | 0   |
| CONTIG-013803 | 149  | 198 | 127 | 980  | 99  |
| CONTIG-013804 | 131  | 7   | 21  | 9    | 0   |
| CONTIG-013805 | 289  | 17  | 9   | 238  | 0   |
| CONTIG-013806 | 87   | 38  | 150 | 0    | 0   |
| CONTIG-013807 | 259  | 16  | 70  | 39   | 0   |
| CONTIG-013808 | 233  | 14  | 146 | 29   | 0   |
| CONTIG-013809 | 214  | 23  | 2   | 13   | 0   |
| CONTIG-013810 | 118  | 3   | 3   | 6    | 0   |
| CONTIG-013811 | 110  | 5   | 0   | 11   | 0   |
| CONTIG-013813 | 173  | 17  | 69  | 52   | 2   |
| CONTIG-013814 | 96   | 17  | 41  | 20   | 0   |
| CONTIG-013815 | 94   | 14  | 24  | 0    | 0   |
| CONTIG-013816 | 500  | 8   | 20  | 131  | 2   |
| CONTIG-013817 | 114  | 13  | 78  | 2    | 0   |
| CONTIG-013818 | 177  | 20  | 24  | 164  | 2   |
| CONTIG-013819 | 352  | 9   | 20  | 142  | 0   |
| CONTIG-013820 | 1696 | 39  | 216 | 3737 | 6   |
| CONTIG-013821 | 539  | 9   | 11  | 177  | 0   |
| CONTIG-013822 | 74   | 148 | 65  | 331  | 0   |
| CONTIG-013823 | 313  | 102 | 204 | 497  | 85  |
| CONTIG-013824 | 573  | 12  | 112 | 103  | 0   |
| CONTIG-013825 | 62   | 8   | 51  | 0    | 0   |

|               |      |      |     |       |     |
|---------------|------|------|-----|-------|-----|
| CONTIG-013826 | 91   | 10   | 51  | 7     | 0   |
| CONTIG-013827 | 229  | 12   | 17  | 58    | 0   |
| CONTIG-013829 | 161  | 476  | 957 | 1824  | 90  |
| CONTIG-013830 | 92   | 12   | 41  | 31    | 0   |
| CONTIG-013831 | 156  | 11   | 19  | 56    | 0   |
| CONTIG-013832 | 803  | 18   | 329 | 187   | 0   |
| CONTIG-013833 | 61   | 6    | 9   | 4     | 0   |
| CONTIG-013834 | 135  | 37   | 459 | 0     | 0   |
| CONTIG-013835 | 243  | 13   | 57  | 85    | 0   |
| CONTIG-013837 | 684  | 23   | 155 | 598   | 5   |
| CONTIG-013838 | 58   | 7    | 20  | 0     | 0   |
| CONTIG-013839 | 145  | 7    | 2   | 27    | 0   |
| CONTIG-013840 | 364  | 109  | 326 | 946   | 31  |
| CONTIG-013842 | 490  | 25   | 82  | 460   | 2   |
| CONTIG-013843 | 107  | 9    | 100 | 0     | 0   |
| CONTIG-013844 | 122  | 8    | 2   | 4     | 0   |
| CONTIG-013845 | 737  | 15   | 81  | 320   | 4   |
| CONTIG-013846 | 143  | 8    | 24  | 25    | 0   |
| CONTIG-013847 | 143  | 8    | 5   | 23    | 0   |
| CONTIG-013848 | 91   | 7    | 2   | 0     | 9   |
| CONTIG-013849 | 144  | 11   | 7   | 50    | 0   |
| CONTIG-013850 | 66   | 488  | 55  | 1383  | 0   |
| CONTIG-013851 | 88   | 7    | 8   | 22    | 0   |
| CONTIG-013852 | 168  | 25   | 7   | 214   | 0   |
| CONTIG-013853 | 364  | 17   | 53  | 225   | 0   |
| CONTIG-013854 | 91   | 42   | 253 | 6     | 0   |
| CONTIG-013855 | 628  | 15   | 32  | 343   | 3   |
| CONTIG-013860 | 135  | 18   | 46  | 74    | 0   |
| CONTIG-013869 | 291  | 54   | 47  | 472   | 15  |
| CONTIG-013870 | 547  | 38   | 573 | 567   | 4   |
| CONTIG-013871 | 747  | 16   | 23  | 374   | 2   |
| CONTIG-013872 | 440  | 45   | 320 | 364   | 9   |
| CONTIG-013873 | 521  | 15   | 103 | 202   | 4   |
| CONTIG-013874 | 1158 | 21   | 116 | 600   | 10  |
| CONTIG-013875 | 259  | 9    | 31  | 37    | 0   |
| CONTIG-013876 | 836  | 14   | 97  | 420   | 0   |
| CONTIG-013877 | 171  | 8    | 19  | 22    | 0   |
| CONTIG-013878 | 138  | 6    | 9   | 24    | 0   |
| CONTIG-013879 | 94   | 4    | 0   | 4     | 0   |
| CONTIG-013880 | 248  | 32   | 115 | 329   | 0   |
| CONTIG-013882 | 175  | 7    | 13  | 13    | 0   |
| CONTIG-013883 | 164  | 6    | 4   | 44    | 0   |
| CONTIG-013884 | 61   | 581  | 531 | 558   | 31  |
| CONTIG-013887 | 64   | 10   | 26  | 0     | 0   |
| CONTIG-013888 | 203  | 1010 | 482 | 10310 | 139 |
| CONTIG-013889 | 300  | 26   | 525 | 56    | 0   |
| CONTIG-013890 | 109  | 8    | 29  | 16    | 0   |

|               |      |     |      |      |     |
|---------------|------|-----|------|------|-----|
| CONTIG-013896 | 370  | 16  | 214  | 104  | 2   |
| CONTIG-013897 | 1645 | 35  | 159  | 1336 | 83  |
| CONTIG-013904 | 621  | 46  | 101  | 393  | 133 |
| CONTIG-013905 | 221  | 20  | 194  | 102  | 0   |
| CONTIG-013906 | 182  | 20  | 71   | 45   | 0   |
| CONTIG-013907 | 401  | 20  | 224  | 92   | 9   |
| CONTIG-013908 | 823  | 26  | 471  | 613  | 6   |
| CONTIG-013909 | 76   | 4   | 2    | 2    | 0   |
| CONTIG-013910 | 250  | 10  | 7    | 36   | 0   |
| CONTIG-013911 | 119  | 5   | 2    | 10   | 0   |
| CONTIG-013912 | 125  | 10  | 6    | 50   | 0   |
| CONTIG-013913 | 67   | 7   | 15   | 7    | 0   |
| CONTIG-013914 | 86   | 8   | 7    | 2    | 0   |
| CONTIG-013916 | 61   | 423 | 23   | 882  | 0   |
| CONTIG-013917 | 182  | 14  | 14   | 82   | 7   |
| CONTIG-013918 | 66   | 2   | 0    | 2    | 0   |
| CONTIG-013919 | 407  | 28  | 225  | 94   | 0   |
| CONTIG-013920 | 40   | 29  | 2    | 34   | 0   |
| CONTIG-013921 | 292  | 18  | 173  | 65   | 0   |
| CONTIG-013922 | 139  | 8   | 0    | 36   | 0   |
| CONTIG-013923 | 139  | 52  | 194  | 54   | 0   |
| CONTIG-013924 | 433  | 10  | 72   | 79   | 0   |
| CONTIG-013925 | 65   | 66  | 0    | 0    | 0   |
| CONTIG-013928 | 202  | 11  | 14   | 66   | 0   |
| CONTIG-013929 | 358  | 9   | 43   | 99   | 2   |
| CONTIG-013937 | 361  | 6   | 2    | 14   | 2   |
| CONTIG-013938 | 373  | 41  | 1239 | 100  | 0   |
| CONTIG-013939 | 501  | 33  | 199  | 505  | 37  |
| CONTIG-013940 | 271  | 7   | 17   | 44   | 0   |
| CONTIG-013941 | 187  | 15  | 15   | 85   | 0   |
| CONTIG-013942 | 275  | 7   | 115  | 23   | 0   |
| CONTIG-013943 | 280  | 16  | 8    | 148  | 0   |
| CONTIG-013945 | 128  | 142 | 346  | 760  | 0   |
| CONTIG-013946 | 88   | 6   | 5    | 13   | 0   |
| CONTIG-013947 | 130  | 15  | 48   | 59   | 0   |
| CONTIG-013948 | 454  | 12  | 67   | 109  | 0   |
| CONTIG-013949 | 161  | 12  | 19   | 77   | 0   |
| CONTIG-013950 | 386  | 10  | 23   | 129  | 0   |
| CONTIG-013951 | 1221 | 14  | 76   | 286  | 13  |
| CONTIG-013952 | 1798 | 44  | 159  | 3085 | 149 |
| CONTIG-013953 | 1440 | 48  | 78   | 1457 | 337 |
| CONTIG-013954 | 360  | 36  | 139  | 468  | 24  |
| CONTIG-013956 | 460  | 23  | 250  | 197  | 6   |
| CONTIG-013957 | 71   | 5   | 8    | 7    | 0   |
| CONTIG-013958 | 174  | 353 | 311  | 2027 | 12  |
| CONTIG-013959 | 140  | 4   | 14   | 17   | 0   |
| CONTIG-013960 | 161  | 10  | 30   | 35   | 0   |

|               |      |      |     |      |      |
|---------------|------|------|-----|------|------|
| CONTIG-013961 | 243  | 29   | 41  | 218  | 7    |
| CONTIG-013962 | 562  | 16   | 84  | 342  | 4    |
| CONTIG-013963 | 79   | 6    | 8   | 8    | 0    |
| CONTIG-013964 | 75   | 6    | 2   | 4    | 0    |
| CONTIG-013965 | 67   | 1892 | 264 | 45   | 3047 |
| CONTIG-013966 | 967  | 11   | 74  | 159  | 0    |
| CONTIG-013967 | 70   | 3    | 3   | 0    | 0    |
| CONTIG-013971 | 67   | 4    | 4   | 6    | 0    |
| CONTIG-013972 | 334  | 13   | 11  | 130  | 2    |
| CONTIG-013973 | 123  | 9    | 13  | 15   | 0    |
| CONTIG-013974 | 196  | 8    | 6   | 46   | 0    |
| CONTIG-013975 | 703  | 22   | 54  | 220  | 0    |
| CONTIG-013976 | 299  | 342  | 30  | 2    | 945  |
| CONTIG-013977 | 397  | 13   | 82  | 164  | 0    |
| CONTIG-013979 | 166  | 12   | 34  | 50   | 0    |
| CONTIG-013980 | 57   | 584  | 170 | 1486 | 0    |
| CONTIG-013981 | 175  | 42   | 649 | 0    | 4    |
| CONTIG-013982 | 75   | 3    | 3   | 6    | 0    |
| CONTIG-013987 | 289  | 13   | 8   | 109  | 0    |
| CONTIG-013988 | 164  | 15   | 111 | 33   | 0    |
| CONTIG-013989 | 1599 | 34   | 379 | 1240 | 118  |
| CONTIG-013990 | 237  | 88   | 135 | 6    | 299  |
| CONTIG-013991 | 294  | 6    | 65  | 37   | 0    |
| CONTIG-013992 | 433  | 13   | 20  | 132  | 5    |
| CONTIG-013993 | 1587 | 27   | 86  | 1760 | 40   |
| CONTIG-013994 | 66   | 3    | 2   | 0    | 0    |
| CONTIG-013995 | 79   | 10   | 66  | 2    | 0    |
| CONTIG-013997 | 624  | 30   | 94  | 722  | 15   |
| CONTIG-013998 | 242  | 12   | 2   | 95   | 0    |
| CONTIG-013999 | 1190 | 43   | 21  | 96   | 0    |
| CONTIG-014005 | 206  | 8    | 8   | 42   | 2    |
| CONTIG-014006 | 136  | 8    | 25  | 5    | 0    |
| CONTIG-014007 | 1056 | 44   | 231 | 1421 | 26   |
| CONTIG-014008 | 85   | 6    | 8   | 17   | 2    |
| CONTIG-014009 | 347  | 23   | 183 | 139  | 0    |
| CONTIG-014010 | 185  | 55   | 395 | 152  | 0    |
| CONTIG-014011 | 357  | 11   | 14  | 130  | 0    |
| CONTIG-014012 | 397  | 13   | 43  | 73   | 7    |
| CONTIG-014013 | 230  | 33   | 691 | 4    | 10   |
| CONTIG-014014 | 58   | 7    | 11  | 0    | 0    |
| CONTIG-014015 | 63   | 5    | 11  | 6    | 0    |
| CONTIG-014016 | 1100 | 18   | 108 | 406  | 4    |
| CONTIG-014017 | 178  | 10   | 41  | 8    | 0    |
| CONTIG-014018 | 139  | 12   | 87  | 16   | 0    |
| CONTIG-014019 | 107  | 14   | 4   | 63   | 0    |
| CONTIG-014020 | 59   | 10   | 20  | 6    | 0    |
| CONTIG-014021 | 81   | 8    | 3   | 22   | 0    |

|               |      |     |     |      |     |
|---------------|------|-----|-----|------|-----|
| CONTIG-014030 | 163  | 46  | 421 | 87   | 0   |
| CONTIG-014031 | 269  | 31  | 222 | 125  | 10  |
| CONTIG-014033 | 241  | 11  | 101 | 56   | 0   |
| CONTIG-014034 | 828  | 32  | 284 | 491  | 6   |
| CONTIG-014039 | 406  | 12  | 105 | 178  | 0   |
| CONTIG-014040 | 404  | 42  | 82  | 792  | 6   |
| CONTIG-014041 | 68   | 33  | 133 | 38   | 0   |
| CONTIG-014042 | 989  | 23  | 241 | 732  | 15  |
| CONTIG-014043 | 2577 | 39  | 197 | 3313 | 79  |
| CONTIG-014045 | 89   | 581 | 395 | 1990 | 0   |
| CONTIG-014046 | 202  | 640 | 966 | 3103 | 346 |
| CONTIG-014047 | 234  | 7   | 19  | 42   | 0   |
| CONTIG-014048 | 231  | 23  | 345 | 0    | 2   |
| CONTIG-014050 | 80   | 5   | 6   | 11   | 0   |
| CONTIG-014058 | 1169 | 13  | 44  | 512  | 4   |
| CONTIG-014059 | 387  | 15  | 36  | 156  | 0   |
| CONTIG-014060 | 732  | 32  | 61  | 1399 | 0   |
| CONTIG-014061 | 1215 | 32  | 19  | 1055 | 121 |
| CONTIG-014062 | 148  | 35  | 318 | 41   | 0   |
| CONTIG-014063 | 225  | 157 | 343 | 1254 | 87  |
| CONTIG-014064 | 106  | 9   | 3   | 26   | 0   |
| CONTIG-014065 | 101  | 11  | 19  | 37   | 0   |
| CONTIG-014066 | 393  | 41  | 320 | 290  | 20  |
| CONTIG-014067 | 195  | 47  | 274 | 375  | 0   |
| CONTIG-014068 | 183  | 8   | 6   | 2    | 0   |
| CONTIG-014069 | 648  | 15  | 88  | 225  | 4   |
| CONTIG-014070 | 591  | 40  | 11  | 0    | 200 |
| CONTIG-014075 | 95   | 18  | 0   | 2    | 0   |
| CONTIG-014076 | 170  | 9   | 0   | 37   | 0   |
| CONTIG-014077 | 259  | 8   | 54  | 21   | 0   |
| CONTIG-014078 | 700  | 17  | 130 | 316  | 0   |
| CONTIG-014079 | 576  | 18  | 46  | 519  | 0   |
| CONTIG-014080 | 102  | 8   | 48  | 4    | 0   |
| CONTIG-014081 | 517  | 18  | 99  | 276  | 11  |
| CONTIG-014082 | 355  | 14  | 50  | 116  | 0   |
| CONTIG-014083 | 368  | 8   | 0   | 57   | 2   |
| CONTIG-014085 | 44   | 19  | 10  | 14   | 0   |
| CONTIG-014086 | 316  | 7   | 6   | 49   | 0   |
| CONTIG-014087 | 880  | 22  | 118 | 473  | 37  |
| CONTIG-014088 | 99   | 101 | 235 | 34   | 2   |
| CONTIG-014091 | 109  | 87  | 32  | 281  | 6   |
| CONTIG-014092 | 113  | 7   | 14  | 14   | 0   |
| CONTIG-014093 | 39   | 63  | 25  | 16   | 0   |
| CONTIG-014094 | 360  | 123 | 495 | 2217 | 15  |
| CONTIG-014095 | 77   | 50  | 24  | 155  | 0   |
| CONTIG-014096 | 401  | 13  | 37  | 229  | 0   |
| CONTIG-014100 | 197  | 73  | 330 | 380  | 8   |

|               |      |     |     |      |      |
|---------------|------|-----|-----|------|------|
| CONTIG-014101 | 65   | 5   | 4   | 4    | 0    |
| CONTIG-014102 | 70   | 10  | 20  | 11   | 0    |
| CONTIG-014103 | 241  | 9   | 110 | 23   | 0    |
| CONTIG-014104 | 675  | 19  | 134 | 487  | 0    |
| CONTIG-014105 | 949  | 43  | 654 | 1317 | 16   |
| CONTIG-014106 | 62   | 5   | 4   | 8    | 0    |
| CONTIG-014107 | 110  | 30  | 112 | 63   | 0    |
| CONTIG-014108 | 74   | 91  | 135 | 7    | 0    |
| CONTIG-014110 | 406  | 11  | 43  | 63   | 0    |
| CONTIG-014111 | 254  | 9   | 23  | 48   | 0    |
| CONTIG-014112 | 103  | 11  | 26  | 20   | 0    |
| CONTIG-014113 | 257  | 12  | 10  | 58   | 0    |
| CONTIG-014114 | 456  | 39  | 133 | 265  | 8    |
| CONTIG-014115 | 778  | 24  | 52  | 837  | 0    |
| CONTIG-014116 | 71   | 3   | 3   | 4    | 0    |
| CONTIG-014117 | 135  | 6   | 4   | 27   | 0    |
| CONTIG-014118 | 762  | 39  | 228 | 931  | 32   |
| CONTIG-014119 | 458  | 12  | 23  | 189  | 2    |
| CONTIG-014120 | 593  | 22  | 56  | 667  | 0    |
| CONTIG-014121 | 704  | 28  | 260 | 680  | 0    |
| CONTIG-014122 | 130  | 692 | 161 | 78   | 1785 |
| CONTIG-014124 | 163  | 92  | 116 | 325  | 4    |
| CONTIG-014125 | 930  | 59  | 236 | 2552 | 32   |
| CONTIG-014126 | 187  | 10  | 10  | 91   | 0    |
| CONTIG-014127 | 46   | 153 | 201 | 63   | 7    |
| CONTIG-014128 | 352  | 15  | 30  | 198  | 0    |
| CONTIG-014129 | 243  | 9   | 61  | 69   | 0    |
| CONTIG-014130 | 495  | 18  | 34  | 375  | 0    |
| CONTIG-014131 | 548  | 47  | 79  | 392  | 36   |
| CONTIG-014132 | 436  | 9   | 43  | 124  | 0    |
| CONTIG-014134 | 254  | 14  | 91  | 71   | 0    |
| CONTIG-014135 | 60   | 7   | 17  | 6    | 0    |
| CONTIG-014136 | 94   | 16  | 5   | 60   | 0    |
| CONTIG-014137 | 363  | 7   | 34  | 42   | 2    |
| CONTIG-014138 | 62   | 7   | 15  | 10   | 0    |
| CONTIG-014139 | 807  | 15  | 120 | 451  | 2    |
| CONTIG-014140 | 379  | 21  | 24  | 9    | 0    |
| CONTIG-014141 | 298  | 13  | 52  | 106  | 0    |
| CONTIG-014142 | 72   | 36  | 21  | 44   | 0    |
| CONTIG-014143 | 295  | 21  | 34  | 182  | 2    |
| CONTIG-014144 | 1706 | 26  | 170 | 1249 | 4    |
| CONTIG-014145 | 349  | 120 | 259 | 669  | 118  |
| CONTIG-014151 | 86   | 3   | 0   | 2    | 0    |
| CONTIG-014152 | 499  | 39  | 28  | 595  | 21   |
| CONTIG-014153 | 70   | 3   | 0   | 8    | 0    |
| CONTIG-014157 | 139  | 19  | 27  | 64   | 0    |
| CONTIG-014158 | 94   | 8   | 8   | 34   | 0    |



|               |     |      |     |      |     |
|---------------|-----|------|-----|------|-----|
| CONTIG-014159 | 306 | 14   | 7   | 122  | 6   |
| CONTIG-014160 | 122 | 13   | 9   | 55   | 0   |
| CONTIG-014161 | 381 | 19   | 95  | 190  | 4   |
| CONTIG-014163 | 256 | 11   | 47  | 52   | 0   |
| CONTIG-014164 | 189 | 9    | 33  | 49   | 0   |
| CONTIG-014165 | 133 | 5    | 5   | 10   | 0   |
| CONTIG-014167 | 476 | 31   | 46  | 499  | 4   |
| CONTIG-014168 | 111 | 12   | 9   | 41   | 0   |
| CONTIG-014169 | 89  | 8    | 8   | 6    | 0   |
| CONTIG-014170 | 191 | 8    | 40  | 31   | 0   |
| CONTIG-014171 | 305 | 34   | 431 | 261  | 0   |
| CONTIG-014172 | 211 | 8    | 11  | 41   | 0   |
| CONTIG-014173 | 673 | 20   | 363 | 384  | 4   |
| CONTIG-014174 | 129 | 553  | 356 | 2352 | 226 |
| CONTIG-014176 | 787 | 14   | 66  | 313  | 4   |
| CONTIG-014177 | 101 | 11   | 58  | 8    | 0   |
| CONTIG-014179 | 282 | 11   | 19  | 70   | 0   |
| CONTIG-014180 | 116 | 5    | 5   | 9    | 0   |
| CONTIG-014181 | 215 | 11   | 28  | 116  | 0   |
| CONTIG-014182 | 276 | 27   | 130 | 78   | 2   |
| CONTIG-014189 | 157 | 6    | 10  | 22   | 0   |
| CONTIG-014190 | 117 | 1247 | 172 | 8279 | 0   |
| CONTIG-014191 | 286 | 38   | 106 | 388  | 8   |
| CONTIG-014192 | 565 | 24   | 72  | 481  | 22  |
| CONTIG-014193 | 234 | 6    | 5   | 16   | 0   |
| CONTIG-014195 | 528 | 88   | 392 | 2678 | 4   |
| CONTIG-014196 | 373 | 27   | 153 | 239  | 18  |
| CONTIG-014197 | 72  | 8    | 24  | 12   | 0   |
| CONTIG-014198 | 113 | 7    | 35  | 18   | 0   |
| CONTIG-014199 | 135 | 11   | 9   | 62   | 0   |
| CONTIG-014204 | 123 | 16   | 92  | 21   | 0   |
| CONTIG-014205 | 106 | 231  | 381 | 281  | 40  |
| CONTIG-014206 | 919 | 27   | 75  | 722  | 2   |
| CONTIG-014212 | 49  | 23   | 5   | 0    | 0   |
| CONTIG-014213 | 119 | 31   | 92  | 81   | 0   |
| CONTIG-014214 | 541 | 24   | 67  | 331  | 2   |
| CONTIG-014215 | 634 | 40   | 147 | 1506 | 0   |
| CONTIG-014216 | 59  | 41   | 23  | 0    | 0   |
| CONTIG-014219 | 88  | 11   | 43  | 8    | 2   |
| CONTIG-014221 | 261 | 11   | 3   | 15   | 0   |
| CONTIG-014224 | 313 | 9    | 119 | 23   | 0   |
| CONTIG-014225 | 133 | 10   | 37  | 43   | 0   |
| CONTIG-014226 | 94  | 7    | 3   | 23   | 0   |
| CONTIG-014227 | 179 | 16   | 106 | 89   | 0   |
| CONTIG-014228 | 131 | 9    | 27  | 15   | 0   |
| CONTIG-014229 | 209 | 6    | 19  | 10   | 0   |
| CONTIG-014230 | 796 | 105  | 106 | 5513 | 0   |

|               |      |     |     |      |    |
|---------------|------|-----|-----|------|----|
| CONTIG-014231 | 279  | 22  | 4   | 152  | 6  |
| CONTIG-014232 | 46   | 929 | 455 | 1148 | 45 |
| CONTIG-014233 | 420  | 11  | 176 | 95   | 0  |
| CONTIG-014234 | 117  | 4   | 3   | 6    | 0  |
| CONTIG-014235 | 76   | 24  | 6   | 14   | 0  |
| CONTIG-014236 | 124  | 4   | 3   | 16   | 0  |
| CONTIG-014238 | 132  | 25  | 13  | 90   | 0  |
| CONTIG-014239 | 472  | 11  | 23  | 146  | 2  |
| CONTIG-014244 | 66   | 26  | 77  | 0    | 0  |
| CONTIG-014245 | 247  | 7   | 16  | 53   | 0  |
| CONTIG-014246 | 273  | 14  | 80  | 88   | 0  |
| CONTIG-014247 | 670  | 49  | 2   | 16   | 0  |
| CONTIG-014248 | 113  | 4   | 3   | 6    | 0  |
| CONTIG-014249 | 250  | 9   | 116 | 33   | 0  |
| CONTIG-014250 | 685  | 48  | 378 | 506  | 8  |
| CONTIG-014251 | 1136 | 32  | 56  | 2228 | 0  |
| CONTIG-014252 | 166  | 23  | 75  | 25   | 0  |
| CONTIG-014253 | 192  | 8   | 5   | 41   | 0  |
| CONTIG-014254 | 652  | 17  | 47  | 311  | 0  |
| CONTIG-014255 | 229  | 45  | 51  | 312  | 0  |
| CONTIG-014256 | 349  | 38  | 111 | 359  | 3  |
| CONTIG-014257 | 962  | 22  | 107 | 506  | 38 |
| CONTIG-014258 | 316  | 26  | 104 | 334  | 0  |
| CONTIG-014259 | 226  | 48  | 135 | 205  | 44 |
| CONTIG-014260 | 262  | 16  | 53  | 65   | 4  |
| CONTIG-014261 | 266  | 33  | 60  | 487  | 0  |
| CONTIG-014262 | 670  | 15  | 171 | 260  | 4  |
| CONTIG-014264 | 124  | 13  | 12  | 33   | 2  |
| CONTIG-014265 | 97   | 18  | 4   | 63   | 0  |
| CONTIG-014268 | 67   | 11  | 7   | 16   | 0  |
| CONTIG-014269 | 436  | 18  | 42  | 150  | 2  |
| CONTIG-014270 | 755  | 15  | 53  | 378  | 0  |
| CONTIG-014271 | 70   | 5   | 0   | 8    | 0  |
| CONTIG-014272 | 174  | 14  | 102 | 37   | 0  |
| CONTIG-014273 | 58   | 4   | 13  | 0    | 0  |
| CONTIG-014274 | 298  | 44  | 385 | 347  | 0  |
| CONTIG-014275 | 166  | 25  | 75  | 50   | 0  |
| CONTIG-014276 | 620  | 28  | 193 | 558  | 18 |
| CONTIG-014277 | 50   | 75  | 19  | 155  | 0  |
| CONTIG-014278 | 181  | 11  | 7   | 57   | 0  |
| CONTIG-014279 | 242  | 27  | 127 | 38   | 0  |
| CONTIG-014281 | 86   | 8   | 0   | 19   | 0  |
| CONTIG-014282 | 1295 | 29  | 506 | 1291 | 9  |
| CONTIG-014283 | 140  | 8   | 77  | 6    | 0  |
| CONTIG-014284 | 126  | 17  | 7   | 62   | 0  |
| CONTIG-014285 | 342  | 15  | 43  | 176  | 0  |
| CONTIG-014286 | 668  | 15  | 58  | 340  | 2  |

|               |      |     |     |      |    |
|---------------|------|-----|-----|------|----|
| CONTIG-014287 | 291  | 11  | 102 | 91   | 0  |
| CONTIG-014288 | 157  | 8   | 8   | 31   | 0  |
| CONTIG-014289 | 62   | 9   | 4   | 21   | 0  |
| CONTIG-014290 | 282  | 5   | 33  | 12   | 0  |
| CONTIG-014291 | 851  | 16  | 2   | 218  | 2  |
| CONTIG-014292 | 244  | 17  | 94  | 115  | 0  |
| CONTIG-014293 | 136  | 5   | 2   | 4    | 0  |
| CONTIG-014294 | 85   | 364 | 62  | 1643 | 0  |
| CONTIG-014297 | 71   | 4   | 7   | 5    | 0  |
| CONTIG-014298 | 259  | 20  | 57  | 146  | 2  |
| CONTIG-014299 | 142  | 5   | 2   | 14   | 2  |
| CONTIG-014300 | 256  | 14  | 45  | 95   | 0  |
| CONTIG-014301 | 557  | 20  | 234 | 283  | 0  |
| CONTIG-014302 | 260  | 22  | 28  | 145  | 0  |
| CONTIG-014303 | 300  | 38  | 760 | 268  | 0  |
| CONTIG-014304 | 259  | 25  | 2   | 159  | 2  |
| CONTIG-014305 | 193  | 22  | 71  | 119  | 2  |
| CONTIG-014306 | 971  | 12  | 56  | 438  | 0  |
| CONTIG-014311 | 868  | 20  | 269 | 593  | 8  |
| CONTIG-014312 | 280  | 14  | 18  | 135  | 0  |
| CONTIG-014314 | 235  | 13  | 31  | 91   | 0  |
| CONTIG-014315 | 894  | 21  | 201 | 561  | 7  |
| CONTIG-014317 | 247  | 11  | 42  | 115  | 0  |
| CONTIG-014318 | 153  | 14  | 108 | 27   | 2  |
| CONTIG-014319 | 614  | 18  | 33  | 379  | 18 |
| CONTIG-014321 | 61   | 4   | 6   | 6    | 0  |
| CONTIG-014322 | 363  | 19  | 232 | 184  | 0  |
| CONTIG-014323 | 294  | 17  | 24  | 159  | 0  |
| CONTIG-014329 | 489  | 34  | 292 | 600  | 10 |
| CONTIG-014330 | 65   | 13  | 23  | 33   | 0  |
| CONTIG-014331 | 599  | 25  | 107 | 405  | 0  |
| CONTIG-014333 | 97   | 8   | 13  | 23   | 0  |
| CONTIG-014334 | 1386 | 24  | 450 | 1300 | 6  |
| CONTIG-014335 | 278  | 13  | 48  | 91   | 0  |
| CONTIG-014336 | 1022 | 35  | 478 | 1024 | 37 |
| CONTIG-014337 | 108  | 18  | 23  | 23   | 0  |
| CONTIG-014338 | 282  | 37  | 228 | 299  | 2  |
| CONTIG-014339 | 184  | 16  | 84  | 2    | 50 |
| CONTIG-014340 | 176  | 8   | 42  | 8    | 0  |
| CONTIG-014341 | 667  | 35  | 238 | 955  | 0  |
| CONTIG-014342 | 281  | 112 | 219 | 1183 | 18 |
| CONTIG-014343 | 70   | 5   | 9   | 0    | 0  |
| CONTIG-014344 | 593  | 18  | 76  | 303  | 8  |
| CONTIG-014345 | 134  | 6   | 9   | 14   | 0  |
| CONTIG-014346 | 107  | 8   | 20  | 10   | 0  |
| CONTIG-014347 | 1202 | 18  | 457 | 693  | 0  |
| CONTIG-014348 | 78   | 493 | 142 | 1009 | 98 |

|               |      |     |     |      |     |
|---------------|------|-----|-----|------|-----|
| CONTIG-014349 | 463  | 19  | 109 | 191  | 0   |
| CONTIG-014350 | 75   | 11  | 9   | 23   | 0   |
| CONTIG-014351 | 499  | 12  | 20  | 250  | 0   |
| CONTIG-014352 | 119  | 8   | 24  | 20   | 0   |
| CONTIG-014353 | 180  | 10  | 6   | 0    | 10  |
| CONTIG-014354 | 174  | 8   | 21  | 28   | 2   |
| CONTIG-014355 | 127  | 15  | 20  | 76   | 0   |
| CONTIG-014356 | 79   | 4   | 4   | 0    | 0   |
| CONTIG-014357 | 1159 | 56  | 675 | 1555 | 62  |
| CONTIG-014358 | 413  | 131 | 173 | 1675 | 130 |
| CONTIG-014359 | 1126 | 25  | 437 | 671  | 25  |
| CONTIG-014360 | 599  | 17  | 300 | 343  | 0   |
| CONTIG-014363 | 111  | 13  | 28  | 0    | 0   |
| CONTIG-014364 | 206  | 8   | 33  | 50   | 0   |
| CONTIG-014365 | 619  | 22  | 111 | 403  | 10  |
| CONTIG-014366 | 640  | 26  | 299 | 421  | 5   |
| CONTIG-014367 | 40   | 394 | 97  | 235  | 22  |
| CONTIG-014369 | 214  | 211 | 24  | 2975 | 0   |
| CONTIG-014370 | 522  | 16  | 109 | 299  | 3   |
| CONTIG-014371 | 247  | 14  | 13  | 45   | 16  |
| CONTIG-014372 | 534  | 17  | 118 | 278  | 2   |
| CONTIG-014373 | 365  | 13  | 106 | 138  | 0   |
| CONTIG-014374 | 621  | 30  | 174 | 403  | 18  |
| CONTIG-014375 | 281  | 9   | 42  | 85   | 0   |
| CONTIG-014376 | 270  | 13  | 16  | 128  | 0   |
| CONTIG-014377 | 65   | 8   | 2   | 12   | 0   |
| CONTIG-014378 | 108  | 8   | 14  | 27   | 0   |
| CONTIG-014379 | 111  | 8   | 9   | 36   | 0   |
| CONTIG-014380 | 60   | 205 | 126 | 257  | 27  |
| CONTIG-014381 | 104  | 11  | 13  | 13   | 0   |
| CONTIG-014382 | 245  | 8   | 7   | 78   | 0   |
| CONTIG-014383 | 274  | 9   | 17  | 53   | 0   |
| CONTIG-014384 | 511  | 25  | 61  | 507  | 2   |
| CONTIG-014385 | 247  | 27  | 22  | 314  | 0   |
| CONTIG-014386 | 286  | 12  | 17  | 23   | 0   |
| CONTIG-014387 | 96   | 9   | 15  | 26   | 2   |
| CONTIG-014388 | 148  | 8   | 2   | 66   | 0   |
| CONTIG-014393 | 268  | 13  | 66  | 46   | 2   |
| CONTIG-014394 | 58   | 57  | 288 | 22   | 4   |
| CONTIG-014395 | 318  | 59  | 363 | 387  | 4   |
| CONTIG-014396 | 222  | 20  | 6   | 183  | 0   |
| CONTIG-014397 | 714  | 38  | 179 | 1225 | 9   |
| CONTIG-014398 | 414  | 14  | 12  | 89   | 0   |
| CONTIG-014399 | 100  | 20  | 15  | 67   | 2   |
| CONTIG-014400 | 501  | 17  | 61  | 392  | 2   |
| CONTIG-014401 | 290  | 21  | 34  | 147  | 2   |
| CONTIG-014402 | 80   | 6   | 6   | 4    | 0   |

|               |      |     |     |      |     |
|---------------|------|-----|-----|------|-----|
| CONTIG-014404 | 41   | 40  | 7   | 33   | 0   |
| CONTIG-014405 | 148  | 5   | 14  | 2    | 0   |
| CONTIG-014406 | 339  | 23  | 66  | 184  | 4   |
| CONTIG-014407 | 112  | 9   | 20  | 19   | 2   |
| CONTIG-014408 | 823  | 26  | 57  | 765  | 25  |
| CONTIG-014409 | 1026 | 28  | 61  | 75   | 0   |
| CONTIG-014410 | 80   | 4   | 2   | 10   | 0   |
| CONTIG-014416 | 429  | 85  | 319 | 1713 | 0   |
| CONTIG-014417 | 658  | 16  | 147 | 158  | 4   |
| CONTIG-014420 | 129  | 23  | 9   | 105  | 0   |
| CONTIG-014421 | 77   | 11  | 10  | 8    | 0   |
| CONTIG-014422 | 151  | 8   | 16  | 27   | 0   |
| CONTIG-014423 | 175  | 7   | 4   | 47   | 0   |
| CONTIG-014424 | 248  | 10  | 34  | 86   | 0   |
| CONTIG-014425 | 66   | 7   | 9   | 8    | 0   |
| CONTIG-014426 | 300  | 78  | 293 | 621  | 2   |
| CONTIG-014427 | 146  | 5   | 36  | 9    | 0   |
| CONTIG-014432 | 105  | 9   | 16  | 4    | 0   |
| CONTIG-014433 | 146  | 17  | 182 | 25   | 0   |
| CONTIG-014434 | 192  | 10  | 62  | 36   | 0   |
| CONTIG-014435 | 703  | 19  | 300 | 227  | 4   |
| CONTIG-014436 | 176  | 10  | 2   | 42   | 0   |
| CONTIG-014437 | 647  | 15  | 72  | 216  | 6   |
| CONTIG-014438 | 469  | 13  | 110 | 170  | 2   |
| CONTIG-014439 | 595  | 13  | 91  | 184  | 0   |
| CONTIG-014440 | 322  | 6   | 16  | 12   | 0   |
| CONTIG-014441 | 140  | 12  | 99  | 0    | 0   |
| CONTIG-014442 | 416  | 33  | 756 | 303  | 0   |
| CONTIG-014445 | 163  | 13  | 14  | 44   | 0   |
| CONTIG-014446 | 95   | 20  | 72  | 12   | 0   |
| CONTIG-014447 | 414  | 11  | 9   | 72   | 0   |
| CONTIG-014448 | 416  | 18  | 56  | 195  | 2   |
| CONTIG-014449 | 1007 | 67  | 675 | 3410 | 0   |
| CONTIG-014450 | 83   | 5   | 14  | 6    | 0   |
| CONTIG-014451 | 64   | 136 | 25  | 401  | 0   |
| CONTIG-014452 | 274  | 24  | 28  | 211  | 2   |
| CONTIG-014453 | 560  | 82  | 398 | 2349 | 2   |
| CONTIG-014454 | 86   | 26  | 30  | 84   | 0   |
| CONTIG-014455 | 303  | 18  | 180 | 110  | 2   |
| CONTIG-014456 | 368  | 29  | 54  | 492  | 0   |
| CONTIG-014457 | 509  | 17  | 75  | 205  | 4   |
| CONTIG-014458 | 71   | 6   | 8   | 3    | 0   |
| CONTIG-014459 | 373  | 372 | 330 | 4271 | 606 |
| CONTIG-014460 | 1324 | 28  | 281 | 1949 | 2   |
| CONTIG-014461 | 135  | 22  | 180 | 36   | 0   |
| CONTIG-014466 | 452  | 16  | 92  | 253  | 0   |
| CONTIG-014467 | 350  | 24  | 143 | 276  | 0   |

|               |      |    |     |      |     |
|---------------|------|----|-----|------|-----|
| CONTIG-014468 | 286  | 10 | 2   | 91   | 2   |
| CONTIG-014469 | 1482 | 68 | 537 | 3631 | 279 |
| CONTIG-014470 | 448  | 12 | 157 | 109  | 0   |
| CONTIG-014471 | 779  | 11 | 21  | 142  | 16  |
| CONTIG-014472 | 746  | 14 | 284 | 285  | 0   |
| CONTIG-014473 | 128  | 14 | 13  | 85   | 0   |
| CONTIG-014474 | 86   | 6  | 21  | 13   | 0   |
| CONTIG-014475 | 508  | 14 | 14  | 75   | 2   |
| CONTIG-014476 | 118  | 5  | 10  | 11   | 0   |
| CONTIG-014477 | 661  | 30 | 26  | 78   | 0   |
| CONTIG-014478 | 280  | 13 | 47  | 93   | 0   |
| CONTIG-014479 | 472  | 58 | 6   | 2    | 204 |
| CONTIG-014481 | 256  | 78 | 388 | 768  | 5   |
| CONTIG-014482 | 790  | 16 | 66  | 440  | 0   |
| CONTIG-014483 | 345  | 19 | 84  | 266  | 0   |
| CONTIG-014484 | 270  | 23 | 77  | 227  | 0   |
| CONTIG-014485 | 59   | 5  | 7   | 2    | 0   |
| CONTIG-014486 | 85   | 4  | 3   | 10   | 0   |
| CONTIG-014487 | 248  | 8  | 13  | 16   | 0   |
| CONTIG-014488 | 129  | 8  | 35  | 21   | 0   |
| CONTIG-014489 | 967  | 74 | 150 | 1494 | 181 |
| CONTIG-014490 | 60   | 4  | 0   | 5    | 0   |
| CONTIG-014491 | 418  | 19 | 85  | 217  | 2   |
| CONTIG-014492 | 261  | 36 | 74  | 220  | 4   |
| CONTIG-014493 | 384  | 12 | 110 | 110  | 0   |
| CONTIG-014496 | 170  | 6  | 0   | 22   | 0   |
| CONTIG-014497 | 639  | 41 | 200 | 992  | 10  |
| CONTIG-014498 | 279  | 11 | 74  | 66   | 4   |
| CONTIG-014499 | 344  | 18 | 51  | 228  | 0   |
| CONTIG-014500 | 1545 | 39 | 592 | 2780 | 0   |
| CONTIG-014501 | 86   | 4  | 3   | 10   | 0   |
| CONTIG-014502 | 64   | 7  | 0   | 15   | 0   |
| CONTIG-014503 | 57   | 28 | 117 | 7    | 0   |
| CONTIG-014504 | 702  | 18 | 50  | 238  | 12  |
| CONTIG-014505 | 80   | 24 | 31  | 33   | 0   |
| CONTIG-014506 | 665  | 35 | 179 | 1302 | 0   |
| CONTIG-014507 | 159  | 5  | 15  | 25   | 0   |
| CONTIG-014508 | 102  | 3  | 2   | 0    | 0   |
| CONTIG-014515 | 68   | 6  | 0   | 6    | 0   |
| CONTIG-014517 | 75   | 11 | 21  | 25   | 0   |
| CONTIG-014518 | 205  | 19 | 43  | 28   | 0   |
| CONTIG-014519 | 74   | 5  | 22  | 2    | 0   |
| CONTIG-014520 | 419  | 12 | 38  | 193  | 2   |
| CONTIG-014521 | 434  | 8  | 34  | 94   | 0   |
| CONTIG-014529 | 618  | 13 | 49  | 251  | 0   |
| CONTIG-014530 | 1045 | 16 | 69  | 847  | 0   |
| CONTIG-014531 | 104  | 23 | 126 | 30   | 0   |

|               |      |    |     |      |    |
|---------------|------|----|-----|------|----|
| CONTIG-014535 | 280  | 11 | 10  | 108  | 0  |
| CONTIG-014536 | 339  | 32 | 202 | 140  | 7  |
| CONTIG-014537 | 564  | 33 | 202 | 717  | 0  |
| CONTIG-014542 | 424  | 16 | 66  | 206  | 0  |
| CONTIG-014545 | 90   | 11 | 4   | 7    | 0  |
| CONTIG-014547 | 506  | 14 | 53  | 221  | 0  |
| CONTIG-014548 | 289  | 6  | 26  | 45   | 0  |
| CONTIG-014549 | 284  | 18 | 340 | 87   | 0  |
| CONTIG-014550 | 181  | 15 | 15  | 119  | 0  |
| CONTIG-014551 | 753  | 22 | 185 | 450  | 0  |
| CONTIG-014552 | 334  | 13 | 28  | 66   | 2  |
| CONTIG-014554 | 340  | 14 | 52  | 59   | 7  |
| CONTIG-014556 | 208  | 12 | 43  | 29   | 2  |
| CONTIG-014557 | 651  | 12 | 97  | 184  | 21 |
| CONTIG-014559 | 545  | 15 | 225 | 209  | 0  |
| CONTIG-014560 | 111  | 4  | 3   | 15   | 0  |
| CONTIG-014561 | 250  | 8  | 6   | 47   | 0  |
| CONTIG-014562 | 318  | 29 | 149 | 350  | 5  |
| CONTIG-014563 | 95   | 5  | 12  | 13   | 0  |
| CONTIG-014564 | 286  | 10 | 39  | 63   | 0  |
| CONTIG-014565 | 108  | 4  | 7   | 14   | 0  |
| CONTIG-014566 | 60   | 12 | 87  | 0    | 0  |
| CONTIG-014567 | 934  | 20 | 264 | 647  | 2  |
| CONTIG-014568 | 687  | 15 | 75  | 311  | 0  |
| CONTIG-014569 | 99   | 15 | 13  | 59   | 0  |
| CONTIG-014570 | 835  | 8  | 72  | 176  | 0  |
| CONTIG-014571 | 355  | 17 | 17  | 164  | 2  |
| CONTIG-014572 | 1340 | 43 | 140 | 2728 | 47 |
| CONTIG-014573 | 962  | 46 | 237 | 1894 | 8  |
| CONTIG-014574 | 663  | 15 | 360 | 21   | 35 |
| CONTIG-014575 | 400  | 11 | 54  | 111  | 4  |
| CONTIG-014579 | 60   | 4  | 8   | 7    | 0  |
| CONTIG-014580 | 234  | 10 | 22  | 72   | 0  |
| CONTIG-014582 | 615  | 8  | 48  | 155  | 0  |
| CONTIG-014583 | 691  | 15 | 114 | 145  | 6  |
| CONTIG-014584 | 492  | 24 | 127 | 358  | 2  |
| CONTIG-014585 | 249  | 8  | 26  | 41   | 0  |
| CONTIG-014587 | 185  | 11 | 16  | 30   | 0  |
| CONTIG-014588 | 79   | 14 | 29  | 27   | 0  |
| CONTIG-014589 | 638  | 13 | 65  | 294  | 0  |
| CONTIG-014590 | 375  | 19 | 79  | 149  | 8  |
| CONTIG-014591 | 267  | 21 | 132 | 132  | 0  |
| CONTIG-014592 | 191  | 9  | 33  | 37   | 0  |
| CONTIG-014593 | 293  | 17 | 79  | 185  | 0  |
| CONTIG-014594 | 117  | 7  | 7   | 29   | 0  |
| CONTIG-014595 | 277  | 10 | 9   | 64   | 0  |
| CONTIG-014596 | 548  | 17 | 303 | 228  | 0  |

|               |      |     |     |      |     |
|---------------|------|-----|-----|------|-----|
| CONTIG-014597 | 249  | 6   | 6   | 41   | 2   |
| CONTIG-014601 | 311  | 39  | 119 | 489  | 4   |
| CONTIG-014602 | 1083 | 30  | 121 | 1072 | 11  |
| CONTIG-014603 | 567  | 8   | 96  | 104  | 2   |
| CONTIG-014604 | 625  | 9   | 48  | 210  | 0   |
| CONTIG-014606 | 86   | 9   | 28  | 3    | 0   |
| CONTIG-014607 | 280  | 31  | 137 | 168  | 10  |
| CONTIG-014608 | 114  | 8   | 31  | 21   | 0   |
| CONTIG-014609 | 212  | 17  | 13  | 182  | 0   |
| CONTIG-014610 | 117  | 13  | 18  | 76   | 0   |
| CONTIG-014613 | 651  | 46  | 426 | 847  | 6   |
| CONTIG-014614 | 373  | 102 | 172 | 2274 | 2   |
| CONTIG-014615 | 381  | 9   | 104 | 106  | 0   |
| CONTIG-014616 | 145  | 6   | 8   | 26   | 0   |
| CONTIG-014617 | 62   | 5   | 2   | 8    | 0   |
| CONTIG-014618 | 357  | 18  | 64  | 137  | 0   |
| CONTIG-014619 | 292  | 11  | 54  | 83   | 2   |
| CONTIG-014620 | 304  | 8   | 68  | 34   | 0   |
| CONTIG-014621 | 139  | 6   | 40  | 18   | 0   |
| CONTIG-014622 | 809  | 29  | 189 | 401  | 87  |
| CONTIG-014623 | 80   | 7   | 3   | 4    | 0   |
| CONTIG-014625 | 226  | 8   | 95  | 22   | 0   |
| CONTIG-014626 | 119  | 6   | 2   | 20   | 0   |
| CONTIG-014627 | 195  | 19  | 6   | 114  | 0   |
| CONTIG-014629 | 99   | 4   | 9   | 7    | 0   |
| CONTIG-014630 | 180  | 12  | 11  | 56   | 0   |
| CONTIG-014631 | 199  | 33  | 203 | 238  | 0   |
| CONTIG-014632 | 457  | 27  | 238 | 236  | 10  |
| CONTIG-014633 | 594  | 33  | 114 | 1090 | 0   |
| CONTIG-014636 | 279  | 39  | 32  | 372  | 10  |
| CONTIG-014638 | 97   | 14  | 115 | 0    | 0   |
| CONTIG-014639 | 624  | 42  | 386 | 752  | 14  |
| CONTIG-014641 | 461  | 17  | 72  | 197  | 0   |
| CONTIG-014642 | 146  | 11  | 90  | 13   | 0   |
| CONTIG-014644 | 1191 | 20  | 162 | 607  | 12  |
| CONTIG-014645 | 209  | 8   | 16  | 48   | 2   |
| CONTIG-014646 | 745  | 24  | 208 | 440  | 8   |
| CONTIG-014648 | 77   | 696 | 165 | 1778 | 32  |
| CONTIG-014649 | 92   | 3   | 3   | 12   | 0   |
| CONTIG-014650 | 114  | 5   | 13  | 10   | 0   |
| CONTIG-014651 | 102  | 645 | 376 | 1346 | 126 |
| CONTIG-014652 | 536  | 36  | 111 | 932  | 2   |
| CONTIG-014653 | 211  | 10  | 100 | 17   | 0   |
| CONTIG-014654 | 224  | 10  | 60  | 46   | 0   |
| CONTIG-014655 | 911  | 67  | 589 | 2541 | 6   |
| CONTIG-014656 | 166  | 9   | 7   | 0    | 0   |
| CONTIG-014657 | 812  | 51  | 457 | 895  | 18  |



|               |      |     |      |      |     |
|---------------|------|-----|------|------|-----|
| CONTIG-014659 | 420  | 12  | 18   | 146  | 6   |
| CONTIG-014660 | 289  | 34  | 107  | 156  | 23  |
| CONTIG-014661 | 180  | 132 | 1640 | 195  | 0   |
| CONTIG-014663 | 117  | 128 | 180  | 242  | 68  |
| CONTIG-014664 | 256  | 34  | 161  | 152  | 9   |
| CONTIG-014665 | 270  | 50  | 50   | 429  | 4   |
| CONTIG-014668 | 487  | 24  | 27   | 202  | 12  |
| CONTIG-014669 | 248  | 22  | 103  | 57   | 21  |
| CONTIG-014670 | 58   | 58  | 162  | 39   | 0   |
| CONTIG-014671 | 142  | 11  | 93   | 11   | 0   |
| CONTIG-014672 | 710  | 14  | 73   | 267  | 0   |
| CONTIG-014673 | 220  | 7   | 10   | 30   | 0   |
| CONTIG-014674 | 697  | 22  | 39   | 575  | 4   |
| CONTIG-014675 | 652  | 18  | 135  | 225  | 0   |
| CONTIG-014676 | 215  | 12  | 120  | 58   | 0   |
| CONTIG-014677 | 157  | 6   | 14   | 17   | 0   |
| CONTIG-014678 | 197  | 11  | 11   | 53   | 2   |
| CONTIG-014679 | 61   | 4   | 2    | 2    | 0   |
| CONTIG-014686 | 761  | 32  | 187  | 575  | 19  |
| CONTIG-014687 | 1748 | 48  | 443  | 4190 | 29  |
| CONTIG-014688 | 255  | 12  | 88   | 52   | 0   |
| CONTIG-014689 | 204  | 7   | 77   | 27   | 0   |
| CONTIG-014690 | 128  | 19  | 8    | 78   | 0   |
| CONTIG-014691 | 396  | 23  | 85   | 333  | 3   |
| CONTIG-014692 | 392  | 76  | 83   | 942  | 34  |
| CONTIG-014693 | 457  | 31  | 52   | 773  | 0   |
| CONTIG-014694 | 392  | 20  | 205  | 12   | 39  |
| CONTIG-014695 | 404  | 17  | 187  | 205  | 0   |
| CONTIG-014696 | 90   | 16  | 69   | 26   | 0   |
| CONTIG-014697 | 155  | 10  | 6    | 46   | 2   |
| CONTIG-014698 | 66   | 12  | 24   | 16   | 0   |
| CONTIG-014699 | 190  | 9   | 23   | 42   | 0   |
| CONTIG-014700 | 751  | 31  | 211  | 878  | 53  |
| CONTIG-014701 | 829  | 20  | 91   | 646  | 15  |
| CONTIG-014702 | 65   | 6   | 25   | 2    | 0   |
| CONTIG-014703 | 549  | 28  | 587  | 299  | 0   |
| CONTIG-014704 | 171  | 22  | 62   | 100  | 0   |
| CONTIG-014705 | 850  | 216 | 665  | 6466 | 518 |
| CONTIG-014706 | 171  | 7   | 19   | 39   | 0   |
| CONTIG-014707 | 64   | 3   | 3    | 2    | 0   |
| CONTIG-014708 | 75   | 25  | 80   | 37   | 0   |
| CONTIG-014709 | 307  | 41  | 254  | 298  | 6   |
| CONTIG-014710 | 64   | 17  | 3    | 47   | 4   |
| CONTIG-014711 | 305  | 41  | 29   | 2    | 0   |
| CONTIG-014712 | 218  | 9   | 8    | 57   | 0   |
| CONTIG-014713 | 126  | 41  | 59   | 181  | 0   |
| CONTIG-014714 | 352  | 25  | 223  | 167  | 0   |

|               |      |      |      |      |     |
|---------------|------|------|------|------|-----|
| CONTIG-014715 | 591  | 14   | 71   | 290  | 2   |
| CONTIG-014716 | 122  | 8    | 26   | 26   | 0   |
| CONTIG-014717 | 84   | 5    | 6    | 9    | 0   |
| CONTIG-014718 | 169  | 26   | 4    | 50   | 0   |
| CONTIG-014719 | 80   | 16   | 69   | 3    | 0   |
| CONTIG-014720 | 691  | 36   | 68   | 44   | 0   |
| CONTIG-014721 | 124  | 18   | 14   | 65   | 0   |
| CONTIG-014724 | 237  | 10   | 50   | 40   | 0   |
| CONTIG-014725 | 66   | 25   | 0    | 18   | 0   |
| CONTIG-014726 | 681  | 16   | 105  | 366  | 4   |
| CONTIG-014727 | 67   | 6    | 9    | 7    | 0   |
| CONTIG-014728 | 216  | 12   | 16   | 73   | 2   |
| CONTIG-014730 | 144  | 131  | 36   | 743  | 79  |
| CONTIG-014731 | 115  | 7    | 5    | 22   | 0   |
| CONTIG-014732 | 248  | 11   | 111  | 59   | 0   |
| CONTIG-014733 | 195  | 15   | 40   | 52   | 0   |
| CONTIG-014734 | 604  | 13   | 35   | 282  | 0   |
| CONTIG-014736 | 208  | 10   | 56   | 56   | 0   |
| CONTIG-014737 | 94   | 596  | 275  | 1512 | 166 |
| CONTIG-014738 | 231  | 39   | 63   | 245  | 2   |
| CONTIG-014739 | 333  | 27   | 216  | 137  | 0   |
| CONTIG-014740 | 113  | 8    | 29   | 24   | 0   |
| CONTIG-014741 | 267  | 12   | 25   | 56   | 0   |
| CONTIG-014742 | 1286 | 32   | 12   | 7    | 0   |
| CONTIG-014743 | 499  | 18   | 138  | 269  | 0   |
| CONTIG-014745 | 472  | 24   | 174  | 461  | 0   |
| CONTIG-014746 | 75   | 3    | 8    | 0    | 0   |
| CONTIG-014747 | 41   | 1724 | 1297 | 1494 | 60  |
| CONTIG-014748 | 881  | 17   | 65   | 345  | 18  |
| CONTIG-014749 | 240  | 8    | 23   | 67   | 0   |
| CONTIG-014750 | 159  | 7    | 15   | 28   | 0   |
| CONTIG-014751 | 1060 | 31   | 130  | 1689 | 0   |
| CONTIG-014752 | 441  | 36   | 37   | 561  | 15  |
| CONTIG-014753 | 171  | 13   | 71   | 65   | 0   |
| CONTIG-014754 | 182  | 16   | 54   | 41   | 0   |
| CONTIG-014756 | 296  | 21   | 60   | 83   | 0   |
| CONTIG-014757 | 842  | 24   | 106  | 623  | 6   |
| CONTIG-014758 | 206  | 10   | 7    | 47   | 2   |
| CONTIG-014759 | 1033 | 13   | 56   | 494  | 0   |
| CONTIG-014760 | 311  | 20   | 17   | 179  | 0   |
| CONTIG-014761 | 411  | 10   | 38   | 141  | 0   |
| CONTIG-014762 | 165  | 15   | 26   | 28   | 13  |
| CONTIG-014763 | 1103 | 30   | 76   | 307  | 0   |
| CONTIG-014764 | 599  | 35   | 119  | 965  | 2   |
| CONTIG-014765 | 174  | 13   | 65   | 11   | 0   |
| CONTIG-014766 | 1091 | 46   | 89   | 2956 | 0   |
| CONTIG-014767 | 88   | 4    | 0    | 14   | 0   |

|               |      |     |     |      |     |
|---------------|------|-----|-----|------|-----|
| CONTIG-014768 | 115  | 17  | 70  | 28   | 0   |
| CONTIG-014769 | 146  | 9   | 3   | 47   | 0   |
| CONTIG-014779 | 559  | 16  | 118 | 139  | 4   |
| CONTIG-014781 | 1587 | 34  | 110 | 1134 | 179 |
| CONTIG-014787 | 148  | 6   | 5   | 7    | 0   |
| CONTIG-014788 | 369  | 24  | 55  | 362  | 4   |
| CONTIG-014789 | 103  | 4   | 0   | 7    | 0   |
| CONTIG-014790 | 147  | 13  | 0   | 2    | 0   |
| CONTIG-014791 | 802  | 18  | 88  | 447  | 0   |
| CONTIG-014793 | 483  | 17  | 53  | 110  | 0   |
| CONTIG-014794 | 148  | 11  | 31  | 53   | 0   |
| CONTIG-014795 | 789  | 42  | 550 | 1038 | 12  |
| CONTIG-014796 | 120  | 28  | 266 | 31   | 0   |
| CONTIG-014798 | 417  | 11  | 63  | 102  | 6   |
| CONTIG-014799 | 81   | 38  | 149 | 2    | 0   |
| CONTIG-014800 | 321  | 47  | 276 | 769  | 0   |
| CONTIG-014801 | 302  | 10  | 12  | 66   | 0   |
| CONTIG-014802 | 103  | 7   | 7   | 29   | 0   |
| CONTIG-014803 | 840  | 16  | 143 | 415  | 0   |
| CONTIG-014804 | 621  | 16  | 94  | 235  | 8   |
| CONTIG-014805 | 129  | 10  | 40  | 15   | 0   |
| CONTIG-014806 | 204  | 9   | 17  | 19   | 2   |
| CONTIG-014807 | 75   | 8   | 3   | 33   | 0   |
| CONTIG-014809 | 68   | 817 | 698 | 2726 | 32  |
| CONTIG-014810 | 58   | 5   | 0   | 6    | 0   |
| CONTIG-014811 | 110  | 298 | 173 | 19   | 0   |
| CONTIG-014812 | 85   | 10  | 2   | 0    | 8   |
| CONTIG-014813 | 85   | 6   | 0   | 20   | 0   |
| CONTIG-014814 | 812  | 54  | 303 | 1649 | 0   |
| CONTIG-014815 | 305  | 34  | 216 | 304  | 0   |
| CONTIG-014816 | 79   | 581 | 176 | 1202 | 66  |
| CONTIG-014817 | 114  | 13  | 4   | 0    | 0   |
| CONTIG-014826 | 237  | 8   | 18  | 59   | 0   |
| CONTIG-014827 | 329  | 14  | 52  | 77   | 0   |
| CONTIG-014830 | 289  | 23  | 41  | 228  | 6   |
| CONTIG-014831 | 270  | 17  | 101 | 77   | 0   |
| CONTIG-014832 | 367  | 194 | 816 | 3763 | 40  |
| CONTIG-014833 | 134  | 20  | 11  | 64   | 2   |
| CONTIG-014834 | 113  | 3   | 9   | 2    | 0   |
| CONTIG-014835 | 349  | 14  | 72  | 68   | 0   |
| CONTIG-014836 | 143  | 27  | 275 | 69   | 0   |
| CONTIG-014837 | 70   | 2   | 4   | 0    | 0   |
| CONTIG-014838 | 93   | 33  | 58  | 8    | 0   |
| CONTIG-014839 | 189  | 20  | 37  | 77   | 0   |
| CONTIG-014846 | 438  | 7   | 13  | 89   | 6   |
| CONTIG-014847 | 153  | 22  | 38  | 99   | 0   |
| CONTIG-014851 | 541  | 83  | 203 | 2714 | 0   |

|               |     |     |     |      |     |
|---------------|-----|-----|-----|------|-----|
| CONTIG-014852 | 275 | 10  | 81  | 47   | 0   |
| CONTIG-014853 | 175 | 20  | 65  | 47   | 0   |
| CONTIG-014854 | 432 | 15  | 44  | 102  | 11  |
| CONTIG-014855 | 95  | 7   | 18  | 18   | 0   |
| CONTIG-014856 | 213 | 102 | 261 | 1122 | 2   |
| CONTIG-014857 | 146 | 20  | 27  | 112  | 0   |
| CONTIG-014858 | 571 | 29  | 234 | 226  | 0   |
| CONTIG-014859 | 98  | 51  | 168 | 89   | 8   |
| CONTIG-014860 | 953 | 27  | 161 | 647  | 11  |
| CONTIG-014861 | 455 | 102 | 89  | 1197 | 125 |
| CONTIG-014862 | 70  | 12  | 5   | 27   | 0   |
| CONTIG-014863 | 81  | 3   | 3   | 7    | 0   |
| CONTIG-014864 | 332 | 10  | 32  | 107  | 0   |
| CONTIG-014866 | 93  | 4   | 10  | 2    | 0   |
| CONTIG-014867 | 116 | 6   | 11  | 15   | 0   |
| CONTIG-014868 | 164 | 71  | 249 | 34   | 30  |
| CONTIG-014869 | 312 | 11  | 103 | 23   | 0   |
| CONTIG-014872 | 82  | 7   | 5   | 20   | 0   |
| CONTIG-014873 | 215 | 14  | 165 | 47   | 0   |
| CONTIG-014874 | 716 | 40  | 83  | 1383 | 0   |
| CONTIG-014875 | 192 | 5   | 18  | 20   | 0   |
| CONTIG-014876 | 111 | 7   | 6   | 28   | 0   |
| CONTIG-014878 | 885 | 37  | 810 | 829  | 12  |
| CONTIG-014879 | 159 | 7   | 16  | 29   | 0   |
| CONTIG-014880 | 166 | 11  | 29  | 54   | 0   |
| CONTIG-014881 | 283 | 14  | 339 | 26   | 0   |
| CONTIG-014882 | 131 | 7   | 8   | 22   | 0   |
| CONTIG-014883 | 527 | 37  | 179 | 485  | 0   |
| CONTIG-014886 | 208 | 112 | 130 | 627  | 117 |
| CONTIG-014887 | 161 | 124 | 171 | 458  | 117 |
| CONTIG-014888 | 200 | 22  | 145 | 145  | 0   |
| CONTIG-014889 | 411 | 45  | 145 | 1083 | 0   |
| CONTIG-014890 | 382 | 12  | 53  | 143  | 0   |
| CONTIG-014891 | 577 | 37  | 92  | 1230 | 0   |
| CONTIG-014892 | 868 | 52  | 307 | 2708 | 0   |
| CONTIG-014893 | 503 | 21  | 294 | 216  | 2   |
| CONTIG-014894 | 463 | 16  | 4   | 287  | 3   |
| CONTIG-014895 | 533 | 45  | 173 | 732  | 17  |
| CONTIG-014897 | 128 | 628 | 270 | 1749 | 35  |
| CONTIG-014902 | 69  | 14  | 78  | 3    | 0   |
| CONTIG-014909 | 105 | 5   | 13  | 0    | 7   |
| CONTIG-014910 | 146 | 5   | 0   | 25   | 0   |
| CONTIG-014911 | 76  | 202 | 139 | 219  | 3   |
| CONTIG-014912 | 185 | 21  | 203 | 94   | 0   |
| CONTIG-014913 | 502 | 34  | 38  | 417  | 8   |
| CONTIG-014914 | 302 | 16  | 79  | 94   | 0   |
| CONTIG-014920 | 690 | 29  | 78  | 630  | 22  |

|               |      |     |     |      |    |
|---------------|------|-----|-----|------|----|
| CONTIG-014921 | 278  | 14  | 4   | 28   | 0  |
| CONTIG-014922 | 1094 | 74  | 99  | 1954 | 24 |
| CONTIG-014923 | 233  | 15  | 120 | 75   | 0  |
| CONTIG-014924 | 157  | 12  | 35  | 32   | 0  |
| CONTIG-014927 | 197  | 12  | 54  | 43   | 0  |
| CONTIG-014928 | 173  | 14  | 17  | 112  | 0  |
| CONTIG-014929 | 353  | 11  | 16  | 99   | 0  |
| CONTIG-014930 | 209  | 11  | 67  | 47   | 0  |
| CONTIG-014931 | 168  | 26  | 34  | 170  | 0  |
| CONTIG-014932 | 120  | 4   | 4   | 15   | 0  |
| CONTIG-014933 | 228  | 9   | 43  | 67   | 0  |
| CONTIG-014934 | 510  | 13  | 31  | 140  | 0  |
| CONTIG-014935 | 122  | 16  | 26  | 21   | 0  |
| CONTIG-014936 | 57   | 16  | 2   | 45   | 0  |
| CONTIG-014937 | 476  | 14  | 49  | 192  | 0  |
| CONTIG-014938 | 144  | 15  | 21  | 14   | 2  |
| CONTIG-014939 | 174  | 14  | 173 | 23   | 0  |
| CONTIG-014941 | 183  | 163 | 100 | 1226 | 69 |
| CONTIG-014942 | 246  | 98  | 165 | 1256 | 15 |
| CONTIG-014943 | 95   | 27  | 216 | 0    | 2  |
| CONTIG-014950 | 94   | 8   | 3   | 14   | 0  |
| CONTIG-014952 | 76   | 9   | 10  | 4    | 0  |
| CONTIG-014953 | 849  | 35  | 310 | 1008 | 6  |
| CONTIG-014954 | 225  | 63  | 436 | 86   | 2  |
| CONTIG-014955 | 240  | 12  | 14  | 71   | 0  |
| CONTIG-014956 | 301  | 20  | 35  | 185  | 5  |
| CONTIG-014957 | 289  | 124 | 328 | 1288 | 63 |
| CONTIG-014958 | 50   | 52  | 126 | 74   | 0  |
| CONTIG-014959 | 197  | 11  | 21  | 95   | 0  |
| CONTIG-014960 | 137  | 9   | 22  | 41   | 0  |
| CONTIG-014961 | 137  | 553 | 79  | 2761 | 0  |
| CONTIG-014962 | 46   | 37  | 89  | 12   | 2  |
| CONTIG-014967 | 140  | 6   | 14  | 6    | 0  |
| CONTIG-014968 | 63   | 7   | 17  | 5    | 0  |
| CONTIG-014977 | 149  | 8   | 86  | 6    | 0  |
| CONTIG-014978 | 256  | 11  | 8   | 91   | 0  |
| CONTIG-014979 | 452  | 11  | 40  | 110  | 8  |
| CONTIG-014980 | 231  | 8   | 89  | 35   | 0  |
| CONTIG-014981 | 148  | 8   | 16  | 27   | 0  |
| CONTIG-014982 | 82   | 28  | 79  | 26   | 0  |
| CONTIG-014983 | 684  | 23  | 22  | 941  | 0  |
| CONTIG-014984 | 167  | 19  | 51  | 99   | 0  |
| CONTIG-014985 | 717  | 15  | 108 | 272  | 8  |
| CONTIG-014986 | 412  | 24  | 73  | 292  | 6  |
| CONTIG-014987 | 603  | 24  | 187 | 159  | 12 |
| CONTIG-014988 | 824  | 16  | 212 | 490  | 0  |
| CONTIG-014989 | 462  | 22  | 196 | 311  | 2  |

|               |      |     |     |      |     |
|---------------|------|-----|-----|------|-----|
| CONTIG-014990 | 613  | 38  | 151 | 513  | 13  |
| CONTIG-014991 | 226  | 22  | 345 | 33   | 0   |
| CONTIG-014992 | 169  | 46  | 141 | 157  | 0   |
| CONTIG-014993 | 104  | 5   | 31  | 0    | 0   |
| CONTIG-014994 | 469  | 36  | 27  | 595  | 9   |
| CONTIG-014995 | 140  | 10  | 6   | 51   | 0   |
| CONTIG-014996 | 135  | 6   | 7   | 22   | 0   |
| CONTIG-014997 | 116  | 5   | 0   | 8    | 0   |
| CONTIG-014998 | 246  | 173 | 104 | 2171 | 10  |
| CONTIG-015007 | 346  | 8   | 16  | 76   | 2   |
| CONTIG-015008 | 436  | 8   | 13  | 98   | 0   |
| CONTIG-015009 | 417  | 28  | 26  | 550  | 0   |
| CONTIG-015010 | 119  | 40  | 44  | 278  | 0   |
| CONTIG-015011 | 770  | 21  | 418 | 447  | 0   |
| CONTIG-015012 | 117  | 9   | 12  | 32   | 0   |
| CONTIG-015013 | 67   | 20  | 4   | 26   | 0   |
| CONTIG-015014 | 278  | 98  | 338 | 802  | 12  |
| CONTIG-015015 | 186  | 20  | 48  | 60   | 0   |
| CONTIG-015016 | 671  | 10  | 4   | 183  | 0   |
| CONTIG-015017 | 283  | 19  | 22  | 138  | 9   |
| CONTIG-015018 | 67   | 34  | 30  | 39   | 2   |
| CONTIG-015019 | 164  | 23  | 175 | 66   | 2   |
| CONTIG-015020 | 192  | 18  | 326 | 4    | 0   |
| CONTIG-015024 | 85   | 39  | 5   | 148  | 0   |
| CONTIG-015027 | 43   | 419 | 50  | 244  | 2   |
| CONTIG-015028 | 371  | 21  | 81  | 228  | 2   |
| CONTIG-015029 | 298  | 11  | 6   | 9    | 0   |
| CONTIG-015037 | 334  | 16  | 195 | 160  | 0   |
| CONTIG-015038 | 126  | 4   | 2   | 9    | 0   |
| CONTIG-015039 | 209  | 129 | 151 | 668  | 160 |
| CONTIG-015040 | 41   | 598 | 141 | 235  | 41  |
| CONTIG-015041 | 143  | 12  | 24  | 40   | 0   |
| CONTIG-015042 | 58   | 21  | 4   | 42   | 2   |
| CONTIG-015043 | 227  | 7   | 11  | 21   | 0   |
| CONTIG-015044 | 1083 | 20  | 103 | 866  | 0   |
| CONTIG-015045 | 70   | 19  | 35  | 14   | 0   |
| CONTIG-015046 | 331  | 27  | 255 | 229  | 2   |
| CONTIG-015048 | 348  | 11  | 51  | 160  | 0   |
| CONTIG-015049 | 755  | 29  | 62  | 334  | 12  |
| CONTIG-015050 | 121  | 22  | 31  | 95   | 0   |
| CONTIG-015051 | 527  | 32  | 109 | 638  | 18  |
| CONTIG-015052 | 468  | 14  | 23  | 316  | 2   |
| CONTIG-015053 | 216  | 8   | 44  | 38   | 0   |
| CONTIG-015054 | 1760 | 20  | 107 | 1294 | 22  |
| CONTIG-015055 | 286  | 8   | 57  | 45   | 0   |
| CONTIG-015056 | 334  | 13  | 53  | 103  | 2   |
| CONTIG-015057 | 540  | 8   | 32  | 158  | 0   |

|               |      |     |     |      |     |
|---------------|------|-----|-----|------|-----|
| CONTIG-015058 | 253  | 53  | 197 | 372  | 8   |
| CONTIG-015059 | 152  | 6   | 9   | 19   | 0   |
| CONTIG-015060 | 398  | 19  | 252 | 126  | 0   |
| CONTIG-015061 | 165  | 25  | 108 | 110  | 0   |
| CONTIG-015062 | 215  | 21  | 96  | 144  | 0   |
| CONTIG-015063 | 159  | 5   | 0   | 19   | 0   |
| CONTIG-015064 | 161  | 4   | 4   | 9    | 0   |
| CONTIG-015065 | 753  | 62  | 162 | 2420 | 19  |
| CONTIG-015066 | 88   | 13  | 16  | 31   | 0   |
| CONTIG-015067 | 525  | 18  | 116 | 418  | 0   |
| CONTIG-015068 | 154  | 6   | 10  | 9    | 0   |
| CONTIG-015069 | 470  | 122 | 406 | 595  | 37  |
| CONTIG-015070 | 370  | 13  | 10  | 73   | 4   |
| CONTIG-015071 | 111  | 34  | 305 | 13   | 0   |
| CONTIG-015073 | 416  | 11  | 19  | 65   | 0   |
| CONTIG-015080 | 84   | 4   | 5   | 6    | 0   |
| CONTIG-015081 | 979  | 15  | 97  | 179  | 0   |
| CONTIG-015082 | 73   | 23  | 65  | 12   | 2   |
| CONTIG-015083 | 616  | 77  | 493 | 1603 | 27  |
| CONTIG-015084 | 144  | 5   | 4   | 21   | 0   |
| CONTIG-015085 | 215  | 33  | 80  | 186  | 2   |
| CONTIG-015086 | 117  | 6   | 3   | 12   | 0   |
| CONTIG-015087 | 89   | 9   | 4   | 24   | 0   |
| CONTIG-015088 | 109  | 658 | 31  | 3415 | 0   |
| CONTIG-015090 | 61   | 20  | 89  | 9    | 0   |
| CONTIG-015091 | 151  | 159 | 310 | 636  | 13  |
| CONTIG-015093 | 341  | 28  | 203 | 121  | 4   |
| CONTIG-015094 | 148  | 13  | 20  | 94   | 0   |
| CONTIG-015097 | 91   | 12  | 19  | 40   | 0   |
| CONTIG-015098 | 104  | 4   | 4   | 12   | 0   |
| CONTIG-015099 | 214  | 9   | 46  | 27   | 0   |
| CONTIG-015100 | 451  | 42  | 111 | 572  | 4   |
| CONTIG-015101 | 201  | 5   | 6   | 27   | 0   |
| CONTIG-015102 | 93   | 6   | 2   | 22   | 0   |
| CONTIG-015103 | 246  | 11  | 32  | 73   | 0   |
| CONTIG-015104 | 162  | 26  | 29  | 59   | 2   |
| CONTIG-015105 | 319  | 35  | 73  | 135  | 0   |
| CONTIG-015106 | 1081 | 12  | 21  | 592  | 0   |
| CONTIG-015107 | 82   | 30  | 2   | 0    | 12  |
| CONTIG-015109 | 294  | 21  | 77  | 322  | 0   |
| CONTIG-015110 | 969  | 21  | 298 | 444  | 14  |
| CONTIG-015111 | 252  | 12  | 69  | 92   | 0   |
| CONTIG-015112 | 98   | 560 | 151 | 1775 | 155 |
| CONTIG-015113 | 333  | 10  | 119 | 85   | 0   |
| CONTIG-015114 | 48   | 50  | 127 | 34   | 0   |
| CONTIG-015115 | 190  | 12  | 2   | 89   | 0   |
| CONTIG-015116 | 508  | 16  | 41  | 357  | 0   |

|               |      |     |      |      |     |
|---------------|------|-----|------|------|-----|
| CONTIG-015117 | 90   | 8   | 4    | 29   | 0   |
| CONTIG-015118 | 214  | 8   | 44   | 42   | 0   |
| CONTIG-015119 | 72   | 25  | 116  | 0    | 0   |
| CONTIG-015120 | 493  | 32  | 103  | 469  | 0   |
| CONTIG-015121 | 140  | 191 | 432  | 891  | 0   |
| CONTIG-015122 | 710  | 25  | 96   | 827  | 4   |
| CONTIG-015123 | 112  | 635 | 609  | 2555 | 191 |
| CONTIG-015124 | 958  | 21  | 121  | 643  | 24  |
| CONTIG-015125 | 592  | 12  | 18   | 79   | 0   |
| CONTIG-015127 | 325  | 27  | 63   | 285  | 0   |
| CONTIG-015128 | 288  | 15  | 13   | 156  | 0   |
| CONTIG-015130 | 229  | 16  | 173  | 56   | 0   |
| CONTIG-015131 | 74   | 18  | 37   | 0    | 0   |
| CONTIG-015133 | 67   | 11  | 28   | 13   | 0   |
| CONTIG-015134 | 63   | 185 | 89   | 201  | 58  |
| CONTIG-015135 | 256  | 21  | 48   | 152  | 0   |
| CONTIG-015136 | 516  | 13  | 56   | 80   | 9   |
| CONTIG-015138 | 432  | 15  | 22   | 128  | 2   |
| CONTIG-015139 | 481  | 132 | 24   | 94   | 0   |
| CONTIG-015140 | 64   | 17  | 5    | 7    | 0   |
| CONTIG-015141 | 804  | 44  | 1173 | 1249 | 0   |
| CONTIG-015142 | 152  | 8   | 11   | 30   | 0   |
| CONTIG-015143 | 673  | 12  | 71   | 256  | 2   |
| CONTIG-015144 | 307  | 18  | 27   | 239  | 0   |
| CONTIG-015145 | 613  | 72  | 705  | 1212 | 62  |
| CONTIG-015146 | 98   | 26  | 100  | 23   | 0   |
| CONTIG-015147 | 231  | 10  | 30   | 48   | 0   |
| CONTIG-015148 | 569  | 38  | 252  | 599  | 21  |
| CONTIG-015149 | 662  | 7   | 55   | 133  | 14  |
| CONTIG-015150 | 59   | 4   | 5    | 0    | 0   |
| CONTIG-015151 | 403  | 9   | 60   | 106  | 0   |
| CONTIG-015153 | 298  | 24  | 114  | 100  | 0   |
| CONTIG-015157 | 94   | 17  | 131  | 11   | 0   |
| CONTIG-015158 | 72   | 93  | 93   | 256  | 0   |
| CONTIG-015159 | 150  | 12  | 13   | 60   | 0   |
| CONTIG-015160 | 1041 | 53  | 327  | 3302 | 2   |
| CONTIG-015161 | 227  | 28  | 68   | 263  | 0   |
| CONTIG-015162 | 90   | 23  | 221  | 2    | 0   |
| CONTIG-015163 | 265  | 8   | 29   | 58   | 0   |
| CONTIG-015164 | 420  | 33  | 147  | 471  | 10  |
| CONTIG-015165 | 58   | 12  | 0    | 28   | 0   |
| CONTIG-015166 | 176  | 12  | 41   | 67   | 0   |
| CONTIG-015167 | 187  | 6   | 11   | 22   | 2   |
| CONTIG-015168 | 328  | 11  | 72   | 110  | 0   |
| CONTIG-015169 | 82   | 5   | 28   | 2    | 0   |
| CONTIG-015170 | 741  | 15  | 75   | 626  | 0   |
| CONTIG-015171 | 99   | 12  | 30   | 17   | 0   |



|               |      |     |     |      |    |
|---------------|------|-----|-----|------|----|
| CONTIG-015172 | 828  | 53  | 217 | 1014 | 0  |
| CONTIG-015178 | 390  | 15  | 27  | 272  | 0  |
| CONTIG-015179 | 312  | 12  | 7   | 95   | 6  |
| CONTIG-015180 | 65   | 172 | 10  | 209  | 0  |
| CONTIG-015186 | 80   | 10  | 6   | 0    | 0  |
| CONTIG-015187 | 67   | 5   | 0   | 6    | 0  |
| CONTIG-015188 | 643  | 17  | 41  | 392  | 7  |
| CONTIG-015189 | 793  | 17  | 19  | 412  | 8  |
| CONTIG-015190 | 828  | 25  | 16  | 13   | 2  |
| CONTIG-015191 | 108  | 9   | 8   | 40   | 0  |
| CONTIG-015192 | 50   | 327 | 249 | 220  | 30 |
| CONTIG-015193 | 351  | 7   | 23  | 54   | 0  |
| CONTIG-015194 | 2054 | 20  | 162 | 909  | 47 |
| CONTIG-015195 | 61   | 9   | 3   | 17   | 0  |
| CONTIG-015197 | 393  | 12  | 11  | 211  | 2  |
| CONTIG-015198 | 677  | 27  | 196 | 630  | 0  |
| CONTIG-015199 | 134  | 19  | 22  | 70   | 0  |
| CONTIG-015201 | 632  | 6   | 13  | 65   | 6  |
| CONTIG-015206 | 60   | 13  | 17  | 31   | 0  |
| CONTIG-015207 | 425  | 19  | 140 | 170  | 0  |
| CONTIG-015208 | 132  | 7   | 39  | 4    | 0  |
| CONTIG-015209 | 67   | 16  | 38  | 19   | 0  |
| CONTIG-015210 | 140  | 6   | 8   | 23   | 2  |
| CONTIG-015211 | 222  | 60  | 21  | 794  | 0  |
| CONTIG-015212 | 198  | 6   | 17  | 30   | 0  |
| CONTIG-015219 | 152  | 5   | 10  | 19   | 0  |
| CONTIG-015220 | 168  | 195 | 441 | 329  | 97 |
| CONTIG-015221 | 284  | 7   | 23  | 60   | 2  |
| CONTIG-015222 | 133  | 10  | 9   | 6    | 0  |
| CONTIG-015223 | 170  | 5   | 10  | 16   | 0  |
| CONTIG-015224 | 68   | 25  | 77  | 0    | 0  |
| CONTIG-015225 | 126  | 3   | 3   | 0    | 0  |
| CONTIG-015226 | 224  | 19  | 49  | 99   | 0  |
| CONTIG-015228 | 63   | 18  | 13  | 25   | 0  |
| CONTIG-015232 | 194  | 18  | 101 | 33   | 3  |
| CONTIG-015233 | 1235 | 17  | 189 | 642  | 0  |
| CONTIG-015234 | 448  | 102 | 190 | 1536 | 70 |
| CONTIG-015235 | 827  | 48  | 102 | 1424 | 9  |
| CONTIG-015236 | 297  | 7   | 2   | 46   | 0  |
| CONTIG-015237 | 74   | 63  | 289 | 2    | 2  |
| CONTIG-015238 | 1293 | 31  | 151 | 1251 | 10 |
| CONTIG-015239 | 146  | 5   | 20  | 2    | 0  |
| CONTIG-015240 | 266  | 27  | 79  | 132  | 6  |
| CONTIG-015241 | 161  | 17  | 58  | 71   | 0  |
| CONTIG-015242 | 58   | 10  | 31  | 7    | 0  |
| CONTIG-015243 | 142  | 79  | 146 | 203  | 2  |
| CONTIG-015244 | 74   | 194 | 137 | 320  | 0  |

|               |      |     |     |      |     |
|---------------|------|-----|-----|------|-----|
| CONTIG-015245 | 223  | 11  | 6   | 91   | 0   |
| CONTIG-015246 | 222  | 34  | 220 | 237  | 0   |
| CONTIG-015247 | 108  | 12  | 9   | 43   | 0   |
| CONTIG-015248 | 85   | 8   | 4   | 29   | 0   |
| CONTIG-015249 | 47   | 96  | 31  | 14   | 0   |
| CONTIG-015250 | 145  | 10  | 7   | 42   | 0   |
| CONTIG-015251 | 200  | 11  | 24  | 77   | 0   |
| CONTIG-015252 | 182  | 265 | 96  | 2125 | 84  |
| CONTIG-015257 | 109  | 18  | 24  | 40   | 0   |
| CONTIG-015258 | 303  | 10  | 28  | 63   | 0   |
| CONTIG-015266 | 255  | 16  | 75  | 131  | 0   |
| CONTIG-015267 | 82   | 2   | 2   | 0    | 0   |
| CONTIG-015268 | 64   | 5   | 17  | 0    | 0   |
| CONTIG-015269 | 443  | 9   | 64  | 66   | 2   |
| CONTIG-015270 | 293  | 18  | 148 | 104  | 0   |
| CONTIG-015271 | 120  | 184 | 505 | 731  | 0   |
| CONTIG-015272 | 219  | 21  | 29  | 269  | 0   |
| CONTIG-015273 | 185  | 8   | 2   | 49   | 0   |
| CONTIG-015274 | 89   | 12  | 4   | 9    | 0   |
| CONTIG-015276 | 65   | 27  | 3   | 63   | 0   |
| CONTIG-015278 | 73   | 396 | 164 | 820  | 92  |
| CONTIG-015279 | 150  | 11  | 17  | 40   | 0   |
| CONTIG-015280 | 167  | 8   | 23  | 19   | 0   |
| CONTIG-015281 | 67   | 5   | 6   | 2    | 0   |
| CONTIG-015283 | 104  | 34  | 20  | 127  | 0   |
| CONTIG-015287 | 124  | 8   | 30  | 23   | 0   |
| CONTIG-015288 | 257  | 7   | 8   | 51   | 0   |
| CONTIG-015289 | 56   | 66  | 172 | 40   | 0   |
| CONTIG-015290 | 70   | 24  | 45  | 23   | 0   |
| CONTIG-015291 | 95   | 15  | 57  | 2    | 0   |
| CONTIG-015292 | 1066 | 79  | 421 | 1372 | 280 |
| CONTIG-015293 | 131  | 16  | 24  | 68   | 0   |
| CONTIG-015294 | 200  | 10  | 43  | 33   | 0   |
| CONTIG-015295 | 89   | 75  | 145 | 38   | 0   |
| CONTIG-015296 | 873  | 16  | 183 | 436  | 4   |
| CONTIG-015297 | 79   | 8   | 8   | 15   | 0   |
| CONTIG-015298 | 85   | 9   | 40  | 2    | 0   |
| CONTIG-015299 | 68   | 3   | 6   | 0    | 0   |
| CONTIG-015308 | 423  | 45  | 221 | 310  | 29  |
| CONTIG-015309 | 899  | 16  | 39  | 595  | 4   |
| CONTIG-015317 | 222  | 9   | 0   | 66   | 0   |
| CONTIG-015318 | 96   | 13  | 2   | 0    | 0   |
| CONTIG-015319 | 585  | 20  | 96  | 593  | 0   |
| CONTIG-015320 | 117  | 16  | 42  | 76   | 0   |
| CONTIG-015321 | 84   | 4   | 0   | 6    | 0   |
| CONTIG-015322 | 87   | 11  | 16  | 5    | 0   |
| CONTIG-015323 | 283  | 13  | 19  | 101  | 2   |

|               |      |     |     |      |      |
|---------------|------|-----|-----|------|------|
| CONTIG-015327 | 178  | 20  | 19  | 76   | 0    |
| CONTIG-015328 | 173  | 5   | 5   | 29   | 0    |
| CONTIG-015329 | 374  | 26  | 106 | 211  | 21   |
| CONTIG-015330 | 304  | 48  | 193 | 392  | 5    |
| CONTIG-015331 | 389  | 34  | 219 | 483  | 0    |
| CONTIG-015332 | 602  | 46  | 46  | 1198 | 0    |
| CONTIG-015333 | 531  | 23  | 49  | 625  | 0    |
| CONTIG-015336 | 507  | 26  | 93  | 434  | 4    |
| CONTIG-015337 | 118  | 31  | 25  | 123  | 0    |
| CONTIG-015338 | 63   | 17  | 68  | 0    | 0    |
| CONTIG-015339 | 383  | 11  | 12  | 69   | 2    |
| CONTIG-015340 | 91   | 4   | 6   | 3    | 0    |
| CONTIG-015341 | 146  | 80  | 102 | 364  | 0    |
| CONTIG-015342 | 413  | 11  | 63  | 151  | 2    |
| CONTIG-015343 | 416  | 17  | 131 | 155  | 0    |
| CONTIG-015344 | 158  | 6   | 5   | 12   | 0    |
| CONTIG-015345 | 217  | 188 | 501 | 601  | 29   |
| CONTIG-015346 | 104  | 9   | 15  | 14   | 0    |
| CONTIG-015347 | 93   | 10  | 13  | 36   | 0    |
| CONTIG-015348 | 237  | 323 | 774 | 1346 | 258  |
| CONTIG-015349 | 940  | 33  | 114 | 1141 | 11   |
| CONTIG-015350 | 178  | 11  | 22  | 27   | 2    |
| CONTIG-015352 | 68   | 11  | 11  | 35   | 0    |
| CONTIG-015355 | 94   | 6   | 13  | 13   | 0    |
| CONTIG-015357 | 251  | 6   | 2   | 28   | 2    |
| CONTIG-015358 | 399  | 14  | 109 | 167  | 0    |
| CONTIG-015359 | 83   | 7   | 0   | 20   | 0    |
| CONTIG-015360 | 1375 | 59  | 522 | 1689 | 153  |
| CONTIG-015361 | 281  | 215 | 498 | 1220 | 127  |
| CONTIG-015362 | 145  | 29  | 4   | 115  | 0    |
| CONTIG-015363 | 190  | 6   | 5   | 34   | 0    |
| CONTIG-015364 | 337  | 137 | 0   | 0    | 1004 |
| CONTIG-015365 | 817  | 83  | 52  | 3034 | 72   |
| CONTIG-015366 | 116  | 26  | 113 | 54   | 0    |
| CONTIG-015367 | 1758 | 48  | 280 | 1544 | 19   |
| CONTIG-015368 | 177  | 17  | 30  | 55   | 0    |
| CONTIG-015369 | 81   | 4   | 0   | 0    | 0    |
| CONTIG-015370 | 198  | 6   | 13  | 14   | 0    |
| CONTIG-015371 | 157  | 9   | 4   | 77   | 0    |
| CONTIG-015373 | 140  | 8   | 50  | 0    | 0    |
| CONTIG-015374 | 235  | 13  | 0   | 6    | 0    |
| CONTIG-015375 | 459  | 22  | 194 | 190  | 2    |
| CONTIG-015380 | 129  | 40  | 42  | 177  | 0    |
| CONTIG-015387 | 263  | 10  | 4   | 100  | 0    |
| CONTIG-015388 | 209  | 28  | 75  | 238  | 0    |
| CONTIG-015389 | 151  | 7   | 15  | 13   | 0    |
| CONTIG-015390 | 170  | 12  | 115 | 38   | 0    |

|               |      |    |     |      |    |
|---------------|------|----|-----|------|----|
| CONTIG-015391 | 565  | 9  | 10  | 153  | 0  |
| CONTIG-015392 | 237  | 8  | 40  | 18   | 0  |
| CONTIG-015393 | 70   | 14 | 0   | 27   | 0  |
| CONTIG-015394 | 134  | 7  | 5   | 21   | 0  |
| CONTIG-015395 | 132  | 15 | 22  | 34   | 0  |
| CONTIG-015396 | 101  | 10 | 15  | 39   | 0  |
| CONTIG-015397 | 241  | 16 | 62  | 139  | 0  |
| CONTIG-015398 | 216  | 8  | 3   | 54   | 0  |
| CONTIG-015400 | 73   | 5  | 9   | 12   | 0  |
| CONTIG-015401 | 364  | 19 | 51  | 217  | 0  |
| CONTIG-015402 | 1272 | 20 | 130 | 918  | 17 |
| CONTIG-015403 | 378  | 17 | 214 | 166  | 0  |
| CONTIG-015404 | 332  | 81 | 11  | 1814 | 0  |
| CONTIG-015405 | 701  | 39 | 221 | 869  | 10 |
| CONTIG-015406 | 182  | 9  | 30  | 38   | 0  |
| CONTIG-015407 | 165  | 14 | 68  | 59   | 0  |
| CONTIG-015408 | 643  | 36 | 271 | 341  | 4  |
| CONTIG-015409 | 277  | 16 | 44  | 127  | 0  |
| CONTIG-015410 | 572  | 28 | 153 | 380  | 4  |
| CONTIG-015411 | 494  | 15 | 153 | 117  | 4  |
| CONTIG-015412 | 136  | 31 | 94  | 63   | 0  |
| CONTIG-015413 | 829  | 24 | 55  | 480  | 20 |
| CONTIG-015414 | 127  | 15 | 8   | 85   | 0  |
| CONTIG-015415 | 78   | 10 | 48  | 2    | 0  |
| CONTIG-015416 | 251  | 9  | 4   | 72   | 0  |
| CONTIG-015417 | 144  | 8  | 23  | 42   | 0  |
| CONTIG-015418 | 64   | 7  | 3   | 11   | 0  |
| CONTIG-015419 | 723  | 9  | 70  | 228  | 2  |
| CONTIG-015421 | 88   | 6  | 30  | 0    | 0  |
| CONTIG-015422 | 262  | 8  | 20  | 55   | 0  |
| CONTIG-015423 | 216  | 35 | 244 | 239  | 2  |
| CONTIG-015424 | 248  | 27 | 89  | 249  | 0  |
| CONTIG-015427 | 64   | 15 | 45  | 5    | 0  |
| CONTIG-015430 | 935  | 16 | 53  | 739  | 2  |
| CONTIG-015431 | 767  | 26 | 177 | 587  | 8  |
| CONTIG-015432 | 124  | 11 | 44  | 17   | 0  |
| CONTIG-015435 | 78   | 10 | 35  | 24   | 0  |
| CONTIG-015436 | 399  | 13 | 2   | 102  | 0  |
| CONTIG-015437 | 234  | 30 | 56  | 266  | 2  |
| CONTIG-015438 | 116  | 7  | 91  | 0    | 0  |
| CONTIG-015439 | 455  | 15 | 68  | 210  | 0  |
| CONTIG-015443 | 78   | 8  | 41  | 0    | 0  |
| CONTIG-015444 | 124  | 16 | 104 | 9    | 0  |
| CONTIG-015445 | 326  | 61 | 158 | 360  | 15 |
| CONTIG-015446 | 923  | 18 | 55  | 647  | 8  |
| CONTIG-015447 | 66   | 8  | 0   | 7    | 0  |
| CONTIG-015448 | 202  | 12 | 18  | 88   | 0  |

|               |      |     |     |      |     |
|---------------|------|-----|-----|------|-----|
| CONTIG-015449 | 515  | 9   | 57  | 141  | 2   |
| CONTIG-015450 | 516  | 7   | 102 | 77   | 0   |
| CONTIG-015453 | 674  | 37  | 191 | 1073 | 10  |
| CONTIG-015459 | 702  | 35  | 308 | 373  | 19  |
| CONTIG-015460 | 109  | 5   | 10  | 15   | 0   |
| CONTIG-015461 | 825  | 17  | 156 | 351  | 0   |
| CONTIG-015462 | 179  | 8   | 8   | 40   | 0   |
| CONTIG-015463 | 239  | 142 | 38  | 585  | 242 |
| CONTIG-015464 | 545  | 25  | 308 | 350  | 0   |
| CONTIG-015465 | 139  | 8   | 7   | 42   | 0   |
| CONTIG-015466 | 456  | 14  | 40  | 211  | 4   |
| CONTIG-015467 | 425  | 45  | 61  | 769  | 11  |
| CONTIG-015468 | 667  | 27  | 85  | 808  | 0   |
| CONTIG-015469 | 129  | 7   | 17  | 15   | 0   |
| CONTIG-015471 | 349  | 27  | 34  | 353  | 4   |
| CONTIG-015472 | 438  | 13  | 9   | 109  | 2   |
| CONTIG-015473 | 114  | 14  | 5   | 79   | 0   |
| CONTIG-015474 | 380  | 13  | 17  | 181  | 0   |
| CONTIG-015476 | 1891 | 24  | 200 | 1315 | 32  |
| CONTIG-015479 | 271  | 13  | 46  | 112  | 0   |
| CONTIG-015480 | 66   | 3   | 11  | 2    | 0   |
| CONTIG-015481 | 145  | 4   | 2   | 3    | 0   |
| CONTIG-015482 | 90   | 17  | 0   | 0    | 23  |
| CONTIG-015483 | 96   | 22  | 125 | 0    | 10  |
| CONTIG-015484 | 87   | 435 | 332 | 698  | 111 |
| CONTIG-015485 | 1389 | 27  | 95  | 1135 | 23  |
| CONTIG-015486 | 565  | 66  | 67  | 2397 | 0   |
| CONTIG-015487 | 431  | 35  | 57  | 585  | 19  |
| CONTIG-015488 | 112  | 9   | 26  | 25   | 0   |
| CONTIG-015489 | 304  | 10  | 31  | 105  | 0   |
| CONTIG-015490 | 1254 | 12  | 12  | 2    | 69  |
| CONTIG-015491 | 451  | 15  | 40  | 216  | 10  |
| CONTIG-015492 | 79   | 7   | 13  | 11   | 0   |
| CONTIG-015493 | 188  | 175 | 604 | 577  | 47  |
| CONTIG-015494 | 344  | 18  | 67  | 156  | 2   |
| CONTIG-015497 | 121  | 10  | 0   | 34   | 0   |
| CONTIG-015499 | 220  | 14  | 7   | 138  | 0   |
| CONTIG-015500 | 1209 | 15  | 39  | 521  | 2   |
| CONTIG-015501 | 326  | 16  | 64  | 141  | 5   |
| CONTIG-015502 | 911  | 24  | 388 | 515  | 8   |
| CONTIG-015503 | 71   | 66  | 200 | 53   | 2   |
| CONTIG-015504 | 462  | 149 | 165 | 3314 | 140 |
| CONTIG-015505 | 72   | 3   | 5   | 4    | 0   |
| CONTIG-015506 | 82   | 7   | 4   | 27   | 0   |
| CONTIG-015507 | 77   | 8   | 14  | 9    | 0   |
| CONTIG-015508 | 989  | 31  | 125 | 789  | 46  |
| CONTIG-015509 | 226  | 9   | 23  | 86   | 0   |

|               |      |     |     |      |     |
|---------------|------|-----|-----|------|-----|
| CONTIG-015510 | 84   | 7   | 9   | 0    | 0   |
| CONTIG-015511 | 535  | 13  | 25  | 283  | 2   |
| CONTIG-015512 | 239  | 61  | 14  | 0    | 141 |
| CONTIG-015513 | 626  | 21  | 140 | 398  | 7   |
| CONTIG-015514 | 79   | 36  | 14  | 61   | 0   |
| CONTIG-015515 | 302  | 19  | 24  | 170  | 7   |
| CONTIG-015516 | 147  | 6   | 71  | 4    | 0   |
| CONTIG-015517 | 90   | 12  | 73  | 5    | 0   |
| CONTIG-015518 | 217  | 19  | 16  | 105  | 0   |
| CONTIG-015519 | 494  | 39  | 185 | 1078 | 0   |
| CONTIG-015520 | 1199 | 22  | 329 | 1123 | 6   |
| CONTIG-015523 | 235  | 8   | 14  | 18   | 0   |
| CONTIG-015525 | 232  | 18  | 14  | 169  | 2   |
| CONTIG-015532 | 95   | 5   | 4   | 8    | 0   |
| CONTIG-015533 | 93   | 13  | 7   | 20   | 0   |
| CONTIG-015534 | 142  | 5   | 4   | 22   | 0   |
| CONTIG-015535 | 182  | 14  | 12  | 97   | 0   |
| CONTIG-015536 | 76   | 16  | 17  | 51   | 0   |
| CONTIG-015537 | 218  | 17  | 115 | 141  | 0   |
| CONTIG-015538 | 110  | 485 | 124 | 2250 | 36  |
| CONTIG-015539 | 87   | 9   | 9   | 17   | 0   |
| CONTIG-015541 | 302  | 15  | 30  | 38   | 2   |
| CONTIG-015544 | 165  | 5   | 18  | 11   | 0   |
| CONTIG-015545 | 164  | 6   | 30  | 10   | 0   |
| CONTIG-015546 | 879  | 21  | 113 | 469  | 10  |
| CONTIG-015547 | 78   | 474 | 389 | 1179 | 27  |
| CONTIG-015548 | 584  | 60  | 154 | 882  | 85  |
| CONTIG-015549 | 59   | 21  | 26  | 42   | 0   |
| CONTIG-015550 | 270  | 5   | 0   | 0    | 0   |
| CONTIG-015551 | 158  | 35  | 196 | 23   | 0   |
| CONTIG-015552 | 85   | 3   | 4   | 11   | 0   |
| CONTIG-015553 | 361  | 11  | 16  | 97   | 0   |
| CONTIG-015559 | 227  | 9   | 8   | 85   | 2   |
| CONTIG-015561 | 635  | 16  | 143 | 303  | 0   |
| CONTIG-015562 | 88   | 7   | 8   | 2    | 0   |
| CONTIG-015567 | 188  | 27  | 27  | 282  | 0   |
| CONTIG-015568 | 72   | 5   | 2   | 4    | 0   |
| CONTIG-015569 | 638  | 17  | 74  | 329  | 0   |
| CONTIG-015570 | 517  | 34  | 90  | 671  | 12  |
| CONTIG-015575 | 563  | 182 | 244 | 5159 | 77  |
| CONTIG-015576 | 211  | 9   | 6   | 60   | 0   |
| CONTIG-015577 | 401  | 16  | 26  | 215  | 2   |
| CONTIG-015584 | 94   | 8   | 18  | 13   | 0   |
| CONTIG-015585 | 943  | 28  | 105 | 1202 | 4   |
| CONTIG-015586 | 81   | 9   | 60  | 2    | 0   |
| CONTIG-015587 | 221  | 10  | 33  | 43   | 0   |
| CONTIG-015588 | 408  | 19  | 48  | 251  | 0   |

|               |      |     |     |       |     |
|---------------|------|-----|-----|-------|-----|
| CONTIG-015589 | 548  | 10  | 2   | 66    | 0   |
| CONTIG-015590 | 96   | 34  | 18  | 168   | 0   |
| CONTIG-015591 | 65   | 5   | 0   | 10    | 0   |
| CONTIG-015592 | 582  | 10  | 20  | 203   | 0   |
| CONTIG-015593 | 125  | 8   | 6   | 32    | 2   |
| CONTIG-015594 | 963  | 13  | 360 | 405   | 0   |
| CONTIG-015595 | 82   | 33  | 36  | 67    | 11  |
| CONTIG-015596 | 884  | 17  | 41  | 379   | 10  |
| CONTIG-015597 | 97   | 14  | 13  | 42    | 0   |
| CONTIG-015598 | 174  | 19  | 119 | 88    | 0   |
| CONTIG-015603 | 67   | 11  | 41  | 0     | 0   |
| CONTIG-015604 | 354  | 11  | 11  | 126   | 0   |
| CONTIG-015605 | 203  | 25  | 176 | 123   | 0   |
| CONTIG-015606 | 353  | 10  | 13  | 124   | 2   |
| CONTIG-015607 | 167  | 8   | 5   | 38    | 2   |
| CONTIG-015614 | 391  | 9   | 5   | 114   | 0   |
| CONTIG-015615 | 212  | 6   | 7   | 60    | 0   |
| CONTIG-015616 | 1068 | 195 | 207 | 13453 | 6   |
| CONTIG-015617 | 1030 | 62  | 583 | 1383  | 50  |
| CONTIG-015620 | 842  | 14  | 122 | 460   | 6   |
| CONTIG-015621 | 142  | 11  | 22  | 42    | 0   |
| CONTIG-015622 | 78   | 4   | 2   | 4     | 0   |
| CONTIG-015623 | 66   | 5   | 0   | 9     | 0   |
| CONTIG-015624 | 76   | 4   | 0   | 4     | 0   |
| CONTIG-015627 | 323  | 56  | 93  | 502   | 2   |
| CONTIG-015628 | 43   | 81  | 4   | 146   | 0   |
| CONTIG-015629 | 1795 | 51  | 154 | 3625  | 229 |
| CONTIG-015633 | 234  | 25  | 144 | 209   | 0   |
| CONTIG-015634 | 93   | 249 | 64  | 300   | 750 |
| CONTIG-015640 | 390  | 16  | 64  | 171   | 2   |
| CONTIG-015641 | 171  | 11  | 4   | 8     | 5   |
| CONTIG-015642 | 99   | 11  | 19  | 35    | 0   |
| CONTIG-015643 | 1757 | 21  | 156 | 1037  | 0   |
| CONTIG-015644 | 1333 | 52  | 238 | 4387  | 0   |
| CONTIG-015645 | 268  | 12  | 8   | 105   | 2   |
| CONTIG-015646 | 821  | 26  | 137 | 1183  | 0   |
| CONTIG-015647 | 629  | 64  | 546 | 1163  | 92  |
| CONTIG-015648 | 332  | 15  | 47  | 175   | 0   |
| CONTIG-015649 | 61   | 13  | 31  | 13    | 0   |
| CONTIG-015650 | 778  | 11  | 61  | 424   | 0   |
| CONTIG-015651 | 296  | 14  | 48  | 76    | 0   |
| CONTIG-015652 | 261  | 13  | 100 | 65    | 0   |
| CONTIG-015653 | 158  | 10  | 0   | 58    | 0   |
| CONTIG-015654 | 517  | 55  | 232 | 1128  | 22  |
| CONTIG-015655 | 557  | 25  | 91  | 463   | 4   |
| CONTIG-015656 | 45   | 115 | 49  | 37    | 0   |
| CONTIG-015657 | 67   | 9   | 53  | 6     | 0   |

|               |      |     |     |      |     |
|---------------|------|-----|-----|------|-----|
| CONTIG-015659 | 167  | 10  | 12  | 56   | 2   |
| CONTIG-015660 | 603  | 19  | 80  | 361  | 0   |
| CONTIG-015663 | 102  | 9   | 44  | 0    | 0   |
| CONTIG-015664 | 115  | 6   | 12  | 16   | 0   |
| CONTIG-015665 | 348  | 12  | 45  | 90   | 0   |
| CONTIG-015671 | 85   | 11  | 14  | 5    | 0   |
| CONTIG-015672 | 70   | 41  | 15  | 82   | 0   |
| CONTIG-015674 | 44   | 208 | 317 | 53   | 0   |
| CONTIG-015675 | 217  | 30  | 78  | 339  | 0   |
| CONTIG-015676 | 283  | 9   | 53  | 50   | 0   |
| CONTIG-015677 | 192  | 13  | 29  | 92   | 0   |
| CONTIG-015682 | 618  | 17  | 60  | 368  | 2   |
| CONTIG-015683 | 641  | 18  | 84  | 380  | 2   |
| CONTIG-015684 | 278  | 10  | 9   | 91   | 0   |
| CONTIG-015685 | 1772 | 24  | 272 | 1239 | 30  |
| CONTIG-015690 | 292  | 27  | 51  | 296  | 4   |
| CONTIG-015691 | 541  | 11  | 50  | 103  | 0   |
| CONTIG-015692 | 572  | 18  | 34  | 354  | 2   |
| CONTIG-015693 | 241  | 7   | 29  | 39   | 0   |
| CONTIG-015694 | 69   | 7   | 2   | 21   | 0   |
| CONTIG-015695 | 596  | 40  | 138 | 495  | 0   |
| CONTIG-015696 | 305  | 27  | 114 | 236  | 2   |
| CONTIG-015697 | 84   | 8   | 8   | 23   | 0   |
| CONTIG-015699 | 171  | 96  | 187 | 716  | 4   |
| CONTIG-015701 | 732  | 12  | 61  | 299  | 0   |
| CONTIG-015702 | 526  | 13  | 23  | 319  | 2   |
| CONTIG-015703 | 420  | 11  | 64  | 121  | 0   |
| CONTIG-015704 | 635  | 8   | 2   | 116  | 2   |
| CONTIG-015707 | 53   | 419 | 186 | 490  | 59  |
| CONTIG-015708 | 163  | 20  | 25  | 82   | 0   |
| CONTIG-015709 | 155  | 45  | 303 | 41   | 0   |
| CONTIG-015710 | 133  | 60  | 105 | 137  | 11  |
| CONTIG-015711 | 131  | 12  | 4   | 44   | 0   |
| CONTIG-015712 | 94   | 8   | 7   | 26   | 0   |
| CONTIG-015714 | 224  | 25  | 159 | 177  | 0   |
| CONTIG-015716 | 233  | 8   | 6   | 63   | 0   |
| CONTIG-015717 | 314  | 12  | 63  | 62   | 6   |
| CONTIG-015719 | 367  | 14  | 8   | 182  | 3   |
| CONTIG-015720 | 299  | 13  | 31  | 116  | 2   |
| CONTIG-015721 | 67   | 4   | 13  | 0    | 0   |
| CONTIG-015722 | 111  | 3   | 2   | 8    | 0   |
| CONTIG-015723 | 190  | 14  | 29  | 109  | 2   |
| CONTIG-015724 | 550  | 23  | 172 | 484  | 0   |
| CONTIG-015725 | 258  | 172 | 101 | 1802 | 227 |
| CONTIG-015726 | 442  | 25  | 320 | 177  | 2   |
| CONTIG-015727 | 84   | 19  | 13  | 40   | 0   |
| CONTIG-015728 | 180  | 8   | 22  | 26   | 0   |



|               |      |     |     |      |    |
|---------------|------|-----|-----|------|----|
| CONTIG-015729 | 146  | 19  | 21  | 92   | 0  |
| CONTIG-015731 | 271  | 21  | 61  | 74   | 2  |
| CONTIG-015732 | 177  | 13  | 9   | 92   | 0  |
| CONTIG-015733 | 187  | 8   | 16  | 40   | 0  |
| CONTIG-015734 | 221  | 3   | 4   | 9    | 0  |
| CONTIG-015735 | 135  | 5   | 0   | 17   | 0  |
| CONTIG-015736 | 113  | 6   | 2   | 0    | 0  |
| CONTIG-015737 | 329  | 11  | 35  | 84   | 0  |
| CONTIG-015738 | 174  | 13  | 6   | 85   | 0  |
| CONTIG-015739 | 120  | 9   | 2   | 20   | 0  |
| CONTIG-015740 | 97   | 28  | 112 | 6    | 0  |
| CONTIG-015741 | 38   | 951 | 370 | 103  | 7  |
| CONTIG-015742 | 68   | 4   | 4   | 8    | 0  |
| CONTIG-015743 | 175  | 8   | 4   | 29   | 2  |
| CONTIG-015744 | 132  | 376 | 61  | 2210 | 2  |
| CONTIG-015745 | 79   | 26  | 0   | 34   | 0  |
| CONTIG-015746 | 245  | 12  | 74  | 31   | 0  |
| CONTIG-015747 | 325  | 13  | 13  | 49   | 4  |
| CONTIG-015748 | 106  | 241 | 174 | 681  | 63 |
| CONTIG-015749 | 204  | 24  | 125 | 156  | 0  |
| CONTIG-015750 | 440  | 13  | 67  | 107  | 0  |
| CONTIG-015751 | 1347 | 15  | 23  | 652  | 0  |
| CONTIG-015761 | 608  | 19  | 98  | 330  | 0  |
| CONTIG-015762 | 104  | 6   | 2   | 18   | 0  |
| CONTIG-015763 | 459  | 35  | 196 | 225  | 16 |
| CONTIG-015764 | 630  | 34  | 26  | 19   | 0  |
| CONTIG-015765 | 1071 | 13  | 93  | 109  | 55 |
| CONTIG-015766 | 191  | 8   | 37  | 47   | 0  |
| CONTIG-015767 | 462  | 17  | 35  | 169  | 16 |
| CONTIG-015768 | 2388 | 41  | 310 | 4720 | 48 |
| CONTIG-015769 | 903  | 23  | 106 | 467  | 4  |
| CONTIG-015771 | 78   | 22  | 131 | 0    | 0  |
| CONTIG-015772 | 460  | 18  | 130 | 168  | 0  |
| CONTIG-015773 | 220  | 7   | 3   | 41   | 0  |
| CONTIG-015774 | 103  | 30  | 24  | 137  | 3  |
| CONTIG-015775 | 145  | 7   | 9   | 17   | 0  |
| CONTIG-015776 | 489  | 66  | 260 | 958  | 26 |
| CONTIG-015777 | 66   | 6   | 4   | 7    | 0  |
| CONTIG-015778 | 383  | 21  | 153 | 175  | 2  |
| CONTIG-015779 | 879  | 23  | 130 | 578  | 6  |
| CONTIG-015787 | 103  | 50  | 71  | 33   | 0  |
| CONTIG-015788 | 183  | 7   | 13  | 19   | 0  |
| CONTIG-015789 | 723  | 35  | 132 | 639  | 23 |
| CONTIG-015790 | 1194 | 34  | 177 | 2334 | 0  |
| CONTIG-015791 | 480  | 8   | 25  | 80   | 0  |
| CONTIG-015792 | 366  | 10  | 130 | 68   | 0  |
| CONTIG-015793 | 80   | 15  | 28  | 16   | 0  |

|               |      |     |     |      |     |
|---------------|------|-----|-----|------|-----|
| CONTIG-015794 | 334  | 28  | 114 | 293  | 6   |
| CONTIG-015795 | 83   | 22  | 7   | 74   | 0   |
| CONTIG-015799 | 199  | 6   | 7   | 25   | 0   |
| CONTIG-015800 | 166  | 13  | 2   | 77   | 0   |
| CONTIG-015806 | 131  | 6   | 14  | 23   | 0   |
| CONTIG-015807 | 173  | 6   | 9   | 14   | 0   |
| CONTIG-015808 | 309  | 27  | 118 | 107  | 0   |
| CONTIG-015809 | 765  | 49  | 194 | 1105 | 63  |
| CONTIG-015810 | 811  | 86  | 634 | 3091 | 161 |
| CONTIG-015811 | 105  | 8   | 9   | 22   | 0   |
| CONTIG-015812 | 118  | 31  | 35  | 98   | 2   |
| CONTIG-015813 | 93   | 567 | 535 | 583  | 69  |
| CONTIG-015814 | 286  | 7   | 15  | 23   | 0   |
| CONTIG-015815 | 131  | 28  | 96  | 122  | 0   |
| CONTIG-015816 | 1096 | 21  | 155 | 667  | 4   |
| CONTIG-015817 | 58   | 88  | 129 | 141  | 0   |
| CONTIG-015824 | 91   | 11  | 10  | 25   | 0   |
| CONTIG-015825 | 157  | 4   | 6   | 6    | 0   |
| CONTIG-015826 | 250  | 18  | 166 | 54   | 0   |
| CONTIG-015829 | 72   | 6   | 25  | 10   | 0   |
| CONTIG-015830 | 216  | 12  | 7   | 67   | 0   |
| CONTIG-015831 | 257  | 8   | 59  | 38   | 2   |
| CONTIG-015832 | 79   | 8   | 18  | 7    | 0   |
| CONTIG-015833 | 279  | 6   | 22  | 4    | 0   |
| CONTIG-015834 | 165  | 11  | 3   | 37   | 0   |
| CONTIG-015835 | 61   | 4   | 2   | 2    | 0   |
| CONTIG-015839 | 129  | 10  | 20  | 26   | 0   |
| CONTIG-015840 | 52   | 240 | 74  | 238  | 40  |
| CONTIG-015842 | 63   | 2   | 2   | 2    | 0   |
| CONTIG-015843 | 61   | 6   | 2   | 8    | 0   |
| CONTIG-015844 | 126  | 56  | 23  | 332  | 0   |
| CONTIG-015847 | 150  | 7   | 6   | 38   | 0   |
| CONTIG-015848 | 229  | 26  | 148 | 146  | 0   |
| CONTIG-015849 | 233  | 699 | 74  | 22   | 4   |
| CONTIG-015850 | 357  | 136 | 113 | 1375 | 142 |
| CONTIG-015851 | 426  | 27  | 214 | 328  | 2   |
| CONTIG-015852 | 294  | 11  | 50  | 119  | 0   |
| CONTIG-015853 | 423  | 43  | 103 | 545  | 15  |
| CONTIG-015854 | 238  | 132 | 51  | 28   | 2   |
| CONTIG-015859 | 217  | 8   | 24  | 53   | 0   |
| CONTIG-015860 | 202  | 10  | 22  | 2    | 0   |
| CONTIG-015863 | 198  | 235 | 52  | 0    | 0   |
| CONTIG-015864 | 316  | 17  | 106 | 156  | 0   |
| CONTIG-015865 | 256  | 12  | 17  | 59   | 2   |
| CONTIG-015866 | 206  | 10  | 4   | 5    | 0   |
| CONTIG-015867 | 185  | 9   | 41  | 30   | 0   |
| CONTIG-015868 | 171  | 10  | 5   | 46   | 0   |

|               |      |     |      |      |      |
|---------------|------|-----|------|------|------|
| CONTIG-015869 | 314  | 12  | 38   | 67   | 0    |
| CONTIG-015870 | 1154 | 28  | 34   | 1287 | 8    |
| CONTIG-015871 | 244  | 16  | 129  | 123  | 0    |
| CONTIG-015872 | 144  | 54  | 271  | 52   | 0    |
| CONTIG-015873 | 150  | 12  | 122  | 29   | 0    |
| CONTIG-015874 | 1899 | 36  | 128  | 2014 | 237  |
| CONTIG-015876 | 1126 | 24  | 294  | 793  | 0    |
| CONTIG-015878 | 209  | 17  | 39   | 135  | 0    |
| CONTIG-015879 | 107  | 5   | 10   | 5    | 0    |
| CONTIG-015880 | 483  | 153 | 95   | 2037 | 0    |
| CONTIG-015881 | 945  | 32  | 94   | 963  | 19   |
| CONTIG-015882 | 129  | 5   | 12   | 12   | 0    |
| CONTIG-015888 | 150  | 7   | 2    | 35   | 0    |
| CONTIG-015891 | 204  | 25  | 113  | 125  | 2    |
| CONTIG-015895 | 157  | 6   | 0    | 24   | 0    |
| CONTIG-015896 | 113  | 7   | 58   | 12   | 0    |
| CONTIG-015897 | 98   | 47  | 48   | 132  | 2    |
| CONTIG-015898 | 449  | 28  | 246  | 236  | 9    |
| CONTIG-015899 | 238  | 12  | 44   | 82   | 0    |
| CONTIG-015900 | 2406 | 72  | 219  | 4133 | 1105 |
| CONTIG-015901 | 119  | 5   | 15   | 8    | 0    |
| CONTIG-015903 | 171  | 24  | 4    | 91   | 0    |
| CONTIG-015904 | 175  | 6   | 11   | 25   | 0    |
| CONTIG-015905 | 108  | 121 | 362  | 170  | 51   |
| CONTIG-015906 | 159  | 7   | 9    | 25   | 0    |
| CONTIG-015907 | 206  | 15  | 98   | 60   | 0    |
| CONTIG-015908 | 82   | 11  | 4    | 32   | 2    |
| CONTIG-015909 | 543  | 27  | 213  | 329  | 5    |
| CONTIG-015910 | 185  | 8   | 2    | 39   | 0    |
| CONTIG-015911 | 356  | 11  | 46   | 85   | 0    |
| CONTIG-015912 | 612  | 25  | 93   | 510  | 2    |
| CONTIG-015913 | 2332 | 39  | 96   | 4706 | 45   |
| CONTIG-015915 | 320  | 21  | 81   | 248  | 0    |
| CONTIG-015916 | 209  | 5   | 14   | 32   | 0    |
| CONTIG-015917 | 561  | 11  | 4    | 169  | 0    |
| CONTIG-015918 | 100  | 256 | 323  | 793  | 76   |
| CONTIG-015919 | 150  | 11  | 52   | 41   | 0    |
| CONTIG-015920 | 130  | 129 | 65   | 549  | 22   |
| CONTIG-015921 | 345  | 13  | 8    | 185  | 2    |
| CONTIG-015928 | 303  | 19  | 100  | 105  | 2    |
| CONTIG-015929 | 774  | 15  | 88   | 473  | 0    |
| CONTIG-015930 | 268  | 23  | 110  | 257  | 0    |
| CONTIG-015937 | 45   | 549 | 235  | 339  | 47   |
| CONTIG-015938 | 212  | 229 | 2419 | 236  | 40   |
| CONTIG-015939 | 135  | 19  | 200  | 38   | 0    |
| CONTIG-015942 | 284  | 23  | 34   | 294  | 0    |
| CONTIG-015943 | 409  | 30  | 105  | 295  | 8    |

|               |      |     |     |      |     |
|---------------|------|-----|-----|------|-----|
| CONTIG-015944 | 71   | 11  | 4   | 13   | 2   |
| CONTIG-015945 | 300  | 12  | 15  | 94   | 2   |
| CONTIG-015946 | 98   | 4   | 5   | 9    | 0   |
| CONTIG-015948 | 193  | 7   | 9   | 37   | 0   |
| CONTIG-015949 | 249  | 15  | 25  | 118  | 0   |
| CONTIG-015950 | 464  | 12  | 23  | 186  | 0   |
| CONTIG-015951 | 341  | 14  | 39  | 111  | 2   |
| CONTIG-015952 | 37   | 169 | 238 | 112  | 21  |
| CONTIG-015953 | 61   | 8   | 25  | 3    | 0   |
| CONTIG-015958 | 333  | 19  | 228 | 162  | 0   |
| CONTIG-015959 | 593  | 34  | 77  | 1151 | 2   |
| CONTIG-015960 | 154  | 32  | 22  | 156  | 0   |
| CONTIG-015961 | 156  | 67  | 2   | 17   | 0   |
| CONTIG-015963 | 232  | 48  | 244 | 279  | 0   |
| CONTIG-015965 | 244  | 17  | 126 | 87   | 0   |
| CONTIG-015966 | 354  | 11  | 53  | 77   | 2   |
| CONTIG-015967 | 1599 | 31  | 205 | 2744 | 4   |
| CONTIG-015968 | 399  | 15  | 48  | 173  | 0   |
| CONTIG-015969 | 256  | 33  | 158 | 223  | 2   |
| CONTIG-015970 | 76   | 5   | 7   | 0    | 0   |
| CONTIG-015971 | 330  | 9   | 58  | 80   | 0   |
| CONTIG-015972 | 431  | 20  | 39  | 355  | 0   |
| CONTIG-015973 | 341  | 49  | 91  | 914  | 0   |
| CONTIG-015974 | 582  | 36  | 72  | 1147 | 0   |
| CONTIG-015975 | 516  | 16  | 66  | 175  | 0   |
| CONTIG-015977 | 443  | 100 | 324 | 1512 | 94  |
| CONTIG-015978 | 122  | 6   | 5   | 21   | 0   |
| CONTIG-015979 | 409  | 17  | 44  | 143  | 12  |
| CONTIG-015980 | 757  | 11  | 20  | 320  | 0   |
| CONTIG-015981 | 70   | 5   | 2   | 16   | 0   |
| CONTIG-015982 | 617  | 40  | 144 | 992  | 2   |
| CONTIG-015984 | 315  | 12  | 28  | 87   | 2   |
| CONTIG-015985 | 221  | 32  | 170 | 91   | 0   |
| CONTIG-015986 | 96   | 8   | 4   | 31   | 0   |
| CONTIG-015992 | 489  | 14  | 276 | 200  | 0   |
| CONTIG-015993 | 70   | 11  | 52  | 0    | 0   |
| CONTIG-015995 | 727  | 13  | 32  | 378  | 6   |
| CONTIG-015996 | 146  | 20  | 20  | 141  | 0   |
| CONTIG-015997 | 150  | 10  | 13  | 39   | 4   |
| CONTIG-015998 | 210  | 40  | 149 | 176  | 5   |
| CONTIG-015999 | 916  | 29  | 67  | 1424 | 2   |
| CONTIG-016000 | 75   | 7   | 4   | 11   | 0   |
| CONTIG-016004 | 394  | 10  | 17  | 121  | 4   |
| CONTIG-016005 | 183  | 16  | 102 | 22   | 0   |
| CONTIG-016006 | 241  | 17  | 61  | 77   | 2   |
| CONTIG-016009 | 107  | 120 | 149 | 127  | 0   |
| CONTIG-016010 | 685  | 62  | 663 | 603  | 106 |

|               |      |     |     |      |    |
|---------------|------|-----|-----|------|----|
| CONTIG-016014 | 333  | 12  | 38  | 104  | 4  |
| CONTIG-016015 | 481  | 12  | 18  | 181  | 4  |
| CONTIG-016019 | 193  | 12  | 18  | 45   | 0  |
| CONTIG-016020 | 97   | 22  | 11  | 43   | 0  |
| CONTIG-016021 | 118  | 5   | 9   | 13   | 0  |
| CONTIG-016022 | 82   | 8   | 2   | 25   | 0  |
| CONTIG-016023 | 111  | 12  | 67  | 19   | 0  |
| CONTIG-016024 | 99   | 6   | 20  | 4    | 0  |
| CONTIG-016025 | 297  | 30  | 16  | 83   | 0  |
| CONTIG-016026 | 359  | 12  | 42  | 142  | 0  |
| CONTIG-016027 | 218  | 8   | 29  | 35   | 0  |
| CONTIG-016028 | 612  | 15  | 21  | 18   | 51 |
| CONTIG-016029 | 80   | 174 | 378 | 31   | 5  |
| CONTIG-016030 | 70   | 7   | 24  | 0    | 0  |
| CONTIG-016031 | 510  | 23  | 111 | 569  | 2  |
| CONTIG-016032 | 242  | 16  | 2   | 81   | 2  |
| CONTIG-016034 | 131  | 28  | 31  | 131  | 0  |
| CONTIG-016035 | 1009 | 63  | 683 | 2706 | 11 |
| CONTIG-016036 | 61   | 7   | 10  | 10   | 0  |
| CONTIG-016037 | 122  | 6   | 2   | 6    | 0  |
| CONTIG-016038 | 377  | 7   | 4   | 19   | 0  |
| CONTIG-016039 | 372  | 27  | 200 | 288  | 2  |
| CONTIG-016040 | 97   | 10  | 37  | 2    | 0  |
| CONTIG-016041 | 349  | 27  | 31  | 260  | 0  |
| CONTIG-016042 | 224  | 6   | 9   | 50   | 0  |
| CONTIG-016043 | 227  | 13  | 36  | 79   | 0  |
| CONTIG-016044 | 236  | 31  | 29  | 84   | 2  |
| CONTIG-016047 | 663  | 125 | 271 | 5144 | 0  |
| CONTIG-016048 | 94   | 5   | 2   | 19   | 0  |
| CONTIG-016049 | 504  | 27  | 164 | 251  | 6  |
| CONTIG-016050 | 490  | 19  | 79  | 519  | 0  |
| CONTIG-016051 | 78   | 10  | 11  | 34   | 0  |
| CONTIG-016052 | 536  | 15  | 95  | 182  | 4  |
| CONTIG-016053 | 483  | 15  | 19  | 190  | 0  |
| CONTIG-016054 | 98   | 22  | 34  | 31   | 0  |
| CONTIG-016055 | 219  | 9   | 12  | 48   | 2  |
| CONTIG-016056 | 332  | 11  | 53  | 93   | 0  |
| CONTIG-016057 | 125  | 3   | 10  | 4    | 0  |
| CONTIG-016058 | 514  | 25  | 212 | 216  | 0  |
| CONTIG-016059 | 620  | 8   | 64  | 134  | 0  |
| CONTIG-016060 | 151  | 6   | 61  | 12   | 0  |
| CONTIG-016063 | 115  | 5   | 14  | 6    | 0  |
| CONTIG-016064 | 55   | 81  | 22  | 150  | 0  |
| CONTIG-016065 | 130  | 13  | 15  | 10   | 0  |
| CONTIG-016066 | 352  | 13  | 58  | 167  | 0  |
| CONTIG-016067 | 96   | 12  | 50  | 20   | 0  |
| CONTIG-016068 | 87   | 5   | 6   | 12   | 0  |

|               |      |     |     |      |      |
|---------------|------|-----|-----|------|------|
| CONTIG-016069 | 393  | 22  | 521 | 155  | 2    |
| CONTIG-016070 | 577  | 15  | 42  | 218  | 0    |
| CONTIG-016071 | 181  | 11  | 51  | 22   | 0    |
| CONTIG-016072 | 80   | 35  | 211 | 14   | 0    |
| CONTIG-016073 | 206  | 10  | 72  | 58   | 0    |
| CONTIG-016074 | 339  | 8   | 14  | 141  | 0    |
| CONTIG-016075 | 73   | 4   | 5   | 7    | 0    |
| CONTIG-016076 | 337  | 19  | 66  | 184  | 0    |
| CONTIG-016077 | 69   | 763 | 425 | 14   | 1235 |
| CONTIG-016079 | 1107 | 22  | 17  | 925  | 13   |
| CONTIG-016080 | 185  | 10  | 9   | 36   | 3    |
| CONTIG-016081 | 237  | 7   | 0   | 51   | 0    |
| CONTIG-016082 | 312  | 21  | 122 | 164  | 2    |
| CONTIG-016083 | 265  | 16  | 95  | 124  | 0    |
| CONTIG-016084 | 600  | 37  | 362 | 527  | 7    |
| CONTIG-016085 | 151  | 11  | 19  | 76   | 0    |
| CONTIG-016087 | 142  | 11  | 26  | 8    | 0    |
| CONTIG-016088 | 164  | 18  | 147 | 41   | 0    |
| CONTIG-016089 | 197  | 93  | 201 | 663  | 2    |
| CONTIG-016090 | 60   | 166 | 94  | 250  | 5    |
| CONTIG-016091 | 103  | 5   | 10  | 2    | 0    |
| CONTIG-016092 | 154  | 7   | 29  | 27   | 0    |
| CONTIG-016093 | 96   | 7   | 2   | 15   | 0    |
| CONTIG-016094 | 247  | 135 | 95  | 1164 | 54   |
| CONTIG-016095 | 370  | 9   | 91  | 45   | 0    |
| CONTIG-016096 | 937  | 19  | 532 | 165  | 0    |
| CONTIG-016097 | 481  | 37  | 78  | 180  | 0    |
| CONTIG-016098 | 1213 | 31  | 44  | 2186 | 0    |
| CONTIG-016099 | 122  | 4   | 3   | 14   | 0    |
| CONTIG-016100 | 58   | 242 | 19  | 626  | 25   |
| CONTIG-016101 | 329  | 7   | 17  | 41   | 0    |
| CONTIG-016102 | 166  | 11  | 38  | 63   | 0    |
| CONTIG-016103 | 323  | 22  | 24  | 52   | 2    |
| CONTIG-016104 | 382  | 20  | 45  | 241  | 0    |
| CONTIG-016105 | 195  | 9   | 24  | 81   | 0    |
| CONTIG-016106 | 606  | 16  | 138 | 112  | 6    |
| CONTIG-016107 | 642  | 12  | 58  | 239  | 0    |
| CONTIG-016114 | 463  | 44  | 212 | 681  | 13   |
| CONTIG-016115 | 45   | 48  | 9   | 56   | 0    |
| CONTIG-016116 | 369  | 19  | 150 | 182  | 0    |
| CONTIG-016117 | 162  | 15  | 167 | 24   | 0    |
| CONTIG-016119 | 228  | 22  | 136 | 78   | 0    |
| CONTIG-016120 | 455  | 12  | 117 | 195  | 0    |
| CONTIG-016121 | 185  | 23  | 45  | 84   | 2    |
| CONTIG-016122 | 420  | 16  | 66  | 235  | 4    |
| CONTIG-016123 | 65   | 4   | 6   | 2    | 0    |
| CONTIG-016124 | 1086 | 17  | 15  | 511  | 35   |

|               |      |     |     |      |     |
|---------------|------|-----|-----|------|-----|
| CONTIG-016125 | 377  | 7   | 11  | 57   | 0   |
| CONTIG-016126 | 51   | 190 | 106 | 149  | 0   |
| CONTIG-016127 | 303  | 23  | 55  | 210  | 2   |
| CONTIG-016128 | 329  | 8   | 22  | 54   | 0   |
| CONTIG-016129 | 102  | 12  | 7   | 36   | 0   |
| CONTIG-016130 | 103  | 67  | 10  | 148  | 22  |
| CONTIG-016131 | 816  | 44  | 641 | 1129 | 16  |
| CONTIG-016132 | 1423 | 16  | 372 | 426  | 14  |
| CONTIG-016133 | 320  | 12  | 19  | 134  | 0   |
| CONTIG-016134 | 138  | 5   | 3   | 20   | 0   |
| CONTIG-016135 | 264  | 16  | 53  | 185  | 0   |
| CONTIG-016136 | 568  | 13  | 54  | 269  | 2   |
| CONTIG-016137 | 200  | 11  | 31  | 53   | 0   |
| CONTIG-016138 | 196  | 11  | 23  | 58   | 0   |
| CONTIG-016139 | 436  | 18  | 265 | 185  | 0   |
| CONTIG-016140 | 125  | 18  | 84  | 35   | 7   |
| CONTIG-016141 | 191  | 15  | 35  | 87   | 0   |
| CONTIG-016142 | 659  | 16  | 71  | 295  | 4   |
| CONTIG-016143 | 177  | 14  | 146 | 31   | 0   |
| CONTIG-016144 | 411  | 13  | 41  | 142  | 0   |
| CONTIG-016145 | 88   | 31  | 175 | 56   | 0   |
| CONTIG-016146 | 64   | 6   | 4   | 2    | 0   |
| CONTIG-016147 | 781  | 20  | 281 | 431  | 0   |
| CONTIG-016148 | 152  | 14  | 56  | 33   | 0   |
| CONTIG-016149 | 82   | 26  | 39  | 70   | 0   |
| CONTIG-016150 | 891  | 24  | 134 | 1127 | 0   |
| CONTIG-016151 | 124  | 6   | 20  | 11   | 0   |
| CONTIG-016152 | 92   | 14  | 5   | 48   | 2   |
| CONTIG-016153 | 108  | 20  | 57  | 10   | 0   |
| CONTIG-016155 | 70   | 11  | 16  | 25   | 2   |
| CONTIG-016156 | 97   | 8   | 2   | 30   | 0   |
| CONTIG-016157 | 42   | 89  | 29  | 89   | 0   |
| CONTIG-016158 | 117  | 28  | 53  | 31   | 0   |
| CONTIG-016159 | 95   | 6   | 10  | 2    | 0   |
| CONTIG-016160 | 685  | 8   | 137 | 98   | 2   |
| CONTIG-016161 | 212  | 7   | 10  | 57   | 0   |
| CONTIG-016162 | 110  | 39  | 113 | 47   | 0   |
| CONTIG-016163 | 1225 | 37  | 318 | 2435 | 0   |
| CONTIG-016164 | 960  | 55  | 273 | 2693 | 6   |
| CONTIG-016167 | 494  | 35  | 96  | 245  | 62  |
| CONTIG-016168 | 69   | 595 | 398 | 954  | 139 |
| CONTIG-016169 | 202  | 21  | 12  | 155  | 8   |
| CONTIG-016170 | 179  | 12  | 16  | 82   | 0   |
| CONTIG-016171 | 156  | 149 | 358 | 457  | 64  |
| CONTIG-016172 | 145  | 16  | 25  | 63   | 0   |
| CONTIG-016173 | 263  | 154 | 242 | 1159 | 51  |
| CONTIG-016174 | 812  | 25  | 82  | 1030 | 0   |

|               |     |     |     |      |    |
|---------------|-----|-----|-----|------|----|
| CONTIG-016175 | 174 | 11  | 13  | 49   | 0  |
| CONTIG-016176 | 584 | 37  | 214 | 1048 | 0  |
| CONTIG-016177 | 312 | 14  | 54  | 122  | 0  |
| CONTIG-016178 | 369 | 9   | 31  | 54   | 0  |
| CONTIG-016179 | 364 | 7   | 25  | 43   | 0  |
| CONTIG-016180 | 348 | 19  | 123 | 314  | 0  |
| CONTIG-016181 | 185 | 21  | 26  | 104  | 0  |
| CONTIG-016182 | 151 | 4   | 2   | 0    | 0  |
| CONTIG-016183 | 93  | 15  | 29  | 14   | 0  |
| CONTIG-016184 | 39  | 159 | 22  | 0    | 0  |
| CONTIG-016185 | 66  | 9   | 26  | 9    | 0  |
| CONTIG-016186 | 396 | 56  | 147 | 546  | 14 |
| CONTIG-016187 | 75  | 8   | 12  | 14   | 0  |
| CONTIG-016188 | 936 | 25  | 63  | 1039 | 2  |
| CONTIG-016189 | 80  | 9   | 5   | 13   | 0  |
| CONTIG-016190 | 155 | 6   | 11  | 17   | 0  |
| CONTIG-016191 | 210 | 9   | 45  | 34   | 0  |
| CONTIG-016192 | 66  | 27  | 32  | 62   | 2  |
| CONTIG-016193 | 617 | 11  | 34  | 127  | 0  |
| CONTIG-016194 | 196 | 12  | 88  | 33   | 0  |
| CONTIG-016195 | 193 | 9   | 38  | 35   | 0  |
| CONTIG-016196 | 168 | 43  | 176 | 37   | 4  |
| CONTIG-016197 | 39  | 317 | 65  | 405  | 8  |
| CONTIG-016198 | 58  | 6   | 5   | 0    | 0  |
| CONTIG-016199 | 74  | 5   | 6   | 9    | 0  |
| CONTIG-016200 | 212 | 11  | 8   | 106  | 0  |
| CONTIG-016205 | 812 | 29  | 53  | 51   | 0  |
| CONTIG-016206 | 713 | 30  | 370 | 707  | 2  |
| CONTIG-016207 | 146 | 14  | 47  | 49   | 0  |
| CONTIG-016208 | 656 | 14  | 166 | 218  | 2  |
| CONTIG-016209 | 263 | 22  | 21  | 296  | 5  |
| CONTIG-016210 | 167 | 19  | 31  | 119  | 0  |
| CONTIG-016211 | 250 | 99  | 157 | 493  | 38 |
| CONTIG-016212 | 544 | 19  | 127 | 233  | 0  |
| CONTIG-016213 | 193 | 11  | 90  | 9    | 0  |
| CONTIG-016219 | 198 | 8   | 19  | 47   | 0  |
| CONTIG-016220 | 685 | 16  | 77  | 257  | 0  |
| CONTIG-016221 | 145 | 13  | 48  | 10   | 0  |
| CONTIG-016223 | 121 | 63  | 45  | 249  | 5  |
| CONTIG-016224 | 77  | 3   | 6   | 2    | 0  |
| CONTIG-016225 | 114 | 28  | 54  | 159  | 0  |
| CONTIG-016226 | 426 | 18  | 74  | 92   | 0  |
| CONTIG-016227 | 598 | 9   | 34  | 166  | 0  |
| CONTIG-016228 | 721 | 26  | 213 | 914  | 2  |
| CONTIG-016229 | 82  | 16  | 74  | 0    | 0  |
| CONTIG-016230 | 167 | 4   | 14  | 12   | 0  |
| CONTIG-016232 | 345 | 16  | 108 | 139  | 0  |



|               |      |     |     |       |     |
|---------------|------|-----|-----|-------|-----|
| CONTIG-016233 | 100  | 28  | 19  | 55    | 0   |
| CONTIG-016234 | 198  | 34  | 218 | 76    | 2   |
| CONTIG-016235 | 137  | 10  | 55  | 23    | 0   |
| CONTIG-016236 | 460  | 75  | 274 | 1150  | 119 |
| CONTIG-016237 | 259  | 29  | 205 | 146   | 0   |
| CONTIG-016245 | 220  | 12  | 48  | 79    | 0   |
| CONTIG-016247 | 71   | 74  | 177 | 102   | 0   |
| CONTIG-016248 | 683  | 11  | 29  | 110   | 0   |
| CONTIG-016249 | 295  | 11  | 108 | 106   | 0   |
| CONTIG-016250 | 466  | 11  | 36  | 148   | 0   |
| CONTIG-016251 | 115  | 5   | 10  | 23    | 0   |
| CONTIG-016259 | 75   | 5   | 3   | 9     | 0   |
| CONTIG-016260 | 78   | 4   | 2   | 9     | 0   |
| CONTIG-016262 | 59   | 5   | 6   | 13    | 0   |
| CONTIG-016267 | 113  | 16  | 10  | 27    | 0   |
| CONTIG-016268 | 254  | 10  | 11  | 57    | 0   |
| CONTIG-016272 | 674  | 16  | 2   | 0     | 55  |
| CONTIG-016273 | 79   | 24  | 129 | 10    | 0   |
| CONTIG-016274 | 255  | 14  | 79  | 46    | 0   |
| CONTIG-016280 | 490  | 41  | 257 | 936   | 0   |
| CONTIG-016281 | 451  | 118 | 275 | 1307  | 242 |
| CONTIG-016285 | 63   | 99  | 51  | 160   | 0   |
| CONTIG-016286 | 419  | 18  | 59  | 111   | 0   |
| CONTIG-016287 | 102  | 24  | 14  | 129   | 0   |
| CONTIG-016288 | 57   | 186 | 34  | 195   | 6   |
| CONTIG-016290 | 238  | 15  | 39  | 90    | 2   |
| CONTIG-016291 | 136  | 34  | 63  | 184   | 0   |
| CONTIG-016292 | 1118 | 141 | 187 | 10272 | 2   |
| CONTIG-016293 | 399  | 11  | 49  | 59    | 0   |
| CONTIG-016294 | 354  | 12  | 97  | 157   | 0   |
| CONTIG-016295 | 114  | 276 | 392 | 636   | 53  |
| CONTIG-016296 | 525  | 21  | 130 | 449   | 0   |
| CONTIG-016297 | 63   | 6   | 4   | 10    | 0   |
| CONTIG-016300 | 318  | 10  | 66  | 66    | 2   |
| CONTIG-016301 | 266  | 13  | 26  | 168   | 0   |
| CONTIG-016302 | 512  | 12  | 38  | 104   | 6   |
| CONTIG-016303 | 70   | 11  | 67  | 0     | 0   |
| CONTIG-016307 | 92   | 26  | 41  | 118   | 0   |
| CONTIG-016309 | 887  | 28  | 406 | 1184  | 0   |
| CONTIG-016310 | 252  | 30  | 119 | 335   | 0   |
| CONTIG-016311 | 258  | 14  | 14  | 147   | 2   |
| CONTIG-016312 | 179  | 14  | 83  | 51    | 6   |
| CONTIG-016313 | 315  | 43  | 676 | 381   | 2   |
| CONTIG-016314 | 478  | 20  | 167 | 178   | 2   |
| CONTIG-016315 | 123  | 14  | 12  | 72    | 0   |
| CONTIG-016316 | 92   | 8   | 7   | 10    | 0   |
| CONTIG-016317 | 65   | 10  | 14  | 18    | 0   |

|               |      |     |     |      |    |
|---------------|------|-----|-----|------|----|
| CONTIG-016318 | 1600 | 24  | 319 | 1082 | 33 |
| CONTIG-016319 | 93   | 258 | 184 | 589  | 83 |
| CONTIG-016320 | 65   | 158 | 68  | 399  | 3  |
| CONTIG-016321 | 81   | 271 | 133 | 250  | 15 |
| CONTIG-016322 | 129  | 4   | 0   | 12   | 0  |
| CONTIG-016323 | 63   | 11  | 68  | 0    | 2  |
| CONTIG-016324 | 105  | 56  | 72  | 157  | 0  |
| CONTIG-016325 | 1092 | 34  | 690 | 1376 | 8  |
| CONTIG-016328 | 202  | 8   | 11  | 61   | 0  |
| CONTIG-016329 | 132  | 5   | 5   | 18   | 0  |
| CONTIG-016330 | 742  | 14  | 73  | 339  | 4  |
| CONTIG-016331 | 354  | 41  | 126 | 228  | 6  |
| CONTIG-016332 | 162  | 5   | 16  | 13   | 0  |
| CONTIG-016333 | 432  | 30  | 140 | 273  | 17 |
| CONTIG-016334 | 80   | 55  | 95  | 140  | 0  |
| CONTIG-016339 | 251  | 14  | 54  | 138  | 0  |
| CONTIG-016340 | 77   | 9   | 19  | 0    | 0  |
| CONTIG-016341 | 287  | 38  | 123 | 138  | 0  |
| CONTIG-016344 | 168  | 10  | 74  | 17   | 0  |
| CONTIG-016345 | 734  | 15  | 59  | 256  | 2  |
| CONTIG-016346 | 197  | 20  | 30  | 201  | 0  |
| CONTIG-016347 | 102  | 14  | 23  | 12   | 0  |
| CONTIG-016348 | 92   | 96  | 94  | 423  | 6  |
| CONTIG-016349 | 604  | 30  | 129 | 488  | 0  |
| CONTIG-016350 | 215  | 35  | 62  | 388  | 0  |
| CONTIG-016351 | 473  | 12  | 12  | 166  | 4  |
| CONTIG-016352 | 340  | 18  | 129 | 173  | 4  |
| CONTIG-016353 | 60   | 5   | 3   | 6    | 0  |
| CONTIG-016354 | 385  | 8   | 75  | 40   | 0  |
| CONTIG-016355 | 319  | 11  | 14  | 138  | 8  |
| CONTIG-016356 | 293  | 35  | 68  | 225  | 4  |
| CONTIG-016359 | 67   | 4   | 3   | 5    | 0  |
| CONTIG-016360 | 148  | 8   | 14  | 30   | 0  |
| CONTIG-016361 | 396  | 14  | 45  | 244  | 0  |
| CONTIG-016362 | 64   | 319 | 22  | 233  | 0  |
| CONTIG-016363 | 383  | 15  | 91  | 176  | 0  |
| CONTIG-016364 | 263  | 6   | 3   | 22   | 0  |
| CONTIG-016365 | 1275 | 24  | 438 | 1285 | 0  |
| CONTIG-016367 | 517  | 49  | 214 | 678  | 4  |
| CONTIG-016368 | 159  | 10  | 6   | 30   | 0  |
| CONTIG-016369 | 623  | 14  | 131 | 172  | 0  |
| CONTIG-016370 | 69   | 3   | 0   | 2    | 0  |
| CONTIG-016374 | 275  | 68  | 141 | 478  | 12 |
| CONTIG-016375 | 70   | 6   | 0   | 0    | 0  |
| CONTIG-016377 | 316  | 15  | 16  | 166  | 0  |
| CONTIG-016379 | 255  | 29  | 171 | 229  | 5  |
| CONTIG-016381 | 84   | 4   | 2   | 2    | 0  |

|               |     |     |     |      |     |
|---------------|-----|-----|-----|------|-----|
| CONTIG-016382 | 97  | 5   | 14  | 4    | 0   |
| CONTIG-016383 | 88  | 3   | 8   | 5    | 0   |
| CONTIG-016384 | 548 | 17  | 37  | 278  | 2   |
| CONTIG-016385 | 180 | 7   | 15  | 40   | 0   |
| CONTIG-016386 | 540 | 72  | 113 | 1135 | 129 |
| CONTIG-016387 | 612 | 18  | 107 | 399  | 0   |
| CONTIG-016388 | 386 | 20  | 93  | 350  | 0   |
| CONTIG-016389 | 97  | 5   | 4   | 13   | 0   |
| CONTIG-016390 | 113 | 14  | 6   | 58   | 0   |
| CONTIG-016391 | 77  | 22  | 59  | 37   | 2   |
| CONTIG-016392 | 129 | 19  | 30  | 114  | 0   |
| CONTIG-016393 | 259 | 17  | 19  | 198  | 0   |
| CONTIG-016394 | 768 | 22  | 260 | 462  | 24  |
| CONTIG-016395 | 287 | 11  | 33  | 65   | 2   |
| CONTIG-016396 | 65  | 13  | 17  | 4    | 0   |
| CONTIG-016397 | 172 | 17  | 48  | 28   | 2   |
| CONTIG-016398 | 249 | 7   | 11  | 29   | 0   |
| CONTIG-016399 | 135 | 7   | 9   | 13   | 0   |
| CONTIG-016401 | 255 | 19  | 50  | 212  | 2   |
| CONTIG-016402 | 694 | 17  | 153 | 224  | 4   |
| CONTIG-016403 | 443 | 9   | 99  | 79   | 0   |
| CONTIG-016404 | 254 | 9   | 12  | 71   | 0   |
| CONTIG-016405 | 457 | 8   | 16  | 147  | 0   |
| CONTIG-016406 | 113 | 868 | 111 | 0    | 0   |
| CONTIG-016407 | 780 | 17  | 90  | 321  | 4   |
| CONTIG-016408 | 487 | 37  | 25  | 596  | 30  |
| CONTIG-016409 | 263 | 9   | 5   | 98   | 0   |
| CONTIG-016410 | 271 | 43  | 133 | 249  | 6   |
| CONTIG-016411 | 840 | 17  | 189 | 397  | 2   |
| CONTIG-016412 | 486 | 11  | 21  | 105  | 4   |
| CONTIG-016413 | 188 | 7   | 5   | 36   | 0   |
| CONTIG-016414 | 215 | 9   | 7   | 44   | 0   |
| CONTIG-016415 | 198 | 10  | 0   | 82   | 2   |
| CONTIG-016420 | 379 | 14  | 64  | 119  | 5   |
| CONTIG-016421 | 398 | 16  | 61  | 215  | 4   |
| CONTIG-016422 | 594 | 13  | 35  | 222  | 0   |
| CONTIG-016423 | 128 | 6   | 14  | 13   | 0   |
| CONTIG-016424 | 226 | 8   | 34  | 59   | 0   |
| CONTIG-016426 | 628 | 17  | 62  | 130  | 0   |
| CONTIG-016432 | 144 | 10  | 16  | 59   | 0   |
| CONTIG-016433 | 296 | 13  | 23  | 111  | 4   |
| CONTIG-016434 | 60  | 8   | 8   | 17   | 0   |
| CONTIG-016435 | 73  | 7   | 0   | 8    | 0   |
| CONTIG-016436 | 68  | 5   | 3   | 8    | 0   |
| CONTIG-016437 | 86  | 6   | 7   | 8    | 0   |
| CONTIG-016438 | 164 | 57  | 244 | 135  | 0   |
| CONTIG-016439 | 61  | 6   | 3   | 13   | 0   |

|               |     |      |     |      |    |
|---------------|-----|------|-----|------|----|
| CONTIG-016440 | 181 | 7    | 7   | 35   | 2  |
| CONTIG-016441 | 373 | 21   | 121 | 246  | 0  |
| CONTIG-016446 | 402 | 9    | 26  | 91   | 0  |
| CONTIG-016447 | 62  | 475  | 359 | 1145 | 7  |
| CONTIG-016449 | 407 | 37   | 62  | 382  | 12 |
| CONTIG-016451 | 101 | 10   | 15  | 29   | 0  |
| CONTIG-016452 | 49  | 421  | 155 | 597  | 0  |
| CONTIG-016458 | 59  | 1353 | 90  | 3674 | 0  |
| CONTIG-016459 | 59  | 6    | 7   | 10   | 0  |
| CONTIG-016460 | 57  | 71   | 0   | 230  | 0  |
| CONTIG-016470 | 191 | 53   | 26  | 286  | 17 |
| CONTIG-016476 | 85  | 10   | 71  | 2    | 0  |
| CONTIG-016477 | 477 | 10   | 19  | 233  | 0  |
| CONTIG-016478 | 651 | 14   | 142 | 231  | 12 |
| CONTIG-016480 | 198 | 29   | 14  | 98   | 0  |
| CONTIG-016481 | 50  | 83   | 22  | 90   | 0  |
| CONTIG-016482 | 254 | 99   | 257 | 415  | 53 |
| CONTIG-016483 | 67  | 5    | 22  | 2    | 0  |
| CONTIG-016484 | 86  | 6    | 26  | 6    | 0  |
| CONTIG-016485 | 138 | 10   | 21  | 43   | 0  |
| CONTIG-016486 | 71  | 5    | 11  | 0    | 0  |
| CONTIG-016487 | 158 | 15   | 45  | 58   | 0  |
| CONTIG-016490 | 195 | 12   | 67  | 18   | 0  |
| CONTIG-016498 | 145 | 5    | 36  | 0    | 0  |
| CONTIG-016499 | 132 | 9    | 16  | 7    | 0  |
| CONTIG-016500 | 683 | 30   | 281 | 721  | 2  |
| CONTIG-016501 | 55  | 11   | 2   | 16   | 0  |
| CONTIG-016502 | 190 | 9    | 9   | 19   | 0  |
| CONTIG-016503 | 326 | 24   | 15  | 283  | 13 |
| CONTIG-016504 | 558 | 24   | 171 | 357  | 12 |
| CONTIG-016505 | 365 | 14   | 22  | 81   | 0  |
| CONTIG-016506 | 186 | 7    | 9   | 49   | 0  |
| CONTIG-016507 | 79  | 23   | 17  | 48   | 2  |
| CONTIG-016508 | 560 | 20   | 289 | 389  | 0  |
| CONTIG-016509 | 62  | 4    | 2   | 0    | 0  |
| CONTIG-016510 | 438 | 15   | 39  | 210  | 2  |
| CONTIG-016514 | 135 | 53   | 86  | 128  | 27 |
| CONTIG-016515 | 197 | 9    | 31  | 60   | 0  |
| CONTIG-016516 | 74  | 360  | 36  | 1189 | 21 |
| CONTIG-016517 | 97  | 11   | 10  | 12   | 0  |
| CONTIG-016518 | 63  | 7    | 10  | 6    | 0  |
| CONTIG-016520 | 381 | 22   | 654 | 113  | 0  |
| CONTIG-016521 | 158 | 23   | 16  | 159  | 2  |
| CONTIG-016522 | 205 | 7    | 70  | 16   | 0  |
| CONTIG-016523 | 109 | 9    | 79  | 6    | 0  |
| CONTIG-016524 | 133 | 8    | 4   | 33   | 0  |
| CONTIG-016525 | 632 | 43   | 210 | 475  | 4  |

|               |      |      |     |      |     |
|---------------|------|------|-----|------|-----|
| CONTIG-016526 | 259  | 7    | 21  | 39   | 0   |
| CONTIG-016527 | 1129 | 19   | 207 | 555  | 2   |
| CONTIG-016528 | 429  | 17   | 28  | 239  | 0   |
| CONTIG-016529 | 259  | 9    | 26  | 41   | 0   |
| CONTIG-016530 | 138  | 26   | 25  | 87   | 2   |
| CONTIG-016532 | 670  | 15   | 62  | 237  | 38  |
| CONTIG-016533 | 62   | 10   | 9   | 7    | 0   |
| CONTIG-016539 | 225  | 11   | 66  | 53   | 0   |
| CONTIG-016540 | 116  | 17   | 36  | 59   | 0   |
| CONTIG-016541 | 121  | 8    | 7   | 0    | 4   |
| CONTIG-016542 | 81   | 7    | 19  | 3    | 0   |
| CONTIG-016543 | 250  | 8    | 5   | 75   | 0   |
| CONTIG-016544 | 345  | 32   | 124 | 338  | 2   |
| CONTIG-016545 | 223  | 22   | 30  | 123  | 0   |
| CONTIG-016546 | 224  | 33   | 155 | 245  | 0   |
| CONTIG-016547 | 265  | 22   | 7   | 160  | 0   |
| CONTIG-016549 | 210  | 5    | 37  | 9    | 0   |
| CONTIG-016550 | 566  | 11   | 21  | 115  | 0   |
| CONTIG-016551 | 78   | 2    | 4   | 0    | 0   |
| CONTIG-016552 | 1092 | 38   | 126 | 1731 | 0   |
| CONTIG-016553 | 389  | 35   | 163 | 541  | 2   |
| CONTIG-016554 | 631  | 53   | 203 | 573  | 6   |
| CONTIG-016555 | 149  | 10   | 0   | 62   | 0   |
| CONTIG-016556 | 62   | 63   | 51  | 44   | 2   |
| CONTIG-016557 | 275  | 27   | 62  | 211  | 0   |
| CONTIG-016558 | 55   | 96   | 22  | 169  | 0   |
| CONTIG-016559 | 476  | 22   | 87  | 456  | 0   |
| CONTIG-016560 | 74   | 234  | 6   | 631  | 51  |
| CONTIG-016561 | 898  | 37   | 474 | 1410 | 4   |
| CONTIG-016562 | 68   | 5    | 4   | 5    | 0   |
| CONTIG-016563 | 177  | 208  | 126 | 1545 | 38  |
| CONTIG-016564 | 335  | 9    | 33  | 135  | 0   |
| CONTIG-016565 | 381  | 14   | 32  | 103  | 0   |
| CONTIG-016566 | 83   | 19   | 138 | 10   | 0   |
| CONTIG-016567 | 201  | 7    | 12  | 35   | 0   |
| CONTIG-016568 | 613  | 15   | 131 | 347  | 0   |
| CONTIG-016569 | 124  | 5    | 0   | 10   | 0   |
| CONTIG-016570 | 49   | 132  | 30  | 142  | 2   |
| CONTIG-016571 | 116  | 20   | 50  | 27   | 0   |
| CONTIG-016572 | 265  | 8    | 32  | 67   | 0   |
| CONTIG-016573 | 92   | 1197 | 234 | 2312 | 867 |
| CONTIG-016574 | 297  | 16   | 33  | 196  | 0   |
| CONTIG-016575 | 183  | 10   | 56  | 19   | 0   |
| CONTIG-016576 | 302  | 15   | 105 | 115  | 0   |
| CONTIG-016577 | 849  | 38   | 745 | 904  | 2   |
| CONTIG-016580 | 163  | 15   | 157 | 24   | 0   |
| CONTIG-016584 | 185  | 13   | 12  | 52   | 0   |

|               |      |     |     |      |     |
|---------------|------|-----|-----|------|-----|
| CONTIG-016585 | 128  | 7   | 6   | 28   | 2   |
| CONTIG-016586 | 148  | 8   | 2   | 28   | 0   |
| CONTIG-016587 | 186  | 12  | 8   | 71   | 4   |
| CONTIG-016591 | 123  | 17  | 93  | 21   | 0   |
| CONTIG-016594 | 62   | 247 | 169 | 185  | 379 |
| CONTIG-016595 | 68   | 6   | 5   | 2    | 0   |
| CONTIG-016596 | 723  | 53  | 441 | 982  | 77  |
| CONTIG-016597 | 252  | 381 | 263 | 3658 | 214 |
| CONTIG-016598 | 141  | 6   | 2   | 0    | 0   |
| CONTIG-016599 | 69   | 14  | 56  | 3    | 0   |
| CONTIG-016600 | 136  | 7   | 10  | 27   | 0   |
| CONTIG-016601 | 83   | 15  | 18  | 44   | 0   |
| CONTIG-016602 | 499  | 30  | 116 | 697  | 0   |
| CONTIG-016603 | 103  | 17  | 115 | 13   | 0   |
| CONTIG-016605 | 284  | 16  | 44  | 66   | 3   |
| CONTIG-016606 | 79   | 199 | 15  | 780  | 0   |
| CONTIG-016607 | 225  | 120 | 26  | 1314 | 0   |
| CONTIG-016608 | 330  | 41  | 109 | 74   | 2   |
| CONTIG-016609 | 63   | 2   | 3   | 2    | 0   |
| CONTIG-016610 | 115  | 33  | 192 | 79   | 4   |
| CONTIG-016612 | 236  | 93  | 234 | 811  | 15  |
| CONTIG-016613 | 297  | 12  | 0   | 0    | 14  |
| CONTIG-016614 | 217  | 17  | 96  | 69   | 0   |
| CONTIG-016615 | 87   | 10  | 8   | 36   | 0   |
| CONTIG-016616 | 182  | 9   | 38  | 43   | 0   |
| CONTIG-016617 | 222  | 23  | 74  | 46   | 0   |
| CONTIG-016618 | 309  | 16  | 63  | 148  | 0   |
| CONTIG-016619 | 265  | 176 | 161 | 2850 | 0   |
| CONTIG-016620 | 92   | 16  | 53  | 6    | 0   |
| CONTIG-016621 | 1076 | 18  | 44  | 475  | 6   |
| CONTIG-016622 | 743  | 12  | 119 | 405  | 0   |
| CONTIG-016623 | 261  | 9   | 28  | 39   | 0   |
| CONTIG-016624 | 142  | 10  | 84  | 22   | 0   |
| CONTIG-016625 | 491  | 17  | 83  | 194  | 2   |
| CONTIG-016626 | 141  | 10  | 34  | 32   | 2   |
| CONTIG-016627 | 518  | 30  | 128 | 496  | 0   |
| CONTIG-016628 | 114  | 39  | 94  | 7    | 0   |
| CONTIG-016630 | 427  | 34  | 35  | 247  | 35  |
| CONTIG-016632 | 69   | 8   | 21  | 2    | 0   |
| CONTIG-016635 | 179  | 10  | 12  | 60   | 0   |
| CONTIG-016636 | 732  | 17  | 52  | 422  | 2   |
| CONTIG-016637 | 145  | 5   | 6   | 11   | 0   |
| CONTIG-016639 | 301  | 11  | 16  | 110  | 0   |
| CONTIG-016640 | 249  | 15  | 35  | 129  | 2   |
| CONTIG-016641 | 165  | 12  | 18  | 58   | 0   |
| CONTIG-016642 | 105  | 7   | 4   | 24   | 0   |
| CONTIG-016643 | 229  | 9   | 90  | 39   | 0   |

|               |      |     |     |      |    |
|---------------|------|-----|-----|------|----|
| CONTIG-016644 | 533  | 20  | 59  | 84   | 0  |
| CONTIG-016646 | 141  | 10  | 37  | 44   | 0  |
| CONTIG-016647 | 549  | 17  | 106 | 439  | 0  |
| CONTIG-016648 | 672  | 22  | 48  | 442  | 7  |
| CONTIG-016649 | 520  | 10  | 49  | 176  | 0  |
| CONTIG-016650 | 138  | 13  | 61  | 7    | 2  |
| CONTIG-016651 | 389  | 14  | 89  | 85   | 2  |
| CONTIG-016652 | 172  | 5   | 0   | 27   | 0  |
| CONTIG-016653 | 1894 | 54  | 160 | 6439 | 2  |
| CONTIG-016655 | 458  | 24  | 73  | 226  | 16 |
| CONTIG-016656 | 228  | 407 | 213 | 4496 | 6  |
| CONTIG-016657 | 166  | 4   | 8   | 21   | 0  |
| CONTIG-016658 | 160  | 10  | 22  | 26   | 0  |
| CONTIG-016659 | 126  | 7   | 7   | 40   | 0  |
| CONTIG-016660 | 230  | 6   | 8   | 34   | 2  |
| CONTIG-016661 | 62   | 20  | 9   | 11   | 5  |
| CONTIG-016662 | 645  | 17  | 38  | 452  | 0  |
| CONTIG-016663 | 721  | 28  | 362 | 869  | 0  |
| CONTIG-016664 | 102  | 19  | 24  | 3    | 0  |
| CONTIG-016671 | 380  | 8   | 39  | 123  | 0  |
| CONTIG-016672 | 392  | 25  | 45  | 292  | 0  |
| CONTIG-016673 | 650  | 18  | 45  | 304  | 7  |
| CONTIG-016674 | 355  | 9   | 18  | 130  | 0  |
| CONTIG-016675 | 161  | 13  | 12  | 14   | 0  |
| CONTIG-016676 | 650  | 81  | 251 | 1706 | 51 |
| CONTIG-016677 | 282  | 20  | 60  | 201  | 7  |
| CONTIG-016679 | 104  | 17  | 24  | 15   | 0  |
| CONTIG-016680 | 350  | 28  | 90  | 246  | 6  |
| CONTIG-016681 | 637  | 44  | 147 | 1074 | 64 |
| CONTIG-016682 | 573  | 20  | 195 | 309  | 2  |
| CONTIG-016683 | 77   | 18  | 118 | 6    | 0  |
| CONTIG-016684 | 313  | 10  | 25  | 59   | 0  |
| CONTIG-016685 | 99   | 529 | 369 | 1559 | 73 |
| CONTIG-016686 | 41   | 189 | 8   | 199  | 0  |
| CONTIG-016687 | 94   | 53  | 13  | 119  | 0  |
| CONTIG-016688 | 95   | 8   | 7   | 21   | 0  |
| CONTIG-016689 | 73   | 4   | 6   | 0    | 0  |
| CONTIG-016690 | 210  | 20  | 121 | 136  | 0  |
| CONTIG-016691 | 452  | 11  | 32  | 165  | 2  |
| CONTIG-016692 | 64   | 244 | 301 | 199  | 11 |
| CONTIG-016693 | 503  | 17  | 86  | 216  | 0  |
| CONTIG-016694 | 252  | 9   | 30  | 39   | 0  |
| CONTIG-016695 | 213  | 39  | 139 | 205  | 48 |
| CONTIG-016696 | 732  | 31  | 53  | 1193 | 12 |
| CONTIG-016697 | 72   | 7   | 9   | 4    | 0  |
| CONTIG-016698 | 126  | 10  | 31  | 9    | 0  |
| CONTIG-016699 | 140  | 19  | 33  | 94   | 0  |

|               |     |     |     |      |    |
|---------------|-----|-----|-----|------|----|
| CONTIG-016700 | 163 | 8   | 59  | 33   | 0  |
| CONTIG-016701 | 207 | 8   | 67  | 0    | 2  |
| CONTIG-016702 | 86  | 4   | 7   | 4    | 0  |
| CONTIG-016703 | 71  | 15  | 27  | 2    | 0  |
| CONTIG-016705 | 150 | 12  | 31  | 40   | 0  |
| CONTIG-016706 | 102 | 4   | 10  | 13   | 0  |
| CONTIG-016707 | 480 | 12  | 181 | 152  | 0  |
| CONTIG-016708 | 173 | 11  | 33  | 36   | 0  |
| CONTIG-016709 | 241 | 16  | 26  | 109  | 0  |
| CONTIG-016710 | 116 | 4   | 0   | 13   | 0  |
| CONTIG-016711 | 135 | 14  | 61  | 44   | 0  |
| CONTIG-016712 | 59  | 9   | 10  | 0    | 0  |
| CONTIG-016713 | 96  | 6   | 23  | 9    | 0  |
| CONTIG-016714 | 227 | 15  | 38  | 114  | 8  |
| CONTIG-016715 | 238 | 7   | 2   | 47   | 0  |
| CONTIG-016716 | 876 | 43  | 195 | 855  | 81 |
| CONTIG-016717 | 178 | 16  | 3   | 134  | 0  |
| CONTIG-016719 | 80  | 10  | 17  | 24   | 0  |
| CONTIG-016720 | 187 | 12  | 56  | 49   | 2  |
| CONTIG-016721 | 402 | 11  | 4   | 108  | 6  |
| CONTIG-016722 | 287 | 52  | 117 | 302  | 2  |
| CONTIG-016723 | 256 | 10  | 2   | 10   | 0  |
| CONTIG-016724 | 137 | 26  | 220 | 0    | 2  |
| CONTIG-016734 | 89  | 6   | 3   | 9    | 0  |
| CONTIG-016735 | 111 | 7   | 18  | 0    | 0  |
| CONTIG-016736 | 122 | 7   | 5   | 24   | 0  |
| CONTIG-016737 | 198 | 21  | 102 | 39   | 4  |
| CONTIG-016738 | 75  | 19  | 57  | 19   | 0  |
| CONTIG-016739 | 156 | 7   | 9   | 55   | 0  |
| CONTIG-016740 | 310 | 9   | 12  | 141  | 0  |
| CONTIG-016743 | 314 | 13  | 7   | 154  | 2  |
| CONTIG-016744 | 226 | 17  | 58  | 23   | 3  |
| CONTIG-016745 | 122 | 4   | 10  | 10   | 0  |
| CONTIG-016746 | 257 | 8   | 68  | 49   | 0  |
| CONTIG-016748 | 121 | 30  | 100 | 49   | 0  |
| CONTIG-016749 | 137 | 12  | 16  | 13   | 0  |
| CONTIG-016750 | 102 | 3   | 4   | 9    | 0  |
| CONTIG-016751 | 352 | 28  | 103 | 353  | 0  |
| CONTIG-016752 | 145 | 11  | 19  | 32   | 0  |
| CONTIG-016753 | 95  | 4   | 5   | 2    | 0  |
| CONTIG-016756 | 178 | 274 | 680 | 1420 | 47 |
| CONTIG-016757 | 141 | 20  | 274 | 2    | 0  |
| CONTIG-016758 | 60  | 3   | 3   | 0    | 0  |
| CONTIG-016759 | 226 | 7   | 25  | 46   | 0  |
| CONTIG-016760 | 88  | 23  | 39  | 87   | 0  |
| CONTIG-016761 | 625 | 22  | 132 | 491  | 0  |
| CONTIG-016762 | 804 | 26  | 191 | 745  | 10 |



|               |      |     |     |      |     |
|---------------|------|-----|-----|------|-----|
| CONTIG-016763 | 173  | 12  | 45  | 22   | 0   |
| CONTIG-016768 | 132  | 6   | 7   | 13   | 2   |
| CONTIG-016769 | 632  | 6   | 17  | 109  | 0   |
| CONTIG-016770 | 71   | 16  | 17  | 24   | 0   |
| CONTIG-016775 | 232  | 12  | 18  | 103  | 0   |
| CONTIG-016776 | 105  | 12  | 4   | 33   | 0   |
| CONTIG-016777 | 446  | 30  | 285 | 459  | 2   |
| CONTIG-016778 | 253  | 358 | 443 | 2579 | 297 |
| CONTIG-016780 | 154  | 19  | 82  | 58   | 0   |
| CONTIG-016781 | 138  | 19  | 103 | 77   | 0   |
| CONTIG-016783 | 557  | 22  | 70  | 489  | 4   |
| CONTIG-016784 | 54   | 233 | 100 | 383  | 0   |
| CONTIG-016785 | 617  | 14  | 52  | 342  | 2   |
| CONTIG-016786 | 495  | 6   | 46  | 39   | 0   |
| CONTIG-016787 | 529  | 10  | 74  | 171  | 0   |
| CONTIG-016788 | 294  | 8   | 21  | 38   | 0   |
| CONTIG-016789 | 544  | 16  | 27  | 83   | 15  |
| CONTIG-016790 | 141  | 12  | 10  | 46   | 2   |
| CONTIG-016791 | 189  | 12  | 97  | 9    | 0   |
| CONTIG-016792 | 821  | 29  | 364 | 1136 | 0   |
| CONTIG-016793 | 954  | 34  | 38  | 1990 | 0   |
| CONTIG-016794 | 100  | 6   | 4   | 12   | 0   |
| CONTIG-016796 | 97   | 4   | 8   | 7    | 0   |
| CONTIG-016797 | 268  | 7   | 26  | 53   | 0   |
| CONTIG-016798 | 108  | 11  | 5   | 34   | 0   |
| CONTIG-016799 | 153  | 49  | 52  | 128  | 0   |
| CONTIG-016800 | 202  | 20  | 88  | 13   | 2   |
| CONTIG-016802 | 79   | 5   | 13  | 2    | 0   |
| CONTIG-016810 | 189  | 11  | 35  | 0    | 0   |
| CONTIG-016811 | 886  | 15  | 185 | 537  | 2   |
| CONTIG-016812 | 399  | 11  | 27  | 105  | 2   |
| CONTIG-016813 | 486  | 12  | 58  | 167  | 12  |
| CONTIG-016814 | 571  | 42  | 144 | 474  | 45  |
| CONTIG-016815 | 209  | 90  | 280 | 560  | 0   |
| CONTIG-016816 | 117  | 73  | 176 | 129  | 26  |
| CONTIG-016817 | 1085 | 40  | 159 | 1930 | 20  |
| CONTIG-016818 | 169  | 333 | 190 | 1428 | 153 |
| CONTIG-016824 | 443  | 24  | 26  | 43   | 0   |
| CONTIG-016825 | 235  | 16  | 87  | 139  | 0   |
| CONTIG-016826 | 178  | 45  | 166 | 175  | 0   |
| CONTIG-016827 | 300  | 51  | 189 | 739  | 0   |
| CONTIG-016828 | 79   | 9   | 64  | 2    | 0   |
| CONTIG-016829 | 197  | 13  | 51  | 84   | 0   |
| CONTIG-016830 | 143  | 12  | 11  | 65   | 0   |
| CONTIG-016831 | 155  | 19  | 65  | 112  | 0   |
| CONTIG-016832 | 268  | 42  | 126 | 350  | 6   |
| CONTIG-016833 | 164  | 6   | 6   | 26   | 0   |

|               |     |     |     |      |     |
|---------------|-----|-----|-----|------|-----|
| CONTIG-016834 | 143 | 22  | 113 | 31   | 0   |
| CONTIG-016838 | 69  | 12  | 37  | 0    | 0   |
| CONTIG-016839 | 191 | 11  | 4   | 45   | 2   |
| CONTIG-016840 | 200 | 6   | 7   | 35   | 2   |
| CONTIG-016841 | 200 | 5   | 16  | 21   | 0   |
| CONTIG-016842 | 318 | 20  | 44  | 57   | 0   |
| CONTIG-016843 | 197 | 17  | 84  | 98   | 0   |
| CONTIG-016844 | 59  | 3   | 8   | 0    | 0   |
| CONTIG-016845 | 193 | 28  | 57  | 122  | 4   |
| CONTIG-016846 | 137 | 7   | 12  | 9    | 0   |
| CONTIG-016852 | 153 | 6   | 4   | 19   | 0   |
| CONTIG-016853 | 108 | 6   | 15  | 19   | 0   |
| CONTIG-016854 | 169 | 4   | 2   | 21   | 0   |
| CONTIG-016855 | 68  | 916 | 146 | 1454 | 536 |
| CONTIG-016856 | 170 | 21  | 72  | 89   | 0   |
| CONTIG-016857 | 86  | 9   | 12  | 7    | 2   |
| CONTIG-016858 | 649 | 53  | 350 | 1237 | 6   |
| CONTIG-016859 | 330 | 8   | 78  | 52   | 0   |
| CONTIG-016860 | 450 | 28  | 43  | 393  | 3   |
| CONTIG-016861 | 90  | 11  | 2   | 23   | 2   |
| CONTIG-016862 | 741 | 18  | 177 | 283  | 0   |
| CONTIG-016863 | 107 | 427 | 342 | 1639 | 0   |
| CONTIG-016864 | 79  | 18  | 23  | 0    | 0   |
| CONTIG-016865 | 108 | 12  | 19  | 46   | 0   |
| CONTIG-016866 | 184 | 6   | 6   | 31   | 0   |
| CONTIG-016867 | 63  | 8   | 5   | 19   | 0   |
| CONTIG-016868 | 99  | 101 | 39  | 579  | 0   |
| CONTIG-016869 | 364 | 13  | 44  | 194  | 0   |
| CONTIG-016870 | 791 | 62  | 239 | 1500 | 45  |
| CONTIG-016871 | 323 | 7   | 57  | 60   | 0   |
| CONTIG-016872 | 205 | 9   | 24  | 47   | 0   |
| CONTIG-016875 | 255 | 9   | 38  | 52   | 0   |
| CONTIG-016876 | 227 | 25  | 140 | 197  | 0   |
| CONTIG-016877 | 518 | 21  | 146 | 414  | 6   |
| CONTIG-016879 | 101 | 6   | 7   | 12   | 0   |
| CONTIG-016880 | 192 | 11  | 4   | 77   | 0   |
| CONTIG-016881 | 113 | 6   | 4   | 14   | 0   |
| CONTIG-016882 | 241 | 15  | 39  | 116  | 0   |
| CONTIG-016883 | 115 | 17  | 30  | 71   | 0   |
| CONTIG-016884 | 616 | 8   | 14  | 141  | 0   |
| CONTIG-016885 | 279 | 15  | 34  | 129  | 0   |
| CONTIG-016889 | 497 | 9   | 28  | 64   | 4   |
| CONTIG-016890 | 133 | 5   | 19  | 12   | 0   |
| CONTIG-016891 | 117 | 8   | 16  | 31   | 0   |
| CONTIG-016892 | 132 | 6   | 7   | 22   | 0   |
| CONTIG-016893 | 74  | 372 | 32  | 95   | 0   |
| CONTIG-016894 | 269 | 74  | 319 | 250  | 48  |

|               |      |     |     |     |    |
|---------------|------|-----|-----|-----|----|
| CONTIG-016895 | 141  | 9   | 32  | 35  | 0  |
| CONTIG-016896 | 295  | 12  | 24  | 168 | 0  |
| CONTIG-016899 | 694  | 46  | 71  | 628 | 6  |
| CONTIG-016900 | 88   | 10  | 16  | 24  | 0  |
| CONTIG-016901 | 78   | 3   | 2   | 6   | 0  |
| CONTIG-016902 | 1574 | 56  | 328 | 367 | 27 |
| CONTIG-016903 | 149  | 9   | 32  | 14  | 0  |
| CONTIG-016904 | 106  | 3   | 0   | 13  | 0  |
| CONTIG-016905 | 325  | 14  | 126 | 111 | 2  |
| CONTIG-016906 | 745  | 15  | 13  | 399 | 2  |
| CONTIG-016907 | 117  | 8   | 81  | 4   | 0  |
| CONTIG-016908 | 291  | 78  | 57  | 720 | 41 |
| CONTIG-016909 | 253  | 10  | 13  | 67  | 0  |
| CONTIG-016910 | 338  | 7   | 2   | 20  | 0  |
| CONTIG-016911 | 75   | 27  | 29  | 61  | 0  |
| CONTIG-016918 | 73   | 7   | 4   | 14  | 2  |
| CONTIG-016919 | 59   | 9   | 7   | 18  | 0  |
| CONTIG-016920 | 99   | 9   | 7   | 0   | 0  |
| CONTIG-016921 | 354  | 43  | 224 | 403 | 12 |
| CONTIG-016922 | 110  | 15  | 12  | 36  | 0  |
| CONTIG-016925 | 278  | 42  | 56  | 474 | 8  |
| CONTIG-016926 | 262  | 12  | 47  | 20  | 0  |
| CONTIG-016927 | 217  | 29  | 67  | 203 | 0  |
| CONTIG-016928 | 89   | 8   | 2   | 12  | 2  |
| CONTIG-016929 | 436  | 19  | 223 | 176 | 0  |
| CONTIG-016930 | 387  | 13  | 50  | 118 | 5  |
| CONTIG-016931 | 142  | 24  | 18  | 85  | 0  |
| CONTIG-016934 | 274  | 13  | 100 | 104 | 2  |
| CONTIG-016939 | 98   | 4   | 26  | 2   | 0  |
| CONTIG-016940 | 421  | 17  | 132 | 59  | 3  |
| CONTIG-016941 | 73   | 6   | 4   | 11  | 0  |
| CONTIG-016946 | 168  | 13  | 88  | 58  | 0  |
| CONTIG-016947 | 426  | 12  | 45  | 208 | 0  |
| CONTIG-016948 | 185  | 14  | 67  | 67  | 0  |
| CONTIG-016949 | 108  | 6   | 8   | 17  | 0  |
| CONTIG-016950 | 122  | 10  | 95  | 8   | 0  |
| CONTIG-016951 | 141  | 25  | 216 | 46  | 0  |
| CONTIG-016952 | 171  | 7   | 5   | 31  | 0  |
| CONTIG-016953 | 394  | 25  | 55  | 275 | 8  |
| CONTIG-016954 | 102  | 4   | 0   | 7   | 0  |
| CONTIG-016955 | 213  | 10  | 35  | 49  | 0  |
| CONTIG-016956 | 660  | 14  | 40  | 100 | 0  |
| CONTIG-016957 | 81   | 143 | 131 | 83  | 4  |
| CONTIG-016958 | 139  | 10  | 51  | 11  | 0  |
| CONTIG-016959 | 178  | 7   | 15  | 16  | 0  |
| CONTIG-016960 | 86   | 20  | 68  | 27  | 0  |
| CONTIG-016961 | 111  | 14  | 56  | 16  | 0  |

|               |      |     |     |      |    |
|---------------|------|-----|-----|------|----|
| CONTIG-016962 | 192  | 6   | 38  | 37   | 0  |
| CONTIG-016967 | 68   | 8   | 4   | 15   | 0  |
| CONTIG-016968 | 155  | 7   | 4   | 21   | 0  |
| CONTIG-016969 | 1009 | 18  | 90  | 429  | 12 |
| CONTIG-016970 | 1020 | 13  | 153 | 550  | 0  |
| CONTIG-016971 | 108  | 10  | 14  | 23   | 0  |
| CONTIG-016980 | 70   | 33  | 48  | 2    | 0  |
| CONTIG-016981 | 217  | 78  | 144 | 571  | 2  |
| CONTIG-016982 | 206  | 14  | 12  | 33   | 0  |
| CONTIG-016983 | 66   | 5   | 3   | 2    | 0  |
| CONTIG-016984 | 85   | 7   | 25  | 0    | 0  |
| CONTIG-016987 | 60   | 10  | 31  | 9    | 0  |
| CONTIG-016988 | 54   | 55  | 58  | 106  | 0  |
| CONTIG-016989 | 359  | 289 | 93  | 40   | 0  |
| CONTIG-016990 | 65   | 51  | 2   | 130  | 5  |
| CONTIG-016991 | 284  | 19  | 4   | 31   | 0  |
| CONTIG-016992 | 328  | 17  | 92  | 93   | 2  |
| CONTIG-016993 | 458  | 17  | 200 | 100  | 2  |
| CONTIG-016994 | 427  | 8   | 29  | 87   | 2  |
| CONTIG-016997 | 153  | 8   | 20  | 14   | 2  |
| CONTIG-017000 | 63   | 5   | 4   | 8    | 0  |
| CONTIG-017001 | 78   | 7   | 25  | 2    | 0  |
| CONTIG-017002 | 334  | 14  | 19  | 209  | 0  |
| CONTIG-017003 | 248  | 12  | 29  | 16   | 0  |
| CONTIG-017004 | 655  | 21  | 133 | 345  | 5  |
| CONTIG-017005 | 69   | 30  | 61  | 37   | 0  |
| CONTIG-017006 | 431  | 10  | 23  | 102  | 6  |
| CONTIG-017007 | 148  | 37  | 227 | 14   | 0  |
| CONTIG-017008 | 425  | 38  | 134 | 845  | 0  |
| CONTIG-017009 | 76   | 200 | 45  | 138  | 8  |
| CONTIG-017010 | 182  | 6   | 41  | 28   | 0  |
| CONTIG-017011 | 196  | 20  | 25  | 103  | 4  |
| CONTIG-017012 | 58   | 7   | 25  | 2    | 0  |
| CONTIG-017013 | 77   | 3   | 2   | 0    | 0  |
| CONTIG-017014 | 306  | 7   | 22  | 57   | 0  |
| CONTIG-017015 | 44   | 24  | 0   | 0    | 8  |
| CONTIG-017016 | 97   | 19  | 124 | 19   | 0  |
| CONTIG-017018 | 165  | 16  | 12  | 154  | 0  |
| CONTIG-017019 | 89   | 4   | 7   | 0    | 0  |
| CONTIG-017021 | 63   | 387 | 42  | 676  | 7  |
| CONTIG-017022 | 138  | 6   | 2   | 19   | 0  |
| CONTIG-017023 | 123  | 12  | 57  | 12   | 2  |
| CONTIG-017024 | 494  | 32  | 199 | 451  | 8  |
| CONTIG-017025 | 50   | 797 | 191 | 731  | 59 |
| CONTIG-017026 | 250  | 40  | 37  | 540  | 0  |
| CONTIG-017027 | 387  | 13  | 60  | 148  | 0  |
| CONTIG-017028 | 369  | 103 | 636 | 1381 | 5  |

|               |     |     |     |      |     |
|---------------|-----|-----|-----|------|-----|
| CONTIG-017031 | 62  | 72  | 351 | 0    | 0   |
| CONTIG-017034 | 207 | 27  | 78  | 70   | 4   |
| CONTIG-017035 | 292 | 19  | 52  | 159  | 0   |
| CONTIG-017036 | 743 | 13  | 22  | 99   | 0   |
| CONTIG-017038 | 141 | 5   | 4   | 12   | 0   |
| CONTIG-017039 | 67  | 692 | 276 | 1223 | 102 |
| CONTIG-017040 | 193 | 20  | 16  | 115  | 4   |
| CONTIG-017041 | 393 | 17  | 137 | 153  | 4   |
| CONTIG-017042 | 151 | 7   | 14  | 12   | 0   |
| CONTIG-017043 | 160 | 8   | 4   | 56   | 0   |
| CONTIG-017044 | 369 | 12  | 127 | 106  | 0   |
| CONTIG-017045 | 74  | 10  | 0   | 19   | 0   |
| CONTIG-017046 | 86  | 229 | 21  | 414  | 0   |
| CONTIG-017047 | 88  | 12  | 42  | 3    | 0   |
| CONTIG-017048 | 665 | 42  | 28  | 1284 | 12  |
| CONTIG-017049 | 245 | 11  | 64  | 48   | 0   |
| CONTIG-017050 | 171 | 40  | 390 | 24   | 0   |
| CONTIG-017057 | 182 | 10  | 19  | 67   | 0   |
| CONTIG-017058 | 174 | 22  | 237 | 55   | 0   |
| CONTIG-017059 | 180 | 5   | 15  | 6    | 0   |
| CONTIG-017060 | 265 | 7   | 6   | 86   | 0   |
| CONTIG-017061 | 61  | 3   | 9   | 2    | 0   |
| CONTIG-017062 | 191 | 13  | 87  | 68   | 0   |
| CONTIG-017063 | 276 | 20  | 55  | 184  | 6   |
| CONTIG-017064 | 41  | 40  | 49  | 18   | 0   |
| CONTIG-017065 | 991 | 67  | 492 | 1061 | 127 |
| CONTIG-017067 | 131 | 13  | 42  | 44   | 0   |
| CONTIG-017068 | 347 | 9   | 74  | 95   | 0   |
| CONTIG-017069 | 428 | 21  | 15  | 380  | 2   |
| CONTIG-017071 | 146 | 24  | 81  | 138  | 0   |
| CONTIG-017072 | 161 | 12  | 27  | 55   | 0   |
| CONTIG-017073 | 328 | 6   | 8   | 89   | 0   |
| CONTIG-017074 | 350 | 136 | 366 | 2595 | 0   |
| CONTIG-017075 | 177 | 6   | 10  | 16   | 0   |
| CONTIG-017076 | 120 | 6   | 6   | 18   | 0   |
| CONTIG-017077 | 155 | 8   | 10  | 48   | 0   |
| CONTIG-017078 | 590 | 28  | 172 | 509  | 6   |
| CONTIG-017079 | 198 | 50  | 16  | 241  | 31  |
| CONTIG-017080 | 199 | 19  | 41  | 59   | 0   |
| CONTIG-017081 | 300 | 13  | 148 | 59   | 0   |
| CONTIG-017082 | 85  | 8   | 33  | 0    | 0   |
| CONTIG-017083 | 198 | 7   | 13  | 29   | 0   |
| CONTIG-017084 | 163 | 16  | 140 | 39   | 0   |
| CONTIG-017085 | 146 | 7   | 4   | 26   | 0   |
| CONTIG-017086 | 176 | 30  | 125 | 116  | 2   |
| CONTIG-017088 | 290 | 17  | 33  | 57   | 0   |
| CONTIG-017089 | 301 | 12  | 32  | 119  | 0   |

|               |      |     |     |      |    |
|---------------|------|-----|-----|------|----|
| CONTIG-017090 | 63   | 332 | 79  | 750  | 14 |
| CONTIG-017091 | 107  | 67  | 59  | 52   | 0  |
| CONTIG-017092 | 222  | 19  | 100 | 82   | 0  |
| CONTIG-017093 | 473  | 10  | 21  | 151  | 0  |
| CONTIG-017094 | 113  | 4   | 6   | 8    | 0  |
| CONTIG-017095 | 402  | 21  | 295 | 109  | 0  |
| CONTIG-017099 | 219  | 20  | 26  | 104  | 7  |
| CONTIG-017100 | 114  | 14  | 16  | 39   | 0  |
| CONTIG-017101 | 67   | 64  | 46  | 128  | 2  |
| CONTIG-017102 | 679  | 33  | 153 | 444  | 27 |
| CONTIG-017103 | 101  | 11  | 35  | 7    | 0  |
| CONTIG-017104 | 146  | 43  | 219 | 43   | 0  |
| CONTIG-017105 | 201  | 10  | 45  | 50   | 0  |
| CONTIG-017106 | 659  | 10  | 89  | 155  | 0  |
| CONTIG-017107 | 252  | 10  | 4   | 46   | 5  |
| CONTIG-017108 | 131  | 11  | 74  | 10   | 0  |
| CONTIG-017110 | 188  | 19  | 93  | 81   | 0  |
| CONTIG-017111 | 390  | 21  | 46  | 369  | 2  |
| CONTIG-017112 | 251  | 12  | 33  | 60   | 0  |
| CONTIG-017114 | 244  | 7   | 15  | 56   | 0  |
| CONTIG-017115 | 238  | 13  | 263 | 18   | 0  |
| CONTIG-017117 | 765  | 19  | 71  | 795  | 0  |
| CONTIG-017122 | 924  | 27  | 92  | 826  | 11 |
| CONTIG-017123 | 63   | 16  | 19  | 14   | 0  |
| CONTIG-017124 | 513  | 10  | 38  | 137  | 0  |
| CONTIG-017125 | 572  | 17  | 108 | 199  | 5  |
| CONTIG-017126 | 147  | 8   | 18  | 31   | 0  |
| CONTIG-017127 | 179  | 7   | 19  | 11   | 0  |
| CONTIG-017130 | 254  | 12  | 10  | 109  | 0  |
| CONTIG-017131 | 504  | 23  | 121 | 287  | 8  |
| CONTIG-017132 | 123  | 15  | 14  | 42   | 2  |
| CONTIG-017133 | 98   | 5   | 6   | 17   | 0  |
| CONTIG-017134 | 492  | 17  | 39  | 127  | 6  |
| CONTIG-017135 | 87   | 18  | 54  | 27   | 0  |
| CONTIG-017136 | 320  | 11  | 61  | 89   | 0  |
| CONTIG-017137 | 62   | 2   | 0   | 2    | 0  |
| CONTIG-017139 | 815  | 10  | 58  | 211  | 0  |
| CONTIG-017142 | 106  | 23  | 32  | 58   | 0  |
| CONTIG-017143 | 2493 | 32  | 484 | 2864 | 19 |
| CONTIG-017149 | 98   | 8   | 49  | 10   | 0  |
| CONTIG-017152 | 406  | 13  | 16  | 78   | 0  |
| CONTIG-017153 | 220  | 39  | 140 | 242  | 2  |
| CONTIG-017155 | 295  | 29  | 222 | 230  | 4  |
| CONTIG-017156 | 124  | 6   | 6   | 22   | 0  |
| CONTIG-017157 | 213  | 6   | 29  | 24   | 0  |
| CONTIG-017165 | 259  | 7   | 7   | 28   | 0  |
| CONTIG-017166 | 73   | 6   | 47  | 0    | 0  |

|               |      |     |     |      |     |
|---------------|------|-----|-----|------|-----|
| CONTIG-017167 | 180  | 14  | 35  | 59   | 0   |
| CONTIG-017168 | 230  | 142 | 216 | 708  | 83  |
| CONTIG-017169 | 601  | 25  | 320 | 451  | 14  |
| CONTIG-017170 | 108  | 5   | 7   | 4    | 0   |
| CONTIG-017171 | 61   | 6   | 7   | 11   | 0   |
| CONTIG-017172 | 675  | 64  | 141 | 1031 | 15  |
| CONTIG-017173 | 386  | 24  | 52  | 365  | 4   |
| CONTIG-017174 | 232  | 9   | 24  | 37   | 2   |
| CONTIG-017175 | 290  | 8   | 2   | 72   | 0   |
| CONTIG-017176 | 271  | 525 | 313 | 4716 | 403 |
| CONTIG-017177 | 115  | 10  | 9   | 24   | 0   |
| CONTIG-017181 | 143  | 8   | 32  | 23   | 0   |
| CONTIG-017182 | 715  | 13  | 173 | 270  | 0   |
| CONTIG-017183 | 67   | 65  | 7   | 120  | 13  |
| CONTIG-017184 | 342  | 84  | 96  | 1852 | 0   |
| CONTIG-017185 | 63   | 26  | 68  | 26   | 0   |
| CONTIG-017186 | 186  | 14  | 47  | 38   | 0   |
| CONTIG-017187 | 413  | 22  | 198 | 221  | 0   |
| CONTIG-017188 | 303  | 57  | 191 | 433  | 20  |
| CONTIG-017189 | 118  | 14  | 23  | 68   | 0   |
| CONTIG-017190 | 74   | 6   | 0   | 3    | 0   |
| CONTIG-017192 | 311  | 14  | 18  | 87   | 10  |
| CONTIG-017193 | 164  | 9   | 78  | 2    | 0   |
| CONTIG-017194 | 1437 | 24  | 151 | 1418 | 19  |
| CONTIG-017195 | 181  | 9   | 47  | 6    | 0   |
| CONTIG-017196 | 162  | 5   | 0   | 28   | 0   |
| CONTIG-017197 | 77   | 20  | 15  | 36   | 0   |
| CONTIG-017200 | 2054 | 21  | 244 | 1265 | 21  |
| CONTIG-017201 | 207  | 27  | 31  | 45   | 0   |
| CONTIG-017202 | 71   | 6   | 27  | 2    | 0   |
| CONTIG-017203 | 203  | 8   | 2   | 74   | 0   |
| CONTIG-017205 | 70   | 3   | 2   | 0    | 0   |
| CONTIG-017206 | 201  | 10  | 3   | 109  | 0   |
| CONTIG-017207 | 982  | 32  | 148 | 1704 | 2   |
| CONTIG-017209 | 105  | 9   | 9   | 22   | 0   |
| CONTIG-017210 | 98   | 7   | 12  | 25   | 0   |
| CONTIG-017211 | 436  | 18  | 146 | 161  | 2   |
| CONTIG-017212 | 172  | 7   | 10  | 42   | 0   |
| CONTIG-017213 | 1005 | 14  | 29  | 458  | 4   |
| CONTIG-017214 | 367  | 18  | 146 | 240  | 0   |
| CONTIG-017215 | 522  | 17  | 61  | 209  | 2   |
| CONTIG-017216 | 270  | 7   | 16  | 49   | 0   |
| CONTIG-017220 | 179  | 113 | 11  | 101  | 0   |
| CONTIG-017221 | 85   | 10  | 4   | 21   | 0   |
| CONTIG-017222 | 368  | 23  | 55  | 168  | 2   |
| CONTIG-017223 | 113  | 9   | 8   | 40   | 0   |
| CONTIG-017227 | 97   | 3   | 2   | 5    | 0   |

|               |      |     |     |      |     |
|---------------|------|-----|-----|------|-----|
| CONTIG-017228 | 83   | 4   | 2   | 0    | 0   |
| CONTIG-017229 | 164  | 7   | 18  | 26   | 0   |
| CONTIG-017230 | 250  | 5   | 15  | 28   | 0   |
| CONTIG-017231 | 252  | 9   | 21  | 76   | 2   |
| CONTIG-017232 | 222  | 8   | 35  | 58   | 2   |
| CONTIG-017233 | 417  | 11  | 43  | 43   | 2   |
| CONTIG-017241 | 312  | 14  | 18  | 186  | 0   |
| CONTIG-017242 | 270  | 11  | 49  | 35   | 0   |
| CONTIG-017243 | 241  | 22  | 146 | 127  | 0   |
| CONTIG-017244 | 833  | 20  | 196 | 482  | 4   |
| CONTIG-017245 | 121  | 19  | 125 | 25   | 0   |
| CONTIG-017248 | 290  | 190 | 187 | 2379 | 52  |
| CONTIG-017252 | 123  | 12  | 34  | 30   | 0   |
| CONTIG-017253 | 167  | 40  | 55  | 136  | 11  |
| CONTIG-017254 | 94   | 13  | 13  | 21   | 0   |
| CONTIG-017258 | 153  | 8   | 8   | 8    | 2   |
| CONTIG-017259 | 66   | 23  | 69  | 0    | 0   |
| CONTIG-017260 | 56   | 43  | 6   | 86   | 3   |
| CONTIG-017261 | 175  | 13  | 17  | 56   | 0   |
| CONTIG-017262 | 73   | 20  | 70  | 0    | 0   |
| CONTIG-017263 | 174  | 9   | 47  | 17   | 0   |
| CONTIG-017265 | 86   | 6   | 12  | 0    | 0   |
| CONTIG-017266 | 513  | 13  | 53  | 222  | 4   |
| CONTIG-017267 | 189  | 17  | 208 | 43   | 0   |
| CONTIG-017268 | 190  | 14  | 2   | 140  | 0   |
| CONTIG-017269 | 61   | 3   | 4   | 4    | 0   |
| CONTIG-017270 | 121  | 9   | 10  | 13   | 0   |
| CONTIG-017271 | 211  | 9   | 29  | 49   | 0   |
| CONTIG-017272 | 463  | 14  | 36  | 192  | 0   |
| CONTIG-017273 | 537  | 40  | 326 | 149  | 0   |
| CONTIG-017274 | 264  | 14  | 27  | 107  | 0   |
| CONTIG-017275 | 93   | 5   | 11  | 13   | 0   |
| CONTIG-017276 | 151  | 7   | 6   | 43   | 0   |
| CONTIG-017279 | 247  | 15  | 79  | 11   | 0   |
| CONTIG-017280 | 1052 | 47  | 294 | 1156 | 121 |
| CONTIG-017281 | 61   | 5   | 10  | 0    | 0   |
| CONTIG-017282 | 69   | 9   | 0   | 27   | 0   |
| CONTIG-017283 | 41   | 329 | 10  | 195  | 0   |
| CONTIG-017284 | 338  | 11  | 25  | 101  | 2   |
| CONTIG-017285 | 457  | 10  | 43  | 134  | 8   |
| CONTIG-017286 | 382  | 9   | 56  | 120  | 0   |
| CONTIG-017287 | 80   | 7   | 8   | 19   | 0   |
| CONTIG-017288 | 67   | 6   | 2   | 12   | 0   |
| CONTIG-017290 | 248  | 108 | 160 | 1055 | 35  |
| CONTIG-017291 | 147  | 9   | 8   | 34   | 0   |
| CONTIG-017292 | 81   | 37  | 11  | 122  | 0   |
| CONTIG-017294 | 630  | 41  | 13  | 0    | 294 |



|               |      |     |     |      |    |
|---------------|------|-----|-----|------|----|
| CONTIG-017295 | 104  | 5   | 11  | 18   | 0  |
| CONTIG-017296 | 80   | 376 | 188 | 503  | 99 |
| CONTIG-017297 | 296  | 8   | 13  | 62   | 0  |
| CONTIG-017298 | 746  | 34  | 66  | 326  | 62 |
| CONTIG-017299 | 442  | 7   | 25  | 68   | 2  |
| CONTIG-017300 | 161  | 37  | 188 | 30   | 0  |
| CONTIG-017301 | 72   | 3   | 2   | 7    | 0  |
| CONTIG-017302 | 80   | 218 | 84  | 751  | 0  |
| CONTIG-017303 | 235  | 116 | 133 | 846  | 0  |
| CONTIG-017304 | 300  | 10  | 58  | 28   | 0  |
| CONTIG-017305 | 165  | 8   | 5   | 40   | 0  |
| CONTIG-017306 | 3242 | 36  | 107 | 6774 | 4  |
| CONTIG-017307 | 732  | 14  | 149 | 273  | 2  |
| CONTIG-017308 | 133  | 16  | 24  | 83   | 0  |
| CONTIG-017309 | 94   | 16  | 5   | 61   | 0  |
| CONTIG-017310 | 125  | 6   | 3   | 35   | 0  |
| CONTIG-017311 | 123  | 82  | 137 | 248  | 0  |
| CONTIG-017312 | 167  | 9   | 10  | 38   | 2  |
| CONTIG-017314 | 61   | 13  | 13  | 18   | 0  |
| CONTIG-017319 | 1648 | 28  | 392 | 2533 | 0  |
| CONTIG-017327 | 92   | 11  | 52  | 4    | 0  |
| CONTIG-017328 | 217  | 31  | 148 | 137  | 3  |
| CONTIG-017329 | 173  | 16  | 12  | 124  | 0  |
| CONTIG-017330 | 188  | 16  | 99  | 22   | 0  |
| CONTIG-017331 | 149  | 9   | 5   | 20   | 2  |
| CONTIG-017332 | 377  | 31  | 75  | 522  | 0  |
| CONTIG-017333 | 189  | 12  | 7   | 86   | 0  |
| CONTIG-017334 | 1356 | 92  | 151 | 8237 | 0  |
| CONTIG-017335 | 65   | 4   | 6   | 0    | 0  |
| CONTIG-017336 | 96   | 5   | 9   | 10   | 0  |
| CONTIG-017337 | 386  | 13  | 8   | 60   | 0  |
| CONTIG-017338 | 174  | 9   | 15  | 47   | 0  |
| CONTIG-017339 | 178  | 7   | 8   | 30   | 0  |
| CONTIG-017341 | 650  | 15  | 8   | 21   | 0  |
| CONTIG-017342 | 203  | 15  | 23  | 58   | 4  |
| CONTIG-017343 | 102  | 4   | 2   | 2    | 0  |
| CONTIG-017344 | 608  | 46  | 92  | 989  | 18 |
| CONTIG-017352 | 173  | 17  | 88  | 75   | 0  |
| CONTIG-017354 | 926  | 28  | 193 | 683  | 34 |
| CONTIG-017355 | 136  | 49  | 107 | 183  | 36 |
| CONTIG-017356 | 732  | 35  | 100 | 543  | 14 |
| CONTIG-017357 | 91   | 136 | 16  | 684  | 0  |
| CONTIG-017358 | 263  | 9   | 6   | 66   | 4  |
| CONTIG-017359 | 254  | 18  | 32  | 234  | 0  |
| CONTIG-017360 | 148  | 18  | 51  | 2    | 0  |
| CONTIG-017361 | 190  | 5   | 21  | 13   | 0  |
| CONTIG-017362 | 160  | 9   | 13  | 21   | 0  |

|               |      |     |     |      |     |
|---------------|------|-----|-----|------|-----|
| CONTIG-017364 | 94   | 7   | 12  | 18   | 0   |
| CONTIG-017365 | 89   | 7   | 0   | 26   | 2   |
| CONTIG-017367 | 536  | 13  | 100 | 152  | 2   |
| CONTIG-017368 | 82   | 13  | 37  | 4    | 0   |
| CONTIG-017369 | 460  | 13  | 196 | 161  | 0   |
| CONTIG-017372 | 323  | 10  | 17  | 95   | 0   |
| CONTIG-017373 | 103  | 6   | 6   | 8    | 0   |
| CONTIG-017374 | 181  | 7   | 0   | 47   | 2   |
| CONTIG-017375 | 322  | 30  | 49  | 496  | 2   |
| CONTIG-017376 | 1173 | 19  | 141 | 737  | 4   |
| CONTIG-017377 | 181  | 13  | 14  | 109  | 0   |
| CONTIG-017379 | 249  | 11  | 0   | 103  | 0   |
| CONTIG-017380 | 551  | 10  | 29  | 191  | 0   |
| CONTIG-017381 | 49   | 140 | 13  | 168  | 0   |
| CONTIG-017382 | 170  | 11  | 25  | 34   | 0   |
| CONTIG-017383 | 528  | 45  | 93  | 3    | 827 |
| CONTIG-017384 | 71   | 13  | 96  | 4    | 0   |
| CONTIG-017388 | 899  | 15  | 38  | 438  | 2   |
| CONTIG-017390 | 67   | 6   | 2   | 4    | 0   |
| CONTIG-017392 | 652  | 15  | 119 | 250  | 2   |
| CONTIG-017393 | 496  | 15  | 97  | 98   | 2   |
| CONTIG-017396 | 71   | 13  | 21  | 25   | 0   |
| CONTIG-017397 | 161  | 5   | 4   | 18   | 2   |
| CONTIG-017398 | 314  | 16  | 207 | 40   | 2   |
| CONTIG-017399 | 131  | 7   | 10  | 28   | 2   |
| CONTIG-017400 | 330  | 175 | 61  | 2081 | 113 |
| CONTIG-017402 | 164  | 15  | 44  | 35   | 0   |
| CONTIG-017403 | 234  | 8   | 21  | 54   | 0   |
| CONTIG-017404 | 290  | 36  | 7   | 459  | 2   |
| CONTIG-017405 | 1003 | 24  | 205 | 756  | 8   |
| CONTIG-017406 | 895  | 18  | 316 | 380  | 14  |
| CONTIG-017407 | 795  | 24  | 130 | 623  | 6   |
| CONTIG-017408 | 154  | 31  | 20  | 48   | 0   |
| CONTIG-017409 | 677  | 16  | 337 | 230  | 0   |
| CONTIG-017411 | 408  | 20  | 62  | 333  | 2   |
| CONTIG-017412 | 64   | 6   | 3   | 8    | 0   |
| CONTIG-017414 | 311  | 9   | 16  | 54   | 0   |
| CONTIG-017415 | 551  | 20  | 127 | 326  | 2   |
| CONTIG-017416 | 415  | 12  | 46  | 73   | 2   |
| CONTIG-017417 | 146  | 276 | 457 | 548  | 237 |
| CONTIG-017424 | 141  | 10  | 46  | 25   | 2   |
| CONTIG-017425 | 283  | 106 | 553 | 596  | 33  |
| CONTIG-017426 | 190  | 8   | 4   | 39   | 2   |
| CONTIG-017427 | 193  | 23  | 112 | 114  | 4   |
| CONTIG-017428 | 616  | 17  | 159 | 316  | 2   |
| CONTIG-017429 | 92   | 4   | 13  | 7    | 0   |
| CONTIG-017430 | 200  | 21  | 23  | 119  | 3   |

|               |      |     |     |      |     |
|---------------|------|-----|-----|------|-----|
| CONTIG-017431 | 155  | 8   | 68  | 23   | 0   |
| CONTIG-017432 | 256  | 185 | 214 | 2039 | 146 |
| CONTIG-017434 | 324  | 15  | 7   | 187  | 0   |
| CONTIG-017436 | 67   | 18  | 124 | 0    | 0   |
| CONTIG-017437 | 907  | 20  | 219 | 462  | 6   |
| CONTIG-017438 | 95   | 440 | 188 | 1109 | 131 |
| CONTIG-017439 | 250  | 62  | 50  | 407  | 4   |
| CONTIG-017440 | 220  | 61  | 100 | 714  | 0   |
| CONTIG-017441 | 794  | 14  | 236 | 260  | 2   |
| CONTIG-017442 | 75   | 43  | 46  | 65   | 0   |
| CONTIG-017443 | 104  | 3   | 13  | 2    | 0   |
| CONTIG-017444 | 301  | 35  | 103 | 467  | 0   |
| CONTIG-017445 | 175  | 16  | 84  | 64   | 0   |
| CONTIG-017446 | 146  | 9   | 11  | 35   | 0   |
| CONTIG-017447 | 307  | 379 | 196 | 5978 | 69  |
| CONTIG-017448 | 64   | 6   | 14  | 13   | 0   |
| CONTIG-017450 | 101  | 10  | 18  | 48   | 0   |
| CONTIG-017451 | 113  | 13  | 34  | 13   | 0   |
| CONTIG-017453 | 114  | 17  | 0   | 50   | 0   |
| CONTIG-017454 | 244  | 6   | 3   | 47   | 0   |
| CONTIG-017455 | 134  | 274 | 87  | 671  | 73  |
| CONTIG-017456 | 79   | 4   | 9   | 6    | 0   |
| CONTIG-017457 | 305  | 12  | 34  | 135  | 0   |
| CONTIG-017458 | 822  | 74  | 25  | 3468 | 10  |
| CONTIG-017459 | 81   | 7   | 2   | 17   | 0   |
| CONTIG-017463 | 734  | 12  | 196 | 223  | 5   |
| CONTIG-017464 | 107  | 26  | 83  | 11   | 2   |
| CONTIG-017465 | 68   | 3   | 6   | 3    | 0   |
| CONTIG-017466 | 1191 | 22  | 28  | 26   | 0   |
| CONTIG-017467 | 889  | 13  | 54  | 471  | 0   |
| CONTIG-017468 | 188  | 146 | 108 | 1092 | 40  |
| CONTIG-017469 | 158  | 10  | 9   | 49   | 0   |
| CONTIG-017470 | 991  | 17  | 37  | 579  | 4   |
| CONTIG-017471 | 380  | 10  | 55  | 76   | 4   |
| CONTIG-017472 | 81   | 4   | 9   | 4    | 0   |
| CONTIG-017473 | 197  | 7   | 36  | 28   | 0   |
| CONTIG-017474 | 74   | 10  | 16  | 19   | 0   |
| CONTIG-017475 | 106  | 4   | 21  | 6    | 0   |
| CONTIG-017477 | 233  | 20  | 220 | 44   | 2   |
| CONTIG-017478 | 161  | 7   | 13  | 0    | 0   |
| CONTIG-017479 | 58   | 4   | 0   | 7    | 0   |
| CONTIG-017480 | 218  | 13  | 23  | 123  | 2   |
| CONTIG-017482 | 268  | 20  | 108 | 141  | 0   |
| CONTIG-017483 | 319  | 6   | 21  | 56   | 0   |
| CONTIG-017485 | 176  | 19  | 164 | 70   | 0   |
| CONTIG-017486 | 80   | 8   | 5   | 27   | 0   |
| CONTIG-017487 | 497  | 11  | 68  | 88   | 0   |

|               |      |     |     |     |    |
|---------------|------|-----|-----|-----|----|
| CONTIG-017488 | 74   | 5   | 2   | 8   | 0  |
| CONTIG-017489 | 106  | 5   | 2   | 13  | 0  |
| CONTIG-017491 | 60   | 2   | 5   | 0   | 0  |
| CONTIG-017493 | 647  | 12  | 36  | 290 | 6  |
| CONTIG-017494 | 392  | 65  | 139 | 398 | 27 |
| CONTIG-017495 | 385  | 18  | 2   | 0   | 38 |
| CONTIG-017496 | 184  | 30  | 140 | 168 | 0  |
| CONTIG-017497 | 296  | 17  | 67  | 170 | 0  |
| CONTIG-017498 | 537  | 15  | 72  | 128 | 2  |
| CONTIG-017499 | 495  | 13  | 195 | 143 | 3  |
| CONTIG-017500 | 167  | 7   | 24  | 15  | 0  |
| CONTIG-017501 | 768  | 30  | 74  | 937 | 0  |
| CONTIG-017502 | 281  | 12  | 2   | 62  | 6  |
| CONTIG-017503 | 65   | 3   | 0   | 9   | 0  |
| CONTIG-017504 | 215  | 67  | 349 | 383 | 0  |
| CONTIG-017505 | 226  | 11  | 51  | 26  | 17 |
| CONTIG-017506 | 82   | 224 | 204 | 299 | 17 |
| CONTIG-017507 | 183  | 19  | 69  | 80  | 0  |
| CONTIG-017508 | 482  | 19  | 65  | 372 | 12 |
| CONTIG-017509 | 297  | 16  | 74  | 159 | 0  |
| CONTIG-017510 | 253  | 12  | 112 | 84  | 2  |
| CONTIG-017512 | 152  | 47  | 97  | 202 | 0  |
| CONTIG-017513 | 272  | 16  | 2   | 228 | 0  |
| CONTIG-017514 | 74   | 58  | 136 | 2   | 0  |
| CONTIG-017515 | 585  | 29  | 241 | 294 | 4  |
| CONTIG-017516 | 67   | 124 | 17  | 312 | 2  |
| CONTIG-017517 | 81   | 7   | 10  | 17  | 0  |
| CONTIG-017518 | 281  | 9   | 60  | 49  | 0  |
| CONTIG-017519 | 58   | 7   | 5   | 15  | 0  |
| CONTIG-017520 | 98   | 5   | 2   | 6   | 0  |
| CONTIG-017521 | 657  | 36  | 171 | 991 | 0  |
| CONTIG-017527 | 45   | 364 | 219 | 185 | 0  |
| CONTIG-017530 | 155  | 15  | 22  | 57  | 0  |
| CONTIG-017531 | 208  | 7   | 4   | 52  | 2  |
| CONTIG-017532 | 854  | 20  | 89  | 546 | 4  |
| CONTIG-017533 | 507  | 15  | 9   | 177 | 10 |
| CONTIG-017534 | 222  | 7   | 27  | 36  | 0  |
| CONTIG-017535 | 280  | 44  | 27  | 288 | 8  |
| CONTIG-017536 | 159  | 10  | 7   | 20  | 0  |
| CONTIG-017537 | 59   | 13  | 5   | 30  | 0  |
| CONTIG-017538 | 619  | 32  | 152 | 626 | 7  |
| CONTIG-017539 | 171  | 9   | 15  | 45  | 0  |
| CONTIG-017540 | 378  | 22  | 128 | 135 | 4  |
| CONTIG-017541 | 1064 | 30  | 156 | 826 | 50 |
| CONTIG-017542 | 432  | 16  | 96  | 161 | 0  |
| CONTIG-017543 | 60   | 8   | 4   | 9   | 0  |
| CONTIG-017544 | 378  | 26  | 113 | 333 | 2  |

|               |      |     |     |      |     |
|---------------|------|-----|-----|------|-----|
| CONTIG-017545 | 224  | 21  | 142 | 51   | 2   |
| CONTIG-017546 | 230  | 14  | 12  | 134  | 0   |
| CONTIG-017547 | 276  | 9   | 18  | 54   | 0   |
| CONTIG-017548 | 275  | 99  | 143 | 843  | 12  |
| CONTIG-017549 | 846  | 34  | 106 | 1019 | 13  |
| CONTIG-017550 | 86   | 3   | 2   | 6    | 0   |
| CONTIG-017551 | 218  | 12  | 41  | 53   | 0   |
| CONTIG-017554 | 1277 | 22  | 253 | 988  | 2   |
| CONTIG-017555 | 203  | 9   | 31  | 42   | 0   |
| CONTIG-017558 | 362  | 13  | 92  | 66   | 3   |
| CONTIG-017559 | 605  | 131 | 6   | 0    | 764 |
| CONTIG-017560 | 89   | 6   | 30  | 2    | 0   |
| CONTIG-017561 | 99   | 9   | 23  | 5    | 0   |
| CONTIG-017562 | 885  | 60  | 76  | 3311 | 0   |
| CONTIG-017563 | 177  | 5   | 30  | 2    | 0   |
| CONTIG-017564 | 89   | 8   | 5   | 23   | 0   |
| CONTIG-017565 | 580  | 83  | 455 | 1050 | 144 |
| CONTIG-017566 | 114  | 12  | 2   | 27   | 0   |
| CONTIG-017567 | 1617 | 90  | 63  | 120  | 0   |
| CONTIG-017569 | 87   | 4   | 6   | 7    | 0   |
| CONTIG-017570 | 324  | 16  | 59  | 107  | 12  |
| CONTIG-017571 | 756  | 127 | 45  | 5255 | 6   |
| CONTIG-017572 | 188  | 12  | 58  | 49   | 0   |
| CONTIG-017573 | 97   | 34  | 259 | 2    | 0   |
| CONTIG-017574 | 627  | 14  | 109 | 207  | 0   |
| CONTIG-017576 | 394  | 15  | 19  | 213  | 0   |
| CONTIG-017579 | 113  | 23  | 16  | 95   | 0   |
| CONTIG-017580 | 163  | 29  | 45  | 156  | 0   |
| CONTIG-017581 | 469  | 23  | 158 | 233  | 0   |
| CONTIG-017582 | 301  | 15  | 95  | 172  | 0   |
| CONTIG-017583 | 189  | 8   | 57  | 46   | 0   |
| CONTIG-017584 | 87   | 24  | 29  | 9    | 0   |
| CONTIG-017585 | 165  | 12  | 70  | 32   | 0   |
| CONTIG-017586 | 960  | 51  | 548 | 2794 | 0   |
| CONTIG-017587 | 194  | 11  | 26  | 24   | 0   |
| CONTIG-017588 | 92   | 5   | 3   | 9    | 0   |
| CONTIG-017589 | 147  | 5   | 20  | 2    | 0   |
| CONTIG-017590 | 126  | 8   | 7   | 35   | 0   |
| CONTIG-017592 | 304  | 15  | 33  | 105  | 0   |
| CONTIG-017593 | 217  | 5   | 5   | 31   | 0   |
| CONTIG-017594 | 350  | 25  | 81  | 222  | 0   |
| CONTIG-017595 | 896  | 22  | 95  | 792  | 2   |
| CONTIG-017596 | 118  | 18  | 132 | 13   | 0   |
| CONTIG-017597 | 400  | 10  | 27  | 122  | 2   |
| CONTIG-017598 | 69   | 4   | 19  | 0    | 0   |
| CONTIG-017599 | 38   | 605 | 224 | 0    | 0   |
| CONTIG-017600 | 333  | 7   | 30  | 30   | 0   |

|               |     |      |     |      |    |
|---------------|-----|------|-----|------|----|
| CONTIG-017608 | 183 | 18   | 19  | 82   | 0  |
| CONTIG-017609 | 322 | 19   | 74  | 165  | 2  |
| CONTIG-017610 | 171 | 10   | 6   | 40   | 0  |
| CONTIG-017611 | 441 | 24   | 137 | 518  | 0  |
| CONTIG-017612 | 362 | 16   | 37  | 222  | 9  |
| CONTIG-017616 | 128 | 20   | 39  | 99   | 0  |
| CONTIG-017617 | 71  | 5    | 4   | 0    | 0  |
| CONTIG-017618 | 523 | 21   | 150 | 195  | 8  |
| CONTIG-017619 | 415 | 13   | 269 | 2    | 7  |
| CONTIG-017620 | 99  | 23   | 39  | 54   | 0  |
| CONTIG-017621 | 355 | 42   | 51  | 514  | 29 |
| CONTIG-017622 | 295 | 11   | 35  | 77   | 0  |
| CONTIG-017623 | 168 | 33   | 51  | 166  | 4  |
| CONTIG-017624 | 632 | 21   | 93  | 372  | 3  |
| CONTIG-017625 | 62  | 3    | 6   | 2    | 0  |
| CONTIG-017631 | 123 | 8    | 24  | 22   | 0  |
| CONTIG-017632 | 462 | 9    | 97  | 122  | 0  |
| CONTIG-017633 | 132 | 12   | 15  | 59   | 0  |
| CONTIG-017638 | 220 | 7    | 10  | 47   | 0  |
| CONTIG-017639 | 310 | 17   | 132 | 69   | 0  |
| CONTIG-017641 | 351 | 24   | 140 | 201  | 0  |
| CONTIG-017642 | 185 | 12   | 14  | 52   | 0  |
| CONTIG-017645 | 392 | 12   | 32  | 104  | 0  |
| CONTIG-017647 | 44  | 1640 | 53  | 2709 | 2  |
| CONTIG-017648 | 402 | 22   | 48  | 200  | 4  |
| CONTIG-017649 | 98  | 6    | 0   | 20   | 0  |
| CONTIG-017655 | 582 | 44   | 36  | 745  | 20 |
| CONTIG-017656 | 70  | 4    | 11  | 3    | 0  |
| CONTIG-017657 | 140 | 5    | 0   | 22   | 0  |
| CONTIG-017658 | 79  | 11   | 11  | 22   | 0  |
| CONTIG-017659 | 142 | 10   | 5   | 4    | 0  |
| CONTIG-017660 | 59  | 8    | 22  | 13   | 0  |
| CONTIG-017661 | 101 | 14   | 59  | 0    | 0  |
| CONTIG-017663 | 127 | 16   | 6   | 111  | 0  |
| CONTIG-017664 | 127 | 7    | 10  | 14   | 0  |
| CONTIG-017665 | 95  | 8    | 8   | 27   | 0  |
| CONTIG-017666 | 732 | 24   | 139 | 668  | 2  |
| CONTIG-017667 | 79  | 4    | 0   | 6    | 0  |
| CONTIG-017668 | 226 | 52   | 140 | 283  | 2  |
| CONTIG-017669 | 247 | 9    | 29  | 78   | 0  |
| CONTIG-017670 | 695 | 18   | 13  | 724  | 0  |
| CONTIG-017671 | 450 | 14   | 17  | 260  | 0  |
| CONTIG-017672 | 107 | 8    | 2   | 34   | 0  |
| CONTIG-017673 | 429 | 8    | 18  | 95   | 2  |
| CONTIG-017674 | 142 | 10   | 19  | 43   | 0  |
| CONTIG-017676 | 172 | 10   | 71  | 35   | 0  |
| CONTIG-017677 | 522 | 113  | 35  | 3881 | 0  |

|               |      |     |     |      |    |
|---------------|------|-----|-----|------|----|
| CONTIG-017682 | 464  | 23  | 4   | 0    | 8  |
| CONTIG-017683 | 797  | 10  | 103 | 222  | 6  |
| CONTIG-017684 | 253  | 94  | 189 | 559  | 49 |
| CONTIG-017687 | 104  | 9   | 2   | 23   | 0  |
| CONTIG-017688 | 708  | 18  | 66  | 58   | 0  |
| CONTIG-017690 | 713  | 32  | 223 | 660  | 6  |
| CONTIG-017692 | 182  | 12  | 101 | 37   | 0  |
| CONTIG-017693 | 147  | 20  | 142 | 0    | 8  |
| CONTIG-017698 | 81   | 7   | 6   | 23   | 0  |
| CONTIG-017699 | 350  | 12  | 46  | 82   | 0  |
| CONTIG-017701 | 130  | 10  | 7   | 47   | 0  |
| CONTIG-017702 | 282  | 9   | 45  | 90   | 0  |
| CONTIG-017703 | 296  | 21  | 46  | 143  | 9  |
| CONTIG-017704 | 922  | 22  | 87  | 719  | 0  |
| CONTIG-017706 | 187  | 13  | 20  | 63   | 2  |
| CONTIG-017714 | 97   | 55  | 268 | 0    | 0  |
| CONTIG-017723 | 75   | 81  | 32  | 214  | 0  |
| CONTIG-017724 | 269  | 55  | 56  | 734  | 0  |
| CONTIG-017731 | 65   | 6   | 22  | 0    | 0  |
| CONTIG-017735 | 289  | 10  | 16  | 86   | 0  |
| CONTIG-017737 | 56   | 10  | 5   | 8    | 0  |
| CONTIG-017739 | 1878 | 47  | 129 | 5633 | 0  |
| CONTIG-017763 | 966  | 35  | 115 | 1089 | 29 |
| CONTIG-017771 | 128  | 8   | 14  | 31   | 0  |
| CONTIG-017777 | 304  | 15  | 14  | 216  | 0  |
| CONTIG-017781 | 99   | 16  | 167 | 2    | 0  |
| CONTIG-017782 | 725  | 15  | 46  | 373  | 0  |
| CONTIG-017783 | 1123 | 14  | 28  | 238  | 20 |
| CONTIG-017784 | 272  | 19  | 218 | 74   | 0  |
| CONTIG-017785 | 104  | 10  | 26  | 29   | 0  |
| CONTIG-017786 | 379  | 10  | 9   | 81   | 0  |
| CONTIG-017787 | 376  | 11  | 59  | 85   | 0  |
| CONTIG-017788 | 174  | 7   | 5   | 6    | 0  |
| CONTIG-017791 | 48   | 14  | 5   | 0    | 0  |
| CONTIG-017792 | 294  | 131 | 485 | 538  | 80 |
| CONTIG-017793 | 225  | 47  | 236 | 253  | 6  |
| CONTIG-017794 | 386  | 15  | 48  | 171  | 8  |
| CONTIG-017795 | 293  | 8   | 16  | 88   | 0  |
| CONTIG-017796 | 322  | 30  | 103 | 293  | 0  |
| CONTIG-017797 | 105  | 8   | 6   | 31   | 2  |
| CONTIG-017798 | 179  | 10  | 35  | 24   | 0  |
| CONTIG-017800 | 251  | 6   | 19  | 13   | 4  |
| CONTIG-017801 | 123  | 3   | 4   | 7    | 0  |
| CONTIG-017802 | 106  | 5   | 2   | 12   | 0  |
| CONTIG-017803 | 289  | 17  | 20  | 163  | 0  |
| CONTIG-017804 | 222  | 4   | 12  | 6    | 0  |
| CONTIG-017805 | 103  | 3   | 0   | 11   | 0  |

|               |     |     |     |      |    |
|---------------|-----|-----|-----|------|----|
| CONTIG-017806 | 548 | 10  | 19  | 165  | 6  |
| CONTIG-017807 | 388 | 23  | 47  | 344  | 0  |
| CONTIG-017808 | 314 | 10  | 67  | 63   | 0  |
| CONTIG-017809 | 871 | 32  | 108 | 792  | 93 |
| CONTIG-017810 | 92  | 16  | 9   | 62   | 2  |
| CONTIG-017811 | 456 | 29  | 106 | 526  | 0  |
| CONTIG-017812 | 145 | 6   | 27  | 15   | 0  |
| CONTIG-017813 | 77  | 321 | 58  | 991  | 0  |
| CONTIG-017815 | 102 | 4   | 0   | 0    | 0  |
| CONTIG-017816 | 215 | 40  | 144 | 226  | 4  |
| CONTIG-017817 | 176 | 13  | 29  | 32   | 0  |
| CONTIG-017818 | 113 | 10  | 12  | 15   | 0  |
| CONTIG-017819 | 99  | 6   | 18  | 8    | 0  |
| CONTIG-017820 | 677 | 82  | 427 | 2192 | 54 |
| CONTIG-017829 | 176 | 6   | 6   | 23   | 0  |
| CONTIG-017830 | 464 | 17  | 99  | 111  | 5  |
| CONTIG-017831 | 548 | 11  | 23  | 196  | 0  |
| CONTIG-017833 | 109 | 15  | 10  | 47   | 2  |
| CONTIG-017834 | 308 | 12  | 13  | 138  | 0  |
| CONTIG-017835 | 111 | 16  | 18  | 24   | 0  |
| CONTIG-017836 | 225 | 15  | 86  | 120  | 0  |
| CONTIG-017838 | 634 | 25  | 80  | 488  | 19 |
| CONTIG-017839 | 323 | 17  | 71  | 66   | 0  |
| CONTIG-017840 | 49  | 14  | 14  | 2    | 0  |
| CONTIG-017841 | 533 | 203 | 174 | 6626 | 2  |
| CONTIG-017842 | 471 | 82  | 164 | 429  | 88 |
| CONTIG-017843 | 682 | 17  | 101 | 287  | 6  |
| CONTIG-017844 | 146 | 10  | 13  | 59   | 0  |
| CONTIG-017845 | 60  | 11  | 8   | 12   | 0  |
| CONTIG-017846 | 141 | 17  | 58  | 60   | 0  |
| CONTIG-017847 | 380 | 183 | 136 | 4449 | 0  |
| CONTIG-017848 | 72  | 4   | 4   | 0    | 0  |
| CONTIG-017849 | 68  | 8   | 13  | 12   | 0  |
| CONTIG-017850 | 305 | 6   | 18  | 46   | 0  |
| CONTIG-017851 | 100 | 12  | 92  | 8    | 0  |
| CONTIG-017852 | 406 | 17  | 266 | 134  | 0  |
| CONTIG-017853 | 572 | 19  | 33  | 360  | 7  |
| CONTIG-017854 | 225 | 5   | 10  | 32   | 0  |
| CONTIG-017855 | 701 | 18  | 146 | 302  | 3  |
| CONTIG-017856 | 134 | 9   | 24  | 2    | 0  |
| CONTIG-017857 | 146 | 30  | 56  | 191  | 0  |
| CONTIG-017858 | 402 | 7   | 4   | 67   | 2  |
| CONTIG-017859 | 87  | 3   | 4   | 5    | 0  |
| CONTIG-017860 | 60  | 4   | 2   | 3    | 0  |
| CONTIG-017861 | 176 | 27  | 86  | 97   | 0  |
| CONTIG-017862 | 106 | 36  | 97  | 77   | 0  |
| CONTIG-017863 | 841 | 15  | 120 | 348  | 8  |



|               |      |    |     |      |     |
|---------------|------|----|-----|------|-----|
| CONTIG-017864 | 173  | 6  | 9   | 37   | 2   |
| CONTIG-017865 | 501  | 10 | 55  | 86   | 0   |
| CONTIG-017869 | 221  | 6  | 0   | 46   | 0   |
| CONTIG-017870 | 110  | 16 | 24  | 75   | 0   |
| CONTIG-017871 | 97   | 5  | 2   | 13   | 0   |
| CONTIG-017872 | 147  | 12 | 5   | 52   | 2   |
| CONTIG-017873 | 127  | 6  | 10  | 9    | 0   |
| CONTIG-017874 | 83   | 6  | 7   | 0    | 0   |
| CONTIG-017875 | 138  | 4  | 9   | 14   | 0   |
| CONTIG-017877 | 670  | 35 | 125 | 1399 | 0   |
| CONTIG-017878 | 1604 | 42 | 226 | 2846 | 13  |
| CONTIG-017879 | 836  | 17 | 142 | 338  | 8   |
| CONTIG-017880 | 120  | 24 | 76  | 16   | 0   |
| CONTIG-017881 | 324  | 28 | 93  | 95   | 2   |
| CONTIG-017882 | 59   | 7  | 4   | 7    | 0   |
| CONTIG-017883 | 690  | 21 | 68  | 280  | 6   |
| CONTIG-017884 | 226  | 17 | 35  | 139  | 0   |
| CONTIG-017885 | 560  | 16 | 80  | 324  | 0   |
| CONTIG-017886 | 298  | 18 | 39  | 161  | 2   |
| CONTIG-017887 | 190  | 5  | 5   | 0    | 0   |
| CONTIG-017888 | 869  | 30 | 645 | 1094 | 0   |
| CONTIG-017889 | 94   | 18 | 54  | 44   | 0   |
| CONTIG-017890 | 122  | 12 | 16  | 25   | 0   |
| CONTIG-017891 | 127  | 12 | 13  | 44   | 0   |
| CONTIG-017892 | 125  | 18 | 7   | 97   | 0   |
| CONTIG-017893 | 342  | 18 | 74  | 199  | 2   |
| CONTIG-017894 | 62   | 21 | 27  | 32   | 2   |
| CONTIG-017895 | 629  | 32 | 122 | 669  | 6   |
| CONTIG-017896 | 143  | 9  | 13  | 17   | 0   |
| CONTIG-017897 | 349  | 12 | 36  | 60   | 0   |
| CONTIG-017898 | 75   | 4  | 21  | 0    | 0   |
| CONTIG-017899 | 80   | 5  | 13  | 3    | 0   |
| CONTIG-017900 | 186  | 11 | 18  | 47   | 0   |
| CONTIG-017901 | 146  | 8  | 0   | 24   | 0   |
| CONTIG-017902 | 395  | 8  | 0   | 0    | 10  |
| CONTIG-017903 | 409  | 69 | 3   | 0    | 141 |
| CONTIG-017904 | 473  | 12 | 56  | 168  | 0   |
| CONTIG-017905 | 808  | 30 | 150 | 586  | 45  |
| CONTIG-017906 | 606  | 12 | 35  | 283  | 0   |
| CONTIG-017907 | 117  | 6  | 19  | 19   | 0   |
| CONTIG-017908 | 136  | 14 | 48  | 56   | 2   |
| CONTIG-017909 | 713  | 23 | 54  | 876  | 0   |
| CONTIG-017910 | 370  | 15 | 149 | 256  | 0   |
| CONTIG-017911 | 786  | 25 | 384 | 602  | 0   |
| CONTIG-017912 | 220  | 12 | 86  | 38   | 0   |
| CONTIG-017915 | 90   | 3  | 6   | 0    | 0   |
| CONTIG-017916 | 2034 | 43 | 204 | 2893 | 126 |

|               |      |     |     |      |     |
|---------------|------|-----|-----|------|-----|
| CONTIG-017919 | 429  | 18  | 410 | 169  | 0   |
| CONTIG-017920 | 663  | 55  | 227 | 1898 | 0   |
| CONTIG-017921 | 72   | 35  | 234 | 6    | 0   |
| CONTIG-017922 | 292  | 25  | 137 | 240  | 2   |
| CONTIG-017923 | 612  | 15  | 12  | 342  | 0   |
| CONTIG-017924 | 347  | 24  | 57  | 140  | 4   |
| CONTIG-017925 | 111  | 57  | 82  | 103  | 7   |
| CONTIG-017926 | 223  | 139 | 3   | 0    | 453 |
| CONTIG-017927 | 159  | 4   | 7   | 5    | 0   |
| CONTIG-017928 | 703  | 30  | 178 | 357  | 25  |
| CONTIG-017929 | 205  | 12  | 35  | 85   | 0   |
| CONTIG-017930 | 738  | 17  | 84  | 550  | 4   |
| CONTIG-017931 | 118  | 22  | 35  | 25   | 2   |
| CONTIG-017934 | 75   | 17  | 15  | 39   | 0   |
| CONTIG-017935 | 315  | 7   | 10  | 27   | 0   |
| CONTIG-017936 | 724  | 14  | 11  | 275  | 6   |
| CONTIG-017939 | 495  | 24  | 169 | 239  | 12  |
| CONTIG-017940 | 297  | 9   | 20  | 81   | 0   |
| CONTIG-017941 | 69   | 4   | 18  | 0    | 0   |
| CONTIG-017943 | 152  | 26  | 45  | 185  | 0   |
| CONTIG-017944 | 184  | 20  | 65  | 85   | 0   |
| CONTIG-017945 | 153  | 33  | 68  | 154  | 0   |
| CONTIG-017946 | 176  | 14  | 45  | 34   | 0   |
| CONTIG-017947 | 108  | 8   | 20  | 27   | 0   |
| CONTIG-017948 | 96   | 38  | 36  | 5    | 0   |
| CONTIG-017949 | 64   | 6   | 0   | 16   | 0   |
| CONTIG-017950 | 295  | 24  | 21  | 403  | 0   |
| CONTIG-017954 | 69   | 11  | 36  | 9    | 0   |
| CONTIG-017955 | 182  | 5   | 8   | 10   | 0   |
| CONTIG-017956 | 929  | 13  | 84  | 275  | 12  |
| CONTIG-017957 | 406  | 49  | 35  | 722  | 17  |
| CONTIG-017958 | 50   | 22  | 5   | 18   | 0   |
| CONTIG-017959 | 307  | 12  | 138 | 2    | 35  |
| CONTIG-017960 | 1172 | 39  | 18  | 49   | 0   |
| CONTIG-017961 | 338  | 21  | 53  | 345  | 0   |
| CONTIG-017963 | 437  | 19  | 34  | 256  | 10  |
| CONTIG-017964 | 143  | 8   | 0   | 44   | 2   |
| CONTIG-017965 | 200  | 7   | 17  | 4    | 2   |
| CONTIG-017966 | 174  | 12  | 76  | 20   | 0   |
| CONTIG-017967 | 175  | 115 | 186 | 1198 | 0   |
| CONTIG-017968 | 197  | 12  | 51  | 56   | 2   |
| CONTIG-017969 | 621  | 28  | 160 | 502  | 0   |
| CONTIG-017970 | 183  | 28  | 412 | 12   | 0   |
| CONTIG-017971 | 967  | 36  | 283 | 1094 | 6   |
| CONTIG-017974 | 305  | 66  | 0   | 0    | 2   |
| CONTIG-017975 | 377  | 14  | 80  | 183  | 2   |
| CONTIG-017976 | 361  | 16  | 60  | 63   | 0   |

|               |      |     |     |      |    |
|---------------|------|-----|-----|------|----|
| CONTIG-017977 | 299  | 83  | 137 | 1407 | 2  |
| CONTIG-017978 | 250  | 24  | 203 | 89   | 0  |
| CONTIG-017979 | 244  | 7   | 14  | 36   | 0  |
| CONTIG-017980 | 312  | 9   | 79  | 58   | 0  |
| CONTIG-017981 | 468  | 18  | 22  | 238  | 6  |
| CONTIG-017982 | 80   | 11  | 35  | 19   | 0  |
| CONTIG-017983 | 251  | 17  | 59  | 178  | 0  |
| CONTIG-017984 | 2017 | 25  | 695 | 2740 | 0  |
| CONTIG-017985 | 101  | 404 | 158 | 2055 | 31 |
| CONTIG-017986 | 81   | 11  | 96  | 0    | 0  |
| CONTIG-017987 | 392  | 20  | 28  | 227  | 6  |
| CONTIG-017993 | 384  | 16  | 254 | 4    | 6  |
| CONTIG-017994 | 211  | 14  | 8   | 38   | 0  |
| CONTIG-017995 | 95   | 5   | 4   | 3    | 0  |
| CONTIG-017996 | 359  | 10  | 84  | 84   | 0  |
| CONTIG-017998 | 583  | 24  | 233 | 420  | 0  |
| CONTIG-017999 | 207  | 16  | 2   | 127  | 2  |
| CONTIG-018000 | 557  | 14  | 243 | 268  | 0  |
| CONTIG-018001 | 536  | 9   | 6   | 230  | 0  |
| CONTIG-018002 | 100  | 41  | 22  | 222  | 0  |
| CONTIG-018003 | 371  | 11  | 63  | 71   | 0  |
| CONTIG-018004 | 169  | 5   | 0   | 15   | 0  |
| CONTIG-018005 | 95   | 11  | 25  | 5    | 0  |
| CONTIG-018006 | 143  | 17  | 59  | 10   | 2  |
| CONTIG-018007 | 142  | 12  | 43  | 39   | 0  |
| CONTIG-018008 | 148  | 4   | 12  | 16   | 0  |
| CONTIG-018009 | 452  | 15  | 51  | 264  | 0  |
| CONTIG-018010 | 611  | 11  | 9   | 292  | 0  |
| CONTIG-018011 | 162  | 50  | 33  | 205  | 12 |
| CONTIG-018012 | 308  | 21  | 137 | 112  | 4  |
| CONTIG-018016 | 64   | 9   | 15  | 3    | 0  |
| CONTIG-018017 | 103  | 6   | 7   | 21   | 0  |
| CONTIG-018018 | 106  | 5   | 21  | 8    | 0  |
| CONTIG-018019 | 85   | 30  | 23  | 37   | 0  |
| CONTIG-018020 | 58   | 3   | 2   | 8    | 0  |
| CONTIG-018021 | 245  | 18  | 56  | 143  | 0  |
| CONTIG-018022 | 159  | 40  | 53  | 113  | 2  |
| CONTIG-018023 | 71   | 2   | 5   | 0    | 0  |
| CONTIG-018024 | 162  | 8   | 7   | 8    | 0  |
| CONTIG-018025 | 320  | 43  | 119 | 319  | 0  |
| CONTIG-018026 | 73   | 6   | 6   | 8    | 0  |
| CONTIG-018027 | 99   | 15  | 7   | 30   | 0  |
| CONTIG-018028 | 105  | 6   | 5   | 14   | 0  |
| CONTIG-018029 | 221  | 20  | 24  | 142  | 0  |
| CONTIG-018030 | 131  | 20  | 221 | 0    | 0  |
| CONTIG-018031 | 244  | 10  | 27  | 77   | 0  |
| CONTIG-018032 | 1259 | 28  | 213 | 1123 | 35 |

|               |      |     |     |      |    |
|---------------|------|-----|-----|------|----|
| CONTIG-018035 | 675  | 31  | 125 | 711  | 23 |
| CONTIG-018036 | 78   | 4   | 11  | 0    | 0  |
| CONTIG-018037 | 495  | 58  | 49  | 37   | 0  |
| CONTIG-018038 | 597  | 16  | 59  | 430  | 0  |
| CONTIG-018039 | 96   | 10  | 21  | 28   | 0  |
| CONTIG-018040 | 281  | 11  | 63  | 84   | 0  |
| CONTIG-018041 | 103  | 7   | 0   | 29   | 0  |
| CONTIG-018042 | 180  | 138 | 148 | 1141 | 2  |
| CONTIG-018043 | 95   | 7   | 8   | 20   | 0  |
| CONTIG-018044 | 58   | 13  | 59  | 0    | 0  |
| CONTIG-018046 | 282  | 12  | 54  | 128  | 0  |
| CONTIG-018047 | 63   | 51  | 49  | 48   | 0  |
| CONTIG-018048 | 447  | 14  | 107 | 184  | 0  |
| CONTIG-018055 | 515  | 7   | 8   | 53   | 5  |
| CONTIG-018057 | 130  | 7   | 7   | 15   | 0  |
| CONTIG-018058 | 64   | 12  | 4   | 13   | 0  |
| CONTIG-018059 | 546  | 33  | 81  | 330  | 64 |
| CONTIG-018060 | 663  | 25  | 250 | 614  | 4  |
| CONTIG-018061 | 1518 | 31  | 336 | 1124 | 70 |
| CONTIG-018063 | 230  | 14  | 135 | 50   | 0  |
| CONTIG-018064 | 95   | 6   | 15  | 17   | 0  |
| CONTIG-018065 | 750  | 17  | 20  | 617  | 3  |
| CONTIG-018066 | 68   | 11  | 2   | 7    | 0  |
| CONTIG-018067 | 487  | 18  | 154 | 272  | 0  |
| CONTIG-018072 | 440  | 13  | 45  | 163  | 0  |
| CONTIG-018073 | 328  | 14  | 63  | 130  | 2  |
| CONTIG-018074 | 752  | 22  | 303 | 409  | 6  |
| CONTIG-018075 | 262  | 20  | 128 | 63   | 0  |
| CONTIG-018077 | 75   | 2   | 2   | 3    | 0  |
| CONTIG-018078 | 95   | 7   | 4   | 13   | 0  |
| CONTIG-018079 | 64   | 8   | 15  | 8    | 0  |
| CONTIG-018080 | 102  | 21  | 60  | 72   | 0  |
| CONTIG-018082 | 359  | 21  | 146 | 98   | 7  |
| CONTIG-018087 | 58   | 3   | 2   | 4    | 0  |
| CONTIG-018088 | 566  | 11  | 105 | 226  | 0  |
| CONTIG-018089 | 189  | 15  | 31  | 103  | 0  |
| CONTIG-018090 | 346  | 13  | 46  | 179  | 0  |
| CONTIG-018091 | 70   | 4   | 2   | 4    | 0  |
| CONTIG-018092 | 691  | 14  | 227 | 240  | 9  |
| CONTIG-018093 | 263  | 14  | 22  | 38   | 0  |
| CONTIG-018094 | 136  | 12  | 15  | 49   | 0  |
| CONTIG-018095 | 69   | 16  | 30  | 21   | 0  |
| CONTIG-018096 | 123  | 27  | 167 | 52   | 0  |
| CONTIG-018097 | 268  | 11  | 72  | 101  | 0  |
| CONTIG-018098 | 200  | 8   | 22  | 18   | 0  |
| CONTIG-018099 | 97   | 5   | 13  | 15   | 0  |
| CONTIG-018100 | 433  | 9   | 52  | 136  | 0  |

|               |      |     |     |      |     |
|---------------|------|-----|-----|------|-----|
| CONTIG-018101 | 85   | 8   | 3   | 17   | 0   |
| CONTIG-018103 | 1976 | 22  | 228 | 1323 | 66  |
| CONTIG-018104 | 111  | 10  | 14  | 15   | 0   |
| CONTIG-018105 | 1248 | 35  | 0   | 0    | 386 |
| CONTIG-018106 | 231  | 7   | 11  | 51   | 0   |
| CONTIG-018107 | 73   | 15  | 39  | 7    | 0   |
| CONTIG-018108 | 153  | 12  | 18  | 31   | 0   |
| CONTIG-018109 | 143  | 4   | 5   | 19   | 0   |
| CONTIG-018110 | 326  | 187 | 286 | 2419 | 69  |
| CONTIG-018111 | 130  | 6   | 12  | 5    | 0   |
| CONTIG-018112 | 215  | 14  | 15  | 99   | 0   |
| CONTIG-018113 | 422  | 16  | 155 | 177  | 0   |
| CONTIG-018114 | 60   | 4   | 0   | 0    | 0   |
| CONTIG-018115 | 759  | 23  | 351 | 664  | 4   |
| CONTIG-018116 | 136  | 20  | 33  | 62   | 0   |
| CONTIG-018117 | 121  | 15  | 2   | 98   | 0   |
| CONTIG-018118 | 213  | 13  | 12  | 52   | 0   |
| CONTIG-018119 | 103  | 13  | 4   | 78   | 0   |
| CONTIG-018121 | 111  | 39  | 190 | 107  | 2   |
| CONTIG-018122 | 76   | 15  | 62  | 18   | 2   |
| CONTIG-018124 | 394  | 26  | 150 | 109  | 4   |
| CONTIG-018125 | 325  | 13  | 9   | 188  | 0   |
| CONTIG-018126 | 159  | 5   | 6   | 22   | 0   |
| CONTIG-018127 | 208  | 9   | 17  | 68   | 0   |
| CONTIG-018129 | 1136 | 69  | 300 | 4775 | 0   |
| CONTIG-018131 | 83   | 11  | 76  | 3    | 0   |
| CONTIG-018132 | 279  | 15  | 24  | 128  | 0   |
| CONTIG-018133 | 1363 | 18  | 101 | 730  | 2   |
| CONTIG-018141 | 81   | 149 | 32  | 497  | 0   |
| CONTIG-018142 | 414  | 12  | 62  | 87   | 2   |
| CONTIG-018143 | 226  | 5   | 11  | 40   | 0   |
| CONTIG-018144 | 116  | 28  | 25  | 106  | 0   |
| CONTIG-018145 | 100  | 178 | 13  | 751  | 0   |
| CONTIG-018146 | 531  | 21  | 100 | 449  | 0   |
| CONTIG-018150 | 271  | 6   | 22  | 45   | 0   |
| CONTIG-018151 | 353  | 17  | 272 | 47   | 2   |
| CONTIG-018152 | 72   | 8   | 22  | 8    | 0   |
| CONTIG-018153 | 226  | 124 | 235 | 811  | 2   |
| CONTIG-018154 | 792  | 18  | 138 | 239  | 19  |
| CONTIG-018155 | 197  | 10  | 19  | 68   | 0   |
| CONTIG-018156 | 160  | 10  | 13  | 36   | 0   |
| CONTIG-018157 | 281  | 34  | 192 | 78   | 4   |
| CONTIG-018158 | 129  | 7   | 8   | 35   | 0   |
| CONTIG-018159 | 68   | 7   | 8   | 3    | 0   |
| CONTIG-018160 | 76   | 8   | 12  | 0    | 0   |
| CONTIG-018161 | 80   | 8   | 21  | 2    | 0   |
| CONTIG-018162 | 231  | 13  | 46  | 53   | 0   |

|               |     |     |     |      |    |
|---------------|-----|-----|-----|------|----|
| CONTIG-018163 | 294 | 9   | 42  | 74   | 0  |
| CONTIG-018164 | 63  | 22  | 8   | 56   | 0  |
| CONTIG-018165 | 248 | 51  | 68  | 485  | 4  |
| CONTIG-018166 | 228 | 7   | 30  | 33   | 0  |
| CONTIG-018170 | 376 | 18  | 131 | 182  | 0  |
| CONTIG-018172 | 199 | 14  | 2   | 84   | 2  |
| CONTIG-018173 | 73  | 34  | 88  | 63   | 0  |
| CONTIG-018174 | 178 | 182 | 39  | 1535 | 0  |
| CONTIG-018175 | 680 | 31  | 108 | 818  | 2  |
| CONTIG-018176 | 207 | 37  | 0   | 0    | 97 |
| CONTIG-018177 | 236 | 7   | 12  | 51   | 0  |
| CONTIG-018178 | 73  | 13  | 20  | 28   | 0  |
| CONTIG-018179 | 200 | 96  | 569 | 345  | 4  |
| CONTIG-018181 | 256 | 13  | 27  | 108  | 0  |
| CONTIG-018189 | 127 | 8   | 49  | 20   | 0  |
| CONTIG-018190 | 72  | 91  | 101 | 137  | 0  |
| CONTIG-018193 | 149 | 5   | 4   | 17   | 0  |
| CONTIG-018194 | 95  | 13  | 52  | 4    | 0  |
| CONTIG-018195 | 143 | 7   | 6   | 17   | 0  |
| CONTIG-018196 | 70  | 20  | 4   | 45   | 0  |
| CONTIG-018197 | 88  | 19  | 116 | 0    | 0  |
| CONTIG-018198 | 253 | 19  | 224 | 97   | 0  |
| CONTIG-018202 | 58  | 9   | 48  | 0    | 0  |
| CONTIG-018203 | 139 | 4   | 7   | 5    | 0  |
| CONTIG-018204 | 329 | 12  | 51  | 103  | 0  |
| CONTIG-018205 | 269 | 13  | 106 | 80   | 0  |
| CONTIG-018206 | 64  | 7   | 2   | 6    | 0  |
| CONTIG-018207 | 207 | 15  | 14  | 71   | 0  |
| CONTIG-018208 | 449 | 10  | 13  | 33   | 0  |
| CONTIG-018209 | 178 | 9   | 16  | 31   | 0  |
| CONTIG-018210 | 61  | 3   | 0   | 2    | 0  |
| CONTIG-018211 | 122 | 57  | 225 | 157  | 0  |
| CONTIG-018212 | 452 | 23  | 13  | 402  | 6  |
| CONTIG-018214 | 308 | 19  | 42  | 150  | 2  |
| CONTIG-018215 | 268 | 8   | 115 | 42   | 0  |
| CONTIG-018216 | 309 | 10  | 80  | 70   | 0  |
| CONTIG-018217 | 134 | 11  | 8   | 46   | 0  |
| CONTIG-018224 | 471 | 20  | 4   | 0    | 74 |
| CONTIG-018225 | 262 | 34  | 53  | 365  | 0  |
| CONTIG-018226 | 164 | 15  | 2   | 106  | 0  |
| CONTIG-018227 | 352 | 15  | 65  | 181  | 2  |
| CONTIG-018234 | 132 | 8   | 15  | 40   | 0  |
| CONTIG-018235 | 577 | 13  | 63  | 267  | 4  |
| CONTIG-018236 | 517 | 12  | 47  | 187  | 0  |
| CONTIG-018237 | 100 | 24  | 95  | 45   | 0  |
| CONTIG-018238 | 279 | 25  | 117 | 251  | 2  |
| CONTIG-018242 | 127 | 12  | 16  | 53   | 0  |

|               |      |     |     |      |    |
|---------------|------|-----|-----|------|----|
| CONTIG-018243 | 136  | 5   | 4   | 22   | 0  |
| CONTIG-018244 | 456  | 17  | 78  | 193  | 0  |
| CONTIG-018245 | 862  | 49  | 330 | 1261 | 56 |
| CONTIG-018246 | 307  | 18  | 41  | 226  | 0  |
| CONTIG-018247 | 74   | 486 | 141 | 927  | 79 |
| CONTIG-018248 | 234  | 28  | 36  | 275  | 3  |
| CONTIG-018249 | 218  | 11  | 23  | 78   | 0  |
| CONTIG-018250 | 431  | 10  | 68  | 101  | 0  |
| CONTIG-018251 | 371  | 18  | 14  | 302  | 4  |
| CONTIG-018252 | 61   | 9   | 26  | 15   | 0  |
| CONTIG-018253 | 72   | 16  | 38  | 0    | 0  |
| CONTIG-018254 | 65   | 22  | 38  | 2    | 0  |
| CONTIG-018255 | 85   | 8   | 11  | 17   | 2  |
| CONTIG-018257 | 125  | 7   | 5   | 32   | 0  |
| CONTIG-018258 | 269  | 20  | 174 | 221  | 0  |
| CONTIG-018259 | 278  | 15  | 46  | 130  | 0  |
| CONTIG-018260 | 145  | 193 | 348 | 860  | 87 |
| CONTIG-018261 | 165  | 13  | 50  | 49   | 0  |
| CONTIG-018262 | 265  | 25  | 69  | 34   | 21 |
| CONTIG-018263 | 221  | 41  | 3   | 21   | 0  |
| CONTIG-018264 | 119  | 9   | 4   | 23   | 0  |
| CONTIG-018265 | 176  | 13  | 25  | 86   | 0  |
| CONTIG-018266 | 495  | 12  | 33  | 177  | 2  |
| CONTIG-018267 | 340  | 25  | 58  | 297  | 0  |
| CONTIG-018268 | 261  | 12  | 54  | 111  | 0  |
| CONTIG-018269 | 854  | 24  | 225 | 468  | 12 |
| CONTIG-018270 | 672  | 18  | 105 | 252  | 7  |
| CONTIG-018271 | 123  | 38  | 176 | 6    | 3  |
| CONTIG-018276 | 906  | 19  | 27  | 722  | 12 |
| CONTIG-018277 | 146  | 9   | 12  | 50   | 0  |
| CONTIG-018278 | 374  | 14  | 18  | 111  | 0  |
| CONTIG-018279 | 528  | 11  | 89  | 192  | 2  |
| CONTIG-018280 | 158  | 7   | 36  | 17   | 0  |
| CONTIG-018281 | 1975 | 14  | 33  | 1529 | 0  |
| CONTIG-018282 | 62   | 15  | 22  | 21   | 0  |
| CONTIG-018283 | 242  | 8   | 10  | 47   | 0  |
| CONTIG-018287 | 66   | 6   | 10  | 9    | 0  |
| CONTIG-018289 | 75   | 9   | 11  | 24   | 0  |
| CONTIG-018290 | 145  | 5   | 18  | 7    | 0  |
| CONTIG-018291 | 48   | 10  | 5   | 10   | 0  |
| CONTIG-018292 | 656  | 17  | 17  | 456  | 8  |
| CONTIG-018293 | 64   | 5   | 12  | 2    | 0  |
| CONTIG-018295 | 155  | 11  | 19  | 44   | 0  |
| CONTIG-018296 | 203  | 10  | 41  | 43   | 0  |
| CONTIG-018297 | 1876 | 28  | 100 | 2139 | 8  |
| CONTIG-018298 | 1126 | 16  | 133 | 333  | 39 |
| CONTIG-018301 | 138  | 42  | 49  | 151  | 0  |

|               |     |     |     |      |     |
|---------------|-----|-----|-----|------|-----|
| CONTIG-018302 | 63  | 8   | 25  | 0    | 0   |
| CONTIG-018303 | 244 | 14  | 109 | 27   | 0   |
| CONTIG-018304 | 231 | 9   | 62  | 60   | 0   |
| CONTIG-018305 | 98  | 6   | 23  | 6    | 0   |
| CONTIG-018306 | 145 | 273 | 167 | 1176 | 109 |
| CONTIG-018307 | 140 | 7   | 9   | 23   | 0   |
| CONTIG-018308 | 85  | 125 | 76  | 239  | 2   |
| CONTIG-018312 | 959 | 16  | 105 | 435  | 0   |
| CONTIG-018313 | 245 | 7   | 49  | 31   | 3   |
| CONTIG-018314 | 361 | 34  | 218 | 255  | 0   |
| CONTIG-018315 | 820 | 20  | 181 | 477  | 6   |
| CONTIG-018316 | 264 | 9   | 16  | 111  | 2   |
| CONTIG-018317 | 323 | 11  | 8   | 67   | 0   |
| CONTIG-018318 | 241 | 12  | 17  | 68   | 7   |
| CONTIG-018320 | 322 | 5   | 2   | 27   | 0   |
| CONTIG-018321 | 98  | 8   | 2   | 19   | 0   |
| CONTIG-018322 | 180 | 14  | 18  | 97   | 0   |
| CONTIG-018323 | 91  | 5   | 10  | 12   | 0   |
| CONTIG-018325 | 73  | 194 | 29  | 370  | 0   |
| CONTIG-018327 | 487 | 21  | 100 | 305  | 0   |
| CONTIG-018328 | 220 | 37  | 39  | 286  | 13  |
| CONTIG-018329 | 62  | 7   | 4   | 2    | 0   |
| CONTIG-018330 | 776 | 18  | 21  | 353  | 13  |
| CONTIG-018331 | 291 | 13  | 26  | 96   | 0   |
| CONTIG-018332 | 410 | 11  | 31  | 113  | 0   |
| CONTIG-018333 | 310 | 7   | 28  | 78   | 0   |
| CONTIG-018334 | 110 | 56  | 183 | 173  | 0   |
| CONTIG-018335 | 277 | 8   | 16  | 61   | 0   |
| CONTIG-018336 | 95  | 9   | 15  | 23   | 0   |
| CONTIG-018337 | 70  | 137 | 40  | 5    | 0   |
| CONTIG-018338 | 123 | 12  | 38  | 4    | 2   |
| CONTIG-018339 | 107 | 16  | 30  | 58   | 0   |
| CONTIG-018340 | 157 | 22  | 258 | 44   | 0   |
| CONTIG-018341 | 123 | 142 | 128 | 123  | 0   |
| CONTIG-018342 | 71  | 5   | 10  | 6    | 0   |
| CONTIG-018343 | 164 | 7   | 20  | 6    | 0   |
| CONTIG-018347 | 98  | 7   | 5   | 27   | 0   |
| CONTIG-018348 | 218 | 5   | 21  | 2    | 0   |
| CONTIG-018349 | 125 | 8   | 10  | 20   | 0   |
| CONTIG-018350 | 196 | 13  | 36  | 96   | 0   |
| CONTIG-018356 | 731 | 18  | 194 | 426  | 5   |
| CONTIG-018357 | 122 | 40  | 70  | 202  | 0   |
| CONTIG-018358 | 220 | 17  | 196 | 68   | 0   |
| CONTIG-018359 | 65  | 5   | 0   | 6    | 0   |
| CONTIG-018360 | 471 | 25  | 88  | 281  | 6   |
| CONTIG-018361 | 102 | 4   | 2   | 8    | 0   |
| CONTIG-018362 | 338 | 15  | 52  | 133  | 6   |



|               |      |     |     |      |    |
|---------------|------|-----|-----|------|----|
| CONTIG-018363 | 453  | 8   | 15  | 100  | 2  |
| CONTIG-018364 | 913  | 21  | 192 | 455  | 4  |
| CONTIG-018365 | 125  | 11  | 4   | 52   | 0  |
| CONTIG-018368 | 333  | 52  | 37  | 471  | 2  |
| CONTIG-018369 | 230  | 8   | 12  | 65   | 0  |
| CONTIG-018371 | 459  | 14  | 47  | 259  | 0  |
| CONTIG-018372 | 118  | 7   | 45  | 8    | 0  |
| CONTIG-018373 | 506  | 10  | 30  | 143  | 2  |
| CONTIG-018374 | 100  | 8   | 0   | 5    | 0  |
| CONTIG-018375 | 862  | 52  | 191 | 2797 | 0  |
| CONTIG-018376 | 61   | 6   | 0   | 7    | 0  |
| CONTIG-018377 | 106  | 7   | 0   | 27   | 0  |
| CONTIG-018378 | 166  | 7   | 24  | 21   | 0  |
| CONTIG-018379 | 404  | 26  | 57  | 395  | 5  |
| CONTIG-018380 | 274  | 20  | 183 | 0    | 0  |
| CONTIG-018381 | 72   | 13  | 9   | 0    | 0  |
| CONTIG-018383 | 396  | 28  | 196 | 202  | 4  |
| CONTIG-018384 | 366  | 7   | 2   | 67   | 0  |
| CONTIG-018385 | 101  | 4   | 0   | 9    | 0  |
| CONTIG-018386 | 67   | 235 | 242 | 144  | 39 |
| CONTIG-018387 | 85   | 30  | 167 | 30   | 0  |
| CONTIG-018388 | 617  | 124 | 536 | 4715 | 0  |
| CONTIG-018389 | 249  | 16  | 48  | 85   | 2  |
| CONTIG-018390 | 540  | 19  | 89  | 323  | 0  |
| CONTIG-018391 | 200  | 26  | 37  | 172  | 2  |
| CONTIG-018396 | 62   | 7   | 20  | 4    | 0  |
| CONTIG-018397 | 180  | 5   | 7   | 25   | 0  |
| CONTIG-018398 | 86   | 4   | 0   | 4    | 0  |
| CONTIG-018399 | 410  | 14  | 162 | 139  | 0  |
| CONTIG-018401 | 235  | 46  | 25  | 39   | 0  |
| CONTIG-018402 | 225  | 19  | 29  | 63   | 0  |
| CONTIG-018403 | 473  | 7   | 27  | 99   | 0  |
| CONTIG-018404 | 108  | 10  | 16  | 33   | 0  |
| CONTIG-018405 | 79   | 8   | 11  | 16   | 0  |
| CONTIG-018406 | 132  | 8   | 14  | 17   | 0  |
| CONTIG-018407 | 72   | 12  | 82  | 4    | 0  |
| CONTIG-018408 | 733  | 13  | 136 | 237  | 0  |
| CONTIG-018409 | 303  | 20  | 59  | 190  | 2  |
| CONTIG-018410 | 230  | 9   | 2   | 96   | 0  |
| CONTIG-018411 | 305  | 12  | 38  | 131  | 0  |
| CONTIG-018412 | 62   | 12  | 13  | 20   | 0  |
| CONTIG-018415 | 311  | 6   | 12  | 39   | 0  |
| CONTIG-018416 | 1034 | 30  | 113 | 696  | 47 |
| CONTIG-018417 | 63   | 10  | 12  | 4    | 0  |
| CONTIG-018418 | 147  | 10  | 17  | 21   | 0  |
| CONTIG-018419 | 1217 | 41  | 928 | 1217 | 59 |
| CONTIG-018421 | 788  | 17  | 68  | 610  | 4  |

|               |      |     |     |      |     |
|---------------|------|-----|-----|------|-----|
| CONTIG-018422 | 531  | 33  | 181 | 346  | 9   |
| CONTIG-018423 | 191  | 14  | 59  | 62   | 0   |
| CONTIG-018424 | 108  | 8   | 12  | 4    | 0   |
| CONTIG-018425 | 41   | 296 | 321 | 167  | 0   |
| CONTIG-018426 | 1237 | 22  | 204 | 1073 | 4   |
| CONTIG-018427 | 303  | 17  | 23  | 121  | 0   |
| CONTIG-018428 | 121  | 10  | 30  | 38   | 0   |
| CONTIG-018429 | 72   | 8   | 9   | 9    | 0   |
| CONTIG-018430 | 114  | 57  | 160 | 38   | 0   |
| CONTIG-018431 | 458  | 20  | 6   | 13   | 0   |
| CONTIG-018432 | 68   | 36  | 85  | 37   | 0   |
| CONTIG-018433 | 253  | 118 | 41  | 14   | 349 |
| CONTIG-018434 | 147  | 8   | 28  | 18   | 0   |
| CONTIG-018435 | 148  | 6   | 0   | 35   | 0   |
| CONTIG-018436 | 755  | 63  | 334 | 1554 | 67  |
| CONTIG-018437 | 248  | 13  | 60  | 64   | 2   |
| CONTIG-018438 | 86   | 13  | 13  | 40   | 0   |
| CONTIG-018439 | 81   | 6   | 4   | 16   | 0   |
| CONTIG-018440 | 503  | 23  | 27  | 498  | 2   |
| CONTIG-018441 | 156  | 11  | 49  | 35   | 0   |
| CONTIG-018442 | 229  | 14  | 12  | 133  | 0   |
| CONTIG-018443 | 754  | 14  | 70  | 158  | 0   |
| CONTIG-018444 | 127  | 41  | 162 | 61   | 3   |
| CONTIG-018445 | 225  | 10  | 32  | 70   | 0   |
| CONTIG-018446 | 181  | 19  | 163 | 85   | 0   |
| CONTIG-018447 | 125  | 9   | 12  | 25   | 0   |
| CONTIG-018448 | 87   | 16  | 12  | 7    | 0   |
| CONTIG-018450 | 953  | 39  | 73  | 46   | 517 |
| CONTIG-018454 | 2801 | 24  | 266 | 1931 | 31  |
| CONTIG-018455 | 71   | 81  | 25  | 162  | 2   |
| CONTIG-018456 | 339  | 19  | 26  | 145  | 0   |
| CONTIG-018457 | 206  | 7   | 5   | 46   | 0   |
| CONTIG-018458 | 201  | 11  | 21  | 33   | 0   |
| CONTIG-018459 | 142  | 6   | 0   | 33   | 0   |
| CONTIG-018460 | 532  | 19  | 154 | 328  | 0   |
| CONTIG-018461 | 138  | 9   | 25  | 17   | 0   |
| CONTIG-018462 | 505  | 22  | 147 | 295  | 8   |
| CONTIG-018463 | 678  | 49  | 108 | 725  | 34  |
| CONTIG-018464 | 175  | 6   | 7   | 17   | 0   |
| CONTIG-018465 | 177  | 24  | 20  | 66   | 0   |
| CONTIG-018466 | 98   | 5   | 9   | 16   | 0   |
| CONTIG-018467 | 244  | 6   | 23  | 42   | 0   |
| CONTIG-018468 | 204  | 9   | 7   | 65   | 0   |
| CONTIG-018470 | 205  | 7   | 2   | 60   | 0   |
| CONTIG-018471 | 57   | 549 | 141 | 784  | 13  |
| CONTIG-018472 | 143  | 41  | 36  | 62   | 0   |
| CONTIG-018473 | 171  | 6   | 4   | 39   | 2   |

|               |      |     |     |      |    |
|---------------|------|-----|-----|------|----|
| CONTIG-018474 | 282  | 25  | 81  | 210  | 0  |
| CONTIG-018475 | 118  | 3   | 0   | 0    | 0  |
| CONTIG-018476 | 278  | 15  | 59  | 160  | 0  |
| CONTIG-018477 | 71   | 61  | 86  | 75   | 0  |
| CONTIG-018478 | 172  | 6   | 42  | 0    | 0  |
| CONTIG-018479 | 217  | 4   | 15  | 12   | 0  |
| CONTIG-018480 | 431  | 12  | 73  | 94   | 0  |
| CONTIG-018481 | 184  | 17  | 64  | 157  | 0  |
| CONTIG-018487 | 240  | 12  | 30  | 86   | 0  |
| CONTIG-018488 | 464  | 21  | 279 | 154  | 0  |
| CONTIG-018491 | 89   | 6   | 4   | 9    | 0  |
| CONTIG-018492 | 300  | 16  | 56  | 124  | 7  |
| CONTIG-018499 | 139  | 14  | 52  | 41   | 0  |
| CONTIG-018500 | 204  | 17  | 41  | 27   | 7  |
| CONTIG-018501 | 105  | 16  | 117 | 21   | 0  |
| CONTIG-018502 | 903  | 20  | 101 | 601  | 3  |
| CONTIG-018503 | 88   | 31  | 82  | 41   | 0  |
| CONTIG-018507 | 60   | 2   | 3   | 4    | 0  |
| CONTIG-018508 | 88   | 8   | 25  | 15   | 0  |
| CONTIG-018509 | 1124 | 18  | 38  | 535  | 12 |
| CONTIG-018510 | 321  | 7   | 43  | 75   | 0  |
| CONTIG-018511 | 199  | 15  | 27  | 128  | 3  |
| CONTIG-018514 | 51   | 219 | 20  | 391  | 0  |
| CONTIG-018515 | 120  | 110 | 53  | 261  | 0  |
| CONTIG-018516 | 941  | 50  | 130 | 2066 | 50 |
| CONTIG-018517 | 504  | 20  | 47  | 65   | 34 |
| CONTIG-018518 | 82   | 5   | 24  | 4    | 0  |
| CONTIG-018519 | 141  | 8   | 7   | 41   | 0  |
| CONTIG-018520 | 98   | 10  | 4   | 8    | 0  |
| CONTIG-018521 | 450  | 17  | 85  | 244  | 0  |
| CONTIG-018522 | 93   | 10  | 22  | 25   | 0  |
| CONTIG-018523 | 598  | 47  | 170 | 352  | 0  |
| CONTIG-018525 | 1201 | 22  | 227 | 494  | 0  |
| CONTIG-018527 | 280  | 12  | 14  | 83   | 0  |
| CONTIG-018528 | 371  | 21  | 51  | 221  | 0  |
| CONTIG-018529 | 105  | 9   | 34  | 12   | 0  |
| CONTIG-018530 | 179  | 17  | 7   | 99   | 0  |
| CONTIG-018531 | 60   | 3   | 4   | 0    | 0  |
| CONTIG-018532 | 98   | 10  | 17  | 30   | 0  |
| CONTIG-018533 | 163  | 8   | 20  | 44   | 0  |
| CONTIG-018537 | 333  | 21  | 10  | 154  | 0  |
| CONTIG-018538 | 718  | 15  | 74  | 154  | 24 |
| CONTIG-018539 | 449  | 41  | 475 | 403  | 0  |
| CONTIG-018540 | 64   | 14  | 9   | 25   | 0  |
| CONTIG-018541 | 99   | 4   | 2   | 4    | 0  |
| CONTIG-018542 | 193  | 8   | 4   | 46   | 0  |
| CONTIG-018543 | 906  | 27  | 129 | 531  | 7  |

|               |      |     |     |       |     |
|---------------|------|-----|-----|-------|-----|
| CONTIG-018544 | 495  | 20  | 129 | 309   | 0   |
| CONTIG-018545 | 63   | 63  | 82  | 101   | 2   |
| CONTIG-018546 | 163  | 10  | 26  | 23    | 0   |
| CONTIG-018547 | 156  | 5   | 2   | 32    | 0   |
| CONTIG-018548 | 321  | 17  | 111 | 95    | 0   |
| CONTIG-018549 | 119  | 9   | 10  | 36    | 0   |
| CONTIG-018550 | 420  | 19  | 285 | 120   | 4   |
| CONTIG-018551 | 133  | 10  | 26  | 28    | 0   |
| CONTIG-018552 | 81   | 20  | 94  | 3     | 0   |
| CONTIG-018554 | 193  | 10  | 31  | 33    | 0   |
| CONTIG-018555 | 136  | 14  | 109 | 0     | 0   |
| CONTIG-018556 | 289  | 14  | 129 | 138   | 0   |
| CONTIG-018557 | 317  | 20  | 101 | 99    | 4   |
| CONTIG-018558 | 1835 | 38  | 225 | 3346  | 2   |
| CONTIG-018559 | 376  | 21  | 83  | 190   | 2   |
| CONTIG-018560 | 78   | 108 | 17  | 344   | 6   |
| CONTIG-018561 | 273  | 54  | 103 | 297   | 96  |
| CONTIG-018562 | 324  | 7   | 15  | 82    | 0   |
| CONTIG-018563 | 102  | 5   | 3   | 12    | 0   |
| CONTIG-018564 | 59   | 5   | 8   | 4     | 0   |
| CONTIG-018565 | 77   | 24  | 59  | 36    | 0   |
| CONTIG-018566 | 73   | 525 | 139 | 1052  | 140 |
| CONTIG-018567 | 73   | 5   | 20  | 7     | 0   |
| CONTIG-018568 | 607  | 22  | 99  | 637   | 0   |
| CONTIG-018570 | 2015 | 19  | 99  | 1096  | 14  |
| CONTIG-018571 | 89   | 12  | 65  | 14    | 0   |
| CONTIG-018572 | 134  | 10  | 5   | 59    | 0   |
| CONTIG-018573 | 206  | 5   | 18  | 9     | 4   |
| CONTIG-018575 | 68   | 68  | 151 | 128   | 0   |
| CONTIG-018576 | 69   | 15  | 10  | 29    | 0   |
| CONTIG-018579 | 100  | 42  | 2   | 134   | 0   |
| CONTIG-018580 | 61   | 24  | 50  | 29    | 0   |
| CONTIG-018584 | 1239 | 165 | 569 | 12986 | 4   |
| CONTIG-018585 | 183  | 14  | 89  | 66    | 0   |
| CONTIG-018586 | 253  | 23  | 101 | 78    | 5   |
| CONTIG-018587 | 68   | 3   | 0   | 4     | 0   |
| CONTIG-018591 | 94   | 6   | 3   | 18    | 0   |
| CONTIG-018592 | 250  | 8   | 37  | 50    | 0   |
| CONTIG-018593 | 117  | 342 | 54  | 931   | 147 |
| CONTIG-018594 | 398  | 29  | 24  | 388   | 2   |
| CONTIG-018595 | 106  | 52  | 19  | 165   | 0   |
| CONTIG-018596 | 510  | 13  | 29  | 195   | 20  |
| CONTIG-018597 | 81   | 6   | 4   | 12    | 0   |
| CONTIG-018598 | 679  | 44  | 164 | 559   | 96  |
| CONTIG-018599 | 331  | 20  | 76  | 98    | 8   |
| CONTIG-018600 | 225  | 18  | 33  | 211   | 0   |
| CONTIG-018601 | 200  | 26  | 26  | 305   | 0   |

|               |      |      |     |      |      |
|---------------|------|------|-----|------|------|
| CONTIG-018602 | 167  | 256  | 0   | 1305 | 0    |
| CONTIG-018605 | 50   | 2333 | 700 | 40   | 1741 |
| CONTIG-018606 | 152  | 11   | 31  | 33   | 0    |
| CONTIG-018607 | 491  | 39   | 132 | 518  | 17   |
| CONTIG-018609 | 639  | 28   | 76  | 371  | 17   |
| CONTIG-018610 | 180  | 14   | 58  | 92   | 0    |
| CONTIG-018611 | 101  | 135  | 65  | 449  | 0    |
| CONTIG-018612 | 329  | 18   | 73  | 222  | 0    |
| CONTIG-018613 | 480  | 26   | 66  | 451  | 2    |
| CONTIG-018614 | 78   | 5    | 3   | 12   | 0    |
| CONTIG-018615 | 129  | 5    | 4   | 7    | 0    |
| CONTIG-018616 | 280  | 43   | 65  | 394  | 0    |
| CONTIG-018617 | 131  | 159  | 128 | 1042 | 0    |
| CONTIG-018618 | 93   | 5    | 12  | 16   | 0    |
| CONTIG-018620 | 247  | 6    | 12  | 38   | 2    |
| CONTIG-018621 | 1082 | 17   | 71  | 845  | 2    |
| CONTIG-018622 | 1536 | 43   | 102 | 3052 | 240  |
| CONTIG-018623 | 497  | 14   | 57  | 183  | 0    |
| CONTIG-018624 | 98   | 14   | 67  | 6    | 0    |
| CONTIG-018625 | 208  | 14   | 64  | 107  | 0    |
| CONTIG-018626 | 1311 | 34   | 134 | 1365 | 20   |
| CONTIG-018629 | 90   | 55   | 4   | 214  | 3    |
| CONTIG-018630 | 689  | 30   | 97  | 956  | 0    |
| CONTIG-018631 | 333  | 25   | 76  | 278  | 2    |
| CONTIG-018632 | 484  | 11   | 94  | 180  | 0    |
| CONTIG-018633 | 65   | 5    | 16  | 8    | 0    |
| CONTIG-018634 | 250  | 9    | 17  | 63   | 0    |
| CONTIG-018635 | 209  | 10   | 67  | 60   | 0    |
| CONTIG-018636 | 79   | 9    | 16  | 6    | 0    |
| CONTIG-018638 | 242  | 11   | 21  | 93   | 0    |
| CONTIG-018639 | 293  | 16   | 136 | 68   | 4    |
| CONTIG-018640 | 85   | 11   | 34  | 2    | 0    |
| CONTIG-018641 | 185  | 11   | 38  | 50   | 0    |
| CONTIG-018642 | 97   | 31   | 43  | 75   | 0    |
| CONTIG-018643 | 409  | 16   | 63  | 256  | 0    |
| CONTIG-018644 | 131  | 6    | 33  | 18   | 0    |
| CONTIG-018646 | 68   | 31   | 19  | 18   | 0    |
| CONTIG-018651 | 329  | 10   | 196 | 62   | 0    |
| CONTIG-018652 | 350  | 54   | 99  | 813  | 0    |
| CONTIG-018653 | 246  | 11   | 16  | 86   | 0    |
| CONTIG-018655 | 309  | 9    | 69  | 51   | 0    |
| CONTIG-018656 | 184  | 14   | 27  | 70   | 0    |
| CONTIG-018658 | 141  | 8    | 25  | 24   | 0    |
| CONTIG-018659 | 667  | 16   | 27  | 257  | 0    |
| CONTIG-018660 | 209  | 7    | 5   | 29   | 0    |
| CONTIG-018661 | 882  | 21   | 126 | 395  | 30   |
| CONTIG-018662 | 179  | 10   | 19  | 53   | 0    |

|               |      |     |     |      |    |
|---------------|------|-----|-----|------|----|
| CONTIG-018663 | 128  | 9   | 37  | 18   | 0  |
| CONTIG-018664 | 234  | 7   | 25  | 37   | 0  |
| CONTIG-018665 | 213  | 28  | 15  | 162  | 8  |
| CONTIG-018666 | 746  | 50  | 53  | 43   | 0  |
| CONTIG-018667 | 204  | 19  | 42  | 97   | 0  |
| CONTIG-018668 | 64   | 6   | 0   | 2    | 0  |
| CONTIG-018669 | 1558 | 24  | 247 | 2016 | 2  |
| CONTIG-018670 | 85   | 5   | 16  | 4    | 0  |
| CONTIG-018671 | 89   | 23  | 195 | 2    | 0  |
| CONTIG-018672 | 186  | 44  | 71  | 187  | 6  |
| CONTIG-018674 | 257  | 12  | 11  | 101  | 0  |
| CONTIG-018675 | 446  | 17  | 71  | 350  | 0  |
| CONTIG-018676 | 541  | 19  | 310 | 327  | 0  |
| CONTIG-018677 | 59   | 6   | 0   | 15   | 0  |
| CONTIG-018678 | 725  | 12  | 49  | 379  | 0  |
| CONTIG-018681 | 96   | 8   | 3   | 17   | 0  |
| CONTIG-018682 | 461  | 24  | 258 | 289  | 4  |
| CONTIG-018683 | 68   | 7   | 4   | 10   | 0  |
| CONTIG-018684 | 85   | 3   | 2   | 12   | 0  |
| CONTIG-018685 | 64   | 128 | 145 | 96   | 7  |
| CONTIG-018686 | 361  | 20  | 73  | 210  | 0  |
| CONTIG-018687 | 231  | 14  | 43  | 56   | 0  |
| CONTIG-018688 | 107  | 19  | 7   | 87   | 0  |
| CONTIG-018689 | 306  | 18  | 69  | 171  | 2  |
| CONTIG-018690 | 464  | 31  | 305 | 303  | 8  |
| CONTIG-018691 | 85   | 7   | 36  | 8    | 0  |
| CONTIG-018692 | 95   | 6   | 0   | 20   | 0  |
| CONTIG-018693 | 107  | 15  | 13  | 23   | 4  |
| CONTIG-018694 | 110  | 5   | 2   | 2    | 0  |
| CONTIG-018695 | 499  | 40  | 173 | 1160 | 0  |
| CONTIG-018696 | 847  | 20  | 58  | 455  | 6  |
| CONTIG-018697 | 767  | 18  | 167 | 431  | 2  |
| CONTIG-018698 | 170  | 9   | 4   | 42   | 0  |
| CONTIG-018699 | 90   | 5   | 0   | 10   | 0  |
| CONTIG-018700 | 68   | 6   | 14  | 9    | 2  |
| CONTIG-018702 | 203  | 21  | 90  | 157  | 0  |
| CONTIG-018703 | 65   | 26  | 163 | 6    | 0  |
| CONTIG-018704 | 90   | 3   | 3   | 8    | 0  |
| CONTIG-018705 | 670  | 50  | 135 | 1463 | 8  |
| CONTIG-018711 | 119  | 5   | 8   | 20   | 0  |
| CONTIG-018712 | 616  | 26  | 50  | 226  | 23 |
| CONTIG-018714 | 259  | 17  | 115 | 47   | 2  |
| CONTIG-018716 | 134  | 10  | 27  | 32   | 0  |
| CONTIG-018717 | 105  | 7   | 13  | 9    | 2  |
| CONTIG-018718 | 79   | 4   | 0   | 10   | 0  |
| CONTIG-018719 | 65   | 7   | 8   | 4    | 0  |
| CONTIG-018720 | 120  | 20  | 47  | 80   | 0  |

|               |      |     |     |       |     |
|---------------|------|-----|-----|-------|-----|
| CONTIG-018721 | 98   | 10  | 42  | 23    | 0   |
| CONTIG-018722 | 307  | 11  | 82  | 108   | 8   |
| CONTIG-018723 | 669  | 23  | 474 | 539   | 0   |
| CONTIG-018724 | 1118 | 28  | 420 | 1097  | 16  |
| CONTIG-018725 | 61   | 19  | 32  | 14    | 0   |
| CONTIG-018726 | 93   | 9   | 5   | 37    | 0   |
| CONTIG-018728 | 62   | 4   | 2   | 4     | 0   |
| CONTIG-018729 | 190  | 14  | 22  | 104   | 0   |
| CONTIG-018730 | 355  | 5   | 14  | 45    | 0   |
| CONTIG-018737 | 408  | 11  | 56  | 164   | 0   |
| CONTIG-018738 | 86   | 36  | 6   | 51    | 0   |
| CONTIG-018739 | 252  | 9   | 59  | 52    | 0   |
| CONTIG-018740 | 100  | 13  | 6   | 27    | 0   |
| CONTIG-018741 | 96   | 8   | 23  | 2     | 0   |
| CONTIG-018743 | 76   | 7   | 32  | 2     | 0   |
| CONTIG-018745 | 589  | 16  | 9   | 439   | 0   |
| CONTIG-018746 | 107  | 7   | 7   | 22    | 0   |
| CONTIG-018747 | 210  | 13  | 25  | 106   | 0   |
| CONTIG-018748 | 377  | 12  | 37  | 100   | 2   |
| CONTIG-018749 | 2093 | 122 | 328 | 16558 | 5   |
| CONTIG-018750 | 170  | 14  | 101 | 46    | 0   |
| CONTIG-018751 | 205  | 10  | 55  | 49    | 0   |
| CONTIG-018752 | 648  | 25  | 362 | 463   | 0   |
| CONTIG-018753 | 114  | 7   | 11  | 7     | 0   |
| CONTIG-018754 | 587  | 52  | 9   | 48    | 0   |
| CONTIG-018755 | 137  | 26  | 25  | 25    | 0   |
| CONTIG-018756 | 81   | 7   | 6   | 4     | 0   |
| CONTIG-018757 | 43   | 227 | 220 | 243   | 15  |
| CONTIG-018758 | 476  | 52  | 161 | 748   | 22  |
| CONTIG-018761 | 170  | 64  | 94  | 535   | 0   |
| CONTIG-018764 | 352  | 10  | 18  | 127   | 2   |
| CONTIG-018765 | 290  | 29  | 63  | 369   | 0   |
| CONTIG-018766 | 114  | 8   | 4   | 28    | 0   |
| CONTIG-018767 | 62   | 15  | 9   | 19    | 0   |
| CONTIG-018768 | 45   | 472 | 19  | 1137  | 0   |
| CONTIG-018769 | 419  | 26  | 82  | 208   | 0   |
| CONTIG-018770 | 295  | 26  | 137 | 325   | 6   |
| CONTIG-018771 | 662  | 21  | 203 | 448   | 0   |
| CONTIG-018772 | 67   | 5   | 5   | 0     | 0   |
| CONTIG-018773 | 374  | 10  | 25  | 120   | 0   |
| CONTIG-018774 | 114  | 7   | 2   | 36    | 0   |
| CONTIG-018775 | 60   | 5   | 7   | 4     | 0   |
| CONTIG-018777 | 286  | 18  | 223 | 65    | 0   |
| CONTIG-018778 | 100  | 12  | 22  | 35    | 0   |
| CONTIG-018779 | 304  | 42  | 169 | 373   | 3   |
| CONTIG-018781 | 260  | 171 | 132 | 1840  | 191 |
| CONTIG-018782 | 496  | 58  | 184 | 1090  | 10  |

|               |      |    |     |      |    |
|---------------|------|----|-----|------|----|
| CONTIG-018783 | 255  | 14 | 16  | 144  | 0  |
| CONTIG-018784 | 533  | 25 | 74  | 611  | 2  |
| CONTIG-018787 | 92   | 4  | 3   | 6    | 2  |
| CONTIG-018788 | 561  | 17 | 159 | 241  | 7  |
| CONTIG-018789 | 112  | 9  | 17  | 24   | 0  |
| CONTIG-018790 | 474  | 43 | 134 | 413  | 66 |
| CONTIG-018791 | 180  | 14 | 78  | 25   | 0  |
| CONTIG-018792 | 842  | 20 | 125 | 478  | 6  |
| CONTIG-018793 | 557  | 21 | 244 | 426  | 0  |
| CONTIG-018794 | 909  | 20 | 93  | 363  | 30 |
| CONTIG-018795 | 321  | 24 | 4   | 343  | 4  |
| CONTIG-018796 | 91   | 38 | 108 | 71   | 0  |
| CONTIG-018797 | 207  | 10 | 13  | 102  | 0  |
| CONTIG-018798 | 547  | 25 | 92  | 288  | 2  |
| CONTIG-018799 | 842  | 20 | 350 | 499  | 2  |
| CONTIG-018800 | 329  | 51 | 67  | 706  | 46 |
| CONTIG-018802 | 485  | 24 | 177 | 143  | 0  |
| CONTIG-018803 | 77   | 8  | 23  | 6    | 2  |
| CONTIG-018804 | 274  | 10 | 15  | 62   | 2  |
| CONTIG-018805 | 92   | 7  | 0   | 17   | 0  |
| CONTIG-018806 | 75   | 8  | 12  | 3    | 0  |
| CONTIG-018807 | 77   | 47 | 24  | 146  | 0  |
| CONTIG-018808 | 309  | 24 | 44  | 282  | 0  |
| CONTIG-018809 | 188  | 15 | 31  | 83   | 0  |
| CONTIG-018810 | 899  | 23 | 310 | 452  | 21 |
| CONTIG-018812 | 62   | 15 | 42  | 8    | 0  |
| CONTIG-018813 | 114  | 9  | 18  | 29   | 0  |
| CONTIG-018814 | 894  | 17 | 152 | 353  | 22 |
| CONTIG-018815 | 110  | 7  | 32  | 7    | 0  |
| CONTIG-018816 | 95   | 9  | 19  | 8    | 0  |
| CONTIG-018819 | 114  | 4  | 10  | 11   | 0  |
| CONTIG-018821 | 309  | 14 | 61  | 146  | 0  |
| CONTIG-018822 | 605  | 16 | 59  | 187  | 8  |
| CONTIG-018825 | 80   | 6  | 6   | 5    | 0  |
| CONTIG-018826 | 538  | 14 | 57  | 255  | 0  |
| CONTIG-018827 | 60   | 4  | 2   | 2    | 0  |
| CONTIG-018828 | 152  | 12 | 21  | 47   | 0  |
| CONTIG-018829 | 99   | 12 | 17  | 55   | 0  |
| CONTIG-018830 | 612  | 16 | 25  | 119  | 26 |
| CONTIG-018831 | 749  | 21 | 361 | 322  | 0  |
| CONTIG-018832 | 612  | 18 | 84  | 461  | 0  |
| CONTIG-018833 | 243  | 22 | 36  | 281  | 0  |
| CONTIG-018834 | 84   | 4  | 14  | 4    | 0  |
| CONTIG-018835 | 59   | 5  | 10  | 0    | 0  |
| CONTIG-018836 | 269  | 33 | 328 | 178  | 0  |
| CONTIG-018837 | 1043 | 56 | 69  | 3107 | 19 |
| CONTIG-018838 | 172  | 18 | 23  | 6    | 0  |



|               |      |      |     |      |    |
|---------------|------|------|-----|------|----|
| CONTIG-018840 | 109  | 6    | 17  | 9    | 0  |
| CONTIG-018841 | 72   | 5    | 14  | 7    | 0  |
| CONTIG-018842 | 120  | 15   | 22  | 26   | 12 |
| CONTIG-018843 | 762  | 75   | 147 | 2254 | 88 |
| CONTIG-018844 | 63   | 3    | 2   | 2    | 0  |
| CONTIG-018845 | 295  | 5    | 2   | 54   | 0  |
| CONTIG-018846 | 162  | 10   | 17  | 67   | 0  |
| CONTIG-018847 | 117  | 9    | 73  | 0    | 0  |
| CONTIG-018848 | 141  | 11   | 82  | 38   | 0  |
| CONTIG-018849 | 94   | 36   | 2   | 72   | 0  |
| CONTIG-018850 | 230  | 11   | 39  | 99   | 0  |
| CONTIG-018851 | 96   | 17   | 17  | 78   | 0  |
| CONTIG-018852 | 273  | 19   | 94  | 132  | 6  |
| CONTIG-018853 | 128  | 8    | 5   | 37   | 0  |
| CONTIG-018854 | 222  | 26   | 149 | 194  | 0  |
| CONTIG-018855 | 159  | 11   | 14  | 52   | 0  |
| CONTIG-018857 | 114  | 8    | 9   | 20   | 0  |
| CONTIG-018858 | 587  | 25   | 86  | 326  | 22 |
| CONTIG-018859 | 102  | 24   | 77  | 55   | 0  |
| CONTIG-018860 | 188  | 10   | 32  | 59   | 0  |
| CONTIG-018863 | 1053 | 15   | 50  | 445  | 17 |
| CONTIG-018864 | 153  | 16   | 182 | 36   | 0  |
| CONTIG-018865 | 605  | 12   | 77  | 194  | 0  |
| CONTIG-018866 | 300  | 17   | 89  | 92   | 21 |
| CONTIG-018867 | 150  | 16   | 56  | 34   | 2  |
| CONTIG-018868 | 39   | 1240 | 9   | 1772 | 0  |
| CONTIG-018869 | 143  | 6    | 38  | 4    | 0  |
| CONTIG-018871 | 628  | 16   | 111 | 483  | 0  |
| CONTIG-018872 | 60   | 8    | 18  | 0    | 0  |
| CONTIG-018873 | 96   | 4    | 6   | 4    | 0  |
| CONTIG-018874 | 76   | 38   | 55  | 111  | 2  |
| CONTIG-018875 | 61   | 14   | 21  | 18   | 0  |
| CONTIG-018876 | 68   | 8    | 12  | 13   | 0  |
| CONTIG-018877 | 167  | 15   | 13  | 26   | 13 |
| CONTIG-018878 | 84   | 13   | 5   | 18   | 0  |
| CONTIG-018879 | 550  | 24   | 38  | 259  | 2  |
| CONTIG-018880 | 1346 | 21   | 31  | 1069 | 18 |
| CONTIG-018881 | 78   | 6    | 10  | 10   | 0  |
| CONTIG-018882 | 132  | 12   | 15  | 36   | 0  |
| CONTIG-018883 | 431  | 5    | 15  | 0    | 0  |
| CONTIG-018884 | 175  | 13   | 28  | 9    | 2  |
| CONTIG-018885 | 685  | 34   | 206 | 788  | 6  |
| CONTIG-018886 | 183  | 10   | 8   | 74   | 0  |
| CONTIG-018887 | 304  | 20   | 74  | 149  | 0  |
| CONTIG-018889 | 127  | 8    | 21  | 17   | 0  |
| CONTIG-018890 | 59   | 3    | 4   | 2    | 0  |
| CONTIG-018891 | 424  | 16   | 243 | 181  | 0  |

|               |      |      |     |      |    |
|---------------|------|------|-----|------|----|
| CONTIG-018892 | 538  | 14   | 30  | 383  | 0  |
| CONTIG-018893 | 272  | 17   | 43  | 42   | 2  |
| CONTIG-018894 | 337  | 7    | 13  | 43   | 0  |
| CONTIG-018895 | 377  | 28   | 48  | 345  | 0  |
| CONTIG-018896 | 76   | 10   | 0   | 17   | 2  |
| CONTIG-018897 | 394  | 61   | 43  | 740  | 76 |
| CONTIG-018898 | 36   | 65   | 103 | 0    | 0  |
| CONTIG-018899 | 150  | 4    | 6   | 15   | 2  |
| CONTIG-018900 | 39   | 1063 | 29  | 1361 | 0  |
| CONTIG-018902 | 63   | 6    | 8   | 4    | 0  |
| CONTIG-018903 | 239  | 18   | 181 | 76   | 0  |
| CONTIG-018904 | 68   | 22   | 44  | 48   | 0  |
| CONTIG-018905 | 1298 | 27   | 102 | 483  | 4  |
| CONTIG-018906 | 100  | 19   | 11  | 39   | 0  |
| CONTIG-018907 | 167  | 5    | 2   | 16   | 0  |
| CONTIG-018908 | 81   | 5    | 9   | 2    | 0  |
| CONTIG-018909 | 612  | 32   | 130 | 492  | 0  |
| CONTIG-018910 | 94   | 26   | 8   | 43   | 0  |
| CONTIG-018911 | 169  | 13   | 49  | 61   | 0  |
| CONTIG-018912 | 204  | 11   | 14  | 65   | 0  |
| CONTIG-018914 | 67   | 10   | 4   | 28   | 0  |
| CONTIG-018917 | 61   | 7    | 5   | 8    | 0  |
| CONTIG-018918 | 635  | 34   | 96  | 782  | 0  |
| CONTIG-018919 | 67   | 3    | 0   | 2    | 0  |
| CONTIG-018920 | 111  | 85   | 53  | 236  | 14 |
| CONTIG-018921 | 238  | 12   | 8   | 24   | 0  |
| CONTIG-018923 | 160  | 9    | 7   | 35   | 0  |
| CONTIG-018924 | 188  | 13   | 55  | 68   | 0  |
| CONTIG-018925 | 202  | 16   | 26  | 132  | 0  |
| CONTIG-018926 | 104  | 34   | 15  | 174  | 2  |
| CONTIG-018927 | 267  | 7    | 16  | 43   | 0  |
| CONTIG-018928 | 250  | 7    | 18  | 34   | 0  |
| CONTIG-018929 | 136  | 8    | 15  | 28   | 0  |
| CONTIG-018930 | 902  | 13   | 166 | 374  | 0  |
| CONTIG-018931 | 134  | 7    | 6   | 16   | 0  |
| CONTIG-018932 | 329  | 13   | 32  | 93   | 2  |
| CONTIG-018934 | 88   | 11   | 12  | 2    | 0  |
| CONTIG-018935 | 63   | 285  | 155 | 318  | 57 |
| CONTIG-018936 | 155  | 3    | 5   | 23   | 0  |
| CONTIG-018938 | 593  | 141  | 22  | 56   | 0  |
| CONTIG-018939 | 420  | 63   | 64  | 1252 | 0  |
| CONTIG-018940 | 101  | 81   | 35  | 238  | 15 |
| CONTIG-018941 | 203  | 27   | 23  | 151  | 2  |
| CONTIG-018943 | 140  | 6    | 0   | 0    | 0  |
| CONTIG-018944 | 85   | 6    | 4   | 15   | 0  |
| CONTIG-018945 | 444  | 13   | 32  | 216  | 0  |
| CONTIG-018946 | 849  | 38   | 128 | 1912 | 2  |

|               |     |     |     |     |     |
|---------------|-----|-----|-----|-----|-----|
| CONTIG-018947 | 114 | 15  | 15  | 40  | 0   |
| CONTIG-018948 | 78  | 4   | 6   | 8   | 0   |
| CONTIG-018949 | 452 | 17  | 138 | 234 | 0   |
| CONTIG-018950 | 747 | 14  | 86  | 254 | 0   |
| CONTIG-018951 | 257 | 13  | 16  | 72  | 2   |
| CONTIG-018952 | 319 | 8   | 11  | 56  | 4   |
| CONTIG-018953 | 428 | 19  | 170 | 269 | 4   |
| CONTIG-018954 | 210 | 28  | 70  | 154 | 0   |
| CONTIG-018956 | 36  | 284 | 158 | 223 | 21  |
| CONTIG-018957 | 164 | 7   | 45  | 24  | 0   |
| CONTIG-018958 | 75  | 5   | 0   | 8   | 0   |
| CONTIG-018959 | 642 | 33  | 84  | 822 | 20  |
| CONTIG-018960 | 72  | 5   | 9   | 0   | 0   |
| CONTIG-018961 | 131 | 38  | 8   | 196 | 0   |
| CONTIG-018962 | 73  | 20  | 3   | 52  | 0   |
| CONTIG-018963 | 350 | 10  | 37  | 11  | 0   |
| CONTIG-018964 | 228 | 21  | 42  | 67  | 0   |
| CONTIG-018965 | 169 | 7   | 7   | 30  | 0   |
| CONTIG-018966 | 291 | 29  | 94  | 367 | 0   |
| CONTIG-018968 | 123 | 54  | 36  | 328 | 0   |
| CONTIG-018969 | 85  | 205 | 155 | 740 | 5   |
| CONTIG-018972 | 161 | 11  | 33  | 46  | 0   |
| CONTIG-018973 | 365 | 11  | 40  | 83  | 2   |
| CONTIG-018974 | 555 | 23  | 40  | 536 | 2   |
| CONTIG-018975 | 59  | 21  | 31  | 30  | 0   |
| CONTIG-018976 | 87  | 22  | 25  | 18  | 0   |
| CONTIG-018977 | 758 | 25  | 94  | 729 | 2   |
| CONTIG-018978 | 66  | 6   | 4   | 12  | 0   |
| CONTIG-018979 | 140 | 15  | 0   | 83  | 16  |
| CONTIG-018980 | 61  | 3   | 0   | 2   | 0   |
| CONTIG-018982 | 799 | 75  | 16  | 2   | 958 |
| CONTIG-018983 | 148 | 10  | 19  | 30  | 0   |
| CONTIG-018984 | 105 | 10  | 36  | 29  | 0   |
| CONTIG-018985 | 82  | 8   | 3   | 20  | 0   |
| CONTIG-018986 | 105 | 60  | 39  | 332 | 2   |
| CONTIG-018987 | 176 | 16  | 59  | 109 | 0   |
| CONTIG-018988 | 488 | 15  | 46  | 193 | 2   |
| CONTIG-018989 | 109 | 16  | 6   | 47  | 2   |
| CONTIG-018990 | 75  | 7   | 6   | 15  | 0   |
| CONTIG-018991 | 475 | 16  | 79  | 199 | 3   |
| CONTIG-018992 | 225 | 11  | 9   | 94  | 0   |
| CONTIG-018994 | 82  | 56  | 12  | 223 | 0   |
| CONTIG-018995 | 116 | 6   | 9   | 22  | 0   |
| CONTIG-018996 | 132 | 18  | 73  | 82  | 0   |
| CONTIG-018997 | 166 | 8   | 28  | 28  | 0   |
| CONTIG-019000 | 158 | 8   | 19  | 34  | 0   |
| CONTIG-019001 | 98  | 5   | 15  | 9   | 0   |

|               |      |     |     |      |     |
|---------------|------|-----|-----|------|-----|
| CONTIG-019002 | 149  | 79  | 84  | 327  | 0   |
| CONTIG-019003 | 85   | 4   | 4   | 2    | 0   |
| CONTIG-019004 | 164  | 10  | 16  | 43   | 0   |
| CONTIG-019005 | 733  | 28  | 286 | 613  | 7   |
| CONTIG-019006 | 248  | 15  | 86  | 142  | 2   |
| CONTIG-019009 | 96   | 468 | 0   | 0    | 391 |
| CONTIG-019011 | 210  | 16  | 48  | 145  | 0   |
| CONTIG-019012 | 483  | 17  | 0   | 13   | 0   |
| CONTIG-019013 | 106  | 8   | 4   | 8    | 0   |
| CONTIG-019014 | 60   | 6   | 25  | 2    | 0   |
| CONTIG-019015 | 97   | 12  | 34  | 7    | 0   |
| CONTIG-019016 | 63   | 11  | 42  | 0    | 0   |
| CONTIG-019017 | 432  | 163 | 126 | 3111 | 335 |
| CONTIG-019019 | 201  | 9   | 0   | 84   | 0   |
| CONTIG-019022 | 61   | 4   | 2   | 6    | 0   |
| CONTIG-019025 | 181  | 6   | 69  | 8    | 0   |
| CONTIG-019026 | 443  | 115 | 194 | 2280 | 18  |
| CONTIG-019028 | 195  | 31  | 116 | 278  | 0   |
| CONTIG-019029 | 483  | 16  | 32  | 237  | 0   |
| CONTIG-019030 | 83   | 13  | 39  | 4    | 0   |
| CONTIG-019031 | 465  | 25  | 148 | 390  | 5   |
| CONTIG-019032 | 1156 | 21  | 116 | 741  | 6   |
| CONTIG-019033 | 112  | 5   | 0   | 11   | 0   |
| CONTIG-019034 | 112  | 6   | 9   | 9    | 0   |
| CONTIG-019038 | 269  | 10  | 26  | 50   | 0   |
| CONTIG-019039 | 523  | 35  | 131 | 475  | 22  |
| CONTIG-019040 | 58   | 16  | 13  | 8    | 0   |
| CONTIG-019041 | 317  | 45  | 44  | 208  | 0   |
| CONTIG-019042 | 574  | 16  | 245 | 271  | 8   |
| CONTIG-019043 | 173  | 70  | 75  | 449  | 7   |
| CONTIG-019044 | 292  | 18  | 10  | 159  | 8   |
| CONTIG-019045 | 219  | 7   | 24  | 29   | 0   |
| CONTIG-019046 | 629  | 46  | 76  | 1266 | 0   |
| CONTIG-019047 | 65   | 11  | 28  | 0    | 0   |
| CONTIG-019048 | 109  | 24  | 41  | 49   | 0   |
| CONTIG-019049 | 506  | 20  | 174 | 243  | 0   |
| CONTIG-019050 | 87   | 427 | 23  | 2359 | 0   |
| CONTIG-019051 | 587  | 10  | 18  | 125  | 4   |
| CONTIG-019052 | 259  | 8   | 15  | 84   | 0   |
| CONTIG-019053 | 90   | 12  | 43  | 28   | 2   |
| CONTIG-019054 | 208  | 7   | 14  | 31   | 0   |
| CONTIG-019055 | 159  | 35  | 12  | 150  | 0   |
| CONTIG-019056 | 57   | 10  | 15  | 4    | 0   |
| CONTIG-019057 | 435  | 39  | 182 | 676  | 8   |
| CONTIG-019058 | 303  | 17  | 202 | 125  | 0   |
| CONTIG-019059 | 85   | 424 | 592 | 578  | 64  |
| CONTIG-019060 | 547  | 71  | 515 | 953  | 0   |

|               |      |     |     |      |     |
|---------------|------|-----|-----|------|-----|
| CONTIG-019067 | 68   | 6   | 13  | 5    | 0   |
| CONTIG-019068 | 61   | 6   | 28  | 0    | 0   |
| CONTIG-019069 | 391  | 35  | 8   | 0    | 56  |
| CONTIG-019070 | 422  | 15  | 72  | 169  | 2   |
| CONTIG-019071 | 106  | 6   | 7   | 14   | 0   |
| CONTIG-019072 | 152  | 25  | 40  | 114  | 0   |
| CONTIG-019073 | 85   | 20  | 74  | 16   | 0   |
| CONTIG-019074 | 134  | 9   | 51  | 30   | 0   |
| CONTIG-019075 | 1035 | 50  | 94  | 7    | 319 |
| CONTIG-019076 | 440  | 14  | 110 | 242  | 0   |
| CONTIG-019077 | 69   | 5   | 0   | 7    | 0   |
| CONTIG-019078 | 688  | 14  | 22  | 320  | 0   |
| CONTIG-019079 | 417  | 17  | 143 | 147  | 0   |
| CONTIG-019080 | 40   | 556 | 161 | 415  | 22  |
| CONTIG-019082 | 77   | 2   | 7   | 2    | 0   |
| CONTIG-019083 | 785  | 17  | 226 | 605  | 0   |
| CONTIG-019084 | 281  | 135 | 256 | 1316 | 165 |
| CONTIG-019085 | 129  | 9   | 12  | 36   | 0   |
| CONTIG-019086 | 109  | 13  | 8   | 45   | 0   |
| CONTIG-019087 | 238  | 22  | 192 | 49   | 0   |
| CONTIG-019088 | 659  | 23  | 126 | 639  | 15  |
| CONTIG-019091 | 1940 | 37  | 207 | 1674 | 53  |
| CONTIG-019093 | 268  | 17  | 179 | 85   | 0   |
| CONTIG-019094 | 65   | 7   | 13  | 10   | 0   |
| CONTIG-019096 | 110  | 15  | 14  | 91   | 0   |
| CONTIG-019097 | 86   | 26  | 20  | 67   | 0   |
| CONTIG-019098 | 53   | 4   | 4   | 0    | 0   |
| CONTIG-019099 | 174  | 8   | 5   | 44   | 0   |
| CONTIG-019100 | 433  | 28  | 303 | 314  | 2   |
| CONTIG-019101 | 111  | 13  | 35  | 46   | 0   |
| CONTIG-019102 | 213  | 15  | 83  | 109  | 0   |
| CONTIG-019103 | 156  | 24  | 26  | 120  | 0   |
| CONTIG-019104 | 128  | 19  | 28  | 77   | 2   |
| CONTIG-019105 | 277  | 14  | 124 | 120  | 2   |
| CONTIG-019106 | 63   | 9   | 19  | 9    | 0   |
| CONTIG-019107 | 65   | 39  | 21  | 78   | 2   |
| CONTIG-019108 | 81   | 4   | 0   | 15   | 0   |
| CONTIG-019109 | 507  | 16  | 112 | 156  | 6   |
| CONTIG-019110 | 1854 | 25  | 205 | 2417 | 6   |
| CONTIG-019111 | 113  | 9   | 48  | 14   | 0   |
| CONTIG-019112 | 61   | 4   | 4   | 5    | 0   |
| CONTIG-019113 | 265  | 8   | 21  | 47   | 0   |
| CONTIG-019114 | 156  | 7   | 8   | 8    | 0   |
| CONTIG-019115 | 71   | 89  | 119 | 79   | 7   |
| CONTIG-019116 | 129  | 7   | 2   | 11   | 2   |
| CONTIG-019117 | 126  | 11  | 125 | 0    | 2   |
| CONTIG-019118 | 78   | 8   | 9   | 9    | 0   |

|               |      |     |      |      |    |
|---------------|------|-----|------|------|----|
| CONTIG-019119 | 234  | 11  | 24   | 25   | 0  |
| CONTIG-019120 | 70   | 8   | 37   | 0    | 0  |
| CONTIG-019122 | 187  | 16  | 76   | 54   | 0  |
| CONTIG-019123 | 63   | 10  | 24   | 7    | 0  |
| CONTIG-019125 | 308  | 12  | 99   | 73   | 0  |
| CONTIG-019126 | 98   | 4   | 6    | 9    | 0  |
| CONTIG-019127 | 161  | 15  | 186  | 33   | 0  |
| CONTIG-019128 | 199  | 11  | 17   | 17   | 0  |
| CONTIG-019130 | 2128 | 16  | 260  | 1346 | 2  |
| CONTIG-019131 | 563  | 8   | 15   | 149  | 0  |
| CONTIG-019134 | 86   | 14  | 4    | 49   | 0  |
| CONTIG-019135 | 277  | 220 | 1155 | 2072 | 4  |
| CONTIG-019136 | 153  | 84  | 44   | 544  | 8  |
| CONTIG-019137 | 66   | 6   | 7    | 8    | 0  |
| CONTIG-019138 | 310  | 9   | 20   | 69   | 0  |
| CONTIG-019139 | 706  | 19  | 80   | 420  | 0  |
| CONTIG-019140 | 419  | 16  | 75   | 290  | 0  |
| CONTIG-019141 | 121  | 53  | 27   | 50   | 0  |
| CONTIG-019142 | 71   | 3   | 4    | 0    | 0  |
| CONTIG-019143 | 92   | 528 | 25   | 0    | 0  |
| CONTIG-019144 | 299  | 10  | 24   | 81   | 2  |
| CONTIG-019145 | 84   | 5   | 12   | 9    | 0  |
| CONTIG-019147 | 505  | 17  | 119  | 201  | 2  |
| CONTIG-019148 | 242  | 108 | 160  | 1241 | 8  |
| CONTIG-019152 | 109  | 17  | 73   | 21   | 0  |
| CONTIG-019153 | 1038 | 43  | 135  | 2565 | 12 |
| CONTIG-019154 | 218  | 8   | 51   | 50   | 0  |
| CONTIG-019155 | 555  | 16  | 59   | 305  | 0  |
| CONTIG-019156 | 425  | 76  | 267  | 1698 | 2  |
| CONTIG-019157 | 340  | 12  | 28   | 138  | 0  |
| CONTIG-019158 | 218  | 13  | 94   | 59   | 0  |
| CONTIG-019159 | 315  | 8   | 5    | 82   | 2  |
| CONTIG-019160 | 79   | 3   | 0    | 4    | 0  |
| CONTIG-019161 | 208  | 12  | 28   | 66   | 2  |
| CONTIG-019162 | 185  | 14  | 78   | 67   | 0  |
| CONTIG-019163 | 160  | 18  | 148  | 26   | 4  |
| CONTIG-019164 | 193  | 10  | 16   | 45   | 0  |
| CONTIG-019165 | 200  | 10  | 19   | 59   | 0  |
| CONTIG-019166 | 376  | 42  | 272  | 657  | 2  |
| CONTIG-019167 | 400  | 30  | 161  | 452  | 0  |
| CONTIG-019168 | 543  | 10  | 24   | 136  | 0  |
| CONTIG-019169 | 95   | 13  | 3    | 4    | 0  |
| CONTIG-019170 | 391  | 11  | 69   | 109  | 0  |
| CONTIG-019171 | 261  | 10  | 82   | 67   | 0  |
| CONTIG-019176 | 735  | 25  | 509  | 604  | 0  |
| CONTIG-019177 | 603  | 30  | 32   | 707  | 6  |
| CONTIG-019178 | 106  | 7   | 28   | 25   | 0  |

|               |      |     |     |      |     |
|---------------|------|-----|-----|------|-----|
| CONTIG-019179 | 448  | 32  | 42  | 25   | 0   |
| CONTIG-019181 | 151  | 137 | 49  | 704  | 6   |
| CONTIG-019182 | 101  | 6   | 6   | 10   | 0   |
| CONTIG-019183 | 94   | 4   | 12  | 0    | 0   |
| CONTIG-019184 | 178  | 57  | 2   | 563  | 0   |
| CONTIG-019185 | 533  | 17  | 65  | 155  | 2   |
| CONTIG-019186 | 132  | 5   | 5   | 9    | 0   |
| CONTIG-019187 | 99   | 6   | 0   | 10   | 2   |
| CONTIG-019188 | 83   | 231 | 12  | 709  | 89  |
| CONTIG-019189 | 2153 | 53  | 330 | 5287 | 184 |
| CONTIG-019190 | 278  | 29  | 73  | 184  | 2   |
| CONTIG-019191 | 63   | 3   | 2   | 5    | 0   |
| CONTIG-019192 | 492  | 68  | 132 | 1389 | 46  |
| CONTIG-019196 | 70   | 14  | 13  | 19   | 0   |
| CONTIG-019197 | 203  | 11  | 6   | 93   | 0   |
| CONTIG-019198 | 82   | 35  | 10  | 49   | 2   |
| CONTIG-019200 | 210  | 5   | 3   | 21   | 0   |
| CONTIG-019201 | 146  | 17  | 2   | 94   | 0   |
| CONTIG-019202 | 217  | 14  | 31  | 84   | 9   |
| CONTIG-019203 | 431  | 21  | 40  | 369  | 2   |
| CONTIG-019204 | 599  | 10  | 59  | 261  | 0   |
| CONTIG-019205 | 61   | 8   | 15  | 6    | 0   |
| CONTIG-019206 | 147  | 9   | 6   | 48   | 0   |
| CONTIG-019207 | 86   | 4   | 2   | 4    | 0   |
| CONTIG-019209 | 99   | 6   | 12  | 9    | 0   |
| CONTIG-019210 | 128  | 6   | 16  | 18   | 0   |
| CONTIG-019211 | 105  | 78  | 181 | 120  | 2   |
| CONTIG-019212 | 136  | 14  | 83  | 34   | 0   |
| CONTIG-019213 | 138  | 14  | 16  | 34   | 0   |
| CONTIG-019215 | 87   | 21  | 91  | 15   | 0   |
| CONTIG-019216 | 84   | 11  | 7   | 50   | 0   |
| CONTIG-019217 | 926  | 25  | 55  | 303  | 81  |
| CONTIG-019218 | 65   | 7   | 17  | 0    | 0   |
| CONTIG-019219 | 66   | 13  | 24  | 13   | 0   |
| CONTIG-019220 | 81   | 3   | 8   | 2    | 0   |
| CONTIG-019221 | 311  | 40  | 230 | 269  | 2   |
| CONTIG-019222 | 170  | 6   | 31  | 11   | 0   |
| CONTIG-019223 | 866  | 34  | 187 | 975  | 58  |
| CONTIG-019224 | 487  | 12  | 24  | 71   | 4   |
| CONTIG-019225 | 694  | 16  | 54  | 549  | 0   |
| CONTIG-019226 | 154  | 7   | 4   | 31   | 0   |
| CONTIG-019227 | 248  | 19  | 197 | 124  | 0   |
| CONTIG-019228 | 104  | 6   | 16  | 10   | 0   |
| CONTIG-019229 | 89   | 14  | 24  | 2    | 9   |
| CONTIG-019230 | 122  | 9   | 6   | 38   | 0   |
| CONTIG-019231 | 341  | 12  | 60  | 102  | 0   |
| CONTIG-019232 | 327  | 7   | 59  | 42   | 0   |

|               |     |     |     |      |    |
|---------------|-----|-----|-----|------|----|
| CONTIG-019233 | 301 | 21  | 21  | 253  | 2  |
| CONTIG-019234 | 106 | 6   | 9   | 28   | 0  |
| CONTIG-019236 | 66  | 5   | 0   | 7    | 0  |
| CONTIG-019237 | 92  | 19  | 36  | 24   | 0  |
| CONTIG-019238 | 480 | 11  | 2   | 173  | 10 |
| CONTIG-019239 | 76  | 16  | 5   | 71   | 0  |
| CONTIG-019242 | 263 | 9   | 7   | 66   | 0  |
| CONTIG-019243 | 78  | 12  | 45  | 0    | 0  |
| CONTIG-019244 | 683 | 33  | 143 | 818  | 12 |
| CONTIG-019246 | 81  | 5   | 0   | 13   | 0  |
| CONTIG-019247 | 122 | 8   | 4   | 23   | 0  |
| CONTIG-019250 | 70  | 8   | 48  | 0    | 0  |
| CONTIG-019251 | 332 | 94  | 152 | 1811 | 2  |
| CONTIG-019252 | 82  | 6   | 9   | 14   | 0  |
| CONTIG-019253 | 438 | 14  | 62  | 284  | 0  |
| CONTIG-019254 | 60  | 29  | 15  | 17   | 2  |
| CONTIG-019255 | 165 | 368 | 149 | 2522 | 35 |
| CONTIG-019256 | 158 | 51  | 3   | 278  | 12 |
| CONTIG-019257 | 79  | 24  | 28  | 59   | 0  |
| CONTIG-019258 | 211 | 8   | 6   | 76   | 0  |
| CONTIG-019259 | 330 | 12  | 24  | 109  | 0  |
| CONTIG-019261 | 402 | 37  | 207 | 357  | 10 |
| CONTIG-019262 | 126 | 3   | 2   | 0    | 0  |
| CONTIG-019263 | 185 | 6   | 20  | 17   | 0  |
| CONTIG-019264 | 364 | 41  | 299 | 452  | 4  |
| CONTIG-019265 | 321 | 14  | 104 | 77   | 0  |
| CONTIG-019266 | 249 | 9   | 10  | 76   | 0  |
| CONTIG-019267 | 106 | 20  | 128 | 29   | 0  |
| CONTIG-019271 | 116 | 11  | 8   | 47   | 2  |
| CONTIG-019272 | 220 | 81  | 86  | 1059 | 0  |
| CONTIG-019273 | 123 | 14  | 20  | 34   | 0  |
| CONTIG-019274 | 584 | 17  | 31  | 346  | 0  |
| CONTIG-019275 | 427 | 22  | 27  | 504  | 0  |
| CONTIG-019276 | 78  | 16  | 4   | 13   | 0  |
| CONTIG-019277 | 87  | 17  | 0   | 30   | 0  |
| CONTIG-019278 | 170 | 198 | 294 | 866  | 86 |
| CONTIG-019279 | 488 | 20  | 82  | 250  | 0  |
| CONTIG-019280 | 210 | 221 | 753 | 2121 | 24 |
| CONTIG-019281 | 298 | 37  | 368 | 79   | 0  |
| CONTIG-019282 | 175 | 31  | 73  | 282  | 0  |
| CONTIG-019283 | 148 | 5   | 10  | 18   | 0  |
| CONTIG-019284 | 97  | 486 | 388 | 1487 | 35 |
| CONTIG-019285 | 240 | 19  | 156 | 84   | 5  |
| CONTIG-019286 | 92  | 28  | 70  | 49   | 0  |
| CONTIG-019287 | 65  | 5   | 3   | 9    | 0  |
| CONTIG-019288 | 79  | 11  | 7   | 12   | 0  |
| CONTIG-019290 | 358 | 20  | 92  | 183  | 6  |



|               |      |     |     |      |    |
|---------------|------|-----|-----|------|----|
| CONTIG-019291 | 137  | 4   | 7   | 22   | 0  |
| CONTIG-019292 | 263  | 8   | 18  | 44   | 0  |
| CONTIG-019293 | 573  | 14  | 12  | 246  | 16 |
| CONTIG-019294 | 242  | 29  | 52  | 260  | 0  |
| CONTIG-019295 | 202  | 11  | 13  | 26   | 0  |
| CONTIG-019296 | 377  | 76  | 112 | 936  | 38 |
| CONTIG-019297 | 559  | 11  | 40  | 172  | 2  |
| CONTIG-019299 | 128  | 6   | 2   | 20   | 0  |
| CONTIG-019300 | 99   | 7   | 14  | 21   | 0  |
| CONTIG-019301 | 92   | 7   | 18  | 2    | 0  |
| CONTIG-019302 | 621  | 20  | 210 | 346  | 2  |
| CONTIG-019304 | 1008 | 14  | 109 | 532  | 0  |
| CONTIG-019305 | 38   | 593 | 105 | 678  | 12 |
| CONTIG-019306 | 73   | 5   | 10  | 6    | 0  |
| CONTIG-019307 | 326  | 17  | 73  | 130  | 2  |
| CONTIG-019311 | 443  | 27  | 9   | 728  | 0  |
| CONTIG-019312 | 147  | 37  | 81  | 132  | 2  |
| CONTIG-019313 | 392  | 27  | 54  | 286  | 0  |
| CONTIG-019314 | 79   | 36  | 29  | 47   | 0  |
| CONTIG-019315 | 60   | 19  | 23  | 28   | 2  |
| CONTIG-019316 | 74   | 8   | 10  | 21   | 0  |
| CONTIG-019317 | 455  | 43  | 163 | 1058 | 0  |
| CONTIG-019318 | 101  | 5   | 8   | 14   | 0  |
| CONTIG-019319 | 156  | 11  | 41  | 31   | 2  |
| CONTIG-019320 | 38   | 69  | 31  | 50   | 13 |
| CONTIG-019321 | 959  | 20  | 203 | 516  | 6  |
| CONTIG-019322 | 105  | 6   | 7   | 15   | 0  |
| CONTIG-019323 | 366  | 11  | 39  | 52   | 0  |
| CONTIG-019324 | 142  | 9   | 14  | 46   | 0  |
| CONTIG-019325 | 86   | 99  | 53  | 220  | 0  |
| CONTIG-019326 | 209  | 11  | 11  | 110  | 2  |
| CONTIG-019327 | 327  | 35  | 208 | 301  | 7  |
| CONTIG-019328 | 83   | 92  | 46  | 290  | 0  |
| CONTIG-019329 | 238  | 20  | 61  | 181  | 2  |
| CONTIG-019332 | 77   | 6   | 29  | 2    | 0  |
| CONTIG-019333 | 189  | 6   | 11  | 19   | 0  |
| CONTIG-019335 | 172  | 7   | 20  | 31   | 0  |
| CONTIG-019336 | 206  | 8   | 15  | 33   | 0  |
| CONTIG-019337 | 131  | 8   | 11  | 35   | 0  |
| CONTIG-019338 | 369  | 11  | 73  | 137  | 0  |
| CONTIG-019339 | 395  | 16  | 106 | 168  | 16 |
| CONTIG-019340 | 1276 | 33  | 191 | 1200 | 44 |
| CONTIG-019341 | 550  | 16  | 13  | 469  | 0  |
| CONTIG-019342 | 142  | 16  | 26  | 31   | 0  |
| CONTIG-019343 | 580  | 63  | 361 | 877  | 4  |
| CONTIG-019344 | 159  | 8   | 16  | 25   | 0  |
| CONTIG-019345 | 303  | 11  | 32  | 41   | 0  |

|               |      |     |     |      |     |
|---------------|------|-----|-----|------|-----|
| CONTIG-019346 | 184  | 45  | 301 | 103  | 0   |
| CONTIG-019347 | 1544 | 23  | 154 | 1383 | 15  |
| CONTIG-019348 | 423  | 27  | 123 | 416  | 2   |
| CONTIG-019349 | 86   | 620 | 313 | 1445 | 124 |
| CONTIG-019350 | 914  | 28  | 84  | 596  | 20  |
| CONTIG-019352 | 195  | 6   | 9   | 24   | 0   |
| CONTIG-019353 | 696  | 29  | 69  | 842  | 25  |
| CONTIG-019355 | 248  | 27  | 17  | 302  | 0   |
| CONTIG-019356 | 209  | 9   | 25  | 37   | 0   |
| CONTIG-019357 | 178  | 10  | 47  | 58   | 0   |
| CONTIG-019359 | 139  | 9   | 5   | 59   | 0   |
| CONTIG-019360 | 248  | 9   | 11  | 82   | 0   |
| CONTIG-019361 | 307  | 15  | 115 | 142  | 0   |
| CONTIG-019362 | 257  | 60  | 86  | 399  | 18  |
| CONTIG-019363 | 293  | 33  | 40  | 361  | 0   |
| CONTIG-019365 | 336  | 15  | 54  | 126  | 2   |
| CONTIG-019366 | 84   | 34  | 324 | 0    | 2   |
| CONTIG-019367 | 60   | 15  | 19  | 20   | 2   |
| CONTIG-019368 | 68   | 542 | 86  | 1081 | 119 |
| CONTIG-019369 | 216  | 8   | 24  | 45   | 0   |
| CONTIG-019370 | 163  | 11  | 93  | 10   | 0   |
| CONTIG-019371 | 71   | 7   | 2   | 17   | 0   |
| CONTIG-019372 | 98   | 59  | 106 | 176  | 10  |
| CONTIG-019373 | 81   | 3   | 3   | 5    | 0   |
| CONTIG-019376 | 141  | 8   | 24  | 48   | 0   |
| CONTIG-019377 | 168  | 15  | 76  | 57   | 0   |
| CONTIG-019378 | 75   | 9   | 13  | 12   | 0   |
| CONTIG-019379 | 90   | 6   | 21  | 17   | 0   |
| CONTIG-019382 | 140  | 23  | 93  | 2    | 0   |
| CONTIG-019383 | 889  | 26  | 136 | 530  | 3   |
| CONTIG-019384 | 601  | 26  | 125 | 399  | 21  |
| CONTIG-019385 | 58   | 6   | 6   | 10   | 0   |
| CONTIG-019386 | 85   | 3   | 0   | 4    | 0   |
| CONTIG-019387 | 99   | 10  | 23  | 7    | 0   |
| CONTIG-019388 | 329  | 10  | 93  | 57   | 0   |
| CONTIG-019389 | 223  | 10  | 37  | 66   | 0   |
| CONTIG-019390 | 793  | 19  | 163 | 600  | 4   |
| CONTIG-019391 | 104  | 4   | 2   | 13   | 0   |
| CONTIG-019392 | 145  | 12  | 38  | 29   | 0   |
| CONTIG-019393 | 502  | 14  | 26  | 218  | 2   |
| CONTIG-019394 | 169  | 10  | 26  | 26   | 0   |
| CONTIG-019395 | 201  | 8   | 59  | 33   | 0   |
| CONTIG-019403 | 254  | 27  | 138 | 206  | 0   |
| CONTIG-019404 | 123  | 6   | 30  | 14   | 0   |
| CONTIG-019408 | 67   | 9   | 25  | 6    | 0   |
| CONTIG-019409 | 351  | 14  | 250 | 103  | 0   |
| CONTIG-019410 | 66   | 5   | 4   | 8    | 0   |

|               |      |     |     |      |    |
|---------------|------|-----|-----|------|----|
| CONTIG-019411 | 150  | 7   | 20  | 18   | 0  |
| CONTIG-019412 | 110  | 16  | 2   | 31   | 0  |
| CONTIG-019413 | 58   | 16  | 9   | 11   | 2  |
| CONTIG-019414 | 109  | 14  | 75  | 27   | 0  |
| CONTIG-019415 | 442  | 32  | 48  | 508  | 8  |
| CONTIG-019416 | 418  | 23  | 40  | 318  | 10 |
| CONTIG-019421 | 36   | 279 | 105 | 181  | 11 |
| CONTIG-019422 | 187  | 11  | 24  | 63   | 0  |
| CONTIG-019423 | 98   | 4   | 2   | 8    | 0  |
| CONTIG-019424 | 106  | 5   | 6   | 11   | 0  |
| CONTIG-019425 | 524  | 14  | 189 | 224  | 2  |
| CONTIG-019426 | 99   | 5   | 0   | 14   | 0  |
| CONTIG-019427 | 116  | 8   | 7   | 8    | 0  |
| CONTIG-019428 | 92   | 21  | 96  | 2    | 0  |
| CONTIG-019429 | 166  | 11  | 14  | 39   | 0  |
| CONTIG-019430 | 416  | 27  | 55  | 180  | 23 |
| CONTIG-019431 | 111  | 10  | 30  | 31   | 0  |
| CONTIG-019432 | 194  | 8   | 32  | 37   | 0  |
| CONTIG-019434 | 429  | 12  | 20  | 181  | 0  |
| CONTIG-019435 | 44   | 78  | 0   | 155  | 0  |
| CONTIG-019436 | 70   | 25  | 8   | 53   | 0  |
| CONTIG-019437 | 318  | 11  | 16  | 63   | 2  |
| CONTIG-019438 | 557  | 27  | 126 | 810  | 0  |
| CONTIG-019439 | 429  | 17  | 266 | 124  | 0  |
| CONTIG-019440 | 104  | 13  | 62  | 0    | 0  |
| CONTIG-019441 | 224  | 12  | 44  | 92   | 0  |
| CONTIG-019442 | 297  | 23  | 245 | 173  | 0  |
| CONTIG-019444 | 247  | 10  | 36  | 60   | 8  |
| CONTIG-019445 | 623  | 16  | 35  | 451  | 0  |
| CONTIG-019446 | 190  | 10  | 29  | 80   | 0  |
| CONTIG-019447 | 1227 | 15  | 79  | 327  | 46 |
| CONTIG-019450 | 1662 | 86  | 544 | 7019 | 2  |
| CONTIG-019451 | 159  | 9   | 13  | 22   | 0  |
| CONTIG-019452 | 304  | 44  | 95  | 486  | 9  |
| CONTIG-019453 | 242  | 15  | 40  | 125  | 0  |
| CONTIG-019454 | 385  | 9   | 6   | 100  | 2  |
| CONTIG-019455 | 406  | 12  | 71  | 78   | 4  |
| CONTIG-019456 | 282  | 10  | 2   | 4    | 0  |
| CONTIG-019457 | 287  | 42  | 232 | 371  | 0  |
| CONTIG-019458 | 72   | 10  | 33  | 0    | 0  |
| CONTIG-019460 | 108  | 7   | 9   | 20   | 0  |
| CONTIG-019461 | 60   | 63  | 9   | 112  | 0  |
| CONTIG-019462 | 39   | 79  | 36  | 73   | 0  |
| CONTIG-019463 | 896  | 21  | 190 | 367  | 2  |
| CONTIG-019464 | 149  | 8   | 14  | 63   | 0  |
| CONTIG-019467 | 99   | 11  | 31  | 2    | 0  |
| CONTIG-019468 | 78   | 12  | 12  | 14   | 0  |

|               |      |      |     |      |     |
|---------------|------|------|-----|------|-----|
| CONTIG-019469 | 82   | 67   | 60  | 178  | 5   |
| CONTIG-019470 | 227  | 13   | 55  | 100  | 0   |
| CONTIG-019473 | 212  | 7    | 2   | 32   | 0   |
| CONTIG-019474 | 365  | 15   | 60  | 168  | 0   |
| CONTIG-019476 | 208  | 18   | 38  | 182  | 0   |
| CONTIG-019477 | 172  | 23   | 21  | 204  | 2   |
| CONTIG-019478 | 326  | 11   | 50  | 151  | 0   |
| CONTIG-019479 | 86   | 14   | 15  | 6    | 0   |
| CONTIG-019480 | 226  | 7    | 16  | 55   | 0   |
| CONTIG-019481 | 52   | 56   | 25  | 30   | 0   |
| CONTIG-019486 | 121  | 6    | 11  | 9    | 0   |
| CONTIG-019487 | 204  | 4    | 11  | 26   | 0   |
| CONTIG-019489 | 69   | 9    | 0   | 31   | 0   |
| CONTIG-019490 | 655  | 28   | 72  | 651  | 13  |
| CONTIG-019492 | 260  | 62   | 129 | 561  | 8   |
| CONTIG-019493 | 289  | 35   | 9   | 22   | 135 |
| CONTIG-019494 | 67   | 4    | 4   | 2    | 0   |
| CONTIG-019495 | 1640 | 26   | 172 | 1869 | 0   |
| CONTIG-019496 | 343  | 7    | 14  | 71   | 0   |
| CONTIG-019497 | 148  | 11   | 20  | 32   | 0   |
| CONTIG-019498 | 239  | 21   | 17  | 133  | 0   |
| CONTIG-019499 | 140  | 49   | 122 | 195  | 4   |
| CONTIG-019500 | 79   | 5    | 4   | 9    | 0   |
| CONTIG-019501 | 616  | 22   | 111 | 498  | 2   |
| CONTIG-019504 | 167  | 13   | 84  | 52   | 0   |
| CONTIG-019505 | 75   | 133  | 36  | 410  | 0   |
| CONTIG-019506 | 113  | 365  | 151 | 1643 | 7   |
| CONTIG-019507 | 136  | 15   | 63  | 10   | 0   |
| CONTIG-019508 | 133  | 9    | 2   | 46   | 2   |
| CONTIG-019510 | 205  | 14   | 18  | 103  | 0   |
| CONTIG-019511 | 655  | 23   | 196 | 619  | 2   |
| CONTIG-019515 | 42   | 1322 | 59  | 2213 | 0   |
| CONTIG-019516 | 191  | 15   | 9   | 122  | 0   |
| CONTIG-019517 | 161  | 6    | 6   | 29   | 0   |
| CONTIG-019518 | 42   | 433  | 62  | 429  | 26  |
| CONTIG-019519 | 356  | 15   | 67  | 142  | 0   |
| CONTIG-019520 | 97   | 8    | 0   | 0    | 0   |
| CONTIG-019521 | 51   | 927  | 4   | 869  | 3   |
| CONTIG-019524 | 245  | 42   | 71  | 338  | 4   |
| CONTIG-019525 | 181  | 16   | 23  | 110  | 0   |
| CONTIG-019526 | 208  | 20   | 20  | 138  | 0   |
| CONTIG-019527 | 90   | 17   | 4   | 57   | 0   |
| CONTIG-019528 | 375  | 56   | 153 | 1224 | 0   |
| CONTIG-019529 | 251  | 7    | 22  | 35   | 0   |
| CONTIG-019530 | 95   | 133  | 72  | 617  | 0   |
| CONTIG-019531 | 84   | 11   | 15  | 14   | 0   |
| CONTIG-019532 | 317  | 8    | 56  | 45   | 0   |

|               |      |     |     |      |     |
|---------------|------|-----|-----|------|-----|
| CONTIG-019533 | 59   | 326 | 16  | 59   | 0   |
| CONTIG-019534 | 67   | 5   | 9   | 2    | 0   |
| CONTIG-019535 | 189  | 8   | 44  | 20   | 0   |
| CONTIG-019536 | 523  | 80  | 242 | 917  | 10  |
| CONTIG-019537 | 353  | 13  | 71  | 80   | 0   |
| CONTIG-019538 | 77   | 5   | 7   | 9    | 0   |
| CONTIG-019539 | 149  | 289 | 26  | 2307 | 2   |
| CONTIG-019540 | 127  | 5   | 4   | 12   | 0   |
| CONTIG-019541 | 662  | 27  | 59  | 663  | 2   |
| CONTIG-019542 | 208  | 36  | 37  | 211  | 0   |
| CONTIG-019543 | 142  | 8   | 23  | 8    | 0   |
| CONTIG-019544 | 162  | 13  | 26  | 90   | 0   |
| CONTIG-019545 | 76   | 8   | 19  | 17   | 0   |
| CONTIG-019546 | 637  | 26  | 125 | 535  | 18  |
| CONTIG-019547 | 116  | 7   | 5   | 22   | 0   |
| CONTIG-019548 | 155  | 13  | 0   | 75   | 0   |
| CONTIG-019549 | 126  | 16  | 20  | 80   | 0   |
| CONTIG-019550 | 110  | 9   | 21  | 19   | 2   |
| CONTIG-019551 | 464  | 72  | 62  | 698  | 9   |
| CONTIG-019552 | 331  | 6   | 12  | 30   | 0   |
| CONTIG-019554 | 351  | 13  | 18  | 151  | 0   |
| CONTIG-019555 | 73   | 440 | 387 | 400  | 95  |
| CONTIG-019558 | 616  | 24  | 196 | 575  | 0   |
| CONTIG-019559 | 156  | 11  | 12  | 46   | 2   |
| CONTIG-019562 | 466  | 53  | 145 | 1540 | 0   |
| CONTIG-019563 | 134  | 8   | 17  | 26   | 0   |
| CONTIG-019564 | 308  | 72  | 323 | 332  | 2   |
| CONTIG-019565 | 324  | 18  | 19  | 194  | 0   |
| CONTIG-019566 | 1017 | 23  | 37  | 1268 | 3   |
| CONTIG-019567 | 200  | 7   | 15  | 31   | 0   |
| CONTIG-019568 | 210  | 9   | 14  | 59   | 0   |
| CONTIG-019569 | 88   | 14  | 22  | 50   | 0   |
| CONTIG-019570 | 175  | 6   | 6   | 4    | 6   |
| CONTIG-019571 | 145  | 12  | 62  | 10   | 0   |
| CONTIG-019572 | 704  | 22  | 72  | 397  | 40  |
| CONTIG-019573 | 174  | 16  | 92  | 30   | 0   |
| CONTIG-019574 | 282  | 165 | 546 | 739  | 157 |
| CONTIG-019575 | 458  | 20  | 51  | 358  | 0   |
| CONTIG-019576 | 62   | 24  | 90  | 10   | 0   |
| CONTIG-019582 | 87   | 18  | 10  | 25   | 0   |
| CONTIG-019583 | 128  | 11  | 47  | 15   | 0   |
| CONTIG-019584 | 730  | 23  | 169 | 810  | 0   |
| CONTIG-019585 | 346  | 40  | 120 | 413  | 2   |
| CONTIG-019586 | 438  | 10  | 36  | 101  | 0   |
| CONTIG-019587 | 68   | 5   | 5   | 6    | 0   |
| CONTIG-019588 | 76   | 68  | 59  | 78   | 8   |
| CONTIG-019589 | 84   | 37  | 2   | 142  | 0   |

|               |     |     |     |     |     |
|---------------|-----|-----|-----|-----|-----|
| CONTIG-019591 | 106 | 8   | 20  | 0   | 0   |
| CONTIG-019595 | 103 | 6   | 31  | 6   | 0   |
| CONTIG-019596 | 477 | 30  | 156 | 335 | 5   |
| CONTIG-019597 | 895 | 21  | 260 | 419 | 10  |
| CONTIG-019599 | 340 | 6   | 42  | 51  | 0   |
| CONTIG-019600 | 104 | 8   | 12  | 22  | 0   |
| CONTIG-019601 | 208 | 14  | 71  | 81  | 0   |
| CONTIG-019602 | 306 | 7   | 17  | 52  | 0   |
| CONTIG-019603 | 80  | 6   | 3   | 10  | 0   |
| CONTIG-019604 | 99  | 8   | 2   | 4   | 0   |
| CONTIG-019605 | 626 | 20  | 142 | 399 | 0   |
| CONTIG-019606 | 192 | 32  | 48  | 124 | 6   |
| CONTIG-019607 | 533 | 25  | 93  | 546 | 2   |
| CONTIG-019608 | 551 | 38  | 102 | 851 | 4   |
| CONTIG-019609 | 219 | 5   | 22  | 34  | 0   |
| CONTIG-019610 | 429 | 9   | 16  | 84  | 2   |
| CONTIG-019611 | 156 | 13  | 15  | 31  | 6   |
| CONTIG-019617 | 274 | 12  | 11  | 103 | 2   |
| CONTIG-019620 | 375 | 117 | 141 | 951 | 115 |
| CONTIG-019621 | 135 | 5   | 31  | 14  | 0   |
| CONTIG-019622 | 603 | 23  | 251 | 452 | 0   |
| CONTIG-019623 | 289 | 31  | 262 | 242 | 0   |
| CONTIG-019624 | 156 | 4   | 5   | 16  | 0   |
| CONTIG-019625 | 500 | 13  | 44  | 288 | 0   |
| CONTIG-019626 | 79  | 37  | 48  | 5   | 0   |
| CONTIG-019627 | 414 | 28  | 251 | 197 | 2   |
| CONTIG-019629 | 116 | 5   | 7   | 12  | 0   |
| CONTIG-019630 | 566 | 13  | 118 | 188 | 0   |
| CONTIG-019631 | 538 | 17  | 215 | 281 | 0   |
| CONTIG-019632 | 81  | 7   | 7   | 8   | 0   |
| CONTIG-019633 | 77  | 6   | 2   | 11  | 0   |
| CONTIG-019634 | 374 | 24  | 54  | 198 | 4   |
| CONTIG-019635 | 135 | 5   | 0   | 21  | 0   |
| CONTIG-019636 | 608 | 30  | 86  | 988 | 0   |
| CONTIG-019637 | 637 | 14  | 194 | 329 | 0   |
| CONTIG-019641 | 240 | 12  | 8   | 98  | 2   |
| CONTIG-019642 | 309 | 69  | 145 | 507 | 18  |
| CONTIG-019643 | 118 | 6   | 0   | 5   | 0   |
| CONTIG-019645 | 73  | 72  | 144 | 2   | 0   |
| CONTIG-019646 | 361 | 10  | 10  | 173 | 0   |
| CONTIG-019647 | 443 | 19  | 236 | 177 | 2   |
| CONTIG-019648 | 230 | 7   | 11  | 40  | 0   |
| CONTIG-019649 | 104 | 14  | 4   | 26  | 2   |
| CONTIG-019650 | 298 | 13  | 76  | 135 | 0   |
| CONTIG-019651 | 307 | 9   | 23  | 90  | 0   |
| CONTIG-019657 | 90  | 11  | 17  | 24  | 0   |
| CONTIG-019658 | 152 | 7   | 0   | 24  | 2   |

|               |     |     |     |      |    |
|---------------|-----|-----|-----|------|----|
| CONTIG-019659 | 212 | 9   | 12  | 78   | 0  |
| CONTIG-019660 | 142 | 6   | 11  | 23   | 0  |
| CONTIG-019661 | 88  | 11  | 2   | 28   | 0  |
| CONTIG-019662 | 85  | 9   | 6   | 21   | 0  |
| CONTIG-019663 | 564 | 78  | 161 | 1453 | 64 |
| CONTIG-019664 | 511 | 14  | 31  | 235  | 2  |
| CONTIG-019665 | 93  | 6   | 6   | 4    | 0  |
| CONTIG-019666 | 261 | 10  | 37  | 69   | 0  |
| CONTIG-019669 | 62  | 22  | 14  | 9    | 0  |
| CONTIG-019671 | 426 | 21  | 436 | 208  | 0  |
| CONTIG-019672 | 136 | 17  | 35  | 26   | 0  |
| CONTIG-019673 | 662 | 15  | 84  | 291  | 2  |
| CONTIG-019675 | 204 | 11  | 6   | 45   | 0  |
| CONTIG-019676 | 62  | 8   | 15  | 2    | 0  |
| CONTIG-019677 | 258 | 15  | 95  | 121  | 0  |
| CONTIG-019678 | 115 | 6   | 10  | 19   | 0  |
| CONTIG-019679 | 199 | 6   | 4   | 22   | 0  |
| CONTIG-019680 | 256 | 8   | 30  | 81   | 0  |
| CONTIG-019681 | 216 | 7   | 13  | 47   | 0  |
| CONTIG-019683 | 568 | 19  | 245 | 210  | 6  |
| CONTIG-019684 | 869 | 27  | 407 | 325  | 20 |
| CONTIG-019685 | 434 | 25  | 160 | 233  | 2  |
| CONTIG-019690 | 134 | 6   | 7   | 20   | 0  |
| CONTIG-019691 | 611 | 27  | 155 | 487  | 2  |
| CONTIG-019692 | 383 | 18  | 39  | 225  | 0  |
| CONTIG-019693 | 65  | 4   | 0   | 6    | 0  |
| CONTIG-019694 | 609 | 12  | 108 | 168  | 0  |
| CONTIG-019695 | 124 | 129 | 173 | 891  | 0  |
| CONTIG-019696 | 206 | 15  | 6   | 87   | 2  |
| CONTIG-019698 | 112 | 6   | 2   | 18   | 0  |
| CONTIG-019699 | 84  | 64  | 292 | 125  | 4  |
| CONTIG-019708 | 163 | 7   | 0   | 39   | 0  |
| CONTIG-019709 | 302 | 15  | 71  | 146  | 0  |
| CONTIG-019710 | 155 | 7   | 28  | 27   | 0  |
| CONTIG-019711 | 146 | 4   | 0   | 7    | 0  |
| CONTIG-019712 | 339 | 22  | 58  | 377  | 0  |
| CONTIG-019715 | 92  | 25  | 91  | 35   | 0  |
| CONTIG-019717 | 688 | 28  | 90  | 1045 | 0  |
| CONTIG-019718 | 120 | 16  | 9   | 76   | 0  |
| CONTIG-019720 | 176 | 6   | 15  | 15   | 0  |
| CONTIG-019721 | 177 | 6   | 4   | 41   | 4  |
| CONTIG-019722 | 643 | 19  | 28  | 354  | 2  |
| CONTIG-019727 | 851 | 15  | 100 | 393  | 0  |
| CONTIG-019728 | 507 | 19  | 12  | 8    | 0  |
| CONTIG-019729 | 364 | 10  | 45  | 88   | 0  |
| CONTIG-019730 | 777 | 31  | 18  | 311  | 11 |
| CONTIG-019731 | 294 | 392 | 513 | 4737 | 76 |

|               |      |     |     |      |    |
|---------------|------|-----|-----|------|----|
| CONTIG-019732 | 243  | 30  | 118 | 137  | 0  |
| CONTIG-019733 | 789  | 19  | 72  | 461  | 14 |
| CONTIG-019736 | 477  | 13  | 35  | 183  | 0  |
| CONTIG-019737 | 316  | 34  | 119 | 349  | 6  |
| CONTIG-019738 | 203  | 8   | 28  | 60   | 0  |
| CONTIG-019739 | 235  | 11  | 20  | 93   | 2  |
| CONTIG-019740 | 93   | 201 | 71  | 653  | 0  |
| CONTIG-019743 | 38   | 25  | 53  | 0    | 0  |
| CONTIG-019748 | 80   | 9   | 4   | 13   | 0  |
| CONTIG-019749 | 265  | 10  | 10  | 89   | 0  |
| CONTIG-019750 | 686  | 23  | 9   | 636  | 7  |
| CONTIG-019751 | 493  | 8   | 19  | 81   | 4  |
| CONTIG-019752 | 670  | 35  | 65  | 718  | 33 |
| CONTIG-019753 | 59   | 6   | 6   | 17   | 0  |
| CONTIG-019754 | 842  | 19  | 299 | 541  | 0  |
| CONTIG-019755 | 222  | 8   | 31  | 40   | 0  |
| CONTIG-019756 | 99   | 15  | 89  | 15   | 0  |
| CONTIG-019757 | 106  | 18  | 168 | 24   | 0  |
| CONTIG-019758 | 71   | 2   | 2   | 0    | 0  |
| CONTIG-019761 | 70   | 7   | 61  | 0    | 0  |
| CONTIG-019762 | 158  | 43  | 22  | 255  | 0  |
| CONTIG-019763 | 495  | 26  | 166 | 365  | 3  |
| CONTIG-019764 | 158  | 14  | 116 | 65   | 0  |
| CONTIG-019765 | 74   | 8   | 14  | 16   | 0  |
| CONTIG-019766 | 2328 | 35  | 112 | 3396 | 19 |
| CONTIG-019767 | 135  | 10  | 12  | 30   | 2  |
| CONTIG-019768 | 1233 | 16  | 30  | 948  | 0  |
| CONTIG-019771 | 68   | 32  | 2   | 64   | 0  |
| CONTIG-019772 | 404  | 18  | 195 | 181  | 0  |
| CONTIG-019773 | 1001 | 96  | 331 | 3696 | 61 |
| CONTIG-019775 | 75   | 6   | 22  | 0    | 0  |
| CONTIG-019776 | 567  | 12  | 35  | 302  | 0  |
| CONTIG-019777 | 458  | 15  | 61  | 250  | 2  |
| CONTIG-019778 | 269  | 24  | 118 | 72   | 3  |
| CONTIG-019779 | 204  | 7   | 0   | 34   | 0  |
| CONTIG-019780 | 369  | 16  | 85  | 150  | 6  |
| CONTIG-019782 | 237  | 19  | 21  | 211  | 0  |
| CONTIG-019783 | 64   | 183 | 193 | 445  | 4  |
| CONTIG-019785 | 132  | 6   | 15  | 23   | 0  |
| CONTIG-019786 | 185  | 13  | 15  | 82   | 0  |
| CONTIG-019787 | 1930 | 52  | 127 | 5297 | 42 |
| CONTIG-019788 | 165  | 16  | 57  | 31   | 0  |
| CONTIG-019789 | 215  | 15  | 17  | 59   | 0  |
| CONTIG-019797 | 87   | 66  | 137 | 174  | 0  |
| CONTIG-019799 | 174  | 8   | 13  | 26   | 0  |
| CONTIG-019800 | 446  | 89  | 50  | 2497 | 2  |
| CONTIG-019806 | 386  | 22  | 109 | 164  | 4  |



|               |      |     |     |     |     |
|---------------|------|-----|-----|-----|-----|
| CONTIG-019807 | 111  | 5   | 13  | 8   | 0   |
| CONTIG-019809 | 111  | 11  | 28  | 9   | 0   |
| CONTIG-019810 | 100  | 8   | 0   | 22  | 0   |
| CONTIG-019811 | 341  | 23  | 60  | 214 | 4   |
| CONTIG-019812 | 522  | 18  | 35  | 454 | 0   |
| CONTIG-019813 | 671  | 35  | 144 | 479 | 0   |
| CONTIG-019814 | 253  | 7   | 15  | 46  | 2   |
| CONTIG-019815 | 349  | 17  | 83  | 182 | 0   |
| CONTIG-019816 | 71   | 38  | 120 | 19  | 3   |
| CONTIG-019817 | 130  | 11  | 11  | 57  | 0   |
| CONTIG-019818 | 351  | 33  | 171 | 287 | 4   |
| CONTIG-019819 | 715  | 13  | 49  | 219 | 4   |
| CONTIG-019820 | 67   | 6   | 4   | 6   | 0   |
| CONTIG-019821 | 701  | 11  | 23  | 338 | 5   |
| CONTIG-019822 | 796  | 22  | 26  | 344 | 29  |
| CONTIG-019823 | 81   | 8   | 5   | 23  | 0   |
| CONTIG-019824 | 398  | 19  | 22  | 33  | 0   |
| CONTIG-019825 | 153  | 16  | 38  | 107 | 0   |
| CONTIG-019827 | 61   | 384 | 159 | 2   | 612 |
| CONTIG-019828 | 204  | 10  | 62  | 4   | 0   |
| CONTIG-019829 | 72   | 7   | 12  | 8   | 0   |
| CONTIG-019830 | 169  | 7   | 2   | 19  | 0   |
| CONTIG-019831 | 123  | 21  | 79  | 85  | 0   |
| CONTIG-019832 | 65   | 20  | 118 | 0   | 0   |
| CONTIG-019833 | 1090 | 21  | 278 | 595 | 4   |
| CONTIG-019834 | 306  | 13  | 48  | 128 | 0   |
| CONTIG-019835 | 150  | 21  | 79  | 89  | 0   |
| CONTIG-019836 | 366  | 11  | 12  | 195 | 0   |
| CONTIG-019837 | 717  | 14  | 197 | 233 | 2   |
| CONTIG-019838 | 259  | 10  | 11  | 73  | 2   |
| CONTIG-019842 | 131  | 4   | 3   | 14  | 0   |
| CONTIG-019843 | 176  | 8   | 93  | 7   | 0   |
| CONTIG-019844 | 74   | 4   | 6   | 15  | 0   |
| CONTIG-019845 | 310  | 12  | 66  | 111 | 0   |
| CONTIG-019846 | 132  | 4   | 16  | 2   | 0   |
| CONTIG-019847 | 63   | 8   | 52  | 0   | 0   |
| CONTIG-019848 | 419  | 15  | 21  | 123 | 0   |
| CONTIG-019849 | 97   | 6   | 2   | 19  | 0   |
| CONTIG-019850 | 318  | 18  | 44  | 225 | 0   |
| CONTIG-019851 | 181  | 93  | 255 | 571 | 21  |
| CONTIG-019852 | 264  | 21  | 90  | 198 | 0   |
| CONTIG-019853 | 383  | 33  | 38  | 297 | 15  |
| CONTIG-019854 | 152  | 22  | 38  | 188 | 0   |
| CONTIG-019855 | 308  | 6   | 38  | 8   | 0   |
| CONTIG-019856 | 343  | 8   | 13  | 61  | 0   |
| CONTIG-019857 | 100  | 8   | 7   | 26  | 0   |
| CONTIG-019858 | 152  | 8   | 14  | 47  | 0   |

|               |      |     |     |      |     |
|---------------|------|-----|-----|------|-----|
| CONTIG-019859 | 98   | 5   | 19  | 9    | 2   |
| CONTIG-019860 | 138  | 6   | 9   | 23   | 0   |
| CONTIG-019861 | 62   | 14  | 23  | 0    | 0   |
| CONTIG-019862 | 97   | 8   | 15  | 26   | 0   |
| CONTIG-019863 | 148  | 9   | 3   | 46   | 0   |
| CONTIG-019864 | 123  | 12  | 119 | 0    | 0   |
| CONTIG-019866 | 409  | 21  | 20  | 469  | 0   |
| CONTIG-019867 | 75   | 5   | 12  | 6    | 0   |
| CONTIG-019871 | 63   | 49  | 3   | 13   | 0   |
| CONTIG-019872 | 103  | 6   | 0   | 16   | 0   |
| CONTIG-019879 | 68   | 3   | 3   | 4    | 0   |
| CONTIG-019880 | 1014 | 47  | 160 | 2    | 323 |
| CONTIG-019881 | 47   | 6   | 6   | 2    | 0   |
| CONTIG-019882 | 723  | 15  | 64  | 437  | 2   |
| CONTIG-019883 | 78   | 13  | 13  | 27   | 0   |
| CONTIG-019884 | 226  | 21  | 40  | 119  | 0   |
| CONTIG-019885 | 161  | 15  | 43  | 99   | 0   |
| CONTIG-019886 | 89   | 14  | 14  | 60   | 0   |
| CONTIG-019887 | 296  | 13  | 39  | 104  | 0   |
| CONTIG-019888 | 365  | 44  | 61  | 303  | 0   |
| CONTIG-019889 | 39   | 362 | 118 | 139  | 2   |
| CONTIG-019890 | 364  | 17  | 54  | 110  | 2   |
| CONTIG-019891 | 126  | 725 | 196 | 1343 | 465 |
| CONTIG-019895 | 95   | 13  | 9   | 25   | 0   |
| CONTIG-019896 | 218  | 5   | 17  | 20   | 0   |
| CONTIG-019897 | 223  | 41  | 43  | 382  | 2   |
| CONTIG-019902 | 88   | 13  | 12  | 38   | 2   |
| CONTIG-019903 | 98   | 22  | 177 | 0    | 0   |
| CONTIG-019904 | 162  | 10  | 71  | 15   | 0   |
| CONTIG-019905 | 234  | 7   | 2   | 25   | 0   |
| CONTIG-019906 | 385  | 11  | 8   | 202  | 0   |
| CONTIG-019907 | 240  | 24  | 176 | 173  | 0   |
| CONTIG-019908 | 151  | 74  | 116 | 439  | 2   |
| CONTIG-019909 | 229  | 28  | 15  | 305  | 0   |
| CONTIG-019913 | 623  | 12  | 66  | 281  | 0   |
| CONTIG-019914 | 102  | 7   | 0   | 31   | 0   |
| CONTIG-019915 | 53   | 55  | 7   | 85   | 0   |
| CONTIG-019917 | 381  | 9   | 4   | 108  | 2   |
| CONTIG-019918 | 125  | 10  | 13  | 41   | 0   |
| CONTIG-019919 | 61   | 4   | 8   | 2    | 0   |
| CONTIG-019920 | 134  | 9   | 16  | 32   | 0   |
| CONTIG-019923 | 150  | 8   | 3   | 37   | 0   |
| CONTIG-019924 | 389  | 9   | 15  | 94   | 2   |
| CONTIG-019925 | 95   | 17  | 22  | 7    | 0   |
| CONTIG-019926 | 194  | 13  | 11  | 112  | 2   |
| CONTIG-019927 | 555  | 30  | 216 | 420  | 3   |
| CONTIG-019928 | 226  | 72  | 245 | 243  | 0   |

|               |     |     |     |      |     |
|---------------|-----|-----|-----|------|-----|
| CONTIG-019929 | 199 | 11  | 6   | 50   | 4   |
| CONTIG-019934 | 289 | 24  | 18  | 281  | 0   |
| CONTIG-019935 | 618 | 11  | 34  | 297  | 0   |
| CONTIG-019938 | 161 | 11  | 95  | 35   | 0   |
| CONTIG-019939 | 110 | 8   | 50  | 6    | 0   |
| CONTIG-019940 | 236 | 16  | 173 | 15   | 0   |
| CONTIG-019941 | 81  | 17  | 13  | 34   | 0   |
| CONTIG-019942 | 703 | 32  | 196 | 801  | 0   |
| CONTIG-019943 | 455 | 27  | 118 | 450  | 15  |
| CONTIG-019944 | 476 | 14  | 60  | 217  | 0   |
| CONTIG-019945 | 186 | 7   | 18  | 24   | 0   |
| CONTIG-019946 | 226 | 12  | 28  | 115  | 0   |
| CONTIG-019947 | 556 | 11  | 14  | 173  | 0   |
| CONTIG-019948 | 143 | 309 | 413 | 1677 | 71  |
| CONTIG-019949 | 118 | 8   | 34  | 16   | 0   |
| CONTIG-019950 | 113 | 3   | 4   | 10   | 0   |
| CONTIG-019951 | 157 | 14  | 43  | 71   | 2   |
| CONTIG-019952 | 146 | 209 | 213 | 1508 | 0   |
| CONTIG-019953 | 43  | 253 | 6   | 515  | 0   |
| CONTIG-019954 | 113 | 33  | 348 | 0    | 0   |
| CONTIG-019955 | 363 | 24  | 27  | 292  | 2   |
| CONTIG-019958 | 141 | 10  | 14  | 37   | 4   |
| CONTIG-019960 | 355 | 17  | 12  | 274  | 2   |
| CONTIG-019961 | 255 | 36  | 205 | 91   | 11  |
| CONTIG-019962 | 47  | 985 | 87  | 717  | 68  |
| CONTIG-019963 | 185 | 16  | 73  | 107  | 0   |
| CONTIG-019964 | 99  | 12  | 14  | 35   | 0   |
| CONTIG-019966 | 541 | 118 | 8   | 0    | 631 |
| CONTIG-019968 | 169 | 9   | 26  | 23   | 0   |
| CONTIG-019969 | 340 | 14  | 73  | 135  | 0   |
| CONTIG-019971 | 192 | 12  | 42  | 54   | 0   |
| CONTIG-019972 | 208 | 8   | 19  | 22   | 0   |
| CONTIG-019973 | 208 | 19  | 129 | 0    | 84  |
| CONTIG-019974 | 81  | 6   | 2   | 19   | 0   |
| CONTIG-019975 | 252 | 4   | 5   | 28   | 0   |
| CONTIG-019976 | 118 | 13  | 21  | 42   | 2   |
| CONTIG-019977 | 376 | 17  | 45  | 243  | 0   |
| CONTIG-019978 | 324 | 13  | 64  | 122  | 0   |
| CONTIG-019979 | 107 | 7   | 5   | 8    | 2   |
| CONTIG-019980 | 367 | 16  | 51  | 144  | 0   |
| CONTIG-019981 | 172 | 12  | 13  | 74   | 0   |
| CONTIG-019982 | 144 | 37  | 72  | 66   | 9   |
| CONTIG-019983 | 174 | 27  | 119 | 96   | 0   |
| CONTIG-019984 | 361 | 11  | 40  | 101  | 0   |
| CONTIG-019985 | 318 | 7   | 18  | 20   | 0   |
| CONTIG-019992 | 207 | 10  | 46  | 62   | 0   |
| CONTIG-019993 | 154 | 14  | 9   | 56   | 0   |

|               |      |     |     |      |     |
|---------------|------|-----|-----|------|-----|
| CONTIG-019994 | 352  | 34  | 49  | 504  | 0   |
| CONTIG-019995 | 181  | 7   | 23  | 35   | 0   |
| CONTIG-019996 | 138  | 141 | 98  | 2    | 532 |
| CONTIG-019997 | 549  | 10  | 99  | 131  | 5   |
| CONTIG-019998 | 130  | 8   | 24  | 28   | 0   |
| CONTIG-019999 | 127  | 8   | 7   | 21   | 0   |
| CONTIG-020000 | 355  | 22  | 44  | 256  | 10  |
| CONTIG-020001 | 185  | 14  | 39  | 79   | 0   |
| CONTIG-020002 | 577  | 35  | 81  | 373  | 10  |
| CONTIG-020003 | 64   | 14  | 29  | 18   | 0   |
| CONTIG-020004 | 264  | 4   | 11  | 15   | 0   |
| CONTIG-020006 | 323  | 15  | 14  | 145  | 0   |
| CONTIG-020007 | 202  | 23  | 204 | 25   | 0   |
| CONTIG-020008 | 271  | 5   | 7   | 31   | 0   |
| CONTIG-020010 | 239  | 69  | 72  | 810  | 0   |
| CONTIG-020011 | 514  | 19  | 94  | 336  | 0   |
| CONTIG-020012 | 178  | 8   | 5   | 51   | 0   |
| CONTIG-020013 | 292  | 16  | 43  | 55   | 0   |
| CONTIG-020014 | 86   | 8   | 5   | 21   | 0   |
| CONTIG-020015 | 1004 | 53  | 160 | 1867 | 129 |
| CONTIG-020016 | 142  | 329 | 124 | 990  | 166 |
| CONTIG-020017 | 940  | 59  | 28  | 241  | 0   |
| CONTIG-020018 | 180  | 36  | 15  | 224  | 2   |
| CONTIG-020022 | 230  | 11  | 71  | 78   | 0   |
| CONTIG-020023 | 77   | 8   | 14  | 9    | 0   |
| CONTIG-020024 | 202  | 80  | 22  | 401  | 2   |
| CONTIG-020025 | 376  | 50  | 190 | 349  | 23  |
| CONTIG-020026 | 123  | 20  | 23  | 68   | 4   |
| CONTIG-020027 | 80   | 12  | 36  | 10   | 0   |
| CONTIG-020028 | 112  | 5   | 6   | 15   | 0   |
| CONTIG-020035 | 382  | 10  | 16  | 117  | 2   |
| CONTIG-020036 | 219  | 12  | 55  | 41   | 0   |
| CONTIG-020038 | 177  | 8   | 5   | 49   | 0   |
| CONTIG-020040 | 222  | 380 | 14  | 2    | 23  |
| CONTIG-020041 | 219  | 5   | 8   | 32   | 0   |
| CONTIG-020043 | 121  | 8   | 13  | 35   | 0   |
| CONTIG-020044 | 130  | 18  | 28  | 90   | 0   |
| CONTIG-020045 | 110  | 10  | 10  | 42   | 0   |
| CONTIG-020046 | 76   | 8   | 11  | 20   | 0   |
| CONTIG-020048 | 268  | 10  | 45  | 45   | 0   |
| CONTIG-020052 | 66   | 4   | 22  | 0    | 0   |
| CONTIG-020053 | 263  | 93  | 49  | 1393 | 2   |
| CONTIG-020054 | 279  | 32  | 100 | 166  | 0   |
| CONTIG-020055 | 460  | 16  | 108 | 193  | 6   |
| CONTIG-020056 | 101  | 12  | 4   | 39   | 0   |
| CONTIG-020057 | 142  | 16  | 17  | 92   | 2   |
| CONTIG-020060 | 291  | 35  | 373 | 200  | 0   |

|               |      |    |     |     |    |
|---------------|------|----|-----|-----|----|
| CONTIG-020062 | 213  | 19 | 88  | 135 | 0  |
| CONTIG-020063 | 50   | 27 | 5   | 49  | 0  |
| CONTIG-020064 | 232  | 13 | 58  | 117 | 0  |
| CONTIG-020067 | 283  | 12 | 2   | 109 | 6  |
| CONTIG-020068 | 401  | 19 | 52  | 160 | 0  |
| CONTIG-020069 | 182  | 11 | 8   | 39  | 0  |
| CONTIG-020070 | 270  | 15 | 72  | 110 | 0  |
| CONTIG-020071 | 413  | 24 | 77  | 282 | 2  |
| CONTIG-020072 | 410  | 11 | 118 | 126 | 0  |
| CONTIG-020073 | 199  | 11 | 3   | 91  | 0  |
| CONTIG-020074 | 95   | 5  | 8   | 8   | 0  |
| CONTIG-020075 | 91   | 10 | 46  | 4   | 0  |
| CONTIG-020076 | 414  | 26 | 210 | 140 | 16 |
| CONTIG-020077 | 648  | 15 | 29  | 207 | 20 |
| CONTIG-020078 | 335  | 24 | 52  | 157 | 7  |
| CONTIG-020079 | 150  | 12 | 44  | 17  | 0  |
| CONTIG-020080 | 153  | 14 | 34  | 44  | 0  |
| CONTIG-020088 | 165  | 11 | 23  | 61  | 0  |
| CONTIG-020091 | 122  | 6  | 3   | 31  | 0  |
| CONTIG-020092 | 435  | 23 | 83  | 286 | 0  |
| CONTIG-020093 | 1344 | 22 | 33  | 518 | 4  |
| CONTIG-020094 | 298  | 15 | 194 | 91  | 0  |
| CONTIG-020095 | 291  | 10 | 48  | 59  | 0  |
| CONTIG-020099 | 173  | 9  | 3   | 64  | 0  |
| CONTIG-020100 | 127  | 10 | 11  | 54  | 0  |
| CONTIG-020106 | 180  | 42 | 60  | 164 | 0  |
| CONTIG-020107 | 225  | 7  | 7   | 50  | 0  |
| CONTIG-020108 | 232  | 23 | 35  | 13  | 0  |
| CONTIG-020109 | 71   | 14 | 30  | 0   | 0  |
| CONTIG-020110 | 629  | 15 | 79  | 422 | 0  |
| CONTIG-020111 | 324  | 15 | 172 | 98  | 0  |
| CONTIG-020112 | 126  | 17 | 22  | 112 | 0  |
| CONTIG-020113 | 809  | 16 | 148 | 371 | 4  |
| CONTIG-020114 | 237  | 25 | 132 | 57  | 11 |
| CONTIG-020115 | 574  | 9  | 126 | 133 | 0  |
| CONTIG-020116 | 148  | 31 | 38  | 210 | 0  |
| CONTIG-020118 | 396  | 18 | 50  | 248 | 0  |
| CONTIG-020119 | 67   | 10 | 6   | 9   | 0  |
| CONTIG-020120 | 429  | 21 | 59  | 392 | 0  |
| CONTIG-020121 | 142  | 18 | 124 | 42  | 0  |
| CONTIG-020123 | 1163 | 38 | 116 | 934 | 86 |
| CONTIG-020124 | 213  | 8  | 6   | 55  | 0  |
| CONTIG-020125 | 106  | 20 | 103 | 10  | 0  |
| CONTIG-020126 | 73   | 9  | 10  | 27  | 0  |
| CONTIG-020127 | 299  | 17 | 46  | 103 | 0  |
| CONTIG-020128 | 110  | 6  | 3   | 28  | 0  |
| CONTIG-020129 | 100  | 4  | 6   | 10  | 0  |

|               |      |      |     |      |      |
|---------------|------|------|-----|------|------|
| CONTIG-020130 | 63   | 8    | 42  | 2    | 0    |
| CONTIG-020131 | 92   | 19   | 33  | 21   | 0    |
| CONTIG-020132 | 152  | 13   | 11  | 89   | 0    |
| CONTIG-020133 | 59   | 5    | 22  | 0    | 0    |
| CONTIG-020134 | 421  | 16   | 52  | 174  | 3    |
| CONTIG-020135 | 1422 | 34   | 132 | 2386 | 9    |
| CONTIG-020136 | 191  | 6    | 20  | 21   | 0    |
| CONTIG-020137 | 351  | 39   | 244 | 218  | 4    |
| CONTIG-020139 | 478  | 16   | 290 | 265  | 0    |
| CONTIG-020140 | 156  | 12   | 10  | 77   | 0    |
| CONTIG-020144 | 180  | 6    | 6   | 39   | 0    |
| CONTIG-020145 | 84   | 24   | 135 | 33   | 0    |
| CONTIG-020146 | 113  | 13   | 21  | 34   | 0    |
| CONTIG-020147 | 305  | 13   | 9   | 114  | 8    |
| CONTIG-020148 | 145  | 51   | 75  | 176  | 0    |
| CONTIG-020152 | 71   | 3    | 0   | 5    | 0    |
| CONTIG-020153 | 477  | 19   | 8   | 532  | 0    |
| CONTIG-020154 | 153  | 6    | 22  | 16   | 0    |
| CONTIG-020155 | 241  | 28   | 94  | 57   | 0    |
| CONTIG-020156 | 1246 | 21   | 102 | 458  | 5    |
| CONTIG-020157 | 172  | 31   | 18  | 124  | 15   |
| CONTIG-020158 | 465  | 14   | 37  | 139  | 0    |
| CONTIG-020159 | 133  | 15   | 24  | 42   | 0    |
| CONTIG-020160 | 193  | 22   | 9   | 226  | 0    |
| CONTIG-020162 | 183  | 424  | 145 | 3383 | 0    |
| CONTIG-020163 | 346  | 19   | 76  | 181  | 2    |
| CONTIG-020164 | 128  | 16   | 83  | 10   | 0    |
| CONTIG-020165 | 119  | 10   | 7   | 32   | 0    |
| CONTIG-020166 | 130  | 6    | 50  | 4    | 0    |
| CONTIG-020167 | 59   | 5    | 2   | 3    | 0    |
| CONTIG-020168 | 166  | 278  | 150 | 1566 | 155  |
| CONTIG-020169 | 1717 | 48   | 318 | 4464 | 0    |
| CONTIG-020170 | 121  | 23   | 76  | 33   | 4    |
| CONTIG-020172 | 201  | 12   | 91  | 17   | 0    |
| CONTIG-020173 | 282  | 26   | 92  | 295  | 2    |
| CONTIG-020174 | 227  | 14   | 75  | 94   | 0    |
| CONTIG-020176 | 41   | 694  | 77  | 608  | 41   |
| CONTIG-020177 | 291  | 10   | 2   | 111  | 0    |
| CONTIG-020178 | 204  | 382  | 905 | 2786 | 6    |
| CONTIG-020180 | 86   | 1772 | 125 | 233  | 4022 |
| CONTIG-020181 | 132  | 9    | 33  | 8    | 0    |
| CONTIG-020182 | 554  | 26   | 187 | 503  | 2    |
| CONTIG-020183 | 276  | 23   | 102 | 62   | 2    |
| CONTIG-020184 | 138  | 5    | 13  | 14   | 0    |
| CONTIG-020185 | 396  | 8    | 13  | 114  | 0    |
| CONTIG-020186 | 88   | 17   | 9   | 51   | 0    |
| CONTIG-020187 | 194  | 36   | 27  | 357  | 0    |

|               |      |     |     |      |     |
|---------------|------|-----|-----|------|-----|
| CONTIG-020188 | 414  | 15  | 15  | 219  | 0   |
| CONTIG-020189 | 288  | 20  | 76  | 147  | 0   |
| CONTIG-020195 | 148  | 23  | 60  | 47   | 0   |
| CONTIG-020201 | 226  | 10  | 22  | 40   | 2   |
| CONTIG-020202 | 92   | 10  | 25  | 8    | 0   |
| CONTIG-020204 | 167  | 8   | 19  | 27   | 0   |
| CONTIG-020205 | 232  | 59  | 167 | 470  | 4   |
| CONTIG-020216 | 214  | 8   | 17  | 53   | 0   |
| CONTIG-020217 | 86   | 35  | 137 | 44   | 0   |
| CONTIG-020218 | 69   | 3   | 2   | 0    | 0   |
| CONTIG-020225 | 255  | 14  | 38  | 50   | 0   |
| CONTIG-020226 | 239  | 6   | 55  | 36   | 0   |
| CONTIG-020227 | 74   | 9   | 4   | 10   | 0   |
| CONTIG-020236 | 120  | 5   | 34  | 0    | 0   |
| CONTIG-020237 | 97   | 12  | 17  | 31   | 0   |
| CONTIG-020238 | 72   | 822 | 177 | 1173 | 394 |
| CONTIG-020239 | 185  | 9   | 27  | 58   | 0   |
| CONTIG-020240 | 387  | 10  | 9   | 150  | 2   |
| CONTIG-020241 | 79   | 5   | 12  | 9    | 0   |
| CONTIG-020242 | 279  | 30  | 94  | 170  | 2   |
| CONTIG-020243 | 99   | 631 | 24  | 3380 | 0   |
| CONTIG-020244 | 71   | 5   | 3   | 11   | 0   |
| CONTIG-020245 | 260  | 15  | 8   | 145  | 0   |
| CONTIG-020246 | 98   | 7   | 7   | 7    | 0   |
| CONTIG-020252 | 151  | 5   | 6   | 26   | 0   |
| CONTIG-020253 | 549  | 27  | 456 | 493  | 2   |
| CONTIG-020254 | 69   | 3   | 0   | 8    | 0   |
| CONTIG-020255 | 343  | 11  | 16  | 121  | 0   |
| CONTIG-020256 | 200  | 10  | 53  | 67   | 0   |
| CONTIG-020257 | 407  | 40  | 33  | 163  | 25  |
| CONTIG-020258 | 91   | 10  | 8   | 13   | 0   |
| CONTIG-020259 | 47   | 59  | 31  | 16   | 0   |
| CONTIG-020260 | 76   | 3   | 4   | 0    | 0   |
| CONTIG-020261 | 164  | 11  | 10  | 40   | 2   |
| CONTIG-020262 | 259  | 203 | 502 | 1909 | 97  |
| CONTIG-020263 | 1229 | 31  | 75  | 2150 | 2   |
| CONTIG-020264 | 86   | 9   | 2   | 44   | 0   |
| CONTIG-020265 | 343  | 43  | 137 | 696  | 0   |
| CONTIG-020266 | 185  | 267 | 261 | 241  | 0   |
| CONTIG-020267 | 68   | 7   | 21  | 11   | 0   |
| CONTIG-020268 | 47   | 119 | 5   | 226  | 0   |
| CONTIG-020273 | 88   | 9   | 46  | 9    | 0   |
| CONTIG-020274 | 246  | 25  | 110 | 135  | 14  |
| CONTIG-020276 | 186  | 41  | 90  | 229  | 3   |
| CONTIG-020277 | 840  | 12  | 45  | 323  | 6   |
| CONTIG-020278 | 106  | 5   | 14  | 0    | 0   |
| CONTIG-020279 | 282  | 35  | 46  | 322  | 4   |

|               |      |     |     |     |     |
|---------------|------|-----|-----|-----|-----|
| CONTIG-020280 | 138  | 9   | 8   | 51  | 0   |
| CONTIG-020281 | 79   | 217 | 165 | 416 | 66  |
| CONTIG-020282 | 60   | 8   | 29  | 3   | 0   |
| CONTIG-020283 | 137  | 13  | 82  | 18  | 0   |
| CONTIG-020284 | 384  | 6   | 18  | 33  | 0   |
| CONTIG-020285 | 386  | 20  | 5   | 234 | 5   |
| CONTIG-020286 | 175  | 16  | 44  | 52  | 6   |
| CONTIG-020287 | 97   | 104 | 121 | 238 | 15  |
| CONTIG-020288 | 394  | 33  | 236 | 577 | 2   |
| CONTIG-020289 | 354  | 78  | 232 | 987 | 35  |
| CONTIG-020290 | 166  | 11  | 117 | 18  | 0   |
| CONTIG-020291 | 276  | 8   | 12  | 41  | 0   |
| CONTIG-020292 | 228  | 10  | 109 | 20  | 0   |
| CONTIG-020293 | 225  | 20  | 39  | 117 | 2   |
| CONTIG-020294 | 317  | 11  | 81  | 126 | 0   |
| CONTIG-020295 | 536  | 25  | 23  | 432 | 175 |
| CONTIG-020296 | 408  | 13  | 46  | 158 | 0   |
| CONTIG-020297 | 195  | 72  | 48  | 451 | 17  |
| CONTIG-020298 | 305  | 10  | 59  | 124 | 0   |
| CONTIG-020299 | 87   | 14  | 38  | 28  | 0   |
| CONTIG-020300 | 71   | 7   | 8   | 10  | 0   |
| CONTIG-020301 | 577  | 17  | 48  | 193 | 0   |
| CONTIG-020302 | 704  | 17  | 38  | 341 | 2   |
| CONTIG-020303 | 483  | 36  | 164 | 489 | 6   |
| CONTIG-020304 | 480  | 13  | 28  | 161 | 0   |
| CONTIG-020306 | 39   | 60  | 8   | 63  | 0   |
| CONTIG-020307 | 1098 | 21  | 97  | 680 | 13  |
| CONTIG-020308 | 340  | 9   | 55  | 59  | 4   |
| CONTIG-020309 | 468  | 13  | 94  | 240 | 0   |
| CONTIG-020310 | 51   | 40  | 6   | 27  | 8   |
| CONTIG-020312 | 153  | 12  | 6   | 44  | 0   |
| CONTIG-020313 | 103  | 18  | 76  | 54  | 0   |
| CONTIG-020314 | 103  | 7   | 16  | 10  | 0   |
| CONTIG-020315 | 40   | 193 | 20  | 297 | 9   |
| CONTIG-020316 | 462  | 23  | 50  | 407 | 7   |
| CONTIG-020317 | 211  | 7   | 27  | 33  | 0   |
| CONTIG-020318 | 390  | 12  | 4   | 142 | 4   |
| CONTIG-020319 | 342  | 55  | 290 | 714 | 6   |
| CONTIG-020320 | 873  | 15  | 100 | 623 | 2   |
| CONTIG-020321 | 242  | 22  | 63  | 104 | 4   |
| CONTIG-020322 | 306  | 6   | 14  | 42  | 0   |
| CONTIG-020323 | 90   | 5   | 41  | 0   | 0   |
| CONTIG-020324 | 189  | 14  | 50  | 55  | 0   |
| CONTIG-020325 | 252  | 36  | 16  | 8   | 0   |
| CONTIG-020327 | 206  | 33  | 95  | 344 | 0   |
| CONTIG-020328 | 1029 | 45  | 352 | 549 | 0   |
| CONTIG-020329 | 539  | 21  | 63  | 326 | 6   |



|               |      |     |     |      |    |
|---------------|------|-----|-----|------|----|
| CONTIG-020332 | 77   | 6   | 6   | 12   | 0  |
| CONTIG-020333 | 1123 | 29  | 170 | 1050 | 6  |
| CONTIG-020337 | 397  | 19  | 151 | 99   | 8  |
| CONTIG-020338 | 201  | 17  | 16  | 111  | 2  |
| CONTIG-020339 | 586  | 22  | 4   | 542  | 0  |
| CONTIG-020340 | 88   | 7   | 11  | 17   | 0  |
| CONTIG-020342 | 290  | 10  | 22  | 28   | 2  |
| CONTIG-020343 | 56   | 36  | 31  | 51   | 0  |
| CONTIG-020344 | 223  | 49  | 20  | 496  | 8  |
| CONTIG-020345 | 89   | 45  | 20  | 9    | 4  |
| CONTIG-020346 | 62   | 2   | 7   | 0    | 0  |
| CONTIG-020347 | 624  | 13  | 95  | 366  | 0  |
| CONTIG-020348 | 195  | 8   | 11  | 55   | 0  |
| CONTIG-020349 | 267  | 12  | 43  | 113  | 0  |
| CONTIG-020350 | 106  | 6   | 5   | 12   | 0  |
| CONTIG-020351 | 186  | 11  | 48  | 39   | 0  |
| CONTIG-020352 | 144  | 9   | 16  | 19   | 0  |
| CONTIG-020353 | 46   | 89  | 49  | 163  | 0  |
| CONTIG-020354 | 145  | 5   | 12  | 2    | 0  |
| CONTIG-020355 | 330  | 13  | 109 | 29   | 2  |
| CONTIG-020357 | 659  | 27  | 198 | 382  | 2  |
| CONTIG-020358 | 113  | 13  | 26  | 28   | 0  |
| CONTIG-020359 | 88   | 6   | 3   | 4    | 0  |
| CONTIG-020364 | 91   | 499 | 254 | 2483 | 0  |
| CONTIG-020365 | 196  | 36  | 54  | 371  | 0  |
| CONTIG-020366 | 68   | 7   | 0   | 19   | 0  |
| CONTIG-020367 | 96   | 5   | 5   | 21   | 0  |
| CONTIG-020368 | 146  | 9   | 3   | 51   | 2  |
| CONTIG-020369 | 146  | 4   | 11  | 4    | 0  |
| CONTIG-020370 | 83   | 5   | 17  | 2    | 0  |
| CONTIG-020371 | 727  | 23  | 21  | 683  | 17 |
| CONTIG-020375 | 67   | 19  | 9   | 24   | 0  |
| CONTIG-020376 | 337  | 18  | 27  | 187  | 0  |
| CONTIG-020377 | 330  | 11  | 26  | 83   | 0  |
| CONTIG-020378 | 200  | 9   | 9   | 72   | 0  |
| CONTIG-020379 | 410  | 16  | 41  | 252  | 0  |
| CONTIG-020380 | 182  | 4   | 8   | 27   | 0  |
| CONTIG-020381 | 761  | 22  | 96  | 363  | 2  |
| CONTIG-020382 | 557  | 8   | 33  | 100  | 2  |
| CONTIG-020383 | 169  | 9   | 12  | 57   | 0  |
| CONTIG-020384 | 39   | 24  | 21  | 6    | 2  |
| CONTIG-020385 | 74   | 3   | 0   | 8    | 0  |
| CONTIG-020386 | 233  | 12  | 23  | 72   | 0  |
| CONTIG-020387 | 712  | 20  | 86  | 271  | 15 |
| CONTIG-020388 | 357  | 12  | 19  | 115  | 2  |
| CONTIG-020389 | 317  | 17  | 76  | 86   | 4  |
| CONTIG-020390 | 69   | 56  | 37  | 170  | 4  |

|               |      |     |     |      |     |
|---------------|------|-----|-----|------|-----|
| CONTIG-020391 | 100  | 47  | 135 | 138  | 2   |
| CONTIG-020392 | 1131 | 43  | 398 | 2609 | 2   |
| CONTIG-020393 | 59   | 76  | 22  | 22   | 0   |
| CONTIG-020394 | 150  | 9   | 3   | 47   | 0   |
| CONTIG-020395 | 60   | 6   | 30  | 0    | 0   |
| CONTIG-020396 | 186  | 10  | 42  | 40   | 0   |
| CONTIG-020397 | 78   | 9   | 2   | 11   | 2   |
| CONTIG-020398 | 353  | 14  | 50  | 228  | 0   |
| CONTIG-020399 | 124  | 16  | 26  | 22   | 0   |
| CONTIG-020400 | 150  | 13  | 86  | 32   | 0   |
| CONTIG-020401 | 111  | 16  | 24  | 63   | 0   |
| CONTIG-020402 | 451  | 16  | 40  | 223  | 4   |
| CONTIG-020403 | 142  | 7   | 0   | 10   | 0   |
| CONTIG-020404 | 366  | 17  | 16  | 71   | 6   |
| CONTIG-020405 | 44   | 238 | 64  | 87   | 2   |
| CONTIG-020406 | 88   | 7   | 7   | 19   | 0   |
| CONTIG-020407 | 59   | 163 | 403 | 244  | 0   |
| CONTIG-020408 | 259  | 25  | 124 | 84   | 0   |
| CONTIG-020409 | 485  | 18  | 128 | 234  | 0   |
| CONTIG-020410 | 882  | 27  | 283 | 479  | 6   |
| CONTIG-020411 | 182  | 6   | 6   | 21   | 0   |
| CONTIG-020412 | 114  | 14  | 10  | 34   | 0   |
| CONTIG-020413 | 165  | 10  | 11  | 74   | 0   |
| CONTIG-020414 | 119  | 7   | 10  | 11   | 0   |
| CONTIG-020415 | 495  | 31  | 59  | 45   | 0   |
| CONTIG-020416 | 58   | 3   | 5   | 0    | 0   |
| CONTIG-020417 | 188  | 21  | 49  | 116  | 2   |
| CONTIG-020418 | 65   | 8   | 12  | 9    | 0   |
| CONTIG-020419 | 58   | 24  | 11  | 23   | 0   |
| CONTIG-020420 | 116  | 13  | 63  | 0    | 0   |
| CONTIG-020421 | 601  | 19  | 166 | 353  | 2   |
| CONTIG-020422 | 193  | 15  | 30  | 122  | 2   |
| CONTIG-020423 | 510  | 72  | 242 | 926  | 141 |
| CONTIG-020424 | 542  | 22  | 39  | 262  | 4   |
| CONTIG-020425 | 358  | 7   | 29  | 91   | 0   |
| CONTIG-020426 | 135  | 17  | 11  | 41   | 2   |
| CONTIG-020427 | 84   | 8   | 2   | 25   | 0   |
| CONTIG-020428 | 93   | 8   | 11  | 9    | 0   |
| CONTIG-020432 | 350  | 8   | 50  | 62   | 2   |
| CONTIG-020433 | 89   | 4   | 0   | 7    | 0   |
| CONTIG-020434 | 93   | 23  | 4   | 44   | 2   |
| CONTIG-020435 | 799  | 88  | 130 | 2830 | 0   |
| CONTIG-020436 | 725  | 27  | 382 | 646  | 6   |
| CONTIG-020437 | 157  | 14  | 64  | 5    | 0   |
| CONTIG-020438 | 213  | 14  | 60  | 51   | 0   |
| CONTIG-020439 | 74   | 11  | 2   | 26   | 3   |
| CONTIG-020440 | 66   | 4   | 8   | 6    | 0   |

|               |      |     |     |      |     |
|---------------|------|-----|-----|------|-----|
| CONTIG-020442 | 55   | 67  | 50  | 34   | 0   |
| CONTIG-020443 | 242  | 23  | 111 | 134  | 2   |
| CONTIG-020453 | 173  | 10  | 18  | 35   | 0   |
| CONTIG-020456 | 90   | 13  | 31  | 13   | 0   |
| CONTIG-020457 | 241  | 12  | 31  | 84   | 0   |
| CONTIG-020458 | 249  | 17  | 97  | 179  | 0   |
| CONTIG-020459 | 172  | 12  | 144 | 0    | 0   |
| CONTIG-020460 | 59   | 11  | 11  | 0    | 0   |
| CONTIG-020461 | 586  | 18  | 12  | 461  | 0   |
| CONTIG-020462 | 318  | 15  | 23  | 129  | 0   |
| CONTIG-020463 | 204  | 16  | 91  | 62   | 2   |
| CONTIG-020464 | 58   | 10  | 56  | 0    | 0   |
| CONTIG-020465 | 75   | 19  | 107 | 11   | 0   |
| CONTIG-020466 | 100  | 9   | 7   | 19   | 0   |
| CONTIG-020467 | 1043 | 36  | 347 | 1622 | 0   |
| CONTIG-020468 | 73   | 11  | 25  | 2    | 0   |
| CONTIG-020469 | 113  | 4   | 4   | 4    | 0   |
| CONTIG-020471 | 336  | 13  | 64  | 108  | 2   |
| CONTIG-020472 | 89   | 4   | 12  | 4    | 0   |
| CONTIG-020473 | 191  | 5   | 3   | 11   | 0   |
| CONTIG-020474 | 137  | 11  | 6   | 49   | 0   |
| CONTIG-020475 | 510  | 29  | 178 | 570  | 4   |
| CONTIG-020476 | 1216 | 30  | 179 | 1342 | 4   |
| CONTIG-020477 | 60   | 7   | 4   | 6    | 2   |
| CONTIG-020478 | 103  | 13  | 13  | 24   | 0   |
| CONTIG-020486 | 296  | 13  | 44  | 110  | 0   |
| CONTIG-020490 | 122  | 7   | 9   | 16   | 0   |
| CONTIG-020491 | 487  | 44  | 136 | 1026 | 0   |
| CONTIG-020492 | 80   | 8   | 10  | 25   | 0   |
| CONTIG-020493 | 1100 | 19  | 116 | 533  | 4   |
| CONTIG-020494 | 182  | 24  | 32  | 162  | 0   |
| CONTIG-020495 | 70   | 29  | 38  | 10   | 0   |
| CONTIG-020496 | 181  | 15  | 39  | 80   | 0   |
| CONTIG-020497 | 123  | 23  | 85  | 17   | 4   |
| CONTIG-020498 | 120  | 5   | 9   | 13   | 0   |
| CONTIG-020499 | 111  | 29  | 7   | 176  | 0   |
| CONTIG-020500 | 177  | 116 | 258 | 1129 | 0   |
| CONTIG-020501 | 93   | 5   | 2   | 10   | 0   |
| CONTIG-020502 | 286  | 94  | 154 | 889  | 7   |
| CONTIG-020504 | 565  | 39  | 168 | 494  | 19  |
| CONTIG-020507 | 215  | 13  | 35  | 94   | 2   |
| CONTIG-020508 | 161  | 6   | 8   | 27   | 0   |
| CONTIG-020509 | 77   | 6   | 18  | 10   | 0   |
| CONTIG-020511 | 821  | 26  | 283 | 579  | 6   |
| CONTIG-020515 | 774  | 43  | 95  | 788  | 114 |
| CONTIG-020516 | 127  | 14  | 7   | 58   | 2   |
| CONTIG-020517 | 530  | 20  | 94  | 477  | 0   |

|               |     |     |     |     |    |
|---------------|-----|-----|-----|-----|----|
| CONTIG-020518 | 59  | 8   | 4   | 9   | 0  |
| CONTIG-020519 | 130 | 10  | 82  | 14  | 2  |
| CONTIG-020520 | 133 | 12  | 27  | 55  | 0  |
| CONTIG-020521 | 729 | 13  | 48  | 218 | 12 |
| CONTIG-020522 | 108 | 13  | 78  | 10  | 0  |
| CONTIG-020523 | 462 | 19  | 54  | 205 | 7  |
| CONTIG-020524 | 160 | 11  | 51  | 50  | 0  |
| CONTIG-020525 | 203 | 17  | 240 | 2   | 0  |
| CONTIG-020527 | 71  | 9   | 8   | 24  | 0  |
| CONTIG-020528 | 176 | 8   | 30  | 20  | 0  |
| CONTIG-020529 | 68  | 16  | 44  | 0   | 0  |
| CONTIG-020530 | 563 | 18  | 38  | 344 | 0  |
| CONTIG-020531 | 63  | 7   | 22  | 6   | 0  |
| CONTIG-020532 | 109 | 12  | 73  | 36  | 0  |
| CONTIG-020533 | 511 | 19  | 154 | 322 | 0  |
| CONTIG-020534 | 78  | 7   | 13  | 3   | 0  |
| CONTIG-020535 | 376 | 30  | 10  | 422 | 37 |
| CONTIG-020536 | 723 | 17  | 64  | 135 | 11 |
| CONTIG-020537 | 489 | 11  | 29  | 124 | 2  |
| CONTIG-020538 | 73  | 97  | 74  | 21  | 0  |
| CONTIG-020539 | 186 | 14  | 7   | 72  | 3  |
| CONTIG-020540 | 315 | 15  | 63  | 157 | 0  |
| CONTIG-020546 | 64  | 11  | 4   | 21  | 2  |
| CONTIG-020547 | 162 | 14  | 8   | 45  | 0  |
| CONTIG-020548 | 81  | 17  | 63  | 26  | 0  |
| CONTIG-020549 | 476 | 18  | 73  | 281 | 2  |
| CONTIG-020551 | 197 | 13  | 77  | 24  | 0  |
| CONTIG-020552 | 795 | 13  | 48  | 271 | 2  |
| CONTIG-020553 | 324 | 10  | 110 | 41  | 0  |
| CONTIG-020554 | 163 | 10  | 11  | 30  | 0  |
| CONTIG-020555 | 97  | 59  | 29  | 319 | 0  |
| CONTIG-020556 | 87  | 7   | 6   | 29  | 0  |
| CONTIG-020557 | 299 | 7   | 9   | 68  | 0  |
| CONTIG-020558 | 204 | 14  | 9   | 105 | 0  |
| CONTIG-020559 | 85  | 20  | 10  | 54  | 0  |
| CONTIG-020560 | 79  | 5   | 2   | 12  | 0  |
| CONTIG-020561 | 236 | 13  | 39  | 98  | 2  |
| CONTIG-020562 | 501 | 15  | 56  | 203 | 0  |
| CONTIG-020563 | 561 | 8   | 41  | 123 | 0  |
| CONTIG-020564 | 111 | 8   | 22  | 26  | 0  |
| CONTIG-020565 | 442 | 9   | 13  | 114 | 4  |
| CONTIG-020566 | 370 | 8   | 24  | 54  | 2  |
| CONTIG-020567 | 79  | 6   | 4   | 6   | 0  |
| CONTIG-020568 | 111 | 56  | 87  | 243 | 4  |
| CONTIG-020569 | 107 | 15  | 17  | 38  | 0  |
| CONTIG-020570 | 44  | 664 | 191 | 414 | 47 |
| CONTIG-020574 | 57  | 114 | 8   | 226 | 2  |

|               |      |     |     |      |    |
|---------------|------|-----|-----|------|----|
| CONTIG-020575 | 54   | 66  | 6   | 132  | 0  |
| CONTIG-020576 | 53   | 359 | 32  | 674  | 0  |
| CONTIG-020577 | 73   | 13  | 55  | 8    | 0  |
| CONTIG-020580 | 243  | 11  | 56  | 89   | 0  |
| CONTIG-020581 | 169  | 16  | 63  | 77   | 0  |
| CONTIG-020582 | 1137 | 44  | 490 | 1741 | 52 |
| CONTIG-020583 | 435  | 32  | 147 | 595  | 0  |
| CONTIG-020585 | 585  | 20  | 34  | 388  | 0  |
| CONTIG-020590 | 159  | 16  | 34  | 63   | 0  |
| CONTIG-020591 | 330  | 8   | 19  | 81   | 2  |
| CONTIG-020592 | 87   | 2   | 0   | 0    | 0  |
| CONTIG-020594 | 179  | 9   | 24  | 26   | 0  |
| CONTIG-020595 | 445  | 9   | 38  | 134  | 0  |
| CONTIG-020596 | 132  | 19  | 2   | 0    | 0  |
| CONTIG-020597 | 262  | 33  | 189 | 195  | 6  |
| CONTIG-020600 | 181  | 7   | 30  | 17   | 0  |
| CONTIG-020602 | 134  | 4   | 0   | 21   | 0  |
| CONTIG-020604 | 177  | 10  | 117 | 28   | 0  |
| CONTIG-020605 | 60   | 7   | 11  | 14   | 0  |
| CONTIG-020612 | 153  | 17  | 5   | 70   | 0  |
| CONTIG-020613 | 369  | 25  | 68  | 172  | 0  |
| CONTIG-020614 | 108  | 6   | 9   | 5    | 0  |
| CONTIG-020615 | 213  | 150 | 219 | 1536 | 0  |
| CONTIG-020616 | 118  | 5   | 5   | 10   | 0  |
| CONTIG-020617 | 250  | 8   | 35  | 40   | 2  |
| CONTIG-020618 | 62   | 11  | 9   | 27   | 0  |
| CONTIG-020619 | 515  | 22  | 28  | 491  | 4  |
| CONTIG-020620 | 220  | 19  | 18  | 190  | 0  |
| CONTIG-020621 | 138  | 11  | 19  | 13   | 0  |
| CONTIG-020624 | 786  | 25  | 140 | 871  | 0  |
| CONTIG-020626 | 117  | 23  | 26  | 92   | 0  |
| CONTIG-020627 | 236  | 34  | 23  | 272  | 6  |
| CONTIG-020628 | 93   | 10  | 11  | 12   | 2  |
| CONTIG-020629 | 111  | 15  | 29  | 44   | 0  |
| CONTIG-020630 | 665  | 25  | 32  | 553  | 0  |
| CONTIG-020631 | 43   | 411 | 2   | 377  | 81 |
| CONTIG-020632 | 659  | 54  | 55  | 1056 | 35 |
| CONTIG-020633 | 77   | 16  | 43  | 23   | 0  |
| CONTIG-020634 | 346  | 14  | 46  | 141  | 0  |
| CONTIG-020635 | 60   | 4   | 2   | 9    | 0  |
| CONTIG-020636 | 135  | 97  | 162 | 5    | 0  |
| CONTIG-020637 | 183  | 10  | 24  | 43   | 0  |
| CONTIG-020638 | 70   | 6   | 18  | 9    | 0  |
| CONTIG-020639 | 89   | 34  | 7   | 149  | 0  |
| CONTIG-020640 | 325  | 12  | 61  | 121  | 0  |
| CONTIG-020641 | 414  | 42  | 142 | 286  | 2  |
| CONTIG-020642 | 357  | 13  | 30  | 195  | 0  |

|               |      |     |     |      |    |
|---------------|------|-----|-----|------|----|
| CONTIG-020643 | 455  | 30  | 126 | 359  | 19 |
| CONTIG-020645 | 306  | 7   | 15  | 78   | 0  |
| CONTIG-020646 | 137  | 15  | 81  | 21   | 0  |
| CONTIG-020647 | 59   | 245 | 63  | 287  | 16 |
| CONTIG-020648 | 108  | 30  | 197 | 13   | 0  |
| CONTIG-020649 | 369  | 12  | 65  | 153  | 0  |
| CONTIG-020650 | 190  | 15  | 14  | 94   | 0  |
| CONTIG-020651 | 136  | 31  | 31  | 165  | 0  |
| CONTIG-020656 | 172  | 17  | 48  | 83   | 0  |
| CONTIG-020657 | 144  | 14  | 34  | 47   | 0  |
| CONTIG-020659 | 223  | 10  | 27  | 99   | 0  |
| CONTIG-020660 | 148  | 12  | 57  | 23   | 0  |
| CONTIG-020661 | 122  | 6   | 10  | 16   | 0  |
| CONTIG-020662 | 112  | 187 | 199 | 505  | 14 |
| CONTIG-020663 | 625  | 16  | 35  | 236  | 9  |
| CONTIG-020671 | 84   | 43  | 135 | 34   | 2  |
| CONTIG-020673 | 93   | 4   | 3   | 2    | 0  |
| CONTIG-020674 | 67   | 5   | 6   | 6    | 0  |
| CONTIG-020675 | 820  | 17  | 203 | 318  | 6  |
| CONTIG-020678 | 242  | 22  | 85  | 93   | 0  |
| CONTIG-020680 | 408  | 22  | 67  | 514  | 0  |
| CONTIG-020684 | 174  | 7   | 0   | 17   | 0  |
| CONTIG-020685 | 264  | 8   | 8   | 72   | 0  |
| CONTIG-020686 | 93   | 7   | 7   | 19   | 0  |
| CONTIG-020687 | 203  | 10  | 51  | 23   | 0  |
| CONTIG-020688 | 314  | 18  | 17  | 0    | 5  |
| CONTIG-020689 | 154  | 5   | 2   | 28   | 0  |
| CONTIG-020690 | 167  | 12  | 4   | 51   | 0  |
| CONTIG-020691 | 98   | 5   | 3   | 2    | 0  |
| CONTIG-020692 | 874  | 28  | 369 | 866  | 2  |
| CONTIG-020693 | 176  | 12  | 15  | 60   | 0  |
| CONTIG-020694 | 145  | 5   | 7   | 19   | 0  |
| CONTIG-020696 | 112  | 71  | 38  | 307  | 2  |
| CONTIG-020697 | 216  | 11  | 106 | 10   | 0  |
| CONTIG-020698 | 87   | 20  | 24  | 21   | 0  |
| CONTIG-020699 | 84   | 3   | 5   | 6    | 0  |
| CONTIG-020700 | 143  | 20  | 0   | 94   | 5  |
| CONTIG-020701 | 43   | 28  | 9   | 6    | 2  |
| CONTIG-020703 | 1524 | 18  | 48  | 1162 | 2  |
| CONTIG-020705 | 234  | 8   | 13  | 30   | 0  |
| CONTIG-020707 | 573  | 14  | 81  | 313  | 0  |
| CONTIG-020708 | 354  | 34  | 5   | 9    | 0  |
| CONTIG-020711 | 473  | 14  | 81  | 126  | 2  |
| CONTIG-020712 | 221  | 15  | 51  | 95   | 0  |
| CONTIG-020714 | 644  | 21  | 307 | 257  | 0  |
| CONTIG-020716 | 122  | 5   | 7   | 15   | 0  |
| CONTIG-020717 | 229  | 7   | 15  | 52   | 0  |

|               |      |     |     |      |    |
|---------------|------|-----|-----|------|----|
| CONTIG-020718 | 142  | 14  | 10  | 55   | 0  |
| CONTIG-020719 | 91   | 8   | 14  | 18   | 0  |
| CONTIG-020722 | 280  | 52  | 129 | 481  | 8  |
| CONTIG-020723 | 511  | 6   | 9   | 91   | 0  |
| CONTIG-020724 | 175  | 28  | 99  | 36   | 5  |
| CONTIG-020725 | 239  | 10  | 17  | 9    | 0  |
| CONTIG-020726 | 322  | 33  | 68  | 143  | 28 |
| CONTIG-020727 | 359  | 23  | 77  | 199  | 5  |
| CONTIG-020728 | 73   | 7   | 2   | 4    | 0  |
| CONTIG-020729 | 162  | 19  | 256 | 26   | 0  |
| CONTIG-020730 | 97   | 116 | 196 | 502  | 0  |
| CONTIG-020731 | 76   | 71  | 93  | 35   | 7  |
| CONTIG-020732 | 77   | 6   | 6   | 4    | 0  |
| CONTIG-020733 | 741  | 31  | 75  | 457  | 8  |
| CONTIG-020734 | 1132 | 25  | 75  | 1420 | 0  |
| CONTIG-020735 | 129  | 7   | 18  | 21   | 0  |
| CONTIG-020736 | 435  | 14  | 65  | 181  | 0  |
| CONTIG-020737 | 76   | 16  | 0   | 30   | 0  |
| CONTIG-020738 | 73   | 7   | 4   | 15   | 0  |
| CONTIG-020739 | 107  | 5   | 9   | 17   | 0  |
| CONTIG-020742 | 194  | 20  | 153 | 122  | 0  |
| CONTIG-020743 | 1064 | 14  | 160 | 515  | 2  |
| CONTIG-020745 | 543  | 13  | 81  | 107  | 2  |
| CONTIG-020747 | 109  | 14  | 6   | 51   | 0  |
| CONTIG-020748 | 59   | 5   | 4   | 4    | 0  |
| CONTIG-020749 | 347  | 11  | 27  | 72   | 0  |
| CONTIG-020750 | 123  | 46  | 351 | 74   | 0  |
| CONTIG-020751 | 308  | 26  | 53  | 134  | 5  |
| CONTIG-020753 | 150  | 6   | 10  | 11   | 0  |
| CONTIG-020754 | 500  | 9   | 22  | 146  | 0  |
| CONTIG-020755 | 269  | 28  | 52  | 271  | 0  |
| CONTIG-020756 | 62   | 3   | 2   | 6    | 0  |
| CONTIG-020757 | 562  | 10  | 128 | 123  | 0  |
| CONTIG-020758 | 60   | 6   | 16  | 8    | 0  |
| CONTIG-020759 | 211  | 7   | 14  | 43   | 2  |
| CONTIG-020760 | 153  | 6   | 3   | 26   | 0  |
| CONTIG-020762 | 43   | 155 | 57  | 155  | 6  |
| CONTIG-020763 | 431  | 21  | 30  | 215  | 6  |
| CONTIG-020764 | 132  | 7   | 18  | 34   | 0  |
| CONTIG-020765 | 139  | 5   | 0   | 29   | 0  |
| CONTIG-020766 | 77   | 17  | 14  | 48   | 0  |
| CONTIG-020768 | 66   | 166 | 148 | 338  | 0  |
| CONTIG-020769 | 257  | 10  | 32  | 42   | 0  |
| CONTIG-020770 | 227  | 6   | 9   | 42   | 0  |
| CONTIG-020771 | 105  | 220 | 131 | 888  | 3  |
| CONTIG-020772 | 244  | 8   | 26  | 0    | 8  |
| CONTIG-020773 | 710  | 15  | 71  | 298  | 5  |

|               |      |     |     |      |    |
|---------------|------|-----|-----|------|----|
| CONTIG-020774 | 71   | 60  | 87  | 64   | 0  |
| CONTIG-020775 | 201  | 16  | 57  | 66   | 0  |
| CONTIG-020776 | 47   | 884 | 50  | 1024 | 88 |
| CONTIG-020777 | 325  | 7   | 46  | 66   | 0  |
| CONTIG-020778 | 296  | 9   | 45  | 89   | 0  |
| CONTIG-020779 | 291  | 37  | 262 | 440  | 0  |
| CONTIG-020780 | 99   | 7   | 20  | 21   | 0  |
| CONTIG-020781 | 119  | 7   | 11  | 23   | 0  |
| CONTIG-020782 | 65   | 10  | 8   | 26   | 0  |
| CONTIG-020783 | 446  | 16  | 47  | 169  | 2  |
| CONTIG-020784 | 67   | 4   | 8   | 0    | 0  |
| CONTIG-020785 | 450  | 31  | 250 | 189  | 2  |
| CONTIG-020786 | 290  | 10  | 29  | 34   | 0  |
| CONTIG-020787 | 107  | 61  | 88  | 136  | 0  |
| CONTIG-020788 | 231  | 14  | 34  | 94   | 0  |
| CONTIG-020789 | 885  | 17  | 292 | 342  | 6  |
| CONTIG-020790 | 150  | 6   | 20  | 21   | 0  |
| CONTIG-020792 | 131  | 8   | 61  | 0    | 0  |
| CONTIG-020793 | 97   | 6   | 19  | 11   | 0  |
| CONTIG-020794 | 68   | 32  | 30  | 71   | 0  |
| CONTIG-020795 | 120  | 8   | 7   | 43   | 0  |
| CONTIG-020796 | 188  | 18  | 4   | 119  | 0  |
| CONTIG-020798 | 280  | 6   | 7   | 51   | 2  |
| CONTIG-020799 | 205  | 10  | 8   | 70   | 2  |
| CONTIG-020800 | 464  | 11  | 43  | 137  | 0  |
| CONTIG-020801 | 363  | 7   | 18  | 67   | 0  |
| CONTIG-020802 | 222  | 9   | 11  | 42   | 2  |
| CONTIG-020803 | 147  | 5   | 17  | 3    | 0  |
| CONTIG-020804 | 276  | 12  | 43  | 83   | 0  |
| CONTIG-020805 | 269  | 10  | 24  | 52   | 0  |
| CONTIG-020806 | 99   | 16  | 16  | 61   | 2  |
| CONTIG-020807 | 661  | 15  | 28  | 403  | 0  |
| CONTIG-020808 | 283  | 5   | 11  | 39   | 0  |
| CONTIG-020809 | 117  | 9   | 30  | 34   | 0  |
| CONTIG-020810 | 169  | 5   | 12  | 18   | 0  |
| CONTIG-020811 | 218  | 9   | 34  | 21   | 2  |
| CONTIG-020812 | 181  | 60  | 82  | 308  | 21 |
| CONTIG-020813 | 76   | 2   | 0   | 2    | 0  |
| CONTIG-020814 | 775  | 10  | 4   | 9    | 0  |
| CONTIG-020815 | 1038 | 18  | 54  | 730  | 12 |
| CONTIG-020816 | 92   | 12  | 0   | 0    | 0  |
| CONTIG-020817 | 89   | 2   | 10  | 0    | 0  |
| CONTIG-020823 | 737  | 21  | 98  | 371  | 13 |
| CONTIG-020825 | 208  | 5   | 4   | 19   | 0  |
| CONTIG-020826 | 167  | 15  | 52  | 61   | 0  |
| CONTIG-020827 | 423  | 16  | 103 | 212  | 2  |
| CONTIG-020828 | 127  | 8   | 12  | 37   | 0  |



|               |      |     |     |     |     |
|---------------|------|-----|-----|-----|-----|
| CONTIG-020829 | 331  | 23  | 136 | 199 | 0   |
| CONTIG-020830 | 211  | 5   | 2   | 28  | 0   |
| CONTIG-020831 | 343  | 40  | 109 | 379 | 4   |
| CONTIG-020832 | 223  | 5   | 0   | 17  | 0   |
| CONTIG-020833 | 407  | 21  | 51  | 106 | 0   |
| CONTIG-020834 | 368  | 35  | 0   | 0   | 0   |
| CONTIG-020835 | 129  | 7   | 5   | 28  | 0   |
| CONTIG-020836 | 58   | 86  | 35  | 180 | 0   |
| CONTIG-020837 | 361  | 9   | 18  | 70  | 0   |
| CONTIG-020838 | 61   | 6   | 2   | 9   | 0   |
| CONTIG-020839 | 79   | 8   | 6   | 24  | 0   |
| CONTIG-020840 | 1196 | 56  | 236 | 410 | 0   |
| CONTIG-020844 | 266  | 56  | 0   | 156 | 2   |
| CONTIG-020845 | 237  | 24  | 55  | 134 | 2   |
| CONTIG-020846 | 132  | 10  | 8   | 48  | 0   |
| CONTIG-020847 | 132  | 39  | 13  | 90  | 10  |
| CONTIG-020848 | 43   | 58  | 11  | 28  | 0   |
| CONTIG-020849 | 256  | 6   | 34  | 22  | 0   |
| CONTIG-020850 | 391  | 10  | 13  | 113 | 0   |
| CONTIG-020851 | 80   | 4   | 3   | 6   | 0   |
| CONTIG-020852 | 617  | 11  | 38  | 267 | 0   |
| CONTIG-020853 | 111  | 12  | 120 | 0   | 0   |
| CONTIG-020854 | 71   | 119 | 151 | 152 | 123 |
| CONTIG-020855 | 313  | 13  | 146 | 97  | 0   |
| CONTIG-020856 | 292  | 30  | 25  | 111 | 0   |
| CONTIG-020857 | 455  | 12  | 34  | 240 | 0   |
| CONTIG-020858 | 81   | 9   | 9   | 25  | 0   |
| CONTIG-020859 | 201  | 8   | 6   | 51  | 0   |
| CONTIG-020860 | 504  | 37  | 166 | 359 | 6   |
| CONTIG-020861 | 739  | 21  | 53  | 429 | 21  |
| CONTIG-020862 | 514  | 12  | 21  | 112 | 0   |
| CONTIG-020863 | 117  | 22  | 186 | 0   | 9   |
| CONTIG-020864 | 206  | 8   | 34  | 43  | 0   |
| CONTIG-020865 | 263  | 14  | 32  | 88  | 0   |
| CONTIG-020866 | 70   | 29  | 21  | 0   | 0   |
| CONTIG-020867 | 339  | 87  | 20  | 5   | 0   |
| CONTIG-020868 | 121  | 32  | 5   | 103 | 0   |
| CONTIG-020869 | 209  | 7   | 31  | 21  | 0   |
| CONTIG-020870 | 202  | 6   | 6   | 21  | 0   |
| CONTIG-020871 | 65   | 235 | 40  | 638 | 0   |
| CONTIG-020872 | 82   | 48  | 324 | 0   | 0   |
| CONTIG-020873 | 52   | 448 | 86  | 488 | 36  |
| CONTIG-020874 | 404  | 42  | 12  | 0   | 197 |
| CONTIG-020877 | 521  | 17  | 98  | 370 | 2   |
| CONTIG-020878 | 72   | 273 | 229 | 391 | 38  |
| CONTIG-020879 | 257  | 13  | 59  | 111 | 0   |
| CONTIG-020880 | 77   | 42  | 324 | 0   | 0   |

|               |      |    |     |     |    |
|---------------|------|----|-----|-----|----|
| CONTIG-020881 | 148  | 5  | 7   | 11  | 0  |
| CONTIG-020882 | 89   | 6  | 2   | 13  | 0  |
| CONTIG-020883 | 87   | 26 | 43  | 28  | 0  |
| CONTIG-020884 | 121  | 10 | 0   | 39  | 0  |
| CONTIG-020885 | 216  | 10 | 18  | 68  | 0  |
| CONTIG-020886 | 120  | 8  | 7   | 24  | 3  |
| CONTIG-020887 | 205  | 13 | 17  | 50  | 2  |
| CONTIG-020888 | 622  | 19 | 58  | 372 | 0  |
| CONTIG-020889 | 79   | 9  | 12  | 2   | 0  |
| CONTIG-020890 | 200  | 6  | 8   | 38  | 0  |
| CONTIG-020891 | 207  | 12 | 109 | 50  | 0  |
| CONTIG-020892 | 407  | 22 | 55  | 243 | 6  |
| CONTIG-020893 | 126  | 18 | 31  | 37  | 0  |
| CONTIG-020894 | 84   | 11 | 3   | 32  | 0  |
| CONTIG-020895 | 69   | 7  | 5   | 2   | 0  |
| CONTIG-020898 | 468  | 13 | 18  | 77  | 0  |
| CONTIG-020899 | 63   | 4  | 18  | 2   | 0  |
| CONTIG-020903 | 166  | 9  | 11  | 38  | 0  |
| CONTIG-020904 | 414  | 56 | 170 | 303 | 25 |
| CONTIG-020905 | 834  | 9  | 103 | 156 | 2  |
| CONTIG-020906 | 396  | 17 | 16  | 238 | 2  |
| CONTIG-020907 | 206  | 13 | 30  | 99  | 2  |
| CONTIG-020908 | 180  | 6  | 18  | 8   | 0  |
| CONTIG-020909 | 65   | 5  | 4   | 3   | 0  |
| CONTIG-020910 | 1138 | 23 | 250 | 958 | 0  |
| CONTIG-020911 | 89   | 11 | 28  | 0   | 0  |
| CONTIG-020912 | 656  | 18 | 172 | 282 | 0  |
| CONTIG-020913 | 312  | 7  | 10  | 47  | 0  |
| CONTIG-020916 | 434  | 30 | 12  | 14  | 0  |
| CONTIG-020917 | 276  | 11 | 15  | 139 | 0  |
| CONTIG-020918 | 325  | 13 | 85  | 84  | 2  |
| CONTIG-020919 | 411  | 15 | 140 | 131 | 0  |
| CONTIG-020920 | 323  | 11 | 17  | 117 | 0  |
| CONTIG-020921 | 407  | 9  | 35  | 95  | 0  |
| CONTIG-020922 | 379  | 21 | 147 | 183 | 2  |
| CONTIG-020923 | 78   | 11 | 53  | 0   | 0  |
| CONTIG-020924 | 248  | 25 | 26  | 133 | 17 |
| CONTIG-020925 | 69   | 20 | 132 | 2   | 0  |
| CONTIG-020926 | 96   | 6  | 0   | 33  | 0  |
| CONTIG-020928 | 59   | 13 | 43  | 0   | 0  |
| CONTIG-020929 | 109  | 12 | 2   | 31  | 0  |
| CONTIG-020930 | 44   | 4  | 4   | 3   | 0  |
| CONTIG-020931 | 118  | 29 | 10  | 80  | 0  |
| CONTIG-020932 | 122  | 15 | 32  | 41  | 0  |
| CONTIG-020933 | 91   | 4  | 11  | 3   | 0  |
| CONTIG-020934 | 208  | 14 | 34  | 87  | 0  |
| CONTIG-020935 | 283  | 15 | 67  | 175 | 0  |

|               |      |    |     |      |    |
|---------------|------|----|-----|------|----|
| CONTIG-020936 | 93   | 16 | 80  | 19   | 0  |
| CONTIG-020937 | 146  | 35 | 85  | 122  | 2  |
| CONTIG-020938 | 98   | 16 | 78  | 8    | 0  |
| CONTIG-020946 | 78   | 6  | 21  | 5    | 0  |
| CONTIG-020947 | 88   | 12 | 88  | 0    | 0  |
| CONTIG-020948 | 375  | 35 | 50  | 383  | 7  |
| CONTIG-020949 | 999  | 15 | 78  | 712  | 0  |
| CONTIG-020950 | 259  | 13 | 122 | 60   | 2  |
| CONTIG-020951 | 459  | 14 | 116 | 247  | 0  |
| CONTIG-020952 | 377  | 19 | 18  | 217  | 9  |
| CONTIG-020953 | 297  | 19 | 16  | 322  | 0  |
| CONTIG-020954 | 373  | 18 | 69  | 187  | 0  |
| CONTIG-020955 | 271  | 17 | 30  | 127  | 3  |
| CONTIG-020956 | 123  | 13 | 17  | 40   | 2  |
| CONTIG-020957 | 403  | 26 | 79  | 420  | 0  |
| CONTIG-020958 | 202  | 25 | 17  | 48   | 0  |
| CONTIG-020959 | 412  | 18 | 134 | 201  | 4  |
| CONTIG-020960 | 75   | 9  | 0   | 17   | 0  |
| CONTIG-020961 | 65   | 5  | 4   | 9    | 0  |
| CONTIG-020962 | 117  | 5  | 3   | 15   | 0  |
| CONTIG-020963 | 80   | 18 | 29  | 29   | 0  |
| CONTIG-020964 | 167  | 13 | 2   | 104  | 0  |
| CONTIG-020965 | 155  | 11 | 28  | 46   | 0  |
| CONTIG-020966 | 86   | 9  | 58  | 13   | 0  |
| CONTIG-020967 | 159  | 9  | 5   | 32   | 2  |
| CONTIG-020973 | 281  | 19 | 26  | 157  | 0  |
| CONTIG-020974 | 134  | 10 | 51  | 10   | 0  |
| CONTIG-020976 | 65   | 92 | 298 | 2    | 0  |
| CONTIG-020977 | 511  | 14 | 89  | 139  | 3  |
| CONTIG-020978 | 128  | 19 | 13  | 30   | 0  |
| CONTIG-020979 | 67   | 12 | 12  | 22   | 0  |
| CONTIG-020980 | 93   | 7  | 2   | 8    | 0  |
| CONTIG-020986 | 1047 | 26 | 228 | 750  | 55 |
| CONTIG-020987 | 58   | 10 | 37  | 2    | 0  |
| CONTIG-020988 | 223  | 7  | 11  | 69   | 0  |
| CONTIG-020989 | 942  | 37 | 516 | 980  | 14 |
| CONTIG-020990 | 139  | 5  | 0   | 12   | 0  |
| CONTIG-020991 | 925  | 13 | 77  | 353  | 5  |
| CONTIG-020992 | 1151 | 31 | 249 | 1689 | 2  |
| CONTIG-020993 | 196  | 36 | 18  | 302  | 6  |
| CONTIG-020994 | 877  | 16 | 78  | 496  | 4  |
| CONTIG-020995 | 95   | 17 | 29  | 31   | 0  |
| CONTIG-020996 | 66   | 10 | 43  | 0    | 0  |
| CONTIG-020997 | 576  | 8  | 20  | 149  | 4  |
| CONTIG-020998 | 183  | 30 | 53  | 264  | 0  |
| CONTIG-020999 | 521  | 15 | 62  | 159  | 6  |
| CONTIG-021000 | 321  | 18 | 57  | 41   | 0  |

|               |     |     |     |      |    |
|---------------|-----|-----|-----|------|----|
| CONTIG-021001 | 184 | 6   | 51  | 11   | 0  |
| CONTIG-021003 | 328 | 54  | 55  | 939  | 4  |
| CONTIG-021005 | 141 | 18  | 136 | 14   | 0  |
| CONTIG-021006 | 85  | 6   | 9   | 4    | 0  |
| CONTIG-021007 | 67  | 3   | 2   | 2    | 0  |
| CONTIG-021009 | 287 | 16  | 48  | 169  | 2  |
| CONTIG-021010 | 71  | 12  | 12  | 18   | 0  |
| CONTIG-021012 | 236 | 26  | 102 | 53   | 0  |
| CONTIG-021013 | 140 | 42  | 54  | 267  | 0  |
| CONTIG-021014 | 399 | 12  | 11  | 123  | 2  |
| CONTIG-021015 | 211 | 9   | 51  | 33   | 0  |
| CONTIG-021016 | 280 | 25  | 241 | 262  | 0  |
| CONTIG-021017 | 166 | 4   | 4   | 14   | 0  |
| CONTIG-021018 | 165 | 13  | 151 | 33   | 0  |
| CONTIG-021019 | 331 | 10  | 33  | 97   | 2  |
| CONTIG-021020 | 58  | 6   | 24  | 0    | 0  |
| CONTIG-021021 | 162 | 51  | 126 | 327  | 2  |
| CONTIG-021022 | 117 | 8   | 11  | 26   | 0  |
| CONTIG-021023 | 131 | 11  | 52  | 41   | 0  |
| CONTIG-021032 | 540 | 85  | 100 | 2421 | 9  |
| CONTIG-021033 | 283 | 8   | 7   | 63   | 0  |
| CONTIG-021034 | 82  | 11  | 45  | 15   | 0  |
| CONTIG-021036 | 107 | 148 | 72  | 392  | 17 |
| CONTIG-021037 | 690 | 14  | 122 | 295  | 4  |
| CONTIG-021038 | 170 | 11  | 8   | 32   | 0  |
| CONTIG-021039 | 512 | 10  | 7   | 0    | 11 |
| CONTIG-021040 | 123 | 16  | 14  | 34   | 4  |
| CONTIG-021042 | 501 | 8   | 4   | 16   | 0  |
| CONTIG-021043 | 163 | 24  | 30  | 115  | 0  |
| CONTIG-021044 | 209 | 12  | 43  | 66   | 0  |
| CONTIG-021045 | 318 | 15  | 79  | 98   | 2  |
| CONTIG-021046 | 126 | 11  | 10  | 46   | 0  |
| CONTIG-021047 | 134 | 16  | 60  | 23   | 0  |
| CONTIG-021048 | 202 | 12  | 11  | 101  | 0  |
| CONTIG-021049 | 169 | 10  | 2   | 64   | 0  |
| CONTIG-021050 | 48  | 137 | 120 | 238  | 0  |
| CONTIG-021051 | 355 | 40  | 238 | 314  | 13 |
| CONTIG-021052 | 69  | 57  | 58  | 97   | 0  |
| CONTIG-021061 | 314 | 13  | 43  | 139  | 0  |
| CONTIG-021062 | 345 | 16  | 3   | 14   | 0  |
| CONTIG-021063 | 186 | 14  | 6   | 33   | 2  |
| CONTIG-021064 | 149 | 6   | 3   | 31   | 0  |
| CONTIG-021065 | 631 | 42  | 302 | 1506 | 0  |
| CONTIG-021066 | 87  | 23  | 27  | 62   | 0  |
| CONTIG-021067 | 624 | 11  | 15  | 260  | 2  |
| CONTIG-021068 | 321 | 8   | 28  | 102  | 0  |
| CONTIG-021069 | 86  | 5   | 4   | 16   | 0  |

|               |     |     |     |      |    |
|---------------|-----|-----|-----|------|----|
| CONTIG-021070 | 138 | 9   | 63  | 7    | 0  |
| CONTIG-021071 | 169 | 31  | 233 | 77   | 0  |
| CONTIG-021072 | 187 | 6   | 37  | 10   | 0  |
| CONTIG-021074 | 325 | 19  | 24  | 189  | 0  |
| CONTIG-021075 | 419 | 11  | 47  | 72   | 0  |
| CONTIG-021076 | 531 | 13  | 84  | 232  | 0  |
| CONTIG-021077 | 136 | 8   | 4   | 39   | 0  |
| CONTIG-021078 | 129 | 14  | 42  | 25   | 0  |
| CONTIG-021079 | 70  | 17  | 17  | 6    | 0  |
| CONTIG-021080 | 242 | 13  | 13  | 83   | 0  |
| CONTIG-021081 | 918 | 24  | 222 | 590  | 8  |
| CONTIG-021082 | 384 | 53  | 233 | 295  | 38 |
| CONTIG-021083 | 233 | 11  | 52  | 83   | 0  |
| CONTIG-021084 | 508 | 15  | 112 | 235  | 4  |
| CONTIG-021085 | 220 | 34  | 169 | 185  | 2  |
| CONTIG-021086 | 424 | 11  | 11  | 106  | 4  |
| CONTIG-021087 | 108 | 39  | 7   | 178  | 0  |
| CONTIG-021091 | 100 | 22  | 79  | 61   | 0  |
| CONTIG-021092 | 226 | 13  | 36  | 67   | 0  |
| CONTIG-021094 | 74  | 6   | 26  | 0    | 0  |
| CONTIG-021095 | 78  | 4   | 12  | 0    | 0  |
| CONTIG-021096 | 966 | 113 | 88  | 5850 | 0  |
| CONTIG-021097 | 246 | 6   | 3   | 0    | 8  |
| CONTIG-021098 | 326 | 13  | 44  | 102  | 0  |
| CONTIG-021099 | 351 | 9   | 31  | 96   | 0  |
| CONTIG-021100 | 199 | 12  | 78  | 64   | 2  |
| CONTIG-021101 | 134 | 12  | 7   | 37   | 0  |
| CONTIG-021102 | 273 | 11  | 21  | 139  | 0  |
| CONTIG-021103 | 360 | 11  | 85  | 161  | 0  |
| CONTIG-021104 | 129 | 11  | 9   | 58   | 0  |
| CONTIG-021105 | 126 | 21  | 38  | 74   | 0  |
| CONTIG-021106 | 88  | 4   | 4   | 0    | 0  |
| CONTIG-021107 | 467 | 45  | 175 | 703  | 0  |
| CONTIG-021108 | 118 | 10  | 12  | 38   | 0  |
| CONTIG-021109 | 298 | 11  | 34  | 46   | 4  |
| CONTIG-021110 | 76  | 7   | 0   | 18   | 0  |
| CONTIG-021111 | 78  | 12  | 15  | 22   | 0  |
| CONTIG-021112 | 108 | 36  | 113 | 25   | 0  |
| CONTIG-021113 | 186 | 4   | 10  | 16   | 0  |
| CONTIG-021114 | 257 | 7   | 7   | 82   | 0  |
| CONTIG-021115 | 121 | 4   | 2   | 5    | 0  |
| CONTIG-021116 | 90  | 10  | 12  | 28   | 0  |
| CONTIG-021117 | 191 | 19  | 85  | 67   | 6  |
| CONTIG-021118 | 222 | 44  | 53  | 108  | 2  |
| CONTIG-021119 | 352 | 10  | 2   | 81   | 0  |
| CONTIG-021120 | 171 | 18  | 31  | 85   | 2  |
| CONTIG-021121 | 336 | 18  | 68  | 172  | 0  |

|               |      |     |     |      |    |
|---------------|------|-----|-----|------|----|
| CONTIG-021122 | 210  | 6   | 14  | 20   | 0  |
| CONTIG-021123 | 126  | 9   | 0   | 39   | 0  |
| CONTIG-021124 | 66   | 2   | 0   | 0    | 0  |
| CONTIG-021125 | 183  | 12  | 19  | 9    | 0  |
| CONTIG-021126 | 170  | 8   | 33  | 39   | 0  |
| CONTIG-021127 | 305  | 28  | 76  | 460  | 0  |
| CONTIG-021130 | 439  | 11  | 38  | 149  | 0  |
| CONTIG-021131 | 285  | 203 | 136 | 1158 | 83 |
| CONTIG-021132 | 98   | 13  | 10  | 25   | 0  |
| CONTIG-021133 | 174  | 15  | 184 | 16   | 0  |
| CONTIG-021134 | 160  | 17  | 17  | 86   | 0  |
| CONTIG-021145 | 127  | 6   | 23  | 5    | 0  |
| CONTIG-021146 | 175  | 16  | 4   | 112  | 0  |
| CONTIG-021147 | 214  | 13  | 13  | 45   | 0  |
| CONTIG-021148 | 270  | 106 | 57  | 1740 | 0  |
| CONTIG-021149 | 301  | 18  | 10  | 129  | 14 |
| CONTIG-021150 | 526  | 29  | 266 | 522  | 2  |
| CONTIG-021151 | 63   | 36  | 192 | 0    | 0  |
| CONTIG-021152 | 332  | 9   | 16  | 114  | 0  |
| CONTIG-021160 | 115  | 23  | 139 | 33   | 0  |
| CONTIG-021161 | 102  | 54  | 164 | 185  | 0  |
| CONTIG-021162 | 94   | 9   | 2   | 29   | 0  |
| CONTIG-021163 | 139  | 26  | 50  | 99   | 3  |
| CONTIG-021164 | 79   | 433 | 297 | 1145 | 89 |
| CONTIG-021165 | 256  | 23  | 192 | 42   | 0  |
| CONTIG-021166 | 584  | 19  | 169 | 429  | 0  |
| CONTIG-021167 | 105  | 9   | 12  | 31   | 0  |
| CONTIG-021168 | 1450 | 53  | 253 | 2258 | 99 |
| CONTIG-021169 | 103  | 10  | 47  | 12   | 0  |
| CONTIG-021170 | 538  | 20  | 33  | 273  | 0  |
| CONTIG-021172 | 167  | 30  | 21  | 283  | 0  |
| CONTIG-021173 | 154  | 71  | 97  | 217  | 24 |
| CONTIG-021174 | 123  | 4   | 2   | 3    | 0  |
| CONTIG-021175 | 62   | 4   | 0   | 3    | 0  |
| CONTIG-021178 | 198  | 14  | 11  | 46   | 0  |
| CONTIG-021179 | 64   | 4   | 0   | 9    | 0  |
| CONTIG-021181 | 206  | 6   | 3   | 23   | 0  |
| CONTIG-021182 | 74   | 3   | 4   | 0    | 0  |
| CONTIG-021183 | 497  | 22  | 75  | 410  | 0  |
| CONTIG-021185 | 69   | 5   | 6   | 6    | 0  |
| CONTIG-021186 | 369  | 8   | 24  | 82   | 0  |
| CONTIG-021187 | 308  | 100 | 44  | 1546 | 12 |
| CONTIG-021188 | 198  | 14  | 2   | 78   | 2  |
| CONTIG-021189 | 490  | 14  | 96  | 268  | 0  |
| CONTIG-021190 | 58   | 61  | 23  | 21   | 0  |
| CONTIG-021192 | 102  | 575 | 61  | 0    | 0  |
| CONTIG-021197 | 303  | 29  | 83  | 356  | 2  |

|               |      |      |     |      |      |
|---------------|------|------|-----|------|------|
| CONTIG-021198 | 103  | 8    | 0   | 16   | 0    |
| CONTIG-021199 | 66   | 5    | 2   | 13   | 0    |
| CONTIG-021200 | 193  | 7    | 5   | 21   | 0    |
| CONTIG-021201 | 145  | 8    | 15  | 32   | 0    |
| CONTIG-021202 | 134  | 83   | 79  | 508  | 0    |
| CONTIG-021203 | 700  | 24   | 73  | 589  | 25   |
| CONTIG-021204 | 59   | 7    | 30  | 6    | 0    |
| CONTIG-021205 | 120  | 12   | 2   | 33   | 0    |
| CONTIG-021206 | 201  | 11   | 24  | 61   | 0    |
| CONTIG-021207 | 310  | 9    | 48  | 52   | 0    |
| CONTIG-021215 | 121  | 11   | 8   | 39   | 0    |
| CONTIG-021216 | 230  | 10   | 10  | 71   | 0    |
| CONTIG-021217 | 280  | 16   | 77  | 92   | 0    |
| CONTIG-021218 | 663  | 38   | 146 | 470  | 96   |
| CONTIG-021219 | 73   | 5    | 16  | 3    | 0    |
| CONTIG-021222 | 41   | 572  | 19  | 60   | 0    |
| CONTIG-021223 | 215  | 21   | 25  | 183  | 0    |
| CONTIG-021224 | 61   | 7    | 20  | 0    | 0    |
| CONTIG-021225 | 99   | 6    | 16  | 15   | 0    |
| CONTIG-021226 | 256  | 9    | 34  | 63   | 0    |
| CONTIG-021227 | 68   | 2885 | 43  | 0    | 3510 |
| CONTIG-021228 | 161  | 15   | 3   | 107  | 0    |
| CONTIG-021229 | 140  | 10   | 5   | 68   | 0    |
| CONTIG-021230 | 130  | 26   | 21  | 146  | 0    |
| CONTIG-021231 | 97   | 41   | 139 | 145  | 0    |
| CONTIG-021233 | 79   | 3    | 5   | 4    | 0    |
| CONTIG-021234 | 597  | 11   | 87  | 141  | 2    |
| CONTIG-021235 | 103  | 4    | 8   | 9    | 0    |
| CONTIG-021236 | 119  | 26   | 40  | 110  | 0    |
| CONTIG-021237 | 487  | 12   | 22  | 190  | 0    |
| CONTIG-021238 | 330  | 70   | 72  | 1288 | 0    |
| CONTIG-021239 | 113  | 56   | 85  | 137  | 9    |
| CONTIG-021240 | 196  | 9    | 15  | 51   | 0    |
| CONTIG-021241 | 191  | 5    | 4   | 0    | 2    |
| CONTIG-021242 | 91   | 7    | 3   | 13   | 0    |
| CONTIG-021243 | 510  | 45   | 503 | 260  | 4    |
| CONTIG-021244 | 78   | 8    | 5   | 11   | 0    |
| CONTIG-021245 | 1055 | 26   | 74  | 1111 | 0    |
| CONTIG-021246 | 524  | 25   | 13  | 565  | 6    |
| CONTIG-021247 | 232  | 32   | 21  | 310  | 0    |
| CONTIG-021248 | 631  | 21   | 321 | 193  | 2    |
| CONTIG-021249 | 351  | 23   | 183 | 182  | 4    |
| CONTIG-021250 | 378  | 9    | 23  | 91   | 0    |
| CONTIG-021251 | 69   | 3    | 3   | 0    | 0    |
| CONTIG-021252 | 77   | 4    | 8   | 3    | 0    |
| CONTIG-021253 | 298  | 18   | 11  | 219  | 2    |
| CONTIG-021254 | 220  | 9    | 20  | 39   | 2    |

|               |      |    |     |      |     |
|---------------|------|----|-----|------|-----|
| CONTIG-021255 | 229  | 10 | 39  | 36   | 0   |
| CONTIG-021256 | 258  | 12 | 13  | 85   | 0   |
| CONTIG-021257 | 131  | 4  | 27  | 3    | 0   |
| CONTIG-021258 | 155  | 14 | 7   | 12   | 0   |
| CONTIG-021259 | 188  | 16 | 30  | 110  | 2   |
| CONTIG-021269 | 326  | 78 | 184 | 671  | 352 |
| CONTIG-021270 | 392  | 45 | 2   | 0    | 160 |
| CONTIG-021271 | 155  | 4  | 19  | 7    | 0   |
| CONTIG-021272 | 106  | 13 | 4   | 23   | 0   |
| CONTIG-021273 | 139  | 17 | 27  | 86   | 0   |
| CONTIG-021274 | 350  | 83 | 481 | 990  | 31  |
| CONTIG-021275 | 77   | 6  | 0   | 12   | 0   |
| CONTIG-021277 | 270  | 7  | 22  | 73   | 0   |
| CONTIG-021278 | 145  | 9  | 0   | 27   | 0   |
| CONTIG-021279 | 1062 | 48 | 182 | 3114 | 5   |
| CONTIG-021280 | 705  | 23 | 9   | 885  | 2   |
| CONTIG-021281 | 116  | 23 | 13  | 101  | 2   |
| CONTIG-021282 | 251  | 10 | 7   | 72   | 0   |
| CONTIG-021283 | 103  | 6  | 7   | 21   | 0   |
| CONTIG-021284 | 550  | 11 | 84  | 252  | 0   |
| CONTIG-021285 | 179  | 7  | 2   | 42   | 0   |
| CONTIG-021286 | 126  | 8  | 53  | 24   | 0   |
| CONTIG-021287 | 89   | 8  | 25  | 19   | 0   |
| CONTIG-021289 | 86   | 16 | 38  | 27   | 0   |
| CONTIG-021290 | 117  | 52 | 10  | 118  | 16  |
| CONTIG-021291 | 611  | 12 | 70  | 167  | 2   |
| CONTIG-021292 | 389  | 17 | 44  | 315  | 0   |
| CONTIG-021294 | 180  | 7  | 6   | 36   | 0   |
| CONTIG-021295 | 99   | 8  | 8   | 29   | 0   |
| CONTIG-021296 | 242  | 12 | 10  | 103  | 0   |
| CONTIG-021297 | 213  | 15 | 104 | 93   | 0   |
| CONTIG-021299 | 117  | 4  | 2   | 19   | 0   |
| CONTIG-021300 | 101  | 5  | 29  | 5    | 0   |
| CONTIG-021301 | 183  | 7  | 2   | 20   | 4   |
| CONTIG-021302 | 374  | 36 | 79  | 688  | 0   |
| CONTIG-021303 | 195  | 14 | 201 | 39   | 0   |
| CONTIG-021304 | 365  | 28 | 110 | 391  | 0   |
| CONTIG-021305 | 162  | 12 | 15  | 49   | 2   |
| CONTIG-021306 | 108  | 7  | 13  | 23   | 0   |
| CONTIG-021307 | 112  | 7  | 7   | 19   | 0   |
| CONTIG-021309 | 856  | 39 | 67  | 599  | 16  |
| CONTIG-021315 | 78   | 18 | 33  | 10   | 0   |
| CONTIG-021316 | 297  | 12 | 177 | 94   | 0   |
| CONTIG-021317 | 216  | 5  | 4   | 25   | 0   |
| CONTIG-021318 | 244  | 15 | 46  | 128  | 0   |
| CONTIG-021319 | 109  | 6  | 11  | 9    | 0   |
| CONTIG-021321 | 181  | 17 | 37  | 121  | 0   |



|               |      |     |     |      |    |
|---------------|------|-----|-----|------|----|
| CONTIG-021322 | 1316 | 19  | 24  | 1149 | 2  |
| CONTIG-021323 | 109  | 15  | 45  | 43   | 0  |
| CONTIG-021324 | 263  | 31  | 40  | 190  | 2  |
| CONTIG-021325 | 188  | 5   | 9   | 28   | 0  |
| CONTIG-021327 | 112  | 14  | 26  | 56   | 0  |
| CONTIG-021328 | 73   | 7   | 6   | 15   | 0  |
| CONTIG-021329 | 237  | 18  | 19  | 177  | 4  |
| CONTIG-021330 | 253  | 14  | 20  | 58   | 0  |
| CONTIG-021331 | 82   | 4   | 11  | 0    | 0  |
| CONTIG-021332 | 72   | 6   | 8   | 8    | 2  |
| CONTIG-021333 | 254  | 17  | 14  | 210  | 0  |
| CONTIG-021334 | 86   | 233 | 100 | 321  | 0  |
| CONTIG-021337 | 687  | 20  | 246 | 572  | 0  |
| CONTIG-021338 | 435  | 18  | 50  | 157  | 9  |
| CONTIG-021339 | 112  | 19  | 61  | 51   | 0  |
| CONTIG-021340 | 272  | 13  | 51  | 123  | 0  |
| CONTIG-021341 | 62   | 3   | 2   | 2    | 0  |
| CONTIG-021342 | 901  | 72  | 63  | 21   | 0  |
| CONTIG-021343 | 111  | 7   | 12  | 22   | 0  |
| CONTIG-021344 | 99   | 46  | 0   | 119  | 0  |
| CONTIG-021345 | 454  | 9   | 70  | 90   | 5  |
| CONTIG-021346 | 150  | 20  | 3   | 0    | 0  |
| CONTIG-021347 | 156  | 6   | 5   | 21   | 0  |
| CONTIG-021353 | 65   | 8   | 7   | 16   | 0  |
| CONTIG-021354 | 147  | 11  | 8   | 72   | 0  |
| CONTIG-021355 | 534  | 14  | 32  | 155  | 6  |
| CONTIG-021358 | 111  | 12  | 26  | 14   | 0  |
| CONTIG-021359 | 307  | 48  | 63  | 931  | 2  |
| CONTIG-021360 | 176  | 8   | 39  | 20   | 0  |
| CONTIG-021361 | 112  | 2   | 0   | 5    | 0  |
| CONTIG-021362 | 180  | 9   | 25  | 46   | 0  |
| CONTIG-021363 | 529  | 12  | 33  | 125  | 18 |
| CONTIG-021364 | 468  | 19  | 65  | 301  | 2  |
| CONTIG-021365 | 315  | 13  | 156 | 106  | 0  |
| CONTIG-021366 | 92   | 35  | 0   | 0    | 2  |
| CONTIG-021367 | 85   | 6   | 11  | 2    | 0  |
| CONTIG-021376 | 80   | 38  | 148 | 5    | 0  |
| CONTIG-021377 | 210  | 13  | 71  | 54   | 0  |
| CONTIG-021378 | 103  | 8   | 21  | 17   | 0  |
| CONTIG-021379 | 385  | 27  | 62  | 259  | 10 |
| CONTIG-021380 | 80   | 42  | 93  | 0    | 2  |
| CONTIG-021381 | 386  | 12  | 5   | 177  | 2  |
| CONTIG-021382 | 311  | 14  | 6   | 145  | 0  |
| CONTIG-021383 | 128  | 4   | 7   | 12   | 0  |
| CONTIG-021384 | 323  | 10  | 3   | 7    | 0  |
| CONTIG-021385 | 252  | 4   | 14  | 7    | 0  |
| CONTIG-021386 | 72   | 7   | 10  | 6    | 0  |

|               |      |     |     |      |     |
|---------------|------|-----|-----|------|-----|
| CONTIG-021388 | 85   | 8   | 23  | 8    | 0   |
| CONTIG-021389 | 64   | 6   | 23  | 7    | 0   |
| CONTIG-021390 | 286  | 9   | 15  | 64   | 2   |
| CONTIG-021391 | 69   | 17  | 6   | 39   | 0   |
| CONTIG-021392 | 399  | 17  | 74  | 112  | 9   |
| CONTIG-021393 | 476  | 10  | 14  | 159  | 2   |
| CONTIG-021394 | 241  | 12  | 38  | 53   | 0   |
| CONTIG-021395 | 79   | 3   | 4   | 0    | 0   |
| CONTIG-021396 | 161  | 7   | 12  | 28   | 0   |
| CONTIG-021397 | 123  | 10  | 22  | 13   | 0   |
| CONTIG-021398 | 285  | 14  | 33  | 110  | 3   |
| CONTIG-021399 | 129  | 8   | 4   | 24   | 4   |
| CONTIG-021400 | 94   | 8   | 51  | 0    | 0   |
| CONTIG-021401 | 171  | 7   | 22  | 35   | 0   |
| CONTIG-021402 | 217  | 6   | 0   | 0    | 9   |
| CONTIG-021403 | 649  | 13  | 13  | 310  | 2   |
| CONTIG-021404 | 420  | 9   | 15  | 143  | 0   |
| CONTIG-021406 | 169  | 3   | 8   | 16   | 0   |
| CONTIG-021407 | 172  | 14  | 31  | 95   | 0   |
| CONTIG-021419 | 77   | 8   | 10  | 19   | 0   |
| CONTIG-021420 | 209  | 17  | 115 | 77   | 0   |
| CONTIG-021421 | 136  | 21  | 51  | 108  | 0   |
| CONTIG-021424 | 705  | 14  | 95  | 226  | 2   |
| CONTIG-021425 | 163  | 5   | 14  | 4    | 0   |
| CONTIG-021426 | 63   | 9   | 0   | 6    | 0   |
| CONTIG-021427 | 257  | 9   | 120 | 41   | 0   |
| CONTIG-021428 | 127  | 9   | 32  | 28   | 0   |
| CONTIG-021429 | 90   | 5   | 0   | 20   | 0   |
| CONTIG-021430 | 83   | 16  | 30  | 46   | 0   |
| CONTIG-021431 | 93   | 8   | 63  | 0    | 0   |
| CONTIG-021432 | 148  | 9   | 25  | 22   | 0   |
| CONTIG-021433 | 309  | 41  | 19  | 523  | 4   |
| CONTIG-021434 | 254  | 12  | 41  | 48   | 0   |
| CONTIG-021435 | 150  | 3   | 2   | 12   | 0   |
| CONTIG-021436 | 530  | 27  | 92  | 454  | 6   |
| CONTIG-021437 | 468  | 20  | 108 | 336  | 35  |
| CONTIG-021442 | 151  | 11  | 37  | 17   | 0   |
| CONTIG-021443 | 271  | 18  | 44  | 187  | 7   |
| CONTIG-021444 | 160  | 218 | 168 | 1285 | 137 |
| CONTIG-021446 | 847  | 32  | 173 | 561  | 87  |
| CONTIG-021447 | 130  | 10  | 2   | 43   | 0   |
| CONTIG-021448 | 84   | 19  | 62  | 37   | 0   |
| CONTIG-021449 | 1079 | 20  | 91  | 1006 | 6   |
| CONTIG-021450 | 138  | 4   | 0   | 14   | 0   |
| CONTIG-021451 | 182  | 12  | 55  | 52   | 0   |
| CONTIG-021452 | 167  | 9   | 14  | 51   | 0   |
| CONTIG-021453 | 78   | 4   | 2   | 4    | 0   |

|               |      |     |     |      |    |
|---------------|------|-----|-----|------|----|
| CONTIG-021454 | 86   | 277 | 148 | 624  | 45 |
| CONTIG-021455 | 508  | 35  | 72  | 447  | 41 |
| CONTIG-021458 | 408  | 19  | 99  | 281  | 0  |
| CONTIG-021459 | 257  | 30  | 47  | 112  | 3  |
| CONTIG-021460 | 59   | 6   | 17  | 7    | 0  |
| CONTIG-021461 | 161  | 16  | 35  | 115  | 0  |
| CONTIG-021465 | 108  | 12  | 2   | 2    | 0  |
| CONTIG-021466 | 45   | 32  | 10  | 10   | 0  |
| CONTIG-021467 | 1083 | 14  | 52  | 240  | 0  |
| CONTIG-021468 | 75   | 6   | 6   | 5    | 0  |
| CONTIG-021471 | 149  | 9   | 28  | 31   | 0  |
| CONTIG-021472 | 638  | 13  | 76  | 270  | 2  |
| CONTIG-021480 | 81   | 13  | 25  | 0    | 0  |
| CONTIG-021481 | 78   | 8   | 30  | 5    | 0  |
| CONTIG-021482 | 64   | 11  | 24  | 14   | 0  |
| CONTIG-021483 | 79   | 11  | 8   | 8    | 0  |
| CONTIG-021484 | 80   | 6   | 10  | 0    | 0  |
| CONTIG-021488 | 237  | 8   | 40  | 38   | 2  |
| CONTIG-021489 | 121  | 11  | 9   | 43   | 0  |
| CONTIG-021490 | 72   | 53  | 277 | 0    | 0  |
| CONTIG-021491 | 136  | 6   | 0   | 27   | 0  |
| CONTIG-021492 | 268  | 55  | 205 | 224  | 4  |
| CONTIG-021493 | 422  | 25  | 52  | 477  | 0  |
| CONTIG-021494 | 128  | 9   | 11  | 22   | 0  |
| CONTIG-021495 | 505  | 21  | 15  | 242  | 14 |
| CONTIG-021496 | 587  | 43  | 289 | 1126 | 2  |
| CONTIG-021500 | 182  | 8   | 4   | 33   | 0  |
| CONTIG-021501 | 74   | 5   | 4   | 11   | 0  |
| CONTIG-021502 | 272  | 9   | 16  | 52   | 2  |
| CONTIG-021503 | 147  | 9   | 86  | 2    | 0  |
| CONTIG-021506 | 376  | 11  | 14  | 158  | 0  |
| CONTIG-021507 | 449  | 11  | 67  | 159  | 2  |
| CONTIG-021508 | 62   | 4   | 8   | 2    | 0  |
| CONTIG-021509 | 69   | 3   | 4   | 0    | 0  |
| CONTIG-021510 | 187  | 8   | 31  | 49   | 0  |
| CONTIG-021511 | 138  | 14  | 3   | 44   | 0  |
| CONTIG-021512 | 68   | 8   | 18  | 9    | 0  |
| CONTIG-021513 | 231  | 14  | 26  | 50   | 0  |
| CONTIG-021514 | 535  | 8   | 72  | 70   | 0  |
| CONTIG-021515 | 332  | 11  | 13  | 105  | 5  |
| CONTIG-021516 | 762  | 14  | 99  | 485  | 0  |
| CONTIG-021517 | 141  | 16  | 14  | 53   | 0  |
| CONTIG-021519 | 212  | 5   | 23  | 23   | 0  |
| CONTIG-021520 | 494  | 12  | 145 | 140  | 5  |
| CONTIG-021521 | 321  | 9   | 70  | 90   | 6  |
| CONTIG-021522 | 86   | 254 | 24  | 1067 | 2  |
| CONTIG-021523 | 145  | 17  | 45  | 70   | 0  |

|               |      |     |     |      |    |
|---------------|------|-----|-----|------|----|
| CONTIG-021524 | 88   | 4   | 7   | 8    | 0  |
| CONTIG-021525 | 74   | 10  | 21  | 7    | 0  |
| CONTIG-021526 | 151  | 10  | 23  | 31   | 0  |
| CONTIG-021527 | 394  | 43  | 128 | 492  | 24 |
| CONTIG-021528 | 165  | 20  | 77  | 83   | 0  |
| CONTIG-021529 | 170  | 5   | 4   | 28   | 0  |
| CONTIG-021530 | 86   | 6   | 2   | 7    | 0  |
| CONTIG-021531 | 876  | 33  | 107 | 1060 | 39 |
| CONTIG-021535 | 82   | 8   | 31  | 0    | 0  |
| CONTIG-021536 | 87   | 10  | 3   | 24   | 0  |
| CONTIG-021537 | 93   | 7   | 46  | 5    | 0  |
| CONTIG-021538 | 274  | 10  | 22  | 103  | 2  |
| CONTIG-021539 | 86   | 8   | 5   | 21   | 0  |
| CONTIG-021540 | 231  | 9   | 17  | 65   | 4  |
| CONTIG-021541 | 749  | 13  | 56  | 327  | 0  |
| CONTIG-021542 | 243  | 7   | 18  | 63   | 0  |
| CONTIG-021543 | 189  | 73  | 169 | 370  | 8  |
| CONTIG-021544 | 598  | 14  | 62  | 288  | 0  |
| CONTIG-021545 | 196  | 5   | 30  | 10   | 0  |
| CONTIG-021546 | 176  | 9   | 2   | 30   | 2  |
| CONTIG-021547 | 268  | 7   | 4   | 65   | 0  |
| CONTIG-021548 | 326  | 35  | 204 | 503  | 0  |
| CONTIG-021549 | 116  | 9   | 37  | 11   | 2  |
| CONTIG-021550 | 297  | 14  | 11  | 168  | 0  |
| CONTIG-021551 | 140  | 6   | 27  | 12   | 0  |
| CONTIG-021552 | 241  | 12  | 85  | 73   | 0  |
| CONTIG-021553 | 113  | 13  | 8   | 69   | 0  |
| CONTIG-021554 | 230  | 8   | 10  | 53   | 0  |
| CONTIG-021555 | 456  | 10  | 38  | 126  | 2  |
| CONTIG-021556 | 41   | 528 | 18  | 118  | 0  |
| CONTIG-021557 | 83   | 24  | 12  | 54   | 0  |
| CONTIG-021558 | 96   | 5   | 5   | 15   | 0  |
| CONTIG-021560 | 389  | 202 | 9   | 8    | 0  |
| CONTIG-021561 | 226  | 107 | 153 | 602  | 75 |
| CONTIG-021562 | 88   | 6   | 27  | 6    | 0  |
| CONTIG-021563 | 124  | 14  | 25  | 48   | 0  |
| CONTIG-021564 | 170  | 10  | 35  | 44   | 2  |
| CONTIG-021565 | 79   | 19  | 26  | 23   | 0  |
| CONTIG-021566 | 985  | 25  | 317 | 610  | 3  |
| CONTIG-021567 | 1456 | 30  | 117 | 2285 | 0  |
| CONTIG-021569 | 1208 | 18  | 93  | 457  | 0  |
| CONTIG-021570 | 200  | 7   | 6   | 31   | 0  |
| CONTIG-021571 | 206  | 34  | 169 | 91   | 0  |
| CONTIG-021572 | 304  | 8   | 22  | 66   | 0  |
| CONTIG-021573 | 594  | 32  | 136 | 674  | 0  |
| CONTIG-021574 | 256  | 19  | 16  | 120  | 4  |
| CONTIG-021575 | 59   | 11  | 19  | 0    | 0  |

|               |     |     |     |      |     |
|---------------|-----|-----|-----|------|-----|
| CONTIG-021576 | 756 | 14  | 73  | 240  | 16  |
| CONTIG-021577 | 134 | 10  | 53  | 6    | 0   |
| CONTIG-021578 | 123 | 19  | 28  | 91   | 0   |
| CONTIG-021579 | 611 | 15  | 137 | 369  | 0   |
| CONTIG-021580 | 596 | 16  | 77  | 299  | 2   |
| CONTIG-021581 | 80  | 33  | 0   | 77   | 4   |
| CONTIG-021585 | 380 | 50  | 73  | 799  | 6   |
| CONTIG-021586 | 353 | 154 | 95  | 2067 | 66  |
| CONTIG-021587 | 65  | 8   | 15  | 8    | 0   |
| CONTIG-021588 | 99  | 11  | 12  | 33   | 0   |
| CONTIG-021589 | 106 | 77  | 24  | 486  | 0   |
| CONTIG-021590 | 79  | 22  | 39  | 41   | 0   |
| CONTIG-021591 | 91  | 6   | 3   | 20   | 0   |
| CONTIG-021592 | 137 | 11  | 23  | 48   | 0   |
| CONTIG-021593 | 54  | 7   | 9   | 10   | 0   |
| CONTIG-021594 | 435 | 28  | 366 | 228  | 37  |
| CONTIG-021595 | 145 | 12  | 30  | 57   | 0   |
| CONTIG-021596 | 815 | 13  | 161 | 455  | 0   |
| CONTIG-021597 | 156 | 7   | 38  | 12   | 0   |
| CONTIG-021598 | 86  | 698 | 500 | 1186 | 100 |
| CONTIG-021599 | 375 | 36  | 49  | 778  | 0   |
| CONTIG-021600 | 58  | 5   | 18  | 0    | 0   |
| CONTIG-021601 | 119 | 12  | 12  | 64   | 2   |
| CONTIG-021602 | 523 | 16  | 72  | 242  | 2   |
| CONTIG-021603 | 258 | 12  | 21  | 46   | 0   |
| CONTIG-021604 | 84  | 7   | 0   | 21   | 0   |
| CONTIG-021605 | 292 | 15  | 44  | 53   | 0   |
| CONTIG-021606 | 178 | 11  | 25  | 75   | 0   |
| CONTIG-021608 | 248 | 13  | 20  | 83   | 2   |
| CONTIG-021609 | 249 | 14  | 24  | 40   | 0   |
| CONTIG-021610 | 306 | 9   | 12  | 68   | 0   |
| CONTIG-021611 | 298 | 6   | 21  | 15   | 0   |
| CONTIG-021612 | 406 | 11  | 111 | 104  | 2   |
| CONTIG-021620 | 683 | 15  | 148 | 258  | 2   |
| CONTIG-021621 | 170 | 9   | 0   | 0    | 4   |
| CONTIG-021623 | 304 | 10  | 9   | 125  | 2   |
| CONTIG-021624 | 133 | 34  | 120 | 2    | 0   |
| CONTIG-021625 | 68  | 5   | 2   | 5    | 2   |
| CONTIG-021626 | 926 | 90  | 260 | 4953 | 0   |
| CONTIG-021627 | 523 | 21  | 40  | 429  | 2   |
| CONTIG-021628 | 872 | 28  | 101 | 992  | 0   |
| CONTIG-021629 | 89  | 434 | 5   | 0    | 869 |
| CONTIG-021630 | 59  | 15  | 0   | 21   | 0   |
| CONTIG-021631 | 183 | 7   | 5   | 26   | 0   |
| CONTIG-021638 | 327 | 55  | 160 | 543  | 4   |
| CONTIG-021639 | 180 | 7   | 0   | 45   | 0   |
| CONTIG-021640 | 287 | 20  | 89  | 157  | 0   |

|               |      |     |     |      |    |
|---------------|------|-----|-----|------|----|
| CONTIG-021641 | 95   | 10  | 49  | 12   | 0  |
| CONTIG-021644 | 217  | 12  | 13  | 103  | 6  |
| CONTIG-021645 | 1423 | 28  | 126 | 1254 | 14 |
| CONTIG-021646 | 77   | 74  | 72  | 192  | 3  |
| CONTIG-021647 | 210  | 13  | 36  | 122  | 0  |
| CONTIG-021648 | 125  | 5   | 8   | 9    | 0  |
| CONTIG-021649 | 110  | 6   | 16  | 9    | 0  |
| CONTIG-021650 | 118  | 8   | 5   | 18   | 0  |
| CONTIG-021651 | 262  | 6   | 6   | 18   | 0  |
| CONTIG-021652 | 66   | 7   | 12  | 0    | 0  |
| CONTIG-021656 | 120  | 5   | 2   | 16   | 0  |
| CONTIG-021657 | 300  | 12  | 12  | 107  | 0  |
| CONTIG-021658 | 66   | 33  | 17  | 14   | 0  |
| CONTIG-021659 | 206  | 10  | 9   | 61   | 0  |
| CONTIG-021661 | 339  | 21  | 99  | 352  | 0  |
| CONTIG-021662 | 634  | 27  | 88  | 505  | 12 |
| CONTIG-021663 | 106  | 15  | 34  | 45   | 0  |
| CONTIG-021664 | 64   | 57  | 25  | 64   | 0  |
| CONTIG-021665 | 274  | 20  | 24  | 178  | 2  |
| CONTIG-021666 | 1277 | 20  | 277 | 608  | 4  |
| CONTIG-021667 | 95   | 5   | 6   | 10   | 0  |
| CONTIG-021668 | 273  | 18  | 37  | 191  | 2  |
| CONTIG-021669 | 375  | 12  | 28  | 160  | 2  |
| CONTIG-021670 | 277  | 6   | 8   | 12   | 4  |
| CONTIG-021671 | 299  | 14  | 15  | 181  | 0  |
| CONTIG-021674 | 217  | 12  | 11  | 120  | 0  |
| CONTIG-021675 | 116  | 30  | 32  | 89   | 6  |
| CONTIG-021676 | 77   | 17  | 136 | 0    | 0  |
| CONTIG-021677 | 341  | 16  | 30  | 68   | 0  |
| CONTIG-021678 | 114  | 305 | 165 | 1791 | 0  |
| CONTIG-021680 | 332  | 14  | 10  | 191  | 0  |
| CONTIG-021681 | 74   | 42  | 44  | 75   | 0  |
| CONTIG-021682 | 754  | 17  | 63  | 270  | 13 |
| CONTIG-021683 | 58   | 4   | 3   | 0    | 0  |
| CONTIG-021684 | 347  | 9   | 50  | 61   | 4  |
| CONTIG-021685 | 90   | 6   | 10  | 14   | 0  |
| CONTIG-021686 | 84   | 77  | 203 | 67   | 2  |
| CONTIG-021687 | 81   | 17  | 3   | 28   | 2  |
| CONTIG-021688 | 89   | 8   | 6   | 35   | 0  |
| CONTIG-021689 | 246  | 10  | 27  | 84   | 0  |
| CONTIG-021690 | 184  | 13  | 12  | 65   | 0  |
| CONTIG-021691 | 172  | 30  | 180 | 85   | 0  |
| CONTIG-021692 | 289  | 152 | 383 | 1827 | 23 |
| CONTIG-021693 | 520  | 9   | 11  | 188  | 0  |
| CONTIG-021694 | 88   | 3   | 3   | 4    | 0  |
| CONTIG-021696 | 129  | 17  | 132 | 16   | 0  |
| CONTIG-021699 | 330  | 10  | 13  | 84   | 0  |

|               |      |     |     |     |    |
|---------------|------|-----|-----|-----|----|
| CONTIG-021700 | 945  | 18  | 31  | 335 | 0  |
| CONTIG-021701 | 290  | 9   | 17  | 79  | 0  |
| CONTIG-021702 | 258  | 26  | 174 | 143 | 17 |
| CONTIG-021703 | 305  | 17  | 49  | 227 | 0  |
| CONTIG-021704 | 205  | 7   | 8   | 35  | 2  |
| CONTIG-021705 | 177  | 8   | 4   | 33  | 2  |
| CONTIG-021706 | 48   | 432 | 112 | 318 | 44 |
| CONTIG-021708 | 327  | 7   | 8   | 44  | 0  |
| CONTIG-021709 | 118  | 5   | 2   | 26  | 0  |
| CONTIG-021710 | 122  | 8   | 14  | 28  | 0  |
| CONTIG-021711 | 121  | 10  | 9   | 55  | 0  |
| CONTIG-021712 | 113  | 10  | 15  | 37  | 0  |
| CONTIG-021713 | 248  | 15  | 100 | 118 | 0  |
| CONTIG-021714 | 91   | 5   | 8   | 14  | 0  |
| CONTIG-021715 | 87   | 6   | 0   | 22  | 0  |
| CONTIG-021717 | 147  | 11  | 4   | 42  | 2  |
| CONTIG-021718 | 460  | 16  | 70  | 264 | 0  |
| CONTIG-021719 | 1054 | 22  | 229 | 865 | 0  |
| CONTIG-021720 | 175  | 38  | 70  | 228 | 0  |
| CONTIG-021721 | 143  | 18  | 67  | 71  | 0  |
| CONTIG-021722 | 73   | 19  | 30  | 42  | 0  |
| CONTIG-021724 | 66   | 5   | 5   | 3   | 0  |
| CONTIG-021725 | 1076 | 26  | 224 | 757 | 8  |
| CONTIG-021727 | 69   | 5   | 4   | 4   | 0  |
| CONTIG-021728 | 56   | 50  | 36  | 55  | 0  |
| CONTIG-021729 | 177  | 9   | 22  | 58  | 0  |
| CONTIG-021736 | 275  | 23  | 52  | 84  | 20 |
| CONTIG-021737 | 335  | 12  | 0   | 133 | 2  |
| CONTIG-021738 | 99   | 8   | 0   | 28  | 0  |
| CONTIG-021739 | 536  | 16  | 89  | 356 | 0  |
| CONTIG-021740 | 207  | 17  | 88  | 50  | 3  |
| CONTIG-021742 | 318  | 26  | 32  | 256 | 0  |
| CONTIG-021744 | 151  | 3   | 2   | 7   | 0  |
| CONTIG-021745 | 701  | 37  | 289 | 332 | 2  |
| CONTIG-021746 | 260  | 20  | 101 | 149 | 5  |
| CONTIG-021747 | 367  | 76  | 193 | 619 | 68 |
| CONTIG-021748 | 68   | 3   | 3   | 4   | 0  |
| CONTIG-021749 | 480  | 21  | 141 | 265 | 0  |
| CONTIG-021750 | 167  | 7   | 8   | 51  | 0  |
| CONTIG-021752 | 314  | 9   | 31  | 90  | 0  |
| CONTIG-021753 | 228  | 10  | 35  | 50  | 0  |
| CONTIG-021754 | 179  | 6   | 6   | 24  | 0  |
| CONTIG-021755 | 160  | 7   | 43  | 19  | 0  |
| CONTIG-021756 | 469  | 11  | 6   | 0   | 48 |
| CONTIG-021757 | 128  | 3   | 0   | 0   | 0  |
| CONTIG-021760 | 230  | 22  | 99  | 200 | 0  |
| CONTIG-021761 | 196  | 19  | 39  | 143 | 0  |

|               |      |     |     |     |     |
|---------------|------|-----|-----|-----|-----|
| CONTIG-021763 | 144  | 275 | 187 | 831 | 190 |
| CONTIG-021764 | 208  | 44  | 61  | 396 | 0   |
| CONTIG-021765 | 85   | 40  | 193 | 2   | 0   |
| CONTIG-021766 | 149  | 4   | 6   | 6   | 0   |
| CONTIG-021767 | 200  | 9   | 35  | 67  | 0   |
| CONTIG-021768 | 47   | 8   | 3   | 13  | 0   |
| CONTIG-021770 | 171  | 14  | 16  | 76  | 0   |
| CONTIG-021771 | 184  | 177 | 286 | 691 | 61  |
| CONTIG-021772 | 217  | 30  | 55  | 188 | 2   |
| CONTIG-021775 | 124  | 5   | 7   | 0   | 0   |
| CONTIG-021776 | 253  | 20  | 23  | 80  | 0   |
| CONTIG-021777 | 175  | 27  | 19  | 216 | 0   |
| CONTIG-021778 | 215  | 19  | 141 | 49  | 0   |
| CONTIG-021783 | 156  | 6   | 12  | 9   | 0   |
| CONTIG-021784 | 227  | 10  | 34  | 94  | 0   |
| CONTIG-021785 | 75   | 4   | 11  | 9   | 0   |
| CONTIG-021786 | 67   | 7   | 10  | 13  | 0   |
| CONTIG-021787 | 612  | 13  | 14  | 180 | 0   |
| CONTIG-021788 | 395  | 26  | 433 | 125 | 0   |
| CONTIG-021789 | 186  | 6   | 41  | 16  | 0   |
| CONTIG-021790 | 51   | 471 | 130 | 916 | 2   |
| CONTIG-021791 | 239  | 12  | 55  | 91  | 0   |
| CONTIG-021792 | 230  | 8   | 10  | 30  | 0   |
| CONTIG-021793 | 498  | 15  | 27  | 211 | 12  |
| CONTIG-021794 | 200  | 5   | 2   | 44  | 0   |
| CONTIG-021796 | 411  | 17  | 38  | 167 | 2   |
| CONTIG-021798 | 585  | 21  | 32  | 595 | 0   |
| CONTIG-021801 | 131  | 28  | 18  | 114 | 0   |
| CONTIG-021802 | 94   | 5   | 11  | 11  | 0   |
| CONTIG-021803 | 78   | 5   | 12  | 10  | 0   |
| CONTIG-021804 | 1138 | 12  | 47  | 352 | 4   |
| CONTIG-021805 | 220  | 6   | 2   | 22  | 0   |
| CONTIG-021806 | 62   | 8   | 19  | 5   | 0   |
| CONTIG-021807 | 122  | 11  | 19  | 2   | 0   |
| CONTIG-021808 | 261  | 10  | 42  | 101 | 0   |
| CONTIG-021809 | 399  | 17  | 64  | 222 | 2   |
| CONTIG-021810 | 130  | 13  | 7   | 76  | 0   |
| CONTIG-021811 | 551  | 15  | 141 | 169 | 3   |
| CONTIG-021812 | 77   | 4   | 11  | 2   | 0   |
| CONTIG-021813 | 299  | 21  | 10  | 128 | 5   |
| CONTIG-021815 | 328  | 19  | 71  | 234 | 2   |
| CONTIG-021816 | 151  | 10  | 15  | 44  | 0   |
| CONTIG-021817 | 146  | 7   | 5   | 32  | 0   |
| CONTIG-021818 | 180  | 14  | 19  | 107 | 0   |
| CONTIG-021819 | 785  | 16  | 89  | 338 | 4   |
| CONTIG-021820 | 279  | 26  | 62  | 150 | 2   |
| CONTIG-021821 | 76   | 6   | 3   | 12  | 2   |



|               |      |     |     |      |     |
|---------------|------|-----|-----|------|-----|
| CONTIG-021822 | 121  | 4   | 4   | 11   | 0   |
| CONTIG-021823 | 68   | 4   | 2   | 4    | 0   |
| CONTIG-021824 | 151  | 11  | 54  | 13   | 0   |
| CONTIG-021825 | 294  | 7   | 11  | 70   | 0   |
| CONTIG-021826 | 56   | 104 | 9   | 187  | 0   |
| CONTIG-021827 | 156  | 4   | 8   | 13   | 0   |
| CONTIG-021828 | 203  | 14  | 17  | 61   | 0   |
| CONTIG-021829 | 221  | 12  | 6   | 114  | 2   |
| CONTIG-021832 | 186  | 25  | 135 | 63   | 0   |
| CONTIG-021833 | 372  | 10  | 52  | 56   | 4   |
| CONTIG-021834 | 100  | 13  | 19  | 33   | 0   |
| CONTIG-021835 | 95   | 60  | 67  | 201  | 4   |
| CONTIG-021836 | 422  | 20  | 122 | 320  | 2   |
| CONTIG-021837 | 97   | 3   | 2   | 6    | 0   |
| CONTIG-021838 | 296  | 27  | 322 | 186  | 0   |
| CONTIG-021839 | 705  | 11  | 79  | 165  | 0   |
| CONTIG-021840 | 197  | 27  | 75  | 115  | 0   |
| CONTIG-021841 | 71   | 9   | 2   | 20   | 0   |
| CONTIG-021844 | 199  | 79  | 199 | 326  | 19  |
| CONTIG-021845 | 435  | 17  | 41  | 165  | 0   |
| CONTIG-021846 | 60   | 8   | 21  | 2    | 0   |
| CONTIG-021847 | 294  | 31  | 103 | 228  | 2   |
| CONTIG-021848 | 370  | 21  | 163 | 208  | 0   |
| CONTIG-021849 | 1898 | 27  | 83  | 3024 | 2   |
| CONTIG-021850 | 610  | 33  | 130 | 432  | 32  |
| CONTIG-021851 | 68   | 7   | 7   | 5    | 0   |
| CONTIG-021852 | 280  | 28  | 105 | 281  | 6   |
| CONTIG-021853 | 495  | 150 | 4   | 0    | 367 |
| CONTIG-021854 | 226  | 6   | 6   | 47   | 0   |
| CONTIG-021855 | 282  | 25  | 55  | 351  | 0   |
| CONTIG-021856 | 93   | 187 | 190 | 429  | 2   |
| CONTIG-021857 | 231  | 15  | 61  | 73   | 0   |
| CONTIG-021858 | 100  | 18  | 41  | 56   | 2   |
| CONTIG-021859 | 519  | 19  | 167 | 173  | 0   |
| CONTIG-021860 | 297  | 9   | 3   | 82   | 0   |
| CONTIG-021861 | 72   | 4   | 2   | 0    | 0   |
| CONTIG-021862 | 174  | 17  | 21  | 33   | 2   |
| CONTIG-021863 | 50   | 178 | 58  | 4    | 0   |
| CONTIG-021864 | 307  | 31  | 42  | 337  | 0   |
| CONTIG-021865 | 135  | 14  | 53  | 71   | 0   |
| CONTIG-021867 | 62   | 9   | 24  | 2    | 0   |
| CONTIG-021868 | 189  | 19  | 27  | 132  | 0   |
| CONTIG-021869 | 280  | 12  | 4   | 88   | 8   |
| CONTIG-021870 | 1076 | 16  | 71  | 461  | 12  |
| CONTIG-021871 | 283  | 6   | 2   | 21   | 9   |
| CONTIG-021872 | 666  | 24  | 119 | 459  | 2   |
| CONTIG-021873 | 243  | 6   | 18  | 53   | 0   |

|               |     |     |     |     |    |
|---------------|-----|-----|-----|-----|----|
| CONTIG-021874 | 104 | 4   | 2   | 5   | 0  |
| CONTIG-021875 | 105 | 7   | 15  | 17  | 0  |
| CONTIG-021876 | 618 | 11  | 19  | 257 | 2  |
| CONTIG-021877 | 458 | 14  | 49  | 251 | 2  |
| CONTIG-021878 | 589 | 52  | 155 | 474 | 74 |
| CONTIG-021879 | 437 | 13  | 96  | 210 | 0  |
| CONTIG-021880 | 540 | 42  | 217 | 976 | 2  |
| CONTIG-021881 | 359 | 50  | 238 | 244 | 15 |
| CONTIG-021883 | 468 | 23  | 72  | 293 | 14 |
| CONTIG-021884 | 122 | 27  | 4   | 171 | 2  |
| CONTIG-021891 | 291 | 9   | 11  | 49  | 2  |
| CONTIG-021892 | 752 | 17  | 57  | 185 | 6  |
| CONTIG-021893 | 349 | 22  | 22  | 280 | 0  |
| CONTIG-021895 | 85  | 103 | 19  | 412 | 0  |
| CONTIG-021896 | 507 | 21  | 76  | 427 | 0  |
| CONTIG-021897 | 562 | 24  | 26  | 556 | 13 |
| CONTIG-021898 | 142 | 10  | 17  | 37  | 2  |
| CONTIG-021899 | 65  | 3   | 2   | 0   | 0  |
| CONTIG-021900 | 369 | 14  | 6   | 11  | 0  |
| CONTIG-021901 | 288 | 17  | 79  | 140 | 0  |
| CONTIG-021902 | 92  | 87  | 65  | 178 | 4  |
| CONTIG-021903 | 182 | 32  | 25  | 130 | 9  |
| CONTIG-021904 | 403 | 50  | 138 | 601 | 19 |
| CONTIG-021905 | 70  | 418 | 284 | 573 | 50 |
| CONTIG-021906 | 230 | 24  | 25  | 225 | 0  |
| CONTIG-021907 | 151 | 4   | 2   | 13  | 0  |
| CONTIG-021908 | 99  | 6   | 7   | 11  | 0  |
| CONTIG-021909 | 286 | 246 | 74  | 12  | 0  |
| CONTIG-021910 | 117 | 7   | 16  | 8   | 0  |
| CONTIG-021911 | 280 | 10  | 13  | 59  | 2  |
| CONTIG-021912 | 144 | 5   | 15  | 2   | 0  |
| CONTIG-021913 | 101 | 21  | 38  | 28  | 0  |
| CONTIG-021914 | 340 | 14  | 23  | 158 | 0  |
| CONTIG-021915 | 97  | 6   | 5   | 17  | 0  |
| CONTIG-021916 | 284 | 8   | 51  | 44  | 0  |
| CONTIG-021917 | 924 | 16  | 26  | 900 | 0  |
| CONTIG-021918 | 313 | 42  | 170 | 407 | 9  |
| CONTIG-021919 | 228 | 8   | 4   | 57  | 0  |
| CONTIG-021920 | 207 | 83  | 159 | 382 | 2  |
| CONTIG-021921 | 112 | 6   | 0   | 33  | 0  |
| CONTIG-021922 | 422 | 18  | 46  | 194 | 0  |
| CONTIG-021923 | 571 | 12  | 12  | 217 | 2  |
| CONTIG-021924 | 142 | 10  | 26  | 25  | 0  |
| CONTIG-021925 | 82  | 21  | 10  | 22  | 0  |
| CONTIG-021926 | 283 | 46  | 271 | 252 | 4  |
| CONTIG-021928 | 587 | 25  | 214 | 167 | 5  |
| CONTIG-021929 | 145 | 5   | 7   | 21  | 0  |

|               |     |     |     |      |     |
|---------------|-----|-----|-----|------|-----|
| CONTIG-021930 | 99  | 4   | 16  | 0    | 0   |
| CONTIG-021938 | 405 | 24  | 70  | 344  | 0   |
| CONTIG-021940 | 102 | 25  | 32  | 0    | 0   |
| CONTIG-021949 | 249 | 16  | 109 | 89   | 0   |
| CONTIG-021950 | 827 | 47  | 30  | 14   | 0   |
| CONTIG-021951 | 178 | 8   | 12  | 20   | 0   |
| CONTIG-021952 | 90  | 84  | 31  | 104  | 0   |
| CONTIG-021953 | 49  | 303 | 41  | 670  | 0   |
| CONTIG-021957 | 112 | 12  | 7   | 54   | 0   |
| CONTIG-021958 | 237 | 6   | 23  | 33   | 0   |
| CONTIG-021959 | 69  | 6   | 0   | 13   | 0   |
| CONTIG-021960 | 214 | 5   | 7   | 26   | 0   |
| CONTIG-021961 | 99  | 12  | 37  | 24   | 0   |
| CONTIG-021963 | 152 | 6   | 0   | 22   | 0   |
| CONTIG-021964 | 116 | 3   | 2   | 6    | 0   |
| CONTIG-021965 | 85  | 6   | 24  | 2    | 0   |
| CONTIG-021966 | 238 | 8   | 58  | 25   | 0   |
| CONTIG-021967 | 713 | 46  | 108 | 1548 | 0   |
| CONTIG-021973 | 330 | 18  | 91  | 42   | 11  |
| CONTIG-021974 | 95  | 53  | 16  | 255  | 0   |
| CONTIG-021975 | 333 | 6   | 15  | 49   | 0   |
| CONTIG-021976 | 180 | 9   | 48  | 14   | 0   |
| CONTIG-021977 | 322 | 11  | 58  | 45   | 0   |
| CONTIG-021978 | 487 | 8   | 19  | 102  | 0   |
| CONTIG-021979 | 243 | 293 | 0   | 0    | 297 |
| CONTIG-021980 | 217 | 11  | 2   | 103  | 0   |
| CONTIG-021981 | 65  | 8   | 4   | 0    | 0   |
| CONTIG-021982 | 99  | 7   | 11  | 14   | 0   |
| CONTIG-021989 | 66  | 6   | 6   | 6    | 0   |
| CONTIG-021990 | 85  | 60  | 113 | 189  | 0   |
| CONTIG-021992 | 145 | 12  | 8   | 46   | 4   |
| CONTIG-021993 | 393 | 9   | 24  | 115  | 2   |
| CONTIG-021994 | 97  | 97  | 157 | 389  | 0   |
| CONTIG-021995 | 62  | 5   | 17  | 2    | 0   |
| CONTIG-021996 | 68  | 8   | 4   | 25   | 0   |
| CONTIG-021998 | 222 | 5   | 23  | 17   | 0   |
| CONTIG-021999 | 451 | 51  | 239 | 873  | 4   |
| CONTIG-022000 | 549 | 19  | 237 | 285  | 0   |
| CONTIG-022001 | 492 | 22  | 138 | 337  | 5   |
| CONTIG-022002 | 159 | 6   | 5   | 31   | 0   |
| CONTIG-022003 | 79  | 3   | 0   | 10   | 0   |
| CONTIG-022004 | 236 | 85  | 196 | 215  | 0   |
| CONTIG-022005 | 142 | 11  | 12  | 53   | 0   |
| CONTIG-022006 | 165 | 8   | 12  | 39   | 0   |
| CONTIG-022007 | 79  | 10  | 89  | 0    | 0   |
| CONTIG-022008 | 555 | 13  | 102 | 238  | 0   |
| CONTIG-022009 | 88  | 4   | 0   | 14   | 0   |

|               |      |     |     |      |    |
|---------------|------|-----|-----|------|----|
| CONTIG-022010 | 398  | 17  | 114 | 118  | 0  |
| CONTIG-022011 | 64   | 7   | 9   | 8    | 0  |
| CONTIG-022012 | 262  | 33  | 185 | 85   | 0  |
| CONTIG-022013 | 94   | 16  | 34  | 18   | 0  |
| CONTIG-022014 | 78   | 11  | 52  | 0    | 0  |
| CONTIG-022015 | 314  | 13  | 28  | 137  | 6  |
| CONTIG-022017 | 841  | 26  | 188 | 621  | 4  |
| CONTIG-022018 | 170  | 4   | 7   | 12   | 0  |
| CONTIG-022019 | 248  | 7   | 15  | 55   | 0  |
| CONTIG-022020 | 440  | 7   | 9   | 87   | 0  |
| CONTIG-022021 | 107  | 12  | 15  | 51   | 0  |
| CONTIG-022022 | 73   | 8   | 15  | 15   | 0  |
| CONTIG-022024 | 141  | 11  | 53  | 34   | 0  |
| CONTIG-022025 | 259  | 31  | 103 | 423  | 0  |
| CONTIG-022026 | 326  | 8   | 13  | 64   | 0  |
| CONTIG-022027 | 331  | 6   | 7   | 48   | 2  |
| CONTIG-022028 | 156  | 16  | 35  | 71   | 0  |
| CONTIG-022032 | 81   | 5   | 30  | 4    | 0  |
| CONTIG-022033 | 129  | 6   | 25  | 5    | 0  |
| CONTIG-022035 | 133  | 55  | 68  | 87   | 5  |
| CONTIG-022038 | 238  | 15  | 9   | 56   | 3  |
| CONTIG-022039 | 62   | 4   | 20  | 0    | 0  |
| CONTIG-022040 | 381  | 12  | 97  | 99   | 5  |
| CONTIG-022041 | 622  | 10  | 67  | 216  | 0  |
| CONTIG-022042 | 536  | 17  | 18  | 385  | 0  |
| CONTIG-022043 | 668  | 17  | 87  | 380  | 0  |
| CONTIG-022044 | 449  | 11  | 85  | 93   | 2  |
| CONTIG-022045 | 267  | 7   | 27  | 38   | 0  |
| CONTIG-022046 | 458  | 34  | 78  | 348  | 63 |
| CONTIG-022047 | 83   | 3   | 3   | 7    | 0  |
| CONTIG-022048 | 295  | 7   | 19  | 64   | 0  |
| CONTIG-022049 | 98   | 11  | 24  | 27   | 0  |
| CONTIG-022050 | 89   | 33  | 47  | 76   | 0  |
| CONTIG-022056 | 204  | 335 | 378 | 3087 | 73 |
| CONTIG-022057 | 243  | 5   | 9   | 45   | 0  |
| CONTIG-022058 | 149  | 8   | 4   | 34   | 2  |
| CONTIG-022059 | 415  | 21  | 165 | 205  | 0  |
| CONTIG-022060 | 89   | 35  | 32  | 2    | 0  |
| CONTIG-022061 | 464  | 12  | 14  | 239  | 0  |
| CONTIG-022062 | 60   | 5   | 15  | 3    | 0  |
| CONTIG-022063 | 77   | 10  | 31  | 8    | 0  |
| CONTIG-022069 | 688  | 9   | 58  | 145  | 0  |
| CONTIG-022070 | 122  | 45  | 57  | 204  | 0  |
| CONTIG-022074 | 81   | 458 | 195 | 831  | 8  |
| CONTIG-022075 | 200  | 81  | 192 | 759  | 0  |
| CONTIG-022076 | 1084 | 21  | 11  | 18   | 0  |
| CONTIG-022077 | 278  | 13  | 37  | 131  | 0  |

|               |      |     |     |      |    |
|---------------|------|-----|-----|------|----|
| CONTIG-022078 | 266  | 16  | 50  | 99   | 3  |
| CONTIG-022079 | 88   | 3   | 2   | 5    | 0  |
| CONTIG-022080 | 787  | 36  | 189 | 1027 | 4  |
| CONTIG-022082 | 78   | 5   | 6   | 6    | 0  |
| CONTIG-022083 | 252  | 9   | 46  | 56   | 0  |
| CONTIG-022084 | 150  | 10  | 24  | 30   | 0  |
| CONTIG-022085 | 69   | 5   | 9   | 8    | 0  |
| CONTIG-022086 | 250  | 7   | 7   | 46   | 0  |
| CONTIG-022087 | 637  | 15  | 61  | 225  | 0  |
| CONTIG-022088 | 123  | 4   | 6   | 15   | 0  |
| CONTIG-022089 | 88   | 5   | 6   | 14   | 0  |
| CONTIG-022090 | 290  | 5   | 16  | 22   | 0  |
| CONTIG-022091 | 57   | 332 | 3   | 0    | 6  |
| CONTIG-022092 | 169  | 16  | 158 | 25   | 0  |
| CONTIG-022093 | 685  | 11  | 40  | 207  | 2  |
| CONTIG-022094 | 1006 | 21  | 104 | 381  | 6  |
| CONTIG-022095 | 110  | 5   | 2   | 6    | 0  |
| CONTIG-022097 | 159  | 4   | 2   | 23   | 0  |
| CONTIG-022098 | 88   | 20  | 21  | 49   | 0  |
| CONTIG-022099 | 135  | 16  | 88  | 42   | 2  |
| CONTIG-022100 | 98   | 78  | 52  | 256  | 0  |
| CONTIG-022101 | 108  | 7   | 3   | 19   | 0  |
| CONTIG-022102 | 889  | 24  | 128 | 636  | 6  |
| CONTIG-022105 | 920  | 24  | 51  | 558  | 22 |
| CONTIG-022106 | 76   | 5   | 2   | 0    | 0  |
| CONTIG-022107 | 348  | 14  | 14  | 217  | 0  |
| CONTIG-022109 | 245  | 9   | 8   | 90   | 0  |
| CONTIG-022110 | 317  | 13  | 57  | 169  | 0  |
| CONTIG-022111 | 925  | 13  | 107 | 396  | 2  |
| CONTIG-022112 | 201  | 8   | 3   | 45   | 2  |
| CONTIG-022113 | 71   | 7   | 2   | 15   | 0  |
| CONTIG-022114 | 292  | 10  | 0   | 0    | 2  |
| CONTIG-022115 | 217  | 14  | 63  | 24   | 0  |
| CONTIG-022116 | 75   | 7   | 21  | 2    | 0  |
| CONTIG-022117 | 419  | 15  | 37  | 175  | 0  |
| CONTIG-022118 | 69   | 7   | 15  | 3    | 0  |
| CONTIG-022119 | 97   | 207 | 11  | 0    | 0  |
| CONTIG-022120 | 296  | 14  | 22  | 175  | 0  |
| CONTIG-022121 | 967  | 13  | 42  | 221  | 4  |
| CONTIG-022122 | 110  | 9   | 30  | 2    | 0  |
| CONTIG-022123 | 121  | 8   | 15  | 9    | 0  |
| CONTIG-022124 | 299  | 24  | 47  | 310  | 0  |
| CONTIG-022125 | 363  | 17  | 20  | 97   | 0  |
| CONTIG-022126 | 44   | 64  | 12  | 98   | 0  |
| CONTIG-022127 | 100  | 18  | 14  | 50   | 0  |
| CONTIG-022128 | 72   | 10  | 4   | 0    | 4  |
| CONTIG-022129 | 196  | 5   | 10  | 13   | 0  |

|               |     |     |     |      |    |
|---------------|-----|-----|-----|------|----|
| CONTIG-022130 | 589 | 12  | 43  | 279  | 0  |
| CONTIG-022131 | 320 | 26  | 240 | 208  | 0  |
| CONTIG-022132 | 123 | 14  | 16  | 25   | 0  |
| CONTIG-022133 | 327 | 9   | 51  | 38   | 0  |
| CONTIG-022134 | 101 | 7   | 2   | 23   | 4  |
| CONTIG-022137 | 546 | 25  | 92  | 590  | 0  |
| CONTIG-022138 | 117 | 3   | 10  | 6    | 0  |
| CONTIG-022139 | 568 | 18  | 131 | 324  | 4  |
| CONTIG-022140 | 182 | 20  | 36  | 135  | 2  |
| CONTIG-022141 | 617 | 22  | 33  | 85   | 0  |
| CONTIG-022142 | 135 | 197 | 13  | 1377 | 0  |
| CONTIG-022143 | 79  | 34  | 0   | 91   | 2  |
| CONTIG-022144 | 494 | 52  | 39  | 770  | 93 |
| CONTIG-022145 | 192 | 16  | 49  | 124  | 0  |
| CONTIG-022146 | 221 | 7   | 19  | 34   | 0  |
| CONTIG-022147 | 692 | 18  | 100 | 305  | 5  |
| CONTIG-022148 | 190 | 12  | 3   | 39   | 0  |
| CONTIG-022149 | 415 | 15  | 96  | 221  | 3  |
| CONTIG-022150 | 85  | 19  | 7   | 71   | 0  |
| CONTIG-022151 | 215 | 552 | 74  | 13   | 0  |
| CONTIG-022152 | 72  | 26  | 17  | 43   | 0  |
| CONTIG-022153 | 654 | 25  | 102 | 701  | 2  |
| CONTIG-022154 | 302 | 13  | 34  | 125  | 0  |
| CONTIG-022155 | 134 | 41  | 17  | 279  | 0  |
| CONTIG-022156 | 612 | 17  | 30  | 420  | 6  |
| CONTIG-022157 | 148 | 9   | 11  | 47   | 0  |
| CONTIG-022158 | 453 | 9   | 74  | 88   | 0  |
| CONTIG-022159 | 63  | 12  | 33  | 19   | 0  |
| CONTIG-022162 | 36  | 66  | 3   | 50   | 0  |
| CONTIG-022163 | 135 | 9   | 0   | 40   | 0  |
| CONTIG-022164 | 65  | 13  | 18  | 16   | 0  |
| CONTIG-022166 | 73  | 11  | 19  | 17   | 0  |
| CONTIG-022167 | 508 | 17  | 96  | 285  | 0  |
| CONTIG-022168 | 173 | 8   | 2   | 46   | 0  |
| CONTIG-022169 | 489 | 11  | 24  | 104  | 2  |
| CONTIG-022170 | 846 | 15  | 80  | 391  | 4  |
| CONTIG-022171 | 277 | 70  | 62  | 680  | 2  |
| CONTIG-022172 | 319 | 11  | 23  | 132  | 4  |
| CONTIG-022173 | 58  | 9   | 43  | 0    | 0  |
| CONTIG-022174 | 70  | 9   | 44  | 5    | 0  |
| CONTIG-022175 | 209 | 15  | 33  | 80   | 8  |
| CONTIG-022176 | 63  | 4   | 4   | 6    | 0  |
| CONTIG-022177 | 259 | 26  | 138 | 296  | 0  |
| CONTIG-022180 | 179 | 12  | 43  | 39   | 0  |
| CONTIG-022181 | 145 | 274 | 65  | 2030 | 0  |
| CONTIG-022182 | 514 | 41  | 68  | 832  | 2  |
| CONTIG-022184 | 614 | 16  | 7   | 335  | 0  |

|               |     |    |     |     |    |
|---------------|-----|----|-----|-----|----|
| CONTIG-022190 | 136 | 44 | 177 | 66  | 0  |
| CONTIG-022191 | 148 | 15 | 2   | 65  | 0  |
| CONTIG-022192 | 216 | 13 | 50  | 96  | 0  |
| CONTIG-022193 | 246 | 31 | 83  | 331 | 0  |
| CONTIG-022194 | 176 | 12 | 14  | 31  | 2  |
| CONTIG-022195 | 236 | 6  | 64  | 25  | 0  |
| CONTIG-022196 | 254 | 79 | 161 | 944 | 6  |
| CONTIG-022197 | 172 | 10 | 30  | 50  | 0  |
| CONTIG-022198 | 85  | 5  | 26  | 11  | 0  |
| CONTIG-022199 | 126 | 72 | 11  | 0   | 0  |
| CONTIG-022200 | 114 | 9  | 0   | 58  | 0  |
| CONTIG-022201 | 73  | 35 | 149 | 2   | 0  |
| CONTIG-022202 | 190 | 15 | 25  | 20  | 0  |
| CONTIG-022203 | 179 | 11 | 5   | 60  | 2  |
| CONTIG-022204 | 268 | 9  | 17  | 71  | 4  |
| CONTIG-022205 | 328 | 14 | 119 | 117 | 0  |
| CONTIG-022206 | 799 | 22 | 62  | 902 | 0  |
| CONTIG-022207 | 151 | 19 | 127 | 17  | 0  |
| CONTIG-022208 | 121 | 5  | 0   | 20  | 0  |
| CONTIG-022209 | 836 | 18 | 151 | 487 | 4  |
| CONTIG-022210 | 74  | 20 | 12  | 39  | 0  |
| CONTIG-022215 | 143 | 7  | 12  | 36  | 0  |
| CONTIG-022216 | 195 | 30 | 23  | 138 | 2  |
| CONTIG-022217 | 566 | 18 | 50  | 281 | 4  |
| CONTIG-022218 | 91  | 7  | 16  | 13  | 0  |
| CONTIG-022220 | 150 | 63 | 79  | 304 | 0  |
| CONTIG-022221 | 689 | 27 | 241 | 401 | 14 |
| CONTIG-022223 | 86  | 6  | 11  | 0   | 0  |
| CONTIG-022224 | 105 | 7  | 3   | 17  | 0  |
| CONTIG-022225 | 226 | 5  | 10  | 29  | 2  |
| CONTIG-022226 | 433 | 26 | 46  | 191 | 11 |
| CONTIG-022227 | 436 | 7  | 12  | 67  | 0  |
| CONTIG-022239 | 213 | 6  | 3   | 8   | 0  |
| CONTIG-022241 | 211 | 14 | 67  | 64  | 2  |
| CONTIG-022242 | 542 | 24 | 42  | 467 | 0  |
| CONTIG-022243 | 115 | 32 | 205 | 27  | 0  |
| CONTIG-022244 | 198 | 8  | 18  | 39  | 2  |
| CONTIG-022245 | 228 | 11 | 37  | 71  | 0  |
| CONTIG-022246 | 436 | 38 | 185 | 519 | 13 |
| CONTIG-022247 | 85  | 81 | 136 | 88  | 23 |
| CONTIG-022248 | 75  | 6  | 9   | 5   | 0  |
| CONTIG-022249 | 279 | 7  | 6   | 42  | 0  |
| CONTIG-022250 | 47  | 26 | 7   | 14  | 0  |
| CONTIG-022251 | 59  | 4  | 6   | 4   | 0  |
| CONTIG-022254 | 102 | 17 | 79  | 46  | 0  |
| CONTIG-022255 | 435 | 21 | 42  | 240 | 2  |
| CONTIG-022257 | 369 | 14 | 56  | 172 | 0  |

|               |     |     |     |      |     |
|---------------|-----|-----|-----|------|-----|
| CONTIG-022258 | 61  | 4   | 8   | 4    | 0   |
| CONTIG-022259 | 592 | 15  | 182 | 110  | 2   |
| CONTIG-022260 | 95  | 22  | 24  | 63   | 0   |
| CONTIG-022261 | 69  | 6   | 0   | 4    | 0   |
| CONTIG-022262 | 800 | 39  | 136 | 1165 | 6   |
| CONTIG-022263 | 134 | 18  | 21  | 82   | 2   |
| CONTIG-022264 | 268 | 11  | 51  | 104  | 0   |
| CONTIG-022265 | 116 | 4   | 5   | 9    | 0   |
| CONTIG-022266 | 40  | 431 | 24  | 675  | 104 |
| CONTIG-022267 | 193 | 32  | 5   | 335  | 6   |
| CONTIG-022268 | 69  | 16  | 83  | 2    | 0   |
| CONTIG-022270 | 60  | 9   | 25  | 8    | 0   |
| CONTIG-022271 | 240 | 18  | 67  | 182  | 0   |
| CONTIG-022272 | 774 | 43  | 145 | 1088 | 16  |
| CONTIG-022273 | 58  | 19  | 46  | 18   | 0   |
| CONTIG-022274 | 63  | 7   | 5   | 11   | 2   |
| CONTIG-022275 | 123 | 12  | 104 | 4    | 6   |
| CONTIG-022277 | 172 | 25  | 32  | 139  | 6   |
| CONTIG-022278 | 192 | 10  | 12  | 60   | 2   |
| CONTIG-022279 | 191 | 7   | 25  | 21   | 0   |
| CONTIG-022282 | 111 | 6   | 0   | 8    | 0   |
| CONTIG-022283 | 201 | 19  | 30  | 2    | 0   |
| CONTIG-022284 | 70  | 4   | 4   | 4    | 0   |
| CONTIG-022285 | 72  | 11  | 13  | 3    | 0   |
| CONTIG-022286 | 124 | 14  | 10  | 59   | 2   |
| CONTIG-022287 | 105 | 4   | 3   | 6    | 0   |
| CONTIG-022288 | 89  | 2   | 0   | 2    | 0   |
| CONTIG-022289 | 111 | 14  | 42  | 28   | 2   |
| CONTIG-022290 | 63  | 14  | 27  | 8    | 0   |
| CONTIG-022291 | 183 | 6   | 10  | 21   | 0   |
| CONTIG-022292 | 87  | 9   | 22  | 34   | 2   |
| CONTIG-022293 | 645 | 17  | 11  | 313  | 20  |
| CONTIG-022294 | 92  | 4   | 15  | 0    | 0   |
| CONTIG-022295 | 83  | 2   | 0   | 2    | 0   |
| CONTIG-022296 | 472 | 12  | 4   | 131  | 12  |
| CONTIG-022297 | 117 | 6   | 6   | 6    | 0   |
| CONTIG-022298 | 269 | 15  | 48  | 78   | 2   |
| CONTIG-022299 | 259 | 10  | 67  | 49   | 2   |
| CONTIG-022300 | 82  | 6   | 6   | 11   | 0   |
| CONTIG-022308 | 89  | 3   | 2   | 5    | 0   |
| CONTIG-022309 | 541 | 15  | 45  | 355  | 0   |
| CONTIG-022310 | 145 | 10  | 88  | 4    | 0   |
| CONTIG-022311 | 107 | 176 | 145 | 872  | 17  |
| CONTIG-022312 | 74  | 7   | 7   | 12   | 0   |
| CONTIG-022313 | 416 | 25  | 27  | 108  | 0   |
| CONTIG-022314 | 119 | 7   | 7   | 26   | 0   |
| CONTIG-022315 | 365 | 24  | 92  | 431  | 2   |



|               |      |     |     |      |     |
|---------------|------|-----|-----|------|-----|
| CONTIG-022316 | 318  | 13  | 20  | 181  | 0   |
| CONTIG-022317 | 94   | 7   | 31  | 0    | 0   |
| CONTIG-022318 | 1296 | 49  | 158 | 2711 | 58  |
| CONTIG-022319 | 196  | 8   | 12  | 34   | 0   |
| CONTIG-022320 | 290  | 19  | 103 | 201  | 2   |
| CONTIG-022321 | 310  | 12  | 18  | 95   | 7   |
| CONTIG-022322 | 416  | 126 | 109 | 3089 | 9   |
| CONTIG-022325 | 49   | 327 | 215 | 579  | 3   |
| CONTIG-022326 | 216  | 17  | 54  | 122  | 0   |
| CONTIG-022327 | 778  | 11  | 237 | 254  | 0   |
| CONTIG-022328 | 1320 | 26  | 145 | 1712 | 0   |
| CONTIG-022329 | 90   | 8   | 24  | 24   | 0   |
| CONTIG-022330 | 420  | 14  | 54  | 130  | 3   |
| CONTIG-022331 | 104  | 83  | 78  | 16   | 0   |
| CONTIG-022332 | 458  | 28  | 131 | 567  | 4   |
| CONTIG-022333 | 344  | 12  | 67  | 93   | 0   |
| CONTIG-022335 | 389  | 17  | 134 | 224  | 0   |
| CONTIG-022336 | 68   | 17  | 19  | 43   | 0   |
| CONTIG-022338 | 412  | 79  | 67  | 971  | 96  |
| CONTIG-022339 | 63   | 7   | 8   | 9    | 0   |
| CONTIG-022340 | 127  | 13  | 4   | 64   | 0   |
| CONTIG-022342 | 181  | 23  | 132 | 121  | 0   |
| CONTIG-022343 | 511  | 22  | 81  | 223  | 2   |
| CONTIG-022344 | 251  | 9   | 16  | 67   | 0   |
| CONTIG-022345 | 1201 | 17  | 99  | 888  | 0   |
| CONTIG-022346 | 223  | 16  | 42  | 100  | 2   |
| CONTIG-022347 | 217  | 8   | 8   | 25   | 0   |
| CONTIG-022348 | 720  | 12  | 8   | 315  | 0   |
| CONTIG-022349 | 78   | 7   | 36  | 6    | 0   |
| CONTIG-022350 | 69   | 647 | 104 | 865  | 66  |
| CONTIG-022351 | 143  | 8   | 15  | 32   | 0   |
| CONTIG-022352 | 620  | 24  | 69  | 466  | 2   |
| CONTIG-022356 | 288  | 7   | 68  | 45   | 0   |
| CONTIG-022365 | 106  | 5   | 9   | 12   | 0   |
| CONTIG-022366 | 103  | 11  | 28  | 8    | 0   |
| CONTIG-022367 | 269  | 6   | 4   | 11   | 0   |
| CONTIG-022368 | 441  | 16  | 20  | 307  | 0   |
| CONTIG-022369 | 135  | 252 | 4   | 0    | 461 |
| CONTIG-022370 | 418  | 21  | 187 | 257  | 2   |
| CONTIG-022371 | 252  | 14  | 83  | 58   | 0   |
| CONTIG-022372 | 141  | 50  | 35  | 222  | 3   |
| CONTIG-022373 | 234  | 8   | 5   | 18   | 0   |
| CONTIG-022374 | 845  | 32  | 256 | 1242 | 2   |
| CONTIG-022375 | 150  | 15  | 28  | 82   | 0   |
| CONTIG-022376 | 273  | 13  | 62  | 72   | 0   |
| CONTIG-022377 | 64   | 5   | 3   | 5    | 0   |
| CONTIG-022379 | 199  | 18  | 6   | 61   | 0   |

|               |      |     |     |      |    |
|---------------|------|-----|-----|------|----|
| CONTIG-022380 | 299  | 9   | 19  | 49   | 0  |
| CONTIG-022382 | 180  | 15  | 37  | 71   | 0  |
| CONTIG-022383 | 65   | 15  | 35  | 23   | 0  |
| CONTIG-022384 | 141  | 4   | 4   | 13   | 0  |
| CONTIG-022385 | 290  | 7   | 2   | 6    | 0  |
| CONTIG-022386 | 70   | 8   | 19  | 13   | 0  |
| CONTIG-022387 | 812  | 19  | 49  | 726  | 0  |
| CONTIG-022388 | 77   | 3   | 5   | 5    | 0  |
| CONTIG-022390 | 506  | 15  | 16  | 37   | 0  |
| CONTIG-022391 | 320  | 19  | 69  | 202  | 0  |
| CONTIG-022392 | 205  | 5   | 3   | 16   | 0  |
| CONTIG-022393 | 780  | 47  | 516 | 1155 | 15 |
| CONTIG-022394 | 1278 | 15  | 46  | 552  | 21 |
| CONTIG-022395 | 224  | 13  | 20  | 56   | 0  |
| CONTIG-022396 | 482  | 18  | 40  | 327  | 0  |
| CONTIG-022400 | 153  | 4   | 0   | 15   | 0  |
| CONTIG-022401 | 65   | 15  | 51  | 4    | 0  |
| CONTIG-022402 | 88   | 6   | 0   | 9    | 0  |
| CONTIG-022403 | 158  | 4   | 21  | 0    | 0  |
| CONTIG-022404 | 232  | 195 | 53  | 2327 | 77 |
| CONTIG-022408 | 89   | 4   | 0   | 0    | 2  |
| CONTIG-022409 | 258  | 10  | 39  | 84   | 0  |
| CONTIG-022410 | 492  | 19  | 51  | 395  | 2  |
| CONTIG-022411 | 39   | 423 | 94  | 220  | 44 |
| CONTIG-022412 | 297  | 20  | 120 | 166  | 0  |
| CONTIG-022413 | 141  | 33  | 19  | 213  | 0  |
| CONTIG-022414 | 67   | 5   | 2   | 8    | 0  |
| CONTIG-022415 | 418  | 40  | 234 | 475  | 8  |
| CONTIG-022418 | 163  | 7   | 7   | 30   | 0  |
| CONTIG-022419 | 110  | 14  | 118 | 0    | 0  |
| CONTIG-022422 | 61   | 101 | 2   | 0    | 29 |
| CONTIG-022423 | 324  | 25  | 159 | 299  | 0  |
| CONTIG-022425 | 123  | 7   | 0   | 15   | 0  |
| CONTIG-022426 | 85   | 156 | 194 | 347  | 56 |
| CONTIG-022427 | 66   | 6   | 2   | 6    | 0  |
| CONTIG-022428 | 420  | 20  | 10  | 262  | 9  |
| CONTIG-022429 | 78   | 6   | 2   | 14   | 0  |
| CONTIG-022431 | 600  | 10  | 77  | 72   | 10 |
| CONTIG-022432 | 112  | 14  | 30  | 48   | 0  |
| CONTIG-022434 | 894  | 42  | 212 | 1350 | 41 |
| CONTIG-022438 | 315  | 29  | 56  | 105  | 8  |
| CONTIG-022439 | 405  | 13  | 48  | 100  | 0  |
| CONTIG-022440 | 78   | 4   | 4   | 7    | 0  |
| CONTIG-022441 | 182  | 5   | 20  | 9    | 0  |
| CONTIG-022442 | 560  | 49  | 64  | 1530 | 0  |
| CONTIG-022448 | 723  | 14  | 100 | 441  | 0  |
| CONTIG-022449 | 187  | 13  | 13  | 63   | 0  |

|               |      |     |     |     |    |
|---------------|------|-----|-----|-----|----|
| CONTIG-022466 | 290  | 56  | 78  | 580 | 4  |
| CONTIG-022490 | 1176 | 15  | 255 | 680 | 0  |
| CONTIG-022491 | 113  | 9   | 25  | 2   | 0  |
| CONTIG-022494 | 470  | 13  | 16  | 129 | 10 |
| CONTIG-022495 | 169  | 5   | 7   | 20  | 0  |
| CONTIG-022496 | 60   | 4   | 6   | 4   | 0  |
| CONTIG-022497 | 89   | 6   | 0   | 16  | 0  |
| CONTIG-022498 | 257  | 14  | 45  | 133 | 0  |
| CONTIG-022499 | 432  | 10  | 55  | 77  | 4  |
| CONTIG-022500 | 325  | 19  | 86  | 134 | 2  |
| CONTIG-022501 | 252  | 8   | 19  | 50  | 0  |
| CONTIG-022502 | 113  | 10  | 64  | 0   | 0  |
| CONTIG-022504 | 805  | 28  | 93  | 359 | 0  |
| CONTIG-022505 | 235  | 16  | 64  | 98  | 0  |
| CONTIG-022506 | 126  | 4   | 27  | 6   | 0  |
| CONTIG-022507 | 205  | 7   | 19  | 19  | 0  |
| CONTIG-022508 | 114  | 25  | 39  | 92  | 0  |
| CONTIG-022509 | 102  | 23  | 15  | 123 | 0  |
| CONTIG-022510 | 213  | 18  | 61  | 86  | 2  |
| CONTIG-022511 | 77   | 6   | 3   | 2   | 0  |
| CONTIG-022512 | 61   | 3   | 3   | 4   | 0  |
| CONTIG-022513 | 94   | 10  | 23  | 33  | 0  |
| CONTIG-022514 | 484  | 17  | 12  | 423 | 0  |
| CONTIG-022515 | 621  | 11  | 24  | 123 | 6  |
| CONTIG-022516 | 65   | 4   | 7   | 7   | 0  |
| CONTIG-022517 | 209  | 11  | 25  | 58  | 2  |
| CONTIG-022518 | 107  | 8   | 0   | 38  | 0  |
| CONTIG-022519 | 589  | 30  | 155 | 567 | 5  |
| CONTIG-022520 | 605  | 20  | 103 | 488 | 2  |
| CONTIG-022521 | 264  | 5   | 18  | 42  | 0  |
| CONTIG-022522 | 503  | 22  | 38  | 495 | 2  |
| CONTIG-022523 | 137  | 16  | 64  | 16  | 0  |
| CONTIG-022524 | 134  | 9   | 3   | 34  | 0  |
| CONTIG-022525 | 300  | 8   | 6   | 52  | 0  |
| CONTIG-022526 | 67   | 25  | 31  | 8   | 0  |
| CONTIG-022527 | 85   | 3   | 4   | 0   | 0  |
| CONTIG-022529 | 135  | 42  | 82  | 148 | 0  |
| CONTIG-022532 | 238  | 23  | 17  | 149 | 15 |
| CONTIG-022534 | 458  | 20  | 115 | 275 | 5  |
| CONTIG-022536 | 983  | 11  | 79  | 280 | 0  |
| CONTIG-022538 | 59   | 5   | 2   | 12  | 0  |
| CONTIG-022539 | 365  | 4   | 6   | 47  | 0  |
| CONTIG-022540 | 82   | 6   | 14  | 4   | 0  |
| CONTIG-022541 | 75   | 251 | 111 | 588 | 0  |
| CONTIG-022542 | 393  | 13  | 38  | 99  | 0  |
| CONTIG-022543 | 90   | 6   | 2   | 17  | 0  |
| CONTIG-022545 | 111  | 8   | 11  | 17  | 0  |

|               |      |     |     |      |     |
|---------------|------|-----|-----|------|-----|
| CONTIG-022546 | 60   | 10  | 8   | 6    | 0   |
| CONTIG-022547 | 73   | 13  | 3   | 35   | 0   |
| CONTIG-022548 | 98   | 15  | 37  | 58   | 0   |
| CONTIG-022549 | 122  | 5   | 12  | 9    | 0   |
| CONTIG-022551 | 125  | 54  | 59  | 138  | 2   |
| CONTIG-022552 | 122  | 4   | 4   | 4    | 0   |
| CONTIG-022553 | 303  | 39  | 27  | 31   | 0   |
| CONTIG-022554 | 317  | 116 | 90  | 1110 | 28  |
| CONTIG-022555 | 103  | 2   | 0   | 4    | 0   |
| CONTIG-022556 | 221  | 9   | 46  | 55   | 0   |
| CONTIG-022557 | 108  | 5   | 2   | 15   | 0   |
| CONTIG-022558 | 468  | 11  | 27  | 152  | 0   |
| CONTIG-022559 | 330  | 15  | 95  | 124  | 0   |
| CONTIG-022560 | 359  | 23  | 39  | 351  | 2   |
| CONTIG-022561 | 412  | 30  | 0   | 0    | 310 |
| CONTIG-022562 | 323  | 9   | 43  | 89   | 0   |
| CONTIG-022564 | 188  | 10  | 5   | 50   | 0   |
| CONTIG-022565 | 86   | 17  | 24  | 61   | 0   |
| CONTIG-022566 | 141  | 8   | 7   | 32   | 0   |
| CONTIG-022567 | 129  | 13  | 71  | 24   | 2   |
| CONTIG-022568 | 103  | 48  | 30  | 246  | 0   |
| CONTIG-022571 | 78   | 5   | 0   | 0    | 0   |
| CONTIG-022575 | 931  | 22  | 80  | 616  | 9   |
| CONTIG-022576 | 342  | 28  | 18  | 129  | 0   |
| CONTIG-022577 | 1081 | 24  | 22  | 100  | 0   |
| CONTIG-022579 | 449  | 15  | 35  | 269  | 0   |
| CONTIG-022580 | 146  | 43  | 191 | 198  | 0   |
| CONTIG-022582 | 102  | 6   | 2   | 29   | 0   |
| CONTIG-022583 | 281  | 5   | 8   | 41   | 0   |
| CONTIG-022584 | 106  | 8   | 5   | 21   | 0   |
| CONTIG-022585 | 310  | 21  | 86  | 223  | 2   |
| CONTIG-022586 | 65   | 6   | 14  | 6    | 0   |
| CONTIG-022588 | 524  | 16  | 53  | 271  | 0   |
| CONTIG-022589 | 61   | 7   | 14  | 6    | 0   |
| CONTIG-022597 | 136  | 8   | 2   | 26   | 0   |
| CONTIG-022598 | 285  | 9   | 5   | 99   | 0   |
| CONTIG-022599 | 202  | 25  | 27  | 139  | 0   |
| CONTIG-022600 | 85   | 9   | 10  | 6    | 0   |
| CONTIG-022601 | 163  | 9   | 12  | 34   | 0   |
| CONTIG-022602 | 273  | 14  | 92  | 123  | 0   |
| CONTIG-022603 | 220  | 11  | 35  | 45   | 0   |
| CONTIG-022604 | 133  | 6   | 4   | 15   | 0   |
| CONTIG-022605 | 69   | 5   | 13  | 0    | 0   |
| CONTIG-022606 | 43   | 72  | 52  | 54   | 5   |
| CONTIG-022607 | 63   | 83  | 16  | 123  | 6   |
| CONTIG-022608 | 72   | 3   | 7   | 6    | 0   |
| CONTIG-022609 | 829  | 17  | 121 | 572  | 0   |

|               |      |     |     |      |    |
|---------------|------|-----|-----|------|----|
| CONTIG-022610 | 63   | 76  | 46  | 137  | 2  |
| CONTIG-022611 | 60   | 7   | 7   | 15   | 0  |
| CONTIG-022613 | 144  | 15  | 11  | 62   | 0  |
| CONTIG-022620 | 742  | 29  | 166 | 582  | 4  |
| CONTIG-022621 | 155  | 15  | 53  | 22   | 0  |
| CONTIG-022622 | 100  | 12  | 41  | 15   | 0  |
| CONTIG-022623 | 88   | 20  | 13  | 30   | 0  |
| CONTIG-022624 | 224  | 28  | 127 | 159  | 0  |
| CONTIG-022625 | 120  | 8   | 23  | 17   | 2  |
| CONTIG-022626 | 173  | 9   | 13  | 41   | 6  |
| CONTIG-022627 | 119  | 5   | 8   | 21   | 0  |
| CONTIG-022628 | 480  | 42  | 455 | 457  | 7  |
| CONTIG-022629 | 529  | 23  | 94  | 237  | 5  |
| CONTIG-022630 | 63   | 9   | 14  | 28   | 0  |
| CONTIG-022631 | 82   | 15  | 9   | 50   | 0  |
| CONTIG-022632 | 40   | 733 | 392 | 417  | 35 |
| CONTIG-022633 | 61   | 4   | 4   | 5    | 0  |
| CONTIG-022634 | 60   | 9   | 25  | 10   | 0  |
| CONTIG-022635 | 1251 | 38  | 243 | 1896 | 0  |
| CONTIG-022638 | 82   | 9   | 14  | 19   | 0  |
| CONTIG-022639 | 284  | 12  | 50  | 129  | 0  |
| CONTIG-022640 | 206  | 20  | 74  | 182  | 0  |
| CONTIG-022642 | 140  | 5   | 0   | 0    | 5  |
| CONTIG-022643 | 373  | 15  | 124 | 95   | 2  |
| CONTIG-022644 | 511  | 15  | 44  | 242  | 0  |
| CONTIG-022646 | 63   | 3   | 4   | 6    | 0  |
| CONTIG-022652 | 199  | 16  | 15  | 137  | 0  |
| CONTIG-022655 | 114  | 14  | 30  | 33   | 0  |
| CONTIG-022656 | 148  | 7   | 64  | 0    | 0  |
| CONTIG-022657 | 476  | 24  | 36  | 605  | 2  |
| CONTIG-022658 | 204  | 6   | 3   | 4    | 0  |
| CONTIG-022659 | 84   | 11  | 34  | 10   | 0  |
| CONTIG-022660 | 154  | 16  | 11  | 62   | 2  |
| CONTIG-022661 | 169  | 9   | 64  | 24   | 0  |
| CONTIG-022662 | 157  | 12  | 17  | 3    | 0  |
| CONTIG-022663 | 289  | 11  | 11  | 46   | 0  |
| CONTIG-022664 | 621  | 16  | 42  | 314  | 0  |
| CONTIG-022665 | 163  | 9   | 38  | 4    | 0  |
| CONTIG-022666 | 253  | 18  | 33  | 208  | 0  |
| CONTIG-022667 | 45   | 132 | 10  | 174  | 0  |
| CONTIG-022668 | 71   | 282 | 66  | 292  | 4  |
| CONTIG-022669 | 283  | 7   | 49  | 58   | 2  |
| CONTIG-022670 | 129  | 16  | 6   | 75   | 0  |
| CONTIG-022671 | 364  | 74  | 193 | 1650 | 0  |
| CONTIG-022672 | 534  | 10  | 137 | 175  | 0  |
| CONTIG-022673 | 1081 | 14  | 39  | 513  | 2  |
| CONTIG-022674 | 266  | 13  | 69  | 117  | 0  |

|               |      |    |     |      |    |
|---------------|------|----|-----|------|----|
| CONTIG-022675 | 326  | 12 | 26  | 60   | 4  |
| CONTIG-022676 | 135  | 8  | 6   | 12   | 2  |
| CONTIG-022677 | 211  | 9  | 39  | 42   | 2  |
| CONTIG-022678 | 91   | 13 | 22  | 10   | 0  |
| CONTIG-022679 | 94   | 10 | 36  | 26   | 0  |
| CONTIG-022682 | 52   | 13 | 0   | 20   | 0  |
| CONTIG-022683 | 287  | 20 | 79  | 83   | 0  |
| CONTIG-022684 | 109  | 6  | 27  | 0    | 4  |
| CONTIG-022685 | 822  | 79 | 59  | 3896 | 0  |
| CONTIG-022686 | 223  | 7  | 3   | 20   | 2  |
| CONTIG-022687 | 58   | 11 | 7   | 3    | 0  |
| CONTIG-022696 | 183  | 7  | 6   | 23   | 0  |
| CONTIG-022697 | 305  | 11 | 18  | 55   | 6  |
| CONTIG-022698 | 125  | 14 | 27  | 51   | 0  |
| CONTIG-022700 | 61   | 5  | 6   | 11   | 0  |
| CONTIG-022701 | 115  | 8  | 35  | 2    | 0  |
| CONTIG-022702 | 111  | 8  | 4   | 44   | 0  |
| CONTIG-022703 | 116  | 3  | 0   | 2    | 0  |
| CONTIG-022704 | 651  | 18 | 140 | 177  | 0  |
| CONTIG-022705 | 63   | 8  | 0   | 15   | 0  |
| CONTIG-022706 | 160  | 19 | 67  | 33   | 0  |
| CONTIG-022707 | 64   | 8  | 12  | 14   | 0  |
| CONTIG-022708 | 69   | 9  | 2   | 15   | 0  |
| CONTIG-022710 | 128  | 8  | 13  | 11   | 0  |
| CONTIG-022711 | 453  | 19 | 138 | 176  | 4  |
| CONTIG-022712 | 1227 | 46 | 81  | 2909 | 3  |
| CONTIG-022713 | 97   | 7  | 8   | 26   | 0  |
| CONTIG-022714 | 126  | 9  | 9   | 20   | 0  |
| CONTIG-022715 | 93   | 19 | 58  | 28   | 0  |
| CONTIG-022716 | 272  | 14 | 88  | 109  | 0  |
| CONTIG-022717 | 738  | 18 | 76  | 636  | 0  |
| CONTIG-022719 | 156  | 12 | 60  | 49   | 0  |
| CONTIG-022720 | 76   | 16 | 25  | 13   | 0  |
| CONTIG-022722 | 104  | 7  | 0   | 28   | 0  |
| CONTIG-022723 | 304  | 11 | 30  | 45   | 0  |
| CONTIG-022724 | 116  | 3  | 2   | 2    | 0  |
| CONTIG-022725 | 184  | 34 | 82  | 158  | 4  |
| CONTIG-022726 | 749  | 45 | 81  | 1492 | 0  |
| CONTIG-022727 | 67   | 7  | 12  | 10   | 0  |
| CONTIG-022728 | 349  | 16 | 28  | 216  | 0  |
| CONTIG-022729 | 66   | 12 | 4   | 10   | 0  |
| CONTIG-022730 | 411  | 44 | 173 | 524  | 13 |
| CONTIG-022731 | 62   | 9  | 18  | 6    | 0  |
| CONTIG-022732 | 604  | 16 | 98  | 218  | 0  |
| CONTIG-022736 | 138  | 6  | 8   | 21   | 0  |
| CONTIG-022737 | 113  | 35 | 26  | 142  | 2  |
| CONTIG-022738 | 119  | 6  | 9   | 23   | 0  |

|               |     |     |     |      |     |
|---------------|-----|-----|-----|------|-----|
| CONTIG-022740 | 439 | 9   | 40  | 115  | 0   |
| CONTIG-022741 | 424 | 13  | 93  | 154  | 0   |
| CONTIG-022742 | 205 | 11  | 27  | 66   | 0   |
| CONTIG-022743 | 72  | 8   | 5   | 29   | 0   |
| CONTIG-022744 | 66  | 4   | 2   | 8    | 0   |
| CONTIG-022745 | 383 | 20  | 0   | 0    | 39  |
| CONTIG-022746 | 188 | 7   | 5   | 31   | 0   |
| CONTIG-022748 | 785 | 19  | 78  | 624  | 0   |
| CONTIG-022749 | 189 | 7   | 2   | 45   | 0   |
| CONTIG-022750 | 99  | 15  | 115 | 12   | 0   |
| CONTIG-022752 | 170 | 15  | 22  | 4    | 0   |
| CONTIG-022753 | 123 | 4   | 8   | 9    | 0   |
| CONTIG-022754 | 198 | 7   | 10  | 2    | 2   |
| CONTIG-022755 | 67  | 9   | 11  | 19   | 0   |
| CONTIG-022756 | 182 | 10  | 80  | 4    | 0   |
| CONTIG-022757 | 89  | 11  | 52  | 24   | 0   |
| CONTIG-022758 | 735 | 40  | 157 | 863  | 11  |
| CONTIG-022759 | 717 | 69  | 227 | 1409 | 319 |
| CONTIG-022760 | 234 | 8   | 9   | 51   | 2   |
| CONTIG-022761 | 341 | 15  | 21  | 253  | 0   |
| CONTIG-022762 | 250 | 15  | 37  | 98   | 2   |
| CONTIG-022765 | 340 | 18  | 95  | 143  | 4   |
| CONTIG-022766 | 209 | 12  | 40  | 83   | 0   |
| CONTIG-022767 | 734 | 15  | 84  | 303  | 0   |
| CONTIG-022768 | 210 | 6   | 10  | 9    | 2   |
| CONTIG-022769 | 319 | 14  | 19  | 163  | 0   |
| CONTIG-022770 | 93  | 10  | 50  | 0    | 0   |
| CONTIG-022771 | 242 | 8   | 19  | 70   | 2   |
| CONTIG-022772 | 98  | 14  | 41  | 39   | 0   |
| CONTIG-022775 | 500 | 18  | 20  | 0    | 0   |
| CONTIG-022776 | 100 | 6   | 2   | 26   | 0   |
| CONTIG-022777 | 126 | 6   | 21  | 23   | 0   |
| CONTIG-022778 | 221 | 24  | 90  | 259  | 0   |
| CONTIG-022779 | 364 | 77  | 162 | 1657 | 0   |
| CONTIG-022780 | 53  | 347 | 53  | 830  | 12  |
| CONTIG-022781 | 326 | 24  | 86  | 137  | 11  |
| CONTIG-022782 | 100 | 11  | 5   | 22   | 0   |
| CONTIG-022783 | 110 | 18  | 50  | 42   | 0   |
| CONTIG-022784 | 133 | 11  | 20  | 42   | 0   |
| CONTIG-022785 | 273 | 9   | 23  | 65   | 0   |
| CONTIG-022786 | 286 | 8   | 10  | 38   | 0   |
| CONTIG-022787 | 226 | 16  | 42  | 183  | 0   |
| CONTIG-022788 | 389 | 21  | 85  | 285  | 2   |
| CONTIG-022789 | 117 | 21  | 220 | 13   | 0   |
| CONTIG-022790 | 140 | 9   | 18  | 31   | 0   |
| CONTIG-022791 | 198 | 941 | 60  | 6909 | 0   |
| CONTIG-022792 | 82  | 10  | 45  | 2    | 0   |

|               |     |     |     |      |    |
|---------------|-----|-----|-----|------|----|
| CONTIG-022793 | 417 | 13  | 55  | 132  | 6  |
| CONTIG-022794 | 202 | 12  | 64  | 30   | 0  |
| CONTIG-022795 | 144 | 17  | 21  | 88   | 0  |
| CONTIG-022796 | 493 | 10  | 102 | 125  | 2  |
| CONTIG-022797 | 112 | 186 | 200 | 932  | 0  |
| CONTIG-022798 | 532 | 76  | 255 | 1905 | 0  |
| CONTIG-022799 | 134 | 8   | 9   | 29   | 0  |
| CONTIG-022800 | 536 | 42  | 127 | 1259 | 2  |
| CONTIG-022801 | 380 | 15  | 71  | 264  | 0  |
| CONTIG-022802 | 96  | 7   | 10  | 5    | 0  |
| CONTIG-022803 | 396 | 8   | 63  | 71   | 2  |
| CONTIG-022808 | 189 | 7   | 7   | 13   | 0  |
| CONTIG-022809 | 61  | 6   | 4   | 12   | 0  |
| CONTIG-022810 | 79  | 11  | 47  | 10   | 0  |
| CONTIG-022811 | 76  | 5   | 14  | 4    | 0  |
| CONTIG-022812 | 279 | 16  | 4   | 0    | 44 |
| CONTIG-022813 | 81  | 16  | 92  | 7    | 0  |
| CONTIG-022816 | 71  | 5   | 0   | 2    | 0  |
| CONTIG-022817 | 68  | 9   | 8   | 6    | 2  |
| CONTIG-022818 | 64  | 9   | 2   | 0    | 8  |
| CONTIG-022819 | 140 | 8   | 7   | 31   | 0  |
| CONTIG-022823 | 99  | 39  | 97  | 29   | 0  |
| CONTIG-022826 | 440 | 53  | 162 | 703  | 27 |
| CONTIG-022827 | 228 | 22  | 36  | 205  | 2  |
| CONTIG-022828 | 417 | 9   | 33  | 70   | 0  |
| CONTIG-022829 | 294 | 54  | 47  | 962  | 0  |
| CONTIG-022830 | 132 | 5   | 2   | 19   | 0  |
| CONTIG-022831 | 271 | 15  | 103 | 96   | 0  |
| CONTIG-022832 | 595 | 15  | 55  | 164  | 0  |
| CONTIG-022833 | 478 | 16  | 21  | 432  | 0  |
| CONTIG-022834 | 318 | 190 | 40  | 42   | 0  |
| CONTIG-022835 | 381 | 16  | 86  | 195  | 0  |
| CONTIG-022836 | 148 | 84  | 76  | 609  | 11 |
| CONTIG-022837 | 433 | 33  | 221 | 446  | 13 |
| CONTIG-022838 | 38  | 658 | 49  | 868  | 0  |
| CONTIG-022839 | 200 | 12  | 19  | 84   | 0  |
| CONTIG-022840 | 326 | 9   | 22  | 111  | 4  |
| CONTIG-022841 | 163 | 7   | 13  | 31   | 0  |
| CONTIG-022842 | 244 | 11  | 41  | 98   | 0  |
| CONTIG-022843 | 247 | 7   | 18  | 21   | 0  |
| CONTIG-022844 | 148 | 10  | 83  | 0    | 0  |
| CONTIG-022845 | 105 | 15  | 46  | 25   | 0  |
| CONTIG-022846 | 126 | 18  | 43  | 5    | 0  |
| CONTIG-022847 | 717 | 41  | 52  | 277  | 0  |
| CONTIG-022848 | 163 | 19  | 22  | 132  | 0  |
| CONTIG-022849 | 406 | 10  | 6   | 170  | 0  |
| CONTIG-022850 | 347 | 10  | 34  | 65   | 0  |



|               |     |     |     |      |     |
|---------------|-----|-----|-----|------|-----|
| CONTIG-022851 | 311 | 25  | 43  | 210  | 7   |
| CONTIG-022852 | 276 | 14  | 36  | 177  | 0   |
| CONTIG-022853 | 325 | 11  | 14  | 104  | 6   |
| CONTIG-022854 | 154 | 12  | 34  | 38   | 0   |
| CONTIG-022860 | 165 | 10  | 33  | 33   | 0   |
| CONTIG-022861 | 981 | 19  | 58  | 486  | 21  |
| CONTIG-022866 | 960 | 67  | 114 | 3117 | 242 |
| CONTIG-022867 | 550 | 22  | 81  | 583  | 0   |
| CONTIG-022868 | 581 | 11  | 29  | 54   | 0   |
| CONTIG-022869 | 58  | 51  | 21  | 69   | 0   |
| CONTIG-022870 | 111 | 14  | 8   | 45   | 0   |
| CONTIG-022872 | 224 | 19  | 24  | 10   | 0   |
| CONTIG-022873 | 70  | 6   | 11  | 4    | 0   |
| CONTIG-022874 | 101 | 4   | 6   | 14   | 0   |
| CONTIG-022875 | 40  | 248 | 238 | 157  | 0   |
| CONTIG-022876 | 176 | 8   | 30  | 31   | 0   |
| CONTIG-022877 | 102 | 4   | 0   | 7    | 0   |
| CONTIG-022878 | 363 | 27  | 26  | 256  | 2   |
| CONTIG-022879 | 749 | 22  | 221 | 493  | 2   |
| CONTIG-022880 | 101 | 36  | 325 | 31   | 0   |
| CONTIG-022881 | 172 | 26  | 368 | 49   | 0   |
| CONTIG-022882 | 126 | 8   | 86  | 2    | 0   |
| CONTIG-022883 | 473 | 11  | 11  | 83   | 11  |
| CONTIG-022884 | 386 | 15  | 21  | 241  | 0   |
| CONTIG-022885 | 139 | 8   | 12  | 33   | 0   |
| CONTIG-022886 | 104 | 65  | 22  | 298  | 0   |
| CONTIG-022887 | 169 | 11  | 17  | 9    | 0   |
| CONTIG-022888 | 147 | 93  | 88  | 36   | 3   |
| CONTIG-022889 | 120 | 9   | 2   | 17   | 0   |
| CONTIG-022891 | 142 | 17  | 39  | 79   | 0   |
| CONTIG-022892 | 240 | 23  | 74  | 161  | 0   |
| CONTIG-022893 | 640 | 39  | 2   | 0    | 163 |
| CONTIG-022894 | 221 | 7   | 6   | 49   | 0   |
| CONTIG-022895 | 195 | 9   | 27  | 13   | 0   |
| CONTIG-022896 | 110 | 12  | 16  | 34   | 2   |
| CONTIG-022897 | 333 | 26  | 41  | 128  | 0   |
| CONTIG-022898 | 218 | 7   | 0   | 57   | 0   |
| CONTIG-022899 | 64  | 26  | 40  | 18   | 0   |
| CONTIG-022900 | 84  | 8   | 0   | 18   | 0   |
| CONTIG-022901 | 545 | 11  | 16  | 191  | 6   |
| CONTIG-022902 | 179 | 18  | 99  | 98   | 0   |
| CONTIG-022903 | 231 | 10  | 40  | 46   | 0   |
| CONTIG-022904 | 48  | 476 | 82  | 584  | 2   |
| CONTIG-022905 | 170 | 15  | 5   | 0    | 0   |
| CONTIG-022906 | 647 | 21  | 74  | 652  | 0   |
| CONTIG-022907 | 105 | 67  | 396 | 17   | 0   |
| CONTIG-022908 | 37  | 68  | 10  | 86   | 0   |

|               |      |     |     |      |     |
|---------------|------|-----|-----|------|-----|
| CONTIG-022909 | 94   | 7   | 3   | 10   | 0   |
| CONTIG-022910 | 100  | 5   | 14  | 3    | 0   |
| CONTIG-022911 | 75   | 5   | 14  | 5    | 0   |
| CONTIG-022912 | 419  | 11  | 16  | 38   | 0   |
| CONTIG-022913 | 166  | 6   | 0   | 42   | 0   |
| CONTIG-022914 | 119  | 9   | 12  | 33   | 0   |
| CONTIG-022915 | 806  | 24  | 11  | 25   | 0   |
| CONTIG-022916 | 152  | 10  | 26  | 46   | 0   |
| CONTIG-022917 | 92   | 12  | 10  | 38   | 0   |
| CONTIG-022918 | 94   | 11  | 12  | 39   | 0   |
| CONTIG-022919 | 282  | 7   | 11  | 0    | 11  |
| CONTIG-022920 | 143  | 236 | 227 | 1515 | 12  |
| CONTIG-022922 | 1070 | 17  | 69  | 511  | 10  |
| CONTIG-022923 | 246  | 31  | 56  | 295  | 2   |
| CONTIG-022924 | 190  | 7   | 2   | 19   | 2   |
| CONTIG-022925 | 119  | 7   | 3   | 24   | 0   |
| CONTIG-022926 | 61   | 3   | 5   | 0    | 0   |
| CONTIG-022927 | 108  | 12  | 6   | 43   | 2   |
| CONTIG-022928 | 254  | 16  | 75  | 142  | 0   |
| CONTIG-022929 | 106  | 3   | 0   | 0    | 0   |
| CONTIG-022930 | 329  | 7   | 14  | 37   | 0   |
| CONTIG-022931 | 347  | 11  | 13  | 44   | 2   |
| CONTIG-022932 | 1170 | 19  | 287 | 772  | 2   |
| CONTIG-022933 | 480  | 24  | 36  | 671  | 0   |
| CONTIG-022935 | 78   | 8   | 21  | 13   | 0   |
| CONTIG-022936 | 296  | 7   | 16  | 47   | 0   |
| CONTIG-022937 | 854  | 14  | 114 | 325  | 8   |
| CONTIG-022939 | 138  | 11  | 38  | 38   | 0   |
| CONTIG-022940 | 169  | 37  | 43  | 219  | 0   |
| CONTIG-022941 | 74   | 9   | 11  | 8    | 0   |
| CONTIG-022942 | 835  | 27  | 155 | 1013 | 10  |
| CONTIG-022943 | 198  | 9   | 6   | 54   | 0   |
| CONTIG-022944 | 149  | 6   | 13  | 27   | 0   |
| CONTIG-022945 | 71   | 3   | 3   | 2    | 0   |
| CONTIG-022946 | 211  | 9   | 17  | 67   | 0   |
| CONTIG-022947 | 61   | 7   | 5   | 0    | 0   |
| CONTIG-022948 | 227  | 31  | 94  | 323  | 0   |
| CONTIG-022949 | 168  | 4   | 20  | 11   | 0   |
| CONTIG-022950 | 402  | 24  | 41  | 543  | 0   |
| CONTIG-022951 | 127  | 6   | 50  | 8    | 0   |
| CONTIG-022952 | 723  | 11  | 73  | 199  | 0   |
| CONTIG-022953 | 103  | 24  | 72  | 19   | 0   |
| CONTIG-022954 | 421  | 9   | 16  | 83   | 0   |
| CONTIG-022955 | 550  | 60  | 4   | 0    | 212 |
| CONTIG-022956 | 837  | 24  | 62  | 972  | 0   |
| CONTIG-022957 | 228  | 12  | 4   | 106  | 0   |
| CONTIG-022958 | 112  | 10  | 3   | 4    | 0   |

|               |      |     |     |      |    |
|---------------|------|-----|-----|------|----|
| CONTIG-022959 | 294  | 11  | 44  | 50   | 2  |
| CONTIG-022960 | 109  | 7   | 3   | 6    | 0  |
| CONTIG-022961 | 36   | 91  | 16  | 65   | 0  |
| CONTIG-022962 | 457  | 36  | 30  | 745  | 0  |
| CONTIG-022963 | 84   | 5   | 5   | 12   | 0  |
| CONTIG-022966 | 58   | 17  | 57  | 4    | 2  |
| CONTIG-022967 | 481  | 15  | 42  | 223  | 0  |
| CONTIG-022968 | 303  | 9   | 4   | 71   | 2  |
| CONTIG-022969 | 130  | 4   | 6   | 11   | 0  |
| CONTIG-022970 | 325  | 10  | 21  | 67   | 2  |
| CONTIG-022971 | 80   | 11  | 16  | 38   | 0  |
| CONTIG-022972 | 213  | 13  | 14  | 94   | 0  |
| CONTIG-022973 | 150  | 11  | 24  | 48   | 0  |
| CONTIG-022974 | 70   | 6   | 24  | 0    | 0  |
| CONTIG-022975 | 70   | 9   | 33  | 11   | 0  |
| CONTIG-022976 | 185  | 8   | 10  | 25   | 0  |
| CONTIG-022977 | 287  | 12  | 83  | 92   | 0  |
| CONTIG-022978 | 141  | 11  | 22  | 40   | 0  |
| CONTIG-022979 | 80   | 3   | 4   | 6    | 0  |
| CONTIG-022980 | 69   | 6   | 0   | 7    | 2  |
| CONTIG-022981 | 247  | 41  | 29  | 330  | 2  |
| CONTIG-022982 | 326  | 6   | 9   | 81   | 0  |
| CONTIG-022983 | 233  | 31  | 77  | 156  | 11 |
| CONTIG-022984 | 127  | 8   | 5   | 24   | 0  |
| CONTIG-022985 | 1433 | 21  | 56  | 1083 | 30 |
| CONTIG-022986 | 211  | 10  | 28  | 56   | 0  |
| CONTIG-022987 | 43   | 324 | 11  | 732  | 0  |
| CONTIG-022989 | 94   | 8   | 16  | 25   | 0  |
| CONTIG-022991 | 840  | 15  | 77  | 451  | 0  |
| CONTIG-022992 | 186  | 8   | 7   | 33   | 0  |
| CONTIG-022993 | 777  | 21  | 81  | 112  | 0  |
| CONTIG-022994 | 97   | 18  | 10  | 32   | 2  |
| CONTIG-022995 | 145  | 6   | 31  | 12   | 0  |
| CONTIG-022996 | 548  | 12  | 53  | 196  | 0  |
| CONTIG-022997 | 62   | 7   | 10  | 6    | 0  |
| CONTIG-022998 | 143  | 19  | 54  | 118  | 0  |
| CONTIG-022999 | 184  | 30  | 89  | 206  | 0  |
| CONTIG-023000 | 63   | 13  | 9   | 4    | 0  |
| CONTIG-023001 | 426  | 49  | 119 | 498  | 12 |
| CONTIG-023002 | 144  | 8   | 16  | 40   | 0  |
| CONTIG-023003 | 39   | 34  | 16  | 34   | 0  |
| CONTIG-023004 | 412  | 11  | 28  | 142  | 0  |
| CONTIG-023005 | 182  | 12  | 10  | 81   | 0  |
| CONTIG-023006 | 58   | 10  | 26  | 0    | 0  |
| CONTIG-023007 | 250  | 20  | 52  | 183  | 0  |
| CONTIG-023008 | 268  | 21  | 212 | 120  | 0  |
| CONTIG-023010 | 148  | 14  | 25  | 55   | 0  |

|               |      |    |     |      |   |
|---------------|------|----|-----|------|---|
| CONTIG-023012 | 147  | 8  | 5   | 36   | 0 |
| CONTIG-023014 | 596  | 19 | 68  | 500  | 2 |
| CONTIG-023015 | 350  | 39 | 62  | 585  | 0 |
| CONTIG-023016 | 75   | 4  | 6   | 8    | 0 |
| CONTIG-023017 | 58   | 5  | 2   | 11   | 0 |
| CONTIG-023018 | 87   | 8  | 6   | 25   | 0 |
| CONTIG-023019 | 255  | 42 | 180 | 141  | 0 |
| CONTIG-023020 | 59   | 21 | 50  | 14   | 0 |
| CONTIG-023021 | 378  | 8  | 11  | 57   | 0 |
| CONTIG-023024 | 263  | 12 | 59  | 53   | 0 |
| CONTIG-023025 | 257  | 14 | 27  | 83   | 0 |
| CONTIG-023028 | 237  | 10 | 6   | 82   | 0 |
| CONTIG-023029 | 384  | 62 | 283 | 1317 | 0 |
| CONTIG-023030 | 162  | 12 | 61  | 59   | 0 |
| CONTIG-023031 | 105  | 5  | 12  | 6    | 0 |
| CONTIG-023032 | 58   | 17 | 3   | 12   | 0 |
| CONTIG-023033 | 119  | 18 | 20  | 16   | 0 |
| CONTIG-023034 | 162  | 8  | 12  | 23   | 0 |
| CONTIG-023035 | 194  | 6  | 0   | 21   | 0 |
| CONTIG-023036 | 125  | 8  | 5   | 0    | 0 |
| CONTIG-023037 | 137  | 8  | 4   | 23   | 0 |
| CONTIG-023038 | 61   | 4  | 3   | 5    | 0 |
| CONTIG-023039 | 68   | 14 | 17  | 46   | 0 |
| CONTIG-023040 | 390  | 10 | 110 | 98   | 0 |
| CONTIG-023041 | 274  | 14 | 14  | 132  | 4 |
| CONTIG-023042 | 59   | 7  | 20  | 0    | 0 |
| CONTIG-023043 | 471  | 14 | 50  | 130  | 0 |
| CONTIG-023046 | 135  | 7  | 45  | 17   | 0 |
| CONTIG-023047 | 110  | 9  | 5   | 34   | 0 |
| CONTIG-023048 | 121  | 8  | 20  | 17   | 0 |
| CONTIG-023050 | 108  | 51 | 22  | 152  | 0 |
| CONTIG-023051 | 265  | 12 | 13  | 85   | 0 |
| CONTIG-023052 | 131  | 4  | 0   | 2    | 0 |
| CONTIG-023055 | 510  | 15 | 26  | 220  | 2 |
| CONTIG-023056 | 535  | 19 | 121 | 268  | 0 |
| CONTIG-023058 | 61   | 3  | 5   | 6    | 0 |
| CONTIG-023059 | 118  | 12 | 18  | 56   | 0 |
| CONTIG-023060 | 131  | 20 | 72  | 13   | 0 |
| CONTIG-023061 | 111  | 7  | 8   | 19   | 0 |
| CONTIG-023064 | 602  | 15 | 24  | 163  | 6 |
| CONTIG-023065 | 164  | 53 | 28  | 364  | 0 |
| CONTIG-023066 | 323  | 9  | 13  | 42   | 0 |
| CONTIG-023067 | 108  | 6  | 3   | 12   | 0 |
| CONTIG-023068 | 76   | 5  | 15  | 0    | 0 |
| CONTIG-023069 | 106  | 9  | 14  | 22   | 0 |
| CONTIG-023070 | 1198 | 21 | 94  | 609  | 8 |
| CONTIG-023071 | 71   | 4  | 11  | 9    | 0 |

|               |     |     |     |      |     |
|---------------|-----|-----|-----|------|-----|
| CONTIG-023072 | 219 | 14  | 37  | 127  | 0   |
| CONTIG-023073 | 313 | 13  | 30  | 139  | 0   |
| CONTIG-023074 | 285 | 15  | 19  | 123  | 0   |
| CONTIG-023075 | 118 | 14  | 15  | 59   | 0   |
| CONTIG-023076 | 539 | 19  | 48  | 455  | 2   |
| CONTIG-023077 | 303 | 7   | 46  | 38   | 0   |
| CONTIG-023078 | 257 | 19  | 57  | 171  | 8   |
| CONTIG-023079 | 262 | 13  | 31  | 94   | 0   |
| CONTIG-023080 | 172 | 7   | 31  | 30   | 0   |
| CONTIG-023081 | 58  | 7   | 18  | 9    | 0   |
| CONTIG-023082 | 153 | 5   | 5   | 20   | 0   |
| CONTIG-023083 | 112 | 9   | 24  | 12   | 0   |
| CONTIG-023085 | 113 | 10  | 10  | 27   | 0   |
| CONTIG-023086 | 597 | 24  | 61  | 498  | 4   |
| CONTIG-023087 | 380 | 8   | 8   | 92   | 2   |
| CONTIG-023088 | 218 | 11  | 89  | 22   | 0   |
| CONTIG-023089 | 503 | 9   | 38  | 102  | 2   |
| CONTIG-023093 | 134 | 11  | 23  | 59   | 0   |
| CONTIG-023095 | 176 | 8   | 8   | 45   | 0   |
| CONTIG-023096 | 277 | 6   | 7   | 62   | 0   |
| CONTIG-023097 | 82  | 7   | 11  | 4    | 0   |
| CONTIG-023098 | 414 | 20  | 56  | 251  | 13  |
| CONTIG-023099 | 70  | 9   | 10  | 15   | 2   |
| CONTIG-023100 | 73  | 4   | 11  | 4    | 0   |
| CONTIG-023102 | 662 | 11  | 149 | 266  | 2   |
| CONTIG-023103 | 231 | 9   | 12  | 61   | 0   |
| CONTIG-023104 | 114 | 74  | 69  | 204  | 12  |
| CONTIG-023105 | 121 | 10  | 18  | 26   | 0   |
| CONTIG-023106 | 81  | 4   | 21  | 5    | 0   |
| CONTIG-023107 | 140 | 16  | 8   | 62   | 0   |
| CONTIG-023108 | 223 | 11  | 16  | 84   | 0   |
| CONTIG-023109 | 292 | 13  | 179 | 66   | 2   |
| CONTIG-023110 | 61  | 3   | 2   | 0    | 0   |
| CONTIG-023111 | 178 | 12  | 31  | 65   | 0   |
| CONTIG-023113 | 407 | 18  | 48  | 129  | 17  |
| CONTIG-023114 | 147 | 18  | 108 | 19   | 0   |
| CONTIG-023115 | 539 | 296 | 136 | 7491 | 729 |
| CONTIG-023116 | 177 | 13  | 14  | 61   | 2   |
| CONTIG-023117 | 72  | 4   | 0   | 2    | 0   |
| CONTIG-023118 | 203 | 13  | 81  | 65   | 0   |
| CONTIG-023119 | 390 | 14  | 29  | 110  | 9   |
| CONTIG-023120 | 368 | 10  | 32  | 104  | 6   |
| CONTIG-023121 | 814 | 11  | 2   | 0    | 2   |
| CONTIG-023122 | 59  | 7   | 30  | 0    | 0   |
| CONTIG-023123 | 214 | 8   | 11  | 54   | 0   |
| CONTIG-023124 | 70  | 4   | 4   | 0    | 0   |
| CONTIG-023125 | 135 | 8   | 12  | 15   | 0   |

|               |      |     |     |      |   |
|---------------|------|-----|-----|------|---|
| CONTIG-023126 | 155  | 9   | 21  | 25   | 0 |
| CONTIG-023128 | 79   | 4   | 6   | 4    | 0 |
| CONTIG-023129 | 564  | 43  | 131 | 1280 | 2 |
| CONTIG-023135 | 60   | 3   | 6   | 0    | 0 |
| CONTIG-023136 | 44   | 421 | 21  | 108  | 2 |
| CONTIG-023137 | 147  | 9   | 20  | 43   | 0 |
| CONTIG-023138 | 90   | 18  | 55  | 0    | 0 |
| CONTIG-023139 | 787  | 17  | 74  | 388  | 2 |
| CONTIG-023140 | 228  | 9   | 6   | 120  | 0 |
| CONTIG-023141 | 1550 | 14  | 130 | 695  | 3 |
| CONTIG-023142 | 472  | 23  | 89  | 239  | 0 |
| CONTIG-023143 | 470  | 14  | 12  | 381  | 0 |
| CONTIG-023144 | 417  | 21  | 266 | 197  | 0 |
| CONTIG-023145 | 107  | 5   | 6   | 16   | 0 |
| CONTIG-023146 | 259  | 43  | 90  | 303  | 7 |
| CONTIG-023147 | 91   | 10  | 13  | 22   | 0 |
| CONTIG-023148 | 88   | 10  | 3   | 17   | 0 |
| CONTIG-023149 | 108  | 8   | 5   | 22   | 0 |
| CONTIG-023150 | 243  | 10  | 8   | 83   | 0 |
| CONTIG-023151 | 196  | 14  | 6   | 96   | 2 |
| CONTIG-023153 | 122  | 9   | 16  | 42   | 0 |
| CONTIG-023154 | 74   | 7   | 21  | 11   | 0 |
| CONTIG-023155 | 352  | 6   | 6   | 71   | 0 |
| CONTIG-023157 | 130  | 4   | 2   | 10   | 0 |
| CONTIG-023158 | 212  | 15  | 25  | 110  | 0 |
| CONTIG-023159 | 66   | 8   | 15  | 6    | 0 |
| CONTIG-023160 | 411  | 10  | 91  | 135  | 0 |
| CONTIG-023161 | 207  | 9   | 24  | 40   | 0 |
| CONTIG-023162 | 201  | 11  | 76  | 26   | 0 |
| CONTIG-023163 | 320  | 11  | 18  | 101  | 0 |
| CONTIG-023164 | 515  | 24  | 175 | 573  | 2 |
| CONTIG-023165 | 77   | 13  | 38  | 16   | 0 |
| CONTIG-023166 | 298  | 18  | 30  | 221  | 0 |
| CONTIG-023167 | 224  | 16  | 87  | 93   | 0 |
| CONTIG-023168 | 66   | 3   | 7   | 0    | 0 |
| CONTIG-023169 | 325  | 42  | 284 | 367  | 4 |
| CONTIG-023170 | 198  | 8   | 10  | 40   | 6 |
| CONTIG-023171 | 120  | 4   | 6   | 6    | 0 |
| CONTIG-023172 | 122  | 6   | 22  | 13   | 0 |
| CONTIG-023173 | 648  | 19  | 412 | 418  | 2 |
| CONTIG-023174 | 114  | 6   | 32  | 8    | 0 |
| CONTIG-023175 | 93   | 5   | 3   | 9    | 0 |
| CONTIG-023176 | 109  | 6   | 3   | 18   | 0 |
| CONTIG-023177 | 123  | 4   | 14  | 2    | 0 |
| CONTIG-023178 | 392  | 31  | 71  | 334  | 0 |
| CONTIG-023179 | 295  | 22  | 68  | 177  | 2 |
| CONTIG-023180 | 189  | 9   | 2   | 45   | 0 |

|               |      |     |     |      |    |
|---------------|------|-----|-----|------|----|
| CONTIG-023181 | 776  | 12  | 45  | 315  | 0  |
| CONTIG-023182 | 149  | 10  | 40  | 20   | 0  |
| CONTIG-023183 | 85   | 4   | 4   | 8    | 0  |
| CONTIG-023184 | 281  | 16  | 17  | 85   | 0  |
| CONTIG-023185 | 175  | 16  | 2   | 102  | 0  |
| CONTIG-023186 | 297  | 21  | 61  | 158  | 4  |
| CONTIG-023188 | 86   | 124 | 403 | 35   | 0  |
| CONTIG-023189 | 351  | 15  | 23  | 170  | 0  |
| CONTIG-023190 | 186  | 76  | 258 | 466  | 0  |
| CONTIG-023191 | 137  | 14  | 65  | 50   | 0  |
| CONTIG-023192 | 479  | 27  | 59  | 309  | 0  |
| CONTIG-023193 | 464  | 12  | 49  | 92   | 2  |
| CONTIG-023194 | 136  | 9   | 17  | 49   | 0  |
| CONTIG-023195 | 532  | 15  | 63  | 227  | 7  |
| CONTIG-023196 | 411  | 9   | 37  | 93   | 2  |
| CONTIG-023197 | 705  | 50  | 69  | 2154 | 6  |
| CONTIG-023198 | 147  | 5   | 10  | 14   | 0  |
| CONTIG-023199 | 385  | 11  | 24  | 76   | 0  |
| CONTIG-023200 | 101  | 7   | 15  | 9    | 0  |
| CONTIG-023201 | 152  | 93  | 78  | 245  | 16 |
| CONTIG-023202 | 88   | 9   | 21  | 17   | 2  |
| CONTIG-023203 | 881  | 14  | 150 | 327  | 0  |
| CONTIG-023204 | 162  | 4   | 19  | 13   | 0  |
| CONTIG-023205 | 67   | 8   | 3   | 22   | 0  |
| CONTIG-023206 | 286  | 11  | 77  | 77   | 2  |
| CONTIG-023213 | 225  | 19  | 43  | 131  | 0  |
| CONTIG-023214 | 428  | 19  | 34  | 276  | 2  |
| CONTIG-023215 | 104  | 24  | 0   | 0    | 0  |
| CONTIG-023216 | 345  | 7   | 17  | 84   | 0  |
| CONTIG-023218 | 121  | 9   | 0   | 42   | 0  |
| CONTIG-023219 | 113  | 8   | 19  | 6    | 0  |
| CONTIG-023220 | 307  | 12  | 57  | 136  | 0  |
| CONTIG-023221 | 79   | 272 | 58  | 438  | 22 |
| CONTIG-023222 | 142  | 8   | 38  | 21   | 0  |
| CONTIG-023223 | 739  | 37  | 104 | 979  | 36 |
| CONTIG-023224 | 382  | 12  | 20  | 129  | 6  |
| CONTIG-023225 | 86   | 159 | 6   | 594  | 0  |
| CONTIG-023227 | 159  | 9   | 4   | 4    | 0  |
| CONTIG-023228 | 79   | 4   | 2   | 4    | 0  |
| CONTIG-023229 | 382  | 86  | 7   | 13   | 0  |
| CONTIG-023230 | 1079 | 25  | 96  | 337  | 0  |
| CONTIG-023231 | 98   | 42  | 44  | 195  | 0  |
| CONTIG-023232 | 524  | 52  | 460 | 612  | 15 |
| CONTIG-023233 | 103  | 7   | 2   | 19   | 0  |
| CONTIG-023234 | 61   | 5   | 6   | 0    | 0  |
| CONTIG-023239 | 261  | 7   | 19  | 54   | 0  |
| CONTIG-023240 | 148  | 10  | 56  | 35   | 0  |

|               |     |    |     |     |    |
|---------------|-----|----|-----|-----|----|
| CONTIG-023241 | 657 | 18 | 32  | 347 | 0  |
| CONTIG-023242 | 198 | 26 | 325 | 52  | 0  |
| CONTIG-023243 | 308 | 10 | 12  | 63  | 5  |
| CONTIG-023244 | 112 | 4  | 9   | 6   | 0  |
| CONTIG-023245 | 65  | 4  | 2   | 2   | 0  |
| CONTIG-023246 | 213 | 14 | 66  | 88  | 0  |
| CONTIG-023247 | 70  | 15 | 22  | 29  | 0  |
| CONTIG-023248 | 80  | 6  | 8   | 15  | 0  |
| CONTIG-023249 | 64  | 9  | 22  | 11  | 0  |
| CONTIG-023250 | 118 | 20 | 63  | 73  | 0  |
| CONTIG-023252 | 613 | 17 | 8   | 53  | 0  |
| CONTIG-023253 | 116 | 14 | 22  | 62  | 0  |
| CONTIG-023255 | 305 | 50 | 191 | 380 | 18 |
| CONTIG-023256 | 498 | 42 | 131 | 604 | 16 |
| CONTIG-023257 | 377 | 28 | 181 | 220 | 0  |
| CONTIG-023260 | 478 | 13 | 129 | 149 | 0  |
| CONTIG-023261 | 166 | 5  | 9   | 3   | 0  |
| CONTIG-023262 | 186 | 36 | 112 | 106 | 0  |
| CONTIG-023263 | 648 | 9  | 13  | 280 | 0  |
| CONTIG-023264 | 59  | 4  | 6   | 4   | 0  |
| CONTIG-023265 | 122 | 7  | 45  | 13  | 0  |
| CONTIG-023269 | 87  | 6  | 0   | 20  | 0  |
| CONTIG-023270 | 604 | 15 | 61  | 137 | 5  |
| CONTIG-023271 | 75  | 4  | 0   | 12  | 0  |
| CONTIG-023272 | 116 | 5  | 6   | 4   | 0  |
| CONTIG-023273 | 856 | 17 | 165 | 510 | 4  |
| CONTIG-023276 | 139 | 8  | 0   | 38  | 0  |
| CONTIG-023277 | 63  | 5  | 2   | 7   | 0  |
| CONTIG-023278 | 110 | 9  | 10  | 28  | 0  |
| CONTIG-023279 | 511 | 19 | 83  | 285 | 0  |
| CONTIG-023280 | 65  | 5  | 7   | 6   | 0  |
| CONTIG-023281 | 86  | 8  | 3   | 32  | 0  |
| CONTIG-023282 | 190 | 7  | 24  | 44  | 0  |
| CONTIG-023283 | 58  | 5  | 30  | 0   | 0  |
| CONTIG-023284 | 59  | 9  | 11  | 14  | 0  |
| CONTIG-023285 | 533 | 22 | 73  | 331 | 14 |
| CONTIG-023286 | 84  | 7  | 15  | 2   | 0  |
| CONTIG-023292 | 306 | 9  | 12  | 67  | 0  |
| CONTIG-023293 | 111 | 6  | 2   | 17  | 0  |
| CONTIG-023296 | 240 | 15 | 60  | 135 | 0  |
| CONTIG-023298 | 133 | 8  | 0   | 22  | 0  |
| CONTIG-023299 | 206 | 25 | 51  | 101 | 2  |
| CONTIG-023300 | 223 | 37 | 295 | 139 | 4  |
| CONTIG-023302 | 479 | 21 | 49  | 222 | 10 |
| CONTIG-023303 | 132 | 7  | 5   | 31  | 0  |
| CONTIG-023304 | 93  | 3  | 15  | 0   | 0  |
| CONTIG-023305 | 396 | 12 | 162 | 38  | 0  |



|               |      |     |     |      |    |
|---------------|------|-----|-----|------|----|
| CONTIG-023306 | 142  | 62  | 31  | 260  | 2  |
| CONTIG-023307 | 443  | 38  | 62  | 941  | 0  |
| CONTIG-023308 | 417  | 13  | 45  | 151  | 2  |
| CONTIG-023309 | 61   | 4   | 5   | 7    | 0  |
| CONTIG-023310 | 741  | 21  | 105 | 340  | 6  |
| CONTIG-023311 | 65   | 4   | 8   | 0    | 0  |
| CONTIG-023312 | 694  | 15  | 192 | 400  | 0  |
| CONTIG-023315 | 137  | 4   | 3   | 20   | 0  |
| CONTIG-023316 | 261  | 15  | 10  | 62   | 2  |
| CONTIG-023317 | 420  | 15  | 21  | 229  | 2  |
| CONTIG-023318 | 379  | 11  | 47  | 161  | 0  |
| CONTIG-023324 | 1356 | 25  | 296 | 1252 | 6  |
| CONTIG-023325 | 74   | 4   | 7   | 2    | 0  |
| CONTIG-023328 | 263  | 16  | 122 | 157  | 0  |
| CONTIG-023333 | 405  | 7   | 64  | 57   | 0  |
| CONTIG-023334 | 313  | 10  | 5   | 105  | 0  |
| CONTIG-023335 | 284  | 21  | 108 | 228  | 2  |
| CONTIG-023336 | 660  | 11  | 103 | 193  | 2  |
| CONTIG-023337 | 333  | 21  | 95  | 194  | 2  |
| CONTIG-023338 | 125  | 6   | 19  | 17   | 0  |
| CONTIG-023339 | 139  | 7   | 12  | 36   | 0  |
| CONTIG-023340 | 255  | 20  | 51  | 112  | 2  |
| CONTIG-023341 | 541  | 18  | 41  | 393  | 4  |
| CONTIG-023342 | 317  | 65  | 62  | 1234 | 0  |
| CONTIG-023343 | 499  | 38  | 62  | 232  | 0  |
| CONTIG-023345 | 64   | 15  | 82  | 10   | 0  |
| CONTIG-023347 | 511  | 18  | 315 | 193  | 4  |
| CONTIG-023348 | 172  | 5   | 15  | 16   | 0  |
| CONTIG-023350 | 191  | 86  | 204 | 568  | 6  |
| CONTIG-023351 | 323  | 189 | 216 | 2258 | 66 |
| CONTIG-023352 | 447  | 18  | 67  | 259  | 2  |
| CONTIG-023356 | 101  | 11  | 39  | 8    | 0  |
| CONTIG-023357 | 84   | 9   | 73  | 3    | 0  |
| CONTIG-023358 | 71   | 4   | 11  | 4    | 0  |
| CONTIG-023360 | 151  | 16  | 22  | 90   | 0  |
| CONTIG-023361 | 304  | 10  | 34  | 74   | 0  |
| CONTIG-023362 | 1302 | 24  | 198 | 1018 | 16 |
| CONTIG-023363 | 328  | 16  | 107 | 117  | 0  |
| CONTIG-023364 | 610  | 45  | 138 | 866  | 41 |
| CONTIG-023365 | 150  | 8   | 16  | 47   | 0  |
| CONTIG-023367 | 613  | 15  | 163 | 226  | 0  |
| CONTIG-023368 | 209  | 13  | 31  | 74   | 4  |
| CONTIG-023369 | 224  | 7   | 14  | 48   | 0  |
| CONTIG-023370 | 200  | 11  | 133 | 27   | 0  |
| CONTIG-023373 | 106  | 13  | 27  | 24   | 0  |
| CONTIG-023374 | 141  | 21  | 64  | 61   | 0  |
| CONTIG-023377 | 254  | 15  | 106 | 102  | 0  |

|               |      |      |     |      |      |
|---------------|------|------|-----|------|------|
| CONTIG-023378 | 537  | 15   | 101 | 332  | 0    |
| CONTIG-023379 | 67   | 4    | 4   | 2    | 0    |
| CONTIG-023380 | 873  | 16   | 107 | 326  | 2    |
| CONTIG-023382 | 138  | 13   | 2   | 92   | 0    |
| CONTIG-023384 | 84   | 9    | 2   | 18   | 0    |
| CONTIG-023385 | 204  | 8    | 10  | 60   | 0    |
| CONTIG-023387 | 65   | 7    | 0   | 13   | 0    |
| CONTIG-023388 | 703  | 10   | 26  | 221  | 0    |
| CONTIG-023389 | 190  | 6    | 9   | 35   | 2    |
| CONTIG-023390 | 268  | 26   | 131 | 176  | 7    |
| CONTIG-023391 | 208  | 9    | 28  | 49   | 0    |
| CONTIG-023395 | 1172 | 24   | 160 | 880  | 41   |
| CONTIG-023396 | 119  | 8    | 2   | 0    | 0    |
| CONTIG-023397 | 91   | 9    | 20  | 16   | 0    |
| CONTIG-023398 | 79   | 87   | 6   | 362  | 0    |
| CONTIG-023399 | 548  | 15   | 69  | 221  | 7    |
| CONTIG-023400 | 138  | 10   | 26  | 36   | 0    |
| CONTIG-023401 | 74   | 3    | 7   | 5    | 0    |
| CONTIG-023402 | 417  | 19   | 36  | 371  | 0    |
| CONTIG-023403 | 1230 | 19   | 340 | 758  | 10   |
| CONTIG-023404 | 527  | 77   | 0   | 2    | 35   |
| CONTIG-023413 | 158  | 27   | 51  | 32   | 2    |
| CONTIG-023414 | 148  | 8    | 6   | 34   | 0    |
| CONTIG-023421 | 434  | 11   | 32  | 61   | 0    |
| CONTIG-023426 | 46   | 480  | 65  | 251  | 103  |
| CONTIG-023427 | 422  | 19   | 26  | 266  | 0    |
| CONTIG-023429 | 73   | 23   | 30  | 71   | 0    |
| CONTIG-023430 | 60   | 7    | 3   | 17   | 0    |
| CONTIG-023431 | 165  | 7    | 26  | 26   | 0    |
| CONTIG-023432 | 635  | 24   | 109 | 649  | 0    |
| CONTIG-023433 | 814  | 59   | 100 | 3039 | 0    |
| CONTIG-023434 | 881  | 13   | 69  | 309  | 4    |
| CONTIG-023435 | 59   | 4    | 0   | 10   | 0    |
| CONTIG-023436 | 87   | 9    | 21  | 9    | 0    |
| CONTIG-023438 | 214  | 34   | 50  | 98   | 0    |
| CONTIG-023441 | 192  | 26   | 94  | 84   | 3    |
| CONTIG-023442 | 185  | 15   | 2   | 127  | 0    |
| CONTIG-023443 | 550  | 21   | 160 | 343  | 8    |
| CONTIG-023444 | 1043 | 13   | 100 | 392  | 2    |
| CONTIG-023445 | 1377 | 55   | 176 | 4707 | 0    |
| CONTIG-023446 | 78   | 120  | 473 | 131  | 0    |
| CONTIG-023448 | 199  | 13   | 49  | 62   | 0    |
| CONTIG-023458 | 196  | 100  | 4   | 0    | 0    |
| CONTIG-023459 | 1870 | 27   | 66  | 2968 | 2    |
| CONTIG-023460 | 450  | 21   | 26  | 246  | 2    |
| CONTIG-023461 | 81   | 23   | 6   | 36   | 0    |
| CONTIG-023465 | 36   | 2602 | 319 | 89   | 1661 |

|               |     |     |     |      |    |
|---------------|-----|-----|-----|------|----|
| CONTIG-023468 | 175 | 11  | 2   | 74   | 0  |
| CONTIG-023469 | 225 | 7   | 9   | 34   | 0  |
| CONTIG-023471 | 87  | 32  | 25  | 114  | 0  |
| CONTIG-023472 | 160 | 7   | 50  | 8    | 0  |
| CONTIG-023473 | 432 | 49  | 17  | 1010 | 2  |
| CONTIG-023474 | 209 | 13  | 49  | 90   | 0  |
| CONTIG-023475 | 89  | 6   | 4   | 6    | 0  |
| CONTIG-023476 | 63  | 9   | 30  | 0    | 0  |
| CONTIG-023477 | 155 | 7   | 16  | 31   | 0  |
| CONTIG-023478 | 65  | 4   | 8   | 3    | 0  |
| CONTIG-023479 | 97  | 4   | 13  | 2    | 0  |
| CONTIG-023480 | 778 | 22  | 64  | 584  | 0  |
| CONTIG-023482 | 58  | 19  | 27  | 30   | 0  |
| CONTIG-023483 | 471 | 9   | 0   | 82   | 0  |
| CONTIG-023487 | 228 | 30  | 8   | 318  | 0  |
| CONTIG-023488 | 77  | 4   | 2   | 6    | 0  |
| CONTIG-023489 | 267 | 10  | 25  | 108  | 0  |
| CONTIG-023490 | 59  | 10  | 46  | 0    | 0  |
| CONTIG-023491 | 173 | 6   | 0   | 36   | 0  |
| CONTIG-023493 | 180 | 14  | 31  | 56   | 0  |
| CONTIG-023494 | 455 | 13  | 49  | 140  | 2  |
| CONTIG-023495 | 70  | 109 | 23  | 191  | 2  |
| CONTIG-023496 | 393 | 22  | 59  | 294  | 2  |
| CONTIG-023497 | 72  | 5   | 12  | 0    | 0  |
| CONTIG-023498 | 147 | 6   | 30  | 4    | 0  |
| CONTIG-023499 | 241 | 16  | 99  | 90   | 0  |
| CONTIG-023500 | 176 | 5   | 2   | 0    | 4  |
| CONTIG-023501 | 60  | 8   | 30  | 0    | 0  |
| CONTIG-023502 | 304 | 9   | 13  | 40   | 2  |
| CONTIG-023503 | 238 | 12  | 72  | 60   | 0  |
| CONTIG-023504 | 96  | 9   | 6   | 27   | 0  |
| CONTIG-023505 | 279 | 16  | 21  | 221  | 0  |
| CONTIG-023506 | 142 | 13  | 30  | 50   | 0  |
| CONTIG-023507 | 105 | 11  | 9   | 49   | 0  |
| CONTIG-023508 | 82  | 15  | 16  | 2    | 0  |
| CONTIG-023511 | 286 | 66  | 120 | 480  | 7  |
| CONTIG-023512 | 612 | 13  | 95  | 170  | 0  |
| CONTIG-023513 | 110 | 6   | 4   | 16   | 0  |
| CONTIG-023514 | 144 | 5   | 6   | 15   | 0  |
| CONTIG-023515 | 356 | 10  | 9   | 93   | 9  |
| CONTIG-023516 | 77  | 70  | 40  | 29   | 0  |
| CONTIG-023517 | 76  | 51  | 15  | 77   | 0  |
| CONTIG-023518 | 637 | 65  | 111 | 1707 | 44 |
| CONTIG-023519 | 262 | 48  | 36  | 228  | 0  |
| CONTIG-023520 | 72  | 5   | 0   | 6    | 0  |
| CONTIG-023521 | 92  | 5   | 21  | 7    | 0  |
| CONTIG-023522 | 190 | 6   | 10  | 19   | 0  |

|               |     |     |     |      |    |
|---------------|-----|-----|-----|------|----|
| CONTIG-023523 | 409 | 9   | 67  | 58   | 0  |
| CONTIG-023524 | 315 | 13  | 35  | 107  | 0  |
| CONTIG-023525 | 275 | 13  | 60  | 104  | 0  |
| CONTIG-023526 | 85  | 6   | 7   | 5    | 0  |
| CONTIG-023533 | 75  | 61  | 68  | 71   | 0  |
| CONTIG-023534 | 420 | 17  | 115 | 195  | 6  |
| CONTIG-023535 | 259 | 11  | 12  | 83   | 0  |
| CONTIG-023536 | 345 | 30  | 188 | 469  | 0  |
| CONTIG-023537 | 265 | 8   | 9   | 19   | 0  |
| CONTIG-023538 | 237 | 7   | 2   | 34   | 0  |
| CONTIG-023539 | 63  | 92  | 0   | 287  | 0  |
| CONTIG-023540 | 136 | 17  | 81  | 23   | 0  |
| CONTIG-023541 | 481 | 73  | 298 | 652  | 8  |
| CONTIG-023542 | 940 | 28  | 154 | 887  | 7  |
| CONTIG-023543 | 58  | 6   | 2   | 9    | 0  |
| CONTIG-023544 | 253 | 19  | 24  | 188  | 0  |
| CONTIG-023545 | 622 | 66  | 197 | 2460 | 2  |
| CONTIG-023546 | 91  | 6   | 18  | 2    | 0  |
| CONTIG-023547 | 133 | 9   | 12  | 34   | 0  |
| CONTIG-023548 | 267 | 18  | 47  | 126  | 2  |
| CONTIG-023549 | 336 | 14  | 86  | 148  | 0  |
| CONTIG-023550 | 133 | 52  | 22  | 240  | 0  |
| CONTIG-023551 | 529 | 15  | 86  | 164  | 6  |
| CONTIG-023552 | 268 | 12  | 15  | 44   | 0  |
| CONTIG-023553 | 123 | 7   | 7   | 23   | 0  |
| CONTIG-023554 | 281 | 51  | 63  | 298  | 0  |
| CONTIG-023556 | 64  | 13  | 10  | 12   | 0  |
| CONTIG-023557 | 751 | 19  | 71  | 265  | 10 |
| CONTIG-023558 | 79  | 5   | 5   | 14   | 0  |
| CONTIG-023559 | 197 | 23  | 113 | 59   | 0  |
| CONTIG-023560 | 707 | 13  | 101 | 353  | 2  |
| CONTIG-023561 | 635 | 19  | 74  | 379  | 2  |
| CONTIG-023565 | 100 | 5   | 13  | 4    | 0  |
| CONTIG-023567 | 161 | 8   | 43  | 13   | 2  |
| CONTIG-023568 | 151 | 23  | 2   | 175  | 0  |
| CONTIG-023569 | 99  | 6   | 9   | 9    | 0  |
| CONTIG-023570 | 265 | 78  | 121 | 1272 | 0  |
| CONTIG-023571 | 91  | 8   | 8   | 7    | 0  |
| CONTIG-023572 | 62  | 123 | 21  | 19   | 11 |
| CONTIG-023573 | 93  | 6   | 19  | 15   | 0  |
| CONTIG-023574 | 635 | 24  | 102 | 310  | 9  |
| CONTIG-023575 | 203 | 18  | 17  | 111  | 4  |
| CONTIG-023576 | 136 | 10  | 86  | 25   | 0  |
| CONTIG-023577 | 875 | 14  | 17  | 108  | 56 |
| CONTIG-023579 | 108 | 35  | 133 | 11   | 0  |
| CONTIG-023580 | 85  | 4   | 0   | 10   | 0  |
| CONTIG-023581 | 92  | 12  | 43  | 25   | 0  |

|               |      |     |     |      |    |
|---------------|------|-----|-----|------|----|
| CONTIG-023582 | 124  | 5   | 5   | 25   | 0  |
| CONTIG-023583 | 449  | 25  | 34  | 342  | 15 |
| CONTIG-023586 | 414  | 11  | 24  | 35   | 0  |
| CONTIG-023587 | 104  | 7   | 17  | 22   | 0  |
| CONTIG-023588 | 78   | 635 | 40  | 3012 | 0  |
| CONTIG-023590 | 545  | 21  | 75  | 379  | 6  |
| CONTIG-023591 | 281  | 63  | 377 | 497  | 4  |
| CONTIG-023592 | 72   | 9   | 3   | 11   | 0  |
| CONTIG-023595 | 49   | 152 | 23  | 227  | 3  |
| CONTIG-023596 | 876  | 26  | 192 | 1126 | 0  |
| CONTIG-023597 | 89   | 4   | 2   | 0    | 0  |
| CONTIG-023598 | 480  | 43  | 73  | 1208 | 0  |
| CONTIG-023599 | 530  | 18  | 15  | 0    | 74 |
| CONTIG-023601 | 104  | 15  | 0   | 47   | 0  |
| CONTIG-023602 | 1921 | 48  | 88  | 4964 | 6  |
| CONTIG-023603 | 259  | 6   | 9   | 52   | 0  |
| CONTIG-023605 | 76   | 11  | 8   | 22   | 0  |
| CONTIG-023606 | 155  | 6   | 6   | 30   | 2  |
| CONTIG-023607 | 219  | 12  | 10  | 69   | 2  |
| CONTIG-023608 | 51   | 734 | 59  | 942  | 28 |
| CONTIG-023609 | 83   | 7   | 14  | 7    | 0  |
| CONTIG-023610 | 65   | 174 | 47  | 469  | 0  |
| CONTIG-023611 | 133  | 33  | 9   | 105  | 2  |
| CONTIG-023612 | 662  | 10  | 6   | 156  | 2  |
| CONTIG-023613 | 201  | 16  | 58  | 34   | 2  |
| CONTIG-023614 | 97   | 11  | 26  | 13   | 0  |
| CONTIG-023615 | 229  | 16  | 59  | 66   | 0  |
| CONTIG-023617 | 364  | 25  | 56  | 300  | 2  |
| CONTIG-023618 | 175  | 13  | 50  | 49   | 0  |
| CONTIG-023619 | 350  | 14  | 60  | 104  | 0  |
| CONTIG-023620 | 290  | 8   | 16  | 68   | 0  |
| CONTIG-023621 | 252  | 6   | 4   | 53   | 2  |
| CONTIG-023622 | 127  | 4   | 5   | 6    | 0  |
| CONTIG-023623 | 158  | 9   | 25  | 30   | 0  |
| CONTIG-023624 | 64   | 5   | 2   | 8    | 0  |
| CONTIG-023625 | 123  | 7   | 5   | 29   | 0  |
| CONTIG-023626 | 84   | 41  | 169 | 40   | 0  |
| CONTIG-023627 | 376  | 13  | 3   | 145  | 4  |
| CONTIG-023628 | 61   | 14  | 26  | 3    | 13 |
| CONTIG-023629 | 87   | 8   | 2   | 7    | 0  |
| CONTIG-023630 | 398  | 58  | 199 | 1292 | 0  |
| CONTIG-023631 | 404  | 13  | 35  | 45   | 0  |
| CONTIG-023632 | 872  | 21  | 67  | 571  | 0  |
| CONTIG-023633 | 183  | 10  | 18  | 27   | 0  |
| CONTIG-023634 | 95   | 9   | 11  | 31   | 0  |
| CONTIG-023635 | 978  | 19  | 89  | 200  | 0  |
| CONTIG-023636 | 163  | 6   | 3   | 12   | 0  |

|               |     |     |     |      |     |
|---------------|-----|-----|-----|------|-----|
| CONTIG-023637 | 269 | 11  | 52  | 98   | 0   |
| CONTIG-023639 | 305 | 11  | 52  | 93   | 0   |
| CONTIG-023640 | 68  | 6   | 0   | 12   | 0   |
| CONTIG-023641 | 64  | 7   | 10  | 11   | 0   |
| CONTIG-023642 | 46  | 382 | 29  | 416  | 21  |
| CONTIG-023643 | 608 | 18  | 20  | 123  | 2   |
| CONTIG-023645 | 456 | 15  | 4   | 237  | 4   |
| CONTIG-023646 | 318 | 173 | 461 | 1833 | 33  |
| CONTIG-023647 | 67  | 12  | 19  | 15   | 0   |
| CONTIG-023648 | 248 | 13  | 20  | 126  | 0   |
| CONTIG-023649 | 83  | 4   | 10  | 0    | 0   |
| CONTIG-023650 | 216 | 12  | 57  | 45   | 0   |
| CONTIG-023651 | 105 | 4   | 3   | 9    | 0   |
| CONTIG-023652 | 545 | 124 | 220 | 1778 | 322 |
| CONTIG-023653 | 44  | 56  | 23  | 62   | 0   |
| CONTIG-023654 | 463 | 10  | 9   | 150  | 0   |
| CONTIG-023655 | 687 | 43  | 380 | 403  | 16  |
| CONTIG-023656 | 583 | 9   | 45  | 142  | 0   |
| CONTIG-023657 | 153 | 11  | 53  | 19   | 0   |
| CONTIG-023658 | 165 | 19  | 40  | 144  | 0   |
| CONTIG-023659 | 83  | 35  | 103 | 0    | 0   |
| CONTIG-023660 | 124 | 5   | 5   | 8    | 0   |
| CONTIG-023662 | 71  | 53  | 103 | 16   | 0   |
| CONTIG-023663 | 181 | 14  | 27  | 71   | 0   |
| CONTIG-023664 | 48  | 22  | 0   | 40   | 0   |
| CONTIG-023665 | 480 | 13  | 44  | 249  | 2   |
| CONTIG-023666 | 935 | 60  | 194 | 409  | 0   |
| CONTIG-023667 | 186 | 8   | 4   | 37   | 0   |
| CONTIG-023668 | 81  | 24  | 18  | 94   | 0   |
| CONTIG-023669 | 164 | 18  | 6   | 93   | 0   |
| CONTIG-023673 | 189 | 17  | 64  | 110  | 0   |
| CONTIG-023674 | 275 | 81  | 0   | 0    | 199 |
| CONTIG-023675 | 677 | 12  | 50  | 195  | 2   |
| CONTIG-023677 | 603 | 39  | 360 | 808  | 9   |
| CONTIG-023678 | 80  | 5   | 0   | 15   | 0   |
| CONTIG-023679 | 767 | 23  | 79  | 684  | 7   |
| CONTIG-023681 | 177 | 8   | 35  | 10   | 0   |
| CONTIG-023682 | 252 | 13  | 73  | 92   | 2   |
| CONTIG-023683 | 301 | 12  | 62  | 134  | 0   |
| CONTIG-023684 | 163 | 8   | 27  | 41   | 2   |
| CONTIG-023686 | 351 | 27  | 152 | 232  | 2   |
| CONTIG-023687 | 128 | 5   | 3   | 22   | 0   |
| CONTIG-023688 | 133 | 12  | 21  | 52   | 0   |
| CONTIG-023689 | 77  | 11  | 55  | 0    | 0   |
| CONTIG-023690 | 173 | 6   | 27  | 14   | 0   |
| CONTIG-023691 | 42  | 44  | 79  | 3    | 2   |
| CONTIG-023692 | 294 | 32  | 84  | 308  | 2   |

|               |      |     |     |      |     |
|---------------|------|-----|-----|------|-----|
| CONTIG-023693 | 233  | 9   | 10  | 39   | 0   |
| CONTIG-023694 | 151  | 9   | 6   | 21   | 0   |
| CONTIG-023695 | 101  | 7   | 21  | 18   | 0   |
| CONTIG-023696 | 877  | 13  | 121 | 332  | 0   |
| CONTIG-023697 | 83   | 4   | 2   | 9    | 0   |
| CONTIG-023698 | 89   | 8   | 54  | 0    | 0   |
| CONTIG-023699 | 546  | 26  | 5   | 2    | 113 |
| CONTIG-023700 | 64   | 5   | 2   | 5    | 0   |
| CONTIG-023701 | 198  | 8   | 14  | 31   | 0   |
| CONTIG-023703 | 176  | 9   | 29  | 10   | 0   |
| CONTIG-023704 | 232  | 12  | 34  | 102  | 0   |
| CONTIG-023709 | 316  | 13  | 52  | 185  | 0   |
| CONTIG-023712 | 108  | 9   | 37  | 20   | 0   |
| CONTIG-023713 | 104  | 14  | 118 | 0    | 0   |
| CONTIG-023715 | 74   | 6   | 2   | 17   | 0   |
| CONTIG-023716 | 1020 | 18  | 59  | 383  | 4   |
| CONTIG-023717 | 206  | 14  | 30  | 85   | 2   |
| CONTIG-023718 | 636  | 56  | 196 | 1917 | 0   |
| CONTIG-023719 | 83   | 4   | 2   | 10   | 0   |
| CONTIG-023720 | 363  | 10  | 25  | 109  | 0   |
| CONTIG-023722 | 616  | 23  | 119 | 447  | 8   |
| CONTIG-023723 | 83   | 375 | 163 | 787  | 7   |
| CONTIG-023724 | 433  | 22  | 253 | 52   | 0   |
| CONTIG-023725 | 332  | 12  | 5   | 68   | 15  |
| CONTIG-023726 | 327  | 9   | 19  | 109  | 0   |
| CONTIG-023727 | 87   | 10  | 6   | 8    | 0   |
| CONTIG-023728 | 420  | 31  | 89  | 491  | 8   |
| CONTIG-023729 | 230  | 7   | 10  | 60   | 0   |
| CONTIG-023730 | 67   | 3   | 4   | 0    | 0   |
| CONTIG-023731 | 227  | 10  | 18  | 73   | 2   |
| CONTIG-023732 | 67   | 3   | 10  | 0    | 0   |
| CONTIG-023733 | 270  | 10  | 48  | 18   | 0   |
| CONTIG-023735 | 70   | 10  | 32  | 16   | 0   |
| CONTIG-023736 | 509  | 19  | 26  | 41   | 0   |
| CONTIG-023737 | 89   | 4   | 6   | 9    | 0   |
| CONTIG-023741 | 180  | 5   | 5   | 28   | 2   |
| CONTIG-023742 | 166  | 7   | 47  | 21   | 0   |
| CONTIG-023743 | 296  | 18  | 32  | 191  | 2   |
| CONTIG-023744 | 194  | 13  | 32  | 97   | 0   |
| CONTIG-023745 | 248  | 7   | 15  | 68   | 0   |
| CONTIG-023746 | 353  | 47  | 96  | 683  | 4   |
| CONTIG-023747 | 84   | 4   | 11  | 0    | 0   |
| CONTIG-023756 | 621  | 21  | 50  | 249  | 4   |
| CONTIG-023757 | 567  | 60  | 170 | 618  | 80  |
| CONTIG-023761 | 392  | 16  | 56  | 202  | 0   |
| CONTIG-023762 | 169  | 7   | 53  | 12   | 0   |
| CONTIG-023763 | 161  | 6   | 12  | 23   | 0   |

|               |      |     |     |      |    |
|---------------|------|-----|-----|------|----|
| CONTIG-023769 | 220  | 9   | 11  | 33   | 2  |
| CONTIG-023770 | 269  | 18  | 86  | 77   | 0  |
| CONTIG-023771 | 614  | 21  | 68  | 442  | 2  |
| CONTIG-023772 | 1065 | 11  | 73  | 426  | 2  |
| CONTIG-023773 | 151  | 7   | 9   | 15   | 0  |
| CONTIG-023774 | 260  | 7   | 21  | 51   | 0  |
| CONTIG-023778 | 126  | 12  | 2   | 10   | 0  |
| CONTIG-023779 | 58   | 19  | 11  | 10   | 0  |
| CONTIG-023780 | 188  | 5   | 46  | 12   | 0  |
| CONTIG-023781 | 148  | 22  | 41  | 133  | 2  |
| CONTIG-023782 | 100  | 72  | 16  | 186  | 0  |
| CONTIG-023783 | 95   | 8   | 41  | 2    | 0  |
| CONTIG-023786 | 883  | 22  | 187 | 451  | 23 |
| CONTIG-023787 | 67   | 8   | 2   | 10   | 0  |
| CONTIG-023788 | 198  | 49  | 147 | 323  | 5  |
| CONTIG-023790 | 179  | 6   | 0   | 16   | 0  |
| CONTIG-023791 | 450  | 19  | 28  | 481  | 0  |
| CONTIG-023792 | 173  | 12  | 13  | 67   | 0  |
| CONTIG-023793 | 61   | 4   | 0   | 0    | 0  |
| CONTIG-023794 | 74   | 7   | 15  | 2    | 0  |
| CONTIG-023795 | 325  | 9   | 8   | 98   | 2  |
| CONTIG-023797 | 244  | 4   | 2   | 3    | 0  |
| CONTIG-023798 | 176  | 36  | 97  | 131  | 0  |
| CONTIG-023799 | 58   | 22  | 32  | 21   | 0  |
| CONTIG-023800 | 63   | 4   | 3   | 2    | 0  |
| CONTIG-023801 | 157  | 6   | 24  | 7    | 0  |
| CONTIG-023805 | 264  | 15  | 15  | 123  | 0  |
| CONTIG-023806 | 192  | 29  | 48  | 167  | 4  |
| CONTIG-023807 | 84   | 20  | 25  | 12   | 2  |
| CONTIG-023808 | 567  | 14  | 20  | 75   | 2  |
| CONTIG-023809 | 514  | 9   | 49  | 99   | 0  |
| CONTIG-023810 | 114  | 5   | 12  | 9    | 0  |
| CONTIG-023811 | 305  | 6   | 2   | 47   | 0  |
| CONTIG-023812 | 87   | 13  | 9   | 45   | 0  |
| CONTIG-023813 | 86   | 6   | 4   | 5    | 0  |
| CONTIG-023814 | 120  | 5   | 25  | 6    | 0  |
| CONTIG-023815 | 203  | 359 | 295 | 3871 | 38 |
| CONTIG-023817 | 261  | 8   | 6   | 37   | 0  |
| CONTIG-023821 | 188  | 10  | 3   | 72   | 0  |
| CONTIG-023822 | 773  | 19  | 152 | 299  | 9  |
| CONTIG-023824 | 1012 | 35  | 190 | 1608 | 25 |
| CONTIG-023825 | 360  | 25  | 132 | 231  | 3  |
| CONTIG-023826 | 555  | 12  | 38  | 145  | 2  |
| CONTIG-023827 | 79   | 4   | 3   | 11   | 0  |
| CONTIG-023828 | 230  | 11  | 75  | 32   | 0  |
| CONTIG-023829 | 395  | 13  | 74  | 71   | 2  |
| CONTIG-023830 | 172  | 42  | 56  | 244  | 0  |



|               |      |     |     |      |     |
|---------------|------|-----|-----|------|-----|
| CONTIG-023831 | 854  | 23  | 4   | 1185 | 0   |
| CONTIG-023833 | 65   | 53  | 121 | 2    | 0   |
| CONTIG-023834 | 224  | 7   | 6   | 50   | 0   |
| CONTIG-023835 | 60   | 13  | 5   | 14   | 0   |
| CONTIG-023836 | 67   | 8   | 5   | 21   | 0   |
| CONTIG-023837 | 157  | 4   | 5   | 15   | 2   |
| CONTIG-023838 | 2537 | 47  | 65  | 4449 | 205 |
| CONTIG-023839 | 88   | 8   | 16  | 15   | 0   |
| CONTIG-023840 | 274  | 18  | 58  | 108  | 0   |
| CONTIG-023841 | 107  | 9   | 18  | 25   | 0   |
| CONTIG-023843 | 290  | 10  | 59  | 70   | 0   |
| CONTIG-023844 | 123  | 329 | 115 | 2232 | 0   |
| CONTIG-023845 | 89   | 37  | 6   | 172  | 0   |
| CONTIG-023846 | 1301 | 30  | 112 | 1958 | 0   |
| CONTIG-023847 | 350  | 47  | 157 | 143  | 6   |
| CONTIG-023848 | 75   | 7   | 15  | 4    | 0   |
| CONTIG-023849 | 245  | 13  | 21  | 137  | 0   |
| CONTIG-023850 | 100  | 80  | 57  | 123  | 0   |
| CONTIG-023851 | 110  | 35  | 13  | 123  | 0   |
| CONTIG-023853 | 373  | 16  | 152 | 69   | 0   |
| CONTIG-023854 | 671  | 13  | 46  | 217  | 4   |
| CONTIG-023856 | 105  | 10  | 16  | 5    | 3   |
| CONTIG-023858 | 388  | 17  | 159 | 137  | 0   |
| CONTIG-023861 | 519  | 74  | 287 | 628  | 2   |
| CONTIG-023862 | 688  | 42  | 199 | 846  | 16  |
| CONTIG-023863 | 352  | 32  | 28  | 404  | 2   |
| CONTIG-023864 | 143  | 20  | 21  | 115  | 0   |
| CONTIG-023865 | 651  | 18  | 66  | 393  | 0   |
| CONTIG-023866 | 137  | 68  | 98  | 390  | 2   |
| CONTIG-023867 | 396  | 15  | 25  | 277  | 0   |
| CONTIG-023868 | 2250 | 26  | 203 | 1717 | 11  |
| CONTIG-023869 | 450  | 30  | 145 | 178  | 2   |
| CONTIG-023873 | 83   | 7   | 2   | 17   | 0   |
| CONTIG-023874 | 280  | 111 | 125 | 1235 | 94  |
| CONTIG-023877 | 152  | 19  | 46  | 127  | 0   |
| CONTIG-023881 | 68   | 6   | 10  | 9    | 0   |
| CONTIG-023882 | 207  | 13  | 11  | 82   | 2   |
| CONTIG-023883 | 159  | 9   | 7   | 45   | 6   |
| CONTIG-023884 | 63   | 8   | 13  | 7    | 0   |
| CONTIG-023885 | 221  | 5   | 13  | 25   | 0   |
| CONTIG-023886 | 191  | 45  | 310 | 67   | 6   |
| CONTIG-023887 | 74   | 11  | 6   | 21   | 0   |
| CONTIG-023888 | 80   | 25  | 40  | 12   | 0   |
| CONTIG-023889 | 85   | 11  | 0   | 52   | 0   |
| CONTIG-023890 | 308  | 9   | 21  | 70   | 0   |
| CONTIG-023891 | 183  | 6   | 14  | 35   | 0   |
| CONTIG-023892 | 221  | 11  | 14  | 37   | 0   |

|               |      |     |     |      |     |
|---------------|------|-----|-----|------|-----|
| CONTIG-023893 | 118  | 10  | 8   | 47   | 2   |
| CONTIG-023894 | 107  | 25  | 47  | 82   | 0   |
| CONTIG-023897 | 158  | 7   | 7   | 17   | 0   |
| CONTIG-023898 | 154  | 11  | 32  | 59   | 0   |
| CONTIG-023899 | 67   | 2   | 4   | 0    | 0   |
| CONTIG-023900 | 92   | 10  | 9   | 20   | 2   |
| CONTIG-023901 | 310  | 14  | 30  | 172  | 0   |
| CONTIG-023902 | 111  | 385 | 75  | 7    | 0   |
| CONTIG-023903 | 382  | 14  | 42  | 236  | 0   |
| CONTIG-023904 | 721  | 103 | 164 | 2186 | 113 |
| CONTIG-023905 | 645  | 12  | 82  | 276  | 2   |
| CONTIG-023906 | 646  | 8   | 21  | 142  | 0   |
| CONTIG-023907 | 80   | 28  | 127 | 14   | 0   |
| CONTIG-023909 | 357  | 10  | 16  | 111  | 6   |
| CONTIG-023910 | 106  | 8   | 11  | 29   | 0   |
| CONTIG-023911 | 103  | 11  | 6   | 0    | 0   |
| CONTIG-023917 | 78   | 4   | 0   | 2    | 2   |
| CONTIG-023918 | 60   | 9   | 4   | 8    | 0   |
| CONTIG-023919 | 63   | 5   | 9   | 7    | 0   |
| CONTIG-023920 | 467  | 10  | 34  | 150  | 0   |
| CONTIG-023921 | 202  | 4   | 15  | 2    | 0   |
| CONTIG-023922 | 115  | 13  | 10  | 35   | 0   |
| CONTIG-023923 | 70   | 15  | 5   | 48   | 0   |
| CONTIG-023924 | 96   | 10  | 11  | 24   | 0   |
| CONTIG-023925 | 168  | 8   | 16  | 30   | 0   |
| CONTIG-023926 | 65   | 13  | 10  | 20   | 0   |
| CONTIG-023928 | 158  | 15  | 13  | 36   | 0   |
| CONTIG-023929 | 315  | 36  | 129 | 133  | 2   |
| CONTIG-023930 | 108  | 66  | 116 | 304  | 0   |
| CONTIG-023931 | 173  | 14  | 36  | 130  | 0   |
| CONTIG-023935 | 58   | 3   | 3   | 0    | 0   |
| CONTIG-023946 | 406  | 16  | 81  | 124  | 2   |
| CONTIG-023947 | 1438 | 20  | 33  | 897  | 36  |
| CONTIG-023948 | 436  | 119 | 27  | 111  | 85  |
| CONTIG-023949 | 262  | 18  | 143 | 158  | 0   |
| CONTIG-023950 | 82   | 10  | 2   | 25   | 0   |
| CONTIG-023951 | 196  | 7   | 17  | 43   | 0   |
| CONTIG-023952 | 203  | 12  | 52  | 33   | 0   |
| CONTIG-023953 | 187  | 14  | 71  | 23   | 0   |
| CONTIG-023954 | 397  | 12  | 25  | 150  | 2   |
| CONTIG-023955 | 846  | 10  | 22  | 414  | 2   |
| CONTIG-023961 | 1358 | 18  | 85  | 1086 | 0   |
| CONTIG-023962 | 332  | 13  | 13  | 40   | 2   |
| CONTIG-023963 | 79   | 27  | 28  | 0    | 0   |
| CONTIG-023965 | 90   | 5   | 10  | 12   | 0   |
| CONTIG-023966 | 87   | 7   | 7   | 15   | 0   |
| CONTIG-023967 | 312  | 14  | 35  | 96   | 0   |

|               |     |     |     |      |    |
|---------------|-----|-----|-----|------|----|
| CONTIG-023968 | 60  | 5   | 3   | 12   | 0  |
| CONTIG-023969 | 312 | 10  | 24  | 109  | 0  |
| CONTIG-023970 | 472 | 13  | 54  | 143  | 4  |
| CONTIG-023975 | 97  | 26  | 16  | 24   | 4  |
| CONTIG-023976 | 577 | 11  | 89  | 144  | 2  |
| CONTIG-023977 | 96  | 7   | 0   | 26   | 0  |
| CONTIG-023979 | 126 | 5   | 2   | 25   | 0  |
| CONTIG-023980 | 529 | 27  | 67  | 414  | 37 |
| CONTIG-023981 | 85  | 10  | 2   | 27   | 0  |
| CONTIG-023983 | 130 | 4   | 8   | 21   | 0  |
| CONTIG-023986 | 134 | 7   | 2   | 21   | 0  |
| CONTIG-023987 | 620 | 27  | 131 | 676  | 8  |
| CONTIG-023988 | 286 | 10  | 23  | 90   | 0  |
| CONTIG-023989 | 366 | 7   | 58  | 60   | 0  |
| CONTIG-023990 | 69  | 22  | 60  | 7    | 0  |
| CONTIG-023991 | 122 | 11  | 22  | 44   | 0  |
| CONTIG-023992 | 68  | 48  | 73  | 46   | 0  |
| CONTIG-023994 | 374 | 108 | 303 | 995  | 62 |
| CONTIG-023995 | 159 | 6   | 0   | 12   | 2  |
| CONTIG-023996 | 567 | 13  | 76  | 264  | 0  |
| CONTIG-023997 | 788 | 32  | 113 | 826  | 6  |
| CONTIG-024001 | 62  | 6   | 4   | 8    | 0  |
| CONTIG-024002 | 76  | 7   | 0   | 18   | 0  |
| CONTIG-024003 | 71  | 11  | 22  | 18   | 0  |
| CONTIG-024004 | 44  | 90  | 44  | 35   | 0  |
| CONTIG-024005 | 451 | 15  | 35  | 344  | 2  |
| CONTIG-024006 | 60  | 8   | 0   | 0    | 0  |
| CONTIG-024007 | 86  | 8   | 4   | 0    | 16 |
| CONTIG-024009 | 383 | 20  | 154 | 168  | 2  |
| CONTIG-024010 | 180 | 6   | 19  | 28   | 0  |
| CONTIG-024011 | 69  | 8   | 29  | 10   | 0  |
| CONTIG-024012 | 107 | 8   | 13  | 18   | 0  |
| CONTIG-024013 | 560 | 14  | 11  | 221  | 0  |
| CONTIG-024024 | 263 | 13  | 15  | 23   | 0  |
| CONTIG-024025 | 165 | 7   | 50  | 37   | 0  |
| CONTIG-024026 | 661 | 49  | 136 | 1550 | 38 |
| CONTIG-024027 | 87  | 3   | 6   | 6    | 0  |
| CONTIG-024028 | 114 | 13  | 20  | 26   | 0  |
| CONTIG-024029 | 519 | 15  | 115 | 291  | 0  |
| CONTIG-024030 | 164 | 6   | 12  | 7    | 0  |
| CONTIG-024031 | 152 | 14  | 48  | 52   | 0  |
| CONTIG-024032 | 131 | 30  | 175 | 110  | 0  |
| CONTIG-024033 | 795 | 18  | 53  | 533  | 6  |
| CONTIG-024039 | 88  | 100 | 55  | 152  | 0  |
| CONTIG-024040 | 86  | 62  | 31  | 25   | 0  |
| CONTIG-024042 | 68  | 9   | 19  | 11   | 0  |
| CONTIG-024043 | 82  | 9   | 32  | 9    | 0  |

|               |     |     |     |      |    |
|---------------|-----|-----|-----|------|----|
| CONTIG-024044 | 201 | 9   | 101 | 14   | 0  |
| CONTIG-024045 | 438 | 19  | 51  | 145  | 2  |
| CONTIG-024046 | 62  | 7   | 4   | 0    | 0  |
| CONTIG-024047 | 104 | 17  | 13  | 59   | 0  |
| CONTIG-024048 | 87  | 8   | 10  | 5    | 0  |
| CONTIG-024049 | 59  | 3   | 9   | 0    | 0  |
| CONTIG-024051 | 251 | 6   | 0   | 20   | 0  |
| CONTIG-024053 | 70  | 2   | 0   | 3    | 0  |
| CONTIG-024055 | 67  | 24  | 13  | 19   | 2  |
| CONTIG-024056 | 126 | 6   | 8   | 11   | 0  |
| CONTIG-024057 | 116 | 8   | 47  | 17   | 0  |
| CONTIG-024058 | 80  | 6   | 5   | 8    | 0  |
| CONTIG-024059 | 294 | 11  | 8   | 44   | 7  |
| CONTIG-024060 | 62  | 4   | 0   | 10   | 0  |
| CONTIG-024061 | 100 | 12  | 50  | 10   | 6  |
| CONTIG-024063 | 112 | 7   | 2   | 28   | 0  |
| CONTIG-024064 | 472 | 27  | 37  | 620  | 0  |
| CONTIG-024065 | 195 | 15  | 61  | 57   | 0  |
| CONTIG-024066 | 738 | 16  | 35  | 534  | 4  |
| CONTIG-024067 | 544 | 16  | 84  | 266  | 5  |
| CONTIG-024068 | 308 | 22  | 140 | 254  | 2  |
| CONTIG-024071 | 426 | 11  | 29  | 135  | 0  |
| CONTIG-024072 | 163 | 8   | 21  | 33   | 0  |
| CONTIG-024073 | 192 | 12  | 10  | 101  | 0  |
| CONTIG-024074 | 276 | 119 | 457 | 967  | 0  |
| CONTIG-024075 | 409 | 26  | 15  | 31   | 0  |
| CONTIG-024078 | 162 | 10  | 18  | 32   | 0  |
| CONTIG-024079 | 83  | 7   | 8   | 11   | 0  |
| CONTIG-024081 | 398 | 43  | 124 | 735  | 4  |
| CONTIG-024082 | 215 | 10  | 17  | 52   | 0  |
| CONTIG-024083 | 413 | 13  | 22  | 129  | 0  |
| CONTIG-024084 | 241 | 9   | 9   | 66   | 0  |
| CONTIG-024085 | 83  | 7   | 16  | 9    | 0  |
| CONTIG-024086 | 183 | 157 | 85  | 1514 | 0  |
| CONTIG-024087 | 200 | 10  | 45  | 66   | 0  |
| CONTIG-024088 | 96  | 10  | 9   | 13   | 0  |
| CONTIG-024089 | 184 | 38  | 30  | 346  | 0  |
| CONTIG-024090 | 84  | 10  | 9   | 6    | 0  |
| CONTIG-024091 | 79  | 5   | 6   | 12   | 0  |
| CONTIG-024094 | 466 | 17  | 3   | 0    | 68 |
| CONTIG-024095 | 204 | 19  | 29  | 62   | 4  |
| CONTIG-024096 | 350 | 18  | 66  | 229  | 0  |
| CONTIG-024097 | 146 | 7   | 36  | 30   | 0  |
| CONTIG-024098 | 258 | 8   | 31  | 56   | 0  |
| CONTIG-024099 | 100 | 129 | 198 | 390  | 2  |
| CONTIG-024100 | 101 | 12  | 109 | 4    | 0  |
| CONTIG-024101 | 109 | 4   | 4   | 8    | 0  |

|               |      |     |     |      |     |
|---------------|------|-----|-----|------|-----|
| CONTIG-024102 | 67   | 421 | 7   | 0    | 324 |
| CONTIG-024104 | 371  | 12  | 59  | 81   | 0   |
| CONTIG-024105 | 391  | 12  | 40  | 190  | 0   |
| CONTIG-024106 | 565  | 14  | 80  | 231  | 2   |
| CONTIG-024108 | 71   | 6   | 3   | 0    | 0   |
| CONTIG-024109 | 99   | 6   | 11  | 0    | 0   |
| CONTIG-024110 | 236  | 11  | 4   | 100  | 0   |
| CONTIG-024111 | 72   | 6   | 2   | 0    | 0   |
| CONTIG-024112 | 126  | 6   | 13  | 26   | 0   |
| CONTIG-024113 | 519  | 26  | 105 | 388  | 12  |
| CONTIG-024114 | 258  | 10  | 7   | 69   | 0   |
| CONTIG-024115 | 141  | 11  | 19  | 37   | 0   |
| CONTIG-024116 | 513  | 14  | 49  | 230  | 0   |
| CONTIG-024117 | 2161 | 27  | 214 | 2113 | 20  |
| CONTIG-024118 | 365  | 22  | 130 | 210  | 0   |
| CONTIG-024119 | 363  | 21  | 144 | 178  | 0   |
| CONTIG-024120 | 800  | 31  | 125 | 657  | 4   |
| CONTIG-024121 | 97   | 17  | 21  | 20   | 2   |
| CONTIG-024122 | 119  | 4   | 0   | 11   | 0   |
| CONTIG-024123 | 104  | 12  | 39  | 34   | 0   |
| CONTIG-024124 | 57   | 33  | 108 | 33   | 0   |
| CONTIG-024125 | 175  | 10  | 4   | 68   | 0   |
| CONTIG-024126 | 171  | 17  | 31  | 10   | 0   |
| CONTIG-024127 | 226  | 9   | 17  | 59   | 0   |
| CONTIG-024128 | 271  | 27  | 138 | 130  | 0   |
| CONTIG-024131 | 791  | 30  | 159 | 705  | 16  |
| CONTIG-024137 | 253  | 12  | 53  | 83   | 2   |
| CONTIG-024138 | 224  | 9   | 34  | 65   | 0   |
| CONTIG-024139 | 269  | 24  | 97  | 283  | 0   |
| CONTIG-024146 | 98   | 6   | 27  | 6    | 0   |
| CONTIG-024147 | 183  | 21  | 39  | 168  | 0   |
| CONTIG-024148 | 242  | 5   | 7   | 23   | 0   |
| CONTIG-024149 | 313  | 11  | 9   | 178  | 0   |
| CONTIG-024150 | 91   | 10  | 11  | 11   | 0   |
| CONTIG-024151 | 98   | 5   | 32  | 0    | 0   |
| CONTIG-024152 | 100  | 5   | 5   | 12   | 0   |
| CONTIG-024153 | 194  | 31  | 101 | 209  | 2   |
| CONTIG-024154 | 46   | 107 | 18  | 175  | 0   |
| CONTIG-024155 | 66   | 7   | 2   | 13   | 0   |
| CONTIG-024156 | 358  | 10  | 37  | 142  | 0   |
| CONTIG-024157 | 465  | 13  | 16  | 122  | 2   |
| CONTIG-024158 | 365  | 29  | 84  | 481  | 4   |
| CONTIG-024159 | 82   | 4   | 2   | 8    | 0   |
| CONTIG-024160 | 1816 | 43  | 183 | 3459 | 99  |
| CONTIG-024161 | 43   | 97  | 15  | 86   | 0   |
| CONTIG-024162 | 686  | 21  | 127 | 468  | 5   |
| CONTIG-024163 | 244  | 6   | 4   | 43   | 0   |

|               |     |     |     |     |    |
|---------------|-----|-----|-----|-----|----|
| CONTIG-024164 | 80  | 10  | 18  | 19  | 0  |
| CONTIG-024165 | 84  | 6   | 18  | 8   | 0  |
| CONTIG-024166 | 457 | 24  | 57  | 491 | 0  |
| CONTIG-024167 | 139 | 4   | 5   | 17  | 0  |
| CONTIG-024172 | 186 | 11  | 21  | 23  | 0  |
| CONTIG-024173 | 188 | 11  | 5   | 68  | 0  |
| CONTIG-024175 | 67  | 11  | 26  | 5   | 0  |
| CONTIG-024176 | 420 | 10  | 43  | 163 | 0  |
| CONTIG-024177 | 71  | 10  | 37  | 10  | 0  |
| CONTIG-024180 | 355 | 18  | 6   | 174 | 0  |
| CONTIG-024181 | 158 | 6   | 6   | 12  | 0  |
| CONTIG-024182 | 585 | 30  | 188 | 616 | 2  |
| CONTIG-024183 | 187 | 42  | 33  | 369 | 0  |
| CONTIG-024184 | 101 | 27  | 35  | 83  | 2  |
| CONTIG-024185 | 311 | 16  | 56  | 128 | 0  |
| CONTIG-024186 | 299 | 9   | 12  | 34  | 0  |
| CONTIG-024187 | 156 | 21  | 13  | 52  | 0  |
| CONTIG-024188 | 265 | 7   | 2   | 35  | 0  |
| CONTIG-024189 | 394 | 7   | 9   | 85  | 4  |
| CONTIG-024190 | 96  | 7   | 16  | 11  | 2  |
| CONTIG-024191 | 72  | 7   | 10  | 9   | 0  |
| CONTIG-024192 | 36  | 260 | 61  | 322 | 0  |
| CONTIG-024194 | 200 | 26  | 36  | 14  | 0  |
| CONTIG-024195 | 207 | 10  | 26  | 88  | 0  |
| CONTIG-024196 | 195 | 5   | 9   | 17  | 0  |
| CONTIG-024197 | 391 | 15  | 86  | 145 | 0  |
| CONTIG-024198 | 96  | 3   | 14  | 2   | 0  |
| CONTIG-024199 | 76  | 8   | 40  | 2   | 0  |
| CONTIG-024200 | 315 | 11  | 22  | 150 | 0  |
| CONTIG-024201 | 383 | 7   | 19  | 65  | 0  |
| CONTIG-024202 | 200 | 9   | 5   | 54  | 0  |
| CONTIG-024203 | 422 | 14  | 96  | 201 | 0  |
| CONTIG-024204 | 238 | 10  | 28  | 66  | 0  |
| CONTIG-024205 | 555 | 42  | 179 | 817 | 19 |
| CONTIG-024206 | 296 | 7   | 4   | 58  | 0  |
| CONTIG-024207 | 83  | 44  | 10  | 190 | 0  |
| CONTIG-024208 | 42  | 203 | 2   | 153 | 0  |
| CONTIG-024209 | 61  | 4   | 5   | 0   | 0  |
| CONTIG-024210 | 189 | 13  | 10  | 53  | 0  |
| CONTIG-024211 | 153 | 7   | 0   | 36  | 0  |
| CONTIG-024212 | 639 | 45  | 121 | 201 | 0  |
| CONTIG-024213 | 112 | 5   | 0   | 7   | 0  |
| CONTIG-024215 | 161 | 7   | 21  | 38  | 0  |
| CONTIG-024216 | 94  | 12  | 4   | 50  | 0  |
| CONTIG-024217 | 844 | 18  | 141 | 410 | 7  |
| CONTIG-024218 | 76  | 6   | 10  | 5   | 0  |
| CONTIG-024219 | 936 | 10  | 75  | 169 | 15 |

|               |      |      |     |      |    |
|---------------|------|------|-----|------|----|
| CONTIG-024220 | 59   | 7    | 6   | 0    | 0  |
| CONTIG-024221 | 992  | 16   | 67  | 575  | 2  |
| CONTIG-024222 | 132  | 14   | 41  | 2    | 0  |
| CONTIG-024223 | 992  | 34   | 101 | 1660 | 2  |
| CONTIG-024224 | 42   | 1457 | 22  | 1381 | 0  |
| CONTIG-024225 | 65   | 7    | 4   | 18   | 2  |
| CONTIG-024226 | 38   | 545  | 21  | 742  | 0  |
| CONTIG-024227 | 139  | 17   | 98  | 5    | 2  |
| CONTIG-024228 | 870  | 16   | 50  | 335  | 15 |
| CONTIG-024229 | 212  | 7    | 13  | 46   | 0  |
| CONTIG-024230 | 81   | 3    | 4   | 0    | 0  |
| CONTIG-024231 | 60   | 5    | 6   | 10   | 0  |
| CONTIG-024232 | 70   | 63   | 180 | 126  | 0  |
| CONTIG-024233 | 388  | 16   | 12  | 17   | 2  |
| CONTIG-024234 | 211  | 9    | 29  | 71   | 0  |
| CONTIG-024235 | 196  | 6    | 15  | 17   | 0  |
| CONTIG-024240 | 64   | 2    | 0   | 0    | 0  |
| CONTIG-024241 | 96   | 33   | 19  | 59   | 0  |
| CONTIG-024242 | 363  | 12   | 71  | 90   | 2  |
| CONTIG-024244 | 61   | 8    | 32  | 4    | 0  |
| CONTIG-024245 | 567  | 20   | 43  | 624  | 0  |
| CONTIG-024248 | 1027 | 27   | 132 | 530  | 18 |
| CONTIG-024251 | 821  | 18   | 135 | 349  | 9  |
| CONTIG-024252 | 435  | 21   | 99  | 169  | 0  |
| CONTIG-024253 | 140  | 6    | 2   | 14   | 0  |
| CONTIG-024254 | 875  | 34   | 156 | 92   | 0  |
| CONTIG-024255 | 107  | 7    | 16  | 20   | 0  |
| CONTIG-024256 | 501  | 20   | 49  | 291  | 5  |
| CONTIG-024257 | 270  | 19   | 92  | 93   | 2  |
| CONTIG-024258 | 81   | 6    | 12  | 12   | 0  |
| CONTIG-024259 | 631  | 27   | 117 | 852  | 2  |
| CONTIG-024260 | 827  | 28   | 104 | 320  | 54 |
| CONTIG-024261 | 83   | 6    | 13  | 15   | 0  |
| CONTIG-024262 | 152  | 100  | 323 | 462  | 37 |
| CONTIG-024263 | 109  | 3    | 0   | 6    | 0  |
| CONTIG-024266 | 82   | 10   | 17  | 14   | 0  |
| CONTIG-024267 | 881  | 37   | 256 | 1404 | 0  |
| CONTIG-024268 | 2017 | 47   | 428 | 5459 | 4  |
| CONTIG-024269 | 123  | 5    | 13  | 8    | 2  |
| CONTIG-024270 | 247  | 15   | 10  | 10   | 0  |
| CONTIG-024271 | 251  | 29   | 34  | 89   | 0  |
| CONTIG-024272 | 262  | 20   | 14  | 42   | 0  |
| CONTIG-024273 | 924  | 14   | 109 | 351  | 2  |
| CONTIG-024274 | 782  | 11   | 127 | 283  | 0  |
| CONTIG-024275 | 83   | 13   | 4   | 25   | 0  |
| CONTIG-024276 | 60   | 27   | 39  | 13   | 0  |
| CONTIG-024283 | 53   | 41   | 47  | 57   | 4  |

|               |      |     |     |      |     |
|---------------|------|-----|-----|------|-----|
| CONTIG-024284 | 181  | 10  | 8   | 43   | 0   |
| CONTIG-024289 | 195  | 19  | 181 | 72   | 0   |
| CONTIG-024290 | 129  | 4   | 3   | 9    | 0   |
| CONTIG-024292 | 287  | 17  | 48  | 141  | 5   |
| CONTIG-024295 | 411  | 8   | 19  | 88   | 0   |
| CONTIG-024296 | 215  | 14  | 11  | 86   | 0   |
| CONTIG-024297 | 475  | 16  | 57  | 214  | 0   |
| CONTIG-024298 | 821  | 23  | 30  | 512  | 48  |
| CONTIG-024302 | 141  | 6   | 4   | 19   | 0   |
| CONTIG-024303 | 68   | 5   | 8   | 2    | 0   |
| CONTIG-024304 | 79   | 3   | 3   | 0    | 0   |
| CONTIG-024305 | 163  | 10  | 10  | 47   | 4   |
| CONTIG-024306 | 85   | 37  | 21  | 133  | 0   |
| CONTIG-024307 | 350  | 15  | 261 | 63   | 0   |
| CONTIG-024308 | 86   | 7   | 10  | 12   | 0   |
| CONTIG-024309 | 77   | 6   | 4   | 2    | 0   |
| CONTIG-024310 | 276  | 11  | 21  | 74   | 0   |
| CONTIG-024311 | 101  | 10  | 9   | 12   | 0   |
| CONTIG-024312 | 339  | 14  | 60  | 123  | 2   |
| CONTIG-024313 | 322  | 25  | 38  | 200  | 6   |
| CONTIG-024314 | 1219 | 50  | 5   | 1346 | 365 |
| CONTIG-024315 | 484  | 24  | 46  | 451  | 4   |
| CONTIG-024316 | 92   | 632 | 166 | 2224 | 48  |
| CONTIG-024320 | 65   | 9   | 21  | 2    | 0   |
| CONTIG-024321 | 453  | 15  | 9   | 147  | 0   |
| CONTIG-024323 | 108  | 9   | 6   | 25   | 0   |
| CONTIG-024325 | 192  | 10  | 2   | 56   | 0   |
| CONTIG-024326 | 75   | 15  | 9   | 2    | 0   |
| CONTIG-024327 | 149  | 13  | 8   | 45   | 2   |
| CONTIG-024328 | 411  | 10  | 8   | 142  | 0   |
| CONTIG-024329 | 61   | 7   | 11  | 2    | 0   |
| CONTIG-024330 | 99   | 25  | 31  | 59   | 0   |
| CONTIG-024331 | 78   | 3   | 2   | 2    | 0   |
| CONTIG-024332 | 284  | 13  | 30  | 75   | 2   |
| CONTIG-024333 | 83   | 36  | 11  | 115  | 0   |
| CONTIG-024334 | 98   | 5   | 18  | 2    | 0   |
| CONTIG-024335 | 763  | 27  | 100 | 838  | 2   |
| CONTIG-024336 | 106  | 5   | 0   | 16   | 0   |
| CONTIG-024337 | 85   | 6   | 13  | 12   | 0   |
| CONTIG-024338 | 297  | 11  | 20  | 102  | 0   |
| CONTIG-024339 | 271  | 6   | 21  | 30   | 0   |
| CONTIG-024340 | 206  | 8   | 8   | 45   | 2   |
| CONTIG-024341 | 890  | 15  | 248 | 323  | 8   |
| CONTIG-024342 | 88   | 15  | 11  | 10   | 0   |
| CONTIG-024343 | 588  | 15  | 54  | 232  | 8   |
| CONTIG-024344 | 117  | 10  | 13  | 34   | 0   |
| CONTIG-024345 | 288  | 7   | 0   | 52   | 0   |



|               |      |    |     |      |     |
|---------------|------|----|-----|------|-----|
| CONTIG-024346 | 105  | 12 | 51  | 20   | 0   |
| CONTIG-024348 | 210  | 19 | 72  | 117  | 0   |
| CONTIG-024349 | 61   | 10 | 32  | 10   | 0   |
| CONTIG-024351 | 310  | 14 | 11  | 99   | 2   |
| CONTIG-024353 | 112  | 7  | 2   | 40   | 0   |
| CONTIG-024357 | 183  | 13 | 37  | 61   | 0   |
| CONTIG-024358 | 181  | 5  | 12  | 20   | 0   |
| CONTIG-024359 | 85   | 13 | 4   | 44   | 0   |
| CONTIG-024360 | 59   | 10 | 11  | 12   | 0   |
| CONTIG-024361 | 86   | 9  | 33  | 10   | 0   |
| CONTIG-024362 | 89   | 7  | 25  | 23   | 0   |
| CONTIG-024363 | 112  | 4  | 2   | 6    | 0   |
| CONTIG-024364 | 114  | 7  | 17  | 6    | 0   |
| CONTIG-024365 | 930  | 30 | 153 | 711  | 51  |
| CONTIG-024366 | 121  | 6  | 0   | 27   | 0   |
| CONTIG-024367 | 549  | 30 | 161 | 357  | 9   |
| CONTIG-024368 | 558  | 24 | 84  | 366  | 6   |
| CONTIG-024369 | 1566 | 32 | 276 | 1761 | 37  |
| CONTIG-024370 | 246  | 22 | 49  | 155  | 3   |
| CONTIG-024371 | 464  | 11 | 60  | 100  | 0   |
| CONTIG-024372 | 468  | 29 | 9   | 0    | 116 |
| CONTIG-024373 | 216  | 16 | 19  | 30   | 0   |
| CONTIG-024374 | 75   | 7  | 7   | 13   | 0   |
| CONTIG-024375 | 865  | 28 | 55  | 848  | 0   |
| CONTIG-024376 | 60   | 4  | 0   | 9    | 0   |
| CONTIG-024378 | 44   | 84 | 0   | 52   | 0   |
| CONTIG-024379 | 201  | 7  | 18  | 34   | 0   |
| CONTIG-024380 | 113  | 7  | 11  | 32   | 0   |
| CONTIG-024381 | 170  | 4  | 2   | 13   | 0   |
| CONTIG-024382 | 122  | 19 | 25  | 101  | 0   |
| CONTIG-024383 | 262  | 11 | 49  | 116  | 0   |
| CONTIG-024384 | 67   | 8  | 2   | 25   | 0   |
| CONTIG-024385 | 365  | 10 | 18  | 115  | 0   |
| CONTIG-024386 | 186  | 6  | 19  | 24   | 6   |
| CONTIG-024387 | 346  | 10 | 147 | 74   | 0   |
| CONTIG-024388 | 967  | 20 | 68  | 718  | 6   |
| CONTIG-024390 | 115  | 11 | 110 | 11   | 0   |
| CONTIG-024391 | 72   | 4  | 3   | 0    | 0   |
| CONTIG-024392 | 292  | 10 | 0   | 26   | 0   |
| CONTIG-024393 | 345  | 7  | 42  | 60   | 0   |
| CONTIG-024394 | 748  | 15 | 29  | 138  | 0   |
| CONTIG-024397 | 167  | 6  | 22  | 16   | 0   |
| CONTIG-024398 | 111  | 6  | 11  | 16   | 0   |
| CONTIG-024399 | 126  | 6  | 14  | 35   | 0   |
| CONTIG-024400 | 254  | 13 | 17  | 7    | 0   |
| CONTIG-024402 | 97   | 4  | 21  | 6    | 0   |
| CONTIG-024403 | 75   | 11 | 6   | 25   | 0   |

|               |     |     |     |      |    |
|---------------|-----|-----|-----|------|----|
| CONTIG-024404 | 101 | 9   | 5   | 32   | 0  |
| CONTIG-024405 | 138 | 21  | 9   | 91   | 0  |
| CONTIG-024417 | 77  | 728 | 72  | 2273 | 29 |
| CONTIG-024418 | 273 | 13  | 29  | 68   | 0  |
| CONTIG-024419 | 70  | 3   | 0   | 0    | 0  |
| CONTIG-024420 | 71  | 5   | 0   | 7    | 0  |
| CONTIG-024421 | 82  | 9   | 21  | 18   | 0  |
| CONTIG-024422 | 221 | 481 | 57  | 14   | 0  |
| CONTIG-024423 | 134 | 6   | 9   | 21   | 0  |
| CONTIG-024430 | 105 | 5   | 8   | 12   | 0  |
| CONTIG-024431 | 174 | 9   | 6   | 68   | 0  |
| CONTIG-024432 | 103 | 6   | 8   | 25   | 2  |
| CONTIG-024433 | 70  | 6   | 9   | 5    | 0  |
| CONTIG-024434 | 240 | 6   | 3   | 40   | 0  |
| CONTIG-024435 | 511 | 12  | 33  | 254  | 8  |
| CONTIG-024436 | 384 | 114 | 249 | 1039 | 49 |
| CONTIG-024437 | 98  | 8   | 9   | 29   | 0  |
| CONTIG-024438 | 68  | 21  | 64  | 6    | 0  |
| CONTIG-024439 | 343 | 17  | 63  | 240  | 2  |
| CONTIG-024442 | 228 | 6   | 0   | 48   | 0  |
| CONTIG-024444 | 485 | 18  | 48  | 387  | 0  |
| CONTIG-024445 | 62  | 3   | 3   | 2    | 0  |
| CONTIG-024446 | 211 | 11  | 10  | 41   | 2  |
| CONTIG-024447 | 385 | 20  | 55  | 247  | 6  |
| CONTIG-024448 | 61  | 3   | 0   | 6    | 0  |
| CONTIG-024449 | 244 | 11  | 13  | 126  | 0  |
| CONTIG-024450 | 111 | 9   | 41  | 11   | 2  |
| CONTIG-024455 | 94  | 3   | 2   | 4    | 0  |
| CONTIG-024456 | 180 | 11  | 48  | 51   | 0  |
| CONTIG-024457 | 111 | 8   | 38  | 12   | 0  |
| CONTIG-024458 | 237 | 6   | 15  | 44   | 2  |
| CONTIG-024459 | 405 | 21  | 19  | 215  | 2  |
| CONTIG-024460 | 175 | 15  | 7   | 99   | 0  |
| CONTIG-024461 | 359 | 5   | 2   | 46   | 2  |
| CONTIG-024462 | 179 | 6   | 2   | 20   | 0  |
| CONTIG-024463 | 683 | 11  | 30  | 213  | 2  |
| CONTIG-024464 | 668 | 11  | 31  | 198  | 0  |
| CONTIG-024465 | 77  | 46  | 119 | 5    | 0  |
| CONTIG-024466 | 204 | 8   | 31  | 55   | 0  |
| CONTIG-024467 | 79  | 14  | 30  | 5    | 0  |
| CONTIG-024468 | 512 | 17  | 182 | 287  | 0  |
| CONTIG-024469 | 217 | 7   | 24  | 42   | 0  |
| CONTIG-024470 | 99  | 13  | 37  | 10   | 0  |
| CONTIG-024471 | 114 | 5   | 4   | 9    | 0  |
| CONTIG-024472 | 302 | 10  | 19  | 112  | 0  |
| CONTIG-024473 | 453 | 13  | 20  | 220  | 0  |
| CONTIG-024474 | 209 | 4   | 8   | 22   | 0  |

|               |      |    |     |     |     |
|---------------|------|----|-----|-----|-----|
| CONTIG-024475 | 71   | 5  | 7   | 8   | 0   |
| CONTIG-024476 | 343  | 48 | 197 | 432 | 0   |
| CONTIG-024477 | 419  | 8  | 6   | 98  | 2   |
| CONTIG-024478 | 428  | 15 | 17  | 309 | 0   |
| CONTIG-024479 | 72   | 5  | 5   | 10  | 0   |
| CONTIG-024480 | 130  | 7  | 21  | 14  | 0   |
| CONTIG-024481 | 168  | 7  | 9   | 32  | 0   |
| CONTIG-024482 | 63   | 6  | 9   | 2   | 0   |
| CONTIG-024483 | 766  | 18 | 94  | 791 | 0   |
| CONTIG-024484 | 459  | 18 | 37  | 277 | 4   |
| CONTIG-024485 | 267  | 9  | 22  | 6   | 4   |
| CONTIG-024486 | 141  | 72 | 78  | 494 | 2   |
| CONTIG-024487 | 124  | 8  | 26  | 20  | 0   |
| CONTIG-024488 | 1084 | 16 | 35  | 726 | 4   |
| CONTIG-024489 | 252  | 18 | 209 | 104 | 0   |
| CONTIG-024490 | 156  | 16 | 138 | 26  | 0   |
| CONTIG-024498 | 172  | 6  | 16  | 24  | 0   |
| CONTIG-024499 | 133  | 12 | 41  | 25  | 0   |
| CONTIG-024500 | 264  | 18 | 35  | 16  | 0   |
| CONTIG-024509 | 118  | 17 | 17  | 14  | 0   |
| CONTIG-024510 | 488  | 36 | 34  | 555 | 31  |
| CONTIG-024511 | 259  | 52 | 146 | 183 | 15  |
| CONTIG-024512 | 65   | 14 | 58  | 14  | 0   |
| CONTIG-024513 | 818  | 13 | 14  | 601 | 0   |
| CONTIG-024514 | 462  | 13 | 14  | 64  | 0   |
| CONTIG-024515 | 325  | 12 | 32  | 95  | 0   |
| CONTIG-024516 | 328  | 12 | 28  | 71  | 0   |
| CONTIG-024517 | 73   | 14 | 19  | 24  | 2   |
| CONTIG-024518 | 101  | 9  | 6   | 34  | 0   |
| CONTIG-024520 | 827  | 49 | 217 | 689 | 14  |
| CONTIG-024521 | 362  | 29 | 0   | 0   | 146 |
| CONTIG-024522 | 273  | 8  | 28  | 105 | 0   |
| CONTIG-024523 | 373  | 14 | 59  | 163 | 0   |
| CONTIG-024524 | 121  | 21 | 8   | 25  | 0   |
| CONTIG-024525 | 248  | 10 | 16  | 41  | 0   |
| CONTIG-024526 | 84   | 4  | 3   | 5   | 0   |
| CONTIG-024527 | 439  | 19 | 92  | 246 | 0   |
| CONTIG-024528 | 158  | 15 | 15  | 112 | 0   |
| CONTIG-024529 | 222  | 18 | 40  | 128 | 4   |
| CONTIG-024530 | 294  | 10 | 53  | 63  | 0   |
| CONTIG-024531 | 100  | 12 | 29  | 21  | 0   |
| CONTIG-024532 | 66   | 4  | 2   | 3   | 0   |
| CONTIG-024533 | 197  | 8  | 5   | 32  | 0   |
| CONTIG-024534 | 1024 | 23 | 89  | 893 | 2   |
| CONTIG-024535 | 82   | 6  | 7   | 18  | 0   |
| CONTIG-024536 | 241  | 12 | 11  | 104 | 0   |
| CONTIG-024537 | 66   | 6  | 19  | 0   | 0   |

|               |      |     |     |      |     |
|---------------|------|-----|-----|------|-----|
| CONTIG-024538 | 120  | 16  | 33  | 62   | 0   |
| CONTIG-024539 | 71   | 5   | 7   | 3    | 0   |
| CONTIG-024540 | 496  | 17  | 79  | 233  | 2   |
| CONTIG-024541 | 300  | 10  | 9   | 70   | 0   |
| CONTIG-024542 | 214  | 6   | 7   | 30   | 0   |
| CONTIG-024543 | 415  | 17  | 121 | 131  | 4   |
| CONTIG-024544 | 313  | 15  | 50  | 130  | 7   |
| CONTIG-024545 | 1369 | 31  | 183 | 1171 | 76  |
| CONTIG-024546 | 118  | 100 | 77  | 147  | 326 |
| CONTIG-024547 | 60   | 7   | 5   | 10   | 0   |
| CONTIG-024548 | 83   | 76  | 160 | 60   | 0   |
| CONTIG-024549 | 348  | 8   | 31  | 79   | 0   |
| CONTIG-024550 | 525  | 13  | 139 | 87   | 4   |
| CONTIG-024551 | 513  | 23  | 100 | 481  | 2   |
| CONTIG-024552 | 74   | 6   | 10  | 8    | 0   |
| CONTIG-024553 | 111  | 11  | 9   | 19   | 0   |
| CONTIG-024554 | 303  | 9   | 44  | 30   | 0   |
| CONTIG-024555 | 110  | 6   | 3   | 18   | 0   |
| CONTIG-024556 | 395  | 21  | 27  | 118  | 2   |
| CONTIG-024557 | 59   | 3   | 5   | 0    | 0   |
| CONTIG-024559 | 66   | 40  | 74  | 10   | 0   |
| CONTIG-024560 | 72   | 4   | 4   | 0    | 3   |
| CONTIG-024561 | 87   | 28  | 32  | 66   | 0   |
| CONTIG-024562 | 392  | 15  | 81  | 196  | 0   |
| CONTIG-024563 | 190  | 27  | 32  | 300  | 0   |
| CONTIG-024564 | 66   | 17  | 9   | 48   | 0   |
| CONTIG-024565 | 350  | 16  | 87  | 93   | 2   |
| CONTIG-024566 | 216  | 26  | 129 | 159  | 0   |
| CONTIG-024567 | 427  | 15  | 128 | 172  | 2   |
| CONTIG-024568 | 340  | 7   | 6   | 44   | 0   |
| CONTIG-024569 | 241  | 13  | 74  | 79   | 0   |
| CONTIG-024570 | 67   | 6   | 3   | 0    | 0   |
| CONTIG-024571 | 565  | 16  | 88  | 398  | 2   |
| CONTIG-024572 | 535  | 15  | 7   | 23   | 0   |
| CONTIG-024573 | 121  | 42  | 17  | 282  | 0   |
| CONTIG-024574 | 237  | 25  | 37  | 189  | 4   |
| CONTIG-024576 | 82   | 14  | 2   | 55   | 0   |
| CONTIG-024577 | 591  | 123 | 56  | 3645 | 10  |
| CONTIG-024578 | 253  | 15  | 20  | 127  | 0   |
| CONTIG-024579 | 125  | 5   | 15  | 14   | 0   |
| CONTIG-024580 | 122  | 11  | 45  | 21   | 0   |
| CONTIG-024582 | 102  | 21  | 146 | 20   | 0   |
| CONTIG-024583 | 477  | 13  | 36  | 179  | 0   |
| CONTIG-024584 | 334  | 15  | 16  | 194  | 0   |
| CONTIG-024585 | 86   | 4   | 2   | 6    | 0   |
| CONTIG-024588 | 85   | 11  | 84  | 2    | 0   |
| CONTIG-024591 | 192  | 35  | 109 | 258  | 0   |

|               |      |     |     |      |     |
|---------------|------|-----|-----|------|-----|
| CONTIG-024592 | 347  | 28  | 47  | 110  | 9   |
| CONTIG-024593 | 201  | 8   | 21  | 21   | 0   |
| CONTIG-024594 | 260  | 9   | 13  | 70   | 0   |
| CONTIG-024595 | 1211 | 26  | 100 | 1802 | 0   |
| CONTIG-024596 | 936  | 71  | 72  | 37   | 0   |
| CONTIG-024597 | 144  | 99  | 36  | 611  | 0   |
| CONTIG-024598 | 58   | 28  | 12  | 21   | 2   |
| CONTIG-024599 | 102  | 16  | 24  | 23   | 0   |
| CONTIG-024600 | 79   | 27  | 49  | 31   | 0   |
| CONTIG-024601 | 87   | 12  | 3   | 33   | 0   |
| CONTIG-024602 | 118  | 16  | 54  | 36   | 0   |
| CONTIG-024603 | 222  | 15  | 5   | 25   | 0   |
| CONTIG-024604 | 399  | 10  | 45  | 129  | 2   |
| CONTIG-024605 | 915  | 27  | 64  | 43   | 0   |
| CONTIG-024606 | 249  | 13  | 24  | 56   | 0   |
| CONTIG-024607 | 143  | 13  | 36  | 77   | 0   |
| CONTIG-024608 | 59   | 7   | 3   | 16   | 0   |
| CONTIG-024609 | 379  | 36  | 28  | 245  | 0   |
| CONTIG-024610 | 87   | 49  | 17  | 122  | 0   |
| CONTIG-024611 | 784  | 14  | 47  | 333  | 6   |
| CONTIG-024612 | 219  | 15  | 7   | 140  | 0   |
| CONTIG-024613 | 131  | 11  | 11  | 43   | 0   |
| CONTIG-024614 | 319  | 20  | 39  | 279  | 0   |
| CONTIG-024615 | 71   | 30  | 28  | 65   | 2   |
| CONTIG-024616 | 57   | 74  | 40  | 127  | 0   |
| CONTIG-024617 | 89   | 5   | 14  | 16   | 0   |
| CONTIG-024618 | 138  | 5   | 4   | 11   | 0   |
| CONTIG-024619 | 65   | 19  | 64  | 8    | 0   |
| CONTIG-024620 | 58   | 10  | 22  | 12   | 0   |
| CONTIG-024621 | 399  | 29  | 349 | 270  | 0   |
| CONTIG-024622 | 263  | 11  | 18  | 94   | 2   |
| CONTIG-024623 | 328  | 14  | 75  | 42   | 0   |
| CONTIG-024624 | 313  | 10  | 46  | 49   | 0   |
| CONTIG-024625 | 567  | 34  | 83  | 342  | 26  |
| CONTIG-024626 | 135  | 7   | 28  | 0    | 0   |
| CONTIG-024627 | 61   | 7   | 5   | 0    | 0   |
| CONTIG-024628 | 269  | 13  | 7   | 179  | 0   |
| CONTIG-024629 | 274  | 21  | 86  | 82   | 0   |
| CONTIG-024630 | 125  | 11  | 2   | 35   | 0   |
| CONTIG-024631 | 732  | 27  | 80  | 1091 | 2   |
| CONTIG-024632 | 168  | 3   | 2   | 9    | 0   |
| CONTIG-024633 | 303  | 11  | 17  | 108  | 0   |
| CONTIG-024635 | 97   | 51  | 52  | 281  | 0   |
| CONTIG-024636 | 193  | 15  | 14  | 102  | 0   |
| CONTIG-024637 | 338  | 11  | 15  | 72   | 0   |
| CONTIG-024638 | 123  | 14  | 99  | 32   | 0   |
| CONTIG-024642 | 276  | 137 | 65  | 844  | 128 |

|               |     |     |     |      |    |
|---------------|-----|-----|-----|------|----|
| CONTIG-024643 | 295 | 14  | 36  | 101  | 0  |
| CONTIG-024644 | 122 | 6   | 0   | 14   | 0  |
| CONTIG-024645 | 911 | 28  | 198 | 932  | 6  |
| CONTIG-024647 | 147 | 165 | 144 | 1126 | 0  |
| CONTIG-024648 | 355 | 27  | 191 | 274  | 0  |
| CONTIG-024650 | 199 | 17  | 23  | 134  | 0  |
| CONTIG-024651 | 385 | 11  | 9   | 98   | 0  |
| CONTIG-024652 | 88  | 5   | 13  | 8    | 0  |
| CONTIG-024653 | 626 | 16  | 23  | 225  | 4  |
| CONTIG-024655 | 133 | 11  | 8   | 54   | 0  |
| CONTIG-024656 | 128 | 6   | 27  | 13   | 0  |
| CONTIG-024661 | 148 | 9   | 12  | 51   | 0  |
| CONTIG-024662 | 85  | 6   | 4   | 8    | 0  |
| CONTIG-024663 | 111 | 13  | 2   | 9    | 0  |
| CONTIG-024664 | 158 | 3   | 6   | 4    | 0  |
| CONTIG-024665 | 697 | 11  | 131 | 203  | 0  |
| CONTIG-024666 | 323 | 17  | 13  | 106  | 20 |
| CONTIG-024667 | 313 | 12  | 39  | 139  | 0  |
| CONTIG-024668 | 115 | 10  | 30  | 2    | 0  |
| CONTIG-024669 | 181 | 18  | 105 | 44   | 0  |
| CONTIG-024670 | 437 | 17  | 26  | 225  | 13 |
| CONTIG-024671 | 204 | 10  | 7   | 48   | 0  |
| CONTIG-024672 | 68  | 25  | 107 | 22   | 0  |
| CONTIG-024673 | 243 | 13  | 133 | 36   | 0  |
| CONTIG-024674 | 136 | 21  | 25  | 72   | 0  |
| CONTIG-024675 | 230 | 9   | 36  | 33   | 0  |
| CONTIG-024676 | 65  | 6   | 3   | 11   | 0  |
| CONTIG-024677 | 164 | 15  | 20  | 26   | 0  |
| CONTIG-024678 | 372 | 15  | 22  | 182  | 0  |
| CONTIG-024683 | 165 | 38  | 60  | 236  | 0  |
| CONTIG-024684 | 560 | 9   | 32  | 203  | 0  |
| CONTIG-024686 | 67  | 5   | 4   | 7    | 0  |
| CONTIG-024688 | 226 | 5   | 4   | 27   | 0  |
| CONTIG-024689 | 67  | 6   | 17  | 6    | 0  |
| CONTIG-024690 | 383 | 32  | 397 | 353  | 0  |
| CONTIG-024691 | 673 | 10  | 16  | 181  | 10 |
| CONTIG-024693 | 199 | 7   | 32  | 29   | 0  |
| CONTIG-024694 | 76  | 5   | 4   | 4    | 0  |
| CONTIG-024695 | 95  | 6   | 19  | 2    | 0  |
| CONTIG-024696 | 507 | 11  | 13  | 145  | 0  |
| CONTIG-024697 | 375 | 13  | 57  | 123  | 0  |
| CONTIG-024698 | 428 | 11  | 84  | 133  | 0  |
| CONTIG-024699 | 149 | 15  | 33  | 60   | 0  |
| CONTIG-024700 | 340 | 14  | 7   | 265  | 0  |
| CONTIG-024701 | 123 | 5   | 2   | 13   | 0  |
| CONTIG-024702 | 87  | 10  | 12  | 23   | 0  |
| CONTIG-024703 | 208 | 21  | 41  | 140  | 2  |

|               |      |     |     |      |     |
|---------------|------|-----|-----|------|-----|
| CONTIG-024704 | 197  | 10  | 31  | 34   | 2   |
| CONTIG-024705 | 407  | 10  | 16  | 90   | 3   |
| CONTIG-024706 | 286  | 14  | 31  | 168  | 0   |
| CONTIG-024707 | 433  | 9   | 34  | 124  | 2   |
| CONTIG-024708 | 64   | 5   | 6   | 2    | 0   |
| CONTIG-024709 | 329  | 20  | 50  | 262  | 0   |
| CONTIG-024712 | 339  | 14  | 4   | 0    | 2   |
| CONTIG-024713 | 410  | 22  | 25  | 280  | 0   |
| CONTIG-024714 | 62   | 7   | 10  | 7    | 0   |
| CONTIG-024715 | 79   | 6   | 9   | 0    | 0   |
| CONTIG-024716 | 68   | 69  | 63  | 82   | 0   |
| CONTIG-024717 | 65   | 6   | 3   | 5    | 0   |
| CONTIG-024718 | 178  | 7   | 15  | 8    | 0   |
| CONTIG-024719 | 547  | 17  | 7   | 205  | 0   |
| CONTIG-024720 | 210  | 10  | 14  | 43   | 0   |
| CONTIG-024721 | 788  | 11  | 32  | 325  | 0   |
| CONTIG-024722 | 120  | 13  | 14  | 19   | 0   |
| CONTIG-024723 | 156  | 11  | 28  | 51   | 2   |
| CONTIG-024724 | 99   | 8   | 2   | 38   | 0   |
| CONTIG-024725 | 134  | 77  | 103 | 378  | 2   |
| CONTIG-024726 | 1511 | 28  | 94  | 2335 | 0   |
| CONTIG-024727 | 442  | 20  | 35  | 180  | 12  |
| CONTIG-024728 | 229  | 26  | 59  | 186  | 0   |
| CONTIG-024729 | 211  | 10  | 24  | 89   | 0   |
| CONTIG-024730 | 71   | 3   | 5   | 2    | 0   |
| CONTIG-024731 | 194  | 11  | 11  | 68   | 0   |
| CONTIG-024732 | 112  | 6   | 0   | 25   | 0   |
| CONTIG-024733 | 569  | 104 | 339 | 1739 | 21  |
| CONTIG-024734 | 69   | 3   | 4   | 4    | 0   |
| CONTIG-024735 | 240  | 12  | 83  | 52   | 0   |
| CONTIG-024736 | 63   | 5   | 0   | 11   | 0   |
| CONTIG-024737 | 73   | 5   | 4   | 2    | 0   |
| CONTIG-024738 | 623  | 13  | 48  | 274  | 2   |
| CONTIG-024739 | 607  | 22  | 193 | 611  | 0   |
| CONTIG-024740 | 132  | 447 | 194 | 2133 | 347 |
| CONTIG-024741 | 898  | 15  | 101 | 299  | 2   |
| CONTIG-024743 | 72   | 67  | 119 | 39   | 0   |
| CONTIG-024744 | 201  | 12  | 7   | 81   | 0   |
| CONTIG-024745 | 153  | 11  | 16  | 65   | 0   |
| CONTIG-024746 | 59   | 4   | 12  | 0    | 0   |
| CONTIG-024749 | 582  | 66  | 7   | 0    | 4   |
| CONTIG-024751 | 137  | 273 | 171 | 227  | 9   |
| CONTIG-024752 | 110  | 4   | 7   | 12   | 0   |
| CONTIG-024755 | 80   | 5   | 6   | 18   | 0   |
| CONTIG-024756 | 214  | 9   | 13  | 55   | 0   |
| CONTIG-024757 | 83   | 8   | 9   | 24   | 0   |
| CONTIG-024760 | 251  | 18  | 43  | 87   | 0   |

|               |      |     |     |      |    |
|---------------|------|-----|-----|------|----|
| CONTIG-024761 | 467  | 30  | 24  | 875  | 0  |
| CONTIG-024762 | 76   | 9   | 28  | 6    | 0  |
| CONTIG-024763 | 98   | 3   | 9   | 0    | 0  |
| CONTIG-024764 | 64   | 17  | 9   | 31   | 0  |
| CONTIG-024766 | 511  | 15  | 34  | 234  | 0  |
| CONTIG-024767 | 268  | 15  | 77  | 179  | 0  |
| CONTIG-024768 | 93   | 9   | 36  | 13   | 0  |
| CONTIG-024769 | 82   | 11  | 11  | 24   | 0  |
| CONTIG-024771 | 60   | 7   | 13  | 12   | 0  |
| CONTIG-024772 | 189  | 28  | 162 | 47   | 0  |
| CONTIG-024773 | 68   | 100 | 142 | 9    | 0  |
| CONTIG-024774 | 465  | 15  | 82  | 253  | 2  |
| CONTIG-024775 | 1423 | 17  | 102 | 997  | 2  |
| CONTIG-024776 | 77   | 11  | 7   | 27   | 0  |
| CONTIG-024777 | 762  | 21  | 29  | 468  | 15 |
| CONTIG-024778 | 321  | 10  | 48  | 113  | 0  |
| CONTIG-024779 | 296  | 16  | 15  | 158  | 4  |
| CONTIG-024780 | 128  | 7   | 25  | 6    | 0  |
| CONTIG-024783 | 158  | 9   | 20  | 35   | 0  |
| CONTIG-024784 | 466  | 34  | 285 | 810  | 0  |
| CONTIG-024785 | 231  | 26  | 139 | 193  | 0  |
| CONTIG-024791 | 70   | 353 | 58  | 487  | 11 |
| CONTIG-024793 | 69   | 340 | 74  | 702  | 0  |
| CONTIG-024794 | 139  | 20  | 70  | 11   | 0  |
| CONTIG-024795 | 70   | 6   | 20  | 2    | 0  |
| CONTIG-024796 | 325  | 13  | 4   | 106  | 0  |
| CONTIG-024798 | 155  | 6   | 9   | 15   | 2  |
| CONTIG-024799 | 289  | 15  | 99  | 76   | 2  |
| CONTIG-024800 | 81   | 7   | 6   | 12   | 0  |
| CONTIG-024805 | 970  | 37  | 122 | 772  | 26 |
| CONTIG-024806 | 64   | 5   | 2   | 6    | 0  |
| CONTIG-024807 | 188  | 9   | 4   | 63   | 3  |
| CONTIG-024809 | 228  | 9   | 6   | 84   | 0  |
| CONTIG-024810 | 372  | 27  | 93  | 300  | 2  |
| CONTIG-024811 | 94   | 7   | 19  | 19   | 0  |
| CONTIG-024812 | 449  | 41  | 75  | 1027 | 2  |
| CONTIG-024813 | 59   | 2   | 0   | 4    | 0  |
| CONTIG-024814 | 293  | 14  | 107 | 92   | 0  |
| CONTIG-024815 | 59   | 24  | 138 | 0    | 0  |
| CONTIG-024816 | 76   | 8   | 3   | 12   | 2  |
| CONTIG-024818 | 298  | 11  | 6   | 98   | 2  |
| CONTIG-024819 | 148  | 26  | 88  | 121  | 0  |
| CONTIG-024820 | 176  | 9   | 46  | 47   | 0  |
| CONTIG-024821 | 139  | 9   | 16  | 48   | 0  |
| CONTIG-024822 | 1047 | 17  | 58  | 976  | 0  |
| CONTIG-024823 | 1127 | 51  | 160 | 2374 | 0  |
| CONTIG-024824 | 497  | 25  | 86  | 377  | 0  |



|               |      |     |     |      |    |
|---------------|------|-----|-----|------|----|
| CONTIG-024825 | 63   | 6   | 0   | 2    | 0  |
| CONTIG-024826 | 58   | 5   | 14  | 0    | 0  |
| CONTIG-024836 | 48   | 21  | 16  | 0    | 0  |
| CONTIG-024837 | 1599 | 20  | 26  | 1146 | 8  |
| CONTIG-024838 | 114  | 28  | 49  | 85   | 2  |
| CONTIG-024839 | 76   | 8   | 15  | 9    | 0  |
| CONTIG-024840 | 80   | 12  | 47  | 16   | 0  |
| CONTIG-024841 | 65   | 5   | 11  | 0    | 0  |
| CONTIG-024843 | 197  | 10  | 20  | 36   | 2  |
| CONTIG-024844 | 165  | 7   | 19  | 25   | 0  |
| CONTIG-024845 | 72   | 21  | 55  | 32   | 0  |
| CONTIG-024846 | 88   | 6   | 6   | 8    | 0  |
| CONTIG-024847 | 76   | 5   | 2   | 7    | 0  |
| CONTIG-024848 | 497  | 14  | 62  | 185  | 0  |
| CONTIG-024849 | 110  | 4   | 5   | 0    | 0  |
| CONTIG-024857 | 235  | 6   | 26  | 47   | 0  |
| CONTIG-024858 | 243  | 38  | 15  | 128  | 0  |
| CONTIG-024859 | 38   | 849 | 0   | 0    | 11 |
| CONTIG-024860 | 175  | 8   | 7   | 35   | 0  |
| CONTIG-024861 | 800  | 40  | 218 | 1330 | 7  |
| CONTIG-024863 | 147  | 3   | 2   | 12   | 0  |
| CONTIG-024864 | 273  | 10  | 19  | 42   | 2  |
| CONTIG-024865 | 680  | 18  | 174 | 252  | 12 |
| CONTIG-024866 | 95   | 101 | 139 | 371  | 5  |
| CONTIG-024867 | 37   | 164 | 31  | 228  | 0  |
| CONTIG-024868 | 159  | 6   | 26  | 14   | 0  |
| CONTIG-024869 | 125  | 355 | 82  | 1893 | 0  |
| CONTIG-024871 | 244  | 14  | 76  | 74   | 0  |
| CONTIG-024872 | 64   | 4   | 4   | 0    | 0  |
| CONTIG-024873 | 186  | 14  | 3   | 105  | 0  |
| CONTIG-024874 | 279  | 8   | 37  | 66   | 0  |
| CONTIG-024875 | 155  | 26  | 251 | 37   | 0  |
| CONTIG-024876 | 67   | 6   | 10  | 9    | 0  |
| CONTIG-024878 | 713  | 13  | 11  | 286  | 2  |
| CONTIG-024879 | 1065 | 10  | 41  | 333  | 0  |
| CONTIG-024880 | 479  | 21  | 52  | 169  | 0  |
| CONTIG-024881 | 146  | 3   | 0   | 16   | 0  |
| CONTIG-024886 | 87   | 6   | 13  | 5    | 0  |
| CONTIG-024887 | 130  | 10  | 19  | 56   | 0  |
| CONTIG-024888 | 98   | 13  | 17  | 42   | 0  |
| CONTIG-024890 | 145  | 11  | 68  | 38   | 0  |
| CONTIG-024891 | 337  | 9   | 5   | 80   | 2  |
| CONTIG-024892 | 217  | 13  | 74  | 53   | 0  |
| CONTIG-024893 | 95   | 6   | 38  | 0    | 0  |
| CONTIG-024894 | 120  | 4   | 2   | 14   | 0  |
| CONTIG-024895 | 362  | 8   | 9   | 72   | 0  |
| CONTIG-024896 | 145  | 22  | 10  | 101  | 0  |

|               |      |     |     |      |     |
|---------------|------|-----|-----|------|-----|
| CONTIG-024897 | 293  | 10  | 23  | 95   | 0   |
| CONTIG-024898 | 320  | 6   | 21  | 43   | 0   |
| CONTIG-024899 | 198  | 16  | 20  | 77   | 4   |
| CONTIG-024900 | 308  | 10  | 14  | 117  | 0   |
| CONTIG-024901 | 71   | 7   | 15  | 5    | 0   |
| CONTIG-024902 | 129  | 8   | 8   | 13   | 0   |
| CONTIG-024903 | 349  | 10  | 16  | 146  | 2   |
| CONTIG-024904 | 156  | 14  | 12  | 48   | 2   |
| CONTIG-024905 | 314  | 18  | 13  | 100  | 8   |
| CONTIG-024907 | 299  | 10  | 2   | 12   | 0   |
| CONTIG-024908 | 85   | 8   | 0   | 14   | 0   |
| CONTIG-024914 | 194  | 7   | 13  | 28   | 0   |
| CONTIG-024916 | 419  | 15  | 95  | 128  | 0   |
| CONTIG-024917 | 203  | 46  | 43  | 154  | 2   |
| CONTIG-024918 | 621  | 35  | 16  | 902  | 20  |
| CONTIG-024919 | 58   | 12  | 0   | 22   | 0   |
| CONTIG-024920 | 87   | 10  | 92  | 0    | 0   |
| CONTIG-024921 | 192  | 38  | 97  | 313  | 2   |
| CONTIG-024922 | 463  | 21  | 62  | 447  | 6   |
| CONTIG-024923 | 373  | 23  | 19  | 88   | 0   |
| CONTIG-024924 | 719  | 24  | 120 | 586  | 9   |
| CONTIG-024925 | 372  | 14  | 33  | 133  | 2   |
| CONTIG-024926 | 336  | 6   | 17  | 62   | 2   |
| CONTIG-024928 | 179  | 5   | 13  | 16   | 0   |
| CONTIG-024929 | 120  | 8   | 16  | 32   | 0   |
| CONTIG-024935 | 323  | 22  | 42  | 213  | 7   |
| CONTIG-024936 | 208  | 9   | 10  | 17   | 0   |
| CONTIG-024937 | 377  | 9   | 38  | 64   | 0   |
| CONTIG-024938 | 153  | 10  | 5   | 48   | 0   |
| CONTIG-024939 | 549  | 15  | 89  | 261  | 0   |
| CONTIG-024940 | 575  | 19  | 38  | 468  | 2   |
| CONTIG-024941 | 292  | 21  | 131 | 141  | 0   |
| CONTIG-024942 | 152  | 8   | 19  | 16   | 0   |
| CONTIG-024943 | 125  | 10  | 54  | 15   | 0   |
| CONTIG-024944 | 215  | 10  | 40  | 37   | 0   |
| CONTIG-024945 | 260  | 6   | 16  | 42   | 0   |
| CONTIG-024948 | 203  | 11  | 8   | 76   | 4   |
| CONTIG-024949 | 148  | 18  | 90  | 62   | 0   |
| CONTIG-024950 | 747  | 40  | 198 | 1055 | 12  |
| CONTIG-024951 | 101  | 5   | 20  | 7    | 0   |
| CONTIG-024952 | 257  | 154 | 57  | 513  | 104 |
| CONTIG-024953 | 134  | 8   | 7   | 27   | 0   |
| CONTIG-024954 | 123  | 12  | 23  | 6    | 0   |
| CONTIG-024956 | 56   | 279 | 10  | 435  | 0   |
| CONTIG-024957 | 164  | 12  | 55  | 31   | 0   |
| CONTIG-024960 | 60   | 5   | 13  | 0    | 0   |
| CONTIG-024961 | 1209 | 36  | 135 | 944  | 68  |

|               |      |     |     |      |    |
|---------------|------|-----|-----|------|----|
| CONTIG-024962 | 218  | 15  | 56  | 77   | 0  |
| CONTIG-024963 | 224  | 20  | 48  | 30   | 0  |
| CONTIG-024964 | 229  | 15  | 18  | 149  | 0  |
| CONTIG-024965 | 67   | 7   | 51  | 0    | 0  |
| CONTIG-024968 | 299  | 13  | 43  | 132  | 0  |
| CONTIG-024969 | 163  | 5   | 7   | 2    | 0  |
| CONTIG-024970 | 361  | 9   | 102 | 108  | 0  |
| CONTIG-024971 | 965  | 16  | 268 | 441  | 0  |
| CONTIG-024972 | 228  | 21  | 51  | 151  | 0  |
| CONTIG-024973 | 896  | 13  | 37  | 356  | 11 |
| CONTIG-024974 | 148  | 6   | 10  | 37   | 0  |
| CONTIG-024975 | 142  | 13  | 14  | 66   | 0  |
| CONTIG-024976 | 486  | 23  | 150 | 319  | 2  |
| CONTIG-024983 | 90   | 9   | 14  | 27   | 0  |
| CONTIG-024984 | 77   | 3   | 0   | 8    | 0  |
| CONTIG-024985 | 78   | 4   | 6   | 3    | 0  |
| CONTIG-024986 | 59   | 2   | 2   | 4    | 0  |
| CONTIG-024987 | 141  | 350 | 98  | 2144 | 66 |
| CONTIG-024988 | 93   | 7   | 11  | 15   | 0  |
| CONTIG-024989 | 1009 | 18  | 313 | 516  | 0  |
| CONTIG-024990 | 415  | 7   | 79  | 52   | 4  |
| CONTIG-024991 | 114  | 371 | 272 | 1317 | 4  |
| CONTIG-024992 | 136  | 51  | 476 | 93   | 0  |
| CONTIG-024993 | 355  | 240 | 386 | 5569 | 2  |
| CONTIG-024994 | 320  | 26  | 32  | 431  | 0  |
| CONTIG-024995 | 350  | 12  | 67  | 61   | 2  |
| CONTIG-024996 | 74   | 9   | 4   | 20   | 0  |
| CONTIG-024997 | 294  | 11  | 16  | 116  | 0  |
| CONTIG-025001 | 207  | 16  | 24  | 13   | 0  |
| CONTIG-025002 | 82   | 4   | 0   | 0    | 0  |
| CONTIG-025004 | 885  | 17  | 59  | 549  | 0  |
| CONTIG-025008 | 588  | 19  | 30  | 433  | 0  |
| CONTIG-025009 | 68   | 7   | 4   | 9    | 0  |
| CONTIG-025010 | 150  | 6   | 0   | 25   | 0  |
| CONTIG-025011 | 512  | 27  | 43  | 752  | 0  |
| CONTIG-025012 | 265  | 15  | 81  | 120  | 0  |
| CONTIG-025014 | 132  | 5   | 4   | 21   | 2  |
| CONTIG-025015 | 372  | 28  | 119 | 441  | 2  |
| CONTIG-025018 | 596  | 20  | 29  | 467  | 4  |
| CONTIG-025019 | 117  | 9   | 2   | 33   | 0  |
| CONTIG-025020 | 241  | 7   | 24  | 69   | 0  |
| CONTIG-025021 | 151  | 6   | 19  | 25   | 0  |
| CONTIG-025022 | 601  | 17  | 159 | 291  | 6  |
| CONTIG-025023 | 71   | 12  | 25  | 5    | 0  |
| CONTIG-025024 | 113  | 6   | 14  | 21   | 0  |
| CONTIG-025025 | 74   | 3   | 0   | 5    | 0  |
| CONTIG-025026 | 804  | 17  | 51  | 458  | 4  |

|               |     |     |     |      |     |
|---------------|-----|-----|-----|------|-----|
| CONTIG-025027 | 368 | 16  | 144 | 68   | 2   |
| CONTIG-025028 | 633 | 23  | 46  | 646  | 5   |
| CONTIG-025029 | 117 | 5   | 9   | 0    | 0   |
| CONTIG-025030 | 77  | 16  | 6   | 48   | 0   |
| CONTIG-025031 | 733 | 11  | 136 | 242  | 0   |
| CONTIG-025032 | 58  | 7   | 16  | 13   | 0   |
| CONTIG-025033 | 584 | 15  | 74  | 186  | 0   |
| CONTIG-025035 | 101 | 261 | 485 | 450  | 39  |
| CONTIG-025036 | 76  | 8   | 4   | 23   | 0   |
| CONTIG-025037 | 168 | 5   | 5   | 15   | 0   |
| CONTIG-025038 | 92  | 20  | 2   | 0    | 0   |
| CONTIG-025041 | 369 | 19  | 235 | 39   | 12  |
| CONTIG-025042 | 275 | 8   | 2   | 0    | 9   |
| CONTIG-025043 | 196 | 9   | 9   | 46   | 0   |
| CONTIG-025044 | 220 | 12  | 21  | 64   | 0   |
| CONTIG-025045 | 64  | 5   | 5   | 12   | 0   |
| CONTIG-025046 | 72  | 9   | 39  | 0    | 0   |
| CONTIG-025047 | 729 | 22  | 184 | 472  | 13  |
| CONTIG-025048 | 266 | 29  | 98  | 321  | 2   |
| CONTIG-025049 | 60  | 4   | 19  | 0    | 0   |
| CONTIG-025050 | 36  | 152 | 39  | 107  | 0   |
| CONTIG-025051 | 90  | 10  | 0   | 8    | 0   |
| CONTIG-025052 | 106 | 714 | 361 | 1422 | 20  |
| CONTIG-025053 | 367 | 6   | 5   | 97   | 0   |
| CONTIG-025054 | 382 | 10  | 2   | 122  | 0   |
| CONTIG-025056 | 542 | 12  | 19  | 185  | 4   |
| CONTIG-025057 | 256 | 9   | 10  | 66   | 0   |
| CONTIG-025058 | 783 | 16  | 51  | 484  | 0   |
| CONTIG-025059 | 84  | 8   | 20  | 4    | 0   |
| CONTIG-025060 | 554 | 22  | 39  | 429  | 4   |
| CONTIG-025061 | 87  | 8   | 31  | 4    | 0   |
| CONTIG-025062 | 113 | 6   | 5   | 10   | 0   |
| CONTIG-025063 | 210 | 12  | 10  | 34   | 2   |
| CONTIG-025064 | 186 | 18  | 124 | 37   | 0   |
| CONTIG-025065 | 177 | 13  | 2   | 59   | 0   |
| CONTIG-025068 | 192 | 10  | 63  | 20   | 0   |
| CONTIG-025069 | 184 | 13  | 32  | 23   | 0   |
| CONTIG-025070 | 112 | 4   | 27  | 6    | 0   |
| CONTIG-025072 | 467 | 88  | 0   | 0    | 661 |
| CONTIG-025073 | 70  | 3   | 4   | 3    | 0   |
| CONTIG-025074 | 114 | 6   | 35  | 6    | 0   |
| CONTIG-025078 | 136 | 18  | 25  | 93   | 0   |
| CONTIG-025079 | 118 | 5   | 3   | 21   | 0   |
| CONTIG-025080 | 129 | 7   | 44  | 11   | 0   |
| CONTIG-025081 | 71  | 5   | 18  | 3    | 0   |
| CONTIG-025083 | 354 | 7   | 7   | 76   | 0   |
| CONTIG-025084 | 70  | 16  | 39  | 21   | 0   |

|               |      |     |     |      |      |
|---------------|------|-----|-----|------|------|
| CONTIG-025085 | 347  | 20  | 43  | 306  | 0    |
| CONTIG-025087 | 140  | 27  | 109 | 36   | 0    |
| CONTIG-025088 | 436  | 25  | 123 | 238  | 10   |
| CONTIG-025089 | 80   | 10  | 10  | 18   | 0    |
| CONTIG-025090 | 194  | 12  | 59  | 67   | 0    |
| CONTIG-025094 | 81   | 7   | 23  | 2    | 0    |
| CONTIG-025096 | 132  | 4   | 14  | 19   | 0    |
| CONTIG-025097 | 394  | 13  | 28  | 154  | 2    |
| CONTIG-025098 | 162  | 21  | 56  | 99   | 0    |
| CONTIG-025099 | 203  | 16  | 82  | 57   | 0    |
| CONTIG-025100 | 77   | 5   | 9   | 6    | 0    |
| CONTIG-025101 | 253  | 34  | 169 | 160  | 2    |
| CONTIG-025104 | 103  | 9   | 33  | 21   | 0    |
| CONTIG-025105 | 766  | 23  | 75  | 713  | 2    |
| CONTIG-025109 | 69   | 12  | 3   | 15   | 0    |
| CONTIG-025110 | 444  | 11  | 15  | 134  | 2    |
| CONTIG-025111 | 105  | 9   | 11  | 27   | 0    |
| CONTIG-025118 | 102  | 11  | 19  | 22   | 0    |
| CONTIG-025119 | 75   | 4   | 10  | 4    | 0    |
| CONTIG-025120 | 311  | 37  | 37  | 474  | 0    |
| CONTIG-025121 | 679  | 11  | 2   | 84   | 0    |
| CONTIG-025122 | 251  | 13  | 23  | 84   | 0    |
| CONTIG-025123 | 250  | 12  | 17  | 44   | 8    |
| CONTIG-025124 | 642  | 10  | 38  | 170  | 0    |
| CONTIG-025125 | 101  | 6   | 4   | 7    | 0    |
| CONTIG-025128 | 72   | 9   | 21  | 13   | 0    |
| CONTIG-025129 | 135  | 27  | 48  | 130  | 0    |
| CONTIG-025130 | 141  | 9   | 27  | 2    | 0    |
| CONTIG-025131 | 125  | 11  | 21  | 46   | 0    |
| CONTIG-025132 | 321  | 30  | 21  | 308  | 0    |
| CONTIG-025133 | 583  | 27  | 146 | 663  | 0    |
| CONTIG-025134 | 725  | 43  | 226 | 2    | 1125 |
| CONTIG-025135 | 321  | 10  | 16  | 108  | 0    |
| CONTIG-025136 | 155  | 7   | 15  | 20   | 0    |
| CONTIG-025137 | 854  | 25  | 56  | 929  | 26   |
| CONTIG-025138 | 79   | 3   | 0   | 6    | 0    |
| CONTIG-025139 | 1162 | 42  | 89  | 2686 | 0    |
| CONTIG-025141 | 96   | 27  | 71  | 27   | 0    |
| CONTIG-025142 | 125  | 7   | 8   | 21   | 0    |
| CONTIG-025143 | 100  | 11  | 18  | 18   | 0    |
| CONTIG-025144 | 434  | 11  | 27  | 165  | 2    |
| CONTIG-025145 | 123  | 17  | 26  | 46   | 0    |
| CONTIG-025146 | 950  | 36  | 80  | 1939 | 16   |
| CONTIG-025147 | 103  | 15  | 12  | 69   | 0    |
| CONTIG-025148 | 268  | 9   | 8   | 47   | 2    |
| CONTIG-025149 | 666  | 25  | 100 | 562  | 8    |
| CONTIG-025153 | 75   | 168 | 36  | 0    | 2    |

|               |     |     |     |     |     |
|---------------|-----|-----|-----|-----|-----|
| CONTIG-025154 | 234 | 7   | 35  | 46  | 0   |
| CONTIG-025155 | 196 | 9   | 2   | 52  | 0   |
| CONTIG-025156 | 283 | 22  | 83  | 125 | 0   |
| CONTIG-025157 | 40  | 15  | 0   | 11  | 0   |
| CONTIG-025158 | 138 | 8   | 15  | 12  | 0   |
| CONTIG-025159 | 313 | 35  | 23  | 627 | 0   |
| CONTIG-025160 | 199 | 46  | 47  | 238 | 24  |
| CONTIG-025161 | 244 | 11  | 44  | 69  | 0   |
| CONTIG-025162 | 151 | 8   | 21  | 35  | 0   |
| CONTIG-025163 | 166 | 55  | 208 | 0   | 110 |
| CONTIG-025164 | 400 | 13  | 30  | 175 | 0   |
| CONTIG-025165 | 114 | 9   | 2   | 45  | 0   |
| CONTIG-025167 | 125 | 7   | 4   | 24  | 0   |
| CONTIG-025175 | 220 | 12  | 9   | 117 | 0   |
| CONTIG-025176 | 458 | 32  | 293 | 240 | 2   |
| CONTIG-025177 | 293 | 10  | 15  | 75  | 3   |
| CONTIG-025178 | 74  | 4   | 6   | 5   | 0   |
| CONTIG-025179 | 85  | 24  | 54  | 41  | 0   |
| CONTIG-025186 | 480 | 13  | 49  | 233 | 2   |
| CONTIG-025187 | 77  | 6   | 10  | 11  | 0   |
| CONTIG-025188 | 210 | 7   | 20  | 16  | 0   |
| CONTIG-025189 | 146 | 8   | 18  | 28  | 0   |
| CONTIG-025190 | 140 | 7   | 5   | 22  | 0   |
| CONTIG-025191 | 97  | 4   | 4   | 13  | 0   |
| CONTIG-025192 | 203 | 26  | 57  | 164 | 3   |
| CONTIG-025193 | 69  | 15  | 4   | 46  | 0   |
| CONTIG-025194 | 39  | 231 | 38  | 306 | 0   |
| CONTIG-025195 | 195 | 7   | 53  | 26  | 0   |
| CONTIG-025198 | 269 | 13  | 2   | 191 | 0   |
| CONTIG-025199 | 201 | 10  | 9   | 78  | 0   |
| CONTIG-025200 | 480 | 17  | 12  | 0   | 15  |
| CONTIG-025201 | 59  | 6   | 3   | 3   | 0   |
| CONTIG-025202 | 103 | 29  | 45  | 82  | 4   |
| CONTIG-025203 | 191 | 7   | 23  | 42  | 0   |
| CONTIG-025204 | 232 | 6   | 15  | 39  | 0   |
| CONTIG-025205 | 380 | 12  | 87  | 137 | 0   |
| CONTIG-025206 | 61  | 14  | 65  | 12  | 0   |
| CONTIG-025207 | 265 | 9   | 19  | 74  | 0   |
| CONTIG-025208 | 362 | 9   | 8   | 65  | 0   |
| CONTIG-025209 | 176 | 13  | 2   | 105 | 0   |
| CONTIG-025210 | 97  | 20  | 10  | 104 | 0   |
| CONTIG-025211 | 175 | 9   | 11  | 54  | 0   |
| CONTIG-025212 | 153 | 10  | 47  | 35  | 0   |
| CONTIG-025216 | 59  | 27  | 47  | 2   | 0   |
| CONTIG-025217 | 120 | 11  | 19  | 12  | 0   |
| CONTIG-025220 | 84  | 6   | 7   | 15  | 0   |
| CONTIG-025222 | 121 | 11  | 77  | 15  | 0   |

|               |     |     |     |     |    |
|---------------|-----|-----|-----|-----|----|
| CONTIG-025223 | 155 | 12  | 33  | 70  | 0  |
| CONTIG-025224 | 154 | 12  | 75  | 23  | 0  |
| CONTIG-025226 | 67  | 35  | 12  | 88  | 0  |
| CONTIG-025227 | 41  | 92  | 18  | 33  | 0  |
| CONTIG-025228 | 200 | 34  | 15  | 322 | 11 |
| CONTIG-025229 | 125 | 7   | 13  | 30  | 0  |
| CONTIG-025230 | 75  | 10  | 54  | 0   | 0  |
| CONTIG-025231 | 69  | 6   | 0   | 8   | 0  |
| CONTIG-025232 | 83  | 14  | 97  | 2   | 0  |
| CONTIG-025233 | 94  | 7   | 2   | 28  | 0  |
| CONTIG-025234 | 143 | 14  | 103 | 15  | 0  |
| CONTIG-025235 | 96  | 51  | 119 | 188 | 0  |
| CONTIG-025236 | 162 | 6   | 10  | 21  | 0  |
| CONTIG-025237 | 257 | 19  | 95  | 158 | 0  |
| CONTIG-025238 | 243 | 13  | 114 | 88  | 0  |
| CONTIG-025239 | 616 | 13  | 50  | 213 | 0  |
| CONTIG-025240 | 721 | 22  | 28  | 496 | 20 |
| CONTIG-025241 | 37  | 405 | 97  | 433 | 0  |
| CONTIG-025242 | 513 | 13  | 39  | 111 | 0  |
| CONTIG-025243 | 98  | 4   | 5   | 15  | 0  |
| CONTIG-025244 | 133 | 7   | 4   | 0   | 0  |
| CONTIG-025245 | 145 | 15  | 44  | 94  | 0  |
| CONTIG-025246 | 66  | 10  | 10  | 0   | 0  |
| CONTIG-025247 | 758 | 12  | 5   | 410 | 2  |
| CONTIG-025248 | 190 | 4   | 18  | 6   | 0  |
| CONTIG-025249 | 97  | 3   | 3   | 0   | 0  |
| CONTIG-025250 | 45  | 4   | 3   | 2   | 0  |
| CONTIG-025251 | 125 | 6   | 0   | 25  | 0  |
| CONTIG-025252 | 518 | 23  | 88  | 282 | 4  |
| CONTIG-025253 | 602 | 9   | 29  | 86  | 0  |
| CONTIG-025254 | 49  | 14  | 0   | 20  | 0  |
| CONTIG-025255 | 121 | 12  | 84  | 17  | 0  |
| CONTIG-025257 | 494 | 23  | 72  | 156 | 8  |
| CONTIG-025258 | 193 | 12  | 52  | 85  | 0  |
| CONTIG-025259 | 65  | 5   | 3   | 12  | 0  |
| CONTIG-025261 | 84  | 6   | 6   | 11  | 0  |
| CONTIG-025263 | 573 | 22  | 86  | 542 | 0  |
| CONTIG-025264 | 36  | 478 | 85  | 406 | 40 |
| CONTIG-025265 | 261 | 9   | 17  | 32  | 0  |
| CONTIG-025266 | 202 | 16  | 15  | 124 | 0  |
| CONTIG-025267 | 316 | 29  | 22  | 399 | 12 |
| CONTIG-025268 | 180 | 8   | 7   | 45  | 2  |
| CONTIG-025269 | 76  | 6   | 0   | 14  | 0  |
| CONTIG-025270 | 118 | 5   | 5   | 16  | 0  |
| CONTIG-025271 | 106 | 12  | 8   | 60  | 0  |
| CONTIG-025272 | 327 | 23  | 117 | 125 | 2  |
| CONTIG-025273 | 174 | 101 | 93  | 624 | 37 |

|               |      |     |     |      |    |
|---------------|------|-----|-----|------|----|
| CONTIG-025274 | 193  | 43  | 24  | 383  | 0  |
| CONTIG-025275 | 106  | 22  | 28  | 99   | 0  |
| CONTIG-025276 | 162  | 9   | 31  | 44   | 0  |
| CONTIG-025277 | 122  | 9   | 23  | 0    | 4  |
| CONTIG-025284 | 183  | 13  | 4   | 118  | 0  |
| CONTIG-025285 | 1088 | 17  | 44  | 470  | 9  |
| CONTIG-025286 | 216  | 10  | 70  | 55   | 0  |
| CONTIG-025287 | 404  | 27  | 47  | 10   | 0  |
| CONTIG-025288 | 92   | 6   | 9   | 0    | 0  |
| CONTIG-025289 | 93   | 6   | 0   | 12   | 0  |
| CONTIG-025290 | 60   | 7   | 10  | 7    | 0  |
| CONTIG-025292 | 162  | 6   | 9   | 31   | 0  |
| CONTIG-025293 | 243  | 12  | 129 | 62   | 2  |
| CONTIG-025294 | 54   | 337 | 251 | 235  | 70 |
| CONTIG-025298 | 87   | 9   | 25  | 9    | 0  |
| CONTIG-025299 | 288  | 12  | 62  | 116  | 0  |
| CONTIG-025300 | 111  | 4   | 3   | 18   | 0  |
| CONTIG-025301 | 317  | 23  | 60  | 298  | 4  |
| CONTIG-025302 | 427  | 9   | 53  | 87   | 0  |
| CONTIG-025303 | 389  | 14  | 25  | 199  | 2  |
| CONTIG-025304 | 364  | 15  | 121 | 114  | 2  |
| CONTIG-025305 | 1166 | 18  | 19  | 101  | 0  |
| CONTIG-025306 | 63   | 17  | 84  | 0    | 0  |
| CONTIG-025307 | 217  | 11  | 26  | 74   | 0  |
| CONTIG-025308 | 129  | 7   | 37  | 3    | 2  |
| CONTIG-025309 | 138  | 12  | 6   | 64   | 0  |
| CONTIG-025310 | 376  | 11  | 87  | 83   | 2  |
| CONTIG-025311 | 354  | 15  | 44  | 147  | 0  |
| CONTIG-025312 | 170  | 39  | 124 | 155  | 0  |
| CONTIG-025313 | 514  | 8   | 13  | 123  | 2  |
| CONTIG-025314 | 121  | 6   | 5   | 23   | 0  |
| CONTIG-025316 | 130  | 17  | 9   | 121  | 0  |
| CONTIG-025317 | 534  | 11  | 42  | 190  | 4  |
| CONTIG-025318 | 92   | 5   | 19  | 2    | 0  |
| CONTIG-025320 | 322  | 13  | 26  | 98   | 0  |
| CONTIG-025321 | 349  | 9   | 18  | 135  | 0  |
| CONTIG-025322 | 70   | 64  | 17  | 67   | 0  |
| CONTIG-025323 | 1062 | 40  | 320 | 1634 | 87 |
| CONTIG-025324 | 531  | 8   | 13  | 135  | 5  |
| CONTIG-025325 | 343  | 38  | 153 | 255  | 10 |
| CONTIG-025326 | 531  | 18  | 61  | 400  | 2  |
| CONTIG-025327 | 130  | 8   | 7   | 0    | 6  |
| CONTIG-025328 | 70   | 3   | 4   | 4    | 0  |
| CONTIG-025329 | 226  | 13  | 4   | 80   | 2  |
| CONTIG-025337 | 159  | 7   | 2   | 47   | 0  |
| CONTIG-025338 | 220  | 9   | 30  | 71   | 0  |
| CONTIG-025339 | 231  | 9   | 6   | 73   | 0  |



|               |      |     |     |      |    |
|---------------|------|-----|-----|------|----|
| CONTIG-025340 | 123  | 11  | 30  | 4    | 3  |
| CONTIG-025341 | 1175 | 11  | 29  | 453  | 10 |
| CONTIG-025342 | 778  | 8   | 13  | 262  | 0  |
| CONTIG-025343 | 76   | 21  | 73  | 0    | 0  |
| CONTIG-025344 | 63   | 6   | 8   | 8    | 0  |
| CONTIG-025345 | 208  | 5   | 6   | 20   | 0  |
| CONTIG-025346 | 89   | 6   | 4   | 13   | 0  |
| CONTIG-025347 | 91   | 25  | 19  | 52   | 0  |
| CONTIG-025348 | 77   | 7   | 16  | 3    | 0  |
| CONTIG-025349 | 150  | 8   | 6   | 2    | 0  |
| CONTIG-025350 | 175  | 13  | 59  | 8    | 0  |
| CONTIG-025351 | 159  | 15  | 29  | 81   | 0  |
| CONTIG-025352 | 323  | 24  | 48  | 152  | 2  |
| CONTIG-025353 | 219  | 17  | 132 | 27   | 0  |
| CONTIG-025354 | 278  | 5   | 15  | 23   | 0  |
| CONTIG-025355 | 86   | 16  | 10  | 28   | 0  |
| CONTIG-025356 | 176  | 9   | 11  | 51   | 0  |
| CONTIG-025358 | 140  | 8   | 10  | 16   | 0  |
| CONTIG-025359 | 330  | 13  | 11  | 112  | 2  |
| CONTIG-025361 | 230  | 14  | 17  | 62   | 0  |
| CONTIG-025362 | 77   | 807 | 21  | 2686 | 0  |
| CONTIG-025363 | 293  | 25  | 353 | 129  | 0  |
| CONTIG-025364 | 72   | 5   | 17  | 2    | 0  |
| CONTIG-025365 | 108  | 12  | 18  | 59   | 0  |
| CONTIG-025366 | 314  | 19  | 94  | 179  | 0  |
| CONTIG-025367 | 210  | 14  | 30  | 93   | 0  |
| CONTIG-025368 | 377  | 21  | 63  | 210  | 2  |
| CONTIG-025369 | 92   | 4   | 3   | 2    | 0  |
| CONTIG-025371 | 74   | 7   | 19  | 12   | 0  |
| CONTIG-025372 | 285  | 11  | 59  | 90   | 0  |
| CONTIG-025379 | 255  | 14  | 12  | 89   | 2  |
| CONTIG-025380 | 207  | 11  | 5   | 11   | 2  |
| CONTIG-025381 | 125  | 11  | 46  | 37   | 0  |
| CONTIG-025384 | 123  | 11  | 34  | 46   | 0  |
| CONTIG-025385 | 173  | 5   | 23  | 22   | 0  |
| CONTIG-025386 | 112  | 14  | 117 | 10   | 0  |
| CONTIG-025387 | 126  | 13  | 51  | 26   | 0  |
| CONTIG-025388 | 865  | 18  | 116 | 428  | 9  |
| CONTIG-025389 | 167  | 12  | 9   | 82   | 0  |
| CONTIG-025390 | 796  | 16  | 104 | 366  | 0  |
| CONTIG-025391 | 96   | 8   | 19  | 23   | 0  |
| CONTIG-025392 | 347  | 20  | 8   | 394  | 0  |
| CONTIG-025394 | 644  | 17  | 23  | 136  | 20 |
| CONTIG-025395 | 422  | 11  | 27  | 92   | 0  |
| CONTIG-025396 | 136  | 6   | 8   | 25   | 0  |
| CONTIG-025398 | 166  | 7   | 17  | 37   | 0  |
| CONTIG-025399 | 58   | 8   | 2   | 18   | 0  |

|               |      |     |     |      |    |
|---------------|------|-----|-----|------|----|
| CONTIG-025400 | 631  | 26  | 2   | 0    | 85 |
| CONTIG-025401 | 239  | 6   | 24  | 46   | 2  |
| CONTIG-025402 | 64   | 5   | 5   | 7    | 0  |
| CONTIG-025403 | 40   | 331 | 198 | 189  | 34 |
| CONTIG-025404 | 221  | 6   | 8   | 36   | 0  |
| CONTIG-025405 | 59   | 7   | 8   | 12   | 0  |
| CONTIG-025406 | 98   | 8   | 27  | 2    | 0  |
| CONTIG-025407 | 252  | 9   | 37  | 76   | 0  |
| CONTIG-025409 | 139  | 15  | 16  | 66   | 0  |
| CONTIG-025410 | 138  | 7   | 10  | 9    | 0  |
| CONTIG-025411 | 303  | 10  | 14  | 128  | 0  |
| CONTIG-025412 | 122  | 3   | 0   | 7    | 0  |
| CONTIG-025413 | 538  | 44  | 110 | 816  | 0  |
| CONTIG-025415 | 282  | 60  | 100 | 565  | 0  |
| CONTIG-025416 | 444  | 12  | 15  | 138  | 0  |
| CONTIG-025419 | 121  | 13  | 7   | 22   | 0  |
| CONTIG-025420 | 202  | 7   | 23  | 26   | 0  |
| CONTIG-025421 | 1359 | 18  | 53  | 1019 | 0  |
| CONTIG-025423 | 121  | 8   | 8   | 24   | 0  |
| CONTIG-025424 | 88   | 13  | 34  | 2    | 0  |
| CONTIG-025425 | 261  | 11  | 57  | 108  | 0  |
| CONTIG-025426 | 71   | 8   | 3   | 16   | 0  |
| CONTIG-025427 | 255  | 9   | 7   | 90   | 0  |
| CONTIG-025434 | 70   | 6   | 4   | 11   | 0  |
| CONTIG-025435 | 96   | 12  | 4   | 31   | 0  |
| CONTIG-025436 | 69   | 4   | 2   | 4    | 0  |
| CONTIG-025437 | 73   | 65  | 11  | 27   | 0  |
| CONTIG-025438 | 77   | 3   | 2   | 7    | 0  |
| CONTIG-025439 | 493  | 13  | 16  | 135  | 6  |
| CONTIG-025440 | 674  | 16  | 55  | 235  | 3  |
| CONTIG-025441 | 100  | 8   | 67  | 0    | 0  |
| CONTIG-025442 | 600  | 149 | 77  | 4978 | 0  |
| CONTIG-025443 | 521  | 19  | 82  | 293  | 6  |
| CONTIG-025444 | 422  | 10  | 56  | 91   | 2  |
| CONTIG-025445 | 353  | 13  | 130 | 42   | 0  |
| CONTIG-025446 | 121  | 5   | 6   | 10   | 0  |
| CONTIG-025447 | 85   | 19  | 20  | 2    | 0  |
| CONTIG-025448 | 65   | 9   | 13  | 7    | 0  |
| CONTIG-025449 | 457  | 14  | 53  | 205  | 0  |
| CONTIG-025450 | 776  | 23  | 32  | 665  | 0  |
| CONTIG-025453 | 179  | 11  | 22  | 55   | 0  |
| CONTIG-025454 | 935  | 30  | 60  | 381  | 99 |
| CONTIG-025455 | 112  | 7   | 7   | 23   | 2  |
| CONTIG-025456 | 395  | 17  | 163 | 255  | 0  |
| CONTIG-025457 | 271  | 14  | 75  | 45   | 0  |
| CONTIG-025458 | 58   | 13  | 21  | 0    | 6  |
| CONTIG-025459 | 166  | 8   | 8   | 6    | 0  |

|               |      |     |     |      |    |
|---------------|------|-----|-----|------|----|
| CONTIG-025460 | 104  | 46  | 114 | 95   | 2  |
| CONTIG-025461 | 503  | 13  | 41  | 175  | 0  |
| CONTIG-025462 | 324  | 15  | 24  | 116  | 2  |
| CONTIG-025463 | 64   | 41  | 44  | 71   | 0  |
| CONTIG-025464 | 126  | 7   | 11  | 16   | 0  |
| CONTIG-025465 | 90   | 53  | 17  | 157  | 0  |
| CONTIG-025466 | 206  | 12  | 82  | 14   | 0  |
| CONTIG-025467 | 117  | 8   | 3   | 29   | 0  |
| CONTIG-025468 | 382  | 28  | 112 | 278  | 12 |
| CONTIG-025469 | 324  | 16  | 99  | 135  | 0  |
| CONTIG-025470 | 214  | 5   | 4   | 27   | 0  |
| CONTIG-025471 | 326  | 8   | 6   | 80   | 0  |
| CONTIG-025472 | 248  | 7   | 57  | 17   | 0  |
| CONTIG-025473 | 119  | 50  | 83  | 148  | 2  |
| CONTIG-025475 | 779  | 18  | 80  | 669  | 0  |
| CONTIG-025476 | 173  | 25  | 31  | 171  | 0  |
| CONTIG-025477 | 276  | 13  | 78  | 83   | 0  |
| CONTIG-025478 | 174  | 10  | 53  | 44   | 2  |
| CONTIG-025479 | 1039 | 30  | 24  | 1708 | 0  |
| CONTIG-025480 | 94   | 6   | 3   | 14   | 0  |
| CONTIG-025481 | 114  | 13  | 0   | 0    | 0  |
| CONTIG-025483 | 640  | 30  | 2   | 37   | 0  |
| CONTIG-025484 | 253  | 15  | 62  | 47   | 0  |
| CONTIG-025486 | 537  | 12  | 55  | 125  | 2  |
| CONTIG-025487 | 63   | 7   | 11  | 16   | 0  |
| CONTIG-025488 | 164  | 15  | 43  | 43   | 0  |
| CONTIG-025491 | 125  | 7   | 15  | 0    | 0  |
| CONTIG-025492 | 59   | 4   | 17  | 0    | 0  |
| CONTIG-025493 | 367  | 10  | 30  | 142  | 0  |
| CONTIG-025496 | 228  | 36  | 3   | 8    | 0  |
| CONTIG-025497 | 417  | 19  | 31  | 140  | 14 |
| CONTIG-025500 | 75   | 118 | 121 | 285  | 4  |
| CONTIG-025501 | 171  | 6   | 48  | 18   | 0  |
| CONTIG-025502 | 189  | 5   | 8   | 24   | 0  |
| CONTIG-025503 | 80   | 12  | 16  | 34   | 0  |
| CONTIG-025504 | 487  | 10  | 14  | 101  | 0  |
| CONTIG-025505 | 1156 | 19  | 88  | 823  | 0  |
| CONTIG-025506 | 474  | 12  | 15  | 184  | 0  |
| CONTIG-025507 | 969  | 21  | 231 | 396  | 31 |
| CONTIG-025508 | 162  | 6   | 2   | 26   | 0  |
| CONTIG-025513 | 133  | 4   | 6   | 16   | 0  |
| CONTIG-025514 | 91   | 5   | 8   | 4    | 0  |
| CONTIG-025515 | 144  | 10  | 29  | 32   | 0  |
| CONTIG-025516 | 127  | 15  | 10  | 44   | 6  |
| CONTIG-025517 | 158  | 9   | 31  | 36   | 0  |
| CONTIG-025518 | 345  | 8   | 14  | 98   | 0  |
| CONTIG-025519 | 211  | 15  | 14  | 155  | 0  |

|               |     |     |     |      |   |
|---------------|-----|-----|-----|------|---|
| CONTIG-025520 | 72  | 7   | 11  | 11   | 0 |
| CONTIG-025522 | 66  | 4   | 0   | 18   | 0 |
| CONTIG-025523 | 122 | 10  | 2   | 40   | 2 |
| CONTIG-025524 | 227 | 19  | 19  | 193  | 0 |
| CONTIG-025525 | 133 | 7   | 10  | 31   | 0 |
| CONTIG-025526 | 142 | 6   | 2   | 22   | 0 |
| CONTIG-025527 | 91  | 16  | 19  | 24   | 0 |
| CONTIG-025528 | 120 | 55  | 148 | 261  | 0 |
| CONTIG-025529 | 273 | 15  | 39  | 70   | 0 |
| CONTIG-025538 | 125 | 12  | 9   | 36   | 0 |
| CONTIG-025539 | 232 | 11  | 7   | 92   | 0 |
| CONTIG-025540 | 65  | 9   | 26  | 4    | 0 |
| CONTIG-025541 | 78  | 88  | 14  | 295  | 0 |
| CONTIG-025543 | 57  | 61  | 6   | 94   | 0 |
| CONTIG-025549 | 77  | 12  | 18  | 20   | 0 |
| CONTIG-025550 | 397 | 14  | 44  | 193  | 0 |
| CONTIG-025551 | 337 | 5   | 13  | 29   | 0 |
| CONTIG-025554 | 92  | 34  | 141 | 45   | 0 |
| CONTIG-025555 | 141 | 9   | 12  | 26   | 0 |
| CONTIG-025556 | 98  | 15  | 72  | 0    | 0 |
| CONTIG-025557 | 91  | 5   | 0   | 6    | 0 |
| CONTIG-025558 | 277 | 17  | 31  | 100  | 2 |
| CONTIG-025559 | 107 | 7   | 18  | 4    | 0 |
| CONTIG-025560 | 146 | 12  | 72  | 30   | 0 |
| CONTIG-025561 | 400 | 19  | 168 | 257  | 0 |
| CONTIG-025562 | 76  | 5   | 3   | 11   | 0 |
| CONTIG-025563 | 137 | 9   | 5   | 38   | 2 |
| CONTIG-025564 | 80  | 3   | 8   | 0    | 0 |
| CONTIG-025565 | 100 | 7   | 7   | 9    | 0 |
| CONTIG-025566 | 148 | 14  | 55  | 0    | 0 |
| CONTIG-025567 | 407 | 24  | 248 | 272  | 0 |
| CONTIG-025569 | 770 | 21  | 33  | 647  | 0 |
| CONTIG-025570 | 531 | 129 | 37  | 3659 | 9 |
| CONTIG-025571 | 195 | 13  | 72  | 20   | 3 |
| CONTIG-025572 | 341 | 7   | 34  | 68   | 0 |
| CONTIG-025573 | 526 | 9   | 27  | 159  | 0 |
| CONTIG-025575 | 85  | 4   | 12  | 0    | 0 |
| CONTIG-025576 | 180 | 6   | 5   | 34   | 0 |
| CONTIG-025577 | 94  | 16  | 26  | 47   | 0 |
| CONTIG-025578 | 116 | 8   | 27  | 16   | 0 |
| CONTIG-025579 | 346 | 21  | 73  | 367  | 0 |
| CONTIG-025580 | 286 | 9   | 13  | 51   | 0 |
| CONTIG-025581 | 554 | 13  | 92  | 249  | 0 |
| CONTIG-025584 | 389 | 14  | 105 | 171  | 2 |
| CONTIG-025585 | 44  | 44  | 23  | 15   | 0 |
| CONTIG-025586 | 97  | 22  | 17  | 54   | 0 |
| CONTIG-025587 | 80  | 15  | 2   | 52   | 0 |

|               |      |     |     |      |    |
|---------------|------|-----|-----|------|----|
| CONTIG-025588 | 110  | 9   | 11  | 7    | 0  |
| CONTIG-025589 | 165  | 10  | 41  | 24   | 0  |
| CONTIG-025590 | 196  | 10  | 0   | 66   | 0  |
| CONTIG-025591 | 74   | 15  | 5   | 54   | 0  |
| CONTIG-025592 | 121  | 7   | 6   | 6    | 0  |
| CONTIG-025595 | 131  | 13  | 5   | 30   | 0  |
| CONTIG-025597 | 65   | 5   | 8   | 6    | 0  |
| CONTIG-025598 | 1497 | 34  | 238 | 1143 | 50 |
| CONTIG-025599 | 166  | 4   | 0   | 22   | 0  |
| CONTIG-025600 | 192  | 7   | 9   | 51   | 0  |
| CONTIG-025601 | 199  | 4   | 0   | 18   | 0  |
| CONTIG-025602 | 81   | 15  | 89  | 0    | 0  |
| CONTIG-025603 | 94   | 9   | 8   | 26   | 0  |
| CONTIG-025604 | 350  | 15  | 11  | 233  | 0  |
| CONTIG-025605 | 163  | 4   | 2   | 12   | 0  |
| CONTIG-025606 | 115  | 24  | 21  | 65   | 0  |
| CONTIG-025607 | 217  | 27  | 89  | 281  | 0  |
| CONTIG-025608 | 409  | 66  | 162 | 1664 | 0  |
| CONTIG-025609 | 95   | 8   | 14  | 17   | 0  |
| CONTIG-025610 | 213  | 6   | 0   | 11   | 0  |
| CONTIG-025611 | 141  | 8   | 7   | 35   | 0  |
| CONTIG-025612 | 66   | 3   | 9   | 0    | 0  |
| CONTIG-025613 | 222  | 16  | 146 | 18   | 0  |
| CONTIG-025614 | 971  | 249 | 47  | 15   | 0  |
| CONTIG-025615 | 202  | 9   | 19  | 59   | 0  |
| CONTIG-025618 | 126  | 10  | 82  | 6    | 0  |
| CONTIG-025619 | 451  | 25  | 143 | 597  | 0  |
| CONTIG-025620 | 226  | 54  | 135 | 416  | 0  |
| CONTIG-025621 | 103  | 6   | 10  | 14   | 0  |
| CONTIG-025622 | 300  | 8   | 40  | 63   | 0  |
| CONTIG-025623 | 84   | 10  | 0   | 33   | 0  |
| CONTIG-025624 | 113  | 15  | 2   | 61   | 0  |
| CONTIG-025625 | 95   | 4   | 2   | 10   | 0  |
| CONTIG-025626 | 595  | 20  | 86  | 319  | 6  |
| CONTIG-025635 | 319  | 13  | 65  | 194  | 0  |
| CONTIG-025636 | 228  | 12  | 12  | 78   | 0  |
| CONTIG-025637 | 94   | 71  | 8   | 185  | 2  |
| CONTIG-025638 | 234  | 21  | 41  | 167  | 0  |
| CONTIG-025639 | 595  | 20  | 12  | 87   | 0  |
| CONTIG-025641 | 268  | 8   | 46  | 57   | 0  |
| CONTIG-025648 | 349  | 31  | 93  | 471  | 2  |
| CONTIG-025650 | 67   | 27  | 0   | 33   | 2  |
| CONTIG-025652 | 139  | 9   | 13  | 32   | 0  |
| CONTIG-025653 | 172  | 7   | 17  | 18   | 0  |
| CONTIG-025654 | 376  | 10  | 8   | 114  | 6  |
| CONTIG-025655 | 170  | 10  | 10  | 38   | 2  |
| CONTIG-025656 | 709  | 28  | 79  | 950  | 2  |

|               |      |     |     |      |     |
|---------------|------|-----|-----|------|-----|
| CONTIG-025657 | 976  | 92  | 29  | 43   | 0   |
| CONTIG-025658 | 611  | 21  | 130 | 490  | 11  |
| CONTIG-025659 | 235  | 9   | 29  | 78   | 0   |
| CONTIG-025660 | 148  | 11  | 11  | 3    | 0   |
| CONTIG-025665 | 127  | 14  | 83  | 6    | 0   |
| CONTIG-025666 | 489  | 14  | 17  | 362  | 0   |
| CONTIG-025667 | 142  | 8   | 23  | 5    | 0   |
| CONTIG-025668 | 159  | 24  | 36  | 0    | 2   |
| CONTIG-025669 | 180  | 12  | 14  | 89   | 0   |
| CONTIG-025670 | 385  | 13  | 15  | 152  | 0   |
| CONTIG-025671 | 94   | 7   | 5   | 22   | 0   |
| CONTIG-025672 | 658  | 14  | 20  | 91   | 12  |
| CONTIG-025673 | 73   | 4   | 0   | 7    | 0   |
| CONTIG-025674 | 1039 | 38  | 58  | 1140 | 114 |
| CONTIG-025675 | 123  | 7   | 0   | 22   | 0   |
| CONTIG-025676 | 348  | 26  | 94  | 399  | 2   |
| CONTIG-025677 | 110  | 12  | 45  | 18   | 0   |
| CONTIG-025678 | 461  | 27  | 58  | 225  | 44  |
| CONTIG-025679 | 89   | 16  | 59  | 17   | 0   |
| CONTIG-025680 | 169  | 9   | 13  | 61   | 0   |
| CONTIG-025682 | 124  | 9   | 9   | 29   | 0   |
| CONTIG-025683 | 61   | 3   | 3   | 2    | 0   |
| CONTIG-025686 | 151  | 8   | 25  | 30   | 0   |
| CONTIG-025687 | 120  | 26  | 41  | 31   | 0   |
| CONTIG-025688 | 68   | 6   | 6   | 3    | 0   |
| CONTIG-025689 | 191  | 11  | 20  | 53   | 0   |
| CONTIG-025691 | 59   | 19  | 23  | 8    | 0   |
| CONTIG-025692 | 66   | 3   | 0   | 4    | 0   |
| CONTIG-025693 | 59   | 437 | 529 | 420  | 16  |
| CONTIG-025694 | 141  | 26  | 71  | 43   | 0   |
| CONTIG-025696 | 71   | 18  | 3   | 50   | 0   |
| CONTIG-025697 | 88   | 20  | 55  | 44   | 0   |
| CONTIG-025698 | 64   | 7   | 0   | 12   | 0   |
| CONTIG-025699 | 83   | 12  | 14  | 17   | 0   |
| CONTIG-025700 | 355  | 38  | 91  | 155  | 4   |
| CONTIG-025701 | 185  | 44  | 74  | 307  | 5   |
| CONTIG-025702 | 64   | 7   | 7   | 7    | 0   |
| CONTIG-025703 | 186  | 17  | 95  | 50   | 0   |
| CONTIG-025704 | 86   | 4   | 3   | 4    | 0   |
| CONTIG-025705 | 517  | 69  | 98  | 2119 | 0   |
| CONTIG-025706 | 64   | 7   | 25  | 0    | 0   |
| CONTIG-025707 | 167  | 26  | 76  | 58   | 0   |
| CONTIG-025708 | 81   | 11  | 20  | 11   | 0   |
| CONTIG-025709 | 95   | 7   | 14  | 19   | 0   |
| CONTIG-025710 | 184  | 15  | 17  | 64   | 0   |
| CONTIG-025711 | 301  | 9   | 11  | 58   | 0   |
| CONTIG-025712 | 148  | 11  | 17  | 47   | 0   |

|               |      |     |     |      |     |
|---------------|------|-----|-----|------|-----|
| CONTIG-025713 | 1782 | 30  | 105 | 2183 | 3   |
| CONTIG-025714 | 151  | 9   | 17  | 30   | 0   |
| CONTIG-025716 | 566  | 15  | 95  | 159  | 4   |
| CONTIG-025717 | 94   | 3   | 2   | 5    | 0   |
| CONTIG-025718 | 220  | 12  | 21  | 78   | 0   |
| CONTIG-025719 | 392  | 14  | 34  | 52   | 5   |
| CONTIG-025720 | 82   | 13  | 17  | 44   | 0   |
| CONTIG-025721 | 196  | 11  | 21  | 13   | 0   |
| CONTIG-025722 | 171  | 8   | 17  | 14   | 2   |
| CONTIG-025723 | 71   | 2   | 2   | 6    | 0   |
| CONTIG-025725 | 234  | 17  | 17  | 164  | 0   |
| CONTIG-025726 | 69   | 8   | 3   | 21   | 2   |
| CONTIG-025727 | 431  | 15  | 63  | 256  | 0   |
| CONTIG-025728 | 105  | 69  | 61  | 323  | 0   |
| CONTIG-025729 | 477  | 10  | 64  | 109  | 2   |
| CONTIG-025731 | 1280 | 30  | 88  | 2096 | 4   |
| CONTIG-025732 | 228  | 48  | 29  | 461  | 5   |
| CONTIG-025733 | 77   | 11  | 0   | 37   | 0   |
| CONTIG-025734 | 383  | 26  | 118 | 383  | 0   |
| CONTIG-025736 | 1567 | 25  | 129 | 1042 | 6   |
| CONTIG-025737 | 155  | 12  | 12  | 49   | 0   |
| CONTIG-025739 | 359  | 13  | 51  | 92   | 0   |
| CONTIG-025740 | 79   | 22  | 13  | 89   | 0   |
| CONTIG-025741 | 314  | 15  | 12  | 64   | 0   |
| CONTIG-025742 | 340  | 13  | 20  | 129  | 2   |
| CONTIG-025743 | 489  | 12  | 100 | 111  | 0   |
| CONTIG-025744 | 108  | 63  | 45  | 83   | 0   |
| CONTIG-025745 | 523  | 15  | 20  | 310  | 2   |
| CONTIG-025746 | 70   | 9   | 17  | 15   | 0   |
| CONTIG-025753 | 129  | 6   | 14  | 12   | 0   |
| CONTIG-025754 | 248  | 9   | 46  | 29   | 0   |
| CONTIG-025755 | 770  | 18  | 46  | 285  | 32  |
| CONTIG-025756 | 303  | 5   | 7   | 14   | 0   |
| CONTIG-025757 | 1761 | 35  | 261 | 2060 | 140 |
| CONTIG-025758 | 322  | 21  | 48  | 136  | 6   |
| CONTIG-025759 | 59   | 4   | 2   | 5    | 0   |
| CONTIG-025760 | 61   | 19  | 40  | 12   | 0   |
| CONTIG-025762 | 81   | 9   | 41  | 15   | 0   |
| CONTIG-025763 | 92   | 154 | 72  | 389  | 10  |
| CONTIG-025764 | 188  | 17  | 35  | 68   | 0   |
| CONTIG-025765 | 105  | 5   | 4   | 9    | 0   |
| CONTIG-025766 | 209  | 7   | 6   | 42   | 0   |
| CONTIG-025767 | 214  | 75  | 239 | 375  | 2   |
| CONTIG-025768 | 91   | 6   | 8   | 11   | 0   |
| CONTIG-025769 | 1184 | 28  | 220 | 1272 | 0   |
| CONTIG-025770 | 319  | 24  | 64  | 191  | 0   |
| CONTIG-025771 | 352  | 12  | 10  | 219  | 0   |

|               |     |     |     |      |    |
|---------------|-----|-----|-----|------|----|
| CONTIG-025772 | 519 | 9   | 29  | 127  | 0  |
| CONTIG-025773 | 94  | 9   | 24  | 15   | 0  |
| CONTIG-025774 | 270 | 7   | 7   | 56   | 0  |
| CONTIG-025775 | 292 | 12  | 34  | 89   | 0  |
| CONTIG-025776 | 158 | 11  | 83  | 13   | 0  |
| CONTIG-025777 | 85  | 6   | 4   | 3    | 0  |
| CONTIG-025778 | 454 | 12  | 14  | 149  | 4  |
| CONTIG-025779 | 84  | 13  | 13  | 13   | 0  |
| CONTIG-025780 | 545 | 57  | 77  | 1499 | 18 |
| CONTIG-025781 | 211 | 4   | 11  | 15   | 0  |
| CONTIG-025782 | 153 | 6   | 5   | 22   | 0  |
| CONTIG-025783 | 150 | 15  | 58  | 68   | 0  |
| CONTIG-025784 | 290 | 25  | 76  | 287  | 0  |
| CONTIG-025785 | 177 | 9   | 7   | 60   | 0  |
| CONTIG-025786 | 494 | 16  | 22  | 328  | 0  |
| CONTIG-025787 | 184 | 45  | 201 | 307  | 3  |
| CONTIG-025788 | 62  | 17  | 34  | 0    | 0  |
| CONTIG-025789 | 167 | 20  | 31  | 143  | 0  |
| CONTIG-025792 | 269 | 14  | 16  | 123  | 0  |
| CONTIG-025793 | 58  | 21  | 43  | 17   | 0  |
| CONTIG-025794 | 212 | 7   | 15  | 40   | 0  |
| CONTIG-025795 | 60  | 4   | 3   | 0    | 0  |
| CONTIG-025806 | 335 | 19  | 18  | 162  | 6  |
| CONTIG-025807 | 358 | 19  | 45  | 202  | 2  |
| CONTIG-025808 | 457 | 11  | 25  | 79   | 0  |
| CONTIG-025809 | 795 | 17  | 68  | 551  | 0  |
| CONTIG-025810 | 265 | 17  | 13  | 168  | 0  |
| CONTIG-025811 | 258 | 17  | 17  | 210  | 0  |
| CONTIG-025812 | 229 | 11  | 3   | 76   | 2  |
| CONTIG-025813 | 81  | 6   | 17  | 2    | 0  |
| CONTIG-025814 | 114 | 3   | 4   | 2    | 0  |
| CONTIG-025815 | 82  | 8   | 14  | 13   | 0  |
| CONTIG-025816 | 65  | 490 | 16  | 1701 | 0  |
| CONTIG-025817 | 105 | 10  | 79  | 15   | 0  |
| CONTIG-025818 | 386 | 17  | 36  | 269  | 0  |
| CONTIG-025819 | 100 | 9   | 19  | 12   | 0  |
| CONTIG-025820 | 158 | 7   | 21  | 8    | 0  |
| CONTIG-025821 | 267 | 15  | 64  | 132  | 0  |
| CONTIG-025822 | 268 | 8   | 13  | 66   | 0  |
| CONTIG-025823 | 185 | 20  | 13  | 179  | 0  |
| CONTIG-025824 | 190 | 7   | 9   | 42   | 0  |
| CONTIG-025825 | 92  | 382 | 31  | 1134 | 2  |
| CONTIG-025826 | 164 | 4   | 29  | 0    | 0  |
| CONTIG-025827 | 126 | 30  | 138 | 86   | 0  |
| CONTIG-025828 | 71  | 317 | 45  | 1274 | 0  |
| CONTIG-025829 | 139 | 19  | 0   | 126  | 0  |
| CONTIG-025830 | 66  | 4   | 0   | 2    | 0  |



|               |      |     |     |      |     |
|---------------|------|-----|-----|------|-----|
| CONTIG-025831 | 97   | 7   | 5   | 10   | 0   |
| CONTIG-025832 | 473  | 19  | 47  | 313  | 2   |
| CONTIG-025833 | 159  | 11  | 8   | 69   | 0   |
| CONTIG-025834 | 466  | 14  | 26  | 213  | 3   |
| CONTIG-025835 | 59   | 7   | 7   | 18   | 0   |
| CONTIG-025836 | 59   | 7   | 0   | 14   | 0   |
| CONTIG-025837 | 303  | 8   | 18  | 36   | 4   |
| CONTIG-025838 | 61   | 14  | 67  | 0    | 0   |
| CONTIG-025840 | 157  | 16  | 28  | 86   | 4   |
| CONTIG-025841 | 188  | 9   | 10  | 80   | 0   |
| CONTIG-025842 | 184  | 9   | 48  | 9    | 0   |
| CONTIG-025843 | 76   | 127 | 403 | 58   | 2   |
| CONTIG-025844 | 39   | 604 | 77  | 421  | 106 |
| CONTIG-025845 | 157  | 7   | 10  | 25   | 0   |
| CONTIG-025846 | 174  | 14  | 27  | 90   | 0   |
| CONTIG-025847 | 224  | 11  | 19  | 82   | 0   |
| CONTIG-025848 | 51   | 10  | 6   | 12   | 0   |
| CONTIG-025849 | 251  | 16  | 33  | 147  | 0   |
| CONTIG-025850 | 171  | 16  | 81  | 62   | 0   |
| CONTIG-025851 | 815  | 11  | 128 | 377  | 0   |
| CONTIG-025852 | 343  | 10  | 21  | 157  | 0   |
| CONTIG-025853 | 188  | 8   | 48  | 18   | 0   |
| CONTIG-025854 | 208  | 20  | 25  | 129  | 0   |
| CONTIG-025855 | 277  | 10  | 37  | 89   | 0   |
| CONTIG-025856 | 596  | 32  | 34  | 36   | 2   |
| CONTIG-025857 | 38   | 276 | 28  | 111  | 6   |
| CONTIG-025858 | 126  | 34  | 23  | 99   | 2   |
| CONTIG-025859 | 338  | 19  | 305 | 88   | 0   |
| CONTIG-025860 | 166  | 21  | 39  | 152  | 0   |
| CONTIG-025861 | 114  | 33  | 52  | 124  | 2   |
| CONTIG-025862 | 115  | 10  | 11  | 19   | 0   |
| CONTIG-025864 | 116  | 259 | 140 | 1464 | 2   |
| CONTIG-025865 | 92   | 6   | 15  | 8    | 0   |
| CONTIG-025866 | 141  | 5   | 25  | 8    | 0   |
| CONTIG-025867 | 170  | 14  | 23  | 44   | 9   |
| CONTIG-025868 | 63   | 9   | 21  | 4    | 0   |
| CONTIG-025869 | 72   | 142 | 9   | 377  | 34  |
| CONTIG-025870 | 227  | 6   | 7   | 34   | 0   |
| CONTIG-025873 | 149  | 21  | 74  | 78   | 0   |
| CONTIG-025874 | 1662 | 27  | 46  | 2100 | 12  |
| CONTIG-025875 | 450  | 47  | 35  | 977  | 0   |
| CONTIG-025876 | 221  | 18  | 20  | 220  | 0   |
| CONTIG-025877 | 414  | 11  | 63  | 202  | 0   |
| CONTIG-025878 | 344  | 8   | 18  | 83   | 0   |
| CONTIG-025879 | 94   | 12  | 44  | 2    | 0   |
| CONTIG-025880 | 298  | 12  | 10  | 75   | 0   |
| CONTIG-025881 | 563  | 14  | 28  | 99   | 2   |

|               |     |     |     |      |    |
|---------------|-----|-----|-----|------|----|
| CONTIG-025888 | 124 | 10  | 17  | 12   | 0  |
| CONTIG-025889 | 79  | 3   | 2   | 6    | 0  |
| CONTIG-025890 | 242 | 14  | 77  | 21   | 0  |
| CONTIG-025891 | 112 | 3   | 2   | 2    | 0  |
| CONTIG-025892 | 636 | 39  | 83  | 1526 | 0  |
| CONTIG-025896 | 478 | 12  | 20  | 113  | 0  |
| CONTIG-025897 | 685 | 10  | 9   | 233  | 2  |
| CONTIG-025898 | 968 | 49  | 68  | 1574 | 37 |
| CONTIG-025899 | 736 | 22  | 46  | 531  | 0  |
| CONTIG-025900 | 66  | 8   | 18  | 2    | 0  |
| CONTIG-025901 | 77  | 31  | 58  | 0    | 0  |
| CONTIG-025902 | 314 | 13  | 38  | 162  | 0  |
| CONTIG-025903 | 826 | 17  | 138 | 564  | 0  |
| CONTIG-025905 | 84  | 10  | 7   | 15   | 0  |
| CONTIG-025906 | 96  | 7   | 4   | 8    | 0  |
| CONTIG-025907 | 253 | 28  | 94  | 257  | 0  |
| CONTIG-025908 | 66  | 3   | 5   | 2    | 0  |
| CONTIG-025909 | 201 | 6   | 6   | 22   | 0  |
| CONTIG-025910 | 180 | 6   | 10  | 30   | 0  |
| CONTIG-025911 | 164 | 7   | 10  | 37   | 0  |
| CONTIG-025912 | 106 | 7   | 6   | 9    | 0  |
| CONTIG-025913 | 337 | 16  | 31  | 128  | 3  |
| CONTIG-025920 | 226 | 12  | 4   | 96   | 0  |
| CONTIG-025921 | 86  | 5   | 11  | 8    | 0  |
| CONTIG-025922 | 391 | 180 | 119 | 4305 | 0  |
| CONTIG-025923 | 310 | 15  | 13  | 82   | 2  |
| CONTIG-025925 | 193 | 16  | 19  | 108  | 0  |
| CONTIG-025926 | 76  | 4   | 2   | 7    | 0  |
| CONTIG-025927 | 127 | 19  | 31  | 114  | 0  |
| CONTIG-025928 | 48  | 194 | 31  | 306  | 24 |
| CONTIG-025929 | 100 | 54  | 6   | 173  | 4  |
| CONTIG-025930 | 131 | 10  | 4   | 46   | 0  |
| CONTIG-025931 | 671 | 13  | 59  | 345  | 2  |
| CONTIG-025932 | 188 | 5   | 12  | 18   | 0  |
| CONTIG-025934 | 197 | 18  | 16  | 155  | 0  |
| CONTIG-025935 | 120 | 5   | 0   | 19   | 0  |
| CONTIG-025936 | 251 | 13  | 4   | 93   | 4  |
| CONTIG-025937 | 72  | 7   | 14  | 10   | 0  |
| CONTIG-025943 | 194 | 9   | 76  | 14   | 0  |
| CONTIG-025944 | 807 | 16  | 20  | 653  | 2  |
| CONTIG-025945 | 242 | 8   | 0   | 41   | 0  |
| CONTIG-025946 | 339 | 18  | 143 | 209  | 0  |
| CONTIG-025947 | 219 | 10  | 22  | 73   | 0  |
| CONTIG-025950 | 68  | 4   | 4   | 0    | 0  |
| CONTIG-025951 | 322 | 6   | 30  | 43   | 3  |
| CONTIG-025952 | 124 | 12  | 9   | 26   | 9  |
| CONTIG-025953 | 498 | 30  | 41  | 477  | 34 |

|               |     |     |     |      |    |
|---------------|-----|-----|-----|------|----|
| CONTIG-025954 | 236 | 10  | 63  | 80   | 0  |
| CONTIG-025955 | 977 | 28  | 96  | 952  | 34 |
| CONTIG-025956 | 431 | 10  | 81  | 66   | 0  |
| CONTIG-025957 | 263 | 13  | 43  | 68   | 2  |
| CONTIG-025958 | 141 | 9   | 18  | 36   | 0  |
| CONTIG-025959 | 46  | 203 | 20  | 184  | 0  |
| CONTIG-025960 | 437 | 50  | 94  | 1377 | 0  |
| CONTIG-025961 | 293 | 16  | 100 | 164  | 0  |
| CONTIG-025962 | 355 | 10  | 34  | 97   | 0  |
| CONTIG-025964 | 103 | 13  | 12  | 33   | 0  |
| CONTIG-025965 | 310 | 18  | 67  | 71   | 0  |
| CONTIG-025966 | 48  | 5   | 9   | 4    | 0  |
| CONTIG-025967 | 92  | 21  | 8   | 49   | 2  |
| CONTIG-025968 | 153 | 20  | 51  | 52   | 0  |
| CONTIG-025969 | 168 | 5   | 0   | 16   | 0  |
| CONTIG-025970 | 232 | 11  | 15  | 42   | 0  |
| CONTIG-025971 | 380 | 20  | 18  | 233  | 6  |
| CONTIG-025972 | 438 | 13  | 20  | 188  | 0  |
| CONTIG-025973 | 495 | 18  | 46  | 188  | 2  |
| CONTIG-025974 | 272 | 56  | 118 | 786  | 0  |
| CONTIG-025975 | 284 | 12  | 2   | 85   | 4  |
| CONTIG-025976 | 344 | 17  | 74  | 217  | 0  |
| CONTIG-025977 | 361 | 18  | 56  | 66   | 0  |
| CONTIG-025978 | 286 | 12  | 7   | 17   | 0  |
| CONTIG-025979 | 74  | 10  | 0   | 25   | 2  |
| CONTIG-025983 | 392 | 12  | 23  | 86   | 0  |
| CONTIG-025984 | 98  | 4   | 2   | 18   | 0  |
| CONTIG-025985 | 109 | 29  | 39  | 108  | 0  |
| CONTIG-025986 | 96  | 12  | 4   | 43   | 0  |
| CONTIG-025987 | 63  | 5   | 2   | 6    | 0  |
| CONTIG-025988 | 348 | 31  | 248 | 205  | 0  |
| CONTIG-025989 | 220 | 11  | 6   | 71   | 0  |
| CONTIG-025990 | 194 | 9   | 48  | 49   | 0  |
| CONTIG-025991 | 82  | 12  | 31  | 26   | 0  |
| CONTIG-025992 | 239 | 15  | 17  | 158  | 0  |
| CONTIG-025994 | 431 | 12  | 8   | 186  | 0  |
| CONTIG-025995 | 163 | 15  | 12  | 104  | 0  |
| CONTIG-025996 | 321 | 11  | 43  | 82   | 2  |
| CONTIG-025997 | 258 | 6   | 17  | 29   | 0  |
| CONTIG-025998 | 255 | 7   | 48  | 70   | 0  |
| CONTIG-026000 | 527 | 16  | 58  | 217  | 0  |
| CONTIG-026001 | 70  | 18  | 34  | 22   | 0  |
| CONTIG-026002 | 409 | 15  | 63  | 178  | 5  |
| CONTIG-026003 | 226 | 12  | 49  | 13   | 2  |
| CONTIG-026004 | 106 | 5   | 5   | 14   | 0  |
| CONTIG-026008 | 90  | 6   | 2   | 12   | 0  |
| CONTIG-026011 | 179 | 8   | 8   | 43   | 2  |

|               |     |      |     |      |      |
|---------------|-----|------|-----|------|------|
| CONTIG-026012 | 50  | 1353 | 66  | 1259 | 64   |
| CONTIG-026013 | 77  | 9    | 27  | 5    | 4    |
| CONTIG-026014 | 338 | 10   | 87  | 132  | 0    |
| CONTIG-026015 | 235 | 6    | 38  | 33   | 2    |
| CONTIG-026016 | 146 | 4    | 7   | 16   | 0    |
| CONTIG-026017 | 62  | 5    | 0   | 9    | 0    |
| CONTIG-026018 | 116 | 8    | 15  | 16   | 0    |
| CONTIG-026020 | 444 | 30   | 33  | 739  | 2    |
| CONTIG-026021 | 72  | 64   | 65  | 9    | 0    |
| CONTIG-026024 | 63  | 8    | 2   | 10   | 0    |
| CONTIG-026025 | 196 | 4    | 6   | 25   | 0    |
| CONTIG-026026 | 93  | 36   | 118 | 70   | 0    |
| CONTIG-026027 | 278 | 9    | 46  | 95   | 0    |
| CONTIG-026028 | 84  | 24   | 21  | 51   | 0    |
| CONTIG-026029 | 129 | 9    | 3   | 55   | 0    |
| CONTIG-026030 | 179 | 7    | 2   | 44   | 0    |
| CONTIG-026031 | 148 | 7    | 4   | 16   | 0    |
| CONTIG-026032 | 599 | 8    | 43  | 120  | 0    |
| CONTIG-026033 | 86  | 8    | 38  | 16   | 0    |
| CONTIG-026034 | 150 | 18   | 18  | 5    | 0    |
| CONTIG-026035 | 221 | 8    | 54  | 19   | 2    |
| CONTIG-026036 | 401 | 21   | 81  | 182  | 4    |
| CONTIG-026037 | 357 | 10   | 16  | 45   | 0    |
| CONTIG-026038 | 369 | 38   | 96  | 489  | 14   |
| CONTIG-026039 | 87  | 4    | 4   | 7    | 0    |
| CONTIG-026040 | 542 | 8    | 45  | 76   | 2    |
| CONTIG-026042 | 986 | 12   | 56  | 293  | 4    |
| CONTIG-026043 | 516 | 6    | 11  | 54   | 0    |
| CONTIG-026044 | 248 | 13   | 7   | 0    | 5    |
| CONTIG-026045 | 107 | 4    | 5   | 2    | 0    |
| CONTIG-026047 | 157 | 8    | 5   | 25   | 0    |
| CONTIG-026048 | 183 | 9    | 0   | 56   | 0    |
| CONTIG-026053 | 114 | 134  | 32  | 554  | 0    |
| CONTIG-026054 | 69  | 317  | 130 | 301  | 32   |
| CONTIG-026055 | 246 | 12   | 86  | 64   | 0    |
| CONTIG-026057 | 60  | 4    | 12  | 2    | 0    |
| CONTIG-026058 | 219 | 12   | 2   | 73   | 0    |
| CONTIG-026059 | 427 | 7    | 19  | 77   | 0    |
| CONTIG-026060 | 177 | 11   | 27  | 37   | 0    |
| CONTIG-026061 | 66  | 6    | 5   | 12   | 0    |
| CONTIG-026062 | 646 | 15   | 70  | 548  | 0    |
| CONTIG-026063 | 81  | 4    | 5   | 5    | 0    |
| CONTIG-026064 | 264 | 16   | 56  | 90   | 2    |
| CONTIG-026065 | 245 | 33   | 139 | 301  | 0    |
| CONTIG-026066 | 111 | 8    | 8   | 19   | 0    |
| CONTIG-026067 | 39  | 2313 | 157 | 25   | 1778 |
| CONTIG-026068 | 224 | 9    | 16  | 38   | 0    |

|               |     |     |     |      |    |
|---------------|-----|-----|-----|------|----|
| CONTIG-026069 | 212 | 9   | 10  | 68   | 2  |
| CONTIG-026071 | 341 | 28  | 3   | 0    | 86 |
| CONTIG-026072 | 117 | 8   | 8   | 31   | 2  |
| CONTIG-026073 | 446 | 10  | 35  | 120  | 0  |
| CONTIG-026075 | 159 | 10  | 0   | 16   | 0  |
| CONTIG-026076 | 76  | 8   | 4   | 16   | 0  |
| CONTIG-026077 | 424 | 13  | 75  | 171  | 0  |
| CONTIG-026085 | 105 | 6   | 0   | 21   | 0  |
| CONTIG-026088 | 829 | 48  | 175 | 511  | 6  |
| CONTIG-026091 | 363 | 11  | 36  | 109  | 4  |
| CONTIG-026092 | 249 | 12  | 44  | 81   | 0  |
| CONTIG-026093 | 118 | 28  | 25  | 151  | 0  |
| CONTIG-026094 | 91  | 10  | 2   | 35   | 0  |
| CONTIG-026095 | 98  | 5   | 0   | 4    | 0  |
| CONTIG-026096 | 153 | 7   | 15  | 7    | 0  |
| CONTIG-026097 | 632 | 12  | 62  | 309  | 0  |
| CONTIG-026098 | 113 | 203 | 37  | 918  | 5  |
| CONTIG-026099 | 221 | 7   | 25  | 32   | 0  |
| CONTIG-026100 | 228 | 60  | 214 | 256  | 2  |
| CONTIG-026101 | 90  | 3   | 6   | 12   | 0  |
| CONTIG-026102 | 120 | 7   | 10  | 21   | 0  |
| CONTIG-026103 | 313 | 28  | 38  | 160  | 0  |
| CONTIG-026104 | 180 | 9   | 3   | 64   | 0  |
| CONTIG-026105 | 311 | 15  | 40  | 200  | 0  |
| CONTIG-026106 | 51  | 222 | 146 | 156  | 44 |
| CONTIG-026109 | 382 | 16  | 16  | 247  | 0  |
| CONTIG-026110 | 59  | 59  | 32  | 132  | 0  |
| CONTIG-026111 | 798 | 16  | 82  | 245  | 10 |
| CONTIG-026112 | 156 | 17  | 92  | 83   | 0  |
| CONTIG-026113 | 72  | 6   | 0   | 15   | 0  |
| CONTIG-026114 | 526 | 17  | 133 | 130  | 6  |
| CONTIG-026116 | 231 | 10  | 7   | 79   | 0  |
| CONTIG-026117 | 475 | 10  | 4   | 132  | 0  |
| CONTIG-026118 | 183 | 13  | 30  | 77   | 0  |
| CONTIG-026119 | 80  | 370 | 270 | 1079 | 23 |
| CONTIG-026120 | 361 | 41  | 65  | 485  | 18 |
| CONTIG-026121 | 75  | 5   | 3   | 14   | 0  |
| CONTIG-026122 | 151 | 7   | 4   | 13   | 0  |
| CONTIG-026123 | 141 | 6   | 9   | 25   | 0  |
| CONTIG-026125 | 77  | 7   | 16  | 8    | 0  |
| CONTIG-026126 | 460 | 21  | 67  | 356  | 0  |
| CONTIG-026127 | 193 | 38  | 61  | 139  | 6  |
| CONTIG-026129 | 457 | 7   | 19  | 84   | 0  |
| CONTIG-026130 | 88  | 23  | 2   | 64   | 0  |
| CONTIG-026131 | 124 | 7   | 2   | 9    | 0  |
| CONTIG-026132 | 108 | 95  | 37  | 248  | 0  |
| CONTIG-026134 | 199 | 8   | 14  | 39   | 0  |

|               |      |     |     |      |     |
|---------------|------|-----|-----|------|-----|
| CONTIG-026135 | 517  | 20  | 38  | 449  | 0   |
| CONTIG-026136 | 128  | 49  | 73  | 290  | 0   |
| CONTIG-026137 | 579  | 18  | 24  | 535  | 0   |
| CONTIG-026138 | 213  | 9   | 28  | 71   | 0   |
| CONTIG-026139 | 120  | 27  | 105 | 128  | 0   |
| CONTIG-026140 | 93   | 10  | 20  | 16   | 0   |
| CONTIG-026141 | 84   | 18  | 15  | 63   | 0   |
| CONTIG-026146 | 688  | 18  | 50  | 646  | 0   |
| CONTIG-026147 | 89   | 24  | 43  | 59   | 2   |
| CONTIG-026149 | 221  | 10  | 11  | 76   | 0   |
| CONTIG-026150 | 131  | 16  | 10  | 34   | 4   |
| CONTIG-026154 | 453  | 18  | 80  | 275  | 0   |
| CONTIG-026155 | 832  | 51  | 556 | 1337 | 33  |
| CONTIG-026156 | 731  | 86  | 0   | 0    | 865 |
| CONTIG-026157 | 457  | 12  | 16  | 180  | 0   |
| CONTIG-026158 | 75   | 101 | 101 | 247  | 2   |
| CONTIG-026159 | 95   | 45  | 122 | 44   | 0   |
| CONTIG-026160 | 83   | 6   | 3   | 8    | 0   |
| CONTIG-026165 | 293  | 8   | 16  | 48   | 0   |
| CONTIG-026166 | 254  | 56  | 233 | 602  | 0   |
| CONTIG-026167 | 415  | 7   | 22  | 61   | 0   |
| CONTIG-026168 | 92   | 12  | 36  | 10   | 0   |
| CONTIG-026170 | 180  | 10  | 40  | 47   | 0   |
| CONTIG-026171 | 536  | 12  | 93  | 68   | 23  |
| CONTIG-026173 | 377  | 11  | 32  | 46   | 2   |
| CONTIG-026174 | 247  | 13  | 27  | 120  | 0   |
| CONTIG-026175 | 433  | 14  | 58  | 65   | 2   |
| CONTIG-026176 | 987  | 33  | 104 | 677  | 32  |
| CONTIG-026177 | 188  | 16  | 11  | 146  | 0   |
| CONTIG-026178 | 285  | 30  | 85  | 222  | 27  |
| CONTIG-026179 | 296  | 14  | 274 | 17   | 0   |
| CONTIG-026180 | 405  | 22  | 131 | 284  | 2   |
| CONTIG-026181 | 709  | 16  | 76  | 314  | 0   |
| CONTIG-026182 | 338  | 10  | 39  | 92   | 4   |
| CONTIG-026183 | 145  | 7   | 25  | 35   | 0   |
| CONTIG-026184 | 135  | 8   | 37  | 16   | 0   |
| CONTIG-026185 | 253  | 11  | 98  | 92   | 0   |
| CONTIG-026186 | 409  | 23  | 52  | 195  | 0   |
| CONTIG-026187 | 79   | 568 | 10  | 1431 | 81  |
| CONTIG-026189 | 426  | 8   | 14  | 0    | 7   |
| CONTIG-026190 | 1511 | 18  | 112 | 585  | 13  |
| CONTIG-026191 | 78   | 4   | 6   | 7    | 0   |
| CONTIG-026192 | 92   | 8   | 3   | 37   | 0   |
| CONTIG-026193 | 193  | 96  | 164 | 701  | 10  |
| CONTIG-026196 | 76   | 232 | 87  | 216  | 10  |
| CONTIG-026197 | 237  | 36  | 36  | 302  | 0   |
| CONTIG-026198 | 82   | 4   | 3   | 11   | 0   |

|               |     |     |     |      |    |
|---------------|-----|-----|-----|------|----|
| CONTIG-026199 | 500 | 21  | 44  | 148  | 0  |
| CONTIG-026201 | 183 | 7   | 26  | 22   | 0  |
| CONTIG-026202 | 332 | 13  | 52  | 103  | 0  |
| CONTIG-026203 | 85  | 34  | 53  | 128  | 0  |
| CONTIG-026204 | 69  | 9   | 2   | 7    | 0  |
| CONTIG-026205 | 703 | 17  | 359 | 249  | 0  |
| CONTIG-026206 | 485 | 148 | 145 | 4103 | 50 |
| CONTIG-026207 | 96  | 5   | 2   | 2    | 0  |
| CONTIG-026208 | 95  | 6   | 3   | 15   | 0  |
| CONTIG-026209 | 737 | 12  | 37  | 245  | 4  |
| CONTIG-026210 | 210 | 23  | 80  | 120  | 3  |
| CONTIG-026211 | 346 | 13  | 44  | 135  | 4  |
| CONTIG-026212 | 236 | 25  | 26  | 46   | 0  |
| CONTIG-026215 | 364 | 12  | 25  | 169  | 0  |
| CONTIG-026216 | 209 | 8   | 14  | 37   | 0  |
| CONTIG-026217 | 297 | 54  | 57  | 536  | 17 |
| CONTIG-026218 | 132 | 5   | 0   | 16   | 2  |
| CONTIG-026219 | 176 | 11  | 15  | 63   | 0  |
| CONTIG-026220 | 243 | 16  | 42  | 98   | 0  |
| CONTIG-026221 | 241 | 98  | 15  | 1292 | 2  |
| CONTIG-026222 | 74  | 16  | 39  | 15   | 0  |
| CONTIG-026223 | 67  | 9   | 3   | 15   | 0  |
| CONTIG-026224 | 131 | 59  | 45  | 258  | 0  |
| CONTIG-026225 | 369 | 34  | 63  | 425  | 9  |
| CONTIG-026226 | 61  | 9   | 7   | 11   | 0  |
| CONTIG-026227 | 582 | 34  | 55  | 336  | 38 |
| CONTIG-026228 | 147 | 11  | 5   | 45   | 0  |
| CONTIG-026235 | 71  | 4   | 0   | 3    | 0  |
| CONTIG-026236 | 363 | 17  | 37  | 27   | 0  |
| CONTIG-026238 | 104 | 21  | 24  | 67   | 0  |
| CONTIG-026239 | 394 | 12  | 4   | 2    | 9  |
| CONTIG-026240 | 195 | 12  | 68  | 42   | 0  |
| CONTIG-026241 | 377 | 8   | 19  | 57   | 2  |
| CONTIG-026243 | 489 | 22  | 76  | 349  | 63 |
| CONTIG-026244 | 237 | 5   | 2   | 28   | 2  |
| CONTIG-026246 | 96  | 9   | 17  | 17   | 0  |
| CONTIG-026258 | 168 | 27  | 77  | 184  | 0  |
| CONTIG-026259 | 73  | 3   | 0   | 4    | 0  |
| CONTIG-026266 | 138 | 64  | 19  | 341  | 0  |
| CONTIG-026272 | 60  | 54  | 2   | 14   | 0  |
| CONTIG-026277 | 183 | 12  | 123 | 48   | 0  |
| CONTIG-026289 | 224 | 14  | 109 | 74   | 0  |
| CONTIG-026290 | 62  | 6   | 7   | 9    | 0  |
| CONTIG-026294 | 480 | 16  | 122 | 176  | 2  |
| CONTIG-026295 | 289 | 15  | 92  | 115  | 0  |
| CONTIG-026296 | 273 | 8   | 22  | 38   | 0  |
| CONTIG-026297 | 102 | 10  | 41  | 0    | 0  |

|               |     |     |     |      |    |
|---------------|-----|-----|-----|------|----|
| CONTIG-026298 | 63  | 4   | 2   | 9    | 0  |
| CONTIG-026299 | 403 | 16  | 59  | 167  | 0  |
| CONTIG-026300 | 118 | 13  | 36  | 10   | 0  |
| CONTIG-026301 | 108 | 15  | 23  | 47   | 2  |
| CONTIG-026302 | 319 | 16  | 97  | 100  | 0  |
| CONTIG-026303 | 38  | 666 | 59  | 1130 | 2  |
| CONTIG-026304 | 437 | 18  | 55  | 179  | 0  |
| CONTIG-026307 | 238 | 16  | 20  | 110  | 0  |
| CONTIG-026308 | 116 | 14  | 12  | 76   | 0  |
| CONTIG-026309 | 71  | 8   | 7   | 2    | 0  |
| CONTIG-026311 | 291 | 13  | 36  | 103  | 0  |
| CONTIG-026313 | 340 | 57  | 257 | 561  | 10 |
| CONTIG-026314 | 889 | 17  | 66  | 628  | 0  |
| CONTIG-026315 | 189 | 9   | 6   | 62   | 2  |
| CONTIG-026316 | 360 | 16  | 112 | 170  | 3  |
| CONTIG-026317 | 78  | 6   | 5   | 9    | 0  |
| CONTIG-026318 | 550 | 18  | 106 | 264  | 0  |
| CONTIG-026319 | 874 | 18  | 32  | 414  | 12 |
| CONTIG-026320 | 106 | 5   | 8   | 2    | 0  |
| CONTIG-026324 | 488 | 14  | 37  | 194  | 0  |
| CONTIG-026325 | 148 | 6   | 56  | 7    | 0  |
| CONTIG-026326 | 64  | 10  | 24  | 6    | 0  |
| CONTIG-026327 | 143 | 32  | 125 | 128  | 0  |
| CONTIG-026328 | 66  | 6   | 0   | 4    | 0  |
| CONTIG-026330 | 192 | 19  | 62  | 100  | 4  |
| CONTIG-026331 | 63  | 6   | 9   | 0    | 0  |
| CONTIG-026332 | 350 | 15  | 23  | 178  | 0  |
| CONTIG-026333 | 411 | 21  | 19  | 257  | 4  |
| CONTIG-026334 | 805 | 35  | 26  | 1014 | 46 |
| CONTIG-026335 | 153 | 10  | 38  | 59   | 0  |
| CONTIG-026336 | 585 | 14  | 9   | 341  | 2  |
| CONTIG-026337 | 318 | 10  | 8   | 93   | 2  |
| CONTIG-026338 | 122 | 7   | 35  | 2    | 0  |
| CONTIG-026339 | 68  | 11  | 13  | 15   | 0  |
| CONTIG-026340 | 126 | 18  | 25  | 79   | 0  |
| CONTIG-026341 | 172 | 5   | 12  | 21   | 0  |
| CONTIG-026342 | 101 | 8   | 20  | 5    | 0  |
| CONTIG-026347 | 119 | 6   | 7   | 16   | 0  |
| CONTIG-026348 | 106 | 5   | 2   | 18   | 0  |
| CONTIG-026349 | 223 | 22  | 17  | 217  | 0  |
| CONTIG-026356 | 146 | 20  | 30  | 29   | 4  |
| CONTIG-026362 | 459 | 14  | 39  | 206  | 0  |
| CONTIG-026363 | 184 | 6   | 17  | 46   | 0  |
| CONTIG-026366 | 66  | 6   | 16  | 0    | 0  |
| CONTIG-026367 | 195 | 8   | 4   | 59   | 0  |
| CONTIG-026368 | 104 | 7   | 75  | 2    | 0  |
| CONTIG-026369 | 129 | 13  | 10  | 62   | 0  |



|               |      |    |     |     |    |
|---------------|------|----|-----|-----|----|
| CONTIG-026370 | 63   | 5  | 2   | 8   | 0  |
| CONTIG-026371 | 61   | 3  | 3   | 0   | 0  |
| CONTIG-026372 | 118  | 5  | 5   | 11  | 0  |
| CONTIG-026373 | 424  | 34 | 76  | 310 | 16 |
| CONTIG-026374 | 124  | 11 | 35  | 16  | 0  |
| CONTIG-026375 | 142  | 8  | 41  | 7   | 0  |
| CONTIG-026376 | 118  | 5  | 7   | 15  | 0  |
| CONTIG-026377 | 331  | 14 | 24  | 80  | 2  |
| CONTIG-026378 | 316  | 8  | 8   | 48  | 0  |
| CONTIG-026379 | 412  | 11 | 29  | 170 | 0  |
| CONTIG-026380 | 181  | 8  | 15  | 49  | 0  |
| CONTIG-026381 | 135  | 7  | 24  | 0   | 0  |
| CONTIG-026382 | 318  | 13 | 6   | 11  | 0  |
| CONTIG-026383 | 217  | 6  | 16  | 32  | 0  |
| CONTIG-026384 | 229  | 13 | 39  | 83  | 0  |
| CONTIG-026385 | 83   | 19 | 172 | 2   | 0  |
| CONTIG-026386 | 82   | 3  | 10  | 2   | 0  |
| CONTIG-026387 | 90   | 8  | 4   | 8   | 0  |
| CONTIG-026388 | 242  | 6  | 43  | 41  | 0  |
| CONTIG-026389 | 298  | 36 | 46  | 366 | 0  |
| CONTIG-026391 | 180  | 10 | 80  | 26  | 0  |
| CONTIG-026392 | 304  | 10 | 11  | 144 | 0  |
| CONTIG-026393 | 191  | 11 | 42  | 70  | 2  |
| CONTIG-026394 | 63   | 12 | 5   | 24  | 0  |
| CONTIG-026395 | 141  | 7  | 7   | 33  | 0  |
| CONTIG-026396 | 57   | 70 | 22  | 116 | 0  |
| CONTIG-026397 | 76   | 8  | 11  | 20  | 0  |
| CONTIG-026398 | 502  | 9  | 28  | 21  | 6  |
| CONTIG-026399 | 168  | 8  | 36  | 23  | 0  |
| CONTIG-026400 | 302  | 13 | 16  | 103 | 2  |
| CONTIG-026401 | 104  | 3  | 2   | 11  | 0  |
| CONTIG-026402 | 102  | 9  | 37  | 3   | 0  |
| CONTIG-026403 | 1256 | 11 | 18  | 365 | 0  |
| CONTIG-026404 | 113  | 13 | 115 | 0   | 0  |
| CONTIG-026405 | 182  | 6  | 21  | 28  | 0  |
| CONTIG-026406 | 114  | 8  | 14  | 17  | 0  |
| CONTIG-026407 | 165  | 11 | 14  | 39  | 0  |
| CONTIG-026408 | 83   | 5  | 16  | 0   | 0  |
| CONTIG-026409 | 93   | 4  | 2   | 7   | 0  |
| CONTIG-026410 | 443  | 22 | 135 | 368 | 5  |
| CONTIG-026411 | 60   | 7  | 28  | 2   | 0  |
| CONTIG-026412 | 74   | 17 | 9   | 52  | 0  |
| CONTIG-026413 | 237  | 7  | 56  | 34  | 0  |
| CONTIG-026414 | 214  | 7  | 17  | 19  | 0  |
| CONTIG-026415 | 107  | 9  | 7   | 24  | 0  |
| CONTIG-026422 | 125  | 24 | 56  | 84  | 0  |
| CONTIG-026423 | 519  | 15 | 46  | 297 | 0  |

|               |     |     |     |     |     |
|---------------|-----|-----|-----|-----|-----|
| CONTIG-026424 | 454 | 11  | 31  | 156 | 5   |
| CONTIG-026425 | 101 | 6   | 12  | 7   | 0   |
| CONTIG-026426 | 286 | 19  | 25  | 90  | 2   |
| CONTIG-026428 | 480 | 20  | 93  | 367 | 2   |
| CONTIG-026429 | 370 | 16  | 108 | 162 | 0   |
| CONTIG-026430 | 159 | 5   | 5   | 19  | 0   |
| CONTIG-026431 | 399 | 11  | 5   | 84  | 0   |
| CONTIG-026432 | 205 | 17  | 69  | 0   | 0   |
| CONTIG-026433 | 448 | 17  | 91  | 261 | 2   |
| CONTIG-026434 | 191 | 4   | 17  | 22  | 0   |
| CONTIG-026437 | 82  | 15  | 33  | 17  | 0   |
| CONTIG-026438 | 436 | 16  | 37  | 290 | 0   |
| CONTIG-026439 | 84  | 45  | 17  | 84  | 0   |
| CONTIG-026440 | 171 | 18  | 130 | 57  | 0   |
| CONTIG-026441 | 72  | 10  | 20  | 2   | 0   |
| CONTIG-026442 | 59  | 5   | 15  | 0   | 0   |
| CONTIG-026443 | 381 | 12  | 28  | 120 | 2   |
| CONTIG-026444 | 298 | 47  | 4   | 0   | 124 |
| CONTIG-026445 | 66  | 8   | 2   | 8   | 0   |
| CONTIG-026446 | 217 | 10  | 13  | 22  | 2   |
| CONTIG-026447 | 525 | 8   | 10  | 115 | 2   |
| CONTIG-026448 | 168 | 6   | 2   | 16  | 0   |
| CONTIG-026449 | 544 | 12  | 84  | 221 | 0   |
| CONTIG-026450 | 226 | 9   | 10  | 14  | 0   |
| CONTIG-026451 | 50  | 119 | 14  | 96  | 0   |
| CONTIG-026452 | 285 | 13  | 48  | 96  | 2   |
| CONTIG-026453 | 136 | 17  | 46  | 14  | 2   |
| CONTIG-026454 | 607 | 40  | 113 | 813 | 7   |
| CONTIG-026456 | 202 | 25  | 65  | 252 | 0   |
| CONTIG-026457 | 190 | 10  | 15  | 47  | 2   |
| CONTIG-026460 | 458 | 23  | 40  | 410 | 2   |
| CONTIG-026461 | 413 | 23  | 116 | 311 | 0   |
| CONTIG-026462 | 65  | 7   | 7   | 10  | 0   |
| CONTIG-026463 | 124 | 15  | 25  | 15  | 0   |
| CONTIG-026469 | 551 | 31  | 148 | 505 | 16  |
| CONTIG-026470 | 262 | 11  | 24  | 43  | 0   |
| CONTIG-026471 | 290 | 11  | 32  | 129 | 0   |
| CONTIG-026475 | 156 | 5   | 10  | 0   | 18  |
| CONTIG-026476 | 127 | 14  | 13  | 68  | 0   |
| CONTIG-026477 | 369 | 17  | 25  | 204 | 4   |
| CONTIG-026479 | 705 | 19  | 105 | 322 | 9   |
| CONTIG-026480 | 230 | 7   | 13  | 43  | 0   |
| CONTIG-026481 | 143 | 10  | 16  | 35  | 0   |
| CONTIG-026482 | 117 | 10  | 5   | 2   | 0   |
| CONTIG-026483 | 147 | 18  | 139 | 6   | 0   |
| CONTIG-026485 | 58  | 3   | 2   | 4   | 0   |
| CONTIG-026486 | 154 | 6   | 6   | 7   | 0   |

|               |     |     |     |     |    |
|---------------|-----|-----|-----|-----|----|
| CONTIG-026487 | 589 | 14  | 9   | 398 | 0  |
| CONTIG-026488 | 59  | 20  | 77  | 0   | 0  |
| CONTIG-026489 | 86  | 3   | 5   | 9   | 0  |
| CONTIG-026490 | 158 | 23  | 12  | 88  | 7  |
| CONTIG-026491 | 148 | 7   | 3   | 24  | 0  |
| CONTIG-026492 | 78  | 32  | 41  | 94  | 0  |
| CONTIG-026493 | 155 | 7   | 6   | 33  | 0  |
| CONTIG-026496 | 412 | 18  | 93  | 183 | 0  |
| CONTIG-026497 | 142 | 21  | 74  | 102 | 0  |
| CONTIG-026498 | 651 | 18  | 36  | 343 | 4  |
| CONTIG-026500 | 93  | 6   | 0   | 25  | 0  |
| CONTIG-026501 | 71  | 13  | 11  | 0   | 0  |
| CONTIG-026502 | 75  | 215 | 97  | 254 | 11 |
| CONTIG-026504 | 75  | 12  | 2   | 29  | 0  |
| CONTIG-026505 | 93  | 17  | 48  | 2   | 0  |
| CONTIG-026506 | 365 | 32  | 275 | 249 | 25 |
| CONTIG-026507 | 429 | 18  | 95  | 301 | 0  |
| CONTIG-026508 | 194 | 4   | 7   | 2   | 0  |
| CONTIG-026509 | 74  | 8   | 41  | 0   | 0  |
| CONTIG-026510 | 77  | 5   | 15  | 0   | 0  |
| CONTIG-026511 | 380 | 21  | 19  | 448 | 0  |
| CONTIG-026512 | 250 | 16  | 8   | 4   | 0  |
| CONTIG-026513 | 177 | 8   | 6   | 41  | 0  |
| CONTIG-026514 | 308 | 8   | 19  | 28  | 0  |
| CONTIG-026515 | 74  | 12  | 7   | 34  | 0  |
| CONTIG-026517 | 482 | 17  | 163 | 242 | 2  |
| CONTIG-026521 | 61  | 8   | 13  | 3   | 0  |
| CONTIG-026525 | 243 | 39  | 59  | 132 | 6  |
| CONTIG-026526 | 236 | 16  | 99  | 126 | 0  |
| CONTIG-026529 | 119 | 13  | 51  | 37  | 0  |
| CONTIG-026530 | 248 | 9   | 95  | 57  | 0  |
| CONTIG-026531 | 332 | 16  | 57  | 175 | 0  |
| CONTIG-026536 | 75  | 6   | 9   | 8   | 0  |
| CONTIG-026537 | 85  | 40  | 6   | 176 | 0  |
| CONTIG-026538 | 157 | 25  | 27  | 165 | 0  |
| CONTIG-026539 | 318 | 7   | 16  | 79  | 0  |
| CONTIG-026540 | 192 | 14  | 24  | 85  | 0  |
| CONTIG-026541 | 345 | 17  | 11  | 128 | 8  |
| CONTIG-026544 | 400 | 9   | 40  | 104 | 3  |
| CONTIG-026545 | 69  | 6   | 5   | 17  | 0  |
| CONTIG-026546 | 690 | 19  | 9   | 22  | 0  |
| CONTIG-026547 | 63  | 18  | 12  | 48  | 0  |
| CONTIG-026548 | 115 | 16  | 34  | 41  | 0  |
| CONTIG-026549 | 147 | 7   | 5   | 15  | 0  |
| CONTIG-026550 | 86  | 9   | 18  | 11  | 0  |
| CONTIG-026551 | 354 | 9   | 2   | 142 | 0  |
| CONTIG-026552 | 587 | 10  | 12  | 165 | 2  |

|               |     |     |     |     |   |
|---------------|-----|-----|-----|-----|---|
| CONTIG-026557 | 63  | 7   | 0   | 23  | 0 |
| CONTIG-026558 | 100 | 15  | 10  | 34  | 0 |
| CONTIG-026563 | 162 | 13  | 16  | 58  | 0 |
| CONTIG-026564 | 111 | 5   | 9   | 6   | 0 |
| CONTIG-026565 | 80  | 4   | 25  | 2   | 0 |
| CONTIG-026575 | 125 | 12  | 35  | 25  | 0 |
| CONTIG-026579 | 61  | 27  | 2   | 41  | 0 |
| CONTIG-026580 | 70  | 4   | 7   | 2   | 0 |
| CONTIG-026581 | 101 | 5   | 4   | 22  | 0 |
| CONTIG-026582 | 44  | 129 | 120 | 26  | 4 |
| CONTIG-026583 | 197 | 10  | 64  | 15  | 0 |
| CONTIG-026587 | 62  | 11  | 15  | 27  | 0 |
| CONTIG-026588 | 186 | 10  | 29  | 48  | 0 |
| CONTIG-026589 | 163 | 14  | 81  | 48  | 0 |
| CONTIG-026590 | 116 | 23  | 137 | 2   | 0 |
| CONTIG-026591 | 48  | 30  | 92  | 22  | 0 |
| CONTIG-026592 | 65  | 5   | 3   | 0   | 0 |
| CONTIG-026593 | 335 | 21  | 48  | 234 | 2 |
| CONTIG-026594 | 122 | 78  | 617 | 19  | 0 |
| CONTIG-026595 | 184 | 9   | 14  | 43  | 0 |
| CONTIG-026596 | 121 | 17  | 34  | 25  | 0 |
| CONTIG-026597 | 75  | 8   | 27  | 16  | 0 |
| CONTIG-026598 | 406 | 17  | 10  | 303 | 0 |
| CONTIG-026599 | 265 | 18  | 102 | 137 | 0 |
| CONTIG-026600 | 273 | 11  | 69  | 90  | 0 |
| CONTIG-026601 | 101 | 7   | 11  | 9   | 0 |
| CONTIG-026605 | 67  | 6   | 7   | 7   | 0 |
| CONTIG-026606 | 467 | 10  | 27  | 73  | 0 |
| CONTIG-026607 | 643 | 9   | 6   | 72  | 2 |
| CONTIG-026608 | 111 | 32  | 159 | 54  | 0 |
| CONTIG-026609 | 235 | 36  | 115 | 315 | 4 |
| CONTIG-026610 | 107 | 18  | 80  | 6   | 0 |
| CONTIG-026611 | 284 | 14  | 22  | 124 | 5 |
| CONTIG-026612 | 198 | 8   | 7   | 50  | 0 |
| CONTIG-026615 | 77  | 6   | 5   | 12  | 0 |
| CONTIG-026616 | 270 | 18  | 55  | 218 | 0 |
| CONTIG-026617 | 136 | 8   | 19  | 19  | 0 |
| CONTIG-026618 | 166 | 100 | 56  | 505 | 9 |
| CONTIG-026619 | 97  | 5   | 2   | 10  | 0 |
| CONTIG-026620 | 295 | 20  | 65  | 282 | 0 |
| CONTIG-026622 | 49  | 41  | 58  | 20  | 0 |
| CONTIG-026623 | 78  | 12  | 23  | 23  | 0 |
| CONTIG-026624 | 511 | 12  | 107 | 95  | 0 |
| CONTIG-026625 | 746 | 17  | 81  | 358 | 2 |
| CONTIG-026626 | 120 | 5   | 7   | 11  | 0 |
| CONTIG-026627 | 276 | 12  | 76  | 79  | 0 |
| CONTIG-026628 | 71  | 20  | 48  | 34  | 0 |

|               |      |     |     |      |     |
|---------------|------|-----|-----|------|-----|
| CONTIG-026629 | 160  | 14  | 5   | 111  | 0   |
| CONTIG-026630 | 523  | 42  | 187 | 852  | 14  |
| CONTIG-026631 | 89   | 6   | 5   | 4    | 0   |
| CONTIG-026632 | 143  | 9   | 33  | 24   | 3   |
| CONTIG-026633 | 39   | 532 | 242 | 260  | 28  |
| CONTIG-026634 | 144  | 3   | 3   | 6    | 0   |
| CONTIG-026635 | 669  | 30  | 52  | 719  | 2   |
| CONTIG-026636 | 142  | 22  | 86  | 84   | 0   |
| CONTIG-026638 | 62   | 39  | 29  | 0    | 6   |
| CONTIG-026639 | 821  | 25  | 81  | 681  | 2   |
| CONTIG-026640 | 1290 | 38  | 71  | 2125 | 12  |
| CONTIG-026641 | 136  | 4   | 14  | 11   | 0   |
| CONTIG-026642 | 93   | 19  | 9   | 90   | 0   |
| CONTIG-026643 | 112  | 8   | 10  | 22   | 0   |
| CONTIG-026645 | 133  | 15  | 103 | 40   | 0   |
| CONTIG-026646 | 206  | 161 | 0   | 0    | 341 |
| CONTIG-026647 | 106  | 9   | 53  | 0    | 6   |
| CONTIG-026648 | 1634 | 18  | 107 | 922  | 38  |
| CONTIG-026649 | 357  | 10  | 112 | 47   | 0   |
| CONTIG-026650 | 323  | 22  | 89  | 250  | 0   |
| CONTIG-026651 | 375  | 13  | 61  | 156  | 0   |
| CONTIG-026652 | 247  | 15  | 126 | 106  | 0   |
| CONTIG-026653 | 135  | 13  | 34  | 21   | 0   |
| CONTIG-026654 | 88   | 7   | 7   | 13   | 2   |
| CONTIG-026655 | 712  | 22  | 117 | 522  | 0   |
| CONTIG-026656 | 332  | 16  | 32  | 199  | 6   |
| CONTIG-026657 | 175  | 12  | 13  | 41   | 0   |
| CONTIG-026658 | 241  | 4   | 11  | 23   | 2   |
| CONTIG-026659 | 100  | 6   | 6   | 15   | 0   |
| CONTIG-026660 | 66   | 13  | 17  | 20   | 0   |
| CONTIG-026661 | 155  | 11  | 47  | 45   | 2   |
| CONTIG-026662 | 70   | 14  | 3   | 0    | 0   |
| CONTIG-026663 | 256  | 10  | 18  | 89   | 0   |
| CONTIG-026664 | 386  | 22  | 112 | 147  | 0   |
| CONTIG-026665 | 38   | 298 | 29  | 91   | 0   |
| CONTIG-026666 | 79   | 6   | 5   | 16   | 0   |
| CONTIG-026667 | 60   | 29  | 16  | 0    | 0   |
| CONTIG-026668 | 60   | 13  | 47  | 6    | 0   |
| CONTIG-026669 | 88   | 13  | 38  | 22   | 2   |
| CONTIG-026670 | 92   | 20  | 32  | 30   | 0   |
| CONTIG-026671 | 359  | 11  | 3   | 143  | 6   |
| CONTIG-026672 | 172  | 155 | 5   | 1004 | 11  |
| CONTIG-026673 | 309  | 13  | 20  | 62   | 0   |
| CONTIG-026674 | 319  | 8   | 12  | 60   | 0   |
| CONTIG-026675 | 182  | 11  | 8   | 42   | 0   |
| CONTIG-026676 | 170  | 11  | 39  | 40   | 0   |
| CONTIG-026677 | 613  | 12  | 39  | 269  | 0   |

|               |     |    |     |      |     |
|---------------|-----|----|-----|------|-----|
| CONTIG-026678 | 129 | 7  | 8   | 23   | 0   |
| CONTIG-026679 | 166 | 5  | 2   | 18   | 0   |
| CONTIG-026680 | 79  | 7  | 0   | 21   | 0   |
| CONTIG-026682 | 212 | 4  | 5   | 8    | 0   |
| CONTIG-026683 | 128 | 12 | 18  | 34   | 0   |
| CONTIG-026684 | 274 | 17 | 85  | 191  | 0   |
| CONTIG-026685 | 74  | 15 | 7   | 28   | 0   |
| CONTIG-026686 | 61  | 4  | 5   | 2    | 0   |
| CONTIG-026687 | 142 | 7  | 4   | 17   | 0   |
| CONTIG-026689 | 209 | 13 | 37  | 78   | 4   |
| CONTIG-026690 | 87  | 5  | 0   | 12   | 0   |
| CONTIG-026691 | 214 | 14 | 29  | 110  | 0   |
| CONTIG-026692 | 442 | 21 | 97  | 324  | 0   |
| CONTIG-026693 | 428 | 10 | 71  | 84   | 0   |
| CONTIG-026694 | 580 | 11 | 37  | 147  | 0   |
| CONTIG-026695 | 166 | 9  | 14  | 27   | 0   |
| CONTIG-026696 | 75  | 7  | 11  | 0    | 0   |
| CONTIG-026697 | 839 | 62 | 0   | 0    | 320 |
| CONTIG-026698 | 403 | 17 | 93  | 199  | 0   |
| CONTIG-026699 | 164 | 21 | 118 | 83   | 0   |
| CONTIG-026700 | 70  | 10 | 39  | 0    | 0   |
| CONTIG-026701 | 566 | 16 | 60  | 259  | 6   |
| CONTIG-026702 | 301 | 8  | 9   | 47   | 2   |
| CONTIG-026703 | 187 | 10 | 26  | 61   | 0   |
| CONTIG-026704 | 120 | 14 | 69  | 25   | 0   |
| CONTIG-026705 | 137 | 5  | 2   | 10   | 0   |
| CONTIG-026706 | 362 | 18 | 197 | 161  | 2   |
| CONTIG-026707 | 107 | 67 | 17  | 130  | 0   |
| CONTIG-026708 | 301 | 10 | 50  | 43   | 3   |
| CONTIG-026709 | 157 | 12 | 21  | 71   | 0   |
| CONTIG-026710 | 389 | 17 | 68  | 269  | 0   |
| CONTIG-026711 | 213 | 14 | 40  | 72   | 0   |
| CONTIG-026712 | 109 | 64 | 64  | 145  | 4   |
| CONTIG-026713 | 142 | 4  | 3   | 7    | 0   |
| CONTIG-026714 | 207 | 10 | 5   | 34   | 0   |
| CONTIG-026715 | 102 | 7  | 11  | 17   | 0   |
| CONTIG-026716 | 90  | 12 | 49  | 11   | 0   |
| CONTIG-026717 | 141 | 7  | 4   | 24   | 0   |
| CONTIG-026718 | 72  | 3  | 0   | 15   | 0   |
| CONTIG-026719 | 713 | 16 | 23  | 498  | 3   |
| CONTIG-026720 | 255 | 10 | 48  | 69   | 0   |
| CONTIG-026721 | 129 | 5  | 8   | 4    | 0   |
| CONTIG-026722 | 686 | 16 | 88  | 327  | 2   |
| CONTIG-026723 | 90  | 16 | 26  | 36   | 0   |
| CONTIG-026724 | 434 | 52 | 147 | 1337 | 0   |
| CONTIG-026725 | 605 | 14 | 14  | 478  | 0   |
| CONTIG-026726 | 456 | 27 | 71  | 555  | 0   |

|               |      |     |     |      |    |
|---------------|------|-----|-----|------|----|
| CONTIG-026727 | 280  | 13  | 25  | 199  | 0  |
| CONTIG-026728 | 651  | 35  | 177 | 728  | 16 |
| CONTIG-026729 | 150  | 9   | 28  | 39   | 0  |
| CONTIG-026730 | 473  | 54  | 25  | 898  | 15 |
| CONTIG-026731 | 52   | 121 | 64  | 37   | 0  |
| CONTIG-026732 | 261  | 14  | 62  | 94   | 0  |
| CONTIG-026733 | 496  | 19  | 19  | 287  | 0  |
| CONTIG-026734 | 133  | 13  | 2   | 17   | 2  |
| CONTIG-026735 | 175  | 9   | 19  | 55   | 0  |
| CONTIG-026736 | 111  | 10  | 10  | 33   | 0  |
| CONTIG-026737 | 214  | 14  | 77  | 61   | 0  |
| CONTIG-026738 | 231  | 24  | 111 | 85   | 0  |
| CONTIG-026739 | 260  | 7   | 11  | 10   | 0  |
| CONTIG-026740 | 204  | 21  | 25  | 21   | 0  |
| CONTIG-026741 | 75   | 5   | 5   | 6    | 0  |
| CONTIG-026742 | 72   | 62  | 7   | 112  | 0  |
| CONTIG-026746 | 101  | 7   | 16  | 13   | 0  |
| CONTIG-026747 | 153  | 10  | 21  | 22   | 0  |
| CONTIG-026749 | 117  | 9   | 6   | 42   | 0  |
| CONTIG-026751 | 131  | 13  | 12  | 54   | 0  |
| CONTIG-026752 | 387  | 20  | 80  | 362  | 0  |
| CONTIG-026756 | 75   | 8   | 9   | 11   | 0  |
| CONTIG-026757 | 1010 | 38  | 195 | 1382 | 46 |
| CONTIG-026758 | 537  | 27  | 75  | 363  | 13 |
| CONTIG-026759 | 239  | 14  | 20  | 82   | 0  |
| CONTIG-026761 | 182  | 19  | 14  | 113  | 2  |
| CONTIG-026762 | 67   | 22  | 40  | 34   | 0  |
| CONTIG-026763 | 97   | 10  | 8   | 25   | 0  |
| CONTIG-026764 | 1199 | 22  | 40  | 929  | 14 |
| CONTIG-026765 | 77   | 12  | 47  | 5    | 0  |
| CONTIG-026770 | 399  | 14  | 88  | 144  | 0  |
| CONTIG-026771 | 781  | 16  | 57  | 623  | 2  |
| CONTIG-026772 | 92   | 6   | 4   | 4    | 0  |
| CONTIG-026773 | 89   | 10  | 39  | 0    | 0  |
| CONTIG-026780 | 445  | 9   | 18  | 138  | 0  |
| CONTIG-026781 | 195  | 18  | 34  | 98   | 2  |
| CONTIG-026782 | 101  | 12  | 35  | 9    | 0  |
| CONTIG-026783 | 262  | 20  | 109 | 95   | 0  |
| CONTIG-026787 | 79   | 19  | 118 | 3    | 0  |
| CONTIG-026788 | 106  | 6   | 8   | 21   | 0  |
| CONTIG-026789 | 96   | 7   | 10  | 18   | 0  |
| CONTIG-026790 | 193  | 5   | 3   | 27   | 0  |
| CONTIG-026791 | 215  | 10  | 9   | 91   | 0  |
| CONTIG-026792 | 305  | 19  | 280 | 26   | 2  |
| CONTIG-026793 | 114  | 6   | 11  | 8    | 0  |
| CONTIG-026794 | 96   | 4   | 3   | 10   | 0  |
| CONTIG-026795 | 169  | 12  | 4   | 35   | 0  |

|               |     |    |     |     |    |
|---------------|-----|----|-----|-----|----|
| CONTIG-026796 | 165 | 7  | 0   | 27  | 0  |
| CONTIG-026797 | 484 | 25 | 46  | 67  | 0  |
| CONTIG-026798 | 164 | 8  | 38  | 33  | 0  |
| CONTIG-026799 | 683 | 16 | 37  | 530 | 0  |
| CONTIG-026800 | 160 | 13 | 0   | 111 | 0  |
| CONTIG-026801 | 384 | 47 | 4   | 2   | 0  |
| CONTIG-026802 | 84  | 4  | 7   | 10  | 0  |
| CONTIG-026803 | 262 | 9  | 35  | 55  | 0  |
| CONTIG-026804 | 145 | 5  | 0   | 22  | 0  |
| CONTIG-026805 | 73  | 8  | 40  | 0   | 0  |
| CONTIG-026806 | 134 | 4  | 14  | 12  | 0  |
| CONTIG-026809 | 67  | 5  | 5   | 6   | 0  |
| CONTIG-026816 | 78  | 6  | 8   | 14  | 0  |
| CONTIG-026817 | 141 | 5  | 4   | 19  | 0  |
| CONTIG-026818 | 350 | 10 | 18  | 119 | 0  |
| CONTIG-026819 | 146 | 14 | 0   | 80  | 0  |
| CONTIG-026820 | 225 | 4  | 9   | 28  | 0  |
| CONTIG-026821 | 702 | 23 | 126 | 436 | 33 |
| CONTIG-026822 | 296 | 5  | 26  | 0   | 0  |
| CONTIG-026829 | 213 | 11 | 20  | 68  | 0  |
| CONTIG-026830 | 162 | 4  | 3   | 20  | 2  |
| CONTIG-026831 | 755 | 24 | 65  | 463 | 20 |
| CONTIG-026833 | 59  | 14 | 4   | 9   | 0  |
| CONTIG-026834 | 145 | 11 | 78  | 4   | 0  |
| CONTIG-026835 | 66  | 3  | 5   | 2   | 0  |
| CONTIG-026836 | 285 | 13 | 9   | 121 | 0  |
| CONTIG-026837 | 174 | 13 | 20  | 73  | 0  |
| CONTIG-026838 | 154 | 6  | 16  | 25  | 0  |
| CONTIG-026839 | 69  | 3  | 6   | 0   | 0  |
| CONTIG-026840 | 284 | 13 | 8   | 180 | 2  |
| CONTIG-026841 | 128 | 4  | 2   | 16  | 0  |
| CONTIG-026842 | 77  | 9  | 21  | 7   | 0  |
| CONTIG-026843 | 294 | 10 | 45  | 123 | 0  |
| CONTIG-026844 | 58  | 13 | 23  | 25  | 0  |
| CONTIG-026845 | 165 | 45 | 79  | 117 | 0  |
| CONTIG-026846 | 301 | 11 | 126 | 47  | 0  |
| CONTIG-026847 | 138 | 19 | 46  | 36  | 0  |
| CONTIG-026848 | 359 | 26 | 37  | 117 | 0  |
| CONTIG-026849 | 87  | 5  | 2   | 11  | 0  |
| CONTIG-026850 | 375 | 11 | 31  | 166 | 4  |
| CONTIG-026851 | 83  | 17 | 44  | 11  | 0  |
| CONTIG-026853 | 229 | 5  | 7   | 31  | 0  |
| CONTIG-026854 | 280 | 14 | 9   | 127 | 2  |
| CONTIG-026855 | 155 | 48 | 117 | 82  | 2  |
| CONTIG-026856 | 164 | 16 | 12  | 80  | 3  |
| CONTIG-026857 | 59  | 7  | 7   | 7   | 0  |
| CONTIG-026858 | 211 | 11 | 185 | 23  | 0  |



|               |      |    |     |      |    |
|---------------|------|----|-----|------|----|
| CONTIG-026861 | 80   | 44 | 49  | 109  | 0  |
| CONTIG-026862 | 107  | 8  | 27  | 8    | 0  |
| CONTIG-026863 | 219  | 10 | 9   | 66   | 2  |
| CONTIG-026864 | 254  | 5  | 6   | 35   | 0  |
| CONTIG-026865 | 151  | 10 | 55  | 52   | 0  |
| CONTIG-026866 | 324  | 23 | 27  | 145  | 0  |
| CONTIG-026867 | 154  | 6  | 16  | 25   | 0  |
| CONTIG-026868 | 70   | 8  | 12  | 10   | 0  |
| CONTIG-026869 | 109  | 6  | 4   | 5    | 0  |
| CONTIG-026870 | 829  | 72 | 163 | 2809 | 6  |
| CONTIG-026871 | 418  | 26 | 95  | 228  | 8  |
| CONTIG-026872 | 146  | 14 | 21  | 75   | 0  |
| CONTIG-026873 | 164  | 36 | 25  | 188  | 8  |
| CONTIG-026874 | 371  | 18 | 21  | 260  | 0  |
| CONTIG-026875 | 278  | 10 | 23  | 49   | 2  |
| CONTIG-026876 | 212  | 7  | 10  | 50   | 0  |
| CONTIG-026877 | 65   | 35 | 54  | 35   | 0  |
| CONTIG-026878 | 309  | 6  | 11  | 37   | 0  |
| CONTIG-026879 | 216  | 15 | 70  | 107  | 0  |
| CONTIG-026880 | 330  | 10 | 55  | 100  | 0  |
| CONTIG-026881 | 242  | 14 | 4   | 106  | 2  |
| CONTIG-026882 | 355  | 17 | 18  | 273  | 2  |
| CONTIG-026883 | 79   | 7  | 15  | 9    | 0  |
| CONTIG-026884 | 287  | 6  | 16  | 41   | 0  |
| CONTIG-026885 | 380  | 13 | 8   | 136  | 0  |
| CONTIG-026886 | 238  | 84 | 280 | 220  | 77 |
| CONTIG-026887 | 110  | 5  | 6   | 18   | 0  |
| CONTIG-026893 | 65   | 7  | 18  | 2    | 0  |
| CONTIG-026895 | 184  | 9  | 12  | 57   | 0  |
| CONTIG-026897 | 259  | 13 | 45  | 26   | 0  |
| CONTIG-026898 | 89   | 5  | 0   | 6    | 0  |
| CONTIG-026899 | 376  | 10 | 14  | 171  | 0  |
| CONTIG-026900 | 609  | 14 | 55  | 331  | 0  |
| CONTIG-026901 | 448  | 12 | 113 | 101  | 0  |
| CONTIG-026902 | 63   | 8  | 9   | 2    | 0  |
| CONTIG-026903 | 796  | 30 | 66  | 545  | 12 |
| CONTIG-026904 | 1522 | 54 | 140 | 1781 | 29 |
| CONTIG-026905 | 171  | 19 | 81  | 61   | 2  |
| CONTIG-026906 | 45   | 7  | 4   | 7    | 0  |
| CONTIG-026907 | 324  | 9  | 22  | 102  | 0  |
| CONTIG-026908 | 113  | 16 | 9   | 59   | 0  |
| CONTIG-026909 | 445  | 22 | 70  | 437  | 0  |
| CONTIG-026910 | 151  | 10 | 7   | 36   | 8  |
| CONTIG-026911 | 1149 | 17 | 156 | 672  | 0  |
| CONTIG-026912 | 192  | 9  | 35  | 39   | 4  |
| CONTIG-026913 | 521  | 15 | 64  | 152  | 0  |
| CONTIG-026914 | 664  | 13 | 46  | 367  | 5  |

|               |      |     |     |      |    |
|---------------|------|-----|-----|------|----|
| CONTIG-026916 | 255  | 8   | 10  | 62   | 2  |
| CONTIG-026917 | 456  | 15  | 43  | 183  | 0  |
| CONTIG-026918 | 328  | 13  | 7   | 100  | 2  |
| CONTIG-026920 | 151  | 216 | 23  | 1146 | 0  |
| CONTIG-026921 | 92   | 6   | 0   | 13   | 0  |
| CONTIG-026922 | 96   | 6   | 21  | 4    | 0  |
| CONTIG-026923 | 90   | 4   | 2   | 15   | 0  |
| CONTIG-026924 | 102  | 3   | 6   | 4    | 0  |
| CONTIG-026925 | 118  | 9   | 15  | 26   | 0  |
| CONTIG-026926 | 503  | 21  | 71  | 405  | 2  |
| CONTIG-026927 | 386  | 21  | 108 | 327  | 0  |
| CONTIG-026928 | 60   | 5   | 2   | 0    | 0  |
| CONTIG-026929 | 137  | 6   | 55  | 4    | 0  |
| CONTIG-026930 | 528  | 17  | 112 | 234  | 8  |
| CONTIG-026933 | 109  | 7   | 16  | 14   | 0  |
| CONTIG-026934 | 212  | 54  | 122 | 505  | 0  |
| CONTIG-026936 | 282  | 7   | 24  | 39   | 0  |
| CONTIG-026938 | 86   | 6   | 0   | 7    | 0  |
| CONTIG-026939 | 101  | 46  | 20  | 77   | 0  |
| CONTIG-026940 | 41   | 78  | 11  | 96   | 2  |
| CONTIG-026941 | 373  | 17  | 51  | 83   | 5  |
| CONTIG-026942 | 226  | 8   | 47  | 45   | 0  |
| CONTIG-026943 | 124  | 4   | 5   | 3    | 0  |
| CONTIG-026944 | 173  | 6   | 11  | 29   | 0  |
| CONTIG-026945 | 325  | 12  | 45  | 84   | 0  |
| CONTIG-026946 | 143  | 11  | 17  | 52   | 0  |
| CONTIG-026947 | 1816 | 26  | 64  | 1542 | 59 |
| CONTIG-026948 | 86   | 44  | 300 | 2    | 0  |
| CONTIG-026949 | 122  | 13  | 60  | 22   | 0  |
| CONTIG-026951 | 186  | 15  | 29  | 83   | 2  |
| CONTIG-026953 | 276  | 16  | 79  | 87   | 2  |
| CONTIG-026954 | 58   | 10  | 2   | 10   | 0  |
| CONTIG-026955 | 1224 | 11  | 72  | 558  | 2  |
| CONTIG-026956 | 229  | 5   | 4   | 26   | 0  |
| CONTIG-026957 | 104  | 16  | 95  | 23   | 0  |
| CONTIG-026958 | 172  | 9   | 51  | 21   | 0  |
| CONTIG-026961 | 177  | 13  | 37  | 7    | 0  |
| CONTIG-026962 | 217  | 7   | 11  | 29   | 0  |
| CONTIG-026967 | 257  | 20  | 27  | 65   | 0  |
| CONTIG-026968 | 283  | 7   | 12  | 66   | 0  |
| CONTIG-026969 | 319  | 12  | 8   | 59   | 0  |
| CONTIG-026970 | 76   | 20  | 27  | 35   | 0  |
| CONTIG-026971 | 60   | 3   | 0   | 2    | 0  |
| CONTIG-026972 | 131  | 7   | 19  | 2    | 0  |
| CONTIG-026973 | 152  | 7   | 6   | 25   | 0  |
| CONTIG-026974 | 92   | 5   | 5   | 18   | 0  |
| CONTIG-026975 | 67   | 11  | 3   | 17   | 2  |

|               |      |     |     |      |    |
|---------------|------|-----|-----|------|----|
| CONTIG-026976 | 255  | 15  | 59  | 154  | 0  |
| CONTIG-026979 | 96   | 8   | 39  | 13   | 0  |
| CONTIG-026980 | 321  | 179 | 84  | 1909 | 62 |
| CONTIG-026981 | 665  | 27  | 121 | 366  | 6  |
| CONTIG-026982 | 488  | 18  | 44  | 290  | 0  |
| CONTIG-026983 | 119  | 19  | 32  | 99   | 0  |
| CONTIG-026984 | 100  | 11  | 2   | 47   | 0  |
| CONTIG-026985 | 356  | 26  | 16  | 309  | 14 |
| CONTIG-026987 | 134  | 17  | 43  | 38   | 2  |
| CONTIG-026989 | 94   | 10  | 15  | 13   | 0  |
| CONTIG-026990 | 891  | 16  | 35  | 640  | 2  |
| CONTIG-026994 | 108  | 7   | 26  | 7    | 0  |
| CONTIG-026995 | 215  | 16  | 78  | 83   | 0  |
| CONTIG-026996 | 105  | 13  | 56  | 17   | 0  |
| CONTIG-026997 | 110  | 16  | 29  | 29   | 0  |
| CONTIG-026998 | 263  | 7   | 16  | 43   | 0  |
| CONTIG-026999 | 122  | 6   | 0   | 12   | 0  |
| CONTIG-027000 | 334  | 8   | 9   | 52   | 0  |
| CONTIG-027001 | 522  | 19  | 26  | 295  | 8  |
| CONTIG-027002 | 243  | 11  | 5   | 83   | 0  |
| CONTIG-027003 | 376  | 14  | 39  | 138  | 0  |
| CONTIG-027006 | 210  | 3   | 6   | 11   | 0  |
| CONTIG-027007 | 467  | 10  | 9   | 62   | 9  |
| CONTIG-027008 | 95   | 8   | 6   | 18   | 0  |
| CONTIG-027009 | 492  | 13  | 69  | 165  | 4  |
| CONTIG-027010 | 216  | 19  | 77  | 93   | 2  |
| CONTIG-027011 | 297  | 11  | 6   | 79   | 0  |
| CONTIG-027019 | 272  | 9   | 23  | 41   | 0  |
| CONTIG-027020 | 91   | 13  | 18  | 15   | 0  |
| CONTIG-027021 | 1158 | 11  | 150 | 394  | 0  |
| CONTIG-027022 | 134  | 22  | 74  | 100  | 2  |
| CONTIG-027023 | 691  | 12  | 76  | 349  | 0  |
| CONTIG-027024 | 63   | 4   | 0   | 6    | 0  |
| CONTIG-027025 | 485  | 9   | 21  | 80   | 2  |
| CONTIG-027026 | 399  | 13  | 17  | 219  | 0  |
| CONTIG-027027 | 315  | 23  | 77  | 162  | 0  |
| CONTIG-027029 | 214  | 8   | 22  | 73   | 0  |
| CONTIG-027030 | 176  | 30  | 60  | 113  | 0  |
| CONTIG-027032 | 391  | 16  | 21  | 217  | 4  |
| CONTIG-027033 | 76   | 7   | 9   | 17   | 0  |
| CONTIG-027034 | 182  | 7   | 5   | 35   | 0  |
| CONTIG-027035 | 157  | 5   | 0   | 26   | 0  |
| CONTIG-027036 | 128  | 10  | 8   | 75   | 0  |
| CONTIG-027037 | 265  | 13  | 29  | 111  | 0  |
| CONTIG-027038 | 68   | 22  | 79  | 0    | 0  |
| CONTIG-027039 | 60   | 13  | 0   | 2    | 0  |
| CONTIG-027040 | 151  | 6   | 10  | 33   | 0  |

|               |      |     |     |     |    |
|---------------|------|-----|-----|-----|----|
| CONTIG-027041 | 222  | 9   | 9   | 64  | 0  |
| CONTIG-027042 | 129  | 27  | 48  | 0   | 29 |
| CONTIG-027043 | 354  | 8   | 12  | 110 | 2  |
| CONTIG-027046 | 83   | 48  | 6   | 198 | 0  |
| CONTIG-027049 | 653  | 7   | 5   | 66  | 0  |
| CONTIG-027050 | 591  | 16  | 42  | 352 | 0  |
| CONTIG-027051 | 70   | 10  | 17  | 11  | 0  |
| CONTIG-027052 | 112  | 4   | 2   | 5   | 0  |
| CONTIG-027054 | 158  | 21  | 63  | 48  | 0  |
| CONTIG-027055 | 126  | 4   | 9   | 2   | 0  |
| CONTIG-027056 | 402  | 14  | 55  | 295 | 0  |
| CONTIG-027057 | 892  | 17  | 39  | 293 | 0  |
| CONTIG-027058 | 313  | 7   | 8   | 77  | 0  |
| CONTIG-027059 | 82   | 9   | 6   | 6   | 0  |
| CONTIG-027060 | 140  | 12  | 32  | 14  | 0  |
| CONTIG-027061 | 297  | 16  | 65  | 118 | 0  |
| CONTIG-027062 | 91   | 6   | 0   | 21  | 0  |
| CONTIG-027063 | 273  | 18  | 33  | 143 | 0  |
| CONTIG-027064 | 473  | 10  | 15  | 104 | 4  |
| CONTIG-027065 | 192  | 16  | 24  | 73  | 2  |
| CONTIG-027066 | 153  | 8   | 23  | 24  | 0  |
| CONTIG-027067 | 833  | 20  | 51  | 416 | 0  |
| CONTIG-027068 | 558  | 23  | 155 | 382 | 0  |
| CONTIG-027069 | 150  | 7   | 22  | 38  | 0  |
| CONTIG-027072 | 167  | 7   | 4   | 13  | 0  |
| CONTIG-027073 | 630  | 14  | 41  | 304 | 0  |
| CONTIG-027074 | 756  | 20  | 156 | 275 | 17 |
| CONTIG-027075 | 220  | 10  | 9   | 50  | 2  |
| CONTIG-027076 | 546  | 27  | 118 | 185 | 4  |
| CONTIG-027077 | 333  | 15  | 19  | 144 | 2  |
| CONTIG-027078 | 249  | 24  | 66  | 115 | 0  |
| CONTIG-027079 | 113  | 5   | 22  | 2   | 0  |
| CONTIG-027080 | 279  | 15  | 31  | 167 | 8  |
| CONTIG-027081 | 1528 | 17  | 49  | 719 | 4  |
| CONTIG-027082 | 101  | 15  | 62  | 38  | 0  |
| CONTIG-027083 | 196  | 10  | 11  | 52  | 0  |
| CONTIG-027084 | 82   | 335 | 100 | 987 | 9  |
| CONTIG-027086 | 212  | 32  | 48  | 305 | 0  |
| CONTIG-027087 | 215  | 7   | 23  | 37  | 0  |
| CONTIG-027088 | 58   | 9   | 9   | 21  | 0  |
| CONTIG-027089 | 286  | 12  | 99  | 61  | 0  |
| CONTIG-027090 | 176  | 10  | 30  | 43  | 0  |
| CONTIG-027098 | 105  | 7   | 15  | 14  | 0  |
| CONTIG-027099 | 179  | 9   | 7   | 62  | 0  |
| CONTIG-027100 | 495  | 22  | 94  | 281 | 4  |
| CONTIG-027101 | 74   | 8   | 19  | 0   | 0  |
| CONTIG-027102 | 116  | 7   | 38  | 20  | 0  |

|               |     |     |     |      |    |
|---------------|-----|-----|-----|------|----|
| CONTIG-027103 | 68  | 4   | 16  | 2    | 0  |
| CONTIG-027104 | 91  | 8   | 10  | 15   | 0  |
| CONTIG-027105 | 512 | 38  | 255 | 756  | 8  |
| CONTIG-027106 | 150 | 5   | 13  | 14   | 0  |
| CONTIG-027107 | 422 | 26  | 22  | 421  | 2  |
| CONTIG-027108 | 371 | 21  | 45  | 291  | 2  |
| CONTIG-027109 | 242 | 9   | 14  | 84   | 0  |
| CONTIG-027110 | 186 | 15  | 62  | 44   | 0  |
| CONTIG-027111 | 87  | 4   | 0   | 9    | 0  |
| CONTIG-027112 | 331 | 8   | 12  | 90   | 2  |
| CONTIG-027113 | 62  | 4   | 0   | 6    | 0  |
| CONTIG-027114 | 93  | 6   | 0   | 17   | 0  |
| CONTIG-027115 | 457 | 26  | 56  | 560  | 2  |
| CONTIG-027116 | 671 | 24  | 94  | 756  | 2  |
| CONTIG-027117 | 193 | 6   | 13  | 25   | 0  |
| CONTIG-027118 | 322 | 12  | 35  | 108  | 0  |
| CONTIG-027119 | 350 | 15  | 61  | 196  | 0  |
| CONTIG-027120 | 170 | 10  | 10  | 50   | 0  |
| CONTIG-027121 | 87  | 10  | 19  | 27   | 0  |
| CONTIG-027122 | 91  | 45  | 51  | 105  | 2  |
| CONTIG-027123 | 73  | 4   | 3   | 4    | 0  |
| CONTIG-027124 | 413 | 20  | 7   | 208  | 4  |
| CONTIG-027125 | 83  | 23  | 16  | 47   | 0  |
| CONTIG-027126 | 175 | 18  | 35  | 97   | 0  |
| CONTIG-027138 | 208 | 62  | 81  | 315  | 58 |
| CONTIG-027139 | 119 | 9   | 6   | 6    | 0  |
| CONTIG-027140 | 345 | 27  | 25  | 379  | 0  |
| CONTIG-027141 | 107 | 118 | 31  | 326  | 16 |
| CONTIG-027143 | 145 | 6   | 14  | 8    | 0  |
| CONTIG-027144 | 87  | 7   | 2   | 23   | 0  |
| CONTIG-027145 | 87  | 5   | 6   | 9    | 0  |
| CONTIG-027146 | 77  | 6   | 0   | 19   | 0  |
| CONTIG-027147 | 117 | 4   | 2   | 17   | 0  |
| CONTIG-027148 | 852 | 18  | 12  | 12   | 0  |
| CONTIG-027149 | 82  | 4   | 8   | 8    | 0  |
| CONTIG-027150 | 219 | 9   | 21  | 26   | 0  |
| CONTIG-027151 | 111 | 8   | 5   | 29   | 0  |
| CONTIG-027152 | 601 | 20  | 165 | 413  | 0  |
| CONTIG-027153 | 101 | 15  | 13  | 33   | 2  |
| CONTIG-027154 | 74  | 49  | 24  | 46   | 0  |
| CONTIG-027155 | 195 | 7   | 10  | 53   | 0  |
| CONTIG-027156 | 67  | 11  | 28  | 0    | 0  |
| CONTIG-027157 | 227 | 21  | 33  | 164  | 0  |
| CONTIG-027159 | 902 | 47  | 197 | 1554 | 19 |
| CONTIG-027160 | 84  | 75  | 2   | 0    | 19 |
| CONTIG-027161 | 126 | 6   | 12  | 18   | 0  |
| CONTIG-027164 | 110 | 27  | 10  | 135  | 0  |

|               |     |     |     |      |     |
|---------------|-----|-----|-----|------|-----|
| CONTIG-027165 | 748 | 119 | 105 | 5290 | 119 |
| CONTIG-027166 | 596 | 20  | 31  | 30   | 0   |
| CONTIG-027168 | 368 | 6   | 6   | 56   | 0   |
| CONTIG-027169 | 157 | 9   | 13  | 13   | 0   |
| CONTIG-027170 | 765 | 20  | 31  | 571  | 2   |
| CONTIG-027171 | 219 | 11  | 10  | 54   | 0   |
| CONTIG-027172 | 221 | 25  | 55  | 142  | 0   |
| CONTIG-027173 | 264 | 33  | 20  | 21   | 0   |
| CONTIG-027174 | 211 | 16  | 22  | 39   | 0   |
| CONTIG-027175 | 475 | 27  | 132 | 221  | 12  |
| CONTIG-027176 | 237 | 9   | 30  | 91   | 0   |
| CONTIG-027177 | 723 | 18  | 58  | 231  | 10  |
| CONTIG-027178 | 127 | 15  | 9   | 13   | 0   |
| CONTIG-027179 | 383 | 10  | 10  | 136  | 0   |
| CONTIG-027180 | 563 | 17  | 113 | 184  | 6   |
| CONTIG-027181 | 132 | 6   | 8   | 7    | 0   |
| CONTIG-027182 | 119 | 85  | 23  | 162  | 191 |
| CONTIG-027183 | 164 | 11  | 3   | 33   | 0   |
| CONTIG-027184 | 159 | 21  | 34  | 44   | 0   |
| CONTIG-027185 | 135 | 15  | 24  | 45   | 0   |
| CONTIG-027186 | 181 | 7   | 33  | 5    | 0   |
| CONTIG-027189 | 375 | 8   | 16  | 69   | 2   |
| CONTIG-027190 | 335 | 12  | 25  | 120  | 0   |
| CONTIG-027191 | 300 | 9   | 53  | 95   | 0   |
| CONTIG-027192 | 130 | 7   | 4   | 19   | 0   |
| CONTIG-027193 | 338 | 14  | 45  | 154  | 2   |
| CONTIG-027194 | 102 | 16  | 22  | 48   | 0   |
| CONTIG-027195 | 268 | 19  | 59  | 69   | 3   |
| CONTIG-027196 | 204 | 50  | 13  | 24   | 197 |
| CONTIG-027197 | 118 | 10  | 17  | 32   | 0   |
| CONTIG-027198 | 566 | 15  | 79  | 267  | 2   |
| CONTIG-027199 | 116 | 6   | 21  | 21   | 0   |
| CONTIG-027201 | 179 | 6   | 27  | 18   | 0   |
| CONTIG-027202 | 559 | 20  | 124 | 250  | 5   |
| CONTIG-027203 | 526 | 9   | 14  | 125  | 2   |
| CONTIG-027204 | 360 | 10  | 16  | 129  | 12  |
| CONTIG-027205 | 122 | 11  | 67  | 22   | 0   |
| CONTIG-027206 | 78  | 21  | 4   | 98   | 0   |
| CONTIG-027207 | 830 | 37  | 95  | 898  | 13  |
| CONTIG-027208 | 77  | 8   | 24  | 0    | 0   |
| CONTIG-027209 | 303 | 9   | 34  | 81   | 0   |
| CONTIG-027210 | 242 | 22  | 145 | 137  | 0   |
| CONTIG-027211 | 73  | 9   | 9   | 17   | 0   |
| CONTIG-027212 | 162 | 6   | 11  | 9    | 0   |
| CONTIG-027213 | 463 | 8   | 19  | 105  | 0   |
| CONTIG-027214 | 99  | 5   | 11  | 6    | 0   |
| CONTIG-027215 | 919 | 81  | 19  | 58   | 0   |

|               |     |     |     |      |    |
|---------------|-----|-----|-----|------|----|
| CONTIG-027216 | 933 | 29  | 8   | 1576 | 2  |
| CONTIG-027217 | 190 | 5   | 27  | 14   | 0  |
| CONTIG-027218 | 892 | 22  | 65  | 416  | 21 |
| CONTIG-027219 | 41  | 145 | 89  | 151  | 2  |
| CONTIG-027220 | 391 | 14  | 43  | 244  | 4  |
| CONTIG-027221 | 76  | 4   | 0   | 6    | 0  |
| CONTIG-027222 | 446 | 9   | 20  | 53   | 0  |
| CONTIG-027225 | 117 | 20  | 18  | 132  | 0  |
| CONTIG-027226 | 89  | 6   | 4   | 9    | 0  |
| CONTIG-027227 | 188 | 9   | 14  | 53   | 0  |
| CONTIG-027228 | 107 | 7   | 5   | 28   | 0  |
| CONTIG-027229 | 228 | 6   | 31  | 49   | 0  |
| CONTIG-027230 | 77  | 7   | 4   | 8    | 0  |
| CONTIG-027231 | 527 | 14  | 36  | 277  | 0  |
| CONTIG-027233 | 174 | 8   | 21  | 27   | 2  |
| CONTIG-027234 | 269 | 9   | 35  | 52   | 0  |
| CONTIG-027235 | 359 | 18  | 27  | 157  | 2  |
| CONTIG-027236 | 196 | 9   | 2   | 50   | 0  |
| CONTIG-027237 | 255 | 60  | 132 | 391  | 7  |
| CONTIG-027238 | 116 | 9   | 30  | 24   | 0  |
| CONTIG-027239 | 68  | 7   | 6   | 7    | 0  |
| CONTIG-027240 | 190 | 10  | 21  | 45   | 0  |
| CONTIG-027241 | 307 | 15  | 65  | 219  | 0  |
| CONTIG-027242 | 72  | 7   | 3   | 13   | 0  |
| CONTIG-027243 | 235 | 6   | 8   | 51   | 0  |
| CONTIG-027244 | 159 | 15  | 52  | 65   | 0  |
| CONTIG-027245 | 110 | 11  | 4   | 42   | 2  |
| CONTIG-027246 | 253 | 10  | 5   | 65   | 2  |
| CONTIG-027247 | 66  | 2   | 2   | 2    | 0  |
| CONTIG-027249 | 77  | 6   | 8   | 6    | 0  |
| CONTIG-027250 | 140 | 4   | 14  | 17   | 0  |
| CONTIG-027251 | 89  | 6   | 7   | 0    | 0  |
| CONTIG-027254 | 59  | 10  | 16  | 7    | 0  |
| CONTIG-027255 | 129 | 7   | 7   | 29   | 0  |
| CONTIG-027256 | 60  | 11  | 13  | 26   | 0  |
| CONTIG-027257 | 548 | 87  | 14  | 2795 | 6  |
| CONTIG-027263 | 299 | 15  | 141 | 51   | 0  |
| CONTIG-027264 | 86  | 5   | 0   | 7    | 0  |
| CONTIG-027265 | 187 | 9   | 0   | 37   | 2  |
| CONTIG-027266 | 271 | 18  | 80  | 132  | 2  |
| CONTIG-027267 | 151 | 74  | 75  | 440  | 2  |
| CONTIG-027268 | 71  | 12  | 6   | 26   | 0  |
| CONTIG-027269 | 61  | 10  | 4   | 2    | 0  |
| CONTIG-027270 | 81  | 5   | 2   | 8    | 0  |
| CONTIG-027271 | 65  | 6   | 2   | 11   | 2  |
| CONTIG-027272 | 810 | 46  | 96  | 1123 | 69 |
| CONTIG-027273 | 231 | 13  | 11  | 104  | 0  |

|               |     |    |     |     |   |
|---------------|-----|----|-----|-----|---|
| CONTIG-027274 | 102 | 7  | 28  | 2   | 0 |
| CONTIG-027275 | 702 | 15 | 63  | 256 | 3 |
| CONTIG-027276 | 314 | 9  | 6   | 62  | 0 |
| CONTIG-027277 | 223 | 7  | 11  | 25  | 0 |
| CONTIG-027278 | 73  | 6  | 3   | 19  | 0 |
| CONTIG-027279 | 79  | 11 | 11  | 23  | 0 |
| CONTIG-027280 | 71  | 6  | 25  | 3   | 0 |
| CONTIG-027281 | 102 | 5  | 28  | 0   | 0 |
| CONTIG-027282 | 47  | 44 | 15  | 36  | 0 |
| CONTIG-027283 | 303 | 17 | 66  | 56  | 0 |
| CONTIG-027284 | 91  | 7  | 11  | 0   | 0 |
| CONTIG-027285 | 61  | 9  | 33  | 0   | 0 |
| CONTIG-027291 | 69  | 5  | 13  | 2   | 0 |
| CONTIG-027292 | 280 | 18 | 8   | 0   | 0 |
| CONTIG-027293 | 92  | 13 | 66  | 5   | 0 |
| CONTIG-027294 | 364 | 9  | 32  | 80  | 0 |
| CONTIG-027295 | 119 | 39 | 19  | 160 | 0 |
| CONTIG-027296 | 207 | 4  | 2   | 17  | 0 |
| CONTIG-027297 | 155 | 8  | 17  | 54  | 0 |
| CONTIG-027298 | 69  | 6  | 7   | 0   | 0 |
| CONTIG-027305 | 69  | 7  | 7   | 6   | 0 |
| CONTIG-027306 | 240 | 13 | 15  | 149 | 0 |
| CONTIG-027307 | 173 | 12 | 10  | 57  | 0 |
| CONTIG-027308 | 452 | 11 | 46  | 108 | 6 |
| CONTIG-027309 | 280 | 10 | 55  | 42  | 2 |
| CONTIG-027310 | 355 | 21 | 40  | 360 | 0 |
| CONTIG-027311 | 676 | 26 | 87  | 589 | 2 |
| CONTIG-027312 | 311 | 12 | 28  | 85  | 0 |
| CONTIG-027314 | 140 | 5  | 6   | 19  | 0 |
| CONTIG-027315 | 97  | 14 | 21  | 27  | 0 |
| CONTIG-027316 | 100 | 4  | 3   | 8   | 0 |
| CONTIG-027317 | 148 | 4  | 8   | 7   | 0 |
| CONTIG-027318 | 305 | 17 | 20  | 234 | 2 |
| CONTIG-027319 | 597 | 18 | 125 | 475 | 0 |
| CONTIG-027321 | 68  | 8  | 27  | 4   | 0 |
| CONTIG-027322 | 163 | 20 | 4   | 74  | 8 |
| CONTIG-027323 | 285 | 13 | 6   | 76  | 2 |
| CONTIG-027324 | 196 | 53 | 105 | 509 | 0 |
| CONTIG-027325 | 212 | 17 | 27  | 126 | 2 |
| CONTIG-027326 | 84  | 11 | 4   | 27  | 0 |
| CONTIG-027327 | 200 | 34 | 48  | 307 | 0 |
| CONTIG-027328 | 127 | 10 | 14  | 34  | 0 |
| CONTIG-027329 | 58  | 18 | 3   | 28  | 0 |
| CONTIG-027330 | 62  | 4  | 2   | 9   | 0 |
| CONTIG-027331 | 233 | 8  | 63  | 39  | 0 |
| CONTIG-027332 | 55  | 11 | 9   | 26  | 0 |
| CONTIG-027333 | 393 | 16 | 8   | 168 | 0 |



|               |      |     |     |      |    |
|---------------|------|-----|-----|------|----|
| CONTIG-027334 | 358  | 9   | 43  | 93   | 0  |
| CONTIG-027335 | 105  | 94  | 73  | 404  | 5  |
| CONTIG-027340 | 72   | 6   | 11  | 4    | 0  |
| CONTIG-027342 | 117  | 9   | 18  | 16   | 0  |
| CONTIG-027343 | 335  | 8   | 132 | 26   | 0  |
| CONTIG-027346 | 214  | 200 | 164 | 2366 | 14 |
| CONTIG-027347 | 978  | 27  | 99  | 392  | 4  |
| CONTIG-027348 | 119  | 7   | 13  | 21   | 0  |
| CONTIG-027349 | 1218 | 30  | 2   | 0    | 25 |
| CONTIG-027350 | 313  | 17  | 22  | 233  | 0  |
| CONTIG-027351 | 145  | 11  | 36  | 2    | 0  |
| CONTIG-027352 | 189  | 12  | 75  | 56   | 0  |
| CONTIG-027353 | 132  | 4   | 15  | 8    | 0  |
| CONTIG-027354 | 120  | 8   | 25  | 19   | 0  |
| CONTIG-027355 | 360  | 22  | 84  | 319  | 0  |
| CONTIG-027356 | 74   | 6   | 11  | 5    | 0  |
| CONTIG-027357 | 1366 | 22  | 152 | 1423 | 2  |
| CONTIG-027358 | 95   | 5   | 2   | 15   | 0  |
| CONTIG-027359 | 485  | 13  | 153 | 85   | 0  |
| CONTIG-027360 | 243  | 13  | 21  | 142  | 0  |
| CONTIG-027361 | 108  | 4   | 9   | 6    | 0  |
| CONTIG-027362 | 535  | 12  | 43  | 176  | 4  |
| CONTIG-027363 | 461  | 12  | 27  | 140  | 2  |
| CONTIG-027364 | 191  | 13  | 14  | 78   | 0  |
| CONTIG-027365 | 656  | 16  | 218 | 311  | 4  |
| CONTIG-027366 | 102  | 4   | 2   | 15   | 0  |
| CONTIG-027367 | 222  | 7   | 5   | 57   | 0  |
| CONTIG-027368 | 219  | 31  | 27  | 296  | 4  |
| CONTIG-027369 | 55   | 74  | 34  | 61   | 0  |
| CONTIG-027370 | 1407 | 26  | 189 | 1427 | 36 |
| CONTIG-027371 | 574  | 9   | 17  | 51   | 3  |
| CONTIG-027372 | 263  | 14  | 48  | 112  | 0  |
| CONTIG-027373 | 71   | 35  | 45  | 0    | 0  |
| CONTIG-027374 | 252  | 11  | 42  | 17   | 0  |
| CONTIG-027375 | 88   | 5   | 22  | 9    | 0  |
| CONTIG-027377 | 58   | 8   | 11  | 0    | 0  |
| CONTIG-027378 | 346  | 27  | 37  | 230  | 3  |
| CONTIG-027379 | 189  | 8   | 18  | 26   | 0  |
| CONTIG-027380 | 435  | 10  | 23  | 110  | 0  |
| CONTIG-027381 | 166  | 11  | 10  | 77   | 0  |
| CONTIG-027382 | 593  | 14  | 64  | 361  | 2  |
| CONTIG-027383 | 115  | 8   | 5   | 18   | 0  |
| CONTIG-027384 | 108  | 7   | 8   | 27   | 0  |
| CONTIG-027385 | 138  | 10  | 3   | 55   | 0  |
| CONTIG-027386 | 72   | 14  | 10  | 0    | 0  |
| CONTIG-027387 | 78   | 72  | 18  | 236  | 2  |
| CONTIG-027388 | 126  | 17  | 20  | 74   | 0  |

|               |      |     |     |      |     |
|---------------|------|-----|-----|------|-----|
| CONTIG-027389 | 42   | 466 | 5   | 1022 | 0   |
| CONTIG-027391 | 133  | 11  | 16  | 42   | 0   |
| CONTIG-027392 | 321  | 8   | 61  | 60   | 0   |
| CONTIG-027393 | 88   | 14  | 72  | 3    | 0   |
| CONTIG-027394 | 134  | 12  | 18  | 54   | 0   |
| CONTIG-027395 | 233  | 9   | 51  | 71   | 0   |
| CONTIG-027396 | 737  | 47  | 94  | 985  | 190 |
| CONTIG-027397 | 205  | 7   | 10  | 46   | 0   |
| CONTIG-027398 | 417  | 8   | 16  | 82   | 0   |
| CONTIG-027399 | 186  | 15  | 8   | 61   | 0   |
| CONTIG-027401 | 443  | 16  | 55  | 262  | 2   |
| CONTIG-027402 | 383  | 9   | 7   | 158  | 0   |
| CONTIG-027405 | 68   | 60  | 34  | 121  | 0   |
| CONTIG-027406 | 78   | 8   | 39  | 15   | 0   |
| CONTIG-027407 | 105  | 13  | 21  | 26   | 0   |
| CONTIG-027408 | 81   | 15  | 13  | 39   | 0   |
| CONTIG-027409 | 62   | 9   | 0   | 23   | 0   |
| CONTIG-027410 | 109  | 8   | 21  | 20   | 0   |
| CONTIG-027411 | 386  | 10  | 20  | 160  | 4   |
| CONTIG-027412 | 231  | 7   | 0   | 35   | 2   |
| CONTIG-027413 | 273  | 30  | 43  | 11   | 0   |
| CONTIG-027414 | 62   | 3   | 7   | 2    | 0   |
| CONTIG-027415 | 102  | 8   | 18  | 26   | 0   |
| CONTIG-027416 | 98   | 13  | 20  | 0    | 0   |
| CONTIG-027417 | 302  | 10  | 89  | 19   | 0   |
| CONTIG-027418 | 142  | 52  | 111 | 149  | 0   |
| CONTIG-027419 | 59   | 7   | 7   | 7    | 0   |
| CONTIG-027426 | 470  | 15  | 30  | 299  | 0   |
| CONTIG-027427 | 135  | 22  | 4   | 138  | 0   |
| CONTIG-027429 | 374  | 33  | 48  | 236  | 0   |
| CONTIG-027430 | 206  | 9   | 8   | 62   | 0   |
| CONTIG-027431 | 1149 | 17  | 121 | 509  | 10  |
| CONTIG-027432 | 101  | 13  | 26  | 42   | 0   |
| CONTIG-027433 | 808  | 19  | 40  | 761  | 0   |
| CONTIG-027434 | 121  | 10  | 14  | 20   | 0   |
| CONTIG-027435 | 77   | 19  | 8   | 25   | 0   |
| CONTIG-027436 | 224  | 6   | 35  | 39   | 0   |
| CONTIG-027437 | 130  | 18  | 57  | 99   | 0   |
| CONTIG-027439 | 80   | 4   | 12  | 4    | 0   |
| CONTIG-027440 | 108  | 8   | 6   | 7    | 0   |
| CONTIG-027441 | 105  | 13  | 9   | 45   | 0   |
| CONTIG-027442 | 1059 | 18  | 30  | 399  | 2   |
| CONTIG-027443 | 371  | 16  | 67  | 146  | 0   |
| CONTIG-027444 | 270  | 25  | 129 | 296  | 0   |
| CONTIG-027445 | 254  | 11  | 54  | 27   | 2   |
| CONTIG-027446 | 190  | 6   | 25  | 20   | 0   |
| CONTIG-027447 | 1466 | 29  | 152 | 1494 | 16  |

|               |      |     |     |      |     |
|---------------|------|-----|-----|------|-----|
| CONTIG-027448 | 495  | 14  | 20  | 188  | 4   |
| CONTIG-027449 | 234  | 15  | 110 | 15   | 0   |
| CONTIG-027450 | 546  | 8   | 28  | 173  | 2   |
| CONTIG-027452 | 219  | 8   | 0   | 76   | 2   |
| CONTIG-027453 | 157  | 5   | 7   | 11   | 0   |
| CONTIG-027454 | 212  | 37  | 85  | 302  | 0   |
| CONTIG-027455 | 781  | 13  | 48  | 253  | 14  |
| CONTIG-027456 | 193  | 11  | 19  | 30   | 2   |
| CONTIG-027457 | 85   | 4   | 2   | 11   | 0   |
| CONTIG-027458 | 143  | 6   | 2   | 24   | 2   |
| CONTIG-027459 | 279  | 6   | 10  | 17   | 0   |
| CONTIG-027460 | 77   | 6   | 7   | 4    | 0   |
| CONTIG-027461 | 436  | 19  | 23  | 367  | 3   |
| CONTIG-027462 | 74   | 3   | 0   | 0    | 0   |
| CONTIG-027463 | 102  | 3   | 2   | 4    | 0   |
| CONTIG-027465 | 110  | 592 | 209 | 2276 | 6   |
| CONTIG-027466 | 75   | 6   | 15  | 9    | 0   |
| CONTIG-027468 | 107  | 58  | 47  | 269  | 0   |
| CONTIG-027469 | 80   | 6   | 30  | 7    | 0   |
| CONTIG-027470 | 297  | 33  | 10  | 0    | 70  |
| CONTIG-027471 | 336  | 11  | 13  | 90   | 6   |
| CONTIG-027472 | 363  | 11  | 16  | 93   | 2   |
| CONTIG-027473 | 346  | 11  | 11  | 87   | 0   |
| CONTIG-027477 | 74   | 4   | 5   | 9    | 0   |
| CONTIG-027478 | 573  | 75  | 257 | 744  | 82  |
| CONTIG-027479 | 223  | 13  | 34  | 42   | 0   |
| CONTIG-027480 | 59   | 4   | 6   | 0    | 0   |
| CONTIG-027481 | 129  | 8   | 8   | 32   | 2   |
| CONTIG-027482 | 343  | 44  | 0   | 0    | 186 |
| CONTIG-027483 | 168  | 6   | 15  | 17   | 2   |
| CONTIG-027484 | 68   | 7   | 6   | 12   | 0   |
| CONTIG-027485 | 579  | 15  | 54  | 268  | 4   |
| CONTIG-027486 | 291  | 34  | 33  | 223  | 6   |
| CONTIG-027487 | 411  | 13  | 117 | 203  | 0   |
| CONTIG-027488 | 1056 | 26  | 45  | 416  | 110 |
| CONTIG-027489 | 202  | 8   | 6   | 56   | 0   |
| CONTIG-027490 | 86   | 139 | 93  | 316  | 9   |
| CONTIG-027491 | 131  | 6   | 0   | 19   | 0   |
| CONTIG-027492 | 75   | 4   | 2   | 10   | 0   |
| CONTIG-027493 | 53   | 564 | 160 | 348  | 82  |
| CONTIG-027498 | 97   | 8   | 5   | 20   | 0   |
| CONTIG-027499 | 419  | 43  | 8   | 1179 | 0   |
| CONTIG-027500 | 74   | 7   | 12  | 0    | 0   |
| CONTIG-027501 | 110  | 174 | 182 | 948  | 2   |
| CONTIG-027502 | 736  | 22  | 38  | 41   | 0   |
| CONTIG-027503 | 585  | 13  | 22  | 168  | 0   |
| CONTIG-027504 | 573  | 22  | 92  | 559  | 6   |

|               |     |     |     |     |    |
|---------------|-----|-----|-----|-----|----|
| CONTIG-027505 | 337 | 9   | 34  | 76  | 0  |
| CONTIG-027506 | 60  | 2   | 0   | 2   | 0  |
| CONTIG-027507 | 176 | 8   | 7   | 53  | 0  |
| CONTIG-027508 | 71  | 23  | 11  | 72  | 0  |
| CONTIG-027509 | 144 | 8   | 27  | 37  | 0  |
| CONTIG-027510 | 111 | 4   | 8   | 11  | 0  |
| CONTIG-027511 | 75  | 6   | 21  | 14  | 0  |
| CONTIG-027512 | 330 | 13  | 25  | 117 | 0  |
| CONTIG-027513 | 266 | 16  | 45  | 138 | 0  |
| CONTIG-027514 | 245 | 8   | 40  | 58  | 0  |
| CONTIG-027515 | 213 | 9   | 13  | 17  | 0  |
| CONTIG-027516 | 162 | 8   | 19  | 25  | 0  |
| CONTIG-027517 | 165 | 5   | 2   | 0   | 0  |
| CONTIG-027518 | 207 | 11  | 30  | 36  | 0  |
| CONTIG-027519 | 302 | 7   | 19  | 79  | 0  |
| CONTIG-027520 | 69  | 3   | 2   | 0   | 0  |
| CONTIG-027521 | 193 | 18  | 40  | 148 | 0  |
| CONTIG-027523 | 276 | 16  | 31  | 182 | 0  |
| CONTIG-027524 | 594 | 27  | 110 | 366 | 18 |
| CONTIG-027525 | 142 | 10  | 8   | 47  | 0  |
| CONTIG-027526 | 173 | 7   | 0   | 37  | 0  |
| CONTIG-027528 | 152 | 12  | 26  | 42  | 0  |
| CONTIG-027529 | 193 | 11  | 97  | 21  | 0  |
| CONTIG-027530 | 101 | 9   | 11  | 38  | 2  |
| CONTIG-027531 | 107 | 6   | 10  | 11  | 0  |
| CONTIG-027532 | 423 | 15  | 20  | 266 | 0  |
| CONTIG-027533 | 204 | 15  | 7   | 148 | 0  |
| CONTIG-027534 | 116 | 8   | 3   | 34  | 0  |
| CONTIG-027536 | 77  | 6   | 2   | 7   | 0  |
| CONTIG-027537 | 318 | 15  | 15  | 175 | 0  |
| CONTIG-027538 | 682 | 14  | 216 | 291 | 2  |
| CONTIG-027539 | 91  | 6   | 2   | 20  | 0  |
| CONTIG-027540 | 74  | 5   | 10  | 4   | 0  |
| CONTIG-027541 | 269 | 14  | 152 | 107 | 0  |
| CONTIG-027542 | 213 | 17  | 77  | 110 | 2  |
| CONTIG-027543 | 122 | 4   | 2   | 9   | 0  |
| CONTIG-027545 | 145 | 9   | 22  | 20  | 0  |
| CONTIG-027547 | 114 | 118 | 214 | 351 | 16 |
| CONTIG-027548 | 89  | 5   | 16  | 10  | 0  |
| CONTIG-027549 | 139 | 25  | 60  | 9   | 0  |
| CONTIG-027550 | 528 | 22  | 181 | 385 | 8  |
| CONTIG-027551 | 233 | 10  | 5   | 31  | 2  |
| CONTIG-027552 | 93  | 12  | 21  | 34  | 0  |
| CONTIG-027554 | 59  | 262 | 126 | 435 | 15 |
| CONTIG-027555 | 59  | 13  | 6   | 19  | 0  |
| CONTIG-027556 | 711 | 24  | 65  | 740 | 0  |
| CONTIG-027557 | 97  | 5   | 0   | 0   | 2  |

|               |      |     |     |      |    |
|---------------|------|-----|-----|------|----|
| CONTIG-027558 | 365  | 11  | 45  | 72   | 5  |
| CONTIG-027559 | 95   | 9   | 15  | 32   | 0  |
| CONTIG-027560 | 101  | 12  | 4   | 45   | 0  |
| CONTIG-027561 | 108  | 5   | 6   | 8    | 0  |
| CONTIG-027562 | 155  | 13  | 49  | 58   | 2  |
| CONTIG-027564 | 163  | 8   | 37  | 17   | 0  |
| CONTIG-027565 | 143  | 42  | 30  | 323  | 0  |
| CONTIG-027566 | 112  | 253 | 30  | 1495 | 2  |
| CONTIG-027567 | 106  | 36  | 20  | 75   | 0  |
| CONTIG-027568 | 78   | 8   | 4   | 19   | 0  |
| CONTIG-027569 | 66   | 11  | 12  | 19   | 0  |
| CONTIG-027570 | 306  | 19  | 99  | 173  | 0  |
| CONTIG-027571 | 272  | 10  | 12  | 43   | 2  |
| CONTIG-027572 | 277  | 24  | 11  | 82   | 0  |
| CONTIG-027573 | 86   | 9   | 7   | 26   | 0  |
| CONTIG-027574 | 333  | 20  | 94  | 206  | 0  |
| CONTIG-027575 | 194  | 24  | 85  | 67   | 2  |
| CONTIG-027576 | 103  | 7   | 19  | 10   | 0  |
| CONTIG-027578 | 397  | 23  | 255 | 158  | 0  |
| CONTIG-027580 | 215  | 28  | 81  | 242  | 0  |
| CONTIG-027581 | 74   | 33  | 3   | 38   | 0  |
| CONTIG-027582 | 108  | 9   | 28  | 2    | 0  |
| CONTIG-027583 | 143  | 11  | 6   | 52   | 0  |
| CONTIG-027584 | 88   | 21  | 101 | 16   | 0  |
| CONTIG-027586 | 927  | 14  | 109 | 350  | 0  |
| CONTIG-027587 | 124  | 7   | 14  | 19   | 0  |
| CONTIG-027588 | 568  | 15  | 28  | 248  | 6  |
| CONTIG-027594 | 510  | 15  | 25  | 177  | 2  |
| CONTIG-027595 | 236  | 4   | 0   | 0    | 0  |
| CONTIG-027600 | 207  | 5   | 2   | 24   | 0  |
| CONTIG-027601 | 1400 | 44  | 64  | 2423 | 50 |
| CONTIG-027602 | 67   | 8   | 32  | 0    | 0  |
| CONTIG-027603 | 67   | 9   | 5   | 17   | 0  |
| CONTIG-027604 | 68   | 17  | 4   | 48   | 0  |
| CONTIG-027605 | 339  | 15  | 39  | 154  | 2  |
| CONTIG-027606 | 58   | 4   | 7   | 2    | 0  |
| CONTIG-027607 | 61   | 5   | 2   | 4    | 0  |
| CONTIG-027608 | 185  | 11  | 4   | 86   | 0  |
| CONTIG-027611 | 75   | 9   | 7   | 21   | 0  |
| CONTIG-027615 | 564  | 13  | 107 | 210  | 0  |
| CONTIG-027616 | 128  | 10  | 36  | 31   | 0  |
| CONTIG-027617 | 393  | 18  | 123 | 102  | 4  |
| CONTIG-027621 | 95   | 22  | 49  | 50   | 0  |
| CONTIG-027622 | 180  | 14  | 45  | 91   | 0  |
| CONTIG-027623 | 509  | 15  | 69  | 288  | 0  |
| CONTIG-027625 | 51   | 369 | 24  | 401  | 43 |
| CONTIG-027626 | 274  | 11  | 4   | 115  | 0  |

|               |     |      |     |      |     |
|---------------|-----|------|-----|------|-----|
| CONTIG-027627 | 108 | 3    | 0   | 4    | 0   |
| CONTIG-027628 | 380 | 14   | 58  | 132  | 4   |
| CONTIG-027629 | 659 | 29   | 97  | 794  | 0   |
| CONTIG-027631 | 58  | 364  | 92  | 607  | 4   |
| CONTIG-027632 | 276 | 18   | 42  | 171  | 0   |
| CONTIG-027633 | 663 | 16   | 132 | 270  | 0   |
| CONTIG-027634 | 171 | 9    | 29  | 22   | 0   |
| CONTIG-027635 | 128 | 8    | 41  | 8    | 0   |
| CONTIG-027636 | 117 | 11   | 10  | 41   | 0   |
| CONTIG-027637 | 68  | 9    | 13  | 13   | 0   |
| CONTIG-027638 | 73  | 8    | 9   | 8    | 0   |
| CONTIG-027639 | 253 | 9    | 11  | 71   | 0   |
| CONTIG-027640 | 243 | 15   | 100 | 61   | 0   |
| CONTIG-027642 | 224 | 15   | 6   | 99   | 10  |
| CONTIG-027650 | 998 | 11   | 0   | 0    | 0   |
| CONTIG-027651 | 42  | 1648 | 25  | 73   | 0   |
| CONTIG-027654 | 78  | 8    | 3   | 28   | 0   |
| CONTIG-027655 | 639 | 22   | 63  | 456  | 2   |
| CONTIG-027656 | 61  | 8    | 4   | 12   | 0   |
| CONTIG-027659 | 136 | 14   | 5   | 58   | 0   |
| CONTIG-027660 | 247 | 8    | 16  | 54   | 0   |
| CONTIG-027661 | 140 | 10   | 16  | 4    | 0   |
| CONTIG-027662 | 342 | 8    | 82  | 37   | 0   |
| CONTIG-027663 | 428 | 9    | 60  | 98   | 0   |
| CONTIG-027664 | 185 | 125  | 187 | 867  | 0   |
| CONTIG-027665 | 84  | 11   | 7   | 23   | 0   |
| CONTIG-027666 | 646 | 12   | 66  | 260  | 0   |
| CONTIG-027667 | 108 | 17   | 10  | 92   | 0   |
| CONTIG-027668 | 67  | 28   | 10  | 52   | 0   |
| CONTIG-027669 | 526 | 53   | 206 | 662  | 34  |
| CONTIG-027670 | 120 | 11   | 2   | 46   | 2   |
| CONTIG-027671 | 438 | 104  | 90  | 2777 | 3   |
| CONTIG-027672 | 127 | 7    | 8   | 28   | 0   |
| CONTIG-027673 | 185 | 11   | 47  | 56   | 0   |
| CONTIG-027674 | 98  | 9    | 8   | 27   | 2   |
| CONTIG-027676 | 71  | 9    | 2   | 17   | 0   |
| CONTIG-027677 | 61  | 13   | 24  | 7    | 0   |
| CONTIG-027678 | 212 | 16   | 0   | 0    | 49  |
| CONTIG-027679 | 147 | 17   | 18  | 98   | 0   |
| CONTIG-027680 | 233 | 11   | 24  | 102  | 0   |
| CONTIG-027681 | 312 | 10   | 4   | 84   | 2   |
| CONTIG-027682 | 113 | 14   | 14  | 35   | 0   |
| CONTIG-027683 | 194 | 25   | 61  | 146  | 4   |
| CONTIG-027684 | 38  | 980  | 43  | 18   | 640 |
| CONTIG-027685 | 132 | 278  | 178 | 986  | 122 |
| CONTIG-027686 | 645 | 54   | 86  | 820  | 105 |
| CONTIG-027687 | 192 | 7    | 4   | 18   | 0   |

|               |      |    |     |      |    |
|---------------|------|----|-----|------|----|
| CONTIG-027688 | 152  | 14 | 54  | 26   | 0  |
| CONTIG-027689 | 59   | 8  | 0   | 8    | 0  |
| CONTIG-027690 | 471  | 12 | 23  | 99   | 14 |
| CONTIG-027691 | 748  | 15 | 2   | 107  | 4  |
| CONTIG-027693 | 146  | 7  | 6   | 16   | 0  |
| CONTIG-027694 | 157  | 9  | 6   | 43   | 0  |
| CONTIG-027695 | 138  | 4  | 5   | 15   | 0  |
| CONTIG-027696 | 138  | 6  | 3   | 15   | 0  |
| CONTIG-027697 | 108  | 5  | 0   | 12   | 0  |
| CONTIG-027699 | 68   | 7  | 22  | 4    | 0  |
| CONTIG-027700 | 110  | 22 | 135 | 15   | 0  |
| CONTIG-027701 | 1206 | 15 | 68  | 1001 | 0  |
| CONTIG-027702 | 89   | 7  | 17  | 13   | 0  |
| CONTIG-027703 | 538  | 13 | 56  | 372  | 0  |
| CONTIG-027704 | 61   | 6  | 9   | 0    | 0  |
| CONTIG-027706 | 485  | 30 | 70  | 392  | 2  |
| CONTIG-027709 | 1383 | 30 | 82  | 2234 | 0  |
| CONTIG-027711 | 216  | 13 | 11  | 74   | 0  |
| CONTIG-027713 | 107  | 15 | 45  | 43   | 0  |
| CONTIG-027714 | 130  | 11 | 9   | 43   | 0  |
| CONTIG-027715 | 259  | 7  | 15  | 57   | 0  |
| CONTIG-027716 | 89   | 22 | 7   | 77   | 0  |
| CONTIG-027717 | 72   | 8  | 3   | 17   | 0  |
| CONTIG-027718 | 428  | 12 | 9   | 280  | 0  |
| CONTIG-027719 | 272  | 68 | 232 | 926  | 2  |
| CONTIG-027722 | 427  | 36 | 209 | 352  | 2  |
| CONTIG-027723 | 222  | 12 | 5   | 111  | 0  |
| CONTIG-027724 | 369  | 20 | 58  | 65   | 0  |
| CONTIG-027725 | 116  | 5  | 2   | 14   | 0  |
| CONTIG-027726 | 781  | 33 | 41  | 1143 | 8  |
| CONTIG-027727 | 223  | 8  | 36  | 27   | 0  |
| CONTIG-027728 | 129  | 17 | 25  | 43   | 0  |
| CONTIG-027729 | 59   | 6  | 0   | 12   | 0  |
| CONTIG-027730 | 350  | 47 | 19  | 844  | 0  |
| CONTIG-027731 | 422  | 19 | 18  | 347  | 0  |
| CONTIG-027735 | 89   | 3  | 0   | 0    | 0  |
| CONTIG-027736 | 185  | 4  | 16  | 14   | 0  |
| CONTIG-027737 | 454  | 19 | 61  | 252  | 4  |
| CONTIG-027738 | 65   | 4  | 2   | 3    | 0  |
| CONTIG-027739 | 63   | 7  | 2   | 14   | 0  |
| CONTIG-027751 | 194  | 5  | 9   | 27   | 2  |
| CONTIG-027752 | 88   | 5  | 2   | 18   | 0  |
| CONTIG-027759 | 148  | 14 | 39  | 36   | 0  |
| CONTIG-027760 | 168  | 9  | 2   | 18   | 2  |
| CONTIG-027761 | 87   | 5  | 0   | 9    | 0  |
| CONTIG-027763 | 250  | 17 | 39  | 124  | 0  |
| CONTIG-027764 | 294  | 18 | 85  | 193  | 0  |

|               |      |     |     |     |     |
|---------------|------|-----|-----|-----|-----|
| CONTIG-027765 | 349  | 15  | 92  | 75  | 2   |
| CONTIG-027766 | 141  | 7   | 4   | 31  | 2   |
| CONTIG-027767 | 328  | 10  | 50  | 123 | 0   |
| CONTIG-027768 | 239  | 46  | 70  | 426 | 0   |
| CONTIG-027769 | 275  | 27  | 40  | 128 | 0   |
| CONTIG-027770 | 88   | 4   | 23  | 0   | 0   |
| CONTIG-027771 | 126  | 4   | 4   | 5   | 0   |
| CONTIG-027772 | 313  | 19  | 64  | 77  | 7   |
| CONTIG-027773 | 188  | 5   | 16  | 22  | 0   |
| CONTIG-027774 | 63   | 3   | 10  | 0   | 0   |
| CONTIG-027775 | 141  | 45  | 168 | 223 | 2   |
| CONTIG-027776 | 122  | 10  | 18  | 36  | 0   |
| CONTIG-027777 | 1473 | 23  | 265 | 935 | 6   |
| CONTIG-027778 | 366  | 12  | 26  | 65  | 0   |
| CONTIG-027779 | 106  | 17  | 135 | 0   | 0   |
| CONTIG-027780 | 243  | 33  | 46  | 413 | 19  |
| CONTIG-027781 | 123  | 17  | 30  | 91  | 0   |
| CONTIG-027782 | 88   | 129 | 50  | 505 | 2   |
| CONTIG-027783 | 226  | 22  | 101 | 138 | 8   |
| CONTIG-027784 | 171  | 3   | 6   | 6   | 0   |
| CONTIG-027785 | 175  | 17  | 54  | 59  | 4   |
| CONTIG-027786 | 169  | 4   | 3   | 22  | 0   |
| CONTIG-027788 | 243  | 17  | 26  | 106 | 0   |
| CONTIG-027789 | 666  | 19  | 109 | 319 | 2   |
| CONTIG-027790 | 93   | 3   | 6   | 5   | 0   |
| CONTIG-027791 | 689  | 25  | 255 | 239 | 12  |
| CONTIG-027792 | 119  | 9   | 0   | 31  | 0   |
| CONTIG-027793 | 104  | 6   | 20  | 7   | 0   |
| CONTIG-027794 | 104  | 16  | 32  | 57  | 2   |
| CONTIG-027795 | 64   | 6   | 13  | 8   | 0   |
| CONTIG-027796 | 272  | 14  | 179 | 0   | 56  |
| CONTIG-027797 | 185  | 8   | 23  | 35  | 0   |
| CONTIG-027798 | 86   | 7   | 27  | 0   | 0   |
| CONTIG-027799 | 71   | 3   | 0   | 6   | 0   |
| CONTIG-027800 | 657  | 16  | 69  | 464 | 0   |
| CONTIG-027801 | 403  | 109 | 2   | 0   | 374 |
| CONTIG-027802 | 348  | 14  | 3   | 130 | 2   |
| CONTIG-027803 | 69   | 8   | 15  | 18  | 0   |
| CONTIG-027804 | 276  | 13  | 6   | 96  | 4   |
| CONTIG-027805 | 154  | 10  | 6   | 45  | 0   |
| CONTIG-027807 | 272  | 7   | 3   | 43  | 0   |
| CONTIG-027808 | 133  | 11  | 13  | 44  | 0   |
| CONTIG-027810 | 105  | 16  | 9   | 53  | 0   |
| CONTIG-027812 | 285  | 18  | 124 | 154 | 0   |
| CONTIG-027813 | 135  | 578 | 325 | 55  | 0   |
| CONTIG-027814 | 205  | 9   | 13  | 71  | 0   |
| CONTIG-027815 | 209  | 10  | 6   | 73  | 0   |



|               |     |     |     |      |     |
|---------------|-----|-----|-----|------|-----|
| CONTIG-027816 | 111 | 6   | 16  | 21   | 0   |
| CONTIG-027817 | 278 | 15  | 73  | 109  | 2   |
| CONTIG-027818 | 670 | 11  | 19  | 180  | 13  |
| CONTIG-027819 | 130 | 3   | 4   | 8    | 0   |
| CONTIG-027820 | 234 | 16  | 48  | 74   | 2   |
| CONTIG-027823 | 60  | 5   | 6   | 5    | 0   |
| CONTIG-027829 | 193 | 15  | 10  | 0    | 29  |
| CONTIG-027830 | 186 | 38  | 28  | 357  | 2   |
| CONTIG-027831 | 73  | 6   | 5   | 14   | 0   |
| CONTIG-027832 | 867 | 16  | 137 | 472  | 0   |
| CONTIG-027833 | 520 | 17  | 100 | 191  | 7   |
| CONTIG-027836 | 71  | 4   | 2   | 5    | 0   |
| CONTIG-027837 | 447 | 12  | 55  | 232  | 0   |
| CONTIG-027838 | 85  | 19  | 2   | 79   | 0   |
| CONTIG-027839 | 265 | 165 | 2   | 0    | 443 |
| CONTIG-027840 | 194 | 14  | 19  | 99   | 0   |
| CONTIG-027841 | 574 | 14  | 29  | 174  | 31  |
| CONTIG-027842 | 307 | 12  | 4   | 110  | 2   |
| CONTIG-027843 | 395 | 23  | 22  | 337  | 0   |
| CONTIG-027844 | 167 | 8   | 11  | 49   | 0   |
| CONTIG-027845 | 239 | 17  | 9   | 16   | 0   |
| CONTIG-027846 | 164 | 118 | 113 | 167  | 530 |
| CONTIG-027848 | 128 | 18  | 46  | 110  | 0   |
| CONTIG-027849 | 90  | 8   | 20  | 16   | 0   |
| CONTIG-027852 | 64  | 4   | 8   | 5    | 0   |
| CONTIG-027853 | 121 | 7   | 12  | 27   | 0   |
| CONTIG-027854 | 156 | 12  | 20  | 49   | 0   |
| CONTIG-027855 | 233 | 9   | 24  | 73   | 0   |
| CONTIG-027856 | 131 | 4   | 5   | 14   | 0   |
| CONTIG-027857 | 518 | 16  | 21  | 327  | 0   |
| CONTIG-027858 | 92  | 4   | 6   | 13   | 0   |
| CONTIG-027860 | 825 | 21  | 65  | 586  | 6   |
| CONTIG-027861 | 131 | 5   | 4   | 27   | 0   |
| CONTIG-027863 | 89  | 3   | 2   | 4    | 0   |
| CONTIG-027865 | 52  | 34  | 64  | 19   | 0   |
| CONTIG-027866 | 236 | 8   | 2   | 45   | 0   |
| CONTIG-027867 | 111 | 2   | 5   | 8    | 0   |
| CONTIG-027868 | 162 | 18  | 59  | 79   | 0   |
| CONTIG-027869 | 292 | 13  | 20  | 77   | 0   |
| CONTIG-027870 | 107 | 373 | 57  | 1379 | 42  |
| CONTIG-027871 | 118 | 5   | 4   | 17   | 0   |
| CONTIG-027872 | 93  | 8   | 29  | 4    | 0   |
| CONTIG-027873 | 75  | 16  | 33  | 4    | 2   |
| CONTIG-027874 | 194 | 64  | 95  | 231  | 21  |
| CONTIG-027875 | 91  | 6   | 4   | 25   | 0   |
| CONTIG-027876 | 84  | 3   | 3   | 0    | 0   |
| CONTIG-027877 | 232 | 12  | 51  | 100  | 0   |

|               |      |     |     |      |   |
|---------------|------|-----|-----|------|---|
| CONTIG-027878 | 70   | 5   | 2   | 15   | 0 |
| CONTIG-027879 | 96   | 6   | 15  | 18   | 0 |
| CONTIG-027881 | 138  | 10  | 35  | 44   | 0 |
| CONTIG-027882 | 154  | 17  | 7   | 102  | 0 |
| CONTIG-027883 | 97   | 6   | 6   | 2    | 0 |
| CONTIG-027884 | 146  | 4   | 0   | 29   | 0 |
| CONTIG-027885 | 153  | 5   | 33  | 4    | 0 |
| CONTIG-027886 | 225  | 19  | 89  | 134  | 0 |
| CONTIG-027887 | 120  | 7   | 7   | 31   | 2 |
| CONTIG-027888 | 364  | 10  | 11  | 98   | 0 |
| CONTIG-027890 | 66   | 7   | 0   | 5    | 0 |
| CONTIG-027891 | 697  | 9   | 43  | 105  | 0 |
| CONTIG-027893 | 396  | 28  | 130 | 353  | 2 |
| CONTIG-027894 | 171  | 11  | 10  | 34   | 0 |
| CONTIG-027895 | 131  | 29  | 23  | 173  | 0 |
| CONTIG-027899 | 85   | 5   | 2   | 8    | 0 |
| CONTIG-027900 | 70   | 4   | 0   | 11   | 0 |
| CONTIG-027901 | 249  | 4   | 11  | 33   | 0 |
| CONTIG-027902 | 618  | 128 | 54  | 27   | 0 |
| CONTIG-027903 | 37   | 11  | 0   | 8    | 0 |
| CONTIG-027904 | 106  | 7   | 3   | 28   | 0 |
| CONTIG-027905 | 212  | 11  | 13  | 59   | 0 |
| CONTIG-027906 | 103  | 5   | 8   | 15   | 0 |
| CONTIG-027912 | 237  | 10  | 33  | 39   | 2 |
| CONTIG-027913 | 206  | 43  | 78  | 334  | 4 |
| CONTIG-027914 | 298  | 24  | 126 | 155  | 0 |
| CONTIG-027915 | 263  | 33  | 14  | 412  | 9 |
| CONTIG-027923 | 162  | 19  | 32  | 86   | 0 |
| CONTIG-027924 | 98   | 4   | 11  | 10   | 0 |
| CONTIG-027925 | 150  | 13  | 3   | 48   | 0 |
| CONTIG-027927 | 451  | 12  | 67  | 141  | 0 |
| CONTIG-027928 | 90   | 2   | 4   | 2    | 0 |
| CONTIG-027929 | 267  | 11  | 30  | 29   | 2 |
| CONTIG-027930 | 70   | 16  | 31  | 14   | 2 |
| CONTIG-027931 | 171  | 7   | 0   | 37   | 0 |
| CONTIG-027935 | 90   | 7   | 2   | 19   | 0 |
| CONTIG-027936 | 243  | 18  | 44  | 113  | 0 |
| CONTIG-027937 | 72   | 4   | 8   | 0    | 0 |
| CONTIG-027938 | 263  | 20  | 54  | 116  | 2 |
| CONTIG-027939 | 797  | 72  | 271 | 3330 | 2 |
| CONTIG-027940 | 538  | 7   | 18  | 95   | 0 |
| CONTIG-027941 | 1022 | 29  | 65  | 1722 | 0 |
| CONTIG-027942 | 129  | 5   | 10  | 12   | 0 |
| CONTIG-027943 | 70   | 10  | 3   | 26   | 0 |
| CONTIG-027944 | 192  | 10  | 58  | 26   | 0 |
| CONTIG-027948 | 74   | 15  | 31  | 3    | 0 |
| CONTIG-027949 | 183  | 7   | 11  | 27   | 0 |

|               |      |     |     |     |   |
|---------------|------|-----|-----|-----|---|
| CONTIG-027950 | 63   | 3   | 4   | 0   | 0 |
| CONTIG-027951 | 240  | 5   | 9   | 18  | 0 |
| CONTIG-027952 | 83   | 6   | 8   | 2   | 0 |
| CONTIG-027953 | 316  | 19  | 44  | 195 | 0 |
| CONTIG-027954 | 85   | 10  | 27  | 10  | 0 |
| CONTIG-027955 | 106  | 11  | 19  | 34  | 0 |
| CONTIG-027957 | 372  | 18  | 15  | 140 | 0 |
| CONTIG-027958 | 166  | 16  | 15  | 100 | 0 |
| CONTIG-027959 | 102  | 11  | 83  | 11  | 0 |
| CONTIG-027960 | 294  | 29  | 41  | 325 | 4 |
| CONTIG-027961 | 238  | 20  | 203 | 146 | 0 |
| CONTIG-027962 | 140  | 6   | 4   | 16  | 4 |
| CONTIG-027963 | 69   | 5   | 0   | 0   | 0 |
| CONTIG-027964 | 189  | 11  | 20  | 94  | 0 |
| CONTIG-027965 | 91   | 19  | 32  | 29  | 0 |
| CONTIG-027966 | 1253 | 18  | 185 | 968 | 2 |
| CONTIG-027968 | 82   | 5   | 6   | 4   | 0 |
| CONTIG-027969 | 60   | 3   | 2   | 4   | 0 |
| CONTIG-027970 | 134  | 12  | 15  | 47  | 0 |
| CONTIG-027971 | 75   | 16  | 16  | 48  | 2 |
| CONTIG-027972 | 80   | 7   | 9   | 10  | 0 |
| CONTIG-027973 | 145  | 35  | 53  | 142 | 4 |
| CONTIG-027974 | 561  | 17  | 271 | 213 | 0 |
| CONTIG-027975 | 85   | 6   | 7   | 7   | 0 |
| CONTIG-027976 | 298  | 18  | 45  | 125 | 0 |
| CONTIG-027977 | 111  | 7   | 0   | 17  | 2 |
| CONTIG-027983 | 114  | 13  | 3   | 19  | 2 |
| CONTIG-027984 | 176  | 12  | 27  | 58  | 0 |
| CONTIG-027989 | 106  | 11  | 2   | 41  | 0 |
| CONTIG-027990 | 201  | 13  | 26  | 50  | 0 |
| CONTIG-027991 | 163  | 6   | 4   | 36  | 0 |
| CONTIG-027992 | 107  | 9   | 15  | 0   | 0 |
| CONTIG-027994 | 1098 | 15  | 166 | 536 | 2 |
| CONTIG-027995 | 152  | 16  | 16  | 63  | 0 |
| CONTIG-027996 | 283  | 8   | 36  | 51  | 0 |
| CONTIG-027997 | 67   | 6   | 4   | 6   | 0 |
| CONTIG-027998 | 40   | 147 | 16  | 92  | 0 |
| CONTIG-027999 | 58   | 27  | 30  | 27  | 0 |
| CONTIG-028000 | 138  | 24  | 53  | 63  | 4 |
| CONTIG-028001 | 145  | 9   | 4   | 44  | 0 |
| CONTIG-028002 | 64   | 10  | 21  | 5   | 0 |
| CONTIG-028004 | 91   | 5   | 23  | 2   | 0 |
| CONTIG-028006 | 71   | 2   | 3   | 0   | 0 |
| CONTIG-028007 | 75   | 5   | 5   | 14  | 0 |
| CONTIG-028008 | 62   | 6   | 4   | 8   | 0 |
| CONTIG-028009 | 222  | 23  | 258 | 6   | 0 |
| CONTIG-028010 | 110  | 8   | 5   | 19  | 0 |

|               |     |    |     |     |   |
|---------------|-----|----|-----|-----|---|
| CONTIG-028011 | 113 | 5  | 6   | 4   | 0 |
| CONTIG-028012 | 297 | 13 | 26  | 152 | 0 |
| CONTIG-028014 | 109 | 17 | 76  | 51  | 0 |
| CONTIG-028015 | 81  | 5  | 2   | 10  | 0 |
| CONTIG-028016 | 145 | 4  | 0   | 11  | 0 |
| CONTIG-028017 | 69  | 6  | 0   | 15  | 0 |
| CONTIG-028019 | 586 | 17 | 104 | 249 | 0 |
| CONTIG-028020 | 75  | 6  | 5   | 15  | 0 |
| CONTIG-028021 | 89  | 5  | 4   | 7   | 0 |
| CONTIG-028022 | 115 | 6  | 7   | 13  | 0 |
| CONTIG-028023 | 73  | 5  | 16  | 3   | 0 |
| CONTIG-028024 | 231 | 32 | 20  | 422 | 0 |
| CONTIG-028025 | 228 | 8  | 24  | 54  | 0 |
| CONTIG-028026 | 87  | 8  | 14  | 7   | 0 |
| CONTIG-028027 | 59  | 7  | 9   | 10  | 0 |
| CONTIG-028028 | 62  | 4  | 4   | 7   | 0 |
| CONTIG-028029 | 160 | 21 | 72  | 50  | 0 |
| CONTIG-028030 | 63  | 25 | 19  | 42  | 0 |
| CONTIG-028031 | 261 | 12 | 73  | 67  | 0 |
| CONTIG-028032 | 90  | 5  | 4   | 6   | 0 |
| CONTIG-028033 | 354 | 11 | 40  | 122 | 6 |
| CONTIG-028034 | 63  | 6  | 2   | 4   | 0 |
| CONTIG-028035 | 225 | 21 | 146 | 19  | 0 |
| CONTIG-028036 | 261 | 8  | 17  | 62  | 0 |
| CONTIG-028043 | 142 | 30 | 125 | 136 | 0 |
| CONTIG-028044 | 158 | 13 | 4   | 67  | 0 |
| CONTIG-028045 | 243 | 5  | 7   | 25  | 0 |
| CONTIG-028046 | 637 | 12 | 53  | 292 | 0 |
| CONTIG-028047 | 501 | 43 | 145 | 887 | 0 |
| CONTIG-028048 | 299 | 13 | 178 | 126 | 0 |
| CONTIG-028049 | 84  | 2  | 0   | 4   | 0 |
| CONTIG-028050 | 128 | 6  | 0   | 21  | 0 |
| CONTIG-028051 | 402 | 16 | 87  | 256 | 0 |
| CONTIG-028052 | 281 | 30 | 24  | 248 | 0 |
| CONTIG-028053 | 84  | 6  | 0   | 20  | 0 |
| CONTIG-028054 | 161 | 14 | 21  | 119 | 0 |
| CONTIG-028057 | 216 | 10 | 7   | 33  | 0 |
| CONTIG-028058 | 770 | 16 | 88  | 367 | 2 |
| CONTIG-028059 | 148 | 10 | 34  | 26  | 2 |
| CONTIG-028060 | 182 | 8  | 60  | 13  | 0 |
| CONTIG-028061 | 77  | 55 | 27  | 118 | 0 |
| CONTIG-028062 | 325 | 10 | 56  | 105 | 2 |
| CONTIG-028064 | 61  | 4  | 12  | 6   | 0 |
| CONTIG-028065 | 329 | 54 | 98  | 380 | 0 |
| CONTIG-028066 | 201 | 34 | 129 | 156 | 0 |
| CONTIG-028071 | 745 | 19 | 126 | 556 | 0 |
| CONTIG-028072 | 64  | 2  | 0   | 0   | 0 |

|               |     |     |     |      |    |
|---------------|-----|-----|-----|------|----|
| CONTIG-028073 | 175 | 6   | 11  | 25   | 0  |
| CONTIG-028074 | 268 | 18  | 45  | 124  | 4  |
| CONTIG-028075 | 207 | 15  | 28  | 80   | 2  |
| CONTIG-028076 | 521 | 20  | 22  | 367  | 0  |
| CONTIG-028077 | 897 | 22  | 22  | 1196 | 0  |
| CONTIG-028078 | 47  | 20  | 2   | 16   | 0  |
| CONTIG-028080 | 285 | 14  | 28  | 84   | 0  |
| CONTIG-028081 | 395 | 12  | 16  | 205  | 0  |
| CONTIG-028082 | 112 | 461 | 182 | 2094 | 0  |
| CONTIG-028083 | 481 | 17  | 72  | 88   | 0  |
| CONTIG-028084 | 68  | 22  | 57  | 13   | 0  |
| CONTIG-028085 | 64  | 4   | 2   | 6    | 0  |
| CONTIG-028088 | 50  | 366 | 46  | 370  | 11 |
| CONTIG-028089 | 77  | 11  | 69  | 0    | 2  |
| CONTIG-028090 | 659 | 18  | 46  | 277  | 4  |
| CONTIG-028091 | 470 | 22  | 89  | 336  | 0  |
| CONTIG-028093 | 503 | 17  | 102 | 261  | 0  |
| CONTIG-028094 | 166 | 20  | 25  | 111  | 11 |
| CONTIG-028095 | 66  | 17  | 39  | 19   | 0  |
| CONTIG-028097 | 75  | 19  | 33  | 7    | 0  |
| CONTIG-028098 | 161 | 16  | 19  | 94   | 2  |
| CONTIG-028099 | 492 | 19  | 4   | 0    | 7  |
| CONTIG-028100 | 338 | 9   | 16  | 6    | 0  |
| CONTIG-028101 | 70  | 8   | 8   | 14   | 0  |
| CONTIG-028102 | 665 | 21  | 124 | 93   | 0  |
| CONTIG-028103 | 916 | 44  | 41  | 138  | 0  |
| CONTIG-028104 | 107 | 340 | 36  | 2078 | 0  |
| CONTIG-028105 | 83  | 4   | 0   | 16   | 0  |
| CONTIG-028106 | 536 | 23  | 55  | 356  | 11 |
| CONTIG-028107 | 217 | 11  | 41  | 45   | 5  |
| CONTIG-028108 | 347 | 26  | 56  | 348  | 4  |
| CONTIG-028109 | 75  | 9   | 12  | 25   | 0  |
| CONTIG-028110 | 217 | 14  | 15  | 119  | 0  |
| CONTIG-028111 | 391 | 12  | 55  | 164  | 0  |
| CONTIG-028112 | 82  | 7   | 0   | 15   | 0  |
| CONTIG-028113 | 58  | 4   | 11  | 2    | 0  |
| CONTIG-028115 | 506 | 18  | 38  | 404  | 0  |
| CONTIG-028116 | 309 | 19  | 34  | 328  | 0  |
| CONTIG-028117 | 264 | 21  | 45  | 132  | 3  |
| CONTIG-028118 | 243 | 37  | 120 | 321  | 2  |
| CONTIG-028119 | 227 | 5   | 0   | 50   | 0  |
| CONTIG-028120 | 271 | 16  | 19  | 177  | 0  |
| CONTIG-028121 | 238 | 48  | 66  | 358  | 2  |
| CONTIG-028122 | 73  | 5   | 9   | 4    | 0  |
| CONTIG-028123 | 76  | 9   | 17  | 7    | 0  |
| CONTIG-028124 | 400 | 7   | 70  | 76   | 0  |
| CONTIG-028125 | 193 | 15  | 7   | 45   | 0  |

|               |     |      |     |     |      |
|---------------|-----|------|-----|-----|------|
| CONTIG-028126 | 294 | 36   | 19  | 522 | 0    |
| CONTIG-028127 | 503 | 11   | 35  | 210 | 0    |
| CONTIG-028128 | 67  | 21   | 53  | 24  | 0    |
| CONTIG-028131 | 114 | 16   | 76  | 10  | 0    |
| CONTIG-028132 | 114 | 4    | 7   | 11  | 0    |
| CONTIG-028134 | 81  | 3    | 4   | 5   | 0    |
| CONTIG-028135 | 493 | 12   | 123 | 78  | 0    |
| CONTIG-028137 | 66  | 126  | 328 | 131 | 11   |
| CONTIG-028138 | 406 | 11   | 74  | 136 | 0    |
| CONTIG-028139 | 208 | 13   | 46  | 47  | 0    |
| CONTIG-028140 | 80  | 4    | 2   | 14  | 0    |
| CONTIG-028141 | 344 | 7    | 11  | 76  | 2    |
| CONTIG-028149 | 176 | 9    | 21  | 40  | 0    |
| CONTIG-028150 | 71  | 11   | 6   | 6   | 0    |
| CONTIG-028151 | 546 | 11   | 13  | 320 | 0    |
| CONTIG-028152 | 464 | 10   | 46  | 132 | 0    |
| CONTIG-028153 | 248 | 7    | 0   | 56  | 0    |
| CONTIG-028154 | 766 | 31   | 36  | 754 | 40   |
| CONTIG-028155 | 417 | 13   | 93  | 163 | 0    |
| CONTIG-028156 | 188 | 10   | 26  | 5   | 0    |
| CONTIG-028157 | 39  | 2515 | 18  | 2   | 1425 |
| CONTIG-028158 | 144 | 18   | 107 | 69  | 0    |
| CONTIG-028159 | 763 | 22   | 50  | 643 | 18   |
| CONTIG-028160 | 162 | 9    | 5   | 57  | 0    |
| CONTIG-028161 | 125 | 9    | 12  | 38  | 0    |
| CONTIG-028162 | 77  | 4    | 0   | 6   | 0    |
| CONTIG-028165 | 645 | 26   | 93  | 641 | 10   |
| CONTIG-028166 | 393 | 17   | 90  | 193 | 15   |
| CONTIG-028167 | 126 | 7    | 14  | 29  | 0    |
| CONTIG-028169 | 66  | 7    | 2   | 24  | 0    |
| CONTIG-028170 | 766 | 10   | 54  | 236 | 2    |
| CONTIG-028171 | 133 | 57   | 39  | 252 | 4    |
| CONTIG-028172 | 112 | 5    | 0   | 0   | 0    |
| CONTIG-028175 | 70  | 3    | 0   | 8   | 0    |
| CONTIG-028176 | 118 | 109  | 12  | 0   | 68   |
| CONTIG-028177 | 59  | 74   | 260 | 47  | 0    |
| CONTIG-028178 | 193 | 5    | 8   | 25  | 0    |
| CONTIG-028179 | 212 | 13   | 64  | 47  | 0    |
| CONTIG-028180 | 247 | 8    | 14  | 39  | 0    |
| CONTIG-028181 | 494 | 14   | 14  | 256 | 0    |
| CONTIG-028182 | 509 | 13   | 27  | 149 | 7    |
| CONTIG-028183 | 167 | 7    | 24  | 23  | 0    |
| CONTIG-028190 | 55  | 50   | 12  | 94  | 0    |
| CONTIG-028191 | 400 | 20   | 75  | 295 | 4    |
| CONTIG-028192 | 105 | 4    | 8   | 11  | 0    |
| CONTIG-028193 | 70  | 13   | 26  | 21  | 0    |
| CONTIG-028194 | 69  | 6    | 11  | 4   | 0    |

|               |      |     |     |      |    |
|---------------|------|-----|-----|------|----|
| CONTIG-028195 | 61   | 7   | 13  | 5    | 0  |
| CONTIG-028196 | 277  | 12  | 7   | 88   | 0  |
| CONTIG-028197 | 277  | 14  | 68  | 105  | 2  |
| CONTIG-028198 | 274  | 11  | 8   | 72   | 7  |
| CONTIG-028199 | 82   | 5   | 3   | 9    | 0  |
| CONTIG-028200 | 77   | 5   | 5   | 8    | 0  |
| CONTIG-028201 | 69   | 34  | 20  | 11   | 0  |
| CONTIG-028202 | 93   | 3   | 6   | 4    | 0  |
| CONTIG-028203 | 180  | 17  | 24  | 88   | 2  |
| CONTIG-028205 | 66   | 2   | 0   | 0    | 0  |
| CONTIG-028206 | 180  | 10  | 19  | 33   | 0  |
| CONTIG-028207 | 65   | 3   | 3   | 2    | 0  |
| CONTIG-028209 | 76   | 5   | 5   | 8    | 0  |
| CONTIG-028210 | 91   | 9   | 11  | 16   | 2  |
| CONTIG-028211 | 409  | 110 | 73  | 836  | 62 |
| CONTIG-028212 | 216  | 7   | 4   | 49   | 0  |
| CONTIG-028213 | 330  | 5   | 11  | 30   | 0  |
| CONTIG-028214 | 430  | 13  | 11  | 190  | 0  |
| CONTIG-028215 | 141  | 24  | 81  | 3    | 0  |
| CONTIG-028218 | 80   | 13  | 5   | 20   | 0  |
| CONTIG-028219 | 189  | 11  | 8   | 97   | 0  |
| CONTIG-028220 | 464  | 8   | 4   | 88   | 6  |
| CONTIG-028221 | 210  | 10  | 6   | 59   | 0  |
| CONTIG-028222 | 293  | 4   | 2   | 19   | 2  |
| CONTIG-028223 | 69   | 10  | 34  | 2    | 0  |
| CONTIG-028224 | 111  | 6   | 28  | 4    | 0  |
| CONTIG-028225 | 270  | 15  | 17  | 87   | 0  |
| CONTIG-028226 | 319  | 12  | 40  | 145  | 0  |
| CONTIG-028229 | 523  | 44  | 60  | 1053 | 97 |
| CONTIG-028230 | 357  | 19  | 60  | 286  | 2  |
| CONTIG-028231 | 276  | 14  | 124 | 149  | 0  |
| CONTIG-028232 | 276  | 7   | 10  | 71   | 0  |
| CONTIG-028233 | 329  | 9   | 31  | 62   | 0  |
| CONTIG-028234 | 102  | 18  | 6   | 102  | 0  |
| CONTIG-028235 | 172  | 8   | 25  | 13   | 0  |
| CONTIG-028236 | 62   | 8   | 13  | 9    | 0  |
| CONTIG-028237 | 1420 | 17  | 109 | 649  | 17 |
| CONTIG-028238 | 390  | 24  | 63  | 267  | 4  |
| CONTIG-028239 | 155  | 13  | 21  | 68   | 0  |
| CONTIG-028240 | 79   | 14  | 7   | 21   | 0  |
| CONTIG-028241 | 216  | 22  | 71  | 62   | 3  |
| CONTIG-028242 | 222  | 13  | 18  | 67   | 0  |
| CONTIG-028243 | 182  | 6   | 31  | 18   | 0  |
| CONTIG-028244 | 93   | 822 | 59  | 3865 | 0  |
| CONTIG-028245 | 457  | 24  | 95  | 196  | 2  |
| CONTIG-028246 | 512  | 10  | 99  | 53   | 0  |
| CONTIG-028247 | 202  | 5   | 30  | 19   | 0  |

|               |     |     |     |      |    |
|---------------|-----|-----|-----|------|----|
| CONTIG-028248 | 115 | 13  | 17  | 44   | 0  |
| CONTIG-028249 | 114 | 11  | 7   | 27   | 0  |
| CONTIG-028250 | 191 | 16  | 14  | 42   | 3  |
| CONTIG-028252 | 184 | 55  | 34  | 0    | 63 |
| CONTIG-028254 | 99  | 6   | 29  | 8    | 0  |
| CONTIG-028255 | 131 | 28  | 33  | 51   | 0  |
| CONTIG-028257 | 312 | 17  | 19  | 153  | 0  |
| CONTIG-028258 | 61  | 4   | 2   | 6    | 0  |
| CONTIG-028259 | 130 | 5   | 5   | 9    | 0  |
| CONTIG-028260 | 416 | 10  | 42  | 194  | 0  |
| CONTIG-028261 | 111 | 14  | 12  | 69   | 0  |
| CONTIG-028262 | 162 | 9   | 5   | 54   | 0  |
| CONTIG-028263 | 83  | 10  | 20  | 19   | 0  |
| CONTIG-028264 | 257 | 7   | 11  | 70   | 0  |
| CONTIG-028265 | 437 | 11  | 18  | 6    | 0  |
| CONTIG-028266 | 69  | 65  | 49  | 51   | 0  |
| CONTIG-028267 | 511 | 71  | 248 | 794  | 49 |
| CONTIG-028268 | 122 | 5   | 15  | 6    | 0  |
| CONTIG-028269 | 151 | 3   | 8   | 9    | 0  |
| CONTIG-028270 | 273 | 10  | 73  | 47   | 0  |
| CONTIG-028271 | 73  | 128 | 117 | 344  | 0  |
| CONTIG-028272 | 384 | 22  | 85  | 281  | 4  |
| CONTIG-028273 | 264 | 5   | 6   | 35   | 0  |
| CONTIG-028274 | 272 | 15  | 22  | 24   | 0  |
| CONTIG-028275 | 136 | 37  | 12  | 0    | 41 |
| CONTIG-028276 | 111 | 17  | 39  | 61   | 0  |
| CONTIG-028277 | 173 | 16  | 68  | 43   | 0  |
| CONTIG-028278 | 62  | 3   | 0   | 3    | 0  |
| CONTIG-028279 | 160 | 11  | 14  | 43   | 0  |
| CONTIG-028280 | 458 | 34  | 54  | 243  | 11 |
| CONTIG-028281 | 180 | 10  | 24  | 12   | 0  |
| CONTIG-028282 | 607 | 20  | 64  | 252  | 17 |
| CONTIG-028283 | 430 | 22  | 152 | 233  | 5  |
| CONTIG-028285 | 150 | 6   | 8   | 20   | 0  |
| CONTIG-028290 | 557 | 18  | 63  | 271  | 0  |
| CONTIG-028291 | 458 | 20  | 107 | 263  | 7  |
| CONTIG-028292 | 463 | 11  | 48  | 83   | 0  |
| CONTIG-028293 | 90  | 15  | 0   | 49   | 0  |
| CONTIG-028294 | 303 | 134 | 111 | 1664 | 11 |
| CONTIG-028295 | 74  | 6   | 2   | 15   | 0  |
| CONTIG-028299 | 325 | 11  | 103 | 91   | 0  |
| CONTIG-028301 | 137 | 12  | 100 | 5    | 0  |
| CONTIG-028302 | 301 | 7   | 3   | 73   | 0  |
| CONTIG-028303 | 199 | 45  | 57  | 296  | 0  |
| CONTIG-028304 | 123 | 8   | 3   | 32   | 3  |
| CONTIG-028317 | 609 | 11  | 28  | 139  | 2  |
| CONTIG-028318 | 305 | 9   | 17  | 24   | 0  |



|               |      |     |     |     |    |
|---------------|------|-----|-----|-----|----|
| CONTIG-028319 | 254  | 10  | 11  | 28  | 6  |
| CONTIG-028320 | 384  | 15  | 91  | 84  | 0  |
| CONTIG-028330 | 402  | 44  | 94  | 299 | 10 |
| CONTIG-028331 | 144  | 14  | 0   | 0   | 4  |
| CONTIG-028337 | 254  | 12  | 30  | 116 | 0  |
| CONTIG-028341 | 437  | 9   | 35  | 85  | 0  |
| CONTIG-028342 | 89   | 9   | 19  | 6   | 0  |
| CONTIG-028343 | 75   | 22  | 85  | 41  | 0  |
| CONTIG-028344 | 74   | 6   | 8   | 6   | 0  |
| CONTIG-028345 | 47   | 273 | 346 | 86  | 25 |
| CONTIG-028346 | 88   | 5   | 10  | 4   | 0  |
| CONTIG-028347 | 67   | 6   | 10  | 2   | 0  |
| CONTIG-028348 | 58   | 4   | 2   | 7   | 0  |
| CONTIG-028349 | 144  | 16  | 156 | 15  | 0  |
| CONTIG-028350 | 566  | 16  | 30  | 323 | 2  |
| CONTIG-028352 | 170  | 9   | 4   | 29  | 0  |
| CONTIG-028353 | 291  | 12  | 24  | 89  | 0  |
| CONTIG-028354 | 62   | 9   | 6   | 17  | 0  |
| CONTIG-028355 | 513  | 16  | 53  | 269 | 3  |
| CONTIG-028356 | 57   | 63  | 78  | 138 | 0  |
| CONTIG-028357 | 333  | 35  | 73  | 605 | 0  |
| CONTIG-028359 | 233  | 26  | 66  | 155 | 0  |
| CONTIG-028360 | 75   | 6   | 0   | 16  | 0  |
| CONTIG-028361 | 69   | 4   | 8   | 7   | 0  |
| CONTIG-028362 | 413  | 15  | 145 | 136 | 0  |
| CONTIG-028363 | 65   | 8   | 6   | 17  | 2  |
| CONTIG-028365 | 74   | 8   | 3   | 19  | 0  |
| CONTIG-028367 | 54   | 12  | 5   | 17  | 0  |
| CONTIG-028368 | 607  | 18  | 22  | 333 | 0  |
| CONTIG-028369 | 356  | 20  | 65  | 279 | 0  |
| CONTIG-028374 | 109  | 4   | 0   | 3   | 0  |
| CONTIG-028375 | 1048 | 15  | 51  | 701 | 0  |
| CONTIG-028380 | 191  | 11  | 11  | 57  | 0  |
| CONTIG-028381 | 114  | 10  | 13  | 42  | 0  |
| CONTIG-028382 | 429  | 20  | 35  | 199 | 4  |
| CONTIG-028386 | 141  | 18  | 38  | 43  | 0  |
| CONTIG-028387 | 176  | 16  | 77  | 87  | 0  |
| CONTIG-028388 | 64   | 34  | 33  | 44  | 0  |
| CONTIG-028389 | 244  | 9   | 32  | 66  | 0  |
| CONTIG-028393 | 110  | 6   | 5   | 26  | 0  |
| CONTIG-028394 | 434  | 20  | 13  | 285 | 6  |
| CONTIG-028395 | 65   | 29  | 22  | 37  | 2  |
| CONTIG-028396 | 96   | 36  | 4   | 200 | 0  |
| CONTIG-028397 | 158  | 8   | 14  | 12  | 0  |
| CONTIG-028398 | 110  | 9   | 4   | 35  | 0  |
| CONTIG-028400 | 65   | 3   | 3   | 4   | 0  |
| CONTIG-028403 | 80   | 8   | 24  | 14  | 0  |

|               |      |     |     |      |     |
|---------------|------|-----|-----|------|-----|
| CONTIG-028404 | 349  | 165 | 72  | 1751 | 183 |
| CONTIG-028406 | 96   | 9   | 15  | 25   | 0   |
| CONTIG-028407 | 73   | 14  | 14  | 2    | 0   |
| CONTIG-028408 | 142  | 28  | 6   | 107  | 0   |
| CONTIG-028409 | 1021 | 14  | 41  | 544  | 4   |
| CONTIG-028410 | 150  | 9   | 4   | 35   | 0   |
| CONTIG-028411 | 1695 | 22  | 254 | 1095 | 17  |
| CONTIG-028412 | 292  | 14  | 3   | 60   | 0   |
| CONTIG-028413 | 569  | 32  | 57  | 476  | 2   |
| CONTIG-028414 | 409  | 5   | 13  | 47   | 0   |
| CONTIG-028415 | 63   | 8   | 51  | 0    | 0   |
| CONTIG-028416 | 111  | 12  | 57  | 19   | 0   |
| CONTIG-028417 | 792  | 27  | 118 | 748  | 0   |
| CONTIG-028418 | 168  | 9   | 47  | 48   | 0   |
| CONTIG-028419 | 727  | 29  | 50  | 804  | 23  |
| CONTIG-028420 | 524  | 9   | 44  | 50   | 6   |
| CONTIG-028426 | 264  | 32  | 141 | 309  | 2   |
| CONTIG-028427 | 208  | 11  | 46  | 75   | 0   |
| CONTIG-028428 | 193  | 6   | 39  | 23   | 0   |
| CONTIG-028429 | 120  | 14  | 77  | 17   | 0   |
| CONTIG-028430 | 123  | 13  | 7   | 37   | 0   |
| CONTIG-028431 | 249  | 20  | 13  | 26   | 0   |
| CONTIG-028432 | 72   | 75  | 6   | 250  | 0   |
| CONTIG-028433 | 185  | 10  | 20  | 73   | 0   |
| CONTIG-028434 | 420  | 18  | 42  | 300  | 0   |
| CONTIG-028435 | 169  | 14  | 19  | 111  | 0   |
| CONTIG-028436 | 143  | 4   | 7   | 9    | 0   |
| CONTIG-028438 | 184  | 20  | 4   | 114  | 5   |
| CONTIG-028439 | 47   | 34  | 23  | 23   | 0   |
| CONTIG-028441 | 150  | 9   | 13  | 46   | 0   |
| CONTIG-028442 | 66   | 9   | 32  | 0    | 0   |
| CONTIG-028443 | 233  | 26  | 14  | 308  | 0   |
| CONTIG-028445 | 276  | 18  | 2   | 217  | 9   |
| CONTIG-028446 | 543  | 12  | 75  | 120  | 0   |
| CONTIG-028447 | 659  | 28  | 40  | 346  | 18  |
| CONTIG-028448 | 224  | 9   | 34  | 62   | 0   |
| CONTIG-028449 | 170  | 12  | 0   | 76   | 0   |
| CONTIG-028450 | 88   | 8   | 13  | 19   | 0   |
| CONTIG-028451 | 103  | 20  | 4   | 96   | 0   |
| CONTIG-028452 | 320  | 13  | 64  | 93   | 2   |
| CONTIG-028453 | 374  | 17  | 57  | 112  | 0   |
| CONTIG-028454 | 123  | 10  | 14  | 34   | 0   |
| CONTIG-028455 | 72   | 4   | 3   | 6    | 0   |
| CONTIG-028456 | 479  | 23  | 111 | 360  | 2   |
| CONTIG-028457 | 61   | 12  | 10  | 7    | 0   |
| CONTIG-028458 | 111  | 28  | 28  | 142  | 0   |
| CONTIG-028459 | 89   | 86  | 48  | 92   | 3   |

|               |     |     |     |     |    |
|---------------|-----|-----|-----|-----|----|
| CONTIG-028463 | 577 | 35  | 16  | 633 | 65 |
| CONTIG-028464 | 383 | 38  | 35  | 223 | 2  |
| CONTIG-028465 | 132 | 8   | 8   | 39  | 0  |
| CONTIG-028466 | 669 | 22  | 26  | 770 | 2  |
| CONTIG-028467 | 233 | 15  | 160 | 40  | 0  |
| CONTIG-028468 | 154 | 5   | 18  | 13  | 3  |
| CONTIG-028469 | 329 | 13  | 158 | 78  | 0  |
| CONTIG-028470 | 107 | 9   | 24  | 4   | 0  |
| CONTIG-028471 | 67  | 10  | 57  | 0   | 0  |
| CONTIG-028472 | 139 | 12  | 12  | 34  | 0  |
| CONTIG-028473 | 65  | 9   | 2   | 2   | 0  |
| CONTIG-028474 | 72  | 11  | 32  | 13  | 0  |
| CONTIG-028475 | 117 | 9   | 5   | 34  | 0  |
| CONTIG-028476 | 136 | 23  | 8   | 65  | 0  |
| CONTIG-028477 | 186 | 18  | 19  | 106 | 2  |
| CONTIG-028478 | 136 | 9   | 15  | 18  | 0  |
| CONTIG-028479 | 97  | 13  | 2   | 32  | 0  |
| CONTIG-028480 | 56  | 39  | 29  | 92  | 0  |
| CONTIG-028481 | 162 | 146 | 115 | 909 | 2  |
| CONTIG-028482 | 215 | 20  | 23  | 137 | 0  |
| CONTIG-028483 | 62  | 3   | 6   | 5   | 0  |
| CONTIG-028484 | 267 | 7   | 14  | 0   | 10 |
| CONTIG-028485 | 133 | 15  | 8   | 91  | 0  |
| CONTIG-028487 | 124 | 37  | 14  | 27  | 0  |
| CONTIG-028488 | 69  | 5   | 16  | 7   | 0  |
| CONTIG-028489 | 195 | 18  | 46  | 153 | 0  |
| CONTIG-028490 | 215 | 19  | 172 | 121 | 0  |
| CONTIG-028491 | 634 | 140 | 40  | 106 | 0  |
| CONTIG-028492 | 215 | 46  | 16  | 208 | 6  |
| CONTIG-028493 | 94  | 14  | 16  | 8   | 0  |
| CONTIG-028495 | 91  | 6   | 17  | 19  | 0  |
| CONTIG-028496 | 575 | 18  | 47  | 130 | 10 |
| CONTIG-028497 | 232 | 7   | 7   | 28  | 2  |
| CONTIG-028498 | 142 | 9   | 8   | 51  | 0  |
| CONTIG-028499 | 129 | 13  | 10  | 19  | 0  |
| CONTIG-028500 | 133 | 11  | 24  | 20  | 0  |
| CONTIG-028501 | 70  | 3   | 6   | 5   | 0  |
| CONTIG-028502 | 461 | 7   | 37  | 71  | 5  |
| CONTIG-028503 | 245 | 15  | 67  | 157 | 0  |
| CONTIG-028507 | 411 | 10  | 59  | 63  | 2  |
| CONTIG-028508 | 170 | 32  | 109 | 191 | 0  |
| CONTIG-028511 | 89  | 5   | 4   | 12  | 0  |
| CONTIG-028512 | 386 | 18  | 5   | 212 | 2  |
| CONTIG-028513 | 392 | 12  | 43  | 91  | 4  |
| CONTIG-028514 | 428 | 40  | 17  | 547 | 0  |
| CONTIG-028515 | 62  | 2   | 0   | 0   | 0  |
| CONTIG-028518 | 110 | 5   | 8   | 17  | 0  |

|               |     |    |     |     |    |
|---------------|-----|----|-----|-----|----|
| CONTIG-028519 | 169 | 28 | 132 | 147 | 2  |
| CONTIG-028520 | 72  | 5  | 18  | 0   | 0  |
| CONTIG-028521 | 89  | 9  | 37  | 0   | 0  |
| CONTIG-028522 | 146 | 14 | 78  | 29  | 0  |
| CONTIG-028523 | 187 | 9  | 37  | 39  | 0  |
| CONTIG-028524 | 151 | 6  | 5   | 32  | 0  |
| CONTIG-028525 | 169 | 11 | 21  | 43  | 0  |
| CONTIG-028526 | 294 | 16 | 107 | 114 | 0  |
| CONTIG-028528 | 195 | 10 | 66  | 41  | 0  |
| CONTIG-028529 | 259 | 26 | 46  | 347 | 0  |
| CONTIG-028530 | 134 | 8  | 32  | 4   | 0  |
| CONTIG-028531 | 395 | 16 | 57  | 105 | 2  |
| CONTIG-028537 | 64  | 7  | 21  | 2   | 0  |
| CONTIG-028539 | 72  | 13 | 50  | 0   | 0  |
| CONTIG-028543 | 307 | 14 | 40  | 40  | 2  |
| CONTIG-028544 | 281 | 62 | 123 | 978 | 0  |
| CONTIG-028545 | 61  | 6  | 20  | 0   | 0  |
| CONTIG-028546 | 69  | 6  | 2   | 13  | 0  |
| CONTIG-028547 | 243 | 11 | 3   | 99  | 0  |
| CONTIG-028552 | 936 | 13 | 68  | 231 | 11 |
| CONTIG-028553 | 106 | 7  | 3   | 24  | 0  |
| CONTIG-028554 | 70  | 10 | 2   | 22  | 0  |
| CONTIG-028555 | 419 | 13 | 50  | 227 | 0  |
| CONTIG-028556 | 172 | 12 | 29  | 46  | 0  |
| CONTIG-028557 | 171 | 8  | 6   | 66  | 0  |
| CONTIG-028558 | 155 | 3  | 6   | 0   | 0  |
| CONTIG-028559 | 498 | 14 | 62  | 171 | 0  |
| CONTIG-028560 | 137 | 11 | 29  | 47  | 0  |
| CONTIG-028561 | 434 | 14 | 28  | 68  | 4  |
| CONTIG-028562 | 68  | 30 | 101 | 30  | 0  |
| CONTIG-028563 | 121 | 12 | 110 | 13  | 0  |
| CONTIG-028564 | 165 | 11 | 18  | 63  | 0  |
| CONTIG-028565 | 112 | 8  | 0   | 33  | 0  |
| CONTIG-028567 | 180 | 7  | 3   | 38  | 0  |
| CONTIG-028568 | 401 | 13 | 35  | 159 | 4  |
| CONTIG-028569 | 139 | 18 | 35  | 93  | 0  |
| CONTIG-028573 | 155 | 12 | 10  | 63  | 2  |
| CONTIG-028574 | 68  | 4  | 9   | 2   | 0  |
| CONTIG-028575 | 180 | 9  | 18  | 51  | 0  |
| CONTIG-028579 | 293 | 34 | 74  | 315 | 8  |
| CONTIG-028580 | 59  | 4  | 5   | 8   | 0  |
| CONTIG-028581 | 112 | 6  | 6   | 12  | 0  |
| CONTIG-028582 | 90  | 6  | 17  | 0   | 0  |
| CONTIG-028583 | 156 | 6  | 23  | 10  | 0  |
| CONTIG-028587 | 279 | 25 | 38  | 182 | 2  |
| CONTIG-028588 | 508 | 19 | 51  | 212 | 10 |
| CONTIG-028589 | 483 | 19 | 132 | 229 | 0  |

|               |     |     |     |     |    |
|---------------|-----|-----|-----|-----|----|
| CONTIG-028590 | 150 | 20  | 34  | 74  | 0  |
| CONTIG-028591 | 142 | 12  | 39  | 42  | 0  |
| CONTIG-028592 | 129 | 8   | 12  | 19  | 0  |
| CONTIG-028593 | 196 | 9   | 11  | 54  | 2  |
| CONTIG-028594 | 345 | 6   | 14  | 47  | 0  |
| CONTIG-028595 | 97  | 11  | 28  | 14  | 0  |
| CONTIG-028596 | 481 | 11  | 19  | 268 | 0  |
| CONTIG-028597 | 45  | 514 | 39  | 756 | 92 |
| CONTIG-028598 | 91  | 6   | 15  | 13  | 0  |
| CONTIG-028599 | 393 | 10  | 28  | 144 | 0  |
| CONTIG-028600 | 474 | 14  | 2   | 214 | 6  |
| CONTIG-028601 | 67  | 6   | 0   | 4   | 0  |
| CONTIG-028605 | 266 | 9   | 79  | 32  | 0  |
| CONTIG-028608 | 150 | 9   | 30  | 2   | 0  |
| CONTIG-028609 | 107 | 9   | 22  | 2   | 0  |
| CONTIG-028610 | 119 | 12  | 6   | 42  | 4  |
| CONTIG-028611 | 347 | 7   | 17  | 65  | 0  |
| CONTIG-028612 | 205 | 8   | 8   | 72  | 0  |
| CONTIG-028613 | 240 | 20  | 84  | 79  | 0  |
| CONTIG-028614 | 292 | 6   | 31  | 60  | 0  |
| CONTIG-028615 | 119 | 6   | 12  | 15  | 0  |
| CONTIG-028616 | 782 | 25  | 88  | 802 | 0  |
| CONTIG-028617 | 786 | 23  | 6   | 80  | 0  |
| CONTIG-028618 | 72  | 23  | 5   | 64  | 0  |
| CONTIG-028619 | 117 | 49  | 10  | 262 | 3  |
| CONTIG-028620 | 228 | 5   | 5   | 30  | 0  |
| CONTIG-028621 | 121 | 9   | 18  | 32  | 0  |
| CONTIG-028622 | 287 | 34  | 7   | 2   | 0  |
| CONTIG-028623 | 221 | 14  | 4   | 93  | 0  |
| CONTIG-028624 | 109 | 6   | 12  | 7   | 0  |
| CONTIG-028625 | 102 | 145 | 75  | 181 | 0  |
| CONTIG-028626 | 234 | 46  | 48  | 593 | 0  |
| CONTIG-028627 | 181 | 30  | 117 | 146 | 0  |
| CONTIG-028628 | 146 | 8   | 11  | 34  | 0  |
| CONTIG-028629 | 237 | 8   | 38  | 30  | 0  |
| CONTIG-028631 | 293 | 8   | 45  | 53  | 0  |
| CONTIG-028633 | 61  | 5   | 2   | 7   | 0  |
| CONTIG-028634 | 89  | 11  | 29  | 16  | 0  |
| CONTIG-028636 | 358 | 10  | 34  | 134 | 0  |
| CONTIG-028637 | 152 | 12  | 42  | 51  | 0  |
| CONTIG-028638 | 538 | 36  | 108 | 748 | 13 |
| CONTIG-028639 | 274 | 19  | 19  | 148 | 0  |
| CONTIG-028640 | 158 | 15  | 12  | 94  | 0  |
| CONTIG-028641 | 145 | 5   | 2   | 17  | 0  |
| CONTIG-028642 | 101 | 8   | 11  | 24  | 0  |
| CONTIG-028643 | 265 | 39  | 144 | 195 | 0  |
| CONTIG-028645 | 859 | 21  | 80  | 627 | 10 |

|               |      |    |     |      |     |
|---------------|------|----|-----|------|-----|
| CONTIG-028646 | 513  | 24 | 35  | 397  | 6   |
| CONTIG-028647 | 200  | 12 | 17  | 68   | 0   |
| CONTIG-028648 | 413  | 44 | 96  | 855  | 4   |
| CONTIG-028649 | 72   | 8  | 6   | 10   | 0   |
| CONTIG-028650 | 935  | 18 | 39  | 545  | 2   |
| CONTIG-028651 | 95   | 7  | 0   | 4    | 0   |
| CONTIG-028652 | 369  | 18 | 69  | 130  | 0   |
| CONTIG-028653 | 151  | 6  | 8   | 24   | 0   |
| CONTIG-028654 | 237  | 40 | 81  | 186  | 2   |
| CONTIG-028655 | 65   | 9  | 12  | 8    | 0   |
| CONTIG-028656 | 61   | 2  | 0   | 2    | 0   |
| CONTIG-028660 | 156  | 9  | 16  | 40   | 0   |
| CONTIG-028661 | 98   | 4  | 0   | 21   | 0   |
| CONTIG-028662 | 63   | 3  | 0   | 5    | 0   |
| CONTIG-028663 | 71   | 11 | 30  | 2    | 0   |
| CONTIG-028664 | 410  | 27 | 130 | 106  | 0   |
| CONTIG-028665 | 95   | 7  | 0   | 0    | 0   |
| CONTIG-028666 | 101  | 12 | 51  | 8    | 0   |
| CONTIG-028667 | 318  | 88 | 9   | 0    | 664 |
| CONTIG-028668 | 265  | 9  | 5   | 42   | 3   |
| CONTIG-028669 | 281  | 17 | 18  | 174  | 0   |
| CONTIG-028670 | 88   | 10 | 19  | 25   | 0   |
| CONTIG-028671 | 78   | 4  | 0   | 3    | 0   |
| CONTIG-028672 | 59   | 6  | 2   | 7    | 0   |
| CONTIG-028673 | 206  | 10 | 43  | 55   | 0   |
| CONTIG-028674 | 242  | 21 | 12  | 177  | 7   |
| CONTIG-028679 | 1026 | 25 | 85  | 1423 | 0   |
| CONTIG-028680 | 158  | 5  | 5   | 28   | 0   |
| CONTIG-028681 | 209  | 6  | 4   | 29   | 0   |
| CONTIG-028682 | 162  | 9  | 13  | 31   | 0   |
| CONTIG-028683 | 563  | 13 | 23  | 44   | 0   |
| CONTIG-028685 | 73   | 10 | 25  | 3    | 0   |
| CONTIG-028686 | 197  | 12 | 12  | 59   | 0   |
| CONTIG-028687 | 211  | 12 | 5   | 40   | 6   |
| CONTIG-028688 | 125  | 5  | 8   | 14   | 0   |
| CONTIG-028689 | 136  | 5  | 32  | 11   | 0   |
| CONTIG-028690 | 369  | 28 | 57  | 464  | 0   |
| CONTIG-028691 | 82   | 31 | 12  | 107  | 0   |
| CONTIG-028692 | 86   | 5  | 3   | 18   | 0   |
| CONTIG-028693 | 97   | 4  | 0   | 11   | 0   |
| CONTIG-028694 | 107  | 9  | 4   | 30   | 0   |
| CONTIG-028695 | 92   | 6  | 24  | 5    | 0   |
| CONTIG-028696 | 296  | 14 | 195 | 81   | 0   |
| CONTIG-028697 | 155  | 9  | 13  | 47   | 0   |
| CONTIG-028698 | 319  | 11 | 42  | 94   | 0   |
| CONTIG-028699 | 288  | 5  | 5   | 23   | 0   |
| CONTIG-028700 | 97   | 5  | 10  | 4    | 0   |

|               |      |     |     |      |    |
|---------------|------|-----|-----|------|----|
| CONTIG-028701 | 224  | 10  | 17  | 71   | 0  |
| CONTIG-028702 | 113  | 13  | 17  | 53   | 0  |
| CONTIG-028703 | 70   | 4   | 5   | 5    | 0  |
| CONTIG-028704 | 130  | 11  | 12  | 25   | 0  |
| CONTIG-028705 | 208  | 6   | 30  | 42   | 0  |
| CONTIG-028706 | 182  | 9   | 20  | 36   | 0  |
| CONTIG-028707 | 425  | 12  | 38  | 165  | 0  |
| CONTIG-028708 | 60   | 11  | 0   | 0    | 0  |
| CONTIG-028709 | 59   | 10  | 7   | 18   | 0  |
| CONTIG-028710 | 143  | 11  | 0   | 74   | 0  |
| CONTIG-028711 | 382  | 9   | 38  | 118  | 0  |
| CONTIG-028712 | 1115 | 18  | 58  | 764  | 5  |
| CONTIG-028713 | 642  | 24  | 147 | 422  | 6  |
| CONTIG-028714 | 66   | 261 | 95  | 600  | 21 |
| CONTIG-028715 | 541  | 37  | 145 | 555  | 2  |
| CONTIG-028716 | 186  | 7   | 5   | 30   | 0  |
| CONTIG-028717 | 169  | 22  | 5   | 165  | 0  |
| CONTIG-028718 | 270  | 8   | 30  | 16   | 0  |
| CONTIG-028719 | 1118 | 25  | 76  | 1309 | 4  |
| CONTIG-028720 | 99   | 3   | 0   | 5    | 0  |
| CONTIG-028721 | 210  | 28  | 40  | 196  | 0  |
| CONTIG-028722 | 181  | 12  | 2   | 94   | 0  |
| CONTIG-028723 | 202  | 10  | 8   | 47   | 0  |
| CONTIG-028724 | 112  | 8   | 9   | 2    | 0  |
| CONTIG-028725 | 67   | 11  | 0   | 27   | 2  |
| CONTIG-028726 | 312  | 30  | 7   | 51   | 0  |
| CONTIG-028727 | 79   | 7   | 5   | 11   | 0  |
| CONTIG-028728 | 237  | 9   | 9   | 44   | 0  |
| CONTIG-028731 | 391  | 14  | 29  | 277  | 0  |
| CONTIG-028734 | 211  | 6   | 20  | 10   | 0  |
| CONTIG-028735 | 107  | 9   | 2   | 10   | 0  |
| CONTIG-028736 | 97   | 28  | 47  | 78   | 0  |
| CONTIG-028737 | 274  | 8   | 36  | 66   | 0  |
| CONTIG-028745 | 107  | 19  | 30  | 72   | 0  |
| CONTIG-028746 | 468  | 20  | 74  | 382  | 0  |
| CONTIG-028749 | 470  | 29  | 64  | 212  | 8  |
| CONTIG-028750 | 527  | 15  | 74  | 164  | 0  |
| CONTIG-028751 | 88   | 4   | 5   | 4    | 0  |
| CONTIG-028752 | 65   | 10  | 23  | 4    | 0  |
| CONTIG-028753 | 294  | 14  | 56  | 116  | 0  |
| CONTIG-028754 | 63   | 6   | 4   | 15   | 0  |
| CONTIG-028755 | 59   | 7   | 12  | 10   | 0  |
| CONTIG-028758 | 126  | 16  | 37  | 50   | 0  |
| CONTIG-028770 | 190  | 7   | 4   | 40   | 0  |
| CONTIG-028771 | 155  | 5   | 7   | 26   | 0  |
| CONTIG-028774 | 209  | 11  | 31  | 67   | 0  |
| CONTIG-028775 | 779  | 14  | 98  | 321  | 4  |

|               |      |     |     |      |   |
|---------------|------|-----|-----|------|---|
| CONTIG-028779 | 178  | 4   | 7   | 23   | 0 |
| CONTIG-028780 | 76   | 8   | 2   | 17   | 0 |
| CONTIG-028781 | 88   | 10  | 12  | 28   | 0 |
| CONTIG-028782 | 58   | 50  | 38  | 94   | 0 |
| CONTIG-028783 | 476  | 8   | 2   | 146  | 0 |
| CONTIG-028785 | 72   | 9   | 0   | 12   | 4 |
| CONTIG-028786 | 255  | 12  | 13  | 79   | 0 |
| CONTIG-028787 | 192  | 27  | 24  | 177  | 2 |
| CONTIG-028788 | 1153 | 25  | 57  | 185  | 0 |
| CONTIG-028789 | 422  | 12  | 136 | 54   | 0 |
| CONTIG-028790 | 95   | 5   | 2   | 5    | 2 |
| CONTIG-028791 | 77   | 10  | 46  | 5    | 0 |
| CONTIG-028792 | 124  | 7   | 5   | 12   | 0 |
| CONTIG-028793 | 97   | 7   | 8   | 14   | 0 |
| CONTIG-028795 | 119  | 4   | 6   | 17   | 0 |
| CONTIG-028796 | 197  | 7   | 43  | 36   | 2 |
| CONTIG-028797 | 53   | 141 | 280 | 170  | 0 |
| CONTIG-028798 | 73   | 443 | 262 | 736  | 6 |
| CONTIG-028799 | 59   | 4   | 10  | 3    | 0 |
| CONTIG-028800 | 92   | 4   | 4   | 2    | 0 |
| CONTIG-028801 | 111  | 8   | 19  | 2    | 0 |
| CONTIG-028802 | 288  | 9   | 13  | 57   | 0 |
| CONTIG-028803 | 117  | 8   | 25  | 26   | 0 |
| CONTIG-028804 | 79   | 6   | 9   | 6    | 0 |
| CONTIG-028806 | 77   | 8   | 11  | 4    | 0 |
| CONTIG-028807 | 108  | 12  | 10  | 46   | 0 |
| CONTIG-028808 | 370  | 8   | 68  | 94   | 0 |
| CONTIG-028809 | 74   | 6   | 9   | 3    | 0 |
| CONTIG-028810 | 169  | 13  | 5   | 83   | 0 |
| CONTIG-028813 | 379  | 23  | 30  | 61   | 0 |
| CONTIG-028814 | 129  | 53  | 19  | 24   | 0 |
| CONTIG-028815 | 68   | 3   | 0   | 4    | 0 |
| CONTIG-028816 | 136  | 23  | 16  | 102  | 2 |
| CONTIG-028818 | 197  | 6   | 6   | 36   | 0 |
| CONTIG-028819 | 589  | 27  | 64  | 823  | 0 |
| CONTIG-028820 | 167  | 9   | 19  | 5    | 0 |
| CONTIG-028821 | 264  | 9   | 22  | 54   | 2 |
| CONTIG-028822 | 518  | 51  | 27  | 49   | 0 |
| CONTIG-028824 | 98   | 16  | 33  | 16   | 0 |
| CONTIG-028825 | 101  | 8   | 0   | 4    | 0 |
| CONTIG-028826 | 114  | 4   | 3   | 11   | 0 |
| CONTIG-028827 | 294  | 78  | 24  | 1327 | 0 |
| CONTIG-028828 | 113  | 13  | 19  | 46   | 2 |
| CONTIG-028829 | 206  | 10  | 12  | 72   | 0 |
| CONTIG-028830 | 103  | 7   | 10  | 12   | 0 |
| CONTIG-028831 | 94   | 22  | 15  | 54   | 3 |
| CONTIG-028832 | 420  | 15  | 35  | 257  | 0 |



|               |     |      |     |      |    |
|---------------|-----|------|-----|------|----|
| CONTIG-028833 | 343 | 12   | 21  | 100  | 0  |
| CONTIG-028834 | 156 | 13   | 56  | 60   | 2  |
| CONTIG-028835 | 115 | 3    | 5   | 10   | 0  |
| CONTIG-028836 | 668 | 12   | 33  | 130  | 0  |
| CONTIG-028837 | 247 | 14   | 28  | 104  | 0  |
| CONTIG-028838 | 246 | 21   | 33  | 126  | 0  |
| CONTIG-028839 | 207 | 10   | 21  | 55   | 0  |
| CONTIG-028840 | 58  | 16   | 54  | 2    | 0  |
| CONTIG-028841 | 81  | 6    | 20  | 11   | 0  |
| CONTIG-028842 | 73  | 3    | 5   | 2    | 0  |
| CONTIG-028843 | 115 | 7    | 5   | 20   | 0  |
| CONTIG-028844 | 280 | 19   | 92  | 122  | 2  |
| CONTIG-028846 | 117 | 4    | 9   | 2    | 0  |
| CONTIG-028855 | 586 | 25   | 81  | 580  | 0  |
| CONTIG-028856 | 86  | 6    | 0   | 16   | 0  |
| CONTIG-028857 | 307 | 27   | 43  | 288  | 5  |
| CONTIG-028860 | 70  | 6    | 0   | 8    | 0  |
| CONTIG-028861 | 662 | 14   | 96  | 243  | 8  |
| CONTIG-028862 | 529 | 11   | 40  | 181  | 2  |
| CONTIG-028864 | 443 | 35   | 63  | 829  | 0  |
| CONTIG-028865 | 515 | 46   | 232 | 494  | 15 |
| CONTIG-028867 | 500 | 12   | 37  | 147  | 0  |
| CONTIG-028868 | 78  | 8    | 25  | 9    | 0  |
| CONTIG-028869 | 111 | 9    | 63  | 10   | 0  |
| CONTIG-028870 | 72  | 1552 | 173 | 4691 | 0  |
| CONTIG-028871 | 168 | 12   | 14  | 40   | 0  |
| CONTIG-028872 | 197 | 7    | 4   | 39   | 0  |
| CONTIG-028873 | 419 | 15   | 5   | 12   | 0  |
| CONTIG-028874 | 467 | 8    | 9   | 133  | 0  |
| CONTIG-028875 | 213 | 19   | 66  | 74   | 0  |
| CONTIG-028877 | 72  | 3    | 2   | 8    | 0  |
| CONTIG-028878 | 153 | 8    | 33  | 28   | 0  |
| CONTIG-028881 | 230 | 21   | 33  | 119  | 0  |
| CONTIG-028882 | 110 | 39   | 9   | 96   | 2  |
| CONTIG-028883 | 92  | 8    | 6   | 28   | 0  |
| CONTIG-028884 | 59  | 6    | 0   | 0    | 0  |
| CONTIG-028885 | 58  | 7    | 6   | 10   | 0  |
| CONTIG-028886 | 229 | 139  | 27  | 0    | 0  |
| CONTIG-028887 | 136 | 6    | 8   | 4    | 2  |
| CONTIG-028888 | 264 | 25   | 50  | 159  | 6  |
| CONTIG-028889 | 236 | 19   | 19  | 146  | 0  |
| CONTIG-028890 | 393 | 10   | 36  | 64   | 0  |
| CONTIG-028891 | 258 | 5    | 0   | 34   | 0  |
| CONTIG-028892 | 124 | 14   | 0   | 24   | 0  |
| CONTIG-028893 | 99  | 7    | 2   | 25   | 0  |
| CONTIG-028894 | 235 | 25   | 16  | 4    | 0  |
| CONTIG-028895 | 122 | 8    | 3   | 2    | 0  |

|               |      |    |     |      |    |
|---------------|------|----|-----|------|----|
| CONTIG-028896 | 280  | 12 | 39  | 119  | 2  |
| CONTIG-028897 | 347  | 34 | 31  | 679  | 2  |
| CONTIG-028898 | 109  | 4  | 0   | 9    | 0  |
| CONTIG-028899 | 353  | 9  | 42  | 48   | 2  |
| CONTIG-028900 | 92   | 4  | 6   | 6    | 0  |
| CONTIG-028901 | 235  | 11 | 59  | 59   | 0  |
| CONTIG-028902 | 98   | 7  | 4   | 2    | 6  |
| CONTIG-028905 | 182  | 8  | 29  | 34   | 0  |
| CONTIG-028906 | 80   | 4  | 12  | 10   | 0  |
| CONTIG-028907 | 99   | 6  | 10  | 17   | 0  |
| CONTIG-028908 | 297  | 11 | 35  | 66   | 0  |
| CONTIG-028909 | 63   | 6  | 2   | 13   | 0  |
| CONTIG-028910 | 130  | 5  | 5   | 17   | 0  |
| CONTIG-028911 | 234  | 32 | 10  | 315  | 0  |
| CONTIG-028912 | 145  | 10 | 15  | 35   | 0  |
| CONTIG-028913 | 487  | 26 | 6   | 0    | 92 |
| CONTIG-028914 | 152  | 12 | 13  | 32   | 0  |
| CONTIG-028915 | 122  | 6  | 11  | 26   | 0  |
| CONTIG-028916 | 968  | 50 | 18  | 22   | 0  |
| CONTIG-028919 | 177  | 21 | 121 | 95   | 0  |
| CONTIG-028920 | 1200 | 22 | 138 | 1068 | 6  |
| CONTIG-028921 | 229  | 24 | 120 | 190  | 0  |
| CONTIG-028923 | 418  | 25 | 34  | 337  | 4  |
| CONTIG-028924 | 589  | 14 | 63  | 299  | 0  |
| CONTIG-028925 | 1169 | 11 | 48  | 531  | 0  |
| CONTIG-028926 | 238  | 10 | 9   | 76   | 4  |
| CONTIG-028927 | 190  | 8  | 3   | 43   | 4  |
| CONTIG-028928 | 117  | 6  | 20  | 4    | 2  |
| CONTIG-028929 | 104  | 3  | 10  | 2    | 0  |
| CONTIG-028930 | 94   | 7  | 2   | 2    | 0  |
| CONTIG-028931 | 127  | 5  | 0   | 22   | 0  |
| CONTIG-028932 | 259  | 33 | 82  | 201  | 4  |
| CONTIG-028933 | 324  | 18 | 9   | 196  | 12 |
| CONTIG-028934 | 36   | 37 | 0   | 34   | 2  |
| CONTIG-028935 | 138  | 11 | 17  | 30   | 2  |
| CONTIG-028936 | 431  | 13 | 36  | 198  | 4  |
| CONTIG-028937 | 82   | 3  | 0   | 5    | 0  |
| CONTIG-028938 | 1108 | 17 | 90  | 990  | 0  |
| CONTIG-028939 | 224  | 8  | 17  | 45   | 0  |
| CONTIG-028940 | 203  | 6  | 15  | 41   | 0  |
| CONTIG-028941 | 191  | 16 | 26  | 146  | 0  |
| CONTIG-028942 | 488  | 15 | 76  | 287  | 2  |
| CONTIG-028943 | 585  | 12 | 72  | 166  | 2  |
| CONTIG-028944 | 197  | 8  | 3   | 0    | 13 |
| CONTIG-028945 | 285  | 20 | 33  | 181  | 0  |
| CONTIG-028946 | 66   | 5  | 6   | 9    | 0  |
| CONTIG-028948 | 133  | 42 | 12  | 287  | 2  |

|               |     |     |     |      |    |
|---------------|-----|-----|-----|------|----|
| CONTIG-028949 | 75  | 8   | 2   | 6    | 0  |
| CONTIG-028950 | 503 | 9   | 68  | 85   | 2  |
| CONTIG-028952 | 96  | 4   | 0   | 2    | 0  |
| CONTIG-028953 | 660 | 15  | 86  | 274  | 4  |
| CONTIG-028954 | 128 | 21  | 85  | 91   | 0  |
| CONTIG-028955 | 491 | 9   | 18  | 149  | 0  |
| CONTIG-028956 | 85  | 6   | 2   | 16   | 0  |
| CONTIG-028957 | 71  | 15  | 22  | 40   | 2  |
| CONTIG-028958 | 396 | 20  | 136 | 220  | 0  |
| CONTIG-028959 | 278 | 15  | 55  | 132  | 0  |
| CONTIG-028960 | 195 | 9   | 12  | 76   | 0  |
| CONTIG-028961 | 329 | 61  | 21  | 1060 | 2  |
| CONTIG-028962 | 361 | 19  | 87  | 280  | 0  |
| CONTIG-028963 | 267 | 10  | 5   | 31   | 0  |
| CONTIG-028964 | 113 | 3   | 0   | 11   | 0  |
| CONTIG-028969 | 146 | 4   | 3   | 11   | 0  |
| CONTIG-028970 | 569 | 20  | 169 | 363  | 0  |
| CONTIG-028971 | 73  | 10  | 8   | 21   | 0  |
| CONTIG-028972 | 59  | 22  | 43  | 12   | 0  |
| CONTIG-028973 | 67  | 7   | 2   | 4    | 0  |
| CONTIG-028975 | 500 | 16  | 139 | 336  | 0  |
| CONTIG-028976 | 119 | 7   | 4   | 14   | 0  |
| CONTIG-028977 | 76  | 6   | 4   | 9    | 0  |
| CONTIG-028978 | 97  | 7   | 21  | 7    | 0  |
| CONTIG-028979 | 400 | 15  | 25  | 278  | 0  |
| CONTIG-028980 | 340 | 14  | 9   | 5    | 0  |
| CONTIG-028981 | 655 | 12  | 48  | 330  | 0  |
| CONTIG-028982 | 154 | 8   | 5   | 28   | 2  |
| CONTIG-028983 | 225 | 194 | 101 | 1762 | 13 |
| CONTIG-028984 | 558 | 18  | 41  | 372  | 2  |
| CONTIG-028985 | 146 | 7   | 12  | 17   | 0  |
| CONTIG-028986 | 759 | 41  | 221 | 1769 | 0  |
| CONTIG-028987 | 161 | 21  | 210 | 45   | 0  |
| CONTIG-028988 | 710 | 19  | 127 | 342  | 4  |
| CONTIG-028989 | 278 | 7   | 31  | 39   | 0  |
| CONTIG-028990 | 465 | 14  | 36  | 163  | 0  |
| CONTIG-028991 | 239 | 14  | 119 | 73   | 0  |
| CONTIG-028992 | 151 | 18  | 91  | 34   | 0  |
| CONTIG-028993 | 175 | 53  | 24  | 545  | 0  |
| CONTIG-028994 | 653 | 12  | 22  | 293  | 0  |
| CONTIG-028996 | 210 | 9   | 32  | 22   | 0  |
| CONTIG-028997 | 303 | 6   | 14  | 44   | 0  |
| CONTIG-028998 | 58  | 22  | 4   | 32   | 0  |
| CONTIG-028999 | 42  | 79  | 8   | 98   | 0  |
| CONTIG-029002 | 150 | 11  | 16  | 62   | 0  |
| CONTIG-029003 | 156 | 13  | 9   | 20   | 0  |
| CONTIG-029004 | 104 | 83  | 240 | 53   | 12 |

|               |      |     |     |      |    |
|---------------|------|-----|-----|------|----|
| CONTIG-029005 | 205  | 7   | 13  | 14   | 0  |
| CONTIG-029006 | 1174 | 36  | 24  | 150  | 9  |
| CONTIG-029007 | 189  | 5   | 2   | 23   | 0  |
| CONTIG-029008 | 92   | 11  | 25  | 0    | 0  |
| CONTIG-029009 | 182  | 13  | 17  | 94   | 0  |
| CONTIG-029010 | 388  | 20  | 14  | 0    | 29 |
| CONTIG-029012 | 63   | 109 | 91  | 318  | 2  |
| CONTIG-029013 | 67   | 3   | 4   | 5    | 0  |
| CONTIG-029014 | 562  | 11  | 101 | 90   | 0  |
| CONTIG-029015 | 81   | 17  | 11  | 42   | 0  |
| CONTIG-029016 | 76   | 5   | 7   | 13   | 0  |
| CONTIG-029017 | 434  | 8   | 23  | 126  | 0  |
| CONTIG-029018 | 104  | 6   | 19  | 22   | 0  |
| CONTIG-029019 | 266  | 18  | 6   | 237  | 0  |
| CONTIG-029027 | 68   | 16  | 31  | 16   | 0  |
| CONTIG-029030 | 595  | 14  | 58  | 212  | 6  |
| CONTIG-029031 | 92   | 11  | 5   | 30   | 0  |
| CONTIG-029033 | 521  | 14  | 110 | 169  | 4  |
| CONTIG-029034 | 389  | 21  | 51  | 357  | 0  |
| CONTIG-029035 | 146  | 14  | 76  | 51   | 0  |
| CONTIG-029036 | 72   | 9   | 13  | 0    | 0  |
| CONTIG-029037 | 1392 | 24  | 98  | 1051 | 2  |
| CONTIG-029038 | 390  | 20  | 13  | 10   | 0  |
| CONTIG-029039 | 202  | 8   | 15  | 18   | 0  |
| CONTIG-029040 | 174  | 6   | 4   | 14   | 0  |
| CONTIG-029041 | 78   | 13  | 12  | 8    | 0  |
| CONTIG-029042 | 157  | 14  | 13  | 62   | 0  |
| CONTIG-029043 | 168  | 13  | 11  | 78   | 0  |
| CONTIG-029044 | 110  | 10  | 19  | 8    | 0  |
| CONTIG-029045 | 100  | 4   | 22  | 3    | 0  |
| CONTIG-029054 | 201  | 6   | 13  | 27   | 0  |
| CONTIG-029055 | 159  | 6   | 22  | 4    | 0  |
| CONTIG-029057 | 93   | 309 | 152 | 425  | 10 |
| CONTIG-029058 | 397  | 13  | 67  | 160  | 0  |
| CONTIG-029061 | 482  | 16  | 35  | 312  | 2  |
| CONTIG-029062 | 194  | 10  | 26  | 71   | 2  |
| CONTIG-029063 | 430  | 12  | 59  | 165  | 0  |
| CONTIG-029064 | 845  | 24  | 44  | 424  | 10 |
| CONTIG-029065 | 713  | 17  | 34  | 308  | 6  |
| CONTIG-029067 | 94   | 15  | 39  | 31   | 0  |
| CONTIG-029069 | 126  | 9   | 4   | 54   | 0  |
| CONTIG-029070 | 266  | 10  | 4   | 87   | 0  |
| CONTIG-029071 | 64   | 26  | 7   | 0    | 0  |
| CONTIG-029073 | 87   | 13  | 4   | 52   | 0  |
| CONTIG-029074 | 184  | 9   | 0   | 82   | 0  |
| CONTIG-029083 | 75   | 3   | 0   | 2    | 0  |
| CONTIG-029084 | 76   | 7   | 11  | 8    | 0  |

|               |      |     |     |      |    |
|---------------|------|-----|-----|------|----|
| CONTIG-029085 | 68   | 7   | 9   | 11   | 0  |
| CONTIG-029086 | 137  | 5   | 9   | 17   | 0  |
| CONTIG-029087 | 739  | 25  | 115 | 295  | 6  |
| CONTIG-029088 | 192  | 12  | 40  | 86   | 0  |
| CONTIG-029089 | 376  | 17  | 36  | 273  | 4  |
| CONTIG-029090 | 73   | 14  | 26  | 25   | 0  |
| CONTIG-029091 | 348  | 21  | 78  | 150  | 0  |
| CONTIG-029092 | 73   | 17  | 19  | 40   | 2  |
| CONTIG-029093 | 68   | 3   | 7   | 0    | 0  |
| CONTIG-029094 | 516  | 22  | 145 | 342  | 2  |
| CONTIG-029095 | 802  | 27  | 31  | 1289 | 0  |
| CONTIG-029096 | 220  | 11  | 6   | 61   | 0  |
| CONTIG-029097 | 74   | 7   | 45  | 5    | 0  |
| CONTIG-029098 | 77   | 12  | 11  | 22   | 0  |
| CONTIG-029099 | 646  | 25  | 73  | 482  | 6  |
| CONTIG-029100 | 166  | 8   | 62  | 28   | 0  |
| CONTIG-029101 | 84   | 5   | 0   | 4    | 0  |
| CONTIG-029102 | 58   | 6   | 0   | 12   | 0  |
| CONTIG-029103 | 105  | 11  | 10  | 2    | 0  |
| CONTIG-029104 | 491  | 14  | 2   | 73   | 18 |
| CONTIG-029110 | 311  | 11  | 15  | 113  | 0  |
| CONTIG-029112 | 70   | 14  | 39  | 8    | 0  |
| CONTIG-029113 | 487  | 113 | 26  | 1664 | 2  |
| CONTIG-029114 | 113  | 12  | 12  | 16   | 0  |
| CONTIG-029115 | 67   | 12  | 4   | 12   | 0  |
| CONTIG-029116 | 108  | 6   | 20  | 0    | 0  |
| CONTIG-029118 | 122  | 8   | 0   | 41   | 0  |
| CONTIG-029119 | 118  | 7   | 43  | 9    | 0  |
| CONTIG-029120 | 60   | 6   | 0   | 19   | 0  |
| CONTIG-029121 | 742  | 73  | 90  | 2087 | 0  |
| CONTIG-029122 | 63   | 12  | 11  | 28   | 0  |
| CONTIG-029123 | 194  | 8   | 4   | 47   | 0  |
| CONTIG-029124 | 195  | 10  | 25  | 58   | 0  |
| CONTIG-029125 | 1025 | 13  | 12  | 172  | 51 |
| CONTIG-029126 | 520  | 11  | 6   | 198  | 0  |
| CONTIG-029127 | 102  | 83  | 95  | 302  | 0  |
| CONTIG-029128 | 71   | 4   | 9   | 0    | 0  |
| CONTIG-029129 | 523  | 21  | 152 | 218  | 2  |
| CONTIG-029132 | 45   | 98  | 11  | 164  | 0  |
| CONTIG-029133 | 367  | 15  | 84  | 113  | 2  |
| CONTIG-029134 | 115  | 24  | 73  | 8    | 0  |
| CONTIG-029135 | 363  | 9   | 14  | 77   | 4  |
| CONTIG-029140 | 352  | 11  | 26  | 119  | 0  |
| CONTIG-029141 | 360  | 9   | 14  | 59   | 0  |
| CONTIG-029142 | 63   | 6   | 3   | 4    | 0  |
| CONTIG-029143 | 101  | 25  | 38  | 119  | 0  |
| CONTIG-029144 | 143  | 10  | 3   | 17   | 0  |

|               |      |    |     |      |     |
|---------------|------|----|-----|------|-----|
| CONTIG-029145 | 67   | 9  | 3   | 8    | 0   |
| CONTIG-029146 | 253  | 30 | 57  | 298  | 4   |
| CONTIG-029148 | 89   | 6  | 31  | 0    | 0   |
| CONTIG-029150 | 871  | 15 | 146 | 298  | 0   |
| CONTIG-029151 | 661  | 12 | 38  | 245  | 2   |
| CONTIG-029152 | 1633 | 25 | 167 | 1216 | 104 |
| CONTIG-029153 | 59   | 5  | 4   | 0    | 0   |
| CONTIG-029154 | 68   | 8  | 2   | 21   | 0   |
| CONTIG-029155 | 66   | 10 | 6   | 11   | 4   |
| CONTIG-029157 | 252  | 19 | 67  | 118  | 0   |
| CONTIG-029158 | 91   | 11 | 4   | 25   | 0   |
| CONTIG-029160 | 129  | 7  | 8   | 30   | 0   |
| CONTIG-029161 | 97   | 5  | 0   | 25   | 0   |
| CONTIG-029162 | 155  | 4  | 0   | 19   | 0   |
| CONTIG-029163 | 59   | 10 | 31  | 0    | 0   |
| CONTIG-029164 | 87   | 6  | 8   | 13   | 0   |
| CONTIG-029165 | 134  | 8  | 21  | 26   | 0   |
| CONTIG-029166 | 66   | 15 | 10  | 39   | 0   |
| CONTIG-029167 | 199  | 9  | 5   | 99   | 0   |
| CONTIG-029168 | 307  | 10 | 14  | 89   | 0   |
| CONTIG-029169 | 90   | 44 | 46  | 174  | 0   |
| CONTIG-029170 | 942  | 25 | 122 | 622  | 0   |
| CONTIG-029171 | 321  | 9  | 7   | 82   | 0   |
| CONTIG-029172 | 219  | 9  | 30  | 41   | 0   |
| CONTIG-029173 | 175  | 25 | 105 | 96   | 4   |
| CONTIG-029174 | 82   | 8  | 29  | 5    | 0   |
| CONTIG-029181 | 123  | 11 | 22  | 23   | 0   |
| CONTIG-029182 | 380  | 8  | 12  | 99   | 0   |
| CONTIG-029183 | 117  | 4  | 16  | 2    | 0   |
| CONTIG-029184 | 73   | 4  | 2   | 7    | 0   |
| CONTIG-029185 | 415  | 10 | 26  | 92   | 0   |
| CONTIG-029186 | 413  | 11 | 112 | 127  | 0   |
| CONTIG-029187 | 69   | 19 | 22  | 52   | 0   |
| CONTIG-029188 | 63   | 5  | 2   | 0    | 0   |
| CONTIG-029189 | 744  | 21 | 36  | 534  | 2   |
| CONTIG-029190 | 86   | 5  | 5   | 10   | 0   |
| CONTIG-029191 | 219  | 17 | 34  | 54   | 0   |
| CONTIG-029192 | 117  | 9  | 24  | 28   | 0   |
| CONTIG-029193 | 66   | 5  | 2   | 0    | 0   |
| CONTIG-029194 | 264  | 8  | 24  | 57   | 2   |
| CONTIG-029195 | 103  | 5  | 8   | 17   | 0   |
| CONTIG-029196 | 114  | 96 | 74  | 25   | 0   |
| CONTIG-029198 | 641  | 17 | 78  | 425  | 6   |
| CONTIG-029200 | 768  | 12 | 41  | 333  | 0   |
| CONTIG-029201 | 264  | 22 | 213 | 68   | 2   |
| CONTIG-029202 | 204  | 10 | 3   | 69   | 0   |
| CONTIG-029203 | 273  | 9  | 5   | 87   | 0   |

|               |     |    |     |     |    |
|---------------|-----|----|-----|-----|----|
| CONTIG-029204 | 307 | 15 | 39  | 153 | 2  |
| CONTIG-029205 | 140 | 10 | 30  | 41  | 2  |
| CONTIG-029206 | 176 | 4  | 8   | 19  | 0  |
| CONTIG-029207 | 128 | 7  | 4   | 15  | 0  |
| CONTIG-029208 | 179 | 6  | 2   | 32  | 0  |
| CONTIG-029210 | 689 | 18 | 117 | 440 | 4  |
| CONTIG-029211 | 352 | 9  | 22  | 91  | 0  |
| CONTIG-029212 | 202 | 5  | 0   | 23  | 0  |
| CONTIG-029214 | 178 | 15 | 25  | 88  | 0  |
| CONTIG-029215 | 110 | 7  | 11  | 31  | 0  |
| CONTIG-029216 | 377 | 11 | 13  | 105 | 4  |
| CONTIG-029217 | 85  | 43 | 110 | 61  | 0  |
| CONTIG-029218 | 81  | 8  | 45  | 4   | 0  |
| CONTIG-029219 | 174 | 7  | 16  | 28  | 0  |
| CONTIG-029220 | 899 | 25 | 51  | 589 | 16 |
| CONTIG-029221 | 160 | 64 | 151 | 296 | 0  |
| CONTIG-029222 | 332 | 19 | 37  | 140 | 0  |
| CONTIG-029223 | 165 | 42 | 77  | 146 | 0  |
| CONTIG-029226 | 362 | 47 | 8   | 802 | 0  |
| CONTIG-029227 | 120 | 13 | 62  | 8   | 0  |
| CONTIG-029228 | 254 | 15 | 9   | 84  | 2  |
| CONTIG-029229 | 607 | 17 | 159 | 237 | 2  |
| CONTIG-029230 | 75  | 3  | 9   | 0   | 0  |
| CONTIG-029231 | 76  | 7  | 9   | 10  | 0  |
| CONTIG-029233 | 306 | 15 | 21  | 183 | 0  |
| CONTIG-029236 | 316 | 8  | 9   | 55  | 0  |
| CONTIG-029237 | 77  | 4  | 0   | 0   | 2  |
| CONTIG-029238 | 224 | 9  | 36  | 18  | 0  |
| CONTIG-029239 | 149 | 6  | 2   | 25  | 0  |
| CONTIG-029240 | 149 | 10 | 0   | 44  | 0  |
| CONTIG-029241 | 104 | 2  | 2   | 6   | 0  |
| CONTIG-029242 | 324 | 7  | 42  | 53  | 0  |
| CONTIG-029243 | 277 | 11 | 42  | 75  | 0  |
| CONTIG-029244 | 362 | 9  | 3   | 86  | 2  |
| CONTIG-029245 | 176 | 5  | 9   | 15  | 0  |
| CONTIG-029246 | 82  | 8  | 20  | 7   | 0  |
| CONTIG-029247 | 102 | 5  | 12  | 4   | 0  |
| CONTIG-029248 | 89  | 7  | 5   | 13  | 2  |
| CONTIG-029249 | 312 | 22 | 87  | 78  | 7  |
| CONTIG-029250 | 393 | 18 | 42  | 211 | 0  |
| CONTIG-029252 | 448 | 18 | 27  | 437 | 0  |
| CONTIG-029253 | 516 | 17 | 66  | 333 | 0  |
| CONTIG-029254 | 497 | 11 | 10  | 180 | 0  |
| CONTIG-029259 | 190 | 14 | 93  | 56  | 0  |
| CONTIG-029260 | 135 | 3  | 14  | 2   | 0  |
| CONTIG-029261 | 61  | 22 | 12  | 0   | 0  |
| CONTIG-029262 | 173 | 5  | 26  | 17  | 0  |

|               |     |     |     |     |    |
|---------------|-----|-----|-----|-----|----|
| CONTIG-029263 | 138 | 6   | 3   | 21  | 0  |
| CONTIG-029264 | 269 | 8   | 17  | 58  | 7  |
| CONTIG-029270 | 138 | 7   | 12  | 22  | 0  |
| CONTIG-029271 | 63  | 7   | 3   | 5   | 0  |
| CONTIG-029272 | 74  | 21  | 13  | 39  | 0  |
| CONTIG-029273 | 383 | 19  | 57  | 40  | 0  |
| CONTIG-029274 | 118 | 6   | 5   | 26  | 0  |
| CONTIG-029277 | 47  | 188 | 32  | 11  | 0  |
| CONTIG-029278 | 87  | 6   | 2   | 21  | 0  |
| CONTIG-029279 | 78  | 4   | 3   | 9   | 0  |
| CONTIG-029280 | 69  | 10  | 4   | 6   | 0  |
| CONTIG-029281 | 98  | 7   | 12  | 17  | 0  |
| CONTIG-029282 | 106 | 8   | 35  | 2   | 0  |
| CONTIG-029283 | 242 | 9   | 12  | 42  | 0  |
| CONTIG-029284 | 190 | 14  | 53  | 30  | 0  |
| CONTIG-029285 | 366 | 15  | 9   | 98  | 0  |
| CONTIG-029286 | 59  | 7   | 28  | 0   | 0  |
| CONTIG-029287 | 105 | 12  | 75  | 11  | 0  |
| CONTIG-029288 | 132 | 6   | 10  | 25  | 0  |
| CONTIG-029290 | 216 | 60  | 75  | 420 | 4  |
| CONTIG-029291 | 83  | 9   | 7   | 18  | 0  |
| CONTIG-029292 | 266 | 12  | 2   | 158 | 0  |
| CONTIG-029293 | 331 | 6   | 2   | 55  | 0  |
| CONTIG-029295 | 429 | 12  | 33  | 241 | 0  |
| CONTIG-029296 | 536 | 13  | 30  | 329 | 2  |
| CONTIG-029297 | 113 | 5   | 3   | 10  | 0  |
| CONTIG-029298 | 122 | 7   | 8   | 26  | 0  |
| CONTIG-029299 | 63  | 4   | 2   | 0   | 0  |
| CONTIG-029300 | 384 | 9   | 40  | 48  | 0  |
| CONTIG-029302 | 99  | 8   | 0   | 23  | 0  |
| CONTIG-029303 | 141 | 7   | 6   | 20  | 0  |
| CONTIG-029304 | 168 | 8   | 22  | 18  | 0  |
| CONTIG-029305 | 68  | 8   | 9   | 5   | 0  |
| CONTIG-029306 | 548 | 20  | 102 | 240 | 2  |
| CONTIG-029307 | 69  | 17  | 49  | 0   | 0  |
| CONTIG-029308 | 300 | 8   | 10  | 83  | 0  |
| CONTIG-029309 | 389 | 20  | 89  | 343 | 0  |
| CONTIG-029310 | 83  | 7   | 7   | 23  | 0  |
| CONTIG-029311 | 69  | 10  | 6   | 19  | 0  |
| CONTIG-029312 | 105 | 19  | 23  | 33  | 0  |
| CONTIG-029313 | 220 | 11  | 19  | 74  | 0  |
| CONTIG-029314 | 69  | 3   | 2   | 6   | 0  |
| CONTIG-029315 | 207 | 13  | 74  | 34  | 0  |
| CONTIG-029316 | 83  | 7   | 17  | 17  | 0  |
| CONTIG-029320 | 306 | 49  | 105 | 652 | 20 |
| CONTIG-029321 | 657 | 28  | 185 | 506 | 0  |
| CONTIG-029322 | 517 | 10  | 51  | 198 | 0  |



|               |      |     |     |      |     |
|---------------|------|-----|-----|------|-----|
| CONTIG-029323 | 99   | 495 | 43  | 1831 | 0   |
| CONTIG-029324 | 785  | 21  | 15  | 573  | 8   |
| CONTIG-029325 | 131  | 4   | 5   | 13   | 0   |
| CONTIG-029326 | 224  | 8   | 7   | 63   | 0   |
| CONTIG-029327 | 63   | 8   | 10  | 7    | 0   |
| CONTIG-029328 | 184  | 8   | 3   | 24   | 2   |
| CONTIG-029330 | 130  | 5   | 10  | 3    | 0   |
| CONTIG-029331 | 115  | 22  | 94  | 17   | 0   |
| CONTIG-029332 | 772  | 13  | 53  | 274  | 4   |
| CONTIG-029333 | 178  | 7   | 6   | 28   | 0   |
| CONTIG-029334 | 586  | 24  | 89  | 449  | 15  |
| CONTIG-029335 | 163  | 9   | 12  | 42   | 0   |
| CONTIG-029336 | 61   | 6   | 17  | 4    | 0   |
| CONTIG-029337 | 157  | 48  | 29  | 104  | 0   |
| CONTIG-029338 | 304  | 17  | 84  | 192  | 3   |
| CONTIG-029339 | 66   | 185 | 57  | 108  | 0   |
| CONTIG-029340 | 378  | 10  | 73  | 96   | 0   |
| CONTIG-029341 | 170  | 15  | 44  | 49   | 0   |
| CONTIG-029342 | 241  | 8   | 8   | 24   | 0   |
| CONTIG-029344 | 352  | 33  | 136 | 427  | 2   |
| CONTIG-029345 | 144  | 10  | 9   | 53   | 0   |
| CONTIG-029346 | 324  | 14  | 38  | 194  | 0   |
| CONTIG-029347 | 117  | 7   | 7   | 33   | 0   |
| CONTIG-029348 | 166  | 280 | 85  | 1487 | 131 |
| CONTIG-029349 | 1020 | 42  | 98  | 2531 | 0   |
| CONTIG-029352 | 251  | 16  | 25  | 76   | 0   |
| CONTIG-029357 | 467  | 21  | 22  | 378  | 0   |
| CONTIG-029358 | 193  | 10  | 38  | 65   | 4   |
| CONTIG-029359 | 200  | 16  | 47  | 117  | 0   |
| CONTIG-029360 | 138  | 99  | 76  | 591  | 0   |
| CONTIG-029361 | 216  | 11  | 11  | 104  | 0   |
| CONTIG-029362 | 73   | 3   | 5   | 2    | 0   |
| CONTIG-029363 | 92   | 31  | 65  | 13   | 0   |
| CONTIG-029364 | 36   | 494 | 19  | 451  | 0   |
| CONTIG-029366 | 293  | 50  | 11  | 12   | 120 |
| CONTIG-029367 | 130  | 13  | 20  | 60   | 0   |
| CONTIG-029369 | 596  | 15  | 12  | 27   | 0   |
| CONTIG-029370 | 82   | 22  | 60  | 9    | 0   |
| CONTIG-029371 | 652  | 22  | 30  | 645  | 0   |
| CONTIG-029373 | 183  | 13  | 4   | 91   | 0   |
| CONTIG-029374 | 95   | 4   | 6   | 6    | 0   |
| CONTIG-029378 | 298  | 51  | 56  | 199  | 0   |
| CONTIG-029380 | 69   | 7   | 9   | 11   | 0   |
| CONTIG-029381 | 190  | 18  | 47  | 93   | 0   |
| CONTIG-029382 | 82   | 6   | 0   | 8    | 0   |
| CONTIG-029383 | 61   | 16  | 26  | 17   | 2   |
| CONTIG-029384 | 498  | 17  | 20  | 455  | 0   |

|               |      |    |     |     |    |
|---------------|------|----|-----|-----|----|
| CONTIG-029385 | 44   | 12 | 5   | 10  | 0  |
| CONTIG-029386 | 643  | 36 | 217 | 319 | 2  |
| CONTIG-029387 | 662  | 22 | 77  | 446 | 0  |
| CONTIG-029388 | 88   | 5  | 4   | 7   | 0  |
| CONTIG-029389 | 48   | 57 | 32  | 88  | 0  |
| CONTIG-029390 | 58   | 6  | 2   | 0   | 0  |
| CONTIG-029391 | 113  | 5  | 15  | 12  | 0  |
| CONTIG-029392 | 179  | 21 | 5   | 123 | 2  |
| CONTIG-029393 | 59   | 32 | 15  | 52  | 0  |
| CONTIG-029394 | 198  | 10 | 12  | 69  | 0  |
| CONTIG-029395 | 262  | 6  | 15  | 60  | 0  |
| CONTIG-029396 | 188  | 15 | 6   | 115 | 0  |
| CONTIG-029397 | 431  | 9  | 10  | 97  | 0  |
| CONTIG-029398 | 95   | 12 | 19  | 35  | 0  |
| CONTIG-029399 | 128  | 9  | 7   | 9   | 0  |
| CONTIG-029400 | 197  | 17 | 71  | 37  | 0  |
| CONTIG-029401 | 300  | 8  | 15  | 100 | 0  |
| CONTIG-029402 | 435  | 35 | 90  | 16  | 94 |
| CONTIG-029404 | 258  | 7  | 18  | 38  | 0  |
| CONTIG-029405 | 334  | 8  | 5   | 46  | 0  |
| CONTIG-029406 | 416  | 10 | 35  | 110 | 0  |
| CONTIG-029407 | 237  | 13 | 10  | 67  | 0  |
| CONTIG-029408 | 67   | 8  | 21  | 10  | 0  |
| CONTIG-029409 | 61   | 9  | 10  | 0   | 0  |
| CONTIG-029412 | 78   | 3  | 0   | 7   | 0  |
| CONTIG-029414 | 404  | 12 | 24  | 130 | 0  |
| CONTIG-029415 | 251  | 7  | 0   | 46  | 0  |
| CONTIG-029416 | 85   | 10 | 20  | 17  | 2  |
| CONTIG-029417 | 149  | 15 | 8   | 101 | 0  |
| CONTIG-029418 | 220  | 20 | 15  | 129 | 0  |
| CONTIG-029420 | 306  | 15 | 13  | 124 | 5  |
| CONTIG-029421 | 469  | 8  | 29  | 60  | 0  |
| CONTIG-029422 | 135  | 4  | 3   | 5   | 0  |
| CONTIG-029423 | 185  | 22 | 34  | 110 | 0  |
| CONTIG-029424 | 270  | 20 | 16  | 173 | 9  |
| CONTIG-029425 | 124  | 7  | 3   | 33  | 0  |
| CONTIG-029426 | 235  | 9  | 21  | 18  | 0  |
| CONTIG-029427 | 558  | 15 | 100 | 239 | 17 |
| CONTIG-029428 | 261  | 46 | 151 | 535 | 0  |
| CONTIG-029429 | 1073 | 14 | 135 | 321 | 10 |
| CONTIG-029430 | 141  | 20 | 86  | 6   | 0  |
| CONTIG-029431 | 151  | 9  | 19  | 37  | 2  |
| CONTIG-029432 | 376  | 16 | 22  | 83  | 4  |
| CONTIG-029433 | 143  | 12 | 10  | 57  | 0  |
| CONTIG-029434 | 70   | 4  | 3   | 0   | 0  |
| CONTIG-029435 | 281  | 32 | 23  | 405 | 2  |
| CONTIG-029436 | 172  | 13 | 16  | 84  | 0  |

|               |     |     |     |      |    |
|---------------|-----|-----|-----|------|----|
| CONTIG-029437 | 133 | 15  | 29  | 68   | 2  |
| CONTIG-029438 | 82  | 4   | 2   | 9    | 0  |
| CONTIG-029440 | 136 | 6   | 2   | 22   | 2  |
| CONTIG-029441 | 83  | 3   | 3   | 2    | 0  |
| CONTIG-029443 | 114 | 4   | 2   | 5    | 0  |
| CONTIG-029445 | 284 | 49  | 117 | 495  | 2  |
| CONTIG-029446 | 175 | 7   | 9   | 41   | 0  |
| CONTIG-029447 | 156 | 8   | 5   | 36   | 0  |
| CONTIG-029451 | 81  | 8   | 0   | 14   | 0  |
| CONTIG-029452 | 94  | 24  | 82  | 38   | 0  |
| CONTIG-029453 | 101 | 10  | 11  | 34   | 0  |
| CONTIG-029456 | 301 | 6   | 31  | 24   | 0  |
| CONTIG-029457 | 146 | 4   | 4   | 4    | 0  |
| CONTIG-029459 | 118 | 12  | 67  | 6    | 0  |
| CONTIG-029460 | 224 | 8   | 11  | 43   | 0  |
| CONTIG-029461 | 259 | 40  | 151 | 335  | 11 |
| CONTIG-029462 | 731 | 27  | 211 | 274  | 0  |
| CONTIG-029463 | 208 | 54  | 74  | 340  | 0  |
| CONTIG-029464 | 559 | 14  | 35  | 272  | 2  |
| CONTIG-029465 | 114 | 23  | 65  | 87   | 0  |
| CONTIG-029466 | 101 | 361 | 150 | 1463 | 5  |
| CONTIG-029467 | 176 | 15  | 22  | 78   | 0  |
| CONTIG-029468 | 171 | 6   | 6   | 17   | 0  |
| CONTIG-029469 | 104 | 5   | 7   | 0    | 0  |
| CONTIG-029470 | 128 | 10  | 4   | 51   | 0  |
| CONTIG-029472 | 66  | 4   | 3   | 12   | 0  |
| CONTIG-029473 | 47  | 882 | 123 | 107  | 0  |
| CONTIG-029474 | 130 | 10  | 79  | 19   | 0  |
| CONTIG-029475 | 74  | 193 | 35  | 939  | 0  |
| CONTIG-029476 | 95  | 5   | 15  | 11   | 0  |
| CONTIG-029477 | 196 | 5   | 22  | 32   | 0  |
| CONTIG-029478 | 119 | 6   | 28  | 17   | 0  |
| CONTIG-029479 | 274 | 10  | 20  | 115  | 0  |
| CONTIG-029481 | 288 | 12  | 15  | 100  | 4  |
| CONTIG-029482 | 194 | 9   | 8   | 48   | 0  |
| CONTIG-029484 | 111 | 5   | 5   | 17   | 0  |
| CONTIG-029485 | 520 | 19  | 78  | 126  | 6  |
| CONTIG-029486 | 122 | 7   | 0   | 28   | 0  |
| CONTIG-029487 | 418 | 12  | 39  | 166  | 0  |
| CONTIG-029488 | 60  | 4   | 2   | 4    | 0  |
| CONTIG-029489 | 77  | 5   | 8   | 8    | 0  |
| CONTIG-029491 | 46  | 23  | 2   | 46   | 0  |
| CONTIG-029492 | 111 | 20  | 40  | 51   | 0  |
| CONTIG-029493 | 203 | 20  | 26  | 171  | 6  |
| CONTIG-029494 | 400 | 10  | 45  | 112  | 0  |
| CONTIG-029495 | 61  | 13  | 6   | 25   | 0  |
| CONTIG-029496 | 229 | 7   | 7   | 17   | 0  |

|               |     |    |     |     |   |
|---------------|-----|----|-----|-----|---|
| CONTIG-029497 | 142 | 16 | 21  | 116 | 0 |
| CONTIG-029498 | 61  | 3  | 4   | 0   | 0 |
| CONTIG-029499 | 156 | 8  | 0   | 54  | 0 |
| CONTIG-029500 | 78  | 12 | 6   | 22  | 0 |
| CONTIG-029501 | 378 | 12 | 46  | 114 | 7 |
| CONTIG-029505 | 61  | 10 | 4   | 15  | 0 |
| CONTIG-029506 | 282 | 48 | 65  | 415 | 2 |
| CONTIG-029507 | 50  | 8  | 3   | 0   | 0 |
| CONTIG-029508 | 148 | 6  | 2   | 41  | 0 |
| CONTIG-029509 | 180 | 22 | 158 | 70  | 2 |
| CONTIG-029510 | 219 | 4  | 2   | 28  | 0 |
| CONTIG-029511 | 158 | 6  | 10  | 20  | 0 |
| CONTIG-029512 | 79  | 7  | 0   | 21  | 0 |
| CONTIG-029513 | 71  | 7  | 6   | 14  | 0 |
| CONTIG-029514 | 107 | 14 | 11  | 59  | 0 |
| CONTIG-029515 | 88  | 8  | 21  | 6   | 0 |
| CONTIG-029516 | 98  | 8  | 10  | 5   | 0 |
| CONTIG-029517 | 145 | 18 | 11  | 135 | 0 |
| CONTIG-029521 | 120 | 7  | 3   | 22  | 0 |
| CONTIG-029523 | 310 | 24 | 28  | 297 | 4 |
| CONTIG-029528 | 370 | 18 | 48  | 29  | 6 |
| CONTIG-029529 | 160 | 14 | 7   | 115 | 0 |
| CONTIG-029530 | 344 | 20 | 57  | 154 | 0 |
| CONTIG-029536 | 397 | 14 | 13  | 194 | 2 |
| CONTIG-029537 | 155 | 23 | 24  | 58  | 0 |
| CONTIG-029538 | 246 | 7  | 7   | 56  | 0 |
| CONTIG-029539 | 253 | 14 | 38  | 91  | 0 |
| CONTIG-029540 | 579 | 25 | 50  | 395 | 2 |
| CONTIG-029542 | 475 | 13 | 79  | 160 | 0 |
| CONTIG-029543 | 150 | 7  | 25  | 27  | 0 |
| CONTIG-029544 | 181 | 14 | 55  | 62  | 0 |
| CONTIG-029545 | 685 | 12 | 87  | 216 | 0 |
| CONTIG-029546 | 97  | 5  | 10  | 3   | 0 |
| CONTIG-029547 | 66  | 7  | 7   | 10  | 0 |
| CONTIG-029548 | 52  | 8  | 7   | 4   | 0 |
| CONTIG-029549 | 696 | 25 | 226 | 606 | 7 |
| CONTIG-029556 | 74  | 6  | 15  | 10  | 0 |
| CONTIG-029557 | 104 | 7  | 5   | 13  | 0 |
| CONTIG-029558 | 71  | 3  | 3   | 2   | 0 |
| CONTIG-029559 | 299 | 21 | 75  | 8   | 0 |
| CONTIG-029562 | 83  | 4  | 2   | 10  | 0 |
| CONTIG-029563 | 223 | 7  | 27  | 27  | 0 |
| CONTIG-029564 | 230 | 5  | 9   | 35  | 0 |
| CONTIG-029565 | 111 | 7  | 9   | 21  | 0 |
| CONTIG-029566 | 136 | 84 | 112 | 345 | 0 |
| CONTIG-029567 | 133 | 11 | 2   | 28  | 0 |
| CONTIG-029569 | 84  | 6  | 9   | 9   | 0 |

|               |     |     |     |      |     |
|---------------|-----|-----|-----|------|-----|
| CONTIG-029570 | 349 | 63  | 37  | 1351 | 4   |
| CONTIG-029575 | 73  | 5   | 17  | 0    | 0   |
| CONTIG-029577 | 83  | 5   | 9   | 14   | 0   |
| CONTIG-029578 | 717 | 10  | 195 | 192  | 0   |
| CONTIG-029579 | 225 | 18  | 9   | 114  | 2   |
| CONTIG-029581 | 361 | 14  | 32  | 198  | 4   |
| CONTIG-029582 | 453 | 15  | 49  | 217  | 0   |
| CONTIG-029583 | 342 | 69  | 5   | 1371 | 2   |
| CONTIG-029584 | 309 | 20  | 23  | 288  | 2   |
| CONTIG-029585 | 70  | 4   | 0   | 5    | 2   |
| CONTIG-029586 | 223 | 178 | 85  | 2119 | 19  |
| CONTIG-029589 | 116 | 12  | 37  | 14   | 0   |
| CONTIG-029590 | 255 | 6   | 26  | 46   | 0   |
| CONTIG-029591 | 162 | 23  | 29  | 72   | 0   |
| CONTIG-029592 | 336 | 8   | 21  | 45   | 0   |
| CONTIG-029593 | 60  | 10  | 6   | 12   | 0   |
| CONTIG-029596 | 256 | 12  | 7   | 116  | 2   |
| CONTIG-029598 | 375 | 10  | 23  | 89   | 0   |
| CONTIG-029599 | 260 | 28  | 52  | 264  | 0   |
| CONTIG-029600 | 251 | 33  | 37  | 68   | 0   |
| CONTIG-029601 | 70  | 26  | 5   | 27   | 0   |
| CONTIG-029602 | 208 | 10  | 11  | 78   | 0   |
| CONTIG-029603 | 373 | 9   | 10  | 154  | 0   |
| CONTIG-029605 | 94  | 4   | 7   | 3    | 0   |
| CONTIG-029606 | 67  | 4   | 0   | 4    | 0   |
| CONTIG-029607 | 125 | 11  | 63  | 8    | 0   |
| CONTIG-029609 | 498 | 22  | 2   | 0    | 131 |
| CONTIG-029611 | 195 | 9   | 47  | 55   | 0   |
| CONTIG-029613 | 129 | 5   | 6   | 8    | 0   |
| CONTIG-029614 | 322 | 24  | 94  | 273  | 0   |
| CONTIG-029615 | 879 | 16  | 86  | 342  | 6   |
| CONTIG-029616 | 262 | 18  | 32  | 139  | 4   |
| CONTIG-029617 | 101 | 34  | 2   | 169  | 0   |
| CONTIG-029618 | 173 | 10  | 13  | 24   | 0   |
| CONTIG-029619 | 167 | 6   | 6   | 24   | 0   |
| CONTIG-029620 | 357 | 15  | 76  | 135  | 0   |
| CONTIG-029621 | 155 | 8   | 18  | 25   | 0   |
| CONTIG-029622 | 180 | 8   | 6   | 24   | 0   |
| CONTIG-029623 | 79  | 11  | 21  | 15   | 0   |
| CONTIG-029624 | 86  | 12  | 15  | 21   | 0   |
| CONTIG-029625 | 148 | 4   | 2   | 2    | 0   |
| CONTIG-029626 | 224 | 24  | 45  | 210  | 0   |
| CONTIG-029627 | 160 | 15  | 180 | 17   | 0   |
| CONTIG-029628 | 391 | 15  | 54  | 124  | 6   |
| CONTIG-029629 | 222 | 140 | 112 | 1036 | 33  |
| CONTIG-029630 | 182 | 9   | 25  | 32   | 2   |
| CONTIG-029633 | 64  | 8   | 13  | 0    | 0   |

|               |     |    |     |     |    |
|---------------|-----|----|-----|-----|----|
| CONTIG-029634 | 77  | 25 | 7   | 4   | 0  |
| CONTIG-029637 | 728 | 14 | 72  | 299 | 0  |
| CONTIG-029640 | 359 | 9  | 74  | 0   | 12 |
| CONTIG-029642 | 406 | 38 | 68  | 547 | 0  |
| CONTIG-029645 | 279 | 19 | 50  | 168 | 0  |
| CONTIG-029663 | 131 | 14 | 103 | 31  | 0  |
| CONTIG-029669 | 59  | 9  | 21  | 6   | 0  |
| CONTIG-029671 | 65  | 5  | 2   | 7   | 0  |
| CONTIG-029672 | 210 | 17 | 93  | 66  | 0  |
| CONTIG-029673 | 783 | 10 | 13  | 211 | 2  |
| CONTIG-029674 | 168 | 8  | 8   | 12  | 0  |
| CONTIG-029675 | 58  | 5  | 3   | 4   | 0  |
| CONTIG-029676 | 159 | 8  | 12  | 51  | 0  |
| CONTIG-029677 | 71  | 14 | 60  | 11  | 0  |
| CONTIG-029678 | 89  | 13 | 20  | 46  | 0  |
| CONTIG-029679 | 170 | 18 | 35  | 139 | 0  |
| CONTIG-029680 | 123 | 14 | 18  | 71  | 0  |
| CONTIG-029681 | 886 | 12 | 364 | 286 | 0  |
| CONTIG-029683 | 59  | 8  | 3   | 4   | 0  |
| CONTIG-029684 | 817 | 27 | 142 | 493 | 14 |
| CONTIG-029685 | 102 | 7  | 16  | 27  | 0  |
| CONTIG-029686 | 320 | 5  | 19  | 50  | 0  |
| CONTIG-029687 | 168 | 14 | 19  | 62  | 0  |
| CONTIG-029688 | 67  | 8  | 13  | 0   | 0  |
| CONTIG-029689 | 162 | 8  | 6   | 43  | 0  |
| CONTIG-029690 | 282 | 13 | 12  | 155 | 0  |
| CONTIG-029691 | 338 | 8  | 16  | 25  | 0  |
| CONTIG-029692 | 112 | 11 | 40  | 37  | 0  |
| CONTIG-029693 | 81  | 5  | 4   | 18  | 0  |
| CONTIG-029694 | 157 | 13 | 7   | 93  | 0  |
| CONTIG-029695 | 330 | 20 | 61  | 263 | 0  |
| CONTIG-029696 | 84  | 13 | 4   | 45  | 0  |
| CONTIG-029697 | 416 | 9  | 73  | 101 | 0  |
| CONTIG-029698 | 64  | 7  | 4   | 6   | 0  |
| CONTIG-029699 | 64  | 6  | 40  | 0   | 0  |
| CONTIG-029700 | 183 | 21 | 6   | 19  | 0  |
| CONTIG-029701 | 162 | 10 | 19  | 14  | 0  |
| CONTIG-029702 | 176 | 14 | 11  | 65  | 0  |
| CONTIG-029703 | 419 | 29 | 167 | 118 | 12 |
| CONTIG-029704 | 222 | 5  | 16  | 32  | 0  |
| CONTIG-029707 | 168 | 13 | 16  | 95  | 0  |
| CONTIG-029708 | 104 | 7  | 0   | 0   | 2  |
| CONTIG-029709 | 152 | 15 | 8   | 65  | 0  |
| CONTIG-029710 | 271 | 25 | 41  | 49  | 0  |
| CONTIG-029711 | 223 | 8  | 31  | 62  | 0  |
| CONTIG-029712 | 94  | 10 | 2   | 20  | 4  |
| CONTIG-029713 | 329 | 21 | 29  | 175 | 0  |

|               |     |     |     |      |     |
|---------------|-----|-----|-----|------|-----|
| CONTIG-029714 | 58  | 7   | 4   | 4    | 0   |
| CONTIG-029715 | 302 | 8   | 55  | 58   | 0   |
| CONTIG-029716 | 229 | 438 | 364 | 4964 | 103 |
| CONTIG-029717 | 166 | 14  | 41  | 43   | 0   |
| CONTIG-029718 | 105 | 10  | 3   | 28   | 0   |
| CONTIG-029719 | 713 | 22  | 43  | 886  | 2   |
| CONTIG-029720 | 671 | 23  | 61  | 333  | 4   |
| CONTIG-029721 | 91  | 21  | 88  | 10   | 0   |
| CONTIG-029722 | 70  | 9   | 30  | 13   | 0   |
| CONTIG-029723 | 65  | 18  | 2   | 47   | 0   |
| CONTIG-029724 | 969 | 14  | 48  | 314  | 8   |
| CONTIG-029725 | 544 | 11  | 84  | 146  | 0   |
| CONTIG-029726 | 305 | 22  | 92  | 215  | 6   |
| CONTIG-029732 | 573 | 26  | 69  | 775  | 0   |
| CONTIG-029733 | 84  | 7   | 4   | 6    | 0   |
| CONTIG-029734 | 166 | 18  | 96  | 50   | 0   |
| CONTIG-029735 | 468 | 12  | 63  | 137  | 6   |
| CONTIG-029737 | 133 | 13  | 40  | 6    | 2   |
| CONTIG-029738 | 71  | 10  | 8   | 0    | 0   |
| CONTIG-029739 | 141 | 13  | 64  | 9    | 0   |
| CONTIG-029740 | 85  | 8   | 2   | 16   | 0   |
| CONTIG-029741 | 96  | 14  | 30  | 4    | 0   |
| CONTIG-029742 | 383 | 12  | 31  | 101  | 0   |
| CONTIG-029743 | 129 | 22  | 27  | 71   | 0   |
| CONTIG-029744 | 73  | 6   | 2   | 4    | 0   |
| CONTIG-029745 | 367 | 12  | 42  | 121  | 0   |
| CONTIG-029746 | 153 | 12  | 3   | 79   | 0   |
| CONTIG-029747 | 185 | 30  | 199 | 130  | 2   |
| CONTIG-029748 | 394 | 8   | 17  | 85   | 0   |
| CONTIG-029749 | 75  | 8   | 43  | 0    | 0   |
| CONTIG-029750 | 111 | 6   | 9   | 17   | 0   |
| CONTIG-029751 | 811 | 12  | 118 | 253  | 6   |
| CONTIG-029752 | 341 | 13  | 37  | 206  | 0   |
| CONTIG-029753 | 86  | 5   | 8   | 12   | 0   |
| CONTIG-029754 | 895 | 21  | 34  | 82   | 61  |
| CONTIG-029755 | 468 | 13  | 35  | 146  | 2   |
| CONTIG-029757 | 545 | 45  | 0   | 0    | 145 |
| CONTIG-029758 | 598 | 52  | 82  | 1280 | 4   |
| CONTIG-029759 | 190 | 6   | 19  | 35   | 0   |
| CONTIG-029760 | 100 | 22  | 16  | 10   | 0   |
| CONTIG-029761 | 284 | 7   | 4   | 43   | 0   |
| CONTIG-029762 | 117 | 8   | 5   | 16   | 0   |
| CONTIG-029763 | 179 | 13  | 9   | 77   | 2   |
| CONTIG-029764 | 234 | 9   | 48  | 49   | 0   |
| CONTIG-029765 | 307 | 10  | 24  | 69   | 0   |
| CONTIG-029766 | 449 | 16  | 4   | 9    | 0   |
| CONTIG-029768 | 83  | 9   | 20  | 8    | 0   |

|               |      |     |     |      |    |
|---------------|------|-----|-----|------|----|
| CONTIG-029769 | 371  | 12  | 61  | 93   | 2  |
| CONTIG-029772 | 81   | 27  | 73  | 42   | 2  |
| CONTIG-029773 | 93   | 16  | 25  | 24   | 0  |
| CONTIG-029774 | 96   | 22  | 42  | 83   | 0  |
| CONTIG-029775 | 112  | 8   | 6   | 24   | 0  |
| CONTIG-029776 | 147  | 8   | 6   | 17   | 0  |
| CONTIG-029777 | 181  | 9   | 29  | 38   | 0  |
| CONTIG-029778 | 336  | 11  | 2   | 0    | 25 |
| CONTIG-029779 | 270  | 8   | 18  | 60   | 0  |
| CONTIG-029780 | 519  | 10  | 11  | 177  | 0  |
| CONTIG-029781 | 80   | 6   | 3   | 18   | 0  |
| CONTIG-029782 | 1575 | 22  | 161 | 1749 | 0  |
| CONTIG-029783 | 86   | 3   | 0   | 4    | 2  |
| CONTIG-029784 | 347  | 9   | 17  | 137  | 0  |
| CONTIG-029785 | 609  | 24  | 86  | 514  | 0  |
| CONTIG-029786 | 131  | 9   | 44  | 10   | 2  |
| CONTIG-029787 | 162  | 8   | 45  | 27   | 0  |
| CONTIG-029795 | 191  | 10  | 28  | 55   | 0  |
| CONTIG-029797 | 80   | 8   | 18  | 9    | 0  |
| CONTIG-029798 | 292  | 7   | 4   | 45   | 0  |
| CONTIG-029799 | 69   | 7   | 8   | 9    | 0  |
| CONTIG-029800 | 584  | 13  | 15  | 105  | 0  |
| CONTIG-029801 | 73   | 3   | 7   | 4    | 0  |
| CONTIG-029802 | 289  | 15  | 128 | 60   | 0  |
| CONTIG-029803 | 69   | 7   | 16  | 0    | 0  |
| CONTIG-029804 | 113  | 7   | 2   | 10   | 0  |
| CONTIG-029805 | 244  | 7   | 15  | 45   | 0  |
| CONTIG-029807 | 41   | 49  | 47  | 19   | 10 |
| CONTIG-029808 | 52   | 10  | 2   | 13   | 0  |
| CONTIG-029809 | 346  | 10  | 43  | 30   | 2  |
| CONTIG-029810 | 300  | 21  | 40  | 171  | 0  |
| CONTIG-029813 | 432  | 8   | 97  | 62   | 0  |
| CONTIG-029814 | 591  | 16  | 90  | 504  | 0  |
| CONTIG-029815 | 153  | 5   | 6   | 20   | 0  |
| CONTIG-029816 | 95   | 3   | 4   | 4    | 0  |
| CONTIG-029817 | 120  | 7   | 31  | 19   | 0  |
| CONTIG-029818 | 67   | 5   | 2   | 2    | 0  |
| CONTIG-029820 | 527  | 33  | 144 | 895  | 0  |
| CONTIG-029823 | 224  | 239 | 25  | 165  | 0  |
| CONTIG-029829 | 2656 | 44  | 27  | 23   | 0  |
| CONTIG-029830 | 334  | 18  | 14  | 177  | 22 |
| CONTIG-029831 | 112  | 5   | 5   | 15   | 0  |
| CONTIG-029832 | 100  | 5   | 5   | 4    | 0  |
| CONTIG-029833 | 113  | 11  | 52  | 28   | 0  |
| CONTIG-029834 | 68   | 3   | 2   | 2    | 0  |
| CONTIG-029835 | 495  | 13  | 36  | 219  | 4  |
| CONTIG-029843 | 99   | 15  | 17  | 65   | 2  |



|               |      |     |     |      |    |
|---------------|------|-----|-----|------|----|
| CONTIG-029850 | 670  | 20  | 73  | 289  | 4  |
| CONTIG-029851 | 74   | 4   | 9   | 0    | 0  |
| CONTIG-029852 | 115  | 15  | 23  | 26   | 0  |
| CONTIG-029853 | 117  | 8   | 6   | 25   | 0  |
| CONTIG-029854 | 175  | 9   | 16  | 40   | 3  |
| CONTIG-029855 | 115  | 4   | 5   | 2    | 0  |
| CONTIG-029856 | 143  | 7   | 3   | 46   | 0  |
| CONTIG-029857 | 344  | 106 | 240 | 1236 | 92 |
| CONTIG-029858 | 114  | 3   | 2   | 7    | 0  |
| CONTIG-029859 | 239  | 12  | 17  | 108  | 0  |
| CONTIG-029860 | 116  | 4   | 8   | 13   | 0  |
| CONTIG-029861 | 70   | 11  | 24  | 0    | 0  |
| CONTIG-029862 | 90   | 9   | 0   | 16   | 2  |
| CONTIG-029863 | 77   | 6   | 7   | 9    | 0  |
| CONTIG-029864 | 510  | 9   | 8   | 159  | 2  |
| CONTIG-029865 | 93   | 25  | 21  | 78   | 0  |
| CONTIG-029866 | 142  | 11  | 31  | 35   | 0  |
| CONTIG-029868 | 97   | 5   | 0   | 12   | 0  |
| CONTIG-029869 | 225  | 16  | 109 | 129  | 0  |
| CONTIG-029870 | 100  | 7   | 5   | 13   | 0  |
| CONTIG-029871 | 401  | 8   | 6   | 48   | 0  |
| CONTIG-029872 | 387  | 14  | 35  | 24   | 0  |
| CONTIG-029873 | 70   | 6   | 6   | 13   | 0  |
| CONTIG-029881 | 94   | 11  | 4   | 30   | 0  |
| CONTIG-029882 | 640  | 20  | 181 | 485  | 0  |
| CONTIG-029883 | 244  | 13  | 17  | 122  | 0  |
| CONTIG-029884 | 112  | 14  | 16  | 42   | 0  |
| CONTIG-029885 | 174  | 7   | 6   | 38   | 0  |
| CONTIG-029886 | 307  | 13  | 47  | 162  | 0  |
| CONTIG-029887 | 173  | 13  | 82  | 53   | 0  |
| CONTIG-029896 | 114  | 10  | 72  | 10   | 0  |
| CONTIG-029897 | 41   | 99  | 20  | 24   | 0  |
| CONTIG-029898 | 329  | 12  | 4   | 119  | 0  |
| CONTIG-029899 | 395  | 12  | 12  | 175  | 4  |
| CONTIG-029900 | 194  | 11  | 19  | 85   | 0  |
| CONTIG-029901 | 149  | 13  | 9   | 51   | 0  |
| CONTIG-029902 | 106  | 15  | 24  | 17   | 2  |
| CONTIG-029903 | 121  | 18  | 14  | 28   | 0  |
| CONTIG-029904 | 69   | 8   | 20  | 12   | 0  |
| CONTIG-029905 | 790  | 36  | 301 | 660  | 23 |
| CONTIG-029906 | 646  | 19  | 170 | 380  | 7  |
| CONTIG-029907 | 108  | 6   | 7   | 0    | 0  |
| CONTIG-029908 | 143  | 9   | 46  | 8    | 0  |
| CONTIG-029910 | 455  | 28  | 4   | 27   | 0  |
| CONTIG-029911 | 163  | 7   | 2   | 36   | 0  |
| CONTIG-029912 | 529  | 9   | 18  | 172  | 6  |
| CONTIG-029913 | 1136 | 24  | 79  | 729  | 25 |

|               |     |     |     |      |     |
|---------------|-----|-----|-----|------|-----|
| CONTIG-029914 | 145 | 11  | 20  | 6    | 0   |
| CONTIG-029915 | 60  | 7   | 5   | 11   | 0   |
| CONTIG-029916 | 109 | 6   | 4   | 13   | 0   |
| CONTIG-029921 | 77  | 5   | 7   | 4    | 0   |
| CONTIG-029922 | 186 | 9   | 2   | 82   | 0   |
| CONTIG-029923 | 369 | 9   | 4   | 0    | 12  |
| CONTIG-029924 | 311 | 80  | 30  | 964  | 28  |
| CONTIG-029925 | 140 | 10  | 32  | 6    | 0   |
| CONTIG-029932 | 146 | 23  | 20  | 90   | 2   |
| CONTIG-029933 | 144 | 7   | 13  | 25   | 0   |
| CONTIG-029934 | 596 | 14  | 21  | 97   | 0   |
| CONTIG-029936 | 441 | 10  | 17  | 104  | 2   |
| CONTIG-029937 | 77  | 5   | 3   | 0    | 0   |
| CONTIG-029953 | 77  | 501 | 38  | 23   | 813 |
| CONTIG-029954 | 198 | 7   | 35  | 17   | 0   |
| CONTIG-029955 | 209 | 8   | 6   | 51   | 0   |
| CONTIG-029956 | 154 | 14  | 118 | 3    | 0   |
| CONTIG-029957 | 134 | 17  | 0   | 77   | 2   |
| CONTIG-029958 | 76  | 19  | 40  | 25   | 0   |
| CONTIG-029959 | 83  | 6   | 4   | 0    | 0   |
| CONTIG-029960 | 58  | 4   | 10  | 0    | 0   |
| CONTIG-029961 | 126 | 6   | 10  | 32   | 0   |
| CONTIG-029962 | 148 | 14  | 15  | 81   | 2   |
| CONTIG-029963 | 259 | 12  | 36  | 100  | 5   |
| CONTIG-029964 | 91  | 4   | 0   | 12   | 0   |
| CONTIG-029965 | 93  | 9   | 9   | 31   | 2   |
| CONTIG-029966 | 410 | 12  | 42  | 5    | 0   |
| CONTIG-029967 | 101 | 28  | 29  | 72   | 3   |
| CONTIG-029968 | 439 | 9   | 28  | 89   | 0   |
| CONTIG-029969 | 952 | 40  | 89  | 1299 | 37  |
| CONTIG-029971 | 512 | 16  | 28  | 315  | 2   |
| CONTIG-029972 | 158 | 14  | 44  | 34   | 0   |
| CONTIG-029974 | 249 | 20  | 106 | 22   | 0   |
| CONTIG-029975 | 298 | 16  | 45  | 117  | 0   |
| CONTIG-029976 | 164 | 5   | 0   | 26   | 0   |
| CONTIG-029977 | 64  | 51  | 54  | 65   | 4   |
| CONTIG-029978 | 85  | 7   | 5   | 12   | 0   |
| CONTIG-029979 | 148 | 16  | 45  | 13   | 0   |
| CONTIG-029980 | 120 | 13  | 21  | 29   | 0   |
| CONTIG-029981 | 520 | 22  | 94  | 395  | 5   |
| CONTIG-029982 | 332 | 26  | 28  | 396  | 4   |
| CONTIG-029983 | 184 | 10  | 100 | 39   | 0   |
| CONTIG-029984 | 338 | 7   | 24  | 44   | 0   |
| CONTIG-029985 | 63  | 2   | 2   | 0    | 0   |
| CONTIG-029986 | 106 | 12  | 5   | 31   | 0   |
| CONTIG-029987 | 87  | 8   | 15  | 12   | 0   |
| CONTIG-029988 | 482 | 14  | 90  | 207  | 2   |

|               |      |      |     |      |     |
|---------------|------|------|-----|------|-----|
| CONTIG-029989 | 65   | 17   | 21  | 0    | 0   |
| CONTIG-029990 | 89   | 10   | 68  | 2    | 0   |
| CONTIG-029991 | 192  | 11   | 20  | 71   | 3   |
| CONTIG-029992 | 99   | 8    | 7   | 22   | 0   |
| CONTIG-029993 | 116  | 4    | 4   | 8    | 0   |
| CONTIG-029994 | 270  | 12   | 103 | 63   | 0   |
| CONTIG-029997 | 361  | 10   | 20  | 0    | 21  |
| CONTIG-029998 | 82   | 6    | 2   | 10   | 0   |
| CONTIG-029999 | 138  | 13   | 17  | 67   | 0   |
| CONTIG-030000 | 58   | 10   | 8   | 0    | 0   |
| CONTIG-030001 | 74   | 7    | 16  | 16   | 0   |
| CONTIG-030002 | 68   | 3    | 10  | 0    | 0   |
| CONTIG-030003 | 284  | 20   | 52  | 93   | 2   |
| CONTIG-030005 | 84   | 10   | 8   | 16   | 3   |
| CONTIG-030006 | 97   | 5    | 0   | 16   | 0   |
| CONTIG-030007 | 77   | 11   | 5   | 6    | 2   |
| CONTIG-030008 | 131  | 15   | 2   | 45   | 0   |
| CONTIG-030012 | 72   | 1228 | 71  | 2622 | 0   |
| CONTIG-030013 | 94   | 11   | 30  | 30   | 0   |
| CONTIG-030016 | 315  | 11   | 64  | 11   | 14  |
| CONTIG-030017 | 159  | 9    | 5   | 54   | 0   |
| CONTIG-030018 | 397  | 21   | 93  | 115  | 0   |
| CONTIG-030019 | 72   | 5    | 8   | 8    | 0   |
| CONTIG-030021 | 112  | 22   | 104 | 89   | 0   |
| CONTIG-030022 | 86   | 4    | 4   | 7    | 0   |
| CONTIG-030023 | 1357 | 30   | 14  | 1113 | 100 |
| CONTIG-030024 | 88   | 8    | 9   | 8    | 0   |
| CONTIG-030025 | 374  | 15   | 56  | 111  | 2   |
| CONTIG-030026 | 221  | 12   | 94  | 73   | 0   |
| CONTIG-030027 | 551  | 11   | 43  | 119  | 2   |
| CONTIG-030028 | 672  | 12   | 10  | 50   | 0   |
| CONTIG-030029 | 162  | 147  | 130 | 666  | 14  |
| CONTIG-030030 | 163  | 71   | 190 | 270  | 14  |
| CONTIG-030031 | 188  | 403  | 79  | 3380 | 0   |
| CONTIG-030032 | 272  | 11   | 30  | 87   | 2   |
| CONTIG-030033 | 117  | 11   | 4   | 56   | 0   |
| CONTIG-030034 | 128  | 7    | 6   | 25   | 0   |
| CONTIG-030035 | 252  | 28   | 80  | 234  | 0   |
| CONTIG-030036 | 371  | 20   | 20  | 54   | 0   |
| CONTIG-030037 | 178  | 7    | 3   | 51   | 0   |
| CONTIG-030038 | 428  | 14   | 47  | 240  | 0   |
| CONTIG-030039 | 188  | 21   | 76  | 102  | 4   |
| CONTIG-030040 | 277  | 10   | 76  | 43   | 0   |
| CONTIG-030041 | 79   | 5    | 4   | 4    | 0   |
| CONTIG-030042 | 135  | 13   | 19  | 42   | 0   |
| CONTIG-030043 | 66   | 157  | 243 | 389  | 0   |
| CONTIG-030044 | 75   | 5    | 2   | 2    | 0   |

|               |      |     |     |     |    |
|---------------|------|-----|-----|-----|----|
| CONTIG-030045 | 512  | 10  | 10  | 126 | 6  |
| CONTIG-030046 | 190  | 9   | 2   | 38  | 0  |
| CONTIG-030047 | 156  | 24  | 74  | 141 | 0  |
| CONTIG-030048 | 349  | 21  | 124 | 251 | 0  |
| CONTIG-030049 | 146  | 8   | 28  | 42  | 0  |
| CONTIG-030050 | 1044 | 25  | 61  | 593 | 17 |
| CONTIG-030051 | 61   | 11  | 14  | 17  | 0  |
| CONTIG-030052 | 705  | 44  | 424 | 849 | 14 |
| CONTIG-030053 | 430  | 10  | 15  | 154 | 2  |
| CONTIG-030054 | 260  | 41  | 45  | 442 | 4  |
| CONTIG-030056 | 164  | 6   | 5   | 0   | 0  |
| CONTIG-030057 | 579  | 11  | 14  | 193 | 19 |
| CONTIG-030058 | 47   | 233 | 14  | 405 | 0  |
| CONTIG-030059 | 108  | 18  | 7   | 55  | 2  |
| CONTIG-030060 | 135  | 7   | 12  | 27  | 0  |
| CONTIG-030061 | 118  | 4   | 0   | 10  | 0  |
| CONTIG-030062 | 153  | 24  | 26  | 128 | 0  |
| CONTIG-030063 | 159  | 7   | 54  | 0   | 2  |
| CONTIG-030064 | 218  | 9   | 26  | 46  | 0  |
| CONTIG-030065 | 181  | 15  | 36  | 124 | 0  |
| CONTIG-030066 | 307  | 8   | 53  | 48  | 5  |
| CONTIG-030068 | 346  | 17  | 9   | 227 | 0  |
| CONTIG-030069 | 185  | 8   | 36  | 17  | 0  |
| CONTIG-030070 | 99   | 14  | 127 | 2   | 0  |
| CONTIG-030071 | 181  | 13  | 19  | 52  | 0  |
| CONTIG-030072 | 380  | 13  | 60  | 194 | 0  |
| CONTIG-030073 | 243  | 62  | 150 | 702 | 0  |
| CONTIG-030074 | 125  | 7   | 6   | 12  | 0  |
| CONTIG-030075 | 169  | 18  | 68  | 67  | 2  |
| CONTIG-030076 | 398  | 17  | 28  | 203 | 5  |
| CONTIG-030077 | 206  | 19  | 29  | 13  | 0  |
| CONTIG-030078 | 113  | 4   | 5   | 9   | 0  |
| CONTIG-030079 | 79   | 5   | 2   | 0   | 2  |
| CONTIG-030080 | 206  | 11  | 50  | 46  | 0  |
| CONTIG-030081 | 558  | 14  | 53  | 153 | 0  |
| CONTIG-030082 | 687  | 25  | 90  | 393 | 14 |
| CONTIG-030083 | 134  | 6   | 7   | 12  | 0  |
| CONTIG-030084 | 362  | 9   | 4   | 115 | 6  |
| CONTIG-030085 | 348  | 73  | 135 | 950 | 24 |
| CONTIG-030087 | 818  | 16  | 6   | 0   | 0  |
| CONTIG-030088 | 71   | 4   | 2   | 0   | 0  |
| CONTIG-030089 | 69   | 5   | 17  | 3   | 0  |
| CONTIG-030100 | 88   | 4   | 0   | 9   | 0  |
| CONTIG-030101 | 123  | 6   | 4   | 20  | 0  |
| CONTIG-030102 | 86   | 11  | 8   | 38  | 0  |
| CONTIG-030103 | 185  | 9   | 10  | 37  | 0  |
| CONTIG-030104 | 291  | 8   | 11  | 69  | 0  |

|               |     |     |     |     |     |
|---------------|-----|-----|-----|-----|-----|
| CONTIG-030105 | 374 | 17  | 67  | 149 | 0   |
| CONTIG-030106 | 79  | 12  | 6   | 29  | 0   |
| CONTIG-030107 | 67  | 16  | 20  | 14  | 0   |
| CONTIG-030108 | 146 | 11  | 49  | 37  | 0   |
| CONTIG-030109 | 126 | 22  | 4   | 40  | 0   |
| CONTIG-030110 | 187 | 14  | 12  | 110 | 0   |
| CONTIG-030111 | 141 | 12  | 60  | 27  | 0   |
| CONTIG-030112 | 266 | 6   | 3   | 6   | 10  |
| CONTIG-030113 | 97  | 17  | 80  | 4   | 0   |
| CONTIG-030114 | 534 | 17  | 210 | 220 | 2   |
| CONTIG-030115 | 106 | 419 | 100 | 402 | 2   |
| CONTIG-030117 | 248 | 15  | 27  | 109 | 0   |
| CONTIG-030118 | 283 | 29  | 39  | 322 | 2   |
| CONTIG-030119 | 724 | 41  | 255 | 730 | 36  |
| CONTIG-030120 | 205 | 35  | 32  | 200 | 3   |
| CONTIG-030121 | 988 | 14  | 21  | 25  | 117 |
| CONTIG-030122 | 342 | 9   | 4   | 0   | 25  |
| CONTIG-030123 | 871 | 14  | 5   | 236 | 0   |
| CONTIG-030124 | 209 | 7   | 14  | 29  | 0   |
| CONTIG-030125 | 296 | 49  | 123 | 312 | 10  |
| CONTIG-030126 | 98  | 24  | 69  | 41  | 0   |
| CONTIG-030127 | 630 | 13  | 30  | 289 | 4   |
| CONTIG-030132 | 209 | 9   | 20  | 60  | 0   |
| CONTIG-030133 | 241 | 16  | 6   | 135 | 0   |
| CONTIG-030134 | 232 | 26  | 20  | 322 | 0   |
| CONTIG-030135 | 428 | 17  | 13  | 40  | 0   |
| CONTIG-030136 | 481 | 29  | 101 | 639 | 0   |
| CONTIG-030143 | 134 | 11  | 8   | 40  | 2   |
| CONTIG-030144 | 86  | 5   | 3   | 8   | 0   |
| CONTIG-030145 | 213 | 11  | 5   | 67  | 4   |
| CONTIG-030146 | 896 | 16  | 7   | 72  | 180 |
| CONTIG-030148 | 162 | 7   | 16  | 23  | 0   |
| CONTIG-030149 | 158 | 14  | 11  | 108 | 0   |
| CONTIG-030150 | 850 | 22  | 130 | 462 | 9   |
| CONTIG-030151 | 218 | 8   | 9   | 55  | 0   |
| CONTIG-030152 | 687 | 13  | 67  | 289 | 4   |
| CONTIG-030153 | 154 | 30  | 12  | 152 | 10  |
| CONTIG-030154 | 62  | 113 | 48  | 276 | 0   |
| CONTIG-030156 | 352 | 12  | 65  | 114 | 2   |
| CONTIG-030157 | 379 | 16  | 70  | 143 | 6   |
| CONTIG-030158 | 135 | 7   | 24  | 24  | 2   |
| CONTIG-030159 | 130 | 9   | 9   | 43  | 0   |
| CONTIG-030160 | 520 | 14  | 48  | 185 | 2   |
| CONTIG-030161 | 109 | 28  | 129 | 69  | 0   |
| CONTIG-030162 | 106 | 5   | 12  | 11  | 0   |
| CONTIG-030163 | 126 | 5   | 4   | 21  | 0   |
| CONTIG-030164 | 183 | 9   | 11  | 38  | 0   |

|               |     |     |     |     |    |
|---------------|-----|-----|-----|-----|----|
| CONTIG-030165 | 113 | 3   | 2   | 4   | 2  |
| CONTIG-030166 | 129 | 12  | 2   | 24  | 0  |
| CONTIG-030167 | 404 | 11  | 80  | 141 | 0  |
| CONTIG-030168 | 360 | 12  | 23  | 161 | 0  |
| CONTIG-030169 | 105 | 8   | 9   | 21  | 0  |
| CONTIG-030170 | 102 | 7   | 8   | 17  | 0  |
| CONTIG-030171 | 62  | 4   | 4   | 7   | 0  |
| CONTIG-030172 | 132 | 5   | 10  | 12  | 0  |
| CONTIG-030173 | 95  | 13  | 9   | 29  | 0  |
| CONTIG-030174 | 95  | 8   | 0   | 39  | 0  |
| CONTIG-030175 | 282 | 10  | 10  | 94  | 0  |
| CONTIG-030177 | 305 | 20  | 35  | 217 | 4  |
| CONTIG-030178 | 198 | 5   | 2   | 24  | 0  |
| CONTIG-030179 | 163 | 6   | 2   | 10  | 3  |
| CONTIG-030180 | 84  | 5   | 15  | 5   | 0  |
| CONTIG-030181 | 246 | 11  | 8   | 137 | 0  |
| CONTIG-030182 | 95  | 19  | 10  | 43  | 0  |
| CONTIG-030183 | 143 | 7   | 15  | 16  | 0  |
| CONTIG-030184 | 196 | 19  | 28  | 103 | 0  |
| CONTIG-030185 | 188 | 19  | 9   | 134 | 0  |
| CONTIG-030186 | 455 | 18  | 118 | 292 | 2  |
| CONTIG-030187 | 99  | 3   | 0   | 4   | 0  |
| CONTIG-030188 | 112 | 13  | 52  | 2   | 0  |
| CONTIG-030189 | 568 | 14  | 19  | 27  | 0  |
| CONTIG-030190 | 166 | 34  | 4   | 276 | 2  |
| CONTIG-030191 | 460 | 24  | 195 | 347 | 0  |
| CONTIG-030192 | 292 | 17  | 42  | 138 | 0  |
| CONTIG-030193 | 85  | 13  | 21  | 29  | 0  |
| CONTIG-030194 | 162 | 9   | 18  | 41  | 0  |
| CONTIG-030195 | 309 | 13  | 16  | 73  | 2  |
| CONTIG-030196 | 63  | 70  | 4   | 151 | 0  |
| CONTIG-030197 | 297 | 13  | 12  | 110 | 2  |
| CONTIG-030198 | 591 | 14  | 30  | 266 | 2  |
| CONTIG-030199 | 409 | 14  | 8   | 290 | 0  |
| CONTIG-030200 | 81  | 6   | 2   | 22  | 0  |
| CONTIG-030201 | 109 | 28  | 12  | 141 | 0  |
| CONTIG-030202 | 95  | 140 | 44  | 500 | 53 |
| CONTIG-030203 | 84  | 20  | 35  | 55  | 0  |
| CONTIG-030204 | 91  | 26  | 42  | 101 | 0  |
| CONTIG-030205 | 69  | 5   | 2   | 4   | 0  |
| CONTIG-030206 | 128 | 18  | 4   | 85  | 0  |
| CONTIG-030207 | 55  | 23  | 9   | 23  | 0  |
| CONTIG-030208 | 288 | 25  | 94  | 38  | 0  |
| CONTIG-030209 | 122 | 11  | 18  | 14  | 0  |
| CONTIG-030210 | 248 | 9   | 15  | 75  | 2  |
| CONTIG-030211 | 71  | 3   | 0   | 7   | 0  |
| CONTIG-030212 | 764 | 15  | 164 | 329 | 0  |

|               |     |     |     |     |    |
|---------------|-----|-----|-----|-----|----|
| CONTIG-030213 | 416 | 16  | 24  | 335 | 0  |
| CONTIG-030214 | 289 | 28  | 56  | 286 | 0  |
| CONTIG-030215 | 245 | 11  | 31  | 56  | 0  |
| CONTIG-030216 | 165 | 6   | 9   | 18  | 0  |
| CONTIG-030217 | 432 | 11  | 28  | 208 | 0  |
| CONTIG-030218 | 103 | 12  | 25  | 24  | 0  |
| CONTIG-030219 | 277 | 22  | 56  | 179 | 0  |
| CONTIG-030220 | 111 | 5   | 0   | 9   | 2  |
| CONTIG-030221 | 193 | 4   | 2   | 9   | 0  |
| CONTIG-030222 | 297 | 10  | 20  | 88  | 0  |
| CONTIG-030223 | 122 | 35  | 133 | 50  | 3  |
| CONTIG-030224 | 432 | 13  | 35  | 113 | 0  |
| CONTIG-030225 | 724 | 28  | 105 | 821 | 11 |
| CONTIG-030226 | 451 | 14  | 17  | 137 | 0  |
| CONTIG-030227 | 90  | 6   | 16  | 7   | 0  |
| CONTIG-030228 | 153 | 10  | 21  | 17  | 0  |
| CONTIG-030229 | 116 | 8   | 8   | 40  | 0  |
| CONTIG-030230 | 463 | 10  | 31  | 158 | 0  |
| CONTIG-030231 | 181 | 13  | 56  | 29  | 0  |
| CONTIG-030232 | 152 | 8   | 10  | 31  | 0  |
| CONTIG-030233 | 59  | 6   | 4   | 0   | 0  |
| CONTIG-030234 | 137 | 8   | 7   | 21  | 0  |
| CONTIG-030235 | 176 | 10  | 30  | 32  | 0  |
| CONTIG-030236 | 86  | 13  | 18  | 14  | 0  |
| CONTIG-030240 | 127 | 4   | 0   | 15  | 0  |
| CONTIG-030241 | 332 | 17  | 32  | 187 | 4  |
| CONTIG-030242 | 352 | 17  | 43  | 170 | 2  |
| CONTIG-030247 | 89  | 25  | 18  | 0   | 0  |
| CONTIG-030248 | 58  | 6   | 10  | 0   | 0  |
| CONTIG-030249 | 308 | 13  | 63  | 42  | 0  |
| CONTIG-030250 | 88  | 19  | 27  | 49  | 0  |
| CONTIG-030251 | 197 | 35  | 127 | 248 | 2  |
| CONTIG-030252 | 328 | 15  | 41  | 168 | 0  |
| CONTIG-030253 | 96  | 8   | 2   | 5   | 0  |
| CONTIG-030254 | 76  | 12  | 3   | 4   | 0  |
| CONTIG-030255 | 184 | 8   | 12  | 24  | 0  |
| CONTIG-030256 | 142 | 6   | 9   | 2   | 0  |
| CONTIG-030257 | 42  | 153 | 172 | 69  | 4  |
| CONTIG-030258 | 212 | 6   | 9   | 42  | 0  |
| CONTIG-030263 | 77  | 9   | 46  | 3   | 0  |
| CONTIG-030264 | 303 | 13  | 84  | 135 | 0  |
| CONTIG-030265 | 76  | 10  | 28  | 19  | 2  |
| CONTIG-030266 | 124 | 99  | 75  | 555 | 31 |
| CONTIG-030267 | 394 | 19  | 43  | 212 | 0  |
| CONTIG-030268 | 82  | 4   | 6   | 2   | 0  |
| CONTIG-030269 | 144 | 10  | 16  | 16  | 0  |
| CONTIG-030270 | 194 | 12  | 3   | 33  | 2  |

|               |      |     |     |     |      |
|---------------|------|-----|-----|-----|------|
| CONTIG-030271 | 106  | 9   | 45  | 2   | 0    |
| CONTIG-030272 | 87   | 7   | 11  | 19  | 0    |
| CONTIG-030273 | 40   | 17  | 17  | 4   | 0    |
| CONTIG-030274 | 310  | 7   | 9   | 46  | 0    |
| CONTIG-030275 | 147  | 9   | 8   | 29  | 0    |
| CONTIG-030276 | 93   | 25  | 78  | 38  | 0    |
| CONTIG-030277 | 326  | 10  | 37  | 139 | 0    |
| CONTIG-030278 | 191  | 9   | 14  | 32  | 2    |
| CONTIG-030279 | 375  | 7   | 7   | 80  | 0    |
| CONTIG-030280 | 84   | 11  | 2   | 9   | 0    |
| CONTIG-030281 | 284  | 12  | 91  | 81  | 0    |
| CONTIG-030282 | 155  | 12  | 12  | 64  | 2    |
| CONTIG-030283 | 383  | 17  | 113 | 177 | 2    |
| CONTIG-030284 | 880  | 17  | 42  | 792 | 0    |
| CONTIG-030285 | 1608 | 76  | 3   | 2   | 1294 |
| CONTIG-030286 | 79   | 13  | 111 | 0   | 0    |
| CONTIG-030287 | 134  | 17  | 4   | 70  | 0    |
| CONTIG-030288 | 90   | 10  | 8   | 29  | 0    |
| CONTIG-030289 | 118  | 15  | 7   | 75  | 0    |
| CONTIG-030290 | 136  | 3   | 4   | 8   | 0    |
| CONTIG-030291 | 72   | 4   | 2   | 4   | 0    |
| CONTIG-030292 | 307  | 17  | 19  | 147 | 4    |
| CONTIG-030294 | 278  | 13  | 34  | 105 | 0    |
| CONTIG-030295 | 147  | 7   | 4   | 22  | 0    |
| CONTIG-030296 | 539  | 10  | 29  | 194 | 2    |
| CONTIG-030297 | 346  | 8   | 24  | 80  | 0    |
| CONTIG-030299 | 62   | 894 | 22  | 0   | 453  |
| CONTIG-030300 | 124  | 9   | 2   | 33  | 0    |
| CONTIG-030301 | 451  | 14  | 78  | 138 | 0    |
| CONTIG-030302 | 352  | 16  | 17  | 176 | 0    |
| CONTIG-030303 | 58   | 35  | 52  | 35  | 2    |
| CONTIG-030305 | 256  | 14  | 21  | 89  | 0    |
| CONTIG-030306 | 113  | 6   | 18  | 25  | 0    |
| CONTIG-030309 | 76   | 11  | 0   | 27  | 0    |
| CONTIG-030310 | 97   | 26  | 13  | 39  | 0    |
| CONTIG-030311 | 452  | 14  | 21  | 287 | 0    |
| CONTIG-030312 | 97   | 5   | 0   | 12  | 0    |
| CONTIG-030313 | 109  | 41  | 34  | 55  | 0    |
| CONTIG-030314 | 110  | 4   | 6   | 0   | 0    |
| CONTIG-030315 | 601  | 18  | 21  | 393 | 5    |
| CONTIG-030316 | 219  | 10  | 14  | 37  | 0    |
| CONTIG-030317 | 63   | 7   | 11  | 6   | 0    |
| CONTIG-030318 | 211  | 10  | 15  | 49  | 2    |
| CONTIG-030319 | 866  | 13  | 20  | 396 | 6    |
| CONTIG-030320 | 178  | 10  | 19  | 34  | 0    |
| CONTIG-030321 | 604  | 10  | 103 | 171 | 0    |
| CONTIG-030322 | 610  | 11  | 11  | 25  | 0    |



|               |      |     |     |     |    |
|---------------|------|-----|-----|-----|----|
| CONTIG-030323 | 460  | 24  | 70  | 335 | 10 |
| CONTIG-030324 | 709  | 11  | 49  | 332 | 0  |
| CONTIG-030325 | 352  | 11  | 21  | 160 | 0  |
| CONTIG-030326 | 383  | 15  | 48  | 170 | 2  |
| CONTIG-030327 | 1089 | 17  | 33  | 673 | 23 |
| CONTIG-030328 | 183  | 11  | 26  | 51  | 0  |
| CONTIG-030329 | 102  | 17  | 39  | 2   | 0  |
| CONTIG-030330 | 42   | 16  | 25  | 22  | 0  |
| CONTIG-030331 | 95   | 36  | 177 | 38  | 0  |
| CONTIG-030332 | 44   | 500 | 78  | 446 | 20 |
| CONTIG-030333 | 151  | 9   | 7   | 26  | 0  |
| CONTIG-030334 | 262  | 27  | 126 | 213 | 3  |
| CONTIG-030336 | 218  | 11  | 7   | 95  | 0  |
| CONTIG-030337 | 274  | 7   | 7   | 75  | 0  |
| CONTIG-030338 | 131  | 22  | 76  | 31  | 0  |
| CONTIG-030339 | 113  | 29  | 5   | 142 | 0  |
| CONTIG-030340 | 149  | 6   | 5   | 35  | 2  |
| CONTIG-030341 | 205  | 10  | 35  | 72  | 0  |
| CONTIG-030342 | 389  | 17  | 16  | 345 | 0  |
| CONTIG-030343 | 143  | 14  | 94  | 51  | 0  |
| CONTIG-030344 | 245  | 13  | 70  | 114 | 0  |
| CONTIG-030345 | 215  | 21  | 12  | 154 | 0  |
| CONTIG-030347 | 75   | 3   | 9   | 3   | 0  |
| CONTIG-030348 | 71   | 6   | 19  | 9   | 0  |
| CONTIG-030349 | 109  | 15  | 26  | 45  | 2  |
| CONTIG-030350 | 155  | 7   | 35  | 28  | 0  |
| CONTIG-030351 | 179  | 9   | 52  | 15  | 0  |
| CONTIG-030352 | 75   | 5   | 8   | 13  | 0  |
| CONTIG-030353 | 323  | 55  | 119 | 858 | 0  |
| CONTIG-030354 | 106  | 5   | 0   | 12  | 0  |
| CONTIG-030355 | 177  | 6   | 2   | 30  | 0  |
| CONTIG-030356 | 332  | 29  | 84  | 307 | 2  |
| CONTIG-030357 | 588  | 30  | 59  | 975 | 0  |
| CONTIG-030358 | 441  | 17  | 67  | 153 | 0  |
| CONTIG-030359 | 98   | 5   | 8   | 2   | 0  |
| CONTIG-030360 | 247  | 14  | 38  | 122 | 0  |
| CONTIG-030361 | 470  | 11  | 0   | 128 | 0  |
| CONTIG-030362 | 64   | 4   | 5   | 7   | 0  |
| CONTIG-030363 | 214  | 10  | 94  | 5   | 0  |
| CONTIG-030364 | 699  | 16  | 20  | 385 | 2  |
| CONTIG-030365 | 111  | 17  | 52  | 28  | 0  |
| CONTIG-030371 | 234  | 17  | 5   | 10  | 0  |
| CONTIG-030372 | 257  | 13  | 33  | 63  | 0  |
| CONTIG-030373 | 377  | 13  | 11  | 139 | 0  |
| CONTIG-030376 | 73   | 7   | 6   | 6   | 0  |
| CONTIG-030377 | 455  | 35  | 142 | 508 | 12 |
| CONTIG-030378 | 72   | 6   | 2   | 24  | 0  |

|               |     |     |     |      |     |
|---------------|-----|-----|-----|------|-----|
| CONTIG-030379 | 147 | 10  | 20  | 48   | 0   |
| CONTIG-030380 | 212 | 63  | 69  | 342  | 19  |
| CONTIG-030381 | 83  | 9   | 0   | 17   | 0   |
| CONTIG-030382 | 86  | 18  | 75  | 25   | 0   |
| CONTIG-030383 | 65  | 6   | 6   | 15   | 0   |
| CONTIG-030384 | 96  | 4   | 0   | 11   | 0   |
| CONTIG-030385 | 178 | 11  | 9   | 52   | 0   |
| CONTIG-030386 | 159 | 7   | 11  | 23   | 0   |
| CONTIG-030387 | 135 | 10  | 24  | 10   | 0   |
| CONTIG-030388 | 136 | 6   | 9   | 7    | 0   |
| CONTIG-030389 | 71  | 6   | 14  | 6    | 0   |
| CONTIG-030390 | 203 | 12  | 19  | 73   | 0   |
| CONTIG-030391 | 625 | 9   | 52  | 126  | 2   |
| CONTIG-030392 | 81  | 3   | 2   | 0    | 0   |
| CONTIG-030393 | 189 | 27  | 78  | 144  | 0   |
| CONTIG-030394 | 72  | 8   | 5   | 6    | 0   |
| CONTIG-030395 | 88  | 9   | 7   | 14   | 0   |
| CONTIG-030399 | 91  | 19  | 22  | 18   | 0   |
| CONTIG-030400 | 443 | 14  | 27  | 160  | 0   |
| CONTIG-030401 | 291 | 12  | 43  | 60   | 0   |
| CONTIG-030402 | 115 | 12  | 21  | 29   | 0   |
| CONTIG-030403 | 255 | 9   | 11  | 82   | 0   |
| CONTIG-030404 | 223 | 10  | 19  | 71   | 2   |
| CONTIG-030405 | 137 | 10  | 17  | 37   | 0   |
| CONTIG-030406 | 366 | 161 | 13  | 1654 | 60  |
| CONTIG-030407 | 243 | 8   | 9   | 34   | 2   |
| CONTIG-030408 | 193 | 12  | 6   | 38   | 0   |
| CONTIG-030409 | 75  | 10  | 20  | 11   | 0   |
| CONTIG-030410 | 125 | 7   | 5   | 23   | 0   |
| CONTIG-030412 | 157 | 13  | 16  | 86   | 0   |
| CONTIG-030413 | 402 | 9   | 11  | 97   | 11  |
| CONTIG-030414 | 264 | 6   | 17  | 36   | 0   |
| CONTIG-030415 | 340 | 17  | 12  | 126  | 0   |
| CONTIG-030416 | 99  | 8   | 8   | 19   | 0   |
| CONTIG-030418 | 547 | 21  | 2   | 0    | 76  |
| CONTIG-030419 | 970 | 18  | 169 | 365  | 10  |
| CONTIG-030420 | 199 | 5   | 4   | 20   | 7   |
| CONTIG-030421 | 125 | 17  | 95  | 15   | 0   |
| CONTIG-030422 | 367 | 107 | 9   | 2    | 200 |
| CONTIG-030423 | 216 | 5   | 2   | 13   | 0   |
| CONTIG-030424 | 482 | 27  | 103 | 270  | 9   |
| CONTIG-030425 | 298 | 21  | 84  | 179  | 0   |
| CONTIG-030426 | 58  | 69  | 198 | 51   | 2   |
| CONTIG-030427 | 135 | 6   | 16  | 12   | 0   |
| CONTIG-030428 | 123 | 9   | 10  | 21   | 0   |
| CONTIG-030429 | 350 | 16  | 12  | 111  | 4   |
| CONTIG-030430 | 229 | 24  | 7   | 188  | 0   |

|               |     |     |     |     |    |
|---------------|-----|-----|-----|-----|----|
| CONTIG-030431 | 310 | 14  | 58  | 2   | 2  |
| CONTIG-030432 | 97  | 152 | 186 | 179 | 36 |
| CONTIG-030433 | 247 | 9   | 3   | 61  | 0  |
| CONTIG-030434 | 125 | 14  | 2   | 0   | 0  |
| CONTIG-030435 | 213 | 31  | 82  | 246 | 17 |
| CONTIG-030436 | 287 | 16  | 51  | 164 | 0  |
| CONTIG-030437 | 237 | 29  | 108 | 88  | 0  |
| CONTIG-030442 | 72  | 5   | 6   | 10  | 0  |
| CONTIG-030443 | 96  | 10  | 5   | 4   | 0  |
| CONTIG-030444 | 104 | 5   | 9   | 11  | 0  |
| CONTIG-030445 | 457 | 16  | 213 | 231 | 0  |
| CONTIG-030446 | 106 | 6   | 7   | 15  | 0  |
| CONTIG-030447 | 120 | 13  | 2   | 71  | 0  |
| CONTIG-030449 | 396 | 9   | 41  | 120 | 2  |
| CONTIG-030450 | 287 | 10  | 17  | 100 | 0  |
| CONTIG-030451 | 242 | 10  | 2   | 0   | 14 |
| CONTIG-030452 | 77  | 5   | 5   | 8   | 0  |
| CONTIG-030453 | 88  | 20  | 12  | 52  | 0  |
| CONTIG-030454 | 353 | 6   | 3   | 71  | 0  |
| CONTIG-030455 | 111 | 16  | 27  | 45  | 0  |
| CONTIG-030456 | 173 | 4   | 9   | 6   | 0  |
| CONTIG-030457 | 81  | 7   | 23  | 8   | 2  |
| CONTIG-030458 | 239 | 8   | 18  | 47  | 0  |
| CONTIG-030459 | 94  | 8   | 7   | 4   | 0  |
| CONTIG-030460 | 101 | 9   | 47  | 11  | 0  |
| CONTIG-030461 | 393 | 20  | 74  | 363 | 2  |
| CONTIG-030462 | 145 | 9   | 3   | 29  | 0  |
| CONTIG-030463 | 83  | 16  | 28  | 29  | 0  |
| CONTIG-030464 | 88  | 10  | 2   | 34  | 0  |
| CONTIG-030466 | 549 | 11  | 26  | 82  | 0  |
| CONTIG-030467 | 89  | 30  | 28  | 0   | 10 |
| CONTIG-030468 | 75  | 4   | 18  | 6   | 0  |
| CONTIG-030471 | 133 | 10  | 15  | 29  | 0  |
| CONTIG-030472 | 111 | 5   | 15  | 10  | 0  |
| CONTIG-030473 | 63  | 4   | 4   | 0   | 0  |
| CONTIG-030474 | 155 | 13  | 19  | 42  | 2  |
| CONTIG-030475 | 250 | 11  | 23  | 83  | 0  |
| CONTIG-030476 | 216 | 6   | 2   | 59  | 0  |
| CONTIG-030478 | 73  | 11  | 12  | 18  | 0  |
| CONTIG-030479 | 398 | 8   | 36  | 86  | 2  |
| CONTIG-030480 | 273 | 9   | 26  | 78  | 0  |
| CONTIG-030481 | 130 | 11  | 3   | 2   | 0  |
| CONTIG-030482 | 68  | 8   | 11  | 6   | 0  |
| CONTIG-030483 | 123 | 9   | 14  | 46  | 0  |
| CONTIG-030484 | 87  | 186 | 69  | 956 | 0  |
| CONTIG-030485 | 63  | 34  | 2   | 84  | 0  |
| CONTIG-030487 | 84  | 3   | 5   | 5   | 0  |

|               |      |     |     |      |    |
|---------------|------|-----|-----|------|----|
| CONTIG-030488 | 139  | 156 | 330 | 503  | 55 |
| CONTIG-030489 | 81   | 8   | 15  | 14   | 0  |
| CONTIG-030490 | 60   | 214 | 58  | 338  | 0  |
| CONTIG-030492 | 409  | 23  | 24  | 293  | 6  |
| CONTIG-030493 | 371  | 11  | 8   | 139  | 0  |
| CONTIG-030494 | 173  | 7   | 43  | 28   | 0  |
| CONTIG-030495 | 89   | 7   | 9   | 21   | 0  |
| CONTIG-030496 | 63   | 11  | 6   | 7    | 0  |
| CONTIG-030497 | 74   | 20  | 0   | 26   | 0  |
| CONTIG-030498 | 268  | 7   | 4   | 35   | 7  |
| CONTIG-030499 | 595  | 13  | 30  | 231  | 0  |
| CONTIG-030500 | 379  | 7   | 22  | 58   | 0  |
| CONTIG-030501 | 277  | 13  | 12  | 145  | 0  |
| CONTIG-030502 | 161  | 13  | 50  | 83   | 0  |
| CONTIG-030505 | 106  | 11  | 5   | 15   | 0  |
| CONTIG-030506 | 131  | 7   | 26  | 20   | 0  |
| CONTIG-030507 | 194  | 21  | 2   | 5    | 0  |
| CONTIG-030512 | 672  | 27  | 153 | 924  | 2  |
| CONTIG-030515 | 252  | 15  | 18  | 197  | 0  |
| CONTIG-030516 | 63   | 5   | 5   | 8    | 0  |
| CONTIG-030517 | 147  | 11  | 6   | 56   | 0  |
| CONTIG-030518 | 58   | 3   | 0   | 6    | 0  |
| CONTIG-030519 | 479  | 39  | 113 | 390  | 65 |
| CONTIG-030520 | 94   | 9   | 7   | 21   | 0  |
| CONTIG-030521 | 279  | 12  | 27  | 121  | 0  |
| CONTIG-030522 | 618  | 15  | 13  | 327  | 2  |
| CONTIG-030523 | 87   | 13  | 15  | 34   | 0  |
| CONTIG-030524 | 135  | 19  | 59  | 76   | 3  |
| CONTIG-030525 | 83   | 5   | 17  | 6    | 0  |
| CONTIG-030526 | 68   | 6   | 9   | 9    | 0  |
| CONTIG-030527 | 311  | 11  | 8   | 174  | 0  |
| CONTIG-030528 | 65   | 7   | 4   | 13   | 0  |
| CONTIG-030529 | 139  | 12  | 20  | 22   | 0  |
| CONTIG-030530 | 1043 | 20  | 107 | 827  | 0  |
| CONTIG-030531 | 73   | 13  | 14  | 41   | 0  |
| CONTIG-030532 | 133  | 15  | 44  | 67   | 0  |
| CONTIG-030533 | 340  | 13  | 27  | 233  | 0  |
| CONTIG-030534 | 241  | 6   | 9   | 44   | 0  |
| CONTIG-030535 | 69   | 11  | 0   | 23   | 0  |
| CONTIG-030536 | 102  | 28  | 8   | 140  | 0  |
| CONTIG-030539 | 112  | 8   | 37  | 15   | 0  |
| CONTIG-030540 | 94   | 10  | 4   | 14   | 0  |
| CONTIG-030541 | 2649 | 34  | 47  | 4952 | 40 |
| CONTIG-030542 | 141  | 4   | 14  | 11   | 0  |
| CONTIG-030543 | 68   | 18  | 3   | 49   | 0  |
| CONTIG-030544 | 625  | 15  | 46  | 312  | 4  |
| CONTIG-030545 | 154  | 5   | 13  | 14   | 0  |

|               |     |     |    |      |    |
|---------------|-----|-----|----|------|----|
| CONTIG-030546 | 161 | 11  | 21 | 61   | 0  |
| CONTIG-030547 | 140 | 14  | 21 | 60   | 3  |
| CONTIG-030548 | 306 | 16  | 88 | 137  | 0  |
| CONTIG-030549 | 153 | 25  | 91 | 15   | 0  |
| CONTIG-030550 | 194 | 5   | 7  | 23   | 0  |
| CONTIG-030551 | 89  | 5   | 0  | 12   | 0  |
| CONTIG-030552 | 74  | 7   | 0  | 13   | 2  |
| CONTIG-030553 | 526 | 10  | 25 | 140  | 0  |
| CONTIG-030555 | 77  | 4   | 2  | 12   | 0  |
| CONTIG-030556 | 66  | 7   | 19 | 5    | 0  |
| CONTIG-030557 | 210 | 12  | 16 | 73   | 2  |
| CONTIG-030558 | 61  | 4   | 2  | 0    | 0  |
| CONTIG-030559 | 74  | 33  | 10 | 24   | 0  |
| CONTIG-030560 | 45  | 620 | 36 | 1262 | 0  |
| CONTIG-030561 | 199 | 9   | 22 | 69   | 0  |
| CONTIG-030563 | 58  | 12  | 27 | 7    | 0  |
| CONTIG-030564 | 114 | 22  | 26 | 0    | 0  |
| CONTIG-030565 | 262 | 22  | 41 | 107  | 2  |
| CONTIG-030566 | 95  | 9   | 34 | 0    | 0  |
| CONTIG-030567 | 286 | 10  | 91 | 37   | 0  |
| CONTIG-030568 | 71  | 4   | 7  | 5    | 0  |
| CONTIG-030569 | 178 | 6   | 21 | 19   | 0  |
| CONTIG-030570 | 253 | 9   | 20 | 89   | 0  |
| CONTIG-030571 | 88  | 5   | 18 | 6    | 0  |
| CONTIG-030572 | 276 | 13  | 16 | 103  | 0  |
| CONTIG-030574 | 140 | 12  | 6  | 62   | 0  |
| CONTIG-030575 | 174 | 6   | 15 | 22   | 0  |
| CONTIG-030576 | 91  | 4   | 0  | 0    | 0  |
| CONTIG-030577 | 651 | 51  | 51 | 2037 | 2  |
| CONTIG-030578 | 577 | 15  | 46 | 136  | 0  |
| CONTIG-030580 | 58  | 8   | 10 | 0    | 0  |
| CONTIG-030581 | 64  | 18  | 2  | 46   | 0  |
| CONTIG-030582 | 132 | 12  | 25 | 60   | 0  |
| CONTIG-030583 | 187 | 8   | 47 | 35   | 0  |
| CONTIG-030584 | 104 | 9   | 30 | 27   | 0  |
| CONTIG-030585 | 242 | 9   | 5  | 57   | 2  |
| CONTIG-030586 | 104 | 2   | 2  | 3    | 0  |
| CONTIG-030587 | 89  | 7   | 6  | 4    | 2  |
| CONTIG-030588 | 159 | 11  | 18 | 60   | 0  |
| CONTIG-030590 | 471 | 12  | 69 | 249  | 0  |
| CONTIG-030591 | 61  | 10  | 31 | 10   | 0  |
| CONTIG-030592 | 69  | 15  | 12 | 2    | 2  |
| CONTIG-030593 | 356 | 9   | 7  | 55   | 2  |
| CONTIG-030594 | 291 | 23  | 20 | 12   | 0  |
| CONTIG-030595 | 647 | 16  | 40 | 320  | 12 |
| CONTIG-030597 | 58  | 6   | 2  | 6    | 0  |
| CONTIG-030598 | 111 | 14  | 19 | 53   | 2  |

|               |      |    |     |      |    |
|---------------|------|----|-----|------|----|
| CONTIG-030599 | 127  | 7  | 4   | 34   | 0  |
| CONTIG-030602 | 119  | 9  | 24  | 9    | 0  |
| CONTIG-030603 | 154  | 12 | 20  | 37   | 0  |
| CONTIG-030604 | 71   | 7  | 11  | 0    | 0  |
| CONTIG-030605 | 78   | 73 | 130 | 4    | 0  |
| CONTIG-030606 | 910  | 36 | 209 | 1332 | 4  |
| CONTIG-030607 | 339  | 10 | 34  | 99   | 0  |
| CONTIG-030608 | 96   | 15 | 35  | 25   | 0  |
| CONTIG-030612 | 102  | 8  | 0   | 22   | 0  |
| CONTIG-030613 | 179  | 66 | 35  | 629  | 0  |
| CONTIG-030614 | 857  | 23 | 72  | 592  | 3  |
| CONTIG-030615 | 577  | 19 | 87  | 334  | 2  |
| CONTIG-030616 | 66   | 6  | 5   | 7    | 0  |
| CONTIG-030617 | 588  | 19 | 61  | 615  | 0  |
| CONTIG-030618 | 404  | 17 | 45  | 191  | 5  |
| CONTIG-030619 | 165  | 28 | 47  | 148  | 0  |
| CONTIG-030620 | 182  | 11 | 10  | 60   | 0  |
| CONTIG-030621 | 139  | 8  | 5   | 15   | 0  |
| CONTIG-030622 | 330  | 22 | 27  | 271  | 0  |
| CONTIG-030623 | 177  | 11 | 20  | 78   | 0  |
| CONTIG-030624 | 117  | 8  | 29  | 27   | 2  |
| CONTIG-030625 | 63   | 9  | 5   | 17   | 0  |
| CONTIG-030626 | 108  | 14 | 43  | 4    | 0  |
| CONTIG-030629 | 174  | 13 | 34  | 58   | 4  |
| CONTIG-030630 | 134  | 6  | 20  | 8    | 0  |
| CONTIG-030631 | 103  | 8  | 2   | 40   | 0  |
| CONTIG-030632 | 99   | 5  | 8   | 16   | 0  |
| CONTIG-030634 | 437  | 9  | 42  | 131  | 0  |
| CONTIG-030635 | 1299 | 18 | 16  | 1442 | 0  |
| CONTIG-030636 | 136  | 12 | 18  | 39   | 0  |
| CONTIG-030637 | 92   | 3  | 2   | 9    | 0  |
| CONTIG-030638 | 189  | 10 | 14  | 71   | 0  |
| CONTIG-030639 | 82   | 6  | 13  | 0    | 0  |
| CONTIG-030640 | 253  | 18 | 43  | 188  | 0  |
| CONTIG-030644 | 350  | 97 | 78  | 1754 | 29 |
| CONTIG-030645 | 392  | 7  | 10  | 84   | 0  |
| CONTIG-030646 | 351  | 12 | 86  | 0    | 76 |
| CONTIG-030647 | 418  | 14 | 27  | 180  | 0  |
| CONTIG-030648 | 189  | 11 | 25  | 89   | 0  |
| CONTIG-030649 | 66   | 18 | 41  | 25   | 2  |
| CONTIG-030650 | 119  | 12 | 12  | 44   | 5  |
| CONTIG-030651 | 240  | 11 | 10  | 87   | 4  |
| CONTIG-030653 | 145  | 28 | 117 | 117  | 2  |
| CONTIG-030654 | 258  | 21 | 48  | 122  | 2  |
| CONTIG-030655 | 244  | 18 | 267 | 26   | 0  |
| CONTIG-030656 | 388  | 16 | 24  | 49   | 5  |
| CONTIG-030657 | 230  | 10 | 39  | 56   | 0  |

|               |     |    |     |     |     |
|---------------|-----|----|-----|-----|-----|
| CONTIG-030658 | 102 | 4  | 9   | 8   | 0   |
| CONTIG-030659 | 164 | 8  | 44  | 19  | 0   |
| CONTIG-030660 | 181 | 12 | 129 | 18  | 0   |
| CONTIG-030661 | 594 | 18 | 62  | 440 | 2   |
| CONTIG-030662 | 238 | 7  | 5   | 77  | 0   |
| CONTIG-030664 | 220 | 7  | 31  | 43  | 0   |
| CONTIG-030667 | 70  | 8  | 0   | 17  | 0   |
| CONTIG-030670 | 97  | 6  | 29  | 6   | 0   |
| CONTIG-030671 | 177 | 10 | 6   | 45  | 0   |
| CONTIG-030672 | 138 | 5  | 4   | 21  | 0   |
| CONTIG-030673 | 448 | 13 | 54  | 161 | 2   |
| CONTIG-030674 | 193 | 5  | 15  | 45  | 2   |
| CONTIG-030675 | 216 | 10 | 65  | 59  | 0   |
| CONTIG-030676 | 106 | 11 | 3   | 35  | 0   |
| CONTIG-030678 | 76  | 8  | 3   | 4   | 2   |
| CONTIG-030679 | 75  | 4  | 4   | 0   | 0   |
| CONTIG-030680 | 78  | 11 | 30  | 10  | 0   |
| CONTIG-030681 | 173 | 8  | 33  | 35  | 0   |
| CONTIG-030682 | 137 | 26 | 2   | 5   | 0   |
| CONTIG-030683 | 312 | 10 | 13  | 59  | 0   |
| CONTIG-030684 | 279 | 14 | 102 | 76  | 0   |
| CONTIG-030685 | 254 | 6  | 2   | 6   | 0   |
| CONTIG-030686 | 60  | 5  | 3   | 4   | 0   |
| CONTIG-030688 | 139 | 9  | 19  | 38  | 0   |
| CONTIG-030689 | 773 | 13 | 31  | 365 | 0   |
| CONTIG-030690 | 470 | 14 | 76  | 189 | 0   |
| CONTIG-030691 | 58  | 5  | 7   | 0   | 0   |
| CONTIG-030692 | 103 | 11 | 29  | 21  | 0   |
| CONTIG-030693 | 833 | 16 | 244 | 315 | 2   |
| CONTIG-030694 | 75  | 6  | 21  | 0   | 0   |
| CONTIG-030695 | 272 | 9  | 42  | 35  | 0   |
| CONTIG-030696 | 107 | 6  | 8   | 8   | 0   |
| CONTIG-030697 | 332 | 15 | 10  | 174 | 0   |
| CONTIG-030698 | 125 | 11 | 5   | 12  | 0   |
| CONTIG-030699 | 101 | 8  | 42  | 17  | 0   |
| CONTIG-030700 | 98  | 2  | 2   | 0   | 0   |
| CONTIG-030701 | 100 | 4  | 18  | 3   | 0   |
| CONTIG-030703 | 135 | 5  | 12  | 17  | 0   |
| CONTIG-030704 | 100 | 8  | 14  | 20  | 0   |
| CONTIG-030705 | 203 | 8  | 0   | 60  | 0   |
| CONTIG-030706 | 290 | 9  | 25  | 29  | 0   |
| CONTIG-030707 | 169 | 7  | 43  | 2   | 0   |
| CONTIG-030708 | 292 | 14 | 29  | 164 | 0   |
| CONTIG-030711 | 477 | 20 | 46  | 400 | 18  |
| CONTIG-030712 | 90  | 3  | 0   | 8   | 0   |
| CONTIG-030713 | 157 | 3  | 4   | 0   | 0   |
| CONTIG-030714 | 588 | 38 | 18  | 17  | 243 |

|               |      |    |     |      |    |
|---------------|------|----|-----|------|----|
| CONTIG-030715 | 482  | 41 | 85  | 346  | 22 |
| CONTIG-030716 | 121  | 18 | 5   | 97   | 0  |
| CONTIG-030717 | 77   | 5  | 0   | 5    | 0  |
| CONTIG-030718 | 610  | 10 | 10  | 245  | 0  |
| CONTIG-030719 | 253  | 14 | 19  | 55   | 0  |
| CONTIG-030720 | 1191 | 15 | 49  | 369  | 2  |
| CONTIG-030721 | 279  | 12 | 2   | 56   | 0  |
| CONTIG-030722 | 253  | 11 | 21  | 59   | 0  |
| CONTIG-030723 | 138  | 10 | 2   | 36   | 2  |
| CONTIG-030724 | 284  | 12 | 58  | 79   | 2  |
| CONTIG-030725 | 1329 | 24 | 107 | 1526 | 4  |
| CONTIG-030726 | 344  | 23 | 40  | 219  | 8  |
| CONTIG-030727 | 168  | 7  | 6   | 24   | 0  |
| CONTIG-030728 | 252  | 9  | 52  | 75   | 0  |
| CONTIG-030731 | 133  | 7  | 7   | 35   | 0  |
| CONTIG-030732 | 72   | 6  | 20  | 2    | 0  |
| CONTIG-030733 | 60   | 8  | 17  | 0    | 0  |
| CONTIG-030734 | 607  | 35 | 168 | 580  | 2  |
| CONTIG-030736 | 80   | 20 | 9   | 8    | 0  |
| CONTIG-030737 | 288  | 13 | 8   | 12   | 0  |
| CONTIG-030738 | 58   | 5  | 0   | 2    | 0  |
| CONTIG-030739 | 77   | 10 | 16  | 7    | 0  |
| CONTIG-030740 | 97   | 24 | 0   | 0    | 4  |
| CONTIG-030741 | 197  | 7  | 15  | 36   | 0  |
| CONTIG-030742 | 470  | 7  | 16  | 79   | 0  |
| CONTIG-030743 | 331  | 17 | 30  | 165  | 0  |
| CONTIG-030744 | 210  | 7  | 17  | 47   | 2  |
| CONTIG-030745 | 94   | 5  | 3   | 15   | 0  |
| CONTIG-030746 | 535  | 11 | 48  | 151  | 2  |
| CONTIG-030747 | 172  | 9  | 17  | 47   | 0  |
| CONTIG-030748 | 361  | 11 | 17  | 233  | 0  |
| CONTIG-030749 | 458  | 10 | 11  | 0    | 12 |
| CONTIG-030750 | 112  | 23 | 25  | 123  | 0  |
| CONTIG-030751 | 74   | 21 | 27  | 29   | 0  |
| CONTIG-030752 | 59   | 10 | 46  | 2    | 0  |
| CONTIG-030753 | 145  | 17 | 18  | 69   | 2  |
| CONTIG-030754 | 84   | 4  | 2   | 3    | 0  |
| CONTIG-030755 | 160  | 11 | 44  | 6    | 0  |
| CONTIG-030756 | 184  | 4  | 6   | 18   | 0  |
| CONTIG-030757 | 80   | 6  | 4   | 9    | 0  |
| CONTIG-030763 | 101  | 19 | 149 | 26   | 0  |
| CONTIG-030764 | 510  | 10 | 48  | 215  | 0  |
| CONTIG-030766 | 83   | 7  | 0   | 17   | 0  |
| CONTIG-030767 | 84   | 10 | 0   | 0    | 0  |
| CONTIG-030769 | 434  | 9  | 33  | 104  | 0  |
| CONTIG-030774 | 305  | 12 | 32  | 84   | 8  |
| CONTIG-030775 | 61   | 51 | 16  | 127  | 0  |



|               |      |    |     |      |    |
|---------------|------|----|-----|------|----|
| CONTIG-030777 | 1132 | 34 | 43  | 832  | 71 |
| CONTIG-030778 | 79   | 10 | 26  | 13   | 0  |
| CONTIG-030779 | 424  | 57 | 154 | 1454 | 0  |
| CONTIG-030780 | 150  | 5  | 2   | 25   | 0  |
| CONTIG-030781 | 202  | 38 | 104 | 217  | 2  |
| CONTIG-030782 | 74   | 2  | 2   | 4    | 0  |
| CONTIG-030783 | 124  | 14 | 6   | 0    | 0  |
| CONTIG-030784 | 165  | 33 | 89  | 122  | 4  |
| CONTIG-030785 | 119  | 8  | 3   | 27   | 0  |
| CONTIG-030786 | 239  | 12 | 12  | 36   | 0  |
| CONTIG-030787 | 168  | 5  | 2   | 14   | 0  |
| CONTIG-030788 | 76   | 4  | 2   | 8    | 0  |
| CONTIG-030789 | 187  | 5  | 14  | 17   | 0  |
| CONTIG-030790 | 491  | 11 | 79  | 144  | 0  |
| CONTIG-030791 | 490  | 14 | 37  | 112  | 0  |
| CONTIG-030792 | 59   | 7  | 2   | 10   | 0  |
| CONTIG-030793 | 294  | 13 | 27  | 72   | 0  |
| CONTIG-030794 | 769  | 20 | 98  | 196  | 11 |
| CONTIG-030795 | 100  | 9  | 0   | 18   | 0  |
| CONTIG-030797 | 293  | 7  | 21  | 44   | 0  |
| CONTIG-030798 | 74   | 18 | 5   | 39   | 4  |
| CONTIG-030799 | 72   | 6  | 2   | 13   | 0  |
| CONTIG-030800 | 60   | 34 | 123 | 0    | 0  |
| CONTIG-030801 | 75   | 16 | 17  | 21   | 0  |
| CONTIG-030802 | 656  | 18 | 41  | 427  | 2  |
| CONTIG-030803 | 153  | 13 | 48  | 56   | 0  |
| CONTIG-030804 | 187  | 6  | 52  | 24   | 0  |
| CONTIG-030805 | 1113 | 28 | 44  | 1892 | 0  |
| CONTIG-030806 | 101  | 10 | 30  | 22   | 0  |
| CONTIG-030807 | 167  | 19 | 56  | 70   | 0  |
| CONTIG-030808 | 98   | 17 | 14  | 53   | 0  |
| CONTIG-030809 | 124  | 30 | 12  | 140  | 2  |
| CONTIG-030810 | 60   | 4  | 6   | 0    | 0  |
| CONTIG-030811 | 314  | 6  | 13  | 48   | 0  |
| CONTIG-030812 | 114  | 9  | 17  | 23   | 0  |
| CONTIG-030813 | 206  | 8  | 2   | 80   | 0  |
| CONTIG-030815 | 47   | 21 | 8   | 2    | 4  |
| CONTIG-030816 | 73   | 12 | 0   | 40   | 0  |
| CONTIG-030820 | 98   | 25 | 58  | 4    | 0  |
| CONTIG-030822 | 147  | 20 | 73  | 116  | 0  |
| CONTIG-030823 | 71   | 11 | 15  | 9    | 0  |
| CONTIG-030824 | 867  | 22 | 22  | 637  | 23 |
| CONTIG-030826 | 266  | 16 | 57  | 81   | 7  |
| CONTIG-030827 | 269  | 10 | 10  | 121  | 0  |
| CONTIG-030828 | 152  | 12 | 74  | 9    | 0  |
| CONTIG-030829 | 85   | 8  | 39  | 4    | 0  |
| CONTIG-030830 | 59   | 3  | 3   | 0    | 0  |

|               |      |     |     |      |    |
|---------------|------|-----|-----|------|----|
| CONTIG-030832 | 232  | 21  | 81  | 47   | 0  |
| CONTIG-030833 | 603  | 34  | 107 | 699  | 14 |
| CONTIG-030834 | 161  | 5   | 8   | 2    | 12 |
| CONTIG-030835 | 61   | 5   | 5   | 5    | 0  |
| CONTIG-030836 | 619  | 28  | 142 | 427  | 2  |
| CONTIG-030837 | 294  | 10  | 41  | 113  | 0  |
| CONTIG-030838 | 146  | 7   | 2   | 0    | 5  |
| CONTIG-030839 | 487  | 27  | 146 | 234  | 20 |
| CONTIG-030840 | 182  | 6   | 13  | 40   | 0  |
| CONTIG-030841 | 119  | 6   | 0   | 24   | 0  |
| CONTIG-030844 | 146  | 43  | 4   | 358  | 0  |
| CONTIG-030846 | 267  | 9   | 66  | 48   | 0  |
| CONTIG-030847 | 300  | 12  | 83  | 42   | 0  |
| CONTIG-030848 | 60   | 6   | 4   | 10   | 0  |
| CONTIG-030849 | 439  | 13  | 0   | 325  | 0  |
| CONTIG-030850 | 97   | 3   | 0   | 4    | 0  |
| CONTIG-030852 | 225  | 25  | 58  | 75   | 0  |
| CONTIG-030853 | 333  | 58  | 99  | 500  | 31 |
| CONTIG-030854 | 74   | 6   | 4   | 4    | 0  |
| CONTIG-030855 | 828  | 19  | 7   | 0    | 77 |
| CONTIG-030856 | 126  | 11  | 13  | 37   | 0  |
| CONTIG-030857 | 78   | 5   | 22  | 5    | 0  |
| CONTIG-030858 | 70   | 21  | 131 | 2    | 0  |
| CONTIG-030859 | 63   | 4   | 8   | 2    | 0  |
| CONTIG-030860 | 58   | 3   | 0   | 4    | 0  |
| CONTIG-030861 | 166  | 10  | 7   | 50   | 0  |
| CONTIG-030862 | 1041 | 15  | 78  | 681  | 2  |
| CONTIG-030863 | 443  | 12  | 58  | 172  | 0  |
| CONTIG-030864 | 185  | 11  | 11  | 73   | 2  |
| CONTIG-030865 | 212  | 6   | 21  | 30   | 0  |
| CONTIG-030866 | 133  | 15  | 87  | 40   | 0  |
| CONTIG-030867 | 265  | 9   | 8   | 39   | 0  |
| CONTIG-030868 | 98   | 5   | 0   | 24   | 0  |
| CONTIG-030869 | 142  | 8   | 33  | 2    | 0  |
| CONTIG-030870 | 131  | 8   | 41  | 0    | 0  |
| CONTIG-030871 | 253  | 11  | 29  | 78   | 0  |
| CONTIG-030872 | 620  | 14  | 47  | 74   | 5  |
| CONTIG-030873 | 225  | 19  | 6   | 209  | 5  |
| CONTIG-030874 | 328  | 17  | 36  | 194  | 2  |
| CONTIG-030875 | 68   | 8   | 0   | 20   | 0  |
| CONTIG-030876 | 463  | 54  | 99  | 1059 | 5  |
| CONTIG-030877 | 166  | 33  | 66  | 112  | 0  |
| CONTIG-030879 | 822  | 16  | 47  | 410  | 10 |
| CONTIG-030880 | 304  | 16  | 27  | 33   | 0  |
| CONTIG-030881 | 123  | 13  | 9   | 40   | 0  |
| CONTIG-030883 | 130  | 436 | 137 | 2802 | 4  |
| CONTIG-030884 | 607  | 14  | 17  | 264  | 13 |

|               |     |     |     |     |      |
|---------------|-----|-----|-----|-----|------|
| CONTIG-030885 | 455 | 15  | 72  | 157 | 2    |
| CONTIG-030886 | 399 | 18  | 12  | 167 | 12   |
| CONTIG-030887 | 116 | 8   | 24  | 30  | 0    |
| CONTIG-030888 | 78  | 11  | 12  | 23  | 0    |
| CONTIG-030889 | 101 | 10  | 16  | 25  | 0    |
| CONTIG-030890 | 58  | 8   | 2   | 14  | 0    |
| CONTIG-030891 | 343 | 13  | 22  | 15  | 0    |
| CONTIG-030892 | 214 | 9   | 5   | 69  | 0    |
| CONTIG-030893 | 94  | 6   | 9   | 15  | 0    |
| CONTIG-030895 | 378 | 20  | 35  | 250 | 0    |
| CONTIG-030896 | 91  | 46  | 75  | 0   | 0    |
| CONTIG-030897 | 264 | 16  | 16  | 89  | 0    |
| CONTIG-030898 | 89  | 7   | 18  | 2   | 0    |
| CONTIG-030899 | 158 | 10  | 12  | 67  | 0    |
| CONTIG-030900 | 268 | 8   | 4   | 45  | 0    |
| CONTIG-030901 | 114 | 3   | 13  | 8   | 0    |
| CONTIG-030902 | 124 | 32  | 22  | 0   | 0    |
| CONTIG-030903 | 100 | 7   | 2   | 16  | 0    |
| CONTIG-030905 | 100 | 6   | 7   | 27  | 0    |
| CONTIG-030906 | 260 | 14  | 18  | 84  | 0    |
| CONTIG-030907 | 272 | 21  | 112 | 110 | 5    |
| CONTIG-030908 | 366 | 17  | 8   | 225 | 0    |
| CONTIG-030909 | 373 | 18  | 107 | 256 | 0    |
| CONTIG-030911 | 51  | 131 | 34  | 291 | 0    |
| CONTIG-030912 | 82  | 12  | 9   | 0   | 0    |
| CONTIG-030914 | 435 | 18  | 18  | 227 | 5    |
| CONTIG-030915 | 171 | 21  | 57  | 145 | 0    |
| CONTIG-030916 | 160 | 13  | 23  | 34  | 2    |
| CONTIG-030917 | 297 | 17  | 7   | 250 | 0    |
| CONTIG-030918 | 281 | 57  | 38  | 19  | 214  |
| CONTIG-030919 | 76  | 3   | 2   | 0   | 0    |
| CONTIG-030920 | 268 | 32  | 28  | 173 | 8    |
| CONTIG-030921 | 59  | 35  | 17  | 57  | 0    |
| CONTIG-030922 | 126 | 373 | 47  | 57  | 1165 |
| CONTIG-030923 | 271 | 17  | 46  | 235 | 2    |
| CONTIG-030924 | 100 | 9   | 9   | 15  | 0    |
| CONTIG-030925 | 112 | 9   | 4   | 25  | 0    |
| CONTIG-030926 | 38  | 57  | 24  | 2   | 0    |
| CONTIG-030927 | 161 | 6   | 2   | 33  | 0    |
| CONTIG-030928 | 179 | 15  | 7   | 111 | 0    |
| CONTIG-030929 | 63  | 10  | 14  | 2   | 0    |
| CONTIG-030930 | 166 | 10  | 17  | 53  | 0    |
| CONTIG-030931 | 162 | 15  | 18  | 96  | 0    |
| CONTIG-030932 | 81  | 9   | 47  | 10  | 0    |
| CONTIG-030933 | 228 | 89  | 8   | 562 | 128  |
| CONTIG-030934 | 338 | 7   | 12  | 85  | 2    |
| CONTIG-030935 | 111 | 6   | 7   | 9   | 0    |

|               |      |     |     |      |     |
|---------------|------|-----|-----|------|-----|
| CONTIG-030936 | 256  | 23  | 69  | 303  | 0   |
| CONTIG-030937 | 1734 | 15  | 86  | 400  | 63  |
| CONTIG-030938 | 242  | 5   | 2   | 21   | 0   |
| CONTIG-030940 | 91   | 4   | 0   | 5    | 0   |
| CONTIG-030944 | 161  | 14  | 111 | 35   | 0   |
| CONTIG-030945 | 359  | 9   | 7   | 111  | 0   |
| CONTIG-030946 | 89   | 6   | 4   | 17   | 0   |
| CONTIG-030947 | 69   | 7   | 9   | 17   | 2   |
| CONTIG-030948 | 243  | 8   | 12  | 71   | 0   |
| CONTIG-030949 | 305  | 6   | 12  | 48   | 2   |
| CONTIG-030950 | 222  | 12  | 39  | 118  | 0   |
| CONTIG-030951 | 325  | 14  | 49  | 127  | 2   |
| CONTIG-030952 | 301  | 9   | 17  | 94   | 2   |
| CONTIG-030953 | 89   | 11  | 24  | 2    | 0   |
| CONTIG-030954 | 77   | 7   | 7   | 19   | 0   |
| CONTIG-030955 | 458  | 15  | 49  | 145  | 0   |
| CONTIG-030956 | 263  | 7   | 16  | 60   | 0   |
| CONTIG-030960 | 171  | 5   | 11  | 19   | 0   |
| CONTIG-030962 | 291  | 43  | 91  | 320  | 9   |
| CONTIG-030963 | 172  | 8   | 15  | 49   | 0   |
| CONTIG-030964 | 313  | 37  | 134 | 169  | 54  |
| CONTIG-030965 | 466  | 7   | 18  | 103  | 0   |
| CONTIG-030967 | 293  | 176 | 175 | 1829 | 258 |
| CONTIG-030968 | 588  | 34  | 129 | 629  | 25  |
| CONTIG-030969 | 226  | 7   | 5   | 28   | 0   |
| CONTIG-030970 | 192  | 9   | 31  | 18   | 0   |
| CONTIG-030971 | 141  | 8   | 53  | 0    | 4   |
| CONTIG-030972 | 87   | 12  | 39  | 0    | 0   |
| CONTIG-030973 | 121  | 4   | 6   | 12   | 0   |
| CONTIG-030974 | 132  | 6   | 12  | 26   | 0   |
| CONTIG-030975 | 92   | 13  | 18  | 49   | 0   |
| CONTIG-030976 | 81   | 7   | 18  | 7    | 0   |
| CONTIG-030977 | 423  | 8   | 10  | 79   | 0   |
| CONTIG-030978 | 153  | 18  | 73  | 63   | 0   |
| CONTIG-030979 | 472  | 28  | 26  | 57   | 0   |
| CONTIG-030980 | 163  | 11  | 27  | 47   | 0   |
| CONTIG-030981 | 90   | 7   | 9   | 7    | 0   |
| CONTIG-030982 | 218  | 10  | 6   | 89   | 0   |
| CONTIG-030983 | 109  | 25  | 83  | 80   | 0   |
| CONTIG-030984 | 112  | 14  | 40  | 29   | 6   |
| CONTIG-030985 | 410  | 6   | 22  | 73   | 2   |
| CONTIG-030986 | 153  | 5   | 0   | 10   | 0   |
| CONTIG-030987 | 520  | 16  | 19  | 446  | 0   |
| CONTIG-030988 | 95   | 3   | 7   | 5    | 0   |
| CONTIG-030989 | 287  | 15  | 28  | 50   | 2   |
| CONTIG-030990 | 97   | 10  | 20  | 13   | 0   |
| CONTIG-030991 | 150  | 14  | 3   | 61   | 2   |

|               |      |     |     |      |     |
|---------------|------|-----|-----|------|-----|
| CONTIG-030992 | 260  | 43  | 54  | 281  | 0   |
| CONTIG-030993 | 419  | 26  | 55  | 308  | 0   |
| CONTIG-030994 | 166  | 174 | 79  | 1069 | 27  |
| CONTIG-030995 | 106  | 10  | 11  | 27   | 0   |
| CONTIG-030996 | 131  | 6   | 15  | 21   | 0   |
| CONTIG-030997 | 60   | 15  | 2   | 13   | 0   |
| CONTIG-031001 | 544  | 25  | 139 | 366  | 2   |
| CONTIG-031003 | 551  | 31  | 40  | 970  | 0   |
| CONTIG-031004 | 216  | 14  | 29  | 87   | 0   |
| CONTIG-031005 | 269  | 15  | 36  | 161  | 0   |
| CONTIG-031006 | 138  | 4   | 9   | 16   | 0   |
| CONTIG-031007 | 126  | 8   | 2   | 32   | 0   |
| CONTIG-031008 | 359  | 13  | 30  | 266  | 0   |
| CONTIG-031009 | 68   | 4   | 2   | 2    | 0   |
| CONTIG-031010 | 103  | 6   | 6   | 16   | 0   |
| CONTIG-031011 | 140  | 10  | 12  | 59   | 0   |
| CONTIG-031012 | 638  | 76  | 6   | 0    | 420 |
| CONTIG-031014 | 217  | 9   | 16  | 42   | 4   |
| CONTIG-031015 | 73   | 13  | 10  | 42   | 0   |
| CONTIG-031016 | 162  | 7   | 46  | 26   | 0   |
| CONTIG-031017 | 1018 | 36  | 221 | 2088 | 2   |
| CONTIG-031018 | 111  | 4   | 2   | 8    | 0   |
| CONTIG-031019 | 298  | 12  | 48  | 69   | 3   |
| CONTIG-031020 | 62   | 5   | 11  | 0    | 0   |
| CONTIG-031021 | 176  | 18  | 81  | 30   | 0   |
| CONTIG-031024 | 187  | 6   | 2   | 6    | 0   |
| CONTIG-031025 | 110  | 17  | 38  | 71   | 0   |
| CONTIG-031026 | 273  | 14  | 62  | 83   | 0   |
| CONTIG-031027 | 254  | 7   | 16  | 29   | 2   |
| CONTIG-031028 | 40   | 239 | 3   | 621  | 0   |
| CONTIG-031029 | 130  | 10  | 32  | 25   | 0   |
| CONTIG-031030 | 121  | 7   | 10  | 7    | 0   |
| CONTIG-031031 | 199  | 8   | 32  | 29   | 0   |
| CONTIG-031032 | 465  | 22  | 74  | 334  | 6   |
| CONTIG-031033 | 133  | 10  | 19  | 45   | 0   |
| CONTIG-031034 | 314  | 21  | 34  | 322  | 0   |
| CONTIG-031035 | 299  | 13  | 103 | 2    | 71  |
| CONTIG-031036 | 271  | 9   | 21  | 55   | 0   |
| CONTIG-031037 | 115  | 147 | 66  | 533  | 0   |
| CONTIG-031038 | 80   | 7   | 12  | 2    | 0   |
| CONTIG-031039 | 104  | 4   | 6   | 3    | 0   |
| CONTIG-031043 | 155  | 6   | 29  | 26   | 0   |
| CONTIG-031044 | 69   | 19  | 40  | 13   | 0   |
| CONTIG-031045 | 207  | 8   | 8   | 75   | 0   |
| CONTIG-031046 | 223  | 10  | 14  | 91   | 0   |
| CONTIG-031047 | 620  | 30  | 16  | 254  | 2   |
| CONTIG-031048 | 62   | 29  | 19  | 42   | 0   |

|               |      |     |     |      |     |
|---------------|------|-----|-----|------|-----|
| CONTIG-031049 | 71   | 5   | 14  | 2    | 0   |
| CONTIG-031050 | 114  | 5   | 0   | 14   | 0   |
| CONTIG-031051 | 118  | 7   | 0   | 12   | 0   |
| CONTIG-031052 | 315  | 8   | 26  | 81   | 2   |
| CONTIG-031053 | 302  | 50  | 479 | 311  | 0   |
| CONTIG-031055 | 110  | 9   | 7   | 18   | 0   |
| CONTIG-031056 | 70   | 8   | 4   | 11   | 0   |
| CONTIG-031057 | 99   | 11  | 48  | 9    | 0   |
| CONTIG-031058 | 141  | 18  | 27  | 97   | 0   |
| CONTIG-031059 | 147  | 26  | 39  | 117  | 9   |
| CONTIG-031060 | 144  | 6   | 44  | 4    | 0   |
| CONTIG-031061 | 85   | 8   | 0   | 25   | 0   |
| CONTIG-031062 | 120  | 10  | 10  | 12   | 0   |
| CONTIG-031063 | 290  | 9   | 14  | 66   | 0   |
| CONTIG-031064 | 97   | 21  | 39  | 20   | 0   |
| CONTIG-031065 | 97   | 7   | 13  | 18   | 0   |
| CONTIG-031066 | 167  | 16  | 7   | 48   | 2   |
| CONTIG-031067 | 75   | 14  | 4   | 28   | 0   |
| CONTIG-031069 | 211  | 4   | 9   | 13   | 0   |
| CONTIG-031070 | 589  | 17  | 53  | 231  | 12  |
| CONTIG-031073 | 58   | 4   | 2   | 5    | 0   |
| CONTIG-031074 | 392  | 9   | 26  | 85   | 0   |
| CONTIG-031075 | 60   | 7   | 13  | 9    | 0   |
| CONTIG-031076 | 116  | 3   | 0   | 9    | 0   |
| CONTIG-031077 | 121  | 4   | 30  | 0    | 0   |
| CONTIG-031078 | 237  | 11  | 8   | 61   | 0   |
| CONTIG-031079 | 1381 | 37  | 42  | 1176 | 107 |
| CONTIG-031080 | 72   | 10  | 9   | 27   | 0   |
| CONTIG-031081 | 124  | 4   | 0   | 4    | 0   |
| CONTIG-031082 | 300  | 8   | 11  | 75   | 0   |
| CONTIG-031083 | 65   | 4   | 0   | 8    | 0   |
| CONTIG-031084 | 123  | 8   | 5   | 25   | 0   |
| CONTIG-031085 | 66   | 7   | 8   | 7    | 0   |
| CONTIG-031086 | 110  | 4   | 6   | 5    | 0   |
| CONTIG-031087 | 201  | 26  | 5   | 109  | 0   |
| CONTIG-031088 | 60   | 3   | 9   | 0    | 0   |
| CONTIG-031090 | 123  | 6   | 12  | 16   | 0   |
| CONTIG-031091 | 588  | 14  | 51  | 214  | 0   |
| CONTIG-031092 | 190  | 242 | 141 | 2440 | 53  |
| CONTIG-031094 | 80   | 5   | 18  | 0    | 0   |
| CONTIG-031095 | 125  | 5   | 8   | 6    | 0   |
| CONTIG-031096 | 110  | 14  | 8   | 45   | 0   |
| CONTIG-031097 | 67   | 17  | 65  | 0    | 0   |
| CONTIG-031100 | 244  | 10  | 26  | 88   | 0   |
| CONTIG-031104 | 146  | 9   | 4   | 36   | 0   |
| CONTIG-031105 | 150  | 15  | 34  | 60   | 0   |
| CONTIG-031106 | 225  | 16  | 35  | 125  | 0   |

|               |      |    |     |      |   |
|---------------|------|----|-----|------|---|
| CONTIG-031107 | 170  | 16 | 52  | 23   | 0 |
| CONTIG-031112 | 91   | 11 | 19  | 10   | 0 |
| CONTIG-031114 | 187  | 11 | 7   | 77   | 0 |
| CONTIG-031116 | 645  | 26 | 174 | 669  | 2 |
| CONTIG-031117 | 640  | 29 | 4   | 6    | 0 |
| CONTIG-031118 | 83   | 6  | 17  | 2    | 0 |
| CONTIG-031119 | 107  | 15 | 64  | 38   | 0 |
| CONTIG-031120 | 581  | 63 | 207 | 1816 | 0 |
| CONTIG-031121 | 281  | 6  | 8   | 37   | 0 |
| CONTIG-031122 | 174  | 26 | 16  | 245  | 0 |
| CONTIG-031125 | 579  | 11 | 27  | 212  | 8 |
| CONTIG-031136 | 347  | 20 | 38  | 193  | 6 |
| CONTIG-031137 | 66   | 6  | 10  | 2    | 0 |
| CONTIG-031138 | 87   | 11 | 4   | 21   | 0 |
| CONTIG-031139 | 122  | 12 | 38  | 14   | 0 |
| CONTIG-031140 | 123  | 10 | 10  | 38   | 0 |
| CONTIG-031141 | 174  | 7  | 4   | 37   | 0 |
| CONTIG-031142 | 244  | 28 | 35  | 193  | 0 |
| CONTIG-031144 | 635  | 15 | 47  | 342  | 0 |
| CONTIG-031145 | 128  | 7  | 9   | 15   | 0 |
| CONTIG-031146 | 155  | 19 | 35  | 78   | 0 |
| CONTIG-031147 | 134  | 7  | 6   | 4    | 0 |
| CONTIG-031148 | 100  | 5  | 18  | 13   | 0 |
| CONTIG-031149 | 84   | 8  | 28  | 16   | 0 |
| CONTIG-031150 | 71   | 7  | 8   | 19   | 0 |
| CONTIG-031152 | 106  | 7  | 2   | 21   | 0 |
| CONTIG-031153 | 77   | 5  | 13  | 11   | 0 |
| CONTIG-031154 | 323  | 12 | 9   | 157  | 2 |
| CONTIG-031155 | 102  | 6  | 9   | 0    | 0 |
| CONTIG-031156 | 111  | 14 | 42  | 53   | 0 |
| CONTIG-031157 | 345  | 21 | 31  | 244  | 0 |
| CONTIG-031159 | 84   | 12 | 14  | 15   | 6 |
| CONTIG-031160 | 745  | 10 | 22  | 289  | 4 |
| CONTIG-031161 | 178  | 13 | 22  | 54   | 0 |
| CONTIG-031162 | 144  | 9  | 3   | 29   | 0 |
| CONTIG-031163 | 1414 | 11 | 97  | 540  | 2 |
| CONTIG-031165 | 74   | 5  | 9   | 2    | 0 |
| CONTIG-031166 | 344  | 7  | 30  | 6    | 0 |
| CONTIG-031167 | 39   | 73 | 32  | 49   | 0 |
| CONTIG-031169 | 160  | 9  | 11  | 57   | 0 |
| CONTIG-031172 | 425  | 13 | 38  | 142  | 0 |
| CONTIG-031173 | 214  | 4  | 19  | 5    | 0 |
| CONTIG-031174 | 101  | 13 | 31  | 15   | 0 |
| CONTIG-031175 | 85   | 9  | 23  | 17   | 0 |
| CONTIG-031176 | 347  | 10 | 54  | 120  | 0 |
| CONTIG-031177 | 79   | 26 | 56  | 61   | 2 |
| CONTIG-031179 | 143  | 5  | 16  | 16   | 0 |

|               |     |      |     |      |     |
|---------------|-----|------|-----|------|-----|
| CONTIG-031180 | 179 | 6    | 26  | 29   | 0   |
| CONTIG-031181 | 144 | 12   | 22  | 58   | 0   |
| CONTIG-031182 | 267 | 16   | 6   | 187  | 0   |
| CONTIG-031187 | 95  | 7    | 13  | 12   | 0   |
| CONTIG-031188 | 182 | 9    | 2   | 39   | 4   |
| CONTIG-031189 | 327 | 14   | 62  | 190  | 0   |
| CONTIG-031190 | 312 | 18   | 48  | 121  | 7   |
| CONTIG-031191 | 60  | 8    | 5   | 0    | 0   |
| CONTIG-031192 | 296 | 25   | 53  | 253  | 0   |
| CONTIG-031193 | 154 | 7    | 5   | 32   | 0   |
| CONTIG-031194 | 71  | 7    | 42  | 2    | 0   |
| CONTIG-031195 | 340 | 17   | 35  | 159  | 12  |
| CONTIG-031196 | 124 | 4    | 2   | 11   | 0   |
| CONTIG-031197 | 109 | 13   | 11  | 37   | 2   |
| CONTIG-031198 | 447 | 16   | 27  | 286  | 4   |
| CONTIG-031199 | 244 | 13   | 31  | 93   | 3   |
| CONTIG-031200 | 116 | 16   | 74  | 39   | 0   |
| CONTIG-031202 | 975 | 23   | 183 | 699  | 7   |
| CONTIG-031203 | 78  | 1222 | 89  | 5076 | 0   |
| CONTIG-031204 | 220 | 10   | 21  | 55   | 0   |
| CONTIG-031205 | 134 | 5    | 8   | 27   | 0   |
| CONTIG-031206 | 118 | 15   | 19  | 61   | 0   |
| CONTIG-031207 | 59  | 5    | 17  | 2    | 0   |
| CONTIG-031208 | 200 | 9    | 5   | 30   | 4   |
| CONTIG-031209 | 227 | 8    | 14  | 63   | 0   |
| CONTIG-031210 | 279 | 14   | 29  | 151  | 0   |
| CONTIG-031211 | 342 | 14   | 133 | 95   | 0   |
| CONTIG-031212 | 311 | 9    | 30  | 52   | 0   |
| CONTIG-031213 | 46  | 1226 | 62  | 854  | 233 |
| CONTIG-031214 | 80  | 538  | 107 | 560  | 0   |
| CONTIG-031215 | 98  | 10   | 14  | 21   | 0   |
| CONTIG-031217 | 105 | 8    | 34  | 18   | 0   |
| CONTIG-031225 | 78  | 8    | 23  | 0    | 0   |
| CONTIG-031226 | 70  | 18   | 6   | 53   | 2   |
| CONTIG-031227 | 522 | 22   | 31  | 285  | 4   |
| CONTIG-031228 | 296 | 26   | 19  | 362  | 0   |
| CONTIG-031229 | 148 | 11   | 12  | 62   | 0   |
| CONTIG-031230 | 78  | 6    | 3   | 18   | 0   |
| CONTIG-031231 | 69  | 8    | 11  | 13   | 0   |
| CONTIG-031232 | 259 | 10   | 34  | 80   | 0   |
| CONTIG-031233 | 123 | 14   | 25  | 27   | 0   |
| CONTIG-031234 | 41  | 371  | 82  | 527  | 2   |
| CONTIG-031235 | 452 | 7    | 18  | 92   | 0   |
| CONTIG-031236 | 421 | 16   | 33  | 339  | 0   |
| CONTIG-031237 | 272 | 7    | 9   | 28   | 0   |
| CONTIG-031239 | 136 | 9    | 16  | 34   | 0   |
| CONTIG-031240 | 143 | 93   | 162 | 325  | 0   |



|               |     |     |     |     |     |
|---------------|-----|-----|-----|-----|-----|
| CONTIG-031241 | 104 | 4   | 20  | 4   | 0   |
| CONTIG-031242 | 361 | 7   | 26  | 86  | 4   |
| CONTIG-031243 | 349 | 12  | 18  | 64  | 2   |
| CONTIG-031244 | 103 | 4   | 5   | 14  | 0   |
| CONTIG-031246 | 62  | 9   | 2   | 0   | 0   |
| CONTIG-031247 | 352 | 15  | 29  | 111 | 2   |
| CONTIG-031248 | 154 | 13  | 57  | 39  | 0   |
| CONTIG-031249 | 96  | 3   | 3   | 2   | 0   |
| CONTIG-031250 | 103 | 5   | 2   | 19  | 0   |
| CONTIG-031251 | 217 | 3   | 6   | 11  | 0   |
| CONTIG-031256 | 152 | 5   | 5   | 26  | 0   |
| CONTIG-031257 | 285 | 14  | 39  | 98  | 2   |
| CONTIG-031259 | 297 | 6   | 5   | 51  | 5   |
| CONTIG-031260 | 200 | 14  | 22  | 6   | 0   |
| CONTIG-031261 | 422 | 10  | 33  | 86  | 6   |
| CONTIG-031262 | 141 | 11  | 74  | 11  | 0   |
| CONTIG-031263 | 104 | 6   | 3   | 11  | 6   |
| CONTIG-031270 | 571 | 14  | 20  | 389 | 7   |
| CONTIG-031271 | 94  | 9   | 19  | 2   | 0   |
| CONTIG-031272 | 131 | 8   | 3   | 31  | 0   |
| CONTIG-031273 | 523 | 64  | 217 | 736 | 118 |
| CONTIG-031274 | 137 | 6   | 5   | 18  | 0   |
| CONTIG-031276 | 230 | 7   | 37  | 52  | 3   |
| CONTIG-031277 | 227 | 10  | 7   | 4   | 0   |
| CONTIG-031278 | 205 | 5   | 4   | 22  | 0   |
| CONTIG-031279 | 225 | 9   | 26  | 16  | 2   |
| CONTIG-031280 | 69  | 138 | 27  | 275 | 0   |
| CONTIG-031281 | 88  | 13  | 36  | 35  | 0   |
| CONTIG-031282 | 145 | 11  | 11  | 11  | 0   |
| CONTIG-031283 | 147 | 7   | 4   | 23  | 0   |
| CONTIG-031284 | 51  | 40  | 64  | 4   | 0   |
| CONTIG-031285 | 372 | 16  | 15  | 130 | 10  |
| CONTIG-031286 | 84  | 21  | 87  | 42  | 0   |
| CONTIG-031287 | 128 | 3   | 3   | 10  | 0   |
| CONTIG-031288 | 245 | 10  | 41  | 77  | 0   |
| CONTIG-031289 | 131 | 20  | 10  | 55  | 2   |
| CONTIG-031290 | 62  | 9   | 25  | 2   | 0   |
| CONTIG-031291 | 127 | 9   | 41  | 33  | 0   |
| CONTIG-031292 | 169 | 10  | 0   | 62  | 0   |
| CONTIG-031293 | 271 | 10  | 147 | 68  | 2   |
| CONTIG-031294 | 397 | 13  | 17  | 241 | 6   |
| CONTIG-031295 | 137 | 12  | 8   | 41  | 3   |
| CONTIG-031296 | 344 | 15  | 25  | 120 | 0   |
| CONTIG-031297 | 291 | 9   | 33  | 44  | 0   |
| CONTIG-031298 | 726 | 18  | 45  | 554 | 0   |
| CONTIG-031299 | 109 | 16  | 10  | 39  | 0   |
| CONTIG-031306 | 867 | 19  | 89  | 426 | 0   |

|               |     |     |     |      |   |
|---------------|-----|-----|-----|------|---|
| CONTIG-031307 | 70  | 18  | 44  | 23   | 0 |
| CONTIG-031308 | 72  | 6   | 16  | 2    | 0 |
| CONTIG-031310 | 283 | 16  | 39  | 101  | 2 |
| CONTIG-031312 | 251 | 11  | 14  | 143  | 0 |
| CONTIG-031313 | 72  | 5   | 2   | 10   | 0 |
| CONTIG-031314 | 322 | 10  | 13  | 67   | 0 |
| CONTIG-031315 | 67  | 7   | 0   | 14   | 0 |
| CONTIG-031316 | 61  | 7   | 4   | 21   | 0 |
| CONTIG-031317 | 579 | 9   | 31  | 144  | 0 |
| CONTIG-031318 | 150 | 10  | 43  | 14   | 0 |
| CONTIG-031319 | 118 | 18  | 56  | 40   | 2 |
| CONTIG-031320 | 62  | 6   | 0   | 4    | 0 |
| CONTIG-031322 | 400 | 14  | 74  | 225  | 0 |
| CONTIG-031323 | 197 | 18  | 23  | 35   | 0 |
| CONTIG-031325 | 72  | 8   | 39  | 8    | 0 |
| CONTIG-031326 | 457 | 23  | 19  | 611  | 0 |
| CONTIG-031327 | 87  | 9   | 11  | 18   | 0 |
| CONTIG-031328 | 235 | 8   | 24  | 41   | 0 |
| CONTIG-031330 | 496 | 11  | 22  | 122  | 2 |
| CONTIG-031331 | 103 | 5   | 2   | 10   | 0 |
| CONTIG-031332 | 85  | 4   | 6   | 8    | 0 |
| CONTIG-031333 | 492 | 21  | 73  | 375  | 0 |
| CONTIG-031334 | 62  | 3   | 3   | 2    | 0 |
| CONTIG-031336 | 39  | 453 | 31  | 721  | 0 |
| CONTIG-031337 | 79  | 8   | 2   | 20   | 0 |
| CONTIG-031338 | 255 | 10  | 0   | 2    | 0 |
| CONTIG-031339 | 269 | 18  | 116 | 91   | 0 |
| CONTIG-031340 | 143 | 5   | 5   | 22   | 0 |
| CONTIG-031341 | 275 | 22  | 143 | 61   | 0 |
| CONTIG-031342 | 94  | 5   | 13  | 10   | 0 |
| CONTIG-031343 | 77  | 17  | 24  | 27   | 0 |
| CONTIG-031344 | 361 | 20  | 43  | 216  | 0 |
| CONTIG-031345 | 73  | 83  | 8   | 36   | 0 |
| CONTIG-031346 | 70  | 4   | 6   | 2    | 0 |
| CONTIG-031347 | 193 | 8   | 15  | 24   | 0 |
| CONTIG-031348 | 77  | 3   | 5   | 2    | 0 |
| CONTIG-031349 | 176 | 11  | 6   | 77   | 0 |
| CONTIG-031350 | 127 | 7   | 14  | 14   | 0 |
| CONTIG-031351 | 255 | 13  | 14  | 143  | 8 |
| CONTIG-031352 | 110 | 10  | 16  | 0    | 0 |
| CONTIG-031354 | 41  | 701 | 163 | 1506 | 0 |
| CONTIG-031355 | 156 | 10  | 4   | 49   | 2 |
| CONTIG-031356 | 85  | 7   | 2   | 17   | 0 |
| CONTIG-031358 | 294 | 9   | 10  | 81   | 6 |
| CONTIG-031359 | 80  | 16  | 2   | 53   | 0 |
| CONTIG-031360 | 68  | 4   | 10  | 8    | 0 |
| CONTIG-031364 | 162 | 17  | 6   | 106  | 2 |

|               |      |     |     |     |     |
|---------------|------|-----|-----|-----|-----|
| CONTIG-031365 | 218  | 11  | 56  | 29  | 0   |
| CONTIG-031369 | 119  | 7   | 27  | 22  | 0   |
| CONTIG-031370 | 560  | 13  | 12  | 149 | 2   |
| CONTIG-031371 | 357  | 70  | 4   | 0   | 236 |
| CONTIG-031372 | 74   | 4   | 5   | 5   | 0   |
| CONTIG-031373 | 65   | 3   | 6   | 2   | 0   |
| CONTIG-031374 | 179  | 25  | 128 | 57  | 0   |
| CONTIG-031375 | 88   | 29  | 89  | 54  | 0   |
| CONTIG-031376 | 116  | 5   | 4   | 18  | 0   |
| CONTIG-031377 | 331  | 11  | 85  | 113 | 0   |
| CONTIG-031378 | 59   | 9   | 20  | 0   | 0   |
| CONTIG-031382 | 95   | 6   | 2   | 13  | 0   |
| CONTIG-031383 | 158  | 4   | 0   | 11  | 0   |
| CONTIG-031384 | 205  | 17  | 66  | 39  | 0   |
| CONTIG-031385 | 80   | 9   | 9   | 31  | 0   |
| CONTIG-031386 | 139  | 6   | 4   | 15  | 0   |
| CONTIG-031387 | 81   | 7   | 4   | 13  | 0   |
| CONTIG-031388 | 173  | 9   | 14  | 40  | 0   |
| CONTIG-031389 | 109  | 5   | 12  | 15  | 0   |
| CONTIG-031390 | 130  | 9   | 5   | 25  | 0   |
| CONTIG-031391 | 324  | 14  | 19  | 94  | 2   |
| CONTIG-031392 | 178  | 29  | 27  | 30  | 0   |
| CONTIG-031393 | 294  | 8   | 4   | 81  | 0   |
| CONTIG-031395 | 139  | 7   | 13  | 22  | 0   |
| CONTIG-031398 | 309  | 13  | 37  | 64  | 0   |
| CONTIG-031399 | 73   | 187 | 149 | 516 | 0   |
| CONTIG-031400 | 94   | 17  | 80  | 29  | 0   |
| CONTIG-031401 | 220  | 7   | 3   | 54  | 0   |
| CONTIG-031402 | 150  | 10  | 9   | 6   | 0   |
| CONTIG-031404 | 303  | 15  | 167 | 129 | 0   |
| CONTIG-031405 | 245  | 16  | 70  | 68  | 8   |
| CONTIG-031406 | 404  | 17  | 27  | 205 | 6   |
| CONTIG-031407 | 248  | 9   | 25  | 70  | 0   |
| CONTIG-031408 | 1050 | 12  | 45  | 314 | 0   |
| CONTIG-031409 | 522  | 36  | 56  | 929 | 2   |
| CONTIG-031410 | 201  | 6   | 13  | 26  | 0   |
| CONTIG-031411 | 308  | 10  | 26  | 40  | 6   |
| CONTIG-031412 | 67   | 7   | 2   | 21  | 0   |
| CONTIG-031413 | 160  | 9   | 0   | 64  | 0   |
| CONTIG-031414 | 193  | 12  | 9   | 51  | 0   |
| CONTIG-031415 | 94   | 4   | 23  | 4   | 0   |
| CONTIG-031416 | 89   | 12  | 17  | 28  | 2   |
| CONTIG-031418 | 88   | 2   | 0   | 2   | 0   |
| CONTIG-031419 | 274  | 16  | 32  | 137 | 0   |
| CONTIG-031420 | 194  | 13  | 7   | 26  | 0   |
| CONTIG-031424 | 101  | 5   | 3   | 2   | 0   |
| CONTIG-031430 | 167  | 7   | 5   | 27  | 0   |

|               |     |     |     |      |   |
|---------------|-----|-----|-----|------|---|
| CONTIG-031432 | 474 | 7   | 24  | 79   | 0 |
| CONTIG-031433 | 57  | 649 | 6   | 42   | 0 |
| CONTIG-031434 | 71  | 16  | 17  | 17   | 0 |
| CONTIG-031435 | 670 | 13  | 81  | 253  | 2 |
| CONTIG-031436 | 261 | 13  | 19  | 96   | 2 |
| CONTIG-031437 | 218 | 5   | 7   | 13   | 0 |
| CONTIG-031438 | 370 | 15  | 44  | 235  | 0 |
| CONTIG-031445 | 60  | 3   | 0   | 8    | 0 |
| CONTIG-031446 | 226 | 6   | 8   | 25   | 0 |
| CONTIG-031447 | 401 | 29  | 67  | 519  | 2 |
| CONTIG-031448 | 67  | 7   | 2   | 13   | 0 |
| CONTIG-031449 | 624 | 18  | 13  | 396  | 7 |
| CONTIG-031450 | 90  | 8   | 31  | 6    | 0 |
| CONTIG-031451 | 170 | 11  | 39  | 45   | 5 |
| CONTIG-031452 | 376 | 7   | 14  | 62   | 0 |
| CONTIG-031454 | 140 | 27  | 14  | 182  | 0 |
| CONTIG-031455 | 296 | 18  | 42  | 118  | 0 |
| CONTIG-031461 | 297 | 9   | 21  | 49   | 0 |
| CONTIG-031462 | 250 | 5   | 12  | 42   | 0 |
| CONTIG-031463 | 79  | 7   | 0   | 15   | 0 |
| CONTIG-031464 | 136 | 12  | 0   | 88   | 0 |
| CONTIG-031472 | 62  | 429 | 48  | 1232 | 0 |
| CONTIG-031473 | 194 | 30  | 41  | 291  | 2 |
| CONTIG-031474 | 109 | 15  | 26  | 48   | 0 |
| CONTIG-031475 | 70  | 15  | 57  | 0    | 0 |
| CONTIG-031476 | 129 | 10  | 13  | 54   | 0 |
| CONTIG-031479 | 108 | 4   | 22  | 4    | 0 |
| CONTIG-031480 | 305 | 13  | 42  | 203  | 0 |
| CONTIG-031481 | 143 | 14  | 110 | 23   | 0 |
| CONTIG-031489 | 73  | 26  | 10  | 20   | 0 |
| CONTIG-031490 | 251 | 7   | 32  | 34   | 0 |
| CONTIG-031491 | 87  | 2   | 0   | 2    | 0 |
| CONTIG-031492 | 492 | 28  | 143 | 281  | 0 |
| CONTIG-031493 | 102 | 7   | 13  | 23   | 0 |
| CONTIG-031494 | 166 | 13  | 20  | 60   | 2 |
| CONTIG-031495 | 59  | 5   | 3   | 4    | 0 |
| CONTIG-031496 | 187 | 15  | 44  | 27   | 0 |
| CONTIG-031497 | 485 | 22  | 21  | 240  | 2 |
| CONTIG-031498 | 252 | 41  | 172 | 172  | 9 |
| CONTIG-031499 | 399 | 10  | 35  | 101  | 0 |
| CONTIG-031500 | 343 | 9   | 18  | 96   | 0 |
| CONTIG-031501 | 88  | 6   | 0   | 15   | 0 |
| CONTIG-031502 | 379 | 7   | 69  | 68   | 0 |
| CONTIG-031503 | 69  | 4   | 0   | 0    | 0 |
| CONTIG-031504 | 95  | 4   | 17  | 8    | 0 |
| CONTIG-031505 | 234 | 12  | 19  | 16   | 0 |
| CONTIG-031506 | 760 | 15  | 39  | 442  | 4 |

|               |      |     |     |     |     |
|---------------|------|-----|-----|-----|-----|
| CONTIG-031507 | 160  | 10  | 6   | 48  | 0   |
| CONTIG-031508 | 121  | 7   | 5   | 34  | 0   |
| CONTIG-031509 | 356  | 17  | 34  | 338 | 0   |
| CONTIG-031510 | 396  | 15  | 21  | 152 | 2   |
| CONTIG-031511 | 51   | 553 | 29  | 488 | 0   |
| CONTIG-031515 | 147  | 10  | 24  | 40  | 0   |
| CONTIG-031516 | 196  | 10  | 7   | 38  | 0   |
| CONTIG-031517 | 185  | 12  | 10  | 120 | 0   |
| CONTIG-031518 | 294  | 7   | 20  | 65  | 0   |
| CONTIG-031519 | 117  | 6   | 20  | 10  | 0   |
| CONTIG-031520 | 139  | 8   | 11  | 30  | 0   |
| CONTIG-031521 | 1191 | 22  | 138 | 670 | 35  |
| CONTIG-031522 | 121  | 4   | 11  | 11  | 0   |
| CONTIG-031523 | 613  | 22  | 63  | 446 | 7   |
| CONTIG-031524 | 135  | 4   | 0   | 8   | 0   |
| CONTIG-031525 | 78   | 5   | 2   | 2   | 0   |
| CONTIG-031526 | 105  | 10  | 3   | 28  | 0   |
| CONTIG-031527 | 330  | 13  | 3   | 127 | 0   |
| CONTIG-031528 | 610  | 23  | 115 | 292 | 0   |
| CONTIG-031529 | 209  | 12  | 42  | 69  | 0   |
| CONTIG-031530 | 296  | 35  | 88  | 333 | 4   |
| CONTIG-031531 | 190  | 19  | 174 | 95  | 0   |
| CONTIG-031532 | 467  | 17  | 74  | 73  | 0   |
| CONTIG-031533 | 91   | 10  | 3   | 31  | 0   |
| CONTIG-031534 | 659  | 17  | 85  | 407 | 0   |
| CONTIG-031536 | 165  | 9   | 10  | 25  | 0   |
| CONTIG-031540 | 182  | 6   | 8   | 27  | 0   |
| CONTIG-031541 | 154  | 7   | 21  | 16  | 0   |
| CONTIG-031542 | 70   | 7   | 8   | 4   | 0   |
| CONTIG-031543 | 109  | 7   | 4   | 15  | 0   |
| CONTIG-031544 | 255  | 25  | 137 | 81  | 0   |
| CONTIG-031545 | 69   | 23  | 14  | 35  | 4   |
| CONTIG-031546 | 58   | 9   | 17  | 13  | 0   |
| CONTIG-031547 | 240  | 6   | 2   | 51  | 2   |
| CONTIG-031548 | 123  | 23  | 28  | 98  | 0   |
| CONTIG-031549 | 140  | 11  | 11  | 41  | 0   |
| CONTIG-031555 | 421  | 8   | 33  | 83  | 0   |
| CONTIG-031556 | 512  | 18  | 76  | 242 | 7   |
| CONTIG-031557 | 566  | 81  | 10  | 2   | 490 |
| CONTIG-031558 | 79   | 8   | 3   | 8   | 0   |
| CONTIG-031559 | 62   | 12  | 10  | 21  | 0   |
| CONTIG-031560 | 373  | 51  | 21  | 48  | 0   |
| CONTIG-031561 | 74   | 9   | 10  | 8   | 0   |
| CONTIG-031562 | 64   | 3   | 0   | 5   | 0   |
| CONTIG-031563 | 62   | 2   | 0   | 2   | 0   |
| CONTIG-031564 | 347  | 10  | 13  | 81  | 0   |
| CONTIG-031565 | 381  | 9   | 22  | 83  | 0   |

|               |     |      |     |      |     |
|---------------|-----|------|-----|------|-----|
| CONTIG-031566 | 76  | 566  | 250 | 1666 | 8   |
| CONTIG-031567 | 503 | 13   | 35  | 385  | 0   |
| CONTIG-031568 | 344 | 12   | 39  | 139  | 0   |
| CONTIG-031569 | 168 | 12   | 26  | 42   | 0   |
| CONTIG-031570 | 146 | 11   | 63  | 14   | 0   |
| CONTIG-031578 | 890 | 20   | 72  | 656  | 2   |
| CONTIG-031579 | 67  | 20   | 58  | 29   | 2   |
| CONTIG-031581 | 278 | 10   | 90  | 56   | 0   |
| CONTIG-031582 | 178 | 20   | 74  | 12   | 3   |
| CONTIG-031583 | 71  | 4    | 0   | 7    | 0   |
| CONTIG-031584 | 339 | 11   | 32  | 134  | 2   |
| CONTIG-031585 | 75  | 5    | 6   | 3    | 0   |
| CONTIG-031586 | 122 | 7    | 11  | 11   | 0   |
| CONTIG-031587 | 376 | 9    | 20  | 0    | 10  |
| CONTIG-031588 | 180 | 8    | 35  | 42   | 0   |
| CONTIG-031589 | 66  | 6    | 14  | 6    | 0   |
| CONTIG-031592 | 78  | 4    | 0   | 2    | 0   |
| CONTIG-031593 | 70  | 4    | 14  | 0    | 0   |
| CONTIG-031594 | 193 | 327  | 98  | 1000 | 584 |
| CONTIG-031595 | 285 | 12   | 88  | 84   | 0   |
| CONTIG-031596 | 66  | 3    | 0   | 0    | 0   |
| CONTIG-031598 | 107 | 35   | 31  | 239  | 0   |
| CONTIG-031599 | 298 | 6    | 4   | 0    | 10  |
| CONTIG-031600 | 241 | 22   | 83  | 129  | 0   |
| CONTIG-031601 | 217 | 5    | 36  | 14   | 0   |
| CONTIG-031602 | 196 | 16   | 13  | 67   | 0   |
| CONTIG-031603 | 99  | 508  | 103 | 2179 | 35  |
| CONTIG-031604 | 269 | 15   | 53  | 126  | 0   |
| CONTIG-031605 | 93  | 11   | 102 | 0    | 2   |
| CONTIG-031606 | 493 | 27   | 105 | 752  | 0   |
| CONTIG-031607 | 102 | 7    | 5   | 19   | 0   |
| CONTIG-031608 | 188 | 8    | 10  | 59   | 0   |
| CONTIG-031609 | 58  | 3    | 7   | 5    | 0   |
| CONTIG-031610 | 922 | 18   | 34  | 710  | 0   |
| CONTIG-031611 | 83  | 13   | 2   | 15   | 2   |
| CONTIG-031612 | 63  | 13   | 17  | 3    | 0   |
| CONTIG-031613 | 801 | 14   | 44  | 334  | 6   |
| CONTIG-031614 | 86  | 3    | 0   | 7    | 0   |
| CONTIG-031615 | 611 | 36   | 48  | 1000 | 0   |
| CONTIG-031616 | 131 | 4    | 14  | 10   | 0   |
| CONTIG-031617 | 87  | 15   | 8   | 48   | 0   |
| CONTIG-031618 | 104 | 9    | 5   | 29   | 0   |
| CONTIG-031619 | 590 | 12   | 15  | 301  | 0   |
| CONTIG-031620 | 149 | 9    | 16  | 23   | 5   |
| CONTIG-031621 | 515 | 14   | 59  | 260  | 2   |
| CONTIG-031622 | 180 | 18   | 28  | 155  | 0   |
| CONTIG-031623 | 38  | 1103 | 312 | 745  | 76  |

|               |     |    |     |      |    |
|---------------|-----|----|-----|------|----|
| CONTIG-031624 | 670 | 20 | 47  | 448  | 4  |
| CONTIG-031625 | 490 | 20 | 27  | 219  | 4  |
| CONTIG-031626 | 451 | 11 | 21  | 118  | 2  |
| CONTIG-031628 | 550 | 78 | 85  | 1240 | 6  |
| CONTIG-031629 | 135 | 7  | 2   | 30   | 2  |
| CONTIG-031632 | 60  | 7  | 4   | 5    | 0  |
| CONTIG-031633 | 124 | 9  | 3   | 23   | 2  |
| CONTIG-031634 | 166 | 10 | 21  | 56   | 0  |
| CONTIG-031635 | 137 | 11 | 18  | 53   | 0  |
| CONTIG-031636 | 61  | 13 | 4   | 10   | 0  |
| CONTIG-031637 | 373 | 16 | 17  | 211  | 0  |
| CONTIG-031638 | 357 | 17 | 83  | 230  | 0  |
| CONTIG-031639 | 75  | 3  | 2   | 0    | 0  |
| CONTIG-031640 | 118 | 5  | 0   | 9    | 0  |
| CONTIG-031641 | 207 | 7  | 4   | 27   | 0  |
| CONTIG-031642 | 92  | 6  | 3   | 6    | 0  |
| CONTIG-031643 | 113 | 25 | 6   | 88   | 0  |
| CONTIG-031644 | 144 | 7  | 9   | 19   | 0  |
| CONTIG-031645 | 67  | 7  | 29  | 0    | 0  |
| CONTIG-031646 | 98  | 8  | 3   | 32   | 0  |
| CONTIG-031647 | 671 | 17 | 14  | 249  | 7  |
| CONTIG-031648 | 64  | 12 | 13  | 31   | 0  |
| CONTIG-031649 | 184 | 10 | 80  | 24   | 0  |
| CONTIG-031651 | 741 | 13 | 60  | 293  | 12 |
| CONTIG-031652 | 77  | 11 | 33  | 0    | 0  |
| CONTIG-031653 | 305 | 12 | 9   | 151  | 0  |
| CONTIG-031660 | 146 | 9  | 7   | 32   | 0  |
| CONTIG-031661 | 199 | 7  | 10  | 39   | 0  |
| CONTIG-031662 | 70  | 8  | 5   | 5    | 0  |
| CONTIG-031664 | 121 | 5  | 10  | 9    | 0  |
| CONTIG-031669 | 251 | 20 | 68  | 87   | 4  |
| CONTIG-031670 | 193 | 55 | 30  | 0    | 66 |
| CONTIG-031671 | 67  | 3  | 0   | 5    | 0  |
| CONTIG-031672 | 261 | 5  | 6   | 56   | 0  |
| CONTIG-031673 | 417 | 68 | 64  | 872  | 4  |
| CONTIG-031674 | 90  | 6  | 25  | 3    | 0  |
| CONTIG-031675 | 78  | 5  | 5   | 11   | 0  |
| CONTIG-031677 | 295 | 23 | 118 | 132  | 4  |
| CONTIG-031678 | 243 | 10 | 44  | 43   | 0  |
| CONTIG-031679 | 266 | 5  | 13  | 37   | 0  |
| CONTIG-031682 | 358 | 12 | 14  | 152  | 2  |
| CONTIG-031683 | 174 | 12 | 18  | 83   | 0  |
| CONTIG-031684 | 672 | 12 | 70  | 220  | 5  |
| CONTIG-031687 | 190 | 9  | 17  | 10   | 0  |
| CONTIG-031688 | 207 | 10 | 34  | 75   | 0  |
| CONTIG-031689 | 445 | 15 | 13  | 100  | 0  |
| CONTIG-031690 | 200 | 12 | 27  | 80   | 0  |

|               |      |     |     |      |     |
|---------------|------|-----|-----|------|-----|
| CONTIG-031691 | 152  | 11  | 19  | 47   | 0   |
| CONTIG-031692 | 75   | 14  | 41  | 2    | 0   |
| CONTIG-031693 | 155  | 7   | 0   | 27   | 2   |
| CONTIG-031694 | 201  | 21  | 96  | 114  | 0   |
| CONTIG-031695 | 208  | 12  | 13  | 73   | 0   |
| CONTIG-031696 | 99   | 8   | 19  | 12   | 0   |
| CONTIG-031697 | 259  | 12  | 34  | 89   | 0   |
| CONTIG-031698 | 697  | 38  | 3   | 0    | 188 |
| CONTIG-031700 | 126  | 5   | 0   | 13   | 0   |
| CONTIG-031701 | 1571 | 33  | 24  | 1998 | 2   |
| CONTIG-031702 | 83   | 59  | 26  | 146  | 0   |
| CONTIG-031703 | 173  | 10  | 21  | 30   | 0   |
| CONTIG-031704 | 79   | 12  | 4   | 30   | 0   |
| CONTIG-031705 | 92   | 14  | 30  | 46   | 0   |
| CONTIG-031706 | 205  | 10  | 21  | 35   | 0   |
| CONTIG-031707 | 766  | 33  | 182 | 1400 | 0   |
| CONTIG-031708 | 174  | 11  | 2   | 76   | 0   |
| CONTIG-031709 | 95   | 15  | 6   | 28   | 0   |
| CONTIG-031712 | 153  | 11  | 33  | 42   | 0   |
| CONTIG-031713 | 234  | 12  | 35  | 80   | 0   |
| CONTIG-031714 | 75   | 12  | 0   | 36   | 2   |
| CONTIG-031715 | 130  | 11  | 11  | 48   | 0   |
| CONTIG-031716 | 446  | 35  | 145 | 607  | 4   |
| CONTIG-031717 | 108  | 6   | 7   | 21   | 0   |
| CONTIG-031718 | 81   | 10  | 2   | 47   | 0   |
| CONTIG-031719 | 49   | 955 | 113 | 2027 | 0   |
| CONTIG-031720 | 474  | 22  | 16  | 29   | 0   |
| CONTIG-031736 | 75   | 11  | 7   | 11   | 0   |
| CONTIG-031737 | 73   | 16  | 2   | 48   | 0   |
| CONTIG-031738 | 326  | 14  | 28  | 149  | 0   |
| CONTIG-031741 | 162  | 14  | 31  | 83   | 0   |
| CONTIG-031742 | 165  | 7   | 3   | 40   | 0   |
| CONTIG-031743 | 293  | 20  | 33  | 142  | 0   |
| CONTIG-031744 | 109  | 5   | 6   | 12   | 0   |
| CONTIG-031745 | 276  | 11  | 44  | 91   | 0   |
| CONTIG-031746 | 401  | 9   | 34  | 79   | 2   |
| CONTIG-031753 | 353  | 6   | 5   | 18   | 0   |
| CONTIG-031754 | 284  | 45  | 166 | 628  | 0   |
| CONTIG-031757 | 304  | 13  | 4   | 131  | 2   |
| CONTIG-031758 | 1382 | 30  | 2   | 0    | 123 |
| CONTIG-031759 | 992  | 46  | 6   | 2    | 273 |
| CONTIG-031760 | 145  | 15  | 60  | 53   | 0   |
| CONTIG-031761 | 266  | 17  | 73  | 239  | 0   |
| CONTIG-031762 | 448  | 11  | 12  | 200  | 0   |
| CONTIG-031763 | 455  | 7   | 25  | 72   | 0   |
| CONTIG-031764 | 60   | 6   | 10  | 0    | 0   |
| CONTIG-031765 | 63   | 6   | 9   | 0    | 0   |



|               |      |    |     |     |     |
|---------------|------|----|-----|-----|-----|
| CONTIG-031766 | 128  | 6  | 2   | 38  | 0   |
| CONTIG-031767 | 104  | 9  | 0   | 45  | 0   |
| CONTIG-031768 | 295  | 7  | 4   | 49  | 0   |
| CONTIG-031769 | 308  | 7  | 17  | 78  | 0   |
| CONTIG-031770 | 61   | 5  | 2   | 8   | 0   |
| CONTIG-031771 | 82   | 24 | 56  | 45  | 0   |
| CONTIG-031772 | 83   | 7  | 32  | 6   | 0   |
| CONTIG-031773 | 77   | 3  | 2   | 6   | 0   |
| CONTIG-031774 | 310  | 10 | 10  | 88  | 0   |
| CONTIG-031775 | 257  | 11 | 10  | 131 | 0   |
| CONTIG-031776 | 72   | 4  | 7   | 7   | 0   |
| CONTIG-031777 | 987  | 14 | 54  | 531 | 2   |
| CONTIG-031778 | 284  | 12 | 71  | 50  | 2   |
| CONTIG-031779 | 65   | 9  | 42  | 0   | 0   |
| CONTIG-031780 | 84   | 10 | 9   | 2   | 0   |
| CONTIG-031781 | 92   | 14 | 26  | 33  | 0   |
| CONTIG-031782 | 196  | 14 | 10  | 43  | 0   |
| CONTIG-031783 | 759  | 26 | 229 | 264 | 21  |
| CONTIG-031784 | 78   | 22 | 22  | 50  | 2   |
| CONTIG-031785 | 572  | 32 | 47  | 258 | 0   |
| CONTIG-031786 | 127  | 6  | 0   | 24  | 0   |
| CONTIG-031787 | 148  | 6  | 5   | 25  | 0   |
| CONTIG-031790 | 766  | 12 | 38  | 305 | 2   |
| CONTIG-031791 | 66   | 6  | 24  | 0   | 0   |
| CONTIG-031799 | 111  | 5  | 2   | 18  | 0   |
| CONTIG-031800 | 92   | 7  | 8   | 16  | 0   |
| CONTIG-031801 | 304  | 18 | 77  | 121 | 0   |
| CONTIG-031802 | 94   | 9  | 15  | 6   | 0   |
| CONTIG-031804 | 266  | 8  | 17  | 54  | 0   |
| CONTIG-031805 | 364  | 9  | 18  | 90  | 0   |
| CONTIG-031806 | 249  | 10 | 13  | 100 | 0   |
| CONTIG-031807 | 143  | 14 | 17  | 92  | 0   |
| CONTIG-031808 | 659  | 22 | 104 | 356 | 26  |
| CONTIG-031809 | 295  | 6  | 74  | 9   | 0   |
| CONTIG-031810 | 183  | 21 | 32  | 167 | 0   |
| CONTIG-031811 | 204  | 9  | 9   | 47  | 0   |
| CONTIG-031812 | 136  | 6  | 5   | 29  | 0   |
| CONTIG-031813 | 254  | 8  | 2   | 34  | 0   |
| CONTIG-031814 | 100  | 6  | 3   | 16  | 0   |
| CONTIG-031815 | 1052 | 32 | 18  | 0   | 298 |
| CONTIG-031818 | 171  | 23 | 40  | 96  | 0   |
| CONTIG-031819 | 157  | 12 | 65  | 9   | 0   |
| CONTIG-031820 | 62   | 13 | 4   | 16  | 0   |
| CONTIG-031821 | 231  | 11 | 7   | 103 | 0   |
| CONTIG-031822 | 58   | 9  | 3   | 14  | 0   |
| CONTIG-031823 | 210  | 13 | 147 | 41  | 0   |
| CONTIG-031824 | 219  | 19 | 8   | 128 | 0   |

|               |     |     |     |      |     |
|---------------|-----|-----|-----|------|-----|
| CONTIG-031825 | 163 | 15  | 52  | 96   | 0   |
| CONTIG-031826 | 340 | 7   | 9   | 41   | 0   |
| CONTIG-031827 | 156 | 11  | 13  | 70   | 0   |
| CONTIG-031828 | 85  | 8   | 18  | 19   | 0   |
| CONTIG-031829 | 64  | 15  | 3   | 32   | 0   |
| CONTIG-031831 | 189 | 9   | 11  | 38   | 0   |
| CONTIG-031832 | 328 | 67  | 112 | 603  | 24  |
| CONTIG-031833 | 78  | 7   | 13  | 6    | 2   |
| CONTIG-031834 | 202 | 13  | 0   | 31   | 2   |
| CONTIG-031835 | 115 | 4   | 0   | 12   | 0   |
| CONTIG-031836 | 89  | 2   | 2   | 7    | 0   |
| CONTIG-031837 | 91  | 6   | 2   | 19   | 0   |
| CONTIG-031839 | 60  | 8   | 6   | 15   | 0   |
| CONTIG-031840 | 237 | 9   | 2   | 109  | 0   |
| CONTIG-031841 | 147 | 10  | 32  | 22   | 0   |
| CONTIG-031843 | 182 | 14  | 20  | 120  | 0   |
| CONTIG-031844 | 356 | 10  | 17  | 102  | 2   |
| CONTIG-031845 | 112 | 5   | 6   | 12   | 0   |
| CONTIG-031846 | 235 | 5   | 5   | 24   | 0   |
| CONTIG-031847 | 70  | 519 | 120 | 1012 | 129 |
| CONTIG-031848 | 428 | 24  | 77  | 432  | 0   |
| CONTIG-031849 | 261 | 12  | 22  | 63   | 0   |
| CONTIG-031850 | 112 | 4   | 9   | 9    | 0   |
| CONTIG-031851 | 107 | 6   | 3   | 2    | 0   |
| CONTIG-031852 | 132 | 7   | 21  | 22   | 0   |
| CONTIG-031853 | 266 | 11  | 17  | 80   | 0   |
| CONTIG-031854 | 84  | 5   | 3   | 6    | 0   |
| CONTIG-031855 | 123 | 9   | 4   | 44   | 0   |
| CONTIG-031857 | 114 | 11  | 21  | 31   | 0   |
| CONTIG-031858 | 193 | 17  | 32  | 66   | 2   |
| CONTIG-031859 | 136 | 9   | 3   | 45   | 2   |
| CONTIG-031860 | 159 | 7   | 4   | 0    | 11  |
| CONTIG-031861 | 135 | 7   | 21  | 25   | 0   |
| CONTIG-031862 | 64  | 7   | 2   | 10   | 0   |
| CONTIG-031863 | 123 | 10  | 12  | 28   | 0   |
| CONTIG-031865 | 195 | 8   | 7   | 70   | 0   |
| CONTIG-031866 | 85  | 7   | 2   | 10   | 0   |
| CONTIG-031867 | 116 | 15  | 5   | 62   | 0   |
| CONTIG-031868 | 67  | 5   | 11  | 0    | 0   |
| CONTIG-031869 | 84  | 6   | 5   | 15   | 0   |
| CONTIG-031870 | 396 | 13  | 8   | 155  | 0   |
| CONTIG-031871 | 172 | 13  | 2   | 54   | 0   |
| CONTIG-031872 | 414 | 12  | 25  | 167  | 2   |
| CONTIG-031873 | 128 | 7   | 6   | 15   | 0   |
| CONTIG-031874 | 361 | 14  | 16  | 153  | 6   |
| CONTIG-031875 | 285 | 12  | 21  | 99   | 0   |
| CONTIG-031876 | 117 | 5   | 8   | 11   | 0   |

|               |     |     |     |      |     |
|---------------|-----|-----|-----|------|-----|
| CONTIG-031878 | 539 | 17  | 44  | 176  | 5   |
| CONTIG-031879 | 80  | 6   | 6   | 5    | 0   |
| CONTIG-031880 | 94  | 6   | 25  | 10   | 0   |
| CONTIG-031881 | 229 | 8   | 6   | 38   | 0   |
| CONTIG-031882 | 109 | 8   | 9   | 25   | 0   |
| CONTIG-031883 | 166 | 7   | 7   | 29   | 0   |
| CONTIG-031884 | 171 | 7   | 2   | 38   | 0   |
| CONTIG-031885 | 200 | 5   | 13  | 4    | 0   |
| CONTIG-031887 | 92  | 5   | 5   | 0    | 0   |
| CONTIG-031888 | 465 | 13  | 57  | 193  | 0   |
| CONTIG-031890 | 140 | 73  | 211 | 77   | 16  |
| CONTIG-031891 | 158 | 7   | 19  | 39   | 0   |
| CONTIG-031892 | 87  | 6   | 4   | 24   | 0   |
| CONTIG-031893 | 297 | 7   | 10  | 63   | 0   |
| CONTIG-031894 | 251 | 8   | 87  | 33   | 0   |
| CONTIG-031895 | 530 | 21  | 16  | 510  | 2   |
| CONTIG-031896 | 73  | 12  | 2   | 21   | 0   |
| CONTIG-031897 | 403 | 13  | 4   | 167  | 0   |
| CONTIG-031898 | 183 | 13  | 20  | 53   | 0   |
| CONTIG-031899 | 234 | 5   | 4   | 35   | 0   |
| CONTIG-031900 | 144 | 5   | 2   | 33   | 0   |
| CONTIG-031901 | 136 | 6   | 0   | 25   | 0   |
| CONTIG-031902 | 44  | 314 | 80  | 469  | 5   |
| CONTIG-031903 | 119 | 4   | 3   | 12   | 0   |
| CONTIG-031904 | 187 | 21  | 119 | 25   | 2   |
| CONTIG-031905 | 628 | 61  | 213 | 1519 | 148 |
| CONTIG-031906 | 393 | 17  | 37  | 241  | 2   |
| CONTIG-031909 | 194 | 15  | 36  | 45   | 2   |
| CONTIG-031910 | 91  | 6   | 4   | 5    | 2   |
| CONTIG-031911 | 361 | 26  | 179 | 147  | 2   |
| CONTIG-031912 | 988 | 15  | 84  | 327  | 4   |
| CONTIG-031913 | 309 | 11  | 29  | 102  | 0   |
| CONTIG-031915 | 169 | 10  | 43  | 69   | 0   |
| CONTIG-031916 | 207 | 3   | 0   | 18   | 0   |
| CONTIG-031917 | 367 | 15  | 9   | 256  | 0   |
| CONTIG-031918 | 92  | 4   | 2   | 7    | 0   |
| CONTIG-031919 | 131 | 3   | 4   | 11   | 0   |
| CONTIG-031920 | 75  | 4   | 3   | 6    | 0   |
| CONTIG-031921 | 370 | 9   | 13  | 101  | 2   |
| CONTIG-031922 | 73  | 60  | 108 | 8    | 0   |
| CONTIG-031923 | 249 | 11  | 13  | 46   | 0   |
| CONTIG-031925 | 563 | 19  | 80  | 404  | 4   |
| CONTIG-031926 | 336 | 35  | 29  | 637  | 0   |
| CONTIG-031927 | 393 | 27  | 70  | 123  | 2   |
| CONTIG-031928 | 164 | 4   | 12  | 8    | 0   |
| CONTIG-031929 | 95  | 8   | 0   | 18   | 0   |
| CONTIG-031930 | 67  | 17  | 48  | 25   | 0   |

|               |     |    |    |     |   |
|---------------|-----|----|----|-----|---|
| CONTIG-031931 | 145 | 10 | 25 | 22  | 0 |
| CONTIG-031932 | 193 | 28 | 28 | 199 | 0 |
| CONTIG-031938 | 62  | 8  | 5  | 25  | 0 |
| CONTIG-031939 | 333 | 13 | 50 | 104 | 5 |
| CONTIG-031940 | 144 | 7  | 0  | 29  | 0 |
| CONTIG-031941 | 82  | 48 | 0  | 80  | 5 |
| CONTIG-031943 | 507 | 19 | 28 | 394 | 2 |
| CONTIG-031944 | 65  | 7  | 7  | 15  | 0 |
| CONTIG-031945 | 149 | 22 | 19 | 81  | 0 |
| CONTIG-031946 | 204 | 12 | 2  | 92  | 0 |
| CONTIG-031947 | 370 | 14 | 50 | 117 | 0 |
| CONTIG-031948 | 149 | 13 | 67 | 42  | 0 |
| CONTIG-031949 | 280 | 48 | 32 | 355 | 0 |
| CONTIG-031950 | 79  | 4  | 13 | 3   | 0 |
| CONTIG-031951 | 91  | 15 | 7  | 34  | 0 |
| CONTIG-031952 | 99  | 6  | 24 | 9   | 2 |
| CONTIG-031953 | 137 | 22 | 42 | 3   | 0 |
| CONTIG-031955 | 137 | 6  | 9  | 19  | 0 |
| CONTIG-031956 | 120 | 7  | 9  | 6   | 0 |
| CONTIG-031957 | 66  | 12 | 33 | 9   | 0 |
| CONTIG-031958 | 69  | 27 | 65 | 62  | 0 |
| CONTIG-031959 | 294 | 15 | 83 | 86  | 0 |
| CONTIG-031960 | 292 | 19 | 31 | 228 | 0 |
| CONTIG-031961 | 176 | 5  | 7  | 18  | 0 |
| CONTIG-031962 | 257 | 15 | 18 | 141 | 0 |
| CONTIG-031964 | 80  | 5  | 2  | 8   | 0 |
| CONTIG-031965 | 533 | 9  | 7  | 155 | 2 |
| CONTIG-031966 | 96  | 4  | 27 | 4   | 0 |
| CONTIG-031967 | 351 | 16 | 20 | 247 | 0 |
| CONTIG-031968 | 90  | 26 | 63 | 53  | 0 |
| CONTIG-031969 | 193 | 15 | 57 | 94  | 0 |
| CONTIG-031970 | 111 | 10 | 6  | 48  | 0 |
| CONTIG-031971 | 113 | 10 | 5  | 59  | 0 |
| CONTIG-031972 | 148 | 5  | 12 | 17  | 0 |
| CONTIG-031973 | 68  | 3  | 5  | 0   | 0 |
| CONTIG-031974 | 74  | 7  | 17 | 8   | 0 |
| CONTIG-031975 | 68  | 4  | 4  | 7   | 0 |
| CONTIG-031976 | 102 | 10 | 2  | 21  | 0 |
| CONTIG-031977 | 86  | 8  | 8  | 32  | 0 |
| CONTIG-031978 | 147 | 20 | 16 | 30  | 4 |
| CONTIG-031979 | 475 | 10 | 38 | 207 | 0 |
| CONTIG-031980 | 368 | 7  | 16 | 89  | 0 |
| CONTIG-031981 | 118 | 7  | 32 | 6   | 0 |
| CONTIG-031982 | 359 | 11 | 32 | 118 | 2 |
| CONTIG-031983 | 59  | 6  | 15 | 0   | 0 |
| CONTIG-031984 | 74  | 5  | 7  | 17  | 0 |
| CONTIG-031985 | 121 | 17 | 50 | 72  | 0 |

|               |     |    |     |      |    |
|---------------|-----|----|-----|------|----|
| CONTIG-031986 | 130 | 5  | 10  | 11   | 0  |
| CONTIG-031989 | 173 | 14 | 96  | 54   | 0  |
| CONTIG-031997 | 156 | 12 | 15  | 85   | 0  |
| CONTIG-031998 | 110 | 6  | 29  | 5    | 0  |
| CONTIG-031999 | 238 | 7  | 9   | 38   | 0  |
| CONTIG-032001 | 61  | 4  | 0   | 5    | 0  |
| CONTIG-032002 | 58  | 11 | 3   | 2    | 0  |
| CONTIG-032003 | 331 | 8  | 10  | 65   | 0  |
| CONTIG-032004 | 217 | 19 | 9   | 145  | 6  |
| CONTIG-032006 | 119 | 10 | 28  | 6    | 0  |
| CONTIG-032007 | 360 | 9  | 38  | 106  | 0  |
| CONTIG-032008 | 58  | 3  | 6   | 2    | 0  |
| CONTIG-032009 | 154 | 31 | 58  | 192  | 0  |
| CONTIG-032010 | 441 | 8  | 16  | 94   | 0  |
| CONTIG-032011 | 73  | 10 | 23  | 14   | 0  |
| CONTIG-032012 | 435 | 23 | 3   | 0    | 66 |
| CONTIG-032015 | 81  | 5  | 2   | 4    | 0  |
| CONTIG-032016 | 329 | 10 | 65  | 107  | 0  |
| CONTIG-032017 | 376 | 13 | 36  | 109  | 0  |
| CONTIG-032018 | 281 | 13 | 23  | 127  | 0  |
| CONTIG-032019 | 372 | 59 | 49  | 1070 | 5  |
| CONTIG-032020 | 86  | 4  | 0   | 10   | 0  |
| CONTIG-032021 | 268 | 19 | 22  | 142  | 2  |
| CONTIG-032022 | 83  | 10 | 25  | 21   | 0  |
| CONTIG-032023 | 81  | 7  | 0   | 12   | 2  |
| CONTIG-032024 | 88  | 5  | 5   | 17   | 0  |
| CONTIG-032025 | 143 | 8  | 4   | 32   | 0  |
| CONTIG-032026 | 77  | 11 | 16  | 20   | 0  |
| CONTIG-032027 | 76  | 8  | 11  | 19   | 0  |
| CONTIG-032028 | 78  | 2  | 4   | 4    | 0  |
| CONTIG-032029 | 76  | 15 | 56  | 0    | 0  |
| CONTIG-032030 | 256 | 12 | 11  | 69   | 2  |
| CONTIG-032033 | 188 | 11 | 11  | 70   | 0  |
| CONTIG-032034 | 121 | 13 | 2   | 4    | 0  |
| CONTIG-032035 | 183 | 19 | 65  | 88   | 0  |
| CONTIG-032036 | 59  | 23 | 69  | 0    | 0  |
| CONTIG-032037 | 738 | 19 | 100 | 454  | 0  |
| CONTIG-032038 | 479 | 13 | 2   | 0    | 25 |
| CONTIG-032039 | 71  | 3  | 0   | 5    | 0  |
| CONTIG-032040 | 155 | 8  | 7   | 42   | 0  |
| CONTIG-032041 | 253 | 40 | 90  | 429  | 0  |
| CONTIG-032042 | 151 | 7  | 10  | 38   | 0  |
| CONTIG-032043 | 109 | 15 | 51  | 48   | 2  |
| CONTIG-032044 | 356 | 16 | 147 | 151  | 0  |
| CONTIG-032048 | 149 | 13 | 29  | 60   | 0  |
| CONTIG-032049 | 225 | 16 | 15  | 85   | 0  |
| CONTIG-032050 | 107 | 8  | 18  | 9    | 0  |

|               |     |    |     |     |    |
|---------------|-----|----|-----|-----|----|
| CONTIG-032051 | 87  | 10 | 49  | 2   | 0  |
| CONTIG-032052 | 92  | 4  | 2   | 4   | 0  |
| CONTIG-032053 | 78  | 9  | 36  | 4   | 0  |
| CONTIG-032056 | 743 | 15 | 94  | 489 | 2  |
| CONTIG-032057 | 155 | 8  | 27  | 6   | 0  |
| CONTIG-032058 | 136 | 9  | 5   | 58  | 0  |
| CONTIG-032060 | 349 | 8  | 42  | 80  | 0  |
| CONTIG-032061 | 63  | 4  | 7   | 5   | 0  |
| CONTIG-032067 | 512 | 29 | 39  | 710 | 4  |
| CONTIG-032068 | 440 | 12 | 72  | 149 | 0  |
| CONTIG-032069 | 149 | 7  | 2   | 30  | 0  |
| CONTIG-032070 | 180 | 14 | 10  | 122 | 0  |
| CONTIG-032071 | 104 | 8  | 9   | 20  | 0  |
| CONTIG-032072 | 252 | 8  | 5   | 63  | 0  |
| CONTIG-032073 | 59  | 9  | 4   | 6   | 0  |
| CONTIG-032074 | 279 | 11 | 25  | 94  | 0  |
| CONTIG-032075 | 138 | 25 | 0   | 62  | 0  |
| CONTIG-032076 | 92  | 4  | 2   | 9   | 0  |
| CONTIG-032077 | 300 | 5  | 9   | 6   | 0  |
| CONTIG-032078 | 419 | 7  | 6   | 108 | 0  |
| CONTIG-032079 | 128 | 18 | 97  | 12  | 0  |
| CONTIG-032080 | 82  | 8  | 9   | 0   | 0  |
| CONTIG-032081 | 144 | 4  | 3   | 0   | 0  |
| CONTIG-032082 | 256 | 12 | 28  | 107 | 0  |
| CONTIG-032083 | 401 | 10 | 9   | 109 | 2  |
| CONTIG-032084 | 140 | 7  | 7   | 22  | 0  |
| CONTIG-032085 | 301 | 9  | 17  | 52  | 0  |
| CONTIG-032087 | 66  | 4  | 4   | 4   | 0  |
| CONTIG-032088 | 252 | 17 | 0   | 0   | 30 |
| CONTIG-032089 | 677 | 12 | 10  | 112 | 0  |
| CONTIG-032090 | 243 | 52 | 19  | 301 | 0  |
| CONTIG-032091 | 113 | 17 | 50  | 46  | 0  |
| CONTIG-032092 | 216 | 8  | 5   | 62  | 0  |
| CONTIG-032094 | 60  | 10 | 26  | 11  | 0  |
| CONTIG-032095 | 344 | 13 | 116 | 149 | 0  |
| CONTIG-032096 | 118 | 12 | 17  | 0   | 0  |
| CONTIG-032097 | 296 | 20 | 11  | 170 | 0  |
| CONTIG-032098 | 120 | 11 | 3   | 47  | 3  |
| CONTIG-032099 | 78  | 9  | 6   | 12  | 0  |
| CONTIG-032100 | 149 | 11 | 16  | 71  | 0  |
| CONTIG-032101 | 237 | 5  | 7   | 32  | 0  |
| CONTIG-032102 | 424 | 12 | 48  | 218 | 0  |
| CONTIG-032103 | 228 | 7  | 0   | 73  | 0  |
| CONTIG-032104 | 254 | 7  | 27  | 48  | 0  |
| CONTIG-032105 | 67  | 8  | 5   | 21  | 0  |
| CONTIG-032107 | 349 | 23 | 26  | 419 | 2  |
| CONTIG-032109 | 121 | 5  | 7   | 19  | 0  |

|               |     |     |     |      |    |
|---------------|-----|-----|-----|------|----|
| CONTIG-032110 | 139 | 12  | 8   | 43   | 0  |
| CONTIG-032112 | 80  | 9   | 11  | 20   | 0  |
| CONTIG-032113 | 430 | 17  | 31  | 146  | 0  |
| CONTIG-032115 | 138 | 5   | 4   | 23   | 0  |
| CONTIG-032116 | 398 | 9   | 54  | 102  | 0  |
| CONTIG-032117 | 59  | 4   | 0   | 0    | 0  |
| CONTIG-032118 | 94  | 3   | 2   | 2    | 0  |
| CONTIG-032121 | 89  | 4   | 2   | 4    | 0  |
| CONTIG-032122 | 288 | 9   | 60  | 73   | 0  |
| CONTIG-032131 | 66  | 6   | 2   | 19   | 0  |
| CONTIG-032132 | 552 | 18  | 74  | 260  | 12 |
| CONTIG-032133 | 712 | 23  | 84  | 644  | 4  |
| CONTIG-032137 | 194 | 13  | 3   | 108  | 0  |
| CONTIG-032138 | 277 | 13  | 51  | 35   | 0  |
| CONTIG-032139 | 164 | 25  | 19  | 143  | 4  |
| CONTIG-032140 | 71  | 6   | 3   | 12   | 0  |
| CONTIG-032141 | 190 | 7   | 9   | 37   | 0  |
| CONTIG-032142 | 236 | 59  | 59  | 645  | 2  |
| CONTIG-032143 | 85  | 102 | 38  | 356  | 2  |
| CONTIG-032144 | 59  | 380 | 120 | 727  | 32 |
| CONTIG-032146 | 366 | 16  | 83  | 186  | 2  |
| CONTIG-032152 | 60  | 8   | 2   | 17   | 0  |
| CONTIG-032153 | 443 | 34  | 32  | 668  | 0  |
| CONTIG-032154 | 88  | 33  | 14  | 118  | 0  |
| CONTIG-032155 | 85  | 7   | 17  | 0    | 0  |
| CONTIG-032156 | 500 | 20  | 175 | 248  | 0  |
| CONTIG-032157 | 119 | 9   | 36  | 24   | 0  |
| CONTIG-032158 | 422 | 13  | 37  | 248  | 0  |
| CONTIG-032159 | 64  | 15  | 56  | 2    | 0  |
| CONTIG-032160 | 165 | 18  | 19  | 38   | 0  |
| CONTIG-032161 | 91  | 8   | 0   | 36   | 0  |
| CONTIG-032163 | 66  | 3   | 3   | 5    | 0  |
| CONTIG-032164 | 62  | 8   | 10  | 5    | 0  |
| CONTIG-032165 | 430 | 60  | 37  | 985  | 22 |
| CONTIG-032166 | 192 | 9   | 33  | 25   | 0  |
| CONTIG-032167 | 181 | 10  | 6   | 60   | 2  |
| CONTIG-032168 | 311 | 7   | 11  | 76   | 0  |
| CONTIG-032169 | 51  | 78  | 24  | 128  | 0  |
| CONTIG-032170 | 165 | 7   | 5   | 31   | 2  |
| CONTIG-032171 | 298 | 10  | 35  | 93   | 0  |
| CONTIG-032172 | 68  | 7   | 0   | 15   | 0  |
| CONTIG-032173 | 70  | 11  | 14  | 35   | 0  |
| CONTIG-032174 | 295 | 12  | 51  | 40   | 5  |
| CONTIG-032175 | 816 | 17  | 100 | 550  | 4  |
| CONTIG-032176 | 282 | 12  | 40  | 71   | 0  |
| CONTIG-032178 | 63  | 656 | 134 | 1947 | 0  |
| CONTIG-032179 | 50  | 19  | 11  | 12   | 0  |

|               |      |    |     |      |    |
|---------------|------|----|-----|------|----|
| CONTIG-032180 | 115  | 7  | 13  | 9    | 0  |
| CONTIG-032181 | 101  | 3  | 0   | 3    | 0  |
| CONTIG-032183 | 444  | 58 | 77  | 1626 | 0  |
| CONTIG-032184 | 83   | 7  | 15  | 7    | 0  |
| CONTIG-032185 | 540  | 15 | 35  | 224  | 0  |
| CONTIG-032186 | 139  | 5  | 10  | 15   | 0  |
| CONTIG-032187 | 401  | 10 | 31  | 135  | 0  |
| CONTIG-032188 | 196  | 4  | 8   | 21   | 0  |
| CONTIG-032189 | 1214 | 22 | 13  | 137  | 91 |
| CONTIG-032193 | 578  | 27 | 144 | 707  | 0  |
| CONTIG-032194 | 66   | 7  | 7   | 15   | 0  |
| CONTIG-032195 | 200  | 6  | 7   | 57   | 0  |
| CONTIG-032196 | 211  | 9  | 14  | 47   | 0  |
| CONTIG-032197 | 79   | 35 | 114 | 78   | 0  |
| CONTIG-032198 | 1317 | 53 | 34  | 68   | 0  |
| CONTIG-032199 | 67   | 6  | 2   | 9    | 0  |
| CONTIG-032200 | 326  | 14 | 29  | 101  | 0  |
| CONTIG-032201 | 270  | 8  | 26  | 41   | 0  |
| CONTIG-032202 | 75   | 11 | 11  | 28   | 2  |
| CONTIG-032209 | 110  | 5  | 4   | 12   | 0  |
| CONTIG-032211 | 114  | 8  | 31  | 4    | 0  |
| CONTIG-032212 | 276  | 9  | 39  | 43   | 4  |
| CONTIG-032213 | 441  | 17 | 68  | 183  | 9  |
| CONTIG-032218 | 199  | 9  | 19  | 89   | 0  |
| CONTIG-032219 | 206  | 7  | 7   | 17   | 0  |
| CONTIG-032220 | 210  | 13 | 11  | 128  | 0  |
| CONTIG-032221 | 109  | 11 | 0   | 32   | 0  |
| CONTIG-032222 | 291  | 7  | 13  | 57   | 4  |
| CONTIG-032223 | 201  | 6  | 4   | 32   | 2  |
| CONTIG-032224 | 87   | 8  | 45  | 10   | 0  |
| CONTIG-032225 | 891  | 33 | 81  | 1283 | 30 |
| CONTIG-032226 | 138  | 7  | 0   | 8    | 0  |
| CONTIG-032227 | 327  | 28 | 129 | 374  | 0  |
| CONTIG-032228 | 359  | 14 | 41  | 54   | 8  |
| CONTIG-032229 | 127  | 7  | 0   | 35   | 2  |
| CONTIG-032230 | 202  | 91 | 7   | 6    | 0  |
| CONTIG-032231 | 64   | 21 | 118 | 3    | 0  |
| CONTIG-032232 | 161  | 7  | 2   | 30   | 0  |
| CONTIG-032234 | 115  | 18 | 59  | 55   | 2  |
| CONTIG-032235 | 218  | 5  | 4   | 31   | 0  |
| CONTIG-032236 | 189  | 4  | 11  | 9    | 0  |
| CONTIG-032238 | 252  | 11 | 11  | 66   | 4  |
| CONTIG-032239 | 229  | 12 | 35  | 78   | 0  |
| CONTIG-032240 | 108  | 11 | 43  | 20   | 0  |
| CONTIG-032241 | 416  | 10 | 9   | 116  | 3  |
| CONTIG-032242 | 211  | 12 | 14  | 129  | 2  |
| CONTIG-032243 | 162  | 12 | 41  | 14   | 0  |



|               |      |    |     |     |    |
|---------------|------|----|-----|-----|----|
| CONTIG-032244 | 78   | 10 | 6   | 15  | 0  |
| CONTIG-032247 | 132  | 14 | 29  | 26  | 0  |
| CONTIG-032248 | 714  | 17 | 37  | 496 | 3  |
| CONTIG-032249 | 287  | 14 | 26  | 157 | 0  |
| CONTIG-032251 | 226  | 12 | 20  | 63  | 2  |
| CONTIG-032252 | 102  | 4  | 17  | 0   | 0  |
| CONTIG-032253 | 676  | 41 | 62  | 24  | 0  |
| CONTIG-032254 | 102  | 4  | 0   | 11  | 0  |
| CONTIG-032256 | 214  | 12 | 15  | 115 | 0  |
| CONTIG-032257 | 204  | 15 | 85  | 68  | 2  |
| CONTIG-032260 | 1011 | 21 | 129 | 500 | 19 |
| CONTIG-032261 | 567  | 17 | 118 | 285 | 4  |
| CONTIG-032262 | 153  | 3  | 10  | 9   | 0  |
| CONTIG-032263 | 148  | 9  | 0   | 47  | 2  |
| CONTIG-032265 | 328  | 18 | 56  | 191 | 0  |
| CONTIG-032266 | 132  | 8  | 20  | 22  | 0  |
| CONTIG-032267 | 150  | 11 | 44  | 60  | 0  |
| CONTIG-032268 | 527  | 8  | 43  | 135 | 0  |
| CONTIG-032269 | 217  | 13 | 23  | 46  | 0  |
| CONTIG-032270 | 83   | 5  | 0   | 17  | 0  |
| CONTIG-032271 | 693  | 13 | 71  | 275 | 2  |
| CONTIG-032272 | 189  | 6  | 11  | 30  | 0  |
| CONTIG-032273 | 292  | 11 | 11  | 122 | 0  |
| CONTIG-032274 | 73   | 5  | 0   | 10  | 0  |
| CONTIG-032275 | 151  | 22 | 57  | 77  | 0  |
| CONTIG-032276 | 120  | 9  | 8   | 15  | 0  |
| CONTIG-032277 | 295  | 10 | 36  | 41  | 2  |
| CONTIG-032278 | 235  | 15 | 15  | 122 | 2  |
| CONTIG-032281 | 189  | 9  | 11  | 64  | 0  |
| CONTIG-032282 | 105  | 4  | 4   | 8   | 0  |
| CONTIG-032285 | 103  | 7  | 20  | 7   | 0  |
| CONTIG-032286 | 121  | 20 | 13  | 96  | 0  |
| CONTIG-032287 | 81   | 3  | 7   | 5   | 0  |
| CONTIG-032288 | 92   | 6  | 2   | 16  | 0  |
| CONTIG-032289 | 91   | 11 | 13  | 26  | 2  |
| CONTIG-032290 | 96   | 3  | 2   | 8   | 0  |
| CONTIG-032291 | 459  | 18 | 29  | 245 | 0  |
| CONTIG-032292 | 111  | 9  | 19  | 23  | 0  |
| CONTIG-032293 | 85   | 20 | 28  | 37  | 0  |
| CONTIG-032294 | 73   | 7  | 4   | 5   | 0  |
| CONTIG-032295 | 232  | 10 | 15  | 79  | 0  |
| CONTIG-032296 | 95   | 9  | 5   | 32  | 0  |
| CONTIG-032297 | 753  | 9  | 64  | 136 | 4  |
| CONTIG-032298 | 69   | 14 | 3   | 0   | 2  |
| CONTIG-032299 | 65   | 4  | 0   | 5   | 0  |
| CONTIG-032300 | 91   | 7  | 18  | 19  | 0  |
| CONTIG-032301 | 76   | 11 | 4   | 36  | 0  |

|               |     |    |     |      |    |
|---------------|-----|----|-----|------|----|
| CONTIG-032302 | 81  | 4  | 0   | 10   | 0  |
| CONTIG-032303 | 103 | 19 | 0   | 64   | 0  |
| CONTIG-032304 | 181 | 20 | 44  | 56   | 0  |
| CONTIG-032305 | 317 | 11 | 25  | 68   | 2  |
| CONTIG-032306 | 203 | 8  | 6   | 86   | 0  |
| CONTIG-032308 | 270 | 11 | 32  | 111  | 2  |
| CONTIG-032311 | 152 | 6  | 9   | 47   | 0  |
| CONTIG-032312 | 368 | 7  | 44  | 46   | 2  |
| CONTIG-032313 | 323 | 11 | 72  | 69   | 3  |
| CONTIG-032314 | 170 | 10 | 4   | 21   | 0  |
| CONTIG-032315 | 77  | 6  | 2   | 6    | 0  |
| CONTIG-032316 | 67  | 3  | 0   | 0    | 0  |
| CONTIG-032318 | 40  | 99 | 2   | 45   | 0  |
| CONTIG-032319 | 91  | 4  | 0   | 9    | 0  |
| CONTIG-032320 | 412 | 18 | 38  | 240  | 4  |
| CONTIG-032321 | 121 | 11 | 5   | 48   | 0  |
| CONTIG-032324 | 181 | 10 | 3   | 45   | 0  |
| CONTIG-032330 | 399 | 7  | 3   | 41   | 0  |
| CONTIG-032332 | 148 | 4  | 2   | 16   | 0  |
| CONTIG-032333 | 226 | 14 | 58  | 87   | 0  |
| CONTIG-032334 | 412 | 28 | 12  | 354  | 46 |
| CONTIG-032335 | 540 | 46 | 69  | 1524 | 0  |
| CONTIG-032337 | 204 | 12 | 2   | 61   | 4  |
| CONTIG-032338 | 63  | 61 | 25  | 171  | 0  |
| CONTIG-032339 | 75  | 31 | 106 | 15   | 8  |
| CONTIG-032341 | 218 | 15 | 35  | 108  | 0  |
| CONTIG-032347 | 247 | 7  | 8   | 38   | 2  |
| CONTIG-032348 | 58  | 5  | 0   | 6    | 0  |
| CONTIG-032349 | 180 | 9  | 20  | 39   | 0  |
| CONTIG-032350 | 63  | 6  | 3   | 11   | 0  |
| CONTIG-032352 | 136 | 3  | 0   | 0    | 0  |
| CONTIG-032353 | 105 | 21 | 58  | 14   | 0  |
| CONTIG-032354 | 78  | 4  | 3   | 10   | 0  |
| CONTIG-032355 | 83  | 7  | 7   | 20   | 0  |
| CONTIG-032357 | 379 | 29 | 66  | 154  | 14 |
| CONTIG-032358 | 297 | 17 | 10  | 278  | 0  |
| CONTIG-032359 | 270 | 17 | 121 | 163  | 0  |
| CONTIG-032360 | 264 | 13 | 27  | 35   | 2  |
| CONTIG-032361 | 71  | 7  | 0   | 16   | 0  |
| CONTIG-032362 | 139 | 15 | 58  | 31   | 0  |
| CONTIG-032363 | 86  | 24 | 41  | 32   | 0  |
| CONTIG-032364 | 628 | 27 | 32  | 102  | 0  |
| CONTIG-032365 | 68  | 5  | 0   | 10   | 0  |
| CONTIG-032366 | 149 | 9  | 8   | 38   | 0  |
| CONTIG-032367 | 358 | 9  | 50  | 94   | 0  |
| CONTIG-032368 | 462 | 22 | 90  | 232  | 2  |
| CONTIG-032370 | 181 | 6  | 2   | 34   | 0  |

|               |      |    |     |     |    |
|---------------|------|----|-----|-----|----|
| CONTIG-032373 | 487  | 16 | 107 | 234 | 2  |
| CONTIG-032374 | 62   | 5  | 5   | 4   | 0  |
| CONTIG-032375 | 362  | 6  | 10  | 32  | 0  |
| CONTIG-032376 | 116  | 17 | 9   | 91  | 0  |
| CONTIG-032377 | 1059 | 28 | 107 | 701 | 81 |
| CONTIG-032378 | 433  | 39 | 203 | 391 | 4  |
| CONTIG-032379 | 472  | 8  | 8   | 116 | 0  |
| CONTIG-032380 | 89   | 7  | 46  | 7   | 0  |
| CONTIG-032381 | 73   | 9  | 7   | 24  | 0  |
| CONTIG-032382 | 82   | 33 | 22  | 147 | 0  |
| CONTIG-032383 | 187  | 8  | 15  | 46  | 0  |
| CONTIG-032384 | 218  | 5  | 10  | 10  | 2  |
| CONTIG-032385 | 163  | 5  | 0   | 15  | 0  |
| CONTIG-032386 | 98   | 8  | 19  | 19  | 0  |
| CONTIG-032387 | 191  | 16 | 89  | 82  | 0  |
| CONTIG-032389 | 165  | 21 | 43  | 120 | 0  |
| CONTIG-032390 | 243  | 7  | 8   | 37  | 0  |
| CONTIG-032391 | 311  | 10 | 116 | 24  | 0  |
| CONTIG-032392 | 138  | 5  | 5   | 14  | 0  |
| CONTIG-032393 | 711  | 17 | 95  | 367 | 2  |
| CONTIG-032394 | 169  | 7  | 27  | 34  | 0  |
| CONTIG-032395 | 71   | 5  | 2   | 10  | 0  |
| CONTIG-032397 | 69   | 10 | 5   | 34  | 0  |
| CONTIG-032398 | 95   | 9  | 47  | 15  | 0  |
| CONTIG-032402 | 153  | 16 | 9   | 16  | 0  |
| CONTIG-032406 | 254  | 8  | 7   | 59  | 0  |
| CONTIG-032411 | 61   | 8  | 3   | 15  | 0  |
| CONTIG-032425 | 634  | 38 | 79  | 557 | 45 |
| CONTIG-032426 | 264  | 16 | 27  | 139 | 0  |
| CONTIG-032427 | 197  | 6  | 11  | 23  | 0  |
| CONTIG-032428 | 215  | 18 | 21  | 105 | 6  |
| CONTIG-032429 | 58   | 21 | 83  | 2   | 0  |
| CONTIG-032430 | 61   | 14 | 7   | 10  | 0  |
| CONTIG-032431 | 182  | 7  | 10  | 48  | 0  |
| CONTIG-032432 | 474  | 23 | 127 | 178 | 6  |
| CONTIG-032433 | 842  | 14 | 30  | 318 | 6  |
| CONTIG-032434 | 224  | 8  | 14  | 20  | 0  |
| CONTIG-032438 | 108  | 5  | 2   | 11  | 0  |
| CONTIG-032439 | 129  | 14 | 17  | 59  | 0  |
| CONTIG-032440 | 140  | 20 | 4   | 142 | 0  |
| CONTIG-032441 | 71   | 12 | 4   | 11  | 0  |
| CONTIG-032442 | 329  | 10 | 34  | 104 | 2  |
| CONTIG-032443 | 130  | 9  | 14  | 28  | 0  |
| CONTIG-032444 | 63   | 8  | 8   | 15  | 0  |
| CONTIG-032445 | 175  | 10 | 33  | 61  | 0  |
| CONTIG-032446 | 595  | 25 | 84  | 412 | 2  |
| CONTIG-032447 | 123  | 6  | 11  | 17  | 0  |

|               |     |     |     |      |    |
|---------------|-----|-----|-----|------|----|
| CONTIG-032448 | 124 | 11  | 18  | 35   | 0  |
| CONTIG-032449 | 75  | 18  | 21  | 37   | 0  |
| CONTIG-032450 | 225 | 13  | 10  | 107  | 0  |
| CONTIG-032451 | 149 | 20  | 52  | 29   | 0  |
| CONTIG-032452 | 68  | 6   | 5   | 11   | 0  |
| CONTIG-032453 | 361 | 31  | 227 | 260  | 2  |
| CONTIG-032454 | 129 | 12  | 8   | 74   | 0  |
| CONTIG-032455 | 725 | 24  | 165 | 380  | 55 |
| CONTIG-032456 | 520 | 12  | 127 | 230  | 0  |
| CONTIG-032458 | 225 | 103 | 103 | 1376 | 0  |
| CONTIG-032459 | 305 | 17  | 33  | 110  | 6  |
| CONTIG-032460 | 180 | 9   | 3   | 0    | 0  |
| CONTIG-032461 | 229 | 12  | 2   | 38   | 0  |
| CONTIG-032462 | 381 | 9   | 34  | 82   | 0  |
| CONTIG-032463 | 264 | 11  | 52  | 69   | 0  |
| CONTIG-032464 | 148 | 7   | 5   | 26   | 0  |
| CONTIG-032465 | 149 | 5   | 17  | 9    | 0  |
| CONTIG-032466 | 467 | 14  | 28  | 251  | 0  |
| CONTIG-032467 | 78  | 31  | 2   | 0    | 16 |
| CONTIG-032468 | 249 | 13  | 16  | 102  | 0  |
| CONTIG-032469 | 89  | 15  | 10  | 17   | 0  |
| CONTIG-032470 | 72  | 12  | 38  | 11   | 0  |
| CONTIG-032471 | 522 | 33  | 68  | 958  | 2  |
| CONTIG-032472 | 141 | 6   | 29  | 16   | 0  |
| CONTIG-032473 | 323 | 15  | 40  | 197  | 0  |
| CONTIG-032474 | 61  | 6   | 10  | 2    | 0  |
| CONTIG-032475 | 188 | 21  | 14  | 121  | 0  |
| CONTIG-032477 | 93  | 6   | 36  | 0    | 0  |
| CONTIG-032478 | 431 | 16  | 33  | 337  | 0  |
| CONTIG-032479 | 162 | 9   | 28  | 18   | 0  |
| CONTIG-032480 | 107 | 6   | 28  | 4    | 0  |
| CONTIG-032481 | 103 | 5   | 3   | 10   | 0  |
| CONTIG-032482 | 77  | 5   | 6   | 4    | 0  |
| CONTIG-032483 | 73  | 4   | 5   | 6    | 0  |
| CONTIG-032485 | 152 | 3   | 2   | 10   | 0  |
| CONTIG-032486 | 176 | 9   | 14  | 41   | 0  |
| CONTIG-032487 | 434 | 12  | 2   | 167  | 11 |
| CONTIG-032488 | 67  | 14  | 24  | 17   | 0  |
| CONTIG-032489 | 340 | 34  | 20  | 458  | 2  |
| CONTIG-032490 | 216 | 20  | 22  | 226  | 0  |
| CONTIG-032491 | 254 | 14  | 60  | 40   | 0  |
| CONTIG-032492 | 215 | 15  | 40  | 86   | 2  |
| CONTIG-032499 | 848 | 20  | 223 | 644  | 0  |
| CONTIG-032500 | 124 | 16  | 14  | 66   | 0  |
| CONTIG-032501 | 94  | 9   | 4   | 35   | 0  |
| CONTIG-032502 | 385 | 9   | 121 | 83   | 0  |
| CONTIG-032503 | 137 | 8   | 0   | 29   | 0  |

|               |     |     |     |     |     |
|---------------|-----|-----|-----|-----|-----|
| CONTIG-032504 | 167 | 5   | 8   | 33  | 0   |
| CONTIG-032505 | 122 | 62  | 52  | 439 | 0   |
| CONTIG-032507 | 64  | 28  | 26  | 16  | 0   |
| CONTIG-032508 | 136 | 8   | 2   | 37  | 0   |
| CONTIG-032509 | 127 | 6   | 5   | 26  | 0   |
| CONTIG-032511 | 221 | 12  | 11  | 112 | 0   |
| CONTIG-032512 | 129 | 9   | 5   | 28  | 0   |
| CONTIG-032513 | 59  | 2   | 2   | 0   | 0   |
| CONTIG-032514 | 423 | 10  | 4   | 113 | 4   |
| CONTIG-032519 | 100 | 13  | 10  | 55  | 0   |
| CONTIG-032522 | 269 | 8   | 2   | 81  | 0   |
| CONTIG-032523 | 60  | 8   | 4   | 14  | 0   |
| CONTIG-032524 | 752 | 15  | 0   | 0   | 114 |
| CONTIG-032525 | 204 | 13  | 6   | 108 | 0   |
| CONTIG-032526 | 253 | 25  | 50  | 339 | 0   |
| CONTIG-032527 | 137 | 9   | 34  | 8   | 0   |
| CONTIG-032528 | 84  | 13  | 7   | 24  | 0   |
| CONTIG-032529 | 393 | 20  | 17  | 280 | 2   |
| CONTIG-032531 | 118 | 24  | 35  | 25  | 2   |
| CONTIG-032532 | 86  | 9   | 17  | 15  | 0   |
| CONTIG-032533 | 599 | 15  | 189 | 260 | 12  |
| CONTIG-032534 | 67  | 13  | 20  | 20  | 0   |
| CONTIG-032535 | 460 | 16  | 25  | 176 | 2   |
| CONTIG-032536 | 848 | 19  | 113 | 747 | 0   |
| CONTIG-032537 | 114 | 7   | 17  | 13  | 0   |
| CONTIG-032539 | 83  | 13  | 2   | 39  | 0   |
| CONTIG-032540 | 597 | 10  | 37  | 188 | 0   |
| CONTIG-032541 | 77  | 3   | 7   | 2   | 0   |
| CONTIG-032542 | 108 | 6   | 3   | 29  | 0   |
| CONTIG-032543 | 99  | 36  | 53  | 91  | 0   |
| CONTIG-032544 | 631 | 17  | 138 | 364 | 0   |
| CONTIG-032545 | 86  | 11  | 19  | 32  | 0   |
| CONTIG-032546 | 297 | 19  | 51  | 136 | 9   |
| CONTIG-032547 | 80  | 5   | 4   | 2   | 0   |
| CONTIG-032548 | 61  | 5   | 5   | 8   | 0   |
| CONTIG-032549 | 213 | 7   | 6   | 7   | 0   |
| CONTIG-032550 | 69  | 5   | 2   | 6   | 0   |
| CONTIG-032551 | 102 | 6   | 6   | 6   | 0   |
| CONTIG-032554 | 792 | 24  | 16  | 865 | 6   |
| CONTIG-032555 | 272 | 13  | 12  | 128 | 0   |
| CONTIG-032556 | 87  | 8   | 2   | 22  | 0   |
| CONTIG-032557 | 143 | 19  | 75  | 109 | 0   |
| CONTIG-032558 | 275 | 15  | 42  | 171 | 0   |
| CONTIG-032559 | 59  | 85  | 5   | 111 | 6   |
| CONTIG-032560 | 76  | 175 | 15  | 695 | 0   |
| CONTIG-032561 | 109 | 12  | 27  | 28  | 0   |
| CONTIG-032562 | 196 | 18  | 9   | 97  | 2   |

|               |      |     |     |      |     |
|---------------|------|-----|-----|------|-----|
| CONTIG-032563 | 109  | 6   | 0   | 22   | 2   |
| CONTIG-032564 | 218  | 10  | 27  | 45   | 0   |
| CONTIG-032565 | 73   | 5   | 2   | 9    | 0   |
| CONTIG-032566 | 180  | 11  | 39  | 77   | 0   |
| CONTIG-032567 | 296  | 7   | 10  | 61   | 0   |
| CONTIG-032568 | 746  | 13  | 45  | 438  | 0   |
| CONTIG-032569 | 521  | 14  | 108 | 203  | 4   |
| CONTIG-032570 | 481  | 9   | 0   | 123  | 0   |
| CONTIG-032572 | 180  | 45  | 54  | 194  | 2   |
| CONTIG-032573 | 75   | 7   | 10  | 2    | 0   |
| CONTIG-032575 | 248  | 9   | 4   | 41   | 0   |
| CONTIG-032576 | 79   | 5   | 12  | 2    | 0   |
| CONTIG-032580 | 139  | 17  | 3   | 0    | 0   |
| CONTIG-032581 | 806  | 17  | 82  | 504  | 0   |
| CONTIG-032582 | 69   | 8   | 4   | 15   | 0   |
| CONTIG-032583 | 37   | 43  | 19  | 41   | 0   |
| CONTIG-032584 | 316  | 9   | 32  | 5    | 2   |
| CONTIG-032585 | 123  | 7   | 5   | 31   | 0   |
| CONTIG-032586 | 225  | 13  | 72  | 60   | 0   |
| CONTIG-032587 | 269  | 10  | 28  | 71   | 0   |
| CONTIG-032588 | 144  | 12  | 0   | 2    | 0   |
| CONTIG-032589 | 337  | 6   | 31  | 48   | 0   |
| CONTIG-032590 | 377  | 15  | 123 | 85   | 0   |
| CONTIG-032591 | 123  | 214 | 58  | 2    | 411 |
| CONTIG-032592 | 97   | 9   | 9   | 10   | 0   |
| CONTIG-032593 | 110  | 21  | 53  | 42   | 0   |
| CONTIG-032594 | 156  | 17  | 36  | 0    | 12  |
| CONTIG-032595 | 82   | 2   | 3   | 3    | 3   |
| CONTIG-032596 | 218  | 10  | 25  | 69   | 0   |
| CONTIG-032597 | 96   | 40  | 28  | 76   | 0   |
| CONTIG-032599 | 918  | 18  | 91  | 621  | 4   |
| CONTIG-032600 | 894  | 27  | 138 | 555  | 10  |
| CONTIG-032601 | 250  | 8   | 7   | 37   | 0   |
| CONTIG-032603 | 65   | 7   | 9   | 9    | 0   |
| CONTIG-032604 | 1274 | 17  | 21  | 969  | 2   |
| CONTIG-032605 | 306  | 9   | 25  | 92   | 0   |
| CONTIG-032606 | 866  | 20  | 40  | 1017 | 2   |
| CONTIG-032607 | 129  | 12  | 20  | 46   | 0   |
| CONTIG-032608 | 290  | 12  | 46  | 108  | 0   |
| CONTIG-032609 | 64   | 4   | 5   | 4    | 0   |
| CONTIG-032610 | 265  | 9   | 4   | 83   | 0   |
| CONTIG-032612 | 755  | 16  | 30  | 665  | 0   |
| CONTIG-032613 | 72   | 7   | 11  | 17   | 0   |
| CONTIG-032614 | 87   | 4   | 2   | 10   | 0   |
| CONTIG-032615 | 1110 | 20  | 77  | 405  | 2   |
| CONTIG-032616 | 1140 | 33  | 6   | 2    | 228 |
| CONTIG-032617 | 76   | 4   | 7   | 5    | 0   |

|               |     |     |    |      |     |
|---------------|-----|-----|----|------|-----|
| CONTIG-032618 | 114 | 10  | 36 | 38   | 0   |
| CONTIG-032619 | 501 | 57  | 99 | 1474 | 0   |
| CONTIG-032620 | 180 | 12  | 15 | 51   | 6   |
| CONTIG-032621 | 98  | 7   | 3  | 23   | 0   |
| CONTIG-032622 | 143 | 3   | 3  | 4    | 0   |
| CONTIG-032623 | 69  | 6   | 5  | 15   | 0   |
| CONTIG-032624 | 121 | 8   | 23 | 26   | 0   |
| CONTIG-032625 | 304 | 16  | 93 | 153  | 0   |
| CONTIG-032626 | 63  | 9   | 4  | 10   | 0   |
| CONTIG-032627 | 302 | 13  | 19 | 70   | 0   |
| CONTIG-032628 | 118 | 7   | 4  | 34   | 0   |
| CONTIG-032629 | 83  | 14  | 10 | 0    | 0   |
| CONTIG-032630 | 78  | 7   | 8  | 15   | 0   |
| CONTIG-032632 | 388 | 37  | 45 | 543  | 0   |
| CONTIG-032633 | 505 | 11  | 66 | 219  | 0   |
| CONTIG-032634 | 171 | 16  | 44 | 54   | 0   |
| CONTIG-032635 | 586 | 18  | 64 | 230  | 2   |
| CONTIG-032636 | 137 | 6   | 8  | 26   | 0   |
| CONTIG-032637 | 58  | 5   | 7  | 4    | 0   |
| CONTIG-032638 | 81  | 6   | 5  | 5    | 0   |
| CONTIG-032639 | 97  | 12  | 37 | 16   | 0   |
| CONTIG-032640 | 516 | 12  | 41 | 255  | 2   |
| CONTIG-032641 | 137 | 9   | 8  | 35   | 2   |
| CONTIG-032646 | 76  | 15  | 26 | 24   | 0   |
| CONTIG-032647 | 178 | 15  | 10 | 110  | 0   |
| CONTIG-032648 | 59  | 10  | 3  | 20   | 0   |
| CONTIG-032649 | 127 | 15  | 19 | 55   | 0   |
| CONTIG-032650 | 496 | 22  | 8  | 0    | 132 |
| CONTIG-032651 | 116 | 4   | 5  | 10   | 2   |
| CONTIG-032652 | 234 | 29  | 6  | 385  | 0   |
| CONTIG-032653 | 142 | 3   | 0  | 8    | 0   |
| CONTIG-032654 | 258 | 12  | 27 | 82   | 2   |
| CONTIG-032655 | 150 | 4   | 2  | 17   | 2   |
| CONTIG-032656 | 93  | 8   | 0  | 11   | 0   |
| CONTIG-032657 | 234 | 8   | 38 | 67   | 0   |
| CONTIG-032658 | 101 | 8   | 7  | 18   | 0   |
| CONTIG-032659 | 110 | 253 | 62 | 894  | 109 |
| CONTIG-032660 | 80  | 17  | 10 | 22   | 0   |
| CONTIG-032661 | 58  | 2   | 6  | 2    | 0   |
| CONTIG-032663 | 90  | 6   | 25 | 12   | 0   |
| CONTIG-032664 | 180 | 6   | 4  | 2    | 0   |
| CONTIG-032665 | 179 | 10  | 84 | 47   | 0   |
| CONTIG-032666 | 832 | 12  | 39 | 0    | 41  |
| CONTIG-032667 | 143 | 6   | 10 | 23   | 0   |
| CONTIG-032668 | 78  | 6   | 20 | 0    | 0   |
| CONTIG-032669 | 89  | 7   | 3  | 8    | 0   |
| CONTIG-032670 | 179 | 10  | 10 | 43   | 0   |

|               |     |     |    |     |    |
|---------------|-----|-----|----|-----|----|
| CONTIG-032671 | 82  | 9   | 69 | 5   | 0  |
| CONTIG-032672 | 260 | 12  | 11 | 88  | 0  |
| CONTIG-032674 | 117 | 16  | 34 | 0   | 0  |
| CONTIG-032675 | 222 | 12  | 9  | 107 | 0  |
| CONTIG-032676 | 89  | 5   | 14 | 8   | 0  |
| CONTIG-032677 | 155 | 33  | 28 | 104 | 2  |
| CONTIG-032678 | 347 | 11  | 78 | 0   | 0  |
| CONTIG-032679 | 77  | 8   | 48 | 2   | 0  |
| CONTIG-032682 | 85  | 17  | 17 | 12  | 0  |
| CONTIG-032683 | 89  | 11  | 2  | 41  | 0  |
| CONTIG-032684 | 436 | 12  | 23 | 162 | 0  |
| CONTIG-032685 | 138 | 8   | 5  | 44  | 0  |
| CONTIG-032686 | 433 | 11  | 14 | 153 | 0  |
| CONTIG-032687 | 249 | 13  | 17 | 66  | 2  |
| CONTIG-032688 | 220 | 9   | 9  | 93  | 2  |
| CONTIG-032689 | 109 | 10  | 20 | 16  | 0  |
| CONTIG-032690 | 174 | 50  | 85 | 354 | 2  |
| CONTIG-032691 | 97  | 42  | 17 | 55  | 0  |
| CONTIG-032692 | 145 | 7   | 15 | 37  | 0  |
| CONTIG-032693 | 57  | 269 | 31 | 180 | 2  |
| CONTIG-032695 | 119 | 23  | 41 | 83  | 0  |
| CONTIG-032696 | 431 | 9   | 57 | 115 | 0  |
| CONTIG-032697 | 83  | 3   | 2  | 0   | 0  |
| CONTIG-032698 | 121 | 11  | 43 | 25  | 0  |
| CONTIG-032699 | 81  | 8   | 35 | 4   | 0  |
| CONTIG-032700 | 285 | 26  | 3  | 0   | 34 |
| CONTIG-032703 | 121 | 11  | 0  | 46  | 3  |
| CONTIG-032704 | 145 | 10  | 4  | 49  | 0  |
| CONTIG-032705 | 66  | 6   | 0  | 13  | 0  |
| CONTIG-032706 | 290 | 13  | 17 | 130 | 3  |
| CONTIG-032709 | 80  | 4   | 0  | 6   | 0  |
| CONTIG-032710 | 166 | 22  | 54 | 92  | 4  |
| CONTIG-032711 | 94  | 6   | 9  | 16  | 0  |
| CONTIG-032712 | 58  | 9   | 0  | 13  | 0  |
| CONTIG-032713 | 81  | 18  | 45 | 29  | 0  |
| CONTIG-032714 | 429 | 10  | 29 | 95  | 0  |
| CONTIG-032715 | 181 | 5   | 2  | 31  | 0  |
| CONTIG-032716 | 101 | 5   | 18 | 2   | 0  |
| CONTIG-032717 | 176 | 47  | 93 | 121 | 11 |
| CONTIG-032718 | 118 | 18  | 40 | 2   | 0  |
| CONTIG-032719 | 160 | 10  | 9  | 22  | 0  |
| CONTIG-032720 | 168 | 8   | 32 | 5   | 3  |
| CONTIG-032721 | 78  | 6   | 13 | 3   | 0  |
| CONTIG-032722 | 247 | 4   | 5  | 12  | 0  |
| CONTIG-032723 | 194 | 23  | 57 | 144 | 0  |
| CONTIG-032724 | 394 | 9   | 45 | 141 | 0  |
| CONTIG-032725 | 383 | 5   | 18 | 48  | 0  |



|               |     |     |     |     |     |
|---------------|-----|-----|-----|-----|-----|
| CONTIG-032726 | 149 | 6   | 4   | 11  | 0   |
| CONTIG-032727 | 560 | 8   | 92  | 48  | 5   |
| CONTIG-032728 | 433 | 11  | 17  | 79  | 2   |
| CONTIG-032729 | 212 | 5   | 14  | 23  | 0   |
| CONTIG-032731 | 792 | 11  | 28  | 218 | 6   |
| CONTIG-032732 | 416 | 8   | 18  | 60  | 0   |
| CONTIG-032733 | 143 | 10  | 4   | 0   | 8   |
| CONTIG-032734 | 148 | 18  | 13  | 121 | 0   |
| CONTIG-032735 | 83  | 140 | 118 | 591 | 0   |
| CONTIG-032737 | 196 | 8   | 26  | 9   | 0   |
| CONTIG-032738 | 245 | 15  | 42  | 85  | 0   |
| CONTIG-032739 | 60  | 6   | 13  | 13  | 0   |
| CONTIG-032740 | 92  | 8   | 12  | 23  | 0   |
| CONTIG-032741 | 333 | 22  | 95  | 52  | 0   |
| CONTIG-032742 | 199 | 16  | 4   | 12  | 0   |
| CONTIG-032743 | 170 | 51  | 17  | 339 | 0   |
| CONTIG-032744 | 115 | 11  | 20  | 33  | 0   |
| CONTIG-032745 | 484 | 60  | 15  | 0   | 592 |
| CONTIG-032746 | 187 | 8   | 15  | 29  | 0   |
| CONTIG-032747 | 120 | 5   | 13  | 4   | 0   |
| CONTIG-032748 | 238 | 8   | 21  | 82  | 0   |
| CONTIG-032749 | 267 | 10  | 40  | 14  | 0   |
| CONTIG-032750 | 201 | 30  | 27  | 279 | 0   |
| CONTIG-032751 | 169 | 10  | 24  | 57  | 0   |
| CONTIG-032752 | 64  | 8   | 17  | 4   | 0   |
| CONTIG-032753 | 139 | 9   | 26  | 32  | 0   |
| CONTIG-032754 | 112 | 6   | 0   | 9   | 0   |
| CONTIG-032755 | 389 | 24  | 69  | 360 | 0   |
| CONTIG-032756 | 154 | 5   | 37  | 5   | 0   |
| CONTIG-032757 | 60  | 11  | 20  | 2   | 0   |
| CONTIG-032758 | 148 | 7   | 8   | 28  | 0   |
| CONTIG-032759 | 65  | 9   | 21  | 0   | 0   |
| CONTIG-032760 | 761 | 11  | 57  | 300 | 6   |
| CONTIG-032761 | 177 | 32  | 111 | 183 | 0   |
| CONTIG-032762 | 71  | 9   | 28  | 11  | 0   |
| CONTIG-032764 | 143 | 15  | 23  | 67  | 0   |
| CONTIG-032765 | 63  | 24  | 6   | 34  | 0   |
| CONTIG-032766 | 134 | 10  | 62  | 15  | 0   |
| CONTIG-032767 | 355 | 17  | 85  | 105 | 2   |
| CONTIG-032768 | 336 | 40  | 72  | 443 | 25  |
| CONTIG-032769 | 85  | 11  | 13  | 11  | 0   |
| CONTIG-032770 | 181 | 12  | 131 | 29  | 0   |
| CONTIG-032771 | 109 | 15  | 8   | 56  | 0   |
| CONTIG-032772 | 113 | 3   | 6   | 5   | 0   |
| CONTIG-032773 | 120 | 9   | 6   | 17  | 0   |
| CONTIG-032775 | 294 | 16  | 12  | 170 | 2   |
| CONTIG-032776 | 397 | 11  | 16  | 162 | 2   |

|               |     |      |     |      |     |
|---------------|-----|------|-----|------|-----|
| CONTIG-032777 | 68  | 7    | 10  | 9    | 0   |
| CONTIG-032778 | 230 | 8    | 13  | 57   | 0   |
| CONTIG-032779 | 94  | 3    | 0   | 5    | 0   |
| CONTIG-032780 | 66  | 1832 | 31  | 5917 | 0   |
| CONTIG-032781 | 176 | 12   | 26  | 78   | 2   |
| CONTIG-032782 | 248 | 17   | 80  | 40   | 0   |
| CONTIG-032783 | 348 | 69   | 44  | 878  | 103 |
| CONTIG-032786 | 295 | 11   | 10  | 113  | 0   |
| CONTIG-032790 | 110 | 23   | 82  | 90   | 0   |
| CONTIG-032791 | 790 | 17   | 172 | 324  | 2   |
| CONTIG-032792 | 764 | 16   | 76  | 294  | 18  |
| CONTIG-032793 | 493 | 11   | 18  | 200  | 2   |
| CONTIG-032794 | 66  | 11   | 3   | 15   | 0   |
| CONTIG-032795 | 107 | 7    | 6   | 21   | 0   |
| CONTIG-032796 | 87  | 24   | 28  | 2    | 0   |
| CONTIG-032797 | 325 | 12   | 49  | 101  | 0   |
| CONTIG-032798 | 157 | 15   | 22  | 37   | 0   |
| CONTIG-032799 | 179 | 11   | 28  | 41   | 0   |
| CONTIG-032800 | 60  | 8    | 15  | 6    | 0   |
| CONTIG-032807 | 68  | 12   | 22  | 18   | 0   |
| CONTIG-032808 | 211 | 14   | 13  | 89   | 0   |
| CONTIG-032809 | 67  | 10   | 54  | 5    | 0   |
| CONTIG-032810 | 78  | 7    | 0   | 13   | 2   |
| CONTIG-032811 | 111 | 25   | 3   | 103  | 0   |
| CONTIG-032812 | 408 | 31   | 31  | 377  | 6   |
| CONTIG-032813 | 526 | 12   | 42  | 286  | 0   |
| CONTIG-032814 | 52  | 376  | 2   | 7    | 0   |
| CONTIG-032815 | 77  | 3    | 7   | 7    | 0   |
| CONTIG-032816 | 126 | 5    | 3   | 12   | 0   |
| CONTIG-032817 | 816 | 12   | 13  | 414  | 2   |
| CONTIG-032818 | 123 | 7    | 11  | 4    | 0   |
| CONTIG-032820 | 474 | 26   | 79  | 653  | 2   |
| CONTIG-032821 | 84  | 3    | 14  | 0    | 0   |
| CONTIG-032822 | 323 | 9    | 15  | 96   | 0   |
| CONTIG-032823 | 228 | 12   | 22  | 123  | 0   |
| CONTIG-032824 | 100 | 12   | 8   | 28   | 0   |
| CONTIG-032825 | 199 | 28   | 13  | 205  | 4   |
| CONTIG-032826 | 244 | 8    | 0   | 47   | 0   |
| CONTIG-032827 | 71  | 8    | 2   | 11   | 0   |
| CONTIG-032828 | 71  | 7    | 12  | 3    | 0   |
| CONTIG-032829 | 293 | 6    | 3   | 44   | 2   |
| CONTIG-032830 | 51  | 21   | 5   | 16   | 0   |
| CONTIG-032831 | 101 | 27   | 14  | 108  | 0   |
| CONTIG-032832 | 65  | 485  | 302 | 1106 | 2   |
| CONTIG-032833 | 153 | 9    | 7   | 45   | 2   |
| CONTIG-032834 | 59  | 5    | 3   | 7    | 0   |
| CONTIG-032835 | 214 | 8    | 12  | 61   | 0   |

|               |      |     |     |      |     |
|---------------|------|-----|-----|------|-----|
| CONTIG-032836 | 177  | 8   | 6   | 39   | 0   |
| CONTIG-032837 | 111  | 7   | 20  | 0    | 0   |
| CONTIG-032838 | 393  | 50  | 18  | 1208 | 2   |
| CONTIG-032839 | 381  | 13  | 55  | 124  | 0   |
| CONTIG-032840 | 327  | 10  | 16  | 104  | 2   |
| CONTIG-032841 | 264  | 10  | 22  | 80   | 0   |
| CONTIG-032842 | 350  | 10  | 8   | 93   | 0   |
| CONTIG-032844 | 142  | 4   | 2   | 7    | 0   |
| CONTIG-032845 | 332  | 10  | 2   | 123  | 0   |
| CONTIG-032846 | 148  | 9   | 23  | 40   | 2   |
| CONTIG-032847 | 553  | 38  | 51  | 30   | 0   |
| CONTIG-032848 | 102  | 5   | 12  | 4    | 0   |
| CONTIG-032849 | 54   | 521 | 98  | 445  | 127 |
| CONTIG-032850 | 328  | 4   | 6   | 33   | 0   |
| CONTIG-032851 | 365  | 10  | 8   | 182  | 0   |
| CONTIG-032852 | 224  | 8   | 8   | 65   | 0   |
| CONTIG-032853 | 281  | 16  | 21  | 147  | 0   |
| CONTIG-032854 | 1314 | 25  | 99  | 895  | 6   |
| CONTIG-032860 | 69   | 10  | 2   | 25   | 0   |
| CONTIG-032861 | 241  | 13  | 63  | 94   | 2   |
| CONTIG-032862 | 162  | 25  | 13  | 208  | 0   |
| CONTIG-032863 | 314  | 8   | 39  | 80   | 0   |
| CONTIG-032864 | 440  | 24  | 47  | 480  | 4   |
| CONTIG-032865 | 476  | 12  | 2   | 6    | 0   |
| CONTIG-032866 | 106  | 10  | 0   | 2    | 0   |
| CONTIG-032867 | 82   | 6   | 35  | 4    | 0   |
| CONTIG-032868 | 102  | 5   | 9   | 18   | 0   |
| CONTIG-032869 | 73   | 9   | 2   | 35   | 0   |
| CONTIG-032870 | 89   | 17  | 115 | 4    | 0   |
| CONTIG-032871 | 228  | 12  | 29  | 97   | 0   |
| CONTIG-032872 | 59   | 3   | 0   | 0    | 0   |
| CONTIG-032873 | 80   | 15  | 44  | 0    | 0   |
| CONTIG-032874 | 315  | 12  | 72  | 147  | 2   |
| CONTIG-032875 | 60   | 2   | 3   | 0    | 0   |
| CONTIG-032876 | 260  | 6   | 11  | 34   | 0   |
| CONTIG-032877 | 58   | 9   | 15  | 7    | 0   |
| CONTIG-032878 | 303  | 14  | 19  | 210  | 0   |
| CONTIG-032879 | 36   | 38  | 2   | 18   | 0   |
| CONTIG-032880 | 92   | 14  | 3   | 0    | 0   |
| CONTIG-032881 | 90   | 7   | 12  | 20   | 0   |
| CONTIG-032882 | 206  | 9   | 8   | 77   | 0   |
| CONTIG-032883 | 1775 | 25  | 22  | 2473 | 0   |
| CONTIG-032884 | 225  | 6   | 6   | 30   | 0   |
| CONTIG-032886 | 80   | 8   | 2   | 14   | 0   |
| CONTIG-032887 | 59   | 9   | 29  | 3    | 0   |
| CONTIG-032888 | 276  | 116 | 297 | 938  | 5   |
| CONTIG-032889 | 957  | 33  | 112 | 1234 | 9   |

|               |     |     |     |      |    |
|---------------|-----|-----|-----|------|----|
| CONTIG-032890 | 92  | 7   | 4   | 12   | 0  |
| CONTIG-032891 | 82  | 6   | 7   | 18   | 0  |
| CONTIG-032892 | 91  | 3   | 15  | 0    | 0  |
| CONTIG-032893 | 517 | 9   | 4   | 0    | 10 |
| CONTIG-032895 | 153 | 8   | 21  | 16   | 0  |
| CONTIG-032896 | 76  | 3   | 5   | 2    | 0  |
| CONTIG-032897 | 240 | 9   | 20  | 59   | 0  |
| CONTIG-032898 | 78  | 6   | 7   | 6    | 0  |
| CONTIG-032899 | 157 | 21  | 94  | 42   | 2  |
| CONTIG-032900 | 115 | 10  | 5   | 58   | 0  |
| CONTIG-032901 | 101 | 9   | 65  | 14   | 0  |
| CONTIG-032902 | 141 | 5   | 2   | 23   | 0  |
| CONTIG-032903 | 647 | 11  | 17  | 322  | 0  |
| CONTIG-032904 | 100 | 6   | 18  | 16   | 0  |
| CONTIG-032905 | 980 | 16  | 27  | 122  | 35 |
| CONTIG-032911 | 277 | 10  | 34  | 81   | 0  |
| CONTIG-032912 | 475 | 12  | 64  | 155  | 2  |
| CONTIG-032914 | 198 | 14  | 16  | 84   | 0  |
| CONTIG-032915 | 170 | 8   | 2   | 2    | 0  |
| CONTIG-032917 | 475 | 13  | 100 | 186  | 2  |
| CONTIG-032918 | 536 | 11  | 30  | 212  | 0  |
| CONTIG-032924 | 110 | 8   | 9   | 22   | 0  |
| CONTIG-032925 | 289 | 18  | 17  | 204  | 2  |
| CONTIG-032926 | 310 | 11  | 8   | 103  | 0  |
| CONTIG-032928 | 919 | 19  | 42  | 664  | 11 |
| CONTIG-032929 | 95  | 7   | 11  | 12   | 0  |
| CONTIG-032930 | 528 | 22  | 102 | 238  | 0  |
| CONTIG-032931 | 325 | 17  | 46  | 181  | 0  |
| CONTIG-032932 | 105 | 4   | 4   | 8    | 0  |
| CONTIG-032933 | 86  | 31  | 52  | 0    | 2  |
| CONTIG-032934 | 413 | 11  | 10  | 8    | 0  |
| CONTIG-032935 | 280 | 19  | 160 | 140  | 0  |
| CONTIG-032936 | 116 | 7   | 2   | 27   | 0  |
| CONTIG-032938 | 172 | 8   | 6   | 63   | 0  |
| CONTIG-032940 | 295 | 14  | 88  | 101  | 0  |
| CONTIG-032941 | 84  | 7   | 9   | 15   | 0  |
| CONTIG-032942 | 95  | 381 | 517 | 1237 | 0  |
| CONTIG-032944 | 172 | 7   | 20  | 14   | 0  |
| CONTIG-032945 | 82  | 7   | 13  | 22   | 0  |
| CONTIG-032946 | 69  | 6   | 0   | 15   | 0  |
| CONTIG-032947 | 373 | 9   | 24  | 139  | 0  |
| CONTIG-032948 | 330 | 9   | 6   | 80   | 3  |
| CONTIG-032949 | 179 | 17  | 9   | 149  | 0  |
| CONTIG-032951 | 525 | 7   | 11  | 101  | 2  |
| CONTIG-032952 | 334 | 26  | 56  | 322  | 0  |
| CONTIG-032953 | 67  | 9   | 21  | 13   | 2  |
| CONTIG-032954 | 406 | 15  | 61  | 286  | 0  |

|               |     |     |     |      |    |
|---------------|-----|-----|-----|------|----|
| CONTIG-032961 | 120 | 3   | 3   | 2    | 0  |
| CONTIG-032962 | 143 | 14  | 55  | 28   | 2  |
| CONTIG-032963 | 120 | 5   | 4   | 2    | 0  |
| CONTIG-032964 | 46  | 46  | 17  | 28   | 0  |
| CONTIG-032965 | 148 | 8   | 2   | 32   | 0  |
| CONTIG-032966 | 163 | 6   | 14  | 28   | 0  |
| CONTIG-032967 | 291 | 13  | 76  | 89   | 0  |
| CONTIG-032968 | 296 | 28  | 46  | 331  | 2  |
| CONTIG-032969 | 183 | 10  | 14  | 44   | 0  |
| CONTIG-032970 | 274 | 7   | 16  | 57   | 0  |
| CONTIG-032971 | 227 | 5   | 24  | 11   | 0  |
| CONTIG-032972 | 38  | 16  | 0   | 16   | 0  |
| CONTIG-032973 | 90  | 10  | 5   | 37   | 0  |
| CONTIG-032974 | 398 | 147 | 28  | 1525 | 53 |
| CONTIG-032975 | 232 | 9   | 95  | 18   | 0  |
| CONTIG-032976 | 119 | 3   | 0   | 6    | 0  |
| CONTIG-032977 | 290 | 9   | 4   | 70   | 2  |
| CONTIG-032978 | 62  | 7   | 12  | 7    | 0  |
| CONTIG-032979 | 70  | 7   | 20  | 0    | 0  |
| CONTIG-032980 | 95  | 11  | 62  | 17   | 0  |
| CONTIG-032981 | 86  | 9   | 13  | 20   | 0  |
| CONTIG-032982 | 192 | 12  | 5   | 130  | 0  |
| CONTIG-032983 | 86  | 9   | 10  | 14   | 0  |
| CONTIG-032984 | 456 | 12  | 22  | 187  | 0  |
| CONTIG-032985 | 326 | 10  | 6   | 117  | 0  |
| CONTIG-032986 | 421 | 53  | 103 | 273  | 66 |
| CONTIG-032987 | 199 | 7   | 21  | 24   | 0  |
| CONTIG-032989 | 146 | 11  | 13  | 47   | 0  |
| CONTIG-032990 | 84  | 5   | 4   | 3    | 0  |
| CONTIG-032991 | 403 | 23  | 39  | 187  | 0  |
| CONTIG-032993 | 226 | 37  | 181 | 190  | 0  |
| CONTIG-032994 | 325 | 21  | 41  | 99   | 0  |
| CONTIG-032997 | 128 | 9   | 3   | 64   | 0  |
| CONTIG-032998 | 274 | 16  | 73  | 153  | 0  |
| CONTIG-032999 | 76  | 6   | 5   | 12   | 0  |
| CONTIG-033000 | 99  | 12  | 37  | 15   | 0  |
| CONTIG-033001 | 133 | 12  | 8   | 53   | 0  |
| CONTIG-033002 | 271 | 14  | 73  | 88   | 0  |
| CONTIG-033003 | 169 | 7   | 4   | 20   | 0  |
| CONTIG-033004 | 185 | 6   | 7   | 22   | 2  |
| CONTIG-033005 | 62  | 77  | 118 | 62   | 0  |
| CONTIG-033006 | 81  | 2   | 2   | 8    | 0  |
| CONTIG-033007 | 479 | 11  | 110 | 147  | 4  |
| CONTIG-033008 | 164 | 19  | 11  | 42   | 0  |
| CONTIG-033010 | 95  | 53  | 67  | 197  | 0  |
| CONTIG-033011 | 240 | 7   | 7   | 62   | 2  |
| CONTIG-033012 | 436 | 35  | 58  | 743  | 6  |

|               |     |     |     |      |    |
|---------------|-----|-----|-----|------|----|
| CONTIG-033014 | 202 | 64  | 5   | 2    | 91 |
| CONTIG-033015 | 77  | 23  | 19  | 19   | 0  |
| CONTIG-033016 | 60  | 11  | 2   | 25   | 0  |
| CONTIG-033017 | 84  | 9   | 6   | 2    | 0  |
| CONTIG-033018 | 494 | 22  | 44  | 121  | 9  |
| CONTIG-033019 | 525 | 12  | 29  | 173  | 0  |
| CONTIG-033020 | 753 | 22  | 184 | 699  | 0  |
| CONTIG-033021 | 219 | 8   | 8   | 24   | 0  |
| CONTIG-033022 | 626 | 16  | 112 | 324  | 4  |
| CONTIG-033025 | 171 | 10  | 6   | 43   | 0  |
| CONTIG-033027 | 77  | 86  | 11  | 243  | 0  |
| CONTIG-033028 | 60  | 10  | 49  | 2    | 0  |
| CONTIG-033029 | 263 | 19  | 141 | 126  | 0  |
| CONTIG-033031 | 62  | 25  | 113 | 27   | 0  |
| CONTIG-033032 | 103 | 4   | 0   | 4    | 0  |
| CONTIG-033033 | 59  | 10  | 0   | 14   | 0  |
| CONTIG-033034 | 91  | 7   | 12  | 16   | 0  |
| CONTIG-033035 | 198 | 5   | 5   | 22   | 0  |
| CONTIG-033036 | 137 | 9   | 7   | 26   | 0  |
| CONTIG-033037 | 352 | 9   | 8   | 81   | 2  |
| CONTIG-033038 | 304 | 31  | 8   | 2    | 56 |
| CONTIG-033039 | 118 | 163 | 63  | 706  | 21 |
| CONTIG-033040 | 155 | 13  | 13  | 28   | 2  |
| CONTIG-033041 | 884 | 34  | 142 | 1219 | 2  |
| CONTIG-033042 | 247 | 9   | 13  | 89   | 0  |
| CONTIG-033045 | 69  | 6   | 3   | 14   | 0  |
| CONTIG-033046 | 330 | 6   | 7   | 81   | 0  |
| CONTIG-033047 | 469 | 27  | 57  | 593  | 0  |
| CONTIG-033048 | 181 | 19  | 24  | 153  | 0  |
| CONTIG-033049 | 90  | 6   | 23  | 0    | 0  |
| CONTIG-033051 | 135 | 7   | 0   | 9    | 0  |
| CONTIG-033052 | 180 | 11  | 57  | 12   | 0  |
| CONTIG-033056 | 100 | 10  | 6   | 15   | 0  |
| CONTIG-033057 | 78  | 15  | 6   | 23   | 0  |
| CONTIG-033058 | 105 | 17  | 22  | 65   | 0  |
| CONTIG-033060 | 135 | 4   | 7   | 3    | 0  |
| CONTIG-033061 | 131 | 6   | 6   | 11   | 3  |
| CONTIG-033062 | 109 | 3   | 2   | 6    | 0  |
| CONTIG-033063 | 89  | 10  | 4   | 44   | 0  |
| CONTIG-033065 | 52  | 109 | 12  | 339  | 0  |
| CONTIG-033066 | 67  | 5   | 15  | 2    | 0  |
| CONTIG-033067 | 85  | 7   | 0   | 22   | 0  |
| CONTIG-033068 | 65  | 269 | 174 | 201  | 77 |
| CONTIG-033069 | 86  | 68  | 12  | 161  | 0  |
| CONTIG-033070 | 157 | 19  | 15  | 32   | 0  |
| CONTIG-033071 | 104 | 4   | 7   | 3    | 0  |
| CONTIG-033072 | 484 | 9   | 18  | 91   | 0  |

|               |     |     |     |     |     |
|---------------|-----|-----|-----|-----|-----|
| CONTIG-033073 | 217 | 10  | 5   | 55  | 2   |
| CONTIG-033081 | 121 | 13  | 23  | 6   | 0   |
| CONTIG-033082 | 163 | 8   | 2   | 20  | 0   |
| CONTIG-033084 | 148 | 13  | 74  | 47  | 0   |
| CONTIG-033085 | 69  | 2   | 0   | 4   | 2   |
| CONTIG-033086 | 461 | 14  | 85  | 189 | 0   |
| CONTIG-033087 | 383 | 9   | 6   | 133 | 0   |
| CONTIG-033088 | 102 | 5   | 2   | 11  | 0   |
| CONTIG-033089 | 72  | 7   | 18  | 0   | 0   |
| CONTIG-033091 | 86  | 17  | 48  | 10  | 2   |
| CONTIG-033092 | 133 | 7   | 28  | 27  | 0   |
| CONTIG-033093 | 192 | 7   | 15  | 16  | 0   |
| CONTIG-033094 | 96  | 7   | 4   | 18  | 0   |
| CONTIG-033095 | 211 | 5   | 19  | 20  | 0   |
| CONTIG-033096 | 305 | 17  | 49  | 144 | 0   |
| CONTIG-033097 | 76  | 4   | 0   | 12  | 0   |
| CONTIG-033098 | 234 | 8   | 12  | 48  | 0   |
| CONTIG-033099 | 66  | 7   | 6   | 13  | 0   |
| CONTIG-033100 | 197 | 16  | 127 | 23  | 0   |
| CONTIG-033101 | 109 | 14  | 48  | 47  | 0   |
| CONTIG-033102 | 86  | 16  | 30  | 53  | 0   |
| CONTIG-033103 | 612 | 18  | 18  | 501 | 2   |
| CONTIG-033104 | 208 | 5   | 14  | 18  | 0   |
| CONTIG-033105 | 57  | 135 | 11  | 10  | 0   |
| CONTIG-033107 | 199 | 21  | 0   | 105 | 0   |
| CONTIG-033109 | 118 | 7   | 2   | 31  | 0   |
| CONTIG-033112 | 92  | 11  | 60  | 24  | 0   |
| CONTIG-033113 | 76  | 6   | 9   | 8   | 0   |
| CONTIG-033114 | 449 | 82  | 81  | 0   | 516 |
| CONTIG-033115 | 546 | 18  | 122 | 198 | 0   |
| CONTIG-033116 | 282 | 30  | 17  | 369 | 4   |
| CONTIG-033117 | 101 | 7   | 4   | 16  | 0   |
| CONTIG-033121 | 335 | 14  | 60  | 81  | 0   |
| CONTIG-033122 | 112 | 7   | 13  | 19  | 0   |
| CONTIG-033123 | 166 | 5   | 10  | 12  | 0   |
| CONTIG-033124 | 437 | 14  | 37  | 249 | 0   |
| CONTIG-033125 | 87  | 17  | 15  | 46  | 0   |
| CONTIG-033126 | 125 | 6   | 15  | 31  | 0   |
| CONTIG-033127 | 266 | 5   | 5   | 19  | 0   |
| CONTIG-033128 | 44  | 78  | 19  | 98  | 0   |
| CONTIG-033129 | 125 | 12  | 0   | 25  | 0   |
| CONTIG-033130 | 89  | 26  | 172 | 0   | 0   |
| CONTIG-033131 | 269 | 8   | 4   | 65  | 6   |
| CONTIG-033137 | 98  | 9   | 14  | 9   | 0   |
| CONTIG-033138 | 131 | 33  | 30  | 126 | 0   |
| CONTIG-033139 | 161 | 10  | 13  | 25  | 2   |
| CONTIG-033140 | 201 | 12  | 0   | 57  | 0   |

|               |     |     |     |      |    |
|---------------|-----|-----|-----|------|----|
| CONTIG-033141 | 124 | 6   | 2   | 13   | 0  |
| CONTIG-033142 | 328 | 19  | 134 | 118  | 0  |
| CONTIG-033143 | 146 | 257 | 141 | 2102 | 3  |
| CONTIG-033144 | 85  | 7   | 6   | 14   | 0  |
| CONTIG-033145 | 200 | 44  | 138 | 244  | 4  |
| CONTIG-033146 | 163 | 9   | 8   | 9    | 3  |
| CONTIG-033147 | 95  | 7   | 2   | 25   | 0  |
| CONTIG-033148 | 61  | 4   | 12  | 2    | 2  |
| CONTIG-033149 | 428 | 24  | 27  | 265  | 6  |
| CONTIG-033150 | 98  | 6   | 3   | 13   | 0  |
| CONTIG-033151 | 100 | 14  | 73  | 23   | 0  |
| CONTIG-033152 | 125 | 4   | 0   | 12   | 0  |
| CONTIG-033153 | 58  | 8   | 7   | 5    | 0  |
| CONTIG-033157 | 77  | 13  | 26  | 14   | 0  |
| CONTIG-033158 | 69  | 9   | 7   | 27   | 0  |
| CONTIG-033159 | 750 | 20  | 123 | 692  | 0  |
| CONTIG-033160 | 252 | 9   | 2   | 72   | 0  |
| CONTIG-033161 | 136 | 12  | 14  | 39   | 0  |
| CONTIG-033162 | 415 | 16  | 12  | 115  | 18 |
| CONTIG-033163 | 95  | 36  | 131 | 96   | 0  |
| CONTIG-033164 | 303 | 16  | 53  | 152  | 4  |
| CONTIG-033165 | 231 | 13  | 6   | 111  | 0  |
| CONTIG-033166 | 158 | 9   | 34  | 53   | 0  |
| CONTIG-033167 | 80  | 9   | 2   | 30   | 0  |
| CONTIG-033168 | 105 | 6   | 19  | 13   | 0  |
| CONTIG-033169 | 205 | 14  | 18  | 110  | 0  |
| CONTIG-033170 | 337 | 26  | 57  | 276  | 0  |
| CONTIG-033171 | 62  | 9   | 6   | 0    | 0  |
| CONTIG-033172 | 678 | 17  | 58  | 399  | 2  |
| CONTIG-033174 | 178 | 9   | 45  | 35   | 0  |
| CONTIG-033175 | 135 | 9   | 30  | 30   | 0  |
| CONTIG-033176 | 72  | 6   | 0   | 15   | 0  |
| CONTIG-033177 | 308 | 24  | 44  | 317  | 3  |
| CONTIG-033178 | 215 | 7   | 8   | 62   | 0  |
| CONTIG-033179 | 111 | 8   | 6   | 24   | 0  |
| CONTIG-033180 | 75  | 10  | 4   | 24   | 0  |
| CONTIG-033181 | 86  | 5   | 2   | 4    | 0  |
| CONTIG-033182 | 88  | 8   | 6   | 25   | 2  |
| CONTIG-033183 | 80  | 6   | 28  | 11   | 0  |
| CONTIG-033184 | 85  | 9   | 42  | 0    | 0  |
| CONTIG-033185 | 182 | 14  | 18  | 97   | 0  |
| CONTIG-033186 | 190 | 8   | 28  | 41   | 0  |
| CONTIG-033187 | 110 | 6   | 10  | 10   | 0  |
| CONTIG-033191 | 241 | 11  | 15  | 74   | 0  |
| CONTIG-033192 | 198 | 12  | 2   | 0    | 7  |
| CONTIG-033193 | 232 | 12  | 5   | 95   | 0  |
| CONTIG-033194 | 216 | 15  | 21  | 74   | 2  |



|               |      |     |     |     |    |
|---------------|------|-----|-----|-----|----|
| CONTIG-033195 | 121  | 9   | 4   | 36  | 0  |
| CONTIG-033196 | 75   | 10  | 5   | 11  | 0  |
| CONTIG-033200 | 143  | 35  | 35  | 146 | 7  |
| CONTIG-033201 | 143  | 14  | 11  | 68  | 2  |
| CONTIG-033202 | 373  | 17  | 21  | 181 | 0  |
| CONTIG-033203 | 294  | 15  | 84  | 43  | 2  |
| CONTIG-033204 | 169  | 36  | 114 | 93  | 0  |
| CONTIG-033205 | 73   | 4   | 12  | 0   | 0  |
| CONTIG-033206 | 91   | 59  | 8   | 186 | 6  |
| CONTIG-033207 | 732  | 12  | 38  | 187 | 10 |
| CONTIG-033208 | 112  | 12  | 3   | 61  | 0  |
| CONTIG-033209 | 124  | 9   | 6   | 12  | 0  |
| CONTIG-033210 | 93   | 7   | 8   | 9   | 0  |
| CONTIG-033211 | 336  | 10  | 93  | 76  | 0  |
| CONTIG-033213 | 100  | 9   | 9   | 13  | 0  |
| CONTIG-033214 | 83   | 19  | 4   | 59  | 0  |
| CONTIG-033215 | 263  | 16  | 6   | 193 | 0  |
| CONTIG-033216 | 388  | 9   | 24  | 81  | 2  |
| CONTIG-033221 | 67   | 7   | 8   | 13  | 0  |
| CONTIG-033223 | 84   | 379 | 0   | 0   | 59 |
| CONTIG-033224 | 985  | 29  | 225 | 904 | 11 |
| CONTIG-033225 | 236  | 19  | 67  | 127 | 4  |
| CONTIG-033226 | 519  | 59  | 125 | 590 | 86 |
| CONTIG-033227 | 131  | 5   | 2   | 27  | 0  |
| CONTIG-033228 | 452  | 13  | 64  | 248 | 0  |
| CONTIG-033229 | 104  | 19  | 71  | 36  | 0  |
| CONTIG-033230 | 1141 | 17  | 48  | 349 | 0  |
| CONTIG-033231 | 58   | 34  | 6   | 94  | 0  |
| CONTIG-033232 | 87   | 23  | 48  | 7   | 2  |
| CONTIG-033233 | 601  | 11  | 6   | 117 | 9  |
| CONTIG-033234 | 265  | 28  | 7   | 213 | 0  |
| CONTIG-033235 | 115  | 61  | 51  | 77  | 0  |
| CONTIG-033236 | 73   | 6   | 0   | 16  | 0  |
| CONTIG-033237 | 100  | 6   | 3   | 9   | 0  |
| CONTIG-033238 | 487  | 6   | 23  | 38  | 0  |
| CONTIG-033240 | 148  | 7   | 0   | 46  | 2  |
| CONTIG-033241 | 439  | 9   | 3   | 86  | 0  |
| CONTIG-033242 | 176  | 11  | 20  | 30  | 0  |
| CONTIG-033243 | 173  | 19  | 75  | 119 | 0  |
| CONTIG-033244 | 44   | 28  | 6   | 10  | 4  |
| CONTIG-033245 | 130  | 5   | 7   | 14  | 0  |
| CONTIG-033246 | 184  | 8   | 21  | 52  | 0  |
| CONTIG-033247 | 98   | 46  | 230 | 103 | 2  |
| CONTIG-033248 | 142  | 9   | 11  | 36  | 2  |
| CONTIG-033249 | 230  | 9   | 26  | 54  | 0  |
| CONTIG-033250 | 80   | 3   | 0   | 2   | 0  |
| CONTIG-033251 | 74   | 6   | 2   | 19  | 0  |

|               |      |     |    |      |    |
|---------------|------|-----|----|------|----|
| CONTIG-033252 | 170  | 6   | 13 | 36   | 0  |
| CONTIG-033253 | 572  | 18  | 6  | 601  | 0  |
| CONTIG-033254 | 282  | 78  | 33 | 1350 | 19 |
| CONTIG-033255 | 159  | 9   | 18 | 34   | 0  |
| CONTIG-033256 | 227  | 10  | 13 | 98   | 0  |
| CONTIG-033257 | 269  | 10  | 9  | 127  | 0  |
| CONTIG-033259 | 390  | 20  | 23 | 228  | 6  |
| CONTIG-033260 | 67   | 4   | 3  | 14   | 0  |
| CONTIG-033261 | 260  | 7   | 10 | 55   | 0  |
| CONTIG-033264 | 51   | 277 | 0  | 313  | 0  |
| CONTIG-033265 | 121  | 9   | 4  | 36   | 0  |
| CONTIG-033266 | 336  | 15  | 57 | 129  | 2  |
| CONTIG-033268 | 81   | 8   | 63 | 0    | 0  |
| CONTIG-033269 | 127  | 12  | 16 | 30   | 0  |
| CONTIG-033270 | 286  | 12  | 5  | 138  | 0  |
| CONTIG-033271 | 84   | 11  | 8  | 41   | 0  |
| CONTIG-033272 | 58   | 6   | 19 | 5    | 0  |
| CONTIG-033273 | 553  | 13  | 68 | 287  | 2  |
| CONTIG-033274 | 182  | 159 | 55 | 1399 | 0  |
| CONTIG-033275 | 246  | 14  | 12 | 133  | 0  |
| CONTIG-033276 | 92   | 12  | 6  | 25   | 0  |
| CONTIG-033277 | 133  | 10  | 9  | 43   | 0  |
| CONTIG-033278 | 214  | 9   | 18 | 56   | 0  |
| CONTIG-033279 | 96   | 9   | 29 | 24   | 0  |
| CONTIG-033280 | 68   | 2   | 4  | 0    | 0  |
| CONTIG-033281 | 290  | 15  | 61 | 40   | 0  |
| CONTIG-033282 | 277  | 7   | 24 | 26   | 2  |
| CONTIG-033283 | 112  | 4   | 4  | 6    | 0  |
| CONTIG-033285 | 509  | 17  | 39 | 273  | 6  |
| CONTIG-033286 | 180  | 10  | 4  | 75   | 0  |
| CONTIG-033287 | 247  | 13  | 19 | 100  | 0  |
| CONTIG-033289 | 180  | 11  | 30 | 40   | 0  |
| CONTIG-033290 | 686  | 13  | 32 | 289  | 2  |
| CONTIG-033291 | 247  | 19  | 41 | 12   | 0  |
| CONTIG-033292 | 513  | 9   | 41 | 188  | 0  |
| CONTIG-033293 | 358  | 11  | 29 | 56   | 2  |
| CONTIG-033294 | 289  | 7   | 32 | 66   | 0  |
| CONTIG-033295 | 504  | 15  | 22 | 222  | 0  |
| CONTIG-033296 | 70   | 9   | 3  | 5    | 2  |
| CONTIG-033297 | 84   | 6   | 10 | 12   | 0  |
| CONTIG-033298 | 865  | 29  | 42 | 1084 | 2  |
| CONTIG-033299 | 146  | 8   | 32 | 20   | 2  |
| CONTIG-033300 | 98   | 4   | 10 | 2    | 0  |
| CONTIG-033301 | 1123 | 19  | 73 | 635  | 13 |
| CONTIG-033302 | 126  | 4   | 9  | 10   | 0  |
| CONTIG-033303 | 347  | 14  | 54 | 149  | 4  |
| CONTIG-033304 | 556  | 23  | 29 | 268  | 0  |

|               |     |     |     |     |   |
|---------------|-----|-----|-----|-----|---|
| CONTIG-033305 | 455 | 37  | 211 | 233 | 0 |
| CONTIG-033306 | 234 | 13  | 3   | 75  | 0 |
| CONTIG-033307 | 115 | 3   | 0   | 12  | 0 |
| CONTIG-033308 | 153 | 5   | 5   | 21  | 0 |
| CONTIG-033309 | 117 | 11  | 22  | 21  | 0 |
| CONTIG-033312 | 121 | 10  | 18  | 35  | 0 |
| CONTIG-033314 | 89  | 4   | 10  | 2   | 0 |
| CONTIG-033315 | 809 | 19  | 125 | 283 | 7 |
| CONTIG-033316 | 70  | 5   | 0   | 10  | 0 |
| CONTIG-033317 | 317 | 27  | 129 | 333 | 0 |
| CONTIG-033318 | 374 | 24  | 64  | 120 | 0 |
| CONTIG-033319 | 258 | 13  | 20  | 89  | 0 |
| CONTIG-033320 | 229 | 38  | 161 | 148 | 6 |
| CONTIG-033321 | 36  | 528 | 2   | 37  | 0 |
| CONTIG-033322 | 531 | 14  | 21  | 209 | 0 |
| CONTIG-033323 | 68  | 15  | 102 | 3   | 0 |
| CONTIG-033324 | 333 | 13  | 34  | 110 | 0 |
| CONTIG-033325 | 333 | 23  | 43  | 254 | 3 |
| CONTIG-033326 | 87  | 4   | 0   | 0   | 0 |
| CONTIG-033327 | 85  | 28  | 6   | 75  | 0 |
| CONTIG-033328 | 285 | 16  | 145 | 85  | 0 |
| CONTIG-033329 | 221 | 9   | 11  | 47  | 0 |
| CONTIG-033330 | 233 | 10  | 43  | 46  | 0 |
| CONTIG-033331 | 58  | 76  | 150 | 116 | 0 |
| CONTIG-033334 | 186 | 4   | 4   | 15  | 0 |
| CONTIG-033335 | 113 | 16  | 0   | 82  | 2 |
| CONTIG-033338 | 92  | 12  | 8   | 27  | 0 |
| CONTIG-033339 | 315 | 11  | 71  | 95  | 0 |
| CONTIG-033340 | 120 | 7   | 4   | 16  | 0 |
| CONTIG-033341 | 86  | 8   | 0   | 2   | 0 |
| CONTIG-033342 | 152 | 34  | 61  | 134 | 0 |
| CONTIG-033343 | 316 | 7   | 50  | 48  | 0 |
| CONTIG-033344 | 494 | 10  | 125 | 112 | 2 |
| CONTIG-033345 | 137 | 7   | 4   | 41  | 0 |
| CONTIG-033353 | 123 | 40  | 96  | 110 | 0 |
| CONTIG-033356 | 111 | 4   | 6   | 0   | 5 |
| CONTIG-033357 | 206 | 19  | 100 | 78  | 0 |
| CONTIG-033358 | 134 | 24  | 22  | 81  | 2 |
| CONTIG-033359 | 90  | 7   | 27  | 11  | 0 |
| CONTIG-033360 | 439 | 31  | 77  | 386 | 4 |
| CONTIG-033361 | 139 | 6   | 4   | 20  | 0 |
| CONTIG-033362 | 165 | 11  | 12  | 40  | 0 |
| CONTIG-033363 | 84  | 10  | 11  | 21  | 0 |
| CONTIG-033364 | 40  | 17  | 14  | 11  | 0 |
| CONTIG-033365 | 122 | 12  | 35  | 38  | 0 |
| CONTIG-033366 | 192 | 20  | 82  | 160 | 0 |
| CONTIG-033367 | 226 | 6   | 12  | 31  | 0 |

|               |     |     |     |     |     |
|---------------|-----|-----|-----|-----|-----|
| CONTIG-033368 | 223 | 10  | 7   | 72  | 0   |
| CONTIG-033369 | 68  | 144 | 21  | 374 | 0   |
| CONTIG-033370 | 516 | 15  | 18  | 295 | 0   |
| CONTIG-033371 | 99  | 6   | 10  | 11  | 2   |
| CONTIG-033372 | 60  | 3   | 0   | 2   | 0   |
| CONTIG-033373 | 150 | 7   | 2   | 22  | 0   |
| CONTIG-033374 | 346 | 10  | 5   | 111 | 0   |
| CONTIG-033376 | 261 | 7   | 21  | 55  | 2   |
| CONTIG-033377 | 151 | 21  | 36  | 41  | 0   |
| CONTIG-033378 | 110 | 10  | 27  | 9   | 4   |
| CONTIG-033379 | 69  | 10  | 5   | 27  | 0   |
| CONTIG-033381 | 256 | 10  | 4   | 23  | 0   |
| CONTIG-033382 | 192 | 27  | 99  | 177 | 0   |
| CONTIG-033383 | 85  | 21  | 3   | 57  | 0   |
| CONTIG-033384 | 61  | 4   | 0   | 2   | 0   |
| CONTIG-033385 | 702 | 22  | 0   | 0   | 138 |
| CONTIG-033386 | 136 | 6   | 14  | 18  | 0   |
| CONTIG-033387 | 101 | 6   | 5   | 17  | 0   |
| CONTIG-033388 | 81  | 8   | 11  | 4   | 0   |
| CONTIG-033391 | 541 | 11  | 11  | 313 | 0   |
| CONTIG-033392 | 234 | 10  | 32  | 76  | 0   |
| CONTIG-033393 | 486 | 19  | 97  | 332 | 0   |
| CONTIG-033394 | 44  | 455 | 129 | 111 | 56  |
| CONTIG-033396 | 534 | 22  | 69  | 650 | 0   |
| CONTIG-033397 | 187 | 7   | 5   | 50  | 4   |
| CONTIG-033398 | 674 | 23  | 88  | 661 | 0   |
| CONTIG-033399 | 69  | 4   | 3   | 0   | 0   |
| CONTIG-033400 | 469 | 18  | 9   | 340 | 0   |
| CONTIG-033401 | 283 | 6   | 5   | 56  | 0   |
| CONTIG-033402 | 79  | 46  | 39  | 74  | 6   |
| CONTIG-033407 | 212 | 23  | 102 | 62  | 0   |
| CONTIG-033409 | 257 | 16  | 5   | 131 | 10  |
| CONTIG-033410 | 272 | 19  | 83  | 135 | 0   |
| CONTIG-033411 | 245 | 6   | 7   | 8   | 0   |
| CONTIG-033412 | 139 | 15  | 2   | 71  | 0   |
| CONTIG-033413 | 66  | 9   | 11  | 0   | 0   |
| CONTIG-033414 | 187 | 9   | 6   | 98  | 0   |
| CONTIG-033415 | 111 | 9   | 3   | 35  | 2   |
| CONTIG-033416 | 132 | 25  | 31  | 70  | 0   |
| CONTIG-033418 | 63  | 6   | 2   | 15  | 0   |
| CONTIG-033423 | 104 | 17  | 27  | 26  | 0   |
| CONTIG-033424 | 59  | 3   | 0   | 5   | 0   |
| CONTIG-033425 | 112 | 6   | 6   | 21  | 0   |
| CONTIG-033426 | 317 | 9   | 14  | 83  | 0   |
| CONTIG-033427 | 109 | 20  | 15  | 90  | 0   |
| CONTIG-033428 | 110 | 85  | 116 | 199 | 3   |
| CONTIG-033429 | 258 | 11  | 10  | 94  | 0   |

|               |      |    |    |     |     |
|---------------|------|----|----|-----|-----|
| CONTIG-033430 | 83   | 3  | 3  | 2   | 0   |
| CONTIG-033431 | 185  | 6  | 18 | 29  | 0   |
| CONTIG-033432 | 435  | 14 | 39 | 106 | 0   |
| CONTIG-033439 | 112  | 33 | 6  | 0   | 0   |
| CONTIG-033440 | 204  | 12 | 29 | 53  | 0   |
| CONTIG-033441 | 447  | 15 | 17 | 156 | 0   |
| CONTIG-033442 | 281  | 6  | 59 | 28  | 0   |
| CONTIG-033444 | 96   | 8  | 7  | 18  | 0   |
| CONTIG-033445 | 367  | 9  | 3  | 52  | 2   |
| CONTIG-033446 | 166  | 11 | 4  | 46  | 0   |
| CONTIG-033447 | 108  | 10 | 13 | 31  | 0   |
| CONTIG-033448 | 386  | 16 | 42 | 199 | 0   |
| CONTIG-033449 | 145  | 10 | 12 | 33  | 0   |
| CONTIG-033450 | 73   | 3  | 2  | 6   | 0   |
| CONTIG-033451 | 264  | 7  | 13 | 66  | 0   |
| CONTIG-033452 | 252  | 14 | 12 | 157 | 0   |
| CONTIG-033453 | 71   | 2  | 2  | 4   | 0   |
| CONTIG-033454 | 194  | 9  | 7  | 49  | 0   |
| CONTIG-033455 | 307  | 8  | 38 | 51  | 0   |
| CONTIG-033457 | 559  | 16 | 23 | 352 | 2   |
| CONTIG-033460 | 61   | 8  | 16 | 2   | 0   |
| CONTIG-033461 | 91   | 11 | 10 | 15  | 0   |
| CONTIG-033462 | 176  | 8  | 6  | 57  | 0   |
| CONTIG-033463 | 242  | 29 | 39 | 421 | 0   |
| CONTIG-033464 | 94   | 15 | 41 | 55  | 0   |
| CONTIG-033465 | 173  | 13 | 5  | 74  | 0   |
| CONTIG-033466 | 165  | 33 | 45 | 151 | 4   |
| CONTIG-033467 | 42   | 20 | 0  | 0   | 0   |
| CONTIG-033469 | 65   | 14 | 33 | 13  | 2   |
| CONTIG-033470 | 310  | 10 | 23 | 62  | 0   |
| CONTIG-033471 | 59   | 3  | 6  | 4   | 0   |
| CONTIG-033472 | 440  | 19 | 13 | 296 | 0   |
| CONTIG-033477 | 406  | 30 | 43 | 598 | 0   |
| CONTIG-033480 | 177  | 48 | 4  | 0   | 187 |
| CONTIG-033481 | 71   | 6  | 4  | 11  | 0   |
| CONTIG-033482 | 356  | 15 | 40 | 187 | 0   |
| CONTIG-033483 | 72   | 11 | 23 | 0   | 0   |
| CONTIG-033484 | 67   | 2  | 2  | 0   | 0   |
| CONTIG-033485 | 1123 | 27 | 23 | 47  | 0   |
| CONTIG-033486 | 398  | 16 | 47 | 173 | 0   |
| CONTIG-033487 | 141  | 8  | 4  | 33  | 2   |
| CONTIG-033488 | 82   | 7  | 26 | 2   | 0   |
| CONTIG-033489 | 194  | 5  | 8  | 43  | 0   |
| CONTIG-033490 | 161  | 11 | 11 | 69  | 2   |
| CONTIG-033491 | 255  | 26 | 17 | 243 | 0   |
| CONTIG-033492 | 248  | 7  | 33 | 8   | 2   |
| CONTIG-033493 | 118  | 27 | 17 | 95  | 0   |

|               |     |     |     |     |   |
|---------------|-----|-----|-----|-----|---|
| CONTIG-033496 | 140 | 9   | 0   | 38  | 0 |
| CONTIG-033497 | 105 | 9   | 32  | 3   | 0 |
| CONTIG-033500 | 112 | 4   | 0   | 7   | 0 |
| CONTIG-033501 | 74  | 4   | 0   | 6   | 0 |
| CONTIG-033502 | 83  | 5   | 3   | 4   | 0 |
| CONTIG-033503 | 98  | 148 | 31  | 570 | 6 |
| CONTIG-033504 | 164 | 7   | 13  | 38  | 0 |
| CONTIG-033506 | 115 | 9   | 41  | 6   | 0 |
| CONTIG-033507 | 399 | 12  | 3   | 155 | 4 |
| CONTIG-033509 | 297 | 7   | 18  | 32  | 2 |
| CONTIG-033510 | 58  | 6   | 12  | 3   | 0 |
| CONTIG-033511 | 134 | 9   | 11  | 0   | 0 |
| CONTIG-033512 | 225 | 22  | 8   | 83  | 2 |
| CONTIG-033513 | 379 | 16  | 101 | 101 | 2 |
| CONTIG-033514 | 411 | 19  | 23  | 296 | 3 |
| CONTIG-033515 | 215 | 5   | 26  | 31  | 0 |
| CONTIG-033516 | 110 | 14  | 27  | 43  | 0 |
| CONTIG-033517 | 66  | 6   | 12  | 4   | 0 |
| CONTIG-033518 | 224 | 14  | 11  | 49  | 0 |
| CONTIG-033519 | 216 | 6   | 0   | 0   | 6 |
| CONTIG-033520 | 88  | 5   | 5   | 17  | 0 |
| CONTIG-033521 | 90  | 4   | 0   | 3   | 0 |
| CONTIG-033522 | 273 | 10  | 0   | 93  | 0 |
| CONTIG-033523 | 118 | 5   | 8   | 6   | 0 |
| CONTIG-033524 | 88  | 8   | 11  | 27  | 0 |
| CONTIG-033525 | 96  | 28  | 4   | 90  | 0 |
| CONTIG-033526 | 415 | 9   | 6   | 199 | 0 |
| CONTIG-033527 | 100 | 15  | 7   | 45  | 3 |
| CONTIG-033528 | 202 | 13  | 18  | 38  | 0 |
| CONTIG-033529 | 361 | 14  | 18  | 57  | 2 |
| CONTIG-033530 | 114 | 4   | 0   | 0   | 0 |
| CONTIG-033531 | 689 | 22  | 7   | 43  | 0 |
| CONTIG-033532 | 62  | 4   | 4   | 4   | 0 |
| CONTIG-033533 | 824 | 16  | 111 | 307 | 0 |
| CONTIG-033534 | 109 | 11  | 2   | 47  | 0 |
| CONTIG-033535 | 84  | 6   | 12  | 5   | 0 |
| CONTIG-033536 | 98  | 4   | 2   | 2   | 0 |
| CONTIG-033537 | 127 | 8   | 4   | 32  | 0 |
| CONTIG-033538 | 85  | 15  | 19  | 49  | 0 |
| CONTIG-033539 | 62  | 8   | 7   | 19  | 0 |
| CONTIG-033540 | 103 | 5   | 0   | 8   | 0 |
| CONTIG-033541 | 393 | 12  | 16  | 124 | 2 |
| CONTIG-033542 | 61  | 3   | 3   | 0   | 0 |
| CONTIG-033543 | 58  | 10  | 40  | 0   | 0 |
| CONTIG-033544 | 81  | 3   | 5   | 3   | 0 |
| CONTIG-033546 | 49  | 134 | 110 | 77  | 0 |
| CONTIG-033547 | 385 | 11  | 47  | 130 | 2 |

|               |     |     |    |      |     |
|---------------|-----|-----|----|------|-----|
| CONTIG-033548 | 161 | 4   | 6  | 12   | 0   |
| CONTIG-033549 | 115 | 5   | 6  | 27   | 0   |
| CONTIG-033550 | 75  | 35  | 0  | 26   | 2   |
| CONTIG-033551 | 124 | 7   | 11 | 6    | 0   |
| CONTIG-033553 | 71  | 329 | 17 | 1306 | 5   |
| CONTIG-033554 | 121 | 5   | 16 | 0    | 2   |
| CONTIG-033555 | 828 | 16  | 76 | 352  | 0   |
| CONTIG-033556 | 91  | 11  | 61 | 2    | 0   |
| CONTIG-033557 | 74  | 17  | 52 | 0    | 0   |
| CONTIG-033558 | 104 | 8   | 24 | 13   | 0   |
| CONTIG-033559 | 107 | 15  | 49 | 28   | 0   |
| CONTIG-033560 | 109 | 7   | 12 | 20   | 0   |
| CONTIG-033561 | 74  | 6   | 11 | 8    | 0   |
| CONTIG-033562 | 160 | 4   | 0  | 2    | 0   |
| CONTIG-033563 | 262 | 8   | 9  | 43   | 0   |
| CONTIG-033564 | 162 | 21  | 17 | 171  | 0   |
| CONTIG-033565 | 111 | 5   | 6  | 15   | 0   |
| CONTIG-033566 | 208 | 8   | 32 | 35   | 0   |
| CONTIG-033567 | 375 | 13  | 24 | 110  | 2   |
| CONTIG-033568 | 84  | 3   | 10 | 2    | 0   |
| CONTIG-033569 | 268 | 11  | 41 | 125  | 0   |
| CONTIG-033570 | 293 | 7   | 4  | 40   | 0   |
| CONTIG-033571 | 231 | 23  | 41 | 163  | 0   |
| CONTIG-033572 | 429 | 8   | 12 | 93   | 0   |
| CONTIG-033573 | 235 | 10  | 16 | 51   | 0   |
| CONTIG-033575 | 61  | 7   | 0  | 11   | 0   |
| CONTIG-033576 | 321 | 5   | 9  | 48   | 0   |
| CONTIG-033577 | 93  | 117 | 44 | 197  | 2   |
| CONTIG-033578 | 62  | 6   | 5  | 2    | 0   |
| CONTIG-033579 | 298 | 17  | 12 | 243  | 0   |
| CONTIG-033580 | 253 | 12  | 21 | 65   | 0   |
| CONTIG-033582 | 140 | 67  | 48 | 331  | 27  |
| CONTIG-033583 | 86  | 18  | 6  | 49   | 0   |
| CONTIG-033584 | 104 | 23  | 0  | 33   | 0   |
| CONTIG-033585 | 343 | 9   | 46 | 27   | 8   |
| CONTIG-033586 | 213 | 21  | 57 | 65   | 2   |
| CONTIG-033587 | 206 | 311 | 36 | 1140 | 592 |
| CONTIG-033588 | 258 | 10  | 19 | 87   | 0   |
| CONTIG-033589 | 227 | 12  | 10 | 107  | 2   |
| CONTIG-033591 | 120 | 10  | 11 | 33   | 0   |
| CONTIG-033592 | 72  | 2   | 6  | 0    | 0   |
| CONTIG-033593 | 818 | 14  | 41 | 495  | 0   |
| CONTIG-033594 | 91  | 12  | 6  | 22   | 0   |
| CONTIG-033595 | 85  | 11  | 12 | 36   | 0   |
| CONTIG-033596 | 475 | 12  | 19 | 168  | 0   |
| CONTIG-033597 | 63  | 16  | 9  | 39   | 0   |
| CONTIG-033598 | 293 | 8   | 25 | 98   | 0   |

|               |      |     |    |      |    |
|---------------|------|-----|----|------|----|
| CONTIG-033599 | 348  | 18  | 78 | 120  | 0  |
| CONTIG-033600 | 171  | 9   | 8  | 60   | 0  |
| CONTIG-033601 | 81   | 20  | 9  | 3    | 0  |
| CONTIG-033602 | 318  | 14  | 32 | 110  | 0  |
| CONTIG-033603 | 92   | 128 | 90 | 406  | 0  |
| CONTIG-033604 | 177  | 31  | 36 | 197  | 0  |
| CONTIG-033605 | 59   | 8   | 12 | 8    | 0  |
| CONTIG-033606 | 193  | 6   | 18 | 13   | 0  |
| CONTIG-033607 | 152  | 6   | 0  | 20   | 0  |
| CONTIG-033608 | 227  | 22  | 47 | 141  | 2  |
| CONTIG-033609 | 453  | 15  | 62 | 95   | 6  |
| CONTIG-033611 | 239  | 17  | 67 | 179  | 0  |
| CONTIG-033612 | 485  | 21  | 9  | 515  | 0  |
| CONTIG-033613 | 121  | 14  | 38 | 44   | 0  |
| CONTIG-033614 | 298  | 11  | 15 | 98   | 0  |
| CONTIG-033616 | 132  | 6   | 14 | 27   | 0  |
| CONTIG-033617 | 265  | 12  | 70 | 107  | 0  |
| CONTIG-033618 | 167  | 16  | 10 | 53   | 0  |
| CONTIG-033619 | 219  | 4   | 6  | 24   | 0  |
| CONTIG-033620 | 80   | 28  | 13 | 26   | 0  |
| CONTIG-033621 | 140  | 6   | 5  | 35   | 0  |
| CONTIG-033628 | 65   | 29  | 25 | 0    | 0  |
| CONTIG-033629 | 577  | 14  | 49 | 143  | 0  |
| CONTIG-033631 | 352  | 16  | 21 | 125  | 4  |
| CONTIG-033632 | 241  | 8   | 11 | 49   | 0  |
| CONTIG-033633 | 64   | 7   | 20 | 9    | 0  |
| CONTIG-033641 | 105  | 8   | 23 | 5    | 0  |
| CONTIG-033642 | 361  | 15  | 12 | 299  | 0  |
| CONTIG-033643 | 192  | 6   | 4  | 35   | 0  |
| CONTIG-033644 | 87   | 6   | 2  | 19   | 0  |
| CONTIG-033645 | 259  | 8   | 0  | 86   | 0  |
| CONTIG-033646 | 260  | 12  | 44 | 132  | 0  |
| CONTIG-033648 | 538  | 17  | 63 | 163  | 7  |
| CONTIG-033649 | 176  | 5   | 2  | 38   | 0  |
| CONTIG-033651 | 293  | 16  | 39 | 154  | 2  |
| CONTIG-033652 | 1166 | 19  | 37 | 1112 | 13 |
| CONTIG-033655 | 126  | 14  | 4  | 79   | 0  |
| CONTIG-033656 | 75   | 12  | 75 | 3    | 0  |
| CONTIG-033663 | 325  | 15  | 43 | 144  | 3  |
| CONTIG-033665 | 99   | 4   | 2  | 7    | 0  |
| CONTIG-033666 | 153  | 9   | 19 | 39   | 0  |
| CONTIG-033667 | 628  | 19  | 43 | 194  | 15 |
| CONTIG-033670 | 235  | 7   | 4  | 8    | 0  |
| CONTIG-033671 | 75   | 6   | 18 | 6    | 0  |
| CONTIG-033672 | 126  | 8   | 9  | 24   | 0  |
| CONTIG-033673 | 572  | 19  | 36 | 624  | 0  |
| CONTIG-033674 | 184  | 10  | 0  | 65   | 0  |



|               |     |     |     |     |    |
|---------------|-----|-----|-----|-----|----|
| CONTIG-033675 | 158 | 5   | 0   | 20  | 0  |
| CONTIG-033676 | 68  | 12  | 14  | 17  | 0  |
| CONTIG-033677 | 120 | 9   | 8   | 12  | 0  |
| CONTIG-033678 | 135 | 14  | 22  | 60  | 0  |
| CONTIG-033684 | 60  | 5   | 2   | 2   | 0  |
| CONTIG-033686 | 237 | 17  | 108 | 83  | 0  |
| CONTIG-033687 | 234 | 25  | 77  | 152 | 4  |
| CONTIG-033688 | 118 | 4   | 15  | 10  | 0  |
| CONTIG-033689 | 87  | 9   | 3   | 33  | 0  |
| CONTIG-033690 | 327 | 10  | 17  | 68  | 0  |
| CONTIG-033691 | 171 | 7   | 2   | 22  | 0  |
| CONTIG-033692 | 91  | 6   | 10  | 7   | 0  |
| CONTIG-033693 | 165 | 9   | 0   | 60  | 0  |
| CONTIG-033694 | 209 | 90  | 101 | 683 | 15 |
| CONTIG-033695 | 191 | 6   | 5   | 14  | 0  |
| CONTIG-033696 | 113 | 7   | 2   | 12  | 0  |
| CONTIG-033698 | 105 | 16  | 37  | 39  | 0  |
| CONTIG-033699 | 67  | 8   | 7   | 29  | 0  |
| CONTIG-033700 | 214 | 13  | 23  | 39  | 2  |
| CONTIG-033701 | 306 | 11  | 7   | 105 | 0  |
| CONTIG-033702 | 516 | 13  | 14  | 259 | 6  |
| CONTIG-033703 | 110 | 12  | 3   | 47  | 0  |
| CONTIG-033704 | 56  | 17  | 6   | 32  | 0  |
| CONTIG-033706 | 158 | 4   | 4   | 8   | 0  |
| CONTIG-033707 | 67  | 6   | 11  | 11  | 0  |
| CONTIG-033710 | 67  | 10  | 13  | 8   | 0  |
| CONTIG-033711 | 341 | 38  | 48  | 525 | 4  |
| CONTIG-033712 | 207 | 9   | 39  | 16  | 0  |
| CONTIG-033713 | 111 | 19  | 6   | 47  | 0  |
| CONTIG-033714 | 242 | 6   | 14  | 29  | 0  |
| CONTIG-033715 | 99  | 6   | 5   | 11  | 0  |
| CONTIG-033716 | 254 | 42  | 33  | 149 | 35 |
| CONTIG-033717 | 85  | 4   | 0   | 6   | 0  |
| CONTIG-033719 | 63  | 4   | 12  | 0   | 0  |
| CONTIG-033720 | 623 | 23  | 147 | 384 | 12 |
| CONTIG-033721 | 179 | 10  | 34  | 38  | 0  |
| CONTIG-033722 | 60  | 155 | 14  | 341 | 2  |
| CONTIG-033723 | 83  | 6   | 2   | 6   | 0  |
| CONTIG-033724 | 127 | 10  | 4   | 35  | 0  |
| CONTIG-033725 | 119 | 7   | 9   | 18  | 0  |
| CONTIG-033726 | 101 | 5   | 0   | 4   | 0  |
| CONTIG-033727 | 91  | 9   | 16  | 37  | 0  |
| CONTIG-033729 | 496 | 15  | 32  | 177 | 0  |
| CONTIG-033730 | 94  | 4   | 17  | 0   | 0  |
| CONTIG-033731 | 350 | 15  | 67  | 162 | 0  |
| CONTIG-033732 | 109 | 7   | 13  | 29  | 0  |
| CONTIG-033733 | 115 | 7   | 38  | 9   | 0  |

|               |      |     |     |      |     |
|---------------|------|-----|-----|------|-----|
| CONTIG-033734 | 391  | 16  | 54  | 107  | 0   |
| CONTIG-033735 | 143  | 13  | 58  | 46   | 0   |
| CONTIG-033736 | 106  | 9   | 5   | 6    | 0   |
| CONTIG-033737 | 134  | 6   | 40  | 0    | 0   |
| CONTIG-033738 | 105  | 6   | 3   | 25   | 0   |
| CONTIG-033742 | 2191 | 23  | 19  | 2593 | 0   |
| CONTIG-033743 | 120  | 10  | 47  | 13   | 2   |
| CONTIG-033744 | 162  | 10  | 17  | 34   | 2   |
| CONTIG-033745 | 386  | 7   | 30  | 70   | 0   |
| CONTIG-033746 | 90   | 10  | 20  | 36   | 0   |
| CONTIG-033747 | 144  | 13  | 14  | 104  | 0   |
| CONTIG-033748 | 87   | 5   | 2   | 17   | 0   |
| CONTIG-033750 | 1065 | 13  | 39  | 443  | 2   |
| CONTIG-033751 | 36   | 34  | 3   | 0    | 6   |
| CONTIG-033752 | 207  | 10  | 12  | 74   | 0   |
| CONTIG-033753 | 118  | 7   | 13  | 19   | 0   |
| CONTIG-033754 | 127  | 251 | 25  | 1636 | 0   |
| CONTIG-033755 | 343  | 9   | 54  | 77   | 0   |
| CONTIG-033756 | 177  | 27  | 29  | 186  | 2   |
| CONTIG-033757 | 88   | 16  | 6   | 49   | 0   |
| CONTIG-033758 | 375  | 35  | 80  | 492  | 0   |
| CONTIG-033759 | 103  | 4   | 5   | 11   | 0   |
| CONTIG-033760 | 334  | 15  | 27  | 93   | 0   |
| CONTIG-033761 | 881  | 15  | 108 | 458  | 0   |
| CONTIG-033762 | 146  | 6   | 10  | 25   | 0   |
| CONTIG-033763 | 170  | 8   | 2   | 55   | 0   |
| CONTIG-033764 | 105  | 6   | 8   | 6    | 0   |
| CONTIG-033765 | 101  | 15  | 11  | 68   | 0   |
| CONTIG-033766 | 341  | 10  | 25  | 17   | 0   |
| CONTIG-033767 | 270  | 9   | 18  | 48   | 0   |
| CONTIG-033768 | 325  | 12  | 14  | 102  | 0   |
| CONTIG-033769 | 101  | 8   | 13  | 12   | 0   |
| CONTIG-033771 | 69   | 4   | 2   | 4    | 0   |
| CONTIG-033772 | 67   | 4   | 2   | 6    | 0   |
| CONTIG-033773 | 393  | 24  | 52  | 37   | 0   |
| CONTIG-033774 | 661  | 65  | 161 | 1224 | 280 |
| CONTIG-033776 | 154  | 13  | 37  | 19   | 2   |
| CONTIG-033777 | 105  | 13  | 24  | 47   | 0   |
| CONTIG-033778 | 557  | 21  | 154 | 483  | 2   |
| CONTIG-033779 | 103  | 5   | 4   | 2    | 0   |
| CONTIG-033784 | 297  | 14  | 19  | 28   | 0   |
| CONTIG-033785 | 150  | 4   | 2   | 9    | 0   |
| CONTIG-033787 | 478  | 35  | 65  | 338  | 27  |
| CONTIG-033788 | 115  | 3   | 2   | 11   | 0   |
| CONTIG-033789 | 71   | 7   | 0   | 20   | 0   |
| CONTIG-033790 | 437  | 15  | 45  | 167  | 8   |
| CONTIG-033791 | 201  | 27  | 40  | 51   | 4   |

|               |     |    |     |     |   |
|---------------|-----|----|-----|-----|---|
| CONTIG-033792 | 75  | 5  | 7   | 2   | 0 |
| CONTIG-033793 | 133 | 6  | 3   | 24  | 0 |
| CONTIG-033794 | 65  | 7  | 14  | 0   | 0 |
| CONTIG-033795 | 89  | 5  | 6   | 15  | 0 |
| CONTIG-033796 | 217 | 14 | 27  | 37  | 0 |
| CONTIG-033797 | 180 | 5  | 2   | 18  | 0 |
| CONTIG-033798 | 313 | 7  | 5   | 69  | 0 |
| CONTIG-033799 | 454 | 12 | 39  | 261 | 0 |
| CONTIG-033800 | 74  | 9  | 4   | 19  | 0 |
| CONTIG-033801 | 112 | 10 | 18  | 27  | 0 |
| CONTIG-033802 | 342 | 9  | 8   | 53  | 6 |
| CONTIG-033803 | 273 | 20 | 131 | 155 | 0 |
| CONTIG-033804 | 234 | 15 | 29  | 113 | 0 |
| CONTIG-033805 | 218 | 13 | 8   | 133 | 0 |
| CONTIG-033806 | 550 | 16 | 29  | 236 | 3 |
| CONTIG-033807 | 534 | 16 | 20  | 202 | 0 |
| CONTIG-033808 | 400 | 12 | 25  | 179 | 0 |
| CONTIG-033810 | 59  | 7  | 0   | 20  | 0 |
| CONTIG-033811 | 350 | 9  | 71  | 77  | 0 |
| CONTIG-033814 | 227 | 21 | 82  | 165 | 0 |
| CONTIG-033815 | 615 | 23 | 25  | 225 | 0 |
| CONTIG-033816 | 67  | 9  | 7   | 7   | 0 |
| CONTIG-033817 | 82  | 50 | 20  | 83  | 0 |
| CONTIG-033818 | 182 | 4  | 14  | 7   | 2 |
| CONTIG-033819 | 269 | 18 | 21  | 192 | 0 |
| CONTIG-033821 | 176 | 7  | 7   | 33  | 0 |
| CONTIG-033822 | 501 | 55 | 78  | 838 | 2 |
| CONTIG-033823 | 138 | 21 | 16  | 54  | 0 |
| CONTIG-033824 | 286 | 13 | 32  | 103 | 0 |
| CONTIG-033825 | 481 | 13 | 64  | 53  | 0 |
| CONTIG-033826 | 66  | 3  | 0   | 3   | 0 |
| CONTIG-033827 | 141 | 7  | 2   | 9   | 0 |
| CONTIG-033828 | 65  | 6  | 4   | 8   | 0 |
| CONTIG-033830 | 72  | 18 | 8   | 48  | 2 |
| CONTIG-033832 | 394 | 57 | 59  | 734 | 2 |
| CONTIG-033833 | 206 | 5  | 4   | 19  | 0 |
| CONTIG-033834 | 194 | 15 | 32  | 18  | 2 |
| CONTIG-033835 | 133 | 9  | 96  | 2   | 0 |
| CONTIG-033836 | 75  | 11 | 4   | 33  | 0 |
| CONTIG-033840 | 121 | 4  | 5   | 5   | 0 |
| CONTIG-033841 | 87  | 14 | 4   | 20  | 0 |
| CONTIG-033842 | 268 | 8  | 6   | 55  | 0 |
| CONTIG-033843 | 237 | 22 | 95  | 109 | 0 |
| CONTIG-033844 | 71  | 8  | 4   | 0   | 0 |
| CONTIG-033846 | 83  | 3  | 3   | 0   | 0 |
| CONTIG-033847 | 131 | 9  | 18  | 36  | 0 |
| CONTIG-033848 | 110 | 21 | 0   | 0   | 0 |

|               |      |     |     |      |     |
|---------------|------|-----|-----|------|-----|
| CONTIG-033850 | 169  | 13  | 20  | 50   | 0   |
| CONTIG-033851 | 91   | 7   | 18  | 19   | 0   |
| CONTIG-033852 | 194  | 6   | 9   | 33   | 0   |
| CONTIG-033853 | 183  | 8   | 4   | 51   | 2   |
| CONTIG-033855 | 277  | 15  | 17  | 155  | 0   |
| CONTIG-033859 | 98   | 20  | 77  | 2    | 0   |
| CONTIG-033860 | 754  | 16  | 81  | 228  | 9   |
| CONTIG-033861 | 143  | 17  | 62  | 33   | 0   |
| CONTIG-033862 | 267  | 25  | 29  | 290  | 2   |
| CONTIG-033863 | 74   | 3   | 3   | 2    | 0   |
| CONTIG-033864 | 218  | 164 | 271 | 1686 | 16  |
| CONTIG-033865 | 173  | 5   | 4   | 24   | 0   |
| CONTIG-033866 | 132  | 6   | 2   | 21   | 0   |
| CONTIG-033867 | 69   | 8   | 3   | 2    | 0   |
| CONTIG-033868 | 126  | 12  | 26  | 37   | 0   |
| CONTIG-033869 | 165  | 8   | 11  | 32   | 0   |
| CONTIG-033870 | 71   | 6   | 15  | 0    | 0   |
| CONTIG-033876 | 84   | 11  | 19  | 35   | 0   |
| CONTIG-033877 | 142  | 8   | 12  | 13   | 0   |
| CONTIG-033878 | 78   | 5   | 0   | 11   | 0   |
| CONTIG-033879 | 69   | 5   | 0   | 7    | 0   |
| CONTIG-033880 | 1261 | 29  | 0   | 0    | 427 |
| CONTIG-033881 | 138  | 6   | 3   | 27   | 0   |
| CONTIG-033882 | 89   | 5   | 11  | 6    | 0   |
| CONTIG-033883 | 262  | 6   | 12  | 26   | 0   |
| CONTIG-033884 | 97   | 3   | 8   | 5    | 0   |
| CONTIG-033885 | 406  | 9   | 41  | 82   | 0   |
| CONTIG-033887 | 80   | 4   | 6   | 6    | 0   |
| CONTIG-033888 | 522  | 12  | 41  | 234  | 0   |
| CONTIG-033889 | 45   | 9   | 8   | 4    | 0   |
| CONTIG-033890 | 67   | 18  | 13  | 47   | 2   |
| CONTIG-033891 | 131  | 7   | 34  | 10   | 2   |
| CONTIG-033892 | 148  | 10  | 98  | 17   | 0   |
| CONTIG-033894 | 273  | 10  | 6   | 88   | 0   |
| CONTIG-033895 | 123  | 13  | 4   | 35   | 0   |
| CONTIG-033896 | 121  | 4   | 7   | 8    | 0   |
| CONTIG-033898 | 120  | 11  | 13  | 47   | 0   |
| CONTIG-033899 | 489  | 11  | 80  | 170  | 7   |
| CONTIG-033900 | 67   | 5   | 0   | 2    | 0   |
| CONTIG-033901 | 216  | 18  | 27  | 42   | 0   |
| CONTIG-033902 | 536  | 18  | 43  | 362  | 4   |
| CONTIG-033903 | 535  | 15  | 47  | 204  | 2   |
| CONTIG-033904 | 103  | 7   | 15  | 20   | 0   |
| CONTIG-033905 | 182  | 9   | 44  | 14   | 3   |
| CONTIG-033906 | 61   | 10  | 16  | 3    | 0   |
| CONTIG-033907 | 1257 | 204 | 67  | 195  | 0   |
| CONTIG-033908 | 233  | 6   | 5   | 54   | 0   |

|               |     |     |     |     |    |
|---------------|-----|-----|-----|-----|----|
| CONTIG-033909 | 282 | 12  | 32  | 136 | 0  |
| CONTIG-033910 | 87  | 13  | 8   | 2   | 0  |
| CONTIG-033911 | 251 | 6   | 6   | 38  | 0  |
| CONTIG-033912 | 225 | 5   | 8   | 7   | 0  |
| CONTIG-033913 | 273 | 21  | 61  | 242 | 0  |
| CONTIG-033914 | 154 | 14  | 27  | 74  | 0  |
| CONTIG-033915 | 312 | 7   | 0   | 14  | 0  |
| CONTIG-033916 | 217 | 27  | 49  | 105 | 2  |
| CONTIG-033917 | 82  | 3   | 0   | 5   | 0  |
| CONTIG-033918 | 216 | 12  | 14  | 82  | 5  |
| CONTIG-033919 | 110 | 6   | 3   | 24  | 0  |
| CONTIG-033920 | 464 | 7   | 11  | 98  | 0  |
| CONTIG-033921 | 90  | 12  | 0   | 20  | 0  |
| CONTIG-033922 | 103 | 17  | 24  | 23  | 2  |
| CONTIG-033925 | 110 | 8   | 12  | 21  | 0  |
| CONTIG-033928 | 236 | 9   | 13  | 4   | 0  |
| CONTIG-033929 | 400 | 18  | 96  | 276 | 0  |
| CONTIG-033930 | 78  | 4   | 8   | 5   | 0  |
| CONTIG-033931 | 185 | 13  | 15  | 81  | 0  |
| CONTIG-033932 | 146 | 6   | 20  | 26  | 0  |
| CONTIG-033933 | 228 | 7   | 9   | 14  | 0  |
| CONTIG-033935 | 175 | 10  | 65  | 31  | 0  |
| CONTIG-033936 | 133 | 11  | 7   | 59  | 0  |
| CONTIG-033937 | 176 | 12  | 3   | 57  | 2  |
| CONTIG-033938 | 340 | 7   | 53  | 4   | 31 |
| CONTIG-033941 | 248 | 26  | 62  | 162 | 2  |
| CONTIG-033942 | 113 | 5   | 5   | 4   | 0  |
| CONTIG-033946 | 203 | 5   | 12  | 10  | 0  |
| CONTIG-033948 | 358 | 8   | 16  | 112 | 0  |
| CONTIG-033949 | 162 | 11  | 19  | 27  | 0  |
| CONTIG-033952 | 77  | 8   | 0   | 24  | 0  |
| CONTIG-033953 | 960 | 27  | 142 | 710 | 13 |
| CONTIG-033954 | 105 | 12  | 20  | 64  | 0  |
| CONTIG-033955 | 140 | 26  | 71  | 37  | 2  |
| CONTIG-033956 | 74  | 87  | 17  | 244 | 0  |
| CONTIG-033957 | 275 | 38  | 78  | 253 | 23 |
| CONTIG-033958 | 328 | 5   | 24  | 42  | 0  |
| CONTIG-033964 | 91  | 26  | 58  | 53  | 0  |
| CONTIG-033967 | 105 | 6   | 6   | 16  | 0  |
| CONTIG-033968 | 381 | 14  | 9   | 143 | 0  |
| CONTIG-033969 | 147 | 14  | 19  | 70  | 0  |
| CONTIG-033970 | 82  | 503 | 37  | 15  | 0  |
| CONTIG-033971 | 269 | 18  | 41  | 213 | 0  |
| CONTIG-033972 | 187 | 10  | 26  | 56  | 0  |
| CONTIG-033973 | 74  | 7   | 14  | 7   | 0  |
| CONTIG-033974 | 101 | 6   | 0   | 6   | 2  |
| CONTIG-033975 | 58  | 23  | 13  | 37  | 0  |

|               |     |     |     |     |     |
|---------------|-----|-----|-----|-----|-----|
| CONTIG-033976 | 188 | 14  | 8   | 63  | 0   |
| CONTIG-033977 | 158 | 11  | 15  | 15  | 0   |
| CONTIG-033978 | 105 | 6   | 6   | 10  | 0   |
| CONTIG-033981 | 431 | 12  | 42  | 128 | 2   |
| CONTIG-033984 | 787 | 16  | 34  | 460 | 15  |
| CONTIG-033985 | 192 | 9   | 18  | 54  | 0   |
| CONTIG-033986 | 618 | 13  | 104 | 247 | 2   |
| CONTIG-033987 | 226 | 5   | 9   | 8   | 0   |
| CONTIG-033988 | 133 | 58  | 27  | 213 | 0   |
| CONTIG-033989 | 404 | 17  | 34  | 181 | 6   |
| CONTIG-033991 | 150 | 7   | 8   | 11  | 0   |
| CONTIG-033992 | 177 | 3   | 0   | 2   | 0   |
| CONTIG-033993 | 494 | 19  | 40  | 264 | 9   |
| CONTIG-033994 | 59  | 4   | 2   | 4   | 0   |
| CONTIG-033995 | 144 | 8   | 11  | 33  | 0   |
| CONTIG-033996 | 392 | 40  | 97  | 516 | 2   |
| CONTIG-033997 | 240 | 32  | 122 | 302 | 0   |
| CONTIG-033998 | 364 | 9   | 6   | 114 | 4   |
| CONTIG-033999 | 277 | 9   | 28  | 53  | 0   |
| CONTIG-034000 | 268 | 16  | 41  | 26  | 0   |
| CONTIG-034005 | 171 | 7   | 26  | 25  | 0   |
| CONTIG-034006 | 207 | 17  | 222 | 28  | 0   |
| CONTIG-034007 | 616 | 35  | 2   | 0   | 283 |
| CONTIG-034008 | 108 | 23  | 20  | 71  | 0   |
| CONTIG-034009 | 173 | 13  | 10  | 49  | 5   |
| CONTIG-034010 | 155 | 27  | 7   | 161 | 3   |
| CONTIG-034011 | 336 | 21  | 67  | 90  | 6   |
| CONTIG-034012 | 106 | 8   | 2   | 27  | 0   |
| CONTIG-034013 | 186 | 10  | 18  | 56  | 0   |
| CONTIG-034014 | 166 | 19  | 11  | 86  | 0   |
| CONTIG-034015 | 126 | 34  | 13  | 129 | 2   |
| CONTIG-034016 | 446 | 17  | 20  | 354 | 0   |
| CONTIG-034017 | 437 | 18  | 12  | 9   | 0   |
| CONTIG-034018 | 370 | 11  | 47  | 212 | 0   |
| CONTIG-034019 | 78  | 10  | 2   | 11  | 0   |
| CONTIG-034020 | 142 | 16  | 41  | 93  | 0   |
| CONTIG-034021 | 529 | 27  | 15  | 77  | 0   |
| CONTIG-034022 | 292 | 11  | 55  | 43  | 0   |
| CONTIG-034023 | 163 | 9   | 8   | 45  | 0   |
| CONTIG-034024 | 110 | 8   | 0   | 4   | 0   |
| CONTIG-034025 | 75  | 7   | 13  | 0   | 0   |
| CONTIG-034026 | 248 | 23  | 19  | 17  | 0   |
| CONTIG-034027 | 256 | 20  | 26  | 143 | 2   |
| CONTIG-034028 | 88  | 160 | 30  | 380 | 0   |
| CONTIG-034029 | 669 | 29  | 28  | 769 | 5   |
| CONTIG-034030 | 81  | 8   | 50  | 0   | 0   |
| CONTIG-034031 | 114 | 10  | 5   | 27  | 0   |

|               |     |     |     |      |     |
|---------------|-----|-----|-----|------|-----|
| CONTIG-034033 | 219 | 7   | 19  | 22   | 0   |
| CONTIG-034034 | 259 | 12  | 13  | 122  | 0   |
| CONTIG-034035 | 261 | 31  | 105 | 112  | 2   |
| CONTIG-034036 | 462 | 10  | 22  | 129  | 4   |
| CONTIG-034037 | 140 | 643 | 2   | 0    | 154 |
| CONTIG-034038 | 69  | 8   | 20  | 14   | 0   |
| CONTIG-034041 | 335 | 13  | 20  | 221  | 0   |
| CONTIG-034042 | 311 | 18  | 123 | 115  | 0   |
| CONTIG-034043 | 99  | 4   | 13  | 4    | 0   |
| CONTIG-034044 | 244 | 12  | 54  | 79   | 4   |
| CONTIG-034045 | 119 | 8   | 7   | 36   | 0   |
| CONTIG-034046 | 118 | 5   | 2   | 17   | 0   |
| CONTIG-034048 | 198 | 24  | 18  | 83   | 0   |
| CONTIG-034049 | 65  | 8   | 11  | 13   | 0   |
| CONTIG-034050 | 108 | 8   | 3   | 32   | 2   |
| CONTIG-034051 | 180 | 18  | 8   | 110  | 0   |
| CONTIG-034054 | 99  | 14  | 5   | 47   | 4   |
| CONTIG-034055 | 67  | 5   | 5   | 10   | 2   |
| CONTIG-034056 | 98  | 8   | 4   | 0    | 0   |
| CONTIG-034057 | 350 | 16  | 69  | 230  | 0   |
| CONTIG-034059 | 106 | 7   | 4   | 19   | 0   |
| CONTIG-034060 | 124 | 55  | 10  | 109  | 0   |
| CONTIG-034061 | 184 | 4   | 0   | 20   | 0   |
| CONTIG-034062 | 308 | 39  | 6   | 0    | 138 |
| CONTIG-034063 | 256 | 7   | 43  | 47   | 0   |
| CONTIG-034064 | 131 | 9   | 7   | 0    | 0   |
| CONTIG-034065 | 174 | 5   | 5   | 28   | 0   |
| CONTIG-034066 | 67  | 6   | 3   | 0    | 0   |
| CONTIG-034067 | 618 | 17  | 0   | 0    | 100 |
| CONTIG-034068 | 319 | 12  | 8   | 140  | 0   |
| CONTIG-034069 | 135 | 37  | 18  | 194  | 0   |
| CONTIG-034070 | 203 | 5   | 0   | 9    | 0   |
| CONTIG-034071 | 87  | 17  | 11  | 21   | 0   |
| CONTIG-034072 | 406 | 26  | 98  | 310  | 4   |
| CONTIG-034073 | 176 | 10  | 14  | 22   | 0   |
| CONTIG-034075 | 59  | 7   | 5   | 2    | 0   |
| CONTIG-034076 | 78  | 9   | 2   | 26   | 0   |
| CONTIG-034083 | 481 | 13  | 32  | 173  | 2   |
| CONTIG-034084 | 232 | 15  | 29  | 54   | 0   |
| CONTIG-034088 | 91  | 15  | 4   | 52   | 0   |
| CONTIG-034089 | 354 | 9   | 49  | 146  | 0   |
| CONTIG-034090 | 390 | 14  | 8   | 226  | 0   |
| CONTIG-034091 | 137 | 11  | 5   | 13   | 0   |
| CONTIG-034092 | 87  | 7   | 11  | 10   | 0   |
| CONTIG-034093 | 227 | 17  | 23  | 93   | 2   |
| CONTIG-034097 | 381 | 48  | 35  | 1070 | 2   |
| CONTIG-034099 | 110 | 3   | 9   | 8    | 0   |

|               |     |     |     |     |    |
|---------------|-----|-----|-----|-----|----|
| CONTIG-034100 | 382 | 9   | 34  | 95  | 0  |
| CONTIG-034101 | 245 | 9   | 10  | 104 | 0  |
| CONTIG-034102 | 320 | 8   | 49  | 64  | 0  |
| CONTIG-034103 | 60  | 6   | 8   | 13  | 0  |
| CONTIG-034104 | 662 | 16  | 49  | 495 | 0  |
| CONTIG-034105 | 165 | 4   | 6   | 18  | 2  |
| CONTIG-034106 | 182 | 7   | 14  | 18  | 0  |
| CONTIG-034107 | 114 | 9   | 9   | 17  | 0  |
| CONTIG-034108 | 153 | 42  | 19  | 283 | 0  |
| CONTIG-034111 | 61  | 5   | 3   | 6   | 0  |
| CONTIG-034112 | 122 | 3   | 2   | 7   | 0  |
| CONTIG-034113 | 89  | 2   | 6   | 2   | 0  |
| CONTIG-034114 | 107 | 12  | 53  | 11  | 0  |
| CONTIG-034115 | 312 | 31  | 122 | 246 | 8  |
| CONTIG-034116 | 677 | 13  | 25  | 257 | 0  |
| CONTIG-034117 | 84  | 7   | 5   | 7   | 0  |
| CONTIG-034118 | 172 | 9   | 32  | 33  | 0  |
| CONTIG-034119 | 63  | 5   | 7   | 4   | 0  |
| CONTIG-034120 | 257 | 13  | 42  | 66  | 2  |
| CONTIG-034121 | 464 | 12  | 20  | 48  | 12 |
| CONTIG-034122 | 125 | 7   | 17  | 2   | 0  |
| CONTIG-034123 | 74  | 8   | 7   | 17  | 0  |
| CONTIG-034124 | 163 | 6   | 12  | 17  | 0  |
| CONTIG-034125 | 64  | 4   | 3   | 6   | 0  |
| CONTIG-034128 | 411 | 17  | 86  | 191 | 0  |
| CONTIG-034129 | 64  | 8   | 10  | 0   | 0  |
| CONTIG-034132 | 87  | 7   | 5   | 14  | 0  |
| CONTIG-034133 | 69  | 8   | 2   | 18  | 0  |
| CONTIG-034134 | 229 | 13  | 48  | 58  | 0  |
| CONTIG-034137 | 112 | 13  | 12  | 49  | 0  |
| CONTIG-034139 | 296 | 8   | 34  | 62  | 0  |
| CONTIG-034140 | 115 | 8   | 9   | 10  | 0  |
| CONTIG-034141 | 42  | 109 | 19  | 101 | 0  |
| CONTIG-034142 | 160 | 13  | 62  | 47  | 0  |
| CONTIG-034143 | 75  | 5   | 0   | 12  | 0  |
| CONTIG-034144 | 104 | 14  | 4   | 79  | 0  |
| CONTIG-034145 | 130 | 5   | 0   | 21  | 0  |
| CONTIG-034146 | 198 | 12  | 37  | 66  | 0  |
| CONTIG-034149 | 86  | 4   | 10  | 0   | 0  |
| CONTIG-034150 | 84  | 2   | 4   | 2   | 0  |
| CONTIG-034151 | 224 | 7   | 13  | 16  | 0  |
| CONTIG-034152 | 58  | 2   | 0   | 0   | 0  |
| CONTIG-034153 | 241 | 17  | 33  | 166 | 0  |
| CONTIG-034154 | 189 | 9   | 3   | 50  | 0  |
| CONTIG-034155 | 134 | 8   | 57  | 8   | 0  |
| CONTIG-034156 | 301 | 10  | 27  | 113 | 0  |
| CONTIG-034157 | 487 | 26  | 24  | 555 | 0  |



|               |     |     |     |     |    |
|---------------|-----|-----|-----|-----|----|
| CONTIG-034159 | 173 | 9   | 6   | 33  | 0  |
| CONTIG-034160 | 63  | 7   | 19  | 11  | 0  |
| CONTIG-034161 | 107 | 5   | 3   | 15  | 0  |
| CONTIG-034162 | 141 | 7   | 9   | 31  | 0  |
| CONTIG-034163 | 280 | 9   | 13  | 74  | 0  |
| CONTIG-034164 | 683 | 16  | 20  | 304 | 8  |
| CONTIG-034166 | 290 | 10  | 9   | 121 | 0  |
| CONTIG-034167 | 389 | 17  | 26  | 176 | 2  |
| CONTIG-034170 | 106 | 5   | 8   | 12  | 0  |
| CONTIG-034171 | 124 | 6   | 13  | 19  | 0  |
| CONTIG-034172 | 314 | 15  | 47  | 96  | 0  |
| CONTIG-034173 | 472 | 14  | 57  | 240 | 0  |
| CONTIG-034174 | 91  | 16  | 39  | 32  | 0  |
| CONTIG-034175 | 164 | 9   | 48  | 20  | 0  |
| CONTIG-034176 | 285 | 11  | 13  | 72  | 4  |
| CONTIG-034177 | 107 | 6   | 2   | 7   | 3  |
| CONTIG-034178 | 496 | 8   | 40  | 136 | 0  |
| CONTIG-034179 | 60  | 8   | 23  | 13  | 0  |
| CONTIG-034180 | 59  | 5   | 3   | 13  | 0  |
| CONTIG-034181 | 131 | 27  | 51  | 90  | 2  |
| CONTIG-034182 | 325 | 6   | 8   | 18  | 0  |
| CONTIG-034183 | 67  | 5   | 0   | 11  | 0  |
| CONTIG-034185 | 407 | 31  | 46  | 376 | 23 |
| CONTIG-034187 | 281 | 8   | 12  | 34  | 0  |
| CONTIG-034188 | 99  | 6   | 18  | 20  | 0  |
| CONTIG-034189 | 652 | 9   | 22  | 124 | 2  |
| CONTIG-034192 | 302 | 7   | 11  | 28  | 2  |
| CONTIG-034193 | 108 | 7   | 9   | 23  | 0  |
| CONTIG-034194 | 91  | 175 | 33  | 524 | 2  |
| CONTIG-034195 | 136 | 4   | 7   | 8   | 0  |
| CONTIG-034197 | 82  | 9   | 0   | 19  | 0  |
| CONTIG-034198 | 214 | 21  | 81  | 128 | 0  |
| CONTIG-034199 | 65  | 9   | 8   | 22  | 0  |
| CONTIG-034200 | 234 | 7   | 20  | 27  | 0  |
| CONTIG-034201 | 86  | 10  | 7   | 32  | 0  |
| CONTIG-034202 | 352 | 28  | 93  | 304 | 2  |
| CONTIG-034203 | 125 | 5   | 6   | 18  | 0  |
| CONTIG-034204 | 337 | 23  | 26  | 287 | 2  |
| CONTIG-034205 | 528 | 9   | 14  | 166 | 5  |
| CONTIG-034207 | 209 | 6   | 10  | 6   | 0  |
| CONTIG-034208 | 437 | 12  | 34  | 166 | 0  |
| CONTIG-034209 | 76  | 7   | 0   | 9   | 0  |
| CONTIG-034210 | 148 | 28  | 4   | 97  | 2  |
| CONTIG-034211 | 87  | 5   | 4   | 0   | 0  |
| CONTIG-034212 | 235 | 26  | 149 | 207 | 0  |
| CONTIG-034213 | 447 | 13  | 44  | 163 | 2  |
| CONTIG-034214 | 83  | 8   | 12  | 24  | 0  |

|               |     |     |     |     |    |
|---------------|-----|-----|-----|-----|----|
| CONTIG-034215 | 105 | 10  | 10  | 6   | 0  |
| CONTIG-034216 | 714 | 17  | 23  | 288 | 4  |
| CONTIG-034217 | 74  | 8   | 0   | 22  | 0  |
| CONTIG-034218 | 91  | 4   | 8   | 4   | 0  |
| CONTIG-034219 | 510 | 15  | 40  | 276 | 4  |
| CONTIG-034220 | 202 | 7   | 2   | 25  | 0  |
| CONTIG-034221 | 95  | 72  | 89  | 315 | 2  |
| CONTIG-034224 | 68  | 25  | 8   | 41  | 0  |
| CONTIG-034225 | 339 | 13  | 49  | 203 | 0  |
| CONTIG-034226 | 223 | 13  | 64  | 44  | 0  |
| CONTIG-034227 | 65  | 4   | 6   | 2   | 0  |
| CONTIG-034228 | 89  | 11  | 7   | 39  | 0  |
| CONTIG-034229 | 239 | 14  | 9   | 175 | 0  |
| CONTIG-034230 | 346 | 17  | 19  | 338 | 0  |
| CONTIG-034231 | 343 | 13  | 42  | 146 | 2  |
| CONTIG-034232 | 225 | 15  | 22  | 97  | 0  |
| CONTIG-034233 | 83  | 9   | 19  | 16  | 0  |
| CONTIG-034234 | 73  | 14  | 9   | 28  | 0  |
| CONTIG-034235 | 78  | 6   | 0   | 8   | 0  |
| CONTIG-034236 | 41  | 106 | 25  | 23  | 0  |
| CONTIG-034237 | 349 | 26  | 83  | 138 | 11 |
| CONTIG-034238 | 78  | 18  | 12  | 51  | 0  |
| CONTIG-034239 | 105 | 7   | 17  | 8   | 0  |
| CONTIG-034240 | 138 | 54  | 73  | 203 | 0  |
| CONTIG-034241 | 127 | 42  | 15  | 247 | 0  |
| CONTIG-034242 | 60  | 18  | 5   | 52  | 0  |
| CONTIG-034243 | 141 | 6   | 7   | 18  | 0  |
| CONTIG-034244 | 261 | 11  | 43  | 59  | 0  |
| CONTIG-034245 | 131 | 22  | 103 | 15  | 2  |
| CONTIG-034246 | 58  | 24  | 11  | 4   | 0  |
| CONTIG-034247 | 102 | 11  | 31  | 7   | 0  |
| CONTIG-034248 | 104 | 8   | 5   | 3   | 0  |
| CONTIG-034251 | 253 | 10  | 46  | 75  | 0  |
| CONTIG-034252 | 268 | 26  | 164 | 143 | 0  |
| CONTIG-034253 | 152 | 8   | 19  | 15  | 0  |
| CONTIG-034254 | 237 | 9   | 6   | 38  | 10 |
| CONTIG-034255 | 177 | 15  | 36  | 87  | 0  |
| CONTIG-034256 | 136 | 10  | 2   | 40  | 0  |
| CONTIG-034257 | 215 | 10  | 25  | 65  | 0  |
| CONTIG-034258 | 159 | 9   | 10  | 26  | 0  |
| CONTIG-034259 | 337 | 21  | 81  | 132 | 4  |
| CONTIG-034260 | 209 | 14  | 14  | 73  | 3  |
| CONTIG-034261 | 434 | 16  | 74  | 56  | 2  |
| CONTIG-034262 | 143 | 18  | 46  | 58  | 0  |
| CONTIG-034266 | 45  | 302 | 80  | 498 | 2  |
| CONTIG-034267 | 99  | 7   | 3   | 28  | 0  |
| CONTIG-034268 | 328 | 10  | 20  | 80  | 2  |

|               |     |     |     |     |    |
|---------------|-----|-----|-----|-----|----|
| CONTIG-034269 | 70  | 4   | 9   | 0   | 0  |
| CONTIG-034270 | 60  | 7   | 2   | 2   | 0  |
| CONTIG-034271 | 175 | 19  | 5   | 188 | 0  |
| CONTIG-034273 | 285 | 37  | 21  | 168 | 9  |
| CONTIG-034274 | 137 | 58  | 14  | 488 | 2  |
| CONTIG-034275 | 129 | 16  | 78  | 70  | 0  |
| CONTIG-034276 | 117 | 4   | 5   | 7   | 0  |
| CONTIG-034277 | 103 | 17  | 80  | 30  | 0  |
| CONTIG-034279 | 499 | 29  | 56  | 290 | 23 |
| CONTIG-034280 | 169 | 6   | 0   | 28  | 0  |
| CONTIG-034281 | 240 | 6   | 10  | 44  | 2  |
| CONTIG-034282 | 154 | 21  | 25  | 163 | 0  |
| CONTIG-034283 | 731 | 14  | 17  | 354 | 2  |
| CONTIG-034284 | 163 | 11  | 14  | 92  | 0  |
| CONTIG-034285 | 89  | 12  | 26  | 37  | 0  |
| CONTIG-034286 | 52  | 235 | 127 | 233 | 4  |
| CONTIG-034287 | 784 | 14  | 66  | 289 | 4  |
| CONTIG-034288 | 67  | 20  | 18  | 3   | 0  |
| CONTIG-034289 | 93  | 2   | 4   | 2   | 0  |
| CONTIG-034290 | 58  | 9   | 9   | 6   | 0  |
| CONTIG-034291 | 228 | 9   | 8   | 45  | 0  |
| CONTIG-034292 | 313 | 31  | 50  | 212 | 4  |
| CONTIG-034293 | 133 | 7   | 6   | 22  | 0  |
| CONTIG-034294 | 429 | 7   | 8   | 80  | 0  |
| CONTIG-034296 | 76  | 7   | 27  | 7   | 0  |
| CONTIG-034297 | 88  | 11  | 0   | 54  | 0  |
| CONTIG-034298 | 151 | 7   | 5   | 18  | 0  |
| CONTIG-034299 | 60  | 2   | 0   | 2   | 0  |
| CONTIG-034300 | 290 | 21  | 93  | 72  | 4  |
| CONTIG-034301 | 188 | 17  | 16  | 131 | 0  |
| CONTIG-034302 | 324 | 31  | 84  | 309 | 0  |
| CONTIG-034303 | 93  | 9   | 14  | 19  | 2  |
| CONTIG-034305 | 434 | 15  | 22  | 183 | 0  |
| CONTIG-034306 | 50  | 31  | 33  | 33  | 0  |
| CONTIG-034307 | 240 | 20  | 57  | 217 | 0  |
| CONTIG-034308 | 180 | 11  | 2   | 70  | 0  |
| CONTIG-034309 | 143 | 12  | 22  | 47  | 0  |
| CONTIG-034310 | 78  | 59  | 9   | 227 | 2  |
| CONTIG-034311 | 146 | 11  | 46  | 60  | 0  |
| CONTIG-034312 | 64  | 8   | 5   | 16  | 0  |
| CONTIG-034313 | 157 | 15  | 12  | 70  | 0  |
| CONTIG-034315 | 158 | 9   | 0   | 65  | 0  |
| CONTIG-034316 | 59  | 4   | 5   | 0   | 0  |
| CONTIG-034317 | 119 | 8   | 10  | 24  | 0  |
| CONTIG-034318 | 185 | 13  | 5   | 87  | 0  |
| CONTIG-034322 | 326 | 43  | 104 | 673 | 0  |
| CONTIG-034324 | 162 | 4   | 6   | 14  | 0  |

|               |     |     |    |      |    |
|---------------|-----|-----|----|------|----|
| CONTIG-034325 | 419 | 15  | 56 | 242  | 0  |
| CONTIG-034326 | 160 | 7   | 10 | 34   | 0  |
| CONTIG-034330 | 104 | 7   | 5  | 19   | 0  |
| CONTIG-034332 | 162 | 7   | 6  | 21   | 0  |
| CONTIG-034333 | 70  | 6   | 0  | 0    | 0  |
| CONTIG-034337 | 167 | 11  | 44 | 66   | 0  |
| CONTIG-034338 | 305 | 8   | 10 | 33   | 0  |
| CONTIG-034339 | 64  | 3   | 2  | 0    | 0  |
| CONTIG-034340 | 580 | 12  | 17 | 275  | 2  |
| CONTIG-034341 | 456 | 10  | 35 | 134  | 0  |
| CONTIG-034346 | 313 | 20  | 35 | 179  | 4  |
| CONTIG-034347 | 91  | 7   | 18 | 6    | 0  |
| CONTIG-034348 | 271 | 6   | 16 | 35   | 0  |
| CONTIG-034349 | 285 | 7   | 13 | 42   | 0  |
| CONTIG-034350 | 173 | 13  | 4  | 96   | 0  |
| CONTIG-034351 | 248 | 11  | 48 | 76   | 0  |
| CONTIG-034352 | 60  | 10  | 27 | 14   | 0  |
| CONTIG-034353 | 506 | 22  | 62 | 279  | 10 |
| CONTIG-034354 | 106 | 5   | 2  | 16   | 0  |
| CONTIG-034356 | 320 | 5   | 12 | 38   | 0  |
| CONTIG-034357 | 221 | 35  | 47 | 14   | 0  |
| CONTIG-034358 | 153 | 6   | 24 | 22   | 0  |
| CONTIG-034359 | 90  | 4   | 2  | 10   | 0  |
| CONTIG-034360 | 57  | 461 | 85 | 1006 | 15 |
| CONTIG-034361 | 253 | 15  | 70 | 90   | 0  |
| CONTIG-034362 | 151 | 7   | 5  | 0    | 0  |
| CONTIG-034363 | 81  | 8   | 4  | 20   | 2  |
| CONTIG-034364 | 401 | 8   | 13 | 92   | 2  |
| CONTIG-034365 | 118 | 6   | 17 | 15   | 0  |
| CONTIG-034366 | 83  | 4   | 3  | 7    | 0  |
| CONTIG-034368 | 87  | 4   | 7  | 9    | 0  |
| CONTIG-034369 | 253 | 12  | 7  | 83   | 2  |
| CONTIG-034370 | 227 | 59  | 22 | 749  | 0  |
| CONTIG-034371 | 561 | 17  | 61 | 430  | 2  |
| CONTIG-034372 | 281 | 12  | 61 | 147  | 0  |
| CONTIG-034373 | 274 | 8   | 0  | 89   | 0  |
| CONTIG-034374 | 110 | 20  | 22 | 60   | 0  |
| CONTIG-034375 | 120 | 9   | 5  | 27   | 0  |
| CONTIG-034376 | 96  | 7   | 21 | 15   | 0  |
| CONTIG-034377 | 490 | 7   | 12 | 103  | 0  |
| CONTIG-034378 | 598 | 19  | 30 | 141  | 25 |
| CONTIG-034379 | 310 | 21  | 13 | 376  | 0  |
| CONTIG-034380 | 134 | 7   | 12 | 31   | 0  |
| CONTIG-034381 | 198 | 95  | 21 | 939  | 2  |
| CONTIG-034382 | 261 | 10  | 24 | 75   | 0  |
| CONTIG-034383 | 161 | 13  | 16 | 34   | 2  |
| CONTIG-034384 | 305 | 12  | 17 | 142  | 0  |

|               |      |     |    |      |    |
|---------------|------|-----|----|------|----|
| CONTIG-034385 | 68   | 6   | 16 | 2    | 0  |
| CONTIG-034387 | 72   | 116 | 16 | 108  | 0  |
| CONTIG-034388 | 361  | 10  | 44 | 73   | 0  |
| CONTIG-034390 | 181  | 4   | 6  | 8    | 2  |
| CONTIG-034391 | 404  | 9   | 24 | 95   | 0  |
| CONTIG-034392 | 62   | 3   | 9  | 0    | 0  |
| CONTIG-034393 | 101  | 7   | 3  | 19   | 0  |
| CONTIG-034394 | 67   | 7   | 6  | 11   | 0  |
| CONTIG-034395 | 735  | 17  | 70 | 469  | 0  |
| CONTIG-034397 | 114  | 14  | 14 | 64   | 0  |
| CONTIG-034398 | 150  | 8   | 37 | 24   | 0  |
| CONTIG-034399 | 187  | 9   | 12 | 28   | 0  |
| CONTIG-034401 | 86   | 148 | 66 | 409  | 2  |
| CONTIG-034402 | 301  | 10  | 37 | 116  | 0  |
| CONTIG-034403 | 61   | 3   | 6  | 0    | 0  |
| CONTIG-034404 | 119  | 43  | 2  | 82   | 22 |
| CONTIG-034405 | 1226 | 29  | 99 | 1235 | 57 |
| CONTIG-034406 | 62   | 6   | 6  | 0    | 0  |
| CONTIG-034407 | 109  | 224 | 34 | 1215 | 6  |
| CONTIG-034408 | 121  | 7   | 39 | 16   | 0  |
| CONTIG-034409 | 76   | 4   | 4  | 3    | 0  |
| CONTIG-034410 | 95   | 8   | 30 | 5    | 0  |
| CONTIG-034411 | 185  | 21  | 34 | 99   | 0  |
| CONTIG-034412 | 162  | 6   | 6  | 35   | 0  |
| CONTIG-034414 | 202  | 6   | 0  | 44   | 0  |
| CONTIG-034415 | 83   | 7   | 17 | 4    | 0  |
| CONTIG-034416 | 172  | 8   | 6  | 4    | 0  |
| CONTIG-034418 | 138  | 6   | 8  | 17   | 0  |
| CONTIG-034419 | 156  | 3   | 6  | 9    | 0  |
| CONTIG-034420 | 72   | 7   | 3  | 6    | 0  |
| CONTIG-034421 | 580  | 9   | 12 | 170  | 2  |
| CONTIG-034422 | 136  | 5   | 11 | 4    | 0  |
| CONTIG-034423 | 64   | 5   | 22 | 0    | 0  |
| CONTIG-034425 | 58   | 6   | 29 | 0    | 0  |
| CONTIG-034426 | 119  | 8   | 25 | 38   | 0  |
| CONTIG-034427 | 558  | 17  | 25 | 353  | 2  |
| CONTIG-034428 | 860  | 15  | 89 | 297  | 7  |
| CONTIG-034429 | 606  | 12  | 9  | 159  | 14 |
| CONTIG-034430 | 182  | 8   | 17 | 61   | 0  |
| CONTIG-034431 | 309  | 37  | 92 | 393  | 3  |
| CONTIG-034432 | 306  | 15  | 40 | 108  | 0  |
| CONTIG-034433 | 290  | 6   | 5  | 47   | 0  |
| CONTIG-034434 | 142  | 8   | 11 | 22   | 0  |
| CONTIG-034435 | 251  | 13  | 15 | 115  | 0  |
| CONTIG-034436 | 125  | 12  | 65 | 20   | 0  |
| CONTIG-034438 | 437  | 24  | 46 | 154  | 2  |
| CONTIG-034439 | 544  | 11  | 45 | 43   | 0  |

|               |      |     |     |      |    |
|---------------|------|-----|-----|------|----|
| CONTIG-034440 | 281  | 10  | 35  | 100  | 0  |
| CONTIG-034441 | 237  | 10  | 24  | 79   | 0  |
| CONTIG-034442 | 116  | 5   | 11  | 0    | 2  |
| CONTIG-034450 | 77   | 3   | 2   | 0    | 0  |
| CONTIG-034451 | 168  | 4   | 9   | 15   | 0  |
| CONTIG-034452 | 85   | 20  | 35  | 32   | 0  |
| CONTIG-034454 | 1510 | 33  | 139 | 2597 | 0  |
| CONTIG-034455 | 253  | 5   | 2   | 50   | 0  |
| CONTIG-034456 | 129  | 4   | 0   | 7    | 0  |
| CONTIG-034457 | 390  | 15  | 21  | 134  | 0  |
| CONTIG-034458 | 75   | 5   | 2   | 13   | 0  |
| CONTIG-034459 | 283  | 20  | 64  | 100  | 0  |
| CONTIG-034461 | 126  | 12  | 26  | 65   | 0  |
| CONTIG-034462 | 43   | 703 | 39  | 23   | 0  |
| CONTIG-034463 | 42   | 75  | 0   | 72   | 0  |
| CONTIG-034464 | 179  | 7   | 25  | 36   | 0  |
| CONTIG-034465 | 196  | 6   | 17  | 35   | 0  |
| CONTIG-034466 | 98   | 12  | 3   | 4    | 0  |
| CONTIG-034467 | 107  | 5   | 2   | 16   | 0  |
| CONTIG-034469 | 183  | 35  | 103 | 262  | 2  |
| CONTIG-034470 | 76   | 8   | 31  | 5    | 0  |
| CONTIG-034471 | 272  | 25  | 73  | 294  | 2  |
| CONTIG-034472 | 233  | 13  | 44  | 20   | 2  |
| CONTIG-034473 | 296  | 18  | 85  | 113  | 2  |
| CONTIG-034474 | 272  | 11  | 0   | 0    | 6  |
| CONTIG-034475 | 108  | 6   | 5   | 17   | 0  |
| CONTIG-034476 | 64   | 9   | 6   | 10   | 0  |
| CONTIG-034477 | 192  | 5   | 2   | 23   | 0  |
| CONTIG-034478 | 772  | 12  | 21  | 363  | 2  |
| CONTIG-034479 | 994  | 19  | 44  | 662  | 11 |
| CONTIG-034480 | 77   | 7   | 5   | 2    | 0  |
| CONTIG-034481 | 252  | 101 | 60  | 1037 | 0  |
| CONTIG-034482 | 150  | 8   | 9   | 22   | 0  |
| CONTIG-034483 | 72   | 7   | 6   | 10   | 0  |
| CONTIG-034484 | 59   | 36  | 0   | 96   | 0  |
| CONTIG-034485 | 120  | 8   | 16  | 38   | 0  |
| CONTIG-034486 | 107  | 24  | 59  | 2    | 0  |
| CONTIG-034487 | 73   | 4   | 0   | 5    | 0  |
| CONTIG-034488 | 64   | 4   | 6   | 2    | 0  |
| CONTIG-034489 | 174  | 6   | 25  | 26   | 0  |
| CONTIG-034492 | 563  | 19  | 48  | 604  | 0  |
| CONTIG-034493 | 129  | 8   | 48  | 17   | 0  |
| CONTIG-034494 | 223  | 14  | 39  | 124  | 0  |
| CONTIG-034495 | 155  | 107 | 23  | 902  | 0  |
| CONTIG-034496 | 114  | 15  | 4   | 38   | 2  |
| CONTIG-034497 | 787  | 14  | 204 | 170  | 4  |
| CONTIG-034498 | 120  | 16  | 0   | 46   | 2  |

|               |     |     |    |      |     |
|---------------|-----|-----|----|------|-----|
| CONTIG-034499 | 149 | 9   | 8  | 54   | 2   |
| CONTIG-034500 | 125 | 5   | 7  | 14   | 0   |
| CONTIG-034501 | 58  | 6   | 4  | 5    | 0   |
| CONTIG-034502 | 107 | 8   | 18 | 23   | 0   |
| CONTIG-034506 | 122 | 4   | 8  | 8    | 0   |
| CONTIG-034507 | 935 | 16  | 39 | 653  | 0   |
| CONTIG-034508 | 87  | 11  | 16 | 12   | 2   |
| CONTIG-034509 | 61  | 6   | 11 | 3    | 0   |
| CONTIG-034510 | 280 | 17  | 5  | 0    | 81  |
| CONTIG-034511 | 319 | 22  | 9  | 73   | 0   |
| CONTIG-034512 | 628 | 29  | 85 | 801  | 4   |
| CONTIG-034513 | 304 | 27  | 19 | 266  | 0   |
| CONTIG-034514 | 226 | 115 | 27 | 899  | 52  |
| CONTIG-034515 | 225 | 11  | 47 | 82   | 0   |
| CONTIG-034516 | 255 | 11  | 65 | 103  | 0   |
| CONTIG-034517 | 66  | 26  | 2  | 0    | 0   |
| CONTIG-034518 | 272 | 13  | 26 | 141  | 0   |
| CONTIG-034519 | 166 | 5   | 8  | 24   | 0   |
| CONTIG-034520 | 134 | 4   | 23 | 6    | 0   |
| CONTIG-034521 | 102 | 13  | 84 | 22   | 0   |
| CONTIG-034522 | 98  | 18  | 21 | 89   | 0   |
| CONTIG-034523 | 197 | 12  | 69 | 42   | 0   |
| CONTIG-034524 | 60  | 4   | 0  | 7    | 0   |
| CONTIG-034525 | 179 | 11  | 17 | 65   | 0   |
| CONTIG-034526 | 168 | 57  | 24 | 602  | 0   |
| CONTIG-034527 | 115 | 16  | 30 | 68   | 0   |
| CONTIG-034528 | 59  | 5   | 0  | 14   | 0   |
| CONTIG-034529 | 390 | 14  | 32 | 137  | 4   |
| CONTIG-034530 | 501 | 18  | 58 | 251  | 6   |
| CONTIG-034531 | 563 | 12  | 83 | 222  | 2   |
| CONTIG-034532 | 77  | 21  | 12 | 0    | 5   |
| CONTIG-034533 | 142 | 9   | 10 | 42   | 0   |
| CONTIG-034534 | 629 | 13  | 23 | 290  | 4   |
| CONTIG-034535 | 219 | 15  | 16 | 87   | 4   |
| CONTIG-034536 | 361 | 21  | 0  | 411  | 0   |
| CONTIG-034537 | 229 | 8   | 11 | 57   | 0   |
| CONTIG-034538 | 275 | 16  | 17 | 155  | 2   |
| CONTIG-034539 | 143 | 5   | 4  | 11   | 0   |
| CONTIG-034540 | 67  | 9   | 5  | 14   | 0   |
| CONTIG-034541 | 432 | 115 | 2  | 3    | 479 |
| CONTIG-034542 | 916 | 74  | 28 | 64   | 0   |
| CONTIG-034543 | 209 | 5   | 21 | 12   | 0   |
| CONTIG-034544 | 88  | 3   | 6  | 2    | 0   |
| CONTIG-034545 | 166 | 13  | 36 | 44   | 0   |
| CONTIG-034546 | 66  | 6   | 6  | 12   | 0   |
| CONTIG-034547 | 99  | 601 | 57 | 3884 | 0   |
| CONTIG-034548 | 74  | 11  | 6  | 27   | 0   |

|               |      |      |     |      |   |
|---------------|------|------|-----|------|---|
| CONTIG-034549 | 84   | 6    | 4   | 9    | 0 |
| CONTIG-034550 | 159  | 12   | 0   | 101  | 0 |
| CONTIG-034552 | 414  | 13   | 52  | 141  | 0 |
| CONTIG-034553 | 168  | 10   | 13  | 68   | 0 |
| CONTIG-034555 | 67   | 407  | 4   | 1250 | 0 |
| CONTIG-034556 | 166  | 8    | 4   | 26   | 0 |
| CONTIG-034557 | 285  | 54   | 34  | 24   | 0 |
| CONTIG-034558 | 181  | 8    | 36  | 33   | 2 |
| CONTIG-034560 | 204  | 11   | 10  | 92   | 0 |
| CONTIG-034561 | 106  | 7    | 27  | 18   | 0 |
| CONTIG-034562 | 256  | 11   | 33  | 47   | 0 |
| CONTIG-034563 | 134  | 61   | 15  | 39   | 0 |
| CONTIG-034564 | 60   | 18   | 25  | 10   | 0 |
| CONTIG-034565 | 237  | 15   | 52  | 50   | 6 |
| CONTIG-034566 | 88   | 14   | 25  | 26   | 2 |
| CONTIG-034567 | 341  | 16   | 13  | 57   | 0 |
| CONTIG-034568 | 260  | 9    | 53  | 40   | 0 |
| CONTIG-034576 | 222  | 5    | 11  | 18   | 0 |
| CONTIG-034577 | 653  | 19   | 63  | 299  | 8 |
| CONTIG-034578 | 1324 | 18   | 103 | 988  | 0 |
| CONTIG-034579 | 306  | 22   | 49  | 53   | 0 |
| CONTIG-034580 | 338  | 50   | 42  | 770  | 0 |
| CONTIG-034581 | 136  | 5    | 2   | 20   | 0 |
| CONTIG-034582 | 169  | 20   | 19  | 125  | 0 |
| CONTIG-034583 | 106  | 6    | 8   | 18   | 0 |
| CONTIG-034584 | 304  | 13   | 12  | 170  | 0 |
| CONTIG-034585 | 75   | 7    | 12  | 8    | 0 |
| CONTIG-034586 | 79   | 3579 | 121 | 277  | 0 |
| CONTIG-034587 | 1101 | 21   | 136 | 986  | 2 |
| CONTIG-034588 | 240  | 7    | 14  | 55   | 0 |
| CONTIG-034589 | 128  | 6    | 4   | 20   | 0 |
| CONTIG-034590 | 154  | 18   | 6   | 61   | 0 |
| CONTIG-034591 | 82   | 6    | 41  | 0    | 0 |
| CONTIG-034592 | 101  | 8    | 0   | 34   | 0 |
| CONTIG-034593 | 111  | 8    | 17  | 14   | 0 |
| CONTIG-034594 | 133  | 14   | 6   | 84   | 0 |
| CONTIG-034595 | 62   | 4    | 3   | 11   | 0 |
| CONTIG-034597 | 226  | 11   | 11  | 59   | 2 |
| CONTIG-034598 | 418  | 20   | 71  | 290  | 2 |
| CONTIG-034599 | 484  | 11   | 144 | 136  | 0 |
| CONTIG-034600 | 1053 | 19   | 76  | 538  | 0 |
| CONTIG-034601 | 137  | 4    | 5   | 15   | 0 |
| CONTIG-034602 | 120  | 3    | 3   | 2    | 0 |
| CONTIG-034603 | 175  | 7    | 12  | 35   | 0 |
| CONTIG-034604 | 286  | 19   | 34  | 146  | 0 |
| CONTIG-034605 | 64   | 12   | 0   | 27   | 0 |
| CONTIG-034607 | 81   | 11   | 7   | 26   | 0 |



|               |      |    |     |      |    |
|---------------|------|----|-----|------|----|
| CONTIG-034608 | 67   | 6  | 4   | 10   | 0  |
| CONTIG-034609 | 77   | 2  | 2   | 5    | 0  |
| CONTIG-034614 | 370  | 16 | 11  | 230  | 0  |
| CONTIG-034615 | 70   | 6  | 4   | 10   | 0  |
| CONTIG-034617 | 250  | 15 | 83  | 98   | 6  |
| CONTIG-034618 | 328  | 12 | 59  | 133  | 2  |
| CONTIG-034619 | 72   | 3  | 0   | 6    | 2  |
| CONTIG-034620 | 130  | 26 | 6   | 54   | 0  |
| CONTIG-034621 | 247  | 8  | 51  | 46   | 0  |
| CONTIG-034622 | 206  | 11 | 13  | 68   | 0  |
| CONTIG-034623 | 126  | 9  | 16  | 43   | 0  |
| CONTIG-034624 | 114  | 8  | 10  | 27   | 2  |
| CONTIG-034626 | 128  | 52 | 0   | 0    | 73 |
| CONTIG-034627 | 182  | 7  | 20  | 39   | 0  |
| CONTIG-034628 | 269  | 12 | 11  | 114  | 0  |
| CONTIG-034629 | 158  | 10 | 3   | 0    | 0  |
| CONTIG-034630 | 1004 | 15 | 37  | 815  | 0  |
| CONTIG-034631 | 173  | 17 | 8   | 73   | 0  |
| CONTIG-034632 | 58   | 9  | 14  | 8    | 0  |
| CONTIG-034633 | 98   | 17 | 58  | 13   | 0  |
| CONTIG-034634 | 74   | 14 | 0   | 20   | 0  |
| CONTIG-034635 | 91   | 6  | 4   | 17   | 0  |
| CONTIG-034636 | 416  | 55 | 141 | 1208 | 6  |
| CONTIG-034637 | 78   | 44 | 13  | 6    | 0  |
| CONTIG-034640 | 125  | 7  | 5   | 29   | 0  |
| CONTIG-034641 | 221  | 6  | 15  | 47   | 0  |
| CONTIG-034642 | 150  | 7  | 15  | 30   | 0  |
| CONTIG-034643 | 99   | 8  | 5   | 33   | 0  |
| CONTIG-034644 | 164  | 4  | 6   | 12   | 0  |
| CONTIG-034645 | 90   | 7  | 34  | 15   | 0  |
| CONTIG-034646 | 110  | 5  | 10  | 5    | 0  |
| CONTIG-034647 | 116  | 4  | 7   | 0    | 2  |
| CONTIG-034648 | 62   | 19 | 67  | 17   | 0  |
| CONTIG-034649 | 337  | 12 | 25  | 133  | 0  |
| CONTIG-034650 | 109  | 24 | 37  | 92   | 0  |
| CONTIG-034651 | 567  | 17 | 32  | 249  | 0  |
| CONTIG-034652 | 151  | 8  | 11  | 0    | 0  |
| CONTIG-034653 | 90   | 14 | 15  | 56   | 0  |
| CONTIG-034654 | 99   | 9  | 2   | 32   | 0  |
| CONTIG-034655 | 184  | 20 | 21  | 180  | 0  |
| CONTIG-034657 | 65   | 7  | 20  | 4    | 0  |
| CONTIG-034659 | 258  | 7  | 0   | 55   | 0  |
| CONTIG-034660 | 92   | 7  | 2   | 22   | 0  |
| CONTIG-034663 | 287  | 7  | 8   | 50   | 0  |
| CONTIG-034664 | 122  | 68 | 29  | 473  | 0  |
| CONTIG-034665 | 142  | 9  | 6   | 33   | 0  |
| CONTIG-034666 | 71   | 7  | 26  | 0    | 0  |

|               |     |     |     |      |    |
|---------------|-----|-----|-----|------|----|
| CONTIG-034667 | 270 | 8   | 13  | 93   | 0  |
| CONTIG-034668 | 484 | 16  | 33  | 84   | 0  |
| CONTIG-034669 | 79  | 8   | 20  | 2    | 0  |
| CONTIG-034670 | 165 | 15  | 13  | 110  | 0  |
| CONTIG-034671 | 511 | 60  | 62  | 1785 | 2  |
| CONTIG-034672 | 139 | 6   | 5   | 34   | 0  |
| CONTIG-034673 | 67  | 8   | 19  | 0    | 0  |
| CONTIG-034675 | 73  | 4   | 8   | 0    | 0  |
| CONTIG-034677 | 384 | 8   | 101 | 30   | 4  |
| CONTIG-034678 | 95  | 6   | 19  | 0    | 0  |
| CONTIG-034679 | 116 | 4   | 4   | 9    | 0  |
| CONTIG-034680 | 62  | 6   | 5   | 0    | 0  |
| CONTIG-034681 | 99  | 6   | 2   | 15   | 0  |
| CONTIG-034682 | 143 | 22  | 23  | 116  | 0  |
| CONTIG-034683 | 219 | 6   | 11  | 33   | 0  |
| CONTIG-034684 | 665 | 12  | 37  | 251  | 2  |
| CONTIG-034685 | 219 | 13  | 13  | 127  | 0  |
| CONTIG-034686 | 71  | 10  | 23  | 14   | 0  |
| CONTIG-034687 | 91  | 6   | 9   | 10   | 0  |
| CONTIG-034688 | 120 | 13  | 7   | 21   | 0  |
| CONTIG-034689 | 676 | 17  | 53  | 346  | 2  |
| CONTIG-034690 | 115 | 5   | 9   | 17   | 0  |
| CONTIG-034691 | 71  | 7   | 0   | 20   | 0  |
| CONTIG-034693 | 240 | 12  | 15  | 73   | 0  |
| CONTIG-034694 | 177 | 18  | 22  | 104  | 0  |
| CONTIG-034695 | 55  | 177 | 34  | 48   | 0  |
| CONTIG-034696 | 212 | 400 | 24  | 11   | 0  |
| CONTIG-034697 | 60  | 8   | 14  | 0    | 0  |
| CONTIG-034698 | 69  | 5   | 5   | 10   | 0  |
| CONTIG-034699 | 212 | 8   | 8   | 48   | 0  |
| CONTIG-034700 | 535 | 17  | 86  | 235  | 12 |
| CONTIG-034701 | 172 | 30  | 24  | 171  | 2  |
| CONTIG-034702 | 81  | 11  | 23  | 21   | 0  |
| CONTIG-034703 | 82  | 11  | 4   | 38   | 0  |
| CONTIG-034704 | 408 | 18  | 51  | 112  | 6  |
| CONTIG-034705 | 344 | 10  | 11  | 120  | 0  |
| CONTIG-034706 | 172 | 13  | 32  | 41   | 2  |
| CONTIG-034707 | 425 | 26  | 21  | 551  | 0  |
| CONTIG-034708 | 249 | 9   | 39  | 79   | 0  |
| CONTIG-034709 | 93  | 6   | 9   | 11   | 0  |
| CONTIG-034710 | 216 | 11  | 9   | 51   | 0  |
| CONTIG-034711 | 244 | 10  | 13  | 26   | 4  |
| CONTIG-034712 | 73  | 13  | 24  | 5    | 0  |
| CONTIG-034713 | 70  | 5   | 2   | 0    | 2  |
| CONTIG-034714 | 87  | 5   | 2   | 8    | 0  |
| CONTIG-034715 | 255 | 21  | 11  | 222  | 0  |
| CONTIG-034716 | 68  | 2   | 7   | 0    | 0  |

|               |      |    |     |      |    |
|---------------|------|----|-----|------|----|
| CONTIG-034717 | 70   | 14 | 14  | 15   | 0  |
| CONTIG-034718 | 732  | 20 | 49  | 61   | 0  |
| CONTIG-034719 | 543  | 25 | 115 | 641  | 2  |
| CONTIG-034721 | 222  | 14 | 12  | 65   | 10 |
| CONTIG-034722 | 99   | 15 | 9   | 47   | 0  |
| CONTIG-034723 | 70   | 19 | 10  | 28   | 0  |
| CONTIG-034724 | 150  | 9  | 0   | 42   | 0  |
| CONTIG-034725 | 644  | 23 | 142 | 527  | 11 |
| CONTIG-034727 | 129  | 13 | 5   | 21   | 0  |
| CONTIG-034728 | 343  | 11 | 0   | 176  | 4  |
| CONTIG-034729 | 1113 | 24 | 73  | 1277 | 4  |
| CONTIG-034730 | 67   | 29 | 50  | 5    | 0  |
| CONTIG-034731 | 218  | 14 | 43  | 104  | 2  |
| CONTIG-034732 | 104  | 16 | 4   | 72   | 0  |
| CONTIG-034733 | 1600 | 30 | 163 | 1841 | 14 |
| CONTIG-034734 | 576  | 20 | 38  | 381  | 0  |
| CONTIG-034735 | 171  | 9  | 9   | 54   | 0  |
| CONTIG-034737 | 539  | 11 | 21  | 124  | 0  |
| CONTIG-034738 | 70   | 6  | 6   | 2    | 0  |
| CONTIG-034744 | 292  | 10 | 40  | 77   | 0  |
| CONTIG-034745 | 112  | 5  | 31  | 9    | 0  |
| CONTIG-034747 | 330  | 14 | 25  | 178  | 2  |
| CONTIG-034748 | 210  | 4  | 7   | 24   | 0  |
| CONTIG-034749 | 716  | 12 | 0   | 290  | 2  |
| CONTIG-034750 | 158  | 11 | 4   | 51   | 0  |
| CONTIG-034751 | 351  | 29 | 195 | 236  | 13 |
| CONTIG-034752 | 164  | 11 | 48  | 48   | 0  |
| CONTIG-034753 | 124  | 10 | 14  | 47   | 0  |
| CONTIG-034754 | 71   | 5  | 4   | 7    | 0  |
| CONTIG-034755 | 245  | 6  | 11  | 37   | 0  |
| CONTIG-034756 | 112  | 8  | 41  | 2    | 0  |
| CONTIG-034757 | 369  | 21 | 38  | 391  | 0  |
| CONTIG-034758 | 490  | 24 | 120 | 379  | 0  |
| CONTIG-034759 | 68   | 5  | 6   | 11   | 0  |
| CONTIG-034760 | 566  | 15 | 26  | 159  | 76 |
| CONTIG-034761 | 69   | 8  | 4   | 6    | 0  |
| CONTIG-034762 | 167  | 9  | 23  | 37   | 0  |
| CONTIG-034763 | 99   | 10 | 12  | 22   | 0  |
| CONTIG-034764 | 494  | 12 | 45  | 224  | 0  |
| CONTIG-034765 | 102  | 17 | 31  | 22   | 2  |
| CONTIG-034769 | 493  | 21 | 16  | 523  | 2  |
| CONTIG-034770 | 144  | 9  | 36  | 18   | 0  |
| CONTIG-034771 | 147  | 9  | 2   | 22   | 0  |
| CONTIG-034772 | 86   | 7  | 12  | 12   | 0  |
| CONTIG-034773 | 136  | 8  | 5   | 29   | 0  |
| CONTIG-034774 | 89   | 12 | 11  | 2    | 0  |
| CONTIG-034777 | 854  | 20 | 26  | 693  | 9  |

|               |      |     |     |      |    |
|---------------|------|-----|-----|------|----|
| CONTIG-034778 | 95   | 5   | 4   | 10   | 0  |
| CONTIG-034779 | 120  | 4   | 11  | 6    | 0  |
| CONTIG-034780 | 229  | 8   | 32  | 53   | 0  |
| CONTIG-034781 | 90   | 9   | 12  | 28   | 0  |
| CONTIG-034782 | 93   | 44  | 4   | 92   | 0  |
| CONTIG-034783 | 73   | 61  | 14  | 115  | 0  |
| CONTIG-034785 | 320  | 13  | 11  | 162  | 0  |
| CONTIG-034789 | 134  | 10  | 6   | 36   | 0  |
| CONTIG-034790 | 1777 | 33  | 61  | 1387 | 65 |
| CONTIG-034792 | 108  | 10  | 14  | 21   | 0  |
| CONTIG-034793 | 170  | 7   | 5   | 33   | 0  |
| CONTIG-034794 | 193  | 8   | 5   | 15   | 0  |
| CONTIG-034795 | 227  | 10  | 13  | 76   | 0  |
| CONTIG-034796 | 99   | 11  | 5   | 33   | 0  |
| CONTIG-034797 | 138  | 11  | 5   | 52   | 0  |
| CONTIG-034798 | 122  | 3   | 10  | 2    | 0  |
| CONTIG-034799 | 845  | 14  | 60  | 399  | 7  |
| CONTIG-034800 | 115  | 8   | 2   | 21   | 0  |
| CONTIG-034801 | 318  | 12  | 33  | 29   | 2  |
| CONTIG-034809 | 112  | 9   | 19  | 32   | 0  |
| CONTIG-034810 | 136  | 11  | 5   | 28   | 0  |
| CONTIG-034812 | 272  | 9   | 36  | 50   | 0  |
| CONTIG-034813 | 120  | 9   | 8   | 19   | 0  |
| CONTIG-034814 | 305  | 57  | 79  | 414  | 47 |
| CONTIG-034815 | 236  | 9   | 16  | 80   | 0  |
| CONTIG-034816 | 58   | 3   | 2   | 2    | 0  |
| CONTIG-034819 | 292  | 6   | 8   | 42   | 0  |
| CONTIG-034821 | 519  | 17  | 49  | 380  | 0  |
| CONTIG-034822 | 199  | 7   | 12  | 43   | 0  |
| CONTIG-034823 | 64   | 5   | 2   | 10   | 0  |
| CONTIG-034824 | 116  | 12  | 3   | 72   | 0  |
| CONTIG-034825 | 233  | 8   | 2   | 63   | 0  |
| CONTIG-034826 | 139  | 6   | 12  | 27   | 0  |
| CONTIG-034827 | 98   | 4   | 5   | 0    | 0  |
| CONTIG-034828 | 127  | 5   | 5   | 19   | 0  |
| CONTIG-034829 | 571  | 22  | 55  | 691  | 0  |
| CONTIG-034830 | 763  | 21  | 47  | 405  | 15 |
| CONTIG-034831 | 252  | 12  | 36  | 90   | 0  |
| CONTIG-034833 | 93   | 140 | 54  | 505  | 0  |
| CONTIG-034834 | 87   | 6   | 6   | 13   | 0  |
| CONTIG-034835 | 309  | 11  | 7   | 80   | 0  |
| CONTIG-034836 | 65   | 38  | 8   | 138  | 0  |
| CONTIG-034837 | 118  | 5   | 6   | 12   | 0  |
| CONTIG-034839 | 546  | 13  | 85  | 254  | 2  |
| CONTIG-034840 | 93   | 334 | 146 | 432  | 44 |
| CONTIG-034841 | 451  | 15  | 93  | 200  | 2  |
| CONTIG-034842 | 63   | 5   | 35  | 0    | 0  |

|               |     |    |     |      |    |
|---------------|-----|----|-----|------|----|
| CONTIG-034843 | 73  | 12 | 37  | 12   | 0  |
| CONTIG-034844 | 221 | 16 | 17  | 154  | 0  |
| CONTIG-034847 | 523 | 8  | 18  | 72   | 4  |
| CONTIG-034848 | 218 | 6  | 6   | 18   | 0  |
| CONTIG-034849 | 101 | 10 | 11  | 0    | 0  |
| CONTIG-034850 | 246 | 63 | 93  | 689  | 2  |
| CONTIG-034851 | 428 | 15 | 23  | 103  | 0  |
| CONTIG-034852 | 281 | 14 | 12  | 169  | 2  |
| CONTIG-034853 | 103 | 6  | 13  | 17   | 0  |
| CONTIG-034854 | 235 | 7  | 21  | 24   | 0  |
| CONTIG-034855 | 288 | 14 | 71  | 100  | 0  |
| CONTIG-034856 | 43  | 14 | 6   | 11   | 0  |
| CONTIG-034857 | 919 | 23 | 23  | 615  | 2  |
| CONTIG-034858 | 105 | 4  | 4   | 13   | 0  |
| CONTIG-034859 | 283 | 10 | 22  | 45   | 2  |
| CONTIG-034860 | 153 | 6  | 0   | 5    | 0  |
| CONTIG-034861 | 109 | 3  | 2   | 8    | 0  |
| CONTIG-034862 | 133 | 14 | 6   | 65   | 0  |
| CONTIG-034863 | 83  | 7  | 3   | 15   | 0  |
| CONTIG-034864 | 187 | 14 | 9   | 72   | 5  |
| CONTIG-034865 | 91  | 4  | 9   | 3    | 0  |
| CONTIG-034866 | 264 | 14 | 4   | 89   | 0  |
| CONTIG-034867 | 208 | 12 | 2   | 74   | 2  |
| CONTIG-034868 | 226 | 48 | 80  | 259  | 17 |
| CONTIG-034869 | 145 | 11 | 11  | 54   | 0  |
| CONTIG-034870 | 105 | 9  | 24  | 27   | 0  |
| CONTIG-034871 | 82  | 8  | 3   | 21   | 0  |
| CONTIG-034872 | 120 | 18 | 59  | 7    | 0  |
| CONTIG-034873 | 70  | 4  | 3   | 0    | 0  |
| CONTIG-034874 | 130 | 28 | 7   | 61   | 0  |
| CONTIG-034875 | 269 | 10 | 16  | 96   | 0  |
| CONTIG-034876 | 118 | 31 | 26  | 108  | 0  |
| CONTIG-034877 | 304 | 9  | 5   | 95   | 0  |
| CONTIG-034878 | 390 | 6  | 13  | 58   | 0  |
| CONTIG-034879 | 329 | 9  | 21  | 66   | 0  |
| CONTIG-034880 | 481 | 13 | 57  | 113  | 0  |
| CONTIG-034881 | 369 | 16 | 177 | 168  | 0  |
| CONTIG-034883 | 130 | 6  | 18  | 15   | 0  |
| CONTIG-034884 | 203 | 13 | 21  | 110  | 0  |
| CONTIG-034885 | 381 | 10 | 70  | 94   | 0  |
| CONTIG-034886 | 307 | 19 | 0   | 0    | 73 |
| CONTIG-034887 | 864 | 29 | 33  | 1178 | 14 |
| CONTIG-034889 | 145 | 39 | 16  | 35   | 0  |
| CONTIG-034890 | 61  | 9  | 6   | 13   | 0  |
| CONTIG-034891 | 89  | 13 | 12  | 30   | 0  |
| CONTIG-034892 | 542 | 25 | 129 | 361  | 0  |
| CONTIG-034893 | 126 | 10 | 9   | 27   | 0  |

|               |      |     |     |      |    |
|---------------|------|-----|-----|------|----|
| CONTIG-034897 | 877  | 33  | 62  | 1262 | 8  |
| CONTIG-034898 | 532  | 16  | 30  | 258  | 0  |
| CONTIG-034899 | 401  | 8   | 40  | 79   | 2  |
| CONTIG-034900 | 86   | 5   | 9   | 8    | 0  |
| CONTIG-034901 | 220  | 40  | 36  | 365  | 0  |
| CONTIG-034902 | 61   | 9   | 4   | 15   | 0  |
| CONTIG-034903 | 117  | 9   | 12  | 24   | 0  |
| CONTIG-034904 | 300  | 12  | 23  | 129  | 0  |
| CONTIG-034905 | 79   | 3   | 5   | 2    | 0  |
| CONTIG-034906 | 215  | 8   | 20  | 48   | 0  |
| CONTIG-034911 | 206  | 8   | 12  | 52   | 2  |
| CONTIG-034913 | 264  | 8   | 8   | 25   | 0  |
| CONTIG-034914 | 66   | 246 | 13  | 384  | 0  |
| CONTIG-034915 | 482  | 11  | 16  | 196  | 0  |
| CONTIG-034916 | 68   | 63  | 30  | 254  | 0  |
| CONTIG-034917 | 115  | 19  | 21  | 79   | 0  |
| CONTIG-034918 | 139  | 24  | 10  | 79   | 0  |
| CONTIG-034919 | 166  | 26  | 43  | 135  | 4  |
| CONTIG-034920 | 501  | 11  | 8   | 242  | 0  |
| CONTIG-034921 | 217  | 9   | 48  | 46   | 0  |
| CONTIG-034923 | 68   | 14  | 43  | 2    | 0  |
| CONTIG-034924 | 512  | 9   | 28  | 140  | 3  |
| CONTIG-034925 | 128  | 6   | 13  | 17   | 2  |
| CONTIG-034927 | 123  | 10  | 11  | 48   | 0  |
| CONTIG-034929 | 159  | 8   | 6   | 55   | 0  |
| CONTIG-034930 | 114  | 8   | 27  | 13   | 0  |
| CONTIG-034931 | 119  | 132 | 153 | 580  | 0  |
| CONTIG-034932 | 141  | 11  | 5   | 20   | 2  |
| CONTIG-034933 | 107  | 23  | 65  | 78   | 0  |
| CONTIG-034935 | 101  | 9   | 4   | 42   | 2  |
| CONTIG-034936 | 118  | 12  | 19  | 45   | 0  |
| CONTIG-034937 | 111  | 5   | 8   | 14   | 0  |
| CONTIG-034938 | 203  | 10  | 7   | 41   | 0  |
| CONTIG-034939 | 152  | 33  | 14  | 9    | 0  |
| CONTIG-034940 | 213  | 7   | 5   | 43   | 0  |
| CONTIG-034941 | 672  | 16  | 178 | 266  | 3  |
| CONTIG-034942 | 212  | 5   | 12  | 37   | 0  |
| CONTIG-034943 | 149  | 6   | 8   | 21   | 0  |
| CONTIG-034944 | 79   | 7   | 5   | 6    | 0  |
| CONTIG-034945 | 546  | 12  | 18  | 152  | 0  |
| CONTIG-034946 | 76   | 7   | 14  | 12   | 0  |
| CONTIG-034947 | 159  | 7   | 7   | 29   | 0  |
| CONTIG-034948 | 588  | 7   | 22  | 82   | 2  |
| CONTIG-034949 | 372  | 14  | 10  | 7    | 0  |
| CONTIG-034951 | 61   | 4   | 3   | 2    | 0  |
| CONTIG-034952 | 1078 | 20  | 66  | 542  | 25 |
| CONTIG-034953 | 175  | 10  | 27  | 28   | 0  |

|               |      |     |     |     |     |
|---------------|------|-----|-----|-----|-----|
| CONTIG-034954 | 84   | 7   | 2   | 27  | 0   |
| CONTIG-034957 | 69   | 10  | 0   | 24  | 0   |
| CONTIG-034958 | 110  | 8   | 11  | 33  | 0   |
| CONTIG-034959 | 280  | 6   | 15  | 49  | 0   |
| CONTIG-034962 | 129  | 8   | 3   | 34  | 0   |
| CONTIG-034963 | 351  | 23  | 6   | 7   | 0   |
| CONTIG-034964 | 158  | 7   | 16  | 34  | 0   |
| CONTIG-034965 | 303  | 21  | 23  | 191 | 0   |
| CONTIG-034966 | 175  | 6   | 37  | 20  | 2   |
| CONTIG-034967 | 83   | 8   | 20  | 12  | 0   |
| CONTIG-034968 | 253  | 20  | 12  | 70  | 2   |
| CONTIG-034969 | 320  | 11  | 32  | 69  | 2   |
| CONTIG-034970 | 82   | 11  | 3   | 38  | 0   |
| CONTIG-034971 | 104  | 8   | 2   | 0   | 0   |
| CONTIG-034972 | 143  | 11  | 6   | 34  | 0   |
| CONTIG-034973 | 205  | 7   | 4   | 42  | 0   |
| CONTIG-034974 | 342  | 8   | 17  | 95  | 0   |
| CONTIG-034975 | 159  | 10  | 3   | 67  | 0   |
| CONTIG-034976 | 109  | 6   | 6   | 20  | 0   |
| CONTIG-034977 | 452  | 9   | 46  | 120 | 4   |
| CONTIG-034978 | 266  | 8   | 47  | 40  | 0   |
| CONTIG-034979 | 73   | 5   | 3   | 6   | 0   |
| CONTIG-034980 | 181  | 36  | 53  | 14  | 4   |
| CONTIG-034981 | 266  | 46  | 10  | 0   | 96  |
| CONTIG-034983 | 197  | 20  | 33  | 142 | 0   |
| CONTIG-034984 | 1045 | 22  | 22  | 46  | 2   |
| CONTIG-034985 | 71   | 3   | 2   | 8   | 0   |
| CONTIG-034986 | 75   | 8   | 9   | 4   | 0   |
| CONTIG-034996 | 66   | 6   | 8   | 9   | 0   |
| CONTIG-034997 | 69   | 5   | 2   | 11  | 0   |
| CONTIG-034998 | 115  | 8   | 41  | 10  | 0   |
| CONTIG-034999 | 134  | 7   | 13  | 13  | 0   |
| CONTIG-035000 | 100  | 11  | 22  | 0   | 0   |
| CONTIG-035003 | 212  | 19  | 170 | 55  | 0   |
| CONTIG-035009 | 188  | 10  | 2   | 61  | 0   |
| CONTIG-035014 | 172  | 7   | 4   | 40  | 0   |
| CONTIG-035015 | 120  | 6   | 23  | 11  | 0   |
| CONTIG-035016 | 226  | 9   | 4   | 87  | 0   |
| CONTIG-035017 | 88   | 7   | 20  | 0   | 0   |
| CONTIG-035018 | 205  | 49  | 39  | 527 | 2   |
| CONTIG-035019 | 317  | 13  | 9   | 75  | 11  |
| CONTIG-035020 | 249  | 15  | 38  | 65  | 4   |
| CONTIG-035021 | 187  | 175 | 2   | 0   | 209 |
| CONTIG-035022 | 142  | 14  | 0   | 71  | 0   |
| CONTIG-035023 | 73   | 11  | 24  | 16  | 0   |
| CONTIG-035024 | 115  | 11  | 10  | 43  | 0   |
| CONTIG-035025 | 98   | 12  | 12  | 39  | 0   |

|               |     |     |     |     |    |
|---------------|-----|-----|-----|-----|----|
| CONTIG-035026 | 149 | 9   | 20  | 32  | 0  |
| CONTIG-035027 | 339 | 11  | 43  | 123 | 0  |
| CONTIG-035028 | 126 | 10  | 3   | 0   | 0  |
| CONTIG-035029 | 261 | 17  | 6   | 126 | 2  |
| CONTIG-035030 | 76  | 9   | 5   | 23  | 0  |
| CONTIG-035031 | 190 | 11  | 8   | 75  | 0  |
| CONTIG-035032 | 767 | 13  | 26  | 272 | 6  |
| CONTIG-035033 | 402 | 6   | 28  | 86  | 0  |
| CONTIG-035034 | 89  | 8   | 2   | 21  | 0  |
| CONTIG-035035 | 172 | 8   | 17  | 36  | 0  |
| CONTIG-035036 | 219 | 8   | 18  | 31  | 0  |
| CONTIG-035037 | 68  | 10  | 6   | 21  | 2  |
| CONTIG-035038 | 180 | 15  | 123 | 79  | 0  |
| CONTIG-035039 | 97  | 21  | 33  | 77  | 0  |
| CONTIG-035040 | 164 | 5   | 9   | 0   | 0  |
| CONTIG-035041 | 409 | 15  | 53  | 270 | 0  |
| CONTIG-035048 | 507 | 12  | 31  | 171 | 0  |
| CONTIG-035049 | 107 | 103 | 16  | 0   | 0  |
| CONTIG-035050 | 222 | 7   | 15  | 35  | 3  |
| CONTIG-035052 | 452 | 10  | 41  | 133 | 2  |
| CONTIG-035053 | 461 | 11  | 7   | 58  | 12 |
| CONTIG-035054 | 201 | 14  | 10  | 47  | 0  |
| CONTIG-035055 | 98  | 6   | 8   | 18  | 0  |
| CONTIG-035056 | 111 | 4   | 0   | 2   | 0  |
| CONTIG-035057 | 157 | 8   | 13  | 28  | 0  |
| CONTIG-035059 | 59  | 6   | 10  | 5   | 0  |
| CONTIG-035060 | 134 | 4   | 10  | 9   | 0  |
| CONTIG-035061 | 111 | 9   | 2   | 27  | 0  |
| CONTIG-035062 | 78  | 13  | 12  | 32  | 0  |
| CONTIG-035063 | 147 | 14  | 19  | 56  | 3  |
| CONTIG-035064 | 130 | 2   | 0   | 0   | 0  |
| CONTIG-035065 | 728 | 13  | 29  | 418 | 2  |
| CONTIG-035066 | 177 | 23  | 79  | 119 | 0  |
| CONTIG-035067 | 224 | 13  | 22  | 46  | 0  |
| CONTIG-035068 | 132 | 5   | 0   | 22  | 0  |
| CONTIG-035069 | 107 | 11  | 40  | 27  | 0  |
| CONTIG-035070 | 157 | 4   | 2   | 12  | 2  |
| CONTIG-035071 | 378 | 11  | 45  | 159 | 0  |
| CONTIG-035072 | 232 | 11  | 25  | 48  | 0  |
| CONTIG-035073 | 101 | 5   | 6   | 13  | 2  |
| CONTIG-035074 | 111 | 7   | 34  | 11  | 0  |
| CONTIG-035075 | 142 | 10  | 14  | 57  | 0  |
| CONTIG-035076 | 183 | 9   | 6   | 52  | 0  |
| CONTIG-035077 | 266 | 14  | 44  | 60  | 3  |
| CONTIG-035078 | 310 | 16  | 55  | 67  | 5  |
| CONTIG-035079 | 110 | 16  | 15  | 56  | 2  |
| CONTIG-035080 | 620 | 19  | 67  | 227 | 19 |



|               |     |     |     |      |      |
|---------------|-----|-----|-----|------|------|
| CONTIG-035081 | 170 | 16  | 84  | 100  | 0    |
| CONTIG-035082 | 75  | 13  | 0   | 18   | 2    |
| CONTIG-035083 | 143 | 8   | 12  | 32   | 0    |
| CONTIG-035084 | 82  | 868 | 2   | 0    | 1049 |
| CONTIG-035085 | 71  | 6   | 0   | 0    | 0    |
| CONTIG-035086 | 81  | 4   | 4   | 7    | 0    |
| CONTIG-035087 | 390 | 57  | 4   | 18   | 0    |
| CONTIG-035088 | 574 | 36  | 8   | 39   | 0    |
| CONTIG-035089 | 155 | 6   | 0   | 43   | 0    |
| CONTIG-035090 | 478 | 9   | 32  | 119  | 0    |
| CONTIG-035091 | 140 | 8   | 14  | 29   | 0    |
| CONTIG-035092 | 63  | 5   | 10  | 0    | 0    |
| CONTIG-035093 | 89  | 9   | 4   | 11   | 0    |
| CONTIG-035094 | 131 | 8   | 0   | 29   | 0    |
| CONTIG-035095 | 58  | 9   | 33  | 0    | 0    |
| CONTIG-035096 | 226 | 13  | 23  | 75   | 0    |
| CONTIG-035106 | 326 | 53  | 175 | 335  | 20   |
| CONTIG-035107 | 59  | 16  | 4   | 28   | 0    |
| CONTIG-035108 | 662 | 20  | 7   | 5    | 0    |
| CONTIG-035109 | 213 | 18  | 26  | 194  | 0    |
| CONTIG-035110 | 84  | 45  | 77  | 96   | 0    |
| CONTIG-035111 | 65  | 118 | 12  | 370  | 0    |
| CONTIG-035112 | 100 | 18  | 25  | 32   | 4    |
| CONTIG-035115 | 83  | 5   | 0   | 19   | 0    |
| CONTIG-035116 | 100 | 6   | 21  | 13   | 2    |
| CONTIG-035117 | 396 | 18  | 88  | 66   | 3    |
| CONTIG-035118 | 77  | 4   | 10  | 2    | 2    |
| CONTIG-035119 | 113 | 12  | 5   | 2    | 0    |
| CONTIG-035120 | 70  | 7   | 4   | 20   | 0    |
| CONTIG-035122 | 71  | 4   | 4   | 10   | 0    |
| CONTIG-035123 | 92  | 17  | 8   | 40   | 0    |
| CONTIG-035124 | 76  | 3   | 2   | 5    | 0    |
| CONTIG-035125 | 63  | 5   | 10  | 10   | 0    |
| CONTIG-035126 | 78  | 9   | 22  | 2    | 0    |
| CONTIG-035127 | 341 | 7   | 4   | 97   | 0    |
| CONTIG-035128 | 343 | 16  | 86  | 153  | 0    |
| CONTIG-035129 | 72  | 400 | 73  | 1137 | 7    |
| CONTIG-035130 | 67  | 4   | 2   | 2    | 0    |
| CONTIG-035131 | 73  | 7   | 24  | 5    | 0    |
| CONTIG-035133 | 203 | 8   | 16  | 29   | 0    |
| CONTIG-035134 | 236 | 11  | 26  | 84   | 0    |
| CONTIG-035135 | 649 | 18  | 18  | 232  | 15   |
| CONTIG-035136 | 734 | 27  | 145 | 494  | 0    |
| CONTIG-035137 | 38  | 661 | 90  | 368  | 109  |
| CONTIG-035138 | 286 | 7   | 7   | 44   | 0    |
| CONTIG-035139 | 65  | 4   | 11  | 5    | 0    |
| CONTIG-035141 | 177 | 10  | 2   | 67   | 0    |

|               |      |    |    |      |    |
|---------------|------|----|----|------|----|
| CONTIG-035143 | 58   | 5  | 11 | 0    | 0  |
| CONTIG-035144 | 109  | 9  | 9  | 33   | 0  |
| CONTIG-035145 | 520  | 16 | 80 | 225  | 4  |
| CONTIG-035146 | 240  | 23 | 60 | 32   | 0  |
| CONTIG-035147 | 128  | 97 | 10 | 4    | 0  |
| CONTIG-035148 | 62   | 8  | 26 | 3    | 0  |
| CONTIG-035150 | 178  | 16 | 6  | 0    | 4  |
| CONTIG-035151 | 131  | 13 | 42 | 42   | 0  |
| CONTIG-035152 | 111  | 9  | 25 | 17   | 2  |
| CONTIG-035154 | 84   | 21 | 57 | 2    | 0  |
| CONTIG-035155 | 171  | 9  | 15 | 40   | 2  |
| CONTIG-035156 | 119  | 5  | 20 | 5    | 0  |
| CONTIG-035157 | 749  | 13 | 60 | 252  | 6  |
| CONTIG-035158 | 183  | 13 | 33 | 39   | 0  |
| CONTIG-035159 | 59   | 5  | 21 | 0    | 0  |
| CONTIG-035160 | 72   | 33 | 0  | 46   | 0  |
| CONTIG-035163 | 1098 | 14 | 82 | 477  | 6  |
| CONTIG-035164 | 130  | 11 | 6  | 43   | 0  |
| CONTIG-035167 | 201  | 6  | 22 | 38   | 0  |
| CONTIG-035168 | 276  | 6  | 8  | 44   | 2  |
| CONTIG-035169 | 242  | 13 | 58 | 120  | 0  |
| CONTIG-035170 | 70   | 12 | 17 | 0    | 0  |
| CONTIG-035171 | 211  | 7  | 30 | 53   | 0  |
| CONTIG-035173 | 88   | 6  | 18 | 10   | 0  |
| CONTIG-035174 | 67   | 4  | 4  | 6    | 0  |
| CONTIG-035175 | 299  | 7  | 15 | 64   | 0  |
| CONTIG-035176 | 174  | 8  | 4  | 6    | 0  |
| CONTIG-035178 | 164  | 8  | 13 | 34   | 0  |
| CONTIG-035179 | 100  | 9  | 4  | 36   | 0  |
| CONTIG-035183 | 65   | 12 | 14 | 18   | 0  |
| CONTIG-035184 | 75   | 5  | 13 | 7    | 0  |
| CONTIG-035185 | 67   | 8  | 7  | 16   | 0  |
| CONTIG-035186 | 58   | 18 | 29 | 19   | 0  |
| CONTIG-035187 | 492  | 9  | 33 | 108  | 2  |
| CONTIG-035188 | 176  | 15 | 22 | 66   | 2  |
| CONTIG-035189 | 71   | 16 | 5  | 11   | 0  |
| CONTIG-035190 | 623  | 15 | 70 | 275  | 16 |
| CONTIG-035191 | 114  | 9  | 2  | 39   | 0  |
| CONTIG-035192 | 188  | 8  | 8  | 48   | 0  |
| CONTIG-035193 | 91   | 15 | 63 | 0    | 0  |
| CONTIG-035194 | 399  | 8  | 72 | 67   | 2  |
| CONTIG-035195 | 963  | 26 | 42 | 1038 | 10 |
| CONTIG-035196 | 66   | 24 | 10 | 29   | 0  |
| CONTIG-035197 | 355  | 7  | 4  | 48   | 0  |
| CONTIG-035198 | 65   | 11 | 39 | 4    | 0  |
| CONTIG-035199 | 218  | 7  | 50 | 33   | 0  |
| CONTIG-035200 | 119  | 6  | 8  | 0    | 0  |

|               |      |     |     |     |     |
|---------------|------|-----|-----|-----|-----|
| CONTIG-035201 | 129  | 8   | 28  | 29  | 0   |
| CONTIG-035202 | 473  | 7   | 6   | 52  | 4   |
| CONTIG-035203 | 90   | 3   | 3   | 4   | 0   |
| CONTIG-035204 | 93   | 11  | 16  | 4   | 0   |
| CONTIG-035205 | 425  | 11  | 13  | 100 | 0   |
| CONTIG-035206 | 327  | 10  | 27  | 57  | 4   |
| CONTIG-035207 | 62   | 15  | 15  | 18  | 0   |
| CONTIG-035208 | 247  | 10  | 50  | 55  | 0   |
| CONTIG-035209 | 70   | 21  | 22  | 12  | 2   |
| CONTIG-035212 | 420  | 15  | 53  | 147 | 0   |
| CONTIG-035213 | 65   | 7   | 0   | 2   | 0   |
| CONTIG-035214 | 75   | 5   | 2   | 12  | 0   |
| CONTIG-035215 | 123  | 9   | 8   | 51  | 0   |
| CONTIG-035216 | 111  | 14  | 12  | 40  | 0   |
| CONTIG-035217 | 135  | 12  | 30  | 29  | 0   |
| CONTIG-035218 | 73   | 7   | 2   | 10  | 0   |
| CONTIG-035220 | 245  | 16  | 65  | 89  | 0   |
| CONTIG-035221 | 680  | 34  | 0   | 0   | 214 |
| CONTIG-035222 | 158  | 6   | 6   | 38  | 0   |
| CONTIG-035224 | 82   | 7   | 8   | 11  | 0   |
| CONTIG-035225 | 1150 | 19  | 90  | 715 | 0   |
| CONTIG-035227 | 270  | 43  | 38  | 340 | 12  |
| CONTIG-035228 | 60   | 14  | 7   | 36  | 0   |
| CONTIG-035230 | 219  | 14  | 18  | 61  | 0   |
| CONTIG-035236 | 64   | 6   | 9   | 4   | 0   |
| CONTIG-035237 | 151  | 16  | 10  | 56  | 2   |
| CONTIG-035238 | 142  | 4   | 4   | 19  | 0   |
| CONTIG-035239 | 117  | 9   | 10  | 33  | 0   |
| CONTIG-035240 | 289  | 14  | 26  | 121 | 0   |
| CONTIG-035248 | 103  | 6   | 8   | 0   | 0   |
| CONTIG-035251 | 116  | 28  | 3   | 74  | 0   |
| CONTIG-035252 | 295  | 50  | 15  | 287 | 0   |
| CONTIG-035253 | 120  | 34  | 3   | 110 | 0   |
| CONTIG-035254 | 45   | 832 | 203 | 22  | 758 |
| CONTIG-035255 | 255  | 23  | 8   | 248 | 4   |
| CONTIG-035256 | 553  | 7   | 20  | 94  | 0   |
| CONTIG-035257 | 187  | 10  | 44  | 19  | 0   |
| CONTIG-035258 | 62   | 5   | 0   | 2   | 0   |
| CONTIG-035259 | 127  | 22  | 17  | 119 | 0   |
| CONTIG-035260 | 62   | 10  | 15  | 22  | 0   |
| CONTIG-035261 | 187  | 11  | 9   | 41  | 0   |
| CONTIG-035262 | 176  | 6   | 7   | 33  | 0   |
| CONTIG-035263 | 99   | 8   | 14  | 15  | 0   |
| CONTIG-035264 | 231  | 12  | 28  | 65  | 0   |
| CONTIG-035265 | 132  | 16  | 24  | 76  | 0   |
| CONTIG-035266 | 943  | 22  | 154 | 714 | 4   |
| CONTIG-035267 | 130  | 4   | 2   | 8   | 0   |

|               |     |     |     |      |    |
|---------------|-----|-----|-----|------|----|
| CONTIG-035268 | 113 | 4   | 5   | 6    | 0  |
| CONTIG-035269 | 61  | 3   | 2   | 0    | 0  |
| CONTIG-035270 | 525 | 13  | 19  | 132  | 0  |
| CONTIG-035271 | 141 | 27  | 67  | 136  | 0  |
| CONTIG-035272 | 825 | 37  | 82  | 1570 | 0  |
| CONTIG-035273 | 59  | 6   | 0   | 10   | 0  |
| CONTIG-035274 | 914 | 13  | 89  | 259  | 4  |
| CONTIG-035275 | 63  | 8   | 4   | 22   | 0  |
| CONTIG-035276 | 253 | 8   | 30  | 68   | 0  |
| CONTIG-035277 | 90  | 7   | 2   | 20   | 0  |
| CONTIG-035278 | 234 | 15  | 7   | 200  | 0  |
| CONTIG-035279 | 152 | 7   | 18  | 6    | 0  |
| CONTIG-035280 | 43  | 35  | 20  | 25   | 0  |
| CONTIG-035281 | 125 | 7   | 14  | 31   | 0  |
| CONTIG-035282 | 269 | 30  | 31  | 247  | 0  |
| CONTIG-035283 | 82  | 5   | 7   | 5    | 0  |
| CONTIG-035284 | 262 | 8   | 11  | 67   | 0  |
| CONTIG-035285 | 227 | 9   | 6   | 88   | 0  |
| CONTIG-035286 | 175 | 6   | 5   | 32   | 0  |
| CONTIG-035287 | 111 | 6   | 11  | 18   | 0  |
| CONTIG-035288 | 96  | 12  | 33  | 14   | 0  |
| CONTIG-035290 | 161 | 65  | 46  | 321  | 14 |
| CONTIG-035291 | 37  | 74  | 9   | 78   | 0  |
| CONTIG-035292 | 89  | 13  | 2   | 32   | 0  |
| CONTIG-035293 | 187 | 15  | 19  | 104  | 0  |
| CONTIG-035294 | 85  | 4   | 4   | 7    | 0  |
| CONTIG-035295 | 121 | 8   | 13  | 39   | 0  |
| CONTIG-035296 | 70  | 7   | 6   | 10   | 0  |
| CONTIG-035297 | 95  | 193 | 52  | 658  | 55 |
| CONTIG-035298 | 67  | 8   | 7   | 16   | 0  |
| CONTIG-035301 | 356 | 9   | 24  | 57   | 0  |
| CONTIG-035302 | 126 | 17  | 2   | 103  | 0  |
| CONTIG-035304 | 932 | 12  | 2   | 0    | 33 |
| CONTIG-035306 | 141 | 12  | 10  | 58   | 0  |
| CONTIG-035307 | 127 | 15  | 17  | 78   | 0  |
| CONTIG-035308 | 197 | 292 | 9   | 8    | 0  |
| CONTIG-035309 | 537 | 17  | 22  | 532  | 0  |
| CONTIG-035310 | 224 | 11  | 4   | 32   | 0  |
| CONTIG-035311 | 296 | 16  | 17  | 276  | 0  |
| CONTIG-035312 | 60  | 2   | 0   | 4    | 0  |
| CONTIG-035313 | 400 | 10  | 6   | 110  | 0  |
| CONTIG-035314 | 375 | 32  | 169 | 323  | 9  |
| CONTIG-035315 | 180 | 9   | 43  | 30   | 0  |
| CONTIG-035316 | 126 | 21  | 43  | 65   | 0  |
| CONTIG-035317 | 321 | 14  | 28  | 81   | 2  |
| CONTIG-035318 | 223 | 11  | 58  | 97   | 0  |
| CONTIG-035319 | 167 | 5   | 0   | 32   | 0  |

|               |      |     |     |     |   |
|---------------|------|-----|-----|-----|---|
| CONTIG-035320 | 121  | 9   | 7   | 8   | 0 |
| CONTIG-035321 | 200  | 12  | 35  | 84  | 0 |
| CONTIG-035322 | 198  | 13  | 56  | 134 | 0 |
| CONTIG-035323 | 116  | 20  | 7   | 92  | 0 |
| CONTIG-035327 | 107  | 3   | 6   | 8   | 0 |
| CONTIG-035328 | 344  | 26  | 92  | 280 | 2 |
| CONTIG-035329 | 149  | 12  | 24  | 20  | 0 |
| CONTIG-035330 | 83   | 7   | 14  | 6   | 0 |
| CONTIG-035331 | 202  | 8   | 87  | 23  | 0 |
| CONTIG-035332 | 194  | 21  | 24  | 127 | 0 |
| CONTIG-035333 | 73   | 4   | 5   | 4   | 0 |
| CONTIG-035334 | 575  | 22  | 74  | 631 | 6 |
| CONTIG-035335 | 331  | 8   | 25  | 79  | 4 |
| CONTIG-035340 | 540  | 8   | 22  | 127 | 0 |
| CONTIG-035341 | 60   | 12  | 21  | 18  | 0 |
| CONTIG-035342 | 71   | 6   | 7   | 7   | 0 |
| CONTIG-035343 | 334  | 10  | 6   | 109 | 2 |
| CONTIG-035344 | 293  | 11  | 10  | 127 | 0 |
| CONTIG-035345 | 60   | 5   | 5   | 10  | 0 |
| CONTIG-035346 | 59   | 5   | 8   | 6   | 0 |
| CONTIG-035347 | 367  | 11  | 33  | 142 | 0 |
| CONTIG-035348 | 326  | 10  | 3   | 9   | 0 |
| CONTIG-035349 | 192  | 11  | 33  | 98  | 0 |
| CONTIG-035350 | 63   | 6   | 19  | 8   | 0 |
| CONTIG-035351 | 148  | 10  | 12  | 38  | 0 |
| CONTIG-035352 | 612  | 10  | 10  | 224 | 2 |
| CONTIG-035353 | 76   | 4   | 2   | 10  | 0 |
| CONTIG-035355 | 177  | 5   | 4   | 6   | 0 |
| CONTIG-035356 | 218  | 10  | 9   | 68  | 0 |
| CONTIG-035357 | 1010 | 33  | 68  | 761 | 2 |
| CONTIG-035358 | 136  | 38  | 101 | 24  | 0 |
| CONTIG-035359 | 402  | 131 | 7   | 80  | 0 |
| CONTIG-035360 | 397  | 12  | 43  | 200 | 0 |
| CONTIG-035361 | 82   | 6   | 14  | 5   | 0 |
| CONTIG-035362 | 530  | 29  | 83  | 804 | 0 |
| CONTIG-035363 | 96   | 5   | 5   | 9   | 2 |
| CONTIG-035364 | 171  | 10  | 10  | 45  | 0 |
| CONTIG-035365 | 194  | 6   | 7   | 12  | 0 |
| CONTIG-035366 | 630  | 20  | 87  | 465 | 4 |
| CONTIG-035367 | 79   | 12  | 16  | 27  | 0 |
| CONTIG-035368 | 295  | 8   | 32  | 87  | 0 |
| CONTIG-035369 | 267  | 16  | 28  | 149 | 0 |
| CONTIG-035370 | 61   | 4   | 6   | 4   | 0 |
| CONTIG-035371 | 229  | 10  | 24  | 60  | 0 |
| CONTIG-035372 | 349  | 9   | 53  | 119 | 0 |
| CONTIG-035373 | 272  | 11  | 13  | 124 | 0 |
| CONTIG-035374 | 189  | 8   | 26  | 45  | 0 |

|               |     |    |     |     |    |
|---------------|-----|----|-----|-----|----|
| CONTIG-035375 | 179 | 4  | 5   | 4   | 0  |
| CONTIG-035376 | 41  | 32 | 4   | 26  | 0  |
| CONTIG-035377 | 327 | 20 | 24  | 202 | 2  |
| CONTIG-035378 | 84  | 5  | 11  | 5   | 0  |
| CONTIG-035379 | 109 | 5  | 5   | 20  | 0  |
| CONTIG-035380 | 60  | 8  | 15  | 8   | 0  |
| CONTIG-035381 | 95  | 3  | 0   | 5   | 0  |
| CONTIG-035382 | 82  | 9  | 4   | 30  | 0  |
| CONTIG-035383 | 120 | 11 | 107 | 0   | 2  |
| CONTIG-035384 | 120 | 7  | 12  | 14  | 0  |
| CONTIG-035385 | 110 | 6  | 5   | 21  | 0  |
| CONTIG-035386 | 165 | 8  | 2   | 35  | 0  |
| CONTIG-035393 | 184 | 7  | 4   | 30  | 4  |
| CONTIG-035394 | 436 | 31 | 36  | 346 | 16 |
| CONTIG-035395 | 64  | 7  | 6   | 10  | 0  |
| CONTIG-035396 | 443 | 10 | 10  | 152 | 2  |
| CONTIG-035398 | 225 | 6  | 10  | 30  | 0  |
| CONTIG-035399 | 295 | 14 | 31  | 122 | 2  |
| CONTIG-035400 | 172 | 32 | 6   | 0   | 49 |
| CONTIG-035401 | 378 | 10 | 27  | 155 | 0  |
| CONTIG-035402 | 67  | 7  | 5   | 0   | 0  |
| CONTIG-035403 | 148 | 11 | 15  | 56  | 0  |
| CONTIG-035404 | 62  | 4  | 6   | 5   | 0  |
| CONTIG-035405 | 387 | 9  | 65  | 83  | 0  |
| CONTIG-035406 | 177 | 7  | 7   | 27  | 2  |
| CONTIG-035407 | 74  | 4  | 6   | 10  | 0  |
| CONTIG-035408 | 308 | 5  | 7   | 29  | 0  |
| CONTIG-035409 | 78  | 6  | 16  | 4   | 0  |
| CONTIG-035410 | 48  | 96 | 2   | 214 | 0  |
| CONTIG-035411 | 60  | 7  | 6   | 12  | 0  |
| CONTIG-035412 | 76  | 5  | 14  | 10  | 0  |
| CONTIG-035414 | 389 | 8  | 34  | 89  | 0  |
| CONTIG-035415 | 91  | 5  | 2   | 7   | 0  |
| CONTIG-035416 | 65  | 9  | 9   | 9   | 0  |
| CONTIG-035417 | 274 | 11 | 21  | 110 | 0  |
| CONTIG-035418 | 120 | 5  | 9   | 10  | 0  |
| CONTIG-035419 | 96  | 72 | 23  | 409 | 0  |
| CONTIG-035420 | 234 | 9  | 30  | 52  | 0  |
| CONTIG-035421 | 322 | 10 | 2   | 112 | 2  |
| CONTIG-035422 | 134 | 10 | 12  | 26  | 0  |
| CONTIG-035423 | 107 | 11 | 10  | 15  | 0  |
| CONTIG-035424 | 63  | 2  | 5   | 0   | 0  |
| CONTIG-035425 | 62  | 3  | 8   | 0   | 0  |
| CONTIG-035426 | 450 | 9  | 28  | 141 | 0  |
| CONTIG-035430 | 91  | 11 | 52  | 6   | 0  |
| CONTIG-035431 | 290 | 24 | 87  | 167 | 0  |
| CONTIG-035432 | 308 | 29 | 15  | 28  | 0  |

|               |     |     |     |     |    |
|---------------|-----|-----|-----|-----|----|
| CONTIG-035433 | 192 | 10  | 49  | 42  | 0  |
| CONTIG-035434 | 227 | 9   | 5   | 27  | 0  |
| CONTIG-035435 | 95  | 461 | 101 | 699 | 8  |
| CONTIG-035436 | 450 | 10  | 37  | 166 | 0  |
| CONTIG-035437 | 317 | 16  | 41  | 182 | 0  |
| CONTIG-035438 | 101 | 8   | 8   | 17  | 0  |
| CONTIG-035439 | 81  | 10  | 35  | 16  | 0  |
| CONTIG-035440 | 65  | 6   | 2   | 10  | 0  |
| CONTIG-035441 | 176 | 11  | 12  | 63  | 3  |
| CONTIG-035442 | 344 | 8   | 17  | 105 | 0  |
| CONTIG-035443 | 349 | 9   | 2   | 7   | 0  |
| CONTIG-035449 | 171 | 6   | 2   | 31  | 0  |
| CONTIG-035452 | 341 | 13  | 11  | 157 | 0  |
| CONTIG-035453 | 169 | 4   | 6   | 9   | 0  |
| CONTIG-035455 | 71  | 9   | 3   | 12  | 0  |
| CONTIG-035456 | 692 | 10  | 25  | 78  | 15 |
| CONTIG-035457 | 281 | 6   | 12  | 48  | 0  |
| CONTIG-035458 | 177 | 6   | 21  | 35  | 0  |
| CONTIG-035459 | 125 | 6   | 6   | 15  | 0  |
| CONTIG-035460 | 109 | 6   | 8   | 12  | 0  |
| CONTIG-035461 | 128 | 15  | 24  | 44  | 0  |
| CONTIG-035462 | 94  | 10  | 43  | 14  | 0  |
| CONTIG-035465 | 214 | 15  | 5   | 51  | 0  |
| CONTIG-035466 | 101 | 6   | 2   | 9   | 0  |
| CONTIG-035467 | 229 | 15  | 14  | 159 | 0  |
| CONTIG-035468 | 202 | 10  | 7   | 73  | 0  |
| CONTIG-035469 | 222 | 8   | 17  | 51  | 0  |
| CONTIG-035470 | 113 | 5   | 12  | 16  | 0  |
| CONTIG-035473 | 218 | 12  | 38  | 57  | 0  |
| CONTIG-035474 | 120 | 14  | 58  | 33  | 0  |
| CONTIG-035475 | 170 | 6   | 0   | 29  | 0  |
| CONTIG-035476 | 649 | 10  | 22  | 281 | 10 |
| CONTIG-035477 | 548 | 35  | 53  | 397 | 17 |
| CONTIG-035478 | 66  | 10  | 56  | 0   | 0  |
| CONTIG-035479 | 81  | 7   | 10  | 6   | 0  |
| CONTIG-035480 | 283 | 21  | 34  | 285 | 2  |
| CONTIG-035481 | 94  | 4   | 6   | 2   | 0  |
| CONTIG-035482 | 623 | 12  | 30  | 229 | 0  |
| CONTIG-035483 | 161 | 11  | 5   | 56  | 0  |
| CONTIG-035484 | 84  | 4   | 11  | 6   | 0  |
| CONTIG-035485 | 114 | 15  | 3   | 71  | 0  |
| CONTIG-035486 | 300 | 12  | 81  | 93  | 0  |
| CONTIG-035487 | 140 | 63  | 228 | 202 | 11 |
| CONTIG-035490 | 66  | 26  | 29  | 42  | 0  |
| CONTIG-035491 | 225 | 17  | 27  | 54  | 0  |
| CONTIG-035493 | 475 | 32  | 63  | 504 | 2  |
| CONTIG-035494 | 158 | 10  | 15  | 62  | 5  |

|               |     |    |     |     |    |
|---------------|-----|----|-----|-----|----|
| CONTIG-035495 | 226 | 29 | 4   | 350 | 0  |
| CONTIG-035496 | 108 | 4  | 3   | 8   | 0  |
| CONTIG-035497 | 85  | 14 | 29  | 21  | 0  |
| CONTIG-035498 | 80  | 69 | 112 | 247 | 0  |
| CONTIG-035499 | 142 | 17 | 17  | 50  | 0  |
| CONTIG-035500 | 69  | 5  | 2   | 13  | 0  |
| CONTIG-035501 | 104 | 2  | 0   | 8   | 0  |
| CONTIG-035502 | 345 | 10 | 13  | 170 | 0  |
| CONTIG-035503 | 160 | 13 | 7   | 77  | 0  |
| CONTIG-035504 | 75  | 7  | 40  | 0   | 0  |
| CONTIG-035505 | 361 | 9  | 9   | 116 | 2  |
| CONTIG-035506 | 557 | 10 | 25  | 198 | 4  |
| CONTIG-035507 | 139 | 10 | 7   | 50  | 0  |
| CONTIG-035508 | 70  | 10 | 4   | 21  | 0  |
| CONTIG-035509 | 226 | 6  | 21  | 46  | 0  |
| CONTIG-035511 | 62  | 8  | 10  | 0   | 0  |
| CONTIG-035512 | 100 | 6  | 17  | 8   | 3  |
| CONTIG-035513 | 110 | 3  | 2   | 10  | 0  |
| CONTIG-035514 | 189 | 6  | 7   | 23  | 0  |
| CONTIG-035515 | 90  | 8  | 8   | 12  | 0  |
| CONTIG-035516 | 83  | 12 | 55  | 2   | 0  |
| CONTIG-035517 | 504 | 9  | 39  | 96  | 0  |
| CONTIG-035518 | 193 | 20 | 33  | 98  | 2  |
| CONTIG-035519 | 183 | 11 | 18  | 45  | 0  |
| CONTIG-035520 | 248 | 69 | 14  | 502 | 14 |
| CONTIG-035521 | 120 | 8  | 8   | 25  | 0  |
| CONTIG-035522 | 110 | 7  | 8   | 20  | 0  |
| CONTIG-035523 | 215 | 8  | 2   | 63  | 0  |
| CONTIG-035524 | 99  | 8  | 4   | 10  | 0  |
| CONTIG-035525 | 148 | 11 | 16  | 32  | 0  |
| CONTIG-035526 | 434 | 9  | 19  | 61  | 0  |
| CONTIG-035527 | 471 | 47 | 30  | 773 | 2  |
| CONTIG-035528 | 172 | 23 | 41  | 85  | 0  |
| CONTIG-035532 | 540 | 14 | 3   | 0   | 12 |
| CONTIG-035534 | 99  | 3  | 4   | 4   | 0  |
| CONTIG-035535 | 151 | 5  | 2   | 36  | 0  |
| CONTIG-035536 | 169 | 8  | 10  | 32  | 0  |
| CONTIG-035537 | 192 | 15 | 66  | 30  | 2  |
| CONTIG-035538 | 192 | 8  | 35  | 31  | 0  |
| CONTIG-035539 | 211 | 6  | 21  | 44  | 0  |
| CONTIG-035540 | 103 | 8  | 2   | 14  | 0  |
| CONTIG-035541 | 57  | 18 | 4   | 39  | 0  |
| CONTIG-035542 | 65  | 7  | 12  | 5   | 0  |
| CONTIG-035543 | 123 | 4  | 4   | 13  | 0  |
| CONTIG-035545 | 163 | 9  | 20  | 43  | 0  |
| CONTIG-035547 | 572 | 14 | 27  | 298 | 0  |
| CONTIG-035548 | 96  | 17 | 24  | 58  | 0  |



|               |     |    |    |     |   |
|---------------|-----|----|----|-----|---|
| CONTIG-035549 | 76  | 9  | 7  | 17  | 0 |
| CONTIG-035550 | 341 | 10 | 7  | 157 | 0 |
| CONTIG-035552 | 148 | 10 | 11 | 47  | 0 |
| CONTIG-035553 | 466 | 17 | 41 | 328 | 4 |
| CONTIG-035554 | 98  | 12 | 23 | 20  | 0 |
| CONTIG-035555 | 122 | 6  | 3  | 12  | 0 |
| CONTIG-035556 | 64  | 5  | 4  | 7   | 0 |
| CONTIG-035557 | 125 | 18 | 17 | 122 | 0 |
| CONTIG-035558 | 78  | 5  | 18 | 2   | 0 |
| CONTIG-035559 | 198 | 8  | 17 | 24  | 0 |
| CONTIG-035560 | 272 | 15 | 59 | 149 | 0 |
| CONTIG-035561 | 64  | 3  | 0  | 0   | 0 |
| CONTIG-035562 | 335 | 12 | 30 | 112 | 0 |
| CONTIG-035563 | 105 | 11 | 24 | 30  | 0 |
| CONTIG-035564 | 133 | 63 | 10 | 385 | 0 |
| CONTIG-035566 | 276 | 36 | 73 | 232 | 2 |
| CONTIG-035567 | 350 | 10 | 2  | 78  | 0 |
| CONTIG-035568 | 278 | 17 | 62 | 65  | 0 |
| CONTIG-035569 | 434 | 13 | 16 | 171 | 0 |
| CONTIG-035570 | 102 | 8  | 4  | 2   | 0 |
| CONTIG-035571 | 96  | 10 | 18 | 35  | 0 |
| CONTIG-035573 | 61  | 8  | 2  | 0   | 0 |
| CONTIG-035575 | 158 | 9  | 7  | 62  | 0 |
| CONTIG-035576 | 85  | 16 | 13 | 17  | 0 |
| CONTIG-035577 | 128 | 5  | 2  | 8   | 0 |
| CONTIG-035578 | 145 | 13 | 21 | 37  | 0 |
| CONTIG-035579 | 461 | 18 | 96 | 207 | 4 |
| CONTIG-035580 | 157 | 28 | 55 | 93  | 0 |
| CONTIG-035581 | 201 | 16 | 29 | 170 | 0 |
| CONTIG-035582 | 81  | 5  | 9  | 11  | 0 |
| CONTIG-035583 | 411 | 11 | 42 | 126 | 0 |
| CONTIG-035584 | 126 | 5  | 4  | 22  | 0 |
| CONTIG-035585 | 241 | 14 | 31 | 119 | 0 |
| CONTIG-035587 | 524 | 12 | 85 | 203 | 4 |
| CONTIG-035588 | 193 | 18 | 0  | 128 | 0 |
| CONTIG-035589 | 197 | 7  | 12 | 21  | 0 |
| CONTIG-035590 | 177 | 7  | 6  | 31  | 0 |
| CONTIG-035591 | 85  | 3  | 9  | 8   | 0 |
| CONTIG-035592 | 73  | 4  | 2  | 5   | 0 |
| CONTIG-035593 | 63  | 5  | 5  | 6   | 0 |
| CONTIG-035594 | 173 | 11 | 4  | 67  | 0 |
| CONTIG-035595 | 388 | 13 | 77 | 81  | 2 |
| CONTIG-035596 | 148 | 7  | 13 | 10  | 0 |
| CONTIG-035597 | 174 | 8  | 10 | 42  | 0 |
| CONTIG-035598 | 97  | 6  | 6  | 14  | 0 |
| CONTIG-035599 | 118 | 5  | 2  | 11  | 0 |
| CONTIG-035602 | 76  | 5  | 3  | 4   | 0 |

|               |      |     |    |      |    |
|---------------|------|-----|----|------|----|
| CONTIG-035603 | 355  | 21  | 46 | 238  | 5  |
| CONTIG-035604 | 436  | 8   | 39 | 87   | 0  |
| CONTIG-035605 | 1056 | 14  | 53 | 384  | 9  |
| CONTIG-035606 | 161  | 15  | 32 | 76   | 2  |
| CONTIG-035607 | 409  | 9   | 6  | 50   | 0  |
| CONTIG-035608 | 113  | 5   | 17 | 2    | 0  |
| CONTIG-035609 | 629  | 75  | 36 | 2667 | 8  |
| CONTIG-035610 | 232  | 8   | 7  | 20   | 0  |
| CONTIG-035611 | 221  | 8   | 6  | 57   | 0  |
| CONTIG-035612 | 211  | 9   | 35 | 76   | 0  |
| CONTIG-035613 | 143  | 15  | 39 | 69   | 0  |
| CONTIG-035614 | 155  | 6   | 5  | 28   | 2  |
| CONTIG-035615 | 995  | 13  | 40 | 298  | 11 |
| CONTIG-035616 | 129  | 7   | 0  | 22   | 0  |
| CONTIG-035617 | 62   | 6   | 8  | 11   | 0  |
| CONTIG-035618 | 92   | 8   | 21 | 22   | 0  |
| CONTIG-035619 | 106  | 7   | 10 | 16   | 0  |
| CONTIG-035620 | 173  | 12  | 28 | 70   | 0  |
| CONTIG-035621 | 79   | 3   | 7  | 4    | 0  |
| CONTIG-035622 | 129  | 12  | 15 | 32   | 0  |
| CONTIG-035623 | 160  | 12  | 9  | 51   | 0  |
| CONTIG-035624 | 124  | 13  | 2  | 40   | 0  |
| CONTIG-035627 | 251  | 30  | 87 | 198  | 13 |
| CONTIG-035628 | 147  | 9   | 3  | 43   | 0  |
| CONTIG-035629 | 97   | 11  | 9  | 13   | 0  |
| CONTIG-035630 | 75   | 8   | 24 | 11   | 0  |
| CONTIG-035631 | 165  | 15  | 9  | 61   | 0  |
| CONTIG-035633 | 112  | 8   | 8  | 20   | 0  |
| CONTIG-035634 | 92   | 6   | 4  | 0    | 3  |
| CONTIG-035635 | 101  | 7   | 14 | 14   | 0  |
| CONTIG-035636 | 82   | 161 | 12 | 367  | 4  |
| CONTIG-035638 | 244  | 30  | 12 | 192  | 0  |
| CONTIG-035639 | 747  | 14  | 36 | 311  | 0  |
| CONTIG-035640 | 127  | 7   | 26 | 25   | 0  |
| CONTIG-035642 | 148  | 8   | 5  | 32   | 0  |
| CONTIG-035643 | 115  | 19  | 16 | 130  | 0  |
| CONTIG-035644 | 95   | 14  | 34 | 38   | 0  |
| CONTIG-035645 | 246  | 11  | 20 | 99   | 2  |
| CONTIG-035646 | 411  | 20  | 0  | 0    | 43 |
| CONTIG-035647 | 96   | 5   | 2  | 7    | 0  |
| CONTIG-035648 | 93   | 6   | 4  | 18   | 0  |
| CONTIG-035649 | 184  | 18  | 15 | 74   | 5  |
| CONTIG-035650 | 657  | 13  | 18 | 354  | 6  |
| CONTIG-035651 | 236  | 15  | 14 | 75   | 2  |
| CONTIG-035652 | 73   | 10  | 6  | 0    | 2  |
| CONTIG-035653 | 130  | 5   | 10 | 0    | 0  |
| CONTIG-035654 | 101  | 8   | 6  | 21   | 0  |

|               |     |     |     |      |     |
|---------------|-----|-----|-----|------|-----|
| CONTIG-035655 | 264 | 18  | 54  | 89   | 0   |
| CONTIG-035656 | 58  | 22  | 20  | 7    | 0   |
| CONTIG-035658 | 139 | 5   | 12  | 7    | 0   |
| CONTIG-035659 | 141 | 5   | 2   | 17   | 0   |
| CONTIG-035660 | 108 | 19  | 12  | 107  | 0   |
| CONTIG-035661 | 175 | 28  | 29  | 162  | 0   |
| CONTIG-035662 | 682 | 14  | 0   | 0    | 102 |
| CONTIG-035663 | 148 | 6   | 2   | 46   | 0   |
| CONTIG-035664 | 229 | 37  | 20  | 420  | 4   |
| CONTIG-035668 | 137 | 33  | 27  | 151  | 8   |
| CONTIG-035669 | 66  | 5   | 5   | 11   | 0   |
| CONTIG-035670 | 316 | 10  | 22  | 76   | 0   |
| CONTIG-035671 | 324 | 10  | 6   | 136  | 0   |
| CONTIG-035672 | 299 | 20  | 130 | 152  | 0   |
| CONTIG-035673 | 232 | 10  | 32  | 40   | 2   |
| CONTIG-035674 | 94  | 8   | 21  | 20   | 0   |
| CONTIG-035675 | 740 | 11  | 33  | 330  | 0   |
| CONTIG-035676 | 91  | 6   | 25  | 5    | 0   |
| CONTIG-035677 | 161 | 6   | 0   | 27   | 0   |
| CONTIG-035678 | 71  | 10  | 3   | 25   | 0   |
| CONTIG-035679 | 142 | 14  | 31  | 30   | 2   |
| CONTIG-035681 | 235 | 11  | 8   | 56   | 2   |
| CONTIG-035682 | 71  | 7   | 7   | 10   | 0   |
| CONTIG-035683 | 74  | 5   | 4   | 0    | 0   |
| CONTIG-035684 | 225 | 8   | 21  | 39   | 0   |
| CONTIG-035685 | 377 | 18  | 26  | 351  | 0   |
| CONTIG-035686 | 265 | 27  | 66  | 409  | 0   |
| CONTIG-035687 | 142 | 10  | 6   | 76   | 0   |
| CONTIG-035688 | 157 | 7   | 16  | 31   | 0   |
| CONTIG-035689 | 157 | 7   | 11  | 36   | 0   |
| CONTIG-035690 | 281 | 12  | 44  | 97   | 0   |
| CONTIG-035691 | 300 | 17  | 54  | 105  | 2   |
| CONTIG-035697 | 609 | 9   | 37  | 142  | 0   |
| CONTIG-035698 | 95  | 6   | 8   | 12   | 2   |
| CONTIG-035699 | 110 | 408 | 59  | 2476 | 0   |
| CONTIG-035700 | 273 | 7   | 15  | 33   | 0   |
| CONTIG-035701 | 165 | 20  | 10  | 66   | 0   |
| CONTIG-035702 | 61  | 5   | 17  | 5    | 0   |
| CONTIG-035704 | 77  | 11  | 2   | 32   | 2   |
| CONTIG-035705 | 139 | 6   | 9   | 23   | 0   |
| CONTIG-035706 | 152 | 7   | 8   | 19   | 0   |
| CONTIG-035707 | 164 | 15  | 11  | 97   | 0   |
| CONTIG-035708 | 172 | 12  | 2   | 64   | 0   |
| CONTIG-035709 | 65  | 6   | 0   | 0    | 0   |
| CONTIG-035710 | 152 | 11  | 5   | 31   | 0   |
| CONTIG-035711 | 173 | 8   | 15  | 37   | 0   |
| CONTIG-035712 | 213 | 14  | 22  | 101  | 0   |

|               |      |     |     |      |    |
|---------------|------|-----|-----|------|----|
| CONTIG-035713 | 125  | 35  | 4   | 207  | 0  |
| CONTIG-035714 | 76   | 9   | 0   | 22   | 0  |
| CONTIG-035715 | 248  | 21  | 112 | 158  | 2  |
| CONTIG-035716 | 130  | 14  | 11  | 27   | 0  |
| CONTIG-035717 | 112  | 8   | 6   | 29   | 0  |
| CONTIG-035718 | 240  | 45  | 63  | 212  | 2  |
| CONTIG-035719 | 84   | 7   | 9   | 14   | 0  |
| CONTIG-035720 | 106  | 7   | 0   | 22   | 0  |
| CONTIG-035721 | 391  | 29  | 24  | 236  | 12 |
| CONTIG-035722 | 99   | 6   | 11  | 5    | 0  |
| CONTIG-035723 | 82   | 8   | 9   | 2    | 2  |
| CONTIG-035724 | 394  | 13  | 11  | 206  | 0  |
| CONTIG-035725 | 253  | 22  | 9   | 115  | 10 |
| CONTIG-035726 | 327  | 9   | 16  | 85   | 2  |
| CONTIG-035727 | 133  | 6   | 3   | 20   | 0  |
| CONTIG-035728 | 138  | 5   | 2   | 22   | 0  |
| CONTIG-035729 | 91   | 5   | 5   | 2    | 0  |
| CONTIG-035731 | 178  | 10  | 9   | 36   | 0  |
| CONTIG-035732 | 142  | 13  | 52  | 30   | 0  |
| CONTIG-035733 | 872  | 15  | 28  | 423  | 0  |
| CONTIG-035735 | 666  | 21  | 52  | 400  | 4  |
| CONTIG-035737 | 129  | 4   | 9   | 15   | 0  |
| CONTIG-035738 | 112  | 25  | 12  | 76   | 0  |
| CONTIG-035739 | 145  | 22  | 4   | 89   | 6  |
| CONTIG-035740 | 107  | 8   | 2   | 29   | 0  |
| CONTIG-035741 | 726  | 24  | 20  | 867  | 0  |
| CONTIG-035743 | 74   | 406 | 219 | 564  | 83 |
| CONTIG-035744 | 2241 | 18  | 18  | 1805 | 0  |
| CONTIG-035745 | 93   | 5   | 0   | 17   | 0  |
| CONTIG-035746 | 104  | 7   | 10  | 16   | 0  |
| CONTIG-035747 | 379  | 15  | 31  | 201  | 0  |
| CONTIG-035748 | 248  | 14  | 91  | 92   | 0  |
| CONTIG-035749 | 149  | 13  | 3   | 46   | 0  |
| CONTIG-035750 | 102  | 79  | 18  | 346  | 10 |
| CONTIG-035751 | 58   | 6   | 23  | 2    | 0  |
| CONTIG-035752 | 502  | 14  | 83  | 142  | 0  |
| CONTIG-035753 | 145  | 7   | 46  | 14   | 0  |
| CONTIG-035757 | 161  | 5   | 54  | 10   | 0  |
| CONTIG-035762 | 312  | 8   | 12  | 84   | 0  |
| CONTIG-035763 | 231  | 10  | 59  | 31   | 0  |
| CONTIG-035764 | 60   | 3   | 0   | 3    | 0  |
| CONTIG-035766 | 253  | 18  | 16  | 132  | 2  |
| CONTIG-035767 | 72   | 4   | 9   | 4    | 0  |
| CONTIG-035768 | 130  | 8   | 2   | 37   | 0  |
| CONTIG-035769 | 125  | 26  | 17  | 69   | 10 |
| CONTIG-035770 | 86   | 9   | 14  | 29   | 0  |
| CONTIG-035771 | 139  | 9   | 5   | 38   | 0  |

|               |      |    |     |     |      |
|---------------|------|----|-----|-----|------|
| CONTIG-035772 | 215  | 9  | 10  | 59  | 0    |
| CONTIG-035773 | 234  | 53 | 107 | 402 | 4    |
| CONTIG-035774 | 191  | 12 | 20  | 56  | 0    |
| CONTIG-035775 | 380  | 24 | 0   | 0   | 0    |
| CONTIG-035776 | 150  | 7  | 28  | 18  | 0    |
| CONTIG-035777 | 130  | 4  | 13  | 17  | 0    |
| CONTIG-035778 | 309  | 7  | 12  | 60  | 2    |
| CONTIG-035779 | 347  | 12 | 8   | 39  | 0    |
| CONTIG-035780 | 68   | 4  | 2   | 0   | 0    |
| CONTIG-035781 | 151  | 5  | 0   | 12  | 0    |
| CONTIG-035782 | 369  | 14 | 7   | 186 | 4    |
| CONTIG-035783 | 184  | 12 | 24  | 56  | 2    |
| CONTIG-035784 | 79   | 6  | 17  | 7   | 0    |
| CONTIG-035785 | 78   | 5  | 4   | 0   | 0    |
| CONTIG-035786 | 2615 | 28 | 0   | 4   | 1348 |
| CONTIG-035787 | 97   | 3  | 0   | 7   | 0    |
| CONTIG-035788 | 112  | 13 | 2   | 55  | 0    |
| CONTIG-035789 | 171  | 3  | 2   | 11  | 0    |
| CONTIG-035790 | 297  | 15 | 46  | 58  | 0    |
| CONTIG-035791 | 87   | 8  | 0   | 6   | 0    |
| CONTIG-035792 | 337  | 9  | 20  | 83  | 4    |
| CONTIG-035793 | 180  | 19 | 0   | 122 | 4    |
| CONTIG-035794 | 144  | 11 | 4   | 50  | 0    |
| CONTIG-035795 | 186  | 11 | 45  | 12  | 0    |
| CONTIG-035796 | 89   | 7  | 2   | 12  | 0    |
| CONTIG-035797 | 164  | 3  | 4   | 2   | 0    |
| CONTIG-035798 | 866  | 42 | 30  | 321 | 0    |
| CONTIG-035799 | 63   | 3  | 11  | 0   | 0    |
| CONTIG-035800 | 80   | 35 | 19  | 102 | 0    |
| CONTIG-035801 | 151  | 27 | 10  | 126 | 0    |
| CONTIG-035802 | 171  | 10 | 12  | 67  | 0    |
| CONTIG-035803 | 479  | 18 | 27  | 232 | 2    |
| CONTIG-035804 | 57   | 9  | 4   | 0   | 0    |
| CONTIG-035805 | 103  | 13 | 16  | 12  | 0    |
| CONTIG-035806 | 96   | 6  | 8   | 0   | 0    |
| CONTIG-035807 | 119  | 5  | 11  | 22  | 0    |
| CONTIG-035808 | 145  | 10 | 30  | 19  | 0    |
| CONTIG-035811 | 220  | 19 | 6   | 114 | 4    |
| CONTIG-035812 | 103  | 9  | 6   | 25  | 0    |
| CONTIG-035813 | 69   | 5  | 0   | 6   | 0    |
| CONTIG-035814 | 101  | 12 | 7   | 44  | 0    |
| CONTIG-035816 | 100  | 4  | 0   | 11  | 0    |
| CONTIG-035817 | 99   | 3  | 2   | 2   | 0    |
| CONTIG-035818 | 320  | 70 | 264 | 407 | 19   |
| CONTIG-035819 | 86   | 6  | 4   | 8   | 0    |
| CONTIG-035822 | 253  | 22 | 8   | 215 | 0    |
| CONTIG-035823 | 836  | 12 | 19  | 379 | 0    |

|               |     |     |     |     |     |
|---------------|-----|-----|-----|-----|-----|
| CONTIG-035824 | 71  | 35  | 2   | 0   | 2   |
| CONTIG-035828 | 323 | 25  | 22  | 295 | 15  |
| CONTIG-035829 | 66  | 4   | 2   | 2   | 0   |
| CONTIG-035830 | 122 | 3   | 4   | 4   | 0   |
| CONTIG-035831 | 527 | 8   | 22  | 67  | 0   |
| CONTIG-035832 | 373 | 21  | 89  | 399 | 0   |
| CONTIG-035833 | 69  | 3   | 0   | 0   | 0   |
| CONTIG-035834 | 100 | 4   | 6   | 8   | 0   |
| CONTIG-035835 | 821 | 16  | 41  | 430 | 7   |
| CONTIG-035836 | 58  | 9   | 7   | 8   | 0   |
| CONTIG-035837 | 467 | 13  | 10  | 246 | 0   |
| CONTIG-035838 | 226 | 10  | 10  | 60  | 0   |
| CONTIG-035839 | 120 | 5   | 0   | 18  | 0   |
| CONTIG-035840 | 90  | 10  | 12  | 19  | 0   |
| CONTIG-035841 | 63  | 7   | 4   | 5   | 0   |
| CONTIG-035842 | 159 | 10  | 23  | 27  | 0   |
| CONTIG-035843 | 70  | 6   | 2   | 6   | 0   |
| CONTIG-035844 | 125 | 6   | 5   | 19  | 0   |
| CONTIG-035845 | 264 | 12  | 11  | 94  | 0   |
| CONTIG-035846 | 165 | 7   | 13  | 40  | 0   |
| CONTIG-035847 | 284 | 11  | 33  | 81  | 2   |
| CONTIG-035849 | 184 | 14  | 15  | 86  | 0   |
| CONTIG-035850 | 107 | 11  | 55  | 0   | 0   |
| CONTIG-035852 | 73  | 12  | 7   | 22  | 0   |
| CONTIG-035853 | 121 | 11  | 4   | 38  | 0   |
| CONTIG-035854 | 45  | 110 | 11  | 257 | 0   |
| CONTIG-035856 | 71  | 5   | 5   | 12  | 0   |
| CONTIG-035858 | 237 | 9   | 11  | 45  | 0   |
| CONTIG-035859 | 341 | 12  | 25  | 91  | 3   |
| CONTIG-035860 | 37  | 161 | 3   | 72  | 3   |
| CONTIG-035861 | 99  | 16  | 25  | 37  | 0   |
| CONTIG-035862 | 133 | 18  | 0   | 0   | 24  |
| CONTIG-035865 | 66  | 5   | 4   | 11  | 0   |
| CONTIG-035866 | 645 | 40  | 74  | 691 | 37  |
| CONTIG-035867 | 247 | 326 | 9   | 2   | 168 |
| CONTIG-035868 | 434 | 23  | 152 | 307 | 0   |
| CONTIG-035869 | 262 | 8   | 30  | 32  | 0   |
| CONTIG-035870 | 336 | 8   | 32  | 64  | 0   |
| CONTIG-035871 | 157 | 13  | 4   | 97  | 0   |
| CONTIG-035872 | 127 | 14  | 10  | 49  | 0   |
| CONTIG-035873 | 216 | 161 | 49  | 20  | 0   |
| CONTIG-035874 | 94  | 9   | 3   | 0   | 0   |
| CONTIG-035876 | 431 | 12  | 21  | 4   | 5   |
| CONTIG-035877 | 119 | 8   | 15  | 39  | 0   |
| CONTIG-035878 | 129 | 6   | 7   | 21  | 0   |
| CONTIG-035879 | 543 | 13  | 33  | 221 | 9   |
| CONTIG-035880 | 74  | 5   | 14  | 4   | 0   |

|               |     |    |     |     |   |
|---------------|-----|----|-----|-----|---|
| CONTIG-035881 | 473 | 13 | 2   | 0   | 0 |
| CONTIG-035882 | 951 | 17 | 66  | 885 | 0 |
| CONTIG-035883 | 166 | 9  | 2   | 35  | 0 |
| CONTIG-035884 | 100 | 7  | 5   | 18  | 0 |
| CONTIG-035885 | 68  | 4  | 7   | 0   | 0 |
| CONTIG-035886 | 139 | 13 | 9   | 7   | 0 |
| CONTIG-035887 | 530 | 8  | 75  | 110 | 0 |
| CONTIG-035896 | 822 | 15 | 145 | 258 | 8 |
| CONTIG-035898 | 199 | 9  | 41  | 33  | 0 |
| CONTIG-035899 | 136 | 5  | 13  | 23  | 0 |
| CONTIG-035900 | 36  | 56 | 16  | 30  | 0 |
| CONTIG-035901 | 140 | 8  | 2   | 46  | 0 |
| CONTIG-035902 | 340 | 11 | 7   | 122 | 0 |
| CONTIG-035903 | 145 | 6  | 8   | 15  | 0 |
| CONTIG-035904 | 340 | 7  | 6   | 70  | 0 |
| CONTIG-035905 | 127 | 10 | 9   | 0   | 0 |
| CONTIG-035906 | 78  | 14 | 28  | 6   | 0 |
| CONTIG-035907 | 231 | 3  | 5   | 23  | 0 |
| CONTIG-035908 | 218 | 4  | 7   | 18  | 0 |
| CONTIG-035909 | 61  | 13 | 9   | 9   | 0 |
| CONTIG-035910 | 81  | 13 | 12  | 27  | 0 |
| CONTIG-035911 | 95  | 9  | 8   | 14  | 0 |
| CONTIG-035912 | 123 | 10 | 26  | 37  | 0 |
| CONTIG-035913 | 390 | 35 | 59  | 183 | 0 |
| CONTIG-035914 | 185 | 12 | 35  | 39  | 0 |
| CONTIG-035915 | 116 | 7  | 5   | 11  | 0 |
| CONTIG-035916 | 116 | 11 | 15  | 33  | 0 |
| CONTIG-035917 | 141 | 18 | 37  | 46  | 0 |
| CONTIG-035918 | 135 | 14 | 18  | 22  | 4 |
| CONTIG-035919 | 82  | 11 | 3   | 36  | 0 |
| CONTIG-035920 | 67  | 5  | 16  | 2   | 0 |
| CONTIG-035921 | 81  | 6  | 4   | 0   | 0 |
| CONTIG-035923 | 85  | 7  | 23  | 6   | 0 |
| CONTIG-035924 | 90  | 4  | 10  | 11  | 0 |
| CONTIG-035925 | 319 | 32 | 9   | 467 | 2 |
| CONTIG-035926 | 148 | 6  | 20  | 31  | 0 |
| CONTIG-035927 | 92  | 21 | 36  | 49  | 0 |
| CONTIG-035928 | 98  | 7  | 0   | 12  | 0 |
| CONTIG-035929 | 50  | 34 | 6   | 62  | 0 |
| CONTIG-035930 | 109 | 12 | 68  | 19  | 0 |
| CONTIG-035931 | 460 | 32 | 173 | 559 | 0 |
| CONTIG-035932 | 380 | 8  | 74  | 83  | 0 |
| CONTIG-035933 | 196 | 33 | 200 | 72  | 4 |
| CONTIG-035934 | 222 | 12 | 22  | 65  | 0 |
| CONTIG-035935 | 108 | 7  | 29  | 21  | 0 |
| CONTIG-035936 | 223 | 7  | 6   | 31  | 2 |
| CONTIG-035937 | 86  | 14 | 30  | 9   | 0 |

|               |     |     |     |     |    |
|---------------|-----|-----|-----|-----|----|
| CONTIG-035938 | 114 | 5   | 0   | 12  | 0  |
| CONTIG-035939 | 393 | 9   | 19  | 113 | 0  |
| CONTIG-035940 | 158 | 21  | 40  | 157 | 0  |
| CONTIG-035942 | 67  | 8   | 17  | 6   | 0  |
| CONTIG-035943 | 491 | 10  | 58  | 112 | 13 |
| CONTIG-035944 | 68  | 5   | 4   | 18  | 0  |
| CONTIG-035945 | 90  | 10  | 9   | 39  | 0  |
| CONTIG-035946 | 68  | 7   | 12  | 3   | 0  |
| CONTIG-035947 | 97  | 8   | 3   | 23  | 0  |
| CONTIG-035948 | 245 | 7   | 27  | 43  | 3  |
| CONTIG-035949 | 69  | 4   | 5   | 8   | 0  |
| CONTIG-035950 | 181 | 12  | 83  | 14  | 0  |
| CONTIG-035951 | 664 | 7   | 40  | 110 | 0  |
| CONTIG-035952 | 223 | 9   | 24  | 87  | 0  |
| CONTIG-035953 | 215 | 12  | 9   | 68  | 2  |
| CONTIG-035955 | 222 | 4   | 8   | 20  | 0  |
| CONTIG-035956 | 108 | 6   | 2   | 22  | 0  |
| CONTIG-035957 | 120 | 6   | 0   | 11  | 0  |
| CONTIG-035958 | 364 | 12  | 19  | 129 | 0  |
| CONTIG-035965 | 197 | 9   | 15  | 27  | 0  |
| CONTIG-035966 | 192 | 6   | 2   | 40  | 0  |
| CONTIG-035967 | 78  | 5   | 10  | 10  | 0  |
| CONTIG-035968 | 66  | 7   | 0   | 2   | 0  |
| CONTIG-035969 | 112 | 9   | 89  | 0   | 0  |
| CONTIG-035970 | 106 | 5   | 2   | 15  | 0  |
| CONTIG-035971 | 207 | 8   | 31  | 42  | 0  |
| CONTIG-035973 | 77  | 137 | 41  | 8   | 0  |
| CONTIG-035974 | 72  | 4   | 5   | 9   | 0  |
| CONTIG-035975 | 223 | 53  | 23  | 599 | 0  |
| CONTIG-035977 | 427 | 14  | 8   | 111 | 6  |
| CONTIG-035978 | 224 | 15  | 51  | 54  | 2  |
| CONTIG-035979 | 749 | 13  | 17  | 384 | 4  |
| CONTIG-035980 | 125 | 7   | 11  | 26  | 0  |
| CONTIG-035981 | 429 | 34  | 195 | 537 | 0  |
| CONTIG-035982 | 247 | 13  | 35  | 45  | 0  |
| CONTIG-035983 | 139 | 10  | 13  | 25  | 0  |
| CONTIG-035984 | 122 | 6   | 13  | 14  | 0  |
| CONTIG-035985 | 174 | 12  | 4   | 91  | 0  |
| CONTIG-035986 | 72  | 6   | 6   | 6   | 0  |
| CONTIG-035987 | 214 | 11  | 4   | 87  | 2  |
| CONTIG-035988 | 128 | 5   | 5   | 12  | 0  |
| CONTIG-035989 | 162 | 9   | 22  | 57  | 0  |
| CONTIG-035990 | 113 | 22  | 17  | 107 | 0  |
| CONTIG-035991 | 415 | 7   | 18  | 103 | 0  |
| CONTIG-035995 | 95  | 4   | 3   | 12  | 0  |
| CONTIG-035996 | 373 | 32  | 63  | 504 | 5  |
| CONTIG-036000 | 217 | 10  | 76  | 54  | 0  |



|               |      |     |     |     |     |
|---------------|------|-----|-----|-----|-----|
| CONTIG-036001 | 101  | 38  | 9   | 134 | 2   |
| CONTIG-036002 | 76   | 7   | 12  | 6   | 0   |
| CONTIG-036003 | 163  | 8   | 10  | 54  | 0   |
| CONTIG-036004 | 162  | 8   | 10  | 52  | 0   |
| CONTIG-036005 | 141  | 5   | 4   | 16  | 0   |
| CONTIG-036006 | 184  | 10  | 9   | 57  | 0   |
| CONTIG-036007 | 79   | 5   | 15  | 5   | 0   |
| CONTIG-036008 | 115  | 9   | 17  | 30  | 0   |
| CONTIG-036009 | 70   | 3   | 5   | 0   | 0   |
| CONTIG-036010 | 94   | 7   | 2   | 30  | 0   |
| CONTIG-036011 | 1458 | 34  | 10  | 4   | 295 |
| CONTIG-036012 | 90   | 19  | 96  | 17  | 0   |
| CONTIG-036017 | 196  | 11  | 10  | 103 | 0   |
| CONTIG-036020 | 149  | 23  | 8   | 84  | 0   |
| CONTIG-036025 | 88   | 6   | 6   | 11  | 0   |
| CONTIG-036026 | 135  | 3   | 2   | 2   | 0   |
| CONTIG-036027 | 171  | 134 | 136 | 483 | 60  |
| CONTIG-036028 | 196  | 10  | 6   | 37  | 0   |
| CONTIG-036029 | 183  | 24  | 98  | 51  | 2   |
| CONTIG-036030 | 141  | 10  | 0   | 2   | 2   |
| CONTIG-036031 | 124  | 6   | 3   | 25  | 0   |
| CONTIG-036034 | 306  | 7   | 68  | 40  | 2   |
| CONTIG-036035 | 306  | 14  | 20  | 166 | 0   |
| CONTIG-036036 | 77   | 12  | 21  | 9   | 0   |
| CONTIG-036037 | 463  | 14  | 58  | 312 | 0   |
| CONTIG-036041 | 455  | 19  | 5   | 405 | 0   |
| CONTIG-036042 | 211  | 20  | 61  | 101 | 0   |
| CONTIG-036043 | 136  | 5   | 4   | 17  | 0   |
| CONTIG-036044 | 73   | 2   | 4   | 0   | 0   |
| CONTIG-036046 | 151  | 7   | 11  | 34  | 2   |
| CONTIG-036047 | 204  | 20  | 16  | 78  | 2   |
| CONTIG-036048 | 259  | 9   | 3   | 119 | 0   |
| CONTIG-036049 | 186  | 30  | 163 | 68  | 2   |
| CONTIG-036051 | 80   | 6   | 2   | 2   | 0   |
| CONTIG-036054 | 337  | 10  | 20  | 160 | 0   |
| CONTIG-036059 | 397  | 53  | 20  | 48  | 0   |
| CONTIG-036061 | 1006 | 20  | 25  | 692 | 24  |
| CONTIG-036062 | 119  | 7   | 5   | 2   | 0   |
| CONTIG-036063 | 83   | 6   | 7   | 5   | 0   |
| CONTIG-036064 | 626  | 17  | 82  | 441 | 4   |
| CONTIG-036065 | 106  | 9   | 2   | 33  | 0   |
| CONTIG-036066 | 565  | 20  | 45  | 267 | 8   |
| CONTIG-036067 | 327  | 15  | 57  | 180 | 0   |
| CONTIG-036069 | 61   | 5   | 15  | 0   | 0   |
| CONTIG-036070 | 104  | 3   | 2   | 10  | 0   |
| CONTIG-036071 | 161  | 4   | 2   | 16  | 0   |
| CONTIG-036072 | 475  | 10  | 12  | 79  | 0   |

|               |     |    |     |     |   |
|---------------|-----|----|-----|-----|---|
| CONTIG-036073 | 239 | 20 | 168 | 98  | 0 |
| CONTIG-036074 | 589 | 22 | 51  | 514 | 0 |
| CONTIG-036078 | 941 | 12 | 72  | 206 | 0 |
| CONTIG-036080 | 62  | 2  | 2   | 2   | 0 |
| CONTIG-036084 | 69  | 11 | 48  | 0   | 0 |
| CONTIG-036085 | 168 | 5  | 21  | 20  | 0 |
| CONTIG-036086 | 299 | 18 | 48  | 51  | 0 |
| CONTIG-036088 | 193 | 11 | 17  | 73  | 0 |
| CONTIG-036089 | 78  | 12 | 0   | 38  | 0 |
| CONTIG-036090 | 143 | 63 | 133 | 428 | 0 |
| CONTIG-036091 | 145 | 5  | 6   | 23  | 0 |
| CONTIG-036092 | 336 | 12 | 22  | 170 | 0 |
| CONTIG-036093 | 622 | 11 | 6   | 247 | 2 |
| CONTIG-036094 | 71  | 3  | 6   | 2   | 0 |
| CONTIG-036095 | 162 | 11 | 24  | 24  | 0 |
| CONTIG-036096 | 282 | 15 | 59  | 180 | 0 |
| CONTIG-036097 | 185 | 24 | 47  | 213 | 0 |
| CONTIG-036098 | 58  | 43 | 12  | 58  | 0 |
| CONTIG-036099 | 94  | 9  | 16  | 29  | 0 |
| CONTIG-036100 | 568 | 14 | 115 | 227 | 0 |
| CONTIG-036101 | 95  | 6  | 4   | 12  | 0 |
| CONTIG-036102 | 619 | 19 | 29  | 211 | 0 |
| CONTIG-036103 | 217 | 12 | 67  | 71  | 0 |
| CONTIG-036104 | 110 | 8  | 8   | 44  | 0 |
| CONTIG-036105 | 59  | 10 | 26  | 0   | 0 |
| CONTIG-036106 | 61  | 7  | 6   | 9   | 0 |
| CONTIG-036107 | 459 | 15 | 0   | 8   | 0 |
| CONTIG-036108 | 345 | 22 | 26  | 169 | 0 |
| CONTIG-036109 | 132 | 3  | 7   | 10  | 0 |
| CONTIG-036110 | 667 | 18 | 35  | 2   | 0 |
| CONTIG-036111 | 94  | 3  | 12  | 5   | 0 |
| CONTIG-036112 | 109 | 7  | 7   | 4   | 0 |
| CONTIG-036113 | 94  | 4  | 7   | 10  | 0 |
| CONTIG-036115 | 209 | 9  | 56  | 0   | 0 |
| CONTIG-036116 | 129 | 11 | 6   | 73  | 0 |
| CONTIG-036117 | 79  | 7  | 5   | 10  | 0 |
| CONTIG-036118 | 223 | 18 | 10  | 65  | 0 |
| CONTIG-036120 | 85  | 4  | 2   | 7   | 0 |
| CONTIG-036121 | 217 | 4  | 0   | 13  | 0 |
| CONTIG-036122 | 236 | 11 | 15  | 74  | 3 |
| CONTIG-036123 | 141 | 5  | 5   | 2   | 0 |
| CONTIG-036124 | 225 | 7  | 2   | 37  | 0 |
| CONTIG-036127 | 70  | 5  | 7   | 4   | 0 |
| CONTIG-036128 | 603 | 14 | 11  | 8   | 0 |
| CONTIG-036129 | 242 | 13 | 56  | 47  | 0 |
| CONTIG-036131 | 178 | 13 | 13  | 61  | 0 |
| CONTIG-036132 | 129 | 6  | 5   | 15  | 0 |

|               |      |     |     |      |    |
|---------------|------|-----|-----|------|----|
| CONTIG-036133 | 163  | 5   | 4   | 28   | 0  |
| CONTIG-036134 | 863  | 12  | 8   | 67   | 30 |
| CONTIG-036137 | 76   | 14  | 6   | 26   | 0  |
| CONTIG-036138 | 176  | 7   | 24  | 28   | 0  |
| CONTIG-036140 | 606  | 9   | 90  | 112  | 0  |
| CONTIG-036141 | 114  | 7   | 2   | 25   | 0  |
| CONTIG-036142 | 766  | 14  | 48  | 446  | 4  |
| CONTIG-036143 | 465  | 20  | 168 | 395  | 0  |
| CONTIG-036147 | 276  | 12  | 10  | 24   | 6  |
| CONTIG-036149 | 131  | 7   | 9   | 9    | 0  |
| CONTIG-036150 | 85   | 9   | 11  | 21   | 0  |
| CONTIG-036151 | 106  | 4   | 2   | 4    | 0  |
| CONTIG-036152 | 92   | 7   | 16  | 20   | 0  |
| CONTIG-036154 | 175  | 12  | 4   | 106  | 0  |
| CONTIG-036155 | 113  | 9   | 40  | 22   | 0  |
| CONTIG-036156 | 174  | 5   | 3   | 0    | 2  |
| CONTIG-036157 | 83   | 6   | 10  | 24   | 0  |
| CONTIG-036158 | 1340 | 23  | 86  | 1564 | 0  |
| CONTIG-036159 | 127  | 7   | 4   | 27   | 0  |
| CONTIG-036161 | 209  | 11  | 16  | 72   | 0  |
| CONTIG-036162 | 454  | 22  | 11  | 451  | 0  |
| CONTIG-036163 | 80   | 6   | 0   | 9    | 0  |
| CONTIG-036164 | 104  | 6   | 8   | 11   | 0  |
| CONTIG-036165 | 111  | 53  | 9   | 117  | 4  |
| CONTIG-036169 | 281  | 12  | 15  | 109  | 0  |
| CONTIG-036170 | 211  | 7   | 8   | 47   | 0  |
| CONTIG-036171 | 209  | 10  | 16  | 49   | 0  |
| CONTIG-036172 | 68   | 71  | 14  | 145  | 0  |
| CONTIG-036173 | 229  | 14  | 18  | 66   | 0  |
| CONTIG-036174 | 230  | 15  | 15  | 180  | 0  |
| CONTIG-036175 | 473  | 12  | 48  | 234  | 2  |
| CONTIG-036177 | 91   | 3   | 5   | 2    | 0  |
| CONTIG-036178 | 72   | 2   | 0   | 0    | 0  |
| CONTIG-036179 | 343  | 9   | 8   | 83   | 0  |
| CONTIG-036180 | 71   | 6   | 7   | 11   | 0  |
| CONTIG-036181 | 130  | 7   | 14  | 25   | 0  |
| CONTIG-036182 | 589  | 31  | 81  | 620  | 2  |
| CONTIG-036183 | 498  | 17  | 77  | 291  | 6  |
| CONTIG-036184 | 170  | 25  | 70  | 81   | 0  |
| CONTIG-036185 | 132  | 24  | 2   | 148  | 5  |
| CONTIG-036186 | 161  | 152 | 145 | 1293 | 2  |
| CONTIG-036187 | 392  | 11  | 28  | 121  | 5  |
| CONTIG-036191 | 122  | 17  | 12  | 58   | 0  |
| CONTIG-036192 | 84   | 12  | 43  | 0    | 0  |
| CONTIG-036193 | 239  | 14  | 26  | 82   | 0  |
| CONTIG-036194 | 49   | 26  | 0   | 29   | 0  |
| CONTIG-036195 | 148  | 5   | 2   | 19   | 0  |

|               |     |    |     |     |    |
|---------------|-----|----|-----|-----|----|
| CONTIG-036196 | 143 | 9  | 33  | 26  | 0  |
| CONTIG-036197 | 110 | 10 | 0   | 25  | 0  |
| CONTIG-036199 | 215 | 8  | 19  | 61  | 0  |
| CONTIG-036200 | 220 | 11 | 11  | 87  | 0  |
| CONTIG-036201 | 193 | 19 | 62  | 83  | 0  |
| CONTIG-036202 | 102 | 14 | 60  | 2   | 16 |
| CONTIG-036205 | 254 | 5  | 6   | 56  | 0  |
| CONTIG-036206 | 71  | 2  | 0   | 2   | 0  |
| CONTIG-036207 | 120 | 7  | 4   | 32  | 0  |
| CONTIG-036208 | 125 | 8  | 9   | 11  | 0  |
| CONTIG-036209 | 170 | 40 | 27  | 291 | 0  |
| CONTIG-036210 | 114 | 4  | 2   | 6   | 0  |
| CONTIG-036211 | 947 | 26 | 67  | 800 | 17 |
| CONTIG-036212 | 88  | 13 | 13  | 21  | 0  |
| CONTIG-036213 | 251 | 16 | 91  | 165 | 0  |
| CONTIG-036214 | 265 | 12 | 9   | 83  | 0  |
| CONTIG-036215 | 110 | 36 | 2   | 52  | 0  |
| CONTIG-036216 | 111 | 5  | 5   | 12  | 0  |
| CONTIG-036217 | 76  | 19 | 21  | 7   | 0  |
| CONTIG-036218 | 368 | 11 | 8   | 69  | 0  |
| CONTIG-036219 | 254 | 13 | 12  | 67  | 2  |
| CONTIG-036220 | 118 | 13 | 17  | 32  | 2  |
| CONTIG-036221 | 103 | 5  | 7   | 17  | 0  |
| CONTIG-036222 | 69  | 17 | 19  | 8   | 2  |
| CONTIG-036223 | 65  | 5  | 5   | 10  | 0  |
| CONTIG-036224 | 93  | 5  | 2   | 6   | 0  |
| CONTIG-036225 | 443 | 12 | 78  | 161 | 2  |
| CONTIG-036226 | 207 | 30 | 45  | 243 | 0  |
| CONTIG-036227 | 240 | 9  | 22  | 48  | 2  |
| CONTIG-036228 | 45  | 36 | 11  | 6   | 5  |
| CONTIG-036229 | 200 | 9  | 47  | 41  | 0  |
| CONTIG-036230 | 154 | 4  | 0   | 23  | 0  |
| CONTIG-036231 | 210 | 8  | 32  | 29  | 0  |
| CONTIG-036232 | 226 | 71 | 18  | 413 | 29 |
| CONTIG-036233 | 393 | 19 | 71  | 229 | 0  |
| CONTIG-036234 | 336 | 14 | 14  | 190 | 0  |
| CONTIG-036235 | 122 | 8  | 7   | 14  | 0  |
| CONTIG-036236 | 155 | 9  | 3   | 43  | 0  |
| CONTIG-036237 | 132 | 7  | 5   | 22  | 0  |
| CONTIG-036238 | 83  | 7  | 0   | 23  | 0  |
| CONTIG-036239 | 884 | 18 | 100 | 720 | 2  |
| CONTIG-036240 | 179 | 25 | 17  | 257 | 0  |
| CONTIG-036241 | 183 | 10 | 9   | 80  | 0  |
| CONTIG-036242 | 166 | 26 | 16  | 224 | 0  |
| CONTIG-036243 | 113 | 35 | 97  | 13  | 0  |
| CONTIG-036244 | 234 | 6  | 21  | 46  | 2  |
| CONTIG-036246 | 536 | 18 | 45  | 293 | 8  |

|               |      |     |     |      |    |
|---------------|------|-----|-----|------|----|
| CONTIG-036247 | 85   | 36  | 211 | 3    | 0  |
| CONTIG-036249 | 196  | 9   | 21  | 44   | 2  |
| CONTIG-036254 | 287  | 14  | 85  | 117  | 0  |
| CONTIG-036255 | 78   | 13  | 16  | 30   | 0  |
| CONTIG-036256 | 136  | 8   | 24  | 31   | 0  |
| CONTIG-036257 | 133  | 7   | 16  | 20   | 0  |
| CONTIG-036258 | 67   | 7   | 7   | 14   | 0  |
| CONTIG-036259 | 309  | 15  | 44  | 101  | 0  |
| CONTIG-036261 | 182  | 16  | 14  | 83   | 0  |
| CONTIG-036262 | 464  | 14  | 30  | 281  | 0  |
| CONTIG-036263 | 78   | 5   | 5   | 14   | 0  |
| CONTIG-036264 | 1282 | 86  | 128 | 42   | 0  |
| CONTIG-036266 | 235  | 12  | 6   | 71   | 0  |
| CONTIG-036267 | 143  | 14  | 49  | 28   | 0  |
| CONTIG-036268 | 158  | 11  | 7   | 80   | 0  |
| CONTIG-036272 | 100  | 5   | 0   | 4    | 0  |
| CONTIG-036273 | 323  | 19  | 44  | 93   | 6  |
| CONTIG-036274 | 84   | 13  | 9   | 56   | 0  |
| CONTIG-036275 | 113  | 7   | 9   | 8    | 0  |
| CONTIG-036276 | 63   | 6   | 10  | 4    | 0  |
| CONTIG-036277 | 122  | 5   | 6   | 6    | 0  |
| CONTIG-036278 | 621  | 24  | 67  | 393  | 4  |
| CONTIG-036279 | 476  | 12  | 12  | 161  | 7  |
| CONTIG-036280 | 397  | 15  | 85  | 294  | 0  |
| CONTIG-036281 | 83   | 44  | 190 | 2    | 0  |
| CONTIG-036282 | 67   | 42  | 7   | 163  | 0  |
| CONTIG-036283 | 84   | 5   | 13  | 4    | 0  |
| CONTIG-036284 | 102  | 10  | 44  | 2    | 0  |
| CONTIG-036285 | 132  | 6   | 29  | 10   | 0  |
| CONTIG-036286 | 73   | 10  | 4   | 26   | 0  |
| CONTIG-036288 | 72   | 9   | 8   | 27   | 0  |
| CONTIG-036291 | 143  | 13  | 13  | 72   | 0  |
| CONTIG-036292 | 446  | 16  | 55  | 228  | 2  |
| CONTIG-036293 | 207  | 9   | 12  | 78   | 0  |
| CONTIG-036294 | 60   | 321 | 2   | 469  | 11 |
| CONTIG-036295 | 271  | 12  | 50  | 131  | 0  |
| CONTIG-036296 | 652  | 17  | 23  | 442  | 8  |
| CONTIG-036297 | 1186 | 26  | 68  | 1642 | 2  |
| CONTIG-036298 | 58   | 5   | 12  | 0    | 0  |
| CONTIG-036300 | 161  | 12  | 2   | 88   | 0  |
| CONTIG-036301 | 127  | 6   | 4   | 32   | 0  |
| CONTIG-036302 | 290  | 7   | 41  | 45   | 0  |
| CONTIG-036303 | 58   | 5   | 13  | 2    | 0  |
| CONTIG-036304 | 471  | 13  | 19  | 170  | 4  |
| CONTIG-036305 | 387  | 15  | 17  | 84   | 9  |
| CONTIG-036306 | 187  | 17  | 14  | 79   | 0  |
| CONTIG-036307 | 345  | 8   | 49  | 80   | 0  |

|               |     |      |     |      |     |
|---------------|-----|------|-----|------|-----|
| CONTIG-036308 | 120 | 17   | 75  | 50   | 0   |
| CONTIG-036310 | 84  | 11   | 2   | 24   | 0   |
| CONTIG-036312 | 91  | 23   | 28  | 10   | 3   |
| CONTIG-036313 | 63  | 6    | 11  | 9    | 0   |
| CONTIG-036314 | 86  | 8    | 13  | 16   | 0   |
| CONTIG-036315 | 152 | 19   | 54  | 92   | 0   |
| CONTIG-036316 | 513 | 9    | 14  | 158  | 0   |
| CONTIG-036318 | 146 | 21   | 22  | 114  | 8   |
| CONTIG-036320 | 570 | 12   | 62  | 151  | 11  |
| CONTIG-036321 | 97  | 12   | 44  | 12   | 0   |
| CONTIG-036322 | 272 | 9    | 38  | 30   | 0   |
| CONTIG-036323 | 199 | 16   | 31  | 143  | 0   |
| CONTIG-036324 | 119 | 4    | 2   | 10   | 0   |
| CONTIG-036325 | 450 | 14   | 80  | 167  | 2   |
| CONTIG-036326 | 133 | 7    | 0   | 46   | 0   |
| CONTIG-036327 | 614 | 13   | 14  | 125  | 0   |
| CONTIG-036328 | 202 | 10   | 16  | 68   | 0   |
| CONTIG-036329 | 66  | 39   | 151 | 35   | 0   |
| CONTIG-036330 | 316 | 37   | 98  | 53   | 2   |
| CONTIG-036331 | 971 | 22   | 7   | 0    | 109 |
| CONTIG-036333 | 275 | 74   | 118 | 1228 | 0   |
| CONTIG-036334 | 64  | 3    | 2   | 7    | 0   |
| CONTIG-036336 | 269 | 10   | 22  | 43   | 0   |
| CONTIG-036337 | 120 | 56   | 21  | 187  | 0   |
| CONTIG-036338 | 59  | 4    | 11  | 4    | 0   |
| CONTIG-036340 | 289 | 8    | 2   | 51   | 0   |
| CONTIG-036341 | 129 | 9    | 34  | 37   | 0   |
| CONTIG-036342 | 592 | 21   | 107 | 117  | 4   |
| CONTIG-036343 | 182 | 10   | 36  | 31   | 0   |
| CONTIG-036344 | 528 | 16   | 40  | 422  | 0   |
| CONTIG-036345 | 896 | 38   | 0   | 0    | 310 |
| CONTIG-036346 | 65  | 5    | 7   | 5    | 0   |
| CONTIG-036348 | 37  | 1078 | 32  | 9    | 0   |
| CONTIG-036349 | 146 | 11   | 14  | 43   | 0   |
| CONTIG-036350 | 81  | 8    | 10  | 20   | 0   |
| CONTIG-036351 | 80  | 99   | 46  | 298  | 0   |
| CONTIG-036353 | 369 | 17   | 6   | 18   | 0   |
| CONTIG-036354 | 288 | 12   | 7   | 166  | 0   |
| CONTIG-036355 | 74  | 7    | 3   | 16   | 0   |
| CONTIG-036356 | 165 | 19   | 64  | 17   | 0   |
| CONTIG-036357 | 396 | 13   | 20  | 184  | 0   |
| CONTIG-036359 | 262 | 11   | 12  | 72   | 2   |
| CONTIG-036360 | 39  | 137  | 48  | 87   | 0   |
| CONTIG-036361 | 81  | 3    | 7   | 2    | 0   |
| CONTIG-036362 | 59  | 8    | 19  | 2    | 0   |
| CONTIG-036363 | 119 | 6    | 10  | 20   | 0   |
| CONTIG-036364 | 178 | 11   | 8   | 56   | 0   |

|               |     |    |     |     |     |
|---------------|-----|----|-----|-----|-----|
| CONTIG-036365 | 306 | 16 | 43  | 104 | 0   |
| CONTIG-036366 | 328 | 31 | 84  | 262 | 6   |
| CONTIG-036367 | 64  | 5  | 3   | 2   | 0   |
| CONTIG-036368 | 726 | 17 | 136 | 348 | 2   |
| CONTIG-036369 | 105 | 8  | 20  | 13  | 0   |
| CONTIG-036370 | 206 | 9  | 35  | 38  | 0   |
| CONTIG-036371 | 251 | 28 | 82  | 239 | 0   |
| CONTIG-036372 | 589 | 11 | 29  | 124 | 0   |
| CONTIG-036373 | 282 | 9  | 32  | 101 | 0   |
| CONTIG-036374 | 210 | 11 | 42  | 15  | 3   |
| CONTIG-036375 | 86  | 6  | 4   | 17  | 0   |
| CONTIG-036376 | 325 | 7  | 30  | 47  | 2   |
| CONTIG-036377 | 93  | 17 | 2   | 61  | 0   |
| CONTIG-036378 | 96  | 4  | 0   | 12  | 0   |
| CONTIG-036379 | 88  | 10 | 45  | 7   | 0   |
| CONTIG-036380 | 73  | 69 | 9   | 280 | 0   |
| CONTIG-036381 | 221 | 10 | 14  | 47  | 2   |
| CONTIG-036385 | 78  | 6  | 0   | 6   | 0   |
| CONTIG-036386 | 62  | 7  | 7   | 11  | 0   |
| CONTIG-036387 | 164 | 12 | 10  | 47  | 0   |
| CONTIG-036388 | 263 | 8  | 15  | 77  | 0   |
| CONTIG-036389 | 72  | 39 | 111 | 68  | 0   |
| CONTIG-036390 | 116 | 5  | 13  | 12  | 0   |
| CONTIG-036391 | 223 | 9  | 8   | 69  | 0   |
| CONTIG-036392 | 196 | 11 | 49  | 43  | 0   |
| CONTIG-036395 | 59  | 22 | 19  | 26  | 0   |
| CONTIG-036396 | 116 | 57 | 10  | 140 | 3   |
| CONTIG-036397 | 84  | 24 | 58  | 32  | 0   |
| CONTIG-036398 | 161 | 12 | 15  | 36  | 0   |
| CONTIG-036399 | 65  | 3  | 9   | 2   | 0   |
| CONTIG-036400 | 136 | 5  | 2   | 16  | 0   |
| CONTIG-036401 | 467 | 19 | 68  | 304 | 2   |
| CONTIG-036402 | 119 | 10 | 3   | 36  | 0   |
| CONTIG-036404 | 243 | 5  | 3   | 26  | 0   |
| CONTIG-036405 | 418 | 13 | 22  | 145 | 0   |
| CONTIG-036407 | 392 | 39 | 116 | 634 | 2   |
| CONTIG-036408 | 217 | 19 | 14  | 187 | 0   |
| CONTIG-036409 | 173 | 7  | 10  | 42  | 0   |
| CONTIG-036410 | 158 | 62 | 53  | 378 | 0   |
| CONTIG-036411 | 499 | 18 | 9   | 244 | 4   |
| CONTIG-036412 | 158 | 15 | 21  | 41  | 0   |
| CONTIG-036413 | 237 | 12 | 44  | 81  | 0   |
| CONTIG-036414 | 93  | 5  | 8   | 13  | 0   |
| CONTIG-036415 | 86  | 7  | 12  | 17  | 0   |
| CONTIG-036416 | 356 | 4  | 2   | 46  | 0   |
| CONTIG-036417 | 330 | 8  | 31  | 6   | 0   |
| CONTIG-036418 | 575 | 28 | 5   | 0   | 116 |

|               |     |     |     |     |   |
|---------------|-----|-----|-----|-----|---|
| CONTIG-036419 | 136 | 35  | 81  | 23  | 0 |
| CONTIG-036420 | 86  | 10  | 25  | 0   | 0 |
| CONTIG-036421 | 64  | 13  | 6   | 15  | 0 |
| CONTIG-036422 | 62  | 8   | 8   | 10  | 0 |
| CONTIG-036423 | 197 | 7   | 13  | 41  | 0 |
| CONTIG-036424 | 80  | 3   | 8   | 10  | 0 |
| CONTIG-036425 | 153 | 6   | 6   | 4   | 0 |
| CONTIG-036426 | 178 | 7   | 2   | 45  | 0 |
| CONTIG-036427 | 174 | 21  | 0   | 3   | 0 |
| CONTIG-036428 | 64  | 13  | 24  | 0   | 0 |
| CONTIG-036429 | 92  | 6   | 2   | 15  | 0 |
| CONTIG-036430 | 78  | 9   | 2   | 35  | 0 |
| CONTIG-036431 | 66  | 5   | 21  | 2   | 0 |
| CONTIG-036432 | 193 | 7   | 5   | 42  | 0 |
| CONTIG-036433 | 188 | 11  | 47  | 13  | 2 |
| CONTIG-036434 | 183 | 67  | 85  | 626 | 0 |
| CONTIG-036435 | 307 | 13  | 85  | 113 | 0 |
| CONTIG-036436 | 179 | 26  | 46  | 68  | 0 |
| CONTIG-036437 | 64  | 6   | 3   | 13  | 0 |
| CONTIG-036438 | 86  | 6   | 7   | 6   | 0 |
| CONTIG-036439 | 649 | 17  | 16  | 555 | 0 |
| CONTIG-036440 | 106 | 11  | 14  | 19  | 0 |
| CONTIG-036442 | 700 | 11  | 16  | 276 | 2 |
| CONTIG-036443 | 346 | 23  | 10  | 38  | 0 |
| CONTIG-036444 | 90  | 9   | 2   | 20  | 0 |
| CONTIG-036445 | 90  | 10  | 51  | 5   | 0 |
| CONTIG-036446 | 184 | 7   | 9   | 32  | 0 |
| CONTIG-036447 | 74  | 4   | 17  | 4   | 0 |
| CONTIG-036448 | 65  | 11  | 30  | 0   | 0 |
| CONTIG-036449 | 121 | 7   | 7   | 24  | 0 |
| CONTIG-036450 | 129 | 5   | 8   | 11  | 0 |
| CONTIG-036451 | 236 | 45  | 46  | 474 | 2 |
| CONTIG-036453 | 157 | 5   | 21  | 16  | 0 |
| CONTIG-036454 | 62  | 15  | 38  | 0   | 0 |
| CONTIG-036455 | 105 | 6   | 2   | 0   | 4 |
| CONTIG-036456 | 82  | 8   | 0   | 26  | 0 |
| CONTIG-036458 | 236 | 8   | 15  | 60  | 0 |
| CONTIG-036459 | 92  | 8   | 5   | 3   | 0 |
| CONTIG-036460 | 135 | 4   | 20  | 10  | 0 |
| CONTIG-036461 | 92  | 4   | 7   | 6   | 0 |
| CONTIG-036462 | 237 | 11  | 40  | 72  | 0 |
| CONTIG-036463 | 152 | 7   | 0   | 39  | 0 |
| CONTIG-036464 | 233 | 6   | 26  | 26  | 0 |
| CONTIG-036472 | 53  | 287 | 105 | 203 | 0 |
| CONTIG-036473 | 169 | 8   | 0   | 31  | 0 |
| CONTIG-036474 | 243 | 7   | 22  | 47  | 0 |
| CONTIG-036475 | 80  | 7   | 3   | 19  | 0 |



|               |      |    |    |      |    |
|---------------|------|----|----|------|----|
| CONTIG-036480 | 262  | 27 | 36 | 224  | 2  |
| CONTIG-036481 | 195  | 11 | 32 | 34   | 4  |
| CONTIG-036482 | 76   | 12 | 30 | 0    | 0  |
| CONTIG-036483 | 200  | 8  | 4  | 18   | 0  |
| CONTIG-036484 | 281  | 10 | 28 | 107  | 0  |
| CONTIG-036485 | 71   | 7  | 0  | 11   | 0  |
| CONTIG-036486 | 195  | 14 | 4  | 133  | 0  |
| CONTIG-036487 | 153  | 8  | 13 | 33   | 0  |
| CONTIG-036488 | 85   | 7  | 20 | 6    | 0  |
| CONTIG-036489 | 610  | 10 | 12 | 105  | 19 |
| CONTIG-036490 | 215  | 13 | 41 | 31   | 2  |
| CONTIG-036491 | 453  | 8  | 26 | 42   | 13 |
| CONTIG-036492 | 419  | 13 | 85 | 139  | 4  |
| CONTIG-036493 | 332  | 28 | 31 | 335  | 6  |
| CONTIG-036494 | 142  | 10 | 8  | 31   | 0  |
| CONTIG-036495 | 224  | 6  | 13 | 10   | 0  |
| CONTIG-036496 | 185  | 33 | 17 | 20   | 0  |
| CONTIG-036497 | 298  | 12 | 3  | 134  | 0  |
| CONTIG-036498 | 733  | 17 | 47 | 208  | 4  |
| CONTIG-036499 | 1692 | 19 | 59 | 1071 | 15 |
| CONTIG-036500 | 211  | 21 | 38 | 147  | 0  |
| CONTIG-036501 | 163  | 6  | 6  | 25   | 0  |
| CONTIG-036502 | 99   | 5  | 11 | 10   | 0  |
| CONTIG-036503 | 67   | 7  | 17 | 4    | 0  |
| CONTIG-036504 | 371  | 9  | 43 | 72   | 0  |
| CONTIG-036505 | 58   | 8  | 10 | 8    | 0  |
| CONTIG-036506 | 226  | 10 | 82 | 50   | 0  |
| CONTIG-036507 | 76   | 3  | 3  | 2    | 0  |
| CONTIG-036508 | 146  | 8  | 3  | 15   | 0  |
| CONTIG-036509 | 89   | 16 | 26 | 34   | 0  |
| CONTIG-036510 | 106  | 3  | 2  | 7    | 0  |
| CONTIG-036511 | 73   | 18 | 32 | 6    | 0  |
| CONTIG-036513 | 526  | 10 | 47 | 212  | 2  |
| CONTIG-036514 | 78   | 33 | 10 | 78   | 6  |
| CONTIG-036515 | 100  | 7  | 10 | 12   | 0  |
| CONTIG-036516 | 88   | 9  | 0  | 32   | 0  |
| CONTIG-036517 | 151  | 12 | 5  | 75   | 0  |
| CONTIG-036518 | 197  | 5  | 3  | 29   | 0  |
| CONTIG-036519 | 79   | 10 | 65 | 6    | 0  |
| CONTIG-036520 | 477  | 11 | 4  | 136  | 2  |
| CONTIG-036521 | 82   | 6  | 27 | 2    | 0  |
| CONTIG-036522 | 145  | 9  | 2  | 50   | 0  |
| CONTIG-036527 | 209  | 7  | 8  | 73   | 0  |
| CONTIG-036528 | 141  | 8  | 5  | 47   | 0  |
| CONTIG-036529 | 225  | 15 | 71 | 124  | 0  |
| CONTIG-036530 | 239  | 5  | 3  | 16   | 0  |
| CONTIG-036532 | 180  | 9  | 17 | 58   | 2  |

|               |      |    |     |      |    |
|---------------|------|----|-----|------|----|
| CONTIG-036533 | 410  | 11 | 6   | 140  | 2  |
| CONTIG-036534 | 607  | 14 | 54  | 186  | 2  |
| CONTIG-036535 | 143  | 17 | 21  | 19   | 0  |
| CONTIG-036537 | 281  | 17 | 59  | 169  | 0  |
| CONTIG-036538 | 671  | 13 | 18  | 234  | 2  |
| CONTIG-036540 | 84   | 4  | 5   | 13   | 0  |
| CONTIG-036541 | 160  | 5  | 2   | 38   | 0  |
| CONTIG-036542 | 268  | 19 | 25  | 170  | 0  |
| CONTIG-036545 | 589  | 26 | 41  | 459  | 0  |
| CONTIG-036546 | 320  | 17 | 28  | 80   | 0  |
| CONTIG-036549 | 101  | 4  | 11  | 0    | 0  |
| CONTIG-036550 | 214  | 12 | 20  | 79   | 0  |
| CONTIG-036551 | 216  | 14 | 10  | 128  | 0  |
| CONTIG-036556 | 300  | 14 | 16  | 176  | 0  |
| CONTIG-036557 | 143  | 6  | 0   | 14   | 0  |
| CONTIG-036558 | 259  | 7  | 8   | 42   | 0  |
| CONTIG-036559 | 114  | 8  | 2   | 7    | 0  |
| CONTIG-036560 | 118  | 5  | 2   | 7    | 0  |
| CONTIG-036561 | 91   | 31 | 7   | 160  | 0  |
| CONTIG-036562 | 82   | 46 | 12  | 118  | 15 |
| CONTIG-036563 | 125  | 7  | 8   | 32   | 0  |
| CONTIG-036564 | 289  | 33 | 55  | 359  | 0  |
| CONTIG-036565 | 246  | 8  | 14  | 42   | 0  |
| CONTIG-036566 | 273  | 8  | 98  | 14   | 0  |
| CONTIG-036567 | 137  | 4  | 8   | 17   | 0  |
| CONTIG-036568 | 111  | 7  | 3   | 6    | 0  |
| CONTIG-036569 | 412  | 23 | 39  | 299  | 4  |
| CONTIG-036570 | 64   | 8  | 3   | 10   | 0  |
| CONTIG-036571 | 1245 | 24 | 68  | 1179 | 18 |
| CONTIG-036572 | 237  | 10 | 13  | 113  | 0  |
| CONTIG-036573 | 676  | 32 | 206 | 647  | 2  |
| CONTIG-036574 | 464  | 15 | 26  | 255  | 2  |
| CONTIG-036575 | 120  | 6  | 9   | 19   | 0  |
| CONTIG-036576 | 232  | 14 | 32  | 59   | 2  |
| CONTIG-036578 | 626  | 15 | 46  | 300  | 0  |
| CONTIG-036579 | 84   | 13 | 30  | 5    | 0  |
| CONTIG-036581 | 171  | 8  | 0   | 49   | 0  |
| CONTIG-036582 | 122  | 10 | 12  | 46   | 0  |
| CONTIG-036583 | 64   | 5  | 4   | 9    | 0  |
| CONTIG-036585 | 234  | 6  | 42  | 22   | 0  |
| CONTIG-036586 | 67   | 3  | 5   | 0    | 0  |
| CONTIG-036587 | 65   | 3  | 3   | 4    | 0  |
| CONTIG-036588 | 197  | 15 | 17  | 72   | 0  |
| CONTIG-036589 | 102  | 10 | 21  | 26   | 0  |
| CONTIG-036590 | 78   | 4  | 14  | 2    | 0  |
| CONTIG-036591 | 136  | 9  | 12  | 18   | 0  |
| CONTIG-036592 | 425  | 15 | 76  | 147  | 0  |

|               |     |     |     |     |   |
|---------------|-----|-----|-----|-----|---|
| CONTIG-036593 | 103 | 6   | 7   | 17  | 0 |
| CONTIG-036594 | 361 | 11  | 32  | 88  | 0 |
| CONTIG-036595 | 36  | 521 | 60  | 571 | 0 |
| CONTIG-036596 | 253 | 12  | 26  | 57  | 2 |
| CONTIG-036597 | 116 | 5   | 5   | 23  | 0 |
| CONTIG-036598 | 580 | 8   | 73  | 115 | 2 |
| CONTIG-036599 | 585 | 10  | 19  | 118 | 0 |
| CONTIG-036600 | 119 | 7   | 3   | 29  | 0 |
| CONTIG-036601 | 301 | 6   | 4   | 39  | 0 |
| CONTIG-036602 | 194 | 6   | 17  | 24  | 0 |
| CONTIG-036603 | 266 | 20  | 32  | 154 | 2 |
| CONTIG-036604 | 438 | 21  | 39  | 310 | 7 |
| CONTIG-036605 | 66  | 6   | 0   | 0   | 0 |
| CONTIG-036606 | 140 | 6   | 2   | 12  | 0 |
| CONTIG-036607 | 210 | 9   | 23  | 53  | 0 |
| CONTIG-036608 | 170 | 46  | 11  | 221 | 7 |
| CONTIG-036609 | 159 | 8   | 13  | 44  | 0 |
| CONTIG-036610 | 127 | 5   | 16  | 17  | 0 |
| CONTIG-036611 | 111 | 9   | 13  | 41  | 0 |
| CONTIG-036612 | 452 | 11  | 41  | 67  | 0 |
| CONTIG-036613 | 37  | 30  | 0   | 28  | 0 |
| CONTIG-036616 | 115 | 5   | 2   | 14  | 0 |
| CONTIG-036619 | 222 | 6   | 0   | 41  | 0 |
| CONTIG-036620 | 375 | 28  | 89  | 198 | 4 |
| CONTIG-036621 | 225 | 7   | 32  | 45  | 0 |
| CONTIG-036622 | 135 | 7   | 4   | 25  | 0 |
| CONTIG-036623 | 93  | 11  | 12  | 2   | 0 |
| CONTIG-036624 | 170 | 9   | 23  | 51  | 0 |
| CONTIG-036625 | 411 | 7   | 26  | 86  | 0 |
| CONTIG-036626 | 133 | 5   | 0   | 26  | 0 |
| CONTIG-036627 | 98  | 12  | 28  | 31  | 0 |
| CONTIG-036628 | 67  | 20  | 3   | 71  | 0 |
| CONTIG-036629 | 357 | 8   | 59  | 51  | 0 |
| CONTIG-036630 | 145 | 7   | 4   | 33  | 0 |
| CONTIG-036632 | 158 | 5   | 5   | 32  | 0 |
| CONTIG-036633 | 64  | 3   | 5   | 4   | 0 |
| CONTIG-036634 | 103 | 8   | 5   | 26  | 0 |
| CONTIG-036635 | 740 | 23  | 32  | 361 | 0 |
| CONTIG-036636 | 82  | 4   | 7   | 7   | 0 |
| CONTIG-036637 | 115 | 8   | 4   | 26  | 0 |
| CONTIG-036638 | 101 | 24  | 10  | 87  | 0 |
| CONTIG-036639 | 196 | 10  | 23  | 46  | 0 |
| CONTIG-036640 | 92  | 11  | 41  | 0   | 0 |
| CONTIG-036641 | 285 | 11  | 7   | 72  | 2 |
| CONTIG-036642 | 102 | 5   | 5   | 16  | 0 |
| CONTIG-036643 | 148 | 18  | 62  | 88  | 0 |
| CONTIG-036644 | 183 | 17  | 106 | 49  | 0 |

|               |     |     |     |      |    |
|---------------|-----|-----|-----|------|----|
| CONTIG-036645 | 76  | 5   | 3   | 5    | 0  |
| CONTIG-036646 | 104 | 18  | 10  | 43   | 0  |
| CONTIG-036647 | 82  | 6   | 4   | 17   | 0  |
| CONTIG-036648 | 63  | 8   | 9   | 4    | 0  |
| CONTIG-036649 | 280 | 11  | 17  | 87   | 0  |
| CONTIG-036650 | 71  | 5   | 9   | 2    | 0  |
| CONTIG-036651 | 225 | 20  | 5   | 121  | 0  |
| CONTIG-036652 | 428 | 49  | 15  | 1300 | 0  |
| CONTIG-036656 | 71  | 12  | 13  | 0    | 0  |
| CONTIG-036657 | 131 | 10  | 27  | 30   | 0  |
| CONTIG-036658 | 212 | 5   | 9   | 2    | 0  |
| CONTIG-036659 | 43  | 369 | 54  | 249  | 44 |
| CONTIG-036660 | 40  | 607 | 42  | 421  | 16 |
| CONTIG-036661 | 62  | 8   | 17  | 2    | 0  |
| CONTIG-036666 | 79  | 8   | 13  | 16   | 0  |
| CONTIG-036667 | 133 | 7   | 21  | 8    | 0  |
| CONTIG-036668 | 130 | 4   | 16  | 4    | 0  |
| CONTIG-036669 | 187 | 6   | 12  | 19   | 0  |
| CONTIG-036670 | 157 | 7   | 40  | 31   | 0  |
| CONTIG-036672 | 59  | 28  | 102 | 19   | 0  |
| CONTIG-036673 | 458 | 10  | 55  | 64   | 0  |
| CONTIG-036675 | 136 | 4   | 15  | 9    | 0  |
| CONTIG-036676 | 542 | 12  | 30  | 232  | 2  |
| CONTIG-036677 | 170 | 12  | 13  | 33   | 0  |
| CONTIG-036678 | 146 | 6   | 0   | 21   | 0  |
| CONTIG-036679 | 115 | 17  | 7   | 81   | 0  |
| CONTIG-036680 | 189 | 6   | 10  | 39   | 0  |
| CONTIG-036681 | 267 | 20  | 65  | 127  | 2  |
| CONTIG-036682 | 67  | 6   | 7   | 2    | 0  |
| CONTIG-036691 | 577 | 51  | 72  | 1818 | 0  |
| CONTIG-036692 | 361 | 12  | 87  | 142  | 0  |
| CONTIG-036693 | 108 | 18  | 42  | 40   | 0  |
| CONTIG-036694 | 101 | 13  | 5   | 40   | 0  |
| CONTIG-036697 | 66  | 9   | 5   | 15   | 0  |
| CONTIG-036698 | 504 | 6   | 10  | 79   | 0  |
| CONTIG-036699 | 155 | 7   | 12  | 26   | 0  |
| CONTIG-036700 | 804 | 18  | 48  | 680  | 0  |
| CONTIG-036701 | 947 | 28  | 69  | 1581 | 2  |
| CONTIG-036702 | 68  | 4   | 0   | 4    | 0  |
| CONTIG-036703 | 46  | 18  | 10  | 6    | 0  |
| CONTIG-036704 | 68  | 6   | 0   | 10   | 0  |
| CONTIG-036705 | 120 | 10  | 5   | 21   | 0  |
| CONTIG-036706 | 309 | 113 | 28  | 103  | 0  |
| CONTIG-036707 | 169 | 12  | 63  | 10   | 4  |
| CONTIG-036708 | 321 | 29  | 77  | 195  | 0  |
| CONTIG-036709 | 230 | 9   | 27  | 82   | 0  |
| CONTIG-036710 | 158 | 11  | 64  | 52   | 0  |

|               |     |     |     |      |    |
|---------------|-----|-----|-----|------|----|
| CONTIG-036711 | 112 | 23  | 74  | 8    | 0  |
| CONTIG-036712 | 97  | 8   | 8   | 6    | 0  |
| CONTIG-036713 | 71  | 6   | 4   | 11   | 0  |
| CONTIG-036714 | 58  | 287 | 94  | 312  | 25 |
| CONTIG-036715 | 144 | 6   | 3   | 33   | 0  |
| CONTIG-036717 | 348 | 37  | 157 | 460  | 18 |
| CONTIG-036720 | 518 | 11  | 84  | 94   | 2  |
| CONTIG-036721 | 97  | 8   | 0   | 0    | 6  |
| CONTIG-036722 | 262 | 13  | 36  | 86   | 0  |
| CONTIG-036723 | 427 | 11  | 44  | 156  | 0  |
| CONTIG-036724 | 157 | 12  | 28  | 2    | 0  |
| CONTIG-036725 | 191 | 18  | 17  | 132  | 0  |
| CONTIG-036726 | 455 | 7   | 13  | 49   | 6  |
| CONTIG-036727 | 346 | 9   | 18  | 116  | 0  |
| CONTIG-036728 | 130 | 10  | 8   | 35   | 0  |
| CONTIG-036731 | 122 | 16  | 39  | 25   | 0  |
| CONTIG-036732 | 229 | 8   | 17  | 30   | 3  |
| CONTIG-036733 | 618 | 11  | 56  | 209  | 4  |
| CONTIG-036734 | 96  | 5   | 17  | 11   | 0  |
| CONTIG-036735 | 257 | 7   | 39  | 51   | 0  |
| CONTIG-036736 | 176 | 10  | 25  | 32   | 0  |
| CONTIG-036737 | 304 | 26  | 29  | 129  | 24 |
| CONTIG-036739 | 151 | 10  | 41  | 49   | 0  |
| CONTIG-036740 | 91  | 10  | 4   | 47   | 0  |
| CONTIG-036741 | 157 | 5   | 0   | 32   | 0  |
| CONTIG-036746 | 125 | 6   | 3   | 22   | 0  |
| CONTIG-036747 | 136 | 14  | 50  | 59   | 0  |
| CONTIG-036748 | 672 | 42  | 21  | 1409 | 4  |
| CONTIG-036754 | 183 | 8   | 15  | 50   | 0  |
| CONTIG-036755 | 59  | 3   | 3   | 0    | 0  |
| CONTIG-036756 | 359 | 9   | 12  | 80   | 0  |
| CONTIG-036757 | 66  | 79  | 0   | 112  | 0  |
| CONTIG-036759 | 118 | 7   | 10  | 18   | 0  |
| CONTIG-036760 | 117 | 5   | 40  | 0    | 0  |
| CONTIG-036761 | 406 | 11  | 16  | 153  | 2  |
| CONTIG-036762 | 62  | 9   | 26  | 0    | 0  |
| CONTIG-036770 | 66  | 4   | 0   | 8    | 0  |
| CONTIG-036771 | 125 | 4   | 10  | 6    | 0  |
| CONTIG-036772 | 462 | 10  | 13  | 112  | 0  |
| CONTIG-036773 | 226 | 35  | 11  | 260  | 2  |
| CONTIG-036774 | 143 | 6   | 3   | 16   | 0  |
| CONTIG-036776 | 74  | 6   | 0   | 14   | 0  |
| CONTIG-036778 | 163 | 7   | 7   | 40   | 0  |
| CONTIG-036779 | 122 | 12  | 59  | 36   | 0  |
| CONTIG-036780 | 134 | 9   | 9   | 47   | 2  |
| CONTIG-036781 | 110 | 8   | 9   | 23   | 0  |
| CONTIG-036782 | 110 | 24  | 18  | 84   | 0  |

|               |      |     |    |      |    |
|---------------|------|-----|----|------|----|
| CONTIG-036783 | 857  | 11  | 6  | 43   | 0  |
| CONTIG-036784 | 363  | 10  | 19 | 66   | 0  |
| CONTIG-036785 | 93   | 3   | 3  | 0    | 0  |
| CONTIG-036786 | 246  | 12  | 13 | 74   | 0  |
| CONTIG-036787 | 309  | 13  | 24 | 123  | 6  |
| CONTIG-036788 | 718  | 30  | 91 | 581  | 6  |
| CONTIG-036789 | 117  | 5   | 10 | 13   | 0  |
| CONTIG-036790 | 140  | 9   | 12 | 35   | 0  |
| CONTIG-036791 | 1210 | 71  | 67 | 5446 | 2  |
| CONTIG-036793 | 198  | 13  | 12 | 78   | 0  |
| CONTIG-036794 | 329  | 6   | 5  | 44   | 0  |
| CONTIG-036795 | 131  | 15  | 28 | 34   | 0  |
| CONTIG-036796 | 68   | 14  | 0  | 31   | 0  |
| CONTIG-036797 | 463  | 10  | 24 | 216  | 0  |
| CONTIG-036798 | 100  | 13  | 15 | 0    | 2  |
| CONTIG-036799 | 65   | 6   | 2  | 9    | 0  |
| CONTIG-036801 | 1587 | 26  | 36 | 1323 | 6  |
| CONTIG-036802 | 246  | 6   | 20 | 41   | 0  |
| CONTIG-036803 | 348  | 11  | 2  | 193  | 0  |
| CONTIG-036804 | 240  | 9   | 13 | 66   | 2  |
| CONTIG-036805 | 130  | 8   | 6  | 21   | 0  |
| CONTIG-036806 | 947  | 29  | 39 | 893  | 39 |
| CONTIG-036807 | 662  | 16  | 78 | 256  | 3  |
| CONTIG-036808 | 210  | 11  | 12 | 54   | 0  |
| CONTIG-036810 | 51   | 47  | 18 | 54   | 0  |
| CONTIG-036811 | 74   | 4   | 4  | 0    | 0  |
| CONTIG-036812 | 295  | 15  | 13 | 154  | 0  |
| CONTIG-036813 | 137  | 5   | 4  | 15   | 0  |
| CONTIG-036814 | 212  | 34  | 28 | 25   | 0  |
| CONTIG-036815 | 430  | 11  | 20 | 179  | 0  |
| CONTIG-036816 | 567  | 8   | 13 | 95   | 10 |
| CONTIG-036817 | 99   | 5   | 3  | 11   | 0  |
| CONTIG-036818 | 167  | 22  | 58 | 150  | 0  |
| CONTIG-036819 | 185  | 4   | 9  | 10   | 0  |
| CONTIG-036820 | 61   | 8   | 11 | 7    | 0  |
| CONTIG-036821 | 189  | 18  | 7  | 117  | 2  |
| CONTIG-036822 | 72   | 19  | 23 | 19   | 0  |
| CONTIG-036823 | 234  | 9   | 16 | 12   | 0  |
| CONTIG-036824 | 291  | 7   | 38 | 17   | 4  |
| CONTIG-036825 | 211  | 12  | 10 | 83   | 0  |
| CONTIG-036826 | 594  | 18  | 78 | 377  | 0  |
| CONTIG-036827 | 139  | 8   | 26 | 18   | 0  |
| CONTIG-036828 | 63   | 104 | 23 | 212  | 3  |
| CONTIG-036829 | 96   | 12  | 9  | 46   | 0  |
| CONTIG-036830 | 77   | 15  | 31 | 28   | 0  |
| CONTIG-036831 | 153  | 4   | 6  | 11   | 0  |
| CONTIG-036832 | 1108 | 16  | 58 | 909  | 0  |

|               |     |     |     |     |    |
|---------------|-----|-----|-----|-----|----|
| CONTIG-036833 | 139 | 9   | 15  | 34  | 0  |
| CONTIG-036834 | 452 | 24  | 66  | 138 | 58 |
| CONTIG-036835 | 79  | 3   | 4   | 4   | 0  |
| CONTIG-036836 | 328 | 20  | 106 | 212 | 2  |
| CONTIG-036837 | 193 | 7   | 4   | 18  | 0  |
| CONTIG-036838 | 171 | 4   | 5   | 11  | 0  |
| CONTIG-036839 | 70  | 5   | 5   | 2   | 0  |
| CONTIG-036840 | 156 | 8   | 25  | 30  | 0  |
| CONTIG-036841 | 78  | 7   | 5   | 19  | 0  |
| CONTIG-036850 | 58  | 4   | 12  | 0   | 2  |
| CONTIG-036851 | 67  | 15  | 6   | 22  | 0  |
| CONTIG-036853 | 246 | 17  | 23  | 13  | 0  |
| CONTIG-036854 | 107 | 9   | 4   | 8   | 0  |
| CONTIG-036856 | 177 | 13  | 20  | 59  | 0  |
| CONTIG-036857 | 154 | 4   | 6   | 12  | 0  |
| CONTIG-036858 | 120 | 4   | 4   | 14  | 0  |
| CONTIG-036860 | 50  | 236 | 51  | 338 | 23 |
| CONTIG-036865 | 212 | 6   | 0   | 45  | 0  |
| CONTIG-036866 | 76  | 30  | 18  | 68  | 0  |
| CONTIG-036867 | 201 | 81  | 23  | 474 | 19 |
| CONTIG-036868 | 495 | 14  | 6   | 367 | 0  |
| CONTIG-036869 | 154 | 5   | 2   | 21  | 0  |
| CONTIG-036870 | 97  | 4   | 11  | 7   | 2  |
| CONTIG-036871 | 234 | 4   | 0   | 8   | 0  |
| CONTIG-036872 | 41  | 622 | 38  | 461 | 0  |
| CONTIG-036873 | 72  | 17  | 19  | 28  | 0  |
| CONTIG-036874 | 118 | 11  | 15  | 17  | 0  |
| CONTIG-036875 | 65  | 7   | 7   | 14  | 0  |
| CONTIG-036876 | 65  | 3   | 2   | 7   | 0  |
| CONTIG-036884 | 39  | 652 | 46  | 561 | 52 |
| CONTIG-036885 | 129 | 4   | 12  | 6   | 0  |
| CONTIG-036888 | 135 | 7   | 4   | 31  | 0  |
| CONTIG-036889 | 261 | 7   | 6   | 49  | 0  |
| CONTIG-036890 | 153 | 112 | 57  | 639 | 33 |
| CONTIG-036892 | 111 | 14  | 9   | 43  | 0  |
| CONTIG-036893 | 125 | 18  | 58  | 44  | 0  |
| CONTIG-036894 | 450 | 26  | 41  | 258 | 6  |
| CONTIG-036895 | 95  | 15  | 28  | 11  | 0  |
| CONTIG-036896 | 355 | 15  | 14  | 258 | 0  |
| CONTIG-036897 | 78  | 12  | 27  | 21  | 0  |
| CONTIG-036898 | 200 | 13  | 32  | 48  | 2  |
| CONTIG-036900 | 81  | 3   | 7   | 2   | 0  |
| CONTIG-036902 | 67  | 6   | 3   | 4   | 0  |
| CONTIG-036903 | 60  | 16  | 29  | 0   | 0  |
| CONTIG-036904 | 110 | 8   | 5   | 31  | 0  |
| CONTIG-036905 | 153 | 16  | 67  | 69  | 0  |
| CONTIG-036906 | 139 | 4   | 2   | 9   | 0  |

|               |     |     |    |      |      |
|---------------|-----|-----|----|------|------|
| CONTIG-036907 | 175 | 10  | 25 | 17   | 2    |
| CONTIG-036908 | 121 | 8   | 0  | 25   | 0    |
| CONTIG-036909 | 358 | 10  | 18 | 153  | 0    |
| CONTIG-036910 | 153 | 25  | 63 | 10   | 0    |
| CONTIG-036911 | 97  | 6   | 6  | 11   | 0    |
| CONTIG-036912 | 643 | 12  | 53 | 205  | 7    |
| CONTIG-036913 | 78  | 7   | 2  | 2    | 0    |
| CONTIG-036914 | 58  | 3   | 2  | 2    | 0    |
| CONTIG-036915 | 90  | 11  | 13 | 18   | 0    |
| CONTIG-036916 | 78  | 12  | 7  | 37   | 0    |
| CONTIG-036917 | 636 | 27  | 43 | 762  | 0    |
| CONTIG-036918 | 93  | 34  | 75 | 114  | 0    |
| CONTIG-036919 | 172 | 62  | 54 | 473  | 4    |
| CONTIG-036920 | 268 | 13  | 9  | 75   | 4    |
| CONTIG-036921 | 146 | 7   | 0  | 23   | 3    |
| CONTIG-036929 | 366 | 14  | 22 | 93   | 4    |
| CONTIG-036930 | 119 | 6   | 7  | 9    | 0    |
| CONTIG-036932 | 72  | 8   | 3  | 19   | 0    |
| CONTIG-036933 | 60  | 4   | 5  | 8    | 0    |
| CONTIG-036934 | 149 | 13  | 69 | 34   | 0    |
| CONTIG-036935 | 92  | 6   | 15 | 15   | 0    |
| CONTIG-036936 | 76  | 404 | 30 | 41   | 1156 |
| CONTIG-036937 | 209 | 6   | 0  | 24   | 0    |
| CONTIG-036938 | 289 | 5   | 20 | 28   | 0    |
| CONTIG-036939 | 417 | 54  | 42 | 1087 | 0    |
| CONTIG-036940 | 416 | 7   | 47 | 48   | 0    |
| CONTIG-036944 | 60  | 6   | 15 | 9    | 0    |
| CONTIG-036945 | 290 | 12  | 9  | 146  | 3    |
| CONTIG-036946 | 155 | 31  | 41 | 105  | 2    |
| CONTIG-036947 | 247 | 7   | 20 | 23   | 0    |
| CONTIG-036948 | 253 | 8   | 12 | 34   | 0    |
| CONTIG-036949 | 130 | 10  | 17 | 47   | 0    |
| CONTIG-036950 | 280 | 7   | 24 | 52   | 0    |
| CONTIG-036951 | 125 | 4   | 11 | 9    | 0    |
| CONTIG-036952 | 131 | 6   | 5  | 12   | 0    |
| CONTIG-036953 | 343 | 11  | 41 | 56   | 9    |
| CONTIG-036955 | 632 | 17  | 0  | 572  | 0    |
| CONTIG-036956 | 91  | 7   | 3  | 10   | 0    |
| CONTIG-036958 | 153 | 4   | 4  | 8    | 0    |
| CONTIG-036959 | 86  | 5   | 12 | 6    | 0    |
| CONTIG-036960 | 187 | 31  | 36 | 275  | 0    |
| CONTIG-036961 | 163 | 11  | 38 | 43   | 2    |
| CONTIG-036962 | 240 | 9   | 27 | 47   | 0    |
| CONTIG-036963 | 120 | 31  | 13 | 0    | 0    |
| CONTIG-036964 | 49  | 22  | 26 | 32   | 0    |
| CONTIG-036965 | 136 | 15  | 5  | 41   | 0    |
| CONTIG-036966 | 65  | 6   | 28 | 2    | 0    |



|               |      |    |    |      |    |
|---------------|------|----|----|------|----|
| CONTIG-036967 | 62   | 7  | 28 | 0    | 0  |
| CONTIG-036968 | 147  | 6  | 8  | 21   | 0  |
| CONTIG-036969 | 295  | 11 | 4  | 106  | 0  |
| CONTIG-036970 | 103  | 4  | 5  | 13   | 0  |
| CONTIG-036972 | 58   | 4  | 4  | 2    | 0  |
| CONTIG-036973 | 171  | 8  | 2  | 38   | 0  |
| CONTIG-036974 | 60   | 5  | 9  | 4    | 0  |
| CONTIG-036975 | 179  | 10 | 37 | 36   | 0  |
| CONTIG-036976 | 93   | 3  | 2  | 2    | 0  |
| CONTIG-036977 | 89   | 8  | 5  | 31   | 0  |
| CONTIG-036978 | 221  | 10 | 25 | 57   | 0  |
| CONTIG-036979 | 371  | 10 | 38 | 118  | 0  |
| CONTIG-036981 | 204  | 63 | 6  | 568  | 4  |
| CONTIG-036982 | 1462 | 69 | 19 | 10   | 2  |
| CONTIG-036983 | 257  | 13 | 30 | 100  | 0  |
| CONTIG-036984 | 83   | 16 | 28 | 26   | 0  |
| CONTIG-036985 | 247  | 21 | 33 | 139  | 4  |
| CONTIG-036986 | 441  | 13 | 51 | 179  | 0  |
| CONTIG-036987 | 442  | 13 | 35 | 227  | 0  |
| CONTIG-036988 | 115  | 4  | 0  | 8    | 0  |
| CONTIG-036989 | 180  | 5  | 4  | 25   | 0  |
| CONTIG-036990 | 180  | 8  | 3  | 48   | 0  |
| CONTIG-036991 | 286  | 5  | 5  | 39   | 0  |
| CONTIG-036992 | 74   | 28 | 10 | 51   | 0  |
| CONTIG-036993 | 96   | 8  | 0  | 32   | 0  |
| CONTIG-036994 | 60   | 87 | 44 | 67   | 0  |
| CONTIG-036995 | 226  | 32 | 67 | 155  | 0  |
| CONTIG-036996 | 75   | 7  | 0  | 18   | 0  |
| CONTIG-036997 | 128  | 5  | 12 | 10   | 0  |
| CONTIG-036998 | 233  | 12 | 6  | 29   | 0  |
| CONTIG-036999 | 68   | 6  | 34 | 0    | 0  |
| CONTIG-037000 | 1613 | 21 | 9  | 1786 | 0  |
| CONTIG-037001 | 296  | 11 | 44 | 77   | 0  |
| CONTIG-037002 | 722  | 22 | 55 | 410  | 17 |
| CONTIG-037004 | 94   | 7  | 13 | 8    | 0  |
| CONTIG-037005 | 281  | 9  | 0  | 11   | 0  |
| CONTIG-037006 | 216  | 6  | 6  | 36   | 0  |
| CONTIG-037007 | 67   | 6  | 8  | 5    | 0  |
| CONTIG-037008 | 67   | 2  | 8  | 2    | 0  |
| CONTIG-037009 | 93   | 7  | 7  | 4    | 0  |
| CONTIG-037010 | 262  | 10 | 23 | 95   | 0  |
| CONTIG-037011 | 188  | 23 | 55 | 114  | 0  |
| CONTIG-037012 | 48   | 35 | 20 | 13   | 0  |
| CONTIG-037013 | 429  | 12 | 53 | 187  | 6  |
| CONTIG-037014 | 170  | 36 | 57 | 134  | 0  |
| CONTIG-037015 | 178  | 9  | 0  | 48   | 2  |
| CONTIG-037016 | 243  | 12 | 20 | 39   | 2  |

|               |     |    |     |     |    |
|---------------|-----|----|-----|-----|----|
| CONTIG-037017 | 143 | 11 | 25  | 67  | 0  |
| CONTIG-037018 | 41  | 29 | 4   | 38  | 0  |
| CONTIG-037019 | 253 | 8  | 7   | 77  | 0  |
| CONTIG-037021 | 316 | 14 | 16  | 74  | 0  |
| CONTIG-037022 | 116 | 9  | 2   | 35  | 0  |
| CONTIG-037023 | 83  | 6  | 15  | 4   | 0  |
| CONTIG-037024 | 74  | 6  | 15  | 16  | 0  |
| CONTIG-037026 | 79  | 5  | 3   | 9   | 0  |
| CONTIG-037027 | 306 | 7  | 16  | 81  | 0  |
| CONTIG-037028 | 89  | 7  | 15  | 11  | 0  |
| CONTIG-037029 | 102 | 5  | 11  | 11  | 0  |
| CONTIG-037030 | 85  | 8  | 18  | 20  | 0  |
| CONTIG-037031 | 123 | 8  | 25  | 22  | 0  |
| CONTIG-037032 | 432 | 9  | 21  | 106 | 4  |
| CONTIG-037033 | 77  | 4  | 3   | 8   | 0  |
| CONTIG-037034 | 67  | 3  | 3   | 0   | 0  |
| CONTIG-037035 | 110 | 17 | 29  | 44  | 2  |
| CONTIG-037036 | 396 | 47 | 68  | 787 | 2  |
| CONTIG-037037 | 76  | 8  | 20  | 11  | 0  |
| CONTIG-037040 | 80  | 6  | 8   | 0   | 0  |
| CONTIG-037041 | 291 | 17 | 42  | 70  | 10 |
| CONTIG-037042 | 137 | 6  | 3   | 16  | 0  |
| CONTIG-037044 | 105 | 9  | 5   | 29  | 0  |
| CONTIG-037045 | 58  | 14 | 8   | 0   | 0  |
| CONTIG-037046 | 178 | 6  | 25  | 18  | 2  |
| CONTIG-037048 | 612 | 12 | 29  | 112 | 0  |
| CONTIG-037049 | 119 | 6  | 7   | 20  | 0  |
| CONTIG-037055 | 62  | 8  | 3   | 14  | 0  |
| CONTIG-037057 | 107 | 17 | 91  | 22  | 0  |
| CONTIG-037058 | 126 | 9  | 5   | 20  | 0  |
| CONTIG-037062 | 59  | 7  | 4   | 12  | 0  |
| CONTIG-037063 | 782 | 14 | 33  | 232 | 0  |
| CONTIG-037064 | 100 | 7  | 19  | 14  | 0  |
| CONTIG-037068 | 70  | 15 | 0   | 5   | 0  |
| CONTIG-037070 | 93  | 12 | 4   | 55  | 0  |
| CONTIG-037071 | 141 | 7  | 15  | 30  | 0  |
| CONTIG-037072 | 279 | 24 | 13  | 375 | 0  |
| CONTIG-037073 | 498 | 24 | 105 | 390 | 0  |
| CONTIG-037075 | 59  | 48 | 77  | 65  | 0  |
| CONTIG-037081 | 174 | 5  | 12  | 35  | 0  |
| CONTIG-037082 | 59  | 21 | 5   | 0   | 0  |
| CONTIG-037083 | 149 | 6  | 0   | 30  | 0  |
| CONTIG-037084 | 128 | 6  | 9   | 15  | 0  |
| CONTIG-037085 | 62  | 12 | 53  | 0   | 0  |
| CONTIG-037086 | 94  | 6  | 29  | 10  | 0  |
| CONTIG-037087 | 95  | 6  | 34  | 0   | 0  |
| CONTIG-037088 | 190 | 24 | 9   | 136 | 8  |

|               |     |    |    |     |    |
|---------------|-----|----|----|-----|----|
| CONTIG-037090 | 75  | 50 | 23 | 83  | 6  |
| CONTIG-037091 | 45  | 63 | 29 | 40  | 0  |
| CONTIG-037092 | 121 | 9  | 0  | 36  | 0  |
| CONTIG-037093 | 99  | 9  | 13 | 15  | 0  |
| CONTIG-037094 | 73  | 5  | 26 | 0   | 0  |
| CONTIG-037095 | 187 | 12 | 13 | 53  | 0  |
| CONTIG-037096 | 113 | 5  | 4  | 10  | 0  |
| CONTIG-037097 | 302 | 7  | 20 | 81  | 0  |
| CONTIG-037098 | 65  | 12 | 29 | 27  | 0  |
| CONTIG-037099 | 204 | 10 | 12 | 56  | 0  |
| CONTIG-037100 | 172 | 10 | 9  | 22  | 0  |
| CONTIG-037101 | 167 | 13 | 9  | 107 | 0  |
| CONTIG-037103 | 172 | 13 | 3  | 51  | 2  |
| CONTIG-037104 | 741 | 41 | 92 | 923 | 58 |
| CONTIG-037105 | 103 | 4  | 6  | 5   | 0  |
| CONTIG-037106 | 77  | 4  | 3  | 0   | 0  |
| CONTIG-037107 | 276 | 26 | 17 | 160 | 5  |
| CONTIG-037108 | 185 | 8  | 8  | 52  | 0  |
| CONTIG-037109 | 175 | 13 | 11 | 100 | 0  |
| CONTIG-037110 | 179 | 13 | 13 | 75  | 2  |
| CONTIG-037112 | 129 | 11 | 24 | 50  | 0  |
| CONTIG-037113 | 156 | 15 | 9  | 59  | 0  |
| CONTIG-037114 | 402 | 13 | 53 | 174 | 0  |
| CONTIG-037115 | 76  | 8  | 7  | 21  | 0  |
| CONTIG-037116 | 106 | 7  | 14 | 22  | 0  |
| CONTIG-037117 | 261 | 11 | 5  | 102 | 0  |
| CONTIG-037118 | 84  | 6  | 28 | 3   | 0  |
| CONTIG-037119 | 171 | 10 | 6  | 35  | 3  |
| CONTIG-037120 | 287 | 14 | 6  | 171 | 2  |
| CONTIG-037123 | 139 | 6  | 7  | 29  | 0  |
| CONTIG-037124 | 513 | 34 | 45 | 836 | 10 |
| CONTIG-037125 | 267 | 15 | 31 | 118 | 0  |
| CONTIG-037126 | 206 | 10 | 4  | 59  | 4  |
| CONTIG-037127 | 79  | 4  | 3  | 0   | 0  |
| CONTIG-037128 | 179 | 11 | 21 | 84  | 0  |
| CONTIG-037130 | 153 | 4  | 6  | 16  | 0  |
| CONTIG-037131 | 368 | 21 | 70 | 149 | 5  |
| CONTIG-037132 | 419 | 8  | 22 | 74  | 0  |
| CONTIG-037133 | 99  | 17 | 22 | 60  | 0  |
| CONTIG-037134 | 47  | 23 | 29 | 29  | 0  |
| CONTIG-037135 | 102 | 7  | 0  | 26  | 0  |
| CONTIG-037136 | 106 | 10 | 2  | 27  | 0  |
| CONTIG-037137 | 66  | 13 | 13 | 23  | 0  |
| CONTIG-037138 | 98  | 6  | 19 | 9   | 0  |
| CONTIG-037139 | 239 | 14 | 34 | 64  | 0  |
| CONTIG-037140 | 220 | 8  | 17 | 47  | 0  |
| CONTIG-037141 | 79  | 12 | 13 | 25  | 0  |

|               |     |    |     |     |     |
|---------------|-----|----|-----|-----|-----|
| CONTIG-037142 | 369 | 32 | 53  | 368 | 10  |
| CONTIG-037143 | 310 | 6  | 9   | 67  | 0   |
| CONTIG-037144 | 58  | 7  | 6   | 16  | 0   |
| CONTIG-037145 | 67  | 3  | 7   | 0   | 0   |
| CONTIG-037146 | 86  | 9  | 23  | 18  | 0   |
| CONTIG-037147 | 282 | 9  | 18  | 65  | 0   |
| CONTIG-037148 | 199 | 32 | 79  | 89  | 2   |
| CONTIG-037149 | 101 | 3  | 5   | 5   | 0   |
| CONTIG-037154 | 203 | 9  | 5   | 30  | 0   |
| CONTIG-037155 | 58  | 3  | 6   | 0   | 0   |
| CONTIG-037156 | 138 | 14 | 13  | 2   | 0   |
| CONTIG-037157 | 58  | 3  | 2   | 4   | 0   |
| CONTIG-037160 | 110 | 6  | 12  | 22  | 0   |
| CONTIG-037161 | 68  | 7  | 2   | 9   | 0   |
| CONTIG-037163 | 225 | 10 | 15  | 79  | 0   |
| CONTIG-037168 | 124 | 3  | 7   | 5   | 0   |
| CONTIG-037169 | 206 | 18 | 10  | 179 | 0   |
| CONTIG-037171 | 437 | 16 | 25  | 220 | 2   |
| CONTIG-037174 | 192 | 7  | 6   | 23  | 0   |
| CONTIG-037175 | 311 | 10 | 2   | 81  | 0   |
| CONTIG-037176 | 86  | 16 | 15  | 52  | 0   |
| CONTIG-037177 | 569 | 10 | 53  | 153 | 2   |
| CONTIG-037178 | 69  | 4  | 2   | 9   | 0   |
| CONTIG-037179 | 167 | 9  | 93  | 27  | 0   |
| CONTIG-037180 | 671 | 18 | 47  | 400 | 2   |
| CONTIG-037181 | 125 | 17 | 145 | 14  | 0   |
| CONTIG-037182 | 101 | 14 | 54  | 7   | 0   |
| CONTIG-037183 | 60  | 3  | 3   | 4   | 0   |
| CONTIG-037184 | 86  | 4  | 3   | 0   | 0   |
| CONTIG-037185 | 102 | 10 | 6   | 22  | 0   |
| CONTIG-037186 | 287 | 5  | 10  | 22  | 0   |
| CONTIG-037187 | 118 | 10 | 48  | 12  | 0   |
| CONTIG-037188 | 69  | 4  | 3   | 4   | 0   |
| CONTIG-037189 | 577 | 92 | 10  | 0   | 548 |
| CONTIG-037190 | 835 | 20 | 58  | 518 | 13  |
| CONTIG-037191 | 413 | 8  | 24  | 126 | 0   |
| CONTIG-037192 | 89  | 4  | 0   | 4   | 0   |
| CONTIG-037193 | 197 | 7  | 6   | 28  | 0   |
| CONTIG-037194 | 850 | 19 | 87  | 468 | 2   |
| CONTIG-037195 | 88  | 19 | 193 | 0   | 0   |
| CONTIG-037196 | 71  | 10 | 10  | 3   | 2   |
| CONTIG-037197 | 99  | 5  | 12  | 4   | 0   |
| CONTIG-037199 | 316 | 11 | 0   | 0   | 0   |
| CONTIG-037201 | 87  | 16 | 2   | 31  | 0   |
| CONTIG-037202 | 288 | 4  | 7   | 27  | 0   |
| CONTIG-037203 | 146 | 20 | 50  | 36  | 0   |
| CONTIG-037204 | 108 | 9  | 11  | 20  | 0   |

|               |     |     |     |     |    |
|---------------|-----|-----|-----|-----|----|
| CONTIG-037205 | 93  | 10  | 56  | 20  | 0  |
| CONTIG-037206 | 125 | 7   | 6   | 21  | 0  |
| CONTIG-037207 | 61  | 4   | 2   | 2   | 0  |
| CONTIG-037208 | 121 | 5   | 0   | 15  | 0  |
| CONTIG-037209 | 127 | 12  | 60  | 49  | 0  |
| CONTIG-037210 | 116 | 7   | 8   | 27  | 0  |
| CONTIG-037211 | 89  | 9   | 42  | 3   | 0  |
| CONTIG-037212 | 86  | 15  | 11  | 0   | 0  |
| CONTIG-037213 | 194 | 9   | 48  | 54  | 0  |
| CONTIG-037214 | 196 | 11  | 17  | 84  | 2  |
| CONTIG-037215 | 120 | 17  | 28  | 64  | 0  |
| CONTIG-037216 | 63  | 3   | 5   | 0   | 0  |
| CONTIG-037217 | 369 | 8   | 52  | 77  | 0  |
| CONTIG-037219 | 225 | 9   | 10  | 59  | 0  |
| CONTIG-037220 | 213 | 12  | 12  | 79  | 0  |
| CONTIG-037221 | 76  | 10  | 13  | 18  | 0  |
| CONTIG-037222 | 100 | 8   | 3   | 20  | 0  |
| CONTIG-037223 | 619 | 9   | 41  | 191 | 2  |
| CONTIG-037224 | 94  | 16  | 8   | 46  | 0  |
| CONTIG-037225 | 282 | 16  | 72  | 121 | 0  |
| CONTIG-037226 | 434 | 8   | 29  | 86  | 0  |
| CONTIG-037227 | 73  | 6   | 7   | 13  | 0  |
| CONTIG-037229 | 114 | 11  | 13  | 9   | 0  |
| CONTIG-037230 | 134 | 179 | 5   | 0   | 0  |
| CONTIG-037231 | 415 | 17  | 51  | 205 | 0  |
| CONTIG-037232 | 126 | 9   | 2   | 34  | 0  |
| CONTIG-037233 | 222 | 14  | 38  | 58  | 0  |
| CONTIG-037234 | 160 | 39  | 116 | 76  | 2  |
| CONTIG-037235 | 515 | 17  | 137 | 215 | 0  |
| CONTIG-037236 | 81  | 12  | 0   | 32  | 0  |
| CONTIG-037237 | 66  | 37  | 4   | 116 | 0  |
| CONTIG-037238 | 72  | 5   | 3   | 14  | 0  |
| CONTIG-037239 | 59  | 7   | 7   | 4   | 2  |
| CONTIG-037240 | 262 | 13  | 19  | 103 | 0  |
| CONTIG-037241 | 124 | 13  | 39  | 28  | 2  |
| CONTIG-037245 | 144 | 5   | 2   | 15  | 0  |
| CONTIG-037246 | 238 | 17  | 19  | 177 | 0  |
| CONTIG-037247 | 310 | 20  | 63  | 154 | 4  |
| CONTIG-037249 | 110 | 11  | 15  | 34  | 0  |
| CONTIG-037250 | 613 | 10  | 13  | 117 | 8  |
| CONTIG-037251 | 103 | 16  | 65  | 26  | 0  |
| CONTIG-037252 | 61  | 7   | 10  | 14  | 0  |
| CONTIG-037253 | 587 | 9   | 37  | 101 | 15 |
| CONTIG-037254 | 217 | 12  | 40  | 34  | 2  |
| CONTIG-037255 | 249 | 36  | 75  | 327 | 4  |
| CONTIG-037256 | 73  | 17  | 19  | 25  | 0  |
| CONTIG-037257 | 117 | 6   | 8   | 18  | 0  |

|               |      |     |    |     |     |
|---------------|------|-----|----|-----|-----|
| CONTIG-037258 | 117  | 16  | 35 | 42  | 0   |
| CONTIG-037260 | 409  | 20  | 29 | 383 | 0   |
| CONTIG-037261 | 80   | 33  | 55 | 39  | 0   |
| CONTIG-037262 | 145  | 7   | 10 | 21  | 0   |
| CONTIG-037263 | 362  | 17  | 88 | 2   | 4   |
| CONTIG-037264 | 156  | 4   | 10 | 20  | 0   |
| CONTIG-037265 | 73   | 21  | 18 | 37  | 0   |
| CONTIG-037266 | 73   | 9   | 14 | 16  | 0   |
| CONTIG-037267 | 94   | 5   | 13 | 4   | 0   |
| CONTIG-037268 | 585  | 17  | 27 | 15  | 0   |
| CONTIG-037269 | 188  | 10  | 16 | 23  | 2   |
| CONTIG-037270 | 91   | 5   | 25 | 4   | 0   |
| CONTIG-037271 | 101  | 299 | 32 | 0   | 0   |
| CONTIG-037274 | 1601 | 21  | 42 | 59  | 2   |
| CONTIG-037275 | 233  | 13  | 7  | 87  | 2   |
| CONTIG-037283 | 115  | 9   | 6  | 11  | 0   |
| CONTIG-037284 | 82   | 11  | 2  | 14  | 0   |
| CONTIG-037285 | 73   | 17  | 12 | 21  | 0   |
| CONTIG-037286 | 359  | 8   | 13 | 74  | 0   |
| CONTIG-037287 | 104  | 25  | 8  | 133 | 0   |
| CONTIG-037288 | 142  | 7   | 9  | 46  | 0   |
| CONTIG-037289 | 91   | 13  | 17 | 17  | 0   |
| CONTIG-037291 | 148  | 14  | 11 | 46  | 3   |
| CONTIG-037292 | 1591 | 49  | 7  | 2   | 760 |
| CONTIG-037293 | 77   | 2   | 5  | 2   | 0   |
| CONTIG-037294 | 81   | 14  | 40 | 16  | 0   |
| CONTIG-037295 | 355  | 29  | 67 | 168 | 10  |
| CONTIG-037296 | 101  | 8   | 6  | 0   | 4   |
| CONTIG-037297 | 255  | 9   | 2  | 104 | 0   |
| CONTIG-037298 | 177  | 11  | 8  | 60  | 0   |
| CONTIG-037299 | 67   | 7   | 0  | 13  | 0   |
| CONTIG-037300 | 129  | 7   | 3  | 26  | 0   |
| CONTIG-037301 | 225  | 17  | 34 | 137 | 0   |
| CONTIG-037302 | 132  | 12  | 19 | 61  | 0   |
| CONTIG-037303 | 248  | 37  | 53 | 127 | 0   |
| CONTIG-037304 | 550  | 7   | 5  | 92  | 0   |
| CONTIG-037305 | 194  | 19  | 55 | 72  | 2   |
| CONTIG-037306 | 108  | 56  | 62 | 228 | 0   |
| CONTIG-037307 | 133  | 7   | 7  | 24  | 2   |
| CONTIG-037308 | 125  | 6   | 12 | 21  | 0   |
| CONTIG-037309 | 183  | 13  | 8  | 102 | 0   |
| CONTIG-037310 | 326  | 7   | 16 | 16  | 6   |
| CONTIG-037311 | 52   | 6   | 7  | 4   | 0   |
| CONTIG-037312 | 203  | 9   | 19 | 38  | 0   |
| CONTIG-037313 | 548  | 11  | 14 | 317 | 0   |
| CONTIG-037314 | 136  | 10  | 39 | 38  | 0   |
| CONTIG-037315 | 121  | 2   | 5  | 2   | 0   |

|               |     |     |     |     |    |
|---------------|-----|-----|-----|-----|----|
| CONTIG-037316 | 118 | 6   | 4   | 9   | 0  |
| CONTIG-037317 | 88  | 6   | 22  | 6   | 0  |
| CONTIG-037320 | 63  | 5   | 7   | 5   | 0  |
| CONTIG-037321 | 214 | 12  | 20  | 54  | 2  |
| CONTIG-037322 | 322 | 9   | 17  | 15  | 0  |
| CONTIG-037323 | 172 | 10  | 26  | 49  | 0  |
| CONTIG-037324 | 64  | 22  | 31  | 52  | 0  |
| CONTIG-037325 | 344 | 7   | 13  | 63  | 0  |
| CONTIG-037326 | 67  | 20  | 13  | 61  | 0  |
| CONTIG-037327 | 304 | 12  | 15  | 39  | 2  |
| CONTIG-037328 | 169 | 86  | 176 | 450 | 0  |
| CONTIG-037329 | 99  | 20  | 13  | 0   | 0  |
| CONTIG-037336 | 234 | 9   | 11  | 40  | 0  |
| CONTIG-037337 | 140 | 13  | 15  | 0   | 4  |
| CONTIG-037339 | 69  | 10  | 63  | 4   | 0  |
| CONTIG-037340 | 62  | 6   | 6   | 6   | 0  |
| CONTIG-037341 | 143 | 15  | 54  | 31  | 2  |
| CONTIG-037342 | 90  | 8   | 28  | 0   | 0  |
| CONTIG-037343 | 674 | 12  | 32  | 323 | 8  |
| CONTIG-037344 | 335 | 11  | 63  | 94  | 0  |
| CONTIG-037345 | 94  | 4   | 7   | 0   | 0  |
| CONTIG-037346 | 123 | 8   | 5   | 18  | 0  |
| CONTIG-037347 | 65  | 3   | 0   | 4   | 0  |
| CONTIG-037348 | 129 | 6   | 3   | 16  | 0  |
| CONTIG-037349 | 96  | 13  | 14  | 0   | 0  |
| CONTIG-037351 | 52  | 30  | 0   | 83  | 0  |
| CONTIG-037352 | 117 | 6   | 8   | 5   | 0  |
| CONTIG-037353 | 179 | 31  | 21  | 284 | 0  |
| CONTIG-037354 | 152 | 6   | 33  | 16  | 0  |
| CONTIG-037355 | 426 | 17  | 15  | 152 | 8  |
| CONTIG-037356 | 485 | 48  | 109 | 521 | 21 |
| CONTIG-037357 | 200 | 11  | 4   | 53  | 0  |
| CONTIG-037359 | 163 | 10  | 16  | 18  | 0  |
| CONTIG-037363 | 221 | 8   | 7   | 56  | 0  |
| CONTIG-037364 | 54  | 143 | 20  | 146 | 85 |
| CONTIG-037365 | 63  | 166 | 78  | 21  | 0  |
| CONTIG-037366 | 142 | 9   | 36  | 26  | 0  |
| CONTIG-037367 | 62  | 2   | 0   | 0   | 0  |
| CONTIG-037368 | 405 | 14  | 64  | 129 | 0  |
| CONTIG-037369 | 130 | 6   | 53  | 6   | 0  |
| CONTIG-037370 | 150 | 17  | 35  | 80  | 2  |
| CONTIG-037371 | 100 | 4   | 7   | 0   | 0  |
| CONTIG-037372 | 316 | 8   | 19  | 36  | 0  |
| CONTIG-037373 | 60  | 4   | 9   | 4   | 0  |
| CONTIG-037374 | 255 | 5   | 7   | 8   | 0  |
| CONTIG-037377 | 209 | 24  | 92  | 112 | 2  |
| CONTIG-037379 | 66  | 76  | 32  | 28  | 0  |

|               |     |    |     |     |     |
|---------------|-----|----|-----|-----|-----|
| CONTIG-037380 | 79  | 4  | 3   | 6   | 0   |
| CONTIG-037381 | 318 | 7  | 13  | 70  | 0   |
| CONTIG-037382 | 104 | 6  | 11  | 0   | 0   |
| CONTIG-037383 | 141 | 4  | 3   | 16  | 0   |
| CONTIG-037384 | 72  | 5  | 0   | 2   | 0   |
| CONTIG-037385 | 64  | 5  | 2   | 11  | 0   |
| CONTIG-037386 | 581 | 17 | 21  | 351 | 0   |
| CONTIG-037388 | 189 | 5  | 5   | 22  | 0   |
| CONTIG-037389 | 176 | 8  | 12  | 5   | 0   |
| CONTIG-037390 | 206 | 28 | 117 | 160 | 0   |
| CONTIG-037391 | 377 | 19 | 41  | 255 | 0   |
| CONTIG-037399 | 102 | 12 | 8   | 26  | 5   |
| CONTIG-037400 | 88  | 11 | 18  | 30  | 0   |
| CONTIG-037401 | 127 | 12 | 13  | 22  | 2   |
| CONTIG-037402 | 142 | 4  | 21  | 0   | 0   |
| CONTIG-037403 | 125 | 7  | 9   | 6   | 0   |
| CONTIG-037404 | 81  | 14 | 21  | 18  | 2   |
| CONTIG-037406 | 66  | 4  | 6   | 2   | 0   |
| CONTIG-037407 | 264 | 8  | 15  | 73  | 0   |
| CONTIG-037408 | 135 | 7  | 2   | 21  | 0   |
| CONTIG-037409 | 67  | 5  | 17  | 2   | 0   |
| CONTIG-037410 | 306 | 24 | 47  | 309 | 0   |
| CONTIG-037411 | 104 | 13 | 23  | 0   | 0   |
| CONTIG-037412 | 75  | 85 | 60  | 323 | 0   |
| CONTIG-037413 | 165 | 18 | 13  | 56  | 6   |
| CONTIG-037414 | 402 | 19 | 88  | 342 | 0   |
| CONTIG-037415 | 157 | 19 | 61  | 43  | 0   |
| CONTIG-037416 | 197 | 9  | 160 | 5   | 0   |
| CONTIG-037417 | 205 | 9  | 3   | 100 | 0   |
| CONTIG-037418 | 126 | 5  | 2   | 12  | 0   |
| CONTIG-037419 | 155 | 31 | 52  | 181 | 0   |
| CONTIG-037420 | 240 | 10 | 15  | 72  | 0   |
| CONTIG-037421 | 126 | 14 | 5   | 77  | 0   |
| CONTIG-037422 | 63  | 5  | 4   | 8   | 0   |
| CONTIG-037423 | 246 | 18 | 83  | 60  | 0   |
| CONTIG-037424 | 171 | 5  | 6   | 23  | 0   |
| CONTIG-037426 | 226 | 8  | 38  | 28  | 2   |
| CONTIG-037427 | 130 | 5  | 5   | 3   | 0   |
| CONTIG-037429 | 244 | 7  | 16  | 25  | 0   |
| CONTIG-037430 | 103 | 6  | 30  | 2   | 0   |
| CONTIG-037431 | 303 | 13 | 72  | 107 | 0   |
| CONTIG-037432 | 435 | 54 | 2   | 0   | 183 |
| CONTIG-037433 | 69  | 4  | 6   | 2   | 0   |
| CONTIG-037436 | 183 | 7  | 39  | 11  | 0   |
| CONTIG-037437 | 364 | 22 | 69  | 320 | 0   |
| CONTIG-037438 | 96  | 14 | 32  | 23  | 2   |
| CONTIG-037441 | 248 | 14 | 9   | 91  | 0   |



|               |     |     |     |      |    |
|---------------|-----|-----|-----|------|----|
| CONTIG-037442 | 225 | 9   | 12  | 48   | 0  |
| CONTIG-037443 | 247 | 8   | 8   | 71   | 0  |
| CONTIG-037444 | 92  | 5   | 11  | 7    | 0  |
| CONTIG-037445 | 129 | 9   | 2   | 41   | 0  |
| CONTIG-037446 | 122 | 7   | 0   | 6    | 0  |
| CONTIG-037447 | 266 | 10  | 2   | 145  | 0  |
| CONTIG-037448 | 190 | 11  | 16  | 57   | 0  |
| CONTIG-037449 | 71  | 5   | 5   | 0    | 0  |
| CONTIG-037450 | 208 | 15  | 13  | 74   | 2  |
| CONTIG-037451 | 445 | 12  | 64  | 202  | 0  |
| CONTIG-037452 | 63  | 13  | 16  | 26   | 0  |
| CONTIG-037453 | 154 | 5   | 6   | 20   | 0  |
| CONTIG-037454 | 111 | 14  | 4   | 69   | 0  |
| CONTIG-037456 | 487 | 11  | 27  | 49   | 0  |
| CONTIG-037457 | 206 | 165 | 111 | 1471 | 25 |
| CONTIG-037458 | 64  | 5   | 2   | 11   | 0  |
| CONTIG-037459 | 74  | 8   | 22  | 2    | 0  |
| CONTIG-037460 | 96  | 25  | 56  | 110  | 0  |
| CONTIG-037461 | 342 | 9   | 21  | 86   | 0  |
| CONTIG-037462 | 64  | 7   | 18  | 12   | 0  |
| CONTIG-037464 | 525 | 24  | 10  | 510  | 13 |
| CONTIG-037465 | 94  | 13  | 5   | 72   | 0  |
| CONTIG-037466 | 723 | 22  | 47  | 711  | 0  |
| CONTIG-037467 | 234 | 15  | 65  | 89   | 0  |
| CONTIG-037468 | 111 | 5   | 11  | 13   | 0  |
| CONTIG-037469 | 109 | 18  | 24  | 63   | 0  |
| CONTIG-037470 | 122 | 8   | 12  | 9    | 0  |
| CONTIG-037473 | 114 | 6   | 2   | 14   | 0  |
| CONTIG-037474 | 388 | 14  | 34  | 133  | 0  |
| CONTIG-037475 | 96  | 9   | 2   | 25   | 0  |
| CONTIG-037476 | 74  | 25  | 30  | 0    | 0  |
| CONTIG-037477 | 103 | 9   | 5   | 18   | 0  |
| CONTIG-037478 | 68  | 14  | 60  | 6    | 0  |
| CONTIG-037480 | 78  | 8   | 17  | 5    | 0  |
| CONTIG-037481 | 73  | 9   | 29  | 11   | 0  |
| CONTIG-037482 | 82  | 10  | 7   | 28   | 0  |
| CONTIG-037483 | 81  | 445 | 78  | 691  | 16 |
| CONTIG-037484 | 218 | 16  | 44  | 76   | 2  |
| CONTIG-037485 | 72  | 6   | 5   | 3    | 2  |
| CONTIG-037486 | 64  | 5   | 19  | 2    | 0  |
| CONTIG-037487 | 150 | 13  | 15  | 81   | 0  |
| CONTIG-037488 | 336 | 19  | 22  | 167  | 0  |
| CONTIG-037489 | 186 | 4   | 7   | 28   | 0  |
| CONTIG-037490 | 149 | 15  | 35  | 3    | 0  |
| CONTIG-037494 | 126 | 6   | 2   | 19   | 0  |
| CONTIG-037495 | 78  | 11  | 23  | 14   | 0  |
| CONTIG-037496 | 374 | 12  | 13  | 132  | 0  |

|               |     |    |    |     |   |
|---------------|-----|----|----|-----|---|
| CONTIG-037497 | 182 | 13 | 21 | 88  | 0 |
| CONTIG-037498 | 482 | 11 | 10 | 86  | 0 |
| CONTIG-037499 | 68  | 9  | 8  | 2   | 0 |
| CONTIG-037500 | 70  | 12 | 2  | 0   | 0 |
| CONTIG-037501 | 140 | 7  | 5  | 18  | 0 |
| CONTIG-037502 | 249 | 7  | 2  | 49  | 0 |
| CONTIG-037503 | 63  | 20 | 17 | 47  | 0 |
| CONTIG-037504 | 69  | 7  | 4  | 6   | 0 |
| CONTIG-037505 | 73  | 5  | 2  | 15  | 0 |
| CONTIG-037506 | 65  | 4  | 5  | 8   | 0 |
| CONTIG-037507 | 359 | 13 | 59 | 173 | 0 |
| CONTIG-037508 | 309 | 56 | 67 | 723 | 0 |
| CONTIG-037509 | 370 | 18 | 10 | 304 | 0 |
| CONTIG-037510 | 213 | 21 | 85 | 162 | 0 |
| CONTIG-037511 | 153 | 5  | 6  | 16  | 0 |
| CONTIG-037512 | 69  | 9  | 4  | 8   | 0 |
| CONTIG-037515 | 125 | 5  | 9  | 21  | 0 |
| CONTIG-037516 | 69  | 12 | 2  | 41  | 0 |
| CONTIG-037517 | 270 | 11 | 8  | 92  | 0 |
| CONTIG-037518 | 127 | 5  | 10 | 6   | 0 |
| CONTIG-037519 | 165 | 27 | 22 | 199 | 0 |
| CONTIG-037522 | 61  | 4  | 12 | 4   | 0 |
| CONTIG-037523 | 478 | 33 | 19 | 598 | 0 |
| CONTIG-037524 | 205 | 6  | 10 | 8   | 0 |
| CONTIG-037525 | 394 | 7  | 14 | 74  | 0 |
| CONTIG-037526 | 110 | 14 | 55 | 22  | 0 |
| CONTIG-037527 | 103 | 5  | 12 | 16  | 0 |
| CONTIG-037528 | 131 | 9  | 11 | 22  | 2 |
| CONTIG-037529 | 63  | 5  | 9  | 10  | 0 |
| CONTIG-037530 | 63  | 5  | 2  | 12  | 2 |
| CONTIG-037531 | 329 | 9  | 32 | 31  | 4 |
| CONTIG-037533 | 172 | 5  | 0  | 12  | 0 |
| CONTIG-037535 | 56  | 20 | 0  | 62  | 0 |
| CONTIG-037536 | 311 | 12 | 8  | 188 | 0 |
| CONTIG-037537 | 108 | 25 | 22 | 115 | 0 |
| CONTIG-037538 | 76  | 5  | 5  | 10  | 0 |
| CONTIG-037540 | 463 | 20 | 10 | 362 | 8 |
| CONTIG-037541 | 495 | 11 | 12 | 181 | 0 |
| CONTIG-037542 | 106 | 7  | 27 | 3   | 0 |
| CONTIG-037543 | 135 | 20 | 0  | 0   | 8 |
| CONTIG-037544 | 134 | 6  | 12 | 6   | 0 |
| CONTIG-037545 | 515 | 38 | 5  | 5   | 0 |
| CONTIG-037546 | 669 | 10 | 39 | 279 | 0 |
| CONTIG-037547 | 267 | 38 | 44 | 499 | 8 |
| CONTIG-037548 | 197 | 4  | 4  | 29  | 0 |
| CONTIG-037549 | 118 | 4  | 4  | 12  | 2 |
| CONTIG-037550 | 89  | 8  | 2  | 25  | 0 |

|               |     |     |    |      |     |
|---------------|-----|-----|----|------|-----|
| CONTIG-037551 | 108 | 5   | 0  | 17   | 0   |
| CONTIG-037552 | 272 | 11  | 17 | 90   | 0   |
| CONTIG-037553 | 212 | 104 | 90 | 690  | 4   |
| CONTIG-037554 | 244 | 14  | 30 | 92   | 0   |
| CONTIG-037555 | 77  | 12  | 14 | 10   | 0   |
| CONTIG-037559 | 167 | 6   | 6  | 28   | 0   |
| CONTIG-037560 | 236 | 6   | 8  | 20   | 0   |
| CONTIG-037561 | 364 | 7   | 17 | 79   | 0   |
| CONTIG-037562 | 277 | 6   | 5  | 27   | 0   |
| CONTIG-037563 | 98  | 9   | 17 | 2    | 0   |
| CONTIG-037564 | 98  | 8   | 4  | 27   | 0   |
| CONTIG-037565 | 301 | 32  | 23 | 394  | 2   |
| CONTIG-037566 | 84  | 9   | 12 | 10   | 0   |
| CONTIG-037567 | 64  | 7   | 6  | 9    | 0   |
| CONTIG-037568 | 241 | 20  | 19 | 121  | 0   |
| CONTIG-037569 | 242 | 10  | 19 | 89   | 0   |
| CONTIG-037570 | 85  | 19  | 6  | 46   | 0   |
| CONTIG-037571 | 181 | 12  | 29 | 9    | 12  |
| CONTIG-037572 | 439 | 14  | 8  | 138  | 0   |
| CONTIG-037573 | 73  | 5   | 9  | 14   | 0   |
| CONTIG-037575 | 236 | 19  | 4  | 0    | 20  |
| CONTIG-037576 | 62  | 9   | 10 | 13   | 0   |
| CONTIG-037577 | 89  | 5   | 0  | 8    | 0   |
| CONTIG-037578 | 111 | 6   | 8  | 3    | 0   |
| CONTIG-037579 | 276 | 13  | 30 | 90   | 0   |
| CONTIG-037580 | 89  | 13  | 0  | 44   | 0   |
| CONTIG-037581 | 93  | 27  | 56 | 114  | 0   |
| CONTIG-037583 | 331 | 15  | 15 | 142  | 4   |
| CONTIG-037584 | 517 | 11  | 25 | 209  | 2   |
| CONTIG-037585 | 112 | 249 | 35 | 1166 | 9   |
| CONTIG-037586 | 72  | 4   | 3  | 2    | 0   |
| CONTIG-037587 | 157 | 16  | 12 | 22   | 0   |
| CONTIG-037588 | 92  | 16  | 20 | 67   | 0   |
| CONTIG-037589 | 247 | 10  | 13 | 58   | 2   |
| CONTIG-037591 | 58  | 5   | 4  | 7    | 0   |
| CONTIG-037592 | 131 | 18  | 13 | 52   | 2   |
| CONTIG-037593 | 119 | 12  | 16 | 44   | 0   |
| CONTIG-037594 | 158 | 11  | 13 | 50   | 2   |
| CONTIG-037595 | 205 | 7   | 15 | 33   | 0   |
| CONTIG-037596 | 301 | 13  | 14 | 128  | 0   |
| CONTIG-037597 | 106 | 7   | 19 | 20   | 0   |
| CONTIG-037598 | 449 | 13  | 60 | 195  | 0   |
| CONTIG-037599 | 88  | 4   | 3  | 2    | 0   |
| CONTIG-037600 | 91  | 7   | 2  | 0    | 0   |
| CONTIG-037601 | 450 | 32  | 4  | 0    | 148 |
| CONTIG-037602 | 65  | 78  | 15 | 308  | 0   |
| CONTIG-037603 | 67  | 209 | 2  | 822  | 0   |

|               |     |     |    |      |    |
|---------------|-----|-----|----|------|----|
| CONTIG-037604 | 291 | 18  | 31 | 224  | 0  |
| CONTIG-037605 | 390 | 20  | 31 | 254  | 2  |
| CONTIG-037606 | 96  | 5   | 0  | 11   | 0  |
| CONTIG-037607 | 212 | 10  | 67 | 60   | 0  |
| CONTIG-037610 | 123 | 14  | 29 | 55   | 0  |
| CONTIG-037611 | 122 | 9   | 5  | 2    | 0  |
| CONTIG-037612 | 136 | 10  | 11 | 34   | 0  |
| CONTIG-037613 | 147 | 11  | 9  | 61   | 0  |
| CONTIG-037614 | 141 | 9   | 31 | 39   | 0  |
| CONTIG-037615 | 118 | 4   | 0  | 11   | 0  |
| CONTIG-037616 | 184 | 12  | 31 | 55   | 0  |
| CONTIG-037617 | 329 | 8   | 18 | 68   | 0  |
| CONTIG-037618 | 233 | 11  | 9  | 89   | 0  |
| CONTIG-037619 | 610 | 8   | 38 | 109  | 2  |
| CONTIG-037620 | 159 | 13  | 7  | 46   | 0  |
| CONTIG-037621 | 87  | 6   | 0  | 17   | 0  |
| CONTIG-037622 | 864 | 26  | 83 | 1304 | 2  |
| CONTIG-037623 | 81  | 3   | 8  | 2    | 0  |
| CONTIG-037624 | 616 | 9   | 38 | 141  | 0  |
| CONTIG-037625 | 149 | 12  | 14 | 51   | 0  |
| CONTIG-037626 | 180 | 31  | 78 | 220  | 2  |
| CONTIG-037627 | 380 | 8   | 14 | 52   | 0  |
| CONTIG-037628 | 59  | 2   | 0  | 2    | 0  |
| CONTIG-037629 | 225 | 13  | 29 | 125  | 0  |
| CONTIG-037630 | 403 | 9   | 18 | 104  | 0  |
| CONTIG-037632 | 222 | 10  | 20 | 63   | 2  |
| CONTIG-037633 | 118 | 14  | 2  | 59   | 0  |
| CONTIG-037634 | 171 | 17  | 10 | 64   | 0  |
| CONTIG-037635 | 293 | 18  | 38 | 197  | 0  |
| CONTIG-037636 | 416 | 7   | 14 | 57   | 0  |
| CONTIG-037637 | 100 | 5   | 2  | 4    | 0  |
| CONTIG-037638 | 156 | 9   | 4  | 35   | 2  |
| CONTIG-037639 | 75  | 3   | 7  | 4    | 0  |
| CONTIG-037640 | 336 | 16  | 48 | 123  | 2  |
| CONTIG-037641 | 162 | 22  | 30 | 131  | 0  |
| CONTIG-037642 | 44  | 135 | 29 | 99   | 4  |
| CONTIG-037643 | 59  | 3   | 4  | 2    | 0  |
| CONTIG-037644 | 199 | 7   | 19 | 2    | 0  |
| CONTIG-037645 | 184 | 5   | 17 | 31   | 0  |
| CONTIG-037646 | 84  | 8   | 19 | 9    | 0  |
| CONTIG-037647 | 62  | 6   | 16 | 2    | 0  |
| CONTIG-037652 | 327 | 19  | 9  | 228  | 0  |
| CONTIG-037653 | 92  | 4   | 2  | 2    | 0  |
| CONTIG-037654 | 843 | 14  | 4  | 0    | 54 |
| CONTIG-037655 | 79  | 3   | 2  | 9    | 0  |
| CONTIG-037656 | 74  | 48  | 0  | 165  | 0  |
| CONTIG-037657 | 501 | 30  | 50 | 773  | 2  |

|               |     |     |     |      |     |
|---------------|-----|-----|-----|------|-----|
| CONTIG-037658 | 75  | 7   | 2   | 28   | 0   |
| CONTIG-037659 | 60  | 3   | 4   | 4    | 0   |
| CONTIG-037660 | 70  | 2   | 0   | 4    | 0   |
| CONTIG-037661 | 58  | 3   | 2   | 6    | 0   |
| CONTIG-037662 | 116 | 8   | 27  | 0    | 0   |
| CONTIG-037663 | 85  | 5   | 11  | 9    | 0   |
| CONTIG-037664 | 530 | 9   | 2   | 116  | 0   |
| CONTIG-037665 | 39  | 57  | 0   | 88   | 0   |
| CONTIG-037667 | 107 | 86  | 15  | 522  | 0   |
| CONTIG-037668 | 230 | 8   | 6   | 54   | 2   |
| CONTIG-037670 | 74  | 5   | 4   | 17   | 0   |
| CONTIG-037671 | 210 | 7   | 9   | 31   | 0   |
| CONTIG-037672 | 324 | 13  | 8   | 121  | 2   |
| CONTIG-037673 | 162 | 13  | 18  | 57   | 3   |
| CONTIG-037674 | 88  | 11  | 10  | 29   | 0   |
| CONTIG-037675 | 159 | 6   | 2   | 26   | 0   |
| CONTIG-037676 | 552 | 112 | 302 | 3434 | 0   |
| CONTIG-037677 | 79  | 7   | 22  | 0    | 0   |
| CONTIG-037678 | 181 | 6   | 13  | 21   | 0   |
| CONTIG-037679 | 414 | 15  | 23  | 172  | 0   |
| CONTIG-037680 | 351 | 16  | 4   | 31   | 0   |
| CONTIG-037681 | 136 | 11  | 51  | 32   | 0   |
| CONTIG-037682 | 45  | 782 | 109 | 590  | 205 |
| CONTIG-037683 | 337 | 14  | 22  | 120  | 0   |
| CONTIG-037684 | 167 | 21  | 54  | 95   | 0   |
| CONTIG-037685 | 87  | 7   | 15  | 16   | 0   |
| CONTIG-037686 | 105 | 4   | 12  | 5    | 0   |
| CONTIG-037687 | 73  | 13  | 2   | 10   | 0   |
| CONTIG-037689 | 203 | 13  | 58  | 25   | 0   |
| CONTIG-037690 | 485 | 85  | 225 | 2182 | 7   |
| CONTIG-037691 | 173 | 10  | 32  | 25   | 0   |
| CONTIG-037692 | 465 | 17  | 48  | 368  | 0   |
| CONTIG-037693 | 113 | 11  | 11  | 32   | 0   |
| CONTIG-037696 | 80  | 22  | 7   | 30   | 0   |
| CONTIG-037698 | 143 | 8   | 10  | 8    | 0   |
| CONTIG-037699 | 82  | 12  | 9   | 0    | 0   |
| CONTIG-037700 | 288 | 9   | 25  | 32   | 0   |
| CONTIG-037701 | 511 | 9   | 11  | 106  | 0   |
| CONTIG-037702 | 111 | 63  | 109 | 122  | 0   |
| CONTIG-037703 | 88  | 6   | 0   | 14   | 0   |
| CONTIG-037704 | 125 | 12  | 19  | 22   | 0   |
| CONTIG-037705 | 69  | 6   | 13  | 5    | 0   |
| CONTIG-037709 | 414 | 22  | 78  | 337  | 2   |
| CONTIG-037710 | 207 | 9   | 22  | 51   | 0   |
| CONTIG-037711 | 90  | 5   | 6   | 2    | 0   |
| CONTIG-037712 | 335 | 15  | 35  | 210  | 0   |
| CONTIG-037713 | 74  | 6   | 2   | 0    | 0   |

|               |      |    |     |      |    |
|---------------|------|----|-----|------|----|
| CONTIG-037714 | 373  | 11 | 15  | 110  | 0  |
| CONTIG-037715 | 216  | 9  | 24  | 26   | 0  |
| CONTIG-037716 | 101  | 4  | 5   | 10   | 0  |
| CONTIG-037717 | 68   | 7  | 4   | 0    | 0  |
| CONTIG-037718 | 66   | 16 | 16  | 50   | 0  |
| CONTIG-037719 | 135  | 57 | 36  | 210  | 2  |
| CONTIG-037720 | 62   | 5  | 0   | 0    | 0  |
| CONTIG-037721 | 181  | 13 | 24  | 43   | 2  |
| CONTIG-037724 | 202  | 9  | 38  | 41   | 0  |
| CONTIG-037725 | 91   | 7  | 0   | 7    | 0  |
| CONTIG-037726 | 88   | 5  | 15  | 0    | 0  |
| CONTIG-037727 | 137  | 10 | 7   | 15   | 0  |
| CONTIG-037728 | 1987 | 45 | 103 | 5029 | 0  |
| CONTIG-037729 | 62   | 6  | 7   | 3    | 0  |
| CONTIG-037730 | 213  | 14 | 36  | 72   | 0  |
| CONTIG-037731 | 110  | 9  | 9   | 33   | 0  |
| CONTIG-037732 | 128  | 4  | 8   | 15   | 0  |
| CONTIG-037733 | 161  | 8  | 11  | 36   | 0  |
| CONTIG-037734 | 88   | 12 | 17  | 14   | 0  |
| CONTIG-037735 | 117  | 6  | 4   | 0    | 0  |
| CONTIG-037736 | 150  | 9  | 0   | 15   | 0  |
| CONTIG-037737 | 62   | 10 | 6   | 21   | 0  |
| CONTIG-037738 | 155  | 35 | 26  | 31   | 16 |
| CONTIG-037739 | 83   | 5  | 8   | 12   | 0  |
| CONTIG-037740 | 233  | 7  | 13  | 44   | 2  |
| CONTIG-037741 | 135  | 5  | 7   | 20   | 0  |
| CONTIG-037742 | 106  | 7  | 21  | 5    | 0  |
| CONTIG-037743 | 93   | 29 | 118 | 4    | 0  |
| CONTIG-037744 | 426  | 18 | 14  | 63   | 0  |
| CONTIG-037747 | 86   | 10 | 2   | 0    | 2  |
| CONTIG-037748 | 206  | 15 | 7   | 101  | 0  |
| CONTIG-037749 | 298  | 15 | 42  | 193  | 0  |
| CONTIG-037750 | 288  | 11 | 25  | 78   | 4  |
| CONTIG-037751 | 105  | 12 | 26  | 8    | 2  |
| CONTIG-037752 | 217  | 20 | 40  | 198  | 0  |
| CONTIG-037753 | 673  | 16 | 25  | 343  | 0  |
| CONTIG-037754 | 100  | 16 | 87  | 7    | 0  |
| CONTIG-037755 | 216  | 6  | 8   | 7    | 0  |
| CONTIG-037756 | 150  | 20 | 13  | 103  | 0  |
| CONTIG-037757 | 153  | 7  | 9   | 16   | 0  |
| CONTIG-037758 | 104  | 8  | 9   | 0    | 0  |
| CONTIG-037759 | 75   | 6  | 15  | 4    | 0  |
| CONTIG-037760 | 73   | 5  | 2   | 4    | 0  |
| CONTIG-037761 | 197  | 8  | 19  | 39   | 0  |
| CONTIG-037762 | 247  | 11 | 4   | 104  | 0  |
| CONTIG-037763 | 115  | 6  | 13  | 12   | 0  |
| CONTIG-037764 | 139  | 5  | 4   | 24   | 0  |

|               |     |     |    |      |   |
|---------------|-----|-----|----|------|---|
| CONTIG-037765 | 269 | 37  | 64 | 362  | 2 |
| CONTIG-037766 | 377 | 9   | 0  | 156  | 0 |
| CONTIG-037767 | 126 | 13  | 6  | 21   | 0 |
| CONTIG-037768 | 134 | 18  | 19 | 79   | 0 |
| CONTIG-037769 | 447 | 24  | 10 | 217  | 0 |
| CONTIG-037770 | 153 | 8   | 25 | 2    | 0 |
| CONTIG-037771 | 311 | 15  | 19 | 244  | 0 |
| CONTIG-037772 | 113 | 3   | 8  | 4    | 0 |
| CONTIG-037773 | 385 | 7   | 34 | 85   | 0 |
| CONTIG-037774 | 269 | 13  | 28 | 42   | 0 |
| CONTIG-037775 | 73  | 6   | 22 | 9    | 0 |
| CONTIG-037776 | 871 | 121 | 21 | 5993 | 2 |
| CONTIG-037777 | 231 | 6   | 5  | 45   | 0 |
| CONTIG-037779 | 103 | 17  | 16 | 9    | 0 |
| CONTIG-037780 | 90  | 83  | 95 | 134  | 2 |
| CONTIG-037781 | 86  | 8   | 16 | 23   | 0 |
| CONTIG-037782 | 260 | 5   | 13 | 23   | 4 |
| CONTIG-037783 | 203 | 5   | 28 | 6    | 0 |
| CONTIG-037784 | 443 | 9   | 33 | 68   | 4 |
| CONTIG-037785 | 243 | 12  | 23 | 86   | 2 |
| CONTIG-037786 | 65  | 6   | 6  | 4    | 0 |
| CONTIG-037787 | 61  | 10  | 66 | 0    | 0 |
| CONTIG-037788 | 157 | 12  | 7  | 3    | 0 |
| CONTIG-037791 | 108 | 14  | 39 | 33   | 0 |
| CONTIG-037792 | 104 | 9   | 2  | 19   | 0 |
| CONTIG-037796 | 63  | 9   | 11 | 0    | 0 |
| CONTIG-037797 | 68  | 3   | 3  | 2    | 0 |
| CONTIG-037798 | 151 | 4   | 3  | 10   | 0 |
| CONTIG-037799 | 64  | 11  | 21 | 19   | 0 |
| CONTIG-037800 | 523 | 22  | 77 | 330  | 0 |
| CONTIG-037801 | 177 | 8   | 4  | 43   | 0 |
| CONTIG-037802 | 310 | 7   | 5  | 23   | 2 |
| CONTIG-037803 | 210 | 39  | 24 | 76   | 0 |
| CONTIG-037804 | 300 | 16  | 87 | 131  | 0 |
| CONTIG-037805 | 87  | 5   | 39 | 0    | 0 |
| CONTIG-037806 | 87  | 4   | 2  | 0    | 0 |
| CONTIG-037807 | 73  | 14  | 33 | 26   | 0 |
| CONTIG-037808 | 212 | 20  | 29 | 151  | 2 |
| CONTIG-037809 | 75  | 6   | 6  | 13   | 0 |
| CONTIG-037810 | 233 | 5   | 2  | 44   | 0 |
| CONTIG-037811 | 71  | 10  | 13 | 10   | 0 |
| CONTIG-037812 | 164 | 5   | 3  | 10   | 0 |
| CONTIG-037814 | 71  | 9   | 10 | 18   | 0 |
| CONTIG-037815 | 72  | 4   | 2  | 8    | 0 |
| CONTIG-037816 | 80  | 18  | 88 | 0    | 0 |
| CONTIG-037817 | 258 | 9   | 15 | 61   | 0 |
| CONTIG-037818 | 104 | 5   | 3  | 20   | 0 |

|               |     |     |     |      |     |
|---------------|-----|-----|-----|------|-----|
| CONTIG-037820 | 82  | 6   | 4   | 8    | 0   |
| CONTIG-037821 | 160 | 8   | 21  | 19   | 0   |
| CONTIG-037822 | 381 | 22  | 16  | 225  | 3   |
| CONTIG-037823 | 164 | 10  | 4   | 46   | 0   |
| CONTIG-037824 | 249 | 9   | 18  | 104  | 0   |
| CONTIG-037825 | 299 | 13  | 23  | 179  | 0   |
| CONTIG-037826 | 170 | 7   | 28  | 18   | 0   |
| CONTIG-037827 | 102 | 5   | 2   | 15   | 0   |
| CONTIG-037828 | 87  | 8   | 7   | 28   | 0   |
| CONTIG-037829 | 102 | 19  | 18  | 76   | 0   |
| CONTIG-037830 | 327 | 21  | 4   | 17   | 0   |
| CONTIG-037831 | 127 | 7   | 11  | 29   | 0   |
| CONTIG-037832 | 145 | 8   | 39  | 7    | 0   |
| CONTIG-037833 | 153 | 10  | 29  | 31   | 2   |
| CONTIG-037834 | 66  | 10  | 2   | 27   | 0   |
| CONTIG-037835 | 43  | 177 | 18  | 90   | 0   |
| CONTIG-037836 | 204 | 13  | 4   | 91   | 2   |
| CONTIG-037837 | 72  | 8   | 8   | 17   | 0   |
| CONTIG-037838 | 217 | 21  | 12  | 174  | 0   |
| CONTIG-037839 | 936 | 25  | 75  | 1097 | 0   |
| CONTIG-037840 | 321 | 14  | 30  | 192  | 2   |
| CONTIG-037841 | 324 | 150 | 73  | 2    | 693 |
| CONTIG-037843 | 72  | 4   | 11  | 6    | 0   |
| CONTIG-037844 | 143 | 4   | 30  | 0    | 0   |
| CONTIG-037845 | 81  | 324 | 19  | 1245 | 0   |
| CONTIG-037846 | 236 | 8   | 33  | 43   | 0   |
| CONTIG-037851 | 369 | 12  | 50  | 149  | 0   |
| CONTIG-037852 | 216 | 8   | 16  | 49   | 0   |
| CONTIG-037853 | 67  | 4   | 3   | 11   | 0   |
| CONTIG-037854 | 72  | 9   | 5   | 23   | 0   |
| CONTIG-037855 | 107 | 10  | 5   | 48   | 0   |
| CONTIG-037856 | 72  | 449 | 39  | 718  | 0   |
| CONTIG-037864 | 78  | 9   | 4   | 22   | 0   |
| CONTIG-037865 | 322 | 24  | 26  | 227  | 7   |
| CONTIG-037866 | 325 | 12  | 12  | 149  | 2   |
| CONTIG-037867 | 71  | 4   | 4   | 0    | 0   |
| CONTIG-037868 | 107 | 29  | 0   | 60   | 0   |
| CONTIG-037869 | 431 | 11  | 64  | 110  | 0   |
| CONTIG-037870 | 130 | 6   | 33  | 23   | 0   |
| CONTIG-037871 | 292 | 8   | 16  | 71   | 0   |
| CONTIG-037872 | 133 | 896 | 3   | 3    | 491 |
| CONTIG-037873 | 194 | 9   | 17  | 35   | 0   |
| CONTIG-037874 | 532 | 5   | 56  | 35   | 2   |
| CONTIG-037875 | 189 | 5   | 2   | 42   | 0   |
| CONTIG-037876 | 534 | 72  | 187 | 1400 | 0   |
| CONTIG-037877 | 152 | 9   | 34  | 31   | 0   |
| CONTIG-037879 | 172 | 11  | 19  | 59   | 0   |



|               |      |    |     |     |   |
|---------------|------|----|-----|-----|---|
| CONTIG-037880 | 366  | 9  | 5   | 120 | 0 |
| CONTIG-037881 | 67   | 8  | 0   | 2   | 0 |
| CONTIG-037882 | 72   | 7  | 11  | 3   | 0 |
| CONTIG-037883 | 81   | 13 | 30  | 14  | 0 |
| CONTIG-037884 | 44   | 7  | 7   | 6   | 0 |
| CONTIG-037885 | 144  | 10 | 50  | 36  | 0 |
| CONTIG-037886 | 63   | 3  | 0   | 6   | 0 |
| CONTIG-037887 | 118  | 5  | 6   | 13  | 0 |
| CONTIG-037888 | 78   | 9  | 14  | 14  | 0 |
| CONTIG-037889 | 166  | 8  | 16  | 44  | 0 |
| CONTIG-037890 | 1106 | 18 | 38  | 754 | 6 |
| CONTIG-037891 | 115  | 14 | 11  | 56  | 0 |
| CONTIG-037892 | 105  | 18 | 50  | 0   | 0 |
| CONTIG-037893 | 76   | 2  | 0   | 0   | 0 |
| CONTIG-037894 | 404  | 13 | 28  | 235 | 0 |
| CONTIG-037895 | 333  | 12 | 28  | 143 | 0 |
| CONTIG-037896 | 656  | 13 | 57  | 334 | 2 |
| CONTIG-037897 | 150  | 8  | 10  | 14  | 0 |
| CONTIG-037898 | 856  | 14 | 36  | 219 | 4 |
| CONTIG-037902 | 176  | 8  | 82  | 22  | 0 |
| CONTIG-037904 | 236  | 9  | 6   | 47  | 0 |
| CONTIG-037905 | 214  | 8  | 58  | 39  | 0 |
| CONTIG-037907 | 126  | 8  | 12  | 16  | 0 |
| CONTIG-037908 | 175  | 13 | 4   | 56  | 2 |
| CONTIG-037909 | 90   | 3  | 2   | 2   | 0 |
| CONTIG-037910 | 113  | 6  | 6   | 30  | 0 |
| CONTIG-037911 | 148  | 6  | 4   | 34  | 0 |
| CONTIG-037912 | 59   | 4  | 4   | 7   | 0 |
| CONTIG-037913 | 275  | 50 | 12  | 278 | 8 |
| CONTIG-037916 | 115  | 7  | 3   | 28  | 0 |
| CONTIG-037918 | 68   | 8  | 15  | 12  | 0 |
| CONTIG-037919 | 77   | 7  | 3   | 22  | 0 |
| CONTIG-037920 | 95   | 9  | 42  | 8   | 0 |
| CONTIG-037921 | 434  | 8  | 40  | 115 | 0 |
| CONTIG-037922 | 206  | 10 | 54  | 64  | 0 |
| CONTIG-037924 | 490  | 36 | 104 | 441 | 6 |
| CONTIG-037925 | 79   | 12 | 2   | 33  | 0 |
| CONTIG-037926 | 737  | 16 | 0   | 6   | 0 |
| CONTIG-037927 | 708  | 10 | 19  | 232 | 0 |
| CONTIG-037928 | 64   | 6  | 0   | 15  | 0 |
| CONTIG-037929 | 107  | 7  | 10  | 23  | 0 |
| CONTIG-037930 | 68   | 2  | 4   | 2   | 0 |
| CONTIG-037931 | 59   | 6  | 20  | 0   | 0 |
| CONTIG-037932 | 136  | 30 | 15  | 108 | 8 |
| CONTIG-037934 | 64   | 12 | 28  | 24  | 0 |
| CONTIG-037935 | 84   | 9  | 19  | 7   | 0 |
| CONTIG-037936 | 305  | 18 | 10  | 286 | 0 |

|               |     |     |     |     |      |
|---------------|-----|-----|-----|-----|------|
| CONTIG-037937 | 262 | 10  | 7   | 126 | 0    |
| CONTIG-037938 | 285 | 7   | 24  | 66  | 0    |
| CONTIG-037939 | 208 | 15  | 4   | 5   | 0    |
| CONTIG-037940 | 421 | 12  | 11  | 11  | 0    |
| CONTIG-037941 | 461 | 11  | 76  | 173 | 0    |
| CONTIG-037942 | 71  | 10  | 57  | 0   | 0    |
| CONTIG-037943 | 284 | 29  | 167 | 146 | 17   |
| CONTIG-037944 | 202 | 18  | 20  | 170 | 0    |
| CONTIG-037945 | 891 | 19  | 35  | 926 | 0    |
| CONTIG-037946 | 395 | 6   | 11  | 66  | 0    |
| CONTIG-037947 | 123 | 5   | 9   | 12  | 0    |
| CONTIG-037948 | 62  | 7   | 0   | 0   | 0    |
| CONTIG-037949 | 476 | 10  | 49  | 142 | 4    |
| CONTIG-037950 | 117 | 608 | 37  | 149 | 0    |
| CONTIG-037951 | 176 | 9   | 15  | 45  | 0    |
| CONTIG-037952 | 179 | 9   | 6   | 35  | 0    |
| CONTIG-037955 | 300 | 44  | 121 | 582 | 0    |
| CONTIG-037956 | 158 | 9   | 23  | 37  | 0    |
| CONTIG-037957 | 191 | 9   | 17  | 58  | 0    |
| CONTIG-037958 | 146 | 18  | 23  | 76  | 0    |
| CONTIG-037963 | 60  | 8   | 2   | 15  | 0    |
| CONTIG-037964 | 653 | 12  | 16  | 202 | 0    |
| CONTIG-037965 | 64  | 4   | 5   | 12  | 0    |
| CONTIG-037966 | 73  | 4   | 2   | 10  | 0    |
| CONTIG-037967 | 100 | 10  | 16  | 42  | 0    |
| CONTIG-037968 | 239 | 16  | 116 | 112 | 0    |
| CONTIG-037969 | 332 | 16  | 18  | 184 | 0    |
| CONTIG-037970 | 278 | 873 | 44  | 3   | 5049 |
| CONTIG-037972 | 383 | 24  | 29  | 389 | 7    |
| CONTIG-037973 | 168 | 7   | 9   | 35  | 0    |
| CONTIG-037974 | 209 | 7   | 2   | 42  | 0    |
| CONTIG-037975 | 271 | 11  | 25  | 55  | 0    |
| CONTIG-037978 | 148 | 7   | 5   | 15  | 0    |
| CONTIG-037979 | 101 | 5   | 2   | 7   | 0    |
| CONTIG-037980 | 124 | 8   | 2   | 38  | 0    |
| CONTIG-037981 | 68  | 3   | 2   | 3   | 0    |
| CONTIG-037982 | 141 | 8   | 18  | 37  | 0    |
| CONTIG-037983 | 89  | 7   | 21  | 2   | 0    |
| CONTIG-037984 | 157 | 5   | 8   | 12  | 0    |
| CONTIG-037985 | 243 | 8   | 14  | 47  | 0    |
| CONTIG-037986 | 74  | 3   | 3   | 4   | 0    |
| CONTIG-037987 | 451 | 10  | 13  | 134 | 0    |
| CONTIG-037988 | 525 | 14  | 23  | 170 | 0    |
| CONTIG-037989 | 64  | 5   | 2   | 10  | 2    |
| CONTIG-037991 | 123 | 11  | 12  | 33  | 2    |
| CONTIG-037992 | 435 | 26  | 162 | 458 | 0    |
| CONTIG-037993 | 88  | 8   | 36  | 10  | 0    |

|               |      |     |    |     |    |
|---------------|------|-----|----|-----|----|
| CONTIG-037994 | 58   | 105 | 4  | 89  | 4  |
| CONTIG-037996 | 184  | 12  | 11 | 67  | 0  |
| CONTIG-037998 | 216  | 7   | 19 | 29  | 0  |
| CONTIG-038000 | 216  | 7   | 20 | 37  | 0  |
| CONTIG-038001 | 274  | 7   | 10 | 49  | 0  |
| CONTIG-038002 | 279  | 8   | 18 | 35  | 0  |
| CONTIG-038003 | 153  | 11  | 0  | 27  | 0  |
| CONTIG-038004 | 349  | 24  | 43 | 317 | 4  |
| CONTIG-038005 | 90   | 5   | 2  | 0   | 2  |
| CONTIG-038006 | 262  | 7   | 21 | 44  | 2  |
| CONTIG-038007 | 63   | 5   | 7  | 7   | 0  |
| CONTIG-038008 | 88   | 12  | 5  | 5   | 0  |
| CONTIG-038009 | 192  | 89  | 87 | 877 | 0  |
| CONTIG-038020 | 95   | 14  | 18 | 55  | 0  |
| CONTIG-038021 | 58   | 19  | 19 | 29  | 0  |
| CONTIG-038022 | 447  | 16  | 23 | 303 | 0  |
| CONTIG-038023 | 321  | 33  | 2  | 466 | 2  |
| CONTIG-038024 | 93   | 4   | 2  | 14  | 0  |
| CONTIG-038025 | 163  | 10  | 21 | 31  | 0  |
| CONTIG-038026 | 158  | 13  | 16 | 60  | 0  |
| CONTIG-038027 | 818  | 10  | 4  | 0   | 42 |
| CONTIG-038036 | 135  | 5   | 18 | 10  | 0  |
| CONTIG-038037 | 257  | 8   | 4  | 106 | 0  |
| CONTIG-038039 | 472  | 40  | 83 | 796 | 0  |
| CONTIG-038040 | 396  | 10  | 39 | 97  | 2  |
| CONTIG-038041 | 107  | 6   | 9  | 6   | 0  |
| CONTIG-038043 | 229  | 6   | 16 | 24  | 0  |
| CONTIG-038044 | 149  | 43  | 34 | 193 | 0  |
| CONTIG-038045 | 1571 | 20  | 61 | 423 | 66 |
| CONTIG-038046 | 44   | 46  | 8  | 24  | 0  |
| CONTIG-038047 | 187  | 8   | 55 | 28  | 0  |
| CONTIG-038054 | 119  | 8   | 55 | 0   | 0  |
| CONTIG-038055 | 60   | 4   | 4  | 0   | 0  |
| CONTIG-038056 | 290  | 9   | 44 | 14  | 0  |
| CONTIG-038057 | 95   | 19  | 29 | 8   | 0  |
| CONTIG-038058 | 70   | 7   | 0  | 19  | 0  |
| CONTIG-038059 | 357  | 32  | 80 | 191 | 8  |
| CONTIG-038060 | 187  | 8   | 8  | 37  | 0  |
| CONTIG-038061 | 128  | 5   | 3  | 14  | 0  |
| CONTIG-038062 | 75   | 6   | 16 | 0   | 0  |
| CONTIG-038063 | 113  | 13  | 19 | 19  | 0  |
| CONTIG-038064 | 155  | 12  | 7  | 36  | 0  |
| CONTIG-038065 | 177  | 16  | 33 | 83  | 2  |
| CONTIG-038066 | 107  | 10  | 15 | 32  | 0  |
| CONTIG-038067 | 182  | 8   | 13 | 51  | 0  |
| CONTIG-038068 | 69   | 6   | 5  | 6   | 0  |
| CONTIG-038076 | 253  | 17  | 17 | 165 | 0  |

|               |      |    |     |     |     |
|---------------|------|----|-----|-----|-----|
| CONTIG-038077 | 615  | 21 | 45  | 476 | 2   |
| CONTIG-038078 | 208  | 17 | 91  | 74  | 0   |
| CONTIG-038081 | 355  | 15 | 30  | 174 | 0   |
| CONTIG-038082 | 195  | 82 | 0   | 0   | 119 |
| CONTIG-038083 | 312  | 8  | 25  | 66  | 2   |
| CONTIG-038084 | 73   | 5  | 0   | 7   | 0   |
| CONTIG-038085 | 75   | 3  | 2   | 7   | 0   |
| CONTIG-038086 | 104  | 17 | 12  | 16  | 0   |
| CONTIG-038087 | 263  | 7  | 13  | 50  | 0   |
| CONTIG-038088 | 152  | 8  | 7   | 34  | 0   |
| CONTIG-038089 | 97   | 6  | 0   | 21  | 0   |
| CONTIG-038092 | 295  | 9  | 20  | 42  | 0   |
| CONTIG-038093 | 1001 | 13 | 25  | 469 | 2   |
| CONTIG-038094 | 326  | 11 | 55  | 104 | 0   |
| CONTIG-038095 | 123  | 6  | 5   | 20  | 0   |
| CONTIG-038096 | 108  | 6  | 10  | 17  | 0   |
| CONTIG-038097 | 179  | 10 | 35  | 54  | 2   |
| CONTIG-038098 | 136  | 5  | 5   | 12  | 0   |
| CONTIG-038099 | 516  | 7  | 3   | 12  | 0   |
| CONTIG-038100 | 210  | 10 | 12  | 68  | 0   |
| CONTIG-038101 | 480  | 21 | 47  | 247 | 2   |
| CONTIG-038102 | 689  | 18 | 19  | 69  | 0   |
| CONTIG-038103 | 166  | 25 | 17  | 18  | 0   |
| CONTIG-038104 | 125  | 3  | 2   | 10  | 0   |
| CONTIG-038105 | 102  | 7  | 22  | 2   | 0   |
| CONTIG-038107 | 374  | 17 | 28  | 218 | 0   |
| CONTIG-038108 | 78   | 7  | 0   | 19  | 0   |
| CONTIG-038109 | 509  | 30 | 123 | 287 | 2   |
| CONTIG-038110 | 617  | 31 | 86  | 722 | 4   |
| CONTIG-038111 | 135  | 9  | 7   | 59  | 0   |
| CONTIG-038113 | 665  | 21 | 92  | 465 | 4   |
| CONTIG-038114 | 249  | 7  | 4   | 53  | 0   |
| CONTIG-038117 | 209  | 15 | 17  | 133 | 2   |
| CONTIG-038118 | 79   | 4  | 8   | 10  | 0   |
| CONTIG-038119 | 348  | 8  | 4   | 40  | 0   |
| CONTIG-038120 | 122  | 8  | 12  | 11  | 0   |
| CONTIG-038122 | 59   | 13 | 30  | 2   | 0   |
| CONTIG-038123 | 81   | 3  | 0   | 2   | 0   |
| CONTIG-038124 | 122  | 5  | 3   | 8   | 0   |
| CONTIG-038128 | 851  | 17 | 18  | 50  | 0   |
| CONTIG-038129 | 88   | 12 | 22  | 13  | 0   |
| CONTIG-038130 | 102  | 4  | 5   | 15  | 0   |
| CONTIG-038131 | 74   | 14 | 49  | 2   | 0   |
| CONTIG-038132 | 159  | 13 | 2   | 46  | 4   |
| CONTIG-038133 | 108  | 5  | 10  | 0   | 0   |
| CONTIG-038134 | 353  | 12 | 25  | 109 | 2   |
| CONTIG-038135 | 674  | 13 | 11  | 252 | 8   |

|               |     |    |     |     |     |
|---------------|-----|----|-----|-----|-----|
| CONTIG-038136 | 138 | 4  | 9   | 13  | 0   |
| CONTIG-038137 | 401 | 50 | 109 | 420 | 96  |
| CONTIG-038138 | 88  | 5  | 4   | 0   | 0   |
| CONTIG-038139 | 223 | 11 | 0   | 90  | 0   |
| CONTIG-038140 | 250 | 15 | 31  | 87  | 0   |
| CONTIG-038141 | 175 | 13 | 41  | 71  | 2   |
| CONTIG-038142 | 62  | 7  | 0   | 9   | 0   |
| CONTIG-038143 | 327 | 9  | 37  | 86  | 0   |
| CONTIG-038145 | 72  | 7  | 13  | 2   | 0   |
| CONTIG-038146 | 77  | 8  | 2   | 34  | 0   |
| CONTIG-038147 | 74  | 8  | 33  | 5   | 0   |
| CONTIG-038148 | 73  | 6  | 0   | 15  | 0   |
| CONTIG-038149 | 63  | 3  | 0   | 2   | 2   |
| CONTIG-038151 | 92  | 10 | 14  | 29  | 0   |
| CONTIG-038155 | 88  | 11 | 10  | 35  | 0   |
| CONTIG-038160 | 147 | 8  | 10  | 34  | 2   |
| CONTIG-038161 | 100 | 16 | 22  | 16  | 0   |
| CONTIG-038162 | 59  | 27 | 24  | 25  | 0   |
| CONTIG-038163 | 206 | 7  | 6   | 11  | 0   |
| CONTIG-038164 | 258 | 7  | 10  | 32  | 0   |
| CONTIG-038165 | 812 | 22 | 0   | 0   | 129 |
| CONTIG-038167 | 215 | 16 | 40  | 97  | 2   |
| CONTIG-038168 | 113 | 6  | 0   | 5   | 0   |
| CONTIG-038169 | 366 | 8  | 45  | 59  | 2   |
| CONTIG-038170 | 244 | 12 | 12  | 159 | 0   |
| CONTIG-038171 | 116 | 4  | 7   | 8   | 0   |
| CONTIG-038172 | 69  | 9  | 56  | 2   | 0   |
| CONTIG-038173 | 338 | 11 | 48  | 115 | 0   |
| CONTIG-038174 | 271 | 11 | 41  | 65  | 0   |
| CONTIG-038178 | 418 | 11 | 11  | 125 | 0   |
| CONTIG-038179 | 669 | 11 | 14  | 4   | 0   |
| CONTIG-038180 | 89  | 11 | 0   | 14  | 5   |
| CONTIG-038182 | 115 | 12 | 5   | 45  | 0   |
| CONTIG-038183 | 289 | 6  | 35  | 41  | 2   |
| CONTIG-038184 | 141 | 14 | 27  | 32  | 0   |
| CONTIG-038185 | 169 | 9  | 8   | 4   | 0   |
| CONTIG-038186 | 212 | 9  | 25  | 44  | 0   |
| CONTIG-038187 | 287 | 16 | 44  | 94  | 2   |
| CONTIG-038188 | 63  | 4  | 2   | 2   | 0   |
| CONTIG-038189 | 273 | 11 | 38  | 77  | 0   |
| CONTIG-038190 | 217 | 23 | 32  | 137 | 0   |
| CONTIG-038191 | 339 | 14 | 15  | 115 | 2   |
| CONTIG-038192 | 405 | 68 | 15  | 12  | 0   |
| CONTIG-038193 | 152 | 9  | 3   | 17  | 0   |
| CONTIG-038194 | 90  | 6  | 2   | 15  | 0   |
| CONTIG-038195 | 479 | 11 | 30  | 211 | 0   |
| CONTIG-038196 | 281 | 11 | 42  | 65  | 2   |

|               |      |    |    |     |     |
|---------------|------|----|----|-----|-----|
| CONTIG-038197 | 406  | 26 | 74 | 575 | 0   |
| CONTIG-038198 | 308  | 14 | 25 | 143 | 0   |
| CONTIG-038199 | 105  | 25 | 46 | 59  | 0   |
| CONTIG-038200 | 205  | 12 | 14 | 100 | 2   |
| CONTIG-038201 | 95   | 7  | 5  | 11  | 0   |
| CONTIG-038202 | 72   | 3  | 8  | 5   | 0   |
| CONTIG-038203 | 86   | 9  | 7  | 25  | 0   |
| CONTIG-038204 | 1446 | 25 | 2  | 0   | 535 |
| CONTIG-038205 | 157  | 11 | 2  | 39  | 0   |
| CONTIG-038211 | 100  | 35 | 31 | 137 | 0   |
| CONTIG-038218 | 84   | 14 | 29 | 36  | 0   |
| CONTIG-038219 | 60   | 4  | 4  | 4   | 0   |
| CONTIG-038220 | 81   | 18 | 56 | 0   | 0   |
| CONTIG-038225 | 85   | 6  | 0  | 7   | 0   |
| CONTIG-038226 | 152  | 7  | 15 | 27  | 0   |
| CONTIG-038227 | 252  | 12 | 65 | 70  | 0   |
| CONTIG-038228 | 237  | 6  | 16 | 20  | 0   |
| CONTIG-038229 | 355  | 6  | 5  | 52  | 2   |
| CONTIG-038230 | 98   | 8  | 2  | 21  | 0   |
| CONTIG-038231 | 84   | 7  | 14 | 17  | 0   |
| CONTIG-038232 | 146  | 7  | 8  | 8   | 0   |
| CONTIG-038233 | 66   | 6  | 3  | 9   | 0   |
| CONTIG-038234 | 262  | 30 | 24 | 338 | 4   |
| CONTIG-038235 | 99   | 8  | 7  | 28  | 0   |
| CONTIG-038236 | 63   | 9  | 50 | 0   | 0   |
| CONTIG-038237 | 65   | 5  | 0  | 4   | 0   |
| CONTIG-038238 | 284  | 11 | 9  | 147 | 0   |
| CONTIG-038239 | 156  | 25 | 38 | 120 | 4   |
| CONTIG-038240 | 1321 | 21 | 0  | 0   | 135 |
| CONTIG-038242 | 60   | 3  | 6  | 0   | 0   |
| CONTIG-038243 | 144  | 14 | 59 | 40  | 0   |
| CONTIG-038246 | 126  | 6  | 24 | 9   | 2   |
| CONTIG-038247 | 242  | 13 | 0  | 24  | 0   |
| CONTIG-038249 | 226  | 10 | 9  | 59  | 4   |
| CONTIG-038250 | 58   | 5  | 0  | 2   | 0   |
| CONTIG-038251 | 68   | 10 | 2  | 11  | 0   |
| CONTIG-038252 | 76   | 4  | 2  | 9   | 0   |
| CONTIG-038253 | 236  | 9  | 5  | 48  | 0   |
| CONTIG-038254 | 184  | 11 | 35 | 60  | 0   |
| CONTIG-038255 | 129  | 13 | 8  | 60  | 0   |
| CONTIG-038256 | 190  | 28 | 95 | 194 | 0   |
| CONTIG-038257 | 542  | 12 | 19 | 232 | 0   |
| CONTIG-038258 | 173  | 6  | 2  | 23  | 0   |
| CONTIG-038259 | 76   | 9  | 6  | 20  | 0   |
| CONTIG-038260 | 200  | 9  | 16 | 51  | 2   |
| CONTIG-038261 | 350  | 14 | 97 | 180 | 4   |
| CONTIG-038262 | 119  | 5  | 4  | 6   | 0   |

|               |     |    |     |     |    |
|---------------|-----|----|-----|-----|----|
| CONTIG-038263 | 178 | 16 | 21  | 111 | 0  |
| CONTIG-038264 | 41  | 34 | 0   | 42  | 0  |
| CONTIG-038265 | 101 | 5  | 22  | 2   | 0  |
| CONTIG-038266 | 364 | 40 | 50  | 92  | 0  |
| CONTIG-038267 | 73  | 4  | 10  | 3   | 0  |
| CONTIG-038268 | 234 | 21 | 44  | 127 | 0  |
| CONTIG-038269 | 198 | 14 | 14  | 90  | 0  |
| CONTIG-038270 | 60  | 3  | 2   | 4   | 0  |
| CONTIG-038271 | 210 | 8  | 5   | 0   | 0  |
| CONTIG-038272 | 281 | 64 | 179 | 859 | 0  |
| CONTIG-038273 | 76  | 5  | 3   | 12  | 0  |
| CONTIG-038274 | 86  | 8  | 14  | 17  | 2  |
| CONTIG-038275 | 70  | 5  | 3   | 12  | 0  |
| CONTIG-038276 | 195 | 7  | 16  | 27  | 0  |
| CONTIG-038278 | 295 | 10 | 13  | 57  | 0  |
| CONTIG-038279 | 91  | 4  | 3   | 8   | 0  |
| CONTIG-038284 | 44  | 14 | 2   | 20  | 0  |
| CONTIG-038285 | 226 | 15 | 21  | 122 | 0  |
| CONTIG-038286 | 61  | 4  | 4   | 8   | 0  |
| CONTIG-038288 | 255 | 15 | 33  | 159 | 0  |
| CONTIG-038289 | 175 | 11 | 14  | 74  | 0  |
| CONTIG-038290 | 62  | 27 | 39  | 14  | 10 |
| CONTIG-038291 | 185 | 12 | 14  | 64  | 0  |
| CONTIG-038292 | 117 | 47 | 15  | 298 | 0  |
| CONTIG-038293 | 62  | 4  | 7   | 0   | 0  |
| CONTIG-038294 | 94  | 6  | 5   | 0   | 0  |
| CONTIG-038295 | 127 | 5  | 9   | 21  | 0  |
| CONTIG-038296 | 373 | 15 | 51  | 141 | 0  |
| CONTIG-038297 | 176 | 60 | 29  | 369 | 5  |
| CONTIG-038298 | 495 | 11 | 7   | 175 | 2  |
| CONTIG-038299 | 160 | 9  | 11  | 18  | 0  |
| CONTIG-038300 | 98  | 4  | 16  | 4   | 0  |
| CONTIG-038301 | 71  | 10 | 21  | 28  | 0  |
| CONTIG-038302 | 149 | 65 | 14  | 0   | 74 |
| CONTIG-038303 | 106 | 5  | 7   | 16  | 0  |
| CONTIG-038304 | 108 | 7  | 8   | 21  | 0  |
| CONTIG-038305 | 144 | 13 | 17  | 63  | 0  |
| CONTIG-038306 | 103 | 6  | 11  | 6   | 0  |
| CONTIG-038307 | 96  | 13 | 5   | 39  | 0  |
| CONTIG-038308 | 304 | 6  | 3   | 84  | 0  |
| CONTIG-038309 | 108 | 7  | 11  | 0   | 2  |
| CONTIG-038310 | 90  | 4  | 10  | 6   | 0  |
| CONTIG-038311 | 249 | 29 | 67  | 247 | 0  |
| CONTIG-038312 | 141 | 6  | 12  | 25  | 0  |
| CONTIG-038313 | 116 | 7  | 0   | 25  | 0  |
| CONTIG-038314 | 136 | 6  | 10  | 16  | 0  |
| CONTIG-038315 | 61  | 32 | 2   | 25  | 0  |

|               |     |    |    |      |    |
|---------------|-----|----|----|------|----|
| CONTIG-038316 | 183 | 6  | 20 | 11   | 0  |
| CONTIG-038318 | 214 | 5  | 10 | 32   | 0  |
| CONTIG-038319 | 234 | 5  | 8  | 5    | 2  |
| CONTIG-038320 | 124 | 5  | 7  | 21   | 0  |
| CONTIG-038321 | 66  | 45 | 13 | 111  | 0  |
| CONTIG-038322 | 131 | 42 | 31 | 51   | 0  |
| CONTIG-038323 | 408 | 11 | 7  | 96   | 0  |
| CONTIG-038324 | 118 | 15 | 34 | 68   | 0  |
| CONTIG-038325 | 575 | 23 | 50 | 333  | 16 |
| CONTIG-038326 | 448 | 11 | 24 | 141  | 0  |
| CONTIG-038327 | 106 | 9  | 32 | 17   | 2  |
| CONTIG-038331 | 65  | 5  | 8  | 3    | 0  |
| CONTIG-038335 | 119 | 5  | 4  | 24   | 0  |
| CONTIG-038336 | 395 | 16 | 35 | 194  | 0  |
| CONTIG-038337 | 59  | 9  | 27 | 10   | 0  |
| CONTIG-038338 | 134 | 3  | 2  | 9    | 0  |
| CONTIG-038339 | 408 | 18 | 7  | 145  | 0  |
| CONTIG-038340 | 107 | 3  | 0  | 6    | 0  |
| CONTIG-038341 | 815 | 92 | 69 | 4872 | 0  |
| CONTIG-038342 | 122 | 11 | 19 | 34   | 0  |
| CONTIG-038343 | 74  | 3  | 5  | 9    | 0  |
| CONTIG-038344 | 188 | 13 | 47 | 61   | 0  |
| CONTIG-038345 | 199 | 17 | 13 | 166  | 0  |
| CONTIG-038346 | 247 | 10 | 10 | 86   | 0  |
| CONTIG-038348 | 78  | 9  | 16 | 0    | 0  |
| CONTIG-038350 | 174 | 47 | 13 | 371  | 0  |
| CONTIG-038351 | 81  | 7  | 3  | 16   | 0  |
| CONTIG-038352 | 194 | 7  | 0  | 52   | 0  |
| CONTIG-038353 | 657 | 23 | 42 | 786  | 0  |
| CONTIG-038354 | 84  | 13 | 36 | 17   | 0  |
| CONTIG-038355 | 149 | 14 | 20 | 56   | 0  |
| CONTIG-038356 | 267 | 11 | 33 | 83   | 0  |
| CONTIG-038358 | 110 | 6  | 2  | 11   | 0  |
| CONTIG-038359 | 265 | 9  | 56 | 72   | 0  |
| CONTIG-038360 | 464 | 11 | 38 | 167  | 0  |
| CONTIG-038361 | 65  | 8  | 4  | 7    | 2  |
| CONTIG-038362 | 647 | 11 | 9  | 190  | 0  |
| CONTIG-038363 | 337 | 7  | 19 | 86   | 0  |
| CONTIG-038369 | 58  | 22 | 10 | 16   | 0  |
| CONTIG-038370 | 138 | 9  | 4  | 26   | 0  |
| CONTIG-038371 | 323 | 12 | 15 | 115  | 0  |
| CONTIG-038372 | 69  | 4  | 2  | 8    | 0  |
| CONTIG-038373 | 71  | 43 | 11 | 48   | 0  |
| CONTIG-038374 | 607 | 11 | 12 | 84   | 0  |
| CONTIG-038375 | 195 | 25 | 6  | 107  | 0  |
| CONTIG-038376 | 68  | 3  | 4  | 4    | 0  |
| CONTIG-038384 | 214 | 6  | 23 | 44   | 0  |



|               |     |    |     |      |    |
|---------------|-----|----|-----|------|----|
| CONTIG-038385 | 68  | 5  | 3   | 7    | 0  |
| CONTIG-038386 | 70  | 10 | 29  | 2    | 0  |
| CONTIG-038387 | 207 | 12 | 3   | 112  | 0  |
| CONTIG-038388 | 64  | 5  | 4   | 0    | 0  |
| CONTIG-038389 | 92  | 13 | 11  | 36   | 0  |
| CONTIG-038390 | 151 | 7  | 0   | 27   | 2  |
| CONTIG-038391 | 159 | 6  | 4   | 18   | 0  |
| CONTIG-038392 | 45  | 6  | 0   | 10   | 0  |
| CONTIG-038393 | 247 | 22 | 69  | 189  | 0  |
| CONTIG-038394 | 89  | 4  | 8   | 0    | 0  |
| CONTIG-038395 | 105 | 7  | 18  | 0    | 0  |
| CONTIG-038396 | 654 | 15 | 35  | 383  | 2  |
| CONTIG-038397 | 296 | 19 | 7   | 234  | 0  |
| CONTIG-038398 | 595 | 24 | 19  | 316  | 51 |
| CONTIG-038399 | 60  | 8  | 32  | 7    | 0  |
| CONTIG-038400 | 385 | 9  | 25  | 92   | 0  |
| CONTIG-038401 | 180 | 11 | 21  | 26   | 0  |
| CONTIG-038402 | 869 | 21 | 24  | 978  | 0  |
| CONTIG-038403 | 139 | 5  | 0   | 22   | 0  |
| CONTIG-038404 | 165 | 6  | 6   | 27   | 0  |
| CONTIG-038405 | 66  | 7  | 15  | 8    | 0  |
| CONTIG-038406 | 191 | 10 | 17  | 49   | 0  |
| CONTIG-038407 | 92  | 7  | 16  | 15   | 0  |
| CONTIG-038408 | 465 | 15 | 34  | 110  | 5  |
| CONTIG-038409 | 123 | 8  | 16  | 29   | 0  |
| CONTIG-038410 | 181 | 15 | 56  | 32   | 0  |
| CONTIG-038412 | 141 | 5  | 13  | 18   | 0  |
| CONTIG-038413 | 85  | 6  | 0   | 11   | 0  |
| CONTIG-038414 | 281 | 12 | 11  | 101  | 2  |
| CONTIG-038415 | 227 | 16 | 50  | 152  | 0  |
| CONTIG-038416 | 187 | 5  | 9   | 30   | 0  |
| CONTIG-038417 | 62  | 8  | 10  | 15   | 0  |
| CONTIG-038418 | 118 | 4  | 2   | 0    | 4  |
| CONTIG-038419 | 41  | 7  | 3   | 8    | 0  |
| CONTIG-038420 | 164 | 12 | 4   | 56   | 2  |
| CONTIG-038421 | 645 | 10 | 18  | 171  | 2  |
| CONTIG-038422 | 201 | 14 | 32  | 142  | 0  |
| CONTIG-038423 | 60  | 9  | 9   | 8    | 0  |
| CONTIG-038424 | 93  | 13 | 4   | 30   | 0  |
| CONTIG-038425 | 870 | 31 | 126 | 1242 | 2  |
| CONTIG-038431 | 167 | 11 | 23  | 24   | 0  |
| CONTIG-038432 | 271 | 14 | 29  | 103  | 2  |
| CONTIG-038433 | 218 | 27 | 67  | 141  | 4  |
| CONTIG-038435 | 175 | 10 | 13  | 75   | 0  |
| CONTIG-038436 | 104 | 9  | 13  | 40   | 0  |
| CONTIG-038437 | 139 | 9  | 23  | 52   | 0  |
| CONTIG-038438 | 80  | 6  | 8   | 6    | 0  |

|               |     |    |    |      |    |
|---------------|-----|----|----|------|----|
| CONTIG-038439 | 59  | 9  | 4  | 19   | 0  |
| CONTIG-038440 | 141 | 4  | 17 | 2    | 0  |
| CONTIG-038441 | 327 | 9  | 16 | 75   | 2  |
| CONTIG-038442 | 396 | 20 | 25 | 164  | 4  |
| CONTIG-038443 | 100 | 6  | 2  | 14   | 0  |
| CONTIG-038445 | 166 | 9  | 18 | 72   | 0  |
| CONTIG-038446 | 176 | 10 | 74 | 7    | 0  |
| CONTIG-038447 | 459 | 13 | 74 | 106  | 0  |
| CONTIG-038448 | 720 | 14 | 56 | 232  | 9  |
| CONTIG-038449 | 124 | 7  | 0  | 34   | 0  |
| CONTIG-038452 | 58  | 6  | 2  | 7    | 0  |
| CONTIG-038453 | 224 | 16 | 0  | 64   | 2  |
| CONTIG-038454 | 598 | 27 | 26 | 362  | 19 |
| CONTIG-038455 | 456 | 23 | 99 | 283  | 0  |
| CONTIG-038456 | 95  | 32 | 13 | 161  | 2  |
| CONTIG-038457 | 127 | 6  | 2  | 12   | 0  |
| CONTIG-038458 | 726 | 13 | 55 | 271  | 0  |
| CONTIG-038459 | 163 | 8  | 6  | 32   | 0  |
| CONTIG-038460 | 327 | 14 | 35 | 192  | 0  |
| CONTIG-038462 | 583 | 14 | 45 | 280  | 2  |
| CONTIG-038463 | 253 | 32 | 43 | 223  | 0  |
| CONTIG-038473 | 186 | 6  | 6  | 38   | 0  |
| CONTIG-038474 | 100 | 14 | 19 | 27   | 0  |
| CONTIG-038475 | 139 | 6  | 3  | 26   | 0  |
| CONTIG-038476 | 166 | 4  | 0  | 2    | 0  |
| CONTIG-038477 | 146 | 14 | 11 | 75   | 0  |
| CONTIG-038479 | 103 | 5  | 7  | 9    | 0  |
| CONTIG-038480 | 92  | 4  | 4  | 6    | 0  |
| CONTIG-038481 | 59  | 8  | 2  | 17   | 0  |
| CONTIG-038482 | 87  | 7  | 10 | 24   | 0  |
| CONTIG-038483 | 641 | 16 | 41 | 407  | 0  |
| CONTIG-038484 | 687 | 46 | 18 | 1228 | 2  |
| CONTIG-038485 | 129 | 9  | 11 | 33   | 0  |
| CONTIG-038486 | 64  | 8  | 9  | 16   | 0  |
| CONTIG-038487 | 130 | 24 | 72 | 125  | 0  |
| CONTIG-038488 | 128 | 9  | 10 | 8    | 0  |
| CONTIG-038489 | 111 | 5  | 12 | 18   | 0  |
| CONTIG-038490 | 77  | 6  | 5  | 2    | 0  |
| CONTIG-038491 | 224 | 17 | 26 | 154  | 0  |
| CONTIG-038492 | 170 | 22 | 13 | 49   | 0  |
| CONTIG-038493 | 113 | 6  | 41 | 14   | 0  |
| CONTIG-038494 | 284 | 11 | 26 | 56   | 0  |
| CONTIG-038496 | 68  | 8  | 5  | 7    | 0  |
| CONTIG-038498 | 82  | 11 | 7  | 33   | 0  |
| CONTIG-038499 | 84  | 3  | 2  | 6    | 0  |
| CONTIG-038500 | 376 | 11 | 32 | 132  | 0  |
| CONTIG-038502 | 82  | 8  | 17 | 11   | 0  |

|               |     |    |     |     |    |
|---------------|-----|----|-----|-----|----|
| CONTIG-038503 | 106 | 11 | 2   | 4   | 0  |
| CONTIG-038504 | 152 | 28 | 33  | 116 | 5  |
| CONTIG-038505 | 253 | 14 | 112 | 102 | 0  |
| CONTIG-038506 | 308 | 8  | 20  | 90  | 0  |
| CONTIG-038507 | 142 | 7  | 10  | 22  | 0  |
| CONTIG-038508 | 98  | 4  | 5   | 10  | 0  |
| CONTIG-038509 | 324 | 18 | 22  | 244 | 0  |
| CONTIG-038510 | 61  | 10 | 30  | 4   | 0  |
| CONTIG-038511 | 66  | 8  | 10  | 10  | 0  |
| CONTIG-038512 | 127 | 7  | 2   | 30  | 0  |
| CONTIG-038513 | 144 | 8  | 27  | 22  | 0  |
| CONTIG-038514 | 210 | 8  | 19  | 33  | 0  |
| CONTIG-038515 | 436 | 12 | 9   | 277 | 2  |
| CONTIG-038516 | 95  | 7  | 7   | 24  | 0  |
| CONTIG-038517 | 84  | 10 | 2   | 42  | 0  |
| CONTIG-038518 | 285 | 17 | 32  | 177 | 0  |
| CONTIG-038522 | 66  | 12 | 47  | 9   | 0  |
| CONTIG-038523 | 194 | 13 | 115 | 28  | 0  |
| CONTIG-038524 | 132 | 9  | 7   | 34  | 0  |
| CONTIG-038525 | 78  | 7  | 10  | 14  | 0  |
| CONTIG-038526 | 101 | 6  | 6   | 19  | 0  |
| CONTIG-038528 | 179 | 10 | 0   | 32  | 0  |
| CONTIG-038529 | 592 | 29 | 31  | 735 | 8  |
| CONTIG-038530 | 293 | 12 | 47  | 64  | 2  |
| CONTIG-038533 | 64  | 4  | 4   | 3   | 0  |
| CONTIG-038535 | 89  | 22 | 21  | 22  | 0  |
| CONTIG-038536 | 60  | 3  | 8   | 0   | 0  |
| CONTIG-038537 | 85  | 9  | 12  | 17  | 0  |
| CONTIG-038538 | 152 | 23 | 72  | 77  | 5  |
| CONTIG-038541 | 67  | 4  | 7   | 2   | 0  |
| CONTIG-038543 | 319 | 8  | 4   | 54  | 9  |
| CONTIG-038544 | 122 | 6  | 7   | 18  | 0  |
| CONTIG-038545 | 117 | 8  | 3   | 35  | 0  |
| CONTIG-038546 | 124 | 2  | 0   | 4   | 0  |
| CONTIG-038547 | 811 | 24 | 4   | 0   | 58 |
| CONTIG-038548 | 100 | 9  | 3   | 32  | 0  |
| CONTIG-038549 | 67  | 11 | 8   | 0   | 0  |
| CONTIG-038550 | 193 | 5  | 15  | 18  | 0  |
| CONTIG-038551 | 162 | 41 | 37  | 160 | 7  |
| CONTIG-038552 | 217 | 8  | 10  | 40  | 0  |
| CONTIG-038553 | 146 | 7  | 10  | 40  | 0  |
| CONTIG-038554 | 193 | 11 | 5   | 68  | 0  |
| CONTIG-038555 | 130 | 6  | 5   | 26  | 0  |
| CONTIG-038556 | 78  | 9  | 15  | 24  | 0  |
| CONTIG-038557 | 340 | 10 | 35  | 93  | 0  |
| CONTIG-038558 | 93  | 5  | 2   | 12  | 0  |
| CONTIG-038560 | 161 | 22 | 34  | 170 | 0  |

|               |      |     |     |      |   |
|---------------|------|-----|-----|------|---|
| CONTIG-038561 | 72   | 7   | 4   | 19   | 0 |
| CONTIG-038562 | 61   | 4   | 0   | 2    | 0 |
| CONTIG-038563 | 703  | 49  | 169 | 2139 | 0 |
| CONTIG-038564 | 101  | 8   | 4   | 12   | 0 |
| CONTIG-038566 | 97   | 4   | 6   | 9    | 0 |
| CONTIG-038567 | 60   | 2   | 3   | 2    | 0 |
| CONTIG-038568 | 172  | 12  | 8   | 74   | 0 |
| CONTIG-038569 | 130  | 4   | 2   | 14   | 0 |
| CONTIG-038570 | 283  | 16  | 44  | 141  | 0 |
| CONTIG-038571 | 383  | 19  | 73  | 188  | 0 |
| CONTIG-038572 | 164  | 11  | 29  | 56   | 0 |
| CONTIG-038573 | 75   | 11  | 7   | 37   | 0 |
| CONTIG-038574 | 108  | 10  | 18  | 26   | 0 |
| CONTIG-038575 | 65   | 7   | 2   | 14   | 0 |
| CONTIG-038576 | 301  | 240 | 51  | 1400 | 0 |
| CONTIG-038577 | 193  | 8   | 35  | 32   | 2 |
| CONTIG-038578 | 66   | 11  | 19  | 0    | 0 |
| CONTIG-038579 | 106  | 8   | 11  | 30   | 0 |
| CONTIG-038580 | 132  | 21  | 142 | 57   | 0 |
| CONTIG-038584 | 1079 | 14  | 99  | 217  | 0 |
| CONTIG-038585 | 284  | 12  | 19  | 105  | 0 |
| CONTIG-038586 | 1874 | 46  | 0   | 0    | 2 |
| CONTIG-038587 | 97   | 5   | 14  | 6    | 0 |
| CONTIG-038588 | 418  | 14  | 57  | 148  | 0 |
| CONTIG-038589 | 209  | 10  | 18  | 57   | 2 |
| CONTIG-038590 | 61   | 6   | 4   | 4    | 0 |
| CONTIG-038591 | 66   | 4   | 2   | 2    | 0 |
| CONTIG-038592 | 122  | 12  | 15  | 61   | 0 |
| CONTIG-038593 | 394  | 27  | 65  | 259  | 6 |
| CONTIG-038594 | 61   | 10  | 4   | 33   | 0 |
| CONTIG-038598 | 58   | 11  | 34  | 0    | 0 |
| CONTIG-038599 | 119  | 10  | 13  | 31   | 0 |
| CONTIG-038600 | 62   | 10  | 0   | 29   | 0 |
| CONTIG-038601 | 99   | 7   | 3   | 18   | 0 |
| CONTIG-038602 | 92   | 3   | 0   | 2    | 0 |
| CONTIG-038603 | 272  | 8   | 13  | 52   | 0 |
| CONTIG-038604 | 67   | 4   | 0   | 6    | 0 |
| CONTIG-038606 | 238  | 16  | 18  | 148  | 0 |
| CONTIG-038607 | 65   | 5   | 0   | 11   | 0 |
| CONTIG-038608 | 197  | 19  | 15  | 106  | 0 |
| CONTIG-038609 | 63   | 2   | 0   | 4    | 0 |
| CONTIG-038610 | 416  | 16  | 30  | 162  | 2 |
| CONTIG-038611 | 61   | 9   | 32  | 7    | 0 |
| CONTIG-038615 | 796  | 14  | 62  | 435  | 2 |
| CONTIG-038616 | 197  | 10  | 39  | 69   | 0 |
| CONTIG-038617 | 796  | 10  | 65  | 212  | 0 |
| CONTIG-038618 | 100  | 17  | 26  | 63   | 0 |

|               |     |     |     |     |     |
|---------------|-----|-----|-----|-----|-----|
| CONTIG-038621 | 58  | 12  | 32  | 6   | 0   |
| CONTIG-038622 | 351 | 20  | 61  | 242 | 0   |
| CONTIG-038623 | 223 | 6   | 5   | 35  | 4   |
| CONTIG-038624 | 36  | 329 | 10  | 12  | 129 |
| CONTIG-038626 | 561 | 35  | 53  | 582 | 34  |
| CONTIG-038627 | 263 | 8   | 15  | 52  | 0   |
| CONTIG-038628 | 61  | 12  | 8   | 36  | 0   |
| CONTIG-038630 | 93  | 16  | 30  | 34  | 2   |
| CONTIG-038631 | 508 | 18  | 36  | 343 | 0   |
| CONTIG-038632 | 78  | 7   | 3   | 7   | 0   |
| CONTIG-038633 | 89  | 5   | 8   | 13  | 0   |
| CONTIG-038635 | 201 | 12  | 44  | 61  | 0   |
| CONTIG-038636 | 84  | 10  | 2   | 21  | 0   |
| CONTIG-038637 | 153 | 16  | 45  | 82  | 0   |
| CONTIG-038638 | 497 | 12  | 22  | 267 | 2   |
| CONTIG-038641 | 62  | 6   | 0   | 8   | 0   |
| CONTIG-038642 | 290 | 10  | 44  | 91  | 0   |
| CONTIG-038643 | 121 | 5   | 6   | 20  | 0   |
| CONTIG-038644 | 213 | 6   | 44  | 39  | 0   |
| CONTIG-038645 | 184 | 6   | 10  | 16  | 0   |
| CONTIG-038648 | 386 | 5   | 2   | 17  | 2   |
| CONTIG-038649 | 483 | 9   | 20  | 99  | 0   |
| CONTIG-038650 | 166 | 7   | 9   | 27  | 0   |
| CONTIG-038651 | 217 | 11  | 66  | 31  | 0   |
| CONTIG-038654 | 227 | 9   | 18  | 90  | 0   |
| CONTIG-038655 | 95  | 9   | 4   | 20  | 0   |
| CONTIG-038656 | 68  | 7   | 6   | 2   | 0   |
| CONTIG-038657 | 70  | 8   | 10  | 11  | 0   |
| CONTIG-038658 | 327 | 13  | 41  | 165 | 0   |
| CONTIG-038659 | 122 | 6   | 15  | 7   | 0   |
| CONTIG-038660 | 103 | 5   | 8   | 19  | 0   |
| CONTIG-038661 | 270 | 8   | 8   | 66  | 0   |
| CONTIG-038662 | 245 | 16  | 18  | 138 | 0   |
| CONTIG-038663 | 212 | 10  | 28  | 43  | 0   |
| CONTIG-038664 | 213 | 9   | 34  | 54  | 4   |
| CONTIG-038673 | 126 | 4   | 2   | 9   | 0   |
| CONTIG-038675 | 209 | 13  | 28  | 97  | 2   |
| CONTIG-038676 | 263 | 9   | 13  | 84  | 0   |
| CONTIG-038677 | 134 | 6   | 6   | 24  | 0   |
| CONTIG-038678 | 192 | 13  | 134 | 60  | 0   |
| CONTIG-038679 | 76  | 13  | 33  | 32  | 0   |
| CONTIG-038680 | 72  | 6   | 29  | 3   | 0   |
| CONTIG-038681 | 136 | 9   | 11  | 45  | 0   |
| CONTIG-038690 | 495 | 58  | 250 | 629 | 8   |
| CONTIG-038691 | 365 | 17  | 63  | 170 | 5   |
| CONTIG-038692 | 346 | 10  | 12  | 141 | 0   |
| CONTIG-038694 | 199 | 11  | 40  | 32  | 0   |

|               |      |     |     |      |     |
|---------------|------|-----|-----|------|-----|
| CONTIG-038695 | 925  | 14  | 81  | 320  | 0   |
| CONTIG-038696 | 71   | 5   | 2   | 11   | 0   |
| CONTIG-038697 | 373  | 11  | 10  | 117  | 0   |
| CONTIG-038698 | 213  | 14  | 16  | 78   | 0   |
| CONTIG-038699 | 90   | 5   | 2   | 4    | 0   |
| CONTIG-038700 | 223  | 11  | 40  | 75   | 0   |
| CONTIG-038701 | 87   | 7   | 10  | 18   | 0   |
| CONTIG-038702 | 75   | 62  | 0   | 16   | 0   |
| CONTIG-038703 | 92   | 35  | 2   | 19   | 0   |
| CONTIG-038704 | 140  | 9   | 11  | 36   | 0   |
| CONTIG-038705 | 208  | 13  | 24  | 129  | 0   |
| CONTIG-038706 | 130  | 214 | 16  | 1086 | 154 |
| CONTIG-038707 | 137  | 10  | 38  | 23   | 0   |
| CONTIG-038709 | 206  | 54  | 58  | 450  | 20  |
| CONTIG-038710 | 1224 | 27  | 54  | 843  | 45  |
| CONTIG-038711 | 94   | 23  | 26  | 72   | 0   |
| CONTIG-038712 | 2234 | 36  | 137 | 3652 | 22  |
| CONTIG-038713 | 156  | 4   | 4   | 2    | 0   |
| CONTIG-038714 | 221  | 30  | 24  | 349  | 0   |
| CONTIG-038715 | 199  | 6   | 4   | 20   | 0   |
| CONTIG-038716 | 236  | 8   | 4   | 37   | 2   |
| CONTIG-038717 | 315  | 28  | 8   | 172  | 0   |
| CONTIG-038718 | 66   | 3   | 2   | 0    | 0   |
| CONTIG-038719 | 245  | 14  | 94  | 28   | 0   |
| CONTIG-038720 | 244  | 6   | 33  | 43   | 0   |
| CONTIG-038721 | 107  | 8   | 7   | 13   | 0   |
| CONTIG-038723 | 155  | 10  | 16  | 17   | 0   |
| CONTIG-038724 | 182  | 6   | 6   | 38   | 0   |
| CONTIG-038725 | 102  | 6   | 2   | 2    | 0   |
| CONTIG-038726 | 252  | 5   | 5   | 23   | 0   |
| CONTIG-038727 | 159  | 21  | 6   | 146  | 0   |
| CONTIG-038728 | 153  | 5   | 0   | 21   | 0   |
| CONTIG-038729 | 129  | 10  | 13  | 6    | 0   |
| CONTIG-038733 | 145  | 14  | 25  | 74   | 0   |
| CONTIG-038734 | 160  | 21  | 98  | 93   | 0   |
| CONTIG-038735 | 88   | 5   | 3   | 7    | 0   |
| CONTIG-038736 | 148  | 9   | 15  | 36   | 0   |
| CONTIG-038737 | 88   | 7   | 6   | 15   | 0   |
| CONTIG-038738 | 139  | 9   | 7   | 16   | 0   |
| CONTIG-038739 | 61   | 8   | 0   | 14   | 0   |
| CONTIG-038740 | 75   | 4   | 2   | 2    | 0   |
| CONTIG-038741 | 255  | 93  | 27  | 1502 | 0   |
| CONTIG-038742 | 114  | 8   | 14  | 30   | 0   |
| CONTIG-038743 | 113  | 12  | 11  | 9    | 0   |
| CONTIG-038744 | 126  | 5   | 8   | 19   | 0   |
| CONTIG-038745 | 173  | 8   | 12  | 37   | 0   |
| CONTIG-038746 | 77   | 5   | 11  | 7    | 0   |

|               |      |     |     |     |    |
|---------------|------|-----|-----|-----|----|
| CONTIG-038748 | 162  | 41  | 100 | 134 | 3  |
| CONTIG-038749 | 166  | 15  | 20  | 89  | 0  |
| CONTIG-038750 | 160  | 32  | 25  | 248 | 5  |
| CONTIG-038751 | 640  | 17  | 93  | 307 | 0  |
| CONTIG-038752 | 64   | 4   | 4   | 7   | 0  |
| CONTIG-038753 | 1045 | 18  | 84  | 602 | 6  |
| CONTIG-038754 | 268  | 11  | 17  | 123 | 0  |
| CONTIG-038755 | 108  | 6   | 11  | 18  | 0  |
| CONTIG-038756 | 371  | 24  | 14  | 322 | 2  |
| CONTIG-038759 | 337  | 12  | 2   | 181 | 0  |
| CONTIG-038760 | 370  | 19  | 12  | 396 | 0  |
| CONTIG-038761 | 235  | 15  | 14  | 103 | 0  |
| CONTIG-038762 | 212  | 14  | 28  | 70  | 2  |
| CONTIG-038763 | 64   | 24  | 15  | 33  | 0  |
| CONTIG-038764 | 186  | 8   | 6   | 73  | 0  |
| CONTIG-038765 | 91   | 4   | 2   | 2   | 0  |
| CONTIG-038766 | 340  | 13  | 34  | 97  | 0  |
| CONTIG-038767 | 301  | 8   | 4   | 42  | 0  |
| CONTIG-038768 | 390  | 35  | 157 | 489 | 4  |
| CONTIG-038769 | 155  | 8   | 0   | 5   | 0  |
| CONTIG-038774 | 193  | 20  | 15  | 133 | 3  |
| CONTIG-038775 | 78   | 9   | 7   | 17  | 0  |
| CONTIG-038776 | 42   | 221 | 118 | 43  | 2  |
| CONTIG-038777 | 445  | 6   | 49  | 58  | 0  |
| CONTIG-038778 | 308  | 16  | 86  | 104 | 2  |
| CONTIG-038779 | 327  | 9   | 22  | 98  | 2  |
| CONTIG-038780 | 70   | 4   | 0   | 2   | 0  |
| CONTIG-038781 | 72   | 5   | 10  | 12  | 0  |
| CONTIG-038782 | 78   | 6   | 4   | 16  | 0  |
| CONTIG-038783 | 563  | 16  | 50  | 149 | 20 |
| CONTIG-038784 | 76   | 5   | 5   | 8   | 0  |
| CONTIG-038785 | 76   | 6   | 5   | 16  | 0  |
| CONTIG-038786 | 72   | 5   | 7   | 0   | 0  |
| CONTIG-038787 | 86   | 137 | 57  | 294 | 24 |
| CONTIG-038788 | 136  | 5   | 2   | 15  | 0  |
| CONTIG-038789 | 352  | 13  | 27  | 104 | 0  |
| CONTIG-038790 | 119  | 11  | 6   | 14  | 0  |
| CONTIG-038791 | 116  | 11  | 7   | 29  | 0  |
| CONTIG-038792 | 145  | 6   | 44  | 8   | 0  |
| CONTIG-038793 | 124  | 10  | 16  | 49  | 0  |
| CONTIG-038794 | 113  | 9   | 20  | 26  | 2  |
| CONTIG-038795 | 100  | 12  | 46  | 7   | 0  |
| CONTIG-038796 | 373  | 11  | 13  | 151 | 0  |
| CONTIG-038797 | 90   | 3   | 3   | 5   | 0  |
| CONTIG-038798 | 155  | 7   | 17  | 2   | 0  |
| CONTIG-038799 | 102  | 10  | 2   | 20  | 0  |
| CONTIG-038801 | 96   | 14  | 43  | 33  | 0  |

|               |     |     |     |     |    |
|---------------|-----|-----|-----|-----|----|
| CONTIG-038802 | 109 | 4   | 2   | 11  | 0  |
| CONTIG-038803 | 197 | 9   | 2   | 31  | 0  |
| CONTIG-038804 | 149 | 11  | 3   | 60  | 0  |
| CONTIG-038805 | 157 | 6   | 12  | 21  | 0  |
| CONTIG-038806 | 107 | 7   | 11  | 2   | 0  |
| CONTIG-038810 | 59  | 12  | 36  | 3   | 0  |
| CONTIG-038816 | 104 | 13  | 28  | 22  | 2  |
| CONTIG-038817 | 308 | 7   | 21  | 19  | 0  |
| CONTIG-038818 | 242 | 23  | 0   | 0   | 43 |
| CONTIG-038819 | 58  | 7   | 32  | 0   | 0  |
| CONTIG-038822 | 134 | 5   | 5   | 2   | 0  |
| CONTIG-038823 | 110 | 13  | 6   | 65  | 0  |
| CONTIG-038824 | 379 | 13  | 139 | 106 | 0  |
| CONTIG-038825 | 128 | 11  | 48  | 16  | 0  |
| CONTIG-038826 | 710 | 239 | 86  | 0   | 0  |
| CONTIG-038827 | 404 | 11  | 24  | 133 | 0  |
| CONTIG-038828 | 572 | 11  | 11  | 181 | 0  |
| CONTIG-038829 | 58  | 19  | 40  | 2   | 0  |
| CONTIG-038830 | 575 | 20  | 66  | 442 | 0  |
| CONTIG-038831 | 235 | 6   | 29  | 32  | 0  |
| CONTIG-038832 | 181 | 8   | 0   | 32  | 0  |
| CONTIG-038833 | 101 | 6   | 10  | 20  | 0  |
| CONTIG-038834 | 88  | 12  | 17  | 40  | 0  |
| CONTIG-038835 | 318 | 10  | 28  | 102 | 0  |
| CONTIG-038836 | 65  | 5   | 5   | 11  | 0  |
| CONTIG-038837 | 244 | 17  | 32  | 93  | 2  |
| CONTIG-038838 | 164 | 22  | 11  | 77  | 0  |
| CONTIG-038839 | 186 | 6   | 8   | 35  | 0  |
| CONTIG-038840 | 128 | 5   | 10  | 16  | 0  |
| CONTIG-038841 | 195 | 8   | 17  | 26  | 0  |
| CONTIG-038842 | 307 | 5   | 11  | 48  | 0  |
| CONTIG-038843 | 135 | 6   | 23  | 14  | 0  |
| CONTIG-038844 | 172 | 65  | 42  | 166 | 0  |
| CONTIG-038845 | 58  | 15  | 41  | 9   | 0  |
| CONTIG-038846 | 446 | 15  | 32  | 199 | 4  |
| CONTIG-038847 | 194 | 10  | 12  | 78  | 0  |
| CONTIG-038848 | 144 | 6   | 4   | 27  | 0  |
| CONTIG-038849 | 86  | 3   | 2   | 0   | 0  |
| CONTIG-038850 | 415 | 6   | 12  | 68  | 0  |
| CONTIG-038851 | 107 | 3   | 0   | 6   | 0  |
| CONTIG-038852 | 84  | 6   | 39  | 3   | 0  |
| CONTIG-038853 | 79  | 3   | 0   | 10  | 0  |
| CONTIG-038854 | 41  | 20  | 2   | 7   | 0  |
| CONTIG-038855 | 202 | 8   | 4   | 70  | 0  |
| CONTIG-038856 | 277 | 14  | 33  | 172 | 2  |
| CONTIG-038857 | 113 | 7   | 6   | 26  | 0  |
| CONTIG-038858 | 186 | 5   | 7   | 14  | 0  |



|               |     |     |    |      |    |
|---------------|-----|-----|----|------|----|
| CONTIG-038860 | 128 | 11  | 10 | 42   | 0  |
| CONTIG-038861 | 115 | 6   | 7  | 20   | 0  |
| CONTIG-038862 | 132 | 30  | 27 | 105  | 0  |
| CONTIG-038863 | 797 | 31  | 93 | 340  | 44 |
| CONTIG-038865 | 196 | 208 | 72 | 2516 | 0  |
| CONTIG-038866 | 94  | 24  | 22 | 44   | 0  |
| CONTIG-038867 | 214 | 14  | 14 | 148  | 0  |
| CONTIG-038868 | 454 | 14  | 15 | 260  | 0  |
| CONTIG-038869 | 984 | 17  | 2  | 0    | 27 |
| CONTIG-038870 | 135 | 12  | 24 | 33   | 2  |
| CONTIG-038871 | 399 | 9   | 23 | 148  | 0  |
| CONTIG-038872 | 266 | 19  | 23 | 214  | 2  |
| CONTIG-038873 | 130 | 7   | 5  | 14   | 2  |
| CONTIG-038874 | 82  | 38  | 10 | 135  | 0  |
| CONTIG-038875 | 77  | 3   | 0  | 3    | 0  |
| CONTIG-038876 | 165 | 54  | 2  | 0    | 44 |
| CONTIG-038877 | 305 | 18  | 32 | 207  | 0  |
| CONTIG-038878 | 200 | 8   | 16 | 46   | 0  |
| CONTIG-038879 | 44  | 7   | 5  | 10   | 0  |
| CONTIG-038882 | 118 | 13  | 7  | 49   | 0  |
| CONTIG-038883 | 93  | 27  | 0  | 107  | 0  |
| CONTIG-038884 | 77  | 7   | 15 | 14   | 0  |
| CONTIG-038885 | 111 | 17  | 15 | 67   | 2  |
| CONTIG-038886 | 133 | 20  | 0  | 157  | 0  |
| CONTIG-038887 | 79  | 4   | 2  | 12   | 0  |
| CONTIG-038888 | 147 | 5   | 13 | 28   | 0  |
| CONTIG-038889 | 114 | 22  | 11 | 0    | 0  |
| CONTIG-038890 | 82  | 8   | 35 | 4    | 0  |
| CONTIG-038892 | 324 | 31  | 78 | 399  | 2  |
| CONTIG-038893 | 144 | 23  | 24 | 98   | 0  |
| CONTIG-038894 | 60  | 17  | 65 | 0    | 0  |
| CONTIG-038895 | 150 | 3   | 3  | 10   | 0  |
| CONTIG-038896 | 280 | 6   | 18 | 58   | 0  |
| CONTIG-038897 | 83  | 11  | 31 | 14   | 0  |
| CONTIG-038898 | 75  | 6   | 0  | 9    | 0  |
| CONTIG-038900 | 204 | 6   | 0  | 43   | 0  |
| CONTIG-038901 | 186 | 4   | 9  | 21   | 0  |
| CONTIG-038902 | 121 | 6   | 11 | 15   | 0  |
| CONTIG-038903 | 104 | 14  | 55 | 47   | 0  |
| CONTIG-038904 | 79  | 8   | 7  | 3    | 0  |
| CONTIG-038905 | 165 | 9   | 7  | 53   | 0  |
| CONTIG-038906 | 149 | 11  | 41 | 33   | 2  |
| CONTIG-038907 | 60  | 18  | 11 | 34   | 0  |
| CONTIG-038908 | 170 | 6   | 2  | 31   | 0  |
| CONTIG-038909 | 87  | 5   | 7  | 8    | 0  |
| CONTIG-038910 | 91  | 9   | 24 | 21   | 0  |
| CONTIG-038911 | 214 | 9   | 2  | 37   | 0  |

|               |     |     |     |      |     |
|---------------|-----|-----|-----|------|-----|
| CONTIG-038912 | 364 | 124 | 101 | 1526 | 250 |
| CONTIG-038913 | 184 | 34  | 56  | 210  | 12  |
| CONTIG-038914 | 89  | 6   | 4   | 24   | 0   |
| CONTIG-038915 | 81  | 6   | 2   | 14   | 0   |
| CONTIG-038917 | 109 | 2   | 2   | 2    | 0   |
| CONTIG-038920 | 78  | 11  | 64  | 9    | 0   |
| CONTIG-038921 | 127 | 6   | 7   | 19   | 2   |
| CONTIG-038922 | 148 | 9   | 8   | 32   | 0   |
| CONTIG-038923 | 307 | 14  | 10  | 172  | 0   |
| CONTIG-038924 | 225 | 6   | 17  | 24   | 0   |
| CONTIG-038925 | 225 | 6   | 2   | 26   | 0   |
| CONTIG-038927 | 211 | 24  | 68  | 197  | 2   |
| CONTIG-038928 | 76  | 5   | 2   | 14   | 0   |
| CONTIG-038929 | 77  | 3   | 0   | 4    | 0   |
| CONTIG-038930 | 355 | 8   | 2   | 44   | 0   |
| CONTIG-038931 | 84  | 15  | 6   | 34   | 0   |
| CONTIG-038932 | 132 | 17  | 5   | 112  | 0   |
| CONTIG-038935 | 105 | 6   | 3   | 23   | 0   |
| CONTIG-038936 | 203 | 9   | 12  | 56   | 0   |
| CONTIG-038937 | 83  | 7   | 6   | 0    | 0   |
| CONTIG-038938 | 347 | 14  | 35  | 51   | 6   |
| CONTIG-038939 | 211 | 9   | 25  | 36   | 0   |
| CONTIG-038940 | 193 | 18  | 60  | 68   | 0   |
| CONTIG-038941 | 166 | 11  | 5   | 62   | 0   |
| CONTIG-038942 | 81  | 13  | 21  | 2    | 0   |
| CONTIG-038944 | 64  | 6   | 7   | 10   | 0   |
| CONTIG-038945 | 63  | 15  | 10  | 21   | 0   |
| CONTIG-038946 | 87  | 11  | 40  | 14   | 0   |
| CONTIG-038947 | 423 | 44  | 201 | 873  | 0   |
| CONTIG-038948 | 73  | 6   | 6   | 6    | 0   |
| CONTIG-038950 | 82  | 12  | 6   | 31   | 0   |
| CONTIG-038951 | 202 | 13  | 15  | 64   | 4   |
| CONTIG-038952 | 79  | 6   | 12  | 5    | 0   |
| CONTIG-038958 | 85  | 5   | 6   | 6    | 0   |
| CONTIG-038959 | 324 | 9   | 17  | 84   | 0   |
| CONTIG-038960 | 603 | 20  | 58  | 497  | 0   |
| CONTIG-038968 | 171 | 7   | 17  | 21   | 0   |
| CONTIG-038969 | 130 | 7   | 12  | 15   | 0   |
| CONTIG-038970 | 98  | 8   | 6   | 12   | 0   |
| CONTIG-038972 | 66  | 4   | 11  | 2    | 0   |
| CONTIG-038973 | 88  | 6   | 5   | 23   | 0   |
| CONTIG-038974 | 769 | 20  | 124 | 700  | 0   |
| CONTIG-038977 | 119 | 15  | 23  | 49   | 0   |
| CONTIG-038978 | 210 | 6   | 7   | 47   | 0   |
| CONTIG-038979 | 157 | 4   | 3   | 0    | 0   |
| CONTIG-038980 | 208 | 4   | 9   | 9    | 0   |
| CONTIG-038981 | 93  | 15  | 58  | 30   | 0   |

|               |      |    |     |     |    |
|---------------|------|----|-----|-----|----|
| CONTIG-038982 | 181  | 16 | 18  | 60  | 0  |
| CONTIG-038983 | 97   | 7  | 8   | 3   | 0  |
| CONTIG-038984 | 195  | 10 | 7   | 76  | 0  |
| CONTIG-038985 | 208  | 10 | 11  | 70  | 0  |
| CONTIG-038986 | 145  | 8  | 30  | 28  | 0  |
| CONTIG-038987 | 104  | 11 | 4   | 6   | 0  |
| CONTIG-038988 | 458  | 9  | 22  | 145 | 0  |
| CONTIG-038989 | 109  | 8  | 6   | 36  | 0  |
| CONTIG-038990 | 181  | 10 | 24  | 59  | 0  |
| CONTIG-038991 | 330  | 8  | 25  | 67  | 0  |
| CONTIG-038992 | 82   | 8  | 5   | 22  | 0  |
| CONTIG-038993 | 246  | 19 | 20  | 234 | 0  |
| CONTIG-038994 | 1193 | 14 | 54  | 544 | 6  |
| CONTIG-038995 | 167  | 14 | 11  | 82  | 2  |
| CONTIG-038996 | 923  | 13 | 70  | 613 | 0  |
| CONTIG-038997 | 107  | 80 | 18  | 400 | 0  |
| CONTIG-038998 | 319  | 14 | 22  | 173 | 0  |
| CONTIG-038999 | 132  | 7  | 13  | 4   | 0  |
| CONTIG-039000 | 80   | 11 | 49  | 8   | 0  |
| CONTIG-039001 | 244  | 7  | 5   | 0   | 10 |
| CONTIG-039002 | 387  | 18 | 34  | 268 | 0  |
| CONTIG-039003 | 230  | 7  | 7   | 6   | 0  |
| CONTIG-039004 | 160  | 6  | 3   | 20  | 0  |
| CONTIG-039005 | 171  | 27 | 5   | 185 | 0  |
| CONTIG-039007 | 66   | 8  | 13  | 17  | 0  |
| CONTIG-039008 | 197  | 5  | 2   | 7   | 0  |
| CONTIG-039009 | 183  | 6  | 0   | 48  | 0  |
| CONTIG-039010 | 71   | 5  | 6   | 0   | 0  |
| CONTIG-039011 | 136  | 10 | 2   | 13  | 0  |
| CONTIG-039012 | 70   | 8  | 12  | 10  | 0  |
| CONTIG-039013 | 206  | 8  | 37  | 19  | 0  |
| CONTIG-039014 | 253  | 11 | 9   | 98  | 0  |
| CONTIG-039015 | 109  | 6  | 8   | 21  | 0  |
| CONTIG-039016 | 106  | 14 | 6   | 58  | 0  |
| CONTIG-039017 | 61   | 4  | 4   | 6   | 0  |
| CONTIG-039018 | 251  | 6  | 2   | 39  | 0  |
| CONTIG-039019 | 62   | 33 | 103 | 0   | 0  |
| CONTIG-039021 | 360  | 15 | 18  | 240 | 0  |
| CONTIG-039022 | 384  | 49 | 73  | 789 | 2  |
| CONTIG-039023 | 450  | 13 | 52  | 173 | 6  |
| CONTIG-039024 | 112  | 24 | 3   | 89  | 8  |
| CONTIG-039025 | 237  | 8  | 9   | 42  | 0  |
| CONTIG-039026 | 117  | 10 | 12  | 29  | 0  |
| CONTIG-039027 | 139  | 5  | 0   | 26  | 0  |
| CONTIG-039028 | 125  | 6  | 0   | 28  | 0  |
| CONTIG-039029 | 65   | 12 | 10  | 8   | 0  |
| CONTIG-039030 | 514  | 26 | 43  | 460 | 2  |

|               |      |     |     |      |    |
|---------------|------|-----|-----|------|----|
| CONTIG-039033 | 159  | 7   | 13  | 36   | 0  |
| CONTIG-039034 | 84   | 4   | 0   | 0    | 0  |
| CONTIG-039036 | 507  | 9   | 19  | 119  | 6  |
| CONTIG-039037 | 211  | 6   | 10  | 29   | 0  |
| CONTIG-039041 | 148  | 28  | 61  | 43   | 2  |
| CONTIG-039042 | 623  | 41  | 119 | 919  | 4  |
| CONTIG-039043 | 77   | 5   | 3   | 10   | 0  |
| CONTIG-039045 | 281  | 10  | 18  | 52   | 0  |
| CONTIG-039048 | 298  | 14  | 23  | 137  | 0  |
| CONTIG-039049 | 474  | 9   | 7   | 88   | 0  |
| CONTIG-039051 | 91   | 13  | 7   | 39   | 0  |
| CONTIG-039052 | 67   | 5   | 4   | 12   | 0  |
| CONTIG-039054 | 71   | 19  | 3   | 40   | 0  |
| CONTIG-039055 | 108  | 11  | 19  | 17   | 0  |
| CONTIG-039056 | 189  | 17  | 21  | 78   | 2  |
| CONTIG-039057 | 59   | 6   | 3   | 17   | 0  |
| CONTIG-039058 | 93   | 11  | 14  | 22   | 0  |
| CONTIG-039059 | 276  | 9   | 15  | 119  | 0  |
| CONTIG-039060 | 129  | 26  | 7   | 96   | 4  |
| CONTIG-039061 | 132  | 7   | 6   | 23   | 2  |
| CONTIG-039062 | 125  | 8   | 0   | 24   | 0  |
| CONTIG-039065 | 234  | 4   | 2   | 16   | 0  |
| CONTIG-039066 | 350  | 8   | 28  | 76   | 0  |
| CONTIG-039070 | 69   | 9   | 16  | 4    | 0  |
| CONTIG-039071 | 94   | 5   | 0   | 10   | 0  |
| CONTIG-039072 | 217  | 7   | 3   | 57   | 0  |
| CONTIG-039073 | 81   | 17  | 2   | 41   | 0  |
| CONTIG-039074 | 74   | 13  | 19  | 38   | 0  |
| CONTIG-039075 | 183  | 8   | 7   | 40   | 0  |
| CONTIG-039077 | 44   | 20  | 0   | 33   | 0  |
| CONTIG-039078 | 234  | 12  | 53  | 9    | 0  |
| CONTIG-039079 | 164  | 4   | 2   | 2    | 0  |
| CONTIG-039080 | 259  | 10  | 18  | 97   | 0  |
| CONTIG-039081 | 99   | 6   | 2   | 20   | 0  |
| CONTIG-039082 | 570  | 29  | 106 | 693  | 17 |
| CONTIG-039084 | 80   | 634 | 2   | 1702 | 0  |
| CONTIG-039085 | 236  | 5   | 2   | 29   | 0  |
| CONTIG-039086 | 114  | 7   | 2   | 37   | 0  |
| CONTIG-039088 | 87   | 8   | 2   | 5    | 0  |
| CONTIG-039089 | 177  | 11  | 7   | 17   | 0  |
| CONTIG-039091 | 188  | 7   | 60  | 22   | 0  |
| CONTIG-039092 | 120  | 3   | 3   | 4    | 0  |
| CONTIG-039093 | 1114 | 19  | 26  | 892  | 4  |
| CONTIG-039094 | 245  | 32  | 58  | 292  | 3  |
| CONTIG-039095 | 88   | 4   | 6   | 6    | 0  |
| CONTIG-039096 | 268  | 13  | 45  | 26   | 6  |
| CONTIG-039097 | 345  | 7   | 53  | 56   | 3  |

|               |     |     |     |     |    |
|---------------|-----|-----|-----|-----|----|
| CONTIG-039098 | 80  | 12  | 4   | 33  | 0  |
| CONTIG-039099 | 77  | 5   | 13  | 12  | 0  |
| CONTIG-039100 | 77  | 4   | 6   | 6   | 0  |
| CONTIG-039101 | 84  | 13  | 0   | 53  | 0  |
| CONTIG-039102 | 394 | 14  | 50  | 211 | 0  |
| CONTIG-039103 | 171 | 11  | 19  | 52  | 0  |
| CONTIG-039104 | 101 | 11  | 16  | 19  | 0  |
| CONTIG-039105 | 275 | 7   | 8   | 55  | 0  |
| CONTIG-039106 | 349 | 26  | 88  | 202 | 0  |
| CONTIG-039107 | 188 | 15  | 25  | 103 | 0  |
| CONTIG-039108 | 280 | 10  | 16  | 106 | 0  |
| CONTIG-039109 | 65  | 9   | 38  | 8   | 0  |
| CONTIG-039110 | 231 | 15  | 56  | 110 | 0  |
| CONTIG-039111 | 484 | 21  | 77  | 452 | 0  |
| CONTIG-039112 | 296 | 10  | 4   | 71  | 0  |
| CONTIG-039114 | 132 | 13  | 23  | 4   | 0  |
| CONTIG-039120 | 210 | 6   | 22  | 11  | 0  |
| CONTIG-039121 | 111 | 8   | 12  | 13  | 0  |
| CONTIG-039122 | 56  | 272 | 23  | 709 | 4  |
| CONTIG-039124 | 129 | 31  | 48  | 109 | 0  |
| CONTIG-039125 | 258 | 13  | 16  | 136 | 6  |
| CONTIG-039126 | 104 | 13  | 8   | 14  | 0  |
| CONTIG-039127 | 103 | 13  | 115 | 2   | 0  |
| CONTIG-039128 | 61  | 5   | 2   | 4   | 0  |
| CONTIG-039129 | 88  | 56  | 42  | 91  | 3  |
| CONTIG-039130 | 83  | 7   | 2   | 16  | 0  |
| CONTIG-039131 | 99  | 4   | 14  | 6   | 0  |
| CONTIG-039132 | 460 | 11  | 29  | 138 | 0  |
| CONTIG-039133 | 41  | 314 | 33  | 425 | 0  |
| CONTIG-039134 | 127 | 68  | 155 | 64  | 2  |
| CONTIG-039135 | 835 | 12  | 60  | 278 | 2  |
| CONTIG-039136 | 47  | 13  | 13  | 4   | 0  |
| CONTIG-039137 | 188 | 7   | 4   | 52  | 0  |
| CONTIG-039138 | 260 | 14  | 0   | 137 | 4  |
| CONTIG-039139 | 108 | 8   | 4   | 30  | 0  |
| CONTIG-039143 | 66  | 24  | 16  | 0   | 0  |
| CONTIG-039144 | 163 | 8   | 3   | 36  | 0  |
| CONTIG-039145 | 117 | 5   | 4   | 12  | 0  |
| CONTIG-039150 | 59  | 8   | 9   | 7   | 0  |
| CONTIG-039151 | 238 | 6   | 12  | 40  | 0  |
| CONTIG-039152 | 81  | 5   | 7   | 9   | 0  |
| CONTIG-039153 | 114 | 5   | 3   | 20  | 0  |
| CONTIG-039154 | 226 | 7   | 0   | 36  | 0  |
| CONTIG-039155 | 165 | 6   | 6   | 28  | 0  |
| CONTIG-039156 | 328 | 9   | 26  | 123 | 0  |
| CONTIG-039157 | 545 | 9   | 11  | 215 | 0  |
| CONTIG-039158 | 283 | 13  | 0   | 0   | 13 |

|               |     |      |     |     |    |
|---------------|-----|------|-----|-----|----|
| CONTIG-039160 | 64  | 7    | 29  | 0   | 0  |
| CONTIG-039161 | 197 | 22   | 33  | 154 | 3  |
| CONTIG-039162 | 535 | 14   | 60  | 292 | 0  |
| CONTIG-039163 | 123 | 11   | 4   | 28  | 0  |
| CONTIG-039164 | 70  | 6    | 10  | 12  | 0  |
| CONTIG-039165 | 87  | 6    | 0   | 27  | 0  |
| CONTIG-039166 | 147 | 29   | 19  | 118 | 0  |
| CONTIG-039168 | 283 | 8    | 18  | 67  | 0  |
| CONTIG-039169 | 79  | 11   | 2   | 42  | 0  |
| CONTIG-039170 | 254 | 8    | 19  | 48  | 0  |
| CONTIG-039171 | 171 | 5    | 8   | 30  | 0  |
| CONTIG-039175 | 179 | 8    | 2   | 41  | 2  |
| CONTIG-039176 | 53  | 25   | 100 | 7   | 0  |
| CONTIG-039179 | 58  | 3    | 4   | 0   | 0  |
| CONTIG-039180 | 727 | 11   | 2   | 5   | 0  |
| CONTIG-039181 | 189 | 7    | 25  | 18  | 0  |
| CONTIG-039182 | 639 | 13   | 19  | 372 | 0  |
| CONTIG-039183 | 278 | 11   | 14  | 66  | 0  |
| CONTIG-039184 | 601 | 27   | 94  | 554 | 7  |
| CONTIG-039185 | 123 | 13   | 9   | 68  | 0  |
| CONTIG-039186 | 291 | 20   | 22  | 268 | 2  |
| CONTIG-039187 | 141 | 6    | 7   | 2   | 0  |
| CONTIG-039189 | 150 | 10   | 6   | 38  | 0  |
| CONTIG-039190 | 634 | 19   | 38  | 455 | 8  |
| CONTIG-039191 | 169 | 35   | 252 | 148 | 0  |
| CONTIG-039193 | 117 | 6    | 2   | 15  | 0  |
| CONTIG-039194 | 63  | 6    | 2   | 14  | 0  |
| CONTIG-039195 | 184 | 10   | 11  | 46  | 0  |
| CONTIG-039196 | 72  | 168  | 15  | 321 | 4  |
| CONTIG-039197 | 258 | 11   | 56  | 63  | 0  |
| CONTIG-039198 | 338 | 10   | 8   | 98  | 0  |
| CONTIG-039199 | 695 | 19   | 18  | 647 | 2  |
| CONTIG-039200 | 466 | 24   | 83  | 104 | 13 |
| CONTIG-039201 | 120 | 14   | 70  | 7   | 2  |
| CONTIG-039202 | 43  | 1122 | 70  | 970 | 0  |
| CONTIG-039210 | 132 | 6    | 13  | 8   | 0  |
| CONTIG-039211 | 39  | 90   | 27  | 52  | 5  |
| CONTIG-039212 | 583 | 14   | 4   | 426 | 0  |
| CONTIG-039217 | 191 | 5    | 6   | 13  | 2  |
| CONTIG-039218 | 123 | 8    | 2   | 24  | 0  |
| CONTIG-039219 | 151 | 13   | 0   | 46  | 2  |
| CONTIG-039220 | 253 | 16   | 27  | 147 | 0  |
| CONTIG-039228 | 112 | 7    | 51  | 7   | 0  |
| CONTIG-039229 | 210 | 9    | 13  | 72  | 0  |
| CONTIG-039230 | 154 | 12   | 6   | 52  | 0  |
| CONTIG-039231 | 128 | 6    | 2   | 23  | 0  |
| CONTIG-039232 | 59  | 6    | 16  | 0   | 0  |

|               |      |     |     |      |     |
|---------------|------|-----|-----|------|-----|
| CONTIG-039233 | 102  | 5   | 0   | 13   | 0   |
| CONTIG-039234 | 636  | 17  | 64  | 194  | 6   |
| CONTIG-039235 | 1010 | 31  | 67  | 1210 | 27  |
| CONTIG-039236 | 228  | 10  | 3   | 81   | 4   |
| CONTIG-039239 | 177  | 11  | 5   | 66   | 0   |
| CONTIG-039240 | 207  | 8   | 0   | 28   | 0   |
| CONTIG-039241 | 453  | 10  | 4   | 57   | 8   |
| CONTIG-039242 | 412  | 24  | 24  | 218  | 10  |
| CONTIG-039243 | 147  | 6   | 0   | 23   | 0   |
| CONTIG-039244 | 266  | 8   | 0   | 43   | 0   |
| CONTIG-039245 | 177  | 7   | 8   | 51   | 0   |
| CONTIG-039250 | 192  | 5   | 0   | 19   | 0   |
| CONTIG-039251 | 277  | 11  | 11  | 82   | 2   |
| CONTIG-039252 | 135  | 5   | 0   | 15   | 0   |
| CONTIG-039253 | 442  | 12  | 75  | 48   | 0   |
| CONTIG-039254 | 70   | 5   | 3   | 10   | 0   |
| CONTIG-039256 | 226  | 53  | 11  | 386  | 2   |
| CONTIG-039257 | 65   | 11  | 71  | 0    | 0   |
| CONTIG-039258 | 212  | 18  | 76  | 103  | 3   |
| CONTIG-039259 | 92   | 6   | 9   | 18   | 0   |
| CONTIG-039260 | 274  | 11  | 45  | 125  | 0   |
| CONTIG-039261 | 137  | 7   | 19  | 20   | 0   |
| CONTIG-039262 | 321  | 11  | 13  | 88   | 2   |
| CONTIG-039263 | 569  | 9   | 11  | 145  | 6   |
| CONTIG-039265 | 508  | 9   | 14  | 22   | 0   |
| CONTIG-039266 | 303  | 8   | 35  | 54   | 0   |
| CONTIG-039267 | 111  | 13  | 60  | 12   | 0   |
| CONTIG-039268 | 225  | 18  | 33  | 98   | 0   |
| CONTIG-039269 | 1163 | 95  | 254 | 3951 | 609 |
| CONTIG-039270 | 118  | 9   | 18  | 32   | 0   |
| CONTIG-039271 | 304  | 10  | 5   | 7    | 0   |
| CONTIG-039272 | 379  | 33  | 7   | 5    | 0   |
| CONTIG-039273 | 177  | 8   | 10  | 29   | 0   |
| CONTIG-039274 | 95   | 5   | 3   | 13   | 0   |
| CONTIG-039275 | 324  | 9   | 10  | 64   | 0   |
| CONTIG-039278 | 110  | 5   | 2   | 9    | 0   |
| CONTIG-039287 | 161  | 7   | 7   | 22   | 0   |
| CONTIG-039296 | 297  | 20  | 71  | 110  | 2   |
| CONTIG-039297 | 66   | 184 | 21  | 614  | 2   |
| CONTIG-039301 | 67   | 3   | 0   | 0    | 0   |
| CONTIG-039302 | 167  | 10  | 12  | 50   | 2   |
| CONTIG-039303 | 65   | 14  | 22  | 10   | 0   |
| CONTIG-039309 | 66   | 2   | 0   | 2    | 0   |
| CONTIG-039310 | 116  | 7   | 2   | 26   | 0   |
| CONTIG-039311 | 61   | 7   | 6   | 2    | 0   |
| CONTIG-039316 | 59   | 5   | 3   | 8    | 0   |
| CONTIG-039323 | 120  | 9   | 16  | 34   | 0   |

|               |     |    |     |      |     |
|---------------|-----|----|-----|------|-----|
| CONTIG-039324 | 327 | 56 | 40  | 1193 | 0   |
| CONTIG-039325 | 85  | 7  | 3   | 0    | 2   |
| CONTIG-039326 | 77  | 11 | 61  | 0    | 0   |
| CONTIG-039327 | 424 | 7  | 31  | 94   | 0   |
| CONTIG-039328 | 94  | 6  | 25  | 9    | 0   |
| CONTIG-039329 | 412 | 14 | 104 | 104  | 0   |
| CONTIG-039330 | 95  | 4  | 2   | 2    | 0   |
| CONTIG-039333 | 112 | 16 | 35  | 37   | 0   |
| CONTIG-039334 | 137 | 9  | 11  | 13   | 6   |
| CONTIG-039335 | 110 | 5  | 12  | 2    | 0   |
| CONTIG-039336 | 121 | 8  | 8   | 38   | 0   |
| CONTIG-039337 | 645 | 16 | 59  | 185  | 0   |
| CONTIG-039338 | 637 | 24 | 25  | 824  | 2   |
| CONTIG-039339 | 293 | 14 | 44  | 119  | 4   |
| CONTIG-039340 | 211 | 8  | 41  | 38   | 0   |
| CONTIG-039341 | 128 | 11 | 7   | 2    | 0   |
| CONTIG-039342 | 409 | 17 | 17  | 171  | 0   |
| CONTIG-039343 | 44  | 13 | 22  | 0    | 0   |
| CONTIG-039344 | 130 | 8  | 0   | 53   | 0   |
| CONTIG-039346 | 168 | 11 | 0   | 0    | 5   |
| CONTIG-039347 | 65  | 6  | 2   | 16   | 0   |
| CONTIG-039348 | 213 | 16 | 53  | 47   | 0   |
| CONTIG-039349 | 348 | 7  | 9   | 60   | 0   |
| CONTIG-039350 | 78  | 8  | 7   | 14   | 0   |
| CONTIG-039357 | 85  | 9  | 14  | 0    | 0   |
| CONTIG-039358 | 98  | 19 | 45  | 48   | 0   |
| CONTIG-039359 | 355 | 9  | 59  | 42   | 0   |
| CONTIG-039360 | 85  | 8  | 6   | 29   | 0   |
| CONTIG-039361 | 159 | 7  | 0   | 13   | 0   |
| CONTIG-039362 | 158 | 35 | 58  | 143  | 14  |
| CONTIG-039363 | 82  | 4  | 2   | 2    | 0   |
| CONTIG-039364 | 62  | 4  | 9   | 4    | 0   |
| CONTIG-039365 | 623 | 16 | 102 | 312  | 0   |
| CONTIG-039366 | 118 | 10 | 18  | 16   | 0   |
| CONTIG-039367 | 181 | 5  | 15  | 6    | 0   |
| CONTIG-039368 | 79  | 45 | 4   | 161  | 0   |
| CONTIG-039369 | 803 | 21 | 75  | 497  | 29  |
| CONTIG-039370 | 86  | 6  | 8   | 10   | 0   |
| CONTIG-039371 | 402 | 11 | 9   | 125  | 0   |
| CONTIG-039372 | 168 | 9  | 3   | 59   | 0   |
| CONTIG-039373 | 164 | 8  | 9   | 49   | 0   |
| CONTIG-039374 | 483 | 18 | 11  | 169  | 0   |
| CONTIG-039375 | 218 | 8  | 2   | 25   | 0   |
| CONTIG-039376 | 63  | 6  | 7   | 8    | 0   |
| CONTIG-039377 | 518 | 25 | 37  | 5    | 365 |
| CONTIG-039378 | 100 | 4  | 5   | 14   | 0   |
| CONTIG-039380 | 421 | 10 | 37  | 123  | 0   |



|               |     |     |     |      |   |
|---------------|-----|-----|-----|------|---|
| CONTIG-039382 | 64  | 4   | 9   | 2    | 0 |
| CONTIG-039383 | 71  | 4   | 0   | 2    | 0 |
| CONTIG-039385 | 133 | 10  | 65  | 10   | 0 |
| CONTIG-039386 | 378 | 8   | 24  | 73   | 0 |
| CONTIG-039387 | 327 | 9   | 11  | 92   | 0 |
| CONTIG-039388 | 105 | 7   | 10  | 16   | 0 |
| CONTIG-039389 | 167 | 13  | 20  | 66   | 0 |
| CONTIG-039390 | 74  | 3   | 5   | 2    | 4 |
| CONTIG-039391 | 153 | 10  | 4   | 71   | 0 |
| CONTIG-039392 | 295 | 11  | 17  | 123  | 0 |
| CONTIG-039393 | 210 | 11  | 9   | 58   | 2 |
| CONTIG-039394 | 218 | 40  | 38  | 420  | 7 |
| CONTIG-039395 | 203 | 19  | 88  | 118  | 0 |
| CONTIG-039396 | 75  | 3   | 4   | 4    | 0 |
| CONTIG-039399 | 97  | 5   | 2   | 7    | 0 |
| CONTIG-039400 | 91  | 3   | 7   | 2    | 0 |
| CONTIG-039401 | 155 | 9   | 29  | 20   | 0 |
| CONTIG-039402 | 225 | 21  | 44  | 218  | 2 |
| CONTIG-039403 | 114 | 3   | 6   | 8    | 0 |
| CONTIG-039404 | 106 | 4   | 6   | 10   | 2 |
| CONTIG-039405 | 95  | 8   | 42  | 0    | 0 |
| CONTIG-039406 | 66  | 6   | 3   | 3    | 0 |
| CONTIG-039407 | 235 | 17  | 21  | 108  | 2 |
| CONTIG-039408 | 227 | 9   | 6   | 55   | 0 |
| CONTIG-039409 | 212 | 12  | 42  | 80   | 0 |
| CONTIG-039410 | 270 | 11  | 82  | 62   | 0 |
| CONTIG-039411 | 327 | 16  | 253 | 87   | 0 |
| CONTIG-039412 | 263 | 67  | 43  | 988  | 0 |
| CONTIG-039413 | 229 | 7   | 49  | 24   | 0 |
| CONTIG-039415 | 212 | 13  | 38  | 77   | 0 |
| CONTIG-039416 | 216 | 6   | 4   | 37   | 0 |
| CONTIG-039417 | 109 | 11  | 3   | 29   | 0 |
| CONTIG-039419 | 87  | 13  | 18  | 24   | 0 |
| CONTIG-039420 | 188 | 4   | 11  | 18   | 0 |
| CONTIG-039421 | 86  | 27  | 16  | 99   | 0 |
| CONTIG-039422 | 101 | 6   | 3   | 18   | 0 |
| CONTIG-039423 | 160 | 9   | 15  | 28   | 0 |
| CONTIG-039424 | 782 | 17  | 33  | 205  | 2 |
| CONTIG-039425 | 461 | 40  | 102 | 798  | 2 |
| CONTIG-039426 | 77  | 6   | 8   | 15   | 0 |
| CONTIG-039427 | 950 | 23  | 17  | 1240 | 0 |
| CONTIG-039428 | 269 | 18  | 49  | 72   | 0 |
| CONTIG-039429 | 38  | 375 | 30  | 287  | 0 |
| CONTIG-039432 | 102 | 213 | 88  | 124  | 0 |
| CONTIG-039433 | 139 | 10  | 18  | 44   | 0 |
| CONTIG-039434 | 126 | 10  | 13  | 31   | 0 |
| CONTIG-039435 | 621 | 13  | 28  | 232  | 2 |

|               |     |     |     |     |    |
|---------------|-----|-----|-----|-----|----|
| CONTIG-039436 | 53  | 13  | 18  | 8   | 0  |
| CONTIG-039437 | 161 | 13  | 59  | 48  | 0  |
| CONTIG-039438 | 109 | 7   | 6   | 33  | 0  |
| CONTIG-039439 | 117 | 4   | 4   | 10  | 0  |
| CONTIG-039440 | 447 | 18  | 90  | 74  | 0  |
| CONTIG-039441 | 67  | 10  | 0   | 20  | 0  |
| CONTIG-039442 | 78  | 9   | 23  | 15  | 0  |
| CONTIG-039450 | 151 | 5   | 4   | 16  | 0  |
| CONTIG-039451 | 135 | 6   | 15  | 0   | 0  |
| CONTIG-039452 | 396 | 18  | 175 | 169 | 0  |
| CONTIG-039453 | 177 | 9   | 23  | 57  | 0  |
| CONTIG-039454 | 669 | 141 | 22  | 245 | 0  |
| CONTIG-039455 | 211 | 321 | 144 | 447 | 0  |
| CONTIG-039456 | 66  | 9   | 4   | 27  | 0  |
| CONTIG-039457 | 84  | 8   | 7   | 9   | 2  |
| CONTIG-039458 | 70  | 5   | 4   | 0   | 0  |
| CONTIG-039459 | 85  | 7   | 7   | 17  | 0  |
| CONTIG-039460 | 58  | 10  | 3   | 21  | 0  |
| CONTIG-039461 | 189 | 14  | 10  | 91  | 0  |
| CONTIG-039462 | 125 | 10  | 11  | 30  | 0  |
| CONTIG-039463 | 67  | 5   | 14  | 0   | 0  |
| CONTIG-039464 | 119 | 7   | 0   | 12  | 2  |
| CONTIG-039465 | 84  | 5   | 29  | 0   | 0  |
| CONTIG-039466 | 133 | 7   | 2   | 30  | 0  |
| CONTIG-039467 | 146 | 13  | 2   | 31  | 2  |
| CONTIG-039468 | 83  | 8   | 8   | 18  | 0  |
| CONTIG-039469 | 85  | 6   | 5   | 9   | 0  |
| CONTIG-039470 | 162 | 9   | 52  | 18  | 0  |
| CONTIG-039471 | 201 | 17  | 4   | 190 | 0  |
| CONTIG-039472 | 252 | 9   | 3   | 56  | 0  |
| CONTIG-039473 | 305 | 13  | 52  | 113 | 0  |
| CONTIG-039474 | 166 | 12  | 24  | 60  | 0  |
| CONTIG-039475 | 51  | 40  | 19  | 18  | 2  |
| CONTIG-039477 | 59  | 5   | 17  | 0   | 0  |
| CONTIG-039478 | 210 | 11  | 13  | 81  | 0  |
| CONTIG-039479 | 916 | 16  | 35  | 393 | 19 |
| CONTIG-039480 | 99  | 9   | 19  | 14  | 0  |
| CONTIG-039483 | 67  | 11  | 2   | 26  | 2  |
| CONTIG-039484 | 87  | 7   | 6   | 13  | 0  |
| CONTIG-039485 | 115 | 43  | 14  | 180 | 0  |
| CONTIG-039486 | 148 | 9   | 15  | 39  | 2  |
| CONTIG-039487 | 239 | 10  | 20  | 78  | 0  |
| CONTIG-039488 | 98  | 7   | 6   | 5   | 0  |
| CONTIG-039489 | 121 | 11  | 59  | 23  | 0  |
| CONTIG-039490 | 155 | 12  | 64  | 36  | 0  |
| CONTIG-039491 | 114 | 10  | 13  | 27  | 0  |
| CONTIG-039492 | 46  | 150 | 19  | 39  | 0  |

|               |     |     |     |      |     |
|---------------|-----|-----|-----|------|-----|
| CONTIG-039493 | 108 | 11  | 32  | 19   | 0   |
| CONTIG-039494 | 116 | 7   | 17  | 26   | 0   |
| CONTIG-039496 | 126 | 4   | 9   | 0    | 0   |
| CONTIG-039504 | 71  | 13  | 14  | 27   | 3   |
| CONTIG-039505 | 65  | 5   | 0   | 9    | 0   |
| CONTIG-039506 | 59  | 64  | 13  | 72   | 2   |
| CONTIG-039507 | 330 | 14  | 13  | 170  | 4   |
| CONTIG-039508 | 81  | 6   | 3   | 0    | 0   |
| CONTIG-039509 | 98  | 23  | 56  | 70   | 0   |
| CONTIG-039510 | 107 | 10  | 0   | 17   | 0   |
| CONTIG-039511 | 176 | 6   | 16  | 12   | 0   |
| CONTIG-039512 | 251 | 6   | 11  | 35   | 0   |
| CONTIG-039514 | 497 | 22  | 88  | 164  | 19  |
| CONTIG-039515 | 259 | 11  | 31  | 53   | 0   |
| CONTIG-039516 | 127 | 7   | 15  | 23   | 0   |
| CONTIG-039517 | 258 | 24  | 51  | 114  | 0   |
| CONTIG-039518 | 291 | 17  | 40  | 134  | 2   |
| CONTIG-039519 | 235 | 8   | 18  | 69   | 0   |
| CONTIG-039521 | 166 | 6   | 16  | 2    | 0   |
| CONTIG-039522 | 62  | 3   | 12  | 2    | 0   |
| CONTIG-039526 | 112 | 5   | 6   | 12   | 0   |
| CONTIG-039527 | 293 | 15  | 2   | 118  | 0   |
| CONTIG-039528 | 86  | 9   | 2   | 8    | 0   |
| CONTIG-039529 | 192 | 7   | 3   | 54   | 0   |
| CONTIG-039533 | 188 | 12  | 27  | 44   | 0   |
| CONTIG-039534 | 451 | 12  | 8   | 0    | 107 |
| CONTIG-039535 | 703 | 42  | 19  | 1753 | 0   |
| CONTIG-039537 | 252 | 13  | 11  | 90   | 0   |
| CONTIG-039538 | 229 | 11  | 52  | 21   | 0   |
| CONTIG-039539 | 87  | 7   | 10  | 16   | 0   |
| CONTIG-039543 | 510 | 13  | 36  | 233  | 2   |
| CONTIG-039544 | 263 | 5   | 6   | 47   | 0   |
| CONTIG-039545 | 163 | 6   | 9   | 26   | 0   |
| CONTIG-039546 | 236 | 14  | 14  | 130  | 0   |
| CONTIG-039547 | 268 | 17  | 17  | 76   | 0   |
| CONTIG-039548 | 60  | 8   | 5   | 11   | 0   |
| CONTIG-039550 | 521 | 15  | 51  | 184  | 4   |
| CONTIG-039551 | 106 | 5   | 35  | 6    | 0   |
| CONTIG-039554 | 456 | 10  | 17  | 124  | 0   |
| CONTIG-039555 | 287 | 10  | 16  | 90   | 0   |
| CONTIG-039558 | 151 | 6   | 5   | 14   | 2   |
| CONTIG-039559 | 110 | 6   | 6   | 9    | 0   |
| CONTIG-039560 | 43  | 415 | 83  | 705  | 3   |
| CONTIG-039562 | 71  | 3   | 0   | 2    | 0   |
| CONTIG-039563 | 76  | 242 | 57  | 441  | 4   |
| CONTIG-039564 | 396 | 20  | 77  | 68   | 6   |
| CONTIG-039565 | 578 | 17  | 100 | 365  | 4   |

|               |      |    |     |      |   |
|---------------|------|----|-----|------|---|
| CONTIG-039566 | 66   | 10 | 11  | 25   | 0 |
| CONTIG-039567 | 108  | 7  | 5   | 29   | 0 |
| CONTIG-039569 | 214  | 16 | 13  | 170  | 2 |
| CONTIG-039570 | 88   | 7  | 3   | 20   | 0 |
| CONTIG-039572 | 303  | 13 | 18  | 175  | 0 |
| CONTIG-039573 | 59   | 4  | 5   | 6    | 0 |
| CONTIG-039574 | 260  | 6  | 5   | 52   | 0 |
| CONTIG-039575 | 493  | 34 | 86  | 607  | 4 |
| CONTIG-039576 | 166  | 11 | 22  | 65   | 0 |
| CONTIG-039577 | 82   | 4  | 2   | 4    | 0 |
| CONTIG-039578 | 63   | 6  | 3   | 8    | 0 |
| CONTIG-039579 | 60   | 5  | 6   | 0    | 0 |
| CONTIG-039580 | 59   | 22 | 15  | 29   | 0 |
| CONTIG-039581 | 166  | 20 | 128 | 54   | 0 |
| CONTIG-039582 | 101  | 12 | 28  | 32   | 0 |
| CONTIG-039583 | 81   | 8  | 4   | 12   | 0 |
| CONTIG-039585 | 113  | 6  | 5   | 14   | 0 |
| CONTIG-039586 | 65   | 5  | 3   | 2    | 0 |
| CONTIG-039587 | 154  | 5  | 3   | 13   | 0 |
| CONTIG-039588 | 1302 | 28 | 184 | 1346 | 8 |
| CONTIG-039589 | 96   | 6  | 5   | 11   | 0 |
| CONTIG-039591 | 189  | 4  | 12  | 33   | 0 |
| CONTIG-039592 | 103  | 10 | 12  | 37   | 0 |
| CONTIG-039593 | 188  | 10 | 5   | 65   | 2 |
| CONTIG-039594 | 305  | 10 | 21  | 86   | 3 |
| CONTIG-039595 | 248  | 10 | 29  | 44   | 0 |
| CONTIG-039596 | 133  | 6  | 3   | 11   | 0 |
| CONTIG-039597 | 80   | 4  | 6   | 5    | 0 |
| CONTIG-039599 | 118  | 12 | 7   | 61   | 0 |
| CONTIG-039600 | 411  | 14 | 66  | 212  | 6 |
| CONTIG-039601 | 397  | 17 | 31  | 215  | 4 |
| CONTIG-039602 | 84   | 7  | 13  | 9    | 0 |
| CONTIG-039603 | 98   | 7  | 9   | 25   | 0 |
| CONTIG-039604 | 77   | 7  | 8   | 15   | 0 |
| CONTIG-039605 | 227  | 14 | 9   | 52   | 4 |
| CONTIG-039606 | 102  | 5  | 12  | 7    | 0 |
| CONTIG-039607 | 183  | 8  | 20  | 21   | 2 |
| CONTIG-039608 | 168  | 7  | 0   | 46   | 0 |
| CONTIG-039609 | 226  | 11 | 29  | 0    | 6 |
| CONTIG-039610 | 183  | 6  | 4   | 28   | 0 |
| CONTIG-039612 | 96   | 7  | 7   | 15   | 0 |
| CONTIG-039613 | 199  | 13 | 7   | 112  | 0 |
| CONTIG-039614 | 160  | 14 | 24  | 54   | 0 |
| CONTIG-039617 | 301  | 13 | 13  | 177  | 0 |
| CONTIG-039618 | 65   | 2  | 0   | 2    | 0 |
| CONTIG-039619 | 65   | 4  | 2   | 0    | 0 |
| CONTIG-039620 | 59   | 4  | 4   | 9    | 0 |

|               |     |    |     |     |    |
|---------------|-----|----|-----|-----|----|
| CONTIG-039623 | 86  | 11 | 57  | 2   | 0  |
| CONTIG-039624 | 129 | 9  | 3   | 33  | 0  |
| CONTIG-039625 | 80  | 7  | 31  | 4   | 0  |
| CONTIG-039626 | 122 | 7  | 7   | 10  | 0  |
| CONTIG-039627 | 60  | 11 | 5   | 6   | 0  |
| CONTIG-039628 | 98  | 5  | 0   | 13  | 0  |
| CONTIG-039629 | 118 | 6  | 5   | 17  | 0  |
| CONTIG-039630 | 129 | 5  | 14  | 8   | 0  |
| CONTIG-039631 | 782 | 16 | 91  | 590 | 0  |
| CONTIG-039632 | 72  | 4  | 6   | 2   | 0  |
| CONTIG-039633 | 137 | 14 | 5   | 112 | 0  |
| CONTIG-039634 | 260 | 7  | 7   | 62  | 0  |
| CONTIG-039635 | 46  | 12 | 10  | 20  | 0  |
| CONTIG-039636 | 183 | 15 | 15  | 77  | 0  |
| CONTIG-039637 | 342 | 11 | 34  | 112 | 0  |
| CONTIG-039638 | 265 | 14 | 39  | 154 | 0  |
| CONTIG-039644 | 72  | 16 | 24  | 21  | 0  |
| CONTIG-039645 | 464 | 10 | 28  | 82  | 4  |
| CONTIG-039646 | 145 | 9  | 13  | 37  | 2  |
| CONTIG-039650 | 87  | 60 | 17  | 90  | 6  |
| CONTIG-039651 | 205 | 19 | 30  | 157 | 0  |
| CONTIG-039653 | 63  | 8  | 2   | 15  | 0  |
| CONTIG-039654 | 188 | 13 | 13  | 71  | 0  |
| CONTIG-039655 | 300 | 9  | 19  | 80  | 0  |
| CONTIG-039656 | 625 | 14 | 25  | 388 | 0  |
| CONTIG-039658 | 354 | 11 | 36  | 104 | 2  |
| CONTIG-039659 | 144 | 9  | 41  | 4   | 0  |
| CONTIG-039660 | 111 | 9  | 16  | 22  | 0  |
| CONTIG-039661 | 105 | 3  | 0   | 2   | 0  |
| CONTIG-039662 | 61  | 2  | 0   | 0   | 0  |
| CONTIG-039663 | 104 | 8  | 2   | 2   | 0  |
| CONTIG-039665 | 427 | 9  | 19  | 25  | 0  |
| CONTIG-039666 | 309 | 12 | 31  | 135 | 0  |
| CONTIG-039667 | 457 | 34 | 145 | 387 | 2  |
| CONTIG-039668 | 190 | 9  | 19  | 48  | 0  |
| CONTIG-039669 | 293 | 5  | 5   | 33  | 0  |
| CONTIG-039670 | 81  | 81 | 4   | 0   | 53 |
| CONTIG-039671 | 663 | 12 | 4   | 19  | 0  |
| CONTIG-039672 | 494 | 13 | 23  | 246 | 2  |
| CONTIG-039673 | 315 | 14 | 32  | 172 | 0  |
| CONTIG-039674 | 665 | 11 | 26  | 230 | 2  |
| CONTIG-039675 | 73  | 11 | 63  | 6   | 0  |
| CONTIG-039676 | 148 | 7  | 12  | 25  | 0  |
| CONTIG-039677 | 127 | 12 | 34  | 35  | 0  |
| CONTIG-039678 | 69  | 9  | 4   | 29  | 0  |
| CONTIG-039679 | 149 | 9  | 49  | 26  | 0  |
| CONTIG-039680 | 62  | 14 | 31  | 9   | 0  |

|               |     |     |     |      |    |
|---------------|-----|-----|-----|------|----|
| CONTIG-039681 | 469 | 23  | 15  | 603  | 0  |
| CONTIG-039682 | 244 | 11  | 15  | 97   | 0  |
| CONTIG-039683 | 63  | 8   | 36  | 0    | 0  |
| CONTIG-039684 | 104 | 5   | 6   | 14   | 0  |
| CONTIG-039685 | 144 | 6   | 9   | 25   | 0  |
| CONTIG-039686 | 537 | 20  | 10  | 150  | 0  |
| CONTIG-039687 | 129 | 3   | 5   | 6    | 0  |
| CONTIG-039688 | 482 | 22  | 11  | 472  | 0  |
| CONTIG-039689 | 155 | 19  | 71  | 16   | 0  |
| CONTIG-039690 | 324 | 22  | 45  | 226  | 17 |
| CONTIG-039691 | 256 | 16  | 17  | 185  | 0  |
| CONTIG-039692 | 126 | 5   | 4   | 0    | 2  |
| CONTIG-039693 | 293 | 9   | 21  | 48   | 0  |
| CONTIG-039694 | 153 | 9   | 3   | 46   | 0  |
| CONTIG-039700 | 95  | 4   | 3   | 6    | 0  |
| CONTIG-039702 | 403 | 13  | 24  | 78   | 2  |
| CONTIG-039703 | 679 | 20  | 100 | 327  | 19 |
| CONTIG-039704 | 340 | 8   | 0   | 96   | 0  |
| CONTIG-039705 | 339 | 7   | 26  | 70   | 0  |
| CONTIG-039706 | 88  | 4   | 6   | 4    | 0  |
| CONTIG-039707 | 391 | 10  | 25  | 124  | 4  |
| CONTIG-039708 | 65  | 12  | 21  | 16   | 0  |
| CONTIG-039709 | 297 | 9   | 23  | 59   | 2  |
| CONTIG-039712 | 185 | 5   | 20  | 3    | 0  |
| CONTIG-039713 | 120 | 12  | 9   | 32   | 5  |
| CONTIG-039714 | 515 | 11  | 15  | 192  | 0  |
| CONTIG-039715 | 72  | 8   | 4   | 16   | 0  |
| CONTIG-039716 | 324 | 10  | 30  | 109  | 0  |
| CONTIG-039718 | 80  | 140 | 80  | 287  | 0  |
| CONTIG-039719 | 353 | 19  | 113 | 201  | 0  |
| CONTIG-039720 | 157 | 13  | 19  | 72   | 0  |
| CONTIG-039721 | 82  | 5   | 6   | 8    | 0  |
| CONTIG-039723 | 146 | 11  | 33  | 33   | 0  |
| CONTIG-039724 | 162 | 11  | 8   | 48   | 0  |
| CONTIG-039725 | 179 | 15  | 86  | 61   | 0  |
| CONTIG-039726 | 135 | 16  | 6   | 74   | 0  |
| CONTIG-039727 | 363 | 13  | 17  | 84   | 0  |
| CONTIG-039728 | 59  | 6   | 9   | 7    | 0  |
| CONTIG-039729 | 535 | 35  | 128 | 1126 | 0  |
| CONTIG-039730 | 88  | 9   | 16  | 4    | 0  |
| CONTIG-039731 | 70  | 11  | 10  | 5    | 0  |
| CONTIG-039732 | 174 | 9   | 31  | 42   | 0  |
| CONTIG-039733 | 115 | 5   | 0   | 10   | 0  |
| CONTIG-039734 | 196 | 21  | 11  | 166  | 3  |
| CONTIG-039735 | 772 | 13  | 28  | 223  | 2  |
| CONTIG-039736 | 72  | 25  | 34  | 4    | 0  |
| CONTIG-039737 | 211 | 6   | 9   | 26   | 4  |

|               |     |     |     |     |    |
|---------------|-----|-----|-----|-----|----|
| CONTIG-039741 | 176 | 13  | 22  | 44  | 0  |
| CONTIG-039743 | 126 | 5   | 8   | 22  | 0  |
| CONTIG-039745 | 113 | 4   | 5   | 7   | 0  |
| CONTIG-039746 | 118 | 7   | 13  | 12  | 0  |
| CONTIG-039747 | 155 | 6   | 9   | 15  | 0  |
| CONTIG-039748 | 135 | 8   | 26  | 22  | 0  |
| CONTIG-039749 | 122 | 12  | 17  | 30  | 0  |
| CONTIG-039750 | 97  | 6   | 6   | 15  | 0  |
| CONTIG-039752 | 668 | 12  | 26  | 291 | 0  |
| CONTIG-039753 | 158 | 14  | 19  | 79  | 2  |
| CONTIG-039755 | 67  | 15  | 9   | 23  | 0  |
| CONTIG-039756 | 69  | 6   | 8   | 7   | 0  |
| CONTIG-039757 | 112 | 12  | 8   | 33  | 0  |
| CONTIG-039758 | 179 | 15  | 26  | 127 | 0  |
| CONTIG-039759 | 119 | 6   | 24  | 15  | 0  |
| CONTIG-039760 | 161 | 5   | 0   | 33  | 0  |
| CONTIG-039761 | 88  | 8   | 12  | 9   | 0  |
| CONTIG-039762 | 153 | 211 | 13  | 0   | 17 |
| CONTIG-039763 | 527 | 21  | 2   | 0   | 12 |
| CONTIG-039764 | 68  | 8   | 0   | 9   | 0  |
| CONTIG-039766 | 112 | 9   | 0   | 47  | 0  |
| CONTIG-039767 | 61  | 5   | 2   | 9   | 0  |
| CONTIG-039768 | 225 | 14  | 12  | 123 | 0  |
| CONTIG-039769 | 221 | 7   | 7   | 36  | 0  |
| CONTIG-039770 | 445 | 12  | 57  | 90  | 2  |
| CONTIG-039771 | 121 | 24  | 4   | 153 | 0  |
| CONTIG-039772 | 100 | 96  | 18  | 586 | 0  |
| CONTIG-039781 | 62  | 7   | 3   | 4   | 0  |
| CONTIG-039782 | 318 | 11  | 26  | 130 | 0  |
| CONTIG-039783 | 124 | 6   | 14  | 28  | 2  |
| CONTIG-039785 | 289 | 15  | 27  | 153 | 0  |
| CONTIG-039786 | 489 | 15  | 127 | 108 | 2  |
| CONTIG-039787 | 309 | 8   | 6   | 43  | 0  |
| CONTIG-039788 | 104 | 9   | 5   | 35  | 0  |
| CONTIG-039789 | 129 | 6   | 2   | 41  | 0  |
| CONTIG-039790 | 187 | 7   | 26  | 34  | 0  |
| CONTIG-039791 | 87  | 7   | 8   | 30  | 0  |
| CONTIG-039792 | 71  | 9   | 34  | 0   | 0  |
| CONTIG-039793 | 64  | 9   | 2   | 0   | 0  |
| CONTIG-039794 | 83  | 15  | 29  | 44  | 0  |
| CONTIG-039795 | 235 | 9   | 8   | 98  | 0  |
| CONTIG-039796 | 249 | 16  | 12  | 171 | 0  |
| CONTIG-039797 | 355 | 8   | 28  | 66  | 0  |
| CONTIG-039798 | 197 | 6   | 6   | 29  | 0  |
| CONTIG-039799 | 203 | 17  | 10  | 113 | 0  |
| CONTIG-039800 | 282 | 7   | 4   | 62  | 0  |
| CONTIG-039803 | 263 | 16  | 41  | 140 | 0  |

|               |     |    |     |     |   |
|---------------|-----|----|-----|-----|---|
| CONTIG-039804 | 109 | 4  | 7   | 0   | 0 |
| CONTIG-039805 | 67  | 5  | 6   | 10  | 0 |
| CONTIG-039806 | 95  | 13 | 8   | 40  | 0 |
| CONTIG-039810 | 82  | 9  | 10  | 21  | 0 |
| CONTIG-039812 | 196 | 13 | 46  | 74  | 3 |
| CONTIG-039813 | 120 | 26 | 52  | 112 | 2 |
| CONTIG-039815 | 119 | 7  | 29  | 12  | 0 |
| CONTIG-039816 | 120 | 7  | 6   | 31  | 0 |
| CONTIG-039817 | 84  | 4  | 5   | 0   | 0 |
| CONTIG-039818 | 308 | 13 | 51  | 86  | 0 |
| CONTIG-039819 | 298 | 8  | 19  | 79  | 0 |
| CONTIG-039820 | 86  | 12 | 8   | 25  | 0 |
| CONTIG-039821 | 200 | 6  | 43  | 0   | 0 |
| CONTIG-039822 | 250 | 7  | 18  | 46  | 0 |
| CONTIG-039823 | 198 | 5  | 35  | 5   | 0 |
| CONTIG-039824 | 85  | 6  | 3   | 19  | 0 |
| CONTIG-039825 | 575 | 9  | 19  | 92  | 2 |
| CONTIG-039826 | 75  | 54 | 12  | 116 | 5 |
| CONTIG-039827 | 212 | 9  | 116 | 41  | 0 |
| CONTIG-039828 | 368 | 19 | 28  | 252 | 4 |
| CONTIG-039829 | 167 | 11 | 12  | 57  | 0 |
| CONTIG-039830 | 282 | 17 | 13  | 194 | 0 |
| CONTIG-039831 | 304 | 17 | 33  | 273 | 0 |
| CONTIG-039832 | 218 | 18 | 26  | 95  | 0 |
| CONTIG-039833 | 565 | 13 | 52  | 234 | 3 |
| CONTIG-039840 | 98  | 4  | 4   | 9   | 0 |
| CONTIG-039841 | 126 | 5  | 2   | 2   | 0 |
| CONTIG-039842 | 103 | 8  | 7   | 8   | 3 |
| CONTIG-039843 | 42  | 56 | 3   | 43  | 0 |
| CONTIG-039845 | 49  | 50 | 6   | 0   | 9 |
| CONTIG-039846 | 249 | 10 | 9   | 97  | 0 |
| CONTIG-039847 | 214 | 8  | 9   | 29  | 0 |
| CONTIG-039848 | 80  | 6  | 2   | 9   | 0 |
| CONTIG-039849 | 133 | 18 | 30  | 93  | 0 |
| CONTIG-039850 | 173 | 8  | 24  | 35  | 0 |
| CONTIG-039851 | 186 | 13 | 22  | 87  | 0 |
| CONTIG-039852 | 127 | 8  | 6   | 17  | 0 |
| CONTIG-039853 | 393 | 14 | 10  | 127 | 0 |
| CONTIG-039854 | 234 | 14 | 15  | 134 | 0 |
| CONTIG-039855 | 88  | 10 | 0   | 18  | 0 |
| CONTIG-039856 | 178 | 7  | 13  | 8   | 0 |
| CONTIG-039857 | 89  | 5  | 5   | 7   | 0 |
| CONTIG-039858 | 77  | 18 | 40  | 19  | 0 |
| CONTIG-039859 | 129 | 8  | 5   | 33  | 0 |
| CONTIG-039860 | 907 | 12 | 115 | 379 | 0 |
| CONTIG-039861 | 215 | 8  | 2   | 37  | 0 |
| CONTIG-039862 | 132 | 11 | 14  | 49  | 0 |



|               |      |    |     |      |     |
|---------------|------|----|-----|------|-----|
| CONTIG-039863 | 98   | 8  | 2   | 0    | 0   |
| CONTIG-039864 | 466  | 10 | 19  | 186  | 0   |
| CONTIG-039865 | 122  | 7  | 8   | 41   | 0   |
| CONTIG-039866 | 187  | 13 | 79  | 41   | 0   |
| CONTIG-039867 | 220  | 31 | 7   | 194  | 10  |
| CONTIG-039868 | 119  | 15 | 17  | 46   | 0   |
| CONTIG-039869 | 210  | 12 | 13  | 66   | 0   |
| CONTIG-039870 | 308  | 5  | 3   | 4    | 0   |
| CONTIG-039871 | 62   | 3  | 0   | 3    | 0   |
| CONTIG-039872 | 165  | 11 | 52  | 46   | 0   |
| CONTIG-039873 | 99   | 6  | 6   | 4    | 0   |
| CONTIG-039874 | 67   | 4  | 0   | 13   | 0   |
| CONTIG-039876 | 221  | 33 | 19  | 330  | 0   |
| CONTIG-039877 | 215  | 7  | 15  | 0    | 0   |
| CONTIG-039878 | 882  | 13 | 73  | 393  | 0   |
| CONTIG-039879 | 133  | 6  | 10  | 22   | 0   |
| CONTIG-039880 | 765  | 61 | 162 | 2032 | 8   |
| CONTIG-039881 | 78   | 30 | 21  | 83   | 0   |
| CONTIG-039882 | 61   | 3  | 2   | 2    | 0   |
| CONTIG-039883 | 74   | 2  | 0   | 2    | 0   |
| CONTIG-039884 | 125  | 23 | 29  | 78   | 6   |
| CONTIG-039885 | 395  | 10 | 41  | 100  | 0   |
| CONTIG-039886 | 269  | 6  | 11  | 22   | 0   |
| CONTIG-039887 | 118  | 6  | 5   | 16   | 0   |
| CONTIG-039888 | 478  | 9  | 36  | 42   | 0   |
| CONTIG-039889 | 296  | 10 | 18  | 88   | 0   |
| CONTIG-039890 | 594  | 29 | 0   | 0    | 141 |
| CONTIG-039891 | 71   | 9  | 12  | 9    | 0   |
| CONTIG-039892 | 180  | 16 | 24  | 99   | 0   |
| CONTIG-039893 | 170  | 9  | 10  | 37   | 0   |
| CONTIG-039894 | 121  | 20 | 43  | 105  | 0   |
| CONTIG-039895 | 208  | 10 | 10  | 67   | 4   |
| CONTIG-039896 | 298  | 12 | 9   | 147  | 0   |
| CONTIG-039897 | 384  | 6  | 22  | 58   | 4   |
| CONTIG-039898 | 498  | 14 | 42  | 221  | 0   |
| CONTIG-039899 | 188  | 5  | 17  | 34   | 0   |
| CONTIG-039900 | 332  | 26 | 92  | 194  | 0   |
| CONTIG-039901 | 107  | 10 | 13  | 7    | 0   |
| CONTIG-039902 | 59   | 5  | 6   | 0    | 0   |
| CONTIG-039903 | 285  | 10 | 8   | 93   | 0   |
| CONTIG-039904 | 415  | 18 | 54  | 259  | 0   |
| CONTIG-039905 | 559  | 27 | 101 | 693  | 0   |
| CONTIG-039906 | 310  | 13 | 40  | 112  | 0   |
| CONTIG-039907 | 221  | 6  | 6   | 15   | 2   |
| CONTIG-039911 | 1359 | 20 | 208 | 787  | 0   |
| CONTIG-039912 | 89   | 5  | 2   | 18   | 0   |
| CONTIG-039913 | 349  | 13 | 52  | 123  | 0   |

|               |     |    |     |      |    |
|---------------|-----|----|-----|------|----|
| CONTIG-039914 | 82  | 7  | 8   | 9    | 0  |
| CONTIG-039915 | 80  | 11 | 13  | 23   | 0  |
| CONTIG-039917 | 168 | 5  | 2   | 12   | 0  |
| CONTIG-039918 | 132 | 14 | 48  | 0    | 0  |
| CONTIG-039919 | 69  | 20 | 14  | 51   | 0  |
| CONTIG-039920 | 93  | 3  | 3   | 2    | 0  |
| CONTIG-039921 | 63  | 3  | 5   | 3    | 0  |
| CONTIG-039922 | 59  | 8  | 10  | 20   | 0  |
| CONTIG-039923 | 143 | 19 | 17  | 74   | 0  |
| CONTIG-039924 | 65  | 5  | 0   | 10   | 0  |
| CONTIG-039925 | 441 | 25 | 113 | 186  | 4  |
| CONTIG-039926 | 169 | 9  | 7   | 53   | 0  |
| CONTIG-039927 | 265 | 7  | 52  | 38   | 0  |
| CONTIG-039928 | 491 | 14 | 11  | 320  | 7  |
| CONTIG-039929 | 254 | 19 | 16  | 85   | 0  |
| CONTIG-039930 | 154 | 20 | 28  | 4    | 17 |
| CONTIG-039931 | 173 | 8  | 16  | 44   | 0  |
| CONTIG-039932 | 63  | 4  | 5   | 8    | 0  |
| CONTIG-039933 | 116 | 93 | 4   | 631  | 0  |
| CONTIG-039934 | 76  | 14 | 5   | 43   | 0  |
| CONTIG-039935 | 209 | 5  | 15  | 23   | 0  |
| CONTIG-039936 | 972 | 50 | 132 | 1230 | 63 |
| CONTIG-039937 | 110 | 13 | 27  | 31   | 0  |
| CONTIG-039939 | 236 | 6  | 29  | 14   | 0  |
| CONTIG-039940 | 210 | 12 | 10  | 113  | 0  |
| CONTIG-039941 | 131 | 10 | 13  | 41   | 0  |
| CONTIG-039942 | 306 | 7  | 11  | 53   | 0  |
| CONTIG-039943 | 61  | 5  | 2   | 9    | 0  |
| CONTIG-039944 | 109 | 7  | 9   | 15   | 0  |
| CONTIG-039945 | 127 | 11 | 24  | 42   | 0  |
| CONTIG-039946 | 67  | 5  | 7   | 4    | 0  |
| CONTIG-039947 | 177 | 18 | 92  | 66   | 0  |
| CONTIG-039948 | 59  | 42 | 27  | 59   | 0  |
| CONTIG-039949 | 63  | 5  | 3   | 8    | 0  |
| CONTIG-039950 | 125 | 8  | 32  | 11   | 0  |
| CONTIG-039951 | 340 | 15 | 85  | 116  | 0  |
| CONTIG-039952 | 147 | 8  | 5   | 33   | 0  |
| CONTIG-039953 | 75  | 7  | 3   | 2    | 0  |
| CONTIG-039954 | 119 | 11 | 4   | 38   | 0  |
| CONTIG-039955 | 68  | 5  | 7   | 0    | 0  |
| CONTIG-039956 | 207 | 28 | 37  | 112  | 9  |
| CONTIG-039957 | 395 | 28 | 22  | 293  | 19 |
| CONTIG-039958 | 145 | 7  | 4   | 17   | 0  |
| CONTIG-039959 | 69  | 3  | 0   | 0    | 0  |
| CONTIG-039960 | 236 | 8  | 5   | 16   | 2  |
| CONTIG-039961 | 151 | 14 | 31  | 60   | 0  |
| CONTIG-039962 | 138 | 11 | 3   | 40   | 0  |

|               |     |    |    |      |    |
|---------------|-----|----|----|------|----|
| CONTIG-039963 | 331 | 10 | 9  | 76   | 0  |
| CONTIG-039965 | 142 | 9  | 2  | 43   | 0  |
| CONTIG-039969 | 143 | 8  | 2  | 36   | 0  |
| CONTIG-039970 | 211 | 11 | 8  | 89   | 0  |
| CONTIG-039978 | 243 | 6  | 9  | 47   | 2  |
| CONTIG-039979 | 63  | 10 | 10 | 8    | 0  |
| CONTIG-039980 | 65  | 6  | 6  | 3    | 0  |
| CONTIG-039981 | 92  | 4  | 0  | 0    | 0  |
| CONTIG-039984 | 540 | 8  | 20 | 145  | 0  |
| CONTIG-039986 | 92  | 7  | 20 | 2    | 0  |
| CONTIG-039987 | 173 | 8  | 14 | 46   | 0  |
| CONTIG-039988 | 164 | 5  | 27 | 7    | 0  |
| CONTIG-039989 | 176 | 10 | 27 | 65   | 0  |
| CONTIG-039990 | 63  | 12 | 50 | 3    | 0  |
| CONTIG-039991 | 150 | 10 | 8  | 57   | 2  |
| CONTIG-039992 | 113 | 7  | 4  | 24   | 0  |
| CONTIG-039993 | 138 | 10 | 12 | 53   | 0  |
| CONTIG-039994 | 841 | 10 | 15 | 47   | 0  |
| CONTIG-039995 | 550 | 14 | 16 | 176  | 15 |
| CONTIG-039996 | 812 | 33 | 69 | 1027 | 6  |
| CONTIG-039997 | 77  | 5  | 7  | 2    | 0  |
| CONTIG-039998 | 695 | 21 | 25 | 626  | 3  |
| CONTIG-039999 | 101 | 85 | 53 | 168  | 68 |
| CONTIG-040000 | 75  | 4  | 3  | 4    | 0  |
| CONTIG-040001 | 211 | 4  | 13 | 19   | 0  |
| CONTIG-040010 | 310 | 6  | 5  | 5    | 0  |
| CONTIG-040011 | 76  | 11 | 7  | 35   | 0  |
| CONTIG-040012 | 260 | 9  | 37 | 64   | 0  |
| CONTIG-040013 | 227 | 9  | 6  | 83   | 0  |
| CONTIG-040014 | 504 | 29 | 16 | 597  | 19 |
| CONTIG-040015 | 198 | 7  | 10 | 38   | 0  |
| CONTIG-040016 | 439 | 17 | 35 | 147  | 4  |
| CONTIG-040017 | 507 | 16 | 40 | 271  | 3  |
| CONTIG-040018 | 160 | 6  | 2  | 19   | 0  |
| CONTIG-040019 | 85  | 7  | 16 | 13   | 0  |
| CONTIG-040020 | 267 | 17 | 20 | 60   | 4  |
| CONTIG-040021 | 89  | 10 | 11 | 18   | 0  |
| CONTIG-040022 | 248 | 16 | 16 | 68   | 2  |
| CONTIG-040023 | 244 | 12 | 22 | 149  | 0  |
| CONTIG-040024 | 105 | 7  | 6  | 24   | 0  |
| CONTIG-040025 | 95  | 20 | 37 | 2    | 0  |
| CONTIG-040029 | 117 | 6  | 12 | 19   | 0  |
| CONTIG-040030 | 82  | 5  | 0  | 12   | 0  |
| CONTIG-040031 | 121 | 6  | 4  | 25   | 0  |
| CONTIG-040032 | 812 | 68 | 40 | 89   | 0  |
| CONTIG-040033 | 138 | 36 | 72 | 52   | 7  |
| CONTIG-040034 | 904 | 8  | 11 | 201  | 2  |

|               |     |     |     |      |    |
|---------------|-----|-----|-----|------|----|
| CONTIG-040035 | 140 | 4   | 2   | 20   | 0  |
| CONTIG-040036 | 128 | 10  | 2   | 0    | 9  |
| CONTIG-040037 | 169 | 7   | 3   | 33   | 0  |
| CONTIG-040038 | 77  | 11  | 9   | 16   | 0  |
| CONTIG-040040 | 85  | 5   | 6   | 13   | 0  |
| CONTIG-040041 | 71  | 8   | 12  | 10   | 0  |
| CONTIG-040042 | 94  | 12  | 15  | 16   | 0  |
| CONTIG-040043 | 324 | 12  | 13  | 83   | 0  |
| CONTIG-040044 | 73  | 39  | 42  | 50   | 0  |
| CONTIG-040045 | 347 | 31  | 5   | 23   | 0  |
| CONTIG-040046 | 162 | 5   | 3   | 6    | 0  |
| CONTIG-040050 | 212 | 15  | 7   | 11   | 0  |
| CONTIG-040051 | 230 | 7   | 6   | 55   | 4  |
| CONTIG-040052 | 234 | 22  | 28  | 158  | 0  |
| CONTIG-040053 | 69  | 5   | 17  | 2    | 0  |
| CONTIG-040054 | 647 | 29  | 16  | 57   | 0  |
| CONTIG-040055 | 120 | 3   | 3   | 13   | 0  |
| CONTIG-040056 | 341 | 14  | 12  | 206  | 0  |
| CONTIG-040057 | 198 | 13  | 19  | 76   | 0  |
| CONTIG-040058 | 86  | 8   | 10  | 30   | 0  |
| CONTIG-040059 | 67  | 11  | 18  | 15   | 0  |
| CONTIG-040060 | 84  | 68  | 117 | 162  | 0  |
| CONTIG-040061 | 138 | 13  | 23  | 70   | 0  |
| CONTIG-040062 | 67  | 12  | 0   | 14   | 3  |
| CONTIG-040063 | 81  | 5   | 5   | 14   | 0  |
| CONTIG-040065 | 92  | 8   | 5   | 13   | 0  |
| CONTIG-040066 | 62  | 4   | 2   | 0    | 0  |
| CONTIG-040067 | 364 | 8   | 8   | 100  | 0  |
| CONTIG-040068 | 361 | 6   | 19  | 53   | 0  |
| CONTIG-040069 | 208 | 11  | 2   | 44   | 0  |
| CONTIG-040070 | 363 | 46  | 105 | 680  | 52 |
| CONTIG-040071 | 73  | 9   | 35  | 0    | 0  |
| CONTIG-040072 | 347 | 13  | 59  | 111  | 0  |
| CONTIG-040073 | 165 | 8   | 7   | 37   | 0  |
| CONTIG-040074 | 131 | 6   | 13  | 10   | 0  |
| CONTIG-040075 | 115 | 8   | 23  | 6    | 2  |
| CONTIG-040076 | 77  | 3   | 2   | 4    | 0  |
| CONTIG-040077 | 103 | 6   | 9   | 12   | 2  |
| CONTIG-040078 | 67  | 4   | 6   | 11   | 0  |
| CONTIG-040079 | 227 | 8   | 11  | 17   | 0  |
| CONTIG-040081 | 78  | 27  | 0   | 0    | 3  |
| CONTIG-040082 | 61  | 443 | 160 | 1194 | 10 |
| CONTIG-040084 | 402 | 7   | 3   | 61   | 0  |
| CONTIG-040085 | 150 | 3   | 4   | 9    | 0  |
| CONTIG-040086 | 207 | 10  | 14  | 42   | 0  |
| CONTIG-040087 | 373 | 8   | 23  | 62   | 0  |
| CONTIG-040088 | 126 | 4   | 22  | 2    | 2  |

|               |     |     |     |      |    |
|---------------|-----|-----|-----|------|----|
| CONTIG-040089 | 887 | 14  | 39  | 530  | 0  |
| CONTIG-040090 | 68  | 19  | 23  | 0    | 0  |
| CONTIG-040091 | 107 | 7   | 39  | 4    | 0  |
| CONTIG-040092 | 76  | 16  | 38  | 0    | 0  |
| CONTIG-040094 | 181 | 17  | 8   | 88   | 0  |
| CONTIG-040095 | 173 | 8   | 42  | 6    | 0  |
| CONTIG-040096 | 643 | 13  | 29  | 236  | 0  |
| CONTIG-040097 | 109 | 12  | 24  | 43   | 2  |
| CONTIG-040098 | 121 | 10  | 2   | 29   | 4  |
| CONTIG-040099 | 517 | 66  | 20  | 2189 | 0  |
| CONTIG-040100 | 75  | 13  | 9   | 39   | 0  |
| CONTIG-040101 | 285 | 10  | 19  | 56   | 0  |
| CONTIG-040102 | 174 | 11  | 35  | 47   | 0  |
| CONTIG-040103 | 264 | 12  | 4   | 76   | 7  |
| CONTIG-040104 | 58  | 5   | 2   | 6    | 0  |
| CONTIG-040107 | 187 | 17  | 11  | 122  | 0  |
| CONTIG-040108 | 66  | 5   | 2   | 12   | 0  |
| CONTIG-040109 | 136 | 5   | 11  | 14   | 0  |
| CONTIG-040110 | 78  | 13  | 4   | 42   | 0  |
| CONTIG-040111 | 93  | 6   | 0   | 8    | 0  |
| CONTIG-040112 | 201 | 12  | 74  | 74   | 2  |
| CONTIG-040113 | 585 | 41  | 71  | 906  | 15 |
| CONTIG-040114 | 95  | 7   | 4   | 11   | 0  |
| CONTIG-040115 | 213 | 23  | 110 | 58   | 4  |
| CONTIG-040116 | 175 | 17  | 23  | 103  | 3  |
| CONTIG-040117 | 236 | 13  | 9   | 140  | 0  |
| CONTIG-040118 | 169 | 10  | 5   | 15   | 0  |
| CONTIG-040119 | 239 | 10  | 32  | 15   | 0  |
| CONTIG-040120 | 258 | 6   | 5   | 37   | 0  |
| CONTIG-040121 | 89  | 10  | 3   | 10   | 0  |
| CONTIG-040125 | 66  | 4   | 0   | 9    | 0  |
| CONTIG-040126 | 64  | 10  | 14  | 3    | 0  |
| CONTIG-040127 | 434 | 12  | 28  | 137  | 0  |
| CONTIG-040128 | 160 | 19  | 37  | 75   | 0  |
| CONTIG-040129 | 209 | 27  | 24  | 59   | 13 |
| CONTIG-040130 | 38  | 32  | 4   | 20   | 0  |
| CONTIG-040132 | 152 | 5   | 6   | 28   | 0  |
| CONTIG-040133 | 222 | 5   | 2   | 11   | 0  |
| CONTIG-040134 | 859 | 22  | 57  | 133  | 0  |
| CONTIG-040135 | 226 | 11  | 42  | 62   | 0  |
| CONTIG-040136 | 323 | 21  | 35  | 399  | 0  |
| CONTIG-040137 | 211 | 9   | 12  | 33   | 0  |
| CONTIG-040138 | 482 | 20  | 49  | 223  | 6  |
| CONTIG-040141 | 36  | 722 | 18  | 1025 | 0  |
| CONTIG-040142 | 269 | 16  | 33  | 116  | 0  |
| CONTIG-040143 | 103 | 7   | 8   | 17   | 2  |
| CONTIG-040149 | 79  | 3   | 3   | 5    | 0  |

|               |     |    |     |     |    |
|---------------|-----|----|-----|-----|----|
| CONTIG-040150 | 82  | 3  | 0   | 2   | 0  |
| CONTIG-040151 | 75  | 27 | 107 | 3   | 0  |
| CONTIG-040152 | 204 | 7  | 17  | 38  | 0  |
| CONTIG-040153 | 154 | 22 | 7   | 22  | 0  |
| CONTIG-040154 | 264 | 6  | 5   | 23  | 0  |
| CONTIG-040155 | 84  | 8  | 18  | 18  | 0  |
| CONTIG-040156 | 226 | 14 | 10  | 167 | 0  |
| CONTIG-040157 | 56  | 74 | 41  | 15  | 0  |
| CONTIG-040158 | 271 | 8  | 6   | 64  | 0  |
| CONTIG-040159 | 290 | 6  | 2   | 22  | 0  |
| CONTIG-040160 | 185 | 9  | 23  | 52  | 0  |
| CONTIG-040161 | 274 | 18 | 36  | 54  | 15 |
| CONTIG-040162 | 82  | 5  | 3   | 11  | 0  |
| CONTIG-040163 | 307 | 19 | 10  | 174 | 2  |
| CONTIG-040164 | 84  | 5  | 20  | 9   | 0  |
| CONTIG-040165 | 226 | 19 | 38  | 19  | 8  |
| CONTIG-040169 | 92  | 8  | 17  | 20  | 0  |
| CONTIG-040170 | 365 | 10 | 8   | 108 | 0  |
| CONTIG-040171 | 273 | 7  | 4   | 34  | 0  |
| CONTIG-040172 | 221 | 7  | 31  | 51  | 0  |
| CONTIG-040173 | 241 | 8  | 18  | 49  | 0  |
| CONTIG-040174 | 68  | 5  | 4   | 4   | 2  |
| CONTIG-040175 | 164 | 5  | 4   | 21  | 0  |
| CONTIG-040176 | 138 | 9  | 12  | 26  | 0  |
| CONTIG-040177 | 137 | 20 | 11  | 98  | 2  |
| CONTIG-040179 | 110 | 8  | 4   | 2   | 0  |
| CONTIG-040180 | 628 | 10 | 61  | 135 | 13 |
| CONTIG-040181 | 180 | 15 | 48  | 40  | 0  |
| CONTIG-040182 | 58  | 5  | 2   | 2   | 0  |
| CONTIG-040184 | 243 | 12 | 27  | 95  | 0  |
| CONTIG-040185 | 194 | 18 | 22  | 132 | 2  |
| CONTIG-040186 | 171 | 16 | 28  | 90  | 0  |
| CONTIG-040187 | 66  | 2  | 3   | 0   | 0  |
| CONTIG-040188 | 381 | 7  | 15  | 117 | 0  |
| CONTIG-040189 | 168 | 8  | 17  | 44  | 0  |
| CONTIG-040190 | 606 | 10 | 15  | 146 | 0  |
| CONTIG-040191 | 110 | 93 | 175 | 483 | 0  |
| CONTIG-040193 | 77  | 89 | 45  | 325 | 0  |
| CONTIG-040194 | 97  | 5  | 2   | 2   | 0  |
| CONTIG-040195 | 161 | 18 | 9   | 96  | 2  |
| CONTIG-040196 | 130 | 12 | 9   | 52  | 0  |
| CONTIG-040198 | 74  | 4  | 7   | 3   | 0  |
| CONTIG-040199 | 113 | 11 | 13  | 45  | 0  |
| CONTIG-040200 | 147 | 10 | 9   | 41  | 2  |
| CONTIG-040201 | 95  | 17 | 6   | 77  | 2  |
| CONTIG-040202 | 218 | 13 | 50  | 74  | 4  |
| CONTIG-040203 | 340 | 48 | 105 | 693 | 0  |

|               |     |     |    |     |   |
|---------------|-----|-----|----|-----|---|
| CONTIG-040204 | 176 | 6   | 2  | 10  | 0 |
| CONTIG-040205 | 70  | 4   | 10 | 2   | 0 |
| CONTIG-040206 | 91  | 8   | 14 | 10  | 0 |
| CONTIG-040207 | 423 | 11  | 19 | 47  | 0 |
| CONTIG-040208 | 279 | 11  | 2  | 91  | 2 |
| CONTIG-040209 | 38  | 30  | 9  | 5   | 0 |
| CONTIG-040211 | 99  | 8   | 3  | 22  | 0 |
| CONTIG-040212 | 126 | 57  | 38 | 272 | 2 |
| CONTIG-040214 | 343 | 10  | 90 | 104 | 2 |
| CONTIG-040215 | 150 | 6   | 14 | 21  | 0 |
| CONTIG-040216 | 70  | 2   | 3  | 2   | 0 |
| CONTIG-040217 | 309 | 26  | 32 | 113 | 2 |
| CONTIG-040218 | 436 | 13  | 41 | 216 | 0 |
| CONTIG-040219 | 101 | 4   | 6  | 4   | 0 |
| CONTIG-040220 | 176 | 14  | 6  | 91  | 0 |
| CONTIG-040222 | 147 | 11  | 13 | 33  | 0 |
| CONTIG-040223 | 96  | 8   | 48 | 0   | 0 |
| CONTIG-040224 | 68  | 4   | 4  | 6   | 0 |
| CONTIG-040225 | 120 | 9   | 72 | 8   | 0 |
| CONTIG-040226 | 123 | 12  | 82 | 28  | 0 |
| CONTIG-040229 | 100 | 13  | 5  | 26  | 0 |
| CONTIG-040230 | 61  | 8   | 12 | 4   | 0 |
| CONTIG-040231 | 214 | 7   | 9  | 53  | 0 |
| CONTIG-040232 | 96  | 8   | 18 | 20  | 0 |
| CONTIG-040233 | 128 | 11  | 46 | 14  | 0 |
| CONTIG-040234 | 64  | 5   | 9  | 9   | 0 |
| CONTIG-040235 | 60  | 8   | 10 | 9   | 0 |
| CONTIG-040236 | 785 | 38  | 4  | 116 | 4 |
| CONTIG-040237 | 110 | 12  | 8  | 69  | 0 |
| CONTIG-040238 | 179 | 19  | 14 | 125 | 4 |
| CONTIG-040239 | 97  | 274 | 23 | 557 | 0 |
| CONTIG-040240 | 64  | 6   | 24 | 0   | 0 |
| CONTIG-040241 | 84  | 20  | 32 | 37  | 0 |
| CONTIG-040242 | 253 | 9   | 43 | 78  | 2 |
| CONTIG-040243 | 74  | 8   | 5  | 18  | 0 |
| CONTIG-040244 | 169 | 9   | 21 | 32  | 0 |
| CONTIG-040245 | 88  | 11  | 48 | 13  | 0 |
| CONTIG-040246 | 80  | 5   | 10 | 3   | 0 |
| CONTIG-040249 | 124 | 6   | 17 | 17  | 0 |
| CONTIG-040250 | 90  | 6   | 6  | 10  | 0 |
| CONTIG-040251 | 280 | 10  | 37 | 33  | 0 |
| CONTIG-040252 | 232 | 5   | 11 | 38  | 0 |
| CONTIG-040253 | 130 | 5   | 0  | 17  | 0 |
| CONTIG-040258 | 313 | 8   | 14 | 48  | 0 |
| CONTIG-040259 | 166 | 8   | 5  | 58  | 0 |
| CONTIG-040260 | 105 | 10  | 11 | 13  | 0 |
| CONTIG-040261 | 160 | 11  | 50 | 31  | 0 |

|               |     |     |     |     |     |
|---------------|-----|-----|-----|-----|-----|
| CONTIG-040262 | 704 | 20  | 125 | 312 | 0   |
| CONTIG-040263 | 106 | 6   | 5   | 13  | 0   |
| CONTIG-040264 | 73  | 27  | 5   | 118 | 0   |
| CONTIG-040266 | 156 | 15  | 10  | 60  | 2   |
| CONTIG-040270 | 201 | 98  | 129 | 806 | 2   |
| CONTIG-040272 | 926 | 44  | 61  | 732 | 210 |
| CONTIG-040273 | 132 | 9   | 3   | 19  | 0   |
| CONTIG-040274 | 154 | 26  | 37  | 94  | 13  |
| CONTIG-040275 | 398 | 12  | 39  | 57  | 0   |
| CONTIG-040276 | 413 | 16  | 43  | 156 | 0   |
| CONTIG-040277 | 111 | 4   | 3   | 12  | 0   |
| CONTIG-040278 | 65  | 14  | 48  | 0   | 0   |
| CONTIG-040279 | 195 | 10  | 30  | 60  | 0   |
| CONTIG-040280 | 135 | 11  | 3   | 0   | 0   |
| CONTIG-040281 | 215 | 9   | 19  | 71  | 0   |
| CONTIG-040282 | 95  | 7   | 13  | 11  | 0   |
| CONTIG-040283 | 202 | 12  | 16  | 54  | 2   |
| CONTIG-040284 | 152 | 10  | 10  | 32  | 0   |
| CONTIG-040285 | 112 | 11  | 43  | 3   | 0   |
| CONTIG-040286 | 308 | 15  | 95  | 59  | 0   |
| CONTIG-040287 | 61  | 6   | 5   | 10  | 0   |
| CONTIG-040288 | 78  | 375 | 45  | 426 | 2   |
| CONTIG-040289 | 218 | 17  | 5   | 150 | 4   |
| CONTIG-040292 | 84  | 5   | 6   | 12  | 0   |
| CONTIG-040293 | 76  | 13  | 5   | 25  | 0   |
| CONTIG-040294 | 158 | 35  | 9   | 108 | 0   |
| CONTIG-040295 | 83  | 8   | 4   | 0   | 2   |
| CONTIG-040296 | 67  | 4   | 19  | 0   | 0   |
| CONTIG-040297 | 711 | 14  | 31  | 325 | 10  |
| CONTIG-040298 | 50  | 11  | 2   | 16  | 3   |
| CONTIG-040299 | 289 | 13  | 17  | 188 | 0   |
| CONTIG-040300 | 123 | 8   | 29  | 2   | 0   |
| CONTIG-040301 | 130 | 10  | 12  | 39  | 0   |
| CONTIG-040302 | 276 | 10  | 13  | 49  | 0   |
| CONTIG-040303 | 487 | 20  | 13  | 469 | 0   |
| CONTIG-040304 | 337 | 19  | 26  | 76  | 0   |
| CONTIG-040305 | 925 | 23  | 101 | 408 | 7   |
| CONTIG-040306 | 772 | 16  | 18  | 129 | 13  |
| CONTIG-040307 | 221 | 5   | 12  | 47  | 0   |
| CONTIG-040308 | 157 | 7   | 16  | 23  | 0   |
| CONTIG-040309 | 203 | 11  | 22  | 62  | 2   |
| CONTIG-040310 | 112 | 4   | 0   | 7   | 0   |
| CONTIG-040312 | 95  | 9   | 2   | 10  | 0   |
| CONTIG-040313 | 124 | 13  | 36  | 45  | 0   |
| CONTIG-040314 | 125 | 7   | 21  | 15  | 0   |
| CONTIG-040315 | 131 | 10  | 8   | 43  | 0   |
| CONTIG-040316 | 94  | 5   | 6   | 15  | 0   |



|               |     |     |    |     |    |
|---------------|-----|-----|----|-----|----|
| CONTIG-040317 | 119 | 9   | 18 | 32  | 0  |
| CONTIG-040318 | 65  | 51  | 21 | 147 | 0  |
| CONTIG-040319 | 73  | 4   | 7  | 2   | 0  |
| CONTIG-040320 | 76  | 3   | 2  | 2   | 0  |
| CONTIG-040321 | 164 | 16  | 41 | 49  | 2  |
| CONTIG-040322 | 108 | 46  | 33 | 23  | 0  |
| CONTIG-040324 | 144 | 16  | 21 | 85  | 0  |
| CONTIG-040325 | 174 | 10  | 5  | 52  | 4  |
| CONTIG-040326 | 106 | 7   | 14 | 23  | 0  |
| CONTIG-040327 | 196 | 8   | 6  | 69  | 0  |
| CONTIG-040328 | 36  | 589 | 12 | 99  | 0  |
| CONTIG-040329 | 177 | 10  | 5  | 15  | 0  |
| CONTIG-040330 | 146 | 9   | 9  | 26  | 0  |
| CONTIG-040331 | 121 | 5   | 6  | 11  | 0  |
| CONTIG-040332 | 72  | 6   | 10 | 11  | 0  |
| CONTIG-040333 | 79  | 3   | 7  | 2   | 0  |
| CONTIG-040334 | 212 | 14  | 24 | 47  | 0  |
| CONTIG-040335 | 67  | 4   | 0  | 8   | 0  |
| CONTIG-040336 | 187 | 7   | 41 | 17  | 0  |
| CONTIG-040337 | 151 | 24  | 30 | 125 | 0  |
| CONTIG-040338 | 61  | 18  | 53 | 0   | 0  |
| CONTIG-040339 | 257 | 16  | 2  | 129 | 0  |
| CONTIG-040340 | 49  | 380 | 3  | 5   | 0  |
| CONTIG-040341 | 75  | 2   | 4  | 0   | 0  |
| CONTIG-040342 | 106 | 37  | 21 | 140 | 0  |
| CONTIG-040343 | 89  | 407 | 67 | 885 | 33 |
| CONTIG-040344 | 151 | 7   | 21 | 25  | 0  |
| CONTIG-040345 | 74  | 12  | 53 | 24  | 0  |
| CONTIG-040352 | 160 | 24  | 68 | 23  | 0  |
| CONTIG-040353 | 236 | 9   | 13 | 46  | 0  |
| CONTIG-040354 | 125 | 8   | 10 | 25  | 0  |
| CONTIG-040355 | 241 | 7   | 14 | 38  | 2  |
| CONTIG-040356 | 207 | 8   | 39 | 40  | 0  |
| CONTIG-040365 | 91  | 14  | 6  | 35  | 0  |
| CONTIG-040366 | 60  | 4   | 15 | 0   | 0  |
| CONTIG-040367 | 66  | 11  | 20 | 30  | 0  |
| CONTIG-040368 | 741 | 14  | 27 | 310 | 4  |
| CONTIG-040369 | 78  | 6   | 18 | 14  | 0  |
| CONTIG-040371 | 174 | 15  | 56 | 81  | 0  |
| CONTIG-040372 | 186 | 18  | 23 | 87  | 0  |
| CONTIG-040373 | 98  | 6   | 27 | 7   | 0  |
| CONTIG-040374 | 213 | 7   | 16 | 22  | 3  |
| CONTIG-040375 | 401 | 13  | 12 | 72  | 0  |
| CONTIG-040376 | 307 | 7   | 33 | 80  | 2  |
| CONTIG-040377 | 198 | 6   | 3  | 29  | 0  |
| CONTIG-040383 | 79  | 7   | 4  | 17  | 0  |
| CONTIG-040384 | 476 | 17  | 28 | 209 | 0  |

|               |     |    |     |      |   |
|---------------|-----|----|-----|------|---|
| CONTIG-040385 | 80  | 10 | 52  | 4    | 0 |
| CONTIG-040386 | 203 | 5  | 7   | 30   | 0 |
| CONTIG-040387 | 81  | 6  | 15  | 18   | 0 |
| CONTIG-040388 | 235 | 10 | 9   | 83   | 0 |
| CONTIG-040389 | 184 | 15 | 6   | 75   | 4 |
| CONTIG-040390 | 616 | 43 | 113 | 1039 | 8 |
| CONTIG-040391 | 495 | 10 | 20  | 143  | 0 |
| CONTIG-040392 | 267 | 10 | 8   | 86   | 0 |
| CONTIG-040393 | 544 | 10 | 40  | 123  | 4 |
| CONTIG-040394 | 205 | 9  | 0   | 53   | 0 |
| CONTIG-040396 | 193 | 33 | 38  | 152  | 6 |
| CONTIG-040397 | 129 | 26 | 15  | 26   | 0 |
| CONTIG-040398 | 58  | 16 | 24  | 12   | 0 |
| CONTIG-040400 | 447 | 22 | 146 | 142  | 0 |
| CONTIG-040401 | 85  | 30 | 25  | 7    | 0 |
| CONTIG-040403 | 153 | 14 | 22  | 40   | 0 |
| CONTIG-040404 | 67  | 6  | 2   | 15   | 0 |
| CONTIG-040405 | 126 | 5  | 13  | 8    | 0 |
| CONTIG-040406 | 241 | 14 | 7   | 129  | 0 |
| CONTIG-040407 | 118 | 7  | 22  | 30   | 0 |
| CONTIG-040408 | 249 | 8  | 11  | 59   | 0 |
| CONTIG-040409 | 70  | 5  | 2   | 8    | 0 |
| CONTIG-040411 | 298 | 26 | 37  | 168  | 0 |
| CONTIG-040412 | 90  | 5  | 4   | 10   | 0 |
| CONTIG-040413 | 69  | 32 | 12  | 88   | 0 |
| CONTIG-040414 | 169 | 7  | 32  | 36   | 0 |
| CONTIG-040415 | 84  | 22 | 8   | 54   | 2 |
| CONTIG-040417 | 44  | 57 | 3   | 132  | 0 |
| CONTIG-040418 | 477 | 13 | 28  | 183  | 2 |
| CONTIG-040419 | 321 | 11 | 8   | 127  | 0 |
| CONTIG-040420 | 79  | 8  | 7   | 6    | 0 |
| CONTIG-040421 | 85  | 4  | 12  | 0    | 0 |
| CONTIG-040422 | 90  | 18 | 32  | 64   | 0 |
| CONTIG-040423 | 70  | 7  | 0   | 16   | 0 |
| CONTIG-040424 | 60  | 13 | 12  | 0    | 0 |
| CONTIG-040425 | 103 | 8  | 7   | 21   | 0 |
| CONTIG-040426 | 123 | 7  | 4   | 17   | 2 |
| CONTIG-040427 | 70  | 6  | 17  | 0    | 0 |
| CONTIG-040428 | 276 | 10 | 17  | 63   | 0 |
| CONTIG-040429 | 360 | 8  | 14  | 105  | 0 |
| CONTIG-040430 | 78  | 11 | 36  | 20   | 0 |
| CONTIG-040431 | 195 | 10 | 4   | 77   | 0 |
| CONTIG-040432 | 203 | 17 | 65  | 62   | 0 |
| CONTIG-040436 | 102 | 3  | 2   | 7    | 0 |
| CONTIG-040437 | 247 | 12 | 29  | 64   | 8 |
| CONTIG-040438 | 58  | 8  | 34  | 2    | 0 |
| CONTIG-040439 | 103 | 3  | 0   | 12   | 0 |

|               |      |    |    |     |     |
|---------------|------|----|----|-----|-----|
| CONTIG-040440 | 119  | 5  | 11 | 2   | 3   |
| CONTIG-040441 | 69   | 4  | 11 | 4   | 0   |
| CONTIG-040442 | 101  | 15 | 40 | 26  | 0   |
| CONTIG-040443 | 244  | 14 | 4  | 61  | 2   |
| CONTIG-040444 | 228  | 13 | 10 | 65  | 0   |
| CONTIG-040446 | 102  | 11 | 4  | 35  | 0   |
| CONTIG-040447 | 87   | 11 | 2  | 49  | 0   |
| CONTIG-040449 | 105  | 9  | 8  | 30  | 0   |
| CONTIG-040450 | 161  | 17 | 32 | 78  | 0   |
| CONTIG-040451 | 58   | 2  | 0  | 2   | 0   |
| CONTIG-040452 | 137  | 9  | 0  | 33  | 2   |
| CONTIG-040453 | 311  | 6  | 20 | 68  | 0   |
| CONTIG-040454 | 83   | 16 | 37 | 48  | 0   |
| CONTIG-040455 | 90   | 8  | 23 | 6   | 0   |
| CONTIG-040456 | 69   | 7  | 16 | 0   | 0   |
| CONTIG-040459 | 80   | 5  | 2  | 14  | 0   |
| CONTIG-040460 | 244  | 9  | 2  | 49  | 4   |
| CONTIG-040461 | 107  | 20 | 28 | 56  | 0   |
| CONTIG-040462 | 63   | 3  | 2  | 2   | 0   |
| CONTIG-040463 | 87   | 6  | 4  | 6   | 0   |
| CONTIG-040464 | 513  | 16 | 32 | 0   | 0   |
| CONTIG-040465 | 302  | 10 | 24 | 83  | 0   |
| CONTIG-040466 | 61   | 2  | 8  | 0   | 0   |
| CONTIG-040473 | 120  | 5  | 17 | 11  | 0   |
| CONTIG-040474 | 72   | 10 | 30 | 9   | 0   |
| CONTIG-040475 | 75   | 2  | 2  | 4   | 0   |
| CONTIG-040476 | 186  | 16 | 35 | 23  | 0   |
| CONTIG-040477 | 363  | 23 | 22 | 260 | 0   |
| CONTIG-040478 | 289  | 13 | 34 | 74  | 18  |
| CONTIG-040479 | 293  | 9  | 18 | 84  | 0   |
| CONTIG-040480 | 277  | 25 | 58 | 188 | 7   |
| CONTIG-040481 | 378  | 19 | 36 | 200 | 9   |
| CONTIG-040484 | 123  | 18 | 9  | 55  | 2   |
| CONTIG-040485 | 422  | 14 | 24 | 238 | 0   |
| CONTIG-040486 | 119  | 4  | 2  | 15  | 0   |
| CONTIG-040488 | 134  | 32 | 25 | 150 | 0   |
| CONTIG-040489 | 109  | 10 | 3  | 29  | 0   |
| CONTIG-040490 | 171  | 21 | 24 | 124 | 0   |
| CONTIG-040491 | 60   | 5  | 2  | 10  | 0   |
| CONTIG-040492 | 1422 | 16 | 68 | 978 | 2   |
| CONTIG-040493 | 176  | 14 | 48 | 70  | 0   |
| CONTIG-040494 | 282  | 8  | 2  | 85  | 0   |
| CONTIG-040495 | 433  | 11 | 53 | 103 | 0   |
| CONTIG-040496 | 209  | 15 | 13 | 41  | 0   |
| CONTIG-040498 | 82   | 11 | 3  | 13  | 0   |
| CONTIG-040499 | 856  | 15 | 4  | 0   | 124 |
| CONTIG-040500 | 249  | 11 | 49 | 76  | 0   |

|               |     |     |     |     |     |
|---------------|-----|-----|-----|-----|-----|
| CONTIG-040501 | 64  | 5   | 0   | 6   | 0   |
| CONTIG-040502 | 133 | 3   | 2   | 4   | 0   |
| CONTIG-040503 | 537 | 32  | 68  | 299 | 5   |
| CONTIG-040504 | 612 | 118 | 5   | 0   | 982 |
| CONTIG-040506 | 80  | 6   | 0   | 7   | 0   |
| CONTIG-040507 | 147 | 14  | 12  | 57  | 5   |
| CONTIG-040508 | 297 | 10  | 21  | 80  | 0   |
| CONTIG-040509 | 439 | 9   | 13  | 58  | 3   |
| CONTIG-040510 | 318 | 10  | 8   | 54  | 5   |
| CONTIG-040511 | 135 | 5   | 6   | 13  | 0   |
| CONTIG-040512 | 73  | 10  | 14  | 10  | 0   |
| CONTIG-040516 | 70  | 3   | 0   | 4   | 0   |
| CONTIG-040517 | 391 | 11  | 28  | 94  | 0   |
| CONTIG-040518 | 371 | 13  | 25  | 194 | 0   |
| CONTIG-040519 | 81  | 10  | 16  | 15  | 0   |
| CONTIG-040521 | 144 | 7   | 8   | 27  | 0   |
| CONTIG-040522 | 148 | 4   | 2   | 8   | 0   |
| CONTIG-040523 | 162 | 6   | 15  | 42  | 0   |
| CONTIG-040526 | 129 | 12  | 8   | 35  | 0   |
| CONTIG-040527 | 154 | 5   | 2   | 14  | 0   |
| CONTIG-040528 | 67  | 13  | 23  | 2   | 2   |
| CONTIG-040530 | 256 | 9   | 14  | 53  | 0   |
| CONTIG-040531 | 83  | 11  | 8   | 28  | 0   |
| CONTIG-040532 | 93  | 4   | 21  | 0   | 0   |
| CONTIG-040533 | 66  | 4   | 23  | 2   | 0   |
| CONTIG-040534 | 171 | 12  | 10  | 72  | 0   |
| CONTIG-040535 | 499 | 11  | 27  | 139 | 0   |
| CONTIG-040536 | 413 | 14  | 16  | 160 | 0   |
| CONTIG-040537 | 105 | 6   | 9   | 14  | 0   |
| CONTIG-040538 | 119 | 15  | 20  | 47  | 0   |
| CONTIG-040539 | 143 | 11  | 26  | 48  | 0   |
| CONTIG-040540 | 258 | 11  | 13  | 86  | 0   |
| CONTIG-040541 | 353 | 14  | 28  | 185 | 2   |
| CONTIG-040542 | 306 | 7   | 12  | 23  | 0   |
| CONTIG-040543 | 148 | 11  | 8   | 70  | 0   |
| CONTIG-040544 | 58  | 9   | 0   | 14  | 0   |
| CONTIG-040545 | 60  | 46  | 3   | 84  | 0   |
| CONTIG-040546 | 180 | 9   | 24  | 15  | 4   |
| CONTIG-040547 | 72  | 17  | 81  | 2   | 0   |
| CONTIG-040548 | 117 | 5   | 4   | 15  | 2   |
| CONTIG-040550 | 83  | 19  | 10  | 57  | 0   |
| CONTIG-040551 | 176 | 9   | 2   | 57  | 0   |
| CONTIG-040553 | 181 | 42  | 115 | 123 | 0   |
| CONTIG-040554 | 77  | 6   | 3   | 7   | 0   |
| CONTIG-040555 | 60  | 2   | 5   | 2   | 0   |
| CONTIG-040556 | 65  | 5   | 14  | 4   | 0   |
| CONTIG-040557 | 260 | 18  | 32  | 171 | 0   |

|               |     |    |     |      |     |
|---------------|-----|----|-----|------|-----|
| CONTIG-040559 | 231 | 12 | 10  | 137  | 0   |
| CONTIG-040560 | 272 | 11 | 5   | 103  | 0   |
| CONTIG-040561 | 84  | 7  | 2   | 18   | 0   |
| CONTIG-040562 | 143 | 8  | 6   | 20   | 0   |
| CONTIG-040563 | 113 | 11 | 15  | 32   | 0   |
| CONTIG-040564 | 130 | 3  | 2   | 5    | 0   |
| CONTIG-040567 | 76  | 5  | 11  | 6    | 0   |
| CONTIG-040568 | 639 | 17 | 36  | 420  | 0   |
| CONTIG-040569 | 237 | 8  | 0   | 0    | 4   |
| CONTIG-040570 | 369 | 23 | 27  | 421  | 0   |
| CONTIG-040571 | 489 | 14 | 6   | 251  | 3   |
| CONTIG-040573 | 61  | 3  | 4   | 5    | 0   |
| CONTIG-040575 | 443 | 12 | 73  | 24   | 0   |
| CONTIG-040584 | 68  | 8  | 17  | 2    | 0   |
| CONTIG-040585 | 84  | 21 | 10  | 54   | 0   |
| CONTIG-040586 | 90  | 7  | 15  | 10   | 0   |
| CONTIG-040587 | 128 | 13 | 13  | 38   | 0   |
| CONTIG-040588 | 354 | 13 | 43  | 189  | 0   |
| CONTIG-040589 | 190 | 5  | 2   | 33   | 0   |
| CONTIG-040591 | 217 | 25 | 10  | 270  | 0   |
| CONTIG-040592 | 117 | 37 | 35  | 120  | 0   |
| CONTIG-040593 | 250 | 8  | 54  | 31   | 0   |
| CONTIG-040595 | 556 | 32 | 100 | 603  | 4   |
| CONTIG-040599 | 70  | 5  | 2   | 11   | 0   |
| CONTIG-040600 | 97  | 7  | 2   | 16   | 0   |
| CONTIG-040601 | 75  | 55 | 3   | 164  | 3   |
| CONTIG-040602 | 70  | 7  | 21  | 0    | 0   |
| CONTIG-040603 | 817 | 36 | 69  | 1079 | 0   |
| CONTIG-040604 | 201 | 12 | 2   | 0    | 6   |
| CONTIG-040605 | 110 | 6  | 4   | 13   | 0   |
| CONTIG-040606 | 161 | 7  | 0   | 25   | 0   |
| CONTIG-040607 | 127 | 12 | 24  | 12   | 0   |
| CONTIG-040609 | 91  | 5  | 11  | 2    | 0   |
| CONTIG-040610 | 229 | 8  | 7   | 59   | 2   |
| CONTIG-040611 | 896 | 19 | 30  | 38   | 0   |
| CONTIG-040612 | 170 | 10 | 69  | 38   | 0   |
| CONTIG-040614 | 458 | 15 | 53  | 252  | 0   |
| CONTIG-040615 | 109 | 12 | 31  | 2    | 0   |
| CONTIG-040616 | 351 | 61 | 0   | 0    | 279 |
| CONTIG-040617 | 430 | 11 | 30  | 135  | 0   |
| CONTIG-040619 | 88  | 7  | 16  | 4    | 0   |
| CONTIG-040620 | 240 | 11 | 19  | 39   | 0   |
| CONTIG-040621 | 114 | 5  | 4   | 11   | 0   |
| CONTIG-040622 | 213 | 8  | 15  | 31   | 0   |
| CONTIG-040623 | 274 | 9  | 10  | 59   | 0   |
| CONTIG-040629 | 179 | 9  | 24  | 36   | 0   |
| CONTIG-040630 | 308 | 23 | 49  | 267  | 4   |

|               |      |    |     |     |     |
|---------------|------|----|-----|-----|-----|
| CONTIG-040631 | 1039 | 21 | 147 | 456 | 5   |
| CONTIG-040632 | 205  | 5  | 7   | 0   | 2   |
| CONTIG-040633 | 90   | 7  | 10  | 17  | 0   |
| CONTIG-040634 | 403  | 12 | 21  | 71  | 4   |
| CONTIG-040635 | 149  | 12 | 4   | 78  | 0   |
| CONTIG-040636 | 217  | 10 | 2   | 45  | 4   |
| CONTIG-040637 | 79   | 7  | 20  | 7   | 0   |
| CONTIG-040638 | 430  | 15 | 81  | 213 | 0   |
| CONTIG-040640 | 241  | 8  | 3   | 34  | 0   |
| CONTIG-040641 | 73   | 27 | 28  | 63  | 0   |
| CONTIG-040644 | 69   | 9  | 4   | 3   | 0   |
| CONTIG-040645 | 64   | 6  | 7   | 4   | 0   |
| CONTIG-040646 | 83   | 6  | 2   | 13  | 0   |
| CONTIG-040648 | 345  | 12 | 48  | 94  | 0   |
| CONTIG-040649 | 70   | 4  | 3   | 4   | 0   |
| CONTIG-040650 | 127  | 7  | 19  | 13  | 0   |
| CONTIG-040651 | 98   | 4  | 4   | 4   | 0   |
| CONTIG-040652 | 62   | 4  | 5   | 6   | 0   |
| CONTIG-040653 | 63   | 6  | 4   | 2   | 0   |
| CONTIG-040654 | 97   | 8  | 4   | 20  | 0   |
| CONTIG-040655 | 254  | 7  | 6   | 41  | 0   |
| CONTIG-040656 | 71   | 6  | 3   | 8   | 0   |
| CONTIG-040657 | 645  | 11 | 25  | 274 | 0   |
| CONTIG-040658 | 271  | 5  | 13  | 23  | 0   |
| CONTIG-040659 | 177  | 6  | 20  | 28  | 0   |
| CONTIG-040660 | 165  | 14 | 36  | 86  | 0   |
| CONTIG-040661 | 781  | 9  | 35  | 243 | 0   |
| CONTIG-040662 | 403  | 9  | 3   | 17  | 2   |
| CONTIG-040663 | 189  | 5  | 23  | 19  | 0   |
| CONTIG-040665 | 752  | 12 | 38  | 439 | 2   |
| CONTIG-040666 | 90   | 4  | 0   | 8   | 0   |
| CONTIG-040667 | 70   | 8  | 21  | 2   | 0   |
| CONTIG-040668 | 171  | 8  | 48  | 38  | 0   |
| CONTIG-040669 | 129  | 5  | 2   | 19  | 0   |
| CONTIG-040670 | 115  | 3  | 4   | 6   | 0   |
| CONTIG-040671 | 63   | 8  | 4   | 3   | 0   |
| CONTIG-040672 | 82   | 9  | 11  | 0   | 0   |
| CONTIG-040673 | 104  | 22 | 2   | 102 | 2   |
| CONTIG-040674 | 108  | 9  | 7   | 26  | 2   |
| CONTIG-040675 | 262  | 8  | 19  | 54  | 2   |
| CONTIG-040676 | 118  | 7  | 2   | 30  | 0   |
| CONTIG-040679 | 67   | 6  | 4   | 0   | 4   |
| CONTIG-040680 | 401  | 82 | 3   | 0   | 251 |
| CONTIG-040685 | 112  | 4  | 11  | 8   | 0   |
| CONTIG-040686 | 85   | 2  | 0   | 4   | 0   |
| CONTIG-040687 | 112  | 6  | 17  | 9   | 0   |
| CONTIG-040688 | 99   | 21 | 9   | 51  | 2   |

|               |     |     |    |     |     |
|---------------|-----|-----|----|-----|-----|
| CONTIG-040691 | 166 | 9   | 14 | 39  | 0   |
| CONTIG-040692 | 373 | 10  | 26 | 145 | 0   |
| CONTIG-040693 | 196 | 7   | 4  | 30  | 2   |
| CONTIG-040694 | 61  | 7   | 15 | 17  | 0   |
| CONTIG-040695 | 133 | 11  | 13 | 52  | 0   |
| CONTIG-040696 | 108 | 5   | 7  | 20  | 0   |
| CONTIG-040697 | 401 | 13  | 13 | 111 | 6   |
| CONTIG-040698 | 75  | 6   | 0  | 13  | 0   |
| CONTIG-040700 | 175 | 12  | 6  | 99  | 0   |
| CONTIG-040701 | 96  | 19  | 18 | 36  | 0   |
| CONTIG-040702 | 68  | 10  | 5  | 15  | 0   |
| CONTIG-040703 | 85  | 4   | 3  | 12  | 0   |
| CONTIG-040705 | 134 | 12  | 0  | 17  | 0   |
| CONTIG-040706 | 460 | 13  | 26 | 171 | 0   |
| CONTIG-040708 | 184 | 10  | 4  | 96  | 0   |
| CONTIG-040709 | 89  | 7   | 20 | 4   | 0   |
| CONTIG-040710 | 125 | 7   | 18 | 34  | 0   |
| CONTIG-040711 | 74  | 7   | 38 | 2   | 0   |
| CONTIG-040712 | 117 | 3   | 4  | 6   | 0   |
| CONTIG-040713 | 264 | 6   | 17 | 28  | 0   |
| CONTIG-040714 | 548 | 36  | 7  | 0   | 74  |
| CONTIG-040715 | 58  | 12  | 20 | 6   | 0   |
| CONTIG-040716 | 174 | 10  | 2  | 45  | 2   |
| CONTIG-040717 | 86  | 5   | 2  | 13  | 0   |
| CONTIG-040718 | 261 | 9   | 6  | 49  | 3   |
| CONTIG-040719 | 234 | 8   | 2  | 66  | 0   |
| CONTIG-040720 | 87  | 13  | 26 | 13  | 0   |
| CONTIG-040721 | 120 | 12  | 69 | 31  | 0   |
| CONTIG-040722 | 92  | 4   | 4  | 11  | 0   |
| CONTIG-040724 | 95  | 6   | 14 | 8   | 0   |
| CONTIG-040725 | 560 | 140 | 0  | 0   | 776 |
| CONTIG-040726 | 281 | 6   | 10 | 29  | 0   |
| CONTIG-040727 | 208 | 13  | 59 | 75  | 0   |
| CONTIG-040729 | 207 | 10  | 26 | 82  | 0   |
| CONTIG-040730 | 135 | 6   | 14 | 19  | 0   |
| CONTIG-040731 | 120 | 3   | 4  | 11  | 0   |
| CONTIG-040732 | 120 | 14  | 5  | 4   | 0   |
| CONTIG-040733 | 58  | 22  | 56 | 25  | 0   |
| CONTIG-040734 | 828 | 15  | 61 | 296 | 2   |
| CONTIG-040735 | 179 | 7   | 34 | 27  | 0   |
| CONTIG-040736 | 208 | 7   | 12 | 25  | 0   |
| CONTIG-040737 | 114 | 8   | 23 | 8   | 0   |
| CONTIG-040738 | 316 | 18  | 33 | 130 | 2   |
| CONTIG-040739 | 400 | 12  | 12 | 214 | 0   |
| CONTIG-040740 | 351 | 9   | 56 | 56  | 0   |
| CONTIG-040741 | 423 | 7   | 37 | 82  | 0   |
| CONTIG-040742 | 222 | 8   | 55 | 30  | 0   |

|               |     |     |     |     |    |
|---------------|-----|-----|-----|-----|----|
| CONTIG-040743 | 162 | 26  | 14  | 145 | 0  |
| CONTIG-040745 | 165 | 13  | 2   | 32  | 0  |
| CONTIG-040746 | 97  | 9   | 18  | 14  | 0  |
| CONTIG-040747 | 108 | 4   | 2   | 0   | 2  |
| CONTIG-040748 | 100 | 22  | 13  | 109 | 0  |
| CONTIG-040749 | 177 | 9   | 25  | 59  | 0  |
| CONTIG-040750 | 51  | 78  | 14  | 154 | 0  |
| CONTIG-040751 | 213 | 8   | 13  | 19  | 0  |
| CONTIG-040752 | 321 | 7   | 3   | 51  | 4  |
| CONTIG-040753 | 120 | 4   | 9   | 13  | 0  |
| CONTIG-040754 | 72  | 6   | 9   | 5   | 0  |
| CONTIG-040756 | 109 | 6   | 24  | 15  | 0  |
| CONTIG-040758 | 92  | 98  | 63  | 483 | 0  |
| CONTIG-040759 | 267 | 27  | 12  | 258 | 0  |
| CONTIG-040760 | 95  | 87  | 76  | 126 | 0  |
| CONTIG-040763 | 142 | 8   | 9   | 25  | 0  |
| CONTIG-040765 | 221 | 15  | 24  | 74  | 0  |
| CONTIG-040766 | 69  | 6   | 2   | 18  | 0  |
| CONTIG-040767 | 232 | 15  | 48  | 80  | 2  |
| CONTIG-040768 | 119 | 4   | 23  | 4   | 0  |
| CONTIG-040769 | 225 | 26  | 3   | 0   | 68 |
| CONTIG-040770 | 295 | 11  | 50  | 48  | 0  |
| CONTIG-040771 | 150 | 332 | 11  | 19  | 0  |
| CONTIG-040772 | 185 | 11  | 10  | 24  | 0  |
| CONTIG-040773 | 264 | 12  | 44  | 48  | 0  |
| CONTIG-040774 | 64  | 9   | 9   | 7   | 0  |
| CONTIG-040775 | 272 | 10  | 11  | 60  | 0  |
| CONTIG-040776 | 611 | 13  | 35  | 292 | 0  |
| CONTIG-040777 | 75  | 317 | 188 | 603 | 0  |
| CONTIG-040778 | 105 | 11  | 4   | 27  | 0  |
| CONTIG-040779 | 48  | 102 | 6   | 88  | 20 |
| CONTIG-040781 | 142 | 27  | 10  | 236 | 0  |
| CONTIG-040782 | 125 | 12  | 28  | 28  | 0  |
| CONTIG-040783 | 188 | 12  | 64  | 55  | 0  |
| CONTIG-040784 | 179 | 13  | 19  | 92  | 0  |
| CONTIG-040785 | 365 | 7   | 14  | 52  | 0  |
| CONTIG-040786 | 82  | 3   | 4   | 0   | 0  |
| CONTIG-040788 | 242 | 25  | 30  | 127 | 0  |
| CONTIG-040789 | 85  | 7   | 2   | 0   | 0  |
| CONTIG-040790 | 188 | 16  | 10  | 105 | 0  |
| CONTIG-040791 | 134 | 5   | 0   | 19  | 0  |
| CONTIG-040792 | 314 | 15  | 39  | 221 | 0  |
| CONTIG-040794 | 140 | 7   | 8   | 5   | 0  |
| CONTIG-040795 | 85  | 30  | 170 | 2   | 0  |
| CONTIG-040796 | 187 | 11  | 17  | 75  | 0  |
| CONTIG-040797 | 101 | 7   | 13  | 21  | 0  |
| CONTIG-040798 | 384 | 16  | 65  | 194 | 0  |



|               |     |     |    |      |   |
|---------------|-----|-----|----|------|---|
| CONTIG-040799 | 85  | 5   | 3  | 13   | 0 |
| CONTIG-040800 | 309 | 136 | 19 | 2    | 5 |
| CONTIG-040801 | 174 | 6   | 0  | 18   | 0 |
| CONTIG-040803 | 61  | 2   | 6  | 0    | 0 |
| CONTIG-040804 | 120 | 10  | 17 | 9    | 0 |
| CONTIG-040805 | 563 | 15  | 32 | 372  | 2 |
| CONTIG-040806 | 98  | 5   | 4  | 18   | 2 |
| CONTIG-040807 | 366 | 21  | 84 | 353  | 0 |
| CONTIG-040808 | 428 | 15  | 10 | 156  | 2 |
| CONTIG-040811 | 86  | 7   | 32 | 8    | 0 |
| CONTIG-040812 | 160 | 6   | 16 | 38   | 0 |
| CONTIG-040813 | 294 | 8   | 30 | 72   | 0 |
| CONTIG-040814 | 124 | 64  | 63 | 175  | 8 |
| CONTIG-040815 | 138 | 7   | 0  | 35   | 0 |
| CONTIG-040816 | 83  | 5   | 8  | 16   | 0 |
| CONTIG-040817 | 95  | 13  | 6  | 17   | 0 |
| CONTIG-040818 | 184 | 14  | 16 | 76   | 0 |
| CONTIG-040819 | 171 | 7   | 2  | 35   | 2 |
| CONTIG-040820 | 95  | 10  | 45 | 15   | 0 |
| CONTIG-040821 | 80  | 4   | 7  | 2    | 0 |
| CONTIG-040822 | 143 | 5   | 4  | 12   | 0 |
| CONTIG-040823 | 121 | 15  | 42 | 59   | 0 |
| CONTIG-040824 | 71  | 25  | 2  | 66   | 0 |
| CONTIG-040826 | 76  | 18  | 19 | 50   | 0 |
| CONTIG-040827 | 116 | 11  | 3  | 0    | 0 |
| CONTIG-040828 | 196 | 9   | 14 | 41   | 0 |
| CONTIG-040829 | 234 | 14  | 31 | 71   | 0 |
| CONTIG-040830 | 80  | 3   | 4  | 5    | 0 |
| CONTIG-040831 | 208 | 6   | 2  | 39   | 0 |
| CONTIG-040832 | 134 | 10  | 23 | 35   | 0 |
| CONTIG-040833 | 68  | 3   | 6  | 0    | 0 |
| CONTIG-040834 | 60  | 3   | 5  | 2    | 0 |
| CONTIG-040836 | 69  | 3   | 3  | 2    | 0 |
| CONTIG-040837 | 95  | 7   | 0  | 27   | 0 |
| CONTIG-040838 | 75  | 7   | 3  | 9    | 0 |
| CONTIG-040839 | 308 | 9   | 54 | 37   | 0 |
| CONTIG-040840 | 169 | 9   | 2  | 38   | 0 |
| CONTIG-040841 | 898 | 76  | 23 | 4091 | 0 |
| CONTIG-040843 | 456 | 9   | 8  | 18   | 0 |
| CONTIG-040844 | 143 | 19  | 13 | 122  | 0 |
| CONTIG-040845 | 134 | 9   | 14 | 39   | 0 |
| CONTIG-040846 | 172 | 18  | 5  | 136  | 0 |
| CONTIG-040847 | 62  | 7   | 3  | 4    | 0 |
| CONTIG-040848 | 139 | 15  | 19 | 38   | 2 |
| CONTIG-040849 | 161 | 10  | 6  | 66   | 0 |
| CONTIG-040850 | 100 | 6   | 2  | 19   | 0 |
| CONTIG-040851 | 188 | 5   | 34 | 11   | 0 |

|               |     |    |     |     |     |
|---------------|-----|----|-----|-----|-----|
| CONTIG-040852 | 60  | 5  | 9   | 2   | 0   |
| CONTIG-040853 | 179 | 6  | 5   | 44  | 0   |
| CONTIG-040854 | 117 | 7  | 0   | 22  | 0   |
| CONTIG-040860 | 78  | 6  | 13  | 2   | 0   |
| CONTIG-040861 | 237 | 13 | 2   | 171 | 0   |
| CONTIG-040862 | 67  | 27 | 10  | 71  | 0   |
| CONTIG-040863 | 96  | 5  | 9   | 15  | 0   |
| CONTIG-040864 | 260 | 4  | 3   | 36  | 0   |
| CONTIG-040865 | 646 | 14 | 33  | 341 | 0   |
| CONTIG-040866 | 85  | 12 | 24  | 24  | 0   |
| CONTIG-040870 | 194 | 12 | 6   | 45  | 2   |
| CONTIG-040871 | 93  | 5  | 9   | 10  | 0   |
| CONTIG-040872 | 833 | 43 | 30  | 63  | 0   |
| CONTIG-040874 | 246 | 11 | 8   | 119 | 0   |
| CONTIG-040875 | 845 | 27 | 3   | 0   | 113 |
| CONTIG-040877 | 252 | 14 | 40  | 28  | 0   |
| CONTIG-040878 | 88  | 7  | 14  | 16  | 0   |
| CONTIG-040879 | 226 | 17 | 25  | 89  | 0   |
| CONTIG-040880 | 67  | 2  | 10  | 0   | 0   |
| CONTIG-040881 | 428 | 12 | 52  | 134 | 0   |
| CONTIG-040882 | 109 | 4  | 4   | 9   | 0   |
| CONTIG-040884 | 347 | 12 | 21  | 119 | 0   |
| CONTIG-040885 | 149 | 14 | 27  | 51  | 2   |
| CONTIG-040886 | 128 | 10 | 14  | 31  | 0   |
| CONTIG-040888 | 148 | 5  | 2   | 26  | 0   |
| CONTIG-040889 | 78  | 5  | 8   | 9   | 0   |
| CONTIG-040890 | 483 | 12 | 106 | 109 | 0   |
| CONTIG-040891 | 151 | 12 | 11  | 46  | 0   |
| CONTIG-040892 | 286 | 13 | 17  | 88  | 0   |
| CONTIG-040893 | 151 | 5  | 9   | 25  | 0   |
| CONTIG-040894 | 88  | 5  | 8   | 7   | 0   |
| CONTIG-040895 | 329 | 8  | 6   | 40  | 0   |
| CONTIG-040898 | 270 | 8  | 19  | 47  | 0   |
| CONTIG-040899 | 141 | 15 | 23  | 91  | 0   |
| CONTIG-040900 | 227 | 15 | 38  | 120 | 0   |
| CONTIG-040901 | 344 | 12 | 17  | 125 | 2   |
| CONTIG-040902 | 176 | 20 | 19  | 139 | 0   |
| CONTIG-040903 | 392 | 17 | 40  | 183 | 6   |
| CONTIG-040904 | 263 | 9  | 5   | 93  | 0   |
| CONTIG-040905 | 111 | 6  | 6   | 6   | 0   |
| CONTIG-040907 | 161 | 7  | 2   | 0   | 0   |
| CONTIG-040908 | 64  | 6  | 5   | 6   | 0   |
| CONTIG-040909 | 94  | 4  | 8   | 3   | 0   |
| CONTIG-040910 | 283 | 11 | 32  | 108 | 0   |
| CONTIG-040911 | 91  | 10 | 67  | 10  | 0   |
| CONTIG-040912 | 64  | 11 | 21  | 9   | 0   |
| CONTIG-040913 | 429 | 15 | 38  | 227 | 0   |

|               |     |     |    |     |    |
|---------------|-----|-----|----|-----|----|
| CONTIG-040914 | 646 | 17  | 56 | 308 | 0  |
| CONTIG-040915 | 318 | 12  | 24 | 50  | 7  |
| CONTIG-040916 | 62  | 3   | 10 | 2   | 0  |
| CONTIG-040918 | 86  | 11  | 2  | 32  | 0  |
| CONTIG-040919 | 94  | 8   | 2  | 20  | 0  |
| CONTIG-040920 | 80  | 14  | 42 | 6   | 0  |
| CONTIG-040923 | 170 | 5   | 8  | 8   | 2  |
| CONTIG-040924 | 149 | 7   | 10 | 2   | 0  |
| CONTIG-040926 | 316 | 7   | 53 | 33  | 0  |
| CONTIG-040927 | 200 | 10  | 2  | 53  | 0  |
| CONTIG-040929 | 74  | 5   | 15 | 2   | 0  |
| CONTIG-040930 | 220 | 10  | 33 | 52  | 0  |
| CONTIG-040931 | 993 | 27  | 16 | 324 | 31 |
| CONTIG-040932 | 201 | 11  | 47 | 74  | 0  |
| CONTIG-040934 | 97  | 6   | 29 | 10  | 0  |
| CONTIG-040935 | 109 | 4   | 3  | 13  | 0  |
| CONTIG-040936 | 60  | 7   | 2  | 12  | 0  |
| CONTIG-040939 | 209 | 24  | 3  | 140 | 10 |
| CONTIG-040940 | 70  | 5   | 8  | 5   | 0  |
| CONTIG-040941 | 96  | 10  | 0  | 23  | 2  |
| CONTIG-040942 | 139 | 12  | 20 | 41  | 0  |
| CONTIG-040943 | 61  | 213 | 11 | 127 | 0  |
| CONTIG-040944 | 304 | 16  | 23 | 253 | 0  |
| CONTIG-040945 | 334 | 12  | 15 | 87  | 0  |
| CONTIG-040946 | 112 | 5   | 6  | 19  | 0  |
| CONTIG-040947 | 73  | 4   | 4  | 2   | 0  |
| CONTIG-040948 | 150 | 7   | 13 | 16  | 0  |
| CONTIG-040949 | 96  | 8   | 13 | 19  | 0  |
| CONTIG-040950 | 267 | 8   | 44 | 40  | 2  |
| CONTIG-040952 | 75  | 11  | 73 | 2   | 0  |
| CONTIG-040955 | 557 | 11  | 8  | 214 | 2  |
| CONTIG-040956 | 105 | 9   | 8  | 16  | 0  |
| CONTIG-040957 | 115 | 5   | 2  | 15  | 0  |
| CONTIG-040958 | 894 | 15  | 15 | 286 | 0  |
| CONTIG-040959 | 411 | 15  | 44 | 211 | 0  |
| CONTIG-040960 | 304 | 9   | 14 | 38  | 0  |
| CONTIG-040961 | 181 | 8   | 15 | 19  | 0  |
| CONTIG-040962 | 341 | 12  | 15 | 143 | 2  |
| CONTIG-040964 | 89  | 15  | 11 | 16  | 0  |
| CONTIG-040965 | 397 | 10  | 72 | 164 | 0  |
| CONTIG-040967 | 105 | 8   | 9  | 31  | 0  |
| CONTIG-040968 | 203 | 9   | 2  | 19  | 10 |
| CONTIG-040969 | 219 | 10  | 6  | 24  | 2  |
| CONTIG-040970 | 165 | 10  | 3  | 43  | 0  |
| CONTIG-040971 | 796 | 11  | 47 | 297 | 2  |
| CONTIG-040972 | 36  | 977 | 2  | 769 | 0  |
| CONTIG-040973 | 45  | 28  | 0  | 46  | 0  |

|               |      |      |    |      |   |
|---------------|------|------|----|------|---|
| CONTIG-040981 | 91   | 6    | 24 | 0    | 0 |
| CONTIG-040982 | 465  | 23   | 13 | 11   | 0 |
| CONTIG-040983 | 234  | 12   | 54 | 76   | 0 |
| CONTIG-040984 | 87   | 10   | 10 | 23   | 0 |
| CONTIG-040987 | 39   | 1210 | 4  | 1372 | 0 |
| CONTIG-040988 | 296  | 6    | 7  | 82   | 0 |
| CONTIG-040989 | 100  | 9    | 10 | 28   | 0 |
| CONTIG-040990 | 1332 | 18   | 9  | 1475 | 0 |
| CONTIG-040991 | 89   | 35   | 2  | 0    | 0 |
| CONTIG-040992 | 192  | 28   | 93 | 241  | 0 |
| CONTIG-040993 | 189  | 32   | 23 | 333  | 0 |
| CONTIG-040994 | 126  | 9    | 34 | 2    | 0 |
| CONTIG-040995 | 64   | 4    | 2  | 7    | 0 |
| CONTIG-040996 | 300  | 8    | 8  | 61   | 2 |
| CONTIG-040998 | 552  | 17   | 38 | 120  | 0 |
| CONTIG-040999 | 224  | 10   | 33 | 40   | 2 |
| CONTIG-041002 | 86   | 4    | 2  | 14   | 0 |
| CONTIG-041004 | 63   | 4    | 4  | 4    | 0 |
| CONTIG-041006 | 159  | 8    | 11 | 43   | 0 |
| CONTIG-041007 | 59   | 6    | 0  | 7    | 0 |
| CONTIG-041008 | 365  | 9    | 19 | 96   | 0 |
| CONTIG-041009 | 244  | 14   | 48 | 143  | 0 |
| CONTIG-041010 | 121  | 9    | 2  | 42   | 0 |
| CONTIG-041011 | 69   | 12   | 27 | 3    | 0 |
| CONTIG-041014 | 117  | 7    | 7  | 26   | 0 |
| CONTIG-041015 | 262  | 7    | 9  | 61   | 0 |
| CONTIG-041016 | 160  | 5    | 2  | 10   | 0 |
| CONTIG-041017 | 86   | 6    | 20 | 9    | 0 |
| CONTIG-041018 | 160  | 5    | 2  | 14   | 0 |
| CONTIG-041019 | 64   | 5    | 10 | 2    | 0 |
| CONTIG-041020 | 304  | 9    | 23 | 36   | 2 |
| CONTIG-041021 | 128  | 9    | 10 | 32   | 0 |
| CONTIG-041022 | 92   | 14   | 7  | 40   | 0 |
| CONTIG-041023 | 120  | 8    | 4  | 22   | 2 |
| CONTIG-041024 | 216  | 23   | 47 | 155  | 0 |
| CONTIG-041025 | 53   | 13   | 0  | 0    | 7 |
| CONTIG-041026 | 342  | 15   | 21 | 178  | 0 |
| CONTIG-041027 | 428  | 19   | 29 | 405  | 0 |
| CONTIG-041028 | 221  | 8    | 9  | 43   | 0 |
| CONTIG-041029 | 121  | 4    | 2  | 7    | 0 |
| CONTIG-041030 | 109  | 11   | 6  | 50   | 0 |
| CONTIG-041031 | 92   | 15   | 58 | 31   | 0 |
| CONTIG-041032 | 231  | 14   | 9  | 95   | 0 |
| CONTIG-041033 | 90   | 6    | 15 | 11   | 0 |
| CONTIG-041034 | 87   | 5    | 16 | 5    | 0 |
| CONTIG-041035 | 137  | 4    | 12 | 0    | 0 |
| CONTIG-041036 | 207  | 13   | 7  | 93   | 0 |

|               |      |     |     |      |      |
|---------------|------|-----|-----|------|------|
| CONTIG-041037 | 306  | 12  | 2   | 163  | 0    |
| CONTIG-041038 | 373  | 10  | 25  | 119  | 0    |
| CONTIG-041039 | 58   | 7   | 4   | 16   | 0    |
| CONTIG-041040 | 260  | 9   | 5   | 74   | 0    |
| CONTIG-041041 | 237  | 6   | 4   | 44   | 0    |
| CONTIG-041042 | 73   | 10  | 52  | 4    | 0    |
| CONTIG-041043 | 65   | 12  | 17  | 29   | 0    |
| CONTIG-041044 | 168  | 39  | 9   | 312  | 0    |
| CONTIG-041045 | 87   | 4   | 7   | 4    | 0    |
| CONTIG-041046 | 204  | 10  | 32  | 8    | 0    |
| CONTIG-041047 | 45   | 360 | 42  | 77   | 0    |
| CONTIG-041048 | 54   | 96  | 303 | 25   | 0    |
| CONTIG-041049 | 89   | 14  | 5   | 4    | 0    |
| CONTIG-041051 | 113  | 7   | 2   | 27   | 0    |
| CONTIG-041052 | 164  | 16  | 9   | 123  | 0    |
| CONTIG-041053 | 245  | 7   | 2   | 53   | 0    |
| CONTIG-041054 | 201  | 9   | 17  | 34   | 0    |
| CONTIG-041055 | 249  | 17  | 57  | 180  | 0    |
| CONTIG-041056 | 96   | 4   | 5   | 4    | 0    |
| CONTIG-041057 | 627  | 20  | 92  | 231  | 0    |
| CONTIG-041058 | 149  | 12  | 34  | 56   | 0    |
| CONTIG-041059 | 593  | 9   | 16  | 181  | 2    |
| CONTIG-041061 | 217  | 14  | 3   | 0    | 0    |
| CONTIG-041062 | 170  | 17  | 68  | 40   | 0    |
| CONTIG-041064 | 262  | 10  | 16  | 93   | 2    |
| CONTIG-041065 | 77   | 345 | 29  | 39   | 1060 |
| CONTIG-041066 | 166  | 11  | 4   | 58   | 0    |
| CONTIG-041067 | 92   | 5   | 8   | 8    | 0    |
| CONTIG-041068 | 89   | 6   | 8   | 5    | 0    |
| CONTIG-041071 | 146  | 18  | 61  | 59   | 0    |
| CONTIG-041072 | 145  | 6   | 15  | 0    | 0    |
| CONTIG-041073 | 71   | 7   | 6   | 12   | 0    |
| CONTIG-041074 | 141  | 8   | 4   | 36   | 0    |
| CONTIG-041075 | 77   | 47  | 9   | 109  | 4    |
| CONTIG-041076 | 192  | 10  | 47  | 37   | 0    |
| CONTIG-041077 | 1341 | 27  | 125 | 1515 | 10   |
| CONTIG-041078 | 176  | 7   | 8   | 0    | 4    |
| CONTIG-041079 | 71   | 110 | 60  | 247  | 2    |
| CONTIG-041082 | 61   | 6   | 12  | 7    | 0    |
| CONTIG-041085 | 347  | 33  | 29  | 90   | 8    |
| CONTIG-041086 | 135  | 12  | 5   | 28   | 0    |
| CONTIG-041087 | 148  | 8   | 24  | 37   | 0    |
| CONTIG-041088 | 471  | 10  | 11  | 218  | 2    |
| CONTIG-041089 | 170  | 3   | 0   | 0    | 0    |
| CONTIG-041090 | 190  | 11  | 33  | 55   | 0    |
| CONTIG-041091 | 108  | 3   | 0   | 10   | 0    |
| CONTIG-041092 | 208  | 7   | 31  | 30   | 0    |

|               |     |     |     |     |     |
|---------------|-----|-----|-----|-----|-----|
| CONTIG-041093 | 689 | 66  | 2   | 3   | 554 |
| CONTIG-041094 | 121 | 3   | 8   | 9   | 0   |
| CONTIG-041095 | 74  | 116 | 14  | 473 | 0   |
| CONTIG-041096 | 69  | 4   | 6   | 6   | 0   |
| CONTIG-041098 | 152 | 22  | 5   | 124 | 0   |
| CONTIG-041102 | 78  | 6   | 2   | 16  | 0   |
| CONTIG-041103 | 97  | 7   | 19  | 17  | 0   |
| CONTIG-041104 | 124 | 24  | 19  | 170 | 0   |
| CONTIG-041105 | 322 | 47  | 69  | 267 | 0   |
| CONTIG-041106 | 81  | 4   | 11  | 5   | 0   |
| CONTIG-041107 | 96  | 5   | 16  | 8   | 0   |
| CONTIG-041108 | 145 | 10  | 3   | 37  | 0   |
| CONTIG-041109 | 190 | 18  | 3   | 0   | 0   |
| CONTIG-041110 | 112 | 4   | 9   | 13  | 0   |
| CONTIG-041111 | 670 | 15  | 33  | 297 | 4   |
| CONTIG-041112 | 366 | 9   | 56  | 92  | 0   |
| CONTIG-041113 | 196 | 5   | 6   | 27  | 0   |
| CONTIG-041114 | 812 | 20  | 200 | 454 | 6   |
| CONTIG-041115 | 205 | 8   | 38  | 44  | 0   |
| CONTIG-041116 | 77  | 11  | 2   | 17  | 0   |
| CONTIG-041117 | 159 | 7   | 5   | 27  | 0   |
| CONTIG-041118 | 95  | 8   | 13  | 7   | 0   |
| CONTIG-041119 | 723 | 19  | 19  | 345 | 2   |
| CONTIG-041120 | 320 | 15  | 32  | 180 | 0   |
| CONTIG-041121 | 287 | 8   | 5   | 49  | 2   |
| CONTIG-041122 | 67  | 6   | 0   | 11  | 0   |
| CONTIG-041123 | 66  | 8   | 10  | 8   | 0   |
| CONTIG-041124 | 103 | 5   | 3   | 2   | 0   |
| CONTIG-041125 | 90  | 33  | 163 | 45  | 0   |
| CONTIG-041126 | 260 | 11  | 0   | 112 | 0   |
| CONTIG-041127 | 269 | 15  | 72  | 67  | 0   |
| CONTIG-041128 | 204 | 108 | 57  | 461 | 145 |
| CONTIG-041129 | 150 | 18  | 13  | 95  | 0   |
| CONTIG-041130 | 247 | 15  | 30  | 99  | 0   |
| CONTIG-041131 | 60  | 23  | 5   | 37  | 0   |
| CONTIG-041132 | 255 | 16  | 32  | 105 | 0   |
| CONTIG-041133 | 147 | 8   | 7   | 17  | 0   |
| CONTIG-041134 | 90  | 3   | 2   | 2   | 0   |
| CONTIG-041135 | 162 | 18  | 10  | 98  | 0   |
| CONTIG-041136 | 66  | 3   | 15  | 0   | 0   |
| CONTIG-041137 | 347 | 14  | 22  | 41  | 0   |
| CONTIG-041138 | 94  | 225 | 33  | 546 | 6   |
| CONTIG-041139 | 231 | 13  | 58  | 76  | 3   |
| CONTIG-041140 | 78  | 2   | 0   | 2   | 0   |
| CONTIG-041141 | 107 | 13  | 6   | 36  | 0   |
| CONTIG-041142 | 155 | 10  | 22  | 53  | 0   |
| CONTIG-041143 | 84  | 6   | 0   | 20  | 0   |

|               |      |     |     |      |    |
|---------------|------|-----|-----|------|----|
| CONTIG-041144 | 1341 | 23  | 30  | 1409 | 0  |
| CONTIG-041145 | 69   | 3   | 7   | 4    | 0  |
| CONTIG-041146 | 210  | 8   | 2   | 44   | 0  |
| CONTIG-041147 | 268  | 17  | 107 | 114  | 0  |
| CONTIG-041149 | 224  | 15  | 30  | 65   | 0  |
| CONTIG-041150 | 99   | 6   | 4   | 23   | 3  |
| CONTIG-041151 | 197  | 6   | 8   | 50   | 0  |
| CONTIG-041152 | 197  | 13  | 18  | 98   | 0  |
| CONTIG-041153 | 195  | 19  | 12  | 114  | 4  |
| CONTIG-041154 | 58   | 12  | 8   | 26   | 0  |
| CONTIG-041155 | 209  | 9   | 6   | 37   | 0  |
| CONTIG-041156 | 147  | 13  | 7   | 50   | 2  |
| CONTIG-041157 | 75   | 6   | 4   | 6    | 0  |
| CONTIG-041158 | 236  | 9   | 6   | 59   | 0  |
| CONTIG-041164 | 206  | 13  | 48  | 87   | 0  |
| CONTIG-041165 | 110  | 8   | 5   | 22   | 0  |
| CONTIG-041166 | 103  | 4   | 2   | 13   | 0  |
| CONTIG-041167 | 64   | 6   | 21  | 2    | 0  |
| CONTIG-041168 | 561  | 12  | 32  | 106  | 0  |
| CONTIG-041171 | 69   | 6   | 17  | 0    | 2  |
| CONTIG-041172 | 163  | 5   | 8   | 28   | 0  |
| CONTIG-041173 | 406  | 8   | 11  | 102  | 0  |
| CONTIG-041177 | 64   | 4   | 29  | 0    | 0  |
| CONTIG-041178 | 181  | 7   | 14  | 30   | 0  |
| CONTIG-041179 | 158  | 6   | 7   | 26   | 0  |
| CONTIG-041180 | 69   | 5   | 0   | 8    | 0  |
| CONTIG-041181 | 105  | 4   | 4   | 22   | 0  |
| CONTIG-041182 | 98   | 7   | 2   | 32   | 0  |
| CONTIG-041184 | 159  | 11  | 42  | 43   | 0  |
| CONTIG-041185 | 387  | 6   | 8   | 68   | 0  |
| CONTIG-041186 | 100  | 10  | 7   | 11   | 0  |
| CONTIG-041188 | 414  | 13  | 35  | 239  | 0  |
| CONTIG-041189 | 462  | 13  | 45  | 88   | 9  |
| CONTIG-041190 | 72   | 34  | 10  | 52   | 0  |
| CONTIG-041191 | 98   | 7   | 13  | 30   | 0  |
| CONTIG-041192 | 83   | 13  | 24  | 31   | 0  |
| CONTIG-041193 | 315  | 12  | 3   | 201  | 0  |
| CONTIG-041194 | 930  | 41  | 29  | 26   | 0  |
| CONTIG-041199 | 43   | 245 | 15  | 69   | 3  |
| CONTIG-041200 | 143  | 6   | 5   | 20   | 0  |
| CONTIG-041202 | 206  | 9   | 10  | 62   | 0  |
| CONTIG-041203 | 98   | 4   | 4   | 4    | 0  |
| CONTIG-041204 | 186  | 7   | 30  | 34   | 0  |
| CONTIG-041205 | 167  | 9   | 12  | 48   | 0  |
| CONTIG-041206 | 86   | 14  | 5   | 22   | 0  |
| CONTIG-041207 | 714  | 37  | 83  | 307  | 15 |
| CONTIG-041208 | 891  | 12  | 15  | 282  | 24 |

|               |     |     |     |     |   |
|---------------|-----|-----|-----|-----|---|
| CONTIG-041209 | 103 | 5   | 8   | 11  | 0 |
| CONTIG-041210 | 77  | 4   | 0   | 6   | 0 |
| CONTIG-041211 | 101 | 9   | 20  | 14  | 0 |
| CONTIG-041212 | 154 | 9   | 9   | 38  | 0 |
| CONTIG-041213 | 284 | 13  | 29  | 59  | 2 |
| CONTIG-041215 | 40  | 714 | 36  | 59  | 0 |
| CONTIG-041216 | 286 | 6   | 8   | 66  | 0 |
| CONTIG-041217 | 130 | 7   | 23  | 14  | 0 |
| CONTIG-041218 | 448 | 18  | 28  | 224 | 4 |
| CONTIG-041219 | 59  | 8   | 21  | 0   | 0 |
| CONTIG-041220 | 223 | 9   | 2   | 65  | 0 |
| CONTIG-041221 | 536 | 13  | 10  | 408 | 0 |
| CONTIG-041222 | 175 | 8   | 13  | 28  | 0 |
| CONTIG-041223 | 297 | 6   | 13  | 59  | 0 |
| CONTIG-041225 | 379 | 11  | 8   | 130 | 0 |
| CONTIG-041226 | 211 | 10  | 23  | 18  | 0 |
| CONTIG-041227 | 79  | 4   | 5   | 4   | 0 |
| CONTIG-041228 | 187 | 5   | 6   | 22  | 0 |
| CONTIG-041229 | 529 | 11  | 31  | 214 | 0 |
| CONTIG-041230 | 138 | 6   | 4   | 26  | 0 |
| CONTIG-041232 | 675 | 18  | 15  | 60  | 2 |
| CONTIG-041233 | 83  | 15  | 4   | 55  | 0 |
| CONTIG-041235 | 87  | 4   | 6   | 2   | 0 |
| CONTIG-041236 | 83  | 34  | 37  | 76  | 2 |
| CONTIG-041237 | 181 | 10  | 10  | 46  | 2 |
| CONTIG-041238 | 74  | 4   | 12  | 2   | 0 |
| CONTIG-041240 | 111 | 12  | 36  | 36  | 0 |
| CONTIG-041242 | 85  | 5   | 9   | 10  | 0 |
| CONTIG-041243 | 100 | 9   | 4   | 26  | 0 |
| CONTIG-041244 | 343 | 13  | 150 | 75  | 0 |
| CONTIG-041245 | 143 | 11  | 0   | 0   | 0 |
| CONTIG-041246 | 196 | 7   | 3   | 24  | 0 |
| CONTIG-041247 | 171 | 13  | 7   | 98  | 0 |
| CONTIG-041248 | 86  | 14  | 25  | 25  | 0 |
| CONTIG-041249 | 204 | 7   | 45  | 29  | 0 |
| CONTIG-041250 | 238 | 7   | 23  | 45  | 0 |
| CONTIG-041251 | 147 | 5   | 8   | 30  | 0 |
| CONTIG-041252 | 197 | 12  | 37  | 88  | 0 |
| CONTIG-041253 | 58  | 4   | 0   | 2   | 0 |
| CONTIG-041254 | 125 | 6   | 8   | 23  | 2 |
| CONTIG-041255 | 63  | 5   | 2   | 0   | 0 |
| CONTIG-041256 | 71  | 4   | 9   | 8   | 0 |
| CONTIG-041257 | 226 | 8   | 0   | 60  | 0 |
| CONTIG-041258 | 232 | 14  | 74  | 155 | 0 |
| CONTIG-041259 | 204 | 7   | 12  | 61  | 0 |
| CONTIG-041260 | 190 | 11  | 17  | 49  | 2 |
| CONTIG-041264 | 67  | 6   | 5   | 2   | 0 |



|               |     |     |    |     |     |
|---------------|-----|-----|----|-----|-----|
| CONTIG-041265 | 91  | 6   | 4  | 15  | 0   |
| CONTIG-041266 | 71  | 6   | 4  | 21  | 0   |
| CONTIG-041267 | 110 | 12  | 0  | 53  | 0   |
| CONTIG-041268 | 874 | 20  | 8  | 4   | 513 |
| CONTIG-041269 | 231 | 9   | 23 | 46  | 0   |
| CONTIG-041270 | 86  | 4   | 2  | 7   | 0   |
| CONTIG-041271 | 251 | 8   | 35 | 22  | 0   |
| CONTIG-041272 | 154 | 11  | 5  | 69  | 0   |
| CONTIG-041273 | 155 | 6   | 11 | 9   | 0   |
| CONTIG-041274 | 60  | 6   | 10 | 5   | 0   |
| CONTIG-041275 | 160 | 8   | 11 | 23  | 0   |
| CONTIG-041276 | 88  | 8   | 20 | 13  | 0   |
| CONTIG-041277 | 522 | 11  | 57 | 122 | 0   |
| CONTIG-041279 | 680 | 13  | 16 | 353 | 0   |
| CONTIG-041280 | 147 | 12  | 57 | 15  | 2   |
| CONTIG-041281 | 748 | 23  | 70 | 478 | 2   |
| CONTIG-041286 | 347 | 7   | 7  | 89  | 0   |
| CONTIG-041287 | 79  | 5   | 8  | 9   | 0   |
| CONTIG-041288 | 304 | 11  | 42 | 97  | 4   |
| CONTIG-041289 | 356 | 11  | 5  | 20  | 0   |
| CONTIG-041290 | 385 | 8   | 19 | 73  | 0   |
| CONTIG-041291 | 107 | 5   | 0  | 5   | 0   |
| CONTIG-041292 | 135 | 27  | 26 | 137 | 0   |
| CONTIG-041293 | 305 | 6   | 8  | 48  | 2   |
| CONTIG-041294 | 102 | 10  | 5  | 39  | 0   |
| CONTIG-041307 | 169 | 50  | 14 | 488 | 0   |
| CONTIG-041309 | 87  | 4   | 0  | 8   | 0   |
| CONTIG-041310 | 126 | 4   | 3  | 8   | 0   |
| CONTIG-041313 | 116 | 7   | 5  | 10  | 2   |
| CONTIG-041314 | 84  | 6   | 6  | 23  | 0   |
| CONTIG-041315 | 147 | 8   | 20 | 42  | 0   |
| CONTIG-041316 | 195 | 12  | 37 | 87  | 0   |
| CONTIG-041317 | 223 | 12  | 6  | 77  | 0   |
| CONTIG-041319 | 166 | 7   | 20 | 45  | 0   |
| CONTIG-041320 | 123 | 24  | 88 | 81  | 0   |
| CONTIG-041321 | 327 | 10  | 0  | 90  | 2   |
| CONTIG-041322 | 393 | 7   | 8  | 85  | 0   |
| CONTIG-041323 | 121 | 21  | 38 | 32  | 0   |
| CONTIG-041327 | 90  | 6   | 8  | 4   | 0   |
| CONTIG-041329 | 119 | 7   | 4  | 8   | 2   |
| CONTIG-041330 | 310 | 12  | 37 | 175 | 0   |
| CONTIG-041331 | 159 | 6   | 20 | 21  | 0   |
| CONTIG-041334 | 111 | 9   | 6  | 33  | 0   |
| CONTIG-041335 | 53  | 35  | 36 | 19  | 0   |
| CONTIG-041343 | 45  | 101 | 25 | 99  | 6   |
| CONTIG-041344 | 123 | 4   | 0  | 0   | 0   |
| CONTIG-041345 | 540 | 15  | 28 | 347 | 5   |

|               |     |     |     |     |    |
|---------------|-----|-----|-----|-----|----|
| CONTIG-041346 | 622 | 22  | 147 | 403 | 3  |
| CONTIG-041347 | 161 | 13  | 7   | 45  | 0  |
| CONTIG-041348 | 81  | 4   | 0   | 17  | 0  |
| CONTIG-041349 | 131 | 125 | 51  | 942 | 0  |
| CONTIG-041350 | 124 | 6   | 3   | 4   | 2  |
| CONTIG-041352 | 265 | 12  | 45  | 34  | 0  |
| CONTIG-041353 | 184 | 6   | 17  | 29  | 0  |
| CONTIG-041354 | 522 | 11  | 12  | 206 | 4  |
| CONTIG-041355 | 288 | 9   | 6   | 112 | 0  |
| CONTIG-041356 | 421 | 7   | 31  | 110 | 4  |
| CONTIG-041357 | 192 | 6   | 4   | 38  | 0  |
| CONTIG-041358 | 65  | 4   | 0   | 4   | 0  |
| CONTIG-041359 | 331 | 6   | 9   | 54  | 0  |
| CONTIG-041360 | 390 | 12  | 10  | 132 | 2  |
| CONTIG-041361 | 262 | 34  | 21  | 405 | 0  |
| CONTIG-041362 | 59  | 5   | 8   | 11  | 0  |
| CONTIG-041363 | 527 | 7   | 14  | 50  | 4  |
| CONTIG-041364 | 178 | 4   | 13  | 14  | 0  |
| CONTIG-041365 | 72  | 6   | 22  | 4   | 0  |
| CONTIG-041367 | 67  | 6   | 7   | 4   | 0  |
| CONTIG-041368 | 408 | 10  | 40  | 98  | 0  |
| CONTIG-041369 | 133 | 15  | 31  | 69  | 0  |
| CONTIG-041370 | 88  | 10  | 37  | 8   | 0  |
| CONTIG-041371 | 235 | 36  | 51  | 427 | 2  |
| CONTIG-041372 | 111 | 7   | 0   | 28  | 0  |
| CONTIG-041373 | 171 | 6   | 4   | 28  | 0  |
| CONTIG-041374 | 192 | 7   | 4   | 11  | 2  |
| CONTIG-041375 | 65  | 4   | 8   | 0   | 0  |
| CONTIG-041376 | 103 | 10  | 14  | 29  | 2  |
| CONTIG-041377 | 82  | 4   | 4   | 0   | 0  |
| CONTIG-041378 | 104 | 10  | 22  | 33  | 0  |
| CONTIG-041379 | 61  | 5   | 0   | 14  | 0  |
| CONTIG-041380 | 161 | 7   | 38  | 24  | 0  |
| CONTIG-041381 | 324 | 7   | 24  | 45  | 0  |
| CONTIG-041382 | 60  | 7   | 10  | 0   | 0  |
| CONTIG-041383 | 323 | 10  | 30  | 97  | 0  |
| CONTIG-041384 | 123 | 10  | 40  | 19  | 0  |
| CONTIG-041393 | 62  | 5   | 7   | 7   | 0  |
| CONTIG-041394 | 152 | 11  | 15  | 35  | 0  |
| CONTIG-041395 | 68  | 90  | 3   | 0   | 45 |
| CONTIG-041396 | 423 | 10  | 0   | 0   | 6  |
| CONTIG-041399 | 108 | 6   | 10  | 24  | 0  |
| CONTIG-041400 | 74  | 9   | 4   | 13  | 0  |
| CONTIG-041401 | 183 | 5   | 17  | 31  | 0  |
| CONTIG-041402 | 67  | 4   | 2   | 5   | 0  |
| CONTIG-041403 | 88  | 10  | 19  | 0   | 0  |
| CONTIG-041404 | 476 | 11  | 13  | 219 | 2  |

|               |     |     |     |     |     |
|---------------|-----|-----|-----|-----|-----|
| CONTIG-041406 | 472 | 10  | 4   | 157 | 2   |
| CONTIG-041408 | 66  | 4   | 7   | 10  | 0   |
| CONTIG-041409 | 100 | 18  | 2   | 105 | 0   |
| CONTIG-041411 | 62  | 308 | 33  | 250 | 99  |
| CONTIG-041413 | 125 | 5   | 3   | 11  | 0   |
| CONTIG-041414 | 92  | 8   | 4   | 18  | 0   |
| CONTIG-041415 | 498 | 12  | 51  | 173 | 0   |
| CONTIG-041416 | 127 | 7   | 2   | 19  | 2   |
| CONTIG-041417 | 786 | 28  | 188 | 789 | 14  |
| CONTIG-041418 | 74  | 84  | 10  | 147 | 0   |
| CONTIG-041419 | 71  | 11  | 48  | 7   | 0   |
| CONTIG-041420 | 152 | 15  | 11  | 70  | 2   |
| CONTIG-041421 | 195 | 9   | 65  | 29  | 2   |
| CONTIG-041422 | 224 | 5   | 14  | 27  | 0   |
| CONTIG-041423 | 209 | 40  | 10  | 0   | 130 |
| CONTIG-041424 | 433 | 11  | 26  | 132 | 0   |
| CONTIG-041425 | 60  | 6   | 14  | 6   | 0   |
| CONTIG-041426 | 287 | 13  | 18  | 143 | 0   |
| CONTIG-041428 | 206 | 9   | 12  | 41  | 0   |
| CONTIG-041429 | 101 | 7   | 7   | 12  | 0   |
| CONTIG-041431 | 104 | 9   | 4   | 23  | 2   |
| CONTIG-041432 | 86  | 14  | 21  | 42  | 0   |
| CONTIG-041434 | 84  | 27  | 11  | 8   | 0   |
| CONTIG-041441 | 101 | 6   | 5   | 14  | 0   |
| CONTIG-041443 | 158 | 9   | 18  | 36  | 0   |
| CONTIG-041444 | 112 | 7   | 5   | 13  | 0   |
| CONTIG-041445 | 62  | 4   | 12  | 4   | 0   |
| CONTIG-041449 | 72  | 19  | 11  | 44  | 0   |
| CONTIG-041451 | 67  | 8   | 7   | 12  | 0   |
| CONTIG-041452 | 72  | 4   | 7   | 8   | 0   |
| CONTIG-041453 | 397 | 13  | 48  | 238 | 3   |
| CONTIG-041454 | 66  | 9   | 50  | 4   | 0   |
| CONTIG-041455 | 395 | 24  | 78  | 423 | 0   |
| CONTIG-041456 | 359 | 12  | 26  | 90  | 4   |
| CONTIG-041457 | 399 | 10  | 25  | 83  | 2   |
| CONTIG-041458 | 108 | 6   | 18  | 4   | 0   |
| CONTIG-041459 | 85  | 3   | 0   | 8   | 0   |
| CONTIG-041460 | 126 | 4   | 7   | 11  | 0   |
| CONTIG-041461 | 245 | 14  | 79  | 90  | 0   |
| CONTIG-041470 | 59  | 3   | 14  | 0   | 0   |
| CONTIG-041471 | 265 | 8   | 2   | 62  | 2   |
| CONTIG-041472 | 104 | 32  | 16  | 78  | 2   |
| CONTIG-041473 | 175 | 15  | 30  | 64  | 2   |
| CONTIG-041474 | 302 | 25  | 70  | 124 | 6   |
| CONTIG-041475 | 300 | 16  | 14  | 128 | 0   |
| CONTIG-041476 | 199 | 12  | 8   | 107 | 0   |
| CONTIG-041477 | 101 | 5   | 0   | 14  | 0   |

|               |     |    |     |     |    |
|---------------|-----|----|-----|-----|----|
| CONTIG-041478 | 58  | 2  | 2   | 0   | 0  |
| CONTIG-041479 | 72  | 3  | 0   | 6   | 0  |
| CONTIG-041480 | 137 | 7  | 17  | 29  | 0  |
| CONTIG-041481 | 202 | 6  | 5   | 51  | 0  |
| CONTIG-041489 | 155 | 10 | 2   | 73  | 0  |
| CONTIG-041490 | 79  | 6  | 17  | 5   | 0  |
| CONTIG-041491 | 110 | 4  | 5   | 10  | 0  |
| CONTIG-041492 | 64  | 6  | 0   | 16  | 0  |
| CONTIG-041493 | 139 | 4  | 5   | 8   | 0  |
| CONTIG-041499 | 76  | 4  | 14  | 0   | 0  |
| CONTIG-041505 | 232 | 8  | 24  | 67  | 0  |
| CONTIG-041506 | 72  | 6  | 3   | 14  | 0  |
| CONTIG-041507 | 59  | 2  | 0   | 7   | 0  |
| CONTIG-041508 | 62  | 3  | 2   | 0   | 0  |
| CONTIG-041509 | 173 | 7  | 16  | 50  | 0  |
| CONTIG-041510 | 218 | 8  | 44  | 36  | 0  |
| CONTIG-041511 | 156 | 10 | 2   | 69  | 0  |
| CONTIG-041512 | 149 | 7  | 12  | 45  | 0  |
| CONTIG-041513 | 65  | 24 | 117 | 0   | 0  |
| CONTIG-041514 | 105 | 5  | 3   | 19  | 0  |
| CONTIG-041516 | 143 | 12 | 15  | 49  | 0  |
| CONTIG-041517 | 378 | 18 | 42  | 163 | 0  |
| CONTIG-041518 | 59  | 21 | 38  | 4   | 0  |
| CONTIG-041519 | 202 | 7  | 23  | 43  | 0  |
| CONTIG-041520 | 552 | 27 | 8   | 816 | 2  |
| CONTIG-041521 | 98  | 7  | 24  | 11  | 0  |
| CONTIG-041522 | 361 | 58 | 11  | 0   | 88 |
| CONTIG-041523 | 117 | 5  | 4   | 12  | 0  |
| CONTIG-041524 | 129 | 9  | 8   | 34  | 0  |
| CONTIG-041525 | 260 | 13 | 64  | 45  | 0  |
| CONTIG-041526 | 142 | 6  | 2   | 33  | 0  |
| CONTIG-041527 | 96  | 10 | 23  | 17  | 0  |
| CONTIG-041529 | 239 | 8  | 2   | 76  | 0  |
| CONTIG-041530 | 73  | 14 | 47  | 7   | 0  |
| CONTIG-041531 | 64  | 10 | 10  | 0   | 0  |
| CONTIG-041532 | 87  | 14 | 41  | 0   | 0  |
| CONTIG-041533 | 134 | 9  | 14  | 19  | 0  |
| CONTIG-041535 | 152 | 10 | 19  | 41  | 0  |
| CONTIG-041537 | 404 | 8  | 22  | 60  | 0  |
| CONTIG-041538 | 65  | 5  | 19  | 2   | 0  |
| CONTIG-041539 | 78  | 30 | 29  | 63  | 0  |
| CONTIG-041540 | 105 | 6  | 2   | 23  | 0  |
| CONTIG-041541 | 81  | 6  | 8   | 10  | 0  |
| CONTIG-041542 | 120 | 7  | 11  | 29  | 0  |
| CONTIG-041543 | 71  | 70 | 77  | 10  | 0  |
| CONTIG-041544 | 158 | 19 | 18  | 81  | 3  |
| CONTIG-041546 | 337 | 9  | 5   | 86  | 0  |

|               |     |     |     |      |     |
|---------------|-----|-----|-----|------|-----|
| CONTIG-041547 | 112 | 9   | 13  | 31   | 0   |
| CONTIG-041548 | 64  | 3   | 5   | 5    | 0   |
| CONTIG-041549 | 178 | 6   | 10  | 9    | 0   |
| CONTIG-041550 | 43  | 214 | 53  | 294  | 9   |
| CONTIG-041551 | 173 | 13  | 22  | 50   | 0   |
| CONTIG-041552 | 232 | 8   | 10  | 11   | 0   |
| CONTIG-041553 | 67  | 6   | 0   | 6    | 0   |
| CONTIG-041554 | 75  | 3   | 2   | 0    | 0   |
| CONTIG-041555 | 65  | 4   | 0   | 3    | 0   |
| CONTIG-041556 | 97  | 7   | 16  | 15   | 0   |
| CONTIG-041558 | 61  | 11  | 22  | 17   | 0   |
| CONTIG-041559 | 100 | 10  | 2   | 39   | 0   |
| CONTIG-041560 | 186 | 25  | 24  | 220  | 0   |
| CONTIG-041561 | 163 | 10  | 48  | 29   | 0   |
| CONTIG-041562 | 77  | 7   | 35  | 3    | 0   |
| CONTIG-041563 | 155 | 47  | 68  | 0    | 40  |
| CONTIG-041564 | 62  | 7   | 7   | 3    | 0   |
| CONTIG-041565 | 370 | 38  | 39  | 357  | 0   |
| CONTIG-041566 | 88  | 7   | 2   | 27   | 0   |
| CONTIG-041567 | 576 | 13  | 28  | 340  | 0   |
| CONTIG-041568 | 174 | 14  | 10  | 92   | 15  |
| CONTIG-041569 | 868 | 20  | 73  | 804  | 0   |
| CONTIG-041570 | 181 | 7   | 0   | 39   | 0   |
| CONTIG-041572 | 71  | 8   | 4   | 12   | 0   |
| CONTIG-041575 | 325 | 9   | 36  | 72   | 0   |
| CONTIG-041576 | 82  | 17  | 2   | 41   | 2   |
| CONTIG-041578 | 74  | 37  | 6   | 20   | 2   |
| CONTIG-041579 | 837 | 17  | 14  | 816  | 2   |
| CONTIG-041580 | 124 | 5   | 5   | 6    | 0   |
| CONTIG-041581 | 68  | 5   | 0   | 10   | 0   |
| CONTIG-041582 | 86  | 310 | 139 | 1122 | 3   |
| CONTIG-041583 | 391 | 8   | 16  | 102  | 0   |
| CONTIG-041584 | 145 | 9   | 27  | 21   | 2   |
| CONTIG-041585 | 143 | 11  | 26  | 42   | 0   |
| CONTIG-041586 | 272 | 8   | 12  | 29   | 0   |
| CONTIG-041587 | 62  | 8   | 0   | 16   | 0   |
| CONTIG-041588 | 129 | 6   | 8   | 37   | 0   |
| CONTIG-041589 | 91  | 7   | 3   | 28   | 0   |
| CONTIG-041590 | 231 | 6   | 0   | 48   | 0   |
| CONTIG-041591 | 306 | 8   | 3   | 13   | 0   |
| CONTIG-041592 | 88  | 6   | 0   | 18   | 0   |
| CONTIG-041593 | 176 | 12  | 48  | 29   | 0   |
| CONTIG-041594 | 76  | 26  | 32  | 93   | 0   |
| CONTIG-041595 | 87  | 15  | 7   | 26   | 0   |
| CONTIG-041596 | 431 | 75  | 0   | 0    | 137 |
| CONTIG-041598 | 268 | 7   | 14  | 43   | 0   |
| CONTIG-041599 | 73  | 12  | 0   | 9    | 2   |

|               |     |     |    |     |    |
|---------------|-----|-----|----|-----|----|
| CONTIG-041600 | 66  | 6   | 9  | 0   | 0  |
| CONTIG-041601 | 79  | 148 | 37 | 434 | 2  |
| CONTIG-041602 | 216 | 8   | 8  | 30  | 0  |
| CONTIG-041603 | 153 | 7   | 9  | 35  | 0  |
| CONTIG-041604 | 79  | 6   | 2  | 21  | 0  |
| CONTIG-041605 | 149 | 6   | 8  | 23  | 0  |
| CONTIG-041606 | 94  | 4   | 0  | 13  | 0  |
| CONTIG-041607 | 211 | 6   | 14 | 43  | 0  |
| CONTIG-041608 | 82  | 8   | 0  | 13  | 0  |
| CONTIG-041609 | 259 | 25  | 84 | 168 | 3  |
| CONTIG-041610 | 621 | 21  | 28 | 202 | 10 |
| CONTIG-041611 | 160 | 10  | 13 | 43  | 0  |
| CONTIG-041612 | 256 | 7   | 10 | 25  | 0  |
| CONTIG-041613 | 83  | 10  | 3  | 38  | 0  |
| CONTIG-041614 | 132 | 11  | 22 | 18  | 0  |
| CONTIG-041615 | 84  | 5   | 0  | 10  | 0  |
| CONTIG-041616 | 67  | 4   | 10 | 2   | 0  |
| CONTIG-041617 | 278 | 17  | 2  | 2   | 0  |
| CONTIG-041618 | 60  | 8   | 8  | 20  | 0  |
| CONTIG-041620 | 254 | 9   | 12 | 93  | 0  |
| CONTIG-041621 | 95  | 15  | 18 | 25  | 0  |
| CONTIG-041622 | 78  | 8   | 2  | 4   | 0  |
| CONTIG-041623 | 354 | 7   | 32 | 70  | 0  |
| CONTIG-041624 | 164 | 6   | 25 | 11  | 0  |
| CONTIG-041625 | 417 | 15  | 69 | 231 | 0  |
| CONTIG-041626 | 197 | 11  | 4  | 48  | 0  |
| CONTIG-041627 | 98  | 7   | 10 | 24  | 0  |
| CONTIG-041628 | 188 | 7   | 5  | 37  | 0  |
| CONTIG-041629 | 65  | 6   | 17 | 7   | 0  |
| CONTIG-041630 | 144 | 9   | 15 | 39  | 0  |
| CONTIG-041631 | 753 | 16  | 14 | 654 | 0  |
| CONTIG-041632 | 191 | 11  | 34 | 74  | 0  |
| CONTIG-041633 | 261 | 23  | 33 | 183 | 0  |
| CONTIG-041634 | 279 | 7   | 5  | 38  | 2  |
| CONTIG-041635 | 65  | 17  | 15 | 37  | 0  |
| CONTIG-041636 | 329 | 37  | 87 | 299 | 5  |
| CONTIG-041637 | 125 | 21  | 9  | 141 | 0  |
| CONTIG-041638 | 108 | 9   | 3  | 13  | 0  |
| CONTIG-041639 | 205 | 12  | 6  | 26  | 0  |
| CONTIG-041640 | 298 | 13  | 16 | 190 | 0  |
| CONTIG-041641 | 321 | 9   | 24 | 111 | 0  |
| CONTIG-041642 | 170 | 12  | 26 | 50  | 2  |
| CONTIG-041643 | 671 | 23  | 96 | 457 | 13 |
| CONTIG-041644 | 95  | 3   | 0  | 9   | 0  |
| CONTIG-041645 | 449 | 12  | 3  | 0   | 11 |
| CONTIG-041646 | 401 | 15  | 15 | 287 | 0  |
| CONTIG-041647 | 66  | 4   | 10 | 4   | 0  |

|               |      |     |     |     |    |
|---------------|------|-----|-----|-----|----|
| CONTIG-041648 | 267  | 14  | 2   | 173 | 0  |
| CONTIG-041649 | 336  | 7   | 6   | 84  | 0  |
| CONTIG-041650 | 123  | 9   | 8   | 34  | 0  |
| CONTIG-041651 | 89   | 6   | 2   | 4   | 0  |
| CONTIG-041653 | 175  | 25  | 18  | 119 | 0  |
| CONTIG-041654 | 82   | 8   | 12  | 15  | 0  |
| CONTIG-041655 | 114  | 115 | 38  | 511 | 0  |
| CONTIG-041657 | 543  | 14  | 45  | 166 | 0  |
| CONTIG-041658 | 115  | 10  | 2   | 49  | 0  |
| CONTIG-041659 | 242  | 8   | 19  | 23  | 0  |
| CONTIG-041660 | 178  | 12  | 147 | 13  | 2  |
| CONTIG-041661 | 58   | 7   | 14  | 6   | 0  |
| CONTIG-041662 | 85   | 17  | 17  | 40  | 0  |
| CONTIG-041663 | 84   | 6   | 8   | 11  | 0  |
| CONTIG-041664 | 1204 | 17  | 58  | 793 | 12 |
| CONTIG-041665 | 115  | 4   | 5   | 6   | 0  |
| CONTIG-041667 | 102  | 10  | 7   | 40  | 0  |
| CONTIG-041668 | 186  | 27  | 34  | 269 | 0  |
| CONTIG-041669 | 85   | 6   | 6   | 24  | 0  |
| CONTIG-041670 | 59   | 3   | 10  | 4   | 0  |
| CONTIG-041671 | 101  | 4   | 7   | 10  | 0  |
| CONTIG-041672 | 64   | 6   | 4   | 0   | 0  |
| CONTIG-041673 | 258  | 9   | 3   | 105 | 4  |
| CONTIG-041674 | 190  | 24  | 25  | 173 | 2  |
| CONTIG-041675 | 116  | 5   | 8   | 5   | 0  |
| CONTIG-041676 | 118  | 23  | 14  | 61  | 5  |
| CONTIG-041677 | 120  | 7   | 26  | 0   | 0  |
| CONTIG-041678 | 60   | 3   | 7   | 2   | 0  |
| CONTIG-041679 | 298  | 15  | 28  | 196 | 0  |
| CONTIG-041680 | 205  | 20  | 17  | 180 | 2  |
| CONTIG-041682 | 278  | 12  | 18  | 13  | 0  |
| CONTIG-041689 | 152  | 4   | 0   | 10  | 0  |
| CONTIG-041690 | 81   | 23  | 13  | 48  | 0  |
| CONTIG-041692 | 57   | 17  | 14  | 14  | 0  |
| CONTIG-041693 | 167  | 7   | 2   | 45  | 0  |
| CONTIG-041694 | 93   | 6   | 0   | 16  | 0  |
| CONTIG-041695 | 64   | 5   | 4   | 7   | 0  |
| CONTIG-041696 | 305  | 15  | 32  | 165 | 2  |
| CONTIG-041697 | 143  | 23  | 19  | 106 | 0  |
| CONTIG-041698 | 426  | 7   | 4   | 26  | 0  |
| CONTIG-041699 | 90   | 7   | 29  | 0   | 0  |
| CONTIG-041700 | 151  | 9   | 2   | 15  | 0  |
| CONTIG-041701 | 345  | 10  | 14  | 108 | 0  |
| CONTIG-041702 | 138  | 79  | 92  | 393 | 4  |
| CONTIG-041703 | 303  | 9   | 30  | 80  | 0  |
| CONTIG-041704 | 295  | 12  | 42  | 127 | 0  |
| CONTIG-041705 | 59   | 9   | 27  | 8   | 0  |

|               |     |    |     |      |    |
|---------------|-----|----|-----|------|----|
| CONTIG-041706 | 120 | 12 | 7   | 69   | 0  |
| CONTIG-041707 | 72  | 10 | 8   | 25   | 0  |
| CONTIG-041708 | 303 | 11 | 44  | 144  | 0  |
| CONTIG-041709 | 147 | 6  | 7   | 28   | 2  |
| CONTIG-041710 | 64  | 18 | 35  | 16   | 0  |
| CONTIG-041711 | 150 | 7  | 9   | 33   | 0  |
| CONTIG-041712 | 125 | 2  | 4   | 2    | 0  |
| CONTIG-041713 | 192 | 14 | 19  | 86   | 2  |
| CONTIG-041714 | 554 | 17 | 223 | 292  | 2  |
| CONTIG-041715 | 82  | 24 | 54  | 25   | 0  |
| CONTIG-041716 | 106 | 6  | 4   | 2    | 0  |
| CONTIG-041717 | 68  | 15 | 3   | 38   | 0  |
| CONTIG-041718 | 101 | 6  | 0   | 19   | 0  |
| CONTIG-041719 | 675 | 38 | 122 | 951  | 6  |
| CONTIG-041720 | 268 | 5  | 3   | 32   | 2  |
| CONTIG-041721 | 568 | 10 | 13  | 201  | 0  |
| CONTIG-041722 | 253 | 12 | 15  | 124  | 0  |
| CONTIG-041723 | 106 | 29 | 22  | 0    | 0  |
| CONTIG-041724 | 201 | 15 | 4   | 33   | 2  |
| CONTIG-041726 | 253 | 9  | 30  | 24   | 0  |
| CONTIG-041727 | 62  | 13 | 49  | 9    | 0  |
| CONTIG-041728 | 65  | 69 | 15  | 65   | 0  |
| CONTIG-041730 | 134 | 4  | 20  | 4    | 0  |
| CONTIG-041731 | 62  | 4  | 6   | 4    | 0  |
| CONTIG-041732 | 104 | 7  | 17  | 20   | 0  |
| CONTIG-041733 | 504 | 10 | 22  | 207  | 2  |
| CONTIG-041734 | 207 | 8  | 0   | 36   | 2  |
| CONTIG-041736 | 176 | 8  | 9   | 19   | 0  |
| CONTIG-041739 | 77  | 3  | 6   | 0    | 0  |
| CONTIG-041740 | 125 | 9  | 0   | 35   | 2  |
| CONTIG-041741 | 100 | 5  | 16  | 0    | 0  |
| CONTIG-041742 | 85  | 13 | 2   | 6    | 27 |
| CONTIG-041744 | 68  | 7  | 2   | 21   | 0  |
| CONTIG-041745 | 317 | 15 | 23  | 134  | 0  |
| CONTIG-041746 | 118 | 35 | 20  | 85   | 2  |
| CONTIG-041747 | 385 | 15 | 101 | 195  | 0  |
| CONTIG-041748 | 97  | 5  | 19  | 4    | 0  |
| CONTIG-041749 | 134 | 5  | 6   | 16   | 2  |
| CONTIG-041750 | 232 | 7  | 8   | 42   | 0  |
| CONTIG-041751 | 295 | 13 | 30  | 107  | 0  |
| CONTIG-041752 | 284 | 15 | 72  | 110  | 0  |
| CONTIG-041753 | 217 | 7  | 10  | 33   | 2  |
| CONTIG-041754 | 826 | 27 | 108 | 1190 | 0  |
| CONTIG-041755 | 469 | 11 | 52  | 176  | 0  |
| CONTIG-041756 | 171 | 11 | 2   | 66   | 0  |
| CONTIG-041757 | 144 | 15 | 0   | 85   | 0  |
| CONTIG-041758 | 188 | 54 | 55  | 193  | 0  |



|               |     |     |     |      |    |
|---------------|-----|-----|-----|------|----|
| CONTIG-041759 | 108 | 12  | 68  | 10   | 0  |
| CONTIG-041760 | 512 | 18  | 21  | 261  | 2  |
| CONTIG-041763 | 165 | 8   | 3   | 56   | 0  |
| CONTIG-041764 | 124 | 7   | 3   | 3    | 0  |
| CONTIG-041765 | 78  | 5   | 17  | 6    | 0  |
| CONTIG-041766 | 806 | 16  | 90  | 303  | 2  |
| CONTIG-041767 | 109 | 5   | 7   | 15   | 0  |
| CONTIG-041768 | 69  | 8   | 11  | 17   | 0  |
| CONTIG-041776 | 95  | 5   | 28  | 0    | 0  |
| CONTIG-041777 | 64  | 108 | 43  | 242  | 0  |
| CONTIG-041778 | 126 | 16  | 2   | 61   | 2  |
| CONTIG-041779 | 381 | 12  | 9   | 133  | 0  |
| CONTIG-041780 | 973 | 13  | 25  | 259  | 10 |
| CONTIG-041781 | 73  | 56  | 11  | 128  | 0  |
| CONTIG-041782 | 68  | 8   | 2   | 27   | 0  |
| CONTIG-041783 | 173 | 7   | 12  | 36   | 0  |
| CONTIG-041785 | 229 | 9   | 11  | 57   | 0  |
| CONTIG-041786 | 389 | 14  | 6   | 275  | 0  |
| CONTIG-041787 | 195 | 7   | 5   | 24   | 0  |
| CONTIG-041788 | 469 | 28  | 158 | 346  | 4  |
| CONTIG-041789 | 259 | 7   | 11  | 43   | 2  |
| CONTIG-041790 | 135 | 6   | 13  | 18   | 0  |
| CONTIG-041792 | 225 | 7   | 26  | 21   | 0  |
| CONTIG-041793 | 224 | 13  | 13  | 90   | 0  |
| CONTIG-041794 | 79  | 14  | 13  | 0    | 0  |
| CONTIG-041795 | 97  | 3   | 2   | 11   | 0  |
| CONTIG-041796 | 123 | 3   | 5   | 10   | 0  |
| CONTIG-041797 | 115 | 5   | 4   | 10   | 0  |
| CONTIG-041798 | 60  | 2   | 0   | 2    | 0  |
| CONTIG-041799 | 63  | 5   | 0   | 3    | 0  |
| CONTIG-041800 | 107 | 29  | 10  | 97   | 0  |
| CONTIG-041801 | 292 | 4   | 2   | 21   | 0  |
| CONTIG-041802 | 156 | 14  | 2   | 126  | 0  |
| CONTIG-041803 | 411 | 7   | 34  | 88   | 2  |
| CONTIG-041804 | 595 | 20  | 65  | 428  | 2  |
| CONTIG-041805 | 77  | 4   | 0   | 9    | 0  |
| CONTIG-041812 | 249 | 11  | 26  | 130  | 0  |
| CONTIG-041813 | 605 | 48  | 93  | 1313 | 2  |
| CONTIG-041814 | 59  | 6   | 3   | 2    | 0  |
| CONTIG-041815 | 72  | 6   | 4   | 13   | 0  |
| CONTIG-041816 | 247 | 7   | 27  | 47   | 0  |
| CONTIG-041817 | 80  | 5   | 0   | 9    | 0  |
| CONTIG-041818 | 217 | 10  | 14  | 62   | 2  |
| CONTIG-041819 | 120 | 14  | 6   | 45   | 0  |
| CONTIG-041820 | 134 | 14  | 21  | 6    | 0  |
| CONTIG-041823 | 134 | 9   | 32  | 35   | 0  |
| CONTIG-041824 | 78  | 20  | 18  | 47   | 0  |

|               |     |    |    |     |   |
|---------------|-----|----|----|-----|---|
| CONTIG-041825 | 254 | 8  | 21 | 44  | 2 |
| CONTIG-041826 | 109 | 4  | 8  | 11  | 0 |
| CONTIG-041827 | 148 | 7  | 2  | 9   | 0 |
| CONTIG-041828 | 208 | 8  | 19 | 38  | 0 |
| CONTIG-041829 | 117 | 10 | 36 | 30  | 0 |
| CONTIG-041830 | 716 | 10 | 19 | 179 | 2 |
| CONTIG-041831 | 102 | 7  | 0  | 15  | 0 |
| CONTIG-041833 | 259 | 8  | 30 | 9   | 0 |
| CONTIG-041834 | 210 | 10 | 3  | 44  | 0 |
| CONTIG-041835 | 381 | 11 | 5  | 62  | 0 |
| CONTIG-041836 | 81  | 6  | 4  | 4   | 0 |
| CONTIG-041837 | 58  | 3  | 0  | 5   | 0 |
| CONTIG-041838 | 217 | 34 | 31 | 352 | 0 |
| CONTIG-041841 | 295 | 46 | 77 | 651 | 2 |
| CONTIG-041842 | 489 | 39 | 26 | 244 | 0 |
| CONTIG-041843 | 137 | 7  | 27 | 29  | 0 |
| CONTIG-041844 | 75  | 60 | 26 | 56  | 0 |
| CONTIG-041845 | 61  | 11 | 9  | 12  | 0 |
| CONTIG-041846 | 486 | 8  | 73 | 94  | 0 |
| CONTIG-041847 | 248 | 11 | 4  | 95  | 0 |
| CONTIG-041849 | 135 | 3  | 2  | 10  | 0 |
| CONTIG-041850 | 93  | 6  | 2  | 18  | 0 |
| CONTIG-041851 | 553 | 17 | 15 | 449 | 0 |
| CONTIG-041852 | 95  | 5  | 12 | 8   | 0 |
| CONTIG-041853 | 66  | 6  | 7  | 5   | 0 |
| CONTIG-041854 | 690 | 30 | 15 | 680 | 0 |
| CONTIG-041855 | 294 | 8  | 45 | 76  | 0 |
| CONTIG-041856 | 66  | 3  | 4  | 0   | 0 |
| CONTIG-041857 | 316 | 15 | 45 | 123 | 2 |
| CONTIG-041858 | 265 | 15 | 34 | 98  | 2 |
| CONTIG-041859 | 125 | 6  | 10 | 16  | 0 |
| CONTIG-041860 | 99  | 8  | 5  | 31  | 0 |
| CONTIG-041861 | 449 | 9  | 33 | 33  | 0 |
| CONTIG-041862 | 124 | 9  | 10 | 24  | 3 |
| CONTIG-041863 | 135 | 9  | 19 | 42  | 0 |
| CONTIG-041864 | 125 | 5  | 9  | 18  | 0 |
| CONTIG-041865 | 179 | 7  | 2  | 32  | 0 |
| CONTIG-041866 | 313 | 8  | 27 | 83  | 2 |
| CONTIG-041867 | 576 | 13 | 9  | 241 | 8 |
| CONTIG-041868 | 263 | 20 | 37 | 221 | 0 |
| CONTIG-041869 | 129 | 5  | 5  | 17  | 0 |
| CONTIG-041870 | 83  | 4  | 3  | 15  | 0 |
| CONTIG-041871 | 59  | 7  | 2  | 11  | 2 |
| CONTIG-041872 | 128 | 2  | 0  | 8   | 0 |
| CONTIG-041873 | 210 | 5  | 9  | 32  | 0 |
| CONTIG-041874 | 485 | 21 | 26 | 406 | 6 |
| CONTIG-041875 | 91  | 5  | 9  | 12  | 0 |

|               |     |     |     |     |    |
|---------------|-----|-----|-----|-----|----|
| CONTIG-041876 | 81  | 3   | 4   | 4   | 0  |
| CONTIG-041877 | 183 | 12  | 46  | 36  | 0  |
| CONTIG-041878 | 93  | 6   | 4   | 17  | 0  |
| CONTIG-041879 | 95  | 13  | 28  | 27  | 2  |
| CONTIG-041881 | 59  | 10  | 53  | 5   | 0  |
| CONTIG-041882 | 70  | 24  | 20  | 33  | 0  |
| CONTIG-041883 | 98  | 8   | 33  | 4   | 0  |
| CONTIG-041884 | 510 | 19  | 15  | 444 | 0  |
| CONTIG-041886 | 158 | 18  | 13  | 89  | 0  |
| CONTIG-041888 | 72  | 6   | 4   | 13  | 0  |
| CONTIG-041889 | 108 | 5   | 2   | 25  | 0  |
| CONTIG-041890 | 62  | 6   | 4   | 6   | 0  |
| CONTIG-041891 | 156 | 8   | 5   | 41  | 2  |
| CONTIG-041892 | 170 | 7   | 3   | 28  | 0  |
| CONTIG-041894 | 39  | 34  | 9   | 14  | 0  |
| CONTIG-041895 | 105 | 14  | 8   | 41  | 0  |
| CONTIG-041903 | 203 | 23  | 40  | 179 | 0  |
| CONTIG-041904 | 247 | 18  | 5   | 2   | 0  |
| CONTIG-041905 | 113 | 10  | 3   | 13  | 0  |
| CONTIG-041906 | 213 | 14  | 8   | 45  | 0  |
| CONTIG-041907 | 398 | 11  | 64  | 46  | 0  |
| CONTIG-041908 | 355 | 21  | 58  | 97  | 22 |
| CONTIG-041909 | 148 | 3   | 0   | 6   | 0  |
| CONTIG-041910 | 211 | 18  | 31  | 135 | 0  |
| CONTIG-041911 | 393 | 19  | 37  | 397 | 0  |
| CONTIG-041913 | 115 | 12  | 16  | 27  | 0  |
| CONTIG-041914 | 200 | 8   | 7   | 47  | 0  |
| CONTIG-041915 | 111 | 11  | 13  | 41  | 2  |
| CONTIG-041916 | 136 | 640 | 30  | 186 | 0  |
| CONTIG-041917 | 169 | 7   | 10  | 28  | 0  |
| CONTIG-041918 | 70  | 11  | 4   | 14  | 0  |
| CONTIG-041919 | 164 | 12  | 8   | 41  | 0  |
| CONTIG-041920 | 129 | 14  | 17  | 6   | 0  |
| CONTIG-041921 | 94  | 9   | 36  | 17  | 0  |
| CONTIG-041922 | 109 | 8   | 10  | 28  | 0  |
| CONTIG-041923 | 272 | 55  | 180 | 241 | 0  |
| CONTIG-041925 | 94  | 8   | 6   | 23  | 0  |
| CONTIG-041927 | 85  | 19  | 75  | 6   | 0  |
| CONTIG-041928 | 625 | 19  | 112 | 524 | 5  |
| CONTIG-041929 | 422 | 37  | 84  | 256 | 15 |
| CONTIG-041930 | 262 | 20  | 113 | 70  | 0  |
| CONTIG-041931 | 61  | 9   | 10  | 9   | 0  |
| CONTIG-041932 | 324 | 13  | 34  | 99  | 0  |
| CONTIG-041933 | 85  | 6   | 17  | 7   | 0  |
| CONTIG-041936 | 427 | 10  | 15  | 194 | 0  |
| CONTIG-041938 | 189 | 6   | 8   | 35  | 2  |
| CONTIG-041939 | 150 | 9   | 9   | 62  | 0  |

|               |      |    |     |      |    |
|---------------|------|----|-----|------|----|
| CONTIG-041940 | 225  | 33 | 67  | 290  | 0  |
| CONTIG-041941 | 158  | 10 | 23  | 56   | 0  |
| CONTIG-041942 | 162  | 18 | 13  | 110  | 0  |
| CONTIG-041943 | 82   | 12 | 5   | 45   | 0  |
| CONTIG-041944 | 63   | 16 | 8   | 38   | 0  |
| CONTIG-041945 | 106  | 17 | 5   | 48   | 0  |
| CONTIG-041947 | 67   | 7  | 2   | 2    | 0  |
| CONTIG-041948 | 150  | 4  | 28  | 10   | 0  |
| CONTIG-041949 | 170  | 25 | 40  | 242  | 0  |
| CONTIG-041950 | 201  | 12 | 7   | 51   | 2  |
| CONTIG-041951 | 1019 | 34 | 34  | 1465 | 11 |
| CONTIG-041952 | 245  | 13 | 51  | 57   | 2  |
| CONTIG-041954 | 861  | 12 | 0   | 356  | 12 |
| CONTIG-041955 | 117  | 9  | 2   | 28   | 0  |
| CONTIG-041956 | 592  | 10 | 59  | 110  | 3  |
| CONTIG-041957 | 182  | 6  | 19  | 32   | 0  |
| CONTIG-041959 | 270  | 15 | 53  | 88   | 0  |
| CONTIG-041960 | 83   | 15 | 14  | 41   | 0  |
| CONTIG-041962 | 66   | 6  | 12  | 0    | 0  |
| CONTIG-041963 | 636  | 30 | 35  | 984  | 2  |
| CONTIG-041964 | 121  | 11 | 20  | 49   | 0  |
| CONTIG-041965 | 69   | 2  | 0   | 3    | 0  |
| CONTIG-041966 | 164  | 7  | 14  | 33   | 0  |
| CONTIG-041967 | 62   | 5  | 11  | 4    | 0  |
| CONTIG-041968 | 151  | 15 | 0   | 122  | 0  |
| CONTIG-041969 | 367  | 12 | 3   | 150  | 0  |
| CONTIG-041970 | 235  | 11 | 10  | 73   | 4  |
| CONTIG-041971 | 87   | 9  | 11  | 18   | 0  |
| CONTIG-041972 | 135  | 35 | 6   | 182  | 2  |
| CONTIG-041973 | 85   | 5  | 2   | 9    | 0  |
| CONTIG-041975 | 223  | 6  | 34  | 39   | 0  |
| CONTIG-041976 | 330  | 8  | 5   | 2    | 6  |
| CONTIG-041977 | 129  | 21 | 7   | 134  | 0  |
| CONTIG-041978 | 158  | 12 | 44  | 43   | 0  |
| CONTIG-041980 | 296  | 14 | 4   | 179  | 0  |
| CONTIG-041981 | 434  | 14 | 42  | 232  | 0  |
| CONTIG-041982 | 126  | 8  | 2   | 15   | 0  |
| CONTIG-041984 | 150  | 8  | 8   | 41   | 0  |
| CONTIG-041985 | 92   | 15 | 2   | 30   | 0  |
| CONTIG-041986 | 336  | 12 | 7   | 94   | 2  |
| CONTIG-041987 | 596  | 12 | 127 | 238  | 0  |
| CONTIG-041988 | 165  | 27 | 35  | 212  | 0  |
| CONTIG-041989 | 86   | 7  | 17  | 17   | 0  |
| CONTIG-041990 | 203  | 7  | 8   | 46   | 0  |
| CONTIG-041991 | 120  | 6  | 10  | 2    | 0  |
| CONTIG-041992 | 87   | 7  | 2   | 27   | 0  |
| CONTIG-041993 | 121  | 5  | 41  | 10   | 0  |

|               |     |     |    |      |   |
|---------------|-----|-----|----|------|---|
| CONTIG-041994 | 62  | 6   | 2  | 13   | 0 |
| CONTIG-041995 | 88  | 10  | 4  | 29   | 0 |
| CONTIG-041996 | 326 | 15  | 20 | 88   | 0 |
| CONTIG-041997 | 515 | 15  | 8  | 5    | 0 |
| CONTIG-041998 | 97  | 7   | 22 | 11   | 0 |
| CONTIG-041999 | 58  | 5   | 2  | 10   | 2 |
| CONTIG-042000 | 156 | 9   | 16 | 43   | 0 |
| CONTIG-042001 | 92  | 8   | 49 | 0    | 0 |
| CONTIG-042003 | 279 | 7   | 25 | 25   | 0 |
| CONTIG-042004 | 116 | 5   | 7  | 18   | 0 |
| CONTIG-042005 | 88  | 7   | 6  | 0    | 0 |
| CONTIG-042006 | 144 | 3   | 15 | 18   | 0 |
| CONTIG-042007 | 88  | 5   | 0  | 8    | 0 |
| CONTIG-042008 | 69  | 13  | 0  | 0    | 0 |
| CONTIG-042009 | 67  | 882 | 12 | 1610 | 0 |
| CONTIG-042010 | 142 | 11  | 40 | 34   | 3 |
| CONTIG-042016 | 139 | 15  | 61 | 22   | 0 |
| CONTIG-042017 | 299 | 18  | 3  | 229  | 2 |
| CONTIG-042018 | 126 | 9   | 4  | 45   | 0 |
| CONTIG-042019 | 159 | 8   | 10 | 34   | 0 |
| CONTIG-042020 | 401 | 17  | 21 | 233  | 0 |
| CONTIG-042021 | 241 | 12  | 18 | 54   | 0 |
| CONTIG-042022 | 233 | 10  | 12 | 49   | 0 |
| CONTIG-042023 | 145 | 4   | 16 | 6    | 0 |
| CONTIG-042025 | 76  | 6   | 6  | 5    | 0 |
| CONTIG-042026 | 355 | 7   | 26 | 65   | 0 |
| CONTIG-042027 | 67  | 6   | 0  | 4    | 0 |
| CONTIG-042028 | 210 | 8   | 5  | 68   | 0 |
| CONTIG-042029 | 84  | 7   | 4  | 24   | 0 |
| CONTIG-042031 | 177 | 11  | 24 | 72   | 0 |
| CONTIG-042032 | 93  | 9   | 63 | 11   | 0 |
| CONTIG-042033 | 469 | 20  | 19 | 484  | 0 |
| CONTIG-042036 | 182 | 4   | 7  | 13   | 0 |
| CONTIG-042037 | 348 | 28  | 48 | 508  | 0 |
| CONTIG-042038 | 76  | 6   | 2  | 20   | 0 |
| CONTIG-042046 | 545 | 20  | 20 | 204  | 0 |
| CONTIG-042047 | 124 | 6   | 65 | 0    | 0 |
| CONTIG-042048 | 191 | 21  | 27 | 117  | 2 |
| CONTIG-042050 | 128 | 8   | 14 | 14   | 0 |
| CONTIG-042051 | 127 | 9   | 10 | 22   | 2 |
| CONTIG-042052 | 325 | 6   | 11 | 31   | 0 |
| CONTIG-042053 | 182 | 6   | 8  | 26   | 2 |
| CONTIG-042055 | 90  | 5   | 6  | 19   | 0 |
| CONTIG-042056 | 167 | 8   | 7  | 21   | 2 |
| CONTIG-042057 | 92  | 6   | 5  | 19   | 0 |
| CONTIG-042058 | 93  | 3   | 4  | 2    | 0 |
| CONTIG-042059 | 187 | 12  | 37 | 23   | 0 |

|               |     |    |    |     |   |
|---------------|-----|----|----|-----|---|
| CONTIG-042060 | 300 | 15 | 6  | 136 | 2 |
| CONTIG-042061 | 78  | 5  | 2  | 2   | 0 |
| CONTIG-042064 | 138 | 4  | 0  | 13  | 0 |
| CONTIG-042065 | 118 | 11 | 14 | 30  | 0 |
| CONTIG-042066 | 150 | 9  | 68 | 13  | 0 |
| CONTIG-042067 | 157 | 2  | 0  | 13  | 0 |
| CONTIG-042068 | 88  | 11 | 15 | 39  | 0 |
| CONTIG-042069 | 381 | 24 | 51 | 103 | 4 |
| CONTIG-042070 | 88  | 5  | 0  | 0   | 0 |
| CONTIG-042071 | 63  | 6  | 4  | 6   | 0 |
| CONTIG-042077 | 88  | 14 | 2  | 52  | 0 |
| CONTIG-042078 | 167 | 5  | 2  | 23  | 2 |
| CONTIG-042079 | 91  | 8  | 7  | 12  | 0 |
| CONTIG-042080 | 258 | 12 | 7  | 107 | 0 |
| CONTIG-042081 | 136 | 11 | 21 | 53  | 0 |
| CONTIG-042082 | 86  | 6  | 23 | 0   | 0 |
| CONTIG-042083 | 97  | 14 | 25 | 29  | 0 |
| CONTIG-042084 | 637 | 15 | 47 | 343 | 0 |
| CONTIG-042085 | 115 | 28 | 20 | 97  | 0 |
| CONTIG-042086 | 95  | 13 | 16 | 4   | 0 |
| CONTIG-042087 | 362 | 9  | 3  | 78  | 0 |
| CONTIG-042088 | 206 | 10 | 16 | 64  | 0 |
| CONTIG-042089 | 106 | 6  | 14 | 17  | 0 |
| CONTIG-042090 | 105 | 70 | 21 | 0   | 0 |
| CONTIG-042091 | 90  | 7  | 0  | 5   | 0 |
| CONTIG-042093 | 193 | 18 | 36 | 95  | 2 |
| CONTIG-042094 | 249 | 11 | 14 | 97  | 0 |
| CONTIG-042095 | 244 | 10 | 22 | 73  | 0 |
| CONTIG-042096 | 81  | 7  | 4  | 12  | 0 |
| CONTIG-042097 | 72  | 30 | 63 | 0   | 0 |
| CONTIG-042098 | 290 | 6  | 20 | 47  | 0 |
| CONTIG-042099 | 76  | 3  | 15 | 0   | 0 |
| CONTIG-042104 | 154 | 9  | 6  | 37  | 0 |
| CONTIG-042105 | 141 | 6  | 4  | 32  | 0 |
| CONTIG-042106 | 88  | 4  | 2  | 2   | 0 |
| CONTIG-042107 | 66  | 11 | 4  | 24  | 0 |
| CONTIG-042109 | 244 | 8  | 3  | 22  | 0 |
| CONTIG-042110 | 116 | 7  | 21 | 2   | 0 |
| CONTIG-042111 | 143 | 5  | 8  | 8   | 0 |
| CONTIG-042112 | 160 | 9  | 3  | 24  | 0 |
| CONTIG-042113 | 609 | 11 | 23 | 314 | 0 |
| CONTIG-042114 | 78  | 3  | 0  | 6   | 0 |
| CONTIG-042115 | 206 | 10 | 8  | 67  | 0 |
| CONTIG-042116 | 253 | 8  | 32 | 29  | 0 |
| CONTIG-042117 | 603 | 21 | 9  | 195 | 6 |
| CONTIG-042118 | 133 | 9  | 0  | 0   | 0 |
| CONTIG-042119 | 70  | 20 | 41 | 6   | 0 |

|               |     |      |     |     |      |
|---------------|-----|------|-----|-----|------|
| CONTIG-042120 | 281 | 10   | 25  | 90  | 0    |
| CONTIG-042121 | 152 | 3    | 4   | 5   | 0    |
| CONTIG-042123 | 96  | 16   | 13  | 30  | 2    |
| CONTIG-042124 | 216 | 11   | 62  | 80  | 0    |
| CONTIG-042128 | 148 | 6    | 15  | 13  | 2    |
| CONTIG-042129 | 273 | 14   | 134 | 106 | 0    |
| CONTIG-042130 | 124 | 3    | 13  | 4   | 0    |
| CONTIG-042131 | 64  | 4    | 10  | 2   | 0    |
| CONTIG-042132 | 93  | 5    | 5   | 5   | 0    |
| CONTIG-042133 | 362 | 8    | 24  | 89  | 0    |
| CONTIG-042134 | 82  | 9    | 0   | 37  | 2    |
| CONTIG-042135 | 209 | 9    | 8   | 30  | 2    |
| CONTIG-042136 | 146 | 11   | 4   | 32  | 0    |
| CONTIG-042137 | 386 | 12   | 110 | 52  | 0    |
| CONTIG-042138 | 86  | 3    | 0   | 0   | 0    |
| CONTIG-042139 | 154 | 4    | 35  | 12  | 0    |
| CONTIG-042141 | 65  | 5    | 5   | 0   | 0    |
| CONTIG-042144 | 115 | 11   | 51  | 6   | 0    |
| CONTIG-042145 | 78  | 5    | 4   | 12  | 0    |
| CONTIG-042146 | 140 | 15   | 6   | 73  | 0    |
| CONTIG-042147 | 98  | 7    | 0   | 20  | 0    |
| CONTIG-042148 | 126 | 21   | 12  | 101 | 0    |
| CONTIG-042149 | 261 | 19   | 109 | 53  | 0    |
| CONTIG-042150 | 114 | 6    | 4   | 24  | 0    |
| CONTIG-042151 | 435 | 21   | 46  | 362 | 0    |
| CONTIG-042152 | 76  | 3    | 0   | 6   | 0    |
| CONTIG-042153 | 148 | 8    | 11  | 28  | 0    |
| CONTIG-042154 | 357 | 15   | 21  | 154 | 0    |
| CONTIG-042155 | 330 | 19   | 35  | 144 | 2    |
| CONTIG-042158 | 185 | 6    | 6   | 51  | 0    |
| CONTIG-042159 | 209 | 14   | 0   | 37  | 8    |
| CONTIG-042160 | 259 | 9    | 16  | 45  | 2    |
| CONTIG-042163 | 111 | 9    | 6   | 21  | 0    |
| CONTIG-042164 | 200 | 9    | 25  | 75  | 0    |
| CONTIG-042165 | 224 | 7    | 5   | 19  | 2    |
| CONTIG-042166 | 178 | 17   | 9   | 82  | 0    |
| CONTIG-042167 | 85  | 19   | 42  | 17  | 0    |
| CONTIG-042168 | 79  | 4    | 3   | 3   | 0    |
| CONTIG-042169 | 199 | 10   | 7   | 82  | 0    |
| CONTIG-042170 | 87  | 6    | 15  | 11  | 0    |
| CONTIG-042171 | 36  | 1427 | 7   | 76  | 0    |
| CONTIG-042172 | 132 | 7    | 0   | 2   | 0    |
| CONTIG-042173 | 181 | 6    | 8   | 33  | 0    |
| CONTIG-042174 | 125 | 528  | 67  | 73  | 1823 |
| CONTIG-042175 | 95  | 16   | 22  | 43  | 0    |
| CONTIG-042177 | 460 | 17   | 75  | 305 | 4    |
| CONTIG-042178 | 526 | 12   | 12  | 137 | 2    |

|               |     |     |     |     |    |
|---------------|-----|-----|-----|-----|----|
| CONTIG-042181 | 566 | 13  | 103 | 290 | 0  |
| CONTIG-042186 | 126 | 4   | 3   | 9   | 0  |
| CONTIG-042191 | 71  | 7   | 32  | 2   | 0  |
| CONTIG-042195 | 671 | 15  | 78  | 317 | 0  |
| CONTIG-042197 | 77  | 38  | 4   | 164 | 0  |
| CONTIG-042198 | 119 | 19  | 4   | 81  | 2  |
| CONTIG-042199 | 61  | 5   | 17  | 0   | 0  |
| CONTIG-042200 | 154 | 12  | 30  | 46  | 0  |
| CONTIG-042201 | 92  | 6   | 8   | 19  | 0  |
| CONTIG-042202 | 369 | 9   | 6   | 108 | 2  |
| CONTIG-042203 | 190 | 4   | 8   | 10  | 0  |
| CONTIG-042204 | 113 | 12  | 4   | 57  | 3  |
| CONTIG-042205 | 127 | 7   | 9   | 25  | 0  |
| CONTIG-042206 | 82  | 4   | 2   | 8   | 0  |
| CONTIG-042207 | 73  | 5   | 0   | 11  | 0  |
| CONTIG-042208 | 67  | 7   | 10  | 8   | 0  |
| CONTIG-042210 | 40  | 21  | 2   | 35  | 0  |
| CONTIG-042211 | 107 | 2   | 0   | 0   | 0  |
| CONTIG-042212 | 80  | 4   | 0   | 5   | 0  |
| CONTIG-042213 | 157 | 6   | 4   | 4   | 0  |
| CONTIG-042214 | 246 | 18  | 84  | 90  | 0  |
| CONTIG-042215 | 291 | 5   | 6   | 39  | 2  |
| CONTIG-042216 | 78  | 6   | 0   | 8   | 0  |
| CONTIG-042217 | 514 | 29  | 83  | 39  | 0  |
| CONTIG-042218 | 185 | 11  | 26  | 78  | 0  |
| CONTIG-042219 | 167 | 5   | 0   | 23  | 0  |
| CONTIG-042220 | 240 | 12  | 15  | 97  | 0  |
| CONTIG-042221 | 89  | 3   | 13  | 5   | 0  |
| CONTIG-042222 | 491 | 16  | 53  | 94  | 0  |
| CONTIG-042223 | 115 | 3   | 5   | 0   | 0  |
| CONTIG-042224 | 93  | 6   | 2   | 17  | 0  |
| CONTIG-042225 | 211 | 15  | 41  | 93  | 0  |
| CONTIG-042228 | 84  | 6   | 10  | 11  | 0  |
| CONTIG-042229 | 373 | 19  | 31  | 340 | 0  |
| CONTIG-042232 | 228 | 8   | 13  | 42  | 2  |
| CONTIG-042234 | 97  | 58  | 14  | 325 | 0  |
| CONTIG-042235 | 507 | 10  | 23  | 116 | 2  |
| CONTIG-042236 | 117 | 27  | 17  | 87  | 0  |
| CONTIG-042237 | 62  | 3   | 3   | 0   | 0  |
| CONTIG-042238 | 58  | 6   | 15  | 0   | 0  |
| CONTIG-042239 | 161 | 6   | 12  | 0   | 15 |
| CONTIG-042241 | 102 | 4   | 2   | 7   | 0  |
| CONTIG-042242 | 128 | 16  | 38  | 39  | 0  |
| CONTIG-042243 | 192 | 12  | 20  | 57  | 0  |
| CONTIG-042244 | 222 | 60  | 18  | 0   | 0  |
| CONTIG-042245 | 177 | 4   | 9   | 14  | 0  |
| CONTIG-042246 | 157 | 152 | 508 | 718 | 0  |



|               |     |    |    |     |    |
|---------------|-----|----|----|-----|----|
| CONTIG-042247 | 213 | 8  | 15 | 57  | 0  |
| CONTIG-042248 | 468 | 10 | 2  | 0   | 16 |
| CONTIG-042250 | 275 | 5  | 10 | 49  | 0  |
| CONTIG-042251 | 196 | 6  | 27 | 29  | 0  |
| CONTIG-042252 | 60  | 4  | 0  | 3   | 0  |
| CONTIG-042253 | 190 | 13 | 25 | 78  | 0  |
| CONTIG-042255 | 325 | 12 | 55 | 126 | 0  |
| CONTIG-042256 | 146 | 9  | 4  | 6   | 0  |
| CONTIG-042258 | 110 | 4  | 0  | 12  | 0  |
| CONTIG-042259 | 316 | 24 | 17 | 218 | 13 |
| CONTIG-042260 | 428 | 9  | 20 | 116 | 0  |
| CONTIG-042262 | 156 | 6  | 11 | 18  | 0  |
| CONTIG-042263 | 72  | 7  | 15 | 8   | 0  |
| CONTIG-042264 | 88  | 6  | 8  | 24  | 0  |
| CONTIG-042266 | 62  | 3  | 8  | 0   | 0  |
| CONTIG-042267 | 730 | 17 | 67 | 321 | 15 |
| CONTIG-042268 | 81  | 4  | 6  | 10  | 0  |
| CONTIG-042269 | 587 | 21 | 17 | 541 | 2  |
| CONTIG-042270 | 129 | 4  | 9  | 21  | 0  |
| CONTIG-042271 | 184 | 11 | 12 | 49  | 0  |
| CONTIG-042272 | 89  | 6  | 6  | 4   | 0  |
| CONTIG-042273 | 61  | 24 | 59 | 4   | 7  |
| CONTIG-042274 | 492 | 12 | 16 | 186 | 10 |
| CONTIG-042275 | 62  | 3  | 0  | 2   | 0  |
| CONTIG-042276 | 87  | 11 | 2  | 24  | 0  |
| CONTIG-042277 | 105 | 15 | 41 | 37  | 2  |
| CONTIG-042278 | 96  | 13 | 5  | 40  | 0  |
| CONTIG-042281 | 74  | 5  | 5  | 5   | 0  |
| CONTIG-042282 | 93  | 10 | 7  | 0   | 0  |
| CONTIG-042283 | 335 | 9  | 84 | 47  | 0  |
| CONTIG-042285 | 69  | 6  | 14 | 2   | 0  |
| CONTIG-042286 | 250 | 9  | 5  | 94  | 0  |
| CONTIG-042287 | 169 | 9  | 8  | 37  | 0  |
| CONTIG-042288 | 222 | 27 | 29 | 215 | 0  |
| CONTIG-042289 | 134 | 3  | 5  | 4   | 0  |
| CONTIG-042290 | 60  | 23 | 17 | 44  | 0  |
| CONTIG-042291 | 192 | 8  | 3  | 9   | 0  |
| CONTIG-042292 | 285 | 17 | 22 | 171 | 0  |
| CONTIG-042293 | 150 | 10 | 7  | 38  | 0  |
| CONTIG-042294 | 387 | 11 | 11 | 166 | 2  |
| CONTIG-042295 | 71  | 11 | 10 | 30  | 0  |
| CONTIG-042296 | 111 | 15 | 26 | 16  | 0  |
| CONTIG-042297 | 751 | 11 | 34 | 330 | 2  |
| CONTIG-042299 | 241 | 5  | 11 | 28  | 0  |
| CONTIG-042300 | 295 | 16 | 13 | 94  | 2  |
| CONTIG-042305 | 142 | 9  | 2  | 58  | 0  |
| CONTIG-042306 | 237 | 8  | 46 | 26  | 0  |

|               |     |      |    |      |   |
|---------------|-----|------|----|------|---|
| CONTIG-042307 | 76  | 6    | 13 | 8    | 0 |
| CONTIG-042308 | 180 | 20   | 40 | 43   | 5 |
| CONTIG-042309 | 88  | 7    | 15 | 0    | 0 |
| CONTIG-042310 | 143 | 9    | 23 | 31   | 0 |
| CONTIG-042316 | 204 | 39   | 49 | 429  | 0 |
| CONTIG-042317 | 409 | 10   | 54 | 136  | 0 |
| CONTIG-042318 | 116 | 6    | 10 | 16   | 0 |
| CONTIG-042319 | 247 | 22   | 62 | 205  | 0 |
| CONTIG-042320 | 293 | 25   | 43 | 63   | 0 |
| CONTIG-042321 | 78  | 4    | 4  | 5    | 0 |
| CONTIG-042322 | 153 | 7    | 8  | 22   | 0 |
| CONTIG-042323 | 64  | 14   | 17 | 0    | 0 |
| CONTIG-042324 | 83  | 13   | 4  | 43   | 0 |
| CONTIG-042326 | 78  | 4    | 0  | 7    | 0 |
| CONTIG-042327 | 52  | 1047 | 11 | 2699 | 0 |
| CONTIG-042328 | 87  | 11   | 13 | 33   | 0 |
| CONTIG-042329 | 99  | 13   | 16 | 21   | 0 |
| CONTIG-042330 | 130 | 7    | 5  | 9    | 0 |
| CONTIG-042331 | 87  | 6    | 8  | 9    | 0 |
| CONTIG-042332 | 552 | 64   | 16 | 38   | 0 |
| CONTIG-042333 | 199 | 6    | 8  | 20   | 0 |
| CONTIG-042334 | 84  | 58   | 86 | 192  | 0 |
| CONTIG-042335 | 68  | 3    | 0  | 5    | 0 |
| CONTIG-042336 | 103 | 22   | 17 | 109  | 0 |
| CONTIG-042337 | 356 | 21   | 18 | 86   | 0 |
| CONTIG-042338 | 59  | 8    | 9  | 20   | 0 |
| CONTIG-042339 | 62  | 12   | 10 | 10   | 0 |
| CONTIG-042340 | 210 | 15   | 24 | 125  | 2 |
| CONTIG-042341 | 292 | 18   | 30 | 151  | 0 |
| CONTIG-042342 | 408 | 9    | 20 | 107  | 2 |
| CONTIG-042343 | 198 | 166  | 23 | 2029 | 0 |
| CONTIG-042345 | 164 | 36   | 53 | 199  | 0 |
| CONTIG-042346 | 138 | 11   | 7  | 33   | 0 |
| CONTIG-042347 | 155 | 6    | 14 | 32   | 0 |
| CONTIG-042348 | 187 | 17   | 11 | 128  | 0 |
| CONTIG-042349 | 236 | 9    | 32 | 76   | 0 |
| CONTIG-042350 | 754 | 16   | 19 | 479  | 2 |
| CONTIG-042353 | 280 | 12   | 32 | 94   | 0 |
| CONTIG-042355 | 410 | 14   | 28 | 117  | 9 |
| CONTIG-042356 | 61  | 2    | 11 | 0    | 0 |
| CONTIG-042357 | 112 | 10   | 0  | 15   | 0 |
| CONTIG-042358 | 72  | 5    | 8  | 4    | 0 |
| CONTIG-042359 | 122 | 9    | 10 | 33   | 0 |
| CONTIG-042360 | 61  | 3    | 0  | 3    | 0 |
| CONTIG-042361 | 196 | 8    | 17 | 54   | 0 |
| CONTIG-042362 | 586 | 15   | 16 | 346  | 4 |
| CONTIG-042363 | 97  | 18   | 19 | 0    | 0 |

|               |      |    |     |      |     |
|---------------|------|----|-----|------|-----|
| CONTIG-042364 | 66   | 47 | 7   | 120  | 2   |
| CONTIG-042365 | 1052 | 26 | 2   | 0    | 100 |
| CONTIG-042366 | 60   | 8  | 9   | 22   | 0   |
| CONTIG-042367 | 246  | 10 | 18  | 73   | 0   |
| CONTIG-042368 | 534  | 17 | 124 | 104  | 2   |
| CONTIG-042369 | 63   | 17 | 47  | 8    | 2   |
| CONTIG-042370 | 222  | 6  | 57  | 7    | 0   |
| CONTIG-042371 | 100  | 6  | 0   | 19   | 0   |
| CONTIG-042372 | 175  | 20 | 73  | 97   | 0   |
| CONTIG-042374 | 51   | 16 | 4   | 15   | 0   |
| CONTIG-042375 | 117  | 4  | 6   | 8    | 0   |
| CONTIG-042376 | 170  | 8  | 31  | 37   | 0   |
| CONTIG-042377 | 446  | 19 | 27  | 83   | 0   |
| CONTIG-042378 | 178  | 17 | 44  | 160  | 0   |
| CONTIG-042379 | 199  | 8  | 27  | 23   | 0   |
| CONTIG-042380 | 72   | 3  | 2   | 2    | 0   |
| CONTIG-042383 | 127  | 5  | 9   | 16   | 0   |
| CONTIG-042385 | 151  | 12 | 6   | 57   | 0   |
| CONTIG-042386 | 213  | 7  | 13  | 49   | 2   |
| CONTIG-042390 | 215  | 32 | 35  | 166  | 0   |
| CONTIG-042393 | 226  | 17 | 7   | 60   | 2   |
| CONTIG-042394 | 177  | 67 | 5   | 0    | 236 |
| CONTIG-042395 | 72   | 36 | 29  | 7    | 22  |
| CONTIG-042397 | 173  | 6  | 8   | 23   | 0   |
| CONTIG-042399 | 309  | 9  | 39  | 26   | 0   |
| CONTIG-042400 | 197  | 9  | 7   | 47   | 0   |
| CONTIG-042401 | 87   | 9  | 0   | 34   | 0   |
| CONTIG-042405 | 240  | 7  | 12  | 53   | 0   |
| CONTIG-042406 | 346  | 13 | 2   | 0    | 21  |
| CONTIG-042407 | 95   | 7  | 17  | 10   | 0   |
| CONTIG-042408 | 115  | 5  | 2   | 2    | 0   |
| CONTIG-042409 | 723  | 36 | 120 | 1102 | 2   |
| CONTIG-042410 | 109  | 65 | 23  | 332  | 0   |
| CONTIG-042411 | 86   | 11 | 8   | 4    | 2   |
| CONTIG-042412 | 219  | 8  | 12  | 45   | 0   |
| CONTIG-042413 | 65   | 6  | 10  | 4    | 0   |
| CONTIG-042415 | 179  | 8  | 13  | 60   | 0   |
| CONTIG-042416 | 141  | 3  | 6   | 0    | 0   |
| CONTIG-042417 | 113  | 12 | 23  | 13   | 0   |
| CONTIG-042419 | 319  | 26 | 26  | 351  | 0   |
| CONTIG-042420 | 294  | 10 | 10  | 88   | 0   |
| CONTIG-042421 | 58   | 3  | 2   | 0    | 0   |
| CONTIG-042422 | 214  | 7  | 32  | 29   | 0   |
| CONTIG-042423 | 168  | 11 | 6   | 56   | 2   |
| CONTIG-042424 | 78   | 5  | 0   | 8    | 0   |
| CONTIG-042425 | 146  | 12 | 20  | 33   | 0   |
| CONTIG-042426 | 296  | 7  | 8   | 48   | 0   |

|               |     |     |     |      |   |
|---------------|-----|-----|-----|------|---|
| CONTIG-042427 | 66  | 293 | 25  | 874  | 2 |
| CONTIG-042428 | 116 | 14  | 26  | 50   | 2 |
| CONTIG-042429 | 77  | 3   | 0   | 9    | 0 |
| CONTIG-042431 | 92  | 6   | 15  | 17   | 0 |
| CONTIG-042432 | 100 | 8   | 5   | 4    | 0 |
| CONTIG-042433 | 108 | 5   | 2   | 7    | 0 |
| CONTIG-042434 | 271 | 19  | 76  | 100  | 0 |
| CONTIG-042435 | 108 | 10  | 3   | 51   | 0 |
| CONTIG-042436 | 102 | 9   | 23  | 13   | 0 |
| CONTIG-042437 | 93  | 12  | 2   | 0    | 8 |
| CONTIG-042438 | 358 | 8   | 12  | 64   | 0 |
| CONTIG-042439 | 143 | 4   | 0   | 2    | 2 |
| CONTIG-042440 | 160 | 12  | 16  | 23   | 3 |
| CONTIG-042441 | 212 | 22  | 6   | 124  | 0 |
| CONTIG-042442 | 207 | 6   | 14  | 33   | 0 |
| CONTIG-042443 | 287 | 13  | 21  | 86   | 2 |
| CONTIG-042444 | 267 | 11  | 27  | 53   | 2 |
| CONTIG-042445 | 103 | 8   | 9   | 19   | 0 |
| CONTIG-042447 | 237 | 11  | 34  | 85   | 0 |
| CONTIG-042448 | 139 | 6   | 11  | 8    | 0 |
| CONTIG-042449 | 136 | 6   | 6   | 11   | 0 |
| CONTIG-042450 | 82  | 8   | 12  | 2    | 0 |
| CONTIG-042451 | 242 | 9   | 93  | 48   | 0 |
| CONTIG-042452 | 236 | 9   | 10  | 66   | 0 |
| CONTIG-042457 | 91  | 3   | 5   | 6    | 0 |
| CONTIG-042458 | 974 | 25  | 74  | 1435 | 0 |
| CONTIG-042459 | 77  | 12  | 12  | 17   | 0 |
| CONTIG-042460 | 163 | 6   | 3   | 8    | 0 |
| CONTIG-042461 | 258 | 9   | 25  | 41   | 0 |
| CONTIG-042462 | 193 | 7   | 4   | 43   | 0 |
| CONTIG-042463 | 110 | 3   | 0   | 0    | 0 |
| CONTIG-042464 | 317 | 7   | 22  | 70   | 2 |
| CONTIG-042465 | 110 | 12  | 7   | 30   | 0 |
| CONTIG-042466 | 277 | 13  | 24  | 73   | 2 |
| CONTIG-042467 | 69  | 6   | 2   | 12   | 0 |
| CONTIG-042468 | 63  | 14  | 11  | 19   | 0 |
| CONTIG-042469 | 70  | 9   | 10  | 17   | 0 |
| CONTIG-042471 | 70  | 7   | 2   | 13   | 0 |
| CONTIG-042472 | 95  | 6   | 26  | 7    | 0 |
| CONTIG-042474 | 239 | 8   | 7   | 39   | 0 |
| CONTIG-042475 | 308 | 20  | 41  | 338  | 0 |
| CONTIG-042476 | 106 | 10  | 2   | 34   | 0 |
| CONTIG-042477 | 78  | 6   | 2   | 18   | 0 |
| CONTIG-042478 | 349 | 46  | 145 | 354  | 8 |
| CONTIG-042479 | 164 | 7   | 12  | 11   | 2 |
| CONTIG-042480 | 103 | 7   | 0   | 24   | 3 |
| CONTIG-042481 | 250 | 31  | 17  | 394  | 8 |

|               |     |     |     |     |     |
|---------------|-----|-----|-----|-----|-----|
| CONTIG-042482 | 155 | 7   | 11  | 16  | 0   |
| CONTIG-042483 | 80  | 3   | 5   | 0   | 0   |
| CONTIG-042484 | 177 | 5   | 4   | 29  | 0   |
| CONTIG-042485 | 86  | 10  | 22  | 19  | 2   |
| CONTIG-042486 | 370 | 8   | 34  | 26  | 0   |
| CONTIG-042487 | 228 | 8   | 0   | 44  | 0   |
| CONTIG-042488 | 94  | 6   | 6   | 0   | 0   |
| CONTIG-042489 | 326 | 7   | 4   | 57  | 0   |
| CONTIG-042491 | 120 | 7   | 5   | 25  | 0   |
| CONTIG-042492 | 222 | 7   | 8   | 43  | 0   |
| CONTIG-042493 | 127 | 7   | 2   | 31  | 2   |
| CONTIG-042494 | 71  | 3   | 3   | 4   | 0   |
| CONTIG-042496 | 73  | 6   | 0   | 20  | 0   |
| CONTIG-042497 | 145 | 7   | 10  | 25  | 0   |
| CONTIG-042498 | 372 | 15  | 40  | 85  | 0   |
| CONTIG-042499 | 232 | 12  | 13  | 91  | 0   |
| CONTIG-042500 | 171 | 12  | 35  | 18  | 0   |
| CONTIG-042501 | 89  | 5   | 0   | 5   | 0   |
| CONTIG-042502 | 84  | 9   | 12  | 15  | 0   |
| CONTIG-042503 | 428 | 12  | 25  | 131 | 2   |
| CONTIG-042504 | 63  | 12  | 20  | 24  | 0   |
| CONTIG-042505 | 78  | 6   | 15  | 6   | 0   |
| CONTIG-042506 | 404 | 16  | 73  | 243 | 0   |
| CONTIG-042507 | 270 | 9   | 20  | 58  | 2   |
| CONTIG-042508 | 310 | 18  | 71  | 158 | 0   |
| CONTIG-042509 | 76  | 4   | 0   | 4   | 0   |
| CONTIG-042512 | 357 | 13  | 0   | 90  | 0   |
| CONTIG-042513 | 96  | 11  | 0   | 34  | 0   |
| CONTIG-042514 | 75  | 33  | 54  | 34  | 0   |
| CONTIG-042515 | 49  | 888 | 116 | 15  | 852 |
| CONTIG-042517 | 126 | 26  | 12  | 109 | 0   |
| CONTIG-042518 | 91  | 43  | 15  | 200 | 0   |
| CONTIG-042519 | 92  | 4   | 8   | 6   | 2   |
| CONTIG-042520 | 106 | 7   | 4   | 37  | 0   |
| CONTIG-042521 | 162 | 8   | 3   | 45  | 0   |
| CONTIG-042522 | 59  | 5   | 0   | 9   | 0   |
| CONTIG-042523 | 206 | 20  | 14  | 152 | 0   |
| CONTIG-042524 | 50  | 10  | 36  | 0   | 0   |
| CONTIG-042525 | 90  | 8   | 24  | 2   | 0   |
| CONTIG-042526 | 158 | 16  | 10  | 106 | 0   |
| CONTIG-042527 | 133 | 9   | 8   | 13  | 0   |
| CONTIG-042528 | 133 | 4   | 4   | 14  | 0   |
| CONTIG-042529 | 618 | 21  | 150 | 458 | 2   |
| CONTIG-042530 | 165 | 9   | 20  | 37  | 0   |
| CONTIG-042531 | 446 | 12  | 12  | 172 | 7   |
| CONTIG-042533 | 343 | 17  | 42  | 164 | 2   |
| CONTIG-042534 | 102 | 27  | 59  | 92  | 0   |

|               |     |    |    |      |    |
|---------------|-----|----|----|------|----|
| CONTIG-042535 | 313 | 10 | 58 | 28   | 6  |
| CONTIG-042536 | 289 | 16 | 21 | 183  | 10 |
| CONTIG-042537 | 95  | 10 | 7  | 13   | 2  |
| CONTIG-042538 | 101 | 13 | 19 | 63   | 0  |
| CONTIG-042539 | 83  | 11 | 11 | 19   | 0  |
| CONTIG-042540 | 161 | 8  | 8  | 50   | 0  |
| CONTIG-042541 | 196 | 13 | 21 | 59   | 0  |
| CONTIG-042542 | 88  | 10 | 2  | 37   | 0  |
| CONTIG-042543 | 124 | 7  | 5  | 15   | 0  |
| CONTIG-042544 | 118 | 10 | 23 | 30   | 0  |
| CONTIG-042545 | 90  | 8  | 38 | 4    | 0  |
| CONTIG-042546 | 199 | 11 | 77 | 13   | 0  |
| CONTIG-042547 | 81  | 6  | 6  | 4    | 0  |
| CONTIG-042548 | 69  | 13 | 13 | 14   | 0  |
| CONTIG-042549 | 351 | 9  | 26 | 104  | 0  |
| CONTIG-042550 | 707 | 53 | 56 | 1139 | 68 |
| CONTIG-042552 | 61  | 5  | 6  | 9    | 0  |
| CONTIG-042553 | 110 | 6  | 7  | 5    | 0  |
| CONTIG-042554 | 111 | 8  | 3  | 38   | 0  |
| CONTIG-042555 | 242 | 9  | 24 | 59   | 0  |
| CONTIG-042556 | 203 | 6  | 23 | 14   | 0  |
| CONTIG-042558 | 167 | 13 | 14 | 69   | 0  |
| CONTIG-042559 | 208 | 11 | 5  | 84   | 0  |
| CONTIG-042560 | 233 | 16 | 15 | 98   | 2  |
| CONTIG-042561 | 107 | 31 | 19 | 96   | 0  |
| CONTIG-042562 | 72  | 83 | 39 | 180  | 11 |
| CONTIG-042564 | 77  | 30 | 7  | 0    | 0  |
| CONTIG-042565 | 211 | 17 | 60 | 53   | 0  |
| CONTIG-042566 | 383 | 9  | 5  | 144  | 0  |
| CONTIG-042567 | 61  | 5  | 0  | 6    | 0  |
| CONTIG-042568 | 79  | 3  | 0  | 6    | 0  |
| CONTIG-042569 | 85  | 24 | 9  | 73   | 0  |
| CONTIG-042570 | 167 | 11 | 14 | 28   | 2  |
| CONTIG-042571 | 106 | 3  | 2  | 6    | 0  |
| CONTIG-042572 | 285 | 15 | 12 | 150  | 0  |
| CONTIG-042573 | 129 | 54 | 35 | 45   | 0  |
| CONTIG-042574 | 62  | 25 | 35 | 69   | 0  |
| CONTIG-042575 | 380 | 12 | 16 | 149  | 0  |
| CONTIG-042576 | 115 | 7  | 5  | 19   | 0  |
| CONTIG-042577 | 147 | 9  | 2  | 56   | 2  |
| CONTIG-042578 | 163 | 11 | 40 | 16   | 2  |
| CONTIG-042579 | 82  | 3  | 3  | 5    | 0  |
| CONTIG-042584 | 137 | 4  | 8  | 13   | 0  |
| CONTIG-042586 | 220 | 7  | 2  | 67   | 0  |
| CONTIG-042587 | 473 | 8  | 12 | 83   | 0  |
| CONTIG-042588 | 178 | 6  | 24 | 28   | 0  |
| CONTIG-042589 | 175 | 8  | 6  | 26   | 0  |

|               |     |     |    |      |    |
|---------------|-----|-----|----|------|----|
| CONTIG-042590 | 84  | 7   | 11 | 7    | 2  |
| CONTIG-042591 | 76  | 3   | 2  | 3    | 0  |
| CONTIG-042592 | 171 | 6   | 4  | 24   | 0  |
| CONTIG-042593 | 146 | 6   | 39 | 8    | 0  |
| CONTIG-042594 | 172 | 16  | 5  | 69   | 3  |
| CONTIG-042595 | 244 | 16  | 63 | 32   | 0  |
| CONTIG-042596 | 96  | 11  | 26 | 26   | 0  |
| CONTIG-042597 | 425 | 8   | 2  | 32   | 0  |
| CONTIG-042598 | 95  | 3   | 0  | 4    | 0  |
| CONTIG-042599 | 316 | 8   | 5  | 123  | 0  |
| CONTIG-042600 | 168 | 6   | 2  | 24   | 0  |
| CONTIG-042601 | 531 | 24  | 64 | 463  | 6  |
| CONTIG-042604 | 121 | 380 | 52 | 2198 | 30 |
| CONTIG-042605 | 85  | 18  | 8  | 31   | 0  |
| CONTIG-042606 | 154 | 16  | 7  | 45   | 7  |
| CONTIG-042607 | 78  | 4   | 0  | 9    | 0  |
| CONTIG-042608 | 161 | 9   | 7  | 65   | 0  |
| CONTIG-042609 | 128 | 43  | 10 | 287  | 2  |
| CONTIG-042610 | 157 | 12  | 10 | 75   | 0  |
| CONTIG-042611 | 679 | 17  | 44 | 138  | 0  |
| CONTIG-042612 | 60  | 6   | 4  | 7    | 0  |
| CONTIG-042613 | 130 | 6   | 2  | 6    | 0  |
| CONTIG-042614 | 367 | 17  | 7  | 297  | 0  |
| CONTIG-042615 | 137 | 7   | 2  | 34   | 0  |
| CONTIG-042616 | 103 | 7   | 3  | 21   | 0  |
| CONTIG-042617 | 207 | 7   | 34 | 48   | 0  |
| CONTIG-042618 | 370 | 17  | 44 | 205  | 0  |
| CONTIG-042619 | 194 | 10  | 19 | 81   | 0  |
| CONTIG-042620 | 169 | 15  | 20 | 58   | 0  |
| CONTIG-042623 | 210 | 8   | 30 | 26   | 0  |
| CONTIG-042624 | 332 | 6   | 4  | 31   | 0  |
| CONTIG-042625 | 227 | 8   | 0  | 47   | 0  |
| CONTIG-042626 | 42  | 105 | 12 | 176  | 0  |
| CONTIG-042627 | 334 | 10  | 4  | 145  | 0  |
| CONTIG-042630 | 228 | 26  | 52 | 144  | 0  |
| CONTIG-042631 | 182 | 11  | 29 | 44   | 3  |
| CONTIG-042632 | 123 | 5   | 4  | 16   | 0  |
| CONTIG-042633 | 324 | 15  | 71 | 138  | 4  |
| CONTIG-042634 | 131 | 4   | 7  | 16   | 0  |
| CONTIG-042637 | 185 | 5   | 6  | 31   | 0  |
| CONTIG-042638 | 200 | 12  | 48 | 73   | 0  |
| CONTIG-042639 | 345 | 11  | 26 | 113  | 0  |
| CONTIG-042640 | 196 | 11  | 11 | 64   | 2  |
| CONTIG-042641 | 139 | 5   | 5  | 4    | 0  |
| CONTIG-042642 | 146 | 11  | 17 | 16   | 0  |
| CONTIG-042643 | 423 | 8   | 17 | 67   | 2  |
| CONTIG-042644 | 734 | 13  | 23 | 255  | 9  |

|               |     |     |    |      |     |
|---------------|-----|-----|----|------|-----|
| CONTIG-042645 | 318 | 12  | 9  | 115  | 0   |
| CONTIG-042646 | 140 | 7   | 4  | 23   | 0   |
| CONTIG-042647 | 87  | 5   | 11 | 10   | 0   |
| CONTIG-042648 | 216 | 26  | 36 | 155  | 0   |
| CONTIG-042650 | 106 | 4   | 20 | 5    | 0   |
| CONTIG-042651 | 424 | 8   | 16 | 87   | 0   |
| CONTIG-042652 | 706 | 19  | 4  | 2    | 0   |
| CONTIG-042653 | 329 | 12  | 37 | 101  | 0   |
| CONTIG-042654 | 183 | 136 | 56 | 1424 | 0   |
| CONTIG-042655 | 66  | 10  | 9  | 0    | 0   |
| CONTIG-042657 | 95  | 4   | 3  | 15   | 0   |
| CONTIG-042658 | 262 | 5   | 14 | 38   | 0   |
| CONTIG-042659 | 109 | 25  | 43 | 27   | 2   |
| CONTIG-042660 | 121 | 13  | 11 | 52   | 0   |
| CONTIG-042662 | 112 | 16  | 7  | 44   | 0   |
| CONTIG-042663 | 66  | 5   | 2  | 11   | 0   |
| CONTIG-042664 | 60  | 2   | 2  | 6    | 0   |
| CONTIG-042665 | 109 | 4   | 4  | 6    | 0   |
| CONTIG-042666 | 170 | 15  | 21 | 80   | 2   |
| CONTIG-042667 | 85  | 12  | 4  | 39   | 0   |
| CONTIG-042668 | 198 | 6   | 12 | 27   | 0   |
| CONTIG-042669 | 323 | 6   | 24 | 22   | 0   |
| CONTIG-042670 | 69  | 9   | 12 | 0    | 0   |
| CONTIG-042671 | 294 | 5   | 13 | 50   | 0   |
| CONTIG-042672 | 60  | 6   | 3  | 13   | 0   |
| CONTIG-042673 | 62  | 3   | 6  | 2    | 0   |
| CONTIG-042674 | 131 | 7   | 3  | 37   | 0   |
| CONTIG-042675 | 64  | 13  | 18 | 18   | 0   |
| CONTIG-042676 | 283 | 18  | 29 | 124  | 0   |
| CONTIG-042677 | 474 | 11  | 24 | 114  | 0   |
| CONTIG-042680 | 89  | 7   | 53 | 7    | 0   |
| CONTIG-042681 | 65  | 8   | 16 | 9    | 0   |
| CONTIG-042683 | 199 | 8   | 9  | 45   | 0   |
| CONTIG-042684 | 95  | 4   | 9  | 2    | 0   |
| CONTIG-042685 | 350 | 7   | 34 | 79   | 2   |
| CONTIG-042686 | 231 | 10  | 59 | 26   | 0   |
| CONTIG-042687 | 68  | 52  | 0  | 127  | 0   |
| CONTIG-042688 | 188 | 4   | 0  | 14   | 0   |
| CONTIG-042689 | 108 | 9   | 4  | 29   | 0   |
| CONTIG-042690 | 126 | 4   | 11 | 7    | 0   |
| CONTIG-042692 | 923 | 58  | 93 | 1506 | 158 |
| CONTIG-042693 | 79  | 5   | 6  | 9    | 0   |
| CONTIG-042694 | 316 | 8   | 11 | 46   | 2   |
| CONTIG-042695 | 58  | 9   | 21 | 11   | 0   |
| CONTIG-042696 | 310 | 11  | 17 | 101  | 0   |
| CONTIG-042697 | 586 | 16  | 50 | 337  | 0   |
| CONTIG-042698 | 357 | 7   | 46 | 80   | 0   |



|               |     |    |    |     |     |
|---------------|-----|----|----|-----|-----|
| CONTIG-042699 | 131 | 12 | 3  | 52  | 0   |
| CONTIG-042700 | 330 | 13 | 39 | 125 | 4   |
| CONTIG-042701 | 69  | 8  | 27 | 4   | 0   |
| CONTIG-042702 | 93  | 4  | 5  | 16  | 0   |
| CONTIG-042704 | 176 | 7  | 2  | 37  | 0   |
| CONTIG-042705 | 233 | 7  | 5  | 50  | 0   |
| CONTIG-042706 | 76  | 3  | 6  | 0   | 0   |
| CONTIG-042707 | 340 | 7  | 8  | 14  | 0   |
| CONTIG-042708 | 950 | 16 | 46 | 77  | 38  |
| CONTIG-042709 | 155 | 11 | 58 | 48  | 0   |
| CONTIG-042710 | 68  | 34 | 13 | 6   | 0   |
| CONTIG-042711 | 116 | 6  | 17 | 0   | 0   |
| CONTIG-042712 | 467 | 13 | 42 | 236 | 0   |
| CONTIG-042713 | 427 | 12 | 13 | 266 | 0   |
| CONTIG-042714 | 126 | 13 | 29 | 7   | 0   |
| CONTIG-042715 | 181 | 41 | 16 | 343 | 2   |
| CONTIG-042716 | 110 | 4  | 7  | 6   | 0   |
| CONTIG-042717 | 384 | 13 | 0  | 129 | 0   |
| CONTIG-042719 | 174 | 10 | 7  | 44  | 0   |
| CONTIG-042720 | 160 | 12 | 11 | 30  | 0   |
| CONTIG-042721 | 90  | 6  | 0  | 16  | 0   |
| CONTIG-042723 | 149 | 2  | 2  | 6   | 0   |
| CONTIG-042724 | 291 | 6  | 2  | 72  | 0   |
| CONTIG-042726 | 62  | 3  | 0  | 4   | 0   |
| CONTIG-042727 | 83  | 5  | 0  | 9   | 2   |
| CONTIG-042728 | 266 | 20 | 27 | 130 | 8   |
| CONTIG-042731 | 130 | 10 | 11 | 38  | 0   |
| CONTIG-042732 | 96  | 8  | 12 | 14  | 0   |
| CONTIG-042733 | 743 | 14 | 3  | 0   | 80  |
| CONTIG-042734 | 72  | 4  | 3  | 10  | 0   |
| CONTIG-042735 | 85  | 4  | 0  | 2   | 0   |
| CONTIG-042737 | 222 | 6  | 8  | 20  | 0   |
| CONTIG-042738 | 85  | 18 | 3  | 41  | 0   |
| CONTIG-042739 | 224 | 8  | 2  | 56  | 0   |
| CONTIG-042740 | 807 | 81 | 15 | 0   | 352 |
| CONTIG-042741 | 349 | 10 | 17 | 134 | 0   |
| CONTIG-042743 | 95  | 6  | 2  | 11  | 0   |
| CONTIG-042744 | 122 | 22 | 26 | 75  | 0   |
| CONTIG-042745 | 72  | 7  | 5  | 2   | 0   |
| CONTIG-042746 | 72  | 12 | 8  | 23  | 0   |
| CONTIG-042750 | 181 | 16 | 82 | 89  | 0   |
| CONTIG-042751 | 58  | 3  | 12 | 2   | 0   |
| CONTIG-042752 | 207 | 14 | 53 | 100 | 0   |
| CONTIG-042753 | 59  | 24 | 19 | 39  | 0   |
| CONTIG-042754 | 272 | 8  | 24 | 7   | 0   |
| CONTIG-042758 | 75  | 6  | 7  | 15  | 0   |
| CONTIG-042759 | 73  | 2  | 2  | 3   | 0   |

|               |      |    |    |     |    |
|---------------|------|----|----|-----|----|
| CONTIG-042760 | 64   | 4  | 5  | 4   | 0  |
| CONTIG-042761 | 268  | 10 | 42 | 29  | 4  |
| CONTIG-042762 | 230  | 6  | 14 | 41  | 0  |
| CONTIG-042763 | 153  | 4  | 13 | 10  | 0  |
| CONTIG-042765 | 115  | 9  | 0  | 30  | 0  |
| CONTIG-042767 | 134  | 6  | 11 | 17  | 0  |
| CONTIG-042768 | 115  | 11 | 3  | 42  | 2  |
| CONTIG-042769 | 181  | 5  | 4  | 8   | 0  |
| CONTIG-042770 | 272  | 19 | 12 | 319 | 0  |
| CONTIG-042771 | 79   | 5  | 10 | 0   | 0  |
| CONTIG-042772 | 78   | 3  | 4  | 3   | 0  |
| CONTIG-042773 | 64   | 9  | 10 | 3   | 0  |
| CONTIG-042774 | 174  | 18 | 2  | 178 | 0  |
| CONTIG-042775 | 867  | 14 | 21 | 129 | 37 |
| CONTIG-042776 | 151  | 7  | 21 | 31  | 0  |
| CONTIG-042777 | 293  | 6  | 46 | 28  | 0  |
| CONTIG-042779 | 1237 | 31 | 4  | 4   | 2  |
| CONTIG-042780 | 145  | 25 | 25 | 80  | 0  |
| CONTIG-042781 | 536  | 20 | 23 | 522 | 4  |
| CONTIG-042782 | 142  | 8  | 36 | 36  | 0  |
| CONTIG-042783 | 231  | 6  | 0  | 45  | 2  |
| CONTIG-042784 | 70   | 3  | 3  | 6   | 0  |
| CONTIG-042785 | 116  | 19 | 13 | 97  | 0  |
| CONTIG-042786 | 87   | 11 | 20 | 0   | 0  |
| CONTIG-042787 | 109  | 33 | 17 | 116 | 0  |
| CONTIG-042788 | 191  | 4  | 2  | 9   | 0  |
| CONTIG-042789 | 225  | 12 | 41 | 101 | 0  |
| CONTIG-042790 | 278  | 18 | 25 | 74  | 10 |
| CONTIG-042791 | 233  | 12 | 11 | 128 | 0  |
| CONTIG-042792 | 69   | 9  | 14 | 0   | 0  |
| CONTIG-042793 | 65   | 9  | 11 | 16  | 0  |
| CONTIG-042795 | 356  | 13 | 83 | 95  | 0  |
| CONTIG-042796 | 99   | 4  | 3  | 8   | 0  |
| CONTIG-042797 | 173  | 11 | 32 | 47  | 0  |
| CONTIG-042798 | 100  | 3  | 6  | 9   | 0  |
| CONTIG-042799 | 167  | 9  | 5  | 52  | 0  |
| CONTIG-042802 | 62   | 4  | 3  | 7   | 0  |
| CONTIG-042803 | 67   | 13 | 20 | 24  | 0  |
| CONTIG-042804 | 505  | 31 | 50 | 442 | 17 |
| CONTIG-042805 | 295  | 16 | 29 | 161 | 0  |
| CONTIG-042806 | 141  | 11 | 9  | 45  | 0  |
| CONTIG-042808 | 47   | 24 | 12 | 46  | 0  |
| CONTIG-042809 | 135  | 17 | 53 | 71  | 0  |
| CONTIG-042810 | 139  | 10 | 8  | 57  | 0  |
| CONTIG-042811 | 102  | 18 | 33 | 0   | 0  |
| CONTIG-042812 | 100  | 8  | 17 | 0   | 0  |
| CONTIG-042813 | 72   | 4  | 2  | 4   | 0  |

|               |      |    |    |     |    |
|---------------|------|----|----|-----|----|
| CONTIG-042814 | 339  | 13 | 78 | 153 | 6  |
| CONTIG-042815 | 81   | 4  | 2  | 12  | 0  |
| CONTIG-042816 | 77   | 6  | 6  | 16  | 0  |
| CONTIG-042817 | 1068 | 18 | 58 | 400 | 0  |
| CONTIG-042820 | 302  | 10 | 28 | 68  | 2  |
| CONTIG-042821 | 117  | 5  | 2  | 25  | 0  |
| CONTIG-042822 | 205  | 24 | 11 | 235 | 0  |
| CONTIG-042823 | 89   | 25 | 27 | 44  | 0  |
| CONTIG-042824 | 242  | 7  | 10 | 35  | 0  |
| CONTIG-042825 | 219  | 9  | 11 | 60  | 0  |
| CONTIG-042826 | 74   | 5  | 13 | 6   | 0  |
| CONTIG-042827 | 689  | 29 | 98 | 460 | 32 |
| CONTIG-042829 | 293  | 9  | 10 | 74  | 0  |
| CONTIG-042830 | 95   | 4  | 0  | 12  | 0  |
| CONTIG-042831 | 469  | 10 | 12 | 240 | 0  |
| CONTIG-042832 | 62   | 7  | 9  | 17  | 0  |
| CONTIG-042833 | 71   | 12 | 19 | 11  | 0  |
| CONTIG-042834 | 222  | 15 | 2  | 18  | 0  |
| CONTIG-042835 | 100  | 8  | 3  | 17  | 0  |
| CONTIG-042837 | 68   | 7  | 6  | 17  | 0  |
| CONTIG-042838 | 63   | 7  | 3  | 7   | 0  |
| CONTIG-042839 | 221  | 6  | 9  | 44  | 2  |
| CONTIG-042840 | 186  | 13 | 54 | 91  | 0  |
| CONTIG-042843 | 59   | 14 | 20 | 6   | 0  |
| CONTIG-042844 | 157  | 10 | 5  | 47  | 0  |
| CONTIG-042845 | 104  | 6  | 5  | 7   | 0  |
| CONTIG-042846 | 110  | 8  | 7  | 22  | 0  |
| CONTIG-042847 | 172  | 39 | 99 | 218 | 5  |
| CONTIG-042848 | 182  | 11 | 17 | 34  | 0  |
| CONTIG-042850 | 121  | 14 | 58 | 27  | 0  |
| CONTIG-042851 | 321  | 17 | 86 | 67  | 0  |
| CONTIG-042852 | 124  | 9  | 17 | 0   | 0  |
| CONTIG-042853 | 453  | 11 | 38 | 167 | 0  |
| CONTIG-042854 | 81   | 5  | 2  | 14  | 0  |
| CONTIG-042855 | 184  | 13 | 15 | 97  | 0  |
| CONTIG-042856 | 181  | 9  | 5  | 60  | 0  |
| CONTIG-042857 | 531  | 16 | 35 | 485 | 0  |
| CONTIG-042858 | 129  | 11 | 12 | 65  | 0  |
| CONTIG-042860 | 112  | 19 | 36 | 39  | 0  |
| CONTIG-042861 | 157  | 15 | 34 | 58  | 2  |
| CONTIG-042862 | 156  | 7  | 6  | 19  | 0  |
| CONTIG-042863 | 147  | 5  | 4  | 26  | 0  |
| CONTIG-042864 | 100  | 9  | 21 | 24  | 0  |
| CONTIG-042865 | 59   | 23 | 6  | 53  | 0  |
| CONTIG-042866 | 244  | 8  | 34 | 41  | 0  |
| CONTIG-042867 | 83   | 8  | 7  | 2   | 0  |
| CONTIG-042868 | 76   | 9  | 50 | 3   | 0  |

|               |     |     |    |      |   |
|---------------|-----|-----|----|------|---|
| CONTIG-042873 | 86  | 11  | 49 | 10   | 0 |
| CONTIG-042874 | 150 | 5   | 12 | 19   | 0 |
| CONTIG-042875 | 69  | 19  | 14 | 54   | 0 |
| CONTIG-042877 | 391 | 12  | 6  | 136  | 0 |
| CONTIG-042879 | 64  | 9   | 10 | 13   | 2 |
| CONTIG-042880 | 104 | 8   | 7  | 16   | 0 |
| CONTIG-042881 | 72  | 5   | 4  | 6    | 0 |
| CONTIG-042884 | 149 | 25  | 0  | 133  | 6 |
| CONTIG-042885 | 187 | 10  | 7  | 91   | 0 |
| CONTIG-042888 | 153 | 10  | 6  | 61   | 0 |
| CONTIG-042889 | 222 | 6   | 6  | 49   | 0 |
| CONTIG-042890 | 81  | 8   | 20 | 17   | 0 |
| CONTIG-042898 | 172 | 6   | 7  | 12   | 0 |
| CONTIG-042899 | 200 | 7   | 27 | 9    | 0 |
| CONTIG-042900 | 104 | 10  | 24 | 17   | 0 |
| CONTIG-042901 | 274 | 16  | 14 | 112  | 0 |
| CONTIG-042902 | 68  | 20  | 91 | 28   | 0 |
| CONTIG-042903 | 251 | 12  | 7  | 10   | 0 |
| CONTIG-042904 | 110 | 9   | 64 | 5    | 0 |
| CONTIG-042905 | 149 | 5   | 23 | 12   | 0 |
| CONTIG-042906 | 106 | 8   | 11 | 34   | 0 |
| CONTIG-042907 | 157 | 14  | 25 | 74   | 0 |
| CONTIG-042908 | 82  | 8   | 21 | 17   | 0 |
| CONTIG-042909 | 114 | 7   | 16 | 25   | 0 |
| CONTIG-042910 | 61  | 4   | 2  | 9    | 0 |
| CONTIG-042911 | 260 | 15  | 14 | 87   | 0 |
| CONTIG-042912 | 71  | 568 | 13 | 2326 | 7 |
| CONTIG-042913 | 315 | 9   | 10 | 123  | 0 |
| CONTIG-042916 | 128 | 7   | 5  | 20   | 0 |
| CONTIG-042917 | 188 | 10  | 11 | 14   | 3 |
| CONTIG-042918 | 84  | 3   | 6  | 2    | 0 |
| CONTIG-042919 | 353 | 47  | 6  | 0    | 0 |
| CONTIG-042920 | 621 | 15  | 7  | 263  | 0 |
| CONTIG-042921 | 69  | 5   | 0  | 10   | 0 |
| CONTIG-042923 | 147 | 6   | 18 | 14   | 0 |
| CONTIG-042925 | 926 | 11  | 39 | 335  | 0 |
| CONTIG-042926 | 68  | 4   | 0  | 2    | 0 |
| CONTIG-042927 | 91  | 5   | 5  | 9    | 0 |
| CONTIG-042928 | 133 | 19  | 32 | 98   | 0 |
| CONTIG-042929 | 209 | 13  | 8  | 72   | 0 |
| CONTIG-042930 | 123 | 3   | 5  | 2    | 0 |
| CONTIG-042931 | 267 | 10  | 56 | 80   | 0 |
| CONTIG-042932 | 260 | 9   | 14 | 65   | 0 |
| CONTIG-042933 | 928 | 62  | 11 | 60   | 0 |
| CONTIG-042934 | 58  | 5   | 14 | 2    | 0 |
| CONTIG-042935 | 251 | 12  | 16 | 94   | 0 |
| CONTIG-042936 | 106 | 7   | 55 | 4    | 0 |

|               |     |     |     |      |   |
|---------------|-----|-----|-----|------|---|
| CONTIG-042938 | 75  | 11  | 15  | 16   | 0 |
| CONTIG-042939 | 113 | 8   | 64  | 4    | 0 |
| CONTIG-042940 | 233 | 10  | 17  | 110  | 0 |
| CONTIG-042941 | 475 | 6   | 6   | 119  | 0 |
| CONTIG-042942 | 86  | 6   | 2   | 20   | 0 |
| CONTIG-042943 | 133 | 6   | 0   | 24   | 0 |
| CONTIG-042944 | 61  | 4   | 5   | 6    | 0 |
| CONTIG-042945 | 101 | 6   | 5   | 29   | 0 |
| CONTIG-042947 | 78  | 12  | 8   | 29   | 0 |
| CONTIG-042948 | 75  | 105 | 0   | 4    | 0 |
| CONTIG-042949 | 54  | 108 | 0   | 0    | 0 |
| CONTIG-042952 | 130 | 5   | 0   | 20   | 0 |
| CONTIG-042953 | 155 | 3   | 0   | 9    | 0 |
| CONTIG-042955 | 99  | 14  | 59  | 7    | 0 |
| CONTIG-042956 | 198 | 97  | 42  | 1194 | 0 |
| CONTIG-042957 | 62  | 6   | 0   | 9    | 0 |
| CONTIG-042958 | 292 | 11  | 11  | 72   | 6 |
| CONTIG-042959 | 290 | 12  | 11  | 121  | 2 |
| CONTIG-042960 | 92  | 12  | 21  | 26   | 0 |
| CONTIG-042961 | 66  | 4   | 9   | 5    | 0 |
| CONTIG-042962 | 99  | 6   | 2   | 7    | 0 |
| CONTIG-042963 | 309 | 8   | 19  | 72   | 0 |
| CONTIG-042965 | 213 | 8   | 4   | 57   | 0 |
| CONTIG-042966 | 180 | 13  | 32  | 44   | 0 |
| CONTIG-042967 | 61  | 6   | 8   | 9    | 0 |
| CONTIG-042968 | 252 | 7   | 4   | 63   | 0 |
| CONTIG-042969 | 369 | 13  | 44  | 237  | 0 |
| CONTIG-042970 | 104 | 11  | 5   | 2    | 0 |
| CONTIG-042971 | 115 | 7   | 9   | 29   | 0 |
| CONTIG-042972 | 354 | 16  | 114 | 233  | 2 |
| CONTIG-042979 | 105 | 86  | 25  | 237  | 5 |
| CONTIG-042983 | 195 | 5   | 2   | 28   | 0 |
| CONTIG-042985 | 84  | 4   | 9   | 2    | 0 |
| CONTIG-042986 | 106 | 5   | 5   | 9    | 0 |
| CONTIG-042988 | 58  | 9   | 2   | 12   | 0 |
| CONTIG-042989 | 80  | 16  | 2   | 36   | 0 |
| CONTIG-042990 | 176 | 4   | 3   | 13   | 0 |
| CONTIG-042991 | 41  | 6   | 2   | 2    | 0 |
| CONTIG-042992 | 82  | 3   | 0   | 2    | 0 |
| CONTIG-042993 | 387 | 13  | 32  | 142  | 0 |
| CONTIG-042994 | 67  | 6   | 21  | 4    | 0 |
| CONTIG-042995 | 357 | 18  | 4   | 257  | 4 |
| CONTIG-042996 | 172 | 7   | 23  | 23   | 0 |
| CONTIG-042997 | 205 | 6   | 17  | 34   | 2 |
| CONTIG-042998 | 122 | 12  | 27  | 18   | 0 |
| CONTIG-042999 | 329 | 10  | 56  | 48   | 4 |
| CONTIG-043000 | 458 | 11  | 7   | 189  | 2 |

|               |     |     |    |     |    |
|---------------|-----|-----|----|-----|----|
| CONTIG-043001 | 120 | 8   | 20 | 23  | 0  |
| CONTIG-043002 | 169 | 6   | 7  | 2   | 0  |
| CONTIG-043003 | 153 | 10  | 34 | 31  | 0  |
| CONTIG-043004 | 59  | 21  | 40 | 19  | 0  |
| CONTIG-043005 | 88  | 21  | 0  | 95  | 0  |
| CONTIG-043006 | 249 | 7   | 9  | 29  | 0  |
| CONTIG-043007 | 230 | 12  | 11 | 115 | 0  |
| CONTIG-043008 | 44  | 8   | 3  | 8   | 0  |
| CONTIG-043009 | 90  | 9   | 16 | 8   | 2  |
| CONTIG-043010 | 89  | 15  | 19 | 44  | 0  |
| CONTIG-043011 | 136 | 35  | 4  | 0   | 0  |
| CONTIG-043014 | 223 | 5   | 14 | 12  | 0  |
| CONTIG-043015 | 100 | 20  | 3  | 0   | 0  |
| CONTIG-043016 | 452 | 14  | 26 | 225 | 6  |
| CONTIG-043017 | 127 | 6   | 20 | 10  | 0  |
| CONTIG-043018 | 81  | 2   | 7  | 0   | 0  |
| CONTIG-043019 | 139 | 8   | 7  | 24  | 0  |
| CONTIG-043020 | 68  | 9   | 17 | 2   | 0  |
| CONTIG-043021 | 60  | 9   | 26 | 6   | 0  |
| CONTIG-043022 | 128 | 10  | 5  | 34  | 0  |
| CONTIG-043023 | 388 | 42  | 28 | 942 | 0  |
| CONTIG-043024 | 124 | 15  | 25 | 61  | 0  |
| CONTIG-043025 | 102 | 7   | 11 | 6   | 0  |
| CONTIG-043026 | 184 | 8   | 9  | 47  | 0  |
| CONTIG-043028 | 281 | 11  | 2  | 83  | 4  |
| CONTIG-043029 | 249 | 7   | 2  | 44  | 0  |
| CONTIG-043031 | 131 | 8   | 2  | 15  | 0  |
| CONTIG-043032 | 214 | 18  | 8  | 56  | 0  |
| CONTIG-043033 | 450 | 10  | 6  | 146 | 14 |
| CONTIG-043034 | 251 | 11  | 20 | 131 | 0  |
| CONTIG-043035 | 125 | 9   | 3  | 36  | 0  |
| CONTIG-043038 | 273 | 6   | 5  | 54  | 2  |
| CONTIG-043039 | 79  | 4   | 2  | 4   | 0  |
| CONTIG-043040 | 123 | 7   | 0  | 29  | 0  |
| CONTIG-043041 | 189 | 5   | 7  | 7   | 0  |
| CONTIG-043042 | 280 | 9   | 6  | 73  | 0  |
| CONTIG-043045 | 76  | 5   | 11 | 12  | 0  |
| CONTIG-043046 | 68  | 7   | 6  | 13  | 0  |
| CONTIG-043047 | 65  | 3   | 2  | 0   | 0  |
| CONTIG-043048 | 61  | 3   | 2  | 4   | 0  |
| CONTIG-043049 | 193 | 14  | 46 | 108 | 2  |
| CONTIG-043050 | 260 | 24  | 37 | 356 | 0  |
| CONTIG-043051 | 256 | 14  | 33 | 95  | 0  |
| CONTIG-043059 | 150 | 13  | 20 | 77  | 0  |
| CONTIG-043060 | 39  | 78  | 10 | 98  | 0  |
| CONTIG-043062 | 58  | 229 | 33 | 247 | 0  |
| CONTIG-043063 | 467 | 12  | 35 | 2   | 23 |

|               |      |     |     |      |    |
|---------------|------|-----|-----|------|----|
| CONTIG-043064 | 124  | 35  | 10  | 153  | 2  |
| CONTIG-043065 | 265  | 43  | 143 | 174  | 26 |
| CONTIG-043066 | 66   | 7   | 6   | 0    | 0  |
| CONTIG-043067 | 59   | 9   | 5   | 14   | 0  |
| CONTIG-043068 | 151  | 55  | 15  | 317  | 0  |
| CONTIG-043069 | 106  | 11  | 127 | 0    | 0  |
| CONTIG-043070 | 81   | 7   | 23  | 6    | 2  |
| CONTIG-043072 | 135  | 5   | 2   | 29   | 0  |
| CONTIG-043073 | 189  | 8   | 4   | 17   | 0  |
| CONTIG-043074 | 180  | 12  | 35  | 85   | 0  |
| CONTIG-043076 | 338  | 16  | 30  | 255  | 0  |
| CONTIG-043077 | 163  | 9   | 29  | 50   | 0  |
| CONTIG-043078 | 104  | 8   | 24  | 0    | 0  |
| CONTIG-043083 | 77   | 3   | 0   | 10   | 0  |
| CONTIG-043084 | 677  | 31  | 9   | 1243 | 0  |
| CONTIG-043085 | 101  | 4   | 0   | 8    | 0  |
| CONTIG-043086 | 286  | 9   | 10  | 44   | 0  |
| CONTIG-043087 | 70   | 3   | 4   | 8    | 0  |
| CONTIG-043088 | 130  | 16  | 8   | 41   | 0  |
| CONTIG-043089 | 431  | 14  | 49  | 164  | 0  |
| CONTIG-043090 | 366  | 45  | 83  | 686  | 0  |
| CONTIG-043091 | 236  | 11  | 2   | 111  | 5  |
| CONTIG-043092 | 166  | 12  | 101 | 36   | 0  |
| CONTIG-043093 | 232  | 8   | 3   | 48   | 0  |
| CONTIG-043095 | 101  | 10  | 16  | 36   | 0  |
| CONTIG-043096 | 192  | 4   | 5   | 25   | 0  |
| CONTIG-043097 | 85   | 6   | 23  | 0    | 0  |
| CONTIG-043098 | 208  | 5   | 2   | 36   | 0  |
| CONTIG-043104 | 648  | 18  | 78  | 469  | 0  |
| CONTIG-043105 | 388  | 10  | 16  | 117  | 0  |
| CONTIG-043106 | 54   | 401 | 23  | 902  | 0  |
| CONTIG-043107 | 518  | 26  | 42  | 532  | 3  |
| CONTIG-043108 | 163  | 13  | 11  | 72   | 0  |
| CONTIG-043109 | 281  | 6   | 37  | 17   | 0  |
| CONTIG-043110 | 1120 | 24  | 23  | 705  | 11 |
| CONTIG-043111 | 100  | 6   | 5   | 18   | 0  |
| CONTIG-043112 | 184  | 14  | 17  | 93   | 0  |
| CONTIG-043113 | 260  | 9   | 8   | 87   | 0  |
| CONTIG-043115 | 74   | 11  | 8   | 25   | 0  |
| CONTIG-043116 | 129  | 4   | 6   | 5    | 0  |
| CONTIG-043117 | 156  | 23  | 56  | 120  | 0  |
| CONTIG-043118 | 86   | 3   | 2   | 6    | 0  |
| CONTIG-043119 | 504  | 14  | 22  | 16   | 9  |
| CONTIG-043120 | 194  | 9   | 4   | 80   | 0  |
| CONTIG-043121 | 61   | 2   | 3   | 2    | 0  |
| CONTIG-043122 | 163  | 6   | 20  | 21   | 0  |
| CONTIG-043123 | 87   | 42  | 34  | 128  | 0  |

|               |     |    |     |      |   |
|---------------|-----|----|-----|------|---|
| CONTIG-043124 | 107 | 19 | 24  | 83   | 0 |
| CONTIG-043125 | 692 | 35 | 38  | 1241 | 4 |
| CONTIG-043126 | 81  | 5  | 12  | 0    | 0 |
| CONTIG-043128 | 355 | 10 | 13  | 49   | 2 |
| CONTIG-043129 | 75  | 11 | 2   | 36   | 0 |
| CONTIG-043130 | 139 | 5  | 2   | 18   | 0 |
| CONTIG-043131 | 243 | 6  | 6   | 33   | 0 |
| CONTIG-043132 | 155 | 7  | 0   | 30   | 0 |
| CONTIG-043135 | 120 | 13 | 12  | 51   | 0 |
| CONTIG-043136 | 86  | 8  | 3   | 27   | 0 |
| CONTIG-043137 | 454 | 8  | 4   | 104  | 0 |
| CONTIG-043138 | 104 | 7  | 44  | 5    | 0 |
| CONTIG-043139 | 336 | 35 | 20  | 774  | 0 |
| CONTIG-043141 | 61  | 11 | 13  | 29   | 0 |
| CONTIG-043142 | 60  | 5  | 4   | 11   | 0 |
| CONTIG-043143 | 285 | 8  | 6   | 77   | 0 |
| CONTIG-043144 | 65  | 3  | 0   | 0    | 0 |
| CONTIG-043145 | 87  | 18 | 6   | 62   | 0 |
| CONTIG-043146 | 381 | 12 | 24  | 87   | 5 |
| CONTIG-043147 | 58  | 12 | 2   | 35   | 0 |
| CONTIG-043148 | 235 | 8  | 14  | 55   | 2 |
| CONTIG-043149 | 126 | 8  | 4   | 21   | 0 |
| CONTIG-043150 | 179 | 12 | 12  | 71   | 0 |
| CONTIG-043151 | 513 | 22 | 86  | 282  | 0 |
| CONTIG-043152 | 80  | 16 | 106 | 16   | 0 |
| CONTIG-043153 | 140 | 38 | 11  | 282  | 2 |
| CONTIG-043154 | 671 | 16 | 38  | 457  | 4 |
| CONTIG-043155 | 133 | 6  | 0   | 17   | 0 |
| CONTIG-043156 | 144 | 10 | 12  | 49   | 0 |
| CONTIG-043157 | 223 | 7  | 13  | 18   | 0 |
| CONTIG-043158 | 81  | 3  | 15  | 2    | 0 |
| CONTIG-043159 | 157 | 10 | 98  | 20   | 0 |
| CONTIG-043161 | 65  | 9  | 0   | 0    | 2 |
| CONTIG-043163 | 117 | 9  | 8   | 34   | 0 |
| CONTIG-043164 | 556 | 18 | 36  | 131  | 2 |
| CONTIG-043168 | 83  | 18 | 11  | 55   | 0 |
| CONTIG-043169 | 115 | 11 | 15  | 25   | 0 |
| CONTIG-043172 | 83  | 3  | 2   | 2    | 0 |
| CONTIG-043173 | 162 | 14 | 7   | 63   | 2 |
| CONTIG-043174 | 401 | 8  | 43  | 43   | 0 |
| CONTIG-043175 | 409 | 10 | 53  | 159  | 0 |
| CONTIG-043177 | 149 | 8  | 10  | 26   | 0 |
| CONTIG-043178 | 103 | 3  | 0   | 5    | 0 |
| CONTIG-043179 | 220 | 7  | 10  | 45   | 0 |
| CONTIG-043180 | 834 | 21 | 129 | 711  | 4 |
| CONTIG-043181 | 144 | 9  | 3   | 30   | 0 |
| CONTIG-043182 | 471 | 19 | 26  | 116  | 0 |



|               |     |     |     |     |    |
|---------------|-----|-----|-----|-----|----|
| CONTIG-043183 | 208 | 18  | 9   | 133 | 0  |
| CONTIG-043184 | 138 | 10  | 7   | 41  | 0  |
| CONTIG-043185 | 172 | 12  | 23  | 69  | 0  |
| CONTIG-043186 | 163 | 10  | 10  | 54  | 2  |
| CONTIG-043187 | 285 | 8   | 10  | 69  | 0  |
| CONTIG-043188 | 483 | 13  | 57  | 160 | 0  |
| CONTIG-043189 | 143 | 9   | 14  | 29  | 0  |
| CONTIG-043190 | 554 | 19  | 49  | 244 | 0  |
| CONTIG-043191 | 200 | 19  | 26  | 126 | 0  |
| CONTIG-043192 | 455 | 17  | 0   | 2   | 38 |
| CONTIG-043193 | 98  | 12  | 49  | 7   | 0  |
| CONTIG-043194 | 117 | 8   | 16  | 33  | 0  |
| CONTIG-043195 | 144 | 5   | 0   | 24  | 2  |
| CONTIG-043196 | 64  | 2   | 0   | 0   | 0  |
| CONTIG-043197 | 524 | 17  | 39  | 210 | 10 |
| CONTIG-043199 | 65  | 4   | 9   | 0   | 0  |
| CONTIG-043204 | 175 | 4   | 3   | 12  | 0  |
| CONTIG-043205 | 86  | 10  | 9   | 26  | 0  |
| CONTIG-043206 | 475 | 8   | 49  | 82  | 0  |
| CONTIG-043207 | 375 | 13  | 26  | 229 | 0  |
| CONTIG-043208 | 98  | 73  | 30  | 225 | 4  |
| CONTIG-043209 | 113 | 8   | 10  | 14  | 0  |
| CONTIG-043210 | 530 | 7   | 5   | 96  | 0  |
| CONTIG-043211 | 473 | 88  | 3   | 0   | 23 |
| CONTIG-043212 | 282 | 16  | 25  | 114 | 0  |
| CONTIG-043213 | 122 | 10  | 11  | 28  | 0  |
| CONTIG-043214 | 88  | 8   | 6   | 31  | 0  |
| CONTIG-043215 | 240 | 15  | 61  | 80  | 0  |
| CONTIG-043216 | 764 | 14  | 33  | 193 | 0  |
| CONTIG-043217 | 69  | 7   | 4   | 0   | 0  |
| CONTIG-043218 | 91  | 9   | 6   | 24  | 0  |
| CONTIG-043219 | 130 | 27  | 3   | 122 | 0  |
| CONTIG-043220 | 68  | 10  | 3   | 6   | 0  |
| CONTIG-043221 | 89  | 7   | 6   | 19  | 0  |
| CONTIG-043222 | 75  | 5   | 0   | 9   | 0  |
| CONTIG-043223 | 66  | 8   | 2   | 18  | 0  |
| CONTIG-043224 | 402 | 6   | 25  | 72  | 0  |
| CONTIG-043225 | 144 | 9   | 14  | 40  | 2  |
| CONTIG-043226 | 441 | 12  | 50  | 180 | 4  |
| CONTIG-043234 | 65  | 4   | 2   | 6   | 0  |
| CONTIG-043235 | 97  | 10  | 38  | 0   | 0  |
| CONTIG-043236 | 271 | 9   | 30  | 11  | 0  |
| CONTIG-043237 | 183 | 125 | 573 | 452 | 2  |
| CONTIG-043238 | 519 | 32  | 0   | 0   | 42 |
| CONTIG-043239 | 120 | 6   | 6   | 21  | 0  |
| CONTIG-043240 | 226 | 14  | 43  | 79  | 2  |
| CONTIG-043241 | 193 | 7   | 7   | 27  | 0  |

|               |     |     |     |      |   |
|---------------|-----|-----|-----|------|---|
| CONTIG-043243 | 71  | 19  | 15  | 59   | 0 |
| CONTIG-043244 | 225 | 5   | 11  | 4    | 0 |
| CONTIG-043245 | 256 | 8   | 20  | 70   | 0 |
| CONTIG-043246 | 65  | 5   | 4   | 5    | 0 |
| CONTIG-043247 | 323 | 10  | 21  | 87   | 0 |
| CONTIG-043248 | 85  | 9   | 7   | 7    | 0 |
| CONTIG-043251 | 482 | 70  | 86  | 1333 | 2 |
| CONTIG-043252 | 397 | 8   | 9   | 78   | 0 |
| CONTIG-043253 | 114 | 5   | 7   | 14   | 0 |
| CONTIG-043254 | 88  | 5   | 5   | 9    | 0 |
| CONTIG-043255 | 554 | 11  | 21  | 219  | 0 |
| CONTIG-043256 | 826 | 19  | 122 | 496  | 2 |
| CONTIG-043257 | 141 | 8   | 26  | 13   | 0 |
| CONTIG-043258 | 383 | 19  | 98  | 352  | 0 |
| CONTIG-043259 | 310 | 16  | 22  | 255  | 0 |
| CONTIG-043260 | 100 | 6   | 2   | 15   | 0 |
| CONTIG-043261 | 170 | 9   | 19  | 39   | 0 |
| CONTIG-043262 | 376 | 6   | 5   | 11   | 0 |
| CONTIG-043263 | 61  | 6   | 7   | 6    | 0 |
| CONTIG-043264 | 138 | 8   | 20  | 25   | 2 |
| CONTIG-043265 | 250 | 20  | 22  | 52   | 0 |
| CONTIG-043266 | 139 | 10  | 4   | 28   | 0 |
| CONTIG-043267 | 88  | 28  | 62  | 41   | 0 |
| CONTIG-043268 | 72  | 9   | 0   | 23   | 0 |
| CONTIG-043270 | 430 | 10  | 32  | 143  | 0 |
| CONTIG-043271 | 211 | 7   | 6   | 15   | 0 |
| CONTIG-043272 | 77  | 24  | 9   | 75   | 0 |
| CONTIG-043276 | 105 | 4   | 6   | 12   | 0 |
| CONTIG-043277 | 147 | 8   | 6   | 48   | 0 |
| CONTIG-043278 | 45  | 13  | 7   | 15   | 0 |
| CONTIG-043279 | 107 | 6   | 17  | 11   | 0 |
| CONTIG-043280 | 93  | 11  | 25  | 19   | 0 |
| CONTIG-043282 | 148 | 6   | 11  | 16   | 0 |
| CONTIG-043283 | 314 | 13  | 45  | 121  | 0 |
| CONTIG-043284 | 79  | 8   | 0   | 22   | 0 |
| CONTIG-043285 | 173 | 13  | 50  | 34   | 0 |
| CONTIG-043286 | 142 | 132 | 44  | 824  | 0 |
| CONTIG-043288 | 100 | 6   | 4   | 14   | 0 |
| CONTIG-043289 | 213 | 11  | 3   | 83   | 4 |
| CONTIG-043290 | 312 | 18  | 42  | 223  | 0 |
| CONTIG-043291 | 124 | 7   | 32  | 7    | 2 |
| CONTIG-043292 | 75  | 18  | 40  | 21   | 0 |
| CONTIG-043293 | 328 | 7   | 8   | 45   | 2 |
| CONTIG-043294 | 81  | 7   | 8   | 12   | 0 |
| CONTIG-043295 | 242 | 12  | 27  | 99   | 0 |
| CONTIG-043297 | 793 | 12  | 66  | 237  | 0 |
| CONTIG-043298 | 264 | 29  | 74  | 104  | 7 |

|               |     |    |    |      |    |
|---------------|-----|----|----|------|----|
| CONTIG-043299 | 395 | 29 | 46 | 222  | 2  |
| CONTIG-043300 | 160 | 5  | 14 | 28   | 0  |
| CONTIG-043301 | 364 | 11 | 12 | 200  | 0  |
| CONTIG-043302 | 110 | 7  | 6  | 25   | 0  |
| CONTIG-043303 | 255 | 11 | 13 | 81   | 2  |
| CONTIG-043305 | 326 | 9  | 23 | 66   | 0  |
| CONTIG-043306 | 342 | 12 | 30 | 78   | 2  |
| CONTIG-043307 | 324 | 16 | 48 | 270  | 0  |
| CONTIG-043308 | 145 | 7  | 9  | 34   | 0  |
| CONTIG-043309 | 250 | 8  | 14 | 42   | 0  |
| CONTIG-043310 | 166 | 7  | 56 | 20   | 0  |
| CONTIG-043311 | 348 | 9  | 2  | 19   | 0  |
| CONTIG-043312 | 93  | 2  | 12 | 0    | 0  |
| CONTIG-043313 | 89  | 5  | 17 | 4    | 0  |
| CONTIG-043315 | 68  | 4  | 2  | 11   | 0  |
| CONTIG-043316 | 66  | 7  | 11 | 10   | 0  |
| CONTIG-043317 | 58  | 7  | 11 | 6    | 0  |
| CONTIG-043318 | 150 | 7  | 4  | 41   | 0  |
| CONTIG-043319 | 143 | 10 | 12 | 59   | 0  |
| CONTIG-043320 | 158 | 7  | 28 | 17   | 0  |
| CONTIG-043321 | 262 | 11 | 17 | 81   | 0  |
| CONTIG-043322 | 244 | 9  | 13 | 64   | 0  |
| CONTIG-043323 | 304 | 8  | 33 | 45   | 0  |
| CONTIG-043324 | 130 | 7  | 16 | 10   | 0  |
| CONTIG-043325 | 96  | 12 | 39 | 4    | 0  |
| CONTIG-043326 | 353 | 10 | 40 | 139  | 2  |
| CONTIG-043327 | 57  | 18 | 83 | 4    | 0  |
| CONTIG-043328 | 92  | 4  | 4  | 2    | 0  |
| CONTIG-043329 | 96  | 5  | 8  | 6    | 0  |
| CONTIG-043331 | 113 | 5  | 18 | 13   | 0  |
| CONTIG-043333 | 223 | 5  | 29 | 19   | 0  |
| CONTIG-043334 | 90  | 3  | 13 | 3    | 0  |
| CONTIG-043335 | 98  | 4  | 10 | 6    | 0  |
| CONTIG-043336 | 126 | 11 | 2  | 35   | 0  |
| CONTIG-043337 | 98  | 7  | 11 | 23   | 0  |
| CONTIG-043338 | 308 | 20 | 17 | 88   | 2  |
| CONTIG-043339 | 261 | 85 | 18 | 1244 | 0  |
| CONTIG-043340 | 129 | 9  | 18 | 0    | 7  |
| CONTIG-043341 | 99  | 18 | 4  | 0    | 14 |
| CONTIG-043342 | 300 | 16 | 46 | 227  | 3  |
| CONTIG-043343 | 193 | 8  | 20 | 13   | 0  |
| CONTIG-043344 | 414 | 34 | 55 | 448  | 0  |
| CONTIG-043345 | 188 | 14 | 30 | 31   | 0  |
| CONTIG-043346 | 240 | 7  | 23 | 53   | 0  |
| CONTIG-043347 | 495 | 11 | 45 | 150  | 0  |
| CONTIG-043348 | 64  | 7  | 10 | 10   | 0  |
| CONTIG-043349 | 303 | 13 | 12 | 141  | 0  |

|               |     |    |     |      |    |
|---------------|-----|----|-----|------|----|
| CONTIG-043350 | 178 | 6  | 4   | 26   | 0  |
| CONTIG-043351 | 121 | 11 | 9   | 29   | 0  |
| CONTIG-043352 | 136 | 18 | 13  | 53   | 0  |
| CONTIG-043353 | 92  | 4  | 4   | 14   | 0  |
| CONTIG-043354 | 94  | 10 | 4   | 30   | 0  |
| CONTIG-043358 | 88  | 5  | 0   | 14   | 0  |
| CONTIG-043359 | 66  | 3  | 2   | 7    | 0  |
| CONTIG-043360 | 409 | 10 | 35  | 90   | 3  |
| CONTIG-043361 | 176 | 88 | 6   | 715  | 0  |
| CONTIG-043363 | 232 | 7  | 0   | 69   | 0  |
| CONTIG-043364 | 70  | 6  | 4   | 9    | 0  |
| CONTIG-043365 | 256 | 8  | 22  | 35   | 0  |
| CONTIG-043366 | 96  | 7  | 6   | 11   | 0  |
| CONTIG-043367 | 94  | 8  | 2   | 15   | 2  |
| CONTIG-043368 | 178 | 7  | 8   | 25   | 0  |
| CONTIG-043369 | 75  | 6  | 13  | 4    | 2  |
| CONTIG-043370 | 94  | 5  | 12  | 8    | 0  |
| CONTIG-043371 | 91  | 3  | 3   | 8    | 0  |
| CONTIG-043372 | 108 | 6  | 12  | 12   | 0  |
| CONTIG-043373 | 476 | 13 | 105 | 202  | 0  |
| CONTIG-043374 | 230 | 9  | 2   | 83   | 2  |
| CONTIG-043375 | 101 | 6  | 0   | 15   | 0  |
| CONTIG-043376 | 143 | 19 | 41  | 40   | 0  |
| CONTIG-043378 | 87  | 3  | 3   | 4    | 0  |
| CONTIG-043379 | 136 | 6  | 0   | 36   | 0  |
| CONTIG-043382 | 207 | 17 | 20  | 104  | 0  |
| CONTIG-043383 | 380 | 10 | 26  | 114  | 0  |
| CONTIG-043384 | 238 | 7  | 8   | 61   | 0  |
| CONTIG-043385 | 306 | 18 | 0   | 57   | 0  |
| CONTIG-043389 | 64  | 7  | 2   | 21   | 0  |
| CONTIG-043390 | 220 | 9  | 34  | 25   | 2  |
| CONTIG-043391 | 196 | 8  | 22  | 26   | 0  |
| CONTIG-043392 | 105 | 6  | 9   | 9    | 0  |
| CONTIG-043394 | 268 | 9  | 17  | 60   | 0  |
| CONTIG-043395 | 90  | 9  | 19  | 4    | 0  |
| CONTIG-043396 | 196 | 8  | 0   | 46   | 0  |
| CONTIG-043397 | 301 | 6  | 8   | 54   | 0  |
| CONTIG-043399 | 444 | 10 | 19  | 116  | 19 |
| CONTIG-043400 | 83  | 10 | 6   | 29   | 0  |
| CONTIG-043401 | 156 | 7  | 54  | 9    | 0  |
| CONTIG-043402 | 186 | 9  | 53  | 46   | 0  |
| CONTIG-043403 | 433 | 16 | 20  | 299  | 2  |
| CONTIG-043404 | 73  | 3  | 4   | 7    | 0  |
| CONTIG-043405 | 123 | 51 | 39  | 332  | 0  |
| CONTIG-043406 | 67  | 9  | 5   | 15   | 0  |
| CONTIG-043407 | 137 | 9  | 11  | 56   | 0  |
| CONTIG-043414 | 606 | 32 | 25  | 1252 | 0  |

|               |     |    |     |      |   |
|---------------|-----|----|-----|------|---|
| CONTIG-043415 | 141 | 7  | 11  | 21   | 0 |
| CONTIG-043416 | 85  | 24 | 5   | 97   | 2 |
| CONTIG-043417 | 180 | 14 | 9   | 85   | 0 |
| CONTIG-043418 | 307 | 7  | 7   | 50   | 7 |
| CONTIG-043419 | 73  | 19 | 33  | 25   | 0 |
| CONTIG-043420 | 95  | 40 | 13  | 149  | 0 |
| CONTIG-043421 | 367 | 13 | 18  | 136  | 4 |
| CONTIG-043422 | 505 | 14 | 19  | 315  | 0 |
| CONTIG-043425 | 286 | 21 | 14  | 226  | 0 |
| CONTIG-043426 | 58  | 3  | 0   | 4    | 0 |
| CONTIG-043428 | 99  | 7  | 23  | 22   | 0 |
| CONTIG-043429 | 70  | 20 | 10  | 24   | 0 |
| CONTIG-043430 | 125 | 12 | 8   | 52   | 0 |
| CONTIG-043436 | 101 | 3  | 6   | 5    | 0 |
| CONTIG-043437 | 923 | 28 | 13  | 1622 | 0 |
| CONTIG-043438 | 64  | 5  | 3   | 8    | 0 |
| CONTIG-043442 | 133 | 5  | 4   | 18   | 0 |
| CONTIG-043443 | 59  | 7  | 25  | 0    | 0 |
| CONTIG-043444 | 59  | 4  | 2   | 2    | 0 |
| CONTIG-043445 | 166 | 5  | 4   | 25   | 0 |
| CONTIG-043446 | 87  | 11 | 0   | 10   | 0 |
| CONTIG-043448 | 645 | 14 | 63  | 155  | 0 |
| CONTIG-043453 | 63  | 9  | 2   | 24   | 2 |
| CONTIG-043455 | 71  | 7  | 8   | 17   | 0 |
| CONTIG-043458 | 523 | 9  | 0   | 0    | 4 |
| CONTIG-043459 | 163 | 7  | 34  | 14   | 0 |
| CONTIG-043461 | 688 | 14 | 153 | 233  | 0 |
| CONTIG-043462 | 136 | 3  | 2   | 11   | 0 |
| CONTIG-043464 | 149 | 10 | 4   | 34   | 0 |
| CONTIG-043465 | 98  | 19 | 45  | 2    | 0 |
| CONTIG-043466 | 150 | 10 | 18  | 44   | 2 |
| CONTIG-043467 | 232 | 4  | 2   | 13   | 0 |
| CONTIG-043468 | 126 | 6  | 17  | 4    | 0 |
| CONTIG-043469 | 222 | 9  | 15  | 7    | 0 |
| CONTIG-043470 | 212 | 8  | 39  | 28   | 4 |
| CONTIG-043471 | 61  | 4  | 5   | 0    | 0 |
| CONTIG-043472 | 59  | 7  | 8   | 8    | 0 |
| CONTIG-043473 | 143 | 9  | 10  | 34   | 0 |
| CONTIG-043474 | 58  | 10 | 9   | 12   | 0 |
| CONTIG-043475 | 278 | 9  | 3   | 27   | 0 |
| CONTIG-043476 | 158 | 22 | 40  | 93   | 0 |
| CONTIG-043477 | 100 | 24 | 33  | 61   | 0 |
| CONTIG-043478 | 118 | 35 | 49  | 123  | 0 |
| CONTIG-043479 | 223 | 14 | 56  | 11   | 4 |
| CONTIG-043480 | 280 | 8  | 75  | 23   | 2 |
| CONTIG-043481 | 136 | 5  | 9   | 21   | 0 |
| CONTIG-043483 | 88  | 5  | 8   | 10   | 0 |

|               |     |    |     |     |   |
|---------------|-----|----|-----|-----|---|
| CONTIG-043484 | 216 | 9  | 5   | 75  | 0 |
| CONTIG-043485 | 182 | 13 | 44  | 70  | 0 |
| CONTIG-043486 | 64  | 8  | 6   | 0   | 0 |
| CONTIG-043487 | 87  | 3  | 0   | 2   | 2 |
| CONTIG-043488 | 638 | 18 | 40  | 344 | 2 |
| CONTIG-043489 | 146 | 18 | 117 | 29  | 0 |
| CONTIG-043490 | 431 | 11 | 38  | 129 | 2 |
| CONTIG-043491 | 94  | 5  | 12  | 7   | 0 |
| CONTIG-043492 | 484 | 15 | 114 | 201 | 2 |
| CONTIG-043493 | 104 | 5  | 4   | 16  | 0 |
| CONTIG-043495 | 193 | 11 | 41  | 65  | 2 |
| CONTIG-043496 | 150 | 6  | 5   | 26  | 0 |
| CONTIG-043497 | 60  | 8  | 3   | 13  | 0 |
| CONTIG-043498 | 255 | 7  | 2   | 60  | 2 |
| CONTIG-043499 | 174 | 7  | 4   | 50  | 0 |
| CONTIG-043508 | 103 | 11 | 5   | 35  | 0 |
| CONTIG-043509 | 279 | 8  | 26  | 55  | 0 |
| CONTIG-043510 | 223 | 18 | 10  | 108 | 6 |
| CONTIG-043511 | 66  | 14 | 49  | 0   | 0 |
| CONTIG-043512 | 99  | 9  | 14  | 2   | 0 |
| CONTIG-043513 | 914 | 23 | 15  | 28  | 0 |
| CONTIG-043515 | 148 | 6  | 25  | 18  | 0 |
| CONTIG-043516 | 390 | 9  | 4   | 65  | 0 |
| CONTIG-043517 | 145 | 18 | 19  | 72  | 0 |
| CONTIG-043518 | 70  | 10 | 5   | 3   | 0 |
| CONTIG-043519 | 129 | 7  | 2   | 19  | 0 |
| CONTIG-043520 | 260 | 13 | 14  | 98  | 0 |
| CONTIG-043521 | 78  | 3  | 5   | 2   | 0 |
| CONTIG-043522 | 160 | 69 | 61  | 439 | 2 |
| CONTIG-043523 | 238 | 7  | 17  | 19  | 0 |
| CONTIG-043524 | 136 | 14 | 17  | 52  | 0 |
| CONTIG-043525 | 139 | 7  | 0   | 25  | 0 |
| CONTIG-043526 | 61  | 4  | 2   | 5   | 0 |
| CONTIG-043527 | 100 | 7  | 4   | 17  | 0 |
| CONTIG-043528 | 119 | 6  | 2   | 2   | 0 |
| CONTIG-043529 | 390 | 13 | 139 | 111 | 2 |
| CONTIG-043530 | 63  | 20 | 43  | 4   | 0 |
| CONTIG-043531 | 149 | 10 | 43  | 4   | 0 |
| CONTIG-043532 | 172 | 7  | 6   | 12  | 0 |
| CONTIG-043533 | 199 | 6  | 0   | 11  | 0 |
| CONTIG-043534 | 347 | 11 | 47  | 60  | 2 |
| CONTIG-043535 | 135 | 8  | 32  | 15  | 2 |
| CONTIG-043536 | 348 | 43 | 70  | 748 | 2 |
| CONTIG-043537 | 137 | 15 | 46  | 67  | 0 |
| CONTIG-043538 | 200 | 12 | 23  | 51  | 0 |
| CONTIG-043539 | 55  | 12 | 2   | 0   | 0 |
| CONTIG-043540 | 180 | 7  | 10  | 28  | 0 |

|               |      |    |    |     |    |
|---------------|------|----|----|-----|----|
| CONTIG-043541 | 445  | 10 | 44 | 117 | 0  |
| CONTIG-043542 | 236  | 7  | 32 | 42  | 0  |
| CONTIG-043543 | 113  | 6  | 3  | 21  | 0  |
| CONTIG-043544 | 493  | 11 | 0  | 253 | 0  |
| CONTIG-043545 | 223  | 17 | 6  | 4   | 29 |
| CONTIG-043546 | 140  | 11 | 12 | 27  | 4  |
| CONTIG-043547 | 75   | 13 | 5  | 0   | 5  |
| CONTIG-043548 | 570  | 14 | 35 | 94  | 4  |
| CONTIG-043549 | 73   | 13 | 5  | 23  | 0  |
| CONTIG-043550 | 211  | 18 | 89 | 60  | 0  |
| CONTIG-043551 | 72   | 9  | 3  | 22  | 0  |
| CONTIG-043552 | 344  | 6  | 4  | 28  | 0  |
| CONTIG-043553 | 71   | 7  | 4  | 15  | 0  |
| CONTIG-043554 | 134  | 16 | 2  | 81  | 0  |
| CONTIG-043555 | 142  | 8  | 4  | 24  | 2  |
| CONTIG-043556 | 285  | 17 | 20 | 68  | 8  |
| CONTIG-043557 | 561  | 20 | 57 | 556 | 0  |
| CONTIG-043558 | 99   | 4  | 11 | 4   | 0  |
| CONTIG-043559 | 611  | 11 | 14 | 287 | 0  |
| CONTIG-043560 | 213  | 9  | 0  | 69  | 0  |
| CONTIG-043561 | 251  | 11 | 7  | 90  | 0  |
| CONTIG-043562 | 84   | 7  | 5  | 19  | 0  |
| CONTIG-043563 | 137  | 8  | 36 | 2   | 0  |
| CONTIG-043564 | 329  | 30 | 30 | 2   | 0  |
| CONTIG-043565 | 1140 | 19 | 17 | 599 | 73 |
| CONTIG-043566 | 94   | 13 | 11 | 48  | 0  |
| CONTIG-043567 | 633  | 26 | 77 | 922 | 2  |
| CONTIG-043568 | 332  | 7  | 16 | 61  | 0  |
| CONTIG-043569 | 86   | 8  | 7  | 24  | 0  |
| CONTIG-043570 | 42   | 26 | 54 | 0   | 0  |
| CONTIG-043571 | 80   | 13 | 19 | 3   | 0  |
| CONTIG-043572 | 438  | 7  | 13 | 63  | 0  |
| CONTIG-043574 | 145  | 9  | 2  | 28  | 0  |
| CONTIG-043576 | 261  | 23 | 96 | 265 | 0  |
| CONTIG-043577 | 228  | 9  | 37 | 37  | 0  |
| CONTIG-043580 | 91   | 9  | 9  | 10  | 0  |
| CONTIG-043581 | 120  | 7  | 7  | 24  | 0  |
| CONTIG-043582 | 195  | 13 | 25 | 118 | 0  |
| CONTIG-043583 | 273  | 8  | 19 | 86  | 0  |
| CONTIG-043584 | 61   | 3  | 4  | 2   | 0  |
| CONTIG-043586 | 301  | 7  | 18 | 76  | 0  |
| CONTIG-043587 | 107  | 8  | 0  | 41  | 2  |
| CONTIG-043588 | 317  | 11 | 20 | 138 | 0  |
| CONTIG-043589 | 172  | 13 | 4  | 72  | 0  |
| CONTIG-043590 | 164  | 16 | 26 | 54  | 0  |
| CONTIG-043591 | 197  | 8  | 24 | 36  | 0  |
| CONTIG-043592 | 61   | 6  | 8  | 12  | 0  |

|               |     |    |     |     |    |
|---------------|-----|----|-----|-----|----|
| CONTIG-043593 | 95  | 11 | 5   | 25  | 0  |
| CONTIG-043599 | 116 | 6  | 0   | 17  | 0  |
| CONTIG-043600 | 83  | 4  | 7   | 5   | 0  |
| CONTIG-043601 | 242 | 10 | 7   | 66  | 0  |
| CONTIG-043609 | 104 | 10 | 21  | 25  | 0  |
| CONTIG-043610 | 342 | 7  | 13  | 78  | 0  |
| CONTIG-043611 | 597 | 11 | 29  | 183 | 2  |
| CONTIG-043612 | 168 | 48 | 106 | 179 | 10 |
| CONTIG-043613 | 97  | 12 | 73  | 17  | 0  |
| CONTIG-043614 | 77  | 24 | 19  | 104 | 0  |
| CONTIG-043616 | 529 | 24 | 11  | 55  | 0  |
| CONTIG-043617 | 141 | 14 | 14  | 37  | 2  |
| CONTIG-043618 | 126 | 27 | 14  | 187 | 0  |
| CONTIG-043619 | 72  | 8  | 46  | 0   | 0  |
| CONTIG-043620 | 62  | 12 | 0   | 18  | 0  |
| CONTIG-043621 | 85  | 8  | 21  | 8   | 0  |
| CONTIG-043622 | 163 | 16 | 47  | 65  | 0  |
| CONTIG-043625 | 86  | 7  | 0   | 4   | 0  |
| CONTIG-043626 | 78  | 12 | 11  | 25  | 0  |
| CONTIG-043627 | 253 | 17 | 39  | 121 | 0  |
| CONTIG-043630 | 144 | 10 | 10  | 42  | 0  |
| CONTIG-043631 | 181 | 20 | 36  | 172 | 0  |
| CONTIG-043632 | 130 | 9  | 16  | 32  | 4  |
| CONTIG-043633 | 63  | 9  | 8   | 6   | 0  |
| CONTIG-043634 | 105 | 7  | 7   | 15  | 0  |
| CONTIG-043635 | 118 | 4  | 13  | 8   | 0  |
| CONTIG-043636 | 60  | 13 | 29  | 7   | 0  |
| CONTIG-043637 | 153 | 6  | 6   | 8   | 2  |
| CONTIG-043638 | 123 | 22 | 7   | 117 | 0  |
| CONTIG-043640 | 292 | 17 | 24  | 164 | 0  |
| CONTIG-043641 | 62  | 8  | 3   | 11  | 0  |
| CONTIG-043642 | 402 | 23 | 29  | 347 | 0  |
| CONTIG-043643 | 151 | 12 | 6   | 56  | 0  |
| CONTIG-043644 | 111 | 7  | 5   | 24  | 0  |
| CONTIG-043645 | 397 | 23 | 70  | 107 | 3  |
| CONTIG-043646 | 129 | 8  | 8   | 40  | 0  |
| CONTIG-043647 | 86  | 9  | 12  | 27  | 0  |
| CONTIG-043648 | 166 | 9  | 20  | 17  | 0  |
| CONTIG-043649 | 66  | 6  | 2   | 2   | 0  |
| CONTIG-043650 | 382 | 16 | 40  | 165 | 0  |
| CONTIG-043651 | 150 | 26 | 77  | 118 | 0  |
| CONTIG-043652 | 280 | 14 | 65  | 119 | 0  |
| CONTIG-043653 | 139 | 4  | 2   | 4   | 0  |
| CONTIG-043654 | 76  | 13 | 19  | 11  | 0  |
| CONTIG-043655 | 196 | 14 | 12  | 40  | 0  |
| CONTIG-043656 | 382 | 11 | 27  | 122 | 0  |
| CONTIG-043657 | 79  | 8  | 8   | 14  | 0  |



|               |     |     |     |     |    |
|---------------|-----|-----|-----|-----|----|
| CONTIG-043658 | 269 | 12  | 42  | 91  | 0  |
| CONTIG-043659 | 101 | 8   | 13  | 16  | 0  |
| CONTIG-043660 | 143 | 14  | 86  | 11  | 0  |
| CONTIG-043661 | 174 | 17  | 37  | 73  | 0  |
| CONTIG-043662 | 128 | 6   | 10  | 21  | 0  |
| CONTIG-043663 | 193 | 13  | 6   | 82  | 0  |
| CONTIG-043664 | 144 | 8   | 14  | 38  | 0  |
| CONTIG-043667 | 90  | 4   | 2   | 5   | 0  |
| CONTIG-043668 | 233 | 10  | 27  | 37  | 0  |
| CONTIG-043670 | 79  | 6   | 2   | 23  | 0  |
| CONTIG-043671 | 391 | 5   | 11  | 53  | 2  |
| CONTIG-043672 | 621 | 12  | 38  | 252 | 0  |
| CONTIG-043673 | 109 | 10  | 13  | 24  | 0  |
| CONTIG-043674 | 303 | 10  | 8   | 97  | 0  |
| CONTIG-043675 | 147 | 36  | 17  | 238 | 0  |
| CONTIG-043676 | 149 | 10  | 15  | 32  | 0  |
| CONTIG-043677 | 58  | 5   | 0   | 9   | 0  |
| CONTIG-043678 | 233 | 12  | 20  | 78  | 0  |
| CONTIG-043680 | 143 | 14  | 8   | 16  | 0  |
| CONTIG-043681 | 156 | 7   | 23  | 25  | 0  |
| CONTIG-043682 | 93  | 7   | 4   | 23  | 0  |
| CONTIG-043683 | 136 | 5   | 19  | 11  | 0  |
| CONTIG-043686 | 92  | 17  | 18  | 61  | 0  |
| CONTIG-043687 | 42  | 9   | 0   | 9   | 0  |
| CONTIG-043688 | 177 | 9   | 6   | 53  | 0  |
| CONTIG-043689 | 151 | 9   | 3   | 56  | 0  |
| CONTIG-043690 | 318 | 11  | 58  | 76  | 0  |
| CONTIG-043691 | 292 | 8   | 65  | 35  | 0  |
| CONTIG-043692 | 456 | 10  | 16  | 156 | 0  |
| CONTIG-043693 | 111 | 4   | 2   | 7   | 0  |
| CONTIG-043694 | 82  | 5   | 8   | 8   | 0  |
| CONTIG-043695 | 392 | 9   | 17  | 87  | 0  |
| CONTIG-043696 | 146 | 5   | 9   | 9   | 0  |
| CONTIG-043697 | 628 | 20  | 143 | 479 | 5  |
| CONTIG-043698 | 170 | 5   | 20  | 18  | 0  |
| CONTIG-043699 | 599 | 15  | 20  | 150 | 0  |
| CONTIG-043700 | 73  | 8   | 25  | 2   | 0  |
| CONTIG-043701 | 63  | 13  | 3   | 30  | 0  |
| CONTIG-043702 | 67  | 144 | 54  | 149 | 79 |
| CONTIG-043703 | 38  | 10  | 3   | 11  | 0  |
| CONTIG-043706 | 88  | 14  | 13  | 60  | 0  |
| CONTIG-043707 | 160 | 9   | 8   | 50  | 0  |
| CONTIG-043708 | 114 | 12  | 4   | 82  | 0  |
| CONTIG-043709 | 115 | 5   | 8   | 14  | 0  |
| CONTIG-043710 | 109 | 3   | 8   | 4   | 0  |
| CONTIG-043711 | 94  | 20  | 8   | 99  | 0  |
| CONTIG-043712 | 115 | 6   | 2   | 25  | 0  |

|               |     |     |    |     |   |
|---------------|-----|-----|----|-----|---|
| CONTIG-043713 | 247 | 7   | 13 | 54  | 2 |
| CONTIG-043714 | 154 | 5   | 10 | 14  | 0 |
| CONTIG-043715 | 150 | 7   | 13 | 12  | 0 |
| CONTIG-043718 | 448 | 20  | 66 | 377 | 0 |
| CONTIG-043723 | 347 | 36  | 57 | 480 | 9 |
| CONTIG-043724 | 409 | 14  | 11 | 203 | 2 |
| CONTIG-043725 | 108 | 8   | 4  | 35  | 0 |
| CONTIG-043726 | 149 | 11  | 10 | 11  | 0 |
| CONTIG-043727 | 642 | 16  | 19 | 550 | 0 |
| CONTIG-043728 | 60  | 2   | 0  | 2   | 0 |
| CONTIG-043729 | 461 | 11  | 32 | 138 | 4 |
| CONTIG-043730 | 92  | 18  | 2  | 64  | 0 |
| CONTIG-043731 | 120 | 8   | 2  | 41  | 0 |
| CONTIG-043732 | 102 | 8   | 18 | 14  | 0 |
| CONTIG-043733 | 137 | 5   | 4  | 11  | 0 |
| CONTIG-043734 | 177 | 9   | 4  | 38  | 0 |
| CONTIG-043735 | 104 | 10  | 18 | 37  | 0 |
| CONTIG-043736 | 262 | 11  | 35 | 87  | 0 |
| CONTIG-043737 | 162 | 6   | 6  | 4   | 0 |
| CONTIG-043738 | 148 | 10  | 39 | 13  | 0 |
| CONTIG-043739 | 128 | 16  | 36 | 54  | 2 |
| CONTIG-043740 | 129 | 8   | 16 | 28  | 2 |
| CONTIG-043741 | 119 | 20  | 14 | 8   | 0 |
| CONTIG-043743 | 347 | 13  | 18 | 168 | 0 |
| CONTIG-043750 | 203 | 5   | 5  | 33  | 0 |
| CONTIG-043751 | 84  | 5   | 2  | 16  | 0 |
| CONTIG-043757 | 780 | 19  | 71 | 623 | 6 |
| CONTIG-043758 | 124 | 13  | 19 | 11  | 0 |
| CONTIG-043759 | 311 | 22  | 40 | 230 | 2 |
| CONTIG-043760 | 161 | 7   | 9  | 19  | 0 |
| CONTIG-043761 | 79  | 10  | 2  | 17  | 3 |
| CONTIG-043762 | 450 | 17  | 35 | 248 | 0 |
| CONTIG-043763 | 87  | 6   | 0  | 14  | 0 |
| CONTIG-043766 | 51  | 135 | 16 | 164 | 2 |
| CONTIG-043767 | 912 | 19  | 44 | 644 | 2 |
| CONTIG-043768 | 153 | 6   | 0  | 14  | 0 |
| CONTIG-043769 | 53  | 211 | 0  | 90  | 0 |
| CONTIG-043770 | 154 | 10  | 25 | 59  | 0 |
| CONTIG-043771 | 450 | 9   | 22 | 121 | 2 |
| CONTIG-043772 | 480 | 10  | 32 | 151 | 2 |
| CONTIG-043773 | 753 | 15  | 51 | 356 | 0 |
| CONTIG-043774 | 364 | 8   | 2  | 87  | 0 |
| CONTIG-043775 | 176 | 12  | 28 | 32  | 0 |
| CONTIG-043776 | 97  | 14  | 4  | 39  | 4 |
| CONTIG-043777 | 72  | 8   | 9  | 10  | 0 |
| CONTIG-043778 | 315 | 15  | 81 | 140 | 2 |
| CONTIG-043779 | 384 | 8   | 17 | 73  | 0 |

|               |     |     |     |     |    |
|---------------|-----|-----|-----|-----|----|
| CONTIG-043780 | 195 | 81  | 104 | 557 | 29 |
| CONTIG-043781 | 170 | 6   | 2   | 59  | 0  |
| CONTIG-043782 | 228 | 9   | 7   | 57  | 2  |
| CONTIG-043783 | 101 | 9   | 4   | 31  | 0  |
| CONTIG-043784 | 310 | 21  | 32  | 190 | 2  |
| CONTIG-043785 | 44  | 5   | 4   | 2   | 0  |
| CONTIG-043786 | 408 | 8   | 9   | 34  | 0  |
| CONTIG-043787 | 384 | 11  | 17  | 70  | 0  |
| CONTIG-043788 | 87  | 12  | 39  | 29  | 0  |
| CONTIG-043790 | 275 | 10  | 9   | 0   | 2  |
| CONTIG-043791 | 400 | 9   | 10  | 64  | 0  |
| CONTIG-043792 | 161 | 14  | 17  | 77  | 0  |
| CONTIG-043793 | 69  | 5   | 3   | 0   | 0  |
| CONTIG-043794 | 284 | 13  | 37  | 92  | 0  |
| CONTIG-043795 | 160 | 8   | 18  | 11  | 0  |
| CONTIG-043796 | 82  | 3   | 11  | 6   | 0  |
| CONTIG-043797 | 63  | 104 | 7   | 206 | 0  |
| CONTIG-043798 | 244 | 6   | 8   | 51  | 0  |
| CONTIG-043799 | 243 | 17  | 5   | 159 | 2  |
| CONTIG-043800 | 121 | 9   | 10  | 46  | 0  |
| CONTIG-043801 | 153 | 12  | 5   | 56  | 0  |
| CONTIG-043803 | 211 | 9   | 5   | 58  | 0  |
| CONTIG-043804 | 44  | 33  | 7   | 40  | 0  |
| CONTIG-043805 | 74  | 5   | 5   | 0   | 0  |
| CONTIG-043806 | 404 | 17  | 8   | 171 | 2  |
| CONTIG-043809 | 201 | 10  | 14  | 34  | 0  |
| CONTIG-043810 | 211 | 9   | 16  | 45  | 0  |
| CONTIG-043812 | 566 | 10  | 0   | 297 | 0  |
| CONTIG-043813 | 172 | 18  | 40  | 46  | 0  |
| CONTIG-043814 | 60  | 2   | 3   | 0   | 0  |
| CONTIG-043815 | 411 | 7   | 7   | 65  | 0  |
| CONTIG-043816 | 97  | 2   | 0   | 2   | 0  |
| CONTIG-043817 | 140 | 7   | 0   | 13  | 0  |
| CONTIG-043818 | 155 | 7   | 23  | 30  | 0  |
| CONTIG-043819 | 117 | 19  | 80  | 18  | 0  |
| CONTIG-043820 | 211 | 6   | 45  | 23  | 0  |
| CONTIG-043821 | 153 | 6   | 61  | 7   | 0  |
| CONTIG-043822 | 161 | 49  | 12  | 7   | 72 |
| CONTIG-043823 | 144 | 6   | 0   | 3   | 0  |
| CONTIG-043824 | 270 | 8   | 17  | 59  | 0  |
| CONTIG-043825 | 113 | 4   | 9   | 10  | 0  |
| CONTIG-043826 | 92  | 5   | 0   | 15  | 0  |
| CONTIG-043827 | 116 | 6   | 4   | 12  | 0  |
| CONTIG-043828 | 190 | 14  | 12  | 29  | 0  |
| CONTIG-043829 | 171 | 5   | 7   | 14  | 0  |
| CONTIG-043830 | 141 | 9   | 8   | 42  | 0  |
| CONTIG-043831 | 61  | 9   | 3   | 19  | 0  |

|               |     |     |    |     |    |
|---------------|-----|-----|----|-----|----|
| CONTIG-043832 | 94  | 6   | 2  | 13  | 0  |
| CONTIG-043834 | 160 | 12  | 45 | 32  | 0  |
| CONTIG-043835 | 129 | 9   | 10 | 14  | 0  |
| CONTIG-043836 | 69  | 7   | 5  | 16  | 0  |
| CONTIG-043837 | 70  | 5   | 2  | 6   | 0  |
| CONTIG-043839 | 143 | 10  | 17 | 34  | 0  |
| CONTIG-043840 | 79  | 14  | 14 | 25  | 0  |
| CONTIG-043841 | 405 | 12  | 30 | 171 | 0  |
| CONTIG-043842 | 154 | 9   | 23 | 39  | 0  |
| CONTIG-043843 | 139 | 8   | 4  | 0   | 2  |
| CONTIG-043844 | 89  | 10  | 0  | 14  | 0  |
| CONTIG-043845 | 75  | 27  | 10 | 94  | 0  |
| CONTIG-043846 | 120 | 20  | 20 | 73  | 0  |
| CONTIG-043847 | 72  | 6   | 19 | 9   | 0  |
| CONTIG-043848 | 230 | 8   | 41 | 25  | 0  |
| CONTIG-043849 | 79  | 8   | 4  | 13  | 2  |
| CONTIG-043850 | 291 | 8   | 34 | 48  | 0  |
| CONTIG-043851 | 59  | 3   | 4  | 0   | 0  |
| CONTIG-043852 | 170 | 9   | 9  | 56  | 0  |
| CONTIG-043853 | 100 | 4   | 8  | 9   | 0  |
| CONTIG-043854 | 403 | 15  | 52 | 122 | 0  |
| CONTIG-043855 | 86  | 11  | 4  | 13  | 0  |
| CONTIG-043856 | 284 | 5   | 12 | 40  | 0  |
| CONTIG-043857 | 480 | 6   | 20 | 38  | 0  |
| CONTIG-043858 | 480 | 17  | 30 | 258 | 0  |
| CONTIG-043862 | 281 | 8   | 52 | 48  | 0  |
| CONTIG-043863 | 360 | 13  | 60 | 94  | 0  |
| CONTIG-043864 | 397 | 8   | 5  | 61  | 0  |
| CONTIG-043865 | 68  | 4   | 0  | 0   | 0  |
| CONTIG-043866 | 245 | 27  | 29 | 171 | 4  |
| CONTIG-043867 | 64  | 9   | 3  | 18  | 0  |
| CONTIG-043868 | 78  | 4   | 13 | 6   | 0  |
| CONTIG-043869 | 126 | 10  | 7  | 42  | 0  |
| CONTIG-043870 | 151 | 14  | 8  | 0   | 18 |
| CONTIG-043871 | 77  | 4   | 3  | 15  | 0  |
| CONTIG-043872 | 82  | 4   | 2  | 2   | 0  |
| CONTIG-043873 | 64  | 2   | 2  | 0   | 0  |
| CONTIG-043874 | 174 | 9   | 11 | 59  | 0  |
| CONTIG-043875 | 300 | 16  | 30 | 180 | 0  |
| CONTIG-043876 | 348 | 9   | 26 | 55  | 0  |
| CONTIG-043877 | 153 | 13  | 10 | 80  | 0  |
| CONTIG-043878 | 262 | 9   | 17 | 104 | 2  |
| CONTIG-043879 | 196 | 9   | 32 | 49  | 2  |
| CONTIG-043880 | 687 | 18  | 17 | 711 | 0  |
| CONTIG-043881 | 117 | 8   | 0  | 40  | 0  |
| CONTIG-043882 | 39  | 120 | 24 | 186 | 0  |
| CONTIG-043883 | 319 | 11  | 16 | 61  | 12 |

|               |     |     |     |     |    |
|---------------|-----|-----|-----|-----|----|
| CONTIG-043884 | 64  | 7   | 10  | 5   | 0  |
| CONTIG-043885 | 275 | 7   | 22  | 53  | 0  |
| CONTIG-043886 | 586 | 15  | 109 | 213 | 2  |
| CONTIG-043887 | 56  | 101 | 30  | 55  | 0  |
| CONTIG-043890 | 263 | 15  | 46  | 122 | 0  |
| CONTIG-043891 | 129 | 7   | 2   | 21  | 0  |
| CONTIG-043892 | 423 | 20  | 54  | 106 | 0  |
| CONTIG-043893 | 59  | 3   | 0   | 3   | 0  |
| CONTIG-043894 | 69  | 18  | 20  | 48  | 0  |
| CONTIG-043896 | 95  | 5   | 5   | 16  | 0  |
| CONTIG-043897 | 271 | 15  | 12  | 134 | 4  |
| CONTIG-043898 | 113 | 4   | 9   | 5   | 0  |
| CONTIG-043899 | 258 | 7   | 3   | 50  | 0  |
| CONTIG-043900 | 130 | 4   | 10  | 9   | 0  |
| CONTIG-043901 | 69  | 4   | 13  | 0   | 0  |
| CONTIG-043902 | 190 | 13  | 7   | 113 | 0  |
| CONTIG-043904 | 62  | 5   | 10  | 0   | 0  |
| CONTIG-043906 | 107 | 9   | 18  | 28  | 0  |
| CONTIG-043908 | 378 | 19  | 52  | 203 | 0  |
| CONTIG-043909 | 195 | 23  | 10  | 166 | 2  |
| CONTIG-043910 | 72  | 5   | 4   | 4   | 0  |
| CONTIG-043912 | 70  | 7   | 13  | 5   | 0  |
| CONTIG-043913 | 152 | 9   | 64  | 20  | 0  |
| CONTIG-043914 | 530 | 9   | 0   | 180 | 0  |
| CONTIG-043916 | 208 | 5   | 8   | 13  | 0  |
| CONTIG-043917 | 425 | 23  | 46  | 285 | 12 |
| CONTIG-043927 | 186 | 7   | 2   | 31  | 0  |
| CONTIG-043928 | 863 | 13  | 36  | 243 | 6  |
| CONTIG-043929 | 76  | 24  | 5   | 26  | 0  |
| CONTIG-043930 | 188 | 11  | 31  | 63  | 0  |
| CONTIG-043931 | 332 | 17  | 29  | 61  | 0  |
| CONTIG-043932 | 77  | 4   | 5   | 4   | 0  |
| CONTIG-043933 | 736 | 10  | 2   | 0   | 31 |
| CONTIG-043934 | 77  | 7   | 18  | 16  | 0  |
| CONTIG-043936 | 58  | 24  | 14  | 24  | 0  |
| CONTIG-043937 | 675 | 21  | 40  | 177 | 18 |
| CONTIG-043938 | 228 | 5   | 21  | 31  | 0  |
| CONTIG-043939 | 89  | 5   | 2   | 10  | 0  |
| CONTIG-043940 | 51  | 29  | 2   | 19  | 0  |
| CONTIG-043941 | 207 | 9   | 20  | 17  | 0  |
| CONTIG-043942 | 72  | 4   | 2   | 9   | 0  |
| CONTIG-043943 | 307 | 9   | 16  | 96  | 0  |
| CONTIG-043944 | 216 | 13  | 34  | 149 | 0  |
| CONTIG-043945 | 83  | 10  | 0   | 40  | 0  |
| CONTIG-043948 | 150 | 10  | 25  | 9   | 0  |
| CONTIG-043949 | 139 | 11  | 22  | 44  | 2  |
| CONTIG-043950 | 84  | 4   | 4   | 3   | 0  |

|               |     |     |    |      |   |
|---------------|-----|-----|----|------|---|
| CONTIG-043951 | 284 | 18  | 12 | 127  | 6 |
| CONTIG-043952 | 145 | 11  | 7  | 52   | 0 |
| CONTIG-043953 | 92  | 8   | 4  | 18   | 0 |
| CONTIG-043954 | 181 | 11  | 14 | 66   | 0 |
| CONTIG-043955 | 284 | 13  | 11 | 160  | 2 |
| CONTIG-043956 | 198 | 7   | 13 | 32   | 0 |
| CONTIG-043957 | 147 | 13  | 29 | 36   | 0 |
| CONTIG-043958 | 105 | 11  | 6  | 33   | 0 |
| CONTIG-043960 | 68  | 12  | 19 | 3    | 0 |
| CONTIG-043961 | 103 | 5   | 14 | 14   | 0 |
| CONTIG-043962 | 176 | 13  | 19 | 77   | 0 |
| CONTIG-043963 | 174 | 7   | 10 | 32   | 0 |
| CONTIG-043964 | 281 | 14  | 81 | 75   | 0 |
| CONTIG-043965 | 141 | 10  | 2  | 46   | 0 |
| CONTIG-043966 | 138 | 6   | 17 | 21   | 0 |
| CONTIG-043967 | 341 | 6   | 12 | 42   | 0 |
| CONTIG-043969 | 57  | 542 | 10 | 1056 | 0 |
| CONTIG-043972 | 60  | 13  | 10 | 3    | 4 |
| CONTIG-043973 | 145 | 10  | 34 | 63   | 0 |
| CONTIG-043974 | 134 | 11  | 12 | 48   | 0 |
| CONTIG-043976 | 122 | 8   | 7  | 34   | 0 |
| CONTIG-043978 | 109 | 6   | 3  | 18   | 0 |
| CONTIG-043979 | 125 | 5   | 10 | 18   | 0 |
| CONTIG-043980 | 72  | 3   | 0  | 4    | 0 |
| CONTIG-043981 | 254 | 12  | 5  | 111  | 0 |
| CONTIG-043983 | 264 | 11  | 18 | 118  | 0 |
| CONTIG-043984 | 374 | 10  | 19 | 106  | 0 |
| CONTIG-043985 | 84  | 7   | 9  | 17   | 0 |
| CONTIG-043986 | 196 | 11  | 11 | 64   | 2 |
| CONTIG-043987 | 268 | 9   | 0  | 91   | 0 |
| CONTIG-043988 | 66  | 8   | 8  | 23   | 0 |
| CONTIG-043989 | 216 | 8   | 33 | 31   | 0 |
| CONTIG-043990 | 148 | 4   | 4  | 14   | 0 |
| CONTIG-043992 | 239 | 27  | 49 | 201  | 0 |
| CONTIG-043993 | 94  | 4   | 14 | 4    | 0 |
| CONTIG-043994 | 146 | 35  | 14 | 192  | 2 |
| CONTIG-043995 | 62  | 8   | 15 | 10   | 0 |
| CONTIG-043997 | 316 | 11  | 17 | 99   | 0 |
| CONTIG-043998 | 168 | 7   | 4  | 31   | 0 |
| CONTIG-043999 | 87  | 6   | 6  | 15   | 0 |
| CONTIG-044000 | 372 | 8   | 4  | 69   | 0 |
| CONTIG-044001 | 137 | 8   | 3  | 9    | 0 |
| CONTIG-044002 | 64  | 2   | 0  | 4    | 0 |
| CONTIG-044003 | 71  | 5   | 6  | 9    | 0 |
| CONTIG-044004 | 108 | 2   | 2  | 5    | 0 |
| CONTIG-044005 | 205 | 11  | 28 | 64   | 0 |
| CONTIG-044009 | 96  | 5   | 0  | 6    | 0 |

|               |     |     |     |      |   |
|---------------|-----|-----|-----|------|---|
| CONTIG-044010 | 85  | 3   | 4   | 2    | 0 |
| CONTIG-044011 | 136 | 6   | 18  | 6    | 0 |
| CONTIG-044012 | 67  | 8   | 24  | 8    | 0 |
| CONTIG-044014 | 152 | 7   | 11  | 37   | 0 |
| CONTIG-044015 | 94  | 8   | 9   | 19   | 0 |
| CONTIG-044016 | 97  | 5   | 30  | 4    | 0 |
| CONTIG-044017 | 183 | 11  | 4   | 12   | 2 |
| CONTIG-044018 | 117 | 24  | 11  | 118  | 0 |
| CONTIG-044019 | 227 | 11  | 2   | 104  | 0 |
| CONTIG-044020 | 79  | 58  | 30  | 47   | 0 |
| CONTIG-044021 | 114 | 14  | 41  | 35   | 0 |
| CONTIG-044022 | 128 | 19  | 9   | 70   | 0 |
| CONTIG-044024 | 183 | 27  | 23  | 244  | 0 |
| CONTIG-044025 | 82  | 8   | 0   | 36   | 0 |
| CONTIG-044026 | 80  | 16  | 51  | 4    | 0 |
| CONTIG-044027 | 216 | 5   | 12  | 5    | 0 |
| CONTIG-044028 | 190 | 7   | 33  | 25   | 2 |
| CONTIG-044029 | 65  | 14  | 0   | 0    | 0 |
| CONTIG-044030 | 190 | 8   | 10  | 45   | 0 |
| CONTIG-044031 | 120 | 31  | 19  | 78   | 0 |
| CONTIG-044032 | 66  | 8   | 19  | 7    | 0 |
| CONTIG-044040 | 109 | 5   | 6   | 9    | 0 |
| CONTIG-044045 | 183 | 14  | 20  | 100  | 0 |
| CONTIG-044046 | 295 | 28  | 68  | 170  | 0 |
| CONTIG-044047 | 93  | 7   | 6   | 10   | 0 |
| CONTIG-044048 | 62  | 297 | 126 | 696  | 0 |
| CONTIG-044049 | 210 | 4   | 4   | 24   | 0 |
| CONTIG-044050 | 447 | 10  | 34  | 97   | 0 |
| CONTIG-044052 | 125 | 8   | 9   | 33   | 0 |
| CONTIG-044053 | 108 | 179 | 6   | 1003 | 2 |
| CONTIG-044054 | 96  | 6   | 4   | 27   | 0 |
| CONTIG-044055 | 269 | 13  | 10  | 87   | 2 |
| CONTIG-044056 | 59  | 6   | 0   | 13   | 0 |
| CONTIG-044057 | 231 | 8   | 47  | 23   | 0 |
| CONTIG-044064 | 157 | 5   | 9   | 8    | 0 |
| CONTIG-044066 | 157 | 7   | 3   | 27   | 0 |
| CONTIG-044067 | 39  | 18  | 11  | 6    | 0 |
| CONTIG-044068 | 242 | 12  | 3   | 82   | 7 |
| CONTIG-044069 | 73  | 9   | 19  | 2    | 0 |
| CONTIG-044070 | 182 | 12  | 10  | 111  | 0 |
| CONTIG-044071 | 125 | 10  | 6   | 33   | 0 |
| CONTIG-044072 | 200 | 11  | 0   | 22   | 4 |
| CONTIG-044073 | 64  | 7   | 8   | 2    | 2 |
| CONTIG-044074 | 84  | 4   | 5   | 6    | 0 |
| CONTIG-044075 | 446 | 8   | 24  | 104  | 2 |
| CONTIG-044076 | 191 | 6   | 4   | 0    | 2 |
| CONTIG-044077 | 232 | 12  | 26  | 82   | 0 |

|               |      |     |    |     |   |
|---------------|------|-----|----|-----|---|
| CONTIG-044078 | 80   | 16  | 8  | 32  | 0 |
| CONTIG-044079 | 170  | 12  | 52 | 71  | 0 |
| CONTIG-044080 | 741  | 17  | 7  | 587 | 2 |
| CONTIG-044081 | 155  | 10  | 11 | 40  | 2 |
| CONTIG-044082 | 140  | 14  | 42 | 81  | 0 |
| CONTIG-044083 | 82   | 67  | 2  | 283 | 0 |
| CONTIG-044084 | 170  | 5   | 4  | 15  | 0 |
| CONTIG-044085 | 723  | 10  | 33 | 191 | 0 |
| CONTIG-044086 | 67   | 2   | 0  | 5   | 0 |
| CONTIG-044087 | 768  | 14  | 55 | 330 | 4 |
| CONTIG-044088 | 1020 | 20  | 31 | 255 | 0 |
| CONTIG-044089 | 75   | 7   | 15 | 13  | 0 |
| CONTIG-044090 | 489  | 12  | 14 | 19  | 0 |
| CONTIG-044091 | 128  | 5   | 4  | 15  | 0 |
| CONTIG-044092 | 64   | 7   | 8  | 10  | 0 |
| CONTIG-044093 | 153  | 6   | 4  | 23  | 0 |
| CONTIG-044100 | 167  | 6   | 4  | 41  | 0 |
| CONTIG-044101 | 84   | 3   | 0  | 7   | 0 |
| CONTIG-044103 | 167  | 7   | 4  | 4   | 0 |
| CONTIG-044104 | 105  | 7   | 13 | 23  | 0 |
| CONTIG-044105 | 60   | 13  | 0  | 7   | 0 |
| CONTIG-044106 | 113  | 8   | 43 | 13  | 0 |
| CONTIG-044107 | 45   | 117 | 28 | 179 | 0 |
| CONTIG-044108 | 105  | 3   | 6  | 8   | 0 |
| CONTIG-044109 | 232  | 8   | 10 | 18  | 0 |
| CONTIG-044110 | 77   | 10  | 2  | 39  | 0 |
| CONTIG-044111 | 450  | 16  | 44 | 195 | 5 |
| CONTIG-044112 | 66   | 4   | 7  | 6   | 0 |
| CONTIG-044113 | 241  | 8   | 36 | 46  | 0 |
| CONTIG-044114 | 77   | 5   | 3  | 5   | 0 |
| CONTIG-044117 | 191  | 33  | 51 | 276 | 0 |
| CONTIG-044118 | 160  | 4   | 4  | 17  | 0 |
| CONTIG-044119 | 87   | 9   | 27 | 17  | 0 |
| CONTIG-044121 | 83   | 6   | 2  | 4   | 0 |
| CONTIG-044122 | 221  | 8   | 2  | 47  | 0 |
| CONTIG-044123 | 324  | 7   | 8  | 81  | 0 |
| CONTIG-044124 | 129  | 9   | 8  | 50  | 0 |
| CONTIG-044125 | 111  | 8   | 16 | 6   | 0 |
| CONTIG-044126 | 112  | 4   | 8  | 18  | 0 |
| CONTIG-044127 | 445  | 16  | 20 | 143 | 0 |
| CONTIG-044128 | 64   | 3   | 4  | 0   | 0 |
| CONTIG-044129 | 88   | 4   | 16 | 6   | 0 |
| CONTIG-044130 | 457  | 14  | 49 | 167 | 0 |
| CONTIG-044131 | 62   | 7   | 3  | 12  | 0 |
| CONTIG-044132 | 357  | 6   | 0  | 15  | 0 |
| CONTIG-044133 | 235  | 5   | 23 | 10  | 0 |
| CONTIG-044134 | 76   | 14  | 13 | 20  | 0 |



|               |     |    |     |     |    |
|---------------|-----|----|-----|-----|----|
| CONTIG-044135 | 383 | 7  | 18  | 57  | 0  |
| CONTIG-044137 | 161 | 7  | 3   | 41  | 0  |
| CONTIG-044140 | 85  | 6  | 13  | 15  | 0  |
| CONTIG-044142 | 142 | 41 | 10  | 216 | 33 |
| CONTIG-044143 | 80  | 7  | 10  | 0   | 0  |
| CONTIG-044144 | 59  | 2  | 0   | 0   | 0  |
| CONTIG-044145 | 102 | 3  | 0   | 0   | 0  |
| CONTIG-044146 | 58  | 4  | 6   | 5   | 0  |
| CONTIG-044147 | 143 | 7  | 2   | 26  | 0  |
| CONTIG-044149 | 77  | 6  | 0   | 10  | 2  |
| CONTIG-044150 | 181 | 16 | 34  | 52  | 0  |
| CONTIG-044151 | 225 | 17 | 109 | 28  | 0  |
| CONTIG-044152 | 76  | 8  | 6   | 10  | 0  |
| CONTIG-044153 | 349 | 14 | 4   | 216 | 2  |
| CONTIG-044154 | 72  | 4  | 0   | 5   | 0  |
| CONTIG-044155 | 183 | 12 | 16  | 53  | 0  |
| CONTIG-044156 | 172 | 10 | 12  | 48  | 0  |
| CONTIG-044157 | 793 | 13 | 48  | 442 | 4  |
| CONTIG-044158 | 786 | 16 | 82  | 529 | 4  |
| CONTIG-044159 | 73  | 8  | 7   | 17  | 0  |
| CONTIG-044160 | 185 | 12 | 9   | 30  | 0  |
| CONTIG-044161 | 102 | 32 | 5   | 155 | 0  |
| CONTIG-044162 | 197 | 9  | 11  | 57  | 0  |
| CONTIG-044163 | 218 | 6  | 10  | 40  | 4  |
| CONTIG-044164 | 111 | 9  | 0   | 39  | 0  |
| CONTIG-044165 | 69  | 11 | 8   | 24  | 0  |
| CONTIG-044166 | 536 | 10 | 20  | 162 | 6  |
| CONTIG-044168 | 84  | 12 | 7   | 18  | 0  |
| CONTIG-044170 | 103 | 6  | 6   | 8   | 0  |
| CONTIG-044176 | 369 | 12 | 10  | 112 | 0  |
| CONTIG-044178 | 229 | 15 | 30  | 104 | 0  |
| CONTIG-044179 | 389 | 41 | 22  | 548 | 33 |
| CONTIG-044180 | 111 | 9  | 5   | 17  | 2  |
| CONTIG-044181 | 442 | 8  | 18  | 44  | 0  |
| CONTIG-044186 | 68  | 15 | 6   | 44  | 0  |
| CONTIG-044187 | 60  | 13 | 24  | 0   | 0  |
| CONTIG-044188 | 83  | 2  | 2   | 2   | 0  |
| CONTIG-044189 | 68  | 3  | 0   | 0   | 0  |
| CONTIG-044190 | 554 | 10 | 27  | 146 | 0  |
| CONTIG-044191 | 77  | 5  | 39  | 4   | 0  |
| CONTIG-044192 | 288 | 10 | 57  | 33  | 2  |
| CONTIG-044193 | 61  | 4  | 6   | 0   | 0  |
| CONTIG-044194 | 70  | 4  | 0   | 2   | 0  |
| CONTIG-044195 | 78  | 8  | 6   | 18  | 0  |
| CONTIG-044198 | 112 | 12 | 9   | 35  | 0  |
| CONTIG-044199 | 134 | 6  | 16  | 5   | 0  |
| CONTIG-044200 | 238 | 21 | 97  | 66  | 6  |

|               |     |     |     |     |    |
|---------------|-----|-----|-----|-----|----|
| CONTIG-044201 | 219 | 11  | 16  | 56  | 0  |
| CONTIG-044202 | 847 | 15  | 36  | 95  | 35 |
| CONTIG-044203 | 58  | 524 | 190 | 776 | 85 |
| CONTIG-044204 | 141 | 5   | 3   | 14  | 0  |
| CONTIG-044206 | 78  | 5   | 19  | 0   | 0  |
| CONTIG-044207 | 59  | 5   | 18  | 0   | 0  |
| CONTIG-044210 | 356 | 16  | 41  | 131 | 4  |
| CONTIG-044211 | 231 | 9   | 4   | 43  | 0  |
| CONTIG-044212 | 129 | 9   | 10  | 47  | 0  |
| CONTIG-044213 | 81  | 8   | 10  | 22  | 0  |
| CONTIG-044214 | 121 | 7   | 14  | 18  | 0  |
| CONTIG-044215 | 126 | 10  | 0   | 4   | 4  |
| CONTIG-044216 | 636 | 7   | 29  | 141 | 0  |
| CONTIG-044217 | 241 | 6   | 4   | 50  | 0  |
| CONTIG-044218 | 128 | 11  | 26  | 58  | 0  |
| CONTIG-044219 | 38  | 36  | 17  | 0   | 0  |
| CONTIG-044220 | 261 | 13  | 23  | 65  | 4  |
| CONTIG-044221 | 128 | 10  | 46  | 11  | 0  |
| CONTIG-044222 | 227 | 11  | 10  | 100 | 0  |
| CONTIG-044224 | 166 | 7   | 2   | 16  | 0  |
| CONTIG-044225 | 193 | 13  | 5   | 102 | 0  |
| CONTIG-044226 | 89  | 4   | 2   | 6   | 0  |
| CONTIG-044227 | 256 | 13  | 73  | 124 | 0  |
| CONTIG-044228 | 87  | 5   | 6   | 11  | 0  |
| CONTIG-044229 | 311 | 11  | 15  | 147 | 2  |
| CONTIG-044230 | 191 | 9   | 5   | 3   | 0  |
| CONTIG-044231 | 85  | 8   | 11  | 18  | 0  |
| CONTIG-044232 | 60  | 4   | 6   | 2   | 0  |
| CONTIG-044233 | 148 | 16  | 31  | 55  | 0  |
| CONTIG-044234 | 157 | 6   | 7   | 29  | 0  |
| CONTIG-044236 | 75  | 60  | 34  | 179 | 0  |
| CONTIG-044237 | 452 | 13  | 17  | 266 | 2  |
| CONTIG-044238 | 279 | 4   | 22  | 2   | 0  |
| CONTIG-044239 | 300 | 10  | 22  | 129 | 0  |
| CONTIG-044240 | 442 | 8   | 33  | 33  | 0  |
| CONTIG-044241 | 132 | 24  | 25  | 164 | 0  |
| CONTIG-044242 | 75  | 194 | 22  | 676 | 5  |
| CONTIG-044243 | 68  | 14  | 27  | 12  | 0  |
| CONTIG-044244 | 66  | 10  | 21  | 13  | 0  |
| CONTIG-044245 | 201 | 8   | 9   | 58  | 0  |
| CONTIG-044248 | 181 | 9   | 8   | 41  | 0  |
| CONTIG-044249 | 395 | 10  | 24  | 179 | 0  |
| CONTIG-044250 | 76  | 12  | 2   | 35  | 0  |
| CONTIG-044251 | 66  | 3   | 0   | 8   | 0  |
| CONTIG-044252 | 72  | 6   | 38  | 0   | 0  |
| CONTIG-044253 | 143 | 69  | 56  | 373 | 8  |
| CONTIG-044254 | 243 | 7   | 3   | 42  | 0  |

|               |      |     |     |      |    |
|---------------|------|-----|-----|------|----|
| CONTIG-044259 | 84   | 5   | 4   | 6    | 0  |
| CONTIG-044260 | 167  | 4   | 2   | 22   | 0  |
| CONTIG-044261 | 274  | 28  | 18  | 275  | 4  |
| CONTIG-044262 | 946  | 16  | 55  | 598  | 4  |
| CONTIG-044263 | 384  | 15  | 5   | 185  | 0  |
| CONTIG-044264 | 129  | 6   | 9   | 26   | 0  |
| CONTIG-044265 | 106  | 6   | 14  | 12   | 0  |
| CONTIG-044267 | 93   | 8   | 14  | 0    | 0  |
| CONTIG-044268 | 947  | 30  | 91  | 1666 | 0  |
| CONTIG-044269 | 311  | 12  | 32  | 163  | 0  |
| CONTIG-044270 | 505  | 13  | 46  | 126  | 2  |
| CONTIG-044271 | 88   | 6   | 3   | 9    | 0  |
| CONTIG-044272 | 450  | 11  | 26  | 90   | 0  |
| CONTIG-044273 | 262  | 12  | 14  | 150  | 0  |
| CONTIG-044274 | 105  | 18  | 52  | 34   | 0  |
| CONTIG-044275 | 225  | 12  | 56  | 49   | 0  |
| CONTIG-044277 | 83   | 4   | 13  | 0    | 0  |
| CONTIG-044278 | 99   | 2   | 2   | 2    | 0  |
| CONTIG-044279 | 266  | 17  | 10  | 34   | 0  |
| CONTIG-044281 | 101  | 3   | 3   | 0    | 0  |
| CONTIG-044283 | 380  | 10  | 63  | 113  | 0  |
| CONTIG-044284 | 186  | 9   | 8   | 83   | 0  |
| CONTIG-044285 | 50   | 24  | 42  | 0    | 0  |
| CONTIG-044286 | 75   | 4   | 5   | 4    | 0  |
| CONTIG-044287 | 134  | 3   | 0   | 11   | 0  |
| CONTIG-044288 | 149  | 7   | 14  | 49   | 0  |
| CONTIG-044289 | 1300 | 20  | 87  | 514  | 71 |
| CONTIG-044290 | 104  | 10  | 38  | 5    | 0  |
| CONTIG-044292 | 209  | 16  | 2   | 109  | 0  |
| CONTIG-044293 | 316  | 438 | 71  | 270  | 0  |
| CONTIG-044294 | 228  | 22  | 19  | 157  | 4  |
| CONTIG-044295 | 45   | 509 | 16  | 856  | 0  |
| CONTIG-044296 | 174  | 13  | 59  | 31   | 0  |
| CONTIG-044297 | 97   | 5   | 8   | 9    | 0  |
| CONTIG-044298 | 129  | 18  | 6   | 127  | 0  |
| CONTIG-044299 | 169  | 13  | 12  | 62   | 0  |
| CONTIG-044300 | 89   | 19  | 51  | 6    | 0  |
| CONTIG-044301 | 72   | 3   | 0   | 4    | 0  |
| CONTIG-044302 | 106  | 4   | 2   | 8    | 0  |
| CONTIG-044304 | 517  | 18  | 110 | 295  | 2  |
| CONTIG-044305 | 197  | 12  | 18  | 97   | 0  |
| CONTIG-044307 | 151  | 14  | 19  | 77   | 0  |
| CONTIG-044308 | 160  | 7   | 14  | 24   | 0  |
| CONTIG-044309 | 131  | 7   | 8   | 33   | 0  |
| CONTIG-044310 | 358  | 16  | 43  | 105  | 2  |
| CONTIG-044314 | 78   | 2   | 0   | 2    | 0  |
| CONTIG-044315 | 671  | 8   | 38  | 98   | 2  |

|               |     |    |    |      |    |
|---------------|-----|----|----|------|----|
| CONTIG-044316 | 194 | 11 | 12 | 61   | 0  |
| CONTIG-044317 | 219 | 9  | 4  | 47   | 0  |
| CONTIG-044318 | 436 | 16 | 32 | 233  | 4  |
| CONTIG-044319 | 149 | 11 | 18 | 15   | 0  |
| CONTIG-044320 | 114 | 4  | 4  | 11   | 0  |
| CONTIG-044321 | 725 | 15 | 74 | 347  | 2  |
| CONTIG-044322 | 153 | 32 | 28 | 218  | 4  |
| CONTIG-044323 | 289 | 14 | 42 | 56   | 0  |
| CONTIG-044326 | 204 | 13 | 0  | 137  | 0  |
| CONTIG-044327 | 383 | 8  | 2  | 80   | 2  |
| CONTIG-044328 | 155 | 7  | 44 | 29   | 0  |
| CONTIG-044329 | 67  | 8  | 24 | 0    | 0  |
| CONTIG-044330 | 144 | 9  | 17 | 15   | 0  |
| CONTIG-044331 | 148 | 8  | 4  | 51   | 0  |
| CONTIG-044332 | 171 | 5  | 0  | 11   | 0  |
| CONTIG-044333 | 835 | 76 | 98 | 4129 | 0  |
| CONTIG-044334 | 405 | 7  | 24 | 92   | 0  |
| CONTIG-044335 | 77  | 7  | 5  | 9    | 0  |
| CONTIG-044336 | 232 | 6  | 6  | 32   | 2  |
| CONTIG-044337 | 56  | 60 | 0  | 66   | 0  |
| CONTIG-044338 | 177 | 8  | 3  | 64   | 0  |
| CONTIG-044339 | 225 | 10 | 5  | 24   | 0  |
| CONTIG-044340 | 169 | 7  | 11 | 43   | 0  |
| CONTIG-044341 | 219 | 7  | 10 | 32   | 0  |
| CONTIG-044342 | 77  | 13 | 3  | 39   | 0  |
| CONTIG-044343 | 287 | 9  | 12 | 65   | 0  |
| CONTIG-044344 | 77  | 63 | 22 | 185  | 0  |
| CONTIG-044345 | 99  | 5  | 4  | 2    | 0  |
| CONTIG-044346 | 112 | 6  | 3  | 16   | 0  |
| CONTIG-044347 | 178 | 9  | 9  | 70   | 0  |
| CONTIG-044349 | 456 | 14 | 27 | 169  | 6  |
| CONTIG-044350 | 103 | 4  | 3  | 14   | 0  |
| CONTIG-044351 | 135 | 30 | 27 | 154  | 0  |
| CONTIG-044352 | 584 | 7  | 16 | 149  | 0  |
| CONTIG-044353 | 265 | 10 | 23 | 68   | 0  |
| CONTIG-044354 | 85  | 44 | 7  | 147  | 0  |
| CONTIG-044360 | 170 | 16 | 48 | 42   | 0  |
| CONTIG-044361 | 248 | 18 | 82 | 131  | 0  |
| CONTIG-044362 | 243 | 14 | 61 | 75   | 0  |
| CONTIG-044363 | 100 | 6  | 2  | 8    | 0  |
| CONTIG-044364 | 101 | 4  | 2  | 2    | 0  |
| CONTIG-044365 | 294 | 11 | 31 | 60   | 0  |
| CONTIG-044366 | 322 | 11 | 2  | 0    | 30 |
| CONTIG-044367 | 399 | 26 | 34 | 49   | 14 |
| CONTIG-044368 | 109 | 10 | 11 | 39   | 0  |
| CONTIG-044369 | 121 | 6  | 5  | 18   | 0  |
| CONTIG-044370 | 74  | 18 | 34 | 38   | 0  |

|               |     |     |    |      |   |
|---------------|-----|-----|----|------|---|
| CONTIG-044371 | 439 | 15  | 14 | 219  | 3 |
| CONTIG-044372 | 152 | 15  | 10 | 98   | 0 |
| CONTIG-044373 | 82  | 3   | 2  | 2    | 0 |
| CONTIG-044374 | 978 | 16  | 20 | 629  | 2 |
| CONTIG-044375 | 103 | 5   | 5  | 3    | 0 |
| CONTIG-044376 | 281 | 12  | 98 | 91   | 0 |
| CONTIG-044377 | 377 | 11  | 15 | 144  | 0 |
| CONTIG-044378 | 89  | 4   | 5  | 9    | 0 |
| CONTIG-044379 | 64  | 8   | 24 | 2    | 0 |
| CONTIG-044380 | 85  | 11  | 7  | 32   | 0 |
| CONTIG-044381 | 93  | 4   | 6  | 8    | 0 |
| CONTIG-044382 | 137 | 7   | 7  | 28   | 0 |
| CONTIG-044383 | 295 | 16  | 71 | 187  | 4 |
| CONTIG-044384 | 233 | 8   | 7  | 61   | 0 |
| CONTIG-044385 | 79  | 4   | 5  | 4    | 0 |
| CONTIG-044386 | 84  | 5   | 0  | 2    | 0 |
| CONTIG-044387 | 92  | 7   | 3  | 18   | 0 |
| CONTIG-044388 | 110 | 9   | 9  | 29   | 0 |
| CONTIG-044389 | 473 | 15  | 28 | 340  | 0 |
| CONTIG-044390 | 198 | 10  | 10 | 69   | 0 |
| CONTIG-044391 | 695 | 27  | 60 | 790  | 0 |
| CONTIG-044392 | 188 | 7   | 0  | 64   | 0 |
| CONTIG-044393 | 115 | 9   | 37 | 9    | 0 |
| CONTIG-044394 | 110 | 5   | 4  | 6    | 0 |
| CONTIG-044395 | 119 | 10  | 0  | 27   | 0 |
| CONTIG-044396 | 93  | 8   | 6  | 26   | 0 |
| CONTIG-044398 | 280 | 8   | 33 | 101  | 0 |
| CONTIG-044399 | 304 | 18  | 29 | 85   | 4 |
| CONTIG-044400 | 77  | 3   | 4  | 2    | 0 |
| CONTIG-044401 | 638 | 11  | 77 | 236  | 0 |
| CONTIG-044402 | 60  | 6   | 4  | 11   | 0 |
| CONTIG-044403 | 201 | 10  | 8  | 46   | 0 |
| CONTIG-044404 | 98  | 8   | 14 | 2    | 0 |
| CONTIG-044405 | 97  | 256 | 14 | 1583 | 0 |
| CONTIG-044406 | 82  | 7   | 2  | 19   | 0 |
| CONTIG-044407 | 337 | 7   | 13 | 77   | 0 |
| CONTIG-044408 | 185 | 13  | 6  | 61   | 2 |
| CONTIG-044409 | 68  | 5   | 0  | 8    | 0 |
| CONTIG-044413 | 133 | 11  | 6  | 49   | 0 |
| CONTIG-044414 | 84  | 12  | 15 | 42   | 0 |
| CONTIG-044416 | 154 | 5   | 2  | 18   | 0 |
| CONTIG-044418 | 182 | 6   | 29 | 24   | 0 |
| CONTIG-044419 | 133 | 6   | 6  | 29   | 0 |
| CONTIG-044420 | 549 | 63  | 24 | 11   | 0 |
| CONTIG-044421 | 50  | 50  | 2  | 110  | 0 |
| CONTIG-044423 | 234 | 23  | 3  | 245  | 2 |
| CONTIG-044424 | 93  | 10  | 16 | 21   | 0 |

|               |     |     |    |      |    |
|---------------|-----|-----|----|------|----|
| CONTIG-044427 | 106 | 20  | 48 | 9    | 0  |
| CONTIG-044428 | 226 | 9   | 16 | 50   | 0  |
| CONTIG-044430 | 66  | 5   | 0  | 10   | 0  |
| CONTIG-044431 | 249 | 11  | 35 | 88   | 0  |
| CONTIG-044432 | 344 | 9   | 13 | 150  | 2  |
| CONTIG-044433 | 193 | 11  | 35 | 66   | 0  |
| CONTIG-044435 | 56  | 16  | 3  | 15   | 0  |
| CONTIG-044436 | 90  | 6   | 13 | 7    | 0  |
| CONTIG-044437 | 181 | 7   | 13 | 20   | 2  |
| CONTIG-044438 | 165 | 9   | 3  | 38   | 3  |
| CONTIG-044439 | 194 | 11  | 5  | 77   | 2  |
| CONTIG-044440 | 88  | 7   | 4  | 9    | 0  |
| CONTIG-044441 | 269 | 7   | 14 | 62   | 0  |
| CONTIG-044442 | 208 | 13  | 20 | 117  | 0  |
| CONTIG-044443 | 61  | 4   | 2  | 4    | 0  |
| CONTIG-044444 | 285 | 6   | 4  | 36   | 2  |
| CONTIG-044445 | 330 | 9   | 15 | 114  | 0  |
| CONTIG-044447 | 100 | 5   | 4  | 11   | 0  |
| CONTIG-044448 | 106 | 13  | 19 | 5    | 0  |
| CONTIG-044450 | 99  | 78  | 49 | 156  | 7  |
| CONTIG-044451 | 110 | 10  | 10 | 40   | 0  |
| CONTIG-044452 | 443 | 12  | 17 | 263  | 0  |
| CONTIG-044453 | 83  | 360 | 28 | 558  | 2  |
| CONTIG-044454 | 395 | 11  | 62 | 121  | 0  |
| CONTIG-044456 | 296 | 46  | 23 | 299  | 0  |
| CONTIG-044457 | 81  | 158 | 3  | 333  | 0  |
| CONTIG-044458 | 94  | 11  | 6  | 36   | 0  |
| CONTIG-044459 | 141 | 10  | 4  | 52   | 0  |
| CONTIG-044460 | 205 | 22  | 43 | 127  | 0  |
| CONTIG-044461 | 351 | 9   | 27 | 124  | 0  |
| CONTIG-044462 | 67  | 7   | 3  | 15   | 0  |
| CONTIG-044463 | 515 | 42  | 72 | 1333 | 0  |
| CONTIG-044464 | 48  | 12  | 10 | 9    | 0  |
| CONTIG-044465 | 769 | 39  | 43 | 1027 | 11 |
| CONTIG-044470 | 245 | 11  | 6  | 39   | 0  |
| CONTIG-044471 | 524 | 10  | 38 | 109  | 2  |
| CONTIG-044472 | 254 | 12  | 22 | 99   | 0  |
| CONTIG-044473 | 248 | 17  | 4  | 71   | 0  |
| CONTIG-044474 | 64  | 6   | 0  | 3    | 0  |
| CONTIG-044475 | 118 | 12  | 16 | 58   | 0  |
| CONTIG-044476 | 200 | 12  | 17 | 59   | 2  |
| CONTIG-044477 | 44  | 162 | 39 | 143  | 34 |
| CONTIG-044478 | 75  | 3   | 0  | 0    | 0  |
| CONTIG-044479 | 69  | 39  | 4  | 78   | 4  |
| CONTIG-044480 | 622 | 21  | 53 | 238  | 2  |
| CONTIG-044482 | 115 | 28  | 31 | 0    | 0  |
| CONTIG-044483 | 56  | 54  | 2  | 84   | 0  |

|               |     |    |    |     |   |
|---------------|-----|----|----|-----|---|
| CONTIG-044484 | 171 | 14 | 0  | 88  | 0 |
| CONTIG-044485 | 324 | 10 | 8  | 140 | 0 |
| CONTIG-044486 | 549 | 13 | 41 | 250 | 0 |
| CONTIG-044487 | 177 | 16 | 10 | 80  | 4 |
| CONTIG-044488 | 219 | 12 | 8  | 5   | 0 |
| CONTIG-044489 | 122 | 8  | 10 | 13  | 0 |
| CONTIG-044493 | 313 | 23 | 41 | 388 | 0 |
| CONTIG-044494 | 80  | 5  | 4  | 8   | 0 |
| CONTIG-044495 | 71  | 16 | 46 | 2   | 0 |
| CONTIG-044496 | 109 | 8  | 23 | 0   | 0 |
| CONTIG-044497 | 80  | 6  | 23 | 4   | 0 |
| CONTIG-044498 | 304 | 21 | 49 | 348 | 0 |
| CONTIG-044499 | 191 | 22 | 5  | 93  | 0 |
| CONTIG-044501 | 164 | 8  | 2  | 27  | 0 |
| CONTIG-044502 | 738 | 14 | 10 | 44  | 0 |
| CONTIG-044503 | 274 | 8  | 52 | 40  | 0 |
| CONTIG-044504 | 81  | 5  | 15 | 4   | 0 |
| CONTIG-044509 | 383 | 11 | 10 | 116 | 2 |
| CONTIG-044510 | 315 | 18 | 22 | 223 | 0 |
| CONTIG-044511 | 101 | 14 | 16 | 32  | 0 |
| CONTIG-044512 | 71  | 5  | 0  | 14  | 0 |
| CONTIG-044513 | 146 | 28 | 8  | 178 | 0 |
| CONTIG-044514 | 446 | 15 | 28 | 231 | 2 |
| CONTIG-044515 | 76  | 4  | 3  | 5   | 0 |
| CONTIG-044516 | 113 | 9  | 6  | 19  | 0 |
| CONTIG-044517 | 111 | 9  | 0  | 24  | 0 |
| CONTIG-044521 | 61  | 3  | 2  | 4   | 0 |
| CONTIG-044522 | 78  | 4  | 0  | 4   | 0 |
| CONTIG-044523 | 342 | 12 | 50 | 143 | 0 |
| CONTIG-044524 | 549 | 32 | 62 | 314 | 2 |
| CONTIG-044525 | 169 | 16 | 26 | 96  | 0 |
| CONTIG-044526 | 560 | 10 | 44 | 173 | 2 |
| CONTIG-044527 | 174 | 15 | 5  | 86  | 4 |
| CONTIG-044531 | 61  | 19 | 15 | 27  | 0 |
| CONTIG-044532 | 71  | 4  | 2  | 5   | 2 |
| CONTIG-044534 | 87  | 10 | 27 | 0   | 0 |
| CONTIG-044535 | 184 | 16 | 5  | 101 | 2 |
| CONTIG-044536 | 81  | 6  | 3  | 20  | 0 |
| CONTIG-044537 | 61  | 8  | 8  | 14  | 0 |
| CONTIG-044538 | 444 | 11 | 48 | 114 | 4 |
| CONTIG-044539 | 198 | 10 | 63 | 26  | 0 |
| CONTIG-044540 | 71  | 2  | 2  | 0   | 0 |
| CONTIG-044541 | 67  | 3  | 2  | 4   | 0 |
| CONTIG-044542 | 175 | 12 | 8  | 28  | 0 |
| CONTIG-044543 | 79  | 7  | 19 | 10  | 0 |
| CONTIG-044544 | 253 | 18 | 8  | 165 | 0 |
| CONTIG-044545 | 108 | 18 | 14 | 83  | 0 |

|               |      |     |    |     |    |
|---------------|------|-----|----|-----|----|
| CONTIG-044546 | 297  | 7   | 21 | 20  | 0  |
| CONTIG-044554 | 63   | 6   | 4  | 2   | 0  |
| CONTIG-044555 | 317  | 6   | 11 | 72  | 0  |
| CONTIG-044557 | 1009 | 18  | 27 | 735 | 9  |
| CONTIG-044558 | 196  | 14  | 30 | 121 | 2  |
| CONTIG-044561 | 302  | 7   | 28 | 63  | 0  |
| CONTIG-044568 | 292  | 17  | 54 | 121 | 3  |
| CONTIG-044583 | 66   | 10  | 40 | 5   | 0  |
| CONTIG-044584 | 78   | 4   | 0  | 0   | 2  |
| CONTIG-044585 | 161  | 12  | 21 | 67  | 0  |
| CONTIG-044586 | 133  | 11  | 30 | 32  | 0  |
| CONTIG-044587 | 192  | 9   | 7  | 54  | 0  |
| CONTIG-044588 | 149  | 8   | 23 | 41  | 0  |
| CONTIG-044589 | 96   | 6   | 8  | 16  | 2  |
| CONTIG-044590 | 212  | 8   | 6  | 2   | 0  |
| CONTIG-044592 | 246  | 22  | 20 | 202 | 0  |
| CONTIG-044593 | 45   | 352 | 60 | 172 | 3  |
| CONTIG-044594 | 113  | 5   | 0  | 0   | 2  |
| CONTIG-044595 | 72   | 9   | 11 | 19  | 2  |
| CONTIG-044596 | 92   | 4   | 0  | 6   | 0  |
| CONTIG-044598 | 178  | 10  | 19 | 46  | 0  |
| CONTIG-044599 | 66   | 4   | 6  | 9   | 0  |
| CONTIG-044600 | 145  | 16  | 8  | 53  | 0  |
| CONTIG-044601 | 1012 | 14  | 52 | 618 | 2  |
| CONTIG-044602 | 92   | 24  | 4  | 75  | 0  |
| CONTIG-044603 | 99   | 35  | 10 | 70  | 0  |
| CONTIG-044604 | 81   | 4   | 0  | 2   | 0  |
| CONTIG-044609 | 244  | 7   | 7  | 25  | 0  |
| CONTIG-044611 | 122  | 4   | 6  | 0   | 0  |
| CONTIG-044617 | 161  | 8   | 10 | 27  | 0  |
| CONTIG-044618 | 195  | 37  | 27 | 82  | 13 |
| CONTIG-044620 | 152  | 10  | 47 | 4   | 0  |
| CONTIG-044621 | 66   | 8   | 9  | 11  | 0  |
| CONTIG-044622 | 244  | 8   | 16 | 55  | 0  |
| CONTIG-044625 | 242  | 20  | 2  | 0   | 27 |
| CONTIG-044626 | 200  | 8   | 6  | 49  | 0  |
| CONTIG-044627 | 1286 | 25  | 53 | 843 | 15 |
| CONTIG-044628 | 204  | 7   | 31 | 34  | 0  |
| CONTIG-044629 | 376  | 8   | 10 | 78  | 4  |
| CONTIG-044630 | 285  | 7   | 30 | 66  | 0  |
| CONTIG-044631 | 105  | 10  | 4  | 48  | 0  |
| CONTIG-044632 | 368  | 17  | 0  | 2   | 0  |
| CONTIG-044633 | 82   | 6   | 13 | 20  | 0  |
| CONTIG-044634 | 64   | 4   | 9  | 3   | 0  |
| CONTIG-044635 | 81   | 8   | 12 | 15  | 0  |
| CONTIG-044636 | 89   | 7   | 3  | 13  | 0  |
| CONTIG-044637 | 93   | 18  | 51 | 23  | 0  |



|               |      |    |    |      |    |
|---------------|------|----|----|------|----|
| CONTIG-044638 | 151  | 10 | 8  | 71   | 0  |
| CONTIG-044639 | 124  | 10 | 25 | 0    | 0  |
| CONTIG-044640 | 106  | 10 | 14 | 47   | 0  |
| CONTIG-044641 | 123  | 8  | 16 | 24   | 0  |
| CONTIG-044642 | 349  | 14 | 28 | 86   | 0  |
| CONTIG-044643 | 134  | 7  | 10 | 33   | 0  |
| CONTIG-044644 | 366  | 16 | 28 | 139  | 0  |
| CONTIG-044645 | 58   | 8  | 2  | 20   | 0  |
| CONTIG-044646 | 160  | 4  | 0  | 10   | 0  |
| CONTIG-044649 | 200  | 8  | 10 | 31   | 0  |
| CONTIG-044651 | 236  | 14 | 30 | 120  | 0  |
| CONTIG-044652 | 225  | 12 | 19 | 95   | 0  |
| CONTIG-044653 | 62   | 5  | 3  | 5    | 0  |
| CONTIG-044654 | 1349 | 30 | 64 | 1803 | 0  |
| CONTIG-044655 | 528  | 13 | 28 | 239  | 4  |
| CONTIG-044656 | 302  | 7  | 18 | 36   | 2  |
| CONTIG-044658 | 75   | 4  | 5  | 3    | 0  |
| CONTIG-044659 | 664  | 18 | 7  | 464  | 7  |
| CONTIG-044660 | 103  | 7  | 2  | 17   | 0  |
| CONTIG-044661 | 61   | 5  | 4  | 4    | 0  |
| CONTIG-044662 | 63   | 6  | 34 | 2    | 0  |
| CONTIG-044663 | 281  | 11 | 31 | 73   | 0  |
| CONTIG-044664 | 97   | 6  | 4  | 21   | 0  |
| CONTIG-044665 | 1290 | 20 | 2  | 0    | 56 |
| CONTIG-044666 | 500  | 11 | 17 | 191  | 5  |
| CONTIG-044667 | 622  | 23 | 79 | 410  | 2  |
| CONTIG-044668 | 131  | 8  | 4  | 43   | 0  |
| CONTIG-044669 | 103  | 8  | 2  | 17   | 0  |
| CONTIG-044670 | 216  | 20 | 20 | 22   | 0  |
| CONTIG-044671 | 157  | 8  | 11 | 30   | 0  |
| CONTIG-044672 | 88   | 10 | 3  | 11   | 0  |
| CONTIG-044673 | 70   | 6  | 0  | 2    | 0  |
| CONTIG-044674 | 153  | 11 | 21 | 41   | 0  |
| CONTIG-044675 | 219  | 9  | 2  | 27   | 2  |
| CONTIG-044676 | 526  | 9  | 35 | 208  | 0  |
| CONTIG-044677 | 67   | 7  | 0  | 0    | 0  |
| CONTIG-044678 | 385  | 11 | 31 | 72   | 0  |
| CONTIG-044682 | 324  | 12 | 14 | 190  | 0  |
| CONTIG-044683 | 65   | 4  | 22 | 0    | 0  |
| CONTIG-044684 | 74   | 11 | 65 | 11   | 0  |
| CONTIG-044685 | 257  | 24 | 21 | 46   | 0  |
| CONTIG-044686 | 100  | 16 | 8  | 13   | 0  |
| CONTIG-044687 | 140  | 18 | 18 | 34   | 0  |
| CONTIG-044688 | 210  | 18 | 63 | 88   | 0  |
| CONTIG-044689 | 193  | 8  | 6  | 23   | 0  |
| CONTIG-044690 | 366  | 13 | 6  | 250  | 0  |
| CONTIG-044692 | 60   | 5  | 27 | 2    | 0  |

|               |     |     |    |     |    |
|---------------|-----|-----|----|-----|----|
| CONTIG-044693 | 122 | 13  | 13 | 55  | 0  |
| CONTIG-044694 | 230 | 12  | 34 | 82  | 2  |
| CONTIG-044695 | 82  | 30  | 4  | 124 | 0  |
| CONTIG-044696 | 73  | 6   | 16 | 0   | 0  |
| CONTIG-044697 | 138 | 10  | 9  | 20  | 0  |
| CONTIG-044698 | 79  | 4   | 0  | 9   | 0  |
| CONTIG-044699 | 66  | 3   | 2  | 9   | 0  |
| CONTIG-044701 | 110 | 5   | 10 | 14  | 0  |
| CONTIG-044702 | 537 | 16  | 39 | 306 | 3  |
| CONTIG-044703 | 360 | 8   | 10 | 88  | 0  |
| CONTIG-044704 | 181 | 10  | 6  | 47  | 0  |
| CONTIG-044705 | 151 | 18  | 4  | 84  | 0  |
| CONTIG-044706 | 89  | 6   | 11 | 11  | 0  |
| CONTIG-044707 | 84  | 28  | 21 | 98  | 2  |
| CONTIG-044708 | 203 | 4   | 6  | 15  | 0  |
| CONTIG-044709 | 691 | 9   | 44 | 220 | 4  |
| CONTIG-044710 | 114 | 9   | 18 | 14  | 0  |
| CONTIG-044711 | 164 | 8   | 10 | 27  | 0  |
| CONTIG-044712 | 69  | 3   | 2  | 3   | 0  |
| CONTIG-044713 | 256 | 8   | 8  | 57  | 0  |
| CONTIG-044714 | 79  | 6   | 28 | 3   | 0  |
| CONTIG-044715 | 98  | 6   | 12 | 10  | 0  |
| CONTIG-044716 | 221 | 14  | 20 | 157 | 0  |
| CONTIG-044717 | 85  | 7   | 23 | 13  | 0  |
| CONTIG-044718 | 94  | 30  | 17 | 110 | 0  |
| CONTIG-044719 | 282 | 14  | 20 | 130 | 0  |
| CONTIG-044720 | 220 | 11  | 34 | 39  | 0  |
| CONTIG-044721 | 407 | 9   | 13 | 179 | 0  |
| CONTIG-044723 | 281 | 6   | 5  | 72  | 0  |
| CONTIG-044726 | 184 | 11  | 72 | 19  | 0  |
| CONTIG-044727 | 243 | 18  | 10 | 155 | 2  |
| CONTIG-044728 | 254 | 10  | 56 | 64  | 0  |
| CONTIG-044729 | 241 | 14  | 23 | 111 | 0  |
| CONTIG-044730 | 222 | 13  | 54 | 51  | 0  |
| CONTIG-044731 | 173 | 10  | 12 | 63  | 0  |
| CONTIG-044732 | 408 | 11  | 13 | 152 | 2  |
| CONTIG-044733 | 263 | 14  | 27 | 93  | 0  |
| CONTIG-044737 | 218 | 8   | 2  | 73  | 0  |
| CONTIG-044738 | 138 | 6   | 13 | 27  | 0  |
| CONTIG-044739 | 111 | 6   | 10 | 12  | 0  |
| CONTIG-044740 | 135 | 9   | 2  | 64  | 0  |
| CONTIG-044741 | 82  | 6   | 3  | 9   | 0  |
| CONTIG-044742 | 246 | 7   | 10 | 43  | 0  |
| CONTIG-044743 | 163 | 9   | 4  | 67  | 0  |
| CONTIG-044744 | 89  | 4   | 0  | 9   | 0  |
| CONTIG-044747 | 58  | 3   | 2  | 0   | 0  |
| CONTIG-044748 | 96  | 122 | 20 | 313 | 37 |

|               |     |    |     |     |   |
|---------------|-----|----|-----|-----|---|
| CONTIG-044749 | 123 | 23 | 76  | 62  | 0 |
| CONTIG-044750 | 240 | 30 | 13  | 31  | 0 |
| CONTIG-044751 | 149 | 13 | 3   | 57  | 0 |
| CONTIG-044752 | 63  | 5  | 8   | 9   | 0 |
| CONTIG-044754 | 167 | 8  | 9   | 21  | 0 |
| CONTIG-044755 | 314 | 11 | 10  | 132 | 0 |
| CONTIG-044756 | 531 | 11 | 8   | 319 | 0 |
| CONTIG-044757 | 73  | 5  | 0   | 9   | 0 |
| CONTIG-044758 | 160 | 4  | 2   | 24  | 0 |
| CONTIG-044759 | 215 | 12 | 14  | 98  | 0 |
| CONTIG-044761 | 99  | 7  | 2   | 21  | 0 |
| CONTIG-044762 | 441 | 10 | 13  | 163 | 4 |
| CONTIG-044763 | 99  | 5  | 17  | 5   | 0 |
| CONTIG-044764 | 258 | 35 | 84  | 513 | 0 |
| CONTIG-044765 | 122 | 10 | 2   | 26  | 0 |
| CONTIG-044766 | 98  | 6  | 5   | 12  | 0 |
| CONTIG-044767 | 72  | 10 | 33  | 2   | 0 |
| CONTIG-044768 | 72  | 9  | 9   | 16  | 0 |
| CONTIG-044769 | 60  | 2  | 0   | 5   | 0 |
| CONTIG-044770 | 151 | 6  | 4   | 33  | 0 |
| CONTIG-044773 | 80  | 7  | 4   | 16  | 0 |
| CONTIG-044774 | 179 | 12 | 8   | 63  | 5 |
| CONTIG-044775 | 273 | 8  | 26  | 45  | 0 |
| CONTIG-044776 | 231 | 11 | 33  | 108 | 0 |
| CONTIG-044777 | 432 | 12 | 5   | 2   | 0 |
| CONTIG-044778 | 74  | 4  | 0   | 14  | 0 |
| CONTIG-044779 | 102 | 6  | 4   | 24  | 0 |
| CONTIG-044780 | 64  | 2  | 2   | 2   | 0 |
| CONTIG-044781 | 250 | 11 | 10  | 73  | 2 |
| CONTIG-044782 | 387 | 44 | 4   | 76  | 2 |
| CONTIG-044783 | 115 | 32 | 48  | 65  | 0 |
| CONTIG-044789 | 180 | 15 | 14  | 76  | 0 |
| CONTIG-044791 | 92  | 7  | 2   | 15  | 0 |
| CONTIG-044792 | 230 | 13 | 18  | 124 | 0 |
| CONTIG-044793 | 84  | 17 | 12  | 17  | 0 |
| CONTIG-044794 | 75  | 6  | 0   | 0   | 0 |
| CONTIG-044795 | 118 | 9  | 13  | 43  | 0 |
| CONTIG-044796 | 101 | 9  | 19  | 20  | 0 |
| CONTIG-044797 | 74  | 3  | 7   | 2   | 0 |
| CONTIG-044798 | 71  | 10 | 6   | 18  | 0 |
| CONTIG-044800 | 97  | 14 | 4   | 42  | 6 |
| CONTIG-044801 | 781 | 15 | 147 | 404 | 0 |
| CONTIG-044802 | 125 | 6  | 9   | 19  | 0 |
| CONTIG-044803 | 120 | 6  | 21  | 7   | 0 |
| CONTIG-044804 | 155 | 5  | 0   | 22  | 0 |
| CONTIG-044805 | 104 | 7  | 9   | 23  | 0 |
| CONTIG-044806 | 64  | 2  | 0   | 0   | 0 |

|               |     |     |    |      |    |
|---------------|-----|-----|----|------|----|
| CONTIG-044808 | 159 | 15  | 46 | 66   | 0  |
| CONTIG-044809 | 195 | 30  | 2  | 245  | 0  |
| CONTIG-044811 | 147 | 5   | 8  | 12   | 0  |
| CONTIG-044812 | 247 | 13  | 31 | 50   | 0  |
| CONTIG-044813 | 142 | 7   | 0  | 36   | 0  |
| CONTIG-044814 | 168 | 7   | 3  | 39   | 0  |
| CONTIG-044816 | 198 | 19  | 2  | 0    | 2  |
| CONTIG-044817 | 153 | 7   | 2  | 40   | 0  |
| CONTIG-044818 | 40  | 300 | 2  | 6    | 0  |
| CONTIG-044820 | 170 | 11  | 24 | 53   | 0  |
| CONTIG-044821 | 108 | 13  | 3  | 39   | 0  |
| CONTIG-044822 | 189 | 10  | 9  | 80   | 0  |
| CONTIG-044823 | 260 | 6   | 23 | 15   | 0  |
| CONTIG-044824 | 140 | 8   | 25 | 16   | 2  |
| CONTIG-044825 | 339 | 17  | 18 | 151  | 0  |
| CONTIG-044826 | 522 | 11  | 58 | 167  | 0  |
| CONTIG-044828 | 197 | 9   | 7  | 57   | 0  |
| CONTIG-044829 | 92  | 5   | 0  | 5    | 0  |
| CONTIG-044830 | 829 | 35  | 74 | 1162 | 0  |
| CONTIG-044831 | 372 | 7   | 27 | 61   | 0  |
| CONTIG-044832 | 357 | 6   | 4  | 69   | 0  |
| CONTIG-044833 | 125 | 9   | 7  | 32   | 2  |
| CONTIG-044834 | 182 | 9   | 19 | 22   | 0  |
| CONTIG-044835 | 150 | 4   | 24 | 0    | 0  |
| CONTIG-044836 | 336 | 8   | 14 | 89   | 2  |
| CONTIG-044837 | 76  | 4   | 6  | 4    | 0  |
| CONTIG-044841 | 725 | 10  | 38 | 161  | 12 |
| CONTIG-044842 | 160 | 4   | 11 | 10   | 0  |
| CONTIG-044843 | 197 | 16  | 2  | 0    | 8  |
| CONTIG-044844 | 477 | 7   | 5  | 87   | 2  |
| CONTIG-044845 | 185 | 10  | 44 | 26   | 0  |
| CONTIG-044848 | 154 | 9   | 5  | 47   | 0  |
| CONTIG-044849 | 363 | 11  | 45 | 145  | 0  |
| CONTIG-044850 | 109 | 6   | 2  | 19   | 0  |
| CONTIG-044852 | 500 | 21  | 9  | 88   | 0  |
| CONTIG-044853 | 184 | 8   | 21 | 44   | 0  |
| CONTIG-044854 | 122 | 9   | 2  | 29   | 0  |
| CONTIG-044855 | 147 | 7   | 21 | 17   | 0  |
| CONTIG-044856 | 445 | 73  | 24 | 1916 | 0  |
| CONTIG-044857 | 150 | 5   | 8  | 18   | 0  |
| CONTIG-044858 | 181 | 12  | 30 | 42   | 2  |
| CONTIG-044859 | 97  | 4   | 10 | 12   | 0  |
| CONTIG-044860 | 201 | 10  | 0  | 0    | 0  |
| CONTIG-044862 | 205 | 12  | 40 | 43   | 0  |
| CONTIG-044863 | 262 | 10  | 4  | 91   | 5  |
| CONTIG-044865 | 92  | 9   | 2  | 25   | 0  |
| CONTIG-044866 | 84  | 10  | 10 | 34   | 0  |

|               |     |    |     |     |    |
|---------------|-----|----|-----|-----|----|
| CONTIG-044867 | 66  | 4  | 2   | 7   | 0  |
| CONTIG-044870 | 256 | 14 | 4   | 0   | 29 |
| CONTIG-044871 | 185 | 7  | 20  | 39  | 3  |
| CONTIG-044872 | 61  | 4  | 8   | 7   | 0  |
| CONTIG-044873 | 68  | 6  | 11  | 10  | 0  |
| CONTIG-044874 | 89  | 13 | 16  | 3   | 0  |
| CONTIG-044875 | 165 | 6  | 10  | 19  | 2  |
| CONTIG-044876 | 899 | 36 | 5   | 0   | 0  |
| CONTIG-044877 | 158 | 7  | 30  | 12  | 0  |
| CONTIG-044878 | 127 | 6  | 4   | 5   | 0  |
| CONTIG-044879 | 61  | 3  | 5   | 0   | 0  |
| CONTIG-044880 | 86  | 19 | 5   | 38  | 0  |
| CONTIG-044881 | 99  | 10 | 0   | 51  | 0  |
| CONTIG-044882 | 263 | 9  | 15  | 69  | 0  |
| CONTIG-044888 | 890 | 41 | 0   | 2   | 6  |
| CONTIG-044892 | 277 | 8  | 4   | 72  | 0  |
| CONTIG-044893 | 67  | 4  | 3   | 8   | 0  |
| CONTIG-044894 | 115 | 9  | 17  | 37  | 0  |
| CONTIG-044895 | 83  | 10 | 5   | 35  | 0  |
| CONTIG-044896 | 130 | 5  | 8   | 19  | 0  |
| CONTIG-044898 | 387 | 19 | 7   | 415 | 4  |
| CONTIG-044899 | 246 | 4  | 4   | 31  | 0  |
| CONTIG-044900 | 190 | 18 | 151 | 96  | 0  |
| CONTIG-044901 | 276 | 8  | 0   | 2   | 0  |
| CONTIG-044902 | 140 | 7  | 7   | 33  | 0  |
| CONTIG-044903 | 217 | 12 | 39  | 103 | 0  |
| CONTIG-044904 | 382 | 10 | 9   | 95  | 2  |
| CONTIG-044905 | 119 | 5  | 4   | 13  | 5  |
| CONTIG-044906 | 156 | 8  | 19  | 25  | 0  |
| CONTIG-044907 | 321 | 9  | 15  | 127 | 0  |
| CONTIG-044908 | 170 | 12 | 27  | 24  | 2  |
| CONTIG-044909 | 72  | 9  | 27  | 8   | 0  |
| CONTIG-044910 | 228 | 8  | 4   | 28  | 0  |
| CONTIG-044911 | 147 | 10 | 12  | 52  | 4  |
| CONTIG-044912 | 371 | 9  | 10  | 104 | 0  |
| CONTIG-044914 | 76  | 19 | 19  | 35  | 0  |
| CONTIG-044915 | 50  | 50 | 20  | 67  | 0  |
| CONTIG-044916 | 126 | 22 | 12  | 45  | 4  |
| CONTIG-044917 | 157 | 11 | 33  | 49  | 0  |
| CONTIG-044918 | 254 | 9  | 21  | 41  | 0  |
| CONTIG-044919 | 113 | 13 | 5   | 46  | 0  |
| CONTIG-044920 | 157 | 11 | 2   | 50  | 0  |
| CONTIG-044921 | 72  | 13 | 15  | 7   | 2  |
| CONTIG-044922 | 60  | 8  | 10  | 11  | 0  |
| CONTIG-044923 | 59  | 3  | 2   | 2   | 0  |
| CONTIG-044930 | 143 | 19 | 62  | 102 | 0  |
| CONTIG-044931 | 67  | 7  | 21  | 4   | 0  |

|               |     |    |    |     |    |
|---------------|-----|----|----|-----|----|
| CONTIG-044932 | 195 | 7  | 7  | 27  | 0  |
| CONTIG-044933 | 246 | 9  | 10 | 71  | 0  |
| CONTIG-044934 | 138 | 11 | 2  | 25  | 6  |
| CONTIG-044935 | 126 | 9  | 14 | 11  | 0  |
| CONTIG-044936 | 97  | 6  | 10 | 12  | 0  |
| CONTIG-044937 | 494 | 12 | 42 | 158 | 4  |
| CONTIG-044938 | 58  | 13 | 21 | 9   | 0  |
| CONTIG-044939 | 220 | 12 | 5  | 68  | 2  |
| CONTIG-044942 | 127 | 5  | 9  | 22  | 0  |
| CONTIG-044945 | 129 | 13 | 23 | 46  | 0  |
| CONTIG-044946 | 198 | 5  | 0  | 17  | 0  |
| CONTIG-044947 | 968 | 14 | 57 | 327 | 4  |
| CONTIG-044948 | 134 | 11 | 4  | 14  | 0  |
| CONTIG-044949 | 72  | 5  | 3  | 2   | 0  |
| CONTIG-044950 | 265 | 15 | 42 | 113 | 2  |
| CONTIG-044951 | 131 | 6  | 9  | 19  | 0  |
| CONTIG-044952 | 283 | 11 | 31 | 75  | 2  |
| CONTIG-044953 | 657 | 14 | 11 | 347 | 5  |
| CONTIG-044954 | 146 | 6  | 7  | 22  | 0  |
| CONTIG-044955 | 129 | 15 | 6  | 55  | 0  |
| CONTIG-044956 | 103 | 7  | 4  | 7   | 0  |
| CONTIG-044957 | 86  | 12 | 45 | 17  | 0  |
| CONTIG-044958 | 110 | 5  | 12 | 11  | 0  |
| CONTIG-044959 | 219 | 6  | 5  | 27  | 0  |
| CONTIG-044960 | 392 | 13 | 44 | 149 | 2  |
| CONTIG-044961 | 120 | 7  | 9  | 10  | 0  |
| CONTIG-044962 | 131 | 4  | 2  | 12  | 0  |
| CONTIG-044963 | 275 | 10 | 15 | 92  | 0  |
| CONTIG-044964 | 107 | 3  | 0  | 0   | 0  |
| CONTIG-044965 | 85  | 14 | 4  | 9   | 0  |
| CONTIG-044966 | 77  | 9  | 2  | 6   | 0  |
| CONTIG-044967 | 285 | 6  | 13 | 27  | 0  |
| CONTIG-044968 | 402 | 16 | 48 | 195 | 2  |
| CONTIG-044969 | 223 | 8  | 7  | 34  | 0  |
| CONTIG-044970 | 138 | 11 | 3  | 30  | 27 |
| CONTIG-044971 | 191 | 6  | 2  | 43  | 0  |
| CONTIG-044972 | 84  | 5  | 8  | 7   | 0  |
| CONTIG-044973 | 107 | 7  | 10 | 22  | 0  |
| CONTIG-044974 | 313 | 10 | 35 | 86  | 4  |
| CONTIG-044976 | 94  | 25 | 12 | 62  | 2  |
| CONTIG-044977 | 719 | 28 | 39 | 32  | 0  |
| CONTIG-044978 | 66  | 3  | 0  | 4   | 0  |
| CONTIG-044980 | 86  | 4  | 9  | 2   | 0  |
| CONTIG-044981 | 59  | 14 | 8  | 37  | 0  |
| CONTIG-044982 | 392 | 16 | 36 | 253 | 8  |
| CONTIG-044986 | 389 | 9  | 44 | 50  | 0  |
| CONTIG-044987 | 102 | 5  | 7  | 11  | 0  |

|               |      |     |     |     |     |
|---------------|------|-----|-----|-----|-----|
| CONTIG-044988 | 294  | 157 | 7   | 0   | 194 |
| CONTIG-044989 | 162  | 7   | 38  | 15  | 0   |
| CONTIG-044990 | 146  | 5   | 5   | 21  | 0   |
| CONTIG-044991 | 285  | 5   | 2   | 18  | 0   |
| CONTIG-044993 | 178  | 8   | 9   | 35  | 0   |
| CONTIG-044994 | 63   | 7   | 5   | 0   | 0   |
| CONTIG-044995 | 281  | 13  | 5   | 62  | 0   |
| CONTIG-045005 | 158  | 8   | 5   | 25  | 3   |
| CONTIG-045006 | 159  | 11  | 12  | 61  | 0   |
| CONTIG-045009 | 80   | 8   | 22  | 0   | 0   |
| CONTIG-045010 | 77   | 9   | 12  | 25  | 0   |
| CONTIG-045012 | 67   | 13  | 12  | 17  | 0   |
| CONTIG-045013 | 79   | 6   | 0   | 2   | 0   |
| CONTIG-045014 | 97   | 4   | 11  | 7   | 0   |
| CONTIG-045015 | 72   | 7   | 8   | 17  | 0   |
| CONTIG-045016 | 333  | 10  | 52  | 45  | 2   |
| CONTIG-045017 | 109  | 11  | 7   | 17  | 0   |
| CONTIG-045018 | 191  | 9   | 33  | 54  | 0   |
| CONTIG-045019 | 153  | 12  | 30  | 29  | 0   |
| CONTIG-045020 | 99   | 10  | 2   | 41  | 0   |
| CONTIG-045021 | 93   | 7   | 22  | 15  | 0   |
| CONTIG-045022 | 116  | 5   | 23  | 11  | 0   |
| CONTIG-045023 | 173  | 10  | 15  | 26  | 0   |
| CONTIG-045024 | 60   | 7   | 2   | 17  | 0   |
| CONTIG-045025 | 237  | 21  | 99  | 134 | 2   |
| CONTIG-045026 | 401  | 7   | 2   | 90  | 0   |
| CONTIG-045027 | 252  | 12  | 22  | 101 | 0   |
| CONTIG-045035 | 256  | 8   | 27  | 0   | 0   |
| CONTIG-045036 | 64   | 6   | 3   | 6   | 0   |
| CONTIG-045037 | 127  | 12  | 55  | 30  | 0   |
| CONTIG-045038 | 153  | 17  | 17  | 89  | 0   |
| CONTIG-045039 | 80   | 8   | 3   | 0   | 0   |
| CONTIG-045040 | 60   | 19  | 2   | 39  | 3   |
| CONTIG-045041 | 341  | 11  | 23  | 134 | 0   |
| CONTIG-045042 | 1052 | 17  | 122 | 708 | 0   |
| CONTIG-045043 | 63   | 7   | 2   | 15  | 0   |
| CONTIG-045044 | 163  | 5   | 4   | 2   | 0   |
| CONTIG-045045 | 60   | 7   | 29  | 0   | 0   |
| CONTIG-045046 | 463  | 15  | 57  | 153 | 0   |
| CONTIG-045047 | 661  | 14  | 25  | 522 | 0   |
| CONTIG-045048 | 137  | 5   | 4   | 24  | 2   |
| CONTIG-045049 | 637  | 21  | 100 | 474 | 2   |
| CONTIG-045050 | 108  | 5   | 34  | 7   | 0   |
| CONTIG-045051 | 60   | 4   | 4   | 2   | 0   |
| CONTIG-045053 | 424  | 8   | 14  | 35  | 0   |
| CONTIG-045054 | 108  | 8   | 2   | 0   | 2   |
| CONTIG-045055 | 97   | 13  | 17  | 35  | 0   |

|               |      |     |    |     |   |
|---------------|------|-----|----|-----|---|
| CONTIG-045056 | 95   | 156 | 36 | 419 | 2 |
| CONTIG-045057 | 94   | 6   | 3  | 20  | 0 |
| CONTIG-045058 | 71   | 17  | 39 | 3   | 0 |
| CONTIG-045059 | 62   | 13  | 2  | 0   | 0 |
| CONTIG-045060 | 73   | 2   | 0  | 2   | 0 |
| CONTIG-045061 | 65   | 5   | 0  | 4   | 0 |
| CONTIG-045062 | 70   | 6   | 2  | 11  | 0 |
| CONTIG-045063 | 76   | 11  | 33 | 0   | 0 |
| CONTIG-045064 | 89   | 9   | 3  | 2   | 0 |
| CONTIG-045065 | 232  | 18  | 32 | 172 | 2 |
| CONTIG-045066 | 154  | 9   | 24 | 14  | 0 |
| CONTIG-045067 | 212  | 8   | 2  | 4   | 0 |
| CONTIG-045069 | 244  | 10  | 2  | 51  | 0 |
| CONTIG-045070 | 178  | 8   | 4  | 26  | 0 |
| CONTIG-045071 | 167  | 12  | 0  | 85  | 0 |
| CONTIG-045072 | 119  | 17  | 14 | 46  | 0 |
| CONTIG-045073 | 96   | 7   | 0  | 5   | 0 |
| CONTIG-045076 | 108  | 8   | 2  | 24  | 0 |
| CONTIG-045077 | 103  | 10  | 76 | 10  | 0 |
| CONTIG-045078 | 82   | 7   | 4  | 11  | 0 |
| CONTIG-045079 | 207  | 11  | 3  | 43  | 0 |
| CONTIG-045080 | 134  | 19  | 6  | 50  | 0 |
| CONTIG-045081 | 83   | 6   | 7  | 6   | 0 |
| CONTIG-045082 | 108  | 6   | 9  | 4   | 0 |
| CONTIG-045083 | 228  | 13  | 22 | 104 | 0 |
| CONTIG-045084 | 352  | 24  | 49 | 88  | 7 |
| CONTIG-045086 | 135  | 4   | 10 | 12  | 0 |
| CONTIG-045088 | 256  | 15  | 11 | 15  | 0 |
| CONTIG-045089 | 143  | 5   | 2  | 16  | 0 |
| CONTIG-045090 | 1231 | 13  | 57 | 363 | 4 |
| CONTIG-045092 | 121  | 6   | 12 | 24  | 0 |
| CONTIG-045094 | 69   | 3   | 0  | 0   | 0 |
| CONTIG-045095 | 309  | 8   | 11 | 32  | 0 |
| CONTIG-045096 | 91   | 10  | 17 | 11  | 0 |
| CONTIG-045097 | 325  | 24  | 25 | 269 | 0 |
| CONTIG-045098 | 161  | 8   | 0  | 46  | 0 |
| CONTIG-045099 | 230  | 10  | 10 | 83  | 0 |
| CONTIG-045101 | 219  | 6   | 6  | 37  | 0 |
| CONTIG-045102 | 201  | 8   | 27 | 17  | 0 |
| CONTIG-045103 | 137  | 9   | 6  | 39  | 0 |
| CONTIG-045104 | 194  | 9   | 6  | 38  | 4 |
| CONTIG-045106 | 351  | 15  | 97 | 123 | 2 |
| CONTIG-045107 | 62   | 2   | 0  | 2   | 0 |
| CONTIG-045108 | 135  | 5   | 13 | 19  | 0 |
| CONTIG-045109 | 353  | 8   | 52 | 25  | 0 |
| CONTIG-045110 | 166  | 5   | 2  | 29  | 0 |
| CONTIG-045111 | 211  | 13  | 6  | 125 | 0 |



|               |     |    |     |     |    |
|---------------|-----|----|-----|-----|----|
| CONTIG-045112 | 194 | 9  | 4   | 89  | 0  |
| CONTIG-045113 | 196 | 6  | 7   | 17  | 0  |
| CONTIG-045117 | 348 | 14 | 7   | 154 | 2  |
| CONTIG-045118 | 98  | 6  | 8   | 20  | 0  |
| CONTIG-045120 | 188 | 5  | 2   | 23  | 2  |
| CONTIG-045121 | 182 | 25 | 4   | 0   | 0  |
| CONTIG-045123 | 72  | 11 | 23  | 19  | 0  |
| CONTIG-045124 | 343 | 20 | 28  | 258 | 0  |
| CONTIG-045125 | 133 | 7  | 18  | 16  | 0  |
| CONTIG-045126 | 172 | 8  | 0   | 0   | 2  |
| CONTIG-045127 | 126 | 11 | 2   | 46  | 0  |
| CONTIG-045128 | 328 | 15 | 14  | 81  | 0  |
| CONTIG-045130 | 560 | 14 | 50  | 175 | 7  |
| CONTIG-045131 | 402 | 20 | 37  | 206 | 2  |
| CONTIG-045132 | 60  | 6  | 0   | 13  | 0  |
| CONTIG-045134 | 267 | 7  | 11  | 65  | 0  |
| CONTIG-045135 | 155 | 8  | 38  | 7   | 0  |
| CONTIG-045136 | 66  | 4  | 2   | 7   | 0  |
| CONTIG-045137 | 258 | 9  | 3   | 56  | 2  |
| CONTIG-045138 | 223 | 19 | 20  | 161 | 2  |
| CONTIG-045139 | 92  | 5  | 15  | 12  | 0  |
| CONTIG-045141 | 86  | 6  | 0   | 19  | 0  |
| CONTIG-045142 | 102 | 13 | 3   | 39  | 0  |
| CONTIG-045143 | 80  | 6  | 21  | 0   | 0  |
| CONTIG-045144 | 72  | 3  | 3   | 0   | 0  |
| CONTIG-045145 | 180 | 12 | 47  | 57  | 0  |
| CONTIG-045146 | 67  | 16 | 14  | 18  | 0  |
| CONTIG-045147 | 91  | 7  | 9   | 4   | 0  |
| CONTIG-045148 | 919 | 24 | 75  | 683 | 10 |
| CONTIG-045149 | 348 | 15 | 6   | 164 | 0  |
| CONTIG-045150 | 160 | 5  | 7   | 7   | 0  |
| CONTIG-045151 | 258 | 13 | 24  | 160 | 0  |
| CONTIG-045154 | 254 | 15 | 112 | 77  | 0  |
| CONTIG-045155 | 186 | 10 | 20  | 13  | 2  |
| CONTIG-045156 | 190 | 9  | 29  | 45  | 0  |
| CONTIG-045157 | 59  | 6  | 6   | 3   | 0  |
| CONTIG-045158 | 77  | 4  | 6   | 10  | 0  |
| CONTIG-045159 | 214 | 5  | 17  | 28  | 0  |
| CONTIG-045160 | 68  | 5  | 0   | 9   | 0  |
| CONTIG-045161 | 247 | 12 | 9   | 92  | 2  |
| CONTIG-045162 | 160 | 8  | 0   | 49  | 0  |
| CONTIG-045163 | 687 | 19 | 65  | 371 | 0  |
| CONTIG-045164 | 118 | 7  | 6   | 31  | 0  |
| CONTIG-045165 | 166 | 11 | 24  | 25  | 0  |
| CONTIG-045166 | 63  | 15 | 45  | 16  | 0  |
| CONTIG-045167 | 102 | 13 | 9   | 8   | 0  |
| CONTIG-045168 | 422 | 13 | 17  | 4   | 0  |

|               |     |    |    |     |    |
|---------------|-----|----|----|-----|----|
| CONTIG-045169 | 72  | 5  | 7  | 5   | 0  |
| CONTIG-045170 | 59  | 6  | 16 | 9   | 0  |
| CONTIG-045171 | 60  | 14 | 2  | 21  | 0  |
| CONTIG-045172 | 467 | 27 | 26 | 62  | 6  |
| CONTIG-045174 | 269 | 16 | 49 | 109 | 0  |
| CONTIG-045175 | 87  | 8  | 25 | 13  | 0  |
| CONTIG-045176 | 63  | 5  | 2  | 0   | 0  |
| CONTIG-045177 | 633 | 15 | 17 | 360 | 2  |
| CONTIG-045178 | 213 | 8  | 16 | 54  | 0  |
| CONTIG-045179 | 75  | 10 | 6  | 27  | 0  |
| CONTIG-045180 | 480 | 12 | 0  | 0   | 41 |
| CONTIG-045181 | 296 | 13 | 2  | 146 | 0  |
| CONTIG-045182 | 98  | 12 | 32 | 42  | 0  |
| CONTIG-045183 | 187 | 8  | 2  | 50  | 0  |
| CONTIG-045184 | 156 | 11 | 12 | 34  | 0  |
| CONTIG-045185 | 47  | 73 | 42 | 47  | 0  |
| CONTIG-045186 | 70  | 4  | 11 | 2   | 0  |
| CONTIG-045187 | 235 | 14 | 9  | 8   | 0  |
| CONTIG-045188 | 97  | 12 | 4  | 42  | 0  |
| CONTIG-045189 | 130 | 8  | 15 | 18  | 0  |
| CONTIG-045190 | 228 | 26 | 66 | 194 | 2  |
| CONTIG-045191 | 122 | 8  | 6  | 7   | 0  |
| CONTIG-045192 | 219 | 11 | 8  | 107 | 0  |
| CONTIG-045193 | 96  | 21 | 2  | 94  | 0  |
| CONTIG-045194 | 107 | 8  | 11 | 23  | 0  |
| CONTIG-045195 | 116 | 15 | 4  | 97  | 0  |
| CONTIG-045196 | 159 | 14 | 2  | 79  | 2  |
| CONTIG-045199 | 188 | 10 | 22 | 44  | 0  |
| CONTIG-045200 | 116 | 5  | 2  | 17  | 0  |
| CONTIG-045201 | 774 | 17 | 79 | 318 | 9  |
| CONTIG-045203 | 82  | 7  | 13 | 15  | 0  |
| CONTIG-045206 | 373 | 8  | 3  | 76  | 0  |
| CONTIG-045210 | 323 | 10 | 9  | 140 | 0  |
| CONTIG-045211 | 82  | 3  | 11 | 2   | 0  |
| CONTIG-045212 | 121 | 17 | 59 | 33  | 2  |
| CONTIG-045214 | 114 | 6  | 0  | 15  | 0  |
| CONTIG-045215 | 117 | 8  | 16 | 31  | 0  |
| CONTIG-045216 | 116 | 14 | 0  | 55  | 0  |
| CONTIG-045218 | 47  | 20 | 4  | 25  | 0  |
| CONTIG-045219 | 164 | 15 | 2  | 135 | 0  |
| CONTIG-045220 | 130 | 12 | 10 | 45  | 0  |
| CONTIG-045221 | 215 | 9  | 14 | 79  | 0  |
| CONTIG-045222 | 240 | 9  | 17 | 80  | 0  |
| CONTIG-045223 | 239 | 7  | 14 | 81  | 0  |
| CONTIG-045225 | 70  | 8  | 8  | 10  | 0  |
| CONTIG-045226 | 69  | 22 | 4  | 68  | 0  |
| CONTIG-045227 | 399 | 14 | 34 | 204 | 2  |

|               |     |    |    |     |    |
|---------------|-----|----|----|-----|----|
| CONTIG-045228 | 98  | 8  | 8  | 2   | 0  |
| CONTIG-045229 | 84  | 27 | 0  | 5   | 0  |
| CONTIG-045230 | 76  | 4  | 3  | 12  | 0  |
| CONTIG-045238 | 101 | 48 | 8  | 105 | 41 |
| CONTIG-045239 | 118 | 9  | 9  | 24  | 0  |
| CONTIG-045240 | 167 | 8  | 24 | 40  | 0  |
| CONTIG-045241 | 107 | 5  | 5  | 9   | 0  |
| CONTIG-045243 | 206 | 7  | 24 | 26  | 0  |
| CONTIG-045244 | 421 | 14 | 59 | 193 | 0  |
| CONTIG-045245 | 127 | 6  | 3  | 2   | 0  |
| CONTIG-045247 | 480 | 15 | 63 | 154 | 6  |
| CONTIG-045251 | 61  | 13 | 25 | 16  | 0  |
| CONTIG-045252 | 87  | 8  | 6  | 16  | 0  |
| CONTIG-045253 | 275 | 8  | 9  | 74  | 0  |
| CONTIG-045254 | 62  | 9  | 52 | 0   | 0  |
| CONTIG-045255 | 117 | 6  | 12 | 12  | 0  |
| CONTIG-045256 | 272 | 13 | 11 | 154 | 0  |
| CONTIG-045257 | 85  | 4  | 3  | 8   | 0  |
| CONTIG-045258 | 173 | 8  | 12 | 43  | 0  |
| CONTIG-045259 | 298 | 11 | 30 | 107 | 0  |
| CONTIG-045260 | 73  | 5  | 9  | 5   | 0  |
| CONTIG-045261 | 69  | 10 | 2  | 9   | 0  |
| CONTIG-045262 | 169 | 12 | 10 | 43  | 0  |
| CONTIG-045263 | 136 | 26 | 42 | 148 | 0  |
| CONTIG-045264 | 83  | 5  | 2  | 7   | 2  |
| CONTIG-045265 | 389 | 11 | 48 | 95  | 2  |
| CONTIG-045266 | 95  | 8  | 14 | 17  | 0  |
| CONTIG-045267 | 105 | 23 | 17 | 105 | 0  |
| CONTIG-045268 | 73  | 69 | 51 | 0   | 0  |
| CONTIG-045269 | 123 | 7  | 0  | 9   | 0  |
| CONTIG-045270 | 142 | 6  | 20 | 28  | 0  |
| CONTIG-045271 | 141 | 17 | 27 | 78  | 0  |
| CONTIG-045272 | 161 | 12 | 9  | 63  | 0  |
| CONTIG-045273 | 86  | 6  | 4  | 3   | 0  |
| CONTIG-045274 | 77  | 3  | 3  | 0   | 0  |
| CONTIG-045275 | 636 | 11 | 64 | 219 | 0  |
| CONTIG-045276 | 263 | 23 | 43 | 139 | 14 |
| CONTIG-045277 | 102 | 9  | 27 | 28  | 2  |
| CONTIG-045278 | 146 | 16 | 4  | 117 | 0  |
| CONTIG-045279 | 79  | 7  | 7  | 21  | 0  |
| CONTIG-045280 | 312 | 13 | 18 | 173 | 0  |
| CONTIG-045281 | 540 | 9  | 17 | 152 | 0  |
| CONTIG-045282 | 170 | 8  | 12 | 0   | 0  |
| CONTIG-045283 | 166 | 9  | 6  | 38  | 0  |
| CONTIG-045284 | 113 | 11 | 33 | 14  | 2  |
| CONTIG-045286 | 78  | 9  | 0  | 28  | 0  |
| CONTIG-045287 | 280 | 13 | 23 | 122 | 0  |

|               |     |    |    |      |    |
|---------------|-----|----|----|------|----|
| CONTIG-045288 | 135 | 10 | 9  | 40   | 2  |
| CONTIG-045289 | 121 | 6  | 0  | 5    | 0  |
| CONTIG-045290 | 150 | 9  | 2  | 51   | 0  |
| CONTIG-045291 | 63  | 7  | 7  | 9    | 0  |
| CONTIG-045292 | 70  | 7  | 23 | 10   | 0  |
| CONTIG-045293 | 175 | 7  | 20 | 31   | 0  |
| CONTIG-045294 | 261 | 8  | 33 | 78   | 0  |
| CONTIG-045295 | 133 | 11 | 0  | 68   | 0  |
| CONTIG-045296 | 237 | 16 | 63 | 116  | 0  |
| CONTIG-045298 | 217 | 43 | 16 | 397  | 0  |
| CONTIG-045299 | 77  | 7  | 12 | 17   | 0  |
| CONTIG-045300 | 101 | 9  | 0  | 0    | 8  |
| CONTIG-045301 | 280 | 11 | 38 | 59   | 2  |
| CONTIG-045302 | 155 | 7  | 32 | 2    | 0  |
| CONTIG-045303 | 115 | 9  | 14 | 4    | 0  |
| CONTIG-045304 | 272 | 11 | 19 | 104  | 2  |
| CONTIG-045306 | 162 | 19 | 38 | 65   | 0  |
| CONTIG-045307 | 60  | 14 | 2  | 26   | 0  |
| CONTIG-045308 | 69  | 4  | 3  | 0    | 0  |
| CONTIG-045309 | 110 | 45 | 4  | 105  | 17 |
| CONTIG-045310 | 51  | 40 | 2  | 49   | 0  |
| CONTIG-045311 | 935 | 29 | 52 | 1574 | 0  |
| CONTIG-045312 | 91  | 20 | 23 | 81   | 0  |
| CONTIG-045313 | 211 | 7  | 0  | 0    | 6  |
| CONTIG-045314 | 272 | 11 | 16 | 41   | 0  |
| CONTIG-045315 | 83  | 10 | 25 | 6    | 0  |
| CONTIG-045316 | 99  | 12 | 25 | 38   | 0  |
| CONTIG-045317 | 202 | 22 | 31 | 160  | 2  |
| CONTIG-045318 | 645 | 33 | 63 | 990  | 10 |
| CONTIG-045319 | 89  | 6  | 25 | 9    | 0  |
| CONTIG-045320 | 644 | 24 | 39 | 856  | 0  |
| CONTIG-045321 | 66  | 4  | 0  | 3    | 0  |
| CONTIG-045322 | 324 | 10 | 3  | 111  | 0  |
| CONTIG-045323 | 59  | 5  | 2  | 3    | 0  |
| CONTIG-045324 | 151 | 11 | 13 | 67   | 0  |
| CONTIG-045325 | 65  | 11 | 4  | 14   | 0  |
| CONTIG-045326 | 105 | 61 | 44 | 42   | 0  |
| CONTIG-045328 | 130 | 8  | 31 | 13   | 2  |
| CONTIG-045329 | 196 | 5  | 4  | 8    | 0  |
| CONTIG-045330 | 447 | 19 | 24 | 410  | 4  |
| CONTIG-045331 | 436 | 8  | 5  | 97   | 0  |
| CONTIG-045332 | 193 | 8  | 28 | 50   | 2  |
| CONTIG-045333 | 370 | 10 | 12 | 131  | 0  |
| CONTIG-045334 | 542 | 21 | 15 | 372  | 0  |
| CONTIG-045335 | 102 | 7  | 6  | 8    | 0  |
| CONTIG-045336 | 164 | 9  | 0  | 51   | 0  |
| CONTIG-045337 | 581 | 22 | 24 | 545  | 0  |

|               |      |    |     |     |     |
|---------------|------|----|-----|-----|-----|
| CONTIG-045339 | 144  | 6  | 14  | 27  | 0   |
| CONTIG-045340 | 69   | 20 | 8   | 0   | 0   |
| CONTIG-045341 | 184  | 5  | 10  | 18  | 0   |
| CONTIG-045342 | 183  | 11 | 3   | 48  | 0   |
| CONTIG-045343 | 120  | 30 | 78  | 90  | 0   |
| CONTIG-045344 | 194  | 6  | 6   | 53  | 0   |
| CONTIG-045345 | 167  | 11 | 23  | 56  | 0   |
| CONTIG-045346 | 1092 | 55 | 0   | 0   | 222 |
| CONTIG-045347 | 167  | 4  | 0   | 13  | 0   |
| CONTIG-045348 | 66   | 5  | 13  | 0   | 0   |
| CONTIG-045349 | 112  | 9  | 8   | 24  | 0   |
| CONTIG-045350 | 207  | 7  | 9   | 27  | 2   |
| CONTIG-045351 | 165  | 9  | 8   | 60  | 0   |
| CONTIG-045352 | 326  | 17 | 12  | 320 | 0   |
| CONTIG-045353 | 304  | 8  | 7   | 63  | 4   |
| CONTIG-045354 | 250  | 7  | 2   | 32  | 2   |
| CONTIG-045355 | 193  | 7  | 33  | 14  | 0   |
| CONTIG-045356 | 423  | 26 | 116 | 304 | 4   |
| CONTIG-045357 | 228  | 37 | 19  | 281 | 4   |
| CONTIG-045359 | 349  | 11 | 33  | 36  | 0   |
| CONTIG-045360 | 719  | 9  | 31  | 254 | 0   |
| CONTIG-045361 | 686  | 24 | 25  | 678 | 8   |
| CONTIG-045362 | 506  | 12 | 21  | 167 | 14  |
| CONTIG-045363 | 134  | 6  | 5   | 5   | 0   |
| CONTIG-045364 | 95   | 23 | 4   | 112 | 0   |
| CONTIG-045365 | 117  | 31 | 37  | 99  | 0   |
| CONTIG-045366 | 226  | 5  | 20  | 29  | 0   |
| CONTIG-045367 | 97   | 8  | 10  | 6   | 0   |
| CONTIG-045368 | 729  | 13 | 28  | 354 | 6   |
| CONTIG-045369 | 80   | 86 | 22  | 237 | 4   |
| CONTIG-045370 | 149  | 8  | 0   | 53  | 0   |
| CONTIG-045371 | 121  | 9  | 4   | 8   | 0   |
| CONTIG-045373 | 548  | 12 | 15  | 172 | 3   |
| CONTIG-045374 | 79   | 7  | 3   | 19  | 0   |
| CONTIG-045375 | 80   | 4  | 2   | 17  | 0   |
| CONTIG-045376 | 149  | 6  | 9   | 14  | 0   |
| CONTIG-045377 | 177  | 75 | 8   | 14  | 0   |
| CONTIG-045378 | 925  | 20 | 0   | 0   | 115 |
| CONTIG-045380 | 103  | 10 | 17  | 34  | 0   |
| CONTIG-045383 | 115  | 7  | 6   | 32  | 0   |
| CONTIG-045384 | 438  | 8  | 10  | 146 | 0   |
| CONTIG-045385 | 96   | 9  | 14  | 15  | 2   |
| CONTIG-045386 | 497  | 13 | 37  | 151 | 0   |
| CONTIG-045387 | 159  | 15 | 8   | 60  | 0   |
| CONTIG-045388 | 70   | 4  | 0   | 10  | 0   |
| CONTIG-045389 | 187  | 7  | 26  | 32  | 0   |
| CONTIG-045390 | 189  | 6  | 40  | 7   | 0   |

|               |     |     |    |     |   |
|---------------|-----|-----|----|-----|---|
| CONTIG-045391 | 74  | 32  | 53 | 12  | 0 |
| CONTIG-045392 | 104 | 4   | 0  | 14  | 0 |
| CONTIG-045393 | 377 | 6   | 13 | 52  | 0 |
| CONTIG-045394 | 63  | 33  | 2  | 23  | 0 |
| CONTIG-045395 | 166 | 7   | 8  | 25  | 0 |
| CONTIG-045396 | 97  | 12  | 6  | 34  | 6 |
| CONTIG-045397 | 272 | 15  | 10 | 114 | 0 |
| CONTIG-045398 | 79  | 5   | 5  | 0   | 0 |
| CONTIG-045402 | 80  | 93  | 12 | 72  | 0 |
| CONTIG-045403 | 609 | 11  | 40 | 186 | 4 |
| CONTIG-045404 | 109 | 23  | 88 | 63  | 0 |
| CONTIG-045405 | 124 | 4   | 2  | 11  | 0 |
| CONTIG-045407 | 152 | 10  | 5  | 24  | 0 |
| CONTIG-045408 | 55  | 101 | 2  | 216 | 0 |
| CONTIG-045410 | 350 | 22  | 35 | 248 | 0 |
| CONTIG-045411 | 371 | 12  | 24 | 128 | 4 |
| CONTIG-045412 | 49  | 64  | 18 | 34  | 0 |
| CONTIG-045414 | 188 | 6   | 0  | 37  | 0 |
| CONTIG-045420 | 150 | 9   | 32 | 38  | 0 |
| CONTIG-045421 | 109 | 6   | 0  | 37  | 0 |
| CONTIG-045428 | 75  | 14  | 3  | 37  | 0 |
| CONTIG-045433 | 359 | 32  | 33 | 403 | 2 |
| CONTIG-045434 | 106 | 6   | 3  | 23  | 0 |
| CONTIG-045435 | 178 | 16  | 20 | 50  | 2 |
| CONTIG-045436 | 195 | 9   | 10 | 49  | 2 |
| CONTIG-045437 | 75  | 7   | 13 | 12  | 0 |
| CONTIG-045439 | 135 | 4   | 2  | 13  | 0 |
| CONTIG-045440 | 113 | 8   | 2  | 18  | 0 |
| CONTIG-045441 | 371 | 10  | 27 | 121 | 0 |
| CONTIG-045442 | 185 | 6   | 0  | 43  | 0 |
| CONTIG-045443 | 87  | 11  | 30 | 4   | 0 |
| CONTIG-045444 | 70  | 5   | 3  | 9   | 0 |
| CONTIG-045445 | 299 | 10  | 19 | 109 | 0 |
| CONTIG-045446 | 153 | 14  | 10 | 82  | 2 |
| CONTIG-045447 | 108 | 6   | 6  | 22  | 0 |
| CONTIG-045448 | 523 | 14  | 32 | 94  | 8 |
| CONTIG-045449 | 67  | 3   | 3  | 0   | 0 |
| CONTIG-045450 | 71  | 10  | 5  | 20  | 0 |
| CONTIG-045451 | 305 | 10  | 39 | 90  | 2 |
| CONTIG-045452 | 241 | 12  | 25 | 101 | 0 |
| CONTIG-045453 | 212 | 5   | 3  | 28  | 0 |
| CONTIG-045454 | 200 | 16  | 22 | 154 | 0 |
| CONTIG-045455 | 543 | 9   | 3  | 164 | 2 |
| CONTIG-045457 | 71  | 7   | 0  | 9   | 0 |
| CONTIG-045458 | 265 | 25  | 22 | 210 | 8 |
| CONTIG-045459 | 66  | 5   | 14 | 2   | 0 |
| CONTIG-045460 | 224 | 9   | 24 | 35  | 0 |

|               |     |     |     |     |      |
|---------------|-----|-----|-----|-----|------|
| CONTIG-045461 | 543 | 27  | 50  | 130 | 0    |
| CONTIG-045462 | 76  | 61  | 17  | 92  | 18   |
| CONTIG-045463 | 185 | 6   | 4   | 43  | 0    |
| CONTIG-045464 | 176 | 8   | 8   | 43  | 0    |
| CONTIG-045465 | 89  | 11  | 23  | 41  | 0    |
| CONTIG-045466 | 254 | 13  | 25  | 71  | 0    |
| CONTIG-045467 | 356 | 39  | 158 | 540 | 0    |
| CONTIG-045468 | 210 | 13  | 24  | 109 | 2    |
| CONTIG-045469 | 262 | 83  | 80  | 0   | 273  |
| CONTIG-045470 | 331 | 9   | 35  | 55  | 0    |
| CONTIG-045471 | 385 | 7   | 21  | 71  | 0    |
| CONTIG-045473 | 93  | 3   | 3   | 4   | 0    |
| CONTIG-045474 | 105 | 6   | 11  | 22  | 0    |
| CONTIG-045475 | 81  | 9   | 35  | 2   | 0    |
| CONTIG-045476 | 48  | 41  | 16  | 74  | 0    |
| CONTIG-045478 | 62  | 11  | 3   | 35  | 0    |
| CONTIG-045479 | 135 | 9   | 6   | 42  | 0    |
| CONTIG-045484 | 106 | 9   | 31  | 10  | 0    |
| CONTIG-045485 | 162 | 17  | 51  | 30  | 2    |
| CONTIG-045486 | 177 | 6   | 12  | 27  | 0    |
| CONTIG-045487 | 94  | 15  | 13  | 55  | 0    |
| CONTIG-045488 | 113 | 3   | 6   | 2   | 0    |
| CONTIG-045489 | 487 | 19  | 8   | 0   | 19   |
| CONTIG-045490 | 147 | 7   | 0   | 42  | 0    |
| CONTIG-045491 | 175 | 5   | 7   | 26  | 2    |
| CONTIG-045492 | 111 | 24  | 19  | 8   | 0    |
| CONTIG-045493 | 153 | 5   | 0   | 0   | 0    |
| CONTIG-045494 | 149 | 8   | 5   | 10  | 0    |
| CONTIG-045495 | 776 | 11  | 22  | 303 | 2    |
| CONTIG-045496 | 74  | 4   | 2   | 4   | 0    |
| CONTIG-045497 | 155 | 18  | 17  | 93  | 0    |
| CONTIG-045498 | 83  | 22  | 10  | 87  | 0    |
| CONTIG-045499 | 86  | 4   | 6   | 4   | 0    |
| CONTIG-045500 | 103 | 8   | 18  | 14  | 2    |
| CONTIG-045501 | 609 | 16  | 12  | 221 | 7    |
| CONTIG-045502 | 286 | 15  | 29  | 136 | 2    |
| CONTIG-045503 | 262 | 21  | 65  | 133 | 7    |
| CONTIG-045504 | 171 | 10  | 18  | 27  | 0    |
| CONTIG-045505 | 98  | 6   | 2   | 12  | 0    |
| CONTIG-045506 | 642 | 10  | 30  | 197 | 6    |
| CONTIG-045507 | 113 | 6   | 8   | 30  | 0    |
| CONTIG-045508 | 158 | 180 | 20  | 852 | 23   |
| CONTIG-045509 | 59  | 23  | 4   | 60  | 0    |
| CONTIG-045510 | 410 | 212 | 52  | 0   | 1539 |
| CONTIG-045511 | 140 | 18  | 65  | 0   | 61   |
| CONTIG-045512 | 170 | 14  | 9   | 79  | 0    |
| CONTIG-045513 | 58  | 4   | 13  | 0   | 0    |

|               |     |     |    |     |     |
|---------------|-----|-----|----|-----|-----|
| CONTIG-045514 | 166 | 7   | 12 | 30  | 0   |
| CONTIG-045515 | 257 | 6   | 17 | 31  | 0   |
| CONTIG-045516 | 81  | 14  | 7  | 57  | 0   |
| CONTIG-045517 | 131 | 10  | 14 | 14  | 2   |
| CONTIG-045518 | 62  | 3   | 3  | 2   | 0   |
| CONTIG-045519 | 141 | 4   | 3  | 15  | 0   |
| CONTIG-045520 | 360 | 12  | 8  | 168 | 0   |
| CONTIG-045521 | 84  | 6   | 0  | 11  | 0   |
| CONTIG-045522 | 316 | 138 | 26 | 14  | 583 |
| CONTIG-045523 | 335 | 12  | 15 | 21  | 4   |
| CONTIG-045525 | 299 | 10  | 7  | 87  | 0   |
| CONTIG-045526 | 215 | 39  | 53 | 311 | 2   |
| CONTIG-045527 | 341 | 5   | 0  | 46  | 0   |
| CONTIG-045528 | 59  | 6   | 19 | 4   | 0   |
| CONTIG-045529 | 99  | 9   | 23 | 33  | 0   |
| CONTIG-045530 | 118 | 6   | 50 | 4   | 0   |
| CONTIG-045531 | 64  | 6   | 3  | 13  | 0   |
| CONTIG-045532 | 74  | 21  | 18 | 14  | 0   |
| CONTIG-045533 | 198 | 107 | 3  | 0   | 232 |
| CONTIG-045534 | 174 | 6   | 9  | 30  | 0   |
| CONTIG-045535 | 43  | 17  | 6  | 0   | 0   |
| CONTIG-045536 | 147 | 5   | 11 | 13  | 0   |
| CONTIG-045537 | 142 | 6   | 14 | 18  | 0   |
| CONTIG-045538 | 148 | 7   | 20 | 17  | 0   |
| CONTIG-045539 | 94  | 12  | 13 | 28  | 0   |
| CONTIG-045540 | 101 | 3   | 0  | 2   | 0   |
| CONTIG-045541 | 92  | 6   | 13 | 6   | 0   |
| CONTIG-045542 | 238 | 8   | 22 | 63  | 0   |
| CONTIG-045543 | 114 | 13  | 5  | 17  | 0   |
| CONTIG-045544 | 108 | 9   | 27 | 23  | 0   |
| CONTIG-045545 | 136 | 18  | 54 | 40  | 0   |
| CONTIG-045546 | 128 | 8   | 2  | 48  | 0   |
| CONTIG-045547 | 121 | 13  | 8  | 35  | 2   |
| CONTIG-045548 | 266 | 12  | 30 | 48  | 2   |
| CONTIG-045549 | 121 | 9   | 0  | 26  | 0   |
| CONTIG-045554 | 67  | 8   | 4  | 12  | 0   |
| CONTIG-045555 | 81  | 10  | 13 | 20  | 0   |
| CONTIG-045556 | 88  | 5   | 4  | 8   | 0   |
| CONTIG-045557 | 83  | 20  | 9  | 20  | 0   |
| CONTIG-045558 | 92  | 9   | 3  | 9   | 0   |
| CONTIG-045559 | 157 | 4   | 17 | 16  | 0   |
| CONTIG-045560 | 113 | 4   | 10 | 12  | 0   |
| CONTIG-045561 | 124 | 12  | 22 | 25  | 6   |
| CONTIG-045563 | 363 | 8   | 12 | 42  | 2   |
| CONTIG-045565 | 111 | 13  | 58 | 13  | 0   |
| CONTIG-045566 | 68  | 6   | 6  | 11  | 0   |
| CONTIG-045567 | 185 | 14  | 21 | 78  | 0   |



|               |      |     |    |     |    |
|---------------|------|-----|----|-----|----|
| CONTIG-045568 | 60   | 6   | 3  | 5   | 0  |
| CONTIG-045569 | 154  | 8   | 25 | 22  | 0  |
| CONTIG-045570 | 372  | 10  | 37 | 36  | 0  |
| CONTIG-045571 | 648  | 14  | 42 | 213 | 0  |
| CONTIG-045572 | 130  | 8   | 23 | 32  | 0  |
| CONTIG-045573 | 98   | 6   | 5  | 20  | 0  |
| CONTIG-045574 | 78   | 5   | 0  | 15  | 0  |
| CONTIG-045575 | 416  | 35  | 44 | 233 | 14 |
| CONTIG-045576 | 145  | 7   | 14 | 21  | 0  |
| CONTIG-045577 | 201  | 7   | 7  | 52  | 0  |
| CONTIG-045578 | 122  | 6   | 26 | 10  | 0  |
| CONTIG-045579 | 1070 | 19  | 2  | 0   | 99 |
| CONTIG-045580 | 64   | 10  | 23 | 12  | 0  |
| CONTIG-045581 | 423  | 8   | 9  | 124 | 0  |
| CONTIG-045582 | 184  | 101 | 58 | 866 | 0  |
| CONTIG-045583 | 59   | 6   | 2  | 15  | 0  |
| CONTIG-045584 | 144  | 5   | 2  | 21  | 0  |
| CONTIG-045585 | 482  | 10  | 29 | 163 | 0  |
| CONTIG-045586 | 111  | 6   | 27 | 11  | 0  |
| CONTIG-045587 | 135  | 4   | 4  | 21  | 0  |
| CONTIG-045588 | 76   | 41  | 3  | 87  | 2  |
| CONTIG-045589 | 473  | 12  | 29 | 140 | 0  |
| CONTIG-045590 | 473  | 8   | 16 | 94  | 0  |
| CONTIG-045591 | 412  | 22  | 51 | 137 | 2  |
| CONTIG-045592 | 94   | 14  | 49 | 19  | 0  |
| CONTIG-045593 | 105  | 5   | 33 | 0   | 0  |
| CONTIG-045594 | 124  | 6   | 7  | 25  | 0  |
| CONTIG-045602 | 96   | 5   | 2  | 10  | 0  |
| CONTIG-045603 | 134  | 4   | 5  | 8   | 0  |
| CONTIG-045604 | 98   | 5   | 16 | 7   | 0  |
| CONTIG-045605 | 88   | 6   | 2  | 7   | 0  |
| CONTIG-045606 | 234  | 10  | 2  | 80  | 0  |
| CONTIG-045607 | 58   | 4   | 2  | 9   | 0  |
| CONTIG-045608 | 96   | 8   | 15 | 19  | 0  |
| CONTIG-045609 | 68   | 8   | 8  | 12  | 0  |
| CONTIG-045610 | 197  | 16  | 16 | 154 | 0  |
| CONTIG-045611 | 64   | 15  | 16 | 11  | 0  |
| CONTIG-045612 | 168  | 8   | 79 | 23  | 0  |
| CONTIG-045613 | 62   | 4   | 0  | 4   | 2  |
| CONTIG-045614 | 204  | 25  | 91 | 47  | 0  |
| CONTIG-045615 | 65   | 3   | 0  | 0   | 0  |
| CONTIG-045616 | 137  | 7   | 10 | 19  | 0  |
| CONTIG-045617 | 76   | 6   | 7  | 6   | 0  |
| CONTIG-045618 | 913  | 14  | 28 | 395 | 9  |
| CONTIG-045619 | 131  | 9   | 5  | 26  | 0  |
| CONTIG-045620 | 83   | 23  | 12 | 59  | 0  |
| CONTIG-045621 | 209  | 15  | 15 | 150 | 0  |

|               |     |    |    |     |    |
|---------------|-----|----|----|-----|----|
| CONTIG-045622 | 156 | 20 | 15 | 55  | 4  |
| CONTIG-045623 | 92  | 5  | 3  | 5   | 0  |
| CONTIG-045624 | 200 | 22 | 6  | 198 | 0  |
| CONTIG-045625 | 52  | 23 | 31 | 26  | 0  |
| CONTIG-045626 | 126 | 7  | 5  | 27  | 0  |
| CONTIG-045627 | 59  | 3  | 2  | 2   | 0  |
| CONTIG-045628 | 36  | 19 | 0  | 3   | 0  |
| CONTIG-045629 | 230 | 8  | 0  | 32  | 0  |
| CONTIG-045630 | 395 | 13 | 32 | 94  | 4  |
| CONTIG-045631 | 112 | 11 | 9  | 40  | 0  |
| CONTIG-045632 | 177 | 11 | 31 | 77  | 0  |
| CONTIG-045634 | 63  | 4  | 5  | 0   | 0  |
| CONTIG-045635 | 131 | 38 | 45 | 197 | 0  |
| CONTIG-045636 | 77  | 9  | 18 | 17  | 0  |
| CONTIG-045637 | 79  | 13 | 26 | 26  | 0  |
| CONTIG-045638 | 100 | 4  | 3  | 10  | 0  |
| CONTIG-045639 | 246 | 4  | 6  | 34  | 0  |
| CONTIG-045640 | 218 | 6  | 9  | 29  | 2  |
| CONTIG-045641 | 261 | 7  | 7  | 30  | 0  |
| CONTIG-045642 | 116 | 10 | 0  | 0   | 2  |
| CONTIG-045643 | 96  | 4  | 7  | 2   | 0  |
| CONTIG-045644 | 125 | 50 | 4  | 357 | 0  |
| CONTIG-045645 | 108 | 5  | 2  | 10  | 0  |
| CONTIG-045646 | 545 | 27 | 24 | 27  | 0  |
| CONTIG-045648 | 102 | 5  | 2  | 15  | 0  |
| CONTIG-045649 | 69  | 5  | 0  | 10  | 2  |
| CONTIG-045650 | 262 | 8  | 3  | 63  | 0  |
| CONTIG-045652 | 49  | 36 | 12 | 42  | 0  |
| CONTIG-045653 | 187 | 10 | 12 | 47  | 0  |
| CONTIG-045654 | 81  | 18 | 34 | 10  | 0  |
| CONTIG-045655 | 169 | 15 | 20 | 85  | 0  |
| CONTIG-045656 | 176 | 18 | 10 | 122 | 0  |
| CONTIG-045657 | 113 | 7  | 3  | 25  | 0  |
| CONTIG-045658 | 97  | 12 | 16 | 25  | 0  |
| CONTIG-045659 | 198 | 8  | 7  | 58  | 0  |
| CONTIG-045660 | 162 | 12 | 15 | 59  | 0  |
| CONTIG-045661 | 71  | 4  | 2  | 0   | 0  |
| CONTIG-045662 | 69  | 4  | 6  | 2   | 0  |
| CONTIG-045663 | 355 | 14 | 24 | 195 | 0  |
| CONTIG-045664 | 470 | 16 | 44 | 185 | 14 |
| CONTIG-045665 | 208 | 11 | 34 | 39  | 7  |
| CONTIG-045666 | 70  | 16 | 13 | 38  | 0  |
| CONTIG-045667 | 590 | 27 | 47 | 906 | 2  |
| CONTIG-045668 | 128 | 4  | 5  | 14  | 0  |
| CONTIG-045669 | 97  | 9  | 10 | 2   | 0  |
| CONTIG-045670 | 79  | 6  | 13 | 14  | 0  |
| CONTIG-045671 | 69  | 5  | 8  | 2   | 0  |

|               |      |    |     |      |    |
|---------------|------|----|-----|------|----|
| CONTIG-045672 | 302  | 10 | 13  | 16   | 0  |
| CONTIG-045673 | 111  | 16 | 23  | 31   | 0  |
| CONTIG-045674 | 146  | 6  | 10  | 25   | 0  |
| CONTIG-045675 | 188  | 9  | 15  | 45   | 2  |
| CONTIG-045676 | 116  | 6  | 8   | 2    | 0  |
| CONTIG-045677 | 149  | 35 | 141 | 174  | 2  |
| CONTIG-045678 | 476  | 12 | 23  | 184  | 0  |
| CONTIG-045679 | 556  | 19 | 18  | 574  | 0  |
| CONTIG-045680 | 69   | 2  | 3   | 2    | 0  |
| CONTIG-045681 | 387  | 17 | 2   | 214  | 2  |
| CONTIG-045682 | 169  | 6  | 0   | 0    | 0  |
| CONTIG-045683 | 440  | 10 | 20  | 115  | 0  |
| CONTIG-045684 | 66   | 4  | 17  | 2    | 0  |
| CONTIG-045685 | 347  | 21 | 5   | 119  | 0  |
| CONTIG-045686 | 65   | 3  | 6   | 4    | 0  |
| CONTIG-045690 | 111  | 8  | 9   | 24   | 0  |
| CONTIG-045692 | 459  | 10 | 9   | 137  | 4  |
| CONTIG-045693 | 85   | 5  | 7   | 16   | 0  |
| CONTIG-045694 | 199  | 10 | 16  | 53   | 2  |
| CONTIG-045695 | 315  | 12 | 22  | 160  | 0  |
| CONTIG-045696 | 217  | 14 | 42  | 18   | 0  |
| CONTIG-045697 | 733  | 47 | 58  | 1820 | 11 |
| CONTIG-045698 | 58   | 9  | 4   | 9    | 0  |
| CONTIG-045699 | 62   | 5  | 8   | 5    | 0  |
| CONTIG-045700 | 108  | 7  | 6   | 25   | 0  |
| CONTIG-045701 | 1378 | 20 | 62  | 750  | 39 |
| CONTIG-045702 | 87   | 7  | 4   | 11   | 0  |
| CONTIG-045705 | 113  | 23 | 37  | 2    | 0  |
| CONTIG-045706 | 201  | 9  | 8   | 78   | 0  |
| CONTIG-045707 | 62   | 55 | 65  | 111  | 0  |
| CONTIG-045708 | 585  | 13 | 6   | 297  | 6  |
| CONTIG-045709 | 167  | 7  | 5   | 43   | 0  |
| CONTIG-045710 | 67   | 31 | 0   | 76   | 0  |
| CONTIG-045712 | 124  | 5  | 22  | 9    | 2  |
| CONTIG-045713 | 225  | 7  | 5   | 55   | 0  |
| CONTIG-045715 | 333  | 11 | 35  | 57   | 0  |
| CONTIG-045716 | 341  | 11 | 23  | 66   | 2  |
| CONTIG-045718 | 76   | 8  | 7   | 24   | 0  |
| CONTIG-045719 | 133  | 13 | 0   | 75   | 0  |
| CONTIG-045720 | 181  | 6  | 26  | 20   | 0  |
| CONTIG-045721 | 158  | 7  | 8   | 28   | 0  |
| CONTIG-045722 | 372  | 16 | 28  | 250  | 0  |
| CONTIG-045723 | 154  | 7  | 9   | 34   | 0  |
| CONTIG-045724 | 837  | 16 | 25  | 291  | 11 |
| CONTIG-045725 | 59   | 2  | 2   | 0    | 0  |
| CONTIG-045726 | 345  | 6  | 12  | 62   | 0  |
| CONTIG-045728 | 174  | 5  | 3   | 7    | 0  |

|               |     |    |     |     |    |
|---------------|-----|----|-----|-----|----|
| CONTIG-045729 | 81  | 7  | 8   | 15  | 0  |
| CONTIG-045730 | 58  | 7  | 5   | 10  | 0  |
| CONTIG-045732 | 139 | 14 | 6   | 78  | 0  |
| CONTIG-045733 | 127 | 10 | 7   | 65  | 0  |
| CONTIG-045734 | 311 | 15 | 6   | 224 | 0  |
| CONTIG-045736 | 84  | 6  | 13  | 15  | 0  |
| CONTIG-045737 | 116 | 13 | 103 | 16  | 0  |
| CONTIG-045738 | 630 | 15 | 45  | 400 | 0  |
| CONTIG-045739 | 110 | 6  | 11  | 8   | 0  |
| CONTIG-045740 | 104 | 13 | 6   | 66  | 0  |
| CONTIG-045741 | 190 | 7  | 31  | 21  | 2  |
| CONTIG-045743 | 94  | 5  | 0   | 14  | 0  |
| CONTIG-045744 | 461 | 10 | 8   | 120 | 2  |
| CONTIG-045745 | 567 | 9  | 24  | 117 | 15 |
| CONTIG-045746 | 717 | 16 | 45  | 334 | 9  |
| CONTIG-045747 | 83  | 6  | 9   | 5   | 0  |
| CONTIG-045751 | 73  | 4  | 3   | 4   | 0  |
| CONTIG-045752 | 69  | 19 | 5   | 42  | 0  |
| CONTIG-045753 | 343 | 44 | 19  | 895 | 0  |
| CONTIG-045754 | 92  | 10 | 25  | 25  | 0  |
| CONTIG-045755 | 202 | 13 | 39  | 112 | 0  |
| CONTIG-045756 | 139 | 8  | 11  | 63  | 0  |
| CONTIG-045758 | 133 | 8  | 18  | 30  | 0  |
| CONTIG-045759 | 203 | 19 | 9   | 85  | 0  |
| CONTIG-045760 | 70  | 4  | 0   | 6   | 0  |
| CONTIG-045761 | 84  | 7  | 2   | 28  | 0  |
| CONTIG-045762 | 757 | 7  | 26  | 145 | 0  |
| CONTIG-045763 | 191 | 9  | 29  | 58  | 2  |
| CONTIG-045764 | 212 | 7  | 5   | 44  | 0  |
| CONTIG-045766 | 238 | 15 | 14  | 179 | 0  |
| CONTIG-045767 | 83  | 10 | 21  | 25  | 0  |
| CONTIG-045768 | 405 | 11 | 24  | 234 | 0  |
| CONTIG-045769 | 174 | 4  | 7   | 4   | 0  |
| CONTIG-045770 | 67  | 4  | 4   | 6   | 0  |
| CONTIG-045771 | 228 | 6  | 23  | 41  | 0  |
| CONTIG-045772 | 381 | 19 | 10  | 11  | 0  |
| CONTIG-045773 | 168 | 7  | 4   | 15  | 0  |
| CONTIG-045774 | 442 | 19 | 15  | 332 | 4  |
| CONTIG-045775 | 156 | 6  | 16  | 22  | 0  |
| CONTIG-045776 | 236 | 4  | 3   | 34  | 0  |
| CONTIG-045777 | 194 | 16 | 4   | 77  | 0  |
| CONTIG-045778 | 99  | 5  | 16  | 5   | 0  |
| CONTIG-045779 | 567 | 10 | 24  | 38  | 0  |
| CONTIG-045780 | 89  | 2  | 0   | 2   | 0  |
| CONTIG-045781 | 54  | 14 | 3   | 9   | 0  |
| CONTIG-045782 | 74  | 62 | 5   | 79  | 0  |
| CONTIG-045783 | 65  | 9  | 4   | 14  | 2  |

|               |     |    |    |     |    |
|---------------|-----|----|----|-----|----|
| CONTIG-045784 | 195 | 17 | 31 | 59  | 4  |
| CONTIG-045786 | 150 | 12 | 20 | 71  | 0  |
| CONTIG-045787 | 108 | 9  | 25 | 20  | 0  |
| CONTIG-045788 | 127 | 6  | 12 | 26  | 0  |
| CONTIG-045789 | 133 | 5  | 2  | 2   | 0  |
| CONTIG-045790 | 460 | 21 | 22 | 463 | 0  |
| CONTIG-045791 | 216 | 15 | 6  | 72  | 0  |
| CONTIG-045792 | 66  | 3  | 4  | 0   | 0  |
| CONTIG-045794 | 69  | 15 | 7  | 4   | 0  |
| CONTIG-045795 | 191 | 6  | 12 | 5   | 0  |
| CONTIG-045796 | 139 | 11 | 23 | 33  | 0  |
| CONTIG-045797 | 548 | 8  | 20 | 131 | 0  |
| CONTIG-045798 | 82  | 9  | 26 | 18  | 0  |
| CONTIG-045799 | 109 | 7  | 13 | 20  | 0  |
| CONTIG-045800 | 459 | 7  | 36 | 70  | 5  |
| CONTIG-045801 | 116 | 10 | 7  | 31  | 0  |
| CONTIG-045808 | 281 | 11 | 25 | 67  | 0  |
| CONTIG-045809 | 182 | 8  | 11 | 49  | 0  |
| CONTIG-045810 | 147 | 15 | 5  | 94  | 2  |
| CONTIG-045811 | 159 | 3  | 14 | 2   | 0  |
| CONTIG-045813 | 235 | 6  | 10 | 43  | 0  |
| CONTIG-045814 | 191 | 11 | 16 | 69  | 0  |
| CONTIG-045815 | 235 | 9  | 20 | 61  | 0  |
| CONTIG-045817 | 161 | 12 | 15 | 58  | 0  |
| CONTIG-045818 | 59  | 6  | 4  | 4   | 0  |
| CONTIG-045819 | 67  | 11 | 18 | 25  | 0  |
| CONTIG-045821 | 59  | 12 | 13 | 19  | 3  |
| CONTIG-045823 | 75  | 6  | 0  | 12  | 0  |
| CONTIG-045824 | 69  | 24 | 34 | 34  | 0  |
| CONTIG-045825 | 83  | 7  | 24 | 13  | 0  |
| CONTIG-045826 | 140 | 8  | 11 | 31  | 0  |
| CONTIG-045827 | 72  | 6  | 12 | 0   | 0  |
| CONTIG-045828 | 147 | 8  | 18 | 16  | 0  |
| CONTIG-045830 | 68  | 5  | 0  | 10  | 2  |
| CONTIG-045831 | 71  | 3  | 0  | 6   | 0  |
| CONTIG-045832 | 103 | 19 | 7  | 58  | 0  |
| CONTIG-045834 | 242 | 8  | 9  | 18  | 6  |
| CONTIG-045835 | 89  | 6  | 16 | 15  | 0  |
| CONTIG-045836 | 522 | 15 | 56 | 222 | 0  |
| CONTIG-045837 | 521 | 18 | 8  | 312 | 11 |
| CONTIG-045838 | 109 | 4  | 0  | 10  | 0  |
| CONTIG-045839 | 112 | 5  | 2  | 15  | 0  |
| CONTIG-045840 | 74  | 5  | 9  | 11  | 0  |
| CONTIG-045845 | 98  | 9  | 15 | 15  | 0  |
| CONTIG-045846 | 219 | 11 | 29 | 71  | 0  |
| CONTIG-045847 | 196 | 9  | 26 | 54  | 2  |
| CONTIG-045848 | 80  | 6  | 3  | 0   | 0  |

|               |     |    |     |     |   |
|---------------|-----|----|-----|-----|---|
| CONTIG-045849 | 77  | 7  | 55  | 0   | 0 |
| CONTIG-045850 | 349 | 9  | 13  | 71  | 0 |
| CONTIG-045851 | 92  | 5  | 3   | 8   | 0 |
| CONTIG-045852 | 106 | 4  | 3   | 13  | 0 |
| CONTIG-045853 | 281 | 12 | 22  | 137 | 0 |
| CONTIG-045854 | 69  | 5  | 6   | 2   | 0 |
| CONTIG-045855 | 100 | 6  | 11  | 17  | 0 |
| CONTIG-045856 | 98  | 8  | 20  | 8   | 0 |
| CONTIG-045857 | 108 | 23 | 10  | 104 | 0 |
| CONTIG-045858 | 381 | 12 | 50  | 84  | 4 |
| CONTIG-045859 | 540 | 14 | 43  | 157 | 3 |
| CONTIG-045860 | 81  | 12 | 8   | 25  | 0 |
| CONTIG-045861 | 327 | 15 | 54  | 104 | 2 |
| CONTIG-045862 | 486 | 18 | 51  | 224 | 2 |
| CONTIG-045863 | 74  | 3  | 2   | 2   | 0 |
| CONTIG-045865 | 116 | 6  | 4   | 14  | 0 |
| CONTIG-045866 | 183 | 6  | 9   | 20  | 0 |
| CONTIG-045867 | 291 | 18 | 57  | 162 | 2 |
| CONTIG-045868 | 143 | 8  | 15  | 36  | 0 |
| CONTIG-045869 | 131 | 5  | 7   | 10  | 0 |
| CONTIG-045870 | 219 | 15 | 7   | 136 | 0 |
| CONTIG-045871 | 347 | 7  | 29  | 46  | 2 |
| CONTIG-045872 | 37  | 6  | 6   | 0   | 0 |
| CONTIG-045873 | 456 | 11 | 45  | 166 | 0 |
| CONTIG-045874 | 215 | 10 | 32  | 67  | 0 |
| CONTIG-045875 | 124 | 7  | 8   | 34  | 0 |
| CONTIG-045876 | 75  | 23 | 25  | 37  | 0 |
| CONTIG-045877 | 345 | 19 | 22  | 114 | 0 |
| CONTIG-045879 | 452 | 8  | 12  | 82  | 2 |
| CONTIG-045880 | 257 | 7  | 0   | 52  | 0 |
| CONTIG-045882 | 81  | 8  | 14  | 15  | 0 |
| CONTIG-045883 | 118 | 7  | 3   | 34  | 0 |
| CONTIG-045885 | 158 | 6  | 0   | 15  | 0 |
| CONTIG-045886 | 180 | 5  | 2   | 22  | 2 |
| CONTIG-045887 | 463 | 20 | 17  | 380 | 0 |
| CONTIG-045888 | 151 | 6  | 10  | 22  | 0 |
| CONTIG-045889 | 156 | 8  | 0   | 49  | 0 |
| CONTIG-045892 | 616 | 17 | 30  | 424 | 3 |
| CONTIG-045893 | 155 | 12 | 21  | 46  | 0 |
| CONTIG-045894 | 73  | 11 | 16  | 0   | 0 |
| CONTIG-045895 | 53  | 38 | 7   | 51  | 0 |
| CONTIG-045897 | 144 | 12 | 8   | 77  | 0 |
| CONTIG-045899 | 99  | 6  | 9   | 20  | 0 |
| CONTIG-045900 | 107 | 9  | 4   | 34  | 0 |
| CONTIG-045901 | 383 | 13 | 18  | 43  | 0 |
| CONTIG-045906 | 129 | 12 | 108 | 0   | 0 |
| CONTIG-045907 | 106 | 6  | 0   | 21  | 0 |

|               |     |     |    |     |    |
|---------------|-----|-----|----|-----|----|
| CONTIG-045909 | 70  | 6   | 14 | 0   | 0  |
| CONTIG-045910 | 161 | 12  | 32 | 11  | 0  |
| CONTIG-045911 | 91  | 7   | 26 | 4   | 0  |
| CONTIG-045912 | 191 | 7   | 6  | 34  | 2  |
| CONTIG-045913 | 162 | 8   | 7  | 24  | 0  |
| CONTIG-045914 | 326 | 25  | 33 | 295 | 4  |
| CONTIG-045915 | 360 | 12  | 15 | 111 | 0  |
| CONTIG-045916 | 424 | 12  | 16 | 194 | 2  |
| CONTIG-045917 | 187 | 17  | 24 | 110 | 0  |
| CONTIG-045918 | 62  | 3   | 0  | 0   | 0  |
| CONTIG-045919 | 194 | 6   | 2  | 25  | 0  |
| CONTIG-045920 | 80  | 13  | 2  | 10  | 0  |
| CONTIG-045921 | 149 | 7   | 10 | 39  | 0  |
| CONTIG-045922 | 390 | 19  | 29 | 332 | 0  |
| CONTIG-045925 | 252 | 13  | 12 | 70  | 2  |
| CONTIG-045926 | 70  | 6   | 5  | 6   | 0  |
| CONTIG-045927 | 88  | 9   | 3  | 0   | 0  |
| CONTIG-045928 | 78  | 5   | 0  | 0   | 0  |
| CONTIG-045929 | 143 | 4   | 5  | 12  | 2  |
| CONTIG-045930 | 251 | 9   | 4  | 79  | 2  |
| CONTIG-045931 | 120 | 6   | 4  | 12  | 0  |
| CONTIG-045933 | 49  | 387 | 34 | 725 | 39 |
| CONTIG-045936 | 280 | 11  | 24 | 128 | 0  |
| CONTIG-045938 | 91  | 4   | 7  | 4   | 0  |
| CONTIG-045939 | 214 | 13  | 45 | 39  | 0  |
| CONTIG-045942 | 140 | 64  | 83 | 445 | 3  |
| CONTIG-045943 | 82  | 6   | 2  | 17  | 0  |
| CONTIG-045944 | 73  | 10  | 13 | 19  | 0  |
| CONTIG-045946 | 183 | 8   | 15 | 32  | 0  |
| CONTIG-045947 | 65  | 28  | 49 | 38  | 0  |
| CONTIG-045948 | 124 | 10  | 19 | 43  | 0  |
| CONTIG-045949 | 59  | 3   | 0  | 2   | 0  |
| CONTIG-045950 | 109 | 7   | 17 | 28  | 0  |
| CONTIG-045952 | 74  | 7   | 0  | 15  | 0  |
| CONTIG-045953 | 61  | 6   | 0  | 2   | 0  |
| CONTIG-045954 | 197 | 8   | 18 | 40  | 0  |
| CONTIG-045955 | 182 | 8   | 9  | 28  | 0  |
| CONTIG-045956 | 356 | 15  | 31 | 125 | 0  |
| CONTIG-045957 | 226 | 8   | 21 | 46  | 0  |
| CONTIG-045958 | 115 | 6   | 0  | 17  | 0  |
| CONTIG-045959 | 361 | 28  | 41 | 328 | 2  |
| CONTIG-045960 | 153 | 16  | 42 | 121 | 0  |
| CONTIG-045961 | 195 | 8   | 9  | 45  | 0  |
| CONTIG-045962 | 216 | 9   | 27 | 41  | 0  |
| CONTIG-045963 | 178 | 10  | 6  | 61  | 0  |
| CONTIG-045964 | 114 | 6   | 2  | 20  | 0  |
| CONTIG-045965 | 129 | 4   | 8  | 12  | 0  |

|               |     |     |    |     |    |
|---------------|-----|-----|----|-----|----|
| CONTIG-045966 | 88  | 12  | 0  | 6   | 0  |
| CONTIG-045967 | 301 | 12  | 32 | 61  | 4  |
| CONTIG-045968 | 101 | 9   | 2  | 49  | 0  |
| CONTIG-045969 | 59  | 9   | 5  | 10  | 0  |
| CONTIG-045970 | 71  | 3   | 2  | 0   | 0  |
| CONTIG-045971 | 156 | 16  | 69 | 40  | 0  |
| CONTIG-045972 | 461 | 18  | 4  | 491 | 0  |
| CONTIG-045973 | 103 | 6   | 2  | 20  | 0  |
| CONTIG-045974 | 250 | 32  | 8  | 253 | 30 |
| CONTIG-045975 | 104 | 5   | 2  | 16  | 0  |
| CONTIG-045976 | 172 | 11  | 29 | 21  | 0  |
| CONTIG-045977 | 248 | 9   | 30 | 58  | 0  |
| CONTIG-045979 | 236 | 5   | 19 | 3   | 5  |
| CONTIG-045980 | 72  | 16  | 16 | 21  | 0  |
| CONTIG-045981 | 60  | 3   | 0  | 3   | 0  |
| CONTIG-045982 | 314 | 12  | 17 | 192 | 0  |
| CONTIG-045983 | 96  | 7   | 48 | 2   | 0  |
| CONTIG-045984 | 121 | 7   | 27 | 14  | 0  |
| CONTIG-045985 | 227 | 21  | 28 | 61  | 0  |
| CONTIG-045986 | 72  | 10  | 12 | 17  | 0  |
| CONTIG-045987 | 65  | 6   | 4  | 7   | 0  |
| CONTIG-045988 | 63  | 16  | 2  | 0   | 0  |
| CONTIG-045989 | 207 | 13  | 79 | 32  | 2  |
| CONTIG-045990 | 179 | 20  | 21 | 114 | 0  |
| CONTIG-045991 | 84  | 17  | 95 | 20  | 0  |
| CONTIG-045992 | 120 | 5   | 2  | 23  | 0  |
| CONTIG-045993 | 84  | 10  | 8  | 37  | 0  |
| CONTIG-045996 | 64  | 147 | 14 | 463 | 0  |
| CONTIG-045997 | 161 | 10  | 86 | 29  | 0  |
| CONTIG-045998 | 60  | 7   | 0  | 8   | 0  |
| CONTIG-045999 | 89  | 6   | 6  | 10  | 0  |
| CONTIG-046000 | 256 | 7   | 23 | 41  | 2  |
| CONTIG-046001 | 158 | 11  | 3  | 14  | 0  |
| CONTIG-046002 | 127 | 6   | 9  | 25  | 0  |
| CONTIG-046003 | 98  | 6   | 5  | 19  | 0  |
| CONTIG-046006 | 98  | 17  | 46 | 10  | 0  |
| CONTIG-046007 | 333 | 10  | 79 | 100 | 0  |
| CONTIG-046008 | 164 | 9   | 4  | 57  | 0  |
| CONTIG-046009 | 159 | 9   | 11 | 56  | 0  |
| CONTIG-046010 | 91  | 4   | 9  | 2   | 0  |
| CONTIG-046011 | 62  | 6   | 5  | 7   | 0  |
| CONTIG-046012 | 470 | 7   | 11 | 63  | 5  |
| CONTIG-046013 | 200 | 12  | 18 | 6   | 0  |
| CONTIG-046014 | 141 | 6   | 15 | 11  | 0  |
| CONTIG-046015 | 97  | 5   | 2  | 18  | 0  |
| CONTIG-046016 | 231 | 7   | 6  | 38  | 0  |
| CONTIG-046024 | 210 | 13  | 42 | 78  | 2  |



|               |     |     |     |     |   |
|---------------|-----|-----|-----|-----|---|
| CONTIG-046025 | 231 | 16  | 14  | 20  | 0 |
| CONTIG-046026 | 93  | 5   | 12  | 0   | 0 |
| CONTIG-046027 | 135 | 7   | 9   | 15  | 0 |
| CONTIG-046028 | 209 | 6   | 3   | 53  | 0 |
| CONTIG-046029 | 150 | 11  | 13  | 61  | 2 |
| CONTIG-046030 | 164 | 24  | 26  | 175 | 2 |
| CONTIG-046031 | 267 | 11  | 8   | 80  | 0 |
| CONTIG-046032 | 94  | 6   | 0   | 17  | 0 |
| CONTIG-046034 | 193 | 7   | 0   | 44  | 0 |
| CONTIG-046035 | 84  | 5   | 2   | 13  | 0 |
| CONTIG-046036 | 130 | 9   | 0   | 64  | 0 |
| CONTIG-046037 | 67  | 12  | 15  | 0   | 0 |
| CONTIG-046039 | 100 | 7   | 5   | 12  | 0 |
| CONTIG-046040 | 63  | 5   | 3   | 8   | 0 |
| CONTIG-046041 | 286 | 16  | 21  | 211 | 0 |
| CONTIG-046043 | 167 | 4   | 9   | 4   | 0 |
| CONTIG-046044 | 259 | 15  | 56  | 135 | 2 |
| CONTIG-046046 | 333 | 14  | 24  | 115 | 2 |
| CONTIG-046047 | 196 | 9   | 2   | 39  | 4 |
| CONTIG-046048 | 98  | 6   | 0   | 3   | 0 |
| CONTIG-046049 | 276 | 12  | 21  | 42  | 0 |
| CONTIG-046050 | 335 | 8   | 13  | 89  | 2 |
| CONTIG-046051 | 123 | 9   | 17  | 37  | 0 |
| CONTIG-046052 | 203 | 12  | 31  | 102 | 0 |
| CONTIG-046053 | 169 | 10  | 30  | 53  | 0 |
| CONTIG-046054 | 809 | 11  | 23  | 282 | 6 |
| CONTIG-046055 | 354 | 20  | 75  | 108 | 2 |
| CONTIG-046056 | 154 | 4   | 2   | 8   | 0 |
| CONTIG-046057 | 74  | 8   | 30  | 0   | 0 |
| CONTIG-046058 | 143 | 8   | 17  | 13  | 0 |
| CONTIG-046059 | 155 | 7   | 16  | 17  | 0 |
| CONTIG-046060 | 71  | 6   | 8   | 9   | 0 |
| CONTIG-046061 | 128 | 6   | 8   | 12  | 0 |
| CONTIG-046062 | 62  | 24  | 22  | 37  | 2 |
| CONTIG-046063 | 89  | 47  | 118 | 76  | 0 |
| CONTIG-046064 | 121 | 8   | 12  | 26  | 0 |
| CONTIG-046065 | 109 | 130 | 11  | 557 | 0 |
| CONTIG-046066 | 169 | 5   | 20  | 15  | 0 |
| CONTIG-046067 | 292 | 8   | 0   | 59  | 0 |
| CONTIG-046068 | 138 | 8   | 13  | 34  | 0 |
| CONTIG-046069 | 304 | 10  | 24  | 77  | 4 |
| CONTIG-046070 | 487 | 16  | 9   | 7   | 0 |
| CONTIG-046071 | 58  | 2   | 0   | 0   | 0 |
| CONTIG-046074 | 130 | 13  | 21  | 2   | 0 |
| CONTIG-046075 | 76  | 5   | 8   | 0   | 0 |
| CONTIG-046076 | 551 | 31  | 100 | 468 | 2 |
| CONTIG-046077 | 210 | 7   | 8   | 40  | 2 |

|               |     |     |    |     |     |
|---------------|-----|-----|----|-----|-----|
| CONTIG-046079 | 91  | 8   | 13 | 29  | 0   |
| CONTIG-046080 | 233 | 51  | 81 | 370 | 16  |
| CONTIG-046081 | 107 | 9   | 4  | 38  | 0   |
| CONTIG-046082 | 265 | 12  | 14 | 103 | 0   |
| CONTIG-046083 | 78  | 5   | 0  | 5   | 0   |
| CONTIG-046084 | 296 | 10  | 0  | 74  | 0   |
| CONTIG-046085 | 107 | 5   | 5  | 12  | 0   |
| CONTIG-046086 | 124 | 6   | 6  | 20  | 0   |
| CONTIG-046087 | 155 | 12  | 3  | 76  | 3   |
| CONTIG-046090 | 351 | 13  | 11 | 166 | 0   |
| CONTIG-046091 | 89  | 6   | 5  | 16  | 0   |
| CONTIG-046092 | 78  | 6   | 2  | 15  | 0   |
| CONTIG-046093 | 152 | 9   | 19 | 18  | 3   |
| CONTIG-046094 | 108 | 5   | 19 | 2   | 0   |
| CONTIG-046096 | 352 | 14  | 17 | 125 | 0   |
| CONTIG-046097 | 459 | 50  | 27 | 956 | 0   |
| CONTIG-046098 | 159 | 11  | 5  | 43  | 0   |
| CONTIG-046099 | 118 | 3   | 0  | 7   | 0   |
| CONTIG-046100 | 412 | 8   | 18 | 134 | 0   |
| CONTIG-046101 | 118 | 7   | 6  | 27  | 0   |
| CONTIG-046102 | 253 | 14  | 9  | 104 | 10  |
| CONTIG-046103 | 132 | 8   | 6  | 8   | 3   |
| CONTIG-046105 | 303 | 9   | 10 | 67  | 0   |
| CONTIG-046106 | 212 | 11  | 39 | 77  | 0   |
| CONTIG-046107 | 160 | 8   | 0  | 44  | 0   |
| CONTIG-046108 | 38  | 77  | 12 | 32  | 0   |
| CONTIG-046109 | 136 | 6   | 13 | 22  | 0   |
| CONTIG-046110 | 111 | 559 | 3  | 0   | 351 |
| CONTIG-046111 | 754 | 11  | 26 | 192 | 6   |
| CONTIG-046112 | 97  | 11  | 2  | 40  | 0   |
| CONTIG-046113 | 217 | 9   | 49 | 30  | 0   |
| CONTIG-046114 | 139 | 8   | 49 | 27  | 0   |
| CONTIG-046115 | 104 | 6   | 5  | 21  | 0   |
| CONTIG-046117 | 68  | 5   | 3  | 9   | 0   |
| CONTIG-046118 | 284 | 12  | 7  | 147 | 0   |
| CONTIG-046119 | 79  | 5   | 11 | 12  | 0   |
| CONTIG-046120 | 92  | 8   | 2  | 14  | 2   |
| CONTIG-046121 | 99  | 6   | 47 | 2   | 0   |
| CONTIG-046122 | 178 | 18  | 23 | 141 | 0   |
| CONTIG-046123 | 228 | 8   | 14 | 23  | 2   |
| CONTIG-046124 | 166 | 11  | 0  | 27  | 0   |
| CONTIG-046125 | 64  | 11  | 14 | 18  | 0   |
| CONTIG-046126 | 186 | 5   | 8  | 22  | 0   |
| CONTIG-046127 | 122 | 18  | 24 | 37  | 3   |
| CONTIG-046128 | 137 | 8   | 2  | 30  | 2   |
| CONTIG-046129 | 299 | 10  | 41 | 63  | 0   |
| CONTIG-046130 | 163 | 12  | 4  | 107 | 0   |

|               |     |     |     |      |      |
|---------------|-----|-----|-----|------|------|
| CONTIG-046131 | 103 | 12  | 56  | 0    | 0    |
| CONTIG-046132 | 60  | 79  | 43  | 130  | 0    |
| CONTIG-046133 | 59  | 8   | 29  | 0    | 0    |
| CONTIG-046134 | 372 | 14  | 26  | 143  | 2    |
| CONTIG-046135 | 229 | 6   | 40  | 0    | 2    |
| CONTIG-046136 | 84  | 10  | 3   | 18   | 0    |
| CONTIG-046137 | 64  | 12  | 0   | 0    | 0    |
| CONTIG-046139 | 149 | 9   | 13  | 35   | 0    |
| CONTIG-046140 | 79  | 22  | 24  | 87   | 0    |
| CONTIG-046141 | 68  | 8   | 16  | 6    | 0    |
| CONTIG-046142 | 209 | 14  | 7   | 172  | 0    |
| CONTIG-046143 | 845 | 15  | 13  | 378  | 14   |
| CONTIG-046145 | 865 | 19  | 37  | 412  | 3    |
| CONTIG-046146 | 107 | 9   | 3   | 18   | 0    |
| CONTIG-046147 | 120 | 281 | 558 | 1184 | 8    |
| CONTIG-046148 | 347 | 144 | 3   | 0    | 1208 |
| CONTIG-046149 | 72  | 5   | 12  | 6    | 0    |
| CONTIG-046150 | 160 | 7   | 8   | 27   | 0    |
| CONTIG-046151 | 193 | 19  | 28  | 79   | 0    |
| CONTIG-046152 | 416 | 23  | 25  | 50   | 0    |
| CONTIG-046153 | 185 | 62  | 65  | 325  | 14   |
| CONTIG-046154 | 75  | 4   | 2   | 4    | 0    |
| CONTIG-046155 | 65  | 3   | 2   | 6    | 0    |
| CONTIG-046156 | 80  | 83  | 16  | 144  | 14   |
| CONTIG-046157 | 124 | 8   | 26  | 0    | 0    |
| CONTIG-046158 | 350 | 13  | 51  | 152  | 0    |
| CONTIG-046159 | 75  | 12  | 46  | 16   | 0    |
| CONTIG-046160 | 255 | 11  | 22  | 78   | 0    |
| CONTIG-046161 | 166 | 9   | 22  | 36   | 0    |
| CONTIG-046162 | 80  | 10  | 10  | 32   | 0    |
| CONTIG-046163 | 162 | 8   | 14  | 36   | 0    |
| CONTIG-046169 | 120 | 19  | 14  | 0    | 23   |
| CONTIG-046170 | 128 | 5   | 8   | 18   | 0    |
| CONTIG-046171 | 97  | 6   | 9   | 18   | 0    |
| CONTIG-046174 | 892 | 14  | 6   | 132  | 0    |
| CONTIG-046175 | 79  | 19  | 21  | 37   | 2    |
| CONTIG-046176 | 246 | 7   | 23  | 42   | 0    |
| CONTIG-046177 | 101 | 7   | 11  | 19   | 0    |
| CONTIG-046178 | 148 | 16  | 4   | 6    | 0    |
| CONTIG-046179 | 356 | 29  | 31  | 157  | 0    |
| CONTIG-046180 | 166 | 6   | 5   | 35   | 0    |
| CONTIG-046181 | 84  | 53  | 83  | 81   | 0    |
| CONTIG-046182 | 64  | 6   | 5   | 6    | 0    |
| CONTIG-046183 | 79  | 8   | 4   | 15   | 0    |
| CONTIG-046184 | 63  | 4   | 0   | 4    | 0    |
| CONTIG-046185 | 423 | 15  | 80  | 123  | 2    |
| CONTIG-046186 | 219 | 3   | 5   | 11   | 0    |

|               |     |    |     |     |    |
|---------------|-----|----|-----|-----|----|
| CONTIG-046187 | 307 | 51 | 47  | 613 | 0  |
| CONTIG-046189 | 396 | 20 | 23  | 144 | 16 |
| CONTIG-046190 | 278 | 22 | 15  | 240 | 2  |
| CONTIG-046191 | 420 | 20 | 10  | 362 | 2  |
| CONTIG-046192 | 223 | 6  | 3   | 36  | 0  |
| CONTIG-046193 | 99  | 4  | 6   | 7   | 0  |
| CONTIG-046194 | 117 | 10 | 5   | 19  | 0  |
| CONTIG-046195 | 120 | 7  | 11  | 28  | 0  |
| CONTIG-046196 | 172 | 3  | 6   | 2   | 0  |
| CONTIG-046197 | 91  | 10 | 2   | 31  | 0  |
| CONTIG-046204 | 274 | 13 | 17  | 162 | 0  |
| CONTIG-046205 | 107 | 9  | 9   | 26  | 0  |
| CONTIG-046206 | 59  | 3  | 0   | 0   | 0  |
| CONTIG-046207 | 79  | 10 | 7   | 33  | 0  |
| CONTIG-046208 | 69  | 5  | 6   | 8   | 0  |
| CONTIG-046209 | 70  | 5  | 7   | 4   | 0  |
| CONTIG-046210 | 121 | 6  | 0   | 18  | 0  |
| CONTIG-046211 | 72  | 5  | 2   | 9   | 0  |
| CONTIG-046212 | 98  | 8  | 32  | 2   | 0  |
| CONTIG-046213 | 92  | 8  | 4   | 18  | 0  |
| CONTIG-046214 | 120 | 11 | 9   | 49  | 0  |
| CONTIG-046216 | 73  | 5  | 4   | 9   | 0  |
| CONTIG-046217 | 222 | 5  | 28  | 20  | 0  |
| CONTIG-046219 | 922 | 24 | 101 | 736 | 2  |
| CONTIG-046220 | 128 | 7  | 5   | 25  | 0  |
| CONTIG-046221 | 365 | 27 | 15  | 404 | 10 |
| CONTIG-046222 | 61  | 2  | 2   | 2   | 0  |
| CONTIG-046223 | 144 | 18 | 4   | 32  | 0  |
| CONTIG-046224 | 349 | 28 | 59  | 274 | 10 |
| CONTIG-046225 | 66  | 12 | 11  | 24  | 0  |
| CONTIG-046226 | 124 | 5  | 4   | 12  | 0  |
| CONTIG-046227 | 757 | 17 | 3   | 0   | 0  |
| CONTIG-046228 | 99  | 6  | 26  | 11  | 0  |
| CONTIG-046229 | 104 | 15 | 23  | 50  | 0  |
| CONTIG-046230 | 161 | 8  | 5   | 44  | 0  |
| CONTIG-046231 | 118 | 75 | 19  | 366 | 2  |
| CONTIG-046232 | 59  | 9  | 5   | 15  | 0  |
| CONTIG-046233 | 120 | 11 | 6   | 26  | 0  |
| CONTIG-046234 | 391 | 89 | 135 | 997 | 0  |
| CONTIG-046235 | 194 | 6  | 15  | 33  | 0  |
| CONTIG-046236 | 111 | 11 | 5   | 27  | 0  |
| CONTIG-046237 | 81  | 17 | 20  | 39  | 0  |
| CONTIG-046238 | 59  | 7  | 14  | 0   | 0  |
| CONTIG-046239 | 107 | 7  | 12  | 14  | 0  |
| CONTIG-046240 | 180 | 9  | 16  | 42  | 0  |
| CONTIG-046248 | 77  | 8  | 11  | 20  | 0  |
| CONTIG-046249 | 152 | 7  | 0   | 34  | 0  |

|               |      |    |     |      |     |
|---------------|------|----|-----|------|-----|
| CONTIG-046250 | 130  | 10 | 26  | 34   | 0   |
| CONTIG-046251 | 70   | 13 | 15  | 10   | 0   |
| CONTIG-046252 | 152  | 6  | 40  | 8    | 0   |
| CONTIG-046253 | 346  | 7  | 15  | 51   | 0   |
| CONTIG-046254 | 93   | 5  | 19  | 2    | 0   |
| CONTIG-046256 | 72   | 7  | 4   | 15   | 0   |
| CONTIG-046257 | 241  | 6  | 14  | 24   | 4   |
| CONTIG-046258 | 60   | 7  | 6   | 11   | 0   |
| CONTIG-046260 | 201  | 5  | 3   | 30   | 0   |
| CONTIG-046261 | 70   | 8  | 3   | 12   | 0   |
| CONTIG-046262 | 86   | 15 | 40  | 46   | 0   |
| CONTIG-046263 | 98   | 6  | 26  | 4    | 0   |
| CONTIG-046264 | 302  | 14 | 17  | 74   | 0   |
| CONTIG-046265 | 241  | 11 | 22  | 99   | 0   |
| CONTIG-046266 | 76   | 15 | 3   | 17   | 0   |
| CONTIG-046268 | 196  | 8  | 44  | 36   | 0   |
| CONTIG-046269 | 99   | 13 | 10  | 29   | 2   |
| CONTIG-046270 | 602  | 17 | 55  | 227  | 2   |
| CONTIG-046271 | 244  | 18 | 8   | 2    | 0   |
| CONTIG-046272 | 165  | 56 | 101 | 136  | 0   |
| CONTIG-046273 | 529  | 7  | 3   | 144  | 2   |
| CONTIG-046274 | 130  | 8  | 3   | 0    | 8   |
| CONTIG-046275 | 804  | 16 | 46  | 306  | 2   |
| CONTIG-046276 | 851  | 21 | 60  | 570  | 25  |
| CONTIG-046278 | 267  | 23 | 47  | 183  | 0   |
| CONTIG-046279 | 377  | 7  | 15  | 70   | 2   |
| CONTIG-046280 | 132  | 4  | 2   | 9    | 0   |
| CONTIG-046281 | 93   | 11 | 4   | 41   | 0   |
| CONTIG-046282 | 119  | 4  | 2   | 12   | 0   |
| CONTIG-046283 | 168  | 11 | 6   | 54   | 0   |
| CONTIG-046284 | 111  | 16 | 35  | 34   | 0   |
| CONTIG-046285 | 142  | 5  | 5   | 23   | 2   |
| CONTIG-046286 | 392  | 11 | 24  | 85   | 0   |
| CONTIG-046287 | 78   | 7  | 23  | 9    | 0   |
| CONTIG-046288 | 86   | 8  | 6   | 20   | 0   |
| CONTIG-046289 | 126  | 7  | 0   | 14   | 0   |
| CONTIG-046290 | 63   | 9  | 11  | 11   | 0   |
| CONTIG-046291 | 301  | 48 | 4   | 0    | 122 |
| CONTIG-046292 | 101  | 6  | 9   | 12   | 0   |
| CONTIG-046293 | 139  | 11 | 8   | 0    | 0   |
| CONTIG-046294 | 231  | 9  | 2   | 64   | 2   |
| CONTIG-046295 | 103  | 7  | 34  | 17   | 0   |
| CONTIG-046298 | 560  | 35 | 48  | 1115 | 0   |
| CONTIG-046299 | 108  | 15 | 21  | 35   | 0   |
| CONTIG-046300 | 73   | 7  | 12  | 4    | 0   |
| CONTIG-046301 | 305  | 14 | 38  | 99   | 2   |
| CONTIG-046302 | 1164 | 22 | 18  | 1075 | 6   |

|               |      |     |     |     |     |
|---------------|------|-----|-----|-----|-----|
| CONTIG-046303 | 134  | 9   | 8   | 32  | 0   |
| CONTIG-046304 | 78   | 8   | 2   | 14  | 0   |
| CONTIG-046305 | 317  | 10  | 11  | 146 | 0   |
| CONTIG-046306 | 153  | 57  | 186 | 143 | 0   |
| CONTIG-046307 | 889  | 17  | 76  | 604 | 0   |
| CONTIG-046309 | 66   | 12  | 0   | 20  | 0   |
| CONTIG-046312 | 584  | 15  | 16  | 58  | 0   |
| CONTIG-046313 | 49   | 454 | 38  | 560 | 0   |
| CONTIG-046315 | 79   | 6   | 0   | 17  | 0   |
| CONTIG-046316 | 86   | 3   | 2   | 0   | 0   |
| CONTIG-046317 | 158  | 6   | 6   | 34  | 0   |
| CONTIG-046318 | 97   | 5   | 0   | 16  | 0   |
| CONTIG-046319 | 80   | 4   | 12  | 0   | 0   |
| CONTIG-046320 | 82   | 4   | 0   | 7   | 0   |
| CONTIG-046321 | 87   | 4   | 5   | 12  | 0   |
| CONTIG-046322 | 463  | 15  | 33  | 342 | 0   |
| CONTIG-046323 | 126  | 4   | 4   | 8   | 0   |
| CONTIG-046325 | 119  | 6   | 17  | 17  | 0   |
| CONTIG-046326 | 155  | 4   | 4   | 0   | 2   |
| CONTIG-046327 | 125  | 13  | 7   | 38  | 0   |
| CONTIG-046328 | 348  | 44  | 101 | 148 | 7   |
| CONTIG-046329 | 66   | 5   | 0   | 8   | 0   |
| CONTIG-046330 | 75   | 9   | 13  | 8   | 0   |
| CONTIG-046331 | 251  | 13  | 9   | 103 | 0   |
| CONTIG-046332 | 376  | 10  | 21  | 137 | 0   |
| CONTIG-046333 | 220  | 9   | 2   | 41  | 0   |
| CONTIG-046334 | 490  | 9   | 19  | 205 | 0   |
| CONTIG-046338 | 180  | 8   | 8   | 39  | 0   |
| CONTIG-046339 | 191  | 10  | 11  | 74  | 0   |
| CONTIG-046340 | 240  | 9   | 14  | 61  | 0   |
| CONTIG-046341 | 291  | 10  | 6   | 110 | 0   |
| CONTIG-046343 | 203  | 6   | 0   | 17  | 0   |
| CONTIG-046344 | 1094 | 35  | 2   | 0   | 315 |
| CONTIG-046346 | 684  | 27  | 115 | 733 | 7   |
| CONTIG-046347 | 61   | 4   | 6   | 2   | 0   |
| CONTIG-046348 | 247  | 8   | 9   | 71  | 2   |
| CONTIG-046353 | 130  | 8   | 12  | 32  | 0   |
| CONTIG-046354 | 63   | 11  | 15  | 14  | 0   |
| CONTIG-046355 | 570  | 12  | 26  | 176 | 2   |
| CONTIG-046356 | 223  | 10  | 40  | 59  | 0   |
| CONTIG-046357 | 112  | 4   | 10  | 7   | 0   |
| CONTIG-046358 | 117  | 8   | 8   | 16  | 0   |
| CONTIG-046359 | 70   | 14  | 2   | 40  | 0   |
| CONTIG-046360 | 51   | 176 | 16  | 156 | 6   |
| CONTIG-046361 | 114  | 9   | 2   | 20  | 0   |
| CONTIG-046362 | 271  | 15  | 24  | 120 | 2   |
| CONTIG-046363 | 200  | 10  | 5   | 66  | 0   |

|               |     |     |    |     |    |
|---------------|-----|-----|----|-----|----|
| CONTIG-046364 | 403 | 6   | 7  | 68  | 2  |
| CONTIG-046365 | 69  | 3   | 2  | 4   | 0  |
| CONTIG-046366 | 107 | 8   | 50 | 13  | 0  |
| CONTIG-046367 | 60  | 3   | 4  | 6   | 0  |
| CONTIG-046376 | 346 | 11  | 21 | 126 | 2  |
| CONTIG-046377 | 226 | 8   | 53 | 40  | 0  |
| CONTIG-046378 | 127 | 5   | 4  | 11  | 0  |
| CONTIG-046379 | 324 | 10  | 41 | 89  | 4  |
| CONTIG-046380 | 474 | 21  | 50 | 459 | 2  |
| CONTIG-046381 | 67  | 10  | 36 | 10  | 0  |
| CONTIG-046382 | 127 | 5   | 0  | 18  | 0  |
| CONTIG-046383 | 87  | 5   | 0  | 8   | 0  |
| CONTIG-046384 | 85  | 6   | 0  | 11  | 0  |
| CONTIG-046385 | 75  | 3   | 0  | 7   | 0  |
| CONTIG-046386 | 130 | 6   | 3  | 23  | 0  |
| CONTIG-046387 | 403 | 15  | 16 | 100 | 11 |
| CONTIG-046388 | 58  | 14  | 25 | 12  | 0  |
| CONTIG-046390 | 150 | 5   | 3  | 31  | 0  |
| CONTIG-046391 | 142 | 6   | 7  | 33  | 0  |
| CONTIG-046392 | 303 | 6   | 0  | 2   | 0  |
| CONTIG-046393 | 129 | 10  | 18 | 46  | 0  |
| CONTIG-046394 | 144 | 6   | 20 | 19  | 0  |
| CONTIG-046395 | 250 | 10  | 17 | 54  | 2  |
| CONTIG-046396 | 211 | 8   | 24 | 37  | 0  |
| CONTIG-046397 | 80  | 5   | 4  | 0   | 0  |
| CONTIG-046398 | 95  | 34  | 2  | 128 | 0  |
| CONTIG-046401 | 59  | 13  | 11 | 21  | 0  |
| CONTIG-046403 | 64  | 5   | 14 | 4   | 0  |
| CONTIG-046404 | 110 | 30  | 18 | 153 | 0  |
| CONTIG-046405 | 125 | 7   | 0  | 33  | 0  |
| CONTIG-046406 | 84  | 21  | 12 | 60  | 0  |
| CONTIG-046407 | 63  | 9   | 11 | 19  | 0  |
| CONTIG-046408 | 92  | 150 | 16 | 316 | 0  |
| CONTIG-046409 | 230 | 8   | 2  | 89  | 2  |
| CONTIG-046410 | 179 | 14  | 57 | 63  | 0  |
| CONTIG-046414 | 390 | 11  | 47 | 63  | 7  |
| CONTIG-046415 | 390 | 22  | 73 | 330 | 2  |
| CONTIG-046416 | 169 | 9   | 2  | 50  | 0  |
| CONTIG-046417 | 334 | 15  | 14 | 182 | 2  |
| CONTIG-046419 | 147 | 6   | 0  | 14  | 0  |
| CONTIG-046420 | 144 | 8   | 0  | 46  | 0  |
| CONTIG-046421 | 197 | 14  | 6  | 93  | 0  |
| CONTIG-046422 | 58  | 9   | 0  | 11  | 0  |
| CONTIG-046423 | 88  | 5   | 6  | 8   | 0  |
| CONTIG-046424 | 115 | 10  | 13 | 29  | 2  |
| CONTIG-046425 | 58  | 2   | 0  | 2   | 0  |
| CONTIG-046426 | 179 | 8   | 4  | 26  | 5  |

|               |      |    |     |     |   |
|---------------|------|----|-----|-----|---|
| CONTIG-046427 | 87   | 6  | 25  | 21  | 0 |
| CONTIG-046428 | 328  | 45 | 29  | 60  | 0 |
| CONTIG-046429 | 1026 | 18 | 8   | 21  | 2 |
| CONTIG-046430 | 90   | 4  | 11  | 0   | 0 |
| CONTIG-046431 | 273  | 12 | 11  | 88  | 0 |
| CONTIG-046432 | 71   | 21 | 15  | 22  | 0 |
| CONTIG-046434 | 352  | 11 | 4   | 117 | 0 |
| CONTIG-046435 | 473  | 7  | 26  | 93  | 0 |
| CONTIG-046436 | 140  | 5  | 4   | 8   | 0 |
| CONTIG-046437 | 129  | 4  | 7   | 8   | 2 |
| CONTIG-046438 | 221  | 59 | 5   | 407 | 0 |
| CONTIG-046439 | 77   | 10 | 45  | 0   | 0 |
| CONTIG-046441 | 203  | 7  | 2   | 59  | 0 |
| CONTIG-046442 | 75   | 11 | 7   | 4   | 0 |
| CONTIG-046443 | 77   | 5  | 4   | 11  | 0 |
| CONTIG-046449 | 279  | 6  | 10  | 38  | 0 |
| CONTIG-046450 | 162  | 14 | 12  | 87  | 0 |
| CONTIG-046451 | 71   | 11 | 4   | 25  | 0 |
| CONTIG-046452 | 346  | 8  | 9   | 102 | 0 |
| CONTIG-046453 | 98   | 9  | 3   | 12  | 0 |
| CONTIG-046454 | 98   | 9  | 42  | 2   | 0 |
| CONTIG-046455 | 333  | 18 | 0   | 5   | 0 |
| CONTIG-046456 | 175  | 9  | 40  | 31  | 0 |
| CONTIG-046457 | 117  | 6  | 10  | 14  | 0 |
| CONTIG-046458 | 116  | 11 | 5   | 56  | 0 |
| CONTIG-046460 | 191  | 13 | 6   | 49  | 0 |
| CONTIG-046462 | 87   | 24 | 54  | 34  | 0 |
| CONTIG-046466 | 462  | 17 | 35  | 220 | 4 |
| CONTIG-046467 | 432  | 13 | 25  | 224 | 2 |
| CONTIG-046471 | 199  | 14 | 20  | 13  | 0 |
| CONTIG-046472 | 67   | 4  | 2   | 5   | 0 |
| CONTIG-046473 | 228  | 41 | 80  | 300 | 0 |
| CONTIG-046474 | 160  | 13 | 11  | 70  | 0 |
| CONTIG-046475 | 597  | 24 | 56  | 571 | 0 |
| CONTIG-046476 | 97   | 12 | 6   | 56  | 0 |
| CONTIG-046481 | 130  | 11 | 8   | 24  | 0 |
| CONTIG-046482 | 149  | 8  | 9   | 54  | 0 |
| CONTIG-046483 | 39   | 42 | 112 | 6   | 0 |
| CONTIG-046485 | 84   | 10 | 26  | 13  | 0 |
| CONTIG-046486 | 1111 | 12 | 37  | 560 | 4 |
| CONTIG-046494 | 124  | 15 | 2   | 48  | 2 |
| CONTIG-046495 | 156  | 5  | 10  | 28  | 0 |
| CONTIG-046496 | 140  | 9  | 24  | 5   | 0 |
| CONTIG-046497 | 80   | 3  | 10  | 2   | 0 |
| CONTIG-046498 | 229  | 8  | 7   | 28  | 0 |
| CONTIG-046499 | 160  | 12 | 68  | 15  | 0 |
| CONTIG-046500 | 77   | 11 | 4   | 19  | 0 |



|               |      |    |     |     |    |
|---------------|------|----|-----|-----|----|
| CONTIG-046503 | 141  | 8  | 2   | 30  | 2  |
| CONTIG-046504 | 106  | 5  | 9   | 17  | 0  |
| CONTIG-046505 | 130  | 7  | 6   | 10  | 2  |
| CONTIG-046506 | 84   | 7  | 6   | 13  | 0  |
| CONTIG-046507 | 591  | 41 | 37  | 746 | 55 |
| CONTIG-046508 | 164  | 8  | 14  | 8   | 0  |
| CONTIG-046509 | 226  | 7  | 34  | 25  | 0  |
| CONTIG-046511 | 60   | 8  | 4   | 6   | 0  |
| CONTIG-046514 | 146  | 7  | 2   | 4   | 0  |
| CONTIG-046515 | 245  | 16 | 14  | 18  | 0  |
| CONTIG-046518 | 194  | 6  | 5   | 40  | 0  |
| CONTIG-046520 | 84   | 7  | 5   | 9   | 4  |
| CONTIG-046521 | 64   | 20 | 9   | 13  | 0  |
| CONTIG-046522 | 189  | 4  | 8   | 23  | 0  |
| CONTIG-046523 | 278  | 9  | 19  | 76  | 0  |
| CONTIG-046524 | 89   | 12 | 37  | 17  | 0  |
| CONTIG-046525 | 97   | 2  | 0   | 3   | 0  |
| CONTIG-046526 | 89   | 7  | 22  | 7   | 0  |
| CONTIG-046527 | 171  | 6  | 13  | 31  | 0  |
| CONTIG-046528 | 61   | 7  | 4   | 7   | 0  |
| CONTIG-046529 | 293  | 9  | 34  | 85  | 0  |
| CONTIG-046530 | 138  | 7  | 12  | 17  | 0  |
| CONTIG-046531 | 192  | 7  | 2   | 36  | 0  |
| CONTIG-046532 | 89   | 17 | 29  | 26  | 3  |
| CONTIG-046533 | 155  | 22 | 25  | 64  | 2  |
| CONTIG-046534 | 145  | 5  | 9   | 10  | 2  |
| CONTIG-046535 | 144  | 6  | 24  | 12  | 0  |
| CONTIG-046536 | 173  | 17 | 121 | 28  | 0  |
| CONTIG-046537 | 104  | 7  | 13  | 22  | 0  |
| CONTIG-046538 | 118  | 8  | 15  | 19  | 0  |
| CONTIG-046539 | 90   | 3  | 3   | 3   | 0  |
| CONTIG-046540 | 472  | 33 | 23  | 930 | 0  |
| CONTIG-046542 | 278  | 24 | 71  | 128 | 0  |
| CONTIG-046543 | 145  | 7  | 4   | 21  | 0  |
| CONTIG-046545 | 75   | 13 | 49  | 0   | 0  |
| CONTIG-046546 | 119  | 9  | 40  | 14  | 0  |
| CONTIG-046547 | 104  | 10 | 2   | 23  | 4  |
| CONTIG-046548 | 269  | 7  | 2   | 28  | 2  |
| CONTIG-046549 | 882  | 21 | 28  | 771 | 10 |
| CONTIG-046550 | 96   | 3  | 0   | 8   | 0  |
| CONTIG-046551 | 1009 | 10 | 26  | 196 | 2  |
| CONTIG-046552 | 456  | 11 | 23  | 222 | 0  |
| CONTIG-046553 | 183  | 6  | 12  | 9   | 0  |
| CONTIG-046554 | 93   | 4  | 17  | 5   | 0  |
| CONTIG-046555 | 82   | 4  | 9   | 8   | 0  |
| CONTIG-046556 | 145  | 9  | 7   | 45  | 0  |
| CONTIG-046557 | 82   | 5  | 2   | 6   | 0  |

|               |     |     |    |     |    |
|---------------|-----|-----|----|-----|----|
| CONTIG-046559 | 79  | 5   | 5  | 4   | 0  |
| CONTIG-046561 | 79  | 5   | 0  | 13  | 0  |
| CONTIG-046565 | 199 | 16  | 20 | 135 | 0  |
| CONTIG-046566 | 156 | 10  | 6  | 52  | 0  |
| CONTIG-046567 | 295 | 12  | 54 | 78  | 0  |
| CONTIG-046568 | 374 | 7   | 9  | 74  | 2  |
| CONTIG-046569 | 231 | 11  | 7  | 119 | 0  |
| CONTIG-046570 | 206 | 10  | 17 | 78  | 0  |
| CONTIG-046571 | 220 | 12  | 11 | 83  | 0  |
| CONTIG-046572 | 60  | 2   | 5  | 0   | 0  |
| CONTIG-046573 | 81  | 7   | 5  | 15  | 0  |
| CONTIG-046574 | 96  | 3   | 5  | 5   | 0  |
| CONTIG-046575 | 134 | 11  | 11 | 45  | 0  |
| CONTIG-046576 | 193 | 10  | 75 | 21  | 0  |
| CONTIG-046577 | 201 | 7   | 3  | 50  | 0  |
| CONTIG-046579 | 478 | 26  | 62 | 710 | 0  |
| CONTIG-046580 | 147 | 8   | 5  | 45  | 0  |
| CONTIG-046581 | 75  | 5   | 4  | 6   | 0  |
| CONTIG-046583 | 279 | 10  | 19 | 36  | 0  |
| CONTIG-046584 | 107 | 7   | 8  | 15  | 0  |
| CONTIG-046585 | 127 | 10  | 43 | 40  | 0  |
| CONTIG-046586 | 69  | 6   | 2  | 16  | 0  |
| CONTIG-046587 | 154 | 4   | 8  | 17  | 0  |
| CONTIG-046588 | 368 | 22  | 0  | 0   | 53 |
| CONTIG-046589 | 98  | 15  | 6  | 54  | 2  |
| CONTIG-046590 | 379 | 21  | 17 | 317 | 0  |
| CONTIG-046591 | 136 | 6   | 5  | 21  | 0  |
| CONTIG-046593 | 312 | 13  | 19 | 167 | 0  |
| CONTIG-046594 | 631 | 14  | 67 | 174 | 2  |
| CONTIG-046595 | 58  | 4   | 7  | 6   | 0  |
| CONTIG-046596 | 37  | 130 | 24 | 267 | 0  |
| CONTIG-046598 | 361 | 7   | 2  | 91  | 0  |
| CONTIG-046599 | 456 | 15  | 61 | 195 | 0  |
| CONTIG-046600 | 65  | 2   | 0  | 2   | 0  |
| CONTIG-046601 | 126 | 6   | 5  | 21  | 0  |
| CONTIG-046608 | 222 | 11  | 0  | 65  | 2  |
| CONTIG-046609 | 103 | 27  | 2  | 91  | 0  |
| CONTIG-046610 | 70  | 375 | 42 | 219 | 0  |
| CONTIG-046611 | 123 | 7   | 8  | 18  | 0  |
| CONTIG-046612 | 80  | 8   | 16 | 12  | 0  |
| CONTIG-046613 | 212 | 8   | 3  | 2   | 0  |
| CONTIG-046614 | 843 | 20  | 43 | 707 | 8  |
| CONTIG-046615 | 76  | 11  | 40 | 4   | 0  |
| CONTIG-046616 | 84  | 3   | 0  | 2   | 0  |
| CONTIG-046617 | 92  | 3   | 5  | 6   | 0  |
| CONTIG-046618 | 314 | 16  | 7  | 247 | 0  |
| CONTIG-046620 | 107 | 6   | 5  | 12  | 2  |

|               |     |     |    |     |    |
|---------------|-----|-----|----|-----|----|
| CONTIG-046621 | 172 | 11  | 2  | 62  | 0  |
| CONTIG-046622 | 415 | 18  | 47 | 213 | 0  |
| CONTIG-046623 | 55  | 174 | 50 | 248 | 0  |
| CONTIG-046624 | 229 | 64  | 53 | 568 | 9  |
| CONTIG-046625 | 329 | 7   | 7  | 59  | 0  |
| CONTIG-046626 | 71  | 8   | 20 | 13  | 0  |
| CONTIG-046627 | 98  | 8   | 13 | 16  | 0  |
| CONTIG-046628 | 141 | 12  | 17 | 21  | 0  |
| CONTIG-046629 | 391 | 20  | 54 | 153 | 0  |
| CONTIG-046630 | 60  | 2   | 3  | 2   | 0  |
| CONTIG-046631 | 120 | 7   | 4  | 6   | 0  |
| CONTIG-046634 | 129 | 9   | 9  | 37  | 0  |
| CONTIG-046635 | 113 | 7   | 17 | 33  | 0  |
| CONTIG-046637 | 72  | 5   | 5  | 13  | 0  |
| CONTIG-046638 | 100 | 11  | 7  | 40  | 0  |
| CONTIG-046640 | 194 | 13  | 3  | 82  | 2  |
| CONTIG-046641 | 42  | 185 | 23 | 165 | 0  |
| CONTIG-046642 | 79  | 8   | 21 | 6   | 0  |
| CONTIG-046643 | 153 | 9   | 2  | 17  | 2  |
| CONTIG-046644 | 282 | 7   | 2  | 64  | 0  |
| CONTIG-046645 | 204 | 6   | 2  | 0   | 0  |
| CONTIG-046646 | 86  | 7   | 26 | 10  | 0  |
| CONTIG-046647 | 62  | 6   | 5  | 12  | 0  |
| CONTIG-046650 | 68  | 14  | 2  | 21  | 0  |
| CONTIG-046651 | 107 | 8   | 13 | 23  | 0  |
| CONTIG-046652 | 87  | 4   | 2  | 7   | 0  |
| CONTIG-046653 | 58  | 82  | 6  | 99  | 2  |
| CONTIG-046654 | 609 | 14  | 28 | 168 | 15 |
| CONTIG-046655 | 71  | 13  | 16 | 38  | 0  |
| CONTIG-046656 | 100 | 64  | 12 | 158 | 2  |
| CONTIG-046658 | 164 | 11  | 5  | 37  | 0  |
| CONTIG-046659 | 179 | 9   | 0  | 47  | 0  |
| CONTIG-046660 | 61  | 8   | 27 | 8   | 0  |
| CONTIG-046661 | 151 | 5   | 7  | 21  | 0  |
| CONTIG-046662 | 194 | 7   | 22 | 41  | 0  |
| CONTIG-046663 | 169 | 6   | 8  | 27  | 0  |
| CONTIG-046664 | 76  | 6   | 6  | 3   | 0  |
| CONTIG-046665 | 468 | 11  | 44 | 155 | 0  |
| CONTIG-046666 | 98  | 11  | 5  | 37  | 0  |
| CONTIG-046667 | 95  | 4   | 0  | 6   | 0  |
| CONTIG-046671 | 297 | 13  | 78 | 105 | 0  |
| CONTIG-046672 | 103 | 9   | 6  | 32  | 0  |
| CONTIG-046673 | 37  | 782 | 20 | 230 | 0  |
| CONTIG-046674 | 71  | 6   | 13 | 7   | 0  |
| CONTIG-046675 | 267 | 7   | 13 | 49  | 0  |
| CONTIG-046676 | 133 | 22  | 35 | 63  | 0  |
| CONTIG-046678 | 70  | 6   | 11 | 0   | 2  |

|               |     |    |     |     |    |
|---------------|-----|----|-----|-----|----|
| CONTIG-046679 | 47  | 36 | 9   | 46  | 0  |
| CONTIG-046681 | 131 | 6  | 13  | 30  | 0  |
| CONTIG-046682 | 464 | 9  | 0   | 0   | 13 |
| CONTIG-046683 | 130 | 10 | 12  | 52  | 0  |
| CONTIG-046684 | 80  | 10 | 0   | 33  | 0  |
| CONTIG-046685 | 65  | 16 | 2   | 46  | 0  |
| CONTIG-046686 | 178 | 24 | 32  | 153 | 0  |
| CONTIG-046687 | 63  | 5  | 0   | 15  | 0  |
| CONTIG-046688 | 148 | 8  | 8   | 17  | 0  |
| CONTIG-046689 | 68  | 8  | 12  | 0   | 0  |
| CONTIG-046690 | 107 | 9  | 8   | 22  | 0  |
| CONTIG-046691 | 147 | 8  | 11  | 41  | 0  |
| CONTIG-046692 | 83  | 9  | 3   | 0   | 0  |
| CONTIG-046693 | 113 | 5  | 5   | 12  | 0  |
| CONTIG-046694 | 191 | 18 | 7   | 4   | 0  |
| CONTIG-046695 | 197 | 24 | 15  | 190 | 2  |
| CONTIG-046696 | 84  | 3  | 0   | 4   | 2  |
| CONTIG-046697 | 507 | 8  | 14  | 48  | 2  |
| CONTIG-046698 | 95  | 5  | 5   | 15  | 0  |
| CONTIG-046699 | 272 | 13 | 4   | 89  | 3  |
| CONTIG-046700 | 117 | 5  | 6   | 18  | 0  |
| CONTIG-046701 | 106 | 11 | 13  | 11  | 0  |
| CONTIG-046703 | 105 | 8  | 34  | 13  | 0  |
| CONTIG-046704 | 111 | 8  | 8   | 11  | 0  |
| CONTIG-046705 | 142 | 17 | 24  | 79  | 0  |
| CONTIG-046706 | 78  | 21 | 43  | 31  | 0  |
| CONTIG-046707 | 84  | 39 | 18  | 4   | 0  |
| CONTIG-046708 | 139 | 8  | 2   | 28  | 0  |
| CONTIG-046709 | 72  | 11 | 10  | 22  | 0  |
| CONTIG-046712 | 307 | 18 | 12  | 125 | 0  |
| CONTIG-046713 | 368 | 35 | 144 | 354 | 10 |
| CONTIG-046714 | 107 | 9  | 8   | 19  | 0  |
| CONTIG-046715 | 90  | 19 | 9   | 87  | 0  |
| CONTIG-046716 | 222 | 6  | 8   | 29  | 0  |
| CONTIG-046717 | 244 | 12 | 27  | 16  | 0  |
| CONTIG-046718 | 59  | 3  | 4   | 0   | 0  |
| CONTIG-046719 | 170 | 6  | 3   | 39  | 0  |
| CONTIG-046720 | 63  | 9  | 10  | 0   | 0  |
| CONTIG-046721 | 147 | 8  | 10  | 21  | 0  |
| CONTIG-046722 | 232 | 6  | 8   | 42  | 0  |
| CONTIG-046723 | 546 | 34 | 34  | 883 | 16 |
| CONTIG-046724 | 441 | 12 | 33  | 179 | 7  |
| CONTIG-046725 | 98  | 66 | 55  | 164 | 2  |
| CONTIG-046726 | 88  | 3  | 3   | 0   | 0  |
| CONTIG-046727 | 503 | 8  | 60  | 82  | 0  |
| CONTIG-046728 | 179 | 10 | 46  | 66  | 0  |
| CONTIG-046729 | 165 | 12 | 11  | 56  | 0  |

|               |     |     |    |     |     |
|---------------|-----|-----|----|-----|-----|
| CONTIG-046730 | 174 | 7   | 2  | 24  | 0   |
| CONTIG-046731 | 121 | 16  | 27 | 49  | 0   |
| CONTIG-046732 | 192 | 13  | 3  | 82  | 0   |
| CONTIG-046733 | 106 | 6   | 6  | 16  | 0   |
| CONTIG-046734 | 278 | 18  | 12 | 195 | 0   |
| CONTIG-046735 | 801 | 11  | 42 | 296 | 4   |
| CONTIG-046736 | 213 | 15  | 22 | 93  | 0   |
| CONTIG-046737 | 199 | 57  | 85 | 207 | 11  |
| CONTIG-046738 | 132 | 31  | 21 | 120 | 0   |
| CONTIG-046739 | 350 | 24  | 32 | 335 | 4   |
| CONTIG-046740 | 204 | 4   | 0  | 6   | 0   |
| CONTIG-046741 | 158 | 10  | 29 | 48  | 0   |
| CONTIG-046742 | 92  | 6   | 2  | 14  | 0   |
| CONTIG-046743 | 85  | 7   | 0  | 0   | 2   |
| CONTIG-046744 | 405 | 13  | 55 | 265 | 0   |
| CONTIG-046745 | 101 | 7   | 9  | 17  | 3   |
| CONTIG-046746 | 258 | 9   | 22 | 78  | 0   |
| CONTIG-046747 | 365 | 9   | 12 | 116 | 0   |
| CONTIG-046748 | 163 | 8   | 4  | 41  | 2   |
| CONTIG-046749 | 837 | 39  | 4  | 17  | 0   |
| CONTIG-046750 | 138 | 9   | 5  | 58  | 0   |
| CONTIG-046751 | 108 | 2   | 2  | 0   | 0   |
| CONTIG-046752 | 135 | 8   | 19 | 18  | 0   |
| CONTIG-046753 | 59  | 6   | 4  | 11  | 0   |
| CONTIG-046757 | 172 | 8   | 2  | 54  | 0   |
| CONTIG-046758 | 59  | 4   | 0  | 2   | 0   |
| CONTIG-046761 | 422 | 30  | 41 | 214 | 7   |
| CONTIG-046762 | 115 | 19  | 2  | 89  | 0   |
| CONTIG-046763 | 413 | 11  | 83 | 102 | 2   |
| CONTIG-046764 | 74  | 318 | 52 | 371 | 71  |
| CONTIG-046765 | 80  | 11  | 4  | 24  | 0   |
| CONTIG-046766 | 114 | 10  | 18 | 19  | 4   |
| CONTIG-046767 | 114 | 12  | 6  | 58  | 0   |
| CONTIG-046768 | 270 | 9   | 4  | 91  | 0   |
| CONTIG-046769 | 120 | 8   | 12 | 39  | 0   |
| CONTIG-046770 | 66  | 77  | 8  | 35  | 0   |
| CONTIG-046771 | 107 | 5   | 0  | 0   | 0   |
| CONTIG-046773 | 67  | 5   | 2  | 5   | 0   |
| CONTIG-046774 | 73  | 7   | 13 | 4   | 0   |
| CONTIG-046775 | 158 | 8   | 22 | 21  | 0   |
| CONTIG-046776 | 148 | 24  | 66 | 137 | 0   |
| CONTIG-046777 | 343 | 11  | 6  | 125 | 2   |
| CONTIG-046779 | 97  | 6   | 10 | 20  | 0   |
| CONTIG-046787 | 185 | 6   | 2  | 5   | 0   |
| CONTIG-046788 | 161 | 7   | 11 | 23  | 0   |
| CONTIG-046792 | 166 | 123 | 11 | 0   | 155 |
| CONTIG-046793 | 84  | 14  | 6  | 31  | 0   |

|               |     |     |     |      |    |
|---------------|-----|-----|-----|------|----|
| CONTIG-046794 | 143 | 7   | 2   | 4    | 0  |
| CONTIG-046795 | 190 | 13  | 75  | 16   | 0  |
| CONTIG-046796 | 90  | 9   | 8   | 15   | 0  |
| CONTIG-046806 | 109 | 2   | 4   | 0    | 0  |
| CONTIG-046807 | 139 | 5   | 4   | 14   | 0  |
| CONTIG-046808 | 106 | 8   | 8   | 3    | 0  |
| CONTIG-046810 | 94  | 9   | 7   | 13   | 0  |
| CONTIG-046811 | 88  | 6   | 6   | 7    | 0  |
| CONTIG-046816 | 799 | 73  | 26  | 2438 | 90 |
| CONTIG-046826 | 342 | 18  | 23  | 189  | 0  |
| CONTIG-046827 | 78  | 3   | 3   | 4    | 0  |
| CONTIG-046828 | 90  | 3   | 11  | 8    | 0  |
| CONTIG-046829 | 61  | 6   | 4   | 11   | 0  |
| CONTIG-046830 | 355 | 20  | 55  | 201  | 2  |
| CONTIG-046831 | 161 | 9   | 24  | 29   | 0  |
| CONTIG-046832 | 59  | 5   | 2   | 11   | 0  |
| CONTIG-046834 | 123 | 13  | 20  | 24   | 0  |
| CONTIG-046835 | 241 | 6   | 18  | 7    | 0  |
| CONTIG-046836 | 495 | 11  | 65  | 67   | 5  |
| CONTIG-046837 | 111 | 16  | 20  | 67   | 0  |
| CONTIG-046839 | 292 | 15  | 18  | 115  | 0  |
| CONTIG-046840 | 98  | 7   | 0   | 19   | 0  |
| CONTIG-046841 | 70  | 2   | 0   | 2    | 0  |
| CONTIG-046842 | 89  | 6   | 0   | 18   | 0  |
| CONTIG-046847 | 44  | 99  | 32  | 53   | 0  |
| CONTIG-046848 | 468 | 24  | 39  | 346  | 10 |
| CONTIG-046849 | 397 | 8   | 35  | 79   | 2  |
| CONTIG-046850 | 89  | 18  | 48  | 40   | 0  |
| CONTIG-046851 | 73  | 6   | 15  | 2    | 0  |
| CONTIG-046852 | 90  | 3   | 2   | 0    | 0  |
| CONTIG-046853 | 137 | 224 | 461 | 707  | 4  |
| CONTIG-046855 | 324 | 10  | 2   | 97   | 0  |
| CONTIG-046856 | 88  | 18  | 5   | 58   | 0  |
| CONTIG-046857 | 511 | 27  | 124 | 362  | 12 |
| CONTIG-046858 | 77  | 5   | 9   | 2    | 0  |
| CONTIG-046859 | 127 | 5   | 2   | 23   | 4  |
| CONTIG-046860 | 82  | 27  | 12  | 104  | 0  |
| CONTIG-046861 | 40  | 267 | 0   | 482  | 0  |
| CONTIG-046862 | 332 | 15  | 57  | 103  | 0  |
| CONTIG-046863 | 306 | 19  | 15  | 136  | 2  |
| CONTIG-046864 | 151 | 8   | 0   | 44   | 0  |
| CONTIG-046865 | 91  | 55  | 178 | 8    | 0  |
| CONTIG-046866 | 87  | 5   | 0   | 13   | 0  |
| CONTIG-046867 | 196 | 3   | 6   | 8    | 0  |
| CONTIG-046868 | 123 | 10  | 87  | 4    | 0  |
| CONTIG-046869 | 396 | 17  | 51  | 251  | 2  |
| CONTIG-046870 | 137 | 5   | 2   | 15   | 0  |

|               |      |     |    |      |     |
|---------------|------|-----|----|------|-----|
| CONTIG-046871 | 122  | 6   | 15 | 6    | 0   |
| CONTIG-046872 | 155  | 13  | 18 | 46   | 0   |
| CONTIG-046873 | 120  | 5   | 5  | 16   | 2   |
| CONTIG-046874 | 166  | 5   | 4  | 20   | 0   |
| CONTIG-046875 | 87   | 10  | 10 | 24   | 2   |
| CONTIG-046876 | 75   | 5   | 10 | 0    | 0   |
| CONTIG-046879 | 239  | 27  | 32 | 237  | 0   |
| CONTIG-046880 | 86   | 6   | 7  | 16   | 2   |
| CONTIG-046882 | 103  | 17  | 5  | 59   | 0   |
| CONTIG-046883 | 276  | 5   | 18 | 25   | 0   |
| CONTIG-046884 | 58   | 69  | 18 | 160  | 5   |
| CONTIG-046885 | 161  | 241 | 47 | 1749 | 252 |
| CONTIG-046886 | 324  | 9   | 8  | 65   | 2   |
| CONTIG-046887 | 142  | 5   | 6  | 7    | 0   |
| CONTIG-046888 | 135  | 29  | 43 | 86   | 0   |
| CONTIG-046889 | 1687 | 28  | 6  | 5    | 0   |
| CONTIG-046890 | 110  | 8   | 39 | 5    | 0   |
| CONTIG-046892 | 199  | 6   | 15 | 24   | 2   |
| CONTIG-046893 | 147  | 9   | 3  | 8    | 2   |
| CONTIG-046894 | 73   | 7   | 2  | 9    | 4   |
| CONTIG-046896 | 146  | 13  | 8  | 69   | 0   |
| CONTIG-046897 | 126  | 4   | 3  | 13   | 0   |
| CONTIG-046898 | 85   | 4   | 0  | 4    | 0   |
| CONTIG-046899 | 203  | 12  | 19 | 65   | 2   |
| CONTIG-046900 | 109  | 8   | 11 | 17   | 0   |
| CONTIG-046901 | 379  | 12  | 62 | 134  | 0   |
| CONTIG-046908 | 161  | 4   | 0  | 24   | 0   |
| CONTIG-046909 | 647  | 8   | 8  | 147  | 9   |
| CONTIG-046910 | 236  | 9   | 2  | 45   | 0   |
| CONTIG-046911 | 63   | 8   | 2  | 15   | 2   |
| CONTIG-046912 | 102  | 8   | 15 | 14   | 0   |
| CONTIG-046913 | 103  | 16  | 12 | 52   | 2   |
| CONTIG-046914 | 85   | 24  | 16 | 78   | 0   |
| CONTIG-046915 | 129  | 18  | 2  | 0    | 10  |
| CONTIG-046916 | 207  | 4   | 10 | 11   | 0   |
| CONTIG-046917 | 190  | 13  | 4  | 46   | 4   |
| CONTIG-046918 | 66   | 7   | 9  | 5    | 0   |
| CONTIG-046922 | 129  | 11  | 23 | 11   | 0   |
| CONTIG-046924 | 469  | 12  | 29 | 154  | 0   |
| CONTIG-046925 | 174  | 7   | 14 | 44   | 0   |
| CONTIG-046926 | 135  | 5   | 6  | 19   | 0   |
| CONTIG-046927 | 65   | 4   | 0  | 5    | 0   |
| CONTIG-046928 | 337  | 12  | 23 | 99   | 0   |
| CONTIG-046929 | 123  | 6   | 6  | 18   | 0   |
| CONTIG-046930 | 223  | 9   | 20 | 15   | 0   |
| CONTIG-046931 | 367  | 14  | 25 | 140  | 6   |
| CONTIG-046932 | 132  | 8   | 8  | 12   | 0   |

|               |     |     |     |     |    |
|---------------|-----|-----|-----|-----|----|
| CONTIG-046933 | 107 | 10  | 30  | 13  | 0  |
| CONTIG-046934 | 111 | 7   | 0   | 19  | 0  |
| CONTIG-046935 | 164 | 10  | 50  | 9   | 0  |
| CONTIG-046936 | 552 | 14  | 14  | 187 | 11 |
| CONTIG-046937 | 86  | 5   | 0   | 17  | 0  |
| CONTIG-046938 | 200 | 12  | 54  | 66  | 0  |
| CONTIG-046939 | 88  | 7   | 14  | 12  | 0  |
| CONTIG-046943 | 225 | 6   | 3   | 39  | 0  |
| CONTIG-046944 | 69  | 38  | 6   | 85  | 0  |
| CONTIG-046945 | 70  | 13  | 10  | 11  | 0  |
| CONTIG-046946 | 79  | 5   | 3   | 17  | 0  |
| CONTIG-046947 | 287 | 7   | 26  | 33  | 0  |
| CONTIG-046948 | 400 | 10  | 28  | 115 | 0  |
| CONTIG-046949 | 318 | 9   | 40  | 81  | 0  |
| CONTIG-046950 | 554 | 7   | 12  | 118 | 4  |
| CONTIG-046951 | 141 | 10  | 20  | 24  | 0  |
| CONTIG-046952 | 168 | 11  | 9   | 50  | 2  |
| CONTIG-046953 | 81  | 83  | 29  | 244 | 20 |
| CONTIG-046954 | 167 | 8   | 6   | 48  | 0  |
| CONTIG-046955 | 225 | 5   | 3   | 20  | 0  |
| CONTIG-046956 | 125 | 8   | 9   | 23  | 0  |
| CONTIG-046957 | 58  | 2   | 0   | 0   | 0  |
| CONTIG-046958 | 169 | 22  | 156 | 103 | 0  |
| CONTIG-046959 | 136 | 4   | 2   | 15  | 0  |
| CONTIG-046960 | 164 | 6   | 2   | 12  | 0  |
| CONTIG-046961 | 268 | 14  | 49  | 80  | 0  |
| CONTIG-046963 | 61  | 7   | 13  | 2   | 0  |
| CONTIG-046964 | 280 | 13  | 7   | 0   | 30 |
| CONTIG-046966 | 247 | 8   | 17  | 24  | 0  |
| CONTIG-046967 | 83  | 7   | 4   | 16  | 0  |
| CONTIG-046968 | 246 | 12  | 34  | 117 | 0  |
| CONTIG-046969 | 157 | 8   | 11  | 27  | 2  |
| CONTIG-046970 | 63  | 2   | 0   | 2   | 0  |
| CONTIG-046971 | 78  | 218 | 87  | 710 | 2  |
| CONTIG-046972 | 313 | 18  | 6   | 186 | 0  |
| CONTIG-046973 | 64  | 3   | 2   | 0   | 0  |
| CONTIG-046974 | 97  | 11  | 47  | 7   | 0  |
| CONTIG-046975 | 74  | 5   | 4   | 8   | 0  |
| CONTIG-046976 | 207 | 64  | 391 | 344 | 0  |
| CONTIG-046977 | 461 | 9   | 11  | 112 | 0  |
| CONTIG-046978 | 84  | 3   | 0   | 5   | 0  |
| CONTIG-046979 | 118 | 12  | 70  | 22  | 0  |
| CONTIG-046981 | 56  | 97  | 13  | 82  | 6  |
| CONTIG-046982 | 130 | 11  | 3   | 43  | 0  |
| CONTIG-046983 | 86  | 6   | 15  | 11  | 0  |
| CONTIG-046984 | 246 | 26  | 43  | 212 | 0  |
| CONTIG-046985 | 163 | 16  | 10  | 111 | 0  |



|               |     |    |    |      |     |
|---------------|-----|----|----|------|-----|
| CONTIG-046988 | 59  | 4  | 2  | 2    | 0   |
| CONTIG-046989 | 166 | 10 | 92 | 2    | 0   |
| CONTIG-046990 | 205 | 6  | 17 | 22   | 0   |
| CONTIG-046991 | 450 | 66 | 83 | 1676 | 0   |
| CONTIG-046992 | 505 | 5  | 28 | 40   | 0   |
| CONTIG-046993 | 70  | 10 | 4  | 21   | 0   |
| CONTIG-046994 | 127 | 12 | 8  | 46   | 0   |
| CONTIG-046995 | 177 | 8  | 6  | 25   | 0   |
| CONTIG-046996 | 85  | 6  | 14 | 14   | 0   |
| CONTIG-046997 | 78  | 5  | 4  | 8    | 0   |
| CONTIG-046999 | 115 | 18 | 10 | 76   | 0   |
| CONTIG-047000 | 212 | 12 | 53 | 90   | 0   |
| CONTIG-047001 | 85  | 7  | 12 | 0    | 0   |
| CONTIG-047002 | 99  | 12 | 34 | 24   | 0   |
| CONTIG-047004 | 81  | 15 | 28 | 33   | 0   |
| CONTIG-047005 | 165 | 5  | 3  | 32   | 0   |
| CONTIG-047007 | 142 | 9  | 23 | 36   | 0   |
| CONTIG-047008 | 68  | 4  | 0  | 9    | 0   |
| CONTIG-047013 | 59  | 3  | 2  | 4    | 0   |
| CONTIG-047017 | 97  | 7  | 4  | 23   | 0   |
| CONTIG-047019 | 152 | 11 | 20 | 36   | 0   |
| CONTIG-047022 | 125 | 10 | 44 | 24   | 0   |
| CONTIG-047023 | 202 | 95 | 48 | 735  | 41  |
| CONTIG-047025 | 89  | 6  | 22 | 14   | 0   |
| CONTIG-047026 | 252 | 9  | 17 | 95   | 0   |
| CONTIG-047027 | 63  | 16 | 20 | 24   | 2   |
| CONTIG-047029 | 424 | 13 | 34 | 130  | 0   |
| CONTIG-047033 | 39  | 63 | 7  | 76   | 0   |
| CONTIG-047034 | 577 | 36 | 10 | 11   | 254 |
| CONTIG-047035 | 93  | 6  | 12 | 6    | 0   |
| CONTIG-047036 | 125 | 6  | 2  | 0    | 6   |
| CONTIG-047038 | 116 | 8  | 3  | 33   | 0   |
| CONTIG-047039 | 171 | 7  | 8  | 34   | 0   |
| CONTIG-047040 | 105 | 3  | 8  | 4    | 0   |
| CONTIG-047041 | 81  | 3  | 3  | 4    | 0   |
| CONTIG-047042 | 71  | 3  | 0  | 0    | 0   |
| CONTIG-047043 | 326 | 7  | 10 | 68   | 0   |
| CONTIG-047044 | 303 | 11 | 2  | 0    | 9   |
| CONTIG-047045 | 185 | 7  | 6  | 19   | 0   |
| CONTIG-047046 | 74  | 9  | 2  | 24   | 0   |
| CONTIG-047047 | 66  | 10 | 12 | 17   | 0   |
| CONTIG-047052 | 111 | 9  | 11 | 29   | 2   |
| CONTIG-047054 | 60  | 4  | 2  | 4    | 0   |
| CONTIG-047055 | 89  | 9  | 4  | 17   | 0   |
| CONTIG-047056 | 59  | 9  | 5  | 24   | 0   |
| CONTIG-047057 | 348 | 33 | 39 | 502  | 2   |
| CONTIG-047058 | 68  | 3  | 6  | 0    | 0   |

|               |      |     |    |      |    |
|---------------|------|-----|----|------|----|
| CONTIG-047059 | 92   | 10  | 7  | 12   | 0  |
| CONTIG-047060 | 91   | 8   | 8  | 19   | 0  |
| CONTIG-047061 | 98   | 5   | 2  | 5    | 0  |
| CONTIG-047062 | 85   | 5   | 6  | 9    | 0  |
| CONTIG-047063 | 132  | 6   | 0  | 28   | 0  |
| CONTIG-047064 | 506  | 13  | 11 | 273  | 0  |
| CONTIG-047065 | 122  | 7   | 4  | 20   | 0  |
| CONTIG-047066 | 123  | 7   | 37 | 6    | 0  |
| CONTIG-047067 | 87   | 6   | 0  | 15   | 0  |
| CONTIG-047068 | 332  | 7   | 8  | 113  | 0  |
| CONTIG-047069 | 76   | 4   | 2  | 12   | 0  |
| CONTIG-047070 | 95   | 23  | 15 | 24   | 0  |
| CONTIG-047071 | 61   | 7   | 23 | 2    | 0  |
| CONTIG-047072 | 71   | 19  | 18 | 42   | 3  |
| CONTIG-047073 | 143  | 10  | 22 | 38   | 0  |
| CONTIG-047074 | 349  | 37  | 24 | 650  | 4  |
| CONTIG-047075 | 302  | 9   | 8  | 105  | 0  |
| CONTIG-047080 | 108  | 7   | 4  | 21   | 0  |
| CONTIG-047081 | 74   | 9   | 4  | 2    | 0  |
| CONTIG-047082 | 102  | 8   | 8  | 15   | 4  |
| CONTIG-047083 | 232  | 14  | 33 | 28   | 0  |
| CONTIG-047084 | 1033 | 71  | 5  | 2    | 72 |
| CONTIG-047085 | 122  | 6   | 7  | 19   | 0  |
| CONTIG-047086 | 172  | 15  | 47 | 71   | 0  |
| CONTIG-047087 | 265  | 8   | 5  | 94   | 0  |
| CONTIG-047088 | 299  | 13  | 76 | 102  | 0  |
| CONTIG-047089 | 220  | 9   | 4  | 86   | 0  |
| CONTIG-047090 | 112  | 5   | 0  | 2    | 0  |
| CONTIG-047091 | 254  | 56  | 39 | 427  | 9  |
| CONTIG-047092 | 124  | 5   | 4  | 19   | 0  |
| CONTIG-047093 | 424  | 15  | 45 | 145  | 6  |
| CONTIG-047094 | 73   | 4   | 5  | 3    | 0  |
| CONTIG-047095 | 995  | 11  | 87 | 280  | 0  |
| CONTIG-047096 | 79   | 8   | 7  | 32   | 0  |
| CONTIG-047097 | 136  | 12  | 5  | 36   | 0  |
| CONTIG-047098 | 105  | 7   | 6  | 18   | 0  |
| CONTIG-047099 | 223  | 8   | 13 | 59   | 0  |
| CONTIG-047100 | 149  | 5   | 0  | 20   | 0  |
| CONTIG-047101 | 548  | 8   | 46 | 162  | 0  |
| CONTIG-047102 | 151  | 19  | 16 | 133  | 0  |
| CONTIG-047105 | 68   | 5   | 4  | 12   | 0  |
| CONTIG-047106 | 68   | 6   | 5  | 7    | 0  |
| CONTIG-047107 | 65   | 8   | 5  | 20   | 0  |
| CONTIG-047108 | 514  | 10  | 12 | 109  | 0  |
| CONTIG-047109 | 192  | 5   | 7  | 29   | 0  |
| CONTIG-047110 | 167  | 151 | 88 | 1420 | 0  |
| CONTIG-047111 | 159  | 8   | 2  | 54   | 0  |

|               |     |     |     |     |   |
|---------------|-----|-----|-----|-----|---|
| CONTIG-047112 | 141 | 6   | 13  | 8   | 2 |
| CONTIG-047113 | 44  | 408 | 127 | 206 | 2 |
| CONTIG-047114 | 119 | 5   | 2   | 7   | 0 |
| CONTIG-047115 | 101 | 6   | 28  | 0   | 0 |
| CONTIG-047116 | 148 | 9   | 9   | 53  | 0 |
| CONTIG-047117 | 245 | 10  | 23  | 48  | 0 |
| CONTIG-047118 | 203 | 13  | 56  | 30  | 0 |
| CONTIG-047119 | 304 | 14  | 19  | 108 | 0 |
| CONTIG-047120 | 255 | 12  | 82  | 70  | 2 |
| CONTIG-047121 | 82  | 9   | 4   | 30  | 5 |
| CONTIG-047122 | 88  | 8   | 24  | 12  | 0 |
| CONTIG-047123 | 118 | 7   | 4   | 18  | 0 |
| CONTIG-047124 | 77  | 7   | 4   | 10  | 0 |
| CONTIG-047125 | 71  | 5   | 3   | 7   | 0 |
| CONTIG-047126 | 76  | 11  | 12  | 7   | 0 |
| CONTIG-047127 | 137 | 9   | 23  | 47  | 0 |
| CONTIG-047128 | 119 | 8   | 2   | 15  | 0 |
| CONTIG-047130 | 217 | 10  | 7   | 75  | 0 |
| CONTIG-047131 | 80  | 5   | 6   | 14  | 0 |
| CONTIG-047132 | 59  | 4   | 0   | 0   | 0 |
| CONTIG-047133 | 80  | 8   | 4   | 0   | 0 |
| CONTIG-047134 | 97  | 3   | 13  | 5   | 0 |
| CONTIG-047136 | 143 | 15  | 10  | 93  | 0 |
| CONTIG-047137 | 59  | 4   | 10  | 0   | 0 |
| CONTIG-047138 | 127 | 4   | 0   | 14  | 0 |
| CONTIG-047139 | 261 | 15  | 14  | 115 | 4 |
| CONTIG-047140 | 125 | 10  | 18  | 21  | 0 |
| CONTIG-047141 | 74  | 5   | 4   | 0   | 0 |
| CONTIG-047142 | 210 | 7   | 20  | 40  | 0 |
| CONTIG-047143 | 532 | 26  | 4   | 0   | 0 |
| CONTIG-047144 | 111 | 5   | 17  | 8   | 0 |
| CONTIG-047145 | 205 | 9   | 29  | 52  | 0 |
| CONTIG-047146 | 272 | 16  | 19  | 169 | 0 |
| CONTIG-047147 | 289 | 7   | 2   | 0   | 8 |
| CONTIG-047148 | 270 | 13  | 23  | 47  | 2 |
| CONTIG-047157 | 82  | 6   | 0   | 7   | 0 |
| CONTIG-047158 | 114 | 6   | 12  | 30  | 0 |
| CONTIG-047159 | 219 | 11  | 13  | 76  | 0 |
| CONTIG-047160 | 423 | 16  | 71  | 143 | 7 |
| CONTIG-047161 | 523 | 16  | 17  | 462 | 0 |
| CONTIG-047162 | 217 | 6   | 10  | 45  | 0 |
| CONTIG-047163 | 357 | 19  | 12  | 135 | 2 |
| CONTIG-047164 | 181 | 8   | 9   | 29  | 0 |
| CONTIG-047165 | 201 | 10  | 0   | 81  | 0 |
| CONTIG-047166 | 169 | 8   | 6   | 42  | 0 |
| CONTIG-047169 | 90  | 4   | 2   | 7   | 0 |
| CONTIG-047170 | 79  | 4   | 5   | 11  | 0 |

|               |     |    |    |     |    |
|---------------|-----|----|----|-----|----|
| CONTIG-047171 | 68  | 6  | 3  | 13  | 0  |
| CONTIG-047172 | 168 | 7  | 2  | 30  | 0  |
| CONTIG-047173 | 223 | 19 | 26 | 155 | 0  |
| CONTIG-047174 | 169 | 8  | 20 | 36  | 0  |
| CONTIG-047177 | 104 | 8  | 6  | 33  | 0  |
| CONTIG-047178 | 230 | 24 | 26 | 124 | 4  |
| CONTIG-047179 | 37  | 46 | 15 | 2   | 0  |
| CONTIG-047180 | 230 | 8  | 21 | 36  | 0  |
| CONTIG-047181 | 162 | 7  | 22 | 26  | 0  |
| CONTIG-047182 | 138 | 7  | 0  | 37  | 2  |
| CONTIG-047183 | 370 | 33 | 4  | 0   | 92 |
| CONTIG-047184 | 169 | 6  | 7  | 26  | 0  |
| CONTIG-047185 | 218 | 11 | 12 | 61  | 0  |
| CONTIG-047186 | 167 | 7  | 2  | 19  | 0  |
| CONTIG-047187 | 236 | 5  | 21 | 15  | 0  |
| CONTIG-047188 | 66  | 3  | 2  | 4   | 0  |
| CONTIG-047189 | 96  | 13 | 3  | 67  | 0  |
| CONTIG-047190 | 158 | 5  | 4  | 20  | 2  |
| CONTIG-047191 | 81  | 12 | 4  | 40  | 0  |
| CONTIG-047192 | 212 | 4  | 5  | 20  | 0  |
| CONTIG-047193 | 226 | 12 | 28 | 60  | 0  |
| CONTIG-047194 | 320 | 8  | 17 | 75  | 0  |
| CONTIG-047195 | 932 | 21 | 55 | 681 | 0  |
| CONTIG-047196 | 329 | 18 | 87 | 153 | 4  |
| CONTIG-047197 | 136 | 6  | 0  | 24  | 0  |
| CONTIG-047198 | 204 | 8  | 15 | 41  | 0  |
| CONTIG-047199 | 74  | 12 | 23 | 0   | 0  |
| CONTIG-047200 | 144 | 5  | 10 | 4   | 0  |
| CONTIG-047201 | 64  | 3  | 0  | 6   | 0  |
| CONTIG-047202 | 114 | 18 | 46 | 10  | 2  |
| CONTIG-047204 | 228 | 12 | 30 | 77  | 0  |
| CONTIG-047205 | 349 | 10 | 32 | 67  | 0  |
| CONTIG-047206 | 74  | 5  | 0  | 8   | 0  |
| CONTIG-047207 | 75  | 12 | 4  | 22  | 0  |
| CONTIG-047208 | 93  | 6  | 9  | 14  | 0  |
| CONTIG-047209 | 165 | 8  | 2  | 53  | 0  |
| CONTIG-047210 | 63  | 18 | 4  | 15  | 0  |
| CONTIG-047211 | 457 | 11 | 15 | 50  | 0  |
| CONTIG-047212 | 60  | 5  | 8  | 0   | 0  |
| CONTIG-047213 | 127 | 7  | 2  | 2   | 0  |
| CONTIG-047219 | 104 | 8  | 2  | 26  | 0  |
| CONTIG-047220 | 134 | 13 | 0  | 83  | 0  |
| CONTIG-047221 | 90  | 15 | 6  | 25  | 0  |
| CONTIG-047222 | 193 | 5  | 2  | 29  | 0  |
| CONTIG-047223 | 201 | 7  | 19 | 28  | 0  |
| CONTIG-047225 | 106 | 7  | 2  | 16  | 0  |
| CONTIG-047226 | 65  | 6  | 6  | 16  | 0  |

|               |     |     |    |     |     |
|---------------|-----|-----|----|-----|-----|
| CONTIG-047233 | 231 | 13  | 9  | 67  | 8   |
| CONTIG-047234 | 159 | 26  | 22 | 110 | 0   |
| CONTIG-047235 | 263 | 9   | 57 | 55  | 0   |
| CONTIG-047236 | 282 | 9   | 28 | 47  | 0   |
| CONTIG-047237 | 138 | 10  | 3  | 49  | 0   |
| CONTIG-047238 | 165 | 4   | 4  | 14  | 0   |
| CONTIG-047239 | 363 | 21  | 87 | 231 | 0   |
| CONTIG-047240 | 388 | 8   | 19 | 78  | 0   |
| CONTIG-047241 | 331 | 10  | 11 | 110 | 0   |
| CONTIG-047242 | 203 | 8   | 26 | 48  | 0   |
| CONTIG-047243 | 325 | 14  | 51 | 101 | 6   |
| CONTIG-047244 | 157 | 26  | 33 | 97  | 6   |
| CONTIG-047245 | 138 | 28  | 10 | 3   | 0   |
| CONTIG-047246 | 220 | 7   | 18 | 58  | 0   |
| CONTIG-047247 | 67  | 4   | 14 | 4   | 0   |
| CONTIG-047248 | 59  | 14  | 7  | 11  | 0   |
| CONTIG-047249 | 86  | 9   | 10 | 27  | 0   |
| CONTIG-047250 | 134 | 11  | 11 | 53  | 0   |
| CONTIG-047251 | 68  | 8   | 3  | 0   | 0   |
| CONTIG-047252 | 179 | 7   | 5  | 27  | 0   |
| CONTIG-047253 | 250 | 7   | 0  | 55  | 0   |
| CONTIG-047254 | 227 | 5   | 8  | 24  | 0   |
| CONTIG-047255 | 166 | 5   | 11 | 22  | 0   |
| CONTIG-047256 | 127 | 5   | 3  | 11  | 0   |
| CONTIG-047257 | 152 | 10  | 18 | 15  | 2   |
| CONTIG-047258 | 293 | 13  | 45 | 126 | 0   |
| CONTIG-047259 | 163 | 6   | 6  | 27  | 0   |
| CONTIG-047260 | 77  | 2   | 0  | 0   | 0   |
| CONTIG-047261 | 128 | 344 | 40 | 0   | 740 |
| CONTIG-047262 | 498 | 28  | 40 | 503 | 34  |
| CONTIG-047263 | 61  | 5   | 5  | 2   | 0   |
| CONTIG-047264 | 140 | 6   | 4  | 24  | 0   |
| CONTIG-047265 | 75  | 19  | 0  | 43  | 0   |
| CONTIG-047266 | 252 | 4   | 0  | 23  | 0   |
| CONTIG-047267 | 191 | 12  | 40 | 59  | 0   |
| CONTIG-047268 | 422 | 10  | 51 | 145 | 0   |
| CONTIG-047269 | 176 | 10  | 3  | 48  | 0   |
| CONTIG-047270 | 105 | 6   | 2  | 13  | 0   |
| CONTIG-047271 | 565 | 9   | 46 | 136 | 2   |
| CONTIG-047272 | 517 | 41  | 81 | 406 | 42  |
| CONTIG-047273 | 63  | 9   | 0  | 12  | 0   |
| CONTIG-047274 | 97  | 14  | 20 | 42  | 0   |
| CONTIG-047275 | 73  | 4   | 0  | 8   | 0   |
| CONTIG-047276 | 181 | 6   | 5  | 33  | 0   |
| CONTIG-047277 | 87  | 10  | 15 | 23  | 3   |
| CONTIG-047278 | 60  | 4   | 4  | 2   | 0   |
| CONTIG-047279 | 60  | 2   | 4  | 2   | 0   |

|               |     |     |    |     |   |
|---------------|-----|-----|----|-----|---|
| CONTIG-047280 | 81  | 16  | 6  | 35  | 0 |
| CONTIG-047282 | 126 | 13  | 19 | 17  | 0 |
| CONTIG-047283 | 111 | 5   | 7  | 4   | 0 |
| CONTIG-047284 | 231 | 20  | 27 | 86  | 0 |
| CONTIG-047285 | 302 | 19  | 14 | 165 | 5 |
| CONTIG-047286 | 198 | 8   | 29 | 53  | 0 |
| CONTIG-047287 | 152 | 6   | 12 | 19  | 0 |
| CONTIG-047288 | 214 | 8   | 4  | 0   | 0 |
| CONTIG-047289 | 210 | 12  | 20 | 61  | 0 |
| CONTIG-047290 | 159 | 5   | 4  | 4   | 0 |
| CONTIG-047291 | 94  | 11  | 13 | 34  | 0 |
| CONTIG-047292 | 100 | 6   | 5  | 8   | 0 |
| CONTIG-047293 | 142 | 9   | 0  | 47  | 0 |
| CONTIG-047294 | 96  | 14  | 26 | 32  | 0 |
| CONTIG-047295 | 66  | 21  | 4  | 24  | 0 |
| CONTIG-047297 | 47  | 27  | 4  | 15  | 0 |
| CONTIG-047298 | 104 | 5   | 2  | 15  | 0 |
| CONTIG-047299 | 186 | 3   | 10 | 4   | 0 |
| CONTIG-047300 | 197 | 10  | 56 | 40  | 2 |
| CONTIG-047301 | 112 | 7   | 6  | 15  | 0 |
| CONTIG-047302 | 292 | 8   | 19 | 68  | 0 |
| CONTIG-047303 | 183 | 11  | 22 | 61  | 0 |
| CONTIG-047304 | 67  | 10  | 2  | 0   | 0 |
| CONTIG-047305 | 100 | 7   | 2  | 29  | 0 |
| CONTIG-047306 | 117 | 9   | 9  | 34  | 0 |
| CONTIG-047307 | 65  | 17  | 0  | 29  | 0 |
| CONTIG-047308 | 754 | 10  | 10 | 261 | 3 |
| CONTIG-047309 | 151 | 14  | 26 | 25  | 2 |
| CONTIG-047310 | 331 | 8   | 6  | 52  | 2 |
| CONTIG-047312 | 170 | 13  | 16 | 81  | 0 |
| CONTIG-047313 | 64  | 5   | 5  | 10  | 0 |
| CONTIG-047314 | 322 | 15  | 0  | 102 | 9 |
| CONTIG-047315 | 107 | 9   | 12 | 25  | 0 |
| CONTIG-047316 | 88  | 4   | 0  | 16  | 0 |
| CONTIG-047317 | 385 | 13  | 14 | 109 | 0 |
| CONTIG-047318 | 69  | 8   | 3  | 13  | 0 |
| CONTIG-047319 | 697 | 9   | 21 | 220 | 2 |
| CONTIG-047320 | 128 | 141 | 32 | 770 | 0 |
| CONTIG-047321 | 96  | 4   | 6  | 4   | 0 |
| CONTIG-047322 | 211 | 15  | 8  | 141 | 2 |
| CONTIG-047323 | 92  | 4   | 7  | 7   | 0 |
| CONTIG-047324 | 133 | 4   | 4  | 16  | 0 |
| CONTIG-047325 | 157 | 14  | 48 | 13  | 2 |
| CONTIG-047326 | 226 | 6   | 34 | 47  | 0 |
| CONTIG-047327 | 117 | 11  | 11 | 34  | 0 |
| CONTIG-047328 | 191 | 8   | 23 | 60  | 0 |
| CONTIG-047329 | 119 | 9   | 5  | 6   | 0 |

|               |     |     |     |      |   |
|---------------|-----|-----|-----|------|---|
| CONTIG-047330 | 527 | 7   | 17  | 107  | 0 |
| CONTIG-047332 | 64  | 5   | 5   | 9    | 0 |
| CONTIG-047333 | 64  | 5   | 14  | 4    | 0 |
| CONTIG-047335 | 131 | 9   | 21  | 3    | 0 |
| CONTIG-047336 | 96  | 42  | 30  | 185  | 0 |
| CONTIG-047337 | 280 | 14  | 56  | 114  | 4 |
| CONTIG-047339 | 86  | 7   | 9   | 10   | 0 |
| CONTIG-047340 | 260 | 8   | 15  | 50   | 0 |
| CONTIG-047341 | 69  | 6   | 6   | 5    | 0 |
| CONTIG-047342 | 139 | 7   | 0   | 45   | 0 |
| CONTIG-047343 | 65  | 7   | 10  | 2    | 0 |
| CONTIG-047344 | 56  | 126 | 38  | 200  | 6 |
| CONTIG-047349 | 91  | 67  | 36  | 366  | 0 |
| CONTIG-047350 | 119 | 23  | 8   | 71   | 0 |
| CONTIG-047351 | 455 | 8   | 21  | 105  | 4 |
| CONTIG-047353 | 85  | 5   | 3   | 0    | 0 |
| CONTIG-047354 | 230 | 6   | 2   | 35   | 0 |
| CONTIG-047355 | 807 | 55  | 15  | 2903 | 0 |
| CONTIG-047357 | 172 | 17  | 12  | 39   | 0 |
| CONTIG-047359 | 60  | 6   | 2   | 19   | 0 |
| CONTIG-047360 | 331 | 15  | 49  | 62   | 5 |
| CONTIG-047361 | 125 | 12  | 10  | 43   | 0 |
| CONTIG-047362 | 127 | 5   | 11  | 24   | 0 |
| CONTIG-047363 | 90  | 10  | 5   | 32   | 0 |
| CONTIG-047364 | 72  | 6   | 24  | 4    | 0 |
| CONTIG-047365 | 158 | 16  | 17  | 65   | 0 |
| CONTIG-047366 | 60  | 4   | 14  | 0    | 0 |
| CONTIG-047367 | 150 | 10  | 3   | 41   | 0 |
| CONTIG-047368 | 69  | 33  | 18  | 70   | 0 |
| CONTIG-047370 | 111 | 7   | 7   | 28   | 0 |
| CONTIG-047371 | 65  | 10  | 36  | 4    | 0 |
| CONTIG-047372 | 85  | 2   | 0   | 3    | 0 |
| CONTIG-047373 | 62  | 2   | 4   | 2    | 0 |
| CONTIG-047374 | 214 | 27  | 41  | 170  | 8 |
| CONTIG-047375 | 96  | 158 | 9   | 0    | 0 |
| CONTIG-047376 | 112 | 4   | 14  | 4    | 0 |
| CONTIG-047377 | 222 | 13  | 16  | 92   | 6 |
| CONTIG-047378 | 229 | 9   | 21  | 57   | 0 |
| CONTIG-047379 | 96  | 19  | 2   | 76   | 0 |
| CONTIG-047380 | 65  | 3   | 5   | 2    | 0 |
| CONTIG-047381 | 89  | 5   | 8   | 4    | 0 |
| CONTIG-047383 | 96  | 20  | 107 | 0    | 0 |
| CONTIG-047384 | 78  | 12  | 5   | 0    | 2 |
| CONTIG-047385 | 375 | 43  | 51  | 784  | 6 |
| CONTIG-047387 | 332 | 27  | 103 | 303  | 0 |
| CONTIG-047391 | 102 | 18  | 49  | 58   | 0 |
| CONTIG-047392 | 78  | 7   | 2   | 13   | 0 |

|               |     |    |     |     |   |
|---------------|-----|----|-----|-----|---|
| CONTIG-047393 | 60  | 3  | 2   | 2   | 0 |
| CONTIG-047394 | 144 | 11 | 19  | 63  | 0 |
| CONTIG-047395 | 356 | 19 | 30  | 227 | 0 |
| CONTIG-047396 | 131 | 9  | 21  | 24  | 0 |
| CONTIG-047397 | 170 | 12 | 12  | 61  | 0 |
| CONTIG-047398 | 137 | 4  | 11  | 12  | 0 |
| CONTIG-047399 | 68  | 7  | 13  | 0   | 0 |
| CONTIG-047400 | 141 | 11 | 3   | 67  | 0 |
| CONTIG-047401 | 106 | 4  | 0   | 9   | 0 |
| CONTIG-047402 | 63  | 9  | 11  | 13  | 0 |
| CONTIG-047403 | 223 | 11 | 5   | 46  | 2 |
| CONTIG-047404 | 67  | 10 | 0   | 27  | 0 |
| CONTIG-047414 | 162 | 4  | 2   | 10  | 0 |
| CONTIG-047415 | 935 | 8  | 25  | 350 | 0 |
| CONTIG-047416 | 95  | 8  | 3   | 29  | 0 |
| CONTIG-047417 | 84  | 4  | 2   | 13  | 0 |
| CONTIG-047419 | 554 | 14 | 31  | 379 | 0 |
| CONTIG-047420 | 132 | 6  | 0   | 24  | 0 |
| CONTIG-047421 | 280 | 11 | 4   | 100 | 0 |
| CONTIG-047422 | 179 | 15 | 36  | 99  | 0 |
| CONTIG-047423 | 198 | 14 | 25  | 83  | 3 |
| CONTIG-047424 | 102 | 24 | 18  | 2   | 0 |
| CONTIG-047425 | 198 | 9  | 7   | 69  | 0 |
| CONTIG-047426 | 82  | 5  | 2   | 2   | 0 |
| CONTIG-047427 | 60  | 11 | 9   | 18  | 0 |
| CONTIG-047428 | 190 | 8  | 25  | 57  | 0 |
| CONTIG-047429 | 95  | 8  | 8   | 12  | 0 |
| CONTIG-047430 | 310 | 7  | 11  | 37  | 0 |
| CONTIG-047432 | 62  | 3  | 0   | 5   | 0 |
| CONTIG-047433 | 369 | 12 | 51  | 98  | 4 |
| CONTIG-047434 | 148 | 5  | 0   | 13  | 0 |
| CONTIG-047435 | 231 | 7  | 10  | 32  | 0 |
| CONTIG-047436 | 179 | 16 | 10  | 62  | 2 |
| CONTIG-047437 | 80  | 6  | 15  | 0   | 0 |
| CONTIG-047438 | 129 | 7  | 10  | 13  | 0 |
| CONTIG-047439 | 311 | 8  | 3   | 49  | 4 |
| CONTIG-047440 | 183 | 19 | 3   | 119 | 2 |
| CONTIG-047441 | 110 | 11 | 3   | 59  | 2 |
| CONTIG-047442 | 94  | 7  | 22  | 3   | 0 |
| CONTIG-047443 | 81  | 11 | 11  | 8   | 0 |
| CONTIG-047444 | 60  | 4  | 4   | 0   | 0 |
| CONTIG-047445 | 55  | 11 | 0   | 16  | 0 |
| CONTIG-047446 | 84  | 22 | 30  | 43  | 2 |
| CONTIG-047447 | 158 | 5  | 3   | 12  | 0 |
| CONTIG-047448 | 205 | 8  | 20  | 42  | 0 |
| CONTIG-047449 | 164 | 9  | 22  | 38  | 0 |
| CONTIG-047450 | 257 | 52 | 111 | 624 | 2 |



|               |      |     |    |     |    |
|---------------|------|-----|----|-----|----|
| CONTIG-047451 | 167  | 7   | 5  | 29  | 0  |
| CONTIG-047452 | 64   | 3   | 8  | 0   | 0  |
| CONTIG-047453 | 80   | 8   | 4  | 19  | 0  |
| CONTIG-047454 | 124  | 10  | 34 | 43  | 0  |
| CONTIG-047455 | 170  | 18  | 40 | 92  | 0  |
| CONTIG-047456 | 39   | 31  | 3  | 21  | 0  |
| CONTIG-047457 | 205  | 4   | 7  | 18  | 0  |
| CONTIG-047458 | 62   | 8   | 12 | 7   | 0  |
| CONTIG-047459 | 283  | 11  | 6  | 111 | 0  |
| CONTIG-047461 | 196  | 10  | 20 | 38  | 0  |
| CONTIG-047462 | 170  | 5   | 0  | 23  | 0  |
| CONTIG-047463 | 202  | 14  | 2  | 90  | 6  |
| CONTIG-047465 | 77   | 15  | 2  | 47  | 0  |
| CONTIG-047466 | 505  | 9   | 10 | 169 | 0  |
| CONTIG-047467 | 106  | 5   | 14 | 5   | 0  |
| CONTIG-047468 | 153  | 15  | 17 | 54  | 0  |
| CONTIG-047469 | 173  | 10  | 14 | 35  | 0  |
| CONTIG-047470 | 171  | 6   | 4  | 30  | 0  |
| CONTIG-047471 | 77   | 5   | 0  | 14  | 0  |
| CONTIG-047472 | 118  | 4   | 12 | 17  | 0  |
| CONTIG-047474 | 62   | 5   | 9  | 0   | 0  |
| CONTIG-047475 | 73   | 3   | 0  | 0   | 0  |
| CONTIG-047477 | 58   | 8   | 12 | 11  | 0  |
| CONTIG-047478 | 191  | 6   | 16 | 13  | 0  |
| CONTIG-047479 | 301  | 13  | 9  | 98  | 0  |
| CONTIG-047480 | 73   | 4   | 2  | 15  | 0  |
| CONTIG-047481 | 277  | 9   | 11 | 81  | 0  |
| CONTIG-047482 | 144  | 5   | 0  | 32  | 0  |
| CONTIG-047483 | 149  | 8   | 3  | 45  | 0  |
| CONTIG-047484 | 47   | 515 | 13 | 783 | 5  |
| CONTIG-047485 | 218  | 9   | 17 | 37  | 0  |
| CONTIG-047487 | 286  | 6   | 14 | 26  | 0  |
| CONTIG-047488 | 124  | 9   | 12 | 22  | 0  |
| CONTIG-047489 | 156  | 58  | 17 | 528 | 0  |
| CONTIG-047490 | 220  | 5   | 8  | 27  | 0  |
| CONTIG-047491 | 98   | 5   | 19 | 0   | 0  |
| CONTIG-047492 | 212  | 21  | 53 | 140 | 0  |
| CONTIG-047493 | 46   | 11  | 2  | 20  | 0  |
| CONTIG-047494 | 181  | 13  | 0  | 91  | 2  |
| CONTIG-047495 | 91   | 25  | 19 | 99  | 0  |
| CONTIG-047496 | 82   | 4   | 6  | 10  | 0  |
| CONTIG-047497 | 83   | 5   | 12 | 5   | 0  |
| CONTIG-047498 | 488  | 24  | 2  | 0   | 51 |
| CONTIG-047499 | 85   | 6   | 10 | 4   | 0  |
| CONTIG-047500 | 282  | 8   | 2  | 35  | 2  |
| CONTIG-047501 | 1032 | 16  | 21 | 676 | 2  |
| CONTIG-047502 | 192  | 42  | 2  | 0   | 45 |

|               |     |    |    |     |    |
|---------------|-----|----|----|-----|----|
| CONTIG-047503 | 112 | 8  | 12 | 9   | 0  |
| CONTIG-047504 | 170 | 7  | 8  | 30  | 0  |
| CONTIG-047505 | 61  | 13 | 2  | 26  | 0  |
| CONTIG-047506 | 532 | 12 | 11 | 16  | 0  |
| CONTIG-047507 | 59  | 8  | 2  | 16  | 0  |
| CONTIG-047508 | 96  | 3  | 2  | 5   | 0  |
| CONTIG-047509 | 115 | 12 | 9  | 64  | 0  |
| CONTIG-047510 | 58  | 62 | 40 | 97  | 4  |
| CONTIG-047511 | 199 | 9  | 10 | 37  | 0  |
| CONTIG-047512 | 247 | 20 | 23 | 209 | 0  |
| CONTIG-047513 | 181 | 11 | 10 | 34  | 2  |
| CONTIG-047514 | 173 | 5  | 20 | 5   | 0  |
| CONTIG-047515 | 136 | 14 | 71 | 61  | 0  |
| CONTIG-047516 | 135 | 19 | 5  | 107 | 18 |
| CONTIG-047518 | 85  | 7  | 2  | 9   | 0  |
| CONTIG-047519 | 169 | 8  | 14 | 53  | 0  |
| CONTIG-047520 | 140 | 12 | 16 | 18  | 0  |
| CONTIG-047521 | 73  | 11 | 18 | 17  | 0  |
| CONTIG-047522 | 111 | 11 | 25 | 20  | 0  |
| CONTIG-047524 | 197 | 17 | 6  | 91  | 3  |
| CONTIG-047525 | 155 | 19 | 56 | 60  | 0  |
| CONTIG-047526 | 149 | 9  | 5  | 32  | 0  |
| CONTIG-047527 | 75  | 3  | 4  | 3   | 0  |
| CONTIG-047528 | 75  | 7  | 0  | 4   | 0  |
| CONTIG-047529 | 80  | 7  | 10 | 14  | 0  |
| CONTIG-047531 | 93  | 3  | 4  | 7   | 0  |
| CONTIG-047532 | 107 | 11 | 11 | 16  | 0  |
| CONTIG-047533 | 461 | 14 | 46 | 222 | 2  |
| CONTIG-047534 | 105 | 5  | 0  | 24  | 0  |
| CONTIG-047535 | 61  | 12 | 8  | 12  | 0  |
| CONTIG-047538 | 105 | 10 | 15 | 21  | 0  |
| CONTIG-047539 | 90  | 20 | 5  | 0   | 0  |
| CONTIG-047540 | 206 | 8  | 9  | 50  | 0  |
| CONTIG-047541 | 162 | 14 | 24 | 78  | 0  |
| CONTIG-047542 | 113 | 13 | 27 | 15  | 0  |
| CONTIG-047543 | 88  | 26 | 7  | 0   | 0  |
| CONTIG-047544 | 97  | 11 | 18 | 33  | 0  |
| CONTIG-047545 | 135 | 8  | 22 | 18  | 0  |
| CONTIG-047546 | 86  | 8  | 4  | 16  | 0  |
| CONTIG-047547 | 105 | 13 | 4  | 11  | 0  |
| CONTIG-047548 | 93  | 4  | 3  | 12  | 0  |
| CONTIG-047549 | 58  | 6  | 5  | 9   | 0  |
| CONTIG-047550 | 224 | 12 | 36 | 43  | 2  |
| CONTIG-047551 | 401 | 11 | 13 | 200 | 0  |
| CONTIG-047552 | 197 | 12 | 37 | 29  | 0  |
| CONTIG-047553 | 93  | 8  | 10 | 25  | 0  |
| CONTIG-047555 | 71  | 6  | 3  | 8   | 0  |

|               |     |    |    |     |     |
|---------------|-----|----|----|-----|-----|
| CONTIG-047556 | 213 | 7  | 3  | 28  | 0   |
| CONTIG-047557 | 111 | 6  | 37 | 20  | 0   |
| CONTIG-047558 | 177 | 6  | 8  | 29  | 0   |
| CONTIG-047559 | 141 | 10 | 0  | 70  | 0   |
| CONTIG-047560 | 72  | 6  | 19 | 0   | 0   |
| CONTIG-047561 | 167 | 5  | 8  | 21  | 0   |
| CONTIG-047563 | 132 | 26 | 34 | 108 | 0   |
| CONTIG-047564 | 291 | 18 | 36 | 128 | 2   |
| CONTIG-047565 | 204 | 17 | 37 | 110 | 0   |
| CONTIG-047566 | 183 | 4  | 2  | 22  | 0   |
| CONTIG-047569 | 61  | 2  | 8  | 0   | 0   |
| CONTIG-047570 | 679 | 73 | 11 | 0   | 482 |
| CONTIG-047571 | 86  | 6  | 2  | 6   | 0   |
| CONTIG-047572 | 63  | 5  | 15 | 0   | 0   |
| CONTIG-047573 | 260 | 7  | 10 | 65  | 0   |
| CONTIG-047574 | 144 | 6  | 15 | 17  | 0   |
| CONTIG-047575 | 56  | 14 | 2  | 13  | 0   |
| CONTIG-047576 | 81  | 12 | 11 | 31  | 0   |
| CONTIG-047577 | 70  | 11 | 4  | 20  | 0   |
| CONTIG-047578 | 109 | 14 | 28 | 22  | 0   |
| CONTIG-047579 | 59  | 29 | 29 | 74  | 2   |
| CONTIG-047580 | 116 | 22 | 75 | 72  | 0   |
| CONTIG-047581 | 180 | 48 | 12 | 13  | 0   |
| CONTIG-047582 | 103 | 71 | 9  | 8   | 0   |
| CONTIG-047583 | 123 | 15 | 27 | 60  | 0   |
| CONTIG-047584 | 136 | 9  | 5  | 54  | 0   |
| CONTIG-047585 | 69  | 41 | 25 | 123 | 0   |
| CONTIG-047586 | 148 | 9  | 7  | 30  | 0   |
| CONTIG-047587 | 147 | 4  | 3  | 8   | 0   |
| CONTIG-047588 | 61  | 18 | 4  | 48  | 0   |
| CONTIG-047589 | 167 | 29 | 9  | 177 | 4   |
| CONTIG-047590 | 323 | 12 | 15 | 162 | 0   |
| CONTIG-047592 | 142 | 5  | 6  | 13  | 0   |
| CONTIG-047593 | 95  | 51 | 43 | 14  | 2   |
| CONTIG-047595 | 76  | 11 | 3  | 17  | 0   |
| CONTIG-047596 | 171 | 8  | 18 | 22  | 0   |
| CONTIG-047597 | 194 | 9  | 29 | 63  | 0   |
| CONTIG-047598 | 118 | 15 | 4  | 4   | 0   |
| CONTIG-047599 | 331 | 11 | 26 | 156 | 0   |
| CONTIG-047600 | 145 | 5  | 14 | 13  | 0   |
| CONTIG-047601 | 226 | 17 | 39 | 141 | 0   |
| CONTIG-047602 | 109 | 4  | 3  | 13  | 0   |
| CONTIG-047603 | 105 | 6  | 7  | 16  | 0   |
| CONTIG-047604 | 615 | 23 | 50 | 579 | 0   |
| CONTIG-047605 | 67  | 8  | 29 | 7   | 0   |
| CONTIG-047606 | 95  | 13 | 7  | 14  | 0   |
| CONTIG-047607 | 91  | 4  | 0  | 9   | 0   |

|               |     |     |     |      |    |
|---------------|-----|-----|-----|------|----|
| CONTIG-047609 | 207 | 7   | 0   | 74   | 0  |
| CONTIG-047610 | 126 | 6   | 0   | 28   | 0  |
| CONTIG-047611 | 305 | 8   | 0   | 73   | 6  |
| CONTIG-047612 | 76  | 3   | 2   | 0    | 0  |
| CONTIG-047613 | 338 | 10  | 11  | 113  | 0  |
| CONTIG-047614 | 67  | 6   | 29  | 2    | 0  |
| CONTIG-047618 | 82  | 7   | 12  | 12   | 0  |
| CONTIG-047619 | 116 | 7   | 0   | 6    | 0  |
| CONTIG-047621 | 466 | 7   | 9   | 114  | 0  |
| CONTIG-047622 | 125 | 5   | 8   | 23   | 0  |
| CONTIG-047623 | 133 | 5   | 2   | 0    | 4  |
| CONTIG-047624 | 667 | 11  | 17  | 194  | 2  |
| CONTIG-047625 | 141 | 8   | 6   | 24   | 0  |
| CONTIG-047626 | 129 | 6   | 0   | 9    | 0  |
| CONTIG-047627 | 193 | 16  | 18  | 132  | 0  |
| CONTIG-047628 | 134 | 13  | 6   | 67   | 0  |
| CONTIG-047629 | 84  | 5   | 3   | 14   | 0  |
| CONTIG-047630 | 374 | 11  | 23  | 89   | 0  |
| CONTIG-047632 | 100 | 386 | 188 | 1324 | 11 |
| CONTIG-047635 | 454 | 14  | 15  | 384  | 0  |
| CONTIG-047636 | 66  | 45  | 14  | 114  | 0  |
| CONTIG-047637 | 83  | 4   | 7   | 2    | 0  |
| CONTIG-047641 | 74  | 4   | 0   | 7    | 0  |
| CONTIG-047642 | 215 | 8   | 7   | 46   | 0  |
| CONTIG-047643 | 148 | 12  | 24  | 59   | 0  |
| CONTIG-047644 | 371 | 18  | 41  | 127  | 10 |
| CONTIG-047646 | 99  | 4   | 0   | 14   | 0  |
| CONTIG-047647 | 74  | 5   | 0   | 10   | 0  |
| CONTIG-047648 | 69  | 16  | 52  | 0    | 0  |
| CONTIG-047649 | 125 | 6   | 10  | 7    | 0  |
| CONTIG-047651 | 245 | 11  | 22  | 47   | 0  |
| CONTIG-047652 | 210 | 12  | 44  | 78   | 2  |
| CONTIG-047653 | 152 | 7   | 2   | 19   | 0  |
| CONTIG-047654 | 333 | 11  | 58  | 48   | 0  |
| CONTIG-047655 | 181 | 10  | 0   | 59   | 0  |
| CONTIG-047656 | 82  | 18  | 56  | 24   | 0  |
| CONTIG-047657 | 190 | 7   | 25  | 22   | 0  |
| CONTIG-047658 | 479 | 9   | 16  | 83   | 0  |
| CONTIG-047659 | 83  | 6   | 35  | 2    | 0  |
| CONTIG-047660 | 85  | 3   | 4   | 3    | 0  |
| CONTIG-047661 | 75  | 8   | 15  | 6    | 0  |
| CONTIG-047662 | 349 | 16  | 2   | 57   | 0  |
| CONTIG-047663 | 88  | 6   | 10  | 6    | 0  |
| CONTIG-047664 | 88  | 8   | 5   | 2    | 0  |
| CONTIG-047665 | 61  | 4   | 4   | 4    | 0  |
| CONTIG-047666 | 102 | 6   | 8   | 15   | 0  |
| CONTIG-047667 | 968 | 16  | 26  | 642  | 6  |

|               |     |     |     |      |     |
|---------------|-----|-----|-----|------|-----|
| CONTIG-047668 | 36  | 109 | 6   | 65   | 0   |
| CONTIG-047669 | 910 | 50  | 107 | 1630 | 50  |
| CONTIG-047670 | 268 | 16  | 41  | 187  | 0   |
| CONTIG-047671 | 239 | 8   | 35  | 33   | 2   |
| CONTIG-047672 | 156 | 11  | 4   | 41   | 0   |
| CONTIG-047673 | 121 | 5   | 11  | 25   | 2   |
| CONTIG-047674 | 149 | 11  | 4   | 53   | 0   |
| CONTIG-047675 | 42  | 95  | 7   | 193  | 0   |
| CONTIG-047676 | 253 | 12  | 12  | 100  | 0   |
| CONTIG-047677 | 394 | 9   | 21  | 14   | 2   |
| CONTIG-047678 | 123 | 4   | 0   | 15   | 0   |
| CONTIG-047679 | 58  | 4   | 0   | 8    | 0   |
| CONTIG-047680 | 60  | 17  | 33  | 2    | 0   |
| CONTIG-047681 | 60  | 37  | 14  | 92   | 2   |
| CONTIG-047682 | 97  | 4   | 14  | 2    | 0   |
| CONTIG-047683 | 58  | 4   | 8   | 4    | 0   |
| CONTIG-047684 | 89  | 6   | 5   | 0    | 2   |
| CONTIG-047685 | 385 | 10  | 69  | 144  | 0   |
| CONTIG-047688 | 110 | 8   | 14  | 14   | 0   |
| CONTIG-047689 | 61  | 3   | 0   | 6    | 0   |
| CONTIG-047690 | 159 | 12  | 10  | 92   | 0   |
| CONTIG-047691 | 141 | 10  | 2   | 0    | 0   |
| CONTIG-047692 | 66  | 4   | 13  | 7    | 0   |
| CONTIG-047693 | 119 | 10  | 9   | 51   | 0   |
| CONTIG-047694 | 44  | 8   | 10  | 2    | 0   |
| CONTIG-047696 | 154 | 17  | 15  | 74   | 0   |
| CONTIG-047697 | 101 | 3   | 0   | 6    | 0   |
| CONTIG-047700 | 329 | 34  | 68  | 435  | 4   |
| CONTIG-047701 | 66  | 258 | 6   | 1047 | 0   |
| CONTIG-047702 | 81  | 6   | 6   | 11   | 0   |
| CONTIG-047703 | 106 | 5   | 17  | 6    | 0   |
| CONTIG-047704 | 82  | 6   | 5   | 6    | 0   |
| CONTIG-047707 | 96  | 10  | 15  | 42   | 0   |
| CONTIG-047708 | 193 | 5   | 9   | 33   | 0   |
| CONTIG-047709 | 121 | 8   | 18  | 29   | 2   |
| CONTIG-047710 | 416 | 17  | 13  | 302  | 2   |
| CONTIG-047711 | 133 | 4   | 5   | 9    | 0   |
| CONTIG-047712 | 58  | 36  | 8   | 87   | 0   |
| CONTIG-047713 | 151 | 12  | 13  | 74   | 0   |
| CONTIG-047714 | 90  | 9   | 7   | 22   | 0   |
| CONTIG-047715 | 67  | 3   | 5   | 5    | 0   |
| CONTIG-047716 | 286 | 129 | 3   | 2    | 125 |
| CONTIG-047717 | 247 | 7   | 4   | 48   | 0   |
| CONTIG-047718 | 236 | 17  | 28  | 7    | 0   |
| CONTIG-047719 | 126 | 7   | 17  | 20   | 0   |
| CONTIG-047720 | 201 | 6   | 21  | 43   | 2   |
| CONTIG-047721 | 121 | 5   | 2   | 18   | 2   |

|               |     |     |    |      |     |
|---------------|-----|-----|----|------|-----|
| CONTIG-047722 | 97  | 13  | 2  | 50   | 0   |
| CONTIG-047723 | 98  | 5   | 7  | 11   | 0   |
| CONTIG-047724 | 899 | 22  | 3  | 0    | 109 |
| CONTIG-047725 | 352 | 15  | 20 | 119  | 9   |
| CONTIG-047726 | 261 | 13  | 6  | 169  | 0   |
| CONTIG-047727 | 137 | 9   | 5  | 40   | 2   |
| CONTIG-047728 | 145 | 33  | 21 | 180  | 0   |
| CONTIG-047729 | 157 | 9   | 21 | 21   | 0   |
| CONTIG-047730 | 446 | 8   | 26 | 127  | 0   |
| CONTIG-047731 | 38  | 402 | 0  | 0    | 124 |
| CONTIG-047732 | 102 | 9   | 29 | 24   | 0   |
| CONTIG-047734 | 185 | 12  | 8  | 103  | 0   |
| CONTIG-047735 | 228 | 22  | 0  | 242  | 0   |
| CONTIG-047736 | 161 | 41  | 30 | 262  | 0   |
| CONTIG-047737 | 514 | 28  | 37 | 756  | 0   |
| CONTIG-047738 | 149 | 9   | 7  | 18   | 0   |
| CONTIG-047739 | 67  | 12  | 23 | 6    | 0   |
| CONTIG-047740 | 137 | 11  | 5  | 75   | 2   |
| CONTIG-047742 | 123 | 10  | 13 | 56   | 0   |
| CONTIG-047743 | 78  | 5   | 0  | 6    | 2   |
| CONTIG-047744 | 430 | 11  | 18 | 186  | 2   |
| CONTIG-047745 | 566 | 10  | 32 | 125  | 0   |
| CONTIG-047746 | 93  | 6   | 4  | 18   | 0   |
| CONTIG-047747 | 159 | 38  | 2  | 352  | 0   |
| CONTIG-047748 | 97  | 82  | 13 | 389  | 4   |
| CONTIG-047749 | 242 | 7   | 10 | 51   | 0   |
| CONTIG-047751 | 82  | 4   | 5  | 15   | 0   |
| CONTIG-047752 | 98  | 8   | 0  | 26   | 0   |
| CONTIG-047753 | 518 | 14  | 64 | 172  | 0   |
| CONTIG-047754 | 122 | 5   | 0  | 24   | 0   |
| CONTIG-047756 | 79  | 3   | 0  | 6    | 0   |
| CONTIG-047757 | 80  | 10  | 26 | 20   | 0   |
| CONTIG-047758 | 257 | 17  | 25 | 183  | 2   |
| CONTIG-047759 | 67  | 3   | 2  | 0    | 0   |
| CONTIG-047760 | 227 | 7   | 0  | 0    | 2   |
| CONTIG-047761 | 82  | 24  | 61 | 36   | 0   |
| CONTIG-047762 | 100 | 6   | 6  | 5    | 0   |
| CONTIG-047763 | 206 | 12  | 11 | 99   | 0   |
| CONTIG-047765 | 64  | 829 | 6  | 1738 | 0   |
| CONTIG-047766 | 291 | 8   | 21 | 72   | 4   |
| CONTIG-047767 | 230 | 6   | 0  | 64   | 0   |
| CONTIG-047768 | 192 | 14  | 24 | 51   | 0   |
| CONTIG-047769 | 269 | 13  | 28 | 21   | 3   |
| CONTIG-047770 | 84  | 3   | 2  | 5    | 0   |
| CONTIG-047771 | 461 | 11  | 7  | 174  | 2   |
| CONTIG-047773 | 116 | 8   | 3  | 0    | 0   |
| CONTIG-047774 | 459 | 9   | 18 | 147  | 0   |

|               |     |     |     |     |     |
|---------------|-----|-----|-----|-----|-----|
| CONTIG-047776 | 206 | 8   | 13  | 65  | 0   |
| CONTIG-047777 | 313 | 17  | 0   | 0   | 25  |
| CONTIG-047778 | 83  | 10  | 6   | 6   | 0   |
| CONTIG-047779 | 138 | 9   | 2   | 42  | 2   |
| CONTIG-047780 | 94  | 6   | 2   | 2   | 0   |
| CONTIG-047781 | 81  | 17  | 8   | 63  | 2   |
| CONTIG-047782 | 139 | 5   | 5   | 16  | 0   |
| CONTIG-047783 | 181 | 6   | 43  | 17  | 0   |
| CONTIG-047785 | 68  | 4   | 5   | 5   | 0   |
| CONTIG-047786 | 68  | 404 | 61  | 0   | 136 |
| CONTIG-047787 | 363 | 19  | 92  | 272 | 0   |
| CONTIG-047788 | 151 | 8   | 0   | 33  | 7   |
| CONTIG-047789 | 84  | 5   | 4   | 15  | 0   |
| CONTIG-047790 | 124 | 17  | 39  | 93  | 0   |
| CONTIG-047791 | 81  | 6   | 2   | 8   | 0   |
| CONTIG-047792 | 64  | 7   | 17  | 2   | 0   |
| CONTIG-047793 | 70  | 6   | 17  | 0   | 0   |
| CONTIG-047794 | 274 | 10  | 42  | 75  | 0   |
| CONTIG-047795 | 66  | 13  | 8   | 6   | 0   |
| CONTIG-047796 | 93  | 4   | 0   | 9   | 0   |
| CONTIG-047797 | 185 | 9   | 22  | 33  | 0   |
| CONTIG-047799 | 202 | 15  | 12  | 162 | 0   |
| CONTIG-047800 | 284 | 8   | 14  | 74  | 0   |
| CONTIG-047801 | 203 | 10  | 3   | 27  | 0   |
| CONTIG-047802 | 127 | 21  | 37  | 134 | 0   |
| CONTIG-047803 | 385 | 9   | 2   | 70  | 4   |
| CONTIG-047804 | 117 | 3   | 0   | 2   | 0   |
| CONTIG-047805 | 161 | 9   | 10  | 36  | 0   |
| CONTIG-047806 | 133 | 9   | 16  | 27  | 0   |
| CONTIG-047809 | 63  | 6   | 0   | 4   | 0   |
| CONTIG-047810 | 70  | 3   | 0   | 3   | 0   |
| CONTIG-047811 | 157 | 24  | 35  | 157 | 0   |
| CONTIG-047812 | 66  | 12  | 7   | 9   | 0   |
| CONTIG-047813 | 160 | 20  | 23  | 112 | 0   |
| CONTIG-047814 | 60  | 6   | 6   | 2   | 0   |
| CONTIG-047815 | 188 | 10  | 37  | 52  | 0   |
| CONTIG-047816 | 67  | 7   | 0   | 15  | 0   |
| CONTIG-047817 | 320 | 10  | 3   | 107 | 2   |
| CONTIG-047818 | 59  | 4   | 0   | 4   | 0   |
| CONTIG-047819 | 185 | 6   | 4   | 33  | 2   |
| CONTIG-047820 | 58  | 4   | 10  | 2   | 0   |
| CONTIG-047821 | 282 | 6   | 8   | 40  | 0   |
| CONTIG-047822 | 154 | 7   | 9   | 37  | 0   |
| CONTIG-047824 | 211 | 8   | 27  | 22  | 0   |
| CONTIG-047825 | 197 | 41  | 112 | 113 | 0   |
| CONTIG-047826 | 407 | 9   | 27  | 79  | 0   |
| CONTIG-047827 | 91  | 3   | 0   | 9   | 0   |

|               |     |     |     |      |    |
|---------------|-----|-----|-----|------|----|
| CONTIG-047828 | 384 | 5   | 0   | 0    | 2  |
| CONTIG-047829 | 64  | 9   | 13  | 9    | 0  |
| CONTIG-047830 | 143 | 11  | 0   | 49   | 0  |
| CONTIG-047831 | 170 | 5   | 41  | 7    | 0  |
| CONTIG-047832 | 167 | 8   | 28  | 30   | 0  |
| CONTIG-047834 | 114 | 167 | 41  | 631  | 2  |
| CONTIG-047835 | 94  | 5   | 2   | 3    | 2  |
| CONTIG-047836 | 98  | 8   | 5   | 23   | 0  |
| CONTIG-047837 | 219 | 12  | 12  | 74   | 0  |
| CONTIG-047839 | 75  | 7   | 2   | 12   | 0  |
| CONTIG-047840 | 81  | 6   | 7   | 3    | 0  |
| CONTIG-047841 | 119 | 3   | 0   | 11   | 0  |
| CONTIG-047842 | 84  | 11  | 16  | 6    | 0  |
| CONTIG-047843 | 96  | 3   | 2   | 9    | 0  |
| CONTIG-047844 | 60  | 28  | 5   | 36   | 0  |
| CONTIG-047846 | 387 | 10  | 21  | 82   | 4  |
| CONTIG-047847 | 296 | 15  | 33  | 164  | 2  |
| CONTIG-047848 | 72  | 6   | 2   | 8    | 0  |
| CONTIG-047849 | 172 | 3   | 11  | 5    | 0  |
| CONTIG-047850 | 386 | 14  | 35  | 167  | 0  |
| CONTIG-047851 | 68  | 16  | 31  | 22   | 0  |
| CONTIG-047852 | 81  | 8   | 17  | 11   | 0  |
| CONTIG-047853 | 232 | 20  | 13  | 132  | 0  |
| CONTIG-047854 | 63  | 5   | 8   | 4    | 0  |
| CONTIG-047855 | 115 | 5   | 9   | 6    | 0  |
| CONTIG-047856 | 205 | 10  | 20  | 70   | 0  |
| CONTIG-047857 | 250 | 16  | 14  | 65   | 3  |
| CONTIG-047858 | 424 | 22  | 43  | 490  | 0  |
| CONTIG-047859 | 868 | 32  | 114 | 1307 | 19 |
| CONTIG-047860 | 219 | 51  | 2   | 643  | 0  |
| CONTIG-047861 | 135 | 5   | 3   | 23   | 0  |
| CONTIG-047862 | 198 | 6   | 3   | 41   | 0  |
| CONTIG-047863 | 305 | 8   | 10  | 78   | 0  |
| CONTIG-047864 | 554 | 24  | 79  | 510  | 2  |
| CONTIG-047865 | 132 | 8   | 9   | 44   | 0  |
| CONTIG-047866 | 92  | 5   | 5   | 5    | 0  |
| CONTIG-047867 | 79  | 8   | 8   | 15   | 0  |
| CONTIG-047868 | 118 | 15  | 56  | 58   | 0  |
| CONTIG-047869 | 348 | 10  | 18  | 109  | 0  |
| CONTIG-047870 | 68  | 3   | 4   | 7    | 0  |
| CONTIG-047871 | 198 | 11  | 9   | 55   | 0  |
| CONTIG-047872 | 91  | 4   | 0   | 8    | 0  |
| CONTIG-047873 | 251 | 9   | 6   | 99   | 2  |
| CONTIG-047874 | 77  | 10  | 10  | 21   | 2  |
| CONTIG-047875 | 274 | 5   | 10  | 36   | 0  |
| CONTIG-047876 | 79  | 9   | 7   | 18   | 2  |
| CONTIG-047877 | 72  | 7   | 8   | 4    | 0  |



|               |     |    |    |     |    |
|---------------|-----|----|----|-----|----|
| CONTIG-047878 | 129 | 8  | 77 | 8   | 0  |
| CONTIG-047880 | 539 | 18 | 21 | 346 | 20 |
| CONTIG-047881 | 77  | 7  | 16 | 14  | 0  |
| CONTIG-047882 | 189 | 9  | 14 | 45  | 5  |
| CONTIG-047883 | 205 | 8  | 34 | 39  | 0  |
| CONTIG-047884 | 71  | 11 | 8  | 0   | 0  |
| CONTIG-047885 | 117 | 11 | 8  | 41  | 0  |
| CONTIG-047886 | 64  | 3  | 2  | 0   | 0  |
| CONTIG-047887 | 86  | 7  | 0  | 25  | 2  |
| CONTIG-047890 | 194 | 6  | 5  | 36  | 0  |
| CONTIG-047891 | 162 | 7  | 0  | 33  | 0  |
| CONTIG-047892 | 186 | 5  | 2  | 48  | 0  |
| CONTIG-047893 | 141 | 7  | 5  | 34  | 0  |
| CONTIG-047894 | 920 | 20 | 59 | 768 | 2  |
| CONTIG-047900 | 117 | 3  | 0  | 12  | 0  |
| CONTIG-047901 | 66  | 9  | 16 | 20  | 0  |
| CONTIG-047907 | 53  | 36 | 20 | 26  | 0  |
| CONTIG-047908 | 377 | 16 | 27 | 107 | 5  |
| CONTIG-047909 | 210 | 5  | 3  | 28  | 0  |
| CONTIG-047914 | 69  | 5  | 6  | 11  | 0  |
| CONTIG-047916 | 124 | 9  | 6  | 22  | 0  |
| CONTIG-047917 | 60  | 4  | 3  | 2   | 0  |
| CONTIG-047918 | 320 | 15 | 24 | 106 | 0  |
| CONTIG-047919 | 136 | 4  | 0  | 13  | 0  |
| CONTIG-047921 | 173 | 10 | 43 | 49  | 0  |
| CONTIG-047922 | 259 | 8  | 11 | 40  | 0  |
| CONTIG-047923 | 59  | 4  | 2  | 4   | 0  |
| CONTIG-047924 | 66  | 8  | 0  | 21  | 0  |
| CONTIG-047930 | 66  | 4  | 14 | 2   | 0  |
| CONTIG-047931 | 143 | 12 | 17 | 0   | 0  |
| CONTIG-047932 | 73  | 6  | 2  | 14  | 0  |
| CONTIG-047935 | 381 | 9  | 0  | 73  | 0  |
| CONTIG-047936 | 192 | 8  | 16 | 44  | 2  |
| CONTIG-047937 | 134 | 12 | 7  | 33  | 0  |
| CONTIG-047938 | 103 | 8  | 2  | 29  | 0  |
| CONTIG-047939 | 62  | 32 | 34 | 5   | 0  |
| CONTIG-047940 | 190 | 10 | 2  | 26  | 0  |
| CONTIG-047941 | 62  | 4  | 5  | 6   | 0  |
| CONTIG-047942 | 139 | 10 | 0  | 55  | 0  |
| CONTIG-047943 | 365 | 21 | 22 | 296 | 0  |
| CONTIG-047944 | 96  | 3  | 8  | 2   | 0  |
| CONTIG-047945 | 137 | 16 | 20 | 32  | 0  |
| CONTIG-047946 | 169 | 5  | 4  | 25  | 0  |
| CONTIG-047947 | 233 | 9  | 22 | 39  | 2  |
| CONTIG-047953 | 380 | 9  | 68 | 122 | 0  |
| CONTIG-047954 | 224 | 8  | 9  | 43  | 0  |
| CONTIG-047955 | 118 | 11 | 9  | 51  | 0  |

|               |     |     |    |     |    |
|---------------|-----|-----|----|-----|----|
| CONTIG-047956 | 118 | 5   | 4  | 19  | 0  |
| CONTIG-047957 | 103 | 11  | 24 | 40  | 0  |
| CONTIG-047958 | 444 | 28  | 62 | 506 | 0  |
| CONTIG-047959 | 217 | 9   | 7  | 68  | 0  |
| CONTIG-047960 | 65  | 14  | 2  | 40  | 0  |
| CONTIG-047962 | 393 | 10  | 14 | 136 | 0  |
| CONTIG-047963 | 140 | 9   | 14 | 34  | 0  |
| CONTIG-047964 | 108 | 35  | 78 | 33  | 4  |
| CONTIG-047966 | 53  | 106 | 33 | 108 | 0  |
| CONTIG-047967 | 117 | 3   | 3  | 8   | 0  |
| CONTIG-047968 | 181 | 13  | 29 | 41  | 0  |
| CONTIG-047969 | 67  | 4   | 0  | 0   | 0  |
| CONTIG-047970 | 380 | 9   | 13 | 114 | 2  |
| CONTIG-047971 | 124 | 5   | 0  | 0   | 0  |
| CONTIG-047972 | 122 | 4   | 2  | 5   | 0  |
| CONTIG-047973 | 133 | 4   | 4  | 7   | 0  |
| CONTIG-047974 | 60  | 4   | 10 | 0   | 0  |
| CONTIG-047975 | 64  | 86  | 64 | 123 | 0  |
| CONTIG-047976 | 85  | 13  | 11 | 33  | 0  |
| CONTIG-047977 | 128 | 6   | 14 | 18  | 0  |
| CONTIG-047978 | 149 | 7   | 2  | 29  | 0  |
| CONTIG-047979 | 92  | 9   | 9  | 32  | 0  |
| CONTIG-047980 | 121 | 5   | 2  | 23  | 0  |
| CONTIG-047981 | 103 | 5   | 17 | 8   | 0  |
| CONTIG-047982 | 118 | 11  | 2  | 32  | 2  |
| CONTIG-047983 | 68  | 6   | 28 | 2   | 0  |
| CONTIG-047984 | 97  | 6   | 14 | 4   | 0  |
| CONTIG-047985 | 737 | 18  | 6  | 480 | 8  |
| CONTIG-047987 | 77  | 3   | 0  | 4   | 0  |
| CONTIG-047988 | 82  | 7   | 3  | 14  | 2  |
| CONTIG-047989 | 112 | 6   | 0  | 22  | 0  |
| CONTIG-047990 | 185 | 7   | 14 | 55  | 0  |
| CONTIG-047991 | 161 | 23  | 56 | 127 | 0  |
| CONTIG-047992 | 149 | 16  | 23 | 121 | 0  |
| CONTIG-047993 | 358 | 17  | 3  | 239 | 2  |
| CONTIG-047994 | 124 | 6   | 11 | 18  | 0  |
| CONTIG-047995 | 126 | 9   | 28 | 8   | 2  |
| CONTIG-047996 | 360 | 20  | 14 | 48  | 0  |
| CONTIG-048002 | 143 | 9   | 0  | 31  | 0  |
| CONTIG-048003 | 128 | 11  | 14 | 40  | 0  |
| CONTIG-048004 | 85  | 3   | 6  | 6   | 0  |
| CONTIG-048005 | 60  | 8   | 22 | 4   | 0  |
| CONTIG-048006 | 74  | 4   | 5  | 7   | 0  |
| CONTIG-048007 | 83  | 4   | 3  | 4   | 0  |
| CONTIG-048018 | 123 | 12  | 18 | 42  | 0  |
| CONTIG-048019 | 179 | 20  | 5  | 80  | 18 |
| CONTIG-048024 | 91  | 9   | 3  | 2   | 0  |

|               |     |    |    |     |    |
|---------------|-----|----|----|-----|----|
| CONTIG-048025 | 43  | 60 | 5  | 84  | 0  |
| CONTIG-048026 | 112 | 8  | 2  | 8   | 2  |
| CONTIG-048028 | 74  | 15 | 2  | 0   | 0  |
| CONTIG-048030 | 455 | 14 | 58 | 231 | 0  |
| CONTIG-048032 | 120 | 5  | 0  | 16  | 0  |
| CONTIG-048033 | 171 | 20 | 14 | 153 | 0  |
| CONTIG-048034 | 119 | 10 | 0  | 8   | 0  |
| CONTIG-048035 | 61  | 6  | 10 | 8   | 0  |
| CONTIG-048036 | 142 | 6  | 10 | 10  | 0  |
| CONTIG-048037 | 281 | 7  | 19 | 52  | 0  |
| CONTIG-048039 | 139 | 5  | 9  | 17  | 0  |
| CONTIG-048043 | 284 | 9  | 6  | 81  | 0  |
| CONTIG-048044 | 280 | 7  | 19 | 30  | 0  |
| CONTIG-048045 | 157 | 9  | 2  | 46  | 0  |
| CONTIG-048046 | 85  | 8  | 5  | 7   | 0  |
| CONTIG-048047 | 81  | 4  | 8  | 0   | 0  |
| CONTIG-048048 | 247 | 7  | 2  | 35  | 2  |
| CONTIG-048049 | 304 | 11 | 10 | 80  | 0  |
| CONTIG-048050 | 273 | 20 | 11 | 223 | 0  |
| CONTIG-048051 | 74  | 4  | 0  | 8   | 0  |
| CONTIG-048054 | 174 | 22 | 13 | 153 | 0  |
| CONTIG-048061 | 75  | 6  | 2  | 10  | 0  |
| CONTIG-048062 | 145 | 38 | 41 | 208 | 0  |
| CONTIG-048063 | 122 | 28 | 2  | 191 | 0  |
| CONTIG-048064 | 265 | 9  | 23 | 65  | 0  |
| CONTIG-048065 | 356 | 16 | 33 | 189 | 0  |
| CONTIG-048066 | 568 | 8  | 7  | 155 | 2  |
| CONTIG-048067 | 759 | 25 | 56 | 750 | 6  |
| CONTIG-048069 | 114 | 12 | 0  | 55  | 0  |
| CONTIG-048070 | 103 | 7  | 2  | 6   | 2  |
| CONTIG-048071 | 146 | 6  | 2  | 20  | 0  |
| CONTIG-048072 | 82  | 3  | 0  | 0   | 0  |
| CONTIG-048074 | 425 | 7  | 5  | 86  | 2  |
| CONTIG-048075 | 71  | 4  | 6  | 4   | 0  |
| CONTIG-048076 | 77  | 3  | 0  | 6   | 0  |
| CONTIG-048077 | 171 | 7  | 10 | 39  | 0  |
| CONTIG-048079 | 43  | 46 | 0  | 78  | 0  |
| CONTIG-048080 | 109 | 15 | 5  | 60  | 2  |
| CONTIG-048081 | 320 | 15 | 17 | 156 | 6  |
| CONTIG-048083 | 407 | 15 | 14 | 120 | 22 |
| CONTIG-048084 | 55  | 33 | 8  | 78  | 0  |
| CONTIG-048085 | 182 | 11 | 5  | 66  | 0  |
| CONTIG-048088 | 308 | 11 | 37 | 103 | 2  |
| CONTIG-048089 | 119 | 13 | 40 | 41  | 0  |
| CONTIG-048090 | 75  | 6  | 13 | 0   | 0  |
| CONTIG-048091 | 287 | 16 | 45 | 138 | 0  |
| CONTIG-048092 | 195 | 6  | 13 | 41  | 0  |

|               |     |    |    |     |   |
|---------------|-----|----|----|-----|---|
| CONTIG-048093 | 263 | 12 | 27 | 33  | 0 |
| CONTIG-048096 | 76  | 7  | 10 | 8   | 0 |
| CONTIG-048097 | 150 | 5  | 4  | 18  | 0 |
| CONTIG-048098 | 156 | 4  | 7  | 2   | 0 |
| CONTIG-048099 | 47  | 23 | 5  | 30  | 0 |
| CONTIG-048100 | 198 | 10 | 2  | 69  | 0 |
| CONTIG-048101 | 123 | 10 | 17 | 43  | 0 |
| CONTIG-048102 | 59  | 97 | 20 | 194 | 0 |
| CONTIG-048103 | 191 | 19 | 19 | 99  | 0 |
| CONTIG-048108 | 128 | 35 | 21 | 110 | 2 |
| CONTIG-048109 | 63  | 5  | 0  | 15  | 0 |
| CONTIG-048110 | 157 | 6  | 4  | 27  | 0 |
| CONTIG-048111 | 104 | 10 | 4  | 45  | 0 |
| CONTIG-048112 | 115 | 7  | 5  | 35  | 0 |
| CONTIG-048113 | 206 | 14 | 27 | 71  | 0 |
| CONTIG-048114 | 211 | 16 | 16 | 89  | 0 |
| CONTIG-048115 | 107 | 13 | 0  | 60  | 0 |
| CONTIG-048116 | 449 | 14 | 24 | 252 | 0 |
| CONTIG-048117 | 261 | 6  | 17 | 27  | 0 |
| CONTIG-048118 | 89  | 6  | 4  | 13  | 0 |
| CONTIG-048119 | 250 | 7  | 7  | 41  | 2 |
| CONTIG-048120 | 131 | 12 | 51 | 18  | 0 |
| CONTIG-048121 | 63  | 8  | 6  | 12  | 0 |
| CONTIG-048122 | 80  | 6  | 0  | 11  | 0 |
| CONTIG-048123 | 129 | 15 | 13 | 60  | 0 |
| CONTIG-048124 | 197 | 7  | 0  | 71  | 0 |
| CONTIG-048125 | 429 | 15 | 46 | 138 | 6 |
| CONTIG-048126 | 331 | 10 | 12 | 51  | 0 |
| CONTIG-048127 | 398 | 11 | 12 | 137 | 0 |
| CONTIG-048128 | 144 | 5  | 0  | 7   | 0 |
| CONTIG-048129 | 498 | 11 | 6  | 35  | 0 |
| CONTIG-048130 | 80  | 5  | 17 | 2   | 0 |
| CONTIG-048131 | 236 | 16 | 2  | 16  | 0 |
| CONTIG-048132 | 222 | 12 | 17 | 74  | 0 |
| CONTIG-048133 | 98  | 5  | 0  | 12  | 0 |
| CONTIG-048134 | 200 | 8  | 11 | 17  | 2 |
| CONTIG-048136 | 63  | 4  | 2  | 0   | 2 |
| CONTIG-048137 | 201 | 8  | 13 | 55  | 0 |
| CONTIG-048138 | 547 | 17 | 48 | 278 | 2 |
| CONTIG-048143 | 116 | 8  | 25 | 5   | 0 |
| CONTIG-048144 | 60  | 4  | 14 | 0   | 0 |
| CONTIG-048145 | 64  | 15 | 6  | 0   | 0 |
| CONTIG-048147 | 110 | 5  | 2  | 9   | 0 |
| CONTIG-048148 | 63  | 12 | 18 | 21  | 0 |
| CONTIG-048149 | 85  | 7  | 0  | 10  | 0 |
| CONTIG-048150 | 77  | 9  | 12 | 19  | 0 |
| CONTIG-048151 | 217 | 10 | 49 | 41  | 0 |

|               |     |    |    |      |    |
|---------------|-----|----|----|------|----|
| CONTIG-048152 | 133 | 16 | 14 | 103  | 0  |
| CONTIG-048153 | 201 | 10 | 10 | 45   | 0  |
| CONTIG-048154 | 67  | 3  | 2  | 7    | 0  |
| CONTIG-048155 | 82  | 7  | 6  | 27   | 0  |
| CONTIG-048156 | 71  | 6  | 11 | 18   | 0  |
| CONTIG-048157 | 200 | 9  | 32 | 29   | 0  |
| CONTIG-048158 | 146 | 10 | 2  | 55   | 0  |
| CONTIG-048159 | 645 | 15 | 25 | 202  | 16 |
| CONTIG-048160 | 324 | 6  | 5  | 57   | 0  |
| CONTIG-048161 | 78  | 4  | 2  | 0    | 0  |
| CONTIG-048162 | 234 | 13 | 8  | 54   | 0  |
| CONTIG-048163 | 168 | 11 | 19 | 8    | 0  |
| CONTIG-048164 | 206 | 4  | 12 | 22   | 2  |
| CONTIG-048165 | 697 | 16 | 15 | 482  | 7  |
| CONTIG-048166 | 285 | 6  | 11 | 10   | 0  |
| CONTIG-048167 | 153 | 4  | 12 | 11   | 0  |
| CONTIG-048168 | 160 | 5  | 6  | 24   | 0  |
| CONTIG-048169 | 161 | 34 | 2  | 179  | 0  |
| CONTIG-048170 | 94  | 12 | 22 | 23   | 0  |
| CONTIG-048172 | 208 | 6  | 4  | 18   | 0  |
| CONTIG-048173 | 160 | 5  | 0  | 34   | 0  |
| CONTIG-048174 | 360 | 6  | 14 | 44   | 2  |
| CONTIG-048175 | 513 | 22 | 18 | 424  | 15 |
| CONTIG-048177 | 355 | 88 | 86 | 1834 | 0  |
| CONTIG-048178 | 135 | 15 | 6  | 45   | 0  |
| CONTIG-048180 | 68  | 10 | 0  | 21   | 0  |
| CONTIG-048181 | 157 | 3  | 0  | 0    | 0  |
| CONTIG-048182 | 298 | 6  | 34 | 21   | 0  |
| CONTIG-048183 | 386 | 25 | 33 | 295  | 0  |
| CONTIG-048184 | 81  | 14 | 5  | 48   | 0  |
| CONTIG-048185 | 130 | 28 | 47 | 88   | 3  |
| CONTIG-048186 | 398 | 12 | 7  | 3    | 0  |
| CONTIG-048188 | 249 | 7  | 7  | 29   | 0  |
| CONTIG-048189 | 215 | 8  | 5  | 72   | 0  |
| CONTIG-048191 | 162 | 37 | 28 | 261  | 0  |
| CONTIG-048192 | 380 | 30 | 78 | 282  | 7  |
| CONTIG-048193 | 179 | 8  | 18 | 21   | 0  |
| CONTIG-048194 | 94  | 8  | 0  | 43   | 0  |
| CONTIG-048195 | 118 | 23 | 53 | 74   | 0  |
| CONTIG-048198 | 203 | 5  | 11 | 37   | 0  |
| CONTIG-048199 | 141 | 3  | 0  | 4    | 0  |
| CONTIG-048200 | 130 | 13 | 9  | 82   | 0  |
| CONTIG-048201 | 76  | 10 | 3  | 2    | 0  |
| CONTIG-048202 | 245 | 15 | 63 | 147  | 4  |
| CONTIG-048203 | 231 | 18 | 78 | 165  | 0  |
| CONTIG-048204 | 412 | 12 | 33 | 206  | 0  |
| CONTIG-048205 | 145 | 11 | 2  | 66   | 0  |

|               |     |     |    |      |    |
|---------------|-----|-----|----|------|----|
| CONTIG-048206 | 231 | 16  | 20 | 18   | 0  |
| CONTIG-048208 | 160 | 9   | 15 | 51   | 0  |
| CONTIG-048209 | 128 | 6   | 8  | 17   | 0  |
| CONTIG-048210 | 343 | 19  | 23 | 315  | 0  |
| CONTIG-048211 | 133 | 8   | 14 | 16   | 0  |
| CONTIG-048212 | 58  | 9   | 8  | 0    | 0  |
| CONTIG-048213 | 222 | 10  | 9  | 50   | 0  |
| CONTIG-048214 | 118 | 10  | 3  | 26   | 0  |
| CONTIG-048215 | 69  | 3   | 6  | 4    | 0  |
| CONTIG-048216 | 107 | 134 | 17 | 495  | 30 |
| CONTIG-048218 | 108 | 10  | 6  | 21   | 0  |
| CONTIG-048219 | 38  | 117 | 12 | 191  | 0  |
| CONTIG-048220 | 112 | 394 | 19 | 1397 | 0  |
| CONTIG-048221 | 187 | 14  | 18 | 43   | 0  |
| CONTIG-048222 | 68  | 11  | 2  | 13   | 0  |
| CONTIG-048223 | 350 | 22  | 8  | 188  | 14 |
| CONTIG-048224 | 86  | 6   | 43 | 0    | 0  |
| CONTIG-048225 | 67  | 4   | 7  | 0    | 0  |
| CONTIG-048226 | 105 | 8   | 0  | 30   | 0  |
| CONTIG-048227 | 95  | 8   | 2  | 20   | 0  |
| CONTIG-048228 | 804 | 13  | 31 | 279  | 2  |
| CONTIG-048229 | 66  | 2   | 0  | 2    | 0  |
| CONTIG-048230 | 847 | 18  | 38 | 104  | 39 |
| CONTIG-048231 | 193 | 6   | 16 | 23   | 0  |
| CONTIG-048232 | 394 | 56  | 44 | 676  | 34 |
| CONTIG-048233 | 140 | 7   | 4  | 12   | 0  |
| CONTIG-048234 | 66  | 4   | 12 | 3    | 0  |
| CONTIG-048235 | 338 | 7   | 5  | 18   | 0  |
| CONTIG-048236 | 554 | 12  | 5  | 356  | 0  |
| CONTIG-048237 | 180 | 9   | 5  | 94   | 0  |
| CONTIG-048238 | 313 | 10  | 41 | 121  | 0  |
| CONTIG-048239 | 276 | 10  | 22 | 89   | 0  |
| CONTIG-048240 | 60  | 11  | 4  | 15   | 0  |
| CONTIG-048242 | 60  | 10  | 4  | 30   | 0  |
| CONTIG-048244 | 248 | 6   | 7  | 60   | 0  |
| CONTIG-048245 | 106 | 7   | 2  | 29   | 0  |
| CONTIG-048246 | 440 | 44  | 17 | 52   | 0  |
| CONTIG-048247 | 276 | 27  | 14 | 228  | 4  |
| CONTIG-048248 | 171 | 5   | 23 | 17   | 0  |
| CONTIG-048251 | 78  | 6   | 9  | 2    | 0  |
| CONTIG-048252 | 150 | 7   | 11 | 3    | 0  |
| CONTIG-048254 | 98  | 16  | 2  | 36   | 0  |
| CONTIG-048255 | 84  | 6   | 17 | 6    | 0  |
| CONTIG-048256 | 468 | 29  | 44 | 149  | 49 |
| CONTIG-048257 | 83  | 3   | 4  | 0    | 0  |
| CONTIG-048258 | 78  | 5   | 8  | 3    | 0  |
| CONTIG-048259 | 114 | 6   | 13 | 7    | 0  |

|               |     |    |     |     |   |
|---------------|-----|----|-----|-----|---|
| CONTIG-048260 | 44  | 18 | 5   | 9   | 0 |
| CONTIG-048261 | 63  | 4  | 11  | 0   | 0 |
| CONTIG-048262 | 62  | 14 | 29  | 24  | 0 |
| CONTIG-048263 | 485 | 17 | 136 | 324 | 0 |
| CONTIG-048267 | 87  | 8  | 11  | 7   | 0 |
| CONTIG-048268 | 177 | 11 | 12  | 43  | 0 |
| CONTIG-048269 | 81  | 6  | 2   | 18  | 2 |
| CONTIG-048270 | 615 | 11 | 8   | 9   | 0 |
| CONTIG-048271 | 87  | 3  | 2   | 12  | 0 |
| CONTIG-048272 | 83  | 8  | 12  | 19  | 0 |
| CONTIG-048273 | 259 | 8  | 40  | 65  | 0 |
| CONTIG-048274 | 684 | 18 | 68  | 400 | 4 |
| CONTIG-048275 | 334 | 15 | 39  | 108 | 6 |
| CONTIG-048276 | 272 | 8  | 33  | 71  | 0 |
| CONTIG-048277 | 136 | 10 | 48  | 18  | 0 |
| CONTIG-048278 | 99  | 6  | 4   | 5   | 0 |
| CONTIG-048279 | 106 | 7  | 22  | 2   | 0 |
| CONTIG-048280 | 164 | 9  | 2   | 46  | 0 |
| CONTIG-048281 | 43  | 52 | 28  | 61  | 4 |
| CONTIG-048283 | 178 | 6  | 5   | 23  | 0 |
| CONTIG-048284 | 172 | 16 | 45  | 71  | 2 |
| CONTIG-048286 | 85  | 63 | 10  | 305 | 0 |
| CONTIG-048289 | 207 | 20 | 17  | 180 | 0 |
| CONTIG-048290 | 66  | 10 | 11  | 7   | 0 |
| CONTIG-048291 | 135 | 12 | 23  | 55  | 0 |
| CONTIG-048292 | 63  | 7  | 11  | 0   | 0 |
| CONTIG-048293 | 61  | 2  | 0   | 4   | 0 |
| CONTIG-048294 | 241 | 7  | 0   | 62  | 0 |
| CONTIG-048295 | 239 | 7  | 26  | 49  | 0 |
| CONTIG-048296 | 235 | 12 | 17  | 101 | 0 |
| CONTIG-048297 | 147 | 12 | 37  | 49  | 0 |
| CONTIG-048298 | 160 | 9  | 3   | 63  | 0 |
| CONTIG-048299 | 65  | 5  | 6   | 2   | 0 |
| CONTIG-048300 | 206 | 12 | 20  | 55  | 2 |
| CONTIG-048301 | 75  | 5  | 8   | 4   | 0 |
| CONTIG-048302 | 168 | 7  | 12  | 12  | 0 |
| CONTIG-048303 | 115 | 4  | 18  | 7   | 0 |
| CONTIG-048304 | 127 | 6  | 10  | 28  | 0 |
| CONTIG-048305 | 432 | 13 | 9   | 32  | 3 |
| CONTIG-048306 | 401 | 10 | 18  | 98  | 0 |
| CONTIG-048307 | 237 | 10 | 4   | 98  | 0 |
| CONTIG-048308 | 54  | 7  | 0   | 3   | 0 |
| CONTIG-048309 | 248 | 5  | 18  | 30  | 0 |
| CONTIG-048311 | 85  | 5  | 4   | 12  | 0 |
| CONTIG-048312 | 113 | 8  | 6   | 29  | 0 |
| CONTIG-048319 | 203 | 10 | 0   | 69  | 0 |
| CONTIG-048320 | 81  | 8  | 2   | 13  | 0 |

|               |      |     |    |     |    |
|---------------|------|-----|----|-----|----|
| CONTIG-048321 | 161  | 5   | 2  | 12  | 0  |
| CONTIG-048322 | 69   | 7   | 4  | 0   | 0  |
| CONTIG-048323 | 60   | 4   | 0  | 9   | 0  |
| CONTIG-048324 | 62   | 2   | 0  | 2   | 0  |
| CONTIG-048325 | 445  | 13  | 15 | 150 | 4  |
| CONTIG-048326 | 233  | 11  | 36 | 104 | 0  |
| CONTIG-048327 | 162  | 8   | 3  | 61  | 0  |
| CONTIG-048328 | 86   | 5   | 0  | 6   | 0  |
| CONTIG-048329 | 100  | 5   | 3  | 7   | 0  |
| CONTIG-048330 | 217  | 10  | 51 | 48  | 0  |
| CONTIG-048331 | 76   | 7   | 21 | 4   | 0  |
| CONTIG-048333 | 61   | 10  | 17 | 2   | 0  |
| CONTIG-048338 | 240  | 5   | 6  | 15  | 2  |
| CONTIG-048339 | 125  | 9   | 14 | 33  | 0  |
| CONTIG-048340 | 60   | 115 | 17 | 22  | 0  |
| CONTIG-048341 | 251  | 14  | 9  | 109 | 8  |
| CONTIG-048342 | 169  | 15  | 22 | 55  | 7  |
| CONTIG-048344 | 116  | 30  | 13 | 112 | 0  |
| CONTIG-048346 | 64   | 6   | 20 | 0   | 0  |
| CONTIG-048348 | 258  | 12  | 31 | 65  | 0  |
| CONTIG-048349 | 264  | 12  | 9  | 110 | 4  |
| CONTIG-048350 | 74   | 3   | 0  | 6   | 0  |
| CONTIG-048351 | 168  | 11  | 8  | 70  | 0  |
| CONTIG-048352 | 232  | 13  | 0  | 97  | 0  |
| CONTIG-048353 | 1181 | 14  | 2  | 0   | 84 |
| CONTIG-048354 | 214  | 7   | 4  | 0   | 12 |
| CONTIG-048355 | 89   | 9   | 9  | 16  | 2  |
| CONTIG-048356 | 73   | 5   | 3  | 6   | 0  |
| CONTIG-048357 | 268  | 5   | 13 | 32  | 0  |
| CONTIG-048358 | 100  | 5   | 2  | 6   | 0  |
| CONTIG-048359 | 359  | 6   | 2  | 33  | 0  |
| CONTIG-048360 | 105  | 12  | 13 | 5   | 0  |
| CONTIG-048363 | 160  | 10  | 15 | 18  | 0  |
| CONTIG-048364 | 67   | 10  | 6  | 6   | 0  |
| CONTIG-048365 | 78   | 3   | 2  | 4   | 0  |
| CONTIG-048366 | 89   | 6   | 8  | 10  | 0  |
| CONTIG-048367 | 277  | 10  | 0  | 9   | 0  |
| CONTIG-048369 | 201  | 17  | 33 | 169 | 0  |
| CONTIG-048371 | 151  | 5   | 8  | 14  | 0  |
| CONTIG-048372 | 120  | 3   | 3  | 6   | 0  |
| CONTIG-048373 | 36   | 159 | 0  | 45  | 0  |
| CONTIG-048374 | 104  | 11  | 0  | 62  | 0  |
| CONTIG-048375 | 120  | 8   | 2  | 31  | 0  |
| CONTIG-048376 | 83   | 5   | 2  | 2   | 0  |
| CONTIG-048377 | 110  | 4   | 3  | 11  | 0  |
| CONTIG-048378 | 184  | 10  | 26 | 36  | 0  |
| CONTIG-048379 | 80   | 14  | 28 | 36  | 0  |



|               |     |     |    |      |    |
|---------------|-----|-----|----|------|----|
| CONTIG-048380 | 90  | 12  | 32 | 31   | 0  |
| CONTIG-048382 | 208 | 11  | 6  | 81   | 0  |
| CONTIG-048383 | 162 | 5   | 10 | 22   | 0  |
| CONTIG-048384 | 125 | 4   | 4  | 7    | 0  |
| CONTIG-048385 | 272 | 13  | 18 | 22   | 0  |
| CONTIG-048386 | 261 | 17  | 85 | 93   | 0  |
| CONTIG-048387 | 130 | 7   | 15 | 4    | 0  |
| CONTIG-048388 | 453 | 22  | 14 | 137  | 41 |
| CONTIG-048389 | 124 | 9   | 13 | 4    | 0  |
| CONTIG-048390 | 169 | 4   | 0  | 10   | 0  |
| CONTIG-048391 | 94  | 7   | 10 | 24   | 0  |
| CONTIG-048392 | 247 | 8   | 0  | 59   | 0  |
| CONTIG-048393 | 280 | 8   | 13 | 4    | 0  |
| CONTIG-048395 | 149 | 18  | 2  | 14   | 2  |
| CONTIG-048396 | 175 | 11  | 28 | 70   | 0  |
| CONTIG-048397 | 567 | 89  | 80 | 3308 | 0  |
| CONTIG-048398 | 95  | 6   | 17 | 5    | 0  |
| CONTIG-048399 | 406 | 15  | 18 | 168  | 2  |
| CONTIG-048400 | 139 | 11  | 9  | 54   | 0  |
| CONTIG-048401 | 100 | 13  | 37 | 28   | 0  |
| CONTIG-048402 | 153 | 10  | 6  | 66   | 0  |
| CONTIG-048403 | 58  | 3   | 4  | 5    | 0  |
| CONTIG-048404 | 58  | 4   | 6  | 2    | 0  |
| CONTIG-048405 | 91  | 242 | 12 | 834  | 0  |
| CONTIG-048406 | 935 | 22  | 36 | 626  | 25 |
| CONTIG-048408 | 66  | 8   | 4  | 16   | 0  |
| CONTIG-048409 | 73  | 3   | 4  | 0    | 2  |
| CONTIG-048410 | 143 | 10  | 22 | 4    | 0  |
| CONTIG-048411 | 86  | 3   | 2  | 0    | 0  |
| CONTIG-048412 | 200 | 6   | 4  | 2    | 0  |
| CONTIG-048413 | 200 | 14  | 20 | 87   | 0  |
| CONTIG-048414 | 155 | 6   | 15 | 15   | 0  |
| CONTIG-048416 | 174 | 10  | 24 | 51   | 0  |
| CONTIG-048417 | 168 | 5   | 14 | 7    | 0  |
| CONTIG-048418 | 170 | 4   | 15 | 15   | 0  |
| CONTIG-048423 | 101 | 8   | 4  | 27   | 0  |
| CONTIG-048424 | 95  | 7   | 4  | 0    | 0  |
| CONTIG-048425 | 356 | 15  | 16 | 306  | 0  |
| CONTIG-048426 | 136 | 4   | 2  | 20   | 0  |
| CONTIG-048429 | 102 | 5   | 5  | 4    | 0  |
| CONTIG-048431 | 168 | 7   | 10 | 34   | 0  |
| CONTIG-048432 | 109 | 4   | 7  | 8    | 0  |
| CONTIG-048433 | 154 | 72  | 21 | 3    | 0  |
| CONTIG-048434 | 158 | 13  | 50 | 22   | 0  |
| CONTIG-048435 | 134 | 9   | 10 | 30   | 0  |
| CONTIG-048436 | 464 | 8   | 0  | 0    | 2  |
| CONTIG-048437 | 141 | 15  | 95 | 57   | 0  |

|               |      |    |     |     |    |
|---------------|------|----|-----|-----|----|
| CONTIG-048438 | 583  | 11 | 36  | 184 | 2  |
| CONTIG-048439 | 138  | 6  | 6   | 19  | 0  |
| CONTIG-048440 | 815  | 24 | 136 | 366 | 2  |
| CONTIG-048441 | 124  | 11 | 2   | 70  | 0  |
| CONTIG-048442 | 277  | 9  | 8   | 36  | 4  |
| CONTIG-048444 | 173  | 9  | 3   | 53  | 2  |
| CONTIG-048445 | 335  | 6  | 2   | 17  | 2  |
| CONTIG-048446 | 75   | 10 | 19  | 6   | 0  |
| CONTIG-048447 | 231  | 9  | 44  | 22  | 0  |
| CONTIG-048448 | 59   | 11 | 0   | 34  | 0  |
| CONTIG-048449 | 129  | 9  | 4   | 32  | 0  |
| CONTIG-048452 | 201  | 31 | 6   | 2   | 0  |
| CONTIG-048453 | 113  | 8  | 7   | 15  | 0  |
| CONTIG-048455 | 208  | 10 | 12  | 86  | 0  |
| CONTIG-048456 | 132  | 8  | 0   | 0   | 0  |
| CONTIG-048457 | 118  | 11 | 23  | 51  | 0  |
| CONTIG-048458 | 36   | 4  | 2   | 0   | 0  |
| CONTIG-048459 | 140  | 3  | 7   | 5   | 0  |
| CONTIG-048460 | 329  | 8  | 27  | 107 | 2  |
| CONTIG-048461 | 74   | 11 | 28  | 3   | 0  |
| CONTIG-048462 | 58   | 3  | 2   | 2   | 0  |
| CONTIG-048463 | 241  | 8  | 4   | 39  | 0  |
| CONTIG-048464 | 93   | 8  | 2   | 26  | 0  |
| CONTIG-048468 | 89   | 4  | 7   | 4   | 0  |
| CONTIG-048469 | 176  | 17 | 38  | 123 | 0  |
| CONTIG-048470 | 36   | 81 | 7   | 77  | 0  |
| CONTIG-048471 | 68   | 50 | 31  | 109 | 0  |
| CONTIG-048472 | 197  | 17 | 6   | 113 | 0  |
| CONTIG-048473 | 250  | 12 | 12  | 131 | 0  |
| CONTIG-048474 | 244  | 13 | 2   | 127 | 0  |
| CONTIG-048475 | 144  | 4  | 8   | 4   | 0  |
| CONTIG-048476 | 76   | 5  | 3   | 9   | 2  |
| CONTIG-048477 | 74   | 14 | 8   | 36  | 0  |
| CONTIG-048479 | 599  | 12 | 37  | 221 | 0  |
| CONTIG-048480 | 59   | 4  | 5   | 7   | 0  |
| CONTIG-048481 | 451  | 13 | 2   | 168 | 2  |
| CONTIG-048482 | 97   | 10 | 0   | 36  | 0  |
| CONTIG-048483 | 215  | 8  | 5   | 45  | 0  |
| CONTIG-048484 | 60   | 6  | 0   | 7   | 0  |
| CONTIG-048485 | 111  | 8  | 4   | 20  | 2  |
| CONTIG-048486 | 298  | 5  | 15  | 23  | 2  |
| CONTIG-048487 | 123  | 7  | 9   | 22  | 0  |
| CONTIG-048488 | 1034 | 39 | 2   | 3   | 56 |
| CONTIG-048489 | 95   | 22 | 13  | 25  | 0  |
| CONTIG-048491 | 95   | 5  | 4   | 19  | 0  |
| CONTIG-048493 | 298  | 10 | 20  | 62  | 0  |
| CONTIG-048494 | 186  | 6  | 10  | 21  | 0  |

|               |      |     |    |     |    |
|---------------|------|-----|----|-----|----|
| CONTIG-048502 | 127  | 13  | 13 | 42  | 2  |
| CONTIG-048503 | 79   | 4   | 2  | 7   | 0  |
| CONTIG-048507 | 80   | 2   | 2  | 2   | 0  |
| CONTIG-048508 | 71   | 4   | 23 | 0   | 0  |
| CONTIG-048510 | 166  | 18  | 10 | 144 | 2  |
| CONTIG-048511 | 149  | 70  | 2  | 0   | 64 |
| CONTIG-048512 | 262  | 5   | 4  | 31  | 2  |
| CONTIG-048513 | 200  | 15  | 27 | 81  | 2  |
| CONTIG-048514 | 161  | 5   | 2  | 22  | 0  |
| CONTIG-048515 | 71   | 6   | 4  | 7   | 0  |
| CONTIG-048516 | 380  | 14  | 52 | 183 | 0  |
| CONTIG-048517 | 172  | 5   | 10 | 14  | 0  |
| CONTIG-048518 | 71   | 2   | 0  | 0   | 0  |
| CONTIG-048519 | 139  | 6   | 5  | 27  | 0  |
| CONTIG-048520 | 128  | 31  | 41 | 68  | 2  |
| CONTIG-048521 | 1346 | 18  | 88 | 689 | 9  |
| CONTIG-048522 | 85   | 9   | 14 | 11  | 0  |
| CONTIG-048523 | 138  | 4   | 2  | 17  | 0  |
| CONTIG-048524 | 157  | 6   | 6  | 0   | 6  |
| CONTIG-048525 | 127  | 12  | 3  | 3   | 0  |
| CONTIG-048526 | 309  | 10  | 17 | 53  | 4  |
| CONTIG-048527 | 97   | 3   | 11 | 0   | 0  |
| CONTIG-048528 | 96   | 3   | 0  | 7   | 0  |
| CONTIG-048529 | 217  | 19  | 10 | 76  | 0  |
| CONTIG-048531 | 127  | 6   | 5  | 15  | 0  |
| CONTIG-048532 | 167  | 7   | 14 | 27  | 0  |
| CONTIG-048533 | 135  | 6   | 9  | 22  | 0  |
| CONTIG-048534 | 145  | 5   | 8  | 10  | 0  |
| CONTIG-048535 | 119  | 7   | 8  | 22  | 0  |
| CONTIG-048536 | 171  | 16  | 36 | 39  | 0  |
| CONTIG-048537 | 39   | 7   | 8  | 7   | 0  |
| CONTIG-048538 | 95   | 4   | 5  | 7   | 0  |
| CONTIG-048539 | 132  | 6   | 3  | 28  | 0  |
| CONTIG-048541 | 230  | 7   | 8  | 57  | 0  |
| CONTIG-048542 | 175  | 11  | 24 | 27  | 0  |
| CONTIG-048543 | 407  | 9   | 35 | 100 | 0  |
| CONTIG-048544 | 246  | 14  | 76 | 123 | 0  |
| CONTIG-048545 | 67   | 3   | 7  | 2   | 0  |
| CONTIG-048546 | 266  | 8   | 7  | 76  | 4  |
| CONTIG-048547 | 779  | 17  | 19 | 794 | 0  |
| CONTIG-048548 | 255  | 16  | 7  | 45  | 4  |
| CONTIG-048549 | 151  | 7   | 8  | 33  | 2  |
| CONTIG-048560 | 331  | 135 | 29 | 202 | 2  |
| CONTIG-048561 | 83   | 98  | 17 | 298 | 0  |
| CONTIG-048562 | 201  | 25  | 35 | 149 | 0  |
| CONTIG-048564 | 228  | 6   | 8  | 33  | 0  |
| CONTIG-048565 | 80   | 28  | 7  | 102 | 0  |

|               |      |    |    |     |   |
|---------------|------|----|----|-----|---|
| CONTIG-048566 | 199  | 13 | 13 | 49  | 4 |
| CONTIG-048567 | 121  | 11 | 0  | 23  | 2 |
| CONTIG-048568 | 230  | 3  | 8  | 22  | 0 |
| CONTIG-048569 | 72   | 4  | 13 | 0   | 0 |
| CONTIG-048570 | 138  | 6  | 7  | 17  | 0 |
| CONTIG-048571 | 408  | 10 | 12 | 100 | 0 |
| CONTIG-048572 | 98   | 5  | 0  | 21  | 0 |
| CONTIG-048580 | 66   | 5  | 6  | 6   | 0 |
| CONTIG-048581 | 127  | 7  | 12 | 29  | 0 |
| CONTIG-048584 | 229  | 45 | 15 | 463 | 3 |
| CONTIG-048585 | 45   | 12 | 3  | 12  | 0 |
| CONTIG-048586 | 90   | 5  | 7  | 0   | 0 |
| CONTIG-048587 | 261  | 10 | 20 | 45  | 0 |
| CONTIG-048588 | 59   | 9  | 2  | 9   | 0 |
| CONTIG-048589 | 74   | 19 | 40 | 20  | 2 |
| CONTIG-048590 | 103  | 3  | 4  | 4   | 0 |
| CONTIG-048591 | 75   | 5  | 12 | 2   | 0 |
| CONTIG-048592 | 156  | 7  | 4  | 28  | 0 |
| CONTIG-048593 | 154  | 6  | 15 | 17  | 2 |
| CONTIG-048594 | 257  | 9  | 19 | 93  | 2 |
| CONTIG-048595 | 318  | 17 | 9  | 224 | 0 |
| CONTIG-048596 | 136  | 5  | 12 | 18  | 0 |
| CONTIG-048599 | 115  | 8  | 19 | 29  | 0 |
| CONTIG-048600 | 77   | 5  | 12 | 13  | 0 |
| CONTIG-048601 | 79   | 5  | 6  | 9   | 0 |
| CONTIG-048603 | 93   | 4  | 2  | 7   | 0 |
| CONTIG-048604 | 229  | 7  | 5  | 32  | 0 |
| CONTIG-048605 | 274  | 12 | 33 | 121 | 0 |
| CONTIG-048606 | 201  | 7  | 2  | 42  | 0 |
| CONTIG-048607 | 294  | 11 | 4  | 100 | 2 |
| CONTIG-048608 | 112  | 8  | 5  | 12  | 0 |
| CONTIG-048610 | 108  | 4  | 0  | 2   | 0 |
| CONTIG-048612 | 85   | 5  | 2  | 19  | 0 |
| CONTIG-048613 | 273  | 9  | 9  | 84  | 0 |
| CONTIG-048615 | 71   | 7  | 9  | 13  | 0 |
| CONTIG-048616 | 62   | 6  | 2  | 5   | 0 |
| CONTIG-048617 | 1500 | 18 | 61 | 590 | 6 |
| CONTIG-048618 | 136  | 4  | 2  | 2   | 0 |
| CONTIG-048619 | 64   | 6  | 31 | 6   | 0 |
| CONTIG-048620 | 95   | 4  | 2  | 12  | 0 |
| CONTIG-048621 | 66   | 9  | 16 | 12  | 0 |
| CONTIG-048622 | 730  | 12 | 24 | 283 | 0 |
| CONTIG-048623 | 100  | 7  | 2  | 4   | 0 |
| CONTIG-048624 | 108  | 6  | 0  | 12  | 0 |
| CONTIG-048625 | 137  | 10 | 6  | 54  | 2 |
| CONTIG-048626 | 104  | 7  | 0  | 33  | 0 |
| CONTIG-048627 | 95   | 2  | 0  | 6   | 0 |

|               |     |     |     |     |   |
|---------------|-----|-----|-----|-----|---|
| CONTIG-048628 | 83  | 17  | 29  | 4   | 0 |
| CONTIG-048631 | 78  | 5   | 6   | 11  | 0 |
| CONTIG-048632 | 352 | 15  | 10  | 186 | 0 |
| CONTIG-048633 | 142 | 7   | 20  | 35  | 0 |
| CONTIG-048634 | 87  | 17  | 34  | 50  | 0 |
| CONTIG-048635 | 80  | 5   | 3   | 10  | 0 |
| CONTIG-048636 | 58  | 2   | 2   | 0   | 0 |
| CONTIG-048637 | 323 | 9   | 19  | 67  | 0 |
| CONTIG-048638 | 123 | 9   | 43  | 12  | 0 |
| CONTIG-048639 | 179 | 24  | 63  | 79  | 5 |
| CONTIG-048640 | 105 | 14  | 44  | 32  | 0 |
| CONTIG-048641 | 384 | 17  | 10  | 221 | 0 |
| CONTIG-048642 | 113 | 4   | 3   | 8   | 0 |
| CONTIG-048643 | 94  | 5   | 38  | 0   | 0 |
| CONTIG-048644 | 262 | 16  | 16  | 73  | 0 |
| CONTIG-048645 | 346 | 11  | 33  | 130 | 0 |
| CONTIG-048646 | 76  | 3   | 0   | 0   | 0 |
| CONTIG-048647 | 99  | 10  | 23  | 21  | 0 |
| CONTIG-048648 | 102 | 5   | 8   | 15  | 0 |
| CONTIG-048649 | 98  | 9   | 5   | 27  | 0 |
| CONTIG-048650 | 121 | 7   | 15  | 17  | 0 |
| CONTIG-048651 | 180 | 7   | 19  | 29  | 0 |
| CONTIG-048652 | 67  | 6   | 25  | 0   | 0 |
| CONTIG-048653 | 177 | 3   | 2   | 13  | 0 |
| CONTIG-048654 | 157 | 6   | 0   | 5   | 0 |
| CONTIG-048655 | 264 | 21  | 42  | 291 | 0 |
| CONTIG-048656 | 200 | 86  | 181 | 509 | 0 |
| CONTIG-048657 | 128 | 4   | 3   | 9   | 0 |
| CONTIG-048658 | 198 | 9   | 7   | 36  | 0 |
| CONTIG-048659 | 310 | 59  | 162 | 703 | 0 |
| CONTIG-048660 | 242 | 11  | 29  | 79  | 0 |
| CONTIG-048661 | 63  | 16  | 13  | 16  | 0 |
| CONTIG-048662 | 340 | 11  | 10  | 40  | 0 |
| CONTIG-048663 | 130 | 11  | 37  | 10  | 0 |
| CONTIG-048664 | 294 | 8   | 0   | 86  | 0 |
| CONTIG-048665 | 69  | 7   | 0   | 10  | 0 |
| CONTIG-048666 | 78  | 6   | 10  | 0   | 0 |
| CONTIG-048667 | 160 | 7   | 5   | 43  | 0 |
| CONTIG-048669 | 162 | 21  | 0   | 0   | 6 |
| CONTIG-048670 | 90  | 6   | 15  | 0   | 0 |
| CONTIG-048671 | 194 | 7   | 14  | 31  | 0 |
| CONTIG-048672 | 547 | 22  | 33  | 446 | 6 |
| CONTIG-048675 | 354 | 8   | 30  | 78  | 0 |
| CONTIG-048676 | 572 | 282 | 49  | 55  | 0 |
| CONTIG-048677 | 170 | 8   | 2   | 45  | 0 |
| CONTIG-048678 | 247 | 22  | 61  | 123 | 0 |
| CONTIG-048679 | 81  | 5   | 16  | 8   | 0 |

|               |      |    |    |     |    |
|---------------|------|----|----|-----|----|
| CONTIG-048680 | 74   | 4  | 5  | 4   | 0  |
| CONTIG-048681 | 1794 | 19 | 51 | 914 | 10 |
| CONTIG-048682 | 112  | 11 | 13 | 9   | 0  |
| CONTIG-048683 | 77   | 8  | 9  | 6   | 0  |
| CONTIG-048684 | 192  | 6  | 6  | 27  | 0  |
| CONTIG-048685 | 358  | 8  | 28 | 68  | 0  |
| CONTIG-048688 | 61   | 58 | 15 | 178 | 0  |
| CONTIG-048689 | 68   | 56 | 31 | 44  | 0  |
| CONTIG-048690 | 168  | 13 | 6  | 86  | 2  |
| CONTIG-048691 | 347  | 9  | 27 | 112 | 0  |
| CONTIG-048692 | 112  | 8  | 14 | 18  | 0  |
| CONTIG-048695 | 67   | 15 | 5  | 22  | 0  |
| CONTIG-048696 | 377  | 18 | 15 | 53  | 0  |
| CONTIG-048697 | 129  | 3  | 3  | 8   | 0  |
| CONTIG-048698 | 142  | 5  | 27 | 8   | 0  |
| CONTIG-048699 | 107  | 6  | 20 | 9   | 0  |
| CONTIG-048700 | 64   | 5  | 4  | 5   | 0  |
| CONTIG-048701 | 152  | 5  | 4  | 17  | 2  |
| CONTIG-048702 | 117  | 6  | 2  | 20  | 0  |
| CONTIG-048703 | 217  | 9  | 2  | 80  | 0  |
| CONTIG-048704 | 425  | 7  | 18 | 75  | 2  |
| CONTIG-048705 | 107  | 9  | 14 | 27  | 0  |
| CONTIG-048706 | 184  | 12 | 7  | 54  | 5  |
| CONTIG-048707 | 121  | 13 | 57 | 33  | 0  |
| CONTIG-048708 | 125  | 5  | 9  | 14  | 0  |
| CONTIG-048709 | 122  | 15 | 12 | 61  | 3  |
| CONTIG-048710 | 79   | 3  | 7  | 4   | 0  |
| CONTIG-048711 | 108  | 6  | 3  | 7   | 0  |
| CONTIG-048712 | 99   | 8  | 18 | 12  | 0  |
| CONTIG-048713 | 169  | 17 | 48 | 0   | 16 |
| CONTIG-048715 | 181  | 10 | 7  | 45  | 0  |
| CONTIG-048716 | 161  | 8  | 4  | 30  | 0  |
| CONTIG-048717 | 179  | 11 | 18 | 47  | 2  |
| CONTIG-048718 | 427  | 21 | 58 | 387 | 2  |
| CONTIG-048722 | 105  | 7  | 3  | 2   | 0  |
| CONTIG-048723 | 453  | 16 | 44 | 233 | 4  |
| CONTIG-048724 | 129  | 5  | 12 | 5   | 0  |
| CONTIG-048725 | 59   | 3  | 3  | 3   | 0  |
| CONTIG-048726 | 171  | 5  | 6  | 19  | 0  |
| CONTIG-048728 | 167  | 17 | 27 | 51  | 0  |
| CONTIG-048729 | 295  | 10 | 15 | 80  | 2  |
| CONTIG-048730 | 353  | 15 | 37 | 113 | 0  |
| CONTIG-048733 | 309  | 13 | 7  | 183 | 0  |
| CONTIG-048734 | 282  | 7  | 41 | 68  | 0  |
| CONTIG-048737 | 80   | 4  | 4  | 14  | 0  |
| CONTIG-048738 | 168  | 15 | 34 | 95  | 0  |
| CONTIG-048739 | 132  | 5  | 2  | 17  | 0  |

|               |     |    |     |     |     |
|---------------|-----|----|-----|-----|-----|
| CONTIG-048740 | 92  | 13 | 4   | 29  | 2   |
| CONTIG-048741 | 88  | 4  | 2   | 8   | 0   |
| CONTIG-048742 | 293 | 10 | 46  | 70  | 2   |
| CONTIG-048743 | 174 | 6  | 26  | 9   | 0   |
| CONTIG-048744 | 251 | 20 | 22  | 164 | 2   |
| CONTIG-048745 | 82  | 5  | 6   | 2   | 0   |
| CONTIG-048747 | 297 | 13 | 27  | 126 | 0   |
| CONTIG-048748 | 149 | 5  | 12  | 14  | 0   |
| CONTIG-048749 | 256 | 6  | 27  | 8   | 2   |
| CONTIG-048750 | 242 | 15 | 37  | 179 | 0   |
| CONTIG-048752 | 172 | 10 | 17  | 71  | 0   |
| CONTIG-048754 | 128 | 30 | 11  | 181 | 0   |
| CONTIG-048755 | 97  | 4  | 0   | 4   | 0   |
| CONTIG-048756 | 252 | 9  | 24  | 17  | 0   |
| CONTIG-048757 | 73  | 6  | 0   | 14  | 0   |
| CONTIG-048758 | 140 | 6  | 2   | 19  | 0   |
| CONTIG-048759 | 70  | 12 | 2   | 30  | 0   |
| CONTIG-048760 | 60  | 12 | 45  | 2   | 0   |
| CONTIG-048761 | 225 | 22 | 9   | 48  | 8   |
| CONTIG-048762 | 788 | 17 | 59  | 764 | 0   |
| CONTIG-048763 | 310 | 38 | 29  | 212 | 0   |
| CONTIG-048764 | 119 | 5  | 12  | 9   | 0   |
| CONTIG-048765 | 68  | 6  | 11  | 4   | 0   |
| CONTIG-048766 | 81  | 4  | 6   | 8   | 0   |
| CONTIG-048767 | 453 | 16 | 8   | 408 | 0   |
| CONTIG-048768 | 221 | 7  | 5   | 27  | 12  |
| CONTIG-048769 | 90  | 5  | 6   | 4   | 0   |
| CONTIG-048770 | 104 | 3  | 3   | 9   | 0   |
| CONTIG-048771 | 133 | 11 | 42  | 31  | 0   |
| CONTIG-048772 | 116 | 9  | 0   | 22  | 2   |
| CONTIG-048773 | 315 | 8  | 10  | 5   | 0   |
| CONTIG-048774 | 114 | 6  | 22  | 13  | 0   |
| CONTIG-048775 | 530 | 29 | 124 | 195 | 2   |
| CONTIG-048776 | 108 | 9  | 7   | 30  | 0   |
| CONTIG-048777 | 113 | 8  | 10  | 7   | 0   |
| CONTIG-048778 | 62  | 9  | 5   | 0   | 0   |
| CONTIG-048779 | 78  | 6  | 16  | 2   | 0   |
| CONTIG-048780 | 169 | 41 | 13  | 277 | 0   |
| CONTIG-048781 | 59  | 3  | 2   | 6   | 0   |
| CONTIG-048782 | 154 | 10 | 11  | 26  | 0   |
| CONTIG-048783 | 65  | 3  | 0   | 5   | 0   |
| CONTIG-048784 | 62  | 26 | 142 | 11  | 0   |
| CONTIG-048785 | 86  | 10 | 20  | 6   | 0   |
| CONTIG-048786 | 781 | 75 | 3   | 2   | 740 |
| CONTIG-048787 | 65  | 10 | 10  | 22  | 0   |
| CONTIG-048788 | 142 | 3  | 3   | 18  | 0   |
| CONTIG-048789 | 102 | 7  | 10  | 14  | 0   |

|               |      |    |    |     |     |
|---------------|------|----|----|-----|-----|
| CONTIG-048790 | 78   | 9  | 2  | 29  | 0   |
| CONTIG-048791 | 434  | 10 | 10 | 70  | 6   |
| CONTIG-048792 | 77   | 3  | 3  | 4   | 0   |
| CONTIG-048793 | 122  | 5  | 6  | 7   | 0   |
| CONTIG-048794 | 316  | 13 | 46 | 104 | 0   |
| CONTIG-048795 | 920  | 38 | 2  | 0   | 385 |
| CONTIG-048796 | 94   | 3  | 13 | 0   | 0   |
| CONTIG-048797 | 121  | 5  | 4  | 8   | 0   |
| CONTIG-048798 | 138  | 13 | 5  | 60  | 4   |
| CONTIG-048799 | 890  | 9  | 18 | 255 | 0   |
| CONTIG-048800 | 61   | 5  | 2  | 0   | 0   |
| CONTIG-048801 | 329  | 8  | 18 | 37  | 0   |
| CONTIG-048805 | 61   | 11 | 20 | 2   | 0   |
| CONTIG-048806 | 100  | 4  | 10 | 8   | 0   |
| CONTIG-048807 | 129  | 6  | 16 | 12  | 0   |
| CONTIG-048808 | 108  | 4  | 3  | 9   | 0   |
| CONTIG-048809 | 540  | 13 | 16 | 194 | 0   |
| CONTIG-048810 | 123  | 10 | 18 | 25  | 0   |
| CONTIG-048811 | 78   | 7  | 14 | 12  | 0   |
| CONTIG-048812 | 166  | 6  | 10 | 15  | 0   |
| CONTIG-048813 | 119  | 12 | 39 | 36  | 0   |
| CONTIG-048814 | 1039 | 15 | 27 | 499 | 3   |
| CONTIG-048815 | 110  | 6  | 6  | 22  | 2   |
| CONTIG-048816 | 152  | 6  | 9  | 24  | 0   |
| CONTIG-048817 | 156  | 13 | 12 | 71  | 0   |
| CONTIG-048818 | 297  | 8  | 21 | 39  | 0   |
| CONTIG-048819 | 166  | 7  | 10 | 49  | 0   |
| CONTIG-048820 | 475  | 12 | 11 | 191 | 0   |
| CONTIG-048821 | 123  | 13 | 11 | 15  | 2   |
| CONTIG-048822 | 391  | 8  | 8  | 50  | 33  |
| CONTIG-048823 | 186  | 11 | 56 | 60  | 0   |
| CONTIG-048824 | 62   | 4  | 0  | 6   | 0   |
| CONTIG-048825 | 223  | 7  | 4  | 28  | 0   |
| CONTIG-048826 | 171  | 8  | 11 | 25  | 0   |
| CONTIG-048827 | 90   | 10 | 5  | 42  | 0   |
| CONTIG-048828 | 497  | 20 | 22 | 393 | 0   |
| CONTIG-048829 | 411  | 6  | 23 | 65  | 0   |
| CONTIG-048830 | 83   | 4  | 2  | 12  | 0   |
| CONTIG-048832 | 103  | 11 | 16 | 43  | 0   |
| CONTIG-048836 | 213  | 15 | 6  | 74  | 2   |
| CONTIG-048837 | 102  | 4  | 2  | 0   | 0   |
| CONTIG-048838 | 152  | 10 | 8  | 56  | 0   |
| CONTIG-048844 | 119  | 4  | 8  | 9   | 0   |
| CONTIG-048847 | 166  | 6  | 7  | 25  | 0   |
| CONTIG-048848 | 71   | 9  | 12 | 16  | 0   |
| CONTIG-048849 | 112  | 15 | 0  | 8   | 0   |
| CONTIG-048850 | 110  | 11 | 11 | 29  | 0   |



|               |     |     |    |     |     |
|---------------|-----|-----|----|-----|-----|
| CONTIG-048851 | 96  | 7   | 11 | 14  | 0   |
| CONTIG-048852 | 75  | 5   | 8  | 11  | 0   |
| CONTIG-048853 | 572 | 17  | 99 | 317 | 2   |
| CONTIG-048859 | 333 | 21  | 46 | 2   | 0   |
| CONTIG-048860 | 759 | 16  | 33 | 387 | 0   |
| CONTIG-048861 | 169 | 12  | 40 | 36  | 0   |
| CONTIG-048862 | 188 | 7   | 6  | 2   | 0   |
| CONTIG-048863 | 109 | 6   | 0  | 8   | 0   |
| CONTIG-048864 | 95  | 7   | 15 | 18  | 0   |
| CONTIG-048865 | 435 | 47  | 4  | 0   | 266 |
| CONTIG-048866 | 99  | 8   | 15 | 4   | 0   |
| CONTIG-048868 | 143 | 5   | 15 | 9   | 0   |
| CONTIG-048869 | 115 | 6   | 3  | 15  | 0   |
| CONTIG-048873 | 193 | 8   | 17 | 60  | 0   |
| CONTIG-048874 | 96  | 4   | 0  | 0   | 0   |
| CONTIG-048875 | 112 | 5   | 4  | 6   | 0   |
| CONTIG-048876 | 63  | 2   | 0  | 7   | 0   |
| CONTIG-048877 | 458 | 9   | 32 | 179 | 0   |
| CONTIG-048878 | 185 | 11  | 8  | 47  | 2   |
| CONTIG-048879 | 180 | 11  | 17 | 78  | 0   |
| CONTIG-048880 | 214 | 16  | 26 | 90  | 0   |
| CONTIG-048881 | 66  | 5   | 3  | 5   | 0   |
| CONTIG-048882 | 197 | 7   | 6  | 6   | 0   |
| CONTIG-048883 | 148 | 4   | 17 | 0   | 0   |
| CONTIG-048884 | 175 | 9   | 6  | 56  | 2   |
| CONTIG-048885 | 297 | 11  | 17 | 132 | 0   |
| CONTIG-048886 | 241 | 15  | 2  | 200 | 0   |
| CONTIG-048887 | 90  | 3   | 4  | 3   | 0   |
| CONTIG-048895 | 69  | 5   | 3  | 12  | 0   |
| CONTIG-048896 | 126 | 107 | 90 | 484 | 0   |
| CONTIG-048897 | 612 | 19  | 15 | 98  | 74  |
| CONTIG-048898 | 83  | 8   | 4  | 7   | 0   |
| CONTIG-048899 | 96  | 4   | 5  | 10  | 0   |
| CONTIG-048900 | 245 | 10  | 17 | 91  | 0   |
| CONTIG-048901 | 100 | 12  | 18 | 24  | 0   |
| CONTIG-048902 | 192 | 7   | 5  | 30  | 0   |
| CONTIG-048903 | 365 | 9   | 15 | 108 | 0   |
| CONTIG-048904 | 453 | 18  | 58 | 242 | 11  |
| CONTIG-048905 | 92  | 8   | 6  | 16  | 0   |
| CONTIG-048906 | 449 | 11  | 47 | 138 | 0   |
| CONTIG-048907 | 381 | 11  | 50 | 66  | 0   |
| CONTIG-048908 | 117 | 8   | 8  | 43  | 0   |
| CONTIG-048909 | 72  | 8   | 16 | 8   | 0   |
| CONTIG-048910 | 66  | 7   | 4  | 17  | 0   |
| CONTIG-048911 | 118 | 9   | 0  | 2   | 2   |
| CONTIG-048912 | 67  | 10  | 21 | 11  | 0   |
| CONTIG-048913 | 309 | 7   | 9  | 66  | 0   |

|               |     |    |    |     |    |
|---------------|-----|----|----|-----|----|
| CONTIG-048914 | 112 | 26 | 22 | 51  | 2  |
| CONTIG-048915 | 77  | 8  | 19 | 5   | 0  |
| CONTIG-048916 | 89  | 4  | 2  | 0   | 0  |
| CONTIG-048919 | 129 | 15 | 0  | 44  | 2  |
| CONTIG-048920 | 310 | 15 | 15 | 167 | 4  |
| CONTIG-048921 | 101 | 10 | 9  | 37  | 0  |
| CONTIG-048922 | 70  | 6  | 0  | 8   | 0  |
| CONTIG-048923 | 110 | 12 | 12 | 62  | 0  |
| CONTIG-048924 | 60  | 11 | 30 | 0   | 0  |
| CONTIG-048925 | 114 | 7  | 2  | 23  | 3  |
| CONTIG-048926 | 202 | 8  | 22 | 55  | 0  |
| CONTIG-048927 | 66  | 8  | 6  | 13  | 0  |
| CONTIG-048928 | 61  | 4  | 4  | 2   | 0  |
| CONTIG-048929 | 87  | 7  | 11 | 5   | 0  |
| CONTIG-048930 | 95  | 3  | 2  | 6   | 0  |
| CONTIG-048931 | 159 | 8  | 19 | 48  | 0  |
| CONTIG-048932 | 110 | 8  | 17 | 17  | 0  |
| CONTIG-048933 | 173 | 6  | 4  | 13  | 0  |
| CONTIG-048934 | 327 | 13 | 74 | 14  | 0  |
| CONTIG-048935 | 219 | 8  | 15 | 45  | 0  |
| CONTIG-048941 | 452 | 13 | 20 | 102 | 0  |
| CONTIG-048942 | 90  | 6  | 3  | 24  | 0  |
| CONTIG-048943 | 97  | 13 | 47 | 32  | 0  |
| CONTIG-048945 | 95  | 12 | 19 | 30  | 0  |
| CONTIG-048946 | 257 | 6  | 13 | 25  | 0  |
| CONTIG-048947 | 306 | 10 | 54 | 43  | 2  |
| CONTIG-048948 | 81  | 12 | 7  | 45  | 0  |
| CONTIG-048949 | 80  | 10 | 18 | 24  | 0  |
| CONTIG-048950 | 87  | 11 | 18 | 6   | 0  |
| CONTIG-048951 | 847 | 16 | 66 | 252 | 16 |
| CONTIG-048952 | 172 | 14 | 9  | 74  | 0  |
| CONTIG-048953 | 78  | 11 | 11 | 6   | 0  |
| CONTIG-048955 | 205 | 10 | 5  | 69  | 4  |
| CONTIG-048956 | 189 | 7  | 19 | 30  | 0  |
| CONTIG-048957 | 84  | 5  | 3  | 6   | 0  |
| CONTIG-048958 | 100 | 8  | 17 | 8   | 0  |
| CONTIG-048959 | 654 | 16 | 71 | 455 | 5  |
| CONTIG-048960 | 154 | 8  | 12 | 39  | 2  |
| CONTIG-048961 | 71  | 13 | 3  | 6   | 0  |
| CONTIG-048962 | 162 | 4  | 11 | 7   | 0  |
| CONTIG-048963 | 74  | 4  | 2  | 6   | 0  |
| CONTIG-048964 | 94  | 7  | 2  | 22  | 0  |
| CONTIG-048966 | 134 | 8  | 9  | 32  | 0  |
| CONTIG-048967 | 162 | 6  | 5  | 24  | 0  |
| CONTIG-048968 | 535 | 16 | 42 | 205 | 2  |
| CONTIG-048969 | 199 | 5  | 7  | 7   | 0  |
| CONTIG-048970 | 70  | 8  | 0  | 23  | 0  |

|               |     |    |    |     |    |
|---------------|-----|----|----|-----|----|
| CONTIG-048971 | 62  | 6  | 5  | 2   | 0  |
| CONTIG-048972 | 85  | 4  | 5  | 7   | 0  |
| CONTIG-048975 | 172 | 4  | 10 | 4   | 0  |
| CONTIG-048976 | 407 | 13 | 20 | 214 | 2  |
| CONTIG-048977 | 88  | 6  | 4  | 13  | 0  |
| CONTIG-048978 | 461 | 12 | 21 | 3   | 0  |
| CONTIG-048979 | 159 | 6  | 0  | 33  | 0  |
| CONTIG-048980 | 92  | 42 | 22 | 184 | 0  |
| CONTIG-048981 | 105 | 4  | 5  | 10  | 0  |
| CONTIG-048982 | 282 | 10 | 27 | 89  | 0  |
| CONTIG-048983 | 122 | 26 | 7  | 101 | 0  |
| CONTIG-048984 | 63  | 3  | 2  | 4   | 0  |
| CONTIG-048985 | 77  | 6  | 30 | 2   | 0  |
| CONTIG-048986 | 113 | 10 | 2  | 36  | 0  |
| CONTIG-048987 | 376 | 11 | 40 | 56  | 2  |
| CONTIG-048989 | 124 | 20 | 22 | 95  | 0  |
| CONTIG-048990 | 323 | 8  | 0  | 28  | 0  |
| CONTIG-048991 | 88  | 10 | 4  | 32  | 0  |
| CONTIG-048992 | 246 | 7  | 6  | 57  | 0  |
| CONTIG-048993 | 230 | 9  | 5  | 68  | 0  |
| CONTIG-048994 | 283 | 16 | 16 | 124 | 0  |
| CONTIG-048996 | 101 | 7  | 7  | 9   | 0  |
| CONTIG-048997 | 138 | 4  | 2  | 13  | 0  |
| CONTIG-048998 | 89  | 7  | 11 | 20  | 0  |
| CONTIG-048999 | 244 | 23 | 2  | 315 | 0  |
| CONTIG-049000 | 81  | 4  | 2  | 5   | 0  |
| CONTIG-049001 | 298 | 15 | 11 | 216 | 0  |
| CONTIG-049002 | 308 | 14 | 35 | 132 | 0  |
| CONTIG-049003 | 161 | 8  | 14 | 20  | 0  |
| CONTIG-049004 | 63  | 11 | 2  | 0   | 0  |
| CONTIG-049005 | 572 | 10 | 6  | 69  | 0  |
| CONTIG-049008 | 193 | 9  | 29 | 39  | 0  |
| CONTIG-049009 | 163 | 34 | 13 | 218 | 0  |
| CONTIG-049010 | 67  | 6  | 6  | 10  | 0  |
| CONTIG-049011 | 278 | 9  | 53 | 42  | 0  |
| CONTIG-049012 | 205 | 9  | 11 | 52  | 0  |
| CONTIG-049015 | 104 | 11 | 2  | 50  | 0  |
| CONTIG-049016 | 148 | 11 | 7  | 48  | 0  |
| CONTIG-049018 | 272 | 6  | 23 | 53  | 0  |
| CONTIG-049019 | 187 | 12 | 10 | 49  | 0  |
| CONTIG-049020 | 193 | 8  | 33 | 25  | 0  |
| CONTIG-049021 | 152 | 7  | 24 | 23  | 0  |
| CONTIG-049022 | 162 | 87 | 4  | 0   | 33 |
| CONTIG-049023 | 230 | 8  | 8  | 70  | 0  |
| CONTIG-049025 | 92  | 5  | 0  | 12  | 0  |
| CONTIG-049026 | 77  | 5  | 19 | 10  | 0  |
| CONTIG-049027 | 72  | 4  | 9  | 6   | 0  |

|               |      |    |     |      |    |
|---------------|------|----|-----|------|----|
| CONTIG-049028 | 72   | 4  | 2   | 6    | 0  |
| CONTIG-049029 | 79   | 5  | 7   | 2    | 0  |
| CONTIG-049030 | 309  | 8  | 0   | 89   | 0  |
| CONTIG-049031 | 303  | 96 | 65  | 1100 | 2  |
| CONTIG-049032 | 117  | 15 | 30  | 76   | 0  |
| CONTIG-049033 | 121  | 8  | 3   | 26   | 0  |
| CONTIG-049034 | 89   | 6  | 0   | 15   | 0  |
| CONTIG-049035 | 140  | 3  | 4   | 0    | 0  |
| CONTIG-049036 | 95   | 5  | 14  | 3    | 0  |
| CONTIG-049037 | 71   | 11 | 12  | 6    | 0  |
| CONTIG-049038 | 110  | 24 | 12  | 72   | 0  |
| CONTIG-049040 | 75   | 3  | 11  | 4    | 0  |
| CONTIG-049041 | 172  | 4  | 5   | 12   | 0  |
| CONTIG-049043 | 231  | 10 | 15  | 37   | 0  |
| CONTIG-049046 | 152  | 5  | 6   | 13   | 0  |
| CONTIG-049047 | 59   | 10 | 17  | 13   | 0  |
| CONTIG-049048 | 330  | 9  | 19  | 46   | 0  |
| CONTIG-049049 | 159  | 26 | 52  | 119  | 2  |
| CONTIG-049050 | 352  | 15 | 16  | 155  | 10 |
| CONTIG-049051 | 98   | 13 | 52  | 29   | 0  |
| CONTIG-049052 | 92   | 9  | 3   | 7    | 0  |
| CONTIG-049053 | 150  | 11 | 9   | 78   | 0  |
| CONTIG-049054 | 173  | 5  | 8   | 15   | 0  |
| CONTIG-049055 | 72   | 5  | 3   | 13   | 0  |
| CONTIG-049056 | 239  | 30 | 27  | 243  | 0  |
| CONTIG-049057 | 177  | 14 | 38  | 64   | 2  |
| CONTIG-049059 | 60   | 10 | 11  | 8    | 0  |
| CONTIG-049060 | 240  | 15 | 0   | 44   | 0  |
| CONTIG-049061 | 127  | 5  | 2   | 11   | 0  |
| CONTIG-049062 | 409  | 28 | 119 | 282  | 6  |
| CONTIG-049065 | 160  | 5  | 6   | 14   | 0  |
| CONTIG-049066 | 311  | 12 | 12  | 148  | 0  |
| CONTIG-049067 | 211  | 8  | 27  | 51   | 0  |
| CONTIG-049069 | 286  | 20 | 56  | 110  | 2  |
| CONTIG-049070 | 1105 | 33 | 9   | 106  | 0  |
| CONTIG-049071 | 85   | 5  | 2   | 10   | 0  |
| CONTIG-049072 | 151  | 10 | 15  | 41   | 0  |
| CONTIG-049073 | 333  | 15 | 47  | 171  | 0  |
| CONTIG-049074 | 113  | 3  | 3   | 8    | 0  |
| CONTIG-049075 | 64   | 12 | 5   | 24   | 0  |
| CONTIG-049078 | 103  | 6  | 5   | 10   | 0  |
| CONTIG-049081 | 145  | 6  | 14  | 24   | 0  |
| CONTIG-049082 | 200  | 10 | 11  | 48   | 2  |
| CONTIG-049084 | 183  | 13 | 6   | 50   | 4  |
| CONTIG-049085 | 58   | 6  | 20  | 2    | 0  |
| CONTIG-049086 | 117  | 13 | 42  | 27   | 0  |
| CONTIG-049088 | 107  | 12 | 16  | 19   | 0  |

|               |     |    |     |     |    |
|---------------|-----|----|-----|-----|----|
| CONTIG-049089 | 482 | 22 | 74  | 258 | 11 |
| CONTIG-049090 | 905 | 72 | 16  | 34  | 0  |
| CONTIG-049091 | 77  | 2  | 2   | 0   | 0  |
| CONTIG-049092 | 112 | 10 | 11  | 27  | 0  |
| CONTIG-049093 | 277 | 9  | 12  | 71  | 0  |
| CONTIG-049094 | 64  | 12 | 0   | 0   | 0  |
| CONTIG-049095 | 61  | 17 | 107 | 0   | 0  |
| CONTIG-049096 | 65  | 38 | 57  | 81  | 0  |
| CONTIG-049097 | 264 | 5  | 0   | 48  | 0  |
| CONTIG-049098 | 126 | 3  | 7   | 4   | 0  |
| CONTIG-049099 | 171 | 7  | 7   | 32  | 0  |
| CONTIG-049100 | 359 | 11 | 47  | 130 | 0  |
| CONTIG-049101 | 166 | 4  | 4   | 17  | 0  |
| CONTIG-049102 | 75  | 7  | 10  | 11  | 0  |
| CONTIG-049103 | 121 | 10 | 6   | 17  | 0  |
| CONTIG-049105 | 71  | 6  | 16  | 5   | 0  |
| CONTIG-049106 | 181 | 6  | 21  | 7   | 0  |
| CONTIG-049107 | 171 | 5  | 24  | 6   | 0  |
| CONTIG-049108 | 190 | 14 | 35  | 66  | 0  |
| CONTIG-049109 | 174 | 3  | 2   | 10  | 0  |
| CONTIG-049110 | 706 | 24 | 45  | 501 | 29 |
| CONTIG-049111 | 155 | 16 | 39  | 74  | 0  |
| CONTIG-049112 | 180 | 11 | 23  | 41  | 2  |
| CONTIG-049113 | 95  | 6  | 4   | 8   | 0  |
| CONTIG-049114 | 110 | 32 | 7   | 14  | 0  |
| CONTIG-049115 | 198 | 11 | 46  | 72  | 0  |
| CONTIG-049116 | 149 | 11 | 4   | 21  | 0  |
| CONTIG-049117 | 204 | 11 | 38  | 44  | 0  |
| CONTIG-049121 | 96  | 8  | 5   | 31  | 0  |
| CONTIG-049122 | 67  | 5  | 7   | 9   | 0  |
| CONTIG-049123 | 136 | 4  | 2   | 18  | 0  |
| CONTIG-049124 | 292 | 22 | 64  | 77  | 11 |
| CONTIG-049125 | 60  | 9  | 0   | 11  | 0  |
| CONTIG-049126 | 123 | 25 | 39  | 99  | 0  |
| CONTIG-049127 | 61  | 4  | 7   | 2   | 0  |
| CONTIG-049128 | 71  | 4  | 5   | 4   | 0  |
| CONTIG-049129 | 372 | 8  | 55  | 112 | 0  |
| CONTIG-049130 | 70  | 2  | 2   | 0   | 0  |
| CONTIG-049131 | 198 | 7  | 12  | 27  | 0  |
| CONTIG-049132 | 819 | 19 | 24  | 538 | 13 |
| CONTIG-049133 | 138 | 7  | 23  | 8   | 0  |
| CONTIG-049134 | 73  | 6  | 8   | 2   | 0  |
| CONTIG-049139 | 75  | 6  | 7   | 16  | 0  |
| CONTIG-049140 | 116 | 12 | 14  | 17  | 0  |
| CONTIG-049141 | 247 | 9  | 5   | 54  | 2  |
| CONTIG-049142 | 94  | 9  | 6   | 9   | 0  |
| CONTIG-049143 | 677 | 14 | 47  | 300 | 2  |

|               |     |     |    |      |    |
|---------------|-----|-----|----|------|----|
| CONTIG-049144 | 119 | 8   | 11 | 14   | 0  |
| CONTIG-049145 | 275 | 12  | 7  | 129  | 2  |
| CONTIG-049146 | 89  | 8   | 2  | 33   | 0  |
| CONTIG-049147 | 121 | 5   | 0  | 14   | 0  |
| CONTIG-049148 | 86  | 7   | 20 | 10   | 0  |
| CONTIG-049157 | 190 | 9   | 11 | 27   | 0  |
| CONTIG-049158 | 136 | 10  | 14 | 26   | 2  |
| CONTIG-049159 | 277 | 12  | 29 | 76   | 2  |
| CONTIG-049160 | 283 | 9   | 2  | 70   | 0  |
| CONTIG-049161 | 156 | 16  | 10 | 61   | 0  |
| CONTIG-049162 | 143 | 12  | 12 | 32   | 0  |
| CONTIG-049163 | 251 | 7   | 5  | 50   | 2  |
| CONTIG-049164 | 64  | 3   | 0  | 0    | 0  |
| CONTIG-049165 | 191 | 12  | 25 | 63   | 2  |
| CONTIG-049166 | 101 | 19  | 55 | 14   | 2  |
| CONTIG-049167 | 136 | 6   | 11 | 23   | 2  |
| CONTIG-049168 | 76  | 6   | 2  | 13   | 0  |
| CONTIG-049169 | 147 | 10  | 6  | 22   | 0  |
| CONTIG-049170 | 250 | 11  | 16 | 106  | 0  |
| CONTIG-049171 | 627 | 46  | 20 | 1781 | 0  |
| CONTIG-049172 | 83  | 10  | 2  | 19   | 0  |
| CONTIG-049178 | 105 | 4   | 2  | 10   | 0  |
| CONTIG-049179 | 491 | 12  | 34 | 197  | 2  |
| CONTIG-049180 | 227 | 10  | 5  | 84   | 4  |
| CONTIG-049181 | 83  | 3   | 3  | 6    | 2  |
| CONTIG-049182 | 137 | 12  | 8  | 15   | 0  |
| CONTIG-049184 | 216 | 7   | 5  | 49   | 4  |
| CONTIG-049185 | 59  | 10  | 2  | 0    | 0  |
| CONTIG-049186 | 58  | 15  | 13 | 38   | 0  |
| CONTIG-049187 | 98  | 6   | 5  | 7    | 0  |
| CONTIG-049188 | 211 | 20  | 3  | 131  | 0  |
| CONTIG-049189 | 202 | 7   | 10 | 36   | 0  |
| CONTIG-049190 | 77  | 3   | 0  | 2    | 0  |
| CONTIG-049191 | 59  | 6   | 17 | 6    | 0  |
| CONTIG-049192 | 92  | 8   | 13 | 21   | 0  |
| CONTIG-049193 | 219 | 5   | 8  | 29   | 0  |
| CONTIG-049194 | 61  | 24  | 7  | 26   | 0  |
| CONTIG-049195 | 495 | 15  | 85 | 120  | 6  |
| CONTIG-049196 | 422 | 8   | 4  | 119  | 0  |
| CONTIG-049197 | 80  | 9   | 22 | 8    | 0  |
| CONTIG-049198 | 196 | 9   | 16 | 44   | 0  |
| CONTIG-049205 | 155 | 12  | 53 | 38   | 0  |
| CONTIG-049206 | 78  | 4   | 2  | 8    | 0  |
| CONTIG-049207 | 36  | 958 | 2  | 1511 | 16 |
| CONTIG-049208 | 245 | 8   | 6  | 27   | 0  |
| CONTIG-049209 | 80  | 9   | 19 | 0    | 0  |
| CONTIG-049210 | 86  | 6   | 8  | 14   | 0  |

|               |     |    |     |      |   |
|---------------|-----|----|-----|------|---|
| CONTIG-049211 | 107 | 5  | 8   | 18   | 0 |
| CONTIG-049214 | 195 | 9  | 0   | 3    | 0 |
| CONTIG-049215 | 106 | 8  | 2   | 28   | 0 |
| CONTIG-049216 | 515 | 15 | 48  | 157  | 4 |
| CONTIG-049219 | 271 | 6  | 21  | 23   | 0 |
| CONTIG-049220 | 67  | 9  | 43  | 0    | 0 |
| CONTIG-049221 | 69  | 9  | 3   | 18   | 0 |
| CONTIG-049222 | 116 | 9  | 15  | 35   | 2 |
| CONTIG-049223 | 206 | 7  | 0   | 7    | 0 |
| CONTIG-049224 | 103 | 4  | 3   | 10   | 0 |
| CONTIG-049225 | 79  | 6  | 2   | 0    | 0 |
| CONTIG-049226 | 70  | 5  | 2   | 8    | 0 |
| CONTIG-049227 | 89  | 4  | 7   | 10   | 0 |
| CONTIG-049228 | 158 | 5  | 13  | 12   | 0 |
| CONTIG-049229 | 867 | 19 | 769 | 399  | 0 |
| CONTIG-049230 | 150 | 11 | 15  | 47   | 0 |
| CONTIG-049231 | 96  | 9  | 6   | 20   | 2 |
| CONTIG-049232 | 108 | 10 | 0   | 54   | 2 |
| CONTIG-049233 | 72  | 8  | 9   | 13   | 0 |
| CONTIG-049234 | 966 | 28 | 98  | 1145 | 6 |
| CONTIG-049235 | 160 | 9  | 10  | 13   | 0 |
| CONTIG-049236 | 354 | 7  | 16  | 81   | 0 |
| CONTIG-049237 | 63  | 4  | 13  | 0    | 0 |
| CONTIG-049238 | 61  | 12 | 17  | 0    | 0 |
| CONTIG-049239 | 248 | 15 | 11  | 35   | 0 |
| CONTIG-049240 | 225 | 7  | 12  | 37   | 0 |
| CONTIG-049241 | 93  | 6  | 2   | 12   | 0 |
| CONTIG-049243 | 73  | 3  | 5   | 9    | 0 |
| CONTIG-049244 | 60  | 20 | 11  | 21   | 0 |
| CONTIG-049245 | 67  | 8  | 6   | 4    | 0 |
| CONTIG-049246 | 109 | 8  | 0   | 36   | 0 |
| CONTIG-049247 | 90  | 3  | 14  | 3    | 0 |
| CONTIG-049249 | 60  | 4  | 2   | 13   | 0 |
| CONTIG-049250 | 70  | 8  | 14  | 15   | 0 |
| CONTIG-049251 | 206 | 4  | 10  | 0    | 0 |
| CONTIG-049253 | 124 | 4  | 0   | 9    | 0 |
| CONTIG-049254 | 431 | 24 | 12  | 439  | 6 |
| CONTIG-049255 | 165 | 13 | 27  | 46   | 0 |
| CONTIG-049259 | 353 | 13 | 17  | 141  | 0 |
| CONTIG-049261 | 88  | 3  | 8   | 0    | 0 |
| CONTIG-049262 | 78  | 5  | 0   | 7    | 0 |
| CONTIG-049263 | 72  | 3  | 2   | 0    | 0 |
| CONTIG-049264 | 96  | 13 | 20  | 38   | 0 |
| CONTIG-049266 | 191 | 15 | 38  | 31   | 0 |
| CONTIG-049267 | 84  | 6  | 5   | 16   | 0 |
| CONTIG-049268 | 112 | 8  | 14  | 30   | 0 |
| CONTIG-049269 | 508 | 11 | 15  | 108  | 0 |

|               |     |     |     |      |     |
|---------------|-----|-----|-----|------|-----|
| CONTIG-049270 | 81  | 4   | 6   | 6    | 0   |
| CONTIG-049271 | 83  | 5   | 7   | 8    | 0   |
| CONTIG-049272 | 251 | 9   | 15  | 35   | 0   |
| CONTIG-049273 | 143 | 5   | 9   | 16   | 0   |
| CONTIG-049274 | 105 | 8   | 10  | 14   | 0   |
| CONTIG-049277 | 61  | 7   | 8   | 14   | 0   |
| CONTIG-049278 | 68  | 5   | 9   | 4    | 0   |
| CONTIG-049279 | 76  | 6   | 2   | 9    | 0   |
| CONTIG-049280 | 224 | 7   | 17  | 64   | 0   |
| CONTIG-049281 | 208 | 8   | 25  | 57   | 0   |
| CONTIG-049282 | 78  | 6   | 18  | 14   | 0   |
| CONTIG-049283 | 76  | 3   | 7   | 0    | 0   |
| CONTIG-049284 | 462 | 18  | 16  | 51   | 0   |
| CONTIG-049285 | 112 | 7   | 13  | 32   | 0   |
| CONTIG-049286 | 144 | 6   | 0   | 25   | 0   |
| CONTIG-049287 | 206 | 10  | 9   | 26   | 2   |
| CONTIG-049288 | 69  | 236 | 59  | 590  | 2   |
| CONTIG-049289 | 120 | 8   | 10  | 10   | 0   |
| CONTIG-049290 | 188 | 44  | 45  | 307  | 3   |
| CONTIG-049291 | 194 | 9   | 2   | 58   | 0   |
| CONTIG-049292 | 60  | 8   | 3   | 0    | 0   |
| CONTIG-049293 | 80  | 295 | 199 | 1077 | 2   |
| CONTIG-049294 | 79  | 5   | 3   | 6    | 0   |
| CONTIG-049295 | 70  | 4   | 2   | 2    | 0   |
| CONTIG-049296 | 145 | 10  | 5   | 30   | 0   |
| CONTIG-049297 | 88  | 4   | 5   | 8    | 0   |
| CONTIG-049298 | 163 | 6   | 8   | 37   | 0   |
| CONTIG-049299 | 509 | 18  | 3   | 32   | 2   |
| CONTIG-049300 | 58  | 5   | 12  | 2    | 0   |
| CONTIG-049301 | 152 | 10  | 0   | 41   | 0   |
| CONTIG-049302 | 236 | 9   | 28  | 61   | 0   |
| CONTIG-049304 | 214 | 15  | 14  | 83   | 4   |
| CONTIG-049305 | 968 | 21  | 5   | 0    | 103 |
| CONTIG-049306 | 59  | 7   | 6   | 2    | 0   |
| CONTIG-049307 | 103 | 6   | 11  | 11   | 0   |
| CONTIG-049308 | 63  | 13  | 4   | 6    | 0   |
| CONTIG-049309 | 195 | 20  | 18  | 192  | 4   |
| CONTIG-049310 | 69  | 10  | 3   | 30   | 0   |
| CONTIG-049311 | 366 | 14  | 21  | 181  | 2   |
| CONTIG-049312 | 348 | 11  | 2   | 161  | 2   |
| CONTIG-049323 | 169 | 19  | 10  | 175  | 0   |
| CONTIG-049324 | 306 | 13  | 14  | 102  | 6   |
| CONTIG-049325 | 111 | 10  | 0   | 28   | 0   |
| CONTIG-049326 | 66  | 4   | 6   | 3    | 0   |
| CONTIG-049327 | 75  | 117 | 31  | 305  | 0   |
| CONTIG-049328 | 126 | 11  | 28  | 25   | 0   |
| CONTIG-049329 | 85  | 7   | 2   | 25   | 0   |



|               |     |     |    |     |    |
|---------------|-----|-----|----|-----|----|
| CONTIG-049330 | 109 | 5   | 2  | 0   | 0  |
| CONTIG-049331 | 42  | 158 | 18 | 52  | 0  |
| CONTIG-049332 | 166 | 8   | 0  | 33  | 0  |
| CONTIG-049333 | 71  | 5   | 4  | 0   | 0  |
| CONTIG-049334 | 270 | 18  | 19 | 158 | 6  |
| CONTIG-049335 | 157 | 6   | 5  | 19  | 0  |
| CONTIG-049336 | 85  | 10  | 6  | 30  | 0  |
| CONTIG-049337 | 97  | 4   | 15 | 11  | 0  |
| CONTIG-049338 | 347 | 14  | 42 | 139 | 2  |
| CONTIG-049339 | 78  | 6   | 2  | 11  | 0  |
| CONTIG-049340 | 89  | 6   | 2  | 6   | 0  |
| CONTIG-049341 | 301 | 7   | 18 | 69  | 0  |
| CONTIG-049342 | 101 | 9   | 6  | 17  | 2  |
| CONTIG-049343 | 246 | 17  | 3  | 0   | 13 |
| CONTIG-049346 | 126 | 8   | 17 | 24  | 0  |
| CONTIG-049347 | 81  | 4   | 5  | 5   | 0  |
| CONTIG-049348 | 158 | 5   | 14 | 6   | 0  |
| CONTIG-049350 | 86  | 2   | 0  | 2   | 0  |
| CONTIG-049351 | 158 | 5   | 5  | 15  | 0  |
| CONTIG-049352 | 361 | 11  | 18 | 125 | 6  |
| CONTIG-049353 | 132 | 10  | 7  | 31  | 0  |
| CONTIG-049354 | 147 | 10  | 5  | 49  | 0  |
| CONTIG-049355 | 230 | 10  | 17 | 95  | 2  |
| CONTIG-049356 | 536 | 11  | 0  | 0   | 2  |
| CONTIG-049357 | 96  | 6   | 28 | 0   | 0  |
| CONTIG-049358 | 72  | 15  | 18 | 28  | 0  |
| CONTIG-049359 | 92  | 13  | 30 | 13  | 0  |
| CONTIG-049360 | 99  | 42  | 12 | 112 | 0  |
| CONTIG-049362 | 243 | 8   | 8  | 39  | 2  |
| CONTIG-049363 | 96  | 14  | 6  | 56  | 0  |
| CONTIG-049364 | 123 | 12  | 10 | 44  | 0  |
| CONTIG-049365 | 276 | 6   | 5  | 55  | 0  |
| CONTIG-049366 | 90  | 8   | 34 | 13  | 0  |
| CONTIG-049367 | 224 | 12  | 25 | 99  | 0  |
| CONTIG-049368 | 427 | 14  | 36 | 235 | 0  |
| CONTIG-049369 | 87  | 13  | 4  | 0   | 7  |
| CONTIG-049370 | 285 | 25  | 35 | 292 | 4  |
| CONTIG-049371 | 61  | 9   | 0  | 22  | 0  |
| CONTIG-049372 | 353 | 16  | 33 | 168 | 2  |
| CONTIG-049373 | 42  | 100 | 0  | 81  | 0  |
| CONTIG-049376 | 164 | 10  | 55 | 40  | 0  |
| CONTIG-049377 | 125 | 5   | 3  | 21  | 0  |
| CONTIG-049380 | 120 | 5   | 10 | 4   | 0  |
| CONTIG-049381 | 70  | 5   | 6  | 7   | 0  |
| CONTIG-049382 | 103 | 11  | 18 | 36  | 0  |
| CONTIG-049383 | 64  | 5   | 8  | 5   | 0  |
| CONTIG-049384 | 168 | 12  | 8  | 28  | 0  |

|               |     |     |     |      |     |
|---------------|-----|-----|-----|------|-----|
| CONTIG-049389 | 365 | 10  | 10  | 130  | 0   |
| CONTIG-049390 | 62  | 6   | 0   | 17   | 0   |
| CONTIG-049391 | 801 | 42  | 13  | 1754 | 0   |
| CONTIG-049393 | 59  | 15  | 12  | 15   | 0   |
| CONTIG-049394 | 189 | 7   | 7   | 37   | 2   |
| CONTIG-049395 | 137 | 445 | 85  | 1978 | 0   |
| CONTIG-049396 | 128 | 21  | 51  | 89   | 0   |
| CONTIG-049397 | 235 | 12  | 11  | 98   | 0   |
| CONTIG-049404 | 68  | 7   | 10  | 5    | 0   |
| CONTIG-049405 | 244 | 14  | 6   | 0    | 24  |
| CONTIG-049409 | 220 | 5   | 0   | 41   | 0   |
| CONTIG-049410 | 167 | 6   | 3   | 29   | 0   |
| CONTIG-049411 | 146 | 7   | 11  | 30   | 0   |
| CONTIG-049412 | 191 | 11  | 12  | 51   | 0   |
| CONTIG-049413 | 345 | 26  | 57  | 207  | 0   |
| CONTIG-049414 | 244 | 15  | 44  | 53   | 0   |
| CONTIG-049415 | 566 | 15  | 45  | 339  | 0   |
| CONTIG-049416 | 223 | 5   | 6   | 28   | 0   |
| CONTIG-049422 | 138 | 12  | 2   | 0    | 0   |
| CONTIG-049423 | 278 | 8   | 26  | 66   | 0   |
| CONTIG-049424 | 64  | 3   | 4   | 4    | 0   |
| CONTIG-049425 | 104 | 9   | 10  | 45   | 0   |
| CONTIG-049426 | 503 | 14  | 33  | 285  | 0   |
| CONTIG-049427 | 434 | 14  | 24  | 195  | 5   |
| CONTIG-049428 | 323 | 32  | 72  | 178  | 21  |
| CONTIG-049431 | 64  | 4   | 13  | 2    | 0   |
| CONTIG-049432 | 63  | 65  | 9   | 212  | 0   |
| CONTIG-049433 | 445 | 22  | 6   | 0    | 10  |
| CONTIG-049434 | 73  | 4   | 4   | 6    | 0   |
| CONTIG-049435 | 183 | 12  | 111 | 47   | 0   |
| CONTIG-049436 | 259 | 21  | 0   | 42   | 0   |
| CONTIG-049437 | 194 | 10  | 12  | 52   | 0   |
| CONTIG-049440 | 95  | 8   | 18  | 11   | 0   |
| CONTIG-049441 | 97  | 17  | 47  | 2    | 0   |
| CONTIG-049442 | 143 | 159 | 8   | 0    | 100 |
| CONTIG-049443 | 297 | 13  | 18  | 117  | 0   |
| CONTIG-049444 | 63  | 4   | 6   | 5    | 0   |
| CONTIG-049445 | 392 | 8   | 25  | 96   | 0   |
| CONTIG-049446 | 149 | 5   | 3   | 24   | 0   |
| CONTIG-049447 | 59  | 7   | 6   | 9    | 0   |
| CONTIG-049448 | 183 | 10  | 7   | 67   | 0   |
| CONTIG-049449 | 153 | 4   | 4   | 6    | 0   |
| CONTIG-049450 | 272 | 16  | 15  | 178  | 0   |
| CONTIG-049451 | 97  | 4   | 4   | 7    | 0   |
| CONTIG-049452 | 146 | 9   | 15  | 35   | 0   |
| CONTIG-049453 | 151 | 7   | 8   | 27   | 0   |
| CONTIG-049454 | 166 | 9   | 23  | 20   | 0   |

|               |     |    |    |     |    |
|---------------|-----|----|----|-----|----|
| CONTIG-049455 | 80  | 5  | 0  | 14  | 0  |
| CONTIG-049456 | 198 | 7  | 39 | 33  | 0  |
| CONTIG-049458 | 471 | 13 | 71 | 266 | 0  |
| CONTIG-049459 | 449 | 12 | 14 | 275 | 0  |
| CONTIG-049460 | 228 | 37 | 41 | 79  | 4  |
| CONTIG-049461 | 60  | 5  | 6  | 3   | 0  |
| CONTIG-049463 | 310 | 17 | 6  | 254 | 3  |
| CONTIG-049464 | 182 | 9  | 8  | 41  | 0  |
| CONTIG-049465 | 63  | 16 | 7  | 39  | 0  |
| CONTIG-049466 | 352 | 8  | 7  | 46  | 0  |
| CONTIG-049467 | 156 | 6  | 8  | 30  | 0  |
| CONTIG-049469 | 85  | 18 | 0  | 0   | 8  |
| CONTIG-049470 | 63  | 10 | 4  | 11  | 0  |
| CONTIG-049471 | 120 | 16 | 32 | 13  | 0  |
| CONTIG-049472 | 169 | 13 | 34 | 71  | 0  |
| CONTIG-049473 | 66  | 7  | 4  | 16  | 0  |
| CONTIG-049474 | 240 | 8  | 12 | 62  | 0  |
| CONTIG-049475 | 222 | 6  | 27 | 35  | 0  |
| CONTIG-049476 | 211 | 6  | 7  | 30  | 0  |
| CONTIG-049478 | 135 | 17 | 21 | 67  | 0  |
| CONTIG-049479 | 78  | 3  | 6  | 4   | 0  |
| CONTIG-049480 | 43  | 32 | 0  | 29  | 0  |
| CONTIG-049481 | 51  | 67 | 0  | 84  | 0  |
| CONTIG-049482 | 156 | 5  | 12 | 16  | 0  |
| CONTIG-049483 | 236 | 18 | 6  | 8   | 0  |
| CONTIG-049484 | 86  | 5  | 4  | 7   | 0  |
| CONTIG-049489 | 133 | 6  | 4  | 28  | 0  |
| CONTIG-049490 | 109 | 3  | 3  | 11  | 0  |
| CONTIG-049491 | 147 | 20 | 25 | 48  | 0  |
| CONTIG-049492 | 172 | 11 | 7  | 46  | 0  |
| CONTIG-049493 | 110 | 7  | 4  | 38  | 0  |
| CONTIG-049494 | 177 | 28 | 57 | 111 | 5  |
| CONTIG-049495 | 64  | 13 | 0  | 0   | 2  |
| CONTIG-049496 | 92  | 6  | 3  | 15  | 0  |
| CONTIG-049498 | 336 | 8  | 6  | 110 | 0  |
| CONTIG-049499 | 562 | 11 | 22 | 209 | 2  |
| CONTIG-049500 | 477 | 14 | 5  | 259 | 0  |
| CONTIG-049501 | 412 | 25 | 98 | 213 | 16 |
| CONTIG-049502 | 63  | 5  | 2  | 7   | 0  |
| CONTIG-049503 | 196 | 9  | 38 | 34  | 0  |
| CONTIG-049505 | 66  | 5  | 2  | 10  | 0  |
| CONTIG-049507 | 771 | 13 | 19 | 116 | 0  |
| CONTIG-049508 | 310 | 9  | 4  | 74  | 0  |
| CONTIG-049509 | 209 | 11 | 18 | 100 | 0  |
| CONTIG-049510 | 87  | 5  | 0  | 7   | 0  |
| CONTIG-049512 | 210 | 4  | 13 | 7   | 0  |
| CONTIG-049513 | 539 | 9  | 2  | 149 | 2  |

|               |     |     |    |     |    |
|---------------|-----|-----|----|-----|----|
| CONTIG-049514 | 68  | 9   | 2  | 25  | 0  |
| CONTIG-049515 | 168 | 27  | 13 | 110 | 3  |
| CONTIG-049516 | 152 | 8   | 4  | 43  | 0  |
| CONTIG-049517 | 92  | 21  | 10 | 28  | 0  |
| CONTIG-049518 | 156 | 7   | 21 | 22  | 0  |
| CONTIG-049521 | 259 | 11  | 19 | 34  | 0  |
| CONTIG-049522 | 208 | 9   | 15 | 69  | 0  |
| CONTIG-049523 | 233 | 15  | 15 | 134 | 0  |
| CONTIG-049525 | 161 | 3   | 3  | 0   | 2  |
| CONTIG-049526 | 59  | 7   | 20 | 0   | 0  |
| CONTIG-049527 | 91  | 14  | 44 | 24  | 0  |
| CONTIG-049528 | 131 | 13  | 24 | 35  | 0  |
| CONTIG-049529 | 355 | 24  | 9  | 384 | 6  |
| CONTIG-049530 | 98  | 10  | 13 | 35  | 0  |
| CONTIG-049531 | 136 | 3   | 5  | 0   | 2  |
| CONTIG-049532 | 768 | 16  | 10 | 157 | 15 |
| CONTIG-049534 | 66  | 4   | 13 | 2   | 0  |
| CONTIG-049535 | 103 | 9   | 6  | 13  | 0  |
| CONTIG-049538 | 61  | 2   | 0  | 0   | 0  |
| CONTIG-049539 | 270 | 14  | 32 | 133 | 0  |
| CONTIG-049540 | 168 | 5   | 0  | 21  | 0  |
| CONTIG-049542 | 237 | 8   | 11 | 27  | 0  |
| CONTIG-049543 | 84  | 7   | 16 | 15  | 0  |
| CONTIG-049544 | 64  | 4   | 0  | 12  | 0  |
| CONTIG-049545 | 477 | 12  | 15 | 203 | 0  |
| CONTIG-049546 | 122 | 7   | 10 | 22  | 2  |
| CONTIG-049547 | 74  | 7   | 3  | 7   | 2  |
| CONTIG-049548 | 411 | 13  | 52 | 103 | 0  |
| CONTIG-049549 | 136 | 222 | 15 | 41  | 0  |
| CONTIG-049550 | 818 | 11  | 8  | 109 | 0  |
| CONTIG-049551 | 302 | 18  | 32 | 90  | 8  |
| CONTIG-049552 | 284 | 13  | 0  | 0   | 20 |
| CONTIG-049553 | 100 | 7   | 2  | 18  | 0  |
| CONTIG-049554 | 76  | 16  | 16 | 43  | 0  |
| CONTIG-049555 | 284 | 8   | 22 | 107 | 0  |
| CONTIG-049556 | 326 | 12  | 52 | 80  | 0  |
| CONTIG-049557 | 131 | 18  | 7  | 96  | 3  |
| CONTIG-049558 | 83  | 6   | 2  | 17  | 0  |
| CONTIG-049559 | 109 | 5   | 2  | 11  | 0  |
| CONTIG-049560 | 116 | 4   | 22 | 0   | 0  |
| CONTIG-049561 | 112 | 6   | 17 | 23  | 0  |
| CONTIG-049562 | 223 | 6   | 10 | 45  | 0  |
| CONTIG-049563 | 152 | 15  | 29 | 75  | 0  |
| CONTIG-049564 | 372 | 33  | 18 | 570 | 0  |
| CONTIG-049565 | 96  | 9   | 8  | 18  | 0  |
| CONTIG-049566 | 130 | 9   | 5  | 57  | 0  |
| CONTIG-049567 | 92  | 14  | 86 | 16  | 0  |

|               |     |     |    |     |     |
|---------------|-----|-----|----|-----|-----|
| CONTIG-049568 | 307 | 71  | 12 | 0   | 219 |
| CONTIG-049569 | 307 | 7   | 42 | 60  | 0   |
| CONTIG-049570 | 64  | 6   | 12 | 7   | 0   |
| CONTIG-049571 | 156 | 19  | 19 | 62  | 0   |
| CONTIG-049572 | 184 | 13  | 5  | 85  | 0   |
| CONTIG-049573 | 60  | 7   | 3  | 12  | 0   |
| CONTIG-049576 | 39  | 86  | 29 | 122 | 2   |
| CONTIG-049577 | 111 | 7   | 4  | 16  | 0   |
| CONTIG-049578 | 92  | 7   | 10 | 19  | 0   |
| CONTIG-049579 | 57  | 40  | 4  | 39  | 0   |
| CONTIG-049580 | 374 | 6   | 31 | 44  | 0   |
| CONTIG-049581 | 77  | 4   | 2  | 9   | 0   |
| CONTIG-049582 | 73  | 6   | 4  | 0   | 0   |
| CONTIG-049583 | 65  | 186 | 4  | 260 | 0   |
| CONTIG-049584 | 122 | 5   | 10 | 9   | 0   |
| CONTIG-049585 | 571 | 12  | 29 | 162 | 4   |
| CONTIG-049586 | 71  | 2   | 2  | 4   | 0   |
| CONTIG-049587 | 158 | 11  | 20 | 31  | 0   |
| CONTIG-049588 | 120 | 4   | 6  | 11  | 0   |
| CONTIG-049589 | 242 | 6   | 25 | 46  | 0   |
| CONTIG-049590 | 193 | 8   | 22 | 43  | 0   |
| CONTIG-049591 | 274 | 10  | 15 | 107 | 0   |
| CONTIG-049592 | 62  | 6   | 0  | 6   | 0   |
| CONTIG-049593 | 258 | 12  | 34 | 52  | 2   |
| CONTIG-049594 | 89  | 6   | 0  | 14  | 0   |
| CONTIG-049599 | 65  | 6   | 4  | 8   | 0   |
| CONTIG-049602 | 134 | 19  | 21 | 76  | 0   |
| CONTIG-049603 | 108 | 24  | 33 | 58  | 2   |
| CONTIG-049604 | 394 | 38  | 20 | 538 | 24  |
| CONTIG-049608 | 185 | 9   | 3  | 69  | 0   |
| CONTIG-049609 | 342 | 21  | 0  | 417 | 0   |
| CONTIG-049610 | 331 | 15  | 38 | 199 | 3   |
| CONTIG-049611 | 129 | 7   | 14 | 21  | 0   |
| CONTIG-049612 | 56  | 102 | 6  | 102 | 0   |
| CONTIG-049613 | 158 | 8   | 8  | 43  | 0   |
| CONTIG-049614 | 73  | 5   | 2  | 6   | 0   |
| CONTIG-049615 | 167 | 7   | 25 | 19  | 0   |
| CONTIG-049616 | 156 | 8   | 5  | 39  | 0   |
| CONTIG-049617 | 69  | 7   | 2  | 14  | 0   |
| CONTIG-049618 | 372 | 12  | 41 | 103 | 0   |
| CONTIG-049619 | 86  | 3   | 8  | 4   | 0   |
| CONTIG-049620 | 318 | 10  | 11 | 130 | 0   |
| CONTIG-049621 | 77  | 19  | 31 | 2   | 0   |
| CONTIG-049622 | 93  | 41  | 18 | 45  | 0   |
| CONTIG-049623 | 122 | 6   | 2  | 10  | 0   |
| CONTIG-049624 | 72  | 5   | 10 | 5   | 0   |
| CONTIG-049626 | 211 | 9   | 5  | 77  | 0   |

|               |     |     |     |     |     |
|---------------|-----|-----|-----|-----|-----|
| CONTIG-049627 | 350 | 17  | 96  | 124 | 0   |
| CONTIG-049628 | 87  | 6   | 8   | 13  | 0   |
| CONTIG-049629 | 139 | 3   | 0   | 2   | 0   |
| CONTIG-049630 | 126 | 12  | 22  | 42  | 0   |
| CONTIG-049632 | 219 | 10  | 4   | 61  | 4   |
| CONTIG-049633 | 53  | 21  | 2   | 45  | 0   |
| CONTIG-049634 | 586 | 26  | 181 | 261 | 2   |
| CONTIG-049635 | 81  | 8   | 0   | 8   | 0   |
| CONTIG-049636 | 149 | 6   | 8   | 17  | 0   |
| CONTIG-049637 | 298 | 17  | 40  | 176 | 2   |
| CONTIG-049639 | 395 | 36  | 37  | 368 | 8   |
| CONTIG-049640 | 232 | 7   | 4   | 59  | 0   |
| CONTIG-049641 | 72  | 7   | 3   | 0   | 0   |
| CONTIG-049642 | 96  | 10  | 30  | 29  | 0   |
| CONTIG-049643 | 275 | 26  | 13  | 328 | 4   |
| CONTIG-049644 | 304 | 10  | 15  | 97  | 0   |
| CONTIG-049645 | 143 | 4   | 3   | 14  | 0   |
| CONTIG-049646 | 458 | 124 | 20  | 2   | 935 |
| CONTIG-049647 | 141 | 6   | 17  | 26  | 0   |
| CONTIG-049648 | 179 | 4   | 0   | 18  | 0   |
| CONTIG-049650 | 237 | 13  | 10  | 69  | 4   |
| CONTIG-049651 | 144 | 20  | 5   | 135 | 0   |
| CONTIG-049652 | 219 | 7   | 11  | 26  | 0   |
| CONTIG-049653 | 270 | 21  | 32  | 163 | 2   |
| CONTIG-049654 | 89  | 14  | 20  | 0   | 0   |
| CONTIG-049655 | 111 | 5   | 7   | 7   | 0   |
| CONTIG-049656 | 70  | 8   | 11  | 2   | 0   |
| CONTIG-049657 | 117 | 12  | 26  | 26  | 0   |
| CONTIG-049658 | 90  | 8   | 16  | 0   | 0   |
| CONTIG-049659 | 73  | 34  | 5   | 101 | 0   |
| CONTIG-049662 | 148 | 9   | 2   | 18  | 0   |
| CONTIG-049663 | 147 | 8   | 5   | 25  | 0   |
| CONTIG-049666 | 526 | 19  | 0   | 0   | 78  |
| CONTIG-049668 | 82  | 13  | 17  | 27  | 0   |
| CONTIG-049669 | 269 | 8   | 6   | 59  | 0   |
| CONTIG-049670 | 399 | 12  | 28  | 112 | 3   |
| CONTIG-049671 | 60  | 5   | 2   | 6   | 0   |
| CONTIG-049672 | 179 | 6   | 7   | 35  | 0   |
| CONTIG-049673 | 59  | 3   | 2   | 0   | 0   |
| CONTIG-049674 | 74  | 4   | 2   | 8   | 0   |
| CONTIG-049675 | 99  | 6   | 6   | 23  | 0   |
| CONTIG-049676 | 231 | 31  | 0   | 0   | 52  |
| CONTIG-049679 | 222 | 8   | 7   | 41  | 0   |
| CONTIG-049680 | 90  | 5   | 7   | 7   | 0   |
| CONTIG-049681 | 483 | 21  | 24  | 362 | 9   |
| CONTIG-049682 | 906 | 18  | 93  | 369 | 4   |
| CONTIG-049683 | 154 | 8   | 2   | 46  | 0   |

|               |     |     |    |     |    |
|---------------|-----|-----|----|-----|----|
| CONTIG-049684 | 340 | 11  | 5  | 189 | 0  |
| CONTIG-049685 | 189 | 7   | 4  | 50  | 2  |
| CONTIG-049688 | 102 | 7   | 27 | 16  | 0  |
| CONTIG-049690 | 175 | 11  | 22 | 26  | 0  |
| CONTIG-049691 | 54  | 183 | 16 | 2   | 0  |
| CONTIG-049692 | 387 | 8   | 26 | 67  | 2  |
| CONTIG-049693 | 479 | 15  | 4  | 0   | 22 |
| CONTIG-049694 | 74  | 4   | 15 | 2   | 0  |
| CONTIG-049695 | 405 | 10  | 13 | 176 | 2  |
| CONTIG-049696 | 475 | 11  | 26 | 211 | 0  |
| CONTIG-049697 | 82  | 7   | 11 | 10  | 0  |
| CONTIG-049698 | 89  | 47  | 42 | 82  | 10 |
| CONTIG-049699 | 64  | 8   | 5  | 8   | 0  |
| CONTIG-049700 | 121 | 6   | 7  | 21  | 0  |
| CONTIG-049701 | 85  | 4   | 6  | 5   | 0  |
| CONTIG-049702 | 198 | 7   | 5  | 40  | 0  |
| CONTIG-049703 | 102 | 6   | 24 | 13  | 0  |
| CONTIG-049704 | 246 | 7   | 20 | 31  | 0  |
| CONTIG-049705 | 477 | 8   | 11 | 120 | 0  |
| CONTIG-049706 | 82  | 5   | 9  | 11  | 0  |
| CONTIG-049707 | 153 | 4   | 19 | 2   | 0  |
| CONTIG-049708 | 121 | 9   | 8  | 15  | 0  |
| CONTIG-049709 | 104 | 5   | 6  | 8   | 0  |
| CONTIG-049711 | 110 | 5   | 0  | 19  | 0  |
| CONTIG-049712 | 73  | 11  | 42 | 2   | 0  |
| CONTIG-049713 | 58  | 8   | 3  | 14  | 0  |
| CONTIG-049714 | 68  | 7   | 4  | 21  | 0  |
| CONTIG-049715 | 188 | 8   | 4  | 53  | 0  |
| CONTIG-049716 | 76  | 5   | 5  | 13  | 0  |
| CONTIG-049717 | 110 | 3   | 3  | 10  | 0  |
| CONTIG-049718 | 66  | 10  | 3  | 18  | 2  |
| CONTIG-049720 | 95  | 8   | 7  | 18  | 0  |
| CONTIG-049721 | 199 | 6   | 25 | 19  | 0  |
| CONTIG-049722 | 123 | 22  | 2  | 117 | 0  |
| CONTIG-049723 | 129 | 9   | 4  | 40  | 0  |
| CONTIG-049724 | 91  | 9   | 0  | 20  | 0  |
| CONTIG-049725 | 244 | 12  | 7  | 97  | 2  |
| CONTIG-049726 | 270 | 7   | 8  | 78  | 0  |
| CONTIG-049727 | 72  | 13  | 14 | 19  | 0  |
| CONTIG-049728 | 104 | 13  | 17 | 30  | 0  |
| CONTIG-049729 | 431 | 21  | 21 | 396 | 0  |
| CONTIG-049730 | 169 | 5   | 8  | 17  | 0  |
| CONTIG-049731 | 309 | 13  | 18 | 154 | 0  |
| CONTIG-049732 | 82  | 7   | 17 | 0   | 0  |
| CONTIG-049733 | 172 | 28  | 25 | 174 | 2  |
| CONTIG-049734 | 62  | 3   | 0  | 0   | 0  |
| CONTIG-049735 | 199 | 10  | 18 | 46  | 0  |

|               |     |     |    |     |   |
|---------------|-----|-----|----|-----|---|
| CONTIG-049736 | 137 | 19  | 0  | 135 | 0 |
| CONTIG-049737 | 127 | 7   | 5  | 15  | 0 |
| CONTIG-049738 | 259 | 8   | 5  | 0   | 0 |
| CONTIG-049739 | 149 | 5   | 2  | 28  | 0 |
| CONTIG-049740 | 264 | 16  | 9  | 128 | 0 |
| CONTIG-049741 | 73  | 6   | 4  | 17  | 0 |
| CONTIG-049745 | 134 | 12  | 0  | 58  | 0 |
| CONTIG-049746 | 135 | 12  | 2  | 40  | 2 |
| CONTIG-049747 | 142 | 8   | 0  | 34  | 0 |
| CONTIG-049748 | 131 | 6   | 17 | 18  | 0 |
| CONTIG-049749 | 204 | 9   | 12 | 57  | 4 |
| CONTIG-049750 | 157 | 4   | 9  | 12  | 0 |
| CONTIG-049752 | 163 | 10  | 20 | 32  | 0 |
| CONTIG-049753 | 287 | 16  | 8  | 192 | 0 |
| CONTIG-049756 | 127 | 6   | 7  | 13  | 0 |
| CONTIG-049757 | 66  | 4   | 6  | 14  | 0 |
| CONTIG-049758 | 96  | 6   | 11 | 8   | 0 |
| CONTIG-049759 | 96  | 11  | 5  | 29  | 0 |
| CONTIG-049760 | 238 | 6   | 12 | 27  | 0 |
| CONTIG-049761 | 172 | 5   | 2  | 36  | 0 |
| CONTIG-049762 | 85  | 4   | 0  | 13  | 0 |
| CONTIG-049763 | 65  | 2   | 3  | 0   | 0 |
| CONTIG-049764 | 191 | 200 | 37 | 188 | 0 |
| CONTIG-049765 | 65  | 10  | 0  | 23  | 0 |
| CONTIG-049766 | 140 | 7   | 5  | 47  | 0 |
| CONTIG-049767 | 177 | 7   | 12 | 45  | 0 |
| CONTIG-049768 | 239 | 17  | 47 | 144 | 4 |
| CONTIG-049769 | 226 | 12  | 14 | 68  | 0 |
| CONTIG-049770 | 197 | 6   | 2  | 40  | 0 |
| CONTIG-049771 | 71  | 5   | 4  | 13  | 0 |
| CONTIG-049772 | 145 | 34  | 0  | 320 | 0 |
| CONTIG-049773 | 380 | 10  | 6  | 18  | 0 |
| CONTIG-049774 | 195 | 5   | 8  | 28  | 0 |
| CONTIG-049775 | 180 | 12  | 21 | 89  | 0 |
| CONTIG-049776 | 204 | 8   | 6  | 38  | 0 |
| CONTIG-049778 | 67  | 3   | 0  | 5   | 0 |
| CONTIG-049779 | 110 | 6   | 22 | 10  | 0 |
| CONTIG-049780 | 466 | 9   | 7  | 25  | 0 |
| CONTIG-049781 | 162 | 52  | 29 | 277 | 0 |
| CONTIG-049782 | 87  | 17  | 29 | 47  | 0 |
| CONTIG-049783 | 69  | 3   | 2  | 8   | 0 |
| CONTIG-049784 | 311 | 13  | 17 | 73  | 4 |
| CONTIG-049785 | 78  | 5   | 12 | 4   | 0 |
| CONTIG-049786 | 89  | 7   | 4  | 19  | 2 |
| CONTIG-049787 | 58  | 7   | 15 | 4   | 0 |
| CONTIG-049788 | 287 | 14  | 6  | 62  | 0 |
| CONTIG-049791 | 225 | 16  | 77 | 67  | 0 |



|               |     |     |    |     |     |
|---------------|-----|-----|----|-----|-----|
| CONTIG-049792 | 65  | 18  | 5  | 35  | 0   |
| CONTIG-049793 | 233 | 10  | 13 | 104 | 0   |
| CONTIG-049794 | 580 | 15  | 31 | 24  | 51  |
| CONTIG-049795 | 208 | 42  | 54 | 406 | 0   |
| CONTIG-049796 | 58  | 5   | 2  | 8   | 0   |
| CONTIG-049798 | 889 | 42  | 4  | 0   | 151 |
| CONTIG-049799 | 266 | 57  | 23 | 881 | 0   |
| CONTIG-049800 | 72  | 6   | 12 | 11  | 0   |
| CONTIG-049801 | 227 | 20  | 29 | 132 | 0   |
| CONTIG-049802 | 71  | 4   | 4  | 0   | 0   |
| CONTIG-049803 | 72  | 14  | 7  | 37  | 0   |
| CONTIG-049805 | 107 | 15  | 13 | 45  | 4   |
| CONTIG-049809 | 284 | 7   | 2  | 41  | 0   |
| CONTIG-049810 | 83  | 13  | 20 | 44  | 0   |
| CONTIG-049811 | 63  | 3   | 3  | 2   | 0   |
| CONTIG-049812 | 373 | 7   | 7  | 98  | 0   |
| CONTIG-049813 | 66  | 4   | 2  | 0   | 0   |
| CONTIG-049815 | 72  | 7   | 6  | 19  | 0   |
| CONTIG-049816 | 101 | 19  | 21 | 38  | 2   |
| CONTIG-049817 | 142 | 7   | 5  | 25  | 0   |
| CONTIG-049818 | 166 | 5   | 4  | 20  | 0   |
| CONTIG-049820 | 554 | 29  | 15 | 879 | 0   |
| CONTIG-049821 | 198 | 6   | 0  | 25  | 2   |
| CONTIG-049822 | 85  | 8   | 0  | 26  | 0   |
| CONTIG-049823 | 157 | 8   | 7  | 30  | 0   |
| CONTIG-049824 | 128 | 10  | 5  | 58  | 0   |
| CONTIG-049825 | 154 | 8   | 2  | 31  | 0   |
| CONTIG-049826 | 118 | 6   | 8  | 31  | 0   |
| CONTIG-049828 | 370 | 26  | 32 | 283 | 15  |
| CONTIG-049829 | 247 | 7   | 26 | 42  | 0   |
| CONTIG-049831 | 214 | 12  | 18 | 49  | 0   |
| CONTIG-049832 | 194 | 7   | 10 | 34  | 0   |
| CONTIG-049833 | 107 | 7   | 0  | 14  | 3   |
| CONTIG-049834 | 102 | 4   | 0  | 5   | 0   |
| CONTIG-049835 | 84  | 6   | 4  | 0   | 0   |
| CONTIG-049836 | 181 | 6   | 21 | 29  | 0   |
| CONTIG-049837 | 228 | 14  | 39 | 95  | 0   |
| CONTIG-049838 | 130 | 5   | 0  | 27  | 0   |
| CONTIG-049839 | 122 | 12  | 42 | 36  | 0   |
| CONTIG-049840 | 91  | 6   | 5  | 16  | 0   |
| CONTIG-049841 | 77  | 8   | 3  | 31  | 0   |
| CONTIG-049842 | 92  | 6   | 5  | 11  | 0   |
| CONTIG-049843 | 481 | 19  | 29 | 330 | 0   |
| CONTIG-049844 | 114 | 10  | 3  | 44  | 0   |
| CONTIG-049851 | 255 | 6   | 5  | 42  | 0   |
| CONTIG-049852 | 83  | 2   | 2  | 0   | 0   |
| CONTIG-049853 | 56  | 117 | 4  | 249 | 0   |

|               |     |     |    |      |    |
|---------------|-----|-----|----|------|----|
| CONTIG-049854 | 198 | 8   | 7  | 48   | 0  |
| CONTIG-049856 | 202 | 16  | 23 | 51   | 0  |
| CONTIG-049857 | 166 | 10  | 22 | 19   | 0  |
| CONTIG-049858 | 729 | 162 | 23 | 271  | 0  |
| CONTIG-049859 | 69  | 31  | 9  | 13   | 0  |
| CONTIG-049861 | 178 | 20  | 65 | 145  | 0  |
| CONTIG-049862 | 272 | 11  | 19 | 86   | 0  |
| CONTIG-049863 | 264 | 5   | 9  | 33   | 0  |
| CONTIG-049864 | 800 | 37  | 11 | 1878 | 0  |
| CONTIG-049865 | 73  | 5   | 7  | 11   | 0  |
| CONTIG-049866 | 189 | 9   | 20 | 41   | 0  |
| CONTIG-049867 | 78  | 8   | 11 | 7    | 0  |
| CONTIG-049873 | 321 | 7   | 23 | 65   | 0  |
| CONTIG-049874 | 344 | 6   | 12 | 28   | 0  |
| CONTIG-049875 | 92  | 6   | 4  | 9    | 0  |
| CONTIG-049876 | 151 | 8   | 14 | 32   | 0  |
| CONTIG-049877 | 83  | 8   | 4  | 16   | 0  |
| CONTIG-049878 | 58  | 4   | 3  | 6    | 0  |
| CONTIG-049879 | 837 | 13  | 17 | 344  | 4  |
| CONTIG-049881 | 185 | 5   | 6  | 20   | 0  |
| CONTIG-049882 | 352 | 9   | 10 | 93   | 0  |
| CONTIG-049883 | 603 | 21  | 97 | 210  | 8  |
| CONTIG-049884 | 296 | 5   | 4  | 30   | 0  |
| CONTIG-049885 | 185 | 9   | 8  | 41   | 0  |
| CONTIG-049889 | 92  | 6   | 3  | 4    | 0  |
| CONTIG-049890 | 177 | 36  | 18 | 245  | 0  |
| CONTIG-049891 | 83  | 8   | 0  | 4    | 0  |
| CONTIG-049892 | 118 | 13  | 6  | 58   | 0  |
| CONTIG-049893 | 212 | 5   | 4  | 19   | 0  |
| CONTIG-049894 | 134 | 24  | 32 | 140  | 0  |
| CONTIG-049895 | 85  | 3   | 3  | 7    | 0  |
| CONTIG-049896 | 183 | 6   | 11 | 18   | 0  |
| CONTIG-049897 | 138 | 5   | 2  | 14   | 0  |
| CONTIG-049898 | 117 | 15  | 2  | 11   | 13 |
| CONTIG-049899 | 139 | 23  | 20 | 23   | 0  |
| CONTIG-049901 | 74  | 4   | 2  | 8    | 0  |
| CONTIG-049903 | 72  | 5   | 12 | 0    | 0  |
| CONTIG-049904 | 238 | 14  | 20 | 157  | 0  |
| CONTIG-049905 | 130 | 6   | 5  | 21   | 0  |
| CONTIG-049906 | 227 | 8   | 8  | 48   | 0  |
| CONTIG-049908 | 77  | 3   | 0  | 4    | 0  |
| CONTIG-049909 | 37  | 13  | 13 | 7    | 0  |
| CONTIG-049910 | 166 | 7   | 2  | 34   | 0  |
| CONTIG-049916 | 63  | 5   | 0  | 10   | 0  |
| CONTIG-049917 | 98  | 3   | 3  | 4    | 0  |
| CONTIG-049920 | 99  | 9   | 20 | 11   | 0  |
| CONTIG-049921 | 71  | 3   | 0  | 2    | 2  |

|               |     |    |    |      |    |
|---------------|-----|----|----|------|----|
| CONTIG-049922 | 71  | 8  | 7  | 12   | 0  |
| CONTIG-049923 | 240 | 15 | 34 | 97   | 0  |
| CONTIG-049924 | 192 | 9  | 22 | 35   | 0  |
| CONTIG-049925 | 273 | 7  | 18 | 50   | 0  |
| CONTIG-049926 | 150 | 9  | 9  | 49   | 0  |
| CONTIG-049927 | 105 | 4  | 4  | 14   | 0  |
| CONTIG-049929 | 220 | 9  | 13 | 79   | 0  |
| CONTIG-049930 | 417 | 13 | 2  | 232  | 0  |
| CONTIG-049931 | 116 | 10 | 11 | 28   | 4  |
| CONTIG-049932 | 74  | 8  | 10 | 3    | 0  |
| CONTIG-049933 | 135 | 4  | 4  | 22   | 0  |
| CONTIG-049934 | 426 | 21 | 30 | 261  | 0  |
| CONTIG-049936 | 113 | 8  | 2  | 42   | 0  |
| CONTIG-049937 | 167 | 11 | 10 | 85   | 0  |
| CONTIG-049938 | 398 | 16 | 9  | 228  | 0  |
| CONTIG-049939 | 791 | 25 | 29 | 1004 | 0  |
| CONTIG-049940 | 70  | 7  | 5  | 0    | 0  |
| CONTIG-049941 | 89  | 4  | 11 | 7    | 0  |
| CONTIG-049942 | 80  | 3  | 0  | 7    | 0  |
| CONTIG-049943 | 108 | 6  | 7  | 15   | 0  |
| CONTIG-049944 | 190 | 13 | 16 | 69   | 0  |
| CONTIG-049945 | 38  | 77 | 14 | 49   | 0  |
| CONTIG-049947 | 149 | 5  | 14 | 16   | 0  |
| CONTIG-049948 | 82  | 5  | 4  | 4    | 0  |
| CONTIG-049949 | 134 | 8  | 2  | 16   | 0  |
| CONTIG-049950 | 124 | 4  | 3  | 15   | 0  |
| CONTIG-049951 | 94  | 3  | 0  | 4    | 0  |
| CONTIG-049954 | 122 | 11 | 25 | 32   | 0  |
| CONTIG-049955 | 133 | 33 | 18 | 129  | 33 |
| CONTIG-049956 | 436 | 13 | 19 | 165  | 2  |
| CONTIG-049957 | 80  | 9  | 7  | 24   | 0  |
| CONTIG-049958 | 59  | 5  | 0  | 12   | 0  |
| CONTIG-049959 | 58  | 9  | 5  | 10   | 0  |
| CONTIG-049960 | 128 | 10 | 7  | 51   | 0  |
| CONTIG-049961 | 102 | 7  | 0  | 16   | 0  |
| CONTIG-049962 | 124 | 7  | 12 | 13   | 0  |
| CONTIG-049963 | 94  | 7  | 9  | 8    | 0  |
| CONTIG-049964 | 58  | 4  | 4  | 0    | 0  |
| CONTIG-049965 | 556 | 11 | 9  | 101  | 4  |
| CONTIG-049969 | 103 | 9  | 0  | 36   | 0  |
| CONTIG-049970 | 306 | 8  | 34 | 66   | 0  |
| CONTIG-049971 | 64  | 4  | 0  | 11   | 0  |
| CONTIG-049973 | 85  | 12 | 41 | 24   | 0  |
| CONTIG-049974 | 165 | 8  | 9  | 26   | 0  |
| CONTIG-049975 | 75  | 5  | 4  | 2    | 0  |
| CONTIG-049976 | 150 | 9  | 10 | 29   | 0  |
| CONTIG-049977 | 59  | 6  | 3  | 9    | 0  |

|               |     |    |    |     |    |
|---------------|-----|----|----|-----|----|
| CONTIG-049978 | 63  | 6  | 21 | 6   | 0  |
| CONTIG-049979 | 394 | 13 | 31 | 113 | 2  |
| CONTIG-049980 | 98  | 9  | 12 | 38  | 0  |
| CONTIG-049981 | 85  | 17 | 3  | 2   | 0  |
| CONTIG-049982 | 78  | 10 | 0  | 9   | 0  |
| CONTIG-049983 | 63  | 11 | 0  | 6   | 0  |
| CONTIG-049984 | 164 | 11 | 89 | 33  | 0  |
| CONTIG-049985 | 98  | 6  | 3  | 9   | 0  |
| CONTIG-049987 | 103 | 12 | 2  | 36  | 0  |
| CONTIG-049988 | 68  | 6  | 4  | 7   | 0  |
| CONTIG-049990 | 124 | 4  | 19 | 12  | 0  |
| CONTIG-049991 | 221 | 10 | 4  | 69  | 0  |
| CONTIG-049992 | 151 | 6  | 3  | 17  | 0  |
| CONTIG-049993 | 65  | 8  | 0  | 21  | 0  |
| CONTIG-049994 | 94  | 13 | 5  | 35  | 0  |
| CONTIG-049995 | 484 | 8  | 32 | 90  | 0  |
| CONTIG-049996 | 158 | 7  | 2  | 8   | 0  |
| CONTIG-049998 | 134 | 12 | 19 | 36  | 0  |
| CONTIG-050000 | 201 | 5  | 3  | 21  | 0  |
| CONTIG-050001 | 305 | 10 | 8  | 93  | 0  |
| CONTIG-050002 | 71  | 7  | 7  | 13  | 0  |
| CONTIG-050003 | 104 | 6  | 6  | 6   | 0  |
| CONTIG-050004 | 108 | 8  | 24 | 18  | 0  |
| CONTIG-050006 | 145 | 13 | 23 | 37  | 0  |
| CONTIG-050007 | 82  | 7  | 8  | 11  | 0  |
| CONTIG-050008 | 146 | 5  | 10 | 19  | 0  |
| CONTIG-050010 | 52  | 43 | 0  | 23  | 0  |
| CONTIG-050011 | 74  | 8  | 2  | 28  | 0  |
| CONTIG-050012 | 119 | 6  | 0  | 13  | 0  |
| CONTIG-050013 | 70  | 7  | 21 | 3   | 0  |
| CONTIG-050014 | 221 | 18 | 8  | 118 | 0  |
| CONTIG-050015 | 78  | 3  | 0  | 7   | 0  |
| CONTIG-050016 | 87  | 4  | 24 | 0   | 0  |
| CONTIG-050017 | 178 | 9  | 3  | 45  | 2  |
| CONTIG-050018 | 100 | 62 | 12 | 159 | 23 |
| CONTIG-050019 | 129 | 8  | 10 | 30  | 0  |
| CONTIG-050021 | 362 | 15 | 62 | 95  | 2  |
| CONTIG-050023 | 194 | 10 | 27 | 68  | 0  |
| CONTIG-050024 | 88  | 5  | 6  | 0   | 0  |
| CONTIG-050025 | 123 | 6  | 0  | 4   | 0  |
| CONTIG-050026 | 178 | 8  | 8  | 60  | 2  |
| CONTIG-050027 | 482 | 13 | 17 | 219 | 6  |
| CONTIG-050028 | 100 | 3  | 6  | 0   | 0  |
| CONTIG-050029 | 115 | 13 | 10 | 41  | 0  |
| CONTIG-050030 | 168 | 6  | 2  | 31  | 0  |
| CONTIG-050031 | 236 | 7  | 4  | 26  | 2  |
| CONTIG-050032 | 76  | 15 | 51 | 6   | 0  |

|               |     |    |     |     |    |
|---------------|-----|----|-----|-----|----|
| CONTIG-050034 | 332 | 6  | 21  | 44  | 0  |
| CONTIG-050035 | 71  | 8  | 2   | 6   | 0  |
| CONTIG-050036 | 171 | 46 | 44  | 297 | 0  |
| CONTIG-050037 | 167 | 15 | 23  | 74  | 0  |
| CONTIG-050039 | 195 | 8  | 15  | 38  | 0  |
| CONTIG-050040 | 512 | 19 | 35  | 261 | 6  |
| CONTIG-050041 | 195 | 5  | 11  | 38  | 0  |
| CONTIG-050043 | 269 | 17 | 33  | 87  | 5  |
| CONTIG-050044 | 181 | 11 | 0   | 75  | 2  |
| CONTIG-050045 | 139 | 8  | 29  | 16  | 2  |
| CONTIG-050046 | 90  | 6  | 26  | 0   | 2  |
| CONTIG-050047 | 700 | 22 | 103 | 502 | 4  |
| CONTIG-050048 | 184 | 6  | 0   | 28  | 0  |
| CONTIG-050051 | 207 | 5  | 4   | 14  | 0  |
| CONTIG-050052 | 110 | 9  | 4   | 34  | 0  |
| CONTIG-050053 | 104 | 15 | 7   | 74  | 0  |
| CONTIG-050054 | 254 | 8  | 22  | 46  | 0  |
| CONTIG-050055 | 108 | 6  | 2   | 19  | 0  |
| CONTIG-050056 | 294 | 11 | 41  | 71  | 0  |
| CONTIG-050057 | 88  | 7  | 11  | 16  | 0  |
| CONTIG-050058 | 64  | 3  | 0   | 10  | 0  |
| CONTIG-050059 | 471 | 11 | 6   | 229 | 0  |
| CONTIG-050060 | 62  | 5  | 12  | 4   | 0  |
| CONTIG-050061 | 442 | 20 | 0   | 0   | 29 |
| CONTIG-050062 | 86  | 10 | 12  | 4   | 0  |
| CONTIG-050063 | 219 | 10 | 4   | 76  | 0  |
| CONTIG-050064 | 159 | 7  | 7   | 10  | 0  |
| CONTIG-050065 | 53  | 12 | 2   | 0   | 0  |
| CONTIG-050066 | 77  | 9  | 9   | 17  | 0  |
| CONTIG-050067 | 160 | 5  | 2   | 0   | 0  |
| CONTIG-050068 | 117 | 5  | 2   | 8   | 0  |
| CONTIG-050069 | 209 | 12 | 16  | 80  | 0  |
| CONTIG-050070 | 312 | 7  | 14  | 50  | 0  |
| CONTIG-050071 | 206 | 7  | 0   | 41  | 2  |
| CONTIG-050072 | 252 | 25 | 8   | 254 | 4  |
| CONTIG-050073 | 405 | 10 | 44  | 110 | 0  |
| CONTIG-050074 | 63  | 8  | 18  | 4   | 0  |
| CONTIG-050075 | 378 | 18 | 19  | 221 | 0  |
| CONTIG-050076 | 131 | 10 | 32  | 7   | 0  |
| CONTIG-050077 | 145 | 22 | 62  | 144 | 0  |
| CONTIG-050078 | 145 | 7  | 10  | 28  | 0  |
| CONTIG-050079 | 95  | 9  | 7   | 15  | 0  |
| CONTIG-050080 | 470 | 16 | 16  | 208 | 2  |
| CONTIG-050081 | 74  | 3  | 10  | 2   | 0  |
| CONTIG-050082 | 346 | 14 | 7   | 198 | 0  |
| CONTIG-050083 | 38  | 21 | 20  | 16  | 0  |
| CONTIG-050084 | 309 | 21 | 38  | 109 | 8  |

|               |      |    |     |      |     |
|---------------|------|----|-----|------|-----|
| CONTIG-050087 | 134  | 10 | 25  | 36   | 0   |
| CONTIG-050088 | 132  | 5  | 21  | 15   | 0   |
| CONTIG-050089 | 381  | 87 | 0   | 0    | 348 |
| CONTIG-050090 | 210  | 9  | 26  | 65   | 0   |
| CONTIG-050091 | 151  | 6  | 10  | 9    | 0   |
| CONTIG-050092 | 366  | 23 | 46  | 253  | 4   |
| CONTIG-050093 | 78   | 4  | 5   | 10   | 0   |
| CONTIG-050094 | 68   | 2  | 0   | 4    | 0   |
| CONTIG-050095 | 402  | 14 | 27  | 160  | 8   |
| CONTIG-050096 | 233  | 7  | 5   | 38   | 0   |
| CONTIG-050097 | 83   | 5  | 2   | 21   | 0   |
| CONTIG-050098 | 126  | 13 | 80  | 13   | 0   |
| CONTIG-050099 | 271  | 6  | 0   | 48   | 0   |
| CONTIG-050100 | 267  | 6  | 27  | 42   | 0   |
| CONTIG-050101 | 183  | 12 | 4   | 77   | 0   |
| CONTIG-050102 | 340  | 6  | 11  | 59   | 0   |
| CONTIG-050103 | 228  | 13 | 13  | 127  | 0   |
| CONTIG-050104 | 58   | 15 | 17  | 0    | 0   |
| CONTIG-050105 | 69   | 7  | 8   | 6    | 0   |
| CONTIG-050106 | 197  | 11 | 10  | 82   | 0   |
| CONTIG-050107 | 75   | 3  | 0   | 0    | 0   |
| CONTIG-050112 | 59   | 78 | 122 | 49   | 0   |
| CONTIG-050113 | 446  | 8  | 16  | 92   | 0   |
| CONTIG-050114 | 1648 | 20 | 27  | 1945 | 0   |
| CONTIG-050115 | 65   | 8  | 10  | 17   | 0   |
| CONTIG-050116 | 72   | 3  | 3   | 2    | 0   |
| CONTIG-050118 | 70   | 5  | 5   | 8    | 0   |
| CONTIG-050119 | 104  | 10 | 3   | 29   | 0   |
| CONTIG-050120 | 60   | 58 | 28  | 83   | 2   |
| CONTIG-050122 | 103  | 8  | 14  | 17   | 0   |
| CONTIG-050123 | 70   | 5  | 11  | 8    | 0   |
| CONTIG-050124 | 96   | 5  | 9   | 10   | 0   |
| CONTIG-050126 | 219  | 9  | 15  | 33   | 0   |
| CONTIG-050127 | 273  | 9  | 27  | 71   | 3   |
| CONTIG-050129 | 96   | 6  | 3   | 24   | 0   |
| CONTIG-050130 | 307  | 13 | 12  | 147  | 2   |
| CONTIG-050131 | 334  | 9  | 5   | 22   | 0   |
| CONTIG-050132 | 136  | 13 | 11  | 72   | 0   |
| CONTIG-050133 | 80   | 5  | 0   | 8    | 0   |
| CONTIG-050135 | 65   | 4  | 2   | 6    | 0   |
| CONTIG-050136 | 302  | 10 | 12  | 146  | 0   |
| CONTIG-050137 | 267  | 9  | 17  | 75   | 0   |
| CONTIG-050138 | 64   | 3  | 6   | 0    | 0   |
| CONTIG-050139 | 77   | 15 | 6   | 19   | 0   |
| CONTIG-050141 | 102  | 5  | 11  | 12   | 0   |
| CONTIG-050142 | 60   | 6  | 3   | 6    | 0   |
| CONTIG-050145 | 64   | 5  | 0   | 8    | 0   |

|               |      |     |    |      |    |
|---------------|------|-----|----|------|----|
| CONTIG-050146 | 224  | 5   | 19 | 8    | 0  |
| CONTIG-050147 | 152  | 11  | 16 | 63   | 0  |
| CONTIG-050148 | 249  | 8   | 27 | 48   | 0  |
| CONTIG-050149 | 79   | 3   | 6  | 5    | 0  |
| CONTIG-050150 | 149  | 7   | 16 | 30   | 0  |
| CONTIG-050151 | 137  | 4   | 0  | 20   | 0  |
| CONTIG-050152 | 80   | 6   | 5  | 9    | 0  |
| CONTIG-050153 | 323  | 15  | 18 | 148  | 4  |
| CONTIG-050154 | 119  | 8   | 20 | 24   | 0  |
| CONTIG-050155 | 75   | 3   | 0  | 6    | 0  |
| CONTIG-050156 | 204  | 9   | 20 | 38   | 0  |
| CONTIG-050157 | 192  | 8   | 17 | 53   | 0  |
| CONTIG-050158 | 82   | 7   | 27 | 7    | 0  |
| CONTIG-050159 | 1110 | 36  | 62 | 1461 | 53 |
| CONTIG-050162 | 238  | 12  | 39 | 70   | 2  |
| CONTIG-050163 | 464  | 10  | 15 | 168  | 2  |
| CONTIG-050164 | 59   | 6   | 3  | 12   | 0  |
| CONTIG-050165 | 49   | 225 | 21 | 267  | 26 |
| CONTIG-050166 | 187  | 12  | 44 | 57   | 0  |
| CONTIG-050167 | 281  | 10  | 87 | 76   | 0  |
| CONTIG-050168 | 84   | 12  | 5  | 45   | 0  |
| CONTIG-050169 | 190  | 7   | 8  | 38   | 0  |
| CONTIG-050170 | 80   | 8   | 23 | 15   | 0  |
| CONTIG-050171 | 835  | 12  | 2  | 0    | 73 |
| CONTIG-050172 | 60   | 4   | 5  | 2    | 0  |
| CONTIG-050173 | 86   | 9   | 6  | 28   | 0  |
| CONTIG-050174 | 113  | 3   | 0  | 14   | 0  |
| CONTIG-050176 | 121  | 5   | 0  | 10   | 0  |
| CONTIG-050177 | 76   | 105 | 38 | 135  | 14 |
| CONTIG-050178 | 72   | 21  | 48 | 2    | 0  |
| CONTIG-050179 | 429  | 10  | 25 | 95   | 4  |
| CONTIG-050180 | 60   | 8   | 4  | 12   | 0  |
| CONTIG-050181 | 334  | 7   | 10 | 60   | 0  |
| CONTIG-050182 | 301  | 27  | 13 | 223  | 0  |
| CONTIG-050183 | 327  | 14  | 30 | 158  | 2  |
| CONTIG-050184 | 98   | 7   | 6  | 11   | 0  |
| CONTIG-050185 | 118  | 9   | 13 | 24   | 0  |
| CONTIG-050186 | 114  | 5   | 2  | 25   | 0  |
| CONTIG-050187 | 228  | 8   | 11 | 44   | 0  |
| CONTIG-050188 | 322  | 5   | 14 | 27   | 0  |
| CONTIG-050189 | 238  | 8   | 15 | 45   | 0  |
| CONTIG-050190 | 143  | 27  | 63 | 140  | 0  |
| CONTIG-050191 | 62   | 4   | 0  | 8    | 0  |
| CONTIG-050192 | 66   | 8   | 3  | 11   | 0  |
| CONTIG-050193 | 85   | 4   | 2  | 4    | 0  |
| CONTIG-050194 | 73   | 4   | 3  | 2    | 0  |
| CONTIG-050195 | 589  | 13  | 13 | 426  | 2  |

|               |      |    |     |      |    |
|---------------|------|----|-----|------|----|
| CONTIG-050197 | 71   | 2  | 0   | 0    | 0  |
| CONTIG-050198 | 118  | 8  | 28  | 26   | 0  |
| CONTIG-050199 | 121  | 6  | 6   | 21   | 0  |
| CONTIG-050200 | 191  | 6  | 23  | 24   | 0  |
| CONTIG-050201 | 294  | 7  | 3   | 0    | 7  |
| CONTIG-050202 | 166  | 9  | 11  | 26   | 0  |
| CONTIG-050203 | 422  | 13 | 4   | 197  | 2  |
| CONTIG-050204 | 88   | 15 | 0   | 74   | 0  |
| CONTIG-050205 | 160  | 4  | 0   | 18   | 0  |
| CONTIG-050206 | 98   | 4  | 2   | 3    | 0  |
| CONTIG-050207 | 60   | 3  | 2   | 0    | 0  |
| CONTIG-050208 | 194  | 9  | 0   | 34   | 23 |
| CONTIG-050209 | 59   | 25 | 6   | 19   | 0  |
| CONTIG-050210 | 790  | 35 | 98  | 1159 | 0  |
| CONTIG-050211 | 116  | 7  | 8   | 25   | 0  |
| CONTIG-050213 | 210  | 9  | 9   | 64   | 0  |
| CONTIG-050214 | 353  | 15 | 0   | 194  | 2  |
| CONTIG-050215 | 248  | 12 | 32  | 97   | 0  |
| CONTIG-050216 | 285  | 19 | 36  | 148  | 6  |
| CONTIG-050217 | 1093 | 39 | 166 | 1668 | 4  |
| CONTIG-050218 | 66   | 6  | 11  | 9    | 0  |
| CONTIG-050219 | 281  | 11 | 36  | 105  | 0  |
| CONTIG-050220 | 166  | 5  | 4   | 0    | 0  |
| CONTIG-050221 | 184  | 8  | 2   | 34   | 0  |
| CONTIG-050223 | 151  | 3  | 4   | 10   | 0  |
| CONTIG-050224 | 269  | 10 | 0   | 27   | 0  |
| CONTIG-050225 | 127  | 4  | 2   | 7    | 0  |
| CONTIG-050226 | 164  | 8  | 36  | 27   | 0  |
| CONTIG-050227 | 288  | 10 | 24  | 98   | 0  |
| CONTIG-050228 | 207  | 8  | 4   | 65   | 0  |
| CONTIG-050229 | 326  | 20 | 46  | 267  | 0  |
| CONTIG-050230 | 210  | 7  | 13  | 45   | 0  |
| CONTIG-050231 | 495  | 16 | 21  | 440  | 0  |
| CONTIG-050232 | 251  | 32 | 50  | 298  | 0  |
| CONTIG-050233 | 64   | 3  | 4   | 2    | 0  |
| CONTIG-050234 | 724  | 55 | 40  | 2447 | 0  |
| CONTIG-050236 | 132  | 8  | 10  | 15   | 0  |
| CONTIG-050237 | 362  | 17 | 35  | 329  | 0  |
| CONTIG-050238 | 166  | 5  | 9   | 16   | 0  |
| CONTIG-050239 | 70   | 11 | 0   | 30   | 0  |
| CONTIG-050240 | 266  | 21 | 12  | 216  | 0  |
| CONTIG-050241 | 427  | 20 | 40  | 247  | 4  |
| CONTIG-050242 | 376  | 15 | 6   | 87   | 0  |
| CONTIG-050243 | 102  | 7  | 8   | 10   | 2  |
| CONTIG-050244 | 73   | 8  | 3   | 0    | 0  |
| CONTIG-050246 | 149  | 4  | 0   | 11   | 0  |
| CONTIG-050247 | 161  | 25 | 41  | 51   | 4  |



|               |     |    |    |     |    |
|---------------|-----|----|----|-----|----|
| CONTIG-050248 | 81  | 3  | 4  | 6   | 0  |
| CONTIG-050249 | 145 | 3  | 0  | 5   | 0  |
| CONTIG-050250 | 157 | 5  | 6  | 31  | 0  |
| CONTIG-050251 | 324 | 14 | 13 | 114 | 6  |
| CONTIG-050252 | 41  | 11 | 0  | 7   | 0  |
| CONTIG-050253 | 66  | 7  | 15 | 0   | 0  |
| CONTIG-050255 | 61  | 5  | 2  | 7   | 0  |
| CONTIG-050256 | 111 | 13 | 15 | 45  | 0  |
| CONTIG-050257 | 291 | 12 | 9  | 97  | 7  |
| CONTIG-050258 | 88  | 6  | 21 | 5   | 0  |
| CONTIG-050259 | 94  | 6  | 11 | 0   | 0  |
| CONTIG-050260 | 375 | 10 | 22 | 106 | 0  |
| CONTIG-050261 | 119 | 7  | 24 | 7   | 2  |
| CONTIG-050262 | 80  | 3  | 4  | 8   | 0  |
| CONTIG-050264 | 346 | 12 | 6  | 122 | 0  |
| CONTIG-050265 | 112 | 8  | 9  | 11  | 0  |
| CONTIG-050266 | 100 | 10 | 4  | 49  | 0  |
| CONTIG-050267 | 102 | 18 | 28 | 33  | 0  |
| CONTIG-050268 | 127 | 7  | 11 | 23  | 0  |
| CONTIG-050269 | 210 | 40 | 38 | 453 | 0  |
| CONTIG-050270 | 70  | 3  | 0  | 2   | 0  |
| CONTIG-050273 | 69  | 6  | 4  | 21  | 0  |
| CONTIG-050275 | 67  | 9  | 13 | 6   | 0  |
| CONTIG-050276 | 122 | 5  | 8  | 8   | 0  |
| CONTIG-050277 | 159 | 6  | 7  | 24  | 0  |
| CONTIG-050278 | 63  | 13 | 30 | 0   | 0  |
| CONTIG-050279 | 202 | 5  | 19 | 17  | 0  |
| CONTIG-050280 | 311 | 11 | 30 | 127 | 0  |
| CONTIG-050281 | 225 | 12 | 8  | 94  | 0  |
| CONTIG-050282 | 129 | 11 | 66 | 11  | 0  |
| CONTIG-050283 | 281 | 8  | 10 | 75  | 2  |
| CONTIG-050284 | 375 | 16 | 23 | 211 | 0  |
| CONTIG-050285 | 64  | 4  | 17 | 5   | 0  |
| CONTIG-050286 | 107 | 12 | 24 | 46  | 0  |
| CONTIG-050288 | 163 | 17 | 7  | 77  | 0  |
| CONTIG-050289 | 242 | 27 | 10 | 14  | 0  |
| CONTIG-050290 | 117 | 11 | 4  | 26  | 3  |
| CONTIG-050291 | 95  | 9  | 32 | 0   | 0  |
| CONTIG-050292 | 91  | 45 | 3  | 0   | 26 |
| CONTIG-050293 | 41  | 14 | 5  | 11  | 0  |
| CONTIG-050294 | 90  | 3  | 3  | 5   | 0  |
| CONTIG-050295 | 100 | 5  | 28 | 0   | 0  |
| CONTIG-050297 | 129 | 11 | 46 | 20  | 0  |
| CONTIG-050298 | 98  | 7  | 7  | 22  | 0  |
| CONTIG-050299 | 167 | 13 | 37 | 45  | 2  |
| CONTIG-050300 | 299 | 11 | 7  | 140 | 2  |
| CONTIG-050301 | 95  | 7  | 3  | 17  | 0  |

|               |     |    |    |     |    |
|---------------|-----|----|----|-----|----|
| CONTIG-050302 | 693 | 18 | 42 | 454 | 0  |
| CONTIG-050303 | 198 | 7  | 9  | 37  | 0  |
| CONTIG-050304 | 450 | 9  | 25 | 137 | 0  |
| CONTIG-050305 | 259 | 15 | 2  | 114 | 10 |
| CONTIG-050308 | 89  | 11 | 4  | 49  | 0  |
| CONTIG-050309 | 89  | 19 | 39 | 47  | 0  |
| CONTIG-050310 | 248 | 9  | 10 | 52  | 0  |
| CONTIG-050311 | 65  | 8  | 9  | 18  | 0  |
| CONTIG-050312 | 141 | 4  | 2  | 10  | 0  |
| CONTIG-050313 | 146 | 6  | 5  | 0   | 0  |
| CONTIG-050314 | 94  | 45 | 0  | 0   | 25 |
| CONTIG-050315 | 68  | 5  | 13 | 2   | 0  |
| CONTIG-050316 | 62  | 4  | 8  | 8   | 0  |
| CONTIG-050317 | 321 | 13 | 12 | 163 | 0  |
| CONTIG-050318 | 295 | 12 | 13 | 103 | 2  |
| CONTIG-050319 | 163 | 15 | 35 | 75  | 2  |
| CONTIG-050320 | 817 | 16 | 17 | 521 | 6  |
| CONTIG-050323 | 122 | 10 | 5  | 15  | 0  |
| CONTIG-050324 | 83  | 7  | 6  | 22  | 0  |
| CONTIG-050325 | 134 | 12 | 26 | 35  | 0  |
| CONTIG-050326 | 667 | 27 | 27 | 698 | 19 |
| CONTIG-050327 | 121 | 7  | 11 | 13  | 0  |
| CONTIG-050328 | 146 | 5  | 5  | 13  | 0  |
| CONTIG-050329 | 235 | 19 | 22 | 250 | 0  |
| CONTIG-050330 | 283 | 8  | 26 | 85  | 0  |
| CONTIG-050331 | 82  | 8  | 2  | 18  | 0  |
| CONTIG-050332 | 145 | 16 | 26 | 116 | 0  |
| CONTIG-050333 | 76  | 6  | 4  | 12  | 0  |
| CONTIG-050341 | 183 | 4  | 2  | 14  | 0  |
| CONTIG-050342 | 124 | 4  | 3  | 17  | 0  |
| CONTIG-050343 | 209 | 11 | 12 | 67  | 0  |
| CONTIG-050345 | 101 | 8  | 6  | 29  | 0  |
| CONTIG-050346 | 322 | 15 | 71 | 58  | 6  |
| CONTIG-050347 | 307 | 18 | 4  | 294 | 0  |
| CONTIG-050349 | 199 | 9  | 10 | 63  | 0  |
| CONTIG-050350 | 197 | 8  | 7  | 5   | 0  |
| CONTIG-050351 | 81  | 5  | 9  | 2   | 0  |
| CONTIG-050352 | 97  | 8  | 24 | 9   | 0  |
| CONTIG-050353 | 63  | 6  | 4  | 6   | 0  |
| CONTIG-050354 | 97  | 7  | 17 | 12  | 0  |
| CONTIG-050355 | 92  | 6  | 0  | 17  | 0  |
| CONTIG-050356 | 158 | 8  | 2  | 24  | 0  |
| CONTIG-050357 | 112 | 21 | 9  | 102 | 0  |
| CONTIG-050358 | 108 | 10 | 3  | 26  | 0  |
| CONTIG-050359 | 260 | 9  | 19 | 85  | 0  |
| CONTIG-050360 | 106 | 6  | 12 | 10  | 0  |
| CONTIG-050361 | 100 | 6  | 0  | 0   | 0  |

|               |     |    |    |     |   |
|---------------|-----|----|----|-----|---|
| CONTIG-050365 | 217 | 8  | 4  | 39  | 0 |
| CONTIG-050366 | 65  | 15 | 12 | 2   | 0 |
| CONTIG-050367 | 104 | 12 | 16 | 2   | 0 |
| CONTIG-050369 | 165 | 10 | 23 | 9   | 0 |
| CONTIG-050370 | 85  | 8  | 2  | 0   | 0 |
| CONTIG-050371 | 342 | 6  | 12 | 46  | 2 |
| CONTIG-050372 | 131 | 6  | 7  | 17  | 0 |
| CONTIG-050373 | 128 | 5  | 7  | 18  | 0 |
| CONTIG-050374 | 71  | 3  | 9  | 2   | 0 |
| CONTIG-050375 | 120 | 37 | 68 | 100 | 0 |
| CONTIG-050376 | 76  | 8  | 20 | 8   | 0 |
| CONTIG-050377 | 68  | 8  | 15 | 12  | 0 |
| CONTIG-050378 | 84  | 5  | 2  | 9   | 0 |
| CONTIG-050379 | 216 | 6  | 10 | 18  | 0 |
| CONTIG-050380 | 59  | 4  | 3  | 6   | 0 |
| CONTIG-050382 | 161 | 14 | 29 | 74  | 3 |
| CONTIG-050383 | 606 | 12 | 33 | 97  | 0 |
| CONTIG-050384 | 427 | 9  | 27 | 112 | 0 |
| CONTIG-050385 | 59  | 8  | 0  | 19  | 0 |
| CONTIG-050387 | 112 | 8  | 0  | 37  | 0 |
| CONTIG-050388 | 134 | 14 | 0  | 80  | 0 |
| CONTIG-050389 | 166 | 8  | 26 | 5   | 0 |
| CONTIG-050390 | 66  | 13 | 6  | 43  | 0 |
| CONTIG-050391 | 99  | 16 | 2  | 48  | 0 |
| CONTIG-050392 | 98  | 5  | 11 | 13  | 0 |
| CONTIG-050393 | 519 | 10 | 18 | 210 | 2 |
| CONTIG-050394 | 49  | 4  | 2  | 2   | 0 |
| CONTIG-050396 | 82  | 5  | 8  | 11  | 0 |
| CONTIG-050397 | 232 | 10 | 20 | 110 | 0 |
| CONTIG-050398 | 106 | 7  | 0  | 21  | 0 |
| CONTIG-050399 | 101 | 51 | 55 | 69  | 0 |
| CONTIG-050400 | 253 | 7  | 32 | 35  | 0 |
| CONTIG-050401 | 112 | 5  | 3  | 16  | 0 |
| CONTIG-050402 | 61  | 5  | 17 | 0   | 0 |
| CONTIG-050403 | 87  | 2  | 0  | 2   | 0 |
| CONTIG-050404 | 123 | 15 | 21 | 19  | 0 |
| CONTIG-050405 | 235 | 6  | 5  | 2   | 0 |
| CONTIG-050406 | 152 | 10 | 4  | 47  | 2 |
| CONTIG-050407 | 108 | 4  | 0  | 10  | 0 |
| CONTIG-050408 | 317 | 6  | 2  | 66  | 0 |
| CONTIG-050409 | 67  | 4  | 6  | 0   | 0 |
| CONTIG-050410 | 108 | 4  | 7  | 7   | 0 |
| CONTIG-050411 | 626 | 11 | 17 | 281 | 0 |
| CONTIG-050412 | 116 | 12 | 10 | 40  | 0 |
| CONTIG-050413 | 94  | 8  | 12 | 10  | 0 |
| CONTIG-050414 | 160 | 27 | 17 | 188 | 0 |
| CONTIG-050415 | 73  | 2  | 2  | 2   | 0 |

|               |     |     |    |     |     |
|---------------|-----|-----|----|-----|-----|
| CONTIG-050416 | 101 | 7   | 2  | 24  | 0   |
| CONTIG-050417 | 84  | 4   | 0  | 2   | 0   |
| CONTIG-050418 | 75  | 5   | 13 | 5   | 0   |
| CONTIG-050419 | 115 | 10  | 6  | 43  | 4   |
| CONTIG-050421 | 456 | 14  | 17 | 248 | 0   |
| CONTIG-050422 | 405 | 222 | 2  | 0   | 877 |
| CONTIG-050423 | 155 | 12  | 8  | 96  | 0   |
| CONTIG-050424 | 282 | 11  | 44 | 12  | 0   |
| CONTIG-050425 | 122 | 5   | 22 | 2   | 0   |
| CONTIG-050426 | 285 | 13  | 62 | 62  | 0   |
| CONTIG-050427 | 70  | 5   | 14 | 6   | 0   |
| CONTIG-050428 | 196 | 8   | 15 | 48  | 0   |
| CONTIG-050429 | 128 | 42  | 2  | 4   | 0   |
| CONTIG-050430 | 362 | 11  | 7  | 155 | 0   |
| CONTIG-050431 | 114 | 8   | 18 | 34  | 0   |
| CONTIG-050432 | 193 | 14  | 11 | 137 | 0   |
| CONTIG-050433 | 275 | 11  | 46 | 86  | 0   |
| CONTIG-050434 | 88  | 5   | 6  | 10  | 0   |
| CONTIG-050435 | 140 | 7   | 8  | 23  | 0   |
| CONTIG-050437 | 131 | 5   | 6  | 13  | 0   |
| CONTIG-050438 | 489 | 8   | 17 | 96  | 2   |
| CONTIG-050439 | 177 | 5   | 20 | 19  | 0   |
| CONTIG-050441 | 304 | 8   | 4  | 64  | 2   |
| CONTIG-050442 | 459 | 6   | 18 | 56  | 0   |
| CONTIG-050443 | 161 | 10  | 5  | 66  | 0   |
| CONTIG-050444 | 71  | 8   | 7  | 17  | 0   |
| CONTIG-050447 | 174 | 8   | 8  | 24  | 2   |
| CONTIG-050448 | 122 | 20  | 14 | 70  | 0   |
| CONTIG-050449 | 314 | 11  | 25 | 150 | 0   |
| CONTIG-050450 | 130 | 11  | 7  | 38  | 0   |
| CONTIG-050451 | 145 | 6   | 0  | 20  | 0   |
| CONTIG-050452 | 139 | 49  | 22 | 149 | 0   |
| CONTIG-050453 | 126 | 5   | 7  | 21  | 0   |
| CONTIG-050454 | 92  | 36  | 57 | 117 | 0   |
| CONTIG-050455 | 276 | 19  | 66 | 82  | 0   |
| CONTIG-050456 | 185 | 9   | 14 | 47  | 0   |
| CONTIG-050457 | 171 | 5   | 6  | 22  | 0   |
| CONTIG-050458 | 412 | 17  | 28 | 209 | 3   |
| CONTIG-050461 | 187 | 16  | 37 | 85  | 0   |
| CONTIG-050462 | 138 | 12  | 22 | 35  | 0   |
| CONTIG-050464 | 79  | 22  | 14 | 51  | 0   |
| CONTIG-050465 | 231 | 6   | 4  | 57  | 0   |
| CONTIG-050466 | 281 | 8   | 0  | 69  | 0   |
| CONTIG-050467 | 105 | 5   | 11 | 7   | 0   |
| CONTIG-050468 | 58  | 10  | 4  | 26  | 0   |
| CONTIG-050469 | 74  | 7   | 3  | 11  | 0   |
| CONTIG-050470 | 380 | 10  | 10 | 87  | 0   |

|               |     |    |     |     |    |
|---------------|-----|----|-----|-----|----|
| CONTIG-050471 | 139 | 23 | 0   | 157 | 0  |
| CONTIG-050472 | 59  | 5  | 0   | 11  | 0  |
| CONTIG-050473 | 103 | 15 | 3   | 58  | 0  |
| CONTIG-050474 | 100 | 18 | 43  | 43  | 0  |
| CONTIG-050475 | 178 | 29 | 29  | 173 | 0  |
| CONTIG-050476 | 65  | 13 | 3   | 13  | 0  |
| CONTIG-050477 | 78  | 3  | 0   | 5   | 0  |
| CONTIG-050478 | 101 | 5  | 9   | 12  | 0  |
| CONTIG-050479 | 344 | 14 | 4   | 215 | 0  |
| CONTIG-050480 | 66  | 5  | 0   | 5   | 0  |
| CONTIG-050481 | 62  | 10 | 10  | 15  | 0  |
| CONTIG-050482 | 115 | 13 | 56  | 21  | 0  |
| CONTIG-050483 | 113 | 6  | 2   | 2   | 0  |
| CONTIG-050484 | 218 | 8  | 14  | 29  | 0  |
| CONTIG-050485 | 161 | 5  | 14  | 13  | 2  |
| CONTIG-050486 | 198 | 6  | 4   | 37  | 0  |
| CONTIG-050487 | 39  | 16 | 2   | 9   | 0  |
| CONTIG-050488 | 80  | 6  | 7   | 0   | 0  |
| CONTIG-050489 | 255 | 11 | 13  | 119 | 0  |
| CONTIG-050490 | 67  | 8  | 15  | 0   | 0  |
| CONTIG-050491 | 331 | 24 | 31  | 280 | 0  |
| CONTIG-050492 | 110 | 4  | 6   | 11  | 0  |
| CONTIG-050493 | 100 | 7  | 15  | 18  | 0  |
| CONTIG-050494 | 72  | 9  | 0   | 2   | 0  |
| CONTIG-050495 | 62  | 7  | 4   | 13  | 0  |
| CONTIG-050496 | 186 | 14 | 33  | 59  | 0  |
| CONTIG-050497 | 97  | 73 | 43  | 174 | 15 |
| CONTIG-050498 | 387 | 6  | 22  | 31  | 0  |
| CONTIG-050499 | 48  | 13 | 0   | 0   | 2  |
| CONTIG-050501 | 770 | 32 | 108 | 770 | 37 |
| CONTIG-050502 | 134 | 5  | 16  | 8   | 0  |
| CONTIG-050503 | 64  | 6  | 5   | 8   | 0  |
| CONTIG-050504 | 71  | 6  | 0   | 14  | 0  |
| CONTIG-050505 | 291 | 11 | 36  | 46  | 0  |
| CONTIG-050506 | 91  | 10 | 2   | 29  | 0  |
| CONTIG-050507 | 207 | 8  | 24  | 40  | 0  |
| CONTIG-050508 | 70  | 3  | 4   | 7   | 0  |
| CONTIG-050509 | 144 | 7  | 4   | 27  | 0  |
| CONTIG-050510 | 60  | 3  | 3   | 6   | 0  |
| CONTIG-050511 | 68  | 5  | 5   | 6   | 0  |
| CONTIG-050512 | 148 | 9  | 14  | 26  | 0  |
| CONTIG-050513 | 214 | 12 | 9   | 38  | 0  |
| CONTIG-050514 | 67  | 14 | 7   | 24  | 0  |
| CONTIG-050515 | 220 | 10 | 10  | 111 | 0  |
| CONTIG-050516 | 168 | 21 | 27  | 113 | 2  |
| CONTIG-050517 | 97  | 5  | 7   | 16  | 0  |
| CONTIG-050518 | 112 | 5  | 5   | 0   | 2  |

|               |     |     |    |     |    |
|---------------|-----|-----|----|-----|----|
| CONTIG-050519 | 215 | 9   | 12 | 47  | 2  |
| CONTIG-050520 | 213 | 5   | 5  | 30  | 0  |
| CONTIG-050521 | 178 | 5   | 27 | 15  | 2  |
| CONTIG-050523 | 73  | 6   | 22 | 4   | 0  |
| CONTIG-050524 | 118 | 5   | 12 | 6   | 0  |
| CONTIG-050525 | 215 | 12  | 19 | 83  | 2  |
| CONTIG-050526 | 120 | 81  | 15 | 456 | 0  |
| CONTIG-050527 | 140 | 19  | 20 | 25  | 2  |
| CONTIG-050528 | 143 | 6   | 2  | 26  | 0  |
| CONTIG-050529 | 344 | 13  | 14 | 168 | 5  |
| CONTIG-050530 | 337 | 14  | 2  | 42  | 0  |
| CONTIG-050532 | 203 | 9   | 9  | 57  | 0  |
| CONTIG-050533 | 604 | 10  | 18 | 226 | 0  |
| CONTIG-050534 | 145 | 6   | 11 | 19  | 0  |
| CONTIG-050535 | 80  | 5   | 8  | 2   | 0  |
| CONTIG-050536 | 62  | 35  | 19 | 31  | 2  |
| CONTIG-050537 | 76  | 4   | 14 | 0   | 0  |
| CONTIG-050542 | 133 | 7   | 20 | 3   | 0  |
| CONTIG-050543 | 466 | 12  | 34 | 71  | 2  |
| CONTIG-050545 | 76  | 36  | 5  | 88  | 0  |
| CONTIG-050546 | 138 | 12  | 25 | 38  | 0  |
| CONTIG-050547 | 258 | 18  | 14 | 99  | 11 |
| CONTIG-050548 | 78  | 8   | 3  | 13  | 0  |
| CONTIG-050549 | 293 | 26  | 6  | 0   | 77 |
| CONTIG-050551 | 238 | 15  | 26 | 42  | 0  |
| CONTIG-050552 | 400 | 12  | 18 | 170 | 0  |
| CONTIG-050553 | 256 | 14  | 20 | 109 | 2  |
| CONTIG-050554 | 180 | 8   | 13 | 30  | 0  |
| CONTIG-050555 | 388 | 10  | 10 | 122 | 0  |
| CONTIG-050556 | 102 | 7   | 5  | 18  | 0  |
| CONTIG-050559 | 71  | 6   | 2  | 0   | 0  |
| CONTIG-050560 | 63  | 6   | 2  | 15  | 0  |
| CONTIG-050561 | 69  | 5   | 3  | 8   | 0  |
| CONTIG-050563 | 166 | 6   | 2  | 43  | 0  |
| CONTIG-050564 | 52  | 13  | 27 | 9   | 0  |
| CONTIG-050565 | 62  | 7   | 3  | 16  | 0  |
| CONTIG-050566 | 88  | 12  | 69 | 10  | 0  |
| CONTIG-050567 | 398 | 15  | 41 | 53  | 0  |
| CONTIG-050568 | 61  | 5   | 5  | 9   | 0  |
| CONTIG-050569 | 724 | 29  | 29 | 89  | 0  |
| CONTIG-050570 | 69  | 10  | 51 | 7   | 0  |
| CONTIG-050571 | 64  | 3   | 2  | 4   | 0  |
| CONTIG-050573 | 85  | 684 | 2  | 158 | 0  |
| CONTIG-050576 | 169 | 15  | 10 | 106 | 0  |
| CONTIG-050577 | 115 | 3   | 0  | 0   | 0  |
| CONTIG-050579 | 69  | 4   | 5  | 4   | 0  |
| CONTIG-050580 | 240 | 7   | 7  | 29  | 0  |

|               |     |     |     |     |    |
|---------------|-----|-----|-----|-----|----|
| CONTIG-050581 | 93  | 9   | 6   | 25  | 2  |
| CONTIG-050582 | 257 | 9   | 3   | 102 | 0  |
| CONTIG-050583 | 803 | 13  | 152 | 217 | 0  |
| CONTIG-050584 | 229 | 13  | 3   | 15  | 0  |
| CONTIG-050585 | 65  | 15  | 11  | 0   | 0  |
| CONTIG-050586 | 125 | 8   | 8   | 42  | 0  |
| CONTIG-050587 | 90  | 8   | 0   | 15  | 0  |
| CONTIG-050588 | 101 | 11  | 21  | 25  | 0  |
| CONTIG-050589 | 100 | 8   | 2   | 18  | 2  |
| CONTIG-050590 | 121 | 5   | 2   | 20  | 0  |
| CONTIG-050591 | 123 | 8   | 5   | 39  | 0  |
| CONTIG-050592 | 425 | 8   | 5   | 100 | 2  |
| CONTIG-050593 | 108 | 14  | 38  | 3   | 0  |
| CONTIG-050594 | 145 | 7   | 8   | 35  | 0  |
| CONTIG-050595 | 187 | 9   | 8   | 64  | 0  |
| CONTIG-050596 | 234 | 9   | 4   | 71  | 0  |
| CONTIG-050597 | 411 | 10  | 5   | 6   | 0  |
| CONTIG-050598 | 176 | 9   | 18  | 10  | 3  |
| CONTIG-050601 | 558 | 13  | 13  | 345 | 0  |
| CONTIG-050602 | 235 | 16  | 4   | 168 | 0  |
| CONTIG-050603 | 62  | 8   | 4   | 8   | 0  |
| CONTIG-050604 | 44  | 104 | 4   | 105 | 17 |
| CONTIG-050605 | 94  | 7   | 23  | 0   | 0  |
| CONTIG-050606 | 120 | 5   | 5   | 10  | 0  |
| CONTIG-050609 | 106 | 7   | 14  | 21  | 0  |
| CONTIG-050611 | 104 | 10  | 32  | 22  | 0  |
| CONTIG-050612 | 164 | 11  | 25  | 45  | 0  |
| CONTIG-050613 | 118 | 8   | 21  | 6   | 0  |
| CONTIG-050614 | 234 | 9   | 8   | 61  | 0  |
| CONTIG-050615 | 201 | 17  | 35  | 112 | 4  |
| CONTIG-050616 | 156 | 8   | 0   | 26  | 0  |
| CONTIG-050617 | 90  | 5   | 4   | 14  | 0  |
| CONTIG-050618 | 175 | 6   | 8   | 27  | 0  |
| CONTIG-050619 | 105 | 7   | 2   | 16  | 0  |
| CONTIG-050620 | 297 | 20  | 11  | 261 | 4  |
| CONTIG-050621 | 350 | 9   | 5   | 75  | 5  |
| CONTIG-050622 | 402 | 10  | 18  | 122 | 4  |
| CONTIG-050623 | 74  | 22  | 19  | 53  | 0  |
| CONTIG-050624 | 101 | 10  | 16  | 15  | 0  |
| CONTIG-050627 | 108 | 7   | 6   | 6   | 0  |
| CONTIG-050628 | 76  | 17  | 27  | 52  | 0  |
| CONTIG-050629 | 58  | 3   | 8   | 0   | 0  |
| CONTIG-050630 | 307 | 7   | 10  | 48  | 0  |
| CONTIG-050631 | 193 | 8   | 15  | 45  | 2  |
| CONTIG-050632 | 250 | 13  | 7   | 78  | 0  |
| CONTIG-050633 | 173 | 6   | 2   | 20  | 0  |
| CONTIG-050634 | 412 | 20  | 30  | 273 | 0  |

|               |     |     |    |      |    |
|---------------|-----|-----|----|------|----|
| CONTIG-050635 | 720 | 14  | 9  | 208  | 0  |
| CONTIG-050636 | 205 | 9   | 30 | 83   | 0  |
| CONTIG-050637 | 79  | 4   | 0  | 4    | 0  |
| CONTIG-050638 | 510 | 21  | 10 | 552  | 2  |
| CONTIG-050639 | 100 | 9   | 23 | 38   | 0  |
| CONTIG-050640 | 228 | 11  | 6  | 114  | 0  |
| CONTIG-050641 | 120 | 6   | 15 | 13   | 0  |
| CONTIG-050642 | 200 | 8   | 53 | 30   | 0  |
| CONTIG-050643 | 80  | 11  | 24 | 17   | 0  |
| CONTIG-050644 | 133 | 4   | 2  | 8    | 0  |
| CONTIG-050645 | 119 | 10  | 14 | 17   | 0  |
| CONTIG-050646 | 133 | 8   | 4  | 2    | 0  |
| CONTIG-050647 | 398 | 18  | 24 | 194  | 0  |
| CONTIG-050648 | 252 | 8   | 8  | 46   | 0  |
| CONTIG-050649 | 91  | 14  | 7  | 50   | 0  |
| CONTIG-050650 | 109 | 12  | 26 | 7    | 0  |
| CONTIG-050651 | 68  | 4   | 5  | 8    | 0  |
| CONTIG-050652 | 299 | 11  | 16 | 98   | 0  |
| CONTIG-050653 | 116 | 7   | 10 | 16   | 2  |
| CONTIG-050654 | 550 | 92  | 2  | 0    | 81 |
| CONTIG-050655 | 100 | 4   | 4  | 10   | 0  |
| CONTIG-050656 | 172 | 8   | 17 | 35   | 0  |
| CONTIG-050657 | 120 | 9   | 8  | 13   | 0  |
| CONTIG-050658 | 245 | 139 | 9  | 1979 | 4  |
| CONTIG-050660 | 73  | 6   | 2  | 7    | 0  |
| CONTIG-050661 | 171 | 4   | 4  | 15   | 0  |
| CONTIG-050662 | 58  | 4   | 10 | 2    | 0  |
| CONTIG-050663 | 210 | 10  | 2  | 88   | 0  |
| CONTIG-050664 | 218 | 18  | 6  | 37   | 0  |
| CONTIG-050665 | 126 | 11  | 11 | 73   | 0  |
| CONTIG-050667 | 201 | 11  | 45 | 64   | 2  |
| CONTIG-050668 | 86  | 15  | 10 | 46   | 0  |
| CONTIG-050669 | 398 | 41  | 6  | 22   | 0  |
| CONTIG-050670 | 59  | 4   | 0  | 0    | 0  |
| CONTIG-050671 | 86  | 40  | 19 | 94   | 0  |
| CONTIG-050672 | 649 | 8   | 29 | 116  | 2  |
| CONTIG-050673 | 745 | 11  | 39 | 392  | 0  |
| CONTIG-050674 | 86  | 13  | 11 | 25   | 0  |
| CONTIG-050675 | 283 | 11  | 5  | 122  | 0  |
| CONTIG-050676 | 209 | 11  | 26 | 91   | 0  |
| CONTIG-050684 | 131 | 6   | 14 | 12   | 0  |
| CONTIG-050685 | 588 | 18  | 18 | 0    | 61 |
| CONTIG-050687 | 140 | 7   | 3  | 20   | 0  |
| CONTIG-050688 | 157 | 12  | 10 | 61   | 0  |
| CONTIG-050691 | 236 | 12  | 29 | 53   | 0  |
| CONTIG-050692 | 61  | 7   | 29 | 3    | 2  |
| CONTIG-050693 | 111 | 10  | 22 | 17   | 0  |



|               |     |     |     |     |   |
|---------------|-----|-----|-----|-----|---|
| CONTIG-050694 | 183 | 22  | 37  | 93  | 0 |
| CONTIG-050696 | 181 | 10  | 8   | 57  | 0 |
| CONTIG-050697 | 430 | 14  | 16  | 187 | 2 |
| CONTIG-050698 | 206 | 8   | 12  | 8   | 0 |
| CONTIG-050699 | 275 | 13  | 47  | 64  | 0 |
| CONTIG-050700 | 180 | 8   | 4   | 58  | 0 |
| CONTIG-050701 | 216 | 5   | 5   | 36  | 0 |
| CONTIG-050702 | 142 | 8   | 2   | 51  | 0 |
| CONTIG-050708 | 110 | 5   | 9   | 13  | 0 |
| CONTIG-050709 | 71  | 13  | 2   | 26  | 0 |
| CONTIG-050710 | 118 | 19  | 31  | 0   | 0 |
| CONTIG-050711 | 190 | 8   | 2   | 49  | 0 |
| CONTIG-050712 | 200 | 5   | 2   | 9   | 0 |
| CONTIG-050713 | 114 | 5   | 2   | 9   | 0 |
| CONTIG-050714 | 94  | 6   | 6   | 0   | 0 |
| CONTIG-050715 | 138 | 5   | 2   | 10  | 0 |
| CONTIG-050716 | 70  | 39  | 31  | 124 | 0 |
| CONTIG-050717 | 193 | 5   | 4   | 29  | 0 |
| CONTIG-050718 | 149 | 11  | 13  | 54  | 0 |
| CONTIG-050719 | 63  | 8   | 2   | 14  | 0 |
| CONTIG-050720 | 118 | 18  | 28  | 96  | 0 |
| CONTIG-050721 | 86  | 8   | 2   | 9   | 0 |
| CONTIG-050722 | 298 | 9   | 11  | 22  | 0 |
| CONTIG-050724 | 272 | 19  | 24  | 209 | 0 |
| CONTIG-050725 | 369 | 19  | 36  | 244 | 2 |
| CONTIG-050726 | 99  | 10  | 9   | 38  | 0 |
| CONTIG-050729 | 64  | 5   | 5   | 11  | 0 |
| CONTIG-050730 | 698 | 7   | 8   | 128 | 2 |
| CONTIG-050731 | 71  | 16  | 20  | 38  | 0 |
| CONTIG-050732 | 247 | 6   | 0   | 32  | 0 |
| CONTIG-050733 | 102 | 9   | 4   | 24  | 0 |
| CONTIG-050734 | 92  | 62  | 34  | 197 | 4 |
| CONTIG-050735 | 59  | 25  | 2   | 64  | 0 |
| CONTIG-050737 | 87  | 6   | 3   | 10  | 2 |
| CONTIG-050738 | 197 | 10  | 7   | 85  | 0 |
| CONTIG-050739 | 72  | 7   | 21  | 5   | 0 |
| CONTIG-050740 | 171 | 9   | 6   | 9   | 0 |
| CONTIG-050741 | 94  | 4   | 13  | 0   | 0 |
| CONTIG-050742 | 402 | 16  | 31  | 343 | 0 |
| CONTIG-050743 | 76  | 3   | 5   | 4   | 0 |
| CONTIG-050744 | 76  | 5   | 6   | 0   | 0 |
| CONTIG-050745 | 380 | 12  | 36  | 74  | 0 |
| CONTIG-050746 | 88  | 11  | 66  | 6   | 0 |
| CONTIG-050747 | 197 | 12  | 2   | 55  | 2 |
| CONTIG-050748 | 104 | 8   | 15  | 21  | 2 |
| CONTIG-050749 | 84  | 5   | 18  | 2   | 0 |
| CONTIG-050750 | 64  | 246 | 100 | 381 | 0 |

|               |     |     |    |     |     |
|---------------|-----|-----|----|-----|-----|
| CONTIG-050751 | 190 | 36  | 17 | 324 | 13  |
| CONTIG-050752 | 542 | 9   | 17 | 89  | 0   |
| CONTIG-050753 | 241 | 7   | 8  | 42  | 0   |
| CONTIG-050754 | 322 | 7   | 8  | 80  | 0   |
| CONTIG-050755 | 37  | 2   | 0  | 0   | 0   |
| CONTIG-050756 | 309 | 23  | 62 | 195 | 12  |
| CONTIG-050757 | 209 | 5   | 2  | 40  | 0   |
| CONTIG-050758 | 100 | 4   | 14 | 7   | 0   |
| CONTIG-050759 | 268 | 133 | 5  | 0   | 164 |
| CONTIG-050760 | 133 | 7   | 13 | 36  | 0   |
| CONTIG-050761 | 211 | 8   | 21 | 28  | 0   |
| CONTIG-050762 | 246 | 14  | 47 | 88  | 0   |
| CONTIG-050763 | 162 | 11  | 3  | 33  | 0   |
| CONTIG-050764 | 65  | 19  | 5  | 0   | 30  |
| CONTIG-050765 | 98  | 4   | 2  | 12  | 0   |
| CONTIG-050766 | 70  | 4   | 0  | 8   | 0   |
| CONTIG-050767 | 142 | 6   | 0  | 4   | 0   |
| CONTIG-050769 | 104 | 10  | 10 | 13  | 0   |
| CONTIG-050770 | 309 | 7   | 10 | 2   | 0   |
| CONTIG-050771 | 195 | 5   | 2  | 28  | 0   |
| CONTIG-050775 | 207 | 8   | 2  | 19  | 0   |
| CONTIG-050776 | 216 | 9   | 15 | 21  | 0   |
| CONTIG-050777 | 141 | 8   | 7  | 29  | 0   |
| CONTIG-050778 | 79  | 5   | 5  | 0   | 0   |
| CONTIG-050779 | 392 | 37  | 47 | 810 | 0   |
| CONTIG-050780 | 72  | 5   | 6  | 6   | 0   |
| CONTIG-050781 | 83  | 4   | 9  | 6   | 0   |
| CONTIG-050782 | 84  | 8   | 7  | 15  | 4   |
| CONTIG-050783 | 73  | 10  | 15 | 8   | 0   |
| CONTIG-050784 | 308 | 10  | 23 | 115 | 0   |
| CONTIG-050786 | 71  | 5   | 3  | 0   | 0   |
| CONTIG-050787 | 95  | 35  | 35 | 124 | 3   |
| CONTIG-050789 | 64  | 6   | 7  | 0   | 0   |
| CONTIG-050790 | 62  | 11  | 11 | 34  | 0   |
| CONTIG-050791 | 160 | 16  | 32 | 96  | 0   |
| CONTIG-050792 | 130 | 6   | 2  | 24  | 2   |
| CONTIG-050793 | 78  | 8   | 10 | 6   | 0   |
| CONTIG-050794 | 407 | 41  | 5  | 0   | 199 |
| CONTIG-050795 | 167 | 6   | 4  | 9   | 0   |
| CONTIG-050796 | 86  | 6   | 3  | 24  | 0   |
| CONTIG-050797 | 163 | 13  | 2  | 2   | 0   |
| CONTIG-050798 | 136 | 7   | 2  | 6   | 2   |
| CONTIG-050799 | 135 | 5   | 8  | 9   | 0   |
| CONTIG-050800 | 62  | 3   | 0  | 0   | 0   |
| CONTIG-050801 | 114 | 11  | 24 | 14  | 0   |
| CONTIG-050802 | 66  | 5   | 7  | 5   | 0   |
| CONTIG-050803 | 106 | 16  | 18 | 32  | 2   |

|               |     |     |     |     |    |
|---------------|-----|-----|-----|-----|----|
| CONTIG-050804 | 179 | 9   | 19  | 38  | 0  |
| CONTIG-050805 | 442 | 17  | 15  | 459 | 0  |
| CONTIG-050806 | 65  | 8   | 13  | 21  | 0  |
| CONTIG-050807 | 109 | 24  | 11  | 103 | 3  |
| CONTIG-050808 | 157 | 8   | 12  | 38  | 0  |
| CONTIG-050809 | 151 | 4   | 2   | 7   | 0  |
| CONTIG-050810 | 162 | 8   | 7   | 33  | 2  |
| CONTIG-050813 | 66  | 12  | 22  | 11  | 0  |
| CONTIG-050814 | 160 | 4   | 7   | 18  | 0  |
| CONTIG-050815 | 130 | 13  | 17  | 70  | 0  |
| CONTIG-050816 | 310 | 11  | 13  | 127 | 0  |
| CONTIG-050817 | 68  | 27  | 3   | 15  | 0  |
| CONTIG-050818 | 193 | 7   | 4   | 30  | 0  |
| CONTIG-050819 | 72  | 7   | 8   | 5   | 0  |
| CONTIG-050820 | 225 | 9   | 6   | 4   | 0  |
| CONTIG-050821 | 162 | 8   | 29  | 36  | 0  |
| CONTIG-050822 | 59  | 5   | 3   | 4   | 0  |
| CONTIG-050823 | 212 | 5   | 11  | 31  | 0  |
| CONTIG-050824 | 183 | 7   | 11  | 6   | 0  |
| CONTIG-050825 | 63  | 3   | 0   | 6   | 0  |
| CONTIG-050826 | 60  | 4   | 4   | 2   | 0  |
| CONTIG-050827 | 81  | 9   | 18  | 11  | 0  |
| CONTIG-050828 | 267 | 8   | 7   | 6   | 0  |
| CONTIG-050829 | 100 | 5   | 9   | 10  | 0  |
| CONTIG-050830 | 72  | 14  | 12  | 12  | 0  |
| CONTIG-050831 | 131 | 13  | 11  | 40  | 2  |
| CONTIG-050832 | 216 | 10  | 18  | 77  | 0  |
| CONTIG-050833 | 134 | 11  | 24  | 33  | 0  |
| CONTIG-050834 | 213 | 9   | 15  | 43  | 0  |
| CONTIG-050835 | 558 | 22  | 0   | 0   | 65 |
| CONTIG-050836 | 60  | 2   | 6   | 4   | 0  |
| CONTIG-050837 | 530 | 16  | 14  | 196 | 16 |
| CONTIG-050838 | 571 | 37  | 19  | 879 | 4  |
| CONTIG-050839 | 58  | 5   | 2   | 8   | 0  |
| CONTIG-050840 | 204 | 9   | 19  | 66  | 0  |
| CONTIG-050841 | 62  | 23  | 43  | 45  | 0  |
| CONTIG-050842 | 87  | 10  | 20  | 19  | 0  |
| CONTIG-050843 | 83  | 7   | 2   | 15  | 0  |
| CONTIG-050844 | 79  | 4   | 2   | 2   | 0  |
| CONTIG-050845 | 72  | 104 | 102 | 299 | 0  |
| CONTIG-050846 | 79  | 15  | 25  | 2   | 0  |
| CONTIG-050847 | 46  | 708 | 6   | 683 | 0  |
| CONTIG-050848 | 377 | 6   | 7   | 43  | 2  |
| CONTIG-050849 | 157 | 8   | 3   | 43  | 4  |
| CONTIG-050850 | 115 | 6   | 10  | 11  | 0  |
| CONTIG-050851 | 118 | 9   | 15  | 11  | 0  |
| CONTIG-050852 | 884 | 15  | 112 | 470 | 4  |

|               |      |     |    |      |    |
|---------------|------|-----|----|------|----|
| CONTIG-050853 | 67   | 3   | 5  | 0    | 0  |
| CONTIG-050854 | 130  | 5   | 14 | 2    | 0  |
| CONTIG-050855 | 228  | 5   | 2  | 21   | 0  |
| CONTIG-050856 | 207  | 12  | 12 | 90   | 0  |
| CONTIG-050857 | 120  | 8   | 7  | 37   | 0  |
| CONTIG-050858 | 89   | 5   | 3  | 11   | 2  |
| CONTIG-050859 | 85   | 4   | 4  | 12   | 0  |
| CONTIG-050860 | 92   | 10  | 5  | 5    | 0  |
| CONTIG-050862 | 248  | 14  | 4  | 0    | 13 |
| CONTIG-050863 | 88   | 5   | 4  | 12   | 0  |
| CONTIG-050864 | 291  | 5   | 3  | 44   | 2  |
| CONTIG-050865 | 368  | 12  | 28 | 115  | 0  |
| CONTIG-050866 | 374  | 35  | 14 | 18   | 2  |
| CONTIG-050867 | 182  | 29  | 8  | 129  | 0  |
| CONTIG-050868 | 77   | 4   | 16 | 4    | 0  |
| CONTIG-050871 | 247  | 17  | 13 | 140  | 0  |
| CONTIG-050872 | 65   | 4   | 8  | 6    | 0  |
| CONTIG-050873 | 280  | 17  | 60 | 57   | 0  |
| CONTIG-050875 | 41   | 100 | 35 | 59   | 16 |
| CONTIG-050876 | 74   | 3   | 2  | 6    | 0  |
| CONTIG-050877 | 1513 | 19  | 16 | 1189 | 0  |
| CONTIG-050878 | 74   | 11  | 0  | 37   | 0  |
| CONTIG-050879 | 176  | 3   | 3  | 16   | 0  |
| CONTIG-050880 | 160  | 7   | 10 | 15   | 0  |
| CONTIG-050882 | 72   | 4   | 6  | 4    | 0  |
| CONTIG-050883 | 129  | 6   | 28 | 0    | 0  |
| CONTIG-050884 | 219  | 10  | 29 | 76   | 0  |
| CONTIG-050888 | 301  | 12  | 22 | 121  | 2  |
| CONTIG-050889 | 226  | 10  | 12 | 85   | 2  |
| CONTIG-050890 | 60   | 5   | 16 | 3    | 0  |
| CONTIG-050891 | 159  | 6   | 5  | 10   | 0  |
| CONTIG-050892 | 78   | 6   | 11 | 12   | 0  |
| CONTIG-050893 | 91   | 4   | 3  | 5    | 0  |
| CONTIG-050894 | 121  | 5   | 2  | 17   | 2  |
| CONTIG-050895 | 83   | 8   | 46 | 8    | 0  |
| CONTIG-050896 | 453  | 15  | 18 | 346  | 0  |
| CONTIG-050897 | 329  | 11  | 15 | 109  | 2  |
| CONTIG-050898 | 72   | 3   | 2  | 8    | 0  |
| CONTIG-050899 | 146  | 11  | 7  | 35   | 0  |
| CONTIG-050900 | 88   | 10  | 11 | 21   | 0  |
| CONTIG-050901 | 65   | 3   | 2  | 5    | 0  |
| CONTIG-050902 | 197  | 6   | 15 | 23   | 0  |
| CONTIG-050903 | 175  | 4   | 9  | 14   | 0  |
| CONTIG-050904 | 141  | 8   | 0  | 44   | 0  |
| CONTIG-050905 | 53   | 109 | 13 | 193  | 0  |
| CONTIG-050906 | 87   | 6   | 2  | 16   | 0  |
| CONTIG-050907 | 184  | 6   | 8  | 28   | 0  |

|               |     |    |     |      |    |
|---------------|-----|----|-----|------|----|
| CONTIG-050908 | 91  | 4  | 6   | 3    | 0  |
| CONTIG-050912 | 128 | 6  | 6   | 9    | 0  |
| CONTIG-050913 | 74  | 2  | 0   | 4    | 0  |
| CONTIG-050914 | 60  | 11 | 2   | 15   | 0  |
| CONTIG-050915 | 157 | 9  | 14  | 30   | 0  |
| CONTIG-050916 | 226 | 59 | 171 | 410  | 3  |
| CONTIG-050917 | 82  | 7  | 5   | 8    | 0  |
| CONTIG-050918 | 108 | 3  | 0   | 2    | 0  |
| CONTIG-050919 | 79  | 6  | 14  | 5    | 0  |
| CONTIG-050926 | 94  | 8  | 15  | 14   | 0  |
| CONTIG-050927 | 166 | 12 | 4   | 77   | 0  |
| CONTIG-050928 | 67  | 3  | 11  | 2    | 0  |
| CONTIG-050930 | 155 | 5  | 12  | 17   | 0  |
| CONTIG-050931 | 97  | 8  | 7   | 24   | 0  |
| CONTIG-050932 | 112 | 8  | 5   | 29   | 0  |
| CONTIG-050933 | 248 | 5  | 4   | 15   | 0  |
| CONTIG-050934 | 83  | 12 | 22  | 10   | 0  |
| CONTIG-050935 | 198 | 9  | 15  | 61   | 0  |
| CONTIG-050936 | 445 | 14 | 36  | 154  | 2  |
| CONTIG-050937 | 80  | 3  | 5   | 2    | 0  |
| CONTIG-050938 | 122 | 5  | 28  | 0    | 0  |
| CONTIG-050939 | 83  | 16 | 14  | 60   | 0  |
| CONTIG-050940 | 493 | 18 | 30  | 192  | 4  |
| CONTIG-050941 | 85  | 5  | 2   | 9    | 0  |
| CONTIG-050942 | 74  | 18 | 8   | 56   | 0  |
| CONTIG-050943 | 630 | 7  | 4   | 157  | 0  |
| CONTIG-050944 | 66  | 10 | 2   | 0    | 20 |
| CONTIG-050945 | 65  | 9  | 16  | 11   | 0  |
| CONTIG-050946 | 75  | 30 | 6   | 85   | 2  |
| CONTIG-050947 | 80  | 3  | 0   | 5    | 0  |
| CONTIG-050948 | 615 | 74 | 22  | 2624 | 0  |
| CONTIG-050949 | 581 | 22 | 10  | 557  | 8  |
| CONTIG-050950 | 61  | 7  | 10  | 6    | 0  |
| CONTIG-050951 | 136 | 15 | 19  | 64   | 0  |
| CONTIG-050953 | 441 | 23 | 71  | 270  | 12 |
| CONTIG-050954 | 95  | 9  | 17  | 23   | 0  |
| CONTIG-050955 | 274 | 8  | 17  | 57   | 0  |
| CONTIG-050956 | 526 | 9  | 0   | 125  | 2  |
| CONTIG-050957 | 474 | 8  | 4   | 0    | 15 |
| CONTIG-050958 | 58  | 6  | 9   | 6    | 0  |
| CONTIG-050959 | 78  | 5  | 3   | 12   | 0  |
| CONTIG-050960 | 412 | 24 | 26  | 502  | 0  |
| CONTIG-050961 | 78  | 6  | 3   | 10   | 0  |
| CONTIG-050962 | 66  | 16 | 2   | 40   | 2  |
| CONTIG-050963 | 87  | 7  | 0   | 12   | 0  |
| CONTIG-050964 | 75  | 8  | 24  | 7    | 0  |
| CONTIG-050965 | 183 | 15 | 7   | 110  | 0  |

|               |      |     |    |      |    |
|---------------|------|-----|----|------|----|
| CONTIG-050966 | 71   | 5   | 5  | 11   | 0  |
| CONTIG-050967 | 207  | 6   | 10 | 32   | 0  |
| CONTIG-050968 | 256  | 10  | 7  | 60   | 2  |
| CONTIG-050970 | 195  | 11  | 15 | 73   | 0  |
| CONTIG-050971 | 104  | 4   | 2  | 10   | 0  |
| CONTIG-050972 | 171  | 12  | 0  | 87   | 0  |
| CONTIG-050973 | 151  | 8   | 3  | 14   | 0  |
| CONTIG-050974 | 143  | 5   | 6  | 20   | 2  |
| CONTIG-050975 | 58   | 3   | 4  | 6    | 0  |
| CONTIG-050976 | 130  | 4   | 5  | 6    | 0  |
| CONTIG-050977 | 648  | 15  | 11 | 0    | 24 |
| CONTIG-050978 | 142  | 7   | 2  | 16   | 2  |
| CONTIG-050979 | 146  | 21  | 7  | 70   | 4  |
| CONTIG-050981 | 86   | 9   | 5  | 14   | 0  |
| CONTIG-050982 | 141  | 9   | 5  | 40   | 2  |
| CONTIG-050987 | 96   | 6   | 4  | 10   | 0  |
| CONTIG-050988 | 96   | 13  | 2  | 30   | 0  |
| CONTIG-050989 | 133  | 7   | 5  | 40   | 0  |
| CONTIG-050998 | 396  | 12  | 16 | 128  | 0  |
| CONTIG-050999 | 251  | 36  | 41 | 54   | 2  |
| CONTIG-051000 | 759  | 22  | 45 | 714  | 22 |
| CONTIG-051001 | 164  | 14  | 0  | 97   | 0  |
| CONTIG-051002 | 1069 | 18  | 9  | 69   | 0  |
| CONTIG-051003 | 103  | 4   | 3  | 11   | 0  |
| CONTIG-051005 | 195  | 7   | 2  | 34   | 0  |
| CONTIG-051006 | 49   | 123 | 15 | 200  | 2  |
| CONTIG-051007 | 598  | 25  | 3  | 21   | 0  |
| CONTIG-051008 | 67   | 9   | 29 | 4    | 2  |
| CONTIG-051009 | 1503 | 25  | 24 | 1375 | 16 |
| CONTIG-051010 | 86   | 7   | 3  | 13   | 0  |
| CONTIG-051011 | 252  | 9   | 9  | 30   | 0  |
| CONTIG-051012 | 63   | 11  | 43 | 15   | 0  |
| CONTIG-051013 | 298  | 6   | 11 | 37   | 4  |
| CONTIG-051014 | 113  | 8   | 4  | 25   | 0  |
| CONTIG-051019 | 985  | 26  | 0  | 1032 | 0  |
| CONTIG-051022 | 460  | 23  | 44 | 384  | 0  |
| CONTIG-051027 | 98   | 13  | 2  | 21   | 0  |
| CONTIG-051028 | 169  | 4   | 31 | 0    | 0  |
| CONTIG-051029 | 61   | 10  | 8  | 14   | 0  |
| CONTIG-051030 | 206  | 7   | 8  | 25   | 0  |
| CONTIG-051031 | 368  | 10  | 10 | 116  | 2  |
| CONTIG-051032 | 153  | 5   | 3  | 24   | 0  |
| CONTIG-051034 | 112  | 6   | 50 | 4    | 0  |
| CONTIG-051035 | 285  | 6   | 20 | 51   | 0  |
| CONTIG-051036 | 120  | 5   | 6  | 13   | 0  |
| CONTIG-051037 | 231  | 31  | 23 | 383  | 0  |
| CONTIG-051038 | 316  | 11  | 21 | 128  | 0  |

|               |      |     |     |      |   |
|---------------|------|-----|-----|------|---|
| CONTIG-051039 | 83   | 7   | 2   | 23   | 0 |
| CONTIG-051040 | 66   | 5   | 8   | 4    | 0 |
| CONTIG-051041 | 299  | 20  | 27  | 242  | 2 |
| CONTIG-051042 | 68   | 119 | 25  | 274  | 5 |
| CONTIG-051043 | 152  | 14  | 45  | 54   | 3 |
| CONTIG-051044 | 316  | 9   | 104 | 34   | 2 |
| CONTIG-051048 | 63   | 2   | 5   | 0    | 0 |
| CONTIG-051049 | 138  | 12  | 7   | 46   | 0 |
| CONTIG-051050 | 118  | 9   | 11  | 44   | 0 |
| CONTIG-051051 | 120  | 14  | 22  | 73   | 0 |
| CONTIG-051052 | 182  | 53  | 6   | 4    | 0 |
| CONTIG-051053 | 107  | 5   | 11  | 7    | 2 |
| CONTIG-051054 | 113  | 17  | 20  | 44   | 0 |
| CONTIG-051055 | 75   | 8   | 7   | 15   | 0 |
| CONTIG-051056 | 178  | 6   | 0   | 34   | 0 |
| CONTIG-051057 | 238  | 10  | 5   | 87   | 0 |
| CONTIG-051058 | 140  | 10  | 0   | 59   | 0 |
| CONTIG-051059 | 58   | 10  | 16  | 4    | 0 |
| CONTIG-051061 | 81   | 7   | 4   | 20   | 0 |
| CONTIG-051062 | 1301 | 24  | 22  | 1327 | 2 |
| CONTIG-051063 | 75   | 3   | 4   | 2    | 0 |
| CONTIG-051064 | 105  | 6   | 5   | 3    | 0 |
| CONTIG-051065 | 213  | 7   | 0   | 45   | 0 |
| CONTIG-051066 | 141  | 7   | 36  | 27   | 0 |
| CONTIG-051067 | 355  | 9   | 0   | 45   | 0 |
| CONTIG-051068 | 96   | 3   | 4   | 2    | 0 |
| CONTIG-051071 | 101  | 7   | 3   | 11   | 0 |
| CONTIG-051072 | 114  | 15  | 7   | 75   | 0 |
| CONTIG-051073 | 93   | 5   | 16  | 0    | 0 |
| CONTIG-051074 | 190  | 10  | 24  | 20   | 0 |
| CONTIG-051076 | 83   | 12  | 62  | 5    | 0 |
| CONTIG-051077 | 83   | 4   | 5   | 3    | 0 |
| CONTIG-051078 | 112  | 248 | 23  | 170  | 0 |
| CONTIG-051079 | 89   | 3   | 0   | 2    | 0 |
| CONTIG-051080 | 120  | 8   | 8   | 22   | 0 |
| CONTIG-051081 | 87   | 4   | 2   | 6    | 0 |
| CONTIG-051082 | 127  | 4   | 4   | 16   | 0 |
| CONTIG-051083 | 141  | 32  | 29  | 68   | 0 |
| CONTIG-051084 | 63   | 16  | 9   | 28   | 0 |
| CONTIG-051085 | 70   | 19  | 18  | 6    | 0 |
| CONTIG-051091 | 109  | 17  | 22  | 45   | 0 |
| CONTIG-051092 | 68   | 3   | 9   | 4    | 0 |
| CONTIG-051093 | 163  | 14  | 28  | 23   | 0 |
| CONTIG-051096 | 97   | 8   | 9   | 13   | 0 |
| CONTIG-051097 | 75   | 5   | 0   | 4    | 0 |
| CONTIG-051098 | 85   | 2   | 2   | 4    | 0 |
| CONTIG-051099 | 288  | 7   | 10  | 44   | 0 |

|               |     |     |     |      |   |
|---------------|-----|-----|-----|------|---|
| CONTIG-051100 | 337 | 8   | 36  | 69   | 0 |
| CONTIG-051101 | 100 | 22  | 0   | 106  | 0 |
| CONTIG-051102 | 139 | 70  | 21  | 412  | 0 |
| CONTIG-051107 | 48  | 817 | 10  | 1827 | 2 |
| CONTIG-051108 | 158 | 9   | 6   | 14   | 0 |
| CONTIG-051109 | 163 | 11  | 16  | 52   | 0 |
| CONTIG-051110 | 150 | 9   | 6   | 55   | 0 |
| CONTIG-051111 | 104 | 13  | 23  | 2    | 0 |
| CONTIG-051112 | 72  | 6   | 15  | 8    | 0 |
| CONTIG-051113 | 110 | 14  | 68  | 21   | 0 |
| CONTIG-051114 | 66  | 6   | 2   | 6    | 0 |
| CONTIG-051116 | 76  | 12  | 7   | 18   | 0 |
| CONTIG-051117 | 62  | 11  | 15  | 10   | 0 |
| CONTIG-051118 | 268 | 8   | 8   | 82   | 0 |
| CONTIG-051119 | 260 | 8   | 17  | 82   | 0 |
| CONTIG-051120 | 206 | 24  | 11  | 260  | 0 |
| CONTIG-051121 | 129 | 15  | 24  | 101  | 0 |
| CONTIG-051122 | 151 | 20  | 35  | 97   | 0 |
| CONTIG-051123 | 224 | 27  | 43  | 239  | 2 |
| CONTIG-051124 | 375 | 32  | 155 | 288  | 2 |
| CONTIG-051125 | 127 | 8   | 36  | 7    | 0 |
| CONTIG-051126 | 135 | 12  | 12  | 77   | 0 |
| CONTIG-051127 | 73  | 8   | 4   | 6    | 0 |
| CONTIG-051128 | 269 | 12  | 19  | 31   | 0 |
| CONTIG-051129 | 99  | 5   | 17  | 6    | 0 |
| CONTIG-051130 | 68  | 6   | 21  | 7    | 0 |
| CONTIG-051131 | 245 | 27  | 26  | 380  | 0 |
| CONTIG-051132 | 194 | 8   | 11  | 35   | 0 |
| CONTIG-051133 | 287 | 16  | 25  | 158  | 4 |
| CONTIG-051134 | 87  | 4   | 2   | 5    | 0 |
| CONTIG-051135 | 119 | 7   | 33  | 26   | 0 |
| CONTIG-051136 | 63  | 7   | 4   | 11   | 0 |
| CONTIG-051137 | 170 | 7   | 28  | 17   | 0 |
| CONTIG-051138 | 226 | 6   | 32  | 47   | 0 |
| CONTIG-051139 | 310 | 11  | 6   | 93   | 0 |
| CONTIG-051141 | 61  | 6   | 0   | 12   | 0 |
| CONTIG-051142 | 535 | 13  | 4   | 183  | 0 |
| CONTIG-051145 | 62  | 6   | 9   | 8    | 0 |
| CONTIG-051146 | 71  | 5   | 3   | 9    | 0 |
| CONTIG-051147 | 98  | 10  | 5   | 27   | 0 |
| CONTIG-051148 | 385 | 20  | 46  | 282  | 2 |
| CONTIG-051149 | 240 | 10  | 5   | 79   | 0 |
| CONTIG-051150 | 452 | 13  | 2   | 148  | 2 |
| CONTIG-051151 | 79  | 4   | 13  | 9    | 0 |
| CONTIG-051152 | 116 | 6   | 0   | 17   | 0 |
| CONTIG-051153 | 406 | 17  | 46  | 106  | 0 |
| CONTIG-051154 | 86  | 35  | 51  | 0    | 0 |



|               |     |    |    |     |   |
|---------------|-----|----|----|-----|---|
| CONTIG-051155 | 134 | 8  | 9  | 16  | 0 |
| CONTIG-051156 | 216 | 8  | 18 | 28  | 0 |
| CONTIG-051157 | 117 | 5  | 4  | 13  | 0 |
| CONTIG-051158 | 227 | 13 | 5  | 78  | 0 |
| CONTIG-051159 | 138 | 7  | 0  | 10  | 0 |
| CONTIG-051160 | 335 | 14 | 12 | 147 | 6 |
| CONTIG-051161 | 456 | 11 | 23 | 178 | 2 |
| CONTIG-051162 | 80  | 4  | 5  | 4   | 0 |
| CONTIG-051163 | 121 | 5  | 6  | 26  | 0 |
| CONTIG-051164 | 59  | 4  | 8  | 0   | 0 |
| CONTIG-051165 | 320 | 11 | 10 | 139 | 0 |
| CONTIG-051166 | 907 | 11 | 34 | 57  | 0 |
| CONTIG-051167 | 83  | 8  | 6  | 15  | 0 |
| CONTIG-051168 | 546 | 20 | 43 | 583 | 4 |
| CONTIG-051169 | 173 | 5  | 3  | 36  | 0 |
| CONTIG-051170 | 56  | 81 | 31 | 45  | 0 |
| CONTIG-051171 | 97  | 5  | 6  | 14  | 3 |
| CONTIG-051173 | 231 | 9  | 7  | 9   | 0 |
| CONTIG-051174 | 180 | 4  | 13 | 9   | 0 |
| CONTIG-051176 | 242 | 16 | 35 | 128 | 2 |
| CONTIG-051177 | 82  | 5  | 2  | 10  | 0 |
| CONTIG-051178 | 88  | 4  | 4  | 11  | 0 |
| CONTIG-051179 | 289 | 10 | 6  | 107 | 0 |
| CONTIG-051180 | 332 | 13 | 22 | 90  | 0 |
| CONTIG-051181 | 121 | 13 | 14 | 60  | 0 |
| CONTIG-051182 | 36  | 15 | 0  | 2   | 0 |
| CONTIG-051183 | 86  | 15 | 6  | 49  | 0 |
| CONTIG-051187 | 89  | 8  | 14 | 23  | 0 |
| CONTIG-051188 | 204 | 9  | 10 | 36  | 0 |
| CONTIG-051189 | 383 | 15 | 21 | 146 | 0 |
| CONTIG-051190 | 147 | 7  | 19 | 17  | 0 |
| CONTIG-051191 | 818 | 15 | 32 | 192 | 0 |
| CONTIG-051192 | 102 | 9  | 7  | 6   | 0 |
| CONTIG-051193 | 412 | 14 | 6  | 83  | 0 |
| CONTIG-051194 | 87  | 3  | 0  | 11  | 0 |
| CONTIG-051195 | 130 | 6  | 9  | 29  | 0 |
| CONTIG-051196 | 96  | 16 | 11 | 51  | 0 |
| CONTIG-051197 | 65  | 12 | 15 | 36  | 0 |
| CONTIG-051198 | 122 | 8  | 2  | 41  | 0 |
| CONTIG-051199 | 113 | 5  | 2  | 19  | 0 |
| CONTIG-051201 | 123 | 11 | 32 | 19  | 0 |
| CONTIG-051202 | 152 | 15 | 25 | 51  | 0 |
| CONTIG-051203 | 197 | 17 | 12 | 124 | 0 |
| CONTIG-051204 | 116 | 4  | 4  | 9   | 0 |
| CONTIG-051206 | 108 | 8  | 5  | 23  | 0 |
| CONTIG-051207 | 112 | 11 | 3  | 58  | 4 |
| CONTIG-051208 | 122 | 8  | 2  | 26  | 0 |

|               |     |    |    |     |   |
|---------------|-----|----|----|-----|---|
| CONTIG-051209 | 143 | 7  | 4  | 27  | 4 |
| CONTIG-051210 | 324 | 12 | 17 | 170 | 0 |
| CONTIG-051211 | 176 | 7  | 7  | 49  | 0 |
| CONTIG-051212 | 65  | 12 | 3  | 25  | 0 |
| CONTIG-051213 | 208 | 7  | 4  | 43  | 2 |
| CONTIG-051214 | 97  | 12 | 27 | 33  | 0 |
| CONTIG-051215 | 80  | 68 | 6  | 105 | 0 |
| CONTIG-051216 | 195 | 8  | 13 | 20  | 0 |
| CONTIG-051218 | 244 | 8  | 15 | 38  | 0 |
| CONTIG-051219 | 50  | 23 | 0  | 23  | 0 |
| CONTIG-051220 | 203 | 12 | 18 | 78  | 0 |
| CONTIG-051221 | 85  | 4  | 8  | 5   | 0 |
| CONTIG-051222 | 135 | 8  | 3  | 31  | 0 |
| CONTIG-051223 | 112 | 22 | 46 | 69  | 0 |
| CONTIG-051224 | 176 | 11 | 2  | 12  | 0 |
| CONTIG-051225 | 87  | 4  | 4  | 19  | 0 |
| CONTIG-051226 | 112 | 4  | 14 | 6   | 0 |
| CONTIG-051227 | 168 | 25 | 13 | 240 | 0 |
| CONTIG-051228 | 112 | 15 | 60 | 33  | 0 |
| CONTIG-051229 | 105 | 10 | 8  | 31  | 0 |
| CONTIG-051230 | 112 | 5  | 7  | 8   | 0 |
| CONTIG-051231 | 141 | 4  | 3  | 16  | 0 |
| CONTIG-051232 | 236 | 7  | 26 | 57  | 0 |
| CONTIG-051233 | 97  | 7  | 6  | 9   | 0 |
| CONTIG-051234 | 234 | 7  | 18 | 23  | 0 |
| CONTIG-051235 | 62  | 3  | 3  | 0   | 0 |
| CONTIG-051236 | 72  | 6  | 20 | 2   | 0 |
| CONTIG-051237 | 165 | 7  | 15 | 29  | 0 |
| CONTIG-051238 | 178 | 11 | 19 | 33  | 0 |
| CONTIG-051239 | 125 | 15 | 0  | 27  | 0 |
| CONTIG-051240 | 68  | 41 | 22 | 64  | 0 |
| CONTIG-051243 | 98  | 10 | 9  | 17  | 0 |
| CONTIG-051244 | 170 | 10 | 7  | 32  | 0 |
| CONTIG-051245 | 140 | 6  | 15 | 9   | 0 |
| CONTIG-051246 | 64  | 9  | 4  | 11  | 0 |
| CONTIG-051247 | 308 | 7  | 59 | 13  | 4 |
| CONTIG-051249 | 362 | 12 | 74 | 115 | 0 |
| CONTIG-051250 | 203 | 8  | 31 | 37  | 0 |
| CONTIG-051251 | 273 | 6  | 4  | 39  | 0 |
| CONTIG-051252 | 106 | 7  | 15 | 18  | 0 |
| CONTIG-051253 | 121 | 40 | 79 | 213 | 0 |
| CONTIG-051254 | 116 | 6  | 20 | 13  | 0 |
| CONTIG-051255 | 193 | 6  | 4  | 44  | 0 |
| CONTIG-051256 | 85  | 8  | 6  | 17  | 0 |
| CONTIG-051257 | 92  | 7  | 35 | 5   | 0 |
| CONTIG-051258 | 127 | 11 | 59 | 10  | 0 |
| CONTIG-051259 | 73  | 7  | 4  | 21  | 0 |

|               |     |     |     |     |    |
|---------------|-----|-----|-----|-----|----|
| CONTIG-051269 | 146 | 8   | 18  | 24  | 0  |
| CONTIG-051270 | 61  | 5   | 11  | 5   | 0  |
| CONTIG-051271 | 81  | 8   | 4   | 27  | 0  |
| CONTIG-051272 | 74  | 8   | 0   | 22  | 0  |
| CONTIG-051274 | 122 | 13  | 16  | 54  | 0  |
| CONTIG-051275 | 141 | 11  | 3   | 0   | 37 |
| CONTIG-051279 | 220 | 8   | 5   | 24  | 0  |
| CONTIG-051282 | 378 | 12  | 19  | 169 | 2  |
| CONTIG-051284 | 60  | 12  | 40  | 2   | 0  |
| CONTIG-051286 | 720 | 32  | 23  | 32  | 0  |
| CONTIG-051289 | 96  | 6   | 4   | 20  | 0  |
| CONTIG-051291 | 151 | 10  | 11  | 53  | 0  |
| CONTIG-051293 | 97  | 10  | 5   | 38  | 0  |
| CONTIG-051294 | 64  | 216 | 29  | 457 | 0  |
| CONTIG-051295 | 132 | 5   | 0   | 17  | 0  |
| CONTIG-051296 | 61  | 11  | 0   | 17  | 10 |
| CONTIG-051297 | 155 | 10  | 24  | 58  | 0  |
| CONTIG-051298 | 101 | 6   | 22  | 6   | 2  |
| CONTIG-051305 | 448 | 15  | 53  | 139 | 8  |
| CONTIG-051306 | 304 | 10  | 0   | 100 | 3  |
| CONTIG-051309 | 175 | 8   | 6   | 43  | 0  |
| CONTIG-051310 | 82  | 9   | 2   | 25  | 0  |
| CONTIG-051311 | 94  | 5   | 15  | 2   | 0  |
| CONTIG-051312 | 636 | 15  | 7   | 288 | 4  |
| CONTIG-051313 | 175 | 16  | 102 | 69  | 0  |
| CONTIG-051314 | 103 | 5   | 8   | 13  | 0  |
| CONTIG-051315 | 44  | 19  | 7   | 0   | 0  |
| CONTIG-051316 | 220 | 12  | 14  | 55  | 0  |
| CONTIG-051317 | 70  | 10  | 4   | 25  | 0  |
| CONTIG-051318 | 151 | 64  | 21  | 349 | 19 |
| CONTIG-051319 | 69  | 14  | 0   | 25  | 0  |
| CONTIG-051320 | 78  | 6   | 7   | 16  | 0  |
| CONTIG-051321 | 258 | 9   | 14  | 62  | 0  |
| CONTIG-051323 | 88  | 4   | 5   | 4   | 0  |
| CONTIG-051324 | 160 | 7   | 39  | 2   | 0  |
| CONTIG-051325 | 78  | 4   | 0   | 4   | 0  |
| CONTIG-051326 | 109 | 75  | 49  | 61  | 0  |
| CONTIG-051327 | 87  | 5   | 2   | 10  | 0  |
| CONTIG-051328 | 44  | 40  | 2   | 32  | 0  |
| CONTIG-051329 | 119 | 9   | 4   | 22  | 0  |
| CONTIG-051338 | 87  | 7   | 6   | 4   | 0  |
| CONTIG-051339 | 84  | 6   | 6   | 12  | 0  |
| CONTIG-051342 | 141 | 6   | 4   | 29  | 0  |
| CONTIG-051343 | 170 | 21  | 10  | 9   | 0  |
| CONTIG-051344 | 511 | 8   | 14  | 128 | 0  |
| CONTIG-051345 | 144 | 8   | 13  | 14  | 0  |
| CONTIG-051346 | 301 | 10  | 37  | 53  | 0  |

|               |     |     |     |      |     |
|---------------|-----|-----|-----|------|-----|
| CONTIG-051347 | 224 | 28  | 12  | 43   | 0   |
| CONTIG-051348 | 228 | 8   | 17  | 44   | 0   |
| CONTIG-051349 | 435 | 54  | 3   | 0    | 361 |
| CONTIG-051350 | 122 | 5   | 4   | 8    | 0   |
| CONTIG-051351 | 91  | 5   | 7   | 12   | 0   |
| CONTIG-051352 | 132 | 8   | 17  | 41   | 0   |
| CONTIG-051353 | 205 | 7   | 0   | 35   | 0   |
| CONTIG-051354 | 136 | 21  | 6   | 110  | 0   |
| CONTIG-051355 | 100 | 4   | 8   | 2    | 0   |
| CONTIG-051356 | 83  | 5   | 4   | 2    | 0   |
| CONTIG-051357 | 124 | 7   | 8   | 34   | 0   |
| CONTIG-051361 | 58  | 6   | 0   | 0    | 0   |
| CONTIG-051362 | 132 | 14  | 2   | 9    | 0   |
| CONTIG-051363 | 260 | 16  | 153 | 44   | 0   |
| CONTIG-051364 | 92  | 5   | 0   | 11   | 0   |
| CONTIG-051365 | 103 | 8   | 6   | 31   | 0   |
| CONTIG-051366 | 148 | 6   | 10  | 15   | 0   |
| CONTIG-051367 | 115 | 11  | 2   | 18   | 0   |
| CONTIG-051368 | 109 | 18  | 46  | 75   | 0   |
| CONTIG-051369 | 275 | 12  | 56  | 95   | 2   |
| CONTIG-051370 | 76  | 3   | 8   | 0    | 0   |
| CONTIG-051371 | 135 | 4   | 9   | 5    | 0   |
| CONTIG-051372 | 163 | 12  | 4   | 55   | 2   |
| CONTIG-051373 | 180 | 8   | 10  | 7    | 0   |
| CONTIG-051374 | 104 | 6   | 5   | 24   | 0   |
| CONTIG-051375 | 58  | 16  | 56  | 0    | 0   |
| CONTIG-051377 | 53  | 152 | 45  | 211  | 2   |
| CONTIG-051378 | 267 | 25  | 72  | 190  | 2   |
| CONTIG-051379 | 605 | 19  | 62  | 464  | 0   |
| CONTIG-051380 | 59  | 12  | 38  | 2    | 0   |
| CONTIG-051381 | 459 | 15  | 15  | 194  | 2   |
| CONTIG-051382 | 515 | 12  | 24  | 223  | 0   |
| CONTIG-051383 | 105 | 5   | 10  | 13   | 0   |
| CONTIG-051384 | 707 | 29  | 63  | 531  | 38  |
| CONTIG-051385 | 167 | 7   | 23  | 0    | 0   |
| CONTIG-051386 | 286 | 8   | 14  | 48   | 0   |
| CONTIG-051387 | 313 | 12  | 10  | 113  | 0   |
| CONTIG-051388 | 113 | 9   | 6   | 20   | 0   |
| CONTIG-051390 | 87  | 4   | 3   | 15   | 0   |
| CONTIG-051395 | 126 | 9   | 6   | 15   | 0   |
| CONTIG-051396 | 99  | 7   | 3   | 25   | 0   |
| CONTIG-051397 | 85  | 3   | 2   | 9    | 0   |
| CONTIG-051398 | 76  | 879 | 25  | 2032 | 0   |
| CONTIG-051399 | 193 | 110 | 4   | 4    | 0   |
| CONTIG-051400 | 69  | 4   | 10  | 4    | 0   |
| CONTIG-051401 | 140 | 10  | 40  | 17   | 0   |
| CONTIG-051402 | 165 | 13  | 26  | 57   | 0   |

|               |     |    |    |     |    |
|---------------|-----|----|----|-----|----|
| CONTIG-051403 | 180 | 10 | 29 | 42  | 0  |
| CONTIG-051404 | 186 | 8  | 14 | 35  | 0  |
| CONTIG-051406 | 117 | 8  | 5  | 28  | 0  |
| CONTIG-051407 | 224 | 8  | 12 | 38  | 0  |
| CONTIG-051408 | 117 | 28 | 17 | 136 | 5  |
| CONTIG-051410 | 79  | 6  | 2  | 16  | 0  |
| CONTIG-051411 | 201 | 13 | 32 | 51  | 0  |
| CONTIG-051412 | 183 | 11 | 24 | 9   | 0  |
| CONTIG-051413 | 102 | 4  | 17 | 4   | 0  |
| CONTIG-051414 | 83  | 10 | 28 | 17  | 0  |
| CONTIG-051415 | 96  | 4  | 4  | 15  | 0  |
| CONTIG-051416 | 179 | 5  | 0  | 4   | 0  |
| CONTIG-051417 | 67  | 76 | 42 | 171 | 5  |
| CONTIG-051418 | 269 | 15 | 27 | 120 | 0  |
| CONTIG-051419 | 446 | 12 | 7  | 207 | 27 |
| CONTIG-051420 | 74  | 14 | 36 | 17  | 0  |
| CONTIG-051421 | 147 | 5  | 58 | 2   | 0  |
| CONTIG-051422 | 73  | 9  | 0  | 2   | 0  |
| CONTIG-051423 | 502 | 31 | 64 | 423 | 12 |
| CONTIG-051424 | 149 | 6  | 6  | 33  | 0  |
| CONTIG-051425 | 160 | 8  | 9  | 45  | 0  |
| CONTIG-051426 | 64  | 8  | 0  | 9   | 0  |
| CONTIG-051427 | 80  | 4  | 4  | 7   | 0  |
| CONTIG-051428 | 194 | 5  | 7  | 2   | 0  |
| CONTIG-051429 | 73  | 4  | 5  | 5   | 0  |
| CONTIG-051430 | 133 | 15 | 7  | 85  | 2  |
| CONTIG-051431 | 59  | 7  | 11 | 2   | 0  |
| CONTIG-051432 | 111 | 8  | 7  | 30  | 0  |
| CONTIG-051433 | 72  | 2  | 0  | 4   | 0  |
| CONTIG-051434 | 81  | 8  | 2  | 0   | 0  |
| CONTIG-051435 | 249 | 6  | 11 | 34  | 0  |
| CONTIG-051436 | 73  | 46 | 22 | 119 | 0  |
| CONTIG-051437 | 226 | 7  | 2  | 14  | 0  |
| CONTIG-051438 | 71  | 5  | 0  | 12  | 0  |
| CONTIG-051439 | 69  | 17 | 15 | 44  | 0  |
| CONTIG-051440 | 74  | 36 | 3  | 75  | 0  |
| CONTIG-051441 | 365 | 10 | 4  | 86  | 0  |
| CONTIG-051442 | 400 | 11 | 22 | 157 | 0  |
| CONTIG-051443 | 117 | 16 | 27 | 9   | 0  |
| CONTIG-051445 | 60  | 8  | 8  | 16  | 0  |
| CONTIG-051446 | 114 | 7  | 26 | 2   | 0  |
| CONTIG-051447 | 499 | 22 | 40 | 465 | 0  |
| CONTIG-051448 | 62  | 4  | 3  | 5   | 0  |
| CONTIG-051449 | 76  | 4  | 3  | 10  | 0  |
| CONTIG-051450 | 249 | 9  | 8  | 77  | 0  |
| CONTIG-051451 | 46  | 17 | 14 | 0   | 0  |
| CONTIG-051452 | 102 | 16 | 8  | 29  | 0  |

|               |      |     |    |      |    |
|---------------|------|-----|----|------|----|
| CONTIG-051453 | 152  | 23  | 36 | 124  | 0  |
| CONTIG-051454 | 95   | 8   | 0  | 41   | 0  |
| CONTIG-051455 | 1402 | 22  | 13 | 1916 | 0  |
| CONTIG-051456 | 68   | 4   | 2  | 7    | 0  |
| CONTIG-051457 | 180  | 12  | 8  | 83   | 0  |
| CONTIG-051458 | 419  | 13  | 26 | 159  | 0  |
| CONTIG-051459 | 60   | 207 | 10 | 552  | 0  |
| CONTIG-051460 | 121  | 8   | 15 | 40   | 0  |
| CONTIG-051461 | 250  | 11  | 19 | 81   | 0  |
| CONTIG-051462 | 144  | 14  | 11 | 63   | 2  |
| CONTIG-051463 | 67   | 9   | 8  | 15   | 0  |
| CONTIG-051464 | 86   | 7   | 10 | 17   | 0  |
| CONTIG-051465 | 177  | 12  | 46 | 38   | 0  |
| CONTIG-051466 | 235  | 8   | 39 | 52   | 0  |
| CONTIG-051467 | 178  | 7   | 3  | 32   | 0  |
| CONTIG-051468 | 105  | 11  | 14 | 26   | 0  |
| CONTIG-051469 | 64   | 7   | 4  | 9    | 0  |
| CONTIG-051470 | 251  | 10  | 25 | 80   | 0  |
| CONTIG-051471 | 77   | 7   | 8  | 11   | 0  |
| CONTIG-051472 | 67   | 14  | 4  | 9    | 0  |
| CONTIG-051473 | 280  | 11  | 9  | 116  | 0  |
| CONTIG-051474 | 157  | 7   | 8  | 28   | 0  |
| CONTIG-051475 | 223  | 6   | 4  | 57   | 0  |
| CONTIG-051476 | 396  | 20  | 59 | 250  | 2  |
| CONTIG-051477 | 127  | 31  | 0  | 126  | 0  |
| CONTIG-051478 | 59   | 6   | 9  | 4    | 0  |
| CONTIG-051479 | 107  | 9   | 0  | 15   | 0  |
| CONTIG-051480 | 246  | 7   | 10 | 35   | 0  |
| CONTIG-051481 | 102  | 12  | 16 | 12   | 0  |
| CONTIG-051482 | 164  | 3   | 4  | 17   | 0  |
| CONTIG-051483 | 391  | 47  | 22 | 553  | 79 |
| CONTIG-051484 | 331  | 8   | 19 | 71   | 2  |
| CONTIG-051485 | 584  | 16  | 37 | 453  | 0  |
| CONTIG-051486 | 339  | 9   | 10 | 103  | 0  |
| CONTIG-051487 | 94   | 6   | 7  | 4    | 0  |
| CONTIG-051488 | 132  | 7   | 2  | 28   | 0  |
| CONTIG-051489 | 100  | 6   | 2  | 14   | 0  |
| CONTIG-051490 | 190  | 20  | 6  | 134  | 3  |
| CONTIG-051491 | 424  | 8   | 21 | 94   | 2  |
| CONTIG-051492 | 122  | 17  | 11 | 48   | 0  |
| CONTIG-051493 | 385  | 17  | 12 | 178  | 7  |
| CONTIG-051494 | 115  | 8   | 20 | 9    | 0  |
| CONTIG-051495 | 107  | 48  | 7  | 202  | 0  |
| CONTIG-051496 | 164  | 20  | 24 | 78   | 10 |
| CONTIG-051497 | 134  | 6   | 18 | 15   | 0  |
| CONTIG-051498 | 109  | 5   | 2  | 6    | 0  |
| CONTIG-051499 | 58   | 3   | 5  | 0    | 0  |

|               |     |     |    |      |    |
|---------------|-----|-----|----|------|----|
| CONTIG-051500 | 366 | 20  | 11 | 178  | 2  |
| CONTIG-051501 | 90  | 4   | 2  | 5    | 0  |
| CONTIG-051505 | 73  | 8   | 0  | 3    | 0  |
| CONTIG-051506 | 162 | 8   | 2  | 50   | 0  |
| CONTIG-051507 | 162 | 10  | 23 | 16   | 0  |
| CONTIG-051508 | 119 | 4   | 2  | 2    | 0  |
| CONTIG-051509 | 98  | 10  | 2  | 22   | 0  |
| CONTIG-051511 | 101 | 25  | 19 | 3    | 27 |
| CONTIG-051512 | 187 | 8   | 6  | 20   | 0  |
| CONTIG-051513 | 93  | 9   | 10 | 3    | 2  |
| CONTIG-051514 | 107 | 8   | 19 | 19   | 0  |
| CONTIG-051515 | 140 | 11  | 13 | 33   | 0  |
| CONTIG-051516 | 482 | 15  | 34 | 237  | 0  |
| CONTIG-051517 | 123 | 5   | 13 | 13   | 0  |
| CONTIG-051518 | 74  | 3   | 2  | 2    | 0  |
| CONTIG-051519 | 231 | 13  | 22 | 87   | 0  |
| CONTIG-051520 | 216 | 5   | 17 | 31   | 0  |
| CONTIG-051521 | 55  | 6   | 7  | 2    | 0  |
| CONTIG-051522 | 185 | 6   | 12 | 28   | 0  |
| CONTIG-051523 | 85  | 10  | 2  | 13   | 0  |
| CONTIG-051524 | 118 | 4   | 5  | 10   | 0  |
| CONTIG-051530 | 132 | 10  | 24 | 42   | 0  |
| CONTIG-051531 | 115 | 4   | 3  | 4    | 0  |
| CONTIG-051535 | 47  | 28  | 4  | 32   | 0  |
| CONTIG-051536 | 59  | 4   | 8  | 0    | 0  |
| CONTIG-051537 | 97  | 10  | 3  | 21   | 0  |
| CONTIG-051538 | 238 | 14  | 18 | 87   | 0  |
| CONTIG-051539 | 334 | 13  | 32 | 117  | 0  |
| CONTIG-051540 | 130 | 5   | 18 | 14   | 0  |
| CONTIG-051541 | 213 | 17  | 20 | 131  | 0  |
| CONTIG-051542 | 118 | 7   | 19 | 26   | 0  |
| CONTIG-051543 | 127 | 13  | 6  | 65   | 0  |
| CONTIG-051544 | 59  | 4   | 5  | 9    | 0  |
| CONTIG-051545 | 236 | 8   | 7  | 57   | 0  |
| CONTIG-051546 | 132 | 554 | 43 | 3385 | 5  |
| CONTIG-051547 | 106 | 7   | 8  | 27   | 2  |
| CONTIG-051548 | 319 | 9   | 21 | 108  | 0  |
| CONTIG-051549 | 161 | 28  | 58 | 119  | 0  |
| CONTIG-051550 | 76  | 3   | 0  | 0    | 0  |
| CONTIG-051551 | 95  | 15  | 40 | 16   | 0  |
| CONTIG-051553 | 69  | 4   | 0  | 5    | 0  |
| CONTIG-051554 | 265 | 11  | 9  | 98   | 0  |
| CONTIG-051555 | 111 | 6   | 5  | 25   | 0  |
| CONTIG-051556 | 62  | 145 | 28 | 431  | 2  |
| CONTIG-051557 | 106 | 6   | 14 | 12   | 0  |
| CONTIG-051558 | 58  | 5   | 5  | 0    | 0  |
| CONTIG-051561 | 341 | 9   | 8  | 93   | 0  |

|               |      |    |    |      |     |
|---------------|------|----|----|------|-----|
| CONTIG-051562 | 516  | 29 | 0  | 0    | 117 |
| CONTIG-051563 | 275  | 11 | 3  | 16   | 0   |
| CONTIG-051564 | 73   | 3  | 4  | 3    | 0   |
| CONTIG-051565 | 383  | 13 | 49 | 116  | 0   |
| CONTIG-051566 | 60   | 3  | 3  | 5    | 0   |
| CONTIG-051568 | 188  | 18 | 29 | 87   | 2   |
| CONTIG-051570 | 57   | 13 | 49 | 7    | 0   |
| CONTIG-051572 | 126  | 11 | 7  | 50   | 0   |
| CONTIG-051573 | 191  | 13 | 31 | 74   | 0   |
| CONTIG-051574 | 247  | 14 | 24 | 58   | 2   |
| CONTIG-051575 | 291  | 16 | 0  | 268  | 0   |
| CONTIG-051576 | 1345 | 19 | 14 | 1438 | 2   |
| CONTIG-051577 | 215  | 11 | 19 | 54   | 2   |
| CONTIG-051578 | 165  | 11 | 23 | 52   | 0   |
| CONTIG-051579 | 64   | 7  | 3  | 17   | 0   |
| CONTIG-051580 | 210  | 7  | 22 | 26   | 0   |
| CONTIG-051582 | 96   | 4  | 3  | 7    | 0   |
| CONTIG-051583 | 142  | 3  | 2  | 8    | 0   |
| CONTIG-051584 | 141  | 15 | 3  | 97   | 3   |
| CONTIG-051585 | 105  | 3  | 2  | 6    | 0   |
| CONTIG-051586 | 309  | 9  | 6  | 77   | 0   |
| CONTIG-051587 | 644  | 16 | 43 | 485  | 2   |
| CONTIG-051588 | 94   | 3  | 6  | 4    | 0   |
| CONTIG-051589 | 384  | 18 | 34 | 319  | 0   |
| CONTIG-051590 | 110  | 12 | 6  | 40   | 0   |
| CONTIG-051591 | 282  | 6  | 6  | 47   | 0   |
| CONTIG-051592 | 155  | 15 | 15 | 68   | 0   |
| CONTIG-051595 | 131  | 9  | 22 | 18   | 4   |
| CONTIG-051596 | 207  | 6  | 2  | 24   | 2   |
| CONTIG-051597 | 225  | 11 | 0  | 123  | 0   |
| CONTIG-051598 | 70   | 12 | 3  | 13   | 0   |
| CONTIG-051599 | 61   | 14 | 0  | 27   | 0   |
| CONTIG-051600 | 82   | 10 | 7  | 24   | 0   |
| CONTIG-051601 | 80   | 16 | 37 | 5    | 0   |
| CONTIG-051602 | 472  | 12 | 17 | 149  | 0   |
| CONTIG-051606 | 87   | 6  | 8  | 22   | 0   |
| CONTIG-051607 | 92   | 6  | 2  | 9    | 2   |
| CONTIG-051608 | 66   | 7  | 21 | 9    | 0   |
| CONTIG-051609 | 62   | 8  | 6  | 7    | 0   |
| CONTIG-051610 | 332  | 10 | 13 | 99   | 0   |
| CONTIG-051611 | 134  | 7  | 0  | 34   | 2   |
| CONTIG-051612 | 119  | 9  | 13 | 17   | 0   |
| CONTIG-051613 | 233  | 10 | 0  | 29   | 2   |
| CONTIG-051614 | 289  | 8  | 10 | 35   | 0   |
| CONTIG-051615 | 207  | 12 | 12 | 74   | 0   |
| CONTIG-051616 | 164  | 9  | 6  | 19   | 0   |
| CONTIG-051617 | 91   | 10 | 3  | 42   | 0   |



|               |     |     |    |     |    |
|---------------|-----|-----|----|-----|----|
| CONTIG-051619 | 254 | 4   | 11 | 26  | 0  |
| CONTIG-051620 | 189 | 8   | 9  | 32  | 2  |
| CONTIG-051621 | 235 | 7   | 18 | 34  | 0  |
| CONTIG-051622 | 84  | 12  | 6  | 25  | 0  |
| CONTIG-051623 | 149 | 5   | 0  | 19  | 0  |
| CONTIG-051624 | 82  | 4   | 5  | 4   | 0  |
| CONTIG-051625 | 364 | 8   | 4  | 76  | 2  |
| CONTIG-051626 | 205 | 6   | 9  | 44  | 0  |
| CONTIG-051627 | 94  | 5   | 4  | 8   | 0  |
| CONTIG-051628 | 205 | 12  | 17 | 97  | 0  |
| CONTIG-051629 | 108 | 6   | 0  | 21  | 0  |
| CONTIG-051630 | 489 | 97  | 12 | 636 | 20 |
| CONTIG-051631 | 72  | 10  | 51 | 3   | 0  |
| CONTIG-051632 | 546 | 7   | 19 | 144 | 0  |
| CONTIG-051633 | 147 | 8   | 6  | 35  | 0  |
| CONTIG-051634 | 129 | 10  | 2  | 27  | 0  |
| CONTIG-051635 | 88  | 5   | 0  | 5   | 0  |
| CONTIG-051636 | 127 | 11  | 2  | 47  | 0  |
| CONTIG-051637 | 579 | 14  | 19 | 322 | 0  |
| CONTIG-051638 | 144 | 30  | 19 | 85  | 0  |
| CONTIG-051639 | 118 | 17  | 11 | 48  | 0  |
| CONTIG-051640 | 66  | 6   | 2  | 0   | 0  |
| CONTIG-051641 | 78  | 4   | 3  | 0   | 0  |
| CONTIG-051642 | 124 | 14  | 21 | 70  | 0  |
| CONTIG-051643 | 83  | 34  | 12 | 105 | 2  |
| CONTIG-051645 | 391 | 24  | 26 | 231 | 0  |
| CONTIG-051646 | 85  | 11  | 8  | 9   | 0  |
| CONTIG-051647 | 58  | 9   | 2  | 19  | 0  |
| CONTIG-051648 | 274 | 12  | 46 | 122 | 0  |
| CONTIG-051649 | 68  | 3   | 2  | 2   | 0  |
| CONTIG-051650 | 230 | 6   | 2  | 30  | 0  |
| CONTIG-051651 | 78  | 5   | 0  | 8   | 0  |
| CONTIG-051652 | 86  | 16  | 22 | 34  | 0  |
| CONTIG-051653 | 174 | 6   | 7  | 30  | 0  |
| CONTIG-051654 | 306 | 6   | 7  | 30  | 0  |
| CONTIG-051655 | 126 | 5   | 13 | 17  | 0  |
| CONTIG-051656 | 249 | 11  | 25 | 67  | 0  |
| CONTIG-051657 | 86  | 5   | 9  | 8   | 0  |
| CONTIG-051658 | 291 | 6   | 8  | 42  | 0  |
| CONTIG-051659 | 514 | 11  | 19 | 108 | 4  |
| CONTIG-051660 | 256 | 11  | 41 | 55  | 0  |
| CONTIG-051661 | 119 | 5   | 0  | 14  | 0  |
| CONTIG-051662 | 220 | 21  | 17 | 103 | 15 |
| CONTIG-051663 | 130 | 4   | 2  | 11  | 0  |
| CONTIG-051664 | 206 | 8   | 7  | 25  | 0  |
| CONTIG-051665 | 195 | 112 | 36 | 423 | 0  |
| CONTIG-051667 | 58  | 7   | 2  | 20  | 0  |

|               |      |    |    |      |   |
|---------------|------|----|----|------|---|
| CONTIG-051668 | 93   | 19 | 12 | 36   | 0 |
| CONTIG-051669 | 117  | 3  | 4  | 10   | 0 |
| CONTIG-051670 | 171  | 6  | 3  | 28   | 0 |
| CONTIG-051671 | 73   | 8  | 10 | 13   | 0 |
| CONTIG-051672 | 61   | 3  | 3  | 2    | 0 |
| CONTIG-051673 | 150  | 3  | 8  | 8    | 0 |
| CONTIG-051674 | 242  | 6  | 9  | 45   | 0 |
| CONTIG-051675 | 319  | 9  | 34 | 67   | 2 |
| CONTIG-051677 | 104  | 14 | 7  | 57   | 0 |
| CONTIG-051678 | 196  | 7  | 0  | 47   | 0 |
| CONTIG-051679 | 136  | 13 | 8  | 32   | 2 |
| CONTIG-051680 | 140  | 10 | 8  | 60   | 0 |
| CONTIG-051681 | 74   | 9  | 22 | 25   | 0 |
| CONTIG-051682 | 66   | 13 | 4  | 23   | 0 |
| CONTIG-051683 | 93   | 12 | 11 | 10   | 0 |
| CONTIG-051684 | 187  | 9  | 14 | 79   | 0 |
| CONTIG-051686 | 344  | 13 | 23 | 132  | 0 |
| CONTIG-051687 | 62   | 4  | 6  | 6    | 0 |
| CONTIG-051688 | 149  | 3  | 3  | 8    | 0 |
| CONTIG-051689 | 84   | 6  | 9  | 17   | 0 |
| CONTIG-051690 | 97   | 8  | 28 | 24   | 0 |
| CONTIG-051691 | 628  | 31 | 89 | 867  | 0 |
| CONTIG-051692 | 309  | 10 | 4  | 124  | 2 |
| CONTIG-051693 | 389  | 9  | 4  | 0    | 0 |
| CONTIG-051694 | 119  | 19 | 22 | 93   | 0 |
| CONTIG-051695 | 98   | 3  | 8  | 6    | 0 |
| CONTIG-051697 | 93   | 17 | 7  | 51   | 0 |
| CONTIG-051698 | 90   | 5  | 2  | 12   | 0 |
| CONTIG-051699 | 82   | 9  | 31 | 0    | 2 |
| CONTIG-051700 | 197  | 18 | 43 | 120  | 0 |
| CONTIG-051701 | 283  | 6  | 22 | 50   | 0 |
| CONTIG-051702 | 92   | 6  | 17 | 4    | 0 |
| CONTIG-051703 | 514  | 9  | 15 | 168  | 2 |
| CONTIG-051704 | 202  | 4  | 6  | 30   | 0 |
| CONTIG-051705 | 68   | 10 | 7  | 24   | 0 |
| CONTIG-051706 | 65   | 2  | 2  | 0    | 0 |
| CONTIG-051707 | 489  | 8  | 44 | 91   | 0 |
| CONTIG-051708 | 280  | 6  | 9  | 43   | 0 |
| CONTIG-051709 | 76   | 6  | 2  | 0    | 0 |
| CONTIG-051710 | 348  | 7  | 16 | 46   | 0 |
| CONTIG-051711 | 175  | 9  | 20 | 60   | 0 |
| CONTIG-051712 | 81   | 4  | 0  | 6    | 0 |
| CONTIG-051713 | 98   | 9  | 16 | 19   | 0 |
| CONTIG-051714 | 83   | 11 | 6  | 2    | 0 |
| CONTIG-051715 | 128  | 7  | 2  | 0    | 0 |
| CONTIG-051718 | 1193 | 76 | 14 | 5360 | 6 |
| CONTIG-051719 | 102  | 15 | 13 | 27   | 2 |

|               |      |    |    |     |     |
|---------------|------|----|----|-----|-----|
| CONTIG-051720 | 85   | 4  | 7  | 5   | 0   |
| CONTIG-051721 | 70   | 8  | 14 | 8   | 0   |
| CONTIG-051722 | 120  | 12 | 23 | 43  | 0   |
| CONTIG-051723 | 177  | 12 | 11 | 65  | 0   |
| CONTIG-051724 | 115  | 7  | 7  | 10  | 0   |
| CONTIG-051725 | 94   | 4  | 3  | 10  | 0   |
| CONTIG-051726 | 81   | 7  | 7  | 25  | 0   |
| CONTIG-051727 | 190  | 10 | 26 | 73  | 0   |
| CONTIG-051728 | 163  | 8  | 25 | 0   | 0   |
| CONTIG-051729 | 367  | 26 | 70 | 277 | 4   |
| CONTIG-051730 | 140  | 6  | 13 | 10  | 0   |
| CONTIG-051731 | 145  | 7  | 12 | 12  | 0   |
| CONTIG-051732 | 60   | 4  | 12 | 4   | 0   |
| CONTIG-051733 | 291  | 14 | 15 | 81  | 2   |
| CONTIG-051734 | 102  | 3  | 0  | 4   | 0   |
| CONTIG-051735 | 91   | 13 | 13 | 2   | 0   |
| CONTIG-051736 | 179  | 8  | 23 | 35  | 0   |
| CONTIG-051737 | 116  | 19 | 16 | 50  | 0   |
| CONTIG-051738 | 306  | 12 | 16 | 113 | 2   |
| CONTIG-051739 | 59   | 4  | 2  | 3   | 0   |
| CONTIG-051740 | 60   | 4  | 2  | 5   | 0   |
| CONTIG-051741 | 228  | 12 | 31 | 68  | 0   |
| CONTIG-051742 | 59   | 9  | 37 | 5   | 2   |
| CONTIG-051744 | 175  | 5  | 2  | 6   | 0   |
| CONTIG-051745 | 68   | 10 | 6  | 17  | 0   |
| CONTIG-051746 | 133  | 8  | 9  | 49  | 0   |
| CONTIG-051747 | 142  | 8  | 6  | 17  | 0   |
| CONTIG-051748 | 539  | 9  | 24 | 93  | 2   |
| CONTIG-051749 | 129  | 10 | 5  | 55  | 0   |
| CONTIG-051750 | 81   | 6  | 3  | 2   | 0   |
| CONTIG-051751 | 98   | 3  | 2  | 9   | 0   |
| CONTIG-051752 | 697  | 61 | 0  | 0   | 415 |
| CONTIG-051753 | 126  | 17 | 35 | 99  | 0   |
| CONTIG-051755 | 122  | 5  | 2  | 4   | 0   |
| CONTIG-051756 | 131  | 7  | 4  | 10  | 0   |
| CONTIG-051761 | 162  | 6  | 3  | 27  | 0   |
| CONTIG-051762 | 144  | 5  | 5  | 31  | 0   |
| CONTIG-051764 | 138  | 8  | 34 | 17  | 0   |
| CONTIG-051765 | 183  | 12 | 32 | 89  | 0   |
| CONTIG-051766 | 151  | 19 | 24 | 24  | 0   |
| CONTIG-051767 | 96   | 4  | 2  | 0   | 2   |
| CONTIG-051768 | 1036 | 40 | 8  | 0   | 124 |
| CONTIG-051769 | 428  | 9  | 35 | 145 | 2   |
| CONTIG-051770 | 443  | 21 | 23 | 273 | 2   |
| CONTIG-051771 | 84   | 22 | 47 | 74  | 0   |
| CONTIG-051772 | 174  | 16 | 13 | 99  | 0   |
| CONTIG-051773 | 87   | 6  | 5  | 18  | 0   |

|               |     |     |    |     |   |
|---------------|-----|-----|----|-----|---|
| CONTIG-051774 | 171 | 6   | 15 | 29  | 0 |
| CONTIG-051775 | 80  | 32  | 22 | 89  | 0 |
| CONTIG-051776 | 74  | 9   | 9  | 15  | 0 |
| CONTIG-051778 | 188 | 10  | 32 | 29  | 3 |
| CONTIG-051779 | 76  | 3   | 0  | 7   | 0 |
| CONTIG-051780 | 68  | 4   | 0  | 8   | 0 |
| CONTIG-051781 | 215 | 5   | 10 | 11  | 0 |
| CONTIG-051782 | 158 | 10  | 10 | 49  | 0 |
| CONTIG-051783 | 179 | 7   | 13 | 28  | 0 |
| CONTIG-051784 | 569 | 9   | 4  | 216 | 2 |
| CONTIG-051785 | 90  | 8   | 8  | 20  | 0 |
| CONTIG-051786 | 66  | 213 | 25 | 8   | 0 |
| CONTIG-051787 | 159 | 14  | 30 | 57  | 0 |
| CONTIG-051788 | 59  | 6   | 6  | 7   | 0 |
| CONTIG-051789 | 150 | 18  | 13 | 125 | 0 |
| CONTIG-051791 | 90  | 69  | 58 | 73  | 0 |
| CONTIG-051792 | 76  | 7   | 6  | 9   | 0 |
| CONTIG-051793 | 91  | 10  | 7  | 25  | 0 |
| CONTIG-051794 | 147 | 730 | 50 | 3   | 0 |
| CONTIG-051795 | 74  | 4   | 0  | 12  | 0 |
| CONTIG-051796 | 71  | 5   | 2  | 12  | 0 |
| CONTIG-051797 | 97  | 9   | 23 | 5   | 0 |
| CONTIG-051798 | 124 | 12  | 17 | 48  | 0 |
| CONTIG-051799 | 169 | 6   | 4  | 26  | 0 |
| CONTIG-051800 | 66  | 6   | 6  | 10  | 0 |
| CONTIG-051801 | 156 | 15  | 14 | 90  | 0 |
| CONTIG-051802 | 93  | 9   | 0  | 27  | 0 |
| CONTIG-051803 | 175 | 17  | 8  | 7   | 0 |
| CONTIG-051807 | 94  | 10  | 13 | 13  | 0 |
| CONTIG-051808 | 66  | 9   | 0  | 0   | 0 |
| CONTIG-051809 | 247 | 13  | 5  | 79  | 0 |
| CONTIG-051810 | 119 | 9   | 17 | 7   | 2 |
| CONTIG-051811 | 59  | 6   | 2  | 16  | 0 |
| CONTIG-051812 | 84  | 7   | 23 | 17  | 0 |
| CONTIG-051813 | 61  | 8   | 20 | 6   | 0 |
| CONTIG-051814 | 122 | 7   | 2  | 24  | 0 |
| CONTIG-051815 | 294 | 11  | 2  | 66  | 2 |
| CONTIG-051816 | 153 | 12  | 17 | 41  | 2 |
| CONTIG-051817 | 135 | 8   | 27 | 20  | 0 |
| CONTIG-051818 | 473 | 9   | 10 | 166 | 2 |
| CONTIG-051819 | 45  | 76  | 4  | 57  | 0 |
| CONTIG-051820 | 112 | 7   | 10 | 23  | 0 |
| CONTIG-051821 | 117 | 13  | 4  | 36  | 0 |
| CONTIG-051822 | 160 | 7   | 16 | 28  | 0 |
| CONTIG-051823 | 105 | 6   | 18 | 10  | 0 |
| CONTIG-051824 | 61  | 8   | 0  | 7   | 0 |
| CONTIG-051825 | 113 | 9   | 2  | 17  | 0 |

|               |     |    |    |     |     |
|---------------|-----|----|----|-----|-----|
| CONTIG-051826 | 215 | 8  | 12 | 40  | 0   |
| CONTIG-051827 | 63  | 6  | 7  | 5   | 0   |
| CONTIG-051828 | 211 | 9  | 20 | 73  | 0   |
| CONTIG-051829 | 66  | 5  | 4  | 6   | 0   |
| CONTIG-051830 | 143 | 16 | 3  | 91  | 0   |
| CONTIG-051832 | 123 | 9  | 35 | 5   | 0   |
| CONTIG-051833 | 93  | 5  | 7  | 6   | 0   |
| CONTIG-051834 | 79  | 5  | 4  | 14  | 0   |
| CONTIG-051835 | 89  | 5  | 3  | 12  | 0   |
| CONTIG-051836 | 285 | 11 | 14 | 59  | 0   |
| CONTIG-051837 | 178 | 13 | 4  | 76  | 7   |
| CONTIG-051841 | 87  | 4  | 4  | 12  | 0   |
| CONTIG-051842 | 303 | 10 | 23 | 53  | 0   |
| CONTIG-051843 | 196 | 5  | 3  | 24  | 0   |
| CONTIG-051844 | 189 | 4  | 0  | 21  | 0   |
| CONTIG-051845 | 373 | 12 | 0  | 118 | 6   |
| CONTIG-051846 | 302 | 9  | 7  | 70  | 0   |
| CONTIG-051848 | 82  | 6  | 3  | 16  | 0   |
| CONTIG-051849 | 69  | 4  | 5  | 2   | 0   |
| CONTIG-051850 | 143 | 6  | 3  | 30  | 0   |
| CONTIG-051851 | 300 | 10 | 7  | 123 | 0   |
| CONTIG-051852 | 538 | 12 | 27 | 189 | 4   |
| CONTIG-051853 | 402 | 10 | 18 | 112 | 2   |
| CONTIG-051854 | 137 | 15 | 20 | 33  | 2   |
| CONTIG-051855 | 304 | 7  | 5  | 65  | 0   |
| CONTIG-051856 | 146 | 8  | 15 | 22  | 0   |
| CONTIG-051857 | 71  | 3  | 2  | 7   | 0   |
| CONTIG-051858 | 185 | 5  | 2  | 27  | 0   |
| CONTIG-051859 | 129 | 6  | 2  | 14  | 0   |
| CONTIG-051860 | 267 | 7  | 71 | 0   | 5   |
| CONTIG-051865 | 142 | 6  | 4  | 15  | 0   |
| CONTIG-051867 | 450 | 11 | 18 | 151 | 2   |
| CONTIG-051868 | 200 | 9  | 5  | 17  | 0   |
| CONTIG-051869 | 118 | 21 | 19 | 97  | 0   |
| CONTIG-051870 | 298 | 29 | 8  | 0   | 134 |
| CONTIG-051871 | 82  | 5  | 0  | 8   | 2   |
| CONTIG-051872 | 284 | 12 | 26 | 114 | 0   |
| CONTIG-051873 | 45  | 22 | 3  | 22  | 0   |
| CONTIG-051874 | 192 | 10 | 20 | 4   | 0   |
| CONTIG-051875 | 94  | 8  | 5  | 9   | 0   |
| CONTIG-051876 | 125 | 5  | 2  | 9   | 0   |
| CONTIG-051877 | 73  | 6  | 0  | 14  | 0   |
| CONTIG-051878 | 203 | 4  | 0  | 24  | 0   |
| CONTIG-051879 | 285 | 13 | 44 | 122 | 0   |
| CONTIG-051880 | 195 | 11 | 40 | 48  | 0   |
| CONTIG-051881 | 626 | 12 | 15 | 188 | 2   |
| CONTIG-051882 | 130 | 13 | 15 | 39  | 0   |

|               |     |    |     |      |    |
|---------------|-----|----|-----|------|----|
| CONTIG-051883 | 60  | 18 | 4   | 6    | 0  |
| CONTIG-051884 | 318 | 10 | 19  | 86   | 0  |
| CONTIG-051885 | 166 | 10 | 27  | 57   | 0  |
| CONTIG-051886 | 65  | 7  | 4   | 9    | 0  |
| CONTIG-051887 | 458 | 40 | 47  | 290  | 11 |
| CONTIG-051888 | 73  | 74 | 5   | 0    | 57 |
| CONTIG-051889 | 81  | 6  | 15  | 8    | 0  |
| CONTIG-051892 | 219 | 10 | 32  | 36   | 0  |
| CONTIG-051894 | 102 | 17 | 18  | 24   | 0  |
| CONTIG-051895 | 105 | 6  | 8   | 19   | 0  |
| CONTIG-051896 | 67  | 7  | 4   | 11   | 0  |
| CONTIG-051897 | 92  | 8  | 13  | 10   | 0  |
| CONTIG-051898 | 609 | 13 | 79  | 213  | 4  |
| CONTIG-051899 | 178 | 20 | 27  | 95   | 4  |
| CONTIG-051900 | 85  | 4  | 2   | 2    | 0  |
| CONTIG-051902 | 88  | 4  | 0   | 11   | 0  |
| CONTIG-051903 | 239 | 22 | 71  | 278  | 0  |
| CONTIG-051905 | 159 | 16 | 16  | 117  | 0  |
| CONTIG-051906 | 221 | 9  | 5   | 74   | 0  |
| CONTIG-051907 | 368 | 36 | 61  | 368  | 3  |
| CONTIG-051909 | 244 | 4  | 6   | 15   | 0  |
| CONTIG-051910 | 241 | 6  | 0   | 4    | 0  |
| CONTIG-051911 | 130 | 6  | 9   | 31   | 0  |
| CONTIG-051912 | 65  | 6  | 3   | 11   | 0  |
| CONTIG-051914 | 383 | 10 | 29  | 47   | 0  |
| CONTIG-051915 | 86  | 5  | 13  | 15   | 0  |
| CONTIG-051916 | 257 | 15 | 11  | 150  | 0  |
| CONTIG-051917 | 78  | 14 | 8   | 27   | 0  |
| CONTIG-051918 | 196 | 10 | 5   | 8    | 12 |
| CONTIG-051919 | 135 | 10 | 6   | 13   | 0  |
| CONTIG-051920 | 144 | 6  | 12  | 21   | 0  |
| CONTIG-051922 | 98  | 16 | 11  | 71   | 0  |
| CONTIG-051923 | 63  | 7  | 5   | 16   | 0  |
| CONTIG-051924 | 66  | 5  | 2   | 10   | 0  |
| CONTIG-051925 | 185 | 8  | 6   | 47   | 0  |
| CONTIG-051926 | 388 | 11 | 11  | 190  | 0  |
| CONTIG-051927 | 750 | 73 | 359 | 1504 | 4  |
| CONTIG-051928 | 116 | 16 | 6   | 72   | 0  |
| CONTIG-051929 | 139 | 4  | 4   | 22   | 0  |
| CONTIG-051930 | 274 | 8  | 51  | 59   | 0  |
| CONTIG-051931 | 482 | 11 | 18  | 286  | 0  |
| CONTIG-051932 | 518 | 11 | 2   | 0    | 30 |
| CONTIG-051933 | 100 | 10 | 16  | 26   | 0  |
| CONTIG-051934 | 120 | 3  | 5   | 5    | 0  |
| CONTIG-051935 | 66  | 4  | 0   | 6    | 0  |
| CONTIG-051936 | 76  | 4  | 0   | 3    | 0  |
| CONTIG-051937 | 95  | 6  | 5   | 5    | 0  |

|               |     |     |    |      |    |
|---------------|-----|-----|----|------|----|
| CONTIG-051938 | 113 | 5   | 2  | 0    | 0  |
| CONTIG-051940 | 134 | 13  | 0  | 68   | 0  |
| CONTIG-051941 | 276 | 12  | 17 | 106  | 2  |
| CONTIG-051942 | 108 | 7   | 6  | 4    | 0  |
| CONTIG-051943 | 251 | 6   | 2  | 79   | 0  |
| CONTIG-051944 | 304 | 25  | 14 | 419  | 0  |
| CONTIG-051945 | 121 | 9   | 38 | 28   | 0  |
| CONTIG-051946 | 89  | 6   | 8  | 12   | 0  |
| CONTIG-051947 | 345 | 9   | 5  | 62   | 2  |
| CONTIG-051949 | 71  | 4   | 37 | 0    | 0  |
| CONTIG-051950 | 74  | 6   | 3  | 0    | 0  |
| CONTIG-051952 | 271 | 8   | 16 | 50   | 2  |
| CONTIG-051953 | 87  | 4   | 4  | 7    | 0  |
| CONTIG-051954 | 208 | 9   | 12 | 41   | 0  |
| CONTIG-051955 | 108 | 510 | 2  | 2105 | 0  |
| CONTIG-051960 | 212 | 6   | 10 | 29   | 0  |
| CONTIG-051961 | 70  | 2   | 0  | 3    | 0  |
| CONTIG-051962 | 82  | 4   | 0  | 4    | 0  |
| CONTIG-051963 | 63  | 7   | 5  | 16   | 0  |
| CONTIG-051964 | 185 | 7   | 9  | 42   | 0  |
| CONTIG-051965 | 356 | 10  | 15 | 112  | 0  |
| CONTIG-051966 | 98  | 6   | 2  | 9    | 2  |
| CONTIG-051967 | 69  | 3   | 2  | 5    | 0  |
| CONTIG-051968 | 134 | 6   | 9  | 30   | 0  |
| CONTIG-051969 | 63  | 6   | 0  | 13   | 0  |
| CONTIG-051970 | 176 | 4   | 0  | 5    | 0  |
| CONTIG-051971 | 354 | 14  | 16 | 229  | 2  |
| CONTIG-051972 | 95  | 8   | 9  | 29   | 0  |
| CONTIG-051973 | 89  | 3   | 3  | 6    | 0  |
| CONTIG-051974 | 407 | 10  | 20 | 121  | 0  |
| CONTIG-051975 | 227 | 10  | 47 | 18   | 0  |
| CONTIG-051976 | 149 | 10  | 41 | 36   | 0  |
| CONTIG-051977 | 217 | 10  | 33 | 26   | 0  |
| CONTIG-051978 | 134 | 5   | 2  | 11   | 0  |
| CONTIG-051979 | 191 | 9   | 2  | 78   | 0  |
| CONTIG-051980 | 68  | 14  | 15 | 27   | 0  |
| CONTIG-051981 | 106 | 8   | 4  | 32   | 0  |
| CONTIG-051982 | 443 | 9   | 11 | 105  | 17 |
| CONTIG-051984 | 69  | 6   | 6  | 10   | 0  |
| CONTIG-051985 | 446 | 8   | 12 | 102  | 6  |
| CONTIG-051986 | 155 | 10  | 28 | 63   | 0  |
| CONTIG-051987 | 187 | 12  | 10 | 18   | 3  |
| CONTIG-051988 | 89  | 14  | 41 | 17   | 2  |
| CONTIG-051989 | 347 | 11  | 10 | 142  | 2  |
| CONTIG-051990 | 248 | 8   | 13 | 40   | 0  |
| CONTIG-051991 | 353 | 19  | 34 | 211  | 0  |
| CONTIG-051992 | 72  | 15  | 12 | 30   | 5  |

|               |     |     |    |     |    |
|---------------|-----|-----|----|-----|----|
| CONTIG-051993 | 308 | 14  | 7  | 190 | 0  |
| CONTIG-051994 | 91  | 8   | 5  | 27  | 0  |
| CONTIG-051995 | 77  | 8   | 5  | 17  | 0  |
| CONTIG-051996 | 71  | 2   | 0  | 0   | 0  |
| CONTIG-051997 | 395 | 5   | 25 | 52  | 0  |
| CONTIG-052001 | 69  | 3   | 0  | 6   | 0  |
| CONTIG-052003 | 489 | 13  | 18 | 232 | 2  |
| CONTIG-052004 | 205 | 13  | 9  | 132 | 0  |
| CONTIG-052006 | 226 | 42  | 27 | 260 | 4  |
| CONTIG-052007 | 63  | 7   | 20 | 0   | 0  |
| CONTIG-052008 | 207 | 6   | 7  | 61  | 0  |
| CONTIG-052009 | 604 | 26  | 18 | 186 | 14 |
| CONTIG-052010 | 267 | 139 | 31 | 46  | 52 |
| CONTIG-052011 | 119 | 7   | 6  | 27  | 0  |
| CONTIG-052012 | 744 | 18  | 17 | 422 | 0  |
| CONTIG-052013 | 190 | 9   | 27 | 67  | 0  |
| CONTIG-052014 | 63  | 3   | 0  | 0   | 0  |
| CONTIG-052015 | 103 | 15  | 15 | 61  | 0  |
| CONTIG-052016 | 637 | 14  | 12 | 264 | 4  |
| CONTIG-052017 | 105 | 5   | 20 | 10  | 0  |
| CONTIG-052018 | 100 | 12  | 3  | 48  | 0  |
| CONTIG-052019 | 80  | 17  | 8  | 75  | 0  |
| CONTIG-052020 | 82  | 6   | 2  | 9   | 0  |
| CONTIG-052021 | 138 | 7   | 22 | 25  | 0  |
| CONTIG-052022 | 62  | 3   | 4  | 2   | 0  |
| CONTIG-052023 | 173 | 4   | 4  | 11  | 0  |
| CONTIG-052024 | 295 | 11  | 22 | 139 | 0  |
| CONTIG-052025 | 330 | 10  | 0  | 90  | 0  |
| CONTIG-052026 | 373 | 7   | 4  | 64  | 0  |
| CONTIG-052027 | 86  | 5   | 3  | 14  | 0  |
| CONTIG-052028 | 150 | 8   | 6  | 41  | 0  |
| CONTIG-052029 | 91  | 21  | 23 | 38  | 0  |
| CONTIG-052030 | 121 | 14  | 13 | 26  | 0  |
| CONTIG-052031 | 182 | 10  | 7  | 83  | 0  |
| CONTIG-052032 | 103 | 13  | 2  | 50  | 0  |
| CONTIG-052033 | 128 | 19  | 3  | 53  | 0  |
| CONTIG-052034 | 72  | 10  | 21 | 16  | 0  |
| CONTIG-052035 | 245 | 5   | 2  | 44  | 0  |
| CONTIG-052036 | 337 | 31  | 71 | 486 | 0  |
| CONTIG-052037 | 60  | 3   | 11 | 2   | 0  |
| CONTIG-052038 | 83  | 4   | 3  | 3   | 0  |
| CONTIG-052039 | 179 | 25  | 35 | 131 | 0  |
| CONTIG-052041 | 213 | 8   | 16 | 47  | 0  |
| CONTIG-052042 | 101 | 8   | 4  | 14  | 0  |
| CONTIG-052043 | 78  | 8   | 3  | 14  | 0  |
| CONTIG-052044 | 586 | 11  | 60 | 199 | 0  |
| CONTIG-052045 | 107 | 8   | 4  | 21  | 0  |



|               |     |     |    |     |    |
|---------------|-----|-----|----|-----|----|
| CONTIG-052046 | 130 | 13  | 6  | 58  | 0  |
| CONTIG-052047 | 60  | 3   | 8  | 4   | 0  |
| CONTIG-052048 | 101 | 5   | 12 | 8   | 0  |
| CONTIG-052049 | 203 | 8   | 15 | 36  | 0  |
| CONTIG-052050 | 67  | 9   | 43 | 5   | 0  |
| CONTIG-052051 | 69  | 4   | 2  | 12  | 0  |
| CONTIG-052052 | 112 | 5   | 6  | 19  | 0  |
| CONTIG-052053 | 581 | 11  | 13 | 163 | 5  |
| CONTIG-052054 | 80  | 11  | 17 | 15  | 0  |
| CONTIG-052055 | 90  | 7   | 11 | 19  | 0  |
| CONTIG-052056 | 156 | 9   | 19 | 35  | 0  |
| CONTIG-052057 | 99  | 9   | 5  | 37  | 0  |
| CONTIG-052058 | 214 | 5   | 17 | 22  | 0  |
| CONTIG-052059 | 87  | 8   | 13 | 20  | 0  |
| CONTIG-052060 | 109 | 5   | 8  | 21  | 0  |
| CONTIG-052061 | 115 | 13  | 28 | 44  | 0  |
| CONTIG-052062 | 101 | 5   | 0  | 7   | 0  |
| CONTIG-052063 | 153 | 56  | 22 | 190 | 18 |
| CONTIG-052064 | 555 | 10  | 21 | 219 | 0  |
| CONTIG-052065 | 249 | 7   | 15 | 37  | 2  |
| CONTIG-052066 | 375 | 11  | 15 | 130 | 0  |
| CONTIG-052067 | 170 | 9   | 12 | 69  | 0  |
| CONTIG-052068 | 79  | 9   | 7  | 21  | 0  |
| CONTIG-052069 | 133 | 9   | 0  | 47  | 0  |
| CONTIG-052070 | 124 | 5   | 7  | 21  | 0  |
| CONTIG-052071 | 230 | 4   | 0  | 18  | 0  |
| CONTIG-052072 | 122 | 6   | 0  | 25  | 0  |
| CONTIG-052073 | 99  | 58  | 7  | 202 | 0  |
| CONTIG-052074 | 72  | 6   | 5  | 12  | 0  |
| CONTIG-052075 | 110 | 13  | 8  | 56  | 3  |
| CONTIG-052076 | 60  | 5   | 0  | 7   | 2  |
| CONTIG-052078 | 405 | 17  | 77 | 349 | 0  |
| CONTIG-052079 | 471 | 29  | 57 | 162 | 13 |
| CONTIG-052080 | 132 | 5   | 9  | 9   | 0  |
| CONTIG-052081 | 240 | 5   | 9  | 22  | 0  |
| CONTIG-052082 | 221 | 6   | 13 | 34  | 0  |
| CONTIG-052083 | 275 | 11  | 38 | 58  | 2  |
| CONTIG-052084 | 79  | 3   | 2  | 0   | 0  |
| CONTIG-052085 | 74  | 3   | 7  | 8   | 0  |
| CONTIG-052086 | 130 | 32  | 2  | 0   | 28 |
| CONTIG-052087 | 159 | 4   | 18 | 16  | 0  |
| CONTIG-052088 | 89  | 8   | 8  | 4   | 0  |
| CONTIG-052089 | 107 | 18  | 0  | 0   | 0  |
| CONTIG-052091 | 87  | 7   | 2  | 21  | 0  |
| CONTIG-052092 | 72  | 7   | 7  | 19  | 0  |
| CONTIG-052093 | 332 | 11  | 18 | 76  | 0  |
| CONTIG-052094 | 37  | 191 | 39 | 66  | 0  |

|               |      |     |     |      |    |
|---------------|------|-----|-----|------|----|
| CONTIG-052095 | 213  | 10  | 2   | 49   | 0  |
| CONTIG-052096 | 204  | 12  | 9   | 76   | 0  |
| CONTIG-052097 | 93   | 5   | 8   | 12   | 0  |
| CONTIG-052098 | 76   | 9   | 0   | 10   | 2  |
| CONTIG-052099 | 60   | 3   | 3   | 0    | 0  |
| CONTIG-052100 | 59   | 4   | 4   | 3    | 0  |
| CONTIG-052101 | 282  | 22  | 13  | 208  | 0  |
| CONTIG-052102 | 156  | 13  | 14  | 56   | 0  |
| CONTIG-052103 | 70   | 6   | 5   | 4    | 0  |
| CONTIG-052104 | 65   | 4   | 9   | 5    | 0  |
| CONTIG-052105 | 81   | 4   | 9   | 4    | 0  |
| CONTIG-052106 | 87   | 2   | 0   | 3    | 0  |
| CONTIG-052108 | 120  | 9   | 4   | 42   | 0  |
| CONTIG-052109 | 444  | 17  | 95  | 293  | 0  |
| CONTIG-052110 | 115  | 7   | 8   | 3    | 0  |
| CONTIG-052111 | 158  | 5   | 17  | 20   | 0  |
| CONTIG-052113 | 89   | 55  | 22  | 168  | 0  |
| CONTIG-052114 | 58   | 20  | 26  | 40   | 0  |
| CONTIG-052115 | 131  | 6   | 7   | 10   | 0  |
| CONTIG-052116 | 103  | 178 | 8   | 801  | 0  |
| CONTIG-052117 | 345  | 10  | 19  | 132  | 0  |
| CONTIG-052118 | 146  | 6   | 3   | 28   | 0  |
| CONTIG-052119 | 97   | 2   | 0   | 0    | 0  |
| CONTIG-052120 | 108  | 9   | 12  | 41   | 0  |
| CONTIG-052121 | 140  | 5   | 3   | 17   | 0  |
| CONTIG-052122 | 1812 | 19  | 43  | 1995 | 0  |
| CONTIG-052123 | 85   | 4   | 0   | 0    | 0  |
| CONTIG-052126 | 284  | 7   | 18  | 63   | 0  |
| CONTIG-052127 | 76   | 4   | 0   | 3    | 0  |
| CONTIG-052128 | 108  | 4   | 0   | 12   | 0  |
| CONTIG-052129 | 62   | 8   | 2   | 22   | 0  |
| CONTIG-052130 | 69   | 17  | 16  | 58   | 0  |
| CONTIG-052131 | 121  | 13  | 2   | 82   | 0  |
| CONTIG-052133 | 618  | 11  | 2   | 269  | 0  |
| CONTIG-052135 | 68   | 11  | 2   | 23   | 0  |
| CONTIG-052136 | 117  | 9   | 5   | 29   | 0  |
| CONTIG-052137 | 74   | 8   | 24  | 0    | 0  |
| CONTIG-052138 | 179  | 6   | 8   | 39   | 0  |
| CONTIG-052139 | 72   | 9   | 4   | 17   | 0  |
| CONTIG-052140 | 415  | 21  | 17  | 11   | 0  |
| CONTIG-052141 | 109  | 4   | 2   | 11   | 0  |
| CONTIG-052142 | 762  | 11  | 47  | 214  | 0  |
| CONTIG-052143 | 149  | 12  | 10  | 65   | 0  |
| CONTIG-052144 | 56   | 13  | 2   | 17   | 0  |
| CONTIG-052145 | 163  | 7   | 6   | 28   | 0  |
| CONTIG-052146 | 120  | 3   | 0   | 9    | 0  |
| CONTIG-052147 | 67   | 46  | 103 | 0    | 38 |

|               |     |     |    |     |   |
|---------------|-----|-----|----|-----|---|
| CONTIG-052148 | 61  | 7   | 4  | 0   | 0 |
| CONTIG-052151 | 81  | 5   | 6  | 9   | 0 |
| CONTIG-052152 | 125 | 9   | 12 | 39  | 0 |
| CONTIG-052153 | 63  | 11  | 4  | 25  | 0 |
| CONTIG-052154 | 432 | 13  | 46 | 98  | 0 |
| CONTIG-052155 | 66  | 10  | 2  | 30  | 0 |
| CONTIG-052156 | 112 | 9   | 5  | 33  | 0 |
| CONTIG-052157 | 67  | 4   | 0  | 4   | 0 |
| CONTIG-052158 | 633 | 13  | 20 | 366 | 0 |
| CONTIG-052159 | 136 | 6   | 0  | 14  | 0 |
| CONTIG-052160 | 129 | 8   | 11 | 20  | 0 |
| CONTIG-052161 | 163 | 21  | 8  | 128 | 0 |
| CONTIG-052162 | 168 | 11  | 4  | 52  | 0 |
| CONTIG-052163 | 238 | 11  | 6  | 91  | 0 |
| CONTIG-052164 | 46  | 323 | 0  | 5   | 0 |
| CONTIG-052167 | 332 | 12  | 18 | 142 | 0 |
| CONTIG-052168 | 75  | 7   | 4  | 9   | 0 |
| CONTIG-052169 | 78  | 4   | 4  | 6   | 0 |
| CONTIG-052170 | 126 | 29  | 34 | 72  | 0 |
| CONTIG-052171 | 138 | 7   | 9  | 26  | 0 |
| CONTIG-052172 | 113 | 6   | 8  | 17  | 0 |
| CONTIG-052173 | 132 | 6   | 4  | 25  | 2 |
| CONTIG-052174 | 162 | 9   | 9  | 63  | 0 |
| CONTIG-052175 | 141 | 6   | 20 | 18  | 0 |
| CONTIG-052177 | 70  | 7   | 5  | 2   | 0 |
| CONTIG-052178 | 65  | 3   | 5  | 6   | 0 |
| CONTIG-052179 | 73  | 6   | 2  | 7   | 0 |
| CONTIG-052180 | 141 | 11  | 23 | 47  | 0 |
| CONTIG-052181 | 330 | 14  | 16 | 169 | 0 |
| CONTIG-052182 | 201 | 3   | 3  | 8   | 0 |
| CONTIG-052183 | 62  | 9   | 23 | 0   | 0 |
| CONTIG-052184 | 64  | 4   | 0  | 15  | 0 |
| CONTIG-052185 | 147 | 8   | 2  | 41  | 0 |
| CONTIG-052186 | 130 | 9   | 0  | 14  | 0 |
| CONTIG-052187 | 105 | 16  | 45 | 35  | 0 |
| CONTIG-052188 | 216 | 8   | 8  | 56  | 0 |
| CONTIG-052189 | 82  | 5   | 0  | 6   | 0 |
| CONTIG-052192 | 240 | 13  | 2  | 45  | 0 |
| CONTIG-052193 | 102 | 5   | 2  | 7   | 0 |
| CONTIG-052195 | 137 | 8   | 9  | 41  | 0 |
| CONTIG-052196 | 385 | 12  | 15 | 153 | 2 |
| CONTIG-052197 | 62  | 6   | 3  | 2   | 0 |
| CONTIG-052198 | 116 | 5   | 0  | 8   | 2 |
| CONTIG-052199 | 92  | 64  | 0  | 148 | 0 |
| CONTIG-052201 | 67  | 3   | 2  | 4   | 0 |
| CONTIG-052202 | 150 | 5   | 5  | 17  | 0 |
| CONTIG-052203 | 166 | 8   | 6  | 27  | 0 |

|               |     |     |    |     |    |
|---------------|-----|-----|----|-----|----|
| CONTIG-052204 | 286 | 10  | 4  | 97  | 2  |
| CONTIG-052205 | 151 | 9   | 25 | 26  | 0  |
| CONTIG-052206 | 153 | 7   | 8  | 39  | 0  |
| CONTIG-052207 | 156 | 13  | 2  | 20  | 0  |
| CONTIG-052208 | 81  | 9   | 4  | 5   | 0  |
| CONTIG-052209 | 207 | 7   | 14 | 21  | 0  |
| CONTIG-052210 | 317 | 14  | 26 | 154 | 3  |
| CONTIG-052211 | 72  | 9   | 11 | 0   | 0  |
| CONTIG-052212 | 201 | 7   | 13 | 34  | 0  |
| CONTIG-052213 | 78  | 5   | 18 | 4   | 0  |
| CONTIG-052214 | 106 | 6   | 15 | 18  | 0  |
| CONTIG-052216 | 192 | 4   | 7  | 15  | 0  |
| CONTIG-052217 | 200 | 6   | 5  | 39  | 0  |
| CONTIG-052218 | 63  | 19  | 47 | 17  | 0  |
| CONTIG-052219 | 125 | 6   | 10 | 16  | 0  |
| CONTIG-052220 | 300 | 16  | 69 | 86  | 0  |
| CONTIG-052221 | 150 | 289 | 14 | 118 | 0  |
| CONTIG-052222 | 86  | 14  | 7  | 27  | 0  |
| CONTIG-052223 | 153 | 17  | 2  | 83  | 4  |
| CONTIG-052224 | 156 | 8   | 3  | 49  | 0  |
| CONTIG-052225 | 91  | 12  | 7  | 25  | 2  |
| CONTIG-052227 | 208 | 14  | 4  | 85  | 2  |
| CONTIG-052228 | 63  | 8   | 5  | 13  | 0  |
| CONTIG-052229 | 215 | 6   | 5  | 40  | 0  |
| CONTIG-052230 | 172 | 4   | 8  | 17  | 0  |
| CONTIG-052231 | 74  | 15  | 2  | 44  | 0  |
| CONTIG-052232 | 201 | 5   | 14 | 24  | 0  |
| CONTIG-052233 | 205 | 11  | 16 | 18  | 2  |
| CONTIG-052234 | 70  | 13  | 6  | 5   | 0  |
| CONTIG-052235 | 76  | 7   | 0  | 24  | 0  |
| CONTIG-052236 | 96  | 5   | 4  | 0   | 0  |
| CONTIG-052237 | 126 | 4   | 2  | 7   | 0  |
| CONTIG-052238 | 84  | 5   | 2  | 14  | 0  |
| CONTIG-052239 | 160 | 11  | 4  | 87  | 0  |
| CONTIG-052240 | 95  | 4   | 6  | 11  | 0  |
| CONTIG-052241 | 287 | 30  | 78 | 229 | 10 |
| CONTIG-052242 | 64  | 8   | 2  | 14  | 0  |
| CONTIG-052243 | 77  | 12  | 26 | 26  | 0  |
| CONTIG-052244 | 93  | 12  | 3  | 50  | 0  |
| CONTIG-052245 | 75  | 5   | 0  | 6   | 0  |
| CONTIG-052246 | 111 | 27  | 7  | 84  | 0  |
| CONTIG-052247 | 39  | 30  | 4  | 9   | 0  |
| CONTIG-052248 | 60  | 5   | 0  | 14  | 0  |
| CONTIG-052249 | 101 | 13  | 2  | 25  | 0  |
| CONTIG-052250 | 58  | 7   | 31 | 0   | 0  |
| CONTIG-052251 | 390 | 9   | 10 | 139 | 0  |
| CONTIG-052252 | 256 | 7   | 2  | 33  | 0  |

|               |     |    |     |     |     |
|---------------|-----|----|-----|-----|-----|
| CONTIG-052253 | 150 | 4  | 11  | 10  | 0   |
| CONTIG-052255 | 76  | 14 | 5   | 41  | 0   |
| CONTIG-052256 | 289 | 12 | 45  | 152 | 0   |
| CONTIG-052257 | 92  | 4  | 6   | 7   | 0   |
| CONTIG-052259 | 329 | 17 | 19  | 156 | 2   |
| CONTIG-052262 | 62  | 3  | 3   | 9   | 0   |
| CONTIG-052263 | 72  | 8  | 8   | 18  | 0   |
| CONTIG-052264 | 163 | 7  | 9   | 33  | 0   |
| CONTIG-052265 | 148 | 5  | 16  | 23  | 0   |
| CONTIG-052266 | 273 | 10 | 31  | 41  | 0   |
| CONTIG-052267 | 344 | 30 | 46  | 407 | 0   |
| CONTIG-052268 | 244 | 8  | 5   | 74  | 0   |
| CONTIG-052270 | 150 | 16 | 15  | 87  | 0   |
| CONTIG-052271 | 150 | 7  | 21  | 15  | 2   |
| CONTIG-052272 | 59  | 3  | 2   | 0   | 0   |
| CONTIG-052274 | 189 | 88 | 125 | 503 | 2   |
| CONTIG-052276 | 292 | 18 | 2   | 2   | 124 |
| CONTIG-052277 | 65  | 7  | 5   | 6   | 0   |
| CONTIG-052278 | 117 | 8  | 6   | 25  | 0   |
| CONTIG-052279 | 91  | 8  | 0   | 24  | 0   |
| CONTIG-052280 | 112 | 8  | 3   | 24  | 0   |
| CONTIG-052281 | 107 | 11 | 2   | 54  | 0   |
| CONTIG-052282 | 161 | 14 | 17  | 57  | 0   |
| CONTIG-052283 | 157 | 10 | 5   | 59  | 0   |
| CONTIG-052284 | 79  | 6  | 0   | 24  | 0   |
| CONTIG-052285 | 97  | 5  | 13  | 4   | 0   |
| CONTIG-052286 | 184 | 17 | 70  | 71  | 0   |
| CONTIG-052287 | 83  | 5  | 3   | 8   | 0   |
| CONTIG-052288 | 121 | 40 | 28  | 50  | 0   |
| CONTIG-052289 | 405 | 5  | 0   | 68  | 2   |
| CONTIG-052290 | 635 | 21 | 26  | 455 | 0   |
| CONTIG-052291 | 74  | 4  | 4   | 9   | 0   |
| CONTIG-052292 | 69  | 3  | 0   | 0   | 0   |
| CONTIG-052293 | 167 | 18 | 10  | 52  | 0   |
| CONTIG-052294 | 81  | 4  | 14  | 8   | 0   |
| CONTIG-052295 | 58  | 5  | 13  | 4   | 0   |
| CONTIG-052296 | 76  | 10 | 5   | 26  | 0   |
| CONTIG-052297 | 406 | 12 | 17  | 242 | 0   |
| CONTIG-052299 | 76  | 6  | 10  | 2   | 2   |
| CONTIG-052300 | 129 | 9  | 3   | 43  | 0   |
| CONTIG-052301 | 128 | 5  | 2   | 15  | 2   |
| CONTIG-052302 | 247 | 6  | 6   | 33  | 2   |
| CONTIG-052303 | 606 | 14 | 29  | 380 | 0   |
| CONTIG-052304 | 523 | 9  | 34  | 87  | 0   |
| CONTIG-052305 | 166 | 8  | 3   | 27  | 0   |
| CONTIG-052306 | 92  | 6  | 2   | 9   | 0   |
| CONTIG-052308 | 122 | 10 | 12  | 44  | 0   |

|               |     |     |    |     |   |
|---------------|-----|-----|----|-----|---|
| CONTIG-052309 | 584 | 12  | 34 | 124 | 2 |
| CONTIG-052310 | 286 | 10  | 29 | 76  | 0 |
| CONTIG-052311 | 86  | 70  | 9  | 17  | 0 |
| CONTIG-052312 | 124 | 23  | 3  | 132 | 0 |
| CONTIG-052313 | 101 | 7   | 24 | 19  | 0 |
| CONTIG-052314 | 103 | 5   | 19 | 7   | 0 |
| CONTIG-052315 | 80  | 3   | 3  | 0   | 0 |
| CONTIG-052316 | 77  | 2   | 3  | 0   | 2 |
| CONTIG-052317 | 150 | 11  | 2  | 72  | 0 |
| CONTIG-052318 | 134 | 5   | 2  | 19  | 0 |
| CONTIG-052320 | 95  | 5   | 4  | 15  | 0 |
| CONTIG-052321 | 317 | 6   | 3  | 65  | 0 |
| CONTIG-052322 | 304 | 12  | 4  | 39  | 4 |
| CONTIG-052323 | 317 | 9   | 16 | 87  | 2 |
| CONTIG-052324 | 75  | 5   | 3  | 6   | 0 |
| CONTIG-052325 | 183 | 8   | 13 | 49  | 0 |
| CONTIG-052326 | 130 | 10  | 13 | 27  | 0 |
| CONTIG-052327 | 157 | 3   | 6  | 2   | 0 |
| CONTIG-052328 | 247 | 7   | 43 | 52  | 0 |
| CONTIG-052329 | 145 | 6   | 0  | 0   | 2 |
| CONTIG-052330 | 82  | 7   | 4  | 9   | 0 |
| CONTIG-052331 | 99  | 11  | 21 | 12  | 0 |
| CONTIG-052332 | 60  | 10  | 0  | 18  | 0 |
| CONTIG-052333 | 89  | 8   | 4  | 11  | 0 |
| CONTIG-052334 | 209 | 8   | 6  | 4   | 0 |
| CONTIG-052335 | 217 | 11  | 30 | 91  | 0 |
| CONTIG-052336 | 114 | 11  | 0  | 31  | 2 |
| CONTIG-052337 | 157 | 5   | 16 | 4   | 0 |
| CONTIG-052338 | 206 | 8   | 2  | 52  | 0 |
| CONTIG-052339 | 325 | 8   | 51 | 72  | 0 |
| CONTIG-052340 | 215 | 11  | 10 | 51  | 3 |
| CONTIG-052341 | 123 | 8   | 11 | 0   | 0 |
| CONTIG-052342 | 92  | 133 | 0  | 23  | 0 |
| CONTIG-052343 | 85  | 13  | 6  | 30  | 0 |
| CONTIG-052344 | 61  | 4   | 0  | 7   | 0 |
| CONTIG-052345 | 94  | 4   | 0  | 13  | 0 |
| CONTIG-052346 | 72  | 8   | 11 | 0   | 0 |
| CONTIG-052347 | 95  | 66  | 34 | 293 | 0 |
| CONTIG-052349 | 76  | 12  | 6  | 31  | 2 |
| CONTIG-052350 | 392 | 10  | 24 | 169 | 0 |
| CONTIG-052353 | 87  | 6   | 2  | 18  | 0 |
| CONTIG-052354 | 380 | 30  | 21 | 235 | 0 |
| CONTIG-052355 | 120 | 5   | 0  | 22  | 0 |
| CONTIG-052356 | 113 | 7   | 2  | 18  | 0 |
| CONTIG-052357 | 232 | 7   | 4  | 48  | 0 |
| CONTIG-052358 | 188 | 6   | 3  | 41  | 0 |
| CONTIG-052362 | 385 | 18  | 39 | 270 | 0 |

|               |     |     |    |     |     |
|---------------|-----|-----|----|-----|-----|
| CONTIG-052363 | 481 | 16  | 38 | 148 | 0   |
| CONTIG-052364 | 208 | 6   | 19 | 52  | 0   |
| CONTIG-052365 | 171 | 4   | 5  | 19  | 0   |
| CONTIG-052366 | 109 | 6   | 6  | 22  | 0   |
| CONTIG-052367 | 43  | 958 | 28 | 28  | 525 |
| CONTIG-052368 | 185 | 10  | 2  | 39  | 4   |
| CONTIG-052369 | 126 | 11  | 4  | 57  | 0   |
| CONTIG-052370 | 213 | 6   | 0  | 28  | 0   |
| CONTIG-052375 | 264 | 6   | 14 | 35  | 0   |
| CONTIG-052376 | 218 | 8   | 13 | 50  | 0   |
| CONTIG-052379 | 219 | 6   | 5  | 35  | 2   |
| CONTIG-052380 | 62  | 3   | 8  | 4   | 0   |
| CONTIG-052381 | 176 | 6   | 0  | 10  | 2   |
| CONTIG-052384 | 115 | 4   | 0  | 0   | 0   |
| CONTIG-052385 | 98  | 5   | 8  | 18  | 0   |
| CONTIG-052386 | 300 | 16  | 2  | 14  | 0   |
| CONTIG-052387 | 253 | 9   | 11 | 79  | 0   |
| CONTIG-052388 | 378 | 9   | 3  | 0   | 0   |
| CONTIG-052389 | 286 | 9   | 26 | 46  | 0   |
| CONTIG-052390 | 185 | 51  | 15 | 4   | 0   |
| CONTIG-052391 | 336 | 14  | 17 | 160 | 0   |
| CONTIG-052393 | 207 | 7   | 6  | 33  | 0   |
| CONTIG-052394 | 133 | 5   | 10 | 15  | 0   |
| CONTIG-052395 | 89  | 5   | 8  | 4   | 0   |
| CONTIG-052396 | 209 | 10  | 23 | 50  | 0   |
| CONTIG-052397 | 109 | 8   | 32 | 3   | 0   |
| CONTIG-052398 | 278 | 12  | 5  | 78  | 0   |
| CONTIG-052401 | 69  | 5   | 16 | 2   | 0   |
| CONTIG-052402 | 215 | 5   | 0  | 0   | 4   |
| CONTIG-052403 | 61  | 9   | 6  | 16  | 0   |
| CONTIG-052404 | 92  | 7   | 4  | 4   | 0   |
| CONTIG-052405 | 91  | 4   | 0  | 6   | 0   |
| CONTIG-052406 | 162 | 14  | 46 | 24  | 0   |
| CONTIG-052407 | 153 | 8   | 5  | 53  | 0   |
| CONTIG-052409 | 402 | 12  | 7  | 197 | 0   |
| CONTIG-052410 | 240 | 7   | 20 | 24  | 0   |
| CONTIG-052411 | 555 | 35  | 0  | 0   | 212 |
| CONTIG-052412 | 62  | 10  | 10 | 20  | 0   |
| CONTIG-052413 | 81  | 6   | 3  | 12  | 0   |
| CONTIG-052414 | 414 | 11  | 26 | 131 | 0   |
| CONTIG-052415 | 357 | 16  | 60 | 52  | 0   |
| CONTIG-052419 | 65  | 216 | 6  | 521 | 0   |
| CONTIG-052420 | 202 | 5   | 11 | 27  | 0   |
| CONTIG-052421 | 83  | 7   | 7  | 6   | 0   |
| CONTIG-052422 | 147 | 17  | 4  | 0   | 0   |
| CONTIG-052423 | 78  | 9   | 5  | 21  | 0   |
| CONTIG-052424 | 317 | 9   | 9  | 57  | 0   |

|               |     |    |    |     |     |
|---------------|-----|----|----|-----|-----|
| CONTIG-052425 | 83  | 4  | 2  | 6   | 0   |
| CONTIG-052428 | 69  | 7  | 10 | 10  | 0   |
| CONTIG-052429 | 64  | 9  | 45 | 4   | 0   |
| CONTIG-052430 | 65  | 5  | 5  | 12  | 0   |
| CONTIG-052431 | 285 | 7  | 5  | 43  | 0   |
| CONTIG-052432 | 148 | 7  | 2  | 24  | 0   |
| CONTIG-052433 | 171 | 8  | 7  | 11  | 0   |
| CONTIG-052434 | 75  | 23 | 4  | 23  | 0   |
| CONTIG-052435 | 58  | 11 | 9  | 19  | 0   |
| CONTIG-052436 | 63  | 8  | 24 | 0   | 0   |
| CONTIG-052437 | 174 | 6  | 18 | 27  | 0   |
| CONTIG-052438 | 514 | 13 | 37 | 242 | 2   |
| CONTIG-052439 | 128 | 7  | 9  | 13  | 0   |
| CONTIG-052440 | 97  | 9  | 15 | 18  | 0   |
| CONTIG-052441 | 113 | 6  | 6  | 18  | 0   |
| CONTIG-052442 | 425 | 19 | 59 | 314 | 2   |
| CONTIG-052443 | 181 | 41 | 27 | 180 | 0   |
| CONTIG-052444 | 117 | 7  | 28 | 24  | 0   |
| CONTIG-052445 | 172 | 4  | 8  | 26  | 0   |
| CONTIG-052446 | 139 | 5  | 10 | 12  | 0   |
| CONTIG-052447 | 293 | 18 | 47 | 158 | 2   |
| CONTIG-052448 | 118 | 5  | 3  | 8   | 0   |
| CONTIG-052449 | 162 | 5  | 4  | 17  | 0   |
| CONTIG-052450 | 448 | 42 | 21 | 770 | 0   |
| CONTIG-052451 | 83  | 12 | 13 | 22  | 0   |
| CONTIG-052452 | 83  | 4  | 4  | 6   | 0   |
| CONTIG-052453 | 109 | 6  | 0  | 2   | 0   |
| CONTIG-052454 | 277 | 7  | 9  | 48  | 0   |
| CONTIG-052455 | 261 | 7  | 36 | 7   | 0   |
| CONTIG-052456 | 101 | 10 | 0  | 27  | 0   |
| CONTIG-052457 | 101 | 3  | 0  | 4   | 0   |
| CONTIG-052458 | 139 | 7  | 13 | 33  | 0   |
| CONTIG-052459 | 179 | 7  | 6  | 40  | 0   |
| CONTIG-052460 | 180 | 10 | 40 | 11  | 0   |
| CONTIG-052461 | 346 | 12 | 43 | 122 | 6   |
| CONTIG-052462 | 73  | 3  | 4  | 5   | 0   |
| CONTIG-052463 | 235 | 8  | 42 | 33  | 0   |
| CONTIG-052464 | 132 | 6  | 5  | 10  | 0   |
| CONTIG-052465 | 152 | 8  | 0  | 34  | 0   |
| CONTIG-052466 | 81  | 10 | 9  | 31  | 0   |
| CONTIG-052467 | 515 | 54 | 5  | 2   | 110 |
| CONTIG-052468 | 111 | 4  | 7  | 14  | 0   |
| CONTIG-052471 | 100 | 21 | 49 | 4   | 0   |
| CONTIG-052472 | 72  | 6  | 27 | 3   | 0   |
| CONTIG-052473 | 284 | 13 | 39 | 161 | 0   |
| CONTIG-052474 | 292 | 19 | 10 | 140 | 10  |
| CONTIG-052475 | 175 | 18 | 9  | 89  | 2   |



|               |     |    |    |     |     |
|---------------|-----|----|----|-----|-----|
| CONTIG-052476 | 111 | 8  | 34 | 2   | 2   |
| CONTIG-052477 | 60  | 3  | 3  | 0   | 0   |
| CONTIG-052478 | 76  | 5  | 27 | 0   | 0   |
| CONTIG-052479 | 213 | 18 | 23 | 128 | 0   |
| CONTIG-052480 | 87  | 37 | 18 | 52  | 0   |
| CONTIG-052481 | 50  | 31 | 17 | 14  | 0   |
| CONTIG-052482 | 97  | 4  | 7  | 2   | 0   |
| CONTIG-052483 | 115 | 4  | 12 | 12  | 0   |
| CONTIG-052484 | 177 | 15 | 23 | 28  | 0   |
| CONTIG-052485 | 73  | 7  | 5  | 2   | 0   |
| CONTIG-052486 | 316 | 9  | 21 | 34  | 0   |
| CONTIG-052487 | 426 | 14 | 57 | 191 | 0   |
| CONTIG-052488 | 233 | 25 | 36 | 286 | 0   |
| CONTIG-052489 | 166 | 14 | 0  | 96  | 0   |
| CONTIG-052490 | 99  | 7  | 6  | 20  | 0   |
| CONTIG-052491 | 73  | 7  | 13 | 0   | 0   |
| CONTIG-052492 | 424 | 9  | 10 | 130 | 0   |
| CONTIG-052493 | 59  | 6  | 10 | 0   | 0   |
| CONTIG-052494 | 567 | 13 | 24 | 252 | 0   |
| CONTIG-052495 | 73  | 7  | 5  | 16  | 0   |
| CONTIG-052496 | 342 | 14 | 16 | 158 | 0   |
| CONTIG-052497 | 90  | 5  | 0  | 11  | 0   |
| CONTIG-052498 | 83  | 2  | 0  | 3   | 0   |
| CONTIG-052499 | 98  | 6  | 8  | 14  | 0   |
| CONTIG-052500 | 350 | 50 | 2  | 0   | 275 |
| CONTIG-052501 | 124 | 6  | 27 | 6   | 0   |
| CONTIG-052502 | 86  | 9  | 10 | 7   | 0   |
| CONTIG-052503 | 154 | 15 | 8  | 95  | 0   |
| CONTIG-052505 | 203 | 5  | 22 | 34  | 0   |
| CONTIG-052506 | 58  | 8  | 12 | 4   | 0   |
| CONTIG-052507 | 126 | 7  | 3  | 31  | 0   |
| CONTIG-052508 | 121 | 5  | 6  | 20  | 0   |
| CONTIG-052509 | 321 | 19 | 12 | 254 | 4   |
| CONTIG-052510 | 164 | 8  | 0  | 30  | 2   |
| CONTIG-052511 | 218 | 8  | 24 | 32  | 0   |
| CONTIG-052512 | 163 | 9  | 7  | 16  | 2   |
| CONTIG-052513 | 199 | 7  | 5  | 25  | 4   |
| CONTIG-052514 | 127 | 10 | 13 | 22  | 0   |
| CONTIG-052515 | 579 | 19 | 38 | 527 | 0   |
| CONTIG-052516 | 238 | 15 | 22 | 178 | 0   |
| CONTIG-052517 | 44  | 49 | 8  | 49  | 0   |
| CONTIG-052521 | 169 | 9  | 66 | 27  | 0   |
| CONTIG-052522 | 161 | 6  | 20 | 17  | 0   |
| CONTIG-052523 | 225 | 11 | 11 | 50  | 0   |
| CONTIG-052524 | 69  | 9  | 15 | 12  | 0   |
| CONTIG-052525 | 49  | 66 | 9  | 9   | 0   |
| CONTIG-052526 | 143 | 11 | 4  | 93  | 0   |

|               |     |     |    |     |    |
|---------------|-----|-----|----|-----|----|
| CONTIG-052527 | 36  | 557 | 28 | 902 | 0  |
| CONTIG-052528 | 44  | 403 | 5  | 691 | 0  |
| CONTIG-052529 | 139 | 11  | 19 | 39  | 0  |
| CONTIG-052530 | 127 | 8   | 13 | 36  | 0  |
| CONTIG-052531 | 59  | 10  | 11 | 20  | 2  |
| CONTIG-052532 | 143 | 16  | 10 | 82  | 2  |
| CONTIG-052533 | 169 | 5   | 12 | 21  | 0  |
| CONTIG-052534 | 244 | 8   | 41 | 33  | 0  |
| CONTIG-052535 | 90  | 9   | 14 | 26  | 0  |
| CONTIG-052536 | 160 | 11  | 19 | 64  | 0  |
| CONTIG-052537 | 84  | 9   | 2  | 23  | 0  |
| CONTIG-052538 | 65  | 8   | 3  | 13  | 0  |
| CONTIG-052539 | 269 | 7   | 13 | 58  | 2  |
| CONTIG-052541 | 415 | 9   | 6  | 104 | 2  |
| CONTIG-052542 | 190 | 9   | 5  | 36  | 0  |
| CONTIG-052543 | 209 | 9   | 23 | 44  | 2  |
| CONTIG-052544 | 155 | 7   | 7  | 18  | 0  |
| CONTIG-052545 | 184 | 5   | 15 | 14  | 0  |
| CONTIG-052546 | 55  | 121 | 5  | 295 | 0  |
| CONTIG-052547 | 94  | 8   | 16 | 23  | 0  |
| CONTIG-052548 | 112 | 5   | 4  | 13  | 0  |
| CONTIG-052549 | 92  | 6   | 2  | 11  | 0  |
| CONTIG-052550 | 71  | 4   | 8  | 5   | 0  |
| CONTIG-052551 | 252 | 12  | 17 | 102 | 0  |
| CONTIG-052552 | 141 | 4   | 5  | 5   | 0  |
| CONTIG-052553 | 71  | 12  | 4  | 15  | 0  |
| CONTIG-052554 | 202 | 10  | 18 | 64  | 0  |
| CONTIG-052555 | 85  | 11  | 0  | 23  | 0  |
| CONTIG-052556 | 196 | 26  | 53 | 252 | 0  |
| CONTIG-052557 | 300 | 11  | 28 | 165 | 0  |
| CONTIG-052559 | 120 | 47  | 9  | 273 | 0  |
| CONTIG-052560 | 58  | 6   | 3  | 10  | 0  |
| CONTIG-052561 | 116 | 6   | 19 | 18  | 0  |
| CONTIG-052562 | 67  | 10  | 4  | 15  | 0  |
| CONTIG-052566 | 86  | 9   | 3  | 11  | 0  |
| CONTIG-052569 | 134 | 6   | 5  | 11  | 0  |
| CONTIG-052570 | 126 | 10  | 5  | 22  | 0  |
| CONTIG-052571 | 441 | 10  | 12 | 198 | 0  |
| CONTIG-052572 | 76  | 8   | 8  | 13  | 3  |
| CONTIG-052573 | 419 | 22  | 72 | 236 | 4  |
| CONTIG-052574 | 158 | 13  | 22 | 51  | 0  |
| CONTIG-052575 | 343 | 22  | 50 | 344 | 0  |
| CONTIG-052576 | 183 | 6   | 10 | 28  | 0  |
| CONTIG-052577 | 75  | 5   | 5  | 2   | 0  |
| CONTIG-052578 | 228 | 22  | 2  | 0   | 35 |
| CONTIG-052579 | 73  | 7   | 7  | 13  | 0  |
| CONTIG-052580 | 475 | 11  | 14 | 129 | 2  |

|               |      |     |    |     |    |
|---------------|------|-----|----|-----|----|
| CONTIG-052581 | 92   | 5   | 0  | 10  | 0  |
| CONTIG-052582 | 338  | 18  | 19 | 338 | 0  |
| CONTIG-052583 | 117  | 45  | 24 | 223 | 0  |
| CONTIG-052584 | 165  | 9   | 12 | 56  | 0  |
| CONTIG-052585 | 195  | 18  | 7  | 112 | 0  |
| CONTIG-052586 | 78   | 11  | 4  | 45  | 0  |
| CONTIG-052587 | 104  | 4   | 6  | 0   | 0  |
| CONTIG-052588 | 681  | 20  | 41 | 107 | 0  |
| CONTIG-052589 | 89   | 8   | 6  | 17  | 0  |
| CONTIG-052590 | 203  | 9   | 8  | 43  | 0  |
| CONTIG-052591 | 69   | 9   | 16 | 0   | 0  |
| CONTIG-052592 | 58   | 3   | 15 | 0   | 0  |
| CONTIG-052593 | 63   | 12  | 0  | 33  | 0  |
| CONTIG-052594 | 90   | 7   | 7  | 6   | 0  |
| CONTIG-052595 | 190  | 5   | 10 | 33  | 0  |
| CONTIG-052596 | 1184 | 43  | 18 | 12  | 0  |
| CONTIG-052597 | 83   | 13  | 8  | 30  | 0  |
| CONTIG-052598 | 331  | 20  | 37 | 188 | 20 |
| CONTIG-052599 | 160  | 8   | 30 | 9   | 0  |
| CONTIG-052600 | 92   | 12  | 40 | 21  | 0  |
| CONTIG-052601 | 74   | 84  | 20 | 142 | 0  |
| CONTIG-052602 | 83   | 5   | 10 | 11  | 0  |
| CONTIG-052603 | 109  | 9   | 5  | 22  | 2  |
| CONTIG-052604 | 102  | 14  | 9  | 39  | 0  |
| CONTIG-052605 | 80   | 8   | 10 | 3   | 0  |
| CONTIG-052606 | 238  | 5   | 7  | 27  | 0  |
| CONTIG-052607 | 283  | 9   | 9  | 103 | 2  |
| CONTIG-052608 | 148  | 6   | 21 | 8   | 0  |
| CONTIG-052609 | 509  | 11  | 31 | 230 | 2  |
| CONTIG-052610 | 63   | 17  | 0  | 46  | 0  |
| CONTIG-052611 | 66   | 7   | 2  | 16  | 0  |
| CONTIG-052612 | 255  | 15  | 6  | 0   | 0  |
| CONTIG-052613 | 108  | 3   | 0  | 8   | 0  |
| CONTIG-052614 | 201  | 6   | 2  | 13  | 0  |
| CONTIG-052615 | 194  | 14  | 17 | 111 | 0  |
| CONTIG-052616 | 195  | 23  | 19 | 182 | 27 |
| CONTIG-052617 | 77   | 25  | 27 | 71  | 0  |
| CONTIG-052618 | 89   | 6   | 0  | 6   | 0  |
| CONTIG-052619 | 132  | 8   | 0  | 28  | 2  |
| CONTIG-052620 | 101  | 5   | 6  | 6   | 0  |
| CONTIG-052621 | 146  | 15  | 43 | 33  | 0  |
| CONTIG-052623 | 85   | 10  | 8  | 16  | 0  |
| CONTIG-052624 | 61   | 4   | 2  | 8   | 0  |
| CONTIG-052625 | 43   | 565 | 6  | 0   | 4  |
| CONTIG-052626 | 108  | 27  | 8  | 132 | 2  |
| CONTIG-052627 | 59   | 13  | 0  | 36  | 0  |
| CONTIG-052628 | 85   | 9   | 8  | 10  | 0  |

|               |     |     |     |     |     |
|---------------|-----|-----|-----|-----|-----|
| CONTIG-052629 | 275 | 16  | 152 | 45  | 0   |
| CONTIG-052630 | 190 | 10  | 15  | 31  | 2   |
| CONTIG-052631 | 217 | 8   | 12  | 37  | 0   |
| CONTIG-052632 | 89  | 6   | 3   | 19  | 0   |
| CONTIG-052634 | 114 | 166 | 4   | 0   | 27  |
| CONTIG-052635 | 152 | 4   | 3   | 2   | 0   |
| CONTIG-052637 | 157 | 8   | 2   | 50  | 0   |
| CONTIG-052638 | 176 | 11  | 0   | 65  | 2   |
| CONTIG-052639 | 258 | 20  | 23  | 98  | 3   |
| CONTIG-052640 | 75  | 6   | 11  | 5   | 0   |
| CONTIG-052642 | 115 | 7   | 26  | 16  | 0   |
| CONTIG-052643 | 201 | 8   | 6   | 46  | 0   |
| CONTIG-052644 | 258 | 9   | 9   | 108 | 0   |
| CONTIG-052645 | 320 | 5   | 21  | 55  | 0   |
| CONTIG-052651 | 140 | 11  | 9   | 50  | 0   |
| CONTIG-052652 | 86  | 6   | 12  | 18  | 0   |
| CONTIG-052657 | 60  | 7   | 4   | 20  | 0   |
| CONTIG-052658 | 137 | 13  | 15  | 31  | 0   |
| CONTIG-052659 | 198 | 9   | 13  | 44  | 0   |
| CONTIG-052660 | 320 | 6   | 11  | 58  | 0   |
| CONTIG-052661 | 144 | 74  | 11  | 581 | 0   |
| CONTIG-052662 | 390 | 15  | 30  | 203 | 2   |
| CONTIG-052663 | 545 | 11  | 11  | 104 | 15  |
| CONTIG-052664 | 62  | 2   | 2   | 3   | 0   |
| CONTIG-052665 | 308 | 12  | 28  | 99  | 0   |
| CONTIG-052666 | 135 | 5   | 4   | 15  | 0   |
| CONTIG-052667 | 215 | 14  | 25  | 16  | 0   |
| CONTIG-052668 | 67  | 5   | 8   | 5   | 0   |
| CONTIG-052669 | 71  | 7   | 0   | 2   | 0   |
| CONTIG-052670 | 109 | 3   | 3   | 2   | 0   |
| CONTIG-052671 | 160 | 16  | 24  | 55  | 0   |
| CONTIG-052672 | 92  | 4   | 3   | 12  | 0   |
| CONTIG-052673 | 774 | 13  | 51  | 279 | 8   |
| CONTIG-052678 | 105 | 56  | 14  | 197 | 0   |
| CONTIG-052679 | 104 | 4   | 3   | 3   | 0   |
| CONTIG-052680 | 235 | 5   | 11  | 29  | 0   |
| CONTIG-052681 | 282 | 10  | 15  | 60  | 0   |
| CONTIG-052682 | 274 | 13  | 76  | 93  | 0   |
| CONTIG-052683 | 98  | 6   | 5   | 19  | 0   |
| CONTIG-052684 | 161 | 6   | 2   | 31  | 2   |
| CONTIG-052685 | 92  | 16  | 51  | 26  | 2   |
| CONTIG-052687 | 107 | 9   | 5   | 31  | 0   |
| CONTIG-052688 | 270 | 6   | 9   | 54  | 3   |
| CONTIG-052689 | 495 | 12  | 0   | 158 | 14  |
| CONTIG-052690 | 146 | 11  | 4   | 95  | 0   |
| CONTIG-052691 | 746 | 30  | 2   | 0   | 211 |
| CONTIG-052692 | 128 | 9   | 2   | 58  | 0   |

|               |      |    |    |      |    |
|---------------|------|----|----|------|----|
| CONTIG-052693 | 62   | 3  | 3  | 0    | 0  |
| CONTIG-052694 | 91   | 7  | 11 | 25   | 0  |
| CONTIG-052700 | 60   | 4  | 3  | 4    | 0  |
| CONTIG-052701 | 90   | 64 | 2  | 17   | 0  |
| CONTIG-052702 | 60   | 3  | 6  | 2    | 0  |
| CONTIG-052703 | 66   | 4  | 0  | 2    | 0  |
| CONTIG-052704 | 247  | 25 | 21 | 103  | 2  |
| CONTIG-052705 | 163  | 7  | 12 | 37   | 0  |
| CONTIG-052706 | 159  | 12 | 12 | 37   | 0  |
| CONTIG-052707 | 137  | 7  | 19 | 20   | 0  |
| CONTIG-052708 | 82   | 6  | 25 | 6    | 0  |
| CONTIG-052709 | 373  | 15 | 29 | 217  | 0  |
| CONTIG-052710 | 259  | 6  | 6  | 43   | 0  |
| CONTIG-052712 | 226  | 12 | 39 | 104  | 0  |
| CONTIG-052713 | 107  | 3  | 2  | 10   | 0  |
| CONTIG-052715 | 63   | 5  | 8  | 4    | 0  |
| CONTIG-052716 | 111  | 5  | 0  | 13   | 0  |
| CONTIG-052717 | 333  | 9  | 36 | 92   | 2  |
| CONTIG-052718 | 102  | 8  | 35 | 14   | 0  |
| CONTIG-052719 | 72   | 11 | 11 | 19   | 0  |
| CONTIG-052720 | 127  | 6  | 0  | 26   | 0  |
| CONTIG-052721 | 240  | 10 | 10 | 59   | 0  |
| CONTIG-052722 | 77   | 8  | 10 | 14   | 0  |
| CONTIG-052723 | 100  | 16 | 9  | 29   | 0  |
| CONTIG-052724 | 77   | 31 | 15 | 112  | 0  |
| CONTIG-052725 | 115  | 4  | 5  | 6    | 0  |
| CONTIG-052726 | 141  | 7  | 9  | 26   | 0  |
| CONTIG-052727 | 78   | 6  | 5  | 17   | 0  |
| CONTIG-052731 | 223  | 10 | 12 | 50   | 0  |
| CONTIG-052732 | 239  | 9  | 16 | 85   | 0  |
| CONTIG-052733 | 472  | 9  | 7  | 183  | 0  |
| CONTIG-052734 | 217  | 6  | 2  | 33   | 2  |
| CONTIG-052735 | 264  | 9  | 5  | 36   | 2  |
| CONTIG-052736 | 1271 | 29 | 24 | 1407 | 32 |
| CONTIG-052737 | 275  | 10 | 18 | 99   | 0  |
| CONTIG-052738 | 107  | 7  | 12 | 19   | 0  |
| CONTIG-052739 | 160  | 20 | 0  | 0    | 0  |
| CONTIG-052740 | 39   | 21 | 7  | 5    | 0  |
| CONTIG-052741 | 564  | 83 | 22 | 23   | 0  |
| CONTIG-052742 | 73   | 12 | 23 | 18   | 0  |
| CONTIG-052743 | 294  | 16 | 18 | 80   | 0  |
| CONTIG-052744 | 138  | 5  | 4  | 26   | 0  |
| CONTIG-052745 | 98   | 11 | 17 | 24   | 0  |
| CONTIG-052746 | 149  | 7  | 5  | 6    | 0  |
| CONTIG-052747 | 82   | 3  | 2  | 0    | 0  |
| CONTIG-052748 | 359  | 7  | 6  | 35   | 0  |
| CONTIG-052749 | 246  | 8  | 39 | 57   | 0  |

|               |     |     |    |      |    |
|---------------|-----|-----|----|------|----|
| CONTIG-052750 | 88  | 4   | 0  | 4    | 0  |
| CONTIG-052751 | 80  | 8   | 4  | 2    | 0  |
| CONTIG-052752 | 497 | 16  | 8  | 339  | 8  |
| CONTIG-052758 | 315 | 8   | 8  | 75   | 0  |
| CONTIG-052759 | 113 | 5   | 0  | 9    | 0  |
| CONTIG-052760 | 64  | 5   | 2  | 6    | 0  |
| CONTIG-052761 | 99  | 6   | 3  | 17   | 0  |
| CONTIG-052762 | 300 | 10  | 20 | 90   | 0  |
| CONTIG-052763 | 72  | 7   | 0  | 11   | 0  |
| CONTIG-052764 | 77  | 37  | 9  | 49   | 0  |
| CONTIG-052765 | 229 | 14  | 51 | 67   | 2  |
| CONTIG-052766 | 157 | 8   | 19 | 47   | 0  |
| CONTIG-052767 | 140 | 10  | 4  | 73   | 0  |
| CONTIG-052768 | 65  | 8   | 0  | 17   | 0  |
| CONTIG-052769 | 71  | 14  | 14 | 14   | 0  |
| CONTIG-052770 | 86  | 13  | 68 | 14   | 0  |
| CONTIG-052771 | 91  | 17  | 12 | 53   | 0  |
| CONTIG-052772 | 81  | 11  | 13 | 30   | 0  |
| CONTIG-052773 | 142 | 6   | 46 | 8    | 0  |
| CONTIG-052774 | 132 | 26  | 6  | 181  | 0  |
| CONTIG-052776 | 56  | 75  | 10 | 95   | 4  |
| CONTIG-052777 | 289 | 18  | 6  | 244  | 0  |
| CONTIG-052778 | 120 | 4   | 20 | 11   | 0  |
| CONTIG-052779 | 233 | 8   | 4  | 58   | 0  |
| CONTIG-052780 | 120 | 10  | 44 | 0    | 0  |
| CONTIG-052781 | 77  | 9   | 16 | 6    | 0  |
| CONTIG-052782 | 37  | 20  | 11 | 0    | 0  |
| CONTIG-052783 | 60  | 5   | 2  | 0    | 0  |
| CONTIG-052785 | 105 | 7   | 4  | 20   | 0  |
| CONTIG-052786 | 69  | 10  | 9  | 19   | 0  |
| CONTIG-052787 | 530 | 14  | 30 | 127  | 12 |
| CONTIG-052789 | 82  | 9   | 0  | 23   | 0  |
| CONTIG-052790 | 258 | 5   | 14 | 36   | 0  |
| CONTIG-052791 | 138 | 11  | 47 | 30   | 0  |
| CONTIG-052792 | 79  | 6   | 8  | 8    | 0  |
| CONTIG-052793 | 69  | 5   | 10 | 5    | 0  |
| CONTIG-052794 | 71  | 4   | 0  | 4    | 0  |
| CONTIG-052797 | 68  | 5   | 11 | 9    | 0  |
| CONTIG-052798 | 59  | 6   | 12 | 9    | 0  |
| CONTIG-052799 | 209 | 8   | 16 | 49   | 0  |
| CONTIG-052801 | 481 | 10  | 24 | 133  | 2  |
| CONTIG-052802 | 153 | 9   | 6  | 6    | 0  |
| CONTIG-052803 | 92  | 7   | 4  | 5    | 0  |
| CONTIG-052806 | 41  | 785 | 8  | 1230 | 0  |
| CONTIG-052807 | 76  | 5   | 3  | 6    | 0  |
| CONTIG-052808 | 263 | 8   | 12 | 84   | 0  |
| CONTIG-052809 | 128 | 10  | 5  | 57   | 0  |

|               |     |     |    |      |   |
|---------------|-----|-----|----|------|---|
| CONTIG-052810 | 322 | 8   | 34 | 11   | 0 |
| CONTIG-052811 | 253 | 5   | 0  | 0    | 2 |
| CONTIG-052812 | 144 | 4   | 2  | 23   | 0 |
| CONTIG-052813 | 432 | 15  | 19 | 145  | 0 |
| CONTIG-052814 | 530 | 15  | 4  | 283  | 2 |
| CONTIG-052815 | 213 | 8   | 11 | 64   | 0 |
| CONTIG-052816 | 149 | 169 | 23 | 1492 | 4 |
| CONTIG-052817 | 67  | 9   | 19 | 15   | 0 |
| CONTIG-052821 | 161 | 4   | 2  | 4    | 0 |
| CONTIG-052822 | 76  | 7   | 13 | 22   | 0 |
| CONTIG-052823 | 460 | 9   | 47 | 160  | 0 |
| CONTIG-052825 | 139 | 8   | 9  | 36   | 0 |
| CONTIG-052826 | 80  | 5   | 4  | 13   | 0 |
| CONTIG-052827 | 93  | 10  | 15 | 31   | 0 |
| CONTIG-052828 | 137 | 12  | 17 | 55   | 0 |
| CONTIG-052829 | 119 | 13  | 8  | 66   | 0 |
| CONTIG-052830 | 129 | 6   | 5  | 7    | 0 |
| CONTIG-052831 | 230 | 6   | 11 | 32   | 0 |
| CONTIG-052834 | 235 | 18  | 30 | 125  | 0 |
| CONTIG-052841 | 79  | 6   | 0  | 17   | 0 |
| CONTIG-052842 | 225 | 9   | 3  | 62   | 0 |
| CONTIG-052843 | 167 | 7   | 19 | 42   | 0 |
| CONTIG-052844 | 152 | 12  | 6  | 35   | 0 |
| CONTIG-052845 | 245 | 10  | 12 | 78   | 0 |
| CONTIG-052846 | 176 | 8   | 10 | 38   | 0 |
| CONTIG-052847 | 158 | 6   | 5  | 35   | 0 |
| CONTIG-052848 | 175 | 6   | 7  | 22   | 2 |
| CONTIG-052849 | 152 | 5   | 0  | 0    | 0 |
| CONTIG-052850 | 126 | 7   | 10 | 30   | 0 |
| CONTIG-052851 | 667 | 14  | 29 | 225  | 2 |
| CONTIG-052852 | 161 | 8   | 5  | 18   | 0 |
| CONTIG-052853 | 208 | 40  | 12 | 63   | 0 |
| CONTIG-052854 | 75  | 6   | 3  | 14   | 0 |
| CONTIG-052855 | 66  | 7   | 6  | 7    | 0 |
| CONTIG-052856 | 139 | 45  | 22 | 219  | 2 |
| CONTIG-052857 | 295 | 12  | 22 | 81   | 2 |
| CONTIG-052858 | 264 | 10  | 7  | 75   | 2 |
| CONTIG-052861 | 139 | 12  | 27 | 14   | 0 |
| CONTIG-052862 | 116 | 6   | 3  | 27   | 0 |
| CONTIG-052865 | 81  | 3   | 4  | 4    | 0 |
| CONTIG-052866 | 94  | 8   | 5  | 20   | 0 |
| CONTIG-052867 | 78  | 5   | 8  | 4    | 0 |
| CONTIG-052868 | 116 | 7   | 18 | 25   | 0 |
| CONTIG-052869 | 94  | 16  | 2  | 63   | 0 |
| CONTIG-052870 | 157 | 11  | 14 | 67   | 0 |
| CONTIG-052871 | 148 | 8   | 11 | 12   | 0 |
| CONTIG-052872 | 170 | 7   | 0  | 50   | 0 |

|               |     |     |    |      |    |
|---------------|-----|-----|----|------|----|
| CONTIG-052874 | 829 | 27  | 41 | 1208 | 7  |
| CONTIG-052875 | 108 | 6   | 0  | 20   | 0  |
| CONTIG-052876 | 363 | 10  | 21 | 50   | 0  |
| CONTIG-052877 | 176 | 7   | 8  | 17   | 0  |
| CONTIG-052878 | 262 | 10  | 11 | 48   | 16 |
| CONTIG-052879 | 227 | 7   | 9  | 28   | 2  |
| CONTIG-052880 | 93  | 5   | 4  | 6    | 0  |
| CONTIG-052881 | 104 | 7   | 3  | 17   | 0  |
| CONTIG-052882 | 79  | 2   | 6  | 2    | 0  |
| CONTIG-052883 | 302 | 16  | 19 | 128  | 2  |
| CONTIG-052886 | 40  | 458 | 7  | 686  | 0  |
| CONTIG-052887 | 132 | 12  | 2  | 59   | 0  |
| CONTIG-052888 | 137 | 4   | 5  | 12   | 0  |
| CONTIG-052889 | 683 | 23  | 10 | 2    | 0  |
| CONTIG-052891 | 366 | 18  | 12 | 146  | 0  |
| CONTIG-052892 | 125 | 6   | 9  | 16   | 0  |
| CONTIG-052893 | 172 | 11  | 50 | 40   | 0  |
| CONTIG-052894 | 140 | 7   | 2  | 39   | 0  |
| CONTIG-052895 | 186 | 12  | 0  | 99   | 0  |
| CONTIG-052896 | 150 | 6   | 7  | 10   | 0  |
| CONTIG-052897 | 392 | 8   | 2  | 122  | 0  |
| CONTIG-052900 | 73  | 11  | 3  | 32   | 0  |
| CONTIG-052901 | 346 | 26  | 64 | 384  | 0  |
| CONTIG-052902 | 79  | 12  | 13 | 25   | 0  |
| CONTIG-052903 | 100 | 157 | 40 | 953  | 0  |
| CONTIG-052904 | 497 | 9   | 8  | 135  | 0  |
| CONTIG-052905 | 186 | 9   | 6  | 33   | 0  |
| CONTIG-052906 | 229 | 10  | 16 | 31   | 0  |
| CONTIG-052907 | 301 | 28  | 18 | 50   | 0  |
| CONTIG-052909 | 193 | 9   | 11 | 49   | 0  |
| CONTIG-052911 | 201 | 5   | 2  | 47   | 2  |
| CONTIG-052912 | 72  | 8   | 2  | 0    | 0  |
| CONTIG-052914 | 101 | 12  | 0  | 25   | 0  |
| CONTIG-052915 | 61  | 15  | 4  | 45   | 0  |
| CONTIG-052918 | 112 | 51  | 22 | 128  | 0  |
| CONTIG-052919 | 61  | 3   | 0  | 2    | 0  |
| CONTIG-052920 | 129 | 5   | 9  | 11   | 0  |
| CONTIG-052921 | 140 | 10  | 0  | 11   | 0  |
| CONTIG-052922 | 104 | 7   | 3  | 10   | 0  |
| CONTIG-052923 | 72  | 4   | 2  | 7    | 0  |
| CONTIG-052924 | 294 | 15  | 20 | 155  | 2  |
| CONTIG-052928 | 530 | 6   | 19 | 80   | 2  |
| CONTIG-052929 | 181 | 9   | 4  | 18   | 0  |
| CONTIG-052930 | 100 | 11  | 8  | 26   | 0  |
| CONTIG-052931 | 61  | 6   | 14 | 2    | 0  |
| CONTIG-052939 | 149 | 10  | 9  | 40   | 0  |
| CONTIG-052940 | 110 | 7   | 10 | 20   | 0  |



|               |      |     |    |     |    |
|---------------|------|-----|----|-----|----|
| CONTIG-052941 | 102  | 4   | 21 | 5   | 0  |
| CONTIG-052942 | 193  | 7   | 8  | 28  | 0  |
| CONTIG-052943 | 222  | 6   | 27 | 5   | 0  |
| CONTIG-052944 | 80   | 8   | 3  | 5   | 0  |
| CONTIG-052945 | 270  | 12  | 22 | 106 | 0  |
| CONTIG-052948 | 98   | 6   | 0  | 14  | 0  |
| CONTIG-052949 | 67   | 4   | 2  | 8   | 0  |
| CONTIG-052950 | 58   | 199 | 33 | 205 | 35 |
| CONTIG-052951 | 171  | 23  | 8  | 97  | 5  |
| CONTIG-052953 | 92   | 6   | 16 | 9   | 0  |
| CONTIG-052954 | 162  | 6   | 13 | 7   | 2  |
| CONTIG-052955 | 94   | 8   | 4  | 28  | 0  |
| CONTIG-052956 | 203  | 9   | 4  | 8   | 0  |
| CONTIG-052959 | 460  | 7   | 16 | 60  | 2  |
| CONTIG-052960 | 146  | 15  | 12 | 92  | 0  |
| CONTIG-052961 | 130  | 5   | 10 | 9   | 0  |
| CONTIG-052962 | 356  | 10  | 0  | 113 | 0  |
| CONTIG-052963 | 133  | 10  | 0  | 62  | 0  |
| CONTIG-052964 | 670  | 16  | 32 | 220 | 13 |
| CONTIG-052965 | 105  | 26  | 6  | 17  | 0  |
| CONTIG-052966 | 92   | 10  | 12 | 14  | 2  |
| CONTIG-052967 | 99   | 5   | 19 | 6   | 0  |
| CONTIG-052969 | 184  | 11  | 5  | 93  | 0  |
| CONTIG-052970 | 80   | 6   | 3  | 14  | 0  |
| CONTIG-052971 | 81   | 8   | 21 | 0   | 0  |
| CONTIG-052972 | 512  | 10  | 8  | 69  | 0  |
| CONTIG-052973 | 1006 | 24  | 90 | 954 | 0  |
| CONTIG-052974 | 71   | 9   | 0  | 11  | 0  |
| CONTIG-052976 | 146  | 8   | 8  | 30  | 0  |
| CONTIG-052977 | 84   | 7   | 12 | 10  | 0  |
| CONTIG-052978 | 391  | 9   | 13 | 115 | 0  |
| CONTIG-052979 | 145  | 7   | 21 | 19  | 0  |
| CONTIG-052982 | 85   | 5   | 3  | 13  | 0  |
| CONTIG-052983 | 182  | 9   | 22 | 67  | 0  |
| CONTIG-052984 | 88   | 21  | 4  | 83  | 0  |
| CONTIG-052985 | 170  | 7   | 4  | 36  | 0  |
| CONTIG-052986 | 45   | 8   | 6  | 5   | 0  |
| CONTIG-052987 | 96   | 7   | 7  | 20  | 0  |
| CONTIG-052988 | 142  | 4   | 0  | 21  | 0  |
| CONTIG-052989 | 71   | 4   | 2  | 2   | 2  |
| CONTIG-052990 | 108  | 5   | 4  | 21  | 0  |
| CONTIG-052991 | 79   | 8   | 3  | 19  | 0  |
| CONTIG-053000 | 191  | 8   | 4  | 2   | 0  |
| CONTIG-053001 | 306  | 5   | 12 | 49  | 0  |
| CONTIG-053002 | 125  | 5   | 9  | 37  | 0  |
| CONTIG-053003 | 253  | 5   | 11 | 8   | 0  |
| CONTIG-053004 | 112  | 7   | 4  | 5   | 0  |

|               |     |     |    |     |   |
|---------------|-----|-----|----|-----|---|
| CONTIG-053005 | 122 | 4   | 2  | 12  | 0 |
| CONTIG-053006 | 175 | 4   | 9  | 20  | 0 |
| CONTIG-053007 | 116 | 4   | 0  | 9   | 2 |
| CONTIG-053008 | 115 | 43  | 72 | 182 | 0 |
| CONTIG-053009 | 60  | 4   | 4  | 9   | 0 |
| CONTIG-053011 | 111 | 5   | 6  | 10  | 2 |
| CONTIG-053012 | 306 | 6   | 16 | 55  | 0 |
| CONTIG-053013 | 65  | 3   | 0  | 4   | 0 |
| CONTIG-053014 | 91  | 7   | 5  | 13  | 0 |
| CONTIG-053015 | 272 | 11  | 4  | 55  | 0 |
| CONTIG-053016 | 58  | 3   | 6  | 4   | 0 |
| CONTIG-053017 | 66  | 5   | 0  | 10  | 0 |
| CONTIG-053018 | 37  | 217 | 76 | 94  | 0 |
| CONTIG-053019 | 471 | 8   | 3  | 76  | 4 |
| CONTIG-053020 | 58  | 9   | 19 | 0   | 0 |
| CONTIG-053021 | 80  | 4   | 6  | 0   | 0 |
| CONTIG-053022 | 112 | 6   | 6  | 6   | 0 |
| CONTIG-053023 | 87  | 6   | 2  | 15  | 0 |
| CONTIG-053025 | 264 | 8   | 8  | 48  | 4 |
| CONTIG-053028 | 184 | 5   | 0  | 0   | 2 |
| CONTIG-053029 | 292 | 6   | 5  | 56  | 3 |
| CONTIG-053030 | 279 | 16  | 66 | 131 | 2 |
| CONTIG-053031 | 77  | 10  | 5  | 15  | 0 |
| CONTIG-053032 | 140 | 8   | 14 | 0   | 0 |
| CONTIG-053033 | 75  | 5   | 21 | 2   | 0 |
| CONTIG-053034 | 414 | 14  | 23 | 122 | 6 |
| CONTIG-053036 | 223 | 11  | 9  | 73  | 0 |
| CONTIG-053037 | 50  | 16  | 31 | 6   | 0 |
| CONTIG-053038 | 146 | 6   | 21 | 23  | 0 |
| CONTIG-053039 | 77  | 5   | 4  | 9   | 0 |
| CONTIG-053040 | 291 | 49  | 46 | 556 | 4 |
| CONTIG-053041 | 75  | 9   | 2  | 15  | 0 |
| CONTIG-053043 | 164 | 33  | 0  | 148 | 6 |
| CONTIG-053044 | 93  | 5   | 23 | 9   | 0 |
| CONTIG-053045 | 256 | 14  | 28 | 161 | 0 |
| CONTIG-053046 | 58  | 9   | 14 | 8   | 0 |
| CONTIG-053047 | 662 | 12  | 11 | 279 | 2 |
| CONTIG-053048 | 85  | 5   | 4  | 0   | 0 |
| CONTIG-053049 | 330 | 19  | 13 | 39  | 0 |
| CONTIG-053050 | 176 | 5   | 2  | 29  | 2 |
| CONTIG-053051 | 75  | 3   | 0  | 8   | 0 |
| CONTIG-053052 | 131 | 8   | 5  | 44  | 0 |
| CONTIG-053053 | 91  | 8   | 3  | 27  | 0 |
| CONTIG-053054 | 125 | 24  | 2  | 42  | 0 |
| CONTIG-053055 | 162 | 8   | 2  | 41  | 0 |
| CONTIG-053056 | 201 | 7   | 4  | 53  | 0 |
| CONTIG-053057 | 391 | 18  | 49 | 272 | 4 |

|               |     |    |    |     |   |
|---------------|-----|----|----|-----|---|
| CONTIG-053061 | 118 | 7  | 0  | 10  | 0 |
| CONTIG-053062 | 226 | 28 | 22 | 241 | 2 |
| CONTIG-053063 | 236 | 33 | 31 | 393 | 0 |
| CONTIG-053064 | 123 | 15 | 30 | 46  | 0 |
| CONTIG-053065 | 75  | 12 | 13 | 35  | 2 |
| CONTIG-053066 | 81  | 4  | 2  | 0   | 0 |
| CONTIG-053071 | 124 | 7  | 10 | 13  | 0 |
| CONTIG-053075 | 81  | 13 | 56 | 0   | 0 |
| CONTIG-053076 | 44  | 5  | 0  | 12  | 0 |
| CONTIG-053077 | 425 | 17 | 34 | 164 | 0 |
| CONTIG-053078 | 120 | 4  | 10 | 5   | 0 |
| CONTIG-053079 | 89  | 8  | 6  | 15  | 0 |
| CONTIG-053080 | 105 | 11 | 17 | 43  | 0 |
| CONTIG-053081 | 157 | 5  | 0  | 29  | 0 |
| CONTIG-053083 | 88  | 13 | 17 | 10  | 0 |
| CONTIG-053084 | 275 | 10 | 15 | 80  | 2 |
| CONTIG-053086 | 160 | 10 | 24 | 30  | 0 |
| CONTIG-053087 | 167 | 11 | 10 | 39  | 0 |
| CONTIG-053089 | 80  | 7  | 13 | 10  | 0 |
| CONTIG-053090 | 157 | 5  | 3  | 4   | 0 |
| CONTIG-053091 | 128 | 15 | 16 | 27  | 0 |
| CONTIG-053092 | 169 | 17 | 55 | 113 | 0 |
| CONTIG-053093 | 73  | 10 | 16 | 12  | 0 |
| CONTIG-053094 | 106 | 8  | 5  | 11  | 0 |
| CONTIG-053095 | 83  | 17 | 13 | 56  | 0 |
| CONTIG-053096 | 68  | 21 | 13 | 35  | 0 |
| CONTIG-053098 | 68  | 5  | 0  | 6   | 0 |
| CONTIG-053099 | 84  | 20 | 29 | 46  | 0 |
| CONTIG-053100 | 88  | 9  | 10 | 13  | 0 |
| CONTIG-053101 | 234 | 6  | 3  | 35  | 0 |
| CONTIG-053102 | 266 | 5  | 13 | 19  | 0 |
| CONTIG-053105 | 280 | 30 | 47 | 350 | 0 |
| CONTIG-053106 | 163 | 13 | 16 | 71  | 2 |
| CONTIG-053107 | 67  | 5  | 11 | 6   | 0 |
| CONTIG-053108 | 217 | 10 | 20 | 49  | 0 |
| CONTIG-053109 | 91  | 8  | 8  | 13  | 0 |
| CONTIG-053110 | 112 | 4  | 8  | 7   | 0 |
| CONTIG-053111 | 143 | 12 | 13 | 53  | 0 |
| CONTIG-053112 | 489 | 22 | 24 | 29  | 0 |
| CONTIG-053113 | 133 | 7  | 19 | 11  | 0 |
| CONTIG-053114 | 118 | 9  | 10 | 28  | 0 |
| CONTIG-053115 | 150 | 4  | 3  | 23  | 2 |
| CONTIG-053116 | 163 | 8  | 7  | 46  | 2 |
| CONTIG-053117 | 116 | 5  | 2  | 18  | 0 |
| CONTIG-053118 | 213 | 8  | 21 | 32  | 0 |
| CONTIG-053119 | 334 | 12 | 0  | 0   | 0 |
| CONTIG-053120 | 170 | 6  | 0  | 24  | 0 |

|               |     |     |    |     |    |
|---------------|-----|-----|----|-----|----|
| CONTIG-053121 | 164 | 18  | 4  | 59  | 0  |
| CONTIG-053122 | 103 | 9   | 14 | 18  | 0  |
| CONTIG-053123 | 59  | 6   | 3  | 11  | 0  |
| CONTIG-053124 | 81  | 4   | 2  | 3   | 0  |
| CONTIG-053125 | 96  | 9   | 21 | 30  | 0  |
| CONTIG-053126 | 71  | 6   | 5  | 8   | 2  |
| CONTIG-053127 | 184 | 7   | 7  | 49  | 0  |
| CONTIG-053128 | 175 | 5   | 2  | 21  | 0  |
| CONTIG-053129 | 140 | 7   | 2  | 26  | 0  |
| CONTIG-053130 | 179 | 17  | 21 | 116 | 0  |
| CONTIG-053131 | 276 | 15  | 3  | 208 | 0  |
| CONTIG-053132 | 74  | 7   | 10 | 12  | 0  |
| CONTIG-053133 | 109 | 7   | 6  | 15  | 0  |
| CONTIG-053134 | 147 | 5   | 5  | 34  | 0  |
| CONTIG-053135 | 61  | 4   | 5  | 0   | 0  |
| CONTIG-053136 | 77  | 4   | 11 | 8   | 0  |
| CONTIG-053137 | 136 | 4   | 6  | 8   | 0  |
| CONTIG-053138 | 182 | 8   | 4  | 25  | 0  |
| CONTIG-053139 | 70  | 18  | 17 | 41  | 0  |
| CONTIG-053142 | 73  | 10  | 32 | 0   | 0  |
| CONTIG-053143 | 62  | 3   | 0  | 0   | 2  |
| CONTIG-053144 | 95  | 11  | 9  | 44  | 0  |
| CONTIG-053145 | 109 | 5   | 7  | 19  | 0  |
| CONTIG-053148 | 68  | 10  | 13 | 2   | 0  |
| CONTIG-053150 | 80  | 7   | 0  | 23  | 0  |
| CONTIG-053151 | 211 | 6   | 4  | 60  | 0  |
| CONTIG-053152 | 86  | 8   | 9  | 25  | 0  |
| CONTIG-053153 | 117 | 3   | 2  | 7   | 2  |
| CONTIG-053154 | 188 | 8   | 7  | 36  | 0  |
| CONTIG-053155 | 552 | 12  | 42 | 219 | 2  |
| CONTIG-053156 | 166 | 7   | 22 | 27  | 0  |
| CONTIG-053157 | 74  | 18  | 8  | 9   | 0  |
| CONTIG-053158 | 61  | 6   | 16 | 9   | 0  |
| CONTIG-053159 | 152 | 8   | 2  | 42  | 0  |
| CONTIG-053161 | 177 | 14  | 4  | 0   | 22 |
| CONTIG-053162 | 91  | 6   | 4  | 11  | 0  |
| CONTIG-053163 | 490 | 10  | 61 | 199 | 0  |
| CONTIG-053164 | 88  | 13  | 9  | 38  | 2  |
| CONTIG-053165 | 111 | 6   | 0  | 24  | 0  |
| CONTIG-053166 | 223 | 6   | 24 | 18  | 0  |
| CONTIG-053167 | 73  | 9   | 0  | 31  | 0  |
| CONTIG-053168 | 75  | 12  | 10 | 21  | 0  |
| CONTIG-053169 | 87  | 6   | 6  | 14  | 0  |
| CONTIG-053170 | 262 | 13  | 71 | 66  | 3  |
| CONTIG-053171 | 65  | 504 | 5  | 129 | 0  |
| CONTIG-053172 | 150 | 3   | 7  | 5   | 2  |
| CONTIG-053174 | 77  | 4   | 0  | 10  | 0  |

|               |     |     |     |      |    |
|---------------|-----|-----|-----|------|----|
| CONTIG-053175 | 308 | 25  | 57  | 127  | 2  |
| CONTIG-053176 | 59  | 9   | 16  | 12   | 0  |
| CONTIG-053177 | 363 | 17  | 28  | 185  | 3  |
| CONTIG-053178 | 527 | 10  | 34  | 104  | 2  |
| CONTIG-053179 | 75  | 4   | 0   | 11   | 0  |
| CONTIG-053180 | 64  | 6   | 7   | 4    | 0  |
| CONTIG-053182 | 303 | 22  | 22  | 288  | 0  |
| CONTIG-053183 | 90  | 4   | 2   | 10   | 0  |
| CONTIG-053186 | 63  | 9   | 11  | 7    | 0  |
| CONTIG-053187 | 232 | 8   | 4   | 62   | 0  |
| CONTIG-053188 | 96  | 9   | 4   | 0    | 0  |
| CONTIG-053192 | 83  | 24  | 10  | 58   | 0  |
| CONTIG-053193 | 726 | 13  | 2   | 8    | 0  |
| CONTIG-053194 | 155 | 13  | 32  | 67   | 0  |
| CONTIG-053195 | 100 | 8   | 8   | 10   | 0  |
| CONTIG-053196 | 106 | 5   | 0   | 13   | 0  |
| CONTIG-053197 | 102 | 7   | 14  | 11   | 0  |
| CONTIG-053198 | 80  | 5   | 6   | 0    | 0  |
| CONTIG-053199 | 168 | 7   | 3   | 59   | 0  |
| CONTIG-053200 | 123 | 3   | 7   | 0    | 2  |
| CONTIG-053203 | 150 | 7   | 12  | 28   | 0  |
| CONTIG-053204 | 89  | 6   | 18  | 2    | 0  |
| CONTIG-053205 | 235 | 12  | 0   | 0    | 9  |
| CONTIG-053206 | 724 | 15  | 37  | 444  | 0  |
| CONTIG-053207 | 72  | 5   | 2   | 10   | 0  |
| CONTIG-053213 | 97  | 5   | 9   | 6    | 0  |
| CONTIG-053214 | 247 | 9   | 13  | 54   | 0  |
| CONTIG-053215 | 249 | 51  | 28  | 6    | 0  |
| CONTIG-053216 | 93  | 5   | 6   | 19   | 0  |
| CONTIG-053217 | 112 | 4   | 3   | 16   | 0  |
| CONTIG-053218 | 287 | 13  | 14  | 108  | 2  |
| CONTIG-053219 | 191 | 42  | 5   | 107  | 5  |
| CONTIG-053220 | 104 | 12  | 10  | 42   | 2  |
| CONTIG-053221 | 65  | 8   | 3   | 19   | 0  |
| CONTIG-053222 | 205 | 11  | 4   | 118  | 0  |
| CONTIG-053223 | 82  | 9   | 12  | 23   | 0  |
| CONTIG-053225 | 545 | 12  | 25  | 200  | 2  |
| CONTIG-053226 | 129 | 10  | 4   | 38   | 0  |
| CONTIG-053227 | 409 | 7   | 21  | 71   | 0  |
| CONTIG-053228 | 295 | 7   | 5   | 36   | 0  |
| CONTIG-053229 | 269 | 12  | 56  | 89   | 0  |
| CONTIG-053230 | 115 | 8   | 5   | 32   | 0  |
| CONTIG-053231 | 612 | 10  | 25  | 118  | 8  |
| CONTIG-053232 | 92  | 4   | 2   | 9    | 0  |
| CONTIG-053233 | 140 | 444 | 752 | 2655 | 19 |
| CONTIG-053234 | 119 | 15  | 6   | 49   | 0  |
| CONTIG-053235 | 138 | 7   | 4   | 22   | 0  |

|               |     |    |    |     |    |
|---------------|-----|----|----|-----|----|
| CONTIG-053236 | 935 | 35 | 6  | 2   | 0  |
| CONTIG-053237 | 112 | 21 | 4  | 75  | 2  |
| CONTIG-053238 | 117 | 10 | 29 | 29  | 0  |
| CONTIG-053243 | 567 | 11 | 23 | 139 | 0  |
| CONTIG-053244 | 63  | 5  | 2  | 10  | 0  |
| CONTIG-053245 | 504 | 11 | 17 | 260 | 0  |
| CONTIG-053247 | 156 | 12 | 17 | 59  | 0  |
| CONTIG-053248 | 154 | 12 | 2  | 81  | 0  |
| CONTIG-053249 | 427 | 19 | 35 | 285 | 0  |
| CONTIG-053250 | 347 | 14 | 38 | 93  | 22 |
| CONTIG-053252 | 379 | 13 | 34 | 155 | 0  |
| CONTIG-053253 | 125 | 10 | 9  | 39  | 0  |
| CONTIG-053254 | 149 | 8  | 10 | 3   | 0  |
| CONTIG-053255 | 220 | 6  | 5  | 45  | 2  |
| CONTIG-053256 | 215 | 6  | 4  | 45  | 0  |
| CONTIG-053257 | 172 | 4  | 7  | 11  | 0  |
| CONTIG-053258 | 370 | 10 | 7  | 0   | 15 |
| CONTIG-053262 | 166 | 7  | 14 | 22  | 2  |
| CONTIG-053265 | 235 | 10 | 3  | 0   | 24 |
| CONTIG-053266 | 159 | 4  | 3  | 14  | 0  |
| CONTIG-053267 | 72  | 5  | 9  | 11  | 0  |
| CONTIG-053268 | 128 | 12 | 15 | 28  | 0  |
| CONTIG-053269 | 159 | 7  | 11 | 25  | 0  |
| CONTIG-053270 | 273 | 9  | 8  | 74  | 0  |
| CONTIG-053271 | 88  | 2  | 2  | 5   | 0  |
| CONTIG-053272 | 126 | 7  | 2  | 28  | 0  |
| CONTIG-053273 | 127 | 4  | 0  | 22  | 0  |
| CONTIG-053274 | 203 | 9  | 27 | 65  | 0  |
| CONTIG-053275 | 70  | 11 | 22 | 34  | 0  |
| CONTIG-053276 | 78  | 3  | 9  | 0   | 0  |
| CONTIG-053277 | 103 | 7  | 3  | 22  | 0  |
| CONTIG-053278 | 159 | 8  | 2  | 5   | 0  |
| CONTIG-053279 | 239 | 12 | 6  | 90  | 0  |
| CONTIG-053280 | 176 | 12 | 16 | 71  | 0  |
| CONTIG-053281 | 100 | 5  | 14 | 7   | 0  |
| CONTIG-053282 | 102 | 5  | 16 | 13  | 0  |
| CONTIG-053283 | 94  | 5  | 2  | 6   | 0  |
| CONTIG-053284 | 299 | 8  | 47 | 86  | 0  |
| CONTIG-053286 | 98  | 6  | 0  | 9   | 0  |
| CONTIG-053288 | 411 | 8  | 29 | 113 | 0  |
| CONTIG-053289 | 125 | 5  | 21 | 6   | 0  |
| CONTIG-053290 | 244 | 25 | 72 | 153 | 0  |
| CONTIG-053292 | 71  | 13 | 8  | 5   | 0  |
| CONTIG-053293 | 101 | 8  | 11 | 33  | 0  |
| CONTIG-053294 | 113 | 9  | 8  | 21  | 0  |
| CONTIG-053295 | 216 | 8  | 0  | 37  | 0  |
| CONTIG-053296 | 69  | 6  | 7  | 0   | 0  |

|               |     |     |    |     |    |
|---------------|-----|-----|----|-----|----|
| CONTIG-053297 | 36  | 476 | 17 | 181 | 0  |
| CONTIG-053298 | 91  | 11  | 11 | 51  | 0  |
| CONTIG-053299 | 79  | 5   | 6  | 7   | 0  |
| CONTIG-053300 | 69  | 5   | 0  | 4   | 0  |
| CONTIG-053301 | 668 | 55  | 17 | 17  | 0  |
| CONTIG-053302 | 91  | 7   | 6  | 20  | 0  |
| CONTIG-053303 | 203 | 8   | 4  | 68  | 0  |
| CONTIG-053304 | 133 | 12  | 30 | 63  | 0  |
| CONTIG-053305 | 319 | 7   | 3  | 34  | 0  |
| CONTIG-053306 | 217 | 8   | 7  | 36  | 2  |
| CONTIG-053307 | 117 | 9   | 7  | 30  | 0  |
| CONTIG-053311 | 334 | 7   | 6  | 47  | 19 |
| CONTIG-053312 | 121 | 6   | 11 | 5   | 0  |
| CONTIG-053313 | 65  | 10  | 0  | 18  | 0  |
| CONTIG-053315 | 189 | 6   | 33 | 10  | 0  |
| CONTIG-053316 | 151 | 6   | 3  | 29  | 0  |
| CONTIG-053317 | 88  | 4   | 10 | 4   | 0  |
| CONTIG-053318 | 150 | 9   | 4  | 42  | 0  |
| CONTIG-053319 | 78  | 5   | 0  | 11  | 0  |
| CONTIG-053321 | 219 | 19  | 17 | 78  | 4  |
| CONTIG-053322 | 197 | 9   | 11 | 43  | 2  |
| CONTIG-053323 | 155 | 14  | 9  | 69  | 2  |
| CONTIG-053331 | 191 | 9   | 17 | 60  | 0  |
| CONTIG-053332 | 148 | 8   | 13 | 34  | 0  |
| CONTIG-053333 | 267 | 6   | 4  | 39  | 0  |
| CONTIG-053334 | 158 | 9   | 3  | 41  | 0  |
| CONTIG-053335 | 92  | 9   | 5  | 34  | 0  |
| CONTIG-053336 | 69  | 5   | 6  | 0   | 0  |
| CONTIG-053337 | 107 | 5   | 3  | 18  | 0  |
| CONTIG-053338 | 278 | 9   | 13 | 73  | 0  |
| CONTIG-053339 | 73  | 19  | 7  | 21  | 0  |
| CONTIG-053340 | 96  | 7   | 15 | 22  | 0  |
| CONTIG-053341 | 60  | 6   | 4  | 7   | 0  |
| CONTIG-053342 | 93  | 9   | 11 | 31  | 0  |
| CONTIG-053343 | 68  | 5   | 16 | 6   | 0  |
| CONTIG-053344 | 72  | 7   | 25 | 5   | 0  |
| CONTIG-053345 | 96  | 14  | 27 | 29  | 0  |
| CONTIG-053346 | 323 | 9   | 7  | 85  | 0  |
| CONTIG-053349 | 167 | 6   | 10 | 29  | 0  |
| CONTIG-053350 | 137 | 20  | 31 | 79  | 2  |
| CONTIG-053351 | 164 | 6   | 17 | 17  | 0  |
| CONTIG-053352 | 177 | 5   | 5  | 18  | 0  |
| CONTIG-053353 | 75  | 11  | 2  | 38  | 0  |
| CONTIG-053354 | 63  | 5   | 10 | 2   | 0  |
| CONTIG-053355 | 124 | 6   | 0  | 27  | 0  |
| CONTIG-053356 | 76  | 7   | 16 | 9   | 0  |
| CONTIG-053357 | 134 | 8   | 7  | 24  | 0  |

|               |     |     |     |      |    |
|---------------|-----|-----|-----|------|----|
| CONTIG-053358 | 97  | 3   | 0   | 13   | 0  |
| CONTIG-053359 | 93  | 2   | 5   | 2    | 0  |
| CONTIG-053360 | 299 | 7   | 18  | 51   | 0  |
| CONTIG-053362 | 92  | 28  | 4   | 83   | 0  |
| CONTIG-053363 | 174 | 7   | 15  | 33   | 0  |
| CONTIG-053364 | 160 | 6   | 7   | 28   | 0  |
| CONTIG-053365 | 70  | 10  | 24  | 0    | 10 |
| CONTIG-053366 | 129 | 6   | 5   | 11   | 0  |
| CONTIG-053367 | 186 | 10  | 35  | 56   | 0  |
| CONTIG-053368 | 149 | 6   | 16  | 14   | 0  |
| CONTIG-053370 | 116 | 6   | 7   | 10   | 0  |
| CONTIG-053371 | 67  | 10  | 7   | 20   | 2  |
| CONTIG-053372 | 121 | 8   | 20  | 25   | 0  |
| CONTIG-053373 | 166 | 4   | 0   | 6    | 0  |
| CONTIG-053374 | 265 | 18  | 10  | 157  | 0  |
| CONTIG-053375 | 58  | 8   | 6   | 6    | 0  |
| CONTIG-053377 | 93  | 7   | 19  | 7    | 0  |
| CONTIG-053378 | 113 | 6   | 17  | 16   | 0  |
| CONTIG-053380 | 95  | 8   | 8   | 19   | 0  |
| CONTIG-053384 | 209 | 6   | 14  | 34   | 0  |
| CONTIG-053385 | 287 | 19  | 60  | 62   | 6  |
| CONTIG-053386 | 136 | 16  | 25  | 110  | 0  |
| CONTIG-053387 | 59  | 3   | 4   | 3    | 0  |
| CONTIG-053388 | 100 | 6   | 12  | 17   | 0  |
| CONTIG-053389 | 368 | 14  | 25  | 138  | 0  |
| CONTIG-053390 | 81  | 5   | 5   | 5    | 0  |
| CONTIG-053391 | 563 | 17  | 21  | 437  | 0  |
| CONTIG-053392 | 81  | 6   | 8   | 9    | 0  |
| CONTIG-053393 | 142 | 7   | 10  | 37   | 0  |
| CONTIG-053394 | 86  | 313 | 325 | 1016 | 4  |
| CONTIG-053395 | 228 | 9   | 24  | 74   | 0  |
| CONTIG-053396 | 153 | 12  | 23  | 71   | 0  |
| CONTIG-053397 | 577 | 16  | 5   | 87   | 0  |
| CONTIG-053398 | 88  | 7   | 10  | 4    | 0  |
| CONTIG-053399 | 677 | 28  | 0   | 1153 | 2  |
| CONTIG-053400 | 232 | 6   | 10  | 19   | 2  |
| CONTIG-053401 | 99  | 8   | 21  | 12   | 0  |
| CONTIG-053402 | 86  | 5   | 2   | 3    | 0  |
| CONTIG-053403 | 300 | 13  | 15  | 144  | 0  |
| CONTIG-053404 | 442 | 12  | 5   | 0    | 0  |
| CONTIG-053405 | 217 | 17  | 50  | 121  | 2  |
| CONTIG-053411 | 148 | 17  | 6   | 111  | 2  |
| CONTIG-053412 | 62  | 7   | 8   | 9    | 0  |
| CONTIG-053413 | 322 | 13  | 8   | 220  | 0  |
| CONTIG-053414 | 146 | 12  | 20  | 59   | 2  |
| CONTIG-053416 | 81  | 4   | 2   | 8    | 0  |
| CONTIG-053417 | 106 | 4   | 0   | 12   | 0  |



|               |     |     |    |     |     |
|---------------|-----|-----|----|-----|-----|
| CONTIG-053418 | 414 | 14  | 11 | 188 | 0   |
| CONTIG-053419 | 73  | 5   | 9  | 13  | 0   |
| CONTIG-053420 | 156 | 6   | 10 | 19  | 0   |
| CONTIG-053421 | 330 | 10  | 25 | 35  | 0   |
| CONTIG-053422 | 103 | 9   | 35 | 8   | 0   |
| CONTIG-053423 | 65  | 4   | 3  | 6   | 0   |
| CONTIG-053424 | 203 | 27  | 4  | 0   | 17  |
| CONTIG-053425 | 166 | 8   | 14 | 2   | 4   |
| CONTIG-053426 | 70  | 5   | 5  | 2   | 0   |
| CONTIG-053427 | 298 | 12  | 8  | 70  | 4   |
| CONTIG-053428 | 768 | 16  | 29 | 588 | 2   |
| CONTIG-053429 | 67  | 2   | 5  | 0   | 0   |
| CONTIG-053430 | 346 | 12  | 20 | 89  | 0   |
| CONTIG-053431 | 259 | 9   | 21 | 49  | 0   |
| CONTIG-053432 | 137 | 8   | 24 | 0   | 0   |
| CONTIG-053433 | 206 | 9   | 0  | 48  | 0   |
| CONTIG-053435 | 330 | 12  | 41 | 143 | 0   |
| CONTIG-053436 | 937 | 22  | 59 | 841 | 7   |
| CONTIG-053437 | 100 | 6   | 15 | 4   | 0   |
| CONTIG-053438 | 338 | 178 | 6  | 0   | 697 |
| CONTIG-053439 | 108 | 10  | 10 | 2   | 0   |
| CONTIG-053440 | 83  | 6   | 2  | 19  | 0   |
| CONTIG-053442 | 96  | 13  | 17 | 23  | 0   |
| CONTIG-053443 | 168 | 6   | 11 | 23  | 0   |
| CONTIG-053444 | 174 | 5   | 3  | 11  | 0   |
| CONTIG-053445 | 122 | 5   | 2  | 24  | 0   |
| CONTIG-053446 | 279 | 4   | 6  | 27  | 0   |
| CONTIG-053447 | 73  | 24  | 38 | 31  | 0   |
| CONTIG-053448 | 500 | 14  | 19 | 240 | 0   |
| CONTIG-053449 | 60  | 8   | 19 | 5   | 2   |
| CONTIG-053450 | 96  | 9   | 5  | 5   | 0   |
| CONTIG-053451 | 198 | 4   | 2  | 36  | 0   |
| CONTIG-053453 | 70  | 5   | 5  | 4   | 0   |
| CONTIG-053454 | 176 | 14  | 15 | 70  | 2   |
| CONTIG-053455 | 112 | 7   | 3  | 24  | 0   |
| CONTIG-053456 | 68  | 3   | 5  | 4   | 0   |
| CONTIG-053457 | 461 | 10  | 30 | 79  | 2   |
| CONTIG-053458 | 154 | 7   | 10 | 25  | 0   |
| CONTIG-053459 | 159 | 12  | 12 | 51  | 0   |
| CONTIG-053460 | 225 | 16  | 19 | 97  | 5   |
| CONTIG-053461 | 125 | 13  | 15 | 44  | 2   |
| CONTIG-053462 | 144 | 6   | 5  | 28  | 0   |
| CONTIG-053464 | 76  | 5   | 0  | 7   | 5   |
| CONTIG-053465 | 257 | 10  | 3  | 59  | 0   |
| CONTIG-053466 | 102 | 6   | 5  | 29  | 0   |
| CONTIG-053467 | 98  | 5   | 21 | 9   | 0   |
| CONTIG-053468 | 58  | 7   | 6  | 2   | 0   |

|               |     |    |    |     |    |
|---------------|-----|----|----|-----|----|
| CONTIG-053470 | 77  | 48 | 0  | 3   | 13 |
| CONTIG-053471 | 285 | 11 | 3  | 99  | 0  |
| CONTIG-053472 | 169 | 8  | 12 | 29  | 0  |
| CONTIG-053473 | 63  | 3  | 0  | 2   | 0  |
| CONTIG-053474 | 58  | 3  | 5  | 2   | 0  |
| CONTIG-053475 | 224 | 13 | 14 | 92  | 0  |
| CONTIG-053476 | 62  | 10 | 0  | 27  | 0  |
| CONTIG-053477 | 121 | 6  | 0  | 26  | 0  |
| CONTIG-053478 | 454 | 12 | 21 | 141 | 2  |
| CONTIG-053479 | 70  | 15 | 16 | 39  | 0  |
| CONTIG-053483 | 191 | 12 | 41 | 21  | 0  |
| CONTIG-053484 | 86  | 39 | 3  | 146 | 0  |
| CONTIG-053485 | 63  | 2  | 3  | 0   | 0  |
| CONTIG-053486 | 63  | 3  | 2  | 5   | 0  |
| CONTIG-053487 | 144 | 4  | 8  | 4   | 0  |
| CONTIG-053490 | 241 | 8  | 12 | 37  | 0  |
| CONTIG-053491 | 58  | 2  | 0  | 0   | 0  |
| CONTIG-053494 | 68  | 6  | 2  | 10  | 0  |
| CONTIG-053495 | 116 | 8  | 2  | 39  | 0  |
| CONTIG-053497 | 112 | 45 | 34 | 129 | 4  |
| CONTIG-053498 | 573 | 17 | 9  | 436 | 15 |
| CONTIG-053499 | 445 | 19 | 17 | 142 | 2  |
| CONTIG-053500 | 187 | 8  | 6  | 11  | 0  |
| CONTIG-053501 | 104 | 4  | 2  | 8   | 0  |
| CONTIG-053502 | 88  | 6  | 35 | 2   | 0  |
| CONTIG-053503 | 61  | 12 | 38 | 16  | 0  |
| CONTIG-053504 | 251 | 11 | 41 | 87  | 2  |
| CONTIG-053505 | 59  | 18 | 24 | 41  | 0  |
| CONTIG-053506 | 88  | 3  | 7  | 4   | 0  |
| CONTIG-053508 | 203 | 11 | 23 | 69  | 0  |
| CONTIG-053511 | 930 | 17 | 24 | 643 | 2  |
| CONTIG-053512 | 197 | 4  | 13 | 6   | 0  |
| CONTIG-053513 | 153 | 12 | 2  | 38  | 6  |
| CONTIG-053514 | 196 | 7  | 2  | 41  | 0  |
| CONTIG-053515 | 94  | 5  | 4  | 11  | 0  |
| CONTIG-053516 | 59  | 7  | 4  | 10  | 0  |
| CONTIG-053517 | 89  | 2  | 0  | 3   | 0  |
| CONTIG-053518 | 87  | 11 | 8  | 20  | 0  |
| CONTIG-053519 | 75  | 3  | 0  | 2   | 0  |
| CONTIG-053520 | 126 | 6  | 15 | 8   | 0  |
| CONTIG-053521 | 282 | 16 | 9  | 145 | 6  |
| CONTIG-053522 | 529 | 9  | 52 | 180 | 0  |
| CONTIG-053523 | 403 | 20 | 31 | 411 | 0  |
| CONTIG-053524 | 151 | 17 | 27 | 71  | 0  |
| CONTIG-053525 | 95  | 7  | 14 | 10  | 2  |
| CONTIG-053526 | 62  | 5  | 3  | 6   | 0  |
| CONTIG-053527 | 160 | 5  | 7  | 20  | 0  |

|               |     |      |    |     |      |
|---------------|-----|------|----|-----|------|
| CONTIG-053528 | 36  | 1758 | 0  | 0   | 1030 |
| CONTIG-053531 | 72  | 5    | 0  | 3   | 0    |
| CONTIG-053532 | 74  | 6    | 13 | 17  | 0    |
| CONTIG-053533 | 68  | 8    | 3  | 6   | 0    |
| CONTIG-053534 | 126 | 24   | 4  | 100 | 5    |
| CONTIG-053535 | 89  | 7    | 26 | 2   | 0    |
| CONTIG-053536 | 130 | 4    | 8  | 5   | 0    |
| CONTIG-053537 | 107 | 5    | 0  | 14  | 0    |
| CONTIG-053538 | 389 | 35   | 2  | 838 | 0    |
| CONTIG-053539 | 83  | 11   | 25 | 16  | 0    |
| CONTIG-053540 | 647 | 13   | 24 | 243 | 5    |
| CONTIG-053544 | 149 | 8    | 13 | 12  | 0    |
| CONTIG-053545 | 62  | 4    | 5  | 9   | 0    |
| CONTIG-053546 | 117 | 14   | 6  | 59  | 6    |
| CONTIG-053547 | 67  | 5    | 6  | 10  | 0    |
| CONTIG-053548 | 136 | 9    | 0  | 61  | 0    |
| CONTIG-053549 | 69  | 4    | 0  | 8   | 0    |
| CONTIG-053550 | 99  | 9    | 28 | 2   | 0    |
| CONTIG-053551 | 274 | 10   | 24 | 112 | 0    |
| CONTIG-053552 | 93  | 5    | 5  | 13  | 0    |
| CONTIG-053553 | 396 | 13   | 12 | 200 | 0    |
| CONTIG-053554 | 253 | 8    | 10 | 60  | 0    |
| CONTIG-053555 | 77  | 3    | 0  | 4   | 0    |
| CONTIG-053562 | 97  | 5    | 0  | 18  | 0    |
| CONTIG-053563 | 152 | 13   | 13 | 70  | 2    |
| CONTIG-053564 | 555 | 13   | 2  | 3   | 63   |
| CONTIG-053566 | 87  | 7    | 2  | 2   | 0    |
| CONTIG-053567 | 122 | 8    | 21 | 25  | 0    |
| CONTIG-053568 | 170 | 5    | 19 | 17  | 0    |
| CONTIG-053569 | 129 | 8    | 10 | 30  | 0    |
| CONTIG-053575 | 248 | 29   | 55 | 227 | 4    |
| CONTIG-053577 | 112 | 6    | 20 | 20  | 0    |
| CONTIG-053578 | 94  | 17   | 25 | 40  | 0    |
| CONTIG-053579 | 161 | 13   | 49 | 61  | 0    |
| CONTIG-053580 | 151 | 6    | 9  | 20  | 0    |
| CONTIG-053581 | 87  | 10   | 2  | 34  | 0    |
| CONTIG-053582 | 239 | 24   | 37 | 223 | 6    |
| CONTIG-053583 | 117 | 6    | 2  | 8   | 0    |
| CONTIG-053584 | 74  | 10   | 13 | 23  | 0    |
| CONTIG-053589 | 81  | 5    | 3  | 16  | 0    |
| CONTIG-053590 | 73  | 8    | 2  | 14  | 0    |
| CONTIG-053591 | 824 | 17   | 20 | 708 | 0    |
| CONTIG-053592 | 83  | 8    | 2  | 14  | 0    |
| CONTIG-053593 | 86  | 12   | 30 | 15  | 0    |
| CONTIG-053595 | 283 | 17   | 43 | 141 | 2    |
| CONTIG-053596 | 143 | 10   | 8  | 43  | 0    |
| CONTIG-053597 | 75  | 9    | 6  | 9   | 0    |

|               |     |     |    |     |    |
|---------------|-----|-----|----|-----|----|
| CONTIG-053598 | 92  | 23  | 0  | 82  | 2  |
| CONTIG-053599 | 613 | 25  | 57 | 36  | 0  |
| CONTIG-053600 | 138 | 7   | 4  | 28  | 0  |
| CONTIG-053601 | 515 | 31  | 24 | 619 | 0  |
| CONTIG-053602 | 140 | 8   | 5  | 35  | 0  |
| CONTIG-053603 | 432 | 8   | 51 | 92  | 0  |
| CONTIG-053604 | 174 | 10  | 17 | 72  | 0  |
| CONTIG-053605 | 203 | 15  | 14 | 60  | 0  |
| CONTIG-053606 | 193 | 10  | 29 | 40  | 0  |
| CONTIG-053608 | 68  | 5   | 13 | 4   | 0  |
| CONTIG-053609 | 89  | 10  | 28 | 23  | 0  |
| CONTIG-053610 | 58  | 9   | 4  | 21  | 0  |
| CONTIG-053611 | 152 | 212 | 10 | 615 | 9  |
| CONTIG-053613 | 147 | 8   | 4  | 38  | 0  |
| CONTIG-053614 | 72  | 7   | 13 | 0   | 0  |
| CONTIG-053615 | 106 | 7   | 9  | 16  | 0  |
| CONTIG-053616 | 443 | 13  | 11 | 15  | 0  |
| CONTIG-053617 | 37  | 61  | 0  | 4   | 0  |
| CONTIG-053618 | 58  | 7   | 4  | 4   | 0  |
| CONTIG-053619 | 109 | 5   | 4  | 11  | 0  |
| CONTIG-053620 | 268 | 22  | 8  | 259 | 5  |
| CONTIG-053621 | 121 | 10  | 6  | 31  | 0  |
| CONTIG-053622 | 115 | 7   | 6  | 11  | 0  |
| CONTIG-053623 | 537 | 10  | 29 | 142 | 9  |
| CONTIG-053624 | 357 | 7   | 26 | 79  | 0  |
| CONTIG-053627 | 160 | 11  | 9  | 63  | 0  |
| CONTIG-053630 | 502 | 16  | 0  | 0   | 2  |
| CONTIG-053631 | 85  | 10  | 12 | 22  | 0  |
| CONTIG-053632 | 285 | 29  | 79 | 192 | 0  |
| CONTIG-053633 | 219 | 15  | 5  | 116 | 16 |
| CONTIG-053634 | 100 | 5   | 6  | 12  | 0  |
| CONTIG-053635 | 393 | 14  | 32 | 200 | 2  |
| CONTIG-053636 | 181 | 11  | 27 | 63  | 0  |
| CONTIG-053637 | 82  | 6   | 0  | 17  | 0  |
| CONTIG-053638 | 93  | 2   | 2  | 4   | 0  |
| CONTIG-053639 | 66  | 3   | 0  | 5   | 0  |
| CONTIG-053640 | 345 | 10  | 17 | 97  | 0  |
| CONTIG-053641 | 36  | 592 | 3  | 0   | 11 |
| CONTIG-053642 | 91  | 8   | 17 | 18  | 0  |
| CONTIG-053643 | 99  | 3   | 2  | 7   | 0  |
| CONTIG-053644 | 78  | 3   | 2  | 7   | 0  |
| CONTIG-053645 | 111 | 6   | 2  | 20  | 0  |
| CONTIG-053647 | 183 | 36  | 2  | 242 | 18 |
| CONTIG-053648 | 322 | 13  | 21 | 163 | 2  |
| CONTIG-053649 | 73  | 16  | 2  | 41  | 0  |
| CONTIG-053650 | 207 | 6   | 6  | 31  | 0  |
| CONTIG-053651 | 71  | 59  | 8  | 176 | 0  |

|               |     |    |    |     |    |
|---------------|-----|----|----|-----|----|
| CONTIG-053652 | 177 | 4  | 3  | 18  | 0  |
| CONTIG-053653 | 72  | 6  | 8  | 6   | 0  |
| CONTIG-053654 | 446 | 25 | 6  | 90  | 0  |
| CONTIG-053655 | 384 | 15 | 16 | 163 | 6  |
| CONTIG-053656 | 187 | 9  | 10 | 11  | 6  |
| CONTIG-053657 | 163 | 6  | 7  | 49  | 0  |
| CONTIG-053658 | 71  | 13 | 15 | 28  | 0  |
| CONTIG-053659 | 413 | 7  | 52 | 56  | 0  |
| CONTIG-053660 | 459 | 8  | 14 | 32  | 0  |
| CONTIG-053661 | 244 | 8  | 25 | 46  | 2  |
| CONTIG-053662 | 266 | 17 | 19 | 123 | 0  |
| CONTIG-053663 | 58  | 3  | 0  | 2   | 0  |
| CONTIG-053664 | 109 | 7  | 8  | 8   | 0  |
| CONTIG-053665 | 176 | 8  | 34 | 39  | 0  |
| CONTIG-053666 | 150 | 5  | 2  | 19  | 0  |
| CONTIG-053667 | 238 | 8  | 15 | 76  | 0  |
| CONTIG-053669 | 104 | 4  | 9  | 19  | 0  |
| CONTIG-053671 | 348 | 23 | 28 | 328 | 0  |
| CONTIG-053672 | 270 | 11 | 5  | 42  | 5  |
| CONTIG-053674 | 149 | 7  | 8  | 12  | 3  |
| CONTIG-053675 | 329 | 9  | 8  | 107 | 2  |
| CONTIG-053676 | 71  | 8  | 4  | 23  | 0  |
| CONTIG-053677 | 171 | 6  | 5  | 12  | 0  |
| CONTIG-053678 | 67  | 23 | 0  | 61  | 2  |
| CONTIG-053679 | 86  | 4  | 0  | 3   | 2  |
| CONTIG-053680 | 79  | 6  | 2  | 13  | 0  |
| CONTIG-053681 | 59  | 3  | 2  | 4   | 0  |
| CONTIG-053682 | 165 | 9  | 0  | 47  | 2  |
| CONTIG-053683 | 60  | 5  | 4  | 6   | 0  |
| CONTIG-053684 | 101 | 12 | 23 | 22  | 0  |
| CONTIG-053687 | 134 | 6  | 2  | 11  | 0  |
| CONTIG-053688 | 196 | 9  | 2  | 26  | 2  |
| CONTIG-053689 | 96  | 30 | 12 | 72  | 2  |
| CONTIG-053690 | 124 | 8  | 2  | 28  | 0  |
| CONTIG-053691 | 297 | 16 | 25 | 163 | 3  |
| CONTIG-053692 | 74  | 3  | 3  | 9   | 0  |
| CONTIG-053693 | 470 | 12 | 13 | 163 | 0  |
| CONTIG-053694 | 288 | 11 | 19 | 132 | 0  |
| CONTIG-053695 | 683 | 22 | 34 | 466 | 4  |
| CONTIG-053696 | 219 | 14 | 13 | 89  | 0  |
| CONTIG-053698 | 110 | 9  | 2  | 40  | 0  |
| CONTIG-053699 | 74  | 9  | 23 | 17  | 0  |
| CONTIG-053700 | 269 | 7  | 2  | 55  | 0  |
| CONTIG-053701 | 306 | 19 | 6  | 68  | 2  |
| CONTIG-053702 | 72  | 7  | 2  | 15  | 0  |
| CONTIG-053703 | 360 | 27 | 24 | 302 | 14 |
| CONTIG-053704 | 91  | 8  | 0  | 19  | 0  |

|               |     |    |    |     |    |
|---------------|-----|----|----|-----|----|
| CONTIG-053705 | 82  | 8  | 5  | 18  | 2  |
| CONTIG-053706 | 305 | 11 | 12 | 53  | 2  |
| CONTIG-053707 | 245 | 12 | 9  | 124 | 0  |
| CONTIG-053716 | 139 | 6  | 18 | 23  | 0  |
| CONTIG-053718 | 228 | 28 | 45 | 61  | 0  |
| CONTIG-053719 | 67  | 8  | 7  | 12  | 0  |
| CONTIG-053720 | 171 | 8  | 19 | 33  | 0  |
| CONTIG-053722 | 306 | 12 | 9  | 8   | 31 |
| CONTIG-053724 | 142 | 8  | 6  | 40  | 0  |
| CONTIG-053725 | 166 | 9  | 58 | 9   | 2  |
| CONTIG-053726 | 152 | 13 | 16 | 89  | 0  |
| CONTIG-053728 | 102 | 4  | 0  | 21  | 0  |
| CONTIG-053729 | 59  | 4  | 10 | 4   | 0  |
| CONTIG-053730 | 58  | 5  | 2  | 7   | 2  |
| CONTIG-053731 | 61  | 19 | 26 | 2   | 0  |
| CONTIG-053733 | 76  | 5  | 7  | 12  | 0  |
| CONTIG-053738 | 160 | 11 | 9  | 56  | 0  |
| CONTIG-053739 | 140 | 9  | 10 | 21  | 0  |
| CONTIG-053749 | 219 | 14 | 14 | 79  | 0  |
| CONTIG-053750 | 171 | 12 | 0  | 78  | 0  |
| CONTIG-053751 | 336 | 5  | 4  | 68  | 0  |
| CONTIG-053752 | 96  | 30 | 65 | 27  | 0  |
| CONTIG-053753 | 95  | 10 | 41 | 2   | 0  |
| CONTIG-053754 | 238 | 10 | 2  | 22  | 0  |
| CONTIG-053755 | 95  | 5  | 6  | 13  | 0  |
| CONTIG-053756 | 149 | 7  | 2  | 42  | 0  |
| CONTIG-053757 | 246 | 9  | 4  | 70  | 0  |
| CONTIG-053758 | 151 | 6  | 0  | 27  | 0  |
| CONTIG-053759 | 136 | 8  | 0  | 34  | 2  |
| CONTIG-053760 | 148 | 6  | 22 | 5   | 0  |
| CONTIG-053761 | 108 | 17 | 2  | 36  | 0  |
| CONTIG-053762 | 201 | 3  | 4  | 10  | 0  |
| CONTIG-053763 | 72  | 10 | 11 | 25  | 0  |
| CONTIG-053764 | 92  | 7  | 6  | 9   | 0  |
| CONTIG-053765 | 100 | 8  | 2  | 4   | 0  |
| CONTIG-053766 | 104 | 9  | 5  | 32  | 0  |
| CONTIG-053767 | 231 | 16 | 25 | 122 | 0  |
| CONTIG-053768 | 75  | 6  | 28 | 3   | 0  |
| CONTIG-053769 | 66  | 5  | 17 | 2   | 0  |
| CONTIG-053770 | 435 | 21 | 3  | 0   | 36 |
| CONTIG-053771 | 76  | 5  | 3  | 4   | 0  |
| CONTIG-053772 | 58  | 4  | 4  | 8   | 0  |
| CONTIG-053773 | 236 | 7  | 0  | 46  | 0  |
| CONTIG-053774 | 67  | 5  | 4  | 9   | 0  |
| CONTIG-053775 | 90  | 5  | 2  | 3   | 0  |
| CONTIG-053776 | 159 | 7  | 11 | 0   | 0  |
| CONTIG-053777 | 74  | 5  | 2  | 13  | 0  |

|               |     |    |    |     |    |
|---------------|-----|----|----|-----|----|
| CONTIG-053778 | 76  | 5  | 2  | 6   | 0  |
| CONTIG-053780 | 67  | 6  | 4  | 12  | 0  |
| CONTIG-053781 | 58  | 8  | 2  | 23  | 0  |
| CONTIG-053782 | 257 | 22 | 7  | 170 | 0  |
| CONTIG-053790 | 382 | 8  | 15 | 113 | 0  |
| CONTIG-053791 | 92  | 23 | 7  | 46  | 0  |
| CONTIG-053792 | 89  | 3  | 17 | 5   | 0  |
| CONTIG-053793 | 64  | 5  | 6  | 4   | 0  |
| CONTIG-053794 | 190 | 7  | 0  | 5   | 0  |
| CONTIG-053795 | 64  | 4  | 2  | 0   | 0  |
| CONTIG-053796 | 94  | 6  | 15 | 9   | 0  |
| CONTIG-053797 | 191 | 12 | 3  | 101 | 0  |
| CONTIG-053798 | 111 | 3  | 5  | 9   | 0  |
| CONTIG-053799 | 197 | 4  | 11 | 11  | 0  |
| CONTIG-053800 | 280 | 10 | 25 | 66  | 0  |
| CONTIG-053801 | 149 | 10 | 3  | 66  | 0  |
| CONTIG-053802 | 78  | 4  | 7  | 2   | 0  |
| CONTIG-053806 | 339 | 11 | 48 | 102 | 0  |
| CONTIG-053808 | 402 | 12 | 60 | 75  | 6  |
| CONTIG-053809 | 112 | 14 | 14 | 12  | 0  |
| CONTIG-053810 | 111 | 10 | 2  | 58  | 0  |
| CONTIG-053811 | 121 | 64 | 4  | 75  | 0  |
| CONTIG-053812 | 352 | 7  | 17 | 85  | 0  |
| CONTIG-053813 | 195 | 8  | 23 | 59  | 0  |
| CONTIG-053814 | 61  | 8  | 4  | 24  | 0  |
| CONTIG-053815 | 166 | 10 | 19 | 14  | 0  |
| CONTIG-053816 | 144 | 12 | 5  | 67  | 0  |
| CONTIG-053817 | 131 | 7  | 25 | 9   | 0  |
| CONTIG-053818 | 171 | 9  | 11 | 27  | 0  |
| CONTIG-053819 | 259 | 8  | 19 | 13  | 0  |
| CONTIG-053820 | 65  | 5  | 0  | 2   | 0  |
| CONTIG-053821 | 133 | 20 | 11 | 105 | 0  |
| CONTIG-053822 | 92  | 9  | 29 | 8   | 0  |
| CONTIG-053823 | 155 | 9  | 29 | 12  | 0  |
| CONTIG-053826 | 184 | 14 | 3  | 99  | 0  |
| CONTIG-053827 | 79  | 6  | 0  | 7   | 0  |
| CONTIG-053828 | 403 | 32 | 21 | 366 | 6  |
| CONTIG-053829 | 88  | 5  | 18 | 4   | 0  |
| CONTIG-053830 | 248 | 11 | 6  | 96  | 0  |
| CONTIG-053831 | 97  | 5  | 8  | 16  | 0  |
| CONTIG-053832 | 179 | 19 | 4  | 154 | 0  |
| CONTIG-053833 | 81  | 7  | 25 | 10  | 0  |
| CONTIG-053834 | 99  | 8  | 24 | 11  | 0  |
| CONTIG-053835 | 77  | 8  | 2  | 14  | 0  |
| CONTIG-053836 | 151 | 9  | 0  | 0   | 4  |
| CONTIG-053837 | 95  | 12 | 94 | 0   | 0  |
| CONTIG-053838 | 678 | 35 | 3  | 0   | 14 |

|               |      |     |    |     |     |
|---------------|------|-----|----|-----|-----|
| CONTIG-053839 | 70   | 9   | 0  | 12  | 0   |
| CONTIG-053840 | 81   | 9   | 6  | 9   | 0   |
| CONTIG-053841 | 293  | 8   | 9  | 60  | 0   |
| CONTIG-053842 | 142  | 5   | 4  | 0   | 0   |
| CONTIG-053844 | 74   | 12  | 7  | 7   | 0   |
| CONTIG-053845 | 175  | 11  | 50 | 16  | 0   |
| CONTIG-053846 | 161  | 7   | 17 | 26  | 0   |
| CONTIG-053847 | 74   | 11  | 2  | 39  | 0   |
| CONTIG-053848 | 161  | 10  | 26 | 9   | 0   |
| CONTIG-053849 | 351  | 17  | 12 | 210 | 3   |
| CONTIG-053850 | 103  | 8   | 9  | 10  | 0   |
| CONTIG-053851 | 388  | 67  | 0  | 25  | 0   |
| CONTIG-053852 | 534  | 10  | 32 | 145 | 0   |
| CONTIG-053853 | 81   | 6   | 8  | 12  | 0   |
| CONTIG-053854 | 62   | 5   | 4  | 3   | 0   |
| CONTIG-053855 | 155  | 9   | 21 | 52  | 0   |
| CONTIG-053856 | 79   | 10  | 7  | 20  | 0   |
| CONTIG-053858 | 191  | 11  | 4  | 2   | 0   |
| CONTIG-053859 | 125  | 4   | 4  | 15  | 0   |
| CONTIG-053860 | 65   | 23  | 16 | 5   | 6   |
| CONTIG-053861 | 96   | 7   | 2  | 14  | 0   |
| CONTIG-053862 | 92   | 5   | 11 | 0   | 0   |
| CONTIG-053863 | 444  | 13  | 36 | 119 | 4   |
| CONTIG-053864 | 52   | 68  | 15 | 129 | 0   |
| CONTIG-053865 | 1570 | 43  | 72 | 876 | 210 |
| CONTIG-053866 | 251  | 10  | 20 | 43  | 0   |
| CONTIG-053867 | 184  | 6   | 9  | 27  | 0   |
| CONTIG-053868 | 66   | 6   | 2  | 8   | 0   |
| CONTIG-053870 | 93   | 5   | 2  | 11  | 0   |
| CONTIG-053871 | 345  | 15  | 17 | 160 | 0   |
| CONTIG-053872 | 143  | 9   | 4  | 40  | 0   |
| CONTIG-053873 | 90   | 8   | 7  | 26  | 0   |
| CONTIG-053878 | 117  | 17  | 10 | 50  | 2   |
| CONTIG-053879 | 110  | 6   | 6  | 20  | 0   |
| CONTIG-053880 | 199  | 19  | 23 | 139 | 0   |
| CONTIG-053881 | 242  | 6   | 7  | 10  | 0   |
| CONTIG-053882 | 97   | 15  | 5  | 31  | 5   |
| CONTIG-053883 | 75   | 8   | 14 | 9   | 0   |
| CONTIG-053884 | 394  | 8   | 28 | 79  | 2   |
| CONTIG-053885 | 136  | 10  | 10 | 16  | 2   |
| CONTIG-053886 | 61   | 4   | 3  | 6   | 0   |
| CONTIG-053887 | 842  | 11  | 5  | 280 | 2   |
| CONTIG-053888 | 58   | 7   | 14 | 11  | 0   |
| CONTIG-053889 | 59   | 149 | 6  | 405 | 0   |
| CONTIG-053890 | 114  | 4   | 5  | 17  | 0   |
| CONTIG-053891 | 138  | 5   | 0  | 6   | 0   |
| CONTIG-053893 | 216  | 26  | 9  | 243 | 6   |



|               |     |     |    |     |     |
|---------------|-----|-----|----|-----|-----|
| CONTIG-053895 | 384 | 7   | 31 | 87  | 0   |
| CONTIG-053896 | 111 | 3   | 4  | 2   | 0   |
| CONTIG-053898 | 72  | 4   | 6  | 12  | 0   |
| CONTIG-053899 | 165 | 9   | 7  | 37  | 0   |
| CONTIG-053900 | 280 | 9   | 7  | 100 | 0   |
| CONTIG-053902 | 186 | 6   | 2  | 24  | 2   |
| CONTIG-053903 | 98  | 21  | 16 | 58  | 0   |
| CONTIG-053904 | 239 | 13  | 7  | 87  | 6   |
| CONTIG-053905 | 89  | 10  | 18 | 12  | 0   |
| CONTIG-053906 | 97  | 7   | 14 | 10  | 0   |
| CONTIG-053907 | 191 | 7   | 5  | 57  | 0   |
| CONTIG-053911 | 204 | 7   | 36 | 26  | 0   |
| CONTIG-053912 | 342 | 7   | 19 | 35  | 0   |
| CONTIG-053913 | 86  | 14  | 9  | 8   | 0   |
| CONTIG-053914 | 72  | 6   | 2  | 2   | 0   |
| CONTIG-053915 | 119 | 7   | 5  | 3   | 0   |
| CONTIG-053916 | 236 | 6   | 18 | 26  | 0   |
| CONTIG-053917 | 61  | 7   | 4  | 9   | 0   |
| CONTIG-053918 | 346 | 13  | 12 | 113 | 4   |
| CONTIG-053919 | 76  | 16  | 14 | 46  | 0   |
| CONTIG-053920 | 62  | 4   | 4  | 2   | 0   |
| CONTIG-053921 | 62  | 2   | 5  | 0   | 0   |
| CONTIG-053922 | 95  | 46  | 9  | 212 | 8   |
| CONTIG-053923 | 80  | 4   | 2  | 5   | 0   |
| CONTIG-053924 | 116 | 8   | 15 | 24  | 0   |
| CONTIG-053925 | 174 | 82  | 0  | 0   | 54  |
| CONTIG-053926 | 78  | 245 | 0  | 0   | 168 |
| CONTIG-053927 | 226 | 5   | 11 | 36  | 0   |
| CONTIG-053928 | 154 | 6   | 0  | 14  | 2   |
| CONTIG-053929 | 203 | 9   | 24 | 59  | 0   |
| CONTIG-053930 | 151 | 6   | 18 | 16  | 0   |
| CONTIG-053931 | 527 | 15  | 36 | 281 | 2   |
| CONTIG-053932 | 270 | 9   | 21 | 65  | 0   |
| CONTIG-053933 | 62  | 2   | 0  | 6   | 0   |
| CONTIG-053934 | 500 | 12  | 6  | 213 | 8   |
| CONTIG-053935 | 292 | 7   | 5  | 2   | 0   |
| CONTIG-053936 | 112 | 6   | 24 | 16  | 0   |
| CONTIG-053937 | 78  | 5   | 13 | 13  | 0   |
| CONTIG-053938 | 63  | 6   | 8  | 9   | 0   |
| CONTIG-053939 | 374 | 7   | 3  | 80  | 0   |
| CONTIG-053940 | 195 | 23  | 4  | 250 | 2   |
| CONTIG-053941 | 108 | 4   | 2  | 8   | 0   |
| CONTIG-053942 | 79  | 12  | 29 | 14  | 0   |
| CONTIG-053943 | 87  | 10  | 0  | 36  | 0   |
| CONTIG-053944 | 79  | 11  | 29 | 19  | 0   |
| CONTIG-053945 | 108 | 15  | 4  | 26  | 4   |
| CONTIG-053946 | 149 | 17  | 5  | 99  | 2   |

|               |     |    |    |     |    |
|---------------|-----|----|----|-----|----|
| CONTIG-053947 | 41  | 82 | 26 | 45  | 0  |
| CONTIG-053948 | 59  | 9  | 16 | 13  | 0  |
| CONTIG-053949 | 154 | 4  | 13 | 4   | 0  |
| CONTIG-053950 | 68  | 17 | 13 | 2   | 0  |
| CONTIG-053951 | 176 | 15 | 6  | 86  | 0  |
| CONTIG-053953 | 336 | 11 | 45 | 123 | 0  |
| CONTIG-053954 | 345 | 12 | 17 | 47  | 0  |
| CONTIG-053955 | 251 | 7  | 13 | 40  | 2  |
| CONTIG-053956 | 139 | 7  | 2  | 30  | 0  |
| CONTIG-053957 | 160 | 6  | 0  | 38  | 0  |
| CONTIG-053958 | 95  | 9  | 47 | 0   | 0  |
| CONTIG-053959 | 90  | 4  | 7  | 7   | 0  |
| CONTIG-053960 | 76  | 7  | 3  | 7   | 0  |
| CONTIG-053961 | 93  | 6  | 8  | 14  | 0  |
| CONTIG-053962 | 90  | 5  | 8  | 0   | 0  |
| CONTIG-053963 | 69  | 4  | 0  | 8   | 0  |
| CONTIG-053964 | 69  | 5  | 2  | 4   | 0  |
| CONTIG-053969 | 62  | 7  | 12 | 2   | 0  |
| CONTIG-053970 | 112 | 11 | 12 | 34  | 0  |
| CONTIG-053971 | 370 | 10 | 33 | 89  | 0  |
| CONTIG-053972 | 135 | 8  | 10 | 44  | 0  |
| CONTIG-053973 | 281 | 10 | 8  | 108 | 0  |
| CONTIG-053975 | 225 | 10 | 2  | 18  | 0  |
| CONTIG-053976 | 183 | 33 | 5  | 268 | 14 |
| CONTIG-053977 | 120 | 35 | 11 | 78  | 0  |
| CONTIG-053978 | 130 | 5  | 17 | 5   | 0  |
| CONTIG-053979 | 59  | 4  | 5  | 0   | 0  |
| CONTIG-053980 | 155 | 4  | 2  | 23  | 0  |
| CONTIG-053981 | 113 | 6  | 2  | 15  | 0  |
| CONTIG-053982 | 95  | 4  | 2  | 6   | 0  |
| CONTIG-053983 | 195 | 8  | 2  | 47  | 0  |
| CONTIG-053984 | 129 | 9  | 12 | 33  | 0  |
| CONTIG-053985 | 186 | 8  | 6  | 24  | 0  |
| CONTIG-053988 | 205 | 6  | 0  | 44  | 0  |
| CONTIG-053989 | 62  | 3  | 0  | 2   | 0  |
| CONTIG-053990 | 175 | 11 | 5  | 92  | 0  |
| CONTIG-053991 | 95  | 24 | 8  | 77  | 0  |
| CONTIG-053994 | 151 | 16 | 26 | 61  | 0  |
| CONTIG-053995 | 104 | 15 | 4  | 59  | 3  |
| CONTIG-053996 | 724 | 11 | 3  | 54  | 0  |
| CONTIG-053997 | 59  | 2  | 3  | 0   | 0  |
| CONTIG-053998 | 107 | 8  | 5  | 2   | 5  |
| CONTIG-053999 | 139 | 16 | 0  | 14  | 0  |
| CONTIG-054001 | 117 | 38 | 20 | 147 | 0  |
| CONTIG-054002 | 103 | 3  | 3  | 6   | 0  |
| CONTIG-054006 | 203 | 8  | 2  | 39  | 2  |
| CONTIG-054009 | 243 | 6  | 21 | 23  | 2  |

|               |     |    |    |     |    |
|---------------|-----|----|----|-----|----|
| CONTIG-054010 | 80  | 54 | 8  | 157 | 5  |
| CONTIG-054011 | 340 | 11 | 7  | 181 | 2  |
| CONTIG-054012 | 80  | 7  | 4  | 18  | 0  |
| CONTIG-054013 | 128 | 12 | 14 | 34  | 0  |
| CONTIG-054014 | 198 | 6  | 16 | 32  | 0  |
| CONTIG-054016 | 166 | 36 | 37 | 249 | 0  |
| CONTIG-054017 | 273 | 9  | 18 | 48  | 0  |
| CONTIG-054026 | 81  | 2  | 2  | 2   | 0  |
| CONTIG-054027 | 609 | 24 | 4  | 0   | 0  |
| CONTIG-054028 | 97  | 4  | 4  | 2   | 0  |
| CONTIG-054029 | 60  | 21 | 4  | 51  | 0  |
| CONTIG-054030 | 119 | 4  | 2  | 20  | 0  |
| CONTIG-054031 | 307 | 7  | 15 | 48  | 0  |
| CONTIG-054032 | 294 | 62 | 32 | 893 | 0  |
| CONTIG-054033 | 65  | 9  | 24 | 2   | 0  |
| CONTIG-054035 | 89  | 5  | 12 | 12  | 0  |
| CONTIG-054036 | 253 | 11 | 13 | 91  | 0  |
| CONTIG-054037 | 169 | 13 | 4  | 72  | 0  |
| CONTIG-054038 | 200 | 9  | 13 | 60  | 0  |
| CONTIG-054039 | 301 | 17 | 10 | 193 | 0  |
| CONTIG-054040 | 101 | 8  | 14 | 26  | 0  |
| CONTIG-054041 | 99  | 5  | 0  | 13  | 0  |
| CONTIG-054042 | 666 | 16 | 33 | 326 | 53 |
| CONTIG-054043 | 196 | 6  | 2  | 9   | 0  |
| CONTIG-054045 | 185 | 28 | 0  | 0   | 55 |
| CONTIG-054046 | 237 | 8  | 29 | 59  | 0  |
| CONTIG-054047 | 162 | 7  | 6  | 27  | 0  |
| CONTIG-054048 | 197 | 13 | 18 | 117 | 0  |
| CONTIG-054052 | 59  | 7  | 6  | 6   | 0  |
| CONTIG-054055 | 327 | 18 | 13 | 223 | 6  |
| CONTIG-054057 | 396 | 21 | 43 | 279 | 0  |
| CONTIG-054058 | 84  | 3  | 5  | 2   | 0  |
| CONTIG-054059 | 168 | 8  | 8  | 9   | 2  |
| CONTIG-054060 | 91  | 3  | 3  | 2   | 0  |
| CONTIG-054061 | 95  | 5  | 12 | 4   | 0  |
| CONTIG-054062 | 309 | 11 | 69 | 121 | 0  |
| CONTIG-054063 | 68  | 5  | 0  | 7   | 0  |
| CONTIG-054064 | 109 | 46 | 13 | 248 | 0  |
| CONTIG-054065 | 344 | 19 | 58 | 70  | 0  |
| CONTIG-054066 | 227 | 14 | 24 | 167 | 0  |
| CONTIG-054067 | 71  | 10 | 8  | 7   | 0  |
| CONTIG-054068 | 63  | 22 | 26 | 0   | 0  |
| CONTIG-054069 | 72  | 13 | 20 | 13  | 0  |
| CONTIG-054070 | 75  | 7  | 11 | 6   | 0  |
| CONTIG-054072 | 45  | 88 | 4  | 124 | 0  |
| CONTIG-054073 | 150 | 6  | 2  | 0   | 4  |
| CONTIG-054074 | 579 | 25 | 37 | 826 | 0  |

|               |     |      |    |      |     |
|---------------|-----|------|----|------|-----|
| CONTIG-054075 | 93  | 7    | 23 | 16   | 0   |
| CONTIG-054076 | 315 | 4    | 12 | 39   | 0   |
| CONTIG-054077 | 397 | 26   | 22 | 592  | 0   |
| CONTIG-054079 | 62  | 7    | 7  | 4    | 0   |
| CONTIG-054080 | 87  | 5    | 7  | 4    | 0   |
| CONTIG-054082 | 118 | 5    | 5  | 6    | 0   |
| CONTIG-054083 | 364 | 13   | 33 | 126  | 0   |
| CONTIG-054084 | 477 | 12   | 45 | 156  | 0   |
| CONTIG-054085 | 87  | 8    | 5  | 33   | 0   |
| CONTIG-054086 | 442 | 16   | 21 | 275  | 7   |
| CONTIG-054087 | 59  | 6    | 2  | 6    | 0   |
| CONTIG-054088 | 135 | 28   | 11 | 88   | 0   |
| CONTIG-054090 | 253 | 8    | 5  | 53   | 0   |
| CONTIG-054091 | 310 | 5    | 5  | 38   | 0   |
| CONTIG-054092 | 230 | 6    | 3  | 33   | 0   |
| CONTIG-054093 | 77  | 6    | 9  | 4    | 0   |
| CONTIG-054094 | 154 | 23   | 35 | 179  | 0   |
| CONTIG-054098 | 99  | 5    | 5  | 8    | 0   |
| CONTIG-054099 | 225 | 7    | 12 | 43   | 0   |
| CONTIG-054100 | 91  | 5    | 0  | 13   | 0   |
| CONTIG-054101 | 480 | 129  | 0  | 0    | 774 |
| CONTIG-054102 | 418 | 12   | 47 | 90   | 0   |
| CONTIG-054103 | 209 | 7    | 10 | 26   | 0   |
| CONTIG-054104 | 151 | 7    | 5  | 16   | 0   |
| CONTIG-054105 | 104 | 4    | 5  | 6    | 0   |
| CONTIG-054107 | 201 | 17   | 6  | 130  | 0   |
| CONTIG-054108 | 91  | 7    | 15 | 19   | 0   |
| CONTIG-054109 | 116 | 7    | 14 | 23   | 0   |
| CONTIG-054110 | 153 | 15   | 15 | 86   | 2   |
| CONTIG-054111 | 51  | 21   | 3  | 19   | 0   |
| CONTIG-054113 | 60  | 21   | 14 | 0    | 0   |
| CONTIG-054114 | 304 | 9    | 15 | 100  | 0   |
| CONTIG-054115 | 74  | 9    | 5  | 17   | 0   |
| CONTIG-054116 | 142 | 8    | 8  | 33   | 0   |
| CONTIG-054117 | 346 | 8    | 9  | 72   | 2   |
| CONTIG-054118 | 617 | 15   | 54 | 145  | 17  |
| CONTIG-054119 | 86  | 3    | 5  | 0    | 0   |
| CONTIG-054120 | 67  | 7    | 4  | 17   | 0   |
| CONTIG-054122 | 241 | 11   | 11 | 85   | 2   |
| CONTIG-054124 | 250 | 21   | 17 | 220  | 0   |
| CONTIG-054125 | 111 | 9    | 0  | 26   | 0   |
| CONTIG-054126 | 128 | 1132 | 40 | 4230 | 0   |
| CONTIG-054127 | 67  | 7    | 2  | 14   | 0   |
| CONTIG-054128 | 89  | 10   | 5  | 0    | 11  |
| CONTIG-054129 | 105 | 8    | 15 | 2    | 0   |
| CONTIG-054130 | 393 | 10   | 41 | 163  | 0   |
| CONTIG-054131 | 193 | 10   | 0  | 3    | 0   |

|               |     |    |    |     |    |
|---------------|-----|----|----|-----|----|
| CONTIG-054132 | 144 | 5  | 27 | 11  | 0  |
| CONTIG-054133 | 96  | 9  | 9  | 0   | 0  |
| CONTIG-054134 | 80  | 5  | 6  | 10  | 0  |
| CONTIG-054135 | 76  | 14 | 12 | 27  | 0  |
| CONTIG-054136 | 329 | 39 | 3  | 4   | 0  |
| CONTIG-054137 | 423 | 8  | 15 | 134 | 0  |
| CONTIG-054138 | 213 | 10 | 6  | 78  | 0  |
| CONTIG-054139 | 86  | 61 | 30 | 103 | 5  |
| CONTIG-054140 | 257 | 20 | 39 | 204 | 0  |
| CONTIG-054141 | 78  | 7  | 6  | 0   | 0  |
| CONTIG-054142 | 83  | 5  | 4  | 0   | 0  |
| CONTIG-054143 | 72  | 3  | 5  | 4   | 0  |
| CONTIG-054144 | 77  | 19 | 12 | 39  | 0  |
| CONTIG-054145 | 420 | 16 | 25 | 295 | 0  |
| CONTIG-054146 | 107 | 10 | 2  | 47  | 0  |
| CONTIG-054147 | 73  | 4  | 3  | 7   | 0  |
| CONTIG-054148 | 71  | 4  | 7  | 8   | 0  |
| CONTIG-054149 | 205 | 15 | 40 | 153 | 0  |
| CONTIG-054150 | 289 | 20 | 45 | 200 | 2  |
| CONTIG-054151 | 71  | 6  | 10 | 0   | 0  |
| CONTIG-054154 | 169 | 4  | 14 | 11  | 0  |
| CONTIG-054155 | 118 | 5  | 2  | 22  | 0  |
| CONTIG-054156 | 91  | 9  | 7  | 12  | 0  |
| CONTIG-054157 | 114 | 13 | 7  | 36  | 0  |
| CONTIG-054158 | 321 | 6  | 4  | 16  | 2  |
| CONTIG-054159 | 112 | 5  | 6  | 13  | 0  |
| CONTIG-054160 | 90  | 9  | 18 | 16  | 0  |
| CONTIG-054161 | 103 | 8  | 24 | 15  | 0  |
| CONTIG-054162 | 136 | 9  | 3  | 0   | 16 |
| CONTIG-054163 | 146 | 44 | 16 | 181 | 0  |
| CONTIG-054164 | 68  | 2  | 2  | 4   | 0  |
| CONTIG-054165 | 126 | 6  | 7  | 28  | 0  |
| CONTIG-054166 | 142 | 20 | 30 | 0   | 0  |
| CONTIG-054167 | 60  | 7  | 0  | 11  | 0  |
| CONTIG-054168 | 213 | 11 | 17 | 66  | 2  |
| CONTIG-054169 | 165 | 13 | 12 | 68  | 0  |
| CONTIG-054170 | 246 | 8  | 17 | 17  | 0  |
| CONTIG-054171 | 595 | 11 | 45 | 258 | 0  |
| CONTIG-054172 | 128 | 15 | 13 | 51  | 0  |
| CONTIG-054173 | 274 | 12 | 17 | 154 | 0  |
| CONTIG-054174 | 69  | 4  | 4  | 4   | 0  |
| CONTIG-054175 | 63  | 58 | 21 | 177 | 0  |
| CONTIG-054176 | 120 | 8  | 0  | 20  | 0  |
| CONTIG-054177 | 362 | 13 | 55 | 155 | 0  |
| CONTIG-054178 | 425 | 15 | 66 | 192 | 0  |
| CONTIG-054179 | 120 | 7  | 8  | 13  | 0  |
| CONTIG-054180 | 146 | 68 | 60 | 111 | 4  |

|               |     |    |    |      |    |
|---------------|-----|----|----|------|----|
| CONTIG-054181 | 124 | 11 | 7  | 31   | 0  |
| CONTIG-054185 | 176 | 10 | 6  | 63   | 0  |
| CONTIG-054186 | 223 | 7  | 16 | 47   | 0  |
| CONTIG-054187 | 246 | 9  | 6  | 62   | 0  |
| CONTIG-054188 | 574 | 49 | 18 | 1022 | 16 |
| CONTIG-054189 | 66  | 5  | 8  | 0    | 0  |
| CONTIG-054190 | 287 | 7  | 20 | 21   | 0  |
| CONTIG-054191 | 109 | 7  | 34 | 0    | 0  |
| CONTIG-054193 | 75  | 8  | 21 | 3    | 0  |
| CONTIG-054194 | 343 | 11 | 8  | 59   | 0  |
| CONTIG-054195 | 86  | 12 | 52 | 9    | 0  |
| CONTIG-054196 | 458 | 13 | 2  | 276  | 0  |
| CONTIG-054197 | 105 | 5  | 7  | 23   | 0  |
| CONTIG-054198 | 114 | 18 | 7  | 86   | 0  |
| CONTIG-054199 | 82  | 2  | 2  | 0    | 0  |
| CONTIG-054200 | 146 | 13 | 23 | 44   | 0  |
| CONTIG-054201 | 169 | 21 | 6  | 209  | 0  |
| CONTIG-054202 | 114 | 6  | 5  | 26   | 0  |
| CONTIG-054209 | 81  | 6  | 13 | 9    | 0  |
| CONTIG-054211 | 344 | 15 | 21 | 267  | 0  |
| CONTIG-054212 | 72  | 4  | 16 | 5    | 0  |
| CONTIG-054214 | 281 | 19 | 8  | 228  | 0  |
| CONTIG-054215 | 89  | 3  | 4  | 0    | 0  |
| CONTIG-054216 | 64  | 9  | 19 | 11   | 0  |
| CONTIG-054218 | 276 | 11 | 4  | 97   | 0  |
| CONTIG-054219 | 178 | 14 | 24 | 58   | 0  |
| CONTIG-054222 | 64  | 3  | 0  | 7    | 0  |
| CONTIG-054223 | 66  | 5  | 9  | 5    | 0  |
| CONTIG-054224 | 59  | 6  | 6  | 2    | 0  |
| CONTIG-054227 | 62  | 25 | 12 | 25   | 0  |
| CONTIG-054228 | 87  | 9  | 39 | 4    | 0  |
| CONTIG-054229 | 443 | 13 | 34 | 190  | 0  |
| CONTIG-054230 | 112 | 9  | 0  | 13   | 0  |
| CONTIG-054231 | 619 | 19 | 15 | 125  | 0  |
| CONTIG-054232 | 159 | 10 | 14 | 56   | 0  |
| CONTIG-054233 | 174 | 4  | 0  | 14   | 0  |
| CONTIG-054234 | 58  | 3  | 9  | 2    | 0  |
| CONTIG-054235 | 153 | 12 | 18 | 57   | 2  |
| CONTIG-054236 | 93  | 7  | 8  | 23   | 0  |
| CONTIG-054237 | 214 | 7  | 0  | 26   | 0  |
| CONTIG-054238 | 108 | 21 | 16 | 89   | 2  |
| CONTIG-054239 | 70  | 5  | 3  | 8    | 0  |
| CONTIG-054242 | 75  | 7  | 4  | 8    | 0  |
| CONTIG-054243 | 72  | 16 | 21 | 0    | 0  |
| CONTIG-054244 | 84  | 3  | 4  | 6    | 0  |
| CONTIG-054245 | 239 | 9  | 10 | 69   | 2  |
| CONTIG-054246 | 143 | 7  | 40 | 15   | 0  |

|               |      |    |    |      |    |
|---------------|------|----|----|------|----|
| CONTIG-054247 | 66   | 6  | 3  | 8    | 0  |
| CONTIG-054248 | 106  | 25 | 15 | 3    | 6  |
| CONTIG-054249 | 263  | 4  | 4  | 28   | 0  |
| CONTIG-054251 | 91   | 17 | 30 | 25   | 0  |
| CONTIG-054252 | 1606 | 25 | 48 | 761  | 58 |
| CONTIG-054253 | 179  | 11 | 0  | 88   | 0  |
| CONTIG-054254 | 74   | 3  | 10 | 2    | 0  |
| CONTIG-054255 | 175  | 10 | 28 | 60   | 2  |
| CONTIG-054256 | 138  | 9  | 9  | 37   | 0  |
| CONTIG-054259 | 116  | 4  | 6  | 21   | 0  |
| CONTIG-054260 | 181  | 16 | 11 | 145  | 2  |
| CONTIG-054261 | 406  | 6  | 28 | 65   | 0  |
| CONTIG-054262 | 105  | 14 | 33 | 18   | 0  |
| CONTIG-054263 | 143  | 8  | 19 | 14   | 0  |
| CONTIG-054264 | 100  | 5  | 2  | 10   | 0  |
| CONTIG-054265 | 428  | 54 | 9  | 1463 | 0  |
| CONTIG-054266 | 159  | 6  | 11 | 33   | 0  |
| CONTIG-054267 | 341  | 11 | 14 | 143  | 0  |
| CONTIG-054268 | 89   | 5  | 20 | 0    | 0  |
| CONTIG-054269 | 100  | 6  | 2  | 15   | 0  |
| CONTIG-054270 | 72   | 13 | 11 | 6    | 0  |
| CONTIG-054271 | 244  | 13 | 38 | 101  | 0  |
| CONTIG-054272 | 81   | 5  | 2  | 2    | 0  |
| CONTIG-054273 | 96   | 4  | 7  | 6    | 0  |
| CONTIG-054274 | 112  | 7  | 2  | 30   | 0  |
| CONTIG-054275 | 67   | 7  | 4  | 0    | 0  |
| CONTIG-054276 | 63   | 4  | 11 | 0    | 0  |
| CONTIG-054277 | 149  | 6  | 8  | 27   | 0  |
| CONTIG-054278 | 212  | 17 | 5  | 0    | 14 |
| CONTIG-054279 | 96   | 7  | 10 | 0    | 0  |
| CONTIG-054280 | 62   | 6  | 4  | 2    | 0  |
| CONTIG-054281 | 117  | 6  | 5  | 17   | 0  |
| CONTIG-054282 | 70   | 5  | 7  | 4    | 0  |
| CONTIG-054283 | 94   | 5  | 7  | 2    | 0  |
| CONTIG-054284 | 290  | 15 | 49 | 92   | 2  |
| CONTIG-054285 | 145  | 6  | 0  | 28   | 0  |
| CONTIG-054286 | 107  | 7  | 2  | 18   | 0  |
| CONTIG-054287 | 255  | 11 | 56 | 45   | 8  |
| CONTIG-054290 | 71   | 4  | 0  | 10   | 0  |
| CONTIG-054291 | 70   | 8  | 3  | 11   | 0  |
| CONTIG-054292 | 63   | 6  | 0  | 13   | 0  |
| CONTIG-054293 | 67   | 6  | 4  | 10   | 0  |
| CONTIG-054294 | 87   | 3  | 0  | 10   | 0  |
| CONTIG-054295 | 62   | 10 | 10 | 24   | 0  |
| CONTIG-054296 | 67   | 5  | 12 | 3    | 0  |
| CONTIG-054297 | 218  | 18 | 4  | 140  | 2  |
| CONTIG-054298 | 135  | 5  | 11 | 4    | 0  |

|               |     |     |    |     |    |
|---------------|-----|-----|----|-----|----|
| CONTIG-054299 | 131 | 19  | 0  | 9   | 0  |
| CONTIG-054300 | 116 | 6   | 4  | 8   | 0  |
| CONTIG-054301 | 176 | 6   | 8  | 29  | 0  |
| CONTIG-054302 | 178 | 7   | 5  | 33  | 0  |
| CONTIG-054303 | 45  | 208 | 30 | 136 | 0  |
| CONTIG-054304 | 79  | 2   | 2  | 4   | 0  |
| CONTIG-054305 | 64  | 10  | 8  | 0   | 0  |
| CONTIG-054306 | 150 | 4   | 5  | 18  | 0  |
| CONTIG-054307 | 128 | 20  | 31 | 22  | 11 |
| CONTIG-054308 | 136 | 6   | 2  | 14  | 0  |
| CONTIG-054309 | 88  | 7   | 4  | 13  | 0  |
| CONTIG-054310 | 280 | 8   | 0  | 58  | 0  |
| CONTIG-054311 | 105 | 5   | 9  | 8   | 0  |
| CONTIG-054312 | 73  | 7   | 7  | 7   | 0  |
| CONTIG-054313 | 80  | 16  | 52 | 33  | 0  |
| CONTIG-054314 | 68  | 17  | 19 | 30  | 0  |
| CONTIG-054315 | 140 | 5   | 7  | 18  | 0  |
| CONTIG-054316 | 232 | 10  | 12 | 47  | 0  |
| CONTIG-054317 | 116 | 6   | 14 | 30  | 0  |
| CONTIG-054318 | 62  | 5   | 3  | 2   | 0  |
| CONTIG-054319 | 62  | 7   | 9  | 19  | 0  |
| CONTIG-054320 | 72  | 56  | 3  | 75  | 0  |
| CONTIG-054321 | 104 | 13  | 10 | 43  | 0  |
| CONTIG-054322 | 546 | 13  | 2  | 0   | 30 |
| CONTIG-054323 | 59  | 7   | 11 | 14  | 0  |
| CONTIG-054325 | 88  | 9   | 6  | 28  | 0  |
| CONTIG-054329 | 69  | 24  | 2  | 31  | 0  |
| CONTIG-054330 | 70  | 12  | 2  | 6   | 0  |
| CONTIG-054331 | 365 | 8   | 3  | 7   | 0  |
| CONTIG-054332 | 189 | 5   | 10 | 23  | 0  |
| CONTIG-054335 | 229 | 12  | 18 | 85  | 0  |
| CONTIG-054336 | 384 | 14  | 25 | 128 | 6  |
| CONTIG-054337 | 120 | 7   | 4  | 22  | 2  |
| CONTIG-054338 | 622 | 9   | 19 | 223 | 0  |
| CONTIG-054339 | 75  | 6   | 3  | 2   | 0  |
| CONTIG-054340 | 84  | 6   | 11 | 7   | 0  |
| CONTIG-054341 | 546 | 14  | 35 | 254 | 2  |
| CONTIG-054342 | 147 | 4   | 3  | 6   | 0  |
| CONTIG-054343 | 66  | 14  | 26 | 8   | 4  |
| CONTIG-054344 | 216 | 8   | 4  | 39  | 0  |
| CONTIG-054345 | 209 | 8   | 22 | 36  | 0  |
| CONTIG-054353 | 41  | 15  | 2  | 0   | 0  |
| CONTIG-054354 | 134 | 7   | 7  | 29  | 0  |
| CONTIG-054355 | 58  | 7   | 11 | 12  | 0  |
| CONTIG-054356 | 148 | 12  | 11 | 50  | 0  |
| CONTIG-054357 | 114 | 5   | 2  | 4   | 0  |
| CONTIG-054358 | 103 | 6   | 22 | 5   | 0  |



|               |     |    |    |     |   |
|---------------|-----|----|----|-----|---|
| CONTIG-054359 | 188 | 9  | 19 | 20  | 0 |
| CONTIG-054361 | 60  | 5  | 12 | 2   | 0 |
| CONTIG-054362 | 156 | 6  | 13 | 27  | 0 |
| CONTIG-054363 | 536 | 19 | 6  | 271 | 4 |
| CONTIG-054364 | 242 | 9  | 22 | 73  | 0 |
| CONTIG-054365 | 89  | 76 | 6  | 158 | 4 |
| CONTIG-054367 | 96  | 3  | 0  | 9   | 0 |
| CONTIG-054368 | 327 | 53 | 10 | 646 | 0 |
| CONTIG-054369 | 190 | 6  | 13 | 16  | 0 |
| CONTIG-054370 | 230 | 10 | 26 | 67  | 0 |
| CONTIG-054371 | 216 | 47 | 5  | 569 | 2 |
| CONTIG-054372 | 149 | 7  | 5  | 21  | 0 |
| CONTIG-054373 | 85  | 6  | 2  | 13  | 0 |
| CONTIG-054376 | 160 | 5  | 3  | 12  | 0 |
| CONTIG-054380 | 84  | 5  | 3  | 0   | 0 |
| CONTIG-054381 | 218 | 17 | 7  | 151 | 4 |
| CONTIG-054382 | 69  | 6  | 15 | 8   | 0 |
| CONTIG-054383 | 169 | 8  | 18 | 56  | 0 |
| CONTIG-054384 | 91  | 8  | 5  | 25  | 2 |
| CONTIG-054386 | 226 | 5  | 8  | 25  | 0 |
| CONTIG-054387 | 135 | 5  | 2  | 19  | 0 |
| CONTIG-054388 | 118 | 12 | 21 | 6   | 0 |
| CONTIG-054389 | 342 | 10 | 15 | 67  | 2 |
| CONTIG-054390 | 537 | 14 | 14 | 193 | 2 |
| CONTIG-054395 | 79  | 4  | 11 | 0   | 0 |
| CONTIG-054396 | 94  | 13 | 14 | 28  | 0 |
| CONTIG-054397 | 83  | 8  | 0  | 18  | 0 |
| CONTIG-054402 | 76  | 10 | 2  | 26  | 0 |
| CONTIG-054403 | 120 | 9  | 40 | 30  | 0 |
| CONTIG-054404 | 397 | 8  | 35 | 56  | 2 |
| CONTIG-054405 | 120 | 7  | 10 | 17  | 0 |
| CONTIG-054406 | 162 | 10 | 12 | 20  | 0 |
| CONTIG-054407 | 255 | 10 | 5  | 122 | 0 |
| CONTIG-054408 | 454 | 9  | 15 | 78  | 0 |
| CONTIG-054409 | 165 | 6  | 27 | 9   | 0 |
| CONTIG-054410 | 210 | 27 | 28 | 23  | 0 |
| CONTIG-054411 | 74  | 10 | 16 | 14  | 0 |
| CONTIG-054412 | 60  | 10 | 14 | 9   | 0 |
| CONTIG-054413 | 78  | 14 | 33 | 0   | 0 |
| CONTIG-054414 | 78  | 11 | 4  | 30  | 0 |
| CONTIG-054415 | 59  | 6  | 6  | 4   | 0 |
| CONTIG-054416 | 151 | 15 | 16 | 77  | 2 |
| CONTIG-054418 | 74  | 6  | 3  | 0   | 0 |
| CONTIG-054420 | 156 | 4  | 2  | 0   | 4 |
| CONTIG-054421 | 290 | 12 | 19 | 128 | 2 |
| CONTIG-054425 | 140 | 9  | 8  | 25  | 0 |
| CONTIG-054426 | 159 | 7  | 12 | 22  | 0 |

|               |     |    |    |     |    |
|---------------|-----|----|----|-----|----|
| CONTIG-054427 | 233 | 10 | 5  | 61  | 0  |
| CONTIG-054428 | 302 | 15 | 10 | 90  | 0  |
| CONTIG-054429 | 178 | 13 | 9  | 105 | 0  |
| CONTIG-054430 | 366 | 15 | 19 | 158 | 2  |
| CONTIG-054431 | 178 | 6  | 4  | 24  | 0  |
| CONTIG-054432 | 145 | 19 | 15 | 87  | 0  |
| CONTIG-054433 | 45  | 99 | 4  | 136 | 0  |
| CONTIG-054434 | 218 | 34 | 8  | 27  | 14 |
| CONTIG-054435 | 92  | 6  | 12 | 0   | 0  |
| CONTIG-054437 | 130 | 11 | 9  | 66  | 0  |
| CONTIG-054438 | 237 | 10 | 7  | 109 | 0  |
| CONTIG-054441 | 163 | 3  | 12 | 8   | 2  |
| CONTIG-054442 | 81  | 8  | 6  | 14  | 0  |
| CONTIG-054443 | 77  | 9  | 7  | 19  | 0  |
| CONTIG-054444 | 77  | 6  | 9  | 10  | 0  |
| CONTIG-054445 | 766 | 12 | 75 | 203 | 6  |
| CONTIG-054446 | 155 | 8  | 17 | 6   | 0  |
| CONTIG-054448 | 61  | 3  | 4  | 2   | 0  |
| CONTIG-054449 | 145 | 12 | 11 | 4   | 0  |
| CONTIG-054450 | 180 | 6  | 2  | 31  | 0  |
| CONTIG-054451 | 91  | 4  | 0  | 15  | 0  |
| CONTIG-054452 | 69  | 5  | 2  | 8   | 0  |
| CONTIG-054453 | 328 | 11 | 17 | 177 | 0  |
| CONTIG-054454 | 64  | 9  | 7  | 13  | 0  |
| CONTIG-054455 | 132 | 5  | 8  | 25  | 0  |
| CONTIG-054456 | 165 | 5  | 21 | 7   | 0  |
| CONTIG-054457 | 159 | 10 | 13 | 45  | 0  |
| CONTIG-054458 | 306 | 8  | 2  | 106 | 0  |
| CONTIG-054459 | 68  | 6  | 9  | 10  | 0  |
| CONTIG-054460 | 89  | 5  | 7  | 7   | 0  |
| CONTIG-054461 | 94  | 9  | 6  | 26  | 0  |
| CONTIG-054462 | 119 | 8  | 30 | 6   | 0  |
| CONTIG-054463 | 83  | 19 | 8  | 26  | 0  |
| CONTIG-054464 | 131 | 6  | 5  | 19  | 0  |
| CONTIG-054465 | 209 | 7  | 42 | 35  | 0  |
| CONTIG-054466 | 87  | 6  | 0  | 2   | 0  |
| CONTIG-054467 | 127 | 7  | 6  | 23  | 0  |
| CONTIG-054468 | 76  | 14 | 9  | 12  | 0  |
| CONTIG-054469 | 608 | 13 | 45 | 162 | 8  |
| CONTIG-054471 | 398 | 7  | 15 | 99  | 0  |
| CONTIG-054472 | 162 | 6  | 8  | 12  | 0  |
| CONTIG-054474 | 182 | 6  | 5  | 18  | 0  |
| CONTIG-054477 | 62  | 29 | 11 | 42  | 0  |
| CONTIG-054478 | 158 | 3  | 5  | 9   | 0  |
| CONTIG-054479 | 192 | 20 | 36 | 24  | 0  |
| CONTIG-054480 | 76  | 10 | 26 | 0   | 0  |
| CONTIG-054481 | 62  | 8  | 30 | 2   | 0  |

|               |     |     |    |     |     |
|---------------|-----|-----|----|-----|-----|
| CONTIG-054482 | 278 | 8   | 8  | 55  | 0   |
| CONTIG-054483 | 167 | 11  | 24 | 37  | 4   |
| CONTIG-054484 | 150 | 6   | 2  | 13  | 0   |
| CONTIG-054485 | 102 | 6   | 0  | 0   | 0   |
| CONTIG-054486 | 144 | 5   | 5  | 19  | 0   |
| CONTIG-054487 | 230 | 12  | 16 | 62  | 2   |
| CONTIG-054488 | 76  | 11  | 2  | 7   | 0   |
| CONTIG-054489 | 177 | 8   | 11 | 33  | 0   |
| CONTIG-054490 | 64  | 8   | 2  | 10  | 0   |
| CONTIG-054491 | 88  | 11  | 7  | 31  | 0   |
| CONTIG-054492 | 150 | 8   | 14 | 43  | 0   |
| CONTIG-054494 | 247 | 9   | 29 | 66  | 0   |
| CONTIG-054495 | 87  | 8   | 19 | 7   | 0   |
| CONTIG-054496 | 344 | 7   | 4  | 64  | 0   |
| CONTIG-054497 | 71  | 10  | 6  | 19  | 0   |
| CONTIG-054498 | 132 | 8   | 0  | 27  | 0   |
| CONTIG-054499 | 101 | 22  | 15 | 93  | 0   |
| CONTIG-054500 | 461 | 16  | 26 | 104 | 0   |
| CONTIG-054501 | 64  | 8   | 14 | 8   | 0   |
| CONTIG-054502 | 58  | 11  | 22 | 17  | 0   |
| CONTIG-054503 | 79  | 5   | 2  | 10  | 0   |
| CONTIG-054504 | 231 | 14  | 4  | 103 | 2   |
| CONTIG-054505 | 214 | 7   | 9  | 34  | 0   |
| CONTIG-054506 | 58  | 10  | 0  | 25  | 0   |
| CONTIG-054507 | 165 | 16  | 14 | 51  | 0   |
| CONTIG-054508 | 224 | 7   | 16 | 57  | 0   |
| CONTIG-054509 | 108 | 9   | 5  | 42  | 0   |
| CONTIG-054510 | 69  | 8   | 21 | 13  | 0   |
| CONTIG-054511 | 64  | 8   | 2  | 14  | 0   |
| CONTIG-054512 | 122 | 18  | 29 | 33  | 2   |
| CONTIG-054513 | 142 | 6   | 6  | 37  | 0   |
| CONTIG-054514 | 65  | 3   | 4  | 2   | 0   |
| CONTIG-054515 | 168 | 8   | 22 | 46  | 0   |
| CONTIG-054516 | 138 | 273 | 5  | 0   | 366 |
| CONTIG-054517 | 94  | 4   | 2  | 4   | 0   |
| CONTIG-054518 | 85  | 3   | 22 | 0   | 0   |
| CONTIG-054519 | 100 | 5   | 4  | 27  | 0   |
| CONTIG-054520 | 190 | 12  | 10 | 91  | 0   |
| CONTIG-054529 | 87  | 4   | 0  | 9   | 0   |
| CONTIG-054530 | 243 | 5   | 4  | 34  | 0   |
| CONTIG-054531 | 140 | 8   | 2  | 7   | 0   |
| CONTIG-054532 | 152 | 9   | 0  | 76  | 0   |
| CONTIG-054533 | 61  | 23  | 5  | 38  | 0   |
| CONTIG-054534 | 178 | 7   | 13 | 4   | 0   |
| CONTIG-054535 | 121 | 8   | 3  | 39  | 0   |
| CONTIG-054536 | 180 | 5   | 2  | 24  | 0   |
| CONTIG-054537 | 179 | 7   | 5  | 24  | 0   |

|               |     |    |     |     |   |
|---------------|-----|----|-----|-----|---|
| CONTIG-054539 | 217 | 12 | 15  | 74  | 0 |
| CONTIG-054540 | 161 | 7  | 18  | 19  | 3 |
| CONTIG-054541 | 72  | 10 | 5   | 6   | 0 |
| CONTIG-054542 | 114 | 15 | 52  | 23  | 0 |
| CONTIG-054543 | 336 | 6  | 8   | 31  | 2 |
| CONTIG-054544 | 112 | 6  | 12  | 2   | 0 |
| CONTIG-054545 | 66  | 4  | 4   | 3   | 0 |
| CONTIG-054546 | 129 | 10 | 9   | 30  | 0 |
| CONTIG-054547 | 502 | 9  | 40  | 114 | 0 |
| CONTIG-054548 | 108 | 13 | 12  | 47  | 2 |
| CONTIG-054549 | 275 | 6  | 15  | 47  | 0 |
| CONTIG-054550 | 176 | 7  | 2   | 38  | 0 |
| CONTIG-054551 | 170 | 8  | 2   | 0   | 0 |
| CONTIG-054552 | 97  | 4  | 2   | 9   | 0 |
| CONTIG-054553 | 122 | 15 | 4   | 64  | 0 |
| CONTIG-054554 | 138 | 9  | 11  | 40  | 0 |
| CONTIG-054555 | 112 | 5  | 4   | 12  | 0 |
| CONTIG-054556 | 63  | 61 | 14  | 64  | 0 |
| CONTIG-054557 | 241 | 7  | 6   | 27  | 4 |
| CONTIG-054558 | 233 | 15 | 21  | 175 | 0 |
| CONTIG-054559 | 457 | 25 | 80  | 435 | 0 |
| CONTIG-054560 | 219 | 11 | 26  | 71  | 2 |
| CONTIG-054561 | 88  | 7  | 0   | 15  | 0 |
| CONTIG-054562 | 85  | 5  | 7   | 8   | 0 |
| CONTIG-054564 | 162 | 11 | 5   | 45  | 0 |
| CONTIG-054565 | 251 | 16 | 31  | 76  | 8 |
| CONTIG-054566 | 333 | 6  | 15  | 47  | 0 |
| CONTIG-054567 | 340 | 9  | 19  | 65  | 0 |
| CONTIG-054568 | 75  | 10 | 28  | 6   | 0 |
| CONTIG-054569 | 230 | 11 | 22  | 92  | 0 |
| CONTIG-054570 | 752 | 18 | 121 | 607 | 0 |
| CONTIG-054571 | 323 | 6  | 14  | 54  | 0 |
| CONTIG-054572 | 65  | 8  | 16  | 6   | 2 |
| CONTIG-054573 | 228 | 9  | 2   | 66  | 0 |
| CONTIG-054574 | 250 | 7  | 13  | 45  | 0 |
| CONTIG-054575 | 88  | 10 | 8   | 36  | 0 |
| CONTIG-054576 | 92  | 9  | 7   | 23  | 0 |
| CONTIG-054577 | 96  | 4  | 8   | 4   | 0 |
| CONTIG-054578 | 75  | 3  | 10  | 2   | 0 |
| CONTIG-054579 | 157 | 6  | 2   | 43  | 0 |
| CONTIG-054580 | 59  | 3  | 2   | 5   | 0 |
| CONTIG-054581 | 100 | 19 | 11  | 49  | 0 |
| CONTIG-054583 | 119 | 5  | 20  | 3   | 0 |
| CONTIG-054584 | 301 | 6  | 8   | 33  | 0 |
| CONTIG-054585 | 652 | 11 | 16  | 247 | 4 |
| CONTIG-054586 | 179 | 5  | 3   | 36  | 0 |
| CONTIG-054587 | 162 | 13 | 0   | 66  | 5 |

|               |     |     |    |     |    |
|---------------|-----|-----|----|-----|----|
| CONTIG-054588 | 89  | 4   | 13 | 0   | 0  |
| CONTIG-054589 | 331 | 7   | 10 | 38  | 0  |
| CONTIG-054590 | 127 | 8   | 5  | 0   | 0  |
| CONTIG-054591 | 218 | 10  | 5  | 58  | 4  |
| CONTIG-054592 | 67  | 5   | 2  | 4   | 0  |
| CONTIG-054593 | 63  | 33  | 4  | 108 | 0  |
| CONTIG-054594 | 142 | 6   | 2  | 0   | 2  |
| CONTIG-054595 | 91  | 5   | 3  | 16  | 0  |
| CONTIG-054596 | 90  | 206 | 43 | 376 | 17 |
| CONTIG-054597 | 257 | 14  | 8  | 92  | 0  |
| CONTIG-054598 | 84  | 5   | 9  | 0   | 0  |
| CONTIG-054599 | 82  | 3   | 0  | 3   | 0  |
| CONTIG-054601 | 171 | 12  | 9  | 90  | 0  |
| CONTIG-054602 | 131 | 5   | 0  | 0   | 0  |
| CONTIG-054603 | 667 | 18  | 12 | 18  | 0  |
| CONTIG-054604 | 67  | 3   | 2  | 2   | 0  |
| CONTIG-054605 | 213 | 9   | 13 | 68  | 0  |
| CONTIG-054606 | 149 | 11  | 6  | 65  | 2  |
| CONTIG-054607 | 122 | 8   | 8  | 27  | 0  |
| CONTIG-054608 | 115 | 3   | 10 | 12  | 0  |
| CONTIG-054609 | 199 | 8   | 13 | 54  | 0  |
| CONTIG-054610 | 77  | 3   | 2  | 2   | 0  |
| CONTIG-054611 | 291 | 19  | 39 | 121 | 0  |
| CONTIG-054613 | 169 | 7   | 13 | 19  | 0  |
| CONTIG-054614 | 247 | 5   | 0  | 12  | 0  |
| CONTIG-054615 | 123 | 4   | 3  | 14  | 0  |
| CONTIG-054616 | 64  | 11  | 16 | 0   | 0  |
| CONTIG-054618 | 211 | 11  | 8  | 71  | 0  |
| CONTIG-054619 | 268 | 6   | 8  | 51  | 0  |
| CONTIG-054620 | 153 | 9   | 31 | 0   | 0  |
| CONTIG-054621 | 90  | 280 | 41 | 740 | 48 |
| CONTIG-054622 | 154 | 6   | 4  | 17  | 2  |
| CONTIG-054623 | 51  | 48  | 2  | 73  | 0  |
| CONTIG-054624 | 112 | 4   | 9  | 4   | 0  |
| CONTIG-054625 | 106 | 9   | 8  | 32  | 0  |
| CONTIG-054626 | 37  | 114 | 0  | 61  | 0  |
| CONTIG-054627 | 383 | 20  | 23 | 124 | 0  |
| CONTIG-054628 | 238 | 5   | 12 | 23  | 0  |
| CONTIG-054629 | 88  | 4   | 6  | 6   | 0  |
| CONTIG-054630 | 102 | 6   | 2  | 10  | 0  |
| CONTIG-054631 | 223 | 7   | 13 | 27  | 0  |
| CONTIG-054632 | 80  | 3   | 7  | 4   | 0  |
| CONTIG-054633 | 214 | 25  | 7  | 125 | 0  |
| CONTIG-054634 | 240 | 12  | 6  | 121 | 0  |
| CONTIG-054635 | 94  | 4   | 0  | 5   | 0  |
| CONTIG-054636 | 59  | 9   | 6  | 8   | 0  |
| CONTIG-054637 | 155 | 17  | 7  | 127 | 0  |

|               |      |     |    |     |     |
|---------------|------|-----|----|-----|-----|
| CONTIG-054638 | 276  | 9   | 11 | 84  | 0   |
| CONTIG-054639 | 173  | 8   | 23 | 16  | 0   |
| CONTIG-054640 | 121  | 27  | 12 | 92  | 0   |
| CONTIG-054641 | 112  | 5   | 0  | 15  | 0   |
| CONTIG-054642 | 65   | 8   | 0  | 16  | 0   |
| CONTIG-054643 | 240  | 8   | 9  | 38  | 0   |
| CONTIG-054644 | 80   | 4   | 6  | 2   | 0   |
| CONTIG-054645 | 237  | 10  | 8  | 13  | 0   |
| CONTIG-054646 | 154  | 10  | 10 | 72  | 0   |
| CONTIG-054647 | 259  | 7   | 20 | 61  | 0   |
| CONTIG-054648 | 150  | 5   | 11 | 9   | 0   |
| CONTIG-054649 | 275  | 6   | 2  | 29  | 0   |
| CONTIG-054650 | 60   | 5   | 0  | 0   | 0   |
| CONTIG-054651 | 115  | 6   | 5  | 20  | 0   |
| CONTIG-054652 | 98   | 9   | 18 | 24  | 0   |
| CONTIG-054653 | 49   | 388 | 3  | 0   | 3   |
| CONTIG-054654 | 130  | 4   | 0  | 8   | 0   |
| CONTIG-054655 | 66   | 7   | 0  | 7   | 0   |
| CONTIG-054656 | 152  | 8   | 10 | 48  | 0   |
| CONTIG-054657 | 87   | 15  | 8  | 7   | 0   |
| CONTIG-054658 | 292  | 6   | 19 | 63  | 0   |
| CONTIG-054659 | 134  | 5   | 0  | 33  | 0   |
| CONTIG-054660 | 351  | 23  | 33 | 415 | 0   |
| CONTIG-054661 | 2027 | 23  | 3  | 0   | 424 |
| CONTIG-054662 | 159  | 7   | 12 | 33  | 2   |
| CONTIG-054663 | 83   | 5   | 2  | 6   | 0   |
| CONTIG-054664 | 209  | 5   | 8  | 26  | 0   |
| CONTIG-054665 | 88   | 5   | 0  | 11  | 0   |
| CONTIG-054666 | 91   | 21  | 8  | 64  | 0   |
| CONTIG-054667 | 93   | 3   | 0  | 4   | 0   |
| CONTIG-054668 | 255  | 6   | 15 | 64  | 0   |
| CONTIG-054669 | 98   | 12  | 35 | 30  | 0   |
| CONTIG-054670 | 559  | 16  | 13 | 269 | 16  |
| CONTIG-054671 | 144  | 6   | 5  | 28  | 0   |
| CONTIG-054672 | 362  | 13  | 6  | 68  | 0   |
| CONTIG-054673 | 196  | 13  | 13 | 4   | 0   |
| CONTIG-054674 | 76   | 8   | 2  | 24  | 0   |
| CONTIG-054675 | 270  | 12  | 7  | 110 | 0   |
| CONTIG-054676 | 58   | 3   | 0  | 2   | 0   |
| CONTIG-054677 | 78   | 5   | 5  | 9   | 0   |
| CONTIG-054678 | 101  | 6   | 35 | 4   | 0   |
| CONTIG-054679 | 63   | 3   | 2  | 4   | 0   |
| CONTIG-054680 | 127  | 5   | 10 | 15  | 0   |
| CONTIG-054681 | 409  | 10  | 11 | 118 | 0   |
| CONTIG-054682 | 128  | 29  | 56 | 107 | 4   |
| CONTIG-054683 | 91   | 5   | 4  | 19  | 0   |
| CONTIG-054684 | 256  | 17  | 36 | 140 | 0   |

|               |     |    |    |     |    |
|---------------|-----|----|----|-----|----|
| CONTIG-054685 | 91  | 9  | 5  | 32  | 0  |
| CONTIG-054686 | 88  | 9  | 10 | 5   | 0  |
| CONTIG-054687 | 66  | 3  | 0  | 4   | 0  |
| CONTIG-054688 | 165 | 11 | 5  | 55  | 0  |
| CONTIG-054690 | 157 | 6  | 15 | 25  | 0  |
| CONTIG-054691 | 257 | 9  | 4  | 55  | 0  |
| CONTIG-054692 | 138 | 16 | 5  | 37  | 3  |
| CONTIG-054693 | 92  | 7  | 4  | 34  | 0  |
| CONTIG-054694 | 68  | 5  | 18 | 0   | 0  |
| CONTIG-054695 | 100 | 9  | 0  | 23  | 0  |
| CONTIG-054698 | 70  | 6  | 0  | 12  | 0  |
| CONTIG-054700 | 70  | 8  | 27 | 6   | 0  |
| CONTIG-054702 | 59  | 47 | 14 | 112 | 0  |
| CONTIG-054703 | 86  | 4  | 9  | 5   | 0  |
| CONTIG-054705 | 127 | 6  | 6  | 22  | 0  |
| CONTIG-054706 | 659 | 23 | 16 | 4   | 0  |
| CONTIG-054707 | 155 | 9  | 15 | 49  | 2  |
| CONTIG-054708 | 97  | 5  | 0  | 12  | 0  |
| CONTIG-054709 | 134 | 8  | 7  | 27  | 0  |
| CONTIG-054710 | 206 | 8  | 8  | 38  | 0  |
| CONTIG-054712 | 172 | 17 | 24 | 81  | 2  |
| CONTIG-054713 | 132 | 5  | 4  | 20  | 0  |
| CONTIG-054714 | 412 | 12 | 11 | 173 | 0  |
| CONTIG-054715 | 154 | 7  | 10 | 18  | 0  |
| CONTIG-054716 | 225 | 14 | 30 | 119 | 0  |
| CONTIG-054717 | 150 | 10 | 9  | 18  | 0  |
| CONTIG-054718 | 264 | 5  | 22 | 39  | 0  |
| CONTIG-054719 | 138 | 7  | 7  | 39  | 0  |
| CONTIG-054720 | 61  | 4  | 6  | 3   | 0  |
| CONTIG-054721 | 148 | 33 | 6  | 157 | 10 |
| CONTIG-054722 | 334 | 5  | 11 | 54  | 0  |
| CONTIG-054723 | 207 | 17 | 7  | 58  | 6  |
| CONTIG-054725 | 354 | 11 | 14 | 110 | 0  |
| CONTIG-054726 | 244 | 9  | 5  | 64  | 4  |
| CONTIG-054727 | 180 | 13 | 0  | 82  | 0  |
| CONTIG-054728 | 176 | 14 | 11 | 107 | 0  |
| CONTIG-054729 | 153 | 7  | 12 | 24  | 0  |
| CONTIG-054730 | 284 | 11 | 18 | 108 | 0  |
| CONTIG-054731 | 172 | 6  | 4  | 9   | 0  |
| CONTIG-054732 | 374 | 10 | 9  | 161 | 10 |
| CONTIG-054733 | 363 | 10 | 20 | 97  | 0  |
| CONTIG-054734 | 153 | 65 | 45 | 393 | 8  |
| CONTIG-054735 | 62  | 57 | 2  | 159 | 0  |
| CONTIG-054736 | 85  | 3  | 3  | 2   | 2  |
| CONTIG-054737 | 82  | 6  | 3  | 12  | 0  |
| CONTIG-054738 | 212 | 9  | 8  | 58  | 2  |
| CONTIG-054739 | 197 | 11 | 12 | 75  | 0  |

|               |     |    |    |     |   |
|---------------|-----|----|----|-----|---|
| CONTIG-054741 | 100 | 9  | 6  | 38  | 0 |
| CONTIG-054742 | 104 | 11 | 28 | 4   | 0 |
| CONTIG-054743 | 68  | 4  | 2  | 2   | 0 |
| CONTIG-054744 | 192 | 10 | 2  | 75  | 0 |
| CONTIG-054745 | 126 | 6  | 4  | 28  | 0 |
| CONTIG-054746 | 110 | 5  | 2  | 23  | 0 |
| CONTIG-054747 | 117 | 6  | 9  | 12  | 0 |
| CONTIG-054748 | 127 | 9  | 3  | 4   | 0 |
| CONTIG-054750 | 107 | 5  | 4  | 9   | 0 |
| CONTIG-054752 | 85  | 6  | 0  | 8   | 0 |
| CONTIG-054753 | 195 | 8  | 4  | 45  | 0 |
| CONTIG-054754 | 111 | 8  | 20 | 8   | 0 |
| CONTIG-054755 | 303 | 17 | 20 | 118 | 8 |
| CONTIG-054756 | 68  | 8  | 10 | 8   | 0 |
| CONTIG-054757 | 61  | 17 | 13 | 27  | 0 |
| CONTIG-054758 | 89  | 5  | 3  | 5   | 0 |
| CONTIG-054760 | 60  | 5  | 0  | 2   | 0 |
| CONTIG-054761 | 333 | 11 | 25 | 108 | 0 |
| CONTIG-054762 | 169 | 19 | 8  | 139 | 0 |
| CONTIG-054763 | 280 | 13 | 22 | 108 | 0 |
| CONTIG-054764 | 230 | 9  | 3  | 38  | 4 |
| CONTIG-054765 | 112 | 7  | 22 | 22  | 0 |
| CONTIG-054766 | 94  | 8  | 15 | 21  | 0 |
| CONTIG-054767 | 120 | 15 | 10 | 61  | 0 |
| CONTIG-054768 | 86  | 8  | 11 | 20  | 0 |
| CONTIG-054769 | 108 | 21 | 39 | 20  | 5 |
| CONTIG-054770 | 105 | 8  | 6  | 21  | 0 |
| CONTIG-054771 | 145 | 10 | 6  | 42  | 0 |
| CONTIG-054772 | 72  | 11 | 2  | 16  | 0 |
| CONTIG-054773 | 144 | 35 | 41 | 5   | 0 |
| CONTIG-054774 | 104 | 5  | 0  | 18  | 0 |
| CONTIG-054775 | 362 | 10 | 14 | 108 | 4 |
| CONTIG-054776 | 104 | 5  | 0  | 14  | 0 |
| CONTIG-054777 | 177 | 8  | 14 | 42  | 0 |
| CONTIG-054778 | 83  | 5  | 2  | 9   | 0 |
| CONTIG-054779 | 194 | 7  | 0  | 46  | 0 |
| CONTIG-054780 | 596 | 25 | 48 | 311 | 9 |
| CONTIG-054781 | 157 | 6  | 5  | 16  | 0 |
| CONTIG-054782 | 293 | 10 | 16 | 48  | 2 |
| CONTIG-054784 | 91  | 8  | 24 | 2   | 0 |
| CONTIG-054785 | 283 | 10 | 10 | 95  | 0 |
| CONTIG-054786 | 339 | 12 | 20 | 167 | 0 |
| CONTIG-054787 | 109 | 15 | 12 | 72  | 0 |
| CONTIG-054788 | 77  | 59 | 5  | 138 | 0 |
| CONTIG-054790 | 227 | 12 | 8  | 67  | 0 |
| CONTIG-054791 | 74  | 5  | 5  | 7   | 0 |
| CONTIG-054792 | 165 | 5  | 6  | 20  | 0 |



|               |     |    |    |     |    |
|---------------|-----|----|----|-----|----|
| CONTIG-054793 | 278 | 8  | 28 | 43  | 0  |
| CONTIG-054794 | 169 | 7  | 8  | 31  | 0  |
| CONTIG-054795 | 358 | 10 | 0  | 118 | 0  |
| CONTIG-054796 | 179 | 13 | 4  | 105 | 0  |
| CONTIG-054798 | 104 | 6  | 3  | 2   | 2  |
| CONTIG-054799 | 103 | 8  | 4  | 26  | 0  |
| CONTIG-054800 | 163 | 10 | 11 | 64  | 0  |
| CONTIG-054801 | 72  | 7  | 2  | 5   | 0  |
| CONTIG-054803 | 59  | 14 | 13 | 15  | 0  |
| CONTIG-054804 | 129 | 7  | 3  | 0   | 2  |
| CONTIG-054805 | 204 | 11 | 10 | 98  | 0  |
| CONTIG-054806 | 111 | 6  | 17 | 16  | 0  |
| CONTIG-054807 | 242 | 15 | 15 | 60  | 0  |
| CONTIG-054808 | 70  | 4  | 8  | 2   | 0  |
| CONTIG-054809 | 60  | 3  | 2  | 3   | 0  |
| CONTIG-054810 | 105 | 3  | 0  | 12  | 0  |
| CONTIG-054811 | 179 | 6  | 5  | 27  | 0  |
| CONTIG-054820 | 118 | 8  | 0  | 13  | 0  |
| CONTIG-054821 | 79  | 5  | 0  | 12  | 0  |
| CONTIG-054824 | 292 | 8  | 22 | 106 | 0  |
| CONTIG-054825 | 437 | 14 | 0  | 0   | 40 |
| CONTIG-054826 | 168 | 7  | 14 | 18  | 0  |
| CONTIG-054827 | 184 | 9  | 4  | 41  | 0  |
| CONTIG-054828 | 110 | 9  | 19 | 27  | 0  |
| CONTIG-054829 | 167 | 9  | 4  | 56  | 2  |
| CONTIG-054830 | 107 | 14 | 19 | 53  | 0  |
| CONTIG-054831 | 66  | 4  | 2  | 8   | 0  |
| CONTIG-054832 | 404 | 14 | 10 | 198 | 4  |
| CONTIG-054833 | 344 | 14 | 27 | 279 | 0  |
| CONTIG-054834 | 312 | 6  | 11 | 15  | 0  |
| CONTIG-054835 | 88  | 5  | 0  | 8   | 0  |
| CONTIG-054837 | 238 | 8  | 6  | 83  | 0  |
| CONTIG-054840 | 63  | 4  | 2  | 2   | 0  |
| CONTIG-054841 | 58  | 2  | 5  | 2   | 0  |
| CONTIG-054842 | 171 | 9  | 7  | 54  | 0  |
| CONTIG-054843 | 194 | 25 | 12 | 10  | 0  |
| CONTIG-054844 | 105 | 8  | 22 | 8   | 0  |
| CONTIG-054845 | 495 | 11 | 29 | 156 | 2  |
| CONTIG-054846 | 348 | 13 | 16 | 182 | 0  |
| CONTIG-054847 | 137 | 6  | 13 | 12  | 0  |
| CONTIG-054848 | 44  | 7  | 2  | 8   | 0  |
| CONTIG-054849 | 365 | 14 | 15 | 179 | 5  |
| CONTIG-054851 | 86  | 9  | 7  | 23  | 0  |
| CONTIG-054852 | 111 | 7  | 3  | 28  | 0  |
| CONTIG-054854 | 68  | 17 | 2  | 28  | 0  |
| CONTIG-054857 | 86  | 5  | 6  | 12  | 0  |
| CONTIG-054858 | 83  | 6  | 7  | 8   | 0  |

|               |     |     |    |      |     |
|---------------|-----|-----|----|------|-----|
| CONTIG-054859 | 207 | 6   | 2  | 27   | 2   |
| CONTIG-054860 | 154 | 16  | 24 | 19   | 0   |
| CONTIG-054861 | 121 | 36  | 43 | 126  | 0   |
| CONTIG-054862 | 261 | 184 | 2  | 0    | 257 |
| CONTIG-054863 | 85  | 11  | 2  | 38   | 0   |
| CONTIG-054864 | 149 | 13  | 11 | 42   | 0   |
| CONTIG-054865 | 82  | 15  | 30 | 35   | 0   |
| CONTIG-054866 | 64  | 5   | 0  | 11   | 0   |
| CONTIG-054867 | 64  | 6   | 2  | 5    | 0   |
| CONTIG-054868 | 66  | 4   | 0  | 7    | 0   |
| CONTIG-054869 | 118 | 9   | 21 | 51   | 0   |
| CONTIG-054870 | 58  | 2   | 2  | 2    | 0   |
| CONTIG-054871 | 213 | 9   | 10 | 60   | 0   |
| CONTIG-054872 | 161 | 36  | 19 | 245  | 0   |
| CONTIG-054874 | 80  | 87  | 46 | 211  | 0   |
| CONTIG-054876 | 153 | 4   | 0  | 10   | 0   |
| CONTIG-054877 | 94  | 7   | 5  | 14   | 0   |
| CONTIG-054878 | 169 | 17  | 41 | 80   | 0   |
| CONTIG-054879 | 131 | 12  | 2  | 57   | 0   |
| CONTIG-054880 | 92  | 13  | 23 | 21   | 0   |
| CONTIG-054881 | 283 | 11  | 21 | 42   | 0   |
| CONTIG-054882 | 250 | 14  | 21 | 65   | 0   |
| CONTIG-054883 | 115 | 5   | 12 | 13   | 0   |
| CONTIG-054884 | 72  | 4   | 0  | 3    | 0   |
| CONTIG-054885 | 202 | 17  | 24 | 73   | 0   |
| CONTIG-054886 | 212 | 12  | 9  | 97   | 0   |
| CONTIG-054887 | 184 | 9   | 10 | 36   | 0   |
| CONTIG-054889 | 167 | 8   | 6  | 36   | 0   |
| CONTIG-054890 | 66  | 4   | 9  | 7    | 0   |
| CONTIG-054891 | 153 | 15  | 22 | 81   | 2   |
| CONTIG-054892 | 242 | 7   | 5  | 19   | 2   |
| CONTIG-054893 | 258 | 79  | 41 | 1121 | 0   |
| CONTIG-054894 | 461 | 7   | 11 | 106  | 3   |
| CONTIG-054896 | 153 | 12  | 6  | 38   | 0   |
| CONTIG-054897 | 79  | 5   | 3  | 5    | 0   |
| CONTIG-054898 | 195 | 33  | 15 | 8    | 57  |
| CONTIG-054899 | 72  | 5   | 12 | 2    | 0   |
| CONTIG-054900 | 119 | 6   | 2  | 18   | 0   |
| CONTIG-054901 | 111 | 5   | 19 | 11   | 0   |
| CONTIG-054902 | 99  | 60  | 66 | 310  | 0   |
| CONTIG-054903 | 228 | 17  | 14 | 203  | 0   |
| CONTIG-054904 | 94  | 8   | 11 | 18   | 0   |
| CONTIG-054905 | 53  | 31  | 24 | 46   | 0   |
| CONTIG-054906 | 137 | 15  | 6  | 63   | 0   |
| CONTIG-054907 | 73  | 4   | 4  | 14   | 0   |
| CONTIG-054908 | 202 | 9   | 24 | 67   | 0   |
| CONTIG-054909 | 90  | 4   | 6  | 8    | 0   |

|               |     |     |    |     |     |
|---------------|-----|-----|----|-----|-----|
| CONTIG-054910 | 95  | 7   | 0  | 18  | 0   |
| CONTIG-054915 | 69  | 11  | 12 | 13  | 0   |
| CONTIG-054916 | 63  | 4   | 3  | 2   | 0   |
| CONTIG-054917 | 174 | 8   | 7  | 44  | 0   |
| CONTIG-054918 | 65  | 3   | 0  | 2   | 0   |
| CONTIG-054919 | 154 | 9   | 36 | 11  | 0   |
| CONTIG-054922 | 273 | 12  | 28 | 120 | 0   |
| CONTIG-054929 | 110 | 3   | 0  | 3   | 0   |
| CONTIG-054930 | 63  | 5   | 4  | 6   | 0   |
| CONTIG-054931 | 125 | 5   | 4  | 2   | 0   |
| CONTIG-054932 | 123 | 5   | 0  | 15  | 0   |
| CONTIG-054933 | 96  | 13  | 17 | 39  | 0   |
| CONTIG-054934 | 68  | 9   | 7  | 10  | 0   |
| CONTIG-054935 | 58  | 8   | 0  | 0   | 0   |
| CONTIG-054936 | 66  | 13  | 8  | 39  | 0   |
| CONTIG-054937 | 123 | 20  | 12 | 86  | 2   |
| CONTIG-054938 | 378 | 20  | 20 | 299 | 2   |
| CONTIG-054939 | 165 | 17  | 35 | 80  | 0   |
| CONTIG-054940 | 95  | 5   | 0  | 12  | 0   |
| CONTIG-054941 | 117 | 5   | 10 | 7   | 0   |
| CONTIG-054942 | 71  | 150 | 8  | 0   | 2   |
| CONTIG-054943 | 776 | 63  | 4  | 2   | 403 |
| CONTIG-054944 | 79  | 7   | 2  | 11  | 0   |
| CONTIG-054945 | 59  | 11  | 35 | 3   | 0   |
| CONTIG-054946 | 350 | 8   | 17 | 31  | 0   |
| CONTIG-054947 | 338 | 13  | 38 | 140 | 0   |
| CONTIG-054948 | 77  | 9   | 7  | 15  | 0   |
| CONTIG-054949 | 680 | 21  | 14 | 423 | 37  |
| CONTIG-054950 | 125 | 3   | 3  | 13  | 0   |
| CONTIG-054951 | 209 | 6   | 8  | 24  | 0   |
| CONTIG-054952 | 133 | 14  | 23 | 24  | 0   |
| CONTIG-054953 | 211 | 7   | 11 | 34  | 2   |
| CONTIG-054954 | 133 | 4   | 5  | 9   | 2   |
| CONTIG-054955 | 163 | 16  | 30 | 83  | 0   |
| CONTIG-054956 | 126 | 6   | 2  | 25  | 0   |
| CONTIG-054957 | 99  | 6   | 2  | 13  | 0   |
| CONTIG-054958 | 114 | 5   | 2  | 15  | 0   |
| CONTIG-054959 | 206 | 9   | 48 | 20  | 0   |
| CONTIG-054960 | 159 | 5   | 7  | 18  | 0   |
| CONTIG-054961 | 187 | 12  | 7  | 13  | 0   |
| CONTIG-054962 | 72  | 3   | 6  | 3   | 0   |
| CONTIG-054963 | 80  | 3   | 0  | 2   | 0   |
| CONTIG-054964 | 155 | 5   | 12 | 20  | 0   |
| CONTIG-054965 | 89  | 8   | 30 | 9   | 0   |
| CONTIG-054967 | 73  | 10  | 0  | 6   | 0   |
| CONTIG-054968 | 211 | 7   | 2  | 58  | 0   |
| CONTIG-054969 | 210 | 40  | 4  | 308 | 0   |

|               |     |     |    |     |     |
|---------------|-----|-----|----|-----|-----|
| CONTIG-054971 | 73  | 18  | 16 | 36  | 0   |
| CONTIG-054972 | 119 | 7   | 4  | 0   | 0   |
| CONTIG-054973 | 168 | 23  | 14 | 196 | 0   |
| CONTIG-054974 | 319 | 9   | 13 | 87  | 0   |
| CONTIG-054977 | 260 | 6   | 12 | 32  | 0   |
| CONTIG-054978 | 64  | 5   | 10 | 2   | 0   |
| CONTIG-054979 | 186 | 58  | 32 | 373 | 8   |
| CONTIG-054980 | 320 | 9   | 11 | 97  | 0   |
| CONTIG-054985 | 122 | 11  | 6  | 17  | 0   |
| CONTIG-054986 | 64  | 7   | 6  | 9   | 0   |
| CONTIG-054989 | 204 | 6   | 9  | 17  | 0   |
| CONTIG-054990 | 381 | 12  | 20 | 214 | 0   |
| CONTIG-054991 | 128 | 4   | 0  | 0   | 2   |
| CONTIG-054992 | 85  | 20  | 12 | 24  | 0   |
| CONTIG-054993 | 121 | 18  | 12 | 23  | 7   |
| CONTIG-054994 | 237 | 10  | 26 | 60  | 0   |
| CONTIG-054995 | 99  | 5   | 0  | 2   | 0   |
| CONTIG-054996 | 152 | 10  | 34 | 25  | 0   |
| CONTIG-054997 | 150 | 7   | 9  | 25  | 0   |
| CONTIG-054998 | 165 | 11  | 12 | 59  | 0   |
| CONTIG-054999 | 402 | 10  | 16 | 154 | 0   |
| CONTIG-055000 | 43  | 720 | 50 | 30  | 641 |
| CONTIG-055001 | 92  | 5   | 2  | 0   | 0   |
| CONTIG-055002 | 61  | 6   | 15 | 0   | 0   |
| CONTIG-055003 | 99  | 4   | 0  | 6   | 0   |
| CONTIG-055004 | 558 | 13  | 5  | 10  | 0   |
| CONTIG-055006 | 122 | 7   | 3  | 35  | 0   |
| CONTIG-055007 | 275 | 10  | 18 | 57  | 4   |
| CONTIG-055008 | 81  | 6   | 2  | 6   | 0   |
| CONTIG-055010 | 226 | 6   | 2  | 28  | 0   |
| CONTIG-055011 | 79  | 8   | 9  | 10  | 0   |
| CONTIG-055012 | 178 | 17  | 6  | 77  | 2   |
| CONTIG-055015 | 60  | 8   | 5  | 11  | 0   |
| CONTIG-055016 | 87  | 8   | 10 | 23  | 0   |
| CONTIG-055017 | 71  | 7   | 34 | 0   | 0   |
| CONTIG-055019 | 230 | 9   | 11 | 95  | 0   |
| CONTIG-055020 | 484 | 12  | 20 | 237 | 0   |
| CONTIG-055021 | 60  | 6   | 7  | 7   | 0   |
| CONTIG-055022 | 91  | 3   | 9  | 4   | 0   |
| CONTIG-055023 | 70  | 5   | 2  | 5   | 0   |
| CONTIG-055024 | 84  | 7   | 10 | 6   | 0   |
| CONTIG-055025 | 506 | 9   | 10 | 225 | 0   |
| CONTIG-055027 | 94  | 5   | 5  | 12  | 0   |
| CONTIG-055028 | 187 | 10  | 24 | 46  | 0   |
| CONTIG-055029 | 144 | 11  | 29 | 58  | 0   |
| CONTIG-055030 | 161 | 29  | 8  | 137 | 9   |
| CONTIG-055031 | 60  | 7   | 6  | 14  | 0   |

|               |     |     |    |     |     |
|---------------|-----|-----|----|-----|-----|
| CONTIG-055032 | 75  | 3   | 2  | 7   | 0   |
| CONTIG-055033 | 75  | 25  | 2  | 20  | 0   |
| CONTIG-055034 | 69  | 4   | 10 | 2   | 0   |
| CONTIG-055035 | 267 | 16  | 2  | 0   | 10  |
| CONTIG-055036 | 86  | 9   | 9  | 32  | 0   |
| CONTIG-055037 | 303 | 10  | 5  | 21  | 4   |
| CONTIG-055038 | 116 | 11  | 9  | 55  | 0   |
| CONTIG-055039 | 446 | 8   | 6  | 122 | 3   |
| CONTIG-055040 | 111 | 2   | 0  | 7   | 0   |
| CONTIG-055041 | 92  | 4   | 2  | 4   | 0   |
| CONTIG-055042 | 156 | 8   | 2  | 12  | 0   |
| CONTIG-055043 | 148 | 5   | 2  | 16  | 4   |
| CONTIG-055044 | 109 | 8   | 5  | 25  | 0   |
| CONTIG-055045 | 402 | 9   | 14 | 99  | 0   |
| CONTIG-055046 | 184 | 15  | 18 | 109 | 0   |
| CONTIG-055047 | 578 | 11  | 39 | 201 | 0   |
| CONTIG-055049 | 49  | 16  | 3  | 12  | 0   |
| CONTIG-055050 | 417 | 11  | 14 | 148 | 2   |
| CONTIG-055051 | 84  | 11  | 17 | 14  | 2   |
| CONTIG-055052 | 216 | 11  | 29 | 78  | 2   |
| CONTIG-055053 | 51  | 8   | 6  | 6   | 0   |
| CONTIG-055054 | 492 | 14  | 7  | 194 | 6   |
| CONTIG-055055 | 298 | 52  | 2  | 0   | 86  |
| CONTIG-055057 | 95  | 3   | 2  | 3   | 0   |
| CONTIG-055058 | 896 | 35  | 2  | 0   | 239 |
| CONTIG-055059 | 135 | 8   | 4  | 30  | 0   |
| CONTIG-055060 | 346 | 15  | 27 | 132 | 4   |
| CONTIG-055066 | 364 | 10  | 8  | 193 | 0   |
| CONTIG-055067 | 276 | 11  | 13 | 85  | 0   |
| CONTIG-055068 | 125 | 9   | 2  | 34  | 0   |
| CONTIG-055069 | 67  | 10  | 8  | 21  | 0   |
| CONTIG-055070 | 150 | 9   | 14 | 39  | 0   |
| CONTIG-055071 | 152 | 7   | 7  | 36  | 0   |
| CONTIG-055073 | 457 | 12  | 0  | 0   | 80  |
| CONTIG-055075 | 100 | 7   | 5  | 17  | 0   |
| CONTIG-055077 | 99  | 46  | 32 | 202 | 0   |
| CONTIG-055078 | 228 | 10  | 19 | 78  | 0   |
| CONTIG-055079 | 63  | 13  | 84 | 3   | 0   |
| CONTIG-055080 | 172 | 10  | 19 | 51  | 2   |
| CONTIG-055081 | 284 | 12  | 17 | 99  | 0   |
| CONTIG-055082 | 87  | 3   | 11 | 0   | 0   |
| CONTIG-055083 | 102 | 11  | 9  | 33  | 0   |
| CONTIG-055084 | 42  | 50  | 11 | 33  | 2   |
| CONTIG-055085 | 392 | 9   | 18 | 146 | 0   |
| CONTIG-055086 | 59  | 8   | 4  | 10  | 0   |
| CONTIG-055087 | 239 | 7   | 11 | 45  | 0   |
| CONTIG-055088 | 51  | 323 | 9  | 82  | 0   |

|               |      |    |    |     |    |
|---------------|------|----|----|-----|----|
| CONTIG-055089 | 60   | 3  | 2  | 4   | 0  |
| CONTIG-055090 | 105  | 13 | 66 | 8   | 0  |
| CONTIG-055091 | 198  | 4  | 17 | 10  | 0  |
| CONTIG-055092 | 276  | 21 | 17 | 169 | 9  |
| CONTIG-055093 | 169  | 13 | 11 | 78  | 0  |
| CONTIG-055094 | 323  | 16 | 21 | 160 | 4  |
| CONTIG-055095 | 109  | 15 | 0  | 0   | 13 |
| CONTIG-055096 | 84   | 12 | 7  | 45  | 0  |
| CONTIG-055097 | 174  | 36 | 29 | 161 | 0  |
| CONTIG-055099 | 266  | 11 | 6  | 96  | 0  |
| CONTIG-055101 | 199  | 12 | 3  | 21  | 0  |
| CONTIG-055102 | 226  | 7  | 9  | 25  | 4  |
| CONTIG-055103 | 143  | 12 | 40 | 21  | 0  |
| CONTIG-055106 | 252  | 26 | 31 | 55  | 0  |
| CONTIG-055107 | 124  | 8  | 9  | 42  | 0  |
| CONTIG-055108 | 226  | 11 | 35 | 36  | 6  |
| CONTIG-055109 | 453  | 11 | 42 | 138 | 0  |
| CONTIG-055110 | 77   | 6  | 3  | 6   | 0  |
| CONTIG-055111 | 105  | 7  | 10 | 12  | 0  |
| CONTIG-055112 | 167  | 6  | 9  | 31  | 0  |
| CONTIG-055113 | 249  | 7  | 10 | 44  | 0  |
| CONTIG-055114 | 188  | 7  | 18 | 54  | 0  |
| CONTIG-055115 | 93   | 6  | 3  | 9   | 0  |
| CONTIG-055116 | 77   | 3  | 0  | 4   | 0  |
| CONTIG-055118 | 182  | 16 | 43 | 110 | 0  |
| CONTIG-055119 | 307  | 9  | 14 | 92  | 0  |
| CONTIG-055120 | 71   | 4  | 22 | 2   | 0  |
| CONTIG-055121 | 1014 | 17 | 3  | 0   | 92 |
| CONTIG-055122 | 301  | 8  | 30 | 23  | 0  |
| CONTIG-055125 | 331  | 17 | 86 | 132 | 0  |
| CONTIG-055126 | 108  | 18 | 16 | 63  | 0  |
| CONTIG-055127 | 296  | 21 | 34 | 310 | 0  |
| CONTIG-055128 | 102  | 5  | 19 | 0   | 0  |
| CONTIG-055129 | 62   | 4  | 12 | 5   | 0  |
| CONTIG-055130 | 67   | 21 | 17 | 41  | 0  |
| CONTIG-055131 | 67   | 6  | 0  | 11  | 0  |
| CONTIG-055132 | 128  | 7  | 8  | 4   | 0  |
| CONTIG-055133 | 285  | 10 | 62 | 58  | 2  |
| CONTIG-055134 | 87   | 9  | 9  | 19  | 0  |
| CONTIG-055135 | 126  | 15 | 16 | 41  | 4  |
| CONTIG-055136 | 104  | 6  | 7  | 15  | 0  |
| CONTIG-055137 | 272  | 11 | 28 | 110 | 0  |
| CONTIG-055138 | 364  | 24 | 41 | 78  | 0  |
| CONTIG-055139 | 181  | 6  | 5  | 36  | 0  |
| CONTIG-055140 | 381  | 7  | 12 | 68  | 0  |
| CONTIG-055142 | 91   | 9  | 9  | 15  | 0  |
| CONTIG-055143 | 163  | 14 | 53 | 41  | 0  |

|               |     |     |     |     |   |
|---------------|-----|-----|-----|-----|---|
| CONTIG-055144 | 93  | 10  | 7   | 48  | 0 |
| CONTIG-055145 | 97  | 8   | 9   | 26  | 0 |
| CONTIG-055146 | 217 | 9   | 0   | 0   | 2 |
| CONTIG-055147 | 119 | 9   | 8   | 50  | 0 |
| CONTIG-055150 | 171 | 10  | 2   | 58  | 0 |
| CONTIG-055151 | 160 | 4   | 2   | 18  | 2 |
| CONTIG-055152 | 145 | 19  | 0   | 138 | 0 |
| CONTIG-055153 | 176 | 11  | 12  | 74  | 0 |
| CONTIG-055155 | 108 | 4   | 6   | 3   | 0 |
| CONTIG-055156 | 80  | 9   | 11  | 27  | 0 |
| CONTIG-055157 | 398 | 10  | 19  | 99  | 0 |
| CONTIG-055158 | 90  | 12  | 10  | 26  | 0 |
| CONTIG-055159 | 73  | 5   | 7   | 11  | 0 |
| CONTIG-055160 | 190 | 8   | 12  | 42  | 0 |
| CONTIG-055161 | 99  | 5   | 7   | 4   | 0 |
| CONTIG-055162 | 64  | 3   | 0   | 2   | 0 |
| CONTIG-055169 | 146 | 15  | 23  | 96  | 0 |
| CONTIG-055170 | 122 | 10  | 10  | 37  | 0 |
| CONTIG-055171 | 118 | 4   | 2   | 18  | 0 |
| CONTIG-055172 | 140 | 10  | 3   | 44  | 0 |
| CONTIG-055173 | 256 | 8   | 14  | 27  | 0 |
| CONTIG-055174 | 59  | 11  | 5   | 15  | 0 |
| CONTIG-055175 | 215 | 21  | 14  | 63  | 2 |
| CONTIG-055176 | 187 | 110 | 275 | 645 | 5 |
| CONTIG-055177 | 913 | 20  | 23  | 41  | 0 |
| CONTIG-055178 | 137 | 13  | 9   | 52  | 0 |
| CONTIG-055179 | 62  | 7   | 2   | 14  | 0 |
| CONTIG-055182 | 96  | 5   | 2   | 11  | 0 |
| CONTIG-055183 | 74  | 11  | 32  | 16  | 0 |
| CONTIG-055184 | 338 | 10  | 9   | 100 | 4 |
| CONTIG-055185 | 133 | 9   | 6   | 41  | 0 |
| CONTIG-055186 | 136 | 6   | 2   | 14  | 0 |
| CONTIG-055187 | 124 | 8   | 2   | 13  | 0 |
| CONTIG-055188 | 219 | 48  | 10  | 2   | 0 |
| CONTIG-055189 | 57  | 22  | 4   | 54  | 0 |
| CONTIG-055190 | 691 | 16  | 38  | 442 | 4 |
| CONTIG-055191 | 292 | 8   | 10  | 62  | 0 |
| CONTIG-055192 | 127 | 6   | 2   | 6   | 0 |
| CONTIG-055193 | 58  | 7   | 0   | 9   | 0 |
| CONTIG-055194 | 85  | 42  | 26  | 164 | 0 |
| CONTIG-055195 | 186 | 7   | 16  | 31  | 0 |
| CONTIG-055196 | 122 | 9   | 4   | 23  | 0 |
| CONTIG-055197 | 116 | 6   | 8   | 26  | 0 |
| CONTIG-055198 | 70  | 5   | 4   | 6   | 0 |
| CONTIG-055199 | 156 | 9   | 2   | 59  | 2 |
| CONTIG-055200 | 154 | 8   | 26  | 23  | 0 |
| CONTIG-055201 | 58  | 7   | 18  | 6   | 0 |

|               |     |    |    |     |     |
|---------------|-----|----|----|-----|-----|
| CONTIG-055202 | 69  | 9  | 25 | 4   | 0   |
| CONTIG-055204 | 71  | 6  | 2  | 2   | 2   |
| CONTIG-055205 | 155 | 7  | 0  | 0   | 6   |
| CONTIG-055206 | 279 | 17 | 10 | 227 | 0   |
| CONTIG-055207 | 99  | 90 | 22 | 263 | 0   |
| CONTIG-055208 | 103 | 6  | 6  | 4   | 0   |
| CONTIG-055209 | 164 | 22 | 16 | 164 | 0   |
| CONTIG-055210 | 122 | 5  | 3  | 22  | 0   |
| CONTIG-055211 | 185 | 6  | 6  | 32  | 2   |
| CONTIG-055212 | 579 | 9  | 26 | 176 | 2   |
| CONTIG-055213 | 99  | 8  | 7  | 28  | 0   |
| CONTIG-055214 | 299 | 20 | 0  | 286 | 0   |
| CONTIG-055215 | 77  | 4  | 7  | 7   | 0   |
| CONTIG-055217 | 198 | 6  | 4  | 44  | 0   |
| CONTIG-055218 | 60  | 6  | 4  | 10  | 0   |
| CONTIG-055219 | 95  | 5  | 6  | 9   | 0   |
| CONTIG-055220 | 392 | 12 | 44 | 172 | 0   |
| CONTIG-055221 | 110 | 5  | 11 | 8   | 0   |
| CONTIG-055223 | 89  | 4  | 2  | 5   | 0   |
| CONTIG-055224 | 244 | 11 | 6  | 11  | 0   |
| CONTIG-055225 | 95  | 6  | 6  | 8   | 0   |
| CONTIG-055226 | 381 | 46 | 2  | 0   | 108 |
| CONTIG-055227 | 353 | 8  | 12 | 103 | 0   |
| CONTIG-055228 | 72  | 4  | 6  | 9   | 0   |
| CONTIG-055229 | 138 | 10 | 29 | 45  | 0   |
| CONTIG-055230 | 101 | 3  | 2  | 6   | 0   |
| CONTIG-055231 | 106 | 5  | 2  | 18  | 0   |
| CONTIG-055232 | 162 | 8  | 2  | 53  | 0   |
| CONTIG-055233 | 83  | 4  | 10 | 7   | 0   |
| CONTIG-055234 | 186 | 9  | 3  | 52  | 0   |
| CONTIG-055235 | 84  | 5  | 2  | 0   | 3   |
| CONTIG-055236 | 63  | 9  | 2  | 0   | 0   |
| CONTIG-055237 | 79  | 15 | 50 | 21  | 0   |
| CONTIG-055238 | 136 | 16 | 8  | 70  | 2   |
| CONTIG-055239 | 138 | 9  | 25 | 20  | 0   |
| CONTIG-055240 | 63  | 7  | 2  | 7   | 0   |
| CONTIG-055241 | 349 | 10 | 19 | 132 | 0   |
| CONTIG-055242 | 98  | 5  | 4  | 13  | 0   |
| CONTIG-055243 | 156 | 6  | 0  | 20  | 0   |
| CONTIG-055244 | 269 | 8  | 10 | 41  | 4   |
| CONTIG-055245 | 192 | 13 | 27 | 66  | 0   |
| CONTIG-055246 | 102 | 5  | 5  | 18  | 0   |
| CONTIG-055247 | 160 | 19 | 0  | 0   | 29  |
| CONTIG-055248 | 90  | 15 | 4  | 74  | 0   |
| CONTIG-055249 | 67  | 4  | 5  | 0   | 0   |
| CONTIG-055250 | 140 | 8  | 12 | 14  | 0   |
| CONTIG-055251 | 200 | 7  | 14 | 30  | 0   |



|               |     |     |    |     |    |
|---------------|-----|-----|----|-----|----|
| CONTIG-055252 | 58  | 124 | 18 | 144 | 0  |
| CONTIG-055253 | 325 | 10  | 9  | 145 | 0  |
| CONTIG-055254 | 77  | 4   | 4  | 6   | 0  |
| CONTIG-055255 | 281 | 5   | 4  | 33  | 0  |
| CONTIG-055261 | 133 | 5   | 3  | 21  | 0  |
| CONTIG-055262 | 136 | 14  | 2  | 82  | 2  |
| CONTIG-055263 | 92  | 14  | 8  | 24  | 0  |
| CONTIG-055264 | 138 | 9   | 0  | 17  | 0  |
| CONTIG-055265 | 60  | 5   | 9  | 7   | 0  |
| CONTIG-055266 | 61  | 7   | 17 | 0   | 0  |
| CONTIG-055267 | 102 | 7   | 10 | 10  | 0  |
| CONTIG-055268 | 857 | 44  | 10 | 45  | 0  |
| CONTIG-055269 | 162 | 10  | 16 | 33  | 0  |
| CONTIG-055270 | 252 | 7   | 10 | 43  | 0  |
| CONTIG-055271 | 189 | 15  | 20 | 100 | 0  |
| CONTIG-055273 | 737 | 13  | 24 | 445 | 0  |
| CONTIG-055274 | 121 | 8   | 24 | 20  | 0  |
| CONTIG-055275 | 189 | 9   | 12 | 61  | 0  |
| CONTIG-055276 | 72  | 7   | 7  | 0   | 0  |
| CONTIG-055277 | 81  | 4   | 2  | 6   | 0  |
| CONTIG-055278 | 113 | 5   | 15 | 11  | 0  |
| CONTIG-055280 | 237 | 6   | 5  | 43  | 0  |
| CONTIG-055281 | 125 | 12  | 17 | 30  | 0  |
| CONTIG-055282 | 71  | 25  | 14 | 66  | 0  |
| CONTIG-055283 | 91  | 2   | 2  | 4   | 0  |
| CONTIG-055284 | 153 | 17  | 21 | 50  | 0  |
| CONTIG-055285 | 799 | 12  | 30 | 272 | 6  |
| CONTIG-055286 | 195 | 9   | 10 | 58  | 0  |
| CONTIG-055287 | 74  | 9   | 3  | 14  | 0  |
| CONTIG-055289 | 188 | 6   | 29 | 27  | 0  |
| CONTIG-055290 | 171 | 15  | 21 | 13  | 2  |
| CONTIG-055293 | 121 | 4   | 0  | 0   | 2  |
| CONTIG-055295 | 94  | 5   | 5  | 3   | 0  |
| CONTIG-055296 | 130 | 3   | 18 | 7   | 0  |
| CONTIG-055298 | 122 | 10  | 13 | 39  | 0  |
| CONTIG-055299 | 83  | 13  | 14 | 2   | 0  |
| CONTIG-055300 | 214 | 10  | 12 | 87  | 0  |
| CONTIG-055301 | 305 | 39  | 8  | 474 | 12 |
| CONTIG-055302 | 293 | 7   | 4  | 61  | 0  |
| CONTIG-055303 | 66  | 8   | 5  | 20  | 0  |
| CONTIG-055304 | 135 | 5   | 9  | 26  | 0  |
| CONTIG-055305 | 157 | 8   | 3  | 12  | 2  |
| CONTIG-055306 | 218 | 11  | 7  | 67  | 0  |
| CONTIG-055307 | 357 | 20  | 7  | 0   | 0  |
| CONTIG-055308 | 168 | 6   | 2  | 12  | 2  |
| CONTIG-055309 | 120 | 7   | 23 | 11  | 0  |
| CONTIG-055310 | 117 | 5   | 2  | 8   | 0  |

|               |     |    |    |     |   |
|---------------|-----|----|----|-----|---|
| CONTIG-055311 | 103 | 4  | 3  | 12  | 0 |
| CONTIG-055312 | 102 | 10 | 3  | 40  | 0 |
| CONTIG-055313 | 135 | 4  | 4  | 23  | 0 |
| CONTIG-055314 | 137 | 5  | 24 | 4   | 0 |
| CONTIG-055315 | 75  | 8  | 5  | 19  | 2 |
| CONTIG-055317 | 715 | 30 | 17 | 434 | 0 |
| CONTIG-055318 | 60  | 14 | 12 | 16  | 0 |
| CONTIG-055319 | 135 | 5  | 6  | 15  | 0 |
| CONTIG-055320 | 179 | 16 | 46 | 103 | 2 |
| CONTIG-055321 | 258 | 14 | 24 | 112 | 2 |
| CONTIG-055322 | 78  | 6  | 17 | 0   | 0 |
| CONTIG-055323 | 192 | 16 | 4  | 103 | 2 |
| CONTIG-055324 | 72  | 6  | 3  | 12  | 0 |
| CONTIG-055325 | 71  | 11 | 2  | 42  | 0 |
| CONTIG-055326 | 654 | 20 | 50 | 451 | 4 |
| CONTIG-055329 | 75  | 20 | 12 | 20  | 0 |
| CONTIG-055330 | 110 | 13 | 4  | 53  | 0 |
| CONTIG-055331 | 115 | 6  | 4  | 21  | 0 |
| CONTIG-055332 | 64  | 6  | 0  | 3   | 0 |
| CONTIG-055333 | 348 | 23 | 2  | 326 | 0 |
| CONTIG-055334 | 115 | 29 | 4  | 0   | 0 |
| CONTIG-055335 | 71  | 2  | 0  | 0   | 0 |
| CONTIG-055336 | 241 | 5  | 0  | 40  | 0 |
| CONTIG-055337 | 285 | 8  | 4  | 20  | 0 |
| CONTIG-055338 | 64  | 6  | 4  | 11  | 0 |
| CONTIG-055339 | 84  | 40 | 7  | 26  | 0 |
| CONTIG-055340 | 152 | 4  | 4  | 18  | 0 |
| CONTIG-055341 | 110 | 9  | 7  | 32  | 0 |
| CONTIG-055343 | 98  | 6  | 16 | 9   | 0 |
| CONTIG-055344 | 71  | 5  | 11 | 0   | 0 |
| CONTIG-055345 | 143 | 20 | 16 | 44  | 0 |
| CONTIG-055346 | 96  | 5  | 4  | 7   | 0 |
| CONTIG-055347 | 173 | 13 | 12 | 96  | 0 |
| CONTIG-055348 | 391 | 7  | 3  | 42  | 6 |
| CONTIG-055349 | 71  | 7  | 12 | 0   | 0 |
| CONTIG-055350 | 101 | 5  | 0  | 8   | 0 |
| CONTIG-055351 | 179 | 8  | 23 | 30  | 0 |
| CONTIG-055352 | 71  | 4  | 0  | 11  | 0 |
| CONTIG-055353 | 266 | 14 | 17 | 180 | 0 |
| CONTIG-055354 | 233 | 7  | 0  | 33  | 0 |
| CONTIG-055355 | 120 | 8  | 6  | 23  | 0 |
| CONTIG-055356 | 175 | 5  | 4  | 24  | 0 |
| CONTIG-055357 | 217 | 22 | 30 | 4   | 0 |
| CONTIG-055358 | 95  | 8  | 4  | 12  | 0 |
| CONTIG-055359 | 267 | 10 | 39 | 64  | 0 |
| CONTIG-055360 | 62  | 5  | 0  | 7   | 0 |
| CONTIG-055362 | 84  | 6  | 10 | 12  | 0 |

|               |     |    |    |     |     |
|---------------|-----|----|----|-----|-----|
| CONTIG-055363 | 82  | 6  | 4  | 11  | 0   |
| CONTIG-055365 | 87  | 4  | 0  | 9   | 0   |
| CONTIG-055366 | 72  | 7  | 22 | 4   | 0   |
| CONTIG-055367 | 134 | 5  | 0  | 18  | 0   |
| CONTIG-055368 | 131 | 7  | 5  | 24  | 0   |
| CONTIG-055369 | 854 | 54 | 3  | 0   | 340 |
| CONTIG-055370 | 218 | 7  | 27 | 69  | 0   |
| CONTIG-055371 | 62  | 9  | 14 | 5   | 0   |
| CONTIG-055372 | 69  | 14 | 4  | 22  | 0   |
| CONTIG-055373 | 116 | 4  | 2  | 13  | 0   |
| CONTIG-055374 | 137 | 3  | 0  | 6   | 0   |
| CONTIG-055375 | 194 | 8  | 11 | 37  | 0   |
| CONTIG-055376 | 261 | 12 | 12 | 73  | 0   |
| CONTIG-055377 | 64  | 5  | 6  | 7   | 0   |
| CONTIG-055378 | 621 | 12 | 31 | 281 | 4   |
| CONTIG-055380 | 83  | 8  | 7  | 18  | 0   |
| CONTIG-055381 | 836 | 18 | 31 | 449 | 18  |
| CONTIG-055382 | 147 | 6  | 19 | 7   | 0   |
| CONTIG-055383 | 98  | 5  | 0  | 16  | 0   |
| CONTIG-055384 | 173 | 10 | 7  | 65  | 0   |
| CONTIG-055385 | 198 | 19 | 14 | 102 | 0   |
| CONTIG-055386 | 84  | 5  | 6  | 7   | 0   |
| CONTIG-055389 | 97  | 11 | 19 | 45  | 0   |
| CONTIG-055390 | 280 | 27 | 17 | 262 | 13  |
| CONTIG-055394 | 144 | 5  | 4  | 4   | 2   |
| CONTIG-055395 | 101 | 12 | 13 | 38  | 0   |
| CONTIG-055396 | 403 | 7  | 10 | 62  | 6   |
| CONTIG-055397 | 296 | 13 | 14 | 133 | 0   |
| CONTIG-055398 | 134 | 4  | 2  | 12  | 0   |
| CONTIG-055399 | 74  | 5  | 7  | 15  | 0   |
| CONTIG-055400 | 169 | 19 | 9  | 0   | 24  |
| CONTIG-055401 | 112 | 8  | 4  | 30  | 0   |
| CONTIG-055402 | 138 | 10 | 9  | 25  | 0   |
| CONTIG-055403 | 137 | 10 | 9  | 55  | 0   |
| CONTIG-055404 | 118 | 9  | 8  | 31  | 0   |
| CONTIG-055405 | 81  | 8  | 8  | 4   | 0   |
| CONTIG-055406 | 87  | 5  | 7  | 11  | 0   |
| CONTIG-055407 | 105 | 5  | 0  | 24  | 0   |
| CONTIG-055409 | 292 | 8  | 15 | 55  | 2   |
| CONTIG-055410 | 118 | 4  | 4  | 10  | 0   |
| CONTIG-055411 | 62  | 16 | 9  | 40  | 0   |
| CONTIG-055414 | 81  | 5  | 5  | 5   | 0   |
| CONTIG-055415 | 262 | 12 | 13 | 67  | 2   |
| CONTIG-055416 | 276 | 6  | 16 | 58  | 0   |
| CONTIG-055417 | 105 | 9  | 4  | 41  | 0   |
| CONTIG-055418 | 266 | 18 | 29 | 116 | 0   |
| CONTIG-055419 | 147 | 12 | 4  | 55  | 0   |

|               |      |     |    |      |     |
|---------------|------|-----|----|------|-----|
| CONTIG-055420 | 183  | 19  | 12 | 118  | 0   |
| CONTIG-055422 | 524  | 64  | 3  | 0    | 294 |
| CONTIG-055423 | 121  | 5   | 10 | 10   | 0   |
| CONTIG-055424 | 92   | 6   | 0  | 8    | 2   |
| CONTIG-055425 | 174  | 9   | 15 | 32   | 0   |
| CONTIG-055426 | 71   | 4   | 5  | 3    | 0   |
| CONTIG-055427 | 80   | 4   | 0  | 2    | 0   |
| CONTIG-055428 | 255  | 7   | 11 | 40   | 0   |
| CONTIG-055429 | 98   | 7   | 37 | 0    | 0   |
| CONTIG-055430 | 69   | 5   | 3  | 2    | 0   |
| CONTIG-055432 | 142  | 13  | 11 | 61   | 0   |
| CONTIG-055434 | 92   | 6   | 7  | 12   | 0   |
| CONTIG-055436 | 102  | 4   | 10 | 5    | 0   |
| CONTIG-055437 | 180  | 5   | 29 | 5    | 0   |
| CONTIG-055438 | 108  | 9   | 10 | 29   | 0   |
| CONTIG-055439 | 331  | 7   | 20 | 78   | 0   |
| CONTIG-055440 | 67   | 5   | 5  | 2    | 0   |
| CONTIG-055441 | 150  | 11  | 27 | 44   | 0   |
| CONTIG-055446 | 82   | 8   | 0  | 37   | 0   |
| CONTIG-055447 | 125  | 11  | 29 | 37   | 0   |
| CONTIG-055448 | 180  | 4   | 2  | 14   | 0   |
| CONTIG-055449 | 124  | 4   | 7  | 17   | 0   |
| CONTIG-055450 | 71   | 38  | 2  | 122  | 0   |
| CONTIG-055451 | 61   | 10  | 10 | 14   | 0   |
| CONTIG-055454 | 47   | 66  | 14 | 110  | 0   |
| CONTIG-055455 | 71   | 5   | 8  | 2    | 0   |
| CONTIG-055456 | 386  | 11  | 20 | 44   | 0   |
| CONTIG-055457 | 99   | 16  | 3  | 63   | 2   |
| CONTIG-055458 | 95   | 2   | 0  | 0    | 0   |
| CONTIG-055459 | 78   | 11  | 15 | 25   | 0   |
| CONTIG-055461 | 88   | 9   | 11 | 36   | 0   |
| CONTIG-055462 | 147  | 9   | 7  | 40   | 0   |
| CONTIG-055463 | 100  | 223 | 17 | 1479 | 0   |
| CONTIG-055464 | 287  | 11  | 5  | 62   | 0   |
| CONTIG-055465 | 118  | 6   | 14 | 18   | 0   |
| CONTIG-055466 | 52   | 85  | 3  | 280  | 0   |
| CONTIG-055468 | 1167 | 15  | 0  | 0    | 106 |
| CONTIG-055469 | 146  | 5   | 5  | 10   | 0   |
| CONTIG-055470 | 171  | 608 | 6  | 2    | 987 |
| CONTIG-055471 | 107  | 13  | 31 | 41   | 0   |
| CONTIG-055472 | 435  | 10  | 5  | 12   | 0   |
| CONTIG-055473 | 117  | 6   | 2  | 22   | 0   |
| CONTIG-055474 | 67   | 5   | 0  | 10   | 0   |
| CONTIG-055475 | 93   | 8   | 10 | 21   | 0   |
| CONTIG-055476 | 58   | 3   | 2  | 0    | 0   |
| CONTIG-055477 | 70   | 3   | 2  | 0    | 0   |
| CONTIG-055478 | 71   | 8   | 25 | 7    | 0   |

|               |     |    |    |     |     |
|---------------|-----|----|----|-----|-----|
| CONTIG-055479 | 72  | 5  | 7  | 9   | 0   |
| CONTIG-055480 | 95  | 5  | 6  | 8   | 0   |
| CONTIG-055481 | 214 | 6  | 7  | 30  | 0   |
| CONTIG-055482 | 75  | 6  | 2  | 15  | 0   |
| CONTIG-055483 | 362 | 13 | 7  | 108 | 0   |
| CONTIG-055484 | 184 | 8  | 10 | 42  | 0   |
| CONTIG-055485 | 148 | 9  | 11 | 53  | 0   |
| CONTIG-055486 | 126 | 10 | 32 | 2   | 0   |
| CONTIG-055487 | 83  | 4  | 6  | 0   | 0   |
| CONTIG-055488 | 76  | 4  | 0  | 8   | 0   |
| CONTIG-055489 | 143 | 5  | 16 | 12  | 0   |
| CONTIG-055490 | 97  | 8  | 2  | 18  | 0   |
| CONTIG-055492 | 467 | 8  | 8  | 141 | 0   |
| CONTIG-055493 | 376 | 9  | 20 | 98  | 0   |
| CONTIG-055494 | 138 | 4  | 4  | 11  | 0   |
| CONTIG-055495 | 344 | 9  | 0  | 87  | 2   |
| CONTIG-055496 | 122 | 5  | 2  | 10  | 0   |
| CONTIG-055497 | 112 | 7  | 11 | 32  | 0   |
| CONTIG-055498 | 214 | 14 | 9  | 31  | 0   |
| CONTIG-055499 | 372 | 15 | 17 | 161 | 0   |
| CONTIG-055500 | 73  | 7  | 10 | 11  | 0   |
| CONTIG-055501 | 89  | 8  | 5  | 20  | 0   |
| CONTIG-055503 | 86  | 5  | 8  | 3   | 0   |
| CONTIG-055504 | 234 | 6  | 13 | 44  | 2   |
| CONTIG-055505 | 230 | 98 | 2  | 4   | 262 |
| CONTIG-055506 | 663 | 13 | 19 | 434 | 0   |
| CONTIG-055507 | 174 | 7  | 20 | 23  | 0   |
| CONTIG-055508 | 97  | 16 | 8  | 83  | 0   |
| CONTIG-055509 | 108 | 2  | 0  | 0   | 0   |
| CONTIG-055510 | 271 | 6  | 9  | 4   | 0   |
| CONTIG-055511 | 59  | 5  | 0  | 11  | 0   |
| CONTIG-055512 | 258 | 16 | 25 | 135 | 3   |
| CONTIG-055513 | 107 | 4  | 0  | 23  | 0   |
| CONTIG-055514 | 147 | 5  | 2  | 14  | 0   |
| CONTIG-055515 | 160 | 6  | 4  | 37  | 0   |
| CONTIG-055516 | 129 | 4  | 7  | 12  | 0   |
| CONTIG-055517 | 106 | 8  | 8  | 2   | 0   |
| CONTIG-055518 | 213 | 10 | 14 | 90  | 0   |
| CONTIG-055519 | 67  | 8  | 21 | 0   | 0   |
| CONTIG-055520 | 99  | 7  | 4  | 8   | 0   |
| CONTIG-055521 | 297 | 8  | 16 | 79  | 0   |
| CONTIG-055525 | 204 | 14 | 15 | 123 | 2   |
| CONTIG-055526 | 93  | 6  | 2  | 20  | 0   |
| CONTIG-055527 | 87  | 6  | 3  | 11  | 0   |
| CONTIG-055529 | 61  | 8  | 8  | 14  | 0   |
| CONTIG-055530 | 94  | 10 | 21 | 20  | 0   |
| CONTIG-055531 | 812 | 37 | 15 | 2   | 0   |

|               |     |     |    |     |     |
|---------------|-----|-----|----|-----|-----|
| CONTIG-055532 | 141 | 4   | 4  | 12  | 0   |
| CONTIG-055533 | 110 | 8   | 23 | 20  | 0   |
| CONTIG-055534 | 82  | 6   | 0  | 11  | 0   |
| CONTIG-055535 | 335 | 21  | 20 | 140 | 3   |
| CONTIG-055536 | 273 | 7   | 0  | 53  | 0   |
| CONTIG-055537 | 171 | 7   | 3  | 28  | 0   |
| CONTIG-055538 | 493 | 24  | 23 | 304 | 18  |
| CONTIG-055539 | 266 | 16  | 11 | 8   | 0   |
| CONTIG-055540 | 62  | 2   | 3  | 2   | 0   |
| CONTIG-055542 | 243 | 10  | 3  | 12  | 39  |
| CONTIG-055544 | 142 | 5   | 3  | 32  | 0   |
| CONTIG-055545 | 188 | 10  | 10 | 53  | 0   |
| CONTIG-055546 | 366 | 11  | 14 | 106 | 2   |
| CONTIG-055547 | 87  | 17  | 20 | 53  | 0   |
| CONTIG-055548 | 620 | 27  | 41 | 597 | 28  |
| CONTIG-055549 | 196 | 7   | 7  | 38  | 0   |
| CONTIG-055550 | 83  | 16  | 19 | 8   | 0   |
| CONTIG-055551 | 95  | 8   | 26 | 3   | 0   |
| CONTIG-055552 | 205 | 7   | 4  | 24  | 0   |
| CONTIG-055553 | 189 | 11  | 23 | 42  | 0   |
| CONTIG-055554 | 181 | 7   | 4  | 41  | 0   |
| CONTIG-055555 | 207 | 17  | 15 | 135 | 0   |
| CONTIG-055556 | 65  | 20  | 21 | 63  | 0   |
| CONTIG-055557 | 92  | 5   | 0  | 12  | 0   |
| CONTIG-055558 | 96  | 6   | 6  | 12  | 0   |
| CONTIG-055559 | 77  | 5   | 3  | 0   | 2   |
| CONTIG-055560 | 69  | 12  | 0  | 25  | 0   |
| CONTIG-055561 | 187 | 10  | 0  | 0   | 4   |
| CONTIG-055562 | 331 | 200 | 9  | 0   | 977 |
| CONTIG-055563 | 100 | 5   | 2  | 23  | 0   |
| CONTIG-055564 | 194 | 16  | 3  | 139 | 2   |
| CONTIG-055565 | 236 | 7   | 18 | 44  | 2   |
| CONTIG-055566 | 97  | 7   | 0  | 11  | 0   |
| CONTIG-055567 | 134 | 12  | 2  | 58  | 0   |
| CONTIG-055568 | 232 | 8   | 0  | 53  | 2   |
| CONTIG-055569 | 241 | 19  | 9  | 137 | 2   |
| CONTIG-055570 | 61  | 3   | 2  | 2   | 0   |
| CONTIG-055572 | 263 | 13  | 27 | 91  | 3   |
| CONTIG-055573 | 61  | 6   | 3  | 6   | 0   |
| CONTIG-055574 | 58  | 21  | 5  | 29  | 0   |
| CONTIG-055576 | 82  | 8   | 6  | 0   | 0   |
| CONTIG-055577 | 73  | 6   | 0  | 7   | 0   |
| CONTIG-055578 | 125 | 5   | 5  | 0   | 2   |
| CONTIG-055579 | 321 | 7   | 15 | 42  | 2   |
| CONTIG-055584 | 129 | 6   | 11 | 26  | 0   |
| CONTIG-055585 | 197 | 7   | 4  | 44  | 0   |
| CONTIG-055587 | 144 | 6   | 2  | 19  | 0   |

|               |     |     |     |     |    |
|---------------|-----|-----|-----|-----|----|
| CONTIG-055588 | 118 | 8   | 2   | 40  | 0  |
| CONTIG-055589 | 143 | 4   | 17  | 0   | 0  |
| CONTIG-055590 | 289 | 85  | 31  | 902 | 21 |
| CONTIG-055591 | 159 | 5   | 12  | 17  | 0  |
| CONTIG-055592 | 167 | 6   | 22  | 17  | 0  |
| CONTIG-055593 | 304 | 46  | 100 | 482 | 82 |
| CONTIG-055594 | 117 | 5   | 16  | 5   | 0  |
| CONTIG-055595 | 113 | 4   | 12  | 5   | 0  |
| CONTIG-055596 | 176 | 12  | 37  | 44  | 0  |
| CONTIG-055600 | 95  | 17  | 7   | 32  | 0  |
| CONTIG-055601 | 389 | 10  | 33  | 100 | 2  |
| CONTIG-055602 | 76  | 52  | 5   | 82  | 0  |
| CONTIG-055603 | 106 | 6   | 2   | 15  | 0  |
| CONTIG-055604 | 69  | 12  | 14  | 6   | 2  |
| CONTIG-055605 | 96  | 7   | 8   | 17  | 2  |
| CONTIG-055607 | 66  | 13  | 7   | 0   | 0  |
| CONTIG-055608 | 87  | 16  | 2   | 54  | 0  |
| CONTIG-055609 | 106 | 7   | 10  | 25  | 0  |
| CONTIG-055610 | 86  | 2   | 0   | 2   | 0  |
| CONTIG-055611 | 97  | 3   | 5   | 0   | 0  |
| CONTIG-055612 | 96  | 8   | 11  | 7   | 0  |
| CONTIG-055613 | 238 | 7   | 4   | 44  | 0  |
| CONTIG-055614 | 95  | 6   | 10  | 15  | 0  |
| CONTIG-055615 | 210 | 16  | 16  | 98  | 0  |
| CONTIG-055616 | 59  | 5   | 20  | 0   | 0  |
| CONTIG-055617 | 58  | 4   | 2   | 0   | 0  |
| CONTIG-055618 | 78  | 2   | 0   | 4   | 0  |
| CONTIG-055619 | 76  | 4   | 2   | 2   | 0  |
| CONTIG-055620 | 37  | 8   | 11  | 2   | 0  |
| CONTIG-055621 | 231 | 8   | 8   | 37  | 0  |
| CONTIG-055622 | 102 | 5   | 3   | 8   | 0  |
| CONTIG-055631 | 97  | 5   | 0   | 18  | 0  |
| CONTIG-055632 | 173 | 6   | 2   | 19  | 0  |
| CONTIG-055633 | 122 | 6   | 8   | 25  | 0  |
| CONTIG-055634 | 200 | 29  | 9   | 0   | 80 |
| CONTIG-055635 | 66  | 3   | 4   | 2   | 0  |
| CONTIG-055636 | 101 | 5   | 12  | 10  | 0  |
| CONTIG-055637 | 91  | 11  | 17  | 20  | 0  |
| CONTIG-055638 | 39  | 307 | 0   | 348 | 0  |
| CONTIG-055639 | 109 | 6   | 11  | 16  | 0  |
| CONTIG-055640 | 159 | 11  | 2   | 38  | 2  |
| CONTIG-055641 | 798 | 12  | 5   | 0   | 66 |
| CONTIG-055642 | 72  | 6   | 3   | 7   | 0  |
| CONTIG-055645 | 332 | 9   | 6   | 83  | 2  |
| CONTIG-055646 | 68  | 6   | 8   | 2   | 0  |
| CONTIG-055647 | 307 | 10  | 14  | 63  | 2  |
| CONTIG-055648 | 368 | 10  | 36  | 62  | 0  |

|               |     |     |    |     |      |
|---------------|-----|-----|----|-----|------|
| CONTIG-055649 | 249 | 22  | 23 | 225 | 4    |
| CONTIG-055650 | 169 | 5   | 3  | 42  | 0    |
| CONTIG-055652 | 213 | 6   | 5  | 0   | 0    |
| CONTIG-055653 | 102 | 6   | 2  | 21  | 0    |
| CONTIG-055654 | 127 | 11  | 16 | 30  | 0    |
| CONTIG-055655 | 87  | 3   | 10 | 2   | 0    |
| CONTIG-055656 | 361 | 11  | 21 | 64  | 2    |
| CONTIG-055657 | 97  | 13  | 11 | 58  | 0    |
| CONTIG-055659 | 115 | 12  | 22 | 27  | 0    |
| CONTIG-055660 | 82  | 5   | 2  | 0   | 0    |
| CONTIG-055661 | 275 | 7   | 6  | 38  | 0    |
| CONTIG-055662 | 179 | 6   | 8  | 32  | 0    |
| CONTIG-055664 | 50  | 101 | 30 | 213 | 0    |
| CONTIG-055665 | 78  | 7   | 8  | 15  | 0    |
| CONTIG-055666 | 80  | 8   | 14 | 12  | 0    |
| CONTIG-055667 | 95  | 11  | 22 | 9   | 0    |
| CONTIG-055668 | 376 | 19  | 5  | 0   | 76   |
| CONTIG-055669 | 515 | 299 | 2  | 2   | 2593 |
| CONTIG-055670 | 59  | 3   | 2  | 0   | 0    |
| CONTIG-055671 | 73  | 4   | 0  | 0   | 0    |
| CONTIG-055672 | 75  | 4   | 3  | 9   | 0    |
| CONTIG-055673 | 72  | 4   | 0  | 6   | 0    |
| CONTIG-055674 | 91  | 9   | 8  | 19  | 0    |
| CONTIG-055675 | 63  | 6   | 6  | 0   | 0    |
| CONTIG-055677 | 348 | 9   | 28 | 81  | 0    |
| CONTIG-055678 | 56  | 91  | 0  | 0   | 0    |
| CONTIG-055680 | 104 | 11  | 3  | 39  | 2    |
| CONTIG-055681 | 158 | 8   | 26 | 27  | 0    |
| CONTIG-055682 | 759 | 19  | 41 | 625 | 2    |
| CONTIG-055686 | 71  | 3   | 7  | 7   | 0    |
| CONTIG-055687 | 72  | 6   | 5  | 12  | 0    |
| CONTIG-055688 | 70  | 4   | 9  | 8   | 0    |
| CONTIG-055689 | 271 | 9   | 6  | 83  | 2    |
| CONTIG-055690 | 209 | 70  | 0  | 0   | 138  |
| CONTIG-055691 | 70  | 4   | 2  | 0   | 0    |
| CONTIG-055693 | 78  | 6   | 14 | 3   | 0    |
| CONTIG-055699 | 228 | 7   | 3  | 19  | 0    |
| CONTIG-055700 | 113 | 16  | 18 | 47  | 0    |
| CONTIG-055701 | 165 | 12  | 3  | 61  | 0    |
| CONTIG-055702 | 68  | 5   | 18 | 0   | 0    |
| CONTIG-055703 | 87  | 12  | 12 | 21  | 0    |
| CONTIG-055704 | 240 | 13  | 2  | 0   | 0    |
| CONTIG-055705 | 70  | 7   | 0  | 2   | 0    |
| CONTIG-055706 | 183 | 32  | 5  | 333 | 0    |
| CONTIG-055707 | 160 | 14  | 0  | 76  | 0    |
| CONTIG-055709 | 166 | 7   | 5  | 33  | 0    |
| CONTIG-055710 | 81  | 15  | 2  | 37  | 0    |



|               |     |    |    |     |   |
|---------------|-----|----|----|-----|---|
| CONTIG-055711 | 287 | 7  | 5  | 78  | 0 |
| CONTIG-055712 | 193 | 9  | 4  | 7   | 0 |
| CONTIG-055713 | 197 | 15 | 21 | 106 | 0 |
| CONTIG-055714 | 65  | 5  | 0  | 15  | 0 |
| CONTIG-055715 | 325 | 8  | 14 | 65  | 0 |
| CONTIG-055716 | 421 | 10 | 47 | 96  | 0 |
| CONTIG-055717 | 129 | 5  | 4  | 2   | 0 |
| CONTIG-055718 | 87  | 8  | 12 | 21  | 0 |
| CONTIG-055719 | 224 | 19 | 40 | 37  | 0 |
| CONTIG-055720 | 246 | 6  | 6  | 24  | 4 |
| CONTIG-055721 | 92  | 9  | 0  | 34  | 0 |
| CONTIG-055722 | 73  | 4  | 14 | 2   | 0 |
| CONTIG-055723 | 66  | 5  | 7  | 4   | 0 |
| CONTIG-055724 | 69  | 5  | 4  | 10  | 0 |
| CONTIG-055725 | 97  | 7  | 2  | 14  | 0 |
| CONTIG-055726 | 132 | 6  | 4  | 11  | 0 |
| CONTIG-055727 | 80  | 5  | 7  | 7   | 0 |
| CONTIG-055728 | 271 | 10 | 15 | 98  | 2 |
| CONTIG-055729 | 255 | 15 | 34 | 168 | 0 |
| CONTIG-055736 | 90  | 8  | 2  | 24  | 0 |
| CONTIG-055737 | 347 | 6  | 9  | 49  | 0 |
| CONTIG-055743 | 119 | 18 | 43 | 11  | 0 |
| CONTIG-055744 | 363 | 5  | 5  | 58  | 0 |
| CONTIG-055745 | 65  | 3  | 0  | 0   | 0 |
| CONTIG-055746 | 184 | 13 | 7  | 78  | 0 |
| CONTIG-055749 | 352 | 22 | 17 | 254 | 9 |
| CONTIG-055750 | 176 | 9  | 15 | 41  | 0 |
| CONTIG-055751 | 88  | 11 | 11 | 20  | 0 |
| CONTIG-055752 | 69  | 6  | 0  | 10  | 0 |
| CONTIG-055753 | 61  | 5  | 0  | 9   | 0 |
| CONTIG-055754 | 77  | 3  | 3  | 0   | 0 |
| CONTIG-055755 | 114 | 7  | 9  | 27  | 0 |
| CONTIG-055756 | 149 | 5  | 0  | 16  | 0 |
| CONTIG-055761 | 85  | 10 | 0  | 33  | 0 |
| CONTIG-055762 | 64  | 6  | 9  | 6   | 0 |
| CONTIG-055763 | 106 | 9  | 5  | 4   | 0 |
| CONTIG-055768 | 81  | 5  | 4  | 8   | 0 |
| CONTIG-055769 | 140 | 4  | 5  | 8   | 0 |
| CONTIG-055770 | 198 | 15 | 5  | 127 | 0 |
| CONTIG-055771 | 83  | 5  | 2  | 8   | 0 |
| CONTIG-055772 | 91  | 4  | 4  | 10  | 0 |
| CONTIG-055773 | 790 | 51 | 18 | 4   | 0 |
| CONTIG-055774 | 514 | 7  | 12 | 85  | 2 |
| CONTIG-055776 | 169 | 15 | 8  | 96  | 0 |
| CONTIG-055777 | 173 | 6  | 4  | 2   | 0 |
| CONTIG-055778 | 256 | 11 | 63 | 33  | 0 |
| CONTIG-055779 | 106 | 4  | 2  | 19  | 0 |

|               |     |    |    |     |    |
|---------------|-----|----|----|-----|----|
| CONTIG-055781 | 108 | 8  | 47 | 15  | 0  |
| CONTIG-055783 | 135 | 39 | 12 | 255 | 0  |
| CONTIG-055784 | 85  | 5  | 10 | 12  | 0  |
| CONTIG-055786 | 184 | 16 | 0  | 0   | 21 |
| CONTIG-055789 | 79  | 6  | 6  | 18  | 0  |
| CONTIG-055790 | 88  | 12 | 0  | 41  | 0  |
| CONTIG-055793 | 154 | 15 | 0  | 90  | 0  |
| CONTIG-055794 | 175 | 6  | 7  | 19  | 0  |
| CONTIG-055801 | 180 | 6  | 0  | 37  | 0  |
| CONTIG-055802 | 194 | 5  | 12 | 34  | 0  |
| CONTIG-055803 | 153 | 8  | 39 | 26  | 0  |
| CONTIG-055804 | 159 | 5  | 0  | 15  | 0  |
| CONTIG-055805 | 79  | 5  | 0  | 3   | 0  |
| CONTIG-055806 | 139 | 4  | 0  | 6   | 0  |
| CONTIG-055808 | 534 | 21 | 28 | 655 | 0  |
| CONTIG-055810 | 166 | 10 | 2  | 87  | 0  |
| CONTIG-055811 | 203 | 9  | 18 | 34  | 0  |
| CONTIG-055812 | 281 | 6  | 2  | 36  | 0  |
| CONTIG-055813 | 125 | 10 | 16 | 34  | 0  |
| CONTIG-055814 | 133 | 8  | 7  | 42  | 0  |
| CONTIG-055815 | 356 | 10 | 9  | 119 | 0  |
| CONTIG-055816 | 64  | 8  | 31 | 2   | 0  |
| CONTIG-055817 | 103 | 51 | 34 | 159 | 0  |
| CONTIG-055818 | 125 | 22 | 0  | 2   | 11 |
| CONTIG-055819 | 71  | 8  | 6  | 0   | 0  |
| CONTIG-055820 | 74  | 6  | 0  | 4   | 0  |
| CONTIG-055821 | 363 | 8  | 0  | 138 | 0  |
| CONTIG-055822 | 87  | 8  | 12 | 25  | 0  |
| CONTIG-055823 | 140 | 5  | 2  | 19  | 0  |
| CONTIG-055825 | 284 | 9  | 15 | 60  | 0  |
| CONTIG-055826 | 88  | 7  | 0  | 11  | 0  |
| CONTIG-055827 | 104 | 9  | 2  | 31  | 0  |
| CONTIG-055829 | 71  | 3  | 6  | 2   | 0  |
| CONTIG-055831 | 59  | 8  | 16 | 4   | 0  |
| CONTIG-055832 | 83  | 4  | 3  | 2   | 0  |
| CONTIG-055833 | 109 | 10 | 6  | 40  | 0  |
| CONTIG-055834 | 88  | 12 | 11 | 28  | 0  |
| CONTIG-055835 | 384 | 9  | 22 | 92  | 0  |
| CONTIG-055836 | 426 | 14 | 24 | 214 | 2  |
| CONTIG-055837 | 69  | 4  | 2  | 6   | 0  |
| CONTIG-055838 | 80  | 13 | 40 | 9   | 0  |
| CONTIG-055839 | 77  | 4  | 0  | 11  | 2  |
| CONTIG-055840 | 151 | 9  | 11 | 40  | 0  |
| CONTIG-055841 | 255 | 8  | 7  | 47  | 0  |
| CONTIG-055842 | 153 | 10 | 15 | 24  | 0  |
| CONTIG-055843 | 619 | 16 | 0  | 18  | 0  |
| CONTIG-055844 | 63  | 7  | 6  | 4   | 0  |

|               |      |    |    |      |     |
|---------------|------|----|----|------|-----|
| CONTIG-055845 | 99   | 15 | 4  | 51   | 0   |
| CONTIG-055846 | 504  | 11 | 0  | 0    | 41  |
| CONTIG-055847 | 187  | 13 | 25 | 88   | 0   |
| CONTIG-055848 | 198  | 7  | 4  | 6    | 0   |
| CONTIG-055849 | 94   | 6  | 19 | 0    | 2   |
| CONTIG-055850 | 111  | 5  | 3  | 9    | 0   |
| CONTIG-055851 | 196  | 5  | 12 | 21   | 0   |
| CONTIG-055852 | 104  | 13 | 2  | 66   | 0   |
| CONTIG-055853 | 76   | 3  | 0  | 4    | 0   |
| CONTIG-055854 | 959  | 15 | 43 | 451  | 6   |
| CONTIG-055860 | 101  | 9  | 2  | 25   | 0   |
| CONTIG-055861 | 225  | 7  | 14 | 42   | 2   |
| CONTIG-055862 | 89   | 9  | 0  | 23   | 0   |
| CONTIG-055863 | 98   | 7  | 3  | 19   | 0   |
| CONTIG-055865 | 227  | 6  | 24 | 29   | 0   |
| CONTIG-055866 | 80   | 23 | 31 | 57   | 0   |
| CONTIG-055867 | 63   | 7  | 11 | 10   | 0   |
| CONTIG-055868 | 195  | 14 | 8  | 101  | 3   |
| CONTIG-055869 | 121  | 20 | 4  | 112  | 2   |
| CONTIG-055871 | 474  | 12 | 18 | 174  | 0   |
| CONTIG-055875 | 58   | 5  | 4  | 3    | 0   |
| CONTIG-055876 | 194  | 7  | 18 | 36   | 0   |
| CONTIG-055877 | 104  | 4  | 8  | 13   | 0   |
| CONTIG-055878 | 66   | 4  | 4  | 4    | 0   |
| CONTIG-055879 | 147  | 20 | 15 | 83   | 4   |
| CONTIG-055880 | 127  | 6  | 4  | 9    | 0   |
| CONTIG-055881 | 150  | 6  | 7  | 6    | 0   |
| CONTIG-055882 | 112  | 6  | 10 | 10   | 0   |
| CONTIG-055883 | 187  | 8  | 12 | 53   | 0   |
| CONTIG-055884 | 383  | 10 | 13 | 116  | 0   |
| CONTIG-055885 | 101  | 7  | 4  | 25   | 0   |
| CONTIG-055886 | 422  | 9  | 15 | 120  | 0   |
| CONTIG-055887 | 1124 | 31 | 31 | 1393 | 31  |
| CONTIG-055888 | 92   | 9  | 6  | 24   | 0   |
| CONTIG-055889 | 140  | 6  | 4  | 31   | 0   |
| CONTIG-055890 | 213  | 10 | 4  | 61   | 0   |
| CONTIG-055892 | 51   | 11 | 7  | 15   | 0   |
| CONTIG-055893 | 79   | 5  | 4  | 8    | 0   |
| CONTIG-055894 | 161  | 7  | 7  | 9    | 0   |
| CONTIG-055895 | 201  | 11 | 8  | 41   | 0   |
| CONTIG-055896 | 148  | 12 | 24 | 50   | 0   |
| CONTIG-055897 | 619  | 75 | 2  | 0    | 639 |
| CONTIG-055898 | 231  | 8  | 5  | 68   | 0   |
| CONTIG-055900 | 99   | 5  | 12 | 6    | 0   |
| CONTIG-055901 | 363  | 12 | 20 | 103  | 0   |
| CONTIG-055902 | 58   | 4  | 2  | 3    | 0   |
| CONTIG-055904 | 119  | 9  | 5  | 44   | 0   |

|               |     |    |     |     |   |
|---------------|-----|----|-----|-----|---|
| CONTIG-055906 | 146 | 5  | 7   | 16  | 0 |
| CONTIG-055907 | 235 | 5  | 8   | 28  | 0 |
| CONTIG-055908 | 114 | 11 | 0   | 18  | 0 |
| CONTIG-055909 | 70  | 8  | 14  | 14  | 0 |
| CONTIG-055910 | 195 | 10 | 68  | 30  | 0 |
| CONTIG-055911 | 152 | 6  | 2   | 12  | 0 |
| CONTIG-055922 | 155 | 10 | 24  | 57  | 2 |
| CONTIG-055923 | 104 | 15 | 19  | 55  | 0 |
| CONTIG-055932 | 75  | 9  | 2   | 0   | 0 |
| CONTIG-055933 | 58  | 8  | 2   | 15  | 0 |
| CONTIG-055934 | 95  | 3  | 7   | 2   | 0 |
| CONTIG-055935 | 289 | 13 | 22  | 104 | 0 |
| CONTIG-055936 | 119 | 7  | 4   | 17  | 0 |
| CONTIG-055937 | 334 | 15 | 23  | 192 | 0 |
| CONTIG-055938 | 358 | 9  | 14  | 117 | 0 |
| CONTIG-055939 | 70  | 40 | 9   | 80  | 0 |
| CONTIG-055940 | 340 | 10 | 12  | 144 | 0 |
| CONTIG-055941 | 99  | 29 | 74  | 0   | 0 |
| CONTIG-055942 | 519 | 9  | 16  | 66  | 4 |
| CONTIG-055943 | 232 | 37 | 124 | 131 | 6 |
| CONTIG-055945 | 61  | 4  | 7   | 4   | 0 |
| CONTIG-055946 | 61  | 3  | 6   | 2   | 0 |
| CONTIG-055947 | 58  | 7  | 5   | 5   | 0 |
| CONTIG-055948 | 106 | 8  | 4   | 17  | 0 |
| CONTIG-055949 | 81  | 6  | 0   | 9   | 0 |
| CONTIG-055950 | 268 | 4  | 8   | 24  | 0 |
| CONTIG-055951 | 72  | 5  | 3   | 15  | 0 |
| CONTIG-055952 | 62  | 3  | 4   | 6   | 0 |
| CONTIG-055953 | 261 | 11 | 9   | 135 | 0 |
| CONTIG-055954 | 86  | 2  | 4   | 4   | 0 |
| CONTIG-055955 | 59  | 4  | 5   | 4   | 0 |
| CONTIG-055956 | 189 | 5  | 0   | 23  | 3 |
| CONTIG-055958 | 271 | 15 | 13  | 90  | 2 |
| CONTIG-055959 | 85  | 5  | 3   | 7   | 0 |
| CONTIG-055960 | 115 | 9  | 16  | 37  | 0 |
| CONTIG-055961 | 152 | 9  | 12  | 55  | 0 |
| CONTIG-055962 | 247 | 13 | 10  | 164 | 0 |
| CONTIG-055963 | 125 | 11 | 8   | 19  | 2 |
| CONTIG-055965 | 212 | 78 | 30  | 993 | 2 |
| CONTIG-055966 | 81  | 5  | 7   | 0   | 0 |
| CONTIG-055967 | 87  | 18 | 20  | 21  | 2 |
| CONTIG-055968 | 307 | 9  | 7   | 80  | 4 |
| CONTIG-055969 | 114 | 5  | 15  | 21  | 0 |
| CONTIG-055970 | 221 | 8  | 0   | 8   | 6 |
| CONTIG-055971 | 202 | 10 | 27  | 44  | 0 |
| CONTIG-055974 | 188 | 7  | 11  | 58  | 0 |
| CONTIG-055975 | 71  | 6  | 11  | 14  | 0 |

|               |     |    |    |     |   |
|---------------|-----|----|----|-----|---|
| CONTIG-055976 | 69  | 5  | 12 | 0   | 0 |
| CONTIG-055977 | 173 | 8  | 4  | 45  | 6 |
| CONTIG-055978 | 111 | 3  | 0  | 12  | 0 |
| CONTIG-055979 | 70  | 8  | 5  | 2   | 0 |
| CONTIG-055980 | 72  | 3  | 2  | 7   | 0 |
| CONTIG-055981 | 75  | 9  | 0  | 25  | 0 |
| CONTIG-055982 | 274 | 8  | 16 | 50  | 4 |
| CONTIG-055983 | 101 | 3  | 2  | 8   | 0 |
| CONTIG-055984 | 608 | 14 | 14 | 61  | 0 |
| CONTIG-055985 | 287 | 9  | 5  | 93  | 0 |
| CONTIG-055986 | 125 | 8  | 7  | 27  | 2 |
| CONTIG-055987 | 255 | 5  | 4  | 62  | 0 |
| CONTIG-055988 | 59  | 11 | 15 | 9   | 0 |
| CONTIG-055989 | 61  | 11 | 10 | 20  | 0 |
| CONTIG-055993 | 101 | 5  | 3  | 16  | 0 |
| CONTIG-055994 | 131 | 6  | 4  | 14  | 3 |
| CONTIG-055996 | 221 | 13 | 22 | 81  | 0 |
| CONTIG-055997 | 85  | 7  | 0  | 13  | 0 |
| CONTIG-055998 | 96  | 7  | 6  | 20  | 2 |
| CONTIG-055999 | 127 | 7  | 2  | 47  | 0 |
| CONTIG-056000 | 208 | 8  | 4  | 58  | 0 |
| CONTIG-056002 | 290 | 7  | 3  | 4   | 0 |
| CONTIG-056003 | 464 | 16 | 36 | 200 | 2 |
| CONTIG-056006 | 198 | 24 | 43 | 192 | 0 |
| CONTIG-056007 | 61  | 4  | 0  | 4   | 0 |
| CONTIG-056008 | 217 | 6  | 2  | 29  | 0 |
| CONTIG-056009 | 73  | 18 | 52 | 2   | 0 |
| CONTIG-056010 | 191 | 5  | 6  | 23  | 0 |
| CONTIG-056011 | 325 | 7  | 12 | 36  | 0 |
| CONTIG-056013 | 619 | 28 | 8  | 32  | 0 |
| CONTIG-056014 | 447 | 13 | 11 | 161 | 2 |
| CONTIG-056015 | 46  | 6  | 3  | 10  | 0 |
| CONTIG-056017 | 95  | 6  | 0  | 2   | 0 |
| CONTIG-056018 | 412 | 16 | 18 | 329 | 0 |
| CONTIG-056019 | 208 | 5  | 6  | 27  | 0 |
| CONTIG-056020 | 114 | 10 | 28 | 2   | 0 |
| CONTIG-056021 | 63  | 7  | 3  | 4   | 2 |
| CONTIG-056022 | 121 | 13 | 27 | 0   | 0 |
| CONTIG-056023 | 227 | 10 | 17 | 15  | 0 |
| CONTIG-056025 | 298 | 13 | 8  | 183 | 2 |
| CONTIG-056026 | 73  | 2  | 0  | 4   | 0 |
| CONTIG-056027 | 77  | 11 | 4  | 2   | 0 |
| CONTIG-056028 | 145 | 8  | 2  | 24  | 0 |
| CONTIG-056029 | 98  | 7  | 25 | 11  | 0 |
| CONTIG-056030 | 58  | 6  | 6  | 8   | 0 |
| CONTIG-056035 | 63  | 7  | 6  | 18  | 0 |
| CONTIG-056036 | 263 | 18 | 21 | 128 | 2 |

|               |     |      |    |      |    |
|---------------|-----|------|----|------|----|
| CONTIG-056037 | 90  | 6    | 2  | 6    | 2  |
| CONTIG-056038 | 234 | 7    | 22 | 34   | 2  |
| CONTIG-056039 | 165 | 14   | 9  | 48   | 0  |
| CONTIG-056040 | 100 | 6    | 11 | 15   | 0  |
| CONTIG-056042 | 428 | 15   | 9  | 355  | 0  |
| CONTIG-056043 | 99  | 5    | 0  | 6    | 0  |
| CONTIG-056044 | 135 | 12   | 12 | 58   | 0  |
| CONTIG-056046 | 368 | 10   | 33 | 76   | 0  |
| CONTIG-056051 | 445 | 16   | 5  | 2    | 0  |
| CONTIG-056053 | 59  | 4    | 10 | 3    | 0  |
| CONTIG-056054 | 102 | 6    | 5  | 14   | 0  |
| CONTIG-056055 | 159 | 10   | 2  | 66   | 0  |
| CONTIG-056057 | 146 | 4    | 10 | 6    | 0  |
| CONTIG-056059 | 108 | 7    | 4  | 8    | 0  |
| CONTIG-056060 | 524 | 10   | 9  | 154  | 6  |
| CONTIG-056062 | 158 | 9    | 4  | 27   | 2  |
| CONTIG-056063 | 134 | 14   | 9  | 66   | 0  |
| CONTIG-056064 | 173 | 6    | 2  | 33   | 0  |
| CONTIG-056065 | 231 | 6    | 2  | 27   | 0  |
| CONTIG-056066 | 79  | 4    | 6  | 7    | 0  |
| CONTIG-056067 | 46  | 1225 | 17 | 2426 | 17 |
| CONTIG-056069 | 100 | 7    | 5  | 18   | 0  |
| CONTIG-056071 | 121 | 4    | 0  | 12   | 0  |
| CONTIG-056075 | 54  | 9    | 0  | 9    | 0  |
| CONTIG-056076 | 205 | 6    | 21 | 35   | 0  |
| CONTIG-056077 | 63  | 14   | 9  | 7    | 0  |
| CONTIG-056078 | 65  | 6    | 13 | 14   | 0  |
| CONTIG-056079 | 706 | 17   | 32 | 503  | 0  |
| CONTIG-056081 | 142 | 8    | 23 | 27   | 0  |
| CONTIG-056082 | 127 | 7    | 3  | 26   | 0  |
| CONTIG-056083 | 173 | 3    | 4  | 0    | 0  |
| CONTIG-056090 | 292 | 26   | 24 | 390  | 0  |
| CONTIG-056091 | 193 | 6    | 8  | 12   | 0  |
| CONTIG-056093 | 83  | 3    | 2  | 7    | 0  |
| CONTIG-056101 | 180 | 13   | 20 | 46   | 0  |
| CONTIG-056102 | 148 | 4    | 8  | 5    | 0  |
| CONTIG-056103 | 71  | 5    | 3  | 6    | 0  |
| CONTIG-056107 | 64  | 13   | 13 | 16   | 0  |
| CONTIG-056109 | 142 | 9    | 23 | 33   | 0  |
| CONTIG-056110 | 244 | 12   | 14 | 21   | 0  |
| CONTIG-056111 | 371 | 10   | 45 | 64   | 0  |
| CONTIG-056112 | 75  | 7    | 11 | 16   | 0  |
| CONTIG-056113 | 200 | 10   | 7  | 70   | 0  |
| CONTIG-056114 | 95  | 10   | 11 | 29   | 0  |
| CONTIG-056115 | 394 | 8    | 23 | 24   | 0  |
| CONTIG-056116 | 88  | 11   | 60 | 0    | 6  |
| CONTIG-056117 | 77  | 5    | 11 | 2    | 0  |

|               |     |     |     |      |    |
|---------------|-----|-----|-----|------|----|
| CONTIG-056118 | 78  | 9   | 5   | 29   | 0  |
| CONTIG-056119 | 94  | 9   | 36  | 0    | 0  |
| CONTIG-056121 | 131 | 8   | 4   | 27   | 0  |
| CONTIG-056122 | 81  | 14  | 30  | 7    | 0  |
| CONTIG-056123 | 100 | 5   | 6   | 0    | 0  |
| CONTIG-056124 | 99  | 14  | 62  | 6    | 0  |
| CONTIG-056125 | 357 | 10  | 7   | 190  | 0  |
| CONTIG-056126 | 131 | 5   | 0   | 17   | 0  |
| CONTIG-056127 | 222 | 14  | 27  | 19   | 0  |
| CONTIG-056128 | 668 | 10  | 8   | 299  | 0  |
| CONTIG-056129 | 99  | 5   | 3   | 18   | 0  |
| CONTIG-056130 | 132 | 7   | 3   | 39   | 0  |
| CONTIG-056131 | 95  | 4   | 0   | 6    | 3  |
| CONTIG-056133 | 137 | 5   | 5   | 0    | 0  |
| CONTIG-056134 | 178 | 10  | 9   | 65   | 3  |
| CONTIG-056135 | 63  | 3   | 2   | 0    | 0  |
| CONTIG-056136 | 103 | 3   | 9   | 4    | 0  |
| CONTIG-056137 | 520 | 9   | 9   | 195  | 0  |
| CONTIG-056138 | 96  | 9   | 39  | 22   | 0  |
| CONTIG-056139 | 138 | 7   | 6   | 20   | 0  |
| CONTIG-056140 | 175 | 7   | 23  | 38   | 0  |
| CONTIG-056141 | 141 | 7   | 73  | 9    | 0  |
| CONTIG-056142 | 203 | 9   | 26  | 17   | 0  |
| CONTIG-056143 | 138 | 6   | 4   | 18   | 0  |
| CONTIG-056144 | 178 | 13  | 21  | 58   | 0  |
| CONTIG-056145 | 206 | 16  | 19  | 62   | 2  |
| CONTIG-056146 | 80  | 6   | 11  | 5    | 0  |
| CONTIG-056147 | 115 | 7   | 8   | 21   | 0  |
| CONTIG-056148 | 76  | 10  | 18  | 4    | 2  |
| CONTIG-056149 | 211 | 15  | 14  | 76   | 2  |
| CONTIG-056152 | 167 | 5   | 3   | 31   | 0  |
| CONTIG-056153 | 136 | 5   | 6   | 20   | 0  |
| CONTIG-056154 | 64  | 8   | 5   | 18   | 0  |
| CONTIG-056155 | 292 | 20  | 35  | 124  | 0  |
| CONTIG-056156 | 280 | 14  | 22  | 9    | 0  |
| CONTIG-056157 | 58  | 4   | 0   | 5    | 0  |
| CONTIG-056158 | 297 | 17  | 27  | 189  | 2  |
| CONTIG-056159 | 147 | 10  | 34  | 53   | 0  |
| CONTIG-056160 | 90  | 12  | 2   | 36   | 0  |
| CONTIG-056161 | 325 | 8   | 18  | 46   | 0  |
| CONTIG-056162 | 86  | 4   | 9   | 12   | 0  |
| CONTIG-056163 | 65  | 4   | 4   | 8    | 0  |
| CONTIG-056164 | 58  | 4   | 11  | 0    | 0  |
| CONTIG-056165 | 294 | 214 | 118 | 2855 | 23 |
| CONTIG-056166 | 270 | 4   | 0   | 35   | 0  |
| CONTIG-056167 | 130 | 5   | 11  | 18   | 0  |
| CONTIG-056168 | 120 | 13  | 2   | 77   | 0  |

|               |     |    |    |     |   |
|---------------|-----|----|----|-----|---|
| CONTIG-056169 | 113 | 4  | 0  | 13  | 0 |
| CONTIG-056170 | 254 | 7  | 11 | 48  | 0 |
| CONTIG-056171 | 71  | 4  | 4  | 6   | 0 |
| CONTIG-056175 | 63  | 13 | 16 | 22  | 0 |
| CONTIG-056176 | 74  | 15 | 3  | 67  | 0 |
| CONTIG-056177 | 80  | 5  | 11 | 2   | 0 |
| CONTIG-056178 | 91  | 6  | 18 | 4   | 0 |
| CONTIG-056179 | 270 | 7  | 10 | 38  | 0 |
| CONTIG-056180 | 417 | 26 | 30 | 529 | 0 |
| CONTIG-056181 | 248 | 13 | 21 | 144 | 0 |
| CONTIG-056182 | 140 | 4  | 2  | 9   | 0 |
| CONTIG-056183 | 171 | 6  | 2  | 13  | 0 |
| CONTIG-056184 | 325 | 7  | 10 | 72  | 0 |
| CONTIG-056185 | 83  | 6  | 2  | 15  | 0 |
| CONTIG-056186 | 202 | 10 | 2  | 58  | 4 |
| CONTIG-056188 | 342 | 10 | 7  | 158 | 0 |
| CONTIG-056189 | 184 | 9  | 0  | 54  | 0 |
| CONTIG-056190 | 69  | 10 | 42 | 2   | 0 |
| CONTIG-056191 | 58  | 4  | 9  | 2   | 0 |
| CONTIG-056192 | 264 | 9  | 20 | 78  | 0 |
| CONTIG-056193 | 95  | 6  | 8  | 15  | 0 |
| CONTIG-056194 | 70  | 4  | 0  | 11  | 0 |
| CONTIG-056195 | 401 | 12 | 12 | 100 | 2 |
| CONTIG-056196 | 108 | 7  | 0  | 30  | 0 |
| CONTIG-056197 | 50  | 20 | 14 | 17  | 0 |
| CONTIG-056198 | 124 | 8  | 0  | 39  | 0 |
| CONTIG-056200 | 85  | 4  | 8  | 2   | 0 |
| CONTIG-056201 | 59  | 6  | 7  | 9   | 0 |
| CONTIG-056202 | 150 | 10 | 13 | 15  | 0 |
| CONTIG-056203 | 167 | 5  | 19 | 26  | 0 |
| CONTIG-056204 | 60  | 3  | 4  | 6   | 0 |
| CONTIG-056205 | 59  | 3  | 3  | 2   | 0 |
| CONTIG-056206 | 261 | 7  | 27 | 21  | 0 |
| CONTIG-056207 | 153 | 10 | 8  | 58  | 0 |
| CONTIG-056208 | 78  | 3  | 0  | 4   | 0 |
| CONTIG-056210 | 107 | 2  | 0  | 4   | 0 |
| CONTIG-056211 | 116 | 11 | 10 | 36  | 0 |
| CONTIG-056212 | 217 | 12 | 15 | 112 | 0 |
| CONTIG-056213 | 71  | 7  | 11 | 10  | 0 |
| CONTIG-056214 | 110 | 3  | 9  | 7   | 0 |
| CONTIG-056215 | 83  | 4  | 4  | 11  | 0 |
| CONTIG-056216 | 58  | 10 | 4  | 13  | 0 |
| CONTIG-056217 | 103 | 6  | 4  | 6   | 0 |
| CONTIG-056218 | 61  | 4  | 3  | 5   | 0 |
| CONTIG-056219 | 139 | 10 | 6  | 55  | 0 |
| CONTIG-056220 | 292 | 12 | 2  | 145 | 0 |
| CONTIG-056221 | 58  | 3  | 7  | 0   | 0 |



|               |     |     |    |     |   |
|---------------|-----|-----|----|-----|---|
| CONTIG-056223 | 185 | 12  | 12 | 59  | 0 |
| CONTIG-056224 | 344 | 38  | 54 | 271 | 0 |
| CONTIG-056225 | 155 | 4   | 7  | 8   | 0 |
| CONTIG-056226 | 181 | 8   | 12 | 62  | 0 |
| CONTIG-056227 | 155 | 6   | 12 | 9   | 4 |
| CONTIG-056228 | 280 | 13  | 25 | 183 | 0 |
| CONTIG-056230 | 208 | 20  | 27 | 95  | 0 |
| CONTIG-056231 | 115 | 105 | 88 | 601 | 0 |
| CONTIG-056232 | 234 | 12  | 39 | 70  | 2 |
| CONTIG-056233 | 64  | 9   | 10 | 14  | 0 |
| CONTIG-056234 | 206 | 10  | 13 | 50  | 0 |
| CONTIG-056235 | 110 | 55  | 4  | 198 | 2 |
| CONTIG-056238 | 317 | 11  | 14 | 108 | 0 |
| CONTIG-056239 | 96  | 4   | 0  | 10  | 0 |
| CONTIG-056240 | 61  | 4   | 9  | 7   | 0 |
| CONTIG-056241 | 74  | 6   | 2  | 12  | 0 |
| CONTIG-056242 | 63  | 3   | 5  | 0   | 0 |
| CONTIG-056243 | 103 | 4   | 19 | 9   | 0 |
| CONTIG-056244 | 186 | 10  | 17 | 63  | 3 |
| CONTIG-056245 | 96  | 149 | 0  | 168 | 2 |
| CONTIG-056246 | 107 | 4   | 2  | 7   | 0 |
| CONTIG-056248 | 91  | 5   | 3  | 5   | 0 |
| CONTIG-056249 | 91  | 13  | 10 | 35  | 0 |
| CONTIG-056250 | 213 | 8   | 9  | 29  | 0 |
| CONTIG-056251 | 143 | 5   | 14 | 10  | 0 |
| CONTIG-056252 | 63  | 4   | 5  | 11  | 0 |
| CONTIG-056253 | 76  | 5   | 4  | 2   | 0 |
| CONTIG-056254 | 265 | 11  | 4  | 102 | 0 |
| CONTIG-056255 | 100 | 13  | 19 | 53  | 0 |
| CONTIG-056256 | 109 | 5   | 6  | 16  | 0 |
| CONTIG-056257 | 157 | 27  | 12 | 31  | 0 |
| CONTIG-056258 | 220 | 23  | 13 | 239 | 0 |
| CONTIG-056259 | 82  | 9   | 18 | 2   | 0 |
| CONTIG-056260 | 80  | 45  | 8  | 126 | 3 |
| CONTIG-056261 | 391 | 9   | 11 | 81  | 0 |
| CONTIG-056262 | 74  | 13  | 28 | 24  | 0 |
| CONTIG-056263 | 70  | 6   | 2  | 2   | 0 |
| CONTIG-056264 | 60  | 12  | 6  | 29  | 0 |
| CONTIG-056265 | 59  | 4   | 2  | 6   | 0 |
| CONTIG-056266 | 203 | 16  | 7  | 153 | 0 |
| CONTIG-056267 | 514 | 21  | 26 | 479 | 0 |
| CONTIG-056268 | 173 | 11  | 13 | 33  | 0 |
| CONTIG-056269 | 322 | 5   | 9  | 35  | 0 |
| CONTIG-056270 | 211 | 4   | 2  | 8   | 2 |
| CONTIG-056271 | 65  | 3   | 0  | 0   | 0 |
| CONTIG-056272 | 218 | 9   | 4  | 56  | 0 |
| CONTIG-056273 | 80  | 7   | 5  | 23  | 0 |

|               |     |     |    |     |     |
|---------------|-----|-----|----|-----|-----|
| CONTIG-056274 | 197 | 10  | 11 | 64  | 0   |
| CONTIG-056275 | 95  | 3   | 0  | 4   | 0   |
| CONTIG-056276 | 348 | 11  | 25 | 100 | 0   |
| CONTIG-056277 | 72  | 31  | 33 | 38  | 0   |
| CONTIG-056280 | 109 | 5   | 2  | 15  | 0   |
| CONTIG-056281 | 66  | 3   | 4  | 2   | 0   |
| CONTIG-056282 | 77  | 5   | 6  | 7   | 0   |
| CONTIG-056283 | 102 | 16  | 8  | 9   | 0   |
| CONTIG-056284 | 124 | 5   | 0  | 4   | 0   |
| CONTIG-056285 | 114 | 11  | 16 | 36  | 0   |
| CONTIG-056286 | 60  | 4   | 9  | 4   | 0   |
| CONTIG-056287 | 92  | 24  | 2  | 64  | 0   |
| CONTIG-056288 | 72  | 6   | 7  | 6   | 0   |
| CONTIG-056289 | 64  | 7   | 4  | 4   | 0   |
| CONTIG-056290 | 68  | 4   | 0  | 6   | 0   |
| CONTIG-056291 | 182 | 4   | 6  | 20  | 2   |
| CONTIG-056292 | 162 | 5   | 9  | 24  | 0   |
| CONTIG-056293 | 265 | 11  | 27 | 99  | 3   |
| CONTIG-056294 | 366 | 13  | 34 | 141 | 2   |
| CONTIG-056295 | 115 | 6   | 4  | 12  | 0   |
| CONTIG-056296 | 117 | 13  | 17 | 49  | 0   |
| CONTIG-056297 | 138 | 9   | 4  | 32  | 0   |
| CONTIG-056298 | 346 | 19  | 72 | 92  | 0   |
| CONTIG-056299 | 68  | 6   | 5  | 4   | 0   |
| CONTIG-056301 | 43  | 100 | 0  | 218 | 0   |
| CONTIG-056302 | 78  | 6   | 5  | 18  | 0   |
| CONTIG-056303 | 181 | 12  | 19 | 18  | 0   |
| CONTIG-056304 | 58  | 8   | 11 | 6   | 0   |
| CONTIG-056305 | 67  | 6   | 6  | 8   | 0   |
| CONTIG-056306 | 96  | 11  | 36 | 4   | 0   |
| CONTIG-056307 | 202 | 6   | 7  | 31  | 0   |
| CONTIG-056310 | 69  | 10  | 0  | 27  | 0   |
| CONTIG-056311 | 145 | 5   | 5  | 19  | 0   |
| CONTIG-056312 | 65  | 6   | 13 | 3   | 0   |
| CONTIG-056313 | 299 | 8   | 26 | 54  | 2   |
| CONTIG-056314 | 171 | 11  | 5  | 63  | 0   |
| CONTIG-056315 | 80  | 7   | 2  | 13  | 0   |
| CONTIG-056316 | 193 | 10  | 14 | 50  | 2   |
| CONTIG-056317 | 308 | 16  | 21 | 206 | 0   |
| CONTIG-056318 | 84  | 7   | 10 | 23  | 0   |
| CONTIG-056319 | 231 | 6   | 2  | 34  | 0   |
| CONTIG-056320 | 144 | 5   | 4  | 18  | 0   |
| CONTIG-056321 | 63  | 353 | 44 | 0   | 271 |
| CONTIG-056322 | 88  | 19  | 7  | 50  | 0   |
| CONTIG-056323 | 200 | 13  | 12 | 55  | 2   |
| CONTIG-056324 | 93  | 14  | 7  | 47  | 0   |
| CONTIG-056325 | 66  | 3   | 2  | 2   | 0   |

|               |     |     |    |      |   |
|---------------|-----|-----|----|------|---|
| CONTIG-056326 | 95  | 4   | 4  | 13   | 0 |
| CONTIG-056328 | 342 | 7   | 15 | 103  | 0 |
| CONTIG-056329 | 81  | 12  | 11 | 14   | 0 |
| CONTIG-056331 | 230 | 16  | 8  | 101  | 0 |
| CONTIG-056332 | 64  | 18  | 14 | 49   | 0 |
| CONTIG-056334 | 137 | 9   | 6  | 42   | 0 |
| CONTIG-056335 | 133 | 6   | 6  | 17   | 0 |
| CONTIG-056337 | 78  | 5   | 0  | 0    | 0 |
| CONTIG-056339 | 140 | 3   | 10 | 3    | 0 |
| CONTIG-056340 | 122 | 5   | 2  | 18   | 0 |
| CONTIG-056343 | 296 | 7   | 10 | 69   | 0 |
| CONTIG-056344 | 104 | 3   | 0  | 0    | 0 |
| CONTIG-056345 | 71  | 9   | 16 | 12   | 0 |
| CONTIG-056346 | 189 | 4   | 15 | 9    | 0 |
| CONTIG-056348 | 117 | 21  | 35 | 74   | 2 |
| CONTIG-056349 | 98  | 4   | 5  | 2    | 0 |
| CONTIG-056350 | 105 | 9   | 2  | 29   | 0 |
| CONTIG-056351 | 111 | 11  | 21 | 26   | 0 |
| CONTIG-056352 | 133 | 17  | 0  | 47   | 2 |
| CONTIG-056353 | 329 | 8   | 40 | 61   | 0 |
| CONTIG-056354 | 402 | 15  | 57 | 260  | 0 |
| CONTIG-056355 | 252 | 9   | 5  | 42   | 0 |
| CONTIG-056357 | 387 | 11  | 83 | 100  | 0 |
| CONTIG-056358 | 94  | 10  | 5  | 18   | 0 |
| CONTIG-056359 | 96  | 8   | 7  | 29   | 2 |
| CONTIG-056360 | 309 | 11  | 6  | 84   | 0 |
| CONTIG-056361 | 252 | 7   | 12 | 47   | 0 |
| CONTIG-056362 | 93  | 11  | 2  | 32   | 0 |
| CONTIG-056363 | 83  | 12  | 36 | 2    | 0 |
| CONTIG-056364 | 156 | 10  | 38 | 2    | 0 |
| CONTIG-056365 | 108 | 4   | 11 | 0    | 0 |
| CONTIG-056366 | 115 | 9   | 8  | 32   | 0 |
| CONTIG-056367 | 76  | 4   | 3  | 7    | 0 |
| CONTIG-056368 | 111 | 5   | 20 | 0    | 0 |
| CONTIG-056369 | 335 | 12  | 8  | 149  | 2 |
| CONTIG-056370 | 164 | 5   | 4  | 20   | 0 |
| CONTIG-056371 | 90  | 3   | 0  | 10   | 0 |
| CONTIG-056374 | 200 | 159 | 12 | 1983 | 0 |
| CONTIG-056375 | 200 | 19  | 35 | 135  | 3 |
| CONTIG-056376 | 174 | 4   | 2  | 0    | 0 |
| CONTIG-056377 | 108 | 5   | 3  | 16   | 0 |
| CONTIG-056378 | 117 | 6   | 11 | 18   | 0 |
| CONTIG-056379 | 145 | 6   | 2  | 24   | 0 |
| CONTIG-056380 | 296 | 14  | 27 | 100  | 0 |
| CONTIG-056381 | 64  | 6   | 3  | 6    | 0 |
| CONTIG-056382 | 237 | 8   | 10 | 48   | 0 |
| CONTIG-056383 | 207 | 20  | 6  | 124  | 0 |

|               |     |    |    |     |    |
|---------------|-----|----|----|-----|----|
| CONTIG-056384 | 100 | 6  | 2  | 16  | 0  |
| CONTIG-056388 | 115 | 20 | 24 | 55  | 0  |
| CONTIG-056389 | 105 | 8  | 6  | 30  | 0  |
| CONTIG-056390 | 77  | 6  | 7  | 17  | 0  |
| CONTIG-056391 | 87  | 5  | 2  | 14  | 0  |
| CONTIG-056392 | 542 | 19 | 37 | 243 | 2  |
| CONTIG-056393 | 103 | 11 | 26 | 0   | 0  |
| CONTIG-056394 | 101 | 5  | 0  | 24  | 0  |
| CONTIG-056395 | 157 | 8  | 18 | 24  | 0  |
| CONTIG-056396 | 87  | 5  | 4  | 9   | 0  |
| CONTIG-056397 | 410 | 12 | 24 | 125 | 0  |
| CONTIG-056398 | 111 | 6  | 2  | 18  | 0  |
| CONTIG-056400 | 86  | 12 | 30 | 22  | 0  |
| CONTIG-056401 | 152 | 8  | 6  | 52  | 0  |
| CONTIG-056402 | 62  | 9  | 2  | 12  | 0  |
| CONTIG-056403 | 74  | 6  | 24 | 2   | 0  |
| CONTIG-056404 | 59  | 4  | 5  | 5   | 0  |
| CONTIG-056405 | 104 | 6  | 0  | 16  | 0  |
| CONTIG-056406 | 70  | 7  | 0  | 20  | 0  |
| CONTIG-056413 | 273 | 14 | 31 | 123 | 0  |
| CONTIG-056414 | 114 | 3  | 0  | 13  | 0  |
| CONTIG-056415 | 76  | 3  | 0  | 4   | 0  |
| CONTIG-056416 | 230 | 10 | 21 | 24  | 0  |
| CONTIG-056418 | 143 | 14 | 12 | 66  | 0  |
| CONTIG-056420 | 168 | 8  | 8  | 53  | 0  |
| CONTIG-056421 | 76  | 3  | 3  | 5   | 0  |
| CONTIG-056422 | 90  | 4  | 0  | 8   | 0  |
| CONTIG-056423 | 131 | 4  | 6  | 12  | 0  |
| CONTIG-056424 | 170 | 3  | 2  | 5   | 0  |
| CONTIG-056425 | 126 | 21 | 5  | 173 | 0  |
| CONTIG-056426 | 157 | 5  | 35 | 13  | 0  |
| CONTIG-056427 | 121 | 11 | 5  | 50  | 0  |
| CONTIG-056428 | 165 | 11 | 18 | 51  | 0  |
| CONTIG-056429 | 60  | 6  | 2  | 4   | 0  |
| CONTIG-056430 | 131 | 11 | 5  | 49  | 0  |
| CONTIG-056436 | 156 | 7  | 7  | 19  | 0  |
| CONTIG-056437 | 72  | 3  | 5  | 0   | 0  |
| CONTIG-056438 | 60  | 6  | 0  | 0   | 0  |
| CONTIG-056439 | 97  | 23 | 6  | 66  | 0  |
| CONTIG-056440 | 126 | 6  | 14 | 18  | 0  |
| CONTIG-056441 | 168 | 6  | 10 | 15  | 0  |
| CONTIG-056442 | 120 | 23 | 10 | 118 | 0  |
| CONTIG-056443 | 104 | 8  | 2  | 26  | 2  |
| CONTIG-056444 | 277 | 14 | 3  | 0   | 33 |
| CONTIG-056446 | 61  | 10 | 2  | 30  | 0  |
| CONTIG-056447 | 108 | 69 | 4  | 348 | 2  |
| CONTIG-056448 | 110 | 14 | 10 | 16  | 0  |

|               |     |    |    |     |    |
|---------------|-----|----|----|-----|----|
| CONTIG-056449 | 377 | 16 | 72 | 269 | 2  |
| CONTIG-056450 | 202 | 5  | 4  | 18  | 0  |
| CONTIG-056451 | 68  | 13 | 0  | 25  | 0  |
| CONTIG-056452 | 113 | 7  | 19 | 13  | 0  |
| CONTIG-056453 | 150 | 11 | 5  | 65  | 0  |
| CONTIG-056454 | 86  | 9  | 21 | 0   | 0  |
| CONTIG-056456 | 150 | 6  | 10 | 20  | 0  |
| CONTIG-056457 | 291 | 8  | 9  | 78  | 0  |
| CONTIG-056458 | 108 | 5  | 8  | 14  | 0  |
| CONTIG-056459 | 121 | 8  | 33 | 13  | 0  |
| CONTIG-056460 | 429 | 13 | 23 | 161 | 0  |
| CONTIG-056461 | 68  | 10 | 0  | 5   | 0  |
| CONTIG-056462 | 497 | 18 | 21 | 484 | 2  |
| CONTIG-056463 | 90  | 4  | 4  | 3   | 0  |
| CONTIG-056464 | 363 | 13 | 6  | 106 | 7  |
| CONTIG-056465 | 72  | 7  | 6  | 10  | 0  |
| CONTIG-056466 | 357 | 18 | 56 | 155 | 2  |
| CONTIG-056471 | 286 | 6  | 10 | 43  | 2  |
| CONTIG-056472 | 251 | 8  | 13 | 56  | 0  |
| CONTIG-056473 | 108 | 13 | 0  | 86  | 0  |
| CONTIG-056474 | 433 | 14 | 26 | 247 | 0  |
| CONTIG-056475 | 183 | 6  | 5  | 30  | 0  |
| CONTIG-056476 | 128 | 17 | 18 | 50  | 0  |
| CONTIG-056477 | 65  | 4  | 14 | 3   | 0  |
| CONTIG-056478 | 87  | 5  | 12 | 10  | 0  |
| CONTIG-056479 | 97  | 10 | 16 | 25  | 0  |
| CONTIG-056480 | 227 | 8  | 9  | 47  | 0  |
| CONTIG-056481 | 192 | 16 | 22 | 87  | 0  |
| CONTIG-056482 | 236 | 8  | 0  | 53  | 0  |
| CONTIG-056483 | 72  | 9  | 8  | 10  | 0  |
| CONTIG-056484 | 380 | 10 | 22 | 77  | 2  |
| CONTIG-056485 | 71  | 32 | 12 | 59  | 0  |
| CONTIG-056486 | 179 | 6  | 2  | 35  | 0  |
| CONTIG-056487 | 59  | 10 | 2  | 18  | 0  |
| CONTIG-056488 | 63  | 9  | 11 | 20  | 0  |
| CONTIG-056489 | 211 | 16 | 14 | 143 | 0  |
| CONTIG-056490 | 183 | 32 | 8  | 184 | 17 |
| CONTIG-056491 | 110 | 3  | 5  | 7   | 0  |
| CONTIG-056492 | 116 | 36 | 20 | 81  | 7  |
| CONTIG-056493 | 110 | 6  | 17 | 22  | 0  |
| CONTIG-056494 | 111 | 8  | 14 | 6   | 3  |
| CONTIG-056495 | 70  | 4  | 5  | 0   | 0  |
| CONTIG-056496 | 89  | 4  | 0  | 11  | 0  |
| CONTIG-056497 | 111 | 16 | 6  | 98  | 0  |
| CONTIG-056501 | 146 | 8  | 19 | 25  | 0  |
| CONTIG-056502 | 702 | 12 | 19 | 137 | 23 |
| CONTIG-056503 | 243 | 7  | 13 | 63  | 0  |

|               |      |    |    |     |   |
|---------------|------|----|----|-----|---|
| CONTIG-056504 | 75   | 11 | 33 | 0   | 0 |
| CONTIG-056505 | 72   | 10 | 2  | 12  | 0 |
| CONTIG-056506 | 125  | 3  | 0  | 9   | 0 |
| CONTIG-056507 | 91   | 4  | 6  | 8   | 0 |
| CONTIG-056508 | 1001 | 11 | 64 | 231 | 2 |
| CONTIG-056509 | 471  | 24 | 20 | 496 | 5 |
| CONTIG-056510 | 112  | 5  | 5  | 13  | 0 |
| CONTIG-056512 | 91   | 9  | 8  | 24  | 0 |
| CONTIG-056513 | 351  | 8  | 11 | 68  | 2 |
| CONTIG-056514 | 95   | 12 | 9  | 23  | 0 |
| CONTIG-056515 | 299  | 6  | 35 | 53  | 0 |
| CONTIG-056516 | 182  | 8  | 4  | 34  | 2 |
| CONTIG-056517 | 82   | 8  | 0  | 21  | 0 |
| CONTIG-056518 | 181  | 14 | 10 | 67  | 0 |
| CONTIG-056519 | 110  | 5  | 5  | 13  | 0 |
| CONTIG-056520 | 278  | 9  | 35 | 67  | 2 |
| CONTIG-056521 | 110  | 12 | 4  | 49  | 0 |
| CONTIG-056522 | 190  | 8  | 8  | 56  | 0 |
| CONTIG-056523 | 87   | 8  | 24 | 27  | 0 |
| CONTIG-056524 | 419  | 17 | 32 | 254 | 4 |
| CONTIG-056525 | 320  | 8  | 13 | 94  | 0 |
| CONTIG-056526 | 465  | 10 | 53 | 127 | 0 |
| CONTIG-056528 | 317  | 8  | 12 | 67  | 0 |
| CONTIG-056529 | 89   | 5  | 6  | 12  | 0 |
| CONTIG-056531 | 166  | 5  | 0  | 13  | 2 |
| CONTIG-056532 | 221  | 5  | 4  | 20  | 0 |
| CONTIG-056533 | 141  | 11 | 2  | 74  | 0 |
| CONTIG-056534 | 213  | 8  | 8  | 51  | 0 |
| CONTIG-056535 | 85   | 8  | 15 | 13  | 0 |
| CONTIG-056536 | 92   | 6  | 8  | 19  | 0 |
| CONTIG-056538 | 246  | 8  | 10 | 60  | 0 |
| CONTIG-056539 | 97   | 68 | 9  | 372 | 0 |
| CONTIG-056540 | 119  | 10 | 22 | 10  | 0 |
| CONTIG-056541 | 126  | 21 | 53 | 63  | 0 |
| CONTIG-056542 | 374  | 10 | 4  | 186 | 0 |
| CONTIG-056543 | 300  | 15 | 45 | 135 | 0 |
| CONTIG-056547 | 64   | 6  | 10 | 4   | 0 |
| CONTIG-056548 | 344  | 48 | 37 | 764 | 0 |
| CONTIG-056550 | 227  | 7  | 24 | 14  | 0 |
| CONTIG-056552 | 400  | 10 | 64 | 131 | 0 |
| CONTIG-056553 | 140  | 4  | 2  | 17  | 0 |
| CONTIG-056554 | 140  | 4  | 0  | 16  | 0 |
| CONTIG-056555 | 291  | 8  | 26 | 38  | 0 |
| CONTIG-056556 | 100  | 5  | 4  | 14  | 0 |
| CONTIG-056557 | 787  | 26 | 31 | 924 | 2 |
| CONTIG-056558 | 83   | 6  | 0  | 15  | 0 |
| CONTIG-056559 | 86   | 5  | 15 | 4   | 0 |

|               |     |    |    |      |    |
|---------------|-----|----|----|------|----|
| CONTIG-056560 | 83  | 5  | 7  | 6    | 0  |
| CONTIG-056561 | 67  | 4  | 4  | 0    | 0  |
| CONTIG-056562 | 58  | 3  | 6  | 2    | 0  |
| CONTIG-056563 | 83  | 14 | 4  | 17   | 0  |
| CONTIG-056564 | 143 | 5  | 15 | 14   | 0  |
| CONTIG-056565 | 123 | 5  | 0  | 9    | 0  |
| CONTIG-056567 | 155 | 43 | 4  | 315  | 2  |
| CONTIG-056568 | 120 | 5  | 2  | 16   | 0  |
| CONTIG-056569 | 187 | 5  | 0  | 13   | 0  |
| CONTIG-056570 | 95  | 6  | 0  | 21   | 0  |
| CONTIG-056571 | 179 | 10 | 17 | 33   | 0  |
| CONTIG-056572 | 129 | 10 | 5  | 28   | 0  |
| CONTIG-056573 | 460 | 14 | 27 | 252  | 3  |
| CONTIG-056574 | 61  | 4  | 4  | 8    | 0  |
| CONTIG-056575 | 323 | 9  | 17 | 95   | 2  |
| CONTIG-056576 | 72  | 10 | 7  | 24   | 0  |
| CONTIG-056577 | 147 | 7  | 7  | 31   | 0  |
| CONTIG-056578 | 286 | 26 | 45 | 153  | 22 |
| CONTIG-056579 | 66  | 7  | 13 | 0    | 0  |
| CONTIG-056580 | 349 | 12 | 4  | 154  | 3  |
| CONTIG-056581 | 133 | 10 | 9  | 49   | 0  |
| CONTIG-056582 | 105 | 5  | 0  | 18   | 0  |
| CONTIG-056583 | 89  | 4  | 4  | 10   | 0  |
| CONTIG-056584 | 297 | 11 | 0  | 0    | 15 |
| CONTIG-056585 | 415 | 15 | 2  | 223  | 2  |
| CONTIG-056586 | 233 | 7  | 8  | 39   | 0  |
| CONTIG-056587 | 159 | 6  | 4  | 33   | 0  |
| CONTIG-056588 | 847 | 27 | 10 | 36   | 0  |
| CONTIG-056589 | 80  | 9  | 5  | 35   | 0  |
| CONTIG-056591 | 244 | 9  | 16 | 8    | 0  |
| CONTIG-056592 | 627 | 36 | 78 | 1119 | 0  |
| CONTIG-056593 | 65  | 5  | 4  | 2    | 0  |
| CONTIG-056595 | 74  | 4  | 2  | 4    | 0  |
| CONTIG-056596 | 147 | 10 | 20 | 48   | 0  |
| CONTIG-056597 | 266 | 17 | 36 | 87   | 0  |
| CONTIG-056598 | 68  | 4  | 5  | 10   | 0  |
| CONTIG-056599 | 132 | 10 | 8  | 68   | 0  |
| CONTIG-056600 | 157 | 40 | 8  | 58   | 0  |
| CONTIG-056601 | 74  | 4  | 9  | 6    | 0  |
| CONTIG-056602 | 167 | 6  | 0  | 23   | 0  |
| CONTIG-056603 | 85  | 9  | 18 | 13   | 0  |
| CONTIG-056605 | 112 | 6  | 2  | 17   | 2  |
| CONTIG-056606 | 98  | 10 | 7  | 21   | 0  |
| CONTIG-056607 | 110 | 9  | 9  | 20   | 0  |
| CONTIG-056608 | 412 | 33 | 32 | 334  | 4  |
| CONTIG-056609 | 226 | 6  | 5  | 47   | 0  |
| CONTIG-056610 | 73  | 8  | 4  | 17   | 0  |

|               |     |     |    |     |   |
|---------------|-----|-----|----|-----|---|
| CONTIG-056611 | 68  | 5   | 5  | 11  | 0 |
| CONTIG-056613 | 192 | 10  | 8  | 66  | 0 |
| CONTIG-056614 | 136 | 7   | 26 | 28  | 0 |
| CONTIG-056615 | 95  | 32  | 21 | 38  | 0 |
| CONTIG-056616 | 102 | 7   | 16 | 2   | 0 |
| CONTIG-056617 | 99  | 5   | 6  | 21  | 0 |
| CONTIG-056619 | 233 | 12  | 20 | 88  | 0 |
| CONTIG-056620 | 396 | 7   | 13 | 51  | 4 |
| CONTIG-056621 | 124 | 3   | 5  | 13  | 0 |
| CONTIG-056622 | 91  | 5   | 0  | 2   | 0 |
| CONTIG-056623 | 67  | 3   | 3  | 8   | 0 |
| CONTIG-056625 | 88  | 6   | 8  | 9   | 0 |
| CONTIG-056626 | 220 | 16  | 14 | 153 | 0 |
| CONTIG-056628 | 101 | 8   | 16 | 21  | 0 |
| CONTIG-056629 | 289 | 13  | 16 | 181 | 0 |
| CONTIG-056630 | 85  | 8   | 12 | 13  | 0 |
| CONTIG-056633 | 60  | 6   | 19 | 0   | 0 |
| CONTIG-056634 | 120 | 5   | 6  | 9   | 0 |
| CONTIG-056635 | 170 | 16  | 16 | 96  | 0 |
| CONTIG-056638 | 116 | 109 | 4  | 34  | 0 |
| CONTIG-056639 | 143 | 12  | 14 | 79  | 0 |
| CONTIG-056640 | 187 | 6   | 16 | 14  | 0 |
| CONTIG-056641 | 209 | 6   | 6  | 0   | 0 |
| CONTIG-056642 | 182 | 4   | 5  | 14  | 0 |
| CONTIG-056643 | 87  | 4   | 0  | 2   | 0 |
| CONTIG-056644 | 109 | 6   | 3  | 25  | 0 |
| CONTIG-056645 | 96  | 6   | 5  | 23  | 0 |
| CONTIG-056646 | 116 | 6   | 0  | 15  | 0 |
| CONTIG-056647 | 95  | 9   | 19 | 0   | 0 |
| CONTIG-056648 | 211 | 17  | 73 | 108 | 2 |
| CONTIG-056649 | 128 | 12  | 7  | 20  | 0 |
| CONTIG-056650 | 88  | 11  | 46 | 7   | 0 |
| CONTIG-056652 | 77  | 13  | 26 | 17  | 0 |
| CONTIG-056653 | 169 | 13  | 21 | 53  | 0 |
| CONTIG-056654 | 257 | 17  | 10 | 18  | 0 |
| CONTIG-056656 | 95  | 5   | 2  | 11  | 0 |
| CONTIG-056658 | 148 | 7   | 3  | 30  | 0 |
| CONTIG-056659 | 442 | 10  | 8  | 58  | 0 |
| CONTIG-056660 | 88  | 3   | 3  | 0   | 0 |
| CONTIG-056661 | 182 | 13  | 10 | 10  | 0 |
| CONTIG-056662 | 306 | 12  | 18 | 41  | 0 |
| CONTIG-056663 | 144 | 6   | 0  | 22  | 0 |
| CONTIG-056665 | 159 | 5   | 3  | 21  | 0 |
| CONTIG-056666 | 150 | 7   | 0  | 20  | 4 |
| CONTIG-056667 | 91  | 6   | 8  | 8   | 0 |
| CONTIG-056668 | 71  | 2   | 0  | 6   | 0 |
| CONTIG-056669 | 176 | 7   | 50 | 0   | 0 |



|               |     |    |    |     |   |
|---------------|-----|----|----|-----|---|
| CONTIG-056671 | 198 | 8  | 7  | 20  | 5 |
| CONTIG-056672 | 313 | 7  | 11 | 82  | 0 |
| CONTIG-056673 | 68  | 3  | 0  | 3   | 0 |
| CONTIG-056675 | 170 | 75 | 4  | 654 | 4 |
| CONTIG-056677 | 206 | 10 | 6  | 30  | 0 |
| CONTIG-056678 | 72  | 42 | 6  | 101 | 0 |
| CONTIG-056679 | 77  | 4  | 5  | 6   | 0 |
| CONTIG-056680 | 108 | 8  | 31 | 28  | 0 |
| CONTIG-056681 | 65  | 13 | 7  | 19  | 0 |
| CONTIG-056682 | 173 | 7  | 11 | 36  | 0 |
| CONTIG-056683 | 62  | 5  | 0  | 5   | 0 |
| CONTIG-056684 | 113 | 6  | 5  | 16  | 0 |
| CONTIG-056685 | 143 | 7  | 19 | 11  | 2 |
| CONTIG-056686 | 149 | 12 | 13 | 67  | 0 |
| CONTIG-056687 | 97  | 17 | 10 | 30  | 2 |
| CONTIG-056688 | 197 | 10 | 14 | 23  | 0 |
| CONTIG-056689 | 103 | 13 | 5  | 37  | 0 |
| CONTIG-056690 | 68  | 7  | 2  | 13  | 0 |
| CONTIG-056691 | 646 | 18 | 0  | 0   | 4 |
| CONTIG-056692 | 74  | 6  | 8  | 22  | 0 |
| CONTIG-056693 | 396 | 11 | 11 | 128 | 0 |
| CONTIG-056694 | 83  | 4  | 0  | 9   | 0 |
| CONTIG-056701 | 531 | 18 | 30 | 268 | 0 |
| CONTIG-056702 | 59  | 6  | 7  | 9   | 0 |
| CONTIG-056703 | 67  | 3  | 0  | 7   | 0 |
| CONTIG-056704 | 159 | 9  | 10 | 42  | 0 |
| CONTIG-056706 | 123 | 4  | 2  | 11  | 0 |
| CONTIG-056707 | 143 | 14 | 8  | 84  | 0 |
| CONTIG-056708 | 153 | 6  | 5  | 30  | 0 |
| CONTIG-056709 | 63  | 7  | 5  | 11  | 0 |
| CONTIG-056710 | 118 | 6  | 15 | 10  | 2 |
| CONTIG-056711 | 64  | 11 | 14 | 14  | 0 |
| CONTIG-056712 | 100 | 6  | 3  | 9   | 2 |
| CONTIG-056713 | 520 | 13 | 41 | 219 | 0 |
| CONTIG-056714 | 274 | 17 | 4  | 2   | 0 |
| CONTIG-056715 | 367 | 13 | 9  | 186 | 0 |
| CONTIG-056716 | 263 | 10 | 9  | 81  | 5 |
| CONTIG-056718 | 295 | 10 | 9  | 63  | 2 |
| CONTIG-056719 | 65  | 3  | 3  | 2   | 2 |
| CONTIG-056720 | 120 | 4  | 8  | 6   | 0 |
| CONTIG-056721 | 106 | 4  | 2  | 6   | 0 |
| CONTIG-056722 | 102 | 16 | 7  | 53  | 0 |
| CONTIG-056723 | 282 | 13 | 11 | 39  | 0 |
| CONTIG-056724 | 100 | 18 | 9  | 9   | 0 |
| CONTIG-056725 | 208 | 7  | 47 | 17  | 0 |
| CONTIG-056727 | 104 | 6  | 2  | 21  | 0 |
| CONTIG-056728 | 64  | 8  | 8  | 0   | 2 |

|               |     |     |    |     |     |
|---------------|-----|-----|----|-----|-----|
| CONTIG-056729 | 65  | 11  | 3  | 2   | 0   |
| CONTIG-056730 | 510 | 11  | 6  | 145 | 7   |
| CONTIG-056731 | 161 | 4   | 4  | 25  | 0   |
| CONTIG-056732 | 724 | 20  | 66 | 771 | 2   |
| CONTIG-056733 | 152 | 6   | 16 | 32  | 0   |
| CONTIG-056734 | 107 | 243 | 2  | 5   | 466 |
| CONTIG-056735 | 97  | 10  | 3  | 0   | 0   |
| CONTIG-056736 | 98  | 4   | 7  | 7   | 0   |
| CONTIG-056737 | 75  | 5   | 15 | 0   | 0   |
| CONTIG-056739 | 64  | 4   | 0  | 7   | 0   |
| CONTIG-056740 | 314 | 8   | 4  | 86  | 0   |
| CONTIG-056741 | 131 | 10  | 6  | 40  | 0   |
| CONTIG-056742 | 290 | 20  | 25 | 168 | 2   |
| CONTIG-056743 | 155 | 7   | 8  | 30  | 0   |
| CONTIG-056744 | 92  | 10  | 20 | 18  | 0   |
| CONTIG-056745 | 221 | 11  | 13 | 76  | 0   |
| CONTIG-056746 | 66  | 4   | 2  | 6   | 0   |
| CONTIG-056747 | 167 | 20  | 4  | 154 | 0   |
| CONTIG-056748 | 248 | 7   | 16 | 44  | 0   |
| CONTIG-056749 | 69  | 5   | 0  | 13  | 0   |
| CONTIG-056750 | 80  | 7   | 11 | 0   | 0   |
| CONTIG-056751 | 61  | 3   | 0  | 0   | 0   |
| CONTIG-056752 | 67  | 5   | 11 | 0   | 0   |
| CONTIG-056754 | 202 | 17  | 3  | 0   | 25  |
| CONTIG-056755 | 109 | 6   | 8  | 11  | 0   |
| CONTIG-056756 | 373 | 21  | 43 | 209 | 9   |
| CONTIG-056757 | 218 | 5   | 13 | 22  | 0   |
| CONTIG-056758 | 135 | 10  | 17 | 43  | 0   |
| CONTIG-056759 | 339 | 11  | 4  | 171 | 0   |
| CONTIG-056760 | 106 | 7   | 28 | 6   | 0   |
| CONTIG-056761 | 58  | 17  | 19 | 0   | 0   |
| CONTIG-056762 | 72  | 22  | 25 | 40  | 2   |
| CONTIG-056763 | 378 | 13  | 13 | 257 | 0   |
| CONTIG-056764 | 211 | 6   | 9  | 43  | 0   |
| CONTIG-056765 | 123 | 9   | 2  | 15  | 0   |
| CONTIG-056766 | 117 | 27  | 2  | 57  | 2   |
| CONTIG-056767 | 601 | 20  | 48 | 357 | 9   |
| CONTIG-056768 | 327 | 7   | 18 | 57  | 3   |
| CONTIG-056769 | 66  | 4   | 11 | 0   | 0   |
| CONTIG-056770 | 56  | 696 | 8  | 37  | 0   |
| CONTIG-056771 | 171 | 13  | 2  | 0   | 36  |
| CONTIG-056772 | 169 | 12  | 15 | 66  | 0   |
| CONTIG-056773 | 156 | 6   | 11 | 25  | 2   |
| CONTIG-056774 | 131 | 9   | 3  | 41  | 0   |
| CONTIG-056775 | 76  | 5   | 2  | 7   | 0   |
| CONTIG-056776 | 83  | 6   | 3  | 3   | 0   |
| CONTIG-056777 | 214 | 11  | 5  | 97  | 0   |

|               |     |     |    |      |     |
|---------------|-----|-----|----|------|-----|
| CONTIG-056779 | 100 | 24  | 23 | 42   | 2   |
| CONTIG-056780 | 201 | 7   | 3  | 19   | 0   |
| CONTIG-056781 | 432 | 17  | 40 | 78   | 0   |
| CONTIG-056782 | 183 | 6   | 2  | 29   | 0   |
| CONTIG-056783 | 68  | 5   | 8  | 7    | 0   |
| CONTIG-056784 | 172 | 6   | 11 | 36   | 0   |
| CONTIG-056785 | 314 | 12  | 6  | 16   | 0   |
| CONTIG-056786 | 145 | 5   | 2  | 21   | 0   |
| CONTIG-056787 | 94  | 16  | 2  | 55   | 0   |
| CONTIG-056788 | 225 | 7   | 7  | 47   | 2   |
| CONTIG-056790 | 127 | 16  | 4  | 115  | 0   |
| CONTIG-056791 | 337 | 13  | 51 | 160  | 2   |
| CONTIG-056792 | 146 | 122 | 39 | 376  | 141 |
| CONTIG-056793 | 314 | 5   | 5  | 43   | 0   |
| CONTIG-056794 | 102 | 8   | 6  | 15   | 0   |
| CONTIG-056795 | 199 | 11  | 84 | 31   | 0   |
| CONTIG-056797 | 317 | 12  | 11 | 51   | 4   |
| CONTIG-056798 | 104 | 4   | 0  | 15   | 0   |
| CONTIG-056799 | 185 | 18  | 65 | 0    | 2   |
| CONTIG-056800 | 122 | 6   | 2  | 14   | 0   |
| CONTIG-056801 | 191 | 7   | 4  | 33   | 0   |
| CONTIG-056802 | 141 | 15  | 32 | 22   | 2   |
| CONTIG-056803 | 125 | 5   | 4  | 22   | 2   |
| CONTIG-056804 | 201 | 9   | 2  | 52   | 0   |
| CONTIG-056805 | 62  | 4   | 2  | 4    | 0   |
| CONTIG-056806 | 135 | 4   | 6  | 10   | 2   |
| CONTIG-056807 | 64  | 6   | 2  | 14   | 0   |
| CONTIG-056808 | 152 | 5   | 14 | 11   | 0   |
| CONTIG-056809 | 176 | 8   | 7  | 45   | 0   |
| CONTIG-056811 | 139 | 3   | 15 | 5    | 0   |
| CONTIG-056812 | 65  | 18  | 15 | 0    | 0   |
| CONTIG-056813 | 102 | 15  | 9  | 89   | 0   |
| CONTIG-056814 | 350 | 14  | 45 | 209  | 2   |
| CONTIG-056815 | 103 | 6   | 8  | 4    | 0   |
| CONTIG-056816 | 372 | 7   | 10 | 98   | 0   |
| CONTIG-056817 | 161 | 6   | 0  | 21   | 0   |
| CONTIG-056818 | 145 | 8   | 14 | 14   | 0   |
| CONTIG-056820 | 60  | 21  | 19 | 39   | 2   |
| CONTIG-056821 | 170 | 13  | 2  | 82   | 0   |
| CONTIG-056822 | 80  | 4   | 14 | 2    | 0   |
| CONTIG-056823 | 187 | 12  | 46 | 50   | 0   |
| CONTIG-056824 | 45  | 6   | 3  | 6    | 0   |
| CONTIG-056825 | 207 | 10  | 0  | 81   | 4   |
| CONTIG-056826 | 131 | 14  | 20 | 14   | 2   |
| CONTIG-056827 | 707 | 35  | 3  | 1495 | 0   |
| CONTIG-056828 | 87  | 23  | 96 | 10   | 0   |
| CONTIG-056829 | 352 | 10  | 0  | 73   | 0   |

|               |     |    |    |     |   |
|---------------|-----|----|----|-----|---|
| CONTIG-056830 | 71  | 3  | 8  | 6   | 0 |
| CONTIG-056831 | 112 | 28 | 15 | 161 | 0 |
| CONTIG-056832 | 353 | 10 | 10 | 101 | 0 |
| CONTIG-056833 | 103 | 10 | 21 | 28  | 0 |
| CONTIG-056834 | 70  | 3  | 0  | 0   | 0 |
| CONTIG-056835 | 104 | 6  | 2  | 19  | 0 |
| CONTIG-056836 | 76  | 5  | 16 | 2   | 0 |
| CONTIG-056837 | 75  | 4  | 7  | 6   | 0 |
| CONTIG-056838 | 227 | 6  | 3  | 50  | 0 |
| CONTIG-056839 | 77  | 7  | 23 | 4   | 0 |
| CONTIG-056840 | 345 | 4  | 2  | 51  | 0 |
| CONTIG-056841 | 145 | 17 | 16 | 117 | 0 |
| CONTIG-056843 | 68  | 3  | 0  | 0   | 0 |
| CONTIG-056844 | 290 | 11 | 7  | 137 | 2 |
| CONTIG-056845 | 123 | 5  | 2  | 11  | 0 |
| CONTIG-056846 | 101 | 11 | 9  | 36  | 0 |
| CONTIG-056847 | 105 | 10 | 4  | 48  | 0 |
| CONTIG-056848 | 163 | 8  | 0  | 42  | 0 |
| CONTIG-056849 | 65  | 5  | 5  | 2   | 0 |
| CONTIG-056851 | 200 | 33 | 52 | 82  | 0 |
| CONTIG-056852 | 156 | 6  | 2  | 15  | 0 |
| CONTIG-056853 | 197 | 13 | 0  | 70  | 4 |
| CONTIG-056854 | 217 | 7  | 7  | 47  | 0 |
| CONTIG-056855 | 217 | 5  | 8  | 22  | 0 |
| CONTIG-056856 | 93  | 6  | 0  | 11  | 0 |
| CONTIG-056857 | 80  | 6  | 31 | 7   | 0 |
| CONTIG-056858 | 80  | 11 | 8  | 22  | 0 |
| CONTIG-056859 | 123 | 6  | 6  | 17  | 0 |
| CONTIG-056860 | 87  | 4  | 5  | 0   | 0 |
| CONTIG-056861 | 281 | 11 | 22 | 77  | 4 |
| CONTIG-056862 | 290 | 16 | 18 | 94  | 6 |
| CONTIG-056863 | 182 | 9  | 10 | 44  | 2 |
| CONTIG-056864 | 263 | 15 | 20 | 107 | 2 |
| CONTIG-056865 | 72  | 22 | 19 | 2   | 0 |
| CONTIG-056866 | 67  | 4  | 4  | 2   | 0 |
| CONTIG-056867 | 240 | 6  | 7  | 54  | 0 |
| CONTIG-056868 | 180 | 5  | 2  | 27  | 0 |
| CONTIG-056869 | 61  | 10 | 5  | 6   | 0 |
| CONTIG-056870 | 79  | 10 | 2  | 20  | 0 |
| CONTIG-056871 | 59  | 34 | 4  | 49  | 0 |
| CONTIG-056872 | 261 | 6  | 0  | 68  | 0 |
| CONTIG-056873 | 81  | 7  | 7  | 4   | 0 |
| CONTIG-056881 | 117 | 8  | 24 | 4   | 0 |
| CONTIG-056882 | 154 | 16 | 6  | 110 | 0 |
| CONTIG-056883 | 287 | 7  | 4  | 40  | 0 |
| CONTIG-056884 | 165 | 10 | 16 | 56  | 0 |
| CONTIG-056885 | 239 | 7  | 3  | 35  | 0 |

|               |      |    |     |     |    |
|---------------|------|----|-----|-----|----|
| CONTIG-056887 | 84   | 3  | 0   | 5   | 0  |
| CONTIG-056888 | 101  | 3  | 0   | 5   | 0  |
| CONTIG-056889 | 195  | 19 | 5   | 168 | 0  |
| CONTIG-056890 | 172  | 8  | 6   | 23  | 0  |
| CONTIG-056891 | 114  | 7  | 13  | 24  | 0  |
| CONTIG-056892 | 133  | 7  | 5   | 3   | 0  |
| CONTIG-056895 | 109  | 5  | 4   | 13  | 0  |
| CONTIG-056896 | 162  | 17 | 12  | 116 | 0  |
| CONTIG-056897 | 65   | 5  | 3   | 5   | 0  |
| CONTIG-056898 | 259  | 6  | 8   | 21  | 0  |
| CONTIG-056899 | 450  | 97 | 2   | 882 | 12 |
| CONTIG-056900 | 432  | 11 | 30  | 153 | 0  |
| CONTIG-056901 | 116  | 11 | 9   | 27  | 0  |
| CONTIG-056902 | 141  | 11 | 18  | 22  | 0  |
| CONTIG-056906 | 67   | 5  | 3   | 13  | 0  |
| CONTIG-056907 | 219  | 6  | 8   | 34  | 0  |
| CONTIG-056908 | 1104 | 10 | 47  | 244 | 12 |
| CONTIG-056909 | 62   | 5  | 3   | 3   | 0  |
| CONTIG-056910 | 90   | 3  | 3   | 2   | 0  |
| CONTIG-056911 | 83   | 4  | 12  | 0   | 0  |
| CONTIG-056912 | 226  | 6  | 11  | 46  | 0  |
| CONTIG-056913 | 460  | 7  | 22  | 103 | 0  |
| CONTIG-056914 | 238  | 10 | 19  | 53  | 0  |
| CONTIG-056915 | 106  | 3  | 0   | 9   | 0  |
| CONTIG-056916 | 212  | 14 | 7   | 76  | 0  |
| CONTIG-056917 | 63   | 3  | 3   | 0   | 0  |
| CONTIG-056918 | 147  | 7  | 20  | 38  | 0  |
| CONTIG-056919 | 311  | 4  | 14  | 26  | 0  |
| CONTIG-056920 | 148  | 6  | 37  | 29  | 0  |
| CONTIG-056921 | 113  | 11 | 13  | 54  | 0  |
| CONTIG-056922 | 93   | 4  | 2   | 6   | 0  |
| CONTIG-056923 | 56   | 26 | 6   | 58  | 0  |
| CONTIG-056924 | 65   | 5  | 2   | 9   | 0  |
| CONTIG-056925 | 169  | 8  | 2   | 25  | 0  |
| CONTIG-056926 | 141  | 8  | 0   | 37  | 0  |
| CONTIG-056927 | 106  | 4  | 3   | 5   | 0  |
| CONTIG-056928 | 82   | 6  | 0   | 0   | 0  |
| CONTIG-056931 | 145  | 9  | 11  | 37  | 0  |
| CONTIG-056932 | 69   | 54 | 12  | 128 | 0  |
| CONTIG-056933 | 101  | 5  | 12  | 22  | 0  |
| CONTIG-056934 | 230  | 10 | 4   | 22  | 2  |
| CONTIG-056935 | 108  | 6  | 29  | 16  | 0  |
| CONTIG-056938 | 237  | 8  | 5   | 49  | 0  |
| CONTIG-056939 | 170  | 56 | 2   | 0   | 81 |
| CONTIG-056940 | 434  | 27 | 141 | 422 | 3  |
| CONTIG-056941 | 192  | 9  | 0   | 45  | 0  |
| CONTIG-056942 | 264  | 8  | 8   | 78  | 0  |

|               |     |     |    |     |   |
|---------------|-----|-----|----|-----|---|
| CONTIG-056943 | 71  | 3   | 0  | 4   | 0 |
| CONTIG-056944 | 78  | 3   | 5  | 4   | 0 |
| CONTIG-056948 | 261 | 9   | 49 | 54  | 0 |
| CONTIG-056949 | 102 | 4   | 18 | 0   | 0 |
| CONTIG-056950 | 173 | 4   | 4  | 8   | 0 |
| CONTIG-056951 | 138 | 8   | 27 | 40  | 0 |
| CONTIG-056952 | 74  | 6   | 5  | 12  | 0 |
| CONTIG-056953 | 401 | 10  | 19 | 127 | 0 |
| CONTIG-056954 | 420 | 12  | 7  | 249 | 2 |
| CONTIG-056955 | 277 | 7   | 12 | 32  | 2 |
| CONTIG-056956 | 295 | 7   | 7  | 51  | 2 |
| CONTIG-056957 | 64  | 4   | 4  | 7   | 0 |
| CONTIG-056965 | 151 | 6   | 3  | 4   | 0 |
| CONTIG-056969 | 309 | 9   | 3  | 138 | 0 |
| CONTIG-056970 | 334 | 13  | 31 | 116 | 2 |
| CONTIG-056971 | 157 | 5   | 13 | 15  | 0 |
| CONTIG-056972 | 205 | 14  | 4  | 74  | 2 |
| CONTIG-056973 | 104 | 13  | 10 | 44  | 0 |
| CONTIG-056974 | 71  | 12  | 11 | 14  | 3 |
| CONTIG-056975 | 79  | 16  | 31 | 5   | 0 |
| CONTIG-056976 | 140 | 7   | 4  | 39  | 0 |
| CONTIG-056977 | 229 | 7   | 10 | 36  | 2 |
| CONTIG-056978 | 105 | 15  | 10 | 13  | 4 |
| CONTIG-056979 | 78  | 35  | 21 | 58  | 0 |
| CONTIG-056980 | 106 | 3   | 6  | 6   | 0 |
| CONTIG-056981 | 77  | 7   | 7  | 0   | 0 |
| CONTIG-056982 | 102 | 8   | 2  | 28  | 0 |
| CONTIG-056983 | 687 | 10  | 16 | 213 | 2 |
| CONTIG-056984 | 70  | 8   | 5  | 14  | 0 |
| CONTIG-056985 | 159 | 21  | 16 | 156 | 0 |
| CONTIG-056986 | 99  | 18  | 16 | 38  | 0 |
| CONTIG-056987 | 61  | 9   | 0  | 2   | 0 |
| CONTIG-056988 | 65  | 2   | 0  | 2   | 0 |
| CONTIG-056989 | 89  | 4   | 14 | 4   | 2 |
| CONTIG-056990 | 174 | 9   | 6  | 44  | 0 |
| CONTIG-056991 | 65  | 4   | 2  | 2   | 0 |
| CONTIG-057000 | 343 | 6   | 0  | 27  | 0 |
| CONTIG-057001 | 483 | 13  | 22 | 223 | 4 |
| CONTIG-057002 | 173 | 7   | 6  | 42  | 0 |
| CONTIG-057003 | 408 | 11  | 6  | 123 | 0 |
| CONTIG-057004 | 175 | 6   | 12 | 44  | 0 |
| CONTIG-057005 | 193 | 9   | 14 | 43  | 0 |
| CONTIG-057006 | 206 | 14  | 39 | 91  | 0 |
| CONTIG-057007 | 46  | 106 | 31 | 132 | 0 |
| CONTIG-057008 | 106 | 4   | 3  | 6   | 0 |
| CONTIG-057009 | 117 | 4   | 9  | 13  | 0 |
| CONTIG-057010 | 60  | 4   | 6  | 5   | 0 |

|               |     |    |    |      |    |
|---------------|-----|----|----|------|----|
| CONTIG-057011 | 786 | 20 | 29 | 678  | 0  |
| CONTIG-057012 | 122 | 6  | 26 | 4    | 0  |
| CONTIG-057013 | 182 | 7  | 8  | 42   | 2  |
| CONTIG-057014 | 596 | 18 | 62 | 47   | 10 |
| CONTIG-057015 | 280 | 20 | 32 | 159  | 0  |
| CONTIG-057016 | 827 | 9  | 15 | 161  | 0  |
| CONTIG-057017 | 87  | 13 | 2  | 52   | 0  |
| CONTIG-057018 | 141 | 15 | 46 | 87   | 0  |
| CONTIG-057019 | 153 | 14 | 13 | 102  | 0  |
| CONTIG-057020 | 67  | 7  | 17 | 8    | 0  |
| CONTIG-057021 | 76  | 7  | 2  | 13   | 0  |
| CONTIG-057022 | 101 | 8  | 0  | 25   | 0  |
| CONTIG-057023 | 73  | 2  | 0  | 0    | 0  |
| CONTIG-057024 | 296 | 7  | 0  | 36   | 0  |
| CONTIG-057025 | 272 | 13 | 33 | 77   | 0  |
| CONTIG-057026 | 94  | 4  | 0  | 5    | 0  |
| CONTIG-057027 | 158 | 4  | 0  | 10   | 2  |
| CONTIG-057028 | 313 | 7  | 3  | 2    | 0  |
| CONTIG-057029 | 67  | 2  | 2  | 4    | 0  |
| CONTIG-057030 | 181 | 10 | 40 | 15   | 0  |
| CONTIG-057031 | 125 | 6  | 0  | 20   | 0  |
| CONTIG-057032 | 280 | 10 | 22 | 95   | 0  |
| CONTIG-057033 | 157 | 6  | 5  | 16   | 0  |
| CONTIG-057034 | 373 | 8  | 30 | 77   | 0  |
| CONTIG-057035 | 329 | 10 | 12 | 119  | 0  |
| CONTIG-057036 | 624 | 7  | 13 | 83   | 29 |
| CONTIG-057037 | 131 | 8  | 11 | 36   | 0  |
| CONTIG-057039 | 59  | 4  | 2  | 8    | 0  |
| CONTIG-057040 | 348 | 11 | 6  | 98   | 2  |
| CONTIG-057041 | 552 | 12 | 18 | 125  | 10 |
| CONTIG-057042 | 64  | 7  | 3  | 7    | 0  |
| CONTIG-057044 | 67  | 23 | 47 | 0    | 0  |
| CONTIG-057048 | 268 | 8  | 7  | 87   | 0  |
| CONTIG-057049 | 263 | 9  | 45 | 95   | 0  |
| CONTIG-057050 | 210 | 7  | 17 | 73   | 0  |
| CONTIG-057051 | 164 | 8  | 6  | 60   | 0  |
| CONTIG-057052 | 66  | 6  | 6  | 8    | 0  |
| CONTIG-057053 | 117 | 9  | 5  | 31   | 0  |
| CONTIG-057054 | 592 | 27 | 5  | 6    | 0  |
| CONTIG-057055 | 380 | 10 | 17 | 109  | 2  |
| CONTIG-057056 | 67  | 11 | 9  | 7    | 0  |
| CONTIG-057057 | 284 | 78 | 28 | 1142 | 0  |
| CONTIG-057058 | 59  | 4  | 3  | 6    | 0  |
| CONTIG-057059 | 172 | 8  | 14 | 38   | 0  |
| CONTIG-057061 | 221 | 15 | 24 | 99   | 0  |
| CONTIG-057062 | 88  | 7  | 6  | 4    | 0  |
| CONTIG-057063 | 75  | 10 | 8  | 11   | 0  |

|               |     |     |    |     |   |
|---------------|-----|-----|----|-----|---|
| CONTIG-057064 | 186 | 4   | 6  | 14  | 0 |
| CONTIG-057065 | 179 | 6   | 10 | 19  | 0 |
| CONTIG-057066 | 165 | 7   | 3  | 11  | 2 |
| CONTIG-057068 | 64  | 3   | 0  | 6   | 0 |
| CONTIG-057069 | 129 | 8   | 13 | 10  | 0 |
| CONTIG-057070 | 65  | 5   | 9  | 5   | 0 |
| CONTIG-057071 | 76  | 6   | 2  | 6   | 0 |
| CONTIG-057072 | 65  | 5   | 2  | 6   | 0 |
| CONTIG-057073 | 68  | 6   | 7  | 6   | 0 |
| CONTIG-057074 | 36  | 445 | 0  | 256 | 0 |
| CONTIG-057075 | 94  | 15  | 43 | 32  | 2 |
| CONTIG-057076 | 75  | 11  | 12 | 11  | 0 |
| CONTIG-057079 | 161 | 4   | 6  | 13  | 0 |
| CONTIG-057080 | 74  | 24  | 5  | 73  | 0 |
| CONTIG-057082 | 78  | 3   | 7  | 2   | 0 |
| CONTIG-057083 | 108 | 7   | 8  | 21  | 0 |
| CONTIG-057084 | 109 | 6   | 13 | 11  | 0 |
| CONTIG-057085 | 155 | 13  | 13 | 67  | 0 |
| CONTIG-057086 | 172 | 14  | 15 | 75  | 0 |
| CONTIG-057087 | 89  | 3   | 3  | 0   | 0 |
| CONTIG-057088 | 83  | 12  | 20 | 18  | 0 |
| CONTIG-057089 | 157 | 10  | 11 | 2   | 2 |
| CONTIG-057090 | 130 | 32  | 25 | 138 | 0 |
| CONTIG-057091 | 184 | 6   | 12 | 25  | 0 |
| CONTIG-057092 | 189 | 6   | 8  | 31  | 0 |
| CONTIG-057093 | 81  | 5   | 2  | 4   | 0 |
| CONTIG-057094 | 103 | 7   | 7  | 8   | 0 |
| CONTIG-057095 | 450 | 7   | 29 | 64  | 0 |
| CONTIG-057096 | 184 | 13  | 18 | 71  | 0 |
| CONTIG-057097 | 65  | 15  | 15 | 10  | 0 |
| CONTIG-057098 | 67  | 3   | 0  | 0   | 0 |
| CONTIG-057099 | 86  | 11  | 4  | 32  | 0 |
| CONTIG-057100 | 76  | 4   | 0  | 6   | 0 |
| CONTIG-057101 | 99  | 8   | 2  | 12  | 0 |
| CONTIG-057102 | 61  | 6   | 6  | 2   | 0 |
| CONTIG-057103 | 506 | 13  | 62 | 214 | 0 |
| CONTIG-057104 | 97  | 13  | 2  | 46  | 0 |
| CONTIG-057105 | 122 | 10  | 39 | 14  | 0 |
| CONTIG-057106 | 326 | 10  | 24 | 63  | 0 |
| CONTIG-057107 | 538 | 14  | 43 | 288 | 2 |
| CONTIG-057109 | 168 | 6   | 11 | 15  | 0 |
| CONTIG-057113 | 94  | 14  | 33 | 10  | 0 |
| CONTIG-057114 | 58  | 6   | 7  | 13  | 0 |
| CONTIG-057115 | 378 | 7   | 10 | 59  | 0 |
| CONTIG-057116 | 348 | 11  | 21 | 70  | 3 |
| CONTIG-057117 | 104 | 7   | 0  | 16  | 0 |
| CONTIG-057118 | 133 | 7   | 2  | 0   | 0 |



|               |     |      |    |     |     |
|---------------|-----|------|----|-----|-----|
| CONTIG-057119 | 312 | 15   | 13 | 154 | 0   |
| CONTIG-057121 | 66  | 4    | 7  | 8   | 2   |
| CONTIG-057122 | 78  | 6    | 4  | 7   | 0   |
| CONTIG-057123 | 129 | 11   | 2  | 24  | 0   |
| CONTIG-057124 | 608 | 10   | 44 | 161 | 0   |
| CONTIG-057125 | 67  | 3    | 2  | 2   | 0   |
| CONTIG-057126 | 121 | 14   | 13 | 62  | 0   |
| CONTIG-057127 | 109 | 4    | 2  | 17  | 0   |
| CONTIG-057128 | 60  | 4    | 4  | 0   | 0   |
| CONTIG-057129 | 156 | 8    | 7  | 38  | 0   |
| CONTIG-057130 | 59  | 15   | 57 | 2   | 0   |
| CONTIG-057131 | 544 | 12   | 6  | 234 | 2   |
| CONTIG-057132 | 274 | 18   | 3  | 0   | 61  |
| CONTIG-057133 | 109 | 6    | 5  | 15  | 0   |
| CONTIG-057134 | 63  | 3    | 2  | 7   | 0   |
| CONTIG-057139 | 74  | 5    | 4  | 2   | 0   |
| CONTIG-057140 | 437 | 20   | 53 | 393 | 0   |
| CONTIG-057141 | 272 | 7    | 0  | 66  | 0   |
| CONTIG-057144 | 244 | 11   | 6  | 56  | 0   |
| CONTIG-057145 | 75  | 13   | 2  | 32  | 3   |
| CONTIG-057146 | 78  | 7    | 15 | 0   | 0   |
| CONTIG-057147 | 689 | 12   | 26 | 251 | 4   |
| CONTIG-057148 | 106 | 24   | 8  | 123 | 0   |
| CONTIG-057149 | 104 | 7    | 14 | 23  | 0   |
| CONTIG-057153 | 62  | 1132 | 3  | 0   | 23  |
| CONTIG-057154 | 152 | 5    | 2  | 19  | 0   |
| CONTIG-057155 | 141 | 12   | 0  | 68  | 2   |
| CONTIG-057157 | 79  | 4    | 6  | 3   | 0   |
| CONTIG-057158 | 115 | 8    | 24 | 25  | 0   |
| CONTIG-057159 | 207 | 14   | 4  | 106 | 0   |
| CONTIG-057160 | 232 | 8    | 2  | 47  | 0   |
| CONTIG-057161 | 269 | 11   | 8  | 126 | 2   |
| CONTIG-057164 | 303 | 33   | 0  | 0   | 104 |
| CONTIG-057165 | 385 | 11   | 7  | 98  | 0   |
| CONTIG-057166 | 77  | 8    | 7  | 0   | 0   |
| CONTIG-057167 | 154 | 8    | 16 | 48  | 0   |
| CONTIG-057168 | 122 | 7    | 8  | 0   | 0   |
| CONTIG-057169 | 200 | 7    | 3  | 37  | 0   |
| CONTIG-057170 | 230 | 20   | 17 | 221 | 0   |
| CONTIG-057171 | 257 | 9    | 9  | 98  | 0   |
| CONTIG-057172 | 80  | 3    | 0  | 6   | 0   |
| CONTIG-057173 | 239 | 25   | 23 | 337 | 0   |
| CONTIG-057174 | 75  | 5    | 9  | 10  | 0   |
| CONTIG-057177 | 152 | 62   | 4  | 459 | 0   |
| CONTIG-057178 | 61  | 4    | 2  | 6   | 0   |
| CONTIG-057179 | 111 | 7    | 9  | 25  | 0   |
| CONTIG-057181 | 62  | 6    | 12 | 2   | 0   |

|               |     |     |    |     |      |
|---------------|-----|-----|----|-----|------|
| CONTIG-057182 | 289 | 14  | 49 | 122 | 0    |
| CONTIG-057183 | 236 | 6   | 2  | 0   | 0    |
| CONTIG-057184 | 90  | 7   | 7  | 10  | 0    |
| CONTIG-057185 | 268 | 10  | 19 | 91  | 0    |
| CONTIG-057186 | 260 | 12  | 22 | 78  | 0    |
| CONTIG-057187 | 61  | 4   | 11 | 4   | 0    |
| CONTIG-057188 | 75  | 5   | 0  | 4   | 0    |
| CONTIG-057194 | 123 | 12  | 6  | 41  | 0    |
| CONTIG-057195 | 168 | 12  | 62 | 30  | 0    |
| CONTIG-057196 | 389 | 41  | 5  | 0   | 310  |
| CONTIG-057197 | 89  | 6   | 2  | 19  | 0    |
| CONTIG-057198 | 105 | 4   | 4  | 7   | 0    |
| CONTIG-057199 | 251 | 8   | 3  | 49  | 2    |
| CONTIG-057200 | 69  | 5   | 13 | 2   | 0    |
| CONTIG-057201 | 155 | 8   | 2  | 58  | 0    |
| CONTIG-057202 | 163 | 6   | 4  | 4   | 0    |
| CONTIG-057203 | 141 | 8   | 7  | 35  | 0    |
| CONTIG-057205 | 71  | 12  | 4  | 29  | 0    |
| CONTIG-057206 | 147 | 7   | 17 | 20  | 0    |
| CONTIG-057207 | 65  | 6   | 9  | 4   | 0    |
| CONTIG-057208 | 204 | 27  | 26 | 160 | 0    |
| CONTIG-057209 | 132 | 8   | 2  | 29  | 0    |
| CONTIG-057210 | 138 | 7   | 0  | 41  | 0    |
| CONTIG-057211 | 85  | 6   | 2  | 13  | 0    |
| CONTIG-057212 | 443 | 7   | 16 | 89  | 2    |
| CONTIG-057213 | 77  | 7   | 4  | 23  | 0    |
| CONTIG-057214 | 264 | 6   | 0  | 0   | 0    |
| CONTIG-057215 | 99  | 11  | 15 | 18  | 0    |
| CONTIG-057216 | 59  | 11  | 2  | 23  | 0    |
| CONTIG-057217 | 279 | 7   | 20 | 12  | 0    |
| CONTIG-057219 | 67  | 8   | 6  | 13  | 0    |
| CONTIG-057220 | 93  | 4   | 7  | 0   | 0    |
| CONTIG-057221 | 125 | 3   | 0  | 10  | 0    |
| CONTIG-057223 | 54  | 120 | 3  | 304 | 0    |
| CONTIG-057224 | 46  | 73  | 5  | 90  | 0    |
| CONTIG-057226 | 86  | 10  | 7  | 30  | 0    |
| CONTIG-057227 | 205 | 12  | 25 | 76  | 0    |
| CONTIG-057228 | 514 | 12  | 16 | 176 | 2    |
| CONTIG-057230 | 61  | 4   | 0  | 2   | 0    |
| CONTIG-057231 | 117 | 10  | 2  | 43  | 2    |
| CONTIG-057232 | 379 | 8   | 4  | 146 | 0    |
| CONTIG-057233 | 169 | 11  | 10 | 74  | 2    |
| CONTIG-057234 | 429 | 19  | 24 | 251 | 0    |
| CONTIG-057235 | 318 | 10  | 7  | 115 | 0    |
| CONTIG-057236 | 80  | 11  | 17 | 25  | 0    |
| CONTIG-057237 | 155 | 412 | 15 | 3   | 1190 |
| CONTIG-057238 | 66  | 10  | 9  | 7   | 0    |

|               |     |    |    |     |    |
|---------------|-----|----|----|-----|----|
| CONTIG-057239 | 73  | 21 | 21 | 17  | 0  |
| CONTIG-057240 | 289 | 10 | 18 | 68  | 0  |
| CONTIG-057242 | 117 | 9  | 10 | 27  | 0  |
| CONTIG-057243 | 180 | 4  | 3  | 19  | 0  |
| CONTIG-057244 | 131 | 7  | 2  | 35  | 2  |
| CONTIG-057247 | 67  | 5  | 6  | 2   | 0  |
| CONTIG-057248 | 96  | 16 | 8  | 61  | 0  |
| CONTIG-057253 | 579 | 13 | 7  | 160 | 4  |
| CONTIG-057254 | 88  | 5  | 0  | 16  | 0  |
| CONTIG-057255 | 166 | 4  | 17 | 17  | 0  |
| CONTIG-057256 | 143 | 10 | 14 | 2   | 0  |
| CONTIG-057260 | 109 | 4  | 7  | 0   | 0  |
| CONTIG-057265 | 252 | 7  | 7  | 32  | 5  |
| CONTIG-057266 | 208 | 8  | 11 | 25  | 0  |
| CONTIG-057268 | 256 | 15 | 24 | 117 | 2  |
| CONTIG-057270 | 237 | 13 | 41 | 94  | 0  |
| CONTIG-057273 | 90  | 4  | 0  | 9   | 0  |
| CONTIG-057274 | 620 | 10 | 30 | 94  | 0  |
| CONTIG-057275 | 152 | 23 | 35 | 89  | 5  |
| CONTIG-057280 | 118 | 5  | 5  | 16  | 0  |
| CONTIG-057281 | 72  | 6  | 5  | 11  | 0  |
| CONTIG-057282 | 129 | 7  | 26 | 15  | 0  |
| CONTIG-057283 | 117 | 12 | 4  | 68  | 0  |
| CONTIG-057284 | 88  | 8  | 8  | 16  | 0  |
| CONTIG-057288 | 159 | 5  | 16 | 19  | 0  |
| CONTIG-057289 | 116 | 5  | 10 | 13  | 0  |
| CONTIG-057290 | 137 | 12 | 28 | 68  | 2  |
| CONTIG-057291 | 70  | 55 | 22 | 138 | 2  |
| CONTIG-057293 | 181 | 6  | 2  | 8   | 0  |
| CONTIG-057294 | 120 | 12 | 4  | 29  | 0  |
| CONTIG-057295 | 162 | 5  | 6  | 29  | 0  |
| CONTIG-057296 | 81  | 7  | 8  | 17  | 0  |
| CONTIG-057297 | 119 | 5  | 5  | 15  | 0  |
| CONTIG-057298 | 141 | 4  | 11 | 4   | 0  |
| CONTIG-057300 | 479 | 11 | 25 | 115 | 0  |
| CONTIG-057301 | 99  | 14 | 27 | 28  | 2  |
| CONTIG-057302 | 127 | 8  | 3  | 42  | 0  |
| CONTIG-057303 | 276 | 16 | 23 | 131 | 0  |
| CONTIG-057304 | 69  | 11 | 12 | 28  | 0  |
| CONTIG-057305 | 334 | 13 | 19 | 214 | 0  |
| CONTIG-057307 | 162 | 10 | 4  | 0   | 0  |
| CONTIG-057308 | 99  | 10 | 64 | 7   | 2  |
| CONTIG-057309 | 97  | 6  | 9  | 12  | 0  |
| CONTIG-057310 | 522 | 19 | 17 | 481 | 10 |
| CONTIG-057311 | 416 | 8  | 22 | 93  | 0  |
| CONTIG-057314 | 94  | 6  | 2  | 12  | 0  |
| CONTIG-057315 | 97  | 15 | 23 | 21  | 0  |

|               |     |    |    |     |    |
|---------------|-----|----|----|-----|----|
| CONTIG-057316 | 85  | 11 | 28 | 25  | 0  |
| CONTIG-057319 | 131 | 13 | 6  | 61  | 2  |
| CONTIG-057320 | 158 | 5  | 9  | 5   | 0  |
| CONTIG-057321 | 139 | 7  | 23 | 4   | 0  |
| CONTIG-057322 | 152 | 5  | 12 | 18  | 0  |
| CONTIG-057323 | 127 | 6  | 0  | 22  | 0  |
| CONTIG-057324 | 254 | 11 | 20 | 93  | 0  |
| CONTIG-057325 | 352 | 12 | 5  | 68  | 5  |
| CONTIG-057326 | 199 | 7  | 30 | 29  | 0  |
| CONTIG-057327 | 576 | 9  | 47 | 120 | 2  |
| CONTIG-057328 | 224 | 6  | 0  | 26  | 0  |
| CONTIG-057330 | 460 | 10 | 31 | 158 | 0  |
| CONTIG-057331 | 65  | 3  | 0  | 2   | 0  |
| CONTIG-057333 | 540 | 22 | 45 | 88  | 0  |
| CONTIG-057334 | 81  | 3  | 11 | 6   | 0  |
| CONTIG-057335 | 67  | 4  | 4  | 0   | 0  |
| CONTIG-057336 | 126 | 8  | 5  | 31  | 0  |
| CONTIG-057337 | 60  | 6  | 22 | 0   | 0  |
| CONTIG-057338 | 68  | 5  | 8  | 6   | 0  |
| CONTIG-057339 | 159 | 7  | 21 | 28  | 2  |
| CONTIG-057340 | 100 | 4  | 2  | 5   | 0  |
| CONTIG-057341 | 100 | 6  | 5  | 20  | 0  |
| CONTIG-057342 | 70  | 10 | 5  | 6   | 0  |
| CONTIG-057343 | 66  | 7  | 3  | 5   | 0  |
| CONTIG-057344 | 201 | 9  | 12 | 49  | 0  |
| CONTIG-057345 | 154 | 8  | 27 | 40  | 0  |
| CONTIG-057346 | 190 | 25 | 57 | 103 | 2  |
| CONTIG-057347 | 473 | 32 | 19 | 763 | 0  |
| CONTIG-057348 | 430 | 10 | 0  | 0   | 15 |
| CONTIG-057349 | 99  | 9  | 4  | 27  | 0  |
| CONTIG-057350 | 371 | 14 | 34 | 160 | 0  |
| CONTIG-057351 | 74  | 4  | 2  | 2   | 0  |
| CONTIG-057352 | 465 | 13 | 62 | 231 | 0  |
| CONTIG-057353 | 117 | 5  | 10 | 8   | 0  |
| CONTIG-057354 | 224 | 7  | 15 | 39  | 0  |
| CONTIG-057355 | 134 | 8  | 3  | 30  | 0  |
| CONTIG-057356 | 94  | 7  | 0  | 27  | 0  |
| CONTIG-057357 | 85  | 7  | 8  | 18  | 0  |
| CONTIG-057358 | 93  | 6  | 10 | 6   | 0  |
| CONTIG-057359 | 68  | 5  | 5  | 8   | 0  |
| CONTIG-057360 | 90  | 7  | 30 | 2   | 0  |
| CONTIG-057362 | 351 | 12 | 7  | 0   | 0  |
| CONTIG-057363 | 204 | 14 | 30 | 77  | 0  |
| CONTIG-057364 | 145 | 4  | 2  | 19  | 2  |
| CONTIG-057366 | 147 | 4  | 0  | 21  | 0  |
| CONTIG-057367 | 92  | 4  | 2  | 12  | 0  |
| CONTIG-057368 | 78  | 7  | 2  | 0   | 0  |

|               |     |      |    |      |    |
|---------------|-----|------|----|------|----|
| CONTIG-057373 | 133 | 7    | 2  | 22   | 0  |
| CONTIG-057374 | 98  | 4    | 12 | 2    | 0  |
| CONTIG-057375 | 149 | 11   | 3  | 2    | 0  |
| CONTIG-057377 | 66  | 5    | 2  | 10   | 0  |
| CONTIG-057378 | 74  | 7    | 0  | 29   | 0  |
| CONTIG-057379 | 144 | 12   | 19 | 34   | 3  |
| CONTIG-057380 | 199 | 1048 | 34 | 7578 | 2  |
| CONTIG-057381 | 42  | 45   | 5  | 26   | 2  |
| CONTIG-057382 | 200 | 6    | 4  | 11   | 2  |
| CONTIG-057383 | 235 | 19   | 15 | 251  | 0  |
| CONTIG-057384 | 349 | 7    | 0  | 79   | 0  |
| CONTIG-057385 | 183 | 9    | 5  | 47   | 0  |
| CONTIG-057386 | 100 | 4    | 9  | 0    | 0  |
| CONTIG-057387 | 76  | 5    | 7  | 17   | 0  |
| CONTIG-057388 | 311 | 10   | 5  | 93   | 6  |
| CONTIG-057389 | 138 | 9    | 7  | 38   | 2  |
| CONTIG-057390 | 147 | 6    | 6  | 18   | 0  |
| CONTIG-057391 | 73  | 4    | 4  | 2    | 0  |
| CONTIG-057392 | 195 | 11   | 5  | 85   | 0  |
| CONTIG-057394 | 123 | 15   | 8  | 82   | 0  |
| CONTIG-057395 | 67  | 16   | 4  | 31   | 2  |
| CONTIG-057396 | 146 | 8    | 13 | 38   | 0  |
| CONTIG-057397 | 186 | 12   | 8  | 61   | 0  |
| CONTIG-057398 | 43  | 398  | 0  | 257  | 0  |
| CONTIG-057399 | 81  | 3    | 0  | 8    | 0  |
| CONTIG-057400 | 226 | 7    | 9  | 8    | 0  |
| CONTIG-057401 | 196 | 10   | 2  | 59   | 0  |
| CONTIG-057402 | 418 | 32   | 29 | 567  | 3  |
| CONTIG-057403 | 542 | 18   | 97 | 377  | 0  |
| CONTIG-057404 | 119 | 9    | 15 | 23   | 0  |
| CONTIG-057405 | 148 | 5    | 6  | 14   | 0  |
| CONTIG-057406 | 63  | 11   | 0  | 17   | 0  |
| CONTIG-057407 | 162 | 7    | 0  | 41   | 0  |
| CONTIG-057408 | 59  | 4    | 2  | 2    | 0  |
| CONTIG-057409 | 106 | 10   | 2  | 30   | 2  |
| CONTIG-057410 | 156 | 7    | 12 | 18   | 0  |
| CONTIG-057411 | 78  | 8    | 0  | 21   | 0  |
| CONTIG-057412 | 58  | 5    | 6  | 2    | 0  |
| CONTIG-057414 | 58  | 5    | 24 | 0    | 0  |
| CONTIG-057415 | 196 | 6    | 24 | 26   | 0  |
| CONTIG-057416 | 183 | 27   | 30 | 78   | 27 |
| CONTIG-057417 | 102 | 13   | 20 | 47   | 0  |
| CONTIG-057418 | 110 | 6    | 23 | 16   | 0  |
| CONTIG-057419 | 264 | 16   | 36 | 111  | 4  |
| CONTIG-057420 | 48  | 13   | 11 | 18   | 0  |
| CONTIG-057421 | 65  | 7    | 27 | 2    | 0  |
| CONTIG-057422 | 93  | 5    | 5  | 7    | 0  |

|               |     |     |    |      |    |
|---------------|-----|-----|----|------|----|
| CONTIG-057424 | 63  | 8   | 0  | 11   | 2  |
| CONTIG-057425 | 188 | 4   | 11 | 25   | 0  |
| CONTIG-057426 | 328 | 7   | 0  | 0    | 6  |
| CONTIG-057427 | 44  | 967 | 52 | 2189 | 0  |
| CONTIG-057428 | 79  | 5   | 5  | 4    | 0  |
| CONTIG-057429 | 237 | 10  | 8  | 89   | 0  |
| CONTIG-057430 | 66  | 9   | 21 | 18   | 0  |
| CONTIG-057431 | 93  | 6   | 5  | 11   | 2  |
| CONTIG-057432 | 98  | 7   | 0  | 25   | 0  |
| CONTIG-057433 | 557 | 13  | 22 | 269  | 0  |
| CONTIG-057434 | 524 | 22  | 38 | 415  | 2  |
| CONTIG-057435 | 90  | 107 | 17 | 429  | 0  |
| CONTIG-057436 | 522 | 16  | 22 | 143  | 10 |
| CONTIG-057437 | 62  | 6   | 13 | 5    | 0  |
| CONTIG-057439 | 73  | 2   | 2  | 0    | 0  |
| CONTIG-057440 | 50  | 20  | 2  | 17   | 0  |
| CONTIG-057441 | 219 | 9   | 17 | 69   | 0  |
| CONTIG-057442 | 283 | 8   | 9  | 58   | 0  |
| CONTIG-057443 | 122 | 7   | 16 | 15   | 0  |
| CONTIG-057444 | 229 | 5   | 4  | 43   | 0  |
| CONTIG-057445 | 136 | 6   | 6  | 15   | 0  |
| CONTIG-057447 | 286 | 43  | 22 | 331  | 44 |
| CONTIG-057450 | 64  | 6   | 2  | 7    | 0  |
| CONTIG-057451 | 456 | 25  | 77 | 609  | 0  |
| CONTIG-057452 | 103 | 4   | 0  | 16   | 0  |
| CONTIG-057453 | 127 | 8   | 4  | 24   | 0  |
| CONTIG-057456 | 140 | 7   | 3  | 30   | 0  |
| CONTIG-057457 | 88  | 4   | 7  | 0    | 0  |
| CONTIG-057458 | 154 | 20  | 62 | 119  | 2  |
| CONTIG-057459 | 259 | 9   | 2  | 57   | 2  |
| CONTIG-057461 | 199 | 9   | 5  | 80   | 0  |
| CONTIG-057462 | 238 | 17  | 34 | 121  | 0  |
| CONTIG-057463 | 312 | 15  | 19 | 176  | 2  |
| CONTIG-057464 | 164 | 9   | 19 | 40   | 0  |
| CONTIG-057465 | 125 | 24  | 9  | 102  | 0  |
| CONTIG-057466 | 182 | 4   | 2  | 26   | 0  |
| CONTIG-057467 | 137 | 5   | 8  | 10   | 0  |
| CONTIG-057468 | 66  | 11  | 5  | 28   | 0  |
| CONTIG-057469 | 137 | 4   | 4  | 9    | 0  |
| CONTIG-057470 | 43  | 146 | 2  | 0    | 13 |
| CONTIG-057471 | 271 | 22  | 2  | 242  | 2  |
| CONTIG-057472 | 109 | 5   | 8  | 8    | 0  |
| CONTIG-057473 | 82  | 5   | 3  | 13   | 0  |
| CONTIG-057474 | 48  | 157 | 0  | 385  | 2  |
| CONTIG-057476 | 221 | 9   | 44 | 29   | 0  |
| CONTIG-057477 | 106 | 6   | 4  | 20   | 0  |
| CONTIG-057478 | 104 | 4   | 4  | 16   | 0  |

|               |     |    |    |     |   |
|---------------|-----|----|----|-----|---|
| CONTIG-057479 | 162 | 12 | 17 | 72  | 2 |
| CONTIG-057480 | 153 | 8  | 30 | 14  | 0 |
| CONTIG-057481 | 235 | 18 | 17 | 134 | 0 |
| CONTIG-057482 | 195 | 9  | 15 | 15  | 0 |
| CONTIG-057483 | 103 | 10 | 12 | 15  | 0 |
| CONTIG-057484 | 62  | 4  | 7  | 0   | 0 |
| CONTIG-057490 | 53  | 70 | 16 | 70  | 0 |
| CONTIG-057491 | 253 | 10 | 6  | 72  | 4 |
| CONTIG-057492 | 158 | 12 | 4  | 57  | 2 |
| CONTIG-057493 | 66  | 8  | 0  | 22  | 0 |
| CONTIG-057494 | 102 | 10 | 4  | 40  | 0 |
| CONTIG-057495 | 65  | 3  | 0  | 12  | 0 |
| CONTIG-057496 | 58  | 8  | 14 | 8   | 0 |
| CONTIG-057497 | 440 | 11 | 22 | 94  | 2 |
| CONTIG-057498 | 61  | 5  | 14 | 8   | 0 |
| CONTIG-057499 | 102 | 7  | 6  | 25  | 0 |
| CONTIG-057500 | 226 | 7  | 12 | 41  | 0 |
| CONTIG-057501 | 61  | 6  | 21 | 3   | 0 |
| CONTIG-057502 | 632 | 23 | 27 | 2   | 0 |
| CONTIG-057503 | 233 | 7  | 10 | 45  | 0 |
| CONTIG-057504 | 104 | 5  | 0  | 13  | 0 |
| CONTIG-057505 | 462 | 14 | 19 | 134 | 4 |
| CONTIG-057506 | 67  | 7  | 4  | 6   | 0 |
| CONTIG-057507 | 81  | 5  | 0  | 15  | 0 |
| CONTIG-057508 | 277 | 12 | 9  | 114 | 0 |
| CONTIG-057509 | 63  | 4  | 0  | 2   | 0 |
| CONTIG-057510 | 327 | 9  | 11 | 72  | 0 |
| CONTIG-057511 | 314 | 8  | 5  | 47  | 0 |
| CONTIG-057512 | 137 | 20 | 30 | 81  | 0 |
| CONTIG-057513 | 293 | 11 | 44 | 110 | 0 |
| CONTIG-057514 | 104 | 4  | 4  | 6   | 0 |
| CONTIG-057515 | 104 | 4  | 4  | 14  | 0 |
| CONTIG-057516 | 319 | 8  | 7  | 90  | 0 |
| CONTIG-057517 | 70  | 4  | 2  | 5   | 0 |
| CONTIG-057518 | 60  | 7  | 7  | 6   | 0 |
| CONTIG-057523 | 86  | 13 | 29 | 20  | 0 |
| CONTIG-057524 | 94  | 3  | 0  | 12  | 0 |
| CONTIG-057525 | 218 | 4  | 5  | 26  | 0 |
| CONTIG-057528 | 162 | 6  | 0  | 37  | 0 |
| CONTIG-057529 | 81  | 10 | 5  | 25  | 0 |
| CONTIG-057530 | 126 | 8  | 3  | 30  | 0 |
| CONTIG-057531 | 87  | 6  | 0  | 18  | 0 |
| CONTIG-057532 | 70  | 6  | 4  | 11  | 2 |
| CONTIG-057535 | 93  | 5  | 14 | 11  | 0 |
| CONTIG-057536 | 115 | 25 | 19 | 108 | 0 |
| CONTIG-057537 | 59  | 7  | 7  | 9   | 0 |
| CONTIG-057538 | 134 | 8  | 34 | 18  | 0 |

|               |     |     |    |      |     |
|---------------|-----|-----|----|------|-----|
| CONTIG-057539 | 46  | 171 | 75 | 48   | 2   |
| CONTIG-057540 | 209 | 16  | 14 | 131  | 0   |
| CONTIG-057541 | 73  | 3   | 0  | 5    | 0   |
| CONTIG-057542 | 94  | 12  | 11 | 43   | 0   |
| CONTIG-057543 | 185 | 10  | 3  | 76   | 0   |
| CONTIG-057544 | 105 | 5   | 6  | 15   | 0   |
| CONTIG-057545 | 75  | 7   | 9  | 10   | 0   |
| CONTIG-057546 | 63  | 4   | 8  | 0    | 0   |
| CONTIG-057552 | 195 | 98  | 7  | 16   | 0   |
| CONTIG-057553 | 41  | 207 | 0  | 3    | 0   |
| CONTIG-057554 | 69  | 7   | 4  | 15   | 0   |
| CONTIG-057556 | 40  | 5   | 0  | 5    | 0   |
| CONTIG-057557 | 131 | 9   | 0  | 36   | 0   |
| CONTIG-057558 | 230 | 10  | 45 | 78   | 0   |
| CONTIG-057560 | 204 | 11  | 15 | 54   | 0   |
| CONTIG-057561 | 79  | 6   | 4  | 13   | 0   |
| CONTIG-057562 | 99  | 414 | 40 | 0    | 0   |
| CONTIG-057563 | 120 | 5   | 3  | 21   | 0   |
| CONTIG-057564 | 224 | 8   | 11 | 33   | 0   |
| CONTIG-057565 | 75  | 8   | 10 | 3    | 0   |
| CONTIG-057567 | 99  | 5   | 6  | 21   | 0   |
| CONTIG-057568 | 290 | 16  | 86 | 179  | 0   |
| CONTIG-057569 | 125 | 4   | 4  | 12   | 0   |
| CONTIG-057571 | 147 | 11  | 10 | 57   | 0   |
| CONTIG-057572 | 104 | 5   | 15 | 4    | 0   |
| CONTIG-057577 | 89  | 6   | 6  | 12   | 0   |
| CONTIG-057578 | 106 | 4   | 7  | 5    | 0   |
| CONTIG-057579 | 68  | 4   | 6  | 8    | 0   |
| CONTIG-057580 | 72  | 3   | 3  | 0    | 0   |
| CONTIG-057581 | 169 | 7   | 13 | 49   | 0   |
| CONTIG-057582 | 119 | 6   | 8  | 8    | 0   |
| CONTIG-057583 | 76  | 8   | 0  | 7    | 0   |
| CONTIG-057585 | 560 | 46  | 73 | 1255 | 6   |
| CONTIG-057586 | 444 | 58  | 15 | 123  | 0   |
| CONTIG-057587 | 115 | 4   | 0  | 14   | 0   |
| CONTIG-057588 | 300 | 5   | 22 | 30   | 2   |
| CONTIG-057589 | 134 | 6   | 5  | 12   | 0   |
| CONTIG-057591 | 110 | 4   | 0  | 14   | 0   |
| CONTIG-057592 | 189 | 8   | 6  | 44   | 0   |
| CONTIG-057593 | 62  | 7   | 2  | 9    | 0   |
| CONTIG-057595 | 77  | 5   | 7  | 7    | 0   |
| CONTIG-057596 | 415 | 29  | 39 | 513  | 0   |
| CONTIG-057597 | 293 | 52  | 4  | 0    | 179 |
| CONTIG-057598 | 88  | 9   | 19 | 10   | 0   |
| CONTIG-057599 | 60  | 5   | 7  | 2    | 0   |
| CONTIG-057607 | 58  | 6   | 3  | 9    | 0   |
| CONTIG-057612 | 87  | 6   | 4  | 13   | 0   |



|               |      |    |    |     |     |
|---------------|------|----|----|-----|-----|
| CONTIG-057613 | 268  | 9  | 0  | 41  | 2   |
| CONTIG-057614 | 80   | 3  | 0  | 7   | 0   |
| CONTIG-057615 | 109  | 4  | 2  | 20  | 0   |
| CONTIG-057616 | 118  | 7  | 4  | 23  | 0   |
| CONTIG-057617 | 111  | 7  | 0  | 23  | 0   |
| CONTIG-057618 | 106  | 7  | 2  | 20  | 0   |
| CONTIG-057619 | 166  | 8  | 2  | 12  | 0   |
| CONTIG-057620 | 114  | 8  | 7  | 9   | 0   |
| CONTIG-057622 | 76   | 5  | 6  | 10  | 0   |
| CONTIG-057623 | 278  | 9  | 26 | 70  | 0   |
| CONTIG-057624 | 61   | 4  | 0  | 8   | 0   |
| CONTIG-057625 | 162  | 4  | 8  | 20  | 0   |
| CONTIG-057628 | 126  | 7  | 2  | 26  | 0   |
| CONTIG-057629 | 148  | 10 | 9  | 36  | 0   |
| CONTIG-057630 | 63   | 4  | 7  | 6   | 0   |
| CONTIG-057631 | 70   | 3  | 0  | 5   | 0   |
| CONTIG-057633 | 136  | 10 | 4  | 18  | 0   |
| CONTIG-057634 | 119  | 4  | 4  | 15  | 0   |
| CONTIG-057635 | 92   | 8  | 2  | 2   | 0   |
| CONTIG-057636 | 316  | 8  | 46 | 45  | 0   |
| CONTIG-057637 | 259  | 21 | 14 | 190 | 4   |
| CONTIG-057638 | 208  | 16 | 31 | 133 | 3   |
| CONTIG-057639 | 118  | 9  | 3  | 27  | 0   |
| CONTIG-057640 | 97   | 4  | 2  | 7   | 0   |
| CONTIG-057641 | 82   | 9  | 38 | 21  | 0   |
| CONTIG-057642 | 59   | 5  | 0  | 11  | 0   |
| CONTIG-057643 | 261  | 8  | 21 | 65  | 0   |
| CONTIG-057644 | 226  | 8  | 27 | 59  | 0   |
| CONTIG-057645 | 127  | 7  | 8  | 6   | 0   |
| CONTIG-057646 | 127  | 8  | 2  | 32  | 0   |
| CONTIG-057647 | 93   | 13 | 59 | 2   | 0   |
| CONTIG-057648 | 162  | 8  | 12 | 7   | 0   |
| CONTIG-057649 | 76   | 5  | 4  | 5   | 0   |
| CONTIG-057650 | 194  | 8  | 32 | 43  | 0   |
| CONTIG-057652 | 650  | 11 | 24 | 327 | 0   |
| CONTIG-057653 | 1091 | 15 | 4  | 0   | 317 |
| CONTIG-057654 | 281  | 11 | 16 | 110 | 0   |
| CONTIG-057655 | 195  | 9  | 39 | 18  | 0   |
| CONTIG-057656 | 298  | 14 | 20 | 95  | 4   |
| CONTIG-057657 | 118  | 8  | 3  | 23  | 0   |
| CONTIG-057662 | 233  | 5  | 8  | 31  | 0   |
| CONTIG-057663 | 94   | 8  | 2  | 24  | 0   |
| CONTIG-057664 | 254  | 6  | 21 | 41  | 2   |
| CONTIG-057666 | 73   | 17 | 4  | 39  | 0   |
| CONTIG-057668 | 78   | 8  | 4  | 28  | 2   |
| CONTIG-057669 | 99   | 8  | 5  | 30  | 0   |
| CONTIG-057672 | 347  | 11 | 21 | 125 | 2   |

|               |     |    |    |     |   |
|---------------|-----|----|----|-----|---|
| CONTIG-057673 | 219 | 7  | 4  | 29  | 0 |
| CONTIG-057674 | 79  | 9  | 9  | 11  | 2 |
| CONTIG-057675 | 117 | 8  | 0  | 24  | 0 |
| CONTIG-057677 | 213 | 6  | 5  | 44  | 0 |
| CONTIG-057679 | 73  | 9  | 19 | 0   | 0 |
| CONTIG-057680 | 348 | 22 | 10 | 20  | 0 |
| CONTIG-057681 | 351 | 9  | 40 | 108 | 0 |
| CONTIG-057682 | 100 | 5  | 6  | 11  | 0 |
| CONTIG-057684 | 61  | 7  | 2  | 9   | 0 |
| CONTIG-057685 | 171 | 16 | 31 | 35  | 0 |
| CONTIG-057686 | 67  | 10 | 13 | 0   | 0 |
| CONTIG-057687 | 111 | 2  | 2  | 4   | 0 |
| CONTIG-057688 | 70  | 3  | 9  | 0   | 0 |
| CONTIG-057692 | 122 | 6  | 9  | 21  | 0 |
| CONTIG-057694 | 154 | 5  | 4  | 15  | 0 |
| CONTIG-057695 | 202 | 5  | 8  | 26  | 0 |
| CONTIG-057697 | 59  | 3  | 2  | 8   | 0 |
| CONTIG-057698 | 70  | 4  | 4  | 3   | 2 |
| CONTIG-057699 | 67  | 9  | 18 | 0   | 0 |
| CONTIG-057700 | 97  | 7  | 8  | 11  | 0 |
| CONTIG-057702 | 92  | 9  | 2  | 34  | 0 |
| CONTIG-057703 | 106 | 4  | 7  | 11  | 0 |
| CONTIG-057706 | 125 | 7  | 3  | 21  | 0 |
| CONTIG-057707 | 110 | 6  | 9  | 14  | 0 |
| CONTIG-057708 | 71  | 10 | 9  | 17  | 0 |
| CONTIG-057709 | 314 | 9  | 13 | 59  | 0 |
| CONTIG-057710 | 113 | 10 | 13 | 33  | 6 |
| CONTIG-057711 | 149 | 39 | 66 | 169 | 0 |
| CONTIG-057712 | 67  | 8  | 4  | 17  | 0 |
| CONTIG-057713 | 77  | 4  | 4  | 2   | 0 |
| CONTIG-057714 | 236 | 6  | 12 | 7   | 0 |
| CONTIG-057715 | 104 | 14 | 2  | 45  | 0 |
| CONTIG-057716 | 87  | 11 | 10 | 26  | 0 |
| CONTIG-057721 | 224 | 5  | 4  | 19  | 0 |
| CONTIG-057722 | 256 | 12 | 9  | 87  | 0 |
| CONTIG-057723 | 232 | 11 | 6  | 116 | 0 |
| CONTIG-057725 | 207 | 4  | 8  | 2   | 0 |
| CONTIG-057726 | 106 | 12 | 19 | 42  | 0 |
| CONTIG-057727 | 119 | 9  | 17 | 47  | 2 |
| CONTIG-057728 | 141 | 4  | 6  | 10  | 0 |
| CONTIG-057731 | 152 | 6  | 5  | 35  | 0 |
| CONTIG-057732 | 220 | 9  | 23 | 25  | 0 |
| CONTIG-057733 | 177 | 9  | 18 | 39  | 0 |
| CONTIG-057734 | 69  | 4  | 6  | 2   | 0 |
| CONTIG-057735 | 61  | 11 | 5  | 13  | 0 |
| CONTIG-057736 | 215 | 8  | 14 | 54  | 0 |
| CONTIG-057737 | 68  | 5  | 4  | 16  | 0 |

|               |     |     |    |     |    |
|---------------|-----|-----|----|-----|----|
| CONTIG-057738 | 237 | 10  | 27 | 57  | 0  |
| CONTIG-057739 | 94  | 11  | 9  | 35  | 0  |
| CONTIG-057740 | 155 | 11  | 11 | 11  | 0  |
| CONTIG-057742 | 245 | 13  | 58 | 117 | 0  |
| CONTIG-057743 | 281 | 5   | 9  | 47  | 2  |
| CONTIG-057744 | 144 | 5   | 3  | 23  | 0  |
| CONTIG-057745 | 97  | 3   | 5  | 2   | 0  |
| CONTIG-057746 | 58  | 9   | 40 | 0   | 0  |
| CONTIG-057747 | 94  | 6   | 0  | 3   | 0  |
| CONTIG-057748 | 70  | 8   | 4  | 13  | 0  |
| CONTIG-057749 | 118 | 10  | 12 | 30  | 0  |
| CONTIG-057750 | 115 | 7   | 5  | 7   | 0  |
| CONTIG-057751 | 100 | 5   | 19 | 6   | 0  |
| CONTIG-057752 | 88  | 5   | 6  | 2   | 0  |
| CONTIG-057753 | 210 | 5   | 0  | 33  | 0  |
| CONTIG-057754 | 76  | 10  | 0  | 37  | 0  |
| CONTIG-057758 | 437 | 13  | 29 | 238 | 0  |
| CONTIG-057759 | 58  | 3   | 2  | 4   | 0  |
| CONTIG-057760 | 94  | 5   | 6  | 8   | 0  |
| CONTIG-057761 | 90  | 7   | 16 | 21  | 0  |
| CONTIG-057762 | 56  | 13  | 2  | 2   | 0  |
| CONTIG-057763 | 422 | 13  | 14 | 118 | 7  |
| CONTIG-057765 | 104 | 10  | 10 | 15  | 0  |
| CONTIG-057766 | 217 | 7   | 31 | 24  | 0  |
| CONTIG-057768 | 191 | 11  | 10 | 58  | 0  |
| CONTIG-057769 | 189 | 8   | 10 | 35  | 0  |
| CONTIG-057770 | 136 | 14  | 0  | 96  | 0  |
| CONTIG-057771 | 81  | 3   | 8  | 4   | 0  |
| CONTIG-057772 | 117 | 3   | 0  | 14  | 0  |
| CONTIG-057773 | 119 | 3   | 2  | 11  | 0  |
| CONTIG-057774 | 76  | 12  | 8  | 42  | 0  |
| CONTIG-057775 | 72  | 90  | 13 | 224 | 0  |
| CONTIG-057776 | 73  | 148 | 6  | 508 | 0  |
| CONTIG-057777 | 97  | 3   | 7  | 0   | 0  |
| CONTIG-057778 | 81  | 9   | 6  | 13  | 0  |
| CONTIG-057779 | 142 | 11  | 16 | 27  | 4  |
| CONTIG-057780 | 80  | 6   | 8  | 15  | 0  |
| CONTIG-057781 | 91  | 8   | 5  | 32  | 0  |
| CONTIG-057782 | 277 | 12  | 11 | 145 | 0  |
| CONTIG-057783 | 183 | 13  | 16 | 77  | 0  |
| CONTIG-057784 | 127 | 11  | 26 | 0   | 11 |
| CONTIG-057785 | 279 | 30  | 41 | 428 | 0  |
| CONTIG-057786 | 104 | 13  | 5  | 34  | 0  |
| CONTIG-057787 | 73  | 5   | 2  | 0   | 0  |
| CONTIG-057788 | 83  | 3   | 2  | 5   | 2  |
| CONTIG-057789 | 60  | 7   | 15 | 6   | 0  |
| CONTIG-057790 | 145 | 8   | 6  | 26  | 0  |

|               |     |     |    |     |    |
|---------------|-----|-----|----|-----|----|
| CONTIG-057791 | 109 | 6   | 0  | 15  | 0  |
| CONTIG-057792 | 124 | 7   | 16 | 18  | 0  |
| CONTIG-057793 | 92  | 10  | 13 | 38  | 0  |
| CONTIG-057794 | 435 | 11  | 22 | 149 | 3  |
| CONTIG-057795 | 182 | 8   | 2  | 2   | 0  |
| CONTIG-057796 | 93  | 10  | 20 | 40  | 0  |
| CONTIG-057797 | 69  | 7   | 12 | 12  | 0  |
| CONTIG-057798 | 85  | 7   | 23 | 12  | 0  |
| CONTIG-057799 | 231 | 11  | 3  | 118 | 0  |
| CONTIG-057800 | 93  | 4   | 0  | 0   | 0  |
| CONTIG-057801 | 83  | 8   | 0  | 32  | 0  |
| CONTIG-057802 | 60  | 2   | 0  | 0   | 0  |
| CONTIG-057803 | 90  | 9   | 6  | 29  | 0  |
| CONTIG-057804 | 341 | 10  | 11 | 120 | 2  |
| CONTIG-057805 | 103 | 3   | 0  | 14  | 0  |
| CONTIG-057806 | 75  | 11  | 5  | 12  | 0  |
| CONTIG-057807 | 58  | 5   | 7  | 7   | 0  |
| CONTIG-057808 | 77  | 8   | 27 | 22  | 0  |
| CONTIG-057809 | 196 | 7   | 7  | 29  | 0  |
| CONTIG-057810 | 282 | 12  | 10 | 97  | 5  |
| CONTIG-057811 | 629 | 10  | 4  | 0   | 19 |
| CONTIG-057812 | 70  | 6   | 3  | 9   | 0  |
| CONTIG-057813 | 330 | 14  | 22 | 191 | 2  |
| CONTIG-057814 | 196 | 9   | 28 | 59  | 0  |
| CONTIG-057815 | 65  | 3   | 2  | 3   | 0  |
| CONTIG-057818 | 810 | 16  | 12 | 0   | 55 |
| CONTIG-057819 | 44  | 22  | 21 | 15  | 0  |
| CONTIG-057820 | 217 | 14  | 5  | 142 | 2  |
| CONTIG-057822 | 56  | 109 | 38 | 30  | 0  |
| CONTIG-057823 | 62  | 3   | 0  | 2   | 0  |
| CONTIG-057824 | 158 | 6   | 13 | 15  | 0  |
| CONTIG-057825 | 88  | 6   | 6  | 16  | 0  |
| CONTIG-057826 | 284 | 6   | 4  | 44  | 0  |
| CONTIG-057827 | 290 | 18  | 29 | 155 | 2  |
| CONTIG-057828 | 211 | 5   | 2  | 24  | 0  |
| CONTIG-057829 | 86  | 20  | 15 | 67  | 0  |
| CONTIG-057830 | 62  | 2   | 2  | 0   | 0  |
| CONTIG-057831 | 148 | 11  | 34 | 62  | 0  |
| CONTIG-057832 | 69  | 7   | 9  | 7   | 2  |
| CONTIG-057833 | 314 | 13  | 0  | 0   | 4  |
| CONTIG-057834 | 64  | 7   | 11 | 3   | 0  |
| CONTIG-057835 | 208 | 7   | 5  | 0   | 2  |
| CONTIG-057836 | 89  | 10  | 17 | 21  | 0  |
| CONTIG-057837 | 111 | 6   | 6  | 4   | 0  |
| CONTIG-057838 | 210 | 12  | 7  | 102 | 0  |
| CONTIG-057839 | 100 | 8   | 4  | 24  | 0  |
| CONTIG-057840 | 81  | 2   | 3  | 2   | 0  |

|               |     |     |    |     |     |
|---------------|-----|-----|----|-----|-----|
| CONTIG-057842 | 144 | 5   | 5  | 23  | 0   |
| CONTIG-057845 | 112 | 4   | 13 | 2   | 0   |
| CONTIG-057846 | 79  | 5   | 2  | 8   | 0   |
| CONTIG-057847 | 152 | 6   | 0  | 15  | 0   |
| CONTIG-057848 | 474 | 15  | 11 | 216 | 5   |
| CONTIG-057849 | 66  | 5   | 7  | 2   | 0   |
| CONTIG-057850 | 113 | 4   | 0  | 14  | 0   |
| CONTIG-057851 | 539 | 10  | 9  | 178 | 0   |
| CONTIG-057852 | 61  | 2   | 2  | 0   | 0   |
| CONTIG-057853 | 62  | 11  | 6  | 0   | 0   |
| CONTIG-057854 | 167 | 3   | 5  | 4   | 0   |
| CONTIG-057858 | 166 | 8   | 20 | 63  | 0   |
| CONTIG-057859 | 65  | 4   | 5  | 4   | 0   |
| CONTIG-057860 | 458 | 31  | 0  | 0   | 309 |
| CONTIG-057861 | 73  | 6   | 2  | 12  | 0   |
| CONTIG-057862 | 201 | 178 | 5  | 0   | 0   |
| CONTIG-057863 | 165 | 6   | 7  | 33  | 0   |
| CONTIG-057864 | 634 | 10  | 33 | 182 | 2   |
| CONTIG-057865 | 101 | 6   | 15 | 11  | 0   |
| CONTIG-057866 | 60  | 17  | 0  | 21  | 0   |
| CONTIG-057867 | 148 | 34  | 3  | 0   | 0   |
| CONTIG-057868 | 120 | 8   | 16 | 45  | 0   |
| CONTIG-057869 | 68  | 7   | 26 | 0   | 0   |
| CONTIG-057870 | 107 | 6   | 2  | 17  | 0   |
| CONTIG-057871 | 159 | 14  | 19 | 26  | 0   |
| CONTIG-057872 | 89  | 4   | 4  | 11  | 2   |
| CONTIG-057880 | 52  | 18  | 0  | 33  | 0   |
| CONTIG-057881 | 359 | 10  | 20 | 108 | 0   |
| CONTIG-057882 | 63  | 73  | 14 | 191 | 5   |
| CONTIG-057883 | 295 | 10  | 41 | 69  | 0   |
| CONTIG-057886 | 71  | 6   | 3  | 0   | 0   |
| CONTIG-057887 | 249 | 12  | 21 | 88  | 2   |
| CONTIG-057888 | 255 | 6   | 9  | 70  | 0   |
| CONTIG-057889 | 87  | 9   | 2  | 6   | 0   |
| CONTIG-057890 | 141 | 7   | 4  | 47  | 0   |
| CONTIG-057891 | 145 | 3   | 3  | 18  | 0   |
| CONTIG-057892 | 160 | 12  | 3  | 91  | 0   |
| CONTIG-057893 | 288 | 12  | 0  | 0   | 7   |
| CONTIG-057894 | 223 | 14  | 6  | 48  | 0   |
| CONTIG-057896 | 60  | 15  | 22 | 14  | 0   |
| CONTIG-057897 | 73  | 9   | 59 | 2   | 0   |
| CONTIG-057898 | 86  | 5   | 5  | 11  | 0   |
| CONTIG-057899 | 200 | 18  | 8  | 0   | 0   |
| CONTIG-057900 | 101 | 3   | 2  | 5   | 0   |
| CONTIG-057901 | 110 | 9   | 3  | 16  | 0   |
| CONTIG-057902 | 93  | 6   | 0  | 25  | 2   |
| CONTIG-057903 | 117 | 15  | 3  | 75  | 0   |

|               |     |     |    |     |     |
|---------------|-----|-----|----|-----|-----|
| CONTIG-057904 | 94  | 9   | 3  | 34  | 0   |
| CONTIG-057905 | 152 | 5   | 5  | 11  | 0   |
| CONTIG-057907 | 188 | 13  | 4  | 54  | 0   |
| CONTIG-057908 | 62  | 4   | 0  | 7   | 0   |
| CONTIG-057909 | 296 | 5   | 3  | 24  | 0   |
| CONTIG-057910 | 62  | 4   | 2  | 0   | 0   |
| CONTIG-057911 | 146 | 10  | 26 | 46  | 0   |
| CONTIG-057912 | 232 | 8   | 17 | 25  | 0   |
| CONTIG-057913 | 192 | 7   | 6  | 54  | 0   |
| CONTIG-057914 | 150 | 9   | 46 | 41  | 0   |
| CONTIG-057915 | 73  | 5   | 4  | 6   | 0   |
| CONTIG-057921 | 851 | 56  | 0  | 2   | 283 |
| CONTIG-057924 | 184 | 21  | 11 | 136 | 4   |
| CONTIG-057925 | 775 | 16  | 0  | 28  | 126 |
| CONTIG-057926 | 347 | 7   | 11 | 36  | 0   |
| CONTIG-057927 | 189 | 20  | 15 | 111 | 2   |
| CONTIG-057929 | 75  | 6   | 4  | 12  | 0   |
| CONTIG-057932 | 78  | 14  | 18 | 32  | 0   |
| CONTIG-057933 | 65  | 5   | 9  | 0   | 0   |
| CONTIG-057934 | 77  | 5   | 0  | 14  | 0   |
| CONTIG-057935 | 75  | 4   | 2  | 2   | 0   |
| CONTIG-057936 | 315 | 18  | 23 | 197 | 7   |
| CONTIG-057937 | 163 | 6   | 19 | 10  | 0   |
| CONTIG-057938 | 114 | 13  | 0  | 2   | 14  |
| CONTIG-057939 | 239 | 10  | 21 | 47  | 0   |
| CONTIG-057940 | 67  | 3   | 0  | 2   | 0   |
| CONTIG-057944 | 92  | 9   | 8  | 18  | 0   |
| CONTIG-057945 | 78  | 8   | 17 | 3   | 0   |
| CONTIG-057946 | 217 | 11  | 36 | 74  | 0   |
| CONTIG-057947 | 104 | 9   | 6  | 20  | 0   |
| CONTIG-057948 | 132 | 5   | 11 | 14  | 0   |
| CONTIG-057949 | 410 | 19  | 16 | 334 | 2   |
| CONTIG-057950 | 83  | 7   | 7  | 10  | 0   |
| CONTIG-057951 | 133 | 5   | 2  | 18  | 0   |
| CONTIG-057952 | 191 | 7   | 12 | 40  | 2   |
| CONTIG-057953 | 76  | 25  | 9  | 53  | 0   |
| CONTIG-057955 | 156 | 5   | 6  | 13  | 0   |
| CONTIG-057956 | 181 | 8   | 5  | 29  | 2   |
| CONTIG-057957 | 125 | 9   | 11 | 2   | 0   |
| CONTIG-057958 | 418 | 88  | 2  | 0   | 177 |
| CONTIG-057959 | 72  | 20  | 23 | 25  | 0   |
| CONTIG-057960 | 61  | 8   | 6  | 8   | 0   |
| CONTIG-057962 | 145 | 8   | 11 | 16  | 0   |
| CONTIG-057963 | 231 | 155 | 3  | 0   | 220 |
| CONTIG-057964 | 363 | 32  | 0  | 369 | 9   |
| CONTIG-057965 | 158 | 12  | 11 | 29  | 0   |
| CONTIG-057966 | 150 | 5   | 13 | 20  | 0   |

|               |     |     |    |     |     |
|---------------|-----|-----|----|-----|-----|
| CONTIG-057967 | 89  | 7   | 12 | 2   | 0   |
| CONTIG-057968 | 998 | 17  | 18 | 749 | 0   |
| CONTIG-057969 | 64  | 9   | 13 | 0   | 0   |
| CONTIG-057970 | 203 | 10  | 3  | 49  | 2   |
| CONTIG-057971 | 119 | 13  | 7  | 46  | 0   |
| CONTIG-057973 | 731 | 144 | 0  | 0   | 370 |
| CONTIG-057974 | 120 | 8   | 18 | 0   | 0   |
| CONTIG-057978 | 297 | 7   | 15 | 42  | 0   |
| CONTIG-057979 | 280 | 8   | 34 | 66  | 0   |
| CONTIG-057980 | 89  | 8   | 10 | 11  | 0   |
| CONTIG-057981 | 88  | 5   | 6  | 16  | 0   |
| CONTIG-057982 | 150 | 19  | 4  | 124 | 0   |
| CONTIG-057985 | 72  | 6   | 2  | 18  | 0   |
| CONTIG-057986 | 341 | 11  | 25 | 87  | 0   |
| CONTIG-057987 | 200 | 8   | 2  | 81  | 0   |
| CONTIG-057988 | 130 | 4   | 2  | 8   | 0   |
| CONTIG-057989 | 291 | 11  | 7  | 169 | 2   |
| CONTIG-057990 | 205 | 8   | 8  | 6   | 6   |
| CONTIG-057991 | 292 | 8   | 6  | 11  | 2   |
| CONTIG-057992 | 189 | 14  | 43 | 99  | 0   |
| CONTIG-057993 | 160 | 6   | 10 | 25  | 0   |
| CONTIG-057994 | 67  | 4   | 2  | 3   | 0   |
| CONTIG-057995 | 91  | 5   | 9  | 10  | 0   |
| CONTIG-057996 | 272 | 10  | 2  | 77  | 0   |
| CONTIG-057997 | 77  | 9   | 13 | 19  | 0   |
| CONTIG-057999 | 74  | 10  | 18 | 17  | 0   |
| CONTIG-058001 | 250 | 27  | 8  | 295 | 4   |
| CONTIG-058002 | 116 | 3   | 4  | 10  | 0   |
| CONTIG-058003 | 123 | 4   | 5  | 6   | 0   |
| CONTIG-058004 | 404 | 13  | 17 | 213 | 0   |
| CONTIG-058005 | 136 | 5   | 2  | 7   | 0   |
| CONTIG-058006 | 116 | 5   | 0  | 19  | 0   |
| CONTIG-058007 | 59  | 4   | 10 | 0   | 0   |
| CONTIG-058008 | 68  | 3   | 0  | 5   | 0   |
| CONTIG-058009 | 211 | 7   | 3  | 60  | 2   |
| CONTIG-058010 | 88  | 5   | 0  | 17  | 2   |
| CONTIG-058012 | 932 | 17  | 56 | 583 | 6   |
| CONTIG-058013 | 65  | 5   | 0  | 10  | 0   |
| CONTIG-058014 | 72  | 20  | 5  | 75  | 0   |
| CONTIG-058015 | 82  | 7   | 3  | 11  | 0   |
| CONTIG-058016 | 251 | 12  | 3  | 4   | 0   |
| CONTIG-058017 | 225 | 12  | 12 | 101 | 0   |
| CONTIG-058018 | 52  | 15  | 0  | 10  | 0   |
| CONTIG-058019 | 355 | 9   | 6  | 47  | 9   |
| CONTIG-058021 | 172 | 7   | 0  | 0   | 4   |
| CONTIG-058022 | 63  | 6   | 2  | 8   | 0   |
| CONTIG-058023 | 393 | 10  | 24 | 89  | 0   |

|               |     |     |    |     |     |
|---------------|-----|-----|----|-----|-----|
| CONTIG-058024 | 287 | 7   | 3  | 48  | 2   |
| CONTIG-058025 | 133 | 5   | 3  | 14  | 0   |
| CONTIG-058026 | 75  | 7   | 5  | 9   | 0   |
| CONTIG-058027 | 252 | 19  | 2  | 81  | 0   |
| CONTIG-058028 | 214 | 13  | 25 | 68  | 0   |
| CONTIG-058029 | 289 | 8   | 14 | 78  | 0   |
| CONTIG-058032 | 62  | 6   | 9  | 10  | 0   |
| CONTIG-058033 | 149 | 12  | 17 | 74  | 0   |
| CONTIG-058034 | 682 | 10  | 35 | 228 | 8   |
| CONTIG-058037 | 341 | 13  | 0  | 179 | 0   |
| CONTIG-058038 | 122 | 29  | 30 | 73  | 0   |
| CONTIG-058039 | 61  | 12  | 15 | 18  | 0   |
| CONTIG-058040 | 100 | 6   | 4  | 17  | 0   |
| CONTIG-058041 | 102 | 3   | 5  | 0   | 0   |
| CONTIG-058042 | 142 | 9   | 29 | 7   | 0   |
| CONTIG-058043 | 224 | 34  | 7  | 222 | 0   |
| CONTIG-058044 | 69  | 9   | 0  | 9   | 0   |
| CONTIG-058045 | 175 | 12  | 8  | 9   | 0   |
| CONTIG-058046 | 161 | 7   | 7  | 48  | 0   |
| CONTIG-058047 | 179 | 9   | 10 | 45  | 0   |
| CONTIG-058048 | 148 | 19  | 23 | 89  | 0   |
| CONTIG-058049 | 345 | 13  | 32 | 94  | 0   |
| CONTIG-058050 | 70  | 6   | 4  | 18  | 0   |
| CONTIG-058051 | 68  | 4   | 0  | 4   | 0   |
| CONTIG-058052 | 82  | 4   | 3  | 6   | 0   |
| CONTIG-058054 | 214 | 7   | 6  | 35  | 2   |
| CONTIG-058055 | 59  | 8   | 36 | 3   | 0   |
| CONTIG-058056 | 127 | 9   | 5  | 42  | 0   |
| CONTIG-058057 | 71  | 4   | 2  | 2   | 0   |
| CONTIG-058058 | 59  | 10  | 8  | 9   | 0   |
| CONTIG-058059 | 263 | 8   | 0  | 4   | 44  |
| CONTIG-058060 | 125 | 7   | 0  | 8   | 0   |
| CONTIG-058061 | 77  | 7   | 11 | 0   | 0   |
| CONTIG-058062 | 594 | 11  | 4  | 215 | 2   |
| CONTIG-058063 | 106 | 5   | 4  | 17  | 0   |
| CONTIG-058064 | 164 | 7   | 4  | 35  | 0   |
| CONTIG-058065 | 112 | 4   | 4  | 10  | 0   |
| CONTIG-058066 | 129 | 6   | 9  | 13  | 2   |
| CONTIG-058067 | 86  | 13  | 27 | 0   | 0   |
| CONTIG-058068 | 80  | 16  | 84 | 2   | 3   |
| CONTIG-058069 | 62  | 5   | 0  | 7   | 0   |
| CONTIG-058070 | 178 | 7   | 18 | 5   | 0   |
| CONTIG-058071 | 608 | 41  | 11 | 0   | 173 |
| CONTIG-058072 | 385 | 9   | 0  | 0   | 6   |
| CONTIG-058073 | 111 | 4   | 10 | 10  | 0   |
| CONTIG-058074 | 298 | 154 | 0  | 0   | 737 |
| CONTIG-058075 | 326 | 7   | 12 | 53  | 0   |



|               |     |    |    |     |   |
|---------------|-----|----|----|-----|---|
| CONTIG-058076 | 139 | 8  | 16 | 2   | 0 |
| CONTIG-058077 | 120 | 4  | 0  | 0   | 0 |
| CONTIG-058078 | 70  | 7  | 7  | 19  | 0 |
| CONTIG-058079 | 87  | 6  | 10 | 0   | 0 |
| CONTIG-058080 | 115 | 39 | 18 | 157 | 0 |
| CONTIG-058081 | 120 | 10 | 10 | 38  | 2 |
| CONTIG-058082 | 272 | 11 | 6  | 109 | 0 |
| CONTIG-058084 | 78  | 3  | 2  | 7   | 0 |
| CONTIG-058085 | 193 | 6  | 14 | 20  | 0 |
| CONTIG-058087 | 142 | 5  | 2  | 16  | 0 |
| CONTIG-058088 | 64  | 43 | 8  | 43  | 0 |
| CONTIG-058089 | 428 | 15 | 13 | 26  | 0 |
| CONTIG-058090 | 94  | 8  | 0  | 24  | 0 |
| CONTIG-058092 | 284 | 7  | 11 | 57  | 0 |
| CONTIG-058095 | 365 | 7  | 22 | 81  | 0 |
| CONTIG-058096 | 328 | 8  | 11 | 119 | 0 |
| CONTIG-058098 | 125 | 8  | 2  | 22  | 0 |
| CONTIG-058099 | 273 | 11 | 7  | 43  | 2 |
| CONTIG-058100 | 102 | 4  | 7  | 10  | 0 |
| CONTIG-058101 | 65  | 16 | 20 | 12  | 0 |
| CONTIG-058102 | 59  | 5  | 0  | 2   | 0 |
| CONTIG-058103 | 183 | 5  | 15 | 21  | 0 |
| CONTIG-058104 | 115 | 6  | 9  | 21  | 0 |
| CONTIG-058110 | 193 | 27 | 9  | 171 | 0 |
| CONTIG-058111 | 68  | 4  | 2  | 6   | 0 |
| CONTIG-058112 | 99  | 5  | 3  | 15  | 0 |
| CONTIG-058113 | 95  | 4  | 5  | 7   | 0 |
| CONTIG-058117 | 444 | 10 | 27 | 142 | 2 |
| CONTIG-058118 | 98  | 3  | 0  | 9   | 0 |
| CONTIG-058119 | 61  | 7  | 0  | 6   | 0 |
| CONTIG-058120 | 130 | 11 | 20 | 46  | 0 |
| CONTIG-058121 | 98  | 26 | 6  | 91  | 7 |
| CONTIG-058122 | 124 | 12 | 4  | 19  | 0 |
| CONTIG-058123 | 203 | 6  | 5  | 36  | 0 |
| CONTIG-058124 | 78  | 3  | 4  | 2   | 0 |
| CONTIG-058125 | 134 | 8  | 19 | 21  | 0 |
| CONTIG-058126 | 149 | 4  | 7  | 9   | 0 |
| CONTIG-058128 | 235 | 9  | 10 | 53  | 0 |
| CONTIG-058129 | 115 | 7  | 0  | 30  | 0 |
| CONTIG-058130 | 92  | 11 | 16 | 29  | 0 |
| CONTIG-058131 | 153 | 9  | 0  | 45  | 0 |
| CONTIG-058132 | 98  | 2  | 0  | 7   | 0 |
| CONTIG-058133 | 104 | 3  | 0  | 2   | 0 |
| CONTIG-058134 | 197 | 9  | 0  | 73  | 0 |
| CONTIG-058138 | 78  | 41 | 11 | 89  | 0 |
| CONTIG-058139 | 127 | 4  | 8  | 0   | 0 |
| CONTIG-058140 | 141 | 9  | 3  | 12  | 0 |

|               |     |    |    |     |   |
|---------------|-----|----|----|-----|---|
| CONTIG-058141 | 100 | 5  | 4  | 11  | 0 |
| CONTIG-058142 | 105 | 5  | 26 | 7   | 0 |
| CONTIG-058143 | 106 | 6  | 14 | 4   | 0 |
| CONTIG-058144 | 158 | 8  | 6  | 27  | 0 |
| CONTIG-058145 | 558 | 7  | 30 | 91  | 0 |
| CONTIG-058146 | 120 | 9  | 3  | 41  | 0 |
| CONTIG-058147 | 161 | 5  | 4  | 23  | 0 |
| CONTIG-058148 | 112 | 7  | 21 | 0   | 0 |
| CONTIG-058149 | 90  | 3  | 8  | 0   | 0 |
| CONTIG-058150 | 178 | 12 | 30 | 94  | 0 |
| CONTIG-058152 | 232 | 7  | 5  | 55  | 0 |
| CONTIG-058153 | 146 | 10 | 0  | 37  | 0 |
| CONTIG-058154 | 82  | 9  | 6  | 3   | 0 |
| CONTIG-058155 | 75  | 8  | 12 | 19  | 0 |
| CONTIG-058158 | 115 | 6  | 8  | 16  | 0 |
| CONTIG-058159 | 117 | 16 | 19 | 92  | 0 |
| CONTIG-058160 | 227 | 6  | 12 | 33  | 2 |
| CONTIG-058161 | 169 | 7  | 10 | 38  | 0 |
| CONTIG-058162 | 88  | 8  | 22 | 2   | 0 |
| CONTIG-058163 | 142 | 5  | 4  | 16  | 0 |
| CONTIG-058166 | 349 | 7  | 31 | 34  | 0 |
| CONTIG-058167 | 127 | 82 | 35 | 283 | 0 |
| CONTIG-058168 | 420 | 7  | 16 | 33  | 0 |
| CONTIG-058171 | 66  | 10 | 4  | 23  | 2 |
| CONTIG-058172 | 124 | 8  | 9  | 27  | 0 |
| CONTIG-058176 | 117 | 5  | 2  | 14  | 0 |
| CONTIG-058177 | 396 | 11 | 30 | 54  | 0 |
| CONTIG-058178 | 168 | 7  | 22 | 15  | 0 |
| CONTIG-058179 | 255 | 6  | 22 | 46  | 0 |
| CONTIG-058180 | 72  | 16 | 47 | 2   | 0 |
| CONTIG-058181 | 152 | 4  | 0  | 0   | 0 |
| CONTIG-058182 | 67  | 6  | 10 | 8   | 0 |
| CONTIG-058185 | 93  | 19 | 15 | 24  | 0 |
| CONTIG-058186 | 109 | 6  | 0  | 21  | 0 |
| CONTIG-058187 | 65  | 11 | 0  | 26  | 2 |
| CONTIG-058188 | 208 | 4  | 3  | 27  | 0 |
| CONTIG-058189 | 126 | 7  | 10 | 26  | 0 |
| CONTIG-058195 | 297 | 16 | 17 | 163 | 7 |
| CONTIG-058196 | 93  | 4  | 11 | 11  | 0 |
| CONTIG-058197 | 433 | 8  | 5  | 82  | 2 |
| CONTIG-058198 | 85  | 13 | 0  | 36  | 0 |
| CONTIG-058199 | 362 | 9  | 6  | 46  | 0 |
| CONTIG-058200 | 96  | 8  | 2  | 30  | 2 |
| CONTIG-058201 | 76  | 5  | 0  | 7   | 0 |
| CONTIG-058202 | 196 | 18 | 45 | 59  | 0 |
| CONTIG-058203 | 67  | 9  | 2  | 0   | 0 |
| CONTIG-058204 | 284 | 8  | 9  | 62  | 0 |

|               |     |     |    |     |    |
|---------------|-----|-----|----|-----|----|
| CONTIG-058205 | 73  | 3   | 0  | 4   | 0  |
| CONTIG-058213 | 285 | 8   | 14 | 43  | 2  |
| CONTIG-058214 | 62  | 4   | 2  | 7   | 0  |
| CONTIG-058215 | 66  | 3   | 3  | 2   | 0  |
| CONTIG-058216 | 206 | 4   | 6  | 22  | 0  |
| CONTIG-058217 | 67  | 4   | 3  | 4   | 0  |
| CONTIG-058218 | 186 | 9   | 18 | 37  | 0  |
| CONTIG-058219 | 154 | 17  | 14 | 51  | 2  |
| CONTIG-058220 | 133 | 10  | 23 | 27  | 0  |
| CONTIG-058221 | 104 | 169 | 4  | 212 | 8  |
| CONTIG-058222 | 154 | 7   | 5  | 32  | 3  |
| CONTIG-058224 | 88  | 9   | 11 | 19  | 0  |
| CONTIG-058225 | 276 | 8   | 21 | 70  | 3  |
| CONTIG-058226 | 161 | 22  | 10 | 115 | 0  |
| CONTIG-058227 | 127 | 5   | 7  | 11  | 0  |
| CONTIG-058228 | 172 | 8   | 17 | 52  | 2  |
| CONTIG-058229 | 151 | 5   | 4  | 14  | 0  |
| CONTIG-058230 | 138 | 9   | 28 | 42  | 0  |
| CONTIG-058233 | 687 | 10  | 7  | 220 | 0  |
| CONTIG-058236 | 197 | 11  | 2  | 66  | 7  |
| CONTIG-058237 | 71  | 15  | 5  | 0   | 0  |
| CONTIG-058238 | 183 | 5   | 0  | 0   | 3  |
| CONTIG-058239 | 137 | 209 | 4  | 333 | 10 |
| CONTIG-058240 | 107 | 3   | 2  | 3   | 0  |
| CONTIG-058241 | 92  | 7   | 5  | 25  | 0  |
| CONTIG-058242 | 129 | 8   | 2  | 19  | 3  |
| CONTIG-058243 | 174 | 13  | 19 | 75  | 0  |
| CONTIG-058244 | 191 | 10  | 13 | 58  | 0  |
| CONTIG-058245 | 153 | 6   | 0  | 20  | 0  |
| CONTIG-058246 | 87  | 3   | 0  | 2   | 0  |
| CONTIG-058247 | 101 | 3   | 0  | 4   | 0  |
| CONTIG-058248 | 89  | 10  | 6  | 46  | 0  |
| CONTIG-058253 | 211 | 6   | 0  | 29  | 0  |
| CONTIG-058254 | 325 | 16  | 46 | 218 | 2  |
| CONTIG-058255 | 329 | 14  | 23 | 69  | 3  |
| CONTIG-058256 | 89  | 5   | 2  | 18  | 0  |
| CONTIG-058257 | 240 | 5   | 4  | 37  | 2  |
| CONTIG-058258 | 119 | 12  | 2  | 52  | 0  |
| CONTIG-058259 | 177 | 6   | 2  | 21  | 0  |
| CONTIG-058260 | 115 | 7   | 7  | 20  | 0  |
| CONTIG-058261 | 283 | 6   | 0  | 49  | 2  |
| CONTIG-058263 | 52  | 12  | 0  | 18  | 0  |
| CONTIG-058264 | 189 | 8   | 0  | 49  | 0  |
| CONTIG-058265 | 174 | 5   | 2  | 33  | 0  |
| CONTIG-058266 | 208 | 9   | 5  | 78  | 0  |
| CONTIG-058267 | 230 | 10  | 27 | 9   | 0  |
| CONTIG-058268 | 121 | 11  | 2  | 22  | 0  |

|               |     |     |    |     |   |
|---------------|-----|-----|----|-----|---|
| CONTIG-058269 | 186 | 13  | 9  | 100 | 0 |
| CONTIG-058270 | 122 | 10  | 7  | 0   | 0 |
| CONTIG-058271 | 115 | 11  | 5  | 30  | 0 |
| CONTIG-058272 | 89  | 6   | 7  | 15  | 0 |
| CONTIG-058273 | 75  | 7   | 7  | 13  | 0 |
| CONTIG-058274 | 119 | 6   | 5  | 25  | 0 |
| CONTIG-058275 | 176 | 4   | 47 | 0   | 0 |
| CONTIG-058276 | 90  | 6   | 2  | 0   | 0 |
| CONTIG-058278 | 301 | 10  | 8  | 80  | 0 |
| CONTIG-058281 | 177 | 7   | 4  | 42  | 0 |
| CONTIG-058282 | 105 | 8   | 9  | 13  | 0 |
| CONTIG-058283 | 58  | 3   | 2  | 2   | 0 |
| CONTIG-058284 | 68  | 6   | 4  | 10  | 0 |
| CONTIG-058285 | 80  | 13  | 15 | 16  | 0 |
| CONTIG-058286 | 198 | 4   | 3  | 11  | 0 |
| CONTIG-058287 | 185 | 7   | 30 | 47  | 0 |
| CONTIG-058288 | 117 | 5   | 5  | 12  | 0 |
| CONTIG-058289 | 104 | 8   | 2  | 24  | 0 |
| CONTIG-058290 | 60  | 9   | 53 | 0   | 0 |
| CONTIG-058291 | 134 | 9   | 3  | 22  | 2 |
| CONTIG-058292 | 182 | 6   | 2  | 47  | 0 |
| CONTIG-058293 | 96  | 6   | 0  | 0   | 0 |
| CONTIG-058294 | 173 | 4   | 0  | 4   | 0 |
| CONTIG-058295 | 87  | 4   | 0  | 5   | 2 |
| CONTIG-058296 | 93  | 11  | 16 | 29  | 0 |
| CONTIG-058297 | 325 | 48  | 7  | 3   | 0 |
| CONTIG-058298 | 436 | 26  | 53 | 457 | 2 |
| CONTIG-058299 | 163 | 9   | 4  | 69  | 0 |
| CONTIG-058300 | 74  | 11  | 26 | 9   | 0 |
| CONTIG-058301 | 38  | 463 | 19 | 549 | 0 |
| CONTIG-058302 | 88  | 15  | 9  | 23  | 0 |
| CONTIG-058303 | 90  | 7   | 22 | 10  | 0 |
| CONTIG-058304 | 182 | 26  | 55 | 98  | 0 |
| CONTIG-058305 | 91  | 7   | 3  | 11  | 0 |
| CONTIG-058306 | 193 | 9   | 0  | 42  | 0 |
| CONTIG-058307 | 296 | 12  | 17 | 130 | 0 |
| CONTIG-058308 | 73  | 9   | 22 | 10  | 0 |
| CONTIG-058309 | 93  | 5   | 4  | 14  | 0 |
| CONTIG-058310 | 338 | 9   | 14 | 58  | 5 |
| CONTIG-058311 | 220 | 6   | 5  | 15  | 0 |
| CONTIG-058312 | 202 | 12  | 9  | 63  | 0 |
| CONTIG-058313 | 82  | 5   | 4  | 4   | 0 |
| CONTIG-058314 | 220 | 16  | 3  | 128 | 0 |
| CONTIG-058315 | 99  | 11  | 19 | 25  | 0 |
| CONTIG-058316 | 103 | 7   | 7  | 13  | 0 |
| CONTIG-058317 | 153 | 19  | 34 | 43  | 2 |
| CONTIG-058318 | 85  | 8   | 7  | 17  | 0 |

|               |      |     |    |      |     |
|---------------|------|-----|----|------|-----|
| CONTIG-058319 | 118  | 5   | 10 | 11   | 0   |
| CONTIG-058320 | 138  | 9   | 8  | 28   | 0   |
| CONTIG-058321 | 73   | 6   | 3  | 8    | 0   |
| CONTIG-058322 | 391  | 10  | 18 | 100  | 0   |
| CONTIG-058323 | 523  | 15  | 27 | 188  | 2   |
| CONTIG-058324 | 66   | 4   | 2  | 7    | 0   |
| CONTIG-058325 | 59   | 13  | 31 | 16   | 0   |
| CONTIG-058326 | 371  | 8   | 15 | 130  | 2   |
| CONTIG-058327 | 131  | 7   | 6  | 21   | 0   |
| CONTIG-058329 | 62   | 3   | 0  | 4    | 0   |
| CONTIG-058330 | 89   | 10  | 8  | 33   | 0   |
| CONTIG-058331 | 82   | 34  | 0  | 61   | 0   |
| CONTIG-058333 | 124  | 10  | 10 | 35   | 0   |
| CONTIG-058339 | 59   | 4   | 0  | 11   | 0   |
| CONTIG-058340 | 343  | 25  | 11 | 347  | 2   |
| CONTIG-058341 | 78   | 4   | 6  | 3    | 0   |
| CONTIG-058342 | 76   | 6   | 6  | 9    | 0   |
| CONTIG-058343 | 323  | 13  | 41 | 112  | 2   |
| CONTIG-058344 | 81   | 6   | 2  | 12   | 0   |
| CONTIG-058345 | 312  | 5   | 2  | 46   | 0   |
| CONTIG-058346 | 60   | 6   | 2  | 4    | 0   |
| CONTIG-058348 | 90   | 6   | 14 | 9    | 0   |
| CONTIG-058349 | 142  | 8   | 7  | 44   | 0   |
| CONTIG-058350 | 91   | 6   | 2  | 15   | 0   |
| CONTIG-058351 | 256  | 9   | 36 | 75   | 0   |
| CONTIG-058352 | 129  | 8   | 6  | 21   | 0   |
| CONTIG-058353 | 136  | 9   | 3  | 31   | 0   |
| CONTIG-058354 | 171  | 11  | 3  | 72   | 0   |
| CONTIG-058355 | 75   | 5   | 5  | 4    | 2   |
| CONTIG-058356 | 61   | 6   | 4  | 12   | 0   |
| CONTIG-058360 | 149  | 13  | 6  | 59   | 0   |
| CONTIG-058361 | 106  | 9   | 2  | 44   | 2   |
| CONTIG-058363 | 91   | 7   | 10 | 9    | 0   |
| CONTIG-058364 | 200  | 7   | 9  | 11   | 0   |
| CONTIG-058365 | 134  | 21  | 5  | 123  | 0   |
| CONTIG-058366 | 59   | 70  | 12 | 143  | 2   |
| CONTIG-058367 | 253  | 149 | 7  | 1117 | 40  |
| CONTIG-058368 | 255  | 7   | 5  | 47   | 0   |
| CONTIG-058369 | 86   | 8   | 11 | 6    | 0   |
| CONTIG-058370 | 103  | 6   | 2  | 11   | 0   |
| CONTIG-058371 | 66   | 5   | 2  | 2    | 0   |
| CONTIG-058372 | 126  | 3   | 0  | 6    | 0   |
| CONTIG-058373 | 66   | 23  | 0  | 54   | 0   |
| CONTIG-058374 | 82   | 6   | 2  | 7    | 0   |
| CONTIG-058375 | 91   | 9   | 15 | 10   | 0   |
| CONTIG-058376 | 82   | 10  | 8  | 2    | 0   |
| CONTIG-058377 | 1271 | 43  | 7  | 2    | 788 |

|               |     |    |    |     |    |
|---------------|-----|----|----|-----|----|
| CONTIG-058378 | 125 | 9  | 6  | 42  | 0  |
| CONTIG-058380 | 62  | 95 | 7  | 0   | 28 |
| CONTIG-058383 | 126 | 25 | 27 | 79  | 0  |
| CONTIG-058384 | 88  | 5  | 2  | 6   | 0  |
| CONTIG-058385 | 108 | 11 | 10 | 18  | 0  |
| CONTIG-058386 | 322 | 15 | 50 | 102 | 2  |
| CONTIG-058387 | 74  | 3  | 0  | 7   | 0  |
| CONTIG-058388 | 176 | 9  | 9  | 51  | 0  |
| CONTIG-058389 | 365 | 18 | 22 | 226 | 0  |
| CONTIG-058390 | 63  | 6  | 16 | 0   | 0  |
| CONTIG-058391 | 70  | 7  | 2  | 19  | 0  |
| CONTIG-058392 | 210 | 10 | 14 | 52  | 0  |
| CONTIG-058393 | 253 | 10 | 38 | 67  | 2  |
| CONTIG-058394 | 137 | 11 | 12 | 46  | 0  |
| CONTIG-058395 | 295 | 18 | 5  | 178 | 0  |
| CONTIG-058396 | 72  | 10 | 10 | 32  | 0  |
| CONTIG-058397 | 380 | 21 | 10 | 324 | 4  |
| CONTIG-058398 | 157 | 5  | 2  | 15  | 0  |
| CONTIG-058399 | 85  | 7  | 4  | 23  | 0  |
| CONTIG-058400 | 132 | 18 | 6  | 77  | 0  |
| CONTIG-058401 | 61  | 9  | 42 | 7   | 0  |
| CONTIG-058402 | 92  | 8  | 4  | 10  | 4  |
| CONTIG-058404 | 73  | 3  | 6  | 0   | 0  |
| CONTIG-058409 | 350 | 9  | 11 | 73  | 0  |
| CONTIG-058410 | 90  | 7  | 3  | 2   | 0  |
| CONTIG-058412 | 161 | 13 | 9  | 70  | 0  |
| CONTIG-058415 | 90  | 6  | 3  | 6   | 0  |
| CONTIG-058420 | 193 | 11 | 5  | 0   | 9  |
| CONTIG-058421 | 361 | 10 | 25 | 67  | 0  |
| CONTIG-058422 | 91  | 4  | 0  | 13  | 0  |
| CONTIG-058423 | 131 | 13 | 9  | 89  | 0  |
| CONTIG-058424 | 74  | 7  | 6  | 2   | 0  |
| CONTIG-058425 | 145 | 6  | 5  | 15  | 5  |
| CONTIG-058426 | 153 | 11 | 15 | 10  | 0  |
| CONTIG-058427 | 79  | 5  | 2  | 6   | 0  |
| CONTIG-058428 | 208 | 14 | 25 | 64  | 0  |
| CONTIG-058429 | 295 | 20 | 29 | 144 | 3  |
| CONTIG-058430 | 64  | 8  | 4  | 11  | 0  |
| CONTIG-058431 | 60  | 2  | 2  | 0   | 0  |
| CONTIG-058432 | 549 | 15 | 7  | 372 | 2  |
| CONTIG-058433 | 151 | 7  | 9  | 29  | 0  |
| CONTIG-058434 | 64  | 8  | 6  | 12  | 0  |
| CONTIG-058435 | 124 | 9  | 19 | 26  | 0  |
| CONTIG-058437 | 67  | 3  | 4  | 2   | 0  |
| CONTIG-058438 | 247 | 7  | 23 | 40  | 0  |
| CONTIG-058439 | 62  | 3  | 8  | 2   | 0  |
| CONTIG-058440 | 256 | 14 | 12 | 147 | 0  |

|               |     |     |    |      |     |
|---------------|-----|-----|----|------|-----|
| CONTIG-058441 | 143 | 8   | 5  | 25   | 0   |
| CONTIG-058442 | 129 | 6   | 6  | 17   | 0   |
| CONTIG-058443 | 103 | 5   | 0  | 8    | 0   |
| CONTIG-058444 | 66  | 9   | 15 | 0    | 0   |
| CONTIG-058445 | 106 | 5   | 7  | 7    | 0   |
| CONTIG-058446 | 348 | 6   | 4  | 30   | 0   |
| CONTIG-058448 | 70  | 4   | 8  | 0    | 0   |
| CONTIG-058449 | 59  | 9   | 4  | 13   | 2   |
| CONTIG-058450 | 170 | 16  | 38 | 125  | 0   |
| CONTIG-058451 | 123 | 8   | 18 | 23   | 0   |
| CONTIG-058452 | 72  | 15  | 12 | 34   | 0   |
| CONTIG-058453 | 298 | 66  | 2  | 0    | 167 |
| CONTIG-058454 | 616 | 14  | 21 | 291  | 0   |
| CONTIG-058455 | 102 | 8   | 9  | 21   | 0   |
| CONTIG-058456 | 66  | 36  | 16 | 46   | 0   |
| CONTIG-058457 | 93  | 9   | 18 | 22   | 0   |
| CONTIG-058458 | 85  | 617 | 62 | 1122 | 395 |
| CONTIG-058459 | 237 | 8   | 5  | 72   | 0   |
| CONTIG-058460 | 88  | 4   | 2  | 11   | 0   |
| CONTIG-058461 | 94  | 4   | 10 | 0    | 0   |
| CONTIG-058462 | 105 | 7   | 9  | 8    | 0   |
| CONTIG-058464 | 64  | 10  | 0  | 16   | 0   |
| CONTIG-058465 | 119 | 23  | 42 | 53   | 0   |
| CONTIG-058466 | 376 | 10  | 44 | 139  | 0   |
| CONTIG-058467 | 165 | 6   | 2  | 33   | 0   |
| CONTIG-058468 | 246 | 10  | 19 | 49   | 0   |
| CONTIG-058469 | 70  | 2   | 4  | 0    | 0   |
| CONTIG-058470 | 128 | 23  | 6  | 0    | 0   |
| CONTIG-058471 | 208 | 9   | 9  | 38   | 2   |
| CONTIG-058472 | 277 | 11  | 19 | 48   | 0   |
| CONTIG-058473 | 57  | 13  | 9  | 5    | 0   |
| CONTIG-058474 | 141 | 15  | 2  | 76   | 2   |
| CONTIG-058475 | 187 | 29  | 11 | 4    | 0   |
| CONTIG-058476 | 58  | 7   | 5  | 14   | 0   |
| CONTIG-058477 | 156 | 8   | 0  | 63   | 0   |
| CONTIG-058478 | 65  | 87  | 29 | 144  | 0   |
| CONTIG-058480 | 66  | 6   | 3  | 6    | 0   |
| CONTIG-058481 | 227 | 4   | 2  | 29   | 0   |
| CONTIG-058482 | 69  | 18  | 22 | 6    | 0   |
| CONTIG-058483 | 209 | 6   | 8  | 39   | 0   |
| CONTIG-058485 | 61  | 5   | 3  | 2    | 0   |
| CONTIG-058486 | 79  | 14  | 3  | 27   | 0   |
| CONTIG-058487 | 572 | 7   | 12 | 109  | 0   |
| CONTIG-058488 | 177 | 7   | 2  | 40   | 0   |
| CONTIG-058490 | 184 | 142 | 0  | 0    | 385 |
| CONTIG-058491 | 61  | 7   | 27 | 0    | 0   |
| CONTIG-058492 | 108 | 10  | 24 | 10   | 0   |

|               |     |     |    |     |    |
|---------------|-----|-----|----|-----|----|
| CONTIG-058493 | 76  | 5   | 0  | 11  | 0  |
| CONTIG-058494 | 64  | 5   | 2  | 14  | 0  |
| CONTIG-058495 | 141 | 6   | 0  | 0   | 4  |
| CONTIG-058496 | 86  | 11  | 4  | 40  | 0  |
| CONTIG-058497 | 85  | 5   | 0  | 8   | 0  |
| CONTIG-058498 | 159 | 7   | 9  | 33  | 0  |
| CONTIG-058499 | 942 | 12  | 44 | 345 | 2  |
| CONTIG-058500 | 111 | 5   | 7  | 16  | 0  |
| CONTIG-058501 | 271 | 6   | 10 | 29  | 0  |
| CONTIG-058502 | 101 | 15  | 81 | 33  | 0  |
| CONTIG-058503 | 115 | 5   | 2  | 9   | 0  |
| CONTIG-058504 | 211 | 36  | 12 | 107 | 0  |
| CONTIG-058505 | 123 | 19  | 6  | 72  | 0  |
| CONTIG-058507 | 90  | 3   | 2  | 5   | 0  |
| CONTIG-058508 | 82  | 5   | 3  | 4   | 0  |
| CONTIG-058509 | 303 | 10  | 9  | 111 | 0  |
| CONTIG-058511 | 115 | 6   | 2  | 5   | 0  |
| CONTIG-058512 | 98  | 6   | 5  | 15  | 0  |
| CONTIG-058513 | 216 | 15  | 18 | 138 | 4  |
| CONTIG-058514 | 203 | 32  | 22 | 394 | 0  |
| CONTIG-058515 | 62  | 10  | 17 | 6   | 0  |
| CONTIG-058516 | 124 | 137 | 25 | 0   | 0  |
| CONTIG-058517 | 309 | 5   | 16 | 29  | 0  |
| CONTIG-058520 | 206 | 12  | 7  | 125 | 0  |
| CONTIG-058521 | 203 | 9   | 2  | 4   | 47 |
| CONTIG-058522 | 99  | 8   | 6  | 8   | 2  |
| CONTIG-058523 | 64  | 6   | 11 | 2   | 0  |
| CONTIG-058524 | 132 | 6   | 2  | 26  | 0  |
| CONTIG-058525 | 155 | 10  | 9  | 49  | 2  |
| CONTIG-058526 | 106 | 23  | 4  | 92  | 0  |
| CONTIG-058527 | 76  | 11  | 0  | 25  | 0  |
| CONTIG-058528 | 92  | 9   | 19 | 13  | 0  |
| CONTIG-058531 | 320 | 17  | 24 | 186 | 0  |
| CONTIG-058533 | 302 | 10  | 6  | 53  | 2  |
| CONTIG-058534 | 312 | 8   | 4  | 0   | 0  |
| CONTIG-058535 | 327 | 7   | 11 | 47  | 4  |
| CONTIG-058536 | 279 | 10  | 19 | 87  | 0  |
| CONTIG-058537 | 97  | 4   | 9  | 4   | 0  |
| CONTIG-058538 | 71  | 6   | 3  | 17  | 0  |
| CONTIG-058539 | 59  | 4   | 7  | 2   | 0  |
| CONTIG-058540 | 126 | 4   | 3  | 7   | 0  |
| CONTIG-058541 | 95  | 3   | 4  | 4   | 0  |
| CONTIG-058542 | 130 | 15  | 3  | 0   | 0  |
| CONTIG-058543 | 86  | 3   | 0  | 8   | 0  |
| CONTIG-058544 | 191 | 6   | 11 | 42  | 0  |
| CONTIG-058545 | 141 | 7   | 2  | 29  | 0  |
| CONTIG-058546 | 133 | 4   | 18 | 9   | 0  |



|               |     |     |    |     |   |
|---------------|-----|-----|----|-----|---|
| CONTIG-058547 | 329 | 7   | 5  | 35  | 0 |
| CONTIG-058548 | 63  | 5   | 2  | 9   | 0 |
| CONTIG-058549 | 108 | 6   | 17 | 15  | 0 |
| CONTIG-058550 | 139 | 8   | 10 | 34  | 0 |
| CONTIG-058551 | 264 | 7   | 8  | 59  | 0 |
| CONTIG-058552 | 67  | 8   | 8  | 16  | 0 |
| CONTIG-058553 | 123 | 4   | 0  | 17  | 0 |
| CONTIG-058554 | 99  | 4   | 0  | 14  | 0 |
| CONTIG-058556 | 99  | 4   | 2  | 6   | 0 |
| CONTIG-058557 | 157 | 14  | 0  | 6   | 0 |
| CONTIG-058558 | 136 | 4   | 7  | 13  | 0 |
| CONTIG-058559 | 78  | 4   | 3  | 8   | 0 |
| CONTIG-058560 | 520 | 43  | 7  | 31  | 0 |
| CONTIG-058561 | 72  | 7   | 7  | 20  | 0 |
| CONTIG-058562 | 129 | 51  | 21 | 114 | 0 |
| CONTIG-058563 | 154 | 4   | 12 | 11  | 0 |
| CONTIG-058564 | 90  | 7   | 12 | 17  | 0 |
| CONTIG-058565 | 69  | 3   | 2  | 2   | 0 |
| CONTIG-058566 | 83  | 5   | 4  | 2   | 0 |
| CONTIG-058567 | 142 | 11  | 0  | 3   | 0 |
| CONTIG-058568 | 64  | 9   | 0  | 4   | 0 |
| CONTIG-058569 | 160 | 10  | 10 | 49  | 2 |
| CONTIG-058570 | 190 | 8   | 2  | 46  | 0 |
| CONTIG-058571 | 165 | 9   | 6  | 66  | 0 |
| CONTIG-058572 | 274 | 6   | 12 | 32  | 0 |
| CONTIG-058573 | 100 | 10  | 0  | 42  | 0 |
| CONTIG-058574 | 66  | 6   | 0  | 8   | 0 |
| CONTIG-058575 | 389 | 21  | 24 | 331 | 0 |
| CONTIG-058576 | 497 | 9   | 16 | 114 | 0 |
| CONTIG-058577 | 73  | 5   | 2  | 5   | 3 |
| CONTIG-058578 | 113 | 5   | 6  | 13  | 0 |
| CONTIG-058579 | 74  | 15  | 14 | 51  | 0 |
| CONTIG-058581 | 405 | 10  | 7  | 158 | 0 |
| CONTIG-058582 | 89  | 5   | 4  | 15  | 0 |
| CONTIG-058583 | 78  | 13  | 21 | 0   | 0 |
| CONTIG-058584 | 176 | 7   | 6  | 25  | 0 |
| CONTIG-058585 | 65  | 5   | 4  | 11  | 0 |
| CONTIG-058586 | 170 | 34  | 30 | 143 | 0 |
| CONTIG-058593 | 440 | 7   | 11 | 81  | 4 |
| CONTIG-058594 | 128 | 5   | 3  | 25  | 0 |
| CONTIG-058595 | 59  | 11  | 11 | 21  | 0 |
| CONTIG-058596 | 369 | 290 | 4  | 5   | 2 |
| CONTIG-058597 | 255 | 19  | 5  | 164 | 0 |
| CONTIG-058598 | 93  | 6   | 5  | 20  | 0 |
| CONTIG-058599 | 76  | 14  | 36 | 38  | 0 |
| CONTIG-058600 | 264 | 12  | 37 | 111 | 0 |
| CONTIG-058601 | 516 | 8   | 6  | 27  | 0 |

|               |      |     |    |     |    |
|---------------|------|-----|----|-----|----|
| CONTIG-058602 | 65   | 4   | 0  | 8   | 0  |
| CONTIG-058603 | 86   | 4   | 8  | 7   | 0  |
| CONTIG-058604 | 231  | 5   | 5  | 22  | 0  |
| CONTIG-058605 | 107  | 5   | 9  | 20  | 0  |
| CONTIG-058606 | 354  | 10  | 8  | 72  | 0  |
| CONTIG-058607 | 88   | 4   | 3  | 16  | 0  |
| CONTIG-058608 | 73   | 14  | 12 | 14  | 0  |
| CONTIG-058609 | 369  | 8   | 13 | 95  | 0  |
| CONTIG-058611 | 336  | 6   | 6  | 43  | 0  |
| CONTIG-058612 | 234  | 4   | 10 | 23  | 0  |
| CONTIG-058613 | 112  | 8   | 0  | 29  | 0  |
| CONTIG-058614 | 60   | 9   | 0  | 10  | 0  |
| CONTIG-058615 | 117  | 175 | 8  | 305 | 0  |
| CONTIG-058616 | 173  | 35  | 23 | 138 | 4  |
| CONTIG-058617 | 180  | 8   | 17 | 26  | 0  |
| CONTIG-058618 | 64   | 12  | 7  | 6   | 2  |
| CONTIG-058619 | 1106 | 12  | 2  | 0   | 82 |
| CONTIG-058620 | 104  | 7   | 16 | 3   | 0  |
| CONTIG-058621 | 156  | 12  | 17 | 49  | 0  |
| CONTIG-058622 | 61   | 411 | 97 | 556 | 4  |
| CONTIG-058623 | 81   | 6   | 2  | 10  | 0  |
| CONTIG-058624 | 159  | 5   | 3  | 16  | 0  |
| CONTIG-058625 | 73   | 3   | 0  | 0   | 0  |
| CONTIG-058626 | 100  | 4   | 2  | 14  | 0  |
| CONTIG-058627 | 91   | 14  | 13 | 39  | 0  |
| CONTIG-058628 | 68   | 5   | 16 | 9   | 0  |
| CONTIG-058629 | 131  | 9   | 8  | 24  | 0  |
| CONTIG-058630 | 117  | 16  | 36 | 73  | 0  |
| CONTIG-058631 | 182  | 4   | 0  | 11  | 0  |
| CONTIG-058632 | 230  | 8   | 20 | 41  | 0  |
| CONTIG-058633 | 196  | 5   | 8  | 20  | 0  |
| CONTIG-058634 | 62   | 7   | 8  | 15  | 2  |
| CONTIG-058635 | 105  | 12  | 13 | 5   | 0  |
| CONTIG-058636 | 705  | 10  | 36 | 237 | 2  |
| CONTIG-058637 | 59   | 3   | 0  | 9   | 0  |
| CONTIG-058638 | 463  | 22  | 38 | 336 | 4  |
| CONTIG-058639 | 141  | 7   | 12 | 20  | 0  |
| CONTIG-058640 | 202  | 14  | 4  | 118 | 0  |
| CONTIG-058641 | 107  | 4   | 0  | 9   | 0  |
| CONTIG-058642 | 167  | 8   | 16 | 43  | 0  |
| CONTIG-058643 | 105  | 5   | 8  | 23  | 0  |
| CONTIG-058644 | 441  | 17  | 14 | 442 | 0  |
| CONTIG-058645 | 139  | 8   | 7  | 38  | 0  |
| CONTIG-058646 | 251  | 10  | 3  | 69  | 0  |
| CONTIG-058647 | 237  | 5   | 9  | 27  | 0  |
| CONTIG-058648 | 90   | 10  | 0  | 25  | 0  |
| CONTIG-058649 | 100  | 7   | 4  | 13  | 0  |

|               |     |     |    |      |     |
|---------------|-----|-----|----|------|-----|
| CONTIG-058650 | 89  | 5   | 16 | 2    | 0   |
| CONTIG-058651 | 64  | 9   | 10 | 14   | 0   |
| CONTIG-058653 | 67  | 5   | 9  | 4    | 0   |
| CONTIG-058654 | 217 | 12  | 6  | 68   | 3   |
| CONTIG-058655 | 56  | 26  | 2  | 50   | 0   |
| CONTIG-058656 | 117 | 4   | 3  | 8    | 0   |
| CONTIG-058657 | 105 | 11  | 4  | 12   | 0   |
| CONTIG-058658 | 89  | 694 | 11 | 1575 | 0   |
| CONTIG-058661 | 99  | 5   | 2  | 11   | 0   |
| CONTIG-058662 | 80  | 4   | 2  | 6    | 0   |
| CONTIG-058663 | 152 | 9   | 20 | 39   | 0   |
| CONTIG-058664 | 318 | 8   | 2  | 73   | 0   |
| CONTIG-058665 | 65  | 8   | 0  | 8    | 0   |
| CONTIG-058666 | 105 | 5   | 4  | 5    | 0   |
| CONTIG-058667 | 64  | 4   | 0  | 9    | 0   |
| CONTIG-058668 | 90  | 8   | 5  | 2    | 0   |
| CONTIG-058669 | 102 | 19  | 10 | 86   | 0   |
| CONTIG-058670 | 131 | 8   | 11 | 22   | 0   |
| CONTIG-058671 | 462 | 72  | 2  | 0    | 299 |
| CONTIG-058672 | 119 | 19  | 18 | 95   | 0   |
| CONTIG-058673 | 88  | 9   | 8  | 4    | 0   |
| CONTIG-058674 | 164 | 10  | 0  | 57   | 0   |
| CONTIG-058675 | 140 | 6   | 5  | 29   | 0   |
| CONTIG-058676 | 237 | 7   | 7  | 31   | 2   |
| CONTIG-058677 | 217 | 4   | 13 | 12   | 2   |
| CONTIG-058678 | 197 | 13  | 72 | 43   | 2   |
| CONTIG-058679 | 172 | 9   | 10 | 34   | 0   |
| CONTIG-058680 | 76  | 3   | 12 | 4    | 0   |
| CONTIG-058681 | 90  | 4   | 0  | 0    | 0   |
| CONTIG-058682 | 150 | 17  | 14 | 91   | 0   |
| CONTIG-058683 | 101 | 9   | 2  | 36   | 0   |
| CONTIG-058684 | 775 | 11  | 0  | 0    | 74  |
| CONTIG-058685 | 144 | 5   | 2  | 13   | 2   |
| CONTIG-058686 | 74  | 13  | 13 | 34   | 0   |
| CONTIG-058687 | 61  | 3   | 0  | 9    | 0   |
| CONTIG-058688 | 67  | 7   | 22 | 6    | 0   |
| CONTIG-058689 | 159 | 6   | 9  | 19   | 0   |
| CONTIG-058690 | 182 | 14  | 53 | 65   | 0   |
| CONTIG-058691 | 134 | 15  | 11 | 21   | 0   |
| CONTIG-058692 | 234 | 19  | 22 | 22   | 0   |
| CONTIG-058693 | 258 | 10  | 9  | 78   | 2   |
| CONTIG-058695 | 69  | 20  | 5  | 40   | 0   |
| CONTIG-058696 | 59  | 3   | 5  | 0    | 0   |
| CONTIG-058697 | 152 | 15  | 46 | 49   | 0   |
| CONTIG-058699 | 606 | 17  | 26 | 480  | 0   |
| CONTIG-058700 | 165 | 5   | 4  | 22   | 2   |
| CONTIG-058701 | 106 | 12  | 7  | 3    | 0   |

|               |     |    |    |     |    |
|---------------|-----|----|----|-----|----|
| CONTIG-058703 | 74  | 9  | 8  | 10  | 0  |
| CONTIG-058704 | 136 | 12 | 5  | 87  | 0  |
| CONTIG-058705 | 60  | 24 | 2  | 33  | 0  |
| CONTIG-058707 | 62  | 4  | 9  | 0   | 0  |
| CONTIG-058708 | 154 | 7  | 7  | 24  | 0  |
| CONTIG-058709 | 160 | 8  | 24 | 28  | 2  |
| CONTIG-058710 | 213 | 18 | 24 | 102 | 0  |
| CONTIG-058711 | 70  | 7  | 6  | 15  | 0  |
| CONTIG-058712 | 578 | 8  | 2  | 124 | 0  |
| CONTIG-058713 | 85  | 8  | 3  | 21  | 0  |
| CONTIG-058714 | 145 | 13 | 5  | 67  | 0  |
| CONTIG-058715 | 191 | 6  | 6  | 15  | 0  |
| CONTIG-058716 | 139 | 4  | 2  | 20  | 0  |
| CONTIG-058717 | 89  | 7  | 8  | 18  | 0  |
| CONTIG-058718 | 799 | 29 | 24 | 559 | 27 |
| CONTIG-058719 | 93  | 9  | 5  | 30  | 0  |
| CONTIG-058720 | 172 | 9  | 18 | 59  | 0  |
| CONTIG-058721 | 115 | 8  | 0  | 24  | 0  |
| CONTIG-058722 | 231 | 7  | 0  | 66  | 0  |
| CONTIG-058723 | 382 | 12 | 57 | 71  | 0  |
| CONTIG-058724 | 704 | 12 | 22 | 140 | 8  |
| CONTIG-058725 | 192 | 25 | 47 | 173 | 0  |
| CONTIG-058726 | 157 | 3  | 2  | 2   | 0  |
| CONTIG-058727 | 71  | 4  | 2  | 8   | 0  |
| CONTIG-058728 | 71  | 23 | 29 | 27  | 0  |
| CONTIG-058729 | 311 | 8  | 20 | 53  | 0  |
| CONTIG-058730 | 86  | 8  | 0  | 23  | 0  |
| CONTIG-058732 | 71  | 3  | 3  | 3   | 0  |
| CONTIG-058733 | 192 | 9  | 3  | 33  | 0  |
| CONTIG-058734 | 97  | 4  | 0  | 11  | 0  |
| CONTIG-058735 | 236 | 8  | 2  | 47  | 0  |
| CONTIG-058736 | 153 | 7  | 16 | 19  | 0  |
| CONTIG-058738 | 279 | 9  | 0  | 50  | 0  |
| CONTIG-058739 | 136 | 6  | 0  | 28  | 0  |
| CONTIG-058742 | 93  | 7  | 0  | 8   | 0  |
| CONTIG-058743 | 96  | 6  | 14 | 13  | 0  |
| CONTIG-058744 | 108 | 44 | 6  | 194 | 2  |
| CONTIG-058745 | 60  | 4  | 8  | 0   | 0  |
| CONTIG-058746 | 60  | 4  | 6  | 0   | 0  |
| CONTIG-058747 | 191 | 8  | 24 | 38  | 0  |
| CONTIG-058748 | 73  | 5  | 2  | 12  | 0  |
| CONTIG-058750 | 51  | 28 | 3  | 83  | 0  |
| CONTIG-058751 | 190 | 7  | 2  | 43  | 0  |
| CONTIG-058752 | 146 | 8  | 6  | 34  | 0  |
| CONTIG-058753 | 115 | 5  | 2  | 14  | 0  |
| CONTIG-058754 | 130 | 7  | 9  | 12  | 0  |
| CONTIG-058755 | 99  | 4  | 4  | 2   | 0  |

|               |     |     |    |     |     |
|---------------|-----|-----|----|-----|-----|
| CONTIG-058756 | 340 | 22  | 15 | 392 | 0   |
| CONTIG-058757 | 160 | 11  | 7  | 44  | 4   |
| CONTIG-058759 | 109 | 7   | 0  | 27  | 0   |
| CONTIG-058760 | 89  | 7   | 20 | 5   | 0   |
| CONTIG-058761 | 98  | 17  | 5  | 30  | 0   |
| CONTIG-058762 | 98  | 28  | 15 | 103 | 0   |
| CONTIG-058763 | 549 | 50  | 12 | 0   | 453 |
| CONTIG-058764 | 391 | 12  | 2  | 0   | 39  |
| CONTIG-058765 | 360 | 18  | 27 | 131 | 2   |
| CONTIG-058766 | 213 | 7   | 8  | 32  | 0   |
| CONTIG-058769 | 84  | 3   | 0  | 4   | 0   |
| CONTIG-058770 | 84  | 5   | 0  | 10  | 0   |
| CONTIG-058771 | 201 | 10  | 30 | 54  | 0   |
| CONTIG-058772 | 189 | 10  | 12 | 58  | 2   |
| CONTIG-058773 | 145 | 6   | 3  | 19  | 0   |
| CONTIG-058774 | 75  | 11  | 8  | 0   | 0   |
| CONTIG-058775 | 73  | 2   | 0  | 7   | 0   |
| CONTIG-058776 | 174 | 6   | 9  | 40  | 0   |
| CONTIG-058777 | 63  | 6   | 17 | 3   | 0   |
| CONTIG-058778 | 351 | 10  | 11 | 123 | 2   |
| CONTIG-058779 | 402 | 6   | 6  | 16  | 0   |
| CONTIG-058781 | 65  | 7   | 2  | 5   | 0   |
| CONTIG-058782 | 70  | 6   | 15 | 3   | 0   |
| CONTIG-058783 | 78  | 3   | 2  | 4   | 0   |
| CONTIG-058784 | 82  | 7   | 4  | 16  | 0   |
| CONTIG-058785 | 203 | 96  | 6  | 576 | 19  |
| CONTIG-058786 | 40  | 8   | 4  | 14  | 0   |
| CONTIG-058787 | 427 | 10  | 19 | 163 | 0   |
| CONTIG-058788 | 150 | 5   | 9  | 10  | 0   |
| CONTIG-058789 | 59  | 2   | 3  | 0   | 0   |
| CONTIG-058790 | 397 | 10  | 24 | 117 | 0   |
| CONTIG-058791 | 212 | 8   | 4  | 53  | 2   |
| CONTIG-058792 | 106 | 57  | 0  | 72  | 0   |
| CONTIG-058793 | 105 | 5   | 3  | 0   | 0   |
| CONTIG-058794 | 64  | 4   | 4  | 2   | 0   |
| CONTIG-058795 | 235 | 10  | 24 | 64  | 0   |
| CONTIG-058796 | 225 | 9   | 15 | 54  | 0   |
| CONTIG-058797 | 142 | 3   | 0  | 13  | 0   |
| CONTIG-058798 | 80  | 5   | 2  | 11  | 0   |
| CONTIG-058799 | 225 | 17  | 2  | 135 | 0   |
| CONTIG-058800 | 122 | 10  | 4  | 18  | 0   |
| CONTIG-058801 | 59  | 117 | 6  | 330 | 0   |
| CONTIG-058802 | 138 | 7   | 14 | 41  | 0   |
| CONTIG-058803 | 357 | 11  | 19 | 103 | 2   |
| CONTIG-058804 | 87  | 6   | 2  | 9   | 0   |
| CONTIG-058805 | 80  | 4   | 0  | 5   | 0   |
| CONTIG-058808 | 66  | 6   | 2  | 6   | 0   |

|               |     |      |    |     |      |
|---------------|-----|------|----|-----|------|
| CONTIG-058809 | 116 | 8    | 14 | 0   | 0    |
| CONTIG-058810 | 83  | 8    | 13 | 12  | 0    |
| CONTIG-058811 | 60  | 8    | 4  | 19  | 0    |
| CONTIG-058812 | 245 | 20   | 55 | 76  | 6    |
| CONTIG-058813 | 81  | 15   | 3  | 52  | 0    |
| CONTIG-058814 | 322 | 12   | 20 | 113 | 0    |
| CONTIG-058815 | 76  | 7    | 9  | 9   | 0    |
| CONTIG-058816 | 82  | 6    | 0  | 13  | 0    |
| CONTIG-058817 | 344 | 15   | 23 | 136 | 4    |
| CONTIG-058818 | 331 | 7    | 16 | 48  | 0    |
| CONTIG-058819 | 233 | 6    | 3  | 0   | 0    |
| CONTIG-058820 | 337 | 11   | 11 | 4   | 30   |
| CONTIG-058821 | 99  | 5    | 13 | 7   | 0    |
| CONTIG-058823 | 92  | 5    | 21 | 2   | 0    |
| CONTIG-058824 | 81  | 4    | 0  | 3   | 0    |
| CONTIG-058825 | 422 | 9    | 5  | 108 | 0    |
| CONTIG-058826 | 104 | 6    | 3  | 16  | 0    |
| CONTIG-058827 | 231 | 5    | 6  | 20  | 0    |
| CONTIG-058828 | 62  | 12   | 6  | 7   | 2    |
| CONTIG-058829 | 216 | 10   | 16 | 99  | 0    |
| CONTIG-058830 | 153 | 8    | 14 | 35  | 0    |
| CONTIG-058831 | 67  | 9    | 3  | 0   | 0    |
| CONTIG-058832 | 71  | 249  | 3  | 0   | 99   |
| CONTIG-058833 | 98  | 43   | 7  | 179 | 2    |
| CONTIG-058834 | 85  | 1056 | 0  | 0   | 1348 |
| CONTIG-058835 | 64  | 3    | 3  | 0   | 0    |
| CONTIG-058836 | 61  | 6    | 4  | 8   | 0    |
| CONTIG-058837 | 65  | 3    | 3  | 2   | 0    |
| CONTIG-058838 | 374 | 13   | 2  | 145 | 2    |
| CONTIG-058841 | 141 | 35   | 8  | 198 | 2    |
| CONTIG-058842 | 186 | 11   | 28 | 4   | 0    |
| CONTIG-058843 | 148 | 8    | 2  | 33  | 0    |
| CONTIG-058844 | 119 | 12   | 0  | 55  | 0    |
| CONTIG-058845 | 223 | 8    | 8  | 51  | 0    |
| CONTIG-058846 | 93  | 10   | 0  | 36  | 0    |
| CONTIG-058847 | 90  | 4    | 2  | 9   | 0    |
| CONTIG-058848 | 357 | 14   | 19 | 125 | 0    |
| CONTIG-058849 | 227 | 4    | 5  | 17  | 0    |
| CONTIG-058850 | 60  | 3    | 4  | 0   | 0    |
| CONTIG-058854 | 64  | 6    | 0  | 4   | 0    |
| CONTIG-058855 | 83  | 3    | 12 | 0   | 0    |
| CONTIG-058856 | 100 | 7    | 8  | 13  | 0    |
| CONTIG-058857 | 95  | 9    | 27 | 13  | 0    |
| CONTIG-058858 | 72  | 4    | 0  | 5   | 0    |
| CONTIG-058859 | 118 | 6    | 3  | 27  | 0    |
| CONTIG-058860 | 110 | 25   | 14 | 94  | 0    |
| CONTIG-058861 | 85  | 6    | 6  | 17  | 0    |

|               |     |     |    |     |    |
|---------------|-----|-----|----|-----|----|
| CONTIG-058862 | 74  | 5   | 6  | 6   | 0  |
| CONTIG-058863 | 86  | 159 | 70 | 588 | 4  |
| CONTIG-058864 | 88  | 5   | 5  | 13  | 0  |
| CONTIG-058865 | 189 | 9   | 15 | 60  | 0  |
| CONTIG-058866 | 87  | 8   | 5  | 26  | 0  |
| CONTIG-058867 | 80  | 5   | 0  | 13  | 0  |
| CONTIG-058868 | 110 | 13  | 8  | 33  | 0  |
| CONTIG-058869 | 201 | 9   | 10 | 69  | 0  |
| CONTIG-058872 | 256 | 10  | 32 | 66  | 0  |
| CONTIG-058874 | 126 | 11  | 5  | 42  | 0  |
| CONTIG-058875 | 291 | 6   | 25 | 16  | 0  |
| CONTIG-058876 | 71  | 19  | 90 | 7   | 0  |
| CONTIG-058877 | 194 | 13  | 52 | 62  | 0  |
| CONTIG-058878 | 97  | 6   | 2  | 6   | 0  |
| CONTIG-058879 | 68  | 4   | 3  | 11  | 0  |
| CONTIG-058880 | 258 | 7   | 8  | 50  | 0  |
| CONTIG-058881 | 71  | 5   | 0  | 11  | 0  |
| CONTIG-058883 | 59  | 5   | 3  | 14  | 0  |
| CONTIG-058884 | 283 | 9   | 2  | 0   | 10 |
| CONTIG-058885 | 532 | 13  | 25 | 265 | 0  |
| CONTIG-058886 | 68  | 3   | 3  | 4   | 0  |
| CONTIG-058887 | 91  | 3   | 3  | 2   | 0  |
| CONTIG-058888 | 92  | 10  | 47 | 19  | 0  |
| CONTIG-058889 | 136 | 7   | 2  | 40  | 0  |
| CONTIG-058890 | 66  | 8   | 5  | 18  | 0  |
| CONTIG-058892 | 116 | 9   | 6  | 24  | 2  |
| CONTIG-058893 | 106 | 27  | 22 | 119 | 0  |
| CONTIG-058894 | 86  | 5   | 0  | 10  | 0  |
| CONTIG-058895 | 900 | 15  | 4  | 111 | 0  |
| CONTIG-058896 | 118 | 58  | 46 | 84  | 8  |
| CONTIG-058897 | 213 | 8   | 4  | 39  | 0  |
| CONTIG-058898 | 63  | 8   | 8  | 10  | 0  |
| CONTIG-058899 | 147 | 4   | 20 | 2   | 0  |
| CONTIG-058903 | 67  | 3   | 7  | 2   | 0  |
| CONTIG-058904 | 78  | 5   | 6  | 5   | 0  |
| CONTIG-058905 | 70  | 3   | 0  | 0   | 0  |
| CONTIG-058906 | 85  | 6   | 5  | 13  | 0  |
| CONTIG-058907 | 170 | 7   | 14 | 49  | 0  |
| CONTIG-058910 | 171 | 6   | 9  | 29  | 0  |
| CONTIG-058911 | 155 | 3   | 2  | 14  | 0  |
| CONTIG-058912 | 73  | 15  | 8  | 4   | 0  |
| CONTIG-058913 | 303 | 10  | 11 | 113 | 2  |
| CONTIG-058914 | 277 | 9   | 35 | 55  | 0  |
| CONTIG-058915 | 58  | 10  | 13 | 11  | 0  |
| CONTIG-058916 | 235 | 8   | 6  | 36  | 0  |
| CONTIG-058917 | 89  | 32  | 48 | 61  | 4  |
| CONTIG-058918 | 98  | 3   | 5  | 12  | 0  |

|               |     |     |     |      |    |
|---------------|-----|-----|-----|------|----|
| CONTIG-058919 | 562 | 10  | 9   | 131  | 0  |
| CONTIG-058920 | 75  | 6   | 0   | 14   | 0  |
| CONTIG-058921 | 128 | 13  | 20  | 48   | 0  |
| CONTIG-058922 | 77  | 12  | 25  | 5    | 0  |
| CONTIG-058923 | 122 | 9   | 18  | 2    | 0  |
| CONTIG-058924 | 151 | 6   | 9   | 8    | 0  |
| CONTIG-058925 | 257 | 6   | 0   | 41   | 0  |
| CONTIG-058926 | 151 | 14  | 47  | 67   | 0  |
| CONTIG-058927 | 187 | 20  | 32  | 110  | 0  |
| CONTIG-058930 | 228 | 19  | 20  | 208  | 0  |
| CONTIG-058931 | 84  | 4   | 5   | 4    | 0  |
| CONTIG-058932 | 87  | 12  | 10  | 30   | 0  |
| CONTIG-058933 | 90  | 5   | 10  | 7    | 0  |
| CONTIG-058934 | 73  | 770 | 2   | 2208 | 0  |
| CONTIG-058936 | 274 | 15  | 7   | 150  | 2  |
| CONTIG-058939 | 147 | 8   | 8   | 47   | 0  |
| CONTIG-058940 | 85  | 107 | 320 | 11   | 0  |
| CONTIG-058941 | 84  | 7   | 0   | 34   | 0  |
| CONTIG-058942 | 65  | 7   | 2   | 21   | 0  |
| CONTIG-058944 | 56  | 40  | 7   | 4    | 0  |
| CONTIG-058945 | 136 | 5   | 4   | 18   | 0  |
| CONTIG-058946 | 367 | 11  | 0   | 88   | 2  |
| CONTIG-058947 | 230 | 8   | 4   | 44   | 0  |
| CONTIG-058948 | 97  | 7   | 10  | 17   | 0  |
| CONTIG-058949 | 140 | 33  | 8   | 223  | 0  |
| CONTIG-058950 | 235 | 13  | 37  | 92   | 2  |
| CONTIG-058951 | 82  | 10  | 0   | 46   | 0  |
| CONTIG-058952 | 85  | 3   | 3   | 4    | 0  |
| CONTIG-058953 | 380 | 13  | 23  | 203  | 0  |
| CONTIG-058954 | 114 | 16  | 53  | 8    | 0  |
| CONTIG-058955 | 105 | 53  | 21  | 147  | 0  |
| CONTIG-058956 | 175 | 11  | 28  | 54   | 0  |
| CONTIG-058957 | 404 | 24  | 16  | 420  | 14 |
| CONTIG-058958 | 97  | 8   | 3   | 12   | 0  |
| CONTIG-058959 | 144 | 12  | 6   | 42   | 0  |
| CONTIG-058960 | 109 | 3   | 0   | 9    | 0  |
| CONTIG-058961 | 70  | 12  | 4   | 27   | 0  |
| CONTIG-058962 | 63  | 17  | 7   | 7    | 0  |
| CONTIG-058963 | 186 | 5   | 6   | 22   | 0  |
| CONTIG-058964 | 249 | 8   | 2   | 50   | 0  |
| CONTIG-058965 | 58  | 6   | 2   | 7    | 0  |
| CONTIG-058966 | 201 | 5   | 3   | 16   | 0  |
| CONTIG-058967 | 120 | 8   | 14  | 28   | 0  |
| CONTIG-058968 | 76  | 6   | 8   | 9    | 0  |
| CONTIG-058969 | 90  | 8   | 0   | 23   | 2  |
| CONTIG-058971 | 60  | 5   | 2   | 0    | 2  |
| CONTIG-058972 | 97  | 10  | 8   | 38   | 0  |



|               |     |    |    |      |    |
|---------------|-----|----|----|------|----|
| CONTIG-058973 | 199 | 9  | 0  | 31   | 0  |
| CONTIG-058974 | 171 | 11 | 2  | 0    | 9  |
| CONTIG-058975 | 276 | 7  | 5  | 68   | 0  |
| CONTIG-058976 | 84  | 11 | 6  | 23   | 2  |
| CONTIG-058977 | 245 | 6  | 26 | 37   | 2  |
| CONTIG-058978 | 205 | 9  | 0  | 0    | 6  |
| CONTIG-058979 | 69  | 5  | 8  | 6    | 0  |
| CONTIG-058980 | 392 | 10 | 0  | 0    | 13 |
| CONTIG-058981 | 351 | 14 | 2  | 53   | 0  |
| CONTIG-058982 | 94  | 13 | 19 | 0    | 0  |
| CONTIG-058983 | 206 | 7  | 3  | 61   | 0  |
| CONTIG-058984 | 81  | 5  | 6  | 0    | 0  |
| CONTIG-058986 | 101 | 6  | 2  | 17   | 0  |
| CONTIG-058987 | 67  | 13 | 3  | 0    | 0  |
| CONTIG-058988 | 166 | 15 | 47 | 95   | 0  |
| CONTIG-058989 | 100 | 15 | 11 | 9    | 0  |
| CONTIG-058990 | 80  | 8  | 14 | 14   | 0  |
| CONTIG-058993 | 567 | 78 | 21 | 2357 | 0  |
| CONTIG-058994 | 199 | 6  | 7  | 23   | 0  |
| CONTIG-058996 | 184 | 7  | 9  | 32   | 0  |
| CONTIG-058997 | 373 | 8  | 23 | 110  | 0  |
| CONTIG-058998 | 90  | 10 | 0  | 4    | 0  |
| CONTIG-058999 | 127 | 9  | 0  | 12   | 0  |
| CONTIG-059000 | 72  | 3  | 3  | 5    | 0  |
| CONTIG-059001 | 411 | 15 | 31 | 203  | 2  |
| CONTIG-059010 | 77  | 14 | 11 | 60   | 0  |
| CONTIG-059011 | 537 | 15 | 3  | 0    | 64 |
| CONTIG-059012 | 322 | 14 | 16 | 105  | 2  |
| CONTIG-059013 | 192 | 7  | 23 | 43   | 0  |
| CONTIG-059014 | 56  | 15 | 3  | 31   | 0  |
| CONTIG-059015 | 107 | 11 | 6  | 49   | 0  |
| CONTIG-059016 | 113 | 5  | 10 | 15   | 0  |
| CONTIG-059017 | 58  | 8  | 4  | 15   | 0  |
| CONTIG-059018 | 113 | 5  | 0  | 13   | 0  |
| CONTIG-059019 | 283 | 9  | 13 | 73   | 0  |
| CONTIG-059020 | 168 | 10 | 5  | 65   | 0  |
| CONTIG-059021 | 102 | 7  | 0  | 21   | 0  |
| CONTIG-059023 | 76  | 3  | 2  | 10   | 0  |
| CONTIG-059024 | 125 | 8  | 5  | 29   | 0  |
| CONTIG-059025 | 116 | 8  | 32 | 21   | 0  |
| CONTIG-059026 | 177 | 11 | 7  | 76   | 0  |
| CONTIG-059027 | 89  | 2  | 2  | 2    | 0  |
| CONTIG-059028 | 147 | 9  | 2  | 68   | 0  |
| CONTIG-059029 | 68  | 4  | 5  | 4    | 0  |
| CONTIG-059030 | 365 | 31 | 25 | 394  | 14 |
| CONTIG-059031 | 201 | 8  | 18 | 55   | 0  |
| CONTIG-059032 | 70  | 10 | 9  | 25   | 0  |

|               |     |     |    |     |    |
|---------------|-----|-----|----|-----|----|
| CONTIG-059034 | 58  | 117 | 37 | 151 | 2  |
| CONTIG-059035 | 229 | 15  | 11 | 130 | 0  |
| CONTIG-059036 | 120 | 12  | 2  | 35  | 0  |
| CONTIG-059045 | 157 | 13  | 13 | 22  | 2  |
| CONTIG-059046 | 485 | 9   | 4  | 155 | 0  |
| CONTIG-059047 | 110 | 5   | 5  | 9   | 0  |
| CONTIG-059048 | 124 | 5   | 2  | 29  | 0  |
| CONTIG-059049 | 112 | 6   | 11 | 26  | 0  |
| CONTIG-059050 | 78  | 6   | 7  | 11  | 0  |
| CONTIG-059051 | 204 | 7   | 17 | 34  | 2  |
| CONTIG-059052 | 102 | 22  | 7  | 70  | 6  |
| CONTIG-059053 | 258 | 9   | 3  | 78  | 6  |
| CONTIG-059054 | 74  | 12  | 6  | 25  | 0  |
| CONTIG-059055 | 158 | 4   | 0  | 13  | 0  |
| CONTIG-059056 | 225 | 6   | 6  | 8   | 0  |
| CONTIG-059057 | 66  | 6   | 0  | 11  | 0  |
| CONTIG-059058 | 97  | 4   | 25 | 4   | 0  |
| CONTIG-059059 | 85  | 5   | 2  | 17  | 0  |
| CONTIG-059060 | 167 | 6   | 3  | 23  | 0  |
| CONTIG-059061 | 374 | 13  | 41 | 119 | 0  |
| CONTIG-059062 | 98  | 31  | 21 | 98  | 6  |
| CONTIG-059064 | 61  | 4   | 2  | 3   | 0  |
| CONTIG-059065 | 347 | 11  | 9  | 77  | 2  |
| CONTIG-059066 | 244 | 12  | 5  | 0   | 0  |
| CONTIG-059067 | 332 | 12  | 4  | 126 | 0  |
| CONTIG-059068 | 69  | 11  | 2  | 23  | 0  |
| CONTIG-059069 | 63  | 5   | 0  | 6   | 0  |
| CONTIG-059070 | 88  | 30  | 12 | 118 | 0  |
| CONTIG-059071 | 53  | 12  | 21 | 6   | 0  |
| CONTIG-059072 | 129 | 11  | 13 | 39  | 2  |
| CONTIG-059073 | 73  | 5   | 4  | 16  | 0  |
| CONTIG-059074 | 290 | 7   | 4  | 58  | 0  |
| CONTIG-059075 | 218 | 12  | 15 | 77  | 0  |
| CONTIG-059076 | 347 | 9   | 23 | 89  | 0  |
| CONTIG-059077 | 57  | 27  | 10 | 24  | 0  |
| CONTIG-059078 | 106 | 16  | 4  | 29  | 0  |
| CONTIG-059079 | 203 | 7   | 14 | 17  | 0  |
| CONTIG-059080 | 114 | 4   | 5  | 7   | 0  |
| CONTIG-059081 | 143 | 7   | 7  | 25  | 0  |
| CONTIG-059082 | 98  | 4   | 0  | 6   | 0  |
| CONTIG-059083 | 208 | 5   | 0  | 27  | 0  |
| CONTIG-059084 | 68  | 9   | 10 | 12  | 0  |
| CONTIG-059087 | 326 | 9   | 58 | 66  | 0  |
| CONTIG-059088 | 122 | 7   | 0  | 10  | 2  |
| CONTIG-059089 | 164 | 143 | 4  | 2   | 8  |
| CONTIG-059090 | 85  | 4   | 4  | 0   | 0  |
| CONTIG-059091 | 266 | 9   | 3  | 0   | 14 |

|               |     |     |    |     |     |
|---------------|-----|-----|----|-----|-----|
| CONTIG-059093 | 248 | 7   | 14 | 20  | 2   |
| CONTIG-059094 | 60  | 6   | 8  | 6   | 0   |
| CONTIG-059100 | 69  | 4   | 18 | 2   | 0   |
| CONTIG-059101 | 86  | 3   | 5  | 6   | 0   |
| CONTIG-059103 | 165 | 14  | 4  | 116 | 0   |
| CONTIG-059104 | 102 | 32  | 30 | 23  | 2   |
| CONTIG-059105 | 154 | 10  | 15 | 49  | 0   |
| CONTIG-059106 | 37  | 256 | 6  | 0   | 55  |
| CONTIG-059107 | 66  | 261 | 4  | 0   | 145 |
| CONTIG-059108 | 92  | 4   | 11 | 4   | 0   |
| CONTIG-059109 | 333 | 10  | 8  | 120 | 2   |
| CONTIG-059110 | 124 | 6   | 12 | 22  | 0   |
| CONTIG-059111 | 72  | 3   | 0  | 5   | 0   |
| CONTIG-059112 | 101 | 12  | 0  | 46  | 0   |
| CONTIG-059113 | 96  | 14  | 28 | 43  | 0   |
| CONTIG-059114 | 453 | 22  | 30 | 410 | 2   |
| CONTIG-059115 | 144 | 6   | 2  | 21  | 0   |
| CONTIG-059116 | 54  | 10  | 0  | 11  | 0   |
| CONTIG-059117 | 75  | 13  | 11 | 40  | 0   |
| CONTIG-059118 | 93  | 6   | 2  | 10  | 0   |
| CONTIG-059119 | 132 | 13  | 0  | 72  | 0   |
| CONTIG-059120 | 69  | 4   | 2  | 0   | 0   |
| CONTIG-059121 | 128 | 5   | 5  | 29  | 0   |
| CONTIG-059122 | 433 | 12  | 31 | 164 | 0   |
| CONTIG-059123 | 91  | 6   | 8  | 9   | 0   |
| CONTIG-059124 | 102 | 10  | 6  | 0   | 0   |
| CONTIG-059127 | 92  | 6   | 5  | 16  | 0   |
| CONTIG-059128 | 58  | 2   | 2  | 3   | 0   |
| CONTIG-059129 | 282 | 35  | 20 | 243 | 48  |
| CONTIG-059131 | 88  | 3   | 0  | 4   | 0   |
| CONTIG-059132 | 148 | 3   | 7  | 6   | 0   |
| CONTIG-059133 | 79  | 10  | 36 | 0   | 0   |
| CONTIG-059134 | 119 | 10  | 19 | 46  | 0   |
| CONTIG-059135 | 128 | 6   | 3  | 32  | 0   |
| CONTIG-059136 | 272 | 10  | 0  | 107 | 0   |
| CONTIG-059137 | 332 | 9   | 30 | 108 | 0   |
| CONTIG-059138 | 335 | 59  | 2  | 0   | 166 |
| CONTIG-059139 | 204 | 17  | 0  | 0   | 18  |
| CONTIG-059140 | 148 | 5   | 2  | 39  | 0   |
| CONTIG-059141 | 82  | 4   | 4  | 8   | 0   |
| CONTIG-059142 | 113 | 45  | 2  | 197 | 3   |
| CONTIG-059143 | 63  | 4   | 0  | 5   | 0   |
| CONTIG-059144 | 82  | 25  | 0  | 29  | 0   |
| CONTIG-059145 | 46  | 73  | 7  | 64  | 0   |
| CONTIG-059146 | 145 | 7   | 11 | 6   | 0   |
| CONTIG-059147 | 159 | 5   | 20 | 22  | 0   |
| CONTIG-059148 | 217 | 5   | 5  | 31  | 0   |

|               |     |    |    |     |   |
|---------------|-----|----|----|-----|---|
| CONTIG-059150 | 89  | 23 | 13 | 57  | 0 |
| CONTIG-059151 | 311 | 11 | 19 | 39  | 2 |
| CONTIG-059152 | 202 | 4  | 5  | 24  | 0 |
| CONTIG-059153 | 155 | 4  | 8  | 16  | 0 |
| CONTIG-059154 | 724 | 14 | 5  | 395 | 0 |
| CONTIG-059155 | 79  | 5  | 5  | 11  | 0 |
| CONTIG-059156 | 125 | 4  | 3  | 9   | 0 |
| CONTIG-059157 | 70  | 3  | 0  | 0   | 0 |
| CONTIG-059158 | 144 | 3  | 2  | 14  | 0 |
| CONTIG-059159 | 143 | 6  | 12 | 16  | 0 |
| CONTIG-059160 | 128 | 7  | 3  | 26  | 0 |
| CONTIG-059161 | 381 | 12 | 8  | 166 | 6 |
| CONTIG-059162 | 94  | 2  | 4  | 5   | 0 |
| CONTIG-059163 | 62  | 4  | 6  | 5   | 0 |
| CONTIG-059164 | 62  | 10 | 0  | 15  | 0 |
| CONTIG-059168 | 77  | 9  | 4  | 20  | 0 |
| CONTIG-059169 | 106 | 7  | 3  | 22  | 2 |
| CONTIG-059170 | 281 | 12 | 22 | 6   | 2 |
| CONTIG-059171 | 282 | 9  | 5  | 82  | 0 |
| CONTIG-059172 | 228 | 11 | 40 | 73  | 0 |
| CONTIG-059173 | 91  | 11 | 30 | 26  | 0 |
| CONTIG-059174 | 157 | 11 | 16 | 67  | 0 |
| CONTIG-059176 | 80  | 7  | 3  | 27  | 0 |
| CONTIG-059177 | 130 | 6  | 10 | 26  | 0 |
| CONTIG-059178 | 178 | 10 | 42 | 49  | 0 |
| CONTIG-059179 | 172 | 7  | 9  | 35  | 0 |
| CONTIG-059180 | 150 | 9  | 32 | 20  | 0 |
| CONTIG-059181 | 58  | 2  | 0  | 0   | 0 |
| CONTIG-059182 | 310 | 8  | 17 | 70  | 0 |
| CONTIG-059183 | 196 | 30 | 6  | 341 | 0 |
| CONTIG-059184 | 196 | 12 | 13 | 131 | 0 |
| CONTIG-059186 | 448 | 9  | 24 | 75  | 0 |
| CONTIG-059187 | 161 | 4  | 2  | 4   | 0 |
| CONTIG-059188 | 146 | 5  | 2  | 24  | 0 |
| CONTIG-059189 | 66  | 6  | 3  | 8   | 0 |
| CONTIG-059190 | 504 | 30 | 56 | 480 | 7 |
| CONTIG-059191 | 191 | 8  | 3  | 63  | 2 |
| CONTIG-059192 | 88  | 5  | 3  | 16  | 0 |
| CONTIG-059193 | 116 | 6  | 10 | 8   | 0 |
| CONTIG-059194 | 91  | 3  | 4  | 2   | 0 |
| CONTIG-059196 | 179 | 12 | 15 | 60  | 0 |
| CONTIG-059197 | 246 | 9  | 10 | 20  | 0 |
| CONTIG-059198 | 191 | 10 | 10 | 46  | 0 |
| CONTIG-059199 | 65  | 3  | 8  | 0   | 0 |
| CONTIG-059200 | 182 | 7  | 17 | 37  | 2 |
| CONTIG-059201 | 63  | 10 | 6  | 13  | 0 |
| CONTIG-059202 | 188 | 6  | 2  | 36  | 0 |

|               |     |     |    |     |   |
|---------------|-----|-----|----|-----|---|
| CONTIG-059203 | 71  | 4   | 9  | 6   | 0 |
| CONTIG-059204 | 336 | 7   | 19 | 46  | 0 |
| CONTIG-059205 | 106 | 5   | 2  | 13  | 0 |
| CONTIG-059206 | 90  | 6   | 4  | 20  | 0 |
| CONTIG-059207 | 143 | 14  | 20 | 52  | 0 |
| CONTIG-059212 | 85  | 6   | 2  | 10  | 0 |
| CONTIG-059215 | 186 | 6   | 6  | 43  | 0 |
| CONTIG-059216 | 113 | 23  | 25 | 46  | 0 |
| CONTIG-059217 | 68  | 5   | 3  | 5   | 0 |
| CONTIG-059218 | 168 | 6   | 6  | 16  | 0 |
| CONTIG-059219 | 85  | 12  | 28 | 26  | 0 |
| CONTIG-059220 | 119 | 8   | 7  | 33  | 0 |
| CONTIG-059221 | 58  | 9   | 29 | 0   | 0 |
| CONTIG-059222 | 109 | 6   | 6  | 13  | 0 |
| CONTIG-059223 | 69  | 27  | 25 | 2   | 0 |
| CONTIG-059224 | 551 | 15  | 23 | 258 | 2 |
| CONTIG-059225 | 98  | 10  | 8  | 15  | 0 |
| CONTIG-059228 | 83  | 5   | 14 | 4   | 0 |
| CONTIG-059229 | 242 | 6   | 5  | 4   | 0 |
| CONTIG-059231 | 43  | 170 | 20 | 49  | 0 |
| CONTIG-059232 | 67  | 2   | 0  | 0   | 0 |
| CONTIG-059233 | 64  | 8   | 0  | 0   | 0 |
| CONTIG-059234 | 203 | 11  | 8  | 64  | 0 |
| CONTIG-059235 | 132 | 6   | 11 | 17  | 0 |
| CONTIG-059236 | 147 | 5   | 11 | 11  | 0 |
| CONTIG-059237 | 82  | 4   | 0  | 2   | 0 |
| CONTIG-059238 | 67  | 5   | 2  | 10  | 0 |
| CONTIG-059239 | 74  | 5   | 0  | 8   | 0 |
| CONTIG-059240 | 143 | 5   | 5  | 25  | 0 |
| CONTIG-059241 | 66  | 6   | 7  | 3   | 0 |
| CONTIG-059242 | 74  | 18  | 17 | 35  | 0 |
| CONTIG-059243 | 234 | 6   | 4  | 36  | 2 |
| CONTIG-059244 | 77  | 3   | 0  | 11  | 0 |
| CONTIG-059245 | 102 | 9   | 2  | 37  | 0 |
| CONTIG-059247 | 118 | 18  | 6  | 54  | 2 |
| CONTIG-059248 | 127 | 7   | 5  | 8   | 0 |
| CONTIG-059249 | 67  | 4   | 2  | 6   | 0 |
| CONTIG-059251 | 96  | 6   | 4  | 18  | 0 |
| CONTIG-059252 | 71  | 9   | 3  | 20  | 0 |
| CONTIG-059255 | 215 | 11  | 25 | 59  | 2 |
| CONTIG-059256 | 84  | 7   | 14 | 13  | 0 |
| CONTIG-059257 | 60  | 7   | 5  | 4   | 0 |
| CONTIG-059258 | 93  | 11  | 4  | 13  | 0 |
| CONTIG-059259 | 378 | 7   | 9  | 65  | 2 |
| CONTIG-059260 | 302 | 7   | 11 | 23  | 0 |
| CONTIG-059261 | 70  | 6   | 3  | 7   | 0 |
| CONTIG-059265 | 74  | 8   | 6  | 20  | 0 |

|               |     |    |    |     |   |
|---------------|-----|----|----|-----|---|
| CONTIG-059266 | 67  | 10 | 2  | 21  | 0 |
| CONTIG-059267 | 187 | 19 | 13 | 123 | 2 |
| CONTIG-059268 | 185 | 4  | 7  | 20  | 0 |
| CONTIG-059269 | 139 | 8  | 8  | 15  | 0 |
| CONTIG-059270 | 276 | 6  | 4  | 0   | 0 |
| CONTIG-059271 | 93  | 8  | 6  | 25  | 0 |
| CONTIG-059272 | 132 | 5  | 18 | 2   | 2 |
| CONTIG-059273 | 60  | 14 | 27 | 13  | 0 |
| CONTIG-059274 | 408 | 8  | 0  | 23  | 2 |
| CONTIG-059275 | 166 | 4  | 0  | 18  | 0 |
| CONTIG-059276 | 209 | 15 | 22 | 51  | 8 |
| CONTIG-059277 | 58  | 4  | 3  | 0   | 0 |
| CONTIG-059278 | 58  | 4  | 8  | 0   | 0 |
| CONTIG-059279 | 95  | 10 | 16 | 10  | 0 |
| CONTIG-059280 | 266 | 18 | 4  | 123 | 2 |
| CONTIG-059281 | 97  | 7  | 2  | 0   | 0 |
| CONTIG-059282 | 225 | 15 | 4  | 154 | 0 |
| CONTIG-059284 | 77  | 4  | 3  | 10  | 0 |
| CONTIG-059285 | 65  | 7  | 2  | 17  | 0 |
| CONTIG-059286 | 96  | 4  | 7  | 10  | 0 |
| CONTIG-059287 | 326 | 10 | 6  | 136 | 0 |
| CONTIG-059288 | 280 | 10 | 4  | 30  | 0 |
| CONTIG-059289 | 75  | 5  | 8  | 0   | 0 |
| CONTIG-059290 | 413 | 10 | 6  | 122 | 0 |
| CONTIG-059291 | 442 | 11 | 12 | 169 | 0 |
| CONTIG-059292 | 165 | 5  | 11 | 19  | 0 |
| CONTIG-059294 | 172 | 9  | 11 | 21  | 0 |
| CONTIG-059300 | 78  | 2  | 0  | 5   | 0 |
| CONTIG-059301 | 166 | 20 | 6  | 106 | 0 |
| CONTIG-059302 | 76  | 5  | 0  | 9   | 0 |
| CONTIG-059303 | 102 | 10 | 7  | 15  | 0 |
| CONTIG-059304 | 102 | 5  | 7  | 11  | 0 |
| CONTIG-059305 | 103 | 10 | 9  | 11  | 0 |
| CONTIG-059306 | 111 | 4  | 2  | 9   | 0 |
| CONTIG-059307 | 303 | 9  | 6  | 78  | 0 |
| CONTIG-059308 | 112 | 11 | 2  | 60  | 0 |
| CONTIG-059309 | 93  | 3  | 2  | 0   | 0 |
| CONTIG-059310 | 86  | 6  | 9  | 10  | 0 |
| CONTIG-059311 | 200 | 9  | 15 | 53  | 0 |
| CONTIG-059312 | 513 | 28 | 17 | 674 | 8 |
| CONTIG-059313 | 88  | 5  | 0  | 9   | 0 |
| CONTIG-059314 | 379 | 9  | 16 | 119 | 0 |
| CONTIG-059316 | 253 | 8  | 6  | 49  | 4 |
| CONTIG-059317 | 69  | 7  | 7  | 7   | 0 |
| CONTIG-059318 | 321 | 9  | 7  | 114 | 0 |
| CONTIG-059319 | 83  | 6  | 4  | 12  | 2 |
| CONTIG-059320 | 60  | 34 | 9  | 58  | 0 |

|               |     |     |    |     |   |
|---------------|-----|-----|----|-----|---|
| CONTIG-059321 | 316 | 8   | 14 | 109 | 0 |
| CONTIG-059322 | 340 | 5   | 16 | 37  | 0 |
| CONTIG-059324 | 111 | 5   | 5  | 12  | 0 |
| CONTIG-059325 | 106 | 14  | 30 | 6   | 0 |
| CONTIG-059326 | 111 | 16  | 6  | 56  | 0 |
| CONTIG-059330 | 160 | 99  | 68 | 163 | 6 |
| CONTIG-059331 | 72  | 8   | 2  | 21  | 0 |
| CONTIG-059332 | 223 | 11  | 3  | 0   | 4 |
| CONTIG-059333 | 97  | 4   | 0  | 9   | 0 |
| CONTIG-059334 | 83  | 11  | 4  | 0   | 9 |
| CONTIG-059335 | 110 | 4   | 7  | 6   | 0 |
| CONTIG-059336 | 192 | 6   | 2  | 41  | 0 |
| CONTIG-059339 | 49  | 25  | 14 | 40  | 0 |
| CONTIG-059340 | 156 | 20  | 23 | 25  | 0 |
| CONTIG-059342 | 95  | 9   | 8  | 22  | 2 |
| CONTIG-059343 | 143 | 6   | 0  | 16  | 0 |
| CONTIG-059344 | 157 | 14  | 7  | 74  | 0 |
| CONTIG-059345 | 143 | 5   | 5  | 5   | 0 |
| CONTIG-059346 | 270 | 7   | 16 | 24  | 3 |
| CONTIG-059347 | 138 | 11  | 2  | 71  | 0 |
| CONTIG-059349 | 429 | 10  | 4  | 25  | 0 |
| CONTIG-059350 | 96  | 6   | 16 | 15  | 0 |
| CONTIG-059351 | 109 | 2   | 0  | 2   | 0 |
| CONTIG-059354 | 108 | 16  | 36 | 3   | 0 |
| CONTIG-059359 | 345 | 15  | 37 | 141 | 6 |
| CONTIG-059360 | 349 | 14  | 21 | 30  | 0 |
| CONTIG-059361 | 137 | 22  | 17 | 79  | 2 |
| CONTIG-059362 | 157 | 10  | 13 | 26  | 0 |
| CONTIG-059363 | 193 | 17  | 19 | 132 | 0 |
| CONTIG-059364 | 316 | 8   | 32 | 77  | 0 |
| CONTIG-059365 | 170 | 5   | 0  | 24  | 0 |
| CONTIG-059366 | 80  | 7   | 4  | 27  | 0 |
| CONTIG-059367 | 77  | 10  | 9  | 14  | 0 |
| CONTIG-059369 | 108 | 7   | 25 | 7   | 0 |
| CONTIG-059371 | 61  | 5   | 0  | 0   | 0 |
| CONTIG-059372 | 184 | 13  | 8  | 72  | 0 |
| CONTIG-059373 | 101 | 5   | 4  | 4   | 0 |
| CONTIG-059374 | 53  | 126 | 9  | 183 | 2 |
| CONTIG-059375 | 324 | 29  | 39 | 502 | 0 |
| CONTIG-059376 | 320 | 9   | 6  | 82  | 2 |
| CONTIG-059377 | 87  | 6   | 2  | 11  | 0 |
| CONTIG-059378 | 347 | 12  | 26 | 120 | 0 |
| CONTIG-059379 | 375 | 11  | 19 | 37  | 2 |
| CONTIG-059385 | 87  | 6   | 7  | 2   | 0 |
| CONTIG-059386 | 330 | 9   | 16 | 36  | 4 |
| CONTIG-059387 | 68  | 3   | 0  | 0   | 0 |
| CONTIG-059388 | 112 | 15  | 15 | 23  | 2 |

|               |     |     |    |     |   |
|---------------|-----|-----|----|-----|---|
| CONTIG-059389 | 85  | 5   | 0  | 0   | 4 |
| CONTIG-059390 | 72  | 6   | 2  | 14  | 0 |
| CONTIG-059391 | 406 | 10  | 12 | 60  | 0 |
| CONTIG-059392 | 290 | 12  | 13 | 174 | 0 |
| CONTIG-059393 | 164 | 7   | 6  | 34  | 0 |
| CONTIG-059394 | 125 | 5   | 4  | 14  | 0 |
| CONTIG-059395 | 100 | 4   | 2  | 4   | 0 |
| CONTIG-059396 | 117 | 11  | 21 | 45  | 0 |
| CONTIG-059397 | 132 | 37  | 51 | 59  | 0 |
| CONTIG-059398 | 129 | 8   | 19 | 25  | 0 |
| CONTIG-059399 | 266 | 14  | 6  | 137 | 2 |
| CONTIG-059400 | 68  | 5   | 5  | 15  | 0 |
| CONTIG-059401 | 575 | 14  | 4  | 348 | 7 |
| CONTIG-059402 | 60  | 3   | 2  | 7   | 0 |
| CONTIG-059403 | 72  | 9   | 6  | 27  | 0 |
| CONTIG-059404 | 184 | 14  | 16 | 88  | 0 |
| CONTIG-059405 | 348 | 6   | 10 | 33  | 0 |
| CONTIG-059406 | 143 | 7   | 2  | 28  | 0 |
| CONTIG-059407 | 230 | 10  | 10 | 79  | 0 |
| CONTIG-059408 | 848 | 13  | 45 | 339 | 2 |
| CONTIG-059409 | 122 | 10  | 0  | 58  | 0 |
| CONTIG-059410 | 146 | 5   | 6  | 17  | 0 |
| CONTIG-059412 | 166 | 10  | 2  | 51  | 0 |
| CONTIG-059413 | 150 | 11  | 53 | 15  | 0 |
| CONTIG-059414 | 133 | 4   | 2  | 13  | 0 |
| CONTIG-059415 | 102 | 13  | 6  | 37  | 0 |
| CONTIG-059416 | 86  | 8   | 18 | 5   | 0 |
| CONTIG-059422 | 140 | 9   | 9  | 14  | 0 |
| CONTIG-059423 | 115 | 11  | 32 | 22  | 0 |
| CONTIG-059424 | 79  | 8   | 6  | 8   | 0 |
| CONTIG-059425 | 127 | 11  | 6  | 47  | 0 |
| CONTIG-059426 | 141 | 12  | 34 | 27  | 4 |
| CONTIG-059427 | 102 | 4   | 0  | 8   | 0 |
| CONTIG-059428 | 125 | 14  | 8  | 69  | 0 |
| CONTIG-059429 | 461 | 18  | 16 | 315 | 0 |
| CONTIG-059430 | 251 | 5   | 0  | 47  | 0 |
| CONTIG-059431 | 80  | 3   | 4  | 0   | 0 |
| CONTIG-059432 | 174 | 8   | 7  | 33  | 0 |
| CONTIG-059433 | 146 | 6   | 13 | 17  | 2 |
| CONTIG-059434 | 83  | 2   | 2  | 0   | 0 |
| CONTIG-059435 | 59  | 2   | 0  | 5   | 0 |
| CONTIG-059436 | 129 | 12  | 0  | 51  | 2 |
| CONTIG-059437 | 62  | 4   | 0  | 0   | 0 |
| CONTIG-059439 | 392 | 18  | 12 | 314 | 2 |
| CONTIG-059440 | 101 | 110 | 0  | 2   | 2 |
| CONTIG-059441 | 64  | 13  | 4  | 0   | 0 |
| CONTIG-059442 | 82  | 55  | 15 | 256 | 0 |



|               |     |    |    |     |     |
|---------------|-----|----|----|-----|-----|
| CONTIG-059444 | 78  | 4  | 3  | 10  | 0   |
| CONTIG-059445 | 246 | 6  | 9  | 28  | 0   |
| CONTIG-059446 | 66  | 4  | 0  | 0   | 0   |
| CONTIG-059447 | 141 | 12 | 3  | 79  | 0   |
| CONTIG-059448 | 179 | 6  | 2  | 22  | 0   |
| CONTIG-059449 | 102 | 3  | 5  | 3   | 0   |
| CONTIG-059450 | 128 | 5  | 9  | 24  | 0   |
| CONTIG-059451 | 76  | 10 | 18 | 8   | 0   |
| CONTIG-059452 | 65  | 8  | 2  | 8   | 0   |
| CONTIG-059453 | 68  | 38 | 30 | 67  | 3   |
| CONTIG-059455 | 79  | 3  | 16 | 2   | 0   |
| CONTIG-059456 | 60  | 5  | 6  | 0   | 0   |
| CONTIG-059460 | 139 | 30 | 11 | 53  | 6   |
| CONTIG-059461 | 100 | 4  | 0  | 6   | 0   |
| CONTIG-059462 | 127 | 34 | 10 | 100 | 6   |
| CONTIG-059465 | 131 | 5  | 2  | 15  | 0   |
| CONTIG-059467 | 210 | 12 | 12 | 118 | 0   |
| CONTIG-059468 | 131 | 8  | 2  | 21  | 0   |
| CONTIG-059471 | 87  | 8  | 2  | 42  | 0   |
| CONTIG-059472 | 473 | 14 | 18 | 47  | 24  |
| CONTIG-059473 | 72  | 8  | 6  | 21  | 0   |
| CONTIG-059474 | 188 | 13 | 4  | 50  | 8   |
| CONTIG-059475 | 90  | 9  | 7  | 40  | 0   |
| CONTIG-059476 | 71  | 7  | 15 | 0   | 0   |
| CONTIG-059478 | 84  | 15 | 0  | 33  | 0   |
| CONTIG-059479 | 492 | 10 | 14 | 53  | 0   |
| CONTIG-059480 | 155 | 10 | 4  | 0   | 10  |
| CONTIG-059481 | 163 | 13 | 9  | 94  | 0   |
| CONTIG-059482 | 105 | 11 | 3  | 22  | 0   |
| CONTIG-059483 | 167 | 5  | 0  | 26  | 0   |
| CONTIG-059484 | 125 | 17 | 28 | 71  | 0   |
| CONTIG-059485 | 102 | 12 | 16 | 40  | 0   |
| CONTIG-059486 | 62  | 6  | 12 | 2   | 2   |
| CONTIG-059487 | 142 | 9  | 12 | 20  | 0   |
| CONTIG-059488 | 89  | 10 | 2  | 23  | 0   |
| CONTIG-059489 | 158 | 12 | 10 | 65  | 0   |
| CONTIG-059490 | 204 | 15 | 32 | 87  | 2   |
| CONTIG-059491 | 95  | 4  | 10 | 10  | 0   |
| CONTIG-059492 | 65  | 6  | 4  | 14  | 0   |
| CONTIG-059493 | 696 | 15 | 2  | 0   | 118 |
| CONTIG-059494 | 115 | 9  | 4  | 19  | 0   |
| CONTIG-059495 | 184 | 14 | 0  | 0   | 13  |
| CONTIG-059496 | 78  | 4  | 9  | 10  | 0   |
| CONTIG-059498 | 280 | 14 | 33 | 155 | 0   |
| CONTIG-059499 | 260 | 8  | 2  | 56  | 0   |
| CONTIG-059500 | 462 | 15 | 19 | 228 | 34  |
| CONTIG-059501 | 238 | 10 | 0  | 73  | 0   |

|               |     |    |    |     |   |
|---------------|-----|----|----|-----|---|
| CONTIG-059502 | 86  | 8  | 11 | 2   | 2 |
| CONTIG-059504 | 91  | 5  | 12 | 18  | 0 |
| CONTIG-059505 | 207 | 13 | 18 | 122 | 0 |
| CONTIG-059506 | 79  | 11 | 25 | 10  | 0 |
| CONTIG-059507 | 67  | 2  | 2  | 0   | 0 |
| CONTIG-059511 | 64  | 6  | 5  | 16  | 0 |
| CONTIG-059512 | 59  | 3  | 2  | 4   | 0 |
| CONTIG-059513 | 170 | 9  | 5  | 49  | 0 |
| CONTIG-059514 | 210 | 13 | 10 | 60  | 0 |
| CONTIG-059515 | 135 | 10 | 9  | 32  | 0 |
| CONTIG-059516 | 100 | 8  | 7  | 37  | 0 |
| CONTIG-059517 | 153 | 7  | 5  | 24  | 0 |
| CONTIG-059519 | 111 | 8  | 29 | 23  | 0 |
| CONTIG-059520 | 288 | 6  | 5  | 44  | 0 |
| CONTIG-059521 | 227 | 14 | 5  | 89  | 0 |
| CONTIG-059522 | 59  | 13 | 0  | 18  | 3 |
| CONTIG-059523 | 85  | 7  | 3  | 28  | 0 |
| CONTIG-059524 | 462 | 13 | 43 | 124 | 0 |
| CONTIG-059525 | 243 | 13 | 6  | 68  | 0 |
| CONTIG-059526 | 68  | 4  | 2  | 7   | 0 |
| CONTIG-059527 | 288 | 7  | 27 | 38  | 0 |
| CONTIG-059528 | 85  | 7  | 3  | 13  | 0 |
| CONTIG-059529 | 93  | 7  | 0  | 21  | 0 |
| CONTIG-059530 | 68  | 7  | 8  | 12  | 0 |
| CONTIG-059531 | 161 | 9  | 4  | 60  | 0 |
| CONTIG-059532 | 195 | 14 | 16 | 78  | 0 |
| CONTIG-059533 | 75  | 8  | 2  | 22  | 0 |
| CONTIG-059534 | 245 | 11 | 5  | 89  | 4 |
| CONTIG-059535 | 128 | 4  | 12 | 6   | 0 |
| CONTIG-059536 | 205 | 5  | 0  | 25  | 0 |
| CONTIG-059537 | 158 | 12 | 32 | 53  | 2 |
| CONTIG-059538 | 102 | 9  | 4  | 15  | 0 |
| CONTIG-059539 | 182 | 7  | 8  | 30  | 0 |
| CONTIG-059540 | 131 | 7  | 8  | 33  | 0 |
| CONTIG-059541 | 144 | 5  | 6  | 22  | 0 |
| CONTIG-059542 | 185 | 9  | 40 | 38  | 2 |
| CONTIG-059543 | 131 | 10 | 10 | 24  | 0 |
| CONTIG-059544 | 116 | 7  | 4  | 30  | 0 |
| CONTIG-059545 | 397 | 12 | 18 | 69  | 0 |
| CONTIG-059546 | 163 | 22 | 14 | 145 | 0 |
| CONTIG-059547 | 312 | 9  | 37 | 54  | 0 |
| CONTIG-059548 | 76  | 17 | 17 | 27  | 0 |
| CONTIG-059549 | 177 | 12 | 11 | 99  | 0 |
| CONTIG-059551 | 157 | 11 | 3  | 87  | 0 |
| CONTIG-059552 | 66  | 5  | 9  | 2   | 0 |
| CONTIG-059553 | 88  | 13 | 7  | 16  | 0 |
| CONTIG-059554 | 298 | 8  | 9  | 4   | 0 |

|               |     |     |     |     |   |
|---------------|-----|-----|-----|-----|---|
| CONTIG-059557 | 174 | 5   | 16  | 34  | 0 |
| CONTIG-059558 | 218 | 22  | 8   | 236 | 0 |
| CONTIG-059560 | 62  | 8   | 2   | 0   | 0 |
| CONTIG-059561 | 141 | 11  | 41  | 36  | 0 |
| CONTIG-059562 | 72  | 6   | 5   | 10  | 0 |
| CONTIG-059563 | 66  | 3   | 0   | 5   | 0 |
| CONTIG-059564 | 140 | 6   | 2   | 22  | 4 |
| CONTIG-059565 | 72  | 4   | 12  | 5   | 0 |
| CONTIG-059566 | 128 | 5   | 12  | 2   | 0 |
| CONTIG-059567 | 121 | 15  | 15  | 69  | 0 |
| CONTIG-059568 | 382 | 12  | 24  | 225 | 0 |
| CONTIG-059569 | 138 | 8   | 2   | 20  | 0 |
| CONTIG-059570 | 63  | 4   | 4   | 2   | 0 |
| CONTIG-059571 | 199 | 8   | 8   | 43  | 0 |
| CONTIG-059573 | 58  | 4   | 3   | 2   | 0 |
| CONTIG-059574 | 95  | 10  | 5   | 53  | 0 |
| CONTIG-059575 | 273 | 7   | 12  | 44  | 0 |
| CONTIG-059576 | 123 | 17  | 15  | 0   | 0 |
| CONTIG-059577 | 145 | 7   | 11  | 30  | 0 |
| CONTIG-059578 | 360 | 7   | 13  | 60  | 0 |
| CONTIG-059579 | 97  | 6   | 2   | 10  | 2 |
| CONTIG-059580 | 114 | 8   | 0   | 22  | 0 |
| CONTIG-059581 | 68  | 6   | 3   | 9   | 0 |
| CONTIG-059582 | 72  | 5   | 3   | 4   | 0 |
| CONTIG-059583 | 102 | 8   | 13  | 15  | 0 |
| CONTIG-059584 | 59  | 4   | 6   | 2   | 0 |
| CONTIG-059585 | 98  | 13  | 24  | 28  | 0 |
| CONTIG-059586 | 208 | 19  | 31  | 171 | 0 |
| CONTIG-059588 | 77  | 8   | 2   | 25  | 0 |
| CONTIG-059589 | 61  | 5   | 2   | 7   | 2 |
| CONTIG-059590 | 76  | 9   | 19  | 7   | 0 |
| CONTIG-059591 | 66  | 4   | 3   | 3   | 0 |
| CONTIG-059592 | 68  | 223 | 136 | 441 | 2 |
| CONTIG-059594 | 144 | 16  | 13  | 85  | 2 |
| CONTIG-059595 | 108 | 10  | 4   | 41  | 0 |
| CONTIG-059596 | 157 | 5   | 8   | 15  | 0 |
| CONTIG-059597 | 291 | 19  | 15  | 220 | 4 |
| CONTIG-059598 | 414 | 17  | 25  | 372 | 0 |
| CONTIG-059599 | 63  | 4   | 14  | 2   | 0 |
| CONTIG-059600 | 125 | 3   | 5   | 6   | 0 |
| CONTIG-059601 | 85  | 4   | 2   | 5   | 0 |
| CONTIG-059602 | 278 | 10  | 3   | 103 | 0 |
| CONTIG-059603 | 195 | 7   | 5   | 38  | 0 |
| CONTIG-059604 | 85  | 6   | 20  | 0   | 0 |
| CONTIG-059605 | 59  | 7   | 2   | 9   | 0 |
| CONTIG-059606 | 114 | 3   | 0   | 11  | 0 |
| CONTIG-059607 | 216 | 13  | 25  | 47  | 0 |

|               |     |    |    |     |    |
|---------------|-----|----|----|-----|----|
| CONTIG-059618 | 98  | 7  | 2  | 6   | 0  |
| CONTIG-059619 | 209 | 13 | 43 | 79  | 0  |
| CONTIG-059621 | 65  | 6  | 7  | 10  | 0  |
| CONTIG-059626 | 169 | 7  | 10 | 39  | 0  |
| CONTIG-059627 | 125 | 25 | 17 | 53  | 4  |
| CONTIG-059628 | 339 | 13 | 0  | 0   | 28 |
| CONTIG-059629 | 73  | 6  | 0  | 21  | 0  |
| CONTIG-059630 | 156 | 14 | 3  | 16  | 0  |
| CONTIG-059631 | 628 | 13 | 20 | 14  | 0  |
| CONTIG-059632 | 61  | 7  | 26 | 11  | 0  |
| CONTIG-059633 | 169 | 8  | 36 | 9   | 0  |
| CONTIG-059634 | 88  | 6  | 6  | 13  | 0  |
| CONTIG-059635 | 74  | 7  | 11 | 11  | 0  |
| CONTIG-059636 | 146 | 6  | 9  | 4   | 0  |
| CONTIG-059638 | 216 | 6  | 2  | 5   | 0  |
| CONTIG-059639 | 139 | 8  | 3  | 36  | 0  |
| CONTIG-059640 | 146 | 9  | 17 | 33  | 0  |
| CONTIG-059641 | 260 | 15 | 9  | 206 | 0  |
| CONTIG-059642 | 137 | 13 | 11 | 60  | 0  |
| CONTIG-059643 | 79  | 8  | 4  | 14  | 0  |
| CONTIG-059644 | 139 | 9  | 41 | 30  | 0  |
| CONTIG-059645 | 80  | 12 | 23 | 25  | 0  |
| CONTIG-059646 | 190 | 18 | 26 | 77  | 0  |
| CONTIG-059648 | 512 | 13 | 11 | 23  | 0  |
| CONTIG-059649 | 323 | 25 | 66 | 122 | 2  |
| CONTIG-059650 | 268 | 21 | 18 | 187 | 0  |
| CONTIG-059651 | 261 | 19 | 17 | 267 | 0  |
| CONTIG-059652 | 153 | 5  | 11 | 17  | 0  |
| CONTIG-059653 | 187 | 16 | 30 | 84  | 0  |
| CONTIG-059654 | 230 | 13 | 12 | 91  | 0  |
| CONTIG-059655 | 244 | 9  | 19 | 83  | 0  |
| CONTIG-059656 | 89  | 7  | 5  | 3   | 0  |
| CONTIG-059657 | 95  | 6  | 7  | 17  | 0  |
| CONTIG-059658 | 75  | 7  | 2  | 9   | 0  |
| CONTIG-059660 | 67  | 5  | 5  | 10  | 0  |
| CONTIG-059661 | 107 | 10 | 5  | 7   | 0  |
| CONTIG-059662 | 60  | 6  | 2  | 9   | 0  |
| CONTIG-059663 | 98  | 20 | 2  | 4   | 0  |
| CONTIG-059666 | 118 | 8  | 4  | 49  | 0  |
| CONTIG-059667 | 64  | 14 | 5  | 26  | 0  |
| CONTIG-059668 | 62  | 13 | 10 | 12  | 0  |
| CONTIG-059669 | 138 | 31 | 19 | 57  | 0  |
| CONTIG-059670 | 92  | 8  | 16 | 21  | 0  |
| CONTIG-059671 | 201 | 12 | 16 | 76  | 0  |
| CONTIG-059672 | 77  | 8  | 11 | 11  | 0  |
| CONTIG-059673 | 153 | 9  | 8  | 54  | 2  |
| CONTIG-059674 | 147 | 5  | 9  | 4   | 0  |

|               |      |     |    |     |    |
|---------------|------|-----|----|-----|----|
| CONTIG-059675 | 72   | 5   | 2  | 15  | 0  |
| CONTIG-059676 | 943  | 35  | 12 | 0   | 10 |
| CONTIG-059677 | 78   | 8   | 4  | 25  | 0  |
| CONTIG-059678 | 298  | 48  | 51 | 240 | 10 |
| CONTIG-059679 | 227  | 13  | 14 | 46  | 0  |
| CONTIG-059680 | 225  | 4   | 5  | 13  | 0  |
| CONTIG-059681 | 1141 | 34  | 2  | 4   | 0  |
| CONTIG-059682 | 211  | 5   | 13 | 14  | 0  |
| CONTIG-059683 | 130  | 15  | 11 | 38  | 0  |
| CONTIG-059684 | 117  | 8   | 40 | 16  | 0  |
| CONTIG-059685 | 475  | 6   | 9  | 84  | 0  |
| CONTIG-059686 | 77   | 5   | 7  | 0   | 0  |
| CONTIG-059687 | 162  | 15  | 47 | 82  | 2  |
| CONTIG-059688 | 89   | 60  | 2  | 281 | 2  |
| CONTIG-059689 | 86   | 5   | 0  | 10  | 0  |
| CONTIG-059690 | 305  | 37  | 31 | 198 | 20 |
| CONTIG-059691 | 114  | 3   | 2  | 6   | 0  |
| CONTIG-059692 | 191  | 5   | 14 | 38  | 0  |
| CONTIG-059693 | 62   | 232 | 55 | 343 | 35 |
| CONTIG-059694 | 154  | 6   | 8  | 19  | 0  |
| CONTIG-059695 | 132  | 135 | 17 | 605 | 22 |
| CONTIG-059696 | 153  | 13  | 23 | 50  | 0  |
| CONTIG-059697 | 401  | 8   | 12 | 74  | 0  |
| CONTIG-059699 | 221  | 5   | 13 | 37  | 0  |
| CONTIG-059700 | 362  | 12  | 25 | 111 | 6  |
| CONTIG-059701 | 79   | 14  | 10 | 25  | 2  |
| CONTIG-059702 | 253  | 11  | 0  | 0   | 17 |
| CONTIG-059703 | 161  | 3   | 2  | 13  | 0  |
| CONTIG-059704 | 109  | 5   | 6  | 6   | 0  |
| CONTIG-059705 | 108  | 7   | 0  | 7   | 0  |
| CONTIG-059709 | 82   | 14  | 5  | 32  | 2  |
| CONTIG-059710 | 89   | 16  | 0  | 0   | 0  |
| CONTIG-059711 | 116  | 21  | 43 | 39  | 0  |
| CONTIG-059712 | 106  | 8   | 20 | 20  | 0  |
| CONTIG-059713 | 112  | 11  | 32 | 38  | 0  |
| CONTIG-059714 | 161  | 7   | 8  | 11  | 0  |
| CONTIG-059715 | 93   | 5   | 6  | 7   | 0  |
| CONTIG-059716 | 110  | 35  | 29 | 2   | 36 |
| CONTIG-059717 | 239  | 4   | 3  | 23  | 0  |
| CONTIG-059718 | 720  | 17  | 35 | 512 | 0  |
| CONTIG-059719 | 88   | 23  | 8  | 70  | 0  |
| CONTIG-059722 | 51   | 6   | 7  | 6   | 0  |
| CONTIG-059723 | 40   | 22  | 13 | 11  | 0  |
| CONTIG-059724 | 65   | 9   | 3  | 16  | 0  |
| CONTIG-059725 | 176  | 8   | 3  | 24  | 0  |
| CONTIG-059726 | 451  | 14  | 28 | 227 | 0  |
| CONTIG-059727 | 101  | 7   | 2  | 29  | 0  |

|               |     |     |    |      |    |
|---------------|-----|-----|----|------|----|
| CONTIG-059728 | 399 | 49  | 20 | 24   | 0  |
| CONTIG-059729 | 725 | 31  | 20 | 1218 | 0  |
| CONTIG-059730 | 67  | 5   | 0  | 0    | 2  |
| CONTIG-059731 | 82  | 12  | 6  | 32   | 0  |
| CONTIG-059732 | 61  | 4   | 2  | 0    | 0  |
| CONTIG-059733 | 188 | 6   | 5  | 16   | 0  |
| CONTIG-059734 | 71  | 4   | 3  | 3    | 0  |
| CONTIG-059735 | 125 | 7   | 17 | 28   | 0  |
| CONTIG-059736 | 107 | 17  | 15 | 96   | 0  |
| CONTIG-059737 | 549 | 25  | 40 | 172  | 0  |
| CONTIG-059738 | 69  | 4   | 5  | 0    | 0  |
| CONTIG-059739 | 120 | 6   | 12 | 2    | 0  |
| CONTIG-059740 | 113 | 262 | 12 | 409  | 10 |
| CONTIG-059741 | 62  | 10  | 7  | 7    | 0  |
| CONTIG-059742 | 441 | 7   | 27 | 56   | 0  |
| CONTIG-059744 | 83  | 9   | 7  | 30   | 0  |
| CONTIG-059745 | 70  | 3   | 3  | 2    | 0  |
| CONTIG-059746 | 95  | 5   | 4  | 8    | 0  |
| CONTIG-059747 | 164 | 7   | 8  | 17   | 0  |
| CONTIG-059748 | 205 | 5   | 8  | 26   | 0  |
| CONTIG-059749 | 104 | 8   | 0  | 40   | 0  |
| CONTIG-059750 | 124 | 7   | 18 | 16   | 0  |
| CONTIG-059751 | 59  | 3   | 2  | 6    | 0  |
| CONTIG-059752 | 177 | 7   | 2  | 3    | 0  |
| CONTIG-059753 | 103 | 7   | 6  | 15   | 0  |
| CONTIG-059754 | 375 | 17  | 24 | 187  | 4  |
| CONTIG-059755 | 119 | 5   | 3  | 11   | 0  |
| CONTIG-059756 | 58  | 11  | 13 | 16   | 0  |
| CONTIG-059757 | 62  | 7   | 5  | 7    | 0  |
| CONTIG-059758 | 144 | 4   | 7  | 4    | 0  |
| CONTIG-059759 | 68  | 7   | 2  | 12   | 0  |
| CONTIG-059760 | 181 | 41  | 14 | 128  | 0  |
| CONTIG-059761 | 41  | 21  | 0  | 0    | 0  |
| CONTIG-059762 | 76  | 3   | 4  | 0    | 0  |
| CONTIG-059763 | 77  | 4   | 2  | 0    | 0  |
| CONTIG-059764 | 59  | 7   | 3  | 14   | 0  |
| CONTIG-059765 | 475 | 10  | 19 | 173  | 0  |
| CONTIG-059773 | 168 | 6   | 10 | 35   | 0  |
| CONTIG-059774 | 120 | 8   | 9  | 27   | 0  |
| CONTIG-059777 | 131 | 13  | 20 | 50   | 0  |
| CONTIG-059778 | 78  | 5   | 0  | 2    | 0  |
| CONTIG-059779 | 173 | 13  | 9  | 110  | 0  |
| CONTIG-059780 | 126 | 6   | 14 | 11   | 0  |
| CONTIG-059781 | 124 | 7   | 2  | 7    | 2  |
| CONTIG-059782 | 200 | 14  | 3  | 77   | 0  |
| CONTIG-059783 | 126 | 13  | 14 | 21   | 0  |
| CONTIG-059784 | 61  | 11  | 10 | 20   | 0  |

|               |     |     |    |     |   |
|---------------|-----|-----|----|-----|---|
| CONTIG-059785 | 74  | 5   | 2  | 14  | 0 |
| CONTIG-059786 | 240 | 13  | 0  | 165 | 0 |
| CONTIG-059787 | 313 | 8   | 12 | 87  | 0 |
| CONTIG-059788 | 127 | 5   | 4  | 24  | 0 |
| CONTIG-059789 | 106 | 15  | 13 | 70  | 0 |
| CONTIG-059790 | 61  | 7   | 3  | 16  | 0 |
| CONTIG-059791 | 88  | 8   | 4  | 0   | 0 |
| CONTIG-059792 | 160 | 8   | 4  | 30  | 2 |
| CONTIG-059793 | 151 | 25  | 0  | 75  | 2 |
| CONTIG-059794 | 80  | 13  | 5  | 42  | 0 |
| CONTIG-059796 | 235 | 6   | 15 | 62  | 0 |
| CONTIG-059797 | 136 | 6   | 7  | 19  | 0 |
| CONTIG-059798 | 72  | 10  | 41 | 11  | 0 |
| CONTIG-059799 | 144 | 10  | 2  | 10  | 0 |
| CONTIG-059800 | 156 | 11  | 20 | 62  | 3 |
| CONTIG-059801 | 110 | 5   | 14 | 7   | 0 |
| CONTIG-059802 | 96  | 3   | 2  | 5   | 0 |
| CONTIG-059803 | 92  | 11  | 2  | 47  | 0 |
| CONTIG-059813 | 140 | 8   | 43 | 14  | 0 |
| CONTIG-059814 | 183 | 8   | 21 | 31  | 0 |
| CONTIG-059815 | 312 | 16  | 0  | 104 | 0 |
| CONTIG-059816 | 74  | 5   | 15 | 0   | 0 |
| CONTIG-059817 | 116 | 7   | 4  | 19  | 0 |
| CONTIG-059818 | 275 | 11  | 8  | 83  | 0 |
| CONTIG-059819 | 87  | 12  | 7  | 40  | 0 |
| CONTIG-059820 | 97  | 6   | 14 | 9   | 0 |
| CONTIG-059821 | 97  | 198 | 95 | 759 | 0 |
| CONTIG-059822 | 62  | 3   | 8  | 2   | 0 |
| CONTIG-059823 | 96  | 8   | 6  | 16  | 0 |
| CONTIG-059824 | 119 | 7   | 0  | 10  | 0 |
| CONTIG-059825 | 128 | 12  | 22 | 39  | 0 |
| CONTIG-059828 | 60  | 3   | 2  | 4   | 0 |
| CONTIG-059829 | 88  | 5   | 24 | 0   | 0 |
| CONTIG-059830 | 184 | 8   | 4  | 35  | 0 |
| CONTIG-059831 | 75  | 6   | 2  | 11  | 0 |
| CONTIG-059832 | 136 | 5   | 0  | 0   | 4 |
| CONTIG-059833 | 68  | 9   | 20 | 4   | 0 |
| CONTIG-059834 | 72  | 13  | 39 | 4   | 0 |
| CONTIG-059835 | 338 | 11  | 11 | 131 | 2 |
| CONTIG-059836 | 215 | 22  | 58 | 113 | 0 |
| CONTIG-059837 | 215 | 12  | 6  | 108 | 0 |
| CONTIG-059838 | 78  | 10  | 10 | 15  | 0 |
| CONTIG-059839 | 41  | 87  | 10 | 31  | 0 |
| CONTIG-059840 | 415 | 14  | 4  | 142 | 7 |
| CONTIG-059843 | 72  | 6   | 17 | 0   | 0 |
| CONTIG-059844 | 107 | 6   | 2  | 23  | 0 |
| CONTIG-059845 | 123 | 6   | 0  | 24  | 0 |

|               |     |     |    |      |    |
|---------------|-----|-----|----|------|----|
| CONTIG-059846 | 83  | 7   | 0  | 20   | 0  |
| CONTIG-059847 | 76  | 6   | 2  | 11   | 0  |
| CONTIG-059848 | 157 | 11  | 21 | 26   | 0  |
| CONTIG-059849 | 139 | 5   | 6  | 30   | 0  |
| CONTIG-059850 | 69  | 6   | 7  | 8    | 0  |
| CONTIG-059852 | 122 | 10  | 0  | 45   | 0  |
| CONTIG-059853 | 79  | 3   | 0  | 4    | 0  |
| CONTIG-059854 | 68  | 4   | 10 | 4    | 0  |
| CONTIG-059856 | 132 | 9   | 4  | 45   | 0  |
| CONTIG-059858 | 36  | 13  | 4  | 6    | 0  |
| CONTIG-059859 | 89  | 5   | 5  | 18   | 0  |
| CONTIG-059860 | 138 | 6   | 7  | 27   | 0  |
| CONTIG-059861 | 72  | 6   | 7  | 8    | 0  |
| CONTIG-059863 | 92  | 4   | 0  | 11   | 0  |
| CONTIG-059864 | 169 | 15  | 25 | 107  | 0  |
| CONTIG-059865 | 58  | 3   | 5  | 2    | 0  |
| CONTIG-059866 | 65  | 5   | 10 | 8    | 0  |
| CONTIG-059867 | 87  | 4   | 6  | 2    | 0  |
| CONTIG-059868 | 301 | 12  | 30 | 61   | 0  |
| CONTIG-059869 | 86  | 8   | 10 | 7    | 0  |
| CONTIG-059870 | 114 | 4   | 6  | 2    | 0  |
| CONTIG-059871 | 492 | 54  | 20 | 1004 | 22 |
| CONTIG-059872 | 108 | 8   | 27 | 26   | 0  |
| CONTIG-059873 | 259 | 11  | 6  | 77   | 2  |
| CONTIG-059874 | 78  | 4   | 2  | 0    | 0  |
| CONTIG-059875 | 205 | 10  | 13 | 62   | 0  |
| CONTIG-059876 | 214 | 7   | 12 | 17   | 0  |
| CONTIG-059877 | 148 | 14  | 9  | 55   | 0  |
| CONTIG-059878 | 104 | 189 | 6  | 547  | 0  |
| CONTIG-059879 | 245 | 10  | 15 | 29   | 0  |
| CONTIG-059880 | 117 | 12  | 27 | 42   | 0  |
| CONTIG-059881 | 424 | 11  | 13 | 159  | 2  |
| CONTIG-059882 | 66  | 17  | 6  | 24   | 0  |
| CONTIG-059883 | 62  | 9   | 32 | 0    | 0  |
| CONTIG-059884 | 207 | 20  | 53 | 125  | 0  |
| CONTIG-059885 | 124 | 7   | 4  | 23   | 0  |
| CONTIG-059886 | 95  | 5   | 4  | 23   | 0  |
| CONTIG-059887 | 74  | 4   | 2  | 4    | 2  |
| CONTIG-059888 | 114 | 11  | 17 | 29   | 0  |
| CONTIG-059889 | 178 | 8   | 15 | 55   | 0  |
| CONTIG-059891 | 356 | 8   | 10 | 116  | 2  |
| CONTIG-059892 | 112 | 6   | 8  | 32   | 0  |
| CONTIG-059893 | 43  | 51  | 43 | 28   | 0  |
| CONTIG-059894 | 167 | 9   | 20 | 50   | 0  |
| CONTIG-059895 | 76  | 7   | 0  | 11   | 0  |
| CONTIG-059896 | 70  | 5   | 3  | 0    | 0  |
| CONTIG-059897 | 330 | 26  | 22 | 440  | 0  |



|               |     |     |    |     |    |
|---------------|-----|-----|----|-----|----|
| CONTIG-059899 | 172 | 13  | 7  | 76  | 0  |
| CONTIG-059900 | 59  | 5   | 4  | 8   | 0  |
| CONTIG-059901 | 154 | 6   | 5  | 15  | 0  |
| CONTIG-059902 | 96  | 5   | 3  | 9   | 0  |
| CONTIG-059903 | 137 | 8   | 2  | 31  | 0  |
| CONTIG-059904 | 189 | 3   | 3  | 0   | 0  |
| CONTIG-059905 | 88  | 2   | 2  | 4   | 0  |
| CONTIG-059906 | 61  | 3   | 3  | 2   | 0  |
| CONTIG-059908 | 101 | 9   | 5  | 13  | 0  |
| CONTIG-059909 | 185 | 4   | 6  | 21  | 0  |
| CONTIG-059910 | 67  | 9   | 4  | 0   | 0  |
| CONTIG-059911 | 89  | 4   | 8  | 4   | 0  |
| CONTIG-059912 | 198 | 35  | 42 | 377 | 0  |
| CONTIG-059913 | 80  | 8   | 5  | 0   | 0  |
| CONTIG-059914 | 204 | 10  | 6  | 65  | 0  |
| CONTIG-059915 | 49  | 167 | 38 | 206 | 8  |
| CONTIG-059916 | 90  | 7   | 2  | 9   | 2  |
| CONTIG-059917 | 64  | 4   | 2  | 4   | 0  |
| CONTIG-059918 | 255 | 21  | 33 | 153 | 10 |
| CONTIG-059919 | 507 | 14  | 37 | 188 | 2  |
| CONTIG-059920 | 75  | 8   | 7  | 21  | 0  |
| CONTIG-059921 | 90  | 4   | 2  | 8   | 0  |
| CONTIG-059923 | 184 | 21  | 3  | 162 | 0  |
| CONTIG-059924 | 68  | 3   | 3  | 0   | 0  |
| CONTIG-059925 | 186 | 7   | 7  | 27  | 0  |
| CONTIG-059926 | 738 | 14  | 34 | 423 | 0  |
| CONTIG-059927 | 89  | 10  | 2  | 33  | 0  |
| CONTIG-059929 | 90  | 6   | 0  | 12  | 0  |
| CONTIG-059930 | 93  | 15  | 0  | 79  | 0  |
| CONTIG-059931 | 221 | 10  | 17 | 85  | 0  |
| CONTIG-059932 | 140 | 17  | 32 | 24  | 0  |
| CONTIG-059933 | 147 | 7   | 5  | 22  | 0  |
| CONTIG-059934 | 475 | 9   | 4  | 158 | 2  |
| CONTIG-059935 | 60  | 3   | 3  | 0   | 0  |
| CONTIG-059936 | 213 | 8   | 11 | 8   | 0  |
| CONTIG-059938 | 133 | 11  | 6  | 77  | 0  |
| CONTIG-059939 | 120 | 10  | 16 | 29  | 0  |
| CONTIG-059940 | 173 | 16  | 21 | 110 | 0  |
| CONTIG-059941 | 373 | 8   | 26 | 119 | 0  |
| CONTIG-059942 | 73  | 3   | 3  | 6   | 0  |
| CONTIG-059943 | 182 | 5   | 6  | 18  | 0  |
| CONTIG-059944 | 129 | 4   | 29 | 0   | 0  |
| CONTIG-059945 | 61  | 4   | 5  | 4   | 0  |
| CONTIG-059946 | 102 | 6   | 2  | 8   | 0  |
| CONTIG-059947 | 258 | 6   | 6  | 35  | 0  |
| CONTIG-059948 | 626 | 22  | 5  | 493 | 48 |
| CONTIG-059949 | 174 | 8   | 2  | 22  | 0  |

|               |     |     |    |     |   |
|---------------|-----|-----|----|-----|---|
| CONTIG-059950 | 126 | 18  | 2  | 63  | 0 |
| CONTIG-059951 | 63  | 9   | 4  | 16  | 0 |
| CONTIG-059952 | 373 | 9   | 30 | 87  | 0 |
| CONTIG-059953 | 68  | 266 | 4  | 912 | 4 |
| CONTIG-059954 | 311 | 12  | 0  | 0   | 0 |
| CONTIG-059955 | 162 | 10  | 16 | 28  | 0 |
| CONTIG-059956 | 59  | 53  | 15 | 125 | 0 |
| CONTIG-059957 | 465 | 9   | 11 | 88  | 0 |
| CONTIG-059958 | 183 | 7   | 2  | 26  | 4 |
| CONTIG-059959 | 110 | 7   | 2  | 20  | 0 |
| CONTIG-059962 | 204 | 10  | 0  | 61  | 0 |
| CONTIG-059963 | 97  | 7   | 15 | 11  | 0 |
| CONTIG-059964 | 142 | 11  | 0  | 53  | 0 |
| CONTIG-059965 | 84  | 17  | 3  | 70  | 0 |
| CONTIG-059966 | 65  | 11  | 2  | 23  | 0 |
| CONTIG-059967 | 154 | 7   | 29 | 26  | 0 |
| CONTIG-059968 | 258 | 11  | 8  | 84  | 0 |
| CONTIG-059970 | 456 | 25  | 18 | 517 | 0 |
| CONTIG-059971 | 75  | 5   | 2  | 9   | 0 |
| CONTIG-059973 | 64  | 9   | 0  | 9   | 0 |
| CONTIG-059981 | 214 | 13  | 5  | 57  | 2 |
| CONTIG-059982 | 121 | 30  | 27 | 50  | 0 |
| CONTIG-059983 | 95  | 8   | 0  | 32  | 0 |
| CONTIG-059984 | 66  | 4   | 2  | 4   | 0 |
| CONTIG-059985 | 125 | 4   | 5  | 16  | 0 |
| CONTIG-059986 | 345 | 25  | 20 | 379 | 0 |
| CONTIG-059987 | 351 | 9   | 2  | 83  | 7 |
| CONTIG-059988 | 59  | 4   | 3  | 6   | 0 |
| CONTIG-059989 | 468 | 16  | 17 | 364 | 0 |
| CONTIG-059990 | 114 | 4   | 4  | 14  | 0 |
| CONTIG-059991 | 161 | 8   | 5  | 32  | 0 |
| CONTIG-059992 | 145 | 5   | 2  | 18  | 0 |
| CONTIG-059993 | 99  | 3   | 0  | 2   | 0 |
| CONTIG-059994 | 84  | 3   | 0  | 4   | 0 |
| CONTIG-059995 | 65  | 6   | 2  | 14  | 0 |
| CONTIG-059996 | 63  | 3   | 3  | 0   | 0 |
| CONTIG-059997 | 97  | 24  | 5  | 117 | 7 |
| CONTIG-059998 | 81  | 123 | 68 | 121 | 0 |
| CONTIG-059999 | 569 | 8   | 12 | 144 | 3 |
| CONTIG-060000 | 97  | 7   | 22 | 12  | 0 |
| CONTIG-060001 | 146 | 14  | 15 | 81  | 0 |
| CONTIG-060002 | 58  | 7   | 17 | 0   | 0 |
| CONTIG-060003 | 114 | 13  | 19 | 50  | 0 |
| CONTIG-060004 | 67  | 8   | 4  | 0   | 0 |
| CONTIG-060005 | 119 | 5   | 0  | 21  | 0 |
| CONTIG-060006 | 104 | 4   | 9  | 6   | 0 |
| CONTIG-060007 | 111 | 6   | 0  | 6   | 0 |

|               |     |    |    |     |    |
|---------------|-----|----|----|-----|----|
| CONTIG-060008 | 93  | 7  | 2  | 4   | 0  |
| CONTIG-060009 | 64  | 3  | 5  | 6   | 0  |
| CONTIG-060010 | 81  | 6  | 3  | 4   | 0  |
| CONTIG-060011 | 72  | 7  | 7  | 15  | 0  |
| CONTIG-060012 | 233 | 9  | 9  | 35  | 0  |
| CONTIG-060013 | 90  | 10 | 5  | 21  | 0  |
| CONTIG-060014 | 121 | 14 | 5  | 97  | 0  |
| CONTIG-060015 | 85  | 3  | 7  | 4   | 0  |
| CONTIG-060016 | 134 | 2  | 4  | 7   | 0  |
| CONTIG-060019 | 123 | 3  | 5  | 13  | 0  |
| CONTIG-060020 | 98  | 5  | 0  | 6   | 0  |
| CONTIG-060021 | 192 | 13 | 25 | 92  | 2  |
| CONTIG-060024 | 153 | 6  | 6  | 24  | 0  |
| CONTIG-060025 | 83  | 4  | 2  | 2   | 0  |
| CONTIG-060026 | 68  | 4  | 6  | 2   | 0  |
| CONTIG-060027 | 271 | 11 | 2  | 110 | 0  |
| CONTIG-060028 | 69  | 5  | 0  | 9   | 0  |
| CONTIG-060029 | 62  | 6  | 3  | 0   | 0  |
| CONTIG-060030 | 195 | 7  | 43 | 10  | 0  |
| CONTIG-060031 | 70  | 5  | 13 | 0   | 0  |
| CONTIG-060032 | 246 | 13 | 50 | 108 | 0  |
| CONTIG-060033 | 81  | 8  | 5  | 21  | 0  |
| CONTIG-060034 | 59  | 7  | 2  | 10  | 0  |
| CONTIG-060035 | 92  | 6  | 9  | 7   | 0  |
| CONTIG-060036 | 124 | 5  | 14 | 6   | 0  |
| CONTIG-060037 | 96  | 11 | 6  | 21  | 0  |
| CONTIG-060038 | 304 | 14 | 10 | 155 | 0  |
| CONTIG-060039 | 74  | 6  | 5  | 12  | 0  |
| CONTIG-060040 | 357 | 12 | 31 | 154 | 0  |
| CONTIG-060041 | 103 | 6  | 8  | 14  | 0  |
| CONTIG-060042 | 99  | 70 | 3  | 363 | 2  |
| CONTIG-060043 | 474 | 13 | 5  | 0   | 29 |
| CONTIG-060044 | 254 | 18 | 12 | 45  | 2  |
| CONTIG-060045 | 143 | 6  | 27 | 21  | 0  |
| CONTIG-060046 | 200 | 10 | 2  | 73  | 0  |
| CONTIG-060047 | 141 | 4  | 0  | 22  | 0  |
| CONTIG-060048 | 108 | 9  | 10 | 33  | 0  |
| CONTIG-060049 | 88  | 5  | 4  | 11  | 0  |
| CONTIG-060050 | 220 | 6  | 9  | 31  | 2  |
| CONTIG-060051 | 100 | 4  | 2  | 9   | 0  |
| CONTIG-060052 | 101 | 13 | 17 | 37  | 0  |
| CONTIG-060056 | 161 | 9  | 23 | 26  | 0  |
| CONTIG-060057 | 63  | 3  | 4  | 0   | 0  |
| CONTIG-060058 | 106 | 15 | 22 | 52  | 0  |
| CONTIG-060059 | 289 | 8  | 37 | 64  | 0  |
| CONTIG-060060 | 150 | 15 | 0  | 116 | 2  |
| CONTIG-060061 | 147 | 37 | 19 | 150 | 0  |

|               |     |    |    |     |   |
|---------------|-----|----|----|-----|---|
| CONTIG-060062 | 65  | 5  | 5  | 7   | 0 |
| CONTIG-060063 | 164 | 6  | 2  | 31  | 0 |
| CONTIG-060064 | 77  | 5  | 4  | 7   | 0 |
| CONTIG-060065 | 101 | 6  | 0  | 16  | 0 |
| CONTIG-060068 | 84  | 54 | 15 | 203 | 6 |
| CONTIG-060069 | 364 | 11 | 34 | 100 | 0 |
| CONTIG-060070 | 122 | 4  | 5  | 8   | 0 |
| CONTIG-060071 | 200 | 8  | 6  | 41  | 4 |
| CONTIG-060072 | 74  | 4  | 0  | 2   | 0 |
| CONTIG-060073 | 130 | 6  | 6  | 23  | 0 |
| CONTIG-060075 | 136 | 5  | 0  | 11  | 0 |
| CONTIG-060078 | 204 | 9  | 15 | 57  | 0 |
| CONTIG-060079 | 116 | 3  | 5  | 6   | 0 |
| CONTIG-060080 | 311 | 21 | 32 | 125 | 0 |
| CONTIG-060081 | 165 | 4  | 11 | 14  | 0 |
| CONTIG-060085 | 274 | 14 | 16 | 99  | 2 |
| CONTIG-060089 | 91  | 10 | 0  | 23  | 0 |
| CONTIG-060090 | 169 | 7  | 4  | 43  | 0 |
| CONTIG-060091 | 191 | 4  | 0  | 22  | 0 |
| CONTIG-060092 | 86  | 4  | 5  | 7   | 0 |
| CONTIG-060093 | 286 | 6  | 14 | 17  | 0 |
| CONTIG-060094 | 163 | 7  | 13 | 36  | 0 |
| CONTIG-060095 | 154 | 5  | 5  | 26  | 0 |
| CONTIG-060096 | 237 | 9  | 23 | 51  | 0 |
| CONTIG-060097 | 99  | 7  | 0  | 8   | 2 |
| CONTIG-060098 | 81  | 3  | 2  | 5   | 0 |
| CONTIG-060099 | 109 | 4  | 0  | 23  | 0 |
| CONTIG-060100 | 128 | 11 | 2  | 55  | 0 |
| CONTIG-060101 | 386 | 9  | 10 | 104 | 2 |
| CONTIG-060102 | 77  | 8  | 9  | 15  | 0 |
| CONTIG-060103 | 140 | 6  | 12 | 13  | 0 |
| CONTIG-060104 | 619 | 11 | 9  | 218 | 6 |
| CONTIG-060105 | 106 | 7  | 3  | 24  | 0 |
| CONTIG-060106 | 70  | 4  | 3  | 5   | 0 |
| CONTIG-060107 | 150 | 10 | 13 | 49  | 0 |
| CONTIG-060108 | 250 | 8  | 13 | 52  | 0 |
| CONTIG-060109 | 167 | 6  | 22 | 26  | 0 |
| CONTIG-060112 | 86  | 10 | 18 | 22  | 0 |
| CONTIG-060113 | 115 | 7  | 2  | 22  | 0 |
| CONTIG-060116 | 402 | 13 | 24 | 213 | 0 |
| CONTIG-060117 | 347 | 8  | 4  | 62  | 2 |
| CONTIG-060118 | 358 | 17 | 31 | 205 | 2 |
| CONTIG-060119 | 115 | 10 | 0  | 20  | 0 |
| CONTIG-060120 | 190 | 8  | 4  | 55  | 0 |
| CONTIG-060121 | 304 | 10 | 29 | 69  | 0 |
| CONTIG-060122 | 145 | 8  | 10 | 44  | 0 |
| CONTIG-060123 | 251 | 6  | 9  | 6   | 0 |

|               |     |    |    |      |   |
|---------------|-----|----|----|------|---|
| CONTIG-060124 | 59  | 5  | 6  | 13   | 0 |
| CONTIG-060125 | 163 | 6  | 6  | 20   | 0 |
| CONTIG-060126 | 60  | 3  | 2  | 4    | 0 |
| CONTIG-060127 | 103 | 6  | 11 | 3    | 0 |
| CONTIG-060128 | 186 | 14 | 2  | 117  | 2 |
| CONTIG-060129 | 95  | 4  | 2  | 0    | 0 |
| CONTIG-060130 | 361 | 8  | 6  | 104  | 0 |
| CONTIG-060131 | 85  | 2  | 0  | 2    | 0 |
| CONTIG-060132 | 136 | 7  | 7  | 16   | 0 |
| CONTIG-060133 | 159 | 9  | 0  | 43   | 2 |
| CONTIG-060134 | 129 | 4  | 0  | 16   | 0 |
| CONTIG-060135 | 96  | 3  | 0  | 4    | 0 |
| CONTIG-060136 | 186 | 7  | 22 | 37   | 0 |
| CONTIG-060137 | 61  | 16 | 15 | 25   | 0 |
| CONTIG-060138 | 375 | 59 | 19 | 1214 | 2 |
| CONTIG-060139 | 78  | 4  | 9  | 5    | 0 |
| CONTIG-060140 | 291 | 5  | 28 | 31   | 0 |
| CONTIG-060141 | 104 | 13 | 8  | 41   | 4 |
| CONTIG-060142 | 89  | 8  | 5  | 8    | 0 |
| CONTIG-060143 | 83  | 6  | 2  | 17   | 0 |
| CONTIG-060144 | 108 | 7  | 3  | 17   | 0 |
| CONTIG-060146 | 158 | 18 | 41 | 38   | 0 |
| CONTIG-060147 | 85  | 6  | 6  | 0    | 0 |
| CONTIG-060148 | 126 | 8  | 4  | 28   | 2 |
| CONTIG-060151 | 69  | 14 | 4  | 17   | 0 |
| CONTIG-060153 | 263 | 8  | 2  | 70   | 0 |
| CONTIG-060156 | 243 | 11 | 4  | 79   | 2 |
| CONTIG-060158 | 79  | 10 | 15 | 11   | 0 |
| CONTIG-060159 | 102 | 5  | 5  | 4    | 0 |
| CONTIG-060160 | 103 | 6  | 8  | 35   | 0 |
| CONTIG-060162 | 331 | 11 | 15 | 68   | 4 |
| CONTIG-060163 | 124 | 8  | 2  | 31   | 2 |
| CONTIG-060164 | 88  | 24 | 31 | 85   | 0 |
| CONTIG-060165 | 58  | 5  | 0  | 9    | 0 |
| CONTIG-060166 | 68  | 4  | 2  | 0    | 0 |
| CONTIG-060167 | 141 | 12 | 22 | 69   | 0 |
| CONTIG-060168 | 93  | 5  | 0  | 12   | 0 |
| CONTIG-060169 | 298 | 7  | 4  | 77   | 0 |
| CONTIG-060170 | 77  | 7  | 3  | 8    | 0 |
| CONTIG-060171 | 87  | 5  | 3  | 2    | 0 |
| CONTIG-060178 | 271 | 11 | 11 | 51   | 2 |
| CONTIG-060179 | 75  | 3  | 3  | 5    | 0 |
| CONTIG-060180 | 282 | 18 | 47 | 204  | 0 |
| CONTIG-060181 | 177 | 7  | 0  | 9    | 4 |
| CONTIG-060182 | 470 | 15 | 61 | 246  | 6 |
| CONTIG-060183 | 76  | 5  | 4  | 4    | 2 |
| CONTIG-060185 | 154 | 4  | 3  | 8    | 0 |

|               |     |    |    |     |     |
|---------------|-----|----|----|-----|-----|
| CONTIG-060186 | 414 | 10 | 20 | 86  | 0   |
| CONTIG-060187 | 601 | 58 | 10 | 0   | 244 |
| CONTIG-060188 | 301 | 9  | 8  | 78  | 4   |
| CONTIG-060189 | 67  | 4  | 0  | 2   | 0   |
| CONTIG-060190 | 577 | 12 | 11 | 135 | 2   |
| CONTIG-060191 | 74  | 6  | 9  | 8   | 0   |
| CONTIG-060192 | 98  | 29 | 66 | 86  | 0   |
| CONTIG-060193 | 122 | 18 | 12 | 107 | 0   |
| CONTIG-060194 | 60  | 9  | 0  | 22  | 0   |
| CONTIG-060195 | 113 | 5  | 2  | 12  | 0   |
| CONTIG-060197 | 152 | 12 | 36 | 42  | 0   |
| CONTIG-060198 | 303 | 8  | 13 | 53  | 0   |
| CONTIG-060199 | 348 | 5  | 7  | 72  | 0   |
| CONTIG-060200 | 99  | 8  | 16 | 22  | 0   |
| CONTIG-060201 | 215 | 7  | 3  | 47  | 2   |
| CONTIG-060202 | 396 | 10 | 26 | 87  | 0   |
| CONTIG-060203 | 242 | 7  | 10 | 76  | 0   |
| CONTIG-060204 | 66  | 5  | 6  | 3   | 0   |
| CONTIG-060205 | 89  | 6  | 2  | 0   | 0   |
| CONTIG-060206 | 130 | 7  | 0  | 18  | 0   |
| CONTIG-060207 | 64  | 11 | 41 | 11  | 0   |
| CONTIG-060208 | 174 | 8  | 2  | 26  | 0   |
| CONTIG-060209 | 217 | 7  | 0  | 52  | 0   |
| CONTIG-060211 | 61  | 3  | 0  | 2   | 0   |
| CONTIG-060212 | 108 | 23 | 35 | 99  | 0   |
| CONTIG-060213 | 599 | 14 | 0  | 0   | 50  |
| CONTIG-060220 | 92  | 88 | 3  | 21  | 0   |
| CONTIG-060221 | 110 | 4  | 8  | 6   | 0   |
| CONTIG-060222 | 101 | 4  | 3  | 7   | 0   |
| CONTIG-060223 | 155 | 11 | 16 | 58  | 2   |
| CONTIG-060224 | 156 | 26 | 12 | 194 | 0   |
| CONTIG-060225 | 85  | 8  | 2  | 25  | 0   |
| CONTIG-060226 | 263 | 7  | 7  | 56  | 0   |
| CONTIG-060227 | 76  | 10 | 2  | 16  | 0   |
| CONTIG-060228 | 157 | 6  | 7  | 25  | 0   |
| CONTIG-060229 | 129 | 4  | 6  | 16  | 0   |
| CONTIG-060230 | 72  | 3  | 0  | 5   | 0   |
| CONTIG-060231 | 302 | 21 | 6  | 266 | 4   |
| CONTIG-060232 | 112 | 2  | 0  | 0   | 0   |
| CONTIG-060233 | 70  | 5  | 3  | 8   | 0   |
| CONTIG-060234 | 84  | 6  | 6  | 18  | 0   |
| CONTIG-060235 | 109 | 8  | 4  | 41  | 0   |
| CONTIG-060236 | 103 | 7  | 0  | 21  | 0   |
| CONTIG-060237 | 219 | 6  | 3  | 31  | 0   |
| CONTIG-060238 | 278 | 7  | 15 | 72  | 0   |
| CONTIG-060239 | 122 | 5  | 2  | 23  | 0   |
| CONTIG-060240 | 161 | 7  | 9  | 36  | 0   |

|               |     |     |    |      |    |
|---------------|-----|-----|----|------|----|
| CONTIG-060241 | 84  | 5   | 0  | 10   | 0  |
| CONTIG-060242 | 83  | 7   | 2  | 8    | 0  |
| CONTIG-060243 | 79  | 12  | 28 | 0    | 0  |
| CONTIG-060244 | 118 | 4   | 10 | 15   | 0  |
| CONTIG-060245 | 74  | 3   | 13 | 0    | 0  |
| CONTIG-060247 | 224 | 5   | 8  | 2    | 0  |
| CONTIG-060249 | 276 | 10  | 30 | 96   | 0  |
| CONTIG-060250 | 145 | 9   | 5  | 39   | 0  |
| CONTIG-060251 | 129 | 10  | 28 | 31   | 0  |
| CONTIG-060252 | 235 | 8   | 18 | 38   | 2  |
| CONTIG-060253 | 71  | 7   | 7  | 3    | 0  |
| CONTIG-060255 | 99  | 6   | 10 | 14   | 0  |
| CONTIG-060256 | 183 | 7   | 6  | 40   | 0  |
| CONTIG-060259 | 194 | 7   | 12 | 54   | 0  |
| CONTIG-060260 | 65  | 9   | 26 | 8    | 0  |
| CONTIG-060261 | 342 | 12  | 10 | 142  | 2  |
| CONTIG-060262 | 167 | 13  | 21 | 54   | 0  |
| CONTIG-060263 | 179 | 7   | 8  | 23   | 0  |
| CONTIG-060264 | 116 | 7   | 0  | 24   | 0  |
| CONTIG-060266 | 74  | 18  | 14 | 22   | 2  |
| CONTIG-060268 | 411 | 10  | 10 | 133  | 0  |
| CONTIG-060269 | 238 | 16  | 37 | 121  | 0  |
| CONTIG-060270 | 90  | 8   | 4  | 2    | 0  |
| CONTIG-060271 | 59  | 12  | 6  | 20   | 0  |
| CONTIG-060272 | 84  | 4   | 2  | 7    | 0  |
| CONTIG-060273 | 176 | 9   | 23 | 20   | 3  |
| CONTIG-060274 | 65  | 12  | 4  | 26   | 2  |
| CONTIG-060275 | 219 | 8   | 6  | 57   | 2  |
| CONTIG-060276 | 125 | 6   | 13 | 11   | 0  |
| CONTIG-060277 | 78  | 16  | 8  | 51   | 0  |
| CONTIG-060279 | 67  | 12  | 10 | 12   | 0  |
| CONTIG-060280 | 110 | 5   | 0  | 0    | 0  |
| CONTIG-060281 | 93  | 6   | 2  | 10   | 0  |
| CONTIG-060282 | 85  | 4   | 3  | 2    | 0  |
| CONTIG-060283 | 180 | 9   | 8  | 71   | 0  |
| CONTIG-060284 | 223 | 9   | 5  | 68   | 0  |
| CONTIG-060285 | 199 | 13  | 3  | 4    | 0  |
| CONTIG-060286 | 70  | 5   | 4  | 9    | 0  |
| CONTIG-060287 | 237 | 10  | 11 | 54   | 0  |
| CONTIG-060288 | 176 | 8   | 18 | 44   | 0  |
| CONTIG-060289 | 151 | 6   | 18 | 7    | 0  |
| CONTIG-060291 | 62  | 5   | 3  | 9    | 0  |
| CONTIG-060292 | 874 | 11  | 20 | 169  | 21 |
| CONTIG-060293 | 57  | 572 | 0  | 1826 | 0  |
| CONTIG-060295 | 138 | 6   | 2  | 37   | 0  |
| CONTIG-060296 | 62  | 6   | 3  | 0    | 0  |
| CONTIG-060297 | 105 | 5   | 0  | 0    | 0  |

|               |     |     |    |     |     |
|---------------|-----|-----|----|-----|-----|
| CONTIG-060298 | 145 | 7   | 24 | 9   | 0   |
| CONTIG-060299 | 286 | 7   | 2  | 90  | 0   |
| CONTIG-060300 | 144 | 9   | 5  | 48  | 0   |
| CONTIG-060301 | 72  | 9   | 4  | 25  | 2   |
| CONTIG-060302 | 618 | 22  | 22 | 597 | 0   |
| CONTIG-060303 | 199 | 6   | 6  | 46  | 0   |
| CONTIG-060304 | 86  | 14  | 9  | 42  | 0   |
| CONTIG-060305 | 141 | 4   | 5  | 14  | 0   |
| CONTIG-060306 | 85  | 4   | 0  | 2   | 0   |
| CONTIG-060307 | 89  | 6   | 0  | 0   | 0   |
| CONTIG-060308 | 254 | 7   | 2  | 57  | 0   |
| CONTIG-060309 | 74  | 3   | 5  | 0   | 0   |
| CONTIG-060310 | 180 | 7   | 8  | 45  | 0   |
| CONTIG-060311 | 116 | 4   | 3  | 16  | 0   |
| CONTIG-060312 | 280 | 6   | 20 | 47  | 0   |
| CONTIG-060313 | 470 | 9   | 15 | 74  | 0   |
| CONTIG-060314 | 76  | 18  | 3  | 21  | 0   |
| CONTIG-060315 | 130 | 35  | 24 | 206 | 0   |
| CONTIG-060317 | 86  | 280 | 3  | 2   | 389 |
| CONTIG-060320 | 80  | 7   | 2  | 22  | 0   |
| CONTIG-060322 | 183 | 9   | 11 | 44  | 0   |
| CONTIG-060323 | 99  | 2   | 0  | 5   | 0   |
| CONTIG-060324 | 136 | 5   | 6  | 6   | 0   |
| CONTIG-060325 | 105 | 6   | 5  | 17  | 0   |
| CONTIG-060326 | 329 | 13  | 16 | 196 | 0   |
| CONTIG-060327 | 740 | 13  | 14 | 341 | 4   |
| CONTIG-060328 | 250 | 7   | 2  | 55  | 0   |
| CONTIG-060329 | 219 | 6   | 2  | 25  | 0   |
| CONTIG-060330 | 315 | 12  | 18 | 119 | 0   |
| CONTIG-060331 | 70  | 4   | 2  | 4   | 0   |
| CONTIG-060332 | 76  | 4   | 0  | 5   | 2   |
| CONTIG-060333 | 63  | 5   | 0  | 6   | 0   |
| CONTIG-060334 | 69  | 7   | 3  | 2   | 0   |
| CONTIG-060335 | 74  | 9   | 12 | 11  | 0   |
| CONTIG-060336 | 66  | 2   | 4  | 2   | 0   |
| CONTIG-060337 | 80  | 4   | 4  | 11  | 0   |
| CONTIG-060338 | 91  | 4   | 5  | 6   | 0   |
| CONTIG-060339 | 61  | 8   | 0  | 5   | 0   |
| CONTIG-060340 | 195 | 12  | 23 | 92  | 0   |
| CONTIG-060341 | 168 | 5   | 5  | 16  | 0   |
| CONTIG-060344 | 276 | 5   | 4  | 26  | 0   |
| CONTIG-060345 | 78  | 4   | 2  | 8   | 0   |
| CONTIG-060346 | 72  | 13  | 10 | 29  | 0   |
| CONTIG-060348 | 82  | 7   | 0  | 10  | 0   |
| CONTIG-060349 | 174 | 118 | 28 | 80  | 0   |
| CONTIG-060350 | 148 | 10  | 7  | 39  | 2   |
| CONTIG-060351 | 211 | 13  | 26 | 128 | 0   |



|               |     |    |    |     |   |
|---------------|-----|----|----|-----|---|
| CONTIG-060352 | 66  | 11 | 0  | 19  | 0 |
| CONTIG-060353 | 322 | 12 | 6  | 20  | 0 |
| CONTIG-060354 | 352 | 7  | 7  | 137 | 0 |
| CONTIG-060355 | 134 | 3  | 6  | 6   | 0 |
| CONTIG-060356 | 222 | 18 | 32 | 207 | 0 |
| CONTIG-060357 | 199 | 8  | 19 | 60  | 0 |
| CONTIG-060358 | 132 | 3  | 0  | 7   | 0 |
| CONTIG-060359 | 183 | 8  | 9  | 43  | 0 |
| CONTIG-060360 | 226 | 10 | 9  | 99  | 0 |
| CONTIG-060361 | 72  | 21 | 8  | 54  | 0 |
| CONTIG-060362 | 63  | 5  | 8  | 8   | 0 |
| CONTIG-060363 | 68  | 8  | 9  | 20  | 0 |
| CONTIG-060364 | 88  | 25 | 6  | 95  | 0 |
| CONTIG-060365 | 204 | 10 | 19 | 52  | 4 |
| CONTIG-060366 | 323 | 18 | 52 | 142 | 0 |
| CONTIG-060367 | 138 | 7  | 6  | 27  | 0 |
| CONTIG-060368 | 149 | 4  | 5  | 20  | 0 |
| CONTIG-060369 | 97  | 2  | 2  | 6   | 0 |
| CONTIG-060371 | 148 | 7  | 2  | 21  | 0 |
| CONTIG-060372 | 108 | 7  | 8  | 21  | 0 |
| CONTIG-060373 | 159 | 7  | 0  | 27  | 0 |
| CONTIG-060374 | 86  | 8  | 5  | 14  | 0 |
| CONTIG-060376 | 79  | 7  | 3  | 18  | 0 |
| CONTIG-060377 | 144 | 10 | 15 | 52  | 2 |
| CONTIG-060378 | 309 | 9  | 0  | 71  | 2 |
| CONTIG-060379 | 64  | 5  | 9  | 2   | 0 |
| CONTIG-060380 | 431 | 23 | 43 | 122 | 0 |
| CONTIG-060381 | 211 | 8  | 3  | 46  | 2 |
| CONTIG-060382 | 300 | 10 | 21 | 64  | 0 |
| CONTIG-060383 | 150 | 7  | 0  | 32  | 0 |
| CONTIG-060384 | 62  | 4  | 2  | 8   | 0 |
| CONTIG-060385 | 271 | 10 | 23 | 102 | 0 |
| CONTIG-060386 | 145 | 10 | 8  | 44  | 0 |
| CONTIG-060388 | 91  | 6  | 0  | 2   | 0 |
| CONTIG-060389 | 127 | 4  | 15 | 2   | 0 |
| CONTIG-060390 | 62  | 5  | 7  | 3   | 0 |
| CONTIG-060391 | 99  | 19 | 11 | 74  | 0 |
| CONTIG-060392 | 73  | 4  | 0  | 0   | 0 |
| CONTIG-060393 | 89  | 6  | 14 | 2   | 0 |
| CONTIG-060394 | 372 | 9  | 14 | 97  | 2 |
| CONTIG-060396 | 164 | 17 | 16 | 85  | 2 |
| CONTIG-060397 | 72  | 25 | 11 | 77  | 0 |
| CONTIG-060398 | 289 | 12 | 22 | 80  | 0 |
| CONTIG-060399 | 131 | 7  | 5  | 19  | 0 |
| CONTIG-060400 | 478 | 13 | 8  | 232 | 6 |
| CONTIG-060401 | 66  | 5  | 5  | 4   | 0 |
| CONTIG-060406 | 79  | 5  | 6  | 11  | 0 |

|               |      |     |    |      |   |
|---------------|------|-----|----|------|---|
| CONTIG-060407 | 122  | 4   | 6  | 2    | 0 |
| CONTIG-060408 | 369  | 9   | 15 | 87   | 0 |
| CONTIG-060409 | 374  | 7   | 24 | 23   | 2 |
| CONTIG-060410 | 129  | 6   | 2  | 25   | 0 |
| CONTIG-060411 | 99   | 3   | 2  | 0    | 0 |
| CONTIG-060412 | 214  | 9   | 31 | 39   | 2 |
| CONTIG-060415 | 275  | 4   | 4  | 30   | 0 |
| CONTIG-060416 | 347  | 25  | 18 | 223  | 0 |
| CONTIG-060417 | 73   | 2   | 3  | 2    | 0 |
| CONTIG-060418 | 125  | 11  | 22 | 31   | 0 |
| CONTIG-060419 | 133  | 5   | 0  | 0    | 0 |
| CONTIG-060420 | 124  | 5   | 18 | 7    | 0 |
| CONTIG-060421 | 352  | 12  | 20 | 186  | 0 |
| CONTIG-060423 | 65   | 4   | 4  | 3    | 0 |
| CONTIG-060424 | 238  | 8   | 14 | 15   | 0 |
| CONTIG-060425 | 68   | 14  | 10 | 30   | 0 |
| CONTIG-060426 | 91   | 10  | 6  | 19   | 0 |
| CONTIG-060428 | 501  | 23  | 23 | 413  | 0 |
| CONTIG-060429 | 155  | 3   | 0  | 16   | 0 |
| CONTIG-060430 | 167  | 11  | 23 | 62   | 0 |
| CONTIG-060431 | 79   | 42  | 11 | 159  | 2 |
| CONTIG-060432 | 168  | 4   | 14 | 17   | 0 |
| CONTIG-060433 | 101  | 5   | 0  | 4    | 0 |
| CONTIG-060434 | 91   | 23  | 9  | 54   | 0 |
| CONTIG-060435 | 64   | 64  | 7  | 131  | 0 |
| CONTIG-060436 | 68   | 9   | 0  | 20   | 0 |
| CONTIG-060440 | 636  | 12  | 42 | 176  | 2 |
| CONTIG-060441 | 74   | 10  | 4  | 7    | 0 |
| CONTIG-060442 | 119  | 6   | 16 | 6    | 0 |
| CONTIG-060443 | 86   | 4   | 7  | 5    | 0 |
| CONTIG-060444 | 288  | 9   | 4  | 56   | 6 |
| CONTIG-060445 | 216  | 16  | 15 | 147  | 0 |
| CONTIG-060447 | 164  | 957 | 18 | 6244 | 0 |
| CONTIG-060448 | 102  | 9   | 8  | 34   | 0 |
| CONTIG-060449 | 92   | 22  | 0  | 105  | 0 |
| CONTIG-060450 | 129  | 6   | 5  | 22   | 0 |
| CONTIG-060451 | 47   | 106 | 39 | 149  | 8 |
| CONTIG-060452 | 72   | 7   | 8  | 7    | 0 |
| CONTIG-060453 | 71   | 5   | 6  | 11   | 0 |
| CONTIG-060454 | 93   | 5   | 11 | 0    | 0 |
| CONTIG-060455 | 134  | 12  | 4  | 64   | 0 |
| CONTIG-060456 | 143  | 7   | 3  | 26   | 0 |
| CONTIG-060457 | 68   | 10  | 25 | 10   | 0 |
| CONTIG-060458 | 63   | 2   | 0  | 5    | 0 |
| CONTIG-060460 | 1203 | 24  | 14 | 931  | 0 |
| CONTIG-060461 | 93   | 5   | 0  | 0    | 2 |
| CONTIG-060462 | 115  | 28  | 58 | 121  | 2 |

|               |     |     |    |     |     |
|---------------|-----|-----|----|-----|-----|
| CONTIG-060463 | 156 | 6   | 11 | 17  | 0   |
| CONTIG-060464 | 190 | 7   | 24 | 39  | 0   |
| CONTIG-060465 | 249 | 6   | 14 | 22  | 0   |
| CONTIG-060466 | 93  | 7   | 5  | 17  | 0   |
| CONTIG-060468 | 180 | 7   | 19 | 61  | 0   |
| CONTIG-060469 | 62  | 15  | 0  | 50  | 0   |
| CONTIG-060476 | 110 | 5   | 2  | 10  | 0   |
| CONTIG-060477 | 146 | 9   | 2  | 39  | 0   |
| CONTIG-060478 | 149 | 7   | 9  | 28  | 0   |
| CONTIG-060479 | 182 | 7   | 2  | 30  | 0   |
| CONTIG-060480 | 132 | 6   | 3  | 24  | 0   |
| CONTIG-060483 | 264 | 13  | 19 | 154 | 0   |
| CONTIG-060484 | 73  | 4   | 3  | 9   | 0   |
| CONTIG-060487 | 116 | 7   | 12 | 24  | 2   |
| CONTIG-060488 | 117 | 4   | 2  | 11  | 0   |
| CONTIG-060489 | 86  | 14  | 6  | 0   | 33  |
| CONTIG-060491 | 330 | 41  | 61 | 383 | 27  |
| CONTIG-060492 | 105 | 11  | 11 | 7   | 0   |
| CONTIG-060493 | 210 | 10  | 17 | 51  | 2   |
| CONTIG-060494 | 63  | 3   | 0  | 6   | 0   |
| CONTIG-060495 | 71  | 5   | 3  | 11  | 0   |
| CONTIG-060496 | 68  | 3   | 4  | 2   | 0   |
| CONTIG-060498 | 82  | 17  | 3  | 17  | 0   |
| CONTIG-060499 | 71  | 16  | 2  | 19  | 0   |
| CONTIG-060501 | 66  | 3   | 14 | 4   | 0   |
| CONTIG-060502 | 106 | 11  | 23 | 46  | 0   |
| CONTIG-060503 | 83  | 7   | 4  | 8   | 0   |
| CONTIG-060504 | 336 | 7   | 19 | 12  | 0   |
| CONTIG-060506 | 154 | 10  | 36 | 23  | 2   |
| CONTIG-060507 | 243 | 7   | 6  | 57  | 0   |
| CONTIG-060509 | 72  | 3   | 2  | 0   | 0   |
| CONTIG-060513 | 97  | 3   | 0  | 4   | 0   |
| CONTIG-060514 | 85  | 5   | 2  | 10  | 0   |
| CONTIG-060515 | 359 | 190 | 15 | 67  | 0   |
| CONTIG-060516 | 276 | 125 | 0  | 0   | 134 |
| CONTIG-060517 | 90  | 3   | 0  | 8   | 0   |
| CONTIG-060518 | 213 | 6   | 4  | 33  | 0   |
| CONTIG-060519 | 132 | 7   | 6  | 25  | 0   |
| CONTIG-060520 | 70  | 4   | 0  | 11  | 0   |
| CONTIG-060521 | 59  | 8   | 3  | 17  | 0   |
| CONTIG-060522 | 124 | 5   | 6  | 2   | 0   |
| CONTIG-060523 | 106 | 5   | 5  | 6   | 0   |
| CONTIG-060524 | 72  | 4   | 0  | 12  | 0   |
| CONTIG-060525 | 298 | 8   | 6  | 80  | 0   |
| CONTIG-060526 | 138 | 7   | 8  | 21  | 0   |
| CONTIG-060532 | 403 | 7   | 5  | 107 | 0   |
| CONTIG-060533 | 95  | 6   | 8  | 6   | 0   |

|               |      |    |    |     |    |
|---------------|------|----|----|-----|----|
| CONTIG-060534 | 228  | 5  | 3  | 37  | 0  |
| CONTIG-060535 | 131  | 13 | 9  | 78  | 0  |
| CONTIG-060536 | 184  | 9  | 2  | 44  | 0  |
| CONTIG-060537 | 270  | 11 | 9  | 49  | 0  |
| CONTIG-060538 | 84   | 6  | 4  | 6   | 0  |
| CONTIG-060539 | 354  | 11 | 6  | 136 | 0  |
| CONTIG-060542 | 60   | 2  | 0  | 4   | 0  |
| CONTIG-060544 | 334  | 10 | 14 | 92  | 0  |
| CONTIG-060545 | 75   | 3  | 4  | 0   | 0  |
| CONTIG-060546 | 73   | 20 | 0  | 70  | 0  |
| CONTIG-060547 | 123  | 4  | 4  | 12  | 0  |
| CONTIG-060548 | 84   | 4  | 9  | 5   | 0  |
| CONTIG-060549 | 215  | 9  | 8  | 75  | 0  |
| CONTIG-060550 | 101  | 6  | 9  | 6   | 0  |
| CONTIG-060551 | 59   | 8  | 14 | 8   | 0  |
| CONTIG-060552 | 189  | 16 | 13 | 158 | 0  |
| CONTIG-060553 | 72   | 8  | 4  | 28  | 0  |
| CONTIG-060554 | 93   | 4  | 3  | 15  | 0  |
| CONTIG-060555 | 257  | 9  | 11 | 79  | 2  |
| CONTIG-060560 | 313  | 13 | 51 | 44  | 4  |
| CONTIG-060561 | 149  | 8  | 17 | 37  | 0  |
| CONTIG-060562 | 1074 | 27 | 46 | 158 | 0  |
| CONTIG-060563 | 403  | 9  | 21 | 114 | 0  |
| CONTIG-060564 | 142  | 8  | 9  | 29  | 0  |
| CONTIG-060565 | 183  | 26 | 10 | 280 | 0  |
| CONTIG-060566 | 186  | 5  | 0  | 0   | 0  |
| CONTIG-060567 | 66   | 7  | 11 | 11  | 0  |
| CONTIG-060568 | 116  | 6  | 4  | 4   | 0  |
| CONTIG-060569 | 71   | 13 | 6  | 44  | 0  |
| CONTIG-060574 | 256  | 6  | 0  | 22  | 0  |
| CONTIG-060575 | 118  | 11 | 17 | 49  | 0  |
| CONTIG-060576 | 405  | 8  | 14 | 82  | 0  |
| CONTIG-060577 | 301  | 17 | 5  | 0   | 23 |
| CONTIG-060578 | 124  | 8  | 10 | 20  | 0  |
| CONTIG-060579 | 67   | 4  | 0  | 0   | 0  |
| CONTIG-060580 | 130  | 15 | 9  | 65  | 0  |
| CONTIG-060581 | 156  | 5  | 0  | 21  | 0  |
| CONTIG-060582 | 90   | 11 | 10 | 31  | 0  |
| CONTIG-060583 | 100  | 5  | 2  | 11  | 0  |
| CONTIG-060584 | 72   | 8  | 9  | 0   | 0  |
| CONTIG-060585 | 185  | 8  | 4  | 0   | 2  |
| CONTIG-060586 | 179  | 7  | 5  | 50  | 0  |
| CONTIG-060587 | 150  | 9  | 25 | 31  | 0  |
| CONTIG-060588 | 70   | 9  | 8  | 15  | 0  |
| CONTIG-060589 | 86   | 9  | 17 | 2   | 2  |
| CONTIG-060590 | 184  | 11 | 12 | 59  | 0  |
| CONTIG-060591 | 227  | 8  | 11 | 62  | 0  |

|               |     |     |    |     |   |
|---------------|-----|-----|----|-----|---|
| CONTIG-060593 | 267 | 11  | 26 | 77  | 8 |
| CONTIG-060594 | 58  | 5   | 0  | 6   | 0 |
| CONTIG-060595 | 94  | 12  | 9  | 30  | 2 |
| CONTIG-060596 | 280 | 9   | 28 | 69  | 0 |
| CONTIG-060597 | 70  | 4   | 2  | 2   | 0 |
| CONTIG-060598 | 194 | 5   | 15 | 28  | 0 |
| CONTIG-060599 | 62  | 5   | 2  | 9   | 0 |
| CONTIG-060600 | 185 | 7   | 5  | 44  | 2 |
| CONTIG-060601 | 76  | 4   | 4  | 16  | 0 |
| CONTIG-060602 | 192 | 23  | 21 | 198 | 2 |
| CONTIG-060603 | 232 | 12  | 38 | 44  | 0 |
| CONTIG-060604 | 203 | 8   | 18 | 66  | 0 |
| CONTIG-060605 | 96  | 18  | 17 | 49  | 0 |
| CONTIG-060606 | 267 | 9   | 0  | 42  | 4 |
| CONTIG-060607 | 66  | 5   | 11 | 0   | 0 |
| CONTIG-060608 | 171 | 10  | 26 | 29  | 7 |
| CONTIG-060611 | 116 | 16  | 6  | 75  | 2 |
| CONTIG-060612 | 152 | 16  | 7  | 80  | 0 |
| CONTIG-060613 | 103 | 8   | 9  | 24  | 0 |
| CONTIG-060614 | 139 | 6   | 6  | 23  | 0 |
| CONTIG-060615 | 105 | 4   | 3  | 9   | 0 |
| CONTIG-060616 | 117 | 9   | 14 | 33  | 0 |
| CONTIG-060617 | 49  | 201 | 27 | 362 | 0 |
| CONTIG-060618 | 72  | 6   | 4  | 19  | 0 |
| CONTIG-060619 | 207 | 4   | 6  | 12  | 0 |
| CONTIG-060620 | 137 | 4   | 3  | 11  | 0 |
| CONTIG-060621 | 263 | 7   | 14 | 49  | 0 |
| CONTIG-060622 | 81  | 5   | 5  | 10  | 0 |
| CONTIG-060623 | 69  | 8   | 2  | 16  | 0 |
| CONTIG-060624 | 200 | 7   | 5  | 52  | 2 |
| CONTIG-060627 | 173 | 12  | 4  | 65  | 2 |
| CONTIG-060628 | 274 | 16  | 6  | 146 | 4 |
| CONTIG-060629 | 144 | 7   | 4  | 35  | 0 |
| CONTIG-060633 | 105 | 8   | 17 | 21  | 0 |
| CONTIG-060635 | 226 | 6   | 0  | 30  | 0 |
| CONTIG-060636 | 62  | 5   | 11 | 0   | 0 |
| CONTIG-060637 | 78  | 7   | 2  | 18  | 0 |
| CONTIG-060638 | 97  | 9   | 3  | 8   | 0 |
| CONTIG-060639 | 58  | 2   | 2  | 0   | 0 |
| CONTIG-060640 | 53  | 42  | 2  | 31  | 0 |
| CONTIG-060641 | 72  | 5   | 4  | 2   | 0 |
| CONTIG-060642 | 156 | 8   | 11 | 40  | 0 |
| CONTIG-060643 | 207 | 8   | 25 | 28  | 2 |
| CONTIG-060644 | 92  | 8   | 2  | 21  | 0 |
| CONTIG-060645 | 230 | 6   | 2  | 42  | 0 |
| CONTIG-060646 | 118 | 9   | 9  | 20  | 0 |
| CONTIG-060647 | 147 | 4   | 15 | 20  | 0 |

|               |     |    |    |      |    |
|---------------|-----|----|----|------|----|
| CONTIG-060648 | 117 | 5  | 0  | 6    | 0  |
| CONTIG-060649 | 119 | 8  | 13 | 18   | 0  |
| CONTIG-060650 | 48  | 32 | 6  | 17   | 2  |
| CONTIG-060652 | 157 | 12 | 34 | 56   | 0  |
| CONTIG-060653 | 249 | 16 | 3  | 37   | 16 |
| CONTIG-060654 | 237 | 10 | 5  | 71   | 6  |
| CONTIG-060655 | 110 | 3  | 11 | 6    | 0  |
| CONTIG-060656 | 68  | 5  | 7  | 0    | 0  |
| CONTIG-060657 | 74  | 4  | 4  | 5    | 0  |
| CONTIG-060658 | 59  | 5  | 3  | 6    | 0  |
| CONTIG-060659 | 70  | 4  | 2  | 2    | 0  |
| CONTIG-060662 | 333 | 7  | 25 | 83   | 0  |
| CONTIG-060664 | 81  | 10 | 3  | 0    | 0  |
| CONTIG-060665 | 204 | 4  | 5  | 20   | 0  |
| CONTIG-060666 | 81  | 12 | 16 | 30   | 0  |
| CONTIG-060667 | 101 | 9  | 8  | 27   | 0  |
| CONTIG-060668 | 157 | 10 | 4  | 29   | 2  |
| CONTIG-060669 | 555 | 21 | 29 | 514  | 0  |
| CONTIG-060670 | 127 | 5  | 4  | 12   | 2  |
| CONTIG-060671 | 126 | 18 | 29 | 95   | 0  |
| CONTIG-060672 | 105 | 7  | 14 | 12   | 0  |
| CONTIG-060673 | 189 | 5  | 0  | 20   | 0  |
| CONTIG-060674 | 251 | 7  | 4  | 14   | 0  |
| CONTIG-060675 | 112 | 8  | 5  | 36   | 0  |
| CONTIG-060676 | 63  | 3  | 2  | 2    | 0  |
| CONTIG-060677 | 61  | 5  | 6  | 4    | 0  |
| CONTIG-060678 | 63  | 4  | 7  | 7    | 0  |
| CONTIG-060679 | 196 | 7  | 8  | 4    | 0  |
| CONTIG-060680 | 340 | 32 | 20 | 333  | 2  |
| CONTIG-060681 | 123 | 5  | 4  | 17   | 0  |
| CONTIG-060682 | 134 | 5  | 4  | 23   | 0  |
| CONTIG-060683 | 336 | 7  | 20 | 78   | 0  |
| CONTIG-060684 | 498 | 20 | 33 | 465  | 2  |
| CONTIG-060685 | 60  | 35 | 38 | 6    | 0  |
| CONTIG-060686 | 77  | 8  | 15 | 11   | 0  |
| CONTIG-060687 | 114 | 5  | 2  | 5    | 0  |
| CONTIG-060688 | 98  | 5  | 10 | 13   | 0  |
| CONTIG-060689 | 78  | 33 | 27 | 35   | 0  |
| CONTIG-060690 | 91  | 7  | 4  | 15   | 0  |
| CONTIG-060691 | 947 | 38 | 22 | 2229 | 0  |
| CONTIG-060692 | 85  | 9  | 6  | 20   | 0  |
| CONTIG-060693 | 74  | 6  | 0  | 12   | 0  |
| CONTIG-060694 | 89  | 43 | 15 | 183  | 0  |
| CONTIG-060695 | 60  | 17 | 4  | 25   | 0  |
| CONTIG-060696 | 232 | 9  | 4  | 57   | 0  |
| CONTIG-060697 | 106 | 8  | 6  | 30   | 0  |
| CONTIG-060698 | 76  | 9  | 18 | 17   | 0  |

|               |     |    |    |     |    |
|---------------|-----|----|----|-----|----|
| CONTIG-060699 | 272 | 8  | 27 | 69  | 0  |
| CONTIG-060700 | 94  | 11 | 22 | 25  | 0  |
| CONTIG-060701 | 86  | 10 | 26 | 0   | 13 |
| CONTIG-060702 | 105 | 10 | 3  | 5   | 0  |
| CONTIG-060703 | 59  | 4  | 0  | 7   | 0  |
| CONTIG-060704 | 62  | 8  | 5  | 18  | 0  |
| CONTIG-060705 | 109 | 5  | 2  | 4   | 0  |
| CONTIG-060706 | 354 | 25 | 12 | 45  | 0  |
| CONTIG-060707 | 183 | 8  | 3  | 46  | 0  |
| CONTIG-060708 | 142 | 9  | 15 | 65  | 0  |
| CONTIG-060709 | 170 | 6  | 9  | 14  | 0  |
| CONTIG-060710 | 202 | 5  | 6  | 8   | 0  |
| CONTIG-060711 | 151 | 11 | 0  | 55  | 2  |
| CONTIG-060712 | 118 | 4  | 3  | 9   | 0  |
| CONTIG-060713 | 82  | 3  | 2  | 0   | 0  |
| CONTIG-060714 | 187 | 9  | 7  | 56  | 0  |
| CONTIG-060715 | 161 | 9  | 10 | 72  | 0  |
| CONTIG-060716 | 271 | 13 | 98 | 87  | 0  |
| CONTIG-060717 | 558 | 16 | 75 | 425 | 0  |
| CONTIG-060718 | 337 | 7  | 4  | 82  | 0  |
| CONTIG-060719 | 61  | 18 | 25 | 2   | 0  |
| CONTIG-060720 | 108 | 5  | 11 | 7   | 0  |
| CONTIG-060721 | 198 | 8  | 17 | 39  | 0  |
| CONTIG-060722 | 203 | 7  | 0  | 0   | 0  |
| CONTIG-060723 | 95  | 11 | 7  | 23  | 0  |
| CONTIG-060724 | 109 | 3  | 3  | 4   | 0  |
| CONTIG-060725 | 187 | 14 | 22 | 59  | 0  |
| CONTIG-060726 | 117 | 6  | 3  | 0   | 0  |
| CONTIG-060727 | 198 | 6  | 2  | 25  | 0  |
| CONTIG-060728 | 76  | 3  | 2  | 0   | 0  |
| CONTIG-060729 | 199 | 9  | 29 | 56  | 0  |
| CONTIG-060730 | 263 | 12 | 24 | 85  | 0  |
| CONTIG-060731 | 65  | 2  | 0  | 0   | 0  |
| CONTIG-060732 | 133 | 11 | 6  | 22  | 0  |
| CONTIG-060733 | 364 | 11 | 23 | 146 | 0  |
| CONTIG-060734 | 71  | 4  | 3  | 2   | 0  |
| CONTIG-060736 | 95  | 14 | 2  | 36  | 0  |
| CONTIG-060737 | 182 | 4  | 8  | 22  | 0  |
| CONTIG-060738 | 159 | 11 | 5  | 38  | 4  |
| CONTIG-060739 | 80  | 65 | 6  | 134 | 8  |
| CONTIG-060740 | 152 | 8  | 0  | 41  | 0  |
| CONTIG-060741 | 133 | 11 | 6  | 43  | 2  |
| CONTIG-060742 | 264 | 8  | 0  | 58  | 0  |
| CONTIG-060743 | 99  | 10 | 11 | 4   | 12 |
| CONTIG-060744 | 63  | 3  | 0  | 0   | 0  |
| CONTIG-060745 | 282 | 12 | 7  | 134 | 0  |
| CONTIG-060746 | 163 | 7  | 7  | 32  | 0  |

|               |     |    |    |     |    |
|---------------|-----|----|----|-----|----|
| CONTIG-060747 | 148 | 20 | 18 | 75  | 0  |
| CONTIG-060748 | 116 | 11 | 15 | 43  | 0  |
| CONTIG-060749 | 82  | 3  | 2  | 5   | 0  |
| CONTIG-060754 | 324 | 17 | 41 | 172 | 0  |
| CONTIG-060755 | 102 | 14 | 25 | 62  | 0  |
| CONTIG-060756 | 237 | 16 | 21 | 52  | 0  |
| CONTIG-060757 | 148 | 8  | 0  | 34  | 0  |
| CONTIG-060758 | 271 | 9  | 0  | 0   | 14 |
| CONTIG-060759 | 73  | 9  | 2  | 26  | 0  |
| CONTIG-060760 | 177 | 29 | 8  | 3   | 0  |
| CONTIG-060761 | 98  | 5  | 3  | 7   | 0  |
| CONTIG-060762 | 156 | 28 | 23 | 103 | 2  |
| CONTIG-060763 | 123 | 8  | 5  | 33  | 0  |
| CONTIG-060764 | 58  | 6  | 0  | 11  | 0  |
| CONTIG-060765 | 106 | 5  | 3  | 7   | 0  |
| CONTIG-060768 | 61  | 5  | 14 | 7   | 0  |
| CONTIG-060769 | 89  | 6  | 8  | 4   | 0  |
| CONTIG-060770 | 105 | 2  | 3  | 4   | 0  |
| CONTIG-060771 | 103 | 11 | 16 | 38  | 0  |
| CONTIG-060774 | 85  | 5  | 4  | 7   | 0  |
| CONTIG-060775 | 87  | 6  | 6  | 7   | 0  |
| CONTIG-060776 | 262 | 7  | 0  | 36  | 0  |
| CONTIG-060777 | 200 | 8  | 18 | 34  | 0  |
| CONTIG-060779 | 67  | 3  | 7  | 0   | 0  |
| CONTIG-060780 | 153 | 4  | 8  | 4   | 0  |
| CONTIG-060781 | 162 | 19 | 4  | 0   | 6  |
| CONTIG-060785 | 113 | 7  | 9  | 29  | 0  |
| CONTIG-060786 | 74  | 6  | 3  | 5   | 0  |
| CONTIG-060787 | 102 | 4  | 4  | 12  | 0  |
| CONTIG-060788 | 94  | 6  | 11 | 2   | 0  |
| CONTIG-060789 | 498 | 27 | 17 | 81  | 0  |
| CONTIG-060790 | 475 | 29 | 14 | 746 | 0  |
| CONTIG-060791 | 62  | 4  | 6  | 8   | 0  |
| CONTIG-060792 | 191 | 10 | 8  | 46  | 2  |
| CONTIG-060793 | 105 | 6  | 6  | 11  | 0  |
| CONTIG-060794 | 62  | 29 | 23 | 80  | 2  |
| CONTIG-060795 | 70  | 8  | 21 | 11  | 0  |
| CONTIG-060796 | 72  | 12 | 2  | 12  | 0  |
| CONTIG-060797 | 220 | 10 | 9  | 20  | 0  |
| CONTIG-060798 | 73  | 2  | 0  | 0   | 0  |
| CONTIG-060799 | 192 | 5  | 11 | 4   | 0  |
| CONTIG-060800 | 61  | 8  | 12 | 15  | 0  |
| CONTIG-060801 | 188 | 7  | 12 | 34  | 0  |
| CONTIG-060802 | 95  | 6  | 8  | 11  | 0  |
| CONTIG-060803 | 62  | 10 | 5  | 21  | 0  |
| CONTIG-060804 | 64  | 4  | 3  | 6   | 0  |
| CONTIG-060805 | 122 | 5  | 11 | 11  | 0  |



|               |     |    |    |     |    |
|---------------|-----|----|----|-----|----|
| CONTIG-060806 | 86  | 6  | 5  | 15  | 0  |
| CONTIG-060807 | 156 | 3  | 10 | 9   | 0  |
| CONTIG-060808 | 95  | 4  | 0  | 9   | 0  |
| CONTIG-060809 | 152 | 11 | 16 | 56  | 0  |
| CONTIG-060810 | 87  | 6  | 6  | 15  | 0  |
| CONTIG-060811 | 66  | 9  | 16 | 5   | 0  |
| CONTIG-060812 | 130 | 9  | 0  | 55  | 0  |
| CONTIG-060813 | 137 | 11 | 27 | 39  | 0  |
| CONTIG-060814 | 81  | 5  | 2  | 16  | 0  |
| CONTIG-060815 | 136 | 7  | 0  | 23  | 0  |
| CONTIG-060816 | 115 | 5  | 2  | 16  | 0  |
| CONTIG-060817 | 133 | 16 | 30 | 60  | 2  |
| CONTIG-060818 | 124 | 55 | 21 | 388 | 3  |
| CONTIG-060819 | 158 | 22 | 23 | 16  | 0  |
| CONTIG-060820 | 98  | 16 | 0  | 48  | 2  |
| CONTIG-060821 | 133 | 5  | 3  | 18  | 0  |
| CONTIG-060826 | 195 | 8  | 16 | 33  | 0  |
| CONTIG-060827 | 208 | 10 | 6  | 35  | 2  |
| CONTIG-060828 | 225 | 8  | 2  | 24  | 0  |
| CONTIG-060829 | 114 | 7  | 10 | 17  | 0  |
| CONTIG-060830 | 172 | 7  | 9  | 43  | 0  |
| CONTIG-060831 | 171 | 6  | 5  | 38  | 0  |
| CONTIG-060832 | 134 | 23 | 7  | 100 | 4  |
| CONTIG-060833 | 88  | 3  | 0  | 11  | 0  |
| CONTIG-060834 | 112 | 11 | 9  | 28  | 0  |
| CONTIG-060835 | 498 | 12 | 0  | 0   | 19 |
| CONTIG-060836 | 121 | 5  | 2  | 14  | 0  |
| CONTIG-060837 | 291 | 10 | 0  | 0   | 6  |
| CONTIG-060838 | 147 | 5  | 10 | 21  | 0  |
| CONTIG-060839 | 384 | 11 | 12 | 114 | 0  |
| CONTIG-060840 | 438 | 13 | 12 | 134 | 0  |
| CONTIG-060841 | 95  | 7  | 39 | 0   | 0  |
| CONTIG-060842 | 482 | 16 | 2  | 31  | 0  |
| CONTIG-060843 | 135 | 5  | 3  | 27  | 0  |
| CONTIG-060844 | 305 | 38 | 10 | 0   | 0  |
| CONTIG-060845 | 282 | 12 | 12 | 6   | 2  |
| CONTIG-060846 | 76  | 5  | 4  | 14  | 0  |
| CONTIG-060854 | 71  | 4  | 3  | 10  | 0  |
| CONTIG-060855 | 83  | 5  | 4  | 3   | 0  |
| CONTIG-060856 | 157 | 7  | 30 | 20  | 0  |
| CONTIG-060857 | 122 | 8  | 5  | 40  | 2  |
| CONTIG-060858 | 193 | 15 | 14 | 82  | 0  |
| CONTIG-060859 | 115 | 9  | 2  | 33  | 0  |
| CONTIG-060860 | 223 | 10 | 8  | 20  | 2  |
| CONTIG-060861 | 83  | 5  | 2  | 16  | 0  |
| CONTIG-060862 | 110 | 6  | 15 | 2   | 0  |
| CONTIG-060863 | 198 | 12 | 0  | 11  | 0  |

|               |     |    |    |     |   |
|---------------|-----|----|----|-----|---|
| CONTIG-060864 | 102 | 5  | 13 | 9   | 0 |
| CONTIG-060865 | 138 | 10 | 32 | 36  | 0 |
| CONTIG-060866 | 227 | 9  | 6  | 43  | 0 |
| CONTIG-060867 | 286 | 12 | 29 | 140 | 0 |
| CONTIG-060868 | 73  | 8  | 5  | 14  | 0 |
| CONTIG-060869 | 129 | 38 | 6  | 16  | 0 |
| CONTIG-060870 | 68  | 10 | 2  | 15  | 0 |
| CONTIG-060871 | 342 | 7  | 21 | 81  | 0 |
| CONTIG-060872 | 76  | 2  | 0  | 0   | 0 |
| CONTIG-060873 | 309 | 26 | 8  | 374 | 9 |
| CONTIG-060874 | 174 | 10 | 7  | 45  | 0 |
| CONTIG-060875 | 74  | 14 | 6  | 41  | 0 |
| CONTIG-060877 | 87  | 5  | 0  | 2   | 0 |
| CONTIG-060878 | 123 | 17 | 7  | 82  | 0 |
| CONTIG-060879 | 95  | 6  | 15 | 2   | 0 |
| CONTIG-060882 | 80  | 5  | 8  | 11  | 0 |
| CONTIG-060883 | 58  | 8  | 6  | 18  | 0 |
| CONTIG-060884 | 70  | 16 | 7  | 21  | 0 |
| CONTIG-060885 | 356 | 7  | 4  | 80  | 2 |
| CONTIG-060886 | 196 | 7  | 4  | 41  | 4 |
| CONTIG-060887 | 169 | 6  | 5  | 39  | 0 |
| CONTIG-060888 | 92  | 7  | 3  | 16  | 0 |
| CONTIG-060889 | 168 | 15 | 14 | 102 | 0 |
| CONTIG-060890 | 124 | 10 | 9  | 16  | 0 |
| CONTIG-060891 | 84  | 7  | 37 | 0   | 0 |
| CONTIG-060892 | 102 | 7  | 4  | 10  | 0 |
| CONTIG-060893 | 86  | 5  | 0  | 4   | 0 |
| CONTIG-060894 | 58  | 2  | 2  | 2   | 0 |
| CONTIG-060895 | 88  | 11 | 11 | 21  | 0 |
| CONTIG-060896 | 60  | 9  | 0  | 18  | 0 |
| CONTIG-060897 | 168 | 14 | 14 | 106 | 0 |
| CONTIG-060898 | 126 | 8  | 11 | 0   | 2 |
| CONTIG-060899 | 147 | 3  | 2  | 17  | 0 |
| CONTIG-060900 | 73  | 9  | 7  | 28  | 0 |
| CONTIG-060901 | 74  | 48 | 7  | 25  | 0 |
| CONTIG-060902 | 132 | 4  | 2  | 16  | 0 |
| CONTIG-060905 | 253 | 41 | 38 | 380 | 4 |
| CONTIG-060906 | 79  | 10 | 11 | 28  | 0 |
| CONTIG-060907 | 63  | 5  | 5  | 8   | 0 |
| CONTIG-060908 | 61  | 4  | 0  | 4   | 0 |
| CONTIG-060909 | 115 | 6  | 18 | 4   | 0 |
| CONTIG-060910 | 219 | 11 | 2  | 71  | 0 |
| CONTIG-060913 | 123 | 5  | 11 | 20  | 0 |
| CONTIG-060914 | 141 | 6  | 9  | 18  | 0 |
| CONTIG-060915 | 79  | 4  | 4  | 5   | 0 |
| CONTIG-060916 | 135 | 27 | 0  | 98  | 0 |
| CONTIG-060917 | 182 | 5  | 9  | 19  | 0 |

|               |     |     |    |     |     |
|---------------|-----|-----|----|-----|-----|
| CONTIG-060918 | 207 | 5   | 15 | 21  | 0   |
| CONTIG-060919 | 122 | 6   | 9  | 14  | 0   |
| CONTIG-060920 | 324 | 8   | 40 | 65  | 0   |
| CONTIG-060922 | 289 | 14  | 10 | 21  | 0   |
| CONTIG-060923 | 70  | 3   | 5  | 4   | 0   |
| CONTIG-060924 | 218 | 10  | 4  | 68  | 0   |
| CONTIG-060928 | 108 | 18  | 16 | 70  | 2   |
| CONTIG-060929 | 76  | 3   | 0  | 3   | 0   |
| CONTIG-060930 | 112 | 8   | 2  | 17  | 0   |
| CONTIG-060931 | 142 | 6   | 17 | 13  | 0   |
| CONTIG-060932 | 145 | 8   | 0  | 31  | 0   |
| CONTIG-060933 | 98  | 5   | 13 | 4   | 0   |
| CONTIG-060934 | 213 | 10  | 8  | 36  | 8   |
| CONTIG-060935 | 77  | 6   | 8  | 6   | 0   |
| CONTIG-060937 | 831 | 14  | 8  | 8   | 319 |
| CONTIG-060938 | 118 | 7   | 14 | 19  | 0   |
| CONTIG-060939 | 693 | 14  | 19 | 102 | 3   |
| CONTIG-060940 | 283 | 8   | 26 | 55  | 0   |
| CONTIG-060941 | 59  | 7   | 9  | 7   | 0   |
| CONTIG-060943 | 89  | 8   | 4  | 12  | 0   |
| CONTIG-060944 | 71  | 5   | 7  | 14  | 0   |
| CONTIG-060945 | 333 | 105 | 2  | 0   | 430 |
| CONTIG-060946 | 215 | 10  | 33 | 16  | 0   |
| CONTIG-060951 | 130 | 4   | 0  | 11  | 0   |
| CONTIG-060952 | 250 | 20  | 22 | 91  | 2   |
| CONTIG-060954 | 469 | 8   | 6  | 19  | 0   |
| CONTIG-060955 | 101 | 6   | 6  | 11  | 0   |
| CONTIG-060956 | 182 | 11  | 3  | 65  | 0   |
| CONTIG-060957 | 66  | 5   | 10 | 2   | 0   |
| CONTIG-060958 | 98  | 4   | 3  | 11  | 0   |
| CONTIG-060959 | 130 | 3   | 4  | 8   | 0   |
| CONTIG-060960 | 69  | 5   | 3  | 10  | 2   |
| CONTIG-060961 | 360 | 13  | 22 | 139 | 6   |
| CONTIG-060962 | 76  | 5   | 3  | 4   | 0   |
| CONTIG-060963 | 124 | 6   | 2  | 20  | 0   |
| CONTIG-060964 | 74  | 5   | 8  | 12  | 0   |
| CONTIG-060965 | 103 | 4   | 11 | 14  | 0   |
| CONTIG-060966 | 174 | 8   | 24 | 27  | 0   |
| CONTIG-060967 | 103 | 4   | 8  | 10  | 0   |
| CONTIG-060968 | 71  | 4   | 4  | 4   | 0   |
| CONTIG-060969 | 106 | 7   | 8  | 14  | 0   |
| CONTIG-060970 | 62  | 25  | 10 | 72  | 0   |
| CONTIG-060971 | 108 | 6   | 5  | 19  | 0   |
| CONTIG-060972 | 195 | 11  | 18 | 51  | 0   |
| CONTIG-060973 | 146 | 7   | 19 | 25  | 0   |
| CONTIG-060974 | 79  | 4   | 0  | 13  | 0   |
| CONTIG-060975 | 77  | 5   | 2  | 16  | 0   |

|               |     |     |    |     |   |
|---------------|-----|-----|----|-----|---|
| CONTIG-060976 | 92  | 10  | 4  | 30  | 0 |
| CONTIG-060977 | 260 | 21  | 16 | 301 | 0 |
| CONTIG-060978 | 203 | 9   | 7  | 80  | 0 |
| CONTIG-060979 | 93  | 5   | 4  | 10  | 0 |
| CONTIG-060980 | 64  | 5   | 2  | 7   | 0 |
| CONTIG-060983 | 182 | 8   | 5  | 26  | 3 |
| CONTIG-060984 | 122 | 12  | 13 | 49  | 0 |
| CONTIG-060985 | 455 | 17  | 42 | 118 | 2 |
| CONTIG-060986 | 252 | 7   | 9  | 24  | 0 |
| CONTIG-060987 | 259 | 30  | 25 | 235 | 2 |
| CONTIG-060988 | 76  | 4   | 0  | 9   | 0 |
| CONTIG-060989 | 58  | 23  | 33 | 33  | 0 |
| CONTIG-060990 | 380 | 9   | 24 | 107 | 0 |
| CONTIG-060991 | 126 | 7   | 0  | 33  | 0 |
| CONTIG-060992 | 68  | 4   | 6  | 0   | 0 |
| CONTIG-060993 | 108 | 12  | 2  | 50  | 0 |
| CONTIG-060994 | 114 | 6   | 4  | 12  | 0 |
| CONTIG-060995 | 147 | 9   | 6  | 53  | 2 |
| CONTIG-060996 | 76  | 4   | 5  | 8   | 0 |
| CONTIG-060997 | 69  | 3   | 0  | 5   | 0 |
| CONTIG-060998 | 72  | 4   | 0  | 6   | 0 |
| CONTIG-060999 | 268 | 15  | 13 | 97  | 0 |
| CONTIG-061000 | 68  | 10  | 2  | 22  | 0 |
| CONTIG-061001 | 221 | 8   | 2  | 56  | 2 |
| CONTIG-061003 | 134 | 5   | 44 | 4   | 0 |
| CONTIG-061004 | 195 | 6   | 3  | 37  | 0 |
| CONTIG-061005 | 283 | 9   | 2  | 7   | 0 |
| CONTIG-061006 | 113 | 6   | 18 | 9   | 0 |
| CONTIG-061007 | 75  | 4   | 2  | 8   | 0 |
| CONTIG-061008 | 441 | 8   | 13 | 134 | 0 |
| CONTIG-061009 | 129 | 7   | 5  | 25  | 0 |
| CONTIG-061010 | 67  | 5   | 2  | 14  | 0 |
| CONTIG-061011 | 84  | 4   | 2  | 6   | 0 |
| CONTIG-061012 | 72  | 5   | 12 | 5   | 0 |
| CONTIG-061013 | 79  | 4   | 6  | 2   | 0 |
| CONTIG-061014 | 70  | 4   | 6  | 2   | 0 |
| CONTIG-061015 | 58  | 27  | 13 | 46  | 0 |
| CONTIG-061016 | 90  | 8   | 7  | 2   | 2 |
| CONTIG-061017 | 75  | 10  | 5  | 36  | 0 |
| CONTIG-061018 | 67  | 8   | 10 | 15  | 0 |
| CONTIG-061019 | 60  | 5   | 7  | 7   | 0 |
| CONTIG-061020 | 92  | 6   | 7  | 11  | 0 |
| CONTIG-061021 | 71  | 6   | 2  | 16  | 0 |
| CONTIG-061023 | 188 | 16  | 44 | 121 | 0 |
| CONTIG-061024 | 58  | 6   | 10 | 5   | 0 |
| CONTIG-061025 | 40  | 146 | 4  | 236 | 0 |
| CONTIG-061026 | 63  | 16  | 4  | 19  | 0 |

|               |     |    |     |     |   |
|---------------|-----|----|-----|-----|---|
| CONTIG-061027 | 142 | 4  | 0   | 8   | 0 |
| CONTIG-061028 | 103 | 5  | 2   | 11  | 2 |
| CONTIG-061029 | 64  | 7  | 4   | 16  | 0 |
| CONTIG-061030 | 162 | 31 | 105 | 123 | 4 |
| CONTIG-061031 | 58  | 12 | 41  | 4   | 0 |
| CONTIG-061032 | 264 | 11 | 12  | 62  | 3 |
| CONTIG-061033 | 140 | 6  | 5   | 27  | 0 |
| CONTIG-061035 | 245 | 9  | 14  | 46  | 0 |
| CONTIG-061036 | 78  | 4  | 7   | 7   | 0 |
| CONTIG-061038 | 120 | 5  | 6   | 19  | 0 |
| CONTIG-061039 | 267 | 9  | 22  | 89  | 0 |
| CONTIG-061040 | 76  | 6  | 0   | 11  | 0 |
| CONTIG-061041 | 256 | 15 | 26  | 152 | 0 |
| CONTIG-061042 | 184 | 9  | 16  | 50  | 2 |
| CONTIG-061043 | 143 | 8  | 13  | 40  | 0 |
| CONTIG-061044 | 165 | 8  | 11  | 41  | 0 |
| CONTIG-061045 | 246 | 8  | 22  | 60  | 0 |
| CONTIG-061046 | 267 | 9  | 9   | 92  | 0 |
| CONTIG-061048 | 103 | 7  | 5   | 21  | 0 |
| CONTIG-061049 | 130 | 4  | 3   | 15  | 0 |
| CONTIG-061051 | 130 | 5  | 2   | 12  | 0 |
| CONTIG-061055 | 78  | 16 | 4   | 40  | 2 |
| CONTIG-061056 | 61  | 4  | 10  | 2   | 0 |
| CONTIG-061057 | 156 | 10 | 8   | 21  | 0 |
| CONTIG-061058 | 126 | 9  | 2   | 25  | 0 |
| CONTIG-061060 | 89  | 9  | 8   | 25  | 0 |
| CONTIG-061061 | 162 | 9  | 3   | 33  | 4 |
| CONTIG-061062 | 60  | 6  | 0   | 4   | 0 |
| CONTIG-061063 | 143 | 6  | 5   | 32  | 0 |
| CONTIG-061064 | 82  | 3  | 2   | 6   | 0 |
| CONTIG-061065 | 109 | 6  | 5   | 21  | 0 |
| CONTIG-061066 | 64  | 3  | 2   | 0   | 0 |
| CONTIG-061067 | 210 | 18 | 4   | 28  | 0 |
| CONTIG-061068 | 116 | 6  | 2   | 15  | 0 |
| CONTIG-061069 | 102 | 15 | 29  | 0   | 0 |
| CONTIG-061070 | 78  | 6  | 7   | 14  | 0 |
| CONTIG-061071 | 185 | 11 | 2   | 75  | 0 |
| CONTIG-061072 | 80  | 5  | 5   | 6   | 0 |
| CONTIG-061073 | 93  | 6  | 2   | 16  | 2 |
| CONTIG-061074 | 110 | 8  | 4   | 26  | 0 |
| CONTIG-061075 | 62  | 22 | 5   | 0   | 4 |
| CONTIG-061076 | 79  | 10 | 0   | 27  | 0 |
| CONTIG-061077 | 190 | 13 | 3   | 90  | 0 |
| CONTIG-061078 | 536 | 15 | 29  | 233 | 0 |
| CONTIG-061079 | 58  | 83 | 10  | 287 | 0 |
| CONTIG-061081 | 97  | 6  | 6   | 7   | 2 |
| CONTIG-061082 | 59  | 9  | 17  | 12  | 0 |

|               |     |     |    |      |    |
|---------------|-----|-----|----|------|----|
| CONTIG-061083 | 142 | 7   | 12 | 27   | 0  |
| CONTIG-061084 | 190 | 10  | 9  | 61   | 0  |
| CONTIG-061085 | 87  | 3   | 2  | 2    | 0  |
| CONTIG-061087 | 84  | 13  | 24 | 17   | 0  |
| CONTIG-061088 | 142 | 5   | 10 | 10   | 0  |
| CONTIG-061089 | 61  | 7   | 8  | 12   | 0  |
| CONTIG-061090 | 97  | 4   | 7  | 7    | 0  |
| CONTIG-061091 | 94  | 14  | 2  | 40   | 0  |
| CONTIG-061092 | 70  | 17  | 8  | 6    | 0  |
| CONTIG-061099 | 90  | 5   | 5  | 10   | 0  |
| CONTIG-061100 | 201 | 5   | 2  | 26   | 0  |
| CONTIG-061101 | 88  | 13  | 30 | 12   | 0  |
| CONTIG-061102 | 173 | 10  | 10 | 65   | 0  |
| CONTIG-061103 | 219 | 13  | 27 | 135  | 0  |
| CONTIG-061104 | 585 | 12  | 11 | 238  | 0  |
| CONTIG-061105 | 73  | 5   | 3  | 10   | 0  |
| CONTIG-061106 | 358 | 11  | 23 | 72   | 0  |
| CONTIG-061107 | 59  | 82  | 17 | 184  | 0  |
| CONTIG-061108 | 177 | 20  | 18 | 126  | 0  |
| CONTIG-061110 | 81  | 5   | 9  | 8    | 0  |
| CONTIG-061111 | 67  | 7   | 4  | 16   | 0  |
| CONTIG-061112 | 174 | 5   | 5  | 18   | 0  |
| CONTIG-061113 | 101 | 6   | 4  | 2    | 0  |
| CONTIG-061114 | 96  | 9   | 5  | 30   | 0  |
| CONTIG-061115 | 244 | 12  | 4  | 10   | 0  |
| CONTIG-061116 | 72  | 2   | 2  | 0    | 0  |
| CONTIG-061117 | 93  | 10  | 5  | 29   | 0  |
| CONTIG-061118 | 154 | 5   | 3  | 29   | 0  |
| CONTIG-061120 | 106 | 21  | 17 | 57   | 0  |
| CONTIG-061121 | 69  | 6   | 9  | 10   | 2  |
| CONTIG-061122 | 386 | 30  | 2  | 0    | 88 |
| CONTIG-061123 | 68  | 4   | 2  | 0    | 0  |
| CONTIG-061124 | 169 | 21  | 36 | 90   | 3  |
| CONTIG-061125 | 69  | 9   | 3  | 9    | 0  |
| CONTIG-061126 | 94  | 20  | 5  | 69   | 0  |
| CONTIG-061128 | 139 | 350 | 17 | 1263 | 66 |
| CONTIG-061130 | 79  | 5   | 4  | 7    | 0  |
| CONTIG-061131 | 188 | 12  | 16 | 59   | 0  |
| CONTIG-061132 | 414 | 16  | 19 | 324  | 0  |
| CONTIG-061133 | 229 | 6   | 10 | 44   | 0  |
| CONTIG-061134 | 75  | 13  | 10 | 32   | 0  |
| CONTIG-061135 | 88  | 7   | 5  | 15   | 0  |
| CONTIG-061136 | 346 | 16  | 21 | 174  | 2  |
| CONTIG-061137 | 480 | 14  | 24 | 251  | 0  |
| CONTIG-061138 | 190 | 12  | 2  | 63   | 2  |
| CONTIG-061139 | 237 | 7   | 12 | 53   | 0  |
| CONTIG-061141 | 120 | 99  | 11 | 502  | 0  |

|               |     |    |    |     |    |
|---------------|-----|----|----|-----|----|
| CONTIG-061143 | 118 | 11 | 5  | 53  | 0  |
| CONTIG-061144 | 72  | 4  | 16 | 0   | 0  |
| CONTIG-061145 | 98  | 4  | 0  | 0   | 0  |
| CONTIG-061146 | 169 | 5  | 7  | 20  | 0  |
| CONTIG-061147 | 95  | 5  | 6  | 18  | 0  |
| CONTIG-061148 | 87  | 12 | 2  | 30  | 2  |
| CONTIG-061150 | 72  | 10 | 12 | 27  | 0  |
| CONTIG-061151 | 75  | 6  | 3  | 23  | 0  |
| CONTIG-061152 | 263 | 17 | 6  | 41  | 0  |
| CONTIG-061153 | 501 | 16 | 37 | 288 | 6  |
| CONTIG-061155 | 79  | 4  | 0  | 4   | 0  |
| CONTIG-061156 | 323 | 7  | 5  | 0   | 8  |
| CONTIG-061161 | 142 | 6  | 2  | 22  | 0  |
| CONTIG-061162 | 67  | 4  | 6  | 0   | 0  |
| CONTIG-061163 | 208 | 12 | 8  | 43  | 0  |
| CONTIG-061164 | 98  | 8  | 3  | 16  | 0  |
| CONTIG-061165 | 146 | 5  | 15 | 26  | 0  |
| CONTIG-061166 | 155 | 5  | 16 | 0   | 4  |
| CONTIG-061167 | 93  | 11 | 15 | 4   | 0  |
| CONTIG-061168 | 168 | 10 | 10 | 33  | 0  |
| CONTIG-061169 | 84  | 6  | 0  | 11  | 0  |
| CONTIG-061170 | 158 | 14 | 2  | 113 | 0  |
| CONTIG-061171 | 117 | 35 | 13 | 35  | 2  |
| CONTIG-061172 | 315 | 56 | 46 | 212 | 15 |
| CONTIG-061173 | 79  | 5  | 7  | 12  | 0  |
| CONTIG-061174 | 149 | 7  | 10 | 36  | 0  |
| CONTIG-061175 | 53  | 29 | 0  | 61  | 0  |
| CONTIG-061176 | 146 | 7  | 8  | 13  | 0  |
| CONTIG-061178 | 155 | 6  | 15 | 12  | 0  |
| CONTIG-061179 | 103 | 11 | 76 | 11  | 0  |
| CONTIG-061180 | 88  | 8  | 6  | 26  | 0  |
| CONTIG-061181 | 58  | 2  | 2  | 0   | 0  |
| CONTIG-061182 | 90  | 2  | 0  | 0   | 0  |
| CONTIG-061183 | 241 | 11 | 16 | 8   | 0  |
| CONTIG-061184 | 174 | 9  | 2  | 14  | 0  |
| CONTIG-061185 | 249 | 7  | 2  | 11  | 0  |
| CONTIG-061186 | 80  | 4  | 0  | 12  | 0  |
| CONTIG-061187 | 104 | 5  | 9  | 10  | 0  |
| CONTIG-061188 | 77  | 20 | 32 | 45  | 0  |
| CONTIG-061189 | 95  | 3  | 2  | 8   | 0  |
| CONTIG-061190 | 335 | 21 | 73 | 260 | 2  |
| CONTIG-061191 | 89  | 30 | 25 | 113 | 0  |
| CONTIG-061192 | 136 | 9  | 4  | 40  | 0  |
| CONTIG-061193 | 167 | 9  | 12 | 54  | 0  |
| CONTIG-061194 | 135 | 6  | 0  | 5   | 0  |
| CONTIG-061195 | 77  | 5  | 16 | 2   | 0  |
| CONTIG-061196 | 257 | 17 | 9  | 172 | 0  |

|               |     |    |    |     |   |
|---------------|-----|----|----|-----|---|
| CONTIG-061197 | 99  | 9  | 2  | 26  | 0 |
| CONTIG-061198 | 132 | 5  | 6  | 7   | 0 |
| CONTIG-061199 | 233 | 8  | 9  | 43  | 0 |
| CONTIG-061200 | 131 | 7  | 13 | 22  | 0 |
| CONTIG-061201 | 81  | 5  | 2  | 8   | 0 |
| CONTIG-061202 | 68  | 14 | 8  | 2   | 0 |
| CONTIG-061203 | 91  | 3  | 0  | 6   | 0 |
| CONTIG-061204 | 73  | 14 | 13 | 13  | 0 |
| CONTIG-061205 | 91  | 12 | 5  | 28  | 0 |
| CONTIG-061208 | 100 | 9  | 15 | 28  | 0 |
| CONTIG-061209 | 95  | 15 | 0  | 34  | 0 |
| CONTIG-061210 | 217 | 14 | 25 | 135 | 0 |
| CONTIG-061211 | 286 | 10 | 10 | 98  | 4 |
| CONTIG-061212 | 375 | 12 | 20 | 133 | 4 |
| CONTIG-061213 | 271 | 19 | 27 | 137 | 6 |
| CONTIG-061214 | 89  | 9  | 18 | 20  | 0 |
| CONTIG-061215 | 479 | 11 | 15 | 150 | 0 |
| CONTIG-061216 | 195 | 9  | 16 | 55  | 0 |
| CONTIG-061217 | 79  | 23 | 18 | 55  | 4 |
| CONTIG-061219 | 209 | 6  | 15 | 23  | 0 |
| CONTIG-061220 | 201 | 12 | 29 | 66  | 0 |
| CONTIG-061221 | 114 | 6  | 11 | 13  | 0 |
| CONTIG-061222 | 123 | 2  | 0  | 2   | 0 |
| CONTIG-061223 | 99  | 4  | 22 | 3   | 0 |
| CONTIG-061226 | 175 | 15 | 13 | 106 | 2 |
| CONTIG-061227 | 59  | 2  | 4  | 0   | 0 |
| CONTIG-061228 | 363 | 10 | 5  | 68  | 0 |
| CONTIG-061229 | 71  | 3  | 2  | 5   | 0 |
| CONTIG-061230 | 148 | 6  | 2  | 24  | 0 |
| CONTIG-061231 | 118 | 4  | 8  | 7   | 0 |
| CONTIG-061232 | 64  | 5  | 6  | 6   | 0 |
| CONTIG-061233 | 79  | 3  | 15 | 2   | 0 |
| CONTIG-061234 | 81  | 6  | 2  | 15  | 0 |
| CONTIG-061235 | 98  | 7  | 4  | 21  | 0 |
| CONTIG-061237 | 84  | 2  | 0  | 2   | 0 |
| CONTIG-061238 | 91  | 5  | 7  | 2   | 0 |
| CONTIG-061240 | 204 | 10 | 21 | 43  | 0 |
| CONTIG-061241 | 143 | 11 | 5  | 78  | 0 |
| CONTIG-061242 | 249 | 13 | 22 | 159 | 0 |
| CONTIG-061243 | 102 | 6  | 6  | 12  | 0 |
| CONTIG-061244 | 86  | 4  | 6  | 6   | 0 |
| CONTIG-061245 | 191 | 7  | 7  | 24  | 0 |
| CONTIG-061246 | 119 | 6  | 23 | 0   | 0 |
| CONTIG-061247 | 133 | 14 | 5  | 44  | 0 |
| CONTIG-061248 | 382 | 12 | 24 | 88  | 0 |
| CONTIG-061249 | 62  | 6  | 9  | 8   | 0 |
| CONTIG-061250 | 264 | 8  | 5  | 0   | 0 |



|               |     |    |    |     |   |
|---------------|-----|----|----|-----|---|
| CONTIG-061251 | 110 | 9  | 6  | 24  | 0 |
| CONTIG-061252 | 295 | 12 | 6  | 101 | 0 |
| CONTIG-061253 | 124 | 4  | 5  | 6   | 0 |
| CONTIG-061254 | 174 | 5  | 5  | 17  | 0 |
| CONTIG-061255 | 63  | 4  | 6  | 0   | 0 |
| CONTIG-061256 | 111 | 7  | 14 | 2   | 0 |
| CONTIG-061257 | 104 | 6  | 0  | 3   | 0 |
| CONTIG-061258 | 108 | 9  | 8  | 29  | 0 |
| CONTIG-061259 | 62  | 6  | 4  | 11  | 0 |
| CONTIG-061260 | 107 | 5  | 3  | 10  | 0 |
| CONTIG-061261 | 154 | 10 | 5  | 46  | 0 |
| CONTIG-061262 | 61  | 5  | 0  | 6   | 0 |
| CONTIG-061263 | 162 | 7  | 3  | 4   | 0 |
| CONTIG-061264 | 260 | 10 | 4  | 71  | 0 |
| CONTIG-061265 | 77  | 9  | 8  | 23  | 0 |
| CONTIG-061266 | 67  | 4  | 0  | 7   | 0 |
| CONTIG-061267 | 137 | 6  | 0  | 18  | 0 |
| CONTIG-061269 | 60  | 3  | 0  | 2   | 0 |
| CONTIG-061270 | 419 | 12 | 26 | 84  | 2 |
| CONTIG-061271 | 78  | 7  | 3  | 11  | 0 |
| CONTIG-061272 | 87  | 7  | 2  | 23  | 0 |
| CONTIG-061273 | 239 | 8  | 14 | 48  | 0 |
| CONTIG-061274 | 133 | 5  | 4  | 25  | 0 |
| CONTIG-061275 | 190 | 8  | 10 | 36  | 2 |
| CONTIG-061276 | 100 | 11 | 0  | 39  | 2 |
| CONTIG-061277 | 112 | 11 | 12 | 46  | 0 |
| CONTIG-061278 | 283 | 9  | 23 | 56  | 0 |
| CONTIG-061279 | 271 | 7  | 19 | 43  | 0 |
| CONTIG-061281 | 373 | 9  | 7  | 120 | 0 |
| CONTIG-061282 | 71  | 4  | 5  | 0   | 0 |
| CONTIG-061283 | 88  | 4  | 10 | 0   | 0 |
| CONTIG-061284 | 89  | 5  | 6  | 11  | 0 |
| CONTIG-061287 | 228 | 9  | 31 | 70  | 0 |
| CONTIG-061288 | 69  | 5  | 8  | 4   | 0 |
| CONTIG-061289 | 254 | 8  | 33 | 55  | 0 |
| CONTIG-061290 | 87  | 5  | 9  | 9   | 0 |
| CONTIG-061291 | 146 | 2  | 4  | 2   | 2 |
| CONTIG-061292 | 90  | 7  | 0  | 24  | 0 |
| CONTIG-061293 | 196 | 5  | 3  | 24  | 0 |
| CONTIG-061294 | 197 | 8  | 0  | 0   | 0 |
| CONTIG-061295 | 88  | 39 | 0  | 112 | 0 |
| CONTIG-061296 | 126 | 7  | 6  | 20  | 0 |
| CONTIG-061297 | 81  | 15 | 17 | 43  | 0 |
| CONTIG-061298 | 281 | 10 | 9  | 31  | 0 |
| CONTIG-061299 | 233 | 6  | 6  | 35  | 0 |
| CONTIG-061300 | 191 | 6  | 7  | 13  | 0 |
| CONTIG-061301 | 125 | 10 | 3  | 29  | 0 |

|               |     |     |    |     |    |
|---------------|-----|-----|----|-----|----|
| CONTIG-061302 | 281 | 15  | 14 | 128 | 4  |
| CONTIG-061303 | 169 | 8   | 2  | 62  | 0  |
| CONTIG-061304 | 185 | 35  | 12 | 62  | 0  |
| CONTIG-061305 | 98  | 6   | 6  | 8   | 0  |
| CONTIG-061306 | 201 | 12  | 18 | 66  | 2  |
| CONTIG-061307 | 83  | 2   | 0  | 0   | 0  |
| CONTIG-061308 | 230 | 10  | 8  | 52  | 0  |
| CONTIG-061309 | 161 | 5   | 4  | 12  | 0  |
| CONTIG-061310 | 255 | 8   | 4  | 62  | 0  |
| CONTIG-061311 | 50  | 195 | 13 | 519 | 0  |
| CONTIG-061312 | 86  | 4   | 3  | 13  | 0  |
| CONTIG-061313 | 246 | 12  | 11 | 125 | 0  |
| CONTIG-061314 | 176 | 7   | 2  | 15  | 0  |
| CONTIG-061315 | 225 | 14  | 8  | 65  | 10 |
| CONTIG-061318 | 70  | 5   | 2  | 6   | 0  |
| CONTIG-061319 | 600 | 17  | 5  | 2   | 0  |
| CONTIG-061320 | 113 | 9   | 11 | 19  | 0  |
| CONTIG-061321 | 364 | 4   | 2  | 4   | 0  |
| CONTIG-061322 | 106 | 13  | 2  | 71  | 0  |
| CONTIG-061323 | 147 | 6   | 5  | 31  | 0  |
| CONTIG-061324 | 91  | 2   | 0  | 2   | 0  |
| CONTIG-061325 | 77  | 28  | 17 | 109 | 0  |
| CONTIG-061326 | 113 | 8   | 2  | 18  | 0  |
| CONTIG-061327 | 187 | 6   | 3  | 11  | 0  |
| CONTIG-061328 | 81  | 4   | 3  | 6   | 0  |
| CONTIG-061330 | 100 | 9   | 15 | 27  | 2  |
| CONTIG-061331 | 99  | 6   | 6  | 15  | 0  |
| CONTIG-061332 | 107 | 10  | 0  | 49  | 0  |
| CONTIG-061333 | 88  | 12  | 5  | 53  | 0  |
| CONTIG-061335 | 212 | 6   | 14 | 28  | 0  |
| CONTIG-061336 | 70  | 7   | 2  | 7   | 4  |
| CONTIG-061337 | 166 | 6   | 5  | 6   | 0  |
| CONTIG-061339 | 202 | 20  | 3  | 188 | 0  |
| CONTIG-061340 | 131 | 5   | 5  | 14  | 0  |
| CONTIG-061341 | 78  | 22  | 7  | 51  | 2  |
| CONTIG-061342 | 82  | 8   | 3  | 21  | 0  |
| CONTIG-061344 | 228 | 8   | 16 | 47  | 0  |
| CONTIG-061345 | 43  | 18  | 5  | 7   | 0  |
| CONTIG-061346 | 154 | 5   | 4  | 11  | 0  |
| CONTIG-061347 | 378 | 32  | 0  | 0   | 74 |
| CONTIG-061353 | 158 | 10  | 19 | 29  | 0  |
| CONTIG-061354 | 75  | 12  | 0  | 32  | 0  |
| CONTIG-061355 | 143 | 4   | 0  | 10  | 0  |
| CONTIG-061356 | 85  | 6   | 10 | 13  | 0  |
| CONTIG-061357 | 117 | 5   | 0  | 5   | 0  |
| CONTIG-061358 | 85  | 2   | 7  | 0   | 0  |
| CONTIG-061359 | 70  | 8   | 2  | 6   | 0  |

|               |     |    |    |     |    |
|---------------|-----|----|----|-----|----|
| CONTIG-061360 | 220 | 18 | 6  | 143 | 2  |
| CONTIG-061361 | 73  | 4  | 11 | 2   | 0  |
| CONTIG-061362 | 58  | 3  | 0  | 0   | 0  |
| CONTIG-061364 | 408 | 13 | 16 | 218 | 0  |
| CONTIG-061366 | 120 | 5  | 11 | 20  | 0  |
| CONTIG-061367 | 211 | 18 | 60 | 109 | 0  |
| CONTIG-061368 | 140 | 8  | 9  | 32  | 0  |
| CONTIG-061369 | 93  | 7  | 12 | 12  | 0  |
| CONTIG-061370 | 73  | 11 | 24 | 4   | 0  |
| CONTIG-061371 | 199 | 5  | 5  | 31  | 0  |
| CONTIG-061372 | 119 | 6  | 4  | 19  | 0  |
| CONTIG-061374 | 104 | 19 | 20 | 61  | 2  |
| CONTIG-061375 | 90  | 14 | 14 | 42  | 0  |
| CONTIG-061376 | 63  | 5  | 4  | 4   | 0  |
| CONTIG-061377 | 176 | 12 | 7  | 86  | 0  |
| CONTIG-061378 | 130 | 4  | 8  | 12  | 2  |
| CONTIG-061379 | 66  | 5  | 2  | 6   | 0  |
| CONTIG-061380 | 108 | 5  | 7  | 8   | 0  |
| CONTIG-061386 | 137 | 7  | 13 | 17  | 0  |
| CONTIG-061387 | 243 | 9  | 6  | 66  | 0  |
| CONTIG-061388 | 187 | 11 | 4  | 57  | 0  |
| CONTIG-061389 | 345 | 10 | 34 | 90  | 0  |
| CONTIG-061390 | 799 | 18 | 8  | 318 | 0  |
| CONTIG-061391 | 385 | 6  | 2  | 0   | 21 |
| CONTIG-061392 | 76  | 3  | 7  | 0   | 0  |
| CONTIG-061393 | 114 | 6  | 0  | 13  | 0  |
| CONTIG-061394 | 98  | 7  | 6  | 23  | 0  |
| CONTIG-061395 | 133 | 19 | 14 | 14  | 2  |
| CONTIG-061396 | 194 | 6  | 0  | 36  | 0  |
| CONTIG-061397 | 95  | 10 | 30 | 0   | 0  |
| CONTIG-061398 | 107 | 7  | 0  | 0   | 0  |
| CONTIG-061399 | 67  | 13 | 5  | 12  | 0  |
| CONTIG-061400 | 73  | 4  | 3  | 14  | 0  |
| CONTIG-061401 | 388 | 29 | 22 | 311 | 22 |
| CONTIG-061402 | 68  | 6  | 0  | 0   | 0  |
| CONTIG-061403 | 67  | 3  | 2  | 5   | 0  |
| CONTIG-061404 | 176 | 18 | 40 | 93  | 0  |
| CONTIG-061405 | 297 | 13 | 19 | 140 | 0  |
| CONTIG-061406 | 99  | 5  | 5  | 0   | 8  |
| CONTIG-061407 | 86  | 9  | 22 | 0   | 0  |
| CONTIG-061408 | 110 | 12 | 8  | 2   | 2  |
| CONTIG-061409 | 165 | 6  | 0  | 0   | 2  |
| CONTIG-061410 | 111 | 11 | 0  | 34  | 0  |
| CONTIG-061411 | 105 | 56 | 27 | 232 | 0  |
| CONTIG-061412 | 286 | 6  | 22 | 15  | 0  |
| CONTIG-061413 | 84  | 6  | 6  | 9   | 0  |
| CONTIG-061414 | 74  | 11 | 38 | 5   | 0  |

|               |     |     |    |      |   |
|---------------|-----|-----|----|------|---|
| CONTIG-061415 | 201 | 10  | 7  | 108  | 0 |
| CONTIG-061416 | 112 | 12  | 14 | 45   | 2 |
| CONTIG-061417 | 120 | 4   | 4  | 4    | 0 |
| CONTIG-061419 | 73  | 6   | 5  | 12   | 0 |
| CONTIG-061421 | 140 | 7   | 8  | 38   | 2 |
| CONTIG-061423 | 81  | 6   | 3  | 10   | 0 |
| CONTIG-061424 | 69  | 9   | 8  | 18   | 0 |
| CONTIG-061425 | 137 | 7   | 2  | 23   | 0 |
| CONTIG-061426 | 117 | 6   | 6  | 11   | 0 |
| CONTIG-061427 | 295 | 8   | 20 | 30   | 0 |
| CONTIG-061428 | 285 | 15  | 7  | 23   | 2 |
| CONTIG-061429 | 73  | 4   | 8  | 6    | 0 |
| CONTIG-061430 | 226 | 7   | 6  | 59   | 0 |
| CONTIG-061431 | 242 | 8   | 2  | 32   | 0 |
| CONTIG-061432 | 69  | 3   | 4  | 4    | 0 |
| CONTIG-061435 | 169 | 7   | 14 | 30   | 0 |
| CONTIG-061439 | 114 | 7   | 2  | 25   | 0 |
| CONTIG-061440 | 256 | 6   | 2  | 23   | 0 |
| CONTIG-061441 | 157 | 9   | 13 | 20   | 0 |
| CONTIG-061442 | 134 | 10  | 0  | 0    | 6 |
| CONTIG-061443 | 81  | 8   | 5  | 28   | 0 |
| CONTIG-061444 | 136 | 17  | 2  | 116  | 0 |
| CONTIG-061445 | 296 | 9   | 9  | 56   | 0 |
| CONTIG-061446 | 142 | 6   | 7  | 12   | 0 |
| CONTIG-061447 | 489 | 12  | 11 | 254  | 0 |
| CONTIG-061449 | 70  | 10  | 11 | 4    | 0 |
| CONTIG-061450 | 103 | 10  | 10 | 38   | 0 |
| CONTIG-061451 | 317 | 9   | 6  | 88   | 0 |
| CONTIG-061454 | 61  | 5   | 8  | 2    | 0 |
| CONTIG-061455 | 77  | 6   | 4  | 11   | 0 |
| CONTIG-061456 | 72  | 3   | 0  | 4    | 0 |
| CONTIG-061457 | 238 | 10  | 5  | 28   | 0 |
| CONTIG-061458 | 75  | 4   | 11 | 7    | 0 |
| CONTIG-061459 | 301 | 9   | 17 | 87   | 0 |
| CONTIG-061460 | 100 | 8   | 2  | 30   | 0 |
| CONTIG-061461 | 69  | 903 | 11 | 2410 | 0 |
| CONTIG-061462 | 87  | 244 | 28 | 1119 | 0 |
| CONTIG-061464 | 67  | 13  | 0  | 19   | 0 |
| CONTIG-061465 | 692 | 14  | 52 | 377  | 8 |
| CONTIG-061466 | 139 | 15  | 8  | 54   | 0 |
| CONTIG-061467 | 104 | 3   | 3  | 8    | 0 |
| CONTIG-061468 | 98  | 6   | 4  | 7    | 0 |
| CONTIG-061469 | 75  | 85  | 5  | 359  | 0 |
| CONTIG-061470 | 89  | 11  | 11 | 19   | 0 |
| CONTIG-061473 | 391 | 11  | 11 | 96   | 0 |
| CONTIG-061474 | 171 | 10  | 7  | 27   | 0 |
| CONTIG-061475 | 66  | 10  | 29 | 8    | 0 |

|               |     |     |    |      |    |
|---------------|-----|-----|----|------|----|
| CONTIG-061476 | 72  | 10  | 3  | 16   | 0  |
| CONTIG-061477 | 212 | 16  | 13 | 96   | 0  |
| CONTIG-061478 | 107 | 20  | 18 | 47   | 0  |
| CONTIG-061479 | 392 | 13  | 13 | 108  | 0  |
| CONTIG-061480 | 121 | 10  | 27 | 24   | 0  |
| CONTIG-061481 | 160 | 9   | 13 | 31   | 0  |
| CONTIG-061482 | 152 | 22  | 20 | 65   | 2  |
| CONTIG-061483 | 231 | 5   | 16 | 34   | 0  |
| CONTIG-061484 | 80  | 9   | 11 | 34   | 0  |
| CONTIG-061485 | 160 | 7   | 9  | 26   | 0  |
| CONTIG-061486 | 100 | 9   | 35 | 16   | 0  |
| CONTIG-061487 | 58  | 3   | 0  | 4    | 0  |
| CONTIG-061488 | 164 | 8   | 7  | 36   | 0  |
| CONTIG-061489 | 543 | 19  | 39 | 222  | 0  |
| CONTIG-061490 | 277 | 12  | 4  | 110  | 2  |
| CONTIG-061491 | 454 | 16  | 11 | 361  | 0  |
| CONTIG-061492 | 623 | 27  | 16 | 0    | 0  |
| CONTIG-061494 | 77  | 4   | 4  | 2    | 0  |
| CONTIG-061495 | 107 | 6   | 3  | 5    | 2  |
| CONTIG-061496 | 90  | 18  | 3  | 89   | 0  |
| CONTIG-061497 | 450 | 12  | 6  | 57   | 4  |
| CONTIG-061498 | 138 | 35  | 14 | 299  | 0  |
| CONTIG-061499 | 149 | 9   | 46 | 35   | 0  |
| CONTIG-061500 | 239 | 14  | 4  | 40   | 0  |
| CONTIG-061501 | 94  | 6   | 6  | 7    | 0  |
| CONTIG-061502 | 64  | 7   | 2  | 17   | 0  |
| CONTIG-061503 | 102 | 11  | 0  | 20   | 0  |
| CONTIG-061504 | 58  | 3   | 2  | 0    | 0  |
| CONTIG-061505 | 176 | 170 | 81 | 1880 | 0  |
| CONTIG-061506 | 124 | 8   | 6  | 24   | 0  |
| CONTIG-061507 | 132 | 8   | 4  | 45   | 0  |
| CONTIG-061508 | 122 | 8   | 4  | 29   | 0  |
| CONTIG-061509 | 74  | 3   | 0  | 2    | 0  |
| CONTIG-061510 | 63  | 8   | 0  | 0    | 0  |
| CONTIG-061511 | 124 | 6   | 12 | 6    | 0  |
| CONTIG-061512 | 80  | 6   | 16 | 0    | 0  |
| CONTIG-061515 | 272 | 8   | 39 | 33   | 0  |
| CONTIG-061516 | 128 | 7   | 7  | 28   | 0  |
| CONTIG-061517 | 400 | 14  | 39 | 123  | 11 |
| CONTIG-061518 | 371 | 36  | 7  | 872  | 0  |
| CONTIG-061519 | 300 | 8   | 6  | 71   | 0  |
| CONTIG-061520 | 409 | 9   | 9  | 93   | 0  |
| CONTIG-061521 | 145 | 5   | 6  | 10   | 0  |
| CONTIG-061522 | 506 | 16  | 0  | 0    | 54 |
| CONTIG-061523 | 68  | 6   | 11 | 8    | 0  |
| CONTIG-061525 | 259 | 5   | 10 | 37   | 0  |
| CONTIG-061526 | 251 | 12  | 11 | 109  | 4  |

|               |     |     |    |     |    |
|---------------|-----|-----|----|-----|----|
| CONTIG-061528 | 607 | 126 | 12 | 87  | 0  |
| CONTIG-061529 | 171 | 9   | 6  | 31  | 0  |
| CONTIG-061530 | 347 | 12  | 13 | 145 | 0  |
| CONTIG-061531 | 125 | 6   | 25 | 19  | 0  |
| CONTIG-061532 | 167 | 11  | 15 | 56  | 0  |
| CONTIG-061533 | 79  | 12  | 3  | 33  | 0  |
| CONTIG-061534 | 456 | 11  | 30 | 100 | 12 |
| CONTIG-061536 | 299 | 5   | 6  | 38  | 0  |
| CONTIG-061537 | 390 | 14  | 9  | 34  | 0  |
| CONTIG-061538 | 68  | 10  | 12 | 15  | 0  |
| CONTIG-061539 | 106 | 12  | 7  | 59  | 0  |
| CONTIG-061540 | 134 | 4   | 6  | 12  | 0  |
| CONTIG-061541 | 159 | 10  | 19 | 46  | 0  |
| CONTIG-061542 | 73  | 7   | 10 | 12  | 0  |
| CONTIG-061543 | 87  | 7   | 10 | 17  | 0  |
| CONTIG-061544 | 215 | 9   | 10 | 52  | 0  |
| CONTIG-061545 | 158 | 8   | 6  | 31  | 0  |
| CONTIG-061546 | 265 | 17  | 21 | 143 | 2  |
| CONTIG-061547 | 175 | 7   | 22 | 31  | 0  |
| CONTIG-061548 | 147 | 12  | 12 | 30  | 0  |
| CONTIG-061549 | 79  | 10  | 7  | 10  | 0  |
| CONTIG-061550 | 38  | 244 | 14 | 259 | 0  |
| CONTIG-061555 | 134 | 23  | 23 | 126 | 3  |
| CONTIG-061556 | 249 | 5   | 4  | 30  | 0  |
| CONTIG-061557 | 58  | 4   | 5  | 0   | 0  |
| CONTIG-061558 | 111 | 7   | 16 | 4   | 0  |
| CONTIG-061559 | 71  | 2   | 0  | 4   | 0  |
| CONTIG-061560 | 75  | 5   | 2  | 15  | 0  |
| CONTIG-061561 | 186 | 7   | 2  | 12  | 0  |
| CONTIG-061562 | 62  | 5   | 0  | 0   | 0  |
| CONTIG-061563 | 537 | 12  | 10 | 231 | 0  |
| CONTIG-061564 | 236 | 7   | 13 | 41  | 0  |
| CONTIG-061565 | 231 | 7   | 16 | 54  | 0  |
| CONTIG-061567 | 113 | 7   | 9  | 22  | 0  |
| CONTIG-061569 | 77  | 10  | 13 | 23  | 0  |
| CONTIG-061571 | 302 | 11  | 21 | 75  | 0  |
| CONTIG-061572 | 143 | 9   | 9  | 32  | 2  |
| CONTIG-061573 | 83  | 3   | 0  | 2   | 0  |
| CONTIG-061574 | 158 | 9   | 8  | 33  | 2  |
| CONTIG-061575 | 70  | 7   | 10 | 5   | 0  |
| CONTIG-061576 | 204 | 7   | 2  | 27  | 0  |
| CONTIG-061577 | 538 | 13  | 16 | 236 | 2  |
| CONTIG-061578 | 245 | 6   | 6  | 51  | 0  |
| CONTIG-061579 | 84  | 11  | 25 | 17  | 0  |
| CONTIG-061580 | 66  | 9   | 8  | 5   | 0  |
| CONTIG-061581 | 127 | 3   | 0  | 9   | 0  |
| CONTIG-061582 | 98  | 4   | 0  | 2   | 0  |

|               |      |     |    |      |     |
|---------------|------|-----|----|------|-----|
| CONTIG-061583 | 84   | 9   | 0  | 39   | 0   |
| CONTIG-061584 | 171  | 11  | 10 | 74   | 0   |
| CONTIG-061585 | 715  | 21  | 10 | 629  | 0   |
| CONTIG-061586 | 99   | 4   | 3  | 4    | 0   |
| CONTIG-061587 | 75   | 9   | 9  | 17   | 0   |
| CONTIG-061588 | 335  | 8   | 8  | 84   | 0   |
| CONTIG-061589 | 265  | 5   | 13 | 31   | 0   |
| CONTIG-061590 | 84   | 11  | 11 | 24   | 0   |
| CONTIG-061591 | 95   | 9   | 0  | 36   | 0   |
| CONTIG-061592 | 72   | 5   | 8  | 6    | 0   |
| CONTIG-061593 | 70   | 12  | 2  | 16   | 0   |
| CONTIG-061594 | 75   | 10  | 13 | 19   | 0   |
| CONTIG-061595 | 79   | 4   | 3  | 7    | 0   |
| CONTIG-061596 | 126  | 7   | 10 | 15   | 0   |
| CONTIG-061597 | 71   | 19  | 46 | 0    | 0   |
| CONTIG-061598 | 90   | 6   | 7  | 12   | 0   |
| CONTIG-061599 | 63   | 21  | 10 | 2    | 0   |
| CONTIG-061600 | 68   | 4   | 0  | 5    | 0   |
| CONTIG-061601 | 150  | 6   | 5  | 37   | 0   |
| CONTIG-061602 | 232  | 8   | 2  | 36   | 0   |
| CONTIG-061603 | 86   | 6   | 2  | 21   | 0   |
| CONTIG-061604 | 215  | 8   | 10 | 70   | 0   |
| CONTIG-061605 | 175  | 13  | 8  | 107  | 0   |
| CONTIG-061608 | 142  | 7   | 15 | 20   | 0   |
| CONTIG-061609 | 132  | 14  | 16 | 76   | 0   |
| CONTIG-061610 | 374  | 19  | 58 | 34   | 15  |
| CONTIG-061611 | 96   | 8   | 0  | 21   | 0   |
| CONTIG-061612 | 325  | 8   | 12 | 74   | 2   |
| CONTIG-061613 | 96   | 4   | 2  | 9    | 0   |
| CONTIG-061614 | 189  | 12  | 2  | 14   | 0   |
| CONTIG-061615 | 79   | 3   | 2  | 3    | 0   |
| CONTIG-061616 | 148  | 9   | 12 | 10   | 0   |
| CONTIG-061617 | 371  | 12  | 16 | 98   | 2   |
| CONTIG-061618 | 102  | 15  | 18 | 35   | 2   |
| CONTIG-061619 | 269  | 7   | 0  | 36   | 0   |
| CONTIG-061620 | 61   | 10  | 6  | 18   | 0   |
| CONTIG-061621 | 76   | 3   | 0  | 4    | 0   |
| CONTIG-061623 | 172  | 17  | 10 | 104  | 0   |
| CONTIG-061624 | 173  | 7   | 5  | 21   | 0   |
| CONTIG-061625 | 536  | 20  | 21 | 140  | 4   |
| CONTIG-061626 | 102  | 7   | 3  | 23   | 0   |
| CONTIG-061627 | 1570 | 20  | 9  | 1111 | 32  |
| CONTIG-061628 | 60   | 10  | 21 | 17   | 0   |
| CONTIG-061629 | 139  | 15  | 2  | 93   | 0   |
| CONTIG-061630 | 103  | 4   | 6  | 17   | 0   |
| CONTIG-061631 | 375  | 60  | 5  | 0    | 216 |
| CONTIG-061632 | 39   | 300 | 5  | 0    | 0   |

|               |     |    |    |     |    |
|---------------|-----|----|----|-----|----|
| CONTIG-061633 | 70  | 10 | 10 | 39  | 0  |
| CONTIG-061634 | 82  | 3  | 2  | 6   | 0  |
| CONTIG-061635 | 90  | 3  | 7  | 5   | 0  |
| CONTIG-061636 | 78  | 15 | 2  | 44  | 0  |
| CONTIG-061637 | 197 | 10 | 7  | 64  | 0  |
| CONTIG-061638 | 116 | 5  | 5  | 6   | 10 |
| CONTIG-061640 | 189 | 6  | 8  | 49  | 0  |
| CONTIG-061641 | 310 | 12 | 25 | 146 | 0  |
| CONTIG-061642 | 142 | 5  | 6  | 20  | 0  |
| CONTIG-061643 | 72  | 6  | 0  | 11  | 0  |
| CONTIG-061646 | 185 | 9  | 5  | 17  | 0  |
| CONTIG-061647 | 105 | 5  | 3  | 24  | 0  |
| CONTIG-061648 | 222 | 9  | 6  | 78  | 0  |
| CONTIG-061649 | 101 | 10 | 7  | 21  | 2  |
| CONTIG-061650 | 63  | 6  | 3  | 8   | 0  |
| CONTIG-061651 | 133 | 6  | 14 | 23  | 0  |
| CONTIG-061653 | 86  | 6  | 0  | 21  | 0  |
| CONTIG-061654 | 398 | 13 | 4  | 58  | 6  |
| CONTIG-061655 | 101 | 74 | 0  | 368 | 0  |
| CONTIG-061656 | 243 | 6  | 11 | 38  | 0  |
| CONTIG-061657 | 149 | 6  | 0  | 9   | 0  |
| CONTIG-061659 | 128 | 13 | 4  | 32  | 0  |
| CONTIG-061660 | 650 | 14 | 2  | 0   | 98 |
| CONTIG-061661 | 230 | 7  | 5  | 56  | 2  |
| CONTIG-061663 | 80  | 7  | 7  | 8   | 0  |
| CONTIG-061664 | 81  | 5  | 3  | 6   | 0  |
| CONTIG-061665 | 178 | 7  | 17 | 15  | 0  |
| CONTIG-061666 | 71  | 4  | 2  | 0   | 0  |
| CONTIG-061667 | 127 | 11 | 5  | 51  | 0  |
| CONTIG-061670 | 65  | 6  | 19 | 7   | 0  |
| CONTIG-061671 | 61  | 3  | 5  | 3   | 0  |
| CONTIG-061672 | 68  | 3  | 2  | 5   | 0  |
| CONTIG-061673 | 77  | 4  | 12 | 2   | 0  |
| CONTIG-061674 | 120 | 7  | 4  | 19  | 0  |
| CONTIG-061675 | 143 | 4  | 0  | 24  | 0  |
| CONTIG-061676 | 79  | 2  | 3  | 0   | 0  |
| CONTIG-061678 | 68  | 4  | 2  | 4   | 2  |
| CONTIG-061679 | 112 | 5  | 5  | 17  | 0  |
| CONTIG-061680 | 84  | 9  | 7  | 29  | 0  |
| CONTIG-061683 | 282 | 7  | 23 | 45  | 2  |
| CONTIG-061684 | 94  | 5  | 2  | 9   | 0  |
| CONTIG-061685 | 228 | 19 | 8  | 108 | 3  |
| CONTIG-061686 | 115 | 4  | 8  | 8   | 0  |
| CONTIG-061687 | 200 | 3  | 4  | 9   | 0  |
| CONTIG-061688 | 99  | 9  | 9  | 30  | 0  |
| CONTIG-061689 | 179 | 7  | 17 | 17  | 0  |
| CONTIG-061690 | 99  | 5  | 0  | 14  | 0  |



|               |     |    |    |     |    |
|---------------|-----|----|----|-----|----|
| CONTIG-061691 | 157 | 6  | 5  | 46  | 0  |
| CONTIG-061692 | 85  | 6  | 2  | 13  | 0  |
| CONTIG-061695 | 208 | 9  | 2  | 68  | 0  |
| CONTIG-061696 | 64  | 6  | 6  | 11  | 0  |
| CONTIG-061697 | 74  | 9  | 10 | 32  | 0  |
| CONTIG-061698 | 89  | 6  | 7  | 15  | 0  |
| CONTIG-061699 | 62  | 5  | 9  | 6   | 0  |
| CONTIG-061700 | 140 | 6  | 8  | 16  | 0  |
| CONTIG-061701 | 85  | 5  | 8  | 6   | 0  |
| CONTIG-061703 | 183 | 11 | 13 | 42  | 4  |
| CONTIG-061704 | 147 | 12 | 10 | 99  | 0  |
| CONTIG-061705 | 76  | 5  | 6  | 0   | 0  |
| CONTIG-061706 | 213 | 8  | 26 | 7   | 0  |
| CONTIG-061708 | 125 | 5  | 2  | 11  | 0  |
| CONTIG-061709 | 105 | 9  | 12 | 16  | 2  |
| CONTIG-061710 | 154 | 6  | 5  | 0   | 4  |
| CONTIG-061711 | 268 | 6  | 35 | 35  | 0  |
| CONTIG-061712 | 79  | 16 | 20 | 49  | 0  |
| CONTIG-061713 | 90  | 10 | 7  | 3   | 0  |
| CONTIG-061714 | 151 | 9  | 0  | 42  | 0  |
| CONTIG-061715 | 86  | 4  | 0  | 15  | 0  |
| CONTIG-061716 | 113 | 15 | 30 | 4   | 0  |
| CONTIG-061717 | 101 | 3  | 0  | 6   | 0  |
| CONTIG-061718 | 249 | 9  | 7  | 37  | 2  |
| CONTIG-061719 | 58  | 3  | 0  | 2   | 0  |
| CONTIG-061720 | 226 | 13 | 0  | 0   | 20 |
| CONTIG-061721 | 149 | 22 | 4  | 187 | 2  |
| CONTIG-061722 | 654 | 18 | 4  | 295 | 5  |
| CONTIG-061723 | 407 | 9  | 8  | 11  | 0  |
| CONTIG-061724 | 508 | 11 | 6  | 128 | 2  |
| CONTIG-061725 | 266 | 13 | 8  | 110 | 0  |
| CONTIG-061726 | 69  | 14 | 3  | 26  | 0  |
| CONTIG-061727 | 69  | 11 | 3  | 17  | 0  |
| CONTIG-061736 | 214 | 10 | 8  | 89  | 0  |
| CONTIG-061737 | 139 | 6  | 6  | 11  | 0  |
| CONTIG-061738 | 78  | 10 | 9  | 30  | 2  |
| CONTIG-061739 | 184 | 43 | 27 | 288 | 2  |
| CONTIG-061740 | 72  | 18 | 0  | 51  | 0  |
| CONTIG-061741 | 262 | 7  | 2  | 57  | 0  |
| CONTIG-061742 | 90  | 4  | 5  | 7   | 0  |
| CONTIG-061743 | 62  | 3  | 6  | 5   | 0  |
| CONTIG-061744 | 120 | 7  | 10 | 17  | 2  |
| CONTIG-061745 | 828 | 22 | 6  | 27  | 0  |
| CONTIG-061746 | 104 | 4  | 3  | 12  | 0  |
| CONTIG-061747 | 123 | 14 | 4  | 44  | 2  |
| CONTIG-061748 | 58  | 2  | 2  | 2   | 0  |
| CONTIG-061749 | 105 | 14 | 7  | 46  | 2  |

|               |     |      |    |     |     |
|---------------|-----|------|----|-----|-----|
| CONTIG-061750 | 82  | 4    | 3  | 15  | 0   |
| CONTIG-061751 | 235 | 8    | 6  | 90  | 0   |
| CONTIG-061752 | 157 | 5    | 10 | 11  | 0   |
| CONTIG-061753 | 255 | 16   | 10 | 181 | 0   |
| CONTIG-061754 | 145 | 4    | 8  | 11  | 0   |
| CONTIG-061755 | 278 | 11   | 21 | 11  | 0   |
| CONTIG-061756 | 167 | 4    | 4  | 19  | 0   |
| CONTIG-061757 | 87  | 5    | 9  | 4   | 0   |
| CONTIG-061758 | 465 | 11   | 16 | 82  | 2   |
| CONTIG-061759 | 59  | 7    | 0  | 3   | 0   |
| CONTIG-061760 | 273 | 13   | 40 | 78  | 4   |
| CONTIG-061761 | 90  | 7    | 5  | 12  | 0   |
| CONTIG-061762 | 71  | 9    | 7  | 20  | 0   |
| CONTIG-061763 | 98  | 3    | 2  | 4   | 0   |
| CONTIG-061764 | 446 | 41   | 8  | 0   | 206 |
| CONTIG-061765 | 97  | 8    | 0  | 0   | 0   |
| CONTIG-061766 | 78  | 2    | 0  | 2   | 0   |
| CONTIG-061767 | 81  | 6    | 16 | 17  | 0   |
| CONTIG-061770 | 71  | 8    | 20 | 4   | 0   |
| CONTIG-061771 | 73  | 68   | 4  | 215 | 0   |
| CONTIG-061772 | 117 | 4    | 0  | 6   | 0   |
| CONTIG-061773 | 258 | 10   | 16 | 64  | 2   |
| CONTIG-061774 | 122 | 6    | 16 | 17  | 0   |
| CONTIG-061775 | 115 | 33   | 17 | 114 | 2   |
| CONTIG-061776 | 75  | 10   | 2  | 4   | 0   |
| CONTIG-061777 | 133 | 9    | 9  | 28  | 0   |
| CONTIG-061778 | 89  | 7    | 4  | 15  | 0   |
| CONTIG-061779 | 118 | 4    | 13 | 4   | 0   |
| CONTIG-061780 | 78  | 6    | 10 | 15  | 0   |
| CONTIG-061781 | 268 | 49   | 10 | 0   | 6   |
| CONTIG-061782 | 202 | 10   | 4  | 94  | 0   |
| CONTIG-061783 | 76  | 1101 | 5  | 40  | 2   |
| CONTIG-061785 | 168 | 6    | 15 | 22  | 0   |
| CONTIG-061787 | 93  | 7    | 12 | 11  | 0   |
| CONTIG-061788 | 467 | 8    | 6  | 0   | 19  |
| CONTIG-061789 | 99  | 7    | 39 | 9   | 0   |
| CONTIG-061790 | 83  | 12   | 9  | 0   | 0   |
| CONTIG-061791 | 70  | 7    | 10 | 4   | 0   |
| CONTIG-061794 | 117 | 9    | 7  | 37  | 2   |
| CONTIG-061799 | 95  | 7    | 0  | 17  | 2   |
| CONTIG-061800 | 69  | 6    | 6  | 0   | 0   |
| CONTIG-061801 | 182 | 6    | 16 | 21  | 0   |
| CONTIG-061802 | 124 | 9    | 18 | 36  | 2   |
| CONTIG-061803 | 431 | 17   | 64 | 226 | 5   |
| CONTIG-061804 | 62  | 2    | 0  | 5   | 0   |
| CONTIG-061805 | 62  | 3    | 4  | 0   | 0   |
| CONTIG-061808 | 78  | 159  | 14 | 323 | 53  |

|               |     |     |    |     |    |
|---------------|-----|-----|----|-----|----|
| CONTIG-061809 | 85  | 9   | 18 | 27  | 0  |
| CONTIG-061810 | 207 | 8   | 6  | 28  | 0  |
| CONTIG-061811 | 85  | 4   | 3  | 2   | 0  |
| CONTIG-061812 | 127 | 6   | 4  | 25  | 0  |
| CONTIG-061813 | 105 | 2   | 3  | 4   | 0  |
| CONTIG-061814 | 149 | 8   | 0  | 0   | 0  |
| CONTIG-061815 | 179 | 11  | 5  | 8   | 0  |
| CONTIG-061816 | 73  | 16  | 22 | 35  | 0  |
| CONTIG-061817 | 122 | 4   | 3  | 11  | 0  |
| CONTIG-061818 | 131 | 5   | 0  | 29  | 0  |
| CONTIG-061819 | 110 | 15  | 6  | 59  | 0  |
| CONTIG-061820 | 84  | 4   | 0  | 4   | 0  |
| CONTIG-061821 | 42  | 216 | 4  | 204 | 0  |
| CONTIG-061823 | 153 | 10  | 5  | 63  | 0  |
| CONTIG-061824 | 585 | 27  | 6  | 16  | 0  |
| CONTIG-061825 | 79  | 8   | 0  | 21  | 2  |
| CONTIG-061826 | 102 | 10  | 2  | 25  | 4  |
| CONTIG-061829 | 129 | 5   | 10 | 28  | 0  |
| CONTIG-061830 | 62  | 7   | 15 | 0   | 0  |
| CONTIG-061831 | 141 | 5   | 8  | 8   | 0  |
| CONTIG-061832 | 265 | 24  | 0  | 111 | 0  |
| CONTIG-061833 | 115 | 15  | 16 | 68  | 0  |
| CONTIG-061834 | 114 | 11  | 33 | 36  | 0  |
| CONTIG-061835 | 106 | 8   | 27 | 16  | 0  |
| CONTIG-061836 | 84  | 6   | 2  | 8   | 0  |
| CONTIG-061837 | 587 | 16  | 17 | 475 | 0  |
| CONTIG-061838 | 98  | 8   | 14 | 16  | 0  |
| CONTIG-061839 | 913 | 14  | 0  | 0   | 79 |
| CONTIG-061840 | 84  | 4   | 6  | 12  | 0  |
| CONTIG-061841 | 73  | 5   | 0  | 7   | 0  |
| CONTIG-061842 | 58  | 8   | 0  | 11  | 0  |
| CONTIG-061843 | 115 | 6   | 7  | 19  | 0  |
| CONTIG-061844 | 90  | 5   | 3  | 14  | 0  |
| CONTIG-061845 | 230 | 5   | 2  | 33  | 0  |
| CONTIG-061846 | 469 | 23  | 15 | 303 | 20 |
| CONTIG-061847 | 92  | 75  | 10 | 54  | 0  |
| CONTIG-061848 | 257 | 6   | 2  | 48  | 0  |
| CONTIG-061849 | 232 | 9   | 2  | 72  | 0  |
| CONTIG-061850 | 103 | 8   | 7  | 21  | 0  |
| CONTIG-061851 | 90  | 5   | 16 | 9   | 0  |
| CONTIG-061852 | 125 | 7   | 21 | 10  | 0  |
| CONTIG-061853 | 278 | 6   | 20 | 2   | 0  |
| CONTIG-061854 | 136 | 11  | 6  | 38  | 0  |
| CONTIG-061855 | 205 | 10  | 8  | 35  | 0  |
| CONTIG-061856 | 115 | 11  | 4  | 30  | 0  |
| CONTIG-061857 | 77  | 7   | 11 | 0   | 0  |
| CONTIG-061858 | 65  | 82  | 9  | 39  | 0  |

|               |     |    |    |     |    |
|---------------|-----|----|----|-----|----|
| CONTIG-061859 | 601 | 17 | 31 | 306 | 4  |
| CONTIG-061861 | 58  | 3  | 2  | 2   | 0  |
| CONTIG-061862 | 58  | 8  | 13 | 4   | 0  |
| CONTIG-061863 | 171 | 8  | 11 | 55  | 0  |
| CONTIG-061864 | 65  | 4  | 8  | 8   | 0  |
| CONTIG-061865 | 78  | 8  | 14 | 9   | 0  |
| CONTIG-061866 | 264 | 9  | 6  | 48  | 0  |
| CONTIG-061867 | 99  | 4  | 3  | 4   | 0  |
| CONTIG-061868 | 120 | 29 | 26 | 149 | 0  |
| CONTIG-061869 | 74  | 3  | 2  | 0   | 0  |
| CONTIG-061870 | 341 | 22 | 28 | 325 | 0  |
| CONTIG-061871 | 153 | 7  | 19 | 43  | 0  |
| CONTIG-061872 | 72  | 7  | 4  | 18  | 0  |
| CONTIG-061873 | 202 | 17 | 18 | 54  | 0  |
| CONTIG-061874 | 61  | 7  | 15 | 0   | 0  |
| CONTIG-061875 | 202 | 11 | 18 | 78  | 0  |
| CONTIG-061876 | 167 | 8  | 9  | 30  | 0  |
| CONTIG-061877 | 90  | 4  | 3  | 0   | 0  |
| CONTIG-061878 | 81  | 24 | 7  | 56  | 0  |
| CONTIG-061879 | 203 | 8  | 5  | 61  | 0  |
| CONTIG-061880 | 155 | 4  | 0  | 10  | 0  |
| CONTIG-061881 | 388 | 27 | 41 | 486 | 0  |
| CONTIG-061882 | 109 | 8  | 24 | 30  | 0  |
| CONTIG-061883 | 61  | 8  | 10 | 2   | 0  |
| CONTIG-061884 | 461 | 17 | 26 | 169 | 0  |
| CONTIG-061889 | 80  | 5  | 5  | 11  | 0  |
| CONTIG-061890 | 145 | 6  | 9  | 14  | 0  |
| CONTIG-061891 | 377 | 10 | 8  | 95  | 2  |
| CONTIG-061892 | 167 | 5  | 11 | 0   | 0  |
| CONTIG-061893 | 97  | 5  | 0  | 10  | 0  |
| CONTIG-061894 | 67  | 4  | 3  | 10  | 0  |
| CONTIG-061895 | 106 | 9  | 2  | 22  | 0  |
| CONTIG-061896 | 89  | 5  | 2  | 0   | 0  |
| CONTIG-061897 | 89  | 4  | 0  | 17  | 0  |
| CONTIG-061898 | 59  | 7  | 5  | 9   | 0  |
| CONTIG-061899 | 83  | 5  | 12 | 5   | 0  |
| CONTIG-061900 | 165 | 8  | 13 | 24  | 0  |
| CONTIG-061901 | 103 | 4  | 7  | 0   | 0  |
| CONTIG-061902 | 238 | 12 | 11 | 91  | 0  |
| CONTIG-061903 | 63  | 17 | 10 | 6   | 0  |
| CONTIG-061904 | 256 | 11 | 6  | 52  | 4  |
| CONTIG-061905 | 93  | 10 | 12 | 25  | 0  |
| CONTIG-061906 | 112 | 5  | 7  | 15  | 0  |
| CONTIG-061907 | 390 | 12 | 18 | 0   | 13 |
| CONTIG-061908 | 82  | 14 | 19 | 12  | 2  |
| CONTIG-061909 | 327 | 9  | 16 | 78  | 0  |
| CONTIG-061910 | 73  | 6  | 0  | 9   | 0  |

|               |     |    |    |     |    |
|---------------|-----|----|----|-----|----|
| CONTIG-061912 | 170 | 36 | 17 | 382 | 0  |
| CONTIG-061913 | 162 | 7  | 13 | 27  | 0  |
| CONTIG-061914 | 68  | 8  | 6  | 7   | 0  |
| CONTIG-061917 | 61  | 3  | 3  | 2   | 0  |
| CONTIG-061918 | 87  | 6  | 2  | 0   | 0  |
| CONTIG-061919 | 93  | 5  | 0  | 8   | 0  |
| CONTIG-061920 | 618 | 20 | 27 | 8   | 0  |
| CONTIG-061921 | 59  | 4  | 5  | 0   | 0  |
| CONTIG-061922 | 127 | 7  | 2  | 23  | 0  |
| CONTIG-061923 | 144 | 11 | 13 | 49  | 0  |
| CONTIG-061924 | 97  | 12 | 14 | 26  | 0  |
| CONTIG-061925 | 152 | 10 | 2  | 32  | 0  |
| CONTIG-061926 | 414 | 21 | 16 | 396 | 0  |
| CONTIG-061927 | 59  | 4  | 2  | 4   | 0  |
| CONTIG-061928 | 192 | 36 | 2  | 0   | 70 |
| CONTIG-061929 | 184 | 9  | 5  | 50  | 0  |
| CONTIG-061930 | 204 | 4  | 16 | 17  | 0  |
| CONTIG-061931 | 38  | 9  | 10 | 4   | 0  |
| CONTIG-061932 | 170 | 14 | 16 | 26  | 0  |
| CONTIG-061933 | 70  | 14 | 0  | 21  | 0  |
| CONTIG-061935 | 104 | 7  | 6  | 22  | 0  |
| CONTIG-061936 | 46  | 49 | 10 | 14  | 0  |
| CONTIG-061937 | 62  | 10 | 19 | 9   | 0  |
| CONTIG-061938 | 76  | 8  | 41 | 6   | 2  |
| CONTIG-061939 | 205 | 21 | 11 | 156 | 3  |
| CONTIG-061940 | 219 | 9  | 16 | 52  | 0  |
| CONTIG-061941 | 375 | 7  | 8  | 51  | 0  |
| CONTIG-061942 | 236 | 7  | 24 | 16  | 0  |
| CONTIG-061943 | 141 | 8  | 25 | 16  | 0  |
| CONTIG-061944 | 103 | 7  | 9  | 6   | 0  |
| CONTIG-061945 | 110 | 7  | 9  | 0   | 0  |
| CONTIG-061946 | 193 | 7  | 2  | 52  | 0  |
| CONTIG-061947 | 90  | 7  | 27 | 2   | 0  |
| CONTIG-061948 | 128 | 11 | 2  | 50  | 0  |
| CONTIG-061949 | 184 | 7  | 2  | 21  | 0  |
| CONTIG-061950 | 115 | 6  | 4  | 18  | 0  |
| CONTIG-061951 | 191 | 12 | 12 | 18  | 0  |
| CONTIG-061953 | 131 | 8  | 0  | 34  | 0  |
| CONTIG-061954 | 132 | 12 | 5  | 51  | 0  |
| CONTIG-061955 | 236 | 9  | 15 | 50  | 0  |
| CONTIG-061956 | 208 | 16 | 14 | 50  | 0  |
| CONTIG-061957 | 152 | 7  | 23 | 4   | 0  |
| CONTIG-061958 | 137 | 9  | 3  | 50  | 0  |
| CONTIG-061959 | 135 | 38 | 5  | 0   | 2  |
| CONTIG-061960 | 305 | 5  | 6  | 36  | 0  |
| CONTIG-061961 | 202 | 9  | 8  | 0   | 13 |
| CONTIG-061962 | 276 | 11 | 16 | 90  | 0  |

|               |     |     |    |      |    |
|---------------|-----|-----|----|------|----|
| CONTIG-061963 | 135 | 3   | 2  | 0    | 0  |
| CONTIG-061964 | 91  | 7   | 0  | 31   | 0  |
| CONTIG-061965 | 88  | 5   | 0  | 4    | 0  |
| CONTIG-061966 | 199 | 18  | 16 | 6    | 49 |
| CONTIG-061967 | 68  | 4   | 0  | 2    | 0  |
| CONTIG-061968 | 159 | 14  | 15 | 80   | 3  |
| CONTIG-061969 | 73  | 5   | 9  | 11   | 0  |
| CONTIG-061970 | 299 | 12  | 16 | 46   | 0  |
| CONTIG-061971 | 123 | 7   | 12 | 0    | 0  |
| CONTIG-061973 | 51  | 18  | 4  | 30   | 0  |
| CONTIG-061976 | 78  | 5   | 2  | 6    | 0  |
| CONTIG-061977 | 71  | 5   | 3  | 8    | 0  |
| CONTIG-061978 | 96  | 22  | 13 | 74   | 0  |
| CONTIG-061979 | 253 | 6   | 10 | 29   | 0  |
| CONTIG-061980 | 52  | 303 | 12 | 468  | 0  |
| CONTIG-061981 | 289 | 14  | 14 | 64   | 3  |
| CONTIG-061982 | 149 | 8   | 22 | 42   | 0  |
| CONTIG-061983 | 138 | 14  | 50 | 10   | 0  |
| CONTIG-061984 | 109 | 8   | 2  | 29   | 0  |
| CONTIG-061985 | 68  | 3   | 2  | 0    | 0  |
| CONTIG-061986 | 59  | 3   | 14 | 0    | 0  |
| CONTIG-061990 | 107 | 6   | 5  | 22   | 0  |
| CONTIG-061991 | 248 | 15  | 36 | 47   | 0  |
| CONTIG-061992 | 184 | 7   | 11 | 32   | 0  |
| CONTIG-061993 | 59  | 4   | 2  | 6    | 0  |
| CONTIG-061994 | 108 | 11  | 4  | 18   | 0  |
| CONTIG-061995 | 298 | 11  | 10 | 76   | 2  |
| CONTIG-061996 | 226 | 7   | 17 | 42   | 0  |
| CONTIG-061997 | 131 | 7   | 4  | 29   | 0  |
| CONTIG-061998 | 207 | 8   | 11 | 39   | 0  |
| CONTIG-061999 | 92  | 5   | 3  | 4    | 0  |
| CONTIG-062000 | 94  | 3   | 4  | 3    | 2  |
| CONTIG-062001 | 111 | 9   | 0  | 0    | 0  |
| CONTIG-062003 | 535 | 54  | 17 | 1902 | 0  |
| CONTIG-062004 | 291 | 9   | 26 | 54   | 0  |
| CONTIG-062005 | 359 | 8   | 10 | 96   | 0  |
| CONTIG-062006 | 96  | 6   | 2  | 6    | 0  |
| CONTIG-062007 | 61  | 10  | 5  | 0    | 0  |
| CONTIG-062008 | 86  | 13  | 23 | 29   | 0  |
| CONTIG-062009 | 59  | 4   | 4  | 8    | 0  |
| CONTIG-062010 | 363 | 14  | 0  | 6    | 8  |
| CONTIG-062011 | 71  | 7   | 10 | 8    | 0  |
| CONTIG-062012 | 142 | 5   | 6  | 16   | 0  |
| CONTIG-062013 | 223 | 7   | 6  | 66   | 0  |
| CONTIG-062014 | 72  | 7   | 2  | 21   | 0  |
| CONTIG-062015 | 68  | 7   | 2  | 7    | 0  |
| CONTIG-062016 | 132 | 12  | 5  | 49   | 2  |

|               |     |      |    |      |   |
|---------------|-----|------|----|------|---|
| CONTIG-062017 | 80  | 6    | 12 | 8    | 0 |
| CONTIG-062018 | 93  | 11   | 9  | 16   | 0 |
| CONTIG-062019 | 174 | 6    | 0  | 25   | 2 |
| CONTIG-062021 | 199 | 13   | 15 | 78   | 0 |
| CONTIG-062022 | 185 | 7    | 5  | 31   | 0 |
| CONTIG-062023 | 61  | 3    | 3  | 4    | 0 |
| CONTIG-062025 | 63  | 5    | 4  | 6    | 0 |
| CONTIG-062026 | 202 | 9    | 9  | 57   | 0 |
| CONTIG-062027 | 583 | 8    | 8  | 96   | 3 |
| CONTIG-062028 | 215 | 8    | 13 | 68   | 0 |
| CONTIG-062029 | 85  | 9    | 2  | 14   | 0 |
| CONTIG-062030 | 39  | 25   | 20 | 16   | 0 |
| CONTIG-062031 | 123 | 17   | 14 | 84   | 0 |
| CONTIG-062032 | 76  | 10   | 6  | 14   | 2 |
| CONTIG-062033 | 69  | 10   | 13 | 15   | 0 |
| CONTIG-062034 | 176 | 7    | 8  | 46   | 0 |
| CONTIG-062035 | 574 | 12   | 22 | 205  | 2 |
| CONTIG-062036 | 45  | 62   | 5  | 71   | 0 |
| CONTIG-062037 | 343 | 12   | 10 | 194  | 0 |
| CONTIG-062040 | 113 | 5    | 20 | 19   | 0 |
| CONTIG-062041 | 96  | 7    | 10 | 23   | 0 |
| CONTIG-062042 | 61  | 3    | 4  | 4    | 0 |
| CONTIG-062043 | 462 | 35   | 10 | 62   | 0 |
| CONTIG-062048 | 60  | 5    | 0  | 12   | 0 |
| CONTIG-062049 | 92  | 8    | 4  | 19   | 0 |
| CONTIG-062050 | 137 | 6    | 14 | 18   | 0 |
| CONTIG-062051 | 156 | 6    | 8  | 39   | 0 |
| CONTIG-062052 | 108 | 8    | 4  | 37   | 0 |
| CONTIG-062053 | 86  | 8    | 5  | 17   | 0 |
| CONTIG-062054 | 113 | 9    | 5  | 31   | 0 |
| CONTIG-062055 | 67  | 10   | 4  | 12   | 0 |
| CONTIG-062056 | 204 | 9    | 4  | 55   | 0 |
| CONTIG-062057 | 59  | 2    | 0  | 2    | 0 |
| CONTIG-062058 | 199 | 25   | 11 | 180  | 2 |
| CONTIG-062059 | 263 | 12   | 12 | 119  | 0 |
| CONTIG-062060 | 90  | 3    | 4  | 0    | 0 |
| CONTIG-062062 | 46  | 1073 | 37 | 1598 | 0 |
| CONTIG-062063 | 64  | 16   | 5  | 24   | 0 |
| CONTIG-062064 | 58  | 2    | 5  | 3    | 0 |
| CONTIG-062065 | 209 | 9    | 2  | 35   | 0 |
| CONTIG-062066 | 68  | 8    | 9  | 6    | 0 |
| CONTIG-062073 | 153 | 5    | 12 | 5    | 0 |
| CONTIG-062074 | 113 | 13   | 3  | 8    | 2 |
| CONTIG-062075 | 180 | 13   | 0  | 4    | 0 |
| CONTIG-062076 | 70  | 17   | 10 | 48   | 0 |
| CONTIG-062077 | 153 | 6    | 0  | 9    | 0 |
| CONTIG-062078 | 251 | 5    | 17 | 4    | 0 |

|               |     |    |    |     |    |
|---------------|-----|----|----|-----|----|
| CONTIG-062079 | 67  | 3  | 3  | 3   | 0  |
| CONTIG-062080 | 67  | 2  | 4  | 4   | 0  |
| CONTIG-062081 | 55  | 14 | 2  | 27  | 0  |
| CONTIG-062082 | 140 | 4  | 3  | 13  | 0  |
| CONTIG-062083 | 219 | 6  | 0  | 40  | 0  |
| CONTIG-062085 | 68  | 5  | 0  | 7   | 0  |
| CONTIG-062086 | 61  | 4  | 0  | 4   | 0  |
| CONTIG-062087 | 69  | 6  | 2  | 14  | 0  |
| CONTIG-062088 | 76  | 9  | 12 | 8   | 0  |
| CONTIG-062089 | 73  | 4  | 0  | 7   | 0  |
| CONTIG-062090 | 88  | 11 | 2  | 34  | 0  |
| CONTIG-062092 | 65  | 4  | 2  | 9   | 0  |
| CONTIG-062093 | 233 | 18 | 31 | 172 | 0  |
| CONTIG-062094 | 84  | 5  | 3  | 14  | 0  |
| CONTIG-062096 | 155 | 14 | 8  | 100 | 0  |
| CONTIG-062097 | 68  | 5  | 9  | 7   | 0  |
| CONTIG-062098 | 178 | 9  | 32 | 11  | 0  |
| CONTIG-062099 | 160 | 11 | 15 | 45  | 2  |
| CONTIG-062100 | 73  | 90 | 11 | 105 | 0  |
| CONTIG-062101 | 268 | 7  | 6  | 67  | 0  |
| CONTIG-062102 | 858 | 8  | 35 | 73  | 0  |
| CONTIG-062103 | 118 | 5  | 3  | 6   | 0  |
| CONTIG-062104 | 88  | 4  | 4  | 6   | 0  |
| CONTIG-062108 | 147 | 7  | 15 | 28  | 0  |
| CONTIG-062109 | 118 | 7  | 7  | 30  | 0  |
| CONTIG-062110 | 137 | 9  | 4  | 49  | 0  |
| CONTIG-062114 | 238 | 34 | 2  | 479 | 0  |
| CONTIG-062115 | 354 | 10 | 32 | 68  | 2  |
| CONTIG-062116 | 118 | 4  | 2  | 0   | 0  |
| CONTIG-062117 | 206 | 4  | 2  | 6   | 0  |
| CONTIG-062118 | 324 | 8  | 2  | 82  | 0  |
| CONTIG-062119 | 70  | 10 | 24 | 8   | 0  |
| CONTIG-062120 | 249 | 7  | 12 | 72  | 0  |
| CONTIG-062121 | 118 | 5  | 2  | 12  | 0  |
| CONTIG-062122 | 146 | 9  | 7  | 31  | 2  |
| CONTIG-062123 | 260 | 12 | 34 | 71  | 0  |
| CONTIG-062124 | 108 | 6  | 4  | 11  | 0  |
| CONTIG-062125 | 177 | 8  | 0  | 62  | 0  |
| CONTIG-062127 | 180 | 25 | 19 | 150 | 4  |
| CONTIG-062128 | 184 | 4  | 5  | 22  | 0  |
| CONTIG-062129 | 113 | 17 | 6  | 88  | 0  |
| CONTIG-062130 | 64  | 3  | 0  | 0   | 0  |
| CONTIG-062131 | 89  | 9  | 12 | 27  | 0  |
| CONTIG-062132 | 116 | 7  | 2  | 18  | 0  |
| CONTIG-062133 | 95  | 7  | 3  | 0   | 16 |
| CONTIG-062134 | 68  | 3  | 4  | 4   | 0  |
| CONTIG-062135 | 240 | 8  | 10 | 95  | 0  |



|               |     |     |    |     |     |
|---------------|-----|-----|----|-----|-----|
| CONTIG-062136 | 319 | 10  | 12 | 99  | 0   |
| CONTIG-062138 | 487 | 13  | 88 | 262 | 0   |
| CONTIG-062139 | 126 | 5   | 2  | 18  | 0   |
| CONTIG-062140 | 192 | 6   | 6  | 28  | 0   |
| CONTIG-062141 | 143 | 10  | 0  | 45  | 0   |
| CONTIG-062142 | 76  | 8   | 0  | 17  | 0   |
| CONTIG-062143 | 71  | 9   | 2  | 7   | 0   |
| CONTIG-062144 | 233 | 4   | 17 | 6   | 0   |
| CONTIG-062145 | 211 | 5   | 12 | 16  | 0   |
| CONTIG-062146 | 547 | 18  | 16 | 266 | 0   |
| CONTIG-062147 | 104 | 5   | 4  | 9   | 0   |
| CONTIG-062148 | 95  | 6   | 2  | 25  | 0   |
| CONTIG-062149 | 161 | 4   | 0  | 12  | 0   |
| CONTIG-062150 | 86  | 3   | 4  | 2   | 0   |
| CONTIG-062151 | 177 | 14  | 32 | 105 | 0   |
| CONTIG-062152 | 82  | 6   | 4  | 15  | 0   |
| CONTIG-062154 | 206 | 5   | 7  | 14  | 0   |
| CONTIG-062155 | 321 | 9   | 5  | 127 | 0   |
| CONTIG-062156 | 76  | 4   | 8  | 7   | 0   |
| CONTIG-062157 | 158 | 8   | 6  | 27  | 0   |
| CONTIG-062158 | 111 | 11  | 3  | 37  | 0   |
| CONTIG-062159 | 86  | 4   | 2  | 2   | 0   |
| CONTIG-062163 | 272 | 19  | 15 | 150 | 0   |
| CONTIG-062164 | 158 | 6   | 4  | 26  | 0   |
| CONTIG-062165 | 73  | 3   | 2  | 8   | 0   |
| CONTIG-062166 | 64  | 4   | 0  | 8   | 0   |
| CONTIG-062167 | 187 | 11  | 16 | 31  | 0   |
| CONTIG-062168 | 101 | 9   | 6  | 27  | 0   |
| CONTIG-062169 | 120 | 8   | 3  | 30  | 0   |
| CONTIG-062170 | 305 | 23  | 36 | 168 | 0   |
| CONTIG-062171 | 145 | 5   | 6  | 23  | 0   |
| CONTIG-062176 | 127 | 5   | 4  | 11  | 0   |
| CONTIG-062177 | 78  | 5   | 6  | 12  | 0   |
| CONTIG-062178 | 63  | 3   | 2  | 4   | 0   |
| CONTIG-062182 | 91  | 4   | 3  | 0   | 0   |
| CONTIG-062183 | 212 | 9   | 12 | 80  | 3   |
| CONTIG-062184 | 124 | 9   | 7  | 33  | 0   |
| CONTIG-062185 | 58  | 7   | 11 | 0   | 0   |
| CONTIG-062186 | 236 | 121 | 3  | 0   | 249 |
| CONTIG-062187 | 116 | 15  | 0  | 109 | 0   |
| CONTIG-062188 | 166 | 6   | 3  | 23  | 0   |
| CONTIG-062189 | 73  | 36  | 9  | 45  | 63  |
| CONTIG-062190 | 71  | 7   | 2  | 17  | 0   |
| CONTIG-062191 | 219 | 8   | 18 | 46  | 0   |
| CONTIG-062194 | 686 | 35  | 40 | 306 | 31  |
| CONTIG-062195 | 62  | 5   | 3  | 16  | 0   |
| CONTIG-062196 | 107 | 4   | 0  | 2   | 0   |

|               |     |     |    |      |    |
|---------------|-----|-----|----|------|----|
| CONTIG-062197 | 194 | 16  | 25 | 78   | 2  |
| CONTIG-062198 | 186 | 9   | 10 | 84   | 0  |
| CONTIG-062199 | 162 | 7   | 4  | 48   | 0  |
| CONTIG-062200 | 368 | 68  | 11 | 1290 | 0  |
| CONTIG-062201 | 153 | 4   | 0  | 11   | 0  |
| CONTIG-062202 | 64  | 11  | 6  | 26   | 0  |
| CONTIG-062204 | 69  | 13  | 0  | 17   | 0  |
| CONTIG-062205 | 65  | 4   | 0  | 8    | 0  |
| CONTIG-062206 | 194 | 7   | 0  | 20   | 0  |
| CONTIG-062207 | 100 | 3   | 7  | 4    | 0  |
| CONTIG-062208 | 98  | 13  | 7  | 53   | 0  |
| CONTIG-062210 | 454 | 9   | 21 | 92   | 7  |
| CONTIG-062211 | 83  | 197 | 68 | 493  | 55 |
| CONTIG-062212 | 80  | 4   | 0  | 6    | 0  |
| CONTIG-062213 | 171 | 7   | 4  | 17   | 0  |
| CONTIG-062214 | 232 | 5   | 13 | 6    | 0  |
| CONTIG-062215 | 79  | 5   | 15 | 2    | 0  |
| CONTIG-062224 | 100 | 4   | 17 | 0    | 0  |
| CONTIG-062225 | 101 | 12  | 2  | 58   | 0  |
| CONTIG-062227 | 112 | 5   | 2  | 12   | 0  |
| CONTIG-062228 | 138 | 8   | 11 | 24   | 0  |
| CONTIG-062229 | 89  | 6   | 0  | 9    | 0  |
| CONTIG-062230 | 161 | 8   | 10 | 25   | 0  |
| CONTIG-062231 | 112 | 6   | 8  | 28   | 0  |
| CONTIG-062232 | 532 | 12  | 2  | 306  | 0  |
| CONTIG-062233 | 656 | 10  | 10 | 144  | 2  |
| CONTIG-062235 | 352 | 12  | 2  | 99   | 0  |
| CONTIG-062239 | 58  | 9   | 11 | 0    | 0  |
| CONTIG-062240 | 137 | 10  | 4  | 18   | 0  |
| CONTIG-062241 | 137 | 6   | 8  | 36   | 0  |
| CONTIG-062245 | 353 | 10  | 15 | 113  | 0  |
| CONTIG-062246 | 70  | 3   | 2  | 4    | 0  |
| CONTIG-062247 | 95  | 6   | 3  | 14   | 0  |
| CONTIG-062248 | 71  | 3   | 0  | 0    | 2  |
| CONTIG-062249 | 68  | 5   | 4  | 2    | 0  |
| CONTIG-062251 | 111 | 6   | 0  | 0    | 2  |
| CONTIG-062253 | 174 | 9   | 6  | 40   | 2  |
| CONTIG-062254 | 114 | 7   | 5  | 29   | 0  |
| CONTIG-062255 | 49  | 16  | 10 | 9    | 0  |
| CONTIG-062256 | 78  | 4   | 0  | 2    | 2  |
| CONTIG-062257 | 200 | 40  | 3  | 0    | 94 |
| CONTIG-062258 | 65  | 5   | 3  | 3    | 0  |
| CONTIG-062259 | 100 | 4   | 5  | 8    | 0  |
| CONTIG-062260 | 98  | 11  | 16 | 11   | 0  |
| CONTIG-062261 | 93  | 3   | 5  | 2    | 0  |
| CONTIG-062264 | 420 | 13  | 17 | 169  | 2  |
| CONTIG-062265 | 43  | 942 | 2  | 1329 | 0  |

|               |     |      |    |      |   |
|---------------|-----|------|----|------|---|
| CONTIG-062268 | 71  | 11   | 4  | 4    | 0 |
| CONTIG-062269 | 92  | 110  | 4  | 170  | 0 |
| CONTIG-062270 | 119 | 11   | 4  | 44   | 0 |
| CONTIG-062271 | 81  | 1439 | 24 | 5528 | 0 |
| CONTIG-062273 | 104 | 4    | 17 | 4    | 0 |
| CONTIG-062274 | 107 | 4    | 11 | 14   | 0 |
| CONTIG-062277 | 125 | 12   | 0  | 51   | 0 |
| CONTIG-062278 | 181 | 10   | 13 | 73   | 0 |
| CONTIG-062279 | 167 | 8    | 2  | 25   | 0 |
| CONTIG-062281 | 80  | 3    | 3  | 5    | 0 |
| CONTIG-062282 | 59  | 2    | 0  | 0    | 0 |
| CONTIG-062283 | 114 | 12   | 33 | 44   | 0 |
| CONTIG-062284 | 174 | 8    | 3  | 36   | 0 |
| CONTIG-062285 | 73  | 22   | 6  | 0    | 0 |
| CONTIG-062286 | 108 | 9    | 0  | 48   | 0 |
| CONTIG-062287 | 120 | 8    | 5  | 27   | 0 |
| CONTIG-062288 | 59  | 7    | 8  | 8    | 0 |
| CONTIG-062289 | 74  | 4    | 0  | 2    | 0 |
| CONTIG-062290 | 128 | 4    | 2  | 6    | 0 |
| CONTIG-062291 | 90  | 5    | 10 | 9    | 0 |
| CONTIG-062292 | 89  | 9    | 2  | 0    | 0 |
| CONTIG-062293 | 60  | 18   | 24 | 5    | 0 |
| CONTIG-062298 | 67  | 4    | 2  | 9    | 0 |
| CONTIG-062302 | 230 | 15   | 13 | 87   | 0 |
| CONTIG-062303 | 138 | 14   | 2  | 97   | 0 |
| CONTIG-062306 | 157 | 15   | 7  | 24   | 0 |
| CONTIG-062307 | 45  | 21   | 12 | 27   | 0 |
| CONTIG-062308 | 89  | 3    | 3  | 4    | 0 |
| CONTIG-062309 | 207 | 13   | 2  | 0    | 2 |
| CONTIG-062310 | 232 | 6    | 9  | 40   | 0 |
| CONTIG-062311 | 58  | 2    | 0  | 0    | 0 |
| CONTIG-062312 | 271 | 10   | 19 | 34   | 0 |
| CONTIG-062313 | 105 | 8    | 4  | 2    | 2 |
| CONTIG-062314 | 135 | 10   | 0  | 45   | 0 |
| CONTIG-062315 | 63  | 7    | 4  | 17   | 0 |
| CONTIG-062316 | 93  | 5    | 9  | 15   | 0 |
| CONTIG-062317 | 152 | 15   | 0  | 109  | 0 |
| CONTIG-062318 | 68  | 6    | 24 | 2    | 0 |
| CONTIG-062319 | 457 | 7    | 23 | 95   | 0 |
| CONTIG-062320 | 108 | 11   | 15 | 22   | 0 |
| CONTIG-062321 | 170 | 27   | 29 | 42   | 0 |
| CONTIG-062322 | 101 | 5    | 3  | 15   | 0 |
| CONTIG-062324 | 67  | 5    | 7  | 7    | 0 |
| CONTIG-062326 | 124 | 7    | 7  | 18   | 0 |
| CONTIG-062327 | 93  | 4    | 0  | 10   | 0 |
| CONTIG-062328 | 88  | 62   | 13 | 280  | 0 |
| CONTIG-062329 | 136 | 11   | 5  | 39   | 0 |

|               |     |     |    |      |   |
|---------------|-----|-----|----|------|---|
| CONTIG-062330 | 96  | 6   | 0  | 25   | 0 |
| CONTIG-062331 | 59  | 12  | 32 | 0    | 0 |
| CONTIG-062332 | 127 | 19  | 0  | 83   | 0 |
| CONTIG-062333 | 96  | 8   | 18 | 19   | 0 |
| CONTIG-062334 | 77  | 7   | 2  | 20   | 0 |
| CONTIG-062335 | 82  | 6   | 0  | 9    | 0 |
| CONTIG-062336 | 194 | 21  | 10 | 217  | 0 |
| CONTIG-062337 | 68  | 451 | 13 | 1084 | 0 |
| CONTIG-062340 | 99  | 6   | 11 | 16   | 0 |
| CONTIG-062341 | 179 | 11  | 2  | 64   | 0 |
| CONTIG-062342 | 198 | 8   | 0  | 66   | 0 |
| CONTIG-062343 | 236 | 6   | 3  | 35   | 0 |
| CONTIG-062344 | 78  | 4   | 3  | 8    | 0 |
| CONTIG-062345 | 103 | 7   | 0  | 25   | 0 |
| CONTIG-062346 | 189 | 8   | 5  | 47   | 0 |
| CONTIG-062347 | 220 | 9   | 7  | 37   | 2 |
| CONTIG-062348 | 101 | 16  | 52 | 8    | 2 |
| CONTIG-062349 | 85  | 3   | 0  | 0    | 0 |
| CONTIG-062350 | 335 | 7   | 0  | 16   | 0 |
| CONTIG-062351 | 64  | 10  | 5  | 14   | 0 |
| CONTIG-062352 | 76  | 14  | 8  | 31   | 0 |
| CONTIG-062353 | 88  | 8   | 6  | 24   | 0 |
| CONTIG-062354 | 61  | 5   | 4  | 6    | 0 |
| CONTIG-062355 | 93  | 15  | 3  | 39   | 0 |
| CONTIG-062356 | 74  | 4   | 5  | 8    | 0 |
| CONTIG-062357 | 165 | 5   | 12 | 19   | 0 |
| CONTIG-062361 | 72  | 9   | 2  | 11   | 0 |
| CONTIG-062362 | 82  | 2   | 2  | 6    | 0 |
| CONTIG-062363 | 575 | 24  | 3  | 0    | 4 |
| CONTIG-062364 | 69  | 6   | 23 | 5    | 0 |
| CONTIG-062365 | 312 | 9   | 11 | 70   | 0 |
| CONTIG-062366 | 67  | 4   | 0  | 4    | 0 |
| CONTIG-062367 | 725 | 11  | 67 | 211  | 2 |
| CONTIG-062368 | 336 | 13  | 3  | 233  | 0 |
| CONTIG-062369 | 86  | 17  | 10 | 61   | 0 |
| CONTIG-062370 | 193 | 11  | 6  | 56   | 0 |
| CONTIG-062371 | 67  | 2   | 2  | 2    | 0 |
| CONTIG-062372 | 72  | 3   | 3  | 2    | 0 |
| CONTIG-062373 | 118 | 9   | 14 | 22   | 0 |
| CONTIG-062374 | 114 | 19  | 9  | 83   | 5 |
| CONTIG-062375 | 108 | 6   | 8  | 9    | 0 |
| CONTIG-062376 | 154 | 8   | 25 | 33   | 0 |
| CONTIG-062377 | 364 | 20  | 32 | 211  | 2 |
| CONTIG-062378 | 200 | 5   | 6  | 33   | 0 |
| CONTIG-062379 | 137 | 8   | 7  | 39   | 0 |
| CONTIG-062380 | 73  | 7   | 10 | 2    | 0 |
| CONTIG-062382 | 77  | 7   | 0  | 26   | 0 |

|               |     |    |    |     |     |
|---------------|-----|----|----|-----|-----|
| CONTIG-062383 | 747 | 25 | 0  | 0   | 276 |
| CONTIG-062384 | 109 | 4  | 2  | 0   | 0   |
| CONTIG-062385 | 264 | 16 | 14 | 130 | 0   |
| CONTIG-062391 | 597 | 23 | 25 | 855 | 0   |
| CONTIG-062392 | 404 | 8  | 13 | 112 | 0   |
| CONTIG-062393 | 66  | 3  | 2  | 0   | 0   |
| CONTIG-062395 | 156 | 5  | 7  | 12  | 0   |
| CONTIG-062396 | 165 | 8  | 16 | 22  | 0   |
| CONTIG-062397 | 102 | 4  | 0  | 10  | 0   |
| CONTIG-062398 | 185 | 7  | 5  | 46  | 0   |
| CONTIG-062401 | 238 | 13 | 2  | 105 | 0   |
| CONTIG-062402 | 44  | 7  | 0  | 0   | 0   |
| CONTIG-062403 | 94  | 6  | 0  | 3   | 0   |
| CONTIG-062404 | 66  | 5  | 11 | 4   | 0   |
| CONTIG-062405 | 282 | 13 | 13 | 101 | 6   |
| CONTIG-062407 | 126 | 8  | 13 | 34  | 0   |
| CONTIG-062408 | 188 | 19 | 13 | 99  | 0   |
| CONTIG-062410 | 215 | 19 | 21 | 179 | 0   |
| CONTIG-062412 | 75  | 12 | 6  | 34  | 0   |
| CONTIG-062413 | 174 | 10 | 33 | 30  | 0   |
| CONTIG-062414 | 62  | 4  | 5  | 8   | 0   |
| CONTIG-062415 | 601 | 14 | 18 | 210 | 22  |
| CONTIG-062416 | 59  | 8  | 0  | 15  | 0   |
| CONTIG-062417 | 136 | 5  | 2  | 15  | 0   |
| CONTIG-062418 | 70  | 3  | 8  | 2   | 0   |
| CONTIG-062419 | 79  | 9  | 10 | 28  | 0   |
| CONTIG-062420 | 94  | 15 | 3  | 29  | 0   |
| CONTIG-062421 | 58  | 9  | 6  | 9   | 0   |
| CONTIG-062422 | 64  | 5  | 7  | 8   | 0   |
| CONTIG-062423 | 63  | 12 | 22 | 22  | 0   |
| CONTIG-062424 | 128 | 6  | 7  | 14  | 0   |
| CONTIG-062425 | 127 | 8  | 4  | 37  | 0   |
| CONTIG-062426 | 334 | 8  | 9  | 72  | 0   |
| CONTIG-062427 | 401 | 9  | 3  | 79  | 2   |
| CONTIG-062429 | 430 | 11 | 11 | 178 | 3   |
| CONTIG-062430 | 91  | 5  | 4  | 13  | 0   |
| CONTIG-062431 | 80  | 7  | 2  | 13  | 0   |
| CONTIG-062433 | 106 | 4  | 3  | 2   | 0   |
| CONTIG-062434 | 143 | 8  | 18 | 41  | 0   |
| CONTIG-062435 | 586 | 12 | 9  | 421 | 0   |
| CONTIG-062436 | 67  | 13 | 5  | 29  | 0   |
| CONTIG-062443 | 338 | 20 | 42 | 211 | 4   |
| CONTIG-062444 | 197 | 7  | 11 | 23  | 0   |
| CONTIG-062445 | 66  | 5  | 2  | 8   | 0   |
| CONTIG-062446 | 70  | 4  | 0  | 12  | 0   |
| CONTIG-062447 | 200 | 5  | 6  | 10  | 0   |
| CONTIG-062448 | 292 | 6  | 5  | 36  | 0   |

|               |     |    |    |     |    |
|---------------|-----|----|----|-----|----|
| CONTIG-062449 | 93  | 4  | 0  | 7   | 0  |
| CONTIG-062450 | 91  | 7  | 5  | 14  | 0  |
| CONTIG-062451 | 70  | 6  | 8  | 13  | 2  |
| CONTIG-062452 | 78  | 4  | 0  | 12  | 0  |
| CONTIG-062453 | 177 | 10 | 2  | 51  | 0  |
| CONTIG-062454 | 119 | 5  | 6  | 12  | 0  |
| CONTIG-062455 | 81  | 4  | 9  | 0   | 0  |
| CONTIG-062456 | 90  | 4  | 4  | 10  | 0  |
| CONTIG-062457 | 89  | 10 | 15 | 18  | 2  |
| CONTIG-062458 | 116 | 5  | 4  | 16  | 0  |
| CONTIG-062459 | 65  | 4  | 6  | 8   | 0  |
| CONTIG-062460 | 83  | 3  | 8  | 2   | 0  |
| CONTIG-062461 | 119 | 6  | 2  | 13  | 0  |
| CONTIG-062462 | 189 | 7  | 7  | 61  | 0  |
| CONTIG-062463 | 136 | 9  | 6  | 28  | 9  |
| CONTIG-062464 | 257 | 11 | 10 | 123 | 0  |
| CONTIG-062465 | 85  | 6  | 4  | 7   | 0  |
| CONTIG-062466 | 401 | 6  | 17 | 45  | 0  |
| CONTIG-062467 | 684 | 10 | 37 | 52  | 0  |
| CONTIG-062468 | 68  | 4  | 9  | 0   | 0  |
| CONTIG-062469 | 132 | 8  | 36 | 18  | 0  |
| CONTIG-062470 | 105 | 6  | 2  | 26  | 0  |
| CONTIG-062471 | 111 | 7  | 9  | 26  | 0  |
| CONTIG-062472 | 898 | 15 | 34 | 665 | 2  |
| CONTIG-062473 | 359 | 15 | 4  | 237 | 9  |
| CONTIG-062474 | 68  | 18 | 10 | 25  | 0  |
| CONTIG-062475 | 36  | 10 | 5  | 0   | 0  |
| CONTIG-062484 | 79  | 12 | 2  | 36  | 0  |
| CONTIG-062485 | 106 | 13 | 11 | 38  | 0  |
| CONTIG-062486 | 324 | 6  | 6  | 59  | 0  |
| CONTIG-062487 | 199 | 9  | 7  | 27  | 0  |
| CONTIG-062488 | 58  | 11 | 27 | 16  | 0  |
| CONTIG-062489 | 533 | 10 | 12 | 189 | 0  |
| CONTIG-062490 | 149 | 9  | 5  | 31  | 0  |
| CONTIG-062491 | 179 | 43 | 8  | 287 | 2  |
| CONTIG-062493 | 170 | 66 | 5  | 0   | 0  |
| CONTIG-062494 | 217 | 47 | 0  | 0   | 96 |
| CONTIG-062496 | 169 | 10 | 24 | 46  | 0  |
| CONTIG-062497 | 73  | 7  | 6  | 11  | 0  |
| CONTIG-062498 | 68  | 8  | 7  | 16  | 0  |
| CONTIG-062499 | 105 | 20 | 24 | 40  | 7  |
| CONTIG-062500 | 74  | 10 | 8  | 20  | 2  |
| CONTIG-062501 | 93  | 10 | 11 | 38  | 0  |
| CONTIG-062503 | 200 | 8  | 6  | 54  | 0  |
| CONTIG-062505 | 251 | 11 | 10 | 62  | 0  |
| CONTIG-062506 | 91  | 10 | 12 | 34  | 0  |
| CONTIG-062507 | 62  | 3  | 4  | 0   | 0  |

|               |     |    |    |      |    |
|---------------|-----|----|----|------|----|
| CONTIG-062508 | 313 | 9  | 28 | 67   | 2  |
| CONTIG-062509 | 100 | 6  | 0  | 18   | 0  |
| CONTIG-062510 | 130 | 7  | 4  | 34   | 0  |
| CONTIG-062512 | 109 | 5  | 2  | 13   | 0  |
| CONTIG-062514 | 170 | 6  | 8  | 33   | 0  |
| CONTIG-062515 | 120 | 7  | 0  | 29   | 0  |
| CONTIG-062516 | 249 | 17 | 6  | 114  | 4  |
| CONTIG-062517 | 64  | 2  | 0  | 6    | 0  |
| CONTIG-062518 | 244 | 10 | 10 | 14   | 0  |
| CONTIG-062519 | 129 | 16 | 8  | 45   | 0  |
| CONTIG-062520 | 115 | 8  | 0  | 20   | 0  |
| CONTIG-062521 | 286 | 8  | 2  | 74   | 0  |
| CONTIG-062522 | 61  | 68 | 20 | 0    | 0  |
| CONTIG-062523 | 64  | 5  | 0  | 14   | 0  |
| CONTIG-062524 | 70  | 3  | 0  | 0    | 0  |
| CONTIG-062525 | 483 | 10 | 31 | 192  | 0  |
| CONTIG-062526 | 55  | 78 | 22 | 139  | 0  |
| CONTIG-062527 | 106 | 9  | 14 | 0    | 2  |
| CONTIG-062528 | 69  | 6  | 16 | 7    | 2  |
| CONTIG-062532 | 286 | 6  | 0  | 14   | 7  |
| CONTIG-062533 | 301 | 6  | 4  | 34   | 0  |
| CONTIG-062534 | 218 | 18 | 13 | 175  | 0  |
| CONTIG-062535 | 162 | 6  | 0  | 30   | 0  |
| CONTIG-062537 | 237 | 7  | 26 | 17   | 9  |
| CONTIG-062540 | 346 | 29 | 8  | 0    | 29 |
| CONTIG-062541 | 153 | 8  | 17 | 18   | 0  |
| CONTIG-062542 | 116 | 13 | 7  | 53   | 0  |
| CONTIG-062544 | 239 | 7  | 11 | 49   | 2  |
| CONTIG-062546 | 319 | 13 | 26 | 163  | 0  |
| CONTIG-062547 | 91  | 19 | 30 | 6    | 0  |
| CONTIG-062549 | 125 | 6  | 5  | 22   | 0  |
| CONTIG-062550 | 891 | 27 | 21 | 1200 | 0  |
| CONTIG-062551 | 84  | 5  | 0  | 9    | 0  |
| CONTIG-062553 | 65  | 5  | 5  | 7    | 0  |
| CONTIG-062556 | 116 | 4  | 3  | 13   | 0  |
| CONTIG-062558 | 163 | 9  | 28 | 45   | 0  |
| CONTIG-062559 | 105 | 3  | 10 | 0    | 0  |
| CONTIG-062561 | 69  | 5  | 3  | 20   | 0  |
| CONTIG-062562 | 78  | 5  | 5  | 11   | 0  |
| CONTIG-062563 | 91  | 3  | 2  | 5    | 0  |
| CONTIG-062564 | 101 | 8  | 7  | 34   | 0  |
| CONTIG-062565 | 129 | 5  | 12 | 18   | 0  |
| CONTIG-062566 | 84  | 5  | 4  | 11   | 0  |
| CONTIG-062567 | 187 | 17 | 36 | 144  | 0  |
| CONTIG-062568 | 157 | 5  | 14 | 21   | 0  |
| CONTIG-062569 | 197 | 15 | 28 | 84   | 2  |
| CONTIG-062570 | 171 | 8  | 10 | 24   | 0  |

|               |     |     |    |     |    |
|---------------|-----|-----|----|-----|----|
| CONTIG-062571 | 164 | 11  | 8  | 46  | 0  |
| CONTIG-062572 | 149 | 12  | 14 | 38  | 0  |
| CONTIG-062573 | 365 | 8   | 16 | 95  | 0  |
| CONTIG-062575 | 129 | 11  | 0  | 40  | 0  |
| CONTIG-062576 | 373 | 10  | 8  | 56  | 5  |
| CONTIG-062577 | 83  | 6   | 2  | 14  | 2  |
| CONTIG-062578 | 78  | 5   | 0  | 10  | 0  |
| CONTIG-062579 | 132 | 3   | 4  | 2   | 0  |
| CONTIG-062580 | 431 | 12  | 8  | 75  | 0  |
| CONTIG-062581 | 99  | 6   | 14 | 9   | 0  |
| CONTIG-062582 | 81  | 4   | 15 | 3   | 0  |
| CONTIG-062583 | 93  | 7   | 5  | 12  | 0  |
| CONTIG-062584 | 66  | 6   | 12 | 0   | 0  |
| CONTIG-062586 | 131 | 13  | 4  | 85  | 0  |
| CONTIG-062587 | 84  | 15  | 17 | 18  | 0  |
| CONTIG-062588 | 297 | 14  | 17 | 136 | 0  |
| CONTIG-062589 | 113 | 3   | 7  | 3   | 0  |
| CONTIG-062590 | 83  | 6   | 2  | 12  | 0  |
| CONTIG-062591 | 122 | 7   | 2  | 19  | 0  |
| CONTIG-062592 | 828 | 12  | 0  | 0   | 71 |
| CONTIG-062593 | 62  | 3   | 4  | 7   | 0  |
| CONTIG-062594 | 156 | 5   | 2  | 9   | 0  |
| CONTIG-062595 | 154 | 11  | 8  | 54  | 0  |
| CONTIG-062596 | 123 | 5   | 0  | 24  | 0  |
| CONTIG-062597 | 76  | 7   | 0  | 2   | 0  |
| CONTIG-062599 | 60  | 6   | 2  | 12  | 0  |
| CONTIG-062600 | 122 | 8   | 5  | 15  | 0  |
| CONTIG-062602 | 121 | 11  | 29 | 12  | 0  |
| CONTIG-062604 | 85  | 4   | 12 | 6   | 0  |
| CONTIG-062605 | 111 | 4   | 2  | 6   | 0  |
| CONTIG-062606 | 211 | 13  | 21 | 81  | 5  |
| CONTIG-062607 | 107 | 5   | 6  | 12  | 0  |
| CONTIG-062611 | 334 | 19  | 16 | 0   | 28 |
| CONTIG-062612 | 58  | 9   | 21 | 7   | 0  |
| CONTIG-062613 | 83  | 5   | 0  | 0   | 0  |
| CONTIG-062614 | 220 | 11  | 8  | 39  | 0  |
| CONTIG-062615 | 107 | 15  | 4  | 56  | 4  |
| CONTIG-062616 | 64  | 5   | 2  | 6   | 0  |
| CONTIG-062617 | 87  | 7   | 2  | 20  | 0  |
| CONTIG-062618 | 295 | 14  | 15 | 171 | 0  |
| CONTIG-062619 | 79  | 9   | 2  | 36  | 0  |
| CONTIG-062621 | 294 | 22  | 52 | 36  | 0  |
| CONTIG-062622 | 48  | 253 | 17 | 470 | 0  |
| CONTIG-062623 | 203 | 28  | 13 | 9   | 0  |
| CONTIG-062624 | 71  | 5   | 3  | 4   | 0  |
| CONTIG-062625 | 105 | 6   | 4  | 18  | 0  |
| CONTIG-062626 | 72  | 6   | 3  | 9   | 0  |



|               |     |    |    |     |   |
|---------------|-----|----|----|-----|---|
| CONTIG-062627 | 63  | 4  | 2  | 2   | 0 |
| CONTIG-062628 | 165 | 9  | 2  | 29  | 0 |
| CONTIG-062629 | 39  | 47 | 7  | 17  | 0 |
| CONTIG-062632 | 143 | 10 | 2  | 34  | 0 |
| CONTIG-062633 | 105 | 10 | 0  | 33  | 0 |
| CONTIG-062634 | 164 | 34 | 6  | 231 | 2 |
| CONTIG-062635 | 65  | 7  | 7  | 3   | 0 |
| CONTIG-062636 | 92  | 7  | 5  | 27  | 0 |
| CONTIG-062637 | 141 | 12 | 7  | 85  | 0 |
| CONTIG-062638 | 77  | 16 | 0  | 39  | 0 |
| CONTIG-062639 | 66  | 4  | 8  | 2   | 0 |
| CONTIG-062640 | 90  | 11 | 2  | 40  | 0 |
| CONTIG-062641 | 97  | 9  | 4  | 12  | 0 |
| CONTIG-062642 | 209 | 11 | 7  | 79  | 0 |
| CONTIG-062643 | 266 | 6  | 3  | 25  | 0 |
| CONTIG-062644 | 198 | 11 | 2  | 17  | 0 |
| CONTIG-062645 | 59  | 3  | 7  | 0   | 0 |
| CONTIG-062646 | 142 | 5  | 2  | 19  | 0 |
| CONTIG-062648 | 112 | 15 | 9  | 80  | 2 |
| CONTIG-062649 | 187 | 16 | 20 | 13  | 0 |
| CONTIG-062650 | 94  | 11 | 8  | 12  | 0 |
| CONTIG-062651 | 197 | 10 | 28 | 55  | 0 |
| CONTIG-062652 | 90  | 7  | 3  | 14  | 0 |
| CONTIG-062653 | 74  | 12 | 17 | 26  | 0 |
| CONTIG-062654 | 138 | 6  | 2  | 10  | 0 |
| CONTIG-062655 | 107 | 4  | 3  | 6   | 0 |
| CONTIG-062656 | 165 | 5  | 10 | 21  | 0 |
| CONTIG-062658 | 127 | 5  | 4  | 25  | 0 |
| CONTIG-062659 | 167 | 10 | 3  | 49  | 0 |
| CONTIG-062660 | 186 | 6  | 6  | 19  | 0 |
| CONTIG-062661 | 269 | 16 | 11 | 123 | 8 |
| CONTIG-062662 | 334 | 9  | 13 | 100 | 0 |
| CONTIG-062663 | 62  | 3  | 2  | 4   | 0 |
| CONTIG-062664 | 345 | 8  | 21 | 30  | 4 |
| CONTIG-062665 | 86  | 9  | 10 | 13  | 0 |
| CONTIG-062666 | 87  | 9  | 4  | 15  | 0 |
| CONTIG-062667 | 82  | 5  | 5  | 12  | 0 |
| CONTIG-062668 | 172 | 8  | 0  | 54  | 0 |
| CONTIG-062669 | 357 | 14 | 14 | 138 | 0 |
| CONTIG-062670 | 148 | 6  | 4  | 23  | 0 |
| CONTIG-062671 | 64  | 7  | 5  | 18  | 0 |
| CONTIG-062672 | 210 | 13 | 18 | 50  | 0 |
| CONTIG-062673 | 121 | 5  | 4  | 11  | 0 |
| CONTIG-062674 | 136 | 5  | 6  | 16  | 0 |
| CONTIG-062675 | 194 | 11 | 21 | 87  | 0 |
| CONTIG-062676 | 88  | 6  | 8  | 15  | 0 |
| CONTIG-062677 | 124 | 9  | 4  | 19  | 3 |

|               |     |     |    |     |   |
|---------------|-----|-----|----|-----|---|
| CONTIG-062678 | 231 | 8   | 8  | 42  | 0 |
| CONTIG-062679 | 263 | 9   | 22 | 77  | 0 |
| CONTIG-062680 | 85  | 4   | 7  | 3   | 0 |
| CONTIG-062684 | 93  | 4   | 2  | 4   | 0 |
| CONTIG-062685 | 114 | 30  | 11 | 106 | 0 |
| CONTIG-062689 | 215 | 7   | 15 | 14  | 0 |
| CONTIG-062690 | 200 | 8   | 10 | 45  | 0 |
| CONTIG-062691 | 293 | 19  | 25 | 125 | 2 |
| CONTIG-062692 | 148 | 8   | 0  | 0   | 7 |
| CONTIG-062693 | 103 | 9   | 15 | 26  | 0 |
| CONTIG-062694 | 107 | 7   | 2  | 8   | 0 |
| CONTIG-062695 | 111 | 4   | 0  | 6   | 0 |
| CONTIG-062696 | 158 | 11  | 21 | 65  | 0 |
| CONTIG-062697 | 525 | 20  | 34 | 344 | 0 |
| CONTIG-062700 | 185 | 11  | 18 | 57  | 0 |
| CONTIG-062701 | 88  | 4   | 3  | 0   | 0 |
| CONTIG-062702 | 206 | 10  | 7  | 55  | 2 |
| CONTIG-062703 | 164 | 7   | 5  | 37  | 0 |
| CONTIG-062704 | 157 | 6   | 0  | 30  | 0 |
| CONTIG-062705 | 85  | 10  | 0  | 0   | 6 |
| CONTIG-062706 | 60  | 7   | 10 | 2   | 0 |
| CONTIG-062707 | 79  | 7   | 10 | 8   | 0 |
| CONTIG-062708 | 94  | 5   | 2  | 14  | 0 |
| CONTIG-062709 | 241 | 6   | 4  | 35  | 0 |
| CONTIG-062710 | 131 | 10  | 6  | 41  | 0 |
| CONTIG-062711 | 366 | 11  | 26 | 108 | 0 |
| CONTIG-062712 | 60  | 9   | 0  | 2   | 0 |
| CONTIG-062713 | 174 | 21  | 0  | 35  | 0 |
| CONTIG-062714 | 95  | 7   | 5  | 26  | 0 |
| CONTIG-062715 | 61  | 5   | 0  | 3   | 0 |
| CONTIG-062716 | 258 | 6   | 6  | 34  | 3 |
| CONTIG-062717 | 129 | 5   | 8  | 11  | 0 |
| CONTIG-062718 | 89  | 7   | 2  | 14  | 0 |
| CONTIG-062719 | 39  | 25  | 0  | 19  | 0 |
| CONTIG-062720 | 72  | 6   | 7  | 9   | 0 |
| CONTIG-062722 | 328 | 9   | 4  | 55  | 0 |
| CONTIG-062723 | 87  | 118 | 4  | 130 | 7 |
| CONTIG-062724 | 88  | 36  | 10 | 95  | 0 |
| CONTIG-062725 | 66  | 21  | 31 | 20  | 0 |
| CONTIG-062726 | 187 | 8   | 2  | 54  | 0 |
| CONTIG-062727 | 64  | 3   | 0  | 0   | 0 |
| CONTIG-062728 | 158 | 6   | 5  | 26  | 0 |
| CONTIG-062730 | 165 | 5   | 9  | 7   | 0 |
| CONTIG-062731 | 116 | 5   | 0  | 20  | 0 |
| CONTIG-062732 | 253 | 9   | 25 | 75  | 2 |
| CONTIG-062733 | 166 | 8   | 5  | 40  | 2 |
| CONTIG-062734 | 89  | 10  | 12 | 19  | 0 |

|               |     |     |    |      |    |
|---------------|-----|-----|----|------|----|
| CONTIG-062735 | 58  | 4   | 2  | 2    | 0  |
| CONTIG-062736 | 61  | 5   | 4  | 9    | 0  |
| CONTIG-062737 | 63  | 8   | 9  | 0    | 0  |
| CONTIG-062738 | 59  | 18  | 58 | 9    | 0  |
| CONTIG-062739 | 56  | 453 | 14 | 1245 | 0  |
| CONTIG-062740 | 183 | 14  | 11 | 78   | 0  |
| CONTIG-062741 | 49  | 255 | 28 | 625  | 0  |
| CONTIG-062742 | 158 | 12  | 2  | 54   | 0  |
| CONTIG-062743 | 63  | 7   | 2  | 3    | 0  |
| CONTIG-062744 | 170 | 13  | 35 | 19   | 0  |
| CONTIG-062745 | 279 | 7   | 14 | 26   | 0  |
| CONTIG-062746 | 357 | 27  | 52 | 414  | 2  |
| CONTIG-062747 | 180 | 4   | 0  | 28   | 0  |
| CONTIG-062748 | 184 | 16  | 47 | 51   | 2  |
| CONTIG-062749 | 156 | 7   | 0  | 26   | 0  |
| CONTIG-062750 | 126 | 2   | 3  | 4    | 0  |
| CONTIG-062751 | 130 | 15  | 31 | 10   | 0  |
| CONTIG-062752 | 183 | 7   | 5  | 18   | 0  |
| CONTIG-062753 | 111 | 4   | 0  | 8    | 0  |
| CONTIG-062754 | 61  | 5   | 0  | 16   | 0  |
| CONTIG-062755 | 91  | 7   | 0  | 18   | 0  |
| CONTIG-062756 | 90  | 5   | 0  | 2    | 0  |
| CONTIG-062757 | 227 | 12  | 20 | 82   | 0  |
| CONTIG-062758 | 121 | 11  | 2  | 44   | 0  |
| CONTIG-062759 | 79  | 9   | 4  | 16   | 0  |
| CONTIG-062760 | 227 | 11  | 26 | 84   | 0  |
| CONTIG-062761 | 83  | 7   | 2  | 22   | 0  |
| CONTIG-062762 | 155 | 7   | 0  | 37   | 0  |
| CONTIG-062763 | 314 | 13  | 73 | 118  | 3  |
| CONTIG-062765 | 389 | 24  | 31 | 136  | 2  |
| CONTIG-062766 | 93  | 15  | 18 | 24   | 0  |
| CONTIG-062767 | 72  | 6   | 6  | 14   | 0  |
| CONTIG-062772 | 74  | 5   | 2  | 0    | 0  |
| CONTIG-062773 | 249 | 7   | 24 | 32   | 0  |
| CONTIG-062774 | 175 | 17  | 23 | 91   | 0  |
| CONTIG-062775 | 155 | 5   | 5  | 13   | 2  |
| CONTIG-062776 | 78  | 13  | 4  | 37   | 0  |
| CONTIG-062777 | 98  | 4   | 4  | 4    | 0  |
| CONTIG-062778 | 174 | 9   | 6  | 53   | 0  |
| CONTIG-062779 | 93  | 3   | 2  | 3    | 0  |
| CONTIG-062785 | 110 | 5   | 10 | 4    | 0  |
| CONTIG-062786 | 77  | 3   | 8  | 2    | 0  |
| CONTIG-062787 | 121 | 35  | 2  | 0    | 26 |
| CONTIG-062789 | 89  | 5   | 5  | 10   | 0  |
| CONTIG-062790 | 81  | 12  | 22 | 0    | 0  |
| CONTIG-062791 | 140 | 10  | 14 | 51   | 0  |
| CONTIG-062792 | 55  | 13  | 2  | 13   | 0  |

|               |     |     |    |      |   |
|---------------|-----|-----|----|------|---|
| CONTIG-062796 | 164 | 12  | 3  | 87   | 0 |
| CONTIG-062797 | 136 | 162 | 12 | 1178 | 0 |
| CONTIG-062798 | 194 | 39  | 29 | 329  | 2 |
| CONTIG-062799 | 63  | 71  | 42 | 209  | 0 |
| CONTIG-062800 | 102 | 5   | 6  | 9    | 0 |
| CONTIG-062801 | 430 | 8   | 11 | 110  | 0 |
| CONTIG-062803 | 49  | 35  | 0  | 56   | 0 |
| CONTIG-062804 | 101 | 5   | 4  | 6    | 0 |
| CONTIG-062805 | 58  | 6   | 5  | 9    | 0 |
| CONTIG-062808 | 234 | 9   | 37 | 33   | 0 |
| CONTIG-062809 | 104 | 7   | 4  | 18   | 0 |
| CONTIG-062810 | 274 | 12  | 12 | 87   | 2 |
| CONTIG-062812 | 220 | 7   | 10 | 28   | 0 |
| CONTIG-062813 | 69  | 13  | 4  | 15   | 0 |
| CONTIG-062814 | 93  | 7   | 5  | 6    | 0 |
| CONTIG-062815 | 65  | 4   | 5  | 0    | 0 |
| CONTIG-062816 | 65  | 3   | 0  | 3    | 0 |
| CONTIG-062818 | 303 | 8   | 9  | 50   | 0 |
| CONTIG-062820 | 259 | 10  | 6  | 114  | 2 |
| CONTIG-062821 | 77  | 14  | 6  | 12   | 2 |
| CONTIG-062822 | 109 | 21  | 9  | 97   | 2 |
| CONTIG-062823 | 212 | 11  | 15 | 39   | 0 |
| CONTIG-062824 | 58  | 4   | 0  | 2    | 0 |
| CONTIG-062825 | 91  | 6   | 6  | 14   | 0 |
| CONTIG-062826 | 107 | 13  | 17 | 39   | 0 |
| CONTIG-062827 | 59  | 3   | 10 | 0    | 0 |
| CONTIG-062828 | 117 | 6   | 12 | 21   | 0 |
| CONTIG-062829 | 87  | 3   | 3  | 10   | 0 |
| CONTIG-062830 | 87  | 8   | 22 | 15   | 0 |
| CONTIG-062831 | 66  | 4   | 8  | 2    | 0 |
| CONTIG-062832 | 163 | 27  | 17 | 2    | 0 |
| CONTIG-062833 | 236 | 6   | 32 | 21   | 0 |
| CONTIG-062834 | 59  | 11  | 12 | 12   | 0 |
| CONTIG-062835 | 86  | 4   | 6  | 8    | 0 |
| CONTIG-062836 | 150 | 7   | 16 | 26   | 0 |
| CONTIG-062837 | 61  | 21  | 14 | 30   | 0 |
| CONTIG-062838 | 124 | 10  | 8  | 26   | 0 |
| CONTIG-062839 | 83  | 4   | 5  | 0    | 0 |
| CONTIG-062841 | 230 | 8   | 7  | 46   | 0 |
| CONTIG-062842 | 230 | 13  | 6  | 90   | 0 |
| CONTIG-062843 | 100 | 3   | 2  | 12   | 0 |
| CONTIG-062844 | 99  | 11  | 14 | 35   | 0 |
| CONTIG-062846 | 80  | 9   | 0  | 2    | 0 |
| CONTIG-062847 | 175 | 11  | 20 | 65   | 0 |
| CONTIG-062848 | 85  | 11  | 5  | 49   | 0 |
| CONTIG-062849 | 122 | 7   | 10 | 24   | 0 |
| CONTIG-062850 | 216 | 7   | 13 | 38   | 0 |

|               |     |    |    |     |    |
|---------------|-----|----|----|-----|----|
| CONTIG-062851 | 71  | 7  | 0  | 13  | 0  |
| CONTIG-062852 | 105 | 8  | 3  | 27  | 0  |
| CONTIG-062853 | 176 | 5  | 21 | 15  | 0  |
| CONTIG-062854 | 82  | 4  | 2  | 16  | 0  |
| CONTIG-062855 | 187 | 17 | 16 | 97  | 2  |
| CONTIG-062858 | 90  | 11 | 4  | 37  | 0  |
| CONTIG-062859 | 182 | 12 | 4  | 44  | 2  |
| CONTIG-062860 | 312 | 14 | 12 | 97  | 2  |
| CONTIG-062861 | 66  | 6  | 4  | 11  | 0  |
| CONTIG-062862 | 142 | 17 | 14 | 7   | 0  |
| CONTIG-062863 | 134 | 4  | 3  | 17  | 0  |
| CONTIG-062864 | 302 | 15 | 23 | 98  | 0  |
| CONTIG-062865 | 288 | 6  | 12 | 56  | 0  |
| CONTIG-062866 | 221 | 7  | 16 | 35  | 0  |
| CONTIG-062867 | 100 | 3  | 4  | 8   | 0  |
| CONTIG-062868 | 103 | 5  | 12 | 13  | 0  |
| CONTIG-062869 | 329 | 14 | 23 | 136 | 14 |
| CONTIG-062870 | 129 | 5  | 0  | 28  | 0  |
| CONTIG-062871 | 231 | 8  | 5  | 61  | 0  |
| CONTIG-062872 | 193 | 6  | 4  | 42  | 0  |
| CONTIG-062873 | 64  | 6  | 10 | 16  | 0  |
| CONTIG-062874 | 131 | 6  | 7  | 22  | 0  |
| CONTIG-062875 | 91  | 4  | 5  | 4   | 0  |
| CONTIG-062876 | 264 | 8  | 9  | 23  | 0  |
| CONTIG-062878 | 104 | 3  | 6  | 9   | 0  |
| CONTIG-062879 | 108 | 5  | 4  | 23  | 0  |
| CONTIG-062880 | 208 | 7  | 34 | 47  | 0  |
| CONTIG-062881 | 170 | 5  | 4  | 24  | 0  |
| CONTIG-062882 | 77  | 12 | 4  | 39  | 0  |
| CONTIG-062883 | 189 | 5  | 0  | 0   | 8  |
| CONTIG-062885 | 546 | 16 | 63 | 394 | 2  |
| CONTIG-062886 | 98  | 6  | 6  | 16  | 0  |
| CONTIG-062887 | 277 | 9  | 17 | 78  | 0  |
| CONTIG-062891 | 142 | 5  | 0  | 20  | 0  |
| CONTIG-062892 | 77  | 4  | 2  | 5   | 0  |
| CONTIG-062893 | 328 | 7  | 16 | 81  | 0  |
| CONTIG-062894 | 164 | 13 | 19 | 88  | 0  |
| CONTIG-062895 | 87  | 27 | 13 | 50  | 0  |
| CONTIG-062896 | 75  | 4  | 5  | 0   | 0  |
| CONTIG-062897 | 122 | 4  | 4  | 16  | 0  |
| CONTIG-062907 | 61  | 4  | 5  | 5   | 0  |
| CONTIG-062908 | 189 | 12 | 9  | 50  | 3  |
| CONTIG-062909 | 89  | 6  | 8  | 12  | 0  |
| CONTIG-062910 | 80  | 8  | 7  | 0   | 0  |
| CONTIG-062911 | 58  | 18 | 31 | 14  | 0  |
| CONTIG-062912 | 60  | 5  | 16 | 2   | 0  |
| CONTIG-062913 | 124 | 4  | 2  | 16  | 0  |

|               |     |    |    |     |    |
|---------------|-----|----|----|-----|----|
| CONTIG-062914 | 139 | 11 | 5  | 23  | 0  |
| CONTIG-062915 | 116 | 10 | 11 | 31  | 0  |
| CONTIG-062916 | 282 | 8  | 14 | 59  | 2  |
| CONTIG-062917 | 131 | 5  | 12 | 10  | 0  |
| CONTIG-062918 | 102 | 7  | 0  | 17  | 0  |
| CONTIG-062919 | 94  | 3  | 2  | 2   | 0  |
| CONTIG-062920 | 106 | 7  | 0  | 15  | 0  |
| CONTIG-062921 | 325 | 13 | 14 | 96  | 8  |
| CONTIG-062922 | 85  | 3  | 0  | 3   | 0  |
| CONTIG-062923 | 70  | 4  | 5  | 2   | 0  |
| CONTIG-062924 | 208 | 8  | 11 | 38  | 0  |
| CONTIG-062925 | 164 | 41 | 6  | 11  | 0  |
| CONTIG-062926 | 166 | 5  | 9  | 4   | 0  |
| CONTIG-062928 | 79  | 8  | 2  | 21  | 0  |
| CONTIG-062929 | 42  | 66 | 4  | 73  | 0  |
| CONTIG-062930 | 99  | 15 | 17 | 65  | 2  |
| CONTIG-062931 | 151 | 5  | 0  | 25  | 0  |
| CONTIG-062932 | 113 | 13 | 7  | 31  | 0  |
| CONTIG-062935 | 160 | 10 | 0  | 58  | 0  |
| CONTIG-062936 | 604 | 11 | 17 | 70  | 0  |
| CONTIG-062937 | 67  | 3  | 2  | 4   | 0  |
| CONTIG-062938 | 138 | 9  | 8  | 40  | 0  |
| CONTIG-062939 | 83  | 6  | 4  | 16  | 0  |
| CONTIG-062940 | 164 | 6  | 5  | 22  | 0  |
| CONTIG-062941 | 59  | 8  | 2  | 11  | 0  |
| CONTIG-062942 | 193 | 7  | 19 | 38  | 0  |
| CONTIG-062943 | 66  | 5  | 4  | 7   | 0  |
| CONTIG-062946 | 167 | 85 | 10 | 229 | 10 |
| CONTIG-062952 | 146 | 4  | 6  | 6   | 0  |
| CONTIG-062954 | 156 | 8  | 12 | 20  | 0  |
| CONTIG-062955 | 116 | 32 | 18 | 145 | 0  |
| CONTIG-062956 | 350 | 13 | 6  | 199 | 0  |
| CONTIG-062957 | 145 | 4  | 0  | 13  | 0  |
| CONTIG-062958 | 105 | 8  | 2  | 22  | 0  |
| CONTIG-062959 | 189 | 12 | 28 | 70  | 0  |
| CONTIG-062961 | 101 | 5  | 2  | 14  | 0  |
| CONTIG-062963 | 63  | 9  | 4  | 8   | 2  |
| CONTIG-062964 | 78  | 8  | 2  | 20  | 0  |
| CONTIG-062965 | 125 | 7  | 38 | 19  | 0  |
| CONTIG-062966 | 59  | 3  | 0  | 2   | 0  |
| CONTIG-062967 | 112 | 8  | 8  | 21  | 0  |
| CONTIG-062968 | 179 | 7  | 2  | 32  | 0  |
| CONTIG-062969 | 250 | 9  | 4  | 107 | 0  |
| CONTIG-062970 | 75  | 4  | 4  | 2   | 0  |
| CONTIG-062972 | 69  | 4  | 2  | 6   | 0  |
| CONTIG-062973 | 208 | 5  | 20 | 10  | 0  |
| CONTIG-062974 | 111 | 28 | 4  | 0   | 24 |

|               |     |     |    |     |     |
|---------------|-----|-----|----|-----|-----|
| CONTIG-062975 | 212 | 14  | 12 | 37  | 8   |
| CONTIG-062976 | 63  | 3   | 0  | 0   | 0   |
| CONTIG-062977 | 125 | 8   | 10 | 41  | 0   |
| CONTIG-062978 | 346 | 12  | 3  | 33  | 0   |
| CONTIG-062979 | 274 | 9   | 9  | 68  | 0   |
| CONTIG-062980 | 75  | 10  | 12 | 32  | 0   |
| CONTIG-062981 | 98  | 6   | 6  | 7   | 0   |
| CONTIG-062983 | 89  | 30  | 19 | 128 | 0   |
| CONTIG-062984 | 131 | 6   | 7  | 25  | 0   |
| CONTIG-062985 | 59  | 19  | 5  | 34  | 0   |
| CONTIG-062986 | 148 | 6   | 3  | 32  | 0   |
| CONTIG-062987 | 63  | 4   | 6  | 6   | 0   |
| CONTIG-062988 | 82  | 13  | 7  | 31  | 0   |
| CONTIG-062989 | 61  | 8   | 0  | 12  | 0   |
| CONTIG-062991 | 183 | 13  | 22 | 74  | 0   |
| CONTIG-062992 | 153 | 9   | 0  | 62  | 0   |
| CONTIG-062993 | 170 | 13  | 9  | 60  | 0   |
| CONTIG-062994 | 160 | 34  | 3  | 0   | 7   |
| CONTIG-062995 | 119 | 6   | 6  | 22  | 0   |
| CONTIG-062996 | 85  | 4   | 0  | 8   | 0   |
| CONTIG-062997 | 83  | 12  | 4  | 10  | 0   |
| CONTIG-062998 | 173 | 6   | 5  | 33  | 0   |
| CONTIG-062999 | 140 | 17  | 4  | 81  | 0   |
| CONTIG-063000 | 154 | 4   | 2  | 0   | 2   |
| CONTIG-063001 | 117 | 4   | 3  | 7   | 0   |
| CONTIG-063002 | 73  | 6   | 0  | 19  | 0   |
| CONTIG-063003 | 236 | 12  | 0  | 124 | 4   |
| CONTIG-063004 | 160 | 5   | 2  | 8   | 0   |
| CONTIG-063005 | 110 | 6   | 0  | 24  | 0   |
| CONTIG-063006 | 89  | 11  | 19 | 30  | 0   |
| CONTIG-063007 | 212 | 15  | 26 | 153 | 0   |
| CONTIG-063008 | 89  | 18  | 93 | 33  | 0   |
| CONTIG-063009 | 212 | 6   | 25 | 36  | 0   |
| CONTIG-063010 | 95  | 3   | 2  | 13  | 0   |
| CONTIG-063011 | 203 | 6   | 0  | 39  | 0   |
| CONTIG-063012 | 83  | 6   | 3  | 11  | 0   |
| CONTIG-063017 | 230 | 12  | 10 | 73  | 0   |
| CONTIG-063018 | 268 | 7   | 27 | 56  | 0   |
| CONTIG-063019 | 168 | 11  | 34 | 50  | 0   |
| CONTIG-063021 | 75  | 5   | 2  | 0   | 0   |
| CONTIG-063022 | 230 | 7   | 4  | 72  | 0   |
| CONTIG-063023 | 66  | 7   | 8  | 14  | 0   |
| CONTIG-063026 | 83  | 7   | 13 | 0   | 0   |
| CONTIG-063027 | 74  | 4   | 0  | 6   | 0   |
| CONTIG-063028 | 36  | 784 | 20 | 581 | 169 |
| CONTIG-063031 | 95  | 10  | 6  | 43  | 0   |
| CONTIG-063032 | 99  | 25  | 5  | 91  | 0   |

|               |     |    |    |     |    |
|---------------|-----|----|----|-----|----|
| CONTIG-063033 | 118 | 7  | 7  | 2   | 0  |
| CONTIG-063035 | 72  | 7  | 2  | 11  | 0  |
| CONTIG-063036 | 124 | 5  | 7  | 19  | 0  |
| CONTIG-063038 | 79  | 6  | 3  | 18  | 0  |
| CONTIG-063039 | 549 | 12 | 14 | 130 | 4  |
| CONTIG-063040 | 665 | 10 | 11 | 222 | 0  |
| CONTIG-063041 | 209 | 11 | 7  | 90  | 0  |
| CONTIG-063042 | 405 | 12 | 4  | 2   | 0  |
| CONTIG-063043 | 167 | 8  | 0  | 29  | 0  |
| CONTIG-063044 | 187 | 20 | 7  | 166 | 0  |
| CONTIG-063051 | 100 | 28 | 30 | 85  | 0  |
| CONTIG-063052 | 101 | 12 | 13 | 21  | 0  |
| CONTIG-063054 | 306 | 11 | 34 | 52  | 0  |
| CONTIG-063056 | 141 | 5  | 6  | 10  | 0  |
| CONTIG-063057 | 150 | 3  | 2  | 0   | 0  |
| CONTIG-063059 | 65  | 3  | 2  | 4   | 0  |
| CONTIG-063060 | 102 | 8  | 4  | 23  | 0  |
| CONTIG-063061 | 193 | 13 | 7  | 74  | 0  |
| CONTIG-063062 | 70  | 3  | 2  | 2   | 0  |
| CONTIG-063063 | 277 | 13 | 19 | 80  | 0  |
| CONTIG-063065 | 105 | 23 | 20 | 11  | 0  |
| CONTIG-063066 | 58  | 74 | 13 | 123 | 0  |
| CONTIG-063068 | 317 | 11 | 8  | 134 | 0  |
| CONTIG-063069 | 208 | 9  | 2  | 2   | 0  |
| CONTIG-063070 | 172 | 7  | 8  | 24  | 2  |
| CONTIG-063071 | 73  | 7  | 15 | 2   | 0  |
| CONTIG-063072 | 150 | 6  | 2  | 9   | 0  |
| CONTIG-063075 | 66  | 5  | 7  | 2   | 0  |
| CONTIG-063076 | 121 | 10 | 6  | 20  | 0  |
| CONTIG-063077 | 101 | 5  | 0  | 24  | 0  |
| CONTIG-063078 | 354 | 8  | 8  | 84  | 5  |
| CONTIG-063079 | 163 | 10 | 20 | 58  | 0  |
| CONTIG-063080 | 326 | 7  | 30 | 47  | 0  |
| CONTIG-063082 | 290 | 6  | 0  | 35  | 2  |
| CONTIG-063083 | 127 | 4  | 0  | 0   | 2  |
| CONTIG-063084 | 97  | 7  | 4  | 25  | 0  |
| CONTIG-063085 | 223 | 13 | 6  | 59  | 21 |
| CONTIG-063086 | 213 | 11 | 41 | 47  | 0  |
| CONTIG-063087 | 64  | 4  | 2  | 2   | 0  |
| CONTIG-063088 | 463 | 13 | 27 | 222 | 2  |
| CONTIG-063090 | 188 | 6  | 10 | 24  | 0  |
| CONTIG-063091 | 81  | 3  | 8  | 2   | 0  |
| CONTIG-063092 | 403 | 14 | 43 | 111 | 0  |
| CONTIG-063093 | 58  | 5  | 0  | 4   | 0  |
| CONTIG-063094 | 82  | 2  | 0  | 0   | 0  |
| CONTIG-063095 | 75  | 6  | 2  | 13  | 0  |
| CONTIG-063096 | 66  | 9  | 12 | 16  | 0  |



|               |     |    |    |     |    |
|---------------|-----|----|----|-----|----|
| CONTIG-063097 | 90  | 11 | 5  | 23  | 2  |
| CONTIG-063098 | 312 | 7  | 8  | 47  | 2  |
| CONTIG-063099 | 339 | 10 | 9  | 129 | 0  |
| CONTIG-063100 | 74  | 4  | 2  | 5   | 0  |
| CONTIG-063101 | 171 | 13 | 7  | 64  | 0  |
| CONTIG-063102 | 93  | 8  | 4  | 0   | 0  |
| CONTIG-063103 | 189 | 6  | 11 | 44  | 0  |
| CONTIG-063104 | 130 | 8  | 6  | 24  | 0  |
| CONTIG-063105 | 216 | 10 | 11 | 79  | 0  |
| CONTIG-063106 | 65  | 11 | 0  | 31  | 0  |
| CONTIG-063107 | 70  | 14 | 3  | 39  | 0  |
| CONTIG-063108 | 136 | 8  | 17 | 49  | 0  |
| CONTIG-063110 | 76  | 6  | 4  | 0   | 0  |
| CONTIG-063111 | 94  | 7  | 4  | 30  | 0  |
| CONTIG-063112 | 319 | 5  | 2  | 52  | 0  |
| CONTIG-063113 | 293 | 6  | 3  | 53  | 2  |
| CONTIG-063115 | 60  | 5  | 0  | 6   | 0  |
| CONTIG-063116 | 78  | 5  | 8  | 6   | 0  |
| CONTIG-063117 | 67  | 2  | 0  | 3   | 0  |
| CONTIG-063118 | 68  | 5  | 11 | 2   | 0  |
| CONTIG-063119 | 80  | 8  | 2  | 15  | 0  |
| CONTIG-063120 | 264 | 12 | 13 | 133 | 0  |
| CONTIG-063121 | 220 | 5  | 18 | 18  | 0  |
| CONTIG-063122 | 66  | 3  | 2  | 4   | 0  |
| CONTIG-063123 | 94  | 5  | 2  | 18  | 0  |
| CONTIG-063124 | 60  | 9  | 25 | 12  | 0  |
| CONTIG-063125 | 145 | 8  | 12 | 23  | 0  |
| CONTIG-063126 | 413 | 13 | 22 | 126 | 6  |
| CONTIG-063130 | 381 | 8  | 8  | 155 | 0  |
| CONTIG-063132 | 80  | 8  | 31 | 0   | 0  |
| CONTIG-063133 | 90  | 5  | 8  | 17  | 0  |
| CONTIG-063135 | 75  | 6  | 0  | 16  | 0  |
| CONTIG-063139 | 287 | 10 | 4  | 124 | 0  |
| CONTIG-063140 | 112 | 7  | 15 | 17  | 0  |
| CONTIG-063141 | 700 | 21 | 2  | 0   | 81 |
| CONTIG-063142 | 153 | 6  | 3  | 22  | 0  |
| CONTIG-063145 | 159 | 6  | 5  | 39  | 0  |
| CONTIG-063146 | 152 | 5  | 5  | 8   | 0  |
| CONTIG-063147 | 158 | 7  | 3  | 31  | 0  |
| CONTIG-063148 | 85  | 9  | 11 | 24  | 0  |
| CONTIG-063149 | 643 | 16 | 3  | 8   | 0  |
| CONTIG-063150 | 39  | 23 | 11 | 38  | 0  |
| CONTIG-063152 | 87  | 9  | 22 | 7   | 0  |
| CONTIG-063153 | 403 | 24 | 32 | 180 | 11 |
| CONTIG-063154 | 111 | 13 | 5  | 73  | 0  |
| CONTIG-063155 | 67  | 5  | 6  | 4   | 0  |
| CONTIG-063156 | 146 | 4  | 0  | 14  | 0  |

|               |     |    |    |      |   |
|---------------|-----|----|----|------|---|
| CONTIG-063157 | 87  | 5  | 8  | 11   | 0 |
| CONTIG-063158 | 120 | 5  | 2  | 21   | 0 |
| CONTIG-063159 | 433 | 25 | 22 | 461  | 4 |
| CONTIG-063160 | 65  | 11 | 3  | 19   | 0 |
| CONTIG-063161 | 69  | 6  | 0  | 2    | 0 |
| CONTIG-063162 | 241 | 9  | 3  | 40   | 0 |
| CONTIG-063163 | 123 | 18 | 2  | 3    | 0 |
| CONTIG-063164 | 193 | 16 | 18 | 180  | 0 |
| CONTIG-063165 | 181 | 7  | 17 | 17   | 0 |
| CONTIG-063166 | 219 | 14 | 2  | 67   | 0 |
| CONTIG-063167 | 272 | 15 | 43 | 192  | 0 |
| CONTIG-063168 | 201 | 10 | 11 | 85   | 2 |
| CONTIG-063169 | 292 | 26 | 60 | 256  | 0 |
| CONTIG-063170 | 683 | 57 | 18 | 2287 | 0 |
| CONTIG-063171 | 65  | 4  | 4  | 0    | 0 |
| CONTIG-063172 | 138 | 11 | 17 | 18   | 0 |
| CONTIG-063173 | 155 | 11 | 14 | 63   | 0 |
| CONTIG-063174 | 71  | 7  | 0  | 5    | 0 |
| CONTIG-063175 | 94  | 9  | 9  | 30   | 0 |
| CONTIG-063176 | 104 | 5  | 9  | 9    | 0 |
| CONTIG-063178 | 76  | 3  | 5  | 2    | 0 |
| CONTIG-063179 | 195 | 7  | 5  | 62   | 0 |
| CONTIG-063180 | 69  | 7  | 6  | 2    | 0 |
| CONTIG-063181 | 76  | 7  | 4  | 30   | 0 |
| CONTIG-063182 | 222 | 9  | 14 | 75   | 0 |
| CONTIG-063183 | 144 | 5  | 9  | 22   | 0 |
| CONTIG-063184 | 97  | 44 | 3  | 204  | 2 |
| CONTIG-063185 | 78  | 8  | 4  | 12   | 0 |
| CONTIG-063186 | 72  | 7  | 2  | 14   | 0 |
| CONTIG-063187 | 111 | 16 | 4  | 51   | 0 |
| CONTIG-063188 | 80  | 8  | 10 | 16   | 0 |
| CONTIG-063192 | 141 | 5  | 5  | 15   | 0 |
| CONTIG-063193 | 343 | 7  | 27 | 59   | 0 |
| CONTIG-063194 | 114 | 5  | 11 | 13   | 0 |
| CONTIG-063195 | 140 | 7  | 6  | 14   | 2 |
| CONTIG-063196 | 261 | 19 | 10 | 41   | 0 |
| CONTIG-063197 | 72  | 6  | 5  | 11   | 0 |
| CONTIG-063198 | 237 | 10 | 3  | 0    | 0 |
| CONTIG-063199 | 309 | 8  | 23 | 85   | 0 |
| CONTIG-063200 | 64  | 3  | 0  | 4    | 0 |
| CONTIG-063201 | 110 | 21 | 11 | 101  | 0 |
| CONTIG-063202 | 42  | 7  | 2  | 0    | 0 |
| CONTIG-063204 | 84  | 7  | 27 | 15   | 0 |
| CONTIG-063205 | 132 | 6  | 3  | 7    | 0 |
| CONTIG-063206 | 94  | 16 | 27 | 47   | 2 |
| CONTIG-063207 | 58  | 4  | 4  | 2    | 0 |
| CONTIG-063208 | 98  | 5  | 9  | 6    | 0 |

|               |     |    |    |      |   |
|---------------|-----|----|----|------|---|
| CONTIG-063209 | 91  | 45 | 4  | 208  | 0 |
| CONTIG-063210 | 661 | 77 | 21 | 2947 | 2 |
| CONTIG-063211 | 64  | 5  | 5  | 4    | 0 |
| CONTIG-063212 | 97  | 10 | 0  | 40   | 0 |
| CONTIG-063213 | 101 | 4  | 11 | 7    | 0 |
| CONTIG-063214 | 155 | 17 | 47 | 99   | 2 |
| CONTIG-063215 | 232 | 7  | 9  | 31   | 0 |
| CONTIG-063216 | 78  | 4  | 0  | 4    | 0 |
| CONTIG-063217 | 509 | 10 | 8  | 170  | 2 |
| CONTIG-063218 | 734 | 16 | 75 | 234  | 0 |
| CONTIG-063220 | 189 | 6  | 9  | 23   | 0 |
| CONTIG-063221 | 75  | 14 | 9  | 36   | 0 |
| CONTIG-063222 | 159 | 7  | 14 | 41   | 0 |
| CONTIG-063223 | 71  | 10 | 14 | 4    | 0 |
| CONTIG-063224 | 95  | 7  | 22 | 4    | 0 |
| CONTIG-063225 | 103 | 12 | 6  | 33   | 0 |
| CONTIG-063226 | 213 | 46 | 14 | 418  | 2 |
| CONTIG-063227 | 66  | 16 | 26 | 31   | 0 |
| CONTIG-063228 | 305 | 15 | 11 | 169  | 0 |
| CONTIG-063229 | 209 | 9  | 5  | 68   | 0 |
| CONTIG-063230 | 276 | 10 | 6  | 69   | 0 |
| CONTIG-063231 | 94  | 23 | 6  | 89   | 0 |
| CONTIG-063232 | 82  | 12 | 22 | 38   | 0 |
| CONTIG-063233 | 74  | 5  | 5  | 0    | 0 |
| CONTIG-063234 | 58  | 13 | 25 | 2    | 0 |
| CONTIG-063235 | 326 | 17 | 15 | 110  | 0 |
| CONTIG-063236 | 83  | 6  | 4  | 13   | 0 |
| CONTIG-063237 | 105 | 10 | 5  | 52   | 0 |
| CONTIG-063238 | 66  | 16 | 9  | 9    | 0 |
| CONTIG-063239 | 185 | 5  | 6  | 21   | 2 |
| CONTIG-063240 | 82  | 2  | 0  | 2    | 0 |
| CONTIG-063241 | 148 | 12 | 28 | 33   | 0 |
| CONTIG-063242 | 175 | 10 | 24 | 58   | 0 |
| CONTIG-063243 | 226 | 14 | 11 | 90   | 2 |
| CONTIG-063244 | 79  | 4  | 0  | 4    | 0 |
| CONTIG-063245 | 77  | 6  | 4  | 5    | 0 |
| CONTIG-063246 | 77  | 4  | 3  | 8    | 0 |
| CONTIG-063247 | 162 | 5  | 5  | 17   | 0 |
| CONTIG-063248 | 144 | 13 | 2  | 69   | 0 |
| CONTIG-063249 | 73  | 9  | 5  | 20   | 2 |
| CONTIG-063250 | 227 | 12 | 2  | 111  | 0 |
| CONTIG-063251 | 83  | 3  | 2  | 8    | 0 |
| CONTIG-063252 | 139 | 7  | 0  | 23   | 0 |
| CONTIG-063254 | 161 | 9  | 13 | 44   | 2 |
| CONTIG-063255 | 59  | 7  | 24 | 2    | 0 |
| CONTIG-063256 | 621 | 11 | 12 | 248  | 0 |
| CONTIG-063257 | 414 | 13 | 17 | 159  | 0 |

|               |     |     |    |      |    |
|---------------|-----|-----|----|------|----|
| CONTIG-063258 | 136 | 6   | 5  | 5    | 0  |
| CONTIG-063260 | 172 | 10  | 14 | 33   | 0  |
| CONTIG-063262 | 106 | 5   | 14 | 4    | 0  |
| CONTIG-063263 | 129 | 6   | 8  | 13   | 2  |
| CONTIG-063264 | 69  | 3   | 0  | 2    | 0  |
| CONTIG-063265 | 130 | 7   | 0  | 20   | 0  |
| CONTIG-063266 | 543 | 17  | 33 | 156  | 11 |
| CONTIG-063267 | 73  | 8   | 10 | 18   | 0  |
| CONTIG-063268 | 118 | 10  | 2  | 44   | 0  |
| CONTIG-063269 | 378 | 11  | 9  | 156  | 5  |
| CONTIG-063270 | 298 | 9   | 24 | 74   | 0  |
| CONTIG-063271 | 61  | 7   | 2  | 17   | 0  |
| CONTIG-063272 | 124 | 13  | 0  | 61   | 0  |
| CONTIG-063273 | 88  | 12  | 12 | 25   | 0  |
| CONTIG-063274 | 97  | 9   | 4  | 15   | 0  |
| CONTIG-063275 | 160 | 16  | 27 | 107  | 2  |
| CONTIG-063276 | 173 | 9   | 8  | 12   | 6  |
| CONTIG-063277 | 130 | 10  | 15 | 32   | 0  |
| CONTIG-063278 | 80  | 31  | 15 | 106  | 0  |
| CONTIG-063279 | 70  | 6   | 6  | 19   | 0  |
| CONTIG-063281 | 69  | 3   | 0  | 6    | 0  |
| CONTIG-063282 | 238 | 27  | 15 | 387  | 0  |
| CONTIG-063283 | 90  | 8   | 0  | 26   | 0  |
| CONTIG-063284 | 103 | 8   | 5  | 24   | 0  |
| CONTIG-063285 | 79  | 4   | 9  | 2    | 0  |
| CONTIG-063286 | 198 | 9   | 5  | 32   | 0  |
| CONTIG-063287 | 168 | 7   | 9  | 23   | 0  |
| CONTIG-063288 | 246 | 7   | 16 | 62   | 0  |
| CONTIG-063289 | 178 | 8   | 0  | 48   | 0  |
| CONTIG-063290 | 179 | 10  | 6  | 3    | 0  |
| CONTIG-063291 | 212 | 8   | 13 | 35   | 0  |
| CONTIG-063292 | 121 | 5   | 0  | 16   | 0  |
| CONTIG-063293 | 136 | 8   | 2  | 54   | 0  |
| CONTIG-063294 | 139 | 5   | 0  | 6    | 0  |
| CONTIG-063295 | 446 | 12  | 17 | 174  | 0  |
| CONTIG-063296 | 111 | 5   | 4  | 7    | 0  |
| CONTIG-063297 | 94  | 3   | 2  | 10   | 0  |
| CONTIG-063298 | 99  | 7   | 2  | 17   | 0  |
| CONTIG-063299 | 60  | 4   | 3  | 8    | 0  |
| CONTIG-063300 | 140 | 209 | 25 | 1546 | 0  |
| CONTIG-063301 | 97  | 4   | 2  | 19   | 0  |
| CONTIG-063302 | 421 | 13  | 24 | 144  | 0  |
| CONTIG-063303 | 152 | 9   | 2  | 25   | 0  |
| CONTIG-063304 | 61  | 11  | 0  | 13   | 0  |
| CONTIG-063306 | 965 | 30  | 42 | 1268 | 23 |
| CONTIG-063307 | 101 | 5   | 10 | 12   | 0  |
| CONTIG-063308 | 433 | 13  | 8  | 25   | 0  |

|               |     |     |    |     |    |
|---------------|-----|-----|----|-----|----|
| CONTIG-063309 | 129 | 6   | 8  | 24  | 0  |
| CONTIG-063310 | 133 | 6   | 4  | 19  | 0  |
| CONTIG-063312 | 67  | 6   | 6  | 7   | 0  |
| CONTIG-063313 | 190 | 9   | 10 | 34  | 2  |
| CONTIG-063316 | 169 | 6   | 3  | 28  | 0  |
| CONTIG-063317 | 111 | 10  | 11 | 18  | 2  |
| CONTIG-063318 | 67  | 6   | 4  | 0   | 0  |
| CONTIG-063319 | 151 | 6   | 12 | 15  | 0  |
| CONTIG-063320 | 64  | 2   | 0  | 4   | 0  |
| CONTIG-063321 | 116 | 8   | 0  | 0   | 0  |
| CONTIG-063322 | 175 | 11  | 20 | 54  | 0  |
| CONTIG-063323 | 285 | 18  | 8  | 231 | 0  |
| CONTIG-063324 | 87  | 3   | 4  | 6   | 0  |
| CONTIG-063325 | 276 | 10  | 21 | 70  | 0  |
| CONTIG-063327 | 126 | 6   | 3  | 22  | 0  |
| CONTIG-063328 | 124 | 6   | 5  | 25  | 0  |
| CONTIG-063329 | 177 | 14  | 11 | 82  | 0  |
| CONTIG-063330 | 226 | 9   | 39 | 40  | 0  |
| CONTIG-063331 | 99  | 10  | 9  | 41  | 0  |
| CONTIG-063332 | 104 | 8   | 3  | 25  | 0  |
| CONTIG-063333 | 263 | 5   | 16 | 32  | 2  |
| CONTIG-063334 | 245 | 8   | 12 | 47  | 0  |
| CONTIG-063337 | 381 | 10  | 63 | 118 | 0  |
| CONTIG-063338 | 343 | 7   | 3  | 64  | 0  |
| CONTIG-063339 | 175 | 7   | 28 | 16  | 0  |
| CONTIG-063340 | 261 | 16  | 2  | 167 | 0  |
| CONTIG-063341 | 77  | 6   | 0  | 10  | 0  |
| CONTIG-063342 | 176 | 56  | 0  | 0   | 60 |
| CONTIG-063343 | 102 | 3   | 0  | 6   | 0  |
| CONTIG-063344 | 63  | 4   | 0  | 0   | 0  |
| CONTIG-063345 | 138 | 6   | 6  | 25  | 2  |
| CONTIG-063346 | 63  | 3   | 0  | 0   | 0  |
| CONTIG-063347 | 142 | 5   | 5  | 19  | 0  |
| CONTIG-063348 | 278 | 14  | 68 | 123 | 0  |
| CONTIG-063349 | 215 | 10  | 6  | 64  | 0  |
| CONTIG-063351 | 294 | 6   | 3  | 47  | 0  |
| CONTIG-063352 | 130 | 7   | 7  | 27  | 0  |
| CONTIG-063354 | 101 | 5   | 7  | 0   | 0  |
| CONTIG-063355 | 204 | 157 | 8  | 0   | 0  |
| CONTIG-063356 | 63  | 10  | 28 | 0   | 0  |
| CONTIG-063357 | 110 | 5   | 8  | 17  | 0  |
| CONTIG-063358 | 59  | 4   | 10 | 0   | 0  |
| CONTIG-063359 | 163 | 8   | 7  | 30  | 2  |
| CONTIG-063360 | 81  | 14  | 13 | 11  | 0  |
| CONTIG-063361 | 159 | 4   | 8  | 15  | 0  |
| CONTIG-063362 | 597 | 17  | 56 | 349 | 0  |
| CONTIG-063363 | 109 | 17  | 15 | 29  | 0  |

|               |     |     |    |     |    |
|---------------|-----|-----|----|-----|----|
| CONTIG-063364 | 187 | 5   | 11 | 34  | 0  |
| CONTIG-063365 | 92  | 6   | 11 | 5   | 0  |
| CONTIG-063366 | 137 | 18  | 3  | 105 | 0  |
| CONTIG-063368 | 82  | 2   | 2  | 2   | 0  |
| CONTIG-063369 | 74  | 451 | 14 | 205 | 0  |
| CONTIG-063372 | 60  | 4   | 6  | 2   | 0  |
| CONTIG-063373 | 71  | 5   | 5  | 3   | 0  |
| CONTIG-063374 | 64  | 7   | 4  | 10  | 0  |
| CONTIG-063375 | 383 | 9   | 20 | 64  | 2  |
| CONTIG-063376 | 141 | 9   | 13 | 38  | 0  |
| CONTIG-063377 | 314 | 12  | 21 | 75  | 2  |
| CONTIG-063378 | 65  | 4   | 8  | 5   | 0  |
| CONTIG-063379 | 63  | 8   | 0  | 5   | 0  |
| CONTIG-063380 | 143 | 25  | 43 | 160 | 0  |
| CONTIG-063381 | 80  | 3   | 2  | 5   | 0  |
| CONTIG-063382 | 217 | 27  | 11 | 0   | 49 |
| CONTIG-063383 | 159 | 6   | 15 | 9   | 0  |
| CONTIG-063384 | 148 | 5   | 2  | 20  | 2  |
| CONTIG-063389 | 842 | 19  | 27 | 250 | 2  |
| CONTIG-063390 | 233 | 4   | 3  | 13  | 0  |
| CONTIG-063391 | 112 | 6   | 8  | 19  | 2  |
| CONTIG-063392 | 377 | 27  | 0  | 0   | 90 |
| CONTIG-063393 | 412 | 20  | 12 | 132 | 2  |
| CONTIG-063394 | 146 | 5   | 9  | 17  | 0  |
| CONTIG-063395 | 75  | 9   | 7  | 0   | 0  |
| CONTIG-063396 | 81  | 7   | 4  | 15  | 0  |
| CONTIG-063399 | 212 | 9   | 9  | 43  | 0  |
| CONTIG-063400 | 266 | 14  | 8  | 124 | 2  |
| CONTIG-063402 | 59  | 3   | 3  | 4   | 0  |
| CONTIG-063403 | 79  | 4   | 0  | 13  | 0  |
| CONTIG-063404 | 67  | 26  | 24 | 64  | 0  |
| CONTIG-063405 | 578 | 13  | 23 | 193 | 18 |
| CONTIG-063406 | 159 | 3   | 0  | 13  | 2  |
| CONTIG-063407 | 108 | 7   | 2  | 23  | 0  |
| CONTIG-063408 | 80  | 6   | 17 | 2   | 0  |
| CONTIG-063411 | 146 | 6   | 2  | 12  | 0  |
| CONTIG-063412 | 184 | 7   | 0  | 22  | 0  |
| CONTIG-063413 | 143 | 6   | 0  | 33  | 0  |
| CONTIG-063414 | 78  | 5   | 2  | 10  | 0  |
| CONTIG-063417 | 315 | 12  | 14 | 199 | 0  |
| CONTIG-063418 | 176 | 9   | 4  | 66  | 0  |
| CONTIG-063419 | 66  | 8   | 2  | 3   | 0  |
| CONTIG-063421 | 100 | 18  | 23 | 76  | 0  |
| CONTIG-063422 | 91  | 17  | 15 | 38  | 0  |
| CONTIG-063423 | 288 | 14  | 3  | 0   | 4  |
| CONTIG-063424 | 114 | 9   | 2  | 19  | 0  |
| CONTIG-063426 | 196 | 8   | 4  | 39  | 0  |

|               |     |    |    |     |    |
|---------------|-----|----|----|-----|----|
| CONTIG-063427 | 315 | 19 | 8  | 100 | 0  |
| CONTIG-063428 | 234 | 7  | 4  | 41  | 0  |
| CONTIG-063429 | 275 | 17 | 12 | 207 | 6  |
| CONTIG-063430 | 61  | 5  | 0  | 10  | 0  |
| CONTIG-063431 | 176 | 14 | 14 | 0   | 0  |
| CONTIG-063432 | 88  | 6  | 3  | 9   | 0  |
| CONTIG-063433 | 77  | 6  | 0  | 14  | 0  |
| CONTIG-063434 | 146 | 5  | 7  | 18  | 0  |
| CONTIG-063435 | 445 | 13 | 6  | 29  | 0  |
| CONTIG-063436 | 430 | 27 | 2  | 0   | 84 |
| CONTIG-063437 | 222 | 17 | 5  | 120 | 0  |
| CONTIG-063438 | 501 | 12 | 11 | 44  | 0  |
| CONTIG-063439 | 144 | 7  | 5  | 28  | 0  |
| CONTIG-063440 | 87  | 15 | 22 | 11  | 0  |
| CONTIG-063441 | 74  | 5  | 7  | 9   | 0  |
| CONTIG-063442 | 60  | 12 | 6  | 0   | 0  |
| CONTIG-063443 | 58  | 2  | 4  | 0   | 0  |
| CONTIG-063444 | 70  | 19 | 19 | 2   | 0  |
| CONTIG-063445 | 309 | 6  | 5  | 39  | 0  |
| CONTIG-063446 | 284 | 7  | 0  | 29  | 3  |
| CONTIG-063447 | 116 | 5  | 2  | 10  | 0  |
| CONTIG-063448 | 242 | 8  | 35 | 39  | 0  |
| CONTIG-063449 | 90  | 15 | 0  | 0   | 0  |
| CONTIG-063450 | 56  | 6  | 3  | 6   | 0  |
| CONTIG-063451 | 101 | 4  | 2  | 6   | 0  |
| CONTIG-063452 | 73  | 4  | 4  | 8   | 0  |
| CONTIG-063453 | 207 | 12 | 23 | 100 | 0  |
| CONTIG-063454 | 135 | 10 | 3  | 27  | 0  |
| CONTIG-063455 | 248 | 10 | 2  | 16  | 0  |
| CONTIG-063456 | 364 | 7  | 2  | 29  | 0  |
| CONTIG-063458 | 223 | 12 | 4  | 71  | 0  |
| CONTIG-063459 | 101 | 6  | 5  | 20  | 0  |
| CONTIG-063460 | 175 | 4  | 5  | 23  | 0  |
| CONTIG-063461 | 63  | 4  | 5  | 6   | 0  |
| CONTIG-063462 | 218 | 8  | 8  | 26  | 0  |
| CONTIG-063463 | 162 | 8  | 32 | 19  | 0  |
| CONTIG-063465 | 201 | 8  | 4  | 32  | 0  |
| CONTIG-063466 | 143 | 7  | 5  | 23  | 0  |
| CONTIG-063467 | 241 | 8  | 9  | 30  | 0  |
| CONTIG-063468 | 114 | 7  | 8  | 14  | 0  |
| CONTIG-063470 | 101 | 3  | 0  | 8   | 0  |
| CONTIG-063471 | 68  | 3  | 0  | 3   | 0  |
| CONTIG-063472 | 244 | 10 | 6  | 82  | 0  |
| CONTIG-063473 | 164 | 8  | 8  | 49  | 0  |
| CONTIG-063474 | 169 | 8  | 4  | 63  | 0  |
| CONTIG-063475 | 117 | 2  | 0  | 4   | 0  |
| CONTIG-063476 | 81  | 5  | 12 | 2   | 0  |

|               |     |    |    |     |   |
|---------------|-----|----|----|-----|---|
| CONTIG-063477 | 155 | 4  | 4  | 8   | 0 |
| CONTIG-063478 | 80  | 6  | 10 | 15  | 0 |
| CONTIG-063479 | 185 | 5  | 4  | 17  | 0 |
| CONTIG-063480 | 242 | 37 | 26 | 141 | 6 |
| CONTIG-063481 | 338 | 19 | 18 | 275 | 2 |
| CONTIG-063482 | 63  | 5  | 3  | 10  | 0 |
| CONTIG-063483 | 320 | 9  | 20 | 87  | 0 |
| CONTIG-063484 | 79  | 10 | 7  | 8   | 0 |
| CONTIG-063485 | 77  | 3  | 3  | 5   | 0 |
| CONTIG-063486 | 121 | 7  | 8  | 25  | 0 |
| CONTIG-063487 | 545 | 11 | 16 | 183 | 0 |
| CONTIG-063488 | 79  | 5  | 6  | 12  | 0 |
| CONTIG-063489 | 58  | 8  | 22 | 12  | 0 |
| CONTIG-063490 | 190 | 9  | 5  | 24  | 0 |
| CONTIG-063491 | 124 | 4  | 4  | 0   | 0 |
| CONTIG-063493 | 95  | 8  | 5  | 29  | 0 |
| CONTIG-063494 | 149 | 13 | 9  | 89  | 0 |
| CONTIG-063495 | 401 | 11 | 14 | 144 | 0 |
| CONTIG-063496 | 58  | 13 | 20 | 11  | 0 |
| CONTIG-063497 | 356 | 9  | 11 | 128 | 0 |
| CONTIG-063498 | 127 | 5  | 2  | 11  | 0 |
| CONTIG-063499 | 71  | 11 | 23 | 0   | 0 |
| CONTIG-063500 | 214 | 9  | 6  | 41  | 0 |
| CONTIG-063501 | 286 | 8  | 0  | 0   | 4 |
| CONTIG-063502 | 258 | 7  | 11 | 36  | 0 |
| CONTIG-063503 | 100 | 20 | 0  | 81  | 0 |
| CONTIG-063504 | 301 | 11 | 22 | 111 | 0 |
| CONTIG-063505 | 190 | 10 | 4  | 42  | 2 |
| CONTIG-063506 | 207 | 9  | 12 | 47  | 0 |
| CONTIG-063507 | 94  | 4  | 3  | 6   | 0 |
| CONTIG-063508 | 196 | 10 | 7  | 70  | 0 |
| CONTIG-063509 | 70  | 12 | 26 | 18  | 0 |
| CONTIG-063510 | 84  | 3  | 6  | 6   | 0 |
| CONTIG-063511 | 148 | 6  | 14 | 40  | 0 |
| CONTIG-063512 | 88  | 6  | 3  | 3   | 0 |
| CONTIG-063513 | 109 | 9  | 2  | 44  | 0 |
| CONTIG-063514 | 308 | 6  | 4  | 69  | 0 |
| CONTIG-063515 | 127 | 5  | 7  | 18  | 0 |
| CONTIG-063516 | 213 | 15 | 13 | 112 | 0 |
| CONTIG-063517 | 70  | 4  | 11 | 0   | 0 |
| CONTIG-063518 | 162 | 5  | 4  | 15  | 2 |
| CONTIG-063519 | 337 | 13 | 15 | 198 | 0 |
| CONTIG-063520 | 204 | 5  | 10 | 20  | 0 |
| CONTIG-063521 | 86  | 3  | 8  | 5   | 0 |
| CONTIG-063522 | 184 | 9  | 8  | 65  | 0 |
| CONTIG-063523 | 163 | 4  | 5  | 2   | 0 |
| CONTIG-063524 | 92  | 10 | 10 | 19  | 0 |



|               |     |    |    |     |    |
|---------------|-----|----|----|-----|----|
| CONTIG-063525 | 88  | 4  | 0  | 9   | 0  |
| CONTIG-063526 | 118 | 8  | 8  | 4   | 0  |
| CONTIG-063527 | 304 | 29 | 54 | 317 | 0  |
| CONTIG-063529 | 207 | 21 | 24 | 93  | 0  |
| CONTIG-063530 | 110 | 7  | 14 | 14  | 0  |
| CONTIG-063531 | 62  | 9  | 20 | 7   | 0  |
| CONTIG-063532 | 246 | 27 | 18 | 76  | 0  |
| CONTIG-063533 | 211 | 6  | 11 | 22  | 0  |
| CONTIG-063534 | 125 | 7  | 0  | 30  | 0  |
| CONTIG-063535 | 127 | 14 | 30 | 23  | 0  |
| CONTIG-063536 | 68  | 2  | 2  | 4   | 0  |
| CONTIG-063537 | 60  | 7  | 4  | 12  | 4  |
| CONTIG-063538 | 62  | 11 | 2  | 29  | 0  |
| CONTIG-063539 | 60  | 25 | 13 | 13  | 0  |
| CONTIG-063544 | 151 | 4  | 2  | 17  | 0  |
| CONTIG-063545 | 90  | 5  | 0  | 10  | 0  |
| CONTIG-063546 | 249 | 15 | 36 | 104 | 0  |
| CONTIG-063547 | 179 | 17 | 8  | 29  | 0  |
| CONTIG-063548 | 60  | 6  | 8  | 13  | 0  |
| CONTIG-063549 | 207 | 9  | 15 | 22  | 0  |
| CONTIG-063550 | 119 | 5  | 11 | 12  | 0  |
| CONTIG-063551 | 64  | 6  | 12 | 0   | 2  |
| CONTIG-063552 | 187 | 9  | 2  | 19  | 2  |
| CONTIG-063553 | 679 | 11 | 20 | 241 | 8  |
| CONTIG-063554 | 83  | 6  | 2  | 21  | 0  |
| CONTIG-063555 | 196 | 8  | 6  | 27  | 0  |
| CONTIG-063556 | 258 | 7  | 13 | 26  | 0  |
| CONTIG-063557 | 77  | 6  | 4  | 17  | 0  |
| CONTIG-063558 | 115 | 13 | 18 | 24  | 2  |
| CONTIG-063559 | 82  | 6  | 6  | 15  | 0  |
| CONTIG-063560 | 92  | 5  | 0  | 10  | 0  |
| CONTIG-063561 | 205 | 6  | 2  | 22  | 0  |
| CONTIG-063562 | 278 | 26 | 16 | 10  | 16 |
| CONTIG-063563 | 166 | 15 | 26 | 70  | 0  |
| CONTIG-063564 | 221 | 10 | 5  | 49  | 0  |
| CONTIG-063566 | 65  | 4  | 11 | 7   | 0  |
| CONTIG-063567 | 267 | 26 | 7  | 350 | 0  |
| CONTIG-063569 | 71  | 11 | 8  | 18  | 0  |
| CONTIG-063571 | 252 | 11 | 10 | 48  | 2  |
| CONTIG-063572 | 89  | 8  | 0  | 0   | 0  |
| CONTIG-063573 | 110 | 3  | 3  | 8   | 0  |
| CONTIG-063574 | 122 | 12 | 12 | 24  | 0  |
| CONTIG-063575 | 109 | 11 | 13 | 40  | 0  |
| CONTIG-063576 | 470 | 11 | 44 | 107 | 2  |
| CONTIG-063577 | 112 | 22 | 2  | 53  | 0  |
| CONTIG-063578 | 298 | 22 | 25 | 255 | 2  |
| CONTIG-063579 | 119 | 22 | 24 | 116 | 2  |

|               |      |    |    |     |    |
|---------------|------|----|----|-----|----|
| CONTIG-063580 | 1006 | 18 | 20 | 19  | 0  |
| CONTIG-063581 | 335  | 10 | 14 | 0   | 39 |
| CONTIG-063582 | 585  | 15 | 12 | 321 | 2  |
| CONTIG-063583 | 70   | 5  | 3  | 11  | 0  |
| CONTIG-063584 | 139  | 10 | 3  | 53  | 0  |
| CONTIG-063585 | 163  | 9  | 11 | 42  | 0  |
| CONTIG-063586 | 720  | 10 | 3  | 280 | 9  |
| CONTIG-063587 | 168  | 5  | 26 | 12  | 0  |
| CONTIG-063588 | 1095 | 14 | 20 | 0   | 69 |
| CONTIG-063589 | 94   | 9  | 13 | 13  | 2  |
| CONTIG-063590 | 264  | 9  | 5  | 0   | 0  |
| CONTIG-063591 | 95   | 7  | 5  | 24  | 0  |
| CONTIG-063592 | 390  | 21 | 14 | 251 | 15 |
| CONTIG-063594 | 147  | 8  | 20 | 45  | 0  |
| CONTIG-063595 | 59   | 12 | 30 | 11  | 0  |
| CONTIG-063596 | 74   | 3  | 3  | 4   | 0  |
| CONTIG-063597 | 428  | 13 | 18 | 235 | 0  |
| CONTIG-063598 | 85   | 8  | 20 | 15  | 0  |
| CONTIG-063599 | 180  | 7  | 20 | 24  | 0  |
| CONTIG-063600 | 281  | 6  | 0  | 34  | 0  |
| CONTIG-063601 | 129  | 12 | 10 | 33  | 0  |
| CONTIG-063602 | 391  | 19 | 6  | 35  | 0  |
| CONTIG-063603 | 302  | 9  | 22 | 85  | 0  |
| CONTIG-063604 | 117  | 9  | 6  | 30  | 0  |
| CONTIG-063605 | 290  | 14 | 8  | 108 | 6  |
| CONTIG-063606 | 866  | 31 | 8  | 4   | 0  |
| CONTIG-063607 | 70   | 8  | 6  | 12  | 0  |
| CONTIG-063608 | 105  | 11 | 12 | 36  | 0  |
| CONTIG-063609 | 95   | 7  | 17 | 25  | 0  |
| CONTIG-063610 | 265  | 13 | 15 | 130 | 0  |
| CONTIG-063611 | 68   | 4  | 0  | 3   | 0  |
| CONTIG-063612 | 192  | 5  | 0  | 0   | 0  |
| CONTIG-063613 | 275  | 16 | 5  | 157 | 0  |
| CONTIG-063614 | 224  | 4  | 3  | 45  | 0  |
| CONTIG-063615 | 181  | 6  | 9  | 40  | 0  |
| CONTIG-063616 | 103  | 9  | 0  | 23  | 0  |
| CONTIG-063617 | 76   | 4  | 3  | 0   | 0  |
| CONTIG-063618 | 71   | 9  | 13 | 10  | 0  |
| CONTIG-063619 | 131  | 32 | 7  | 244 | 0  |
| CONTIG-063620 | 266  | 11 | 14 | 98  | 3  |
| CONTIG-063621 | 63   | 5  | 4  | 4   | 0  |
| CONTIG-063622 | 65   | 5  | 0  | 3   | 0  |
| CONTIG-063623 | 128  | 5  | 0  | 17  | 0  |
| CONTIG-063624 | 307  | 6  | 0  | 58  | 0  |
| CONTIG-063625 | 105  | 17 | 10 | 82  | 0  |
| CONTIG-063626 | 69   | 6  | 2  | 9   | 2  |
| CONTIG-063627 | 70   | 4  | 4  | 3   | 0  |

|               |     |    |    |     |    |
|---------------|-----|----|----|-----|----|
| CONTIG-063628 | 139 | 12 | 10 | 49  | 0  |
| CONTIG-063629 | 74  | 8  | 8  | 5   | 0  |
| CONTIG-063630 | 131 | 21 | 37 | 111 | 0  |
| CONTIG-063631 | 121 | 8  | 3  | 33  | 0  |
| CONTIG-063632 | 68  | 14 | 0  | 0   | 0  |
| CONTIG-063633 | 151 | 20 | 9  | 124 | 0  |
| CONTIG-063634 | 64  | 9  | 4  | 22  | 0  |
| CONTIG-063635 | 71  | 3  | 0  | 0   | 0  |
| CONTIG-063636 | 117 | 10 | 20 | 52  | 0  |
| CONTIG-063637 | 58  | 4  | 5  | 5   | 0  |
| CONTIG-063638 | 79  | 4  | 2  | 2   | 0  |
| CONTIG-063639 | 101 | 11 | 5  | 39  | 0  |
| CONTIG-063641 | 114 | 10 | 6  | 22  | 4  |
| CONTIG-063642 | 82  | 5  | 7  | 11  | 0  |
| CONTIG-063643 | 83  | 8  | 5  | 12  | 0  |
| CONTIG-063644 | 230 | 11 | 0  | 120 | 4  |
| CONTIG-063645 | 102 | 16 | 6  | 55  | 4  |
| CONTIG-063646 | 58  | 7  | 8  | 12  | 0  |
| CONTIG-063647 | 78  | 36 | 17 | 80  | 0  |
| CONTIG-063648 | 86  | 7  | 3  | 2   | 0  |
| CONTIG-063649 | 91  | 14 | 0  | 22  | 0  |
| CONTIG-063650 | 95  | 7  | 3  | 0   | 0  |
| CONTIG-063651 | 63  | 6  | 6  | 15  | 0  |
| CONTIG-063652 | 87  | 6  | 2  | 21  | 0  |
| CONTIG-063653 | 108 | 7  | 0  | 27  | 0  |
| CONTIG-063654 | 117 | 6  | 3  | 16  | 0  |
| CONTIG-063656 | 77  | 6  | 3  | 15  | 0  |
| CONTIG-063657 | 185 | 8  | 15 | 43  | 0  |
| CONTIG-063658 | 89  | 3  | 0  | 10  | 0  |
| CONTIG-063659 | 308 | 10 | 9  | 67  | 0  |
| CONTIG-063660 | 263 | 8  | 6  | 72  | 0  |
| CONTIG-063661 | 390 | 23 | 32 | 408 | 0  |
| CONTIG-063662 | 206 | 9  | 6  | 69  | 0  |
| CONTIG-063663 | 108 | 7  | 20 | 8   | 0  |
| CONTIG-063664 | 117 | 8  | 4  | 23  | 2  |
| CONTIG-063665 | 154 | 16 | 23 | 90  | 0  |
| CONTIG-063668 | 62  | 4  | 0  | 11  | 0  |
| CONTIG-063669 | 62  | 5  | 2  | 7   | 0  |
| CONTIG-063670 | 140 | 9  | 16 | 28  | 0  |
| CONTIG-063671 | 196 | 9  | 4  | 37  | 0  |
| CONTIG-063672 | 121 | 7  | 0  | 17  | 0  |
| CONTIG-063673 | 126 | 7  | 9  | 15  | 0  |
| CONTIG-063674 | 633 | 15 | 12 | 33  | 0  |
| CONTIG-063676 | 685 | 20 | 2  | 0   | 65 |
| CONTIG-063677 | 91  | 3  | 3  | 8   | 0  |
| CONTIG-063678 | 334 | 9  | 42 | 4   | 0  |
| CONTIG-063679 | 108 | 5  | 9  | 14  | 0  |

|               |     |    |    |     |   |
|---------------|-----|----|----|-----|---|
| CONTIG-063680 | 62  | 4  | 2  | 5   | 0 |
| CONTIG-063681 | 127 | 7  | 3  | 27  | 2 |
| CONTIG-063682 | 118 | 6  | 11 | 9   | 0 |
| CONTIG-063683 | 99  | 8  | 4  | 12  | 0 |
| CONTIG-063684 | 200 | 11 | 2  | 58  | 2 |
| CONTIG-063685 | 73  | 12 | 10 | 21  | 0 |
| CONTIG-063686 | 419 | 8  | 19 | 133 | 0 |
| CONTIG-063687 | 83  | 5  | 2  | 11  | 0 |
| CONTIG-063688 | 78  | 18 | 12 | 41  | 0 |
| CONTIG-063689 | 88  | 8  | 13 | 2   | 0 |
| CONTIG-063690 | 110 | 15 | 17 | 41  | 0 |
| CONTIG-063691 | 92  | 2  | 2  | 2   | 0 |
| CONTIG-063692 | 117 | 16 | 9  | 72  | 0 |
| CONTIG-063693 | 176 | 11 | 10 | 33  | 0 |
| CONTIG-063694 | 62  | 5  | 8  | 9   | 0 |
| CONTIG-063695 | 192 | 7  | 8  | 30  | 0 |
| CONTIG-063696 | 373 | 12 | 15 | 203 | 3 |
| CONTIG-063697 | 109 | 7  | 6  | 14  | 0 |
| CONTIG-063698 | 123 | 8  | 6  | 34  | 0 |
| CONTIG-063699 | 124 | 29 | 20 | 173 | 0 |
| CONTIG-063700 | 177 | 9  | 0  | 0   | 0 |
| CONTIG-063701 | 59  | 10 | 11 | 0   | 0 |
| CONTIG-063702 | 68  | 5  | 5  | 4   | 0 |
| CONTIG-063703 | 156 | 16 | 12 | 38  | 0 |
| CONTIG-063704 | 68  | 8  | 2  | 5   | 0 |
| CONTIG-063705 | 194 | 8  | 2  | 49  | 0 |
| CONTIG-063706 | 91  | 4  | 6  | 10  | 0 |
| CONTIG-063707 | 116 | 7  | 5  | 20  | 0 |
| CONTIG-063708 | 198 | 11 | 7  | 0   | 0 |
| CONTIG-063709 | 147 | 10 | 7  | 65  | 0 |
| CONTIG-063710 | 106 | 7  | 3  | 19  | 0 |
| CONTIG-063713 | 74  | 4  | 0  | 4   | 0 |
| CONTIG-063714 | 80  | 11 | 21 | 21  | 0 |
| CONTIG-063715 | 102 | 3  | 0  | 11  | 0 |
| CONTIG-063716 | 233 | 8  | 19 | 56  | 2 |
| CONTIG-063717 | 130 | 9  | 26 | 42  | 0 |
| CONTIG-063718 | 217 | 17 | 6  | 110 | 0 |
| CONTIG-063719 | 78  | 22 | 7  | 59  | 0 |
| CONTIG-063720 | 86  | 7  | 25 | 5   | 0 |
| CONTIG-063721 | 89  | 11 | 14 | 9   | 0 |
| CONTIG-063722 | 370 | 12 | 0  | 0   | 2 |
| CONTIG-063723 | 107 | 33 | 30 | 103 | 0 |
| CONTIG-063724 | 66  | 7  | 2  | 19  | 0 |
| CONTIG-063725 | 355 | 16 | 18 | 210 | 0 |
| CONTIG-063726 | 73  | 12 | 20 | 28  | 0 |
| CONTIG-063727 | 153 | 16 | 5  | 58  | 0 |
| CONTIG-063728 | 76  | 6  | 2  | 13  | 0 |

|               |     |     |    |     |    |
|---------------|-----|-----|----|-----|----|
| CONTIG-063729 | 84  | 6   | 0  | 13  | 0  |
| CONTIG-063730 | 404 | 9   | 67 | 125 | 0  |
| CONTIG-063731 | 122 | 5   | 4  | 14  | 0  |
| CONTIG-063732 | 84  | 5   | 0  | 12  | 0  |
| CONTIG-063733 | 44  | 179 | 4  | 263 | 2  |
| CONTIG-063734 | 289 | 6   | 17 | 21  | 0  |
| CONTIG-063735 | 216 | 27  | 6  | 0   | 53 |
| CONTIG-063736 | 142 | 6   | 6  | 20  | 0  |
| CONTIG-063737 | 139 | 8   | 22 | 2   | 2  |
| CONTIG-063738 | 168 | 7   | 7  | 30  | 0  |
| CONTIG-063739 | 271 | 14  | 6  | 156 | 0  |
| CONTIG-063740 | 213 | 5   | 7  | 17  | 0  |
| CONTIG-063741 | 114 | 4   | 4  | 4   | 0  |
| CONTIG-063742 | 55  | 148 | 0  | 0   | 22 |
| CONTIG-063744 | 127 | 4   | 2  | 7   | 0  |
| CONTIG-063745 | 653 | 13  | 6  | 219 | 5  |
| CONTIG-063746 | 99  | 5   | 9  | 5   | 0  |
| CONTIG-063747 | 208 | 7   | 18 | 25  | 0  |
| CONTIG-063749 | 109 | 3   | 0  | 8   | 0  |
| CONTIG-063750 | 157 | 6   | 6  | 5   | 0  |
| CONTIG-063751 | 114 | 5   | 5  | 15  | 0  |
| CONTIG-063752 | 70  | 4   | 3  | 7   | 0  |
| CONTIG-063753 | 79  | 2   | 0  | 0   | 0  |
| CONTIG-063754 | 291 | 8   | 17 | 52  | 0  |
| CONTIG-063755 | 102 | 15  | 14 | 16  | 0  |
| CONTIG-063756 | 337 | 10  | 34 | 91  | 0  |
| CONTIG-063757 | 68  | 6   | 4  | 6   | 0  |
| CONTIG-063758 | 100 | 6   | 5  | 9   | 0  |
| CONTIG-063759 | 432 | 6   | 0  | 46  | 2  |
| CONTIG-063760 | 114 | 8   | 7  | 23  | 0  |
| CONTIG-063763 | 76  | 309 | 15 | 450 | 19 |
| CONTIG-063764 | 169 | 9   | 8  | 43  | 2  |
| CONTIG-063765 | 136 | 4   | 9  | 6   | 0  |
| CONTIG-063766 | 158 | 11  | 10 | 48  | 0  |
| CONTIG-063767 | 134 | 8   | 13 | 27  | 0  |
| CONTIG-063768 | 149 | 5   | 2  | 11  | 2  |
| CONTIG-063769 | 106 | 3   | 13 | 2   | 0  |
| CONTIG-063770 | 219 | 5   | 4  | 39  | 0  |
| CONTIG-063771 | 43  | 12  | 2  | 16  | 0  |
| CONTIG-063772 | 296 | 16  | 26 | 158 | 0  |
| CONTIG-063773 | 63  | 4   | 10 | 4   | 0  |
| CONTIG-063774 | 175 | 8   | 9  | 46  | 3  |
| CONTIG-063775 | 164 | 7   | 2  | 35  | 4  |
| CONTIG-063782 | 67  | 6   | 0  | 15  | 0  |
| CONTIG-063783 | 401 | 6   | 9  | 54  | 0  |
| CONTIG-063784 | 113 | 6   | 4  | 7   | 0  |
| CONTIG-063785 | 84  | 4   | 8  | 2   | 2  |

|               |     |    |    |     |   |
|---------------|-----|----|----|-----|---|
| CONTIG-063787 | 96  | 4  | 0  | 8   | 0 |
| CONTIG-063788 | 296 | 7  | 12 | 65  | 0 |
| CONTIG-063789 | 130 | 6  | 0  | 19  | 0 |
| CONTIG-063790 | 66  | 6  | 6  | 7   | 0 |
| CONTIG-063791 | 306 | 15 | 12 | 121 | 0 |
| CONTIG-063792 | 147 | 8  | 14 | 54  | 0 |
| CONTIG-063794 | 91  | 6  | 0  | 0   | 2 |
| CONTIG-063795 | 58  | 5  | 6  | 2   | 0 |
| CONTIG-063796 | 41  | 15 | 0  | 2   | 0 |
| CONTIG-063797 | 66  | 3  | 6  | 11  | 0 |
| CONTIG-063798 | 81  | 10 | 7  | 35  | 0 |
| CONTIG-063799 | 101 | 3  | 0  | 0   | 0 |
| CONTIG-063800 | 241 | 7  | 0  | 20  | 2 |
| CONTIG-063801 | 67  | 6  | 4  | 5   | 0 |
| CONTIG-063802 | 80  | 5  | 14 | 6   | 0 |
| CONTIG-063803 | 60  | 6  | 5  | 2   | 0 |
| CONTIG-063804 | 76  | 5  | 0  | 2   | 0 |
| CONTIG-063806 | 219 | 12 | 30 | 102 | 0 |
| CONTIG-063810 | 97  | 7  | 17 | 21  | 0 |
| CONTIG-063811 | 95  | 4  | 0  | 17  | 0 |
| CONTIG-063812 | 98  | 15 | 12 | 50  | 2 |
| CONTIG-063813 | 78  | 12 | 0  | 30  | 0 |
| CONTIG-063814 | 866 | 17 | 5  | 536 | 0 |
| CONTIG-063815 | 375 | 11 | 8  | 174 | 0 |
| CONTIG-063816 | 147 | 7  | 0  | 24  | 2 |
| CONTIG-063817 | 104 | 7  | 2  | 28  | 0 |
| CONTIG-063818 | 100 | 3  | 4  | 9   | 0 |
| CONTIG-063819 | 185 | 5  | 4  | 27  | 0 |
| CONTIG-063827 | 287 | 10 | 50 | 89  | 0 |
| CONTIG-063828 | 83  | 5  | 7  | 12  | 0 |
| CONTIG-063829 | 122 | 7  | 0  | 23  | 0 |
| CONTIG-063830 | 94  | 10 | 2  | 2   | 0 |
| CONTIG-063831 | 224 | 6  | 18 | 51  | 0 |
| CONTIG-063834 | 324 | 15 | 11 | 256 | 0 |
| CONTIG-063835 | 63  | 5  | 0  | 0   | 0 |
| CONTIG-063836 | 81  | 5  | 3  | 13  | 0 |
| CONTIG-063837 | 172 | 9  | 6  | 31  | 0 |
| CONTIG-063839 | 351 | 12 | 4  | 161 | 4 |
| CONTIG-063840 | 84  | 8  | 8  | 16  | 0 |
| CONTIG-063841 | 63  | 4  | 0  | 2   | 0 |
| CONTIG-063842 | 71  | 6  | 4  | 17  | 0 |
| CONTIG-063843 | 82  | 4  | 9  | 6   | 0 |
| CONTIG-063844 | 162 | 13 | 4  | 4   | 0 |
| CONTIG-063845 | 53  | 42 | 11 | 84  | 0 |
| CONTIG-063846 | 257 | 9  | 5  | 85  | 0 |
| CONTIG-063847 | 62  | 3  | 6  | 3   | 0 |
| CONTIG-063848 | 317 | 12 | 10 | 108 | 4 |

|               |     |     |    |     |   |
|---------------|-----|-----|----|-----|---|
| CONTIG-063850 | 456 | 17  | 25 | 239 | 2 |
| CONTIG-063851 | 174 | 19  | 8  | 171 | 0 |
| CONTIG-063853 | 59  | 6   | 5  | 0   | 0 |
| CONTIG-063854 | 93  | 8   | 2  | 0   | 0 |
| CONTIG-063863 | 67  | 3   | 0  | 5   | 0 |
| CONTIG-063864 | 180 | 30  | 47 | 201 | 0 |
| CONTIG-063865 | 106 | 7   | 8  | 26  | 0 |
| CONTIG-063866 | 139 | 8   | 0  | 46  | 0 |
| CONTIG-063867 | 59  | 3   | 0  | 2   | 0 |
| CONTIG-063868 | 256 | 7   | 13 | 51  | 0 |
| CONTIG-063869 | 64  | 2   | 0  | 2   | 0 |
| CONTIG-063870 | 580 | 8   | 9  | 138 | 0 |
| CONTIG-063871 | 59  | 12  | 5  | 32  | 0 |
| CONTIG-063872 | 65  | 9   | 13 | 12  | 0 |
| CONTIG-063873 | 244 | 11  | 7  | 65  | 0 |
| CONTIG-063874 | 126 | 4   | 7  | 15  | 0 |
| CONTIG-063875 | 177 | 9   | 2  | 31  | 0 |
| CONTIG-063876 | 113 | 10  | 4  | 42  | 0 |
| CONTIG-063877 | 203 | 7   | 9  | 39  | 0 |
| CONTIG-063878 | 295 | 18  | 16 | 239 | 2 |
| CONTIG-063879 | 264 | 7   | 6  | 75  | 0 |
| CONTIG-063880 | 63  | 6   | 6  | 14  | 0 |
| CONTIG-063881 | 66  | 8   | 2  | 6   | 0 |
| CONTIG-063882 | 77  | 6   | 0  | 11  | 0 |
| CONTIG-063883 | 67  | 36  | 6  | 62  | 0 |
| CONTIG-063884 | 179 | 6   | 2  | 17  | 2 |
| CONTIG-063885 | 491 | 10  | 10 | 163 | 2 |
| CONTIG-063886 | 94  | 7   | 2  | 30  | 0 |
| CONTIG-063887 | 87  | 20  | 11 | 37  | 6 |
| CONTIG-063889 | 58  | 2   | 0  | 3   | 0 |
| CONTIG-063890 | 622 | 7   | 43 | 114 | 0 |
| CONTIG-063891 | 182 | 9   | 5  | 22  | 0 |
| CONTIG-063892 | 114 | 6   | 9  | 29  | 0 |
| CONTIG-063893 | 257 | 15  | 15 | 111 | 2 |
| CONTIG-063894 | 174 | 6   | 7  | 13  | 0 |
| CONTIG-063895 | 162 | 6   | 27 | 5   | 0 |
| CONTIG-063896 | 66  | 3   | 2  | 6   | 0 |
| CONTIG-063897 | 64  | 3   | 0  | 3   | 0 |
| CONTIG-063898 | 64  | 172 | 0  | 0   | 6 |
| CONTIG-063899 | 472 | 8   | 5  | 20  | 0 |
| CONTIG-063900 | 219 | 6   | 4  | 32  | 0 |
| CONTIG-063901 | 114 | 6   | 33 | 6   | 0 |
| CONTIG-063902 | 75  | 10  | 4  | 19  | 0 |
| CONTIG-063903 | 128 | 7   | 2  | 4   | 0 |
| CONTIG-063904 | 168 | 5   | 6  | 26  | 0 |
| CONTIG-063905 | 659 | 14  | 5  | 409 | 0 |
| CONTIG-063906 | 208 | 9   | 9  | 51  | 0 |

|               |      |    |    |     |    |
|---------------|------|----|----|-----|----|
| CONTIG-063907 | 314  | 8  | 8  | 73  | 0  |
| CONTIG-063908 | 119  | 5  | 0  | 25  | 0  |
| CONTIG-063909 | 97   | 7  | 8  | 22  | 0  |
| CONTIG-063910 | 59   | 3  | 3  | 5   | 0  |
| CONTIG-063911 | 318  | 11 | 9  | 128 | 0  |
| CONTIG-063912 | 173  | 10 | 22 | 10  | 3  |
| CONTIG-063913 | 108  | 6  | 7  | 9   | 0  |
| CONTIG-063916 | 90   | 6  | 4  | 10  | 2  |
| CONTIG-063917 | 73   | 2  | 3  | 0   | 0  |
| CONTIG-063918 | 133  | 7  | 8  | 2   | 0  |
| CONTIG-063919 | 81   | 10 | 13 | 34  | 0  |
| CONTIG-063920 | 60   | 6  | 25 | 0   | 0  |
| CONTIG-063921 | 109  | 4  | 0  | 15  | 0  |
| CONTIG-063922 | 61   | 3  | 2  | 0   | 0  |
| CONTIG-063923 | 77   | 4  | 2  | 7   | 0  |
| CONTIG-063924 | 152  | 5  | 5  | 25  | 0  |
| CONTIG-063925 | 110  | 7  | 5  | 31  | 0  |
| CONTIG-063927 | 116  | 13 | 6  | 72  | 0  |
| CONTIG-063928 | 184  | 10 | 4  | 64  | 0  |
| CONTIG-063929 | 87   | 3  | 0  | 8   | 0  |
| CONTIG-063930 | 93   | 3  | 4  | 11  | 0  |
| CONTIG-063931 | 77   | 5  | 3  | 5   | 0  |
| CONTIG-063932 | 127  | 6  | 7  | 20  | 0  |
| CONTIG-063933 | 62   | 3  | 0  | 4   | 0  |
| CONTIG-063934 | 69   | 2  | 2  | 0   | 0  |
| CONTIG-063935 | 226  | 11 | 7  | 95  | 0  |
| CONTIG-063936 | 296  | 14 | 43 | 131 | 0  |
| CONTIG-063942 | 105  | 4  | 0  | 7   | 0  |
| CONTIG-063943 | 107  | 8  | 2  | 13  | 2  |
| CONTIG-063944 | 95   | 15 | 27 | 42  | 0  |
| CONTIG-063945 | 89   | 32 | 6  | 8   | 0  |
| CONTIG-063946 | 266  | 6  | 7  | 19  | 4  |
| CONTIG-063947 | 461  | 21 | 2  | 0   | 80 |
| CONTIG-063948 | 122  | 5  | 2  | 24  | 0  |
| CONTIG-063949 | 294  | 14 | 30 | 59  | 0  |
| CONTIG-063950 | 102  | 5  | 2  | 8   | 2  |
| CONTIG-063951 | 97   | 7  | 4  | 19  | 0  |
| CONTIG-063957 | 309  | 11 | 26 | 133 | 0  |
| CONTIG-063958 | 157  | 9  | 9  | 47  | 0  |
| CONTIG-063959 | 73   | 8  | 0  | 0   | 0  |
| CONTIG-063960 | 72   | 4  | 2  | 0   | 0  |
| CONTIG-063961 | 279  | 5  | 4  | 18  | 0  |
| CONTIG-063962 | 1089 | 19 | 12 | 643 | 19 |
| CONTIG-063965 | 146  | 11 | 8  | 42  | 2  |
| CONTIG-063966 | 118  | 12 | 5  | 45  | 0  |
| CONTIG-063967 | 68   | 5  | 9  | 13  | 0  |
| CONTIG-063968 | 266  | 8  | 10 | 52  | 0  |



|               |     |     |    |     |     |
|---------------|-----|-----|----|-----|-----|
| CONTIG-063969 | 185 | 12  | 4  | 81  | 0   |
| CONTIG-063970 | 193 | 12  | 25 | 76  | 0   |
| CONTIG-063971 | 80  | 4   | 7  | 8   | 0   |
| CONTIG-063972 | 109 | 6   | 15 | 8   | 0   |
| CONTIG-063973 | 71  | 11  | 26 | 21  | 0   |
| CONTIG-063977 | 234 | 11  | 21 | 78  | 2   |
| CONTIG-063978 | 75  | 23  | 6  | 47  | 2   |
| CONTIG-063979 | 112 | 9   | 13 | 31  | 0   |
| CONTIG-063981 | 180 | 7   | 8  | 33  | 0   |
| CONTIG-063982 | 139 | 8   | 12 | 35  | 0   |
| CONTIG-063983 | 126 | 12  | 16 | 77  | 0   |
| CONTIG-063984 | 138 | 6   | 4  | 36  | 0   |
| CONTIG-063985 | 70  | 3   | 2  | 0   | 0   |
| CONTIG-063986 | 134 | 8   | 3  | 0   | 0   |
| CONTIG-063987 | 58  | 44  | 6  | 95  | 0   |
| CONTIG-063988 | 112 | 8   | 0  | 25  | 0   |
| CONTIG-063989 | 63  | 5   | 5  | 4   | 0   |
| CONTIG-063990 | 100 | 6   | 13 | 16  | 0   |
| CONTIG-063991 | 332 | 5   | 5  | 16  | 0   |
| CONTIG-063992 | 102 | 5   | 2  | 4   | 0   |
| CONTIG-063993 | 125 | 6   | 4  | 10  | 0   |
| CONTIG-063994 | 176 | 5   | 17 | 11  | 0   |
| CONTIG-063995 | 141 | 3   | 7  | 4   | 0   |
| CONTIG-063997 | 228 | 9   | 23 | 40  | 2   |
| CONTIG-064000 | 68  | 4   | 2  | 0   | 0   |
| CONTIG-064002 | 236 | 12  | 13 | 137 | 0   |
| CONTIG-064003 | 64  | 4   | 7  | 5   | 0   |
| CONTIG-064004 | 118 | 5   | 0  | 19  | 0   |
| CONTIG-064005 | 79  | 7   | 9  | 13  | 0   |
| CONTIG-064006 | 87  | 5   | 7  | 7   | 0   |
| CONTIG-064007 | 151 | 8   | 5  | 46  | 0   |
| CONTIG-064011 | 67  | 5   | 10 | 0   | 0   |
| CONTIG-064012 | 241 | 6   | 12 | 45  | 2   |
| CONTIG-064013 | 113 | 5   | 6  | 0   | 0   |
| CONTIG-064014 | 265 | 10  | 26 | 78  | 0   |
| CONTIG-064015 | 65  | 6   | 0  | 2   | 0   |
| CONTIG-064016 | 82  | 3   | 5  | 4   | 0   |
| CONTIG-064017 | 71  | 11  | 15 | 24  | 0   |
| CONTIG-064018 | 83  | 4   | 2  | 13  | 2   |
| CONTIG-064019 | 87  | 15  | 5  | 52  | 0   |
| CONTIG-064020 | 67  | 236 | 0  | 0   | 117 |
| CONTIG-064021 | 222 | 12  | 38 | 51  | 5   |
| CONTIG-064022 | 207 | 18  | 2  | 63  | 9   |
| CONTIG-064024 | 100 | 13  | 8  | 57  | 0   |
| CONTIG-064025 | 204 | 6   | 9  | 30  | 0   |
| CONTIG-064026 | 175 | 10  | 0  | 53  | 0   |
| CONTIG-064027 | 70  | 664 | 4  | 581 | 96  |

|               |      |    |    |     |     |
|---------------|------|----|----|-----|-----|
| CONTIG-064029 | 114  | 10 | 7  | 20  | 0   |
| CONTIG-064030 | 74   | 5  | 6  | 5   | 0   |
| CONTIG-064031 | 67   | 7  | 6  | 10  | 0   |
| CONTIG-064032 | 68   | 9  | 3  | 2   | 0   |
| CONTIG-064033 | 307  | 11 | 26 | 96  | 0   |
| CONTIG-064038 | 82   | 6  | 20 | 5   | 0   |
| CONTIG-064044 | 118  | 11 | 28 | 8   | 0   |
| CONTIG-064045 | 484  | 12 | 7  | 118 | 4   |
| CONTIG-064046 | 80   | 7  | 2  | 13  | 0   |
| CONTIG-064047 | 129  | 6  | 8  | 27  | 0   |
| CONTIG-064048 | 74   | 9  | 0  | 0   | 2   |
| CONTIG-064049 | 234  | 10 | 18 | 53  | 0   |
| CONTIG-064050 | 192  | 14 | 7  | 0   | 12  |
| CONTIG-064051 | 190  | 5  | 9  | 23  | 0   |
| CONTIG-064054 | 141  | 5  | 5  | 29  | 0   |
| CONTIG-064055 | 96   | 3  | 2  | 12  | 0   |
| CONTIG-064056 | 63   | 5  | 8  | 0   | 0   |
| CONTIG-064058 | 87   | 8  | 11 | 2   | 0   |
| CONTIG-064059 | 112  | 5  | 9  | 6   | 0   |
| CONTIG-064060 | 103  | 4  | 8  | 0   | 2   |
| CONTIG-064061 | 86   | 4  | 4  | 4   | 0   |
| CONTIG-064062 | 63   | 3  | 0  | 4   | 0   |
| CONTIG-064064 | 318  | 15 | 8  | 108 | 0   |
| CONTIG-064065 | 395  | 15 | 37 | 256 | 0   |
| CONTIG-064066 | 86   | 7  | 2  | 13  | 0   |
| CONTIG-064067 | 129  | 5  | 14 | 7   | 0   |
| CONTIG-064068 | 119  | 7  | 3  | 0   | 0   |
| CONTIG-064069 | 211  | 11 | 11 | 63  | 0   |
| CONTIG-064070 | 428  | 10 | 4  | 141 | 2   |
| CONTIG-064071 | 68   | 5  | 5  | 13  | 0   |
| CONTIG-064072 | 171  | 6  | 5  | 29  | 0   |
| CONTIG-064073 | 1510 | 28 | 4  | 2   | 639 |
| CONTIG-064074 | 63   | 9  | 8  | 16  | 0   |
| CONTIG-064075 | 349  | 9  | 9  | 118 | 0   |
| CONTIG-064076 | 257  | 6  | 5  | 53  | 0   |
| CONTIG-064078 | 347  | 9  | 4  | 46  | 6   |
| CONTIG-064080 | 317  | 42 | 8  | 0   | 0   |
| CONTIG-064081 | 88   | 9  | 0  | 17  | 0   |
| CONTIG-064084 | 288  | 20 | 7  | 255 | 2   |
| CONTIG-064085 | 336  | 12 | 6  | 67  | 0   |
| CONTIG-064086 | 67   | 6  | 22 | 0   | 0   |
| CONTIG-064087 | 167  | 15 | 23 | 67  | 2   |
| CONTIG-064088 | 65   | 5  | 0  | 11  | 0   |
| CONTIG-064091 | 115  | 5  | 2  | 15  | 0   |
| CONTIG-064092 | 283  | 20 | 0  | 2   | 52  |
| CONTIG-064093 | 167  | 8  | 13 | 32  | 0   |
| CONTIG-064094 | 173  | 4  | 18 | 13  | 0   |

|               |     |     |    |     |   |
|---------------|-----|-----|----|-----|---|
| CONTIG-064095 | 214 | 13  | 20 | 27  | 0 |
| CONTIG-064096 | 188 | 7   | 5  | 43  | 0 |
| CONTIG-064097 | 104 | 7   | 37 | 5   | 0 |
| CONTIG-064098 | 136 | 9   | 10 | 38  | 0 |
| CONTIG-064099 | 63  | 4   | 4  | 9   | 0 |
| CONTIG-064100 | 201 | 7   | 4  | 45  | 0 |
| CONTIG-064101 | 127 | 4   | 3  | 14  | 0 |
| CONTIG-064110 | 95  | 16  | 8  | 76  | 0 |
| CONTIG-064111 | 354 | 10  | 15 | 114 | 2 |
| CONTIG-064112 | 99  | 4   | 0  | 10  | 0 |
| CONTIG-064120 | 168 | 20  | 9  | 73  | 0 |
| CONTIG-064121 | 159 | 8   | 6  | 24  | 0 |
| CONTIG-064122 | 132 | 6   | 3  | 15  | 0 |
| CONTIG-064123 | 81  | 14  | 14 | 20  | 4 |
| CONTIG-064124 | 183 | 11  | 4  | 53  | 0 |
| CONTIG-064125 | 72  | 12  | 3  | 12  | 0 |
| CONTIG-064129 | 73  | 6   | 11 | 4   | 0 |
| CONTIG-064130 | 90  | 17  | 8  | 51  | 0 |
| CONTIG-064131 | 173 | 4   | 5  | 23  | 0 |
| CONTIG-064134 | 213 | 16  | 22 | 74  | 0 |
| CONTIG-064135 | 371 | 7   | 3  | 69  | 0 |
| CONTIG-064136 | 59  | 4   | 2  | 2   | 0 |
| CONTIG-064137 | 71  | 147 | 57 | 485 | 0 |
| CONTIG-064138 | 83  | 3   | 5  | 6   | 0 |
| CONTIG-064139 | 84  | 10  | 23 | 20  | 0 |
| CONTIG-064140 | 61  | 4   | 2  | 9   | 0 |
| CONTIG-064141 | 208 | 10  | 4  | 31  | 2 |
| CONTIG-064142 | 170 | 8   | 6  | 44  | 0 |
| CONTIG-064143 | 410 | 12  | 17 | 131 | 2 |
| CONTIG-064144 | 188 | 6   | 18 | 38  | 0 |
| CONTIG-064145 | 134 | 7   | 11 | 27  | 0 |
| CONTIG-064146 | 77  | 5   | 5  | 11  | 2 |
| CONTIG-064147 | 132 | 8   | 3  | 45  | 0 |
| CONTIG-064148 | 246 | 7   | 15 | 60  | 4 |
| CONTIG-064149 | 78  | 7   | 4  | 9   | 0 |
| CONTIG-064150 | 215 | 7   | 0  | 23  | 0 |
| CONTIG-064151 | 128 | 37  | 28 | 121 | 0 |
| CONTIG-064152 | 104 | 17  | 7  | 54  | 0 |
| CONTIG-064153 | 91  | 26  | 27 | 85  | 0 |
| CONTIG-064154 | 67  | 11  | 8  | 10  | 0 |
| CONTIG-064155 | 94  | 11  | 24 | 14  | 0 |
| CONTIG-064156 | 235 | 5   | 2  | 8   | 0 |
| CONTIG-064158 | 79  | 4   | 4  | 10  | 0 |
| CONTIG-064159 | 108 | 5   | 6  | 13  | 0 |
| CONTIG-064160 | 81  | 5   | 9  | 11  | 0 |
| CONTIG-064161 | 233 | 9   | 23 | 75  | 0 |
| CONTIG-064162 | 124 | 38  | 12 | 180 | 0 |

|               |     |     |    |      |    |
|---------------|-----|-----|----|------|----|
| CONTIG-064163 | 119 | 13  | 2  | 25   | 0  |
| CONTIG-064164 | 81  | 10  | 39 | 21   | 0  |
| CONTIG-064165 | 104 | 13  | 13 | 60   | 0  |
| CONTIG-064166 | 432 | 8   | 2  | 89   | 0  |
| CONTIG-064167 | 104 | 6   | 3  | 14   | 0  |
| CONTIG-064168 | 149 | 10  | 11 | 35   | 0  |
| CONTIG-064169 | 64  | 12  | 23 | 26   | 0  |
| CONTIG-064172 | 63  | 7   | 3  | 15   | 0  |
| CONTIG-064173 | 68  | 727 | 7  | 641  | 37 |
| CONTIG-064174 | 95  | 11  | 7  | 0    | 0  |
| CONTIG-064175 | 280 | 130 | 17 | 2010 | 2  |
| CONTIG-064176 | 81  | 11  | 8  | 12   | 2  |
| CONTIG-064177 | 71  | 14  | 15 | 2    | 0  |
| CONTIG-064178 | 112 | 14  | 0  | 74   | 0  |
| CONTIG-064179 | 81  | 5   | 4  | 2    | 0  |
| CONTIG-064180 | 137 | 5   | 8  | 20   | 0  |
| CONTIG-064181 | 68  | 4   | 18 | 5    | 0  |
| CONTIG-064182 | 63  | 6   | 4  | 3    | 0  |
| CONTIG-064183 | 104 | 6   | 11 | 12   | 0  |
| CONTIG-064184 | 86  | 6   | 10 | 14   | 0  |
| CONTIG-064185 | 129 | 5   | 4  | 0    | 0  |
| CONTIG-064186 | 177 | 8   | 8  | 33   | 0  |
| CONTIG-064187 | 134 | 7   | 4  | 14   | 0  |
| CONTIG-064188 | 64  | 15  | 2  | 48   | 0  |
| CONTIG-064189 | 180 | 12  | 7  | 82   | 2  |
| CONTIG-064190 | 68  | 6   | 3  | 12   | 0  |
| CONTIG-064191 | 104 | 7   | 21 | 21   | 0  |
| CONTIG-064192 | 246 | 7   | 15 | 65   | 0  |
| CONTIG-064193 | 100 | 8   | 24 | 13   | 0  |
| CONTIG-064194 | 342 | 15  | 24 | 181  | 0  |
| CONTIG-064195 | 62  | 5   | 6  | 0    | 0  |
| CONTIG-064196 | 416 | 11  | 2  | 203  | 4  |
| CONTIG-064197 | 127 | 10  | 0  | 0    | 3  |
| CONTIG-064198 | 39  | 134 | 3  | 207  | 0  |
| CONTIG-064199 | 63  | 3   | 8  | 0    | 0  |
| CONTIG-064200 | 180 | 9   | 5  | 54   | 0  |
| CONTIG-064201 | 143 | 5   | 5  | 13   | 2  |
| CONTIG-064202 | 191 | 7   | 15 | 33   | 0  |
| CONTIG-064203 | 60  | 11  | 7  | 12   | 0  |
| CONTIG-064204 | 99  | 5   | 6  | 8    | 0  |
| CONTIG-064205 | 67  | 6   | 8  | 4    | 0  |
| CONTIG-064206 | 372 | 10  | 7  | 90   | 2  |
| CONTIG-064207 | 154 | 10  | 16 | 13   | 0  |
| CONTIG-064209 | 77  | 3   | 0  | 6    | 0  |
| CONTIG-064210 | 254 | 5   | 2  | 22   | 0  |
| CONTIG-064211 | 145 | 6   | 10 | 25   | 0  |
| CONTIG-064212 | 87  | 19  | 5  | 97   | 0  |

|               |     |     |    |     |    |
|---------------|-----|-----|----|-----|----|
| CONTIG-064213 | 228 | 9   | 14 | 83  | 0  |
| CONTIG-064215 | 59  | 2   | 2  | 0   | 0  |
| CONTIG-064216 | 41  | 769 | 5  | 588 | 0  |
| CONTIG-064217 | 71  | 6   | 2  | 11  | 0  |
| CONTIG-064218 | 79  | 8   | 3  | 17  | 0  |
| CONTIG-064219 | 121 | 13  | 3  | 2   | 0  |
| CONTIG-064220 | 753 | 11  | 2  | 0   | 38 |
| CONTIG-064221 | 82  | 11  | 11 | 17  | 0  |
| CONTIG-064223 | 239 | 7   | 5  | 29  | 0  |
| CONTIG-064224 | 282 | 5   | 14 | 34  | 0  |
| CONTIG-064226 | 202 | 8   | 2  | 55  | 0  |
| CONTIG-064227 | 83  | 11  | 0  | 2   | 0  |
| CONTIG-064228 | 79  | 6   | 4  | 8   | 0  |
| CONTIG-064229 | 450 | 7   | 5  | 59  | 0  |
| CONTIG-064230 | 260 | 12  | 2  | 84  | 3  |
| CONTIG-064231 | 156 | 13  | 15 | 62  | 0  |
| CONTIG-064232 | 58  | 3   | 2  | 0   | 0  |
| CONTIG-064233 | 99  | 8   | 9  | 37  | 2  |
| CONTIG-064234 | 70  | 5   | 0  | 17  | 0  |
| CONTIG-064235 | 71  | 5   | 0  | 6   | 0  |
| CONTIG-064236 | 253 | 11  | 9  | 74  | 0  |
| CONTIG-064237 | 111 | 7   | 2  | 28  | 0  |
| CONTIG-064238 | 586 | 12  | 10 | 182 | 0  |
| CONTIG-064239 | 179 | 9   | 17 | 34  | 0  |
| CONTIG-064240 | 117 | 6   | 2  | 17  | 0  |
| CONTIG-064241 | 100 | 19  | 13 | 62  | 0  |
| CONTIG-064242 | 611 | 14  | 12 | 333 | 0  |
| CONTIG-064243 | 419 | 11  | 6  | 178 | 0  |
| CONTIG-064244 | 127 | 7   | 2  | 25  | 0  |
| CONTIG-064245 | 95  | 17  | 2  | 32  | 0  |
| CONTIG-064246 | 84  | 5   | 2  | 17  | 0  |
| CONTIG-064247 | 77  | 3   | 2  | 0   | 0  |
| CONTIG-064249 | 153 | 9   | 5  | 41  | 0  |
| CONTIG-064250 | 162 | 6   | 4  | 0   | 4  |
| CONTIG-064251 | 206 | 6   | 13 | 31  | 0  |
| CONTIG-064252 | 115 | 5   | 2  | 4   | 0  |
| CONTIG-064253 | 124 | 4   | 3  | 3   | 0  |
| CONTIG-064254 | 70  | 7   | 14 | 2   | 0  |
| CONTIG-064255 | 89  | 9   | 24 | 16  | 0  |
| CONTIG-064256 | 137 | 11  | 5  | 79  | 0  |
| CONTIG-064257 | 83  | 4   | 5  | 2   | 0  |
| CONTIG-064258 | 152 | 16  | 26 | 47  | 2  |
| CONTIG-064259 | 112 | 13  | 16 | 17  | 0  |
| CONTIG-064260 | 59  | 11  | 7  | 23  | 0  |
| CONTIG-064261 | 301 | 6   | 14 | 32  | 0  |
| CONTIG-064262 | 252 | 10  | 23 | 76  | 0  |
| CONTIG-064263 | 505 | 10  | 13 | 45  | 2  |

|               |     |     |    |     |     |
|---------------|-----|-----|----|-----|-----|
| CONTIG-064264 | 141 | 6   | 8  | 18  | 0   |
| CONTIG-064265 | 109 | 6   | 15 | 3   | 0   |
| CONTIG-064266 | 119 | 8   | 11 | 16  | 0   |
| CONTIG-064271 | 147 | 6   | 27 | 20  | 0   |
| CONTIG-064272 | 81  | 3   | 5  | 8   | 0   |
| CONTIG-064273 | 124 | 11  | 2  | 50  | 2   |
| CONTIG-064274 | 420 | 16  | 14 | 175 | 0   |
| CONTIG-064276 | 120 | 5   | 0  | 7   | 0   |
| CONTIG-064277 | 104 | 7   | 13 | 12  | 0   |
| CONTIG-064278 | 256 | 15  | 3  | 109 | 2   |
| CONTIG-064279 | 155 | 10  | 10 | 43  | 0   |
| CONTIG-064280 | 236 | 10  | 9  | 75  | 0   |
| CONTIG-064281 | 686 | 25  | 3  | 61  | 286 |
| CONTIG-064282 | 183 | 8   | 4  | 0   | 0   |
| CONTIG-064283 | 98  | 8   | 2  | 36  | 0   |
| CONTIG-064285 | 39  | 82  | 30 | 27  | 0   |
| CONTIG-064286 | 62  | 6   | 3  | 11  | 0   |
| CONTIG-064287 | 277 | 9   | 10 | 97  | 0   |
| CONTIG-064288 | 196 | 6   | 4  | 23  | 0   |
| CONTIG-064289 | 424 | 9   | 4  | 152 | 0   |
| CONTIG-064299 | 96  | 5   | 5  | 14  | 0   |
| CONTIG-064301 | 97  | 9   | 9  | 17  | 0   |
| CONTIG-064302 | 104 | 7   | 16 | 8   | 0   |
| CONTIG-064303 | 148 | 33  | 14 | 208 | 0   |
| CONTIG-064304 | 230 | 6   | 0  | 38  | 0   |
| CONTIG-064305 | 83  | 7   | 21 | 3   | 0   |
| CONTIG-064306 | 310 | 21  | 16 | 93  | 18  |
| CONTIG-064308 | 237 | 12  | 16 | 76  | 3   |
| CONTIG-064310 | 59  | 2   | 2  | 4   | 0   |
| CONTIG-064312 | 81  | 6   | 3  | 13  | 0   |
| CONTIG-064313 | 447 | 8   | 4  | 105 | 0   |
| CONTIG-064314 | 130 | 8   | 0  | 47  | 0   |
| CONTIG-064315 | 171 | 15  | 0  | 89  | 0   |
| CONTIG-064316 | 334 | 7   | 10 | 73  | 0   |
| CONTIG-064317 | 120 | 6   | 4  | 27  | 0   |
| CONTIG-064318 | 98  | 6   | 5  | 10  | 0   |
| CONTIG-064319 | 189 | 13  | 15 | 87  | 0   |
| CONTIG-064320 | 68  | 4   | 3  | 0   | 0   |
| CONTIG-064322 | 54  | 330 | 6  | 956 | 0   |
| CONTIG-064323 | 498 | 14  | 7  | 0   | 52  |
| CONTIG-064327 | 312 | 11  | 4  | 95  | 2   |
| CONTIG-064328 | 147 | 6   | 5  | 33  | 0   |
| CONTIG-064329 | 142 | 10  | 25 | 0   | 0   |
| CONTIG-064330 | 80  | 9   | 8  | 29  | 0   |
| CONTIG-064332 | 294 | 10  | 6  | 79  | 0   |
| CONTIG-064333 | 195 | 15  | 11 | 105 | 2   |
| CONTIG-064334 | 216 | 7   | 7  | 25  | 0   |

|               |      |    |    |     |    |
|---------------|------|----|----|-----|----|
| CONTIG-064337 | 1167 | 10 | 6  | 346 | 8  |
| CONTIG-064338 | 86   | 12 | 5  | 20  | 0  |
| CONTIG-064339 | 77   | 26 | 0  | 87  | 0  |
| CONTIG-064340 | 58   | 6  | 0  | 4   | 0  |
| CONTIG-064341 | 208  | 16 | 21 | 92  | 0  |
| CONTIG-064342 | 61   | 14 | 8  | 22  | 0  |
| CONTIG-064343 | 178  | 10 | 7  | 68  | 0  |
| CONTIG-064344 | 72   | 13 | 12 | 19  | 0  |
| CONTIG-064345 | 387  | 8  | 4  | 6   | 0  |
| CONTIG-064346 | 244  | 8  | 15 | 46  | 0  |
| CONTIG-064347 | 59   | 6  | 2  | 4   | 0  |
| CONTIG-064348 | 121  | 8  | 7  | 25  | 0  |
| CONTIG-064349 | 171  | 7  | 2  | 41  | 0  |
| CONTIG-064350 | 65   | 3  | 4  | 2   | 0  |
| CONTIG-064352 | 60   | 3  | 0  | 8   | 0  |
| CONTIG-064353 | 310  | 10 | 6  | 93  | 0  |
| CONTIG-064354 | 95   | 7  | 0  | 15  | 2  |
| CONTIG-064355 | 62   | 3  | 7  | 0   | 0  |
| CONTIG-064356 | 290  | 7  | 8  | 48  | 0  |
| CONTIG-064357 | 63   | 6  | 7  | 14  | 0  |
| CONTIG-064358 | 76   | 4  | 7  | 0   | 0  |
| CONTIG-064359 | 251  | 12 | 7  | 54  | 2  |
| CONTIG-064361 | 77   | 4  | 2  | 0   | 0  |
| CONTIG-064362 | 74   | 3  | 0  | 0   | 0  |
| CONTIG-064363 | 89   | 6  | 4  | 6   | 0  |
| CONTIG-064364 | 262  | 11 | 23 | 62  | 0  |
| CONTIG-064365 | 116  | 10 | 19 | 7   | 0  |
| CONTIG-064366 | 71   | 14 | 19 | 29  | 0  |
| CONTIG-064367 | 82   | 7  | 0  | 25  | 0  |
| CONTIG-064368 | 346  | 8  | 12 | 84  | 0  |
| CONTIG-064370 | 163  | 10 | 2  | 18  | 4  |
| CONTIG-064371 | 383  | 10 | 40 | 121 | 2  |
| CONTIG-064372 | 130  | 5  | 0  | 15  | 0  |
| CONTIG-064373 | 119  | 11 | 14 | 36  | 0  |
| CONTIG-064374 | 674  | 10 | 35 | 267 | 11 |
| CONTIG-064375 | 106  | 10 | 5  | 39  | 0  |
| CONTIG-064376 | 88   | 8  | 0  | 34  | 0  |
| CONTIG-064377 | 59   | 10 | 25 | 19  | 0  |
| CONTIG-064378 | 217  | 9  | 17 | 53  | 2  |
| CONTIG-064379 | 97   | 7  | 4  | 11  | 0  |
| CONTIG-064382 | 72   | 7  | 11 | 13  | 0  |
| CONTIG-064383 | 117  | 3  | 6  | 8   | 0  |
| CONTIG-064384 | 99   | 5  | 6  | 10  | 0  |
| CONTIG-064385 | 85   | 5  | 3  | 12  | 0  |
| CONTIG-064386 | 399  | 12 | 6  | 118 | 0  |
| CONTIG-064387 | 531  | 15 | 36 | 252 | 4  |
| CONTIG-064388 | 71   | 6  | 4  | 8   | 0  |

|               |     |    |    |     |    |
|---------------|-----|----|----|-----|----|
| CONTIG-064389 | 151 | 10 | 8  | 43  | 0  |
| CONTIG-064390 | 98  | 4  | 5  | 9   | 0  |
| CONTIG-064391 | 64  | 4  | 9  | 4   | 0  |
| CONTIG-064392 | 221 | 10 | 7  | 0   | 3  |
| CONTIG-064393 | 74  | 5  | 8  | 5   | 0  |
| CONTIG-064394 | 171 | 9  | 14 | 33  | 0  |
| CONTIG-064395 | 75  | 7  | 6  | 13  | 0  |
| CONTIG-064396 | 75  | 4  | 4  | 12  | 0  |
| CONTIG-064397 | 493 | 8  | 20 | 111 | 0  |
| CONTIG-064398 | 177 | 50 | 2  | 414 | 2  |
| CONTIG-064399 | 191 | 9  | 26 | 31  | 0  |
| CONTIG-064401 | 474 | 10 | 58 | 102 | 0  |
| CONTIG-064402 | 75  | 3  | 4  | 7   | 0  |
| CONTIG-064403 | 187 | 6  | 5  | 25  | 0  |
| CONTIG-064404 | 65  | 4  | 7  | 4   | 0  |
| CONTIG-064405 | 97  | 4  | 2  | 10  | 0  |
| CONTIG-064406 | 450 | 20 | 5  | 8   | 0  |
| CONTIG-064407 | 383 | 8  | 9  | 50  | 2  |
| CONTIG-064408 | 122 | 6  | 3  | 16  | 0  |
| CONTIG-064410 | 89  | 4  | 2  | 0   | 0  |
| CONTIG-064411 | 84  | 7  | 2  | 6   | 3  |
| CONTIG-064412 | 65  | 5  | 0  | 0   | 0  |
| CONTIG-064413 | 115 | 4  | 2  | 7   | 2  |
| CONTIG-064414 | 79  | 6  | 5  | 2   | 0  |
| CONTIG-064415 | 62  | 5  | 5  | 8   | 0  |
| CONTIG-064416 | 40  | 84 | 4  | 0   | 14 |
| CONTIG-064417 | 199 | 6  | 4  | 42  | 0  |
| CONTIG-064418 | 88  | 7  | 12 | 16  | 0  |
| CONTIG-064419 | 75  | 5  | 0  | 3   | 0  |
| CONTIG-064424 | 82  | 19 | 3  | 52  | 0  |
| CONTIG-064425 | 167 | 12 | 8  | 67  | 0  |
| CONTIG-064426 | 168 | 5  | 17 | 26  | 0  |
| CONTIG-064427 | 62  | 7  | 0  | 13  | 0  |
| CONTIG-064429 | 79  | 3  | 13 | 2   | 0  |
| CONTIG-064430 | 69  | 6  | 0  | 0   | 0  |
| CONTIG-064431 | 70  | 7  | 4  | 4   | 0  |
| CONTIG-064432 | 231 | 15 | 2  | 129 | 5  |
| CONTIG-064433 | 164 | 9  | 6  | 41  | 0  |
| CONTIG-064434 | 123 | 5  | 8  | 9   | 0  |
| CONTIG-064435 | 58  | 4  | 2  | 4   | 0  |
| CONTIG-064436 | 769 | 20 | 3  | 63  | 0  |
| CONTIG-064437 | 144 | 6  | 11 | 36  | 0  |
| CONTIG-064438 | 108 | 5  | 19 | 8   | 0  |
| CONTIG-064439 | 118 | 2  | 2  | 6   | 0  |
| CONTIG-064440 | 357 | 14 | 20 | 134 | 4  |
| CONTIG-064441 | 165 | 9  | 5  | 40  | 2  |
| CONTIG-064443 | 172 | 7  | 18 | 22  | 0  |



|               |     |    |    |     |   |
|---------------|-----|----|----|-----|---|
| CONTIG-064444 | 76  | 7  | 11 | 4   | 0 |
| CONTIG-064445 | 140 | 9  | 7  | 25  | 0 |
| CONTIG-064446 | 92  | 4  | 3  | 2   | 0 |
| CONTIG-064447 | 75  | 8  | 12 | 14  | 0 |
| CONTIG-064448 | 77  | 9  | 4  | 33  | 0 |
| CONTIG-064449 | 103 | 6  | 2  | 11  | 0 |
| CONTIG-064450 | 106 | 10 | 5  | 38  | 0 |
| CONTIG-064452 | 90  | 4  | 16 | 6   | 0 |
| CONTIG-064453 | 61  | 3  | 4  | 0   | 0 |
| CONTIG-064454 | 180 | 5  | 9  | 9   | 0 |
| CONTIG-064455 | 106 | 7  | 16 | 7   | 0 |
| CONTIG-064456 | 136 | 15 | 21 | 29  | 0 |
| CONTIG-064457 | 59  | 8  | 0  | 2   | 0 |
| CONTIG-064458 | 104 | 6  | 14 | 4   | 0 |
| CONTIG-064459 | 224 | 7  | 0  | 0   | 2 |
| CONTIG-064460 | 280 | 10 | 4  | 116 | 0 |
| CONTIG-064461 | 60  | 5  | 3  | 2   | 0 |
| CONTIG-064462 | 87  | 34 | 5  | 5   | 0 |
| CONTIG-064463 | 376 | 10 | 14 | 127 | 0 |
| CONTIG-064464 | 169 | 14 | 11 | 79  | 2 |
| CONTIG-064465 | 114 | 8  | 9  | 45  | 0 |
| CONTIG-064466 | 58  | 3  | 4  | 3   | 0 |
| CONTIG-064467 | 99  | 9  | 19 | 8   | 0 |
| CONTIG-064468 | 254 | 8  | 9  | 0   | 7 |
| CONTIG-064469 | 58  | 6  | 4  | 12  | 0 |
| CONTIG-064470 | 72  | 7  | 21 | 12  | 0 |
| CONTIG-064471 | 155 | 5  | 12 | 8   | 0 |
| CONTIG-064472 | 113 | 5  | 17 | 2   | 0 |
| CONTIG-064473 | 106 | 5  | 0  | 0   | 0 |
| CONTIG-064475 | 142 | 8  | 10 | 30  | 2 |
| CONTIG-064476 | 170 | 5  | 2  | 17  | 0 |
| CONTIG-064477 | 154 | 7  | 0  | 12  | 0 |
| CONTIG-064479 | 98  | 26 | 13 | 109 | 2 |
| CONTIG-064480 | 362 | 30 | 7  | 472 | 5 |
| CONTIG-064481 | 66  | 6  | 7  | 8   | 0 |
| CONTIG-064482 | 110 | 4  | 3  | 6   | 0 |
| CONTIG-064483 | 189 | 6  | 2  | 30  | 0 |
| CONTIG-064484 | 318 | 6  | 3  | 50  | 0 |
| CONTIG-064485 | 93  | 8  | 17 | 21  | 0 |
| CONTIG-064487 | 63  | 6  | 6  | 20  | 0 |
| CONTIG-064488 | 177 | 7  | 7  | 50  | 0 |
| CONTIG-064489 | 234 | 12 | 2  | 137 | 0 |
| CONTIG-064490 | 120 | 4  | 5  | 18  | 0 |
| CONTIG-064491 | 98  | 9  | 12 | 10  | 0 |
| CONTIG-064492 | 143 | 3  | 5  | 0   | 0 |
| CONTIG-064493 | 64  | 10 | 22 | 21  | 0 |
| CONTIG-064494 | 81  | 8  | 33 | 2   | 0 |

|               |     |    |    |     |   |
|---------------|-----|----|----|-----|---|
| CONTIG-064495 | 500 | 13 | 15 | 120 | 2 |
| CONTIG-064496 | 82  | 2  | 3  | 4   | 0 |
| CONTIG-064497 | 69  | 6  | 0  | 12  | 2 |
| CONTIG-064498 | 92  | 4  | 10 | 3   | 0 |
| CONTIG-064499 | 83  | 6  | 2  | 17  | 0 |
| CONTIG-064500 | 109 | 10 | 2  | 37  | 0 |
| CONTIG-064501 | 76  | 5  | 7  | 2   | 0 |
| CONTIG-064502 | 103 | 9  | 7  | 22  | 0 |
| CONTIG-064503 | 197 | 10 | 3  | 2   | 0 |
| CONTIG-064504 | 213 | 16 | 33 | 129 | 0 |
| CONTIG-064506 | 273 | 7  | 15 | 76  | 0 |
| CONTIG-064507 | 183 | 4  | 2  | 13  | 0 |
| CONTIG-064508 | 50  | 6  | 0  | 0   | 0 |
| CONTIG-064509 | 93  | 7  | 2  | 28  | 0 |
| CONTIG-064510 | 217 | 5  | 3  | 34  | 0 |
| CONTIG-064511 | 148 | 15 | 5  | 82  | 0 |
| CONTIG-064512 | 144 | 6  | 4  | 21  | 0 |
| CONTIG-064517 | 65  | 4  | 0  | 12  | 0 |
| CONTIG-064518 | 418 | 16 | 15 | 182 | 2 |
| CONTIG-064519 | 74  | 38 | 6  | 39  | 0 |
| CONTIG-064520 | 82  | 5  | 12 | 11  | 0 |
| CONTIG-064521 | 93  | 8  | 0  | 36  | 0 |
| CONTIG-064522 | 128 | 6  | 8  | 24  | 0 |
| CONTIG-064523 | 298 | 9  | 4  | 39  | 0 |
| CONTIG-064524 | 131 | 18 | 3  | 6   | 0 |
| CONTIG-064525 | 101 | 5  | 7  | 11  | 0 |
| CONTIG-064526 | 76  | 7  | 0  | 13  | 0 |
| CONTIG-064527 | 385 | 8  | 17 | 111 | 0 |
| CONTIG-064528 | 77  | 10 | 5  | 14  | 0 |
| CONTIG-064529 | 83  | 7  | 9  | 6   | 2 |
| CONTIG-064530 | 78  | 5  | 5  | 7   | 0 |
| CONTIG-064531 | 290 | 9  | 9  | 8   | 0 |
| CONTIG-064532 | 79  | 7  | 2  | 19  | 0 |
| CONTIG-064533 | 181 | 10 | 7  | 0   | 2 |
| CONTIG-064534 | 91  | 9  | 3  | 25  | 0 |
| CONTIG-064535 | 84  | 9  | 38 | 0   | 0 |
| CONTIG-064536 | 84  | 5  | 6  | 10  | 0 |
| CONTIG-064537 | 91  | 5  | 21 | 7   | 0 |
| CONTIG-064538 | 76  | 4  | 4  | 4   | 0 |
| CONTIG-064539 | 97  | 4  | 2  | 11  | 0 |
| CONTIG-064540 | 320 | 10 | 36 | 140 | 0 |
| CONTIG-064541 | 71  | 4  | 0  | 4   | 0 |
| CONTIG-064542 | 197 | 6  | 0  | 43  | 0 |
| CONTIG-064543 | 186 | 14 | 5  | 80  | 0 |
| CONTIG-064544 | 62  | 4  | 2  | 5   | 0 |
| CONTIG-064545 | 120 | 55 | 35 | 175 | 0 |
| CONTIG-064547 | 164 | 8  | 23 | 58  | 0 |

|               |     |     |    |     |     |
|---------------|-----|-----|----|-----|-----|
| CONTIG-064548 | 65  | 6   | 2  | 2   | 0   |
| CONTIG-064549 | 190 | 13  | 34 | 111 | 0   |
| CONTIG-064550 | 209 | 8   | 0  | 54  | 0   |
| CONTIG-064551 | 100 | 5   | 4  | 0   | 0   |
| CONTIG-064552 | 193 | 7   | 3  | 56  | 0   |
| CONTIG-064554 | 163 | 5   | 5  | 16  | 0   |
| CONTIG-064555 | 90  | 4   | 3  | 8   | 0   |
| CONTIG-064556 | 89  | 3   | 0  | 0   | 0   |
| CONTIG-064557 | 98  | 6   | 5  | 17  | 0   |
| CONTIG-064558 | 582 | 12  | 43 | 331 | 0   |
| CONTIG-064559 | 292 | 6   | 15 | 80  | 0   |
| CONTIG-064560 | 215 | 9   | 18 | 69  | 0   |
| CONTIG-064561 | 131 | 9   | 6  | 18  | 0   |
| CONTIG-064562 | 151 | 4   | 3  | 9   | 0   |
| CONTIG-064563 | 195 | 12  | 20 | 72  | 2   |
| CONTIG-064564 | 84  | 9   | 7  | 18  | 0   |
| CONTIG-064565 | 62  | 2   | 4  | 2   | 0   |
| CONTIG-064566 | 87  | 6   | 3  | 13  | 2   |
| CONTIG-064567 | 186 | 7   | 4  | 29  | 2   |
| CONTIG-064568 | 101 | 8   | 7  | 30  | 0   |
| CONTIG-064570 | 802 | 29  | 36 | 621 | 9   |
| CONTIG-064571 | 84  | 3   | 8  | 4   | 0   |
| CONTIG-064572 | 281 | 14  | 12 | 101 | 2   |
| CONTIG-064573 | 568 | 8   | 9  | 93  | 0   |
| CONTIG-064574 | 123 | 9   | 19 | 21  | 0   |
| CONTIG-064575 | 286 | 11  | 0  | 0   | 15  |
| CONTIG-064576 | 152 | 5   | 30 | 7   | 0   |
| CONTIG-064577 | 124 | 19  | 18 | 69  | 2   |
| CONTIG-064578 | 90  | 5   | 10 | 7   | 0   |
| CONTIG-064579 | 221 | 12  | 15 | 24  | 0   |
| CONTIG-064580 | 370 | 7   | 26 | 32  | 2   |
| CONTIG-064581 | 119 | 9   | 27 | 17  | 0   |
| CONTIG-064582 | 69  | 5   | 7  | 8   | 0   |
| CONTIG-064583 | 71  | 3   | 4  | 0   | 0   |
| CONTIG-064584 | 272 | 7   | 2  | 24  | 0   |
| CONTIG-064585 | 91  | 7   | 16 | 19  | 0   |
| CONTIG-064586 | 166 | 4   | 8  | 7   | 0   |
| CONTIG-064587 | 98  | 7   | 9  | 14  | 0   |
| CONTIG-064590 | 350 | 22  | 2  | 0   | 49  |
| CONTIG-064591 | 215 | 6   | 4  | 42  | 0   |
| CONTIG-064592 | 95  | 169 | 2  | 0   | 184 |
| CONTIG-064593 | 322 | 8   | 28 | 70  | 0   |
| CONTIG-064594 | 131 | 19  | 2  | 109 | 0   |
| CONTIG-064595 | 380 | 30  | 0  | 0   | 83  |
| CONTIG-064596 | 248 | 15  | 17 | 177 | 0   |
| CONTIG-064597 | 84  | 5   | 4  | 10  | 0   |
| CONTIG-064598 | 219 | 14  | 6  | 74  | 9   |

|               |     |     |    |      |   |
|---------------|-----|-----|----|------|---|
| CONTIG-064599 | 171 | 7   | 5  | 17   | 0 |
| CONTIG-064600 | 134 | 10  | 3  | 64   | 0 |
| CONTIG-064601 | 303 | 9   | 7  | 75   | 0 |
| CONTIG-064603 | 136 | 13  | 7  | 53   | 2 |
| CONTIG-064604 | 60  | 4   | 3  | 10   | 0 |
| CONTIG-064605 | 78  | 10  | 10 | 13   | 0 |
| CONTIG-064606 | 78  | 6   | 9  | 13   | 0 |
| CONTIG-064607 | 140 | 8   | 5  | 22   | 0 |
| CONTIG-064608 | 77  | 6   | 2  | 13   | 0 |
| CONTIG-064610 | 92  | 5   | 2  | 16   | 0 |
| CONTIG-064611 | 97  | 8   | 8  | 20   | 0 |
| CONTIG-064615 | 77  | 8   | 0  | 22   | 0 |
| CONTIG-064616 | 98  | 4   | 2  | 16   | 0 |
| CONTIG-064617 | 117 | 192 | 8  | 1136 | 2 |
| CONTIG-064618 | 196 | 7   | 4  | 17   | 0 |
| CONTIG-064619 | 105 | 11  | 8  | 6    | 0 |
| CONTIG-064621 | 220 | 11  | 39 | 81   | 0 |
| CONTIG-064622 | 240 | 8   | 3  | 17   | 0 |
| CONTIG-064623 | 103 | 3   | 2  | 16   | 0 |
| CONTIG-064624 | 123 | 7   | 0  | 40   | 0 |
| CONTIG-064625 | 134 | 4   | 13 | 0    | 0 |
| CONTIG-064626 | 74  | 35  | 22 | 41   | 2 |
| CONTIG-064627 | 114 | 8   | 14 | 20   | 0 |
| CONTIG-064628 | 90  | 40  | 0  | 180  | 2 |
| CONTIG-064629 | 83  | 5   | 7  | 14   | 0 |
| CONTIG-064630 | 183 | 4   | 7  | 10   | 0 |
| CONTIG-064631 | 240 | 7   | 9  | 54   | 0 |
| CONTIG-064634 | 74  | 6   | 2  | 11   | 0 |
| CONTIG-064635 | 128 | 15  | 4  | 87   | 0 |
| CONTIG-064636 | 342 | 7   | 0  | 108  | 0 |
| CONTIG-064637 | 61  | 2   | 2  | 0    | 0 |
| CONTIG-064638 | 67  | 16  | 2  | 17   | 0 |
| CONTIG-064639 | 357 | 7   | 36 | 54   | 0 |
| CONTIG-064643 | 194 | 7   | 10 | 44   | 0 |
| CONTIG-064644 | 78  | 7   | 9  | 10   | 0 |
| CONTIG-064645 | 146 | 8   | 8  | 14   | 0 |
| CONTIG-064646 | 884 | 11  | 5  | 248  | 2 |
| CONTIG-064651 | 74  | 10  | 3  | 2    | 0 |
| CONTIG-064652 | 295 | 6   | 2  | 44   | 0 |
| CONTIG-064653 | 64  | 2   | 4  | 2    | 0 |
| CONTIG-064654 | 932 | 16  | 12 | 638  | 6 |
| CONTIG-064655 | 69  | 3   | 4  | 4    | 0 |
| CONTIG-064656 | 161 | 7   | 18 | 27   | 0 |
| CONTIG-064657 | 324 | 11  | 14 | 159  | 0 |
| CONTIG-064658 | 74  | 8   | 11 | 14   | 0 |
| CONTIG-064659 | 126 | 7   | 11 | 27   | 0 |
| CONTIG-064661 | 109 | 4   | 4  | 9    | 0 |

|               |     |    |    |     |    |
|---------------|-----|----|----|-----|----|
| CONTIG-064662 | 142 | 9  | 15 | 12  | 0  |
| CONTIG-064663 | 835 | 12 | 12 | 412 | 0  |
| CONTIG-064664 | 63  | 23 | 9  | 41  | 0  |
| CONTIG-064665 | 62  | 4  | 2  | 4   | 0  |
| CONTIG-064666 | 292 | 9  | 9  | 129 | 0  |
| CONTIG-064667 | 535 | 19 | 6  | 406 | 0  |
| CONTIG-064668 | 152 | 5  | 11 | 0   | 0  |
| CONTIG-064669 | 187 | 9  | 11 | 57  | 0  |
| CONTIG-064670 | 72  | 7  | 13 | 6   | 0  |
| CONTIG-064671 | 87  | 5  | 0  | 8   | 2  |
| CONTIG-064672 | 91  | 4  | 9  | 7   | 0  |
| CONTIG-064673 | 127 | 10 | 5  | 35  | 0  |
| CONTIG-064674 | 144 | 9  | 4  | 55  | 0  |
| CONTIG-064675 | 120 | 5  | 4  | 8   | 0  |
| CONTIG-064676 | 102 | 5  | 0  | 12  | 0  |
| CONTIG-064677 | 247 | 37 | 4  | 11  | 0  |
| CONTIG-064679 | 218 | 8  | 0  | 24  | 0  |
| CONTIG-064680 | 129 | 9  | 11 | 29  | 0  |
| CONTIG-064681 | 105 | 8  | 4  | 17  | 0  |
| CONTIG-064682 | 307 | 24 | 52 | 200 | 0  |
| CONTIG-064683 | 147 | 7  | 4  | 34  | 0  |
| CONTIG-064684 | 169 | 9  | 11 | 25  | 0  |
| CONTIG-064685 | 309 | 15 | 0  | 0   | 53 |
| CONTIG-064686 | 105 | 5  | 4  | 6   | 0  |
| CONTIG-064687 | 202 | 8  | 9  | 65  | 0  |
| CONTIG-064688 | 326 | 10 | 8  | 91  | 0  |
| CONTIG-064689 | 106 | 8  | 11 | 22  | 0  |
| CONTIG-064690 | 203 | 4  | 2  | 21  | 0  |
| CONTIG-064691 | 49  | 63 | 34 | 64  | 0  |
| CONTIG-064692 | 82  | 11 | 6  | 49  | 0  |
| CONTIG-064693 | 105 | 13 | 8  | 41  | 4  |
| CONTIG-064694 | 103 | 7  | 3  | 19  | 0  |
| CONTIG-064695 | 143 | 12 | 5  | 82  | 0  |
| CONTIG-064696 | 60  | 5  | 5  | 5   | 0  |
| CONTIG-064697 | 320 | 12 | 20 | 136 | 0  |
| CONTIG-064698 | 324 | 7  | 11 | 79  | 0  |
| CONTIG-064699 | 64  | 2  | 0  | 2   | 0  |
| CONTIG-064700 | 163 | 5  | 2  | 5   | 0  |
| CONTIG-064701 | 88  | 6  | 24 | 10  | 0  |
| CONTIG-064702 | 175 | 9  | 5  | 52  | 0  |
| CONTIG-064703 | 78  | 17 | 19 | 18  | 0  |
| CONTIG-064704 | 100 | 5  | 3  | 7   | 0  |
| CONTIG-064706 | 173 | 9  | 11 | 46  | 2  |
| CONTIG-064709 | 229 | 6  | 6  | 19  | 0  |
| CONTIG-064710 | 415 | 8  | 0  | 158 | 0  |
| CONTIG-064711 | 124 | 7  | 9  | 27  | 0  |
| CONTIG-064712 | 127 | 5  | 4  | 10  | 0  |

|               |     |    |    |     |    |
|---------------|-----|----|----|-----|----|
| CONTIG-064713 | 168 | 6  | 3  | 25  | 2  |
| CONTIG-064714 | 123 | 14 | 22 | 30  | 0  |
| CONTIG-064716 | 129 | 10 | 19 | 22  | 0  |
| CONTIG-064717 | 121 | 5  | 4  | 26  | 0  |
| CONTIG-064719 | 73  | 8  | 16 | 8   | 0  |
| CONTIG-064720 | 112 | 6  | 0  | 10  | 0  |
| CONTIG-064721 | 82  | 5  | 9  | 7   | 0  |
| CONTIG-064722 | 130 | 11 | 2  | 48  | 0  |
| CONTIG-064723 | 58  | 7  | 7  | 5   | 0  |
| CONTIG-064724 | 224 | 10 | 7  | 85  | 0  |
| CONTIG-064725 | 148 | 4  | 10 | 20  | 0  |
| CONTIG-064726 | 65  | 4  | 2  | 0   | 0  |
| CONTIG-064727 | 285 | 9  | 0  | 46  | 2  |
| CONTIG-064728 | 183 | 9  | 4  | 66  | 0  |
| CONTIG-064729 | 68  | 10 | 0  | 20  | 0  |
| CONTIG-064730 | 842 | 50 | 10 | 0   | 28 |
| CONTIG-064731 | 76  | 19 | 8  | 73  | 0  |
| CONTIG-064732 | 83  | 6  | 15 | 4   | 0  |
| CONTIG-064733 | 116 | 3  | 5  | 9   | 0  |
| CONTIG-064734 | 501 | 7  | 5  | 146 | 0  |
| CONTIG-064735 | 101 | 4  | 7  | 2   | 0  |
| CONTIG-064736 | 217 | 6  | 12 | 31  | 0  |
| CONTIG-064737 | 121 | 6  | 2  | 20  | 0  |
| CONTIG-064738 | 82  | 6  | 2  | 12  | 0  |
| CONTIG-064739 | 104 | 9  | 3  | 38  | 0  |
| CONTIG-064741 | 120 | 5  | 5  | 18  | 0  |
| CONTIG-064742 | 152 | 8  | 6  | 25  | 2  |
| CONTIG-064743 | 125 | 3  | 4  | 8   | 0  |
| CONTIG-064744 | 319 | 12 | 14 | 181 | 0  |
| CONTIG-064745 | 260 | 9  | 24 | 82  | 0  |
| CONTIG-064746 | 58  | 5  | 3  | 7   | 0  |
| CONTIG-064747 | 118 | 9  | 7  | 37  | 0  |
| CONTIG-064748 | 92  | 4  | 7  | 3   | 0  |
| CONTIG-064749 | 155 | 4  | 2  | 26  | 0  |
| CONTIG-064750 | 201 | 4  | 0  | 0   | 0  |
| CONTIG-064751 | 114 | 8  | 0  | 0   | 2  |
| CONTIG-064752 | 177 | 13 | 14 | 39  | 0  |
| CONTIG-064753 | 254 | 7  | 15 | 48  | 0  |
| CONTIG-064754 | 60  | 17 | 23 | 33  | 0  |
| CONTIG-064756 | 257 | 6  | 0  | 14  | 0  |
| CONTIG-064757 | 261 | 10 | 15 | 49  | 9  |
| CONTIG-064758 | 94  | 4  | 2  | 2   | 0  |
| CONTIG-064759 | 204 | 13 | 2  | 102 | 2  |
| CONTIG-064760 | 91  | 4  | 2  | 11  | 0  |
| CONTIG-064761 | 153 | 17 | 12 | 40  | 0  |
| CONTIG-064762 | 145 | 14 | 7  | 66  | 0  |
| CONTIG-064763 | 78  | 5  | 8  | 6   | 0  |

|               |     |    |    |     |   |
|---------------|-----|----|----|-----|---|
| CONTIG-064764 | 138 | 4  | 2  | 9   | 0 |
| CONTIG-064765 | 92  | 4  | 4  | 10  | 0 |
| CONTIG-064766 | 334 | 8  | 10 | 79  | 3 |
| CONTIG-064767 | 64  | 5  | 5  | 8   | 0 |
| CONTIG-064769 | 100 | 9  | 17 | 8   | 0 |
| CONTIG-064770 | 214 | 17 | 25 | 78  | 2 |
| CONTIG-064771 | 83  | 2  | 7  | 0   | 0 |
| CONTIG-064778 | 62  | 5  | 6  | 8   | 0 |
| CONTIG-064779 | 146 | 8  | 8  | 40  | 0 |
| CONTIG-064780 | 130 | 15 | 12 | 89  | 0 |
| CONTIG-064781 | 60  | 4  | 4  | 3   | 0 |
| CONTIG-064782 | 217 | 7  | 4  | 23  | 0 |
| CONTIG-064783 | 92  | 6  | 2  | 9   | 0 |
| CONTIG-064784 | 76  | 8  | 0  | 14  | 0 |
| CONTIG-064785 | 209 | 6  | 15 | 44  | 0 |
| CONTIG-064786 | 103 | 12 | 0  | 45  | 0 |
| CONTIG-064787 | 61  | 8  | 19 | 7   | 0 |
| CONTIG-064788 | 111 | 10 | 23 | 24  | 0 |
| CONTIG-064789 | 73  | 3  | 3  | 4   | 0 |
| CONTIG-064790 | 143 | 5  | 2  | 30  | 0 |
| CONTIG-064792 | 329 | 8  | 13 | 83  | 2 |
| CONTIG-064793 | 306 | 22 | 9  | 119 | 6 |
| CONTIG-064794 | 58  | 33 | 4  | 69  | 0 |
| CONTIG-064795 | 686 | 14 | 17 | 268 | 6 |
| CONTIG-064796 | 94  | 6  | 16 | 14  | 0 |
| CONTIG-064797 | 151 | 4  | 23 | 4   | 0 |
| CONTIG-064798 | 70  | 4  | 7  | 4   | 0 |
| CONTIG-064799 | 96  | 17 | 7  | 24  | 0 |
| CONTIG-064800 | 392 | 14 | 34 | 148 | 0 |
| CONTIG-064802 | 275 | 12 | 18 | 103 | 4 |
| CONTIG-064803 | 100 | 8  | 5  | 30  | 0 |
| CONTIG-064804 | 115 | 7  | 10 | 23  | 0 |
| CONTIG-064805 | 263 | 5  | 2  | 36  | 0 |
| CONTIG-064806 | 675 | 13 | 59 | 266 | 2 |
| CONTIG-064807 | 75  | 6  | 0  | 18  | 0 |
| CONTIG-064808 | 182 | 7  | 10 | 27  | 0 |
| CONTIG-064809 | 98  | 13 | 12 | 45  | 0 |
| CONTIG-064810 | 102 | 10 | 12 | 18  | 0 |
| CONTIG-064811 | 353 | 9  | 5  | 75  | 3 |
| CONTIG-064812 | 329 | 14 | 12 | 197 | 0 |
| CONTIG-064816 | 130 | 10 | 13 | 38  | 0 |
| CONTIG-064818 | 64  | 3  | 6  | 4   | 0 |
| CONTIG-064820 | 106 | 5  | 2  | 12  | 0 |
| CONTIG-064821 | 95  | 14 | 12 | 31  | 0 |
| CONTIG-064823 | 113 | 3  | 2  | 4   | 0 |
| CONTIG-064824 | 366 | 8  | 3  | 9   | 0 |
| CONTIG-064825 | 92  | 6  | 3  | 14  | 0 |

|               |     |    |    |     |    |
|---------------|-----|----|----|-----|----|
| CONTIG-064829 | 110 | 4  | 18 | 4   | 0  |
| CONTIG-064830 | 83  | 8  | 21 | 11  | 0  |
| CONTIG-064831 | 86  | 7  | 32 | 9   | 0  |
| CONTIG-064832 | 215 | 14 | 17 | 109 | 0  |
| CONTIG-064833 | 202 | 7  | 14 | 53  | 0  |
| CONTIG-064834 | 74  | 14 | 4  | 0   | 0  |
| CONTIG-064835 | 119 | 5  | 20 | 12  | 0  |
| CONTIG-064836 | 134 | 9  | 10 | 18  | 0  |
| CONTIG-064837 | 106 | 7  | 14 | 28  | 0  |
| CONTIG-064838 | 145 | 9  | 17 | 33  | 0  |
| CONTIG-064839 | 74  | 4  | 6  | 11  | 0  |
| CONTIG-064840 | 79  | 5  | 3  | 15  | 0  |
| CONTIG-064841 | 74  | 4  | 0  | 5   | 0  |
| CONTIG-064842 | 227 | 14 | 63 | 96  | 0  |
| CONTIG-064843 | 65  | 3  | 6  | 2   | 0  |
| CONTIG-064844 | 301 | 9  | 7  | 98  | 0  |
| CONTIG-064845 | 118 | 8  | 8  | 25  | 0  |
| CONTIG-064847 | 142 | 6  | 0  | 13  | 0  |
| CONTIG-064848 | 532 | 30 | 87 | 654 | 2  |
| CONTIG-064850 | 90  | 9  | 4  | 30  | 0  |
| CONTIG-064852 | 61  | 5  | 0  | 8   | 0  |
| CONTIG-064853 | 302 | 21 | 11 | 10  | 0  |
| CONTIG-064854 | 180 | 7  | 0  | 32  | 0  |
| CONTIG-064855 | 202 | 7  | 5  | 30  | 0  |
| CONTIG-064856 | 115 | 6  | 19 | 12  | 0  |
| CONTIG-064857 | 160 | 11 | 7  | 76  | 0  |
| CONTIG-064858 | 156 | 8  | 2  | 55  | 0  |
| CONTIG-064860 | 93  | 17 | 8  | 0   | 0  |
| CONTIG-064861 | 90  | 5  | 2  | 8   | 0  |
| CONTIG-064866 | 98  | 4  | 4  | 16  | 0  |
| CONTIG-064867 | 125 | 20 | 14 | 76  | 2  |
| CONTIG-064868 | 101 | 8  | 15 | 23  | 0  |
| CONTIG-064869 | 160 | 4  | 7  | 19  | 0  |
| CONTIG-064870 | 128 | 4  | 6  | 7   | 0  |
| CONTIG-064871 | 60  | 8  | 5  | 8   | 0  |
| CONTIG-064873 | 42  | 9  | 3  | 0   | 0  |
| CONTIG-064875 | 65  | 16 | 0  | 2   | 0  |
| CONTIG-064877 | 174 | 7  | 3  | 38  | 0  |
| CONTIG-064878 | 147 | 9  | 4  | 45  | 0  |
| CONTIG-064879 | 198 | 6  | 9  | 37  | 0  |
| CONTIG-064880 | 643 | 8  | 2  | 243 | 0  |
| CONTIG-064881 | 633 | 9  | 4  | 0   | 48 |
| CONTIG-064882 | 110 | 9  | 11 | 17  | 0  |
| CONTIG-064884 | 407 | 10 | 17 | 78  | 0  |
| CONTIG-064885 | 90  | 6  | 14 | 9   | 0  |
| CONTIG-064886 | 357 | 8  | 11 | 58  | 0  |
| CONTIG-064887 | 63  | 6  | 0  | 10  | 0  |



|               |      |    |    |     |     |
|---------------|------|----|----|-----|-----|
| CONTIG-064888 | 159  | 9  | 4  | 39  | 0   |
| CONTIG-064889 | 71   | 2  | 0  | 4   | 0   |
| CONTIG-064891 | 75   | 3  | 0  | 0   | 0   |
| CONTIG-064892 | 115  | 8  | 13 | 18  | 0   |
| CONTIG-064893 | 145  | 6  | 9  | 33  | 0   |
| CONTIG-064894 | 62   | 3  | 3  | 2   | 0   |
| CONTIG-064895 | 267  | 12 | 6  | 171 | 0   |
| CONTIG-064896 | 198  | 7  | 24 | 55  | 0   |
| CONTIG-064897 | 62   | 3  | 5  | 0   | 0   |
| CONTIG-064898 | 227  | 14 | 95 | 103 | 0   |
| CONTIG-064899 | 307  | 47 | 22 | 475 | 11  |
| CONTIG-064900 | 95   | 9  | 7  | 45  | 0   |
| CONTIG-064901 | 225  | 19 | 7  | 123 | 2   |
| CONTIG-064902 | 79   | 14 | 2  | 63  | 0   |
| CONTIG-064903 | 79   | 10 | 0  | 0   | 0   |
| CONTIG-064904 | 100  | 16 | 48 | 0   | 0   |
| CONTIG-064905 | 167  | 9  | 11 | 80  | 0   |
| CONTIG-064907 | 228  | 14 | 15 | 148 | 0   |
| CONTIG-064908 | 253  | 18 | 4  | 0   | 39  |
| CONTIG-064909 | 68   | 3  | 4  | 2   | 0   |
| CONTIG-064910 | 225  | 10 | 22 | 52  | 2   |
| CONTIG-064912 | 1008 | 17 | 2  | 0   | 111 |
| CONTIG-064913 | 93   | 5  | 6  | 15  | 0   |
| CONTIG-064914 | 92   | 4  | 20 | 0   | 0   |
| CONTIG-064915 | 70   | 4  | 0  | 2   | 0   |
| CONTIG-064916 | 240  | 7  | 10 | 27  | 0   |
| CONTIG-064917 | 68   | 5  | 5  | 4   | 0   |
| CONTIG-064918 | 64   | 8  | 36 | 5   | 0   |
| CONTIG-064920 | 170  | 5  | 10 | 18  | 0   |
| CONTIG-064921 | 103  | 17 | 14 | 41  | 0   |
| CONTIG-064922 | 82   | 5  | 8  | 9   | 0   |
| CONTIG-064924 | 66   | 8  | 5  | 3   | 0   |
| CONTIG-064925 | 102  | 10 | 8  | 20  | 0   |
| CONTIG-064926 | 87   | 4  | 0  | 8   | 0   |
| CONTIG-064927 | 70   | 6  | 10 | 9   | 0   |
| CONTIG-064928 | 204  | 13 | 18 | 93  | 0   |
| CONTIG-064930 | 1124 | 62 | 0  | 4   | 750 |
| CONTIG-064931 | 141  | 7  | 3  | 25  | 0   |
| CONTIG-064933 | 62   | 4  | 5  | 9   | 0   |
| CONTIG-064934 | 139  | 4  | 2  | 13  | 0   |
| CONTIG-064935 | 70   | 9  | 12 | 9   | 0   |
| CONTIG-064936 | 69   | 7  | 2  | 13  | 0   |
| CONTIG-064937 | 72   | 13 | 0  | 25  | 2   |
| CONTIG-064938 | 525  | 7  | 33 | 37  | 0   |
| CONTIG-064939 | 165  | 11 | 14 | 73  | 0   |
| CONTIG-064940 | 69   | 5  | 2  | 10  | 0   |
| CONTIG-064941 | 125  | 8  | 11 | 24  | 0   |

|               |     |     |    |     |   |
|---------------|-----|-----|----|-----|---|
| CONTIG-064942 | 101 | 4   | 4  | 2   | 0 |
| CONTIG-064943 | 98  | 9   | 26 | 0   | 0 |
| CONTIG-064944 | 154 | 10  | 4  | 22  | 0 |
| CONTIG-064945 | 204 | 14  | 26 | 24  | 0 |
| CONTIG-064946 | 230 | 15  | 22 | 135 | 0 |
| CONTIG-064947 | 282 | 16  | 15 | 194 | 0 |
| CONTIG-064948 | 167 | 14  | 6  | 58  | 0 |
| CONTIG-064949 | 94  | 4   | 3  | 12  | 0 |
| CONTIG-064950 | 87  | 16  | 4  | 46  | 0 |
| CONTIG-064951 | 82  | 5   | 3  | 14  | 0 |
| CONTIG-064952 | 86  | 4   | 0  | 6   | 0 |
| CONTIG-064953 | 146 | 8   | 2  | 36  | 0 |
| CONTIG-064954 | 87  | 7   | 9  | 3   | 0 |
| CONTIG-064955 | 83  | 3   | 4  | 9   | 0 |
| CONTIG-064956 | 88  | 2   | 5  | 0   | 0 |
| CONTIG-064957 | 191 | 143 | 0  | 2   | 0 |
| CONTIG-064958 | 226 | 16  | 25 | 120 | 0 |
| CONTIG-064959 | 101 | 6   | 15 | 12  | 0 |
| CONTIG-064960 | 351 | 11  | 4  | 187 | 0 |
| CONTIG-064961 | 127 | 5   | 12 | 23  | 0 |
| CONTIG-064962 | 223 | 10  | 19 | 71  | 0 |
| CONTIG-064963 | 62  | 7   | 0  | 10  | 0 |
| CONTIG-064964 | 78  | 15  | 14 | 27  | 0 |
| CONTIG-064965 | 182 | 12  | 0  | 67  | 0 |
| CONTIG-064966 | 67  | 11  | 26 | 18  | 0 |
| CONTIG-064967 | 111 | 5   | 7  | 12  | 0 |
| CONTIG-064968 | 131 | 7   | 5  | 10  | 0 |
| CONTIG-064969 | 72  | 4   | 3  | 4   | 0 |
| CONTIG-064970 | 87  | 6   | 2  | 15  | 0 |
| CONTIG-064971 | 332 | 9   | 8  | 76  | 4 |
| CONTIG-064972 | 250 | 7   | 2  | 57  | 0 |
| CONTIG-064973 | 150 | 6   | 7  | 11  | 0 |
| CONTIG-064974 | 134 | 5   | 2  | 12  | 0 |
| CONTIG-064975 | 94  | 226 | 8  | 17  | 0 |
| CONTIG-064976 | 149 | 19  | 4  | 0   | 0 |
| CONTIG-064977 | 69  | 7   | 7  | 24  | 0 |
| CONTIG-064978 | 201 | 9   | 22 | 73  | 0 |
| CONTIG-064979 | 461 | 9   | 7  | 111 | 0 |
| CONTIG-064980 | 230 | 10  | 2  | 67  | 0 |
| CONTIG-064981 | 127 | 6   | 19 | 12  | 0 |
| CONTIG-064982 | 58  | 2   | 4  | 0   | 0 |
| CONTIG-064983 | 356 | 8   | 33 | 114 | 2 |
| CONTIG-064984 | 64  | 6   | 3  | 12  | 0 |
| CONTIG-064985 | 101 | 6   | 5  | 17  | 0 |
| CONTIG-064986 | 596 | 14  | 32 | 241 | 4 |
| CONTIG-064987 | 192 | 13  | 5  | 47  | 2 |
| CONTIG-064988 | 234 | 15  | 22 | 78  | 9 |

|               |     |     |    |     |   |
|---------------|-----|-----|----|-----|---|
| CONTIG-064989 | 66  | 12  | 23 | 5   | 0 |
| CONTIG-064990 | 69  | 4   | 0  | 8   | 0 |
| CONTIG-064991 | 232 | 14  | 23 | 145 | 0 |
| CONTIG-064992 | 108 | 12  | 6  | 62  | 0 |
| CONTIG-064993 | 224 | 19  | 9  | 155 | 2 |
| CONTIG-064994 | 98  | 2   | 0  | 6   | 0 |
| CONTIG-064996 | 62  | 4   | 2  | 2   | 0 |
| CONTIG-064997 | 110 | 4   | 4  | 9   | 0 |
| CONTIG-064998 | 66  | 5   | 8  | 0   | 0 |
| CONTIG-064999 | 116 | 10  | 5  | 22  | 0 |
| CONTIG-065000 | 115 | 4   | 7  | 8   | 0 |
| CONTIG-065001 | 139 | 7   | 10 | 29  | 0 |
| CONTIG-065002 | 298 | 11  | 9  | 32  | 2 |
| CONTIG-065003 | 167 | 360 | 2  | 78  | 0 |
| CONTIG-065004 | 89  | 18  | 12 | 59  | 0 |
| CONTIG-065005 | 91  | 6   | 6  | 17  | 0 |
| CONTIG-065006 | 62  | 7   | 30 | 7   | 0 |
| CONTIG-065007 | 114 | 5   | 0  | 17  | 0 |
| CONTIG-065008 | 236 | 11  | 8  | 25  | 0 |
| CONTIG-065009 | 135 | 7   | 4  | 32  | 0 |
| CONTIG-065010 | 152 | 10  | 4  | 32  | 0 |
| CONTIG-065011 | 62  | 5   | 4  | 0   | 0 |
| CONTIG-065012 | 63  | 14  | 17 | 30  | 0 |
| CONTIG-065013 | 124 | 5   | 2  | 0   | 2 |
| CONTIG-065014 | 173 | 6   | 15 | 30  | 0 |
| CONTIG-065015 | 355 | 12  | 45 | 127 | 0 |
| CONTIG-065016 | 353 | 10  | 26 | 84  | 4 |
| CONTIG-065017 | 378 | 11  | 18 | 176 | 0 |
| CONTIG-065018 | 64  | 4   | 4  | 6   | 0 |
| CONTIG-065019 | 63  | 2   | 4  | 0   | 0 |
| CONTIG-065020 | 102 | 9   | 3  | 17  | 0 |
| CONTIG-065021 | 75  | 24  | 2  | 5   | 0 |
| CONTIG-065022 | 46  | 30  | 9  | 36  | 0 |
| CONTIG-065023 | 105 | 10  | 11 | 22  | 0 |
| CONTIG-065024 | 125 | 6   | 8  | 11  | 0 |
| CONTIG-065025 | 245 | 25  | 0  | 208 | 0 |
| CONTIG-065026 | 89  | 7   | 4  | 0   | 0 |
| CONTIG-065027 | 99  | 5   | 2  | 16  | 0 |
| CONTIG-065028 | 92  | 8   | 0  | 21  | 0 |
| CONTIG-065029 | 686 | 12  | 14 | 312 | 2 |
| CONTIG-065030 | 124 | 12  | 14 | 66  | 0 |
| CONTIG-065031 | 100 | 3   | 0  | 6   | 0 |
| CONTIG-065034 | 82  | 13  | 13 | 27  | 0 |
| CONTIG-065035 | 98  | 9   | 4  | 20  | 0 |
| CONTIG-065036 | 162 | 7   | 20 | 25  | 0 |
| CONTIG-065037 | 86  | 8   | 9  | 7   | 0 |
| CONTIG-065038 | 135 | 11  | 25 | 47  | 0 |

|               |     |    |    |     |    |
|---------------|-----|----|----|-----|----|
| CONTIG-065039 | 343 | 9  | 2  | 75  | 0  |
| CONTIG-065040 | 411 | 7  | 2  | 119 | 0  |
| CONTIG-065041 | 220 | 13 | 6  | 84  | 2  |
| CONTIG-065042 | 275 | 11 | 0  | 0   | 15 |
| CONTIG-065043 | 146 | 8  | 3  | 10  | 0  |
| CONTIG-065044 | 128 | 9  | 4  | 27  | 0  |
| CONTIG-065045 | 94  | 8  | 3  | 9   | 0  |
| CONTIG-065046 | 95  | 8  | 2  | 36  | 2  |
| CONTIG-065047 | 159 | 8  | 5  | 47  | 2  |
| CONTIG-065048 | 208 | 4  | 0  | 24  | 0  |
| CONTIG-065049 | 179 | 5  | 11 | 30  | 0  |
| CONTIG-065050 | 94  | 10 | 5  | 9   | 0  |
| CONTIG-065051 | 97  | 11 | 13 | 35  | 0  |
| CONTIG-065052 | 142 | 8  | 5  | 45  | 0  |
| CONTIG-065053 | 76  | 10 | 8  | 6   | 0  |
| CONTIG-065054 | 58  | 5  | 14 | 0   | 0  |
| CONTIG-065055 | 128 | 14 | 11 | 41  | 0  |
| CONTIG-065056 | 87  | 4  | 3  | 0   | 0  |
| CONTIG-065057 | 90  | 5  | 5  | 11  | 0  |
| CONTIG-065058 | 45  | 74 | 3  | 4   | 0  |
| CONTIG-065059 | 87  | 9  | 17 | 24  | 0  |
| CONTIG-065062 | 138 | 7  | 4  | 36  | 0  |
| CONTIG-065063 | 58  | 6  | 0  | 9   | 0  |
| CONTIG-065064 | 90  | 4  | 0  | 7   | 2  |
| CONTIG-065065 | 78  | 5  | 4  | 8   | 0  |
| CONTIG-065066 | 70  | 10 | 11 | 9   | 0  |
| CONTIG-065067 | 105 | 3  | 7  | 2   | 0  |
| CONTIG-065068 | 94  | 6  | 8  | 21  | 0  |
| CONTIG-065074 | 75  | 10 | 4  | 18  | 0  |
| CONTIG-065075 | 86  | 7  | 7  | 16  | 0  |
| CONTIG-065076 | 130 | 13 | 9  | 48  | 2  |
| CONTIG-065077 | 109 | 5  | 6  | 6   | 0  |
| CONTIG-065078 | 138 | 7  | 12 | 41  | 0  |
| CONTIG-065079 | 147 | 8  | 10 | 38  | 0  |
| CONTIG-065081 | 141 | 10 | 8  | 43  | 0  |
| CONTIG-065082 | 197 | 6  | 25 | 9   | 0  |
| CONTIG-065083 | 150 | 6  | 8  | 17  | 0  |
| CONTIG-065084 | 94  | 6  | 0  | 21  | 0  |
| CONTIG-065085 | 62  | 13 | 28 | 11  | 0  |
| CONTIG-065086 | 127 | 5  | 0  | 2   | 0  |
| CONTIG-065087 | 72  | 4  | 2  | 8   | 0  |
| CONTIG-065090 | 101 | 10 | 0  | 31  | 0  |
| CONTIG-065091 | 119 | 11 | 6  | 62  | 0  |
| CONTIG-065092 | 176 | 4  | 6  | 23  | 0  |
| CONTIG-065093 | 198 | 26 | 6  | 139 | 18 |
| CONTIG-065094 | 186 | 11 | 13 | 58  | 0  |
| CONTIG-065095 | 157 | 6  | 3  | 9   | 0  |

|               |     |    |    |     |   |
|---------------|-----|----|----|-----|---|
| CONTIG-065097 | 64  | 5  | 4  | 5   | 0 |
| CONTIG-065098 | 63  | 10 | 20 | 0   | 0 |
| CONTIG-065099 | 176 | 9  | 4  | 52  | 0 |
| CONTIG-065100 | 64  | 4  | 5  | 8   | 0 |
| CONTIG-065101 | 117 | 4  | 21 | 4   | 0 |
| CONTIG-065102 | 72  | 7  | 4  | 11  | 0 |
| CONTIG-065103 | 101 | 7  | 5  | 27  | 0 |
| CONTIG-065104 | 53  | 38 | 3  | 34  | 0 |
| CONTIG-065105 | 114 | 6  | 10 | 16  | 0 |
| CONTIG-065106 | 475 | 13 | 3  | 209 | 2 |
| CONTIG-065107 | 92  | 7  | 3  | 17  | 0 |
| CONTIG-065108 | 157 | 8  | 6  | 18  | 0 |
| CONTIG-065109 | 75  | 5  | 0  | 14  | 0 |
| CONTIG-065110 | 62  | 3  | 4  | 0   | 0 |
| CONTIG-065111 | 262 | 11 | 0  | 32  | 0 |
| CONTIG-065112 | 156 | 9  | 2  | 53  | 0 |
| CONTIG-065113 | 263 | 9  | 8  | 26  | 0 |
| CONTIG-065114 | 116 | 9  | 2  | 38  | 0 |
| CONTIG-065115 | 138 | 13 | 12 | 61  | 0 |
| CONTIG-065116 | 386 | 14 | 12 | 195 | 0 |
| CONTIG-065117 | 99  | 6  | 0  | 22  | 0 |
| CONTIG-065118 | 93  | 7  | 10 | 2   | 2 |
| CONTIG-065119 | 85  | 5  | 7  | 5   | 0 |
| CONTIG-065121 | 63  | 7  | 12 | 7   | 0 |
| CONTIG-065123 | 68  | 2  | 0  | 2   | 0 |
| CONTIG-065124 | 65  | 6  | 2  | 2   | 0 |
| CONTIG-065125 | 100 | 8  | 3  | 33  | 0 |
| CONTIG-065126 | 78  | 8  | 22 | 4   | 0 |
| CONTIG-065127 | 80  | 6  | 5  | 14  | 0 |
| CONTIG-065128 | 97  | 3  | 0  | 0   | 0 |
| CONTIG-065129 | 191 | 6  | 7  | 24  | 0 |
| CONTIG-065133 | 185 | 29 | 50 | 161 | 8 |
| CONTIG-065134 | 64  | 3  | 0  | 6   | 0 |
| CONTIG-065135 | 60  | 7  | 6  | 3   | 0 |
| CONTIG-065136 | 145 | 11 | 11 | 23  | 0 |
| CONTIG-065137 | 204 | 5  | 31 | 24  | 0 |
| CONTIG-065138 | 201 | 10 | 9  | 96  | 0 |
| CONTIG-065139 | 318 | 7  | 4  | 80  | 0 |
| CONTIG-065140 | 80  | 58 | 16 | 116 | 3 |
| CONTIG-065141 | 63  | 3  | 0  | 2   | 0 |
| CONTIG-065142 | 162 | 5  | 16 | 22  | 0 |
| CONTIG-065143 | 241 | 7  | 2  | 35  | 0 |
| CONTIG-065144 | 255 | 6  | 7  | 61  | 0 |
| CONTIG-065145 | 114 | 17 | 5  | 0   | 0 |
| CONTIG-065146 | 209 | 12 | 22 | 57  | 0 |
| CONTIG-065147 | 83  | 4  | 2  | 3   | 0 |
| CONTIG-065148 | 63  | 9  | 2  | 13  | 0 |

|               |     |     |    |     |     |
|---------------|-----|-----|----|-----|-----|
| CONTIG-065149 | 132 | 8   | 2  | 24  | 2   |
| CONTIG-065150 | 299 | 5   | 17 | 30  | 0   |
| CONTIG-065151 | 70  | 4   | 6  | 9   | 0   |
| CONTIG-065152 | 108 | 5   | 0  | 14  | 0   |
| CONTIG-065154 | 93  | 6   | 2  | 0   | 0   |
| CONTIG-065155 | 98  | 8   | 7  | 16  | 0   |
| CONTIG-065156 | 119 | 5   | 6  | 10  | 0   |
| CONTIG-065157 | 236 | 11  | 35 | 77  | 0   |
| CONTIG-065158 | 74  | 9   | 7  | 24  | 0   |
| CONTIG-065160 | 211 | 4   | 5  | 16  | 0   |
| CONTIG-065161 | 247 | 14  | 15 | 46  | 4   |
| CONTIG-065162 | 67  | 166 | 2  | 2   | 131 |
| CONTIG-065163 | 269 | 6   | 13 | 40  | 0   |
| CONTIG-065165 | 102 | 6   | 6  | 17  | 0   |
| CONTIG-065166 | 83  | 9   | 4  | 27  | 0   |
| CONTIG-065167 | 112 | 3   | 0  | 2   | 0   |
| CONTIG-065168 | 330 | 8   | 17 | 81  | 0   |
| CONTIG-065169 | 94  | 6   | 6  | 26  | 0   |
| CONTIG-065170 | 67  | 38  | 19 | 48  | 0   |
| CONTIG-065171 | 273 | 7   | 5  | 47  | 0   |
| CONTIG-065172 | 169 | 8   | 2  | 37  | 0   |
| CONTIG-065173 | 171 | 6   | 11 | 37  | 0   |
| CONTIG-065174 | 144 | 18  | 29 | 87  | 0   |
| CONTIG-065175 | 68  | 3   | 3  | 2   | 0   |
| CONTIG-065176 | 109 | 7   | 4  | 0   | 0   |
| CONTIG-065178 | 271 | 11  | 30 | 101 | 0   |
| CONTIG-065179 | 65  | 6   | 7  | 14  | 0   |
| CONTIG-065180 | 446 | 13  | 7  | 172 | 4   |
| CONTIG-065181 | 69  | 2   | 4  | 2   | 0   |
| CONTIG-065182 | 119 | 7   | 12 | 32  | 0   |
| CONTIG-065184 | 242 | 13  | 14 | 118 | 2   |
| CONTIG-065185 | 117 | 4   | 2  | 11  | 0   |
| CONTIG-065186 | 74  | 5   | 5  | 9   | 0   |
| CONTIG-065187 | 58  | 5   | 5  | 2   | 0   |
| CONTIG-065188 | 139 | 8   | 8  | 15  | 2   |
| CONTIG-065189 | 264 | 9   | 0  | 37  | 0   |
| CONTIG-065190 | 485 | 11  | 0  | 0   | 10  |
| CONTIG-065191 | 143 | 5   | 14 | 8   | 0   |
| CONTIG-065192 | 65  | 3   | 2  | 4   | 0   |
| CONTIG-065193 | 124 | 23  | 20 | 76  | 0   |
| CONTIG-065194 | 85  | 8   | 5  | 23  | 0   |
| CONTIG-065195 | 45  | 31  | 4  | 66  | 0   |
| CONTIG-065196 | 41  | 97  | 2  | 102 | 0   |
| CONTIG-065197 | 99  | 10  | 0  | 33  | 0   |
| CONTIG-065198 | 175 | 5   | 2  | 32  | 0   |
| CONTIG-065200 | 144 | 8   | 0  | 39  | 0   |
| CONTIG-065201 | 64  | 10  | 6  | 11  | 0   |

|               |     |    |    |     |    |
|---------------|-----|----|----|-----|----|
| CONTIG-065203 | 127 | 7  | 15 | 24  | 0  |
| CONTIG-065205 | 152 | 14 | 12 | 87  | 2  |
| CONTIG-065206 | 78  | 10 | 11 | 10  | 0  |
| CONTIG-065207 | 220 | 27 | 2  | 0   | 61 |
| CONTIG-065208 | 206 | 8  | 10 | 34  | 0  |
| CONTIG-065209 | 237 | 9  | 0  | 66  | 2  |
| CONTIG-065210 | 717 | 17 | 18 | 540 | 0  |
| CONTIG-065211 | 66  | 5  | 2  | 7   | 0  |
| CONTIG-065212 | 264 | 7  | 0  | 93  | 0  |
| CONTIG-065213 | 141 | 7  | 2  | 17  | 0  |
| CONTIG-065214 | 67  | 2  | 0  | 0   | 0  |
| CONTIG-065215 | 254 | 20 | 32 | 201 | 0  |
| CONTIG-065216 | 177 | 17 | 23 | 92  | 6  |
| CONTIG-065217 | 354 | 9  | 15 | 110 | 0  |
| CONTIG-065218 | 196 | 4  | 16 | 19  | 0  |
| CONTIG-065220 | 219 | 9  | 13 | 74  | 0  |
| CONTIG-065221 | 62  | 13 | 13 | 27  | 0  |
| CONTIG-065223 | 120 | 12 | 0  | 45  | 0  |
| CONTIG-065225 | 72  | 16 | 28 | 19  | 0  |
| CONTIG-065226 | 187 | 15 | 2  | 0   | 0  |
| CONTIG-065227 | 92  | 7  | 6  | 13  | 2  |
| CONTIG-065228 | 72  | 4  | 7  | 0   | 0  |
| CONTIG-065229 | 73  | 7  | 15 | 2   | 0  |
| CONTIG-065230 | 367 | 6  | 3  | 72  | 0  |
| CONTIG-065231 | 84  | 7  | 4  | 10  | 0  |
| CONTIG-065232 | 82  | 7  | 27 | 4   | 0  |
| CONTIG-065233 | 317 | 11 | 2  | 97  | 0  |
| CONTIG-065234 | 89  | 11 | 5  | 6   | 0  |
| CONTIG-065235 | 150 | 9  | 7  | 34  | 0  |
| CONTIG-065236 | 148 | 8  | 16 | 28  | 0  |
| CONTIG-065241 | 103 | 4  | 2  | 18  | 0  |
| CONTIG-065242 | 494 | 13 | 0  | 0   | 32 |
| CONTIG-065243 | 104 | 7  | 10 | 21  | 0  |
| CONTIG-065244 | 71  | 27 | 3  | 83  | 8  |
| CONTIG-065245 | 60  | 5  | 0  | 12  | 0  |
| CONTIG-065246 | 405 | 9  | 15 | 130 | 0  |
| CONTIG-065247 | 283 | 21 | 3  | 0   | 25 |
| CONTIG-065248 | 151 | 5  | 4  | 20  | 0  |
| CONTIG-065249 | 59  | 7  | 0  | 17  | 0  |
| CONTIG-065250 | 76  | 7  | 4  | 0   | 0  |
| CONTIG-065252 | 107 | 9  | 6  | 9   | 7  |
| CONTIG-065253 | 89  | 6  | 0  | 12  | 2  |
| CONTIG-065254 | 226 | 6  | 5  | 38  | 0  |
| CONTIG-065255 | 151 | 5  | 6  | 12  | 0  |
| CONTIG-065258 | 107 | 8  | 9  | 20  | 0  |
| CONTIG-065259 | 191 | 6  | 14 | 34  | 0  |
| CONTIG-065260 | 218 | 9  | 12 | 71  | 0  |

|               |     |    |    |     |    |
|---------------|-----|----|----|-----|----|
| CONTIG-065261 | 205 | 5  | 2  | 40  | 0  |
| CONTIG-065262 | 83  | 9  | 5  | 3   | 0  |
| CONTIG-065263 | 58  | 4  | 3  | 2   | 0  |
| CONTIG-065264 | 382 | 13 | 15 | 194 | 0  |
| CONTIG-065265 | 216 | 7  | 6  | 42  | 0  |
| CONTIG-065266 | 364 | 11 | 17 | 164 | 2  |
| CONTIG-065269 | 66  | 7  | 9  | 2   | 0  |
| CONTIG-065270 | 189 | 15 | 6  | 74  | 10 |
| CONTIG-065271 | 736 | 9  | 11 | 180 | 2  |
| CONTIG-065272 | 67  | 7  | 4  | 4   | 0  |
| CONTIG-065273 | 65  | 5  | 5  | 7   | 0  |
| CONTIG-065274 | 64  | 3  | 4  | 9   | 0  |
| CONTIG-065275 | 236 | 5  | 11 | 40  | 0  |
| CONTIG-065276 | 97  | 28 | 20 | 128 | 0  |
| CONTIG-065278 | 281 | 10 | 4  | 116 | 2  |
| CONTIG-065279 | 81  | 14 | 2  | 46  | 0  |
| CONTIG-065280 | 85  | 17 | 4  | 43  | 0  |
| CONTIG-065281 | 196 | 6  | 7  | 15  | 0  |
| CONTIG-065282 | 155 | 7  | 4  | 16  | 0  |
| CONTIG-065284 | 66  | 5  | 2  | 16  | 0  |
| CONTIG-065285 | 120 | 8  | 8  | 30  | 0  |
| CONTIG-065286 | 178 | 12 | 40 | 30  | 0  |
| CONTIG-065287 | 644 | 15 | 10 | 342 | 10 |
| CONTIG-065288 | 162 | 7  | 7  | 36  | 0  |
| CONTIG-065289 | 119 | 5  | 6  | 11  | 0  |
| CONTIG-065290 | 260 | 14 | 2  | 119 | 4  |
| CONTIG-065291 | 77  | 5  | 3  | 10  | 0  |
| CONTIG-065292 | 90  | 7  | 5  | 5   | 0  |
| CONTIG-065293 | 77  | 5  | 9  | 6   | 0  |
| CONTIG-065294 | 67  | 3  | 0  | 2   | 0  |
| CONTIG-065295 | 261 | 13 | 22 | 119 | 0  |
| CONTIG-065296 | 100 | 6  | 2  | 8   | 0  |
| CONTIG-065297 | 68  | 4  | 2  | 7   | 0  |
| CONTIG-065298 | 38  | 47 | 14 | 34  | 0  |
| CONTIG-065299 | 59  | 3  | 4  | 0   | 0  |
| CONTIG-065300 | 89  | 8  | 0  | 16  | 0  |
| CONTIG-065301 | 489 | 9  | 4  | 240 | 0  |
| CONTIG-065302 | 95  | 6  | 4  | 12  | 0  |
| CONTIG-065303 | 75  | 4  | 0  | 7   | 0  |
| CONTIG-065305 | 536 | 10 | 2  | 0   | 47 |
| CONTIG-065306 | 83  | 3  | 0  | 4   | 0  |
| CONTIG-065307 | 93  | 15 | 7  | 67  | 0  |
| CONTIG-065309 | 127 | 6  | 2  | 9   | 0  |
| CONTIG-065310 | 95  | 4  | 8  | 11  | 0  |
| CONTIG-065311 | 121 | 8  | 2  | 27  | 0  |
| CONTIG-065315 | 128 | 6  | 3  | 22  | 0  |
| CONTIG-065316 | 398 | 9  | 12 | 93  | 0  |



|               |     |    |    |      |    |
|---------------|-----|----|----|------|----|
| CONTIG-065317 | 214 | 6  | 3  | 0    | 5  |
| CONTIG-065318 | 91  | 2  | 0  | 3    | 0  |
| CONTIG-065320 | 149 | 4  | 7  | 21   | 0  |
| CONTIG-065321 | 102 | 8  | 8  | 11   | 0  |
| CONTIG-065322 | 224 | 8  | 6  | 43   | 0  |
| CONTIG-065323 | 134 | 3  | 4  | 13   | 0  |
| CONTIG-065324 | 124 | 8  | 2  | 22   | 0  |
| CONTIG-065325 | 84  | 6  | 2  | 12   | 0  |
| CONTIG-065326 | 156 | 8  | 2  | 15   | 0  |
| CONTIG-065327 | 273 | 20 | 24 | 246  | 0  |
| CONTIG-065328 | 114 | 5  | 3  | 16   | 0  |
| CONTIG-065329 | 216 | 10 | 20 | 70   | 0  |
| CONTIG-065330 | 397 | 12 | 8  | 153  | 0  |
| CONTIG-065331 | 107 | 6  | 13 | 14   | 0  |
| CONTIG-065332 | 435 | 15 | 2  | 0    | 34 |
| CONTIG-065333 | 77  | 10 | 3  | 11   | 0  |
| CONTIG-065334 | 136 | 5  | 6  | 10   | 0  |
| CONTIG-065336 | 68  | 9  | 6  | 24   | 0  |
| CONTIG-065337 | 284 | 13 | 17 | 100  | 0  |
| CONTIG-065338 | 162 | 6  | 4  | 36   | 0  |
| CONTIG-065339 | 956 | 75 | 26 | 4195 | 0  |
| CONTIG-065340 | 121 | 7  | 11 | 9    | 0  |
| CONTIG-065341 | 235 | 11 | 4  | 52   | 2  |
| CONTIG-065342 | 113 | 5  | 4  | 15   | 0  |
| CONTIG-065343 | 78  | 4  | 5  | 6    | 0  |
| CONTIG-065344 | 169 | 5  | 9  | 32   | 0  |
| CONTIG-065348 | 311 | 4  | 16 | 24   | 0  |
| CONTIG-065349 | 68  | 6  | 2  | 13   | 0  |
| CONTIG-065350 | 81  | 7  | 31 | 4    | 0  |
| CONTIG-065351 | 377 | 31 | 17 | 169  | 0  |
| CONTIG-065352 | 290 | 8  | 19 | 19   | 0  |
| CONTIG-065353 | 175 | 8  | 12 | 23   | 0  |
| CONTIG-065354 | 80  | 10 | 2  | 21   | 0  |
| CONTIG-065355 | 144 | 6  | 5  | 15   | 0  |
| CONTIG-065356 | 81  | 82 | 55 | 238  | 0  |
| CONTIG-065357 | 152 | 9  | 4  | 58   | 0  |
| CONTIG-065358 | 173 | 7  | 6  | 34   | 0  |
| CONTIG-065359 | 133 | 5  | 3  | 8    | 0  |
| CONTIG-065360 | 72  | 5  | 4  | 0    | 0  |
| CONTIG-065361 | 112 | 6  | 2  | 16   | 0  |
| CONTIG-065362 | 212 | 11 | 11 | 54   | 0  |
| CONTIG-065363 | 84  | 5  | 16 | 4    | 0  |
| CONTIG-065364 | 204 | 7  | 15 | 22   | 2  |
| CONTIG-065365 | 60  | 7  | 2  | 19   | 0  |
| CONTIG-065366 | 88  | 4  | 0  | 0    | 0  |
| CONTIG-065367 | 65  | 3  | 3  | 0    | 0  |
| CONTIG-065368 | 384 | 10 | 12 | 126  | 0  |

|               |     |    |    |     |    |
|---------------|-----|----|----|-----|----|
| CONTIG-065369 | 70  | 9  | 3  | 28  | 0  |
| CONTIG-065370 | 302 | 8  | 37 | 79  | 0  |
| CONTIG-065371 | 144 | 8  | 20 | 33  | 0  |
| CONTIG-065372 | 177 | 27 | 10 | 210 | 4  |
| CONTIG-065373 | 98  | 8  | 2  | 20  | 0  |
| CONTIG-065374 | 79  | 4  | 6  | 6   | 0  |
| CONTIG-065375 | 146 | 4  | 4  | 15  | 0  |
| CONTIG-065376 | 74  | 5  | 0  | 19  | 0  |
| CONTIG-065377 | 92  | 4  | 2  | 11  | 2  |
| CONTIG-065378 | 507 | 14 | 12 | 217 | 0  |
| CONTIG-065379 | 170 | 11 | 3  | 67  | 0  |
| CONTIG-065380 | 120 | 89 | 7  | 5   | 0  |
| CONTIG-065381 | 290 | 12 | 28 | 124 | 4  |
| CONTIG-065382 | 332 | 16 | 23 | 131 | 0  |
| CONTIG-065383 | 182 | 6  | 4  | 57  | 0  |
| CONTIG-065384 | 68  | 2  | 2  | 7   | 0  |
| CONTIG-065386 | 175 | 11 | 2  | 34  | 0  |
| CONTIG-065387 | 75  | 2  | 3  | 0   | 0  |
| CONTIG-065388 | 462 | 10 | 11 | 159 | 0  |
| CONTIG-065389 | 63  | 3  | 7  | 5   | 0  |
| CONTIG-065390 | 65  | 5  | 0  | 14  | 0  |
| CONTIG-065391 | 88  | 3  | 9  | 6   | 0  |
| CONTIG-065392 | 68  | 14 | 5  | 36  | 0  |
| CONTIG-065393 | 151 | 6  | 0  | 23  | 0  |
| CONTIG-065394 | 266 | 12 | 19 | 89  | 0  |
| CONTIG-065395 | 83  | 7  | 9  | 12  | 0  |
| CONTIG-065396 | 71  | 6  | 8  | 11  | 0  |
| CONTIG-065397 | 107 | 3  | 0  | 3   | 0  |
| CONTIG-065398 | 79  | 5  | 2  | 0   | 2  |
| CONTIG-065399 | 81  | 10 | 4  | 38  | 0  |
| CONTIG-065400 | 131 | 7  | 30 | 23  | 0  |
| CONTIG-065401 | 440 | 16 | 15 | 35  | 0  |
| CONTIG-065403 | 193 | 8  | 5  | 39  | 3  |
| CONTIG-065404 | 68  | 8  | 7  | 16  | 0  |
| CONTIG-065405 | 69  | 5  | 2  | 8   | 0  |
| CONTIG-065406 | 234 | 25 | 22 | 0   | 48 |
| CONTIG-065407 | 161 | 13 | 7  | 46  | 2  |
| CONTIG-065408 | 122 | 6  | 0  | 18  | 0  |
| CONTIG-065409 | 72  | 3  | 0  | 3   | 0  |
| CONTIG-065410 | 59  | 9  | 20 | 12  | 0  |
| CONTIG-065411 | 95  | 4  | 3  | 0   | 0  |
| CONTIG-065412 | 132 | 8  | 5  | 23  | 4  |
| CONTIG-065413 | 242 | 9  | 13 | 63  | 0  |
| CONTIG-065414 | 162 | 7  | 7  | 29  | 0  |
| CONTIG-065415 | 76  | 14 | 48 | 0   | 16 |
| CONTIG-065417 | 116 | 9  | 6  | 7   | 0  |
| CONTIG-065418 | 75  | 8  | 13 | 13  | 0  |

|               |     |    |    |     |     |
|---------------|-----|----|----|-----|-----|
| CONTIG-065419 | 53  | 22 | 42 | 6   | 0   |
| CONTIG-065420 | 81  | 9  | 8  | 33  | 0   |
| CONTIG-065421 | 69  | 5  | 6  | 6   | 0   |
| CONTIG-065422 | 197 | 6  | 4  | 35  | 0   |
| CONTIG-065423 | 121 | 4  | 2  | 14  | 0   |
| CONTIG-065424 | 517 | 8  | 15 | 85  | 2   |
| CONTIG-065426 | 479 | 12 | 4  | 215 | 6   |
| CONTIG-065427 | 158 | 7  | 0  | 46  | 0   |
| CONTIG-065428 | 187 | 11 | 6  | 61  | 2   |
| CONTIG-065429 | 64  | 3  | 9  | 0   | 0   |
| CONTIG-065430 | 138 | 6  | 0  | 14  | 0   |
| CONTIG-065431 | 100 | 12 | 7  | 45  | 0   |
| CONTIG-065432 | 326 | 11 | 4  | 120 | 0   |
| CONTIG-065433 | 59  | 5  | 2  | 5   | 0   |
| CONTIG-065435 | 135 | 9  | 9  | 32  | 0   |
| CONTIG-065436 | 190 | 8  | 7  | 49  | 2   |
| CONTIG-065437 | 187 | 8  | 12 | 9   | 0   |
| CONTIG-065438 | 61  | 5  | 5  | 5   | 0   |
| CONTIG-065439 | 93  | 6  | 12 | 16  | 0   |
| CONTIG-065440 | 158 | 20 | 4  | 120 | 0   |
| CONTIG-065441 | 178 | 9  | 15 | 19  | 0   |
| CONTIG-065442 | 513 | 10 | 16 | 225 | 0   |
| CONTIG-065443 | 161 | 4  | 28 | 6   | 0   |
| CONTIG-065444 | 227 | 6  | 4  | 26  | 0   |
| CONTIG-065445 | 60  | 6  | 0  | 0   | 9   |
| CONTIG-065446 | 109 | 3  | 0  | 0   | 0   |
| CONTIG-065447 | 347 | 7  | 51 | 49  | 0   |
| CONTIG-065448 | 98  | 7  | 6  | 13  | 0   |
| CONTIG-065449 | 141 | 10 | 21 | 36  | 0   |
| CONTIG-065451 | 71  | 5  | 2  | 9   | 0   |
| CONTIG-065452 | 100 | 5  | 4  | 16  | 0   |
| CONTIG-065453 | 246 | 8  | 4  | 73  | 0   |
| CONTIG-065454 | 88  | 12 | 58 | 0   | 0   |
| CONTIG-065455 | 93  | 7  | 8  | 17  | 0   |
| CONTIG-065456 | 679 | 24 | 4  | 0   | 115 |
| CONTIG-065457 | 64  | 6  | 7  | 9   | 0   |
| CONTIG-065458 | 53  | 6  | 0  | 6   | 0   |
| CONTIG-065459 | 411 | 11 | 11 | 173 | 7   |
| CONTIG-065460 | 98  | 7  | 10 | 23  | 0   |
| CONTIG-065461 | 90  | 4  | 0  | 2   | 0   |
| CONTIG-065462 | 236 | 14 | 13 | 52  | 0   |
| CONTIG-065463 | 74  | 7  | 3  | 6   | 0   |
| CONTIG-065464 | 319 | 40 | 25 | 298 | 13  |
| CONTIG-065465 | 142 | 12 | 5  | 43  | 0   |
| CONTIG-065466 | 95  | 10 | 7  | 37  | 0   |
| CONTIG-065467 | 82  | 5  | 6  | 9   | 0   |
| CONTIG-065468 | 139 | 5  | 0  | 23  | 0   |

|               |     |    |    |     |   |
|---------------|-----|----|----|-----|---|
| CONTIG-065469 | 67  | 3  | 0  | 2   | 0 |
| CONTIG-065470 | 214 | 19 | 11 | 220 | 0 |
| CONTIG-065471 | 137 | 7  | 2  | 16  | 0 |
| CONTIG-065472 | 99  | 6  | 9  | 11  | 2 |
| CONTIG-065473 | 122 | 5  | 2  | 28  | 0 |
| CONTIG-065474 | 104 | 6  | 6  | 20  | 0 |
| CONTIG-065475 | 222 | 10 | 19 | 86  | 0 |
| CONTIG-065476 | 163 | 11 | 5  | 35  | 0 |
| CONTIG-065479 | 327 | 12 | 12 | 51  | 0 |
| CONTIG-065481 | 197 | 5  | 7  | 27  | 0 |
| CONTIG-065482 | 87  | 8  | 2  | 21  | 0 |
| CONTIG-065483 | 176 | 7  | 4  | 36  | 0 |
| CONTIG-065484 | 59  | 2  | 0  | 4   | 0 |
| CONTIG-065485 | 85  | 8  | 6  | 30  | 0 |
| CONTIG-065486 | 86  | 9  | 2  | 18  | 0 |
| CONTIG-065487 | 153 | 19 | 13 | 172 | 0 |
| CONTIG-065488 | 181 | 6  | 12 | 34  | 2 |
| CONTIG-065489 | 127 | 11 | 12 | 47  | 0 |
| CONTIG-065490 | 158 | 9  | 6  | 39  | 0 |
| CONTIG-065491 | 74  | 7  | 5  | 11  | 0 |
| CONTIG-065492 | 60  | 12 | 19 | 6   | 0 |
| CONTIG-065493 | 112 | 6  | 15 | 5   | 0 |
| CONTIG-065494 | 72  | 8  | 3  | 14  | 0 |
| CONTIG-065495 | 71  | 6  | 2  | 7   | 0 |
| CONTIG-065496 | 110 | 3  | 0  | 5   | 0 |
| CONTIG-065497 | 230 | 13 | 0  | 84  | 2 |
| CONTIG-065498 | 182 | 11 | 20 | 62  | 2 |
| CONTIG-065499 | 132 | 5  | 9  | 30  | 0 |
| CONTIG-065500 | 75  | 4  | 0  | 0   | 0 |
| CONTIG-065501 | 152 | 12 | 2  | 77  | 0 |
| CONTIG-065502 | 92  | 5  | 14 | 7   | 0 |
| CONTIG-065503 | 294 | 20 | 25 | 173 | 0 |
| CONTIG-065504 | 135 | 6  | 10 | 2   | 0 |
| CONTIG-065505 | 89  | 5  | 3  | 4   | 0 |
| CONTIG-065506 | 83  | 5  | 0  | 2   | 0 |
| CONTIG-065507 | 304 | 24 | 14 | 302 | 0 |
| CONTIG-065508 | 135 | 18 | 5  | 93  | 0 |
| CONTIG-065510 | 175 | 15 | 9  | 48  | 0 |
| CONTIG-065511 | 139 | 28 | 2  | 203 | 0 |
| CONTIG-065512 | 97  | 7  | 2  | 27  | 0 |
| CONTIG-065513 | 276 | 14 | 4  | 84  | 2 |
| CONTIG-065515 | 163 | 6  | 10 | 19  | 0 |
| CONTIG-065516 | 756 | 13 | 8  | 175 | 0 |
| CONTIG-065518 | 152 | 17 | 15 | 75  | 0 |
| CONTIG-065519 | 63  | 4  | 3  | 0   | 0 |
| CONTIG-065520 | 112 | 9  | 5  | 49  | 0 |
| CONTIG-065521 | 136 | 10 | 11 | 58  | 0 |

|               |      |     |    |     |     |
|---------------|------|-----|----|-----|-----|
| CONTIG-065522 | 204  | 18  | 17 | 60  | 10  |
| CONTIG-065523 | 235  | 8   | 15 | 63  | 0   |
| CONTIG-065524 | 109  | 6   | 6  | 18  | 0   |
| CONTIG-065525 | 84   | 3   | 5  | 6   | 0   |
| CONTIG-065526 | 59   | 3   | 4  | 6   | 0   |
| CONTIG-065531 | 95   | 9   | 2  | 42  | 0   |
| CONTIG-065532 | 110  | 90  | 56 | 280 | 2   |
| CONTIG-065533 | 450  | 8   | 39 | 108 | 0   |
| CONTIG-065534 | 142  | 6   | 7  | 11  | 0   |
| CONTIG-065535 | 157  | 7   | 9  | 40  | 0   |
| CONTIG-065536 | 135  | 5   | 5  | 12  | 0   |
| CONTIG-065537 | 81   | 10  | 25 | 8   | 0   |
| CONTIG-065539 | 132  | 12  | 9  | 38  | 0   |
| CONTIG-065540 | 58   | 9   | 2  | 9   | 0   |
| CONTIG-065541 | 209  | 11  | 12 | 85  | 0   |
| CONTIG-065542 | 67   | 5   | 17 | 5   | 0   |
| CONTIG-065546 | 124  | 4   | 8  | 6   | 0   |
| CONTIG-065547 | 224  | 6   | 19 | 28  | 0   |
| CONTIG-065548 | 70   | 13  | 5  | 30  | 0   |
| CONTIG-065549 | 1307 | 22  | 5  | 0   | 82  |
| CONTIG-065551 | 94   | 5   | 6  | 4   | 0   |
| CONTIG-065552 | 147  | 23  | 14 | 122 | 0   |
| CONTIG-065553 | 148  | 6   | 0  | 35  | 0   |
| CONTIG-065554 | 244  | 9   | 15 | 55  | 3   |
| CONTIG-065555 | 132  | 730 | 26 | 197 | 0   |
| CONTIG-065556 | 77   | 3   | 0  | 6   | 0   |
| CONTIG-065557 | 93   | 3   | 2  | 5   | 0   |
| CONTIG-065559 | 363  | 45  | 18 | 660 | 2   |
| CONTIG-065560 | 265  | 8   | 6  | 49  | 0   |
| CONTIG-065561 | 182  | 58  | 2  | 0   | 114 |
| CONTIG-065562 | 328  | 17  | 24 | 158 | 6   |
| CONTIG-065563 | 277  | 10  | 18 | 111 | 0   |
| CONTIG-065564 | 238  | 13  | 10 | 116 | 0   |
| CONTIG-065565 | 102  | 5   | 9  | 11  | 0   |
| CONTIG-065566 | 1160 | 13  | 28 | 0   | 37  |
| CONTIG-065567 | 235  | 9   | 40 | 72  | 0   |
| CONTIG-065568 | 80   | 10  | 11 | 16  | 2   |
| CONTIG-065569 | 152  | 9   | 5  | 36  | 0   |
| CONTIG-065570 | 386  | 6   | 7  | 10  | 0   |
| CONTIG-065571 | 134  | 7   | 2  | 33  | 0   |
| CONTIG-065572 | 70   | 32  | 10 | 73  | 2   |
| CONTIG-065575 | 127  | 7   | 12 | 18  | 0   |
| CONTIG-065576 | 267  | 5   | 10 | 17  | 0   |
| CONTIG-065577 | 71   | 3   | 5  | 6   | 0   |
| CONTIG-065578 | 82   | 27  | 6  | 62  | 0   |
| CONTIG-065579 | 60   | 4   | 2  | 4   | 0   |
| CONTIG-065580 | 627  | 21  | 0  | 687 | 0   |

|               |      |     |    |      |     |
|---------------|------|-----|----|------|-----|
| CONTIG-065581 | 83   | 9   | 60 | 9    | 0   |
| CONTIG-065582 | 113  | 8   | 0  | 9    | 2   |
| CONTIG-065583 | 99   | 7   | 7  | 0    | 0   |
| CONTIG-065584 | 74   | 3   | 2  | 3    | 0   |
| CONTIG-065585 | 147  | 15  | 25 | 22   | 2   |
| CONTIG-065591 | 125  | 19  | 11 | 69   | 4   |
| CONTIG-065592 | 208  | 16  | 20 | 94   | 0   |
| CONTIG-065593 | 1029 | 25  | 39 | 1019 | 11  |
| CONTIG-065594 | 121  | 8   | 34 | 14   | 0   |
| CONTIG-065595 | 129  | 4   | 3  | 10   | 0   |
| CONTIG-065596 | 74   | 8   | 8  | 2    | 0   |
| CONTIG-065597 | 59   | 6   | 0  | 5    | 0   |
| CONTIG-065598 | 241  | 3   | 0  | 10   | 0   |
| CONTIG-065599 | 609  | 116 | 0  | 0    | 789 |
| CONTIG-065600 | 122  | 8   | 9  | 53   | 0   |
| CONTIG-065601 | 82   | 3   | 2  | 8    | 0   |
| CONTIG-065602 | 58   | 19  | 14 | 55   | 0   |
| CONTIG-065603 | 124  | 9   | 2  | 29   | 0   |
| CONTIG-065604 | 95   | 8   | 7  | 29   | 0   |
| CONTIG-065605 | 259  | 7   | 2  | 64   | 0   |
| CONTIG-065606 | 67   | 5   | 4  | 0    | 0   |
| CONTIG-065607 | 125  | 4   | 0  | 20   | 0   |
| CONTIG-065608 | 110  | 3   | 6  | 4    | 0   |
| CONTIG-065609 | 90   | 5   | 4  | 3    | 0   |
| CONTIG-065610 | 87   | 9   | 6  | 4    | 0   |
| CONTIG-065611 | 315  | 19  | 25 | 242  | 0   |
| CONTIG-065612 | 65   | 3   | 3  | 2    | 0   |
| CONTIG-065613 | 127  | 6   | 11 | 16   | 0   |
| CONTIG-065614 | 87   | 7   | 12 | 19   | 0   |
| CONTIG-065615 | 352  | 7   | 11 | 76   | 0   |
| CONTIG-065616 | 495  | 21  | 7  | 413  | 2   |
| CONTIG-065617 | 81   | 4   | 2  | 8    | 0   |
| CONTIG-065618 | 240  | 17  | 29 | 7    | 0   |
| CONTIG-065619 | 101  | 6   | 0  | 20   | 0   |
| CONTIG-065620 | 180  | 8   | 2  | 23   | 0   |
| CONTIG-065621 | 37   | 207 | 51 | 143  | 0   |
| CONTIG-065622 | 96   | 9   | 17 | 24   | 0   |
| CONTIG-065623 | 377  | 7   | 2  | 114  | 4   |
| CONTIG-065624 | 114  | 5   | 4  | 15   | 0   |
| CONTIG-065625 | 86   | 36  | 5  | 86   | 0   |
| CONTIG-065626 | 68   | 5   | 6  | 5    | 0   |
| CONTIG-065627 | 194  | 8   | 21 | 60   | 0   |
| CONTIG-065631 | 115  | 6   | 3  | 23   | 0   |
| CONTIG-065632 | 77   | 6   | 12 | 4    | 0   |
| CONTIG-065633 | 78   | 3   | 0  | 2    | 0   |
| CONTIG-065634 | 85   | 5   | 16 | 6    | 0   |
| CONTIG-065635 | 62   | 6   | 13 | 0    | 0   |

|               |     |     |    |     |    |
|---------------|-----|-----|----|-----|----|
| CONTIG-065636 | 82  | 14  | 29 | 27  | 0  |
| CONTIG-065637 | 194 | 13  | 2  | 8   | 0  |
| CONTIG-065638 | 159 | 4   | 0  | 10  | 0  |
| CONTIG-065641 | 212 | 6   | 2  | 8   | 0  |
| CONTIG-065643 | 211 | 10  | 2  | 96  | 0  |
| CONTIG-065644 | 163 | 9   | 4  | 22  | 2  |
| CONTIG-065645 | 117 | 5   | 5  | 2   | 0  |
| CONTIG-065646 | 88  | 8   | 4  | 28  | 0  |
| CONTIG-065647 | 60  | 6   | 7  | 6   | 0  |
| CONTIG-065648 | 277 | 35  | 20 | 470 | 0  |
| CONTIG-065649 | 58  | 6   | 23 | 0   | 0  |
| CONTIG-065650 | 242 | 15  | 0  | 186 | 0  |
| CONTIG-065651 | 92  | 15  | 6  | 43  | 2  |
| CONTIG-065652 | 92  | 10  | 5  | 24  | 0  |
| CONTIG-065653 | 82  | 5   | 0  | 15  | 0  |
| CONTIG-065654 | 192 | 10  | 14 | 53  | 0  |
| CONTIG-065655 | 65  | 24  | 2  | 0   | 0  |
| CONTIG-065656 | 121 | 6   | 3  | 26  | 0  |
| CONTIG-065657 | 99  | 6   | 3  | 24  | 0  |
| CONTIG-065658 | 518 | 20  | 43 | 246 | 4  |
| CONTIG-065659 | 59  | 3   | 4  | 4   | 0  |
| CONTIG-065661 | 110 | 18  | 21 | 108 | 0  |
| CONTIG-065662 | 159 | 9   | 10 | 23  | 0  |
| CONTIG-065663 | 82  | 4   | 2  | 0   | 0  |
| CONTIG-065664 | 147 | 5   | 8  | 24  | 0  |
| CONTIG-065665 | 212 | 8   | 3  | 23  | 0  |
| CONTIG-065666 | 129 | 4   | 5  | 9   | 0  |
| CONTIG-065667 | 85  | 5   | 2  | 7   | 0  |
| CONTIG-065669 | 173 | 7   | 4  | 40  | 0  |
| CONTIG-065670 | 348 | 8   | 0  | 99  | 0  |
| CONTIG-065671 | 164 | 6   | 10 | 30  | 0  |
| CONTIG-065672 | 114 | 8   | 10 | 28  | 0  |
| CONTIG-065673 | 79  | 11  | 16 | 13  | 0  |
| CONTIG-065674 | 72  | 7   | 4  | 13  | 0  |
| CONTIG-065675 | 123 | 418 | 17 | 280 | 0  |
| CONTIG-065676 | 64  | 7   | 22 | 0   | 0  |
| CONTIG-065677 | 90  | 44  | 11 | 46  | 15 |
| CONTIG-065678 | 40  | 100 | 2  | 62  | 4  |
| CONTIG-065679 | 108 | 4   | 6  | 0   | 0  |
| CONTIG-065680 | 380 | 9   | 22 | 81  | 0  |
| CONTIG-065681 | 210 | 3   | 4  | 16  | 0  |
| CONTIG-065682 | 229 | 8   | 9  | 63  | 0  |
| CONTIG-065683 | 83  | 3   | 5  | 2   | 0  |
| CONTIG-065685 | 141 | 4   | 2  | 0   | 2  |
| CONTIG-065686 | 175 | 9   | 13 | 13  | 0  |
| CONTIG-065688 | 61  | 7   | 6  | 4   | 0  |
| CONTIG-065690 | 138 | 4   | 13 | 10  | 0  |

|               |      |    |    |     |     |
|---------------|------|----|----|-----|-----|
| CONTIG-065691 | 175  | 11 | 0  | 0   | 0   |
| CONTIG-065692 | 179  | 9  | 2  | 43  | 4   |
| CONTIG-065693 | 171  | 4  | 8  | 20  | 0   |
| CONTIG-065694 | 76   | 6  | 0  | 14  | 0   |
| CONTIG-065695 | 84   | 6  | 2  | 4   | 0   |
| CONTIG-065696 | 306  | 8  | 51 | 33  | 2   |
| CONTIG-065697 | 281  | 16 | 11 | 226 | 2   |
| CONTIG-065698 | 76   | 9  | 6  | 17  | 0   |
| CONTIG-065699 | 117  | 3  | 2  | 2   | 0   |
| CONTIG-065700 | 98   | 4  | 7  | 5   | 0   |
| CONTIG-065701 | 88   | 4  | 2  | 13  | 0   |
| CONTIG-065702 | 117  | 9  | 11 | 26  | 0   |
| CONTIG-065703 | 66   | 6  | 3  | 6   | 0   |
| CONTIG-065704 | 173  | 14 | 6  | 94  | 0   |
| CONTIG-065705 | 114  | 11 | 3  | 19  | 0   |
| CONTIG-065706 | 415  | 29 | 7  | 5   | 0   |
| CONTIG-065707 | 215  | 18 | 8  | 21  | 0   |
| CONTIG-065708 | 102  | 9  | 2  | 29  | 0   |
| CONTIG-065709 | 62   | 13 | 12 | 2   | 0   |
| CONTIG-065710 | 1251 | 26 | 3  | 0   | 647 |
| CONTIG-065711 | 61   | 5  | 2  | 5   | 0   |
| CONTIG-065712 | 162  | 18 | 9  | 88  | 4   |
| CONTIG-065714 | 69   | 5  | 11 | 5   | 0   |
| CONTIG-065715 | 81   | 5  | 6  | 6   | 0   |
| CONTIG-065716 | 143  | 7  | 5  | 21  | 2   |
| CONTIG-065717 | 141  | 3  | 7  | 11  | 0   |
| CONTIG-065718 | 87   | 16 | 27 | 7   | 0   |
| CONTIG-065720 | 491  | 9  | 0  | 120 | 2   |
| CONTIG-065724 | 107  | 4  | 2  | 17  | 0   |
| CONTIG-065725 | 68   | 6  | 0  | 10  | 0   |
| CONTIG-065726 | 138  | 8  | 7  | 11  | 0   |
| CONTIG-065727 | 574  | 9  | 26 | 191 | 2   |
| CONTIG-065728 | 74   | 7  | 0  | 13  | 0   |
| CONTIG-065729 | 62   | 11 | 34 | 0   | 0   |
| CONTIG-065730 | 169  | 7  | 2  | 38  | 0   |
| CONTIG-065731 | 72   | 9  | 19 | 20  | 0   |
| CONTIG-065732 | 61   | 3  | 4  | 4   | 0   |
| CONTIG-065733 | 162  | 6  | 12 | 25  | 2   |
| CONTIG-065734 | 138  | 5  | 0  | 20  | 0   |
| CONTIG-065735 | 130  | 7  | 4  | 40  | 0   |
| CONTIG-065736 | 204  | 11 | 15 | 100 | 0   |
| CONTIG-065737 | 535  | 6  | 11 | 0   | 26  |
| CONTIG-065738 | 386  | 10 | 7  | 0   | 24  |
| CONTIG-065739 | 89   | 4  | 0  | 11  | 0   |
| CONTIG-065740 | 160  | 7  | 15 | 24  | 0   |
| CONTIG-065741 | 129  | 5  | 0  | 14  | 0   |
| CONTIG-065742 | 298  | 9  | 13 | 50  | 0   |



|               |     |     |     |      |   |
|---------------|-----|-----|-----|------|---|
| CONTIG-065743 | 202 | 7   | 4   | 38   | 0 |
| CONTIG-065744 | 75  | 5   | 3   | 17   | 0 |
| CONTIG-065745 | 175 | 6   | 14  | 18   | 0 |
| CONTIG-065746 | 81  | 10  | 13  | 11   | 0 |
| CONTIG-065747 | 93  | 3   | 2   | 6    | 0 |
| CONTIG-065748 | 455 | 11  | 11  | 192  | 4 |
| CONTIG-065749 | 125 | 6   | 0   | 0    | 0 |
| CONTIG-065750 | 93  | 8   | 2   | 13   | 0 |
| CONTIG-065751 | 156 | 6   | 2   | 33   | 0 |
| CONTIG-065752 | 118 | 6   | 2   | 15   | 0 |
| CONTIG-065753 | 211 | 4   | 5   | 24   | 0 |
| CONTIG-065754 | 63  | 4   | 6   | 5    | 0 |
| CONTIG-065755 | 168 | 21  | 27  | 130  | 0 |
| CONTIG-065756 | 124 | 6   | 2   | 9    | 0 |
| CONTIG-065757 | 71  | 5   | 3   | 2    | 0 |
| CONTIG-065758 | 129 | 413 | 117 | 2387 | 0 |
| CONTIG-065759 | 112 | 7   | 2   | 12   | 0 |
| CONTIG-065760 | 79  | 3   | 2   | 8    | 0 |
| CONTIG-065761 | 98  | 9   | 9   | 23   | 0 |
| CONTIG-065763 | 89  | 5   | 3   | 10   | 0 |
| CONTIG-065764 | 65  | 12  | 2   | 18   | 0 |
| CONTIG-065765 | 299 | 13  | 13  | 88   | 0 |
| CONTIG-065766 | 419 | 13  | 30  | 213  | 0 |
| CONTIG-065767 | 569 | 9   | 15  | 119  | 6 |
| CONTIG-065768 | 160 | 9   | 3   | 15   | 0 |
| CONTIG-065769 | 357 | 11  | 19  | 149  | 2 |
| CONTIG-065770 | 324 | 10  | 14  | 73   | 8 |
| CONTIG-065771 | 112 | 22  | 2   | 62   | 0 |
| CONTIG-065773 | 100 | 5   | 10  | 16   | 0 |
| CONTIG-065774 | 63  | 11  | 18  | 0    | 0 |
| CONTIG-065775 | 78  | 5   | 14  | 4    | 0 |
| CONTIG-065777 | 109 | 7   | 18  | 14   | 0 |
| CONTIG-065778 | 158 | 8   | 29  | 43   | 0 |
| CONTIG-065779 | 105 | 3   | 0   | 7    | 0 |
| CONTIG-065780 | 112 | 2   | 0   | 4    | 0 |
| CONTIG-065781 | 71  | 5   | 15  | 0    | 0 |
| CONTIG-065782 | 59  | 3   | 2   | 5    | 0 |
| CONTIG-065783 | 323 | 6   | 2   | 53   | 0 |
| CONTIG-065784 | 510 | 14  | 7   | 62   | 0 |
| CONTIG-065785 | 129 | 8   | 13  | 22   | 0 |
| CONTIG-065786 | 92  | 6   | 9   | 12   | 0 |
| CONTIG-065787 | 163 | 6   | 0   | 26   | 0 |
| CONTIG-065788 | 97  | 5   | 2   | 13   | 0 |
| CONTIG-065790 | 189 | 9   | 16  | 41   | 0 |
| CONTIG-065791 | 102 | 7   | 15  | 23   | 0 |
| CONTIG-065792 | 218 | 11  | 12  | 98   | 0 |
| CONTIG-065793 | 99  | 10  | 20  | 0    | 0 |

|               |     |      |    |      |     |
|---------------|-----|------|----|------|-----|
| CONTIG-065794 | 150 | 4    | 10 | 9    | 0   |
| CONTIG-065795 | 130 | 7    | 13 | 32   | 0   |
| CONTIG-065796 | 49  | 1059 | 65 | 2031 | 83  |
| CONTIG-065797 | 548 | 29   | 0  | 0    | 118 |
| CONTIG-065798 | 81  | 8    | 8  | 13   | 0   |
| CONTIG-065799 | 171 | 15   | 11 | 38   | 0   |
| CONTIG-065800 | 179 | 8    | 4  | 26   | 0   |
| CONTIG-065801 | 71  | 3    | 3  | 4    | 0   |
| CONTIG-065802 | 270 | 16   | 2  | 16   | 0   |
| CONTIG-065803 | 112 | 16   | 18 | 51   | 2   |
| CONTIG-065804 | 162 | 6    | 2  | 25   | 0   |
| CONTIG-065805 | 128 | 3    | 5  | 6    | 0   |
| CONTIG-065806 | 117 | 5    | 0  | 28   | 0   |
| CONTIG-065809 | 151 | 18   | 2  | 133  | 0   |
| CONTIG-065810 | 780 | 18   | 29 | 273  | 2   |
| CONTIG-065811 | 187 | 8    | 2  | 63   | 0   |
| CONTIG-065812 | 81  | 5    | 8  | 6    | 0   |
| CONTIG-065813 | 87  | 6    | 0  | 20   | 0   |
| CONTIG-065815 | 91  | 8    | 10 | 30   | 0   |
| CONTIG-065816 | 160 | 7    | 4  | 29   | 0   |
| CONTIG-065817 | 407 | 29   | 23 | 29   | 0   |
| CONTIG-065818 | 107 | 5    | 7  | 9    | 0   |
| CONTIG-065819 | 144 | 14   | 16 | 33   | 2   |
| CONTIG-065820 | 125 | 6    | 0  | 22   | 0   |
| CONTIG-065821 | 452 | 11   | 34 | 164  | 0   |
| CONTIG-065822 | 74  | 12   | 2  | 33   | 0   |
| CONTIG-065823 | 373 | 16   | 37 | 135  | 0   |
| CONTIG-065824 | 72  | 68   | 2  | 30   | 2   |
| CONTIG-065826 | 63  | 5    | 7  | 4    | 0   |
| CONTIG-065827 | 64  | 6    | 3  | 12   | 0   |
| CONTIG-065828 | 60  | 6    | 0  | 9    | 0   |
| CONTIG-065829 | 113 | 4    | 0  | 9    | 0   |
| CONTIG-065830 | 188 | 7    | 4  | 40   | 0   |
| CONTIG-065831 | 588 | 12   | 18 | 341  | 2   |
| CONTIG-065833 | 60  | 7    | 2  | 14   | 0   |
| CONTIG-065834 | 70  | 42   | 12 | 157  | 0   |
| CONTIG-065835 | 129 | 4    | 0  | 16   | 0   |
| CONTIG-065837 | 546 | 154  | 12 | 4811 | 0   |
| CONTIG-065838 | 63  | 5    | 7  | 11   | 0   |
| CONTIG-065839 | 59  | 46   | 7  | 118  | 0   |
| CONTIG-065840 | 177 | 12   | 17 | 29   | 0   |
| CONTIG-065841 | 70  | 2    | 3  | 2    | 0   |
| CONTIG-065842 | 214 | 18   | 13 | 115  | 0   |
| CONTIG-065843 | 155 | 7    | 5  | 34   | 0   |
| CONTIG-065844 | 535 | 156  | 28 | 69   | 0   |
| CONTIG-065845 | 100 | 9    | 4  | 33   | 0   |
| CONTIG-065846 | 59  | 2    | 0  | 0    | 0   |

|               |      |     |    |     |     |
|---------------|------|-----|----|-----|-----|
| CONTIG-065847 | 165  | 11  | 0  | 57  | 6   |
| CONTIG-065848 | 63   | 5   | 0  | 6   | 0   |
| CONTIG-065849 | 86   | 8   | 2  | 17  | 0   |
| CONTIG-065850 | 168  | 14  | 11 | 14  | 0   |
| CONTIG-065851 | 396  | 19  | 38 | 355 | 0   |
| CONTIG-065852 | 91   | 8   | 5  | 19  | 0   |
| CONTIG-065854 | 95   | 3   | 3  | 3   | 0   |
| CONTIG-065855 | 221  | 7   | 4  | 28  | 0   |
| CONTIG-065856 | 74   | 6   | 5  | 6   | 0   |
| CONTIG-065857 | 62   | 3   | 6  | 0   | 0   |
| CONTIG-065858 | 81   | 6   | 9  | 2   | 0   |
| CONTIG-065859 | 74   | 7   | 2  | 20  | 0   |
| CONTIG-065860 | 129  | 8   | 0  | 29  | 0   |
| CONTIG-065861 | 619  | 24  | 22 | 52  | 5   |
| CONTIG-065862 | 118  | 26  | 0  | 122 | 0   |
| CONTIG-065863 | 92   | 3   | 4  | 4   | 0   |
| CONTIG-065864 | 47   | 84  | 32 | 35  | 0   |
| CONTIG-065865 | 187  | 6   | 5  | 17  | 0   |
| CONTIG-065866 | 160  | 6   | 2  | 24  | 0   |
| CONTIG-065867 | 151  | 12  | 5  | 65  | 0   |
| CONTIG-065869 | 85   | 3   | 0  | 3   | 0   |
| CONTIG-065870 | 301  | 19  | 10 | 44  | 0   |
| CONTIG-065871 | 151  | 8   | 0  | 33  | 0   |
| CONTIG-065874 | 138  | 5   | 6  | 17  | 0   |
| CONTIG-065875 | 149  | 7   | 8  | 25  | 2   |
| CONTIG-065876 | 71   | 8   | 4  | 7   | 0   |
| CONTIG-065877 | 152  | 5   | 18 | 18  | 0   |
| CONTIG-065878 | 77   | 4   | 4  | 6   | 0   |
| CONTIG-065879 | 163  | 18  | 21 | 6   | 0   |
| CONTIG-065880 | 1600 | 46  | 2  | 2   | 463 |
| CONTIG-065881 | 72   | 4   | 0  | 6   | 0   |
| CONTIG-065884 | 226  | 10  | 6  | 111 | 0   |
| CONTIG-065885 | 498  | 9   | 2  | 171 | 4   |
| CONTIG-065887 | 175  | 9   | 15 | 32  | 0   |
| CONTIG-065888 | 544  | 7   | 9  | 6   | 0   |
| CONTIG-065889 | 187  | 10  | 2  | 40  | 2   |
| CONTIG-065891 | 174  | 7   | 12 | 49  | 0   |
| CONTIG-065892 | 72   | 6   | 4  | 10  | 0   |
| CONTIG-065893 | 149  | 10  | 11 | 47  | 0   |
| CONTIG-065894 | 173  | 3   | 0  | 6   | 0   |
| CONTIG-065895 | 230  | 13  | 3  | 30  | 0   |
| CONTIG-065896 | 96   | 13  | 0  | 42  | 2   |
| CONTIG-065898 | 88   | 6   | 3  | 17  | 0   |
| CONTIG-065899 | 170  | 11  | 11 | 77  | 0   |
| CONTIG-065901 | 127  | 9   | 15 | 31  | 0   |
| CONTIG-065902 | 138  | 145 | 16 | 671 | 6   |
| CONTIG-065903 | 218  | 7   | 10 | 31  | 0   |

|               |     |    |    |      |    |
|---------------|-----|----|----|------|----|
| CONTIG-065904 | 376 | 7  | 0  | 13   | 40 |
| CONTIG-065905 | 181 | 36 | 0  | 0    | 27 |
| CONTIG-065906 | 256 | 8  | 14 | 47   | 0  |
| CONTIG-065907 | 75  | 3  | 4  | 0    | 0  |
| CONTIG-065908 | 61  | 75 | 0  | 212  | 0  |
| CONTIG-065909 | 351 | 14 | 12 | 144  | 6  |
| CONTIG-065910 | 310 | 8  | 2  | 72   | 0  |
| CONTIG-065911 | 94  | 4  | 2  | 2    | 2  |
| CONTIG-065912 | 172 | 4  | 12 | 21   | 0  |
| CONTIG-065913 | 143 | 5  | 5  | 26   | 0  |
| CONTIG-065914 | 65  | 8  | 0  | 16   | 0  |
| CONTIG-065915 | 152 | 4  | 6  | 7    | 0  |
| CONTIG-065916 | 68  | 7  | 11 | 10   | 0  |
| CONTIG-065918 | 219 | 9  | 3  | 0    | 6  |
| CONTIG-065919 | 415 | 21 | 31 | 284  | 2  |
| CONTIG-065920 | 340 | 8  | 18 | 66   | 0  |
| CONTIG-065921 | 60  | 14 | 9  | 22   | 0  |
| CONTIG-065922 | 189 | 4  | 0  | 7    | 0  |
| CONTIG-065923 | 77  | 4  | 0  | 12   | 0  |
| CONTIG-065924 | 153 | 14 | 2  | 106  | 0  |
| CONTIG-065926 | 226 | 8  | 4  | 52   | 0  |
| CONTIG-065927 | 71  | 8  | 0  | 23   | 0  |
| CONTIG-065928 | 429 | 13 | 32 | 127  | 0  |
| CONTIG-065929 | 213 | 7  | 12 | 9    | 0  |
| CONTIG-065930 | 101 | 6  | 3  | 23   | 0  |
| CONTIG-065931 | 72  | 3  | 9  | 2    | 0  |
| CONTIG-065932 | 153 | 8  | 14 | 25   | 2  |
| CONTIG-065933 | 353 | 8  | 13 | 96   | 0  |
| CONTIG-065936 | 139 | 5  | 4  | 16   | 0  |
| CONTIG-065937 | 76  | 9  | 4  | 20   | 0  |
| CONTIG-065938 | 303 | 7  | 5  | 62   | 2  |
| CONTIG-065939 | 512 | 46 | 9  | 1447 | 0  |
| CONTIG-065940 | 76  | 6  | 2  | 13   | 0  |
| CONTIG-065941 | 99  | 17 | 19 | 66   | 0  |
| CONTIG-065942 | 82  | 9  | 4  | 33   | 0  |
| CONTIG-065943 | 253 | 8  | 5  | 76   | 0  |
| CONTIG-065944 | 58  | 6  | 6  | 9    | 0  |
| CONTIG-065945 | 182 | 17 | 14 | 159  | 0  |
| CONTIG-065946 | 134 | 12 | 6  | 50   | 0  |
| CONTIG-065947 | 82  | 13 | 2  | 43   | 0  |
| CONTIG-065948 | 86  | 4  | 7  | 6    | 0  |
| CONTIG-065949 | 49  | 43 | 11 | 66   | 0  |
| CONTIG-065950 | 81  | 3  | 0  | 6    | 0  |
| CONTIG-065951 | 89  | 11 | 7  | 42   | 0  |
| CONTIG-065952 | 257 | 7  | 4  | 37   | 2  |
| CONTIG-065954 | 241 | 8  | 4  | 61   | 0  |
| CONTIG-065955 | 82  | 8  | 10 | 18   | 0  |

|               |     |    |    |     |    |
|---------------|-----|----|----|-----|----|
| CONTIG-065956 | 69  | 3  | 5  | 4   | 0  |
| CONTIG-065957 | 345 | 10 | 28 | 39  | 0  |
| CONTIG-065958 | 147 | 8  | 10 | 19  | 0  |
| CONTIG-065959 | 69  | 4  | 2  | 4   | 0  |
| CONTIG-065960 | 216 | 10 | 13 | 63  | 0  |
| CONTIG-065961 | 102 | 3  | 0  | 4   | 0  |
| CONTIG-065962 | 120 | 6  | 16 | 12  | 0  |
| CONTIG-065963 | 301 | 13 | 0  | 100 | 0  |
| CONTIG-065964 | 66  | 4  | 2  | 2   | 0  |
| CONTIG-065965 | 198 | 7  | 5  | 44  | 0  |
| CONTIG-065967 | 64  | 4  | 5  | 6   | 0  |
| CONTIG-065968 | 152 | 12 | 13 | 17  | 2  |
| CONTIG-065969 | 215 | 6  | 11 | 51  | 2  |
| CONTIG-065970 | 74  | 7  | 15 | 7   | 0  |
| CONTIG-065971 | 311 | 11 | 10 | 122 | 0  |
| CONTIG-065972 | 83  | 6  | 31 | 4   | 0  |
| CONTIG-065973 | 90  | 2  | 4  | 2   | 0  |
| CONTIG-065974 | 155 | 12 | 18 | 65  | 0  |
| CONTIG-065975 | 74  | 7  | 6  | 16  | 0  |
| CONTIG-065977 | 373 | 25 | 10 | 265 | 4  |
| CONTIG-065978 | 136 | 9  | 27 | 26  | 0  |
| CONTIG-065979 | 67  | 5  | 16 | 4   | 0  |
| CONTIG-065980 | 107 | 7  | 2  | 0   | 0  |
| CONTIG-065981 | 774 | 9  | 18 | 199 | 8  |
| CONTIG-065982 | 61  | 10 | 3  | 32  | 0  |
| CONTIG-065983 | 49  | 7  | 0  | 6   | 0  |
| CONTIG-065984 | 103 | 5  | 10 | 2   | 0  |
| CONTIG-065985 | 350 | 12 | 2  | 101 | 8  |
| CONTIG-065986 | 286 | 20 | 13 | 147 | 0  |
| CONTIG-065987 | 66  | 4  | 0  | 7   | 0  |
| CONTIG-065988 | 902 | 13 | 4  | 417 | 10 |
| CONTIG-065989 | 242 | 15 | 27 | 170 | 0  |
| CONTIG-065992 | 302 | 6  | 22 | 71  | 0  |
| CONTIG-065993 | 100 | 9  | 4  | 35  | 0  |
| CONTIG-065994 | 62  | 7  | 6  | 15  | 0  |
| CONTIG-065995 | 110 | 4  | 6  | 4   | 0  |
| CONTIG-065998 | 83  | 9  | 4  | 23  | 0  |
| CONTIG-065999 | 234 | 12 | 6  | 96  | 0  |
| CONTIG-066000 | 114 | 7  | 13 | 17  | 0  |
| CONTIG-066001 | 305 | 11 | 23 | 39  | 10 |
| CONTIG-066002 | 222 | 7  | 4  | 37  | 0  |
| CONTIG-066003 | 88  | 3  | 2  | 9   | 0  |
| CONTIG-066005 | 130 | 8  | 2  | 43  | 0  |
| CONTIG-066006 | 150 | 8  | 0  | 0   | 4  |
| CONTIG-066007 | 75  | 6  | 15 | 8   | 0  |
| CONTIG-066008 | 187 | 29 | 11 | 139 | 2  |
| CONTIG-066009 | 125 | 5  | 6  | 6   | 2  |

|               |     |    |    |     |    |
|---------------|-----|----|----|-----|----|
| CONTIG-066011 | 140 | 7  | 3  | 4   | 0  |
| CONTIG-066012 | 92  | 6  | 12 | 19  | 0  |
| CONTIG-066013 | 90  | 4  | 3  | 6   | 0  |
| CONTIG-066014 | 62  | 6  | 4  | 8   | 0  |
| CONTIG-066015 | 433 | 48 | 60 | 739 | 11 |
| CONTIG-066016 | 173 | 9  | 17 | 42  | 2  |
| CONTIG-066017 | 163 | 7  | 8  | 32  | 0  |
| CONTIG-066018 | 99  | 11 | 3  | 11  | 19 |
| CONTIG-066019 | 124 | 14 | 21 | 50  | 0  |
| CONTIG-066020 | 69  | 3  | 0  | 2   | 0  |
| CONTIG-066021 | 87  | 15 | 3  | 56  | 0  |
| CONTIG-066022 | 64  | 7  | 7  | 8   | 0  |
| CONTIG-066023 | 105 | 9  | 5  | 16  | 0  |
| CONTIG-066024 | 88  | 10 | 8  | 30  | 0  |
| CONTIG-066025 | 107 | 7  | 8  | 11  | 0  |
| CONTIG-066026 | 65  | 5  | 5  | 6   | 0  |
| CONTIG-066027 | 249 | 5  | 8  | 33  | 0  |
| CONTIG-066029 | 141 | 12 | 18 | 40  | 0  |
| CONTIG-066030 | 71  | 5  | 8  | 0   | 0  |
| CONTIG-066031 | 119 | 9  | 5  | 24  | 0  |
| CONTIG-066032 | 261 | 7  | 3  | 0   | 4  |
| CONTIG-066033 | 62  | 5  | 3  | 4   | 0  |
| CONTIG-066034 | 88  | 3  | 2  | 4   | 0  |
| CONTIG-066035 | 73  | 4  | 0  | 2   | 0  |
| CONTIG-066036 | 98  | 5  | 0  | 19  | 0  |
| CONTIG-066037 | 92  | 7  | 5  | 2   | 0  |
| CONTIG-066038 | 212 | 7  | 2  | 45  | 0  |
| CONTIG-066039 | 101 | 9  | 0  | 0   | 0  |
| CONTIG-066040 | 109 | 5  | 0  | 20  | 0  |
| CONTIG-066041 | 120 | 15 | 3  | 52  | 2  |
| CONTIG-066042 | 72  | 2  | 0  | 4   | 0  |
| CONTIG-066043 | 185 | 7  | 9  | 7   | 0  |
| CONTIG-066044 | 518 | 8  | 10 | 105 | 0  |
| CONTIG-066045 | 231 | 6  | 6  | 44  | 0  |
| CONTIG-066046 | 75  | 14 | 13 | 39  | 0  |
| CONTIG-066047 | 63  | 6  | 14 | 8   | 0  |
| CONTIG-066048 | 92  | 4  | 3  | 12  | 0  |
| CONTIG-066049 | 117 | 7  | 7  | 25  | 0  |
| CONTIG-066050 | 72  | 7  | 4  | 18  | 0  |
| CONTIG-066051 | 66  | 7  | 5  | 3   | 0  |
| CONTIG-066052 | 138 | 7  | 8  | 31  | 0  |
| CONTIG-066053 | 81  | 6  | 2  | 21  | 0  |
| CONTIG-066054 | 501 | 7  | 10 | 13  | 0  |
| CONTIG-066055 | 687 | 10 | 10 | 207 | 0  |
| CONTIG-066056 | 84  | 7  | 4  | 14  | 0  |
| CONTIG-066057 | 65  | 8  | 9  | 18  | 0  |
| CONTIG-066058 | 129 | 9  | 7  | 28  | 2  |

|               |     |    |    |     |     |
|---------------|-----|----|----|-----|-----|
| CONTIG-066059 | 81  | 11 | 0  | 0   | 10  |
| CONTIG-066061 | 70  | 12 | 14 | 2   | 0   |
| CONTIG-066062 | 89  | 5  | 5  | 6   | 0   |
| CONTIG-066063 | 68  | 3  | 2  | 2   | 0   |
| CONTIG-066064 | 208 | 18 | 9  | 141 | 4   |
| CONTIG-066065 | 95  | 16 | 13 | 0   | 0   |
| CONTIG-066066 | 100 | 14 | 15 | 48  | 0   |
| CONTIG-066067 | 337 | 10 | 6  | 0   | 14  |
| CONTIG-066068 | 391 | 9  | 6  | 127 | 5   |
| CONTIG-066069 | 319 | 16 | 12 | 227 | 4   |
| CONTIG-066073 | 63  | 8  | 18 | 14  | 0   |
| CONTIG-066074 | 243 | 8  | 6  | 74  | 2   |
| CONTIG-066075 | 103 | 7  | 17 | 12  | 0   |
| CONTIG-066076 | 156 | 14 | 10 | 107 | 0   |
| CONTIG-066077 | 139 | 15 | 11 | 82  | 0   |
| CONTIG-066079 | 95  | 5  | 2  | 11  | 0   |
| CONTIG-066080 | 215 | 11 | 20 | 75  | 2   |
| CONTIG-066081 | 80  | 8  | 2  | 13  | 0   |
| CONTIG-066082 | 197 | 11 | 9  | 65  | 0   |
| CONTIG-066083 | 228 | 12 | 12 | 118 | 0   |
| CONTIG-066084 | 123 | 7  | 14 | 26  | 0   |
| CONTIG-066085 | 272 | 19 | 7  | 158 | 0   |
| CONTIG-066086 | 75  | 6  | 14 | 6   | 0   |
| CONTIG-066087 | 211 | 11 | 34 | 89  | 0   |
| CONTIG-066088 | 65  | 6  | 5  | 0   | 0   |
| CONTIG-066089 | 78  | 6  | 4  | 18  | 0   |
| CONTIG-066090 | 155 | 6  | 0  | 38  | 0   |
| CONTIG-066091 | 433 | 12 | 24 | 126 | 2   |
| CONTIG-066092 | 145 | 12 | 9  | 58  | 0   |
| CONTIG-066093 | 108 | 8  | 18 | 4   | 0   |
| CONTIG-066094 | 93  | 10 | 2  | 15  | 0   |
| CONTIG-066095 | 67  | 6  | 2  | 13  | 0   |
| CONTIG-066096 | 78  | 3  | 7  | 4   | 0   |
| CONTIG-066097 | 79  | 8  | 4  | 2   | 0   |
| CONTIG-066099 | 61  | 7  | 0  | 15  | 0   |
| CONTIG-066100 | 523 | 11 | 7  | 0   | 29  |
| CONTIG-066101 | 407 | 63 | 3  | 0   | 176 |
| CONTIG-066102 | 106 | 9  | 5  | 26  | 0   |
| CONTIG-066103 | 127 | 10 | 11 | 51  | 0   |
| CONTIG-066105 | 105 | 4  | 3  | 8   | 0   |
| CONTIG-066106 | 184 | 6  | 0  | 34  | 0   |
| CONTIG-066107 | 144 | 17 | 13 | 93  | 0   |
| CONTIG-066108 | 152 | 12 | 7  | 51  | 0   |
| CONTIG-066109 | 168 | 9  | 8  | 68  | 0   |
| CONTIG-066110 | 146 | 14 | 2  | 99  | 0   |
| CONTIG-066112 | 182 | 7  | 5  | 29  | 2   |
| CONTIG-066113 | 122 | 4  | 2  | 11  | 0   |

|               |      |      |    |     |      |
|---------------|------|------|----|-----|------|
| CONTIG-066114 | 117  | 6    | 6  | 8   | 0    |
| CONTIG-066115 | 409  | 10   | 24 | 130 | 5    |
| CONTIG-066116 | 109  | 11   | 9  | 20  | 0    |
| CONTIG-066117 | 100  | 30   | 65 | 55  | 0    |
| CONTIG-066118 | 1026 | 18   | 11 | 757 | 20   |
| CONTIG-066119 | 207  | 7    | 13 | 56  | 0    |
| CONTIG-066120 | 138  | 4    | 6  | 7   | 0    |
| CONTIG-066121 | 137  | 8    | 6  | 14  | 2    |
| CONTIG-066122 | 186  | 25   | 50 | 99  | 5    |
| CONTIG-066123 | 67   | 4    | 0  | 2   | 0    |
| CONTIG-066124 | 135  | 7    | 3  | 31  | 0    |
| CONTIG-066125 | 89   | 5    | 3  | 13  | 0    |
| CONTIG-066126 | 262  | 15   | 12 | 115 | 0    |
| CONTIG-066127 | 91   | 8    | 8  | 15  | 0    |
| CONTIG-066128 | 81   | 13   | 2  | 47  | 0    |
| CONTIG-066130 | 1320 | 17   | 7  | 285 | 2    |
| CONTIG-066131 | 154  | 10   | 2  | 11  | 0    |
| CONTIG-066132 | 178  | 7    | 7  | 18  | 0    |
| CONTIG-066133 | 85   | 7    | 4  | 8   | 0    |
| CONTIG-066135 | 154  | 5    | 8  | 18  | 0    |
| CONTIG-066136 | 114  | 15   | 4  | 77  | 0    |
| CONTIG-066137 | 43   | 5018 | 8  | 4   | 5804 |
| CONTIG-066141 | 94   | 76   | 39 | 280 | 4    |
| CONTIG-066145 | 103  | 9    | 0  | 28  | 0    |
| CONTIG-066146 | 78   | 13   | 5  | 28  | 0    |
| CONTIG-066147 | 110  | 12   | 7  | 44  | 0    |
| CONTIG-066148 | 141  | 5    | 11 | 2   | 0    |
| CONTIG-066149 | 101  | 7    | 27 | 6   | 0    |
| CONTIG-066150 | 99   | 3    | 6  | 7   | 0    |
| CONTIG-066151 | 60   | 10   | 0  | 29  | 0    |
| CONTIG-066152 | 76   | 6    | 11 | 8   | 0    |
| CONTIG-066153 | 80   | 13   | 10 | 29  | 0    |
| CONTIG-066155 | 66   | 9    | 0  | 26  | 0    |
| CONTIG-066156 | 76   | 8    | 9  | 22  | 0    |
| CONTIG-066157 | 68   | 6    | 2  | 0   | 0    |
| CONTIG-066158 | 526  | 12   | 43 | 217 | 2    |
| CONTIG-066159 | 376  | 12   | 0  | 9   | 0    |
| CONTIG-066161 | 99   | 5    | 8  | 13  | 0    |
| CONTIG-066162 | 334  | 20   | 6  | 272 | 2    |
| CONTIG-066164 | 150  | 6    | 11 | 44  | 0    |
| CONTIG-066165 | 175  | 6    | 9  | 0   | 0    |
| CONTIG-066166 | 81   | 5    | 0  | 12  | 0    |
| CONTIG-066167 | 363  | 7    | 7  | 55  | 0    |
| CONTIG-066168 | 58   | 4    | 2  | 6   | 0    |
| CONTIG-066170 | 140  | 11   | 24 | 25  | 0    |
| CONTIG-066171 | 91   | 43   | 18 | 38  | 0    |
| CONTIG-066172 | 166  | 5    | 2  | 36  | 0    |



|               |      |     |    |     |    |
|---------------|------|-----|----|-----|----|
| CONTIG-066173 | 219  | 10  | 9  | 52  | 0  |
| CONTIG-066174 | 183  | 6   | 15 | 41  | 0  |
| CONTIG-066175 | 87   | 4   | 5  | 5   | 0  |
| CONTIG-066177 | 49   | 62  | 25 | 60  | 2  |
| CONTIG-066178 | 100  | 7   | 5  | 26  | 0  |
| CONTIG-066179 | 138  | 8   | 7  | 24  | 0  |
| CONTIG-066180 | 114  | 7   | 10 | 16  | 0  |
| CONTIG-066181 | 179  | 10  | 3  | 60  | 0  |
| CONTIG-066182 | 73   | 4   | 5  | 5   | 0  |
| CONTIG-066183 | 77   | 3   | 0  | 0   | 0  |
| CONTIG-066184 | 82   | 5   | 4  | 10  | 0  |
| CONTIG-066185 | 314  | 9   | 30 | 85  | 0  |
| CONTIG-066186 | 83   | 5   | 2  | 10  | 0  |
| CONTIG-066187 | 94   | 118 | 14 | 737 | 0  |
| CONTIG-066188 | 127  | 6   | 0  | 15  | 0  |
| CONTIG-066189 | 87   | 8   | 31 | 0   | 0  |
| CONTIG-066190 | 60   | 11  | 37 | 0   | 0  |
| CONTIG-066191 | 279  | 10  | 30 | 106 | 0  |
| CONTIG-066192 | 100  | 3   | 2  | 8   | 0  |
| CONTIG-066194 | 88   | 8   | 2  | 23  | 0  |
| CONTIG-066195 | 83   | 5   | 5  | 11  | 0  |
| CONTIG-066196 | 75   | 8   | 4  | 10  | 0  |
| CONTIG-066197 | 79   | 16  | 19 | 19  | 0  |
| CONTIG-066198 | 84   | 4   | 0  | 2   | 0  |
| CONTIG-066199 | 146  | 13  | 23 | 78  | 0  |
| CONTIG-066200 | 122  | 10  | 5  | 49  | 0  |
| CONTIG-066201 | 271  | 30  | 10 | 18  | 0  |
| CONTIG-066202 | 68   | 4   | 2  | 6   | 0  |
| CONTIG-066203 | 211  | 10  | 57 | 69  | 0  |
| CONTIG-066204 | 75   | 12  | 5  | 38  | 0  |
| CONTIG-066205 | 182  | 6   | 6  | 27  | 0  |
| CONTIG-066206 | 77   | 9   | 3  | 19  | 0  |
| CONTIG-066207 | 69   | 3   | 0  | 3   | 0  |
| CONTIG-066208 | 172  | 20  | 4  | 190 | 0  |
| CONTIG-066209 | 62   | 3   | 0  | 6   | 0  |
| CONTIG-066210 | 90   | 8   | 6  | 11  | 0  |
| CONTIG-066211 | 101  | 12  | 0  | 57  | 0  |
| CONTIG-066212 | 169  | 14  | 6  | 62  | 2  |
| CONTIG-066213 | 77   | 7   | 5  | 16  | 0  |
| CONTIG-066215 | 91   | 5   | 5  | 16  | 0  |
| CONTIG-066216 | 1098 | 16  | 17 | 43  | 0  |
| CONTIG-066221 | 138  | 10  | 0  | 24  | 0  |
| CONTIG-066222 | 190  | 14  | 2  | 97  | 0  |
| CONTIG-066223 | 88   | 4   | 0  | 11  | 0  |
| CONTIG-066224 | 158  | 4   | 3  | 13  | 0  |
| CONTIG-066225 | 452  | 11  | 2  | 0   | 81 |
| CONTIG-066226 | 404  | 9   | 15 | 118 | 0  |

|               |     |    |    |     |   |
|---------------|-----|----|----|-----|---|
| CONTIG-066227 | 355 | 7  | 6  | 78  | 0 |
| CONTIG-066228 | 142 | 10 | 0  | 20  | 0 |
| CONTIG-066229 | 86  | 12 | 6  | 42  | 0 |
| CONTIG-066230 | 189 | 5  | 13 | 25  | 0 |
| CONTIG-066231 | 72  | 3  | 2  | 4   | 0 |
| CONTIG-066232 | 117 | 5  | 16 | 4   | 0 |
| CONTIG-066233 | 206 | 6  | 4  | 20  | 0 |
| CONTIG-066234 | 115 | 5  | 5  | 11  | 0 |
| CONTIG-066236 | 89  | 5  | 14 | 2   | 0 |
| CONTIG-066237 | 177 | 11 | 3  | 0   | 0 |
| CONTIG-066238 | 77  | 10 | 17 | 14  | 0 |
| CONTIG-066239 | 335 | 13 | 8  | 110 | 3 |
| CONTIG-066240 | 94  | 6  | 2  | 25  | 0 |
| CONTIG-066241 | 355 | 11 | 8  | 44  | 4 |
| CONTIG-066242 | 75  | 2  | 0  | 5   | 0 |
| CONTIG-066243 | 65  | 3  | 0  | 0   | 0 |
| CONTIG-066244 | 219 | 6  | 5  | 62  | 0 |
| CONTIG-066246 | 65  | 3  | 2  | 2   | 2 |
| CONTIG-066247 | 75  | 3  | 4  | 3   | 0 |
| CONTIG-066249 | 116 | 8  | 2  | 24  | 0 |
| CONTIG-066250 | 176 | 11 | 2  | 69  | 2 |
| CONTIG-066251 | 200 | 11 | 14 | 78  | 0 |
| CONTIG-066254 | 68  | 7  | 9  | 12  | 0 |
| CONTIG-066258 | 177 | 9  | 11 | 43  | 0 |
| CONTIG-066259 | 89  | 8  | 13 | 10  | 0 |
| CONTIG-066260 | 93  | 4  | 0  | 2   | 0 |
| CONTIG-066261 | 68  | 3  | 2  | 9   | 0 |
| CONTIG-066268 | 61  | 3  | 0  | 3   | 0 |
| CONTIG-066269 | 220 | 16 | 5  | 18  | 0 |
| CONTIG-066270 | 62  | 6  | 2  | 6   | 0 |
| CONTIG-066271 | 84  | 23 | 2  | 93  | 0 |
| CONTIG-066272 | 128 | 3  | 3  | 4   | 0 |
| CONTIG-066273 | 159 | 6  | 11 | 20  | 0 |
| CONTIG-066274 | 82  | 4  | 0  | 2   | 0 |
| CONTIG-066275 | 66  | 4  | 0  | 4   | 0 |
| CONTIG-066277 | 140 | 4  | 0  | 5   | 0 |
| CONTIG-066278 | 128 | 5  | 5  | 18  | 0 |
| CONTIG-066279 | 80  | 5  | 0  | 0   | 0 |
| CONTIG-066280 | 53  | 15 | 0  | 0   | 0 |
| CONTIG-066281 | 89  | 4  | 0  | 5   | 0 |
| CONTIG-066282 | 77  | 14 | 20 | 46  | 0 |
| CONTIG-066283 | 85  | 5  | 2  | 7   | 0 |
| CONTIG-066284 | 95  | 5  | 2  | 9   | 0 |
| CONTIG-066288 | 108 | 5  | 10 | 13  | 0 |
| CONTIG-066289 | 159 | 5  | 4  | 21  | 2 |
| CONTIG-066290 | 69  | 8  | 0  | 14  | 0 |
| CONTIG-066291 | 151 | 20 | 7  | 167 | 0 |

|               |     |    |    |     |     |
|---------------|-----|----|----|-----|-----|
| CONTIG-066295 | 84  | 8  | 15 | 21  | 0   |
| CONTIG-066297 | 164 | 8  | 13 | 35  | 0   |
| CONTIG-066298 | 77  | 7  | 11 | 0   | 0   |
| CONTIG-066299 | 65  | 5  | 6  | 4   | 0   |
| CONTIG-066300 | 254 | 12 | 0  | 106 | 0   |
| CONTIG-066301 | 152 | 13 | 14 | 54  | 0   |
| CONTIG-066302 | 361 | 19 | 14 | 320 | 10  |
| CONTIG-066303 | 184 | 5  | 5  | 33  | 2   |
| CONTIG-066304 | 109 | 12 | 8  | 46  | 4   |
| CONTIG-066305 | 111 | 8  | 28 | 19  | 0   |
| CONTIG-066307 | 90  | 3  | 2  | 0   | 0   |
| CONTIG-066309 | 76  | 5  | 6  | 11  | 0   |
| CONTIG-066310 | 75  | 10 | 19 | 5   | 0   |
| CONTIG-066311 | 211 | 7  | 16 | 37  | 0   |
| CONTIG-066312 | 69  | 18 | 5  | 72  | 0   |
| CONTIG-066313 | 171 | 8  | 8  | 40  | 0   |
| CONTIG-066314 | 92  | 5  | 8  | 0   | 0   |
| CONTIG-066317 | 144 | 6  | 6  | 29  | 0   |
| CONTIG-066318 | 58  | 7  | 3  | 6   | 0   |
| CONTIG-066319 | 60  | 6  | 8  | 0   | 4   |
| CONTIG-066320 | 79  | 4  | 9  | 0   | 0   |
| CONTIG-066321 | 696 | 17 | 39 | 608 | 6   |
| CONTIG-066322 | 120 | 6  | 5  | 26  | 0   |
| CONTIG-066323 | 290 | 14 | 13 | 41  | 0   |
| CONTIG-066324 | 73  | 13 | 4  | 30  | 0   |
| CONTIG-066325 | 166 | 9  | 7  | 21  | 0   |
| CONTIG-066326 | 275 | 9  | 7  | 115 | 0   |
| CONTIG-066327 | 182 | 5  | 3  | 25  | 0   |
| CONTIG-066328 | 85  | 8  | 2  | 33  | 0   |
| CONTIG-066329 | 102 | 7  | 0  | 13  | 0   |
| CONTIG-066337 | 239 | 7  | 2  | 70  | 0   |
| CONTIG-066339 | 121 | 6  | 4  | 15  | 0   |
| CONTIG-066341 | 96  | 13 | 12 | 44  | 3   |
| CONTIG-066342 | 88  | 4  | 2  | 8   | 0   |
| CONTIG-066345 | 153 | 8  | 2  | 37  | 2   |
| CONTIG-066346 | 132 | 10 | 4  | 19  | 0   |
| CONTIG-066347 | 88  | 6  | 2  | 16  | 0   |
| CONTIG-066348 | 83  | 8  | 2  | 16  | 0   |
| CONTIG-066349 | 273 | 8  | 13 | 52  | 0   |
| CONTIG-066350 | 174 | 40 | 65 | 90  | 0   |
| CONTIG-066351 | 321 | 15 | 0  | 0   | 14  |
| CONTIG-066352 | 986 | 14 | 2  | 0   | 182 |
| CONTIG-066354 | 74  | 8  | 0  | 17  | 0   |
| CONTIG-066356 | 118 | 4  | 5  | 18  | 0   |
| CONTIG-066357 | 83  | 63 | 0  | 261 | 0   |
| CONTIG-066358 | 114 | 5  | 0  | 15  | 0   |
| CONTIG-066359 | 231 | 6  | 2  | 26  | 0   |

|               |      |    |    |      |   |
|---------------|------|----|----|------|---|
| CONTIG-066361 | 1744 | 31 | 4  | 2763 | 6 |
| CONTIG-066362 | 198  | 7  | 2  | 43   | 0 |
| CONTIG-066363 | 204  | 8  | 19 | 20   | 0 |
| CONTIG-066365 | 203  | 5  | 9  | 31   | 0 |
| CONTIG-066366 | 158  | 5  | 0  | 23   | 0 |
| CONTIG-066367 | 143  | 9  | 16 | 14   | 0 |
| CONTIG-066368 | 115  | 10 | 8  | 24   | 2 |
| CONTIG-066370 | 203  | 12 | 34 | 95   | 0 |
| CONTIG-066371 | 168  | 5  | 2  | 0    | 0 |
| CONTIG-066372 | 73   | 3  | 0  | 8    | 0 |
| CONTIG-066373 | 115  | 6  | 5  | 12   | 0 |
| CONTIG-066374 | 87   | 5  | 0  | 14   | 0 |
| CONTIG-066375 | 98   | 7  | 12 | 7    | 0 |
| CONTIG-066376 | 70   | 3  | 2  | 2    | 0 |
| CONTIG-066377 | 198  | 6  | 4  | 19   | 0 |
| CONTIG-066378 | 312  | 10 | 10 | 83   | 0 |
| CONTIG-066379 | 59   | 5  | 5  | 2    | 0 |
| CONTIG-066380 | 86   | 3  | 0  | 8    | 0 |
| CONTIG-066381 | 195  | 6  | 3  | 51   | 0 |
| CONTIG-066382 | 143  | 4  | 2  | 2    | 0 |
| CONTIG-066383 | 59   | 11 | 3  | 0    | 0 |
| CONTIG-066384 | 62   | 8  | 12 | 8    | 0 |
| CONTIG-066385 | 92   | 3  | 3  | 2    | 0 |
| CONTIG-066386 | 107  | 8  | 2  | 30   | 0 |
| CONTIG-066387 | 312  | 11 | 26 | 101  | 0 |
| CONTIG-066388 | 64   | 8  | 0  | 15   | 0 |
| CONTIG-066389 | 230  | 9  | 7  | 99   | 0 |
| CONTIG-066390 | 118  | 5  | 0  | 8    | 0 |
| CONTIG-066391 | 143  | 5  | 10 | 15   | 0 |
| CONTIG-066392 | 60   | 11 | 14 | 10   | 0 |
| CONTIG-066393 | 167  | 7  | 14 | 41   | 0 |
| CONTIG-066394 | 134  | 20 | 53 | 89   | 0 |
| CONTIG-066395 | 110  | 4  | 0  | 2    | 0 |
| CONTIG-066396 | 105  | 4  | 4  | 2    | 0 |
| CONTIG-066397 | 127  | 12 | 17 | 57   | 0 |
| CONTIG-066398 | 159  | 12 | 5  | 76   | 0 |
| CONTIG-066399 | 145  | 5  | 6  | 12   | 0 |
| CONTIG-066400 | 505  | 15 | 9  | 272  | 4 |
| CONTIG-066401 | 135  | 58 | 19 | 329  | 0 |
| CONTIG-066402 | 226  | 7  | 8  | 48   | 0 |
| CONTIG-066404 | 76   | 6  | 10 | 5    | 0 |
| CONTIG-066405 | 62   | 2  | 0  | 4    | 0 |
| CONTIG-066406 | 85   | 10 | 11 | 22   | 0 |
| CONTIG-066407 | 73   | 12 | 16 | 32   | 0 |
| CONTIG-066408 | 112  | 7  | 4  | 13   | 0 |
| CONTIG-066409 | 70   | 5  | 10 | 2    | 0 |
| CONTIG-066410 | 170  | 6  | 4  | 39   | 0 |

|               |     |     |    |     |   |
|---------------|-----|-----|----|-----|---|
| CONTIG-066411 | 62  | 16  | 22 | 23  | 0 |
| CONTIG-066412 | 68  | 7   | 3  | 16  | 0 |
| CONTIG-066413 | 167 | 6   | 9  | 4   | 0 |
| CONTIG-066414 | 103 | 12  | 15 | 20  | 0 |
| CONTIG-066415 | 68  | 5   | 0  | 5   | 0 |
| CONTIG-066416 | 232 | 9   | 3  | 86  | 0 |
| CONTIG-066417 | 165 | 9   | 6  | 36  | 3 |
| CONTIG-066419 | 436 | 8   | 12 | 76  | 2 |
| CONTIG-066420 | 165 | 6   | 15 | 22  | 0 |
| CONTIG-066421 | 102 | 8   | 2  | 27  | 0 |
| CONTIG-066423 | 57  | 701 | 5  | 57  | 0 |
| CONTIG-066424 | 170 | 10  | 4  | 46  | 0 |
| CONTIG-066425 | 69  | 6   | 2  | 18  | 0 |
| CONTIG-066426 | 192 | 9   | 6  | 58  | 0 |
| CONTIG-066427 | 127 | 7   | 4  | 30  | 0 |
| CONTIG-066428 | 93  | 8   | 7  | 21  | 0 |
| CONTIG-066429 | 78  | 5   | 5  | 11  | 0 |
| CONTIG-066430 | 115 | 5   | 5  | 18  | 0 |
| CONTIG-066433 | 85  | 3   | 6  | 5   | 0 |
| CONTIG-066439 | 129 | 8   | 3  | 42  | 0 |
| CONTIG-066440 | 139 | 3   | 2  | 15  | 0 |
| CONTIG-066441 | 66  | 6   | 0  | 0   | 0 |
| CONTIG-066442 | 130 | 7   | 10 | 36  | 0 |
| CONTIG-066443 | 294 | 8   | 5  | 76  | 0 |
| CONTIG-066444 | 126 | 19  | 5  | 85  | 0 |
| CONTIG-066445 | 204 | 9   | 6  | 59  | 0 |
| CONTIG-066446 | 203 | 13  | 9  | 131 | 0 |
| CONTIG-066447 | 105 | 9   | 21 | 11  | 0 |
| CONTIG-066448 | 81  | 5   | 0  | 4   | 0 |
| CONTIG-066449 | 228 | 13  | 28 | 82  | 2 |
| CONTIG-066450 | 79  | 4   | 2  | 15  | 0 |
| CONTIG-066451 | 213 | 12  | 15 | 75  | 0 |
| CONTIG-066452 | 91  | 3   | 4  | 11  | 0 |
| CONTIG-066453 | 100 | 12  | 2  | 29  | 0 |
| CONTIG-066454 | 252 | 8   | 22 | 32  | 0 |
| CONTIG-066455 | 243 | 8   | 7  | 113 | 0 |
| CONTIG-066456 | 98  | 4   | 5  | 9   | 0 |
| CONTIG-066457 | 246 | 15  | 25 | 28  | 0 |
| CONTIG-066458 | 253 | 6   | 0  | 59  | 0 |
| CONTIG-066459 | 75  | 22  | 5  | 44  | 0 |
| CONTIG-066460 | 63  | 6   | 2  | 0   | 0 |
| CONTIG-066461 | 152 | 7   | 2  | 41  | 0 |
| CONTIG-066462 | 72  | 13  | 8  | 34  | 0 |
| CONTIG-066463 | 414 | 6   | 0  | 57  | 0 |
| CONTIG-066464 | 62  | 6   | 2  | 4   | 0 |
| CONTIG-066465 | 289 | 11  | 12 | 50  | 0 |
| CONTIG-066467 | 370 | 11  | 12 | 80  | 2 |

|               |      |     |    |      |     |
|---------------|------|-----|----|------|-----|
| CONTIG-066468 | 145  | 6   | 2  | 12   | 0   |
| CONTIG-066469 | 125  | 11  | 14 | 46   | 0   |
| CONTIG-066472 | 346  | 19  | 29 | 178  | 5   |
| CONTIG-066473 | 65   | 5   | 4  | 9    | 0   |
| CONTIG-066474 | 80   | 9   | 2  | 15   | 0   |
| CONTIG-066476 | 114  | 9   | 4  | 45   | 0   |
| CONTIG-066477 | 64   | 6   | 4  | 0    | 0   |
| CONTIG-066478 | 110  | 5   | 5  | 4    | 0   |
| CONTIG-066479 | 136  | 5   | 2  | 16   | 0   |
| CONTIG-066480 | 136  | 2   | 3  | 4    | 0   |
| CONTIG-066482 | 78   | 8   | 12 | 22   | 0   |
| CONTIG-066483 | 87   | 4   | 2  | 13   | 0   |
| CONTIG-066484 | 324  | 9   | 15 | 99   | 2   |
| CONTIG-066485 | 121  | 10  | 4  | 40   | 2   |
| CONTIG-066486 | 73   | 12  | 10 | 28   | 0   |
| CONTIG-066487 | 63   | 3   | 0  | 2    | 0   |
| CONTIG-066490 | 68   | 10  | 2  | 15   | 0   |
| CONTIG-066491 | 89   | 3   | 4  | 7    | 0   |
| CONTIG-066492 | 70   | 4   | 4  | 12   | 0   |
| CONTIG-066493 | 68   | 10  | 27 | 4    | 0   |
| CONTIG-066494 | 405  | 19  | 12 | 349  | 4   |
| CONTIG-066495 | 133  | 11  | 9  | 42   | 0   |
| CONTIG-066496 | 45   | 577 | 26 | 1188 | 0   |
| CONTIG-066497 | 107  | 6   | 15 | 16   | 0   |
| CONTIG-066498 | 106  | 6   | 8  | 21   | 0   |
| CONTIG-066499 | 68   | 5   | 4  | 7    | 0   |
| CONTIG-066501 | 200  | 8   | 3  | 75   | 0   |
| CONTIG-066502 | 92   | 6   | 6  | 3    | 0   |
| CONTIG-066504 | 193  | 7   | 0  | 82   | 0   |
| CONTIG-066505 | 97   | 24  | 0  | 0    | 0   |
| CONTIG-066506 | 259  | 5   | 5  | 33   | 0   |
| CONTIG-066507 | 315  | 17  | 44 | 153  | 0   |
| CONTIG-066508 | 67   | 7   | 9  | 15   | 0   |
| CONTIG-066509 | 1642 | 12  | 5  | 0    | 123 |
| CONTIG-066510 | 86   | 6   | 3  | 16   | 0   |
| CONTIG-066511 | 135  | 11  | 0  | 68   | 0   |
| CONTIG-066512 | 82   | 5   | 7  | 2    | 0   |
| CONTIG-066513 | 328  | 12  | 13 | 147  | 0   |
| CONTIG-066517 | 112  | 3   | 5  | 8    | 0   |
| CONTIG-066518 | 476  | 14  | 37 | 239  | 0   |
| CONTIG-066519 | 76   | 5   | 7  | 10   | 0   |
| CONTIG-066520 | 139  | 6   | 9  | 26   | 0   |
| CONTIG-066521 | 116  | 5   | 6  | 11   | 0   |
| CONTIG-066522 | 210  | 8   | 10 | 54   | 0   |
| CONTIG-066523 | 113  | 6   | 6  | 13   | 0   |
| CONTIG-066524 | 155  | 16  | 2  | 103  | 0   |
| CONTIG-066525 | 324  | 6   | 6  | 56   | 4   |

|               |     |     |    |      |     |
|---------------|-----|-----|----|------|-----|
| CONTIG-066526 | 92  | 7   | 3  | 14   | 0   |
| CONTIG-066528 | 107 | 4   | 4  | 10   | 2   |
| CONTIG-066529 | 223 | 6   | 7  | 32   | 0   |
| CONTIG-066530 | 107 | 4   | 2  | 16   | 0   |
| CONTIG-066531 | 60  | 7   | 0  | 7    | 0   |
| CONTIG-066532 | 106 | 9   | 14 | 18   | 0   |
| CONTIG-066533 | 60  | 3   | 7  | 2    | 0   |
| CONTIG-066534 | 45  | 49  | 18 | 16   | 0   |
| CONTIG-066540 | 65  | 6   | 2  | 9    | 0   |
| CONTIG-066541 | 243 | 7   | 2  | 55   | 0   |
| CONTIG-066542 | 193 | 7   | 8  | 29   | 2   |
| CONTIG-066543 | 65  | 12  | 8  | 2    | 0   |
| CONTIG-066544 | 101 | 9   | 6  | 38   | 0   |
| CONTIG-066546 | 59  | 97  | 5  | 285  | 0   |
| CONTIG-066547 | 98  | 8   | 0  | 34   | 0   |
| CONTIG-066548 | 170 | 9   | 15 | 45   | 0   |
| CONTIG-066549 | 106 | 7   | 7  | 19   | 0   |
| CONTIG-066550 | 256 | 14  | 22 | 134  | 0   |
| CONTIG-066551 | 331 | 15  | 21 | 75   | 0   |
| CONTIG-066552 | 88  | 11  | 4  | 5    | 0   |
| CONTIG-066553 | 218 | 121 | 2  | 0    | 592 |
| CONTIG-066554 | 536 | 9   | 0  | 25   | 0   |
| CONTIG-066555 | 75  | 3   | 3  | 4    | 0   |
| CONTIG-066556 | 89  | 8   | 14 | 17   | 0   |
| CONTIG-066557 | 66  | 4   | 3  | 6    | 0   |
| CONTIG-066558 | 491 | 21  | 10 | 6    | 0   |
| CONTIG-066559 | 91  | 9   | 6  | 35   | 0   |
| CONTIG-066560 | 75  | 6   | 7  | 14   | 0   |
| CONTIG-066561 | 67  | 603 | 25 | 2125 | 0   |
| CONTIG-066563 | 69  | 10  | 18 | 18   | 0   |
| CONTIG-066564 | 209 | 7   | 5  | 52   | 0   |
| CONTIG-066565 | 113 | 12  | 0  | 49   | 4   |
| CONTIG-066566 | 139 | 9   | 12 | 53   | 0   |
| CONTIG-066567 | 97  | 5   | 10 | 8    | 0   |
| CONTIG-066569 | 151 | 12  | 13 | 13   | 0   |
| CONTIG-066570 | 63  | 7   | 2  | 18   | 0   |
| CONTIG-066571 | 390 | 13  | 3  | 0    | 9   |
| CONTIG-066572 | 187 | 13  | 78 | 70   | 2   |
| CONTIG-066575 | 110 | 11  | 7  | 17   | 0   |
| CONTIG-066577 | 237 | 7   | 0  | 0    | 0   |
| CONTIG-066578 | 71  | 22  | 11 | 83   | 0   |
| CONTIG-066579 | 96  | 5   | 6  | 12   | 0   |
| CONTIG-066580 | 165 | 5   | 0  | 15   | 0   |
| CONTIG-066581 | 77  | 12  | 2  | 20   | 0   |
| CONTIG-066582 | 150 | 8   | 17 | 5    | 0   |
| CONTIG-066583 | 103 | 6   | 3  | 13   | 0   |
| CONTIG-066584 | 139 | 6   | 11 | 22   | 0   |

|               |     |    |    |     |    |
|---------------|-----|----|----|-----|----|
| CONTIG-066585 | 74  | 4  | 2  | 6   | 0  |
| CONTIG-066586 | 96  | 7  | 12 | 7   | 0  |
| CONTIG-066587 | 216 | 18 | 0  | 0   | 58 |
| CONTIG-066590 | 286 | 8  | 6  | 64  | 0  |
| CONTIG-066595 | 241 | 4  | 10 | 16  | 0  |
| CONTIG-066596 | 65  | 6  | 5  | 2   | 0  |
| CONTIG-066597 | 141 | 9  | 4  | 23  | 0  |
| CONTIG-066600 | 92  | 4  | 2  | 0   | 0  |
| CONTIG-066601 | 319 | 8  | 19 | 66  | 0  |
| CONTIG-066603 | 133 | 3  | 16 | 8   | 0  |
| CONTIG-066604 | 99  | 14 | 16 | 23  | 0  |
| CONTIG-066605 | 135 | 5  | 10 | 10  | 0  |
| CONTIG-066606 | 62  | 4  | 0  | 7   | 0  |
| CONTIG-066607 | 194 | 10 | 17 | 27  | 0  |
| CONTIG-066610 | 261 | 11 | 26 | 59  | 0  |
| CONTIG-066611 | 142 | 11 | 2  | 59  | 0  |
| CONTIG-066612 | 94  | 4  | 14 | 4   | 0  |
| CONTIG-066613 | 94  | 4  | 5  | 0   | 0  |
| CONTIG-066614 | 102 | 4  | 2  | 3   | 0  |
| CONTIG-066615 | 189 | 7  | 8  | 41  | 0  |
| CONTIG-066616 | 102 | 3  | 3  | 5   | 0  |
| CONTIG-066617 | 81  | 5  | 0  | 6   | 0  |
| CONTIG-066618 | 241 | 9  | 6  | 86  | 0  |
| CONTIG-066619 | 73  | 6  | 0  | 8   | 0  |
| CONTIG-066620 | 64  | 6  | 13 | 0   | 0  |
| CONTIG-066621 | 141 | 12 | 8  | 78  | 2  |
| CONTIG-066622 | 203 | 4  | 27 | 18  | 0  |
| CONTIG-066623 | 295 | 7  | 11 | 64  | 0  |
| CONTIG-066625 | 89  | 5  | 4  | 12  | 0  |
| CONTIG-066626 | 57  | 13 | 4  | 18  | 0  |
| CONTIG-066627 | 63  | 13 | 17 | 13  | 0  |
| CONTIG-066628 | 138 | 9  | 0  | 27  | 0  |
| CONTIG-066629 | 332 | 20 | 0  | 0   | 34 |
| CONTIG-066630 | 63  | 7  | 3  | 4   | 0  |
| CONTIG-066631 | 98  | 7  | 8  | 16  | 0  |
| CONTIG-066633 | 251 | 11 | 4  | 76  | 4  |
| CONTIG-066635 | 100 | 11 | 17 | 11  | 0  |
| CONTIG-066636 | 89  | 3  | 2  | 0   | 0  |
| CONTIG-066637 | 127 | 7  | 12 | 17  | 0  |
| CONTIG-066638 | 74  | 7  | 12 | 21  | 0  |
| CONTIG-066639 | 105 | 6  | 9  | 10  | 0  |
| CONTIG-066640 | 159 | 8  | 3  | 46  | 0  |
| CONTIG-066641 | 156 | 9  | 3  | 50  | 0  |
| CONTIG-066642 | 101 | 6  | 0  | 18  | 0  |
| CONTIG-066643 | 111 | 23 | 44 | 82  | 0  |
| CONTIG-066644 | 70  | 9  | 7  | 6   | 0  |
| CONTIG-066645 | 299 | 12 | 13 | 113 | 0  |



|               |     |    |    |     |   |
|---------------|-----|----|----|-----|---|
| CONTIG-066646 | 116 | 5  | 9  | 16  | 0 |
| CONTIG-066648 | 74  | 10 | 8  | 23  | 0 |
| CONTIG-066649 | 95  | 7  | 9  | 14  | 0 |
| CONTIG-066650 | 74  | 9  | 5  | 29  | 0 |
| CONTIG-066651 | 71  | 3  | 0  | 7   | 0 |
| CONTIG-066652 | 359 | 7  | 10 | 73  | 0 |
| CONTIG-066655 | 70  | 9  | 3  | 24  | 0 |
| CONTIG-066656 | 134 | 8  | 2  | 34  | 0 |
| CONTIG-066657 | 187 | 5  | 4  | 34  | 0 |
| CONTIG-066658 | 212 | 10 | 34 | 9   | 0 |
| CONTIG-066660 | 87  | 9  | 6  | 21  | 0 |
| CONTIG-066661 | 230 | 6  | 5  | 25  | 0 |
| CONTIG-066662 | 690 | 11 | 24 | 341 | 0 |
| CONTIG-066663 | 92  | 7  | 12 | 20  | 0 |
| CONTIG-066664 | 64  | 8  | 14 | 0   | 0 |
| CONTIG-066665 | 85  | 10 | 7  | 28  | 0 |
| CONTIG-066666 | 113 | 5  | 11 | 9   | 0 |
| CONTIG-066667 | 140 | 4  | 7  | 8   | 0 |
| CONTIG-066668 | 170 | 24 | 37 | 111 | 0 |
| CONTIG-066669 | 176 | 6  | 5  | 23  | 2 |
| CONTIG-066670 | 60  | 6  | 0  | 11  | 0 |
| CONTIG-066673 | 249 | 11 | 10 | 109 | 0 |
| CONTIG-066674 | 217 | 5  | 7  | 25  | 0 |
| CONTIG-066675 | 124 | 20 | 2  | 31  | 0 |
| CONTIG-066676 | 178 | 12 | 16 | 46  | 0 |
| CONTIG-066677 | 217 | 11 | 25 | 59  | 4 |
| CONTIG-066678 | 174 | 6  | 2  | 8   | 0 |
| CONTIG-066679 | 295 | 16 | 32 | 108 | 2 |
| CONTIG-066680 | 136 | 7  | 22 | 27  | 0 |
| CONTIG-066681 | 48  | 9  | 4  | 15  | 0 |
| CONTIG-066682 | 131 | 5  | 0  | 19  | 0 |
| CONTIG-066683 | 76  | 4  | 10 | 2   | 0 |
| CONTIG-066684 | 535 | 22 | 2  | 11  | 0 |
| CONTIG-066685 | 68  | 3  | 0  | 9   | 0 |
| CONTIG-066686 | 70  | 4  | 4  | 4   | 0 |
| CONTIG-066687 | 72  | 8  | 7  | 11  | 0 |
| CONTIG-066688 | 159 | 11 | 0  | 59  | 0 |
| CONTIG-066693 | 89  | 3  | 2  | 6   | 0 |
| CONTIG-066694 | 91  | 4  | 8  | 8   | 0 |
| CONTIG-066695 | 234 | 11 | 5  | 47  | 0 |
| CONTIG-066696 | 70  | 6  | 0  | 14  | 0 |
| CONTIG-066697 | 47  | 24 | 9  | 18  | 0 |
| CONTIG-066698 | 180 | 19 | 35 | 110 | 0 |
| CONTIG-066699 | 91  | 3  | 5  | 4   | 0 |
| CONTIG-066701 | 89  | 6  | 13 | 5   | 0 |
| CONTIG-066702 | 313 | 8  | 9  | 81  | 0 |
| CONTIG-066703 | 119 | 7  | 0  | 32  | 0 |

|               |     |     |    |     |     |
|---------------|-----|-----|----|-----|-----|
| CONTIG-066706 | 98  | 2   | 2  | 0   | 0   |
| CONTIG-066708 | 98  | 19  | 6  | 74  | 0   |
| CONTIG-066709 | 164 | 12  | 24 | 40  | 2   |
| CONTIG-066710 | 75  | 15  | 8  | 2   | 0   |
| CONTIG-066711 | 152 | 9   | 7  | 8   | 0   |
| CONTIG-066712 | 272 | 12  | 10 | 105 | 0   |
| CONTIG-066713 | 69  | 4   | 0  | 4   | 0   |
| CONTIG-066714 | 99  | 4   | 8  | 0   | 0   |
| CONTIG-066715 | 175 | 5   | 8  | 24  | 0   |
| CONTIG-066716 | 90  | 5   | 16 | 9   | 0   |
| CONTIG-066721 | 91  | 5   | 8  | 12  | 0   |
| CONTIG-066722 | 201 | 5   | 7  | 23  | 4   |
| CONTIG-066723 | 67  | 5   | 4  | 6   | 0   |
| CONTIG-066724 | 168 | 11  | 19 | 55  | 0   |
| CONTIG-066725 | 99  | 11  | 28 | 30  | 0   |
| CONTIG-066726 | 66  | 7   | 7  | 8   | 0   |
| CONTIG-066727 | 103 | 6   | 10 | 16  | 0   |
| CONTIG-066728 | 155 | 10  | 5  | 43  | 2   |
| CONTIG-066729 | 410 | 75  | 2  | 0   | 237 |
| CONTIG-066730 | 135 | 14  | 0  | 54  | 2   |
| CONTIG-066732 | 41  | 145 | 0  | 69  | 4   |
| CONTIG-066733 | 62  | 6   | 6  | 13  | 0   |
| CONTIG-066734 | 114 | 10  | 0  | 2   | 0   |
| CONTIG-066735 | 78  | 7   | 6  | 15  | 0   |
| CONTIG-066736 | 203 | 7   | 2  | 41  | 0   |
| CONTIG-066737 | 75  | 19  | 8  | 75  | 0   |
| CONTIG-066738 | 114 | 5   | 6  | 8   | 0   |
| CONTIG-066739 | 153 | 10  | 3  | 40  | 5   |
| CONTIG-066740 | 65  | 4   | 6  | 4   | 0   |
| CONTIG-066741 | 77  | 7   | 7  | 8   | 0   |
| CONTIG-066742 | 65  | 2   | 2  | 0   | 0   |
| CONTIG-066743 | 86  | 8   | 34 | 14  | 0   |
| CONTIG-066744 | 160 | 11  | 9  | 43  | 0   |
| CONTIG-066745 | 221 | 9   | 2  | 64  | 0   |
| CONTIG-066746 | 167 | 5   | 28 | 13  | 0   |
| CONTIG-066747 | 130 | 10  | 13 | 23  | 4   |
| CONTIG-066748 | 123 | 6   | 4  | 21  | 0   |
| CONTIG-066750 | 357 | 7   | 16 | 103 | 0   |
| CONTIG-066751 | 92  | 5   | 0  | 11  | 0   |
| CONTIG-066752 | 95  | 7   | 0  | 13  | 0   |
| CONTIG-066753 | 63  | 8   | 6  | 13  | 0   |
| CONTIG-066754 | 113 | 11  | 27 | 27  | 2   |
| CONTIG-066755 | 265 | 8   | 4  | 34  | 0   |
| CONTIG-066756 | 201 | 9   | 26 | 41  | 0   |
| CONTIG-066757 | 114 | 3   | 0  | 7   | 0   |
| CONTIG-066758 | 65  | 4   | 0  | 7   | 0   |
| CONTIG-066759 | 100 | 43  | 13 | 220 | 0   |

|               |     |    |    |     |    |
|---------------|-----|----|----|-----|----|
| CONTIG-066760 | 121 | 9  | 20 | 23  | 2  |
| CONTIG-066761 | 451 | 20 | 10 | 353 | 8  |
| CONTIG-066762 | 149 | 10 | 10 | 43  | 0  |
| CONTIG-066763 | 86  | 7  | 15 | 19  | 0  |
| CONTIG-066765 | 269 | 6  | 10 | 0   | 0  |
| CONTIG-066766 | 170 | 4  | 4  | 14  | 0  |
| CONTIG-066767 | 131 | 9  | 6  | 29  | 0  |
| CONTIG-066768 | 84  | 3  | 0  | 4   | 0  |
| CONTIG-066769 | 111 | 11 | 8  | 0   | 4  |
| CONTIG-066770 | 374 | 9  | 11 | 86  | 0  |
| CONTIG-066771 | 177 | 6  | 11 | 33  | 0  |
| CONTIG-066773 | 189 | 5  | 2  | 8   | 0  |
| CONTIG-066779 | 126 | 6  | 7  | 18  | 0  |
| CONTIG-066780 | 101 | 4  | 10 | 9   | 0  |
| CONTIG-066781 | 136 | 7  | 4  | 28  | 0  |
| CONTIG-066782 | 222 | 10 | 13 | 57  | 2  |
| CONTIG-066783 | 81  | 6  | 2  | 5   | 6  |
| CONTIG-066784 | 104 | 4  | 0  | 2   | 0  |
| CONTIG-066785 | 93  | 10 | 4  | 42  | 0  |
| CONTIG-066786 | 79  | 2  | 2  | 4   | 0  |
| CONTIG-066787 | 219 | 5  | 4  | 36  | 0  |
| CONTIG-066788 | 234 | 6  | 2  | 31  | 0  |
| CONTIG-066789 | 74  | 26 | 0  | 86  | 0  |
| CONTIG-066790 | 134 | 8  | 8  | 12  | 2  |
| CONTIG-066791 | 91  | 5  | 0  | 12  | 0  |
| CONTIG-066792 | 72  | 15 | 0  | 37  | 2  |
| CONTIG-066793 | 415 | 14 | 29 | 193 | 2  |
| CONTIG-066794 | 98  | 7  | 9  | 7   | 0  |
| CONTIG-066795 | 93  | 6  | 7  | 23  | 0  |
| CONTIG-066796 | 140 | 6  | 6  | 26  | 0  |
| CONTIG-066797 | 165 | 5  | 4  | 10  | 2  |
| CONTIG-066798 | 138 | 9  | 12 | 15  | 0  |
| CONTIG-066799 | 124 | 8  | 7  | 30  | 0  |
| CONTIG-066800 | 350 | 19 | 4  | 159 | 2  |
| CONTIG-066801 | 101 | 17 | 0  | 72  | 2  |
| CONTIG-066802 | 83  | 5  | 5  | 8   | 0  |
| CONTIG-066803 | 72  | 10 | 0  | 10  | 0  |
| CONTIG-066804 | 224 | 10 | 4  | 34  | 6  |
| CONTIG-066805 | 893 | 21 | 2  | 0   | 49 |
| CONTIG-066806 | 92  | 8  | 0  | 19  | 0  |
| CONTIG-066807 | 63  | 9  | 2  | 10  | 0  |
| CONTIG-066808 | 101 | 6  | 11 | 9   | 0  |
| CONTIG-066809 | 296 | 9  | 6  | 66  | 4  |
| CONTIG-066810 | 93  | 6  | 0  | 13  | 0  |
| CONTIG-066811 | 284 | 14 | 5  | 162 | 0  |
| CONTIG-066812 | 603 | 19 | 40 | 349 | 0  |
| CONTIG-066813 | 640 | 29 | 11 | 652 | 40 |

|               |     |    |    |     |    |
|---------------|-----|----|----|-----|----|
| CONTIG-066814 | 106 | 8  | 5  | 17  | 0  |
| CONTIG-066815 | 262 | 15 | 31 | 0   | 25 |
| CONTIG-066816 | 179 | 4  | 2  | 21  | 0  |
| CONTIG-066817 | 74  | 20 | 13 | 45  | 0  |
| CONTIG-066819 | 689 | 12 | 26 | 241 | 2  |
| CONTIG-066820 | 88  | 7  | 15 | 14  | 0  |
| CONTIG-066821 | 96  | 5  | 2  | 17  | 0  |
| CONTIG-066822 | 72  | 45 | 0  | 0   | 69 |
| CONTIG-066823 | 62  | 14 | 2  | 6   | 0  |
| CONTIG-066824 | 252 | 9  | 41 | 64  | 0  |
| CONTIG-066825 | 52  | 59 | 8  | 150 | 0  |
| CONTIG-066826 | 174 | 8  | 8  | 50  | 0  |
| CONTIG-066828 | 157 | 5  | 5  | 16  | 0  |
| CONTIG-066829 | 236 | 17 | 26 | 111 | 0  |
| CONTIG-066830 | 90  | 4  | 3  | 10  | 0  |
| CONTIG-066831 | 224 | 14 | 14 | 81  | 4  |
| CONTIG-066832 | 145 | 7  | 0  | 34  | 0  |
| CONTIG-066833 | 235 | 11 | 17 | 87  | 0  |
| CONTIG-066834 | 80  | 6  | 2  | 15  | 0  |
| CONTIG-066835 | 206 | 9  | 3  | 63  | 0  |
| CONTIG-066836 | 138 | 15 | 6  | 67  | 2  |
| CONTIG-066837 | 112 | 5  | 11 | 15  | 0  |
| CONTIG-066838 | 210 | 6  | 4  | 65  | 0  |
| CONTIG-066839 | 189 | 12 | 2  | 60  | 0  |
| CONTIG-066840 | 60  | 8  | 0  | 14  | 0  |
| CONTIG-066841 | 58  | 6  | 5  | 5   | 0  |
| CONTIG-066842 | 83  | 6  | 36 | 0   | 0  |
| CONTIG-066843 | 58  | 2  | 0  | 5   | 0  |
| CONTIG-066844 | 111 | 4  | 0  | 8   | 3  |
| CONTIG-066845 | 397 | 25 | 3  | 0   | 10 |
| CONTIG-066846 | 78  | 4  | 6  | 7   | 0  |
| CONTIG-066847 | 196 | 13 | 54 | 58  | 0  |
| CONTIG-066848 | 163 | 4  | 2  | 17  | 0  |
| CONTIG-066850 | 78  | 3  | 2  | 7   | 0  |
| CONTIG-066851 | 70  | 5  | 8  | 0   | 0  |
| CONTIG-066852 | 410 | 13 | 17 | 231 | 0  |
| CONTIG-066853 | 175 | 8  | 4  | 42  | 0  |
| CONTIG-066854 | 215 | 8  | 4  | 53  | 0  |
| CONTIG-066855 | 173 | 9  | 13 | 53  | 2  |
| CONTIG-066857 | 70  | 5  | 7  | 11  | 0  |
| CONTIG-066858 | 141 | 5  | 6  | 12  | 0  |
| CONTIG-066859 | 58  | 3  | 4  | 0   | 0  |
| CONTIG-066860 | 148 | 18 | 5  | 102 | 2  |
| CONTIG-066861 | 73  | 9  | 6  | 22  | 0  |
| CONTIG-066862 | 306 | 33 | 32 | 71  | 0  |
| CONTIG-066863 | 488 | 11 | 12 | 188 | 0  |
| CONTIG-066865 | 139 | 12 | 46 | 50  | 0  |

|               |     |     |    |     |    |
|---------------|-----|-----|----|-----|----|
| CONTIG-066866 | 476 | 23  | 41 | 302 | 10 |
| CONTIG-066867 | 152 | 15  | 4  | 58  | 0  |
| CONTIG-066868 | 123 | 3   | 0  | 19  | 0  |
| CONTIG-066869 | 74  | 15  | 23 | 0   | 0  |
| CONTIG-066870 | 68  | 3   | 4  | 0   | 0  |
| CONTIG-066871 | 299 | 17  | 30 | 128 | 3  |
| CONTIG-066872 | 742 | 23  | 12 | 6   | 0  |
| CONTIG-066873 | 66  | 4   | 0  | 14  | 0  |
| CONTIG-066874 | 126 | 6   | 4  | 20  | 0  |
| CONTIG-066881 | 137 | 9   | 12 | 33  | 0  |
| CONTIG-066882 | 502 | 8   | 6  | 179 | 0  |
| CONTIG-066883 | 113 | 11  | 5  | 47  | 0  |
| CONTIG-066884 | 68  | 7   | 5  | 18  | 0  |
| CONTIG-066885 | 78  | 6   | 6  | 16  | 0  |
| CONTIG-066886 | 113 | 4   | 3  | 13  | 0  |
| CONTIG-066887 | 309 | 11  | 8  | 43  | 2  |
| CONTIG-066888 | 79  | 8   | 4  | 0   | 2  |
| CONTIG-066889 | 78  | 5   | 7  | 2   | 0  |
| CONTIG-066890 | 212 | 4   | 9  | 24  | 0  |
| CONTIG-066891 | 64  | 4   | 2  | 2   | 0  |
| CONTIG-066892 | 39  | 166 | 7  | 163 | 0  |
| CONTIG-066893 | 572 | 12  | 38 | 217 | 4  |
| CONTIG-066894 | 903 | 22  | 2  | 0   | 90 |
| CONTIG-066895 | 104 | 3   | 0  | 2   | 2  |
| CONTIG-066896 | 133 | 8   | 12 | 41  | 0  |
| CONTIG-066898 | 176 | 7   | 13 | 28  | 0  |
| CONTIG-066899 | 130 | 6   | 8  | 17  | 0  |
| CONTIG-066900 | 221 | 9   | 14 | 68  | 0  |
| CONTIG-066902 | 180 | 9   | 14 | 53  | 0  |
| CONTIG-066903 | 139 | 6   | 6  | 25  | 0  |
| CONTIG-066904 | 110 | 12  | 2  | 52  | 0  |
| CONTIG-066905 | 112 | 10  | 28 | 12  | 0  |
| CONTIG-066906 | 126 | 9   | 10 | 32  | 0  |
| CONTIG-066907 | 52  | 6   | 7  | 7   | 0  |
| CONTIG-066908 | 95  | 8   | 4  | 21  | 0  |
| CONTIG-066909 | 110 | 16  | 6  | 61  | 0  |
| CONTIG-066911 | 59  | 4   | 2  | 0   | 0  |
| CONTIG-066912 | 71  | 4   | 0  | 7   | 0  |
| CONTIG-066913 | 90  | 5   | 4  | 13  | 0  |
| CONTIG-066914 | 184 | 21  | 16 | 81  | 0  |
| CONTIG-066916 | 62  | 12  | 2  | 16  | 0  |
| CONTIG-066917 | 72  | 8   | 10 | 4   | 0  |
| CONTIG-066919 | 87  | 2   | 4  | 2   | 0  |
| CONTIG-066920 | 140 | 12  | 2  | 73  | 0  |
| CONTIG-066922 | 99  | 8   | 4  | 2   | 0  |
| CONTIG-066923 | 78  | 2   | 3  | 0   | 0  |
| CONTIG-066924 | 75  | 9   | 16 | 9   | 0  |

|               |      |    |    |     |     |
|---------------|------|----|----|-----|-----|
| CONTIG-066925 | 103  | 4  | 2  | 4   | 0   |
| CONTIG-066926 | 100  | 3  | 3  | 2   | 0   |
| CONTIG-066927 | 196  | 12 | 9  | 78  | 0   |
| CONTIG-066928 | 214  | 8  | 0  | 50  | 2   |
| CONTIG-066930 | 85   | 9  | 0  | 37  | 0   |
| CONTIG-066932 | 63   | 5  | 4  | 2   | 0   |
| CONTIG-066933 | 74   | 9  | 4  | 13  | 0   |
| CONTIG-066934 | 146  | 6  | 3  | 15  | 0   |
| CONTIG-066935 | 378  | 16 | 33 | 339 | 0   |
| CONTIG-066936 | 74   | 6  | 0  | 17  | 0   |
| CONTIG-066937 | 124  | 4  | 4  | 5   | 0   |
| CONTIG-066938 | 132  | 6  | 9  | 12  | 0   |
| CONTIG-066939 | 112  | 5  | 2  | 7   | 0   |
| CONTIG-066940 | 97   | 10 | 10 | 30  | 0   |
| CONTIG-066941 | 101  | 9  | 2  | 34  | 0   |
| CONTIG-066942 | 169  | 3  | 0  | 17  | 0   |
| CONTIG-066943 | 119  | 8  | 36 | 11  | 0   |
| CONTIG-066944 | 47   | 9  | 3  | 10  | 0   |
| CONTIG-066945 | 133  | 15 | 6  | 92  | 0   |
| CONTIG-066946 | 96   | 4  | 2  | 10  | 0   |
| CONTIG-066947 | 92   | 7  | 17 | 11  | 0   |
| CONTIG-066948 | 90   | 8  | 6  | 15  | 0   |
| CONTIG-066949 | 206  | 6  | 5  | 19  | 0   |
| CONTIG-066950 | 80   | 7  | 3  | 24  | 0   |
| CONTIG-066951 | 1311 | 54 | 2  | 0   | 804 |
| CONTIG-066952 | 72   | 6  | 7  | 2   | 0   |
| CONTIG-066953 | 144  | 18 | 18 | 90  | 4   |
| CONTIG-066955 | 179  | 8  | 29 | 17  | 0   |
| CONTIG-066956 | 222  | 8  | 4  | 64  | 3   |
| CONTIG-066957 | 58   | 5  | 7  | 2   | 0   |
| CONTIG-066958 | 186  | 23 | 14 | 154 | 2   |
| CONTIG-066959 | 221  | 14 | 6  | 166 | 0   |
| CONTIG-066960 | 75   | 6  | 9  | 8   | 0   |
| CONTIG-066961 | 62   | 4  | 2  | 13  | 0   |
| CONTIG-066962 | 111  | 7  | 0  | 20  | 0   |
| CONTIG-066964 | 329  | 9  | 6  | 83  | 3   |
| CONTIG-066965 | 146  | 17 | 8  | 32  | 0   |
| CONTIG-066966 | 110  | 8  | 5  | 12  | 2   |
| CONTIG-066967 | 82   | 14 | 3  | 49  | 0   |
| CONTIG-066968 | 86   | 7  | 0  | 14  | 0   |
| CONTIG-066969 | 67   | 5  | 0  | 0   | 0   |
| CONTIG-066970 | 250  | 12 | 0  | 91  | 2   |
| CONTIG-066971 | 95   | 20 | 14 | 5   | 0   |
| CONTIG-066973 | 90   | 5  | 4  | 8   | 0   |
| CONTIG-066974 | 133  | 3  | 2  | 8   | 0   |
| CONTIG-066975 | 66   | 3  | 0  | 7   | 0   |
| CONTIG-066976 | 118  | 5  | 2  | 13  | 0   |

|               |     |    |    |     |    |
|---------------|-----|----|----|-----|----|
| CONTIG-066977 | 169 | 6  | 18 | 23  | 0  |
| CONTIG-066978 | 68  | 3  | 0  | 6   | 0  |
| CONTIG-066979 | 65  | 5  | 3  | 9   | 0  |
| CONTIG-066982 | 318 | 11 | 11 | 177 | 0  |
| CONTIG-066983 | 462 | 12 | 2  | 0   | 19 |
| CONTIG-066984 | 90  | 3  | 0  | 7   | 0  |
| CONTIG-066986 | 344 | 8  | 15 | 32  | 0  |
| CONTIG-066987 | 104 | 5  | 3  | 9   | 0  |
| CONTIG-066988 | 58  | 9  | 3  | 17  | 0  |
| CONTIG-066989 | 61  | 8  | 15 | 4   | 0  |
| CONTIG-066990 | 167 | 10 | 3  | 12  | 0  |
| CONTIG-066991 | 152 | 6  | 2  | 17  | 0  |
| CONTIG-066992 | 149 | 5  | 0  | 21  | 0  |
| CONTIG-066993 | 64  | 4  | 15 | 0   | 0  |
| CONTIG-066994 | 76  | 5  | 2  | 0   | 0  |
| CONTIG-066995 | 64  | 7  | 0  | 5   | 0  |
| CONTIG-066996 | 194 | 7  | 6  | 45  | 0  |
| CONTIG-066997 | 111 | 58 | 13 | 333 | 0  |
| CONTIG-066998 | 90  | 4  | 3  | 4   | 0  |
| CONTIG-066999 | 111 | 3  | 4  | 2   | 0  |
| CONTIG-067000 | 65  | 7  | 20 | 5   | 0  |
| CONTIG-067001 | 149 | 8  | 15 | 43  | 0  |
| CONTIG-067002 | 133 | 10 | 4  | 25  | 0  |
| CONTIG-067003 | 108 | 17 | 4  | 64  | 2  |
| CONTIG-067004 | 119 | 4  | 5  | 14  | 0  |
| CONTIG-067005 | 445 | 10 | 20 | 172 | 0  |
| CONTIG-067006 | 165 | 10 | 4  | 58  | 0  |
| CONTIG-067007 | 74  | 7  | 2  | 17  | 0  |
| CONTIG-067008 | 287 | 9  | 7  | 51  | 4  |
| CONTIG-067009 | 67  | 5  | 7  | 2   | 0  |
| CONTIG-067011 | 78  | 2  | 2  | 2   | 0  |
| CONTIG-067012 | 188 | 7  | 13 | 33  | 0  |
| CONTIG-067013 | 108 | 8  | 2  | 19  | 0  |
| CONTIG-067014 | 59  | 8  | 11 | 11  | 0  |
| CONTIG-067015 | 118 | 5  | 4  | 9   | 0  |
| CONTIG-067016 | 174 | 6  | 2  | 35  | 0  |
| CONTIG-067017 | 209 | 5  | 4  | 40  | 0  |
| CONTIG-067019 | 131 | 6  | 9  | 29  | 0  |
| CONTIG-067020 | 234 | 20 | 16 | 0   | 20 |
| CONTIG-067022 | 136 | 7  | 2  | 31  | 0  |
| CONTIG-067023 | 213 | 5  | 10 | 11  | 0  |
| CONTIG-067025 | 58  | 20 | 3  | 46  | 0  |
| CONTIG-067027 | 103 | 7  | 2  | 15  | 3  |
| CONTIG-067028 | 144 | 10 | 2  | 33  | 0  |
| CONTIG-067029 | 102 | 6  | 7  | 8   | 0  |
| CONTIG-067030 | 102 | 10 | 7  | 26  | 0  |
| CONTIG-067031 | 563 | 16 | 8  | 188 | 2  |

|               |     |    |    |     |   |
|---------------|-----|----|----|-----|---|
| CONTIG-067032 | 151 | 9  | 14 | 10  | 2 |
| CONTIG-067033 | 75  | 6  | 7  | 12  | 0 |
| CONTIG-067034 | 59  | 15 | 10 | 23  | 0 |
| CONTIG-067035 | 130 | 6  | 11 | 24  | 0 |
| CONTIG-067036 | 115 | 9  | 6  | 29  | 0 |
| CONTIG-067037 | 211 | 11 | 7  | 43  | 0 |
| CONTIG-067038 | 255 | 8  | 28 | 53  | 2 |
| CONTIG-067039 | 76  | 2  | 0  | 4   | 0 |
| CONTIG-067041 | 132 | 5  | 2  | 10  | 0 |
| CONTIG-067042 | 126 | 11 | 7  | 22  | 0 |
| CONTIG-067043 | 183 | 21 | 28 | 127 | 6 |
| CONTIG-067044 | 65  | 2  | 0  | 2   | 0 |
| CONTIG-067045 | 318 | 6  | 0  | 32  | 0 |
| CONTIG-067046 | 98  | 9  | 6  | 25  | 0 |
| CONTIG-067047 | 328 | 15 | 4  | 195 | 2 |
| CONTIG-067048 | 152 | 8  | 10 | 39  | 0 |
| CONTIG-067049 | 294 | 9  | 0  | 18  | 0 |
| CONTIG-067050 | 185 | 9  | 2  | 53  | 2 |
| CONTIG-067051 | 228 | 9  | 7  | 77  | 0 |
| CONTIG-067052 | 96  | 11 | 6  | 51  | 0 |
| CONTIG-067053 | 95  | 3  | 0  | 7   | 0 |
| CONTIG-067054 | 84  | 4  | 4  | 12  | 0 |
| CONTIG-067055 | 64  | 7  | 3  | 14  | 0 |
| CONTIG-067056 | 76  | 15 | 22 | 2   | 0 |
| CONTIG-067057 | 65  | 7  | 2  | 2   | 0 |
| CONTIG-067059 | 90  | 5  | 7  | 7   | 0 |
| CONTIG-067060 | 215 | 7  | 9  | 43  | 0 |
| CONTIG-067061 | 587 | 64 | 4  | 16  | 0 |
| CONTIG-067062 | 185 | 7  | 5  | 27  | 0 |
| CONTIG-067063 | 95  | 7  | 8  | 19  | 0 |
| CONTIG-067064 | 68  | 3  | 0  | 2   | 0 |
| CONTIG-067065 | 227 | 9  | 24 | 66  | 0 |
| CONTIG-067066 | 151 | 5  | 3  | 10  | 0 |
| CONTIG-067067 | 103 | 10 | 4  | 38  | 0 |
| CONTIG-067068 | 312 | 8  | 7  | 68  | 4 |
| CONTIG-067069 | 161 | 6  | 3  | 23  | 0 |
| CONTIG-067070 | 187 | 14 | 25 | 76  | 0 |
| CONTIG-067071 | 85  | 8  | 12 | 22  | 0 |
| CONTIG-067072 | 127 | 13 | 6  | 80  | 0 |
| CONTIG-067073 | 69  | 5  | 11 | 4   | 0 |
| CONTIG-067074 | 398 | 12 | 8  | 157 | 0 |
| CONTIG-067075 | 102 | 5  | 2  | 14  | 0 |
| CONTIG-067076 | 111 | 9  | 2  | 2   | 0 |
| CONTIG-067077 | 122 | 11 | 4  | 30  | 0 |
| CONTIG-067078 | 92  | 11 | 2  | 23  | 0 |
| CONTIG-067080 | 340 | 6  | 9  | 47  | 0 |
| CONTIG-067081 | 68  | 2  | 4  | 0   | 0 |



|               |     |    |    |     |   |
|---------------|-----|----|----|-----|---|
| CONTIG-067082 | 69  | 10 | 21 | 0   | 0 |
| CONTIG-067083 | 71  | 6  | 4  | 10  | 0 |
| CONTIG-067084 | 197 | 7  | 0  | 37  | 0 |
| CONTIG-067085 | 148 | 7  | 7  | 29  | 2 |
| CONTIG-067086 | 131 | 4  | 4  | 0   | 0 |
| CONTIG-067087 | 68  | 16 | 5  | 28  | 0 |
| CONTIG-067088 | 85  | 6  | 19 | 10  | 0 |
| CONTIG-067089 | 372 | 11 | 7  | 91  | 0 |
| CONTIG-067090 | 83  | 7  | 10 | 9   | 0 |
| CONTIG-067091 | 179 | 4  | 2  | 2   | 0 |
| CONTIG-067092 | 402 | 8  | 7  | 65  | 0 |
| CONTIG-067093 | 153 | 17 | 11 | 108 | 2 |
| CONTIG-067095 | 83  | 5  | 2  | 0   | 0 |
| CONTIG-067096 | 87  | 8  | 4  | 6   | 0 |
| CONTIG-067097 | 182 | 8  | 24 | 32  | 0 |
| CONTIG-067098 | 98  | 5  | 0  | 0   | 4 |
| CONTIG-067099 | 113 | 5  | 6  | 6   | 0 |
| CONTIG-067100 | 62  | 24 | 2  | 25  | 0 |
| CONTIG-067101 | 133 | 5  | 7  | 8   | 0 |
| CONTIG-067102 | 148 | 6  | 3  | 23  | 0 |
| CONTIG-067103 | 156 | 9  | 4  | 9   | 0 |
| CONTIG-067104 | 89  | 7  | 4  | 15  | 0 |
| CONTIG-067105 | 65  | 10 | 15 | 22  | 0 |
| CONTIG-067106 | 98  | 3  | 3  | 0   | 0 |
| CONTIG-067107 | 229 | 12 | 6  | 44  | 0 |
| CONTIG-067108 | 106 | 15 | 6  | 55  | 0 |
| CONTIG-067109 | 368 | 8  | 5  | 88  | 0 |
| CONTIG-067110 | 142 | 9  | 11 | 42  | 0 |
| CONTIG-067111 | 215 | 16 | 14 | 119 | 0 |
| CONTIG-067112 | 98  | 13 | 0  | 29  | 2 |
| CONTIG-067113 | 233 | 7  | 12 | 6   | 0 |
| CONTIG-067114 | 82  | 13 | 0  | 45  | 0 |
| CONTIG-067115 | 154 | 12 | 5  | 0   | 0 |
| CONTIG-067116 | 87  | 4  | 0  | 0   | 0 |
| CONTIG-067117 | 85  | 4  | 10 | 6   | 0 |
| CONTIG-067118 | 136 | 15 | 6  | 24  | 0 |
| CONTIG-067119 | 86  | 4  | 3  | 12  | 0 |
| CONTIG-067120 | 89  | 4  | 2  | 0   | 0 |
| CONTIG-067121 | 74  | 6  | 9  | 0   | 4 |
| CONTIG-067122 | 260 | 7  | 8  | 43  | 0 |
| CONTIG-067123 | 235 | 11 | 15 | 85  | 0 |
| CONTIG-067124 | 83  | 7  | 27 | 8   | 0 |
| CONTIG-067125 | 194 | 14 | 8  | 97  | 0 |
| CONTIG-067126 | 125 | 9  | 6  | 9   | 2 |
| CONTIG-067127 | 68  | 27 | 22 | 68  | 2 |
| CONTIG-067130 | 105 | 4  | 2  | 14  | 0 |
| CONTIG-067131 | 127 | 19 | 80 | 54  | 0 |

|               |     |     |    |     |     |
|---------------|-----|-----|----|-----|-----|
| CONTIG-067132 | 89  | 9   | 15 | 23  | 0   |
| CONTIG-067134 | 303 | 15  | 5  | 2   | 78  |
| CONTIG-067135 | 211 | 8   | 2  | 51  | 0   |
| CONTIG-067136 | 94  | 7   | 0  | 26  | 0   |
| CONTIG-067137 | 258 | 5   | 3  | 0   | 0   |
| CONTIG-067138 | 69  | 5   | 2  | 7   | 0   |
| CONTIG-067139 | 303 | 10  | 5  | 120 | 0   |
| CONTIG-067140 | 242 | 15  | 10 | 172 | 0   |
| CONTIG-067141 | 136 | 12  | 13 | 55  | 0   |
| CONTIG-067142 | 174 | 6   | 0  | 12  | 0   |
| CONTIG-067144 | 117 | 5   | 4  | 11  | 0   |
| CONTIG-067146 | 184 | 13  | 9  | 103 | 0   |
| CONTIG-067147 | 131 | 7   | 4  | 22  | 2   |
| CONTIG-067149 | 128 | 30  | 19 | 151 | 6   |
| CONTIG-067150 | 70  | 3   | 0  | 7   | 0   |
| CONTIG-067151 | 132 | 40  | 0  | 25  | 0   |
| CONTIG-067152 | 236 | 5   | 4  | 31  | 0   |
| CONTIG-067153 | 129 | 414 | 3  | 0   | 418 |
| CONTIG-067154 | 60  | 11  | 11 | 25  | 0   |
| CONTIG-067155 | 186 | 14  | 9  | 123 | 0   |
| CONTIG-067156 | 177 | 5   | 7  | 23  | 0   |
| CONTIG-067157 | 569 | 17  | 14 | 496 | 2   |
| CONTIG-067158 | 72  | 3   | 0  | 2   | 0   |
| CONTIG-067159 | 123 | 14  | 2  | 73  | 2   |
| CONTIG-067160 | 411 | 11  | 18 | 146 | 4   |
| CONTIG-067161 | 198 | 10  | 7  | 69  | 2   |
| CONTIG-067163 | 256 | 6   | 0  | 0   | 10  |
| CONTIG-067164 | 286 | 11  | 2  | 143 | 0   |
| CONTIG-067165 | 117 | 6   | 14 | 30  | 0   |
| CONTIG-067166 | 133 | 4   | 7  | 6   | 0   |
| CONTIG-067167 | 215 | 10  | 4  | 113 | 0   |
| CONTIG-067168 | 165 | 28  | 3  | 0   | 7   |
| CONTIG-067171 | 64  | 8   | 19 | 9   | 0   |
| CONTIG-067172 | 79  | 6   | 0  | 20  | 0   |
| CONTIG-067174 | 95  | 3   | 0  | 6   | 2   |
| CONTIG-067175 | 61  | 15  | 13 | 10  | 0   |
| CONTIG-067176 | 82  | 4   | 2  | 7   | 0   |
| CONTIG-067177 | 70  | 12  | 31 | 0   | 0   |
| CONTIG-067178 | 99  | 5   | 0  | 16  | 0   |
| CONTIG-067179 | 66  | 5   | 5  | 5   | 0   |
| CONTIG-067180 | 99  | 5   | 4  | 12  | 0   |
| CONTIG-067187 | 136 | 6   | 25 | 11  | 0   |
| CONTIG-067189 | 232 | 11  | 29 | 91  | 0   |
| CONTIG-067190 | 103 | 7   | 6  | 18  | 0   |
| CONTIG-067191 | 68  | 13  | 0  | 0   | 0   |
| CONTIG-067192 | 191 | 9   | 7  | 37  | 0   |
| CONTIG-067193 | 637 | 8   | 24 | 150 | 0   |

|               |     |    |    |     |   |
|---------------|-----|----|----|-----|---|
| CONTIG-067194 | 96  | 4  | 0  | 6   | 0 |
| CONTIG-067195 | 429 | 17 | 20 | 316 | 6 |
| CONTIG-067196 | 70  | 11 | 12 | 6   | 0 |
| CONTIG-067198 | 148 | 7  | 5  | 22  | 2 |
| CONTIG-067199 | 112 | 8  | 18 | 33  | 0 |
| CONTIG-067200 | 608 | 9  | 13 | 230 | 2 |
| CONTIG-067201 | 61  | 16 | 3  | 52  | 0 |
| CONTIG-067202 | 182 | 5  | 7  | 26  | 0 |
| CONTIG-067203 | 98  | 13 | 10 | 31  | 0 |
| CONTIG-067204 | 186 | 16 | 16 | 122 | 0 |
| CONTIG-067205 | 128 | 6  | 0  | 25  | 0 |
| CONTIG-067206 | 62  | 10 | 5  | 19  | 0 |
| CONTIG-067207 | 191 | 17 | 0  | 8   | 0 |
| CONTIG-067209 | 78  | 6  | 2  | 14  | 0 |
| CONTIG-067211 | 70  | 6  | 22 | 0   | 0 |
| CONTIG-067212 | 413 | 9  | 25 | 152 | 4 |
| CONTIG-067214 | 69  | 5  | 0  | 2   | 0 |
| CONTIG-067215 | 321 | 8  | 16 | 47  | 0 |
| CONTIG-067216 | 58  | 7  | 5  | 12  | 0 |
| CONTIG-067217 | 95  | 5  | 3  | 7   | 0 |
| CONTIG-067218 | 130 | 12 | 17 | 70  | 0 |
| CONTIG-067219 | 104 | 9  | 8  | 12  | 0 |
| CONTIG-067220 | 58  | 5  | 3  | 6   | 0 |
| CONTIG-067221 | 95  | 5  | 9  | 6   | 0 |
| CONTIG-067223 | 97  | 4  | 12 | 0   | 0 |
| CONTIG-067225 | 579 | 12 | 7  | 234 | 2 |
| CONTIG-067226 | 121 | 5  | 0  | 7   | 0 |
| CONTIG-067227 | 73  | 11 | 28 | 22  | 0 |
| CONTIG-067229 | 71  | 15 | 6  | 22  | 0 |
| CONTIG-067230 | 106 | 7  | 4  | 15  | 0 |
| CONTIG-067233 | 228 | 16 | 3  | 0   | 0 |
| CONTIG-067234 | 120 | 18 | 5  | 68  | 0 |
| CONTIG-067238 | 116 | 9  | 12 | 38  | 0 |
| CONTIG-067239 | 89  | 4  | 4  | 0   | 0 |
| CONTIG-067240 | 80  | 5  | 3  | 7   | 0 |
| CONTIG-067241 | 80  | 2  | 3  | 0   | 0 |
| CONTIG-067242 | 96  | 7  | 32 | 0   | 0 |
| CONTIG-067243 | 113 | 4  | 3  | 2   | 0 |
| CONTIG-067245 | 112 | 8  | 24 | 20  | 2 |
| CONTIG-067246 | 128 | 5  | 3  | 4   | 0 |
| CONTIG-067247 | 77  | 4  | 4  | 12  | 0 |
| CONTIG-067249 | 201 | 9  | 10 | 19  | 0 |
| CONTIG-067252 | 259 | 6  | 5  | 32  | 0 |
| CONTIG-067253 | 66  | 5  | 5  | 9   | 0 |
| CONTIG-067254 | 89  | 2  | 0  | 0   | 0 |
| CONTIG-067255 | 154 | 17 | 22 | 42  | 0 |
| CONTIG-067256 | 131 | 6  | 2  | 26  | 0 |

|               |     |    |    |     |   |
|---------------|-----|----|----|-----|---|
| CONTIG-067257 | 123 | 8  | 8  | 22  | 0 |
| CONTIG-067258 | 82  | 4  | 6  | 5   | 0 |
| CONTIG-067259 | 231 | 15 | 16 | 204 | 0 |
| CONTIG-067260 | 168 | 17 | 43 | 85  | 0 |
| CONTIG-067261 | 59  | 5  | 4  | 7   | 0 |
| CONTIG-067262 | 116 | 13 | 5  | 87  | 0 |
| CONTIG-067263 | 97  | 8  | 5  | 27  | 0 |
| CONTIG-067266 | 66  | 8  | 6  | 6   | 0 |
| CONTIG-067267 | 75  | 8  | 8  | 18  | 0 |
| CONTIG-067268 | 73  | 7  | 2  | 4   | 0 |
| CONTIG-067269 | 59  | 7  | 6  | 7   | 0 |
| CONTIG-067270 | 127 | 5  | 4  | 11  | 2 |
| CONTIG-067271 | 131 | 7  | 11 | 40  | 0 |
| CONTIG-067272 | 137 | 3  | 7  | 7   | 0 |
| CONTIG-067273 | 101 | 12 | 2  | 51  | 0 |
| CONTIG-067274 | 228 | 7  | 2  | 50  | 0 |
| CONTIG-067275 | 116 | 5  | 4  | 7   | 0 |
| CONTIG-067276 | 96  | 6  | 0  | 0   | 4 |
| CONTIG-067277 | 70  | 3  | 3  | 7   | 0 |
| CONTIG-067278 | 159 | 10 | 5  | 37  | 2 |
| CONTIG-067279 | 136 | 10 | 6  | 45  | 0 |
| CONTIG-067286 | 76  | 12 | 0  | 11  | 0 |
| CONTIG-067288 | 73  | 5  | 3  | 6   | 0 |
| CONTIG-067289 | 58  | 13 | 9  | 18  | 0 |
| CONTIG-067290 | 80  | 10 | 7  | 25  | 0 |
| CONTIG-067291 | 161 | 5  | 2  | 38  | 0 |
| CONTIG-067292 | 74  | 7  | 2  | 3   | 0 |
| CONTIG-067293 | 94  | 7  | 6  | 9   | 0 |
| CONTIG-067295 | 152 | 9  | 0  | 35  | 0 |
| CONTIG-067296 | 511 | 13 | 28 | 226 | 0 |
| CONTIG-067297 | 347 | 11 | 8  | 124 | 0 |
| CONTIG-067298 | 340 | 10 | 13 | 119 | 2 |
| CONTIG-067299 | 111 | 7  | 11 | 6   | 0 |
| CONTIG-067300 | 251 | 10 | 4  | 88  | 0 |
| CONTIG-067301 | 153 | 8  | 6  | 39  | 2 |
| CONTIG-067302 | 85  | 8  | 9  | 0   | 7 |
| CONTIG-067303 | 111 | 5  | 2  | 14  | 0 |
| CONTIG-067309 | 94  | 5  | 12 | 6   | 0 |
| CONTIG-067310 | 226 | 11 | 2  | 62  | 0 |
| CONTIG-067311 | 141 | 8  | 7  | 34  | 0 |
| CONTIG-067312 | 137 | 9  | 11 | 52  | 0 |
| CONTIG-067313 | 118 | 5  | 16 | 16  | 0 |
| CONTIG-067320 | 87  | 5  | 15 | 2   | 0 |
| CONTIG-067321 | 339 | 9  | 18 | 110 | 0 |
| CONTIG-067322 | 153 | 6  | 5  | 14  | 0 |
| CONTIG-067324 | 76  | 4  | 2  | 0   | 0 |
| CONTIG-067325 | 230 | 7  | 10 | 55  | 0 |

|               |      |     |    |     |     |
|---------------|------|-----|----|-----|-----|
| CONTIG-067326 | 344  | 9   | 0  | 78  | 0   |
| CONTIG-067327 | 70   | 39  | 17 | 35  | 0   |
| CONTIG-067328 | 83   | 17  | 7  | 41  | 0   |
| CONTIG-067329 | 184  | 12  | 6  | 97  | 0   |
| CONTIG-067330 | 72   | 6   | 11 | 8   | 0   |
| CONTIG-067331 | 136  | 27  | 36 | 100 | 2   |
| CONTIG-067332 | 48   | 102 | 10 | 103 | 0   |
| CONTIG-067333 | 117  | 5   | 2  | 17  | 0   |
| CONTIG-067335 | 87   | 9   | 3  | 34  | 0   |
| CONTIG-067337 | 77   | 5   | 2  | 8   | 0   |
| CONTIG-067338 | 138  | 97  | 51 | 464 | 13  |
| CONTIG-067340 | 96   | 6   | 2  | 26  | 0   |
| CONTIG-067341 | 125  | 5   | 15 | 16  | 0   |
| CONTIG-067342 | 179  | 9   | 10 | 44  | 0   |
| CONTIG-067343 | 254  | 5   | 0  | 29  | 0   |
| CONTIG-067344 | 62   | 4   | 0  | 2   | 0   |
| CONTIG-067345 | 93   | 8   | 0  | 17  | 0   |
| CONTIG-067346 | 70   | 9   | 0  | 13  | 0   |
| CONTIG-067347 | 243  | 9   | 2  | 25  | 0   |
| CONTIG-067348 | 323  | 7   | 6  | 33  | 0   |
| CONTIG-067349 | 133  | 7   | 25 | 14  | 0   |
| CONTIG-067350 | 456  | 7   | 5  | 2   | 0   |
| CONTIG-067351 | 1007 | 14  | 8  | 449 | 0   |
| CONTIG-067352 | 342  | 10  | 34 | 95  | 0   |
| CONTIG-067353 | 111  | 10  | 5  | 23  | 0   |
| CONTIG-067356 | 525  | 16  | 14 | 245 | 17  |
| CONTIG-067357 | 70   | 5   | 3  | 2   | 0   |
| CONTIG-067358 | 97   | 3   | 2  | 10  | 0   |
| CONTIG-067359 | 132  | 7   | 0  | 16  | 0   |
| CONTIG-067360 | 70   | 4   | 2  | 2   | 2   |
| CONTIG-067365 | 157  | 15  | 5  | 109 | 2   |
| CONTIG-067366 | 103  | 12  | 9  | 36  | 0   |
| CONTIG-067367 | 189  | 9   | 14 | 29  | 0   |
| CONTIG-067368 | 164  | 12  | 20 | 57  | 3   |
| CONTIG-067369 | 145  | 7   | 5  | 35  | 0   |
| CONTIG-067371 | 91   | 6   | 9  | 13  | 0   |
| CONTIG-067372 | 224  | 6   | 9  | 35  | 0   |
| CONTIG-067374 | 155  | 5   | 9  | 13  | 0   |
| CONTIG-067375 | 85   | 8   | 3  | 27  | 0   |
| CONTIG-067376 | 143  | 6   | 3  | 13  | 0   |
| CONTIG-067379 | 96   | 7   | 2  | 14  | 0   |
| CONTIG-067380 | 127  | 9   | 3  | 0   | 0   |
| CONTIG-067381 | 136  | 6   | 5  | 11  | 0   |
| CONTIG-067382 | 187  | 5   | 8  | 32  | 0   |
| CONTIG-067383 | 100  | 11  | 4  | 58  | 0   |
| CONTIG-067384 | 773  | 16  | 6  | 40  | 151 |
| CONTIG-067385 | 126  | 33  | 0  | 15  | 68  |

|               |     |     |    |     |     |
|---------------|-----|-----|----|-----|-----|
| CONTIG-067386 | 159 | 4   | 2  | 23  | 0   |
| CONTIG-067387 | 306 | 12  | 2  | 116 | 0   |
| CONTIG-067388 | 126 | 12  | 2  | 23  | 4   |
| CONTIG-067390 | 635 | 16  | 3  | 0   | 58  |
| CONTIG-067392 | 253 | 11  | 10 | 100 | 0   |
| CONTIG-067393 | 67  | 4   | 0  | 10  | 0   |
| CONTIG-067394 | 68  | 9   | 5  | 26  | 0   |
| CONTIG-067397 | 51  | 868 | 2  | 281 | 0   |
| CONTIG-067398 | 353 | 29  | 9  | 2   | 214 |
| CONTIG-067399 | 147 | 13  | 5  | 8   | 0   |
| CONTIG-067400 | 363 | 11  | 7  | 172 | 0   |
| CONTIG-067401 | 158 | 8   | 6  | 34  | 0   |
| CONTIG-067402 | 46  | 34  | 10 | 21  | 0   |
| CONTIG-067403 | 71  | 5   | 7  | 4   | 0   |
| CONTIG-067404 | 207 | 7   | 2  | 20  | 0   |
| CONTIG-067405 | 62  | 4   | 0  | 0   | 0   |
| CONTIG-067406 | 263 | 9   | 14 | 49  | 0   |
| CONTIG-067407 | 119 | 12  | 5  | 66  | 0   |
| CONTIG-067408 | 101 | 6   | 0  | 21  | 0   |
| CONTIG-067409 | 62  | 4   | 0  | 0   | 0   |
| CONTIG-067410 | 92  | 5   | 12 | 2   | 0   |
| CONTIG-067412 | 148 | 6   | 0  | 27  | 0   |
| CONTIG-067414 | 222 | 9   | 0  | 0   | 8   |
| CONTIG-067415 | 135 | 8   | 2  | 30  | 0   |
| CONTIG-067416 | 236 | 9   | 13 | 50  | 0   |
| CONTIG-067419 | 284 | 6   | 0  | 35  | 0   |
| CONTIG-067420 | 428 | 11  | 7  | 164 | 0   |
| CONTIG-067421 | 72  | 8   | 3  | 17  | 2   |
| CONTIG-067422 | 77  | 6   | 2  | 10  | 0   |
| CONTIG-067423 | 81  | 16  | 73 | 0   | 0   |
| CONTIG-067424 | 145 | 8   | 9  | 25  | 0   |
| CONTIG-067425 | 94  | 8   | 10 | 24  | 0   |
| CONTIG-067426 | 76  | 3   | 8  | 8   | 0   |
| CONTIG-067427 | 185 | 10  | 8  | 93  | 0   |
| CONTIG-067428 | 98  | 8   | 5  | 30  | 0   |
| CONTIG-067429 | 95  | 4   | 0  | 3   | 0   |
| CONTIG-067433 | 101 | 4   | 2  | 4   | 0   |
| CONTIG-067434 | 293 | 10  | 8  | 77  | 3   |
| CONTIG-067435 | 83  | 5   | 16 | 2   | 0   |
| CONTIG-067436 | 361 | 13  | 13 | 207 | 0   |
| CONTIG-067437 | 134 | 6   | 11 | 12  | 0   |
| CONTIG-067438 | 72  | 5   | 6  | 6   | 0   |
| CONTIG-067439 | 98  | 10  | 21 | 34  | 0   |
| CONTIG-067440 | 74  | 2   | 0  | 2   | 0   |
| CONTIG-067441 | 95  | 14  | 21 | 55  | 2   |
| CONTIG-067442 | 62  | 6   | 6  | 12  | 0   |
| CONTIG-067443 | 123 | 10  | 18 | 13  | 0   |

|               |      |    |    |     |    |
|---------------|------|----|----|-----|----|
| CONTIG-067444 | 934  | 14 | 24 | 486 | 0  |
| CONTIG-067445 | 89   | 3  | 3  | 2   | 0  |
| CONTIG-067446 | 78   | 8  | 2  | 26  | 0  |
| CONTIG-067447 | 80   | 21 | 17 | 58  | 2  |
| CONTIG-067454 | 220  | 6  | 0  | 27  | 0  |
| CONTIG-067455 | 207  | 10 | 2  | 76  | 0  |
| CONTIG-067456 | 166  | 9  | 27 | 25  | 2  |
| CONTIG-067458 | 152  | 10 | 2  | 9   | 3  |
| CONTIG-067459 | 426  | 14 | 39 | 266 | 0  |
| CONTIG-067460 | 189  | 3  | 4  | 15  | 0  |
| CONTIG-067461 | 84   | 10 | 0  | 2   | 0  |
| CONTIG-067462 | 82   | 33 | 2  | 68  | 0  |
| CONTIG-067463 | 266  | 9  | 12 | 66  | 0  |
| CONTIG-067464 | 67   | 4  | 14 | 0   | 0  |
| CONTIG-067465 | 109  | 4  | 2  | 0   | 0  |
| CONTIG-067466 | 98   | 12 | 5  | 49  | 0  |
| CONTIG-067467 | 74   | 16 | 22 | 27  | 0  |
| CONTIG-067468 | 225  | 22 | 14 | 102 | 23 |
| CONTIG-067469 | 928  | 75 | 14 | 90  | 2  |
| CONTIG-067470 | 60   | 4  | 0  | 5   | 0  |
| CONTIG-067471 | 177  | 3  | 3  | 8   | 0  |
| CONTIG-067472 | 127  | 5  | 7  | 15  | 0  |
| CONTIG-067473 | 186  | 12 | 3  | 75  | 4  |
| CONTIG-067474 | 130  | 9  | 7  | 15  | 0  |
| CONTIG-067475 | 118  | 4  | 12 | 4   | 0  |
| CONTIG-067476 | 177  | 5  | 2  | 15  | 2  |
| CONTIG-067477 | 90   | 8  | 9  | 0   | 0  |
| CONTIG-067481 | 77   | 8  | 0  | 22  | 2  |
| CONTIG-067482 | 275  | 14 | 17 | 153 | 2  |
| CONTIG-067483 | 98   | 5  | 7  | 8   | 0  |
| CONTIG-067488 | 63   | 5  | 0  | 6   | 0  |
| CONTIG-067489 | 348  | 14 | 21 | 97  | 2  |
| CONTIG-067490 | 102  | 8  | 0  | 28  | 0  |
| CONTIG-067491 | 106  | 9  | 8  | 0   | 0  |
| CONTIG-067492 | 610  | 12 | 16 | 213 | 0  |
| CONTIG-067493 | 153  | 15 | 6  | 10  | 0  |
| CONTIG-067494 | 117  | 4  | 8  | 4   | 0  |
| CONTIG-067495 | 1139 | 12 | 27 | 637 | 0  |
| CONTIG-067500 | 104  | 3  | 6  | 6   | 0  |
| CONTIG-067501 | 137  | 12 | 8  | 27  | 0  |
| CONTIG-067502 | 183  | 8  | 17 | 59  | 0  |
| CONTIG-067503 | 73   | 9  | 2  | 28  | 0  |
| CONTIG-067504 | 117  | 4  | 6  | 16  | 0  |
| CONTIG-067505 | 72   | 13 | 10 | 9   | 0  |
| CONTIG-067506 | 331  | 13 | 20 | 158 | 0  |
| CONTIG-067507 | 147  | 6  | 12 | 17  | 0  |
| CONTIG-067508 | 288  | 8  | 5  | 59  | 0  |

|               |     |    |    |     |    |
|---------------|-----|----|----|-----|----|
| CONTIG-067509 | 326 | 9  | 22 | 84  | 2  |
| CONTIG-067513 | 103 | 42 | 0  | 0   | 0  |
| CONTIG-067514 | 124 | 3  | 8  | 2   | 0  |
| CONTIG-067515 | 64  | 2  | 4  | 2   | 0  |
| CONTIG-067516 | 178 | 7  | 6  | 24  | 0  |
| CONTIG-067517 | 234 | 9  | 7  | 47  | 0  |
| CONTIG-067518 | 72  | 7  | 4  | 15  | 0  |
| CONTIG-067519 | 61  | 8  | 0  | 14  | 0  |
| CONTIG-067520 | 112 | 8  | 14 | 21  | 0  |
| CONTIG-067523 | 156 | 6  | 4  | 40  | 0  |
| CONTIG-067525 | 67  | 7  | 7  | 10  | 0  |
| CONTIG-067526 | 203 | 12 | 15 | 108 | 0  |
| CONTIG-067527 | 67  | 8  | 0  | 16  | 0  |
| CONTIG-067529 | 131 | 6  | 4  | 31  | 0  |
| CONTIG-067530 | 74  | 7  | 9  | 19  | 0  |
| CONTIG-067531 | 75  | 6  | 6  | 16  | 0  |
| CONTIG-067532 | 254 | 32 | 33 | 435 | 2  |
| CONTIG-067533 | 270 | 9  | 42 | 62  | 0  |
| CONTIG-067534 | 69  | 13 | 57 | 0   | 0  |
| CONTIG-067535 | 185 | 12 | 5  | 58  | 0  |
| CONTIG-067536 | 142 | 7  | 3  | 9   | 0  |
| CONTIG-067537 | 52  | 8  | 0  | 2   | 0  |
| CONTIG-067538 | 370 | 13 | 14 | 149 | 0  |
| CONTIG-067540 | 104 | 7  | 6  | 10  | 0  |
| CONTIG-067541 | 260 | 5  | 5  | 42  | 0  |
| CONTIG-067542 | 59  | 6  | 3  | 4   | 0  |
| CONTIG-067543 | 73  | 9  | 12 | 14  | 0  |
| CONTIG-067544 | 185 | 17 | 0  | 144 | 0  |
| CONTIG-067545 | 63  | 3  | 2  | 4   | 0  |
| CONTIG-067546 | 267 | 14 | 4  | 0   | 9  |
| CONTIG-067547 | 227 | 7  | 9  | 25  | 0  |
| CONTIG-067548 | 182 | 10 | 6  | 30  | 0  |
| CONTIG-067550 | 151 | 4  | 3  | 18  | 0  |
| CONTIG-067551 | 205 | 5  | 7  | 7   | 0  |
| CONTIG-067552 | 194 | 7  | 15 | 40  | 0  |
| CONTIG-067553 | 64  | 30 | 0  | 0   | 0  |
| CONTIG-067554 | 77  | 4  | 0  | 10  | 0  |
| CONTIG-067555 | 316 | 11 | 9  | 182 | 0  |
| CONTIG-067556 | 130 | 6  | 11 | 13  | 0  |
| CONTIG-067557 | 89  | 8  | 0  | 16  | 0  |
| CONTIG-067558 | 190 | 6  | 5  | 54  | 0  |
| CONTIG-067559 | 91  | 8  | 22 | 17  | 0  |
| CONTIG-067560 | 156 | 23 | 8  | 0   | 29 |
| CONTIG-067561 | 252 | 8  | 21 | 51  | 0  |
| CONTIG-067562 | 168 | 9  | 10 | 19  | 0  |
| CONTIG-067563 | 83  | 18 | 21 | 36  | 4  |
| CONTIG-067564 | 81  | 4  | 2  | 2   | 0  |



|               |     |    |    |     |     |
|---------------|-----|----|----|-----|-----|
| CONTIG-067565 | 105 | 6  | 0  | 17  | 0   |
| CONTIG-067566 | 69  | 6  | 3  | 6   | 0   |
| CONTIG-067567 | 90  | 9  | 2  | 22  | 0   |
| CONTIG-067568 | 74  | 5  | 2  | 0   | 0   |
| CONTIG-067569 | 149 | 9  | 2  | 49  | 0   |
| CONTIG-067570 | 113 | 20 | 13 | 26  | 0   |
| CONTIG-067571 | 175 | 17 | 27 | 122 | 0   |
| CONTIG-067572 | 132 | 7  | 13 | 28  | 0   |
| CONTIG-067573 | 174 | 6  | 4  | 33  | 0   |
| CONTIG-067576 | 69  | 7  | 2  | 0   | 0   |
| CONTIG-067577 | 156 | 4  | 4  | 18  | 0   |
| CONTIG-067578 | 88  | 10 | 27 | 13  | 0   |
| CONTIG-067579 | 77  | 8  | 17 | 0   | 0   |
| CONTIG-067580 | 74  | 6  | 7  | 18  | 0   |
| CONTIG-067581 | 74  | 5  | 0  | 2   | 0   |
| CONTIG-067582 | 86  | 3  | 0  | 6   | 0   |
| CONTIG-067583 | 251 | 10 | 15 | 99  | 0   |
| CONTIG-067585 | 138 | 10 | 11 | 28  | 6   |
| CONTIG-067586 | 82  | 6  | 16 | 14  | 0   |
| CONTIG-067587 | 218 | 13 | 19 | 81  | 0   |
| CONTIG-067588 | 163 | 6  | 3  | 17  | 2   |
| CONTIG-067589 | 83  | 12 | 3  | 4   | 0   |
| CONTIG-067590 | 644 | 18 | 38 | 190 | 0   |
| CONTIG-067591 | 199 | 9  | 2  | 78  | 0   |
| CONTIG-067592 | 145 | 7  | 9  | 15  | 0   |
| CONTIG-067593 | 230 | 27 | 28 | 161 | 0   |
| CONTIG-067594 | 68  | 6  | 8  | 4   | 0   |
| CONTIG-067595 | 342 | 13 | 4  | 111 | 0   |
| CONTIG-067596 | 103 | 8  | 0  | 21  | 0   |
| CONTIG-067604 | 80  | 4  | 10 | 0   | 0   |
| CONTIG-067605 | 242 | 8  | 12 | 54  | 0   |
| CONTIG-067606 | 63  | 5  | 0  | 6   | 2   |
| CONTIG-067607 | 79  | 30 | 6  | 75  | 4   |
| CONTIG-067608 | 105 | 10 | 20 | 7   | 0   |
| CONTIG-067609 | 398 | 18 | 26 | 241 | 4   |
| CONTIG-067610 | 89  | 5  | 7  | 7   | 0   |
| CONTIG-067611 | 74  | 8  | 6  | 4   | 0   |
| CONTIG-067612 | 86  | 7  | 3  | 29  | 0   |
| CONTIG-067613 | 63  | 3  | 6  | 0   | 0   |
| CONTIG-067614 | 196 | 11 | 11 | 77  | 0   |
| CONTIG-067615 | 79  | 5  | 7  | 8   | 0   |
| CONTIG-067616 | 78  | 5  | 5  | 7   | 0   |
| CONTIG-067617 | 72  | 34 | 12 | 35  | 0   |
| CONTIG-067618 | 622 | 24 | 0  | 0   | 152 |
| CONTIG-067619 | 77  | 11 | 3  | 29  | 0   |
| CONTIG-067620 | 69  | 10 | 5  | 27  | 0   |
| CONTIG-067621 | 57  | 44 | 0  | 72  | 0   |

|               |     |     |    |     |     |
|---------------|-----|-----|----|-----|-----|
| CONTIG-067622 | 311 | 10  | 13 | 33  | 0   |
| CONTIG-067623 | 211 | 6   | 0  | 44  | 0   |
| CONTIG-067624 | 88  | 7   | 4  | 11  | 0   |
| CONTIG-067625 | 179 | 6   | 8  | 26  | 0   |
| CONTIG-067626 | 96  | 9   | 7  | 25  | 0   |
| CONTIG-067628 | 46  | 67  | 6  | 82  | 0   |
| CONTIG-067629 | 607 | 10  | 0  | 0   | 27  |
| CONTIG-067630 | 92  | 9   | 9  | 19  | 0   |
| CONTIG-067631 | 215 | 9   | 8  | 78  | 0   |
| CONTIG-067632 | 117 | 6   | 8  | 24  | 0   |
| CONTIG-067635 | 82  | 4   | 4  | 5   | 0   |
| CONTIG-067636 | 533 | 33  | 4  | 0   | 210 |
| CONTIG-067637 | 198 | 12  | 8  | 30  | 4   |
| CONTIG-067638 | 174 | 13  | 2  | 92  | 2   |
| CONTIG-067639 | 79  | 3   | 3  | 2   | 0   |
| CONTIG-067640 | 85  | 5   | 11 | 2   | 2   |
| CONTIG-067641 | 92  | 7   | 7  | 25  | 0   |
| CONTIG-067644 | 95  | 10  | 7  | 30  | 0   |
| CONTIG-067645 | 71  | 6   | 11 | 5   | 0   |
| CONTIG-067646 | 86  | 2   | 2  | 0   | 0   |
| CONTIG-067647 | 106 | 7   | 13 | 14  | 0   |
| CONTIG-067648 | 170 | 5   | 0  | 20  | 0   |
| CONTIG-067649 | 189 | 17  | 10 | 80  | 0   |
| CONTIG-067650 | 105 | 16  | 7  | 62  | 0   |
| CONTIG-067651 | 73  | 3   | 0  | 0   | 0   |
| CONTIG-067652 | 367 | 6   | 6  | 87  | 0   |
| CONTIG-067653 | 89  | 6   | 2  | 5   | 0   |
| CONTIG-067654 | 201 | 6   | 2  | 29  | 0   |
| CONTIG-067657 | 129 | 6   | 7  | 13  | 0   |
| CONTIG-067658 | 187 | 8   | 8  | 53  | 0   |
| CONTIG-067661 | 69  | 5   | 5  | 0   | 0   |
| CONTIG-067663 | 217 | 5   | 4  | 40  | 0   |
| CONTIG-067664 | 296 | 13  | 29 | 146 | 0   |
| CONTIG-067665 | 124 | 8   | 8  | 27  | 0   |
| CONTIG-067666 | 147 | 6   | 23 | 4   | 0   |
| CONTIG-067667 | 146 | 11  | 31 | 35  | 2   |
| CONTIG-067668 | 63  | 4   | 4  | 5   | 0   |
| CONTIG-067669 | 183 | 14  | 10 | 49  | 2   |
| CONTIG-067670 | 152 | 6   | 2  | 25  | 0   |
| CONTIG-067671 | 152 | 9   | 7  | 48  | 0   |
| CONTIG-067672 | 292 | 9   | 9  | 49  | 0   |
| CONTIG-067673 | 160 | 128 | 6  | 468 | 7   |
| CONTIG-067674 | 222 | 16  | 2  | 100 | 5   |
| CONTIG-067675 | 85  | 6   | 2  | 16  | 2   |
| CONTIG-067676 | 290 | 27  | 9  | 57  | 0   |
| CONTIG-067677 | 102 | 4   | 2  | 8   | 0   |
| CONTIG-067678 | 193 | 9   | 13 | 36  | 5   |

|               |     |    |    |     |    |
|---------------|-----|----|----|-----|----|
| CONTIG-067679 | 156 | 10 | 6  | 39  | 0  |
| CONTIG-067680 | 166 | 10 | 4  | 43  | 2  |
| CONTIG-067681 | 653 | 17 | 45 | 269 | 2  |
| CONTIG-067682 | 198 | 12 | 56 | 48  | 0  |
| CONTIG-067683 | 122 | 6  | 15 | 4   | 0  |
| CONTIG-067684 | 164 | 12 | 10 | 39  | 2  |
| CONTIG-067685 | 90  | 5  | 0  | 7   | 0  |
| CONTIG-067686 | 62  | 4  | 4  | 7   | 0  |
| CONTIG-067687 | 102 | 4  | 4  | 9   | 0  |
| CONTIG-067688 | 63  | 7  | 3  | 9   | 0  |
| CONTIG-067689 | 71  | 4  | 2  | 2   | 0  |
| CONTIG-067690 | 70  | 5  | 4  | 6   | 0  |
| CONTIG-067695 | 561 | 19 | 15 | 181 | 40 |
| CONTIG-067696 | 340 | 8  | 9  | 105 | 0  |
| CONTIG-067697 | 99  | 7  | 3  | 6   | 0  |
| CONTIG-067698 | 94  | 20 | 48 | 47  | 2  |
| CONTIG-067699 | 324 | 12 | 3  | 94  | 2  |
| CONTIG-067700 | 117 | 6  | 6  | 22  | 0  |
| CONTIG-067701 | 124 | 9  | 19 | 5   | 0  |
| CONTIG-067702 | 74  | 12 | 8  | 14  | 0  |
| CONTIG-067703 | 271 | 6  | 14 | 41  | 0  |
| CONTIG-067704 | 74  | 8  | 2  | 24  | 0  |
| CONTIG-067705 | 155 | 6  | 3  | 47  | 0  |
| CONTIG-067707 | 61  | 3  | 2  | 2   | 0  |
| CONTIG-067708 | 163 | 14 | 2  | 0   | 12 |
| CONTIG-067710 | 357 | 8  | 4  | 74  | 0  |
| CONTIG-067711 | 71  | 18 | 0  | 63  | 2  |
| CONTIG-067713 | 157 | 7  | 7  | 26  | 0  |
| CONTIG-067714 | 96  | 9  | 3  | 8   | 0  |
| CONTIG-067715 | 389 | 19 | 7  | 403 | 0  |
| CONTIG-067716 | 509 | 14 | 6  | 0   | 31 |
| CONTIG-067717 | 235 | 8  | 19 | 47  | 0  |
| CONTIG-067718 | 193 | 5  | 10 | 14  | 0  |
| CONTIG-067719 | 91  | 7  | 3  | 23  | 0  |
| CONTIG-067721 | 133 | 5  | 4  | 12  | 0  |
| CONTIG-067722 | 249 | 7  | 10 | 45  | 0  |
| CONTIG-067723 | 116 | 6  | 7  | 12  | 0  |
| CONTIG-067724 | 201 | 6  | 3  | 35  | 0  |
| CONTIG-067725 | 171 | 9  | 12 | 14  | 0  |
| CONTIG-067726 | 83  | 5  | 2  | 5   | 0  |
| CONTIG-067727 | 117 | 73 | 97 | 219 | 0  |
| CONTIG-067730 | 75  | 6  | 4  | 8   | 0  |
| CONTIG-067731 | 84  | 3  | 3  | 2   | 0  |
| CONTIG-067732 | 299 | 12 | 4  | 12  | 0  |
| CONTIG-067733 | 59  | 3  | 5  | 2   | 0  |
| CONTIG-067734 | 109 | 4  | 0  | 9   | 0  |
| CONTIG-067735 | 288 | 9  | 15 | 76  | 0  |

|               |     |     |    |     |     |
|---------------|-----|-----|----|-----|-----|
| CONTIG-067736 | 89  | 3   | 0  | 2   | 0   |
| CONTIG-067737 | 285 | 8   | 4  | 36  | 0   |
| CONTIG-067738 | 70  | 4   | 2  | 4   | 0   |
| CONTIG-067739 | 163 | 5   | 7  | 17  | 2   |
| CONTIG-067740 | 101 | 6   | 3  | 28  | 0   |
| CONTIG-067741 | 192 | 13  | 22 | 94  | 0   |
| CONTIG-067742 | 69  | 4   | 4  | 5   | 0   |
| CONTIG-067743 | 116 | 8   | 9  | 28  | 0   |
| CONTIG-067744 | 61  | 6   | 18 | 2   | 0   |
| CONTIG-067745 | 131 | 6   | 0  | 8   | 0   |
| CONTIG-067746 | 118 | 4   | 0  | 18  | 0   |
| CONTIG-067747 | 211 | 5   | 13 | 20  | 2   |
| CONTIG-067748 | 66  | 9   | 7  | 8   | 0   |
| CONTIG-067749 | 145 | 10  | 4  | 39  | 3   |
| CONTIG-067750 | 140 | 21  | 19 | 110 | 0   |
| CONTIG-067751 | 84  | 9   | 9  | 12  | 0   |
| CONTIG-067752 | 63  | 5   | 0  | 4   | 0   |
| CONTIG-067753 | 319 | 8   | 7  | 40  | 2   |
| CONTIG-067754 | 220 | 10  | 3  | 76  | 0   |
| CONTIG-067755 | 137 | 7   | 19 | 40  | 0   |
| CONTIG-067756 | 363 | 9   | 19 | 82  | 2   |
| CONTIG-067757 | 191 | 7   | 22 | 35  | 0   |
| CONTIG-067758 | 67  | 15  | 8  | 30  | 0   |
| CONTIG-067759 | 125 | 19  | 3  | 80  | 2   |
| CONTIG-067760 | 75  | 5   | 0  | 4   | 0   |
| CONTIG-067761 | 129 | 10  | 12 | 25  | 0   |
| CONTIG-067762 | 156 | 40  | 21 | 0   | 16  |
| CONTIG-067764 | 103 | 2   | 3  | 2   | 0   |
| CONTIG-067765 | 228 | 48  | 6  | 10  | 128 |
| CONTIG-067766 | 94  | 7   | 3  | 18  | 0   |
| CONTIG-067767 | 160 | 6   | 2  | 26  | 2   |
| CONTIG-067768 | 317 | 8   | 10 | 30  | 2   |
| CONTIG-067769 | 55  | 125 | 20 | 346 | 0   |
| CONTIG-067770 | 194 | 6   | 2  | 46  | 0   |
| CONTIG-067771 | 372 | 8   | 6  | 86  | 3   |
| CONTIG-067772 | 153 | 14  | 28 | 56  | 0   |
| CONTIG-067773 | 383 | 20  | 44 | 236 | 7   |
| CONTIG-067774 | 351 | 8   | 4  | 72  | 0   |
| CONTIG-067775 | 66  | 5   | 0  | 13  | 0   |
| CONTIG-067776 | 81  | 9   | 2  | 20  | 0   |
| CONTIG-067777 | 268 | 26  | 24 | 197 | 2   |
| CONTIG-067778 | 198 | 7   | 4  | 50  | 0   |
| CONTIG-067779 | 465 | 16  | 68 | 141 | 2   |
| CONTIG-067780 | 203 | 13  | 56 | 16  | 0   |
| CONTIG-067783 | 76  | 3   | 4  | 2   | 0   |
| CONTIG-067784 | 277 | 11  | 18 | 63  | 0   |
| CONTIG-067785 | 86  | 8   | 9  | 19  | 0   |

|               |     |    |    |     |    |
|---------------|-----|----|----|-----|----|
| CONTIG-067786 | 219 | 5  | 4  | 35  | 3  |
| CONTIG-067787 | 117 | 3  | 2  | 2   | 0  |
| CONTIG-067788 | 64  | 5  | 3  | 0   | 0  |
| CONTIG-067790 | 76  | 5  | 3  | 7   | 0  |
| CONTIG-067792 | 81  | 5  | 8  | 4   | 0  |
| CONTIG-067793 | 318 | 8  | 18 | 35  | 2  |
| CONTIG-067794 | 116 | 5  | 2  | 11  | 0  |
| CONTIG-067795 | 266 | 11 | 21 | 45  | 0  |
| CONTIG-067796 | 78  | 3  | 2  | 3   | 0  |
| CONTIG-067797 | 96  | 9  | 25 | 26  | 0  |
| CONTIG-067798 | 74  | 7  | 7  | 25  | 0  |
| CONTIG-067799 | 87  | 6  | 2  | 9   | 0  |
| CONTIG-067801 | 214 | 12 | 13 | 110 | 0  |
| CONTIG-067802 | 83  | 4  | 5  | 8   | 0  |
| CONTIG-067803 | 209 | 11 | 0  | 97  | 0  |
| CONTIG-067804 | 104 | 7  | 7  | 14  | 0  |
| CONTIG-067805 | 254 | 21 | 5  | 95  | 34 |
| CONTIG-067811 | 266 | 13 | 9  | 136 | 0  |
| CONTIG-067812 | 58  | 5  | 2  | 13  | 0  |
| CONTIG-067813 | 71  | 2  | 2  | 0   | 0  |
| CONTIG-067818 | 65  | 11 | 2  | 28  | 2  |
| CONTIG-067819 | 372 | 9  | 17 | 120 | 0  |
| CONTIG-067821 | 189 | 13 | 40 | 61  | 0  |
| CONTIG-067822 | 61  | 3  | 6  | 0   | 0  |
| CONTIG-067823 | 100 | 7  | 10 | 8   | 0  |
| CONTIG-067824 | 254 | 17 | 3  | 164 | 0  |
| CONTIG-067825 | 111 | 12 | 3  | 0   | 4  |
| CONTIG-067826 | 82  | 11 | 9  | 18  | 0  |
| CONTIG-067827 | 122 | 11 | 8  | 39  | 4  |
| CONTIG-067828 | 142 | 8  | 6  | 42  | 0  |
| CONTIG-067830 | 72  | 5  | 0  | 11  | 0  |
| CONTIG-067831 | 85  | 4  | 0  | 4   | 0  |
| CONTIG-067832 | 208 | 5  | 8  | 19  | 0  |
| CONTIG-067833 | 71  | 10 | 4  | 21  | 0  |
| CONTIG-067834 | 92  | 7  | 5  | 18  | 0  |
| CONTIG-067835 | 231 | 8  | 4  | 63  | 0  |
| CONTIG-067836 | 256 | 10 | 4  | 77  | 0  |
| CONTIG-067837 | 116 | 15 | 2  | 52  | 0  |
| CONTIG-067838 | 76  | 5  | 0  | 6   | 0  |
| CONTIG-067840 | 146 | 9  | 21 | 40  | 2  |
| CONTIG-067841 | 127 | 7  | 10 | 47  | 0  |
| CONTIG-067842 | 71  | 2  | 4  | 0   | 0  |
| CONTIG-067843 | 180 | 13 | 11 | 117 | 0  |
| CONTIG-067844 | 315 | 18 | 20 | 243 | 2  |
| CONTIG-067845 | 96  | 7  | 17 | 10  | 0  |
| CONTIG-067846 | 206 | 13 | 8  | 85  | 2  |
| CONTIG-067847 | 84  | 4  | 0  | 2   | 0  |

|               |     |    |    |     |   |
|---------------|-----|----|----|-----|---|
| CONTIG-067848 | 65  | 6  | 3  | 8   | 0 |
| CONTIG-067854 | 76  | 4  | 2  | 4   | 0 |
| CONTIG-067855 | 125 | 14 | 7  | 28  | 0 |
| CONTIG-067856 | 63  | 13 | 0  | 4   | 2 |
| CONTIG-067857 | 232 | 12 | 4  | 102 | 0 |
| CONTIG-067858 | 38  | 91 | 63 | 53  | 0 |
| CONTIG-067859 | 249 | 10 | 7  | 63  | 0 |
| CONTIG-067860 | 156 | 6  | 4  | 30  | 0 |
| CONTIG-067861 | 89  | 2  | 3  | 0   | 0 |
| CONTIG-067862 | 443 | 8  | 21 | 83  | 4 |
| CONTIG-067863 | 238 | 17 | 5  | 0   | 0 |
| CONTIG-067864 | 74  | 9  | 4  | 3   | 2 |
| CONTIG-067865 | 82  | 7  | 6  | 17  | 0 |
| CONTIG-067866 | 86  | 7  | 8  | 4   | 0 |
| CONTIG-067867 | 340 | 8  | 0  | 0   | 0 |
| CONTIG-067868 | 146 | 6  | 5  | 2   | 0 |
| CONTIG-067869 | 95  | 3  | 0  | 6   | 0 |
| CONTIG-067870 | 188 | 14 | 0  | 139 | 0 |
| CONTIG-067871 | 95  | 9  | 12 | 32  | 0 |
| CONTIG-067872 | 186 | 6  | 5  | 33  | 0 |
| CONTIG-067873 | 93  | 16 | 6  | 92  | 0 |
| CONTIG-067874 | 69  | 2  | 2  | 3   | 0 |
| CONTIG-067875 | 88  | 7  | 14 | 0   | 0 |
| CONTIG-067877 | 78  | 5  | 3  | 4   | 0 |
| CONTIG-067878 | 63  | 10 | 0  | 14  | 0 |
| CONTIG-067879 | 283 | 7  | 10 | 69  | 2 |
| CONTIG-067880 | 175 | 7  | 0  | 24  | 0 |
| CONTIG-067881 | 292 | 12 | 8  | 118 | 4 |
| CONTIG-067882 | 572 | 13 | 18 | 224 | 6 |
| CONTIG-067888 | 200 | 4  | 5  | 21  | 0 |
| CONTIG-067889 | 203 | 13 | 14 | 43  | 0 |
| CONTIG-067890 | 105 | 9  | 3  | 32  | 0 |
| CONTIG-067891 | 185 | 4  | 2  | 19  | 2 |
| CONTIG-067892 | 58  | 9  | 2  | 12  | 2 |
| CONTIG-067893 | 72  | 3  | 5  | 4   | 0 |
| CONTIG-067894 | 67  | 2  | 2  | 0   | 0 |
| CONTIG-067896 | 247 | 5  | 2  | 27  | 0 |
| CONTIG-067898 | 175 | 9  | 0  | 29  | 0 |
| CONTIG-067899 | 91  | 4  | 0  | 8   | 0 |
| CONTIG-067904 | 107 | 6  | 2  | 0   | 4 |
| CONTIG-067905 | 126 | 7  | 3  | 35  | 0 |
| CONTIG-067906 | 89  | 22 | 22 | 23  | 0 |
| CONTIG-067907 | 82  | 3  | 2  | 8   | 0 |
| CONTIG-067908 | 104 | 3  | 6  | 4   | 0 |
| CONTIG-067909 | 120 | 6  | 0  | 19  | 0 |
| CONTIG-067910 | 430 | 7  | 5  | 0   | 2 |
| CONTIG-067911 | 119 | 4  | 5  | 3   | 0 |

|               |     |    |    |     |    |
|---------------|-----|----|----|-----|----|
| CONTIG-067912 | 168 | 6  | 13 | 22  | 0  |
| CONTIG-067913 | 374 | 19 | 0  | 0   | 46 |
| CONTIG-067914 | 215 | 10 | 6  | 88  | 0  |
| CONTIG-067915 | 98  | 8  | 4  | 37  | 0  |
| CONTIG-067916 | 147 | 17 | 0  | 64  | 2  |
| CONTIG-067917 | 77  | 5  | 7  | 9   | 0  |
| CONTIG-067919 | 180 | 9  | 4  | 31  | 0  |
| CONTIG-067920 | 62  | 7  | 2  | 7   | 0  |
| CONTIG-067921 | 194 | 10 | 3  | 38  | 0  |
| CONTIG-067923 | 300 | 11 | 0  | 17  | 0  |
| CONTIG-067924 | 139 | 15 | 4  | 104 | 0  |
| CONTIG-067925 | 73  | 9  | 0  | 31  | 0  |
| CONTIG-067926 | 179 | 10 | 8  | 55  | 0  |
| CONTIG-067927 | 94  | 11 | 3  | 19  | 0  |
| CONTIG-067928 | 107 | 6  | 2  | 6   | 0  |
| CONTIG-067929 | 184 | 11 | 13 | 55  | 2  |
| CONTIG-067930 | 263 | 9  | 18 | 54  | 0  |
| CONTIG-067931 | 158 | 7  | 17 | 36  | 0  |
| CONTIG-067934 | 198 | 8  | 17 | 70  | 0  |
| CONTIG-067935 | 84  | 12 | 2  | 35  | 0  |
| CONTIG-067936 | 244 | 8  | 5  | 21  | 0  |
| CONTIG-067937 | 67  | 7  | 3  | 9   | 0  |
| CONTIG-067938 | 383 | 10 | 14 | 152 | 0  |
| CONTIG-067939 | 90  | 7  | 2  | 6   | 0  |
| CONTIG-067940 | 104 | 5  | 0  | 5   | 0  |
| CONTIG-067945 | 100 | 4  | 6  | 2   | 0  |
| CONTIG-067946 | 265 | 6  | 0  | 79  | 0  |
| CONTIG-067947 | 273 | 7  | 5  | 47  | 0  |
| CONTIG-067948 | 112 | 5  | 2  | 15  | 0  |
| CONTIG-067949 | 220 | 10 | 3  | 86  | 0  |
| CONTIG-067950 | 151 | 14 | 2  | 105 | 0  |
| CONTIG-067951 | 60  | 6  | 6  | 12  | 0  |
| CONTIG-067952 | 190 | 8  | 32 | 58  | 0  |
| CONTIG-067953 | 182 | 7  | 0  | 41  | 0  |
| CONTIG-067954 | 118 | 4  | 5  | 18  | 0  |
| CONTIG-067955 | 79  | 3  | 2  | 3   | 0  |
| CONTIG-067956 | 68  | 13 | 8  | 10  | 0  |
| CONTIG-067957 | 101 | 65 | 7  | 223 | 14 |
| CONTIG-067958 | 95  | 6  | 2  | 18  | 0  |
| CONTIG-067959 | 137 | 5  | 5  | 12  | 0  |
| CONTIG-067964 | 211 | 7  | 6  | 28  | 0  |
| CONTIG-067965 | 318 | 11 | 8  | 141 | 0  |
| CONTIG-067966 | 372 | 18 | 6  | 29  | 0  |
| CONTIG-067967 | 90  | 6  | 9  | 17  | 0  |
| CONTIG-067968 | 77  | 29 | 3  | 72  | 0  |
| CONTIG-067969 | 281 | 10 | 7  | 62  | 3  |
| CONTIG-067970 | 130 | 19 | 14 | 69  | 2  |

|               |     |    |    |     |   |
|---------------|-----|----|----|-----|---|
| CONTIG-067971 | 148 | 9  | 28 | 34  | 0 |
| CONTIG-067972 | 230 | 8  | 4  | 51  | 0 |
| CONTIG-067973 | 97  | 5  | 11 | 20  | 0 |
| CONTIG-067974 | 492 | 8  | 12 | 145 | 0 |
| CONTIG-067979 | 103 | 6  | 13 | 6   | 0 |
| CONTIG-067980 | 187 | 9  | 22 | 53  | 2 |
| CONTIG-067981 | 82  | 8  | 6  | 2   | 2 |
| CONTIG-067982 | 153 | 6  | 2  | 9   | 0 |
| CONTIG-067990 | 92  | 6  | 7  | 17  | 0 |
| CONTIG-067991 | 766 | 16 | 21 | 519 | 2 |
| CONTIG-067992 | 172 | 8  | 5  | 59  | 0 |
| CONTIG-067993 | 59  | 3  | 9  | 0   | 0 |
| CONTIG-067994 | 187 | 30 | 33 | 150 | 2 |
| CONTIG-067995 | 59  | 5  | 4  | 9   | 0 |
| CONTIG-067996 | 163 | 8  | 2  | 38  | 0 |
| CONTIG-067997 | 69  | 5  | 3  | 7   | 0 |
| CONTIG-067998 | 358 | 7  | 4  | 67  | 0 |
| CONTIG-067999 | 81  | 6  | 7  | 13  | 0 |
| CONTIG-068000 | 58  | 5  | 2  | 4   | 0 |
| CONTIG-068001 | 54  | 10 | 5  | 8   | 0 |
| CONTIG-068003 | 68  | 2  | 4  | 2   | 0 |
| CONTIG-068004 | 80  | 6  | 6  | 14  | 0 |
| CONTIG-068005 | 114 | 6  | 7  | 16  | 0 |
| CONTIG-068006 | 158 | 10 | 13 | 39  | 0 |
| CONTIG-068007 | 82  | 7  | 12 | 2   | 0 |
| CONTIG-068008 | 75  | 8  | 2  | 3   | 0 |
| CONTIG-068009 | 79  | 7  | 0  | 12  | 0 |
| CONTIG-068010 | 226 | 16 | 21 | 102 | 0 |
| CONTIG-068011 | 247 | 11 | 7  | 73  | 0 |
| CONTIG-068012 | 296 | 8  | 8  | 84  | 0 |
| CONTIG-068013 | 103 | 7  | 19 | 16  | 0 |
| CONTIG-068014 | 807 | 13 | 32 | 385 | 0 |
| CONTIG-068015 | 71  | 4  | 3  | 2   | 0 |
| CONTIG-068016 | 84  | 9  | 13 | 0   | 0 |
| CONTIG-068017 | 65  | 16 | 6  | 6   | 0 |
| CONTIG-068018 | 75  | 3  | 0  | 0   | 0 |
| CONTIG-068021 | 85  | 7  | 4  | 18  | 0 |
| CONTIG-068022 | 127 | 10 | 5  | 35  | 0 |
| CONTIG-068023 | 127 | 4  | 0  | 2   | 0 |
| CONTIG-068024 | 223 | 16 | 0  | 192 | 0 |
| CONTIG-068025 | 115 | 6  | 22 | 2   | 0 |
| CONTIG-068026 | 177 | 7  | 4  | 56  | 3 |
| CONTIG-068027 | 90  | 2  | 3  | 0   | 0 |
| CONTIG-068028 | 167 | 6  | 3  | 24  | 0 |
| CONTIG-068029 | 74  | 4  | 6  | 5   | 0 |
| CONTIG-068030 | 140 | 4  | 0  | 11  | 0 |
| CONTIG-068031 | 104 | 8  | 0  | 18  | 0 |



|               |     |     |     |      |   |
|---------------|-----|-----|-----|------|---|
| CONTIG-068033 | 116 | 9   | 5   | 35   | 0 |
| CONTIG-068034 | 260 | 7   | 2   | 59   | 2 |
| CONTIG-068035 | 97  | 5   | 0   | 10   | 0 |
| CONTIG-068036 | 77  | 16  | 21  | 30   | 0 |
| CONTIG-068037 | 347 | 13  | 6   | 180  | 3 |
| CONTIG-068038 | 82  | 3   | 2   | 2    | 0 |
| CONTIG-068039 | 201 | 11  | 2   | 77   | 0 |
| CONTIG-068040 | 284 | 9   | 12  | 78   | 0 |
| CONTIG-068041 | 70  | 2   | 0   | 4    | 0 |
| CONTIG-068042 | 210 | 5   | 6   | 20   | 0 |
| CONTIG-068043 | 367 | 6   | 10  | 77   | 0 |
| CONTIG-068044 | 69  | 6   | 5   | 3    | 0 |
| CONTIG-068046 | 81  | 8   | 3   | 25   | 0 |
| CONTIG-068047 | 84  | 19  | 4   | 71   | 0 |
| CONTIG-068048 | 98  | 6   | 0   | 17   | 0 |
| CONTIG-068049 | 144 | 6   | 11  | 0    | 0 |
| CONTIG-068050 | 657 | 27  | 113 | 549  | 0 |
| CONTIG-068051 | 101 | 4   | 16  | 10   | 0 |
| CONTIG-068052 | 77  | 6   | 16  | 2    | 0 |
| CONTIG-068053 | 154 | 7   | 2   | 44   | 0 |
| CONTIG-068054 | 84  | 6   | 2   | 16   | 0 |
| CONTIG-068055 | 78  | 6   | 4   | 17   | 0 |
| CONTIG-068058 | 164 | 4   | 6   | 23   | 0 |
| CONTIG-068059 | 110 | 6   | 6   | 18   | 0 |
| CONTIG-068060 | 61  | 5   | 0   | 5    | 0 |
| CONTIG-068062 | 133 | 6   | 4   | 24   | 0 |
| CONTIG-068063 | 125 | 20  | 20  | 91   | 0 |
| CONTIG-068067 | 91  | 4   | 3   | 10   | 0 |
| CONTIG-068068 | 66  | 6   | 3   | 16   | 0 |
| CONTIG-068069 | 135 | 6   | 4   | 31   | 0 |
| CONTIG-068070 | 318 | 9   | 0   | 83   | 2 |
| CONTIG-068073 | 79  | 4   | 2   | 6    | 0 |
| CONTIG-068074 | 209 | 7   | 6   | 47   | 0 |
| CONTIG-068080 | 73  | 117 | 20  | 120  | 2 |
| CONTIG-068081 | 59  | 3   | 9   | 0    | 0 |
| CONTIG-068082 | 150 | 12  | 7   | 30   | 0 |
| CONTIG-068083 | 64  | 5   | 4   | 4    | 0 |
| CONTIG-068084 | 156 | 8   | 5   | 21   | 0 |
| CONTIG-068085 | 161 | 6   | 8   | 9    | 0 |
| CONTIG-068087 | 373 | 59  | 6   | 1298 | 0 |
| CONTIG-068088 | 60  | 4   | 2   | 6    | 0 |
| CONTIG-068091 | 129 | 4   | 2   | 0    | 4 |
| CONTIG-068092 | 85  | 5   | 2   | 5    | 0 |
| CONTIG-068093 | 168 | 8   | 21  | 18   | 3 |
| CONTIG-068094 | 65  | 6   | 7   | 9    | 0 |
| CONTIG-068095 | 155 | 9   | 2   | 45   | 0 |
| CONTIG-068096 | 268 | 10  | 13  | 19   | 0 |

|               |      |    |    |     |    |
|---------------|------|----|----|-----|----|
| CONTIG-068097 | 110  | 11 | 8  | 25  | 0  |
| CONTIG-068098 | 104  | 9  | 6  | 27  | 0  |
| CONTIG-068099 | 406  | 8  | 18 | 83  | 0  |
| CONTIG-068100 | 253  | 4  | 2  | 20  | 0  |
| CONTIG-068101 | 1036 | 21 | 29 | 772 | 78 |
| CONTIG-068102 | 79   | 3  | 0  | 0   | 0  |
| CONTIG-068103 | 91   | 3  | 0  | 4   | 0  |
| CONTIG-068104 | 306  | 6  | 4  | 8   | 0  |
| CONTIG-068105 | 129  | 5  | 2  | 25  | 0  |
| CONTIG-068107 | 153  | 7  | 4  | 30  | 0  |
| CONTIG-068108 | 81   | 5  | 6  | 6   | 0  |
| CONTIG-068109 | 241  | 4  | 14 | 15  | 0  |
| CONTIG-068110 | 86   | 5  | 3  | 0   | 0  |
| CONTIG-068111 | 94   | 6  | 7  | 13  | 0  |
| CONTIG-068112 | 116  | 7  | 12 | 19  | 0  |
| CONTIG-068113 | 111  | 5  | 6  | 9   | 0  |
| CONTIG-068114 | 66   | 27 | 10 | 48  | 0  |
| CONTIG-068115 | 106  | 4  | 2  | 0   | 0  |
| CONTIG-068116 | 221  | 7  | 2  | 17  | 0  |
| CONTIG-068117 | 199  | 5  | 29 | 15  | 0  |
| CONTIG-068118 | 60   | 7  | 5  | 4   | 0  |
| CONTIG-068119 | 202  | 5  | 9  | 35  | 0  |
| CONTIG-068120 | 95   | 6  | 4  | 8   | 0  |
| CONTIG-068121 | 296  | 8  | 35 | 83  | 0  |
| CONTIG-068122 | 162  | 12 | 2  | 56  | 0  |
| CONTIG-068123 | 312  | 34 | 11 | 585 | 0  |
| CONTIG-068124 | 212  | 8  | 7  | 44  | 0  |
| CONTIG-068125 | 59   | 4  | 2  | 4   | 0  |
| CONTIG-068126 | 107  | 5  | 2  | 7   | 0  |
| CONTIG-068127 | 98   | 7  | 15 | 11  | 0  |
| CONTIG-068128 | 167  | 7  | 6  | 50  | 2  |
| CONTIG-068129 | 105  | 6  | 0  | 0   | 2  |
| CONTIG-068130 | 69   | 4  | 5  | 4   | 0  |
| CONTIG-068131 | 78   | 3  | 4  | 5   | 0  |
| CONTIG-068132 | 103  | 6  | 12 | 28  | 0  |
| CONTIG-068133 | 269  | 10 | 75 | 45  | 2  |
| CONTIG-068134 | 646  | 19 | 4  | 0   | 37 |
| CONTIG-068135 | 143  | 7  | 2  | 39  | 0  |
| CONTIG-068137 | 428  | 12 | 12 | 171 | 0  |
| CONTIG-068138 | 185  | 14 | 6  | 0   | 13 |
| CONTIG-068139 | 66   | 9  | 6  | 14  | 0  |
| CONTIG-068140 | 75   | 3  | 0  | 4   | 0  |
| CONTIG-068141 | 75   | 4  | 2  | 7   | 0  |
| CONTIG-068142 | 110  | 8  | 3  | 26  | 0  |
| CONTIG-068143 | 99   | 4  | 4  | 14  | 0  |
| CONTIG-068144 | 65   | 6  | 9  | 0   | 0  |
| CONTIG-068145 | 98   | 9  | 32 | 21  | 0  |

|               |     |    |    |     |     |
|---------------|-----|----|----|-----|-----|
| CONTIG-068146 | 211 | 7  | 8  | 13  | 0   |
| CONTIG-068147 | 129 | 5  | 0  | 16  | 0   |
| CONTIG-068148 | 378 | 9  | 7  | 39  | 0   |
| CONTIG-068150 | 105 | 7  | 8  | 29  | 0   |
| CONTIG-068151 | 178 | 5  | 0  | 15  | 0   |
| CONTIG-068152 | 279 | 13 | 7  | 111 | 4   |
| CONTIG-068153 | 313 | 10 | 20 | 74  | 0   |
| CONTIG-068154 | 94  | 4  | 0  | 13  | 0   |
| CONTIG-068155 | 522 | 9  | 14 | 125 | 0   |
| CONTIG-068156 | 260 | 8  | 6  | 59  | 0   |
| CONTIG-068157 | 152 | 11 | 3  | 47  | 0   |
| CONTIG-068158 | 267 | 6  | 12 | 32  | 0   |
| CONTIG-068159 | 118 | 15 | 3  | 82  | 0   |
| CONTIG-068160 | 71  | 9  | 0  | 31  | 0   |
| CONTIG-068161 | 53  | 19 | 2  | 45  | 0   |
| CONTIG-068163 | 75  | 5  | 6  | 6   | 0   |
| CONTIG-068164 | 72  | 2  | 2  | 0   | 0   |
| CONTIG-068166 | 386 | 8  | 13 | 128 | 0   |
| CONTIG-068168 | 121 | 3  | 5  | 4   | 0   |
| CONTIG-068169 | 245 | 9  | 8  | 65  | 0   |
| CONTIG-068170 | 153 | 12 | 5  | 61  | 4   |
| CONTIG-068171 | 65  | 4  | 3  | 2   | 0   |
| CONTIG-068172 | 101 | 6  | 7  | 19  | 0   |
| CONTIG-068173 | 209 | 5  | 0  | 23  | 0   |
| CONTIG-068174 | 197 | 7  | 8  | 51  | 0   |
| CONTIG-068175 | 89  | 7  | 7  | 24  | 0   |
| CONTIG-068177 | 81  | 8  | 0  | 14  | 0   |
| CONTIG-068178 | 123 | 4  | 14 | 0   | 0   |
| CONTIG-068179 | 678 | 8  | 9  | 142 | 0   |
| CONTIG-068180 | 64  | 4  | 3  | 9   | 0   |
| CONTIG-068181 | 263 | 6  | 2  | 37  | 0   |
| CONTIG-068182 | 150 | 7  | 17 | 29  | 0   |
| CONTIG-068183 | 87  | 3  | 0  | 8   | 0   |
| CONTIG-068184 | 64  | 5  | 5  | 0   | 0   |
| CONTIG-068186 | 74  | 4  | 0  | 8   | 0   |
| CONTIG-068187 | 64  | 17 | 12 | 3   | 0   |
| CONTIG-068188 | 113 | 6  | 3  | 14  | 0   |
| CONTIG-068190 | 72  | 3  | 6  | 2   | 0   |
| CONTIG-068191 | 502 | 15 | 17 | 78  | 0   |
| CONTIG-068192 | 194 | 15 | 33 | 141 | 0   |
| CONTIG-068193 | 75  | 11 | 5  | 33  | 0   |
| CONTIG-068194 | 98  | 5  | 9  | 8   | 0   |
| CONTIG-068195 | 422 | 14 | 36 | 176 | 0   |
| CONTIG-068196 | 191 | 6  | 6  | 31  | 0   |
| CONTIG-068197 | 810 | 28 | 0  | 0   | 172 |
| CONTIG-068198 | 183 | 17 | 16 | 104 | 0   |
| CONTIG-068199 | 187 | 10 | 2  | 68  | 0   |

|               |     |     |    |     |     |
|---------------|-----|-----|----|-----|-----|
| CONTIG-068200 | 71  | 65  | 0  | 12  | 0   |
| CONTIG-068201 | 259 | 31  | 13 | 321 | 5   |
| CONTIG-068204 | 215 | 9   | 10 | 65  | 0   |
| CONTIG-068206 | 136 | 7   | 8  | 5   | 0   |
| CONTIG-068207 | 60  | 5   | 0  | 11  | 0   |
| CONTIG-068208 | 346 | 11  | 10 | 33  | 0   |
| CONTIG-068209 | 91  | 5   | 3  | 15  | 0   |
| CONTIG-068210 | 167 | 8   | 4  | 34  | 8   |
| CONTIG-068213 | 141 | 6   | 15 | 16  | 0   |
| CONTIG-068214 | 85  | 8   | 12 | 18  | 0   |
| CONTIG-068215 | 98  | 6   | 0  | 7   | 0   |
| CONTIG-068217 | 64  | 20  | 20 | 27  | 0   |
| CONTIG-068221 | 103 | 7   | 0  | 19  | 0   |
| CONTIG-068225 | 96  | 5   | 15 | 10  | 0   |
| CONTIG-068226 | 94  | 5   | 7  | 6   | 0   |
| CONTIG-068227 | 74  | 9   | 16 | 10  | 0   |
| CONTIG-068228 | 112 | 15  | 2  | 90  | 0   |
| CONTIG-068230 | 172 | 10  | 3  | 0   | 0   |
| CONTIG-068232 | 221 | 10  | 48 | 63  | 0   |
| CONTIG-068233 | 92  | 5   | 6  | 6   | 0   |
| CONTIG-068234 | 127 | 7   | 4  | 4   | 0   |
| CONTIG-068235 | 250 | 165 | 2  | 0   | 578 |
| CONTIG-068236 | 92  | 7   | 0  | 14  | 0   |
| CONTIG-068237 | 97  | 4   | 2  | 0   | 2   |
| CONTIG-068238 | 218 | 8   | 2  | 61  | 0   |
| CONTIG-068239 | 175 | 6   | 9  | 32  | 0   |
| CONTIG-068240 | 95  | 4   | 3  | 14  | 0   |
| CONTIG-068241 | 323 | 12  | 37 | 173 | 0   |
| CONTIG-068242 | 89  | 5   | 2  | 18  | 0   |
| CONTIG-068243 | 242 | 4   | 18 | 20  | 0   |
| CONTIG-068244 | 173 | 5   | 3  | 32  | 0   |
| CONTIG-068245 | 163 | 7   | 0  | 41  | 2   |
| CONTIG-068246 | 339 | 7   | 4  | 0   | 6   |
| CONTIG-068250 | 72  | 10  | 4  | 20  | 0   |
| CONTIG-068251 | 212 | 7   | 10 | 16  | 0   |
| CONTIG-068252 | 76  | 27  | 9  | 25  | 0   |
| CONTIG-068253 | 122 | 12  | 8  | 39  | 0   |
| CONTIG-068254 | 217 | 23  | 16 | 41  | 0   |
| CONTIG-068255 | 256 | 8   | 0  | 58  | 2   |
| CONTIG-068256 | 148 | 14  | 8  | 85  | 2   |
| CONTIG-068257 | 81  | 9   | 9  | 22  | 0   |
| CONTIG-068258 | 156 | 15  | 10 | 66  | 2   |
| CONTIG-068259 | 63  | 11  | 2  | 12  | 0   |
| CONTIG-068262 | 71  | 3   | 0  | 5   | 0   |
| CONTIG-068263 | 46  | 245 | 17 | 136 | 2   |
| CONTIG-068271 | 104 | 7   | 2  | 20  | 0   |
| CONTIG-068272 | 145 | 16  | 12 | 97  | 0   |

|               |     |    |    |     |   |
|---------------|-----|----|----|-----|---|
| CONTIG-068273 | 358 | 12 | 34 | 157 | 2 |
| CONTIG-068274 | 76  | 4  | 0  | 4   | 0 |
| CONTIG-068275 | 200 | 7  | 23 | 30  | 0 |
| CONTIG-068278 | 93  | 6  | 4  | 22  | 0 |
| CONTIG-068279 | 78  | 8  | 2  | 10  | 0 |
| CONTIG-068280 | 315 | 3  | 6  | 32  | 0 |
| CONTIG-068281 | 199 | 4  | 4  | 10  | 0 |
| CONTIG-068282 | 200 | 15 | 5  | 78  | 0 |
| CONTIG-068283 | 101 | 4  | 7  | 8   | 0 |
| CONTIG-068284 | 86  | 4  | 6  | 10  | 0 |
| CONTIG-068285 | 436 | 13 | 11 | 203 | 0 |
| CONTIG-068286 | 94  | 8  | 6  | 23  | 0 |
| CONTIG-068287 | 75  | 11 | 12 | 28  | 0 |
| CONTIG-068288 | 70  | 20 | 4  | 20  | 0 |
| CONTIG-068289 | 89  | 9  | 0  | 7   | 0 |
| CONTIG-068290 | 137 | 8  | 4  | 25  | 0 |
| CONTIG-068291 | 214 | 7  | 4  | 58  | 0 |
| CONTIG-068292 | 74  | 3  | 0  | 2   | 0 |
| CONTIG-068293 | 88  | 6  | 2  | 12  | 0 |
| CONTIG-068294 | 254 | 9  | 13 | 54  | 4 |
| CONTIG-068295 | 110 | 12 | 11 | 55  | 0 |
| CONTIG-068296 | 449 | 15 | 10 | 265 | 0 |
| CONTIG-068297 | 73  | 5  | 0  | 5   | 0 |
| CONTIG-068298 | 842 | 13 | 17 | 504 | 5 |
| CONTIG-068299 | 111 | 11 | 3  | 23  | 0 |
| CONTIG-068300 | 76  | 6  | 0  | 4   | 0 |
| CONTIG-068301 | 62  | 5  | 0  | 6   | 0 |
| CONTIG-068302 | 124 | 20 | 37 | 101 | 0 |
| CONTIG-068303 | 480 | 11 | 35 | 271 | 0 |
| CONTIG-068304 | 109 | 11 | 3  | 43  | 0 |
| CONTIG-068305 | 61  | 4  | 9  | 3   | 0 |
| CONTIG-068306 | 131 | 5  | 5  | 30  | 0 |
| CONTIG-068307 | 119 | 4  | 5  | 2   | 0 |
| CONTIG-068308 | 106 | 6  | 5  | 16  | 0 |
| CONTIG-068309 | 599 | 22 | 19 | 74  | 0 |
| CONTIG-068311 | 104 | 13 | 6  | 64  | 0 |
| CONTIG-068312 | 102 | 4  | 0  | 4   | 0 |
| CONTIG-068313 | 76  | 6  | 22 | 0   | 0 |
| CONTIG-068314 | 68  | 7  | 14 | 4   | 0 |
| CONTIG-068315 | 69  | 4  | 3  | 9   | 0 |
| CONTIG-068316 | 205 | 9  | 13 | 94  | 0 |
| CONTIG-068317 | 91  | 3  | 8  | 0   | 0 |
| CONTIG-068318 | 148 | 20 | 8  | 56  | 3 |
| CONTIG-068319 | 157 | 6  | 4  | 29  | 0 |
| CONTIG-068320 | 99  | 8  | 12 | 22  | 0 |
| CONTIG-068322 | 189 | 8  | 10 | 34  | 3 |
| CONTIG-068324 | 165 | 7  | 10 | 27  | 2 |

|               |     |      |    |     |      |
|---------------|-----|------|----|-----|------|
| CONTIG-068325 | 723 | 12   | 21 | 117 | 0    |
| CONTIG-068326 | 386 | 67   | 15 | 0   | 392  |
| CONTIG-068327 | 466 | 9    | 11 | 121 | 0    |
| CONTIG-068328 | 206 | 9    | 20 | 41  | 0    |
| CONTIG-068329 | 463 | 11   | 21 | 143 | 0    |
| CONTIG-068330 | 569 | 17   | 29 | 127 | 0    |
| CONTIG-068331 | 73  | 4    | 9  | 5   | 0    |
| CONTIG-068333 | 115 | 4    | 16 | 10  | 0    |
| CONTIG-068334 | 79  | 8    | 16 | 14  | 0    |
| CONTIG-068335 | 189 | 8    | 2  | 73  | 0    |
| CONTIG-068336 | 85  | 4    | 3  | 0   | 0    |
| CONTIG-068337 | 70  | 5    | 0  | 9   | 0    |
| CONTIG-068338 | 99  | 12   | 9  | 57  | 0    |
| CONTIG-068339 | 142 | 12   | 8  | 39  | 0    |
| CONTIG-068340 | 149 | 5    | 6  | 17  | 0    |
| CONTIG-068341 | 76  | 5    | 0  | 10  | 0    |
| CONTIG-068342 | 79  | 6    | 0  | 0   | 3    |
| CONTIG-068344 | 82  | 7    | 9  | 15  | 0    |
| CONTIG-068345 | 162 | 10   | 23 | 61  | 2    |
| CONTIG-068346 | 79  | 15   | 19 | 29  | 0    |
| CONTIG-068347 | 81  | 15   | 18 | 30  | 0    |
| CONTIG-068351 | 66  | 4    | 8  | 7   | 0    |
| CONTIG-068352 | 113 | 5    | 2  | 14  | 0    |
| CONTIG-068353 | 67  | 9    | 7  | 9   | 0    |
| CONTIG-068354 | 135 | 3    | 0  | 13  | 0    |
| CONTIG-068358 | 117 | 6    | 13 | 5   | 0    |
| CONTIG-068359 | 54  | 826  | 6  | 787 | 0    |
| CONTIG-068360 | 69  | 4    | 0  | 0   | 0    |
| CONTIG-068361 | 217 | 12   | 5  | 54  | 8    |
| CONTIG-068362 | 36  | 4999 | 5  | 0   | 2522 |
| CONTIG-068363 | 63  | 2    | 0  | 2   | 0    |
| CONTIG-068364 | 350 | 20   | 12 | 84  | 5    |
| CONTIG-068367 | 146 | 9    | 4  | 41  | 0    |
| CONTIG-068368 | 259 | 10   | 6  | 128 | 0    |
| CONTIG-068369 | 266 | 6    | 4  | 63  | 0    |
| CONTIG-068370 | 95  | 9    | 15 | 17  | 0    |
| CONTIG-068372 | 639 | 50   | 0  | 2   | 836  |
| CONTIG-068373 | 65  | 10   | 10 | 27  | 0    |
| CONTIG-068374 | 319 | 12   | 4  | 65  | 0    |
| CONTIG-068375 | 116 | 8    | 0  | 49  | 0    |
| CONTIG-068376 | 288 | 7    | 14 | 72  | 0    |
| CONTIG-068377 | 120 | 9    | 2  | 25  | 0    |
| CONTIG-068378 | 137 | 12   | 11 | 59  | 0    |
| CONTIG-068380 | 76  | 4    | 2  | 7   | 0    |
| CONTIG-068381 | 500 | 9    | 28 | 120 | 0    |
| CONTIG-068383 | 69  | 6    | 5  | 14  | 0    |
| CONTIG-068384 | 107 | 40   | 4  | 140 | 0    |

|               |     |    |    |     |    |
|---------------|-----|----|----|-----|----|
| CONTIG-068385 | 78  | 3  | 7  | 4   | 0  |
| CONTIG-068386 | 66  | 5  | 4  | 11  | 0  |
| CONTIG-068387 | 74  | 23 | 45 | 42  | 0  |
| CONTIG-068388 | 578 | 9  | 18 | 103 | 8  |
| CONTIG-068389 | 181 | 7  | 4  | 39  | 2  |
| CONTIG-068390 | 119 | 5  | 5  | 13  | 0  |
| CONTIG-068391 | 136 | 6  | 11 | 14  | 0  |
| CONTIG-068392 | 102 | 6  | 2  | 15  | 0  |
| CONTIG-068393 | 110 | 2  | 2  | 2   | 0  |
| CONTIG-068394 | 89  | 4  | 6  | 3   | 0  |
| CONTIG-068395 | 102 | 8  | 3  | 28  | 0  |
| CONTIG-068396 | 191 | 8  | 4  | 4   | 0  |
| CONTIG-068397 | 288 | 7  | 10 | 55  | 0  |
| CONTIG-068398 | 92  | 6  | 29 | 4   | 0  |
| CONTIG-068399 | 182 | 5  | 9  | 21  | 0  |
| CONTIG-068400 | 71  | 4  | 0  | 2   | 0  |
| CONTIG-068401 | 256 | 8  | 20 | 71  | 0  |
| CONTIG-068402 | 248 | 31 | 6  | 0   | 82 |
| CONTIG-068403 | 141 | 8  | 11 | 4   | 0  |
| CONTIG-068404 | 478 | 15 | 36 | 191 | 2  |
| CONTIG-068405 | 77  | 15 | 4  | 31  | 2  |
| CONTIG-068407 | 242 | 12 | 11 | 98  | 6  |
| CONTIG-068409 | 101 | 7  | 2  | 20  | 0  |
| CONTIG-068410 | 73  | 4  | 13 | 4   | 0  |
| CONTIG-068412 | 134 | 15 | 12 | 67  | 0  |
| CONTIG-068413 | 78  | 4  | 10 | 5   | 0  |
| CONTIG-068414 | 366 | 13 | 28 | 182 | 4  |
| CONTIG-068415 | 60  | 5  | 5  | 0   | 0  |
| CONTIG-068416 | 67  | 6  | 7  | 12  | 0  |
| CONTIG-068417 | 74  | 8  | 6  | 2   | 0  |
| CONTIG-068418 | 89  | 6  | 8  | 10  | 0  |
| CONTIG-068419 | 160 | 5  | 5  | 21  | 0  |
| CONTIG-068420 | 81  | 6  | 4  | 17  | 0  |
| CONTIG-068421 | 122 | 7  | 4  | 21  | 0  |
| CONTIG-068422 | 52  | 23 | 19 | 32  | 2  |
| CONTIG-068423 | 63  | 3  | 6  | 0   | 0  |
| CONTIG-068424 | 102 | 10 | 14 | 24  | 0  |
| CONTIG-068425 | 44  | 53 | 0  | 61  | 0  |
| CONTIG-068426 | 125 | 3  | 4  | 10  | 0  |
| CONTIG-068427 | 129 | 3  | 0  | 10  | 0  |
| CONTIG-068429 | 80  | 12 | 20 | 13  | 0  |
| CONTIG-068430 | 84  | 10 | 0  | 6   | 0  |
| CONTIG-068431 | 289 | 18 | 7  | 10  | 0  |
| CONTIG-068432 | 99  | 5  | 6  | 5   | 0  |
| CONTIG-068433 | 78  | 6  | 0  | 11  | 0  |
| CONTIG-068434 | 67  | 4  | 12 | 4   | 0  |
| CONTIG-068435 | 161 | 7  | 8  | 43  | 0  |

|               |      |    |    |     |     |
|---------------|------|----|----|-----|-----|
| CONTIG-068436 | 555  | 19 | 28 | 178 | 4   |
| CONTIG-068437 | 68   | 4  | 0  | 0   | 0   |
| CONTIG-068438 | 135  | 8  | 17 | 7   | 0   |
| CONTIG-068439 | 141  | 5  | 2  | 17  | 0   |
| CONTIG-068440 | 146  | 6  | 3  | 20  | 0   |
| CONTIG-068441 | 99   | 5  | 0  | 6   | 0   |
| CONTIG-068443 | 272  | 10 | 22 | 69  | 0   |
| CONTIG-068444 | 316  | 11 | 15 | 117 | 4   |
| CONTIG-068445 | 162  | 17 | 12 | 89  | 5   |
| CONTIG-068446 | 88   | 5  | 4  | 11  | 0   |
| CONTIG-068447 | 593  | 17 | 21 | 224 | 4   |
| CONTIG-068448 | 173  | 7  | 7  | 43  | 0   |
| CONTIG-068449 | 77   | 10 | 6  | 10  | 0   |
| CONTIG-068450 | 77   | 7  | 2  | 16  | 0   |
| CONTIG-068451 | 155  | 5  | 0  | 0   | 0   |
| CONTIG-068452 | 116  | 5  | 0  | 15  | 0   |
| CONTIG-068453 | 612  | 18 | 16 | 566 | 0   |
| CONTIG-068454 | 145  | 9  | 5  | 36  | 0   |
| CONTIG-068455 | 122  | 5  | 2  | 15  | 0   |
| CONTIG-068456 | 62   | 14 | 14 | 13  | 0   |
| CONTIG-068457 | 127  | 5  | 16 | 16  | 0   |
| CONTIG-068458 | 60   | 10 | 0  | 19  | 0   |
| CONTIG-068459 | 555  | 18 | 19 | 428 | 0   |
| CONTIG-068460 | 115  | 6  | 4  | 18  | 0   |
| CONTIG-068461 | 65   | 9  | 2  | 25  | 0   |
| CONTIG-068462 | 1530 | 12 | 2  | 0   | 52  |
| CONTIG-068464 | 95   | 8  | 6  | 20  | 0   |
| CONTIG-068465 | 203  | 6  | 0  | 21  | 0   |
| CONTIG-068466 | 102  | 51 | 10 | 158 | 0   |
| CONTIG-068467 | 66   | 3  | 2  | 2   | 0   |
| CONTIG-068468 | 61   | 4  | 2  | 11  | 0   |
| CONTIG-068469 | 86   | 8  | 5  | 21  | 0   |
| CONTIG-068470 | 101  | 10 | 5  | 35  | 0   |
| CONTIG-068471 | 344  | 14 | 29 | 168 | 0   |
| CONTIG-068472 | 72   | 4  | 2  | 4   | 0   |
| CONTIG-068473 | 192  | 9  | 18 | 51  | 0   |
| CONTIG-068474 | 58   | 8  | 0  | 0   | 0   |
| CONTIG-068475 | 173  | 10 | 17 | 57  | 0   |
| CONTIG-068476 | 200  | 8  | 0  | 55  | 0   |
| CONTIG-068477 | 120  | 14 | 10 | 51  | 0   |
| CONTIG-068478 | 318  | 7  | 10 | 45  | 0   |
| CONTIG-068479 | 96   | 25 | 10 | 70  | 0   |
| CONTIG-068480 | 61   | 5  | 4  | 6   | 0   |
| CONTIG-068481 | 278  | 8  | 31 | 56  | 0   |
| CONTIG-068482 | 91   | 9  | 3  | 31  | 0   |
| CONTIG-068484 | 145  | 5  | 0  | 12  | 0   |
| CONTIG-068485 | 483  | 52 | 0  | 0   | 170 |



|               |     |     |    |     |    |
|---------------|-----|-----|----|-----|----|
| CONTIG-068486 | 95  | 3   | 2  | 4   | 0  |
| CONTIG-068487 | 74  | 11  | 4  | 35  | 0  |
| CONTIG-068488 | 86  | 6   | 2  | 9   | 0  |
| CONTIG-068489 | 190 | 8   | 2  | 71  | 0  |
| CONTIG-068490 | 231 | 5   | 0  | 37  | 0  |
| CONTIG-068492 | 115 | 3   | 0  | 6   | 0  |
| CONTIG-068493 | 91  | 5   | 6  | 4   | 0  |
| CONTIG-068494 | 103 | 7   | 5  | 22  | 0  |
| CONTIG-068495 | 117 | 9   | 24 | 30  | 0  |
| CONTIG-068496 | 603 | 7   | 0  | 0   | 5  |
| CONTIG-068497 | 71  | 15  | 33 | 11  | 0  |
| CONTIG-068498 | 83  | 10  | 0  | 0   | 5  |
| CONTIG-068499 | 128 | 101 | 13 | 607 | 0  |
| CONTIG-068500 | 63  | 8   | 5  | 0   | 0  |
| CONTIG-068501 | 84  | 5   | 7  | 5   | 0  |
| CONTIG-068502 | 103 | 10  | 21 | 20  | 0  |
| CONTIG-068503 | 173 | 14  | 3  | 95  | 2  |
| CONTIG-068505 | 170 | 12  | 33 | 20  | 2  |
| CONTIG-068506 | 282 | 16  | 35 | 165 | 4  |
| CONTIG-068507 | 119 | 8   | 4  | 20  | 0  |
| CONTIG-068509 | 209 | 15  | 20 | 0   | 0  |
| CONTIG-068510 | 58  | 6   | 0  | 9   | 0  |
| CONTIG-068511 | 221 | 9   | 25 | 58  | 0  |
| CONTIG-068512 | 98  | 36  | 2  | 0   | 17 |
| CONTIG-068513 | 92  | 6   | 0  | 25  | 0  |
| CONTIG-068514 | 98  | 18  | 11 | 0   | 0  |
| CONTIG-068515 | 87  | 7   | 11 | 9   | 0  |
| CONTIG-068516 | 127 | 7   | 5  | 33  | 0  |
| CONTIG-068517 | 127 | 9   | 7  | 36  | 0  |
| CONTIG-068518 | 92  | 62  | 5  | 27  | 0  |
| CONTIG-068521 | 75  | 5   | 6  | 9   | 0  |
| CONTIG-068522 | 119 | 11  | 0  | 52  | 0  |
| CONTIG-068523 | 567 | 17  | 3  | 383 | 2  |
| CONTIG-068524 | 79  | 5   | 0  | 8   | 0  |
| CONTIG-068527 | 248 | 13  | 8  | 45  | 0  |
| CONTIG-068528 | 92  | 7   | 2  | 11  | 0  |
| CONTIG-068530 | 179 | 13  | 0  | 125 | 0  |
| CONTIG-068531 | 59  | 3   | 5  | 6   | 0  |
| CONTIG-068532 | 252 | 5   | 5  | 44  | 0  |
| CONTIG-068533 | 96  | 6   | 3  | 11  | 0  |
| CONTIG-068534 | 101 | 7   | 4  | 20  | 0  |
| CONTIG-068535 | 58  | 19  | 2  | 30  | 0  |
| CONTIG-068536 | 146 | 5   | 4  | 15  | 0  |
| CONTIG-068537 | 263 | 8   | 20 | 29  | 2  |
| CONTIG-068538 | 571 | 12  | 5  | 316 | 0  |
| CONTIG-068539 | 143 | 10  | 12 | 38  | 0  |
| CONTIG-068540 | 124 | 6   | 3  | 14  | 0  |

|               |     |    |    |     |    |
|---------------|-----|----|----|-----|----|
| CONTIG-068541 | 238 | 15 | 6  | 100 | 0  |
| CONTIG-068542 | 123 | 5  | 0  | 2   | 0  |
| CONTIG-068544 | 100 | 4  | 2  | 9   | 0  |
| CONTIG-068545 | 457 | 20 | 0  | 0   | 35 |
| CONTIG-068546 | 73  | 4  | 3  | 0   | 2  |
| CONTIG-068547 | 170 | 7  | 8  | 18  | 0  |
| CONTIG-068549 | 390 | 12 | 2  | 133 | 2  |
| CONTIG-068551 | 88  | 6  | 0  | 10  | 2  |
| CONTIG-068552 | 123 | 7  | 19 | 26  | 0  |
| CONTIG-068553 | 73  | 38 | 4  | 135 | 0  |
| CONTIG-068555 | 178 | 12 | 12 | 86  | 0  |
| CONTIG-068557 | 153 | 8  | 22 | 12  | 0  |
| CONTIG-068558 | 72  | 11 | 13 | 2   | 0  |
| CONTIG-068559 | 153 | 17 | 2  | 106 | 2  |
| CONTIG-068560 | 384 | 8  | 28 | 86  | 0  |
| CONTIG-068561 | 80  | 3  | 2  | 2   | 0  |
| CONTIG-068562 | 146 | 5  | 2  | 16  | 0  |
| CONTIG-068563 | 409 | 10 | 7  | 174 | 0  |
| CONTIG-068565 | 188 | 6  | 8  | 17  | 0  |
| CONTIG-068566 | 217 | 5  | 11 | 8   | 2  |
| CONTIG-068567 | 66  | 10 | 6  | 11  | 0  |
| CONTIG-068569 | 255 | 16 | 6  | 159 | 0  |
| CONTIG-068570 | 89  | 4  | 0  | 6   | 0  |
| CONTIG-068571 | 281 | 9  | 4  | 53  | 0  |
| CONTIG-068572 | 137 | 15 | 11 | 73  | 0  |
| CONTIG-068573 | 74  | 8  | 7  | 12  | 0  |
| CONTIG-068574 | 78  | 6  | 5  | 12  | 4  |
| CONTIG-068575 | 60  | 13 | 17 | 13  | 0  |
| CONTIG-068576 | 117 | 7  | 0  | 26  | 0  |
| CONTIG-068577 | 278 | 9  | 19 | 61  | 0  |
| CONTIG-068579 | 77  | 11 | 7  | 29  | 0  |
| CONTIG-068580 | 73  | 4  | 4  | 5   | 0  |
| CONTIG-068581 | 158 | 9  | 2  | 50  | 0  |
| CONTIG-068582 | 71  | 5  | 4  | 12  | 0  |
| CONTIG-068583 | 77  | 5  | 0  | 0   | 0  |
| CONTIG-068584 | 207 | 12 | 3  | 97  | 0  |
| CONTIG-068585 | 113 | 28 | 0  | 164 | 0  |
| CONTIG-068586 | 140 | 14 | 17 | 58  | 2  |
| CONTIG-068587 | 82  | 8  | 17 | 11  | 0  |
| CONTIG-068588 | 79  | 4  | 10 | 4   | 0  |
| CONTIG-068589 | 100 | 3  | 6  | 7   | 0  |
| CONTIG-068590 | 63  | 3  | 2  | 3   | 0  |
| CONTIG-068591 | 112 | 12 | 4  | 56  | 0  |
| CONTIG-068592 | 202 | 38 | 9  | 0   | 72 |
| CONTIG-068593 | 58  | 7  | 7  | 9   | 2  |
| CONTIG-068598 | 68  | 4  | 4  | 5   | 0  |
| CONTIG-068599 | 79  | 5  | 15 | 6   | 0  |

|               |     |     |    |     |   |
|---------------|-----|-----|----|-----|---|
| CONTIG-068600 | 75  | 40  | 0  | 8   | 0 |
| CONTIG-068601 | 94  | 6   | 15 | 15  | 0 |
| CONTIG-068602 | 104 | 7   | 2  | 20  | 0 |
| CONTIG-068603 | 185 | 7   | 5  | 15  | 0 |
| CONTIG-068604 | 66  | 11  | 36 | 0   | 0 |
| CONTIG-068606 | 148 | 4   | 4  | 13  | 2 |
| CONTIG-068607 | 75  | 4   | 8  | 0   | 0 |
| CONTIG-068609 | 65  | 11  | 12 | 14  | 0 |
| CONTIG-068610 | 297 | 23  | 21 | 344 | 0 |
| CONTIG-068611 | 58  | 3   | 5  | 6   | 0 |
| CONTIG-068612 | 121 | 7   | 3  | 26  | 0 |
| CONTIG-068613 | 73  | 6   | 8  | 12  | 0 |
| CONTIG-068614 | 60  | 4   | 13 | 0   | 0 |
| CONTIG-068615 | 71  | 9   | 8  | 15  | 0 |
| CONTIG-068616 | 418 | 13  | 2  | 172 | 2 |
| CONTIG-068617 | 77  | 7   | 2  | 16  | 0 |
| CONTIG-068618 | 157 | 5   | 7  | 7   | 0 |
| CONTIG-068619 | 106 | 4   | 4  | 11  | 0 |
| CONTIG-068620 | 37  | 630 | 48 | 504 | 4 |
| CONTIG-068621 | 382 | 8   | 9  | 76  | 2 |
| CONTIG-068622 | 89  | 8   | 3  | 22  | 0 |
| CONTIG-068623 | 72  | 9   | 2  | 28  | 0 |
| CONTIG-068624 | 139 | 10  | 7  | 73  | 0 |
| CONTIG-068625 | 68  | 6   | 0  | 7   | 0 |
| CONTIG-068626 | 125 | 6   | 0  | 29  | 0 |
| CONTIG-068627 | 71  | 7   | 11 | 12  | 0 |
| CONTIG-068628 | 91  | 10  | 5  | 35  | 0 |
| CONTIG-068629 | 116 | 11  | 5  | 22  | 0 |
| CONTIG-068630 | 479 | 12  | 5  | 256 | 0 |
| CONTIG-068631 | 58  | 4   | 3  | 5   | 0 |
| CONTIG-068632 | 160 | 10  | 10 | 37  | 0 |
| CONTIG-068633 | 126 | 7   | 2  | 35  | 0 |
| CONTIG-068634 | 77  | 4   | 10 | 2   | 0 |
| CONTIG-068635 | 277 | 9   | 11 | 99  | 0 |
| CONTIG-068636 | 117 | 7   | 2  | 25  | 0 |
| CONTIG-068638 | 213 | 7   | 3  | 15  | 3 |
| CONTIG-068639 | 220 | 8   | 10 | 84  | 0 |
| CONTIG-068640 | 184 | 16  | 2  | 110 | 0 |
| CONTIG-068643 | 143 | 5   | 4  | 4   | 0 |
| CONTIG-068644 | 164 | 5   | 6  | 19  | 2 |
| CONTIG-068645 | 254 | 12  | 23 | 91  | 2 |
| CONTIG-068646 | 307 | 21  | 8  | 215 | 4 |
| CONTIG-068647 | 60  | 5   | 0  | 12  | 0 |
| CONTIG-068648 | 171 | 8   | 32 | 22  | 0 |
| CONTIG-068649 | 134 | 5   | 0  | 23  | 0 |
| CONTIG-068650 | 441 | 7   | 14 | 52  | 0 |
| CONTIG-068651 | 91  | 5   | 0  | 5   | 0 |

|               |     |    |    |     |     |
|---------------|-----|----|----|-----|-----|
| CONTIG-068652 | 95  | 4  | 5  | 8   | 0   |
| CONTIG-068657 | 80  | 6  | 2  | 23  | 0   |
| CONTIG-068658 | 285 | 12 | 15 | 72  | 0   |
| CONTIG-068659 | 106 | 11 | 0  | 38  | 2   |
| CONTIG-068660 | 153 | 8  | 16 | 36  | 0   |
| CONTIG-068661 | 79  | 5  | 8  | 15  | 0   |
| CONTIG-068665 | 153 | 12 | 9  | 47  | 0   |
| CONTIG-068666 | 88  | 5  | 4  | 16  | 0   |
| CONTIG-068667 | 368 | 7  | 12 | 18  | 7   |
| CONTIG-068668 | 514 | 15 | 19 | 65  | 2   |
| CONTIG-068669 | 243 | 8  | 17 | 0   | 4   |
| CONTIG-068670 | 80  | 7  | 21 | 8   | 0   |
| CONTIG-068671 | 114 | 13 | 3  | 0   | 14  |
| CONTIG-068672 | 161 | 6  | 4  | 22  | 0   |
| CONTIG-068673 | 199 | 6  | 14 | 28  | 0   |
| CONTIG-068674 | 320 | 7  | 2  | 63  | 2   |
| CONTIG-068675 | 75  | 13 | 9  | 3   | 0   |
| CONTIG-068676 | 64  | 3  | 0  | 2   | 0   |
| CONTIG-068677 | 123 | 3  | 17 | 6   | 0   |
| CONTIG-068678 | 76  | 4  | 0  | 4   | 0   |
| CONTIG-068679 | 270 | 13 | 19 | 113 | 2   |
| CONTIG-068680 | 72  | 15 | 18 | 27  | 0   |
| CONTIG-068681 | 167 | 9  | 30 | 49  | 0   |
| CONTIG-068682 | 89  | 5  | 0  | 0   | 0   |
| CONTIG-068683 | 190 | 14 | 3  | 104 | 0   |
| CONTIG-068684 | 66  | 11 | 6  | 9   | 0   |
| CONTIG-068685 | 406 | 12 | 2  | 150 | 0   |
| CONTIG-068686 | 135 | 29 | 36 | 203 | 0   |
| CONTIG-068687 | 257 | 11 | 10 | 119 | 0   |
| CONTIG-068688 | 81  | 7  | 3  | 5   | 0   |
| CONTIG-068689 | 98  | 6  | 2  | 21  | 0   |
| CONTIG-068690 | 232 | 6  | 7  | 54  | 0   |
| CONTIG-068691 | 162 | 8  | 17 | 44  | 0   |
| CONTIG-068692 | 80  | 5  | 4  | 8   | 0   |
| CONTIG-068694 | 69  | 6  | 2  | 9   | 0   |
| CONTIG-068695 | 119 | 7  | 0  | 23  | 0   |
| CONTIG-068697 | 80  | 6  | 5  | 10  | 0   |
| CONTIG-068698 | 397 | 24 | 5  | 41  | 125 |
| CONTIG-068699 | 133 | 10 | 4  | 35  | 0   |
| CONTIG-068700 | 63  | 13 | 15 | 24  | 0   |
| CONTIG-068701 | 67  | 11 | 9  | 5   | 0   |
| CONTIG-068702 | 86  | 8  | 19 | 11  | 0   |
| CONTIG-068704 | 203 | 9  | 7  | 60  | 0   |
| CONTIG-068705 | 178 | 13 | 15 | 61  | 0   |
| CONTIG-068706 | 218 | 8  | 12 | 38  | 0   |
| CONTIG-068707 | 175 | 8  | 0  | 69  | 0   |
| CONTIG-068708 | 115 | 6  | 7  | 21  | 0   |

|               |      |     |    |     |     |
|---------------|------|-----|----|-----|-----|
| CONTIG-068709 | 1613 | 18  | 3  | 0   | 150 |
| CONTIG-068710 | 295  | 5   | 6  | 25  | 0   |
| CONTIG-068711 | 71   | 6   | 2  | 14  | 0   |
| CONTIG-068713 | 144  | 29  | 18 | 138 | 0   |
| CONTIG-068714 | 194  | 5   | 6  | 20  | 0   |
| CONTIG-068715 | 97   | 3   | 9  | 6   | 0   |
| CONTIG-068716 | 181  | 10  | 21 | 51  | 0   |
| CONTIG-068717 | 127  | 4   | 2  | 15  | 0   |
| CONTIG-068719 | 68   | 23  | 25 | 31  | 0   |
| CONTIG-068720 | 278  | 7   | 21 | 31  | 0   |
| CONTIG-068721 | 96   | 4   | 4  | 9   | 0   |
| CONTIG-068722 | 274  | 8   | 16 | 78  | 0   |
| CONTIG-068724 | 112  | 6   | 13 | 6   | 0   |
| CONTIG-068725 | 58   | 51  | 6  | 140 | 0   |
| CONTIG-068726 | 139  | 13  | 44 | 21  | 0   |
| CONTIG-068727 | 38   | 479 | 43 | 290 | 11  |
| CONTIG-068728 | 135  | 7   | 9  | 30  | 0   |
| CONTIG-068729 | 135  | 46  | 8  | 306 | 0   |
| CONTIG-068730 | 89   | 10  | 22 | 36  | 0   |
| CONTIG-068731 | 322  | 11  | 12 | 142 | 0   |
| CONTIG-068732 | 123  | 13  | 2  | 73  | 0   |
| CONTIG-068733 | 71   | 12  | 2  | 27  | 0   |
| CONTIG-068737 | 74   | 7   | 6  | 16  | 0   |
| CONTIG-068738 | 169  | 5   | 7  | 4   | 2   |
| CONTIG-068739 | 178  | 10  | 12 | 39  | 0   |
| CONTIG-068740 | 91   | 13  | 21 | 51  | 0   |
| CONTIG-068741 | 273  | 15  | 3  | 120 | 0   |
| CONTIG-068742 | 80   | 5   | 5  | 9   | 0   |
| CONTIG-068743 | 62   | 4   | 0  | 4   | 0   |
| CONTIG-068745 | 94   | 8   | 8  | 28  | 0   |
| CONTIG-068746 | 212  | 4   | 5  | 2   | 0   |
| CONTIG-068749 | 83   | 3   | 0  | 5   | 0   |
| CONTIG-068750 | 169  | 6   | 11 | 25  | 0   |
| CONTIG-068751 | 301  | 7   | 2  | 65  | 0   |
| CONTIG-068752 | 103  | 7   | 3  | 27  | 0   |
| CONTIG-068753 | 102  | 6   | 2  | 18  | 0   |
| CONTIG-068754 | 100  | 10  | 15 | 32  | 0   |
| CONTIG-068755 | 514  | 15  | 2  | 290 | 4   |
| CONTIG-068756 | 59   | 3   | 2  | 2   | 0   |
| CONTIG-068757 | 68   | 4   | 2  | 8   | 0   |
| CONTIG-068758 | 91   | 3   | 0  | 9   | 0   |
| CONTIG-068759 | 66   | 14  | 7  | 9   | 0   |
| CONTIG-068760 | 166  | 6   | 7  | 20  | 0   |
| CONTIG-068761 | 152  | 9   | 9  | 39  | 0   |
| CONTIG-068762 | 84   | 3   | 0  | 6   | 0   |
| CONTIG-068763 | 92   | 3   | 0  | 2   | 0   |
| CONTIG-068764 | 251  | 9   | 2  | 21  | 0   |

|               |     |    |    |     |   |
|---------------|-----|----|----|-----|---|
| CONTIG-068765 | 195 | 8  | 4  | 45  | 0 |
| CONTIG-068766 | 61  | 3  | 0  | 2   | 0 |
| CONTIG-068768 | 309 | 9  | 13 | 70  | 0 |
| CONTIG-068769 | 229 | 7  | 11 | 50  | 2 |
| CONTIG-068770 | 166 | 10 | 14 | 41  | 0 |
| CONTIG-068771 | 164 | 4  | 0  | 15  | 0 |
| CONTIG-068772 | 260 | 14 | 18 | 127 | 2 |
| CONTIG-068773 | 226 | 7  | 12 | 47  | 0 |
| CONTIG-068775 | 65  | 6  | 12 | 4   | 0 |
| CONTIG-068776 | 71  | 6  | 2  | 12  | 0 |
| CONTIG-068777 | 179 | 9  | 9  | 41  | 0 |
| CONTIG-068778 | 81  | 14 | 10 | 46  | 2 |
| CONTIG-068779 | 82  | 8  | 5  | 29  | 0 |
| CONTIG-068781 | 149 | 10 | 12 | 49  | 0 |
| CONTIG-068782 | 72  | 8  | 2  | 29  | 0 |
| CONTIG-068783 | 86  | 2  | 2  | 4   | 0 |
| CONTIG-068785 | 156 | 10 | 8  | 42  | 0 |
| CONTIG-068786 | 82  | 5  | 0  | 7   | 0 |
| CONTIG-068787 | 233 | 25 | 15 | 210 | 0 |
| CONTIG-068788 | 99  | 3  | 2  | 4   | 0 |
| CONTIG-068789 | 66  | 6  | 0  | 12  | 0 |
| CONTIG-068790 | 44  | 5  | 2  | 4   | 0 |
| CONTIG-068793 | 99  | 15 | 7  | 55  | 0 |
| CONTIG-068794 | 85  | 3  | 3  | 8   | 0 |
| CONTIG-068795 | 76  | 4  | 2  | 12  | 0 |
| CONTIG-068796 | 142 | 6  | 5  | 15  | 0 |
| CONTIG-068797 | 156 | 7  | 7  | 45  | 0 |
| CONTIG-068798 | 95  | 4  | 3  | 10  | 0 |
| CONTIG-068799 | 102 | 9  | 6  | 43  | 0 |
| CONTIG-068800 | 298 | 8  | 16 | 59  | 0 |
| CONTIG-068801 | 101 | 4  | 3  | 0   | 0 |
| CONTIG-068804 | 119 | 2  | 0  | 11  | 0 |
| CONTIG-068805 | 279 | 12 | 15 | 94  | 0 |
| CONTIG-068806 | 112 | 11 | 21 | 26  | 0 |
| CONTIG-068807 | 360 | 7  | 22 | 43  | 3 |
| CONTIG-068808 | 119 | 15 | 22 | 63  | 0 |
| CONTIG-068809 | 106 | 4  | 15 | 3   | 0 |
| CONTIG-068810 | 61  | 4  | 2  | 6   | 0 |
| CONTIG-068811 | 113 | 6  | 6  | 15  | 0 |
| CONTIG-068812 | 281 | 8  | 7  | 64  | 0 |
| CONTIG-068813 | 378 | 20 | 13 | 90  | 0 |
| CONTIG-068814 | 86  | 8  | 11 | 6   | 0 |
| CONTIG-068815 | 94  | 2  | 0  | 8   | 0 |
| CONTIG-068816 | 86  | 5  | 3  | 9   | 0 |
| CONTIG-068818 | 158 | 9  | 12 | 32  | 0 |
| CONTIG-068819 | 95  | 4  | 0  | 11  | 0 |
| CONTIG-068820 | 227 | 10 | 4  | 54  | 0 |

|               |     |    |    |     |    |
|---------------|-----|----|----|-----|----|
| CONTIG-068821 | 156 | 8  | 19 | 3   | 0  |
| CONTIG-068822 | 90  | 6  | 19 | 11  | 0  |
| CONTIG-068823 | 127 | 6  | 17 | 24  | 0  |
| CONTIG-068824 | 119 | 4  | 12 | 12  | 0  |
| CONTIG-068825 | 79  | 6  | 3  | 12  | 0  |
| CONTIG-068826 | 165 | 7  | 7  | 13  | 0  |
| CONTIG-068827 | 125 | 4  | 2  | 16  | 0  |
| CONTIG-068828 | 153 | 11 | 8  | 43  | 0  |
| CONTIG-068829 | 140 | 5  | 12 | 11  | 0  |
| CONTIG-068831 | 75  | 10 | 0  | 27  | 0  |
| CONTIG-068832 | 84  | 7  | 0  | 8   | 0  |
| CONTIG-068833 | 359 | 6  | 6  | 28  | 0  |
| CONTIG-068834 | 282 | 18 | 34 | 190 | 4  |
| CONTIG-068835 | 66  | 5  | 5  | 8   | 0  |
| CONTIG-068837 | 84  | 6  | 0  | 21  | 0  |
| CONTIG-068838 | 148 | 8  | 0  | 34  | 0  |
| CONTIG-068839 | 215 | 5  | 5  | 30  | 0  |
| CONTIG-068840 | 60  | 10 | 7  | 23  | 0  |
| CONTIG-068842 | 106 | 9  | 12 | 7   | 0  |
| CONTIG-068843 | 101 | 5  | 11 | 8   | 0  |
| CONTIG-068844 | 106 | 7  | 6  | 16  | 2  |
| CONTIG-068845 | 81  | 5  | 3  | 7   | 0  |
| CONTIG-068846 | 58  | 3  | 4  | 6   | 0  |
| CONTIG-068847 | 74  | 3  | 2  | 0   | 0  |
| CONTIG-068848 | 81  | 5  | 0  | 15  | 0  |
| CONTIG-068849 | 148 | 9  | 6  | 17  | 0  |
| CONTIG-068850 | 97  | 6  | 6  | 13  | 0  |
| CONTIG-068851 | 118 | 4  | 0  | 11  | 0  |
| CONTIG-068852 | 83  | 7  | 9  | 5   | 0  |
| CONTIG-068853 | 99  | 13 | 23 | 20  | 0  |
| CONTIG-068854 | 182 | 13 | 7  | 95  | 0  |
| CONTIG-068855 | 113 | 6  | 0  | 3   | 0  |
| CONTIG-068856 | 223 | 10 | 8  | 36  | 0  |
| CONTIG-068857 | 373 | 20 | 0  | 0   | 48 |
| CONTIG-068858 | 72  | 32 | 41 | 39  | 0  |
| CONTIG-068859 | 64  | 6  | 10 | 4   | 0  |
| CONTIG-068860 | 68  | 7  | 3  | 10  | 0  |
| CONTIG-068862 | 138 | 5  | 17 | 16  | 0  |
| CONTIG-068863 | 76  | 2  | 0  | 2   | 0  |
| CONTIG-068864 | 622 | 15 | 30 | 320 | 4  |
| CONTIG-068865 | 170 | 8  | 17 | 36  | 0  |
| CONTIG-068866 | 262 | 26 | 3  | 0   | 40 |
| CONTIG-068867 | 78  | 6  | 0  | 15  | 0  |
| CONTIG-068868 | 63  | 10 | 0  | 26  | 0  |
| CONTIG-068869 | 528 | 25 | 28 | 319 | 13 |
| CONTIG-068870 | 181 | 7  | 0  | 61  | 0  |
| CONTIG-068871 | 86  | 6  | 0  | 0   | 0  |

|               |     |    |    |     |     |
|---------------|-----|----|----|-----|-----|
| CONTIG-068873 | 112 | 7  | 3  | 12  | 2   |
| CONTIG-068874 | 321 | 9  | 12 | 113 | 0   |
| CONTIG-068877 | 106 | 9  | 4  | 21  | 0   |
| CONTIG-068878 | 86  | 3  | 2  | 10  | 0   |
| CONTIG-068879 | 324 | 47 | 4  | 986 | 0   |
| CONTIG-068880 | 71  | 14 | 8  | 46  | 0   |
| CONTIG-068881 | 259 | 4  | 16 | 26  | 0   |
| CONTIG-068882 | 244 | 7  | 4  | 65  | 0   |
| CONTIG-068883 | 61  | 5  | 0  | 10  | 0   |
| CONTIG-068884 | 92  | 8  | 2  | 20  | 0   |
| CONTIG-068886 | 116 | 12 | 2  | 41  | 2   |
| CONTIG-068887 | 240 | 15 | 4  | 149 | 0   |
| CONTIG-068888 | 59  | 4  | 5  | 4   | 0   |
| CONTIG-068889 | 79  | 7  | 2  | 9   | 0   |
| CONTIG-068890 | 150 | 11 | 0  | 65  | 0   |
| CONTIG-068891 | 65  | 3  | 0  | 6   | 0   |
| CONTIG-068893 | 61  | 7  | 16 | 2   | 0   |
| CONTIG-068894 | 68  | 3  | 6  | 2   | 0   |
| CONTIG-068895 | 315 | 7  | 17 | 49  | 4   |
| CONTIG-068896 | 64  | 2  | 4  | 2   | 0   |
| CONTIG-068897 | 94  | 30 | 21 | 79  | 0   |
| CONTIG-068898 | 175 | 18 | 12 | 119 | 0   |
| CONTIG-068900 | 102 | 5  | 6  | 15  | 0   |
| CONTIG-068901 | 293 | 32 | 0  | 521 | 0   |
| CONTIG-068902 | 137 | 13 | 5  | 100 | 0   |
| CONTIG-068903 | 153 | 4  | 0  | 0   | 0   |
| CONTIG-068904 | 60  | 7  | 2  | 2   | 0   |
| CONTIG-068905 | 761 | 28 | 0  | 3   | 123 |
| CONTIG-068906 | 902 | 17 | 61 | 403 | 0   |
| CONTIG-068907 | 208 | 8  | 2  | 59  | 0   |
| CONTIG-068908 | 115 | 11 | 3  | 24  | 0   |
| CONTIG-068909 | 227 | 10 | 13 | 15  | 0   |
| CONTIG-068912 | 98  | 6  | 2  | 24  | 0   |
| CONTIG-068913 | 302 | 10 | 10 | 73  | 0   |
| CONTIG-068914 | 156 | 10 | 8  | 56  | 0   |
| CONTIG-068915 | 216 | 7  | 2  | 30  | 0   |
| CONTIG-068916 | 85  | 5  | 2  | 9   | 0   |
| CONTIG-068917 | 205 | 8  | 0  | 28  | 0   |
| CONTIG-068919 | 90  | 10 | 3  | 39  | 0   |
| CONTIG-068920 | 582 | 14 | 21 | 265 | 4   |
| CONTIG-068921 | 385 | 14 | 46 | 172 | 0   |
| CONTIG-068922 | 159 | 12 | 2  | 29  | 0   |
| CONTIG-068923 | 79  | 6  | 2  | 12  | 0   |
| CONTIG-068924 | 73  | 5  | 5  | 0   | 0   |
| CONTIG-068925 | 148 | 12 | 7  | 53  | 2   |
| CONTIG-068928 | 101 | 31 | 9  | 25  | 0   |
| CONTIG-068929 | 279 | 6  | 2  | 52  | 0   |



|               |      |    |    |     |     |
|---------------|------|----|----|-----|-----|
| CONTIG-068930 | 68   | 4  | 3  | 2   | 0   |
| CONTIG-068931 | 96   | 4  | 2  | 5   | 0   |
| CONTIG-068937 | 177  | 6  | 4  | 19  | 0   |
| CONTIG-068938 | 137  | 8  | 5  | 12  | 0   |
| CONTIG-068939 | 873  | 37 | 0  | 0   | 186 |
| CONTIG-068940 | 210  | 10 | 6  | 44  | 2   |
| CONTIG-068941 | 107  | 3  | 7  | 4   | 0   |
| CONTIG-068942 | 64   | 6  | 3  | 9   | 0   |
| CONTIG-068943 | 58   | 4  | 2  | 2   | 2   |
| CONTIG-068944 | 77   | 3  | 0  | 3   | 0   |
| CONTIG-068945 | 94   | 6  | 0  | 9   | 0   |
| CONTIG-068946 | 66   | 8  | 3  | 7   | 2   |
| CONTIG-068947 | 127  | 3  | 4  | 5   | 0   |
| CONTIG-068948 | 179  | 7  | 11 | 32  | 0   |
| CONTIG-068949 | 112  | 8  | 13 | 35  | 0   |
| CONTIG-068951 | 94   | 6  | 0  | 7   | 0   |
| CONTIG-068952 | 146  | 5  | 9  | 0   | 0   |
| CONTIG-068953 | 145  | 5  | 20 | 14  | 0   |
| CONTIG-068954 | 339  | 6  | 20 | 30  | 0   |
| CONTIG-068955 | 166  | 12 | 3  | 49  | 0   |
| CONTIG-068956 | 119  | 7  | 3  | 19  | 0   |
| CONTIG-068959 | 77   | 11 | 8  | 26  | 0   |
| CONTIG-068960 | 237  | 10 | 28 | 74  | 0   |
| CONTIG-068963 | 132  | 4  | 4  | 4   | 0   |
| CONTIG-068964 | 86   | 4  | 2  | 5   | 0   |
| CONTIG-068965 | 176  | 6  | 0  | 39  | 0   |
| CONTIG-068966 | 318  | 10 | 19 | 94  | 2   |
| CONTIG-068967 | 87   | 15 | 21 | 21  | 0   |
| CONTIG-068969 | 199  | 9  | 5  | 55  | 0   |
| CONTIG-068970 | 241  | 8  | 12 | 71  | 0   |
| CONTIG-068971 | 305  | 11 | 12 | 9   | 0   |
| CONTIG-068972 | 96   | 14 | 4  | 0   | 0   |
| CONTIG-068976 | 87   | 4  | 0  | 14  | 0   |
| CONTIG-068980 | 74   | 4  | 7  | 5   | 0   |
| CONTIG-068981 | 279  | 7  | 7  | 47  | 0   |
| CONTIG-068982 | 79   | 7  | 3  | 4   | 0   |
| CONTIG-068983 | 67   | 7  | 8  | 6   | 0   |
| CONTIG-068984 | 156  | 13 | 0  | 72  | 4   |
| CONTIG-068985 | 131  | 11 | 8  | 41  | 0   |
| CONTIG-068986 | 64   | 4  | 3  | 8   | 0   |
| CONTIG-068987 | 181  | 9  | 7  | 6   | 0   |
| CONTIG-068988 | 80   | 8  | 2  | 0   | 2   |
| CONTIG-068989 | 190  | 5  | 2  | 21  | 0   |
| CONTIG-068990 | 148  | 9  | 12 | 19  | 0   |
| CONTIG-068991 | 1143 | 33 | 2  | 0   | 69  |
| CONTIG-068992 | 172  | 20 | 13 | 125 | 0   |
| CONTIG-068993 | 87   | 8  | 2  | 22  | 0   |

|               |     |     |    |     |   |
|---------------|-----|-----|----|-----|---|
| CONTIG-068994 | 95  | 6   | 0  | 8   | 0 |
| CONTIG-068997 | 74  | 6   | 2  | 0   | 0 |
| CONTIG-068998 | 424 | 18  | 25 | 309 | 0 |
| CONTIG-068999 | 83  | 9   | 2  | 26  | 0 |
| CONTIG-069000 | 68  | 11  | 17 | 17  | 0 |
| CONTIG-069002 | 80  | 5   | 4  | 0   | 0 |
| CONTIG-069004 | 92  | 14  | 5  | 58  | 0 |
| CONTIG-069006 | 71  | 8   | 16 | 14  | 0 |
| CONTIG-069007 | 64  | 6   | 4  | 6   | 0 |
| CONTIG-069008 | 205 | 10  | 2  | 89  | 0 |
| CONTIG-069009 | 126 | 10  | 4  | 31  | 0 |
| CONTIG-069010 | 64  | 190 | 20 | 136 | 0 |
| CONTIG-069011 | 82  | 6   | 2  | 23  | 0 |
| CONTIG-069012 | 80  | 5   | 7  | 0   | 0 |
| CONTIG-069013 | 68  | 9   | 0  | 20  | 0 |
| CONTIG-069014 | 87  | 3   | 0  | 9   | 0 |
| CONTIG-069015 | 78  | 7   | 0  | 7   | 0 |
| CONTIG-069016 | 72  | 8   | 11 | 14  | 0 |
| CONTIG-069017 | 98  | 5   | 3  | 7   | 0 |
| CONTIG-069018 | 123 | 7   | 11 | 25  | 0 |
| CONTIG-069019 | 225 | 12  | 31 | 27  | 6 |
| CONTIG-069020 | 144 | 7   | 10 | 10  | 0 |
| CONTIG-069021 | 98  | 8   | 0  | 32  | 0 |
| CONTIG-069022 | 200 | 9   | 13 | 73  | 0 |
| CONTIG-069023 | 91  | 4   | 12 | 7   | 0 |
| CONTIG-069024 | 245 | 11  | 15 | 116 | 0 |
| CONTIG-069025 | 154 | 8   | 7  | 21  | 0 |
| CONTIG-069026 | 171 | 8   | 0  | 15  | 0 |
| CONTIG-069027 | 115 | 6   | 7  | 17  | 2 |
| CONTIG-069028 | 113 | 8   | 2  | 0   | 4 |
| CONTIG-069030 | 60  | 4   | 5  | 7   | 0 |
| CONTIG-069031 | 194 | 14  | 17 | 10  | 0 |
| CONTIG-069032 | 191 | 18  | 5  | 113 | 0 |
| CONTIG-069033 | 70  | 5   | 3  | 2   | 2 |
| CONTIG-069034 | 84  | 7   | 6  | 16  | 0 |
| CONTIG-069035 | 148 | 5   | 2  | 15  | 0 |
| CONTIG-069036 | 182 | 8   | 2  | 45  | 0 |
| CONTIG-069037 | 99  | 7   | 2  | 22  | 0 |
| CONTIG-069038 | 106 | 10  | 6  | 45  | 0 |
| CONTIG-069039 | 80  | 4   | 6  | 9   | 0 |
| CONTIG-069045 | 285 | 17  | 24 | 174 | 0 |
| CONTIG-069046 | 119 | 5   | 0  | 10  | 0 |
| CONTIG-069047 | 120 | 5   | 0  | 17  | 0 |
| CONTIG-069048 | 66  | 6   | 6  | 10  | 0 |
| CONTIG-069049 | 59  | 4   | 2  | 6   | 0 |
| CONTIG-069050 | 131 | 7   | 3  | 20  | 0 |
| CONTIG-069051 | 83  | 4   | 6  | 4   | 0 |

|               |      |    |    |     |     |
|---------------|------|----|----|-----|-----|
| CONTIG-069052 | 88   | 4  | 3  | 8   | 0   |
| CONTIG-069053 | 170  | 58 | 2  | 2   | 0   |
| CONTIG-069054 | 94   | 5  | 2  | 0   | 0   |
| CONTIG-069055 | 135  | 11 | 2  | 64  | 0   |
| CONTIG-069057 | 148  | 5  | 5  | 11  | 0   |
| CONTIG-069058 | 298  | 7  | 0  | 80  | 0   |
| CONTIG-069059 | 103  | 6  | 15 | 9   | 0   |
| CONTIG-069060 | 191  | 12 | 6  | 97  | 0   |
| CONTIG-069061 | 89   | 8  | 4  | 14  | 0   |
| CONTIG-069062 | 148  | 13 | 16 | 49  | 2   |
| CONTIG-069063 | 73   | 3  | 4  | 8   | 0   |
| CONTIG-069064 | 73   | 4  | 10 | 4   | 0   |
| CONTIG-069065 | 116  | 4  | 6  | 13  | 0   |
| CONTIG-069066 | 123  | 5  | 6  | 21  | 0   |
| CONTIG-069067 | 63   | 14 | 2  | 6   | 15  |
| CONTIG-069068 | 70   | 5  | 0  | 5   | 0   |
| CONTIG-069069 | 124  | 5  | 5  | 17  | 0   |
| CONTIG-069070 | 143  | 4  | 0  | 20  | 2   |
| CONTIG-069071 | 249  | 44 | 11 | 526 | 0   |
| CONTIG-069072 | 142  | 12 | 13 | 54  | 0   |
| CONTIG-069074 | 60   | 7  | 3  | 2   | 0   |
| CONTIG-069075 | 121  | 7  | 11 | 13  | 2   |
| CONTIG-069076 | 157  | 27 | 5  | 150 | 0   |
| CONTIG-069077 | 187  | 8  | 11 | 63  | 0   |
| CONTIG-069078 | 91   | 6  | 5  | 5   | 0   |
| CONTIG-069079 | 95   | 6  | 3  | 15  | 0   |
| CONTIG-069080 | 176  | 13 | 14 | 106 | 0   |
| CONTIG-069081 | 188  | 14 | 2  | 80  | 0   |
| CONTIG-069082 | 217  | 12 | 18 | 68  | 2   |
| CONTIG-069083 | 120  | 12 | 19 | 38  | 0   |
| CONTIG-069084 | 61   | 2  | 5  | 0   | 0   |
| CONTIG-069085 | 158  | 50 | 6  | 0   | 61  |
| CONTIG-069086 | 223  | 16 | 26 | 97  | 0   |
| CONTIG-069087 | 1096 | 31 | 4  | 0   | 337 |
| CONTIG-069088 | 84   | 6  | 4  | 14  | 0   |
| CONTIG-069089 | 194  | 6  | 6  | 31  | 0   |
| CONTIG-069090 | 116  | 8  | 8  | 10  | 0   |
| CONTIG-069091 | 176  | 5  | 7  | 17  | 0   |
| CONTIG-069092 | 232  | 13 | 14 | 82  | 0   |
| CONTIG-069094 | 76   | 12 | 5  | 19  | 0   |
| CONTIG-069095 | 63   | 4  | 11 | 3   | 0   |
| CONTIG-069096 | 77   | 7  | 7  | 19  | 0   |
| CONTIG-069097 | 156  | 5  | 2  | 29  | 0   |
| CONTIG-069098 | 1375 | 23 | 2  | 0   | 100 |
| CONTIG-069099 | 264  | 13 | 0  | 130 | 0   |
| CONTIG-069100 | 263  | 10 | 25 | 82  | 0   |
| CONTIG-069101 | 131  | 9  | 4  | 28  | 0   |

|               |     |    |    |     |   |
|---------------|-----|----|----|-----|---|
| CONTIG-069103 | 68  | 9  | 0  | 5   | 0 |
| CONTIG-069104 | 147 | 11 | 13 | 51  | 3 |
| CONTIG-069105 | 166 | 20 | 47 | 114 | 4 |
| CONTIG-069106 | 69  | 2  | 2  | 0   | 0 |
| CONTIG-069107 | 89  | 5  | 0  | 2   | 0 |
| CONTIG-069108 | 90  | 2  | 4  | 6   | 0 |
| CONTIG-069109 | 69  | 7  | 0  | 12  | 0 |
| CONTIG-069110 | 77  | 11 | 2  | 19  | 0 |
| CONTIG-069111 | 70  | 10 | 5  | 22  | 0 |
| CONTIG-069112 | 79  | 4  | 2  | 6   | 0 |
| CONTIG-069113 | 78  | 12 | 7  | 42  | 0 |
| CONTIG-069115 | 136 | 10 | 11 | 24  | 0 |
| CONTIG-069116 | 62  | 13 | 5  | 23  | 0 |
| CONTIG-069117 | 73  | 8  | 17 | 6   | 0 |
| CONTIG-069118 | 94  | 9  | 7  | 9   | 0 |
| CONTIG-069119 | 148 | 7  | 9  | 33  | 2 |
| CONTIG-069120 | 138 | 8  | 5  | 15  | 0 |
| CONTIG-069121 | 258 | 7  | 15 | 72  | 0 |
| CONTIG-069122 | 86  | 9  | 2  | 31  | 0 |
| CONTIG-069123 | 154 | 7  | 0  | 41  | 0 |
| CONTIG-069124 | 81  | 6  | 6  | 8   | 0 |
| CONTIG-069127 | 220 | 7  | 4  | 52  | 2 |
| CONTIG-069128 | 113 | 4  | 8  | 10  | 0 |
| CONTIG-069129 | 85  | 5  | 8  | 7   | 0 |
| CONTIG-069130 | 204 | 14 | 8  | 70  | 2 |
| CONTIG-069131 | 78  | 6  | 2  | 11  | 0 |
| CONTIG-069132 | 278 | 15 | 0  | 0   | 0 |
| CONTIG-069133 | 164 | 7  | 13 | 37  | 0 |
| CONTIG-069135 | 78  | 7  | 0  | 20  | 0 |
| CONTIG-069136 | 221 | 29 | 14 | 270 | 0 |
| CONTIG-069138 | 70  | 5  | 2  | 12  | 0 |
| CONTIG-069139 | 260 | 8  | 18 | 43  | 0 |
| CONTIG-069140 | 61  | 4  | 0  | 8   | 0 |
| CONTIG-069142 | 99  | 12 | 3  | 14  | 0 |
| CONTIG-069143 | 95  | 9  | 2  | 8   | 0 |
| CONTIG-069144 | 204 | 13 | 11 | 57  | 0 |
| CONTIG-069146 | 74  | 8  | 0  | 12  | 0 |
| CONTIG-069147 | 71  | 10 | 2  | 0   | 0 |
| CONTIG-069148 | 82  | 2  | 0  | 2   | 0 |
| CONTIG-069149 | 64  | 9  | 0  | 15  | 0 |
| CONTIG-069150 | 51  | 58 | 11 | 59  | 0 |
| CONTIG-069151 | 144 | 12 | 15 | 39  | 0 |
| CONTIG-069152 | 196 | 11 | 4  | 69  | 2 |
| CONTIG-069153 | 169 | 14 | 12 | 53  | 0 |
| CONTIG-069154 | 82  | 12 | 6  | 48  | 0 |
| CONTIG-069155 | 211 | 10 | 20 | 52  | 0 |
| CONTIG-069156 | 96  | 7  | 4  | 24  | 0 |

|               |     |    |    |      |   |
|---------------|-----|----|----|------|---|
| CONTIG-069157 | 206 | 6  | 2  | 44   | 2 |
| CONTIG-069158 | 70  | 6  | 7  | 14   | 0 |
| CONTIG-069159 | 170 | 8  | 28 | 21   | 0 |
| CONTIG-069160 | 73  | 4  | 7  | 10   | 0 |
| CONTIG-069162 | 150 | 4  | 0  | 20   | 0 |
| CONTIG-069163 | 130 | 8  | 9  | 30   | 0 |
| CONTIG-069164 | 258 | 7  | 5  | 61   | 0 |
| CONTIG-069165 | 102 | 14 | 12 | 28   | 0 |
| CONTIG-069166 | 52  | 5  | 5  | 2    | 0 |
| CONTIG-069167 | 172 | 9  | 8  | 40   | 0 |
| CONTIG-069168 | 81  | 2  | 0  | 0    | 0 |
| CONTIG-069169 | 153 | 7  | 2  | 32   | 0 |
| CONTIG-069170 | 104 | 6  | 2  | 12   | 0 |
| CONTIG-069175 | 66  | 5  | 23 | 2    | 0 |
| CONTIG-069176 | 295 | 9  | 10 | 61   | 2 |
| CONTIG-069177 | 113 | 11 | 7  | 37   | 2 |
| CONTIG-069180 | 60  | 4  | 0  | 3    | 0 |
| CONTIG-069181 | 101 | 15 | 0  | 44   | 0 |
| CONTIG-069182 | 173 | 8  | 14 | 23   | 0 |
| CONTIG-069183 | 83  | 3  | 2  | 7    | 0 |
| CONTIG-069184 | 88  | 6  | 24 | 6    | 0 |
| CONTIG-069185 | 70  | 6  | 3  | 0    | 0 |
| CONTIG-069186 | 70  | 4  | 0  | 13   | 0 |
| CONTIG-069187 | 67  | 6  | 3  | 9    | 0 |
| CONTIG-069188 | 80  | 7  | 6  | 19   | 0 |
| CONTIG-069189 | 288 | 82 | 34 | 1050 | 0 |
| CONTIG-069190 | 160 | 7  | 4  | 36   | 0 |
| CONTIG-069191 | 200 | 8  | 10 | 21   | 2 |
| CONTIG-069192 | 179 | 12 | 11 | 61   | 0 |
| CONTIG-069193 | 160 | 18 | 32 | 49   | 4 |
| CONTIG-069194 | 145 | 9  | 10 | 45   | 0 |
| CONTIG-069196 | 141 | 4  | 5  | 11   | 0 |
| CONTIG-069197 | 93  | 5  | 9  | 11   | 0 |
| CONTIG-069198 | 90  | 9  | 2  | 22   | 0 |
| CONTIG-069199 | 167 | 7  | 14 | 30   | 0 |
| CONTIG-069202 | 435 | 13 | 20 | 223  | 2 |
| CONTIG-069203 | 133 | 5  | 0  | 17   | 0 |
| CONTIG-069204 | 73  | 5  | 0  | 9    | 2 |
| CONTIG-069205 | 66  | 13 | 8  | 16   | 2 |
| CONTIG-069206 | 80  | 8  | 2  | 21   | 0 |
| CONTIG-069207 | 141 | 9  | 0  | 45   | 0 |
| CONTIG-069208 | 158 | 8  | 0  | 47   | 0 |
| CONTIG-069209 | 71  | 3  | 0  | 0    | 0 |
| CONTIG-069210 | 70  | 10 | 21 | 10   | 0 |
| CONTIG-069211 | 91  | 6  | 20 | 10   | 0 |
| CONTIG-069212 | 169 | 14 | 7  | 73   | 0 |
| CONTIG-069213 | 40  | 46 | 4  | 40   | 0 |

|               |     |     |    |     |   |
|---------------|-----|-----|----|-----|---|
| CONTIG-069214 | 63  | 5   | 2  | 2   | 0 |
| CONTIG-069215 | 207 | 7   | 5  | 33  | 2 |
| CONTIG-069220 | 220 | 7   | 20 | 40  | 0 |
| CONTIG-069221 | 193 | 7   | 7  | 15  | 0 |
| CONTIG-069222 | 142 | 7   | 2  | 24  | 0 |
| CONTIG-069223 | 112 | 8   | 10 | 33  | 0 |
| CONTIG-069224 | 95  | 9   | 0  | 24  | 0 |
| CONTIG-069225 | 213 | 9   | 12 | 76  | 0 |
| CONTIG-069226 | 193 | 9   | 12 | 48  | 0 |
| CONTIG-069227 | 101 | 5   | 2  | 15  | 0 |
| CONTIG-069228 | 68  | 3   | 10 | 0   | 0 |
| CONTIG-069229 | 68  | 4   | 2  | 6   | 0 |
| CONTIG-069230 | 84  | 8   | 4  | 20  | 0 |
| CONTIG-069231 | 138 | 7   | 3  | 34  | 0 |
| CONTIG-069232 | 92  | 14  | 2  | 4   | 0 |
| CONTIG-069233 | 179 | 9   | 16 | 73  | 0 |
| CONTIG-069234 | 284 | 12  | 8  | 85  | 0 |
| CONTIG-069235 | 41  | 245 | 9  | 255 | 2 |
| CONTIG-069236 | 234 | 5   | 2  | 27  | 0 |
| CONTIG-069237 | 89  | 3   | 13 | 0   | 0 |
| CONTIG-069238 | 232 | 9   | 2  | 0   | 7 |
| CONTIG-069239 | 154 | 6   | 6  | 16  | 0 |
| CONTIG-069240 | 77  | 9   | 30 | 2   | 0 |
| CONTIG-069241 | 397 | 20  | 8  | 382 | 0 |
| CONTIG-069242 | 175 | 7   | 10 | 14  | 0 |
| CONTIG-069243 | 324 | 7   | 6  | 69  | 0 |
| CONTIG-069244 | 58  | 6   | 2  | 10  | 0 |
| CONTIG-069245 | 289 | 7   | 0  | 41  | 6 |
| CONTIG-069246 | 70  | 5   | 6  | 8   | 0 |
| CONTIG-069247 | 252 | 5   | 2  | 18  | 0 |
| CONTIG-069248 | 134 | 20  | 12 | 90  | 0 |
| CONTIG-069250 | 72  | 10  | 0  | 14  | 3 |
| CONTIG-069251 | 38  | 16  | 21 | 17  | 0 |
| CONTIG-069252 | 205 | 9   | 12 | 64  | 0 |
| CONTIG-069253 | 68  | 18  | 9  | 53  | 0 |
| CONTIG-069254 | 62  | 11  | 11 | 15  | 0 |
| CONTIG-069255 | 78  | 7   | 2  | 11  | 0 |
| CONTIG-069256 | 190 | 13  | 26 | 84  | 0 |
| CONTIG-069257 | 86  | 11  | 5  | 19  | 0 |
| CONTIG-069258 | 71  | 5   | 0  | 6   | 0 |
| CONTIG-069259 | 235 | 17  | 21 | 83  | 4 |
| CONTIG-069261 | 207 | 5   | 2  | 0   | 6 |
| CONTIG-069262 | 99  | 5   | 5  | 0   | 0 |
| CONTIG-069263 | 113 | 17  | 16 | 67  | 0 |
| CONTIG-069264 | 187 | 10  | 6  | 72  | 0 |
| CONTIG-069265 | 226 | 8   | 5  | 18  | 0 |
| CONTIG-069266 | 210 | 6   | 15 | 38  | 2 |

|               |     |     |    |     |     |
|---------------|-----|-----|----|-----|-----|
| CONTIG-069267 | 300 | 13  | 13 | 115 | 2   |
| CONTIG-069268 | 104 | 8   | 6  | 26  | 0   |
| CONTIG-069269 | 130 | 7   | 14 | 19  | 0   |
| CONTIG-069270 | 114 | 25  | 13 | 130 | 2   |
| CONTIG-069271 | 124 | 6   | 3  | 32  | 0   |
| CONTIG-069272 | 111 | 8   | 6  | 24  | 0   |
| CONTIG-069273 | 177 | 7   | 6  | 34  | 0   |
| CONTIG-069274 | 74  | 20  | 7  | 3   | 0   |
| CONTIG-069275 | 169 | 13  | 4  | 86  | 0   |
| CONTIG-069276 | 95  | 6   | 5  | 4   | 0   |
| CONTIG-069277 | 357 | 10  | 35 | 114 | 4   |
| CONTIG-069278 | 206 | 105 | 4  | 2   | 11  |
| CONTIG-069279 | 247 | 7   | 2  | 60  | 2   |
| CONTIG-069280 | 159 | 5   | 3  | 25  | 0   |
| CONTIG-069281 | 66  | 7   | 12 | 2   | 0   |
| CONTIG-069282 | 254 | 19  | 21 | 127 | 2   |
| CONTIG-069283 | 94  | 15  | 27 | 10  | 0   |
| CONTIG-069284 | 216 | 8   | 17 | 59  | 0   |
| CONTIG-069285 | 71  | 8   | 2  | 14  | 0   |
| CONTIG-069286 | 66  | 8   | 0  | 30  | 0   |
| CONTIG-069287 | 111 | 5   | 8  | 13  | 0   |
| CONTIG-069288 | 179 | 14  | 32 | 96  | 0   |
| CONTIG-069289 | 69  | 4   | 7  | 2   | 0   |
| CONTIG-069290 | 132 | 10  | 5  | 26  | 0   |
| CONTIG-069291 | 66  | 8   | 5  | 0   | 0   |
| CONTIG-069292 | 86  | 5   | 0  | 11  | 0   |
| CONTIG-069294 | 165 | 11  | 2  | 72  | 2   |
| CONTIG-069295 | 134 | 78  | 18 | 0   | 176 |
| CONTIG-069296 | 185 | 11  | 2  | 90  | 0   |
| CONTIG-069297 | 360 | 12  | 12 | 141 | 0   |
| CONTIG-069298 | 193 | 5   | 19 | 21  | 0   |
| CONTIG-069299 | 169 | 12  | 7  | 46  | 4   |
| CONTIG-069300 | 254 | 6   | 5  | 55  | 0   |
| CONTIG-069301 | 158 | 7   | 0  | 51  | 0   |
| CONTIG-069302 | 85  | 108 | 4  | 445 | 0   |
| CONTIG-069303 | 62  | 5   | 7  | 9   | 0   |
| CONTIG-069304 | 120 | 10  | 9  | 45  | 0   |
| CONTIG-069305 | 319 | 20  | 42 | 100 | 0   |
| CONTIG-069306 | 305 | 4   | 2  | 16  | 0   |
| CONTIG-069307 | 64  | 11  | 2  | 11  | 0   |
| CONTIG-069308 | 95  | 6   | 6  | 13  | 0   |
| CONTIG-069309 | 71  | 11  | 3  | 33  | 0   |
| CONTIG-069310 | 75  | 6   | 12 | 0   | 0   |
| CONTIG-069311 | 65  | 2   | 2  | 0   | 0   |
| CONTIG-069312 | 75  | 5   | 2  | 4   | 0   |
| CONTIG-069313 | 118 | 8   | 6  | 28  | 0   |
| CONTIG-069314 | 154 | 4   | 4  | 10  | 0   |

|               |     |    |    |     |    |
|---------------|-----|----|----|-----|----|
| CONTIG-069315 | 160 | 5  | 6  | 4   | 0  |
| CONTIG-069316 | 66  | 10 | 13 | 16  | 0  |
| CONTIG-069317 | 154 | 11 | 26 | 51  | 0  |
| CONTIG-069318 | 182 | 7  | 19 | 53  | 0  |
| CONTIG-069319 | 64  | 2  | 0  | 2   | 0  |
| CONTIG-069320 | 142 | 8  | 18 | 29  | 0  |
| CONTIG-069321 | 64  | 14 | 14 | 24  | 0  |
| CONTIG-069322 | 169 | 9  | 4  | 43  | 0  |
| CONTIG-069323 | 144 | 16 | 16 | 64  | 5  |
| CONTIG-069324 | 372 | 8  | 10 | 85  | 0  |
| CONTIG-069325 | 130 | 5  | 11 | 14  | 0  |
| CONTIG-069326 | 98  | 5  | 6  | 6   | 0  |
| CONTIG-069327 | 146 | 7  | 17 | 33  | 0  |
| CONTIG-069328 | 83  | 3  | 2  | 7   | 0  |
| CONTIG-069329 | 70  | 8  | 16 | 4   | 0  |
| CONTIG-069330 | 67  | 4  | 2  | 8   | 0  |
| CONTIG-069331 | 128 | 4  | 7  | 12  | 0  |
| CONTIG-069332 | 90  | 4  | 2  | 2   | 0  |
| CONTIG-069333 | 157 | 6  | 6  | 15  | 0  |
| CONTIG-069335 | 225 | 7  | 6  | 33  | 2  |
| CONTIG-069337 | 86  | 7  | 15 | 8   | 0  |
| CONTIG-069338 | 413 | 18 | 0  | 0   | 80 |
| CONTIG-069339 | 79  | 8  | 2  | 32  | 0  |
| CONTIG-069340 | 503 | 20 | 8  | 375 | 18 |
| CONTIG-069341 | 156 | 19 | 5  | 149 | 0  |
| CONTIG-069345 | 108 | 8  | 9  | 36  | 0  |
| CONTIG-069346 | 468 | 9  | 2  | 104 | 0  |
| CONTIG-069347 | 90  | 19 | 8  | 29  | 5  |
| CONTIG-069349 | 71  | 3  | 11 | 0   | 0  |
| CONTIG-069351 | 121 | 7  | 4  | 28  | 0  |
| CONTIG-069352 | 87  | 7  | 3  | 6   | 0  |
| CONTIG-069355 | 70  | 10 | 4  | 22  | 0  |
| CONTIG-069356 | 304 | 9  | 8  | 2   | 7  |
| CONTIG-069357 | 90  | 14 | 2  | 66  | 0  |
| CONTIG-069358 | 168 | 6  | 12 | 15  | 0  |
| CONTIG-069359 | 63  | 5  | 10 | 12  | 0  |
| CONTIG-069360 | 142 | 5  | 0  | 9   | 0  |
| CONTIG-069361 | 60  | 4  | 5  | 3   | 0  |
| CONTIG-069362 | 231 | 7  | 2  | 45  | 0  |
| CONTIG-069363 | 162 | 7  | 15 | 19  | 0  |
| CONTIG-069365 | 69  | 5  | 0  | 4   | 0  |
| CONTIG-069366 | 90  | 7  | 3  | 16  | 0  |
| CONTIG-069367 | 218 | 9  | 3  | 9   | 0  |
| CONTIG-069368 | 164 | 4  | 2  | 0   | 0  |
| CONTIG-069369 | 89  | 6  | 13 | 0   | 0  |
| CONTIG-069370 | 123 | 8  | 3  | 47  | 0  |
| CONTIG-069371 | 113 | 5  | 3  | 18  | 0  |



|               |     |    |    |     |    |
|---------------|-----|----|----|-----|----|
| CONTIG-069372 | 123 | 7  | 3  | 31  | 0  |
| CONTIG-069373 | 194 | 5  | 19 | 19  | 0  |
| CONTIG-069374 | 240 | 76 | 12 | 6   | 0  |
| CONTIG-069375 | 81  | 10 | 16 | 12  | 0  |
| CONTIG-069376 | 162 | 11 | 16 | 2   | 0  |
| CONTIG-069377 | 204 | 6  | 6  | 33  | 0  |
| CONTIG-069379 | 94  | 11 | 10 | 19  | 0  |
| CONTIG-069384 | 206 | 8  | 34 | 22  | 0  |
| CONTIG-069385 | 182 | 6  | 0  | 31  | 0  |
| CONTIG-069386 | 152 | 9  | 4  | 35  | 0  |
| CONTIG-069387 | 115 | 9  | 0  | 43  | 0  |
| CONTIG-069388 | 81  | 5  | 4  | 3   | 0  |
| CONTIG-069389 | 215 | 15 | 12 | 95  | 4  |
| CONTIG-069391 | 180 | 8  | 7  | 41  | 2  |
| CONTIG-069392 | 59  | 4  | 2  | 6   | 0  |
| CONTIG-069393 | 99  | 4  | 5  | 0   | 0  |
| CONTIG-069394 | 109 | 18 | 19 | 52  | 0  |
| CONTIG-069395 | 60  | 7  | 2  | 6   | 0  |
| CONTIG-069396 | 283 | 14 | 9  | 121 | 3  |
| CONTIG-069397 | 60  | 7  | 19 | 5   | 0  |
| CONTIG-069398 | 120 | 9  | 4  | 35  | 0  |
| CONTIG-069399 | 73  | 11 | 4  | 21  | 0  |
| CONTIG-069400 | 122 | 10 | 7  | 20  | 2  |
| CONTIG-069401 | 134 | 5  | 5  | 21  | 0  |
| CONTIG-069402 | 284 | 5  | 0  | 65  | 0  |
| CONTIG-069403 | 60  | 5  | 9  | 0   | 0  |
| CONTIG-069404 | 91  | 31 | 15 | 136 | 0  |
| CONTIG-069406 | 75  | 9  | 2  | 15  | 0  |
| CONTIG-069407 | 447 | 7  | 6  | 70  | 0  |
| CONTIG-069408 | 247 | 12 | 6  | 112 | 0  |
| CONTIG-069409 | 226 | 9  | 10 | 45  | 0  |
| CONTIG-069410 | 150 | 12 | 8  | 73  | 0  |
| CONTIG-069411 | 160 | 6  | 7  | 27  | 2  |
| CONTIG-069412 | 130 | 4  | 4  | 12  | 0  |
| CONTIG-069413 | 128 | 29 | 3  | 133 | 0  |
| CONTIG-069414 | 141 | 7  | 8  | 32  | 0  |
| CONTIG-069415 | 89  | 5  | 14 | 9   | 0  |
| CONTIG-069416 | 66  | 21 | 7  | 45  | 0  |
| CONTIG-069417 | 61  | 12 | 5  | 19  | 0  |
| CONTIG-069418 | 586 | 18 | 18 | 310 | 12 |
| CONTIG-069419 | 173 | 11 | 10 | 60  | 0  |
| CONTIG-069420 | 148 | 5  | 0  | 12  | 0  |
| CONTIG-069422 | 60  | 2  | 0  | 0   | 0  |
| CONTIG-069423 | 407 | 13 | 5  | 147 | 4  |
| CONTIG-069424 | 172 | 7  | 6  | 17  | 0  |
| CONTIG-069425 | 99  | 9  | 6  | 26  | 0  |
| CONTIG-069426 | 209 | 16 | 11 | 118 | 5  |

|               |     |     |    |     |     |
|---------------|-----|-----|----|-----|-----|
| CONTIG-069427 | 95  | 7   | 7  | 24  | 0   |
| CONTIG-069428 | 121 | 7   | 3  | 27  | 0   |
| CONTIG-069429 | 103 | 9   | 4  | 8   | 0   |
| CONTIG-069430 | 267 | 31  | 98 | 155 | 0   |
| CONTIG-069431 | 74  | 5   | 3  | 10  | 0   |
| CONTIG-069432 | 74  | 7   | 7  | 25  | 0   |
| CONTIG-069433 | 134 | 5   | 3  | 6   | 4   |
| CONTIG-069434 | 232 | 5   | 2  | 26  | 0   |
| CONTIG-069435 | 119 | 8   | 7  | 16  | 0   |
| CONTIG-069436 | 76  | 5   | 2  | 2   | 0   |
| CONTIG-069437 | 217 | 4   | 6  | 15  | 0   |
| CONTIG-069438 | 102 | 3   | 2  | 2   | 0   |
| CONTIG-069439 | 268 | 9   | 0  | 51  | 0   |
| CONTIG-069440 | 77  | 5   | 13 | 3   | 0   |
| CONTIG-069441 | 78  | 10  | 3  | 29  | 0   |
| CONTIG-069442 | 69  | 7   | 0  | 18  | 0   |
| CONTIG-069443 | 337 | 154 | 0  | 0   | 530 |
| CONTIG-069444 | 103 | 14  | 20 | 36  | 2   |
| CONTIG-069445 | 983 | 74  | 0  | 2   | 13  |
| CONTIG-069448 | 373 | 12  | 32 | 137 | 0   |
| CONTIG-069449 | 111 | 8   | 22 | 13  | 0   |
| CONTIG-069451 | 116 | 5   | 0  | 10  | 0   |
| CONTIG-069452 | 88  | 3   | 5  | 3   | 0   |
| CONTIG-069453 | 777 | 19  | 0  | 0   | 104 |
| CONTIG-069454 | 69  | 6   | 26 | 0   | 0   |
| CONTIG-069455 | 41  | 303 | 42 | 341 | 0   |
| CONTIG-069456 | 79  | 8   | 2  | 9   | 0   |
| CONTIG-069457 | 95  | 3   | 2  | 2   | 0   |
| CONTIG-069458 | 188 | 22  | 0  | 209 | 0   |
| CONTIG-069459 | 101 | 8   | 23 | 23  | 0   |
| CONTIG-069460 | 139 | 34  | 2  | 12  | 0   |
| CONTIG-069461 | 76  | 5   | 2  | 0   | 0   |
| CONTIG-069462 | 99  | 4   | 3  | 7   | 0   |
| CONTIG-069463 | 123 | 7   | 3  | 2   | 2   |
| CONTIG-069464 | 121 | 8   | 35 | 18  | 0   |
| CONTIG-069465 | 75  | 12  | 19 | 20  | 0   |
| CONTIG-069467 | 101 | 5   | 4  | 9   | 0   |
| CONTIG-069468 | 65  | 78  | 4  | 162 | 0   |
| CONTIG-069469 | 263 | 11  | 3  | 4   | 0   |
| CONTIG-069470 | 477 | 20  | 39 | 70  | 0   |
| CONTIG-069471 | 121 | 9   | 4  | 38  | 0   |
| CONTIG-069473 | 172 | 6   | 16 | 9   | 2   |
| CONTIG-069474 | 68  | 4   | 4  | 4   | 0   |
| CONTIG-069475 | 123 | 8   | 11 | 28  | 0   |
| CONTIG-069476 | 141 | 8   | 0  | 52  | 0   |
| CONTIG-069477 | 223 | 5   | 13 | 29  | 0   |
| CONTIG-069478 | 159 | 9   | 2  | 10  | 0   |

|               |     |     |    |     |    |
|---------------|-----|-----|----|-----|----|
| CONTIG-069479 | 168 | 11  | 7  | 88  | 0  |
| CONTIG-069480 | 117 | 4   | 2  | 18  | 0  |
| CONTIG-069481 | 78  | 5   | 4  | 0   | 0  |
| CONTIG-069482 | 187 | 9   | 10 | 70  | 0  |
| CONTIG-069483 | 346 | 12  | 19 | 156 | 0  |
| CONTIG-069484 | 214 | 18  | 6  | 148 | 0  |
| CONTIG-069486 | 85  | 5   | 0  | 5   | 0  |
| CONTIG-069487 | 148 | 9   | 0  | 58  | 0  |
| CONTIG-069489 | 93  | 4   | 15 | 4   | 0  |
| CONTIG-069490 | 262 | 14  | 3  | 5   | 0  |
| CONTIG-069491 | 132 | 6   | 21 | 20  | 0  |
| CONTIG-069492 | 85  | 9   | 4  | 27  | 0  |
| CONTIG-069494 | 183 | 7   | 8  | 39  | 0  |
| CONTIG-069495 | 174 | 6   | 21 | 20  | 0  |
| CONTIG-069496 | 185 | 7   | 4  | 41  | 4  |
| CONTIG-069497 | 265 | 67  | 43 | 924 | 0  |
| CONTIG-069498 | 118 | 5   | 4  | 18  | 0  |
| CONTIG-069499 | 59  | 5   | 9  | 3   | 0  |
| CONTIG-069500 | 225 | 8   | 29 | 46  | 0  |
| CONTIG-069501 | 76  | 8   | 20 | 10  | 3  |
| CONTIG-069502 | 128 | 12  | 12 | 68  | 2  |
| CONTIG-069503 | 519 | 14  | 20 | 210 | 8  |
| CONTIG-069504 | 302 | 21  | 0  | 0   | 58 |
| CONTIG-069505 | 129 | 6   | 0  | 6   | 0  |
| CONTIG-069506 | 106 | 18  | 9  | 92  | 0  |
| CONTIG-069507 | 113 | 10  | 0  | 6   | 0  |
| CONTIG-069509 | 122 | 9   | 4  | 36  | 0  |
| CONTIG-069510 | 130 | 7   | 5  | 26  | 0  |
| CONTIG-069511 | 127 | 4   | 0  | 20  | 0  |
| CONTIG-069512 | 75  | 4   | 0  | 7   | 0  |
| CONTIG-069513 | 59  | 3   | 3  | 3   | 0  |
| CONTIG-069514 | 113 | 10  | 0  | 9   | 0  |
| CONTIG-069515 | 60  | 3   | 4  | 0   | 0  |
| CONTIG-069516 | 52  | 227 | 6  | 455 | 0  |
| CONTIG-069517 | 379 | 17  | 6  | 15  | 0  |
| CONTIG-069518 | 172 | 6   | 2  | 42  | 0  |
| CONTIG-069519 | 81  | 4   | 2  | 2   | 0  |
| CONTIG-069520 | 94  | 4   | 0  | 11  | 0  |
| CONTIG-069521 | 74  | 6   | 2  | 9   | 0  |
| CONTIG-069522 | 125 | 10  | 4  | 43  | 0  |
| CONTIG-069523 | 141 | 15  | 2  | 54  | 0  |
| CONTIG-069524 | 169 | 10  | 0  | 38  | 0  |
| CONTIG-069525 | 59  | 10  | 2  | 11  | 0  |
| CONTIG-069526 | 131 | 97  | 0  | 0   | 56 |
| CONTIG-069528 | 59  | 8   | 4  | 16  | 2  |
| CONTIG-069529 | 114 | 7   | 8  | 16  | 2  |
| CONTIG-069530 | 40  | 119 | 0  | 213 | 0  |

|               |     |    |    |     |   |
|---------------|-----|----|----|-----|---|
| CONTIG-069531 | 252 | 10 | 4  | 73  | 0 |
| CONTIG-069532 | 177 | 86 | 2  | 640 | 0 |
| CONTIG-069533 | 511 | 27 | 9  | 6   | 0 |
| CONTIG-069534 | 234 | 6  | 5  | 70  | 0 |
| CONTIG-069535 | 260 | 5  | 35 | 21  | 0 |
| CONTIG-069536 | 70  | 5  | 4  | 17  | 0 |
| CONTIG-069537 | 75  | 18 | 8  | 59  | 0 |
| CONTIG-069539 | 72  | 3  | 2  | 0   | 0 |
| CONTIG-069540 | 61  | 9  | 0  | 11  | 0 |
| CONTIG-069541 | 147 | 5  | 2  | 26  | 0 |
| CONTIG-069542 | 250 | 7  | 4  | 7   | 0 |
| CONTIG-069544 | 73  | 9  | 4  | 8   | 0 |
| CONTIG-069545 | 188 | 17 | 0  | 9   | 0 |
| CONTIG-069546 | 58  | 5  | 5  | 2   | 0 |
| CONTIG-069547 | 127 | 7  | 6  | 30  | 0 |
| CONTIG-069548 | 142 | 33 | 16 | 180 | 0 |
| CONTIG-069549 | 270 | 5  | 9  | 34  | 0 |
| CONTIG-069550 | 323 | 8  | 5  | 115 | 0 |
| CONTIG-069551 | 84  | 7  | 2  | 19  | 0 |
| CONTIG-069552 | 110 | 11 | 64 | 5   | 0 |
| CONTIG-069554 | 314 | 8  | 17 | 79  | 2 |
| CONTIG-069555 | 60  | 9  | 3  | 28  | 0 |
| CONTIG-069558 | 84  | 6  | 0  | 2   | 0 |
| CONTIG-069559 | 317 | 14 | 18 | 90  | 2 |
| CONTIG-069560 | 246 | 8  | 33 | 44  | 0 |
| CONTIG-069561 | 119 | 5  | 3  | 12  | 0 |
| CONTIG-069562 | 248 | 11 | 10 | 57  | 0 |
| CONTIG-069563 | 72  | 14 | 5  | 4   | 0 |
| CONTIG-069564 | 83  | 6  | 0  | 11  | 4 |
| CONTIG-069565 | 65  | 4  | 4  | 4   | 0 |
| CONTIG-069566 | 98  | 4  | 2  | 2   | 2 |
| CONTIG-069567 | 206 | 9  | 8  | 73  | 0 |
| CONTIG-069568 | 155 | 9  | 16 | 34  | 0 |
| CONTIG-069569 | 61  | 3  | 0  | 3   | 0 |
| CONTIG-069570 | 320 | 7  | 3  | 63  | 4 |
| CONTIG-069571 | 129 | 7  | 3  | 34  | 0 |
| CONTIG-069572 | 77  | 5  | 9  | 2   | 0 |
| CONTIG-069573 | 114 | 3  | 3  | 9   | 2 |
| CONTIG-069574 | 474 | 10 | 4  | 212 | 0 |
| CONTIG-069575 | 103 | 3  | 4  | 2   | 0 |
| CONTIG-069576 | 108 | 8  | 4  | 30  | 0 |
| CONTIG-069577 | 116 | 8  | 2  | 27  | 0 |
| CONTIG-069578 | 96  | 5  | 3  | 13  | 0 |
| CONTIG-069579 | 191 | 8  | 6  | 62  | 0 |
| CONTIG-069580 | 165 | 11 | 2  | 16  | 0 |
| CONTIG-069581 | 235 | 9  | 4  | 60  | 3 |
| CONTIG-069582 | 121 | 7  | 6  | 29  | 0 |

|               |     |    |    |     |    |
|---------------|-----|----|----|-----|----|
| CONTIG-069583 | 95  | 6  | 4  | 19  | 0  |
| CONTIG-069586 | 64  | 2  | 2  | 0   | 0  |
| CONTIG-069589 | 218 | 6  | 5  | 29  | 0  |
| CONTIG-069590 | 660 | 9  | 34 | 211 | 0  |
| CONTIG-069591 | 132 | 5  | 6  | 19  | 0  |
| CONTIG-069592 | 122 | 15 | 3  | 0   | 22 |
| CONTIG-069593 | 108 | 36 | 6  | 134 | 0  |
| CONTIG-069594 | 222 | 6  | 2  | 47  | 0  |
| CONTIG-069595 | 149 | 7  | 7  | 31  | 0  |
| CONTIG-069596 | 849 | 18 | 35 | 63  | 0  |
| CONTIG-069597 | 180 | 12 | 2  | 71  | 0  |
| CONTIG-069598 | 329 | 7  | 21 | 53  | 0  |
| CONTIG-069599 | 95  | 5  | 2  | 10  | 2  |
| CONTIG-069600 | 65  | 4  | 0  | 6   | 0  |
| CONTIG-069601 | 63  | 6  | 0  | 6   | 0  |
| CONTIG-069602 | 122 | 7  | 12 | 11  | 0  |
| CONTIG-069603 | 82  | 4  | 2  | 7   | 0  |
| CONTIG-069604 | 67  | 3  | 0  | 0   | 0  |
| CONTIG-069605 | 80  | 8  | 0  | 0   | 3  |
| CONTIG-069606 | 107 | 11 | 28 | 35  | 0  |
| CONTIG-069607 | 106 | 4  | 0  | 2   | 0  |
| CONTIG-069609 | 60  | 6  | 2  | 4   | 0  |
| CONTIG-069610 | 232 | 7  | 3  | 29  | 2  |
| CONTIG-069611 | 308 | 16 | 14 | 13  | 0  |
| CONTIG-069612 | 77  | 7  | 2  | 16  | 0  |
| CONTIG-069613 | 127 | 5  | 0  | 9   | 0  |
| CONTIG-069614 | 271 | 16 | 2  | 178 | 0  |
| CONTIG-069615 | 195 | 4  | 5  | 19  | 0  |
| CONTIG-069616 | 328 | 9  | 9  | 20  | 9  |
| CONTIG-069617 | 62  | 9  | 17 | 14  | 0  |
| CONTIG-069618 | 141 | 70 | 11 | 558 | 0  |
| CONTIG-069619 | 96  | 5  | 7  | 14  | 0  |
| CONTIG-069620 | 234 | 16 | 8  | 208 | 0  |
| CONTIG-069621 | 211 | 12 | 23 | 34  | 0  |
| CONTIG-069622 | 306 | 10 | 8  | 72  | 0  |
| CONTIG-069623 | 111 | 4  | 15 | 0   | 2  |
| CONTIG-069624 | 65  | 6  | 5  | 4   | 0  |
| CONTIG-069625 | 118 | 9  | 14 | 12  | 0  |
| CONTIG-069626 | 119 | 9  | 14 | 53  | 0  |
| CONTIG-069627 | 224 | 16 | 6  | 144 | 0  |
| CONTIG-069628 | 146 | 10 | 7  | 10  | 0  |
| CONTIG-069629 | 103 | 8  | 0  | 25  | 0  |
| CONTIG-069630 | 95  | 4  | 4  | 4   | 0  |
| CONTIG-069631 | 114 | 5  | 6  | 22  | 0  |
| CONTIG-069632 | 84  | 8  | 5  | 9   | 0  |
| CONTIG-069633 | 63  | 6  | 4  | 0   | 0  |
| CONTIG-069634 | 215 | 7  | 24 | 29  | 0  |

|               |     |    |    |     |    |
|---------------|-----|----|----|-----|----|
| CONTIG-069635 | 163 | 8  | 9  | 36  | 0  |
| CONTIG-069636 | 180 | 8  | 19 | 22  | 0  |
| CONTIG-069637 | 102 | 6  | 6  | 4   | 0  |
| CONTIG-069638 | 85  | 9  | 12 | 13  | 6  |
| CONTIG-069639 | 59  | 4  | 2  | 2   | 2  |
| CONTIG-069640 | 111 | 7  | 2  | 28  | 0  |
| CONTIG-069641 | 81  | 12 | 10 | 38  | 0  |
| CONTIG-069642 | 57  | 15 | 2  | 28  | 0  |
| CONTIG-069643 | 61  | 5  | 4  | 4   | 0  |
| CONTIG-069644 | 73  | 6  | 0  | 4   | 0  |
| CONTIG-069645 | 101 | 36 | 8  | 185 | 0  |
| CONTIG-069646 | 87  | 7  | 19 | 4   | 0  |
| CONTIG-069647 | 61  | 5  | 3  | 10  | 0  |
| CONTIG-069648 | 91  | 8  | 6  | 21  | 0  |
| CONTIG-069652 | 37  | 83 | 6  | 65  | 2  |
| CONTIG-069653 | 123 | 5  | 0  | 10  | 0  |
| CONTIG-069654 | 85  | 5  | 2  | 12  | 0  |
| CONTIG-069655 | 130 | 5  | 2  | 3   | 0  |
| CONTIG-069656 | 205 | 5  | 10 | 45  | 0  |
| CONTIG-069657 | 62  | 3  | 2  | 4   | 0  |
| CONTIG-069658 | 121 | 8  | 5  | 12  | 0  |
| CONTIG-069660 | 60  | 4  | 4  | 0   | 0  |
| CONTIG-069661 | 251 | 8  | 5  | 12  | 0  |
| CONTIG-069662 | 159 | 10 | 4  | 27  | 0  |
| CONTIG-069663 | 197 | 9  | 2  | 13  | 0  |
| CONTIG-069666 | 196 | 4  | 9  | 16  | 0  |
| CONTIG-069668 | 80  | 4  | 0  | 0   | 0  |
| CONTIG-069671 | 139 | 7  | 10 | 25  | 0  |
| CONTIG-069672 | 112 | 4  | 0  | 15  | 2  |
| CONTIG-069674 | 58  | 6  | 4  | 14  | 0  |
| CONTIG-069675 | 211 | 7  | 4  | 50  | 0  |
| CONTIG-069676 | 115 | 5  | 2  | 0   | 0  |
| CONTIG-069677 | 238 | 12 | 2  | 79  | 0  |
| CONTIG-069680 | 268 | 10 | 20 | 44  | 5  |
| CONTIG-069681 | 70  | 4  | 8  | 2   | 0  |
| CONTIG-069682 | 123 | 61 | 39 | 359 | 10 |
| CONTIG-069683 | 162 | 40 | 6  | 178 | 26 |
| CONTIG-069685 | 116 | 6  | 7  | 19  | 0  |
| CONTIG-069686 | 61  | 3  | 3  | 2   | 0  |
| CONTIG-069687 | 58  | 5  | 7  | 2   | 0  |
| CONTIG-069688 | 83  | 5  | 3  | 9   | 0  |
| CONTIG-069689 | 222 | 6  | 10 | 26  | 0  |
| CONTIG-069690 | 184 | 23 | 8  | 166 | 0  |
| CONTIG-069691 | 135 | 5  | 3  | 11  | 0  |
| CONTIG-069692 | 160 | 5  | 4  | 20  | 0  |
| CONTIG-069693 | 111 | 37 | 0  | 168 | 0  |
| CONTIG-069694 | 67  | 33 | 5  | 79  | 3  |

|               |     |    |    |     |     |
|---------------|-----|----|----|-----|-----|
| CONTIG-069695 | 103 | 6  | 0  | 22  | 0   |
| CONTIG-069696 | 91  | 15 | 5  | 40  | 0   |
| CONTIG-069697 | 399 | 18 | 27 | 312 | 0   |
| CONTIG-069698 | 96  | 8  | 8  | 15  | 0   |
| CONTIG-069699 | 81  | 7  | 7  | 7   | 0   |
| CONTIG-069700 | 135 | 6  | 8  | 13  | 0   |
| CONTIG-069701 | 238 | 7  | 11 | 46  | 0   |
| CONTIG-069702 | 87  | 3  | 7  | 0   | 0   |
| CONTIG-069703 | 63  | 3  | 2  | 2   | 0   |
| CONTIG-069704 | 232 | 13 | 19 | 69  | 0   |
| CONTIG-069707 | 80  | 6  | 9  | 20  | 0   |
| CONTIG-069708 | 95  | 7  | 0  | 13  | 0   |
| CONTIG-069709 | 116 | 7  | 14 | 12  | 0   |
| CONTIG-069710 | 60  | 3  | 0  | 8   | 0   |
| CONTIG-069711 | 119 | 6  | 7  | 12  | 0   |
| CONTIG-069712 | 59  | 5  | 2  | 7   | 0   |
| CONTIG-069713 | 291 | 9  | 7  | 63  | 2   |
| CONTIG-069714 | 148 | 4  | 2  | 4   | 0   |
| CONTIG-069715 | 258 | 7  | 8  | 21  | 0   |
| CONTIG-069717 | 806 | 42 | 8  | 2   | 313 |
| CONTIG-069718 | 232 | 33 | 18 | 287 | 2   |
| CONTIG-069719 | 119 | 4  | 8  | 7   | 0   |
| CONTIG-069720 | 78  | 9  | 9  | 9   | 0   |
| CONTIG-069721 | 105 | 6  | 0  | 10  | 0   |
| CONTIG-069722 | 59  | 2  | 3  | 2   | 0   |
| CONTIG-069723 | 191 | 13 | 24 | 47  | 0   |
| CONTIG-069724 | 135 | 5  | 13 | 19  | 0   |
| CONTIG-069725 | 184 | 8  | 16 | 31  | 0   |
| CONTIG-069727 | 294 | 19 | 27 | 16  | 2   |
| CONTIG-069728 | 157 | 6  | 4  | 16  | 0   |
| CONTIG-069729 | 252 | 10 | 5  | 89  | 0   |
| CONTIG-069730 | 358 | 8  | 2  | 60  | 0   |
| CONTIG-069731 | 115 | 15 | 9  | 95  | 0   |
| CONTIG-069734 | 195 | 7  | 17 | 40  | 0   |
| CONTIG-069735 | 258 | 12 | 9  | 43  | 0   |
| CONTIG-069736 | 139 | 6  | 2  | 29  | 0   |
| CONTIG-069737 | 146 | 7  | 2  | 45  | 0   |
| CONTIG-069738 | 378 | 21 | 13 | 21  | 0   |
| CONTIG-069739 | 58  | 2  | 6  | 3   | 0   |
| CONTIG-069742 | 59  | 4  | 4  | 4   | 0   |
| CONTIG-069743 | 742 | 19 | 42 | 802 | 0   |
| CONTIG-069744 | 77  | 10 | 0  | 17  | 0   |
| CONTIG-069745 | 126 | 4  | 2  | 23  | 0   |
| CONTIG-069746 | 245 | 19 | 7  | 5   | 0   |
| CONTIG-069747 | 72  | 4  | 2  | 6   | 0   |
| CONTIG-069748 | 223 | 6  | 0  | 48  | 0   |
| CONTIG-069749 | 80  | 20 | 0  | 37  | 0   |

|               |     |    |    |     |    |
|---------------|-----|----|----|-----|----|
| CONTIG-069750 | 58  | 4  | 3  | 4   | 0  |
| CONTIG-069751 | 93  | 7  | 9  | 31  | 0  |
| CONTIG-069752 | 160 | 7  | 5  | 18  | 0  |
| CONTIG-069753 | 131 | 6  | 0  | 9   | 0  |
| CONTIG-069754 | 101 | 9  | 4  | 36  | 0  |
| CONTIG-069755 | 118 | 8  | 6  | 31  | 0  |
| CONTIG-069756 | 256 | 8  | 14 | 50  | 0  |
| CONTIG-069757 | 93  | 6  | 5  | 7   | 0  |
| CONTIG-069758 | 90  | 4  | 0  | 0   | 0  |
| CONTIG-069760 | 67  | 3  | 2  | 2   | 0  |
| CONTIG-069761 | 84  | 3  | 10 | 0   | 0  |
| CONTIG-069762 | 95  | 5  | 5  | 6   | 0  |
| CONTIG-069763 | 74  | 7  | 8  | 15  | 0  |
| CONTIG-069764 | 147 | 7  | 5  | 7   | 0  |
| CONTIG-069765 | 70  | 7  | 2  | 23  | 0  |
| CONTIG-069766 | 331 | 9  | 11 | 103 | 0  |
| CONTIG-069767 | 78  | 11 | 11 | 18  | 0  |
| CONTIG-069768 | 37  | 12 | 0  | 4   | 2  |
| CONTIG-069769 | 61  | 4  | 2  | 5   | 0  |
| CONTIG-069770 | 69  | 8  | 0  | 21  | 0  |
| CONTIG-069771 | 97  | 3  | 3  | 6   | 0  |
| CONTIG-069772 | 375 | 17 | 4  | 0   | 62 |
| CONTIG-069773 | 87  | 14 | 3  | 57  | 0  |
| CONTIG-069774 | 161 | 7  | 3  | 29  | 0  |
| CONTIG-069775 | 102 | 4  | 12 | 5   | 0  |
| CONTIG-069776 | 89  | 6  | 9  | 16  | 0  |
| CONTIG-069777 | 69  | 8  | 6  | 8   | 0  |
| CONTIG-069778 | 60  | 7  | 2  | 7   | 0  |
| CONTIG-069779 | 64  | 6  | 3  | 13  | 0  |
| CONTIG-069780 | 70  | 3  | 0  | 5   | 0  |
| CONTIG-069781 | 119 | 3  | 4  | 10  | 0  |
| CONTIG-069782 | 193 | 7  | 2  | 39  | 0  |
| CONTIG-069783 | 58  | 25 | 0  | 59  | 0  |
| CONTIG-069784 | 60  | 9  | 6  | 11  | 0  |
| CONTIG-069785 | 125 | 18 | 3  | 48  | 2  |
| CONTIG-069786 | 228 | 15 | 15 | 125 | 0  |
| CONTIG-069787 | 166 | 9  | 20 | 56  | 0  |
| CONTIG-069788 | 130 | 4  | 13 | 13  | 0  |
| CONTIG-069789 | 95  | 9  | 24 | 14  | 0  |
| CONTIG-069790 | 136 | 7  | 7  | 29  | 0  |
| CONTIG-069791 | 86  | 5  | 0  | 8   | 0  |
| CONTIG-069792 | 512 | 18 | 12 | 245 | 9  |
| CONTIG-069793 | 113 | 5  | 5  | 6   | 0  |
| CONTIG-069795 | 154 | 5  | 10 | 10  | 0  |
| CONTIG-069796 | 77  | 12 | 2  | 2   | 0  |
| CONTIG-069797 | 215 | 8  | 8  | 50  | 2  |
| CONTIG-069798 | 80  | 5  | 3  | 0   | 0  |



|               |     |      |    |      |   |
|---------------|-----|------|----|------|---|
| CONTIG-069799 | 365 | 6    | 0  | 31   | 2 |
| CONTIG-069800 | 310 | 13   | 26 | 131  | 0 |
| CONTIG-069801 | 259 | 15   | 31 | 116  | 0 |
| CONTIG-069802 | 200 | 4    | 2  | 27   | 0 |
| CONTIG-069803 | 82  | 18   | 6  | 45   | 0 |
| CONTIG-069804 | 107 | 5    | 0  | 7    | 0 |
| CONTIG-069805 | 101 | 6    | 2  | 7    | 0 |
| CONTIG-069806 | 116 | 22   | 13 | 49   | 0 |
| CONTIG-069807 | 59  | 5    | 2  | 9    | 0 |
| CONTIG-069808 | 76  | 3    | 2  | 0    | 0 |
| CONTIG-069809 | 86  | 4    | 6  | 9    | 0 |
| CONTIG-069810 | 83  | 8    | 15 | 22   | 0 |
| CONTIG-069811 | 63  | 7    | 2  | 15   | 0 |
| CONTIG-069812 | 105 | 4    | 8  | 12   | 0 |
| CONTIG-069813 | 158 | 4    | 7  | 21   | 0 |
| CONTIG-069814 | 110 | 6    | 14 | 7    | 0 |
| CONTIG-069815 | 112 | 6    | 10 | 20   | 0 |
| CONTIG-069816 | 191 | 9    | 10 | 68   | 0 |
| CONTIG-069819 | 99  | 21   | 8  | 0    | 5 |
| CONTIG-069820 | 430 | 7    | 11 | 60   | 0 |
| CONTIG-069821 | 57  | 1110 | 30 | 1913 | 0 |
| CONTIG-069822 | 198 | 14   | 6  | 83   | 2 |
| CONTIG-069823 | 277 | 27   | 37 | 429  | 0 |
| CONTIG-069824 | 252 | 11   | 4  | 83   | 2 |
| CONTIG-069825 | 74  | 8    | 12 | 24   | 0 |
| CONTIG-069826 | 70  | 5    | 7  | 6    | 0 |
| CONTIG-069829 | 62  | 26   | 15 | 82   | 0 |
| CONTIG-069831 | 126 | 4    | 2  | 14   | 0 |
| CONTIG-069832 | 335 | 11   | 57 | 75   | 2 |
| CONTIG-069833 | 182 | 11   | 4  | 64   | 6 |
| CONTIG-069837 | 252 | 16   | 6  | 163  | 0 |
| CONTIG-069838 | 171 | 9    | 16 | 37   | 0 |
| CONTIG-069839 | 155 | 6    | 8  | 30   | 0 |
| CONTIG-069840 | 91  | 6    | 0  | 4    | 0 |
| CONTIG-069841 | 77  | 5    | 0  | 14   | 0 |
| CONTIG-069842 | 63  | 2    | 2  | 0    | 0 |
| CONTIG-069843 | 259 | 5    | 4  | 30   | 0 |
| CONTIG-069844 | 143 | 6    | 9  | 10   | 0 |
| CONTIG-069845 | 225 | 11   | 9  | 76   | 0 |
| CONTIG-069846 | 613 | 10   | 33 | 185  | 0 |
| CONTIG-069847 | 77  | 8    | 19 | 0    | 5 |
| CONTIG-069848 | 191 | 10   | 2  | 50   | 2 |
| CONTIG-069853 | 116 | 7    | 3  | 17   | 0 |
| CONTIG-069854 | 117 | 7    | 3  | 9    | 0 |
| CONTIG-069855 | 129 | 5    | 11 | 11   | 0 |
| CONTIG-069856 | 83  | 4    | 9  | 2    | 0 |
| CONTIG-069857 | 399 | 24   | 43 | 503  | 0 |

|               |     |    |    |     |    |
|---------------|-----|----|----|-----|----|
| CONTIG-069863 | 198 | 20 | 28 | 81  | 0  |
| CONTIG-069865 | 92  | 6  | 8  | 4   | 0  |
| CONTIG-069866 | 186 | 10 | 14 | 63  | 0  |
| CONTIG-069868 | 72  | 4  | 0  | 4   | 2  |
| CONTIG-069869 | 157 | 6  | 2  | 31  | 0  |
| CONTIG-069871 | 185 | 11 | 6  | 0   | 0  |
| CONTIG-069872 | 60  | 4  | 4  | 0   | 0  |
| CONTIG-069873 | 68  | 4  | 3  | 5   | 0  |
| CONTIG-069874 | 79  | 6  | 0  | 14  | 0  |
| CONTIG-069877 | 145 | 7  | 2  | 24  | 0  |
| CONTIG-069878 | 77  | 5  | 5  | 12  | 0  |
| CONTIG-069879 | 69  | 9  | 12 | 8   | 0  |
| CONTIG-069880 | 69  | 9  | 0  | 9   | 0  |
| CONTIG-069881 | 107 | 10 | 21 | 17  | 0  |
| CONTIG-069882 | 91  | 9  | 10 | 24  | 0  |
| CONTIG-069883 | 249 | 12 | 2  | 127 | 2  |
| CONTIG-069884 | 278 | 14 | 14 | 113 | 7  |
| CONTIG-069885 | 113 | 6  | 0  | 13  | 0  |
| CONTIG-069886 | 71  | 6  | 0  | 23  | 0  |
| CONTIG-069887 | 74  | 10 | 23 | 15  | 0  |
| CONTIG-069888 | 78  | 4  | 23 | 5   | 0  |
| CONTIG-069889 | 601 | 20 | 12 | 536 | 0  |
| CONTIG-069890 | 188 | 4  | 2  | 14  | 0  |
| CONTIG-069891 | 93  | 13 | 5  | 22  | 2  |
| CONTIG-069892 | 81  | 8  | 4  | 20  | 0  |
| CONTIG-069895 | 110 | 17 | 8  | 70  | 0  |
| CONTIG-069896 | 418 | 22 | 10 | 304 | 0  |
| CONTIG-069897 | 76  | 6  | 3  | 12  | 0  |
| CONTIG-069898 | 89  | 3  | 0  | 5   | 0  |
| CONTIG-069899 | 61  | 10 | 19 | 15  | 0  |
| CONTIG-069900 | 83  | 3  | 2  | 10  | 0  |
| CONTIG-069901 | 89  | 10 | 19 | 20  | 0  |
| CONTIG-069902 | 406 | 8  | 0  | 91  | 0  |
| CONTIG-069903 | 125 | 14 | 5  | 60  | 0  |
| CONTIG-069904 | 73  | 5  | 2  | 2   | 0  |
| CONTIG-069907 | 59  | 4  | 3  | 4   | 0  |
| CONTIG-069908 | 63  | 7  | 4  | 12  | 0  |
| CONTIG-069909 | 531 | 18 | 6  | 30  | 92 |
| CONTIG-069911 | 76  | 2  | 0  | 0   | 0  |
| CONTIG-069912 | 223 | 6  | 5  | 52  | 0  |
| CONTIG-069913 | 92  | 9  | 10 | 19  | 0  |
| CONTIG-069914 | 115 | 6  | 5  | 10  | 0  |
| CONTIG-069915 | 162 | 8  | 4  | 44  | 0  |
| CONTIG-069916 | 217 | 4  | 0  | 3   | 0  |
| CONTIG-069917 | 92  | 4  | 6  | 0   | 0  |
| CONTIG-069918 | 174 | 31 | 4  | 197 | 0  |
| CONTIG-069919 | 110 | 5  | 0  | 0   | 0  |

|               |     |    |    |     |    |
|---------------|-----|----|----|-----|----|
| CONTIG-069920 | 338 | 11 | 9  | 87  | 2  |
| CONTIG-069921 | 82  | 5  | 13 | 2   | 0  |
| CONTIG-069922 | 61  | 7  | 2  | 12  | 0  |
| CONTIG-069923 | 405 | 10 | 20 | 66  | 4  |
| CONTIG-069924 | 89  | 14 | 15 | 25  | 0  |
| CONTIG-069925 | 157 | 6  | 12 | 9   | 2  |
| CONTIG-069926 | 261 | 13 | 7  | 114 | 0  |
| CONTIG-069927 | 114 | 6  | 3  | 15  | 0  |
| CONTIG-069929 | 136 | 14 | 17 | 39  | 0  |
| CONTIG-069930 | 77  | 6  | 8  | 12  | 0  |
| CONTIG-069931 | 60  | 4  | 0  | 13  | 0  |
| CONTIG-069932 | 389 | 9  | 25 | 141 | 0  |
| CONTIG-069933 | 82  | 9  | 14 | 19  | 0  |
| CONTIG-069934 | 92  | 4  | 2  | 6   | 0  |
| CONTIG-069935 | 94  | 8  | 34 | 16  | 2  |
| CONTIG-069936 | 238 | 11 | 13 | 101 | 2  |
| CONTIG-069937 | 95  | 6  | 9  | 0   | 0  |
| CONTIG-069938 | 120 | 12 | 6  | 34  | 0  |
| CONTIG-069939 | 85  | 10 | 8  | 43  | 0  |
| CONTIG-069940 | 582 | 12 | 12 | 363 | 0  |
| CONTIG-069941 | 116 | 9  | 4  | 36  | 0  |
| CONTIG-069942 | 137 | 10 | 5  | 8   | 0  |
| CONTIG-069943 | 101 | 6  | 12 | 11  | 0  |
| CONTIG-069944 | 392 | 13 | 4  | 100 | 2  |
| CONTIG-069945 | 283 | 10 | 2  | 163 | 0  |
| CONTIG-069946 | 99  | 9  | 0  | 35  | 0  |
| CONTIG-069947 | 131 | 9  | 0  | 30  | 0  |
| CONTIG-069948 | 260 | 17 | 4  | 144 | 0  |
| CONTIG-069949 | 577 | 20 | 6  | 0   | 52 |
| CONTIG-069950 | 196 | 6  | 22 | 34  | 0  |
| CONTIG-069951 | 157 | 5  | 4  | 38  | 0  |
| CONTIG-069953 | 179 | 25 | 17 | 140 | 3  |
| CONTIG-069954 | 98  | 12 | 2  | 40  | 0  |
| CONTIG-069956 | 282 | 10 | 2  | 96  | 0  |
| CONTIG-069957 | 101 | 6  | 11 | 2   | 0  |
| CONTIG-069958 | 224 | 10 | 29 | 75  | 0  |
| CONTIG-069960 | 123 | 6  | 7  | 18  | 0  |
| CONTIG-069961 | 182 | 8  | 7  | 38  | 0  |
| CONTIG-069962 | 60  | 8  | 4  | 11  | 0  |
| CONTIG-069963 | 360 | 12 | 16 | 107 | 2  |
| CONTIG-069964 | 174 | 8  | 5  | 29  | 0  |
| CONTIG-069965 | 106 | 10 | 19 | 34  | 0  |
| CONTIG-069966 | 883 | 15 | 49 | 241 | 10 |
| CONTIG-069967 | 149 | 8  | 5  | 0   | 0  |
| CONTIG-069968 | 65  | 3  | 2  | 5   | 0  |
| CONTIG-069969 | 161 | 5  | 7  | 5   | 0  |
| CONTIG-069970 | 88  | 5  | 9  | 6   | 0  |

|               |     |    |    |     |     |
|---------------|-----|----|----|-----|-----|
| CONTIG-069971 | 117 | 10 | 13 | 35  | 0   |
| CONTIG-069972 | 319 | 12 | 21 | 107 | 0   |
| CONTIG-069973 | 118 | 4  | 6  | 19  | 0   |
| CONTIG-069974 | 551 | 20 | 24 | 438 | 0   |
| CONTIG-069975 | 129 | 14 | 17 | 34  | 0   |
| CONTIG-069977 | 168 | 6  | 10 | 32  | 0   |
| CONTIG-069979 | 99  | 10 | 0  | 6   | 0   |
| CONTIG-069980 | 165 | 7  | 0  | 16  | 0   |
| CONTIG-069981 | 171 | 4  | 6  | 16  | 0   |
| CONTIG-069982 | 514 | 10 | 26 | 158 | 0   |
| CONTIG-069983 | 202 | 10 | 9  | 62  | 0   |
| CONTIG-069984 | 47  | 19 | 2  | 25  | 0   |
| CONTIG-069985 | 76  | 3  | 4  | 4   | 0   |
| CONTIG-069986 | 59  | 6  | 2  | 0   | 0   |
| CONTIG-069987 | 597 | 18 | 3  | 0   | 101 |
| CONTIG-069988 | 59  | 5  | 4  | 0   | 0   |
| CONTIG-069989 | 229 | 6  | 11 | 50  | 0   |
| CONTIG-069990 | 247 | 17 | 19 | 86  | 0   |
| CONTIG-069991 | 93  | 5  | 7  | 12  | 0   |
| CONTIG-069992 | 704 | 17 | 21 | 403 | 0   |
| CONTIG-069993 | 126 | 3  | 2  | 3   | 0   |
| CONTIG-069994 | 143 | 7  | 0  | 36  | 0   |
| CONTIG-069995 | 102 | 14 | 0  | 11  | 0   |
| CONTIG-069996 | 428 | 11 | 7  | 184 | 0   |
| CONTIG-069997 | 147 | 6  | 10 | 22  | 0   |
| CONTIG-069998 | 105 | 7  | 4  | 10  | 0   |
| CONTIG-069999 | 93  | 4  | 7  | 3   | 0   |
| CONTIG-070002 | 60  | 5  | 0  | 7   | 0   |
| CONTIG-070004 | 66  | 6  | 5  | 0   | 0   |
| CONTIG-070005 | 130 | 6  | 5  | 31  | 0   |
| CONTIG-070006 | 125 | 7  | 7  | 24  | 0   |
| CONTIG-070007 | 69  | 6  | 0  | 13  | 0   |
| CONTIG-070008 | 219 | 8  | 4  | 60  | 0   |
| CONTIG-070009 | 138 | 5  | 3  | 25  | 0   |
| CONTIG-070010 | 71  | 5  | 2  | 2   | 0   |
| CONTIG-070011 | 63  | 8  | 0  | 19  | 0   |
| CONTIG-070012 | 222 | 12 | 9  | 60  | 0   |
| CONTIG-070013 | 109 | 5  | 3  | 15  | 0   |
| CONTIG-070014 | 94  | 5  | 7  | 0   | 0   |
| CONTIG-070015 | 70  | 4  | 2  | 6   | 0   |
| CONTIG-070016 | 217 | 6  | 5  | 34  | 0   |
| CONTIG-070017 | 63  | 8  | 30 | 0   | 0   |
| CONTIG-070018 | 207 | 6  | 2  | 35  | 0   |
| CONTIG-070020 | 279 | 13 | 0  | 155 | 0   |
| CONTIG-070024 | 131 | 3  | 2  | 0   | 0   |
| CONTIG-070025 | 103 | 20 | 9  | 39  | 0   |
| CONTIG-070027 | 70  | 6  | 12 | 8   | 0   |

|               |     |    |    |     |    |
|---------------|-----|----|----|-----|----|
| CONTIG-070028 | 163 | 6  | 23 | 24  | 0  |
| CONTIG-070031 | 211 | 4  | 0  | 7   | 0  |
| CONTIG-070032 | 192 | 17 | 61 | 78  | 0  |
| CONTIG-070033 | 58  | 3  | 2  | 2   | 0  |
| CONTIG-070034 | 294 | 15 | 13 | 186 | 2  |
| CONTIG-070035 | 77  | 8  | 8  | 13  | 0  |
| CONTIG-070036 | 78  | 10 | 6  | 35  | 0  |
| CONTIG-070037 | 116 | 13 | 20 | 42  | 0  |
| CONTIG-070038 | 434 | 7  | 9  | 148 | 0  |
| CONTIG-070039 | 135 | 10 | 5  | 31  | 2  |
| CONTIG-070040 | 144 | 5  | 2  | 30  | 0  |
| CONTIG-070042 | 96  | 9  | 20 | 8   | 0  |
| CONTIG-070044 | 107 | 7  | 10 | 19  | 0  |
| CONTIG-070045 | 115 | 5  | 3  | 5   | 0  |
| CONTIG-070046 | 98  | 4  | 5  | 11  | 0  |
| CONTIG-070047 | 353 | 10 | 4  | 59  | 0  |
| CONTIG-070048 | 163 | 11 | 3  | 33  | 0  |
| CONTIG-070049 | 85  | 6  | 4  | 13  | 0  |
| CONTIG-070050 | 120 | 5  | 0  | 0   | 0  |
| CONTIG-070051 | 126 | 13 | 4  | 48  | 0  |
| CONTIG-070052 | 448 | 9  | 2  | 31  | 0  |
| CONTIG-070053 | 138 | 4  | 0  | 0   | 0  |
| CONTIG-070054 | 188 | 8  | 9  | 22  | 0  |
| CONTIG-070055 | 294 | 17 | 59 | 171 | 0  |
| CONTIG-070056 | 191 | 9  | 6  | 71  | 0  |
| CONTIG-070057 | 133 | 4  | 3  | 20  | 0  |
| CONTIG-070058 | 113 | 8  | 3  | 22  | 0  |
| CONTIG-070059 | 139 | 6  | 0  | 22  | 0  |
| CONTIG-070060 | 71  | 9  | 15 | 3   | 0  |
| CONTIG-070061 | 103 | 14 | 14 | 77  | 0  |
| CONTIG-070062 | 155 | 4  | 12 | 24  | 0  |
| CONTIG-070063 | 64  | 5  | 8  | 5   | 0  |
| CONTIG-070064 | 237 | 10 | 3  | 11  | 0  |
| CONTIG-070065 | 89  | 4  | 6  | 8   | 0  |
| CONTIG-070066 | 280 | 11 | 14 | 103 | 0  |
| CONTIG-070067 | 181 | 7  | 6  | 51  | 0  |
| CONTIG-070068 | 58  | 4  | 0  | 0   | 0  |
| CONTIG-070069 | 61  | 3  | 7  | 0   | 0  |
| CONTIG-070070 | 285 | 11 | 7  | 88  | 2  |
| CONTIG-070071 | 67  | 3  | 0  | 3   | 0  |
| CONTIG-070072 | 94  | 6  | 2  | 0   | 0  |
| CONTIG-070073 | 106 | 4  | 0  | 12  | 0  |
| CONTIG-070074 | 307 | 12 | 4  | 0   | 38 |
| CONTIG-070076 | 89  | 8  | 2  | 17  | 0  |
| CONTIG-070077 | 58  | 3  | 4  | 7   | 0  |
| CONTIG-070078 | 250 | 12 | 0  | 108 | 0  |
| CONTIG-070079 | 63  | 19 | 2  | 28  | 0  |

|               |     |    |     |     |    |
|---------------|-----|----|-----|-----|----|
| CONTIG-070080 | 79  | 6  | 3   | 5   | 2  |
| CONTIG-070081 | 133 | 4  | 4   | 7   | 0  |
| CONTIG-070082 | 101 | 9  | 3   | 0   | 0  |
| CONTIG-070083 | 113 | 9  | 8   | 31  | 0  |
| CONTIG-070084 | 51  | 17 | 6   | 22  | 0  |
| CONTIG-070086 | 104 | 5  | 2   | 9   | 0  |
| CONTIG-070087 | 41  | 29 | 11  | 41  | 0  |
| CONTIG-070088 | 113 | 9  | 3   | 29  | 0  |
| CONTIG-070089 | 677 | 20 | 3   | 0   | 2  |
| CONTIG-070090 | 76  | 4  | 11  | 9   | 0  |
| CONTIG-070091 | 226 | 6  | 2   | 58  | 0  |
| CONTIG-070092 | 129 | 9  | 0   | 35  | 0  |
| CONTIG-070093 | 194 | 15 | 0   | 80  | 3  |
| CONTIG-070094 | 140 | 26 | 9   | 212 | 0  |
| CONTIG-070095 | 748 | 17 | 19  | 549 | 2  |
| CONTIG-070096 | 198 | 5  | 7   | 30  | 0  |
| CONTIG-070098 | 98  | 4  | 5   | 4   | 0  |
| CONTIG-070100 | 95  | 5  | 3   | 5   | 0  |
| CONTIG-070101 | 67  | 4  | 2   | 11  | 0  |
| CONTIG-070102 | 252 | 10 | 13  | 87  | 0  |
| CONTIG-070103 | 126 | 20 | 7   | 134 | 0  |
| CONTIG-070104 | 221 | 8  | 4   | 67  | 0  |
| CONTIG-070105 | 188 | 13 | 22  | 71  | 0  |
| CONTIG-070106 | 119 | 8  | 18  | 10  | 0  |
| CONTIG-070107 | 215 | 5  | 0   | 39  | 0  |
| CONTIG-070108 | 183 | 12 | 5   | 33  | 0  |
| CONTIG-070109 | 86  | 7  | 3   | 14  | 0  |
| CONTIG-070110 | 73  | 6  | 3   | 2   | 0  |
| CONTIG-070112 | 79  | 6  | 4   | 12  | 0  |
| CONTIG-070113 | 102 | 5  | 6   | 4   | 0  |
| CONTIG-070114 | 131 | 15 | 37  | 2   | 0  |
| CONTIG-070115 | 196 | 14 | 20  | 15  | 2  |
| CONTIG-070117 | 118 | 6  | 6   | 0   | 0  |
| CONTIG-070118 | 91  | 12 | 3   | 29  | 0  |
| CONTIG-070119 | 254 | 8  | 2   | 65  | 0  |
| CONTIG-070120 | 60  | 4  | 0   | 6   | 0  |
| CONTIG-070121 | 191 | 7  | 7   | 29  | 0  |
| CONTIG-070122 | 63  | 29 | 13  | 54  | 0  |
| CONTIG-070123 | 77  | 4  | 9   | 6   | 0  |
| CONTIG-070124 | 169 | 4  | 0   | 9   | 0  |
| CONTIG-070125 | 120 | 65 | 117 | 186 | 0  |
| CONTIG-070126 | 153 | 5  | 12  | 14  | 0  |
| CONTIG-070127 | 136 | 7  | 5   | 18  | 0  |
| CONTIG-070128 | 154 | 17 | 6   | 66  | 0  |
| CONTIG-070129 | 196 | 63 | 2   | 0   | 99 |
| CONTIG-070130 | 103 | 6  | 14  | 8   | 0  |
| CONTIG-070131 | 125 | 4  | 4   | 16  | 0  |

|               |     |     |    |      |    |
|---------------|-----|-----|----|------|----|
| CONTIG-070132 | 190 | 10  | 9  | 87   | 0  |
| CONTIG-070133 | 74  | 3   | 2  | 0    | 0  |
| CONTIG-070134 | 185 | 19  | 4  | 0    | 15 |
| CONTIG-070135 | 72  | 522 | 3  | 2399 | 0  |
| CONTIG-070136 | 230 | 10  | 10 | 29   | 4  |
| CONTIG-070137 | 126 | 6   | 11 | 23   | 0  |
| CONTIG-070138 | 170 | 7   | 4  | 31   | 0  |
| CONTIG-070139 | 121 | 17  | 9  | 62   | 0  |
| CONTIG-070140 | 119 | 5   | 15 | 0    | 0  |
| CONTIG-070141 | 218 | 8   | 2  | 64   | 0  |
| CONTIG-070143 | 97  | 4   | 2  | 10   | 0  |
| CONTIG-070144 | 200 | 5   | 3  | 29   | 0  |
| CONTIG-070145 | 91  | 5   | 4  | 9    | 0  |
| CONTIG-070146 | 304 | 10  | 7  | 24   | 0  |
| CONTIG-070147 | 307 | 11  | 23 | 71   | 0  |
| CONTIG-070148 | 132 | 6   | 15 | 4    | 0  |
| CONTIG-070149 | 645 | 10  | 2  | 267  | 0  |
| CONTIG-070150 | 182 | 7   | 25 | 23   | 0  |
| CONTIG-070151 | 66  | 5   | 13 | 2    | 2  |
| CONTIG-070152 | 100 | 6   | 11 | 11   | 0  |
| CONTIG-070153 | 71  | 6   | 7  | 10   | 0  |
| CONTIG-070154 | 273 | 7   | 5  | 38   | 0  |
| CONTIG-070155 | 139 | 19  | 19 | 2    | 0  |
| CONTIG-070156 | 70  | 5   | 2  | 13   | 0  |
| CONTIG-070157 | 37  | 15  | 5  | 17   | 0  |
| CONTIG-070158 | 332 | 12  | 15 | 140  | 2  |
| CONTIG-070160 | 68  | 12  | 0  | 27   | 0  |
| CONTIG-070161 | 58  | 9   | 2  | 6    | 0  |
| CONTIG-070162 | 107 | 3   | 4  | 0    | 0  |
| CONTIG-070163 | 88  | 9   | 3  | 14   | 0  |
| CONTIG-070164 | 195 | 10  | 18 | 59   | 0  |
| CONTIG-070166 | 213 | 61  | 0  | 0    | 0  |
| CONTIG-070168 | 132 | 25  | 6  | 161  | 0  |
| CONTIG-070169 | 40  | 8   | 5  | 0    | 0  |
| CONTIG-070171 | 92  | 6   | 2  | 11   | 0  |
| CONTIG-070172 | 47  | 12  | 2  | 26   | 0  |
| CONTIG-070173 | 70  | 4   | 0  | 2    | 0  |
| CONTIG-070174 | 428 | 14  | 12 | 231  | 2  |
| CONTIG-070175 | 89  | 28  | 6  | 75   | 0  |
| CONTIG-070176 | 288 | 18  | 10 | 310  | 0  |
| CONTIG-070177 | 125 | 17  | 41 | 34   | 0  |
| CONTIG-070178 | 146 | 4   | 0  | 6    | 0  |
| CONTIG-070179 | 120 | 4   | 3  | 10   | 2  |
| CONTIG-070180 | 65  | 2   | 3  | 4    | 0  |
| CONTIG-070181 | 139 | 4   | 2  | 13   | 2  |
| CONTIG-070182 | 233 | 8   | 2  | 66   | 0  |
| CONTIG-070183 | 59  | 4   | 4  | 0    | 0  |

|               |     |    |    |     |    |
|---------------|-----|----|----|-----|----|
| CONTIG-070184 | 130 | 7  | 2  | 11  | 0  |
| CONTIG-070185 | 408 | 10 | 18 | 102 | 2  |
| CONTIG-070186 | 144 | 13 | 4  | 60  | 2  |
| CONTIG-070187 | 166 | 7  | 13 | 30  | 0  |
| CONTIG-070189 | 93  | 3  | 2  | 7   | 0  |
| CONTIG-070190 | 107 | 10 | 3  | 22  | 0  |
| CONTIG-070191 | 166 | 90 | 14 | 908 | 0  |
| CONTIG-070192 | 162 | 4  | 7  | 25  | 0  |
| CONTIG-070193 | 440 | 12 | 16 | 197 | 0  |
| CONTIG-070195 | 65  | 5  | 4  | 8   | 0  |
| CONTIG-070196 | 87  | 34 | 12 | 145 | 0  |
| CONTIG-070197 | 63  | 9  | 4  | 11  | 0  |
| CONTIG-070198 | 118 | 6  | 0  | 12  | 0  |
| CONTIG-070199 | 63  | 4  | 0  | 8   | 0  |
| CONTIG-070200 | 127 | 7  | 12 | 16  | 0  |
| CONTIG-070201 | 143 | 4  | 0  | 15  | 0  |
| CONTIG-070202 | 415 | 54 | 6  | 0   | 16 |
| CONTIG-070203 | 86  | 2  | 2  | 0   | 0  |
| CONTIG-070204 | 140 | 10 | 7  | 54  | 4  |
| CONTIG-070206 | 59  | 20 | 6  | 20  | 0  |
| CONTIG-070208 | 152 | 5  | 3  | 25  | 0  |
| CONTIG-070209 | 135 | 11 | 23 | 37  | 0  |
| CONTIG-070210 | 68  | 3  | 2  | 3   | 0  |
| CONTIG-070211 | 66  | 11 | 5  | 10  | 0  |
| CONTIG-070212 | 72  | 4  | 0  | 4   | 0  |
| CONTIG-070213 | 266 | 6  | 4  | 35  | 2  |
| CONTIG-070214 | 70  | 2  | 0  | 0   | 0  |
| CONTIG-070216 | 86  | 7  | 0  | 29  | 0  |
| CONTIG-070217 | 96  | 10 | 8  | 27  | 0  |
| CONTIG-070218 | 122 | 7  | 3  | 15  | 0  |
| CONTIG-070219 | 164 | 8  | 2  | 40  | 0  |
| CONTIG-070220 | 277 | 8  | 0  | 90  | 0  |
| CONTIG-070221 | 69  | 7  | 4  | 5   | 0  |
| CONTIG-070223 | 75  | 15 | 2  | 47  | 0  |
| CONTIG-070224 | 93  | 4  | 4  | 0   | 0  |
| CONTIG-070225 | 130 | 9  | 3  | 12  | 0  |
| CONTIG-070226 | 315 | 8  | 23 | 110 | 0  |
| CONTIG-070229 | 349 | 8  | 8  | 100 | 0  |
| CONTIG-070230 | 130 | 7  | 7  | 36  | 0  |
| CONTIG-070231 | 89  | 9  | 4  | 25  | 0  |
| CONTIG-070233 | 78  | 6  | 7  | 13  | 3  |
| CONTIG-070235 | 132 | 3  | 2  | 12  | 0  |
| CONTIG-070236 | 212 | 7  | 3  | 30  | 0  |
| CONTIG-070238 | 295 | 10 | 14 | 103 | 0  |
| CONTIG-070239 | 147 | 8  | 2  | 29  | 0  |
| CONTIG-070240 | 63  | 7  | 4  | 5   | 0  |
| CONTIG-070241 | 175 | 9  | 8  | 42  | 0  |



|               |     |    |    |     |   |
|---------------|-----|----|----|-----|---|
| CONTIG-070242 | 60  | 16 | 2  | 25  | 0 |
| CONTIG-070243 | 243 | 55 | 49 | 44  | 0 |
| CONTIG-070244 | 130 | 5  | 2  | 17  | 0 |
| CONTIG-070245 | 98  | 2  | 2  | 4   | 0 |
| CONTIG-070246 | 106 | 5  | 13 | 5   | 0 |
| CONTIG-070247 | 80  | 10 | 9  | 17  | 0 |
| CONTIG-070248 | 75  | 5  | 2  | 17  | 2 |
| CONTIG-070249 | 163 | 6  | 7  | 30  | 2 |
| CONTIG-070250 | 155 | 9  | 4  | 27  | 0 |
| CONTIG-070251 | 100 | 6  | 2  | 4   | 0 |
| CONTIG-070252 | 118 | 4  | 7  | 12  | 0 |
| CONTIG-070253 | 59  | 4  | 3  | 7   | 0 |
| CONTIG-070254 | 360 | 7  | 6  | 39  | 0 |
| CONTIG-070255 | 164 | 10 | 20 | 39  | 2 |
| CONTIG-070256 | 164 | 10 | 14 | 63  | 0 |
| CONTIG-070257 | 234 | 13 | 23 | 83  | 0 |
| CONTIG-070258 | 104 | 6  | 11 | 6   | 0 |
| CONTIG-070261 | 64  | 3  | 5  | 0   | 0 |
| CONTIG-070262 | 537 | 13 | 0  | 234 | 4 |
| CONTIG-070264 | 75  | 4  | 14 | 0   | 0 |
| CONTIG-070265 | 69  | 4  | 4  | 10  | 0 |
| CONTIG-070266 | 188 | 7  | 3  | 68  | 0 |
| CONTIG-070267 | 64  | 15 | 2  | 48  | 0 |
| CONTIG-070269 | 122 | 21 | 16 | 103 | 0 |
| CONTIG-070271 | 114 | 25 | 6  | 158 | 0 |
| CONTIG-070272 | 84  | 3  | 2  | 7   | 0 |
| CONTIG-070273 | 102 | 15 | 8  | 0   | 6 |
| CONTIG-070275 | 74  | 7  | 4  | 12  | 0 |
| CONTIG-070276 | 209 | 9  | 2  | 64  | 0 |
| CONTIG-070277 | 71  | 9  | 3  | 30  | 0 |
| CONTIG-070278 | 183 | 8  | 11 | 17  | 0 |
| CONTIG-070279 | 251 | 12 | 12 | 126 | 2 |
| CONTIG-070280 | 478 | 16 | 33 | 12  | 0 |
| CONTIG-070282 | 234 | 8  | 3  | 50  | 0 |
| CONTIG-070283 | 339 | 12 | 6  | 195 | 2 |
| CONTIG-070284 | 129 | 6  | 2  | 12  | 0 |
| CONTIG-070285 | 151 | 9  | 8  | 47  | 0 |
| CONTIG-070286 | 109 | 4  | 6  | 17  | 0 |
| CONTIG-070287 | 97  | 16 | 19 | 49  | 0 |
| CONTIG-070289 | 277 | 7  | 18 | 61  | 0 |
| CONTIG-070290 | 60  | 9  | 8  | 15  | 0 |
| CONTIG-070292 | 197 | 14 | 13 | 58  | 0 |
| CONTIG-070293 | 59  | 4  | 13 | 0   | 0 |
| CONTIG-070294 | 84  | 3  | 0  | 0   | 0 |
| CONTIG-070295 | 89  | 5  | 0  | 0   | 0 |
| CONTIG-070296 | 174 | 7  | 21 | 34  | 0 |
| CONTIG-070297 | 109 | 17 | 11 | 37  | 2 |

|               |     |     |    |     |    |
|---------------|-----|-----|----|-----|----|
| CONTIG-070298 | 333 | 14  | 9  | 152 | 0  |
| CONTIG-070299 | 78  | 9   | 0  | 25  | 0  |
| CONTIG-070300 | 58  | 4   | 11 | 6   | 0  |
| CONTIG-070301 | 214 | 15  | 18 | 92  | 0  |
| CONTIG-070302 | 188 | 6   | 6  | 20  | 0  |
| CONTIG-070303 | 104 | 4   | 12 | 10  | 0  |
| CONTIG-070304 | 74  | 11  | 18 | 22  | 0  |
| CONTIG-070305 | 110 | 4   | 2  | 16  | 0  |
| CONTIG-070306 | 178 | 13  | 2  | 63  | 0  |
| CONTIG-070307 | 36  | 16  | 0  | 18  | 0  |
| CONTIG-070308 | 74  | 7   | 2  | 19  | 0  |
| CONTIG-070309 | 94  | 11  | 7  | 24  | 5  |
| CONTIG-070310 | 108 | 4   | 0  | 5   | 0  |
| CONTIG-070311 | 63  | 17  | 2  | 24  | 0  |
| CONTIG-070313 | 94  | 10  | 2  | 25  | 0  |
| CONTIG-070314 | 101 | 9   | 11 | 28  | 0  |
| CONTIG-070315 | 63  | 7   | 0  | 16  | 0  |
| CONTIG-070318 | 86  | 3   | 2  | 2   | 0  |
| CONTIG-070319 | 110 | 7   | 10 | 0   | 0  |
| CONTIG-070320 | 350 | 11  | 4  | 138 | 0  |
| CONTIG-070322 | 101 | 8   | 3  | 41  | 0  |
| CONTIG-070323 | 71  | 4   | 12 | 4   | 0  |
| CONTIG-070324 | 320 | 13  | 29 | 131 | 0  |
| CONTIG-070326 | 110 | 10  | 0  | 39  | 0  |
| CONTIG-070327 | 587 | 163 | 5  | 2   | 48 |
| CONTIG-070328 | 227 | 5   | 6  | 27  | 0  |
| CONTIG-070330 | 98  | 5   | 11 | 5   | 0  |
| CONTIG-070331 | 90  | 11  | 0  | 44  | 0  |
| CONTIG-070334 | 69  | 7   | 0  | 21  | 0  |
| CONTIG-070335 | 58  | 4   | 4  | 2   | 0  |
| CONTIG-070336 | 72  | 6   | 10 | 5   | 0  |
| CONTIG-070337 | 68  | 10  | 14 | 21  | 0  |
| CONTIG-070338 | 74  | 10  | 12 | 8   | 2  |
| CONTIG-070339 | 88  | 4   | 2  | 12  | 0  |
| CONTIG-070340 | 87  | 5   | 2  | 9   | 0  |
| CONTIG-070341 | 69  | 6   | 3  | 10  | 0  |
| CONTIG-070342 | 341 | 17  | 3  | 0   | 38 |
| CONTIG-070343 | 63  | 9   | 5  | 5   | 0  |
| CONTIG-070344 | 63  | 10  | 10 | 22  | 0  |
| CONTIG-070345 | 315 | 9   | 38 | 107 | 0  |
| CONTIG-070347 | 67  | 4   | 2  | 9   | 0  |
| CONTIG-070348 | 125 | 6   | 16 | 23  | 0  |
| CONTIG-070349 | 149 | 5   | 3  | 8   | 2  |
| CONTIG-070350 | 93  | 5   | 8  | 4   | 0  |
| CONTIG-070351 | 78  | 5   | 5  | 11  | 0  |
| CONTIG-070352 | 84  | 10  | 4  | 20  | 0  |
| CONTIG-070353 | 77  | 7   | 2  | 21  | 0  |

|               |     |    |    |     |   |
|---------------|-----|----|----|-----|---|
| CONTIG-070354 | 78  | 3  | 3  | 2   | 0 |
| CONTIG-070355 | 67  | 6  | 6  | 3   | 0 |
| CONTIG-070356 | 474 | 17 | 9  | 324 | 3 |
| CONTIG-070357 | 62  | 5  | 5  | 7   | 0 |
| CONTIG-070358 | 170 | 7  | 0  | 34  | 0 |
| CONTIG-070359 | 103 | 11 | 5  | 48  | 0 |
| CONTIG-070360 | 82  | 9  | 15 | 2   | 0 |
| CONTIG-070361 | 593 | 13 | 13 | 330 | 0 |
| CONTIG-070363 | 92  | 6  | 5  | 11  | 0 |
| CONTIG-070364 | 94  | 5  | 7  | 13  | 0 |
| CONTIG-070365 | 118 | 8  | 0  | 28  | 0 |
| CONTIG-070366 | 471 | 16 | 13 | 163 | 4 |
| CONTIG-070367 | 92  | 5  | 8  | 11  | 0 |
| CONTIG-070368 | 485 | 10 | 19 | 107 | 0 |
| CONTIG-070369 | 81  | 6  | 13 | 11  | 0 |
| CONTIG-070370 | 106 | 4  | 20 | 2   | 0 |
| CONTIG-070371 | 72  | 4  | 3  | 7   | 0 |
| CONTIG-070372 | 93  | 7  | 0  | 14  | 0 |
| CONTIG-070373 | 184 | 8  | 14 | 19  | 0 |
| CONTIG-070374 | 144 | 5  | 14 | 15  | 0 |
| CONTIG-070375 | 124 | 7  | 11 | 38  | 0 |
| CONTIG-070376 | 159 | 15 | 6  | 64  | 0 |
| CONTIG-070377 | 122 | 5  | 2  | 24  | 0 |
| CONTIG-070378 | 426 | 8  | 15 | 112 | 0 |
| CONTIG-070379 | 136 | 26 | 8  | 167 | 4 |
| CONTIG-070380 | 87  | 6  | 2  | 6   | 0 |
| CONTIG-070381 | 138 | 9  | 13 | 31  | 0 |
| CONTIG-070383 | 276 | 5  | 7  | 40  | 0 |
| CONTIG-070384 | 123 | 6  | 2  | 29  | 0 |
| CONTIG-070385 | 289 | 3  | 8  | 11  | 2 |
| CONTIG-070386 | 85  | 13 | 5  | 12  | 0 |
| CONTIG-070387 | 563 | 15 | 9  | 124 | 0 |
| CONTIG-070388 | 66  | 8  | 4  | 22  | 0 |
| CONTIG-070389 | 87  | 10 | 4  | 9   | 0 |
| CONTIG-070390 | 151 | 6  | 11 | 17  | 0 |
| CONTIG-070391 | 145 | 15 | 2  | 126 | 2 |
| CONTIG-070392 | 232 | 8  | 11 | 52  | 0 |
| CONTIG-070393 | 92  | 5  | 14 | 4   | 0 |
| CONTIG-070394 | 177 | 10 | 43 | 59  | 0 |
| CONTIG-070395 | 71  | 10 | 3  | 29  | 0 |
| CONTIG-070396 | 71  | 5  | 4  | 5   | 0 |
| CONTIG-070397 | 92  | 8  | 2  | 35  | 0 |
| CONTIG-070398 | 294 | 8  | 25 | 59  | 0 |
| CONTIG-070399 | 126 | 14 | 11 | 64  | 0 |
| CONTIG-070400 | 153 | 6  | 0  | 20  | 0 |
| CONTIG-070401 | 64  | 7  | 0  | 9   | 5 |
| CONTIG-070402 | 61  | 14 | 2  | 23  | 0 |

|               |     |    |    |     |    |
|---------------|-----|----|----|-----|----|
| CONTIG-070403 | 60  | 4  | 0  | 9   | 0  |
| CONTIG-070404 | 188 | 5  | 11 | 25  | 0  |
| CONTIG-070405 | 461 | 18 | 10 | 398 | 7  |
| CONTIG-070406 | 344 | 9  | 8  | 65  | 0  |
| CONTIG-070407 | 175 | 9  | 7  | 28  | 0  |
| CONTIG-070408 | 129 | 7  | 2  | 25  | 0  |
| CONTIG-070409 | 61  | 16 | 4  | 41  | 0  |
| CONTIG-070411 | 129 | 4  | 0  | 17  | 0  |
| CONTIG-070412 | 71  | 3  | 7  | 2   | 0  |
| CONTIG-070413 | 66  | 7  | 0  | 17  | 0  |
| CONTIG-070414 | 90  | 7  | 0  | 20  | 0  |
| CONTIG-070415 | 412 | 14 | 4  | 15  | 2  |
| CONTIG-070416 | 145 | 4  | 10 | 9   | 0  |
| CONTIG-070417 | 63  | 9  | 2  | 15  | 0  |
| CONTIG-070418 | 100 | 7  | 2  | 25  | 0  |
| CONTIG-070419 | 73  | 9  | 2  | 7   | 0  |
| CONTIG-070420 | 60  | 19 | 2  | 2   | 0  |
| CONTIG-070421 | 105 | 10 | 16 | 13  | 0  |
| CONTIG-070422 | 62  | 7  | 4  | 6   | 0  |
| CONTIG-070423 | 274 | 7  | 8  | 55  | 2  |
| CONTIG-070424 | 163 | 6  | 5  | 15  | 0  |
| CONTIG-070425 | 270 | 10 | 36 | 64  | 0  |
| CONTIG-070426 | 166 | 5  | 2  | 21  | 0  |
| CONTIG-070427 | 92  | 4  | 9  | 0   | 0  |
| CONTIG-070428 | 88  | 9  | 0  | 23  | 0  |
| CONTIG-070430 | 152 | 13 | 11 | 100 | 0  |
| CONTIG-070431 | 423 | 13 | 27 | 167 | 2  |
| CONTIG-070432 | 225 | 8  | 27 | 42  | 0  |
| CONTIG-070433 | 143 | 8  | 5  | 30  | 0  |
| CONTIG-070434 | 122 | 10 | 2  | 0   | 17 |
| CONTIG-070435 | 92  | 18 | 0  | 88  | 0  |
| CONTIG-070436 | 145 | 4  | 2  | 10  | 0  |
| CONTIG-070437 | 97  | 8  | 8  | 7   | 0  |
| CONTIG-070438 | 137 | 4  | 9  | 7   | 0  |
| CONTIG-070439 | 368 | 5  | 9  | 18  | 0  |
| CONTIG-070440 | 288 | 6  | 9  | 61  | 0  |
| CONTIG-070441 | 61  | 7  | 7  | 2   | 0  |
| CONTIG-070442 | 551 | 27 | 25 | 762 | 0  |
| CONTIG-070443 | 81  | 17 | 5  | 38  | 0  |
| CONTIG-070444 | 67  | 3  | 0  | 0   | 0  |
| CONTIG-070445 | 83  | 7  | 19 | 6   | 0  |
| CONTIG-070446 | 132 | 11 | 13 | 19  | 0  |
| CONTIG-070448 | 156 | 23 | 17 | 128 | 0  |
| CONTIG-070449 | 320 | 10 | 24 | 87  | 2  |
| CONTIG-070450 | 74  | 4  | 6  | 6   | 0  |
| CONTIG-070451 | 122 | 5  | 6  | 18  | 0  |
| CONTIG-070452 | 73  | 6  | 15 | 2   | 0  |

|               |     |    |    |     |   |
|---------------|-----|----|----|-----|---|
| CONTIG-070454 | 78  | 8  | 7  | 13  | 0 |
| CONTIG-070455 | 90  | 5  | 0  | 17  | 0 |
| CONTIG-070456 | 175 | 12 | 24 | 70  | 0 |
| CONTIG-070457 | 60  | 6  | 8  | 13  | 0 |
| CONTIG-070458 | 91  | 4  | 0  | 12  | 0 |
| CONTIG-070459 | 88  | 4  | 6  | 11  | 0 |
| CONTIG-070460 | 144 | 10 | 9  | 20  | 9 |
| CONTIG-070461 | 114 | 5  | 26 | 12  | 0 |
| CONTIG-070462 | 142 | 12 | 8  | 0   | 2 |
| CONTIG-070463 | 298 | 11 | 7  | 83  | 2 |
| CONTIG-070464 | 179 | 15 | 5  | 75  | 0 |
| CONTIG-070465 | 77  | 2  | 2  | 2   | 0 |
| CONTIG-070467 | 117 | 5  | 0  | 21  | 0 |
| CONTIG-070468 | 115 | 6  | 8  | 25  | 0 |
| CONTIG-070469 | 77  | 5  | 2  | 12  | 0 |
| CONTIG-070471 | 121 | 6  | 0  | 13  | 2 |
| CONTIG-070472 | 87  | 6  | 5  | 10  | 0 |
| CONTIG-070473 | 452 | 18 | 35 | 245 | 4 |
| CONTIG-070475 | 418 | 13 | 15 | 158 | 0 |
| CONTIG-070476 | 78  | 6  | 2  | 11  | 0 |
| CONTIG-070478 | 118 | 9  | 9  | 24  | 0 |
| CONTIG-070479 | 188 | 6  | 4  | 16  | 4 |
| CONTIG-070480 | 83  | 15 | 0  | 2   | 0 |
| CONTIG-070481 | 84  | 4  | 4  | 2   | 0 |
| CONTIG-070482 | 135 | 4  | 3  | 10  | 0 |
| CONTIG-070483 | 382 | 7  | 10 | 56  | 2 |
| CONTIG-070484 | 89  | 5  | 0  | 9   | 0 |
| CONTIG-070485 | 76  | 7  | 4  | 15  | 0 |
| CONTIG-070487 | 71  | 5  | 0  | 10  | 0 |
| CONTIG-070488 | 116 | 6  | 2  | 4   | 0 |
| CONTIG-070489 | 104 | 7  | 2  | 8   | 0 |
| CONTIG-070490 | 184 | 8  | 8  | 57  | 2 |
| CONTIG-070491 | 105 | 8  | 3  | 37  | 0 |
| CONTIG-070492 | 98  | 6  | 4  | 2   | 3 |
| CONTIG-070493 | 85  | 6  | 3  | 12  | 2 |
| CONTIG-070494 | 182 | 7  | 0  | 36  | 0 |
| CONTIG-070495 | 156 | 13 | 14 | 34  | 0 |
| CONTIG-070496 | 115 | 6  | 5  | 24  | 0 |
| CONTIG-070497 | 277 | 8  | 8  | 49  | 6 |
| CONTIG-070499 | 64  | 8  | 19 | 5   | 0 |
| CONTIG-070500 | 91  | 9  | 0  | 7   | 2 |
| CONTIG-070501 | 272 | 9  | 7  | 27  | 0 |
| CONTIG-070502 | 180 | 19 | 0  | 0   | 2 |
| CONTIG-070503 | 120 | 10 | 8  | 19  | 0 |
| CONTIG-070504 | 165 | 13 | 5  | 36  | 0 |
| CONTIG-070505 | 61  | 8  | 0  | 17  | 0 |
| CONTIG-070506 | 107 | 3  | 0  | 7   | 0 |

|               |     |    |    |     |   |
|---------------|-----|----|----|-----|---|
| CONTIG-070507 | 119 | 3  | 0  | 7   | 0 |
| CONTIG-070508 | 153 | 13 | 7  | 37  | 2 |
| CONTIG-070509 | 605 | 17 | 24 | 188 | 0 |
| CONTIG-070510 | 139 | 6  | 7  | 37  | 0 |
| CONTIG-070511 | 147 | 10 | 12 | 61  | 0 |
| CONTIG-070512 | 93  | 29 | 12 | 126 | 0 |
| CONTIG-070513 | 176 | 11 | 7  | 65  | 0 |
| CONTIG-070514 | 92  | 3  | 6  | 8   | 0 |
| CONTIG-070515 | 70  | 4  | 12 | 0   | 0 |
| CONTIG-070516 | 142 | 11 | 0  | 0   | 0 |
| CONTIG-070517 | 61  | 5  | 3  | 0   | 0 |
| CONTIG-070518 | 246 | 12 | 8  | 110 | 0 |
| CONTIG-070519 | 165 | 9  | 4  | 41  | 2 |
| CONTIG-070520 | 95  | 7  | 7  | 14  | 0 |
| CONTIG-070521 | 163 | 10 | 0  | 85  | 0 |
| CONTIG-070522 | 108 | 9  | 3  | 37  | 0 |
| CONTIG-070523 | 83  | 4  | 9  | 8   | 0 |
| CONTIG-070524 | 249 | 7  | 0  | 37  | 0 |
| CONTIG-070525 | 101 | 5  | 2  | 12  | 0 |
| CONTIG-070526 | 76  | 7  | 2  | 10  | 0 |
| CONTIG-070527 | 95  | 8  | 21 | 8   | 0 |
| CONTIG-070528 | 117 | 5  | 11 | 4   | 0 |
| CONTIG-070529 | 136 | 7  | 11 | 9   | 0 |
| CONTIG-070530 | 106 | 9  | 7  | 23  | 0 |
| CONTIG-070531 | 124 | 7  | 3  | 24  | 0 |
| CONTIG-070532 | 135 | 5  | 2  | 24  | 0 |
| CONTIG-070533 | 141 | 5  | 0  | 27  | 0 |
| CONTIG-070534 | 77  | 3  | 2  | 7   | 0 |
| CONTIG-070535 | 181 | 8  | 2  | 49  | 0 |
| CONTIG-070536 | 70  | 10 | 6  | 17  | 0 |
| CONTIG-070541 | 44  | 51 | 11 | 84  | 0 |
| CONTIG-070547 | 152 | 12 | 12 | 0   | 0 |
| CONTIG-070548 | 102 | 6  | 10 | 0   | 0 |
| CONTIG-070549 | 190 | 6  | 0  | 10  | 0 |
| CONTIG-070550 | 71  | 7  | 2  | 13  | 0 |
| CONTIG-070551 | 135 | 15 | 2  | 53  | 7 |
| CONTIG-070552 | 184 | 9  | 6  | 50  | 0 |
| CONTIG-070553 | 226 | 9  | 39 | 61  | 0 |
| CONTIG-070554 | 81  | 5  | 2  | 7   | 0 |
| CONTIG-070555 | 61  | 5  | 6  | 5   | 2 |
| CONTIG-070556 | 58  | 10 | 2  | 17  | 0 |
| CONTIG-070557 | 170 | 5  | 14 | 8   | 0 |
| CONTIG-070558 | 63  | 5  | 0  | 11  | 0 |
| CONTIG-070559 | 73  | 13 | 5  | 20  | 0 |
| CONTIG-070561 | 103 | 6  | 0  | 15  | 0 |
| CONTIG-070562 | 227 | 11 | 23 | 70  | 2 |
| CONTIG-070565 | 85  | 70 | 26 | 191 | 4 |

|               |      |     |    |     |      |
|---------------|------|-----|----|-----|------|
| CONTIG-070566 | 88   | 9   | 0  | 28  | 0    |
| CONTIG-070567 | 61   | 4   | 6  | 5   | 0    |
| CONTIG-070568 | 112  | 21  | 0  | 93  | 0    |
| CONTIG-070569 | 308  | 42  | 2  | 0   | 107  |
| CONTIG-070570 | 97   | 5   | 0  | 14  | 0    |
| CONTIG-070571 | 76   | 7   | 2  | 15  | 0    |
| CONTIG-070572 | 382  | 8   | 6  | 68  | 0    |
| CONTIG-070573 | 139  | 6   | 2  | 24  | 0    |
| CONTIG-070574 | 84   | 14  | 13 | 24  | 0    |
| CONTIG-070575 | 300  | 8   | 2  | 119 | 0    |
| CONTIG-070576 | 61   | 5   | 0  | 4   | 0    |
| CONTIG-070577 | 65   | 5   | 0  | 6   | 0    |
| CONTIG-070578 | 67   | 5   | 9  | 3   | 0    |
| CONTIG-070579 | 283  | 15  | 14 | 139 | 3    |
| CONTIG-070580 | 190  | 6   | 0  | 51  | 0    |
| CONTIG-070581 | 61   | 3   | 7  | 0   | 0    |
| CONTIG-070582 | 178  | 7   | 4  | 38  | 0    |
| CONTIG-070583 | 104  | 4   | 5  | 4   | 0    |
| CONTIG-070585 | 307  | 14  | 6  | 213 | 0    |
| CONTIG-070588 | 363  | 8   | 5  | 113 | 0    |
| CONTIG-070589 | 83   | 29  | 19 | 33  | 0    |
| CONTIG-070590 | 69   | 7   | 19 | 9   | 0    |
| CONTIG-070591 | 128  | 6   | 4  | 19  | 0    |
| CONTIG-070592 | 293  | 65  | 0  | 0   | 44   |
| CONTIG-070593 | 125  | 9   | 2  | 32  | 0    |
| CONTIG-070594 | 117  | 10  | 0  | 2   | 0    |
| CONTIG-070596 | 241  | 10  | 15 | 50  | 2    |
| CONTIG-070597 | 71   | 6   | 6  | 3   | 0    |
| CONTIG-070598 | 251  | 4   | 10 | 9   | 0    |
| CONTIG-070599 | 80   | 6   | 6  | 6   | 0    |
| CONTIG-070603 | 72   | 3   | 0  | 4   | 0    |
| CONTIG-070604 | 59   | 40  | 6  | 0   | 0    |
| CONTIG-070605 | 79   | 116 | 0  | 0   | 68   |
| CONTIG-070613 | 112  | 4   | 11 | 11  | 0    |
| CONTIG-070614 | 176  | 5   | 7  | 31  | 0    |
| CONTIG-070615 | 105  | 5   | 3  | 4   | 0    |
| CONTIG-070616 | 110  | 4   | 3  | 0   | 0    |
| CONTIG-070617 | 97   | 4   | 0  | 4   | 0    |
| CONTIG-070620 | 107  | 8   | 2  | 27  | 0    |
| CONTIG-070621 | 1716 | 51  | 0  | 2   | 1098 |
| CONTIG-070622 | 460  | 11  | 60 | 69  | 0    |
| CONTIG-070623 | 79   | 8   | 12 | 11  | 0    |
| CONTIG-070624 | 76   | 5   | 7  | 7   | 0    |
| CONTIG-070625 | 488  | 15  | 4  | 11  | 0    |
| CONTIG-070626 | 114  | 6   | 10 | 9   | 0    |
| CONTIG-070627 | 59   | 8   | 16 | 7   | 0    |
| CONTIG-070628 | 60   | 6   | 19 | 0   | 0    |

|               |     |    |    |     |   |
|---------------|-----|----|----|-----|---|
| CONTIG-070629 | 95  | 8  | 13 | 15  | 0 |
| CONTIG-070630 | 122 | 6  | 9  | 7   | 0 |
| CONTIG-070631 | 82  | 6  | 4  | 11  | 2 |
| CONTIG-070632 | 235 | 9  | 33 | 32  | 2 |
| CONTIG-070633 | 64  | 4  | 4  | 4   | 0 |
| CONTIG-070634 | 85  | 11 | 11 | 26  | 0 |
| CONTIG-070635 | 68  | 6  | 15 | 0   | 0 |
| CONTIG-070636 | 137 | 7  | 8  | 21  | 0 |
| CONTIG-070637 | 176 | 7  | 12 | 28  | 0 |
| CONTIG-070638 | 95  | 3  | 4  | 2   | 2 |
| CONTIG-070640 | 200 | 6  | 11 | 36  | 2 |
| CONTIG-070641 | 145 | 9  | 17 | 17  | 2 |
| CONTIG-070642 | 117 | 12 | 14 | 31  | 0 |
| CONTIG-070643 | 90  | 10 | 0  | 26  | 0 |
| CONTIG-070644 | 128 | 8  | 2  | 41  | 0 |
| CONTIG-070645 | 81  | 12 | 2  | 11  | 0 |
| CONTIG-070646 | 978 | 13 | 17 | 440 | 2 |
| CONTIG-070649 | 237 | 11 | 11 | 89  | 0 |
| CONTIG-070650 | 270 | 5  | 3  | 42  | 0 |
| CONTIG-070651 | 143 | 9  | 24 | 30  | 0 |
| CONTIG-070652 | 64  | 6  | 2  | 6   | 0 |
| CONTIG-070654 | 199 | 17 | 33 | 76  | 4 |
| CONTIG-070656 | 58  | 8  | 2  | 18  | 0 |
| CONTIG-070657 | 96  | 8  | 4  | 30  | 0 |
| CONTIG-070658 | 60  | 5  | 0  | 5   | 0 |
| CONTIG-070659 | 219 | 16 | 34 | 13  | 0 |
| CONTIG-070660 | 369 | 11 | 11 | 160 | 0 |
| CONTIG-070661 | 173 | 25 | 9  | 141 | 5 |
| CONTIG-070662 | 124 | 10 | 6  | 42  | 0 |
| CONTIG-070663 | 37  | 46 | 3  | 21  | 0 |
| CONTIG-070664 | 125 | 10 | 2  | 24  | 2 |
| CONTIG-070665 | 225 | 14 | 10 | 78  | 0 |
| CONTIG-070666 | 187 | 8  | 5  | 2   | 0 |
| CONTIG-070667 | 69  | 6  | 9  | 6   | 0 |
| CONTIG-070668 | 37  | 37 | 4  | 32  | 0 |
| CONTIG-070669 | 202 | 10 | 4  | 72  | 0 |
| CONTIG-070670 | 38  | 3  | 0  | 0   | 0 |
| CONTIG-070671 | 66  | 5  | 3  | 7   | 0 |
| CONTIG-070672 | 65  | 5  | 0  | 11  | 0 |
| CONTIG-070673 | 87  | 6  | 0  | 11  | 0 |
| CONTIG-070674 | 211 | 10 | 17 | 68  | 0 |
| CONTIG-070675 | 105 | 3  | 2  | 2   | 0 |
| CONTIG-070676 | 88  | 10 | 10 | 30  | 0 |
| CONTIG-070677 | 155 | 6  | 3  | 8   | 0 |
| CONTIG-070678 | 156 | 7  | 21 | 33  | 0 |
| CONTIG-070682 | 60  | 2  | 0  | 2   | 0 |
| CONTIG-070684 | 333 | 11 | 14 | 132 | 2 |



|               |     |    |    |     |   |
|---------------|-----|----|----|-----|---|
| CONTIG-070685 | 75  | 5  | 3  | 8   | 0 |
| CONTIG-070686 | 78  | 4  | 2  | 11  | 0 |
| CONTIG-070687 | 128 | 5  | 0  | 12  | 2 |
| CONTIG-070688 | 166 | 8  | 5  | 41  | 0 |
| CONTIG-070689 | 172 | 4  | 4  | 2   | 2 |
| CONTIG-070690 | 433 | 32 | 0  | 627 | 4 |
| CONTIG-070692 | 85  | 3  | 6  | 0   | 0 |
| CONTIG-070693 | 60  | 5  | 12 | 0   | 0 |
| CONTIG-070694 | 139 | 11 | 8  | 59  | 0 |
| CONTIG-070695 | 89  | 5  | 0  | 9   | 0 |
| CONTIG-070696 | 177 | 8  | 16 | 33  | 2 |
| CONTIG-070697 | 253 | 13 | 11 | 105 | 0 |
| CONTIG-070699 | 179 | 28 | 27 | 213 | 0 |
| CONTIG-070700 | 187 | 4  | 2  | 17  | 0 |
| CONTIG-070701 | 75  | 2  | 0  | 0   | 0 |
| CONTIG-070702 | 106 | 11 | 2  | 26  | 0 |
| CONTIG-070703 | 64  | 4  | 6  | 9   | 0 |
| CONTIG-070704 | 128 | 8  | 15 | 34  | 0 |
| CONTIG-070705 | 63  | 7  | 3  | 0   | 0 |
| CONTIG-070706 | 103 | 8  | 0  | 31  | 0 |
| CONTIG-070707 | 209 | 6  | 5  | 41  | 0 |
| CONTIG-070708 | 136 | 6  | 2  | 19  | 0 |
| CONTIG-070709 | 255 | 8  | 14 | 71  | 2 |
| CONTIG-070710 | 130 | 5  | 8  | 6   | 0 |
| CONTIG-070711 | 91  | 4  | 6  | 10  | 0 |
| CONTIG-070712 | 86  | 5  | 16 | 8   | 0 |
| CONTIG-070713 | 75  | 12 | 14 | 14  | 0 |
| CONTIG-070714 | 74  | 20 | 17 | 49  | 0 |
| CONTIG-070717 | 201 | 7  | 4  | 36  | 0 |
| CONTIG-070718 | 193 | 13 | 3  | 21  | 0 |
| CONTIG-070720 | 59  | 3  | 0  | 2   | 0 |
| CONTIG-070721 | 71  | 13 | 12 | 26  | 2 |
| CONTIG-070722 | 81  | 8  | 2  | 22  | 0 |
| CONTIG-070723 | 334 | 9  | 25 | 75  | 0 |
| CONTIG-070724 | 101 | 2  | 9  | 0   | 0 |
| CONTIG-070725 | 200 | 10 | 0  | 33  | 0 |
| CONTIG-070726 | 100 | 4  | 2  | 2   | 0 |
| CONTIG-070727 | 124 | 13 | 18 | 19  | 0 |
| CONTIG-070728 | 239 | 10 | 29 | 51  | 0 |
| CONTIG-070729 | 66  | 3  | 0  | 0   | 0 |
| CONTIG-070730 | 128 | 13 | 6  | 74  | 0 |
| CONTIG-070731 | 63  | 11 | 11 | 0   | 2 |
| CONTIG-070732 | 62  | 9  | 0  | 5   | 0 |
| CONTIG-070733 | 91  | 5  | 2  | 9   | 0 |
| CONTIG-070734 | 108 | 8  | 3  | 32  | 0 |
| CONTIG-070735 | 138 | 8  | 6  | 32  | 0 |
| CONTIG-070736 | 78  | 4  | 5  | 5   | 0 |

|               |     |     |    |     |     |
|---------------|-----|-----|----|-----|-----|
| CONTIG-070737 | 65  | 8   | 18 | 0   | 0   |
| CONTIG-070738 | 96  | 7   | 5  | 9   | 0   |
| CONTIG-070739 | 91  | 6   | 6  | 9   | 0   |
| CONTIG-070740 | 81  | 3   | 0  | 3   | 0   |
| CONTIG-070741 | 107 | 5   | 0  | 12  | 0   |
| CONTIG-070742 | 85  | 4   | 0  | 8   | 0   |
| CONTIG-070743 | 68  | 6   | 4  | 15  | 0   |
| CONTIG-070744 | 79  | 5   | 7  | 18  | 0   |
| CONTIG-070745 | 95  | 6   | 4  | 13  | 0   |
| CONTIG-070746 | 106 | 6   | 33 | 0   | 0   |
| CONTIG-070747 | 59  | 5   | 2  | 0   | 0   |
| CONTIG-070748 | 87  | 3   | 0  | 0   | 0   |
| CONTIG-070749 | 79  | 4   | 6  | 6   | 0   |
| CONTIG-070750 | 186 | 22  | 11 | 192 | 2   |
| CONTIG-070751 | 59  | 9   | 0  | 10  | 0   |
| CONTIG-070753 | 124 | 4   | 3  | 12  | 0   |
| CONTIG-070754 | 124 | 43  | 0  | 3   | 0   |
| CONTIG-070755 | 54  | 402 | 0  | 2   | 0   |
| CONTIG-070756 | 86  | 8   | 13 | 0   | 0   |
| CONTIG-070757 | 484 | 8   | 27 | 74  | 2   |
| CONTIG-070759 | 244 | 11  | 11 | 2   | 0   |
| CONTIG-070760 | 93  | 3   | 2  | 2   | 0   |
| CONTIG-070761 | 90  | 6   | 5  | 13  | 0   |
| CONTIG-070762 | 114 | 9   | 16 | 15  | 0   |
| CONTIG-070763 | 144 | 9   | 8  | 39  | 0   |
| CONTIG-070764 | 75  | 9   | 2  | 33  | 0   |
| CONTIG-070765 | 95  | 3   | 0  | 0   | 0   |
| CONTIG-070768 | 129 | 9   | 8  | 51  | 0   |
| CONTIG-070769 | 299 | 91  | 3  | 0   | 289 |
| CONTIG-070770 | 198 | 6   | 18 | 38  | 0   |
| CONTIG-070771 | 143 | 5   | 10 | 15  | 0   |
| CONTIG-070772 | 149 | 12  | 4  | 46  | 0   |
| CONTIG-070773 | 172 | 6   | 0  | 23  | 0   |
| CONTIG-070774 | 375 | 10  | 3  | 0   | 0   |
| CONTIG-070775 | 103 | 4   | 4  | 9   | 0   |
| CONTIG-070776 | 68  | 3   | 4  | 0   | 0   |
| CONTIG-070777 | 224 | 12  | 4  | 65  | 0   |
| CONTIG-070778 | 121 | 13  | 6  | 59  | 0   |
| CONTIG-070779 | 84  | 10  | 4  | 36  | 0   |
| CONTIG-070780 | 252 | 10  | 8  | 53  | 0   |
| CONTIG-070781 | 185 | 9   | 5  | 30  | 0   |
| CONTIG-070782 | 83  | 4   | 2  | 8   | 0   |
| CONTIG-070783 | 171 | 8   | 6  | 24  | 0   |
| CONTIG-070784 | 88  | 7   | 5  | 7   | 0   |
| CONTIG-070785 | 97  | 6   | 10 | 13  | 0   |
| CONTIG-070786 | 61  | 2   | 0  | 0   | 0   |
| CONTIG-070787 | 76  | 10  | 8  | 10  | 0   |

|               |     |    |    |     |   |
|---------------|-----|----|----|-----|---|
| CONTIG-070788 | 203 | 9  | 10 | 74  | 0 |
| CONTIG-070789 | 101 | 4  | 2  | 2   | 0 |
| CONTIG-070790 | 111 | 13 | 0  | 61  | 0 |
| CONTIG-070791 | 307 | 9  | 4  | 54  | 0 |
| CONTIG-070792 | 118 | 4  | 9  | 6   | 2 |
| CONTIG-070793 | 120 | 11 | 18 | 31  | 0 |
| CONTIG-070794 | 139 | 5  | 14 | 18  | 0 |
| CONTIG-070795 | 181 | 5  | 0  | 23  | 0 |
| CONTIG-070796 | 59  | 6  | 8  | 5   | 0 |
| CONTIG-070797 | 202 | 14 | 5  | 102 | 4 |
| CONTIG-070798 | 69  | 6  | 0  | 12  | 0 |
| CONTIG-070799 | 75  | 5  | 5  | 2   | 0 |
| CONTIG-070801 | 130 | 6  | 8  | 12  | 0 |
| CONTIG-070802 | 167 | 9  | 5  | 53  | 0 |
| CONTIG-070805 | 67  | 9  | 4  | 16  | 0 |
| CONTIG-070806 | 243 | 6  | 11 | 38  | 2 |
| CONTIG-070807 | 321 | 18 | 84 | 107 | 4 |
| CONTIG-070808 | 93  | 4  | 3  | 0   | 0 |
| CONTIG-070809 | 79  | 6  | 29 | 0   | 0 |
| CONTIG-070810 | 74  | 9  | 2  | 13  | 4 |
| CONTIG-070811 | 313 | 13 | 26 | 89  | 2 |
| CONTIG-070813 | 194 | 13 | 5  | 66  | 0 |
| CONTIG-070814 | 144 | 8  | 0  | 6   | 0 |
| CONTIG-070815 | 129 | 5  | 7  | 17  | 0 |
| CONTIG-070816 | 81  | 13 | 0  | 44  | 0 |
| CONTIG-070817 | 68  | 14 | 28 | 22  | 0 |
| CONTIG-070818 | 218 | 8  | 22 | 22  | 0 |
| CONTIG-070819 | 61  | 8  | 30 | 2   | 0 |
| CONTIG-070822 | 178 | 11 | 8  | 71  | 0 |
| CONTIG-070823 | 58  | 4  | 2  | 6   | 0 |
| CONTIG-070824 | 68  | 4  | 0  | 0   | 0 |
| CONTIG-070826 | 97  | 5  | 2  | 12  | 0 |
| CONTIG-070828 | 278 | 7  | 8  | 72  | 0 |
| CONTIG-070829 | 123 | 12 | 5  | 75  | 0 |
| CONTIG-070830 | 158 | 9  | 10 | 30  | 0 |
| CONTIG-070831 | 62  | 5  | 9  | 0   | 2 |
| CONTIG-070832 | 156 | 18 | 0  | 68  | 0 |
| CONTIG-070833 | 172 | 5  | 17 | 13  | 0 |
| CONTIG-070834 | 79  | 6  | 0  | 17  | 0 |
| CONTIG-070835 | 64  | 3  | 2  | 2   | 0 |
| CONTIG-070836 | 95  | 13 | 25 | 4   | 0 |
| CONTIG-070837 | 234 | 9  | 0  | 84  | 0 |
| CONTIG-070838 | 96  | 8  | 4  | 3   | 0 |
| CONTIG-070839 | 103 | 6  | 19 | 7   | 0 |
| CONTIG-070840 | 187 | 5  | 29 | 22  | 0 |
| CONTIG-070843 | 140 | 4  | 3  | 11  | 0 |
| CONTIG-070844 | 106 | 7  | 5  | 22  | 0 |

|               |     |     |    |      |     |
|---------------|-----|-----|----|------|-----|
| CONTIG-070845 | 183 | 10  | 6  | 68   | 0   |
| CONTIG-070846 | 138 | 5   | 9  | 12   | 0   |
| CONTIG-070847 | 94  | 5   | 0  | 15   | 0   |
| CONTIG-070848 | 178 | 14  | 6  | 126  | 0   |
| CONTIG-070851 | 86  | 6   | 2  | 10   | 0   |
| CONTIG-070852 | 381 | 17  | 43 | 132  | 2   |
| CONTIG-070853 | 136 | 9   | 0  | 24   | 2   |
| CONTIG-070854 | 175 | 7   | 8  | 35   | 0   |
| CONTIG-070855 | 61  | 3   | 3  | 2    | 0   |
| CONTIG-070856 | 111 | 13  | 37 | 34   | 0   |
| CONTIG-070857 | 59  | 11  | 17 | 18   | 0   |
| CONTIG-070858 | 61  | 4   | 4  | 9    | 0   |
| CONTIG-070859 | 41  | 21  | 0  | 23   | 0   |
| CONTIG-070861 | 75  | 6   | 6  | 8    | 0   |
| CONTIG-070862 | 91  | 6   | 7  | 4    | 0   |
| CONTIG-070863 | 102 | 8   | 9  | 22   | 0   |
| CONTIG-070864 | 108 | 4   | 5  | 16   | 0   |
| CONTIG-070865 | 236 | 7   | 2  | 48   | 0   |
| CONTIG-070866 | 92  | 4   | 11 | 5    | 0   |
| CONTIG-070867 | 62  | 4   | 0  | 2    | 0   |
| CONTIG-070868 | 225 | 6   | 6  | 33   | 0   |
| CONTIG-070869 | 434 | 11  | 18 | 128  | 2   |
| CONTIG-070870 | 167 | 8   | 12 | 22   | 0   |
| CONTIG-070871 | 105 | 4   | 3  | 4    | 0   |
| CONTIG-070872 | 198 | 11  | 3  | 114  | 0   |
| CONTIG-070873 | 65  | 4   | 0  | 4    | 0   |
| CONTIG-070875 | 98  | 11  | 39 | 22   | 0   |
| CONTIG-070876 | 210 | 19  | 48 | 96   | 0   |
| CONTIG-070877 | 234 | 9   | 0  | 0    | 4   |
| CONTIG-070878 | 79  | 9   | 13 | 25   | 0   |
| CONTIG-070879 | 173 | 7   | 6  | 39   | 0   |
| CONTIG-070880 | 361 | 7   | 13 | 82   | 0   |
| CONTIG-070881 | 97  | 6   | 0  | 20   | 0   |
| CONTIG-070882 | 77  | 3   | 3  | 2    | 0   |
| CONTIG-070884 | 94  | 25  | 2  | 0    | 0   |
| CONTIG-070885 | 96  | 4   | 4  | 2    | 0   |
| CONTIG-070886 | 939 | 159 | 12 | 2290 | 96  |
| CONTIG-070887 | 162 | 7   | 7  | 15   | 0   |
| CONTIG-070888 | 102 | 7   | 0  | 22   | 0   |
| CONTIG-070889 | 76  | 8   | 3  | 0    | 0   |
| CONTIG-070890 | 403 | 76  | 23 | 0    | 283 |
| CONTIG-070891 | 62  | 9   | 5  | 11   | 0   |
| CONTIG-070893 | 132 | 8   | 3  | 44   | 0   |
| CONTIG-070894 | 167 | 22  | 7  | 0    | 15  |
| CONTIG-070895 | 150 | 7   | 12 | 31   | 0   |
| CONTIG-070896 | 58  | 3   | 2  | 8    | 2   |
| CONTIG-070898 | 218 | 11  | 4  | 0    | 0   |

|               |     |    |    |     |    |
|---------------|-----|----|----|-----|----|
| CONTIG-070899 | 84  | 6  | 2  | 6   | 0  |
| CONTIG-070901 | 102 | 4  | 4  | 10  | 0  |
| CONTIG-070902 | 348 | 7  | 6  | 55  | 0  |
| CONTIG-070903 | 112 | 5  | 3  | 11  | 2  |
| CONTIG-070904 | 73  | 7  | 5  | 20  | 0  |
| CONTIG-070905 | 214 | 6  | 15 | 26  | 0  |
| CONTIG-070906 | 170 | 9  | 4  | 28  | 2  |
| CONTIG-070910 | 94  | 36 | 8  | 74  | 0  |
| CONTIG-070912 | 105 | 8  | 10 | 25  | 0  |
| CONTIG-070913 | 162 | 12 | 24 | 66  | 0  |
| CONTIG-070914 | 90  | 8  | 15 | 15  | 0  |
| CONTIG-070915 | 365 | 12 | 14 | 52  | 0  |
| CONTIG-070918 | 120 | 12 | 0  | 72  | 0  |
| CONTIG-070919 | 109 | 10 | 19 | 14  | 0  |
| CONTIG-070920 | 199 | 10 | 28 | 52  | 0  |
| CONTIG-070922 | 91  | 4  | 4  | 13  | 0  |
| CONTIG-070923 | 102 | 4  | 0  | 10  | 0  |
| CONTIG-070924 | 504 | 17 | 0  | 364 | 5  |
| CONTIG-070925 | 96  | 7  | 14 | 18  | 2  |
| CONTIG-070926 | 48  | 41 | 11 | 33  | 2  |
| CONTIG-070927 | 912 | 12 | 43 | 241 | 11 |
| CONTIG-070928 | 92  | 42 | 5  | 6   | 0  |
| CONTIG-070929 | 136 | 10 | 4  | 43  | 2  |
| CONTIG-070930 | 68  | 9  | 0  | 24  | 0  |
| CONTIG-070931 | 92  | 6  | 8  | 19  | 0  |
| CONTIG-070932 | 111 | 6  | 6  | 22  | 0  |
| CONTIG-070933 | 134 | 13 | 6  | 94  | 0  |
| CONTIG-070934 | 72  | 5  | 3  | 15  | 0  |
| CONTIG-070935 | 209 | 11 | 3  | 75  | 0  |
| CONTIG-070937 | 80  | 13 | 19 | 14  | 0  |
| CONTIG-070938 | 327 | 10 | 6  | 117 | 0  |
| CONTIG-070939 | 171 | 9  | 4  | 53  | 0  |
| CONTIG-070940 | 95  | 6  | 4  | 15  | 2  |
| CONTIG-070941 | 225 | 7  | 16 | 42  | 0  |
| CONTIG-070942 | 134 | 7  | 5  | 17  | 0  |
| CONTIG-070944 | 255 | 17 | 11 | 102 | 0  |
| CONTIG-070945 | 219 | 19 | 18 | 175 | 0  |
| CONTIG-070946 | 90  | 7  | 0  | 21  | 0  |
| CONTIG-070947 | 107 | 5  | 7  | 15  | 0  |
| CONTIG-070950 | 178 | 8  | 5  | 55  | 0  |
| CONTIG-070951 | 981 | 12 | 33 | 406 | 10 |
| CONTIG-070953 | 68  | 8  | 7  | 25  | 0  |
| CONTIG-070954 | 123 | 7  | 0  | 15  | 0  |
| CONTIG-070955 | 560 | 14 | 5  | 126 | 2  |
| CONTIG-070956 | 177 | 7  | 2  | 12  | 0  |
| CONTIG-070957 | 194 | 19 | 11 | 120 | 11 |
| CONTIG-070958 | 243 | 16 | 25 | 51  | 0  |

|               |     |    |    |     |     |
|---------------|-----|----|----|-----|-----|
| CONTIG-070959 | 66  | 8  | 6  | 20  | 0   |
| CONTIG-070960 | 138 | 3  | 0  | 13  | 0   |
| CONTIG-070961 | 61  | 7  | 20 | 0   | 0   |
| CONTIG-070962 | 109 | 6  | 4  | 3   | 0   |
| CONTIG-070963 | 87  | 17 | 19 | 48  | 0   |
| CONTIG-070964 | 203 | 6  | 2  | 26  | 0   |
| CONTIG-070965 | 122 | 7  | 11 | 31  | 0   |
| CONTIG-070969 | 299 | 4  | 4  | 32  | 0   |
| CONTIG-070970 | 88  | 5  | 7  | 0   | 0   |
| CONTIG-070971 | 60  | 4  | 2  | 0   | 0   |
| CONTIG-070972 | 60  | 11 | 25 | 0   | 0   |
| CONTIG-070973 | 147 | 5  | 2  | 23  | 0   |
| CONTIG-070974 | 157 | 20 | 16 | 174 | 0   |
| CONTIG-070975 | 101 | 15 | 0  | 32  | 0   |
| CONTIG-070976 | 131 | 49 | 0  | 0   | 136 |
| CONTIG-070977 | 85  | 15 | 6  | 49  | 2   |
| CONTIG-070978 | 60  | 5  | 0  | 0   | 0   |
| CONTIG-070979 | 87  | 3  | 4  | 3   | 0   |
| CONTIG-070980 | 79  | 4  | 0  | 13  | 0   |
| CONTIG-070981 | 88  | 6  | 6  | 7   | 0   |
| CONTIG-070982 | 70  | 2  | 0  | 0   | 0   |
| CONTIG-070983 | 220 | 9  | 8  | 58  | 0   |
| CONTIG-070984 | 88  | 3  | 0  | 5   | 0   |
| CONTIG-070986 | 141 | 5  | 6  | 7   | 0   |
| CONTIG-070987 | 174 | 10 | 14 | 55  | 0   |
| CONTIG-070988 | 62  | 8  | 3  | 5   | 0   |
| CONTIG-070989 | 93  | 4  | 0  | 7   | 0   |
| CONTIG-070997 | 81  | 5  | 5  | 13  | 0   |
| CONTIG-070999 | 175 | 6  | 8  | 29  | 0   |
| CONTIG-071001 | 94  | 6  | 2  | 0   | 0   |
| CONTIG-071002 | 92  | 7  | 2  | 19  | 0   |
| CONTIG-071003 | 203 | 9  | 12 | 77  | 0   |
| CONTIG-071004 | 288 | 22 | 19 | 248 | 7   |
| CONTIG-071005 | 94  | 8  | 7  | 12  | 0   |
| CONTIG-071006 | 87  | 6  | 2  | 15  | 0   |
| CONTIG-071007 | 85  | 5  | 6  | 9   | 0   |
| CONTIG-071009 | 62  | 8  | 27 | 4   | 0   |
| CONTIG-071010 | 79  | 4  | 0  | 4   | 0   |
| CONTIG-071011 | 151 | 3  | 0  | 9   | 0   |
| CONTIG-071012 | 88  | 9  | 2  | 15  | 2   |
| CONTIG-071013 | 303 | 34 | 2  | 0   | 14  |
| CONTIG-071015 | 71  | 6  | 0  | 15  | 0   |
| CONTIG-071016 | 173 | 10 | 0  | 56  | 0   |
| CONTIG-071017 | 292 | 25 | 13 | 318 | 4   |
| CONTIG-071018 | 78  | 11 | 4  | 6   | 0   |
| CONTIG-071019 | 79  | 4  | 3  | 6   | 0   |
| CONTIG-071025 | 82  | 38 | 3  | 0   | 2   |

|               |     |    |    |     |    |
|---------------|-----|----|----|-----|----|
| CONTIG-071026 | 353 | 10 | 12 | 117 | 0  |
| CONTIG-071027 | 115 | 5  | 5  | 6   | 0  |
| CONTIG-071028 | 162 | 10 | 0  | 61  | 0  |
| CONTIG-071029 | 239 | 18 | 5  | 0   | 36 |
| CONTIG-071030 | 159 | 11 | 2  | 57  | 0  |
| CONTIG-071031 | 62  | 9  | 14 | 10  | 0  |
| CONTIG-071035 | 180 | 11 | 47 | 69  | 0  |
| CONTIG-071036 | 111 | 7  | 2  | 21  | 0  |
| CONTIG-071037 | 108 | 3  | 0  | 4   | 0  |
| CONTIG-071038 | 91  | 6  | 7  | 18  | 0  |
| CONTIG-071039 | 70  | 5  | 5  | 8   | 0  |
| CONTIG-071040 | 82  | 4  | 3  | 9   | 0  |
| CONTIG-071041 | 118 | 6  | 6  | 25  | 0  |
| CONTIG-071042 | 99  | 17 | 3  | 62  | 0  |
| CONTIG-071043 | 68  | 3  | 3  | 0   | 0  |
| CONTIG-071044 | 150 | 5  | 10 | 22  | 0  |
| CONTIG-071045 | 160 | 9  | 0  | 0   | 0  |
| CONTIG-071046 | 135 | 7  | 2  | 19  | 2  |
| CONTIG-071047 | 135 | 6  | 2  | 20  | 0  |
| CONTIG-071048 | 576 | 90 | 5  | 0   | 50 |
| CONTIG-071050 | 60  | 6  | 16 | 7   | 0  |
| CONTIG-071051 | 80  | 4  | 7  | 11  | 0  |
| CONTIG-071052 | 77  | 6  | 11 | 12  | 0  |
| CONTIG-071053 | 75  | 10 | 27 | 13  | 2  |
| CONTIG-071056 | 120 | 3  | 4  | 10  | 0  |
| CONTIG-071057 | 213 | 7  | 5  | 44  | 0  |
| CONTIG-071058 | 112 | 12 | 2  | 39  | 0  |
| CONTIG-071059 | 168 | 8  | 7  | 9   | 0  |
| CONTIG-071060 | 63  | 4  | 0  | 0   | 0  |
| CONTIG-071061 | 107 | 5  | 2  | 9   | 0  |
| CONTIG-071062 | 105 | 18 | 2  | 46  | 0  |
| CONTIG-071063 | 163 | 9  | 9  | 43  | 0  |
| CONTIG-071064 | 76  | 3  | 2  | 3   | 0  |
| CONTIG-071065 | 114 | 8  | 8  | 26  | 0  |
| CONTIG-071066 | 86  | 7  | 7  | 12  | 0  |
| CONTIG-071067 | 76  | 4  | 4  | 11  | 0  |
| CONTIG-071068 | 161 | 5  | 0  | 22  | 2  |
| CONTIG-071069 | 242 | 10 | 6  | 53  | 0  |
| CONTIG-071070 | 60  | 7  | 7  | 19  | 0  |
| CONTIG-071071 | 277 | 7  | 11 | 79  | 2  |
| CONTIG-071072 | 65  | 5  | 8  | 5   | 0  |
| CONTIG-071073 | 123 | 9  | 4  | 48  | 0  |
| CONTIG-071074 | 105 | 6  | 0  | 0   | 2  |
| CONTIG-071075 | 157 | 33 | 5  | 234 | 0  |
| CONTIG-071076 | 86  | 7  | 4  | 22  | 0  |
| CONTIG-071077 | 161 | 6  | 14 | 29  | 0  |
| CONTIG-071078 | 58  | 3  | 2  | 0   | 0  |

|               |     |    |    |     |   |
|---------------|-----|----|----|-----|---|
| CONTIG-071079 | 88  | 9  | 4  | 14  | 0 |
| CONTIG-071080 | 93  | 6  | 8  | 19  | 0 |
| CONTIG-071081 | 118 | 5  | 10 | 3   | 0 |
| CONTIG-071082 | 98  | 4  | 2  | 8   | 0 |
| CONTIG-071083 | 112 | 9  | 8  | 35  | 0 |
| CONTIG-071084 | 59  | 6  | 3  | 6   | 0 |
| CONTIG-071085 | 142 | 6  | 0  | 33  | 0 |
| CONTIG-071086 | 89  | 3  | 0  | 6   | 0 |
| CONTIG-071087 | 103 | 16 | 5  | 7   | 0 |
| CONTIG-071088 | 111 | 4  | 0  | 19  | 0 |
| CONTIG-071089 | 66  | 10 | 4  | 30  | 0 |
| CONTIG-071090 | 96  | 13 | 4  | 11  | 0 |
| CONTIG-071091 | 86  | 24 | 15 | 23  | 0 |
| CONTIG-071092 | 168 | 80 | 3  | 2   | 0 |
| CONTIG-071093 | 227 | 5  | 2  | 14  | 0 |
| CONTIG-071094 | 105 | 4  | 0  | 15  | 0 |
| CONTIG-071095 | 101 | 8  | 0  | 11  | 0 |
| CONTIG-071096 | 70  | 7  | 2  | 14  | 0 |
| CONTIG-071097 | 147 | 6  | 2  | 13  | 0 |
| CONTIG-071098 | 194 | 5  | 5  | 26  | 0 |
| CONTIG-071099 | 125 | 4  | 0  | 16  | 0 |
| CONTIG-071100 | 220 | 10 | 2  | 34  | 8 |
| CONTIG-071101 | 235 | 12 | 2  | 2   | 0 |
| CONTIG-071102 | 216 | 19 | 17 | 131 | 2 |
| CONTIG-071103 | 484 | 7  | 3  | 92  | 0 |
| CONTIG-071104 | 112 | 6  | 3  | 8   | 0 |
| CONTIG-071105 | 69  | 5  | 2  | 6   | 0 |
| CONTIG-071106 | 72  | 12 | 2  | 15  | 0 |
| CONTIG-071107 | 374 | 7  | 15 | 48  | 0 |
| CONTIG-071108 | 165 | 12 | 14 | 64  | 0 |
| CONTIG-071110 | 76  | 7  | 4  | 21  | 0 |
| CONTIG-071111 | 299 | 9  | 0  | 0   | 2 |
| CONTIG-071112 | 79  | 3  | 4  | 6   | 0 |
| CONTIG-071113 | 106 | 4  | 3  | 6   | 0 |
| CONTIG-071114 | 149 | 15 | 2  | 134 | 0 |
| CONTIG-071115 | 71  | 7  | 13 | 0   | 0 |
| CONTIG-071116 | 105 | 3  | 2  | 15  | 0 |
| CONTIG-071117 | 129 | 6  | 15 | 19  | 0 |
| CONTIG-071118 | 58  | 5  | 9  | 0   | 0 |
| CONTIG-071119 | 62  | 8  | 8  | 11  | 0 |
| CONTIG-071121 | 84  | 10 | 14 | 13  | 0 |
| CONTIG-071122 | 168 | 11 | 13 | 66  | 0 |
| CONTIG-071123 | 90  | 3  | 2  | 4   | 0 |
| CONTIG-071124 | 177 | 13 | 14 | 8   | 0 |
| CONTIG-071125 | 156 | 5  | 6  | 25  | 0 |
| CONTIG-071126 | 122 | 3  | 0  | 5   | 0 |
| CONTIG-071127 | 59  | 7  | 4  | 18  | 0 |



|               |     |    |    |     |     |
|---------------|-----|----|----|-----|-----|
| CONTIG-071128 | 76  | 5  | 7  | 10  | 0   |
| CONTIG-071129 | 137 | 13 | 43 | 58  | 0   |
| CONTIG-071130 | 205 | 8  | 15 | 29  | 0   |
| CONTIG-071131 | 200 | 6  | 7  | 16  | 0   |
| CONTIG-071134 | 540 | 19 | 17 | 521 | 2   |
| CONTIG-071136 | 87  | 12 | 26 | 28  | 0   |
| CONTIG-071137 | 64  | 10 | 6  | 22  | 0   |
| CONTIG-071138 | 224 | 6  | 5  | 45  | 0   |
| CONTIG-071139 | 331 | 10 | 9  | 86  | 0   |
| CONTIG-071140 | 86  | 5  | 4  | 13  | 0   |
| CONTIG-071141 | 89  | 3  | 6  | 0   | 0   |
| CONTIG-071142 | 93  | 14 | 2  | 28  | 0   |
| CONTIG-071143 | 132 | 4  | 5  | 23  | 0   |
| CONTIG-071144 | 101 | 12 | 24 | 4   | 0   |
| CONTIG-071145 | 259 | 9  | 15 | 89  | 0   |
| CONTIG-071146 | 296 | 10 | 14 | 87  | 0   |
| CONTIG-071147 | 92  | 5  | 0  | 5   | 0   |
| CONTIG-071148 | 144 | 5  | 11 | 30  | 0   |
| CONTIG-071149 | 144 | 4  | 2  | 15  | 2   |
| CONTIG-071150 | 107 | 14 | 37 | 9   | 0   |
| CONTIG-071151 | 91  | 4  | 12 | 6   | 0   |
| CONTIG-071152 | 82  | 11 | 3  | 25  | 0   |
| CONTIG-071153 | 237 | 10 | 9  | 54  | 0   |
| CONTIG-071155 | 87  | 2  | 2  | 4   | 0   |
| CONTIG-071156 | 335 | 9  | 34 | 109 | 0   |
| CONTIG-071159 | 94  | 10 | 0  | 32  | 0   |
| CONTIG-071160 | 75  | 3  | 0  | 2   | 0   |
| CONTIG-071161 | 124 | 11 | 2  | 54  | 0   |
| CONTIG-071162 | 66  | 10 | 2  | 12  | 0   |
| CONTIG-071163 | 64  | 2  | 2  | 2   | 0   |
| CONTIG-071164 | 92  | 5  | 0  | 17  | 0   |
| CONTIG-071166 | 102 | 6  | 16 | 7   | 0   |
| CONTIG-071167 | 192 | 7  | 0  | 66  | 0   |
| CONTIG-071168 | 221 | 12 | 3  | 46  | 0   |
| CONTIG-071169 | 273 | 6  | 19 | 52  | 0   |
| CONTIG-071170 | 268 | 7  | 17 | 30  | 0   |
| CONTIG-071171 | 184 | 9  | 2  | 2   | 0   |
| CONTIG-071172 | 178 | 18 | 6  | 162 | 0   |
| CONTIG-071173 | 164 | 5  | 7  | 18  | 3   |
| CONTIG-071174 | 138 | 5  | 0  | 11  | 0   |
| CONTIG-071175 | 485 | 39 | 0  | 0   | 144 |
| CONTIG-071176 | 165 | 6  | 3  | 6   | 0   |
| CONTIG-071177 | 99  | 18 | 7  | 32  | 0   |
| CONTIG-071179 | 232 | 7  | 2  | 55  | 0   |
| CONTIG-071180 | 94  | 10 | 0  | 2   | 0   |
| CONTIG-071181 | 84  | 4  | 5  | 0   | 0   |
| CONTIG-071182 | 105 | 9  | 9  | 8   | 0   |

|               |     |    |    |     |   |
|---------------|-----|----|----|-----|---|
| CONTIG-071183 | 183 | 7  | 6  | 29  | 0 |
| CONTIG-071184 | 144 | 9  | 9  | 42  | 0 |
| CONTIG-071185 | 155 | 10 | 7  | 78  | 0 |
| CONTIG-071186 | 142 | 4  | 4  | 15  | 0 |
| CONTIG-071187 | 71  | 6  | 2  | 17  | 0 |
| CONTIG-071188 | 121 | 3  | 0  | 13  | 0 |
| CONTIG-071189 | 255 | 7  | 0  | 55  | 0 |
| CONTIG-071190 | 91  | 5  | 2  | 11  | 0 |
| CONTIG-071191 | 78  | 6  | 12 | 5   | 0 |
| CONTIG-071192 | 130 | 5  | 5  | 21  | 0 |
| CONTIG-071193 | 90  | 12 | 2  | 48  | 2 |
| CONTIG-071194 | 392 | 15 | 38 | 62  | 0 |
| CONTIG-071195 | 131 | 5  | 2  | 12  | 0 |
| CONTIG-071196 | 87  | 5  | 5  | 6   | 0 |
| CONTIG-071197 | 154 | 6  | 0  | 0   | 0 |
| CONTIG-071198 | 225 | 12 | 10 | 75  | 2 |
| CONTIG-071200 | 140 | 10 | 15 | 22  | 0 |
| CONTIG-071201 | 68  | 4  | 10 | 3   | 0 |
| CONTIG-071203 | 67  | 16 | 2  | 2   | 0 |
| CONTIG-071204 | 90  | 3  | 0  | 6   | 0 |
| CONTIG-071205 | 136 | 7  | 0  | 9   | 0 |
| CONTIG-071206 | 84  | 40 | 0  | 52  | 0 |
| CONTIG-071207 | 95  | 6  | 0  | 0   | 0 |
| CONTIG-071208 | 299 | 7  | 10 | 17  | 0 |
| CONTIG-071209 | 104 | 5  | 4  | 5   | 0 |
| CONTIG-071210 | 67  | 5  | 2  | 2   | 0 |
| CONTIG-071213 | 64  | 5  | 7  | 4   | 0 |
| CONTIG-071214 | 60  | 4  | 15 | 2   | 0 |
| CONTIG-071216 | 196 | 7  | 11 | 57  | 0 |
| CONTIG-071217 | 127 | 10 | 6  | 59  | 0 |
| CONTIG-071218 | 77  | 11 | 2  | 24  | 0 |
| CONTIG-071219 | 121 | 6  | 13 | 9   | 0 |
| CONTIG-071220 | 80  | 6  | 3  | 6   | 2 |
| CONTIG-071221 | 88  | 13 | 2  | 66  | 0 |
| CONTIG-071222 | 494 | 14 | 35 | 223 | 0 |
| CONTIG-071223 | 189 | 8  | 0  | 55  | 0 |
| CONTIG-071224 | 128 | 7  | 7  | 15  | 0 |
| CONTIG-071225 | 89  | 10 | 9  | 27  | 0 |
| CONTIG-071226 | 101 | 6  | 0  | 21  | 0 |
| CONTIG-071227 | 109 | 7  | 3  | 9   | 0 |
| CONTIG-071228 | 457 | 41 | 11 | 134 | 2 |
| CONTIG-071229 | 68  | 5  | 11 | 9   | 0 |
| CONTIG-071231 | 219 | 8  | 17 | 40  | 0 |
| CONTIG-071232 | 164 | 8  | 9  | 38  | 0 |
| CONTIG-071233 | 109 | 3  | 10 | 4   | 0 |
| CONTIG-071234 | 138 | 6  | 11 | 15  | 0 |
| CONTIG-071236 | 71  | 6  | 3  | 7   | 0 |

|               |     |    |    |     |     |
|---------------|-----|----|----|-----|-----|
| CONTIG-071237 | 309 | 11 | 36 | 121 | 2   |
| CONTIG-071239 | 277 | 7  | 12 | 46  | 0   |
| CONTIG-071240 | 62  | 8  | 10 | 2   | 0   |
| CONTIG-071241 | 342 | 9  | 20 | 50  | 3   |
| CONTIG-071242 | 102 | 3  | 0  | 6   | 0   |
| CONTIG-071243 | 81  | 3  | 2  | 2   | 0   |
| CONTIG-071245 | 131 | 8  | 14 | 32  | 0   |
| CONTIG-071246 | 168 | 15 | 25 | 70  | 0   |
| CONTIG-071247 | 169 | 14 | 6  | 0   | 3   |
| CONTIG-071248 | 86  | 3  | 2  | 6   | 0   |
| CONTIG-071249 | 70  | 5  | 9  | 0   | 0   |
| CONTIG-071250 | 74  | 5  | 20 | 0   | 0   |
| CONTIG-071251 | 246 | 6  | 2  | 62  | 0   |
| CONTIG-071252 | 95  | 7  | 23 | 21  | 0   |
| CONTIG-071253 | 96  | 5  | 2  | 12  | 0   |
| CONTIG-071254 | 94  | 3  | 4  | 8   | 0   |
| CONTIG-071255 | 98  | 5  | 8  | 18  | 0   |
| CONTIG-071257 | 223 | 6  | 51 | 14  | 0   |
| CONTIG-071258 | 180 | 6  | 4  | 37  | 0   |
| CONTIG-071259 | 414 | 6  | 18 | 85  | 2   |
| CONTIG-071260 | 211 | 12 | 7  | 47  | 0   |
| CONTIG-071261 | 134 | 17 | 6  | 89  | 0   |
| CONTIG-071262 | 72  | 3  | 3  | 4   | 0   |
| CONTIG-071263 | 74  | 5  | 8  | 9   | 0   |
| CONTIG-071264 | 234 | 11 | 4  | 54  | 0   |
| CONTIG-071268 | 103 | 14 | 2  | 74  | 0   |
| CONTIG-071270 | 975 | 54 | 2  | 0   | 179 |
| CONTIG-071271 | 127 | 15 | 4  | 34  | 0   |
| CONTIG-071272 | 105 | 17 | 4  | 27  | 0   |
| CONTIG-071273 | 149 | 6  | 2  | 8   | 0   |
| CONTIG-071274 | 125 | 10 | 16 | 39  | 2   |
| CONTIG-071275 | 77  | 3  | 7  | 2   | 0   |
| CONTIG-071276 | 228 | 7  | 35 | 42  | 0   |
| CONTIG-071277 | 114 | 4  | 2  | 10  | 0   |
| CONTIG-071278 | 183 | 5  | 6  | 9   | 0   |
| CONTIG-071279 | 211 | 7  | 3  | 46  | 0   |
| CONTIG-071280 | 119 | 3  | 0  | 0   | 0   |
| CONTIG-071281 | 173 | 14 | 33 | 77  | 4   |
| CONTIG-071282 | 76  | 10 | 5  | 20  | 0   |
| CONTIG-071283 | 65  | 4  | 2  | 9   | 0   |
| CONTIG-071284 | 600 | 19 | 8  | 143 | 0   |
| CONTIG-071285 | 148 | 7  | 2  | 26  | 0   |
| CONTIG-071286 | 125 | 6  | 0  | 18  | 2   |
| CONTIG-071287 | 470 | 12 | 7  | 234 | 2   |
| CONTIG-071288 | 305 | 13 | 12 | 102 | 0   |
| CONTIG-071289 | 129 | 8  | 23 | 25  | 0   |
| CONTIG-071290 | 84  | 8  | 2  | 6   | 0   |

|               |     |    |    |     |     |
|---------------|-----|----|----|-----|-----|
| CONTIG-071292 | 120 | 6  | 3  | 23  | 0   |
| CONTIG-071293 | 290 | 12 | 13 | 94  | 12  |
| CONTIG-071294 | 74  | 14 | 0  | 49  | 0   |
| CONTIG-071295 | 76  | 13 | 6  | 52  | 0   |
| CONTIG-071296 | 256 | 7  | 5  | 60  | 0   |
| CONTIG-071297 | 103 | 4  | 6  | 12  | 0   |
| CONTIG-071298 | 66  | 6  | 8  | 15  | 0   |
| CONTIG-071299 | 80  | 12 | 6  | 25  | 0   |
| CONTIG-071302 | 60  | 8  | 3  | 22  | 0   |
| CONTIG-071303 | 113 | 5  | 0  | 20  | 0   |
| CONTIG-071304 | 92  | 7  | 0  | 25  | 0   |
| CONTIG-071307 | 107 | 5  | 3  | 5   | 0   |
| CONTIG-071308 | 121 | 11 | 0  | 48  | 2   |
| CONTIG-071309 | 104 | 15 | 9  | 35  | 0   |
| CONTIG-071310 | 246 | 11 | 12 | 72  | 0   |
| CONTIG-071311 | 49  | 16 | 7  | 21  | 0   |
| CONTIG-071312 | 90  | 3  | 0  | 4   | 0   |
| CONTIG-071314 | 256 | 6  | 2  | 2   | 0   |
| CONTIG-071315 | 257 | 6  | 8  | 50  | 0   |
| CONTIG-071317 | 136 | 9  | 0  | 17  | 0   |
| CONTIG-071318 | 60  | 3  | 0  | 2   | 0   |
| CONTIG-071319 | 144 | 9  | 2  | 41  | 0   |
| CONTIG-071320 | 69  | 6  | 2  | 15  | 0   |
| CONTIG-071321 | 59  | 5  | 3  | 13  | 0   |
| CONTIG-071322 | 174 | 11 | 22 | 40  | 0   |
| CONTIG-071323 | 877 | 77 | 4  | 0   | 473 |
| CONTIG-071324 | 86  | 12 | 4  | 31  | 0   |
| CONTIG-071325 | 76  | 5  | 8  | 5   | 0   |
| CONTIG-071326 | 117 | 5  | 5  | 6   | 0   |
| CONTIG-071327 | 104 | 6  | 6  | 15  | 0   |
| CONTIG-071329 | 70  | 4  | 5  | 5   | 0   |
| CONTIG-071330 | 61  | 3  | 2  | 0   | 0   |
| CONTIG-071331 | 130 | 6  | 9  | 23  | 0   |
| CONTIG-071332 | 105 | 7  | 6  | 18  | 0   |
| CONTIG-071333 | 97  | 5  | 3  | 13  | 0   |
| CONTIG-071334 | 128 | 6  | 7  | 9   | 0   |
| CONTIG-071335 | 296 | 22 | 17 | 281 | 0   |
| CONTIG-071336 | 159 | 70 | 0  | 0   | 187 |
| CONTIG-071337 | 65  | 3  | 2  | 2   | 0   |
| CONTIG-071338 | 80  | 5  | 6  | 6   | 0   |
| CONTIG-071339 | 60  | 2  | 0  | 4   | 0   |
| CONTIG-071340 | 72  | 4  | 10 | 0   | 0   |
| CONTIG-071342 | 80  | 11 | 3  | 32  | 0   |
| CONTIG-071343 | 68  | 84 | 9  | 227 | 0   |
| CONTIG-071344 | 97  | 3  | 2  | 8   | 0   |
| CONTIG-071345 | 71  | 3  | 2  | 8   | 0   |
| CONTIG-071346 | 553 | 17 | 32 | 512 | 0   |

|               |     |    |    |      |    |
|---------------|-----|----|----|------|----|
| CONTIG-071347 | 311 | 9  | 4  | 100  | 0  |
| CONTIG-071348 | 87  | 4  | 8  | 0    | 0  |
| CONTIG-071349 | 297 | 9  | 0  | 155  | 0  |
| CONTIG-071351 | 64  | 19 | 11 | 30   | 0  |
| CONTIG-071352 | 99  | 7  | 0  | 33   | 0  |
| CONTIG-071353 | 103 | 6  | 0  | 18   | 0  |
| CONTIG-071354 | 166 | 4  | 4  | 11   | 0  |
| CONTIG-071355 | 117 | 10 | 10 | 30   | 0  |
| CONTIG-071356 | 382 | 12 | 18 | 174  | 4  |
| CONTIG-071357 | 841 | 34 | 2  | 1490 | 0  |
| CONTIG-071360 | 715 | 13 | 25 | 367  | 6  |
| CONTIG-071361 | 102 | 8  | 2  | 15   | 0  |
| CONTIG-071362 | 82  | 3  | 3  | 3    | 0  |
| CONTIG-071363 | 198 | 12 | 15 | 28   | 4  |
| CONTIG-071364 | 528 | 14 | 6  | 278  | 9  |
| CONTIG-071365 | 89  | 6  | 2  | 10   | 2  |
| CONTIG-071366 | 60  | 5  | 3  | 0    | 0  |
| CONTIG-071367 | 131 | 14 | 2  | 72   | 2  |
| CONTIG-071368 | 477 | 11 | 8  | 200  | 2  |
| CONTIG-071369 | 171 | 5  | 8  | 10   | 0  |
| CONTIG-071370 | 88  | 4  | 0  | 11   | 0  |
| CONTIG-071371 | 136 | 15 | 46 | 36   | 2  |
| CONTIG-071372 | 102 | 11 | 3  | 46   | 0  |
| CONTIG-071373 | 65  | 7  | 8  | 15   | 0  |
| CONTIG-071374 | 118 | 4  | 0  | 4    | 0  |
| CONTIG-071376 | 91  | 5  | 4  | 4    | 0  |
| CONTIG-071377 | 130 | 9  | 17 | 22   | 0  |
| CONTIG-071378 | 111 | 4  | 2  | 11   | 0  |
| CONTIG-071379 | 67  | 2  | 5  | 0    | 0  |
| CONTIG-071381 | 86  | 6  | 11 | 2    | 0  |
| CONTIG-071382 | 87  | 30 | 37 | 55   | 0  |
| CONTIG-071383 | 646 | 11 | 12 | 165  | 4  |
| CONTIG-071384 | 132 | 5  | 3  | 23   | 0  |
| CONTIG-071385 | 67  | 7  | 8  | 16   | 0  |
| CONTIG-071386 | 139 | 10 | 6  | 42   | 0  |
| CONTIG-071387 | 703 | 11 | 12 | 71   | 15 |
| CONTIG-071388 | 70  | 11 | 0  | 20   | 0  |
| CONTIG-071389 | 238 | 37 | 13 | 6    | 0  |
| CONTIG-071390 | 430 | 10 | 0  | 75   | 10 |
| CONTIG-071391 | 72  | 4  | 5  | 2    | 0  |
| CONTIG-071392 | 242 | 8  | 4  | 78   | 0  |
| CONTIG-071393 | 110 | 9  | 11 | 6    | 0  |
| CONTIG-071394 | 192 | 9  | 9  | 49   | 0  |
| CONTIG-071395 | 139 | 6  | 4  | 13   | 0  |
| CONTIG-071396 | 111 | 7  | 19 | 13   | 0  |
| CONTIG-071398 | 77  | 8  | 7  | 7    | 0  |
| CONTIG-071399 | 143 | 6  | 4  | 26   | 0  |

|               |     |    |    |     |    |
|---------------|-----|----|----|-----|----|
| CONTIG-071400 | 140 | 12 | 9  | 75  | 0  |
| CONTIG-071404 | 97  | 5  | 2  | 2   | 0  |
| CONTIG-071405 | 212 | 8  | 33 | 15  | 2  |
| CONTIG-071406 | 195 | 8  | 8  | 39  | 0  |
| CONTIG-071407 | 138 | 4  | 9  | 2   | 0  |
| CONTIG-071408 | 64  | 3  | 5  | 2   | 0  |
| CONTIG-071409 | 73  | 9  | 3  | 13  | 2  |
| CONTIG-071410 | 76  | 4  | 0  | 8   | 0  |
| CONTIG-071411 | 63  | 4  | 0  | 11  | 0  |
| CONTIG-071415 | 65  | 3  | 9  | 6   | 0  |
| CONTIG-071416 | 343 | 9  | 17 | 59  | 2  |
| CONTIG-071417 | 282 | 8  | 26 | 67  | 0  |
| CONTIG-071418 | 123 | 6  | 2  | 27  | 0  |
| CONTIG-071419 | 418 | 8  | 36 | 128 | 0  |
| CONTIG-071420 | 370 | 17 | 17 | 107 | 0  |
| CONTIG-071421 | 150 | 6  | 12 | 14  | 0  |
| CONTIG-071422 | 199 | 5  | 5  | 29  | 2  |
| CONTIG-071423 | 123 | 8  | 11 | 10  | 2  |
| CONTIG-071424 | 192 | 12 | 4  | 78  | 0  |
| CONTIG-071425 | 74  | 6  | 9  | 9   | 0  |
| CONTIG-071427 | 67  | 7  | 5  | 11  | 0  |
| CONTIG-071428 | 89  | 5  | 0  | 16  | 0  |
| CONTIG-071429 | 67  | 7  | 11 | 2   | 0  |
| CONTIG-071430 | 89  | 6  | 2  | 21  | 2  |
| CONTIG-071432 | 96  | 6  | 21 | 6   | 0  |
| CONTIG-071433 | 103 | 2  | 0  | 2   | 0  |
| CONTIG-071434 | 70  | 8  | 10 | 22  | 0  |
| CONTIG-071435 | 58  | 5  | 6  | 4   | 0  |
| CONTIG-071436 | 79  | 7  | 4  | 20  | 0  |
| CONTIG-071437 | 63  | 13 | 7  | 0   | 13 |
| CONTIG-071439 | 350 | 32 | 17 | 452 | 23 |
| CONTIG-071440 | 102 | 25 | 6  | 12  | 0  |
| CONTIG-071441 | 74  | 3  | 0  | 0   | 0  |
| CONTIG-071442 | 306 | 10 | 16 | 117 | 0  |
| CONTIG-071443 | 165 | 6  | 5  | 32  | 0  |
| CONTIG-071444 | 66  | 6  | 0  | 16  | 0  |
| CONTIG-071445 | 74  | 21 | 9  | 67  | 0  |
| CONTIG-071446 | 211 | 5  | 14 | 13  | 0  |
| CONTIG-071448 | 71  | 2  | 2  | 4   | 0  |
| CONTIG-071449 | 215 | 34 | 5  | 336 | 0  |
| CONTIG-071450 | 58  | 3  | 2  | 3   | 0  |
| CONTIG-071451 | 79  | 3  | 0  | 0   | 0  |
| CONTIG-071452 | 129 | 31 | 0  | 96  | 0  |
| CONTIG-071453 | 191 | 6  | 2  | 5   | 0  |
| CONTIG-071454 | 70  | 7  | 5  | 14  | 0  |
| CONTIG-071455 | 141 | 19 | 12 | 23  | 0  |
| CONTIG-071456 | 111 | 2  | 0  | 0   | 0  |

|               |     |    |    |     |    |
|---------------|-----|----|----|-----|----|
| CONTIG-071457 | 118 | 3  | 8  | 6   | 0  |
| CONTIG-071458 | 243 | 9  | 14 | 70  | 2  |
| CONTIG-071459 | 111 | 10 | 15 | 21  | 0  |
| CONTIG-071460 | 60  | 3  | 0  | 7   | 0  |
| CONTIG-071461 | 103 | 7  | 4  | 8   | 0  |
| CONTIG-071462 | 162 | 13 | 10 | 75  | 0  |
| CONTIG-071463 | 160 | 6  | 0  | 27  | 0  |
| CONTIG-071464 | 61  | 10 | 63 | 2   | 0  |
| CONTIG-071465 | 251 | 7  | 7  | 60  | 0  |
| CONTIG-071466 | 107 | 4  | 2  | 6   | 0  |
| CONTIG-071467 | 88  | 3  | 0  | 9   | 0  |
| CONTIG-071468 | 62  | 8  | 5  | 10  | 0  |
| CONTIG-071469 | 254 | 16 | 15 | 155 | 0  |
| CONTIG-071470 | 93  | 12 | 0  | 0   | 9  |
| CONTIG-071471 | 138 | 8  | 0  | 27  | 0  |
| CONTIG-071473 | 92  | 4  | 4  | 2   | 0  |
| CONTIG-071474 | 79  | 4  | 3  | 5   | 0  |
| CONTIG-071475 | 90  | 11 | 4  | 24  | 0  |
| CONTIG-071476 | 114 | 14 | 3  | 65  | 0  |
| CONTIG-071477 | 87  | 5  | 0  | 10  | 0  |
| CONTIG-071483 | 239 | 21 | 24 | 34  | 24 |
| CONTIG-071484 | 381 | 9  | 10 | 27  | 0  |
| CONTIG-071485 | 72  | 10 | 4  | 14  | 0  |
| CONTIG-071486 | 104 | 3  | 3  | 9   | 0  |
| CONTIG-071487 | 62  | 14 | 5  | 0   | 2  |
| CONTIG-071488 | 96  | 17 | 14 | 73  | 0  |
| CONTIG-071489 | 118 | 7  | 3  | 26  | 2  |
| CONTIG-071492 | 364 | 16 | 9  | 244 | 0  |
| CONTIG-071493 | 225 | 14 | 28 | 32  | 0  |
| CONTIG-071494 | 63  | 7  | 2  | 2   | 0  |
| CONTIG-071495 | 69  | 9  | 3  | 15  | 0  |
| CONTIG-071497 | 172 | 18 | 19 | 106 | 2  |
| CONTIG-071498 | 145 | 14 | 3  | 89  | 4  |
| CONTIG-071499 | 64  | 9  | 4  | 13  | 0  |
| CONTIG-071500 | 146 | 6  | 6  | 18  | 0  |
| CONTIG-071501 | 61  | 4  | 0  | 2   | 0  |
| CONTIG-071502 | 115 | 5  | 2  | 6   | 0  |
| CONTIG-071503 | 158 | 4  | 3  | 17  | 0  |
| CONTIG-071504 | 672 | 13 | 29 | 311 | 0  |
| CONTIG-071505 | 119 | 8  | 10 | 26  | 0  |
| CONTIG-071506 | 143 | 6  | 3  | 2   | 0  |
| CONTIG-071507 | 59  | 8  | 2  | 19  | 0  |
| CONTIG-071508 | 210 | 6  | 5  | 16  | 2  |
| CONTIG-071510 | 134 | 9  | 0  | 47  | 0  |
| CONTIG-071511 | 152 | 10 | 10 | 37  | 0  |
| CONTIG-071512 | 160 | 18 | 4  | 106 | 0  |
| CONTIG-071513 | 204 | 33 | 0  | 258 | 0  |

|               |     |    |    |     |    |
|---------------|-----|----|----|-----|----|
| CONTIG-071514 | 116 | 8  | 0  | 33  | 0  |
| CONTIG-071515 | 148 | 14 | 3  | 54  | 2  |
| CONTIG-071516 | 158 | 8  | 10 | 24  | 0  |
| CONTIG-071518 | 228 | 6  | 2  | 46  | 0  |
| CONTIG-071519 | 69  | 7  | 0  | 16  | 0  |
| CONTIG-071520 | 156 | 5  | 2  | 26  | 0  |
| CONTIG-071521 | 327 | 14 | 11 | 127 | 6  |
| CONTIG-071522 | 327 | 10 | 7  | 99  | 2  |
| CONTIG-071523 | 249 | 10 | 7  | 81  | 0  |
| CONTIG-071530 | 143 | 10 | 20 | 37  | 0  |
| CONTIG-071531 | 328 | 10 | 0  | 104 | 2  |
| CONTIG-071532 | 727 | 15 | 13 | 142 | 30 |
| CONTIG-071533 | 237 | 8  | 14 | 58  | 0  |
| CONTIG-071534 | 138 | 8  | 10 | 25  | 0  |
| CONTIG-071535 | 70  | 43 | 13 | 129 | 0  |
| CONTIG-071536 | 103 | 5  | 5  | 12  | 0  |
| CONTIG-071537 | 85  | 15 | 14 | 29  | 0  |
| CONTIG-071538 | 73  | 8  | 15 | 2   | 0  |
| CONTIG-071539 | 99  | 3  | 2  | 2   | 0  |
| CONTIG-071540 | 237 | 5  | 0  | 29  | 0  |
| CONTIG-071541 | 105 | 12 | 14 | 35  | 0  |
| CONTIG-071542 | 72  | 8  | 11 | 14  | 0  |
| CONTIG-071543 | 100 | 7  | 3  | 19  | 0  |
| CONTIG-071544 | 84  | 18 | 4  | 26  | 0  |
| CONTIG-071546 | 184 | 11 | 4  | 80  | 0  |
| CONTIG-071547 | 132 | 8  | 24 | 16  | 2  |
| CONTIG-071548 | 66  | 5  | 0  | 7   | 0  |
| CONTIG-071549 | 219 | 15 | 2  | 188 | 0  |
| CONTIG-071550 | 89  | 9  | 34 | 15  | 0  |
| CONTIG-071551 | 74  | 10 | 18 | 19  | 0  |
| CONTIG-071552 | 126 | 9  | 27 | 31  | 0  |
| CONTIG-071553 | 125 | 13 | 0  | 86  | 0  |
| CONTIG-071554 | 114 | 14 | 9  | 70  | 0  |
| CONTIG-071555 | 93  | 5  | 0  | 17  | 0  |
| CONTIG-071558 | 149 | 3  | 3  | 15  | 0  |
| CONTIG-071559 | 60  | 6  | 3  | 3   | 0  |
| CONTIG-071560 | 113 | 4  | 0  | 16  | 0  |
| CONTIG-071561 | 337 | 14 | 20 | 160 | 0  |
| CONTIG-071562 | 151 | 10 | 11 | 23  | 0  |
| CONTIG-071563 | 189 | 5  | 5  | 31  | 0  |
| CONTIG-071564 | 204 | 7  | 2  | 58  | 0  |
| CONTIG-071565 | 74  | 4  | 5  | 9   | 0  |
| CONTIG-071568 | 134 | 10 | 13 | 43  | 0  |
| CONTIG-071569 | 70  | 7  | 15 | 9   | 0  |
| CONTIG-071570 | 82  | 9  | 7  | 7   | 2  |
| CONTIG-071571 | 143 | 10 | 4  | 41  | 0  |
| CONTIG-071572 | 140 | 16 | 5  | 22  | 0  |



|               |     |    |    |     |    |
|---------------|-----|----|----|-----|----|
| CONTIG-071573 | 62  | 4  | 0  | 6   | 0  |
| CONTIG-071574 | 89  | 5  | 3  | 14  | 0  |
| CONTIG-071575 | 191 | 6  | 5  | 5   | 0  |
| CONTIG-071576 | 105 | 6  | 7  | 6   | 0  |
| CONTIG-071577 | 41  | 13 | 26 | 0   | 0  |
| CONTIG-071578 | 303 | 14 | 9  | 52  | 0  |
| CONTIG-071581 | 60  | 11 | 8  | 0   | 0  |
| CONTIG-071582 | 83  | 3  | 2  | 11  | 0  |
| CONTIG-071583 | 125 | 7  | 4  | 28  | 0  |
| CONTIG-071584 | 111 | 6  | 5  | 9   | 2  |
| CONTIG-071585 | 118 | 7  | 0  | 27  | 0  |
| CONTIG-071586 | 114 | 6  | 2  | 16  | 0  |
| CONTIG-071587 | 165 | 8  | 18 | 14  | 0  |
| CONTIG-071588 | 114 | 7  | 0  | 13  | 0  |
| CONTIG-071589 | 46  | 16 | 0  | 13  | 0  |
| CONTIG-071590 | 91  | 4  | 2  | 13  | 0  |
| CONTIG-071591 | 76  | 19 | 6  | 57  | 0  |
| CONTIG-071592 | 95  | 4  | 5  | 7   | 0  |
| CONTIG-071593 | 104 | 6  | 0  | 0   | 0  |
| CONTIG-071594 | 67  | 12 | 3  | 0   | 0  |
| CONTIG-071595 | 533 | 11 | 19 | 171 | 0  |
| CONTIG-071599 | 121 | 4  | 0  | 20  | 0  |
| CONTIG-071600 | 108 | 7  | 8  | 23  | 0  |
| CONTIG-071601 | 99  | 15 | 13 | 22  | 0  |
| CONTIG-071603 | 123 | 6  | 3  | 18  | 0  |
| CONTIG-071604 | 151 | 5  | 4  | 10  | 0  |
| CONTIG-071605 | 73  | 3  | 6  | 7   | 0  |
| CONTIG-071606 | 70  | 6  | 3  | 20  | 0  |
| CONTIG-071608 | 87  | 3  | 0  | 5   | 0  |
| CONTIG-071609 | 91  | 8  | 6  | 25  | 0  |
| CONTIG-071610 | 136 | 4  | 8  | 11  | 0  |
| CONTIG-071611 | 185 | 7  | 4  | 41  | 0  |
| CONTIG-071612 | 192 | 10 | 5  | 61  | 0  |
| CONTIG-071613 | 377 | 11 | 0  | 0   | 30 |
| CONTIG-071614 | 324 | 11 | 20 | 102 | 0  |
| CONTIG-071615 | 106 | 5  | 3  | 9   | 0  |
| CONTIG-071619 | 64  | 7  | 0  | 4   | 0  |
| CONTIG-071620 | 230 | 14 | 4  | 0   | 14 |
| CONTIG-071621 | 173 | 7  | 5  | 0   | 0  |
| CONTIG-071623 | 67  | 16 | 0  | 45  | 0  |
| CONTIG-071624 | 149 | 15 | 9  | 58  | 2  |
| CONTIG-071625 | 237 | 11 | 4  | 102 | 0  |
| CONTIG-071626 | 70  | 10 | 6  | 15  | 2  |
| CONTIG-071627 | 73  | 8  | 2  | 13  | 0  |
| CONTIG-071628 | 150 | 7  | 0  | 40  | 0  |
| CONTIG-071629 | 83  | 8  | 2  | 27  | 0  |
| CONTIG-071630 | 157 | 9  | 0  | 53  | 0  |

|               |      |    |    |      |    |
|---------------|------|----|----|------|----|
| CONTIG-071631 | 328  | 7  | 7  | 90   | 0  |
| CONTIG-071632 | 88   | 11 | 6  | 10   | 0  |
| CONTIG-071633 | 166  | 6  | 3  | 8    | 0  |
| CONTIG-071634 | 263  | 10 | 0  | 76   | 0  |
| CONTIG-071635 | 430  | 9  | 33 | 112  | 2  |
| CONTIG-071636 | 122  | 6  | 13 | 11   | 0  |
| CONTIG-071637 | 223  | 6  | 4  | 49   | 0  |
| CONTIG-071638 | 75   | 6  | 5  | 18   | 0  |
| CONTIG-071639 | 142  | 8  | 0  | 31   | 0  |
| CONTIG-071640 | 73   | 63 | 4  | 129  | 16 |
| CONTIG-071641 | 198  | 6  | 5  | 34   | 0  |
| CONTIG-071642 | 104  | 6  | 4  | 15   | 0  |
| CONTIG-071643 | 88   | 8  | 17 | 18   | 0  |
| CONTIG-071644 | 177  | 9  | 2  | 39   | 0  |
| CONTIG-071646 | 1045 | 31 | 13 | 1285 | 31 |
| CONTIG-071647 | 178  | 6  | 7  | 14   | 2  |
| CONTIG-071648 | 281  | 7  | 7  | 54   | 0  |
| CONTIG-071649 | 116  | 25 | 7  | 0    | 0  |
| CONTIG-071650 | 140  | 6  | 0  | 13   | 0  |
| CONTIG-071651 | 62   | 6  | 0  | 4    | 0  |
| CONTIG-071652 | 102  | 4  | 0  | 16   | 0  |
| CONTIG-071654 | 70   | 10 | 40 | 4    | 0  |
| CONTIG-071658 | 241  | 9  | 8  | 63   | 2  |
| CONTIG-071659 | 103  | 5  | 2  | 6    | 0  |
| CONTIG-071660 | 73   | 6  | 0  | 9    | 0  |
| CONTIG-071661 | 135  | 5  | 8  | 15   | 0  |
| CONTIG-071662 | 95   | 9  | 2  | 14   | 0  |
| CONTIG-071663 | 119  | 7  | 19 | 0    | 0  |
| CONTIG-071664 | 121  | 9  | 32 | 4    | 0  |
| CONTIG-071665 | 308  | 16 | 4  | 188  | 0  |
| CONTIG-071666 | 71   | 2  | 5  | 0    | 0  |
| CONTIG-071667 | 180  | 16 | 15 | 99   | 0  |
| CONTIG-071668 | 893  | 45 | 9  | 11   | 0  |
| CONTIG-071669 | 424  | 21 | 4  | 254  | 0  |
| CONTIG-071670 | 121  | 5  | 0  | 14   | 0  |
| CONTIG-071673 | 111  | 12 | 13 | 40   | 2  |
| CONTIG-071674 | 223  | 9  | 3  | 26   | 0  |
| CONTIG-071675 | 129  | 16 | 0  | 57   | 4  |
| CONTIG-071678 | 80   | 4  | 0  | 3    | 0  |
| CONTIG-071679 | 191  | 7  | 0  | 54   | 0  |
| CONTIG-071680 | 128  | 17 | 6  | 72   | 0  |
| CONTIG-071681 | 129  | 10 | 8  | 43   | 0  |
| CONTIG-071683 | 150  | 9  | 5  | 47   | 0  |
| CONTIG-071684 | 108  | 9  | 11 | 30   | 0  |
| CONTIG-071685 | 114  | 8  | 0  | 14   | 0  |
| CONTIG-071686 | 532  | 14 | 15 | 247  | 0  |
| CONTIG-071687 | 1500 | 22 | 29 | 1328 | 2  |

|               |     |    |    |     |     |
|---------------|-----|----|----|-----|-----|
| CONTIG-071689 | 59  | 5  | 5  | 9   | 0   |
| CONTIG-071690 | 65  | 7  | 0  | 2   | 0   |
| CONTIG-071691 | 369 | 9  | 11 | 96  | 0   |
| CONTIG-071692 | 177 | 11 | 2  | 58  | 0   |
| CONTIG-071693 | 63  | 6  | 4  | 16  | 0   |
| CONTIG-071695 | 78  | 12 | 31 | 10  | 4   |
| CONTIG-071696 | 657 | 13 | 12 | 206 | 6   |
| CONTIG-071697 | 95  | 6  | 2  | 17  | 0   |
| CONTIG-071698 | 76  | 14 | 3  | 55  | 0   |
| CONTIG-071699 | 227 | 7  | 0  | 0   | 2   |
| CONTIG-071700 | 97  | 4  | 0  | 11  | 0   |
| CONTIG-071701 | 83  | 9  | 14 | 5   | 0   |
| CONTIG-071702 | 69  | 5  | 5  | 8   | 0   |
| CONTIG-071703 | 137 | 3  | 0  | 8   | 0   |
| CONTIG-071704 | 131 | 6  | 2  | 7   | 0   |
| CONTIG-071705 | 63  | 4  | 4  | 8   | 0   |
| CONTIG-071706 | 98  | 15 | 18 | 28  | 0   |
| CONTIG-071707 | 240 | 16 | 4  | 172 | 2   |
| CONTIG-071708 | 168 | 10 | 24 | 53  | 0   |
| CONTIG-071709 | 191 | 23 | 11 | 11  | 0   |
| CONTIG-071711 | 257 | 9  | 9  | 63  | 0   |
| CONTIG-071712 | 77  | 4  | 5  | 2   | 0   |
| CONTIG-071714 | 64  | 3  | 0  | 2   | 0   |
| CONTIG-071715 | 75  | 8  | 27 | 7   | 0   |
| CONTIG-071716 | 256 | 7  | 0  | 47  | 0   |
| CONTIG-071717 | 128 | 7  | 2  | 11  | 0   |
| CONTIG-071718 | 155 | 6  | 6  | 11  | 0   |
| CONTIG-071719 | 350 | 15 | 2  | 139 | 2   |
| CONTIG-071720 | 94  | 10 | 19 | 10  | 0   |
| CONTIG-071721 | 70  | 7  | 2  | 9   | 0   |
| CONTIG-071722 | 346 | 30 | 15 | 473 | 0   |
| CONTIG-071724 | 116 | 7  | 13 | 0   | 0   |
| CONTIG-071725 | 85  | 2  | 0  | 6   | 0   |
| CONTIG-071726 | 61  | 5  | 8  | 2   | 0   |
| CONTIG-071727 | 89  | 4  | 8  | 7   | 0   |
| CONTIG-071728 | 105 | 5  | 2  | 20  | 0   |
| CONTIG-071729 | 66  | 8  | 2  | 21  | 0   |
| CONTIG-071730 | 76  | 4  | 8  | 6   | 0   |
| CONTIG-071731 | 407 | 42 | 3  | 0   | 149 |
| CONTIG-071732 | 179 | 18 | 10 | 143 | 0   |
| CONTIG-071733 | 182 | 6  | 3  | 24  | 0   |
| CONTIG-071734 | 376 | 19 | 16 | 350 | 0   |
| CONTIG-071735 | 79  | 7  | 16 | 6   | 0   |
| CONTIG-071736 | 155 | 10 | 3  | 41  | 0   |
| CONTIG-071737 | 86  | 7  | 0  | 18  | 0   |
| CONTIG-071738 | 63  | 4  | 4  | 6   | 0   |
| CONTIG-071739 | 179 | 11 | 11 | 69  | 0   |

|               |     |    |    |     |    |
|---------------|-----|----|----|-----|----|
| CONTIG-071740 | 156 | 6  | 16 | 27  | 0  |
| CONTIG-071741 | 352 | 8  | 13 | 25  | 0  |
| CONTIG-071742 | 67  | 9  | 7  | 18  | 0  |
| CONTIG-071748 | 125 | 8  | 12 | 41  | 0  |
| CONTIG-071749 | 610 | 35 | 0  | 0   | 21 |
| CONTIG-071752 | 212 | 13 | 10 | 82  | 0  |
| CONTIG-071753 | 123 | 11 | 7  | 34  | 0  |
| CONTIG-071754 | 114 | 6  | 5  | 14  | 0  |
| CONTIG-071755 | 220 | 13 | 6  | 66  | 0  |
| CONTIG-071756 | 90  | 5  | 7  | 10  | 0  |
| CONTIG-071757 | 109 | 10 | 15 | 11  | 2  |
| CONTIG-071758 | 166 | 10 | 9  | 41  | 0  |
| CONTIG-071759 | 177 | 9  | 18 | 42  | 0  |
| CONTIG-071760 | 82  | 25 | 5  | 19  | 0  |
| CONTIG-071761 | 278 | 8  | 25 | 15  | 0  |
| CONTIG-071762 | 352 | 14 | 0  | 0   | 8  |
| CONTIG-071763 | 93  | 7  | 0  | 20  | 0  |
| CONTIG-071764 | 137 | 6  | 42 | 9   | 0  |
| CONTIG-071765 | 89  | 3  | 3  | 4   | 0  |
| CONTIG-071766 | 91  | 4  | 0  | 6   | 0  |
| CONTIG-071767 | 165 | 10 | 9  | 51  | 0  |
| CONTIG-071768 | 65  | 12 | 48 | 0   | 0  |
| CONTIG-071769 | 124 | 17 | 3  | 62  | 0  |
| CONTIG-071770 | 90  | 11 | 10 | 42  | 0  |
| CONTIG-071771 | 59  | 2  | 2  | 0   | 0  |
| CONTIG-071775 | 58  | 11 | 11 | 15  | 0  |
| CONTIG-071776 | 120 | 6  | 6  | 17  | 0  |
| CONTIG-071777 | 67  | 6  | 2  | 9   | 0  |
| CONTIG-071778 | 80  | 12 | 24 | 20  | 0  |
| CONTIG-071779 | 132 | 3  | 2  | 12  | 0  |
| CONTIG-071780 | 42  | 14 | 15 | 19  | 0  |
| CONTIG-071781 | 66  | 8  | 6  | 17  | 0  |
| CONTIG-071782 | 232 | 15 | 3  | 121 | 2  |
| CONTIG-071783 | 135 | 5  | 0  | 16  | 0  |
| CONTIG-071784 | 82  | 55 | 25 | 94  | 0  |
| CONTIG-071785 | 312 | 6  | 6  | 51  | 0  |
| CONTIG-071786 | 82  | 20 | 3  | 0   | 23 |
| CONTIG-071787 | 227 | 5  | 2  | 0   | 2  |
| CONTIG-071788 | 111 | 4  | 4  | 6   | 0  |
| CONTIG-071789 | 113 | 18 | 5  | 54  | 0  |
| CONTIG-071790 | 250 | 13 | 13 | 173 | 0  |
| CONTIG-071791 | 141 | 12 | 4  | 0   | 0  |
| CONTIG-071792 | 231 | 5  | 0  | 4   | 0  |
| CONTIG-071793 | 82  | 5  | 5  | 4   | 0  |
| CONTIG-071794 | 141 | 9  | 5  | 58  | 0  |
| CONTIG-071795 | 124 | 4  | 6  | 13  | 0  |
| CONTIG-071796 | 368 | 20 | 9  | 175 | 6  |

|               |     |     |    |     |    |
|---------------|-----|-----|----|-----|----|
| CONTIG-071797 | 60  | 3   | 4  | 0   | 0  |
| CONTIG-071798 | 148 | 9   | 10 | 41  | 0  |
| CONTIG-071799 | 70  | 3   | 0  | 2   | 0  |
| CONTIG-071801 | 138 | 10  | 3  | 52  | 0  |
| CONTIG-071802 | 151 | 6   | 0  | 25  | 4  |
| CONTIG-071803 | 316 | 28  | 40 | 124 | 14 |
| CONTIG-071804 | 365 | 16  | 52 | 290 | 0  |
| CONTIG-071805 | 115 | 8   | 4  | 14  | 0  |
| CONTIG-071806 | 250 | 24  | 7  | 279 | 0  |
| CONTIG-071807 | 149 | 24  | 6  | 86  | 5  |
| CONTIG-071808 | 65  | 3   | 0  | 8   | 0  |
| CONTIG-071809 | 93  | 6   | 7  | 16  | 0  |
| CONTIG-071810 | 63  | 7   | 2  | 9   | 2  |
| CONTIG-071811 | 62  | 6   | 4  | 13  | 0  |
| CONTIG-071812 | 116 | 7   | 6  | 21  | 0  |
| CONTIG-071816 | 141 | 4   | 2  | 17  | 0  |
| CONTIG-071817 | 448 | 10  | 27 | 169 | 0  |
| CONTIG-071818 | 136 | 9   | 8  | 26  | 0  |
| CONTIG-071819 | 209 | 7   | 28 | 33  | 0  |
| CONTIG-071820 | 90  | 5   | 7  | 4   | 0  |
| CONTIG-071821 | 123 | 7   | 3  | 31  | 0  |
| CONTIG-071822 | 122 | 11  | 7  | 53  | 0  |
| CONTIG-071823 | 66  | 9   | 10 | 12  | 0  |
| CONTIG-071824 | 105 | 18  | 7  | 46  | 0  |
| CONTIG-071829 | 99  | 3   | 6  | 4   | 0  |
| CONTIG-071835 | 133 | 6   | 14 | 13  | 0  |
| CONTIG-071836 | 174 | 6   | 8  | 18  | 0  |
| CONTIG-071837 | 114 | 11  | 7  | 25  | 2  |
| CONTIG-071838 | 152 | 7   | 10 | 28  | 0  |
| CONTIG-071839 | 68  | 12  | 5  | 25  | 0  |
| CONTIG-071840 | 447 | 14  | 14 | 271 | 0  |
| CONTIG-071841 | 84  | 4   | 4  | 14  | 0  |
| CONTIG-071842 | 143 | 6   | 0  | 37  | 0  |
| CONTIG-071843 | 86  | 9   | 6  | 26  | 0  |
| CONTIG-071844 | 82  | 5   | 5  | 0   | 0  |
| CONTIG-071845 | 56  | 154 | 15 | 412 | 0  |
| CONTIG-071846 | 65  | 3   | 0  | 2   | 0  |
| CONTIG-071847 | 154 | 12  | 0  | 72  | 0  |
| CONTIG-071848 | 117 | 6   | 6  | 33  | 0  |
| CONTIG-071849 | 93  | 4   | 5  | 10  | 0  |
| CONTIG-071850 | 377 | 16  | 11 | 89  | 16 |
| CONTIG-071851 | 71  | 6   | 0  | 0   | 0  |
| CONTIG-071852 | 299 | 8   | 8  | 101 | 0  |
| CONTIG-071853 | 140 | 15  | 22 | 68  | 0  |
| CONTIG-071854 | 91  | 10  | 8  | 3   | 0  |
| CONTIG-071855 | 77  | 18  | 5  | 57  | 0  |
| CONTIG-071856 | 82  | 10  | 8  | 28  | 0  |

|               |     |     |    |     |      |
|---------------|-----|-----|----|-----|------|
| CONTIG-071857 | 161 | 9   | 25 | 37  | 0    |
| CONTIG-071858 | 39  | 427 | 8  | 307 | 0    |
| CONTIG-071860 | 136 | 6   | 3  | 17  | 0    |
| CONTIG-071861 | 100 | 6   | 4  | 8   | 0    |
| CONTIG-071862 | 144 | 8   | 15 | 26  | 0    |
| CONTIG-071863 | 98  | 5   | 3  | 10  | 0    |
| CONTIG-071864 | 322 | 15  | 26 | 122 | 7    |
| CONTIG-071866 | 83  | 15  | 14 | 0   | 0    |
| CONTIG-071867 | 214 | 17  | 0  | 0   | 11   |
| CONTIG-071868 | 160 | 7   | 3  | 31  | 0    |
| CONTIG-071869 | 287 | 8   | 0  | 103 | 0    |
| CONTIG-071870 | 595 | 10  | 9  | 144 | 0    |
| CONTIG-071871 | 59  | 4   | 4  | 2   | 2    |
| CONTIG-071872 | 74  | 6   | 8  | 18  | 0    |
| CONTIG-071873 | 188 | 14  | 5  | 62  | 0    |
| CONTIG-071874 | 218 | 9   | 14 | 58  | 4    |
| CONTIG-071875 | 102 | 10  | 9  | 30  | 0    |
| CONTIG-071876 | 80  | 6   | 0  | 15  | 0    |
| CONTIG-071877 | 100 | 133 | 3  | 786 | 0    |
| CONTIG-071878 | 86  | 4   | 4  | 0   | 0    |
| CONTIG-071879 | 154 | 23  | 5  | 71  | 0    |
| CONTIG-071880 | 81  | 4   | 0  | 7   | 0    |
| CONTIG-071881 | 63  | 14  | 5  | 16  | 0    |
| CONTIG-071882 | 123 | 32  | 2  | 142 | 6    |
| CONTIG-071883 | 81  | 7   | 3  | 16  | 0    |
| CONTIG-071884 | 124 | 3   | 8  | 11  | 0    |
| CONTIG-071885 | 643 | 262 | 2  | 0   | 1876 |
| CONTIG-071886 | 76  | 8   | 2  | 26  | 0    |
| CONTIG-071887 | 77  | 3   | 4  | 2   | 0    |
| CONTIG-071888 | 116 | 4   | 2  | 7   | 0    |
| CONTIG-071889 | 246 | 13  | 16 | 78  | 0    |
| CONTIG-071890 | 105 | 5   | 6  | 19  | 0    |
| CONTIG-071891 | 80  | 7   | 13 | 3   | 0    |
| CONTIG-071892 | 74  | 5   | 3  | 7   | 0    |
| CONTIG-071893 | 95  | 3   | 7  | 2   | 0    |
| CONTIG-071894 | 159 | 25  | 4  | 236 | 0    |
| CONTIG-071895 | 150 | 11  | 14 | 32  | 2    |
| CONTIG-071896 | 68  | 4   | 6  | 7   | 0    |
| CONTIG-071898 | 87  | 8   | 2  | 23  | 0    |
| CONTIG-071899 | 59  | 5   | 6  | 0   | 0    |
| CONTIG-071900 | 77  | 7   | 4  | 19  | 0    |
| CONTIG-071901 | 146 | 9   | 0  | 30  | 0    |
| CONTIG-071902 | 251 | 7   | 0  | 49  | 0    |
| CONTIG-071903 | 66  | 3   | 5  | 2   | 0    |
| CONTIG-071904 | 76  | 11  | 2  | 40  | 0    |
| CONTIG-071905 | 71  | 4   | 5  | 5   | 0    |
| CONTIG-071906 | 94  | 37  | 15 | 186 | 0    |

|               |     |    |    |     |     |
|---------------|-----|----|----|-----|-----|
| CONTIG-071907 | 214 | 6  | 15 | 9   | 0   |
| CONTIG-071908 | 140 | 5  | 2  | 17  | 0   |
| CONTIG-071910 | 560 | 10 | 18 | 166 | 0   |
| CONTIG-071911 | 167 | 8  | 4  | 42  | 0   |
| CONTIG-071912 | 124 | 8  | 0  | 24  | 0   |
| CONTIG-071913 | 171 | 9  | 33 | 58  | 0   |
| CONTIG-071914 | 92  | 9  | 15 | 22  | 0   |
| CONTIG-071915 | 442 | 72 | 6  | 0   | 272 |
| CONTIG-071916 | 144 | 8  | 15 | 22  | 0   |
| CONTIG-071917 | 125 | 5  | 7  | 6   | 0   |
| CONTIG-071918 | 125 | 5  | 2  | 4   | 0   |
| CONTIG-071919 | 77  | 4  | 5  | 8   | 0   |
| CONTIG-071920 | 226 | 13 | 23 | 57  | 0   |
| CONTIG-071921 | 160 | 7  | 6  | 4   | 0   |
| CONTIG-071922 | 44  | 48 | 2  | 33  | 0   |
| CONTIG-071923 | 86  | 7  | 8  | 0   | 0   |
| CONTIG-071924 | 73  | 36 | 11 | 57  | 0   |
| CONTIG-071925 | 77  | 4  | 0  | 4   | 0   |
| CONTIG-071926 | 129 | 6  | 0  | 12  | 0   |
| CONTIG-071927 | 331 | 8  | 7  | 69  | 0   |
| CONTIG-071928 | 295 | 12 | 16 | 77  | 0   |
| CONTIG-071929 | 162 | 14 | 24 | 94  | 0   |
| CONTIG-071930 | 87  | 3  | 0  | 4   | 0   |
| CONTIG-071931 | 72  | 4  | 2  | 0   | 0   |
| CONTIG-071932 | 187 | 13 | 16 | 125 | 0   |
| CONTIG-071933 | 62  | 3  | 0  | 0   | 0   |
| CONTIG-071935 | 90  | 4  | 0  | 5   | 0   |
| CONTIG-071936 | 117 | 5  | 0  | 7   | 0   |
| CONTIG-071937 | 58  | 6  | 19 | 4   | 0   |
| CONTIG-071938 | 176 | 10 | 7  | 49  | 0   |
| CONTIG-071939 | 204 | 23 | 16 | 2   | 0   |
| CONTIG-071941 | 68  | 4  | 0  | 2   | 0   |
| CONTIG-071942 | 102 | 19 | 2  | 72  | 0   |
| CONTIG-071943 | 95  | 4  | 3  | 2   | 0   |
| CONTIG-071944 | 212 | 6  | 8  | 51  | 0   |
| CONTIG-071945 | 526 | 7  | 14 | 59  | 0   |
| CONTIG-071946 | 58  | 3  | 0  | 2   | 0   |
| CONTIG-071947 | 90  | 7  | 3  | 23  | 0   |
| CONTIG-071950 | 88  | 5  | 2  | 2   | 0   |
| CONTIG-071951 | 84  | 19 | 4  | 60  | 0   |
| CONTIG-071953 | 72  | 6  | 0  | 22  | 0   |
| CONTIG-071954 | 116 | 5  | 0  | 8   | 2   |
| CONTIG-071955 | 73  | 7  | 22 | 0   | 0   |
| CONTIG-071956 | 75  | 21 | 3  | 41  | 0   |
| CONTIG-071957 | 155 | 10 | 6  | 52  | 0   |
| CONTIG-071958 | 464 | 18 | 17 | 266 | 0   |
| CONTIG-071960 | 149 | 6  | 10 | 7   | 0   |

|               |     |    |    |     |   |
|---------------|-----|----|----|-----|---|
| CONTIG-071961 | 131 | 14 | 3  | 101 | 0 |
| CONTIG-071963 | 77  | 9  | 4  | 26  | 0 |
| CONTIG-071966 | 90  | 6  | 3  | 13  | 0 |
| CONTIG-071967 | 439 | 15 | 14 | 213 | 2 |
| CONTIG-071968 | 106 | 3  | 2  | 12  | 0 |
| CONTIG-071969 | 160 | 8  | 16 | 36  | 0 |
| CONTIG-071970 | 153 | 8  | 16 | 30  | 0 |
| CONTIG-071973 | 137 | 75 | 72 | 317 | 4 |
| CONTIG-071974 | 137 | 8  | 5  | 18  | 0 |
| CONTIG-071975 | 58  | 10 | 3  | 21  | 0 |
| CONTIG-071976 | 282 | 15 | 19 | 137 | 4 |
| CONTIG-071978 | 460 | 15 | 27 | 239 | 2 |
| CONTIG-071979 | 187 | 5  | 6  | 16  | 0 |
| CONTIG-071980 | 79  | 5  | 0  | 6   | 0 |
| CONTIG-071981 | 231 | 7  | 7  | 75  | 0 |
| CONTIG-071982 | 197 | 7  | 24 | 17  | 2 |
| CONTIG-071983 | 67  | 8  | 5  | 3   | 0 |
| CONTIG-071984 | 93  | 4  | 6  | 8   | 0 |
| CONTIG-071985 | 129 | 7  | 4  | 25  | 0 |
| CONTIG-071986 | 232 | 5  | 6  | 16  | 0 |
| CONTIG-071987 | 175 | 6  | 0  | 23  | 2 |
| CONTIG-071988 | 138 | 11 | 12 | 49  | 2 |
| CONTIG-071990 | 96  | 7  | 13 | 14  | 0 |
| CONTIG-071991 | 207 | 5  | 3  | 17  | 0 |
| CONTIG-071992 | 215 | 9  | 15 | 54  | 0 |
| CONTIG-071993 | 96  | 12 | 31 | 8   | 0 |
| CONTIG-071994 | 115 | 19 | 6  | 84  | 0 |
| CONTIG-071995 | 185 | 13 | 8  | 107 | 0 |
| CONTIG-071997 | 97  | 22 | 0  | 0   | 0 |
| CONTIG-071998 | 50  | 20 | 3  | 17  | 0 |
| CONTIG-071999 | 131 | 13 | 2  | 67  | 2 |
| CONTIG-072001 | 318 | 8  | 4  | 89  | 0 |
| CONTIG-072002 | 142 | 9  | 7  | 42  | 0 |
| CONTIG-072003 | 117 | 5  | 12 | 12  | 0 |
| CONTIG-072004 | 58  | 4  | 11 | 2   | 0 |
| CONTIG-072005 | 88  | 10 | 0  | 42  | 0 |
| CONTIG-072006 | 66  | 6  | 4  | 12  | 0 |
| CONTIG-072007 | 141 | 7  | 0  | 16  | 0 |
| CONTIG-072008 | 267 | 6  | 2  | 58  | 0 |
| CONTIG-072009 | 104 | 12 | 3  | 30  | 0 |
| CONTIG-072011 | 141 | 5  | 10 | 10  | 0 |
| CONTIG-072012 | 106 | 5  | 2  | 17  | 0 |
| CONTIG-072013 | 88  | 31 | 22 | 20  | 0 |
| CONTIG-072014 | 242 | 7  | 19 | 52  | 0 |
| CONTIG-072015 | 157 | 8  | 2  | 18  | 0 |
| CONTIG-072017 | 886 | 27 | 87 | 887 | 2 |
| CONTIG-072018 | 163 | 11 | 2  | 75  | 0 |



|               |     |     |    |     |    |
|---------------|-----|-----|----|-----|----|
| CONTIG-072019 | 79  | 8   | 16 | 16  | 0  |
| CONTIG-072020 | 72  | 2   | 0  | 2   | 0  |
| CONTIG-072021 | 161 | 6   | 4  | 12  | 0  |
| CONTIG-072022 | 61  | 7   | 0  | 18  | 0  |
| CONTIG-072023 | 104 | 5   | 2  | 20  | 0  |
| CONTIG-072024 | 143 | 6   | 15 | 21  | 0  |
| CONTIG-072026 | 79  | 3   | 2  | 6   | 0  |
| CONTIG-072027 | 50  | 21  | 0  | 30  | 2  |
| CONTIG-072028 | 57  | 112 | 2  | 156 | 5  |
| CONTIG-072029 | 115 | 4   | 7  | 16  | 0  |
| CONTIG-072030 | 149 | 7   | 5  | 13  | 0  |
| CONTIG-072031 | 113 | 4   | 0  | 23  | 0  |
| CONTIG-072032 | 226 | 3   | 2  | 26  | 0  |
| CONTIG-072033 | 85  | 4   | 4  | 8   | 0  |
| CONTIG-072034 | 337 | 6   | 14 | 42  | 0  |
| CONTIG-072035 | 88  | 5   | 2  | 15  | 0  |
| CONTIG-072037 | 82  | 5   | 4  | 9   | 0  |
| CONTIG-072038 | 149 | 7   | 6  | 34  | 0  |
| CONTIG-072039 | 75  | 6   | 0  | 2   | 0  |
| CONTIG-072047 | 211 | 7   | 6  | 52  | 0  |
| CONTIG-072048 | 191 | 21  | 0  | 244 | 0  |
| CONTIG-072049 | 136 | 6   | 2  | 14  | 0  |
| CONTIG-072050 | 130 | 8   | 0  | 28  | 0  |
| CONTIG-072051 | 193 | 9   | 14 | 50  | 0  |
| CONTIG-072052 | 131 | 12  | 3  | 80  | 0  |
| CONTIG-072053 | 69  | 16  | 0  | 48  | 0  |
| CONTIG-072054 | 78  | 3   | 0  | 0   | 0  |
| CONTIG-072055 | 228 | 12  | 29 | 42  | 0  |
| CONTIG-072056 | 193 | 6   | 0  | 32  | 0  |
| CONTIG-072058 | 265 | 11  | 11 | 99  | 0  |
| CONTIG-072059 | 58  | 14  | 3  | 27  | 0  |
| CONTIG-072060 | 318 | 27  | 8  | 255 | 30 |
| CONTIG-072061 | 140 | 12  | 8  | 54  | 0  |
| CONTIG-072062 | 138 | 5   | 0  | 15  | 0  |
| CONTIG-072063 | 458 | 27  | 28 | 455 | 8  |
| CONTIG-072064 | 152 | 7   | 5  | 35  | 0  |
| CONTIG-072065 | 198 | 10  | 17 | 25  | 2  |
| CONTIG-072066 | 125 | 10  | 0  | 45  | 0  |
| CONTIG-072067 | 87  | 5   | 4  | 11  | 0  |
| CONTIG-072068 | 204 | 9   | 2  | 30  | 0  |
| CONTIG-072069 | 93  | 4   | 3  | 6   | 0  |
| CONTIG-072070 | 195 | 17  | 10 | 127 | 2  |
| CONTIG-072071 | 113 | 4   | 2  | 5   | 0  |
| CONTIG-072072 | 208 | 6   | 3  | 0   | 2  |
| CONTIG-072073 | 78  | 6   | 6  | 7   | 0  |
| CONTIG-072074 | 92  | 4   | 0  | 2   | 0  |
| CONTIG-072075 | 766 | 55  | 13 | 53  | 0  |

|               |     |     |    |      |     |
|---------------|-----|-----|----|------|-----|
| CONTIG-072076 | 263 | 10  | 2  | 61   | 0   |
| CONTIG-072077 | 71  | 2   | 2  | 2    | 0   |
| CONTIG-072078 | 139 | 4   | 2  | 26   | 0   |
| CONTIG-072079 | 206 | 6   | 11 | 24   | 0   |
| CONTIG-072080 | 84  | 7   | 4  | 13   | 2   |
| CONTIG-072081 | 47  | 229 | 11 | 301  | 0   |
| CONTIG-072082 | 89  | 7   | 3  | 11   | 0   |
| CONTIG-072083 | 71  | 7   | 8  | 8    | 0   |
| CONTIG-072084 | 82  | 4   | 8  | 4    | 0   |
| CONTIG-072085 | 64  | 8   | 2  | 10   | 0   |
| CONTIG-072086 | 230 | 6   | 8  | 26   | 0   |
| CONTIG-072087 | 79  | 6   | 2  | 17   | 0   |
| CONTIG-072088 | 92  | 34  | 2  | 53   | 0   |
| CONTIG-072089 | 53  | 83  | 0  | 11   | 0   |
| CONTIG-072090 | 73  | 4   | 9  | 2    | 0   |
| CONTIG-072091 | 126 | 4   | 4  | 12   | 0   |
| CONTIG-072092 | 113 | 7   | 0  | 0    | 0   |
| CONTIG-072093 | 141 | 17  | 17 | 56   | 0   |
| CONTIG-072094 | 62  | 9   | 7  | 20   | 0   |
| CONTIG-072095 | 111 | 75  | 55 | 397  | 0   |
| CONTIG-072096 | 78  | 7   | 8  | 17   | 0   |
| CONTIG-072097 | 322 | 7   | 13 | 68   | 2   |
| CONTIG-072098 | 276 | 8   | 8  | 72   | 0   |
| CONTIG-072099 | 80  | 4   | 4  | 4    | 0   |
| CONTIG-072100 | 121 | 3   | 4  | 2    | 0   |
| CONTIG-072101 | 136 | 11  | 2  | 0    | 7   |
| CONTIG-072102 | 80  | 4   | 0  | 0    | 0   |
| CONTIG-072103 | 123 | 8   | 0  | 33   | 0   |
| CONTIG-072105 | 170 | 9   | 0  | 47   | 0   |
| CONTIG-072106 | 192 | 5   | 8  | 20   | 0   |
| CONTIG-072108 | 113 | 10  | 9  | 22   | 0   |
| CONTIG-072109 | 218 | 8   | 2  | 57   | 0   |
| CONTIG-072110 | 167 | 13  | 7  | 75   | 0   |
| CONTIG-072111 | 48  | 773 | 7  | 1103 | 0   |
| CONTIG-072112 | 76  | 5   | 7  | 9    | 0   |
| CONTIG-072113 | 113 | 6   | 0  | 10   | 4   |
| CONTIG-072114 | 72  | 34  | 0  | 0    | 32  |
| CONTIG-072115 | 124 | 15  | 5  | 47   | 0   |
| CONTIG-072116 | 296 | 8   | 2  | 85   | 3   |
| CONTIG-072117 | 228 | 32  | 7  | 0    | 131 |
| CONTIG-072118 | 222 | 7   | 0  | 0    | 10  |
| CONTIG-072119 | 62  | 6   | 7  | 11   | 0   |
| CONTIG-072120 | 88  | 7   | 16 | 19   | 0   |
| CONTIG-072122 | 76  | 8   | 0  | 34   | 0   |
| CONTIG-072123 | 126 | 2   | 7  | 0    | 0   |
| CONTIG-072124 | 73  | 4   | 0  | 9    | 0   |
| CONTIG-072125 | 289 | 10  | 10 | 22   | 4   |

|               |     |    |    |     |     |
|---------------|-----|----|----|-----|-----|
| CONTIG-072126 | 396 | 6  | 5  | 56  | 0   |
| CONTIG-072127 | 271 | 10 | 4  | 72  | 0   |
| CONTIG-072128 | 67  | 35 | 3  | 53  | 20  |
| CONTIG-072129 | 79  | 7  | 13 | 11  | 0   |
| CONTIG-072130 | 91  | 3  | 0  | 6   | 0   |
| CONTIG-072131 | 201 | 15 | 12 | 120 | 2   |
| CONTIG-072132 | 75  | 8  | 2  | 23  | 0   |
| CONTIG-072133 | 140 | 5  | 0  | 0   | 0   |
| CONTIG-072134 | 143 | 16 | 20 | 91  | 2   |
| CONTIG-072135 | 125 | 5  | 6  | 25  | 0   |
| CONTIG-072136 | 70  | 8  | 6  | 18  | 0   |
| CONTIG-072137 | 62  | 8  | 6  | 21  | 0   |
| CONTIG-072138 | 64  | 3  | 3  | 3   | 0   |
| CONTIG-072139 | 122 | 12 | 6  | 54  | 3   |
| CONTIG-072146 | 77  | 2  | 2  | 0   | 0   |
| CONTIG-072147 | 123 | 5  | 9  | 7   | 0   |
| CONTIG-072148 | 157 | 11 | 9  | 40  | 2   |
| CONTIG-072149 | 130 | 6  | 2  | 19  | 0   |
| CONTIG-072150 | 61  | 4  | 2  | 2   | 0   |
| CONTIG-072151 | 124 | 5  | 9  | 8   | 0   |
| CONTIG-072155 | 140 | 8  | 5  | 40  | 2   |
| CONTIG-072156 | 131 | 6  | 2  | 31  | 0   |
| CONTIG-072157 | 117 | 4  | 5  | 6   | 0   |
| CONTIG-072158 | 249 | 7  | 4  | 70  | 0   |
| CONTIG-072161 | 116 | 4  | 3  | 5   | 0   |
| CONTIG-072162 | 163 | 6  | 6  | 27  | 0   |
| CONTIG-072163 | 374 | 16 | 13 | 188 | 4   |
| CONTIG-072164 | 63  | 2  | 3  | 2   | 0   |
| CONTIG-072165 | 49  | 22 | 14 | 34  | 0   |
| CONTIG-072166 | 136 | 6  | 2  | 16  | 0   |
| CONTIG-072167 | 119 | 8  | 2  | 19  | 0   |
| CONTIG-072168 | 103 | 6  | 10 | 21  | 2   |
| CONTIG-072170 | 148 | 4  | 6  | 26  | 0   |
| CONTIG-072171 | 310 | 12 | 13 | 144 | 0   |
| CONTIG-072172 | 228 | 10 | 0  | 68  | 0   |
| CONTIG-072173 | 208 | 9  | 15 | 72  | 0   |
| CONTIG-072174 | 115 | 4  | 2  | 18  | 0   |
| CONTIG-072177 | 84  | 63 | 2  | 318 | 0   |
| CONTIG-072178 | 347 | 7  | 10 | 62  | 4   |
| CONTIG-072179 | 117 | 16 | 34 | 33  | 0   |
| CONTIG-072180 | 187 | 7  | 2  | 46  | 0   |
| CONTIG-072181 | 117 | 6  | 11 | 12  | 0   |
| CONTIG-072182 | 119 | 19 | 4  | 61  | 3   |
| CONTIG-072183 | 75  | 4  | 7  | 2   | 0   |
| CONTIG-072184 | 503 | 63 | 3  | 0   | 228 |
| CONTIG-072185 | 61  | 3  | 4  | 2   | 0   |
| CONTIG-072186 | 142 | 15 | 9  | 30  | 0   |

|               |     |     |    |     |     |
|---------------|-----|-----|----|-----|-----|
| CONTIG-072187 | 139 | 185 | 14 | 17  | 212 |
| CONTIG-072188 | 102 | 5   | 6  | 12  | 0   |
| CONTIG-072189 | 118 | 17  | 0  | 54  | 0   |
| CONTIG-072190 | 73  | 3   | 0  | 0   | 0   |
| CONTIG-072191 | 81  | 10  | 5  | 42  | 0   |
| CONTIG-072192 | 84  | 6   | 4  | 20  | 0   |
| CONTIG-072194 | 79  | 7   | 2  | 20  | 0   |
| CONTIG-072195 | 192 | 4   | 7  | 16  | 0   |
| CONTIG-072197 | 69  | 9   | 0  | 25  | 0   |
| CONTIG-072198 | 453 | 19  | 19 | 452 | 0   |
| CONTIG-072199 | 67  | 8   | 10 | 11  | 0   |
| CONTIG-072200 | 58  | 4   | 11 | 3   | 0   |
| CONTIG-072201 | 70  | 3   | 5  | 0   | 0   |
| CONTIG-072202 | 63  | 7   | 12 | 0   | 0   |
| CONTIG-072203 | 164 | 4   | 2  | 25  | 0   |
| CONTIG-072204 | 74  | 3   | 0  | 6   | 0   |
| CONTIG-072205 | 123 | 9   | 0  | 40  | 0   |
| CONTIG-072206 | 62  | 4   | 5  | 5   | 0   |
| CONTIG-072207 | 164 | 11  | 14 | 79  | 0   |
| CONTIG-072208 | 162 | 13  | 7  | 74  | 2   |
| CONTIG-072210 | 258 | 13  | 16 | 108 | 6   |
| CONTIG-072211 | 77  | 4   | 7  | 5   | 0   |
| CONTIG-072212 | 140 | 8   | 4  | 45  | 0   |
| CONTIG-072213 | 124 | 5   | 4  | 16  | 0   |
| CONTIG-072214 | 110 | 3   | 4  | 11  | 0   |
| CONTIG-072216 | 67  | 5   | 5  | 4   | 0   |
| CONTIG-072217 | 80  | 4   | 2  | 2   | 0   |
| CONTIG-072221 | 124 | 4   | 2  | 7   | 2   |
| CONTIG-072225 | 93  | 9   | 0  | 23  | 0   |
| CONTIG-072226 | 66  | 6   | 6  | 10  | 0   |
| CONTIG-072227 | 131 | 3   | 5  | 0   | 0   |
| CONTIG-072228 | 77  | 3   | 2  | 5   | 0   |
| CONTIG-072229 | 63  | 4   | 0  | 4   | 0   |
| CONTIG-072230 | 201 | 7   | 0  | 28  | 0   |
| CONTIG-072232 | 127 | 10  | 4  | 27  | 0   |
| CONTIG-072233 | 156 | 9   | 5  | 38  | 0   |
| CONTIG-072234 | 165 | 9   | 17 | 18  | 4   |
| CONTIG-072235 | 94  | 3   | 0  | 5   | 0   |
| CONTIG-072236 | 73  | 5   | 4  | 8   | 0   |
| CONTIG-072238 | 150 | 5   | 13 | 26  | 0   |
| CONTIG-072239 | 116 | 8   | 2  | 44  | 0   |
| CONTIG-072240 | 79  | 7   | 3  | 0   | 0   |
| CONTIG-072241 | 175 | 7   | 8  | 21  | 0   |
| CONTIG-072243 | 356 | 8   | 2  | 75  | 2   |
| CONTIG-072244 | 114 | 4   | 2  | 15  | 0   |
| CONTIG-072245 | 67  | 3   | 2  | 0   | 0   |
| CONTIG-072246 | 162 | 8   | 10 | 7   | 0   |

|               |     |     |    |     |     |
|---------------|-----|-----|----|-----|-----|
| CONTIG-072247 | 56  | 32  | 22 | 82  | 0   |
| CONTIG-072248 | 117 | 3   | 0  | 0   | 0   |
| CONTIG-072249 | 653 | 15  | 4  | 280 | 2   |
| CONTIG-072252 | 214 | 6   | 8  | 59  | 0   |
| CONTIG-072253 | 55  | 27  | 64 | 9   | 0   |
| CONTIG-072254 | 236 | 4   | 4  | 23  | 0   |
| CONTIG-072255 | 140 | 12  | 7  | 25  | 0   |
| CONTIG-072256 | 61  | 4   | 4  | 8   | 0   |
| CONTIG-072257 | 115 | 8   | 6  | 28  | 0   |
| CONTIG-072258 | 91  | 31  | 14 | 95  | 0   |
| CONTIG-072259 | 140 | 7   | 6  | 23  | 0   |
| CONTIG-072260 | 104 | 7   | 0  | 19  | 0   |
| CONTIG-072261 | 411 | 9   | 27 | 132 | 0   |
| CONTIG-072262 | 64  | 4   | 5  | 5   | 0   |
| CONTIG-072263 | 265 | 16  | 23 | 214 | 0   |
| CONTIG-072264 | 141 | 7   | 2  | 16  | 0   |
| CONTIG-072265 | 151 | 3   | 7  | 9   | 0   |
| CONTIG-072268 | 119 | 7   | 0  | 20  | 0   |
| CONTIG-072269 | 118 | 38  | 4  | 161 | 8   |
| CONTIG-072270 | 194 | 5   | 4  | 30  | 0   |
| CONTIG-072271 | 86  | 6   | 8  | 3   | 0   |
| CONTIG-072273 | 163 | 20  | 8  | 124 | 2   |
| CONTIG-072274 | 69  | 2   | 2  | 4   | 0   |
| CONTIG-072279 | 166 | 7   | 15 | 14  | 0   |
| CONTIG-072280 | 53  | 35  | 0  | 0   | 0   |
| CONTIG-072281 | 191 | 7   | 12 | 40  | 0   |
| CONTIG-072282 | 75  | 7   | 0  | 20  | 0   |
| CONTIG-072283 | 133 | 11  | 16 | 24  | 2   |
| CONTIG-072284 | 51  | 6   | 2  | 7   | 0   |
| CONTIG-072285 | 61  | 248 | 2  | 7   | 0   |
| CONTIG-072286 | 712 | 20  | 2  | 0   | 60  |
| CONTIG-072287 | 93  | 4   | 10 | 8   | 0   |
| CONTIG-072288 | 213 | 6   | 3  | 27  | 2   |
| CONTIG-072289 | 187 | 12  | 12 | 36  | 0   |
| CONTIG-072290 | 150 | 16  | 12 | 88  | 0   |
| CONTIG-072291 | 59  | 2   | 0  | 0   | 0   |
| CONTIG-072293 | 289 | 7   | 24 | 55  | 0   |
| CONTIG-072294 | 215 | 272 | 3  | 0   | 676 |
| CONTIG-072295 | 100 | 8   | 18 | 16  | 0   |
| CONTIG-072296 | 72  | 7   | 0  | 12  | 0   |
| CONTIG-072298 | 204 | 5   | 12 | 4   | 2   |
| CONTIG-072299 | 180 | 15  | 15 | 32  | 0   |
| CONTIG-072300 | 75  | 7   | 12 | 9   | 0   |
| CONTIG-072301 | 93  | 5   | 2  | 10  | 0   |
| CONTIG-072302 | 268 | 8   | 2  | 50  | 0   |
| CONTIG-072303 | 159 | 5   | 5  | 14  | 0   |
| CONTIG-072304 | 149 | 12  | 4  | 99  | 0   |

|               |     |    |    |     |     |
|---------------|-----|----|----|-----|-----|
| CONTIG-072305 | 131 | 5  | 2  | 7   | 0   |
| CONTIG-072306 | 78  | 7  | 0  | 4   | 0   |
| CONTIG-072307 | 85  | 6  | 2  | 2   | 0   |
| CONTIG-072312 | 408 | 14 | 36 | 82  | 6   |
| CONTIG-072313 | 237 | 5  | 0  | 0   | 0   |
| CONTIG-072314 | 153 | 10 | 12 | 18  | 0   |
| CONTIG-072315 | 105 | 6  | 2  | 22  | 0   |
| CONTIG-072316 | 110 | 16 | 7  | 13  | 0   |
| CONTIG-072317 | 85  | 5  | 7  | 15  | 0   |
| CONTIG-072318 | 273 | 8  | 5  | 7   | 0   |
| CONTIG-072320 | 235 | 7  | 15 | 40  | 2   |
| CONTIG-072321 | 60  | 4  | 0  | 4   | 0   |
| CONTIG-072322 | 187 | 6  | 0  | 4   | 0   |
| CONTIG-072323 | 107 | 7  | 8  | 12  | 0   |
| CONTIG-072324 | 92  | 5  | 5  | 8   | 0   |
| CONTIG-072326 | 226 | 8  | 2  | 49  | 0   |
| CONTIG-072327 | 65  | 5  | 4  | 7   | 0   |
| CONTIG-072334 | 250 | 7  | 3  | 31  | 0   |
| CONTIG-072335 | 119 | 4  | 3  | 5   | 0   |
| CONTIG-072336 | 160 | 4  | 2  | 0   | 9   |
| CONTIG-072337 | 316 | 5  | 5  | 32  | 2   |
| CONTIG-072338 | 232 | 15 | 29 | 107 | 0   |
| CONTIG-072340 | 122 | 14 | 11 | 29  | 0   |
| CONTIG-072341 | 156 | 7  | 2  | 36  | 0   |
| CONTIG-072342 | 62  | 3  | 2  | 0   | 0   |
| CONTIG-072343 | 66  | 11 | 10 | 10  | 0   |
| CONTIG-072344 | 80  | 14 | 6  | 37  | 0   |
| CONTIG-072345 | 226 | 12 | 2  | 129 | 0   |
| CONTIG-072346 | 130 | 44 | 30 | 314 | 0   |
| CONTIG-072347 | 60  | 8  | 7  | 14  | 0   |
| CONTIG-072348 | 254 | 9  | 3  | 68  | 0   |
| CONTIG-072349 | 122 | 10 | 6  | 51  | 0   |
| CONTIG-072350 | 148 | 17 | 40 | 4   | 0   |
| CONTIG-072351 | 69  | 3  | 4  | 7   | 0   |
| CONTIG-072353 | 179 | 7  | 4  | 23  | 0   |
| CONTIG-072356 | 524 | 24 | 0  | 0   | 91  |
| CONTIG-072357 | 117 | 70 | 8  | 308 | 0   |
| CONTIG-072358 | 283 | 20 | 2  | 121 | 7   |
| CONTIG-072359 | 68  | 9  | 2  | 13  | 0   |
| CONTIG-072360 | 537 | 43 | 4  | 0   | 233 |
| CONTIG-072361 | 125 | 11 | 3  | 43  | 0   |
| CONTIG-072362 | 81  | 5  | 3  | 16  | 0   |
| CONTIG-072364 | 165 | 6  | 0  | 21  | 2   |
| CONTIG-072365 | 128 | 21 | 4  | 131 | 0   |
| CONTIG-072366 | 90  | 6  | 0  | 18  | 0   |
| CONTIG-072367 | 58  | 6  | 6  | 3   | 0   |
| CONTIG-072368 | 59  | 5  | 6  | 0   | 0   |

|               |     |    |    |     |   |
|---------------|-----|----|----|-----|---|
| CONTIG-072369 | 165 | 12 | 15 | 23  | 0 |
| CONTIG-072371 | 194 | 7  | 8  | 48  | 0 |
| CONTIG-072373 | 59  | 6  | 0  | 3   | 0 |
| CONTIG-072374 | 195 | 6  | 11 | 21  | 0 |
| CONTIG-072375 | 170 | 11 | 4  | 61  | 0 |
| CONTIG-072376 | 126 | 9  | 3  | 26  | 0 |
| CONTIG-072377 | 104 | 24 | 12 | 97  | 0 |
| CONTIG-072378 | 67  | 5  | 7  | 5   | 0 |
| CONTIG-072379 | 109 | 7  | 7  | 7   | 0 |
| CONTIG-072380 | 80  | 13 | 8  | 24  | 0 |
| CONTIG-072381 | 76  | 5  | 2  | 13  | 0 |
| CONTIG-072383 | 87  | 4  | 22 | 2   | 0 |
| CONTIG-072386 | 195 | 10 | 3  | 71  | 0 |
| CONTIG-072387 | 187 | 6  | 6  | 12  | 0 |
| CONTIG-072391 | 72  | 4  | 3  | 0   | 2 |
| CONTIG-072393 | 86  | 5  | 17 | 4   | 0 |
| CONTIG-072395 | 76  | 3  | 2  | 4   | 0 |
| CONTIG-072396 | 435 | 19 | 5  | 444 | 0 |
| CONTIG-072397 | 111 | 6  | 3  | 14  | 0 |
| CONTIG-072398 | 67  | 11 | 2  | 23  | 0 |
| CONTIG-072399 | 72  | 6  | 11 | 6   | 0 |
| CONTIG-072400 | 95  | 3  | 2  | 9   | 0 |
| CONTIG-072401 | 159 | 7  | 6  | 36  | 0 |
| CONTIG-072402 | 90  | 9  | 16 | 31  | 0 |
| CONTIG-072406 | 261 | 6  | 12 | 33  | 0 |
| CONTIG-072407 | 263 | 12 | 10 | 116 | 0 |
| CONTIG-072408 | 63  | 6  | 0  | 13  | 0 |
| CONTIG-072409 | 355 | 13 | 3  | 59  | 0 |
| CONTIG-072410 | 92  | 6  | 0  | 15  | 0 |
| CONTIG-072411 | 71  | 7  | 3  | 25  | 0 |
| CONTIG-072412 | 204 | 6  | 4  | 24  | 0 |
| CONTIG-072413 | 291 | 14 | 10 | 109 | 0 |
| CONTIG-072414 | 69  | 18 | 2  | 69  | 0 |
| CONTIG-072415 | 66  | 7  | 6  | 16  | 0 |
| CONTIG-072416 | 81  | 3  | 0  | 0   | 2 |
| CONTIG-072417 | 69  | 4  | 6  | 5   | 0 |
| CONTIG-072419 | 60  | 7  | 2  | 7   | 0 |
| CONTIG-072420 | 174 | 6  | 16 | 34  | 0 |
| CONTIG-072421 | 69  | 7  | 3  | 14  | 0 |
| CONTIG-072422 | 98  | 8  | 4  | 25  | 0 |
| CONTIG-072424 | 216 | 8  | 6  | 47  | 0 |
| CONTIG-072425 | 207 | 15 | 4  | 118 | 0 |
| CONTIG-072426 | 72  | 11 | 3  | 26  | 0 |
| CONTIG-072427 | 144 | 7  | 0  | 42  | 0 |
| CONTIG-072428 | 445 | 11 | 18 | 193 | 0 |
| CONTIG-072429 | 287 | 6  | 0  | 24  | 0 |
| CONTIG-072431 | 86  | 10 | 25 | 8   | 0 |

|               |     |     |    |     |   |
|---------------|-----|-----|----|-----|---|
| CONTIG-072432 | 152 | 4   | 2  | 17  | 0 |
| CONTIG-072434 | 75  | 7   | 3  | 0   | 0 |
| CONTIG-072435 | 67  | 3   | 3  | 2   | 0 |
| CONTIG-072436 | 84  | 7   | 0  | 17  | 0 |
| CONTIG-072437 | 68  | 8   | 0  | 5   | 0 |
| CONTIG-072438 | 347 | 10  | 27 | 94  | 0 |
| CONTIG-072439 | 75  | 5   | 0  | 14  | 0 |
| CONTIG-072440 | 104 | 6   | 15 | 0   | 0 |
| CONTIG-072441 | 130 | 7   | 9  | 19  | 0 |
| CONTIG-072443 | 82  | 6   | 3  | 17  | 0 |
| CONTIG-072444 | 84  | 6   | 2  | 12  | 0 |
| CONTIG-072445 | 107 | 6   | 3  | 22  | 0 |
| CONTIG-072446 | 168 | 4   | 7  | 7   | 0 |
| CONTIG-072447 | 69  | 10  | 13 | 2   | 0 |
| CONTIG-072448 | 145 | 19  | 15 | 109 | 0 |
| CONTIG-072449 | 270 | 14  | 7  | 32  | 0 |
| CONTIG-072450 | 89  | 4   | 8  | 2   | 0 |
| CONTIG-072451 | 111 | 9   | 10 | 11  | 0 |
| CONTIG-072452 | 108 | 6   | 0  | 17  | 0 |
| CONTIG-072453 | 299 | 11  | 19 | 83  | 0 |
| CONTIG-072454 | 90  | 12  | 3  | 43  | 0 |
| CONTIG-072455 | 65  | 4   | 10 | 0   | 0 |
| CONTIG-072456 | 270 | 9   | 3  | 60  | 2 |
| CONTIG-072457 | 131 | 4   | 4  | 12  | 0 |
| CONTIG-072458 | 144 | 6   | 3  | 22  | 0 |
| CONTIG-072459 | 439 | 6   | 10 | 55  | 0 |
| CONTIG-072460 | 129 | 6   | 12 | 33  | 0 |
| CONTIG-072461 | 84  | 5   | 3  | 6   | 0 |
| CONTIG-072462 | 52  | 150 | 8  | 147 | 7 |
| CONTIG-072463 | 134 | 25  | 13 | 72  | 3 |
| CONTIG-072465 | 89  | 4   | 0  | 6   | 0 |
| CONTIG-072466 | 211 | 7   | 12 | 16  | 0 |
| CONTIG-072467 | 84  | 4   | 11 | 0   | 0 |
| CONTIG-072468 | 82  | 4   | 29 | 2   | 0 |
| CONTIG-072469 | 280 | 14  | 19 | 115 | 0 |
| CONTIG-072470 | 180 | 8   | 8  | 24  | 0 |
| CONTIG-072471 | 138 | 5   | 2  | 14  | 0 |
| CONTIG-072472 | 107 | 7   | 0  | 13  | 0 |
| CONTIG-072473 | 150 | 5   | 5  | 27  | 0 |
| CONTIG-072474 | 149 | 11  | 2  | 40  | 0 |
| CONTIG-072475 | 157 | 26  | 0  | 249 | 0 |
| CONTIG-072476 | 81  | 4   | 0  | 6   | 0 |
| CONTIG-072477 | 283 | 7   | 14 | 30  | 0 |
| CONTIG-072478 | 167 | 5   | 5  | 31  | 0 |
| CONTIG-072479 | 627 | 13  | 10 | 18  | 0 |
| CONTIG-072480 | 132 | 6   | 5  | 22  | 0 |
| CONTIG-072481 | 521 | 15  | 20 | 437 | 0 |



|               |     |    |    |     |   |
|---------------|-----|----|----|-----|---|
| CONTIG-072482 | 320 | 39 | 13 | 200 | 2 |
| CONTIG-072483 | 140 | 6  | 2  | 22  | 0 |
| CONTIG-072484 | 154 | 5  | 3  | 7   | 2 |
| CONTIG-072485 | 190 | 15 | 18 | 25  | 0 |
| CONTIG-072486 | 115 | 4  | 2  | 0   | 2 |
| CONTIG-072488 | 556 | 10 | 8  | 138 | 0 |
| CONTIG-072489 | 60  | 4  | 6  | 7   | 0 |
| CONTIG-072490 | 262 | 7  | 11 | 47  | 4 |
| CONTIG-072491 | 185 | 8  | 12 | 57  | 0 |
| CONTIG-072492 | 151 | 8  | 39 | 40  | 0 |
| CONTIG-072493 | 75  | 7  | 0  | 29  | 0 |
| CONTIG-072494 | 75  | 15 | 4  | 33  | 0 |
| CONTIG-072495 | 117 | 9  | 10 | 31  | 2 |
| CONTIG-072496 | 107 | 6  | 2  | 18  | 0 |
| CONTIG-072497 | 352 | 9  | 3  | 105 | 0 |
| CONTIG-072498 | 98  | 5  | 4  | 10  | 0 |
| CONTIG-072499 | 60  | 4  | 9  | 0   | 0 |
| CONTIG-072500 | 66  | 5  | 4  | 3   | 0 |
| CONTIG-072501 | 94  | 4  | 11 | 8   | 0 |
| CONTIG-072502 | 60  | 12 | 5  | 18  | 0 |
| CONTIG-072504 | 62  | 5  | 5  | 0   | 2 |
| CONTIG-072506 | 115 | 4  | 0  | 7   | 0 |
| CONTIG-072507 | 143 | 19 | 28 | 53  | 2 |
| CONTIG-072508 | 89  | 5  | 0  | 7   | 0 |
| CONTIG-072509 | 66  | 5  | 5  | 7   | 0 |
| CONTIG-072510 | 195 | 15 | 3  | 116 | 0 |
| CONTIG-072511 | 59  | 4  | 2  | 0   | 0 |
| CONTIG-072512 | 106 | 6  | 6  | 8   | 0 |
| CONTIG-072513 | 157 | 5  | 7  | 21  | 4 |
| CONTIG-072514 | 62  | 6  | 0  | 15  | 0 |
| CONTIG-072515 | 62  | 10 | 2  | 13  | 2 |
| CONTIG-072516 | 97  | 7  | 0  | 21  | 0 |
| CONTIG-072517 | 63  | 25 | 9  | 66  | 0 |
| CONTIG-072518 | 71  | 15 | 3  | 29  | 0 |
| CONTIG-072519 | 58  | 5  | 0  | 2   | 0 |
| CONTIG-072520 | 108 | 10 | 14 | 4   | 0 |
| CONTIG-072521 | 121 | 23 | 0  | 0   | 0 |
| CONTIG-072523 | 60  | 5  | 8  | 6   | 0 |
| CONTIG-072526 | 211 | 8  | 10 | 8   | 0 |
| CONTIG-072527 | 58  | 10 | 0  | 25  | 0 |
| CONTIG-072528 | 100 | 12 | 2  | 58  | 2 |
| CONTIG-072529 | 101 | 7  | 4  | 20  | 0 |
| CONTIG-072530 | 95  | 8  | 5  | 23  | 0 |
| CONTIG-072531 | 210 | 5  | 8  | 16  | 0 |
| CONTIG-072532 | 62  | 4  | 3  | 7   | 0 |
| CONTIG-072533 | 135 | 11 | 4  | 34  | 0 |
| CONTIG-072534 | 194 | 7  | 9  | 25  | 0 |

|               |     |    |    |     |    |
|---------------|-----|----|----|-----|----|
| CONTIG-072535 | 277 | 10 | 23 | 58  | 0  |
| CONTIG-072537 | 335 | 11 | 4  | 152 | 0  |
| CONTIG-072538 | 99  | 14 | 0  | 52  | 0  |
| CONTIG-072539 | 136 | 3  | 4  | 6   | 0  |
| CONTIG-072540 | 226 | 6  | 4  | 5   | 0  |
| CONTIG-072541 | 46  | 21 | 6  | 38  | 0  |
| CONTIG-072542 | 415 | 10 | 31 | 216 | 0  |
| CONTIG-072544 | 380 | 11 | 19 | 195 | 0  |
| CONTIG-072545 | 61  | 41 | 3  | 14  | 0  |
| CONTIG-072546 | 226 | 8  | 2  | 18  | 0  |
| CONTIG-072547 | 69  | 11 | 17 | 10  | 0  |
| CONTIG-072548 | 297 | 11 | 0  | 0   | 25 |
| CONTIG-072549 | 96  | 7  | 9  | 17  | 0  |
| CONTIG-072550 | 264 | 12 | 11 | 110 | 5  |
| CONTIG-072551 | 76  | 3  | 2  | 2   | 0  |
| CONTIG-072552 | 80  | 5  | 6  | 9   | 0  |
| CONTIG-072553 | 78  | 3  | 2  | 6   | 0  |
| CONTIG-072554 | 99  | 26 | 0  | 78  | 5  |
| CONTIG-072555 | 130 | 8  | 2  | 16  | 0  |
| CONTIG-072556 | 61  | 8  | 4  | 10  | 0  |
| CONTIG-072557 | 64  | 5  | 0  | 10  | 0  |
| CONTIG-072558 | 93  | 5  | 3  | 14  | 0  |
| CONTIG-072559 | 59  | 8  | 11 | 11  | 0  |
| CONTIG-072560 | 189 | 6  | 21 | 28  | 0  |
| CONTIG-072561 | 76  | 3  | 3  | 7   | 0  |
| CONTIG-072562 | 100 | 6  | 0  | 23  | 0  |
| CONTIG-072563 | 126 | 7  | 0  | 22  | 0  |
| CONTIG-072564 | 171 | 10 | 2  | 37  | 0  |
| CONTIG-072565 | 37  | 18 | 0  | 5   | 0  |
| CONTIG-072566 | 140 | 6  | 13 | 33  | 0  |
| CONTIG-072567 | 535 | 7  | 7  | 89  | 2  |
| CONTIG-072568 | 148 | 6  | 2  | 44  | 0  |
| CONTIG-072569 | 67  | 5  | 9  | 5   | 0  |
| CONTIG-072570 | 286 | 14 | 14 | 167 | 4  |
| CONTIG-072571 | 339 | 12 | 17 | 155 | 0  |
| CONTIG-072572 | 127 | 8  | 4  | 36  | 0  |
| CONTIG-072573 | 76  | 6  | 7  | 6   | 0  |
| CONTIG-072574 | 103 | 10 | 17 | 34  | 0  |
| CONTIG-072575 | 132 | 8  | 4  | 17  | 0  |
| CONTIG-072576 | 60  | 4  | 2  | 5   | 0  |
| CONTIG-072577 | 177 | 8  | 9  | 39  | 0  |
| CONTIG-072579 | 59  | 53 | 8  | 149 | 0  |
| CONTIG-072580 | 60  | 4  | 0  | 7   | 0  |
| CONTIG-072582 | 86  | 18 | 13 | 65  | 0  |
| CONTIG-072583 | 119 | 6  | 0  | 14  | 0  |
| CONTIG-072584 | 265 | 11 | 3  | 116 | 0  |
| CONTIG-072585 | 240 | 8  | 0  | 17  | 0  |

|               |     |      |    |     |     |
|---------------|-----|------|----|-----|-----|
| CONTIG-072586 | 443 | 42   | 6  | 0   | 390 |
| CONTIG-072587 | 75  | 6    | 0  | 16  | 0   |
| CONTIG-072588 | 108 | 5    | 7  | 22  | 0   |
| CONTIG-072590 | 68  | 7    | 0  | 21  | 0   |
| CONTIG-072591 | 320 | 10   | 17 | 57  | 0   |
| CONTIG-072592 | 328 | 8    | 10 | 78  | 0   |
| CONTIG-072593 | 172 | 5    | 0  | 29  | 0   |
| CONTIG-072594 | 235 | 14   | 14 | 41  | 0   |
| CONTIG-072595 | 196 | 7    | 21 | 57  | 0   |
| CONTIG-072596 | 122 | 8    | 7  | 25  | 0   |
| CONTIG-072597 | 45  | 1382 | 0  | 0   | 19  |
| CONTIG-072599 | 414 | 6    | 9  | 76  | 0   |
| CONTIG-072600 | 266 | 30   | 11 | 0   | 0   |
| CONTIG-072601 | 71  | 4    | 0  | 11  | 0   |
| CONTIG-072604 | 64  | 4    | 0  | 2   | 0   |
| CONTIG-072605 | 274 | 10   | 19 | 75  | 0   |
| CONTIG-072606 | 199 | 25   | 6  | 108 | 0   |
| CONTIG-072607 | 171 | 10   | 7  | 40  | 2   |
| CONTIG-072611 | 114 | 5    | 3  | 16  | 0   |
| CONTIG-072612 | 61  | 13   | 31 | 2   | 0   |
| CONTIG-072613 | 68  | 4    | 0  | 14  | 0   |
| CONTIG-072615 | 266 | 6    | 13 | 31  | 0   |
| CONTIG-072619 | 66  | 5    | 0  | 0   | 0   |
| CONTIG-072620 | 183 | 19   | 12 | 60  | 2   |
| CONTIG-072621 | 73  | 4    | 2  | 0   | 0   |
| CONTIG-072622 | 101 | 14   | 20 | 49  | 0   |
| CONTIG-072623 | 94  | 7    | 0  | 30  | 0   |
| CONTIG-072624 | 123 | 5    | 3  | 12  | 0   |
| CONTIG-072625 | 58  | 3    | 5  | 0   | 0   |
| CONTIG-072626 | 104 | 4    | 3  | 4   | 0   |
| CONTIG-072628 | 133 | 8    | 2  | 41  | 0   |
| CONTIG-072629 | 121 | 11   | 6  | 4   | 0   |
| CONTIG-072630 | 148 | 5    | 2  | 15  | 0   |
| CONTIG-072633 | 125 | 12   | 17 | 28  | 0   |
| CONTIG-072634 | 179 | 7    | 2  | 39  | 0   |
| CONTIG-072635 | 69  | 8    | 0  | 22  | 0   |
| CONTIG-072636 | 58  | 15   | 18 | 26  | 0   |
| CONTIG-072637 | 104 | 6    | 5  | 22  | 0   |
| CONTIG-072638 | 94  | 10   | 2  | 19  | 0   |
| CONTIG-072639 | 60  | 3    | 0  | 4   | 0   |
| CONTIG-072640 | 69  | 9    | 7  | 24  | 0   |
| CONTIG-072642 | 132 | 7    | 2  | 27  | 0   |
| CONTIG-072643 | 352 | 21   | 7  | 224 | 2   |
| CONTIG-072645 | 174 | 5    | 0  | 26  | 0   |
| CONTIG-072646 | 169 | 12   | 7  | 39  | 2   |
| CONTIG-072647 | 67  | 3    | 0  | 0   | 0   |
| CONTIG-072648 | 141 | 11   | 11 | 50  | 0   |

|               |     |      |    |     |     |
|---------------|-----|------|----|-----|-----|
| CONTIG-072649 | 103 | 3    | 5  | 0   | 0   |
| CONTIG-072650 | 109 | 8    | 6  | 19  | 2   |
| CONTIG-072651 | 225 | 9    | 7  | 66  | 0   |
| CONTIG-072652 | 164 | 9    | 0  | 60  | 0   |
| CONTIG-072653 | 157 | 7    | 21 | 27  | 0   |
| CONTIG-072654 | 135 | 6    | 0  | 24  | 0   |
| CONTIG-072655 | 71  | 9    | 13 | 10  | 0   |
| CONTIG-072656 | 72  | 14   | 10 | 26  | 0   |
| CONTIG-072659 | 189 | 8    | 0  | 50  | 2   |
| CONTIG-072662 | 47  | 22   | 10 | 20  | 0   |
| CONTIG-072663 | 73  | 4    | 4  | 10  | 0   |
| CONTIG-072664 | 90  | 3    | 3  | 4   | 0   |
| CONTIG-072665 | 200 | 9    | 10 | 37  | 0   |
| CONTIG-072666 | 543 | 10   | 13 | 205 | 2   |
| CONTIG-072667 | 176 | 7    | 13 | 35  | 0   |
| CONTIG-072668 | 62  | 6    | 8  | 6   | 0   |
| CONTIG-072669 | 241 | 13   | 2  | 62  | 0   |
| CONTIG-072670 | 130 | 3    | 2  | 10  | 0   |
| CONTIG-072671 | 113 | 6    | 0  | 27  | 0   |
| CONTIG-072672 | 80  | 12   | 0  | 20  | 0   |
| CONTIG-072674 | 177 | 7    | 2  | 34  | 0   |
| CONTIG-072675 | 179 | 6    | 5  | 31  | 0   |
| CONTIG-072676 | 70  | 4    | 5  | 0   | 0   |
| CONTIG-072677 | 99  | 6    | 13 | 18  | 0   |
| CONTIG-072679 | 261 | 9    | 7  | 64  | 0   |
| CONTIG-072680 | 63  | 9    | 6  | 16  | 0   |
| CONTIG-072681 | 66  | 9    | 4  | 18  | 0   |
| CONTIG-072682 | 65  | 11   | 2  | 40  | 0   |
| CONTIG-072683 | 96  | 6    | 2  | 4   | 2   |
| CONTIG-072684 | 108 | 21   | 4  | 69  | 2   |
| CONTIG-072685 | 77  | 4    | 16 | 0   | 0   |
| CONTIG-072686 | 85  | 11   | 17 | 9   | 0   |
| CONTIG-072687 | 143 | 5    | 8  | 30  | 0   |
| CONTIG-072688 | 116 | 8    | 6  | 28  | 0   |
| CONTIG-072689 | 36  | 1372 | 4  | 0   | 777 |
| CONTIG-072690 | 204 | 5    | 16 | 26  | 0   |
| CONTIG-072691 | 135 | 7    | 2  | 19  | 0   |
| CONTIG-072693 | 122 | 6    | 5  | 13  | 0   |
| CONTIG-072694 | 76  | 3    | 3  | 6   | 0   |
| CONTIG-072696 | 95  | 7    | 0  | 16  | 0   |
| CONTIG-072697 | 99  | 13   | 6  | 59  | 0   |
| CONTIG-072698 | 155 | 7    | 21 | 14  | 0   |
| CONTIG-072699 | 455 | 41   | 2  | 508 | 102 |
| CONTIG-072700 | 145 | 5    | 10 | 30  | 0   |
| CONTIG-072703 | 136 | 9    | 36 | 19  | 0   |
| CONTIG-072704 | 120 | 11   | 26 | 32  | 0   |
| CONTIG-072705 | 128 | 6    | 9  | 27  | 0   |

|               |     |     |    |     |   |
|---------------|-----|-----|----|-----|---|
| CONTIG-072706 | 80  | 4   | 4  | 4   | 0 |
| CONTIG-072707 | 81  | 8   | 11 | 4   | 0 |
| CONTIG-072708 | 131 | 8   | 8  | 38  | 0 |
| CONTIG-072709 | 73  | 9   | 5  | 9   | 0 |
| CONTIG-072710 | 221 | 14  | 10 | 108 | 0 |
| CONTIG-072712 | 114 | 9   | 9  | 9   | 0 |
| CONTIG-072713 | 147 | 10  | 11 | 37  | 0 |
| CONTIG-072714 | 71  | 5   | 3  | 12  | 0 |
| CONTIG-072715 | 89  | 5   | 2  | 12  | 0 |
| CONTIG-072718 | 162 | 7   | 13 | 19  | 0 |
| CONTIG-072719 | 122 | 10  | 5  | 8   | 0 |
| CONTIG-072720 | 140 | 25  | 19 | 85  | 0 |
| CONTIG-072721 | 60  | 6   | 0  | 3   | 0 |
| CONTIG-072723 | 72  | 7   | 8  | 5   | 0 |
| CONTIG-072724 | 231 | 11  | 30 | 68  | 2 |
| CONTIG-072725 | 64  | 3   | 2  | 2   | 0 |
| CONTIG-072726 | 754 | 9   | 16 | 174 | 2 |
| CONTIG-072727 | 72  | 2   | 0  | 0   | 0 |
| CONTIG-072728 | 133 | 9   | 0  | 52  | 0 |
| CONTIG-072729 | 39  | 264 | 4  | 510 | 2 |
| CONTIG-072730 | 125 | 4   | 0  | 13  | 0 |
| CONTIG-072731 | 77  | 4   | 0  | 7   | 0 |
| CONTIG-072733 | 138 | 6   | 10 | 23  | 0 |
| CONTIG-072734 | 87  | 2   | 0  | 0   | 0 |
| CONTIG-072735 | 124 | 9   | 38 | 10  | 0 |
| CONTIG-072736 | 60  | 9   | 0  | 19  | 0 |
| CONTIG-072738 | 108 | 4   | 3  | 18  | 0 |
| CONTIG-072739 | 81  | 6   | 4  | 4   | 0 |
| CONTIG-072740 | 130 | 8   | 9  | 36  | 0 |
| CONTIG-072741 | 59  | 3   | 0  | 4   | 0 |
| CONTIG-072742 | 634 | 8   | 8  | 55  | 0 |
| CONTIG-072743 | 162 | 27  | 13 | 69  | 4 |
| CONTIG-072745 | 120 | 7   | 8  | 11  | 0 |
| CONTIG-072746 | 99  | 13  | 3  | 42  | 0 |
| CONTIG-072747 | 437 | 16  | 12 | 299 | 0 |
| CONTIG-072748 | 133 | 12  | 4  | 37  | 2 |
| CONTIG-072749 | 60  | 9   | 7  | 0   | 0 |
| CONTIG-072750 | 58  | 6   | 7  | 0   | 0 |
| CONTIG-072751 | 159 | 5   | 5  | 11  | 0 |
| CONTIG-072752 | 65  | 3   | 2  | 6   | 0 |
| CONTIG-072753 | 236 | 7   | 14 | 82  | 0 |
| CONTIG-072754 | 122 | 10  | 17 | 13  | 0 |
| CONTIG-072758 | 115 | 4   | 6  | 5   | 0 |
| CONTIG-072759 | 100 | 5   | 16 | 5   | 0 |
| CONTIG-072760 | 51  | 45  | 21 | 80  | 0 |
| CONTIG-072763 | 215 | 7   | 7  | 46  | 0 |
| CONTIG-072764 | 62  | 8   | 9  | 12  | 0 |

|               |     |     |    |     |    |
|---------------|-----|-----|----|-----|----|
| CONTIG-072765 | 310 | 15  | 7  | 168 | 0  |
| CONTIG-072766 | 119 | 4   | 10 | 12  | 0  |
| CONTIG-072768 | 122 | 10  | 2  | 43  | 0  |
| CONTIG-072769 | 102 | 7   | 6  | 13  | 0  |
| CONTIG-072770 | 58  | 15  | 8  | 33  | 0  |
| CONTIG-072771 | 71  | 9   | 3  | 18  | 0  |
| CONTIG-072774 | 94  | 6   | 8  | 14  | 0  |
| CONTIG-072775 | 69  | 5   | 0  | 6   | 0  |
| CONTIG-072776 | 249 | 5   | 7  | 25  | 0  |
| CONTIG-072777 | 43  | 11  | 0  | 9   | 0  |
| CONTIG-072778 | 69  | 6   | 17 | 0   | 0  |
| CONTIG-072779 | 82  | 5   | 6  | 5   | 0  |
| CONTIG-072780 | 97  | 3   | 0  | 12  | 0  |
| CONTIG-072781 | 128 | 6   | 2  | 14  | 0  |
| CONTIG-072782 | 166 | 5   | 4  | 20  | 0  |
| CONTIG-072783 | 103 | 6   | 5  | 20  | 0  |
| CONTIG-072786 | 61  | 3   | 2  | 6   | 0  |
| CONTIG-072787 | 123 | 8   | 2  | 29  | 0  |
| CONTIG-072789 | 915 | 37  | 0  | 0   | 6  |
| CONTIG-072790 | 464 | 20  | 31 | 295 | 0  |
| CONTIG-072792 | 228 | 5   | 0  | 45  | 0  |
| CONTIG-072793 | 65  | 9   | 12 | 8   | 0  |
| CONTIG-072794 | 115 | 10  | 0  | 49  | 0  |
| CONTIG-072795 | 162 | 7   | 6  | 47  | 0  |
| CONTIG-072796 | 87  | 3   | 3  | 6   | 0  |
| CONTIG-072801 | 149 | 11  | 5  | 23  | 2  |
| CONTIG-072802 | 90  | 4   | 0  | 4   | 0  |
| CONTIG-072803 | 69  | 11  | 14 | 18  | 0  |
| CONTIG-072804 | 70  | 6   | 10 | 2   | 0  |
| CONTIG-072805 | 66  | 138 | 6  | 104 | 2  |
| CONTIG-072806 | 80  | 5   | 0  | 11  | 0  |
| CONTIG-072807 | 123 | 8   | 9  | 29  | 0  |
| CONTIG-072808 | 100 | 8   | 3  | 18  | 0  |
| CONTIG-072810 | 124 | 4   | 3  | 17  | 0  |
| CONTIG-072812 | 241 | 15  | 14 | 80  | 2  |
| CONTIG-072813 | 58  | 2   | 0  | 6   | 0  |
| CONTIG-072814 | 84  | 13  | 29 | 2   | 0  |
| CONTIG-072815 | 683 | 13  | 16 | 155 | 8  |
| CONTIG-072816 | 84  | 6   | 0  | 25  | 0  |
| CONTIG-072817 | 229 | 8   | 4  | 43  | 2  |
| CONTIG-072820 | 235 | 16  | 6  | 11  | 0  |
| CONTIG-072821 | 61  | 18  | 13 | 15  | 0  |
| CONTIG-072822 | 157 | 6   | 5  | 10  | 0  |
| CONTIG-072823 | 109 | 7   | 19 | 3   | 0  |
| CONTIG-072824 | 45  | 16  | 10 | 2   | 0  |
| CONTIG-072825 | 482 | 14  | 2  | 0   | 24 |
| CONTIG-072826 | 342 | 7   | 0  | 12  | 0  |

|               |     |     |    |     |   |
|---------------|-----|-----|----|-----|---|
| CONTIG-072827 | 70  | 4   | 0  | 2   | 0 |
| CONTIG-072828 | 182 | 8   | 10 | 42  | 0 |
| CONTIG-072829 | 100 | 4   | 4  | 6   | 0 |
| CONTIG-072830 | 90  | 15  | 6  | 60  | 0 |
| CONTIG-072831 | 96  | 7   | 13 | 11  | 0 |
| CONTIG-072832 | 72  | 8   | 14 | 12  | 0 |
| CONTIG-072833 | 127 | 4   | 17 | 6   | 0 |
| CONTIG-072834 | 73  | 6   | 7  | 16  | 0 |
| CONTIG-072835 | 39  | 753 | 16 | 766 | 0 |
| CONTIG-072836 | 100 | 13  | 0  | 52  | 0 |
| CONTIG-072837 | 129 | 10  | 6  | 66  | 0 |
| CONTIG-072838 | 96  | 7   | 30 | 8   | 0 |
| CONTIG-072839 | 206 | 11  | 8  | 78  | 0 |
| CONTIG-072840 | 305 | 6   | 4  | 46  | 0 |
| CONTIG-072843 | 125 | 7   | 5  | 27  | 0 |
| CONTIG-072844 | 120 | 11  | 17 | 44  | 0 |
| CONTIG-072845 | 173 | 5   | 3  | 11  | 0 |
| CONTIG-072846 | 196 | 7   | 3  | 38  | 0 |
| CONTIG-072847 | 70  | 4   | 0  | 9   | 0 |
| CONTIG-072848 | 140 | 9   | 0  | 0   | 6 |
| CONTIG-072849 | 130 | 7   | 5  | 20  | 0 |
| CONTIG-072850 | 93  | 7   | 2  | 9   | 0 |
| CONTIG-072852 | 303 | 9   | 5  | 82  | 0 |
| CONTIG-072854 | 58  | 23  | 2  | 51  | 0 |
| CONTIG-072855 | 132 | 6   | 17 | 24  | 0 |
| CONTIG-072856 | 478 | 8   | 0  | 22  | 0 |
| CONTIG-072857 | 285 | 5   | 2  | 36  | 0 |
| CONTIG-072858 | 60  | 4   | 4  | 2   | 0 |
| CONTIG-072864 | 131 | 6   | 8  | 15  | 0 |
| CONTIG-072865 | 119 | 6   | 3  | 11  | 0 |
| CONTIG-072866 | 153 | 8   | 10 | 41  | 0 |
| CONTIG-072867 | 100 | 30  | 8  | 79  | 2 |
| CONTIG-072868 | 120 | 5   | 2  | 29  | 0 |
| CONTIG-072869 | 277 | 6   | 7  | 48  | 0 |
| CONTIG-072870 | 123 | 7   | 9  | 23  | 0 |
| CONTIG-072871 | 638 | 14  | 26 | 408 | 0 |
| CONTIG-072872 | 104 | 7   | 2  | 22  | 2 |
| CONTIG-072873 | 73  | 20  | 12 | 71  | 0 |
| CONTIG-072874 | 91  | 7   | 9  | 22  | 0 |
| CONTIG-072875 | 113 | 7   | 23 | 0   | 0 |
| CONTIG-072876 | 269 | 8   | 13 | 55  | 0 |
| CONTIG-072877 | 100 | 4   | 4  | 13  | 0 |
| CONTIG-072878 | 66  | 8   | 2  | 5   | 0 |
| CONTIG-072879 | 429 | 13  | 9  | 98  | 2 |
| CONTIG-072880 | 160 | 12  | 24 | 57  | 0 |
| CONTIG-072881 | 406 | 16  | 10 | 256 | 2 |
| CONTIG-072882 | 153 | 11  | 4  | 16  | 0 |

|               |     |    |    |     |     |
|---------------|-----|----|----|-----|-----|
| CONTIG-072883 | 109 | 7  | 12 | 15  | 0   |
| CONTIG-072884 | 100 | 4  | 2  | 0   | 0   |
| CONTIG-072885 | 306 | 11 | 8  | 71  | 4   |
| CONTIG-072886 | 73  | 7  | 9  | 13  | 0   |
| CONTIG-072887 | 63  | 4  | 3  | 8   | 0   |
| CONTIG-072888 | 223 | 9  | 4  | 72  | 0   |
| CONTIG-072889 | 195 | 8  | 7  | 63  | 0   |
| CONTIG-072890 | 63  | 15 | 5  | 29  | 2   |
| CONTIG-072891 | 442 | 8  | 24 | 81  | 0   |
| CONTIG-072892 | 213 | 9  | 18 | 55  | 0   |
| CONTIG-072893 | 146 | 9  | 4  | 44  | 0   |
| CONTIG-072894 | 149 | 9  | 5  | 47  | 0   |
| CONTIG-072895 | 174 | 17 | 27 | 43  | 0   |
| CONTIG-072896 | 84  | 4  | 0  | 8   | 0   |
| CONTIG-072897 | 110 | 13 | 5  | 67  | 0   |
| CONTIG-072898 | 106 | 5  | 2  | 10  | 0   |
| CONTIG-072899 | 232 | 9  | 0  | 33  | 0   |
| CONTIG-072900 | 86  | 5  | 2  | 14  | 0   |
| CONTIG-072901 | 109 | 5  | 10 | 13  | 0   |
| CONTIG-072902 | 148 | 4  | 7  | 11  | 0   |
| CONTIG-072904 | 68  | 5  | 8  | 4   | 0   |
| CONTIG-072905 | 143 | 5  | 8  | 7   | 0   |
| CONTIG-072906 | 73  | 5  | 15 | 8   | 0   |
| CONTIG-072907 | 205 | 5  | 2  | 29  | 0   |
| CONTIG-072908 | 95  | 10 | 8  | 32  | 0   |
| CONTIG-072909 | 70  | 7  | 0  | 10  | 0   |
| CONTIG-072910 | 83  | 9  | 9  | 20  | 0   |
| CONTIG-072911 | 817 | 36 | 0  | 0   | 154 |
| CONTIG-072912 | 133 | 13 | 2  | 71  | 0   |
| CONTIG-072913 | 562 | 17 | 13 | 579 | 0   |
| CONTIG-072914 | 108 | 3  | 2  | 8   | 2   |
| CONTIG-072915 | 129 | 4  | 4  | 8   | 0   |
| CONTIG-072916 | 83  | 8  | 2  | 17  | 0   |
| CONTIG-072917 | 73  | 4  | 5  | 3   | 0   |
| CONTIG-072918 | 343 | 9  | 6  | 96  | 0   |
| CONTIG-072919 | 59  | 4  | 0  | 0   | 0   |
| CONTIG-072920 | 61  | 7  | 0  | 6   | 0   |
| CONTIG-072921 | 120 | 9  | 6  | 31  | 0   |
| CONTIG-072923 | 108 | 7  | 4  | 27  | 0   |
| CONTIG-072924 | 61  | 3  | 2  | 4   | 0   |
| CONTIG-072925 | 175 | 5  | 0  | 31  | 2   |
| CONTIG-072926 | 140 | 70 | 32 | 17  | 0   |
| CONTIG-072927 | 151 | 7  | 3  | 12  | 0   |
| CONTIG-072928 | 77  | 6  | 10 | 9   | 0   |
| CONTIG-072929 | 167 | 8  | 3  | 27  | 0   |
| CONTIG-072930 | 70  | 10 | 7  | 13  | 0   |
| CONTIG-072931 | 64  | 11 | 30 | 0   | 0   |



|               |     |    |    |     |     |
|---------------|-----|----|----|-----|-----|
| CONTIG-072932 | 110 | 16 | 3  | 76  | 0   |
| CONTIG-072933 | 204 | 9  | 6  | 50  | 0   |
| CONTIG-072934 | 266 | 6  | 8  | 43  | 0   |
| CONTIG-072935 | 80  | 8  | 2  | 19  | 0   |
| CONTIG-072936 | 69  | 9  | 2  | 19  | 0   |
| CONTIG-072937 | 390 | 10 | 29 | 122 | 0   |
| CONTIG-072938 | 79  | 7  | 2  | 16  | 0   |
| CONTIG-072939 | 104 | 3  | 0  | 3   | 0   |
| CONTIG-072942 | 485 | 50 | 5  | 0   | 188 |
| CONTIG-072943 | 182 | 7  | 10 | 12  | 2   |
| CONTIG-072944 | 96  | 6  | 15 | 14  | 0   |
| CONTIG-072945 | 153 | 8  | 8  | 45  | 0   |
| CONTIG-072946 | 430 | 12 | 11 | 203 | 0   |
| CONTIG-072947 | 127 | 5  | 0  | 13  | 0   |
| CONTIG-072948 | 300 | 7  | 5  | 68  | 0   |
| CONTIG-072949 | 83  | 3  | 0  | 4   | 0   |
| CONTIG-072951 | 64  | 25 | 6  | 21  | 0   |
| CONTIG-072952 | 68  | 2  | 11 | 0   | 0   |
| CONTIG-072953 | 86  | 4  | 0  | 10  | 0   |
| CONTIG-072954 | 69  | 2  | 0  | 4   | 0   |
| CONTIG-072955 | 103 | 7  | 6  | 28  | 0   |
| CONTIG-072956 | 70  | 7  | 10 | 16  | 0   |
| CONTIG-072957 | 155 | 48 | 21 | 337 | 0   |
| CONTIG-072958 | 85  | 7  | 0  | 21  | 0   |
| CONTIG-072959 | 355 | 6  | 4  | 8   | 0   |
| CONTIG-072960 | 64  | 3  | 3  | 7   | 0   |
| CONTIG-072961 | 133 | 5  | 2  | 2   | 4   |
| CONTIG-072962 | 142 | 6  | 6  | 11  | 2   |
| CONTIG-072963 | 76  | 5  | 4  | 2   | 0   |
| CONTIG-072964 | 141 | 10 | 38 | 15  | 0   |
| CONTIG-072965 | 207 | 6  | 7  | 19  | 0   |
| CONTIG-072966 | 146 | 4  | 0  | 14  | 2   |
| CONTIG-072967 | 88  | 3  | 2  | 0   | 0   |
| CONTIG-072969 | 466 | 14 | 27 | 131 | 3   |
| CONTIG-072970 | 58  | 7  | 4  | 0   | 0   |
| CONTIG-072971 | 61  | 5  | 3  | 7   | 0   |
| CONTIG-072972 | 74  | 11 | 4  | 17  | 0   |
| CONTIG-072973 | 74  | 8  | 4  | 22  | 0   |
| CONTIG-072974 | 83  | 13 | 11 | 37  | 0   |
| CONTIG-072975 | 136 | 11 | 10 | 53  | 0   |
| CONTIG-072976 | 65  | 6  | 4  | 4   | 0   |
| CONTIG-072977 | 137 | 6  | 5  | 29  | 0   |
| CONTIG-072979 | 64  | 5  | 2  | 2   | 0   |
| CONTIG-072980 | 270 | 11 | 2  | 115 | 0   |
| CONTIG-072981 | 89  | 7  | 9  | 11  | 0   |
| CONTIG-072982 | 74  | 7  | 0  | 13  | 0   |
| CONTIG-072983 | 195 | 6  | 3  | 29  | 0   |

|               |     |     |    |     |    |
|---------------|-----|-----|----|-----|----|
| CONTIG-072984 | 447 | 12  | 6  | 187 | 9  |
| CONTIG-072987 | 118 | 5   | 0  | 0   | 5  |
| CONTIG-072988 | 101 | 8   | 23 | 17  | 0  |
| CONTIG-072989 | 36  | 99  | 3  | 30  | 0  |
| CONTIG-072990 | 74  | 11  | 4  | 12  | 0  |
| CONTIG-072991 | 112 | 13  | 8  | 57  | 0  |
| CONTIG-072992 | 58  | 6   | 5  | 7   | 0  |
| CONTIG-072993 | 98  | 26  | 14 | 39  | 0  |
| CONTIG-072994 | 77  | 4   | 0  | 13  | 0  |
| CONTIG-072995 | 61  | 9   | 2  | 13  | 0  |
| CONTIG-072996 | 134 | 5   | 13 | 2   | 0  |
| CONTIG-072997 | 75  | 5   | 0  | 13  | 0  |
| CONTIG-072998 | 116 | 9   | 3  | 24  | 0  |
| CONTIG-072999 | 58  | 4   | 4  | 8   | 0  |
| CONTIG-073000 | 97  | 7   | 29 | 6   | 0  |
| CONTIG-073001 | 330 | 26  | 0  | 0   | 14 |
| CONTIG-073002 | 169 | 12  | 5  | 66  | 0  |
| CONTIG-073003 | 381 | 16  | 13 | 220 | 0  |
| CONTIG-073004 | 62  | 3   | 3  | 7   | 0  |
| CONTIG-073005 | 236 | 6   | 2  | 33  | 0  |
| CONTIG-073006 | 334 | 9   | 0  | 0   | 14 |
| CONTIG-073007 | 115 | 8   | 6  | 0   | 0  |
| CONTIG-073008 | 88  | 23  | 3  | 83  | 0  |
| CONTIG-073009 | 84  | 5   | 7  | 8   | 0  |
| CONTIG-073010 | 228 | 6   | 10 | 37  | 0  |
| CONTIG-073011 | 118 | 5   | 16 | 12  | 0  |
| CONTIG-073012 | 509 | 15  | 57 | 360 | 0  |
| CONTIG-073013 | 169 | 17  | 2  | 63  | 0  |
| CONTIG-073014 | 91  | 6   | 2  | 14  | 0  |
| CONTIG-073015 | 182 | 6   | 7  | 40  | 0  |
| CONTIG-073016 | 197 | 6   | 10 | 27  | 0  |
| CONTIG-073017 | 106 | 7   | 3  | 10  | 0  |
| CONTIG-073018 | 198 | 9   | 2  | 55  | 2  |
| CONTIG-073019 | 119 | 152 | 9  | 685 | 75 |
| CONTIG-073020 | 144 | 10  | 18 | 22  | 0  |
| CONTIG-073021 | 528 | 14  | 8  | 213 | 10 |
| CONTIG-073022 | 170 | 7   | 11 | 40  | 0  |
| CONTIG-073023 | 62  | 5   | 4  | 10  | 0  |
| CONTIG-073024 | 234 | 10  | 2  | 49  | 0  |
| CONTIG-073025 | 94  | 6   | 6  | 13  | 0  |
| CONTIG-073026 | 466 | 9   | 6  | 142 | 2  |
| CONTIG-073027 | 135 | 8   | 2  | 2   | 0  |
| CONTIG-073028 | 135 | 8   | 7  | 19  | 0  |
| CONTIG-073029 | 77  | 4   | 4  | 4   | 0  |
| CONTIG-073030 | 101 | 12  | 0  | 25  | 3  |
| CONTIG-073032 | 106 | 8   | 3  | 41  | 0  |
| CONTIG-073033 | 133 | 5   | 2  | 15  | 0  |

|               |     |    |    |    |    |
|---------------|-----|----|----|----|----|
| CONTIG-073034 | 89  | 3  | 4  | 6  | 0  |
| CONTIG-073037 | 143 | 6  | 4  | 28 | 0  |
| CONTIG-073038 | 115 | 9  | 2  | 23 | 0  |
| CONTIG-073042 | 208 | 9  | 7  | 52 | 0  |
| CONTIG-073043 | 348 | 19 | 4  | 0  | 42 |
| CONTIG-073044 | 90  | 4  | 0  | 0  | 0  |
| CONTIG-073046 | 182 | 7  | 2  | 18 | 0  |
| CONTIG-073047 | 158 | 14 | 2  | 25 | 2  |
| CONTIG-073048 | 108 | 18 | 12 | 94 | 2  |
| CONTIG-073049 | 322 | 10 | 6  | 81 | 0  |
| CONTIG-073050 | 281 | 10 | 2  | 74 | 2  |
| CONTIG-073051 | 113 | 4  | 3  | 11 | 0  |
| CONTIG-073052 | 123 | 15 | 3  | 88 | 0  |
| CONTIG-073054 | 230 | 10 | 6  | 77 | 0  |
| CONTIG-073055 | 85  | 5  | 8  | 16 | 0  |
| CONTIG-073056 | 94  | 4  | 4  | 4  | 0  |
| CONTIG-073057 | 141 | 5  | 0  | 16 | 0  |
| CONTIG-073058 | 86  | 5  | 9  | 17 | 0  |
| CONTIG-073059 | 97  | 4  | 0  | 14 | 0  |
| CONTIG-073060 | 97  | 31 | 20 | 64 | 0  |
| CONTIG-073061 | 86  | 5  | 0  | 14 | 0  |
| CONTIG-073062 | 73  | 6  | 6  | 8  | 0  |
| CONTIG-073063 | 71  | 7  | 0  | 13 | 0  |
| CONTIG-073066 | 168 | 9  | 3  | 52 | 0  |
| CONTIG-073067 | 97  | 12 | 4  | 36 | 0  |
| CONTIG-073068 | 183 | 13 | 10 | 86 | 0  |
| CONTIG-073069 | 237 | 27 | 12 | 9  | 0  |
| CONTIG-073071 | 59  | 6  | 4  | 11 | 0  |
| CONTIG-073072 | 314 | 24 | 4  | 73 | 0  |
| CONTIG-073073 | 65  | 5  | 2  | 0  | 0  |
| CONTIG-073074 | 78  | 13 | 0  | 30 | 0  |
| CONTIG-073075 | 58  | 14 | 6  | 14 | 0  |
| CONTIG-073076 | 61  | 7  | 4  | 3  | 0  |
| CONTIG-073077 | 132 | 9  | 13 | 42 | 0  |
| CONTIG-073078 | 194 | 6  | 2  | 35 | 0  |
| CONTIG-073080 | 406 | 11 | 2  | 0  | 14 |
| CONTIG-073081 | 153 | 10 | 0  | 47 | 2  |
| CONTIG-073082 | 100 | 6  | 6  | 14 | 2  |
| CONTIG-073083 | 88  | 3  | 3  | 4  | 0  |
| CONTIG-073084 | 158 | 7  | 0  | 34 | 0  |
| CONTIG-073085 | 63  | 6  | 3  | 2  | 0  |
| CONTIG-073087 | 285 | 10 | 10 | 78 | 0  |
| CONTIG-073088 | 174 | 14 | 11 | 3  | 0  |
| CONTIG-073089 | 151 | 10 | 3  | 58 | 0  |
| CONTIG-073090 | 143 | 7  | 10 | 10 | 0  |
| CONTIG-073091 | 193 | 6  | 7  | 32 | 2  |
| CONTIG-073092 | 69  | 15 | 2  | 2  | 0  |

|               |     |    |    |     |    |
|---------------|-----|----|----|-----|----|
| CONTIG-073093 | 104 | 36 | 2  | 14  | 0  |
| CONTIG-073094 | 81  | 4  | 12 | 5   | 0  |
| CONTIG-073095 | 125 | 8  | 36 | 20  | 0  |
| CONTIG-073096 | 154 | 11 | 7  | 55  | 0  |
| CONTIG-073097 | 79  | 7  | 12 | 0   | 0  |
| CONTIG-073098 | 70  | 6  | 0  | 0   | 0  |
| CONTIG-073099 | 69  | 3  | 2  | 2   | 0  |
| CONTIG-073100 | 78  | 6  | 0  | 0   | 0  |
| CONTIG-073101 | 87  | 6  | 0  | 14  | 0  |
| CONTIG-073102 | 120 | 13 | 4  | 60  | 0  |
| CONTIG-073103 | 178 | 10 | 14 | 73  | 0  |
| CONTIG-073104 | 154 | 7  | 7  | 37  | 0  |
| CONTIG-073105 | 158 | 12 | 4  | 84  | 0  |
| CONTIG-073106 | 87  | 8  | 0  | 0   | 4  |
| CONTIG-073107 | 125 | 8  | 2  | 47  | 0  |
| CONTIG-073108 | 165 | 46 | 0  | 0   | 56 |
| CONTIG-073109 | 837 | 18 | 11 | 232 | 47 |
| CONTIG-073111 | 276 | 35 | 3  | 430 | 2  |
| CONTIG-073112 | 482 | 9  | 25 | 184 | 0  |
| CONTIG-073113 | 89  | 18 | 2  | 66  | 2  |
| CONTIG-073114 | 205 | 4  | 7  | 11  | 0  |
| CONTIG-073115 | 419 | 8  | 6  | 128 | 0  |
| CONTIG-073116 | 78  | 8  | 5  | 19  | 2  |
| CONTIG-073117 | 92  | 2  | 2  | 4   | 0  |
| CONTIG-073118 | 232 | 9  | 4  | 0   | 4  |
| CONTIG-073119 | 126 | 3  | 2  | 19  | 0  |
| CONTIG-073120 | 115 | 8  | 2  | 33  | 0  |
| CONTIG-073122 | 321 | 7  | 5  | 50  | 0  |
| CONTIG-073123 | 81  | 6  | 0  | 9   | 0  |
| CONTIG-073124 | 257 | 22 | 0  | 267 | 2  |
| CONTIG-073125 | 127 | 9  | 3  | 44  | 0  |
| CONTIG-073126 | 216 | 9  | 6  | 58  | 0  |
| CONTIG-073127 | 66  | 4  | 2  | 9   | 0  |
| CONTIG-073129 | 99  | 10 | 5  | 0   | 0  |
| CONTIG-073130 | 228 | 5  | 0  | 26  | 0  |
| CONTIG-073131 | 68  | 16 | 0  | 0   | 2  |
| CONTIG-073132 | 308 | 7  | 12 | 53  | 0  |
| CONTIG-073133 | 90  | 7  | 2  | 19  | 0  |
| CONTIG-073134 | 63  | 5  | 0  | 13  | 0  |
| CONTIG-073135 | 69  | 9  | 5  | 14  | 0  |
| CONTIG-073138 | 75  | 4  | 2  | 0   | 0  |
| CONTIG-073139 | 78  | 6  | 7  | 8   | 0  |
| CONTIG-073140 | 82  | 7  | 6  | 8   | 0  |
| CONTIG-073141 | 82  | 5  | 5  | 10  | 0  |
| CONTIG-073142 | 62  | 10 | 3  | 24  | 0  |
| CONTIG-073143 | 67  | 10 | 11 | 14  | 0  |
| CONTIG-073144 | 84  | 3  | 2  | 7   | 0  |

|               |      |     |    |     |      |
|---------------|------|-----|----|-----|------|
| CONTIG-073145 | 82   | 20  | 3  | 36  | 0    |
| CONTIG-073147 | 118  | 6   | 5  | 8   | 0    |
| CONTIG-073148 | 87   | 5   | 6  | 9   | 0    |
| CONTIG-073149 | 185  | 6   | 2  | 30  | 0    |
| CONTIG-073150 | 156  | 6   | 12 | 23  | 0    |
| CONTIG-073151 | 340  | 6   | 2  | 89  | 0    |
| CONTIG-073152 | 83   | 6   | 4  | 20  | 0    |
| CONTIG-073153 | 176  | 15  | 9  | 119 | 0    |
| CONTIG-073154 | 76   | 5   | 9  | 14  | 0    |
| CONTIG-073155 | 195  | 10  | 9  | 65  | 0    |
| CONTIG-073159 | 390  | 8   | 10 | 35  | 6    |
| CONTIG-073161 | 214  | 11  | 16 | 75  | 0    |
| CONTIG-073165 | 123  | 4   | 3  | 14  | 0    |
| CONTIG-073168 | 105  | 4   | 9  | 9   | 0    |
| CONTIG-073169 | 200  | 5   | 17 | 23  | 0    |
| CONTIG-073170 | 117  | 5   | 5  | 8   | 0    |
| CONTIG-073171 | 176  | 9   | 6  | 58  | 0    |
| CONTIG-073173 | 155  | 8   | 7  | 32  | 0    |
| CONTIG-073174 | 59   | 7   | 3  | 0   | 0    |
| CONTIG-073175 | 330  | 8   | 9  | 16  | 0    |
| CONTIG-073176 | 87   | 6   | 10 | 8   | 0    |
| CONTIG-073177 | 73   | 6   | 0  | 13  | 0    |
| CONTIG-073178 | 81   | 4   | 10 | 5   | 0    |
| CONTIG-073179 | 181  | 5   | 0  | 28  | 0    |
| CONTIG-073180 | 111  | 5   | 10 | 9   | 0    |
| CONTIG-073183 | 59   | 2   | 0  | 0   | 0    |
| CONTIG-073184 | 77   | 16  | 10 | 33  | 0    |
| CONTIG-073186 | 104  | 11  | 25 | 11  | 2    |
| CONTIG-073187 | 62   | 10  | 2  | 22  | 0    |
| CONTIG-073188 | 364  | 10  | 0  | 71  | 2    |
| CONTIG-073189 | 85   | 3   | 6  | 5   | 0    |
| CONTIG-073190 | 308  | 9   | 5  | 92  | 2    |
| CONTIG-073191 | 152  | 5   | 4  | 21  | 5    |
| CONTIG-073192 | 352  | 13  | 7  | 181 | 7    |
| CONTIG-073194 | 69   | 7   | 5  | 6   | 0    |
| CONTIG-073195 | 91   | 5   | 2  | 18  | 0    |
| CONTIG-073196 | 75   | 5   | 3  | 4   | 0    |
| CONTIG-073197 | 1189 | 13  | 20 | 880 | 0    |
| CONTIG-073198 | 69   | 6   | 6  | 8   | 0    |
| CONTIG-073199 | 77   | 7   | 6  | 11  | 0    |
| CONTIG-073200 | 772  | 122 | 4  | 2   | 2137 |
| CONTIG-073201 | 135  | 7   | 3  | 25  | 0    |
| CONTIG-073202 | 83   | 3   | 2  | 5   | 0    |
| CONTIG-073203 | 423  | 24  | 11 | 32  | 0    |
| CONTIG-073204 | 77   | 4   | 4  | 0   | 0    |
| CONTIG-073205 | 60   | 4   | 4  | 2   | 0    |
| CONTIG-073206 | 416  | 10  | 23 | 128 | 0    |

|               |     |     |    |     |    |
|---------------|-----|-----|----|-----|----|
| CONTIG-073207 | 158 | 6   | 0  | 35  | 0  |
| CONTIG-073208 | 60  | 4   | 6  | 10  | 0  |
| CONTIG-073209 | 66  | 5   | 4  | 8   | 0  |
| CONTIG-073210 | 82  | 8   | 0  | 8   | 2  |
| CONTIG-073211 | 103 | 6   | 5  | 21  | 0  |
| CONTIG-073212 | 69  | 4   | 0  | 9   | 0  |
| CONTIG-073213 | 200 | 12  | 15 | 117 | 0  |
| CONTIG-073214 | 339 | 11  | 10 | 109 | 0  |
| CONTIG-073215 | 77  | 3   | 0  | 0   | 0  |
| CONTIG-073218 | 118 | 9   | 2  | 23  | 0  |
| CONTIG-073219 | 116 | 9   | 7  | 20  | 0  |
| CONTIG-073220 | 77  | 22  | 11 | 38  | 0  |
| CONTIG-073221 | 67  | 7   | 4  | 17  | 0  |
| CONTIG-073222 | 60  | 2   | 0  | 0   | 0  |
| CONTIG-073223 | 96  | 4   | 3  | 8   | 0  |
| CONTIG-073224 | 87  | 4   | 0  | 16  | 0  |
| CONTIG-073225 | 64  | 7   | 9  | 16  | 0  |
| CONTIG-073228 | 277 | 7   | 4  | 39  | 0  |
| CONTIG-073229 | 121 | 8   | 4  | 31  | 0  |
| CONTIG-073230 | 129 | 6   | 0  | 19  | 2  |
| CONTIG-073231 | 89  | 15  | 2  | 14  | 0  |
| CONTIG-073232 | 149 | 5   | 5  | 21  | 0  |
| CONTIG-073233 | 173 | 5   | 18 | 21  | 0  |
| CONTIG-073234 | 158 | 11  | 3  | 60  | 0  |
| CONTIG-073235 | 176 | 4   | 3  | 5   | 2  |
| CONTIG-073236 | 306 | 14  | 13 | 122 | 0  |
| CONTIG-073237 | 815 | 18  | 2  | 691 | 4  |
| CONTIG-073238 | 140 | 5   | 9  | 15  | 0  |
| CONTIG-073239 | 140 | 12  | 8  | 56  | 0  |
| CONTIG-073240 | 284 | 7   | 6  | 26  | 0  |
| CONTIG-073241 | 726 | 12  | 19 | 246 | 5  |
| CONTIG-073242 | 112 | 11  | 0  | 62  | 0  |
| CONTIG-073243 | 246 | 26  | 0  | 0   | 24 |
| CONTIG-073244 | 135 | 71  | 2  | 2   | 56 |
| CONTIG-073245 | 204 | 8   | 11 | 70  | 0  |
| CONTIG-073246 | 162 | 5   | 5  | 11  | 0  |
| CONTIG-073248 | 158 | 303 | 26 | 138 | 0  |
| CONTIG-073249 | 197 | 12  | 7  | 53  | 4  |
| CONTIG-073250 | 63  | 3   | 6  | 4   | 0  |
| CONTIG-073251 | 87  | 4   | 2  | 4   | 0  |
| CONTIG-073252 | 65  | 21  | 2  | 64  | 0  |
| CONTIG-073253 | 75  | 3   | 7  | 3   | 0  |
| CONTIG-073254 | 173 | 10  | 6  | 61  | 0  |
| CONTIG-073255 | 76  | 26  | 9  | 118 | 0  |
| CONTIG-073256 | 82  | 3   | 4  | 6   | 0  |
| CONTIG-073257 | 174 | 6   | 0  | 11  | 0  |
| CONTIG-073259 | 63  | 6   | 8  | 7   | 0  |

|               |     |    |    |     |   |
|---------------|-----|----|----|-----|---|
| CONTIG-073260 | 66  | 8  | 0  | 12  | 2 |
| CONTIG-073261 | 190 | 6  | 5  | 30  | 0 |
| CONTIG-073262 | 356 | 13 | 2  | 161 | 0 |
| CONTIG-073263 | 368 | 12 | 10 | 124 | 0 |
| CONTIG-073264 | 101 | 10 | 0  | 25  | 0 |
| CONTIG-073265 | 134 | 9  | 8  | 26  | 0 |
| CONTIG-073266 | 302 | 13 | 8  | 55  | 0 |
| CONTIG-073267 | 79  | 11 | 9  | 18  | 0 |
| CONTIG-073268 | 191 | 7  | 15 | 43  | 0 |
| CONTIG-073269 | 75  | 13 | 0  | 7   | 0 |
| CONTIG-073270 | 90  | 4  | 0  | 14  | 0 |
| CONTIG-073271 | 147 | 5  | 2  | 24  | 0 |
| CONTIG-073272 | 85  | 4  | 8  | 0   | 0 |
| CONTIG-073273 | 95  | 5  | 0  | 14  | 0 |
| CONTIG-073274 | 168 | 9  | 15 | 32  | 0 |
| CONTIG-073275 | 105 | 21 | 7  | 106 | 0 |
| CONTIG-073276 | 63  | 3  | 2  | 0   | 0 |
| CONTIG-073277 | 88  | 12 | 8  | 30  | 0 |
| CONTIG-073278 | 89  | 15 | 6  | 17  | 2 |
| CONTIG-073279 | 63  | 5  | 6  | 7   | 0 |
| CONTIG-073280 | 127 | 7  | 9  | 31  | 0 |
| CONTIG-073281 | 64  | 8  | 5  | 17  | 0 |
| CONTIG-073282 | 68  | 3  | 4  | 6   | 0 |
| CONTIG-073283 | 61  | 5  | 2  | 4   | 0 |
| CONTIG-073284 | 103 | 6  | 0  | 19  | 0 |
| CONTIG-073285 | 76  | 9  | 11 | 23  | 0 |
| CONTIG-073286 | 140 | 10 | 16 | 34  | 0 |
| CONTIG-073287 | 139 | 5  | 3  | 10  | 2 |
| CONTIG-073288 | 60  | 7  | 0  | 19  | 0 |
| CONTIG-073290 | 391 | 7  | 5  | 132 | 0 |
| CONTIG-073291 | 82  | 4  | 8  | 9   | 0 |
| CONTIG-073292 | 108 | 10 | 5  | 42  | 2 |
| CONTIG-073293 | 150 | 6  | 2  | 16  | 0 |
| CONTIG-073294 | 76  | 12 | 27 | 0   | 0 |
| CONTIG-073295 | 65  | 7  | 6  | 9   | 0 |
| CONTIG-073296 | 87  | 17 | 4  | 27  | 0 |
| CONTIG-073297 | 82  | 3  | 16 | 0   | 0 |
| CONTIG-073298 | 97  | 4  | 0  | 16  | 0 |
| CONTIG-073300 | 38  | 8  | 2  | 12  | 0 |
| CONTIG-073301 | 59  | 5  | 6  | 6   | 0 |
| CONTIG-073302 | 197 | 6  | 13 | 24  | 0 |
| CONTIG-073303 | 110 | 5  | 8  | 17  | 0 |
| CONTIG-073306 | 154 | 16 | 12 | 84  | 0 |
| CONTIG-073308 | 189 | 6  | 6  | 38  | 0 |
| CONTIG-073309 | 64  | 7  | 5  | 8   | 0 |
| CONTIG-073310 | 62  | 4  | 0  | 10  | 0 |
| CONTIG-073311 | 103 | 16 | 0  | 22  | 0 |

|               |     |    |    |     |   |
|---------------|-----|----|----|-----|---|
| CONTIG-073312 | 85  | 9  | 4  | 29  | 0 |
| CONTIG-073313 | 113 | 5  | 9  | 15  | 0 |
| CONTIG-073314 | 406 | 8  | 8  | 130 | 0 |
| CONTIG-073315 | 62  | 4  | 0  | 10  | 0 |
| CONTIG-073316 | 72  | 10 | 5  | 17  | 0 |
| CONTIG-073318 | 143 | 9  | 13 | 42  | 0 |
| CONTIG-073319 | 146 | 7  | 20 | 6   | 0 |
| CONTIG-073320 | 76  | 10 | 6  | 25  | 0 |
| CONTIG-073321 | 143 | 6  | 2  | 32  | 0 |
| CONTIG-073322 | 565 | 11 | 37 | 107 | 0 |
| CONTIG-073323 | 262 | 11 | 30 | 67  | 0 |
| CONTIG-073324 | 79  | 8  | 15 | 16  | 0 |
| CONTIG-073325 | 552 | 27 | 6  | 8   | 0 |
| CONTIG-073326 | 91  | 3  | 0  | 9   | 0 |
| CONTIG-073328 | 64  | 6  | 5  | 6   | 0 |
| CONTIG-073329 | 80  | 5  | 2  | 17  | 0 |
| CONTIG-073330 | 242 | 5  | 6  | 50  | 0 |
| CONTIG-073331 | 115 | 13 | 5  | 33  | 0 |
| CONTIG-073332 | 410 | 30 | 8  | 573 | 0 |
| CONTIG-073333 | 103 | 4  | 2  | 6   | 0 |
| CONTIG-073334 | 98  | 8  | 8  | 24  | 0 |
| CONTIG-073337 | 276 | 6  | 0  | 56  | 0 |
| CONTIG-073338 | 62  | 4  | 2  | 0   | 0 |
| CONTIG-073339 | 133 | 8  | 8  | 45  | 0 |
| CONTIG-073340 | 243 | 5  | 4  | 23  | 0 |
| CONTIG-073341 | 84  | 3  | 3  | 7   | 0 |
| CONTIG-073342 | 82  | 6  | 2  | 5   | 0 |
| CONTIG-073343 | 84  | 6  | 4  | 23  | 0 |
| CONTIG-073344 | 256 | 5  | 0  | 15  | 0 |
| CONTIG-073345 | 73  | 6  | 18 | 4   | 0 |
| CONTIG-073346 | 243 | 7  | 4  | 49  | 0 |
| CONTIG-073347 | 88  | 27 | 2  | 69  | 0 |
| CONTIG-073348 | 69  | 26 | 5  | 62  | 2 |
| CONTIG-073349 | 90  | 18 | 26 | 67  | 0 |
| CONTIG-073350 | 142 | 11 | 2  | 31  | 0 |
| CONTIG-073351 | 84  | 5  | 0  | 15  | 0 |
| CONTIG-073352 | 95  | 5  | 0  | 16  | 0 |
| CONTIG-073353 | 126 | 5  | 4  | 16  | 0 |
| CONTIG-073354 | 81  | 9  | 2  | 6   | 2 |
| CONTIG-073355 | 130 | 9  | 2  | 37  | 2 |
| CONTIG-073356 | 101 | 4  | 0  | 15  | 0 |
| CONTIG-073357 | 99  | 6  | 5  | 13  | 0 |
| CONTIG-073358 | 70  | 3  | 5  | 0   | 0 |
| CONTIG-073359 | 248 | 10 | 14 | 56  | 0 |
| CONTIG-073360 | 128 | 11 | 21 | 42  | 0 |
| CONTIG-073361 | 134 | 21 | 2  | 2   | 0 |
| CONTIG-073362 | 106 | 7  | 7  | 12  | 0 |



|               |     |     |    |     |     |
|---------------|-----|-----|----|-----|-----|
| CONTIG-073364 | 164 | 9   | 4  | 18  | 0   |
| CONTIG-073365 | 256 | 9   | 7  | 78  | 10  |
| CONTIG-073366 | 89  | 3   | 8  | 0   | 0   |
| CONTIG-073367 | 444 | 28  | 4  | 0   | 0   |
| CONTIG-073368 | 67  | 7   | 12 | 4   | 0   |
| CONTIG-073369 | 125 | 3   | 2  | 4   | 0   |
| CONTIG-073370 | 82  | 4   | 2  | 9   | 0   |
| CONTIG-073371 | 204 | 6   | 9  | 34  | 0   |
| CONTIG-073372 | 120 | 3   | 2  | 4   | 0   |
| CONTIG-073374 | 62  | 13  | 10 | 13  | 0   |
| CONTIG-073375 | 269 | 6   | 30 | 24  | 0   |
| CONTIG-073376 | 120 | 14  | 6  | 70  | 0   |
| CONTIG-073377 | 157 | 4   | 7  | 4   | 0   |
| CONTIG-073379 | 67  | 7   | 11 | 0   | 0   |
| CONTIG-073380 | 114 | 9   | 9  | 45  | 0   |
| CONTIG-073381 | 181 | 21  | 10 | 25  | 0   |
| CONTIG-073382 | 104 | 12  | 0  | 26  | 0   |
| CONTIG-073383 | 112 | 6   | 0  | 14  | 0   |
| CONTIG-073384 | 59  | 3   | 2  | 2   | 0   |
| CONTIG-073385 | 72  | 4   | 11 | 0   | 0   |
| CONTIG-073386 | 934 | 37  | 2  | 9   | 0   |
| CONTIG-073387 | 257 | 8   | 11 | 64  | 0   |
| CONTIG-073388 | 78  | 5   | 2  | 4   | 0   |
| CONTIG-073389 | 194 | 11  | 3  | 73  | 0   |
| CONTIG-073391 | 94  | 7   | 6  | 25  | 0   |
| CONTIG-073392 | 104 | 15  | 20 | 43  | 0   |
| CONTIG-073393 | 118 | 137 | 0  | 0   | 378 |
| CONTIG-073394 | 126 | 4   | 3  | 14  | 0   |
| CONTIG-073395 | 101 | 5   | 6  | 10  | 0   |
| CONTIG-073396 | 72  | 15  | 9  | 27  | 0   |
| CONTIG-073397 | 68  | 3   | 2  | 8   | 0   |
| CONTIG-073398 | 82  | 9   | 0  | 24  | 0   |
| CONTIG-073399 | 92  | 4   | 4  | 6   | 0   |
| CONTIG-073400 | 108 | 4   | 3  | 2   | 0   |
| CONTIG-073401 | 64  | 4   | 0  | 13  | 0   |
| CONTIG-073402 | 250 | 8   | 15 | 51  | 0   |
| CONTIG-073403 | 259 | 10  | 31 | 113 | 2   |
| CONTIG-073404 | 171 | 9   | 0  | 13  | 0   |
| CONTIG-073406 | 102 | 5   | 2  | 9   | 0   |
| CONTIG-073407 | 376 | 11  | 47 | 174 | 0   |
| CONTIG-073408 | 118 | 17  | 2  | 87  | 0   |
| CONTIG-073409 | 100 | 9   | 7  | 28  | 0   |
| CONTIG-073416 | 134 | 6   | 2  | 18  | 0   |
| CONTIG-073417 | 193 | 4   | 2  | 7   | 0   |
| CONTIG-073418 | 113 | 7   | 16 | 17  | 0   |
| CONTIG-073419 | 68  | 5   | 12 | 7   | 0   |
| CONTIG-073420 | 267 | 7   | 2  | 58  | 0   |

|               |     |    |    |     |   |
|---------------|-----|----|----|-----|---|
| CONTIG-073421 | 113 | 3  | 5  | 8   | 0 |
| CONTIG-073422 | 398 | 35 | 22 | 29  | 0 |
| CONTIG-073423 | 101 | 7  | 2  | 0   | 2 |
| CONTIG-073424 | 269 | 7  | 43 | 62  | 0 |
| CONTIG-073425 | 74  | 5  | 0  | 2   | 0 |
| CONTIG-073426 | 182 | 12 | 7  | 84  | 0 |
| CONTIG-073427 | 69  | 5  | 0  | 12  | 0 |
| CONTIG-073428 | 91  | 5  | 0  | 10  | 0 |
| CONTIG-073429 | 100 | 6  | 2  | 13  | 0 |
| CONTIG-073431 | 98  | 16 | 3  | 47  | 0 |
| CONTIG-073432 | 258 | 7  | 3  | 64  | 0 |
| CONTIG-073434 | 69  | 10 | 6  | 6   | 0 |
| CONTIG-073435 | 252 | 7  | 4  | 81  | 0 |
| CONTIG-073436 | 177 | 7  | 12 | 39  | 0 |
| CONTIG-073439 | 81  | 3  | 6  | 5   | 0 |
| CONTIG-073440 | 90  | 8  | 3  | 15  | 0 |
| CONTIG-073441 | 127 | 13 | 4  | 73  | 0 |
| CONTIG-073443 | 195 | 8  | 3  | 39  | 0 |
| CONTIG-073444 | 323 | 10 | 23 | 94  | 0 |
| CONTIG-073445 | 90  | 5  | 2  | 12  | 0 |
| CONTIG-073446 | 91  | 5  | 9  | 8   | 0 |
| CONTIG-073447 | 257 | 6  | 11 | 50  | 0 |
| CONTIG-073449 | 105 | 14 | 7  | 17  | 0 |
| CONTIG-073450 | 79  | 9  | 3  | 29  | 0 |
| CONTIG-073451 | 80  | 9  | 10 | 29  | 0 |
| CONTIG-073452 | 166 | 6  | 6  | 30  | 0 |
| CONTIG-073453 | 61  | 8  | 13 | 10  | 0 |
| CONTIG-073454 | 182 | 10 | 4  | 50  | 0 |
| CONTIG-073456 | 76  | 5  | 5  | 10  | 0 |
| CONTIG-073457 | 168 | 5  | 12 | 13  | 0 |
| CONTIG-073458 | 72  | 12 | 8  | 18  | 2 |
| CONTIG-073459 | 231 | 7  | 12 | 34  | 2 |
| CONTIG-073460 | 243 | 5  | 9  | 39  | 0 |
| CONTIG-073461 | 115 | 15 | 0  | 74  | 0 |
| CONTIG-073462 | 74  | 9  | 12 | 9   | 0 |
| CONTIG-073463 | 159 | 4  | 2  | 0   | 2 |
| CONTIG-073464 | 103 | 4  | 5  | 4   | 0 |
| CONTIG-073466 | 98  | 9  | 2  | 37  | 0 |
| CONTIG-073467 | 118 | 7  | 8  | 26  | 0 |
| CONTIG-073468 | 74  | 6  | 4  | 11  | 0 |
| CONTIG-073469 | 112 | 8  | 6  | 29  | 0 |
| CONTIG-073470 | 279 | 8  | 9  | 42  | 2 |
| CONTIG-073471 | 142 | 7  | 4  | 11  | 0 |
| CONTIG-073472 | 231 | 8  | 2  | 21  | 0 |
| CONTIG-073473 | 251 | 9  | 0  | 106 | 2 |
| CONTIG-073474 | 179 | 11 | 6  | 32  | 0 |
| CONTIG-073475 | 115 | 13 | 11 | 48  | 0 |

|               |     |     |    |     |   |
|---------------|-----|-----|----|-----|---|
| CONTIG-073476 | 275 | 8   | 2  | 46  | 0 |
| CONTIG-073477 | 82  | 4   | 9  | 2   | 0 |
| CONTIG-073478 | 71  | 14  | 11 | 34  | 0 |
| CONTIG-073479 | 84  | 5   | 3  | 9   | 0 |
| CONTIG-073480 | 54  | 659 | 18 | 727 | 0 |
| CONTIG-073481 | 92  | 9   | 2  | 20  | 0 |
| CONTIG-073482 | 244 | 8   | 10 | 20  | 0 |
| CONTIG-073483 | 132 | 7   | 5  | 21  | 0 |
| CONTIG-073484 | 134 | 7   | 12 | 20  | 0 |
| CONTIG-073485 | 72  | 8   | 6  | 9   | 0 |
| CONTIG-073488 | 134 | 5   | 5  | 20  | 0 |
| CONTIG-073489 | 151 | 6   | 6  | 35  | 0 |
| CONTIG-073490 | 58  | 10  | 4  | 14  | 2 |
| CONTIG-073491 | 177 | 9   | 0  | 2   | 0 |
| CONTIG-073492 | 38  | 5   | 0  | 0   | 0 |
| CONTIG-073493 | 68  | 5   | 3  | 11  | 0 |
| CONTIG-073494 | 143 | 19  | 10 | 105 | 0 |
| CONTIG-073495 | 138 | 5   | 4  | 23  | 0 |
| CONTIG-073496 | 64  | 6   | 2  | 11  | 0 |
| CONTIG-073497 | 217 | 12  | 31 | 13  | 0 |
| CONTIG-073498 | 85  | 5   | 5  | 13  | 0 |
| CONTIG-073499 | 63  | 2   | 2  | 2   | 0 |
| CONTIG-073500 | 133 | 10  | 0  | 0   | 5 |
| CONTIG-073501 | 58  | 33  | 10 | 75  | 4 |
| CONTIG-073502 | 330 | 15  | 9  | 256 | 0 |
| CONTIG-073503 | 91  | 9   | 11 | 25  | 0 |
| CONTIG-073504 | 68  | 6   | 0  | 0   | 0 |
| CONTIG-073505 | 60  | 7   | 0  | 9   | 0 |
| CONTIG-073507 | 64  | 31  | 8  | 68  | 0 |
| CONTIG-073508 | 69  | 7   | 2  | 15  | 0 |
| CONTIG-073509 | 67  | 2   | 0  | 3   | 0 |
| CONTIG-073511 | 115 | 8   | 9  | 36  | 0 |
| CONTIG-073512 | 201 | 14  | 12 | 73  | 0 |
| CONTIG-073513 | 69  | 2   | 2  | 0   | 0 |
| CONTIG-073514 | 75  | 6   | 3  | 10  | 0 |
| CONTIG-073515 | 68  | 5   | 2  | 8   | 0 |
| CONTIG-073516 | 193 | 8   | 5  | 30  | 0 |
| CONTIG-073517 | 106 | 11  | 19 | 58  | 0 |
| CONTIG-073518 | 155 | 9   | 4  | 46  | 0 |
| CONTIG-073519 | 73  | 5   | 8  | 8   | 0 |
| CONTIG-073520 | 67  | 8   | 0  | 11  | 0 |
| CONTIG-073521 | 59  | 4   | 4  | 2   | 0 |
| CONTIG-073522 | 85  | 6   | 7  | 4   | 0 |
| CONTIG-073525 | 201 | 5   | 7  | 22  | 0 |
| CONTIG-073526 | 126 | 7   | 21 | 4   | 0 |
| CONTIG-073527 | 77  | 6   | 2  | 15  | 2 |
| CONTIG-073528 | 431 | 25  | 15 | 28  | 0 |

|               |     |    |    |     |     |
|---------------|-----|----|----|-----|-----|
| CONTIG-073529 | 125 | 6  | 2  | 17  | 0   |
| CONTIG-073531 | 258 | 7  | 7  | 59  | 0   |
| CONTIG-073532 | 83  | 9  | 14 | 17  | 0   |
| CONTIG-073533 | 100 | 12 | 9  | 38  | 0   |
| CONTIG-073534 | 325 | 11 | 7  | 119 | 2   |
| CONTIG-073535 | 163 | 6  | 14 | 0   | 0   |
| CONTIG-073536 | 99  | 6  | 10 | 0   | 0   |
| CONTIG-073537 | 63  | 7  | 6  | 4   | 0   |
| CONTIG-073538 | 58  | 6  | 8  | 12  | 0   |
| CONTIG-073539 | 147 | 13 | 0  | 90  | 2   |
| CONTIG-073540 | 87  | 5  | 0  | 13  | 0   |
| CONTIG-073541 | 112 | 33 | 8  | 40  | 0   |
| CONTIG-073542 | 96  | 4  | 0  | 7   | 0   |
| CONTIG-073543 | 250 | 6  | 0  | 0   | 4   |
| CONTIG-073544 | 149 | 10 | 0  | 32  | 0   |
| CONTIG-073545 | 205 | 7  | 4  | 29  | 0   |
| CONTIG-073546 | 251 | 31 | 10 | 334 | 0   |
| CONTIG-073547 | 90  | 14 | 12 | 10  | 0   |
| CONTIG-073548 | 229 | 5  | 4  | 35  | 0   |
| CONTIG-073549 | 81  | 2  | 2  | 0   | 0   |
| CONTIG-073550 | 191 | 90 | 5  | 0   | 394 |
| CONTIG-073555 | 106 | 19 | 25 | 87  | 0   |
| CONTIG-073556 | 73  | 5  | 2  | 4   | 0   |
| CONTIG-073557 | 220 | 8  | 15 | 18  | 0   |
| CONTIG-073558 | 76  | 7  | 10 | 8   | 0   |
| CONTIG-073559 | 80  | 6  | 5  | 7   | 0   |
| CONTIG-073560 | 101 | 6  | 17 | 10  | 0   |
| CONTIG-073561 | 58  | 6  | 0  | 4   | 0   |
| CONTIG-073562 | 187 | 8  | 18 | 30  | 0   |
| CONTIG-073563 | 76  | 10 | 0  | 24  | 0   |
| CONTIG-073564 | 121 | 9  | 0  | 26  | 0   |
| CONTIG-073565 | 202 | 18 | 0  | 110 | 4   |
| CONTIG-073566 | 185 | 7  | 2  | 28  | 2   |
| CONTIG-073567 | 72  | 6  | 0  | 10  | 2   |
| CONTIG-073568 | 94  | 7  | 0  | 13  | 0   |
| CONTIG-073569 | 169 | 4  | 2  | 8   | 0   |
| CONTIG-073570 | 152 | 8  | 2  | 44  | 0   |
| CONTIG-073571 | 101 | 14 | 10 | 33  | 0   |
| CONTIG-073572 | 90  | 11 | 4  | 35  | 0   |
| CONTIG-073573 | 73  | 4  | 9  | 0   | 2   |
| CONTIG-073574 | 260 | 18 | 26 | 27  | 0   |
| CONTIG-073575 | 258 | 9  | 4  | 64  | 0   |
| CONTIG-073576 | 88  | 7  | 2  | 7   | 0   |
| CONTIG-073577 | 365 | 6  | 3  | 85  | 0   |
| CONTIG-073578 | 116 | 11 | 8  | 13  | 2   |
| CONTIG-073579 | 109 | 10 | 4  | 0   | 0   |
| CONTIG-073580 | 91  | 10 | 2  | 7   | 4   |

|               |     |    |    |     |   |
|---------------|-----|----|----|-----|---|
| CONTIG-073582 | 131 | 5  | 9  | 9   | 0 |
| CONTIG-073583 | 79  | 7  | 4  | 13  | 0 |
| CONTIG-073584 | 386 | 22 | 0  | 363 | 0 |
| CONTIG-073585 | 100 | 3  | 2  | 6   | 0 |
| CONTIG-073587 | 186 | 6  | 8  | 28  | 0 |
| CONTIG-073588 | 81  | 4  | 5  | 4   | 0 |
| CONTIG-073589 | 70  | 5  | 4  | 7   | 0 |
| CONTIG-073590 | 80  | 3  | 0  | 13  | 0 |
| CONTIG-073591 | 107 | 5  | 6  | 7   | 0 |
| CONTIG-073592 | 111 | 5  | 2  | 10  | 0 |
| CONTIG-073593 | 162 | 4  | 3  | 8   | 0 |
| CONTIG-073594 | 64  | 4  | 7  | 6   | 0 |
| CONTIG-073595 | 92  | 5  | 3  | 13  | 0 |
| CONTIG-073596 | 68  | 7  | 4  | 17  | 0 |
| CONTIG-073597 | 84  | 9  | 3  | 0   | 0 |
| CONTIG-073598 | 267 | 8  | 17 | 55  | 0 |
| CONTIG-073599 | 66  | 5  | 4  | 16  | 0 |
| CONTIG-073600 | 635 | 15 | 6  | 27  | 2 |
| CONTIG-073601 | 145 | 8  | 0  | 36  | 0 |
| CONTIG-073602 | 95  | 3  | 2  | 0   | 0 |
| CONTIG-073605 | 246 | 7  | 13 | 64  | 0 |
| CONTIG-073606 | 321 | 4  | 0  | 18  | 0 |
| CONTIG-073607 | 279 | 10 | 22 | 76  | 0 |
| CONTIG-073608 | 114 | 11 | 6  | 63  | 0 |
| CONTIG-073609 | 94  | 8  | 12 | 24  | 0 |
| CONTIG-073610 | 205 | 14 | 12 | 85  | 2 |
| CONTIG-073611 | 88  | 7  | 3  | 7   | 0 |
| CONTIG-073612 | 89  | 8  | 0  | 14  | 0 |
| CONTIG-073613 | 98  | 4  | 0  | 0   | 0 |
| CONTIG-073614 | 83  | 5  | 7  | 0   | 0 |
| CONTIG-073616 | 148 | 7  | 6  | 16  | 0 |
| CONTIG-073617 | 237 | 5  | 18 | 40  | 0 |
| CONTIG-073618 | 80  | 13 | 13 | 47  | 0 |
| CONTIG-073620 | 95  | 8  | 2  | 37  | 0 |
| CONTIG-073621 | 84  | 3  | 0  | 7   | 0 |
| CONTIG-073622 | 65  | 7  | 17 | 7   | 0 |
| CONTIG-073623 | 229 | 7  | 4  | 34  | 0 |
| CONTIG-073624 | 106 | 12 | 2  | 44  | 2 |
| CONTIG-073625 | 222 | 5  | 15 | 26  | 0 |
| CONTIG-073626 | 216 | 8  | 14 | 44  | 0 |
| CONTIG-073627 | 67  | 6  | 4  | 8   | 0 |
| CONTIG-073628 | 175 | 10 | 15 | 45  | 0 |
| CONTIG-073629 | 221 | 8  | 6  | 46  | 0 |
| CONTIG-073630 | 70  | 9  | 3  | 8   | 0 |
| CONTIG-073631 | 198 | 5  | 2  | 0   | 6 |
| CONTIG-073632 | 120 | 5  | 5  | 18  | 0 |
| CONTIG-073633 | 105 | 5  | 6  | 9   | 0 |

|               |     |     |    |     |      |
|---------------|-----|-----|----|-----|------|
| CONTIG-073634 | 109 | 8   | 9  | 20  | 0    |
| CONTIG-073635 | 352 | 9   | 6  | 113 | 0    |
| CONTIG-073636 | 140 | 4   | 9  | 8   | 0    |
| CONTIG-073637 | 93  | 5   | 5  | 8   | 0    |
| CONTIG-073638 | 118 | 22  | 2  | 20  | 0    |
| CONTIG-073639 | 223 | 18  | 0  | 0   | 0    |
| CONTIG-073640 | 78  | 2   | 3  | 2   | 0    |
| CONTIG-073641 | 574 | 10  | 23 | 210 | 2    |
| CONTIG-073642 | 94  | 5   | 4  | 11  | 0    |
| CONTIG-073643 | 109 | 5   | 0  | 23  | 0    |
| CONTIG-073644 | 96  | 9   | 5  | 20  | 0    |
| CONTIG-073645 | 65  | 14  | 18 | 18  | 0    |
| CONTIG-073646 | 370 | 11  | 14 | 166 | 0    |
| CONTIG-073647 | 136 | 10  | 6  | 40  | 0    |
| CONTIG-073648 | 201 | 9   | 8  | 65  | 0    |
| CONTIG-073650 | 143 | 5   | 2  | 18  | 0    |
| CONTIG-073651 | 350 | 9   | 22 | 102 | 4    |
| CONTIG-073652 | 61  | 2   | 2  | 0   | 0    |
| CONTIG-073653 | 231 | 11  | 15 | 12  | 0    |
| CONTIG-073654 | 512 | 15  | 41 | 391 | 0    |
| CONTIG-073655 | 128 | 6   | 8  | 19  | 0    |
| CONTIG-073656 | 244 | 4   | 2  | 16  | 0    |
| CONTIG-073657 | 174 | 6   | 6  | 17  | 2    |
| CONTIG-073658 | 187 | 20  | 9  | 74  | 2    |
| CONTIG-073659 | 78  | 10  | 23 | 5   | 0    |
| CONTIG-073661 | 419 | 22  | 52 | 348 | 0    |
| CONTIG-073662 | 112 | 6   | 11 | 12  | 0    |
| CONTIG-073663 | 281 | 6   | 7  | 29  | 0    |
| CONTIG-073664 | 137 | 8   | 2  | 22  | 0    |
| CONTIG-073665 | 92  | 16  | 18 | 61  | 0    |
| CONTIG-073666 | 196 | 9   | 9  | 45  | 0    |
| CONTIG-073667 | 80  | 8   | 3  | 9   | 0    |
| CONTIG-073668 | 100 | 6   | 3  | 15  | 2    |
| CONTIG-073669 | 104 | 5   | 15 | 8   | 0    |
| CONTIG-073670 | 75  | 5   | 5  | 2   | 0    |
| CONTIG-073671 | 154 | 6   | 4  | 0   | 5    |
| CONTIG-073672 | 301 | 21  | 46 | 160 | 4    |
| CONTIG-073673 | 107 | 7   | 2  | 17  | 2    |
| CONTIG-073674 | 131 | 4   | 18 | 4   | 0    |
| CONTIG-073675 | 122 | 6   | 2  | 12  | 0    |
| CONTIG-073676 | 131 | 9   | 9  | 26  | 2    |
| CONTIG-073677 | 81  | 3   | 0  | 0   | 0    |
| CONTIG-073678 | 95  | 3   | 5  | 3   | 0    |
| CONTIG-073679 | 281 | 7   | 4  | 85  | 0    |
| CONTIG-073680 | 58  | 873 | 2  | 0   | 1188 |
| CONTIG-073681 | 91  | 6   | 7  | 20  | 0    |
| CONTIG-073682 | 68  | 2   | 5  | 2   | 0    |

|               |     |     |    |     |    |
|---------------|-----|-----|----|-----|----|
| CONTIG-073683 | 101 | 8   | 19 | 3   | 0  |
| CONTIG-073684 | 130 | 9   | 8  | 37  | 0  |
| CONTIG-073685 | 46  | 23  | 0  | 57  | 0  |
| CONTIG-073688 | 96  | 9   | 18 | 18  | 0  |
| CONTIG-073689 | 75  | 14  | 16 | 32  | 0  |
| CONTIG-073690 | 59  | 4   | 7  | 2   | 0  |
| CONTIG-073694 | 244 | 11  | 3  | 0   | 13 |
| CONTIG-073695 | 65  | 5   | 5  | 0   | 0  |
| CONTIG-073696 | 59  | 5   | 0  | 2   | 0  |
| CONTIG-073697 | 63  | 4   | 0  | 9   | 0  |
| CONTIG-073698 | 128 | 6   | 18 | 16  | 0  |
| CONTIG-073699 | 166 | 8   | 5  | 48  | 0  |
| CONTIG-073700 | 77  | 5   | 0  | 7   | 2  |
| CONTIG-073701 | 78  | 3   | 3  | 2   | 0  |
| CONTIG-073702 | 46  | 4   | 0  | 0   | 2  |
| CONTIG-073703 | 246 | 18  | 17 | 87  | 4  |
| CONTIG-073704 | 107 | 10  | 2  | 37  | 0  |
| CONTIG-073705 | 88  | 3   | 0  | 8   | 0  |
| CONTIG-073706 | 240 | 15  | 15 | 101 | 2  |
| CONTIG-073707 | 125 | 3   | 5  | 3   | 0  |
| CONTIG-073708 | 65  | 10  | 6  | 9   | 0  |
| CONTIG-073709 | 69  | 183 | 5  | 579 | 0  |
| CONTIG-073710 | 146 | 6   | 7  | 26  | 0  |
| CONTIG-073711 | 63  | 11  | 2  | 22  | 0  |
| CONTIG-073712 | 88  | 31  | 2  | 0   | 45 |
| CONTIG-073713 | 154 | 12  | 4  | 50  | 0  |
| CONTIG-073714 | 96  | 3   | 0  | 5   | 0  |
| CONTIG-073715 | 81  | 6   | 9  | 10  | 0  |
| CONTIG-073716 | 169 | 5   | 16 | 16  | 0  |
| CONTIG-073718 | 92  | 4   | 8  | 8   | 0  |
| CONTIG-073719 | 212 | 25  | 29 | 169 | 2  |
| CONTIG-073720 | 59  | 3   | 0  | 7   | 0  |
| CONTIG-073721 | 72  | 12  | 16 | 0   | 0  |
| CONTIG-073722 | 65  | 7   | 2  | 12  | 0  |
| CONTIG-073723 | 173 | 8   | 5  | 38  | 0  |
| CONTIG-073724 | 133 | 10  | 3  | 46  | 0  |
| CONTIG-073725 | 104 | 4   | 3  | 11  | 0  |
| CONTIG-073726 | 94  | 7   | 8  | 11  | 0  |
| CONTIG-073727 | 63  | 3   | 0  | 0   | 0  |
| CONTIG-073728 | 243 | 11  | 12 | 116 | 0  |
| CONTIG-073729 | 161 | 8   | 12 | 43  | 0  |
| CONTIG-073730 | 159 | 15  | 9  | 61  | 0  |
| CONTIG-073731 | 108 | 4   | 2  | 13  | 0  |
| CONTIG-073732 | 165 | 6   | 14 | 28  | 0  |
| CONTIG-073734 | 65  | 10  | 3  | 23  | 0  |
| CONTIG-073735 | 127 | 7   | 0  | 0   | 0  |
| CONTIG-073736 | 156 | 4   | 4  | 15  | 0  |

|               |     |      |    |     |      |
|---------------|-----|------|----|-----|------|
| CONTIG-073737 | 63  | 1717 | 14 | 181 | 2793 |
| CONTIG-073738 | 204 | 8    | 6  | 54  | 0    |
| CONTIG-073739 | 67  | 6    | 9  | 0   | 0    |
| CONTIG-073740 | 101 | 6    | 7  | 14  | 0    |
| CONTIG-073741 | 522 | 28   | 34 | 487 | 30   |
| CONTIG-073742 | 80  | 10   | 0  | 2   | 0    |
| CONTIG-073743 | 67  | 22   | 12 | 64  | 0    |
| CONTIG-073744 | 65  | 9    | 3  | 14  | 0    |
| CONTIG-073745 | 243 | 37   | 2  | 5   | 0    |
| CONTIG-073746 | 155 | 6    | 5  | 17  | 0    |
| CONTIG-073747 | 190 | 5    | 12 | 38  | 0    |
| CONTIG-073748 | 130 | 5    | 5  | 17  | 0    |
| CONTIG-073749 | 268 | 5    | 4  | 43  | 3    |
| CONTIG-073750 | 738 | 42   | 2  | 0   | 163  |
| CONTIG-073751 | 192 | 4    | 4  | 20  | 0    |
| CONTIG-073752 | 81  | 17   | 42 | 45  | 0    |
| CONTIG-073753 | 71  | 1548 | 58 | 261 | 2769 |
| CONTIG-073754 | 65  | 10   | 4  | 15  | 0    |
| CONTIG-073755 | 757 | 10   | 31 | 121 | 2    |
| CONTIG-073756 | 233 | 6    | 16 | 46  | 0    |
| CONTIG-073757 | 217 | 10   | 2  | 87  | 0    |
| CONTIG-073758 | 99  | 23   | 14 | 118 | 0    |
| CONTIG-073759 | 99  | 4    | 0  | 4   | 0    |
| CONTIG-073760 | 67  | 4    | 2  | 7   | 0    |
| CONTIG-073761 | 73  | 4    | 5  | 2   | 0    |
| CONTIG-073762 | 375 | 9    | 16 | 132 | 0    |
| CONTIG-073763 | 107 | 8    | 2  | 15  | 0    |
| CONTIG-073764 | 69  | 16   | 33 | 11  | 0    |
| CONTIG-073765 | 182 | 9    | 2  | 21  | 0    |
| CONTIG-073766 | 75  | 4    | 0  | 3   | 0    |
| CONTIG-073767 | 58  | 3    | 0  | 4   | 0    |
| CONTIG-073769 | 89  | 5    | 10 | 0   | 0    |
| CONTIG-073771 | 66  | 7    | 6  | 6   | 0    |
| CONTIG-073773 | 110 | 5    | 4  | 13  | 0    |
| CONTIG-073774 | 112 | 8    | 21 | 11  | 0    |
| CONTIG-073775 | 83  | 7    | 2  | 19  | 0    |
| CONTIG-073776 | 101 | 5    | 7  | 16  | 0    |
| CONTIG-073777 | 92  | 9    | 2  | 8   | 0    |
| CONTIG-073778 | 378 | 8    | 8  | 52  | 5    |
| CONTIG-073779 | 62  | 3    | 11 | 0   | 0    |
| CONTIG-073780 | 73  | 3    | 0  | 6   | 0    |
| CONTIG-073781 | 115 | 5    | 2  | 13  | 0    |
| CONTIG-073783 | 60  | 7    | 15 | 8   | 0    |
| CONTIG-073784 | 64  | 3    | 5  | 2   | 0    |
| CONTIG-073785 | 80  | 5    | 9  | 0   | 0    |
| CONTIG-073786 | 63  | 5    | 5  | 3   | 0    |
| CONTIG-073787 | 206 | 14   | 0  | 0   | 16   |



|               |     |     |    |     |    |
|---------------|-----|-----|----|-----|----|
| CONTIG-073788 | 271 | 7   | 11 | 30  | 0  |
| CONTIG-073790 | 193 | 9   | 9  | 63  | 0  |
| CONTIG-073791 | 225 | 8   | 5  | 22  | 0  |
| CONTIG-073792 | 209 | 9   | 5  | 59  | 0  |
| CONTIG-073793 | 59  | 5   | 6  | 10  | 0  |
| CONTIG-073794 | 71  | 44  | 4  | 108 | 0  |
| CONTIG-073795 | 68  | 6   | 2  | 13  | 0  |
| CONTIG-073796 | 92  | 7   | 5  | 18  | 0  |
| CONTIG-073797 | 68  | 9   | 0  | 12  | 0  |
| CONTIG-073798 | 250 | 13  | 19 | 108 | 0  |
| CONTIG-073799 | 160 | 7   | 6  | 32  | 0  |
| CONTIG-073800 | 107 | 21  | 4  | 46  | 2  |
| CONTIG-073802 | 184 | 7   | 12 | 34  | 0  |
| CONTIG-073803 | 90  | 6   | 2  | 13  | 0  |
| CONTIG-073804 | 99  | 6   | 11 | 15  | 0  |
| CONTIG-073805 | 154 | 9   | 2  | 35  | 0  |
| CONTIG-073806 | 200 | 18  | 7  | 184 | 0  |
| CONTIG-073807 | 366 | 7   | 14 | 50  | 0  |
| CONTIG-073808 | 123 | 6   | 5  | 16  | 0  |
| CONTIG-073812 | 75  | 3   | 3  | 2   | 0  |
| CONTIG-073814 | 58  | 5   | 14 | 4   | 0  |
| CONTIG-073816 | 125 | 7   | 13 | 13  | 0  |
| CONTIG-073817 | 134 | 16  | 25 | 57  | 4  |
| CONTIG-073818 | 271 | 7   | 10 | 18  | 0  |
| CONTIG-073819 | 48  | 667 | 2  | 0   | 54 |
| CONTIG-073820 | 192 | 7   | 13 | 2   | 0  |
| CONTIG-073821 | 181 | 10  | 2  | 62  | 2  |
| CONTIG-073822 | 230 | 17  | 7  | 72  | 0  |
| CONTIG-073823 | 132 | 11  | 0  | 41  | 0  |
| CONTIG-073824 | 72  | 5   | 2  | 12  | 0  |
| CONTIG-073827 | 80  | 7   | 2  | 9   | 0  |
| CONTIG-073829 | 102 | 6   | 0  | 21  | 0  |
| CONTIG-073830 | 83  | 5   | 6  | 16  | 0  |
| CONTIG-073831 | 339 | 14  | 11 | 258 | 2  |
| CONTIG-073832 | 74  | 6   | 2  | 9   | 0  |
| CONTIG-073833 | 131 | 10  | 0  | 31  | 2  |
| CONTIG-073834 | 61  | 4   | 5  | 2   | 0  |
| CONTIG-073835 | 65  | 3   | 11 | 4   | 0  |
| CONTIG-073836 | 146 | 14  | 0  | 0   | 7  |
| CONTIG-073837 | 39  | 22  | 0  | 0   | 6  |
| CONTIG-073838 | 65  | 4   | 2  | 5   | 0  |
| CONTIG-073839 | 112 | 7   | 16 | 27  | 0  |
| CONTIG-073840 | 86  | 10  | 4  | 39  | 0  |
| CONTIG-073842 | 413 | 8   | 11 | 90  | 0  |
| CONTIG-073843 | 50  | 104 | 3  | 270 | 0  |
| CONTIG-073844 | 145 | 5   | 0  | 24  | 0  |
| CONTIG-073845 | 113 | 6   | 2  | 23  | 0  |

|               |     |     |    |     |     |
|---------------|-----|-----|----|-----|-----|
| CONTIG-073846 | 198 | 14  | 5  | 110 | 0   |
| CONTIG-073848 | 100 | 5   | 4  | 13  | 0   |
| CONTIG-073849 | 173 | 6   | 24 | 25  | 0   |
| CONTIG-073850 | 125 | 6   | 2  | 28  | 0   |
| CONTIG-073851 | 130 | 11  | 21 | 48  | 0   |
| CONTIG-073852 | 347 | 15  | 10 | 255 | 0   |
| CONTIG-073853 | 297 | 5   | 33 | 17  | 0   |
| CONTIG-073854 | 72  | 7   | 14 | 5   | 0   |
| CONTIG-073855 | 103 | 12  | 2  | 36  | 0   |
| CONTIG-073856 | 66  | 5   | 0  | 7   | 0   |
| CONTIG-073857 | 73  | 15  | 2  | 52  | 0   |
| CONTIG-073859 | 116 | 6   | 7  | 23  | 0   |
| CONTIG-073860 | 108 | 3   | 2  | 12  | 0   |
| CONTIG-073862 | 160 | 11  | 6  | 7   | 2   |
| CONTIG-073869 | 76  | 3   | 0  | 6   | 0   |
| CONTIG-073870 | 94  | 9   | 3  | 21  | 0   |
| CONTIG-073871 | 81  | 5   | 15 | 0   | 0   |
| CONTIG-073872 | 76  | 12  | 7  | 21  | 0   |
| CONTIG-073873 | 143 | 9   | 8  | 14  | 0   |
| CONTIG-073874 | 78  | 8   | 0  | 21  | 2   |
| CONTIG-073876 | 114 | 6   | 5  | 15  | 0   |
| CONTIG-073877 | 78  | 6   | 0  | 10  | 0   |
| CONTIG-073878 | 106 | 15  | 4  | 69  | 0   |
| CONTIG-073879 | 134 | 4   | 0  | 20  | 0   |
| CONTIG-073880 | 377 | 18  | 16 | 302 | 2   |
| CONTIG-073881 | 60  | 2   | 0  | 2   | 0   |
| CONTIG-073882 | 81  | 3   | 4  | 6   | 0   |
| CONTIG-073883 | 254 | 9   | 4  | 75  | 0   |
| CONTIG-073884 | 74  | 105 | 5  | 181 | 20  |
| CONTIG-073885 | 164 | 12  | 4  | 56  | 0   |
| CONTIG-073886 | 171 | 7   | 20 | 8   | 2   |
| CONTIG-073887 | 364 | 30  | 3  | 0   | 63  |
| CONTIG-073888 | 88  | 14  | 16 | 34  | 0   |
| CONTIG-073889 | 768 | 15  | 15 | 0   | 134 |
| CONTIG-073890 | 102 | 8   | 5  | 12  | 0   |
| CONTIG-073891 | 58  | 4   | 4  | 2   | 0   |
| CONTIG-073892 | 119 | 10  | 19 | 14  | 2   |
| CONTIG-073893 | 81  | 7   | 3  | 21  | 0   |
| CONTIG-073894 | 221 | 16  | 9  | 127 | 0   |
| CONTIG-073895 | 153 | 6   | 8  | 33  | 0   |
| CONTIG-073896 | 631 | 12  | 3  | 409 | 0   |
| CONTIG-073898 | 85  | 6   | 7  | 8   | 0   |
| CONTIG-073900 | 106 | 6   | 3  | 15  | 0   |
| CONTIG-073901 | 225 | 12  | 0  | 88  | 0   |
| CONTIG-073902 | 112 | 7   | 5  | 31  | 2   |
| CONTIG-073903 | 196 | 8   | 6  | 27  | 2   |
| CONTIG-073904 | 227 | 127 | 2  | 319 | 2   |

|               |     |     |    |     |    |
|---------------|-----|-----|----|-----|----|
| CONTIG-073905 | 537 | 30  | 35 | 330 | 22 |
| CONTIG-073906 | 93  | 7   | 3  | 27  | 0  |
| CONTIG-073907 | 62  | 4   | 4  | 0   | 0  |
| CONTIG-073908 | 168 | 5   | 14 | 9   | 0  |
| CONTIG-073909 | 362 | 5   | 2  | 81  | 0  |
| CONTIG-073910 | 39  | 33  | 4  | 0   | 0  |
| CONTIG-073911 | 249 | 5   | 5  | 21  | 0  |
| CONTIG-073912 | 147 | 8   | 6  | 10  | 0  |
| CONTIG-073913 | 235 | 31  | 7  | 0   | 0  |
| CONTIG-073914 | 89  | 5   | 4  | 4   | 0  |
| CONTIG-073915 | 240 | 4   | 4  | 38  | 0  |
| CONTIG-073916 | 63  | 3   | 2  | 4   | 0  |
| CONTIG-073918 | 83  | 4   | 11 | 2   | 0  |
| CONTIG-073919 | 345 | 6   | 2  | 44  | 2  |
| CONTIG-073920 | 91  | 5   | 2  | 20  | 0  |
| CONTIG-073921 | 77  | 5   | 4  | 10  | 0  |
| CONTIG-073922 | 374 | 10  | 13 | 118 | 0  |
| CONTIG-073923 | 119 | 7   | 4  | 22  | 2  |
| CONTIG-073924 | 121 | 8   | 5  | 29  | 0  |
| CONTIG-073925 | 91  | 4   | 0  | 4   | 0  |
| CONTIG-073926 | 129 | 111 | 0  | 470 | 0  |
| CONTIG-073927 | 81  | 4   | 0  | 11  | 0  |
| CONTIG-073928 | 117 | 6   | 2  | 20  | 0  |
| CONTIG-073929 | 130 | 10  | 4  | 41  | 0  |
| CONTIG-073931 | 192 | 4   | 0  | 22  | 0  |
| CONTIG-073932 | 298 | 32  | 21 | 51  | 0  |
| CONTIG-073934 | 240 | 11  | 12 | 82  | 2  |
| CONTIG-073935 | 182 | 8   | 7  | 56  | 2  |
| CONTIG-073936 | 84  | 9   | 8  | 20  | 0  |
| CONTIG-073937 | 151 | 10  | 12 | 60  | 0  |
| CONTIG-073939 | 107 | 10  | 11 | 38  | 0  |
| CONTIG-073940 | 60  | 5   | 8  | 8   | 0  |
| CONTIG-073941 | 135 | 8   | 7  | 34  | 0  |
| CONTIG-073942 | 88  | 8   | 3  | 14  | 0  |
| CONTIG-073944 | 183 | 6   | 13 | 47  | 0  |
| CONTIG-073947 | 88  | 9   | 3  | 13  | 0  |
| CONTIG-073948 | 134 | 10  | 4  | 28  | 2  |
| CONTIG-073949 | 143 | 5   | 10 | 9   | 0  |
| CONTIG-073950 | 106 | 5   | 2  | 15  | 0  |
| CONTIG-073951 | 136 | 6   | 0  | 0   | 3  |
| CONTIG-073952 | 237 | 7   | 2  | 37  | 0  |
| CONTIG-073953 | 654 | 10  | 6  | 252 | 0  |
| CONTIG-073954 | 157 | 9   | 11 | 32  | 0  |
| CONTIG-073955 | 145 | 8   | 16 | 39  | 0  |
| CONTIG-073956 | 83  | 6   | 2  | 0   | 0  |
| CONTIG-073957 | 247 | 6   | 2  | 40  | 0  |
| CONTIG-073958 | 132 | 11  | 14 | 56  | 4  |

|               |     |      |    |     |      |
|---------------|-----|------|----|-----|------|
| CONTIG-073959 | 67  | 5    | 0  | 10  | 0    |
| CONTIG-073961 | 228 | 11   | 3  | 106 | 0    |
| CONTIG-073962 | 291 | 12   | 0  | 0   | 12   |
| CONTIG-073963 | 120 | 5    | 2  | 19  | 0    |
| CONTIG-073964 | 213 | 14   | 25 | 43  | 0    |
| CONTIG-073965 | 194 | 6    | 9  | 43  | 0    |
| CONTIG-073966 | 134 | 7    | 9  | 16  | 0    |
| CONTIG-073967 | 313 | 41   | 8  | 755 | 2    |
| CONTIG-073968 | 108 | 10   | 19 | 13  | 3    |
| CONTIG-073969 | 130 | 11   | 10 | 34  | 0    |
| CONTIG-073970 | 93  | 8    | 4  | 27  | 0    |
| CONTIG-073971 | 73  | 8    | 13 | 8   | 0    |
| CONTIG-073972 | 73  | 4    | 2  | 6   | 0    |
| CONTIG-073973 | 100 | 6    | 4  | 22  | 0    |
| CONTIG-073974 | 135 | 4    | 3  | 21  | 0    |
| CONTIG-073975 | 126 | 9    | 8  | 48  | 0    |
| CONTIG-073976 | 251 | 6    | 5  | 52  | 0    |
| CONTIG-073977 | 140 | 6    | 11 | 28  | 0    |
| CONTIG-073978 | 70  | 5    | 12 | 4   | 0    |
| CONTIG-073979 | 69  | 3    | 5  | 4   | 0    |
| CONTIG-073981 | 228 | 8    | 0  | 53  | 0    |
| CONTIG-073982 | 89  | 4    | 3  | 4   | 0    |
| CONTIG-073983 | 175 | 7    | 16 | 42  | 4    |
| CONTIG-073984 | 83  | 4    | 4  | 12  | 0    |
| CONTIG-073986 | 60  | 10   | 7  | 8   | 0    |
| CONTIG-073987 | 222 | 7    | 0  | 49  | 0    |
| CONTIG-073988 | 335 | 26   | 12 | 20  | 0    |
| CONTIG-073989 | 223 | 19   | 31 | 161 | 2    |
| CONTIG-073990 | 89  | 4    | 4  | 10  | 0    |
| CONTIG-073997 | 82  | 6    | 10 | 5   | 0    |
| CONTIG-073998 | 62  | 4    | 0  | 12  | 0    |
| CONTIG-073999 | 56  | 1298 | 5  | 0   | 1742 |
| CONTIG-074000 | 82  | 3    | 16 | 4   | 0    |
| CONTIG-074001 | 83  | 6    | 4  | 17  | 0    |
| CONTIG-074002 | 191 | 22   | 5  | 233 | 0    |
| CONTIG-074003 | 59  | 4    | 4  | 7   | 0    |
| CONTIG-074004 | 61  | 3    | 0  | 6   | 0    |
| CONTIG-074005 | 69  | 8    | 2  | 15  | 0    |
| CONTIG-074006 | 117 | 4    | 2  | 12  | 0    |
| CONTIG-074007 | 89  | 5    | 4  | 15  | 0    |
| CONTIG-074008 | 58  | 11   | 12 | 20  | 0    |
| CONTIG-074009 | 142 | 7    | 11 | 28  | 0    |
| CONTIG-074010 | 99  | 6    | 0  | 2   | 0    |
| CONTIG-074011 | 85  | 4    | 4  | 0   | 0    |
| CONTIG-074012 | 518 | 8    | 4  | 2   | 0    |
| CONTIG-074013 | 154 | 4    | 0  | 6   | 0    |
| CONTIG-074015 | 372 | 14   | 39 | 247 | 0    |

|               |     |     |    |     |      |
|---------------|-----|-----|----|-----|------|
| CONTIG-074016 | 216 | 8   | 12 | 59  | 0    |
| CONTIG-074017 | 65  | 4   | 2  | 0   | 0    |
| CONTIG-074018 | 59  | 7   | 3  | 8   | 0    |
| CONTIG-074019 | 74  | 10  | 4  | 37  | 0    |
| CONTIG-074020 | 72  | 3   | 0  | 2   | 0    |
| CONTIG-074021 | 204 | 6   | 0  | 6   | 0    |
| CONTIG-074022 | 205 | 10  | 19 | 52  | 0    |
| CONTIG-074023 | 806 | 12  | 5  | 31  | 0    |
| CONTIG-074024 | 203 | 7   | 11 | 4   | 0    |
| CONTIG-074025 | 39  | 58  | 5  | 62  | 0    |
| CONTIG-074027 | 138 | 13  | 13 | 14  | 0    |
| CONTIG-074028 | 166 | 13  | 0  | 59  | 0    |
| CONTIG-074029 | 471 | 128 | 3  | 0   | 1613 |
| CONTIG-074030 | 99  | 24  | 0  | 6   | 0    |
| CONTIG-074031 | 188 | 179 | 5  | 387 | 17   |
| CONTIG-074032 | 218 | 5   | 6  | 17  | 0    |
| CONTIG-074038 | 196 | 9   | 7  | 50  | 0    |
| CONTIG-074040 | 93  | 3   | 0  | 6   | 0    |
| CONTIG-074041 | 212 | 9   | 8  | 44  | 0    |
| CONTIG-074042 | 382 | 261 | 23 | 7   | 0    |
| CONTIG-074043 | 107 | 6   | 2  | 8   | 0    |
| CONTIG-074044 | 60  | 5   | 6  | 0   | 0    |
| CONTIG-074045 | 204 | 8   | 9  | 26  | 0    |
| CONTIG-074051 | 212 | 5   | 0  | 31  | 0    |
| CONTIG-074054 | 82  | 7   | 5  | 13  | 0    |
| CONTIG-074058 | 121 | 5   | 2  | 2   | 0    |
| CONTIG-074059 | 139 | 5   | 4  | 27  | 0    |
| CONTIG-074060 | 66  | 3   | 3  | 7   | 0    |
| CONTIG-074061 | 93  | 16  | 18 | 9   | 0    |
| CONTIG-074062 | 72  | 6   | 0  | 9   | 0    |
| CONTIG-074063 | 61  | 5   | 5  | 5   | 0    |
| CONTIG-074064 | 153 | 5   | 12 | 17  | 0    |
| CONTIG-074065 | 141 | 8   | 7  | 34  | 0    |
| CONTIG-074066 | 60  | 17  | 22 | 0   | 2    |
| CONTIG-074068 | 103 | 8   | 12 | 14  | 0    |
| CONTIG-074069 | 125 | 6   | 6  | 17  | 0    |
| CONTIG-074070 | 133 | 6   | 5  | 28  | 0    |
| CONTIG-074071 | 126 | 43  | 12 | 285 | 4    |
| CONTIG-074072 | 211 | 10  | 7  | 30  | 0    |
| CONTIG-074073 | 87  | 4   | 3  | 3   | 0    |
| CONTIG-074074 | 100 | 6   | 22 | 0   | 0    |
| CONTIG-074076 | 328 | 5   | 11 | 39  | 0    |
| CONTIG-074077 | 81  | 8   | 3  | 28  | 0    |
| CONTIG-074078 | 71  | 5   | 2  | 10  | 2    |
| CONTIG-074080 | 151 | 9   | 9  | 37  | 0    |
| CONTIG-074081 | 275 | 6   | 7  | 51  | 0    |
| CONTIG-074082 | 148 | 8   | 4  | 27  | 0    |

|               |     |    |    |     |   |
|---------------|-----|----|----|-----|---|
| CONTIG-074083 | 86  | 10 | 8  | 22  | 0 |
| CONTIG-074084 | 137 | 5  | 3  | 16  | 2 |
| CONTIG-074085 | 449 | 8  | 3  | 4   | 0 |
| CONTIG-074086 | 37  | 34 | 0  | 42  | 0 |
| CONTIG-074087 | 75  | 10 | 8  | 26  | 0 |
| CONTIG-074088 | 83  | 3  | 0  | 2   | 0 |
| CONTIG-074089 | 97  | 5  | 2  | 15  | 0 |
| CONTIG-074090 | 58  | 16 | 3  | 10  | 2 |
| CONTIG-074091 | 118 | 7  | 7  | 12  | 0 |
| CONTIG-074092 | 109 | 10 | 24 | 12  | 0 |
| CONTIG-074093 | 277 | 5  | 7  | 23  | 4 |
| CONTIG-074094 | 91  | 11 | 21 | 12  | 0 |
| CONTIG-074095 | 63  | 5  | 6  | 0   | 0 |
| CONTIG-074096 | 59  | 4  | 6  | 2   | 0 |
| CONTIG-074097 | 100 | 10 | 4  | 35  | 0 |
| CONTIG-074098 | 71  | 5  | 0  | 15  | 0 |
| CONTIG-074099 | 108 | 8  | 5  | 32  | 0 |
| CONTIG-074100 | 91  | 5  | 0  | 12  | 0 |
| CONTIG-074101 | 134 | 15 | 10 | 89  | 0 |
| CONTIG-074102 | 172 | 6  | 11 | 25  | 0 |
| CONTIG-074103 | 65  | 5  | 0  | 5   | 0 |
| CONTIG-074104 | 163 | 5  | 8  | 10  | 0 |
| CONTIG-074105 | 72  | 9  | 21 | 4   | 0 |
| CONTIG-074106 | 68  | 6  | 7  | 11  | 0 |
| CONTIG-074107 | 317 | 23 | 0  | 25  | 0 |
| CONTIG-074108 | 137 | 5  | 3  | 14  | 0 |
| CONTIG-074111 | 90  | 6  | 0  | 11  | 0 |
| CONTIG-074112 | 63  | 5  | 2  | 6   | 0 |
| CONTIG-074113 | 133 | 3  | 5  | 10  | 0 |
| CONTIG-074114 | 81  | 9  | 0  | 9   | 0 |
| CONTIG-074115 | 161 | 9  | 6  | 46  | 0 |
| CONTIG-074116 | 116 | 13 | 10 | 23  | 0 |
| CONTIG-074117 | 105 | 18 | 4  | 95  | 0 |
| CONTIG-074118 | 80  | 3  | 6  | 2   | 0 |
| CONTIG-074119 | 69  | 5  | 2  | 4   | 0 |
| CONTIG-074120 | 143 | 11 | 2  | 76  | 0 |
| CONTIG-074122 | 144 | 8  | 8  | 28  | 0 |
| CONTIG-074123 | 255 | 11 | 5  | 100 | 0 |
| CONTIG-074124 | 63  | 15 | 7  | 23  | 0 |
| CONTIG-074125 | 65  | 13 | 16 | 17  | 0 |
| CONTIG-074126 | 127 | 29 | 7  | 121 | 0 |
| CONTIG-074127 | 64  | 4  | 3  | 8   | 0 |
| CONTIG-074128 | 109 | 20 | 10 | 50  | 0 |
| CONTIG-074129 | 238 | 7  | 3  | 41  | 0 |
| CONTIG-074130 | 71  | 5  | 2  | 13  | 0 |
| CONTIG-074131 | 334 | 17 | 25 | 145 | 2 |
| CONTIG-074132 | 106 | 6  | 7  | 20  | 0 |

|               |     |      |    |      |   |
|---------------|-----|------|----|------|---|
| CONTIG-074133 | 107 | 7    | 7  | 26   | 0 |
| CONTIG-074134 | 198 | 10   | 12 | 70   | 0 |
| CONTIG-074135 | 99  | 4    | 4  | 4    | 0 |
| CONTIG-074136 | 371 | 14   | 15 | 144  | 0 |
| CONTIG-074137 | 80  | 13   | 2  | 0    | 2 |
| CONTIG-074138 | 111 | 6    | 0  | 35   | 0 |
| CONTIG-074139 | 231 | 11   | 36 | 24   | 2 |
| CONTIG-074140 | 125 | 7    | 19 | 24   | 0 |
| CONTIG-074141 | 72  | 7    | 0  | 18   | 0 |
| CONTIG-074142 | 93  | 7    | 12 | 21   | 0 |
| CONTIG-074143 | 243 | 9    | 25 | 21   | 0 |
| CONTIG-074144 | 83  | 4    | 7  | 6    | 0 |
| CONTIG-074145 | 404 | 7    | 23 | 67   | 0 |
| CONTIG-074146 | 75  | 6    | 5  | 12   | 0 |
| CONTIG-074147 | 66  | 3    | 2  | 2    | 0 |
| CONTIG-074148 | 60  | 3    | 0  | 2    | 0 |
| CONTIG-074149 | 121 | 4    | 17 | 9    | 0 |
| CONTIG-074150 | 75  | 11   | 8  | 17   | 0 |
| CONTIG-074151 | 219 | 8    | 5  | 36   | 0 |
| CONTIG-074152 | 224 | 7    | 5  | 39   | 0 |
| CONTIG-074153 | 69  | 5    | 0  | 5    | 0 |
| CONTIG-074154 | 136 | 9    | 2  | 46   | 0 |
| CONTIG-074155 | 80  | 5    | 4  | 11   | 0 |
| CONTIG-074157 | 313 | 11   | 23 | 100  | 0 |
| CONTIG-074158 | 124 | 17   | 2  | 35   | 0 |
| CONTIG-074159 | 76  | 11   | 0  | 16   | 0 |
| CONTIG-074160 | 232 | 10   | 3  | 53   | 0 |
| CONTIG-074161 | 92  | 3    | 7  | 0    | 0 |
| CONTIG-074162 | 77  | 8    | 17 | 10   | 0 |
| CONTIG-074163 | 107 | 13   | 12 | 60   | 0 |
| CONTIG-074164 | 60  | 3    | 2  | 0    | 0 |
| CONTIG-074165 | 79  | 4    | 2  | 8    | 0 |
| CONTIG-074166 | 73  | 10   | 8  | 20   | 0 |
| CONTIG-074167 | 113 | 5    | 3  | 13   | 0 |
| CONTIG-074168 | 38  | 2028 | 0  | 1224 | 0 |
| CONTIG-074169 | 235 | 24   | 21 | 238  | 0 |
| CONTIG-074171 | 255 | 48   | 11 | 184  | 7 |
| CONTIG-074172 | 129 | 6    | 0  | 9    | 3 |
| CONTIG-074173 | 123 | 7    | 7  | 26   | 0 |
| CONTIG-074174 | 77  | 6    | 4  | 8    | 0 |
| CONTIG-074175 | 75  | 11   | 19 | 14   | 0 |
| CONTIG-074176 | 104 | 5    | 7  | 14   | 0 |
| CONTIG-074177 | 610 | 10   | 17 | 175  | 0 |
| CONTIG-074178 | 119 | 6    | 4  | 18   | 0 |
| CONTIG-074183 | 72  | 5    | 5  | 4    | 0 |
| CONTIG-074184 | 115 | 4    | 2  | 12   | 0 |
| CONTIG-074185 | 50  | 86   | 4  | 192  | 0 |

|               |     |     |    |     |     |
|---------------|-----|-----|----|-----|-----|
| CONTIG-074186 | 105 | 673 | 14 | 14  | 2   |
| CONTIG-074187 | 225 | 239 | 0  | 0   | 243 |
| CONTIG-074188 | 63  | 7   | 12 | 3   | 0   |
| CONTIG-074189 | 152 | 9   | 3  | 41  | 0   |
| CONTIG-074190 | 88  | 4   | 5  | 2   | 0   |
| CONTIG-074193 | 65  | 7   | 4  | 11  | 0   |
| CONTIG-074194 | 78  | 11  | 15 | 34  | 0   |
| CONTIG-074195 | 157 | 7   | 3  | 40  | 0   |
| CONTIG-074196 | 104 | 5   | 0  | 22  | 0   |
| CONTIG-074197 | 169 | 7   | 0  | 38  | 0   |
| CONTIG-074198 | 103 | 6   | 10 | 2   | 0   |
| CONTIG-074200 | 590 | 14  | 2  | 299 | 0   |
| CONTIG-074201 | 99  | 4   | 13 | 6   | 0   |
| CONTIG-074202 | 98  | 5   | 6  | 2   | 0   |
| CONTIG-074203 | 196 | 10  | 9  | 56  | 0   |
| CONTIG-074204 | 146 | 10  | 5  | 48  | 0   |
| CONTIG-074205 | 83  | 9   | 17 | 7   | 0   |
| CONTIG-074206 | 180 | 20  | 9  | 148 | 2   |
| CONTIG-074207 | 145 | 3   | 2  | 19  | 0   |
| CONTIG-074208 | 102 | 3   | 0  | 0   | 0   |
| CONTIG-074209 | 111 | 5   | 6  | 9   | 0   |
| CONTIG-074211 | 89  | 5   | 5  | 20  | 0   |
| CONTIG-074214 | 80  | 4   | 5  | 2   | 0   |
| CONTIG-074216 | 88  | 4   | 5  | 11  | 0   |
| CONTIG-074218 | 82  | 4   | 0  | 14  | 0   |
| CONTIG-074219 | 126 | 8   | 2  | 34  | 0   |
| CONTIG-074220 | 125 | 4   | 4  | 17  | 0   |
| CONTIG-074221 | 185 | 11  | 22 | 41  | 0   |
| CONTIG-074222 | 95  | 10  | 2  | 39  | 0   |
| CONTIG-074223 | 67  | 5   | 20 | 0   | 0   |
| CONTIG-074224 | 61  | 3   | 7  | 0   | 0   |
| CONTIG-074225 | 60  | 4   | 10 | 4   | 0   |
| CONTIG-074226 | 137 | 8   | 4  | 11  | 0   |
| CONTIG-074227 | 92  | 3   | 5  | 0   | 2   |
| CONTIG-074228 | 67  | 8   | 7  | 14  | 0   |
| CONTIG-074229 | 211 | 8   | 10 | 80  | 0   |
| CONTIG-074230 | 62  | 3   | 3  | 2   | 0   |
| CONTIG-074231 | 134 | 13  | 28 | 10  | 2   |
| CONTIG-074232 | 103 | 10  | 22 | 15  | 0   |
| CONTIG-074236 | 73  | 8   | 4  | 21  | 0   |
| CONTIG-074237 | 99  | 7   | 2  | 20  | 0   |
| CONTIG-074238 | 127 | 8   | 5  | 32  | 0   |
| CONTIG-074239 | 64  | 5   | 2  | 0   | 0   |
| CONTIG-074241 | 92  | 6   | 4  | 14  | 0   |
| CONTIG-074243 | 81  | 3   | 0  | 0   | 0   |
| CONTIG-074244 | 107 | 6   | 4  | 12  | 2   |
| CONTIG-074245 | 66  | 7   | 13 | 3   | 0   |



|               |     |    |    |     |   |
|---------------|-----|----|----|-----|---|
| CONTIG-074246 | 136 | 9  | 25 | 16  | 0 |
| CONTIG-074249 | 151 | 4  | 4  | 15  | 0 |
| CONTIG-074250 | 85  | 4  | 11 | 2   | 0 |
| CONTIG-074251 | 333 | 20 | 35 | 222 | 4 |
| CONTIG-074252 | 143 | 4  | 4  | 4   | 0 |
| CONTIG-074253 | 183 | 7  | 8  | 20  | 0 |
| CONTIG-074254 | 159 | 8  | 2  | 41  | 0 |
| CONTIG-074255 | 79  | 4  | 6  | 11  | 0 |
| CONTIG-074256 | 130 | 19 | 8  | 55  | 0 |
| CONTIG-074257 | 194 | 9  | 2  | 41  | 0 |
| CONTIG-074258 | 61  | 6  | 0  | 9   | 2 |
| CONTIG-074259 | 117 | 5  | 2  | 18  | 0 |
| CONTIG-074260 | 100 | 3  | 0  | 7   | 0 |
| CONTIG-074261 | 241 | 6  | 21 | 41  | 0 |
| CONTIG-074262 | 136 | 6  | 5  | 31  | 0 |
| CONTIG-074263 | 103 | 8  | 12 | 30  | 0 |
| CONTIG-074264 | 115 | 5  | 0  | 4   | 0 |
| CONTIG-074265 | 95  | 5  | 16 | 2   | 0 |
| CONTIG-074266 | 107 | 8  | 5  | 18  | 0 |
| CONTIG-074267 | 208 | 9  | 4  | 41  | 2 |
| CONTIG-074268 | 67  | 5  | 10 | 0   | 0 |
| CONTIG-074269 | 119 | 6  | 2  | 25  | 0 |
| CONTIG-074270 | 319 | 12 | 0  | 0   | 0 |
| CONTIG-074271 | 78  | 3  | 3  | 5   | 0 |
| CONTIG-074272 | 149 | 9  | 15 | 47  | 0 |
| CONTIG-074274 | 102 | 8  | 3  | 26  | 2 |
| CONTIG-074275 | 126 | 4  | 11 | 6   | 0 |
| CONTIG-074276 | 81  | 7  | 5  | 4   | 0 |
| CONTIG-074278 | 88  | 16 | 16 | 46  | 0 |
| CONTIG-074279 | 150 | 9  | 8  | 29  | 0 |
| CONTIG-074280 | 80  | 8  | 5  | 19  | 0 |
| CONTIG-074282 | 60  | 16 | 18 | 0   | 0 |
| CONTIG-074284 | 58  | 7  | 0  | 8   | 0 |
| CONTIG-074285 | 146 | 13 | 19 | 68  | 0 |
| CONTIG-074286 | 193 | 7  | 12 | 26  | 0 |
| CONTIG-074287 | 62  | 5  | 8  | 0   | 0 |
| CONTIG-074288 | 314 | 10 | 23 | 94  | 0 |
| CONTIG-074289 | 44  | 9  | 2  | 2   | 0 |
| CONTIG-074290 | 63  | 8  | 2  | 14  | 0 |
| CONTIG-074292 | 80  | 7  | 2  | 13  | 0 |
| CONTIG-074293 | 111 | 6  | 7  | 28  | 0 |
| CONTIG-074294 | 143 | 4  | 3  | 9   | 0 |
| CONTIG-074295 | 190 | 5  | 6  | 15  | 0 |
| CONTIG-074296 | 88  | 8  | 22 | 11  | 0 |
| CONTIG-074297 | 157 | 12 | 3  | 71  | 0 |
| CONTIG-074303 | 120 | 4  | 0  | 9   | 0 |
| CONTIG-074304 | 130 | 7  | 3  | 36  | 0 |

|               |     |    |    |    |     |
|---------------|-----|----|----|----|-----|
| CONTIG-074305 | 75  | 3  | 0  | 6  | 0   |
| CONTIG-074306 | 116 | 7  | 8  | 18 | 0   |
| CONTIG-074307 | 110 | 6  | 0  | 19 | 0   |
| CONTIG-074308 | 138 | 14 | 13 | 32 | 0   |
| CONTIG-074309 | 68  | 3  | 5  | 3  | 0   |
| CONTIG-074310 | 76  | 4  | 2  | 2  | 0   |
| CONTIG-074311 | 82  | 4  | 5  | 10 | 0   |
| CONTIG-074312 | 113 | 5  | 0  | 14 | 0   |
| CONTIG-074313 | 68  | 3  | 5  | 5  | 0   |
| CONTIG-074314 | 241 | 11 | 18 | 19 | 0   |
| CONTIG-074315 | 106 | 7  | 15 | 24 | 2   |
| CONTIG-074316 | 206 | 4  | 0  | 9  | 0   |
| CONTIG-074317 | 126 | 10 | 23 | 5  | 3   |
| CONTIG-074321 | 160 | 7  | 12 | 14 | 0   |
| CONTIG-074322 | 79  | 3  | 3  | 0  | 0   |
| CONTIG-074323 | 76  | 5  | 5  | 2  | 0   |
| CONTIG-074324 | 91  | 5  | 10 | 9  | 0   |
| CONTIG-074327 | 148 | 7  | 6  | 5  | 0   |
| CONTIG-074328 | 88  | 2  | 2  | 2  | 0   |
| CONTIG-074329 | 144 | 4  | 7  | 14 | 0   |
| CONTIG-074330 | 58  | 5  | 9  | 2  | 0   |
| CONTIG-074331 | 122 | 6  | 5  | 17 | 0   |
| CONTIG-074332 | 71  | 6  | 3  | 15 | 0   |
| CONTIG-074333 | 115 | 10 | 3  | 27 | 2   |
| CONTIG-074335 | 145 | 4  | 4  | 25 | 0   |
| CONTIG-074336 | 105 | 23 | 8  | 76 | 2   |
| CONTIG-074337 | 168 | 7  | 9  | 30 | 0   |
| CONTIG-074338 | 68  | 4  | 4  | 7  | 0   |
| CONTIG-074339 | 151 | 6  | 0  | 0  | 0   |
| CONTIG-074340 | 133 | 6  | 7  | 35 | 0   |
| CONTIG-074341 | 203 | 7  | 10 | 36 | 0   |
| CONTIG-074342 | 91  | 7  | 9  | 2  | 0   |
| CONTIG-074343 | 155 | 4  | 2  | 7  | 0   |
| CONTIG-074344 | 58  | 4  | 2  | 4  | 0   |
| CONTIG-074345 | 62  | 6  | 0  | 15 | 0   |
| CONTIG-074346 | 45  | 12 | 4  | 5  | 0   |
| CONTIG-074347 | 297 | 8  | 5  | 38 | 2   |
| CONTIG-074348 | 89  | 4  | 6  | 4  | 0   |
| CONTIG-074349 | 147 | 9  | 6  | 3  | 0   |
| CONTIG-074350 | 81  | 3  | 2  | 2  | 0   |
| CONTIG-074351 | 77  | 7  | 12 | 13 | 0   |
| CONTIG-074353 | 348 | 95 | 4  | 0  | 692 |
| CONTIG-074354 | 77  | 4  | 2  | 11 | 0   |
| CONTIG-074355 | 387 | 8  | 0  | 42 | 0   |
| CONTIG-074356 | 82  | 18 | 11 | 23 | 0   |
| CONTIG-074357 | 247 | 8  | 7  | 58 | 0   |
| CONTIG-074358 | 116 | 8  | 8  | 26 | 2   |

|               |     |    |    |     |     |
|---------------|-----|----|----|-----|-----|
| CONTIG-074359 | 231 | 11 | 6  | 47  | 0   |
| CONTIG-074360 | 114 | 16 | 24 | 60  | 4   |
| CONTIG-074361 | 136 | 12 | 13 | 32  | 0   |
| CONTIG-074362 | 81  | 4  | 0  | 12  | 0   |
| CONTIG-074364 | 542 | 22 | 25 | 704 | 0   |
| CONTIG-074365 | 107 | 4  | 2  | 14  | 0   |
| CONTIG-074366 | 117 | 7  | 5  | 23  | 0   |
| CONTIG-074367 | 89  | 7  | 5  | 0   | 0   |
| CONTIG-074368 | 60  | 4  | 0  | 6   | 0   |
| CONTIG-074370 | 89  | 6  | 17 | 8   | 0   |
| CONTIG-074371 | 64  | 23 | 3  | 20  | 0   |
| CONTIG-074372 | 87  | 33 | 0  | 0   | 0   |
| CONTIG-074373 | 66  | 7  | 10 | 15  | 0   |
| CONTIG-074374 | 110 | 7  | 2  | 26  | 0   |
| CONTIG-074375 | 171 | 6  | 7  | 17  | 0   |
| CONTIG-074376 | 230 | 10 | 2  | 64  | 0   |
| CONTIG-074377 | 60  | 6  | 7  | 10  | 0   |
| CONTIG-074378 | 138 | 7  | 17 | 41  | 0   |
| CONTIG-074379 | 264 | 4  | 4  | 42  | 0   |
| CONTIG-074380 | 71  | 9  | 0  | 19  | 0   |
| CONTIG-074381 | 62  | 5  | 5  | 0   | 0   |
| CONTIG-074382 | 64  | 6  | 5  | 9   | 0   |
| CONTIG-074383 | 90  | 7  | 14 | 10  | 0   |
| CONTIG-074385 | 87  | 7  | 9  | 14  | 0   |
| CONTIG-074389 | 130 | 5  | 10 | 6   | 0   |
| CONTIG-074390 | 273 | 9  | 21 | 11  | 0   |
| CONTIG-074391 | 58  | 5  | 8  | 4   | 0   |
| CONTIG-074392 | 83  | 4  | 4  | 6   | 0   |
| CONTIG-074393 | 115 | 11 | 15 | 43  | 0   |
| CONTIG-074396 | 129 | 5  | 2  | 8   | 0   |
| CONTIG-074397 | 170 | 7  | 6  | 45  | 0   |
| CONTIG-074398 | 189 | 5  | 2  | 21  | 0   |
| CONTIG-074399 | 84  | 10 | 14 | 29  | 0   |
| CONTIG-074400 | 292 | 14 | 10 | 115 | 6   |
| CONTIG-074401 | 313 | 12 | 30 | 117 | 0   |
| CONTIG-074402 | 226 | 11 | 0  | 72  | 0   |
| CONTIG-074403 | 69  | 17 | 3  | 33  | 0   |
| CONTIG-074404 | 185 | 16 | 3  | 104 | 2   |
| CONTIG-074405 | 166 | 2  | 9  | 0   | 0   |
| CONTIG-074406 | 64  | 3  | 0  | 0   | 0   |
| CONTIG-074407 | 72  | 5  | 0  | 15  | 0   |
| CONTIG-074408 | 254 | 5  | 7  | 11  | 6   |
| CONTIG-074409 | 61  | 4  | 6  | 4   | 0   |
| CONTIG-074410 | 185 | 6  | 3  | 30  | 0   |
| CONTIG-074411 | 189 | 7  | 4  | 29  | 0   |
| CONTIG-074412 | 238 | 5  | 2  | 30  | 0   |
| CONTIG-074413 | 846 | 31 | 4  | 0   | 175 |

|               |     |     |    |      |     |
|---------------|-----|-----|----|------|-----|
| CONTIG-074414 | 102 | 7   | 3  | 0    | 0   |
| CONTIG-074415 | 150 | 5   | 2  | 24   | 0   |
| CONTIG-074417 | 230 | 4   | 5  | 13   | 0   |
| CONTIG-074418 | 93  | 4   | 0  | 6    | 0   |
| CONTIG-074419 | 125 | 5   | 0  | 13   | 0   |
| CONTIG-074420 | 227 | 6   | 9  | 53   | 2   |
| CONTIG-074421 | 101 | 11  | 11 | 20   | 0   |
| CONTIG-074422 | 78  | 189 | 2  | 616  | 17  |
| CONTIG-074423 | 199 | 6   | 7  | 33   | 0   |
| CONTIG-074424 | 65  | 123 | 7  | 28   | 0   |
| CONTIG-074425 | 99  | 3   | 5  | 5    | 0   |
| CONTIG-074426 | 301 | 11  | 4  | 74   | 0   |
| CONTIG-074427 | 57  | 154 | 33 | 10   | 102 |
| CONTIG-074428 | 119 | 4   | 7  | 8    | 0   |
| CONTIG-074429 | 247 | 5   | 9  | 48   | 0   |
| CONTIG-074430 | 97  | 5   | 6  | 12   | 0   |
| CONTIG-074431 | 59  | 5   | 9  | 2    | 0   |
| CONTIG-074432 | 154 | 7   | 2  | 24   | 0   |
| CONTIG-074433 | 86  | 9   | 2  | 27   | 0   |
| CONTIG-074434 | 109 | 6   | 0  | 23   | 0   |
| CONTIG-074435 | 613 | 40  | 46 | 1301 | 2   |
| CONTIG-074436 | 85  | 4   | 4  | 4    | 0   |
| CONTIG-074437 | 110 | 10  | 4  | 31   | 0   |
| CONTIG-074438 | 155 | 10  | 0  | 61   | 0   |
| CONTIG-074439 | 84  | 8   | 2  | 28   | 0   |
| CONTIG-074440 | 118 | 6   | 4  | 21   | 0   |
| CONTIG-074441 | 239 | 6   | 8  | 14   | 0   |
| CONTIG-074442 | 91  | 6   | 0  | 15   | 0   |
| CONTIG-074443 | 51  | 37  | 5  | 61   | 0   |
| CONTIG-074444 | 247 | 8   | 7  | 72   | 0   |
| CONTIG-074445 | 394 | 28  | 33 | 322  | 0   |
| CONTIG-074446 | 333 | 15  | 15 | 164  | 0   |
| CONTIG-074447 | 70  | 3   | 9  | 0    | 0   |
| CONTIG-074448 | 63  | 7   | 11 | 5    | 0   |
| CONTIG-074449 | 128 | 13  | 10 | 23   | 0   |
| CONTIG-074450 | 141 | 5   | 14 | 10   | 0   |
| CONTIG-074453 | 84  | 6   | 4  | 13   | 0   |
| CONTIG-074454 | 262 | 6   | 19 | 35   | 4   |
| CONTIG-074455 | 112 | 5   | 2  | 21   | 0   |
| CONTIG-074456 | 58  | 7   | 3  | 16   | 0   |
| CONTIG-074457 | 94  | 9   | 0  | 33   | 0   |
| CONTIG-074458 | 177 | 4   | 4  | 4    | 0   |
| CONTIG-074459 | 85  | 18  | 8  | 69   | 0   |
| CONTIG-074460 | 127 | 4   | 2  | 15   | 0   |
| CONTIG-074461 | 208 | 8   | 8  | 24   | 0   |
| CONTIG-074464 | 66  | 8   | 16 | 7    | 2   |
| CONTIG-074465 | 226 | 7   | 10 | 58   | 0   |

|               |     |    |    |     |   |
|---------------|-----|----|----|-----|---|
| CONTIG-074466 | 67  | 8  | 13 | 14  | 0 |
| CONTIG-074467 | 147 | 5  | 0  | 6   | 0 |
| CONTIG-074468 | 150 | 6  | 4  | 45  | 0 |
| CONTIG-074469 | 137 | 11 | 4  | 66  | 0 |
| CONTIG-074470 | 79  | 6  | 4  | 13  | 0 |
| CONTIG-074471 | 123 | 17 | 4  | 73  | 0 |
| CONTIG-074472 | 84  | 6  | 13 | 6   | 0 |
| CONTIG-074473 | 114 | 5  | 3  | 14  | 2 |
| CONTIG-074474 | 72  | 6  | 5  | 15  | 0 |
| CONTIG-074475 | 45  | 15 | 5  | 18  | 0 |
| CONTIG-074476 | 312 | 9  | 2  | 48  | 0 |
| CONTIG-074477 | 67  | 14 | 21 | 16  | 0 |
| CONTIG-074478 | 115 | 11 | 21 | 40  | 0 |
| CONTIG-074479 | 145 | 6  | 16 | 19  | 0 |
| CONTIG-074480 | 138 | 6  | 13 | 14  | 0 |
| CONTIG-074481 | 72  | 3  | 2  | 2   | 0 |
| CONTIG-074482 | 86  | 11 | 9  | 15  | 0 |
| CONTIG-074485 | 139 | 5  | 3  | 12  | 0 |
| CONTIG-074486 | 196 | 6  | 6  | 38  | 0 |
| CONTIG-074488 | 73  | 33 | 7  | 51  | 0 |
| CONTIG-074489 | 89  | 7  | 29 | 7   | 0 |
| CONTIG-074490 | 80  | 12 | 12 | 33  | 0 |
| CONTIG-074491 | 242 | 8  | 3  | 41  | 0 |
| CONTIG-074492 | 95  | 7  | 3  | 3   | 0 |
| CONTIG-074494 | 66  | 4  | 0  | 4   | 0 |
| CONTIG-074495 | 107 | 6  | 4  | 10  | 0 |
| CONTIG-074496 | 136 | 8  | 4  | 24  | 0 |
| CONTIG-074497 | 334 | 12 | 12 | 215 | 0 |
| CONTIG-074498 | 124 | 11 | 6  | 72  | 0 |
| CONTIG-074499 | 96  | 7  | 21 | 29  | 0 |
| CONTIG-074500 | 177 | 7  | 4  | 10  | 0 |
| CONTIG-074501 | 87  | 8  | 4  | 25  | 0 |
| CONTIG-074502 | 105 | 9  | 0  | 33  | 0 |
| CONTIG-074503 | 88  | 4  | 2  | 5   | 0 |
| CONTIG-074504 | 128 | 7  | 0  | 20  | 3 |
| CONTIG-074505 | 162 | 9  | 32 | 29  | 0 |
| CONTIG-074506 | 260 | 6  | 3  | 47  | 0 |
| CONTIG-074507 | 109 | 8  | 13 | 17  | 0 |
| CONTIG-074508 | 221 | 5  | 0  | 20  | 0 |
| CONTIG-074511 | 85  | 4  | 5  | 0   | 0 |
| CONTIG-074513 | 179 | 7  | 11 | 48  | 0 |
| CONTIG-074514 | 57  | 12 | 19 | 4   | 0 |
| CONTIG-074515 | 142 | 6  | 0  | 24  | 0 |
| CONTIG-074516 | 208 | 12 | 4  | 75  | 4 |
| CONTIG-074517 | 59  | 2  | 3  | 2   | 0 |
| CONTIG-074518 | 79  | 4  | 2  | 5   | 0 |
| CONTIG-074519 | 552 | 8  | 4  | 117 | 2 |

|               |     |     |    |     |      |
|---------------|-----|-----|----|-----|------|
| CONTIG-074520 | 910 | 72  | 8  | 2   | 1214 |
| CONTIG-074521 | 300 | 7   | 5  | 64  | 0    |
| CONTIG-074522 | 94  | 4   | 13 | 9   | 0    |
| CONTIG-074523 | 97  | 6   | 2  | 24  | 0    |
| CONTIG-074524 | 63  | 6   | 0  | 11  | 0    |
| CONTIG-074525 | 59  | 4   | 0  | 4   | 0    |
| CONTIG-074526 | 90  | 3   | 2  | 10  | 0    |
| CONTIG-074527 | 344 | 13  | 5  | 151 | 0    |
| CONTIG-074528 | 92  | 7   | 4  | 15  | 0    |
| CONTIG-074530 | 101 | 6   | 2  | 16  | 0    |
| CONTIG-074531 | 103 | 4   | 3  | 11  | 0    |
| CONTIG-074532 | 123 | 4   | 5  | 5   | 0    |
| CONTIG-074533 | 156 | 13  | 6  | 0   | 0    |
| CONTIG-074534 | 174 | 12  | 10 | 110 | 0    |
| CONTIG-074535 | 58  | 2   | 0  | 0   | 0    |
| CONTIG-074536 | 170 | 6   | 0  | 9   | 0    |
| CONTIG-074537 | 47  | 71  | 5  | 55  | 0    |
| CONTIG-074538 | 144 | 6   | 2  | 6   | 0    |
| CONTIG-074539 | 254 | 109 | 3  | 0   | 690  |
| CONTIG-074540 | 128 | 5   | 3  | 18  | 0    |
| CONTIG-074541 | 72  | 3   | 4  | 2   | 0    |
| CONTIG-074543 | 58  | 5   | 0  | 15  | 0    |
| CONTIG-074544 | 88  | 6   | 2  | 3   | 0    |
| CONTIG-074545 | 212 | 11  | 7  | 114 | 0    |
| CONTIG-074546 | 99  | 3   | 0  | 2   | 0    |
| CONTIG-074547 | 131 | 7   | 2  | 29  | 0    |
| CONTIG-074548 | 125 | 11  | 2  | 50  | 0    |
| CONTIG-074549 | 101 | 4   | 2  | 9   | 0    |
| CONTIG-074550 | 62  | 4   | 2  | 10  | 0    |
| CONTIG-074551 | 93  | 14  | 13 | 14  | 0    |
| CONTIG-074552 | 198 | 11  | 13 | 40  | 2    |
| CONTIG-074555 | 122 | 8   | 7  | 22  | 0    |
| CONTIG-074557 | 70  | 9   | 0  | 15  | 0    |
| CONTIG-074558 | 170 | 4   | 10 | 25  | 0    |
| CONTIG-074559 | 123 | 5   | 3  | 0   | 0    |
| CONTIG-074560 | 234 | 8   | 17 | 75  | 2    |
| CONTIG-074561 | 134 | 9   | 2  | 22  | 0    |
| CONTIG-074562 | 155 | 8   | 6  | 23  | 0    |
| CONTIG-074563 | 71  | 3   | 7  | 2   | 0    |
| CONTIG-074564 | 90  | 3   | 0  | 8   | 0    |
| CONTIG-074567 | 153 | 6   | 3  | 27  | 0    |
| CONTIG-074568 | 89  | 6   | 5  | 29  | 0    |
| CONTIG-074569 | 112 | 4   | 3  | 12  | 0    |
| CONTIG-074570 | 139 | 6   | 12 | 18  | 0    |
| CONTIG-074571 | 506 | 11  | 0  | 166 | 2    |
| CONTIG-074572 | 113 | 6   | 2  | 18  | 0    |
| CONTIG-074573 | 72  | 112 | 45 | 324 | 0    |

|               |     |     |    |     |    |
|---------------|-----|-----|----|-----|----|
| CONTIG-074574 | 133 | 8   | 4  | 47  | 0  |
| CONTIG-074577 | 131 | 155 | 16 | 712 | 25 |
| CONTIG-074578 | 198 | 21  | 9  | 92  | 0  |
| CONTIG-074579 | 69  | 4   | 3  | 0   | 0  |
| CONTIG-074580 | 40  | 114 | 4  | 2   | 0  |
| CONTIG-074582 | 211 | 4   | 0  | 29  | 0  |
| CONTIG-074583 | 58  | 4   | 3  | 3   | 0  |
| CONTIG-074585 | 102 | 16  | 2  | 64  | 0  |
| CONTIG-074586 | 144 | 6   | 4  | 14  | 4  |
| CONTIG-074587 | 66  | 13  | 7  | 39  | 0  |
| CONTIG-074588 | 208 | 7   | 5  | 20  | 4  |
| CONTIG-074589 | 59  | 3   | 7  | 0   | 0  |
| CONTIG-074590 | 68  | 5   | 2  | 8   | 0  |
| CONTIG-074591 | 65  | 5   | 0  | 13  | 0  |
| CONTIG-074593 | 288 | 10  | 12 | 98  | 2  |
| CONTIG-074594 | 89  | 7   | 3  | 8   | 0  |
| CONTIG-074595 | 70  | 3   | 2  | 2   | 0  |
| CONTIG-074596 | 149 | 5   | 4  | 12  | 0  |
| CONTIG-074597 | 386 | 16  | 36 | 182 | 6  |
| CONTIG-074598 | 62  | 4   | 2  | 5   | 0  |
| CONTIG-074599 | 160 | 6   | 8  | 32  | 0  |
| CONTIG-074600 | 62  | 9   | 4  | 12  | 0  |
| CONTIG-074601 | 151 | 8   | 14 | 24  | 3  |
| CONTIG-074602 | 126 | 5   | 4  | 24  | 0  |
| CONTIG-074603 | 165 | 5   | 5  | 12  | 0  |
| CONTIG-074604 | 65  | 8   | 3  | 10  | 0  |
| CONTIG-074605 | 85  | 3   | 3  | 0   | 0  |
| CONTIG-074606 | 552 | 40  | 4  | 0   | 0  |
| CONTIG-074608 | 55  | 28  | 0  | 22  | 0  |
| CONTIG-074610 | 65  | 14  | 9  | 28  | 0  |
| CONTIG-074611 | 120 | 6   | 5  | 10  | 0  |
| CONTIG-074612 | 117 | 7   | 12 | 4   | 2  |
| CONTIG-074613 | 176 | 7   | 2  | 36  | 0  |
| CONTIG-074614 | 66  | 5   | 6  | 7   | 0  |
| CONTIG-074615 | 116 | 4   | 2  | 3   | 0  |
| CONTIG-074616 | 208 | 6   | 5  | 7   | 2  |
| CONTIG-074617 | 177 | 5   | 2  | 27  | 2  |
| CONTIG-074618 | 86  | 6   | 3  | 11  | 0  |
| CONTIG-074619 | 94  | 12  | 3  | 31  | 0  |
| CONTIG-074620 | 117 | 7   | 7  | 23  | 0  |
| CONTIG-074621 | 76  | 7   | 9  | 0   | 0  |
| CONTIG-074622 | 113 | 3   | 0  | 8   | 0  |
| CONTIG-074623 | 125 | 10  | 4  | 36  | 0  |
| CONTIG-074624 | 131 | 7   | 0  | 31  | 0  |
| CONTIG-074626 | 76  | 8   | 0  | 14  | 0  |
| CONTIG-074627 | 70  | 4   | 2  | 6   | 2  |
| CONTIG-074628 | 136 | 9   | 7  | 40  | 0  |

|               |      |    |    |     |     |
|---------------|------|----|----|-----|-----|
| CONTIG-074629 | 135  | 5  | 0  | 0   | 0   |
| CONTIG-074631 | 74   | 5  | 0  | 10  | 0   |
| CONTIG-074632 | 68   | 3  | 0  | 7   | 0   |
| CONTIG-074633 | 97   | 5  | 2  | 3   | 0   |
| CONTIG-074634 | 178  | 11 | 2  | 93  | 0   |
| CONTIG-074636 | 541  | 9  | 4  | 33  | 8   |
| CONTIG-074637 | 118  | 8  | 5  | 22  | 0   |
| CONTIG-074638 | 229  | 50 | 12 | 608 | 0   |
| CONTIG-074639 | 306  | 8  | 5  | 90  | 0   |
| CONTIG-074640 | 312  | 15 | 0  | 182 | 4   |
| CONTIG-074641 | 289  | 19 | 11 | 41  | 0   |
| CONTIG-074642 | 257  | 7  | 3  | 42  | 0   |
| CONTIG-074643 | 97   | 3  | 2  | 4   | 0   |
| CONTIG-074644 | 130  | 6  | 3  | 21  | 0   |
| CONTIG-074647 | 72   | 7  | 2  | 0   | 0   |
| CONTIG-074648 | 264  | 9  | 11 | 79  | 3   |
| CONTIG-074649 | 127  | 8  | 4  | 21  | 0   |
| CONTIG-074650 | 63   | 8  | 4  | 7   | 0   |
| CONTIG-074651 | 442  | 11 | 14 | 111 | 2   |
| CONTIG-074654 | 71   | 10 | 5  | 25  | 0   |
| CONTIG-074655 | 332  | 33 | 15 | 483 | 0   |
| CONTIG-074656 | 89   | 4  | 4  | 3   | 0   |
| CONTIG-074657 | 138  | 3  | 0  | 14  | 0   |
| CONTIG-074658 | 142  | 7  | 2  | 27  | 0   |
| CONTIG-074659 | 63   | 7  | 2  | 3   | 0   |
| CONTIG-074660 | 255  | 8  | 8  | 47  | 0   |
| CONTIG-074661 | 454  | 8  | 34 | 113 | 0   |
| CONTIG-074662 | 135  | 10 | 2  | 40  | 0   |
| CONTIG-074663 | 88   | 7  | 0  | 22  | 0   |
| CONTIG-074664 | 224  | 6  | 11 | 0   | 0   |
| CONTIG-074665 | 59   | 5  | 5  | 6   | 0   |
| CONTIG-074666 | 429  | 8  | 6  | 127 | 0   |
| CONTIG-074667 | 431  | 13 | 20 | 169 | 0   |
| CONTIG-074668 | 69   | 9  | 11 | 11  | 2   |
| CONTIG-074669 | 60   | 3  | 9  | 2   | 0   |
| CONTIG-074670 | 73   | 5  | 15 | 5   | 0   |
| CONTIG-074671 | 108  | 13 | 4  | 41  | 0   |
| CONTIG-074672 | 121  | 7  | 4  | 33  | 0   |
| CONTIG-074673 | 1807 | 16 | 6  | 0   | 122 |
| CONTIG-074675 | 114  | 10 | 13 | 39  | 0   |
| CONTIG-074676 | 74   | 16 | 4  | 50  | 0   |
| CONTIG-074677 | 63   | 5  | 0  | 0   | 0   |
| CONTIG-074678 | 156  | 3  | 2  | 2   | 0   |
| CONTIG-074679 | 179  | 15 | 21 | 93  | 0   |
| CONTIG-074680 | 410  | 7  | 12 | 81  | 0   |
| CONTIG-074681 | 76   | 5  | 7  | 2   | 0   |
| CONTIG-074682 | 152  | 9  | 8  | 44  | 0   |



|               |     |      |    |      |   |
|---------------|-----|------|----|------|---|
| CONTIG-074683 | 69  | 3    | 2  | 3    | 0 |
| CONTIG-074684 | 91  | 7    | 5  | 18   | 0 |
| CONTIG-074685 | 73  | 3    | 7  | 0    | 0 |
| CONTIG-074686 | 121 | 12   | 12 | 55   | 0 |
| CONTIG-074689 | 59  | 4    | 4  | 11   | 0 |
| CONTIG-074690 | 94  | 3    | 8  | 0    | 0 |
| CONTIG-074691 | 206 | 10   | 13 | 46   | 2 |
| CONTIG-074693 | 58  | 3    | 4  | 0    | 0 |
| CONTIG-074694 | 65  | 12   | 11 | 10   | 0 |
| CONTIG-074695 | 107 | 4    | 0  | 21   | 0 |
| CONTIG-074696 | 242 | 10   | 2  | 15   | 5 |
| CONTIG-074697 | 91  | 4    | 2  | 10   | 0 |
| CONTIG-074698 | 138 | 11   | 4  | 45   | 0 |
| CONTIG-074699 | 74  | 6    | 8  | 5    | 0 |
| CONTIG-074700 | 247 | 9    | 13 | 35   | 0 |
| CONTIG-074701 | 216 | 5    | 11 | 17   | 0 |
| CONTIG-074702 | 59  | 5    | 6  | 4    | 0 |
| CONTIG-074703 | 113 | 8    | 0  | 7    | 6 |
| CONTIG-074704 | 60  | 3    | 4  | 5    | 0 |
| CONTIG-074705 | 82  | 6    | 2  | 25   | 0 |
| CONTIG-074706 | 141 | 4    | 0  | 13   | 2 |
| CONTIG-074707 | 58  | 17   | 30 | 21   | 0 |
| CONTIG-074708 | 123 | 12   | 16 | 47   | 0 |
| CONTIG-074709 | 372 | 13   | 3  | 158  | 2 |
| CONTIG-074710 | 159 | 4    | 11 | 13   | 0 |
| CONTIG-074711 | 139 | 27   | 44 | 54   | 0 |
| CONTIG-074712 | 153 | 6    | 3  | 8    | 0 |
| CONTIG-074713 | 142 | 7    | 9  | 16   | 2 |
| CONTIG-074714 | 166 | 5    | 0  | 23   | 2 |
| CONTIG-074715 | 68  | 14   | 7  | 22   | 0 |
| CONTIG-074716 | 220 | 9    | 8  | 68   | 0 |
| CONTIG-074717 | 65  | 6    | 0  | 2    | 0 |
| CONTIG-074718 | 232 | 7    | 4  | 0    | 0 |
| CONTIG-074719 | 71  | 7    | 3  | 8    | 0 |
| CONTIG-074720 | 85  | 2    | 0  | 0    | 0 |
| CONTIG-074721 | 272 | 9    | 10 | 77   | 0 |
| CONTIG-074722 | 72  | 1059 | 12 | 1417 | 0 |
| CONTIG-074723 | 67  | 2    | 5  | 0    | 0 |
| CONTIG-074724 | 82  | 3    | 7  | 0    | 0 |
| CONTIG-074725 | 78  | 4    | 2  | 8    | 0 |
| CONTIG-074726 | 936 | 9    | 22 | 353  | 0 |
| CONTIG-074727 | 91  | 4    | 0  | 4    | 0 |
| CONTIG-074728 | 235 | 16   | 2  | 114  | 0 |
| CONTIG-074734 | 156 | 8    | 22 | 34   | 0 |
| CONTIG-074735 | 106 | 3    | 4  | 0    | 0 |
| CONTIG-074736 | 86  | 3    | 0  | 10   | 0 |
| CONTIG-074737 | 246 | 17   | 5  | 175  | 2 |

|               |     |     |    |     |    |
|---------------|-----|-----|----|-----|----|
| CONTIG-074738 | 88  | 11  | 0  | 0   | 0  |
| CONTIG-074739 | 280 | 6   | 6  | 41  | 0  |
| CONTIG-074740 | 140 | 9   | 11 | 29  | 0  |
| CONTIG-074741 | 77  | 3   | 3  | 4   | 0  |
| CONTIG-074742 | 98  | 6   | 0  | 16  | 0  |
| CONTIG-074743 | 184 | 7   | 5  | 25  | 0  |
| CONTIG-074745 | 94  | 8   | 0  | 16  | 0  |
| CONTIG-074746 | 75  | 6   | 4  | 21  | 0  |
| CONTIG-074747 | 122 | 10  | 33 | 8   | 0  |
| CONTIG-074748 | 90  | 6   | 17 | 2   | 0  |
| CONTIG-074750 | 145 | 8   | 0  | 14  | 0  |
| CONTIG-074751 | 145 | 7   | 0  | 18  | 0  |
| CONTIG-074752 | 86  | 4   | 0  | 6   | 0  |
| CONTIG-074753 | 134 | 7   | 7  | 27  | 0  |
| CONTIG-074754 | 162 | 7   | 10 | 13  | 0  |
| CONTIG-074755 | 106 | 17  | 2  | 59  | 0  |
| CONTIG-074756 | 160 | 3   | 8  | 10  | 0  |
| CONTIG-074757 | 174 | 8   | 2  | 9   | 0  |
| CONTIG-074758 | 280 | 10  | 12 | 97  | 0  |
| CONTIG-074759 | 156 | 18  | 7  | 66  | 4  |
| CONTIG-074760 | 441 | 6   | 8  | 37  | 0  |
| CONTIG-074761 | 84  | 4   | 3  | 4   | 0  |
| CONTIG-074762 | 327 | 11  | 11 | 117 | 0  |
| CONTIG-074763 | 70  | 7   | 3  | 16  | 0  |
| CONTIG-074764 | 39  | 253 | 5  | 0   | 0  |
| CONTIG-074765 | 492 | 20  | 4  | 33  | 0  |
| CONTIG-074767 | 64  | 6   | 0  | 13  | 0  |
| CONTIG-074768 | 437 | 14  | 2  | 4   | 0  |
| CONTIG-074770 | 209 | 9   | 5  | 45  | 0  |
| CONTIG-074771 | 103 | 2   | 3  | 6   | 0  |
| CONTIG-074773 | 77  | 4   | 2  | 3   | 0  |
| CONTIG-074774 | 172 | 4   | 3  | 22  | 0  |
| CONTIG-074775 | 205 | 11  | 19 | 72  | 0  |
| CONTIG-074776 | 134 | 11  | 6  | 37  | 0  |
| CONTIG-074777 | 58  | 29  | 17 | 36  | 0  |
| CONTIG-074778 | 169 | 7   | 0  | 34  | 0  |
| CONTIG-074779 | 99  | 5   | 0  | 20  | 0  |
| CONTIG-074780 | 64  | 3   | 5  | 4   | 0  |
| CONTIG-074781 | 187 | 5   | 4  | 12  | 0  |
| CONTIG-074782 | 82  | 4   | 24 | 5   | 0  |
| CONTIG-074783 | 74  | 4   | 20 | 2   | 0  |
| CONTIG-074786 | 186 | 21  | 6  | 2   | 0  |
| CONTIG-074787 | 220 | 59  | 0  | 0   | 39 |
| CONTIG-074788 | 63  | 3   | 5  | 4   | 0  |
| CONTIG-074789 | 178 | 5   | 6  | 27  | 0  |
| CONTIG-074790 | 103 | 4   | 8  | 9   | 0  |
| CONTIG-074791 | 159 | 5   | 19 | 25  | 0  |

|               |     |     |    |     |    |
|---------------|-----|-----|----|-----|----|
| CONTIG-074792 | 84  | 2   | 0  | 2   | 0  |
| CONTIG-074793 | 99  | 10  | 7  | 28  | 0  |
| CONTIG-074794 | 66  | 6   | 0  | 12  | 0  |
| CONTIG-074795 | 103 | 6   | 5  | 4   | 0  |
| CONTIG-074796 | 156 | 21  | 16 | 147 | 2  |
| CONTIG-074797 | 287 | 8   | 10 | 69  | 2  |
| CONTIG-074798 | 139 | 6   | 0  | 9   | 0  |
| CONTIG-074799 | 181 | 7   | 3  | 2   | 0  |
| CONTIG-074800 | 65  | 9   | 10 | 0   | 0  |
| CONTIG-074801 | 84  | 3   | 2  | 2   | 0  |
| CONTIG-074802 | 553 | 10  | 28 | 169 | 0  |
| CONTIG-074803 | 69  | 7   | 12 | 15  | 0  |
| CONTIG-074804 | 78  | 3   | 2  | 0   | 0  |
| CONTIG-074805 | 130 | 3   | 2  | 7   | 0  |
| CONTIG-074806 | 152 | 12  | 0  | 58  | 2  |
| CONTIG-074807 | 742 | 15  | 10 | 370 | 2  |
| CONTIG-074808 | 180 | 11  | 17 | 34  | 0  |
| CONTIG-074809 | 69  | 5   | 3  | 12  | 0  |
| CONTIG-074810 | 171 | 10  | 39 | 10  | 9  |
| CONTIG-074811 | 107 | 3   | 4  | 4   | 0  |
| CONTIG-074812 | 167 | 8   | 19 | 42  | 0  |
| CONTIG-074813 | 187 | 8   | 7  | 71  | 0  |
| CONTIG-074814 | 44  | 25  | 6  | 8   | 0  |
| CONTIG-074815 | 132 | 9   | 7  | 46  | 0  |
| CONTIG-074816 | 60  | 5   | 0  | 10  | 0  |
| CONTIG-074817 | 44  | 124 | 2  | 178 | 0  |
| CONTIG-074818 | 68  | 5   | 2  | 14  | 0  |
| CONTIG-074819 | 464 | 19  | 2  | 0   | 56 |
| CONTIG-074820 | 170 | 11  | 9  | 76  | 0  |
| CONTIG-074821 | 134 | 4   | 15 | 10  | 0  |
| CONTIG-074822 | 104 | 6   | 0  | 8   | 0  |
| CONTIG-074823 | 84  | 5   | 6  | 14  | 0  |
| CONTIG-074827 | 111 | 3   | 5  | 4   | 0  |
| CONTIG-074828 | 93  | 8   | 2  | 29  | 0  |
| CONTIG-074829 | 160 | 4   | 7  | 31  | 0  |
| CONTIG-074830 | 89  | 7   | 11 | 24  | 0  |
| CONTIG-074831 | 106 | 6   | 9  | 25  | 0  |
| CONTIG-074832 | 61  | 3   | 2  | 0   | 0  |
| CONTIG-074833 | 61  | 10  | 4  | 3   | 0  |
| CONTIG-074834 | 69  | 8   | 4  | 16  | 0  |
| CONTIG-074835 | 105 | 9   | 6  | 36  | 0  |
| CONTIG-074836 | 395 | 8   | 2  | 135 | 0  |
| CONTIG-074838 | 96  | 7   | 5  | 24  | 0  |
| CONTIG-074839 | 179 | 9   | 6  | 64  | 0  |
| CONTIG-074840 | 95  | 5   | 5  | 15  | 0  |
| CONTIG-074841 | 298 | 8   | 2  | 58  | 2  |
| CONTIG-074842 | 114 | 92  | 12 | 227 | 0  |

|               |     |     |    |     |     |
|---------------|-----|-----|----|-----|-----|
| CONTIG-074843 | 76  | 2   | 0  | 2   | 0   |
| CONTIG-074846 | 59  | 2   | 4  | 0   | 0   |
| CONTIG-074847 | 106 | 5   | 2  | 2   | 0   |
| CONTIG-074848 | 71  | 5   | 5  | 11  | 0   |
| CONTIG-074849 | 90  | 3   | 0  | 0   | 0   |
| CONTIG-074850 | 74  | 5   | 9  | 0   | 0   |
| CONTIG-074851 | 78  | 3   | 4  | 2   | 0   |
| CONTIG-074852 | 50  | 113 | 4  | 0   | 50  |
| CONTIG-074853 | 172 | 7   | 12 | 26  | 2   |
| CONTIG-074854 | 135 | 6   | 13 | 8   | 0   |
| CONTIG-074855 | 910 | 50  | 0  | 2   | 308 |
| CONTIG-074856 | 126 | 5   | 2  | 4   | 0   |
| CONTIG-074857 | 95  | 6   | 24 | 9   | 0   |
| CONTIG-074858 | 94  | 5   | 2  | 5   | 0   |
| CONTIG-074859 | 134 | 9   | 0  | 46  | 2   |
| CONTIG-074860 | 124 | 4   | 2  | 8   | 0   |
| CONTIG-074863 | 163 | 11  | 4  | 27  | 0   |
| CONTIG-074864 | 73  | 3   | 0  | 4   | 0   |
| CONTIG-074865 | 153 | 6   | 2  | 22  | 2   |
| CONTIG-074866 | 172 | 117 | 9  | 726 | 4   |
| CONTIG-074867 | 138 | 26  | 11 | 150 | 0   |
| CONTIG-074868 | 87  | 7   | 6  | 0   | 0   |
| CONTIG-074869 | 136 | 10  | 5  | 32  | 0   |
| CONTIG-074870 | 111 | 3   | 3  | 9   | 0   |
| CONTIG-074871 | 179 | 5   | 14 | 12  | 0   |
| CONTIG-074873 | 224 | 6   | 12 | 20  | 0   |
| CONTIG-074874 | 59  | 7   | 3  | 14  | 0   |
| CONTIG-074875 | 65  | 6   | 3  | 0   | 0   |
| CONTIG-074876 | 112 | 7   | 14 | 2   | 0   |
| CONTIG-074877 | 60  | 2   | 0  | 2   | 0   |
| CONTIG-074878 | 193 | 7   | 2  | 33  | 2   |
| CONTIG-074879 | 176 | 7   | 2  | 28  | 2   |
| CONTIG-074880 | 79  | 6   | 10 | 8   | 0   |
| CONTIG-074881 | 100 | 25  | 12 | 98  | 2   |
| CONTIG-074882 | 115 | 7   | 7  | 10  | 0   |
| CONTIG-074883 | 71  | 5   | 0  | 0   | 0   |
| CONTIG-074884 | 89  | 9   | 0  | 25  | 0   |
| CONTIG-074885 | 202 | 7   | 11 | 43  | 0   |
| CONTIG-074886 | 81  | 10  | 15 | 22  | 0   |
| CONTIG-074887 | 68  | 15  | 3  | 20  | 2   |
| CONTIG-074888 | 99  | 4   | 4  | 6   | 0   |
| CONTIG-074889 | 143 | 5   | 0  | 11  | 0   |
| CONTIG-074890 | 89  | 4   | 2  | 3   | 0   |
| CONTIG-074891 | 62  | 7   | 4  | 7   | 0   |
| CONTIG-074892 | 115 | 6   | 0  | 15  | 0   |
| CONTIG-074893 | 164 | 5   | 3  | 6   | 0   |
| CONTIG-074897 | 60  | 10  | 2  | 30  | 0   |

|               |      |     |    |     |    |
|---------------|------|-----|----|-----|----|
| CONTIG-074898 | 1129 | 22  | 13 | 38  | 0  |
| CONTIG-074899 | 103  | 6   | 26 | 8   | 0  |
| CONTIG-074900 | 101  | 4   | 3  | 9   | 0  |
| CONTIG-074901 | 255  | 8   | 6  | 40  | 0  |
| CONTIG-074902 | 226  | 344 | 12 | 15  | 0  |
| CONTIG-074904 | 177  | 12  | 12 | 72  | 0  |
| CONTIG-074905 | 222  | 16  | 7  | 130 | 4  |
| CONTIG-074906 | 58   | 4   | 3  | 9   | 0  |
| CONTIG-074907 | 174  | 9   | 5  | 49  | 0  |
| CONTIG-074908 | 144  | 7   | 0  | 31  | 2  |
| CONTIG-074909 | 135  | 14  | 8  | 103 | 0  |
| CONTIG-074910 | 85   | 6   | 5  | 4   | 0  |
| CONTIG-074911 | 78   | 22  | 35 | 4   | 0  |
| CONTIG-074912 | 64   | 8   | 7  | 5   | 0  |
| CONTIG-074913 | 179  | 8   | 4  | 32  | 3  |
| CONTIG-074915 | 60   | 7   | 7  | 0   | 0  |
| CONTIG-074916 | 115  | 6   | 3  | 8   | 0  |
| CONTIG-074917 | 403  | 14  | 31 | 157 | 0  |
| CONTIG-074918 | 63   | 6   | 4  | 10  | 0  |
| CONTIG-074919 | 180  | 7   | 5  | 38  | 0  |
| CONTIG-074920 | 59   | 5   | 4  | 0   | 0  |
| CONTIG-074921 | 63   | 9   | 5  | 17  | 0  |
| CONTIG-074922 | 223  | 5   | 4  | 55  | 0  |
| CONTIG-074923 | 73   | 2   | 4  | 2   | 0  |
| CONTIG-074924 | 174  | 18  | 13 | 93  | 0  |
| CONTIG-074925 | 131  | 10  | 2  | 55  | 0  |
| CONTIG-074926 | 233  | 4   | 2  | 32  | 0  |
| CONTIG-074927 | 163  | 6   | 2  | 17  | 0  |
| CONTIG-074929 | 280  | 10  | 5  | 77  | 0  |
| CONTIG-074934 | 94   | 5   | 8  | 4   | 0  |
| CONTIG-074935 | 348  | 8   | 10 | 52  | 2  |
| CONTIG-074936 | 95   | 4   | 0  | 14  | 0  |
| CONTIG-074937 | 135  | 6   | 0  | 32  | 0  |
| CONTIG-074938 | 77   | 15  | 7  | 2   | 0  |
| CONTIG-074939 | 190  | 32  | 2  | 0   | 26 |
| CONTIG-074940 | 143  | 9   | 30 | 22  | 0  |
| CONTIG-074941 | 201  | 7   | 8  | 36  | 0  |
| CONTIG-074942 | 65   | 5   | 0  | 16  | 0  |
| CONTIG-074943 | 66   | 8   | 6  | 10  | 0  |
| CONTIG-074944 | 53   | 5   | 0  | 5   | 0  |
| CONTIG-074945 | 75   | 12  | 10 | 15  | 0  |
| CONTIG-074946 | 95   | 8   | 10 | 25  | 0  |
| CONTIG-074947 | 108  | 6   | 4  | 26  | 0  |
| CONTIG-074948 | 212  | 14  | 6  | 143 | 0  |
| CONTIG-074949 | 61   | 3   | 4  | 5   | 0  |
| CONTIG-074950 | 263  | 6   | 0  | 0   | 0  |
| CONTIG-074951 | 91   | 6   | 10 | 15  | 0  |

|               |      |    |    |     |   |
|---------------|------|----|----|-----|---|
| CONTIG-074952 | 106  | 6  | 11 | 24  | 0 |
| CONTIG-074953 | 76   | 5  | 8  | 6   | 0 |
| CONTIG-074954 | 67   | 3  | 8  | 0   | 0 |
| CONTIG-074955 | 191  | 7  | 7  | 52  | 0 |
| CONTIG-074956 | 66   | 7  | 13 | 13  | 0 |
| CONTIG-074957 | 86   | 8  | 3  | 18  | 0 |
| CONTIG-074958 | 103  | 5  | 5  | 7   | 0 |
| CONTIG-074960 | 372  | 21 | 17 | 313 | 0 |
| CONTIG-074961 | 204  | 8  | 9  | 27  | 0 |
| CONTIG-074962 | 176  | 6  | 17 | 28  | 0 |
| CONTIG-074963 | 290  | 12 | 11 | 94  | 0 |
| CONTIG-074964 | 90   | 4  | 5  | 0   | 0 |
| CONTIG-074965 | 321  | 18 | 0  | 15  | 0 |
| CONTIG-074966 | 93   | 4  | 0  | 6   | 0 |
| CONTIG-074967 | 244  | 8  | 4  | 61  | 9 |
| CONTIG-074968 | 75   | 5  | 4  | 13  | 0 |
| CONTIG-074969 | 72   | 12 | 12 | 20  | 0 |
| CONTIG-074970 | 262  | 7  | 8  | 34  | 2 |
| CONTIG-074971 | 80   | 10 | 4  | 23  | 0 |
| CONTIG-074972 | 84   | 5  | 7  | 6   | 0 |
| CONTIG-074973 | 167  | 5  | 6  | 27  | 0 |
| CONTIG-074975 | 304  | 12 | 8  | 72  | 0 |
| CONTIG-074976 | 78   | 4  | 2  | 10  | 0 |
| CONTIG-074977 | 72   | 18 | 8  | 52  | 2 |
| CONTIG-074983 | 246  | 7  | 0  | 18  | 0 |
| CONTIG-074984 | 93   | 11 | 7  | 30  | 0 |
| CONTIG-074985 | 68   | 5  | 11 | 2   | 0 |
| CONTIG-074986 | 105  | 3  | 4  | 11  | 0 |
| CONTIG-074987 | 149  | 5  | 3  | 17  | 0 |
| CONTIG-074988 | 124  | 5  | 4  | 22  | 0 |
| CONTIG-074989 | 127  | 4  | 3  | 11  | 0 |
| CONTIG-074991 | 88   | 4  | 6  | 9   | 0 |
| CONTIG-074992 | 108  | 5  | 8  | 18  | 0 |
| CONTIG-074993 | 134  | 8  | 4  | 34  | 0 |
| CONTIG-074994 | 62   | 10 | 0  | 8   | 0 |
| CONTIG-074995 | 182  | 4  | 2  | 9   | 0 |
| CONTIG-074996 | 180  | 7  | 0  | 42  | 0 |
| CONTIG-074997 | 70   | 6  | 6  | 9   | 0 |
| CONTIG-074998 | 1189 | 19 | 25 | 89  | 0 |
| CONTIG-074999 | 64   | 4  | 3  | 8   | 0 |
| CONTIG-075000 | 163  | 4  | 2  | 18  | 0 |
| CONTIG-075001 | 153  | 44 | 0  | 378 | 0 |
| CONTIG-075002 | 154  | 13 | 14 | 40  | 0 |
| CONTIG-075003 | 59   | 8  | 2  | 19  | 0 |
| CONTIG-075004 | 119  | 13 | 8  | 36  | 0 |
| CONTIG-075006 | 153  | 11 | 5  | 51  | 0 |
| CONTIG-075007 | 65   | 13 | 8  | 15  | 0 |

|               |     |     |    |     |    |
|---------------|-----|-----|----|-----|----|
| CONTIG-075008 | 91  | 10  | 2  | 18  | 0  |
| CONTIG-075009 | 117 | 5   | 2  | 18  | 0  |
| CONTIG-075010 | 80  | 5   | 11 | 8   | 0  |
| CONTIG-075012 | 76  | 9   | 12 | 17  | 0  |
| CONTIG-075013 | 105 | 9   | 0  | 24  | 2  |
| CONTIG-075014 | 107 | 7   | 12 | 22  | 0  |
| CONTIG-075015 | 102 | 7   | 15 | 15  | 0  |
| CONTIG-075016 | 124 | 11  | 9  | 42  | 0  |
| CONTIG-075017 | 98  | 7   | 0  | 25  | 0  |
| CONTIG-075018 | 84  | 5   | 2  | 8   | 0  |
| CONTIG-075019 | 77  | 4   | 4  | 11  | 0  |
| CONTIG-075021 | 106 | 9   | 0  | 28  | 0  |
| CONTIG-075022 | 66  | 5   | 15 | 0   | 0  |
| CONTIG-075023 | 75  | 4   | 4  | 6   | 0  |
| CONTIG-075024 | 91  | 8   | 0  | 2   | 4  |
| CONTIG-075025 | 339 | 11  | 16 | 60  | 0  |
| CONTIG-075026 | 257 | 8   | 15 | 61  | 0  |
| CONTIG-075027 | 115 | 5   | 2  | 27  | 0  |
| CONTIG-075031 | 197 | 9   | 5  | 0   | 11 |
| CONTIG-075035 | 212 | 5   | 13 | 28  | 0  |
| CONTIG-075036 | 191 | 5   | 2  | 14  | 0  |
| CONTIG-075037 | 130 | 103 | 84 | 395 | 11 |
| CONTIG-075039 | 222 | 11  | 7  | 4   | 0  |
| CONTIG-075040 | 336 | 6   | 3  | 5   | 0  |
| CONTIG-075041 | 147 | 10  | 12 | 45  | 0  |
| CONTIG-075042 | 262 | 8   | 6  | 0   | 0  |
| CONTIG-075043 | 168 | 7   | 13 | 19  | 0  |
| CONTIG-075044 | 66  | 4   | 4  | 9   | 0  |
| CONTIG-075045 | 204 | 18  | 23 | 51  | 0  |
| CONTIG-075046 | 171 | 8   | 6  | 26  | 0  |
| CONTIG-075048 | 94  | 12  | 21 | 0   | 0  |
| CONTIG-075049 | 81  | 21  | 12 | 27  | 0  |
| CONTIG-075050 | 185 | 8   | 7  | 23  | 0  |
| CONTIG-075051 | 263 | 7   | 2  | 52  | 0  |
| CONTIG-075052 | 191 | 6   | 2  | 18  | 0  |
| CONTIG-075053 | 66  | 4   | 0  | 5   | 0  |
| CONTIG-075054 | 124 | 7   | 5  | 26  | 0  |
| CONTIG-075055 | 114 | 8   | 11 | 27  | 0  |
| CONTIG-075056 | 77  | 6   | 3  | 14  | 0  |
| CONTIG-075057 | 68  | 6   | 6  | 0   | 2  |
| CONTIG-075058 | 313 | 7   | 12 | 57  | 4  |
| CONTIG-075059 | 69  | 11  | 0  | 22  | 2  |
| CONTIG-075060 | 186 | 9   | 4  | 51  | 4  |
| CONTIG-075061 | 336 | 11  | 5  | 164 | 0  |
| CONTIG-075062 | 367 | 9   | 2  | 103 | 0  |
| CONTIG-075063 | 292 | 9   | 11 | 65  | 0  |
| CONTIG-075064 | 67  | 6   | 5  | 13  | 0  |

|               |     |    |    |     |    |
|---------------|-----|----|----|-----|----|
| CONTIG-075065 | 71  | 3  | 2  | 6   | 0  |
| CONTIG-075066 | 94  | 10 | 0  | 15  | 0  |
| CONTIG-075069 | 180 | 5  | 21 | 12  | 0  |
| CONTIG-075070 | 75  | 6  | 18 | 3   | 0  |
| CONTIG-075071 | 72  | 22 | 9  | 24  | 0  |
| CONTIG-075078 | 141 | 9  | 0  | 36  | 0  |
| CONTIG-075079 | 148 | 14 | 3  | 26  | 0  |
| CONTIG-075080 | 133 | 9  | 17 | 19  | 0  |
| CONTIG-075081 | 72  | 11 | 0  | 29  | 0  |
| CONTIG-075082 | 220 | 9  | 17 | 68  | 0  |
| CONTIG-075083 | 333 | 12 | 3  | 216 | 0  |
| CONTIG-075085 | 162 | 5  | 8  | 25  | 0  |
| CONTIG-075086 | 80  | 8  | 6  | 14  | 0  |
| CONTIG-075091 | 217 | 8  | 6  | 2   | 0  |
| CONTIG-075093 | 97  | 5  | 3  | 15  | 0  |
| CONTIG-075094 | 294 | 7  | 8  | 75  | 0  |
| CONTIG-075095 | 92  | 8  | 8  | 2   | 0  |
| CONTIG-075096 | 230 | 14 | 7  | 160 | 0  |
| CONTIG-075097 | 152 | 25 | 7  | 217 | 3  |
| CONTIG-075098 | 64  | 11 | 5  | 19  | 0  |
| CONTIG-075099 | 145 | 4  | 0  | 15  | 0  |
| CONTIG-075100 | 290 | 11 | 12 | 105 | 2  |
| CONTIG-075102 | 76  | 5  | 8  | 11  | 0  |
| CONTIG-075103 | 297 | 9  | 23 | 78  | 0  |
| CONTIG-075104 | 150 | 12 | 5  | 60  | 0  |
| CONTIG-075105 | 244 | 21 | 3  | 0   | 57 |
| CONTIG-075106 | 101 | 8  | 0  | 41  | 0  |
| CONTIG-075107 | 96  | 20 | 10 | 96  | 0  |
| CONTIG-075108 | 81  | 5  | 7  | 5   | 0  |
| CONTIG-075109 | 86  | 5  | 2  | 6   | 0  |
| CONTIG-075110 | 110 | 5  | 0  | 14  | 0  |
| CONTIG-075111 | 79  | 9  | 8  | 20  | 0  |
| CONTIG-075112 | 385 | 11 | 2  | 170 | 0  |
| CONTIG-075113 | 98  | 7  | 3  | 20  | 0  |
| CONTIG-075114 | 82  | 6  | 0  | 22  | 0  |
| CONTIG-075115 | 206 | 7  | 0  | 54  | 0  |
| CONTIG-075116 | 124 | 11 | 16 | 37  | 0  |
| CONTIG-075117 | 146 | 5  | 0  | 26  | 0  |
| CONTIG-075118 | 127 | 7  | 5  | 34  | 0  |
| CONTIG-075119 | 155 | 6  | 4  | 14  | 0  |
| CONTIG-075120 | 83  | 4  | 4  | 2   | 0  |
| CONTIG-075121 | 271 | 6  | 10 | 31  | 0  |
| CONTIG-075122 | 481 | 16 | 12 | 250 | 17 |
| CONTIG-075123 | 102 | 6  | 3  | 16  | 0  |
| CONTIG-075124 | 265 | 7  | 16 | 44  | 0  |
| CONTIG-075125 | 105 | 3  | 2  | 5   | 0  |
| CONTIG-075126 | 209 | 8  | 0  | 72  | 4  |



|               |     |    |    |     |     |
|---------------|-----|----|----|-----|-----|
| CONTIG-075130 | 105 | 8  | 5  | 12  | 2   |
| CONTIG-075131 | 76  | 13 | 5  | 36  | 0   |
| CONTIG-075132 | 67  | 4  | 18 | 0   | 0   |
| CONTIG-075133 | 561 | 17 | 12 | 454 | 0   |
| CONTIG-075134 | 140 | 13 | 2  | 52  | 0   |
| CONTIG-075136 | 88  | 5  | 7  | 16  | 0   |
| CONTIG-075137 | 227 | 9  | 13 | 40  | 2   |
| CONTIG-075138 | 230 | 14 | 11 | 167 | 0   |
| CONTIG-075139 | 321 | 13 | 9  | 71  | 2   |
| CONTIG-075140 | 73  | 4  | 2  | 4   | 0   |
| CONTIG-075141 | 73  | 3  | 3  | 0   | 0   |
| CONTIG-075142 | 313 | 8  | 21 | 83  | 2   |
| CONTIG-075143 | 355 | 16 | 2  | 168 | 0   |
| CONTIG-075144 | 149 | 10 | 5  | 48  | 0   |
| CONTIG-075145 | 118 | 7  | 9  | 35  | 0   |
| CONTIG-075146 | 106 | 10 | 12 | 13  | 2   |
| CONTIG-075147 | 96  | 6  | 4  | 14  | 0   |
| CONTIG-075148 | 84  | 3  | 3  | 2   | 0   |
| CONTIG-075149 | 63  | 5  | 0  | 9   | 0   |
| CONTIG-075150 | 152 | 7  | 7  | 42  | 0   |
| CONTIG-075151 | 171 | 6  | 6  | 19  | 0   |
| CONTIG-075152 | 153 | 8  | 7  | 28  | 0   |
| CONTIG-075153 | 369 | 14 | 8  | 267 | 0   |
| CONTIG-075154 | 117 | 3  | 3  | 13  | 0   |
| CONTIG-075155 | 111 | 8  | 4  | 30  | 0   |
| CONTIG-075156 | 172 | 6  | 7  | 17  | 0   |
| CONTIG-075157 | 83  | 4  | 6  | 2   | 0   |
| CONTIG-075158 | 132 | 6  | 12 | 9   | 0   |
| CONTIG-075159 | 130 | 6  | 2  | 24  | 2   |
| CONTIG-075160 | 74  | 10 | 9  | 18  | 0   |
| CONTIG-075161 | 137 | 15 | 18 | 20  | 0   |
| CONTIG-075162 | 73  | 6  | 9  | 9   | 0   |
| CONTIG-075163 | 85  | 9  | 2  | 4   | 11  |
| CONTIG-075164 | 68  | 13 | 12 | 16  | 0   |
| CONTIG-075165 | 147 | 5  | 3  | 2   | 0   |
| CONTIG-075166 | 87  | 13 | 5  | 38  | 0   |
| CONTIG-075168 | 94  | 4  | 2  | 14  | 0   |
| CONTIG-075169 | 63  | 2  | 0  | 4   | 0   |
| CONTIG-075170 | 69  | 7  | 4  | 8   | 0   |
| CONTIG-075171 | 67  | 17 | 2  | 42  | 0   |
| CONTIG-075172 | 176 | 10 | 5  | 67  | 0   |
| CONTIG-075174 | 66  | 9  | 4  | 18  | 0   |
| CONTIG-075175 | 90  | 7  | 11 | 9   | 0   |
| CONTIG-075178 | 92  | 5  | 14 | 12  | 0   |
| CONTIG-075179 | 684 | 52 | 0  | 0   | 396 |
| CONTIG-075180 | 77  | 5  | 4  | 0   | 0   |
| CONTIG-075182 | 158 | 7  | 32 | 19  | 0   |

|               |     |     |    |     |    |
|---------------|-----|-----|----|-----|----|
| CONTIG-075183 | 78  | 4   | 2  | 9   | 0  |
| CONTIG-075184 | 265 | 23  | 9  | 8   | 0  |
| CONTIG-075185 | 71  | 6   | 4  | 8   | 0  |
| CONTIG-075186 | 239 | 6   | 3  | 38  | 0  |
| CONTIG-075187 | 100 | 6   | 8  | 14  | 0  |
| CONTIG-075188 | 61  | 5   | 9  | 4   | 0  |
| CONTIG-075189 | 66  | 7   | 2  | 6   | 0  |
| CONTIG-075190 | 73  | 6   | 2  | 11  | 0  |
| CONTIG-075191 | 79  | 4   | 4  | 11  | 0  |
| CONTIG-075192 | 162 | 34  | 0  | 16  | 0  |
| CONTIG-075193 | 85  | 5   | 0  | 14  | 0  |
| CONTIG-075194 | 88  | 4   | 0  | 11  | 0  |
| CONTIG-075195 | 86  | 13  | 2  | 25  | 0  |
| CONTIG-075196 | 65  | 4   | 0  | 0   | 0  |
| CONTIG-075197 | 112 | 3   | 9  | 4   | 2  |
| CONTIG-075198 | 62  | 3   | 11 | 0   | 0  |
| CONTIG-075200 | 292 | 7   | 3  | 68  | 0  |
| CONTIG-075201 | 145 | 10  | 5  | 63  | 0  |
| CONTIG-075202 | 64  | 5   | 2  | 16  | 0  |
| CONTIG-075203 | 71  | 6   | 12 | 14  | 0  |
| CONTIG-075204 | 71  | 2   | 0  | 2   | 0  |
| CONTIG-075205 | 69  | 3   | 2  | 2   | 0  |
| CONTIG-075206 | 77  | 10  | 3  | 26  | 0  |
| CONTIG-075207 | 88  | 13  | 6  | 25  | 0  |
| CONTIG-075208 | 138 | 7   | 0  | 26  | 2  |
| CONTIG-075209 | 120 | 4   | 0  | 4   | 2  |
| CONTIG-075210 | 110 | 5   | 3  | 19  | 0  |
| CONTIG-075211 | 456 | 8   | 0  | 124 | 4  |
| CONTIG-075212 | 112 | 12  | 4  | 2   | 0  |
| CONTIG-075213 | 68  | 174 | 28 | 343 | 13 |
| CONTIG-075214 | 59  | 7   | 0  | 0   | 2  |
| CONTIG-075215 | 67  | 3   | 0  | 4   | 0  |
| CONTIG-075216 | 83  | 13  | 3  | 42  | 0  |
| CONTIG-075217 | 505 | 10  | 11 | 179 | 0  |
| CONTIG-075218 | 49  | 96  | 5  | 65  | 2  |
| CONTIG-075219 | 143 | 7   | 13 | 47  | 0  |
| CONTIG-075220 | 233 | 5   | 6  | 19  | 2  |
| CONTIG-075221 | 274 | 21  | 5  | 188 | 13 |
| CONTIG-075222 | 62  | 5   | 2  | 9   | 0  |
| CONTIG-075223 | 80  | 6   | 6  | 9   | 0  |
| CONTIG-075224 | 62  | 4   | 5  | 0   | 0  |
| CONTIG-075225 | 80  | 6   | 10 | 16  | 0  |
| CONTIG-075226 | 264 | 12  | 2  | 100 | 0  |
| CONTIG-075232 | 72  | 3   | 5  | 3   | 0  |
| CONTIG-075233 | 118 | 6   | 7  | 18  | 0  |
| CONTIG-075234 | 114 | 11  | 7  | 44  | 0  |
| CONTIG-075235 | 79  | 5   | 2  | 19  | 0  |

|               |     |    |    |     |   |
|---------------|-----|----|----|-----|---|
| CONTIG-075236 | 123 | 4  | 4  | 6   | 0 |
| CONTIG-075237 | 135 | 8  | 5  | 41  | 0 |
| CONTIG-075238 | 77  | 35 | 25 | 61  | 0 |
| CONTIG-075239 | 67  | 3  | 2  | 4   | 0 |
| CONTIG-075241 | 276 | 13 | 25 | 58  | 4 |
| CONTIG-075242 | 98  | 5  | 4  | 0   | 0 |
| CONTIG-075244 | 77  | 10 | 6  | 23  | 0 |
| CONTIG-075246 | 193 | 6  | 14 | 41  | 0 |
| CONTIG-075247 | 404 | 12 | 19 | 212 | 0 |
| CONTIG-075248 | 88  | 9  | 12 | 31  | 0 |
| CONTIG-075249 | 82  | 7  | 5  | 6   | 0 |
| CONTIG-075250 | 139 | 9  | 7  | 56  | 0 |
| CONTIG-075251 | 115 | 9  | 2  | 38  | 0 |
| CONTIG-075252 | 111 | 5  | 12 | 9   | 0 |
| CONTIG-075253 | 65  | 2  | 5  | 2   | 0 |
| CONTIG-075254 | 63  | 7  | 7  | 19  | 0 |
| CONTIG-075256 | 67  | 25 | 16 | 36  | 0 |
| CONTIG-075257 | 213 | 8  | 7  | 25  | 0 |
| CONTIG-075258 | 89  | 4  | 3  | 9   | 0 |
| CONTIG-075259 | 178 | 8  | 9  | 30  | 2 |
| CONTIG-075260 | 104 | 9  | 3  | 27  | 0 |
| CONTIG-075261 | 167 | 20 | 12 | 159 | 0 |
| CONTIG-075262 | 134 | 9  | 9  | 34  | 0 |
| CONTIG-075263 | 162 | 6  | 9  | 35  | 0 |
| CONTIG-075264 | 126 | 8  | 0  | 36  | 0 |
| CONTIG-075265 | 94  | 8  | 8  | 15  | 0 |
| CONTIG-075266 | 64  | 5  | 0  | 4   | 0 |
| CONTIG-075267 | 198 | 11 | 33 | 44  | 0 |
| CONTIG-075268 | 102 | 4  | 0  | 6   | 0 |
| CONTIG-075269 | 154 | 5  | 5  | 26  | 2 |
| CONTIG-075270 | 187 | 10 | 4  | 59  | 0 |
| CONTIG-075273 | 184 | 8  | 0  | 12  | 2 |
| CONTIG-075274 | 144 | 8  | 3  | 35  | 0 |
| CONTIG-075275 | 276 | 11 | 7  | 119 | 0 |
| CONTIG-075276 | 157 | 3  | 0  | 10  | 2 |
| CONTIG-075277 | 125 | 3  | 2  | 5   | 0 |
| CONTIG-075279 | 99  | 5  | 4  | 16  | 0 |
| CONTIG-075280 | 65  | 8  | 0  | 14  | 0 |
| CONTIG-075281 | 122 | 7  | 2  | 22  | 0 |
| CONTIG-075282 | 413 | 11 | 36 | 170 | 0 |
| CONTIG-075283 | 90  | 16 | 3  | 24  | 0 |
| CONTIG-075284 | 236 | 11 | 2  | 22  | 0 |
| CONTIG-075285 | 60  | 6  | 0  | 2   | 0 |
| CONTIG-075286 | 77  | 6  | 7  | 10  | 0 |
| CONTIG-075287 | 72  | 6  | 6  | 7   | 0 |
| CONTIG-075288 | 130 | 8  | 7  | 21  | 0 |
| CONTIG-075289 | 78  | 6  | 4  | 5   | 0 |

|               |     |    |    |     |     |
|---------------|-----|----|----|-----|-----|
| CONTIG-075290 | 150 | 4  | 3  | 13  | 0   |
| CONTIG-075291 | 71  | 7  | 0  | 23  | 0   |
| CONTIG-075292 | 156 | 5  | 7  | 6   | 0   |
| CONTIG-075293 | 131 | 8  | 8  | 38  | 0   |
| CONTIG-075294 | 305 | 10 | 9  | 112 | 0   |
| CONTIG-075295 | 67  | 4  | 3  | 8   | 0   |
| CONTIG-075296 | 102 | 7  | 0  | 21  | 0   |
| CONTIG-075297 | 112 | 7  | 6  | 18  | 0   |
| CONTIG-075298 | 108 | 11 | 22 | 28  | 0   |
| CONTIG-075299 | 81  | 4  | 6  | 4   | 0   |
| CONTIG-075300 | 100 | 5  | 2  | 11  | 0   |
| CONTIG-075301 | 163 | 7  | 4  | 34  | 0   |
| CONTIG-075302 | 196 | 7  | 2  | 34  | 0   |
| CONTIG-075303 | 191 | 11 | 23 | 44  | 0   |
| CONTIG-075304 | 117 | 8  | 6  | 18  | 0   |
| CONTIG-075305 | 196 | 9  | 2  | 0   | 2   |
| CONTIG-075306 | 134 | 11 | 0  | 18  | 0   |
| CONTIG-075307 | 170 | 4  | 0  | 13  | 0   |
| CONTIG-075308 | 116 | 4  | 4  | 14  | 0   |
| CONTIG-075309 | 218 | 4  | 9  | 26  | 0   |
| CONTIG-075310 | 75  | 7  | 2  | 18  | 0   |
| CONTIG-075311 | 90  | 6  | 7  | 16  | 0   |
| CONTIG-075312 | 394 | 44 | 3  | 0   | 106 |
| CONTIG-075313 | 119 | 6  | 2  | 19  | 0   |
| CONTIG-075314 | 133 | 6  | 8  | 26  | 0   |
| CONTIG-075315 | 194 | 7  | 15 | 49  | 0   |
| CONTIG-075316 | 62  | 40 | 7  | 83  | 2   |
| CONTIG-075317 | 70  | 5  | 2  | 9   | 0   |
| CONTIG-075318 | 96  | 4  | 17 | 8   | 0   |
| CONTIG-075319 | 66  | 3  | 3  | 2   | 0   |
| CONTIG-075320 | 119 | 5  | 0  | 11  | 0   |
| CONTIG-075321 | 87  | 5  | 2  | 11  | 0   |
| CONTIG-075322 | 384 | 8  | 2  | 115 | 0   |
| CONTIG-075323 | 85  | 5  | 0  | 0   | 0   |
| CONTIG-075324 | 352 | 13 | 8  | 59  | 0   |
| CONTIG-075325 | 60  | 7  | 2  | 15  | 0   |
| CONTIG-075326 | 607 | 6  | 4  | 0   | 0   |
| CONTIG-075327 | 150 | 9  | 5  | 24  | 0   |
| CONTIG-075328 | 269 | 9  | 5  | 31  | 4   |
| CONTIG-075329 | 163 | 5  | 0  | 16  | 0   |
| CONTIG-075330 | 273 | 15 | 33 | 188 | 0   |
| CONTIG-075331 | 63  | 5  | 11 | 2   | 0   |
| CONTIG-075332 | 125 | 4  | 3  | 10  | 0   |
| CONTIG-075333 | 91  | 5  | 2  | 8   | 0   |
| CONTIG-075334 | 215 | 7  | 2  | 48  | 0   |
| CONTIG-075335 | 102 | 4  | 0  | 8   | 0   |
| CONTIG-075336 | 94  | 4  | 4  | 0   | 0   |

|               |     |    |    |     |   |
|---------------|-----|----|----|-----|---|
| CONTIG-075337 | 172 | 6  | 3  | 34  | 0 |
| CONTIG-075338 | 146 | 6  | 6  | 25  | 0 |
| CONTIG-075339 | 302 | 12 | 12 | 66  | 8 |
| CONTIG-075340 | 104 | 7  | 9  | 13  | 0 |
| CONTIG-075341 | 237 | 7  | 8  | 49  | 0 |
| CONTIG-075342 | 112 | 7  | 4  | 20  | 0 |
| CONTIG-075343 | 316 | 20 | 24 | 298 | 0 |
| CONTIG-075344 | 78  | 4  | 0  | 12  | 0 |
| CONTIG-075345 | 103 | 4  | 0  | 7   | 0 |
| CONTIG-075346 | 155 | 9  | 13 | 35  | 0 |
| CONTIG-075347 | 113 | 15 | 7  | 63  | 0 |
| CONTIG-075349 | 220 | 6  | 2  | 44  | 0 |
| CONTIG-075350 | 221 | 11 | 3  | 89  | 0 |
| CONTIG-075351 | 109 | 31 | 0  | 178 | 0 |
| CONTIG-075352 | 84  | 4  | 5  | 6   | 0 |
| CONTIG-075353 | 97  | 8  | 4  | 25  | 0 |
| CONTIG-075354 | 97  | 5  | 7  | 13  | 0 |
| CONTIG-075355 | 61  | 6  | 5  | 17  | 0 |
| CONTIG-075356 | 147 | 8  | 12 | 45  | 0 |
| CONTIG-075357 | 95  | 9  | 3  | 37  | 0 |
| CONTIG-075358 | 83  | 6  | 4  | 13  | 0 |
| CONTIG-075359 | 66  | 4  | 6  | 6   | 0 |
| CONTIG-075360 | 76  | 2  | 0  | 2   | 0 |
| CONTIG-075361 | 147 | 4  | 4  | 7   | 0 |
| CONTIG-075362 | 87  | 5  | 2  | 18  | 0 |
| CONTIG-075363 | 364 | 14 | 4  | 279 | 0 |
| CONTIG-075364 | 94  | 5  | 0  | 2   | 0 |
| CONTIG-075365 | 93  | 5  | 3  | 12  | 0 |
| CONTIG-075367 | 172 | 7  | 7  | 28  | 0 |
| CONTIG-075368 | 73  | 8  | 6  | 23  | 0 |
| CONTIG-075369 | 61  | 14 | 0  | 43  | 0 |
| CONTIG-075370 | 91  | 2  | 0  | 0   | 0 |
| CONTIG-075371 | 91  | 22 | 6  | 70  | 0 |
| CONTIG-075372 | 79  | 13 | 6  | 50  | 0 |
| CONTIG-075373 | 87  | 3  | 5  | 6   | 0 |
| CONTIG-075374 | 69  | 3  | 0  | 7   | 0 |
| CONTIG-075375 | 227 | 5  | 3  | 20  | 0 |
| CONTIG-075376 | 126 | 9  | 8  | 43  | 0 |
| CONTIG-075378 | 88  | 12 | 13 | 25  | 0 |
| CONTIG-075379 | 830 | 13 | 4  | 480 | 0 |
| CONTIG-075380 | 49  | 12 | 5  | 15  | 0 |
| CONTIG-075381 | 295 | 10 | 14 | 109 | 0 |
| CONTIG-075382 | 380 | 6  | 4  | 24  | 0 |
| CONTIG-075383 | 80  | 8  | 0  | 22  | 2 |
| CONTIG-075384 | 79  | 3  | 7  | 0   | 0 |
| CONTIG-075385 | 65  | 5  | 6  | 11  | 0 |
| CONTIG-075386 | 168 | 13 | 2  | 86  | 0 |

|               |      |     |    |      |    |
|---------------|------|-----|----|------|----|
| CONTIG-075387 | 1567 | 20  | 8  | 1455 | 2  |
| CONTIG-075388 | 82   | 27  | 16 | 112  | 0  |
| CONTIG-075389 | 64   | 6   | 3  | 7    | 0  |
| CONTIG-075390 | 79   | 8   | 0  | 22   | 0  |
| CONTIG-075391 | 87   | 4   | 0  | 9    | 0  |
| CONTIG-075392 | 190  | 6   | 5  | 21   | 0  |
| CONTIG-075394 | 65   | 4   | 3  | 7    | 0  |
| CONTIG-075395 | 109  | 4   | 2  | 2    | 0  |
| CONTIG-075396 | 150  | 5   | 2  | 18   | 0  |
| CONTIG-075399 | 172  | 8   | 3  | 47   | 2  |
| CONTIG-075400 | 59   | 7   | 12 | 0    | 0  |
| CONTIG-075401 | 77   | 6   | 4  | 13   | 0  |
| CONTIG-075402 | 156  | 8   | 31 | 38   | 0  |
| CONTIG-075403 | 60   | 3   | 6  | 2    | 0  |
| CONTIG-075404 | 65   | 6   | 2  | 17   | 0  |
| CONTIG-075405 | 84   | 2   | 4  | 4    | 0  |
| CONTIG-075406 | 76   | 3   | 0  | 2    | 0  |
| CONTIG-075407 | 105  | 7   | 6  | 17   | 0  |
| CONTIG-075408 | 81   | 5   | 5  | 5    | 0  |
| CONTIG-075409 | 166  | 15  | 17 | 98   | 0  |
| CONTIG-075410 | 49   | 92  | 28 | 144  | 0  |
| CONTIG-075411 | 66   | 6   | 7  | 7    | 0  |
| CONTIG-075412 | 205  | 6   | 4  | 35   | 0  |
| CONTIG-075413 | 106  | 7   | 0  | 17   | 0  |
| CONTIG-075414 | 257  | 5   | 0  | 57   | 0  |
| CONTIG-075415 | 119  | 7   | 0  | 16   | 0  |
| CONTIG-075420 | 59   | 4   | 0  | 4    | 0  |
| CONTIG-075422 | 153  | 11  | 17 | 53   | 0  |
| CONTIG-075424 | 86   | 10  | 7  | 19   | 0  |
| CONTIG-075425 | 96   | 3   | 3  | 7    | 0  |
| CONTIG-075426 | 38   | 500 | 16 | 473  | 0  |
| CONTIG-075427 | 136  | 4   | 15 | 2    | 0  |
| CONTIG-075428 | 85   | 30  | 9  | 94   | 0  |
| CONTIG-075429 | 69   | 12  | 10 | 13   | 0  |
| CONTIG-075430 | 425  | 19  | 4  | 352  | 0  |
| CONTIG-075431 | 240  | 6   | 0  | 42   | 0  |
| CONTIG-075432 | 65   | 4   | 9  | 7    | 0  |
| CONTIG-075433 | 65   | 4   | 0  | 11   | 0  |
| CONTIG-075434 | 475  | 15  | 7  | 236  | 15 |
| CONTIG-075435 | 419  | 18  | 35 | 247  | 2  |
| CONTIG-075436 | 117  | 14  | 2  | 35   | 2  |
| CONTIG-075437 | 86   | 10  | 6  | 34   | 0  |
| CONTIG-075438 | 141  | 70  | 6  | 529  | 0  |
| CONTIG-075440 | 125  | 7   | 0  | 22   | 0  |
| CONTIG-075441 | 181  | 9   | 2  | 32   | 0  |
| CONTIG-075442 | 82   | 3   | 0  | 9    | 0  |
| CONTIG-075443 | 66   | 12  | 4  | 25   | 0  |

|               |     |     |    |     |     |
|---------------|-----|-----|----|-----|-----|
| CONTIG-075444 | 134 | 6   | 7  | 22  | 0   |
| CONTIG-075445 | 81  | 9   | 5  | 28  | 0   |
| CONTIG-075446 | 87  | 3   | 2  | 6   | 0   |
| CONTIG-075447 | 192 | 10  | 5  | 62  | 0   |
| CONTIG-075449 | 67  | 6   | 13 | 16  | 0   |
| CONTIG-075450 | 63  | 8   | 0  | 17  | 0   |
| CONTIG-075451 | 613 | 11  | 3  | 31  | 22  |
| CONTIG-075452 | 164 | 14  | 21 | 51  | 2   |
| CONTIG-075455 | 164 | 7   | 16 | 42  | 0   |
| CONTIG-075456 | 189 | 7   | 5  | 16  | 0   |
| CONTIG-075457 | 44  | 22  | 6  | 28  | 0   |
| CONTIG-075458 | 83  | 8   | 5  | 21  | 0   |
| CONTIG-075459 | 111 | 6   | 0  | 12  | 0   |
| CONTIG-075461 | 75  | 17  | 8  | 59  | 0   |
| CONTIG-075462 | 371 | 10  | 0  | 51  | 0   |
| CONTIG-075463 | 87  | 9   | 18 | 14  | 0   |
| CONTIG-075467 | 59  | 4   | 2  | 2   | 0   |
| CONTIG-075468 | 130 | 24  | 10 | 73  | 0   |
| CONTIG-075469 | 113 | 8   | 5  | 25  | 0   |
| CONTIG-075471 | 81  | 5   | 4  | 7   | 0   |
| CONTIG-075472 | 63  | 6   | 6  | 0   | 0   |
| CONTIG-075473 | 131 | 8   | 0  | 37  | 0   |
| CONTIG-075474 | 89  | 8   | 0  | 31  | 0   |
| CONTIG-075475 | 126 | 5   | 0  | 10  | 0   |
| CONTIG-075476 | 198 | 4   | 12 | 13  | 0   |
| CONTIG-075477 | 98  | 5   | 0  | 18  | 0   |
| CONTIG-075478 | 204 | 8   | 0  | 34  | 0   |
| CONTIG-075479 | 72  | 7   | 0  | 13  | 0   |
| CONTIG-075480 | 90  | 7   | 2  | 15  | 0   |
| CONTIG-075481 | 118 | 4   | 2  | 19  | 0   |
| CONTIG-075482 | 454 | 8   | 0  | 0   | 8   |
| CONTIG-075485 | 61  | 4   | 2  | 6   | 0   |
| CONTIG-075486 | 98  | 8   | 5  | 13  | 0   |
| CONTIG-075487 | 233 | 12  | 19 | 75  | 0   |
| CONTIG-075488 | 524 | 11  | 2  | 0   | 0   |
| CONTIG-075491 | 68  | 3   | 3  | 2   | 0   |
| CONTIG-075492 | 809 | 24  | 0  | 0   | 139 |
| CONTIG-075494 | 101 | 6   | 6  | 3   | 0   |
| CONTIG-075495 | 65  | 4   | 6  | 0   | 0   |
| CONTIG-075496 | 343 | 32  | 10 | 683 | 0   |
| CONTIG-075497 | 105 | 8   | 3  | 25  | 0   |
| CONTIG-075498 | 109 | 4   | 7  | 7   | 0   |
| CONTIG-075499 | 77  | 23  | 5  | 75  | 0   |
| CONTIG-075500 | 582 | 12  | 10 | 163 | 6   |
| CONTIG-075501 | 70  | 5   | 9  | 6   | 0   |
| CONTIG-075502 | 79  | 7   | 0  | 22  | 0   |
| CONTIG-075503 | 57  | 128 | 34 | 192 | 0   |

|               |     |    |    |     |   |
|---------------|-----|----|----|-----|---|
| CONTIG-075504 | 111 | 9  | 9  | 24  | 0 |
| CONTIG-075505 | 67  | 5  | 10 | 0   | 0 |
| CONTIG-075506 | 106 | 5  | 2  | 12  | 0 |
| CONTIG-075509 | 71  | 5  | 4  | 5   | 0 |
| CONTIG-075510 | 213 | 5  | 30 | 7   | 0 |
| CONTIG-075511 | 118 | 6  | 2  | 12  | 0 |
| CONTIG-075512 | 149 | 8  | 4  | 0   | 9 |
| CONTIG-075513 | 68  | 15 | 10 | 43  | 0 |
| CONTIG-075514 | 145 | 5  | 7  | 30  | 0 |
| CONTIG-075515 | 134 | 5  | 2  | 24  | 0 |
| CONTIG-075516 | 177 | 7  | 0  | 29  | 0 |
| CONTIG-075517 | 104 | 3  | 4  | 4   | 0 |
| CONTIG-075518 | 201 | 8  | 2  | 59  | 0 |
| CONTIG-075519 | 476 | 14 | 25 | 271 | 0 |
| CONTIG-075520 | 72  | 4  | 2  | 0   | 0 |
| CONTIG-075521 | 84  | 8  | 4  | 29  | 2 |
| CONTIG-075522 | 383 | 8  | 27 | 26  | 0 |
| CONTIG-075523 | 153 | 23 | 13 | 137 | 0 |
| CONTIG-075524 | 47  | 38 | 2  | 10  | 0 |
| CONTIG-075525 | 101 | 4  | 2  | 12  | 0 |
| CONTIG-075526 | 208 | 6  | 4  | 34  | 0 |
| CONTIG-075527 | 112 | 8  | 21 | 27  | 0 |
| CONTIG-075528 | 189 | 6  | 0  | 0   | 0 |
| CONTIG-075529 | 174 | 7  | 5  | 30  | 0 |
| CONTIG-075531 | 82  | 4  | 5  | 2   | 0 |
| CONTIG-075533 | 256 | 5  | 4  | 21  | 3 |
| CONTIG-075535 | 99  | 7  | 15 | 14  | 0 |
| CONTIG-075537 | 92  | 7  | 0  | 2   | 0 |
| CONTIG-075538 | 129 | 4  | 2  | 9   | 0 |
| CONTIG-075539 | 116 | 10 | 0  | 61  | 0 |
| CONTIG-075540 | 78  | 3  | 2  | 4   | 0 |
| CONTIG-075541 | 318 | 9  | 2  | 74  | 0 |
| CONTIG-075542 | 95  | 5  | 0  | 12  | 0 |
| CONTIG-075543 | 104 | 10 | 7  | 15  | 0 |
| CONTIG-075544 | 66  | 5  | 7  | 0   | 0 |
| CONTIG-075545 | 83  | 8  | 9  | 4   | 0 |
| CONTIG-075546 | 158 | 6  | 14 | 0   | 2 |
| CONTIG-075549 | 135 | 5  | 2  | 0   | 4 |
| CONTIG-075550 | 72  | 7  | 2  | 14  | 0 |
| CONTIG-075552 | 336 | 13 | 11 | 17  | 0 |
| CONTIG-075553 | 60  | 4  | 10 | 0   | 0 |
| CONTIG-075554 | 116 | 8  | 3  | 36  | 0 |
| CONTIG-075555 | 74  | 11 | 9  | 12  | 0 |
| CONTIG-075556 | 81  | 2  | 0  | 0   | 0 |
| CONTIG-075557 | 536 | 9  | 3  | 58  | 0 |
| CONTIG-075559 | 222 | 13 | 0  | 132 | 0 |
| CONTIG-075560 | 87  | 8  | 12 | 10  | 0 |



|               |     |     |    |     |     |
|---------------|-----|-----|----|-----|-----|
| CONTIG-075561 | 100 | 5   | 3  | 19  | 0   |
| CONTIG-075562 | 259 | 10  | 18 | 69  | 2   |
| CONTIG-075563 | 121 | 8   | 9  | 23  | 0   |
| CONTIG-075564 | 81  | 7   | 2  | 19  | 0   |
| CONTIG-075565 | 91  | 6   | 2  | 24  | 0   |
| CONTIG-075566 | 97  | 8   | 0  | 17  | 0   |
| CONTIG-075567 | 69  | 8   | 4  | 25  | 0   |
| CONTIG-075568 | 317 | 8   | 25 | 106 | 0   |
| CONTIG-075569 | 74  | 5   | 2  | 13  | 0   |
| CONTIG-075570 | 188 | 5   | 0  | 8   | 0   |
| CONTIG-075571 | 196 | 13  | 11 | 64  | 0   |
| CONTIG-075572 | 87  | 5   | 2  | 12  | 0   |
| CONTIG-075573 | 73  | 4   | 2  | 14  | 0   |
| CONTIG-075574 | 75  | 5   | 25 | 7   | 0   |
| CONTIG-075575 | 78  | 8   | 5  | 0   | 0   |
| CONTIG-075576 | 70  | 13  | 2  | 8   | 0   |
| CONTIG-075577 | 764 | 118 | 4  | 0   | 607 |
| CONTIG-075578 | 66  | 5   | 0  | 9   | 0   |
| CONTIG-075580 | 68  | 5   | 4  | 13  | 0   |
| CONTIG-075581 | 90  | 5   | 7  | 5   | 0   |
| CONTIG-075584 | 68  | 12  | 0  | 0   | 2   |
| CONTIG-075585 | 152 | 4   | 2  | 12  | 0   |
| CONTIG-075586 | 190 | 9   | 23 | 47  | 0   |
| CONTIG-075587 | 120 | 17  | 27 | 2   | 0   |
| CONTIG-075588 | 210 | 4   | 5  | 24  | 0   |
| CONTIG-075589 | 89  | 10  | 5  | 13  | 0   |
| CONTIG-075590 | 259 | 9   | 11 | 51  | 0   |
| CONTIG-075591 | 230 | 9   | 9  | 47  | 2   |
| CONTIG-075593 | 111 | 4   | 3  | 6   | 0   |
| CONTIG-075596 | 207 | 14  | 22 | 107 | 0   |
| CONTIG-075598 | 67  | 5   | 0  | 0   | 0   |
| CONTIG-075600 | 112 | 8   | 3  | 19  | 0   |
| CONTIG-075602 | 75  | 4   | 4  | 7   | 0   |
| CONTIG-075603 | 335 | 13  | 22 | 163 | 0   |
| CONTIG-075604 | 73  | 9   | 5  | 13  | 0   |
| CONTIG-075605 | 86  | 4   | 7  | 5   | 0   |
| CONTIG-075607 | 90  | 11  | 8  | 36  | 0   |
| CONTIG-075611 | 73  | 11  | 37 | 4   | 0   |
| CONTIG-075612 | 112 | 4   | 4  | 12  | 0   |
| CONTIG-075614 | 140 | 7   | 7  | 24  | 0   |
| CONTIG-075615 | 85  | 4   | 7  | 8   | 0   |
| CONTIG-075616 | 74  | 5   | 0  | 8   | 0   |
| CONTIG-075617 | 96  | 6   | 3  | 24  | 0   |
| CONTIG-075618 | 124 | 6   | 2  | 24  | 0   |
| CONTIG-075619 | 308 | 15  | 20 | 124 | 0   |
| CONTIG-075620 | 96  | 8   | 6  | 25  | 0   |
| CONTIG-075621 | 131 | 12  | 20 | 8   | 2   |

|               |     |     |    |     |   |
|---------------|-----|-----|----|-----|---|
| CONTIG-075622 | 80  | 7   | 4  | 2   | 0 |
| CONTIG-075623 | 305 | 12  | 24 | 33  | 0 |
| CONTIG-075624 | 62  | 4   | 3  | 4   | 0 |
| CONTIG-075625 | 350 | 9   | 3  | 85  | 2 |
| CONTIG-075626 | 85  | 7   | 14 | 18  | 0 |
| CONTIG-075628 | 204 | 9   | 6  | 42  | 2 |
| CONTIG-075629 | 50  | 8   | 2  | 16  | 0 |
| CONTIG-075630 | 169 | 5   | 22 | 10  | 0 |
| CONTIG-075631 | 115 | 4   | 5  | 11  | 0 |
| CONTIG-075632 | 58  | 9   | 2  | 24  | 0 |
| CONTIG-075633 | 102 | 5   | 2  | 15  | 0 |
| CONTIG-075634 | 141 | 8   | 14 | 23  | 0 |
| CONTIG-075635 | 108 | 15  | 10 | 46  | 0 |
| CONTIG-075636 | 90  | 86  | 5  | 253 | 0 |
| CONTIG-075638 | 120 | 4   | 4  | 12  | 0 |
| CONTIG-075639 | 163 | 9   | 7  | 58  | 0 |
| CONTIG-075640 | 120 | 5   | 3  | 7   | 0 |
| CONTIG-075641 | 158 | 13  | 2  | 68  | 0 |
| CONTIG-075642 | 227 | 17  | 16 | 162 | 0 |
| CONTIG-075643 | 289 | 8   | 10 | 53  | 0 |
| CONTIG-075644 | 91  | 6   | 11 | 14  | 0 |
| CONTIG-075645 | 58  | 7   | 0  | 13  | 0 |
| CONTIG-075646 | 83  | 5   | 7  | 8   | 0 |
| CONTIG-075647 | 129 | 11  | 14 | 58  | 0 |
| CONTIG-075649 | 152 | 4   | 0  | 9   | 0 |
| CONTIG-075650 | 59  | 6   | 4  | 2   | 0 |
| CONTIG-075651 | 286 | 12  | 4  | 126 | 4 |
| CONTIG-075652 | 65  | 9   | 3  | 9   | 0 |
| CONTIG-075653 | 76  | 3   | 3  | 2   | 0 |
| CONTIG-075654 | 118 | 3   | 6  | 5   | 0 |
| CONTIG-075655 | 191 | 9   | 2  | 48  | 4 |
| CONTIG-075656 | 71  | 3   | 2  | 7   | 0 |
| CONTIG-075657 | 68  | 9   | 4  | 13  | 0 |
| CONTIG-075658 | 93  | 6   | 3  | 0   | 0 |
| CONTIG-075659 | 220 | 6   | 0  | 41  | 0 |
| CONTIG-075660 | 228 | 9   | 0  | 68  | 2 |
| CONTIG-075661 | 108 | 8   | 18 | 10  | 0 |
| CONTIG-075662 | 120 | 6   | 22 | 21  | 0 |
| CONTIG-075663 | 162 | 10  | 18 | 58  | 0 |
| CONTIG-075664 | 78  | 5   | 6  | 11  | 0 |
| CONTIG-075665 | 129 | 3   | 2  | 10  | 0 |
| CONTIG-075666 | 196 | 9   | 14 | 49  | 0 |
| CONTIG-075667 | 65  | 8   | 0  | 27  | 0 |
| CONTIG-075668 | 62  | 7   | 0  | 21  | 0 |
| CONTIG-075669 | 103 | 5   | 5  | 18  | 0 |
| CONTIG-075670 | 77  | 102 | 7  | 330 | 0 |
| CONTIG-075671 | 75  | 5   | 2  | 7   | 0 |

|               |      |     |    |     |     |
|---------------|------|-----|----|-----|-----|
| CONTIG-075672 | 625  | 10  | 35 | 172 | 2   |
| CONTIG-075673 | 88   | 7   | 8  | 2   | 0   |
| CONTIG-075674 | 234  | 10  | 7  | 120 | 0   |
| CONTIG-075675 | 227  | 6   | 13 | 28  | 0   |
| CONTIG-075676 | 150  | 9   | 8  | 0   | 0   |
| CONTIG-075677 | 65   | 4   | 6  | 4   | 0   |
| CONTIG-075679 | 1065 | 12  | 9  | 30  | 0   |
| CONTIG-075680 | 60   | 4   | 2  | 8   | 0   |
| CONTIG-075681 | 274  | 8   | 2  | 52  | 0   |
| CONTIG-075682 | 359  | 14  | 12 | 123 | 0   |
| CONTIG-075683 | 74   | 6   | 2  | 12  | 0   |
| CONTIG-075684 | 66   | 6   | 12 | 2   | 0   |
| CONTIG-075685 | 174  | 11  | 12 | 51  | 0   |
| CONTIG-075686 | 39   | 8   | 2  | 2   | 0   |
| CONTIG-075687 | 104  | 5   | 4  | 0   | 0   |
| CONTIG-075688 | 143  | 8   | 16 | 10  | 0   |
| CONTIG-075689 | 280  | 6   | 10 | 57  | 0   |
| CONTIG-075690 | 171  | 11  | 31 | 53  | 0   |
| CONTIG-075691 | 476  | 20  | 2  | 0   | 72  |
| CONTIG-075692 | 85   | 7   | 11 | 17  | 0   |
| CONTIG-075693 | 192  | 5   | 0  | 48  | 0   |
| CONTIG-075694 | 156  | 7   | 2  | 25  | 0   |
| CONTIG-075695 | 59   | 4   | 3  | 5   | 0   |
| CONTIG-075696 | 2066 | 29  | 2  | 80  | 0   |
| CONTIG-075697 | 72   | 6   | 4  | 0   | 0   |
| CONTIG-075698 | 79   | 8   | 3  | 2   | 0   |
| CONTIG-075700 | 150  | 8   | 0  | 33  | 2   |
| CONTIG-075701 | 122  | 13  | 0  | 59  | 0   |
| CONTIG-075702 | 400  | 9   | 7  | 17  | 0   |
| CONTIG-075703 | 494  | 10  | 3  | 276 | 0   |
| CONTIG-075704 | 240  | 288 | 7  | 0   | 298 |
| CONTIG-075705 | 98   | 5   | 5  | 12  | 0   |
| CONTIG-075706 | 125  | 39  | 20 | 289 | 0   |
| CONTIG-075707 | 191  | 7   | 2  | 9   | 0   |
| CONTIG-075708 | 65   | 17  | 6  | 0   | 0   |
| CONTIG-075709 | 65   | 2   | 6  | 2   | 0   |
| CONTIG-075710 | 81   | 2   | 2  | 0   | 0   |
| CONTIG-075711 | 170  | 10  | 14 | 44  | 0   |
| CONTIG-075712 | 162  | 7   | 16 | 36  | 0   |
| CONTIG-075713 | 129  | 9   | 4  | 48  | 0   |
| CONTIG-075714 | 232  | 5   | 5  | 34  | 0   |
| CONTIG-075715 | 71   | 7   | 22 | 0   | 0   |
| CONTIG-075716 | 123  | 9   | 3  | 23  | 3   |
| CONTIG-075717 | 72   | 2   | 0  | 4   | 0   |
| CONTIG-075718 | 182  | 10  | 4  | 45  | 0   |
| CONTIG-075719 | 355  | 6   | 12 | 48  | 4   |
| CONTIG-075720 | 89   | 12  | 15 | 37  | 0   |

|               |     |     |    |     |     |
|---------------|-----|-----|----|-----|-----|
| CONTIG-075721 | 125 | 3   | 5  | 4   | 0   |
| CONTIG-075722 | 247 | 13  | 0  | 0   | 14  |
| CONTIG-075723 | 136 | 5   | 0  | 15  | 0   |
| CONTIG-075727 | 262 | 5   | 2  | 28  | 0   |
| CONTIG-075728 | 99  | 3   | 7  | 5   | 0   |
| CONTIG-075729 | 114 | 13  | 2  | 73  | 0   |
| CONTIG-075731 | 76  | 4   | 5  | 6   | 0   |
| CONTIG-075732 | 36  | 10  | 3  | 12  | 0   |
| CONTIG-075734 | 65  | 24  | 0  | 0   | 2   |
| CONTIG-075737 | 235 | 16  | 13 | 120 | 2   |
| CONTIG-075738 | 60  | 4   | 8  | 3   | 0   |
| CONTIG-075739 | 413 | 15  | 11 | 143 | 9   |
| CONTIG-075740 | 475 | 8   | 5  | 35  | 0   |
| CONTIG-075741 | 105 | 2   | 2  | 0   | 0   |
| CONTIG-075742 | 217 | 8   | 2  | 50  | 0   |
| CONTIG-075743 | 83  | 5   | 3  | 21  | 0   |
| CONTIG-075744 | 78  | 7   | 7  | 8   | 0   |
| CONTIG-075745 | 189 | 11  | 2  | 47  | 0   |
| CONTIG-075746 | 146 | 8   | 3  | 25  | 0   |
| CONTIG-075747 | 76  | 7   | 11 | 9   | 0   |
| CONTIG-075748 | 73  | 6   | 0  | 18  | 0   |
| CONTIG-075749 | 300 | 30  | 4  | 396 | 0   |
| CONTIG-075751 | 80  | 7   | 12 | 13  | 0   |
| CONTIG-075753 | 307 | 10  | 5  | 47  | 0   |
| CONTIG-075754 | 192 | 755 | 4  | 3   | 636 |
| CONTIG-075755 | 116 | 6   | 7  | 14  | 0   |
| CONTIG-075756 | 81  | 8   | 9  | 29  | 0   |
| CONTIG-075757 | 93  | 4   | 2  | 9   | 0   |
| CONTIG-075758 | 75  | 10  | 6  | 32  | 0   |
| CONTIG-075759 | 422 | 9   | 4  | 93  | 0   |
| CONTIG-075760 | 86  | 2   | 4  | 2   | 0   |
| CONTIG-075761 | 115 | 8   | 8  | 19  | 0   |
| CONTIG-075762 | 316 | 8   | 3  | 61  | 0   |
| CONTIG-075763 | 92  | 6   | 11 | 13  | 0   |
| CONTIG-075764 | 71  | 6   | 5  | 17  | 0   |
| CONTIG-075765 | 61  | 13  | 21 | 24  | 0   |
| CONTIG-075766 | 102 | 5   | 5  | 2   | 0   |
| CONTIG-075767 | 37  | 23  | 0  | 14  | 0   |
| CONTIG-075769 | 67  | 11  | 4  | 34  | 0   |
| CONTIG-075770 | 85  | 5   | 0  | 18  | 0   |
| CONTIG-075771 | 117 | 4   | 5  | 7   | 0   |
| CONTIG-075772 | 211 | 11  | 9  | 90  | 0   |
| CONTIG-075773 | 152 | 12  | 9  | 67  | 0   |
| CONTIG-075774 | 257 | 9   | 0  | 12  | 0   |
| CONTIG-075775 | 101 | 4   | 2  | 10  | 0   |
| CONTIG-075776 | 91  | 11  | 10 | 35  | 0   |
| CONTIG-075777 | 122 | 13  | 2  | 62  | 0   |

|               |     |     |    |     |    |
|---------------|-----|-----|----|-----|----|
| CONTIG-075778 | 193 | 15  | 26 | 109 | 0  |
| CONTIG-075779 | 145 | 12  | 8  | 54  | 0  |
| CONTIG-075780 | 243 | 19  | 5  | 250 | 2  |
| CONTIG-075781 | 101 | 8   | 5  | 23  | 0  |
| CONTIG-075782 | 94  | 6   | 0  | 14  | 0  |
| CONTIG-075783 | 64  | 7   | 7  | 0   | 0  |
| CONTIG-075784 | 617 | 17  | 13 | 366 | 2  |
| CONTIG-075785 | 68  | 3   | 0  | 9   | 0  |
| CONTIG-075786 | 58  | 5   | 0  | 4   | 0  |
| CONTIG-075787 | 93  | 9   | 6  | 27  | 0  |
| CONTIG-075788 | 118 | 12  | 10 | 66  | 0  |
| CONTIG-075789 | 156 | 9   | 2  | 64  | 0  |
| CONTIG-075790 | 199 | 18  | 7  | 92  | 2  |
| CONTIG-075791 | 67  | 3   | 0  | 0   | 0  |
| CONTIG-075792 | 82  | 4   | 0  | 8   | 0  |
| CONTIG-075793 | 377 | 9   | 26 | 106 | 0  |
| CONTIG-075794 | 79  | 258 | 8  | 379 | 0  |
| CONTIG-075795 | 366 | 9   | 8  | 77  | 0  |
| CONTIG-075796 | 78  | 8   | 5  | 15  | 0  |
| CONTIG-075797 | 444 | 10  | 14 | 155 | 0  |
| CONTIG-075798 | 385 | 23  | 8  | 41  | 2  |
| CONTIG-075800 | 70  | 5   | 7  | 13  | 0  |
| CONTIG-075801 | 239 | 15  | 14 | 119 | 0  |
| CONTIG-075803 | 76  | 6   | 25 | 9   | 0  |
| CONTIG-075808 | 372 | 7   | 12 | 115 | 0  |
| CONTIG-075809 | 78  | 9   | 0  | 27  | 0  |
| CONTIG-075810 | 86  | 3   | 15 | 2   | 0  |
| CONTIG-075811 | 238 | 6   | 10 | 12  | 0  |
| CONTIG-075812 | 68  | 6   | 4  | 7   | 0  |
| CONTIG-075813 | 108 | 5   | 3  | 0   | 0  |
| CONTIG-075814 | 344 | 12  | 9  | 84  | 0  |
| CONTIG-075815 | 112 | 6   | 5  | 24  | 0  |
| CONTIG-075816 | 494 | 15  | 3  | 0   | 87 |
| CONTIG-075821 | 84  | 6   | 11 | 9   | 0  |
| CONTIG-075822 | 103 | 8   | 3  | 22  | 0  |
| CONTIG-075823 | 162 | 9   | 7  | 45  | 0  |
| CONTIG-075824 | 63  | 7   | 2  | 13  | 0  |
| CONTIG-075825 | 85  | 10  | 24 | 0   | 0  |
| CONTIG-075826 | 124 | 6   | 4  | 25  | 0  |
| CONTIG-075827 | 191 | 26  | 4  | 195 | 2  |
| CONTIG-075828 | 143 | 7   | 19 | 15  | 0  |
| CONTIG-075829 | 103 | 12  | 3  | 41  | 0  |
| CONTIG-075830 | 70  | 9   | 2  | 19  | 0  |
| CONTIG-075831 | 138 | 5   | 4  | 18  | 0  |
| CONTIG-075832 | 62  | 5   | 0  | 4   | 0  |
| CONTIG-075833 | 116 | 6   | 13 | 6   | 0  |
| CONTIG-075834 | 99  | 4   | 0  | 10  | 0  |

|               |      |    |    |     |     |
|---------------|------|----|----|-----|-----|
| CONTIG-075835 | 78   | 6  | 2  | 13  | 0   |
| CONTIG-075836 | 118  | 4  | 0  | 13  | 0   |
| CONTIG-075837 | 138  | 6  | 0  | 9   | 0   |
| CONTIG-075838 | 156  | 8  | 14 | 44  | 0   |
| CONTIG-075839 | 64   | 4  | 0  | 2   | 0   |
| CONTIG-075840 | 60   | 6  | 3  | 10  | 0   |
| CONTIG-075841 | 180  | 9  | 13 | 19  | 0   |
| CONTIG-075842 | 123  | 4  | 0  | 3   | 0   |
| CONTIG-075843 | 69   | 5  | 11 | 18  | 0   |
| CONTIG-075845 | 105  | 7  | 2  | 19  | 0   |
| CONTIG-075846 | 220  | 12 | 7  | 71  | 0   |
| CONTIG-075847 | 102  | 5  | 6  | 13  | 0   |
| CONTIG-075848 | 66   | 4  | 7  | 6   | 0   |
| CONTIG-075849 | 133  | 3  | 17 | 6   | 0   |
| CONTIG-075850 | 87   | 4  | 3  | 6   | 0   |
| CONTIG-075851 | 68   | 5  | 7  | 8   | 0   |
| CONTIG-075852 | 162  | 7  | 4  | 32  | 0   |
| CONTIG-075853 | 63   | 8  | 2  | 5   | 0   |
| CONTIG-075854 | 74   | 5  | 0  | 10  | 0   |
| CONTIG-075855 | 1396 | 29 | 0  | 0   | 344 |
| CONTIG-075856 | 63   | 5  | 8  | 7   | 0   |
| CONTIG-075857 | 115  | 5  | 6  | 15  | 0   |
| CONTIG-075858 | 120  | 4  | 0  | 18  | 0   |
| CONTIG-075859 | 66   | 3  | 0  | 2   | 0   |
| CONTIG-075860 | 162  | 11 | 2  | 0   | 2   |
| CONTIG-075861 | 145  | 8  | 8  | 42  | 0   |
| CONTIG-075862 | 553  | 19 | 8  | 178 | 14  |
| CONTIG-075863 | 60   | 8  | 10 | 8   | 0   |
| CONTIG-075864 | 147  | 15 | 2  | 97  | 0   |
| CONTIG-075865 | 243  | 9  | 0  | 73  | 0   |
| CONTIG-075867 | 80   | 12 | 5  | 37  | 0   |
| CONTIG-075868 | 91   | 5  | 2  | 6   | 0   |
| CONTIG-075869 | 165  | 5  | 0  | 29  | 0   |
| CONTIG-075870 | 211  | 15 | 16 | 95  | 2   |
| CONTIG-075871 | 316  | 6  | 14 | 50  | 0   |
| CONTIG-075872 | 89   | 12 | 0  | 33  | 0   |
| CONTIG-075873 | 75   | 2  | 2  | 0   | 0   |
| CONTIG-075874 | 72   | 7  | 6  | 18  | 0   |
| CONTIG-075875 | 74   | 10 | 2  | 19  | 0   |
| CONTIG-075876 | 148  | 25 | 3  | 73  | 0   |
| CONTIG-075877 | 121  | 10 | 0  | 18  | 0   |
| CONTIG-075878 | 106  | 5  | 4  | 9   | 0   |
| CONTIG-075879 | 125  | 9  | 19 | 20  | 0   |
| CONTIG-075880 | 62   | 2  | 4  | 0   | 0   |
| CONTIG-075882 | 226  | 8  | 48 | 30  | 2   |
| CONTIG-075883 | 86   | 8  | 0  | 29  | 0   |
| CONTIG-075884 | 66   | 4  | 6  | 4   | 0   |

|               |     |     |    |      |   |
|---------------|-----|-----|----|------|---|
| CONTIG-075885 | 83  | 5   | 7  | 5    | 0 |
| CONTIG-075886 | 91  | 5   | 3  | 7    | 0 |
| CONTIG-075887 | 36  | 30  | 2  | 14   | 0 |
| CONTIG-075888 | 104 | 4   | 8  | 8    | 0 |
| CONTIG-075889 | 84  | 4   | 2  | 11   | 0 |
| CONTIG-075891 | 166 | 7   | 2  | 44   | 0 |
| CONTIG-075892 | 150 | 6   | 6  | 21   | 0 |
| CONTIG-075893 | 59  | 12  | 0  | 33   | 0 |
| CONTIG-075894 | 790 | 14  | 17 | 220  | 0 |
| CONTIG-075895 | 372 | 27  | 14 | 478  | 4 |
| CONTIG-075896 | 163 | 6   | 4  | 33   | 0 |
| CONTIG-075897 | 68  | 5   | 0  | 11   | 0 |
| CONTIG-075898 | 69  | 3   | 7  | 4    | 0 |
| CONTIG-075900 | 63  | 4   | 4  | 6    | 0 |
| CONTIG-075901 | 114 | 6   | 4  | 8    | 0 |
| CONTIG-075902 | 167 | 8   | 0  | 58   | 2 |
| CONTIG-075903 | 103 | 4   | 7  | 5    | 0 |
| CONTIG-075904 | 83  | 7   | 7  | 0    | 4 |
| CONTIG-075905 | 62  | 3   | 2  | 2    | 0 |
| CONTIG-075910 | 84  | 7   | 4  | 19   | 0 |
| CONTIG-075911 | 133 | 7   | 6  | 17   | 0 |
| CONTIG-075912 | 83  | 4   | 9  | 0    | 0 |
| CONTIG-075913 | 58  | 3   | 2  | 4    | 0 |
| CONTIG-075914 | 67  | 5   | 5  | 11   | 0 |
| CONTIG-075915 | 240 | 106 | 36 | 1456 | 0 |
| CONTIG-075916 | 83  | 68  | 4  | 299  | 0 |
| CONTIG-075917 | 79  | 7   | 4  | 7    | 0 |
| CONTIG-075918 | 119 | 4   | 2  | 8    | 0 |
| CONTIG-075919 | 256 | 14  | 7  | 90   | 0 |
| CONTIG-075924 | 182 | 6   | 21 | 38   | 0 |
| CONTIG-075925 | 91  | 5   | 4  | 14   | 0 |
| CONTIG-075926 | 162 | 6   | 5  | 39   | 0 |
| CONTIG-075927 | 93  | 4   | 17 | 2    | 0 |
| CONTIG-075928 | 427 | 20  | 13 | 348  | 0 |
| CONTIG-075929 | 90  | 7   | 4  | 0    | 2 |
| CONTIG-075930 | 75  | 4   | 4  | 6    | 0 |
| CONTIG-075931 | 89  | 4   | 10 | 7    | 0 |
| CONTIG-075932 | 178 | 5   | 4  | 32   | 0 |
| CONTIG-075933 | 177 | 9   | 3  | 63   | 0 |
| CONTIG-075934 | 136 | 14  | 16 | 52   | 0 |
| CONTIG-075935 | 110 | 4   | 0  | 16   | 0 |
| CONTIG-075936 | 120 | 13  | 18 | 36   | 0 |
| CONTIG-075937 | 152 | 15  | 2  | 36   | 0 |
| CONTIG-075938 | 149 | 9   | 3  | 29   | 0 |
| CONTIG-075940 | 122 | 8   | 8  | 38   | 0 |
| CONTIG-075941 | 70  | 5   | 4  | 8    | 0 |
| CONTIG-075942 | 151 | 19  | 16 | 140  | 0 |

|               |     |    |    |     |    |
|---------------|-----|----|----|-----|----|
| CONTIG-075943 | 124 | 4  | 9  | 11  | 0  |
| CONTIG-075944 | 94  | 3  | 2  | 7   | 0  |
| CONTIG-075945 | 83  | 9  | 2  | 30  | 0  |
| CONTIG-075946 | 107 | 5  | 6  | 10  | 0  |
| CONTIG-075947 | 210 | 12 | 7  | 83  | 0  |
| CONTIG-075948 | 69  | 8  | 9  | 15  | 0  |
| CONTIG-075949 | 288 | 14 | 5  | 163 | 2  |
| CONTIG-075950 | 212 | 15 | 29 | 51  | 4  |
| CONTIG-075956 | 126 | 22 | 25 | 21  | 0  |
| CONTIG-075957 | 110 | 52 | 9  | 197 | 2  |
| CONTIG-075958 | 131 | 8  | 7  | 37  | 0  |
| CONTIG-075959 | 284 | 8  | 9  | 109 | 0  |
| CONTIG-075960 | 58  | 7  | 9  | 2   | 0  |
| CONTIG-075961 | 77  | 5  | 12 | 12  | 0  |
| CONTIG-075962 | 115 | 7  | 6  | 21  | 0  |
| CONTIG-075963 | 87  | 6  | 3  | 5   | 0  |
| CONTIG-075964 | 220 | 6  | 2  | 0   | 2  |
| CONTIG-075965 | 120 | 7  | 3  | 11  | 0  |
| CONTIG-075966 | 72  | 6  | 6  | 21  | 0  |
| CONTIG-075969 | 245 | 8  | 4  | 0   | 0  |
| CONTIG-075970 | 109 | 3  | 2  | 4   | 0  |
| CONTIG-075971 | 95  | 16 | 0  | 22  | 0  |
| CONTIG-075972 | 95  | 2  | 2  | 6   | 0  |
| CONTIG-075973 | 65  | 3  | 5  | 2   | 0  |
| CONTIG-075974 | 60  | 3  | 0  | 5   | 0  |
| CONTIG-075975 | 140 | 4  | 3  | 19  | 0  |
| CONTIG-075978 | 143 | 8  | 14 | 26  | 0  |
| CONTIG-075979 | 87  | 5  | 4  | 10  | 0  |
| CONTIG-075980 | 63  | 5  | 7  | 4   | 0  |
| CONTIG-075981 | 433 | 9  | 26 | 98  | 7  |
| CONTIG-075982 | 143 | 6  | 5  | 16  | 0  |
| CONTIG-075983 | 64  | 4  | 3  | 10  | 0  |
| CONTIG-075985 | 145 | 6  | 6  | 2   | 0  |
| CONTIG-075986 | 58  | 6  | 6  | 9   | 0  |
| CONTIG-075987 | 78  | 8  | 4  | 20  | 2  |
| CONTIG-075988 | 123 | 11 | 2  | 56  | 0  |
| CONTIG-075989 | 58  | 4  | 5  | 4   | 0  |
| CONTIG-075990 | 210 | 7  | 13 | 37  | 0  |
| CONTIG-075991 | 96  | 6  | 0  | 6   | 0  |
| CONTIG-075992 | 74  | 9  | 4  | 26  | 0  |
| CONTIG-075993 | 307 | 10 | 2  | 0   | 18 |
| CONTIG-075994 | 99  | 24 | 15 | 33  | 0  |
| CONTIG-075995 | 61  | 9  | 10 | 10  | 0  |
| CONTIG-075996 | 86  | 2  | 6  | 2   | 0  |
| CONTIG-075998 | 73  | 7  | 2  | 0   | 0  |
| CONTIG-075999 | 79  | 8  | 4  | 19  | 0  |
| CONTIG-076000 | 153 | 16 | 0  | 2   | 0  |



|               |     |    |    |     |    |
|---------------|-----|----|----|-----|----|
| CONTIG-076001 | 197 | 6  | 19 | 16  | 0  |
| CONTIG-076002 | 105 | 9  | 16 | 12  | 0  |
| CONTIG-076003 | 164 | 4  | 0  | 14  | 0  |
| CONTIG-076004 | 68  | 4  | 3  | 6   | 0  |
| CONTIG-076005 | 90  | 4  | 14 | 10  | 0  |
| CONTIG-076006 | 215 | 10 | 10 | 94  | 0  |
| CONTIG-076009 | 79  | 5  | 0  | 6   | 0  |
| CONTIG-076010 | 145 | 6  | 14 | 14  | 0  |
| CONTIG-076011 | 90  | 4  | 0  | 6   | 0  |
| CONTIG-076013 | 39  | 18 | 0  | 10  | 0  |
| CONTIG-076014 | 108 | 7  | 0  | 27  | 0  |
| CONTIG-076015 | 211 | 11 | 7  | 52  | 0  |
| CONTIG-076016 | 138 | 7  | 5  | 30  | 0  |
| CONTIG-076017 | 449 | 55 | 37 | 40  | 0  |
| CONTIG-076018 | 95  | 7  | 13 | 25  | 0  |
| CONTIG-076019 | 194 | 11 | 8  | 54  | 0  |
| CONTIG-076020 | 123 | 9  | 6  | 42  | 0  |
| CONTIG-076021 | 96  | 4  | 3  | 9   | 0  |
| CONTIG-076022 | 63  | 8  | 9  | 5   | 0  |
| CONTIG-076023 | 68  | 3  | 3  | 4   | 0  |
| CONTIG-076024 | 68  | 3  | 0  | 0   | 0  |
| CONTIG-076025 | 64  | 6  | 21 | 5   | 0  |
| CONTIG-076026 | 227 | 18 | 21 | 119 | 4  |
| CONTIG-076028 | 226 | 26 | 37 | 169 | 7  |
| CONTIG-076029 | 62  | 5  | 14 | 0   | 0  |
| CONTIG-076030 | 74  | 8  | 2  | 18  | 0  |
| CONTIG-076031 | 428 | 9  | 8  | 110 | 0  |
| CONTIG-076032 | 100 | 4  | 0  | 10  | 2  |
| CONTIG-076033 | 557 | 16 | 0  | 0   | 54 |
| CONTIG-076034 | 197 | 8  | 11 | 20  | 0  |
| CONTIG-076035 | 97  | 5  | 3  | 0   | 0  |
| CONTIG-076036 | 67  | 5  | 0  | 4   | 0  |
| CONTIG-076037 | 151 | 6  | 11 | 18  | 0  |
| CONTIG-076038 | 131 | 9  | 0  | 36  | 2  |
| CONTIG-076039 | 231 | 14 | 8  | 122 | 0  |
| CONTIG-076040 | 79  | 8  | 2  | 15  | 0  |
| CONTIG-076041 | 63  | 4  | 3  | 4   | 0  |
| CONTIG-076042 | 146 | 4  | 0  | 15  | 0  |
| CONTIG-076043 | 87  | 5  | 7  | 9   | 0  |
| CONTIG-076044 | 75  | 5  | 0  | 17  | 0  |
| CONTIG-076045 | 223 | 6  | 3  | 0   | 2  |
| CONTIG-076046 | 376 | 11 | 12 | 165 | 0  |
| CONTIG-076047 | 137 | 7  | 14 | 28  | 0  |
| CONTIG-076048 | 113 | 6  | 5  | 29  | 0  |
| CONTIG-076049 | 150 | 14 | 5  | 71  | 0  |
| CONTIG-076050 | 86  | 6  | 0  | 29  | 0  |
| CONTIG-076051 | 66  | 5  | 4  | 13  | 0  |

|               |     |     |    |     |      |
|---------------|-----|-----|----|-----|------|
| CONTIG-076052 | 125 | 10  | 7  | 10  | 0    |
| CONTIG-076053 | 151 | 5   | 2  | 42  | 0    |
| CONTIG-076059 | 68  | 3   | 0  | 0   | 0    |
| CONTIG-076065 | 110 | 10  | 15 | 5   | 0    |
| CONTIG-076066 | 85  | 7   | 2  | 24  | 0    |
| CONTIG-076068 | 150 | 15  | 13 | 75  | 0    |
| CONTIG-076070 | 58  | 10  | 7  | 22  | 0    |
| CONTIG-076071 | 73  | 10  | 16 | 21  | 0    |
| CONTIG-076072 | 80  | 5   | 9  | 12  | 0    |
| CONTIG-076073 | 121 | 7   | 8  | 26  | 0    |
| CONTIG-076074 | 135 | 6   | 5  | 34  | 2    |
| CONTIG-076075 | 712 | 134 | 6  | 0   | 1997 |
| CONTIG-076077 | 76  | 11  | 26 | 0   | 0    |
| CONTIG-076078 | 168 | 6   | 2  | 32  | 0    |
| CONTIG-076079 | 135 | 5   | 0  | 21  | 0    |
| CONTIG-076080 | 702 | 14  | 20 | 199 | 9    |
| CONTIG-076081 | 62  | 2   | 2  | 0   | 0    |
| CONTIG-076082 | 58  | 3   | 0  | 2   | 0    |
| CONTIG-076083 | 64  | 6   | 6  | 12  | 0    |
| CONTIG-076084 | 74  | 6   | 2  | 8   | 0    |
| CONTIG-076085 | 77  | 4   | 7  | 4   | 0    |
| CONTIG-076088 | 78  | 14  | 18 | 56  | 0    |
| CONTIG-076090 | 63  | 7   | 3  | 5   | 2    |
| CONTIG-076091 | 62  | 11  | 5  | 2   | 0    |
| CONTIG-076092 | 58  | 2   | 0  | 2   | 0    |
| CONTIG-076093 | 162 | 17  | 3  | 113 | 2    |
| CONTIG-076094 | 198 | 6   | 0  | 34  | 0    |
| CONTIG-076095 | 75  | 15  | 9  | 36  | 2    |
| CONTIG-076096 | 56  | 65  | 3  | 173 | 0    |
| CONTIG-076098 | 67  | 12  | 26 | 13  | 2    |
| CONTIG-076099 | 146 | 21  | 9  | 4   | 0    |
| CONTIG-076100 | 38  | 137 | 5  | 72  | 5    |
| CONTIG-076101 | 164 | 10  | 2  | 50  | 0    |
| CONTIG-076102 | 134 | 5   | 12 | 20  | 0    |
| CONTIG-076103 | 80  | 5   | 4  | 0   | 0    |
| CONTIG-076104 | 100 | 3   | 4  | 4   | 0    |
| CONTIG-076105 | 149 | 6   | 2  | 0   | 4    |
| CONTIG-076106 | 103 | 8   | 9  | 5   | 0    |
| CONTIG-076107 | 83  | 3   | 4  | 5   | 0    |
| CONTIG-076108 | 119 | 8   | 7  | 19  | 0    |
| CONTIG-076109 | 81  | 3   | 0  | 6   | 0    |
| CONTIG-076110 | 168 | 8   | 3  | 31  | 0    |
| CONTIG-076111 | 104 | 4   | 0  | 21  | 0    |
| CONTIG-076112 | 38  | 22  | 4  | 13  | 0    |
| CONTIG-076114 | 164 | 8   | 0  | 36  | 0    |
| CONTIG-076115 | 61  | 11  | 15 | 3   | 0    |
| CONTIG-076116 | 39  | 28  | 15 | 22  | 0    |

|               |     |    |    |     |   |
|---------------|-----|----|----|-----|---|
| CONTIG-076117 | 191 | 19 | 9  | 90  | 3 |
| CONTIG-076118 | 110 | 9  | 4  | 26  | 0 |
| CONTIG-076119 | 211 | 4  | 0  | 27  | 0 |
| CONTIG-076120 | 91  | 18 | 6  | 69  | 0 |
| CONTIG-076121 | 108 | 5  | 7  | 4   | 0 |
| CONTIG-076123 | 88  | 3  | 5  | 4   | 0 |
| CONTIG-076125 | 79  | 8  | 3  | 14  | 0 |
| CONTIG-076126 | 71  | 42 | 29 | 0   | 0 |
| CONTIG-076127 | 636 | 9  | 9  | 148 | 9 |
| CONTIG-076128 | 75  | 4  | 2  | 8   | 0 |
| CONTIG-076129 | 58  | 5  | 8  | 7   | 0 |
| CONTIG-076130 | 63  | 9  | 5  | 10  | 0 |
| CONTIG-076131 | 65  | 9  | 2  | 21  | 0 |
| CONTIG-076132 | 451 | 13 | 14 | 17  | 8 |
| CONTIG-076133 | 232 | 5  | 2  | 11  | 0 |
| CONTIG-076134 | 200 | 6  | 10 | 39  | 0 |
| CONTIG-076135 | 128 | 4  | 2  | 18  | 0 |
| CONTIG-076136 | 136 | 12 | 6  | 53  | 0 |
| CONTIG-076137 | 83  | 9  | 4  | 19  | 0 |
| CONTIG-076138 | 53  | 47 | 5  | 73  | 3 |
| CONTIG-076140 | 156 | 6  | 4  | 34  | 0 |
| CONTIG-076141 | 152 | 5  | 2  | 17  | 0 |
| CONTIG-076142 | 99  | 12 | 2  | 45  | 0 |
| CONTIG-076143 | 75  | 7  | 3  | 29  | 0 |
| CONTIG-076144 | 62  | 4  | 6  | 4   | 0 |
| CONTIG-076145 | 78  | 3  | 4  | 0   | 0 |
| CONTIG-076146 | 174 | 7  | 4  | 22  | 0 |
| CONTIG-076147 | 103 | 9  | 2  | 30  | 0 |
| CONTIG-076148 | 343 | 12 | 15 | 186 | 0 |
| CONTIG-076149 | 86  | 6  | 9  | 11  | 0 |
| CONTIG-076150 | 149 | 9  | 8  | 2   | 0 |
| CONTIG-076151 | 74  | 5  | 2  | 11  | 0 |
| CONTIG-076152 | 66  | 4  | 4  | 3   | 0 |
| CONTIG-076153 | 199 | 6  | 7  | 28  | 0 |
| CONTIG-076154 | 67  | 6  | 0  | 5   | 0 |
| CONTIG-076155 | 85  | 5  | 0  | 6   | 0 |
| CONTIG-076156 | 75  | 3  | 5  | 4   | 0 |
| CONTIG-076157 | 157 | 6  | 10 | 20  | 0 |
| CONTIG-076158 | 113 | 10 | 9  | 34  | 0 |
| CONTIG-076159 | 111 | 4  | 5  | 14  | 0 |
| CONTIG-076161 | 73  | 3  | 2  | 2   | 0 |
| CONTIG-076162 | 68  | 5  | 0  | 9   | 0 |
| CONTIG-076163 | 113 | 19 | 22 | 89  | 0 |
| CONTIG-076164 | 185 | 10 | 5  | 19  | 2 |
| CONTIG-076165 | 103 | 14 | 11 | 56  | 0 |
| CONTIG-076166 | 121 | 7  | 2  | 31  | 2 |
| CONTIG-076167 | 84  | 8  | 3  | 12  | 0 |

|               |      |     |    |     |     |
|---------------|------|-----|----|-----|-----|
| CONTIG-076168 | 155  | 16  | 29 | 103 | 0   |
| CONTIG-076169 | 93   | 4   | 0  | 0   | 2   |
| CONTIG-076170 | 102  | 3   | 2  | 0   | 0   |
| CONTIG-076171 | 70   | 4   | 6  | 2   | 0   |
| CONTIG-076172 | 69   | 4   | 0  | 12  | 0   |
| CONTIG-076173 | 94   | 10  | 2  | 38  | 0   |
| CONTIG-076174 | 477  | 91  | 0  | 2   | 232 |
| CONTIG-076175 | 64   | 290 | 0  | 0   | 77  |
| CONTIG-076176 | 58   | 5   | 4  | 3   | 0   |
| CONTIG-076177 | 87   | 3   | 8  | 9   | 0   |
| CONTIG-076178 | 129  | 5   | 6  | 8   | 0   |
| CONTIG-076179 | 96   | 8   | 19 | 0   | 7   |
| CONTIG-076180 | 100  | 5   | 7  | 21  | 0   |
| CONTIG-076181 | 59   | 8   | 17 | 7   | 0   |
| CONTIG-076182 | 83   | 8   | 10 | 2   | 0   |
| CONTIG-076183 | 124  | 5   | 3  | 6   | 0   |
| CONTIG-076184 | 41   | 144 | 10 | 147 | 14  |
| CONTIG-076185 | 89   | 2   | 2  | 2   | 0   |
| CONTIG-076186 | 290  | 2   | 2  | 10  | 0   |
| CONTIG-076187 | 419  | 47  | 12 | 55  | 0   |
| CONTIG-076188 | 126  | 9   | 13 | 44  | 0   |
| CONTIG-076189 | 242  | 8   | 14 | 40  | 0   |
| CONTIG-076190 | 69   | 14  | 7  | 35  | 0   |
| CONTIG-076191 | 92   | 4   | 9  | 0   | 0   |
| CONTIG-076192 | 195  | 6   | 2  | 0   | 3   |
| CONTIG-076193 | 63   | 8   | 4  | 0   | 0   |
| CONTIG-076194 | 222  | 8   | 13 | 23  | 5   |
| CONTIG-076195 | 133  | 8   | 4  | 40  | 0   |
| CONTIG-076196 | 191  | 9   | 4  | 70  | 2   |
| CONTIG-076197 | 196  | 15  | 8  | 78  | 0   |
| CONTIG-076198 | 130  | 14  | 6  | 67  | 0   |
| CONTIG-076199 | 155  | 13  | 5  | 74  | 0   |
| CONTIG-076200 | 194  | 5   | 4  | 25  | 0   |
| CONTIG-076201 | 105  | 3   | 0  | 6   | 0   |
| CONTIG-076202 | 68   | 8   | 6  | 15  | 0   |
| CONTIG-076203 | 187  | 16  | 11 | 5   | 0   |
| CONTIG-076204 | 65   | 3   | 2  | 4   | 0   |
| CONTIG-076206 | 81   | 6   | 0  | 14  | 0   |
| CONTIG-076207 | 81   | 7   | 0  | 8   | 0   |
| CONTIG-076208 | 113  | 5   | 0  | 12  | 0   |
| CONTIG-076209 | 1076 | 16  | 6  | 588 | 13  |
| CONTIG-076210 | 298  | 7   | 17 | 54  | 2   |
| CONTIG-076211 | 325  | 13  | 7  | 48  | 0   |
| CONTIG-076212 | 101  | 4   | 2  | 18  | 0   |
| CONTIG-076213 | 71   | 11  | 3  | 17  | 0   |
| CONTIG-076214 | 179  | 4   | 5  | 10  | 0   |
| CONTIG-076215 | 123  | 7   | 4  | 19  | 0   |

|               |     |    |    |     |   |
|---------------|-----|----|----|-----|---|
| CONTIG-076216 | 292 | 8  | 7  | 88  | 0 |
| CONTIG-076217 | 140 | 16 | 0  | 85  | 0 |
| CONTIG-076219 | 124 | 20 | 7  | 56  | 2 |
| CONTIG-076221 | 70  | 22 | 4  | 59  | 0 |
| CONTIG-076222 | 53  | 56 | 7  | 72  | 0 |
| CONTIG-076223 | 74  | 14 | 5  | 17  | 2 |
| CONTIG-076224 | 440 | 8  | 10 | 99  | 0 |
| CONTIG-076225 | 177 | 5  | 0  | 26  | 0 |
| CONTIG-076226 | 85  | 5  | 10 | 4   | 0 |
| CONTIG-076227 | 185 | 7  | 9  | 49  | 0 |
| CONTIG-076228 | 168 | 16 | 7  | 74  | 5 |
| CONTIG-076229 | 164 | 6  | 7  | 37  | 0 |
| CONTIG-076232 | 101 | 10 | 10 | 45  | 0 |
| CONTIG-076233 | 104 | 21 | 5  | 131 | 0 |
| CONTIG-076234 | 100 | 5  | 0  | 11  | 0 |
| CONTIG-076235 | 62  | 2  | 2  | 0   | 0 |
| CONTIG-076236 | 210 | 12 | 13 | 87  | 0 |
| CONTIG-076237 | 295 | 16 | 17 | 252 | 0 |
| CONTIG-076238 | 105 | 6  | 11 | 4   | 0 |
| CONTIG-076243 | 83  | 6  | 5  | 10  | 0 |
| CONTIG-076244 | 98  | 5  | 7  | 22  | 0 |
| CONTIG-076245 | 73  | 8  | 19 | 5   | 0 |
| CONTIG-076246 | 77  | 6  | 27 | 9   | 0 |
| CONTIG-076247 | 94  | 6  | 4  | 16  | 0 |
| CONTIG-076248 | 240 | 8  | 7  | 56  | 4 |
| CONTIG-076249 | 273 | 21 | 11 | 206 | 0 |
| CONTIG-076250 | 281 | 7  | 9  | 72  | 2 |
| CONTIG-076251 | 101 | 5  | 2  | 12  | 0 |
| CONTIG-076252 | 96  | 6  | 2  | 19  | 0 |
| CONTIG-076253 | 69  | 5  | 0  | 4   | 0 |
| CONTIG-076256 | 165 | 6  | 2  | 36  | 0 |
| CONTIG-076257 | 67  | 6  | 2  | 8   | 0 |
| CONTIG-076258 | 222 | 16 | 17 | 134 | 0 |
| CONTIG-076259 | 90  | 8  | 6  | 24  | 0 |
| CONTIG-076262 | 219 | 12 | 16 | 86  | 2 |
| CONTIG-076263 | 64  | 8  | 4  | 18  | 0 |
| CONTIG-076265 | 299 | 7  | 11 | 70  | 2 |
| CONTIG-076266 | 114 | 4  | 5  | 8   | 0 |
| CONTIG-076267 | 241 | 8  | 0  | 62  | 0 |
| CONTIG-076268 | 64  | 5  | 8  | 0   | 0 |
| CONTIG-076269 | 350 | 6  | 6  | 78  | 0 |
| CONTIG-076270 | 78  | 3  | 6  | 2   | 0 |
| CONTIG-076271 | 148 | 13 | 2  | 48  | 2 |
| CONTIG-076272 | 289 | 27 | 0  | 426 | 0 |
| CONTIG-076273 | 247 | 10 | 2  | 91  | 0 |
| CONTIG-076274 | 62  | 4  | 0  | 0   | 0 |
| CONTIG-076275 | 60  | 5  | 3  | 12  | 0 |

|               |     |    |    |     |    |
|---------------|-----|----|----|-----|----|
| CONTIG-076278 | 218 | 13 | 5  | 121 | 0  |
| CONTIG-076279 | 170 | 10 | 10 | 23  | 4  |
| CONTIG-076281 | 68  | 4  | 5  | 7   | 0  |
| CONTIG-076282 | 97  | 5  | 3  | 7   | 0  |
| CONTIG-076283 | 85  | 7  | 16 | 16  | 0  |
| CONTIG-076284 | 65  | 18 | 4  | 26  | 0  |
| CONTIG-076285 | 132 | 11 | 9  | 15  | 2  |
| CONTIG-076286 | 193 | 15 | 5  | 103 | 4  |
| CONTIG-076287 | 128 | 6  | 8  | 21  | 0  |
| CONTIG-076288 | 114 | 7  | 3  | 18  | 0  |
| CONTIG-076289 | 85  | 9  | 22 | 16  | 0  |
| CONTIG-076290 | 217 | 8  | 16 | 35  | 0  |
| CONTIG-076291 | 260 | 41 | 10 | 414 | 12 |
| CONTIG-076292 | 157 | 13 | 37 | 2   | 0  |
| CONTIG-076294 | 58  | 4  | 2  | 8   | 0  |
| CONTIG-076295 | 234 | 10 | 4  | 51  | 0  |
| CONTIG-076296 | 100 | 7  | 9  | 23  | 0  |
| CONTIG-076297 | 110 | 5  | 6  | 19  | 0  |
| CONTIG-076298 | 62  | 6  | 11 | 0   | 0  |
| CONTIG-076302 | 62  | 5  | 11 | 12  | 0  |
| CONTIG-076303 | 85  | 12 | 2  | 14  | 2  |
| CONTIG-076304 | 72  | 4  | 2  | 8   | 0  |
| CONTIG-076305 | 97  | 5  | 4  | 13  | 0  |
| CONTIG-076306 | 85  | 6  | 0  | 16  | 0  |
| CONTIG-076307 | 83  | 5  | 14 | 3   | 0  |
| CONTIG-076308 | 130 | 7  | 2  | 11  | 0  |
| CONTIG-076309 | 100 | 5  | 4  | 7   | 0  |
| CONTIG-076310 | 141 | 5  | 6  | 17  | 0  |
| CONTIG-076311 | 102 | 8  | 6  | 20  | 0  |
| CONTIG-076312 | 257 | 10 | 10 | 65  | 0  |
| CONTIG-076313 | 76  | 3  | 3  | 0   | 0  |
| CONTIG-076314 | 152 | 11 | 4  | 66  | 0  |
| CONTIG-076315 | 154 | 4  | 4  | 19  | 0  |
| CONTIG-076316 | 62  | 4  | 2  | 9   | 0  |
| CONTIG-076317 | 76  | 5  | 7  | 10  | 0  |
| CONTIG-076318 | 828 | 56 | 25 | 85  | 0  |
| CONTIG-076319 | 449 | 11 | 11 | 150 | 0  |
| CONTIG-076320 | 152 | 5  | 8  | 25  | 0  |
| CONTIG-076321 | 118 | 4  | 0  | 10  | 0  |
| CONTIG-076322 | 298 | 11 | 9  | 4   | 0  |
| CONTIG-076323 | 176 | 7  | 0  | 21  | 2  |
| CONTIG-076324 | 61  | 3  | 0  | 7   | 0  |
| CONTIG-076325 | 80  | 3  | 0  | 2   | 0  |
| CONTIG-076326 | 87  | 4  | 7  | 4   | 0  |
| CONTIG-076327 | 271 | 8  | 17 | 37  | 0  |
| CONTIG-076328 | 76  | 4  | 4  | 2   | 0  |
| CONTIG-076329 | 80  | 4  | 2  | 4   | 0  |

|               |     |      |    |     |      |
|---------------|-----|------|----|-----|------|
| CONTIG-076330 | 130 | 6    | 4  | 25  | 0    |
| CONTIG-076331 | 62  | 13   | 8  | 25  | 0    |
| CONTIG-076332 | 103 | 4    | 4  | 16  | 0    |
| CONTIG-076333 | 167 | 6    | 0  | 32  | 2    |
| CONTIG-076334 | 194 | 6    | 5  | 37  | 0    |
| CONTIG-076335 | 149 | 7    | 0  | 13  | 4    |
| CONTIG-076336 | 103 | 4    | 3  | 13  | 0    |
| CONTIG-076337 | 126 | 6    | 7  | 0   | 0    |
| CONTIG-076338 | 119 | 6    | 10 | 2   | 0    |
| CONTIG-076344 | 97  | 6    | 0  | 15  | 0    |
| CONTIG-076350 | 87  | 4    | 2  | 6   | 0    |
| CONTIG-076351 | 231 | 11   | 20 | 78  | 0    |
| CONTIG-076352 | 69  | 2    | 0  | 2   | 0    |
| CONTIG-076353 | 156 | 10   | 2  | 69  | 0    |
| CONTIG-076357 | 310 | 5    | 4  | 55  | 0    |
| CONTIG-076358 | 89  | 4    | 5  | 0   | 0    |
| CONTIG-076359 | 93  | 4    | 6  | 6   | 0    |
| CONTIG-076360 | 92  | 5    | 4  | 10  | 0    |
| CONTIG-076363 | 111 | 4    | 0  | 8   | 0    |
| CONTIG-076364 | 214 | 6    | 2  | 27  | 0    |
| CONTIG-076365 | 101 | 5    | 3  | 12  | 0    |
| CONTIG-076367 | 150 | 13   | 6  | 75  | 0    |
| CONTIG-076368 | 128 | 6    | 15 | 17  | 0    |
| CONTIG-076369 | 70  | 6    | 5  | 10  | 0    |
| CONTIG-076370 | 83  | 4    | 0  | 14  | 0    |
| CONTIG-076371 | 103 | 12   | 0  | 28  | 0    |
| CONTIG-076373 | 70  | 14   | 0  | 16  | 0    |
| CONTIG-076374 | 59  | 29   | 0  | 57  | 0    |
| CONTIG-076375 | 222 | 4    | 0  | 19  | 0    |
| CONTIG-076376 | 104 | 12   | 24 | 41  | 0    |
| CONTIG-076377 | 139 | 9    | 21 | 41  | 0    |
| CONTIG-076378 | 255 | 8    | 27 | 50  | 0    |
| CONTIG-076381 | 48  | 157  | 0  | 0   | 120  |
| CONTIG-076386 | 53  | 2429 | 0  | 0   | 2845 |
| CONTIG-076388 | 63  | 5    | 4  | 5   | 0    |
| CONTIG-076389 | 67  | 6    | 4  | 19  | 2    |
| CONTIG-076390 | 72  | 4    | 10 | 5   | 0    |
| CONTIG-076391 | 98  | 6    | 3  | 0   | 0    |
| CONTIG-076392 | 95  | 8    | 7  | 0   | 0    |
| CONTIG-076393 | 458 | 11   | 9  | 223 | 2    |
| CONTIG-076394 | 645 | 12   | 8  | 284 | 2    |
| CONTIG-076395 | 93  | 4    | 9  | 8   | 0    |
| CONTIG-076396 | 88  | 8    | 9  | 11  | 0    |
| CONTIG-076397 | 139 | 6    | 5  | 8   | 0    |
| CONTIG-076398 | 156 | 11   | 6  | 35  | 0    |
| CONTIG-076399 | 86  | 8    | 5  | 9   | 0    |
| CONTIG-076400 | 616 | 25   | 2  | 2   | 44   |

|               |     |     |    |     |   |
|---------------|-----|-----|----|-----|---|
| CONTIG-076401 | 179 | 10  | 16 | 54  | 0 |
| CONTIG-076402 | 92  | 3   | 3  | 12  | 0 |
| CONTIG-076404 | 68  | 5   | 2  | 12  | 0 |
| CONTIG-076405 | 144 | 7   | 2  | 41  | 0 |
| CONTIG-076406 | 145 | 10  | 2  | 51  | 2 |
| CONTIG-076407 | 83  | 5   | 0  | 14  | 0 |
| CONTIG-076408 | 129 | 6   | 18 | 24  | 0 |
| CONTIG-076409 | 213 | 11  | 2  | 101 | 0 |
| CONTIG-076410 | 77  | 5   | 8  | 9   | 0 |
| CONTIG-076411 | 65  | 2   | 2  | 0   | 0 |
| CONTIG-076412 | 74  | 8   | 11 | 14  | 0 |
| CONTIG-076413 | 80  | 4   | 2  | 2   | 0 |
| CONTIG-076421 | 109 | 3   | 5  | 2   | 0 |
| CONTIG-076422 | 283 | 5   | 2  | 12  | 0 |
| CONTIG-076423 | 65  | 2   | 0  | 3   | 0 |
| CONTIG-076424 | 68  | 8   | 5  | 19  | 0 |
| CONTIG-076425 | 58  | 3   | 11 | 2   | 0 |
| CONTIG-076428 | 68  | 6   | 4  | 4   | 0 |
| CONTIG-076429 | 100 | 10  | 4  | 42  | 0 |
| CONTIG-076430 | 139 | 8   | 2  | 39  | 0 |
| CONTIG-076431 | 112 | 3   | 0  | 4   | 0 |
| CONTIG-076436 | 126 | 12  | 2  | 57  | 0 |
| CONTIG-076437 | 70  | 4   | 0  | 0   | 0 |
| CONTIG-076438 | 67  | 7   | 0  | 5   | 0 |
| CONTIG-076439 | 158 | 10  | 2  | 72  | 0 |
| CONTIG-076440 | 80  | 5   | 4  | 13  | 0 |
| CONTIG-076441 | 146 | 5   | 5  | 28  | 0 |
| CONTIG-076442 | 101 | 2   | 2  | 5   | 0 |
| CONTIG-076443 | 93  | 8   | 9  | 23  | 0 |
| CONTIG-076444 | 277 | 14  | 34 | 44  | 0 |
| CONTIG-076445 | 37  | 186 | 8  | 178 | 0 |
| CONTIG-076446 | 60  | 5   | 3  | 9   | 0 |
| CONTIG-076447 | 92  | 3   | 4  | 7   | 0 |
| CONTIG-076448 | 68  | 11  | 14 | 8   | 0 |
| CONTIG-076449 | 137 | 4   | 0  | 12  | 0 |
| CONTIG-076450 | 141 | 6   | 3  | 10  | 0 |
| CONTIG-076451 | 176 | 3   | 4  | 14  | 0 |
| CONTIG-076453 | 172 | 12  | 3  | 95  | 0 |
| CONTIG-076454 | 124 | 6   | 8  | 4   | 0 |
| CONTIG-076455 | 180 | 8   | 2  | 42  | 0 |
| CONTIG-076456 | 156 | 10  | 9  | 41  | 2 |
| CONTIG-076457 | 159 | 5   | 2  | 25  | 0 |
| CONTIG-076458 | 213 | 7   | 9  | 39  | 0 |
| CONTIG-076459 | 300 | 6   | 21 | 55  | 0 |
| CONTIG-076460 | 93  | 6   | 0  | 16  | 0 |
| CONTIG-076461 | 315 | 20  | 14 | 147 | 2 |
| CONTIG-076464 | 123 | 4   | 3  | 2   | 0 |



|               |     |    |    |     |     |
|---------------|-----|----|----|-----|-----|
| CONTIG-076465 | 62  | 2  | 0  | 2   | 0   |
| CONTIG-076468 | 92  | 6  | 2  | 4   | 2   |
| CONTIG-076469 | 101 | 4  | 4  | 0   | 0   |
| CONTIG-076470 | 116 | 4  | 10 | 14  | 0   |
| CONTIG-076471 | 146 | 5  | 13 | 23  | 0   |
| CONTIG-076472 | 116 | 9  | 16 | 28  | 0   |
| CONTIG-076473 | 91  | 4  | 7  | 4   | 0   |
| CONTIG-076474 | 260 | 9  | 12 | 57  | 2   |
| CONTIG-076475 | 91  | 3  | 5  | 2   | 0   |
| CONTIG-076476 | 117 | 11 | 17 | 40  | 0   |
| CONTIG-076477 | 79  | 8  | 2  | 8   | 0   |
| CONTIG-076478 | 60  | 6  | 4  | 6   | 0   |
| CONTIG-076479 | 62  | 3  | 7  | 2   | 0   |
| CONTIG-076482 | 202 | 22 | 10 | 160 | 0   |
| CONTIG-076483 | 411 | 70 | 5  | 0   | 228 |
| CONTIG-076484 | 180 | 5  | 4  | 25  | 2   |
| CONTIG-076485 | 173 | 7  | 2  | 43  | 0   |
| CONTIG-076486 | 483 | 11 | 16 | 217 | 0   |
| CONTIG-076487 | 76  | 5  | 0  | 4   | 0   |
| CONTIG-076488 | 88  | 4  | 0  | 10  | 0   |
| CONTIG-076489 | 214 | 5  | 8  | 20  | 0   |
| CONTIG-076490 | 59  | 36 | 3  | 0   | 0   |
| CONTIG-076491 | 58  | 13 | 26 | 0   | 0   |
| CONTIG-076492 | 325 | 12 | 9  | 168 | 0   |
| CONTIG-076493 | 69  | 4  | 6  | 0   | 0   |
| CONTIG-076494 | 319 | 9  | 7  | 99  | 0   |
| CONTIG-076496 | 181 | 5  | 5  | 35  | 0   |
| CONTIG-076497 | 79  | 51 | 6  | 76  | 0   |
| CONTIG-076498 | 80  | 4  | 2  | 2   | 0   |
| CONTIG-076499 | 84  | 3  | 2  | 5   | 0   |
| CONTIG-076500 | 122 | 8  | 3  | 38  | 0   |
| CONTIG-076503 | 159 | 7  | 3  | 16  | 3   |
| CONTIG-076504 | 224 | 11 | 9  | 46  | 0   |
| CONTIG-076505 | 141 | 10 | 22 | 50  | 0   |
| CONTIG-076506 | 71  | 6  | 0  | 11  | 0   |
| CONTIG-076507 | 120 | 5  | 18 | 9   | 0   |
| CONTIG-076508 | 95  | 7  | 2  | 30  | 0   |
| CONTIG-076509 | 250 | 19 | 4  | 175 | 0   |
| CONTIG-076510 | 96  | 6  | 8  | 19  | 0   |
| CONTIG-076511 | 439 | 32 | 20 | 399 | 4   |
| CONTIG-076512 | 74  | 6  | 2  | 0   | 0   |
| CONTIG-076513 | 83  | 7  | 2  | 17  | 0   |
| CONTIG-076514 | 164 | 7  | 4  | 35  | 0   |
| CONTIG-076515 | 77  | 8  | 5  | 12  | 0   |
| CONTIG-076516 | 165 | 9  | 0  | 22  | 0   |
| CONTIG-076517 | 382 | 8  | 2  | 67  | 3   |
| CONTIG-076518 | 212 | 6  | 17 | 28  | 0   |

|               |     |    |    |     |     |
|---------------|-----|----|----|-----|-----|
| CONTIG-076519 | 157 | 5  | 0  | 12  | 0   |
| CONTIG-076520 | 109 | 4  | 3  | 11  | 0   |
| CONTIG-076521 | 564 | 9  | 24 | 129 | 2   |
| CONTIG-076522 | 265 | 5  | 3  | 50  | 0   |
| CONTIG-076523 | 128 | 5  | 0  | 5   | 0   |
| CONTIG-076524 | 165 | 8  | 2  | 57  | 0   |
| CONTIG-076525 | 77  | 11 | 4  | 30  | 0   |
| CONTIG-076526 | 78  | 2  | 4  | 2   | 0   |
| CONTIG-076527 | 58  | 2  | 0  | 0   | 0   |
| CONTIG-076528 | 504 | 10 | 6  | 154 | 0   |
| CONTIG-076529 | 232 | 7  | 19 | 42  | 0   |
| CONTIG-076530 | 149 | 5  | 8  | 27  | 0   |
| CONTIG-076534 | 155 | 27 | 25 | 101 | 10  |
| CONTIG-076535 | 78  | 6  | 9  | 10  | 0   |
| CONTIG-076536 | 193 | 18 | 6  | 152 | 0   |
| CONTIG-076539 | 61  | 6  | 5  | 7   | 0   |
| CONTIG-076540 | 120 | 8  | 5  | 8   | 0   |
| CONTIG-076541 | 101 | 6  | 0  | 15  | 0   |
| CONTIG-076542 | 173 | 4  | 9  | 6   | 0   |
| CONTIG-076543 | 65  | 3  | 0  | 5   | 0   |
| CONTIG-076544 | 141 | 7  | 10 | 26  | 0   |
| CONTIG-076545 | 62  | 3  | 0  | 5   | 0   |
| CONTIG-076546 | 63  | 3  | 16 | 2   | 0   |
| CONTIG-076547 | 72  | 6  | 9  | 0   | 0   |
| CONTIG-076548 | 105 | 6  | 10 | 18  | 0   |
| CONTIG-076549 | 61  | 9  | 2  | 9   | 0   |
| CONTIG-076550 | 192 | 9  | 13 | 25  | 0   |
| CONTIG-076551 | 404 | 90 | 3  | 0   | 178 |
| CONTIG-076552 | 160 | 8  | 4  | 39  | 0   |
| CONTIG-076553 | 112 | 5  | 4  | 17  | 0   |
| CONTIG-076554 | 85  | 8  | 5  | 14  | 0   |
| CONTIG-076555 | 109 | 5  | 6  | 14  | 0   |
| CONTIG-076557 | 213 | 10 | 4  | 39  | 0   |
| CONTIG-076558 | 83  | 6  | 14 | 7   | 0   |
| CONTIG-076559 | 258 | 16 | 26 | 75  | 2   |
| CONTIG-076560 | 66  | 8  | 0  | 0   | 2   |
| CONTIG-076563 | 98  | 5  | 4  | 8   | 0   |
| CONTIG-076564 | 59  | 7  | 13 | 13  | 0   |
| CONTIG-076565 | 104 | 5  | 3  | 6   | 0   |
| CONTIG-076568 | 59  | 3  | 0  | 6   | 0   |
| CONTIG-076569 | 71  | 4  | 3  | 8   | 0   |
| CONTIG-076570 | 161 | 11 | 14 | 56  | 0   |
| CONTIG-076571 | 69  | 4  | 0  | 4   | 0   |
| CONTIG-076573 | 349 | 65 | 0  | 0   | 639 |
| CONTIG-076574 | 126 | 6  | 2  | 7   | 0   |
| CONTIG-076575 | 92  | 4  | 7  | 6   | 0   |
| CONTIG-076576 | 123 | 3  | 2  | 8   | 0   |

|               |     |     |    |     |     |
|---------------|-----|-----|----|-----|-----|
| CONTIG-076580 | 238 | 20  | 24 | 87  | 4   |
| CONTIG-076581 | 60  | 5   | 3  | 5   | 0   |
| CONTIG-076582 | 179 | 4   | 17 | 16  | 0   |
| CONTIG-076583 | 111 | 5   | 2  | 17  | 0   |
| CONTIG-076584 | 99  | 5   | 0  | 12  | 0   |
| CONTIG-076585 | 58  | 20  | 6  | 19  | 0   |
| CONTIG-076586 | 111 | 5   | 14 | 4   | 0   |
| CONTIG-076587 | 60  | 6   | 2  | 5   | 0   |
| CONTIG-076588 | 91  | 11  | 3  | 31  | 0   |
| CONTIG-076589 | 65  | 4   | 5  | 0   | 0   |
| CONTIG-076590 | 188 | 12  | 0  | 68  | 2   |
| CONTIG-076591 | 63  | 4   | 8  | 0   | 0   |
| CONTIG-076592 | 72  | 4   | 4  | 7   | 0   |
| CONTIG-076593 | 180 | 6   | 2  | 32  | 0   |
| CONTIG-076594 | 119 | 6   | 7  | 4   | 0   |
| CONTIG-076595 | 138 | 5   | 12 | 9   | 0   |
| CONTIG-076596 | 290 | 68  | 0  | 0   | 340 |
| CONTIG-076597 | 37  | 411 | 16 | 49  | 0   |
| CONTIG-076598 | 251 | 11  | 5  | 118 | 0   |
| CONTIG-076599 | 174 | 7   | 10 | 16  | 0   |
| CONTIG-076600 | 68  | 6   | 2  | 5   | 0   |
| CONTIG-076601 | 110 | 7   | 12 | 17  | 0   |
| CONTIG-076602 | 71  | 4   | 3  | 2   | 0   |
| CONTIG-076603 | 207 | 5   | 5  | 27  | 0   |
| CONTIG-076604 | 105 | 4   | 3  | 10  | 0   |
| CONTIG-076605 | 63  | 3   | 5  | 2   | 0   |
| CONTIG-076606 | 124 | 6   | 2  | 17  | 0   |
| CONTIG-076607 | 125 | 4   | 4  | 7   | 0   |
| CONTIG-076608 | 301 | 10  | 11 | 68  | 6   |
| CONTIG-076609 | 654 | 14  | 6  | 246 | 8   |
| CONTIG-076610 | 62  | 5   | 5  | 7   | 0   |
| CONTIG-076611 | 114 | 11  | 2  | 0   | 8   |
| CONTIG-076612 | 243 | 7   | 24 | 49  | 0   |
| CONTIG-076613 | 68  | 5   | 9  | 3   | 0   |
| CONTIG-076614 | 99  | 5   | 7  | 18  | 0   |
| CONTIG-076615 | 65  | 6   | 4  | 2   | 0   |
| CONTIG-076616 | 74  | 13  | 14 | 15  | 0   |
| CONTIG-076617 | 352 | 7   | 3  | 5   | 0   |
| CONTIG-076618 | 125 | 8   | 0  | 33  | 0   |
| CONTIG-076619 | 67  | 5   | 2  | 7   | 0   |
| CONTIG-076620 | 132 | 10  | 33 | 20  | 0   |
| CONTIG-076621 | 95  | 5   | 7  | 13  | 2   |
| CONTIG-076622 | 145 | 8   | 3  | 34  | 0   |
| CONTIG-076623 | 88  | 10  | 6  | 23  | 0   |
| CONTIG-076624 | 66  | 3   | 6  | 6   | 0   |
| CONTIG-076625 | 116 | 6   | 2  | 7   | 0   |
| CONTIG-076626 | 64  | 4   | 8  | 5   | 0   |

|               |     |     |    |     |    |
|---------------|-----|-----|----|-----|----|
| CONTIG-076627 | 143 | 4   | 0  | 4   | 0  |
| CONTIG-076628 | 66  | 5   | 0  | 12  | 0  |
| CONTIG-076629 | 61  | 21  | 0  | 52  | 0  |
| CONTIG-076630 | 100 | 7   | 5  | 26  | 0  |
| CONTIG-076631 | 80  | 5   | 2  | 15  | 0  |
| CONTIG-076632 | 87  | 6   | 4  | 7   | 0  |
| CONTIG-076633 | 110 | 13  | 4  | 70  | 0  |
| CONTIG-076634 | 78  | 18  | 0  | 9   | 0  |
| CONTIG-076635 | 165 | 9   | 9  | 43  | 0  |
| CONTIG-076636 | 119 | 9   | 26 | 27  | 0  |
| CONTIG-076637 | 92  | 9   | 7  | 33  | 0  |
| CONTIG-076638 | 165 | 7   | 17 | 16  | 0  |
| CONTIG-076639 | 217 | 8   | 11 | 46  | 2  |
| CONTIG-076640 | 58  | 6   | 8  | 0   | 0  |
| CONTIG-076641 | 67  | 2   | 2  | 3   | 0  |
| CONTIG-076642 | 108 | 6   | 11 | 10  | 0  |
| CONTIG-076643 | 65  | 4   | 0  | 6   | 0  |
| CONTIG-076644 | 142 | 12  | 8  | 60  | 0  |
| CONTIG-076645 | 144 | 7   | 17 | 32  | 0  |
| CONTIG-076646 | 108 | 8   | 14 | 27  | 0  |
| CONTIG-076647 | 174 | 4   | 9  | 17  | 0  |
| CONTIG-076648 | 436 | 14  | 0  | 0   | 2  |
| CONTIG-076649 | 58  | 18  | 4  | 2   | 0  |
| CONTIG-076650 | 120 | 8   | 3  | 28  | 0  |
| CONTIG-076651 | 91  | 5   | 4  | 16  | 0  |
| CONTIG-076652 | 74  | 6   | 3  | 7   | 0  |
| CONTIG-076653 | 68  | 4   | 3  | 9   | 0  |
| CONTIG-076654 | 184 | 11  | 0  | 0   | 16 |
| CONTIG-076655 | 101 | 6   | 5  | 4   | 0  |
| CONTIG-076656 | 153 | 9   | 4  | 40  | 0  |
| CONTIG-076657 | 205 | 8   | 13 | 40  | 0  |
| CONTIG-076658 | 77  | 3   | 0  | 6   | 0  |
| CONTIG-076659 | 100 | 9   | 14 | 17  | 0  |
| CONTIG-076660 | 132 | 16  | 6  | 61  | 0  |
| CONTIG-076661 | 111 | 28  | 12 | 0   | 0  |
| CONTIG-076662 | 189 | 6   | 19 | 11  | 0  |
| CONTIG-076663 | 95  | 4   | 0  | 7   | 0  |
| CONTIG-076665 | 48  | 230 | 8  | 397 | 0  |
| CONTIG-076666 | 172 | 10  | 8  | 46  | 0  |
| CONTIG-076667 | 79  | 6   | 3  | 8   | 0  |
| CONTIG-076668 | 69  | 44  | 7  | 80  | 0  |
| CONTIG-076669 | 186 | 14  | 8  | 129 | 0  |
| CONTIG-076671 | 119 | 13  | 0  | 71  | 0  |
| CONTIG-076672 | 103 | 6   | 0  | 28  | 2  |
| CONTIG-076673 | 126 | 3   | 0  | 9   | 0  |
| CONTIG-076674 | 89  | 4   | 0  | 2   | 0  |
| CONTIG-076675 | 197 | 10  | 0  | 24  | 0  |

|               |      |     |    |      |    |
|---------------|------|-----|----|------|----|
| CONTIG-076676 | 126  | 6   | 10 | 19   | 0  |
| CONTIG-076677 | 104  | 11  | 5  | 30   | 0  |
| CONTIG-076678 | 63   | 4   | 0  | 0    | 0  |
| CONTIG-076679 | 112  | 5   | 0  | 0    | 8  |
| CONTIG-076680 | 145  | 12  | 9  | 31   | 0  |
| CONTIG-076681 | 86   | 10  | 12 | 21   | 0  |
| CONTIG-076682 | 133  | 15  | 15 | 4    | 0  |
| CONTIG-076684 | 103  | 2   | 2  | 0    | 0  |
| CONTIG-076685 | 106  | 14  | 12 | 44   | 0  |
| CONTIG-076686 | 231  | 11  | 11 | 53   | 2  |
| CONTIG-076687 | 60   | 8   | 2  | 7    | 0  |
| CONTIG-076688 | 224  | 7   | 3  | 12   | 8  |
| CONTIG-076689 | 65   | 622 | 36 | 1063 | 0  |
| CONTIG-076690 | 101  | 5   | 0  | 12   | 0  |
| CONTIG-076691 | 73   | 3   | 0  | 4    | 0  |
| CONTIG-076692 | 92   | 5   | 2  | 17   | 0  |
| CONTIG-076693 | 79   | 8   | 5  | 16   | 0  |
| CONTIG-076694 | 72   | 6   | 8  | 5    | 0  |
| CONTIG-076695 | 180  | 6   | 9  | 41   | 0  |
| CONTIG-076696 | 75   | 7   | 9  | 14   | 0  |
| CONTIG-076697 | 1280 | 22  | 6  | 23   | 0  |
| CONTIG-076698 | 257  | 36  | 3  | 0    | 50 |
| CONTIG-076699 | 103  | 4   | 5  | 13   | 0  |
| CONTIG-076700 | 408  | 11  | 8  | 107  | 8  |
| CONTIG-076701 | 75   | 5   | 5  | 7    | 0  |
| CONTIG-076702 | 234  | 5   | 3  | 30   | 0  |
| CONTIG-076703 | 293  | 6   | 17 | 26   | 2  |
| CONTIG-076704 | 47   | 109 | 5  | 0    | 36 |
| CONTIG-076705 | 146  | 7   | 4  | 29   | 0  |
| CONTIG-076706 | 62   | 12  | 7  | 23   | 0  |
| CONTIG-076707 | 124  | 4   | 3  | 14   | 0  |
| CONTIG-076708 | 85   | 40  | 3  | 135  | 0  |
| CONTIG-076710 | 62   | 4   | 0  | 4    | 0  |
| CONTIG-076711 | 248  | 8   | 0  | 84   | 0  |
| CONTIG-076712 | 367  | 14  | 5  | 101  | 2  |
| CONTIG-076713 | 197  | 14  | 7  | 72   | 2  |
| CONTIG-076714 | 78   | 4   | 6  | 2    | 0  |
| CONTIG-076715 | 81   | 4   | 3  | 2    | 0  |
| CONTIG-076716 | 155  | 5   | 0  | 6    | 0  |
| CONTIG-076717 | 214  | 6   | 6  | 30   | 0  |
| CONTIG-076718 | 338  | 6   | 8  | 42   | 2  |
| CONTIG-076719 | 59   | 4   | 6  | 10   | 0  |
| CONTIG-076720 | 81   | 9   | 2  | 33   | 0  |
| CONTIG-076721 | 65   | 13  | 7  | 15   | 0  |
| CONTIG-076723 | 98   | 6   | 0  | 22   | 0  |
| CONTIG-076724 | 254  | 8   | 5  | 91   | 0  |
| CONTIG-076725 | 85   | 6   | 2  | 13   | 0  |

|               |     |    |    |     |   |
|---------------|-----|----|----|-----|---|
| CONTIG-076726 | 63  | 9  | 3  | 30  | 0 |
| CONTIG-076727 | 213 | 9  | 15 | 44  | 0 |
| CONTIG-076728 | 90  | 9  | 2  | 30  | 0 |
| CONTIG-076730 | 135 | 7  | 0  | 37  | 0 |
| CONTIG-076731 | 105 | 68 | 5  | 337 | 0 |
| CONTIG-076732 | 84  | 3  | 7  | 2   | 0 |
| CONTIG-076733 | 62  | 8  | 8  | 22  | 0 |
| CONTIG-076734 | 267 | 9  | 2  | 35  | 2 |
| CONTIG-076735 | 97  | 8  | 0  | 22  | 0 |
| CONTIG-076736 | 80  | 8  | 4  | 14  | 2 |
| CONTIG-076737 | 351 | 14 | 35 | 147 | 0 |
| CONTIG-076738 | 79  | 5  | 8  | 8   | 0 |
| CONTIG-076739 | 77  | 3  | 0  | 4   | 0 |
| CONTIG-076740 | 87  | 3  | 0  | 11  | 0 |
| CONTIG-076741 | 210 | 7  | 33 | 27  | 0 |
| CONTIG-076743 | 79  | 5  | 0  | 5   | 0 |
| CONTIG-076744 | 58  | 18 | 4  | 10  | 0 |
| CONTIG-076745 | 295 | 7  | 19 | 49  | 0 |
| CONTIG-076746 | 91  | 4  | 7  | 3   | 0 |
| CONTIG-076748 | 117 | 5  | 6  | 14  | 0 |
| CONTIG-076749 | 66  | 8  | 6  | 11  | 0 |
| CONTIG-076750 | 82  | 7  | 8  | 12  | 0 |
| CONTIG-076751 | 138 | 3  | 2  | 0   | 0 |
| CONTIG-076752 | 251 | 12 | 9  | 53  | 0 |
| CONTIG-076753 | 206 | 15 | 19 | 96  | 2 |
| CONTIG-076754 | 409 | 17 | 15 | 293 | 0 |
| CONTIG-076755 | 63  | 4  | 0  | 5   | 0 |
| CONTIG-076757 | 199 | 5  | 3  | 21  | 0 |
| CONTIG-076758 | 181 | 37 | 18 | 272 | 0 |
| CONTIG-076759 | 77  | 6  | 10 | 0   | 0 |
| CONTIG-076760 | 79  | 7  | 0  | 12  | 0 |
| CONTIG-076762 | 93  | 10 | 0  | 42  | 0 |
| CONTIG-076763 | 98  | 15 | 20 | 47  | 0 |
| CONTIG-076764 | 360 | 10 | 13 | 109 | 0 |
| CONTIG-076765 | 91  | 6  | 3  | 9   | 0 |
| CONTIG-076766 | 80  | 6  | 8  | 13  | 0 |
| CONTIG-076767 | 72  | 3  | 2  | 0   | 0 |
| CONTIG-076768 | 95  | 6  | 6  | 20  | 0 |
| CONTIG-076770 | 272 | 8  | 19 | 53  | 0 |
| CONTIG-076771 | 87  | 5  | 3  | 17  | 0 |
| CONTIG-076772 | 117 | 11 | 2  | 58  | 0 |
| CONTIG-076773 | 97  | 5  | 4  | 18  | 0 |
| CONTIG-076775 | 175 | 8  | 6  | 34  | 0 |
| CONTIG-076776 | 95  | 10 | 5  | 25  | 0 |
| CONTIG-076777 | 59  | 4  | 3  | 4   | 0 |
| CONTIG-076778 | 291 | 9  | 2  | 92  | 0 |
| CONTIG-076779 | 75  | 14 | 14 | 21  | 0 |

|               |     |    |    |     |     |
|---------------|-----|----|----|-----|-----|
| CONTIG-076780 | 62  | 6  | 2  | 15  | 0   |
| CONTIG-076781 | 553 | 12 | 4  | 157 | 4   |
| CONTIG-076783 | 73  | 5  | 5  | 11  | 0   |
| CONTIG-076784 | 89  | 11 | 11 | 17  | 0   |
| CONTIG-076785 | 185 | 8  | 8  | 23  | 0   |
| CONTIG-076786 | 91  | 6  | 0  | 16  | 0   |
| CONTIG-076788 | 177 | 8  | 8  | 46  | 0   |
| CONTIG-076789 | 109 | 9  | 9  | 34  | 3   |
| CONTIG-076790 | 63  | 3  | 2  | 0   | 0   |
| CONTIG-076795 | 95  | 10 | 5  | 28  | 0   |
| CONTIG-076796 | 82  | 23 | 5  | 88  | 0   |
| CONTIG-076798 | 311 | 7  | 2  | 69  | 0   |
| CONTIG-076799 | 101 | 4  | 2  | 4   | 0   |
| CONTIG-076800 | 125 | 8  | 10 | 18  | 0   |
| CONTIG-076801 | 82  | 4  | 4  | 10  | 0   |
| CONTIG-076802 | 117 | 8  | 2  | 32  | 0   |
| CONTIG-076803 | 160 | 6  | 8  | 18  | 0   |
| CONTIG-076804 | 114 | 2  | 3  | 6   | 0   |
| CONTIG-076805 | 66  | 3  | 3  | 5   | 0   |
| CONTIG-076806 | 251 | 14 | 12 | 126 | 4   |
| CONTIG-076807 | 75  | 3  | 2  | 5   | 0   |
| CONTIG-076808 | 149 | 13 | 0  | 0   | 24  |
| CONTIG-076809 | 65  | 6  | 20 | 2   | 0   |
| CONTIG-076810 | 61  | 20 | 5  | 20  | 0   |
| CONTIG-076811 | 215 | 10 | 8  | 78  | 0   |
| CONTIG-076812 | 58  | 65 | 4  | 115 | 0   |
| CONTIG-076813 | 68  | 6  | 8  | 11  | 0   |
| CONTIG-076814 | 68  | 7  | 3  | 8   | 2   |
| CONTIG-076815 | 135 | 6  | 10 | 32  | 0   |
| CONTIG-076816 | 585 | 46 | 0  | 0   | 447 |
| CONTIG-076817 | 331 | 12 | 11 | 32  | 0   |
| CONTIG-076818 | 103 | 11 | 12 | 17  | 0   |
| CONTIG-076819 | 159 | 6  | 8  | 15  | 0   |
| CONTIG-076820 | 84  | 6  | 7  | 16  | 0   |
| CONTIG-076821 | 58  | 13 | 7  | 16  | 2   |
| CONTIG-076822 | 81  | 7  | 4  | 16  | 0   |
| CONTIG-076823 | 171 | 8  | 2  | 20  | 0   |
| CONTIG-076825 | 128 | 5  | 2  | 14  | 0   |
| CONTIG-076826 | 127 | 32 | 35 | 66  | 5   |
| CONTIG-076827 | 61  | 3  | 3  | 7   | 0   |
| CONTIG-076829 | 59  | 4  | 0  | 5   | 0   |
| CONTIG-076830 | 59  | 4  | 2  | 4   | 0   |
| CONTIG-076831 | 88  | 9  | 7  | 26  | 0   |
| CONTIG-076832 | 118 | 5  | 13 | 8   | 0   |
| CONTIG-076833 | 106 | 8  | 4  | 32  | 0   |
| CONTIG-076834 | 89  | 4  | 5  | 2   | 0   |
| CONTIG-076835 | 88  | 4  | 4  | 11  | 0   |

|               |     |    |    |     |     |
|---------------|-----|----|----|-----|-----|
| CONTIG-076836 | 109 | 8  | 2  | 26  | 0   |
| CONTIG-076837 | 87  | 6  | 8  | 13  | 0   |
| CONTIG-076839 | 86  | 5  | 8  | 14  | 0   |
| CONTIG-076843 | 313 | 8  | 3  | 24  | 0   |
| CONTIG-076845 | 61  | 7  | 8  | 8   | 0   |
| CONTIG-076846 | 185 | 7  | 2  | 33  | 0   |
| CONTIG-076847 | 181 | 11 | 14 | 70  | 0   |
| CONTIG-076848 | 64  | 3  | 0  | 0   | 0   |
| CONTIG-076850 | 49  | 38 | 6  | 38  | 0   |
| CONTIG-076851 | 378 | 77 | 4  | 0   | 467 |
| CONTIG-076852 | 60  | 8  | 0  | 0   | 0   |
| CONTIG-076853 | 117 | 7  | 10 | 32  | 0   |
| CONTIG-076854 | 152 | 4  | 4  | 2   | 0   |
| CONTIG-076857 | 76  | 4  | 3  | 6   | 0   |
| CONTIG-076858 | 194 | 13 | 10 | 68  | 0   |
| CONTIG-076859 | 289 | 8  | 8  | 53  | 0   |
| CONTIG-076860 | 324 | 7  | 6  | 91  | 0   |
| CONTIG-076861 | 81  | 4  | 18 | 5   | 0   |
| CONTIG-076862 | 159 | 4  | 7  | 13  | 0   |
| CONTIG-076864 | 262 | 7  | 4  | 57  | 2   |
| CONTIG-076868 | 89  | 7  | 11 | 14  | 0   |
| CONTIG-076869 | 74  | 6  | 14 | 2   | 0   |
| CONTIG-076872 | 100 | 7  | 6  | 21  | 0   |
| CONTIG-076873 | 183 | 17 | 8  | 141 | 0   |
| CONTIG-076874 | 84  | 7  | 0  | 12  | 0   |
| CONTIG-076875 | 147 | 5  | 7  | 19  | 0   |
| CONTIG-076876 | 67  | 4  | 6  | 5   | 0   |
| CONTIG-076877 | 505 | 9  | 18 | 88  | 0   |
| CONTIG-076878 | 133 | 5  | 2  | 18  | 0   |
| CONTIG-076879 | 102 | 4  | 0  | 9   | 0   |
| CONTIG-076880 | 64  | 5  | 0  | 14  | 0   |
| CONTIG-076881 | 84  | 7  | 0  | 10  | 0   |
| CONTIG-076882 | 69  | 6  | 10 | 0   | 0   |
| CONTIG-076883 | 65  | 3  | 2  | 4   | 0   |
| CONTIG-076884 | 106 | 6  | 2  | 7   | 0   |
| CONTIG-076885 | 84  | 9  | 10 | 32  | 0   |
| CONTIG-076886 | 137 | 4  | 2  | 16  | 0   |
| CONTIG-076887 | 112 | 8  | 6  | 32  | 0   |
| CONTIG-076888 | 133 | 10 | 8  | 35  | 0   |
| CONTIG-076889 | 138 | 12 | 17 | 18  | 0   |
| CONTIG-076890 | 106 | 4  | 5  | 0   | 0   |
| CONTIG-076891 | 91  | 5  | 2  | 12  | 0   |
| CONTIG-076892 | 56  | 47 | 3  | 0   | 14  |
| CONTIG-076893 | 59  | 4  | 7  | 4   | 0   |
| CONTIG-076894 | 80  | 3  | 0  | 0   | 0   |
| CONTIG-076895 | 121 | 4  | 2  | 18  | 0   |
| CONTIG-076896 | 130 | 12 | 6  | 55  | 0   |



|               |     |    |    |     |     |
|---------------|-----|----|----|-----|-----|
| CONTIG-076897 | 536 | 91 | 4  | 0   | 145 |
| CONTIG-076898 | 85  | 3  | 5  | 6   | 0   |
| CONTIG-076899 | 58  | 7  | 2  | 12  | 0   |
| CONTIG-076905 | 319 | 16 | 22 | 35  | 30  |
| CONTIG-076906 | 99  | 13 | 12 | 61  | 0   |
| CONTIG-076907 | 116 | 5  | 17 | 3   | 0   |
| CONTIG-076908 | 332 | 8  | 3  | 100 | 0   |
| CONTIG-076911 | 59  | 8  | 7  | 12  | 0   |
| CONTIG-076912 | 114 | 4  | 0  | 8   | 0   |
| CONTIG-076913 | 71  | 9  | 13 | 0   | 0   |
| CONTIG-076914 | 84  | 6  | 7  | 17  | 0   |
| CONTIG-076915 | 103 | 3  | 2  | 8   | 0   |
| CONTIG-076916 | 102 | 5  | 2  | 11  | 0   |
| CONTIG-076917 | 86  | 5  | 2  | 5   | 0   |
| CONTIG-076918 | 156 | 10 | 7  | 11  | 0   |
| CONTIG-076919 | 402 | 14 | 12 | 191 | 3   |
| CONTIG-076920 | 80  | 9  | 7  | 9   | 0   |
| CONTIG-076921 | 145 | 15 | 0  | 23  | 0   |
| CONTIG-076927 | 63  | 13 | 6  | 14  | 0   |
| CONTIG-076928 | 73  | 4  | 2  | 9   | 0   |
| CONTIG-076929 | 283 | 11 | 3  | 164 | 0   |
| CONTIG-076930 | 91  | 7  | 7  | 11  | 0   |
| CONTIG-076931 | 80  | 18 | 24 | 0   | 0   |
| CONTIG-076932 | 168 | 3  | 0  | 18  | 2   |
| CONTIG-076933 | 66  | 6  | 12 | 2   | 0   |
| CONTIG-076934 | 127 | 29 | 2  | 191 | 0   |
| CONTIG-076935 | 93  | 22 | 8  | 106 | 0   |
| CONTIG-076937 | 224 | 11 | 2  | 0   | 2   |
| CONTIG-076938 | 144 | 7  | 2  | 2   | 0   |
| CONTIG-076939 | 217 | 8  | 9  | 59  | 0   |
| CONTIG-076940 | 60  | 2  | 4  | 0   | 0   |
| CONTIG-076941 | 162 | 6  | 11 | 36  | 0   |
| CONTIG-076942 | 69  | 5  | 2  | 11  | 0   |
| CONTIG-076943 | 73  | 4  | 0  | 9   | 0   |
| CONTIG-076944 | 178 | 4  | 13 | 23  | 0   |
| CONTIG-076945 | 72  | 3  | 0  | 12  | 0   |
| CONTIG-076946 | 88  | 6  | 5  | 5   | 0   |
| CONTIG-076947 | 108 | 8  | 5  | 15  | 0   |
| CONTIG-076948 | 114 | 18 | 4  | 60  | 0   |
| CONTIG-076949 | 127 | 5  | 2  | 0   | 0   |
| CONTIG-076950 | 66  | 5  | 2  | 8   | 0   |
| CONTIG-076951 | 99  | 3  | 4  | 7   | 0   |
| CONTIG-076952 | 99  | 5  | 16 | 4   | 0   |
| CONTIG-076953 | 72  | 6  | 8  | 2   | 0   |
| CONTIG-076954 | 149 | 3  | 2  | 11  | 0   |
| CONTIG-076955 | 87  | 3  | 4  | 0   | 0   |
| CONTIG-076956 | 71  | 3  | 2  | 4   | 0   |

|               |     |     |    |     |    |
|---------------|-----|-----|----|-----|----|
| CONTIG-076957 | 70  | 3   | 2  | 2   | 0  |
| CONTIG-076958 | 561 | 11  | 7  | 257 | 0  |
| CONTIG-076959 | 812 | 18  | 5  | 0   | 84 |
| CONTIG-076960 | 180 | 9   | 18 | 43  | 0  |
| CONTIG-076961 | 109 | 5   | 2  | 13  | 2  |
| CONTIG-076962 | 179 | 10  | 3  | 34  | 0  |
| CONTIG-076963 | 73  | 90  | 82 | 149 | 2  |
| CONTIG-076964 | 71  | 10  | 10 | 0   | 0  |
| CONTIG-076965 | 96  | 12  | 15 | 5   | 0  |
| CONTIG-076966 | 194 | 16  | 9  | 113 | 2  |
| CONTIG-076967 | 118 | 4   | 0  | 19  | 0  |
| CONTIG-076968 | 87  | 4   | 2  | 6   | 0  |
| CONTIG-076969 | 119 | 3   | 0  | 6   | 0  |
| CONTIG-076970 | 65  | 14  | 2  | 34  | 0  |
| CONTIG-076971 | 112 | 6   | 4  | 20  | 0  |
| CONTIG-076972 | 143 | 6   | 2  | 17  | 0  |
| CONTIG-076974 | 178 | 12  | 2  | 49  | 2  |
| CONTIG-076975 | 515 | 13  | 35 | 200 | 0  |
| CONTIG-076976 | 76  | 8   | 3  | 19  | 0  |
| CONTIG-076977 | 140 | 6   | 2  | 19  | 0  |
| CONTIG-076978 | 105 | 6   | 10 | 20  | 0  |
| CONTIG-076979 | 87  | 6   | 5  | 12  | 0  |
| CONTIG-076980 | 105 | 13  | 8  | 27  | 0  |
| CONTIG-076981 | 125 | 6   | 22 | 10  | 0  |
| CONTIG-076982 | 106 | 3   | 2  | 11  | 0  |
| CONTIG-076984 | 122 | 18  | 7  | 82  | 2  |
| CONTIG-076985 | 634 | 24  | 27 | 945 | 0  |
| CONTIG-076986 | 156 | 5   | 2  | 21  | 0  |
| CONTIG-076987 | 119 | 38  | 11 | 69  | 0  |
| CONTIG-076988 | 76  | 2   | 0  | 2   | 0  |
| CONTIG-076989 | 142 | 16  | 11 | 77  | 0  |
| CONTIG-076990 | 312 | 21  | 6  | 16  | 0  |
| CONTIG-076991 | 41  | 236 | 2  | 19  | 0  |
| CONTIG-076992 | 259 | 7   | 2  | 50  | 0  |
| CONTIG-076993 | 107 | 8   | 14 | 16  | 0  |
| CONTIG-076994 | 73  | 7   | 4  | 15  | 0  |
| CONTIG-076995 | 531 | 20  | 5  | 0   | 31 |
| CONTIG-076997 | 58  | 6   | 2  | 9   | 0  |
| CONTIG-076998 | 128 | 5   | 8  | 14  | 0  |
| CONTIG-076999 | 51  | 36  | 16 | 15  | 0  |
| CONTIG-077000 | 68  | 6   | 0  | 19  | 0  |
| CONTIG-077001 | 108 | 3   | 2  | 4   | 0  |
| CONTIG-077002 | 214 | 16  | 4  | 13  | 0  |
| CONTIG-077003 | 110 | 6   | 5  | 22  | 0  |
| CONTIG-077004 | 241 | 7   | 0  | 27  | 2  |
| CONTIG-077006 | 65  | 4   | 2  | 8   | 0  |
| CONTIG-077007 | 97  | 6   | 8  | 16  | 0  |

|               |     |    |    |     |     |
|---------------|-----|----|----|-----|-----|
| CONTIG-077008 | 122 | 4  | 6  | 10  | 0   |
| CONTIG-077009 | 83  | 5  | 0  | 13  | 0   |
| CONTIG-077010 | 212 | 15 | 30 | 46  | 0   |
| CONTIG-077012 | 120 | 10 | 4  | 51  | 0   |
| CONTIG-077013 | 75  | 8  | 22 | 8   | 0   |
| CONTIG-077014 | 106 | 5  | 5  | 20  | 0   |
| CONTIG-077015 | 140 | 6  | 3  | 18  | 0   |
| CONTIG-077016 | 138 | 10 | 4  | 33  | 4   |
| CONTIG-077017 | 82  | 9  | 10 | 19  | 0   |
| CONTIG-077018 | 148 | 11 | 4  | 44  | 0   |
| CONTIG-077020 | 76  | 4  | 10 | 2   | 0   |
| CONTIG-077021 | 60  | 5  | 0  | 13  | 0   |
| CONTIG-077022 | 197 | 8  | 11 | 45  | 0   |
| CONTIG-077023 | 71  | 8  | 0  | 18  | 0   |
| CONTIG-077024 | 62  | 8  | 10 | 0   | 0   |
| CONTIG-077025 | 60  | 6  | 14 | 9   | 0   |
| CONTIG-077026 | 65  | 3  | 3  | 0   | 0   |
| CONTIG-077027 | 89  | 5  | 10 | 10  | 0   |
| CONTIG-077028 | 86  | 4  | 3  | 6   | 0   |
| CONTIG-077029 | 178 | 7  | 0  | 46  | 0   |
| CONTIG-077030 | 240 | 15 | 12 | 145 | 0   |
| CONTIG-077031 | 103 | 5  | 4  | 6   | 0   |
| CONTIG-077032 | 171 | 7  | 5  | 40  | 2   |
| CONTIG-077033 | 246 | 6  | 3  | 37  | 0   |
| CONTIG-077034 | 496 | 84 | 3  | 0   | 450 |
| CONTIG-077035 | 274 | 15 | 2  | 149 | 0   |
| CONTIG-077036 | 88  | 11 | 4  | 25  | 4   |
| CONTIG-077037 | 104 | 13 | 7  | 37  | 0   |
| CONTIG-077038 | 81  | 9  | 5  | 14  | 0   |
| CONTIG-077039 | 91  | 5  | 0  | 2   | 0   |
| CONTIG-077040 | 59  | 4  | 2  | 5   | 0   |
| CONTIG-077041 | 191 | 10 | 6  | 35  | 0   |
| CONTIG-077042 | 89  | 4  | 4  | 10  | 0   |
| CONTIG-077044 | 61  | 3  | 5  | 4   | 0   |
| CONTIG-077045 | 73  | 5  | 0  | 12  | 0   |
| CONTIG-077046 | 173 | 5  | 5  | 33  | 0   |
| CONTIG-077047 | 121 | 5  | 4  | 17  | 0   |
| CONTIG-077048 | 97  | 8  | 3  | 8   | 0   |
| CONTIG-077049 | 582 | 11 | 15 | 142 | 0   |
| CONTIG-077050 | 97  | 5  | 0  | 6   | 0   |
| CONTIG-077051 | 91  | 8  | 0  | 2   | 0   |
| CONTIG-077052 | 112 | 8  | 5  | 14  | 0   |
| CONTIG-077053 | 129 | 8  | 12 | 31  | 0   |
| CONTIG-077054 | 133 | 8  | 10 | 14  | 0   |
| CONTIG-077055 | 63  | 7  | 14 | 2   | 2   |
| CONTIG-077056 | 95  | 7  | 7  | 31  | 0   |
| CONTIG-077057 | 68  | 6  | 3  | 8   | 0   |

|               |     |     |    |     |   |
|---------------|-----|-----|----|-----|---|
| CONTIG-077059 | 113 | 5   | 7  | 22  | 0 |
| CONTIG-077060 | 180 | 13  | 7  | 80  | 0 |
| CONTIG-077061 | 59  | 10  | 2  | 24  | 0 |
| CONTIG-077062 | 76  | 6   | 3  | 18  | 0 |
| CONTIG-077063 | 178 | 8   | 0  | 39  | 0 |
| CONTIG-077064 | 173 | 5   | 0  | 18  | 0 |
| CONTIG-077066 | 126 | 5   | 6  | 18  | 0 |
| CONTIG-077067 | 66  | 6   | 0  | 6   | 2 |
| CONTIG-077068 | 141 | 7   | 4  | 32  | 0 |
| CONTIG-077069 | 76  | 9   | 4  | 27  | 0 |
| CONTIG-077070 | 332 | 7   | 8  | 55  | 0 |
| CONTIG-077071 | 231 | 8   | 7  | 58  | 0 |
| CONTIG-077073 | 408 | 8   | 5  | 94  | 4 |
| CONTIG-077074 | 169 | 6   | 4  | 29  | 0 |
| CONTIG-077075 | 59  | 2   | 2  | 0   | 0 |
| CONTIG-077076 | 144 | 6   | 7  | 19  | 0 |
| CONTIG-077077 | 84  | 3   | 0  | 3   | 0 |
| CONTIG-077078 | 66  | 25  | 2  | 39  | 0 |
| CONTIG-077079 | 120 | 6   | 3  | 26  | 0 |
| CONTIG-077080 | 204 | 5   | 7  | 20  | 0 |
| CONTIG-077083 | 73  | 2   | 2  | 4   | 0 |
| CONTIG-077084 | 118 | 7   | 5  | 32  | 0 |
| CONTIG-077085 | 215 | 5   | 6  | 31  | 0 |
| CONTIG-077086 | 148 | 8   | 0  | 37  | 0 |
| CONTIG-077089 | 58  | 44  | 3  | 89  | 0 |
| CONTIG-077090 | 83  | 15  | 3  | 42  | 0 |
| CONTIG-077091 | 124 | 5   | 0  | 2   | 0 |
| CONTIG-077092 | 67  | 3   | 3  | 2   | 0 |
| CONTIG-077093 | 59  | 4   | 6  | 7   | 0 |
| CONTIG-077094 | 69  | 4   | 2  | 3   | 0 |
| CONTIG-077095 | 135 | 7   | 8  | 19  | 0 |
| CONTIG-077096 | 347 | 9   | 19 | 99  | 2 |
| CONTIG-077097 | 61  | 659 | 4  | 641 | 0 |
| CONTIG-077098 | 73  | 5   | 0  | 0   | 0 |
| CONTIG-077099 | 126 | 6   | 5  | 24  | 0 |
| CONTIG-077100 | 81  | 5   | 3  | 19  | 0 |
| CONTIG-077102 | 71  | 4   | 5  | 10  | 0 |
| CONTIG-077103 | 58  | 7   | 0  | 0   | 0 |
| CONTIG-077105 | 81  | 11  | 13 | 0   | 0 |
| CONTIG-077106 | 108 | 20  | 12 | 59  | 0 |
| CONTIG-077107 | 180 | 6   | 6  | 28  | 0 |
| CONTIG-077108 | 66  | 4   | 7  | 2   | 0 |
| CONTIG-077110 | 193 | 7   | 3  | 7   | 0 |
| CONTIG-077111 | 78  | 7   | 0  | 14  | 0 |
| CONTIG-077112 | 88  | 7   | 9  | 23  | 0 |
| CONTIG-077113 | 75  | 5   | 5  | 0   | 0 |
| CONTIG-077114 | 234 | 6   | 3  | 40  | 0 |

|               |     |    |    |     |   |
|---------------|-----|----|----|-----|---|
| CONTIG-077115 | 68  | 6  | 5  | 10  | 0 |
| CONTIG-077116 | 79  | 6  | 0  | 17  | 0 |
| CONTIG-077117 | 146 | 8  | 13 | 26  | 0 |
| CONTIG-077118 | 219 | 5  | 3  | 43  | 0 |
| CONTIG-077119 | 59  | 4  | 2  | 3   | 0 |
| CONTIG-077120 | 405 | 9  | 9  | 143 | 0 |
| CONTIG-077121 | 126 | 5  | 7  | 11  | 0 |
| CONTIG-077122 | 63  | 5  | 3  | 4   | 0 |
| CONTIG-077125 | 97  | 5  | 9  | 18  | 0 |
| CONTIG-077126 | 90  | 49 | 5  | 2   | 0 |
| CONTIG-077127 | 73  | 4  | 2  | 0   | 0 |
| CONTIG-077128 | 66  | 6  | 0  | 13  | 0 |
| CONTIG-077129 | 170 | 5  | 0  | 21  | 0 |
| CONTIG-077130 | 196 | 18 | 14 | 89  | 0 |
| CONTIG-077131 | 276 | 5  | 4  | 32  | 0 |
| CONTIG-077132 | 331 | 21 | 21 | 246 | 2 |
| CONTIG-077133 | 175 | 7  | 6  | 37  | 0 |
| CONTIG-077135 | 93  | 12 | 3  | 41  | 0 |
| CONTIG-077136 | 59  | 13 | 21 | 14  | 0 |
| CONTIG-077137 | 601 | 15 | 8  | 392 | 2 |
| CONTIG-077138 | 63  | 4  | 5  | 5   | 0 |
| CONTIG-077139 | 214 | 7  | 4  | 19  | 0 |
| CONTIG-077140 | 44  | 7  | 3  | 9   | 0 |
| CONTIG-077141 | 97  | 18 | 10 | 23  | 0 |
| CONTIG-077142 | 123 | 5  | 2  | 10  | 2 |
| CONTIG-077143 | 71  | 4  | 4  | 6   | 0 |
| CONTIG-077144 | 166 | 8  | 7  | 55  | 0 |
| CONTIG-077145 | 76  | 6  | 3  | 6   | 0 |
| CONTIG-077146 | 304 | 7  | 8  | 44  | 0 |
| CONTIG-077147 | 116 | 7  | 9  | 16  | 0 |
| CONTIG-077148 | 177 | 8  | 17 | 46  | 0 |
| CONTIG-077149 | 193 | 7  | 0  | 29  | 0 |
| CONTIG-077150 | 88  | 9  | 17 | 4   | 0 |
| CONTIG-077151 | 78  | 5  | 12 | 4   | 0 |
| CONTIG-077153 | 65  | 6  | 2  | 0   | 0 |
| CONTIG-077154 | 101 | 4  | 7  | 16  | 0 |
| CONTIG-077155 | 62  | 2  | 4  | 6   | 0 |
| CONTIG-077156 | 68  | 10 | 3  | 17  | 0 |
| CONTIG-077157 | 64  | 10 | 5  | 0   | 0 |
| CONTIG-077158 | 68  | 3  | 3  | 9   | 0 |
| CONTIG-077159 | 163 | 7  | 4  | 22  | 0 |
| CONTIG-077160 | 92  | 12 | 2  | 60  | 0 |
| CONTIG-077161 | 103 | 5  | 2  | 5   | 0 |
| CONTIG-077162 | 135 | 10 | 4  | 38  | 2 |
| CONTIG-077163 | 76  | 9  | 0  | 10  | 0 |
| CONTIG-077165 | 289 | 8  | 6  | 65  | 0 |
| CONTIG-077168 | 98  | 4  | 2  | 11  | 0 |

|               |     |    |    |     |    |
|---------------|-----|----|----|-----|----|
| CONTIG-077169 | 81  | 3  | 4  | 6   | 0  |
| CONTIG-077170 | 125 | 9  | 2  | 39  | 0  |
| CONTIG-077171 | 194 | 6  | 4  | 0   | 6  |
| CONTIG-077172 | 93  | 7  | 0  | 18  | 0  |
| CONTIG-077173 | 70  | 8  | 2  | 10  | 2  |
| CONTIG-077174 | 225 | 4  | 14 | 4   | 0  |
| CONTIG-077176 | 141 | 6  | 0  | 2   | 19 |
| CONTIG-077177 | 105 | 12 | 3  | 44  | 2  |
| CONTIG-077178 | 134 | 10 | 2  | 30  | 0  |
| CONTIG-077179 | 74  | 4  | 2  | 8   | 0  |
| CONTIG-077180 | 84  | 4  | 3  | 2   | 0  |
| CONTIG-077181 | 65  | 3  | 3  | 0   | 0  |
| CONTIG-077184 | 61  | 3  | 0  | 4   | 0  |
| CONTIG-077187 | 123 | 7  | 2  | 39  | 0  |
| CONTIG-077188 | 64  | 5  | 4  | 0   | 0  |
| CONTIG-077189 | 74  | 9  | 4  | 17  | 0  |
| CONTIG-077190 | 96  | 4  | 5  | 7   | 0  |
| CONTIG-077191 | 68  | 4  | 4  | 2   | 0  |
| CONTIG-077192 | 81  | 9  | 11 | 29  | 0  |
| CONTIG-077193 | 64  | 5  | 0  | 7   | 0  |
| CONTIG-077194 | 302 | 7  | 8  | 0   | 2  |
| CONTIG-077195 | 61  | 9  | 4  | 7   | 0  |
| CONTIG-077196 | 246 | 9  | 9  | 91  | 0  |
| CONTIG-077197 | 59  | 7  | 13 | 0   | 0  |
| CONTIG-077198 | 86  | 11 | 28 | 7   | 0  |
| CONTIG-077200 | 221 | 9  | 6  | 69  | 0  |
| CONTIG-077201 | 154 | 4  | 3  | 5   | 0  |
| CONTIG-077202 | 238 | 6  | 2  | 10  | 4  |
| CONTIG-077203 | 94  | 7  | 9  | 10  | 0  |
| CONTIG-077204 | 150 | 13 | 2  | 9   | 0  |
| CONTIG-077205 | 103 | 2  | 2  | 0   | 0  |
| CONTIG-077206 | 107 | 6  | 6  | 12  | 0  |
| CONTIG-077208 | 76  | 7  | 3  | 14  | 2  |
| CONTIG-077209 | 112 | 4  | 6  | 14  | 0  |
| CONTIG-077210 | 119 | 4  | 4  | 4   | 0  |
| CONTIG-077211 | 71  | 10 | 3  | 11  | 0  |
| CONTIG-077212 | 93  | 5  | 13 | 18  | 0  |
| CONTIG-077213 | 143 | 8  | 4  | 31  | 0  |
| CONTIG-077214 | 71  | 3  | 3  | 6   | 0  |
| CONTIG-077215 | 985 | 57 | 7  | 0   | 0  |
| CONTIG-077217 | 114 | 6  | 2  | 23  | 0  |
| CONTIG-077218 | 172 | 10 | 11 | 33  | 0  |
| CONTIG-077219 | 123 | 12 | 3  | 37  | 2  |
| CONTIG-077221 | 294 | 5  | 0  | 32  | 0  |
| CONTIG-077222 | 82  | 35 | 6  | 100 | 2  |
| CONTIG-077223 | 129 | 15 | 7  | 90  | 0  |
| CONTIG-077225 | 126 | 5  | 2  | 15  | 0  |

|               |     |     |    |      |     |
|---------------|-----|-----|----|------|-----|
| CONTIG-077226 | 112 | 9   | 17 | 16   | 0   |
| CONTIG-077227 | 214 | 64  | 20 | 326  | 2   |
| CONTIG-077228 | 54  | 5   | 9  | 10   | 0   |
| CONTIG-077233 | 65  | 6   | 0  | 2    | 0   |
| CONTIG-077234 | 63  | 6   | 3  | 2    | 0   |
| CONTIG-077235 | 456 | 41  | 2  | 0    | 125 |
| CONTIG-077236 | 151 | 8   | 2  | 28   | 0   |
| CONTIG-077237 | 77  | 5   | 3  | 5    | 0   |
| CONTIG-077238 | 58  | 6   | 13 | 2    | 0   |
| CONTIG-077239 | 84  | 4   | 4  | 5    | 0   |
| CONTIG-077240 | 132 | 6   | 4  | 27   | 0   |
| CONTIG-077241 | 59  | 4   | 0  | 6    | 0   |
| CONTIG-077242 | 77  | 6   | 2  | 15   | 0   |
| CONTIG-077243 | 95  | 8   | 2  | 29   | 0   |
| CONTIG-077244 | 86  | 7   | 2  | 11   | 2   |
| CONTIG-077247 | 95  | 5   | 4  | 9    | 0   |
| CONTIG-077248 | 87  | 6   | 13 | 6    | 0   |
| CONTIG-077249 | 134 | 5   | 0  | 4    | 0   |
| CONTIG-077250 | 69  | 4   | 8  | 0    | 0   |
| CONTIG-077251 | 61  | 4   | 14 | 0    | 0   |
| CONTIG-077252 | 111 | 4   | 2  | 11   | 0   |
| CONTIG-077253 | 137 | 4   | 3  | 6    | 0   |
| CONTIG-077254 | 83  | 11  | 15 | 20   | 2   |
| CONTIG-077255 | 177 | 6   | 8  | 36   | 0   |
| CONTIG-077256 | 259 | 12  | 3  | 28   | 0   |
| CONTIG-077257 | 212 | 12  | 5  | 49   | 0   |
| CONTIG-077258 | 374 | 10  | 2  | 0    | 8   |
| CONTIG-077259 | 130 | 5   | 8  | 16   | 0   |
| CONTIG-077260 | 337 | 8   | 9  | 81   | 0   |
| CONTIG-077261 | 164 | 9   | 6  | 27   | 2   |
| CONTIG-077262 | 173 | 30  | 5  | 130  | 5   |
| CONTIG-077263 | 70  | 10  | 8  | 26   | 0   |
| CONTIG-077264 | 38  | 359 | 5  | 13   | 329 |
| CONTIG-077265 | 690 | 28  | 3  | 0    | 145 |
| CONTIG-077266 | 245 | 4   | 2  | 0    | 6   |
| CONTIG-077267 | 81  | 3   | 2  | 0    | 0   |
| CONTIG-077268 | 50  | 14  | 6  | 13   | 3   |
| CONTIG-077269 | 108 | 6   | 0  | 15   | 0   |
| CONTIG-077270 | 102 | 13  | 2  | 38   | 0   |
| CONTIG-077271 | 339 | 24  | 8  | 325  | 2   |
| CONTIG-077274 | 155 | 9   | 16 | 36   | 0   |
| CONTIG-077275 | 110 | 138 | 22 | 951  | 0   |
| CONTIG-077279 | 107 | 9   | 3  | 26   | 0   |
| CONTIG-077280 | 60  | 667 | 8  | 1517 | 0   |
| CONTIG-077282 | 149 | 4   | 2  | 10   | 0   |
| CONTIG-077283 | 93  | 6   | 0  | 4    | 0   |
| CONTIG-077285 | 149 | 8   | 0  | 63   | 0   |

|               |     |    |    |     |    |
|---------------|-----|----|----|-----|----|
| CONTIG-077286 | 68  | 6  | 5  | 11  | 0  |
| CONTIG-077287 | 61  | 6  | 0  | 13  | 2  |
| CONTIG-077288 | 122 | 3  | 4  | 4   | 0  |
| CONTIG-077289 | 86  | 10 | 5  | 35  | 0  |
| CONTIG-077290 | 113 | 7  | 14 | 16  | 0  |
| CONTIG-077291 | 67  | 5  | 0  | 4   | 0  |
| CONTIG-077292 | 74  | 4  | 5  | 4   | 0  |
| CONTIG-077293 | 102 | 8  | 6  | 32  | 0  |
| CONTIG-077294 | 168 | 6  | 7  | 24  | 0  |
| CONTIG-077295 | 349 | 8  | 3  | 72  | 0  |
| CONTIG-077296 | 86  | 3  | 2  | 4   | 0  |
| CONTIG-077297 | 82  | 4  | 4  | 6   | 0  |
| CONTIG-077298 | 273 | 16 | 36 | 18  | 25 |
| CONTIG-077299 | 69  | 5  | 2  | 11  | 0  |
| CONTIG-077300 | 241 | 5  | 8  | 32  | 0  |
| CONTIG-077301 | 72  | 13 | 7  | 31  | 0  |
| CONTIG-077305 | 229 | 11 | 7  | 50  | 8  |
| CONTIG-077306 | 93  | 7  | 7  | 18  | 0  |
| CONTIG-077307 | 128 | 5  | 0  | 12  | 0  |
| CONTIG-077308 | 101 | 4  | 5  | 20  | 0  |
| CONTIG-077309 | 135 | 10 | 0  | 42  | 0  |
| CONTIG-077310 | 140 | 14 | 11 | 84  | 0  |
| CONTIG-077311 | 129 | 8  | 2  | 32  | 0  |
| CONTIG-077312 | 117 | 4  | 8  | 12  | 0  |
| CONTIG-077313 | 324 | 7  | 6  | 62  | 0  |
| CONTIG-077314 | 120 | 8  | 8  | 37  | 0  |
| CONTIG-077317 | 63  | 7  | 4  | 17  | 0  |
| CONTIG-077318 | 71  | 4  | 0  | 8   | 0  |
| CONTIG-077319 | 126 | 5  | 5  | 18  | 0  |
| CONTIG-077320 | 166 | 9  | 0  | 23  | 2  |
| CONTIG-077321 | 61  | 4  | 4  | 4   | 0  |
| CONTIG-077322 | 59  | 11 | 5  | 0   | 0  |
| CONTIG-077323 | 89  | 8  | 0  | 15  | 0  |
| CONTIG-077324 | 183 | 9  | 9  | 42  | 0  |
| CONTIG-077325 | 351 | 14 | 10 | 132 | 3  |
| CONTIG-077326 | 123 | 4  | 5  | 14  | 0  |
| CONTIG-077327 | 299 | 7  | 2  | 24  | 0  |
| CONTIG-077328 | 73  | 7  | 25 | 8   | 0  |
| CONTIG-077329 | 214 | 7  | 4  | 73  | 0  |
| CONTIG-077330 | 75  | 7  | 2  | 8   | 2  |
| CONTIG-077331 | 80  | 6  | 0  | 21  | 2  |
| CONTIG-077332 | 116 | 19 | 0  | 0   | 22 |
| CONTIG-077333 | 120 | 9  | 4  | 38  | 0  |
| CONTIG-077336 | 250 | 10 | 3  | 63  | 0  |
| CONTIG-077339 | 73  | 6  | 5  | 17  | 0  |
| CONTIG-077340 | 80  | 44 | 24 | 57  | 3  |
| CONTIG-077342 | 260 | 10 | 4  | 106 | 0  |



|               |     |    |    |     |   |
|---------------|-----|----|----|-----|---|
| CONTIG-077343 | 250 | 6  | 7  | 4   | 0 |
| CONTIG-077344 | 268 | 23 | 27 | 243 | 0 |
| CONTIG-077345 | 141 | 5  | 2  | 0   | 0 |
| CONTIG-077346 | 69  | 6  | 2  | 14  | 0 |
| CONTIG-077347 | 286 | 12 | 12 | 95  | 0 |
| CONTIG-077348 | 124 | 8  | 0  | 21  | 0 |
| CONTIG-077349 | 115 | 6  | 4  | 37  | 0 |
| CONTIG-077351 | 89  | 5  | 0  | 8   | 0 |
| CONTIG-077352 | 121 | 6  | 8  | 25  | 0 |
| CONTIG-077353 | 209 | 6  | 12 | 19  | 0 |
| CONTIG-077354 | 58  | 5  | 2  | 10  | 0 |
| CONTIG-077355 | 120 | 8  | 5  | 30  | 0 |
| CONTIG-077358 | 146 | 4  | 5  | 11  | 2 |
| CONTIG-077359 | 95  | 4  | 4  | 7   | 0 |
| CONTIG-077361 | 59  | 5  | 2  | 0   | 0 |
| CONTIG-077364 | 139 | 8  | 8  | 33  | 0 |
| CONTIG-077365 | 185 | 9  | 4  | 55  | 0 |
| CONTIG-077366 | 215 | 6  | 4  | 27  | 0 |
| CONTIG-077368 | 44  | 35 | 3  | 37  | 6 |
| CONTIG-077369 | 80  | 3  | 2  | 2   | 0 |
| CONTIG-077370 | 196 | 7  | 7  | 43  | 0 |
| CONTIG-077371 | 418 | 17 | 0  | 333 | 2 |
| CONTIG-077372 | 196 | 6  | 9  | 32  | 0 |
| CONTIG-077373 | 102 | 4  | 5  | 4   | 0 |
| CONTIG-077374 | 131 | 9  | 5  | 26  | 0 |
| CONTIG-077375 | 124 | 6  | 2  | 26  | 0 |
| CONTIG-077376 | 65  | 18 | 8  | 60  | 0 |
| CONTIG-077377 | 157 | 6  | 4  | 24  | 0 |
| CONTIG-077378 | 138 | 5  | 2  | 21  | 0 |
| CONTIG-077379 | 87  | 3  | 5  | 2   | 0 |
| CONTIG-077380 | 78  | 11 | 28 | 2   | 0 |
| CONTIG-077381 | 85  | 3  | 2  | 4   | 0 |
| CONTIG-077382 | 353 | 11 | 7  | 157 | 0 |
| CONTIG-077383 | 373 | 12 | 4  | 192 | 0 |
| CONTIG-077384 | 71  | 4  | 0  | 11  | 0 |
| CONTIG-077385 | 139 | 8  | 0  | 4   | 0 |
| CONTIG-077386 | 89  | 4  | 7  | 14  | 0 |
| CONTIG-077387 | 153 | 3  | 2  | 6   | 0 |
| CONTIG-077388 | 168 | 11 | 13 | 34  | 2 |
| CONTIG-077389 | 64  | 6  | 8  | 9   | 0 |
| CONTIG-077390 | 164 | 18 | 12 | 47  | 0 |
| CONTIG-077391 | 107 | 4  | 3  | 13  | 0 |
| CONTIG-077392 | 288 | 13 | 0  | 2   | 0 |
| CONTIG-077394 | 75  | 7  | 21 | 0   | 0 |
| CONTIG-077395 | 88  | 4  | 2  | 2   | 0 |
| CONTIG-077396 | 194 | 74 | 3  | 13  | 0 |
| CONTIG-077397 | 454 | 10 | 9  | 165 | 0 |

|               |     |    |    |     |   |
|---------------|-----|----|----|-----|---|
| CONTIG-077398 | 184 | 7  | 6  | 43  | 2 |
| CONTIG-077399 | 94  | 20 | 24 | 41  | 0 |
| CONTIG-077400 | 136 | 5  | 13 | 16  | 0 |
| CONTIG-077401 | 78  | 6  | 4  | 11  | 0 |
| CONTIG-077402 | 325 | 36 | 23 | 86  | 0 |
| CONTIG-077403 | 231 | 12 | 11 | 65  | 4 |
| CONTIG-077404 | 161 | 19 | 6  | 2   | 0 |
| CONTIG-077405 | 111 | 9  | 17 | 37  | 0 |
| CONTIG-077406 | 324 | 8  | 6  | 78  | 2 |
| CONTIG-077407 | 88  | 9  | 9  | 7   | 4 |
| CONTIG-077408 | 155 | 10 | 12 | 32  | 0 |
| CONTIG-077409 | 310 | 14 | 5  | 204 | 0 |
| CONTIG-077411 | 110 | 11 | 0  | 14  | 7 |
| CONTIG-077413 | 83  | 6  | 2  | 4   | 0 |
| CONTIG-077414 | 158 | 6  | 6  | 32  | 0 |
| CONTIG-077416 | 257 | 7  | 2  | 27  | 0 |
| CONTIG-077417 | 227 | 12 | 15 | 97  | 2 |
| CONTIG-077418 | 82  | 6  | 0  | 13  | 0 |
| CONTIG-077422 | 66  | 7  | 3  | 12  | 0 |
| CONTIG-077423 | 139 | 10 | 3  | 80  | 0 |
| CONTIG-077424 | 75  | 24 | 11 | 107 | 0 |
| CONTIG-077425 | 59  | 6  | 4  | 11  | 0 |
| CONTIG-077426 | 79  | 5  | 0  | 9   | 0 |
| CONTIG-077427 | 85  | 3  | 0  | 6   | 0 |
| CONTIG-077428 | 203 | 8  | 7  | 44  | 0 |
| CONTIG-077429 | 99  | 9  | 12 | 22  | 0 |
| CONTIG-077430 | 111 | 9  | 13 | 8   | 0 |
| CONTIG-077431 | 101 | 6  | 2  | 14  | 0 |
| CONTIG-077434 | 99  | 14 | 14 | 44  | 0 |
| CONTIG-077435 | 93  | 4  | 7  | 12  | 0 |
| CONTIG-077436 | 114 | 6  | 16 | 4   | 0 |
| CONTIG-077437 | 98  | 11 | 18 | 33  | 0 |
| CONTIG-077439 | 222 | 12 | 5  | 55  | 0 |
| CONTIG-077441 | 77  | 5  | 3  | 10  | 0 |
| CONTIG-077442 | 96  | 11 | 2  | 4   | 0 |
| CONTIG-077444 | 217 | 7  | 2  | 33  | 0 |
| CONTIG-077445 | 107 | 4  | 10 | 10  | 0 |
| CONTIG-077446 | 198 | 12 | 2  | 112 | 0 |
| CONTIG-077447 | 72  | 6  | 2  | 10  | 0 |
| CONTIG-077448 | 197 | 9  | 2  | 65  | 0 |
| CONTIG-077450 | 61  | 4  | 0  | 5   | 0 |
| CONTIG-077451 | 79  | 4  | 0  | 2   | 0 |
| CONTIG-077452 | 175 | 9  | 2  | 15  | 0 |
| CONTIG-077453 | 72  | 3  | 0  | 10  | 0 |
| CONTIG-077454 | 232 | 10 | 5  | 74  | 5 |
| CONTIG-077455 | 99  | 6  | 12 | 8   | 0 |
| CONTIG-077456 | 93  | 7  | 2  | 16  | 0 |

|               |     |    |    |     |   |
|---------------|-----|----|----|-----|---|
| CONTIG-077457 | 309 | 13 | 16 | 37  | 0 |
| CONTIG-077458 | 69  | 6  | 6  | 15  | 0 |
| CONTIG-077459 | 114 | 7  | 6  | 13  | 0 |
| CONTIG-077460 | 161 | 8  | 7  | 19  | 2 |
| CONTIG-077461 | 266 | 7  | 13 | 47  | 0 |
| CONTIG-077462 | 58  | 34 | 10 | 64  | 0 |
| CONTIG-077463 | 71  | 8  | 2  | 9   | 0 |
| CONTIG-077464 | 96  | 5  | 4  | 8   | 0 |
| CONTIG-077465 | 123 | 3  | 8  | 6   | 0 |
| CONTIG-077466 | 101 | 13 | 7  | 27  | 0 |
| CONTIG-077467 | 87  | 6  | 4  | 2   | 0 |
| CONTIG-077468 | 62  | 5  | 16 | 0   | 0 |
| CONTIG-077469 | 64  | 6  | 32 | 0   | 0 |
| CONTIG-077470 | 129 | 9  | 3  | 37  | 0 |
| CONTIG-077471 | 132 | 2  | 0  | 6   | 0 |
| CONTIG-077472 | 360 | 18 | 8  | 283 | 4 |
| CONTIG-077473 | 64  | 2  | 3  | 2   | 0 |
| CONTIG-077474 | 167 | 7  | 2  | 35  | 3 |
| CONTIG-077475 | 112 | 14 | 15 | 60  | 0 |
| CONTIG-077476 | 61  | 2  | 3  | 4   | 0 |
| CONTIG-077477 | 116 | 4  | 10 | 5   | 0 |
| CONTIG-077478 | 124 | 12 | 0  | 39  | 0 |
| CONTIG-077479 | 144 | 7  | 2  | 15  | 2 |
| CONTIG-077480 | 181 | 5  | 0  | 18  | 0 |
| CONTIG-077481 | 85  | 7  | 15 | 13  | 0 |
| CONTIG-077482 | 85  | 5  | 8  | 9   | 0 |
| CONTIG-077483 | 83  | 5  | 8  | 6   | 0 |
| CONTIG-077485 | 73  | 8  | 2  | 19  | 0 |
| CONTIG-077486 | 99  | 4  | 9  | 2   | 0 |
| CONTIG-077487 | 110 | 6  | 7  | 13  | 0 |
| CONTIG-077488 | 132 | 3  | 11 | 2   | 0 |
| CONTIG-077489 | 105 | 5  | 3  | 7   | 0 |
| CONTIG-077490 | 64  | 4  | 3  | 2   | 0 |
| CONTIG-077492 | 74  | 9  | 7  | 12  | 0 |
| CONTIG-077493 | 199 | 10 | 3  | 22  | 0 |
| CONTIG-077494 | 80  | 3  | 6  | 5   | 0 |
| CONTIG-077495 | 512 | 15 | 19 | 18  | 0 |
| CONTIG-077496 | 117 | 18 | 16 | 92  | 0 |
| CONTIG-077497 | 77  | 5  | 4  | 3   | 0 |
| CONTIG-077498 | 118 | 4  | 2  | 12  | 0 |
| CONTIG-077499 | 102 | 6  | 8  | 7   | 0 |
| CONTIG-077500 | 81  | 3  | 2  | 2   | 0 |
| CONTIG-077501 | 170 | 10 | 2  | 2   | 0 |
| CONTIG-077502 | 59  | 19 | 3  | 45  | 0 |
| CONTIG-077503 | 349 | 8  | 24 | 98  | 0 |
| CONTIG-077504 | 74  | 4  | 0  | 2   | 0 |
| CONTIG-077506 | 127 | 6  | 3  | 21  | 0 |

|               |     |    |    |     |     |
|---------------|-----|----|----|-----|-----|
| CONTIG-077507 | 218 | 8  | 8  | 63  | 0   |
| CONTIG-077508 | 139 | 11 | 2  | 50  | 0   |
| CONTIG-077512 | 163 | 10 | 3  | 12  | 0   |
| CONTIG-077513 | 63  | 10 | 0  | 3   | 0   |
| CONTIG-077514 | 259 | 9  | 13 | 76  | 2   |
| CONTIG-077515 | 79  | 5  | 5  | 13  | 0   |
| CONTIG-077516 | 90  | 7  | 19 | 12  | 0   |
| CONTIG-077517 | 173 | 5  | 2  | 24  | 2   |
| CONTIG-077518 | 124 | 6  | 0  | 7   | 0   |
| CONTIG-077519 | 69  | 4  | 0  | 7   | 0   |
| CONTIG-077520 | 134 | 7  | 4  | 0   | 0   |
| CONTIG-077521 | 86  | 5  | 24 | 4   | 0   |
| CONTIG-077522 | 100 | 32 | 25 | 133 | 0   |
| CONTIG-077524 | 534 | 26 | 0  | 0   | 206 |
| CONTIG-077525 | 574 | 18 | 17 | 100 | 0   |
| CONTIG-077526 | 84  | 8  | 3  | 15  | 0   |
| CONTIG-077527 | 687 | 10 | 14 | 241 | 0   |
| CONTIG-077528 | 281 | 15 | 22 | 109 | 0   |
| CONTIG-077529 | 75  | 2  | 2  | 3   | 0   |
| CONTIG-077530 | 72  | 8  | 2  | 15  | 0   |
| CONTIG-077531 | 131 | 9  | 5  | 18  | 0   |
| CONTIG-077535 | 119 | 7  | 12 | 10  | 0   |
| CONTIG-077537 | 515 | 10 | 10 | 153 | 0   |
| CONTIG-077538 | 67  | 3  | 3  | 4   | 0   |
| CONTIG-077539 | 113 | 10 | 18 | 0   | 0   |
| CONTIG-077540 | 151 | 5  | 4  | 11  | 2   |
| CONTIG-077541 | 115 | 6  | 8  | 2   | 0   |
| CONTIG-077542 | 106 | 10 | 6  | 30  | 0   |
| CONTIG-077545 | 161 | 4  | 8  | 6   | 0   |
| CONTIG-077546 | 91  | 3  | 4  | 4   | 0   |
| CONTIG-077547 | 137 | 7  | 9  | 25  | 0   |
| CONTIG-077548 | 141 | 8  | 0  | 41  | 0   |
| CONTIG-077549 | 99  | 5  | 3  | 16  | 0   |
| CONTIG-077550 | 161 | 8  | 6  | 33  | 0   |
| CONTIG-077551 | 89  | 9  | 14 | 20  | 0   |
| CONTIG-077552 | 64  | 5  | 5  | 2   | 0   |
| CONTIG-077553 | 138 | 8  | 0  | 21  | 2   |
| CONTIG-077554 | 61  | 3  | 0  | 3   | 0   |
| CONTIG-077555 | 146 | 7  | 10 | 29  | 0   |
| CONTIG-077556 | 122 | 4  | 5  | 2   | 0   |
| CONTIG-077557 | 226 | 8  | 4  | 38  | 0   |
| CONTIG-077558 | 58  | 6  | 0  | 16  | 0   |
| CONTIG-077559 | 61  | 6  | 3  | 4   | 0   |
| CONTIG-077561 | 201 | 10 | 14 | 54  | 0   |
| CONTIG-077563 | 241 | 32 | 5  | 449 | 0   |
| CONTIG-077564 | 107 | 3  | 3  | 2   | 0   |
| CONTIG-077565 | 78  | 7  | 3  | 17  | 0   |

|               |      |    |    |      |    |
|---------------|------|----|----|------|----|
| CONTIG-077566 | 129  | 7  | 4  | 40   | 0  |
| CONTIG-077567 | 142  | 4  | 6  | 19   | 2  |
| CONTIG-077568 | 60   | 4  | 2  | 2    | 0  |
| CONTIG-077570 | 109  | 9  | 11 | 11   | 0  |
| CONTIG-077571 | 60   | 8  | 5  | 10   | 0  |
| CONTIG-077575 | 179  | 7  | 2  | 24   | 0  |
| CONTIG-077576 | 86   | 8  | 6  | 20   | 0  |
| CONTIG-077577 | 95   | 3  | 0  | 0    | 0  |
| CONTIG-077578 | 91   | 4  | 12 | 2    | 0  |
| CONTIG-077579 | 80   | 4  | 2  | 10   | 0  |
| CONTIG-077580 | 103  | 4  | 0  | 8    | 0  |
| CONTIG-077581 | 152  | 6  | 0  | 24   | 0  |
| CONTIG-077582 | 68   | 3  | 3  | 5    | 0  |
| CONTIG-077583 | 93   | 2  | 0  | 2    | 0  |
| CONTIG-077585 | 88   | 4  | 5  | 5    | 0  |
| CONTIG-077587 | 65   | 26 | 6  | 83   | 0  |
| CONTIG-077588 | 232  | 6  | 0  | 0    | 0  |
| CONTIG-077590 | 162  | 13 | 6  | 0    | 0  |
| CONTIG-077591 | 93   | 5  | 3  | 9    | 0  |
| CONTIG-077592 | 1201 | 24 | 14 | 1537 | 0  |
| CONTIG-077593 | 70   | 15 | 0  | 7    | 0  |
| CONTIG-077594 | 67   | 4  | 7  | 8    | 0  |
| CONTIG-077595 | 92   | 13 | 25 | 41   | 0  |
| CONTIG-077596 | 66   | 4  | 4  | 4    | 0  |
| CONTIG-077597 | 144  | 6  | 4  | 25   | 0  |
| CONTIG-077598 | 479  | 10 | 6  | 174  | 0  |
| CONTIG-077599 | 58   | 2  | 3  | 2    | 0  |
| CONTIG-077600 | 196  | 12 | 7  | 63   | 4  |
| CONTIG-077602 | 94   | 15 | 0  | 21   | 0  |
| CONTIG-077605 | 71   | 12 | 5  | 31   | 0  |
| CONTIG-077606 | 104  | 8  | 0  | 0    | 17 |
| CONTIG-077607 | 59   | 4  | 0  | 9    | 0  |
| CONTIG-077608 | 60   | 2  | 2  | 0    | 2  |
| CONTIG-077609 | 77   | 6  | 2  | 15   | 0  |
| CONTIG-077610 | 136  | 8  | 2  | 15   | 0  |
| CONTIG-077611 | 321  | 29 | 0  | 0    | 0  |
| CONTIG-077612 | 137  | 15 | 0  | 62   | 4  |
| CONTIG-077613 | 148  | 8  | 3  | 23   | 0  |
| CONTIG-077614 | 266  | 12 | 13 | 96   | 2  |
| CONTIG-077615 | 158  | 10 | 3  | 0    | 0  |
| CONTIG-077616 | 77   | 8  | 6  | 6    | 2  |
| CONTIG-077617 | 60   | 5  | 4  | 7    | 0  |
| CONTIG-077618 | 186  | 13 | 2  | 93   | 0  |
| CONTIG-077619 | 159  | 8  | 2  | 33   | 0  |
| CONTIG-077620 | 138  | 3  | 0  | 0    | 0  |
| CONTIG-077621 | 250  | 11 | 10 | 93   | 2  |
| CONTIG-077622 | 60   | 6  | 8  | 5    | 0  |

|               |     |     |    |     |    |
|---------------|-----|-----|----|-----|----|
| CONTIG-077624 | 90  | 4   | 2  | 15  | 0  |
| CONTIG-077625 | 168 | 13  | 6  | 23  | 0  |
| CONTIG-077626 | 114 | 5   | 12 | 15  | 0  |
| CONTIG-077628 | 95  | 9   | 0  | 40  | 0  |
| CONTIG-077629 | 82  | 4   | 0  | 6   | 0  |
| CONTIG-077630 | 128 | 3   | 3  | 0   | 0  |
| CONTIG-077631 | 77  | 4   | 3  | 5   | 0  |
| CONTIG-077632 | 82  | 8   | 6  | 17  | 0  |
| CONTIG-077633 | 100 | 9   | 5  | 26  | 0  |
| CONTIG-077634 | 111 | 5   | 7  | 13  | 2  |
| CONTIG-077635 | 106 | 5   | 0  | 16  | 0  |
| CONTIG-077636 | 145 | 18  | 10 | 38  | 0  |
| CONTIG-077637 | 129 | 14  | 20 | 16  | 0  |
| CONTIG-077639 | 61  | 9   | 2  | 14  | 0  |
| CONTIG-077640 | 102 | 7   | 7  | 40  | 0  |
| CONTIG-077641 | 110 | 5   | 4  | 12  | 0  |
| CONTIG-077642 | 311 | 7   | 14 | 18  | 0  |
| CONTIG-077643 | 109 | 4   | 3  | 2   | 0  |
| CONTIG-077644 | 85  | 5   | 0  | 3   | 0  |
| CONTIG-077645 | 230 | 231 | 4  | 17  | 0  |
| CONTIG-077646 | 63  | 8   | 3  | 0   | 0  |
| CONTIG-077647 | 104 | 9   | 2  | 0   | 5  |
| CONTIG-077648 | 111 | 9   | 2  | 51  | 0  |
| CONTIG-077649 | 66  | 11  | 12 | 17  | 0  |
| CONTIG-077650 | 138 | 9   | 2  | 52  | 0  |
| CONTIG-077651 | 147 | 5   | 4  | 20  | 0  |
| CONTIG-077652 | 251 | 5   | 2  | 32  | 2  |
| CONTIG-077653 | 143 | 6   | 0  | 26  | 0  |
| CONTIG-077655 | 75  | 3   | 0  | 7   | 0  |
| CONTIG-077656 | 104 | 9   | 8  | 7   | 0  |
| CONTIG-077657 | 253 | 9   | 9  | 85  | 0  |
| CONTIG-077658 | 90  | 6   | 2  | 4   | 0  |
| CONTIG-077659 | 98  | 6   | 0  | 15  | 0  |
| CONTIG-077661 | 85  | 12  | 9  | 0   | 0  |
| CONTIG-077662 | 61  | 12  | 2  | 20  | 0  |
| CONTIG-077663 | 72  | 3   | 3  | 3   | 0  |
| CONTIG-077666 | 80  | 17  | 15 | 60  | 0  |
| CONTIG-077668 | 88  | 106 | 3  | 273 | 2  |
| CONTIG-077669 | 39  | 504 | 4  | 337 | 46 |
| CONTIG-077670 | 74  | 7   | 2  | 12  | 0  |
| CONTIG-077672 | 161 | 4   | 0  | 11  | 0  |
| CONTIG-077673 | 136 | 7   | 7  | 25  | 0  |
| CONTIG-077674 | 65  | 7   | 10 | 13  | 0  |
| CONTIG-077675 | 415 | 17  | 14 | 200 | 2  |
| CONTIG-077677 | 451 | 20  | 5  | 83  | 0  |
| CONTIG-077678 | 123 | 7   | 4  | 0   | 2  |
| CONTIG-077679 | 100 | 10  | 9  | 27  | 0  |

|               |     |    |    |     |   |
|---------------|-----|----|----|-----|---|
| CONTIG-077680 | 209 | 9  | 22 | 21  | 0 |
| CONTIG-077681 | 72  | 3  | 4  | 0   | 0 |
| CONTIG-077682 | 206 | 8  | 7  | 58  | 0 |
| CONTIG-077683 | 234 | 17 | 11 | 139 | 2 |
| CONTIG-077684 | 90  | 7  | 2  | 17  | 0 |
| CONTIG-077686 | 312 | 17 | 2  | 246 | 0 |
| CONTIG-077687 | 116 | 6  | 6  | 15  | 2 |
| CONTIG-077688 | 229 | 5  | 4  | 35  | 0 |
| CONTIG-077689 | 121 | 9  | 9  | 47  | 0 |
| CONTIG-077690 | 77  | 4  | 2  | 7   | 0 |
| CONTIG-077691 | 114 | 3  | 2  | 6   | 0 |
| CONTIG-077692 | 75  | 10 | 0  | 21  | 0 |
| CONTIG-077693 | 129 | 8  | 2  | 0   | 0 |
| CONTIG-077694 | 169 | 3  | 2  | 16  | 0 |
| CONTIG-077695 | 67  | 4  | 7  | 0   | 0 |
| CONTIG-077696 | 85  | 8  | 0  | 25  | 0 |
| CONTIG-077697 | 128 | 4  | 0  | 10  | 0 |
| CONTIG-077700 | 104 | 6  | 10 | 19  | 0 |
| CONTIG-077701 | 84  | 8  | 4  | 32  | 0 |
| CONTIG-077702 | 92  | 5  | 11 | 9   | 0 |
| CONTIG-077703 | 65  | 5  | 3  | 4   | 0 |
| CONTIG-077704 | 69  | 5  | 0  | 4   | 0 |
| CONTIG-077705 | 114 | 7  | 6  | 19  | 0 |
| CONTIG-077707 | 220 | 7  | 10 | 36  | 0 |
| CONTIG-077710 | 208 | 6  | 8  | 41  | 0 |
| CONTIG-077711 | 160 | 4  | 7  | 18  | 0 |
| CONTIG-077712 | 205 | 11 | 0  | 114 | 0 |
| CONTIG-077713 | 73  | 4  | 12 | 3   | 0 |
| CONTIG-077714 | 71  | 4  | 7  | 0   | 2 |
| CONTIG-077715 | 76  | 5  | 0  | 12  | 0 |
| CONTIG-077716 | 165 | 16 | 20 | 77  | 2 |
| CONTIG-077717 | 306 | 12 | 7  | 164 | 0 |
| CONTIG-077718 | 70  | 11 | 13 | 27  | 0 |
| CONTIG-077719 | 120 | 9  | 8  | 40  | 0 |
| CONTIG-077720 | 150 | 7  | 2  | 37  | 0 |
| CONTIG-077721 | 231 | 4  | 5  | 29  | 0 |
| CONTIG-077723 | 209 | 6  | 8  | 42  | 0 |
| CONTIG-077724 | 76  | 5  | 3  | 17  | 0 |
| CONTIG-077725 | 275 | 10 | 2  | 101 | 0 |
| CONTIG-077731 | 96  | 3  | 0  | 0   | 0 |
| CONTIG-077732 | 102 | 3  | 4  | 8   | 0 |
| CONTIG-077733 | 73  | 9  | 5  | 6   | 0 |
| CONTIG-077734 | 257 | 10 | 0  | 112 | 0 |
| CONTIG-077735 | 143 | 15 | 9  | 40  | 0 |
| CONTIG-077736 | 64  | 8  | 4  | 13  | 0 |
| CONTIG-077737 | 72  | 6  | 0  | 0   | 0 |
| CONTIG-077738 | 77  | 5  | 10 | 9   | 0 |

|               |     |    |    |     |   |
|---------------|-----|----|----|-----|---|
| CONTIG-077739 | 109 | 4  | 4  | 16  | 0 |
| CONTIG-077740 | 374 | 17 | 32 | 202 | 0 |
| CONTIG-077741 | 68  | 6  | 3  | 4   | 0 |
| CONTIG-077742 | 96  | 16 | 5  | 74  | 0 |
| CONTIG-077743 | 64  | 5  | 13 | 4   | 0 |
| CONTIG-077744 | 649 | 11 | 7  | 167 | 0 |
| CONTIG-077745 | 58  | 9  | 12 | 2   | 0 |
| CONTIG-077746 | 92  | 4  | 4  | 3   | 0 |
| CONTIG-077747 | 67  | 5  | 0  | 8   | 0 |
| CONTIG-077748 | 64  | 6  | 10 | 9   | 0 |
| CONTIG-077749 | 178 | 5  | 5  | 26  | 0 |
| CONTIG-077750 | 76  | 5  | 10 | 2   | 2 |
| CONTIG-077751 | 161 | 16 | 10 | 136 | 0 |
| CONTIG-077752 | 174 | 10 | 13 | 34  | 0 |
| CONTIG-077753 | 122 | 6  | 5  | 30  | 0 |
| CONTIG-077754 | 306 | 8  | 7  | 85  | 0 |
| CONTIG-077755 | 86  | 16 | 6  | 67  | 0 |
| CONTIG-077756 | 207 | 12 | 0  | 67  | 0 |
| CONTIG-077758 | 270 | 8  | 4  | 44  | 0 |
| CONTIG-077759 | 194 | 6  | 11 | 38  | 0 |
| CONTIG-077761 | 109 | 6  | 10 | 17  | 0 |
| CONTIG-077762 | 121 | 5  | 4  | 25  | 0 |
| CONTIG-077763 | 155 | 5  | 2  | 18  | 0 |
| CONTIG-077764 | 60  | 6  | 7  | 6   | 0 |
| CONTIG-077765 | 158 | 8  | 10 | 27  | 0 |
| CONTIG-077766 | 128 | 7  | 6  | 21  | 0 |
| CONTIG-077770 | 36  | 16 | 3  | 4   | 0 |
| CONTIG-077771 | 115 | 58 | 11 | 254 | 4 |
| CONTIG-077772 | 122 | 18 | 13 | 75  | 0 |
| CONTIG-077773 | 106 | 7  | 0  | 29  | 2 |
| CONTIG-077774 | 156 | 12 | 9  | 49  | 0 |
| CONTIG-077777 | 81  | 11 | 11 | 16  | 0 |
| CONTIG-077778 | 239 | 8  | 4  | 79  | 0 |
| CONTIG-077779 | 78  | 4  | 4  | 10  | 0 |
| CONTIG-077780 | 181 | 5  | 5  | 17  | 0 |
| CONTIG-077781 | 276 | 14 | 22 | 119 | 0 |
| CONTIG-077782 | 172 | 10 | 4  | 61  | 3 |
| CONTIG-077783 | 61  | 3  | 0  | 0   | 0 |
| CONTIG-077788 | 159 | 10 | 4  | 54  | 0 |
| CONTIG-077789 | 98  | 8  | 5  | 12  | 0 |
| CONTIG-077790 | 87  | 6  | 6  | 6   | 2 |
| CONTIG-077791 | 63  | 6  | 7  | 4   | 0 |
| CONTIG-077792 | 254 | 10 | 9  | 82  | 0 |
| CONTIG-077795 | 62  | 5  | 3  | 7   | 0 |
| CONTIG-077796 | 119 | 4  | 0  | 9   | 0 |
| CONTIG-077797 | 333 | 7  | 18 | 101 | 0 |
| CONTIG-077798 | 156 | 8  | 0  | 53  | 0 |



|               |     |     |    |     |     |
|---------------|-----|-----|----|-----|-----|
| CONTIG-077799 | 149 | 9   | 4  | 37  | 0   |
| CONTIG-077803 | 169 | 8   | 12 | 56  | 0   |
| CONTIG-077804 | 141 | 6   | 3  | 2   | 0   |
| CONTIG-077805 | 262 | 12  | 8  | 104 | 0   |
| CONTIG-077806 | 75  | 10  | 19 | 6   | 0   |
| CONTIG-077810 | 71  | 8   | 8  | 17  | 0   |
| CONTIG-077811 | 113 | 14  | 9  | 56  | 0   |
| CONTIG-077812 | 103 | 79  | 17 | 106 | 0   |
| CONTIG-077813 | 181 | 8   | 8  | 24  | 0   |
| CONTIG-077814 | 150 | 5   | 0  | 9   | 0   |
| CONTIG-077815 | 496 | 8   | 0  | 141 | 0   |
| CONTIG-077817 | 81  | 15  | 18 | 7   | 0   |
| CONTIG-077818 | 159 | 7   | 5  | 32  | 0   |
| CONTIG-077820 | 63  | 3   | 4  | 4   | 0   |
| CONTIG-077823 | 63  | 5   | 2  | 11  | 0   |
| CONTIG-077824 | 71  | 4   | 2  | 4   | 0   |
| CONTIG-077826 | 91  | 7   | 2  | 23  | 0   |
| CONTIG-077827 | 123 | 5   | 4  | 25  | 0   |
| CONTIG-077828 | 197 | 8   | 11 | 36  | 0   |
| CONTIG-077829 | 89  | 8   | 2  | 17  | 0   |
| CONTIG-077830 | 110 | 7   | 2  | 18  | 0   |
| CONTIG-077832 | 94  | 8   | 19 | 12  | 0   |
| CONTIG-077833 | 63  | 7   | 0  | 10  | 0   |
| CONTIG-077834 | 75  | 4   | 2  | 8   | 0   |
| CONTIG-077835 | 108 | 8   | 6  | 0   | 0   |
| CONTIG-077836 | 325 | 9   | 9  | 138 | 0   |
| CONTIG-077837 | 174 | 7   | 5  | 43  | 0   |
| CONTIG-077838 | 60  | 240 | 6  | 188 | 0   |
| CONTIG-077839 | 141 | 7   | 3  | 20  | 0   |
| CONTIG-077840 | 120 | 4   | 6  | 13  | 0   |
| CONTIG-077841 | 181 | 6   | 2  | 21  | 0   |
| CONTIG-077842 | 83  | 8   | 2  | 31  | 0   |
| CONTIG-077843 | 144 | 7   | 8  | 37  | 0   |
| CONTIG-077844 | 118 | 5   | 0  | 22  | 0   |
| CONTIG-077845 | 68  | 8   | 7  | 0   | 0   |
| CONTIG-077846 | 181 | 8   | 9  | 37  | 0   |
| CONTIG-077847 | 75  | 6   | 2  | 9   | 0   |
| CONTIG-077849 | 65  | 7   | 0  | 21  | 0   |
| CONTIG-077850 | 71  | 2   | 3  | 7   | 0   |
| CONTIG-077851 | 76  | 8   | 10 | 8   | 0   |
| CONTIG-077852 | 117 | 5   | 2  | 9   | 0   |
| CONTIG-077853 | 949 | 45  | 2  | 0   | 373 |
| CONTIG-077854 | 194 | 5   | 3  | 12  | 0   |
| CONTIG-077855 | 185 | 6   | 8  | 35  | 0   |
| CONTIG-077856 | 125 | 6   | 0  | 13  | 0   |
| CONTIG-077857 | 234 | 11  | 10 | 82  | 0   |
| CONTIG-077858 | 99  | 6   | 3  | 14  | 0   |

|               |     |     |    |     |    |
|---------------|-----|-----|----|-----|----|
| CONTIG-077859 | 70  | 3   | 2  | 2   | 0  |
| CONTIG-077861 | 748 | 11  | 20 | 201 | 16 |
| CONTIG-077862 | 97  | 4   | 2  | 14  | 0  |
| CONTIG-077863 | 120 | 6   | 10 | 13  | 0  |
| CONTIG-077864 | 318 | 6   | 2  | 48  | 0  |
| CONTIG-077865 | 60  | 6   | 2  | 2   | 0  |
| CONTIG-077866 | 101 | 12  | 0  | 47  | 0  |
| CONTIG-077868 | 124 | 40  | 10 | 233 | 0  |
| CONTIG-077870 | 86  | 4   | 2  | 4   | 0  |
| CONTIG-077871 | 63  | 12  | 9  | 14  | 0  |
| CONTIG-077872 | 136 | 7   | 0  | 37  | 0  |
| CONTIG-077873 | 171 | 8   | 6  | 46  | 0  |
| CONTIG-077874 | 65  | 3   | 2  | 0   | 0  |
| CONTIG-077875 | 601 | 11  | 19 | 239 | 4  |
| CONTIG-077876 | 88  | 8   | 5  | 22  | 0  |
| CONTIG-077877 | 77  | 7   | 4  | 6   | 0  |
| CONTIG-077878 | 89  | 11  | 5  | 48  | 0  |
| CONTIG-077879 | 106 | 8   | 6  | 24  | 0  |
| CONTIG-077880 | 183 | 15  | 18 | 129 | 0  |
| CONTIG-077881 | 127 | 6   | 3  | 12  | 0  |
| CONTIG-077882 | 128 | 6   | 7  | 25  | 0  |
| CONTIG-077883 | 93  | 5   | 3  | 8   | 0  |
| CONTIG-077884 | 75  | 6   | 2  | 17  | 0  |
| CONTIG-077885 | 138 | 7   | 10 | 37  | 0  |
| CONTIG-077886 | 89  | 15  | 0  | 0   | 19 |
| CONTIG-077887 | 60  | 126 | 5  | 377 | 0  |
| CONTIG-077888 | 262 | 6   | 4  | 42  | 0  |
| CONTIG-077897 | 72  | 3   | 5  | 4   | 2  |
| CONTIG-077898 | 75  | 7   | 0  | 9   | 0  |
| CONTIG-077899 | 157 | 5   | 5  | 14  | 0  |
| CONTIG-077900 | 67  | 17  | 11 | 26  | 0  |
| CONTIG-077901 | 234 | 10  | 30 | 49  | 0  |
| CONTIG-077902 | 367 | 11  | 18 | 65  | 2  |
| CONTIG-077903 | 78  | 6   | 0  | 13  | 0  |
| CONTIG-077904 | 96  | 4   | 2  | 12  | 0  |
| CONTIG-077905 | 126 | 10  | 4  | 44  | 0  |
| CONTIG-077906 | 125 | 8   | 3  | 35  | 0  |
| CONTIG-077909 | 426 | 7   | 12 | 87  | 0  |
| CONTIG-077910 | 125 | 12  | 0  | 53  | 6  |
| CONTIG-077911 | 82  | 9   | 6  | 7   | 0  |
| CONTIG-077912 | 156 | 4   | 4  | 13  | 0  |
| CONTIG-077913 | 74  | 3   | 12 | 0   | 0  |
| CONTIG-077914 | 110 | 4   | 2  | 6   | 0  |
| CONTIG-077915 | 103 | 21  | 12 | 32  | 0  |
| CONTIG-077916 | 157 | 6   | 6  | 26  | 0  |
| CONTIG-077917 | 71  | 5   | 2  | 2   | 0  |
| CONTIG-077918 | 186 | 15  | 7  | 136 | 0  |

|               |     |     |    |     |     |
|---------------|-----|-----|----|-----|-----|
| CONTIG-077919 | 248 | 8   | 4  | 40  | 0   |
| CONTIG-077921 | 93  | 10  | 0  | 32  | 0   |
| CONTIG-077922 | 123 | 9   | 7  | 34  | 0   |
| CONTIG-077923 | 647 | 84  | 0  | 0   | 917 |
| CONTIG-077924 | 128 | 13  | 4  | 33  | 0   |
| CONTIG-077925 | 58  | 4   | 0  | 6   | 0   |
| CONTIG-077926 | 153 | 5   | 2  | 16  | 0   |
| CONTIG-077927 | 73  | 11  | 12 | 34  | 0   |
| CONTIG-077928 | 178 | 14  | 18 | 112 | 0   |
| CONTIG-077930 | 63  | 4   | 3  | 0   | 0   |
| CONTIG-077931 | 190 | 6   | 0  | 14  | 0   |
| CONTIG-077932 | 155 | 6   | 7  | 19  | 0   |
| CONTIG-077933 | 91  | 5   | 8  | 4   | 0   |
| CONTIG-077934 | 63  | 8   | 0  | 21  | 0   |
| CONTIG-077935 | 132 | 8   | 0  | 26  | 0   |
| CONTIG-077936 | 147 | 5   | 15 | 8   | 0   |
| CONTIG-077937 | 62  | 6   | 8  | 7   | 0   |
| CONTIG-077938 | 193 | 14  | 5  | 0   | 5   |
| CONTIG-077940 | 180 | 10  | 12 | 0   | 2   |
| CONTIG-077941 | 109 | 12  | 0  | 52  | 0   |
| CONTIG-077942 | 146 | 4   | 9  | 4   | 0   |
| CONTIG-077943 | 74  | 3   | 6  | 2   | 0   |
| CONTIG-077945 | 248 | 7   | 2  | 42  | 0   |
| CONTIG-077946 | 152 | 287 | 0  | 0   | 328 |
| CONTIG-077947 | 88  | 4   | 0  | 9   | 0   |
| CONTIG-077948 | 85  | 4   | 0  | 7   | 0   |
| CONTIG-077953 | 68  | 3   | 7  | 2   | 0   |
| CONTIG-077954 | 89  | 6   | 0  | 0   | 0   |
| CONTIG-077955 | 82  | 3   | 5  | 2   | 0   |
| CONTIG-077956 | 79  | 4   | 0  | 5   | 0   |
| CONTIG-077957 | 91  | 4   | 2  | 3   | 0   |
| CONTIG-077958 | 96  | 4   | 2  | 10  | 0   |
| CONTIG-077959 | 314 | 7   | 8  | 43  | 0   |
| CONTIG-077960 | 120 | 4   | 25 | 0   | 2   |
| CONTIG-077961 | 238 | 9   | 7  | 0   | 2   |
| CONTIG-077962 | 183 | 5   | 4  | 19  | 0   |
| CONTIG-077964 | 79  | 2   | 3  | 2   | 0   |
| CONTIG-077965 | 366 | 7   | 15 | 0   | 11  |
| CONTIG-077966 | 162 | 5   | 10 | 17  | 0   |
| CONTIG-077967 | 90  | 9   | 8  | 26  | 0   |
| CONTIG-077968 | 70  | 10  | 6  | 20  | 0   |
| CONTIG-077969 | 108 | 3   | 0  | 2   | 0   |
| CONTIG-077970 | 130 | 6   | 3  | 20  | 0   |
| CONTIG-077971 | 462 | 16  | 0  | 0   | 31  |
| CONTIG-077972 | 95  | 8   | 8  | 9   | 0   |
| CONTIG-077973 | 112 | 17  | 6  | 86  | 2   |
| CONTIG-077974 | 169 | 8   | 0  | 29  | 0   |

|               |     |    |    |     |     |
|---------------|-----|----|----|-----|-----|
| CONTIG-077975 | 80  | 2  | 2  | 0   | 0   |
| CONTIG-077976 | 110 | 4  | 2  | 11  | 0   |
| CONTIG-077977 | 60  | 8  | 12 | 5   | 0   |
| CONTIG-077978 | 77  | 6  | 2  | 18  | 0   |
| CONTIG-077979 | 187 | 5  | 3  | 33  | 0   |
| CONTIG-077980 | 62  | 3  | 10 | 0   | 0   |
| CONTIG-077981 | 117 | 3  | 0  | 8   | 0   |
| CONTIG-077982 | 128 | 10 | 7  | 16  | 0   |
| CONTIG-077983 | 115 | 10 | 54 | 7   | 2   |
| CONTIG-077984 | 91  | 3  | 0  | 3   | 0   |
| CONTIG-077986 | 138 | 7  | 6  | 23  | 4   |
| CONTIG-077988 | 138 | 10 | 9  | 59  | 2   |
| CONTIG-077989 | 85  | 13 | 18 | 57  | 0   |
| CONTIG-077990 | 122 | 6  | 4  | 10  | 0   |
| CONTIG-077992 | 204 | 7  | 10 | 56  | 0   |
| CONTIG-077993 | 153 | 8  | 4  | 34  | 0   |
| CONTIG-077994 | 322 | 12 | 22 | 89  | 2   |
| CONTIG-077995 | 82  | 10 | 8  | 29  | 0   |
| CONTIG-077996 | 220 | 7  | 8  | 25  | 4   |
| CONTIG-077997 | 576 | 12 | 13 | 261 | 4   |
| CONTIG-077998 | 68  | 7  | 0  | 23  | 0   |
| CONTIG-077999 | 105 | 8  | 0  | 18  | 0   |
| CONTIG-078000 | 207 | 13 | 9  | 55  | 0   |
| CONTIG-078001 | 238 | 9  | 2  | 71  | 2   |
| CONTIG-078002 | 97  | 3  | 10 | 2   | 0   |
| CONTIG-078003 | 147 | 3  | 0  | 9   | 0   |
| CONTIG-078004 | 84  | 11 | 14 | 27  | 0   |
| CONTIG-078005 | 63  | 6  | 0  | 4   | 0   |
| CONTIG-078006 | 82  | 4  | 5  | 6   | 0   |
| CONTIG-078007 | 119 | 11 | 3  | 74  | 0   |
| CONTIG-078008 | 192 | 9  | 2  | 34  | 2   |
| CONTIG-078009 | 106 | 4  | 0  | 0   | 0   |
| CONTIG-078010 | 75  | 3  | 0  | 8   | 0   |
| CONTIG-078011 | 80  | 16 | 5  | 46  | 0   |
| CONTIG-078012 | 189 | 70 | 4  | 0   | 136 |
| CONTIG-078013 | 144 | 6  | 4  | 2   | 0   |
| CONTIG-078014 | 117 | 5  | 8  | 12  | 0   |
| CONTIG-078017 | 104 | 6  | 2  | 34  | 0   |
| CONTIG-078018 | 201 | 7  | 5  | 21  | 0   |
| CONTIG-078021 | 615 | 31 | 0  | 0   | 9   |
| CONTIG-078022 | 308 | 12 | 12 | 99  | 0   |
| CONTIG-078023 | 60  | 4  | 4  | 3   | 0   |
| CONTIG-078024 | 206 | 8  | 14 | 61  | 0   |
| CONTIG-078025 | 342 | 8  | 6  | 57  | 0   |
| CONTIG-078029 | 134 | 9  | 2  | 51  | 0   |
| CONTIG-078030 | 159 | 7  | 0  | 37  | 0   |
| CONTIG-078032 | 68  | 5  | 4  | 17  | 0   |

|               |     |    |    |     |    |
|---------------|-----|----|----|-----|----|
| CONTIG-078033 | 69  | 5  | 2  | 5   | 0  |
| CONTIG-078034 | 86  | 3  | 3  | 4   | 0  |
| CONTIG-078035 | 76  | 5  | 4  | 9   | 0  |
| CONTIG-078036 | 241 | 43 | 0  | 0   | 81 |
| CONTIG-078037 | 103 | 5  | 13 | 4   | 0  |
| CONTIG-078038 | 175 | 7  | 6  | 30  | 0  |
| CONTIG-078039 | 70  | 5  | 7  | 2   | 0  |
| CONTIG-078040 | 76  | 14 | 2  | 45  | 0  |
| CONTIG-078041 | 145 | 5  | 8  | 25  | 0  |
| CONTIG-078042 | 455 | 13 | 15 | 217 | 4  |
| CONTIG-078043 | 240 | 16 | 27 | 135 | 2  |
| CONTIG-078044 | 120 | 7  | 8  | 20  | 0  |
| CONTIG-078048 | 93  | 9  | 0  | 9   | 0  |
| CONTIG-078049 | 74  | 6  | 7  | 6   | 0  |
| CONTIG-078050 | 121 | 4  | 3  | 10  | 0  |
| CONTIG-078051 | 224 | 7  | 0  | 29  | 6  |
| CONTIG-078052 | 471 | 14 | 21 | 115 | 0  |
| CONTIG-078053 | 71  | 12 | 9  | 22  | 0  |
| CONTIG-078054 | 407 | 11 | 16 | 125 | 0  |
| CONTIG-078055 | 269 | 16 | 26 | 191 | 0  |
| CONTIG-078056 | 84  | 12 | 3  | 34  | 0  |
| CONTIG-078058 | 88  | 3  | 7  | 11  | 0  |
| CONTIG-078059 | 95  | 3  | 2  | 12  | 0  |
| CONTIG-078060 | 127 | 3  | 4  | 10  | 0  |
| CONTIG-078061 | 102 | 4  | 4  | 2   | 0  |
| CONTIG-078062 | 115 | 4  | 0  | 9   | 0  |
| CONTIG-078063 | 259 | 59 | 13 | 0   | 0  |
| CONTIG-078065 | 59  | 4  | 15 | 0   | 0  |
| CONTIG-078066 | 97  | 4  | 2  | 7   | 0  |
| CONTIG-078067 | 157 | 8  | 6  | 33  | 0  |
| CONTIG-078069 | 272 | 11 | 7  | 83  | 2  |
| CONTIG-078070 | 84  | 3  | 0  | 5   | 0  |
| CONTIG-078071 | 75  | 8  | 5  | 11  | 0  |
| CONTIG-078072 | 168 | 6  | 4  | 16  | 0  |
| CONTIG-078073 | 88  | 3  | 2  | 4   | 0  |
| CONTIG-078074 | 65  | 17 | 2  | 71  | 0  |
| CONTIG-078076 | 197 | 7  | 4  | 22  | 0  |
| CONTIG-078077 | 110 | 5  | 3  | 15  | 0  |
| CONTIG-078079 | 126 | 14 | 0  | 74  | 2  |
| CONTIG-078080 | 102 | 4  | 7  | 10  | 0  |
| CONTIG-078081 | 64  | 3  | 0  | 0   | 0  |
| CONTIG-078084 | 40  | 7  | 9  | 5   | 0  |
| CONTIG-078085 | 59  | 2  | 0  | 0   | 0  |
| CONTIG-078086 | 95  | 7  | 5  | 17  | 0  |
| CONTIG-078087 | 70  | 3  | 0  | 4   | 0  |
| CONTIG-078088 | 67  | 4  | 2  | 2   | 0  |
| CONTIG-078089 | 74  | 3  | 6  | 6   | 0  |

|               |     |    |    |     |    |
|---------------|-----|----|----|-----|----|
| CONTIG-078090 | 265 | 15 | 4  | 84  | 0  |
| CONTIG-078091 | 108 | 11 | 24 | 38  | 0  |
| CONTIG-078094 | 230 | 10 | 4  | 63  | 3  |
| CONTIG-078095 | 93  | 14 | 4  | 0   | 9  |
| CONTIG-078096 | 65  | 6  | 6  | 0   | 0  |
| CONTIG-078097 | 132 | 4  | 0  | 5   | 0  |
| CONTIG-078098 | 75  | 5  | 2  | 5   | 0  |
| CONTIG-078099 | 112 | 9  | 23 | 3   | 0  |
| CONTIG-078100 | 135 | 15 | 14 | 79  | 0  |
| CONTIG-078101 | 75  | 5  | 2  | 8   | 2  |
| CONTIG-078102 | 61  | 8  | 0  | 17  | 0  |
| CONTIG-078103 | 85  | 7  | 4  | 19  | 0  |
| CONTIG-078104 | 67  | 2  | 2  | 0   | 0  |
| CONTIG-078106 | 237 | 9  | 6  | 93  | 0  |
| CONTIG-078107 | 151 | 6  | 4  | 31  | 0  |
| CONTIG-078108 | 203 | 11 | 13 | 70  | 0  |
| CONTIG-078110 | 66  | 11 | 2  | 0   | 0  |
| CONTIG-078111 | 166 | 7  | 3  | 33  | 0  |
| CONTIG-078112 | 75  | 11 | 0  | 17  | 0  |
| CONTIG-078113 | 110 | 9  | 5  | 34  | 0  |
| CONTIG-078114 | 100 | 4  | 4  | 12  | 0  |
| CONTIG-078115 | 120 | 4  | 6  | 7   | 0  |
| CONTIG-078116 | 75  | 38 | 3  | 0   | 16 |
| CONTIG-078117 | 273 | 8  | 12 | 29  | 0  |
| CONTIG-078118 | 90  | 5  | 3  | 17  | 0  |
| CONTIG-078119 | 113 | 9  | 6  | 39  | 0  |
| CONTIG-078120 | 75  | 4  | 6  | 6   | 0  |
| CONTIG-078122 | 110 | 6  | 5  | 16  | 0  |
| CONTIG-078123 | 63  | 6  | 13 | 4   | 0  |
| CONTIG-078124 | 61  | 62 | 74 | 81  | 2  |
| CONTIG-078125 | 135 | 12 | 16 | 36  | 0  |
| CONTIG-078126 | 108 | 9  | 4  | 34  | 0  |
| CONTIG-078127 | 171 | 6  | 14 | 18  | 0  |
| CONTIG-078128 | 153 | 15 | 22 | 72  | 0  |
| CONTIG-078129 | 136 | 3  | 0  | 16  | 0  |
| CONTIG-078130 | 174 | 15 | 15 | 103 | 2  |
| CONTIG-078132 | 149 | 11 | 4  | 42  | 0  |
| CONTIG-078133 | 135 | 6  | 4  | 0   | 0  |
| CONTIG-078134 | 111 | 11 | 0  | 6   | 0  |
| CONTIG-078135 | 98  | 4  | 0  | 6   | 0  |
| CONTIG-078136 | 310 | 7  | 2  | 48  | 0  |
| CONTIG-078139 | 144 | 18 | 3  | 97  | 0  |
| CONTIG-078141 | 117 | 6  | 3  | 19  | 0  |
| CONTIG-078142 | 64  | 5  | 0  | 8   | 0  |
| CONTIG-078143 | 113 | 4  | 3  | 16  | 0  |
| CONTIG-078144 | 115 | 11 | 0  | 52  | 0  |
| CONTIG-078145 | 165 | 5  | 2  | 7   | 0  |

|               |     |    |    |     |    |
|---------------|-----|----|----|-----|----|
| CONTIG-078146 | 291 | 14 | 0  | 0   | 27 |
| CONTIG-078147 | 143 | 10 | 5  | 30  | 0  |
| CONTIG-078148 | 72  | 11 | 27 | 0   | 0  |
| CONTIG-078149 | 143 | 99 | 90 | 491 | 0  |
| CONTIG-078150 | 83  | 6  | 2  | 15  | 0  |
| CONTIG-078151 | 130 | 8  | 10 | 17  | 0  |
| CONTIG-078152 | 249 | 7  | 2  | 31  | 2  |
| CONTIG-078153 | 150 | 4  | 0  | 22  | 0  |
| CONTIG-078154 | 109 | 6  | 6  | 9   | 0  |
| CONTIG-078155 | 141 | 6  | 5  | 22  | 0  |
| CONTIG-078156 | 58  | 5  | 2  | 2   | 0  |
| CONTIG-078157 | 200 | 20 | 21 | 155 | 0  |
| CONTIG-078158 | 63  | 7  | 6  | 11  | 0  |
| CONTIG-078159 | 112 | 7  | 0  | 21  | 0  |
| CONTIG-078160 | 85  | 6  | 6  | 5   | 0  |
| CONTIG-078161 | 147 | 4  | 22 | 0   | 0  |
| CONTIG-078162 | 60  | 7  | 8  | 12  | 0  |
| CONTIG-078167 | 75  | 2  | 2  | 0   | 0  |
| CONTIG-078168 | 124 | 9  | 12 | 26  | 0  |
| CONTIG-078169 | 274 | 6  | 0  | 46  | 0  |
| CONTIG-078170 | 63  | 23 | 25 | 33  | 2  |
| CONTIG-078171 | 187 | 4  | 13 | 22  | 0  |
| CONTIG-078172 | 132 | 3  | 6  | 6   | 0  |
| CONTIG-078173 | 125 | 13 | 16 | 55  | 0  |
| CONTIG-078174 | 95  | 5  | 0  | 0   | 0  |
| CONTIG-078175 | 105 | 8  | 8  | 24  | 0  |
| CONTIG-078176 | 85  | 9  | 3  | 13  | 0  |
| CONTIG-078178 | 88  | 11 | 0  | 0   | 0  |
| CONTIG-078179 | 97  | 6  | 3  | 17  | 0  |
| CONTIG-078180 | 83  | 9  | 0  | 24  | 0  |
| CONTIG-078181 | 66  | 8  | 7  | 19  | 0  |
| CONTIG-078182 | 160 | 6  | 0  | 22  | 0  |
| CONTIG-078183 | 81  | 4  | 2  | 7   | 0  |
| CONTIG-078184 | 89  | 8  | 0  | 32  | 0  |
| CONTIG-078185 | 60  | 5  | 3  | 4   | 0  |
| CONTIG-078186 | 209 | 13 | 3  | 88  | 0  |
| CONTIG-078187 | 86  | 7  | 3  | 21  | 0  |
| CONTIG-078188 | 83  | 20 | 3  | 79  | 0  |
| CONTIG-078189 | 73  | 7  | 17 | 0   | 0  |
| CONTIG-078190 | 132 | 4  | 6  | 22  | 0  |
| CONTIG-078192 | 378 | 15 | 37 | 122 | 0  |
| CONTIG-078193 | 174 | 5  | 5  | 28  | 0  |
| CONTIG-078194 | 701 | 25 | 7  | 9   | 0  |
| CONTIG-078198 | 41  | 18 | 4  | 29  | 0  |
| CONTIG-078199 | 93  | 6  | 0  | 16  | 2  |
| CONTIG-078200 | 90  | 8  | 0  | 24  | 0  |
| CONTIG-078201 | 61  | 4  | 0  | 3   | 0  |

|               |      |     |    |     |     |
|---------------|------|-----|----|-----|-----|
| CONTIG-078202 | 82   | 9   | 2  | 11  | 0   |
| CONTIG-078203 | 110  | 8   | 0  | 33  | 0   |
| CONTIG-078204 | 68   | 3   | 0  | 4   | 0   |
| CONTIG-078205 | 234  | 7   | 3  | 39  | 0   |
| CONTIG-078206 | 209  | 12  | 4  | 62  | 0   |
| CONTIG-078207 | 72   | 2   | 0  | 3   | 0   |
| CONTIG-078208 | 431  | 8   | 2  | 0   | 14  |
| CONTIG-078209 | 73   | 4   | 3  | 0   | 0   |
| CONTIG-078210 | 77   | 16  | 3  | 4   | 0   |
| CONTIG-078211 | 146  | 13  | 16 | 45  | 0   |
| CONTIG-078212 | 120  | 7   | 6  | 16  | 0   |
| CONTIG-078213 | 153  | 4   | 0  | 4   | 0   |
| CONTIG-078214 | 76   | 4   | 4  | 7   | 0   |
| CONTIG-078216 | 103  | 7   | 2  | 21  | 0   |
| CONTIG-078217 | 157  | 5   | 4  | 22  | 0   |
| CONTIG-078218 | 70   | 7   | 3  | 19  | 0   |
| CONTIG-078220 | 133  | 4   | 2  | 16  | 0   |
| CONTIG-078221 | 90   | 8   | 10 | 14  | 0   |
| CONTIG-078223 | 76   | 5   | 11 | 2   | 0   |
| CONTIG-078224 | 376  | 17  | 2  | 0   | 18  |
| CONTIG-078225 | 67   | 7   | 7  | 11  | 0   |
| CONTIG-078226 | 60   | 5   | 7  | 11  | 0   |
| CONTIG-078227 | 79   | 3   | 7  | 2   | 0   |
| CONTIG-078228 | 79   | 10  | 5  | 21  | 0   |
| CONTIG-078229 | 77   | 8   | 4  | 4   | 4   |
| CONTIG-078230 | 92   | 11  | 4  | 13  | 0   |
| CONTIG-078231 | 305  | 8   | 5  | 61  | 0   |
| CONTIG-078234 | 195  | 4   | 2  | 0   | 7   |
| CONTIG-078235 | 47   | 597 | 96 | 34  | 529 |
| CONTIG-078236 | 67   | 6   | 2  | 17  | 0   |
| CONTIG-078237 | 1291 | 20  | 0  | 0   | 206 |
| CONTIG-078238 | 82   | 8   | 10 | 19  | 0   |
| CONTIG-078239 | 107  | 6   | 0  | 18  | 0   |
| CONTIG-078240 | 74   | 592 | 2  | 0   | 121 |
| CONTIG-078242 | 152  | 5   | 0  | 17  | 0   |
| CONTIG-078243 | 73   | 9   | 3  | 32  | 0   |
| CONTIG-078244 | 465  | 13  | 2  | 240 | 0   |
| CONTIG-078245 | 137  | 4   | 0  | 11  | 0   |
| CONTIG-078246 | 50   | 3   | 3  | 0   | 0   |
| CONTIG-078247 | 65   | 3   | 10 | 2   | 0   |
| CONTIG-078248 | 145  | 3   | 0  | 16  | 0   |
| CONTIG-078249 | 66   | 6   | 3  | 7   | 0   |
| CONTIG-078250 | 39   | 159 | 15 | 273 | 0   |
| CONTIG-078251 | 348  | 14  | 2  | 19  | 0   |
| CONTIG-078253 | 261  | 6   | 18 | 29  | 0   |
| CONTIG-078254 | 173  | 6   | 0  | 20  | 0   |
| CONTIG-078255 | 236  | 7   | 15 | 41  | 0   |



|               |     |    |    |     |   |
|---------------|-----|----|----|-----|---|
| CONTIG-078256 | 259 | 10 | 2  | 76  | 0 |
| CONTIG-078257 | 175 | 10 | 3  | 80  | 0 |
| CONTIG-078267 | 244 | 9  | 17 | 89  | 0 |
| CONTIG-078268 | 76  | 5  | 4  | 8   | 0 |
| CONTIG-078269 | 199 | 12 | 8  | 82  | 5 |
| CONTIG-078270 | 108 | 7  | 16 | 22  | 0 |
| CONTIG-078271 | 177 | 6  | 5  | 45  | 0 |
| CONTIG-078272 | 77  | 7  | 7  | 11  | 0 |
| CONTIG-078274 | 182 | 5  | 2  | 30  | 0 |
| CONTIG-078275 | 188 | 8  | 0  | 45  | 0 |
| CONTIG-078276 | 74  | 10 | 7  | 16  | 0 |
| CONTIG-078277 | 121 | 5  | 2  | 9   | 0 |
| CONTIG-078278 | 81  | 2  | 0  | 2   | 0 |
| CONTIG-078279 | 318 | 10 | 2  | 153 | 0 |
| CONTIG-078280 | 106 | 10 | 4  | 24  | 2 |
| CONTIG-078281 | 120 | 6  | 9  | 25  | 0 |
| CONTIG-078282 | 83  | 4  | 2  | 2   | 0 |
| CONTIG-078283 | 83  | 36 | 6  | 122 | 0 |
| CONTIG-078284 | 219 | 8  | 13 | 39  | 0 |
| CONTIG-078286 | 69  | 13 | 0  | 37  | 0 |
| CONTIG-078287 | 90  | 7  | 17 | 14  | 0 |
| CONTIG-078288 | 110 | 15 | 20 | 33  | 0 |
| CONTIG-078289 | 60  | 5  | 2  | 2   | 0 |
| CONTIG-078291 | 122 | 11 | 0  | 0   | 2 |
| CONTIG-078292 | 166 | 6  | 21 | 27  | 0 |
| CONTIG-078293 | 101 | 9  | 5  | 5   | 0 |
| CONTIG-078294 | 61  | 4  | 3  | 3   | 0 |
| CONTIG-078295 | 59  | 5  | 2  | 5   | 0 |
| CONTIG-078296 | 192 | 6  | 2  | 33  | 0 |
| CONTIG-078297 | 168 | 9  | 2  | 45  | 0 |
| CONTIG-078298 | 59  | 6  | 0  | 0   | 0 |
| CONTIG-078299 | 148 | 5  | 0  | 20  | 0 |
| CONTIG-078300 | 111 | 9  | 20 | 40  | 0 |
| CONTIG-078302 | 87  | 3  | 0  | 0   | 0 |
| CONTIG-078303 | 111 | 3  | 2  | 4   | 0 |
| CONTIG-078304 | 96  | 6  | 0  | 19  | 0 |
| CONTIG-078305 | 98  | 7  | 5  | 13  | 0 |
| CONTIG-078306 | 73  | 3  | 4  | 2   | 0 |
| CONTIG-078307 | 63  | 6  | 15 | 0   | 0 |
| CONTIG-078308 | 139 | 6  | 5  | 25  | 0 |
| CONTIG-078309 | 151 | 6  | 6  | 0   | 0 |
| CONTIG-078310 | 102 | 12 | 8  | 51  | 0 |
| CONTIG-078311 | 64  | 7  | 7  | 15  | 0 |
| CONTIG-078312 | 147 | 5  | 34 | 13  | 0 |
| CONTIG-078313 | 62  | 8  | 0  | 17  | 0 |
| CONTIG-078314 | 136 | 5  | 12 | 13  | 0 |
| CONTIG-078315 | 68  | 9  | 10 | 12  | 0 |

|               |     |    |    |     |   |
|---------------|-----|----|----|-----|---|
| CONTIG-078316 | 69  | 6  | 9  | 6   | 0 |
| CONTIG-078317 | 58  | 3  | 6  | 0   | 0 |
| CONTIG-078318 | 292 | 10 | 13 | 123 | 0 |
| CONTIG-078319 | 69  | 13 | 2  | 24  | 0 |
| CONTIG-078320 | 612 | 11 | 6  | 4   | 0 |
| CONTIG-078321 | 146 | 8  | 3  | 43  | 0 |
| CONTIG-078322 | 130 | 31 | 13 | 154 | 2 |
| CONTIG-078323 | 65  | 7  | 13 | 2   | 0 |
| CONTIG-078324 | 169 | 5  | 4  | 19  | 0 |
| CONTIG-078325 | 78  | 4  | 0  | 9   | 0 |
| CONTIG-078326 | 74  | 5  | 8  | 3   | 0 |
| CONTIG-078327 | 82  | 5  | 3  | 4   | 0 |
| CONTIG-078328 | 323 | 14 | 16 | 161 | 0 |
| CONTIG-078329 | 91  | 7  | 0  | 21  | 0 |
| CONTIG-078330 | 66  | 4  | 10 | 5   | 0 |
| CONTIG-078331 | 293 | 12 | 2  | 167 | 0 |
| CONTIG-078332 | 82  | 8  | 2  | 30  | 0 |
| CONTIG-078333 | 200 | 10 | 17 | 20  | 0 |
| CONTIG-078334 | 80  | 5  | 0  | 11  | 0 |
| CONTIG-078335 | 170 | 9  | 7  | 48  | 0 |
| CONTIG-078337 | 67  | 7  | 0  | 16  | 0 |
| CONTIG-078338 | 107 | 7  | 6  | 21  | 0 |
| CONTIG-078339 | 82  | 9  | 5  | 41  | 0 |
| CONTIG-078340 | 86  | 12 | 3  | 11  | 0 |
| CONTIG-078343 | 297 | 13 | 5  | 46  | 0 |
| CONTIG-078344 | 63  | 5  | 2  | 6   | 0 |
| CONTIG-078345 | 133 | 11 | 2  | 51  | 0 |
| CONTIG-078346 | 259 | 6  | 4  | 24  | 0 |
| CONTIG-078347 | 58  | 2  | 2  | 2   | 0 |
| CONTIG-078348 | 73  | 5  | 4  | 11  | 0 |
| CONTIG-078349 | 379 | 10 | 5  | 192 | 0 |
| CONTIG-078350 | 43  | 12 | 2  | 12  | 0 |
| CONTIG-078351 | 434 | 10 | 14 | 117 | 0 |
| CONTIG-078352 | 69  | 3  | 5  | 0   | 0 |
| CONTIG-078353 | 96  | 8  | 0  | 25  | 0 |
| CONTIG-078355 | 67  | 8  | 3  | 2   | 0 |
| CONTIG-078356 | 322 | 11 | 8  | 170 | 0 |
| CONTIG-078357 | 142 | 6  | 2  | 23  | 0 |
| CONTIG-078358 | 58  | 4  | 3  | 6   | 0 |
| CONTIG-078359 | 90  | 5  | 2  | 0   | 0 |
| CONTIG-078360 | 219 | 7  | 2  | 37  | 0 |
| CONTIG-078361 | 60  | 9  | 6  | 7   | 2 |
| CONTIG-078362 | 58  | 8  | 4  | 5   | 2 |
| CONTIG-078363 | 67  | 3  | 2  | 0   | 0 |
| CONTIG-078364 | 113 | 8  | 6  | 15  | 2 |
| CONTIG-078365 | 60  | 5  | 5  | 4   | 0 |
| CONTIG-078366 | 66  | 3  | 2  | 5   | 0 |

|               |     |     |    |     |   |
|---------------|-----|-----|----|-----|---|
| CONTIG-078368 | 96  | 8   | 4  | 30  | 0 |
| CONTIG-078372 | 180 | 4   | 12 | 11  | 0 |
| CONTIG-078373 | 186 | 7   | 8  | 41  | 0 |
| CONTIG-078374 | 73  | 108 | 8  | 0   | 0 |
| CONTIG-078375 | 108 | 3   | 2  | 10  | 0 |
| CONTIG-078376 | 130 | 8   | 2  | 17  | 0 |
| CONTIG-078377 | 215 | 10  | 11 | 76  | 0 |
| CONTIG-078378 | 80  | 4   | 7  | 0   | 0 |
| CONTIG-078379 | 98  | 5   | 0  | 14  | 0 |
| CONTIG-078380 | 82  | 56  | 26 | 147 | 0 |
| CONTIG-078381 | 59  | 4   | 9  | 5   | 0 |
| CONTIG-078382 | 107 | 6   | 7  | 11  | 0 |
| CONTIG-078383 | 74  | 6   | 7  | 7   | 0 |
| CONTIG-078384 | 194 | 7   | 16 | 42  | 0 |
| CONTIG-078385 | 67  | 3   | 2  | 2   | 0 |
| CONTIG-078386 | 142 | 7   | 2  | 29  | 0 |
| CONTIG-078387 | 83  | 12  | 12 | 26  | 2 |
| CONTIG-078388 | 96  | 5   | 4  | 9   | 0 |
| CONTIG-078389 | 229 | 6   | 16 | 27  | 0 |
| CONTIG-078390 | 121 | 8   | 0  | 31  | 0 |
| CONTIG-078391 | 308 | 10  | 2  | 102 | 5 |
| CONTIG-078392 | 154 | 4   | 3  | 13  | 0 |
| CONTIG-078394 | 72  | 157 | 66 | 256 | 0 |
| CONTIG-078397 | 296 | 4   | 2  | 37  | 0 |
| CONTIG-078398 | 65  | 9   | 0  | 0   | 0 |
| CONTIG-078399 | 126 | 7   | 16 | 18  | 0 |
| CONTIG-078400 | 91  | 8   | 5  | 26  | 0 |
| CONTIG-078401 | 45  | 11  | 9  | 0   | 0 |
| CONTIG-078402 | 63  | 5   | 2  | 6   | 0 |
| CONTIG-078403 | 166 | 8   | 19 | 48  | 0 |
| CONTIG-078404 | 308 | 6   | 6  | 94  | 0 |
| CONTIG-078406 | 120 | 81  | 6  | 457 | 0 |
| CONTIG-078407 | 70  | 9   | 4  | 20  | 0 |
| CONTIG-078408 | 116 | 5   | 0  | 7   | 2 |
| CONTIG-078409 | 87  | 5   | 11 | 2   | 0 |
| CONTIG-078410 | 169 | 6   | 2  | 0   | 0 |
| CONTIG-078411 | 235 | 10  | 18 | 62  | 0 |
| CONTIG-078412 | 104 | 10  | 4  | 54  | 0 |
| CONTIG-078413 | 238 | 9   | 9  | 93  | 0 |
| CONTIG-078414 | 127 | 7   | 3  | 23  | 0 |
| CONTIG-078415 | 132 | 7   | 2  | 41  | 0 |
| CONTIG-078416 | 81  | 9   | 0  | 23  | 0 |
| CONTIG-078418 | 85  | 10  | 4  | 41  | 0 |
| CONTIG-078419 | 303 | 14  | 2  | 138 | 0 |
| CONTIG-078420 | 97  | 4   | 11 | 2   | 0 |
| CONTIG-078421 | 309 | 12  | 11 | 136 | 0 |
| CONTIG-078422 | 106 | 5   | 5  | 13  | 0 |

|               |     |     |    |     |    |
|---------------|-----|-----|----|-----|----|
| CONTIG-078423 | 80  | 4   | 9  | 5   | 0  |
| CONTIG-078424 | 99  | 8   | 3  | 18  | 0  |
| CONTIG-078426 | 226 | 8   | 10 | 57  | 0  |
| CONTIG-078427 | 115 | 6   | 7  | 22  | 0  |
| CONTIG-078431 | 65  | 4   | 0  | 6   | 0  |
| CONTIG-078432 | 136 | 6   | 2  | 25  | 0  |
| CONTIG-078433 | 78  | 3   | 0  | 0   | 0  |
| CONTIG-078435 | 120 | 8   | 3  | 0   | 4  |
| CONTIG-078436 | 164 | 5   | 13 | 16  | 0  |
| CONTIG-078437 | 97  | 6   | 4  | 4   | 0  |
| CONTIG-078438 | 66  | 6   | 0  | 2   | 0  |
| CONTIG-078439 | 123 | 14  | 20 | 12  | 3  |
| CONTIG-078440 | 156 | 13  | 13 | 84  | 0  |
| CONTIG-078441 | 59  | 13  | 0  | 2   | 5  |
| CONTIG-078442 | 161 | 6   | 6  | 35  | 2  |
| CONTIG-078443 | 100 | 9   | 2  | 33  | 0  |
| CONTIG-078444 | 60  | 5   | 6  | 2   | 0  |
| CONTIG-078447 | 140 | 10  | 9  | 48  | 0  |
| CONTIG-078448 | 110 | 3   | 5  | 13  | 0  |
| CONTIG-078449 | 92  | 4   | 2  | 5   | 0  |
| CONTIG-078450 | 243 | 13  | 7  | 96  | 2  |
| CONTIG-078451 | 80  | 62  | 5  | 264 | 2  |
| CONTIG-078452 | 105 | 6   | 0  | 16  | 0  |
| CONTIG-078453 | 63  | 3   | 3  | 0   | 0  |
| CONTIG-078454 | 91  | 5   | 5  | 14  | 0  |
| CONTIG-078455 | 270 | 9   | 11 | 81  | 0  |
| CONTIG-078457 | 166 | 4   | 0  | 19  | 2  |
| CONTIG-078458 | 163 | 10  | 4  | 40  | 0  |
| CONTIG-078461 | 589 | 17  | 4  | 0   | 63 |
| CONTIG-078462 | 74  | 4   | 3  | 7   | 0  |
| CONTIG-078463 | 102 | 5   | 4  | 7   | 0  |
| CONTIG-078464 | 36  | 121 | 0  | 0   | 14 |
| CONTIG-078465 | 146 | 3   | 7  | 7   | 0  |
| CONTIG-078466 | 125 | 6   | 16 | 27  | 0  |
| CONTIG-078468 | 59  | 5   | 2  | 0   | 0  |
| CONTIG-078469 | 65  | 4   | 2  | 5   | 0  |
| CONTIG-078471 | 63  | 6   | 0  | 12  | 0  |
| CONTIG-078472 | 78  | 4   | 2  | 14  | 0  |
| CONTIG-078473 | 66  | 5   | 3  | 11  | 0  |
| CONTIG-078474 | 78  | 4   | 3  | 0   | 0  |
| CONTIG-078475 | 113 | 4   | 0  | 15  | 0  |
| CONTIG-078477 | 565 | 12  | 29 | 40  | 0  |
| CONTIG-078478 | 96  | 4   | 6  | 0   | 0  |
| CONTIG-078479 | 264 | 98  | 2  | 0   | 6  |
| CONTIG-078480 | 624 | 34  | 5  | 0   | 67 |
| CONTIG-078481 | 106 | 5   | 6  | 7   | 0  |
| CONTIG-078482 | 289 | 8   | 14 | 72  | 0  |

|               |     |    |    |     |    |
|---------------|-----|----|----|-----|----|
| CONTIG-078483 | 159 | 9  | 0  | 58  | 0  |
| CONTIG-078484 | 116 | 7  | 2  | 5   | 0  |
| CONTIG-078485 | 62  | 6  | 3  | 10  | 0  |
| CONTIG-078486 | 109 | 4  | 2  | 8   | 0  |
| CONTIG-078487 | 125 | 3  | 6  | 2   | 0  |
| CONTIG-078488 | 397 | 11 | 0  | 0   | 25 |
| CONTIG-078489 | 72  | 10 | 0  | 23  | 0  |
| CONTIG-078490 | 80  | 3  | 7  | 2   | 0  |
| CONTIG-078491 | 161 | 14 | 3  | 125 | 0  |
| CONTIG-078492 | 136 | 4  | 6  | 6   | 0  |
| CONTIG-078494 | 149 | 5  | 0  | 14  | 0  |
| CONTIG-078495 | 44  | 8  | 4  | 0   | 0  |
| CONTIG-078496 | 36  | 10 | 2  | 7   | 0  |
| CONTIG-078497 | 88  | 7  | 2  | 17  | 0  |
| CONTIG-078498 | 74  | 7  | 4  | 10  | 0  |
| CONTIG-078499 | 182 | 8  | 0  | 32  | 0  |
| CONTIG-078500 | 213 | 4  | 3  | 29  | 0  |
| CONTIG-078501 | 125 | 3  | 2  | 8   | 0  |
| CONTIG-078502 | 67  | 3  | 3  | 0   | 0  |
| CONTIG-078503 | 162 | 9  | 3  | 38  | 0  |
| CONTIG-078504 | 110 | 10 | 11 | 15  | 0  |
| CONTIG-078505 | 83  | 7  | 2  | 10  | 0  |
| CONTIG-078506 | 162 | 18 | 3  | 137 | 0  |
| CONTIG-078512 | 216 | 7  | 3  | 52  | 0  |
| CONTIG-078513 | 80  | 4  | 7  | 4   | 0  |
| CONTIG-078514 | 83  | 69 | 0  | 0   | 0  |
| CONTIG-078518 | 176 | 6  | 13 | 25  | 0  |
| CONTIG-078519 | 89  | 18 | 2  | 16  | 0  |
| CONTIG-078520 | 107 | 5  | 11 | 7   | 0  |
| CONTIG-078521 | 223 | 12 | 29 | 92  | 0  |
| CONTIG-078522 | 100 | 4  | 13 | 7   | 0  |
| CONTIG-078523 | 220 | 16 | 15 | 72  | 2  |
| CONTIG-078524 | 111 | 8  | 25 | 16  | 0  |
| CONTIG-078525 | 289 | 8  | 14 | 59  | 0  |
| CONTIG-078526 | 176 | 7  | 6  | 38  | 0  |
| CONTIG-078527 | 515 | 14 | 21 | 411 | 0  |
| CONTIG-078528 | 662 | 11 | 11 | 234 | 4  |
| CONTIG-078529 | 124 | 6  | 0  | 7   | 0  |
| CONTIG-078530 | 271 | 7  | 4  | 55  | 0  |
| CONTIG-078531 | 91  | 7  | 15 | 17  | 0  |
| CONTIG-078532 | 169 | 4  | 13 | 9   | 0  |
| CONTIG-078533 | 107 | 6  | 0  | 17  | 0  |
| CONTIG-078534 | 91  | 6  | 2  | 11  | 0  |
| CONTIG-078535 | 175 | 4  | 0  | 0   | 8  |
| CONTIG-078536 | 171 | 8  | 0  | 38  | 0  |
| CONTIG-078537 | 314 | 10 | 12 | 161 | 0  |
| CONTIG-078539 | 166 | 5  | 0  | 19  | 0  |

|               |     |    |    |     |   |
|---------------|-----|----|----|-----|---|
| CONTIG-078540 | 378 | 11 | 2  | 41  | 4 |
| CONTIG-078541 | 67  | 7  | 7  | 7   | 0 |
| CONTIG-078543 | 67  | 14 | 9  | 28  | 0 |
| CONTIG-078544 | 67  | 3  | 2  | 6   | 0 |
| CONTIG-078545 | 78  | 6  | 5  | 4   | 0 |
| CONTIG-078546 | 242 | 4  | 4  | 11  | 0 |
| CONTIG-078547 | 155 | 11 | 16 | 44  | 0 |
| CONTIG-078548 | 75  | 6  | 4  | 14  | 0 |
| CONTIG-078549 | 69  | 6  | 3  | 18  | 0 |
| CONTIG-078550 | 79  | 4  | 6  | 7   | 0 |
| CONTIG-078551 | 90  | 7  | 0  | 7   | 0 |
| CONTIG-078552 | 65  | 7  | 2  | 16  | 0 |
| CONTIG-078553 | 197 | 8  | 4  | 52  | 0 |
| CONTIG-078556 | 122 | 6  | 3  | 31  | 0 |
| CONTIG-078557 | 80  | 6  | 0  | 5   | 0 |
| CONTIG-078559 | 128 | 8  | 8  | 14  | 0 |
| CONTIG-078561 | 37  | 13 | 0  | 9   | 0 |
| CONTIG-078562 | 138 | 3  | 5  | 10  | 0 |
| CONTIG-078563 | 335 | 12 | 19 | 146 | 2 |
| CONTIG-078564 | 75  | 9  | 6  | 13  | 0 |
| CONTIG-078565 | 122 | 8  | 0  | 45  | 0 |
| CONTIG-078567 | 81  | 7  | 5  | 21  | 0 |
| CONTIG-078568 | 81  | 9  | 4  | 11  | 0 |
| CONTIG-078569 | 58  | 7  | 0  | 0   | 0 |
| CONTIG-078570 | 236 | 19 | 16 | 154 | 0 |
| CONTIG-078571 | 127 | 4  | 0  | 11  | 0 |
| CONTIG-078572 | 59  | 3  | 2  | 3   | 0 |
| CONTIG-078573 | 93  | 5  | 5  | 11  | 0 |
| CONTIG-078574 | 58  | 8  | 4  | 10  | 0 |
| CONTIG-078575 | 293 | 4  | 0  | 24  | 0 |
| CONTIG-078576 | 280 | 10 | 26 | 62  | 0 |
| CONTIG-078577 | 69  | 6  | 7  | 4   | 0 |
| CONTIG-078579 | 115 | 5  | 5  | 6   | 0 |
| CONTIG-078580 | 112 | 3  | 3  | 12  | 0 |
| CONTIG-078581 | 116 | 4  | 3  | 13  | 0 |
| CONTIG-078582 | 79  | 14 | 19 | 6   | 2 |
| CONTIG-078583 | 279 | 13 | 9  | 72  | 0 |
| CONTIG-078584 | 126 | 4  | 4  | 4   | 0 |
| CONTIG-078585 | 64  | 6  | 8  | 12  | 0 |
| CONTIG-078586 | 205 | 11 | 10 | 65  | 0 |
| CONTIG-078587 | 100 | 4  | 0  | 0   | 0 |
| CONTIG-078588 | 135 | 5  | 6  | 5   | 0 |
| CONTIG-078589 | 230 | 8  | 14 | 28  | 0 |
| CONTIG-078590 | 185 | 6  | 8  | 52  | 0 |
| CONTIG-078594 | 183 | 6  | 2  | 34  | 0 |
| CONTIG-078595 | 72  | 4  | 4  | 0   | 0 |
| CONTIG-078596 | 123 | 4  | 0  | 20  | 0 |

|               |     |     |    |     |    |
|---------------|-----|-----|----|-----|----|
| CONTIG-078597 | 114 | 10  | 5  | 26  | 0  |
| CONTIG-078598 | 204 | 6   | 0  | 45  | 0  |
| CONTIG-078599 | 78  | 8   | 16 | 15  | 0  |
| CONTIG-078600 | 74  | 5   | 3  | 8   | 0  |
| CONTIG-078601 | 98  | 9   | 3  | 36  | 0  |
| CONTIG-078602 | 59  | 4   | 0  | 5   | 0  |
| CONTIG-078603 | 73  | 6   | 2  | 7   | 0  |
| CONTIG-078604 | 59  | 4   | 0  | 4   | 0  |
| CONTIG-078605 | 86  | 2   | 2  | 0   | 0  |
| CONTIG-078606 | 64  | 6   | 2  | 14  | 0  |
| CONTIG-078607 | 80  | 5   | 0  | 2   | 0  |
| CONTIG-078608 | 66  | 5   | 4  | 0   | 0  |
| CONTIG-078609 | 62  | 3   | 0  | 6   | 0  |
| CONTIG-078610 | 66  | 5   | 3  | 2   | 0  |
| CONTIG-078611 | 150 | 3   | 0  | 6   | 0  |
| CONTIG-078612 | 293 | 4   | 6  | 28  | 0  |
| CONTIG-078614 | 98  | 9   | 3  | 17  | 0  |
| CONTIG-078615 | 93  | 5   | 0  | 13  | 0  |
| CONTIG-078616 | 75  | 9   | 5  | 6   | 0  |
| CONTIG-078617 | 124 | 7   | 9  | 22  | 0  |
| CONTIG-078618 | 107 | 10  | 2  | 25  | 0  |
| CONTIG-078619 | 155 | 9   | 6  | 46  | 0  |
| CONTIG-078620 | 98  | 10  | 5  | 23  | 4  |
| CONTIG-078621 | 63  | 4   | 3  | 2   | 0  |
| CONTIG-078622 | 74  | 8   | 4  | 8   | 0  |
| CONTIG-078623 | 66  | 3   | 8  | 4   | 0  |
| CONTIG-078624 | 99  | 7   | 6  | 29  | 0  |
| CONTIG-078625 | 76  | 3   | 0  | 2   | 0  |
| CONTIG-078626 | 90  | 8   | 4  | 10  | 0  |
| CONTIG-078627 | 173 | 7   | 10 | 35  | 0  |
| CONTIG-078628 | 88  | 9   | 15 | 9   | 0  |
| CONTIG-078629 | 93  | 3   | 2  | 7   | 0  |
| CONTIG-078631 | 170 | 5   | 2  | 30  | 0  |
| CONTIG-078632 | 68  | 4   | 4  | 6   | 2  |
| CONTIG-078633 | 175 | 9   | 8  | 37  | 0  |
| CONTIG-078634 | 90  | 12  | 5  | 53  | 0  |
| CONTIG-078636 | 56  | 437 | 8  | 872 | 0  |
| CONTIG-078637 | 58  | 2   | 0  | 0   | 0  |
| CONTIG-078638 | 72  | 18  | 6  | 26  | 0  |
| CONTIG-078639 | 247 | 12  | 7  | 83  | 12 |
| CONTIG-078640 | 110 | 9   | 8  | 42  | 0  |
| CONTIG-078641 | 94  | 6   | 0  | 2   | 0  |
| CONTIG-078642 | 115 | 10  | 6  | 32  | 2  |
| CONTIG-078643 | 218 | 13  | 10 | 68  | 0  |
| CONTIG-078644 | 78  | 8   | 10 | 18  | 0  |
| CONTIG-078645 | 102 | 5   | 10 | 11  | 0  |
| CONTIG-078646 | 133 | 5   | 4  | 21  | 0  |

|               |      |    |    |      |     |
|---------------|------|----|----|------|-----|
| CONTIG-078647 | 130  | 12 | 2  | 0    | 0   |
| CONTIG-078649 | 184  | 10 | 32 | 63   | 0   |
| CONTIG-078650 | 118  | 5  | 3  | 20   | 0   |
| CONTIG-078653 | 308  | 9  | 4  | 70   | 0   |
| CONTIG-078654 | 111  | 7  | 6  | 20   | 0   |
| CONTIG-078655 | 69   | 7  | 0  | 7    | 0   |
| CONTIG-078656 | 203  | 6  | 8  | 17   | 0   |
| CONTIG-078657 | 64   | 7  | 2  | 20   | 0   |
| CONTIG-078658 | 160  | 4  | 2  | 28   | 0   |
| CONTIG-078659 | 111  | 9  | 0  | 34   | 0   |
| CONTIG-078660 | 146  | 5  | 4  | 27   | 0   |
| CONTIG-078661 | 118  | 8  | 2  | 42   | 0   |
| CONTIG-078662 | 70   | 8  | 5  | 9    | 0   |
| CONTIG-078663 | 876  | 28 | 2  | 1217 | 0   |
| CONTIG-078664 | 149  | 6  | 2  | 18   | 0   |
| CONTIG-078665 | 135  | 9  | 11 | 38   | 0   |
| CONTIG-078666 | 94   | 10 | 5  | 26   | 0   |
| CONTIG-078667 | 178  | 13 | 3  | 84   | 0   |
| CONTIG-078668 | 65   | 5  | 7  | 2    | 0   |
| CONTIG-078669 | 97   | 5  | 2  | 4    | 0   |
| CONTIG-078671 | 81   | 5  | 2  | 9    | 0   |
| CONTIG-078672 | 121  | 6  | 0  | 0    | 0   |
| CONTIG-078673 | 64   | 17 | 9  | 27   | 0   |
| CONTIG-078674 | 76   | 5  | 2  | 8    | 0   |
| CONTIG-078675 | 58   | 3  | 6  | 2    | 0   |
| CONTIG-078677 | 211  | 8  | 6  | 16   | 0   |
| CONTIG-078678 | 146  | 13 | 20 | 57   | 2   |
| CONTIG-078679 | 73   | 8  | 0  | 14   | 0   |
| CONTIG-078680 | 1515 | 14 | 12 | 317  | 0   |
| CONTIG-078681 | 159  | 7  | 16 | 8    | 0   |
| CONTIG-078682 | 98   | 26 | 2  | 128  | 0   |
| CONTIG-078684 | 85   | 5  | 4  | 14   | 0   |
| CONTIG-078685 | 162  | 5  | 10 | 12   | 0   |
| CONTIG-078686 | 317  | 5  | 7  | 44   | 0   |
| CONTIG-078687 | 96   | 7  | 12 | 11   | 2   |
| CONTIG-078688 | 158  | 7  | 6  | 23   | 0   |
| CONTIG-078691 | 1194 | 27 | 4  | 0    | 266 |
| CONTIG-078692 | 64   | 13 | 8  | 16   | 0   |
| CONTIG-078694 | 106  | 4  | 2  | 8    | 0   |
| CONTIG-078695 | 61   | 7  | 2  | 17   | 0   |
| CONTIG-078696 | 60   | 4  | 0  | 8    | 0   |
| CONTIG-078697 | 58   | 4  | 2  | 4    | 0   |
| CONTIG-078698 | 80   | 4  | 12 | 2    | 0   |
| CONTIG-078699 | 79   | 7  | 14 | 8    | 0   |
| CONTIG-078700 | 111  | 8  | 3  | 27   | 0   |
| CONTIG-078701 | 83   | 4  | 7  | 8    | 0   |
| CONTIG-078702 | 81   | 4  | 6  | 0    | 0   |



|               |     |     |    |     |     |
|---------------|-----|-----|----|-----|-----|
| CONTIG-078703 | 61  | 8   | 4  | 13  | 2   |
| CONTIG-078704 | 66  | 8   | 2  | 21  | 0   |
| CONTIG-078705 | 302 | 62  | 0  | 0   | 227 |
| CONTIG-078706 | 113 | 6   | 8  | 4   | 0   |
| CONTIG-078708 | 67  | 4   | 5  | 6   | 0   |
| CONTIG-078709 | 118 | 10  | 3  | 32  | 0   |
| CONTIG-078710 | 96  | 23  | 6  | 88  | 2   |
| CONTIG-078711 | 69  | 152 | 4  | 151 | 6   |
| CONTIG-078712 | 166 | 8   | 2  | 60  | 0   |
| CONTIG-078715 | 125 | 5   | 17 | 4   | 0   |
| CONTIG-078716 | 178 | 6   | 9  | 40  | 0   |
| CONTIG-078717 | 69  | 8   | 2  | 8   | 0   |
| CONTIG-078719 | 208 | 9   | 6  | 50  | 0   |
| CONTIG-078720 | 122 | 5   | 0  | 11  | 0   |
| CONTIG-078721 | 86  | 7   | 10 | 5   | 0   |
| CONTIG-078722 | 90  | 4   | 7  | 9   | 0   |
| CONTIG-078723 | 62  | 11  | 7  | 4   | 0   |
| CONTIG-078724 | 73  | 3   | 0  | 0   | 0   |
| CONTIG-078725 | 246 | 7   | 0  | 12  | 3   |
| CONTIG-078726 | 127 | 4   | 5  | 10  | 0   |
| CONTIG-078727 | 80  | 5   | 12 | 2   | 0   |
| CONTIG-078728 | 110 | 7   | 0  | 6   | 0   |
| CONTIG-078729 | 655 | 23  | 32 | 868 | 0   |
| CONTIG-078730 | 112 | 14  | 0  | 57  | 0   |
| CONTIG-078731 | 101 | 4   | 0  | 11  | 0   |
| CONTIG-078732 | 81  | 2   | 0  | 3   | 0   |
| CONTIG-078733 | 128 | 3   | 7  | 2   | 0   |
| CONTIG-078734 | 63  | 15  | 5  | 26  | 0   |
| CONTIG-078736 | 600 | 16  | 8  | 24  | 0   |
| CONTIG-078737 | 99  | 6   | 5  | 14  | 0   |
| CONTIG-078738 | 59  | 2   | 8  | 0   | 0   |
| CONTIG-078739 | 179 | 6   | 23 | 27  | 3   |
| CONTIG-078740 | 94  | 4   | 0  | 10  | 2   |
| CONTIG-078744 | 44  | 7   | 0  | 12  | 0   |
| CONTIG-078745 | 122 | 9   | 7  | 14  | 2   |
| CONTIG-078748 | 64  | 4   | 0  | 6   | 0   |
| CONTIG-078749 | 360 | 9   | 9  | 109 | 0   |
| CONTIG-078750 | 116 | 11  | 0  | 59  | 0   |
| CONTIG-078751 | 125 | 4   | 8  | 4   | 0   |
| CONTIG-078752 | 106 | 4   | 8  | 5   | 0   |
| CONTIG-078753 | 87  | 2   | 2  | 4   | 0   |
| CONTIG-078755 | 148 | 5   | 2  | 23  | 0   |
| CONTIG-078756 | 134 | 8   | 5  | 33  | 0   |
| CONTIG-078757 | 175 | 14  | 2  | 64  | 0   |
| CONTIG-078758 | 75  | 5   | 9  | 8   | 0   |
| CONTIG-078759 | 103 | 4   | 4  | 6   | 0   |
| CONTIG-078760 | 106 | 7   | 0  | 29  | 0   |

|               |     |    |    |     |    |
|---------------|-----|----|----|-----|----|
| CONTIG-078761 | 188 | 7  | 2  | 40  | 0  |
| CONTIG-078762 | 215 | 6  | 11 | 33  | 0  |
| CONTIG-078763 | 361 | 14 | 13 | 257 | 0  |
| CONTIG-078764 | 150 | 8  | 15 | 35  | 0  |
| CONTIG-078765 | 206 | 15 | 15 | 120 | 0  |
| CONTIG-078766 | 378 | 19 | 21 | 167 | 2  |
| CONTIG-078768 | 457 | 9  | 5  | 129 | 0  |
| CONTIG-078769 | 59  | 6  | 15 | 6   | 0  |
| CONTIG-078770 | 67  | 3  | 0  | 4   | 0  |
| CONTIG-078771 | 95  | 3  | 12 | 2   | 0  |
| CONTIG-078772 | 138 | 42 | 6  | 0   | 0  |
| CONTIG-078773 | 200 | 15 | 6  | 158 | 0  |
| CONTIG-078774 | 136 | 4  | 2  | 15  | 0  |
| CONTIG-078776 | 294 | 45 | 0  | 0   | 94 |
| CONTIG-078777 | 78  | 7  | 16 | 0   | 0  |
| CONTIG-078778 | 83  | 9  | 3  | 36  | 0  |
| CONTIG-078779 | 307 | 9  | 14 | 71  | 0  |
| CONTIG-078780 | 66  | 33 | 33 | 18  | 0  |
| CONTIG-078781 | 428 | 18 | 40 | 278 | 0  |
| CONTIG-078787 | 173 | 7  | 2  | 46  | 0  |
| CONTIG-078788 | 119 | 4  | 4  | 7   | 2  |
| CONTIG-078789 | 149 | 10 | 9  | 49  | 0  |
| CONTIG-078790 | 75  | 3  | 5  | 0   | 0  |
| CONTIG-078791 | 128 | 8  | 5  | 17  | 0  |
| CONTIG-078794 | 74  | 17 | 15 | 15  | 0  |
| CONTIG-078795 | 122 | 4  | 3  | 10  | 0  |
| CONTIG-078797 | 69  | 7  | 12 | 9   | 0  |
| CONTIG-078798 | 45  | 54 | 0  | 68  | 0  |
| CONTIG-078799 | 192 | 11 | 27 | 13  | 2  |
| CONTIG-078800 | 107 | 12 | 2  | 0   | 2  |
| CONTIG-078802 | 67  | 10 | 6  | 21  | 2  |
| CONTIG-078803 | 88  | 8  | 16 | 7   | 0  |
| CONTIG-078804 | 61  | 2  | 5  | 4   | 0  |
| CONTIG-078805 | 83  | 4  | 0  | 15  | 0  |
| CONTIG-078806 | 204 | 17 | 2  | 118 | 0  |
| CONTIG-078807 | 67  | 9  | 0  | 27  | 0  |
| CONTIG-078808 | 315 | 7  | 2  | 81  | 0  |
| CONTIG-078810 | 67  | 6  | 6  | 3   | 0  |
| CONTIG-078811 | 119 | 8  | 3  | 0   | 8  |
| CONTIG-078812 | 69  | 5  | 9  | 4   | 0  |
| CONTIG-078813 | 74  | 6  | 0  | 8   | 0  |
| CONTIG-078815 | 103 | 6  | 2  | 18  | 0  |
| CONTIG-078817 | 183 | 10 | 6  | 44  | 0  |
| CONTIG-078818 | 60  | 2  | 3  | 2   | 0  |
| CONTIG-078819 | 68  | 6  | 6  | 9   | 0  |
| CONTIG-078820 | 255 | 5  | 3  | 15  | 0  |
| CONTIG-078821 | 185 | 6  | 4  | 31  | 0  |

|               |     |    |    |     |    |
|---------------|-----|----|----|-----|----|
| CONTIG-078822 | 358 | 5  | 6  | 51  | 0  |
| CONTIG-078823 | 427 | 17 | 2  | 0   | 49 |
| CONTIG-078824 | 166 | 9  | 8  | 43  | 0  |
| CONTIG-078825 | 541 | 10 | 30 | 164 | 0  |
| CONTIG-078826 | 58  | 4  | 7  | 0   | 0  |
| CONTIG-078827 | 72  | 5  | 0  | 8   | 0  |
| CONTIG-078828 | 77  | 9  | 20 | 13  | 0  |
| CONTIG-078829 | 214 | 9  | 14 | 75  | 0  |
| CONTIG-078830 | 158 | 5  | 15 | 23  | 0  |
| CONTIG-078831 | 87  | 11 | 8  | 10  | 0  |
| CONTIG-078832 | 98  | 32 | 3  | 11  | 0  |
| CONTIG-078833 | 375 | 12 | 0  | 7   | 0  |
| CONTIG-078834 | 60  | 3  | 6  | 2   | 0  |
| CONTIG-078835 | 70  | 6  | 0  | 9   | 0  |
| CONTIG-078836 | 124 | 4  | 3  | 18  | 0  |
| CONTIG-078837 | 319 | 17 | 5  | 29  | 35 |
| CONTIG-078839 | 69  | 4  | 5  | 9   | 0  |
| CONTIG-078840 | 61  | 7  | 2  | 21  | 0  |
| CONTIG-078841 | 140 | 4  | 6  | 4   | 0  |
| CONTIG-078843 | 206 | 6  | 7  | 38  | 0  |
| CONTIG-078844 | 332 | 10 | 11 | 15  | 0  |
| CONTIG-078845 | 62  | 3  | 7  | 3   | 0  |
| CONTIG-078846 | 135 | 4  | 2  | 9   | 0  |
| CONTIG-078847 | 77  | 11 | 3  | 0   | 0  |
| CONTIG-078848 | 80  | 12 | 0  | 30  | 0  |
| CONTIG-078849 | 100 | 7  | 6  | 23  | 0  |
| CONTIG-078850 | 81  | 6  | 5  | 15  | 0  |
| CONTIG-078852 | 143 | 3  | 4  | 8   | 0  |
| CONTIG-078853 | 139 | 5  | 0  | 17  | 0  |
| CONTIG-078854 | 221 | 6  | 11 | 35  | 0  |
| CONTIG-078855 | 96  | 6  | 5  | 14  | 0  |
| CONTIG-078856 | 152 | 12 | 14 | 86  | 0  |
| CONTIG-078858 | 61  | 7  | 7  | 11  | 0  |
| CONTIG-078859 | 132 | 7  | 6  | 16  | 0  |
| CONTIG-078860 | 83  | 5  | 12 | 9   | 0  |
| CONTIG-078862 | 82  | 9  | 2  | 18  | 0  |
| CONTIG-078863 | 95  | 9  | 5  | 11  | 0  |
| CONTIG-078864 | 207 | 6  | 0  | 20  | 2  |
| CONTIG-078865 | 127 | 14 | 4  | 71  | 0  |
| CONTIG-078866 | 60  | 6  | 0  | 6   | 0  |
| CONTIG-078867 | 82  | 7  | 4  | 12  | 0  |
| CONTIG-078869 | 58  | 4  | 0  | 3   | 0  |
| CONTIG-078870 | 95  | 9  | 6  | 19  | 0  |
| CONTIG-078871 | 92  | 6  | 5  | 9   | 0  |
| CONTIG-078872 | 71  | 7  | 3  | 16  | 0  |
| CONTIG-078873 | 73  | 6  | 0  | 6   | 0  |
| CONTIG-078874 | 276 | 17 | 13 | 139 | 4  |

|               |     |    |    |     |   |
|---------------|-----|----|----|-----|---|
| CONTIG-078875 | 72  | 2  | 0  | 3   | 0 |
| CONTIG-078876 | 168 | 8  | 16 | 51  | 0 |
| CONTIG-078877 | 119 | 4  | 0  | 10  | 0 |
| CONTIG-078878 | 124 | 9  | 8  | 38  | 0 |
| CONTIG-078879 | 113 | 65 | 0  | 424 | 0 |
| CONTIG-078880 | 112 | 6  | 2  | 16  | 0 |
| CONTIG-078881 | 72  | 2  | 0  | 2   | 0 |
| CONTIG-078882 | 331 | 10 | 14 | 107 | 0 |
| CONTIG-078883 | 68  | 4  | 0  | 4   | 0 |
| CONTIG-078884 | 294 | 8  | 0  | 88  | 2 |
| CONTIG-078885 | 155 | 11 | 26 | 31  | 0 |
| CONTIG-078886 | 103 | 3  | 11 | 2   | 0 |
| CONTIG-078887 | 95  | 4  | 2  | 6   | 0 |
| CONTIG-078888 | 99  | 6  | 3  | 8   | 0 |
| CONTIG-078889 | 73  | 10 | 11 | 12  | 0 |
| CONTIG-078890 | 106 | 9  | 5  | 28  | 0 |
| CONTIG-078891 | 124 | 6  | 5  | 6   | 0 |
| CONTIG-078893 | 162 | 11 | 3  | 77  | 0 |
| CONTIG-078894 | 124 | 4  | 6  | 6   | 0 |
| CONTIG-078895 | 121 | 5  | 0  | 29  | 0 |
| CONTIG-078896 | 61  | 4  | 2  | 5   | 0 |
| CONTIG-078897 | 75  | 19 | 8  | 64  | 0 |
| CONTIG-078898 | 67  | 7  | 3  | 3   | 0 |
| CONTIG-078899 | 111 | 9  | 12 | 42  | 0 |
| CONTIG-078900 | 101 | 4  | 5  | 2   | 0 |
| CONTIG-078905 | 132 | 3  | 5  | 4   | 0 |
| CONTIG-078906 | 72  | 6  | 0  | 10  | 0 |
| CONTIG-078910 | 65  | 12 | 6  | 0   | 5 |
| CONTIG-078911 | 172 | 3  | 0  | 0   | 2 |
| CONTIG-078912 | 94  | 9  | 2  | 23  | 0 |
| CONTIG-078913 | 72  | 3  | 2  | 5   | 0 |
| CONTIG-078914 | 129 | 14 | 6  | 19  | 0 |
| CONTIG-078915 | 129 | 15 | 7  | 103 | 0 |
| CONTIG-078916 | 62  | 2  | 0  | 2   | 0 |
| CONTIG-078917 | 735 | 17 | 20 | 503 | 6 |
| CONTIG-078918 | 80  | 5  | 7  | 10  | 0 |
| CONTIG-078919 | 86  | 6  | 2  | 9   | 0 |
| CONTIG-078920 | 92  | 6  | 3  | 17  | 0 |
| CONTIG-078921 | 77  | 9  | 0  | 0   | 0 |
| CONTIG-078922 | 99  | 5  | 14 | 12  | 0 |
| CONTIG-078923 | 368 | 8  | 9  | 63  | 0 |
| CONTIG-078924 | 150 | 5  | 8  | 25  | 0 |
| CONTIG-078925 | 66  | 3  | 0  | 6   | 0 |
| CONTIG-078926 | 63  | 24 | 11 | 35  | 0 |
| CONTIG-078927 | 157 | 6  | 2  | 41  | 0 |
| CONTIG-078928 | 219 | 6  | 8  | 27  | 0 |
| CONTIG-078929 | 103 | 4  | 8  | 11  | 0 |

|               |      |     |    |     |     |
|---------------|------|-----|----|-----|-----|
| CONTIG-078930 | 77   | 3   | 2  | 10  | 0   |
| CONTIG-078931 | 59   | 8   | 3  | 16  | 0   |
| CONTIG-078932 | 92   | 4   | 0  | 2   | 0   |
| CONTIG-078934 | 80   | 6   | 20 | 8   | 0   |
| CONTIG-078935 | 143  | 24  | 18 | 113 | 4   |
| CONTIG-078936 | 196  | 5   | 3  | 0   | 9   |
| CONTIG-078937 | 194  | 6   | 0  | 8   | 0   |
| CONTIG-078939 | 127  | 7   | 3  | 33  | 0   |
| CONTIG-078940 | 135  | 9   | 14 | 50  | 0   |
| CONTIG-078941 | 62   | 12  | 4  | 25  | 0   |
| CONTIG-078946 | 82   | 4   | 2  | 2   | 0   |
| CONTIG-078947 | 180  | 8   | 2  | 36  | 0   |
| CONTIG-078948 | 58   | 2   | 0  | 2   | 0   |
| CONTIG-078949 | 73   | 6   | 6  | 9   | 0   |
| CONTIG-078950 | 64   | 5   | 3  | 6   | 0   |
| CONTIG-078951 | 186  | 9   | 5  | 70  | 0   |
| CONTIG-078952 | 170  | 10  | 4  | 0   | 5   |
| CONTIG-078953 | 83   | 21  | 11 | 33  | 0   |
| CONTIG-078954 | 61   | 3   | 0  | 2   | 0   |
| CONTIG-078955 | 63   | 7   | 21 | 2   | 0   |
| CONTIG-078956 | 78   | 6   | 3  | 4   | 0   |
| CONTIG-078957 | 196  | 10  | 3  | 61  | 0   |
| CONTIG-078958 | 155  | 7   | 7  | 11  | 0   |
| CONTIG-078959 | 61   | 4   | 4  | 2   | 0   |
| CONTIG-078960 | 84   | 25  | 6  | 53  | 0   |
| CONTIG-078962 | 801  | 30  | 0  | 0   | 158 |
| CONTIG-078963 | 224  | 5   | 2  | 37  | 0   |
| CONTIG-078964 | 140  | 8   | 2  | 34  | 0   |
| CONTIG-078966 | 92   | 2   | 0  | 7   | 0   |
| CONTIG-078967 | 189  | 17  | 0  | 0   | 0   |
| CONTIG-078968 | 63   | 4   | 0  | 11  | 0   |
| CONTIG-078969 | 84   | 15  | 6  | 0   | 0   |
| CONTIG-078970 | 115  | 7   | 0  | 28  | 0   |
| CONTIG-078971 | 121  | 4   | 3  | 5   | 0   |
| CONTIG-078972 | 127  | 21  | 11 | 45  | 0   |
| CONTIG-078975 | 58   | 7   | 4  | 11  | 0   |
| CONTIG-078976 | 81   | 4   | 2  | 11  | 0   |
| CONTIG-078977 | 217  | 18  | 11 | 0   | 10  |
| CONTIG-078978 | 210  | 11  | 9  | 63  | 0   |
| CONTIG-078979 | 69   | 4   | 2  | 2   | 0   |
| CONTIG-078981 | 1126 | 44  | 25 | 23  | 0   |
| CONTIG-078982 | 191  | 8   | 3  | 26  | 2   |
| CONTIG-078983 | 135  | 9   | 10 | 30  | 0   |
| CONTIG-078984 | 223  | 10  | 8  | 70  | 0   |
| CONTIG-078985 | 101  | 193 | 40 | 496 | 0   |
| CONTIG-078986 | 71   | 8   | 0  | 13  | 0   |
| CONTIG-078987 | 66   | 3   | 4  | 4   | 0   |

|               |     |      |    |      |     |
|---------------|-----|------|----|------|-----|
| CONTIG-078988 | 112 | 8    | 7  | 34   | 0   |
| CONTIG-078989 | 120 | 6    | 7  | 8    | 0   |
| CONTIG-078990 | 92  | 7    | 0  | 19   | 0   |
| CONTIG-078991 | 108 | 10   | 0  | 45   | 0   |
| CONTIG-078992 | 61  | 4    | 0  | 0    | 0   |
| CONTIG-078993 | 510 | 13   | 12 | 19   | 0   |
| CONTIG-078994 | 395 | 67   | 2  | 0    | 112 |
| CONTIG-078995 | 171 | 14   | 5  | 104  | 0   |
| CONTIG-078996 | 233 | 8    | 18 | 55   | 0   |
| CONTIG-078997 | 106 | 4    | 6  | 8    | 0   |
| CONTIG-078998 | 165 | 5    | 0  | 9    | 0   |
| CONTIG-079000 | 177 | 5    | 6  | 21   | 0   |
| CONTIG-079001 | 69  | 8    | 11 | 0    | 0   |
| CONTIG-079002 | 62  | 14   | 14 | 10   | 0   |
| CONTIG-079006 | 827 | 11   | 3  | 0    | 11  |
| CONTIG-079007 | 253 | 9    | 33 | 60   | 0   |
| CONTIG-079008 | 93  | 5    | 3  | 11   | 0   |
| CONTIG-079009 | 64  | 10   | 13 | 5    | 0   |
| CONTIG-079010 | 144 | 5    | 8  | 23   | 0   |
| CONTIG-079011 | 75  | 9    | 2  | 16   | 0   |
| CONTIG-079012 | 142 | 4    | 6  | 2    | 0   |
| CONTIG-079013 | 82  | 15   | 4  | 58   | 0   |
| CONTIG-079014 | 56  | 1020 | 26 | 1686 | 0   |
| CONTIG-079015 | 197 | 8    | 12 | 43   | 2   |
| CONTIG-079016 | 201 | 9    | 0  | 63   | 0   |
| CONTIG-079017 | 77  | 7    | 4  | 8    | 0   |
| CONTIG-079018 | 197 | 93   | 2  | 0    | 153 |
| CONTIG-079019 | 64  | 5    | 7  | 14   | 0   |
| CONTIG-079020 | 117 | 8    | 0  | 48   | 0   |
| CONTIG-079021 | 60  | 5    | 4  | 2    | 0   |
| CONTIG-079022 | 115 | 5    | 0  | 8    | 0   |
| CONTIG-079023 | 101 | 9    | 5  | 34   | 0   |
| CONTIG-079024 | 180 | 10   | 12 | 2    | 0   |
| CONTIG-079025 | 135 | 22   | 11 | 103  | 0   |
| CONTIG-079026 | 159 | 9    | 8  | 50   | 0   |
| CONTIG-079027 | 69  | 5    | 0  | 2    | 2   |
| CONTIG-079028 | 175 | 8    | 0  | 42   | 0   |
| CONTIG-079029 | 223 | 8    | 5  | 88   | 0   |
| CONTIG-079030 | 145 | 11   | 17 | 24   | 0   |
| CONTIG-079031 | 73  | 2    | 3  | 2    | 0   |
| CONTIG-079032 | 182 | 7    | 7  | 25   | 0   |
| CONTIG-079033 | 143 | 9    | 6  | 60   | 0   |
| CONTIG-079034 | 91  | 6    | 0  | 21   | 0   |
| CONTIG-079035 | 152 | 7    | 5  | 26   | 0   |
| CONTIG-079036 | 83  | 5    | 7  | 0    | 0   |
| CONTIG-079037 | 134 | 6    | 8  | 22   | 0   |
| CONTIG-079038 | 98  | 33   | 0  | 110  | 0   |

|               |      |    |    |     |     |
|---------------|------|----|----|-----|-----|
| CONTIG-079039 | 100  | 8  | 0  | 17  | 0   |
| CONTIG-079040 | 130  | 6  | 6  | 4   | 0   |
| CONTIG-079041 | 143  | 34 | 0  | 250 | 0   |
| CONTIG-079042 | 95   | 4  | 4  | 10  | 0   |
| CONTIG-079043 | 98   | 9  | 0  | 20  | 2   |
| CONTIG-079044 | 140  | 15 | 2  | 103 | 0   |
| CONTIG-079046 | 162  | 8  | 7  | 29  | 0   |
| CONTIG-079047 | 63   | 4  | 8  | 6   | 0   |
| CONTIG-079048 | 85   | 8  | 2  | 26  | 0   |
| CONTIG-079049 | 77   | 9  | 2  | 14  | 0   |
| CONTIG-079050 | 214  | 6  | 0  | 29  | 0   |
| CONTIG-079051 | 136  | 8  | 8  | 38  | 0   |
| CONTIG-079052 | 96   | 7  | 12 | 15  | 0   |
| CONTIG-079053 | 60   | 5  | 0  | 11  | 0   |
| CONTIG-079054 | 146  | 64 | 4  | 492 | 0   |
| CONTIG-079055 | 215  | 6  | 15 | 18  | 2   |
| CONTIG-079056 | 1052 | 24 | 0  | 0   | 249 |
| CONTIG-079057 | 328  | 16 | 22 | 174 | 2   |
| CONTIG-079058 | 77   | 5  | 2  | 4   | 0   |
| CONTIG-079059 | 297  | 9  | 0  | 103 | 0   |
| CONTIG-079061 | 124  | 11 | 6  | 0   | 0   |
| CONTIG-079062 | 454  | 14 | 14 | 313 | 0   |
| CONTIG-079063 | 77   | 10 | 7  | 15  | 0   |
| CONTIG-079064 | 95   | 5  | 16 | 13  | 0   |
| CONTIG-079065 | 129  | 16 | 3  | 18  | 0   |
| CONTIG-079066 | 122  | 7  | 6  | 23  | 0   |
| CONTIG-079067 | 93   | 9  | 2  | 26  | 0   |
| CONTIG-079068 | 84   | 8  | 6  | 20  | 0   |
| CONTIG-079069 | 60   | 5  | 5  | 0   | 0   |
| CONTIG-079070 | 118  | 8  | 6  | 20  | 0   |
| CONTIG-079071 | 127  | 22 | 7  | 75  | 24  |
| CONTIG-079072 | 128  | 17 | 28 | 93  | 0   |
| CONTIG-079075 | 252  | 5  | 0  | 14  | 0   |
| CONTIG-079076 | 67   | 3  | 0  | 4   | 0   |
| CONTIG-079077 | 170  | 20 | 24 | 103 | 2   |
| CONTIG-079078 | 175  | 9  | 6  | 28  | 2   |
| CONTIG-079079 | 99   | 6  | 3  | 12  | 0   |
| CONTIG-079080 | 80   | 7  | 0  | 10  | 0   |
| CONTIG-079081 | 217  | 7  | 8  | 23  | 0   |
| CONTIG-079082 | 128  | 6  | 2  | 26  | 0   |
| CONTIG-079083 | 227  | 10 | 3  | 4   | 0   |
| CONTIG-079084 | 65   | 3  | 0  | 3   | 0   |
| CONTIG-079085 | 177  | 5  | 2  | 35  | 0   |
| CONTIG-079086 | 106  | 5  | 0  | 0   | 0   |
| CONTIG-079087 | 90   | 10 | 13 | 16  | 0   |
| CONTIG-079088 | 87   | 4  | 4  | 6   | 0   |
| CONTIG-079089 | 96   | 5  | 2  | 19  | 0   |

|               |     |    |    |     |   |
|---------------|-----|----|----|-----|---|
| CONTIG-079090 | 96  | 4  | 2  | 2   | 0 |
| CONTIG-079091 | 58  | 3  | 5  | 2   | 0 |
| CONTIG-079092 | 75  | 3  | 2  | 2   | 0 |
| CONTIG-079093 | 140 | 3  | 0  | 2   | 0 |
| CONTIG-079094 | 74  | 4  | 2  | 2   | 2 |
| CONTIG-079095 | 116 | 4  | 3  | 13  | 0 |
| CONTIG-079096 | 165 | 7  | 0  | 42  | 0 |
| CONTIG-079097 | 195 | 8  | 0  | 51  | 0 |
| CONTIG-079098 | 85  | 8  | 6  | 22  | 0 |
| CONTIG-079101 | 59  | 3  | 4  | 2   | 0 |
| CONTIG-079102 | 118 | 6  | 10 | 8   | 0 |
| CONTIG-079103 | 75  | 6  | 3  | 6   | 0 |
| CONTIG-079104 | 129 | 6  | 10 | 10  | 0 |
| CONTIG-079105 | 193 | 7  | 10 | 42  | 0 |
| CONTIG-079106 | 58  | 4  | 0  | 0   | 0 |
| CONTIG-079107 | 137 | 18 | 4  | 100 | 2 |
| CONTIG-079108 | 87  | 9  | 2  | 19  | 0 |
| CONTIG-079109 | 98  | 5  | 0  | 8   | 0 |
| CONTIG-079110 | 163 | 8  | 2  | 40  | 0 |
| CONTIG-079111 | 154 | 5  | 2  | 15  | 0 |
| CONTIG-079112 | 325 | 14 | 3  | 46  | 5 |
| CONTIG-079116 | 102 | 4  | 0  | 7   | 3 |
| CONTIG-079117 | 153 | 14 | 7  | 91  | 0 |
| CONTIG-079118 | 208 | 6  | 0  | 43  | 0 |
| CONTIG-079119 | 141 | 5  | 0  | 16  | 0 |
| CONTIG-079120 | 211 | 12 | 5  | 113 | 0 |
| CONTIG-079121 | 90  | 4  | 2  | 2   | 0 |
| CONTIG-079122 | 153 | 7  | 14 | 16  | 0 |
| CONTIG-079123 | 111 | 5  | 0  | 21  | 0 |
| CONTIG-079125 | 344 | 9  | 9  | 84  | 0 |
| CONTIG-079126 | 89  | 4  | 4  | 16  | 0 |
| CONTIG-079130 | 79  | 2  | 0  | 2   | 0 |
| CONTIG-079131 | 129 | 4  | 0  | 22  | 0 |
| CONTIG-079132 | 64  | 8  | 7  | 3   | 2 |
| CONTIG-079133 | 184 | 4  | 4  | 16  | 0 |
| CONTIG-079134 | 229 | 13 | 3  | 22  | 0 |
| CONTIG-079135 | 66  | 5  | 2  | 5   | 0 |
| CONTIG-079136 | 289 | 9  | 2  | 57  | 2 |
| CONTIG-079137 | 160 | 5  | 5  | 4   | 0 |
| CONTIG-079138 | 201 | 9  | 9  | 72  | 0 |
| CONTIG-079139 | 243 | 15 | 5  | 42  | 0 |
| CONTIG-079140 | 126 | 9  | 2  | 5   | 0 |
| CONTIG-079141 | 89  | 4  | 2  | 7   | 0 |
| CONTIG-079142 | 87  | 3  | 0  | 6   | 0 |
| CONTIG-079143 | 91  | 8  | 9  | 21  | 0 |
| CONTIG-079144 | 222 | 5  | 4  | 23  | 0 |
| CONTIG-079146 | 89  | 5  | 2  | 7   | 0 |



|               |     |     |    |     |   |
|---------------|-----|-----|----|-----|---|
| CONTIG-079147 | 323 | 11  | 14 | 90  | 7 |
| CONTIG-079148 | 328 | 8   | 2  | 95  | 0 |
| CONTIG-079149 | 117 | 4   | 0  | 13  | 0 |
| CONTIG-079150 | 77  | 34  | 10 | 138 | 0 |
| CONTIG-079151 | 190 | 4   | 4  | 18  | 0 |
| CONTIG-079152 | 164 | 12  | 8  | 30  | 0 |
| CONTIG-079153 | 586 | 21  | 6  | 413 | 0 |
| CONTIG-079154 | 113 | 5   | 3  | 20  | 0 |
| CONTIG-079156 | 433 | 11  | 9  | 209 | 0 |
| CONTIG-079157 | 105 | 7   | 5  | 25  | 0 |
| CONTIG-079158 | 66  | 9   | 10 | 10  | 0 |
| CONTIG-079159 | 91  | 3   | 0  | 0   | 0 |
| CONTIG-079160 | 217 | 8   | 0  | 39  | 0 |
| CONTIG-079161 | 167 | 7   | 6  | 18  | 0 |
| CONTIG-079163 | 87  | 7   | 2  | 29  | 0 |
| CONTIG-079164 | 64  | 7   | 2  | 5   | 0 |
| CONTIG-079165 | 81  | 4   | 5  | 2   | 0 |
| CONTIG-079166 | 299 | 12  | 18 | 104 | 2 |
| CONTIG-079167 | 219 | 19  | 2  | 157 | 7 |
| CONTIG-079168 | 86  | 3   | 2  | 3   | 0 |
| CONTIG-079169 | 157 | 7   | 11 | 14  | 3 |
| CONTIG-079170 | 205 | 6   | 4  | 7   | 3 |
| CONTIG-079171 | 244 | 6   | 2  | 42  | 2 |
| CONTIG-079172 | 168 | 7   | 5  | 35  | 0 |
| CONTIG-079173 | 69  | 3   | 0  | 6   | 0 |
| CONTIG-079174 | 99  | 18  | 2  | 94  | 0 |
| CONTIG-079175 | 145 | 4   | 3  | 9   | 0 |
| CONTIG-079176 | 113 | 7   | 2  | 13  | 0 |
| CONTIG-079177 | 243 | 16  | 4  | 132 | 0 |
| CONTIG-079178 | 69  | 8   | 7  | 17  | 0 |
| CONTIG-079179 | 164 | 7   | 5  | 26  | 0 |
| CONTIG-079180 | 70  | 5   | 16 | 2   | 0 |
| CONTIG-079181 | 369 | 9   | 14 | 98  | 2 |
| CONTIG-079182 | 43  | 156 | 0  | 236 | 4 |
| CONTIG-079183 | 582 | 12  | 15 | 196 | 4 |
| CONTIG-079184 | 423 | 6   | 4  | 77  | 0 |
| CONTIG-079185 | 164 | 7   | 0  | 14  | 0 |
| CONTIG-079186 | 63  | 4   | 8  | 2   | 0 |
| CONTIG-079187 | 59  | 4   | 4  | 2   | 0 |
| CONTIG-079188 | 94  | 62  | 12 | 34  | 0 |
| CONTIG-079190 | 64  | 4   | 0  | 2   | 0 |
| CONTIG-079191 | 63  | 7   | 3  | 19  | 0 |
| CONTIG-079192 | 88  | 5   | 7  | 7   | 0 |
| CONTIG-079193 | 73  | 11  | 3  | 25  | 0 |
| CONTIG-079194 | 122 | 6   | 21 | 20  | 0 |
| CONTIG-079195 | 96  | 5   | 2  | 14  | 0 |
| CONTIG-079196 | 218 | 5   | 5  | 33  | 0 |

|               |     |    |    |     |   |
|---------------|-----|----|----|-----|---|
| CONTIG-079197 | 58  | 3  | 2  | 8   | 0 |
| CONTIG-079198 | 76  | 8  | 10 | 11  | 0 |
| CONTIG-079199 | 98  | 6  | 5  | 18  | 0 |
| CONTIG-079200 | 105 | 3  | 2  | 9   | 0 |
| CONTIG-079201 | 174 | 9  | 15 | 58  | 0 |
| CONTIG-079202 | 61  | 5  | 2  | 5   | 0 |
| CONTIG-079203 | 197 | 7  | 5  | 16  | 0 |
| CONTIG-079204 | 303 | 16 | 12 | 263 | 0 |
| CONTIG-079205 | 63  | 18 | 7  | 37  | 0 |
| CONTIG-079206 | 77  | 3  | 0  | 7   | 0 |
| CONTIG-079207 | 183 | 14 | 17 | 95  | 0 |
| CONTIG-079209 | 436 | 24 | 8  | 44  | 0 |
| CONTIG-079210 | 60  | 5  | 3  | 7   | 0 |
| CONTIG-079211 | 106 | 9  | 0  | 10  | 0 |
| CONTIG-079212 | 140 | 8  | 15 | 31  | 0 |
| CONTIG-079213 | 128 | 6  | 4  | 19  | 0 |
| CONTIG-079214 | 72  | 11 | 8  | 28  | 0 |
| CONTIG-079215 | 58  | 9  | 6  | 23  | 0 |
| CONTIG-079217 | 114 | 14 | 2  | 55  | 0 |
| CONTIG-079218 | 133 | 4  | 2  | 6   | 0 |
| CONTIG-079219 | 74  | 13 | 2  | 45  | 0 |
| CONTIG-079220 | 71  | 5  | 5  | 2   | 0 |
| CONTIG-079221 | 287 | 6  | 8  | 0   | 2 |
| CONTIG-079222 | 71  | 8  | 2  | 9   | 0 |
| CONTIG-079224 | 110 | 9  | 5  | 28  | 2 |
| CONTIG-079226 | 144 | 8  | 10 | 49  | 0 |
| CONTIG-079227 | 116 | 9  | 9  | 16  | 0 |
| CONTIG-079228 | 75  | 5  | 0  | 20  | 0 |
| CONTIG-079229 | 159 | 15 | 12 | 106 | 0 |
| CONTIG-079230 | 259 | 11 | 6  | 90  | 0 |
| CONTIG-079231 | 94  | 8  | 10 | 22  | 0 |
| CONTIG-079233 | 82  | 7  | 2  | 16  | 0 |
| CONTIG-079234 | 160 | 5  | 0  | 14  | 0 |
| CONTIG-079235 | 173 | 5  | 2  | 12  | 0 |
| CONTIG-079236 | 197 | 13 | 13 | 79  | 0 |
| CONTIG-079237 | 149 | 6  | 27 | 0   | 0 |
| CONTIG-079238 | 200 | 8  | 3  | 45  | 0 |
| CONTIG-079239 | 201 | 12 | 4  | 85  | 0 |
| CONTIG-079240 | 239 | 6  | 14 | 18  | 0 |
| CONTIG-079241 | 389 | 10 | 2  | 0   | 4 |
| CONTIG-079242 | 65  | 5  | 0  | 13  | 0 |
| CONTIG-079243 | 171 | 8  | 2  | 44  | 0 |
| CONTIG-079244 | 78  | 5  | 2  | 5   | 0 |
| CONTIG-079245 | 116 | 5  | 8  | 21  | 0 |
| CONTIG-079246 | 86  | 3  | 3  | 6   | 0 |
| CONTIG-079247 | 134 | 14 | 9  | 35  | 0 |
| CONTIG-079248 | 111 | 6  | 2  | 14  | 0 |

|               |     |     |    |     |     |
|---------------|-----|-----|----|-----|-----|
| CONTIG-079250 | 150 | 8   | 14 | 46  | 0   |
| CONTIG-079251 | 204 | 13  | 4  | 55  | 0   |
| CONTIG-079254 | 546 | 80  | 2  | 0   | 439 |
| CONTIG-079255 | 248 | 15  | 10 | 127 | 0   |
| CONTIG-079256 | 94  | 5   | 3  | 17  | 0   |
| CONTIG-079257 | 174 | 33  | 16 | 232 | 0   |
| CONTIG-079259 | 183 | 8   | 4  | 41  | 0   |
| CONTIG-079260 | 58  | 4   | 0  | 12  | 0   |
| CONTIG-079262 | 80  | 5   | 7  | 2   | 0   |
| CONTIG-079263 | 201 | 8   | 17 | 63  | 0   |
| CONTIG-079264 | 327 | 8   | 10 | 69  | 0   |
| CONTIG-079265 | 387 | 6   | 8  | 52  | 0   |
| CONTIG-079266 | 70  | 342 | 18 | 549 | 14  |
| CONTIG-079267 | 64  | 10  | 8  | 19  | 0   |
| CONTIG-079268 | 108 | 5   | 0  | 0   | 3   |
| CONTIG-079271 | 203 | 17  | 5  | 88  | 0   |
| CONTIG-079272 | 118 | 6   | 5  | 26  | 0   |
| CONTIG-079273 | 71  | 5   | 6  | 10  | 0   |
| CONTIG-079277 | 49  | 5   | 0  | 6   | 0   |
| CONTIG-079278 | 102 | 4   | 7  | 9   | 0   |
| CONTIG-079279 | 64  | 4   | 2  | 8   | 0   |
| CONTIG-079280 | 144 | 5   | 4  | 25  | 0   |
| CONTIG-079281 | 70  | 4   | 5  | 7   | 0   |
| CONTIG-079282 | 98  | 5   | 4  | 16  | 0   |
| CONTIG-079283 | 70  | 14  | 6  | 32  | 0   |
| CONTIG-079285 | 73  | 4   | 11 | 3   | 0   |
| CONTIG-079286 | 88  | 5   | 0  | 20  | 0   |
| CONTIG-079287 | 65  | 7   | 4  | 11  | 0   |
| CONTIG-079288 | 145 | 9   | 2  | 36  | 0   |
| CONTIG-079289 | 81  | 4   | 3  | 11  | 0   |
| CONTIG-079290 | 62  | 7   | 3  | 5   | 0   |
| CONTIG-079291 | 75  | 9   | 6  | 6   | 0   |
| CONTIG-079292 | 253 | 13  | 2  | 98  | 4   |
| CONTIG-079293 | 147 | 9   | 3  | 36  | 0   |
| CONTIG-079294 | 122 | 3   | 2  | 4   | 0   |
| CONTIG-079295 | 63  | 4   | 5  | 2   | 0   |
| CONTIG-079296 | 58  | 8   | 9  | 4   | 0   |
| CONTIG-079299 | 46  | 5   | 4  | 7   | 0   |
| CONTIG-079300 | 71  | 3   | 5  | 6   | 0   |
| CONTIG-079301 | 98  | 6   | 0  | 17  | 2   |
| CONTIG-079302 | 168 | 13  | 18 | 59  | 0   |
| CONTIG-079303 | 78  | 21  | 3  | 93  | 0   |
| CONTIG-079304 | 196 | 30  | 2  | 237 | 3   |
| CONTIG-079305 | 63  | 7   | 8  | 4   | 0   |
| CONTIG-079306 | 94  | 4   | 6  | 4   | 0   |
| CONTIG-079307 | 105 | 4   | 2  | 6   | 0   |
| CONTIG-079308 | 71  | 45  | 7  | 100 | 3   |

|               |     |    |    |     |    |
|---------------|-----|----|----|-----|----|
| CONTIG-079309 | 83  | 3  | 4  | 0   | 0  |
| CONTIG-079312 | 405 | 7  | 6  | 53  | 0  |
| CONTIG-079313 | 69  | 7  | 3  | 11  | 0  |
| CONTIG-079315 | 412 | 14 | 14 | 31  | 0  |
| CONTIG-079316 | 86  | 7  | 0  | 24  | 0  |
| CONTIG-079317 | 108 | 7  | 4  | 10  | 0  |
| CONTIG-079318 | 80  | 7  | 4  | 21  | 0  |
| CONTIG-079319 | 132 | 5  | 9  | 17  | 0  |
| CONTIG-079320 | 194 | 10 | 2  | 55  | 0  |
| CONTIG-079321 | 190 | 6  | 8  | 44  | 0  |
| CONTIG-079322 | 311 | 11 | 5  | 103 | 4  |
| CONTIG-079324 | 97  | 2  | 5  | 3   | 0  |
| CONTIG-079325 | 170 | 13 | 0  | 70  | 0  |
| CONTIG-079326 | 163 | 6  | 5  | 28  | 0  |
| CONTIG-079327 | 67  | 8  | 11 | 2   | 0  |
| CONTIG-079328 | 69  | 5  | 0  | 8   | 0  |
| CONTIG-079329 | 125 | 9  | 0  | 30  | 0  |
| CONTIG-079330 | 85  | 4  | 3  | 11  | 0  |
| CONTIG-079331 | 73  | 7  | 29 | 2   | 0  |
| CONTIG-079332 | 511 | 16 | 2  | 5   | 0  |
| CONTIG-079333 | 60  | 6  | 3  | 0   | 0  |
| CONTIG-079337 | 42  | 16 | 2  | 5   | 0  |
| CONTIG-079338 | 113 | 4  | 0  | 0   | 0  |
| CONTIG-079339 | 78  | 7  | 3  | 14  | 0  |
| CONTIG-079340 | 75  | 3  | 7  | 0   | 0  |
| CONTIG-079341 | 189 | 12 | 10 | 17  | 0  |
| CONTIG-079342 | 58  | 3  | 4  | 7   | 0  |
| CONTIG-079343 | 286 | 8  | 4  | 47  | 0  |
| CONTIG-079344 | 563 | 15 | 2  | 0   | 45 |
| CONTIG-079345 | 171 | 14 | 3  | 99  | 2  |
| CONTIG-079346 | 222 | 6  | 2  | 20  | 0  |
| CONTIG-079347 | 119 | 7  | 5  | 30  | 0  |
| CONTIG-079348 | 111 | 9  | 3  | 34  | 0  |
| CONTIG-079350 | 75  | 3  | 2  | 8   | 0  |
| CONTIG-079351 | 101 | 3  | 7  | 6   | 0  |
| CONTIG-079352 | 124 | 6  | 6  | 12  | 0  |
| CONTIG-079353 | 242 | 7  | 0  | 56  | 0  |
| CONTIG-079354 | 484 | 22 | 10 | 6   | 0  |
| CONTIG-079355 | 138 | 8  | 12 | 37  | 0  |
| CONTIG-079356 | 72  | 6  | 6  | 11  | 0  |
| CONTIG-079357 | 162 | 9  | 9  | 53  | 0  |
| CONTIG-079358 | 72  | 7  | 2  | 21  | 0  |
| CONTIG-079363 | 171 | 5  | 9  | 26  | 0  |
| CONTIG-079364 | 124 | 11 | 21 | 33  | 2  |
| CONTIG-079365 | 72  | 10 | 0  | 33  | 0  |
| CONTIG-079366 | 82  | 5  | 12 | 6   | 0  |
| CONTIG-079367 | 477 | 9  | 6  | 207 | 0  |

|               |     |      |    |     |      |
|---------------|-----|------|----|-----|------|
| CONTIG-079368 | 126 | 9    | 6  | 22  | 0    |
| CONTIG-079369 | 94  | 5    | 4  | 15  | 0    |
| CONTIG-079370 | 267 | 13   | 13 | 56  | 0    |
| CONTIG-079371 | 68  | 9    | 0  | 22  | 0    |
| CONTIG-079372 | 158 | 2    | 6  | 2   | 0    |
| CONTIG-079373 | 90  | 5    | 3  | 16  | 0    |
| CONTIG-079374 | 95  | 8    | 0  | 4   | 0    |
| CONTIG-079375 | 211 | 5    | 9  | 17  | 0    |
| CONTIG-079376 | 58  | 3    | 2  | 6   | 0    |
| CONTIG-079377 | 852 | 17   | 10 | 811 | 0    |
| CONTIG-079378 | 62  | 2    | 0  | 2   | 0    |
| CONTIG-079379 | 245 | 9    | 2  | 50  | 4    |
| CONTIG-079380 | 92  | 9    | 11 | 31  | 0    |
| CONTIG-079382 | 318 | 7    | 8  | 55  | 0    |
| CONTIG-079383 | 86  | 6    | 2  | 11  | 0    |
| CONTIG-079384 | 92  | 21   | 6  | 23  | 0    |
| CONTIG-079385 | 99  | 10   | 2  | 0   | 3    |
| CONTIG-079386 | 231 | 3    | 5  | 7   | 0    |
| CONTIG-079387 | 145 | 36   | 6  | 214 | 0    |
| CONTIG-079388 | 75  | 77   | 3  | 8   | 0    |
| CONTIG-079390 | 84  | 16   | 0  | 4   | 0    |
| CONTIG-079392 | 146 | 7    | 7  | 29  | 0    |
| CONTIG-079393 | 189 | 6    | 9  | 38  | 0    |
| CONTIG-079394 | 87  | 3    | 3  | 2   | 0    |
| CONTIG-079395 | 123 | 3    | 2  | 13  | 0    |
| CONTIG-079396 | 164 | 7    | 4  | 17  | 0    |
| CONTIG-079397 | 66  | 3857 | 0  | 2   | 6976 |
| CONTIG-079398 | 146 | 12   | 6  | 53  | 2    |
| CONTIG-079399 | 86  | 3    | 0  | 0   | 0    |
| CONTIG-079400 | 82  | 4    | 3  | 5   | 0    |
| CONTIG-079401 | 176 | 13   | 2  | 30  | 0    |
| CONTIG-079402 | 90  | 3    | 2  | 8   | 0    |
| CONTIG-079403 | 100 | 3    | 13 | 6   | 0    |
| CONTIG-079404 | 143 | 7    | 5  | 32  | 0    |
| CONTIG-079405 | 112 | 5    | 6  | 18  | 0    |
| CONTIG-079406 | 227 | 7    | 13 | 62  | 0    |
| CONTIG-079407 | 65  | 5    | 11 | 7   | 0    |
| CONTIG-079408 | 87  | 12   | 4  | 31  | 2    |
| CONTIG-079409 | 97  | 5    | 4  | 7   | 0    |
| CONTIG-079410 | 75  | 4    | 0  | 7   | 0    |
| CONTIG-079412 | 71  | 4    | 6  | 6   | 0    |
| CONTIG-079414 | 90  | 10   | 2  | 24  | 2    |
| CONTIG-079415 | 114 | 8    | 0  | 21  | 0    |
| CONTIG-079416 | 73  | 3    | 6  | 2   | 0    |
| CONTIG-079417 | 144 | 8    | 0  | 32  | 0    |
| CONTIG-079418 | 119 | 7    | 2  | 33  | 0    |
| CONTIG-079419 | 147 | 12   | 5  | 33  | 0    |

|               |     |    |    |     |    |
|---------------|-----|----|----|-----|----|
| CONTIG-079420 | 81  | 9  | 9  | 13  | 0  |
| CONTIG-079421 | 58  | 4  | 0  | 2   | 0  |
| CONTIG-079422 | 90  | 3  | 2  | 4   | 0  |
| CONTIG-079423 | 129 | 15 | 5  | 55  | 0  |
| CONTIG-079424 | 72  | 4  | 3  | 13  | 0  |
| CONTIG-079425 | 87  | 5  | 5  | 10  | 0  |
| CONTIG-079426 | 58  | 8  | 6  | 0   | 0  |
| CONTIG-079427 | 62  | 7  | 0  | 9   | 0  |
| CONTIG-079433 | 135 | 11 | 2  | 34  | 2  |
| CONTIG-079434 | 192 | 10 | 3  | 18  | 0  |
| CONTIG-079435 | 169 | 6  | 5  | 10  | 0  |
| CONTIG-079436 | 124 | 3  | 3  | 2   | 0  |
| CONTIG-079437 | 708 | 36 | 9  | 9   | 0  |
| CONTIG-079438 | 72  | 5  | 2  | 10  | 0  |
| CONTIG-079439 | 61  | 7  | 3  | 4   | 0  |
| CONTIG-079440 | 138 | 6  | 9  | 12  | 0  |
| CONTIG-079441 | 137 | 14 | 4  | 93  | 0  |
| CONTIG-079442 | 83  | 3  | 0  | 7   | 0  |
| CONTIG-079446 | 191 | 4  | 3  | 13  | 0  |
| CONTIG-079447 | 552 | 11 | 14 | 145 | 0  |
| CONTIG-079449 | 430 | 9  | 2  | 0   | 12 |
| CONTIG-079450 | 155 | 5  | 4  | 27  | 0  |
| CONTIG-079451 | 82  | 4  | 2  | 7   | 0  |
| CONTIG-079452 | 297 | 7  | 6  | 61  | 0  |
| CONTIG-079453 | 72  | 7  | 10 | 2   | 0  |
| CONTIG-079454 | 96  | 4  | 2  | 10  | 0  |
| CONTIG-079456 | 135 | 5  | 7  | 14  | 0  |
| CONTIG-079457 | 956 | 18 | 22 | 659 | 10 |
| CONTIG-079458 | 68  | 3  | 2  | 5   | 0  |
| CONTIG-079459 | 39  | 8  | 0  | 2   | 0  |
| CONTIG-079462 | 140 | 5  | 2  | 16  | 0  |
| CONTIG-079463 | 91  | 8  | 4  | 20  | 0  |
| CONTIG-079464 | 79  | 4  | 11 | 6   | 0  |
| CONTIG-079465 | 185 | 9  | 3  | 49  | 0  |
| CONTIG-079466 | 58  | 5  | 0  | 4   | 0  |
| CONTIG-079467 | 72  | 6  | 11 | 5   | 0  |
| CONTIG-079469 | 67  | 10 | 0  | 22  | 0  |
| CONTIG-079471 | 162 | 6  | 11 | 23  | 0  |
| CONTIG-079473 | 80  | 3  | 0  | 10  | 0  |
| CONTIG-079474 | 144 | 6  | 4  | 20  | 0  |
| CONTIG-079475 | 108 | 11 | 5  | 46  | 2  |
| CONTIG-079477 | 130 | 6  | 2  | 19  | 0  |
| CONTIG-079478 | 190 | 8  | 10 | 47  | 0  |
| CONTIG-079479 | 96  | 3  | 2  | 7   | 0  |
| CONTIG-079480 | 452 | 22 | 7  | 9   | 0  |
| CONTIG-079481 | 207 | 11 | 0  | 66  | 0  |
| CONTIG-079482 | 97  | 4  | 0  | 2   | 0  |

|               |     |    |    |     |   |
|---------------|-----|----|----|-----|---|
| CONTIG-079483 | 134 | 7  | 2  | 23  | 0 |
| CONTIG-079484 | 109 | 5  | 2  | 4   | 0 |
| CONTIG-079486 | 103 | 6  | 13 | 11  | 0 |
| CONTIG-079487 | 159 | 9  | 5  | 24  | 2 |
| CONTIG-079488 | 74  | 4  | 0  | 5   | 0 |
| CONTIG-079489 | 189 | 12 | 9  | 61  | 0 |
| CONTIG-079490 | 648 | 18 | 27 | 559 | 0 |
| CONTIG-079491 | 67  | 3  | 4  | 3   | 0 |
| CONTIG-079492 | 65  | 3  | 4  | 2   | 0 |
| CONTIG-079493 | 85  | 3  | 8  | 4   | 0 |
| CONTIG-079494 | 63  | 5  | 2  | 4   | 0 |
| CONTIG-079495 | 187 | 7  | 2  | 50  | 0 |
| CONTIG-079496 | 66  | 3  | 10 | 0   | 0 |
| CONTIG-079501 | 258 | 11 | 15 | 113 | 0 |
| CONTIG-079502 | 80  | 5  | 0  | 10  | 0 |
| CONTIG-079503 | 174 | 6  | 4  | 32  | 0 |
| CONTIG-079504 | 124 | 7  | 2  | 29  | 0 |
| CONTIG-079505 | 77  | 6  | 0  | 15  | 0 |
| CONTIG-079509 | 66  | 3  | 7  | 2   | 0 |
| CONTIG-079510 | 103 | 6  | 2  | 14  | 0 |
| CONTIG-079512 | 66  | 7  | 27 | 0   | 0 |
| CONTIG-079513 | 74  | 4  | 2  | 9   | 0 |
| CONTIG-079517 | 196 | 4  | 5  | 5   | 0 |
| CONTIG-079518 | 143 | 12 | 12 | 64  | 0 |
| CONTIG-079519 | 66  | 4  | 0  | 6   | 0 |
| CONTIG-079520 | 112 | 5  | 0  | 0   | 0 |
| CONTIG-079521 | 171 | 6  | 3  | 32  | 0 |
| CONTIG-079522 | 87  | 3  | 2  | 6   | 3 |
| CONTIG-079523 | 102 | 5  | 5  | 10  | 0 |
| CONTIG-079524 | 147 | 8  | 12 | 36  | 0 |
| CONTIG-079525 | 135 | 18 | 6  | 79  | 4 |
| CONTIG-079527 | 173 | 5  | 2  | 6   | 0 |
| CONTIG-079528 | 159 | 5  | 13 | 13  | 0 |
| CONTIG-079529 | 73  | 9  | 9  | 2   | 0 |
| CONTIG-079530 | 66  | 9  | 4  | 18  | 0 |
| CONTIG-079531 | 116 | 4  | 10 | 2   | 0 |
| CONTIG-079532 | 65  | 5  | 2  | 7   | 0 |
| CONTIG-079533 | 97  | 6  | 0  | 15  | 0 |
| CONTIG-079534 | 171 | 11 | 10 | 53  | 0 |
| CONTIG-079535 | 80  | 7  | 2  | 3   | 0 |
| CONTIG-079536 | 60  | 3  | 4  | 3   | 0 |
| CONTIG-079537 | 86  | 5  | 10 | 13  | 0 |
| CONTIG-079538 | 106 | 9  | 9  | 0   | 0 |
| CONTIG-079539 | 77  | 10 | 19 | 23  | 0 |
| CONTIG-079540 | 72  | 7  | 3  | 17  | 0 |
| CONTIG-079541 | 292 | 9  | 27 | 71  | 0 |
| CONTIG-079542 | 83  | 2  | 2  | 0   | 0 |

|               |     |    |    |     |   |
|---------------|-----|----|----|-----|---|
| CONTIG-079543 | 63  | 6  | 0  | 0   | 2 |
| CONTIG-079544 | 81  | 5  | 4  | 0   | 0 |
| CONTIG-079545 | 99  | 6  | 2  | 27  | 0 |
| CONTIG-079546 | 76  | 3  | 8  | 2   | 0 |
| CONTIG-079547 | 138 | 9  | 26 | 42  | 0 |
| CONTIG-079548 | 74  | 4  | 2  | 8   | 0 |
| CONTIG-079550 | 65  | 11 | 18 | 2   | 0 |
| CONTIG-079551 | 36  | 35 | 9  | 5   | 0 |
| CONTIG-079552 | 209 | 6  | 7  | 44  | 0 |
| CONTIG-079553 | 238 | 53 | 33 | 786 | 0 |
| CONTIG-079554 | 265 | 16 | 7  | 167 | 0 |
| CONTIG-079555 | 216 | 5  | 3  | 36  | 0 |
| CONTIG-079556 | 48  | 34 | 12 | 29  | 0 |
| CONTIG-079557 | 59  | 4  | 2  | 6   | 0 |
| CONTIG-079558 | 310 | 9  | 7  | 105 | 2 |
| CONTIG-079559 | 202 | 9  | 7  | 19  | 0 |
| CONTIG-079560 | 98  | 3  | 2  | 9   | 0 |
| CONTIG-079561 | 170 | 10 | 10 | 7   | 0 |
| CONTIG-079562 | 70  | 3  | 3  | 2   | 0 |
| CONTIG-079563 | 216 | 12 | 3  | 120 | 0 |
| CONTIG-079564 | 202 | 8  | 3  | 42  | 0 |
| CONTIG-079565 | 106 | 6  | 7  | 17  | 0 |
| CONTIG-079572 | 87  | 8  | 6  | 21  | 0 |
| CONTIG-079573 | 167 | 7  | 17 | 38  | 0 |
| CONTIG-079574 | 141 | 28 | 4  | 111 | 0 |
| CONTIG-079575 | 140 | 13 | 2  | 62  | 0 |
| CONTIG-079576 | 146 | 6  | 0  | 30  | 0 |
| CONTIG-079577 | 210 | 6  | 4  | 46  | 0 |
| CONTIG-079578 | 76  | 7  | 21 | 6   | 0 |
| CONTIG-079579 | 299 | 8  | 2  | 41  | 0 |
| CONTIG-079580 | 130 | 4  | 0  | 17  | 0 |
| CONTIG-079581 | 63  | 4  | 5  | 6   | 0 |
| CONTIG-079582 | 69  | 10 | 5  | 14  | 0 |
| CONTIG-079583 | 60  | 3  | 4  | 2   | 0 |
| CONTIG-079584 | 71  | 4  | 0  | 0   | 0 |
| CONTIG-079585 | 185 | 16 | 13 | 67  | 0 |
| CONTIG-079586 | 597 | 12 | 15 | 301 | 0 |
| CONTIG-079587 | 58  | 3  | 3  | 5   | 0 |
| CONTIG-079588 | 87  | 6  | 2  | 3   | 0 |
| CONTIG-079589 | 121 | 3  | 2  | 12  | 0 |
| CONTIG-079590 | 269 | 8  | 16 | 60  | 0 |
| CONTIG-079591 | 64  | 10 | 20 | 0   | 0 |
| CONTIG-079592 | 84  | 3  | 6  | 2   | 0 |
| CONTIG-079593 | 312 | 9  | 10 | 101 | 0 |
| CONTIG-079594 | 122 | 10 | 7  | 29  | 0 |
| CONTIG-079595 | 71  | 10 | 0  | 11  | 0 |
| CONTIG-079596 | 166 | 12 | 4  | 91  | 0 |



|               |     |    |    |     |     |
|---------------|-----|----|----|-----|-----|
| CONTIG-079597 | 85  | 4  | 4  | 10  | 0   |
| CONTIG-079598 | 361 | 7  | 3  | 51  | 0   |
| CONTIG-079599 | 113 | 6  | 2  | 17  | 0   |
| CONTIG-079601 | 75  | 6  | 2  | 15  | 0   |
| CONTIG-079602 | 263 | 13 | 12 | 117 | 0   |
| CONTIG-079603 | 222 | 11 | 9  | 95  | 2   |
| CONTIG-079604 | 139 | 4  | 13 | 7   | 0   |
| CONTIG-079605 | 162 | 6  | 6  | 31  | 0   |
| CONTIG-079606 | 135 | 8  | 12 | 15  | 0   |
| CONTIG-079607 | 88  | 6  | 2  | 13  | 0   |
| CONTIG-079608 | 143 | 13 | 10 | 62  | 0   |
| CONTIG-079609 | 145 | 10 | 0  | 20  | 0   |
| CONTIG-079610 | 214 | 18 | 5  | 16  | 0   |
| CONTIG-079611 | 156 | 8  | 4  | 36  | 0   |
| CONTIG-079612 | 120 | 10 | 4  | 0   | 5   |
| CONTIG-079613 | 71  | 8  | 3  | 12  | 0   |
| CONTIG-079614 | 61  | 14 | 6  | 20  | 0   |
| CONTIG-079615 | 90  | 9  | 3  | 22  | 0   |
| CONTIG-079616 | 90  | 7  | 2  | 21  | 0   |
| CONTIG-079617 | 261 | 27 | 10 | 153 | 15  |
| CONTIG-079618 | 206 | 11 | 6  | 73  | 0   |
| CONTIG-079619 | 323 | 10 | 14 | 108 | 0   |
| CONTIG-079620 | 209 | 6  | 3  | 39  | 0   |
| CONTIG-079621 | 75  | 8  | 4  | 29  | 0   |
| CONTIG-079622 | 480 | 13 | 8  | 317 | 0   |
| CONTIG-079623 | 184 | 17 | 31 | 86  | 0   |
| CONTIG-079624 | 196 | 10 | 10 | 60  | 0   |
| CONTIG-079625 | 211 | 16 | 0  | 0   | 24  |
| CONTIG-079626 | 157 | 35 | 0  | 0   | 61  |
| CONTIG-079627 | 60  | 8  | 12 | 2   | 0   |
| CONTIG-079628 | 117 | 7  | 6  | 19  | 0   |
| CONTIG-079629 | 150 | 8  | 6  | 10  | 0   |
| CONTIG-079630 | 74  | 4  | 3  | 9   | 0   |
| CONTIG-079631 | 182 | 3  | 2  | 9   | 0   |
| CONTIG-079632 | 263 | 6  | 16 | 46  | 0   |
| CONTIG-079633 | 959 | 38 | 4  | 2   | 304 |
| CONTIG-079634 | 96  | 13 | 7  | 26  | 0   |
| CONTIG-079635 | 89  | 3  | 0  | 2   | 0   |
| CONTIG-079636 | 94  | 4  | 0  | 10  | 0   |
| CONTIG-079638 | 319 | 9  | 3  | 139 | 0   |
| CONTIG-079639 | 191 | 12 | 7  | 69  | 0   |
| CONTIG-079640 | 60  | 4  | 2  | 5   | 0   |
| CONTIG-079641 | 91  | 6  | 2  | 23  | 0   |
| CONTIG-079642 | 62  | 3  | 11 | 0   | 0   |
| CONTIG-079643 | 96  | 4  | 2  | 11  | 0   |
| CONTIG-079644 | 110 | 5  | 2  | 5   | 0   |
| CONTIG-079645 | 64  | 69 | 4  | 205 | 0   |

|               |     |    |    |     |    |
|---------------|-----|----|----|-----|----|
| CONTIG-079646 | 207 | 6  | 5  | 23  | 2  |
| CONTIG-079647 | 106 | 14 | 17 | 17  | 0  |
| CONTIG-079648 | 108 | 2  | 2  | 4   | 0  |
| CONTIG-079649 | 70  | 3  | 0  | 8   | 0  |
| CONTIG-079650 | 240 | 11 | 9  | 90  | 2  |
| CONTIG-079651 | 122 | 8  | 17 | 10  | 0  |
| CONTIG-079652 | 103 | 8  | 7  | 15  | 0  |
| CONTIG-079653 | 98  | 5  | 2  | 14  | 0  |
| CONTIG-079654 | 116 | 9  | 7  | 45  | 0  |
| CONTIG-079655 | 184 | 5  | 0  | 14  | 0  |
| CONTIG-079656 | 121 | 11 | 11 | 22  | 0  |
| CONTIG-079657 | 76  | 4  | 0  | 0   | 0  |
| CONTIG-079658 | 104 | 11 | 11 | 28  | 0  |
| CONTIG-079659 | 176 | 8  | 5  | 26  | 0  |
| CONTIG-079660 | 147 | 26 | 18 | 169 | 0  |
| CONTIG-079661 | 168 | 12 | 10 | 80  | 0  |
| CONTIG-079662 | 362 | 18 | 2  | 0   | 11 |
| CONTIG-079663 | 624 | 15 | 2  | 277 | 8  |
| CONTIG-079666 | 193 | 21 | 5  | 159 | 0  |
| CONTIG-079667 | 59  | 6  | 2  | 15  | 0  |
| CONTIG-079668 | 67  | 5  | 2  | 8   | 0  |
| CONTIG-079669 | 86  | 2  | 0  | 0   | 0  |
| CONTIG-079670 | 118 | 4  | 0  | 18  | 0  |
| CONTIG-079671 | 86  | 7  | 2  | 15  | 0  |
| CONTIG-079672 | 146 | 4  | 0  | 26  | 0  |
| CONTIG-079673 | 112 | 5  | 5  | 14  | 0  |
| CONTIG-079674 | 103 | 24 | 3  | 0   | 2  |
| CONTIG-079675 | 69  | 4  | 4  | 4   | 0  |
| CONTIG-079676 | 93  | 3  | 0  | 3   | 0  |
| CONTIG-079677 | 81  | 23 | 6  | 80  | 0  |
| CONTIG-079678 | 61  | 4  | 4  | 0   | 0  |
| CONTIG-079679 | 201 | 22 | 5  | 113 | 0  |
| CONTIG-079680 | 230 | 4  | 0  | 14  | 0  |
| CONTIG-079681 | 119 | 7  | 6  | 11  | 0  |
| CONTIG-079682 | 90  | 8  | 6  | 19  | 0  |
| CONTIG-079683 | 128 | 6  | 0  | 27  | 0  |
| CONTIG-079684 | 164 | 6  | 0  | 20  | 0  |
| CONTIG-079686 | 89  | 10 | 3  | 21  | 0  |
| CONTIG-079687 | 66  | 3  | 0  | 2   | 0  |
| CONTIG-079688 | 58  | 5  | 2  | 9   | 0  |
| CONTIG-079689 | 362 | 5  | 6  | 36  | 0  |
| CONTIG-079690 | 119 | 8  | 11 | 31  | 0  |
| CONTIG-079691 | 82  | 4  | 0  | 9   | 0  |
| CONTIG-079692 | 63  | 8  | 4  | 2   | 0  |
| CONTIG-079693 | 77  | 4  | 0  | 13  | 0  |
| CONTIG-079694 | 302 | 7  | 3  | 57  | 0  |
| CONTIG-079695 | 74  | 4  | 3  | 4   | 0  |

|               |     |     |    |     |     |
|---------------|-----|-----|----|-----|-----|
| CONTIG-079696 | 106 | 13  | 8  | 27  | 0   |
| CONTIG-079697 | 80  | 3   | 0  | 4   | 0   |
| CONTIG-079698 | 91  | 6   | 3  | 19  | 0   |
| CONTIG-079699 | 74  | 14  | 10 | 38  | 0   |
| CONTIG-079700 | 79  | 6   | 8  | 0   | 0   |
| CONTIG-079701 | 286 | 91  | 0  | 0   | 427 |
| CONTIG-079702 | 122 | 8   | 2  | 19  | 0   |
| CONTIG-079703 | 70  | 12  | 2  | 27  | 0   |
| CONTIG-079704 | 62  | 6   | 3  | 2   | 0   |
| CONTIG-079706 | 73  | 10  | 0  | 32  | 0   |
| CONTIG-079707 | 72  | 6   | 0  | 10  | 0   |
| CONTIG-079708 | 114 | 4   | 0  | 11  | 0   |
| CONTIG-079709 | 175 | 4   | 10 | 6   | 0   |
| CONTIG-079710 | 137 | 6   | 2  | 20  | 0   |
| CONTIG-079711 | 69  | 4   | 4  | 7   | 0   |
| CONTIG-079712 | 61  | 4   | 6  | 4   | 0   |
| CONTIG-079713 | 67  | 160 | 2  | 619 | 0   |
| CONTIG-079714 | 88  | 10  | 3  | 40  | 0   |
| CONTIG-079715 | 50  | 9   | 2  | 10  | 0   |
| CONTIG-079716 | 96  | 13  | 0  | 25  | 4   |
| CONTIG-079717 | 73  | 4   | 2  | 0   | 0   |
| CONTIG-079718 | 86  | 9   | 10 | 28  | 0   |
| CONTIG-079719 | 99  | 5   | 2  | 17  | 0   |
| CONTIG-079720 | 338 | 15  | 12 | 113 | 0   |
| CONTIG-079721 | 126 | 17  | 4  | 94  | 4   |
| CONTIG-079722 | 122 | 10  | 6  | 13  | 2   |
| CONTIG-079723 | 86  | 7   | 3  | 23  | 0   |
| CONTIG-079724 | 54  | 20  | 11 | 44  | 0   |
| CONTIG-079725 | 59  | 6   | 2  | 6   | 0   |
| CONTIG-079726 | 150 | 4   | 2  | 25  | 0   |
| CONTIG-079727 | 82  | 12  | 20 | 22  | 0   |
| CONTIG-079728 | 290 | 12  | 23 | 100 | 2   |
| CONTIG-079729 | 81  | 7   | 17 | 0   | 0   |
| CONTIG-079730 | 532 | 29  | 3  | 0   | 105 |
| CONTIG-079731 | 86  | 8   | 9  | 4   | 0   |
| CONTIG-079732 | 74  | 3   | 3  | 0   | 0   |
| CONTIG-079733 | 78  | 11  | 0  | 0   | 0   |
| CONTIG-079734 | 168 | 7   | 6  | 5   | 0   |
| CONTIG-079735 | 96  | 4   | 4  | 5   | 0   |
| CONTIG-079736 | 459 | 11  | 9  | 126 | 2   |
| CONTIG-079737 | 64  | 7   | 4  | 0   | 0   |
| CONTIG-079738 | 107 | 11  | 7  | 52  | 0   |
| CONTIG-079739 | 157 | 6   | 5  | 39  | 0   |
| CONTIG-079742 | 343 | 8   | 0  | 0   | 29  |
| CONTIG-079743 | 64  | 6   | 8  | 6   | 0   |
| CONTIG-079744 | 64  | 5   | 7  | 4   | 0   |
| CONTIG-079745 | 77  | 13  | 4  | 35  | 0   |

|               |     |     |    |     |    |
|---------------|-----|-----|----|-----|----|
| CONTIG-079746 | 108 | 11  | 2  | 11  | 0  |
| CONTIG-079747 | 154 | 5   | 8  | 7   | 0  |
| CONTIG-079748 | 225 | 8   | 9  | 81  | 0  |
| CONTIG-079749 | 126 | 4   | 3  | 14  | 0  |
| CONTIG-079750 | 59  | 4   | 0  | 0   | 0  |
| CONTIG-079751 | 80  | 5   | 3  | 12  | 0  |
| CONTIG-079752 | 89  | 4   | 2  | 0   | 0  |
| CONTIG-079753 | 88  | 4   | 2  | 5   | 0  |
| CONTIG-079754 | 75  | 6   | 0  | 15  | 0  |
| CONTIG-079755 | 221 | 8   | 12 | 54  | 2  |
| CONTIG-079756 | 143 | 3   | 0  | 14  | 0  |
| CONTIG-079757 | 176 | 8   | 16 | 35  | 0  |
| CONTIG-079758 | 64  | 11  | 11 | 4   | 0  |
| CONTIG-079759 | 111 | 7   | 2  | 23  | 0  |
| CONTIG-079760 | 94  | 5   | 0  | 6   | 0  |
| CONTIG-079762 | 97  | 7   | 10 | 5   | 0  |
| CONTIG-079763 | 221 | 7   | 0  | 53  | 0  |
| CONTIG-079764 | 89  | 10  | 0  | 38  | 0  |
| CONTIG-079765 | 95  | 3   | 2  | 0   | 0  |
| CONTIG-079766 | 115 | 3   | 8  | 4   | 0  |
| CONTIG-079767 | 84  | 4   | 4  | 2   | 0  |
| CONTIG-079768 | 152 | 15  | 2  | 92  | 2  |
| CONTIG-079769 | 111 | 11  | 2  | 46  | 0  |
| CONTIG-079770 | 83  | 10  | 0  | 0   | 8  |
| CONTIG-079771 | 117 | 10  | 0  | 44  | 0  |
| CONTIG-079772 | 116 | 6   | 5  | 13  | 0  |
| CONTIG-079773 | 325 | 7   | 2  | 33  | 10 |
| CONTIG-079774 | 86  | 4   | 4  | 0   | 0  |
| CONTIG-079775 | 180 | 9   | 10 | 45  | 0  |
| CONTIG-079776 | 351 | 23  | 0  | 0   | 31 |
| CONTIG-079777 | 140 | 4   | 16 | 10  | 0  |
| CONTIG-079778 | 102 | 5   | 2  | 11  | 0  |
| CONTIG-079779 | 100 | 129 | 2  | 281 | 0  |
| CONTIG-079787 | 205 | 8   | 59 | 27  | 0  |
| CONTIG-079788 | 98  | 4   | 2  | 10  | 0  |
| CONTIG-079789 | 98  | 8   | 13 | 2   | 0  |
| CONTIG-079790 | 190 | 9   | 9  | 40  | 0  |
| CONTIG-079791 | 76  | 6   | 0  | 9   | 0  |
| CONTIG-079792 | 99  | 9   | 0  | 16  | 0  |
| CONTIG-079793 | 62  | 5   | 4  | 2   | 0  |
| CONTIG-079794 | 119 | 8   | 2  | 32  | 0  |
| CONTIG-079795 | 80  | 6   | 3  | 14  | 0  |
| CONTIG-079796 | 175 | 7   | 2  | 35  | 0  |
| CONTIG-079797 | 97  | 9   | 17 | 27  | 0  |
| CONTIG-079798 | 128 | 4   | 3  | 8   | 0  |
| CONTIG-079799 | 84  | 2   | 2  | 4   | 0  |
| CONTIG-079800 | 202 | 7   | 0  | 14  | 0  |

|               |     |     |    |     |     |
|---------------|-----|-----|----|-----|-----|
| CONTIG-079808 | 97  | 3   | 4  | 4   | 0   |
| CONTIG-079809 | 141 | 16  | 32 | 33  | 0   |
| CONTIG-079810 | 76  | 4   | 6  | 0   | 0   |
| CONTIG-079811 | 99  | 5   | 2  | 19  | 0   |
| CONTIG-079813 | 628 | 8   | 16 | 125 | 0   |
| CONTIG-079814 | 132 | 9   | 4  | 32  | 0   |
| CONTIG-079815 | 60  | 4   | 5  | 7   | 0   |
| CONTIG-079816 | 77  | 7   | 11 | 15  | 0   |
| CONTIG-079817 | 145 | 5   | 7  | 18  | 0   |
| CONTIG-079822 | 63  | 6   | 2  | 10  | 0   |
| CONTIG-079823 | 58  | 4   | 3  | 8   | 0   |
| CONTIG-079824 | 314 | 8   | 8  | 92  | 0   |
| CONTIG-079825 | 277 | 9   | 11 | 110 | 0   |
| CONTIG-079826 | 78  | 6   | 7  | 14  | 0   |
| CONTIG-079827 | 94  | 4   | 3  | 10  | 0   |
| CONTIG-079828 | 133 | 9   | 22 | 26  | 0   |
| CONTIG-079829 | 245 | 8   | 0  | 43  | 0   |
| CONTIG-079830 | 195 | 5   | 2  | 25  | 0   |
| CONTIG-079831 | 109 | 5   | 5  | 28  | 0   |
| CONTIG-079833 | 285 | 7   | 0  | 0   | 8   |
| CONTIG-079834 | 110 | 7   | 5  | 24  | 0   |
| CONTIG-079835 | 72  | 8   | 5  | 11  | 0   |
| CONTIG-079836 | 58  | 8   | 12 | 6   | 0   |
| CONTIG-079838 | 109 | 5   | 4  | 17  | 0   |
| CONTIG-079839 | 77  | 5   | 6  | 15  | 0   |
| CONTIG-079840 | 112 | 8   | 10 | 19  | 2   |
| CONTIG-079841 | 126 | 12  | 6  | 62  | 0   |
| CONTIG-079842 | 75  | 11  | 0  | 4   | 0   |
| CONTIG-079844 | 214 | 4   | 2  | 15  | 0   |
| CONTIG-079845 | 75  | 9   | 11 | 16  | 0   |
| CONTIG-079846 | 251 | 5   | 14 | 36  | 0   |
| CONTIG-079847 | 206 | 105 | 17 | 14  | 0   |
| CONTIG-079848 | 144 | 15  | 15 | 16  | 0   |
| CONTIG-079850 | 94  | 11  | 11 | 34  | 0   |
| CONTIG-079851 | 86  | 6   | 4  | 6   | 0   |
| CONTIG-079852 | 72  | 14  | 8  | 0   | 0   |
| CONTIG-079853 | 140 | 6   | 4  | 23  | 0   |
| CONTIG-079854 | 79  | 10  | 6  | 16  | 0   |
| CONTIG-079855 | 144 | 4   | 3  | 6   | 0   |
| CONTIG-079857 | 81  | 5   | 5  | 17  | 0   |
| CONTIG-079858 | 87  | 3   | 2  | 6   | 0   |
| CONTIG-079859 | 579 | 13  | 14 | 413 | 0   |
| CONTIG-079860 | 65  | 5   | 9  | 8   | 0   |
| CONTIG-079861 | 120 | 4   | 6  | 6   | 0   |
| CONTIG-079862 | 114 | 9   | 2  | 39  | 0   |
| CONTIG-079863 | 87  | 21  | 12 | 29  | 7   |
| CONTIG-079864 | 327 | 51  | 0  | 0   | 145 |

|               |     |    |    |     |   |
|---------------|-----|----|----|-----|---|
| CONTIG-079865 | 108 | 4  | 2  | 5   | 0 |
| CONTIG-079866 | 84  | 4  | 2  | 9   | 0 |
| CONTIG-079867 | 142 | 33 | 11 | 190 | 0 |
| CONTIG-079868 | 106 | 6  | 4  | 24  | 0 |
| CONTIG-079869 | 154 | 6  | 0  | 15  | 0 |
| CONTIG-079870 | 85  | 4  | 7  | 11  | 0 |
| CONTIG-079871 | 260 | 10 | 9  | 52  | 4 |
| CONTIG-079872 | 201 | 8  | 10 | 30  | 0 |
| CONTIG-079873 | 85  | 10 | 2  | 13  | 0 |
| CONTIG-079874 | 116 | 9  | 35 | 13  | 0 |
| CONTIG-079875 | 80  | 5  | 5  | 4   | 0 |
| CONTIG-079876 | 202 | 5  | 2  | 20  | 2 |
| CONTIG-079877 | 732 | 14 | 4  | 477 | 2 |
| CONTIG-079878 | 70  | 5  | 0  | 2   | 0 |
| CONTIG-079879 | 157 | 6  | 5  | 33  | 0 |
| CONTIG-079880 | 89  | 5  | 10 | 14  | 0 |
| CONTIG-079881 | 86  | 6  | 2  | 17  | 0 |
| CONTIG-079882 | 118 | 7  | 0  | 25  | 0 |
| CONTIG-079886 | 103 | 6  | 4  | 17  | 0 |
| CONTIG-079887 | 87  | 11 | 6  | 47  | 0 |
| CONTIG-079888 | 84  | 24 | 43 | 46  | 0 |
| CONTIG-079889 | 75  | 22 | 9  | 63  | 0 |
| CONTIG-079890 | 63  | 3  | 0  | 8   | 0 |
| CONTIG-079891 | 84  | 4  | 3  | 2   | 0 |
| CONTIG-079892 | 64  | 5  | 0  | 13  | 0 |
| CONTIG-079893 | 72  | 9  | 0  | 26  | 0 |
| CONTIG-079894 | 120 | 8  | 12 | 30  | 0 |
| CONTIG-079896 | 191 | 5  | 9  | 33  | 0 |
| CONTIG-079897 | 308 | 10 | 5  | 36  | 0 |
| CONTIG-079899 | 219 | 11 | 5  | 59  | 0 |
| CONTIG-079900 | 105 | 4  | 2  | 12  | 0 |
| CONTIG-079901 | 126 | 5  | 0  | 20  | 0 |
| CONTIG-079902 | 103 | 6  | 2  | 14  | 0 |
| CONTIG-079903 | 59  | 5  | 5  | 3   | 0 |
| CONTIG-079904 | 71  | 10 | 0  | 18  | 0 |
| CONTIG-079905 | 52  | 5  | 0  | 4   | 0 |
| CONTIG-079906 | 75  | 9  | 24 | 23  | 0 |
| CONTIG-079907 | 321 | 8  | 11 | 65  | 0 |
| CONTIG-079908 | 80  | 6  | 14 | 9   | 0 |
| CONTIG-079909 | 75  | 5  | 0  | 10  | 0 |
| CONTIG-079911 | 116 | 5  | 0  | 24  | 0 |
| CONTIG-079912 | 74  | 4  | 3  | 9   | 0 |
| CONTIG-079914 | 81  | 3  | 2  | 0   | 0 |
| CONTIG-079915 | 264 | 13 | 10 | 129 | 0 |
| CONTIG-079916 | 76  | 9  | 3  | 2   | 0 |
| CONTIG-079917 | 208 | 16 | 14 | 178 | 0 |
| CONTIG-079918 | 128 | 4  | 0  | 16  | 0 |

|               |     |    |    |     |   |
|---------------|-----|----|----|-----|---|
| CONTIG-079919 | 112 | 18 | 4  | 89  | 0 |
| CONTIG-079920 | 59  | 7  | 10 | 7   | 0 |
| CONTIG-079923 | 111 | 6  | 0  | 25  | 0 |
| CONTIG-079924 | 65  | 8  | 3  | 4   | 0 |
| CONTIG-079925 | 62  | 3  | 2  | 7   | 0 |
| CONTIG-079926 | 83  | 8  | 2  | 13  | 0 |
| CONTIG-079927 | 63  | 7  | 0  | 9   | 0 |
| CONTIG-079928 | 84  | 8  | 4  | 21  | 2 |
| CONTIG-079930 | 53  | 8  | 3  | 4   | 0 |
| CONTIG-079931 | 131 | 9  | 3  | 9   | 0 |
| CONTIG-079932 | 72  | 2  | 2  | 2   | 0 |
| CONTIG-079933 | 65  | 4  | 4  | 4   | 0 |
| CONTIG-079934 | 62  | 7  | 3  | 4   | 0 |
| CONTIG-079935 | 83  | 3  | 2  | 0   | 0 |
| CONTIG-079936 | 168 | 10 | 4  | 55  | 2 |
| CONTIG-079937 | 124 | 9  | 4  | 14  | 0 |
| CONTIG-079938 | 339 | 7  | 2  | 46  | 0 |
| CONTIG-079939 | 201 | 26 | 6  | 58  | 0 |
| CONTIG-079940 | 115 | 7  | 8  | 15  | 0 |
| CONTIG-079942 | 77  | 4  | 0  | 2   | 2 |
| CONTIG-079943 | 70  | 5  | 0  | 9   | 0 |
| CONTIG-079944 | 62  | 2  | 0  | 0   | 0 |
| CONTIG-079945 | 385 | 10 | 5  | 97  | 2 |
| CONTIG-079946 | 143 | 7  | 5  | 33  | 0 |
| CONTIG-079947 | 112 | 4  | 0  | 12  | 0 |
| CONTIG-079948 | 105 | 7  | 2  | 16  | 0 |
| CONTIG-079949 | 78  | 3  | 4  | 0   | 0 |
| CONTIG-079950 | 324 | 22 | 19 | 282 | 4 |
| CONTIG-079951 | 81  | 6  | 5  | 12  | 0 |
| CONTIG-079952 | 202 | 8  | 4  | 32  | 0 |
| CONTIG-079953 | 166 | 7  | 5  | 8   | 0 |
| CONTIG-079954 | 99  | 5  | 10 | 6   | 0 |
| CONTIG-079955 | 172 | 18 | 11 | 73  | 0 |
| CONTIG-079956 | 62  | 12 | 0  | 18  | 0 |
| CONTIG-079957 | 71  | 4  | 0  | 2   | 0 |
| CONTIG-079958 | 92  | 12 | 2  | 35  | 0 |
| CONTIG-079959 | 90  | 18 | 0  | 74  | 0 |
| CONTIG-079960 | 749 | 18 | 33 | 415 | 5 |
| CONTIG-079961 | 211 | 4  | 10 | 19  | 0 |
| CONTIG-079962 | 253 | 14 | 18 | 93  | 0 |
| CONTIG-079963 | 77  | 5  | 0  | 14  | 0 |
| CONTIG-079964 | 152 | 11 | 3  | 47  | 0 |
| CONTIG-079965 | 160 | 3  | 3  | 14  | 0 |
| CONTIG-079966 | 301 | 8  | 2  | 82  | 0 |
| CONTIG-079969 | 83  | 4  | 4  | 7   | 0 |
| CONTIG-079970 | 254 | 24 | 26 | 272 | 9 |
| CONTIG-079971 | 337 | 7  | 3  | 0   | 0 |

|               |      |      |    |     |      |
|---------------|------|------|----|-----|------|
| CONTIG-079972 | 82   | 10   | 8  | 32  | 0    |
| CONTIG-079973 | 64   | 8    | 12 | 13  | 0    |
| CONTIG-079974 | 132  | 17   | 17 | 47  | 0    |
| CONTIG-079975 | 73   | 8    | 3  | 18  | 0    |
| CONTIG-079976 | 98   | 4    | 2  | 9   | 0    |
| CONTIG-079977 | 238  | 15   | 13 | 122 | 0    |
| CONTIG-079978 | 93   | 17   | 7  | 30  | 0    |
| CONTIG-079979 | 103  | 8    | 0  | 34  | 0    |
| CONTIG-079980 | 106  | 4    | 0  | 13  | 0    |
| CONTIG-079982 | 92   | 10   | 15 | 12  | 0    |
| CONTIG-079983 | 81   | 8    | 6  | 18  | 0    |
| CONTIG-079984 | 285  | 15   | 13 | 106 | 7    |
| CONTIG-079985 | 91   | 3    | 3  | 4   | 0    |
| CONTIG-079988 | 67   | 7    | 2  | 0   | 0    |
| CONTIG-079989 | 109  | 3    | 0  | 5   | 0    |
| CONTIG-079991 | 148  | 9    | 0  | 39  | 0    |
| CONTIG-079992 | 68   | 13   | 3  | 39  | 0    |
| CONTIG-079993 | 100  | 8    | 2  | 21  | 0    |
| CONTIG-079994 | 66   | 3    | 5  | 5   | 0    |
| CONTIG-079995 | 153  | 5    | 8  | 18  | 2    |
| CONTIG-079996 | 1105 | 23   | 4  | 0   | 183  |
| CONTIG-079997 | 87   | 3    | 0  | 4   | 0    |
| CONTIG-079999 | 91   | 4    | 11 | 7   | 0    |
| CONTIG-080000 | 126  | 15   | 5  | 74  | 0    |
| CONTIG-080001 | 68   | 8    | 5  | 4   | 0    |
| CONTIG-080002 | 229  | 10   | 4  | 64  | 0    |
| CONTIG-080003 | 72   | 11   | 2  | 33  | 0    |
| CONTIG-080004 | 94   | 4    | 7  | 12  | 0    |
| CONTIG-080005 | 76   | 5    | 2  | 13  | 0    |
| CONTIG-080006 | 76   | 16   | 2  | 47  | 0    |
| CONTIG-080007 | 73   | 7    | 5  | 6   | 0    |
| CONTIG-080008 | 107  | 6    | 11 | 4   | 0    |
| CONTIG-080009 | 135  | 7    | 2  | 27  | 0    |
| CONTIG-080012 | 63   | 4    | 14 | 4   | 0    |
| CONTIG-080013 | 90   | 3    | 2  | 0   | 0    |
| CONTIG-080014 | 42   | 6    | 4  | 0   | 0    |
| CONTIG-080015 | 154  | 8    | 0  | 54  | 0    |
| CONTIG-080016 | 115  | 13   | 13 | 14  | 0    |
| CONTIG-080017 | 156  | 6    | 12 | 24  | 2    |
| CONTIG-080018 | 80   | 7    | 2  | 8   | 0    |
| CONTIG-080019 | 106  | 4    | 4  | 12  | 0    |
| CONTIG-080020 | 85   | 12   | 23 | 13  | 0    |
| CONTIG-080021 | 75   | 8    | 4  | 12  | 0    |
| CONTIG-080022 | 44   | 2178 | 9  | 2   | 1952 |
| CONTIG-080023 | 76   | 7    | 23 | 2   | 0    |
| CONTIG-080024 | 127  | 4    | 4  | 8   | 0    |
| CONTIG-080025 | 314  | 8    | 14 | 22  | 0    |



|               |     |     |    |      |      |
|---------------|-----|-----|----|------|------|
| CONTIG-080026 | 96  | 14  | 2  | 27   | 0    |
| CONTIG-080027 | 85  | 10  | 5  | 11   | 0    |
| CONTIG-080030 | 73  | 6   | 4  | 10   | 0    |
| CONTIG-080031 | 72  | 5   | 4  | 13   | 0    |
| CONTIG-080032 | 91  | 10  | 2  | 32   | 0    |
| CONTIG-080033 | 75  | 5   | 9  | 0    | 0    |
| CONTIG-080034 | 70  | 300 | 10 | 1125 | 9    |
| CONTIG-080036 | 65  | 4   | 0  | 10   | 0    |
| CONTIG-080037 | 132 | 22  | 6  | 162  | 0    |
| CONTIG-080038 | 193 | 6   | 9  | 49   | 0    |
| CONTIG-080039 | 142 | 8   | 36 | 6    | 0    |
| CONTIG-080041 | 107 | 12  | 0  | 35   | 0    |
| CONTIG-080043 | 273 | 5   | 11 | 33   | 0    |
| CONTIG-080044 | 221 | 7   | 11 | 41   | 0    |
| CONTIG-080045 | 287 | 4   | 14 | 29   | 0    |
| CONTIG-080046 | 68  | 4   | 0  | 0    | 0    |
| CONTIG-080047 | 261 | 3   | 6  | 0    | 0    |
| CONTIG-080048 | 105 | 10  | 24 | 12   | 0    |
| CONTIG-080049 | 80  | 4   | 3  | 6    | 0    |
| CONTIG-080050 | 89  | 9   | 15 | 19   | 2    |
| CONTIG-080051 | 179 | 12  | 15 | 66   | 2    |
| CONTIG-080052 | 92  | 9   | 2  | 23   | 0    |
| CONTIG-080053 | 110 | 7   | 2  | 28   | 0    |
| CONTIG-080054 | 344 | 34  | 3  | 0    | 27   |
| CONTIG-080055 | 127 | 281 | 4  | 0    | 38   |
| CONTIG-080056 | 313 | 10  | 3  | 0    | 7    |
| CONTIG-080057 | 286 | 285 | 3  | 6    | 2038 |
| CONTIG-080058 | 201 | 7   | 3  | 49   | 0    |
| CONTIG-080061 | 94  | 5   | 0  | 15   | 0    |
| CONTIG-080062 | 72  | 4   | 3  | 9    | 0    |
| CONTIG-080063 | 135 | 18  | 0  | 0    | 0    |
| CONTIG-080064 | 70  | 4   | 2  | 5    | 0    |
| CONTIG-080065 | 259 | 8   | 5  | 43   | 0    |
| CONTIG-080066 | 129 | 11  | 6  | 30   | 2    |
| CONTIG-080067 | 102 | 14  | 25 | 31   | 0    |
| CONTIG-080068 | 77  | 9   | 7  | 10   | 0    |
| CONTIG-080069 | 113 | 6   | 2  | 17   | 0    |
| CONTIG-080070 | 70  | 5   | 4  | 5    | 0    |
| CONTIG-080071 | 78  | 5   | 0  | 3    | 0    |
| CONTIG-080072 | 59  | 5   | 5  | 7    | 0    |
| CONTIG-080073 | 72  | 34  | 8  | 70   | 2    |
| CONTIG-080074 | 59  | 4   | 0  | 7    | 0    |
| CONTIG-080075 | 192 | 10  | 4  | 64   | 0    |
| CONTIG-080077 | 59  | 3   | 2  | 2    | 0    |
| CONTIG-080078 | 59  | 7   | 6  | 5    | 0    |
| CONTIG-080079 | 187 | 10  | 7  | 70   | 0    |
| CONTIG-080080 | 289 | 9   | 4  | 99   | 0    |

|               |     |    |    |     |    |
|---------------|-----|----|----|-----|----|
| CONTIG-080081 | 75  | 3  | 2  | 5   | 0  |
| CONTIG-080082 | 379 | 12 | 8  | 158 | 2  |
| CONTIG-080083 | 235 | 7  | 9  | 41  | 0  |
| CONTIG-080084 | 147 | 7  | 6  | 36  | 0  |
| CONTIG-080086 | 67  | 4  | 5  | 7   | 0  |
| CONTIG-080087 | 70  | 4  | 0  | 0   | 2  |
| CONTIG-080088 | 167 | 5  | 0  | 25  | 0  |
| CONTIG-080089 | 448 | 7  | 0  | 0   | 5  |
| CONTIG-080090 | 169 | 9  | 15 | 36  | 0  |
| CONTIG-080091 | 93  | 9  | 14 | 20  | 0  |
| CONTIG-080092 | 59  | 7  | 6  | 6   | 0  |
| CONTIG-080093 | 639 | 27 | 15 | 703 | 23 |
| CONTIG-080094 | 86  | 8  | 8  | 23  | 0  |
| CONTIG-080095 | 88  | 5  | 0  | 2   | 0  |
| CONTIG-080097 | 166 | 12 | 2  | 72  | 2  |
| CONTIG-080098 | 209 | 10 | 10 | 81  | 2  |
| CONTIG-080099 | 339 | 9  | 4  | 95  | 6  |
| CONTIG-080100 | 90  | 26 | 3  | 67  | 0  |
| CONTIG-080101 | 106 | 6  | 23 | 5   | 0  |
| CONTIG-080102 | 99  | 10 | 14 | 39  | 0  |
| CONTIG-080103 | 90  | 6  | 0  | 5   | 0  |
| CONTIG-080104 | 315 | 8  | 12 | 74  | 0  |
| CONTIG-080105 | 67  | 5  | 4  | 6   | 0  |
| CONTIG-080106 | 92  | 8  | 0  | 26  | 0  |
| CONTIG-080107 | 60  | 9  | 4  | 0   | 0  |
| CONTIG-080108 | 151 | 9  | 2  | 34  | 0  |
| CONTIG-080109 | 125 | 6  | 0  | 18  | 0  |
| CONTIG-080110 | 73  | 5  | 9  | 6   | 0  |
| CONTIG-080111 | 156 | 11 | 17 | 21  | 2  |
| CONTIG-080112 | 153 | 10 | 3  | 25  | 0  |
| CONTIG-080113 | 75  | 16 | 19 | 0   | 0  |
| CONTIG-080114 | 96  | 5  | 6  | 17  | 0  |
| CONTIG-080117 | 127 | 7  | 7  | 25  | 0  |
| CONTIG-080118 | 147 | 7  | 2  | 35  | 0  |
| CONTIG-080119 | 65  | 6  | 2  | 10  | 0  |
| CONTIG-080120 | 123 | 6  | 5  | 14  | 0  |
| CONTIG-080121 | 511 | 9  | 7  | 40  | 0  |
| CONTIG-080122 | 390 | 9  | 24 | 76  | 4  |
| CONTIG-080123 | 67  | 10 | 2  | 27  | 0  |
| CONTIG-080124 | 77  | 2  | 0  | 0   | 0  |
| CONTIG-080125 | 73  | 3  | 5  | 7   | 0  |
| CONTIG-080126 | 80  | 7  | 7  | 13  | 0  |
| CONTIG-080127 | 92  | 12 | 2  | 5   | 0  |
| CONTIG-080131 | 207 | 6  | 5  | 35  | 0  |
| CONTIG-080132 | 133 | 7  | 3  | 25  | 0  |
| CONTIG-080133 | 141 | 10 | 12 | 29  | 0  |
| CONTIG-080134 | 162 | 5  | 0  | 27  | 0  |

|               |     |    |    |     |   |
|---------------|-----|----|----|-----|---|
| CONTIG-080135 | 336 | 9  | 0  | 98  | 2 |
| CONTIG-080136 | 132 | 8  | 10 | 23  | 0 |
| CONTIG-080137 | 171 | 7  | 5  | 18  | 0 |
| CONTIG-080138 | 166 | 6  | 2  | 31  | 0 |
| CONTIG-080139 | 80  | 17 | 0  | 33  | 0 |
| CONTIG-080140 | 127 | 7  | 8  | 24  | 0 |
| CONTIG-080141 | 316 | 9  | 14 | 31  | 0 |
| CONTIG-080142 | 129 | 7  | 13 | 25  | 0 |
| CONTIG-080143 | 85  | 4  | 9  | 3   | 0 |
| CONTIG-080144 | 112 | 4  | 0  | 15  | 0 |
| CONTIG-080145 | 107 | 25 | 4  | 66  | 0 |
| CONTIG-080146 | 101 | 3  | 5  | 8   | 0 |
| CONTIG-080147 | 64  | 2  | 7  | 2   | 0 |
| CONTIG-080148 | 216 | 8  | 5  | 11  | 0 |
| CONTIG-080149 | 157 | 9  | 0  | 44  | 0 |
| CONTIG-080150 | 139 | 6  | 15 | 28  | 0 |
| CONTIG-080151 | 353 | 4  | 5  | 28  | 0 |
| CONTIG-080152 | 152 | 9  | 2  | 13  | 0 |
| CONTIG-080153 | 104 | 5  | 3  | 15  | 0 |
| CONTIG-080154 | 141 | 5  | 19 | 8   | 0 |
| CONTIG-080155 | 145 | 13 | 3  | 88  | 2 |
| CONTIG-080156 | 190 | 38 | 16 | 422 | 0 |
| CONTIG-080157 | 236 | 10 | 8  | 65  | 0 |
| CONTIG-080158 | 154 | 10 | 2  | 49  | 0 |
| CONTIG-080159 | 68  | 15 | 17 | 37  | 0 |
| CONTIG-080160 | 105 | 4  | 3  | 2   | 0 |
| CONTIG-080161 | 59  | 4  | 3  | 2   | 0 |
| CONTIG-080162 | 313 | 7  | 3  | 74  | 0 |
| CONTIG-080163 | 71  | 5  | 2  | 7   | 0 |
| CONTIG-080164 | 127 | 5  | 0  | 6   | 0 |
| CONTIG-080165 | 202 | 9  | 4  | 23  | 0 |
| CONTIG-080166 | 108 | 3  | 2  | 7   | 0 |
| CONTIG-080167 | 156 | 3  | 8  | 13  | 0 |
| CONTIG-080168 | 164 | 7  | 7  | 31  | 0 |
| CONTIG-080169 | 148 | 11 | 2  | 9   | 0 |
| CONTIG-080170 | 107 | 11 | 0  | 0   | 0 |
| CONTIG-080173 | 129 | 10 | 0  | 58  | 2 |
| CONTIG-080174 | 234 | 13 | 9  | 97  | 0 |
| CONTIG-080175 | 305 | 9  | 2  | 115 | 0 |
| CONTIG-080176 | 65  | 6  | 3  | 2   | 0 |
| CONTIG-080178 | 118 | 9  | 4  | 23  | 0 |
| CONTIG-080179 | 98  | 9  | 8  | 8   | 0 |
| CONTIG-080180 | 318 | 7  | 6  | 109 | 0 |
| CONTIG-080181 | 64  | 4  | 5  | 9   | 0 |
| CONTIG-080182 | 96  | 7  | 4  | 11  | 0 |
| CONTIG-080184 | 81  | 6  | 9  | 4   | 0 |
| CONTIG-080186 | 78  | 7  | 8  | 14  | 0 |

|               |     |     |    |      |    |
|---------------|-----|-----|----|------|----|
| CONTIG-080187 | 41  | 10  | 5  | 0    | 0  |
| CONTIG-080188 | 84  | 4   | 4  | 5    | 0  |
| CONTIG-080189 | 244 | 4   | 6  | 26   | 0  |
| CONTIG-080190 | 60  | 2   | 2  | 4    | 0  |
| CONTIG-080192 | 62  | 9   | 0  | 28   | 0  |
| CONTIG-080193 | 86  | 25  | 26 | 41   | 0  |
| CONTIG-080194 | 222 | 6   | 2  | 2    | 0  |
| CONTIG-080195 | 135 | 6   | 0  | 23   | 0  |
| CONTIG-080196 | 113 | 7   | 11 | 22   | 0  |
| CONTIG-080197 | 116 | 4   | 2  | 10   | 0  |
| CONTIG-080198 | 111 | 5   | 4  | 9    | 0  |
| CONTIG-080199 | 102 | 6   | 0  | 24   | 2  |
| CONTIG-080201 | 113 | 6   | 15 | 4    | 0  |
| CONTIG-080202 | 338 | 11  | 10 | 165  | 0  |
| CONTIG-080204 | 153 | 7   | 22 | 16   | 0  |
| CONTIG-080205 | 60  | 5   | 8  | 4    | 0  |
| CONTIG-080206 | 174 | 8   | 4  | 54   | 0  |
| CONTIG-080207 | 259 | 8   | 8  | 71   | 0  |
| CONTIG-080208 | 66  | 3   | 9  | 0    | 0  |
| CONTIG-080209 | 42  | 6   | 0  | 7    | 0  |
| CONTIG-080210 | 176 | 65  | 2  | 583  | 0  |
| CONTIG-080212 | 73  | 5   | 2  | 10   | 0  |
| CONTIG-080213 | 62  | 4   | 0  | 4    | 0  |
| CONTIG-080214 | 82  | 2   | 0  | 10   | 0  |
| CONTIG-080215 | 215 | 6   | 9  | 30   | 2  |
| CONTIG-080216 | 125 | 10  | 10 | 47   | 2  |
| CONTIG-080217 | 164 | 5   | 0  | 28   | 0  |
| CONTIG-080218 | 134 | 7   | 0  | 30   | 0  |
| CONTIG-080219 | 132 | 2   | 6  | 5    | 0  |
| CONTIG-080220 | 133 | 6   | 7  | 17   | 0  |
| CONTIG-080221 | 62  | 3   | 3  | 0    | 0  |
| CONTIG-080222 | 279 | 13  | 12 | 81   | 7  |
| CONTIG-080223 | 209 | 8   | 4  | 13   | 0  |
| CONTIG-080228 | 612 | 16  | 27 | 237  | 4  |
| CONTIG-080229 | 66  | 4   | 2  | 4    | 0  |
| CONTIG-080230 | 170 | 7   | 7  | 0    | 0  |
| CONTIG-080231 | 78  | 7   | 20 | 11   | 0  |
| CONTIG-080232 | 98  | 7   | 2  | 23   | 0  |
| CONTIG-080233 | 53  | 180 | 4  | 113  | 14 |
| CONTIG-080234 | 141 | 7   | 9  | 24   | 0  |
| CONTIG-080235 | 151 | 148 | 0  | 1259 | 0  |
| CONTIG-080236 | 233 | 16  | 11 | 149  | 0  |
| CONTIG-080237 | 126 | 5   | 5  | 12   | 0  |
| CONTIG-080238 | 110 | 15  | 0  | 94   | 0  |
| CONTIG-080239 | 79  | 6   | 0  | 20   | 0  |
| CONTIG-080240 | 68  | 15  | 4  | 27   | 0  |
| CONTIG-080241 | 59  | 7   | 5  | 4    | 0  |

|               |     |     |    |      |     |
|---------------|-----|-----|----|------|-----|
| CONTIG-080244 | 64  | 3   | 3  | 9    | 0   |
| CONTIG-080245 | 93  | 8   | 3  | 27   | 0   |
| CONTIG-080246 | 101 | 5   | 6  | 3    | 2   |
| CONTIG-080247 | 72  | 4   | 0  | 4    | 0   |
| CONTIG-080248 | 87  | 5   | 6  | 16   | 0   |
| CONTIG-080249 | 80  | 4   | 18 | 0    | 0   |
| CONTIG-080250 | 94  | 17  | 6  | 55   | 0   |
| CONTIG-080251 | 92  | 6   | 4  | 17   | 0   |
| CONTIG-080252 | 71  | 6   | 3  | 10   | 0   |
| CONTIG-080253 | 173 | 11  | 8  | 41   | 4   |
| CONTIG-080254 | 93  | 11  | 10 | 34   | 0   |
| CONTIG-080255 | 114 | 4   | 7  | 12   | 0   |
| CONTIG-080256 | 139 | 6   | 2  | 19   | 0   |
| CONTIG-080257 | 586 | 19  | 2  | 436  | 0   |
| CONTIG-080258 | 95  | 12  | 0  | 48   | 0   |
| CONTIG-080260 | 135 | 7   | 0  | 21   | 2   |
| CONTIG-080261 | 122 | 11  | 7  | 40   | 0   |
| CONTIG-080262 | 88  | 5   | 7  | 13   | 0   |
| CONTIG-080263 | 195 | 3   | 2  | 4    | 2   |
| CONTIG-080264 | 97  | 8   | 2  | 14   | 0   |
| CONTIG-080265 | 149 | 7   | 0  | 37   | 0   |
| CONTIG-080266 | 104 | 6   | 2  | 14   | 0   |
| CONTIG-080267 | 83  | 26  | 5  | 81   | 2   |
| CONTIG-080268 | 429 | 49  | 15 | 1090 | 4   |
| CONTIG-080269 | 110 | 6   | 14 | 22   | 0   |
| CONTIG-080270 | 84  | 3   | 2  | 6    | 0   |
| CONTIG-080271 | 416 | 7   | 17 | 53   | 0   |
| CONTIG-080272 | 63  | 6   | 0  | 13   | 0   |
| CONTIG-080273 | 285 | 10  | 2  | 80   | 4   |
| CONTIG-080274 | 170 | 14  | 9  | 84   | 0   |
| CONTIG-080275 | 113 | 4   | 4  | 4    | 0   |
| CONTIG-080276 | 78  | 5   | 3  | 4    | 0   |
| CONTIG-080277 | 297 | 130 | 0  | 0    | 525 |
| CONTIG-080278 | 92  | 3   | 0  | 7    | 0   |
| CONTIG-080279 | 398 | 12  | 5  | 202  | 0   |
| CONTIG-080280 | 37  | 12  | 5  | 12   | 0   |
| CONTIG-080281 | 140 | 6   | 3  | 21   | 0   |
| CONTIG-080282 | 95  | 5   | 7  | 8    | 0   |
| CONTIG-080284 | 125 | 8   | 5  | 0    | 0   |
| CONTIG-080285 | 204 | 5   | 14 | 17   | 0   |
| CONTIG-080286 | 223 | 146 | 0  | 0    | 761 |
| CONTIG-080287 | 88  | 5   | 5  | 2    | 0   |
| CONTIG-080291 | 98  | 9   | 4  | 28   | 0   |
| CONTIG-080292 | 116 | 4   | 2  | 19   | 0   |
| CONTIG-080293 | 71  | 9   | 17 | 12   | 0   |
| CONTIG-080294 | 149 | 9   | 13 | 37   | 0   |
| CONTIG-080295 | 93  | 6   | 2  | 15   | 0   |

|               |     |    |    |     |     |
|---------------|-----|----|----|-----|-----|
| CONTIG-080296 | 95  | 6  | 3  | 2   | 0   |
| CONTIG-080297 | 108 | 9  | 6  | 36  | 0   |
| CONTIG-080298 | 99  | 15 | 19 | 43  | 0   |
| CONTIG-080299 | 82  | 9  | 11 | 16  | 0   |
| CONTIG-080300 | 147 | 7  | 11 | 18  | 0   |
| CONTIG-080303 | 199 | 6  | 2  | 18  | 8   |
| CONTIG-080304 | 382 | 15 | 0  | 0   | 31  |
| CONTIG-080305 | 98  | 7  | 9  | 23  | 0   |
| CONTIG-080306 | 78  | 4  | 0  | 8   | 0   |
| CONTIG-080307 | 81  | 5  | 4  | 6   | 0   |
| CONTIG-080308 | 62  | 4  | 2  | 6   | 0   |
| CONTIG-080309 | 425 | 14 | 10 | 127 | 0   |
| CONTIG-080310 | 105 | 7  | 3  | 12  | 0   |
| CONTIG-080311 | 100 | 12 | 2  | 46  | 0   |
| CONTIG-080312 | 81  | 39 | 12 | 25  | 0   |
| CONTIG-080314 | 63  | 5  | 10 | 3   | 0   |
| CONTIG-080315 | 67  | 6  | 7  | 13  | 0   |
| CONTIG-080317 | 248 | 10 | 15 | 70  | 2   |
| CONTIG-080318 | 75  | 14 | 4  | 45  | 0   |
| CONTIG-080319 | 70  | 4  | 0  | 9   | 0   |
| CONTIG-080321 | 249 | 25 | 11 | 137 | 0   |
| CONTIG-080322 | 166 | 9  | 9  | 51  | 0   |
| CONTIG-080323 | 59  | 5  | 4  | 10  | 0   |
| CONTIG-080324 | 93  | 7  | 7  | 16  | 0   |
| CONTIG-080325 | 103 | 7  | 7  | 13  | 0   |
| CONTIG-080326 | 61  | 3  | 4  | 2   | 0   |
| CONTIG-080327 | 99  | 9  | 7  | 18  | 0   |
| CONTIG-080328 | 270 | 14 | 3  | 101 | 4   |
| CONTIG-080329 | 125 | 7  | 5  | 4   | 0   |
| CONTIG-080330 | 98  | 17 | 3  | 60  | 0   |
| CONTIG-080331 | 679 | 78 | 2  | 0   | 569 |
| CONTIG-080332 | 190 | 9  | 0  | 57  | 0   |
| CONTIG-080333 | 58  | 7  | 2  | 15  | 0   |
| CONTIG-080334 | 152 | 5  | 0  | 21  | 0   |
| CONTIG-080335 | 62  | 13 | 4  | 9   | 0   |
| CONTIG-080336 | 248 | 14 | 2  | 146 | 0   |
| CONTIG-080338 | 59  | 10 | 2  | 30  | 0   |
| CONTIG-080339 | 134 | 6  | 2  | 21  | 0   |
| CONTIG-080340 | 118 | 4  | 2  | 12  | 0   |
| CONTIG-080343 | 67  | 6  | 2  | 7   | 0   |
| CONTIG-080344 | 108 | 4  | 0  | 2   | 0   |
| CONTIG-080345 | 204 | 8  | 2  | 11  | 4   |
| CONTIG-080346 | 119 | 8  | 14 | 19  | 0   |
| CONTIG-080347 | 743 | 54 | 0  | 0   | 393 |
| CONTIG-080348 | 152 | 4  | 5  | 9   | 0   |
| CONTIG-080349 | 148 | 6  | 0  | 24  | 2   |
| CONTIG-080350 | 217 | 10 | 14 | 41  | 0   |

|               |     |    |    |     |    |
|---------------|-----|----|----|-----|----|
| CONTIG-080357 | 68  | 4  | 5  | 9   | 0  |
| CONTIG-080358 | 362 | 7  | 6  | 38  | 0  |
| CONTIG-080359 | 144 | 9  | 14 | 6   | 0  |
| CONTIG-080360 | 156 | 3  | 11 | 0   | 0  |
| CONTIG-080361 | 218 | 5  | 4  | 19  | 0  |
| CONTIG-080362 | 90  | 5  | 3  | 12  | 0  |
| CONTIG-080364 | 101 | 3  | 8  | 2   | 0  |
| CONTIG-080365 | 145 | 7  | 5  | 13  | 0  |
| CONTIG-080366 | 192 | 8  | 2  | 0   | 0  |
| CONTIG-080367 | 157 | 8  | 6  | 0   | 0  |
| CONTIG-080369 | 513 | 9  | 15 | 137 | 0  |
| CONTIG-080370 | 626 | 20 | 16 | 429 | 6  |
| CONTIG-080371 | 94  | 5  | 3  | 0   | 0  |
| CONTIG-080372 | 87  | 5  | 0  | 5   | 0  |
| CONTIG-080377 | 59  | 2  | 5  | 0   | 0  |
| CONTIG-080378 | 172 | 6  | 3  | 23  | 0  |
| CONTIG-080383 | 94  | 10 | 10 | 27  | 0  |
| CONTIG-080384 | 146 | 4  | 0  | 0   | 0  |
| CONTIG-080385 | 69  | 5  | 4  | 0   | 0  |
| CONTIG-080386 | 72  | 5  | 0  | 18  | 0  |
| CONTIG-080387 | 136 | 3  | 5  | 11  | 0  |
| CONTIG-080388 | 69  | 5  | 0  | 0   | 0  |
| CONTIG-080390 | 75  | 6  | 0  | 11  | 0  |
| CONTIG-080392 | 133 | 5  | 14 | 22  | 0  |
| CONTIG-080393 | 90  | 5  | 4  | 13  | 0  |
| CONTIG-080394 | 213 | 5  | 4  | 0   | 0  |
| CONTIG-080395 | 73  | 5  | 4  | 8   | 0  |
| CONTIG-080396 | 63  | 5  | 5  | 3   | 0  |
| CONTIG-080398 | 68  | 3  | 6  | 4   | 0  |
| CONTIG-080399 | 109 | 3  | 2  | 6   | 0  |
| CONTIG-080400 | 660 | 58 | 5  | 0   | 58 |
| CONTIG-080401 | 61  | 3  | 9  | 4   | 0  |
| CONTIG-080402 | 115 | 10 | 8  | 48  | 0  |
| CONTIG-080403 | 75  | 4  | 0  | 8   | 0  |
| CONTIG-080405 | 80  | 10 | 5  | 19  | 0  |
| CONTIG-080406 | 96  | 6  | 9  | 8   | 0  |
| CONTIG-080407 | 101 | 3  | 4  | 5   | 0  |
| CONTIG-080408 | 163 | 6  | 2  | 26  | 0  |
| CONTIG-080409 | 93  | 5  | 2  | 21  | 0  |
| CONTIG-080410 | 333 | 12 | 6  | 167 | 0  |
| CONTIG-080411 | 156 | 5  | 3  | 25  | 0  |
| CONTIG-080412 | 70  | 3  | 2  | 2   | 0  |
| CONTIG-080413 | 141 | 4  | 3  | 15  | 0  |
| CONTIG-080415 | 226 | 11 | 17 | 94  | 2  |
| CONTIG-080416 | 102 | 8  | 11 | 30  | 0  |
| CONTIG-080418 | 278 | 11 | 3  | 88  | 0  |
| CONTIG-080419 | 161 | 17 | 9  | 97  | 0  |

|               |     |     |    |     |     |
|---------------|-----|-----|----|-----|-----|
| CONTIG-080420 | 114 | 7   | 5  | 22  | 0   |
| CONTIG-080421 | 351 | 21  | 13 | 0   | 95  |
| CONTIG-080422 | 108 | 9   | 9  | 40  | 0   |
| CONTIG-080423 | 150 | 12  | 2  | 64  | 0   |
| CONTIG-080424 | 89  | 5   | 2  | 18  | 0   |
| CONTIG-080427 | 82  | 5   | 4  | 4   | 0   |
| CONTIG-080428 | 113 | 5   | 0  | 11  | 0   |
| CONTIG-080429 | 134 | 5   | 9  | 8   | 2   |
| CONTIG-080430 | 158 | 10  | 2  | 43  | 0   |
| CONTIG-080431 | 85  | 6   | 0  | 6   | 0   |
| CONTIG-080432 | 156 | 6   | 12 | 24  | 0   |
| CONTIG-080433 | 69  | 2   | 2  | 5   | 0   |
| CONTIG-080434 | 66  | 2   | 2  | 4   | 0   |
| CONTIG-080435 | 171 | 8   | 3  | 2   | 0   |
| CONTIG-080436 | 207 | 4   | 2  | 16  | 0   |
| CONTIG-080437 | 373 | 12  | 9  | 0   | 0   |
| CONTIG-080438 | 175 | 9   | 4  | 43  | 0   |
| CONTIG-080439 | 65  | 3   | 6  | 4   | 0   |
| CONTIG-080440 | 220 | 10  | 5  | 67  | 0   |
| CONTIG-080441 | 158 | 3   | 0  | 7   | 0   |
| CONTIG-080442 | 216 | 38  | 9  | 444 | 0   |
| CONTIG-080443 | 359 | 15  | 11 | 203 | 0   |
| CONTIG-080444 | 65  | 6   | 9  | 11  | 0   |
| CONTIG-080445 | 131 | 9   | 3  | 31  | 0   |
| CONTIG-080446 | 679 | 20  | 8  | 103 | 0   |
| CONTIG-080447 | 189 | 8   | 4  | 29  | 0   |
| CONTIG-080448 | 76  | 3   | 2  | 2   | 0   |
| CONTIG-080449 | 239 | 8   | 13 | 56  | 0   |
| CONTIG-080452 | 140 | 9   | 6  | 42  | 0   |
| CONTIG-080453 | 284 | 8   | 6  | 27  | 4   |
| CONTIG-080454 | 82  | 18  | 6  | 26  | 0   |
| CONTIG-080455 | 90  | 7   | 0  | 22  | 0   |
| CONTIG-080456 | 90  | 3   | 0  | 9   | 0   |
| CONTIG-080457 | 75  | 2   | 0  | 4   | 0   |
| CONTIG-080458 | 60  | 6   | 11 | 0   | 0   |
| CONTIG-080461 | 167 | 7   | 11 | 19  | 0   |
| CONTIG-080462 | 183 | 9   | 12 | 22  | 0   |
| CONTIG-080463 | 92  | 131 | 2  | 0   | 100 |
| CONTIG-080464 | 98  | 3   | 0  | 6   | 0   |
| CONTIG-080465 | 132 | 6   | 15 | 32  | 0   |
| CONTIG-080467 | 94  | 5   | 11 | 16  | 0   |
| CONTIG-080468 | 89  | 2   | 0  | 2   | 0   |
| CONTIG-080469 | 132 | 3   | 2  | 13  | 0   |
| CONTIG-080470 | 136 | 9   | 15 | 41  | 0   |
| CONTIG-080471 | 191 | 7   | 9  | 49  | 0   |
| CONTIG-080472 | 205 | 24  | 2  | 148 | 0   |
| CONTIG-080473 | 183 | 6   | 2  | 18  | 0   |



|               |     |    |    |     |   |
|---------------|-----|----|----|-----|---|
| CONTIG-080474 | 105 | 7  | 5  | 18  | 0 |
| CONTIG-080475 | 250 | 8  | 6  | 30  | 0 |
| CONTIG-080476 | 91  | 8  | 0  | 24  | 0 |
| CONTIG-080477 | 76  | 3  | 2  | 6   | 0 |
| CONTIG-080479 | 85  | 8  | 4  | 17  | 0 |
| CONTIG-080480 | 115 | 12 | 3  | 27  | 0 |
| CONTIG-080481 | 100 | 9  | 0  | 13  | 4 |
| CONTIG-080482 | 68  | 25 | 9  | 0   | 0 |
| CONTIG-080483 | 69  | 4  | 2  | 12  | 0 |
| CONTIG-080484 | 61  | 5  | 2  | 2   | 0 |
| CONTIG-080485 | 78  | 6  | 0  | 14  | 0 |
| CONTIG-080486 | 65  | 2  | 2  | 5   | 0 |
| CONTIG-080487 | 165 | 6  | 0  | 0   | 0 |
| CONTIG-080488 | 102 | 6  | 23 | 3   | 0 |
| CONTIG-080489 | 162 | 10 | 4  | 52  | 0 |
| CONTIG-080490 | 53  | 30 | 0  | 0   | 0 |
| CONTIG-080491 | 88  | 6  | 7  | 5   | 0 |
| CONTIG-080492 | 93  | 8  | 14 | 13  | 0 |
| CONTIG-080493 | 117 | 5  | 6  | 14  | 0 |
| CONTIG-080494 | 161 | 5  | 2  | 12  | 2 |
| CONTIG-080495 | 85  | 8  | 0  | 28  | 0 |
| CONTIG-080496 | 72  | 5  | 11 | 7   | 0 |
| CONTIG-080497 | 109 | 8  | 8  | 19  | 0 |
| CONTIG-080498 | 143 | 3  | 4  | 8   | 0 |
| CONTIG-080499 | 170 | 6  | 6  | 13  | 0 |
| CONTIG-080500 | 196 | 6  | 3  | 30  | 9 |
| CONTIG-080501 | 100 | 7  | 3  | 30  | 0 |
| CONTIG-080503 | 95  | 4  | 0  | 9   | 0 |
| CONTIG-080504 | 141 | 8  | 9  | 34  | 0 |
| CONTIG-080505 | 79  | 6  | 0  | 17  | 0 |
| CONTIG-080506 | 633 | 11 | 6  | 347 | 0 |
| CONTIG-080507 | 74  | 3  | 0  | 0   | 0 |
| CONTIG-080510 | 243 | 8  | 13 | 53  | 0 |
| CONTIG-080512 | 99  | 4  | 8  | 11  | 0 |
| CONTIG-080513 | 87  | 8  | 2  | 16  | 0 |
| CONTIG-080515 | 68  | 5  | 0  | 0   | 0 |
| CONTIG-080521 | 65  | 8  | 7  | 9   | 0 |
| CONTIG-080522 | 66  | 4  | 0  | 7   | 0 |
| CONTIG-080523 | 659 | 9  | 11 | 316 | 2 |
| CONTIG-080524 | 213 | 19 | 6  | 107 | 6 |
| CONTIG-080525 | 77  | 8  | 9  | 19  | 0 |
| CONTIG-080526 | 76  | 4  | 0  | 0   | 0 |
| CONTIG-080527 | 63  | 7  | 4  | 24  | 0 |
| CONTIG-080528 | 92  | 4  | 5  | 10  | 2 |
| CONTIG-080529 | 276 | 13 | 20 | 120 | 0 |
| CONTIG-080531 | 71  | 4  | 6  | 4   | 0 |
| CONTIG-080532 | 134 | 8  | 2  | 21  | 0 |

|               |     |    |    |     |    |
|---------------|-----|----|----|-----|----|
| CONTIG-080533 | 132 | 8  | 8  | 27  | 0  |
| CONTIG-080534 | 83  | 8  | 4  | 23  | 0  |
| CONTIG-080536 | 109 | 19 | 0  | 0   | 26 |
| CONTIG-080537 | 128 | 4  | 4  | 6   | 0  |
| CONTIG-080538 | 170 | 7  | 0  | 20  | 2  |
| CONTIG-080540 | 113 | 8  | 13 | 25  | 0  |
| CONTIG-080542 | 172 | 9  | 2  | 59  | 0  |
| CONTIG-080543 | 56  | 4  | 8  | 5   | 0  |
| CONTIG-080548 | 188 | 39 | 4  | 0   | 0  |
| CONTIG-080549 | 98  | 12 | 10 | 19  | 2  |
| CONTIG-080550 | 119 | 10 | 3  | 47  | 0  |
| CONTIG-080551 | 231 | 8  | 3  | 64  | 0  |
| CONTIG-080552 | 78  | 4  | 13 | 0   | 0  |
| CONTIG-080553 | 162 | 7  | 5  | 27  | 0  |
| CONTIG-080554 | 420 | 29 | 3  | 0   | 80 |
| CONTIG-080555 | 37  | 22 | 0  | 23  | 0  |
| CONTIG-080556 | 174 | 12 | 0  | 77  | 0  |
| CONTIG-080557 | 105 | 5  | 2  | 13  | 0  |
| CONTIG-080558 | 60  | 4  | 3  | 3   | 0  |
| CONTIG-080559 | 73  | 3  | 0  | 0   | 0  |
| CONTIG-080560 | 308 | 5  | 14 | 52  | 0  |
| CONTIG-080561 | 461 | 20 | 11 | 418 | 0  |
| CONTIG-080562 | 114 | 13 | 10 | 41  | 0  |
| CONTIG-080563 | 83  | 4  | 5  | 9   | 0  |
| CONTIG-080564 | 42  | 98 | 4  | 87  | 0  |
| CONTIG-080565 | 124 | 10 | 10 | 20  | 0  |
| CONTIG-080566 | 64  | 3  | 3  | 0   | 0  |
| CONTIG-080567 | 68  | 5  | 2  | 0   | 0  |
| CONTIG-080568 | 206 | 8  | 6  | 72  | 0  |
| CONTIG-080569 | 175 | 8  | 3  | 41  | 2  |
| CONTIG-080570 | 67  | 3  | 0  | 5   | 0  |
| CONTIG-080572 | 173 | 14 | 11 | 100 | 0  |
| CONTIG-080573 | 84  | 4  | 0  | 10  | 0  |
| CONTIG-080574 | 136 | 5  | 10 | 23  | 0  |
| CONTIG-080575 | 243 | 8  | 13 | 46  | 0  |
| CONTIG-080579 | 105 | 11 | 6  | 41  | 0  |
| CONTIG-080580 | 135 | 5  | 5  | 20  | 0  |
| CONTIG-080581 | 158 | 7  | 6  | 27  | 0  |
| CONTIG-080582 | 151 | 5  | 3  | 13  | 0  |
| CONTIG-080583 | 170 | 5  | 6  | 25  | 0  |
| CONTIG-080584 | 108 | 5  | 0  | 27  | 0  |
| CONTIG-080585 | 93  | 4  | 3  | 6   | 0  |
| CONTIG-080586 | 87  | 4  | 2  | 10  | 0  |
| CONTIG-080587 | 59  | 2  | 3  | 0   | 0  |
| CONTIG-080588 | 66  | 3  | 0  | 4   | 0  |
| CONTIG-080589 | 95  | 12 | 23 | 26  | 0  |
| CONTIG-080590 | 170 | 8  | 4  | 23  | 0  |

|               |     |    |    |     |   |
|---------------|-----|----|----|-----|---|
| CONTIG-080591 | 81  | 2  | 0  | 4   | 2 |
| CONTIG-080592 | 425 | 20 | 17 | 344 | 0 |
| CONTIG-080593 | 114 | 7  | 0  | 22  | 0 |
| CONTIG-080594 | 177 | 10 | 14 | 57  | 0 |
| CONTIG-080595 | 81  | 5  | 0  | 11  | 0 |
| CONTIG-080596 | 181 | 8  | 5  | 33  | 0 |
| CONTIG-080598 | 150 | 4  | 11 | 16  | 0 |
| CONTIG-080599 | 90  | 4  | 8  | 8   | 0 |
| CONTIG-080600 | 70  | 8  | 0  | 12  | 0 |
| CONTIG-080601 | 215 | 18 | 4  | 234 | 0 |
| CONTIG-080602 | 96  | 11 | 20 | 15  | 0 |
| CONTIG-080604 | 101 | 15 | 10 | 43  | 0 |
| CONTIG-080605 | 561 | 9  | 11 | 101 | 0 |
| CONTIG-080606 | 59  | 3  | 2  | 2   | 0 |
| CONTIG-080607 | 205 | 12 | 10 | 49  | 0 |
| CONTIG-080608 | 206 | 7  | 5  | 21  | 0 |
| CONTIG-080609 | 160 | 13 | 0  | 75  | 0 |
| CONTIG-080610 | 190 | 14 | 0  | 74  | 0 |
| CONTIG-080611 | 68  | 4  | 2  | 2   | 0 |
| CONTIG-080612 | 51  | 26 | 2  | 33  | 0 |
| CONTIG-080613 | 90  | 7  | 0  | 6   | 2 |
| CONTIG-080614 | 59  | 5  | 2  | 2   | 0 |
| CONTIG-080615 | 129 | 7  | 0  | 22  | 0 |
| CONTIG-080616 | 84  | 11 | 4  | 10  | 0 |
| CONTIG-080617 | 72  | 3  | 0  | 0   | 0 |
| CONTIG-080618 | 123 | 5  | 4  | 14  | 0 |
| CONTIG-080619 | 181 | 6  | 0  | 31  | 0 |
| CONTIG-080620 | 132 | 7  | 6  | 10  | 0 |
| CONTIG-080621 | 192 | 9  | 10 | 28  | 0 |
| CONTIG-080622 | 175 | 6  | 10 | 41  | 0 |
| CONTIG-080623 | 392 | 12 | 4  | 0   | 2 |
| CONTIG-080624 | 71  | 3  | 2  | 0   | 0 |
| CONTIG-080625 | 77  | 6  | 9  | 6   | 0 |
| CONTIG-080626 | 207 | 5  | 27 | 29  | 0 |
| CONTIG-080628 | 309 | 23 | 0  | 12  | 0 |
| CONTIG-080629 | 91  | 10 | 6  | 29  | 0 |
| CONTIG-080630 | 154 | 6  | 3  | 28  | 0 |
| CONTIG-080634 | 124 | 7  | 3  | 40  | 0 |
| CONTIG-080635 | 110 | 4  | 2  | 9   | 0 |
| CONTIG-080636 | 67  | 2  | 2  | 2   | 0 |
| CONTIG-080637 | 65  | 5  | 0  | 8   | 0 |
| CONTIG-080638 | 190 | 7  | 4  | 13  | 0 |
| CONTIG-080639 | 107 | 15 | 0  | 30  | 0 |
| CONTIG-080640 | 121 | 5  | 2  | 16  | 0 |
| CONTIG-080641 | 112 | 12 | 8  | 44  | 0 |
| CONTIG-080649 | 73  | 10 | 2  | 32  | 0 |
| CONTIG-080650 | 82  | 3  | 3  | 2   | 0 |

|               |     |    |    |     |     |
|---------------|-----|----|----|-----|-----|
| CONTIG-080651 | 66  | 9  | 0  | 2   | 0   |
| CONTIG-080652 | 68  | 8  | 18 | 11  | 0   |
| CONTIG-080654 | 115 | 7  | 2  | 18  | 0   |
| CONTIG-080655 | 246 | 9  | 9  | 103 | 0   |
| CONTIG-080656 | 250 | 20 | 9  | 79  | 0   |
| CONTIG-080657 | 63  | 4  | 3  | 6   | 0   |
| CONTIG-080658 | 101 | 4  | 0  | 14  | 0   |
| CONTIG-080659 | 58  | 5  | 4  | 0   | 0   |
| CONTIG-080660 | 87  | 6  | 3  | 3   | 0   |
| CONTIG-080661 | 283 | 6  | 3  | 0   | 2   |
| CONTIG-080662 | 86  | 4  | 7  | 6   | 0   |
| CONTIG-080663 | 103 | 8  | 2  | 15  | 0   |
| CONTIG-080664 | 132 | 7  | 2  | 24  | 0   |
| CONTIG-080666 | 80  | 6  | 3  | 9   | 2   |
| CONTIG-080667 | 69  | 4  | 4  | 10  | 0   |
| CONTIG-080668 | 74  | 7  | 0  | 8   | 0   |
| CONTIG-080669 | 225 | 7  | 5  | 55  | 0   |
| CONTIG-080670 | 296 | 37 | 3  | 2   | 0   |
| CONTIG-080671 | 63  | 10 | 4  | 33  | 0   |
| CONTIG-080672 | 76  | 5  | 5  | 0   | 0   |
| CONTIG-080673 | 136 | 6  | 5  | 25  | 0   |
| CONTIG-080674 | 58  | 5  | 0  | 4   | 0   |
| CONTIG-080675 | 113 | 6  | 7  | 10  | 0   |
| CONTIG-080676 | 140 | 13 | 11 | 86  | 2   |
| CONTIG-080677 | 36  | 54 | 5  | 2   | 0   |
| CONTIG-080678 | 64  | 3  | 3  | 4   | 0   |
| CONTIG-080679 | 209 | 7  | 8  | 48  | 0   |
| CONTIG-080680 | 82  | 6  | 4  | 15  | 0   |
| CONTIG-080681 | 403 | 62 | 0  | 0   | 233 |
| CONTIG-080682 | 83  | 4  | 3  | 7   | 0   |
| CONTIG-080683 | 73  | 5  | 3  | 9   | 0   |
| CONTIG-080684 | 143 | 7  | 10 | 14  | 2   |
| CONTIG-080685 | 234 | 12 | 2  | 103 | 4   |
| CONTIG-080686 | 123 | 6  | 2  | 0   | 0   |
| CONTIG-080687 | 153 | 6  | 9  | 25  | 0   |
| CONTIG-080688 | 487 | 14 | 2  | 252 | 8   |
| CONTIG-080689 | 88  | 10 | 4  | 23  | 0   |
| CONTIG-080692 | 468 | 10 | 6  | 231 | 0   |
| CONTIG-080693 | 167 | 13 | 6  | 27  | 2   |
| CONTIG-080694 | 88  | 9  | 8  | 24  | 0   |
| CONTIG-080695 | 129 | 3  | 0  | 0   | 0   |
| CONTIG-080696 | 94  | 10 | 0  | 0   | 0   |
| CONTIG-080697 | 113 | 7  | 11 | 18  | 0   |
| CONTIG-080698 | 66  | 3  | 0  | 2   | 0   |
| CONTIG-080699 | 239 | 7  | 7  | 36  | 0   |
| CONTIG-080700 | 64  | 6  | 0  | 9   | 0   |
| CONTIG-080701 | 62  | 4  | 5  | 8   | 0   |

|               |     |    |    |     |   |
|---------------|-----|----|----|-----|---|
| CONTIG-080702 | 270 | 17 | 24 | 92  | 2 |
| CONTIG-080703 | 65  | 8  | 4  | 0   | 0 |
| CONTIG-080704 | 77  | 9  | 2  | 6   | 0 |
| CONTIG-080707 | 180 | 11 | 3  | 0   | 4 |
| CONTIG-080708 | 93  | 4  | 6  | 5   | 0 |
| CONTIG-080709 | 146 | 7  | 9  | 19  | 0 |
| CONTIG-080710 | 170 | 5  | 0  | 29  | 2 |
| CONTIG-080711 | 79  | 8  | 7  | 35  | 0 |
| CONTIG-080712 | 203 | 4  | 0  | 20  | 0 |
| CONTIG-080713 | 188 | 6  | 0  | 34  | 0 |
| CONTIG-080714 | 103 | 5  | 0  | 0   | 4 |
| CONTIG-080715 | 137 | 7  | 0  | 21  | 0 |
| CONTIG-080716 | 174 | 6  | 2  | 28  | 0 |
| CONTIG-080717 | 71  | 5  | 3  | 12  | 0 |
| CONTIG-080718 | 82  | 4  | 0  | 13  | 0 |
| CONTIG-080719 | 70  | 14 | 2  | 13  | 0 |
| CONTIG-080720 | 76  | 5  | 0  | 13  | 0 |
| CONTIG-080721 | 60  | 3  | 4  | 0   | 0 |
| CONTIG-080722 | 64  | 4  | 0  | 6   | 0 |
| CONTIG-080723 | 595 | 16 | 7  | 10  | 0 |
| CONTIG-080724 | 254 | 10 | 4  | 71  | 0 |
| CONTIG-080725 | 115 | 6  | 2  | 4   | 0 |
| CONTIG-080726 | 80  | 42 | 3  | 185 | 0 |
| CONTIG-080727 | 76  | 3  | 0  | 10  | 0 |
| CONTIG-080728 | 78  | 7  | 13 | 12  | 0 |
| CONTIG-080729 | 103 | 58 | 0  | 258 | 0 |
| CONTIG-080730 | 78  | 5  | 7  | 5   | 0 |
| CONTIG-080731 | 66  | 5  | 2  | 14  | 0 |
| CONTIG-080732 | 95  | 4  | 0  | 14  | 0 |
| CONTIG-080734 | 352 | 17 | 10 | 174 | 2 |
| CONTIG-080735 | 203 | 10 | 12 | 29  | 0 |
| CONTIG-080736 | 75  | 40 | 10 | 97  | 0 |
| CONTIG-080737 | 89  | 4  | 0  | 6   | 0 |
| CONTIG-080738 | 74  | 4  | 3  | 2   | 0 |
| CONTIG-080739 | 81  | 4  | 12 | 0   | 0 |
| CONTIG-080740 | 93  | 6  | 5  | 6   | 0 |
| CONTIG-080741 | 72  | 5  | 2  | 6   | 0 |
| CONTIG-080742 | 104 | 9  | 11 | 21  | 0 |
| CONTIG-080743 | 180 | 7  | 4  | 39  | 0 |
| CONTIG-080744 | 131 | 11 | 20 | 38  | 0 |
| CONTIG-080745 | 64  | 6  | 0  | 12  | 0 |
| CONTIG-080746 | 79  | 3  | 0  | 0   | 0 |
| CONTIG-080747 | 129 | 4  | 0  | 3   | 0 |
| CONTIG-080748 | 59  | 2  | 5  | 0   | 0 |
| CONTIG-080749 | 72  | 5  | 2  | 9   | 0 |
| CONTIG-080750 | 62  | 7  | 2  | 16  | 0 |
| CONTIG-080751 | 92  | 5  | 4  | 4   | 0 |

|               |     |    |    |     |    |
|---------------|-----|----|----|-----|----|
| CONTIG-080752 | 304 | 12 | 18 | 188 | 0  |
| CONTIG-080753 | 77  | 8  | 13 | 21  | 0  |
| CONTIG-080754 | 66  | 5  | 7  | 5   | 3  |
| CONTIG-080755 | 92  | 6  | 7  | 17  | 0  |
| CONTIG-080756 | 144 | 14 | 9  | 59  | 0  |
| CONTIG-080757 | 192 | 18 | 19 | 136 | 0  |
| CONTIG-080758 | 190 | 4  | 3  | 17  | 0  |
| CONTIG-080759 | 220 | 20 | 14 | 175 | 0  |
| CONTIG-080760 | 176 | 14 | 2  | 86  | 5  |
| CONTIG-080764 | 152 | 15 | 10 | 75  | 0  |
| CONTIG-080765 | 149 | 18 | 14 | 133 | 0  |
| CONTIG-080766 | 68  | 2  | 3  | 0   | 0  |
| CONTIG-080767 | 289 | 17 | 13 | 149 | 0  |
| CONTIG-080768 | 61  | 2  | 2  | 0   | 0  |
| CONTIG-080769 | 190 | 6  | 2  | 35  | 0  |
| CONTIG-080770 | 79  | 6  | 6  | 8   | 0  |
| CONTIG-080771 | 433 | 7  | 7  | 78  | 0  |
| CONTIG-080772 | 200 | 7  | 14 | 35  | 0  |
| CONTIG-080773 | 367 | 10 | 11 | 63  | 2  |
| CONTIG-080775 | 94  | 8  | 2  | 26  | 0  |
| CONTIG-080776 | 121 | 7  | 9  | 16  | 0  |
| CONTIG-080777 | 261 | 15 | 2  | 0   | 2  |
| CONTIG-080778 | 139 | 4  | 2  | 2   | 0  |
| CONTIG-080780 | 58  | 5  | 4  | 13  | 0  |
| CONTIG-080781 | 63  | 6  | 2  | 0   | 0  |
| CONTIG-080782 | 62  | 7  | 0  | 21  | 0  |
| CONTIG-080784 | 195 | 9  | 6  | 56  | 0  |
| CONTIG-080785 | 111 | 11 | 5  | 26  | 0  |
| CONTIG-080786 | 70  | 8  | 11 | 12  | 0  |
| CONTIG-080789 | 258 | 8  | 3  | 65  | 2  |
| CONTIG-080790 | 97  | 4  | 0  | 0   | 0  |
| CONTIG-080791 | 264 | 6  | 5  | 40  | 0  |
| CONTIG-080792 | 466 | 18 | 2  | 84  | 0  |
| CONTIG-080793 | 214 | 10 | 5  | 0   | 14 |
| CONTIG-080794 | 369 | 7  | 12 | 58  | 2  |
| CONTIG-080795 | 181 | 10 | 10 | 51  | 0  |
| CONTIG-080796 | 103 | 3  | 2  | 12  | 0  |
| CONTIG-080797 | 65  | 5  | 9  | 5   | 0  |
| CONTIG-080798 | 61  | 29 | 10 | 60  | 0  |
| CONTIG-080800 | 139 | 14 | 14 | 63  | 0  |
| CONTIG-080801 | 656 | 13 | 3  | 0   | 48 |
| CONTIG-080803 | 173 | 9  | 3  | 39  | 4  |
| CONTIG-080806 | 63  | 45 | 16 | 91  | 0  |
| CONTIG-080807 | 155 | 5  | 0  | 12  | 0  |
| CONTIG-080808 | 700 | 12 | 2  | 0   | 67 |
| CONTIG-080809 | 89  | 8  | 0  | 32  | 0  |
| CONTIG-080810 | 129 | 4  | 0  | 14  | 0  |

|               |     |     |    |     |    |
|---------------|-----|-----|----|-----|----|
| CONTIG-080811 | 232 | 7   | 6  | 54  | 0  |
| CONTIG-080812 | 90  | 4   | 3  | 9   | 2  |
| CONTIG-080813 | 90  | 3   | 0  | 0   | 0  |
| CONTIG-080814 | 669 | 8   | 4  | 0   | 14 |
| CONTIG-080815 | 220 | 9   | 4  | 92  | 0  |
| CONTIG-080816 | 104 | 5   | 5  | 8   | 0  |
| CONTIG-080817 | 254 | 10  | 5  | 105 | 0  |
| CONTIG-080818 | 128 | 7   | 8  | 22  | 0  |
| CONTIG-080819 | 511 | 9   | 9  | 140 | 3  |
| CONTIG-080820 | 131 | 7   | 6  | 29  | 0  |
| CONTIG-080821 | 177 | 5   | 9  | 12  | 0  |
| CONTIG-080822 | 97  | 5   | 6  | 15  | 0  |
| CONTIG-080823 | 398 | 12  | 15 | 139 | 2  |
| CONTIG-080824 | 174 | 10  | 0  | 48  | 0  |
| CONTIG-080827 | 140 | 6   | 9  | 23  | 0  |
| CONTIG-080828 | 95  | 5   | 0  | 15  | 2  |
| CONTIG-080829 | 153 | 6   | 0  | 15  | 0  |
| CONTIG-080831 | 119 | 5   | 12 | 24  | 0  |
| CONTIG-080832 | 121 | 10  | 2  | 17  | 0  |
| CONTIG-080833 | 120 | 11  | 5  | 36  | 0  |
| CONTIG-080835 | 155 | 3   | 2  | 0   | 0  |
| CONTIG-080836 | 80  | 4   | 11 | 2   | 0  |
| CONTIG-080837 | 65  | 5   | 2  | 0   | 0  |
| CONTIG-080839 | 204 | 10  | 0  | 80  | 7  |
| CONTIG-080840 | 67  | 2   | 7  | 0   | 0  |
| CONTIG-080843 | 67  | 5   | 5  | 2   | 0  |
| CONTIG-080844 | 80  | 11  | 3  | 20  | 0  |
| CONTIG-080845 | 81  | 5   | 4  | 13  | 0  |
| CONTIG-080846 | 98  | 9   | 3  | 26  | 0  |
| CONTIG-080847 | 63  | 7   | 11 | 13  | 0  |
| CONTIG-080848 | 207 | 9   | 17 | 48  | 0  |
| CONTIG-080849 | 154 | 6   | 8  | 17  | 0  |
| CONTIG-080852 | 106 | 7   | 4  | 18  | 0  |
| CONTIG-080853 | 61  | 4   | 3  | 6   | 0  |
| CONTIG-080854 | 60  | 3   | 2  | 3   | 0  |
| CONTIG-080855 | 161 | 14  | 2  | 2   | 0  |
| CONTIG-080856 | 58  | 14  | 0  | 28  | 0  |
| CONTIG-080857 | 99  | 3   | 2  | 13  | 0  |
| CONTIG-080858 | 64  | 17  | 31 | 0   | 0  |
| CONTIG-080859 | 59  | 6   | 8  | 6   | 0  |
| CONTIG-080860 | 73  | 5   | 8  | 2   | 0  |
| CONTIG-080861 | 171 | 7   | 12 | 28  | 0  |
| CONTIG-080862 | 100 | 7   | 3  | 21  | 0  |
| CONTIG-080864 | 109 | 17  | 12 | 88  | 0  |
| CONTIG-080865 | 433 | 10  | 4  | 155 | 2  |
| CONTIG-080866 | 265 | 9   | 11 | 30  | 0  |
| CONTIG-080867 | 39  | 286 | 6  | 165 | 0  |

|               |     |      |    |     |      |
|---------------|-----|------|----|-----|------|
| CONTIG-080868 | 62  | 29   | 5  | 70  | 0    |
| CONTIG-080869 | 59  | 8    | 2  | 12  | 2    |
| CONTIG-080871 | 129 | 7    | 7  | 11  | 0    |
| CONTIG-080872 | 105 | 4    | 5  | 4   | 6    |
| CONTIG-080874 | 219 | 5    | 11 | 4   | 0    |
| CONTIG-080877 | 63  | 12   | 0  | 33  | 0    |
| CONTIG-080878 | 151 | 6    | 3  | 28  | 0    |
| CONTIG-080879 | 178 | 5    | 7  | 28  | 0    |
| CONTIG-080880 | 791 | 14   | 0  | 496 | 4    |
| CONTIG-080881 | 88  | 8    | 9  | 19  | 2    |
| CONTIG-080882 | 52  | 3438 | 9  | 2   | 5123 |
| CONTIG-080883 | 190 | 7    | 11 | 51  | 0    |
| CONTIG-080884 | 155 | 10   | 20 | 50  | 0    |
| CONTIG-080886 | 121 | 6    | 7  | 20  | 0    |
| CONTIG-080887 | 91  | 6    | 8  | 0   | 0    |
| CONTIG-080888 | 125 | 9    | 8  | 24  | 3    |
| CONTIG-080889 | 151 | 8    | 13 | 46  | 0    |
| CONTIG-080890 | 409 | 12   | 7  | 163 | 8    |
| CONTIG-080891 | 62  | 5    | 2  | 5   | 0    |
| CONTIG-080896 | 117 | 5    | 0  | 23  | 0    |
| CONTIG-080897 | 88  | 4    | 5  | 4   | 0    |
| CONTIG-080900 | 108 | 6    | 0  | 22  | 0    |
| CONTIG-080901 | 112 | 10   | 9  | 41  | 0    |
| CONTIG-080903 | 228 | 13   | 17 | 66  | 0    |
| CONTIG-080904 | 123 | 6    | 9  | 13  | 0    |
| CONTIG-080905 | 74  | 6    | 3  | 15  | 0    |
| CONTIG-080906 | 161 | 6    | 0  | 33  | 0    |
| CONTIG-080907 | 236 | 16   | 0  | 107 | 2    |
| CONTIG-080908 | 70  | 4    | 5  | 7   | 0    |
| CONTIG-080909 | 354 | 12   | 2  | 0   | 27   |
| CONTIG-080910 | 103 | 10   | 15 | 24  | 0    |
| CONTIG-080911 | 96  | 6    | 0  | 18  | 0    |
| CONTIG-080912 | 135 | 4    | 6  | 9   | 0    |
| CONTIG-080913 | 90  | 6    | 6  | 13  | 0    |
| CONTIG-080914 | 139 | 5    | 8  | 12  | 0    |
| CONTIG-080915 | 162 | 9    | 7  | 39  | 0    |
| CONTIG-080916 | 71  | 6    | 14 | 0   | 0    |
| CONTIG-080917 | 76  | 3    | 0  | 2   | 0    |
| CONTIG-080918 | 61  | 3    | 0  | 6   | 0    |
| CONTIG-080919 | 80  | 4    | 0  | 10  | 0    |
| CONTIG-080920 | 94  | 8    | 2  | 31  | 0    |
| CONTIG-080921 | 146 | 7    | 4  | 44  | 2    |
| CONTIG-080922 | 60  | 10   | 6  | 24  | 0    |
| CONTIG-080923 | 64  | 5    | 9  | 0   | 0    |
| CONTIG-080924 | 203 | 16   | 4  | 158 | 0    |
| CONTIG-080925 | 106 | 18   | 3  | 80  | 3    |
| CONTIG-080926 | 307 | 11   | 4  | 69  | 0    |



|               |     |    |    |     |     |
|---------------|-----|----|----|-----|-----|
| CONTIG-080927 | 176 | 7  | 0  | 45  | 2   |
| CONTIG-080928 | 63  | 6  | 3  | 0   | 0   |
| CONTIG-080930 | 111 | 20 | 3  | 0   | 0   |
| CONTIG-080931 | 267 | 9  | 4  | 90  | 0   |
| CONTIG-080932 | 106 | 14 | 0  | 86  | 0   |
| CONTIG-080933 | 62  | 4  | 0  | 9   | 0   |
| CONTIG-080934 | 101 | 6  | 0  | 20  | 0   |
| CONTIG-080935 | 201 | 8  | 6  | 36  | 0   |
| CONTIG-080936 | 135 | 6  | 0  | 35  | 0   |
| CONTIG-080937 | 323 | 14 | 26 | 198 | 0   |
| CONTIG-080938 | 196 | 8  | 14 | 37  | 0   |
| CONTIG-080939 | 106 | 6  | 6  | 25  | 0   |
| CONTIG-080940 | 515 | 98 | 0  | 0   | 552 |
| CONTIG-080941 | 184 | 13 | 3  | 71  | 0   |
| CONTIG-080942 | 163 | 9  | 6  | 30  | 0   |
| CONTIG-080944 | 73  | 4  | 3  | 11  | 0   |
| CONTIG-080945 | 61  | 6  | 2  | 12  | 0   |
| CONTIG-080946 | 75  | 2  | 0  | 0   | 0   |
| CONTIG-080947 | 145 | 13 | 9  | 58  | 0   |
| CONTIG-080948 | 162 | 6  | 4  | 24  | 0   |
| CONTIG-080949 | 60  | 2  | 0  | 3   | 0   |
| CONTIG-080951 | 177 | 14 | 12 | 89  | 0   |
| CONTIG-080952 | 141 | 6  | 0  | 32  | 0   |
| CONTIG-080953 | 139 | 28 | 3  | 0   | 24  |
| CONTIG-080954 | 61  | 7  | 0  | 18  | 0   |
| CONTIG-080955 | 413 | 9  | 31 | 85  | 0   |
| CONTIG-080956 | 59  | 7  | 15 | 8   | 0   |
| CONTIG-080957 | 66  | 8  | 10 | 3   | 0   |
| CONTIG-080958 | 68  | 5  | 2  | 5   | 3   |
| CONTIG-080959 | 100 | 3  | 0  | 4   | 0   |
| CONTIG-080960 | 155 | 4  | 2  | 10  | 2   |
| CONTIG-080961 | 235 | 7  | 7  | 48  | 0   |
| CONTIG-080962 | 139 | 5  | 2  | 22  | 0   |
| CONTIG-080963 | 62  | 8  | 0  | 25  | 0   |
| CONTIG-080964 | 241 | 10 | 5  | 98  | 0   |
| CONTIG-080965 | 72  | 8  | 11 | 14  | 0   |
| CONTIG-080966 | 66  | 7  | 0  | 17  | 0   |
| CONTIG-080967 | 104 | 6  | 3  | 14  | 0   |
| CONTIG-080968 | 84  | 4  | 4  | 9   | 0   |
| CONTIG-080969 | 121 | 12 | 36 | 58  | 0   |
| CONTIG-080970 | 93  | 8  | 2  | 0   | 0   |
| CONTIG-080971 | 95  | 4  | 5  | 10  | 0   |
| CONTIG-080974 | 200 | 6  | 0  | 21  | 0   |
| CONTIG-080975 | 145 | 3  | 4  | 12  | 0   |
| CONTIG-080976 | 142 | 4  | 3  | 19  | 0   |
| CONTIG-080977 | 78  | 11 | 0  | 0   | 0   |
| CONTIG-080978 | 86  | 6  | 0  | 16  | 0   |

|               |     |    |    |     |   |
|---------------|-----|----|----|-----|---|
| CONTIG-080979 | 130 | 8  | 2  | 27  | 0 |
| CONTIG-080980 | 73  | 13 | 7  | 14  | 0 |
| CONTIG-080981 | 81  | 6  | 2  | 19  | 0 |
| CONTIG-080982 | 77  | 5  | 4  | 5   | 0 |
| CONTIG-080984 | 83  | 25 | 2  | 94  | 0 |
| CONTIG-080985 | 65  | 3  | 3  | 4   | 0 |
| CONTIG-080986 | 60  | 10 | 0  | 19  | 0 |
| CONTIG-080987 | 372 | 9  | 8  | 65  | 2 |
| CONTIG-080988 | 96  | 6  | 16 | 14  | 0 |
| CONTIG-080989 | 228 | 7  | 4  | 21  | 2 |
| CONTIG-080990 | 187 | 4  | 3  | 17  | 0 |
| CONTIG-080991 | 72  | 5  | 3  | 9   | 2 |
| CONTIG-080992 | 170 | 7  | 5  | 29  | 0 |
| CONTIG-080993 | 63  | 5  | 2  | 4   | 0 |
| CONTIG-080994 | 73  | 22 | 8  | 82  | 0 |
| CONTIG-080995 | 260 | 5  | 4  | 45  | 0 |
| CONTIG-080996 | 71  | 4  | 2  | 4   | 0 |
| CONTIG-080997 | 184 | 7  | 10 | 46  | 0 |
| CONTIG-080999 | 99  | 13 | 29 | 18  | 0 |
| CONTIG-081000 | 71  | 4  | 0  | 0   | 0 |
| CONTIG-081001 | 126 | 12 | 11 | 30  | 3 |
| CONTIG-081002 | 62  | 13 | 9  | 26  | 0 |
| CONTIG-081003 | 298 | 10 | 8  | 128 | 0 |
| CONTIG-081004 | 161 | 15 | 6  | 73  | 0 |
| CONTIG-081005 | 79  | 6  | 11 | 14  | 0 |
| CONTIG-081006 | 110 | 4  | 4  | 2   | 0 |
| CONTIG-081008 | 158 | 4  | 8  | 7   | 0 |
| CONTIG-081009 | 70  | 5  | 0  | 5   | 0 |
| CONTIG-081010 | 177 | 12 | 10 | 70  | 0 |
| CONTIG-081011 | 262 | 10 | 10 | 116 | 0 |
| CONTIG-081012 | 144 | 9  | 0  | 45  | 0 |
| CONTIG-081013 | 173 | 13 | 36 | 41  | 0 |
| CONTIG-081014 | 127 | 10 | 0  | 29  | 2 |
| CONTIG-081015 | 62  | 9  | 5  | 18  | 0 |
| CONTIG-081016 | 74  | 3  | 0  | 6   | 0 |
| CONTIG-081017 | 118 | 4  | 0  | 6   | 0 |
| CONTIG-081018 | 86  | 12 | 11 | 37  | 0 |
| CONTIG-081019 | 132 | 10 | 8  | 31  | 0 |
| CONTIG-081020 | 97  | 5  | 7  | 4   | 0 |
| CONTIG-081021 | 230 | 17 | 8  | 209 | 0 |
| CONTIG-081022 | 61  | 11 | 3  | 20  | 0 |
| CONTIG-081023 | 68  | 2  | 0  | 0   | 0 |
| CONTIG-081024 | 96  | 4  | 11 | 10  | 0 |
| CONTIG-081025 | 208 | 10 | 7  | 77  | 0 |
| CONTIG-081026 | 60  | 5  | 2  | 9   | 0 |
| CONTIG-081029 | 311 | 15 | 2  | 154 | 0 |
| CONTIG-081030 | 189 | 6  | 3  | 41  | 0 |

|               |     |    |    |     |    |
|---------------|-----|----|----|-----|----|
| CONTIG-081031 | 121 | 7  | 2  | 31  | 0  |
| CONTIG-081032 | 106 | 4  | 13 | 4   | 0  |
| CONTIG-081033 | 119 | 6  | 2  | 16  | 0  |
| CONTIG-081034 | 104 | 4  | 3  | 12  | 0  |
| CONTIG-081035 | 93  | 7  | 4  | 19  | 0  |
| CONTIG-081036 | 95  | 6  | 0  | 20  | 0  |
| CONTIG-081037 | 463 | 8  | 29 | 85  | 0  |
| CONTIG-081038 | 301 | 17 | 3  | 116 | 0  |
| CONTIG-081039 | 71  | 3  | 2  | 4   | 0  |
| CONTIG-081040 | 96  | 2  | 2  | 0   | 0  |
| CONTIG-081041 | 63  | 6  | 5  | 5   | 0  |
| CONTIG-081042 | 146 | 13 | 9  | 19  | 0  |
| CONTIG-081043 | 58  | 6  | 0  | 2   | 0  |
| CONTIG-081044 | 93  | 8  | 0  | 20  | 0  |
| CONTIG-081045 | 303 | 9  | 5  | 64  | 0  |
| CONTIG-081046 | 85  | 6  | 2  | 13  | 0  |
| CONTIG-081047 | 282 | 8  | 0  | 69  | 4  |
| CONTIG-081048 | 106 | 7  | 0  | 29  | 0  |
| CONTIG-081049 | 130 | 4  | 3  | 15  | 0  |
| CONTIG-081051 | 83  | 5  | 2  | 9   | 0  |
| CONTIG-081052 | 176 | 11 | 13 | 55  | 0  |
| CONTIG-081053 | 48  | 8  | 0  | 10  | 0  |
| CONTIG-081054 | 105 | 7  | 13 | 11  | 0  |
| CONTIG-081055 | 114 | 5  | 6  | 10  | 0  |
| CONTIG-081056 | 93  | 7  | 0  | 17  | 0  |
| CONTIG-081057 | 103 | 6  | 6  | 11  | 0  |
| CONTIG-081058 | 588 | 22 | 0  | 45  | 2  |
| CONTIG-081059 | 98  | 4  | 0  | 7   | 0  |
| CONTIG-081061 | 168 | 5  | 9  | 36  | 0  |
| CONTIG-081062 | 66  | 5  | 0  | 11  | 0  |
| CONTIG-081063 | 130 | 7  | 29 | 19  | 0  |
| CONTIG-081064 | 463 | 11 | 4  | 0   | 22 |
| CONTIG-081065 | 66  | 6  | 0  | 15  | 0  |
| CONTIG-081067 | 93  | 5  | 3  | 12  | 0  |
| CONTIG-081068 | 87  | 9  | 20 | 14  | 0  |
| CONTIG-081069 | 171 | 4  | 6  | 6   | 0  |
| CONTIG-081070 | 83  | 4  | 2  | 8   | 0  |
| CONTIG-081071 | 95  | 4  | 7  | 7   | 0  |
| CONTIG-081072 | 66  | 8  | 4  | 16  | 0  |
| CONTIG-081073 | 65  | 9  | 7  | 4   | 0  |
| CONTIG-081074 | 116 | 3  | 2  | 3   | 0  |
| CONTIG-081076 | 91  | 4  | 2  | 4   | 0  |
| CONTIG-081077 | 88  | 3  | 4  | 4   | 0  |
| CONTIG-081078 | 394 | 16 | 20 | 201 | 4  |
| CONTIG-081079 | 78  | 4  | 0  | 10  | 0  |
| CONTIG-081080 | 68  | 4  | 2  | 2   | 0  |
| CONTIG-081081 | 79  | 5  | 0  | 17  | 0  |

|               |     |    |    |     |    |
|---------------|-----|----|----|-----|----|
| CONTIG-081082 | 84  | 3  | 0  | 4   | 0  |
| CONTIG-081083 | 183 | 5  | 0  | 18  | 0  |
| CONTIG-081084 | 188 | 10 | 2  | 36  | 3  |
| CONTIG-081085 | 73  | 6  | 4  | 0   | 0  |
| CONTIG-081086 | 325 | 7  | 10 | 61  | 0  |
| CONTIG-081087 | 80  | 4  | 6  | 9   | 0  |
| CONTIG-081088 | 129 | 9  | 0  | 0   | 0  |
| CONTIG-081089 | 137 | 17 | 9  | 34  | 0  |
| CONTIG-081090 | 73  | 5  | 0  | 12  | 0  |
| CONTIG-081091 | 97  | 5  | 8  | 7   | 0  |
| CONTIG-081092 | 84  | 10 | 12 | 9   | 0  |
| CONTIG-081093 | 64  | 7  | 0  | 15  | 0  |
| CONTIG-081094 | 192 | 7  | 7  | 34  | 0  |
| CONTIG-081095 | 92  | 7  | 0  | 10  | 0  |
| CONTIG-081096 | 73  | 3  | 5  | 4   | 0  |
| CONTIG-081097 | 103 | 9  | 8  | 0   | 0  |
| CONTIG-081098 | 149 | 5  | 0  | 16  | 0  |
| CONTIG-081099 | 86  | 14 | 8  | 0   | 0  |
| CONTIG-081100 | 146 | 15 | 6  | 110 | 0  |
| CONTIG-081101 | 151 | 11 | 7  | 61  | 0  |
| CONTIG-081103 | 147 | 6  | 3  | 11  | 0  |
| CONTIG-081105 | 58  | 6  | 14 | 0   | 0  |
| CONTIG-081106 | 183 | 11 | 3  | 5   | 0  |
| CONTIG-081107 | 108 | 6  | 0  | 7   | 0  |
| CONTIG-081108 | 74  | 16 | 9  | 51  | 0  |
| CONTIG-081109 | 99  | 5  | 2  | 0   | 0  |
| CONTIG-081110 | 433 | 13 | 10 | 191 | 0  |
| CONTIG-081111 | 66  | 9  | 16 | 16  | 0  |
| CONTIG-081112 | 180 | 10 | 4  | 64  | 0  |
| CONTIG-081113 | 92  | 6  | 0  | 7   | 0  |
| CONTIG-081114 | 146 | 11 | 5  | 3   | 10 |
| CONTIG-081115 | 64  | 2  | 3  | 2   | 0  |
| CONTIG-081116 | 85  | 5  | 2  | 9   | 0  |
| CONTIG-081117 | 69  | 3  | 0  | 5   | 0  |
| CONTIG-081118 | 605 | 19 | 11 | 85  | 0  |
| CONTIG-081119 | 65  | 2  | 0  | 2   | 0  |
| CONTIG-081120 | 68  | 5  | 4  | 3   | 0  |
| CONTIG-081122 | 424 | 17 | 3  | 0   | 50 |
| CONTIG-081123 | 109 | 4  | 0  | 8   | 0  |
| CONTIG-081125 | 170 | 7  | 8  | 19  | 0  |
| CONTIG-081126 | 90  | 7  | 5  | 11  | 0  |
| CONTIG-081127 | 58  | 4  | 10 | 2   | 0  |
| CONTIG-081128 | 126 | 8  | 5  | 26  | 0  |
| CONTIG-081129 | 84  | 3  | 7  | 7   | 0  |
| CONTIG-081130 | 90  | 7  | 0  | 20  | 0  |
| CONTIG-081131 | 213 | 13 | 13 | 77  | 0  |
| CONTIG-081132 | 234 | 6  | 2  | 31  | 0  |

|               |     |     |    |     |   |
|---------------|-----|-----|----|-----|---|
| CONTIG-081134 | 76  | 21  | 19 | 57  | 0 |
| CONTIG-081135 | 114 | 8   | 4  | 22  | 4 |
| CONTIG-081136 | 93  | 3   | 2  | 0   | 0 |
| CONTIG-081137 | 102 | 5   | 10 | 10  | 0 |
| CONTIG-081138 | 68  | 3   | 4  | 4   | 0 |
| CONTIG-081139 | 139 | 7   | 0  | 28  | 0 |
| CONTIG-081140 | 138 | 7   | 7  | 5   | 0 |
| CONTIG-081141 | 61  | 9   | 3  | 17  | 0 |
| CONTIG-081142 | 78  | 6   | 6  | 12  | 0 |
| CONTIG-081143 | 161 | 7   | 0  | 39  | 0 |
| CONTIG-081144 | 143 | 17  | 11 | 51  | 0 |
| CONTIG-081145 | 76  | 6   | 2  | 2   | 0 |
| CONTIG-081146 | 126 | 5   | 3  | 22  | 0 |
| CONTIG-081147 | 65  | 7   | 2  | 14  | 0 |
| CONTIG-081148 | 74  | 20  | 10 | 26  | 0 |
| CONTIG-081149 | 74  | 3   | 0  | 9   | 0 |
| CONTIG-081150 | 93  | 4   | 4  | 7   | 0 |
| CONTIG-081151 | 61  | 4   | 0  | 6   | 0 |
| CONTIG-081152 | 93  | 4   | 5  | 5   | 0 |
| CONTIG-081153 | 101 | 11  | 6  | 42  | 2 |
| CONTIG-081154 | 227 | 8   | 11 | 72  | 0 |
| CONTIG-081155 | 78  | 4   | 7  | 13  | 0 |
| CONTIG-081156 | 76  | 4   | 0  | 10  | 0 |
| CONTIG-081157 | 171 | 6   | 8  | 40  | 0 |
| CONTIG-081158 | 135 | 8   | 5  | 38  | 0 |
| CONTIG-081159 | 95  | 11  | 3  | 47  | 0 |
| CONTIG-081160 | 73  | 8   | 16 | 14  | 0 |
| CONTIG-081163 | 129 | 9   | 0  | 23  | 0 |
| CONTIG-081164 | 90  | 6   | 5  | 11  | 0 |
| CONTIG-081165 | 97  | 114 | 0  | 632 | 0 |
| CONTIG-081166 | 146 | 15  | 0  | 128 | 0 |
| CONTIG-081167 | 176 | 5   | 3  | 11  | 0 |
| CONTIG-081168 | 117 | 4   | 10 | 7   | 0 |
| CONTIG-081169 | 113 | 15  | 5  | 6   | 0 |
| CONTIG-081170 | 59  | 6   | 0  | 6   | 0 |
| CONTIG-081171 | 83  | 6   | 9  | 18  | 0 |
| CONTIG-081173 | 87  | 7   | 0  | 15  | 0 |
| CONTIG-081174 | 247 | 8   | 8  | 55  | 0 |
| CONTIG-081175 | 101 | 30  | 22 | 104 | 0 |
| CONTIG-081176 | 156 | 7   | 4  | 27  | 0 |
| CONTIG-081177 | 365 | 8   | 2  | 69  | 6 |
| CONTIG-081181 | 77  | 2   | 2  | 0   | 0 |
| CONTIG-081182 | 71  | 8   | 0  | 12  | 0 |
| CONTIG-081183 | 172 | 8   | 6  | 66  | 0 |
| CONTIG-081184 | 120 | 6   | 8  | 29  | 0 |
| CONTIG-081185 | 80  | 7   | 2  | 5   | 0 |
| CONTIG-081186 | 160 | 5   | 5  | 22  | 0 |

|               |     |    |    |     |   |
|---------------|-----|----|----|-----|---|
| CONTIG-081187 | 69  | 12 | 0  | 20  | 0 |
| CONTIG-081191 | 100 | 13 | 19 | 41  | 0 |
| CONTIG-081192 | 67  | 4  | 17 | 0   | 0 |
| CONTIG-081193 | 84  | 10 | 3  | 34  | 0 |
| CONTIG-081194 | 95  | 14 | 5  | 47  | 0 |
| CONTIG-081195 | 97  | 3  | 0  | 2   | 0 |
| CONTIG-081196 | 218 | 18 | 8  | 9   | 0 |
| CONTIG-081197 | 46  | 16 | 0  | 24  | 0 |
| CONTIG-081199 | 204 | 10 | 6  | 39  | 2 |
| CONTIG-081200 | 134 | 3  | 2  | 4   | 0 |
| CONTIG-081201 | 322 | 4  | 7  | 27  | 0 |
| CONTIG-081202 | 110 | 7  | 2  | 22  | 0 |
| CONTIG-081203 | 132 | 20 | 2  | 71  | 0 |
| CONTIG-081205 | 57  | 21 | 0  | 7   | 0 |
| CONTIG-081206 | 87  | 3  | 0  | 2   | 0 |
| CONTIG-081207 | 63  | 9  | 19 | 7   | 0 |
| CONTIG-081208 | 205 | 21 | 2  | 255 | 0 |
| CONTIG-081209 | 215 | 3  | 2  | 25  | 0 |
| CONTIG-081210 | 110 | 5  | 6  | 13  | 0 |
| CONTIG-081211 | 78  | 11 | 4  | 20  | 0 |
| CONTIG-081216 | 179 | 12 | 7  | 73  | 2 |
| CONTIG-081217 | 78  | 8  | 5  | 10  | 0 |
| CONTIG-081218 | 126 | 9  | 4  | 54  | 0 |
| CONTIG-081219 | 416 | 10 | 22 | 109 | 0 |
| CONTIG-081220 | 210 | 10 | 6  | 56  | 2 |
| CONTIG-081222 | 212 | 7  | 4  | 27  | 0 |
| CONTIG-081223 | 248 | 5  | 4  | 23  | 2 |
| CONTIG-081224 | 66  | 3  | 6  | 5   | 0 |
| CONTIG-081225 | 290 | 9  | 11 | 41  | 0 |
| CONTIG-081226 | 175 | 5  | 4  | 10  | 2 |
| CONTIG-081230 | 87  | 4  | 2  | 8   | 2 |
| CONTIG-081231 | 188 | 9  | 22 | 49  | 0 |
| CONTIG-081232 | 72  | 2  | 0  | 5   | 0 |
| CONTIG-081233 | 76  | 7  | 2  | 18  | 0 |
| CONTIG-081235 | 66  | 5  | 0  | 0   | 0 |
| CONTIG-081236 | 78  | 7  | 4  | 11  | 2 |
| CONTIG-081237 | 230 | 9  | 15 | 79  | 0 |
| CONTIG-081239 | 81  | 14 | 7  | 34  | 0 |
| CONTIG-081240 | 103 | 4  | 9  | 14  | 0 |
| CONTIG-081242 | 68  | 13 | 12 | 22  | 0 |
| CONTIG-081243 | 172 | 6  | 4  | 16  | 3 |
| CONTIG-081244 | 55  | 91 | 7  | 232 | 0 |
| CONTIG-081245 | 182 | 8  | 11 | 29  | 0 |
| CONTIG-081246 | 81  | 8  | 4  | 21  | 0 |
| CONTIG-081247 | 123 | 9  | 0  | 58  | 0 |
| CONTIG-081248 | 333 | 12 | 14 | 130 | 4 |
| CONTIG-081249 | 298 | 15 | 3  | 2   | 0 |

|               |     |     |    |     |     |
|---------------|-----|-----|----|-----|-----|
| CONTIG-081250 | 101 | 17  | 5  | 31  | 0   |
| CONTIG-081251 | 103 | 5   | 7  | 14  | 0   |
| CONTIG-081252 | 58  | 8   | 18 | 2   | 0   |
| CONTIG-081253 | 82  | 13  | 5  | 41  | 0   |
| CONTIG-081254 | 266 | 12  | 2  | 116 | 4   |
| CONTIG-081255 | 212 | 6   | 0  | 35  | 0   |
| CONTIG-081256 | 148 | 6   | 2  | 20  | 0   |
| CONTIG-081257 | 248 | 14  | 18 | 103 | 0   |
| CONTIG-081258 | 67  | 5   | 2  | 9   | 0   |
| CONTIG-081259 | 67  | 8   | 33 | 7   | 0   |
| CONTIG-081260 | 118 | 6   | 4  | 25  | 0   |
| CONTIG-081261 | 102 | 8   | 4  | 14  | 0   |
| CONTIG-081264 | 71  | 6   | 3  | 11  | 0   |
| CONTIG-081265 | 102 | 6   | 2  | 5   | 0   |
| CONTIG-081266 | 68  | 13  | 0  | 30  | 0   |
| CONTIG-081267 | 335 | 16  | 4  | 182 | 4   |
| CONTIG-081268 | 147 | 5   | 8  | 6   | 0   |
| CONTIG-081269 | 60  | 4   | 0  | 10  | 0   |
| CONTIG-081270 | 202 | 6   | 6  | 40  | 2   |
| CONTIG-081271 | 62  | 3   | 0  | 4   | 0   |
| CONTIG-081272 | 114 | 8   | 17 | 22  | 0   |
| CONTIG-081273 | 71  | 11  | 16 | 0   | 0   |
| CONTIG-081274 | 587 | 14  | 11 | 42  | 0   |
| CONTIG-081275 | 85  | 16  | 2  | 60  | 0   |
| CONTIG-081276 | 258 | 7   | 4  | 75  | 0   |
| CONTIG-081277 | 144 | 7   | 3  | 8   | 4   |
| CONTIG-081279 | 204 | 19  | 24 | 135 | 0   |
| CONTIG-081280 | 106 | 5   | 3  | 11  | 0   |
| CONTIG-081281 | 89  | 12  | 12 | 48  | 0   |
| CONTIG-081282 | 164 | 12  | 8  | 48  | 2   |
| CONTIG-081291 | 81  | 23  | 0  | 45  | 0   |
| CONTIG-081292 | 76  | 3   | 2  | 11  | 0   |
| CONTIG-081293 | 160 | 6   | 36 | 2   | 0   |
| CONTIG-081294 | 285 | 10  | 21 | 82  | 0   |
| CONTIG-081295 | 81  | 7   | 2  | 18  | 2   |
| CONTIG-081296 | 84  | 4   | 0  | 6   | 0   |
| CONTIG-081298 | 206 | 103 | 5  | 0   | 414 |
| CONTIG-081299 | 101 | 16  | 7  | 51  | 2   |
| CONTIG-081300 | 93  | 6   | 5  | 24  | 0   |
| CONTIG-081301 | 61  | 6   | 5  | 16  | 0   |
| CONTIG-081302 | 718 | 28  | 0  | 0   | 39  |
| CONTIG-081303 | 100 | 6   | 13 | 5   | 0   |
| CONTIG-081304 | 90  | 5   | 2  | 9   | 0   |
| CONTIG-081305 | 403 | 145 | 8  | 0   | 557 |
| CONTIG-081306 | 66  | 10  | 12 | 17  | 2   |
| CONTIG-081307 | 67  | 8   | 3  | 17  | 0   |
| CONTIG-081308 | 79  | 8   | 9  | 18  | 0   |

|               |     |    |    |     |   |
|---------------|-----|----|----|-----|---|
| CONTIG-081309 | 363 | 8  | 0  | 104 | 0 |
| CONTIG-081310 | 36  | 20 | 0  | 4   | 0 |
| CONTIG-081311 | 94  | 7  | 2  | 18  | 0 |
| CONTIG-081312 | 228 | 11 | 12 | 71  | 0 |
| CONTIG-081313 | 111 | 14 | 14 | 21  | 0 |
| CONTIG-081314 | 44  | 72 | 9  | 117 | 0 |
| CONTIG-081315 | 85  | 2  | 2  | 0   | 0 |
| CONTIG-081316 | 177 | 7  | 2  | 29  | 0 |
| CONTIG-081317 | 147 | 13 | 21 | 66  | 0 |
| CONTIG-081318 | 577 | 16 | 41 | 134 | 0 |
| CONTIG-081319 | 105 | 6  | 3  | 16  | 0 |
| CONTIG-081323 | 79  | 5  | 2  | 17  | 0 |
| CONTIG-081324 | 158 | 8  | 2  | 52  | 0 |
| CONTIG-081325 | 148 | 9  | 2  | 47  | 0 |
| CONTIG-081327 | 117 | 3  | 8  | 4   | 0 |
| CONTIG-081328 | 145 | 10 | 10 | 28  | 0 |
| CONTIG-081329 | 199 | 8  | 7  | 69  | 0 |
| CONTIG-081330 | 123 | 4  | 5  | 20  | 0 |
| CONTIG-081331 | 65  | 6  | 5  | 14  | 0 |
| CONTIG-081332 | 189 | 9  | 7  | 24  | 6 |
| CONTIG-081333 | 58  | 5  | 0  | 6   | 0 |
| CONTIG-081334 | 179 | 4  | 4  | 25  | 0 |
| CONTIG-081335 | 130 | 7  | 5  | 29  | 0 |
| CONTIG-081336 | 66  | 4  | 6  | 3   | 0 |
| CONTIG-081337 | 110 | 3  | 0  | 10  | 0 |
| CONTIG-081338 | 103 | 6  | 10 | 13  | 0 |
| CONTIG-081339 | 106 | 4  | 2  | 8   | 0 |
| CONTIG-081340 | 88  | 4  | 2  | 7   | 0 |
| CONTIG-081341 | 356 | 8  | 13 | 43  | 0 |
| CONTIG-081342 | 122 | 6  | 8  | 13  | 2 |
| CONTIG-081343 | 122 | 5  | 0  | 12  | 0 |
| CONTIG-081344 | 129 | 5  | 8  | 8   | 0 |
| CONTIG-081345 | 67  | 8  | 6  | 15  | 0 |
| CONTIG-081346 | 81  | 13 | 4  | 3   | 0 |
| CONTIG-081347 | 157 | 10 | 2  | 44  | 0 |
| CONTIG-081348 | 84  | 6  | 5  | 2   | 0 |
| CONTIG-081349 | 149 | 15 | 5  | 91  | 0 |
| CONTIG-081350 | 126 | 12 | 5  | 18  | 0 |
| CONTIG-081351 | 129 | 3  | 0  | 10  | 0 |
| CONTIG-081353 | 71  | 3  | 0  | 10  | 0 |
| CONTIG-081354 | 104 | 4  | 3  | 17  | 0 |
| CONTIG-081355 | 68  | 4  | 0  | 0   | 0 |
| CONTIG-081356 | 151 | 7  | 4  | 22  | 0 |
| CONTIG-081357 | 92  | 7  | 4  | 14  | 0 |
| CONTIG-081358 | 178 | 8  | 3  | 54  | 0 |
| CONTIG-081359 | 81  | 4  | 3  | 4   | 0 |
| CONTIG-081360 | 146 | 11 | 7  | 55  | 0 |



|               |     |     |    |     |     |
|---------------|-----|-----|----|-----|-----|
| CONTIG-081361 | 169 | 9   | 2  | 22  | 0   |
| CONTIG-081362 | 113 | 4   | 5  | 7   | 0   |
| CONTIG-081363 | 250 | 3   | 3  | 21  | 0   |
| CONTIG-081364 | 101 | 5   | 2  | 11  | 0   |
| CONTIG-081365 | 206 | 6   | 4  | 58  | 0   |
| CONTIG-081366 | 62  | 3   | 4  | 7   | 0   |
| CONTIG-081367 | 103 | 8   | 13 | 7   | 0   |
| CONTIG-081369 | 92  | 16  | 7  | 20  | 0   |
| CONTIG-081370 | 102 | 9   | 0  | 21  | 0   |
| CONTIG-081371 | 176 | 14  | 11 | 56  | 0   |
| CONTIG-081374 | 113 | 140 | 2  | 928 | 0   |
| CONTIG-081375 | 257 | 10  | 9  | 82  | 3   |
| CONTIG-081377 | 78  | 4   | 5  | 9   | 0   |
| CONTIG-081378 | 95  | 42  | 15 | 117 | 8   |
| CONTIG-081379 | 61  | 45  | 4  | 115 | 2   |
| CONTIG-081380 | 118 | 6   | 22 | 10  | 0   |
| CONTIG-081381 | 117 | 8   | 4  | 26  | 0   |
| CONTIG-081382 | 343 | 12  | 2  | 176 | 0   |
| CONTIG-081383 | 84  | 4   | 4  | 2   | 0   |
| CONTIG-081387 | 269 | 10  | 3  | 50  | 0   |
| CONTIG-081389 | 65  | 4   | 0  | 2   | 0   |
| CONTIG-081390 | 108 | 35  | 23 | 37  | 0   |
| CONTIG-081391 | 146 | 5   | 5  | 15  | 0   |
| CONTIG-081392 | 59  | 9   | 3  | 9   | 0   |
| CONTIG-081394 | 64  | 7   | 0  | 12  | 0   |
| CONTIG-081395 | 79  | 17  | 0  | 0   | 6   |
| CONTIG-081396 | 225 | 12  | 16 | 89  | 0   |
| CONTIG-081397 | 64  | 7   | 7  | 12  | 0   |
| CONTIG-081398 | 70  | 11  | 2  | 17  | 0   |
| CONTIG-081399 | 58  | 8   | 8  | 15  | 0   |
| CONTIG-081400 | 105 | 6   | 11 | 23  | 0   |
| CONTIG-081401 | 72  | 6   | 6  | 6   | 0   |
| CONTIG-081402 | 72  | 3   | 5  | 4   | 0   |
| CONTIG-081403 | 591 | 12  | 2  | 0   | 13  |
| CONTIG-081405 | 250 | 94  | 0  | 0   | 215 |
| CONTIG-081406 | 481 | 43  | 7  | 61  | 0   |
| CONTIG-081407 | 67  | 3   | 2  | 8   | 0   |
| CONTIG-081410 | 61  | 3   | 5  | 3   | 0   |
| CONTIG-081411 | 71  | 3   | 0  | 0   | 0   |
| CONTIG-081412 | 98  | 8   | 9  | 23  | 0   |
| CONTIG-081413 | 154 | 13  | 7  | 63  | 0   |
| CONTIG-081414 | 144 | 14  | 7  | 72  | 0   |
| CONTIG-081415 | 189 | 7   | 9  | 52  | 4   |
| CONTIG-081416 | 282 | 8   | 5  | 70  | 0   |
| CONTIG-081417 | 182 | 11  | 8  | 58  | 0   |
| CONTIG-081418 | 174 | 7   | 0  | 49  | 0   |
| CONTIG-081419 | 164 | 9   | 0  | 0   | 8   |

|               |     |    |    |     |    |
|---------------|-----|----|----|-----|----|
| CONTIG-081420 | 177 | 5  | 2  | 25  | 0  |
| CONTIG-081422 | 62  | 4  | 2  | 11  | 0  |
| CONTIG-081423 | 197 | 7  | 3  | 0   | 0  |
| CONTIG-081424 | 360 | 12 | 28 | 100 | 0  |
| CONTIG-081425 | 82  | 5  | 2  | 12  | 0  |
| CONTIG-081427 | 171 | 9  | 2  | 34  | 0  |
| CONTIG-081428 | 58  | 2  | 0  | 0   | 0  |
| CONTIG-081429 | 76  | 4  | 0  | 5   | 0  |
| CONTIG-081431 | 60  | 7  | 0  | 13  | 2  |
| CONTIG-081432 | 87  | 7  | 13 | 14  | 0  |
| CONTIG-081433 | 189 | 8  | 2  | 51  | 0  |
| CONTIG-081434 | 91  | 5  | 8  | 10  | 2  |
| CONTIG-081435 | 229 | 7  | 5  | 51  | 0  |
| CONTIG-081436 | 89  | 4  | 7  | 6   | 0  |
| CONTIG-081437 | 123 | 7  | 2  | 31  | 0  |
| CONTIG-081438 | 162 | 9  | 16 | 35  | 0  |
| CONTIG-081439 | 74  | 5  | 8  | 10  | 0  |
| CONTIG-081440 | 69  | 2  | 0  | 2   | 0  |
| CONTIG-081442 | 70  | 2  | 0  | 0   | 0  |
| CONTIG-081443 | 177 | 21 | 2  | 0   | 15 |
| CONTIG-081444 | 74  | 15 | 27 | 0   | 0  |
| CONTIG-081446 | 177 | 8  | 12 | 30  | 0  |
| CONTIG-081447 | 80  | 3  | 3  | 6   | 0  |
| CONTIG-081448 | 66  | 6  | 2  | 13  | 0  |
| CONTIG-081449 | 294 | 6  | 2  | 41  | 2  |
| CONTIG-081450 | 187 | 12 | 5  | 48  | 2  |
| CONTIG-081451 | 157 | 3  | 0  | 15  | 0  |
| CONTIG-081452 | 90  | 4  | 0  | 6   | 0  |
| CONTIG-081454 | 279 | 6  | 4  | 43  | 0  |
| CONTIG-081455 | 145 | 16 | 9  | 58  | 3  |
| CONTIG-081456 | 302 | 7  | 5  | 67  | 0  |
| CONTIG-081457 | 144 | 4  | 9  | 11  | 0  |
| CONTIG-081458 | 201 | 5  | 10 | 27  | 0  |
| CONTIG-081459 | 78  | 3  | 6  | 2   | 0  |
| CONTIG-081460 | 361 | 12 | 6  | 117 | 4  |
| CONTIG-081461 | 106 | 5  | 0  | 12  | 0  |
| CONTIG-081462 | 252 | 7  | 10 | 49  | 0  |
| CONTIG-081463 | 68  | 7  | 0  | 14  | 0  |
| CONTIG-081464 | 152 | 7  | 12 | 29  | 2  |
| CONTIG-081465 | 129 | 8  | 24 | 22  | 0  |
| CONTIG-081466 | 72  | 3  | 3  | 0   | 0  |
| CONTIG-081467 | 108 | 7  | 7  | 15  | 0  |
| CONTIG-081468 | 103 | 5  | 6  | 8   | 0  |
| CONTIG-081469 | 100 | 4  | 0  | 2   | 0  |
| CONTIG-081470 | 52  | 46 | 3  | 56  | 0  |
| CONTIG-081471 | 147 | 8  | 0  | 49  | 2  |
| CONTIG-081472 | 71  | 22 | 11 | 49  | 0  |

|               |      |      |    |      |     |
|---------------|------|------|----|------|-----|
| CONTIG-081473 | 96   | 8    | 5  | 20   | 0   |
| CONTIG-081474 | 67   | 11   | 9  | 9    | 2   |
| CONTIG-081475 | 78   | 6    | 0  | 12   | 0   |
| CONTIG-081476 | 118  | 4    | 0  | 7    | 0   |
| CONTIG-081477 | 67   | 6    | 0  | 0    | 0   |
| CONTIG-081478 | 176  | 6    | 9  | 23   | 0   |
| CONTIG-081479 | 76   | 6    | 2  | 6    | 0   |
| CONTIG-081480 | 236  | 10   | 7  | 84   | 0   |
| CONTIG-081481 | 448  | 10   | 8  | 88   | 0   |
| CONTIG-081482 | 42   | 1492 | 10 | 2417 | 0   |
| CONTIG-081483 | 63   | 13   | 4  | 36   | 0   |
| CONTIG-081485 | 280  | 19   | 28 | 127  | 0   |
| CONTIG-081486 | 65   | 4    | 11 | 0    | 0   |
| CONTIG-081487 | 75   | 3    | 6  | 5    | 0   |
| CONTIG-081488 | 63   | 15   | 9  | 0    | 0   |
| CONTIG-081489 | 69   | 10   | 8  | 19   | 0   |
| CONTIG-081490 | 71   | 3    | 3  | 2    | 0   |
| CONTIG-081491 | 65   | 6    | 5  | 17   | 0   |
| CONTIG-081492 | 79   | 6    | 16 | 4    | 0   |
| CONTIG-081493 | 72   | 6    | 10 | 0    | 0   |
| CONTIG-081494 | 53   | 1438 | 2  | 45   | 2   |
| CONTIG-081495 | 97   | 4    | 5  | 6    | 0   |
| CONTIG-081496 | 91   | 5    | 0  | 24   | 0   |
| CONTIG-081497 | 83   | 20   | 3  | 63   | 0   |
| CONTIG-081499 | 115  | 5    | 10 | 17   | 0   |
| CONTIG-081501 | 150  | 4    | 2  | 0    | 0   |
| CONTIG-081502 | 130  | 11   | 4  | 48   | 0   |
| CONTIG-081503 | 100  | 5    | 8  | 9    | 0   |
| CONTIG-081505 | 61   | 5    | 2  | 2    | 0   |
| CONTIG-081506 | 139  | 6    | 4  | 17   | 0   |
| CONTIG-081507 | 61   | 2    | 0  | 0    | 0   |
| CONTIG-081508 | 185  | 9    | 0  | 47   | 0   |
| CONTIG-081509 | 75   | 4    | 2  | 6    | 0   |
| CONTIG-081510 | 118  | 5    | 9  | 16   | 0   |
| CONTIG-081511 | 103  | 19   | 13 | 83   | 0   |
| CONTIG-081512 | 120  | 7    | 2  | 17   | 0   |
| CONTIG-081513 | 73   | 5    | 4  | 0    | 0   |
| CONTIG-081514 | 128  | 11   | 7  | 53   | 0   |
| CONTIG-081515 | 105  | 45   | 17 | 194  | 0   |
| CONTIG-081516 | 59   | 12   | 13 | 22   | 0   |
| CONTIG-081517 | 76   | 5    | 6  | 12   | 0   |
| CONTIG-081518 | 58   | 5    | 2  | 8    | 0   |
| CONTIG-081519 | 1575 | 16   | 0  | 0    | 221 |
| CONTIG-081520 | 245  | 8    | 4  | 51   | 0   |
| CONTIG-081521 | 145  | 7    | 7  | 7    | 0   |
| CONTIG-081522 | 372  | 11   | 23 | 68   | 4   |
| CONTIG-081523 | 789  | 12   | 0  | 0    | 62  |

|               |      |    |     |     |    |
|---------------|------|----|-----|-----|----|
| CONTIG-081524 | 111  | 10 | 3   | 37  | 0  |
| CONTIG-081525 | 95   | 11 | 4   | 30  | 0  |
| CONTIG-081526 | 61   | 2  | 4   | 4   | 0  |
| CONTIG-081527 | 139  | 7  | 0   | 43  | 0  |
| CONTIG-081528 | 78   | 4  | 0   | 6   | 0  |
| CONTIG-081529 | 339  | 7  | 2   | 85  | 0  |
| CONTIG-081530 | 118  | 12 | 10  | 75  | 0  |
| CONTIG-081531 | 134  | 6  | 5   | 29  | 0  |
| CONTIG-081533 | 165  | 8  | 4   | 34  | 0  |
| CONTIG-081534 | 140  | 15 | 2   | 101 | 0  |
| CONTIG-081535 | 81   | 4  | 0   | 0   | 0  |
| CONTIG-081536 | 369  | 11 | 5   | 121 | 2  |
| CONTIG-081538 | 66   | 6  | 2   | 10  | 0  |
| CONTIG-081539 | 99   | 4  | 3   | 8   | 0  |
| CONTIG-081540 | 159  | 6  | 13  | 16  | 0  |
| CONTIG-081541 | 90   | 8  | 2   | 20  | 0  |
| CONTIG-081542 | 68   | 7  | 0   | 13  | 0  |
| CONTIG-081543 | 90   | 17 | 2   | 68  | 0  |
| CONTIG-081544 | 88   | 4  | 0   | 9   | 0  |
| CONTIG-081545 | 141  | 4  | 2   | 2   | 0  |
| CONTIG-081546 | 195  | 4  | 3   | 19  | 0  |
| CONTIG-081547 | 59   | 3  | 2   | 6   | 0  |
| CONTIG-081548 | 176  | 63 | 354 | 235 | 6  |
| CONTIG-081550 | 61   | 7  | 0   | 13  | 0  |
| CONTIG-081551 | 194  | 8  | 8   | 42  | 0  |
| CONTIG-081552 | 64   | 5  | 4   | 11  | 0  |
| CONTIG-081554 | 188  | 25 | 8   | 247 | 0  |
| CONTIG-081555 | 97   | 8  | 18  | 0   | 0  |
| CONTIG-081556 | 115  | 4  | 0   | 0   | 0  |
| CONTIG-081558 | 1082 | 10 | 3   | 0   | 43 |
| CONTIG-081559 | 186  | 8  | 34  | 38  | 0  |
| CONTIG-081560 | 154  | 7  | 15  | 40  | 0  |
| CONTIG-081561 | 193  | 10 | 3   | 0   | 2  |
| CONTIG-081564 | 109  | 6  | 3   | 9   | 0  |
| CONTIG-081565 | 76   | 4  | 0   | 0   | 0  |
| CONTIG-081566 | 58   | 2  | 3   | 0   | 0  |
| CONTIG-081567 | 171  | 12 | 23  | 94  | 0  |
| CONTIG-081568 | 61   | 3  | 2   | 4   | 0  |
| CONTIG-081569 | 110  | 7  | 4   | 9   | 0  |
| CONTIG-081570 | 120  | 10 | 2   | 39  | 0  |
| CONTIG-081571 | 105  | 6  | 7   | 27  | 0  |
| CONTIG-081572 | 88   | 9  | 7   | 27  | 0  |
| CONTIG-081573 | 70   | 11 | 8   | 40  | 0  |
| CONTIG-081574 | 142  | 10 | 2   | 0   | 6  |
| CONTIG-081575 | 273  | 8  | 2   | 80  | 0  |
| CONTIG-081576 | 223  | 7  | 12  | 41  | 0  |
| CONTIG-081577 | 358  | 7  | 4   | 30  | 0  |

|               |     |    |    |     |     |
|---------------|-----|----|----|-----|-----|
| CONTIG-081578 | 184 | 8  | 6  | 73  | 0   |
| CONTIG-081579 | 117 | 5  | 3  | 0   | 0   |
| CONTIG-081580 | 72  | 9  | 2  | 4   | 0   |
| CONTIG-081581 | 78  | 6  | 5  | 7   | 2   |
| CONTIG-081582 | 70  | 5  | 3  | 5   | 0   |
| CONTIG-081583 | 83  | 6  | 5  | 13  | 0   |
| CONTIG-081585 | 84  | 4  | 2  | 0   | 0   |
| CONTIG-081586 | 85  | 4  | 5  | 6   | 0   |
| CONTIG-081587 | 74  | 5  | 3  | 0   | 0   |
| CONTIG-081588 | 67  | 5  | 4  | 4   | 0   |
| CONTIG-081589 | 135 | 6  | 5  | 7   | 0   |
| CONTIG-081590 | 120 | 3  | 2  | 0   | 0   |
| CONTIG-081591 | 135 | 8  | 13 | 40  | 0   |
| CONTIG-081592 | 142 | 5  | 5  | 7   | 0   |
| CONTIG-081593 | 183 | 8  | 5  | 28  | 0   |
| CONTIG-081594 | 178 | 39 | 3  | 368 | 0   |
| CONTIG-081595 | 594 | 46 | 7  | 2   | 194 |
| CONTIG-081596 | 48  | 11 | 0  | 12  | 0   |
| CONTIG-081597 | 288 | 8  | 5  | 35  | 0   |
| CONTIG-081598 | 72  | 12 | 2  | 47  | 0   |
| CONTIG-081599 | 152 | 10 | 10 | 26  | 2   |
| CONTIG-081600 | 174 | 4  | 2  | 11  | 0   |
| CONTIG-081601 | 78  | 4  | 5  | 4   | 0   |
| CONTIG-081603 | 118 | 8  | 20 | 28  | 3   |
| CONTIG-081604 | 87  | 3  | 0  | 2   | 0   |
| CONTIG-081605 | 74  | 8  | 3  | 15  | 0   |
| CONTIG-081606 | 78  | 8  | 9  | 11  | 0   |
| CONTIG-081607 | 105 | 4  | 5  | 9   | 0   |
| CONTIG-081609 | 67  | 5  | 0  | 9   | 0   |
| CONTIG-081610 | 129 | 9  | 24 | 28  | 0   |
| CONTIG-081611 | 88  | 7  | 2  | 4   | 0   |
| CONTIG-081613 | 150 | 7  | 7  | 20  | 0   |
| CONTIG-081614 | 189 | 12 | 10 | 106 | 0   |
| CONTIG-081615 | 156 | 4  | 7  | 20  | 0   |
| CONTIG-081617 | 178 | 5  | 2  | 19  | 0   |
| CONTIG-081618 | 75  | 5  | 3  | 0   | 0   |
| CONTIG-081619 | 63  | 5  | 2  | 9   | 0   |
| CONTIG-081620 | 82  | 6  | 0  | 16  | 0   |
| CONTIG-081621 | 108 | 5  | 6  | 16  | 0   |
| CONTIG-081622 | 159 | 7  | 4  | 40  | 0   |
| CONTIG-081623 | 81  | 18 | 17 | 39  | 0   |
| CONTIG-081624 | 113 | 18 | 5  | 56  | 0   |
| CONTIG-081625 | 74  | 5  | 3  | 8   | 0   |
| CONTIG-081626 | 132 | 4  | 6  | 14  | 0   |
| CONTIG-081627 | 88  | 10 | 9  | 20  | 0   |
| CONTIG-081628 | 82  | 3  | 3  | 2   | 0   |
| CONTIG-081629 | 254 | 8  | 3  | 81  | 0   |

|               |     |    |    |     |   |
|---------------|-----|----|----|-----|---|
| CONTIG-081630 | 264 | 8  | 0  | 10  | 0 |
| CONTIG-081631 | 129 | 6  | 4  | 20  | 0 |
| CONTIG-081632 | 74  | 6  | 2  | 8   | 0 |
| CONTIG-081633 | 80  | 6  | 4  | 10  | 0 |
| CONTIG-081634 | 117 | 9  | 8  | 30  | 0 |
| CONTIG-081635 | 99  | 5  | 4  | 18  | 0 |
| CONTIG-081636 | 116 | 6  | 4  | 33  | 0 |
| CONTIG-081637 | 118 | 16 | 12 | 115 | 0 |
| CONTIG-081638 | 100 | 9  | 11 | 22  | 0 |
| CONTIG-081639 | 81  | 6  | 5  | 11  | 2 |
| CONTIG-081640 | 88  | 7  | 2  | 4   | 0 |
| CONTIG-081641 | 70  | 4  | 0  | 0   | 0 |
| CONTIG-081642 | 93  | 5  | 2  | 3   | 0 |
| CONTIG-081643 | 161 | 5  | 3  | 0   | 2 |
| CONTIG-081644 | 132 | 17 | 43 | 19  | 0 |
| CONTIG-081645 | 71  | 4  | 3  | 13  | 0 |
| CONTIG-081646 | 101 | 7  | 2  | 22  | 0 |
| CONTIG-081647 | 96  | 8  | 5  | 20  | 0 |
| CONTIG-081648 | 286 | 8  | 0  | 70  | 2 |
| CONTIG-081649 | 161 | 17 | 28 | 79  | 2 |
| CONTIG-081650 | 84  | 5  | 3  | 10  | 0 |
| CONTIG-081651 | 89  | 4  | 9  | 6   | 0 |
| CONTIG-081652 | 171 | 5  | 16 | 4   | 0 |
| CONTIG-081653 | 197 | 6  | 16 | 25  | 0 |
| CONTIG-081654 | 124 | 7  | 5  | 38  | 0 |
| CONTIG-081655 | 62  | 2  | 2  | 0   | 0 |
| CONTIG-081656 | 225 | 12 | 12 | 70  | 0 |
| CONTIG-081657 | 124 | 6  | 0  | 15  | 0 |
| CONTIG-081658 | 396 | 11 | 17 | 131 | 3 |
| CONTIG-081659 | 79  | 16 | 7  | 17  | 0 |
| CONTIG-081660 | 64  | 5  | 3  | 4   | 0 |
| CONTIG-081661 | 58  | 16 | 5  | 2   | 0 |
| CONTIG-081662 | 235 | 12 | 4  | 105 | 0 |
| CONTIG-081663 | 63  | 5  | 4  | 2   | 0 |
| CONTIG-081664 | 114 | 12 | 7  | 31  | 0 |
| CONTIG-081665 | 166 | 5  | 4  | 20  | 0 |
| CONTIG-081666 | 183 | 9  | 13 | 42  | 2 |
| CONTIG-081667 | 107 | 7  | 5  | 17  | 0 |
| CONTIG-081668 | 86  | 8  | 0  | 4   | 0 |
| CONTIG-081670 | 270 | 9  | 6  | 71  | 0 |
| CONTIG-081671 | 192 | 5  | 11 | 20  | 0 |
| CONTIG-081672 | 89  | 14 | 15 | 23  | 0 |
| CONTIG-081673 | 59  | 6  | 3  | 4   | 2 |
| CONTIG-081674 | 119 | 6  | 2  | 26  | 0 |
| CONTIG-081675 | 62  | 4  | 2  | 4   | 0 |
| CONTIG-081676 | 111 | 13 | 8  | 59  | 0 |
| CONTIG-081677 | 111 | 3  | 0  | 2   | 0 |

|               |     |    |    |     |     |
|---------------|-----|----|----|-----|-----|
| CONTIG-081678 | 121 | 6  | 10 | 20  | 0   |
| CONTIG-081679 | 283 | 8  | 5  | 10  | 0   |
| CONTIG-081686 | 103 | 8  | 9  | 21  | 0   |
| CONTIG-081687 | 193 | 5  | 2  | 21  | 0   |
| CONTIG-081688 | 37  | 5  | 0  | 0   | 0   |
| CONTIG-081689 | 133 | 6  | 0  | 26  | 0   |
| CONTIG-081690 | 86  | 9  | 34 | 2   | 2   |
| CONTIG-081691 | 110 | 4  | 0  | 17  | 0   |
| CONTIG-081692 | 62  | 6  | 3  | 10  | 0   |
| CONTIG-081693 | 178 | 8  | 12 | 44  | 0   |
| CONTIG-081694 | 62  | 5  | 6  | 7   | 0   |
| CONTIG-081695 | 135 | 6  | 2  | 23  | 0   |
| CONTIG-081696 | 97  | 6  | 4  | 20  | 0   |
| CONTIG-081697 | 71  | 8  | 0  | 20  | 0   |
| CONTIG-081698 | 64  | 3  | 0  | 2   | 0   |
| CONTIG-081699 | 209 | 14 | 11 | 143 | 2   |
| CONTIG-081700 | 137 | 25 | 20 | 138 | 0   |
| CONTIG-081701 | 64  | 7  | 0  | 14  | 0   |
| CONTIG-081702 | 852 | 36 | 4  | 0   | 112 |
| CONTIG-081703 | 178 | 5  | 6  | 13  | 0   |
| CONTIG-081704 | 208 | 8  | 3  | 83  | 0   |
| CONTIG-081705 | 97  | 8  | 7  | 23  | 0   |
| CONTIG-081706 | 107 | 5  | 2  | 9   | 0   |
| CONTIG-081707 | 91  | 4  | 0  | 9   | 0   |
| CONTIG-081708 | 239 | 6  | 8  | 30  | 0   |
| CONTIG-081709 | 68  | 4  | 2  | 5   | 0   |
| CONTIG-081710 | 109 | 5  | 2  | 13  | 0   |
| CONTIG-081712 | 82  | 3  | 3  | 9   | 0   |
| CONTIG-081713 | 58  | 7  | 11 | 0   | 2   |
| CONTIG-081714 | 147 | 6  | 6  | 18  | 2   |
| CONTIG-081715 | 87  | 13 | 9  | 52  | 0   |
| CONTIG-081717 | 46  | 40 | 7  | 87  | 0   |
| CONTIG-081718 | 130 | 14 | 0  | 56  | 0   |
| CONTIG-081719 | 178 | 5  | 0  | 4   | 2   |
| CONTIG-081720 | 102 | 30 | 5  | 150 | 0   |
| CONTIG-081721 | 83  | 8  | 7  | 17  | 0   |
| CONTIG-081722 | 118 | 12 | 12 | 65  | 0   |
| CONTIG-081723 | 161 | 5  | 2  | 20  | 0   |
| CONTIG-081724 | 248 | 10 | 0  | 4   | 0   |
| CONTIG-081725 | 92  | 9  | 2  | 21  | 0   |
| CONTIG-081726 | 274 | 9  | 6  | 81  | 0   |
| CONTIG-081727 | 120 | 8  | 4  | 12  | 0   |
| CONTIG-081729 | 160 | 7  | 12 | 32  | 0   |
| CONTIG-081730 | 90  | 17 | 9  | 47  | 0   |
| CONTIG-081732 | 119 | 10 | 2  | 37  | 0   |
| CONTIG-081734 | 127 | 6  | 3  | 33  | 0   |
| CONTIG-081735 | 197 | 4  | 0  | 12  | 4   |

|               |     |    |    |     |   |
|---------------|-----|----|----|-----|---|
| CONTIG-081736 | 100 | 4  | 3  | 18  | 0 |
| CONTIG-081737 | 325 | 8  | 8  | 50  | 0 |
| CONTIG-081738 | 124 | 12 | 11 | 14  | 0 |
| CONTIG-081739 | 98  | 4  | 7  | 4   | 0 |
| CONTIG-081740 | 145 | 7  | 2  | 15  | 0 |
| CONTIG-081741 | 73  | 7  | 5  | 13  | 0 |
| CONTIG-081742 | 352 | 8  | 0  | 85  | 0 |
| CONTIG-081744 | 333 | 9  | 18 | 71  | 2 |
| CONTIG-081747 | 96  | 6  | 0  | 13  | 0 |
| CONTIG-081748 | 270 | 8  | 5  | 77  | 2 |
| CONTIG-081749 | 141 | 8  | 5  | 17  | 0 |
| CONTIG-081750 | 180 | 5  | 0  | 18  | 0 |
| CONTIG-081751 | 65  | 21 | 6  | 70  | 0 |
| CONTIG-081752 | 465 | 10 | 18 | 140 | 0 |
| CONTIG-081753 | 170 | 10 | 8  | 62  | 0 |
| CONTIG-081754 | 267 | 10 | 9  | 76  | 0 |
| CONTIG-081755 | 73  | 4  | 4  | 10  | 0 |
| CONTIG-081756 | 83  | 9  | 8  | 12  | 0 |
| CONTIG-081757 | 65  | 12 | 5  | 27  | 0 |
| CONTIG-081758 | 70  | 5  | 3  | 14  | 0 |
| CONTIG-081759 | 125 | 4  | 6  | 15  | 0 |
| CONTIG-081760 | 103 | 6  | 10 | 10  | 0 |
| CONTIG-081761 | 528 | 9  | 11 | 100 | 0 |
| CONTIG-081762 | 102 | 13 | 2  | 59  | 0 |
| CONTIG-081763 | 74  | 4  | 4  | 0   | 0 |
| CONTIG-081764 | 105 | 4  | 4  | 10  | 0 |
| CONTIG-081765 | 342 | 24 | 19 | 326 | 0 |
| CONTIG-081766 | 95  | 7  | 0  | 25  | 0 |
| CONTIG-081767 | 68  | 4  | 0  | 3   | 0 |
| CONTIG-081768 | 82  | 3  | 2  | 5   | 0 |
| CONTIG-081769 | 191 | 11 | 6  | 99  | 2 |
| CONTIG-081770 | 162 | 6  | 6  | 34  | 0 |
| CONTIG-081771 | 236 | 10 | 15 | 75  | 0 |
| CONTIG-081772 | 127 | 10 | 0  | 47  | 0 |
| CONTIG-081773 | 59  | 2  | 0  | 2   | 0 |
| CONTIG-081774 | 209 | 7  | 0  | 46  | 0 |
| CONTIG-081775 | 153 | 10 | 25 | 44  | 0 |
| CONTIG-081776 | 152 | 6  | 2  | 40  | 0 |
| CONTIG-081777 | 290 | 12 | 12 | 138 | 0 |
| CONTIG-081778 | 269 | 10 | 13 | 137 | 0 |
| CONTIG-081779 | 240 | 7  | 7  | 45  | 0 |
| CONTIG-081780 | 178 | 3  | 0  | 10  | 0 |
| CONTIG-081781 | 107 | 4  | 0  | 8   | 0 |
| CONTIG-081782 | 219 | 7  | 3  | 51  | 0 |
| CONTIG-081783 | 90  | 7  | 9  | 7   | 0 |
| CONTIG-081784 | 78  | 4  | 0  | 0   | 0 |
| CONTIG-081785 | 68  | 67 | 0  | 200 | 0 |



|               |     |     |    |    |    |
|---------------|-----|-----|----|----|----|
| CONTIG-081786 | 111 | 2   | 0  | 5  | 0  |
| CONTIG-081787 | 197 | 313 | 3  | 0  | 17 |
| CONTIG-081788 | 97  | 10  | 5  | 17 | 0  |
| CONTIG-081789 | 113 | 57  | 0  | 0  | 52 |
| CONTIG-081790 | 68  | 4   | 5  | 0  | 0  |
| CONTIG-081791 | 105 | 5   | 4  | 6  | 0  |
| CONTIG-081792 | 140 | 5   | 4  | 10 | 2  |
| CONTIG-081793 | 134 | 5   | 2  | 7  | 0  |
| CONTIG-081794 | 95  | 4   | 0  | 14 | 0  |
| CONTIG-081795 | 117 | 5   | 7  | 6  | 0  |
| CONTIG-081796 | 73  | 7   | 6  | 7  | 0  |
| CONTIG-081797 | 88  | 4   | 5  | 8  | 0  |
| CONTIG-081798 | 363 | 43  | 4  | 35 | 0  |
| CONTIG-081799 | 101 | 14  | 0  | 34 | 0  |
| CONTIG-081800 | 219 | 8   | 15 | 66 | 0  |
| CONTIG-081801 | 206 | 11  | 20 | 77 | 0  |
| CONTIG-081802 | 71  | 5   | 8  | 4  | 0  |
| CONTIG-081803 | 186 | 7   | 2  | 45 | 0  |
| CONTIG-081804 | 64  | 4   | 6  | 0  | 0  |
| CONTIG-081806 | 137 | 8   | 0  | 36 | 0  |
| CONTIG-081807 | 86  | 6   | 0  | 4  | 0  |
| CONTIG-081808 | 101 | 8   | 4  | 23 | 0  |
| CONTIG-081809 | 60  | 6   | 5  | 9  | 0  |
| CONTIG-081810 | 119 | 4   | 6  | 10 | 0  |
| CONTIG-081811 | 63  | 7   | 2  | 2  | 0  |
| CONTIG-081812 | 99  | 7   | 12 | 22 | 0  |
| CONTIG-081813 | 90  | 26  | 5  | 64 | 2  |
| CONTIG-081814 | 226 | 13  | 5  | 61 | 0  |
| CONTIG-081815 | 94  | 7   | 10 | 25 | 0  |
| CONTIG-081816 | 135 | 7   | 2  | 18 | 0  |
| CONTIG-081817 | 90  | 4   | 0  | 12 | 2  |
| CONTIG-081818 | 60  | 5   | 3  | 7  | 0  |
| CONTIG-081819 | 96  | 6   | 5  | 7  | 0  |
| CONTIG-081821 | 205 | 5   | 0  | 4  | 0  |
| CONTIG-081822 | 205 | 5   | 2  | 29 | 0  |
| CONTIG-081823 | 178 | 8   | 11 | 41 | 0  |
| CONTIG-081824 | 139 | 8   | 12 | 11 | 0  |
| CONTIG-081825 | 160 | 4   | 2  | 24 | 0  |
| CONTIG-081826 | 159 | 11  | 0  | 56 | 0  |
| CONTIG-081827 | 62  | 3   | 0  | 3  | 0  |
| CONTIG-081828 | 134 | 5   | 4  | 16 | 2  |
| CONTIG-081829 | 86  | 3   | 4  | 9  | 0  |
| CONTIG-081830 | 77  | 10  | 11 | 24 | 0  |
| CONTIG-081831 | 169 | 14  | 2  | 0  | 15 |
| CONTIG-081832 | 115 | 6   | 5  | 23 | 0  |
| CONTIG-081833 | 64  | 6   | 0  | 13 | 0  |
| CONTIG-081834 | 58  | 5   | 3  | 4  | 0  |

|               |     |     |    |     |     |
|---------------|-----|-----|----|-----|-----|
| CONTIG-081835 | 98  | 4   | 3  | 7   | 0   |
| CONTIG-081836 | 124 | 13  | 4  | 51  | 0   |
| CONTIG-081837 | 69  | 3   | 8  | 0   | 0   |
| CONTIG-081838 | 180 | 5   | 0  | 31  | 0   |
| CONTIG-081839 | 270 | 13  | 0  | 16  | 0   |
| CONTIG-081840 | 139 | 11  | 14 | 64  | 0   |
| CONTIG-081841 | 210 | 5   | 2  | 15  | 0   |
| CONTIG-081842 | 88  | 7   | 8  | 13  | 0   |
| CONTIG-081843 | 66  | 4   | 0  | 5   | 0   |
| CONTIG-081844 | 42  | 35  | 0  | 2   | 0   |
| CONTIG-081847 | 60  | 8   | 8  | 10  | 0   |
| CONTIG-081849 | 59  | 74  | 0  | 223 | 0   |
| CONTIG-081850 | 217 | 134 | 6  | 0   | 328 |
| CONTIG-081851 | 66  | 2   | 0  | 0   | 0   |
| CONTIG-081852 | 70  | 3   | 2  | 4   | 0   |
| CONTIG-081853 | 181 | 5   | 13 | 14  | 0   |
| CONTIG-081854 | 231 | 9   | 0  | 0   | 2   |
| CONTIG-081855 | 60  | 27  | 5  | 6   | 0   |
| CONTIG-081856 | 523 | 21  | 0  | 0   | 82  |
| CONTIG-081857 | 94  | 6   | 8  | 10  | 0   |
| CONTIG-081858 | 287 | 9   | 2  | 76  | 0   |
| CONTIG-081859 | 76  | 6   | 9  | 3   | 0   |
| CONTIG-081860 | 104 | 11  | 2  | 12  | 0   |
| CONTIG-081861 | 128 | 62  | 10 | 404 | 0   |
| CONTIG-081862 | 70  | 3   | 0  | 5   | 0   |
| CONTIG-081863 | 110 | 10  | 6  | 27  | 0   |
| CONTIG-081864 | 122 | 9   | 9  | 38  | 0   |
| CONTIG-081865 | 60  | 14  | 3  | 0   | 0   |
| CONTIG-081866 | 176 | 6   | 2  | 46  | 0   |
| CONTIG-081867 | 61  | 5   | 0  | 8   | 0   |
| CONTIG-081868 | 92  | 6   | 4  | 9   | 0   |
| CONTIG-081869 | 453 | 11  | 5  | 179 | 2   |
| CONTIG-081870 | 107 | 6   | 4  | 16  | 0   |
| CONTIG-081871 | 72  | 4   | 3  | 4   | 0   |
| CONTIG-081872 | 191 | 12  | 4  | 29  | 0   |
| CONTIG-081874 | 136 | 13  | 8  | 49  | 2   |
| CONTIG-081875 | 74  | 4   | 0  | 0   | 2   |
| CONTIG-081876 | 143 | 8   | 10 | 37  | 0   |
| CONTIG-081877 | 79  | 4   | 5  | 0   | 0   |
| CONTIG-081878 | 151 | 10  | 2  | 48  | 0   |
| CONTIG-081879 | 244 | 20  | 6  | 11  | 2   |
| CONTIG-081880 | 145 | 3   | 3  | 0   | 0   |
| CONTIG-081882 | 73  | 8   | 2  | 23  | 0   |
| CONTIG-081883 | 108 | 5   | 5  | 13  | 0   |
| CONTIG-081884 | 124 | 6   | 8  | 24  | 0   |
| CONTIG-081886 | 70  | 4   | 7  | 2   | 0   |
| CONTIG-081887 | 276 | 14  | 5  | 13  | 0   |

|               |     |    |    |     |    |
|---------------|-----|----|----|-----|----|
| CONTIG-081890 | 356 | 6  | 5  | 13  | 0  |
| CONTIG-081891 | 77  | 8  | 4  | 9   | 0  |
| CONTIG-081892 | 169 | 7  | 0  | 0   | 0  |
| CONTIG-081893 | 244 | 7  | 3  | 28  | 0  |
| CONTIG-081894 | 183 | 6  | 2  | 30  | 0  |
| CONTIG-081895 | 261 | 19 | 2  | 149 | 9  |
| CONTIG-081898 | 64  | 7  | 3  | 2   | 0  |
| CONTIG-081899 | 74  | 3  | 3  | 9   | 0  |
| CONTIG-081900 | 139 | 12 | 8  | 62  | 0  |
| CONTIG-081901 | 86  | 8  | 0  | 21  | 0  |
| CONTIG-081902 | 186 | 6  | 18 | 20  | 0  |
| CONTIG-081903 | 76  | 2  | 2  | 0   | 0  |
| CONTIG-081904 | 251 | 4  | 5  | 25  | 0  |
| CONTIG-081905 | 85  | 6  | 4  | 7   | 0  |
| CONTIG-081906 | 193 | 6  | 8  | 41  | 0  |
| CONTIG-081907 | 94  | 3  | 2  | 11  | 0  |
| CONTIG-081908 | 111 | 4  | 6  | 12  | 0  |
| CONTIG-081909 | 210 | 5  | 6  | 40  | 2  |
| CONTIG-081910 | 76  | 4  | 6  | 12  | 0  |
| CONTIG-081911 | 342 | 12 | 15 | 175 | 0  |
| CONTIG-081912 | 78  | 5  | 0  | 4   | 0  |
| CONTIG-081913 | 250 | 5  | 5  | 30  | 0  |
| CONTIG-081914 | 180 | 7  | 10 | 36  | 0  |
| CONTIG-081915 | 126 | 4  | 3  | 13  | 0  |
| CONTIG-081916 | 69  | 4  | 0  | 4   | 0  |
| CONTIG-081917 | 86  | 4  | 4  | 4   | 0  |
| CONTIG-081918 | 63  | 2  | 0  | 0   | 0  |
| CONTIG-081919 | 200 | 13 | 11 | 90  | 0  |
| CONTIG-081920 | 126 | 2  | 2  | 0   | 0  |
| CONTIG-081921 | 72  | 2  | 2  | 5   | 0  |
| CONTIG-081922 | 70  | 4  | 2  | 10  | 0  |
| CONTIG-081923 | 438 | 16 | 3  | 0   | 27 |
| CONTIG-081924 | 65  | 7  | 4  | 0   | 0  |
| CONTIG-081925 | 214 | 11 | 2  | 7   | 2  |
| CONTIG-081926 | 176 | 5  | 5  | 36  | 0  |
| CONTIG-081927 | 86  | 4  | 0  | 7   | 0  |
| CONTIG-081928 | 165 | 10 | 16 | 33  | 0  |
| CONTIG-081929 | 91  | 9  | 10 | 11  | 0  |
| CONTIG-081930 | 144 | 7  | 0  | 23  | 0  |
| CONTIG-081931 | 63  | 5  | 4  | 2   | 0  |
| CONTIG-081932 | 110 | 4  | 0  | 15  | 0  |
| CONTIG-081933 | 403 | 8  | 14 | 78  | 2  |
| CONTIG-081934 | 190 | 9  | 8  | 63  | 0  |
| CONTIG-081935 | 76  | 5  | 8  | 8   | 0  |
| CONTIG-081939 | 91  | 5  | 8  | 2   | 0  |
| CONTIG-081940 | 222 | 11 | 3  | 12  | 0  |
| CONTIG-081941 | 212 | 7  | 6  | 55  | 0  |

|               |     |    |    |     |    |
|---------------|-----|----|----|-----|----|
| CONTIG-081942 | 119 | 17 | 0  | 73  | 16 |
| CONTIG-081943 | 69  | 4  | 8  | 5   | 0  |
| CONTIG-081944 | 591 | 17 | 0  | 0   | 72 |
| CONTIG-081945 | 105 | 4  | 2  | 18  | 0  |
| CONTIG-081948 | 176 | 6  | 4  | 0   | 6  |
| CONTIG-081949 | 58  | 4  | 5  | 4   | 0  |
| CONTIG-081950 | 60  | 13 | 3  | 35  | 0  |
| CONTIG-081951 | 63  | 6  | 5  | 12  | 0  |
| CONTIG-081952 | 152 | 6  | 4  | 19  | 0  |
| CONTIG-081953 | 223 | 8  | 9  | 19  | 0  |
| CONTIG-081955 | 137 | 8  | 5  | 2   | 0  |
| CONTIG-081956 | 734 | 10 | 13 | 155 | 0  |
| CONTIG-081957 | 166 | 13 | 14 | 69  | 0  |
| CONTIG-081958 | 60  | 2  | 0  | 6   | 0  |
| CONTIG-081959 | 127 | 6  | 0  | 31  | 0  |
| CONTIG-081960 | 111 | 6  | 3  | 28  | 0  |
| CONTIG-081961 | 75  | 3  | 6  | 2   | 0  |
| CONTIG-081962 | 182 | 9  | 2  | 37  | 5  |
| CONTIG-081963 | 78  | 3  | 2  | 4   | 0  |
| CONTIG-081964 | 64  | 4  | 0  | 3   | 0  |
| CONTIG-081966 | 285 | 8  | 12 | 65  | 0  |
| CONTIG-081967 | 123 | 86 | 3  | 21  | 0  |
| CONTIG-081968 | 81  | 3  | 3  | 9   | 0  |
| CONTIG-081969 | 140 | 5  | 6  | 17  | 0  |
| CONTIG-081970 | 129 | 7  | 0  | 36  | 0  |
| CONTIG-081971 | 66  | 3  | 2  | 5   | 0  |
| CONTIG-081972 | 80  | 8  | 5  | 15  | 0  |
| CONTIG-081973 | 213 | 8  | 11 | 44  | 0  |
| CONTIG-081974 | 231 | 11 | 5  | 95  | 0  |
| CONTIG-081975 | 140 | 8  | 0  | 27  | 0  |
| CONTIG-081976 | 169 | 9  | 10 | 33  | 0  |
| CONTIG-081977 | 380 | 10 | 5  | 135 | 4  |
| CONTIG-081978 | 296 | 5  | 8  | 46  | 0  |
| CONTIG-081979 | 72  | 6  | 9  | 10  | 0  |
| CONTIG-081980 | 131 | 10 | 3  | 24  | 4  |
| CONTIG-081982 | 108 | 7  | 6  | 10  | 0  |
| CONTIG-081984 | 83  | 6  | 7  | 0   | 0  |
| CONTIG-081985 | 96  | 11 | 3  | 20  | 2  |
| CONTIG-081987 | 65  | 8  | 4  | 22  | 0  |
| CONTIG-081988 | 63  | 10 | 3  | 19  | 0  |
| CONTIG-081989 | 81  | 8  | 6  | 20  | 0  |
| CONTIG-081990 | 70  | 5  | 0  | 0   | 2  |
| CONTIG-081991 | 67  | 3  | 2  | 7   | 0  |
| CONTIG-081992 | 137 | 6  | 0  | 29  | 0  |
| CONTIG-081994 | 68  | 6  | 15 | 12  | 0  |
| CONTIG-081995 | 198 | 8  | 13 | 32  | 0  |
| CONTIG-081996 | 263 | 16 | 20 | 83  | 0  |

|               |     |     |    |    |     |
|---------------|-----|-----|----|----|-----|
| CONTIG-081997 | 206 | 13  | 14 | 40 | 0   |
| CONTIG-081998 | 46  | 108 | 2  | 36 | 2   |
| CONTIG-082000 | 136 | 8   | 7  | 25 | 0   |
| CONTIG-082001 | 83  | 5   | 2  | 10 | 0   |
| CONTIG-082002 | 62  | 5   | 5  | 10 | 0   |
| CONTIG-082003 | 76  | 5   | 0  | 11 | 0   |
| CONTIG-082004 | 310 | 10  | 7  | 80 | 5   |
| CONTIG-082005 | 60  | 4   | 10 | 2  | 0   |
| CONTIG-082006 | 136 | 3   | 9  | 6  | 0   |
| CONTIG-082007 | 218 | 10  | 2  | 0  | 0   |
| CONTIG-082008 | 61  | 9   | 11 | 14 | 0   |
| CONTIG-082009 | 90  | 10  | 7  | 25 | 0   |
| CONTIG-082010 | 84  | 4   | 6  | 0  | 0   |
| CONTIG-082012 | 194 | 6   | 7  | 32 | 0   |
| CONTIG-082013 | 111 | 12  | 4  | 60 | 0   |
| CONTIG-082014 | 96  | 6   | 3  | 13 | 0   |
| CONTIG-082015 | 75  | 6   | 6  | 0  | 0   |
| CONTIG-082016 | 58  | 12  | 11 | 2  | 0   |
| CONTIG-082017 | 101 | 5   | 0  | 7  | 0   |
| CONTIG-082018 | 90  | 22  | 6  | 62 | 0   |
| CONTIG-082019 | 104 | 3   | 2  | 6  | 0   |
| CONTIG-082020 | 64  | 3   | 0  | 5  | 0   |
| CONTIG-082021 | 61  | 5   | 0  | 7  | 0   |
| CONTIG-082027 | 272 | 59  | 5  | 2  | 276 |
| CONTIG-082028 | 72  | 7   | 4  | 14 | 0   |
| CONTIG-082029 | 284 | 6   | 3  | 0  | 2   |
| CONTIG-082030 | 119 | 6   | 5  | 24 | 0   |
| CONTIG-082031 | 76  | 4   | 0  | 10 | 0   |
| CONTIG-082032 | 193 | 5   | 7  | 22 | 0   |
| CONTIG-082033 | 120 | 4   | 0  | 9  | 0   |
| CONTIG-082034 | 77  | 14  | 11 | 33 | 0   |
| CONTIG-082035 | 75  | 4   | 11 | 4  | 0   |
| CONTIG-082036 | 68  | 3   | 3  | 0  | 0   |
| CONTIG-082037 | 58  | 6   | 3  | 9  | 0   |
| CONTIG-082039 | 102 | 122 | 2  | 0  | 67  |
| CONTIG-082042 | 95  | 6   | 2  | 0  | 0   |
| CONTIG-082043 | 65  | 3   | 8  | 2  | 0   |
| CONTIG-082044 | 78  | 8   | 2  | 28 | 0   |
| CONTIG-082045 | 79  | 4   | 0  | 12 | 0   |
| CONTIG-082046 | 103 | 11  | 0  | 27 | 0   |
| CONTIG-082047 | 58  | 9   | 4  | 22 | 0   |
| CONTIG-082048 | 87  | 8   | 5  | 20 | 0   |
| CONTIG-082050 | 162 | 10  | 13 | 55 | 0   |
| CONTIG-082053 | 78  | 4   | 6  | 0  | 0   |
| CONTIG-082054 | 58  | 8   | 2  | 12 | 0   |
| CONTIG-082055 | 105 | 3   | 7  | 7  | 0   |
| CONTIG-082056 | 119 | 6   | 6  | 27 | 0   |

|               |     |     |    |      |    |
|---------------|-----|-----|----|------|----|
| CONTIG-082057 | 358 | 9   | 5  | 6    | 0  |
| CONTIG-082058 | 156 | 8   | 6  | 26   | 0  |
| CONTIG-082059 | 171 | 7   | 8  | 24   | 0  |
| CONTIG-082060 | 71  | 24  | 2  | 0    | 11 |
| CONTIG-082061 | 104 | 3   | 0  | 16   | 0  |
| CONTIG-082062 | 56  | 862 | 8  | 1977 | 0  |
| CONTIG-082063 | 62  | 2   | 0  | 0    | 0  |
| CONTIG-082064 | 84  | 7   | 2  | 25   | 0  |
| CONTIG-082065 | 80  | 2   | 3  | 2    | 0  |
| CONTIG-082067 | 182 | 2   | 0  | 4    | 0  |
| CONTIG-082068 | 74  | 4   | 0  | 6    | 0  |
| CONTIG-082069 | 81  | 9   | 4  | 7    | 0  |
| CONTIG-082070 | 354 | 7   | 7  | 22   | 2  |
| CONTIG-082071 | 97  | 5   | 2  | 7    | 0  |
| CONTIG-082072 | 200 | 15  | 4  | 152  | 0  |
| CONTIG-082073 | 89  | 3   | 10 | 3    | 0  |
| CONTIG-082074 | 146 | 6   | 2  | 17   | 0  |
| CONTIG-082080 | 100 | 7   | 5  | 35   | 0  |
| CONTIG-082081 | 65  | 10  | 28 | 11   | 0  |
| CONTIG-082082 | 79  | 4   | 8  | 3    | 0  |
| CONTIG-082084 | 115 | 16  | 0  | 85   | 0  |
| CONTIG-082085 | 173 | 5   | 0  | 20   | 0  |
| CONTIG-082086 | 173 | 8   | 7  | 61   | 0  |
| CONTIG-082088 | 269 | 9   | 8  | 62   | 0  |
| CONTIG-082089 | 186 | 6   | 3  | 9    | 3  |
| CONTIG-082090 | 89  | 6   | 16 | 9    | 0  |
| CONTIG-082091 | 178 | 10  | 23 | 53   | 2  |
| CONTIG-082092 | 108 | 4   | 14 | 7    | 0  |
| CONTIG-082093 | 87  | 8   | 10 | 7    | 0  |
| CONTIG-082094 | 209 | 5   | 15 | 21   | 0  |
| CONTIG-082095 | 61  | 5   | 3  | 10   | 0  |
| CONTIG-082096 | 49  | 91  | 67 | 135  | 3  |
| CONTIG-082097 | 144 | 8   | 16 | 40   | 0  |
| CONTIG-082098 | 91  | 81  | 4  | 0    | 72 |
| CONTIG-082099 | 67  | 8   | 2  | 16   | 0  |
| CONTIG-082100 | 67  | 9   | 9  | 28   | 0  |
| CONTIG-082101 | 66  | 6   | 3  | 0    | 0  |
| CONTIG-082102 | 202 | 10  | 2  | 62   | 0  |
| CONTIG-082103 | 80  | 3   | 0  | 4    | 0  |
| CONTIG-082104 | 192 | 9   | 2  | 56   | 4  |
| CONTIG-082105 | 342 | 8   | 4  | 40   | 0  |
| CONTIG-082106 | 267 | 15  | 24 | 48   | 2  |
| CONTIG-082107 | 114 | 6   | 3  | 29   | 0  |
| CONTIG-082108 | 63  | 7   | 4  | 12   | 0  |
| CONTIG-082109 | 78  | 6   | 2  | 11   | 0  |
| CONTIG-082110 | 86  | 3   | 0  | 8    | 0  |
| CONTIG-082111 | 218 | 11  | 0  | 86   | 0  |

|               |      |    |    |     |     |
|---------------|------|----|----|-----|-----|
| CONTIG-082112 | 123  | 14 | 2  | 13  | 0   |
| CONTIG-082113 | 76   | 5  | 4  | 13  | 0   |
| CONTIG-082114 | 233  | 4  | 6  | 9   | 0   |
| CONTIG-082115 | 147  | 7  | 2  | 32  | 0   |
| CONTIG-082116 | 152  | 11 | 0  | 60  | 0   |
| CONTIG-082118 | 181  | 12 | 0  | 105 | 0   |
| CONTIG-082119 | 112  | 10 | 9  | 32  | 0   |
| CONTIG-082120 | 67   | 5  | 5  | 3   | 0   |
| CONTIG-082121 | 74   | 3  | 5  | 6   | 0   |
| CONTIG-082122 | 60   | 6  | 23 | 6   | 0   |
| CONTIG-082123 | 64   | 5  | 2  | 10  | 0   |
| CONTIG-082124 | 126  | 5  | 4  | 17  | 0   |
| CONTIG-082126 | 65   | 7  | 2  | 12  | 0   |
| CONTIG-082127 | 297  | 17 | 17 | 132 | 6   |
| CONTIG-082128 | 66   | 10 | 7  | 25  | 0   |
| CONTIG-082129 | 114  | 6  | 9  | 14  | 0   |
| CONTIG-082130 | 58   | 6  | 8  | 6   | 0   |
| CONTIG-082131 | 177  | 6  | 10 | 19  | 0   |
| CONTIG-082132 | 120  | 6  | 0  | 19  | 0   |
| CONTIG-082133 | 119  | 8  | 6  | 19  | 0   |
| CONTIG-082134 | 93   | 15 | 6  | 57  | 0   |
| CONTIG-082135 | 320  | 10 | 8  | 142 | 0   |
| CONTIG-082136 | 188  | 8  | 7  | 55  | 0   |
| CONTIG-082137 | 95   | 6  | 4  | 17  | 0   |
| CONTIG-082138 | 94   | 3  | 0  | 4   | 0   |
| CONTIG-082139 | 326  | 12 | 2  | 29  | 0   |
| CONTIG-082140 | 82   | 4  | 8  | 10  | 0   |
| CONTIG-082141 | 216  | 9  | 8  | 44  | 0   |
| CONTIG-082142 | 237  | 8  | 9  | 79  | 0   |
| CONTIG-082146 | 131  | 11 | 0  | 7   | 0   |
| CONTIG-082147 | 219  | 5  | 0  | 29  | 0   |
| CONTIG-082148 | 128  | 9  | 0  | 7   | 0   |
| CONTIG-082149 | 104  | 6  | 0  | 15  | 0   |
| CONTIG-082150 | 102  | 10 | 18 | 20  | 0   |
| CONTIG-082151 | 69   | 6  | 4  | 14  | 0   |
| CONTIG-082152 | 150  | 6  | 3  | 16  | 0   |
| CONTIG-082153 | 1455 | 60 | 0  | 0   | 720 |
| CONTIG-082154 | 76   | 7  | 4  | 16  | 0   |
| CONTIG-082155 | 59   | 4  | 2  | 8   | 0   |
| CONTIG-082156 | 103  | 9  | 15 | 10  | 0   |
| CONTIG-082157 | 131  | 11 | 9  | 4   | 0   |
| CONTIG-082158 | 156  | 8  | 12 | 41  | 0   |
| CONTIG-082159 | 83   | 4  | 5  | 4   | 0   |
| CONTIG-082160 | 240  | 11 | 6  | 38  | 0   |
| CONTIG-082161 | 120  | 7  | 8  | 25  | 0   |
| CONTIG-082162 | 116  | 15 | 10 | 85  | 0   |
| CONTIG-082163 | 880  | 20 | 5  | 0   | 170 |

|               |     |     |    |     |     |
|---------------|-----|-----|----|-----|-----|
| CONTIG-082164 | 90  | 5   | 3  | 0   | 0   |
| CONTIG-082167 | 87  | 6   | 0  | 11  | 0   |
| CONTIG-082169 | 126 | 6   | 2  | 24  | 0   |
| CONTIG-082170 | 254 | 8   | 10 | 41  | 0   |
| CONTIG-082171 | 76  | 5   | 5  | 6   | 0   |
| CONTIG-082172 | 211 | 5   | 11 | 13  | 0   |
| CONTIG-082173 | 199 | 16  | 7  | 44  | 0   |
| CONTIG-082174 | 65  | 5   | 2  | 8   | 0   |
| CONTIG-082175 | 123 | 9   | 11 | 12  | 0   |
| CONTIG-082176 | 149 | 7   | 4  | 16  | 0   |
| CONTIG-082177 | 67  | 4   | 2  | 6   | 0   |
| CONTIG-082178 | 144 | 5   | 5  | 13  | 0   |
| CONTIG-082179 | 80  | 6   | 10 | 0   | 0   |
| CONTIG-082180 | 231 | 8   | 6  | 64  | 0   |
| CONTIG-082181 | 37  | 64  | 6  | 0   | 9   |
| CONTIG-082182 | 73  | 9   | 7  | 19  | 0   |
| CONTIG-082183 | 81  | 4   | 3  | 14  | 0   |
| CONTIG-082184 | 76  | 6   | 3  | 14  | 0   |
| CONTIG-082191 | 142 | 20  | 0  | 167 | 0   |
| CONTIG-082192 | 77  | 3   | 0  | 4   | 0   |
| CONTIG-082193 | 75  | 3   | 0  | 0   | 0   |
| CONTIG-082194 | 90  | 5   | 0  | 10  | 0   |
| CONTIG-082195 | 100 | 11  | 6  | 11  | 0   |
| CONTIG-082196 | 64  | 4   | 4  | 8   | 0   |
| CONTIG-082197 | 227 | 8   | 4  | 55  | 0   |
| CONTIG-082198 | 200 | 6   | 13 | 29  | 0   |
| CONTIG-082199 | 62  | 7   | 0  | 8   | 0   |
| CONTIG-082200 | 158 | 6   | 3  | 26  | 0   |
| CONTIG-082201 | 111 | 8   | 0  | 28  | 0   |
| CONTIG-082202 | 119 | 9   | 2  | 2   | 0   |
| CONTIG-082203 | 96  | 4   | 2  | 6   | 0   |
| CONTIG-082204 | 75  | 7   | 4  | 12  | 0   |
| CONTIG-082205 | 88  | 5   | 2  | 11  | 0   |
| CONTIG-082206 | 106 | 4   | 2  | 12  | 0   |
| CONTIG-082208 | 61  | 2   | 0  | 2   | 0   |
| CONTIG-082209 | 74  | 9   | 5  | 0   | 0   |
| CONTIG-082210 | 79  | 189 | 0  | 0   | 236 |
| CONTIG-082211 | 76  | 10  | 10 | 19  | 0   |
| CONTIG-082212 | 62  | 3   | 2  | 6   | 0   |
| CONTIG-082213 | 225 | 6   | 2  | 30  | 0   |
| CONTIG-082214 | 233 | 18  | 7  | 139 | 2   |
| CONTIG-082215 | 49  | 16  | 4  | 10  | 0   |
| CONTIG-082217 | 83  | 2   | 2  | 0   | 0   |
| CONTIG-082218 | 104 | 6   | 0  | 21  | 0   |
| CONTIG-082219 | 42  | 17  | 0  | 6   | 0   |
| CONTIG-082222 | 61  | 4   | 0  | 6   | 0   |
| CONTIG-082223 | 74  | 5   | 5  | 7   | 0   |



|               |     |     |    |     |   |
|---------------|-----|-----|----|-----|---|
| CONTIG-082224 | 137 | 9   | 3  | 34  | 0 |
| CONTIG-082225 | 128 | 7   | 2  | 8   | 0 |
| CONTIG-082226 | 280 | 13  | 3  | 145 | 0 |
| CONTIG-082227 | 69  | 4   | 6  | 0   | 2 |
| CONTIG-082228 | 182 | 9   | 2  | 49  | 0 |
| CONTIG-082229 | 65  | 7   | 5  | 16  | 0 |
| CONTIG-082231 | 82  | 10  | 6  | 29  | 0 |
| CONTIG-082232 | 115 | 7   | 5  | 19  | 0 |
| CONTIG-082233 | 288 | 13  | 2  | 148 | 0 |
| CONTIG-082234 | 67  | 9   | 0  | 22  | 0 |
| CONTIG-082235 | 159 | 7   | 10 | 30  | 0 |
| CONTIG-082236 | 190 | 8   | 6  | 52  | 0 |
| CONTIG-082237 | 180 | 7   | 0  | 39  | 0 |
| CONTIG-082238 | 144 | 14  | 3  | 4   | 0 |
| CONTIG-082239 | 60  | 6   | 5  | 0   | 2 |
| CONTIG-082240 | 93  | 7   | 3  | 12  | 0 |
| CONTIG-082241 | 46  | 260 | 2  | 0   | 0 |
| CONTIG-082242 | 158 | 10  | 8  | 67  | 0 |
| CONTIG-082243 | 74  | 4   | 10 | 0   | 0 |
| CONTIG-082244 | 79  | 2   | 5  | 2   | 0 |
| CONTIG-082245 | 143 | 5   | 0  | 23  | 0 |
| CONTIG-082246 | 143 | 4   | 0  | 11  | 0 |
| CONTIG-082248 | 331 | 10  | 12 | 105 | 0 |
| CONTIG-082249 | 91  | 6   | 0  | 14  | 0 |
| CONTIG-082250 | 216 | 7   | 2  | 45  | 0 |
| CONTIG-082251 | 115 | 5   | 6  | 15  | 0 |
| CONTIG-082252 | 240 | 5   | 12 | 38  | 0 |
| CONTIG-082253 | 179 | 10  | 25 | 35  | 0 |
| CONTIG-082254 | 94  | 5   | 2  | 20  | 0 |
| CONTIG-082255 | 243 | 8   | 6  | 62  | 0 |
| CONTIG-082256 | 154 | 20  | 19 | 100 | 5 |
| CONTIG-082257 | 132 | 13  | 6  | 30  | 0 |
| CONTIG-082258 | 164 | 6   | 0  | 35  | 0 |
| CONTIG-082259 | 104 | 5   | 13 | 17  | 0 |
| CONTIG-082260 | 131 | 4   | 12 | 15  | 0 |
| CONTIG-082261 | 62  | 5   | 0  | 9   | 0 |
| CONTIG-082262 | 184 | 4   | 3  | 29  | 0 |
| CONTIG-082263 | 63  | 10  | 9  | 0   | 2 |
| CONTIG-082264 | 67  | 6   | 0  | 9   | 0 |
| CONTIG-082265 | 90  | 7   | 0  | 7   | 0 |
| CONTIG-082266 | 162 | 11  | 0  | 54  | 2 |
| CONTIG-082267 | 131 | 4   | 3  | 17  | 0 |
| CONTIG-082268 | 164 | 5   | 15 | 6   | 0 |
| CONTIG-082269 | 84  | 9   | 5  | 14  | 0 |
| CONTIG-082270 | 136 | 5   | 0  | 30  | 0 |
| CONTIG-082271 | 276 | 5   | 2  | 23  | 0 |
| CONTIG-082272 | 521 | 6   | 5  | 35  | 9 |

|               |     |    |    |     |    |
|---------------|-----|----|----|-----|----|
| CONTIG-082273 | 65  | 5  | 3  | 5   | 0  |
| CONTIG-082274 | 135 | 7  | 2  | 26  | 0  |
| CONTIG-082275 | 129 | 5  | 7  | 12  | 0  |
| CONTIG-082276 | 72  | 11 | 13 | 12  | 2  |
| CONTIG-082278 | 175 | 6  | 15 | 17  | 0  |
| CONTIG-082279 | 65  | 4  | 2  | 0   | 0  |
| CONTIG-082280 | 155 | 7  | 7  | 31  | 0  |
| CONTIG-082281 | 117 | 12 | 0  | 42  | 0  |
| CONTIG-082283 | 160 | 17 | 0  | 0   | 0  |
| CONTIG-082284 | 109 | 7  | 0  | 26  | 0  |
| CONTIG-082285 | 115 | 6  | 8  | 16  | 0  |
| CONTIG-082286 | 61  | 2  | 0  | 6   | 0  |
| CONTIG-082287 | 193 | 10 | 2  | 34  | 0  |
| CONTIG-082288 | 277 | 6  | 0  | 11  | 9  |
| CONTIG-082289 | 62  | 5  | 6  | 6   | 0  |
| CONTIG-082290 | 71  | 6  | 2  | 18  | 0  |
| CONTIG-082291 | 103 | 4  | 2  | 10  | 0  |
| CONTIG-082292 | 70  | 4  | 2  | 5   | 0  |
| CONTIG-082293 | 136 | 8  | 10 | 39  | 0  |
| CONTIG-082294 | 189 | 5  | 0  | 14  | 0  |
| CONTIG-082295 | 115 | 3  | 0  | 16  | 0  |
| CONTIG-082296 | 89  | 6  | 10 | 15  | 0  |
| CONTIG-082297 | 123 | 6  | 10 | 6   | 0  |
| CONTIG-082298 | 61  | 4  | 0  | 5   | 0  |
| CONTIG-082299 | 116 | 16 | 0  | 0   | 24 |
| CONTIG-082302 | 115 | 13 | 2  | 62  | 0  |
| CONTIG-082303 | 87  | 5  | 2  | 9   | 0  |
| CONTIG-082304 | 198 | 8  | 16 | 38  | 0  |
| CONTIG-082305 | 72  | 9  | 10 | 6   | 0  |
| CONTIG-082306 | 58  | 4  | 2  | 6   | 0  |
| CONTIG-082307 | 95  | 8  | 6  | 16  | 0  |
| CONTIG-082308 | 98  | 6  | 4  | 27  | 0  |
| CONTIG-082309 | 64  | 3  | 4  | 0   | 0  |
| CONTIG-082311 | 79  | 9  | 2  | 18  | 0  |
| CONTIG-082312 | 66  | 2  | 3  | 0   | 0  |
| CONTIG-082314 | 87  | 5  | 7  | 12  | 0  |
| CONTIG-082315 | 161 | 14 | 0  | 82  | 4  |
| CONTIG-082316 | 96  | 3  | 0  | 13  | 0  |
| CONTIG-082317 | 255 | 9  | 0  | 40  | 0  |
| CONTIG-082318 | 168 | 13 | 0  | 104 | 2  |
| CONTIG-082319 | 262 | 23 | 15 | 0   | 59 |
| CONTIG-082320 | 144 | 8  | 2  | 28  | 0  |
| CONTIG-082321 | 112 | 8  | 3  | 37  | 0  |
| CONTIG-082322 | 110 | 7  | 3  | 33  | 0  |
| CONTIG-082324 | 79  | 3  | 2  | 7   | 0  |
| CONTIG-082325 | 101 | 3  | 5  | 6   | 0  |
| CONTIG-082327 | 122 | 75 | 7  | 421 | 0  |

|               |     |     |    |     |   |
|---------------|-----|-----|----|-----|---|
| CONTIG-082328 | 68  | 5   | 2  | 5   | 0 |
| CONTIG-082329 | 84  | 4   | 2  | 12  | 0 |
| CONTIG-082330 | 273 | 15  | 29 | 224 | 0 |
| CONTIG-082331 | 197 | 10  | 8  | 105 | 0 |
| CONTIG-082332 | 143 | 3   | 4  | 9   | 0 |
| CONTIG-082333 | 173 | 9   | 13 | 56  | 0 |
| CONTIG-082335 | 184 | 7   | 4  | 47  | 0 |
| CONTIG-082336 | 70  | 6   | 0  | 6   | 0 |
| CONTIG-082337 | 68  | 6   | 0  | 13  | 0 |
| CONTIG-082338 | 70  | 10  | 5  | 40  | 0 |
| CONTIG-082339 | 104 | 21  | 3  | 79  | 4 |
| CONTIG-082340 | 83  | 108 | 16 | 394 | 0 |
| CONTIG-082342 | 145 | 7   | 4  | 38  | 0 |
| CONTIG-082343 | 150 | 6   | 2  | 11  | 0 |
| CONTIG-082344 | 95  | 6   | 6  | 8   | 0 |
| CONTIG-082345 | 119 | 4   | 0  | 0   | 2 |
| CONTIG-082346 | 111 | 5   | 3  | 10  | 0 |
| CONTIG-082347 | 114 | 6   | 4  | 19  | 0 |
| CONTIG-082348 | 499 | 13  | 0  | 222 | 6 |
| CONTIG-082349 | 138 | 5   | 3  | 16  | 0 |
| CONTIG-082350 | 305 | 8   | 6  | 21  | 0 |
| CONTIG-082351 | 207 | 7   | 4  | 26  | 0 |
| CONTIG-082352 | 72  | 5   | 0  | 2   | 0 |
| CONTIG-082354 | 132 | 13  | 2  | 45  | 0 |
| CONTIG-082355 | 70  | 12  | 6  | 22  | 0 |
| CONTIG-082356 | 87  | 7   | 8  | 12  | 0 |
| CONTIG-082357 | 286 | 8   | 6  | 74  | 0 |
| CONTIG-082358 | 252 | 9   | 19 | 87  | 0 |
| CONTIG-082359 | 65  | 25  | 0  | 33  | 0 |
| CONTIG-082360 | 79  | 5   | 0  | 12  | 0 |
| CONTIG-082361 | 106 | 11  | 0  | 66  | 0 |
| CONTIG-082363 | 75  | 3   | 2  | 2   | 0 |
| CONTIG-082364 | 75  | 6   | 0  | 9   | 0 |
| CONTIG-082365 | 219 | 6   | 3  | 18  | 0 |
| CONTIG-082366 | 119 | 7   | 11 | 26  | 0 |
| CONTIG-082367 | 65  | 25  | 18 | 0   | 0 |
| CONTIG-082368 | 88  | 5   | 12 | 8   | 0 |
| CONTIG-082369 | 64  | 11  | 2  | 42  | 0 |
| CONTIG-082370 | 125 | 3   | 2  | 0   | 0 |
| CONTIG-082371 | 65  | 10  | 0  | 21  | 0 |
| CONTIG-082372 | 90  | 2   | 0  | 4   | 0 |
| CONTIG-082373 | 119 | 6   | 4  | 11  | 0 |
| CONTIG-082374 | 59  | 4   | 0  | 4   | 0 |
| CONTIG-082375 | 92  | 6   | 4  | 15  | 0 |
| CONTIG-082376 | 58  | 12  | 16 | 12  | 0 |
| CONTIG-082377 | 108 | 8   | 2  | 37  | 0 |
| CONTIG-082378 | 151 | 7   | 10 | 29  | 0 |

|               |     |     |    |     |     |
|---------------|-----|-----|----|-----|-----|
| CONTIG-082379 | 201 | 12  | 4  | 87  | 2   |
| CONTIG-082380 | 98  | 9   | 4  | 32  | 0   |
| CONTIG-082381 | 168 | 14  | 7  | 64  | 2   |
| CONTIG-082382 | 237 | 9   | 12 | 55  | 0   |
| CONTIG-082384 | 113 | 13  | 8  | 59  | 0   |
| CONTIG-082385 | 62  | 4   | 3  | 6   | 0   |
| CONTIG-082386 | 64  | 4   | 3  | 4   | 0   |
| CONTIG-082387 | 132 | 7   | 2  | 18  | 0   |
| CONTIG-082388 | 40  | 27  | 4  | 38  | 0   |
| CONTIG-082389 | 180 | 11  | 0  | 65  | 0   |
| CONTIG-082390 | 73  | 3   | 7  | 0   | 0   |
| CONTIG-082391 | 67  | 8   | 3  | 21  | 0   |
| CONTIG-082392 | 133 | 5   | 2  | 25  | 0   |
| CONTIG-082394 | 97  | 10  | 19 | 8   | 0   |
| CONTIG-082395 | 118 | 6   | 3  | 30  | 0   |
| CONTIG-082396 | 216 | 6   | 4  | 51  | 0   |
| CONTIG-082397 | 72  | 6   | 13 | 8   | 0   |
| CONTIG-082398 | 182 | 140 | 9  | 0   | 187 |
| CONTIG-082399 | 71  | 3   | 3  | 4   | 0   |
| CONTIG-082400 | 236 | 11  | 3  | 100 | 0   |
| CONTIG-082401 | 149 | 7   | 16 | 37  | 0   |
| CONTIG-082402 | 175 | 11  | 5  | 8   | 2   |
| CONTIG-082403 | 63  | 9   | 7  | 20  | 0   |
| CONTIG-082404 | 154 | 9   | 10 | 65  | 0   |
| CONTIG-082406 | 135 | 12  | 0  | 18  | 0   |
| CONTIG-082407 | 108 | 6   | 0  | 11  | 0   |
| CONTIG-082408 | 71  | 4   | 4  | 5   | 0   |
| CONTIG-082409 | 63  | 11  | 23 | 18  | 0   |
| CONTIG-082410 | 120 | 7   | 5  | 22  | 0   |
| CONTIG-082411 | 205 | 6   | 8  | 22  | 0   |
| CONTIG-082412 | 82  | 8   | 2  | 18  | 0   |
| CONTIG-082417 | 61  | 5   | 2  | 0   | 0   |
| CONTIG-082418 | 60  | 2   | 0  | 0   | 0   |
| CONTIG-082419 | 144 | 5   | 0  | 19  | 0   |
| CONTIG-082420 | 265 | 9   | 7  | 61  | 0   |
| CONTIG-082421 | 104 | 5   | 3  | 2   | 0   |
| CONTIG-082422 | 249 | 10  | 5  | 87  | 0   |
| CONTIG-082423 | 130 | 3   | 2  | 13  | 0   |
| CONTIG-082424 | 164 | 7   | 2  | 49  | 0   |
| CONTIG-082425 | 271 | 10  | 6  | 83  | 2   |
| CONTIG-082426 | 144 | 6   | 2  | 41  | 0   |
| CONTIG-082427 | 301 | 5   | 2  | 33  | 2   |
| CONTIG-082428 | 123 | 4   | 3  | 23  | 0   |
| CONTIG-082429 | 106 | 4   | 6  | 6   | 0   |
| CONTIG-082430 | 65  | 3   | 2  | 4   | 0   |
| CONTIG-082431 | 76  | 2   | 3  | 3   | 0   |
| CONTIG-082433 | 142 | 15  | 14 | 40  | 0   |

|               |     |     |    |     |    |
|---------------|-----|-----|----|-----|----|
| CONTIG-082435 | 202 | 5   | 0  | 44  | 0  |
| CONTIG-082436 | 154 | 22  | 13 | 0   | 0  |
| CONTIG-082437 | 208 | 7   | 3  | 65  | 0  |
| CONTIG-082438 | 339 | 10  | 2  | 12  | 0  |
| CONTIG-082439 | 90  | 6   | 2  | 17  | 0  |
| CONTIG-082440 | 483 | 159 | 2  | 0   | 38 |
| CONTIG-082441 | 75  | 11  | 10 | 32  | 0  |
| CONTIG-082442 | 94  | 3   | 2  | 14  | 0  |
| CONTIG-082443 | 59  | 5   | 3  | 11  | 0  |
| CONTIG-082444 | 84  | 12  | 3  | 43  | 0  |
| CONTIG-082445 | 162 | 6   | 8  | 31  | 0  |
| CONTIG-082446 | 137 | 4   | 5  | 11  | 0  |
| CONTIG-082447 | 86  | 4   | 2  | 17  | 0  |
| CONTIG-082448 | 229 | 18  | 14 | 166 | 0  |
| CONTIG-082449 | 199 | 11  | 14 | 50  | 0  |
| CONTIG-082450 | 56  | 265 | 6  | 603 | 0  |
| CONTIG-082451 | 285 | 13  | 14 | 110 | 0  |
| CONTIG-082452 | 77  | 11  | 11 | 22  | 0  |
| CONTIG-082453 | 371 | 41  | 12 | 798 | 2  |
| CONTIG-082454 | 146 | 4   | 4  | 14  | 0  |
| CONTIG-082455 | 134 | 8   | 3  | 40  | 0  |
| CONTIG-082456 | 81  | 4   | 7  | 9   | 0  |
| CONTIG-082459 | 123 | 8   | 10 | 21  | 0  |
| CONTIG-082460 | 108 | 6   | 5  | 4   | 0  |
| CONTIG-082461 | 168 | 8   | 0  | 0   | 0  |
| CONTIG-082462 | 192 | 9   | 4  | 80  | 0  |
| CONTIG-082463 | 104 | 6   | 0  | 21  | 0  |
| CONTIG-082464 | 258 | 9   | 8  | 59  | 0  |
| CONTIG-082465 | 66  | 4   | 2  | 0   | 0  |
| CONTIG-082467 | 203 | 11  | 2  | 114 | 0  |
| CONTIG-082468 | 228 | 6   | 2  | 32  | 0  |
| CONTIG-082469 | 126 | 7   | 15 | 15  | 0  |
| CONTIG-082472 | 117 | 4   | 2  | 13  | 0  |
| CONTIG-082475 | 165 | 9   | 2  | 2   | 0  |
| CONTIG-082476 | 74  | 5   | 5  | 6   | 0  |
| CONTIG-082477 | 96  | 3   | 15 | 7   | 0  |
| CONTIG-082478 | 107 | 14  | 12 | 30  | 0  |
| CONTIG-082479 | 66  | 24  | 2  | 84  | 0  |
| CONTIG-082480 | 150 | 3   | 2  | 10  | 0  |
| CONTIG-082481 | 462 | 38  | 6  | 987 | 0  |
| CONTIG-082482 | 91  | 3   | 0  | 2   | 0  |
| CONTIG-082483 | 265 | 5   | 5  | 27  | 0  |
| CONTIG-082484 | 243 | 10  | 7  | 71  | 0  |
| CONTIG-082485 | 87  | 13  | 5  | 50  | 0  |
| CONTIG-082486 | 126 | 6   | 9  | 23  | 0  |
| CONTIG-082487 | 66  | 8   | 0  | 0   | 0  |
| CONTIG-082488 | 130 | 9   | 3  | 56  | 0  |

|               |     |     |    |     |   |
|---------------|-----|-----|----|-----|---|
| CONTIG-082489 | 111 | 6   | 6  | 14  | 0 |
| CONTIG-082490 | 243 | 10  | 11 | 95  | 0 |
| CONTIG-082491 | 68  | 11  | 9  | 16  | 0 |
| CONTIG-082492 | 90  | 4   | 4  | 8   | 0 |
| CONTIG-082493 | 135 | 7   | 2  | 28  | 2 |
| CONTIG-082494 | 328 | 8   | 3  | 119 | 2 |
| CONTIG-082495 | 97  | 7   | 2  | 12  | 0 |
| CONTIG-082496 | 229 | 13  | 0  | 102 | 0 |
| CONTIG-082497 | 68  | 12  | 35 | 14  | 0 |
| CONTIG-082498 | 96  | 4   | 2  | 13  | 0 |
| CONTIG-082499 | 161 | 6   | 2  | 21  | 0 |
| CONTIG-082503 | 238 | 8   | 0  | 101 | 0 |
| CONTIG-082504 | 352 | 15  | 2  | 289 | 0 |
| CONTIG-082505 | 67  | 4   | 5  | 0   | 0 |
| CONTIG-082506 | 67  | 7   | 0  | 7   | 0 |
| CONTIG-082507 | 60  | 3   | 2  | 0   | 0 |
| CONTIG-082508 | 148 | 6   | 10 | 33  | 0 |
| CONTIG-082509 | 41  | 42  | 0  | 57  | 0 |
| CONTIG-082510 | 114 | 8   | 4  | 21  | 0 |
| CONTIG-082511 | 65  | 5   | 19 | 0   | 0 |
| CONTIG-082512 | 60  | 16  | 11 | 29  | 0 |
| CONTIG-082513 | 177 | 7   | 0  | 38  | 0 |
| CONTIG-082514 | 99  | 5   | 10 | 6   | 0 |
| CONTIG-082515 | 104 | 6   | 2  | 17  | 0 |
| CONTIG-082516 | 148 | 6   | 0  | 22  | 0 |
| CONTIG-082517 | 62  | 4   | 10 | 5   | 0 |
| CONTIG-082518 | 166 | 11  | 15 | 56  | 0 |
| CONTIG-082519 | 194 | 8   | 0  | 56  | 0 |
| CONTIG-082520 | 130 | 4   | 9  | 5   | 0 |
| CONTIG-082521 | 117 | 5   | 3  | 23  | 0 |
| CONTIG-082522 | 232 | 5   | 4  | 39  | 2 |
| CONTIG-082523 | 127 | 10  | 4  | 21  | 2 |
| CONTIG-082524 | 79  | 7   | 0  | 19  | 0 |
| CONTIG-082525 | 150 | 9   | 26 | 16  | 0 |
| CONTIG-082526 | 97  | 3   | 2  | 12  | 0 |
| CONTIG-082527 | 100 | 7   | 11 | 14  | 0 |
| CONTIG-082528 | 50  | 102 | 8  | 192 | 0 |
| CONTIG-082529 | 454 | 10  | 27 | 175 | 0 |
| CONTIG-082530 | 84  | 6   | 2  | 20  | 0 |
| CONTIG-082531 | 66  | 5   | 2  | 9   | 0 |
| CONTIG-082532 | 137 | 7   | 0  | 14  | 0 |
| CONTIG-082533 | 71  | 7   | 7  | 13  | 0 |
| CONTIG-082534 | 170 | 8   | 4  | 35  | 0 |
| CONTIG-082535 | 121 | 5   | 13 | 16  | 0 |
| CONTIG-082536 | 169 | 7   | 2  | 40  | 0 |
| CONTIG-082537 | 77  | 10  | 16 | 11  | 0 |
| CONTIG-082539 | 102 | 11  | 12 | 19  | 0 |

|               |     |     |    |     |     |
|---------------|-----|-----|----|-----|-----|
| CONTIG-082540 | 195 | 6   | 4  | 27  | 0   |
| CONTIG-082541 | 58  | 5   | 0  | 6   | 2   |
| CONTIG-082542 | 117 | 5   | 0  | 22  | 0   |
| CONTIG-082543 | 72  | 6   | 0  | 0   | 0   |
| CONTIG-082544 | 82  | 9   | 18 | 18  | 0   |
| CONTIG-082545 | 96  | 9   | 3  | 24  | 0   |
| CONTIG-082548 | 223 | 9   | 4  | 86  | 0   |
| CONTIG-082549 | 92  | 6   | 4  | 13  | 0   |
| CONTIG-082553 | 208 | 7   | 0  | 62  | 0   |
| CONTIG-082554 | 77  | 3   | 0  | 6   | 0   |
| CONTIG-082555 | 80  | 169 | 11 | 37  | 2   |
| CONTIG-082557 | 236 | 9   | 15 | 60  | 0   |
| CONTIG-082558 | 136 | 7   | 4  | 20  | 0   |
| CONTIG-082561 | 98  | 4   | 2  | 5   | 0   |
| CONTIG-082562 | 106 | 4   | 2  | 20  | 0   |
| CONTIG-082565 | 71  | 3   | 2  | 7   | 0   |
| CONTIG-082566 | 248 | 8   | 2  | 46  | 0   |
| CONTIG-082567 | 194 | 5   | 0  | 27  | 0   |
| CONTIG-082568 | 92  | 18  | 2  | 38  | 0   |
| CONTIG-082569 | 236 | 9   | 6  | 72  | 0   |
| CONTIG-082570 | 82  | 6   | 2  | 2   | 0   |
| CONTIG-082571 | 146 | 14  | 10 | 107 | 0   |
| CONTIG-082573 | 79  | 7   | 5  | 12  | 0   |
| CONTIG-082574 | 69  | 4   | 10 | 3   | 0   |
| CONTIG-082575 | 43  | 87  | 15 | 84  | 2   |
| CONTIG-082578 | 63  | 5   | 0  | 7   | 0   |
| CONTIG-082580 | 67  | 4   | 0  | 2   | 0   |
| CONTIG-082581 | 281 | 6   | 21 | 43  | 0   |
| CONTIG-082582 | 112 | 5   | 0  | 18  | 0   |
| CONTIG-082583 | 308 | 5   | 7  | 10  | 0   |
| CONTIG-082587 | 111 | 22  | 6  | 78  | 0   |
| CONTIG-082588 | 59  | 2   | 3  | 0   | 0   |
| CONTIG-082589 | 61  | 12  | 5  | 4   | 0   |
| CONTIG-082590 | 64  | 3   | 5  | 4   | 0   |
| CONTIG-082591 | 167 | 7   | 4  | 23  | 0   |
| CONTIG-082592 | 81  | 7   | 5  | 4   | 0   |
| CONTIG-082593 | 104 | 13  | 2  | 36  | 0   |
| CONTIG-082594 | 138 | 7   | 2  | 26  | 0   |
| CONTIG-082595 | 192 | 10  | 3  | 93  | 0   |
| CONTIG-082596 | 47  | 222 | 4  | 0   | 117 |
| CONTIG-082597 | 200 | 9   | 17 | 4   | 0   |
| CONTIG-082598 | 60  | 6   | 2  | 4   | 0   |
| CONTIG-082599 | 59  | 3   | 3  | 0   | 0   |
| CONTIG-082600 | 81  | 8   | 0  | 10  | 0   |
| CONTIG-082601 | 80  | 7   | 6  | 26  | 0   |
| CONTIG-082602 | 89  | 10  | 2  | 42  | 0   |
| CONTIG-082603 | 179 | 6   | 6  | 23  | 2   |

|               |     |    |    |     |    |
|---------------|-----|----|----|-----|----|
| CONTIG-082604 | 69  | 5  | 2  | 6   | 0  |
| CONTIG-082605 | 561 | 10 | 2  | 186 | 4  |
| CONTIG-082606 | 123 | 8  | 9  | 21  | 2  |
| CONTIG-082607 | 338 | 8  | 4  | 15  | 0  |
| CONTIG-082608 | 227 | 8  | 0  | 35  | 0  |
| CONTIG-082609 | 68  | 4  | 0  | 2   | 0  |
| CONTIG-082610 | 193 | 6  | 8  | 33  | 0  |
| CONTIG-082611 | 502 | 10 | 0  | 0   | 0  |
| CONTIG-082612 | 341 | 7  | 7  | 47  | 0  |
| CONTIG-082613 | 134 | 8  | 11 | 14  | 2  |
| CONTIG-082614 | 251 | 5  | 7  | 0   | 0  |
| CONTIG-082615 | 140 | 14 | 10 | 89  | 0  |
| CONTIG-082616 | 169 | 11 | 7  | 53  | 0  |
| CONTIG-082617 | 245 | 7  | 8  | 47  | 0  |
| CONTIG-082618 | 99  | 7  | 3  | 0   | 3  |
| CONTIG-082619 | 64  | 5  | 0  | 11  | 0  |
| CONTIG-082620 | 91  | 3  | 3  | 0   | 0  |
| CONTIG-082621 | 113 | 10 | 7  | 23  | 0  |
| CONTIG-082622 | 350 | 9  | 10 | 89  | 2  |
| CONTIG-082623 | 142 | 4  | 6  | 27  | 0  |
| CONTIG-082624 | 91  | 6  | 2  | 9   | 0  |
| CONTIG-082625 | 60  | 7  | 0  | 6   | 0  |
| CONTIG-082626 | 98  | 4  | 3  | 6   | 0  |
| CONTIG-082627 | 84  | 3  | 0  | 8   | 0  |
| CONTIG-082628 | 85  | 7  | 5  | 24  | 0  |
| CONTIG-082629 | 87  | 4  | 2  | 12  | 0  |
| CONTIG-082630 | 100 | 5  | 13 | 8   | 0  |
| CONTIG-082631 | 43  | 43 | 16 | 46  | 0  |
| CONTIG-082632 | 73  | 4  | 3  | 3   | 0  |
| CONTIG-082633 | 85  | 5  | 3  | 6   | 0  |
| CONTIG-082634 | 120 | 6  | 6  | 17  | 0  |
| CONTIG-082635 | 68  | 6  | 8  | 11  | 0  |
| CONTIG-082636 | 92  | 9  | 6  | 0   | 12 |
| CONTIG-082637 | 97  | 4  | 6  | 2   | 0  |
| CONTIG-082638 | 109 | 7  | 8  | 19  | 0  |
| CONTIG-082639 | 98  | 3  | 7  | 3   | 0  |
| CONTIG-082640 | 406 | 7  | 4  | 0   | 6  |
| CONTIG-082641 | 128 | 4  | 8  | 8   | 0  |
| CONTIG-082642 | 85  | 6  | 9  | 8   | 0  |
| CONTIG-082643 | 89  | 5  | 0  | 18  | 0  |
| CONTIG-082644 | 197 | 6  | 9  | 33  | 0  |
| CONTIG-082645 | 90  | 7  | 4  | 25  | 0  |
| CONTIG-082646 | 168 | 4  | 2  | 4   | 0  |
| CONTIG-082647 | 79  | 6  | 3  | 9   | 0  |
| CONTIG-082649 | 59  | 8  | 2  | 13  | 0  |
| CONTIG-082650 | 177 | 8  | 17 | 46  | 0  |
| CONTIG-082651 | 79  | 11 | 7  | 38  | 0  |



|               |     |    |    |     |    |
|---------------|-----|----|----|-----|----|
| CONTIG-082653 | 114 | 85 | 0  | 327 | 2  |
| CONTIG-082655 | 128 | 11 | 5  | 58  | 0  |
| CONTIG-082656 | 63  | 6  | 3  | 0   | 0  |
| CONTIG-082657 | 78  | 6  | 0  | 16  | 0  |
| CONTIG-082658 | 68  | 8  | 4  | 5   | 0  |
| CONTIG-082660 | 126 | 14 | 4  | 35  | 0  |
| CONTIG-082661 | 77  | 2  | 0  | 0   | 0  |
| CONTIG-082662 | 59  | 5  | 5  | 0   | 4  |
| CONTIG-082663 | 135 | 13 | 15 | 43  | 0  |
| CONTIG-082664 | 406 | 8  | 24 | 120 | 0  |
| CONTIG-082665 | 90  | 4  | 3  | 0   | 3  |
| CONTIG-082666 | 80  | 6  | 4  | 4   | 0  |
| CONTIG-082667 | 119 | 4  | 2  | 0   | 0  |
| CONTIG-082668 | 228 | 4  | 15 | 2   | 0  |
| CONTIG-082669 | 84  | 7  | 4  | 31  | 0  |
| CONTIG-082670 | 205 | 6  | 11 | 29  | 0  |
| CONTIG-082671 | 80  | 9  | 8  | 33  | 0  |
| CONTIG-082672 | 82  | 3  | 5  | 5   | 0  |
| CONTIG-082673 | 78  | 8  | 5  | 14  | 0  |
| CONTIG-082674 | 161 | 19 | 19 | 126 | 0  |
| CONTIG-082675 | 68  | 3  | 3  | 5   | 0  |
| CONTIG-082676 | 69  | 16 | 7  | 5   | 0  |
| CONTIG-082677 | 115 | 3  | 0  | 16  | 2  |
| CONTIG-082678 | 68  | 4  | 0  | 0   | 0  |
| CONTIG-082679 | 153 | 4  | 4  | 21  | 0  |
| CONTIG-082680 | 59  | 6  | 2  | 13  | 0  |
| CONTIG-082681 | 61  | 6  | 2  | 2   | 0  |
| CONTIG-082684 | 145 | 6  | 13 | 4   | 0  |
| CONTIG-082685 | 86  | 6  | 9  | 7   | 0  |
| CONTIG-082686 | 197 | 7  | 2  | 30  | 0  |
| CONTIG-082687 | 154 | 5  | 8  | 31  | 0  |
| CONTIG-082688 | 122 | 3  | 2  | 2   | 0  |
| CONTIG-082689 | 903 | 13 | 2  | 0   | 62 |
| CONTIG-082690 | 144 | 11 | 6  | 32  | 0  |
| CONTIG-082691 | 161 | 10 | 2  | 13  | 0  |
| CONTIG-082692 | 206 | 8  | 0  | 4   | 0  |
| CONTIG-082693 | 90  | 8  | 2  | 19  | 2  |
| CONTIG-082694 | 163 | 6  | 7  | 18  | 2  |
| CONTIG-082695 | 75  | 30 | 0  | 0   | 0  |
| CONTIG-082699 | 73  | 5  | 3  | 9   | 0  |
| CONTIG-082700 | 80  | 9  | 9  | 18  | 0  |
| CONTIG-082701 | 73  | 5  | 3  | 0   | 0  |
| CONTIG-082702 | 97  | 28 | 2  | 149 | 0  |
| CONTIG-082703 | 127 | 6  | 9  | 17  | 0  |
| CONTIG-082704 | 68  | 16 | 11 | 43  | 0  |
| CONTIG-082705 | 98  | 8  | 3  | 21  | 0  |
| CONTIG-082706 | 69  | 11 | 3  | 25  | 0  |

|               |     |    |    |     |   |
|---------------|-----|----|----|-----|---|
| CONTIG-082707 | 313 | 15 | 8  | 248 | 0 |
| CONTIG-082708 | 96  | 7  | 8  | 15  | 0 |
| CONTIG-082709 | 312 | 7  | 6  | 75  | 0 |
| CONTIG-082710 | 97  | 5  | 2  | 7   | 0 |
| CONTIG-082711 | 159 | 5  | 0  | 20  | 0 |
| CONTIG-082712 | 83  | 6  | 2  | 12  | 0 |
| CONTIG-082713 | 91  | 8  | 0  | 15  | 0 |
| CONTIG-082714 | 56  | 19 | 2  | 28  | 0 |
| CONTIG-082715 | 65  | 7  | 3  | 24  | 0 |
| CONTIG-082716 | 119 | 9  | 18 | 25  | 0 |
| CONTIG-082717 | 455 | 9  | 8  | 5   | 0 |
| CONTIG-082718 | 102 | 6  | 7  | 7   | 0 |
| CONTIG-082719 | 63  | 3  | 6  | 2   | 0 |
| CONTIG-082720 | 175 | 8  | 3  | 41  | 0 |
| CONTIG-082721 | 63  | 8  | 10 | 17  | 0 |
| CONTIG-082722 | 287 | 46 | 13 | 184 | 0 |
| CONTIG-082723 | 62  | 4  | 6  | 2   | 0 |
| CONTIG-082724 | 207 | 8  | 2  | 43  | 0 |
| CONTIG-082726 | 67  | 5  | 2  | 12  | 0 |
| CONTIG-082727 | 134 | 21 | 36 | 101 | 0 |
| CONTIG-082728 | 147 | 10 | 4  | 57  | 0 |
| CONTIG-082729 | 290 | 5  | 7  | 29  | 0 |
| CONTIG-082730 | 269 | 5  | 7  | 50  | 0 |
| CONTIG-082731 | 90  | 12 | 2  | 39  | 0 |
| CONTIG-082732 | 92  | 6  | 0  | 24  | 0 |
| CONTIG-082733 | 75  | 3  | 0  | 0   | 0 |
| CONTIG-082734 | 167 | 7  | 3  | 28  | 2 |
| CONTIG-082735 | 107 | 11 | 0  | 49  | 0 |
| CONTIG-082736 | 93  | 8  | 2  | 12  | 0 |
| CONTIG-082737 | 182 | 4  | 4  | 5   | 0 |
| CONTIG-082738 | 139 | 5  | 0  | 18  | 0 |
| CONTIG-082739 | 67  | 27 | 0  | 54  | 0 |
| CONTIG-082740 | 58  | 4  | 0  | 4   | 0 |
| CONTIG-082741 | 59  | 3  | 2  | 2   | 0 |
| CONTIG-082742 | 89  | 4  | 3  | 9   | 0 |
| CONTIG-082743 | 166 | 8  | 12 | 41  | 0 |
| CONTIG-082745 | 146 | 8  | 6  | 51  | 0 |
| CONTIG-082746 | 73  | 4  | 6  | 0   | 0 |
| CONTIG-082747 | 76  | 15 | 2  | 39  | 0 |
| CONTIG-082748 | 68  | 14 | 3  | 35  | 0 |
| CONTIG-082749 | 64  | 6  | 6  | 7   | 0 |
| CONTIG-082750 | 793 | 11 | 18 | 32  | 2 |
| CONTIG-082751 | 89  | 7  | 0  | 22  | 0 |
| CONTIG-082752 | 59  | 4  | 0  | 8   | 0 |
| CONTIG-082753 | 181 | 16 | 8  | 6   | 0 |
| CONTIG-082755 | 80  | 5  | 6  | 19  | 0 |
| CONTIG-082756 | 150 | 6  | 2  | 19  | 0 |

|               |     |    |    |     |   |
|---------------|-----|----|----|-----|---|
| CONTIG-082757 | 67  | 7  | 2  | 12  | 0 |
| CONTIG-082758 | 174 | 11 | 6  | 81  | 0 |
| CONTIG-082762 | 60  | 6  | 2  | 0   | 0 |
| CONTIG-082763 | 118 | 5  | 6  | 19  | 0 |
| CONTIG-082764 | 140 | 5  | 5  | 18  | 0 |
| CONTIG-082765 | 97  | 7  | 0  | 22  | 0 |
| CONTIG-082769 | 786 | 15 | 13 | 665 | 0 |
| CONTIG-082770 | 62  | 3  | 0  | 5   | 0 |
| CONTIG-082771 | 435 | 7  | 0  | 79  | 2 |
| CONTIG-082772 | 85  | 6  | 6  | 11  | 0 |
| CONTIG-082773 | 138 | 6  | 0  | 30  | 0 |
| CONTIG-082774 | 87  | 11 | 5  | 23  | 0 |
| CONTIG-082775 | 91  | 7  | 6  | 0   | 0 |
| CONTIG-082776 | 124 | 4  | 3  | 13  | 0 |
| CONTIG-082777 | 115 | 13 | 18 | 29  | 0 |
| CONTIG-082778 | 62  | 7  | 2  | 19  | 0 |
| CONTIG-082779 | 125 | 8  | 3  | 15  | 0 |
| CONTIG-082780 | 215 | 4  | 8  | 10  | 0 |
| CONTIG-082781 | 66  | 6  | 2  | 5   | 0 |
| CONTIG-082782 | 65  | 5  | 6  | 6   | 0 |
| CONTIG-082783 | 90  | 3  | 3  | 2   | 0 |
| CONTIG-082784 | 98  | 3  | 4  | 5   | 0 |
| CONTIG-082785 | 137 | 2  | 0  | 2   | 0 |
| CONTIG-082786 | 195 | 9  | 4  | 48  | 0 |
| CONTIG-082788 | 59  | 4  | 6  | 2   | 0 |
| CONTIG-082789 | 63  | 4  | 2  | 4   | 0 |
| CONTIG-082790 | 76  | 4  | 0  | 0   | 0 |
| CONTIG-082791 | 129 | 14 | 9  | 101 | 0 |
| CONTIG-082792 | 86  | 6  | 17 | 8   | 0 |
| CONTIG-082793 | 90  | 4  | 3  | 12  | 0 |
| CONTIG-082794 | 81  | 49 | 15 | 100 | 0 |
| CONTIG-082795 | 92  | 6  | 0  | 9   | 0 |
| CONTIG-082796 | 89  | 7  | 12 | 16  | 0 |
| CONTIG-082797 | 72  | 4  | 2  | 10  | 0 |
| CONTIG-082798 | 79  | 7  | 2  | 13  | 0 |
| CONTIG-082799 | 190 | 5  | 7  | 28  | 2 |
| CONTIG-082800 | 60  | 7  | 0  | 10  | 0 |
| CONTIG-082801 | 79  | 6  | 8  | 12  | 0 |
| CONTIG-082802 | 164 | 6  | 8  | 32  | 0 |
| CONTIG-082804 | 84  | 5  | 10 | 11  | 0 |
| CONTIG-082805 | 115 | 11 | 2  | 52  | 0 |
| CONTIG-082806 | 72  | 4  | 2  | 9   | 0 |
| CONTIG-082807 | 131 | 4  | 10 | 10  | 0 |
| CONTIG-082808 | 117 | 5  | 8  | 6   | 0 |
| CONTIG-082809 | 402 | 13 | 9  | 255 | 0 |
| CONTIG-082810 | 129 | 6  | 10 | 21  | 0 |
| CONTIG-082811 | 100 | 5  | 0  | 5   | 0 |

|               |     |     |    |     |   |
|---------------|-----|-----|----|-----|---|
| CONTIG-082812 | 185 | 16  | 8  | 126 | 4 |
| CONTIG-082814 | 255 | 9   | 0  | 105 | 0 |
| CONTIG-082815 | 275 | 22  | 5  | 375 | 0 |
| CONTIG-082816 | 75  | 4   | 0  | 8   | 0 |
| CONTIG-082817 | 91  | 3   | 2  | 4   | 0 |
| CONTIG-082818 | 75  | 9   | 0  | 25  | 0 |
| CONTIG-082819 | 288 | 8   | 7  | 34  | 2 |
| CONTIG-082820 | 67  | 3   | 4  | 7   | 0 |
| CONTIG-082821 | 66  | 5   | 5  | 14  | 0 |
| CONTIG-082822 | 208 | 12  | 17 | 75  | 0 |
| CONTIG-082823 | 141 | 6   | 3  | 26  | 2 |
| CONTIG-082824 | 75  | 9   | 5  | 25  | 0 |
| CONTIG-082826 | 125 | 3   | 0  | 22  | 0 |
| CONTIG-082827 | 102 | 5   | 2  | 15  | 0 |
| CONTIG-082828 | 147 | 5   | 6  | 13  | 4 |
| CONTIG-082829 | 69  | 5   | 11 | 9   | 0 |
| CONTIG-082830 | 72  | 3   | 3  | 5   | 0 |
| CONTIG-082832 | 110 | 7   | 4  | 20  | 0 |
| CONTIG-082833 | 119 | 7   | 0  | 25  | 0 |
| CONTIG-082834 | 224 | 5   | 7  | 35  | 0 |
| CONTIG-082835 | 94  | 10  | 0  | 16  | 0 |
| CONTIG-082836 | 59  | 125 | 4  | 220 | 0 |
| CONTIG-082837 | 145 | 9   | 2  | 30  | 0 |
| CONTIG-082838 | 46  | 67  | 0  | 68  | 0 |
| CONTIG-082839 | 200 | 7   | 4  | 53  | 0 |
| CONTIG-082840 | 82  | 7   | 6  | 6   | 0 |
| CONTIG-082841 | 112 | 4   | 6  | 12  | 0 |
| CONTIG-082842 | 91  | 6   | 2  | 11  | 2 |
| CONTIG-082843 | 148 | 21  | 10 | 108 | 2 |
| CONTIG-082844 | 105 | 17  | 3  | 4   | 0 |
| CONTIG-082845 | 214 | 9   | 3  | 59  | 0 |
| CONTIG-082847 | 73  | 11  | 3  | 21  | 0 |
| CONTIG-082848 | 113 | 11  | 28 | 10  | 0 |
| CONTIG-082849 | 82  | 19  | 0  | 32  | 0 |
| CONTIG-082851 | 66  | 4   | 4  | 12  | 0 |
| CONTIG-082852 | 100 | 3   | 0  | 2   | 0 |
| CONTIG-082853 | 60  | 3   | 0  | 4   | 0 |
| CONTIG-082854 | 210 | 7   | 9  | 33  | 0 |
| CONTIG-082855 | 92  | 3   | 3  | 4   | 0 |
| CONTIG-082856 | 76  | 7   | 5  | 16  | 0 |
| CONTIG-082857 | 113 | 21  | 2  | 142 | 0 |
| CONTIG-082858 | 412 | 8   | 25 | 115 | 0 |
| CONTIG-082859 | 115 | 6   | 0  | 8   | 0 |
| CONTIG-082860 | 110 | 8   | 3  | 28  | 0 |
| CONTIG-082861 | 171 | 8   | 6  | 32  | 6 |
| CONTIG-082862 | 123 | 8   | 8  | 37  | 0 |
| CONTIG-082863 | 75  | 4   | 2  | 6   | 0 |

|               |     |    |    |     |     |
|---------------|-----|----|----|-----|-----|
| CONTIG-082864 | 96  | 5  | 7  | 17  | 0   |
| CONTIG-082865 | 83  | 8  | 2  | 17  | 0   |
| CONTIG-082866 | 88  | 3  | 2  | 7   | 0   |
| CONTIG-082867 | 193 | 7  | 11 | 62  | 0   |
| CONTIG-082868 | 121 | 17 | 2  | 0   | 2   |
| CONTIG-082869 | 121 | 12 | 4  | 66  | 2   |
| CONTIG-082871 | 132 | 8  | 4  | 38  | 0   |
| CONTIG-082872 | 89  | 5  | 0  | 6   | 0   |
| CONTIG-082873 | 70  | 5  | 8  | 7   | 0   |
| CONTIG-082874 | 66  | 5  | 3  | 7   | 0   |
| CONTIG-082875 | 214 | 8  | 0  | 48  | 0   |
| CONTIG-082876 | 68  | 5  | 2  | 0   | 0   |
| CONTIG-082877 | 410 | 11 | 18 | 145 | 0   |
| CONTIG-082878 | 171 | 4  | 8  | 7   | 0   |
| CONTIG-082881 | 284 | 27 | 7  | 0   | 87  |
| CONTIG-082882 | 102 | 5  | 4  | 22  | 0   |
| CONTIG-082883 | 59  | 5  | 4  | 7   | 0   |
| CONTIG-082885 | 131 | 9  | 3  | 43  | 0   |
| CONTIG-082886 | 83  | 7  | 3  | 11  | 0   |
| CONTIG-082887 | 89  | 12 | 3  | 24  | 0   |
| CONTIG-082889 | 72  | 7  | 3  | 20  | 0   |
| CONTIG-082890 | 93  | 4  | 5  | 7   | 0   |
| CONTIG-082891 | 200 | 7  | 4  | 26  | 0   |
| CONTIG-082892 | 146 | 5  | 8  | 19  | 0   |
| CONTIG-082893 | 100 | 5  | 2  | 22  | 0   |
| CONTIG-082894 | 99  | 4  | 0  | 5   | 4   |
| CONTIG-082895 | 157 | 5  | 2  | 23  | 0   |
| CONTIG-082896 | 140 | 12 | 20 | 60  | 0   |
| CONTIG-082897 | 89  | 5  | 8  | 12  | 0   |
| CONTIG-082898 | 78  | 10 | 15 | 20  | 0   |
| CONTIG-082899 | 113 | 8  | 5  | 31  | 0   |
| CONTIG-082900 | 302 | 6  | 8  | 43  | 0   |
| CONTIG-082901 | 179 | 5  | 7  | 5   | 0   |
| CONTIG-082902 | 541 | 35 | 4  | 0   | 114 |
| CONTIG-082903 | 95  | 15 | 2  | 64  | 0   |
| CONTIG-082904 | 104 | 50 | 6  | 38  | 0   |
| CONTIG-082905 | 316 | 15 | 7  | 68  | 0   |
| CONTIG-082906 | 119 | 5  | 2  | 22  | 0   |
| CONTIG-082907 | 241 | 8  | 5  | 72  | 0   |
| CONTIG-082908 | 71  | 10 | 6  | 21  | 0   |
| CONTIG-082909 | 345 | 9  | 6  | 77  | 0   |
| CONTIG-082910 | 188 | 13 | 17 | 96  | 2   |
| CONTIG-082911 | 93  | 3  | 0  | 0   | 0   |
| CONTIG-082912 | 717 | 33 | 9  | 0   | 198 |
| CONTIG-082913 | 78  | 5  | 16 | 5   | 0   |
| CONTIG-082915 | 80  | 27 | 12 | 95  | 0   |
| CONTIG-082916 | 162 | 5  | 2  | 35  | 0   |

|               |     |     |    |     |     |
|---------------|-----|-----|----|-----|-----|
| CONTIG-082917 | 169 | 10  | 2  | 9   | 0   |
| CONTIG-082918 | 113 | 7   | 2  | 27  | 0   |
| CONTIG-082919 | 66  | 2   | 0  | 0   | 0   |
| CONTIG-082920 | 118 | 4   | 2  | 8   | 0   |
| CONTIG-082921 | 73  | 4   | 0  | 5   | 0   |
| CONTIG-082923 | 734 | 8   | 2  | 0   | 23  |
| CONTIG-082927 | 128 | 3   | 0  | 5   | 0   |
| CONTIG-082928 | 104 | 4   | 5  | 0   | 0   |
| CONTIG-082929 | 139 | 5   | 9  | 11  | 0   |
| CONTIG-082931 | 199 | 11  | 27 | 63  | 0   |
| CONTIG-082932 | 91  | 3   | 3  | 0   | 0   |
| CONTIG-082934 | 134 | 8   | 8  | 20  | 2   |
| CONTIG-082935 | 76  | 4   | 4  | 4   | 0   |
| CONTIG-082936 | 104 | 8   | 2  | 43  | 0   |
| CONTIG-082937 | 98  | 6   | 2  | 10  | 0   |
| CONTIG-082938 | 72  | 5   | 0  | 5   | 0   |
| CONTIG-082939 | 113 | 7   | 17 | 23  | 0   |
| CONTIG-082941 | 180 | 16  | 7  | 74  | 3   |
| CONTIG-082943 | 72  | 5   | 0  | 4   | 0   |
| CONTIG-082944 | 69  | 6   | 0  | 8   | 0   |
| CONTIG-082945 | 431 | 125 | 0  | 0   | 345 |
| CONTIG-082955 | 152 | 14  | 5  | 0   | 4   |
| CONTIG-082956 | 77  | 5   | 10 | 10  | 0   |
| CONTIG-082957 | 224 | 5   | 2  | 50  | 0   |
| CONTIG-082958 | 121 | 6   | 0  | 19  | 0   |
| CONTIG-082959 | 77  | 5   | 2  | 13  | 0   |
| CONTIG-082960 | 59  | 2   | 2  | 0   | 0   |
| CONTIG-082961 | 64  | 7   | 3  | 0   | 2   |
| CONTIG-082962 | 58  | 8   | 19 | 2   | 0   |
| CONTIG-082963 | 288 | 10  | 13 | 110 | 0   |
| CONTIG-082964 | 74  | 2   | 0  | 2   | 0   |
| CONTIG-082965 | 78  | 5   | 7  | 7   | 0   |
| CONTIG-082966 | 153 | 5   | 2  | 7   | 0   |
| CONTIG-082967 | 84  | 8   | 6  | 16  | 0   |
| CONTIG-082968 | 97  | 5   | 5  | 15  | 0   |
| CONTIG-082969 | 105 | 5   | 8  | 12  | 0   |
| CONTIG-082971 | 167 | 8   | 9  | 44  | 0   |
| CONTIG-082972 | 134 | 8   | 4  | 23  | 2   |
| CONTIG-082973 | 97  | 2   | 0  | 4   | 0   |
| CONTIG-082974 | 169 | 6   | 9  | 17  | 0   |
| CONTIG-082976 | 152 | 6   | 0  | 32  | 0   |
| CONTIG-082977 | 77  | 6   | 14 | 12  | 0   |
| CONTIG-082978 | 270 | 10  | 24 | 57  | 0   |
| CONTIG-082979 | 109 | 4   | 2  | 14  | 0   |
| CONTIG-082980 | 64  | 6   | 11 | 8   | 0   |
| CONTIG-082981 | 58  | 3   | 0  | 4   | 0   |
| CONTIG-082983 | 96  | 11  | 4  | 36  | 0   |

|               |     |    |    |     |     |
|---------------|-----|----|----|-----|-----|
| CONTIG-082984 | 150 | 37 | 4  | 273 | 2   |
| CONTIG-082985 | 73  | 9  | 6  | 14  | 0   |
| CONTIG-082987 | 76  | 3  | 3  | 4   | 0   |
| CONTIG-082988 | 66  | 3  | 4  | 2   | 0   |
| CONTIG-082989 | 62  | 2  | 2  | 0   | 0   |
| CONTIG-082990 | 53  | 21 | 0  | 0   | 0   |
| CONTIG-082991 | 230 | 6  | 0  | 48  | 0   |
| CONTIG-082994 | 98  | 8  | 6  | 9   | 0   |
| CONTIG-082995 | 76  | 3  | 3  | 10  | 0   |
| CONTIG-082996 | 76  | 8  | 7  | 15  | 0   |
| CONTIG-082997 | 74  | 5  | 4  | 12  | 0   |
| CONTIG-082998 | 85  | 4  | 3  | 6   | 0   |
| CONTIG-083002 | 139 | 8  | 6  | 23  | 0   |
| CONTIG-083003 | 68  | 8  | 7  | 7   | 0   |
| CONTIG-083004 | 162 | 5  | 6  | 21  | 0   |
| CONTIG-083005 | 117 | 18 | 3  | 0   | 5   |
| CONTIG-083006 | 181 | 8  | 10 | 21  | 0   |
| CONTIG-083008 | 72  | 5  | 2  | 10  | 0   |
| CONTIG-083009 | 340 | 17 | 6  | 202 | 4   |
| CONTIG-083010 | 102 | 4  | 0  | 15  | 0   |
| CONTIG-083012 | 609 | 9  | 8  | 230 | 0   |
| CONTIG-083013 | 66  | 2  | 2  | 0   | 0   |
| CONTIG-083014 | 155 | 5  | 8  | 17  | 0   |
| CONTIG-083015 | 119 | 5  | 6  | 14  | 0   |
| CONTIG-083016 | 184 | 7  | 6  | 20  | 0   |
| CONTIG-083017 | 95  | 5  | 7  | 17  | 0   |
| CONTIG-083018 | 391 | 71 | 2  | 0   | 192 |
| CONTIG-083019 | 223 | 10 | 2  | 60  | 0   |
| CONTIG-083020 | 195 | 80 | 2  | 0   | 150 |
| CONTIG-083021 | 182 | 5  | 9  | 21  | 3   |
| CONTIG-083022 | 86  | 10 | 9  | 41  | 0   |
| CONTIG-083023 | 204 | 17 | 2  | 2   | 0   |
| CONTIG-083028 | 58  | 6  | 2  | 10  | 0   |
| CONTIG-083029 | 98  | 6  | 7  | 14  | 0   |
| CONTIG-083030 | 126 | 5  | 8  | 15  | 0   |
| CONTIG-083031 | 66  | 5  | 0  | 7   | 0   |
| CONTIG-083032 | 309 | 7  | 4  | 48  | 0   |
| CONTIG-083033 | 106 | 2  | 0  | 10  | 0   |
| CONTIG-083034 | 288 | 13 | 13 | 62  | 0   |
| CONTIG-083035 | 110 | 7  | 11 | 18  | 0   |
| CONTIG-083036 | 191 | 11 | 2  | 54  | 0   |
| CONTIG-083037 | 61  | 8  | 0  | 16  | 0   |
| CONTIG-083038 | 71  | 19 | 8  | 61  | 0   |
| CONTIG-083039 | 153 | 8  | 6  | 31  | 0   |
| CONTIG-083041 | 78  | 4  | 0  | 2   | 3   |
| CONTIG-083042 | 87  | 6  | 0  | 10  | 0   |
| CONTIG-083043 | 193 | 6  | 4  | 41  | 0   |

|               |     |    |    |     |    |
|---------------|-----|----|----|-----|----|
| CONTIG-083044 | 116 | 8  | 5  | 36  | 0  |
| CONTIG-083045 | 173 | 5  | 0  | 33  | 0  |
| CONTIG-083047 | 65  | 7  | 0  | 0   | 0  |
| CONTIG-083048 | 103 | 5  | 0  | 10  | 0  |
| CONTIG-083049 | 61  | 6  | 3  | 5   | 0  |
| CONTIG-083050 | 111 | 7  | 0  | 31  | 2  |
| CONTIG-083051 | 88  | 6  | 2  | 14  | 0  |
| CONTIG-083052 | 220 | 6  | 2  | 46  | 0  |
| CONTIG-083053 | 112 | 6  | 9  | 12  | 0  |
| CONTIG-083058 | 260 | 5  | 2  | 71  | 0  |
| CONTIG-083059 | 120 | 6  | 7  | 9   | 0  |
| CONTIG-083060 | 219 | 5  | 0  | 23  | 0  |
| CONTIG-083061 | 43  | 21 | 0  | 19  | 0  |
| CONTIG-083062 | 155 | 5  | 0  | 18  | 0  |
| CONTIG-083063 | 159 | 8  | 7  | 21  | 0  |
| CONTIG-083064 | 75  | 8  | 5  | 4   | 0  |
| CONTIG-083065 | 145 | 3  | 0  | 6   | 2  |
| CONTIG-083066 | 69  | 5  | 6  | 6   | 0  |
| CONTIG-083067 | 157 | 14 | 14 | 42  | 0  |
| CONTIG-083068 | 94  | 6  | 2  | 21  | 0  |
| CONTIG-083069 | 74  | 5  | 0  | 7   | 0  |
| CONTIG-083077 | 39  | 41 | 4  | 38  | 0  |
| CONTIG-083078 | 63  | 5  | 5  | 5   | 0  |
| CONTIG-083079 | 675 | 16 | 22 | 225 | 21 |
| CONTIG-083080 | 66  | 6  | 0  | 0   | 4  |
| CONTIG-083081 | 135 | 10 | 6  | 40  | 0  |
| CONTIG-083082 | 69  | 22 | 4  | 20  | 0  |
| CONTIG-083083 | 249 | 10 | 3  | 71  | 2  |
| CONTIG-083084 | 73  | 4  | 0  | 8   | 0  |
| CONTIG-083087 | 67  | 33 | 6  | 71  | 0  |
| CONTIG-083088 | 102 | 5  | 0  | 20  | 0  |
| CONTIG-083089 | 116 | 5  | 0  | 15  | 0  |
| CONTIG-083090 | 81  | 5  | 4  | 9   | 0  |
| CONTIG-083092 | 217 | 16 | 0  | 113 | 0  |
| CONTIG-083093 | 183 | 18 | 13 | 26  | 0  |
| CONTIG-083094 | 53  | 13 | 9  | 18  | 0  |
| CONTIG-083097 | 83  | 4  | 2  | 5   | 0  |
| CONTIG-083098 | 96  | 3  | 2  | 0   | 0  |
| CONTIG-083099 | 675 | 18 | 10 | 742 | 0  |
| CONTIG-083100 | 72  | 7  | 6  | 15  | 0  |
| CONTIG-083101 | 67  | 4  | 0  | 0   | 0  |
| CONTIG-083102 | 77  | 7  | 7  | 9   | 0  |
| CONTIG-083103 | 141 | 3  | 0  | 0   | 2  |
| CONTIG-083104 | 71  | 10 | 8  | 23  | 0  |
| CONTIG-083105 | 82  | 7  | 0  | 15  | 0  |
| CONTIG-083107 | 100 | 6  | 9  | 21  | 0  |
| CONTIG-083114 | 125 | 6  | 4  | 21  | 0  |



|               |     |    |    |     |     |
|---------------|-----|----|----|-----|-----|
| CONTIG-083115 | 237 | 5  | 0  | 21  | 0   |
| CONTIG-083116 | 450 | 6  | 12 | 60  | 4   |
| CONTIG-083117 | 72  | 3  | 0  | 5   | 0   |
| CONTIG-083118 | 69  | 9  | 4  | 26  | 2   |
| CONTIG-083119 | 157 | 7  | 2  | 13  | 0   |
| CONTIG-083120 | 157 | 5  | 2  | 0   | 2   |
| CONTIG-083121 | 71  | 6  | 0  | 16  | 0   |
| CONTIG-083122 | 86  | 5  | 6  | 8   | 0   |
| CONTIG-083123 | 117 | 6  | 4  | 21  | 0   |
| CONTIG-083125 | 173 | 7  | 6  | 21  | 0   |
| CONTIG-083126 | 280 | 45 | 0  | 0   | 97  |
| CONTIG-083127 | 429 | 18 | 0  | 0   | 127 |
| CONTIG-083128 | 96  | 4  | 2  | 11  | 0   |
| CONTIG-083129 | 78  | 3  | 0  | 2   | 0   |
| CONTIG-083131 | 56  | 64 | 2  | 0   | 11  |
| CONTIG-083132 | 85  | 7  | 2  | 25  | 0   |
| CONTIG-083133 | 221 | 5  | 5  | 22  | 0   |
| CONTIG-083134 | 171 | 9  | 2  | 52  | 0   |
| CONTIG-083136 | 86  | 20 | 7  | 32  | 0   |
| CONTIG-083137 | 251 | 8  | 0  | 59  | 0   |
| CONTIG-083138 | 95  | 8  | 7  | 18  | 0   |
| CONTIG-083140 | 148 | 6  | 2  | 33  | 0   |
| CONTIG-083141 | 173 | 5  | 4  | 0   | 0   |
| CONTIG-083142 | 121 | 16 | 18 | 93  | 0   |
| CONTIG-083143 | 139 | 16 | 10 | 31  | 0   |
| CONTIG-083144 | 124 | 6  | 6  | 28  | 0   |
| CONTIG-083145 | 59  | 12 | 2  | 21  | 0   |
| CONTIG-083146 | 76  | 4  | 0  | 0   | 2   |
| CONTIG-083147 | 213 | 7  | 11 | 60  | 0   |
| CONTIG-083148 | 127 | 14 | 14 | 4   | 0   |
| CONTIG-083149 | 257 | 11 | 20 | 105 | 0   |
| CONTIG-083150 | 69  | 3  | 8  | 0   | 0   |
| CONTIG-083151 | 102 | 10 | 5  | 26  | 0   |
| CONTIG-083152 | 345 | 11 | 12 | 148 | 0   |
| CONTIG-083153 | 69  | 10 | 17 | 4   | 0   |
| CONTIG-083154 | 106 | 6  | 2  | 17  | 0   |
| CONTIG-083155 | 87  | 37 | 5  | 131 | 0   |
| CONTIG-083156 | 202 | 4  | 2  | 16  | 0   |
| CONTIG-083157 | 75  | 6  | 0  | 7   | 0   |
| CONTIG-083158 | 58  | 15 | 2  | 0   | 0   |
| CONTIG-083159 | 74  | 3  | 2  | 0   | 0   |
| CONTIG-083160 | 559 | 18 | 36 | 402 | 0   |
| CONTIG-083161 | 79  | 7  | 9  | 16  | 0   |
| CONTIG-083162 | 109 | 4  | 8  | 2   | 0   |
| CONTIG-083163 | 162 | 8  | 6  | 57  | 0   |
| CONTIG-083164 | 111 | 10 | 7  | 7   | 0   |
| CONTIG-083165 | 79  | 9  | 5  | 20  | 0   |

|               |     |    |    |     |   |
|---------------|-----|----|----|-----|---|
| CONTIG-083166 | 172 | 4  | 2  | 17  | 0 |
| CONTIG-083167 | 94  | 4  | 0  | 9   | 0 |
| CONTIG-083168 | 61  | 6  | 3  | 4   | 0 |
| CONTIG-083169 | 147 | 25 | 5  | 7   | 0 |
| CONTIG-083170 | 66  | 3  | 5  | 2   | 0 |
| CONTIG-083171 | 117 | 5  | 0  | 22  | 0 |
| CONTIG-083172 | 73  | 6  | 11 | 12  | 0 |
| CONTIG-083173 | 115 | 4  | 2  | 9   | 0 |
| CONTIG-083174 | 71  | 4  | 2  | 8   | 0 |
| CONTIG-083175 | 142 | 8  | 2  | 38  | 0 |
| CONTIG-083177 | 81  | 6  | 2  | 12  | 0 |
| CONTIG-083178 | 67  | 7  | 5  | 14  | 0 |
| CONTIG-083179 | 64  | 9  | 4  | 0   | 2 |
| CONTIG-083180 | 69  | 2  | 2  | 4   | 0 |
| CONTIG-083181 | 230 | 6  | 3  | 42  | 0 |
| CONTIG-083182 | 112 | 3  | 4  | 4   | 0 |
| CONTIG-083183 | 135 | 7  | 7  | 35  | 0 |
| CONTIG-083185 | 74  | 25 | 6  | 97  | 0 |
| CONTIG-083186 | 353 | 21 | 13 | 334 | 0 |
| CONTIG-083187 | 59  | 5  | 5  | 4   | 0 |
| CONTIG-083188 | 103 | 5  | 4  | 12  | 0 |
| CONTIG-083189 | 86  | 6  | 5  | 11  | 0 |
| CONTIG-083190 | 60  | 5  | 2  | 6   | 0 |
| CONTIG-083191 | 72  | 6  | 14 | 7   | 0 |
| CONTIG-083192 | 125 | 4  | 5  | 8   | 0 |
| CONTIG-083193 | 109 | 12 | 4  | 36  | 0 |
| CONTIG-083194 | 74  | 10 | 2  | 22  | 0 |
| CONTIG-083195 | 101 | 3  | 0  | 4   | 0 |
| CONTIG-083196 | 159 | 7  | 5  | 4   | 3 |
| CONTIG-083197 | 64  | 7  | 20 | 8   | 0 |
| CONTIG-083198 | 91  | 4  | 2  | 6   | 0 |
| CONTIG-083199 | 101 | 12 | 12 | 23  | 0 |
| CONTIG-083200 | 79  | 7  | 2  | 27  | 0 |
| CONTIG-083203 | 97  | 8  | 4  | 11  | 0 |
| CONTIG-083204 | 132 | 5  | 2  | 8   | 0 |
| CONTIG-083205 | 138 | 8  | 6  | 40  | 0 |
| CONTIG-083206 | 79  | 6  | 8  | 14  | 0 |
| CONTIG-083207 | 151 | 7  | 7  | 41  | 0 |
| CONTIG-083208 | 188 | 5  | 2  | 20  | 0 |
| CONTIG-083209 | 388 | 19 | 8  | 163 | 4 |
| CONTIG-083210 | 68  | 3  | 3  | 4   | 0 |
| CONTIG-083211 | 117 | 5  | 5  | 11  | 0 |
| CONTIG-083212 | 66  | 8  | 7  | 7   | 0 |
| CONTIG-083213 | 79  | 7  | 7  | 14  | 0 |
| CONTIG-083215 | 80  | 8  | 2  | 16  | 0 |
| CONTIG-083216 | 58  | 5  | 0  | 8   | 0 |
| CONTIG-083217 | 128 | 12 | 5  | 77  | 0 |

|               |     |    |    |    |   |
|---------------|-----|----|----|----|---|
| CONTIG-083218 | 78  | 5  | 3  | 9  | 0 |
| CONTIG-083219 | 133 | 10 | 0  | 41 | 0 |
| CONTIG-083220 | 76  | 4  | 4  | 6  | 0 |
| CONTIG-083221 | 246 | 7  | 5  | 51 | 0 |
| CONTIG-083222 | 73  | 7  | 11 | 13 | 0 |
| CONTIG-083223 | 351 | 7  | 18 | 47 | 0 |
| CONTIG-083224 | 95  | 7  | 0  | 7  | 0 |
| CONTIG-083225 | 61  | 3  | 0  | 6  | 0 |
| CONTIG-083226 | 58  | 4  | 3  | 3  | 0 |
| CONTIG-083227 | 136 | 7  | 0  | 20 | 0 |
| CONTIG-083228 | 165 | 16 | 14 | 40 | 0 |
| CONTIG-083229 | 101 | 12 | 4  | 14 | 0 |
| CONTIG-083230 | 299 | 9  | 0  | 85 | 0 |
| CONTIG-083231 | 74  | 8  | 4  | 5  | 0 |
| CONTIG-083236 | 85  | 7  | 0  | 12 | 0 |
| CONTIG-083237 | 94  | 11 | 4  | 32 | 0 |
| CONTIG-083238 | 126 | 3  | 0  | 2  | 0 |
| CONTIG-083240 | 59  | 6  | 2  | 2  | 0 |

length of the contigs and the coverage and the raw counts of the sequences from six libraries that mat

| T3 - Rep2 | T6 - Rep1 | T6 - Rep2 | PITG#      |
|-----------|-----------|-----------|------------|
| 0         | 157       | 311       | PITG_03392 |
| 0         | 6         | 4         | PITG_11410 |
| 0         | 114       | 70        | PITG_08659 |
| 0         | 25        | 2         | PITG_03522 |
| 0         | 4         | 0         | PITG_00251 |
| 0         | 1576      | 2         | PITG_15727 |
| 0         | 935       | 1255      | PITG_09552 |
| 0         | 288       | 81        | PITG_03095 |
| 2         | 3730      | 284       | PITG_10263 |
| 2         | 1121      | 1851      | PITG_03477 |
| 0         | 145       | 95        | PITG_01342 |
| 0         | 56        | 14        | PITG_09291 |
| 5         | 332       | 769       | PITG_22670 |
| 2         | 2         | 0         | NA         |
| 0         | 1038      | 796       | PITG_12745 |
| 0         | 70        | 34        | PITG_00697 |
| 0         | 2017      | 3672      | PITG_07328 |
| 0         | 2059      | 952       | PITG_14850 |
| 0         | 67        | 4         | PITG_11133 |
| 0         | 7197      | 1671      | PITG_11766 |
| 0         | 9         | 4         | PITG_06996 |
| 0         | 12        | 2         | NA         |
| 0         | 748       | 280       | PITG_08462 |
| 65        | 8         | 40        | NA         |
| 0         | 1723      | 1194      | PITG_19121 |
| 2         | 5063      | 1814      | PITG_19999 |
| 0         | 392       | 78        | NA         |
| 0         | 341       | 584       | PITG_01086 |
| 0         | 405       | 167       | PITG_03695 |
| 0         | 3         | 2         | PITG_01154 |
| 0         | 212       | 71        | PITG_00625 |
| 0         | 139       | 119       | PITG_13341 |
| 0         | 17        | 0         | PITG_05611 |
| 0         | 4         | 0         | PITG_03356 |
| 0         | 1478      | 889       | PITG_04487 |
| 0         | 508       | 277       | PITG_03020 |
| 0         | 40        | 32        | PITG_13620 |
| 0         | 266       | 262       | PITG_03695 |
| 0         | 56        | 2         | NA         |
| 0         | 34        | 16        | PITG_10153 |
| 0         | 363       | 126       | NA         |
| 0         | 342       | 20        | PITG_10373 |
| 0         | 2456      | 2784      | PITG_13371 |
| 0         | 633       | 214       | PITG_11712 |
| 0         | 565       | 385       | PITG_08311 |

|   |      |                 |
|---|------|-----------------|
| 0 | 345  | 1308 PITG_20901 |
| 0 | 482  | 43 PITG_16966   |
| 0 | 81   | 0 PITG_00486    |
| 0 | 53   | 42 PITG_11977   |
| 0 | 4    | 6 PITG_05614    |
| 0 | 209  | 24 PITG_13307   |
| 0 | 2    | 2 NA            |
| 2 | 208  | 1112 PITG_13699 |
| 0 | 528  | 1105 PITG_11766 |
| 0 | 218  | 22 PITG_14581   |
| 0 | 11   | 4 PITG_17359    |
| 0 | 5    | 6 PITG_00829    |
| 0 | 26   | 20 PITG_15146   |
| 0 | 526  | 34 PITG_22416   |
| 0 | 0    | 2 PITG_10372    |
| 0 | 0    | 0 PITG_18845    |
| 0 | 0    | 0 PITG_19399    |
| 0 | 161  | 41 PITG_02809   |
| 0 | 28   | 9 PITG_11259    |
| 0 | 22   | 29 PITG_06129   |
| 4 | 496  | 1675 PITG_10032 |
| 2 | 326  | 1283 PITG_12286 |
| 0 | 107  | 71 PITG_06012   |
| 0 | 0    | 4 PITG_02950    |
| 0 | 101  | 63 PITG_20400   |
| 0 | 49   | 23 PITG_12277   |
| 0 | 31   | 2 NA            |
| 0 | 185  | 60 PITG_13396   |
| 0 | 43   | 55 NA           |
| 0 | 22   | 14 PITG_23282   |
| 0 | 9    | 0 PITG_14911    |
| 0 | 116  | 141 PITG_06602  |
| 0 | 101  | 0 PITG_16332    |
| 0 | 4    | 0 PITG_09910    |
| 0 | 46   | 85 PITG_11127   |
| 0 | 0    | 0 NA            |
| 0 | 33   | 14 PITG_05822   |
| 0 | 86   | 2 PITG_00071    |
| 0 | 1210 | 467 PITG_20264  |
| 2 | 2281 | 2218 PITG_09563 |
| 0 | 675  | 557 PITG_13748  |
| 0 | 17   | 22 NA           |
| 0 | 1059 | 529 PITG_19864  |
| 0 | 69   | 188 PITG_14267  |
| 0 | 288  | 534 PITG_03549  |
| 0 | 1576 | 853 PITG_03239  |
| 0 | 4    | 0 PITG_10190    |

|      |      |                 |
|------|------|-----------------|
| 0    | 11   | 4 PITG_00381    |
| 0    | 16   | 0 PITG_02501    |
| 0    | 479  | 49 PITG_05577   |
| 0    | 3191 | 233 PITG_10202  |
| 0    | 17   | 0 PITG_00251    |
| 0    | 4113 | 2454 PITG_18072 |
| 0    | 642  | 193 NA          |
| 0    | 4    | 2 NA            |
| 0    | 179  | 143 NA          |
| 0    | 305  | 209 PITG_07400  |
| 0    | 337  | 59 PITG_11584   |
| 0    | 288  | 105 PITG_16798  |
| 0    | 58   | 23 PITG_15981   |
| 0    | 19   | 20 PITG_00732   |
| 0    | 4    | 25 PITG_05386   |
| 0    | 1732 | 3631 PITG_02925 |
| 12   | 3882 | 4483 PITG_10146 |
| 0    | 826  | 426 NA          |
| 0    | 0    | 0 PITG_16389    |
| 0    | 380  | 86 PITG_15660   |
| 0    | 1854 | 2628 PITG_15407 |
| 0    | 53   | 10 PITG_10417   |
| 0    | 10   | 8 PITG_09065    |
| 0    | 62   | 28 PITG_04996   |
| 0    | 213  | 37 PITG_18298   |
| 0    | 4    | 0 NA            |
| 2    | 609  | 801 PITG_06325  |
| 0    | 209  | 8 NA            |
| 0    | 154  | 108 PITG_13373  |
| 4905 | 290  | 1224 NA         |
| 0    | 384  | 439 PITG_00806  |
| 0    | 871  | 768 PITG_02068  |
| 0    | 201  | 295 PITG_15055  |
| 0    | 4    | 8 NA            |
| 0    | 21   | 6 NA            |
| 0    | 1347 | 1792 PITG_14632 |
| 5    | 1282 | 1344 PITG_20188 |
| 0    | 2    | 0 PITG_04588    |
| 0    | 1271 | 33 PITG_02694   |
| 0    | 1008 | 828 PITG_15638  |
| 6    | 1697 | 3346 PITG_03235 |
| 0    | 5    | 2 NA            |
| 0    | 1994 | 2609 PITG_13312 |
| 0    | 9    | 12 NA           |
| 0    | 257  | 71 PITG_01086   |
| 0    | 122  | 27 PITG_06780   |
| 0    | 38   | 0 NA            |

|   |      |                 |
|---|------|-----------------|
| 4 | 1576 | 2064 PITG_02578 |
| 0 | 14   | 17 PITG_05151   |
| 0 | 63   | 156 PITG_00564  |
| 0 | 1467 | 2254 PITG_20264 |
| 0 | 175  | 106 PITG_05614  |
| 0 | 287  | 96 PITG_06423   |
| 0 | 1923 | 160 PITG_20795  |
| 0 | 1386 | 532 PITG_16921  |
| 0 | 32   | 31 PITG_04708   |
| 0 | 5    | 2 NA            |
| 0 | 1832 | 517 PITG_00505  |
| 0 | 61   | 16 PITG_14722   |
| 0 | 1865 | 1128 PITG_09552 |
| 0 | 7    | 12 PITG_06355   |
| 0 | 599  | 83 PITG_11610   |
| 0 | 316  | 98 PITG_02627   |
| 0 | 877  | 126 PITG_01761  |
| 0 | 17   | 2 PITG_01824    |
| 0 | 91   | 40 PITG_19204   |
| 4 | 1655 | 2199 PITG_06722 |
| 2 | 2357 | 2256 PITG_15639 |
| 0 | 2    | 2 PITG_01045    |
| 0 | 305  | 48 PITG_18306   |
| 0 | 749  | 574 PITG_10263  |
| 0 | 0    | 4 PITG_03947    |
| 0 | 266  | 1129 PITG_02786 |
| 0 | 13   | 13 PITG_22053   |
| 0 | 24   | 14 PITG_15150   |
| 0 | 54   | 31 NA           |
| 0 | 135  | 46 PITG_12286   |
| 0 | 52   | 4 PITG_18101    |
| 0 | 15   | 0 PITG_09849    |
| 0 | 175  | 50 PITG_02285   |
| 0 | 601  | 704 PITG_12528  |
| 0 | 677  | 228 PITG_00431  |
| 0 | 245  | 1196 PITG_05156 |
| 0 | 0    | 2 PITG_08664    |
| 0 | 1038 | 152 NA          |
| 0 | 706  | 616 PITG_12682  |
| 0 | 118  | 49 PITG_02735   |
| 0 | 0    | 4 PITG_05757    |
| 0 | 89   | 173 PITG_02695  |
| 0 | 1364 | 408 PITG_19864  |
| 0 | 4    | 2 PITG_06227    |
| 0 | 45   | 23 PITG_00302   |
| 0 | 1248 | 303 PITG_08611  |
| 0 | 389  | 204 PITG_14594  |

|   |      |                 |
|---|------|-----------------|
| 0 | 32   | 15 PITG_11690   |
| 2 | 2984 | 972 PITG_12745  |
| 0 | 0    | 0 PITG_17996    |
| 0 | 56   | 9 PITG_17734    |
| 0 | 3277 | 692 PITG_13676  |
| 0 | 2    | 79 PITG_11653   |
| 0 | 30   | 138 PITG_21173  |
| 0 | 180  | 314 PITG_09563  |
| 2 | 557  | 872 PITG_09563  |
| 2 | 3357 | 2763 PITG_18774 |
| 6 | 3810 | 4846 PITG_08809 |
| 0 | 240  | 40 PITG_13545   |
| 0 | 218  | 34 PITG_12948   |
| 0 | 820  | 330 PITG_11966  |
| 0 | 29   | 32 PITG_06759   |
| 0 | 16   | 64 PITG_18005   |
| 0 | 3150 | 512 PITG_00987  |
| 0 | 45   | 3 PITG_11249    |
| 0 | 4    | 12 PITG_20994   |
| 2 | 3024 | 3256 PITG_09563 |
| 0 | 2347 | 1484 PITG_11099 |
| 0 | 68   | 25 PITG_07866   |
| 0 | 212  | 137 PITG_10939  |
| 0 | 1408 | 773 PITG_20188  |
| 0 | 420  | 947 PITG_16966  |
| 0 | 0    | 0 PITG_21516    |
| 0 | 161  | 113 PITG_00842  |
| 2 | 4686 | 2875 PITG_13676 |
| 0 | 1589 | 685 PITG_02510  |
| 0 | 456  | 436 PITG_07400  |
| 0 | 28   | 27 PITG_05675   |
| 0 | 688  | 203 PITG_08718  |
| 0 | 91   | 17 PITG_14549   |
| 0 | 67   | 141 PITG_13262  |
| 0 | 353  | 222 PITG_00706  |
| 4 | 150  | 389 PITG_06415  |
| 0 | 54   | 11 PITG_16068   |
| 0 | 136  | 456 PITG_06408  |
| 2 | 9359 | 1786 PITG_06722 |
| 0 | 49   | 10 NA           |
| 2 | 859  | 1150 PITG_11766 |
| 0 | 160  | 215 PITG_08941  |
| 2 | 3365 | 1980 PITG_10202 |
| 0 | 535  | 615 PITG_03738  |
| 0 | 124  | 318 PITG_06383  |
| 0 | 21   | 6 PITG_00369    |
| 0 | 5    | 0 NA            |



|   |      |                 |
|---|------|-----------------|
| 0 | 1578 | 596 PITG_05171  |
| 0 | 139  | 76 PITG_02119   |
| 0 | 150  | 69 NA           |
| 0 | 20   | 3 PITG_16103    |
| 0 | 316  | 114 PITG_00334  |
| 0 | 1508 | 859 PITG_13370  |
| 0 | 2461 | 1055 PITG_12745 |
| 0 | 276  | 802 PITG_17708  |
| 2 | 1051 | 464 PITG_03712  |
| 0 | 4342 | 2128 PITG_19669 |
| 0 | 366  | 873 PITG_03150  |
| 0 | 82   | 7 PITG_06610    |
| 0 | 328  | 272 PITG_23088  |
| 0 | 482  | 1518 PITG_03081 |
| 0 | 797  | 1426 PITG_13614 |
| 0 | 901  | 1947 PITG_20188 |
| 0 | 9    | 5 NA            |
| 0 | 542  | 475 NA          |
| 0 | 111  | 137 PITG_15967  |
| 0 | 471  | 422 PITG_00471  |
| 0 | 33   | 0 PITG_10372    |
| 0 | 13   | 30 PITG_01103   |
| 0 | 93   | 13 PITG_01155   |
| 2 | 572  | 567 PITG_03081  |
| 0 | 78   | 35 PITG_20125   |
| 0 | 119  | 140 PITG_01498  |
| 0 | 371  | 252 PITG_00151  |
| 0 | 2161 | 2665 PITG_06814 |
| 0 | 32   | 4 PITG_05103    |
| 0 | 693  | 366 PITG_01300  |
| 0 | 17   | 0 PITG_09626    |
| 0 | 279  | 151 PITG_03410  |
| 0 | 49   | 0 PITG_02501    |
| 0 | 379  | 497 PITG_18165  |
| 0 | 86   | 383 PITG_12562  |
| 0 | 1440 | 1405 PITG_03632 |
| 2 | 2514 | 1584 PITG_09345 |
| 0 | 0    | 0 PITG_02501    |
| 0 | 0    | 0 NA            |
| 0 | 1117 | 362 PITG_10883  |
| 0 | 25   | 0 PITG_11249    |
| 0 | 576  | 636 NA          |
| 0 | 9    | 0 PITG_14208    |
| 0 | 120  | 145 PITG_12693  |
| 2 | 1449 | 1663 PITG_05840 |
| 0 | 1101 | 716 PITG_05175  |
| 0 | 15   | 3 PITG_19282    |

|     |      |                 |
|-----|------|-----------------|
| 0   | 729  | 1192 PITG_03856 |
| 0   | 235  | 102 PITG_12182  |
| 0   | 1265 | 1154 PITG_20901 |
| 0   | 193  | 72 PITG_09895   |
| 2   | 441  | 473 PITG_06025  |
| 2   | 2167 | 1991 PITG_03235 |
| 0   | 141  | 95 PITG_17275   |
| 0   | 102  | 27 NA           |
| 0   | 29   | 16 PITG_17329   |
| 0   | 12   | 12 PITG_11584   |
| 0   | 6    | 0 PITG_01051    |
| 0   | 11   | 3 PITG_01155    |
| 0   | 192  | 29 PITG_15776   |
| 0   | 24   | 11 PITG_00562   |
| 0   | 1084 | 1126 PITG_10202 |
| 0   | 493  | 357 PITG_18306  |
| 0   | 36   | 62 PITG_18045   |
| 0   | 356  | 778 PITG_05464  |
| 0   | 502  | 280 PITG_16966  |
| 0   | 787  | 12 PITG_09345   |
| 0   | 2481 | 1619 PITG_10202 |
| 0   | 84   | 89 PITG_01172   |
| 25  | 80   | 2719 NA         |
| 0   | 145  | 30 PITG_17117   |
| 0   | 522  | 14 PITG_16766   |
| 0   | 2    | 4 NA            |
| 7   | 2624 | 2979 PITG_10941 |
| 0   | 2713 | 849 PITG_00987  |
| 0   | 297  | 245 PITG_00716  |
| 0   | 381  | 1215 PITG_13509 |
| 0   | 2    | 3 PITG_13915    |
| 0   | 81   | 22 PITG_07109   |
| 0   | 15   | 0 PITG_16221    |
| 0   | 264  | 15 PITG_19851   |
| 0   | 520  | 824 PITG_09402  |
| 0   | 3    | 0 PITG_08834    |
| 0   | 6    | 4 NA            |
| 0   | 173  | 101 PITG_18417  |
| 0   | 1629 | 40 NA           |
| 0   | 0    | 0 PITG_17145    |
| 0   | 6    | 4 PITG_04230    |
| 0   | 74   | 23 PITG_16468   |
| 839 | 55   | 2335 NA         |
| 0   | 17   | 4 PITG_20208    |
| 0   | 637  | 93 PITG_14260   |
| 0   | 69   | 40 PITG_13607   |
| 0   | 600  | 317 PITG_15485  |

|   |      |                 |
|---|------|-----------------|
| 0 | 845  | 524 PITG_08703  |
| 0 | 3783 | 2106 PITG_10193 |
| 0 | 13   | 7 PITG_03623    |
| 6 | 29   | 170 NA          |
| 0 | 644  | 602 PITG_02483  |
| 0 | 208  | 73 PITG_14455   |
| 0 | 32   | 0 NA            |
| 0 | 614  | 195 PITG_14594  |
| 0 | 2    | 2 PITG_03341    |
| 0 | 488  | 667 PITG_21071  |
| 0 | 1142 | 747 PITG_18072  |
| 0 | 105  | 35 PITG_15833   |
| 0 | 2008 | 2900 PITG_20795 |
| 0 | 353  | 418 PITG_06566  |
| 0 | 215  | 213 PITG_00451  |
| 0 | 0    | 2 PITG_01744    |
| 0 | 114  | 17 NA           |
| 0 | 13   | 8 PITG_03017    |
| 2 | 3264 | 3098 PITG_03762 |
| 0 | 174  | 242 PITG_21517  |
| 0 | 18   | 25 PITG_10534   |
| 0 | 8    | 23 PITG_09594   |
| 2 | 566  | 546 PITG_07197  |
| 0 | 363  | 90 NA           |
| 0 | 10   | 3 PITG_04910    |
| 0 | 21   | 12 PITG_18101   |
| 0 | 366  | 841 PITG_01797  |
| 0 | 441  | 494 NA          |
| 0 | 6    | 0 PITG_01722    |
| 0 | 8    | 15 NA           |
| 0 | 1399 | 1228 PITG_02255 |
| 0 | 32   | 0 NA            |
| 0 | 0    | 0 PITG_13836    |
| 0 | 625  | 341 PITG_02416  |
| 0 | 1317 | 749 PITG_10352  |
| 0 | 177  | 108 NA          |
| 0 | 86   | 144 PITG_00505  |
| 0 | 425  | 686 PITG_09345  |
| 0 | 49   | 10 PITG_00334   |
| 0 | 7    | 6 PITG_12989    |
| 0 | 64   | 67 PITG_13622   |
| 0 | 579  | 587 PITG_13500  |
| 0 | 820  | 295 PITG_09768  |
| 0 | 4    | 15 PITG_15150   |
| 0 | 379  | 558 PITG_08810  |
| 0 | 159  | 20 PITG_01976   |
| 0 | 35   | 0 PITG_17164    |

|     |      |                 |
|-----|------|-----------------|
| 0   | 890  | 260 PITG_14910  |
| 0   | 85   | 13 PITG_08734   |
| 0   | 329  | 216 PITG_00663  |
| 2   | 76   | 148 PITG_15846  |
| 0   | 126  | 9 NA            |
| 176 | 2302 | 249 NA          |
| 0   | 48   | 17 NA           |
| 2   | 680  | 1109 PITG_08025 |
| 0   | 94   | 50 PITG_16065   |
| 2   | 1174 | 3247 NA         |
| 0   | 7    | 5 PITG_07794    |
| 0   | 35   | 4 PITG_23112    |
| 2   | 770  | 948 PITG_07300  |
| 0   | 328  | 236 PITG_17042  |
| 0   | 99   | 578 PITG_05636  |
| 0   | 2    | 26 PITG_14380   |
| 4   | 1947 | 4216 PITG_02578 |
| 0   | 450  | 104 PITG_11719  |
| 0   | 0    | 0 PITG_15166    |
| 0   | 195  | 207 PITG_17261  |
| 0   | 50   | 27 PITG_11249   |
| 0   | 47   | 30 PITG_03788   |
| 0   | 20   | 7 PITG_00038    |
| 0   | 301  | 114 PITG_07794  |
| 0   | 831  | 293 PITG_11244  |
| 0   | 2077 | 3216 PITG_00880 |
| 0   | 1742 | 905 PITG_01042  |
| 0   | 10   | 14 PITG_02286   |
| 0   | 1624 | 202 PITG_04843  |
| 0   | 37   | 4 PITG_09523    |
| 0   | 8    | 4 NA            |
| 0   | 1095 | 79 PITG_05249   |
| 0   | 196  | 655 PITG_10219  |
| 0   | 484  | 255 PITG_08376  |
| 0   | 1300 | 926 PITG_14612  |
| 0   | 284  | 42 PITG_20425   |
| 0   | 386  | 286 PITG_11524  |
| 0   | 580  | 747 PITG_12427  |
| 0   | 677  | 1503 PITG_12486 |
| 0   | 39   | 22 PITG_06907   |
| 0   | 637  | 729 PITG_10649  |
| 0   | 5    | 6 NA            |
| 0   | 17   | 0 PITG_05674    |
| 0   | 0    | 0 NA            |
| 0   | 35   | 24 PITG_11552   |
| 0   | 8    | 0 PITG_18172    |
| 0   | 264  | 391 PITG_00578  |

|   |      |                 |
|---|------|-----------------|
| 0 | 656  | 2866 PITG_09798 |
| 0 | 453  | 25 NA           |
| 0 | 0    | 0 PITG_17492    |
| 0 | 29   | 15 PITG_18252   |
| 0 | 774  | 243 PITG_13438  |
| 0 | 20   | 57 PITG_04425   |
| 0 | 447  | 283 PITG_14970  |
| 0 | 117  | 19 PITG_18306   |
| 0 | 41   | 6 PITG_00406    |
| 0 | 281  | 677 PITG_13500  |
| 0 | 1174 | 2546 PITG_19871 |
| 0 | 348  | 369 PITG_05462  |
| 0 | 2401 | 780 PITG_02578  |
| 3 | 30   | 444 PITG_10637  |
| 0 | 21   | 6 PITG_04634    |
| 0 | 1319 | 549 PITG_03376  |
| 0 | 947  | 589 PITG_06597  |
| 0 | 14   | 6 NA            |
| 0 | 1227 | 79 PITG_17406   |
| 0 | 49   | 15 PITG_09277   |
| 0 | 60   | 4 PITG_08489    |
| 2 | 5247 | 3285 NA         |
| 0 | 44   | 11 PITG_01310   |
| 0 | 381  | 71 PITG_20928   |
| 0 | 1496 | 1623 PITG_13500 |
| 4 | 8126 | 3800 PITG_03221 |
| 0 | 18   | 0 NA            |
| 0 | 49   | 20 NA           |
| 0 | 69   | 11 PITG_03995   |
| 0 | 152  | 408 PITG_14008  |
| 0 | 41   | 59 PITG_03850   |
| 0 | 104  | 6 PITG_10374    |
| 0 | 112  | 189 PITG_01400  |
| 0 | 2    | 0 PITG_06988    |
| 0 | 310  | 356 PITG_05462  |
| 0 | 4    | 6 PITG_16020    |
| 0 | 1942 | 1409 PITG_09760 |
| 0 | 327  | 33 NA           |
| 0 | 179  | 124 PITG_00020  |
| 0 | 162  | 155 PITG_13366  |
| 0 | 261  | 129 PITG_03339  |
| 0 | 85   | 22 PITG_01614   |
| 0 | 1644 | 903 PITG_16670  |
| 0 | 872  | 675 PITG_07914  |
| 0 | 1620 | 524 PITG_15904  |
| 0 | 171  | 243 PITG_22666  |
| 0 | 1099 | 803 PITG_12882  |

|     |      |                 |
|-----|------|-----------------|
| 0   | 188  | 6 PITG_09001    |
| 0   | 32   | 6 PITG_11764    |
| 2   | 1592 | 2122 PITG_15697 |
| 0   | 6    | 12 PITG_22625   |
| 0   | 42   | 2 PITG_09307    |
| 0   | 99   | 22 PITG_09439   |
| 0   | 119  | 275 PITG_16207  |
| 0   | 769  | 864 PITG_00272  |
| 0   | 118  | 66 PITG_10905   |
| 0   | 42   | 84 PITG_16005   |
| 0   | 503  | 1091 PITG_06995 |
| 0   | 1230 | 1123 PITG_15248 |
| 0   | 240  | 57 PITG_12693   |
| 0   | 232  | 16 NA           |
| 0   | 7    | 0 PITG_12121    |
| 0   | 123  | 180 PITG_22848  |
| 0   | 2    | 4 PITG_08301    |
| 0   | 130  | 6 NA            |
| 4   | 2    | 2 NA            |
| 0   | 128  | 46 PITG_01280   |
| 0   | 515  | 1406 PITG_03698 |
| 0   | 225  | 123 PITG_00564  |
| 0   | 51   | 3 NA            |
| 0   | 0    | 0 NA            |
| 0   | 109  | 0 PITG_04702    |
| 0   | 1188 | 440 PITG_05498  |
| 602 | 27   | 492 NA          |
| 0   | 70   | 94 PITG_18497   |
| 0   | 896  | 476 PITG_20121  |
| 0   | 48   | 41 PITG_11584   |
| 2   | 8811 | 6227 NA         |
| 0   | 192  | 134 PITG_13371  |
| 0   | 649  | 128 NA          |
| 2   | 475  | 675 PITG_09540  |
| 0   | 386  | 47 PITG_13381   |
| 0   | 10   | 8 PITG_08421    |
| 0   | 108  | 66 PITG_20796   |
| 0   | 1505 | 1108 PITG_02046 |
| 0   | 30   | 12 PITG_02767   |
| 0   | 2    | 4 PITG_02553    |
| 0   | 33   | 13 NA           |
| 0   | 339  | 336 PITG_06579  |
| 0   | 14   | 15 NA           |
| 0   | 80   | 4 PITG_06457    |
| 0   | 189  | 104 PITG_05781  |
| 0   | 13   | 10 PITG_07210   |
| 0   | 448  | 986 PITG_13370  |

|   |      |                 |
|---|------|-----------------|
| 0 | 307  | 111 PITG_12053  |
| 0 | 134  | 40 PITG_08496   |
| 2 | 2466 | 498 PITG_03353  |
| 0 | 56   | 37 PITG_11249   |
| 0 | 331  | 467 PITG_03594  |
| 2 | 722  | 802 PITG_11099  |
| 0 | 183  | 32 PITG_03604   |
| 0 | 632  | 262 PITG_18463  |
| 0 | 0    | 9 PITG_10827    |
| 0 | 97   | 174 PITG_11743  |
| 6 | 2104 | 3151 PITG_00443 |
| 0 | 1152 | 1397 PITG_00266 |
| 0 | 546  | 313 PITG_21517  |
| 0 | 160  | 124 PITG_19691  |
| 0 | 170  | 117 PITG_11789  |
| 0 | 80   | 60 PITG_01583   |
| 0 | 93   | 216 PITG_05676  |
| 0 | 481  | 600 PITG_02211  |
| 0 | 111  | 54 PITG_12264   |
| 0 | 666  | 467 PITG_21540  |
| 0 | 1154 | 2252 PITG_18052 |
| 0 | 63   | 54 PITG_05689   |
| 0 | 26   | 11 PITG_20196   |
| 0 | 27   | 38 PITG_11572   |
| 0 | 274  | 0 PITG_18316    |
| 0 | 6    | 0 PITG_17012    |
| 0 | 2    | 7 PITG_22860    |
| 0 | 63   | 8 PITG_12296    |
| 0 | 281  | 43 PITG_14363   |
| 0 | 657  | 453 PITG_05303  |
| 0 | 19   | 16 PITG_11572   |
| 0 | 2    | 4 PITG_17332    |
| 0 | 737  | 1324 NA         |
| 0 | 1287 | 243 PITG_15654  |
| 0 | 891  | 2147 PITG_10210 |
| 0 | 26   | 16 PITG_22628   |
| 2 | 148  | 2426 NA         |
| 2 | 2776 | 2561 PITG_04522 |
| 0 | 41   | 18 NA           |
| 0 | 8    | 0 PITG_02501    |
| 2 | 170  | 57 NA           |
| 0 | 48   | 44 PITG_02716   |
| 0 | 33   | 4 NA            |
| 0 | 104  | 30 PITG_00658   |
| 0 | 1766 | 3033 PITG_14696 |
| 0 | 143  | 187 PITG_13753  |
| 0 | 77   | 116 PITG_15731  |

|   |      |                 |
|---|------|-----------------|
| 0 | 2247 | 324 PITG_16757  |
| 0 | 566  | 539 PITG_02282  |
| 0 | 172  | 218 PITG_05616  |
| 0 | 164  | 382 PITG_15850  |
| 0 | 39   | 0 PITG_17513    |
| 0 | 18   | 7 PITG_05175    |
| 0 | 6    | 27 PITG_01549   |
| 0 | 14   | 4 NA            |
| 0 | 1290 | 567 PITG_09445  |
| 0 | 2    | 0 PITG_05326    |
| 0 | 520  | 349 PITG_01498  |
| 2 | 1145 | 1251 PITG_00179 |
| 0 | 512  | 719 PITG_07985  |
| 0 | 6    | 5 PITG_08469    |
| 7 | 3612 | 2678 PITG_17261 |
| 0 | 611  | 429 PITG_02053  |
| 0 | 243  | 15 PITG_14917   |
| 0 | 176  | 11 NA           |
| 0 | 30   | 5 PITG_13616    |
| 0 | 278  | 94 PITG_14587   |
| 0 | 11   | 9 NA            |
| 0 | 9    | 11 PITG_20355   |
| 0 | 161  | 33 PITG_05496   |
| 0 | 535  | 1888 PITG_16005 |
| 0 | 137  | 77 PITG_01438   |
| 0 | 310  | 282 PITG_08780  |
| 0 | 1755 | 1870 PITG_15723 |
| 0 | 0    | 0 NA            |
| 0 | 881  | 129 PITG_16921  |
| 2 | 1653 | 2471 PITG_02222 |
| 0 | 4    | 32 PITG_09298   |
| 0 | 736  | 494 PITG_02038  |
| 0 | 0    | 17 PITG_20251   |
| 2 | 497  | 2196 PITG_00527 |
| 0 | 98   | 412 PITG_08001  |
| 0 | 224  | 183 NA          |
| 0 | 132  | 29 PITG_20196   |
| 0 | 1402 | 65 NA           |
| 0 | 107  | 43 PITG_15687   |
| 2 | 5445 | 3372 PITG_10972 |
| 0 | 217  | 249 PITG_10942  |
| 0 | 58   | 47 PITG_07424   |
| 0 | 54   | 35 NA           |
| 0 | 290  | 157 PITG_06325  |
| 0 | 227  | 5 PITG_03898    |
| 0 | 181  | 101 PITG_12760  |
| 0 | 66   | 10 NA           |



|   |      |                 |
|---|------|-----------------|
| 0 | 78   | 14 PITG_10154   |
| 0 | 350  | 192 PITG_16052  |
| 0 | 3    | 4 NA            |
| 0 | 108  | 9 PITG_09597    |
| 2 | 652  | 1306 PITG_17013 |
| 0 | 791  | 826 PITG_18165  |
| 0 | 478  | 231 PITG_11189  |
| 0 | 413  | 202 PITG_03711  |
| 0 | 834  | 71 NA           |
| 0 | 1311 | 109 PITG_03178  |
| 0 | 2    | 2 PITG_05757    |
| 0 | 227  | 583 PITG_07308  |
| 9 | 4345 | 3423 PITG_06722 |
| 0 | 2924 | 1213 PITG_03762 |
| 0 | 0    | 103 NA          |
| 0 | 18   | 0 PITG_03408    |
| 6 | 123  | 1080 NA         |
| 0 | 27   | 43 PITG_15694   |
| 0 | 6    | 5 PITG_16331    |
| 0 | 117  | 243 PITG_06223  |
| 0 | 7    | 27 PITG_01407   |
| 0 | 43   | 104 PITG_00695  |
| 0 | 116  | 34 PITG_18088   |
| 0 | 3    | 12 NA           |
| 0 | 1612 | 1186 PITG_17013 |
| 0 | 11   | 28 PITG_14380   |
| 2 | 554  | 555 PITG_03424  |
| 0 | 637  | 33 PITG_20725   |
| 0 | 266  | 647 PITG_16921  |
| 0 | 1538 | 358 PITG_11452  |
| 0 | 0    | 2 PITG_20637    |
| 6 | 4708 | 5228 PITG_00179 |
| 0 | 148  | 0 PITG_11584    |
| 0 | 2651 | 3029 PITG_10863 |
| 0 | 256  | 799 PITG_18048  |
| 0 | 0    | 0 PITG_11483    |
| 0 | 102  | 2 PITG_20196    |
| 0 | 1487 | 207 PITG_12562  |
| 0 | 5    | 23 PITG_17944   |
| 0 | 268  | 115 PITG_06173  |
| 0 | 1008 | 703 PITG_10951  |
| 0 | 0    | 0 NA            |
| 2 | 346  | 1592 PITG_11244 |
| 0 | 37   | 0 NA            |
| 0 | 4    | 2 PITG_07865    |
| 0 | 275  | 431 PITG_06204  |
| 0 | 158  | 7 NA            |

|      |      |                 |
|------|------|-----------------|
| 5    | 3171 | 3258 PITG_11099 |
| 0    | 16   | 32 PITG_14835   |
| 0    | 152  | 94 PITG_13324   |
| 0    | 4    | 0 PITG_02501    |
| 0    | 501  | 909 PITG_09438  |
| 0    | 100  | 15 NA           |
| 0    | 3762 | 1607 PITG_03353 |
| 0    | 55   | 21 PITG_21556   |
| 0    | 4    | 13 PITG_11178   |
| 0    | 58   | 37 NA           |
| 0    | 188  | 70 PITG_19049   |
| 0    | 179  | 64 PITG_18797   |
| 0    | 455  | 158 PITG_16069  |
| 0    | 5    | 5 NA            |
| 0    | 5    | 0 NA            |
| 0    | 20   | 12 PITG_02792   |
| 0    | 639  | 1205 PITG_10032 |
| 0    | 75   | 61 PITG_16687   |
| 0    | 173  | 141 PITG_16008  |
| 0    | 2366 | 515 PITG_06577  |
| 0    | 19   | 15 PITG_03532   |
| 0    | 4965 | 1123 PITG_08311 |
| 2325 | 515  | 496 NA          |
| 0    | 624  | 1210 NA         |
| 0    | 563  | 1028 PITG_01389 |
| 0    | 2    | 0 PITG_19399    |
| 0    | 10   | 8 NA            |
| 2    | 2315 | 1757 PITG_06771 |
| 2    | 3594 | 1148 PITG_16117 |
| 0    | 317  | 89 PITG_15776   |
| 0    | 11   | 0 PITG_14169    |
| 0    | 7    | 19 PITG_05670   |
| 0    | 608  | 503 PITG_00912  |
| 0    | 56   | 49 PITG_06199   |
| 0    | 12   | 6 NA            |
| 0    | 1221 | 458 NA          |
| 0    | 77   | 22 PITG_22065   |
| 0    | 3509 | 522 PITG_13312  |
| 0    | 451  | 0 PITG_09540    |
| 13   | 55   | 3117 NA         |
| 13   | 6    | 1865 NA         |
| 0    | 87   | 52 PITG_08540   |
| 0    | 4    | 8 NA            |
| 0    | 2    | 0 PITG_10927    |
| 0    | 2    | 2 NA            |
| 0    | 54   | 90 PITG_08579   |
| 0    | 0    | 0 PITG_18845    |

|    |      |                 |
|----|------|-----------------|
| 2  | 819  | 1148 PITG_12122 |
| 0  | 5    | 0 NA            |
| 0  | 917  | 1356 PITG_16117 |
| 0  | 0    | 2 NA            |
| 0  | 160  | 323 PITG_02694  |
| 0  | 42   | 19 PITG_15625   |
| 0  | 434  | 16 PITG_00011   |
| 0  | 79   | 96 PITG_13545   |
| 0  | 59   | 40 PITG_03750   |
| 0  | 221  | 792 PITG_10543  |
| 0  | 290  | 1569 PITG_10543 |
| 0  | 44   | 4 NA            |
| 0  | 2198 | 2765 PITG_12584 |
| 0  | 949  | 616 PITG_05307  |
| 0  | 375  | 590 PITG_06619  |
| 0  | 905  | 341 PITG_03220  |
| 0  | 319  | 889 NA          |
| 0  | 834  | 1056 PITG_13683 |
| 0  | 34   | 40 PITG_11584   |
| 0  | 10   | 8 NA            |
| 0  | 34   | 24 PITG_05317   |
| 0  | 2016 | 1622 PITG_09964 |
| 0  | 99   | 131 PITG_15281  |
| 0  | 299  | 267 PITG_16074  |
| 0  | 0    | 0 PITG_03468    |
| 0  | 18   | 31 PITG_00530   |
| 0  | 114  | 179 PITG_17401  |
| 0  | 551  | 98 PITG_00302   |
| 0  | 22   | 7 NA            |
| 0  | 2390 | 536 PITG_08834  |
| 0  | 28   | 0 PITG_09791    |
| 0  | 28   | 66 PITG_18540   |
| 0  | 849  | 147 PITG_04125  |
| 0  | 1786 | 962 PITG_06512  |
| 34 | 11   | 64 NA           |
| 0  | 15   | 5 PITG_04678    |
| 0  | 75   | 0 PITG_14252    |
| 0  | 477  | 42 PITG_18005   |
| 4  | 1083 | 2786 PITG_18052 |
| 0  | 164  | 125 PITG_03038  |
| 0  | 600  | 508 PITG_16005  |
| 0  | 2231 | 2546 PITG_07056 |
| 0  | 292  | 52 NA           |
| 4  | 1636 | 4213 PITG_02694 |
| 0  | 4422 | 890 PITG_01270  |
| 0  | 1581 | 1423 PITG_13919 |
| 0  | 6    | 8 PITG_12496    |

|    |      |                 |
|----|------|-----------------|
| 0  | 634  | 1715 PITG_09793 |
| 0  | 283  | 64 PITG_07384   |
| 0  | 4    | 0 PITG_11206    |
| 0  | 51   | 6 NA            |
| 0  | 1697 | 998 PITG_12487  |
| 0  | 6    | 27 PITG_18071   |
| 4  | 1005 | 1323 PITG_01833 |
| 0  | 63   | 0 PITG_00861    |
| 0  | 308  | 1198 PITG_06118 |
| 0  | 111  | 144 PITG_17400  |
| 0  | 646  | 92 PITG_22062   |
| 0  | 1825 | 511 PITG_00272  |
| 0  | 480  | 73 PITG_09600   |
| 0  | 411  | 532 PITG_01064  |
| 0  | 634  | 102 PITG_14239  |
| 2  | 572  | 1119 PITG_02502 |
| 0  | 541  | 240 PITG_00045  |
| 0  | 0    | 5 NA            |
| 0  | 83   | 2 NA            |
| 0  | 0    | 0 PITG_13806    |
| 0  | 21   | 31 PITG_15016   |
| 0  | 346  | 124 PITG_13986  |
| 0  | 12   | 0 PITG_10472    |
| 0  | 31   | 13 PITG_09787   |
| 0  | 164  | 115 PITG_12153  |
| 0  | 8    | 9 NA            |
| 0  | 53   | 17 NA           |
| 0  | 997  | 998 PITG_01450  |
| 0  | 205  | 79 PITG_15525   |
| 0  | 31   | 13 PITG_01981   |
| 0  | 148  | 53 PITG_12843   |
| 0  | 41   | 742 PITG_18306  |
| 0  | 18   | 3 NA            |
| 31 | 0    | 10 NA           |
| 0  | 56   | 42 PITG_10365   |
| 0  | 75   | 28 NA           |
| 0  | 236  | 222 PITG_07201  |
| 0  | 35   | 77 NA           |
| 0  | 5    | 2 PITG_13529    |
| 0  | 16   | 10 NA           |
| 0  | 454  | 92 PITG_03623   |
| 0  | 6    | 28 PITG_02917   |
| 2  | 1636 | 859 PITG_20188  |
| 2  | 1036 | 887 PITG_03376  |
| 0  | 2319 | 1336 PITG_18072 |
| 0  | 135  | 48 NA           |
| 11 | 2    | 34 NA           |

|   |      |                 |
|---|------|-----------------|
| 2 | 0    | 27 PITG_04992   |
| 0 | 40   | 35 PITG_04373   |
| 0 | 266  | 0 PITG_16363    |
| 0 | 746  | 326 PITG_08601  |
| 0 | 71   | 32 PITG_05151   |
| 0 | 2    | 2 PITG_13488    |
| 0 | 62   | 2 NA            |
| 0 | 54   | 51 PITG_09597   |
| 0 | 44   | 0 PITG_21067    |
| 0 | 392  | 716 PITG_20188  |
| 0 | 822  | 59 PITG_19121   |
| 0 | 1674 | 403 PITG_19767  |
| 0 | 723  | 432 PITG_01791  |
| 0 | 141  | 337 PITG_02137  |
| 0 | 34   | 25 PITG_13248   |
| 0 | 339  | 298 PITG_14939  |
| 0 | 2    | 0 PITG_16221    |
| 0 | 463  | 342 PITG_18788  |
| 0 | 1128 | 16 PITG_10887   |
| 0 | 228  | 207 PITG_00205  |
| 0 | 687  | 229 PITG_00455  |
| 0 | 92   | 94 PITG_13029   |
| 4 | 5512 | 4515 PITG_01943 |
| 0 | 44   | 2 PITG_09997    |
| 0 | 4872 | 222 PITG_05171  |
| 0 | 5    | 2 PITG_00251    |
| 2 | 746  | 748 NA          |
| 6 | 927  | 2426 PITG_10941 |
| 0 | 891  | 11 PITG_19737   |
| 0 | 315  | 220 PITG_15483  |
| 0 | 0    | 0 NA            |
| 0 | 242  | 210 PITG_17452  |
| 0 | 141  | 53 PITG_10942   |
| 0 | 322  | 522 PITG_18435  |
| 0 | 245  | 385 PITG_18834  |
| 0 | 1579 | 1377 PITG_21117 |
| 0 | 375  | 109 PITG_18775  |
| 0 | 257  | 35 PITG_15197   |
| 0 | 204  | 662 PITG_06118  |
| 0 | 28   | 24 NA           |
| 0 | 30   | 2 PITG_05692    |
| 0 | 599  | 1035 PITG_01833 |
| 0 | 121  | 136 PITG_03589  |
| 0 | 11   | 0 PITG_16221    |
| 0 | 2    | 2 PITG_16264    |
| 0 | 10   | 0 PITG_01824    |
| 0 | 69   | 87 PITG_15998   |

|   |      |                 |
|---|------|-----------------|
| 8 | 1053 | 2694 NA         |
| 0 | 195  | 56 PITG_16338   |
| 0 | 201  | 60 NA           |
| 0 | 1716 | 581 PITG_15407  |
| 0 | 90   | 40 PITG_17719   |
| 0 | 20   | 9 NA            |
| 0 | 74   | 10 PITG_04378   |
| 0 | 0    | 9 PITG_03006    |
| 0 | 332  | 48 PITG_09280   |
| 0 | 133  | 40 PITG_06906   |
| 0 | 261  | 389 PITG_10442  |
| 0 | 708  | 565 PITG_11588  |
| 0 | 1859 | 888 PITG_14913  |
| 0 | 2    | 8 NA            |
| 2 | 5452 | 3187 PITG_10863 |
| 0 | 463  | 27 PITG_15727   |
| 0 | 0    | 10 PITG_04691   |
| 0 | 100  | 1022 PITG_09540 |
| 2 | 236  | 166 PITG_05520  |
| 0 | 2    | 24 PITG_13806   |
| 0 | 11   | 0 PITG_10362    |
| 0 | 949  | 3019 PITG_02022 |
| 0 | 22   | 2 PITG_06846    |
| 0 | 26   | 12 NA           |
| 0 | 1130 | 1417 PITG_13370 |
| 0 | 22   | 32 PITG_11608   |
| 0 | 6    | 2 PITG_13803    |
| 0 | 9    | 2 PITG_18671    |
| 0 | 490  | 188 PITG_17949  |
| 0 | 177  | 15 PITG_22439   |
| 0 | 888  | 506 PITG_08025  |
| 0 | 0    | 2 PITG_05386    |
| 0 | 62   | 28 PITG_03695   |
| 0 | 2    | 0 NA            |
| 0 | 85   | 46 NA           |
| 0 | 25   | 8 NA            |
| 0 | 250  | 0 NA            |
| 2 | 2990 | 3679 PITG_09442 |
| 0 | 63   | 147 PITG_17753  |
| 0 | 2255 | 583 PITG_10352  |
| 0 | 24   | 4 NA            |
| 0 | 524  | 120 PITG_00525  |
| 0 | 85   | 30 PITG_21172   |
| 0 | 81   | 97 NA           |
| 0 | 951  | 46 NA           |
| 0 | 4    | 0 PITG_14993    |
| 0 | 40   | 20 NA           |

|   |      |                 |
|---|------|-----------------|
| 0 | 993  | 367 PITG_15567  |
| 0 | 10   | 14 PITG_00761   |
| 0 | 1620 | 1088 PITG_14229 |
| 2 | 2481 | 3739 PITG_13312 |
| 0 | 146  | 69 PITG_05185   |
| 0 | 53   | 46 PITG_01897   |
| 0 | 9    | 8 PITG_09453    |
| 0 | 0    | 0 PITG_05331    |
| 0 | 232  | 43 PITG_09540   |
| 0 | 6    | 26 PITG_00719   |
| 0 | 0    | 0 NA            |
| 0 | 1398 | 844 PITG_02256  |
| 0 | 318  | 388 PITG_07865  |
| 0 | 43   | 48 PITG_08304   |
| 0 | 562  | 90 PITG_12042   |
| 0 | 408  | 119 PITG_15954  |
| 0 | 8    | 4 PITG_19111    |
| 0 | 195  | 21 NA           |
| 0 | 46   | 6 PITG_07852    |
| 0 | 5    | 2 PITG_11857    |
| 0 | 53   | 14 PITG_16958   |
| 0 | 65   | 6 PITG_04702    |
| 0 | 794  | 347 PITG_17406  |
| 0 | 6    | 12 PITG_14533   |
| 0 | 133  | 68 PITG_09827   |
| 0 | 47   | 23 NA           |
| 0 | 3268 | 2874 PITG_09442 |
| 0 | 2137 | 1580 PITG_01333 |
| 2 | 1700 | 3438 PITG_21378 |
| 0 | 8    | 0 NA            |
| 0 | 414  | 117 PITG_03530  |
| 0 | 499  | 139 PITG_13972  |
| 0 | 1651 | 689 PITG_09563  |
| 0 | 557  | 1004 PITG_04843 |
| 0 | 406  | 212 PITG_01070  |
| 0 | 790  | 1070 PITG_12947 |
| 0 | 0    | 0 PITG_03160    |
| 0 | 934  | 83 NA           |
| 0 | 150  | 53 PITG_19184   |
| 0 | 95   | 20 PITG_05689   |
| 0 | 3259 | 2370 PITG_17093 |
| 0 | 88   | 108 PITG_06589  |
| 2 | 81   | 375 PITG_04690  |
| 0 | 6    | 0 NA            |
| 0 | 174  | 94 PITG_14975   |
| 0 | 20   | 70 NA           |
| 0 | 446  | 402 PITG_13748  |

|   |      |                 |
|---|------|-----------------|
| 0 | 808  | 573 PITG_08718  |
| 0 | 22   | 6 PITG_11506    |
| 0 | 64   | 0 PITG_22416    |
| 2 | 3182 | 2807 PITG_18414 |
| 0 | 563  | 633 PITG_19119  |
| 0 | 163  | 14 PITG_13616   |
| 0 | 52   | 58 PITG_17400   |
| 0 | 10   | 3 PITG_02647    |
| 2 | 1569 | 1596 PITG_12745 |
| 0 | 148  | 201 PITG_00459  |
| 0 | 2706 | 577 PITG_11099  |
| 0 | 9    | 10 PITG_04618   |
| 0 | 968  | 608 PITG_07340  |
| 0 | 167  | 340 PITG_06323  |
| 0 | 553  | 633 PITG_18011  |
| 0 | 1033 | 427 PITG_03344  |
| 0 | 23   | 0 NA            |
| 0 | 150  | 146 PITG_03425  |
| 0 | 123  | 63 PITG_15497   |
| 0 | 23   | 11 NA           |
| 0 | 3    | 8 PITG_12913    |
| 0 | 77   | 14 PITG_08879   |
| 0 | 65   | 15 PITG_04670   |
| 0 | 614  | 18 PITG_21011   |
| 0 | 278  | 171 PITG_11648  |
| 0 | 2430 | 824 PITG_05175  |
| 0 | 483  | 145 NA          |
| 0 | 22   | 17 PITG_10763   |
| 0 | 1895 | 146 PITG_17093  |
| 0 | 183  | 71 PITG_08733   |
| 0 | 44   | 4 PITG_18658    |
| 0 | 13   | 0 PITG_12796    |
| 0 | 418  | 1100 PITG_09402 |
| 0 | 232  | 7 NA            |
| 0 | 500  | 679 PITG_17007  |
| 0 | 280  | 82 PITG_23090   |
| 0 | 43   | 22 NA           |
| 0 | 40   | 42 PITG_04568   |
| 0 | 57   | 371 PITG_06415  |
| 0 | 48   | 8 PITG_15155    |
| 0 | 5401 | 2803 PITG_06799 |
| 0 | 16   | 11 PITG_11249   |
| 0 | 90   | 42 PITG_17136   |
| 0 | 35   | 4 NA            |
| 0 | 0    | 5 NA            |
| 0 | 110  | 16 PITG_11977   |
| 0 | 483  | 364 PITG_01181  |



|   |      |                 |
|---|------|-----------------|
| 0 | 99   | 0 PITG_21557    |
| 0 | 45   | 242 PITG_00471  |
| 0 | 1764 | 199 PITG_09345  |
| 2 | 3047 | 1453 PITG_15639 |
| 0 | 79   | 32 PITG_02923   |
| 0 | 4    | 5 PITG_10372    |
| 0 | 77   | 31 PITG_19382   |
| 0 | 0    | 15 PITG_22065   |
| 0 | 23   | 22 PITG_08879   |
| 0 | 357  | 154 PITG_03226  |
| 0 | 38   | 91 PITG_03552   |
| 0 | 2341 | 1014 PITG_19535 |
| 2 | 0    | 2 NA            |
| 0 | 177  | 47 PITG_15197   |
| 0 | 4    | 4 PITG_11887    |
| 0 | 464  | 35 PITG_10221   |
| 0 | 4    | 10 PITG_05545   |
| 2 | 639  | 3251 PITG_03477 |
| 0 | 0    | 0 PITG_16365    |
| 0 | 148  | 71 NA           |
| 0 | 173  | 19 PITG_14619   |
| 0 | 18   | 2 PITG_03915    |
| 0 | 35   | 3 PITG_04325    |
| 0 | 781  | 65 PITG_14747   |
| 0 | 41   | 129 PITG_00931  |
| 0 | 13   | 2 NA            |
| 0 | 85   | 130 NA          |
| 0 | 70   | 24 PITG_23304   |
| 0 | 154  | 307 PITG_00505  |
| 0 | 162  | 131 PITG_19160  |
| 0 | 161  | 88 PITG_15503   |
| 0 | 0    | 0 PITG_18688    |
| 0 | 104  | 10 NA           |
| 0 | 4    | 9 PITG_11594    |
| 0 | 29   | 6 PITG_02105    |
| 0 | 1147 | 269 PITG_05839  |
| 0 | 384  | 358 PITG_09271  |
| 0 | 21   | 91 PITG_22065   |
| 0 | 34   | 32 PITG_10968   |
| 0 | 124  | 4 PITG_17947    |
| 0 | 17   | 0 PITG_21516    |
| 0 | 16   | 24 PITG_21516   |
| 0 | 264  | 324 PITG_17838  |
| 0 | 593  | 109 PITG_18165  |
| 0 | 267  | 603 PITG_22135  |
| 0 | 612  | 145 PITG_03149  |
| 7 | 2233 | 3673 PITG_03762 |

|   |      |                 |
|---|------|-----------------|
| 0 | 11   | 4 PITG_13838    |
| 0 | 2940 | 363 PITG_05307  |
| 4 | 806  | 2092 PITG_20188 |
| 0 | 523  | 277 PITG_03763  |
| 0 | 998  | 1519 PITG_01248 |
| 0 | 882  | 746 PITG_19854  |
| 0 | 203  | 252 PITG_10022  |
| 0 | 79   | 0 PITG_03472    |
| 0 | 188  | 588 PITG_17921  |
| 0 | 323  | 1367 PITG_12961 |
| 0 | 2    | 0 PITG_06203    |
| 0 | 0    | 2 PITG_09039    |
| 0 | 2    | 2 PITG_10882    |
| 0 | 49   | 34 PITG_12140   |
| 0 | 10   | 11 PITG_03695   |
| 0 | 204  | 173 PITG_00494  |
| 0 | 506  | 198 PITG_17926  |
| 0 | 305  | 147 PITG_13809  |
| 0 | 10   | 12 PITG_16810   |
| 0 | 885  | 829 PITG_09786  |
| 0 | 1704 | 1253 PITG_03353 |
| 3 | 34   | 1140 NA         |
| 0 | 76   | 111 PITG_03353  |
| 0 | 127  | 0 PITG_15242    |
| 0 | 33   | 23 PITG_15642   |
| 0 | 459  | 351 PITG_07173  |
| 0 | 17   | 57 PITG_12264   |
| 2 | 624  | 79 NA           |
| 0 | 773  | 296 PITG_13600  |
| 0 | 26   | 0 NA            |
| 0 | 17   | 5 NA            |
| 0 | 31   | 13 PITG_18071   |
| 0 | 506  | 240 PITG_14274  |
| 0 | 112  | 15 NA           |
| 2 | 711  | 167 PITG_11603  |
| 0 | 2    | 9 PITG_21006    |
| 0 | 798  | 319 PITG_04591  |
| 0 | 4    | 0 PITG_15569    |
| 0 | 114  | 95 PITG_03550   |
| 0 | 78   | 0 PITG_12149    |
| 0 | 13   | 0 PITG_08526    |
| 0 | 500  | 688 PITG_17716  |
| 0 | 422  | 477 PITG_19999  |
| 0 | 0    | 0 PITG_01577    |
| 0 | 467  | 425 PITG_21806  |
| 0 | 21   | 11 PITG_15920   |
| 0 | 56   | 79 PITG_11926   |

|   |      |                 |
|---|------|-----------------|
| 0 | 394  | 340 PITG_10707  |
| 0 | 514  | 859 PITG_19129  |
| 0 | 132  | 211 NA          |
| 0 | 28   | 19 NA           |
| 0 | 568  | 873 PITG_00518  |
| 0 | 4    | 17 NA           |
| 0 | 25   | 15 PITG_17709   |
| 0 | 0    | 0 PITG_17110    |
| 0 | 122  | 27 PITG_03673   |
| 0 | 180  | 17 PITG_00994   |
| 0 | 171  | 320 PITG_01086  |
| 0 | 62   | 7 PITG_16999    |
| 0 | 1035 | 106 PITG_09744  |
| 0 | 0    | 0 NA            |
| 0 | 118  | 4 PITG_15539    |
| 0 | 248  | 85 PITG_15731   |
| 0 | 4    | 11 PITG_03970   |
| 2 | 596  | 728 PITG_19768  |
| 0 | 180  | 91 PITG_08018   |
| 8 | 1214 | 4999 PITG_22670 |
| 0 | 266  | 627 PITG_03020  |
| 0 | 52   | 150 PITG_19537  |
| 0 | 53   | 110 PITG_09090  |
| 0 | 94   | 103 PITG_14455  |
| 0 | 2    | 0 NA            |
| 0 | 31   | 10 PITG_14141   |
| 0 | 603  | 137 PITG_11604  |
| 0 | 458  | 720 PITG_21071  |
| 0 | 43   | 43 PITG_17264   |
| 0 | 0    | 0 PITG_00718    |
| 0 | 1203 | 1540 PITG_12486 |
| 2 | 318  | 1029 PITG_08744 |
| 0 | 4    | 2 PITG_03757    |
| 0 | 1634 | 1111 PITG_10202 |
| 0 | 53   | 20 PITG_10045   |
| 0 | 0    | 0 PITG_13671    |
| 0 | 113  | 8 NA            |
| 0 | 4    | 6 PITG_17663    |
| 0 | 99   | 51 PITG_03830   |
| 0 | 40   | 4 PITG_12110    |
| 0 | 860  | 445 PITG_04842  |
| 0 | 4    | 0 PITG_15877    |
| 0 | 6    | 5 PITG_01743    |
| 0 | 0    | 0 PITG_16069    |
| 0 | 978  | 637 PITG_12905  |
| 0 | 19   | 14 PITG_16978   |
| 0 | 43   | 36 NA           |

|   |      |                 |
|---|------|-----------------|
| 0 | 2    | 8 PITG_12675    |
| 0 | 1628 | 1416 PITG_09963 |
| 0 | 233  | 126 PITG_03095  |
| 0 | 510  | 322 PITG_09828  |
| 0 | 260  | 28 PITG_21378   |
| 0 | 663  | 140 PITG_11750  |
| 2 | 1831 | 1452 PITG_15697 |
| 0 | 366  | 521 PITG_17452  |
| 0 | 2278 | 862 PITG_22135  |
| 0 | 97   | 47 PITG_19318   |
| 0 | 31   | 0 PITG_10995    |
| 0 | 0    | 0 NA            |
| 0 | 333  | 269 PITG_15573  |
| 0 | 1510 | 224 PITG_00266  |
| 0 | 470  | 355 PITG_14609  |
| 0 | 2    | 0 NA            |
| 0 | 24   | 20 PITG_07570   |
| 0 | 102  | 108 PITG_08042  |
| 0 | 136  | 51 PITG_03427   |
| 0 | 103  | 0 NA            |
| 0 | 0    | 0 PITG_08023    |
| 2 | 1863 | 2960 PITG_02053 |
| 0 | 18   | 0 PITG_05111    |
| 0 | 73   | 33 PITG_15926   |
| 0 | 227  | 130 PITG_04846  |
| 0 | 143  | 53 PITG_02798   |
| 0 | 1147 | 161 PITG_12288  |
| 0 | 945  | 101 PITG_03639  |
| 0 | 639  | 2 PITG_03277    |
| 0 | 106  | 230 PITG_12882  |
| 0 | 11   | 9 PITG_15079    |
| 0 | 82   | 38 NA           |
| 0 | 337  | 1041 PITG_17007 |
| 0 | 59   | 109 PITG_00319  |
| 0 | 38   | 50 PITG_13296   |
| 0 | 334  | 353 PITG_03653  |
| 2 | 2722 | 853 PITG_09769  |
| 0 | 338  | 116 PITG_18046  |
| 0 | 101  | 68 PITG_15149   |
| 0 | 996  | 1390 PITG_04906 |
| 0 | 226  | 175 PITG_06131  |
| 0 | 45   | 28 PITG_04342   |
| 2 | 2062 | 2210 PITG_15526 |
| 0 | 63   | 177 PITG_20989  |
| 0 | 635  | 365 NA          |
| 0 | 272  | 159 PITG_14180  |
| 0 | 913  | 437 PITG_02493  |

|   |      |                 |
|---|------|-----------------|
| 0 | 15   | 21 PITG_10375   |
| 0 | 762  | 612 PITG_09436  |
| 0 | 31   | 0 PITG_15621    |
| 0 | 213  | 449 PITG_22685  |
| 0 | 331  | 941 PITG_11766  |
| 0 | 400  | 499 PITG_08565  |
| 0 | 271  | 22 PITG_16021   |
| 0 | 345  | 475 PITG_09963  |
| 0 | 4    | 0 NA            |
| 0 | 19   | 0 PITG_05391    |
| 0 | 2    | 0 PITG_20140    |
| 0 | 63   | 36 PITG_06753   |
| 0 | 228  | 37 PITG_06772   |
| 0 | 672  | 322 NA          |
| 0 | 720  | 128 NA          |
| 0 | 177  | 141 NA          |
| 0 | 142  | 505 PITG_16966  |
| 0 | 128  | 86 PITG_06204   |
| 0 | 1035 | 3 PITG_06204    |
| 0 | 0    | 5 PITG_22065    |
| 0 | 8    | 6 PITG_14702    |
| 0 | 15   | 5 NA            |
| 0 | 711  | 767 PITG_00488  |
| 0 | 105  | 48 PITG_07234   |
| 0 | 8    | 16 PITG_21303   |
| 0 | 218  | 61 PITG_09428   |
| 2 | 2260 | 909 PITG_15358  |
| 0 | 60   | 98 PITG_17543   |
| 0 | 0    | 0 PITG_04629    |
| 0 | 156  | 28 PITG_04043   |
| 0 | 279  | 433 PITG_11205  |
| 0 | 53   | 8 PITG_14619    |
| 0 | 58   | 6 PITG_00471    |
| 0 | 119  | 49 PITG_09283   |
| 0 | 196  | 49 PITG_14198   |
| 0 | 65   | 62 PITG_09965   |
| 2 | 1020 | 2750 PITG_06415 |
| 0 | 171  | 871 PITG_00471  |
| 0 | 14   | 11 NA           |
| 0 | 32   | 8 NA            |
| 0 | 2907 | 85 PITG_03712   |
| 0 | 129  | 77 PITG_06374   |
| 0 | 100  | 10 PITG_03781   |
| 0 | 1392 | 75 PITG_16008   |
| 0 | 3    | 34 PITG_06016   |
| 0 | 21   | 9 NA            |
| 0 | 153  | 52 PITG_00978   |

|    |      |                 |
|----|------|-----------------|
| 0  | 86   | 19 PITG_02046   |
| 0  | 231  | 348 PITG_05577  |
| 0  | 353  | 446 PITG_20743  |
| 0  | 0    | 0 PITG_07327    |
| 0  | 1148 | 3561 PITG_21378 |
| 0  | 188  | 79 PITG_15638   |
| 0  | 22   | 0 PITG_00688    |
| 0  | 421  | 119 PITG_11152  |
| 0  | 5662 | 1886 PITG_14601 |
| 0  | 130  | 379 PITG_03294  |
| 0  | 95   | 54 PITG_02640   |
| 0  | 37   | 14 PITG_10153   |
| 0  | 99   | 131 PITG_02917  |
| 0  | 40   | 0 PITG_17986    |
| 2  | 2280 | 2353 PITG_00631 |
| 0  | 31   | 6 PITG_17393    |
| 0  | 207  | 133 NA          |
| 0  | 415  | 231 PITG_06679  |
| 0  | 60   | 87 PITG_19606   |
| 0  | 200  | 49 PITG_12984   |
| 0  | 61   | 7 PITG_01871    |
| 0  | 141  | 363 PITG_04690  |
| 0  | 6    | 4 PITG_06480    |
| 0  | 1259 | 2791 PITG_18048 |
| 0  | 727  | 1209 PITG_06995 |
| 4  | 957  | 1939 PITG_06995 |
| 0  | 15   | 36 PITG_08941   |
| 0  | 40   | 2 PITG_05780    |
| 0  | 65   | 10 PITG_19024   |
| 0  | 2    | 6 PITG_15786    |
| 0  | 219  | 307 PITG_17527  |
| 0  | 23   | 4 PITG_04679    |
| 0  | 507  | 214 NA          |
| 0  | 0    | 6 PITG_00622    |
| 0  | 98   | 307 PITG_14727  |
| 0  | 188  | 116 PITG_07711  |
| 0  | 58   | 37 NA           |
| 0  | 36   | 14 PITG_03241   |
| 0  | 11   | 33 PITG_14939   |
| 0  | 246  | 270 PITG_09768  |
| 0  | 262  | 517 PITG_00806  |
| 0  | 0    | 0 PITG_02654    |
| 0  | 124  | 80 PITG_00833   |
| 0  | 9    | 41 PITG_10765   |
| 0  | 19   | 7 PITG_06142    |
| 17 | 57   | 1678 NA         |
| 0  | 271  | 391 PITG_07791  |

|   |      |                 |
|---|------|-----------------|
| 0 | 23   | 38 PITG_04108   |
| 0 | 195  | 169 PITG_15055  |
| 0 | 192  | 50 PITG_09772   |
| 0 | 178  | 211 PITG_22928  |
| 0 | 21   | 8 PITG_02748    |
| 0 | 26   | 42 PITG_22839   |
| 0 | 2    | 10 PITG_02679   |
| 0 | 73   | 22 PITG_11825   |
| 0 | 44   | 4 NA            |
| 0 | 33   | 79 PITG_05480   |
| 0 | 16   | 4 PITG_16562    |
| 4 | 7364 | 5875 PITG_03221 |
| 0 | 5    | 2 PITG_16152    |
| 0 | 62   | 143 PITG_05577  |
| 0 | 52   | 28 PITG_05444   |
| 0 | 1620 | 868 PITG_02022  |
| 0 | 100  | 24 PITG_15100   |
| 0 | 124  | 212 PITG_17540  |
| 0 | 115  | 66 PITG_10269   |
| 0 | 271  | 373 PITG_14970  |
| 0 | 56   | 27 PITG_03441   |
| 0 | 16   | 0 NA            |
| 0 | 697  | 1250 PITG_15615 |
| 0 | 367  | 2 PITG_03473    |
| 0 | 754  | 801 PITG_01694  |
| 6 | 4306 | 2897 PITG_10146 |
| 0 | 3    | 0 NA            |
| 0 | 117  | 32 PITG_16735   |
| 0 | 4    | 2 PITG_10645    |
| 0 | 54   | 118 PITG_16376  |
| 0 | 801  | 296 PITG_12881  |
| 0 | 30   | 13 PITG_04941   |
| 0 | 1899 | 728 PITG_05115  |
| 0 | 508  | 220 NA          |
| 0 | 112  | 33 PITG_14995   |
| 0 | 16   | 31 PITG_00833   |
| 0 | 9    | 2 NA            |
| 0 | 6    | 4 NA            |
| 0 | 39   | 17 PITG_05689   |
| 0 | 95   | 176 PITG_08495  |
| 0 | 10   | 4 NA            |
| 0 | 4    | 8 NA            |
| 0 | 0    | 0 PITG_01418    |
| 0 | 586  | 124 PITG_20717  |
| 0 | 217  | 6 PITG_20502    |
| 0 | 4    | 8 PITG_15551    |
| 0 | 2    | 0 NA            |

|     |      |                 |
|-----|------|-----------------|
| 0   | 1364 | 1397 PITG_07285 |
| 0   | 89   | 16 PITG_21556   |
| 0   | 2    | 0 PITG_19088    |
| 0   | 108  | 60 PITG_15357   |
| 0   | 324  | 183 NA          |
| 530 | 10   | 697 NA          |
| 0   | 15   | 7 PITG_01781    |
| 0   | 4    | 7 PITG_13620    |
| 0   | 33   | 81 PITG_16854   |
| 0   | 20   | 79 PITG_12141   |
| 0   | 43   | 21 PITG_01290   |
| 0   | 222  | 436 PITG_02256  |
| 0   | 0    | 0 PITG_21418    |
| 0   | 662  | 1482 PITG_15476 |
| 0   | 164  | 130 PITG_14267  |
| 0   | 1045 | 806 PITG_13729  |
| 2   | 1269 | 2377 PITG_02053 |
| 0   | 40   | 215 PITG_18720  |
| 0   | 2    | 0 NA            |
| 0   | 11   | 3 PITG_07241    |
| 0   | 661  | 87 PITG_17275   |
| 0   | 79   | 40 PITG_00338   |
| 0   | 112  | 30 PITG_14855   |
| 0   | 50   | 31 NA           |
| 0   | 0    | 0 PITG_17159    |
| 0   | 0    | 0 PITG_14312    |
| 0   | 48   | 55 NA           |
| 0   | 83   | 42 PITG_08304   |
| 0   | 0    | 2 NA            |
| 0   | 678  | 30 PITG_06772   |
| 0   | 602  | 2 NA            |
| 0   | 56   | 36 PITG_17930   |
| 0   | 13   | 13 PITG_10378   |
| 0   | 9    | 8 PITG_18207    |
| 0   | 0    | 0 NA            |
| 2   | 1512 | 1738 PITG_03916 |
| 0   | 2    | 0 PITG_13671    |
| 0   | 244  | 158 PITG_19448  |
| 0   | 207  | 308 PITG_03599  |
| 0   | 8    | 8 PITG_08031    |
| 0   | 214  | 51 PITG_03828   |
| 0   | 149  | 120 PITG_14181  |
| 0   | 14   | 4 PITG_11540    |
| 0   | 576  | 62 PITG_18776   |
| 0   | 253  | 15 PITG_09786   |
| 0   | 390  | 117 PITG_09649  |
| 0   | 22   | 260 PITG_14088  |



|   |      |                 |
|---|------|-----------------|
| 0 | 128  | 64 PITG_03445   |
| 0 | 97   | 10 PITG_11792   |
| 2 | 265  | 701 PITG_18306  |
| 0 | 205  | 27 PITG_06762   |
| 0 | 38   | 26 PITG_01559   |
| 0 | 319  | 60 PITG_06972   |
| 0 | 261  | 67 PITG_13620   |
| 2 | 862  | 1238 PITG_03178 |
| 0 | 483  | 206 PITG_14001  |
| 0 | 85   | 57 PITG_14723   |
| 0 | 49   | 37 PITG_08874   |
| 0 | 2    | 4 NA            |
| 0 | 421  | 269 NA          |
| 0 | 4    | 0 PITG_14992    |
| 0 | 51   | 169 PITG_00471  |
| 0 | 267  | 93 PITG_02292   |
| 0 | 18   | 0 PITG_02588    |
| 0 | 2    | 0 PITG_09193    |
| 0 | 22   | 14 PITG_11977   |
| 0 | 92   | 14 NA           |
| 0 | 3    | 17 PITG_02327   |
| 2 | 2359 | 1250 PITG_10941 |
| 0 | 132  | 124 NA          |
| 0 | 498  | 1071 NA         |
| 0 | 57   | 2 PITG_18185    |
| 0 | 2    | 3 NA            |
| 0 | 12   | 2 PITG_09676    |
| 0 | 633  | 2021 PITG_03239 |
| 0 | 187  | 143 PITG_15660  |
| 0 | 0    | 2 PITG_10460    |
| 0 | 167  | 49 PITG_03473   |
| 0 | 1235 | 1101 PITG_15615 |
| 0 | 45   | 36 PITG_08304   |
| 0 | 4    | 0 PITG_06686    |
| 0 | 925  | 1461 PITG_11766 |
| 0 | 248  | 193 NA          |
| 0 | 3    | 0 PITG_20498    |
| 0 | 0    | 0 PITG_03200    |
| 0 | 557  | 458 PITG_19999  |
| 0 | 644  | 192 PITG_09875  |
| 0 | 1198 | 731 PITG_03012  |
| 0 | 407  | 56 PITG_11215   |
| 0 | 971  | 1035 PITG_04961 |
| 0 | 5    | 2 PITG_18316    |
| 0 | 75   | 121 NA          |
| 0 | 1931 | 895 PITG_13500  |
| 0 | 306  | 456 PITG_13682  |

|   |      |                 |
|---|------|-----------------|
| 0 | 30   | 74 PITG_00272   |
| 0 | 451  | 402 PITG_05690  |
| 0 | 32   | 8 PITG_12513    |
| 0 | 459  | 281 PITG_00212  |
| 0 | 791  | 410 PITG_08043  |
| 0 | 42   | 11 PITG_09350   |
| 0 | 276  | 184 PITG_02694  |
| 0 | 4    | 0 NA            |
| 0 | 59   | 14 PITG_03757   |
| 0 | 92   | 206 NA          |
| 0 | 109  | 95 PITG_13971   |
| 0 | 82   | 307 PITG_19121  |
| 0 | 109  | 166 PITG_11120  |
| 0 | 73   | 29 PITG_02347   |
| 0 | 286  | 107 PITG_02762  |
| 0 | 37   | 61 PITG_18728   |
| 0 | 2033 | 703 PITG_15723  |
| 0 | 0    | 6 PITG_20839    |
| 0 | 9    | 7 PITG_07707    |
| 0 | 11   | 4 PITG_11728    |
| 6 | 635  | 1416 PITG_15786 |
| 0 | 4067 | 2693 PITG_12947 |
| 2 | 1976 | 4676 PITG_13371 |
| 0 | 16   | 2 PITG_01783    |
| 0 | 164  | 31 PITG_22848   |
| 0 | 319  | 371 PITG_08787  |
| 0 | 528  | 108 PITG_16854  |
| 0 | 74   | 11 PITG_04707   |
| 0 | 374  | 262 NA          |
| 0 | 183  | 74 NA           |
| 0 | 316  | 252 PITG_17401  |
| 0 | 7    | 12 PITG_02506   |
| 0 | 3264 | 736 PITG_16008  |
| 0 | 881  | 622 NA          |
| 0 | 174  | 22 PITG_19804   |
| 2 | 1177 | 832 PITG_11766  |
| 0 | 633  | 278 PITG_06679  |
| 0 | 723  | 449 PITG_07885  |
| 0 | 15   | 15 PITG_20559   |
| 2 | 1528 | 701 PITG_19669  |
| 0 | 148  | 229 PITG_01551  |
| 0 | 144  | 92 PITG_15688   |
| 0 | 138  | 62 PITG_17782   |
| 0 | 0    | 4 PITG_16221    |
| 0 | 952  | 544 PITG_17005  |
| 0 | 40   | 23 NA           |
| 0 | 0    | 0 NA            |

|   |      |                 |
|---|------|-----------------|
| 0 | 132  | 125 NA          |
| 0 | 1373 | 2119 PITG_04824 |
| 0 | 0    | 2 NA            |
| 0 | 585  | 403 PITG_07711  |
| 0 | 2107 | 2614 PITG_06595 |
| 0 | 27   | 3 PITG_01578    |
| 0 | 26   | 18 PITG_00349   |
| 0 | 292  | 11 PITG_03472   |
| 0 | 216  | 2 NA            |
| 0 | 2    | 4 NA            |
| 0 | 456  | 30 PITG_21932   |
| 0 | 521  | 832 PITG_00443  |
| 0 | 76   | 79 PITG_17359   |
| 0 | 59   | 2 NA            |
| 0 | 2162 | 1301 PITG_05011 |
| 4 | 2    | 12 NA           |
| 0 | 24   | 39 PITG_08643   |
| 0 | 57   | 45 PITG_00855   |
| 0 | 238  | 284 PITG_00592  |
| 0 | 501  | 392 PITG_02662  |
| 0 | 6    | 0 PITG_12806    |
| 0 | 94   | 122 PITG_03501  |
| 0 | 56   | 56 PITG_16338   |
| 0 | 420  | 216 PITG_20288  |
| 0 | 2    | 22 PITG_01774   |
| 0 | 17   | 4 PITG_11858    |
| 0 | 822  | 743 PITG_03150  |
| 0 | 57   | 18 PITG_11922   |
| 0 | 4    | 0 PITG_12107    |
| 0 | 1899 | 1856 PITG_02594 |
| 0 | 2    | 0 PITG_10060    |
| 0 | 44   | 0 PITG_00809    |
| 0 | 66   | 47 PITG_00178   |
| 0 | 209  | 10 PITG_02923   |
| 0 | 1730 | 1418 PITG_08591 |
| 0 | 466  | 1717 PITG_09798 |
| 0 | 0    | 38 PITG_23144   |
| 0 | 659  | 509 PITG_09540  |
| 0 | 60   | 63 NA           |
| 0 | 158  | 38 PITG_17333   |
| 0 | 224  | 90 PITG_19042   |
| 0 | 565  | 115 PITG_13806  |
| 0 | 8    | 0 NA            |
| 0 | 45   | 71 PITG_15055   |
| 0 | 242  | 34 PITG_07976   |
| 0 | 112  | 86 PITG_10693   |
| 0 | 24   | 0 NA            |

|   |      |                 |
|---|------|-----------------|
| 0 | 828  | 1104 PITG_16921 |
| 0 | 11   | 10 PITG_17333   |
| 0 | 6610 | 3957 PITG_01943 |
| 0 | 873  | 83 PITG_07572   |
| 0 | 28   | 18 NA           |
| 0 | 72   | 45 NA           |
| 0 | 113  | 424 PITG_23287  |
| 0 | 919  | 849 PITG_15045  |
| 0 | 184  | 223 PITG_08749  |
| 0 | 0    | 0 PITG_17292    |
| 0 | 240  | 304 PITG_10193  |
| 0 | 318  | 132 PITG_09555  |
| 0 | 19   | 17 PITG_12686   |
| 0 | 57   | 24 NA           |
| 0 | 402  | 87 PITG_01358   |
| 0 | 4    | 0 PITG_15149    |
| 0 | 3822 | 1637 PITG_01255 |
| 0 | 401  | 159 NA          |
| 0 | 1436 | 111 PITG_15638  |
| 0 | 878  | 129 NA          |
| 0 | 270  | 53 PITG_20208   |
| 0 | 0    | 5 PITG_03034    |
| 0 | 80   | 52 PITG_11768   |
| 0 | 3    | 16 PITG_06867   |
| 0 | 17   | 50 NA           |
| 0 | 541  | 798 PITG_13597  |
| 0 | 8906 | 3200 PITG_04121 |
| 0 | 305  | 216 PITG_11474  |
| 0 | 8    | 0 PITG_16389    |
| 0 | 6    | 2 PITG_16810    |
| 2 | 4527 | 3183 PITG_08703 |
| 0 | 0    | 0 PITG_00530    |
| 0 | 156  | 42 PITG_04600   |
| 0 | 1632 | 630 NA          |
| 0 | 79   | 167 PITG_12584  |
| 0 | 476  | 678 PITG_09345  |
| 0 | 59   | 42 PITG_04535   |
| 0 | 3    | 0 PITG_07530    |
| 0 | 251  | 352 PITG_04698  |
| 0 | 475  | 507 PITG_08932  |
| 0 | 67   | 88 PITG_00334   |
| 0 | 230  | 963 PITG_19008  |
| 0 | 0    | 12 PITG_03532   |
| 0 | 101  | 213 PITG_02239  |
| 0 | 325  | 245 PITG_11524  |
| 0 | 0    | 2 PITG_01042    |
| 0 | 1007 | 790 NA          |

|    |      |                 |
|----|------|-----------------|
| 0  | 46   | 45 PITG_03560   |
| 0  | 732  | 722 PITG_19017  |
| 0  | 116  | 15 PITG_05584   |
| 0  | 389  | 267 NA          |
| 0  | 8    | 0 PITG_21918    |
| 0  | 902  | 1560 PITG_10884 |
| 0  | 5291 | 1046 PITG_17007 |
| 0  | 421  | 341 PITG_01043  |
| 0  | 4    | 10 PITG_17004   |
| 0  | 2186 | 1943 PITG_03221 |
| 0  | 1064 | 501 PITG_10300  |
| 0  | 478  | 505 PITG_03020  |
| 0  | 23   | 41 PITG_09772   |
| 0  | 170  | 59 PITG_11870   |
| 0  | 755  | 197 PITG_14047  |
| 0  | 617  | 336 PITG_22743  |
| 0  | 176  | 62 PITG_16360   |
| 0  | 67   | 21 PITG_00986   |
| 2  | 224  | 347 PITG_05245  |
| 0  | 363  | 209 PITG_01830  |
| 0  | 11   | 11 PITG_13406   |
| 26 | 60   | 2596 NA         |
| 0  | 26   | 7 PITG_12852    |
| 0  | 0    | 13 PITG_05557   |
| 0  | 466  | 354 PITG_20759  |
| 0  | 6    | 0 NA            |
| 0  | 28   | 122 PITG_11584  |
| 0  | 205  | 21 PITG_16363   |
| 0  | 220  | 10 PITG_21841   |
| 0  | 4    | 19 PITG_17273   |
| 0  | 922  | 1583 PITG_18774 |
| 0  | 19   | 3 PITG_00257    |
| 0  | 75   | 31 PITG_14855   |
| 0  | 2532 | 827 PITG_19017  |
| 0  | 0    | 0 PITG_17599    |
| 0  | 389  | 161 PITG_01691  |
| 0  | 479  | 312 PITG_12676  |
| 0  | 28   | 46 PITG_12256   |
| 2  | 1996 | 832 PITG_07285  |
| 0  | 111  | 0 NA            |
| 0  | 2    | 0 NA            |
| 0  | 4    | 17 PITG_11572   |
| 0  | 163  | 92 PITG_17005   |
| 0  | 19   | 2 NA            |
| 0  | 74   | 67 PITG_12155   |
| 0  | 6    | 25 NA           |
| 0  | 2    | 0 PITG_10264    |

|   |      |                 |
|---|------|-----------------|
| 0 | 610  | 521 PITG_17747  |
| 2 | 942  | 1983 PITG_05374 |
| 0 | 28   | 17 PITG_14557   |
| 0 | 203  | 134 PITG_15846  |
| 0 | 282  | 165 PITG_01120  |
| 0 | 27   | 5 PITG_03261    |
| 0 | 7    | 8 PITG_19153    |
| 0 | 32   | 0 PITG_01819    |
| 0 | 1920 | 1438 PITG_03333 |
| 0 | 2379 | 540 PITG_08199  |
| 0 | 35   | 32 NA           |
| 0 | 1324 | 691 PITG_19282  |
| 0 | 2    | 0 PITG_18027    |
| 0 | 2629 | 1002 PITG_14612 |
| 0 | 2829 | 1575 PITG_19017 |
| 0 | 170  | 623 PITG_09304  |
| 0 | 197  | 95 PITG_21394   |
| 0 | 328  | 326 PITG_10861  |
| 0 | 2    | 11 PITG_07110   |
| 0 | 205  | 494 PITG_09963  |
| 0 | 1602 | 1675 PITG_02053 |
| 0 | 2    | 0 PITG_06780    |
| 0 | 164  | 86 PITG_03360   |
| 0 | 21   | 19 PITG_05781   |
| 0 | 400  | 53 PITG_03872   |
| 0 | 628  | 114 PITG_06415  |
| 0 | 464  | 187 PITG_00523  |
| 0 | 101  | 32 PITG_05391   |
| 0 | 0    | 4 PITG_00939    |
| 2 | 1904 | 2141 PITG_18052 |
| 0 | 958  | 510 PITG_03644  |
| 0 | 1076 | 627 NA          |
| 0 | 829  | 352 PITG_07340  |
| 2 | 1475 | 1244 PITG_08591 |
| 0 | 211  | 594 PITG_01783  |
| 0 | 17   | 0 PITG_15567    |
| 0 | 90   | 93 PITG_17577   |
| 0 | 560  | 367 PITG_17275  |
| 0 | 758  | 419 PITG_13600  |
| 0 | 914  | 644 PITG_11036  |
| 0 | 1349 | 358 PITG_13617  |
| 0 | 486  | 266 NA          |
| 0 | 166  | 35 PITG_00978   |
| 0 | 71   | 179 PITG_07110  |
| 0 | 1331 | 705 PITG_00880  |
| 0 | 380  | 77 PITG_12179   |
| 0 | 3    | 0 NA            |

|   |      |                 |
|---|------|-----------------|
| 0 | 30   | 24 NA           |
| 0 | 509  | 385 PITG_07340  |
| 0 | 19   | 8 PITG_19735    |
| 0 | 932  | 773 PITG_09556  |
| 0 | 1719 | 752 PITG_11789  |
| 0 | 0    | 0 PITG_10935    |
| 0 | 192  | 15 NA           |
| 0 | 385  | 218 PITG_02532  |
| 0 | 1027 | 1258 PITG_03568 |
| 0 | 60   | 160 PITG_16069  |
| 0 | 11   | 2 PITG_06302    |
| 0 | 208  | 466 PITG_06203  |
| 0 | 270  | 391 PITG_18053  |
| 0 | 37   | 39 PITG_11470   |
| 0 | 26   | 12 PITG_06980   |
| 0 | 58   | 7 PITG_22718    |
| 0 | 6    | 2 NA            |
| 0 | 505  | 256 PITG_01119  |
| 0 | 154  | 120 PITG_15727  |
| 0 | 36   | 25 PITG_04874   |
| 0 | 1267 | 728 PITG_00089  |
| 0 | 39   | 10 PITG_17745   |
| 0 | 803  | 736 PITG_20777  |
| 0 | 12   | 6 PITG_12545    |
| 0 | 3905 | 1208 PITG_03712 |
| 0 | 135  | 41 PITG_16687   |
| 0 | 124  | 50 PITG_00011   |
| 0 | 16   | 3 PITG_15150    |
| 0 | 32   | 15 PITG_13554   |
| 0 | 0    | 0 PITG_18845    |
| 0 | 55   | 3 NA            |
| 0 | 6    | 13 PITG_01549   |
| 0 | 40   | 20 PITG_21504   |
| 0 | 1901 | 2026 PITG_14936 |
| 0 | 428  | 173 PITG_10167  |
| 0 | 28   | 0 PITG_10362    |
| 0 | 508  | 508 PITG_14739  |
| 0 | 6    | 16 PITG_00761   |
| 0 | 100  | 41 PITG_03142   |
| 0 | 347  | 70 PITG_09704   |
| 0 | 239  | 519 PITG_07278  |
| 0 | 25   | 17 PITG_05991   |
| 0 | 321  | 628 PITG_16921  |
| 0 | 2    | 0 NA            |
| 0 | 13   | 2 PITG_21400    |
| 0 | 494  | 538 PITG_14362  |
| 0 | 5    | 13 NA           |

|   |      |                 |
|---|------|-----------------|
| 0 | 457  | 576 PITG_00170  |
| 0 | 176  | 52 PITG_07967   |
| 0 | 68   | 30 PITG_01239   |
| 0 | 201  | 158 PITG_13438  |
| 2 | 2613 | 5024 PITG_07269 |
| 0 | 256  | 5 PITG_19495    |
| 0 | 34   | 23 PITG_12695   |
| 0 | 12   | 4 NA            |
| 0 | 1453 | 104 PITG_07300  |
| 0 | 4    | 4 PITG_16066    |
| 0 | 49   | 54 PITG_09669   |
| 0 | 357  | 437 PITG_15735  |
| 0 | 221  | 14 PITG_21224   |
| 0 | 302  | 529 PITG_02479  |
| 4 | 328  | 917 PITG_09760  |
| 0 | 0    | 2 PITG_08920    |
| 0 | 274  | 183 PITG_03339  |
| 0 | 849  | 401 PITG_03393  |
| 0 | 746  | 1126 PITG_08611 |
| 0 | 532  | 82 PITG_08036   |
| 0 | 6    | 3 PITG_02841    |
| 0 | 665  | 52 PITG_17263   |
| 0 | 4    | 9 PITG_22933    |
| 0 | 95   | 0 PITG_09751    |
| 0 | 205  | 306 PITG_05582  |
| 0 | 23   | 31 PITG_11870   |
| 0 | 15   | 15 PITG_05781   |
| 0 | 18   | 5 PITG_10862    |
| 0 | 88   | 39 PITG_04373   |
| 0 | 1500 | 839 PITG_03712  |
| 0 | 10   | 16 PITG_17292   |
| 2 | 1925 | 2318 PITG_12299 |
| 0 | 116  | 119 PITG_20035  |
| 0 | 121  | 594 PITG_18306  |
| 0 | 53   | 43 PITG_09644   |
| 0 | 272  | 48 PITG_19669   |
| 0 | 9    | 0 NA            |
| 0 | 63   | 75 PITG_15705   |
| 0 | 4104 | 2399 PITG_20209 |
| 0 | 129  | 3 PITG_08026    |
| 0 | 71   | 57 PITG_10830   |
| 0 | 296  | 162 PITG_00490  |
| 0 | 498  | 183 PITG_19907  |
| 0 | 650  | 1408 PITG_21395 |
| 0 | 126  | 32 NA           |
| 0 | 11   | 10 PITG_13473   |
| 0 | 2    | 25 PITG_10374   |



|   |      |                 |
|---|------|-----------------|
| 0 | 784  | 210 PITG_10498  |
| 4 | 2913 | 3842 PITG_07269 |
| 0 | 164  | 105 PITG_21457  |
| 0 | 359  | 287 PITG_16429  |
| 0 | 0    | 0 PITG_06021    |
| 0 | 144  | 274 PITG_04376  |
| 0 | 76   | 87 PITG_05582   |
| 0 | 507  | 444 PITG_17456  |
| 0 | 21   | 17 PITG_03757   |
| 0 | 24   | 0 NA            |
| 0 | 0    | 5 PITG_00152    |
| 0 | 41   | 7 PITG_20382    |
| 0 | 27   | 40 PITG_20928   |
| 0 | 86   | 47 PITG_14636   |
| 0 | 45   | 12 NA           |
| 0 | 0    | 0 PITG_21523    |
| 0 | 0    | 0 PITG_06996    |
| 0 | 361  | 335 PITG_11653  |
| 0 | 15   | 67 PITG_03882   |
| 0 | 113  | 57 PITG_16731   |
| 0 | 0    | 7 PITG_01744    |
| 0 | 5    | 14 PITG_00840   |
| 0 | 0    | 4 PITG_15151    |
| 0 | 7    | 2 NA            |
| 0 | 6    | 40 PITG_17748   |
| 0 | 317  | 8 NA            |
| 0 | 6    | 12 NA           |
| 0 | 159  | 6 PITG_06356    |
| 0 | 7    | 10 PITG_03416   |
| 0 | 4    | 0 PITG_20044    |
| 0 | 204  | 158 PITG_15525  |
| 0 | 0    | 4 PITG_01832    |
| 0 | 45   | 17 PITG_08487   |
| 0 | 35   | 10 NA           |
| 0 | 26   | 25 PITG_12695   |
| 0 | 19   | 11 PITG_13490   |
| 0 | 7    | 4 NA            |
| 0 | 327  | 78 PITG_19204   |
| 0 | 310  | 75 NA           |
| 0 | 59   | 103 PITG_14634  |
| 0 | 18   | 4 PITG_01719    |
| 0 | 2    | 0 PITG_03054    |
| 0 | 1502 | 1443 PITG_08311 |
| 0 | 452  | 312 PITG_08311  |
| 0 | 0    | 15 PITG_00939   |
| 0 | 0    | 2 PITG_16178    |
| 0 | 0    | 0 PITG_10683    |

|    |      |                 |
|----|------|-----------------|
| 0  | 70   | 51 PITG_11466   |
| 0  | 79   | 25 PITG_10373   |
| 0  | 67   | 17 PITG_11914   |
| 0  | 31   | 109 PITG_09346  |
| 0  | 207  | 79 NA           |
| 0  | 76   | 57 PITG_08218   |
| 0  | 854  | 95 PITG_21987   |
| 0  | 33   | 91 PITG_04067   |
| 0  | 790  | 1224 PITG_09793 |
| 0  | 33   | 21 PITG_16203   |
| 0  | 478  | 170 NA          |
| 0  | 175  | 257 PITG_20397  |
| 0  | 0    | 4 PITG_20928    |
| 0  | 0    | 0 PITG_19474    |
| 10 | 2459 | 3967 PITG_13681 |
| 0  | 742  | 461 PITG_14604  |
| 0  | 53   | 20 PITG_13839   |
| 0  | 15   | 12 NA           |
| 0  | 2034 | 30 PITG_05249   |
| 2  | 587  | 679 PITG_10887  |
| 0  | 107  | 67 NA           |
| 0  | 5    | 0 PITG_02501    |
| 0  | 127  | 81 PITG_01619   |
| 0  | 4100 | 1390 PITG_00631 |
| 0  | 327  | 387 PITG_03763  |
| 0  | 149  | 56 PITG_12852   |
| 0  | 17   | 7 PITG_03621    |
| 0  | 57   | 36 PITG_20725   |
| 0  | 636  | 109 PITG_11099  |
| 0  | 41   | 47 PITG_10900   |
| 0  | 73   | 50 PITG_01470   |
| 0  | 42   | 73 PITG_16363   |
| 0  | 991  | 1763 PITG_10974 |
| 0  | 9    | 0 PITG_14626    |
| 0  | 44   | 111 PITG_10899  |
| 0  | 238  | 291 PITG_10736  |
| 0  | 66   | 56 PITG_00654   |
| 0  | 230  | 31 PITG_15864   |
| 0  | 94   | 378 PITG_13918  |
| 2  | 1950 | 3292 PITG_12299 |
| 0  | 2    | 20 PITG_18312   |
| 0  | 63   | 68 PITG_09537   |
| 0  | 655  | 1221 PITG_20465 |
| 0  | 328  | 322 PITG_11323  |
| 0  | 149  | 124 PITG_08305  |
| 0  | 10   | 5 PITG_05391    |
| 0  | 206  | 214 PITG_16854  |

|   |      |                 |
|---|------|-----------------|
| 0 | 4467 | 2338 PITG_00443 |
| 0 | 0    | 0 PITG_12273    |
| 0 | 1057 | 867 PITG_01004  |
| 0 | 247  | 10 PITG_05226   |
| 2 | 76   | 1990 PITG_19053 |
| 0 | 90   | 56 PITG_21727   |
| 0 | 2    | 2 PITG_17332    |
| 0 | 619  | 422 PITG_15638  |
| 0 | 66   | 122 PITG_00506  |
| 0 | 8    | 10 PITG_13412   |
| 0 | 44   | 15 PITG_00381   |
| 0 | 0    | 2 PITG_20077    |
| 0 | 4041 | 3184 PITG_13919 |
| 0 | 4    | 2 PITG_06120    |
| 2 | 1092 | 1596 PITG_22135 |
| 0 | 369  | 82 PITG_09627   |
| 0 | 91   | 38 PITG_14581   |
| 2 | 206  | 264 PITG_19007  |
| 0 | 10   | 2 NA            |
| 0 | 432  | 394 PITG_08044  |
| 0 | 461  | 187 NA          |
| 4 | 1163 | 2708 PITG_06799 |
| 0 | 88   | 21 NA           |
| 0 | 35   | 8 PITG_20486    |
| 0 | 11   | 0 NA            |
| 0 | 16   | 0 NA            |
| 0 | 89   | 12 PITG_07305   |
| 0 | 51   | 12 PITG_10375   |
| 0 | 189  | 45 PITG_08018   |
| 0 | 1447 | 1156 PITG_00827 |
| 0 | 83   | 68 PITG_05582   |
| 0 | 1980 | 1192 PITG_15654 |
| 0 | 645  | 350 NA          |
| 0 | 6    | 4 PITG_08375    |
| 0 | 229  | 57 PITG_03243   |
| 0 | 176  | 49 NA           |
| 0 | 10   | 15 PITG_23159   |
| 0 | 122  | 10 PITG_20727   |
| 0 | 46   | 28 PITG_04497   |
| 0 | 15   | 2 PITG_06202    |
| 0 | 577  | 517 PITG_00488  |
| 0 | 141  | 156 PITG_05140  |
| 0 | 2    | 6 PITG_16083    |
| 0 | 62   | 119 PITG_06374  |
| 4 | 1830 | 3589 PITG_06415 |
| 0 | 109  | 80 PITG_17617   |
| 0 | 6    | 2 PITG_18326    |

|   |      |                 |
|---|------|-----------------|
| 0 | 1541 | 390 PITG_10929  |
| 0 | 21   | 6 PITG_01663    |
| 0 | 442  | 259 PITG_20800  |
| 0 | 6    | 12 PITG_09891   |
| 0 | 36   | 81 PITG_17239   |
| 0 | 246  | 109 PITG_11870  |
| 2 | 252  | 580 PITG_20585  |
| 0 | 88   | 61 PITG_14239   |
| 0 | 1470 | 698 PITG_06995  |
| 0 | 38   | 0 PITG_01107    |
| 0 | 914  | 144 PITG_07107  |
| 0 | 3    | 7 PITG_05103    |
| 0 | 30   | 42 PITG_11265   |
| 0 | 40   | 2 NA            |
| 0 | 15   | 14 PITG_22339   |
| 0 | 10   | 2 NA            |
| 0 | 35   | 73 PITG_04078   |
| 0 | 73   | 372 PITG_00787  |
| 0 | 4    | 2 PITG_06966    |
| 0 | 724  | 510 PITG_10028  |
| 0 | 251  | 93 PITG_13673   |
| 0 | 15   | 17 PITG_19350   |
| 0 | 0    | 2 PITG_04568    |
| 0 | 2    | 6 PITG_00460    |
| 0 | 1190 | 893 PITG_20189  |
| 2 | 1232 | 1161 PITG_18072 |
| 0 | 0    | 6 PITG_02555    |
| 0 | 16   | 0 NA            |
| 0 | 1618 | 529 PITG_03033  |
| 0 | 0    | 3 PITG_05761    |
| 0 | 39   | 29 PITG_06510   |
| 0 | 278  | 275 PITG_02137  |
| 0 | 100  | 201 PITG_16041  |
| 0 | 44   | 83 PITG_06185   |
| 0 | 72   | 106 PITG_11029  |
| 0 | 2    | 9 PITG_18312    |
| 0 | 24   | 8 NA            |
| 0 | 46   | 65 PITG_06918   |
| 0 | 387  | 266 PITG_05628  |
| 0 | 27   | 18 PITG_10821   |
| 0 | 46   | 0 PITG_00175    |
| 0 | 42   | 22 PITG_16810   |
| 0 | 13   | 4 PITG_05468    |
| 0 | 3    | 0 PITG_11572    |
| 0 | 0    | 4 PITG_11977    |
| 0 | 165  | 118 PITG_03971  |
| 0 | 4    | 2 PITG_18091    |

|   |      |                 |
|---|------|-----------------|
| 0 | 9    | 2 PITG_02418    |
| 0 | 17   | 32 PITG_17333   |
| 0 | 42   | 2 PITG_19415    |
| 0 | 2484 | 1580 PITG_16921 |
| 0 | 41   | 52 PITG_06948   |
| 0 | 2    | 2 PITG_12428    |
| 0 | 149  | 35 PITG_09669   |
| 0 | 12   | 4 PITG_02440    |
| 0 | 136  | 215 PITG_08611  |
| 0 | 0    | 0 NA            |
| 0 | 1989 | 772 NA          |
| 0 | 9    | 0 PITG_04714    |
| 0 | 250  | 162 PITG_19961  |
| 0 | 16   | 2 PITG_17978    |
| 0 | 11   | 7 PITG_02433    |
| 0 | 10   | 9 PITG_17897    |
| 0 | 36   | 21 PITG_21915   |
| 0 | 32   | 0 PITG_13841    |
| 0 | 108  | 79 NA           |
| 3 | 3243 | 3799 PITG_17093 |
| 0 | 1461 | 2244 PITG_18776 |
| 0 | 205  | 75 PITG_04534   |
| 0 | 481  | 405 PITG_09387  |
| 0 | 2    | 0 PITG_20253    |
| 0 | 83   | 216 PITG_13387  |
| 0 | 5    | 0 PITG_13387    |
| 0 | 2    | 0 PITG_10837    |
| 0 | 135  | 509 PITG_07341  |
| 0 | 5    | 26 PITG_16021   |
| 0 | 28   | 22 PITG_15607   |
| 0 | 69   | 288 PITG_19263  |
| 0 | 2    | 0 PITG_16479    |
| 9 | 3732 | 4616 PITG_00443 |
| 0 | 13   | 0 PITG_00655    |
| 0 | 153  | 72 PITG_10069   |
| 0 | 19   | 15 PITG_13066   |
| 0 | 56   | 43 PITG_18050   |
| 0 | 429  | 235 PITG_08265  |
| 0 | 1002 | 1500 PITG_01922 |
| 0 | 34   | 4 NA            |
| 0 | 312  | 16 PITG_10064   |
| 0 | 212  | 427 PITG_09552  |
| 0 | 11   | 6 PITG_07301    |
| 0 | 84   | 170 NA          |
| 2 | 1492 | 1022 PITG_15771 |
| 0 | 632  | 448 PITG_20388  |
| 0 | 380  | 270 PITG_10938  |

|    |      |                 |
|----|------|-----------------|
| 0  | 134  | 325 PITG_18306  |
| 0  | 191  | 208 PITG_02762  |
| 0  | 24   | 15 PITG_17333   |
| 0  | 0    | 0 PITG_22311    |
| 0  | 1397 | 218 PITG_16311  |
| 0  | 92   | 26 NA           |
| 0  | 170  | 434 PITG_17921  |
| 0  | 44   | 41 PITG_19842   |
| 0  | 900  | 1545 PITG_18165 |
| 0  | 250  | 277 PITG_00391  |
| 0  | 4    | 14 PITG_15875   |
| 0  | 539  | 984 PITG_07972  |
| 0  | 2000 | 1107 PITG_15626 |
| 0  | 256  | 353 PITG_09875  |
| 0  | 943  | 31 PITG_02336   |
| 0  | 635  | 951 PITG_12486  |
| 43 | 760  | 1704 NA         |
| 2  | 63   | 32 PITG_02985   |
| 0  | 405  | 76 PITG_13673   |
| 0  | 992  | 1218 PITG_15786 |
| 0  | 10   | 9 PITG_02196    |
| 0  | 204  | 81 PITG_04682   |
| 0  | 9    | 4 PITG_03593    |
| 0  | 30   | 17 PITG_02497   |
| 0  | 93   | 44 PITG_17387   |
| 0  | 796  | 1685 PITG_13301 |
| 0  | 20   | 4 PITG_20117    |
| 0  | 257  | 227 PITG_00208  |
| 0  | 9    | 6 PITG_00858    |
| 0  | 0    | 5 PITG_19441    |
| 0  | 244  | 20 PITG_06410   |
| 0  | 53   | 32 PITG_10862   |
| 0  | 1652 | 947 PITG_06385  |
| 0  | 1111 | 796 PITG_10263  |
| 0  | 271  | 105 PITG_12231  |
| 0  | 44   | 19 PITG_03562   |
| 0  | 80   | 31 PITG_12663   |
| 0  | 18   | 0 PITG_12797    |
| 0  | 1433 | 2632 PITG_03239 |
| 0  | 4    | 2 NA            |
| 0  | 19   | 0 PITG_15706    |
| 0  | 50   | 2 PITG_15509    |
| 0  | 1229 | 1255 PITG_08703 |
| 0  | 12   | 8 NA            |
| 0  | 8    | 25 PITG_00809   |
| 0  | 17   | 17 PITG_09435   |
| 0  | 4    | 0 NA            |

|   |      |                 |
|---|------|-----------------|
| 0 | 308  | 323 PITG_01119  |
| 0 | 1537 | 1998 PITG_19121 |
| 0 | 956  | 1038 PITG_09786 |
| 2 | 135  | 101 PITG_00179  |
| 0 | 22   | 0 NA            |
| 0 | 41   | 2 NA            |
| 0 | 185  | 356 PITG_05871  |
| 0 | 0    | 2 PITG_17370    |
| 0 | 162  | 54 PITG_05622   |
| 0 | 82   | 164 PITG_14456  |
| 0 | 2    | 15 PITG_16798   |
| 2 | 1372 | 758 PITG_20188  |
| 0 | 220  | 265 PITG_13262  |
| 0 | 324  | 320 PITG_10462  |
| 0 | 55   | 29 PITG_09453   |
| 0 | 457  | 620 PITG_09445  |
| 0 | 677  | 668 PITG_09445  |
| 0 | 385  | 146 NA          |
| 0 | 164  | 0 PITG_02043    |
| 0 | 96   | 48 NA           |
| 0 | 852  | 937 PITG_06427  |
| 0 | 5    | 20 PITG_04243   |
| 0 | 1163 | 1115 PITG_12288 |
| 2 | 115  | 905 PITG_15117  |
| 0 | 94   | 65 PITG_01925   |
| 0 | 60   | 68 NA           |
| 0 | 19   | 53 NA           |
| 0 | 160  | 43 NA           |
| 0 | 175  | 115 PITG_14723  |
| 0 | 133  | 176 PITG_06659  |
| 0 | 17   | 8 PITG_10765    |
| 0 | 29   | 18 PITG_13558   |
| 0 | 2577 | 1098 PITG_09540 |
| 0 | 30   | 4 NA            |
| 2 | 1286 | 2427 PITG_08959 |
| 0 | 403  | 0 PITG_17344    |
| 2 | 634  | 988 PITG_12882  |
| 0 | 483  | 64 PITG_11249   |
| 0 | 2    | 0 PITG_14247    |
| 0 | 255  | 105 PITG_15407  |
| 0 | 32   | 0 PITG_07366    |
| 0 | 75   | 218 PITG_14739  |
| 0 | 442  | 303 PITG_02255  |
| 0 | 168  | 76 PITG_09247   |
| 0 | 44   | 0 PITG_10865    |
| 0 | 122  | 71 PITG_00925   |
| 0 | 37   | 13 NA           |

|   |      |                 |
|---|------|-----------------|
| 0 | 12   | 3 NA            |
| 0 | 114  | 113 PITG_09430  |
| 0 | 48   | 2 PITG_17452    |
| 0 | 700  | 636 PITG_09556  |
| 0 | 711  | 451 PITG_09556  |
| 0 | 0    | 4 PITG_12912    |
| 0 | 6    | 27 PITG_13492   |
| 0 | 72   | 48 PITG_02259   |
| 0 | 14   | 8 PITG_00964    |
| 0 | 30   | 19 PITG_16666   |
| 0 | 0    | 4 PITG_08175    |
| 0 | 29   | 4 PITG_03862    |
| 0 | 387  | 905 PITG_06322  |
| 0 | 6    | 0 PITG_18173    |
| 0 | 28   | 69 PITG_08780   |
| 0 | 453  | 675 PITG_19854  |
| 0 | 135  | 143 PITG_01931  |
| 0 | 159  | 942 PITG_10195  |
| 0 | 239  | 508 PITG_16833  |
| 0 | 4    | 3 PITG_04680    |
| 0 | 1777 | 1743 PITG_19871 |
| 0 | 136  | 142 PITG_10895  |
| 0 | 43   | 77 PITG_00178   |
| 0 | 8    | 23 PITG_11648   |
| 0 | 603  | 192 NA          |
| 0 | 377  | 359 PITG_00578  |
| 0 | 13   | 3 NA            |
| 0 | 8    | 4 PITG_00407    |
| 0 | 0    | 0 NA            |
| 0 | 20   | 9 PITG_02497    |
| 0 | 667  | 349 PITG_02253  |
| 0 | 2    | 0 PITG_12296    |
| 0 | 208  | 230 PITG_18317  |
| 0 | 280  | 105 PITG_02640  |
| 0 | 130  | 74 PITG_19950   |
| 0 | 61   | 123 PITG_01171  |
| 0 | 2156 | 385 PITG_18052  |
| 0 | 9    | 2 PITG_04133    |
| 0 | 4    | 4 PITG_09564    |
| 0 | 397  | 714 PITG_10974  |
| 0 | 11   | 17 PITG_03710   |
| 0 | 384  | 135 PITG_00118  |
| 0 | 259  | 244 PITG_08234  |
| 0 | 119  | 36 PITG_12619   |
| 2 | 648  | 1445 PITG_10929 |
| 0 | 47   | 68 PITG_03650   |
| 0 | 173  | 150 PITG_08196  |



|   |      |                 |
|---|------|-----------------|
| 0 | 150  | 361 NA          |
| 0 | 545  | 529 PITG_15567  |
| 0 | 1115 | 2116 PITG_19999 |
| 6 | 816  | 2806 PITG_18072 |
| 0 | 47   | 54 PITG_10364   |
| 0 | 10   | 6 PITG_13803    |
| 0 | 1286 | 867 PITG_07173  |
| 0 | 457  | 37 NA           |
| 0 | 401  | 261 PITG_17244  |
| 0 | 0    | 0 NA            |
| 0 | 33   | 4 NA            |
| 0 | 85   | 97 PITG_11775   |
| 2 | 506  | 1724 PITG_03239 |
| 0 | 3    | 0 NA            |
| 0 | 0    | 0 PITG_05395    |
| 0 | 848  | 783 PITG_03644  |
| 0 | 238  | 192 PITG_07455  |
| 0 | 118  | 17 PITG_05185   |
| 0 | 1965 | 247 NA          |
| 0 | 2    | 0 NA            |
| 0 | 70   | 25 PITG_07109   |
| 0 | 8    | 8 PITG_19111    |
| 0 | 491  | 352 NA          |
| 0 | 752  | 305 PITG_12973  |
| 0 | 480  | 486 PITG_09304  |
| 0 | 574  | 8 NA            |
| 0 | 48   | 33 PITG_20196   |
| 4 | 1309 | 2121 PITG_11244 |
| 0 | 14   | 8 PITG_16698    |
| 2 | 711  | 2618 PITG_10193 |
| 0 | 12   | 0 NA            |
| 0 | 2    | 2 PITG_06416    |
| 0 | 660  | 77 PITG_22062   |
| 0 | 22   | 30 PITG_13102   |
| 0 | 12   | 16 PITG_16683   |
| 0 | 197  | 84 PITG_00334   |
| 0 | 152  | 213 PITG_04530  |
| 0 | 157  | 113 PITG_01382  |
| 0 | 2335 | 1804 PITG_08703 |
| 2 | 468  | 23 PITG_09431   |
| 0 | 58   | 36 PITG_05990   |
| 0 | 25   | 0 NA            |
| 0 | 19   | 3 NA            |
| 0 | 424  | 35 PITG_09862   |
| 0 | 581  | 204 PITG_12886  |
| 0 | 22   | 0 PITG_08537    |
| 0 | 30   | 0 PITG_00563    |

|   |      |                 |
|---|------|-----------------|
| 0 | 56   | 354 PITG_18005  |
| 0 | 221  | 77 PITG_08230   |
| 0 | 323  | 156 PITG_07794  |
| 0 | 1355 | 701 PITG_06691  |
| 0 | 13   | 9 PITG_06342    |
| 0 | 30   | 57 PITG_07110   |
| 0 | 737  | 584 PITG_19737  |
| 0 | 723  | 701 NA          |
| 0 | 109  | 74 PITG_01781   |
| 0 | 28   | 13 NA           |
| 0 | 684  | 394 PITG_20746  |
| 0 | 13   | 95 PITG_01535   |
| 0 | 111  | 46 PITG_02109   |
| 0 | 828  | 1689 PITG_10210 |
| 2 | 181  | 768 PITG_00471  |
| 0 | 5    | 2 PITG_12466    |
| 0 | 1255 | 817 PITG_18306  |
| 0 | 78   | 27 PITG_05449   |
| 0 | 291  | 396 PITG_08711  |
| 0 | 15   | 7 PITG_17455    |
| 0 | 26   | 5 NA            |
| 0 | 21   | 20 PITG_15906   |
| 0 | 2    | 2 PITG_09862    |
| 0 | 204  | 98 PITG_15892   |
| 0 | 53   | 26 PITG_04483   |
| 0 | 110  | 63 PITG_05855   |
| 0 | 127  | 65 PITG_03754   |
| 0 | 11   | 2 NA            |
| 0 | 1199 | 2559 PITG_20264 |
| 0 | 80   | 37 PITG_08405   |
| 0 | 954  | 2382 PITG_14936 |
| 0 | 4    | 0 PITG_15166    |
| 0 | 1815 | 370 PITG_10858  |
| 0 | 392  | 359 PITG_03028  |
| 0 | 1468 | 737 NA          |
| 0 | 98   | 66 PITG_09772   |
| 0 | 2    | 2 PITG_15779    |
| 0 | 4    | 8 PITG_17945    |
| 0 | 48   | 17 PITG_02977   |
| 0 | 0    | 0 PITG_20548    |
| 0 | 312  | 159 PITG_12746  |
| 4 | 2579 | 3639 PITG_00443 |
| 0 | 129  | 11 PITG_11955   |
| 0 | 84   | 62 PITG_07546   |
| 0 | 50   | 35 PITG_02810   |
| 0 | 0    | 0 PITG_20324    |
| 0 | 59   | 28 PITG_11594   |

|   |      |                 |
|---|------|-----------------|
| 0 | 13   | 32 PITG_02767   |
| 0 | 31   | 2 NA            |
| 0 | 545  | 552 PITG_00910  |
| 0 | 336  | 205 PITG_08537  |
| 0 | 2392 | 1582 PITG_01700 |
| 0 | 143  | 582 PITG_09941  |
| 0 | 24   | 4 NA            |
| 0 | 31   | 496 PITG_22065  |
| 0 | 22   | 0 PITG_05291    |
| 0 | 123  | 287 PITG_20168  |
| 0 | 1371 | 1162 PITG_19121 |
| 0 | 102  | 23 NA           |
| 0 | 439  | 869 PITG_17716  |
| 0 | 55   | 107 PITG_16344  |
| 0 | 265  | 177 PITG_20901  |
| 0 | 2    | 2 PITG_08237    |
| 0 | 261  | 62 PITG_00965   |
| 0 | 200  | 142 PITG_02458  |
| 0 | 414  | 119 PITG_21176  |
| 0 | 4756 | 1164 PITG_04868 |
| 0 | 497  | 0 NA            |
| 0 | 208  | 101 PITG_16118  |
| 4 | 352  | 1354 PITG_10941 |
| 0 | 38   | 11 PITG_17947   |
| 0 | 0    | 0 PITG_15151    |
| 0 | 227  | 58 NA           |
| 0 | 7    | 36 PITG_03850   |
| 0 | 0    | 0 PITG_08307    |
| 0 | 51   | 67 PITG_09488   |
| 0 | 1438 | 2685 PITG_14175 |
| 0 | 2    | 0 PITG_06898    |
| 0 | 34   | 5 PITG_05192    |
| 0 | 1691 | 1193 PITG_19669 |
| 0 | 4    | 2 NA            |
| 0 | 367  | 308 PITG_12182  |
| 0 | 572  | 1667 PITG_00921 |
| 0 | 33   | 10 PITG_13366   |
| 0 | 27   | 18 PITG_01994   |
| 0 | 138  | 36 PITG_01410   |
| 0 | 57   | 180 PITG_13370  |
| 0 | 272  | 194 PITG_16376  |
| 0 | 18   | 0 PITG_03927    |
| 0 | 74   | 67 PITG_01798   |
| 0 | 4    | 16 PITG_04658   |
| 0 | 21   | 10 PITG_00627   |
| 0 | 5    | 5 PITG_16208    |
| 0 | 0    | 2 PITG_03633    |

|   |      |                 |
|---|------|-----------------|
| 0 | 137  | 179 PITG_19362  |
| 0 | 2257 | 1707 PITG_16925 |
| 0 | 254  | 85 PITG_03830   |
| 0 | 930  | 694 PITG_12578  |
| 0 | 19   | 10 NA           |
| 0 | 1411 | 1458 PITG_18776 |
| 0 | 958  | 216 PITG_14615  |
| 0 | 25   | 3 PITG_02995    |
| 0 | 334  | 125 PITG_03104  |
| 0 | 367  | 707 PITG_16366  |
| 0 | 799  | 1121 PITG_11626 |
| 0 | 1368 | 1474 PITG_09512 |
| 0 | 6    | 2 NA            |
| 2 | 1296 | 2140 PITG_07173 |
| 0 | 1832 | 133 PITG_18072  |
| 0 | 103  | 63 PITG_07232   |
| 0 | 4    | 13 PITG_04588   |
| 0 | 157  | 111 PITG_16353  |
| 0 | 115  | 137 PITG_08926  |
| 0 | 35   | 55 PITG_18037   |
| 0 | 4    | 0 PITG_19191    |
| 0 | 47   | 148 PITG_02283  |
| 0 | 565  | 246 PITG_14416  |
| 0 | 57   | 33 PITG_01664   |
| 0 | 11   | 18 PITG_19065   |
| 0 | 24   | 37 NA           |
| 0 | 32   | 14 PITG_14917   |
| 0 | 64   | 86 PITG_17486   |
| 0 | 201  | 486 PITG_00390  |
| 0 | 1209 | 1612 PITG_06320 |
| 0 | 94   | 48 NA           |
| 0 | 7    | 3 NA            |
| 0 | 563  | 304 PITG_19482  |
| 0 | 282  | 192 PITG_02740  |
| 0 | 31   | 8 PITG_11249    |
| 0 | 1091 | 2337 PITG_02594 |
| 0 | 65   | 21 NA           |
| 0 | 22   | 17 NA           |
| 0 | 140  | 100 PITG_11120  |
| 0 | 0    | 0 PITG_15058    |
| 0 | 84   | 150 PITG_03611  |
| 0 | 426  | 326 PITG_04862  |
| 0 | 139  | 23 PITG_00965   |
| 0 | 33   | 9 PITG_02792    |
| 2 | 23   | 10 PITG_20374   |
| 0 | 40   | 103 PITG_05537  |
| 0 | 22   | 37 PITG_12516   |

|   |      |                 |
|---|------|-----------------|
| 0 | 7    | 0 PITG_15607    |
| 0 | 66   | 44 PITG_00839   |
| 0 | 388  | 691 PITG_14439  |
| 0 | 504  | 266 PITG_15735  |
| 0 | 22   | 2 NA            |
| 2 | 118  | 53 PITG_22358   |
| 0 | 5    | 2 PITG_05814    |
| 0 | 10   | 2 PITG_10087    |
| 0 | 93   | 107 PITG_12753  |
| 0 | 0    | 6 PITG_09832    |
| 0 | 88   | 75 PITG_02737   |
| 4 | 410  | 529 PITG_04640  |
| 2 | 1293 | 1029 PITG_03486 |
| 0 | 283  | 81 PITG_17790   |
| 0 | 252  | 55 PITG_22303   |
| 0 | 108  | 9 PITG_22303    |
| 0 | 35   | 24 PITG_16114   |
| 2 | 1007 | 60 PITG_03294   |
| 0 | 119  | 58 PITG_07279   |
| 0 | 33   | 41 PITG_03881   |
| 0 | 49   | 154 PITG_14380  |
| 0 | 172  | 16 PITG_21842   |
| 0 | 50   | 0 PITG_03777    |
| 0 | 44   | 93 PITG_10883   |
| 0 | 123  | 55 NA           |
| 0 | 105  | 43 PITG_10857   |
| 2 | 878  | 1850 PITG_01833 |
| 0 | 22   | 0 NA            |
| 0 | 910  | 484 PITG_01524  |
| 0 | 310  | 787 PITG_02049  |
| 0 | 69   | 19 PITG_01950   |
| 2 | 4    | 22 PITG_05112   |
| 0 | 16   | 26 PITG_19063   |
| 0 | 4    | 0 PITG_15411    |
| 2 | 721  | 280 PITG_03028  |
| 0 | 17   | 2 PITG_19415    |
| 0 | 18   | 2 PITG_13248    |
| 0 | 1313 | 1374 PITG_09556 |
| 0 | 17   | 9 PITG_12989    |
| 0 | 1495 | 1374 PITG_11997 |
| 0 | 0    | 4 PITG_07102    |
| 4 | 2467 | 1387 PITG_08703 |
| 0 | 7    | 4 PITG_08304    |
| 0 | 4    | 9 PITG_06390    |
| 2 | 21   | 36 PITG_12996   |
| 0 | 336  | 235 PITG_01788  |
| 0 | 1878 | 560 PITG_09547  |

|   |      |                 |
|---|------|-----------------|
| 0 | 754  | 358 PITG_04640  |
| 0 | 25   | 9 PITG_21075    |
| 0 | 52   | 62 NA           |
| 0 | 13   | 6 PITG_16386    |
| 0 | 145  | 417 PITG_07887  |
| 0 | 15   | 11 NA           |
| 0 | 258  | 181 PITG_12947  |
| 0 | 55   | 239 PITG_14939  |
| 0 | 168  | 60 PITG_20619   |
| 0 | 0    | 0 PITG_00231    |
| 2 | 3451 | 3455 PITG_19999 |
| 0 | 19   | 4 PITG_05071    |
| 0 | 131  | 54 PITG_06324   |
| 0 | 241  | 72 PITG_07300   |
| 0 | 1163 | 2730 PITG_07300 |
| 0 | 53   | 43 PITG_01104   |
| 0 | 2    | 0 PITG_06937    |
| 0 | 180  | 163 PITG_18923  |
| 4 | 349  | 921 PITG_15638  |
| 0 | 9    | 21 PITG_04882   |
| 0 | 32   | 3 PITG_18296    |
| 0 | 76   | 71 PITG_14854   |
| 0 | 139  | 88 PITG_02755   |
| 0 | 544  | 578 PITG_16366  |
| 0 | 62   | 40 PITG_19586   |
| 0 | 9    | 0 PITG_11592    |
| 0 | 374  | 330 PITG_02399  |
| 0 | 215  | 68 PITG_09072   |
| 0 | 348  | 402 PITG_03424  |
| 0 | 874  | 1608 PITG_10203 |
| 0 | 75   | 15 PITG_16203   |
| 0 | 1093 | 832 PITG_07056  |
| 0 | 23   | 6 NA            |
| 0 | 10   | 6 PITG_09790    |
| 0 | 161  | 42 NA           |
| 0 | 654  | 104 PITG_03639  |
| 0 | 56   | 37 NA           |
| 0 | 17   | 15 PITG_08447   |
| 0 | 99   | 27 PITG_19166   |
| 0 | 30   | 0 PITG_11572    |
| 0 | 628  | 1241 PITG_06427 |
| 0 | 340  | 360 PITG_11734  |
| 0 | 676  | 115 PITG_19023  |
| 4 | 1993 | 4129 PITG_03353 |
| 0 | 31   | 0 PITG_11857    |
| 0 | 1232 | 824 PITG_06241  |
| 0 | 13   | 4 NA            |

|   |      |                 |
|---|------|-----------------|
| 0 | 15   | 2 PITG_04076    |
| 0 | 38   | 14 PITG_04394   |
| 0 | 101  | 52 PITG_11011   |
| 0 | 38   | 59 PITG_10932   |
| 0 | 1454 | 1187 PITG_16008 |
| 0 | 0    | 2 PITG_16257    |
| 0 | 499  | 141 PITG_01087  |
| 0 | 55   | 37 PITG_12291   |
| 0 | 209  | 1725 PITG_11374 |
| 0 | 80   | 17 PITG_12318   |
| 0 | 21   | 24 PITG_09724   |
| 0 | 6    | 15 PITG_07775   |
| 0 | 362  | 846 PITG_18503  |
| 0 | 91   | 428 PITG_07285  |
| 0 | 226  | 135 PITG_15483  |
| 0 | 72   | 30 PITG_06274   |
| 0 | 19   | 5 PITG_15926    |
| 0 | 931  | 599 PITG_11226  |
| 0 | 755  | 116 PITG_19404  |
| 0 | 49   | 7 PITG_10098    |
| 0 | 529  | 1146 PITG_17007 |
| 0 | 2    | 0 PITG_19876    |
| 3 | 268  | 596 PITG_23111  |
| 4 | 1063 | 943 PITG_12299  |
| 0 | 174  | 94 PITG_06759   |
| 4 | 1168 | 1301 PITG_06722 |
| 0 | 10   | 0 NA            |
| 0 | 15   | 10 NA           |
| 0 | 61   | 52 PITG_06765   |
| 0 | 46   | 74 PITG_07238   |
| 0 | 332  | 194 PITG_20412  |
| 0 | 45   | 4 PITG_15642    |
| 0 | 813  | 138 PITG_03199  |
| 0 | 46   | 18 PITG_04714   |
| 0 | 6    | 0 PITG_12523    |
| 0 | 64   | 62 PITG_00974   |
| 0 | 9    | 8 NA            |
| 0 | 148  | 12 PITG_09724   |
| 0 | 3    | 2 NA            |
| 0 | 32   | 84 PITG_22165   |
| 0 | 23   | 5 NA            |
| 0 | 0    | 2 PITG_19153    |
| 0 | 9    | 0 PITG_00450    |
| 0 | 0    | 2 NA            |
| 0 | 308  | 287 PITG_06146  |
| 0 | 130  | 69 PITG_14707   |
| 0 | 263  | 366 PITG_14278  |

|   |      |                 |
|---|------|-----------------|
| 0 | 55   | 10 NA           |
| 0 | 286  | 326 PITG_20589  |
| 0 | 11   | 17 PITG_21516   |
| 0 | 8    | 5 NA            |
| 0 | 271  | 28 NA           |
| 0 | 89   | 86 PITG_02579   |
| 0 | 68   | 35 PITG_16043   |
| 0 | 6    | 24 PITG_11127   |
| 0 | 20   | 129 PITG_04006  |
| 0 | 198  | 16 NA           |
| 0 | 20   | 4 NA            |
| 0 | 0    | 0 NA            |
| 0 | 157  | 26 PITG_04719   |
| 0 | 43   | 4 PITG_05190    |
| 0 | 150  | 17 NA           |
| 0 | 32   | 5 PITG_16128    |
| 0 | 809  | 552 PITG_02282  |
| 0 | 4    | 2 PITG_03374    |
| 0 | 20   | 27 PITG_00994   |
| 0 | 4    | 6 PITG_18786    |
| 0 | 4    | 0 NA            |
| 0 | 2081 | 3081 PITG_17007 |
| 0 | 2    | 0 NA            |
| 0 | 211  | 146 PITG_17400  |
| 0 | 2    | 7 PITG_03577    |
| 0 | 2    | 0 PITG_05321    |
| 2 | 389  | 771 PITG_08744  |
| 0 | 218  | 54 PITG_05007   |
| 0 | 996  | 832 PITG_05561  |
| 0 | 367  | 198 PITG_21508  |
| 0 | 466  | 305 PITG_08043  |
| 0 | 490  | 64 PITG_12302   |
| 0 | 67   | 20 NA           |
| 0 | 133  | 100 PITG_08609  |
| 0 | 50   | 8 PITG_14594    |
| 0 | 0    | 0 PITG_18845    |
| 0 | 297  | 115 PITG_10282  |
| 0 | 23   | 59 PITG_08193   |
| 0 | 100  | 15 NA           |
| 4 | 883  | 610 PITG_01260  |
| 0 | 275  | 87 PITG_15483   |
| 0 | 638  | 791 PITG_17257  |
| 0 | 179  | 170 PITG_03471  |
| 0 | 143  | 46 PITG_00925   |
| 0 | 1393 | 1176 PITG_09964 |
| 0 | 19   | 10 PITG_17049   |
| 0 | 106  | 307 PITG_07285  |



|   |      |                 |
|---|------|-----------------|
| 0 | 51   | 32 PITG_17740   |
| 0 | 126  | 75 PITG_08067   |
| 0 | 86   | 38 PITG_06895   |
| 0 | 1377 | 998 PITG_09963  |
| 0 | 83   | 129 NA          |
| 0 | 37   | 29 PITG_11870   |
| 0 | 1611 | 960 PITG_13683  |
| 0 | 309  | 355 PITG_15553  |
| 0 | 380  | 94 PITG_18088   |
| 0 | 41   | 74 PITG_05391   |
| 2 | 714  | 1984 PITG_07300 |
| 0 | 0    | 0 PITG_12625    |
| 0 | 16   | 13 PITG_15912   |
| 0 | 51   | 13 PITG_11070   |
| 0 | 1449 | 1392 PITG_18072 |
| 0 | 519  | 267 PITG_16198  |
| 0 | 341  | 136 PITG_21380  |
| 0 | 1346 | 183 NA          |
| 0 | 1642 | 904 PITG_00266  |
| 0 | 368  | 12 PITG_21224   |
| 0 | 59   | 12 NA           |
| 0 | 0    | 2 PITG_12852    |
| 0 | 155  | 155 PITG_01043  |
| 0 | 0    | 0 NA            |
| 0 | 40   | 0 PITG_02292    |
| 0 | 2    | 2 PITG_09193    |
| 0 | 55   | 145 PITG_18000  |
| 0 | 28   | 6 PITG_21983    |
| 0 | 1152 | 979 PITG_11452  |
| 0 | 0    | 2 PITG_07426    |
| 0 | 6    | 0 PITG_12996    |
| 0 | 20   | 10 PITG_12996   |
| 0 | 37   | 7 NA            |
| 0 | 1663 | 305 PITG_12327  |
| 0 | 318  | 492 PITG_10938  |
| 2 | 1694 | 2402 NA         |
| 0 | 9    | 0 PITG_06570    |
| 0 | 171  | 42 PITG_13060   |
| 0 | 74   | 0 NA            |
| 0 | 168  | 43 PITG_04131   |
| 0 | 17   | 40 PITG_17049   |
| 0 | 38   | 6 PITG_17049    |
| 0 | 7    | 0 PITG_17701    |
| 0 | 0    | 0 NA            |
| 0 | 20   | 48 PITG_12228   |
| 0 | 24   | 19 PITG_00252   |
| 0 | 0    | 4 PITG_13224    |

|   |      |                 |
|---|------|-----------------|
| 0 | 11   | 11 PITG_09921   |
| 0 | 476  | 332 PITG_00166  |
| 0 | 588  | 324 PITG_09131  |
| 0 | 166  | 23 PITG_07241   |
| 0 | 32   | 29 PITG_10815   |
| 0 | 800  | 393 PITG_15787  |
| 0 | 209  | 194 PITG_00681  |
| 0 | 90   | 202 PITG_19855  |
| 0 | 135  | 29 PITG_21525   |
| 0 | 31   | 16 PITG_08653   |
| 0 | 43   | 0 PITG_11368    |
| 2 | 195  | 355 PITG_05245  |
| 0 | 68   | 39 PITG_14257   |
| 0 | 102  | 42 PITG_13029   |
| 0 | 62   | 45 PITG_18009   |
| 0 | 113  | 0 PITG_07765    |
| 0 | 73   | 6 NA            |
| 0 | 215  | 258 PITG_09289  |
| 0 | 6    | 0 NA            |
| 0 | 40   | 62 PITG_03267   |
| 0 | 90   | 217 PITG_19234  |
| 0 | 9    | 10 PITG_17361   |
| 0 | 137  | 3 NA            |
| 0 | 6    | 0 NA            |
| 0 | 599  | 309 PITG_09441  |
| 0 | 0    | 2 PITG_18185    |
| 0 | 209  | 315 PITG_13074  |
| 0 | 42   | 11 PITG_10149   |
| 0 | 281  | 892 PITG_10185  |
| 0 | 90   | 137 PITG_03246  |
| 0 | 0    | 5 PITG_10068    |
| 0 | 71   | 49 PITG_19318   |
| 0 | 47   | 2 PITG_11248    |
| 0 | 264  | 69 PITG_13226   |
| 0 | 6    | 21 PITG_06657   |
| 0 | 1014 | 298 NA          |
| 2 | 1577 | 825 PITG_02423  |
| 0 | 91   | 206 PITG_09576  |
| 0 | 184  | 501 PITG_05373  |
| 0 | 53   | 45 PITG_04719   |
| 0 | 226  | 549 PITG_00912  |
| 0 | 26   | 15 PITG_16137   |
| 4 | 456  | 1608 PITG_10887 |
| 0 | 163  | 409 PITG_16117  |
| 0 | 396  | 172 PITG_08537  |
| 0 | 21   | 16 PITG_00795   |
| 0 | 361  | 183 PITG_00525  |

|   |      |                 |
|---|------|-----------------|
| 0 | 6    | 4 PITG_00525    |
| 0 | 32   | 25 PITG_17382   |
| 0 | 1412 | 482 PITG_12108  |
| 0 | 3603 | 576 PITG_03486  |
| 0 | 6    | 49 PITG_00912   |
| 0 | 941  | 460 PITG_10148  |
| 0 | 14   | 16 PITG_13490   |
| 0 | 137  | 42 PITG_10141   |
| 0 | 96   | 134 PITG_13116  |
| 0 | 2050 | 372 PITG_19880  |
| 0 | 0    | 0 PITG_10690    |
| 0 | 16   | 10 NA           |
| 0 | 9    | 0 PITG_13302    |
| 0 | 65   | 26 NA           |
| 0 | 135  | 11 PITG_05611   |
| 0 | 110  | 2 PITG_03080    |
| 0 | 51   | 2 PITG_11248    |
| 0 | 595  | 1244 PITG_11766 |
| 0 | 254  | 142 PITG_11009  |
| 0 | 80   | 32 PITG_03459   |
| 0 | 34   | 102 PITG_10616  |
| 0 | 24   | 34 PITG_06597   |
| 0 | 911  | 880 PITG_01417  |
| 2 | 340  | 705 PITG_17921  |
| 0 | 2911 | 1738 PITG_08897 |
| 0 | 315  | 152 PITG_14231  |
| 0 | 358  | 499 PITG_08834  |
| 0 | 3    | 18 PITG_11466   |
| 0 | 73   | 381 PITG_18306  |
| 0 | 77   | 13 PITG_09439   |
| 0 | 274  | 911 PITG_02694  |
| 0 | 160  | 89 PITG_14641   |
| 0 | 337  | 67 NA           |
| 0 | 18   | 20 NA           |
| 0 | 632  | 627 PITG_13382  |
| 0 | 352  | 183 PITG_15654  |
| 0 | 226  | 563 PITG_01762  |
| 0 | 37   | 8 PITG_20780    |
| 0 | 1632 | 1618 PITG_00179 |
| 0 | 0    | 2 PITG_02139    |
| 0 | 0    | 0 NA            |
| 0 | 11   | 44 PITG_16924   |
| 0 | 36   | 3 PITG_05305    |
| 0 | 42   | 26 PITG_08626   |
| 0 | 2    | 0 PITG_22687    |
| 0 | 1760 | 2120 PITG_01255 |
| 0 | 23   | 2 NA            |

|   |      |                 |
|---|------|-----------------|
| 0 | 515  | 472 PITG_10863  |
| 0 | 2    | 0 PITG_12797    |
| 0 | 193  | 281 PITG_18874  |
| 0 | 28   | 137 PITG_22848  |
| 0 | 3    | 69 NA           |
| 0 | 295  | 434 PITG_05582  |
| 0 | 15   | 6 NA            |
| 0 | 67   | 0 PITG_17004    |
| 0 | 15   | 0 PITG_19314    |
| 0 | 4    | 2 PITG_01553    |
| 0 | 13   | 21 NA           |
| 0 | 106  | 129 PITG_20321  |
| 0 | 4    | 2 NA            |
| 0 | 40   | 33 PITG_14917   |
| 0 | 434  | 792 PITG_19017  |
| 0 | 0    | 2 PITG_06022    |
| 0 | 2    | 0 PITG_13713    |
| 0 | 497  | 137 PITG_20611  |
| 0 | 32   | 24 PITG_01282   |
| 0 | 18   | 24 PITG_14269   |
| 0 | 715  | 599 PITG_13778  |
| 0 | 3848 | 1669 PITG_09742 |
| 0 | 40   | 26 PITG_22416   |
| 0 | 37   | 35 PITG_06695   |
| 0 | 0    | 2 PITG_21597    |
| 2 | 1568 | 629 PITG_08832  |
| 0 | 401  | 432 PITG_10210  |
| 0 | 98   | 185 PITG_12694  |
| 0 | 2285 | 556 PITG_16921  |
| 0 | 812  | 293 PITG_00708  |
| 0 | 221  | 577 PITG_18052  |
| 0 | 3    | 2 PITG_12278    |
| 0 | 110  | 194 PITG_12182  |
| 2 | 468  | 775 PITG_14850  |
| 0 | 430  | 234 PITG_04522  |
| 4 | 468  | 1493 PITG_11966 |
| 0 | 84   | 4 PITG_00323    |
| 0 | 131  | 171 PITG_10028  |
| 0 | 98   | 26 PITG_10311   |
| 0 | 76   | 42 PITG_14853   |
| 0 | 656  | 642 PITG_19535  |
| 0 | 46   | 31 PITG_04717   |
| 0 | 12   | 14 PITG_00688   |
| 0 | 0    | 0 NA            |
| 0 | 54   | 10 PITG_14991   |
| 0 | 2    | 2 PITG_01111    |
| 2 | 2843 | 1647 PITG_07173 |

|   |      |                 |
|---|------|-----------------|
| 0 | 804  | 1372 PITG_01072 |
| 0 | 2    | 0 PITG_03891    |
| 0 | 45   | 0 PITG_18999    |
| 0 | 580  | 269 PITG_19959  |
| 0 | 88   | 0 PITG_09453    |
| 0 | 352  | 253 PITG_00263  |
| 0 | 35   | 54 PITG_08509   |
| 0 | 18   | 34 PITG_03275   |
| 0 | 4642 | 3412 PITG_05392 |
| 0 | 263  | 181 NA          |
| 0 | 56   | 27 PITG_11750   |
| 0 | 2029 | 2126 PITG_03712 |
| 0 | 158  | 90 PITG_03245   |
| 0 | 481  | 156 PITG_12854  |
| 0 | 5    | 2 PITG_18457    |
| 0 | 275  | 70 PITG_17230   |
| 0 | 1262 | 1145 PITG_09699 |
| 0 | 97   | 0 PITG_03374    |
| 0 | 244  | 32 PITG_06483   |
| 0 | 214  | 29 PITG_01946   |
| 0 | 0    | 2 PITG_12619    |
| 0 | 2    | 4 PITG_04702    |
| 0 | 4    | 2 PITG_12162    |
| 0 | 9    | 8 PITG_01537    |
| 0 | 59   | 35 PITG_06919   |
| 0 | 49   | 15 NA           |
| 0 | 225  | 223 PITG_19855  |
| 0 | 142  | 85 PITG_13277   |
| 0 | 46   | 13 PITG_12676   |
| 0 | 215  | 23 PITG_12696   |
| 0 | 2    | 2 PITG_16546    |
| 2 | 656  | 970 PITG_01862  |
| 0 | 4    | 2 PITG_08595    |
| 0 | 74   | 23 PITG_01845   |
| 0 | 59   | 64 NA           |
| 0 | 0    | 13 NA           |
| 0 | 358  | 299 NA          |
| 0 | 0    | 0 PITG_10308    |
| 0 | 3    | 2 PITG_16365    |
| 0 | 67   | 80 PITG_18475   |
| 0 | 33   | 2 PITG_10149    |
| 0 | 227  | 673 PITG_00850  |
| 0 | 8    | 10 PITG_12496   |
| 0 | 0    | 0 NA            |
| 2 | 5349 | 1066 PITG_20189 |
| 2 | 1411 | 2600 PITG_03477 |
| 0 | 399  | 1823 PITG_03178 |

|   |      |                 |
|---|------|-----------------|
| 0 | 16   | 17 PITG_04535   |
| 0 | 83   | 26 PITG_06966   |
| 0 | 186  | 82 PITG_13980   |
| 0 | 364  | 614 PITG_11766  |
| 0 | 396  | 9 PITG_17767    |
| 0 | 240  | 83 PITG_14267   |
| 0 | 0    | 2 PITG_13167    |
| 0 | 107  | 153 PITG_07717  |
| 0 | 1597 | 900 PITG_12990  |
| 0 | 32   | 6 PITG_08722    |
| 0 | 21   | 17 PITG_02447   |
| 0 | 847  | 959 PITG_03333  |
| 0 | 21   | 26 PITG_15660   |
| 0 | 726  | 941 PITG_09626  |
| 0 | 17   | 0 PITG_06669    |
| 0 | 95   | 39 NA           |
| 0 | 59   | 4 NA            |
| 0 | 508  | 248 PITG_12827  |
| 3 | 210  | 899 PITG_03712  |
| 0 | 207  | 357 PITG_11690  |
| 0 | 23   | 84 PITG_01507   |
| 0 | 38   | 5 NA            |
| 0 | 7    | 15 PITG_07277   |
| 0 | 155  | 258 PITG_18934  |
| 0 | 403  | 477 PITG_00263  |
| 0 | 876  | 1082 PITG_12947 |
| 0 | 202  | 14 PITG_12695   |
| 0 | 73   | 64 PITG_03018   |
| 0 | 442  | 133 NA          |
| 0 | 13   | 5 NA            |
| 0 | 531  | 824 PITG_20383  |
| 0 | 63   | 34 PITG_17028   |
| 0 | 7    | 0 PITG_08018    |
| 0 | 392  | 465 PITG_00390  |
| 0 | 150  | 70 PITG_19775   |
| 0 | 78   | 68 PITG_02923   |
| 0 | 161  | 46 PITG_06611   |
| 0 | 96   | 123 PITG_20074  |
| 0 | 35   | 109 PITG_10942  |
| 0 | 37   | 28 PITG_03882   |
| 0 | 369  | 46 PITG_14632   |
| 0 | 2    | 2 PITG_07311    |
| 0 | 312  | 583 PITG_11588  |
| 0 | 355  | 386 PITG_10863  |
| 0 | 31   | 14 PITG_03166   |
| 0 | 138  | 132 PITG_06762  |
| 0 | 0    | 2 PITG_12173    |

|   |      |                 |
|---|------|-----------------|
| 0 | 9    | 2 PITG_12277    |
| 2 | 1953 | 2990 PITG_14913 |
| 0 | 62   | 79 PITG_16801   |
| 0 | 26   | 16 PITG_00641   |
| 0 | 2    | 7 PITG_02981    |
| 0 | 1401 | 1708 PITG_19669 |
| 0 | 22   | 9 PITG_11249    |
| 0 | 0    | 0 PITG_02995    |
| 0 | 162  | 21 NA           |
| 0 | 23   | 2 PITG_03804    |
| 0 | 49   | 10 PITG_12160   |
| 2 | 2182 | 1913 PITG_07173 |
| 0 | 119  | 56 PITG_04125   |
| 0 | 7    | 13 PITG_04884   |
| 0 | 204  | 88 PITG_15383   |
| 0 | 0    | 4 PITG_02501    |
| 0 | 58   | 12 PITG_09401   |
| 0 | 280  | 481 PITG_12990  |
| 0 | 13   | 4 PITG_18326    |
| 0 | 39   | 25 PITG_15138   |
| 0 | 130  | 2 PITG_05617    |
| 0 | 54   | 72 NA           |
| 0 | 180  | 454 PITG_11775  |
| 2 | 2032 | 2622 PITG_03712 |
| 0 | 14   | 8 PITG_00283    |
| 0 | 5    | 10 PITG_09700   |
| 0 | 23   | 21 PITG_19804   |
| 0 | 154  | 190 PITG_16069  |
| 0 | 250  | 17 PITG_01276   |
| 0 | 49   | 152 PITG_09702  |
| 0 | 6    | 2 NA            |
| 0 | 25   | 19 PITG_09707   |
| 0 | 6    | 0 PITG_07301    |
| 0 | 12   | 20 PITG_11977   |
| 0 | 66   | 14 PITG_18393   |
| 0 | 10   | 0 PITG_01647    |
| 0 | 13   | 4 PITG_05467    |
| 0 | 133  | 149 PITG_05489  |
| 0 | 755  | 542 PITG_11215  |
| 0 | 48   | 19 PITG_12140   |
| 0 | 56   | 156 PITG_10765  |
| 0 | 1110 | 250 PITG_06263  |
| 0 | 227  | 106 PITG_05587  |
| 0 | 98   | 50 NA           |
| 0 | 23   | 19 PITG_03008   |
| 0 | 7    | 0 PITG_19149    |
| 0 | 10   | 76 PITG_04618   |

|   |      |                 |
|---|------|-----------------|
| 0 | 297  | 475 PITG_02853  |
| 4 | 893  | 1053 PITG_09626 |
| 0 | 596  | 358 NA          |
| 0 | 77   | 4 NA            |
| 0 | 3    | 0 PITG_16337    |
| 0 | 13   | 9 PITG_03828    |
| 0 | 19   | 13 PITG_01290   |
| 0 | 4    | 0 NA            |
| 0 | 236  | 570 PITG_00867  |
| 0 | 370  | 182 PITG_17926  |
| 0 | 163  | 2 PITG_06428    |
| 0 | 16   | 0 PITG_00257    |
| 0 | 48   | 28 NA           |
| 2 | 86   | 288 NA          |
| 0 | 97   | 87 PITG_14924   |
| 0 | 790  | 978 PITG_20383  |
| 0 | 2    | 6 NA            |
| 2 | 4656 | 2620 PITG_13681 |
| 0 | 134  | 204 PITG_05657  |
| 0 | 107  | 11 PITG_11259   |
| 0 | 501  | 3 NA            |
| 0 | 4    | 0 PITG_02242    |
| 0 | 725  | 1262 PITG_17261 |
| 0 | 39   | 63 PITG_09820   |
| 0 | 76   | 41 PITG_09453   |
| 0 | 60   | 50 PITG_02198   |
| 0 | 342  | 95 PITG_07286   |
| 0 | 42   | 64 PITG_14831   |
| 0 | 13   | 7 PITG_09376    |
| 0 | 1298 | 293 PITG_18107  |
| 0 | 1401 | 59 PITG_00359   |
| 0 | 1553 | 505 PITG_09436  |
| 0 | 13   | 97 PITG_11966   |
| 0 | 262  | 381 PITG_03900  |
| 0 | 74   | 88 PITG_01608   |
| 2 | 1867 | 2581 PITG_15638 |
| 0 | 204  | 93 NA           |
| 0 | 42   | 0 NA            |
| 0 | 25   | 10 PITG_15819   |
| 0 | 0    | 6 PITG_03550    |
| 0 | 70   | 129 PITG_13919  |
| 0 | 26   | 63 PITG_06813   |
| 0 | 1887 | 140 PITG_00179  |
| 0 | 197  | 397 PITG_15639  |
| 0 | 217  | 265 PITG_04002  |
| 0 | 82   | 37 PITG_11783   |
| 2 | 346  | 206 PITG_20412  |



|   |      |                 |
|---|------|-----------------|
| 0 | 200  | 83 PITG_08236   |
| 0 | 7    | 4 PITG_18458    |
| 0 | 118  | 176 PITG_17445  |
| 0 | 0    | 0 NA            |
| 0 | 118  | 42 PITG_14380   |
| 0 | 0    | 0 PITG_06021    |
| 0 | 150  | 34 PITG_17556   |
| 0 | 33   | 0 NA            |
| 0 | 16   | 19 PITG_12521   |
| 0 | 28   | 28 PITG_03017   |
| 0 | 507  | 60 PITG_20629   |
| 0 | 245  | 314 PITG_17596  |
| 0 | 116  | 84 PITG_17779   |
| 0 | 78   | 112 PITG_01715  |
| 0 | 211  | 314 PITG_09786  |
| 0 | 2    | 0 PITG_06669    |
| 0 | 10   | 6 PITG_05627    |
| 0 | 50   | 93 PITG_13423   |
| 0 | 427  | 315 PITG_06415  |
| 0 | 119  | 265 PITG_18752  |
| 0 | 181  | 41 NA           |
| 0 | 728  | 673 PITG_00194  |
| 0 | 202  | 42 NA           |
| 0 | 16   | 38 PITG_12619   |
| 0 | 1488 | 1287 PITG_00827 |
| 0 | 178  | 393 PITG_10142  |
| 0 | 184  | 1357 PITG_13919 |
| 0 | 649  | 1893 PITG_17406 |
| 0 | 70   | 49 PITG_05934   |
| 0 | 12   | 10 PITG_03988   |
| 0 | 172  | 99 PITG_09990   |
| 0 | 1395 | 1238 PITG_08834 |
| 0 | 2    | 2 PITG_17816    |
| 0 | 638  | 102 PITG_04131  |
| 0 | 245  | 315 PITG_17133  |
| 0 | 7    | 2 PITG_18862    |
| 0 | 66   | 32 PITG_11782   |
| 0 | 2    | 0 PITG_01860    |
| 0 | 26   | 14 NA           |
| 0 | 315  | 114 PITG_12516  |
| 0 | 44   | 55 PITG_13307   |
| 0 | 6    | 8 PITG_11451    |
| 0 | 17   | 11 PITG_00668   |
| 0 | 4    | 0 NA            |
| 0 | 64   | 54 NA           |
| 0 | 927  | 1211 PITG_10887 |
| 0 | 25   | 2 NA            |

|   |      |                 |
|---|------|-----------------|
| 0 | 1107 | 771 PITG_07380  |
| 0 | 83   | 31 PITG_11584   |
| 0 | 0    | 0 PITG_06022    |
| 0 | 216  | 254 PITG_13153  |
| 0 | 3    | 0 NA            |
| 0 | 2    | 0 PITG_14005    |
| 0 | 12   | 4 PITG_18304    |
| 0 | 1506 | 524 PITG_14571  |
| 0 | 6    | 2 PITG_05170    |
| 0 | 0    | 8 PITG_03142    |
| 0 | 59   | 12 PITG_04441   |
| 0 | 328  | 119 NA          |
| 0 | 559  | 158 PITG_21658  |
| 6 | 4380 | 3545 PITG_09431 |
| 2 | 1269 | 2422 PITG_20188 |
| 0 | 10   | 7 PITG_11888    |
| 0 | 148  | 596 PITG_01940  |
| 0 | 847  | 92 PITG_17261   |
| 0 | 144  | 47 PITG_02197   |
| 0 | 24   | 0 PITG_20866    |
| 0 | 1515 | 429 PITG_19602  |
| 0 | 36   | 4 PITG_03711    |
| 0 | 2    | 0 PITG_10303    |
| 0 | 8    | 13 PITG_07102   |
| 4 | 5729 | 2499 PITG_06514 |
| 0 | 20   | 19 PITG_12463   |
| 0 | 187  | 103 PITG_13750  |
| 0 | 21   | 2 PITG_11651    |
| 0 | 125  | 110 PITG_05587  |
| 0 | 4677 | 1025 PITG_10459 |
| 0 | 135  | 56 PITG_20999   |
| 0 | 17   | 27 PITG_15571   |
| 0 | 158  | 113 PITG_01640  |
| 0 | 88   | 15 PITG_06817   |
| 0 | 111  | 125 PITG_21596  |
| 0 | 122  | 12 NA           |
| 0 | 643  | 207 PITG_03585  |
| 0 | 58   | 25 PITG_15442   |
| 0 | 79   | 22 PITG_10576   |
| 0 | 729  | 804 PITG_00632  |
| 0 | 50   | 6 PITG_01267    |
| 0 | 69   | 10 PITG_19488   |
| 0 | 454  | 998 PITG_10169  |
| 0 | 429  | 1409 PITG_08611 |
| 0 | 30   | 56 PITG_04994   |
| 0 | 11   | 0 PITG_13827    |
| 0 | 3091 | 321 PITG_19129  |

|   |      |                 |
|---|------|-----------------|
| 0 | 984  | 1755 PITG_03440 |
| 0 | 2    | 2 PITG_04179    |
| 0 | 4    | 2 PITG_03657    |
| 0 | 10   | 22 PITG_21581   |
| 0 | 135  | 164 PITG_21963  |
| 0 | 103  | 73 PITG_16757   |
| 0 | 101  | 61 PITG_04041   |
| 0 | 645  | 504 PITG_12749  |
| 0 | 2    | 0 PITG_15133    |
| 0 | 468  | 37 PITG_15872   |
| 0 | 141  | 169 NA          |
| 0 | 22   | 19 PITG_07562   |
| 0 | 0    | 6 PITG_03152    |
| 0 | 381  | 111 PITG_07795  |
| 9 | 366  | 1237 PITG_15358 |
| 0 | 15   | 11 PITG_09597   |
| 0 | 49   | 30 PITG_00845   |
| 0 | 1387 | 1131 PITG_09512 |
| 0 | 19   | 2 PITG_06182    |
| 0 | 68   | 78 PITG_06972   |
| 0 | 285  | 194 PITG_17527  |
| 0 | 323  | 359 PITG_06325  |
| 0 | 200  | 79 PITG_12839   |
| 0 | 20   | 2 PITG_11572    |
| 0 | 262  | 318 PITG_15531  |
| 2 | 85   | 553 PITG_04843  |
| 0 | 8    | 74 PITG_22065   |
| 0 | 0    | 0 NA            |
| 0 | 728  | 1019 PITG_09540 |
| 0 | 12   | 0 PITG_07109    |
| 0 | 11   | 14 PITG_12480   |
| 0 | 75   | 20 PITG_08351   |
| 2 | 844  | 2063 PITG_04868 |
| 0 | 2    | 3 PITG_01744    |
| 0 | 12   | 20 PITG_10138   |
| 0 | 94   | 95 NA           |
| 2 | 1970 | 1834 PITG_15118 |
| 0 | 5    | 0 NA            |
| 0 | 191  | 34 PITG_02660   |
| 0 | 19   | 20 NA           |
| 0 | 7    | 6 PITG_07200    |
| 4 | 332  | 879 PITG_03239  |
| 0 | 48   | 199 PITG_08445  |
| 0 | 41   | 35 PITG_18298   |
| 0 | 219  | 134 PITG_21510  |
| 0 | 191  | 49 PITG_15055   |
| 0 | 153  | 64 PITG_07241   |

|   |      |                 |
|---|------|-----------------|
| 0 | 70   | 23 PITG_16468   |
| 0 | 7    | 11 PITG_06479   |
| 0 | 119  | 0 NA            |
| 0 | 2    | 7 NA            |
| 0 | 478  | 393 PITG_19880  |
| 0 | 138  | 73 PITG_09986   |
| 0 | 221  | 171 PITG_14576  |
| 0 | 9    | 2 PITG_05325    |
| 0 | 1064 | 825 PITG_09526  |
| 0 | 0    | 0 PITG_11024    |
| 0 | 15   | 54 PITG_03599   |
| 0 | 561  | 656 PITG_09748  |
| 0 | 12   | 0 PITG_02254    |
| 0 | 55   | 12 PITG_15247   |
| 0 | 1674 | 815 PITG_12886  |
| 0 | 221  | 87 PITG_00982   |
| 0 | 681  | 375 PITG_01705  |
| 0 | 8    | 6 PITG_04590    |
| 0 | 4    | 4 PITG_09832    |
| 0 | 11   | 24 PITG_00564   |
| 0 | 6    | 6 PITG_16472    |
| 0 | 0    | 0 PITG_16389    |
| 0 | 9    | 9 PITG_00140    |
| 0 | 739  | 362 PITG_06424  |
| 0 | 310  | 899 PITG_02256  |
| 0 | 4    | 6 PITG_19351    |
| 0 | 0    | 3 PITG_02824    |
| 0 | 2    | 2 PITG_09387    |
| 0 | 38   | 12 NA           |
| 0 | 4    | 3 NA            |
| 0 | 7    | 2 NA            |
| 2 | 1263 | 3798 PITG_05615 |
| 0 | 0    | 0 PITG_02501    |
| 0 | 673  | 678 PITG_13778  |
| 0 | 0    | 4 PITG_00348    |
| 0 | 1755 | 2270 PITG_16008 |
| 0 | 525  | 545 PITG_10083  |
| 0 | 123  | 171 PITG_03477  |
| 0 | 21   | 31 PITG_07247   |
| 0 | 18   | 161 PITG_22670  |
| 0 | 2    | 27 PITG_06016   |
| 0 | 1635 | 2019 PITG_08744 |
| 0 | 0    | 4 NA            |
| 0 | 0    | 2 PITG_03142    |
| 0 | 320  | 128 NA          |
| 0 | 36   | 40 PITG_08042   |
| 0 | 764  | 776 PITG_04843  |

|   |      |                 |
|---|------|-----------------|
| 2 | 530  | 1516 PITG_06415 |
| 0 | 31   | 0 NA            |
| 0 | 731  | 374 PITG_09786  |
| 0 | 0    | 0 PITG_07655    |
| 0 | 11   | 18 PITG_11870   |
| 0 | 44   | 18 PITG_16903   |
| 0 | 381  | 296 PITG_12886  |
| 0 | 1247 | 397 PITG_05325  |
| 0 | 24   | 27 PITG_12517   |
| 0 | 74   | 10 PITG_06643   |
| 0 | 20   | 2 PITG_09800    |
| 0 | 25   | 2 PITG_10443    |
| 0 | 2    | 0 PITG_12914    |
| 0 | 352  | 244 PITG_08444  |
| 0 | 171  | 71 PITG_11118   |
| 0 | 8    | 11 PITG_21182   |
| 0 | 917  | 946 PITG_05115  |
| 0 | 2    | 0 PITG_23029    |
| 0 | 886  | 754 PITG_02049  |
| 0 | 423  | 472 PITG_09131  |
| 0 | 13   | 0 PITG_10154    |
| 0 | 52   | 4 PITG_05176    |
| 0 | 697  | 89 PITG_01041   |
| 0 | 51   | 150 NA          |
| 0 | 0    | 6 PITG_15406    |
| 0 | 87   | 95 PITG_13341   |
| 0 | 370  | 229 PITG_04591  |
| 0 | 4    | 11 PITG_00193   |
| 0 | 212  | 201 PITG_10148  |
| 0 | 2    | 10 PITG_01450   |
| 0 | 103  | 167 PITG_05356  |
| 0 | 0    | 0 PITG_10935    |
| 0 | 50   | 24 PITG_00337   |
| 0 | 455  | 220 PITG_15250  |
| 0 | 410  | 132 NA          |
| 0 | 112  | 296 PITG_05582  |
| 0 | 1243 | 1879 PITG_03277 |
| 0 | 214  | 64 PITG_16798   |
| 9 | 1190 | 7687 PITG_05615 |
| 0 | 25   | 2 PITG_11773    |
| 0 | 51   | 2 NA            |
| 0 | 0    | 30 PITG_22065   |
| 0 | 228  | 565 PITG_05185  |
| 0 | 196  | 155 PITG_13204  |
| 0 | 312  | 151 PITG_03229  |
| 0 | 233  | 1728 NA         |
| 0 | 153  | 29 PITG_15875   |

|   |      |                 |
|---|------|-----------------|
| 0 | 17   | 4 NA            |
| 0 | 196  | 134 PITG_07028  |
| 0 | 63   | 45 PITG_11728   |
| 0 | 352  | 434 PITG_19855  |
| 2 | 118  | 2264 PITG_05615 |
| 0 | 2    | 0 PITG_02841    |
| 2 | 825  | 523 PITG_19063  |
| 0 | 151  | 197 PITG_03306  |
| 0 | 164  | 716 PITG_03221  |
| 0 | 28   | 0 NA            |
| 0 | 57   | 59 PITG_08011   |
| 0 | 68   | 81 PITG_04425   |
| 0 | 191  | 4 NA            |
| 0 | 70   | 17 PITG_12504   |
| 0 | 136  | 143 PITG_12534  |
| 0 | 76   | 131 PITG_13750  |
| 0 | 13   | 4 PITG_00469    |
| 2 | 122  | 417 PITG_16005  |
| 0 | 258  | 69 PITG_00550   |
| 0 | 10   | 11 PITG_01005   |
| 0 | 305  | 28 PITG_11425   |
| 0 | 2    | 0 NA            |
| 0 | 0    | 0 PITG_13713    |
| 0 | 69   | 39 PITG_00984   |
| 0 | 0    | 4 PITG_16671    |
| 0 | 767  | 612 PITG_05185  |
| 0 | 465  | 53 PITG_01982   |
| 0 | 557  | 691 PITG_20188  |
| 0 | 2653 | 298 PITG_03916  |
| 0 | 3    | 0 PITG_03491    |
| 0 | 0    | 13 NA           |
| 0 | 995  | 177 PITG_21378  |
| 0 | 344  | 220 PITG_19166  |
| 0 | 0    | 0 PITG_13671    |
| 0 | 438  | 123 PITG_02853  |
| 0 | 78   | 113 PITG_04078  |
| 0 | 390  | 280 PITG_11189  |
| 0 | 204  | 153 PITG_00451  |
| 0 | 562  | 183 PITG_18788  |
| 0 | 482  | 415 PITG_05240  |
| 0 | 17   | 45 PITG_01591   |
| 0 | 4    | 4 PITG_20031    |
| 0 | 4    | 2 PITG_11009    |
| 0 | 258  | 751 PITG_07285  |
| 0 | 449  | 142 PITG_01897  |
| 0 | 8    | 0 PITG_11803    |
| 0 | 43   | 9 PITG_16067    |

|   |      |                 |
|---|------|-----------------|
| 0 | 86   | 54 PITG_01648   |
| 0 | 10   | 38 PITG_06142   |
| 0 | 6    | 0 PITG_10723    |
| 0 | 335  | 145 PITG_05902  |
| 0 | 2942 | 1123 PITG_10459 |
| 0 | 21   | 0 PITG_18274    |
| 0 | 18   | 15 PITG_05582   |
| 0 | 285  | 74 NA           |
| 0 | 4    | 0 PITG_06759    |
| 0 | 1094 | 280 PITG_03574  |
| 0 | 227  | 545 PITG_08711  |
| 0 | 472  | 2300 PITG_00527 |
| 0 | 487  | 249 PITG_14111  |
| 0 | 48   | 9 NA            |
| 0 | 100  | 62 PITG_06702   |
| 0 | 417  | 492 PITG_08601  |
| 0 | 2060 | 3003 PITG_02925 |
| 0 | 991  | 1388 PITG_19121 |
| 0 | 214  | 225 NA          |
| 0 | 1356 | 829 PITG_06237  |
| 0 | 19   | 63 PITG_06237   |
| 0 | 100  | 192 PITG_22848  |
| 2 | 278  | 756 PITG_18052  |
| 0 | 583  | 325 PITG_15781  |
| 0 | 14   | 4 NA            |
| 0 | 81   | 16 PITG_12915   |
| 0 | 14   | 13 PITG_09278   |
| 0 | 4    | 11 PITG_11291   |
| 0 | 496  | 550 PITG_10649  |
| 0 | 76   | 272 PITG_03685  |
| 0 | 1072 | 744 PITG_18052  |
| 0 | 182  | 73 PITG_00406   |
| 0 | 87   | 91 PITG_01822   |
| 0 | 14   | 57 PITG_16048   |
| 0 | 109  | 46 PITG_13366   |
| 0 | 0    | 0 PITG_02501    |
| 0 | 376  | 196 PITG_15781  |
| 0 | 472  | 702 PITG_09626  |
| 0 | 73   | 92 PITG_12480   |
| 2 | 4087 | 1613 PITG_00941 |
| 0 | 2    | 22 PITG_15365   |
| 0 | 107  | 962 PITG_15358  |
| 0 | 53   | 111 PITG_12747  |
| 0 | 68   | 17 PITG_12739   |
| 0 | 129  | 215 PITG_11524  |
| 0 | 6    | 0 NA            |
| 0 | 18   | 8 PITG_01121    |

|   |      |                 |
|---|------|-----------------|
| 0 | 6    | 22 PITG_08031   |
| 0 | 81   | 36 PITG_15694   |
| 0 | 12   | 28 PITG_11689   |
| 0 | 89   | 142 PITG_09346  |
| 0 | 50   | 211 PITG_22848  |
| 0 | 4    | 13 NA           |
| 0 | 146  | 215 PITG_14747  |
| 0 | 149  | 409 PITG_00266  |
| 0 | 118  | 50 PITG_01832   |
| 0 | 179  | 40 PITG_02192   |
| 2 | 888  | 1081 PITG_17708 |
| 0 | 492  | 35 PITG_15727   |
| 0 | 9    | 0 PITG_10487    |
| 2 | 544  | 504 PITG_01515  |
| 0 | 25   | 23 PITG_10680   |
| 0 | 9    | 56 PITG_19005   |
| 0 | 292  | 239 PITG_18421  |
| 0 | 266  | 66 PITG_19235   |
| 0 | 28   | 47 PITG_13681   |
| 0 | 182  | 174 PITG_07314  |
| 0 | 43   | 18 PITG_00628   |
| 0 | 226  | 63 PITG_08598   |
| 0 | 2    | 10 PITG_22165   |
| 0 | 29   | 6 PITG_02337    |
| 0 | 141  | 17 PITG_02598   |
| 0 | 4    | 0 PITG_20197    |
| 0 | 22   | 0 NA            |
| 0 | 134  | 54 PITG_09449   |
| 0 | 2    | 14 PITG_16468   |
| 0 | 0    | 2 PITG_17792    |
| 0 | 8    | 7 NA            |
| 0 | 0    | 0 PITG_05675    |
| 0 | 40   | 11 NA           |
| 0 | 2    | 0 PITG_21313    |
| 0 | 10   | 4 PITG_01301    |
| 0 | 11   | 0 PITG_01101    |
| 0 | 43   | 176 PITG_05462  |
| 0 | 2    | 6 PITG_05175    |
| 0 | 407  | 358 PITG_07197  |
| 0 | 146  | 210 PITG_11852  |
| 0 | 549  | 1130 PITG_02694 |
| 0 | 0    | 0 PITG_19149    |
| 0 | 2230 | 1342 PITG_12670 |
| 0 | 99   | 0 PITG_10362    |
| 0 | 4    | 18 PITG_13558   |
| 0 | 171  | 58 PITG_11736   |
| 0 | 1135 | 833 NA          |



|   |      |                 |
|---|------|-----------------|
| 0 | 404  | 27 PITG_00443   |
| 0 | 69   | 40 PITG_14260   |
| 0 | 11   | 8 PITG_06669    |
| 0 | 10   | 9 PITG_03987    |
| 0 | 5    | 10 NA           |
| 0 | 182  | 73 NA           |
| 0 | 4    | 9 PITG_12521    |
| 0 | 14   | 7 PITG_07077    |
| 3 | 309  | 462 PITG_10146  |
| 0 | 7969 | 675 PITG_07999  |
| 0 | 503  | 443 PITG_17005  |
| 0 | 20   | 202 PITG_04862  |
| 0 | 372  | 245 NA          |
| 0 | 2    | 10 PITG_00392   |
| 0 | 43   | 2 NA            |
| 2 | 466  | 666 PITG_08932  |
| 0 | 2324 | 2395 PITG_13500 |
| 0 | 29   | 0 NA            |
| 0 | 36   | 2 NA            |
| 0 | 294  | 140 NA          |
| 2 | 336  | 435 PITG_10883  |
| 0 | 147  | 120 PITG_03532  |
| 0 | 109  | 46 PITG_03462   |
| 0 | 211  | 20 PITG_03355   |
| 0 | 1359 | 335 PITG_02022  |
| 0 | 86   | 30 NA           |
| 0 | 8    | 41 PITG_12691   |
| 0 | 314  | 131 PITG_09271  |
| 0 | 2    | 7 PITG_00725    |
| 0 | 0    | 0 PITG_02139    |
| 0 | 39   | 38 PITG_01316   |
| 0 | 52   | 11 PITG_16940   |
| 0 | 819  | 1161 PITG_14727 |
| 0 | 15   | 70 PITG_05778   |
| 0 | 1302 | 597 PITG_09699  |
| 0 | 628  | 197 PITG_00170  |
| 0 | 123  | 194 PITG_18001  |
| 0 | 4    | 0 NA            |
| 0 | 237  | 118 PITG_19314  |
| 0 | 189  | 127 PITG_03235  |
| 0 | 519  | 741 PITG_08044  |
| 0 | 585  | 254 PITG_17725  |
| 7 | 891  | 3969 PITG_10941 |
| 0 | 60   | 42 PITG_19382   |
| 0 | 33   | 13 PITG_11122   |
| 0 | 2    | 26 PITG_00594   |
| 0 | 2    | 0 PITG_23045    |

|   |      |                 |
|---|------|-----------------|
| 0 | 68   | 40 NA           |
| 0 | 1443 | 1339 PITG_14133 |
| 0 | 139  | 23 PITG_01063   |
| 0 | 73   | 40 PITG_00849   |
| 0 | 12   | 0 NA            |
| 0 | 167  | 427 PITG_01783  |
| 0 | 394  | 729 PITG_02211  |
| 0 | 19   | 0 PITG_11286    |
| 0 | 75   | 38 PITG_22409   |
| 0 | 0    | 0 PITG_10473    |
| 0 | 1038 | 294 PITG_17240  |
| 0 | 20   | 10 PITG_16138   |
| 0 | 26   | 6 PITG_19150    |
| 0 | 42   | 0 PITG_09967    |
| 0 | 8    | 92 PITG_07340   |
| 0 | 2    | 6 PITG_07340    |
| 0 | 2    | 0 PITG_12678    |
| 0 | 96   | 34 NA           |
| 0 | 106  | 68 PITG_10900   |
| 0 | 89   | 155 PITG_00054  |
| 0 | 0    | 2 PITG_12693    |
| 0 | 1992 | 1986 PITG_05011 |
| 0 | 39   | 2 PITG_13654    |
| 0 | 23   | 156 PITG_00527  |
| 2 | 367  | 2460 PITG_00527 |
| 0 | 290  | 346 PITG_15531  |
| 0 | 39   | 16 NA           |
| 0 | 15   | 28 PITG_00708   |
| 0 | 76   | 8 PITG_11038    |
| 0 | 0    | 2 PITG_07493    |
| 0 | 624  | 120 NA          |
| 0 | 256  | 219 PITG_10017  |
| 0 | 280  | 177 PITG_17384  |
| 0 | 3549 | 1488 PITG_19772 |
| 0 | 253  | 269 PITG_01569  |
| 0 | 38   | 40 PITG_11011   |
| 0 | 64   | 43 PITG_07029   |
| 0 | 238  | 141 PITG_06967  |
| 0 | 991  | 1049 PITG_09472 |
| 0 | 85   | 135 PITG_03044  |
| 0 | 483  | 321 PITG_01408  |
| 0 | 14   | 17 PITG_10827   |
| 0 | 196  | 48 PITG_10862   |
| 0 | 4584 | 613 NA          |
| 0 | 101  | 23 NA           |
| 0 | 0    | 5 PITG_02371    |
| 0 | 34   | 6 NA            |

|      |      |                 |
|------|------|-----------------|
| 0    | 133  | 72 PITG_00577   |
| 0    | 127  | 68 PITG_04380   |
| 0    | 17   | 19 PITG_07946   |
| 0    | 398  | 169 PITG_15985  |
| 0    | 0    | 0 PITG_06952    |
| 0    | 1280 | 546 PITG_02537  |
| 0    | 233  | 212 PITG_12691  |
| 0    | 100  | 56 PITG_10957   |
| 0    | 4    | 2 PITG_02842    |
| 0    | 130  | 141 NA          |
| 0    | 4    | 0 PITG_18171    |
| 0    | 627  | 523 PITG_06429  |
| 0    | 61   | 52 PITG_20274   |
| 0    | 234  | 218 PITG_04041  |
| 0    | 162  | 2 NA            |
| 0    | 2    | 0 PITG_20319    |
| 0    | 18   | 0 PITG_03229    |
| 0    | 139  | 0 PITG_21626    |
| 0    | 6    | 4 PITG_07848    |
| 0    | 170  | 66 PITG_16161   |
| 0    | 787  | 266 NA          |
| 0    | 19   | 2 NA            |
| 0    | 59   | 15 PITG_10992   |
| 0    | 2    | 14 PITG_01153   |
| 0    | 956  | 529 PITG_16757  |
| 6    | 3989 | 6886 PITG_17516 |
| 0    | 61   | 23 NA           |
| 0    | 13   | 2 PITG_03946    |
| 0    | 9    | 18 NA           |
| 2    | 1437 | 275 PITG_02416  |
| 0    | 60   | 91 PITG_09004   |
| 0    | 539  | 101 PITG_05534  |
| 0    | 1382 | 667 PITG_06608  |
| 0    | 646  | 114 PITG_01508  |
| 0    | 4266 | 4976 PITG_17516 |
| 2645 | 319  | 1174 NA         |
| 0    | 8    | 0 NA            |
| 0    | 386  | 364 PITG_03698  |
| 0    | 18   | 14 PITG_11870   |
| 0    | 237  | 386 PITG_13500  |
| 2    | 2298 | 2589 PITG_14175 |
| 0    | 24   | 22 PITG_19966   |
| 0    | 19   | 54 PITG_11249   |
| 0    | 76   | 12 PITG_08540   |
| 0    | 1834 | 483 PITG_01365  |
| 0    | 113  | 81 PITG_20306   |
| 0    | 2    | 4 PITG_16669    |

|   |      |                 |
|---|------|-----------------|
| 0 | 21   | 48 PITG_10258   |
| 0 | 32   | 8 PITG_01595    |
| 0 | 0    | 2 PITG_20302    |
| 0 | 403  | 218 PITG_05251  |
| 0 | 2523 | 2545 PITG_16198 |
| 0 | 41   | 22 PITG_22477   |
| 0 | 215  | 273 PITG_21397  |
| 0 | 3    | 2 PITG_09751    |
| 0 | 14   | 6 NA            |
| 0 | 0    | 3 PITG_11966    |
| 0 | 92   | 66 PITG_00152   |
| 0 | 2    | 0 PITG_01005    |
| 0 | 6    | 4 PITG_17312    |
| 0 | 310  | 423 PITG_22743  |
| 0 | 100  | 337 PITG_19871  |
| 0 | 186  | 65 PITG_02177   |
| 0 | 359  | 827 PITG_01094  |
| 0 | 13   | 20 PITG_02827   |
| 0 | 164  | 167 PITG_07110  |
| 0 | 149  | 24 NA           |
| 0 | 85   | 73 PITG_04601   |
| 0 | 2    | 2 PITG_15924    |
| 0 | 128  | 26 NA           |
| 0 | 203  | 89 PITG_11274   |
| 0 | 1291 | 322 PITG_13778  |
| 0 | 6    | 6 PITG_10488    |
| 0 | 164  | 72 PITG_01714   |
| 0 | 3    | 6 PITG_02246    |
| 0 | 70   | 4 PITG_04378    |
| 0 | 0    | 9 PITG_04820    |
| 0 | 0    | 0 NA            |
| 0 | 393  | 1141 PITG_06325 |
| 0 | 37   | 20 PITG_02770   |
| 0 | 341  | 898 PITG_13122  |
| 0 | 95   | 212 PITG_14456  |
| 0 | 87   | 613 PITG_18089  |
| 0 | 10   | 13 PITG_07851   |
| 0 | 90   | 89 PITG_12480   |
| 0 | 460  | 274 PITG_10193  |
| 0 | 201  | 279 PITG_13660  |
| 0 | 59   | 4 NA            |
| 0 | 44   | 47 PITG_02494   |
| 0 | 67   | 17 PITG_00845   |
| 0 | 66   | 392 PITG_00505  |
| 0 | 333  | 864 PITG_18089  |
| 0 | 57   | 10 PITG_21505   |
| 0 | 47   | 80 PITG_22135   |

|   |      |                 |
|---|------|-----------------|
| 0 | 487  | 530 PITG_00930  |
| 0 | 0    | 4 PITG_10028    |
| 0 | 572  | 903 PITG_00058  |
| 0 | 74   | 21 PITG_03437   |
| 0 | 23   | 0 PITG_04509    |
| 0 | 83   | 33 PITG_01144   |
| 0 | 66   | 24 PITG_02842   |
| 0 | 8    | 6 PITG_11594    |
| 0 | 399  | 456 PITG_14173  |
| 0 | 510  | 152 PITG_04802  |
| 0 | 46   | 175 NA          |
| 0 | 183  | 332 NA          |
| 0 | 235  | 405 PITG_04843  |
| 0 | 239  | 1433 PITG_13509 |
| 0 | 451  | 273 PITG_06503  |
| 0 | 14   | 2 NA            |
| 0 | 62   | 11 PITG_12228   |
| 0 | 23   | 18 PITG_17137   |
| 0 | 41   | 26 PITG_00688   |
| 0 | 0    | 5 PITG_01783    |
| 0 | 7    | 2 NA            |
| 0 | 1128 | 1025 PITG_05561 |
| 0 | 7    | 16 PITG_04671   |
| 0 | 88   | 442 PITG_15117  |
| 0 | 108  | 93 PITG_17779   |
| 0 | 2    | 0 PITG_22126    |
| 0 | 593  | 193 PITG_09828  |
| 2 | 1428 | 1702 PITG_01042 |
| 2 | 983  | 1531 PITG_15118 |
| 0 | 257  | 785 PITG_06771  |
| 0 | 109  | 157 PITG_06771  |
| 0 | 2183 | 2358 PITG_06595 |
| 0 | 14   | 2 PITG_17168    |
| 0 | 8    | 0 PITG_14106    |
| 0 | 143  | 428 PITG_03424  |
| 0 | 382  | 130 PITG_13382  |
| 0 | 2    | 2 NA            |
| 0 | 281  | 232 PITG_12886  |
| 0 | 0    | 0 NA            |
| 0 | 41   | 17 PITG_00654   |
| 0 | 81   | 20 PITG_02447   |
| 2 | 845  | 685 PITG_07048  |
| 0 | 38   | 61 PITG_10905   |
| 0 | 50   | 31 NA           |
| 0 | 7    | 9 PITG_09548    |
| 0 | 39   | 55 PITG_04908   |
| 0 | 2716 | 2834 PITG_10972 |

|   |      |                 |
|---|------|-----------------|
| 0 | 586  | 407 PITG_09624  |
| 0 | 302  | 101 PITG_01627  |
| 0 | 43   | 26 PITG_10141   |
| 0 | 118  | 145 PITG_14578  |
| 0 | 382  | 444 PITG_00146  |
| 0 | 10   | 0 NA            |
| 0 | 13   | 28 PITG_03830   |
| 0 | 145  | 108 PITG_06979  |
| 0 | 145  | 192 PITG_12693  |
| 0 | 0    | 5 PITG_00564    |
| 0 | 235  | 44 PITG_00486   |
| 0 | 23   | 2 PITG_16117    |
| 0 | 137  | 70 PITG_20307   |
| 0 | 24   | 122 PITG_05112  |
| 0 | 46   | 41 PITG_13658   |
| 0 | 122  | 101 PITG_16458  |
| 3 | 2384 | 4442 PITG_09345 |
| 0 | 0    | 4 PITG_14156    |
| 0 | 6    | 2 PITG_21211    |
| 0 | 390  | 134 PITG_08213  |
| 4 | 1086 | 2663 PITG_10263 |
| 0 | 27   | 95 PITG_10765   |
| 0 | 107  | 45 PITG_02198   |
| 0 | 76   | 47 PITG_14108   |
| 0 | 8    | 10 PITG_06675   |
| 0 | 6    | 0 PITG_07235    |
| 0 | 0    | 0 NA            |
| 0 | 39   | 96 PITG_01181   |
| 0 | 227  | 47 PITG_13366   |
| 0 | 143  | 81 PITG_14924   |
| 0 | 63   | 158 PITG_02741  |
| 2 | 908  | 1149 PITG_06415 |
| 0 | 483  | 2330 PITG_14083 |
| 0 | 22   | 65 PITG_05464   |
| 0 | 31   | 14 NA           |
| 0 | 17   | 6 PITG_08580    |
| 0 | 33   | 96 PITG_05347   |
| 0 | 196  | 35 PITG_09895   |
| 0 | 2    | 21 PITG_21303   |
| 0 | 12   | 8 PITG_02209    |
| 2 | 2975 | 4003 PITG_16198 |
| 0 | 292  | 257 PITG_13726  |
| 0 | 381  | 228 PITG_04501  |
| 0 | 115  | 28 PITG_21017   |
| 0 | 11   | 0 NA            |
| 0 | 18   | 8 PITG_12192    |
| 0 | 58   | 60 PITG_09548   |

|   |     |                 |
|---|-----|-----------------|
| 0 | 201 | 95 PITG_10980   |
| 0 | 130 | 78 PITG_18788   |
| 0 | 239 | 940 PITG_20425  |
| 2 | 892 | 2429 PITG_11966 |
| 0 | 21  | 7 NA            |
| 0 | 36  | 3 NA            |
| 2 | 100 | 756 PITG_11244  |
| 0 | 340 | 182 PITG_02745  |
| 0 | 103 | 50 NA           |
| 0 | 110 | 4 PITG_09436    |
| 0 | 25  | 0 NA            |
| 0 | 289 | 489 PITG_16446  |
| 0 | 201 | 48 NA           |
| 2 | 6   | 2 NA            |
| 0 | 764 | 809 PITG_06722  |
| 0 | 579 | 667 PITG_06722  |
| 0 | 2   | 0 NA            |
| 0 | 68  | 28 NA           |
| 0 | 63  | 11 NA           |
| 0 | 449 | 173 PITG_06762  |
| 0 | 230 | 231 PITG_13970  |
| 0 | 7   | 6 NA            |
| 0 | 20  | 6 PITG_22933    |
| 0 | 313 | 199 PITG_19157  |
| 0 | 74  | 103 PITG_05114  |
| 0 | 0   | 3 NA            |
| 0 | 217 | 92 PITG_21182   |
| 0 | 896 | 46 PITG_09563   |
| 0 | 2   | 0 PITG_10931    |
| 0 | 0   | 0 PITG_09604    |
| 0 | 40  | 2 PITG_08440    |
| 0 | 593 | 572 PITG_03916  |
| 0 | 2   | 3 PITG_13439    |
| 0 | 145 | 282 PITG_20718  |
| 0 | 45  | 2 PITG_15666    |
| 0 | 14  | 8 PITG_07230    |
| 0 | 140 | 51 NA           |
| 0 | 748 | 1153 PITG_11290 |
| 0 | 82  | 64 PITG_16272   |
| 0 | 25  | 49 PITG_03882   |
| 0 | 179 | 246 PITG_04065  |
| 0 | 135 | 104 PITG_03577  |
| 0 | 110 | 49 PITG_13673   |
| 0 | 411 | 47 NA           |
| 0 | 162 | 171 PITG_00552  |
| 0 | 372 | 511 PITG_14439  |
| 0 | 28  | 0 NA            |

|   |      |                 |
|---|------|-----------------|
| 2 | 633  | 198 PITG_20734  |
| 0 | 467  | 134 PITG_10939  |
| 0 | 381  | 240 PITG_15656  |
| 0 | 70   | 2 PITG_19095    |
| 0 | 121  | 69 PITG_02796   |
| 0 | 803  | 1327 PITG_04335 |
| 0 | 28   | 0 PITG_11247    |
| 0 | 16   | 29 PITG_16684   |
| 0 | 1573 | 799 PITG_05264  |
| 0 | 26   | 113 PITG_00455  |
| 0 | 2    | 0 PITG_07135    |
| 0 | 146  | 242 PITG_05140  |
| 0 | 28   | 14 PITG_13622   |
| 0 | 39   | 7 NA            |
| 0 | 10   | 16 PITG_17359   |
| 0 | 2    | 0 PITG_02501    |
| 0 | 751  | 855 PITG_13681  |
| 0 | 2    | 0 PITG_08305    |
| 0 | 12   | 32 PITG_00297   |
| 0 | 351  | 170 PITG_00676  |
| 0 | 2    | 2 PITG_08867    |
| 0 | 64   | 52 NA           |
| 0 | 605  | 627 PITG_18435  |
| 0 | 40   | 25 PITG_03287   |
| 0 | 2    | 4 PITG_13031    |
| 0 | 250  | 172 PITG_05360  |
| 0 | 766  | 1008 PITG_03916 |
| 8 | 1250 | 5424 PITG_13681 |
| 0 | 37   | 5 PITG_05423    |
| 0 | 1613 | 811 PITG_06323  |
| 0 | 8    | 6 PITG_13673    |
| 0 | 2    | 7 PITG_12686    |
| 0 | 104  | 188 PITG_12462  |
| 0 | 199  | 60 PITG_09998   |
| 4 | 34   | 32 PITG_15388   |
| 0 | 251  | 131 PITG_17563  |
| 0 | 30   | 31 PITG_09403   |
| 0 | 0    | 3 PITG_12342    |
| 0 | 0    | 2 PITG_10383    |
| 0 | 255  | 2 PITG_13405    |
| 0 | 3    | 0 PITG_06021    |
| 0 | 37   | 22 NA           |
| 0 | 8    | 0 PITG_09193    |
| 0 | 500  | 613 PITG_00455  |
| 0 | 14   | 20 PITG_06759   |
| 0 | 211  | 118 PITG_00726  |
| 0 | 5    | 9 PITG_06822    |



|      |      |                 |
|------|------|-----------------|
| 0    | 0    | 2 PITG_05176    |
| 0    | 214  | 262 PITG_02527  |
| 0    | 915  | 499 PITG_03596  |
| 0    | 2    | 37 PITG_22064   |
| 0    | 2    | 2 NA            |
| 0    | 178  | 58 PITG_02119   |
| 0    | 598  | 1242 PITG_08834 |
| 0    | 337  | 1000 PITG_19121 |
| 0    | 4    | 0 PITG_03562    |
| 0    | 17   | 37 PITG_10895   |
| 0    | 179  | 492 PITG_19963  |
| 0    | 0    | 4 PITG_11572    |
| 0    | 612  | 633 PITG_18503  |
| 0    | 480  | 144 PITG_17785  |
| 0    | 139  | 80 PITG_14226   |
| 0    | 137  | 78 PITG_02446   |
| 0    | 700  | 531 PITG_08014  |
| 0    | 0    | 2 PITG_07700    |
| 0    | 579  | 483 PITG_02339  |
| 0    | 0    | 2 PITG_04603    |
| 0    | 2    | 4 PITG_16338    |
| 0    | 6    | 11 PITG_00263   |
| 0    | 157  | 191 NA          |
| 0    | 339  | 90 PITG_04229   |
| 0    | 1048 | 226 PITG_15761  |
| 0    | 0    | 8 PITG_02075    |
| 1925 | 3    | 254 NA          |
| 0    | 54   | 15 PITG_02827   |
| 2    | 109  | 443 PITG_07340  |
| 0    | 439  | 497 PITG_17359  |
| 0    | 175  | 243 PITG_06323  |
| 0    | 32   | 15 PITG_08487   |
| 0    | 23   | 16 PITG_15736   |
| 0    | 8    | 3 PITG_08867    |
| 0    | 66   | 85 PITG_04665   |
| 0    | 40   | 48 PITG_07960   |
| 0    | 88   | 5 PITG_18797    |
| 0    | 104  | 264 PITG_03348  |
| 0    | 6    | 2 PITG_08858    |
| 0    | 311  | 986 PITG_00941  |
| 0    | 1680 | 2198 PITG_06404 |
| 0    | 314  | 107 PITG_02662  |
| 0    | 31   | 14 NA           |
| 0    | 240  | 700 PITG_16915  |
| 2    | 1726 | 1432 PITG_04868 |
| 0    | 194  | 13 PITG_09482   |
| 0    | 76   | 18 PITG_06483   |

|   |       |                 |
|---|-------|-----------------|
| 0 | 75    | 174 PITG_14571  |
| 0 | 8     | 46 PITG_09705   |
| 0 | 359   | 397 PITG_00118  |
| 0 | 455   | 108 PITG_03360  |
| 0 | 0     | 0 PITG_17760    |
| 0 | 0     | 0 PITG_06922    |
| 0 | 157   | 78 PITG_08675   |
| 2 | 1904  | 1426 PITG_03239 |
| 0 | 180   | 205 PITG_02670  |
| 0 | 2     | 0 PITG_15611    |
| 0 | 18758 | 9809 PITG_15969 |
| 0 | 38    | 37 NA           |
| 2 | 284   | 381 PITG_17261  |
| 0 | 0     | 0 PITG_02499    |
| 2 | 0     | 0 NA            |
| 0 | 10    | 12 PITG_08305   |
| 0 | 413   | 219 NA          |
| 0 | 9     | 2 NA            |
| 0 | 24    | 5 NA            |
| 0 | 44    | 99 PITG_21596   |
| 0 | 1066  | 1328 PITG_04681 |
| 0 | 254   | 153 PITG_19042  |
| 0 | 439   | 78 NA           |
| 0 | 65    | 165 PITG_09428  |
| 0 | 8     | 2 NA            |
| 0 | 21    | 113 PITG_16916  |
| 0 | 6     | 16 PITG_03490   |
| 2 | 1952  | 4151 PITG_00179 |
| 0 | 35    | 29 PITG_03742   |
| 0 | 15    | 0 PITG_02381    |
| 0 | 32    | 314 PITG_11244  |
| 2 | 606   | 814 PITG_00014  |
| 0 | 77    | 60 PITG_14106   |
| 0 | 0     | 2 PITG_14108    |
| 0 | 0     | 0 NA            |
| 0 | 95    | 70 PITG_01502   |
| 0 | 610   | 37 NA           |
| 0 | 888   | 376 PITG_01982  |
| 0 | 39    | 99 PITG_11926   |
| 0 | 102   | 82 PITG_02867   |
| 0 | 458   | 41 NA           |
| 0 | 0     | 0 PITG_19399    |
| 0 | 6     | 4 PITG_06749    |
| 0 | 24    | 30 PITG_07993   |
| 0 | 14    | 0 PITG_10942    |
| 0 | 187   | 115 PITG_05552  |
| 0 | 48    | 8 NA            |

|   |      |                 |
|---|------|-----------------|
| 0 | 1423 | 948 PITG_09472  |
| 0 | 146  | 68 PITG_13152   |
| 0 | 25   | 85 PITG_14260   |
| 0 | 423  | 62 PITG_06723   |
| 0 | 121  | 18 PITG_18376   |
| 0 | 69   | 0 NA            |
| 0 | 127  | 43 PITG_00482   |
| 0 | 365  | 212 NA          |
| 0 | 51   | 16 PITG_17672   |
| 0 | 141  | 203 PITG_05542  |
| 0 | 157  | 242 PITG_12254  |
| 0 | 18   | 4 PITG_10117    |
| 0 | 435  | 544 PITG_04908  |
| 0 | 206  | 464 PITG_07341  |
| 0 | 64   | 358 PITG_19871  |
| 0 | 617  | 117 PITG_02498  |
| 0 | 1365 | 766 PITG_01208  |
| 0 | 293  | 115 PITG_05545  |
| 0 | 284  | 630 PITG_11127  |
| 0 | 15   | 24 PITG_03551   |
| 2 | 259  | 1359 PITG_08703 |
| 0 | 22   | 5 PITG_14855    |
| 0 | 48   | 322 PITG_06415  |
| 0 | 696  | 1221 PITG_15476 |
| 0 | 232  | 73 PITG_15503   |
| 0 | 80   | 53 PITG_09932   |
| 0 | 625  | 528 PITG_16008  |
| 2 | 368  | 286 PITG_16021  |
| 0 | 3    | 2 PITG_17884    |
| 0 | 30   | 16 PITG_17745   |
| 0 | 44   | 78 PITG_01507   |
| 0 | 100  | 136 PITG_15787  |
| 0 | 163  | 144 PITG_02113  |
| 0 | 48   | 79 NA           |
| 0 | 34   | 117 PITG_17952  |
| 0 | 9    | 17 PITG_20755   |
| 0 | 159  | 51 PITG_10659   |
| 0 | 0    | 0 PITG_02501    |
| 0 | 2    | 0 PITG_05325    |
| 0 | 64   | 44 PITG_16043   |
| 0 | 92   | 55 PITG_15872   |
| 0 | 36   | 6 PITG_14169    |
| 0 | 208  | 257 PITG_05583  |
| 0 | 20   | 14 NA           |
| 0 | 26   | 19 PITG_03888   |
| 0 | 6    | 8 NA            |
| 0 | 194  | 2 PITG_13861    |

|   |      |                 |
|---|------|-----------------|
| 0 | 12   | 46 PITG_05117   |
| 0 | 18   | 112 PITG_02255  |
| 0 | 241  | 315 PITG_04875  |
| 0 | 154  | 52 NA           |
| 0 | 195  | 144 NA          |
| 0 | 63   | 11 PITG_18433   |
| 0 | 186  | 39 PITG_07711   |
| 0 | 598  | 1245 PITG_10193 |
| 0 | 113  | 98 PITG_02071   |
| 0 | 343  | 105 PITG_22666  |
| 0 | 182  | 304 PITG_08346  |
| 0 | 366  | 398 PITG_08761  |
| 0 | 342  | 74 PITG_19121   |
| 0 | 236  | 82 PITG_11364   |
| 0 | 87   | 72 PITG_02071   |
| 0 | 384  | 529 PITG_01031  |
| 0 | 13   | 19 PITG_03657   |
| 0 | 57   | 59 PITG_16791   |
| 0 | 0    | 0 PITG_03758    |
| 0 | 568  | 444 PITG_03252  |
| 0 | 635  | 430 PITG_03958  |
| 0 | 9    | 0 PITG_09897    |
| 0 | 23   | 17 PITG_08514   |
| 0 | 45   | 64 PITG_21398   |
| 2 | 1876 | 286 PITG_08932  |
| 0 | 11   | 12 PITG_04248   |
| 0 | 0    | 0 PITG_09675    |
| 0 | 233  | 108 PITG_14170  |
| 0 | 76   | 24 PITG_09092   |
| 0 | 0    | 0 NA            |
| 0 | 3    | 2 PITG_21183    |
| 0 | 13   | 14 PITG_09791   |
| 0 | 18   | 9 PITG_12258    |
| 0 | 29   | 4 PITG_22416    |
| 0 | 156  | 88 PITG_15656   |
| 0 | 1178 | 959 PITG_03486  |
| 0 | 1508 | 551 PITG_11046  |
| 0 | 287  | 105 PITG_16363  |
| 0 | 107  | 456 PITG_09963  |
| 0 | 0    | 0 PITG_17325    |
| 0 | 30   | 2 PITG_17945    |
| 0 | 635  | 526 PITG_02493  |
| 0 | 15   | 16 PITG_17140   |
| 0 | 10   | 11 PITG_07102   |
| 0 | 14   | 73 PITG_21173   |
| 0 | 10   | 4 NA            |
| 0 | 27   | 44 PITG_14623   |

|   |      |                |
|---|------|----------------|
| 0 | 8    | 0 NA           |
| 0 | 75   | 50 PITG_20819  |
| 0 | 9    | 12 PITG_12226  |
| 0 | 59   | 16 PITG_15301  |
| 0 | 2265 | 638 PITG_19415 |
| 0 | 22   | 30 PITG_06702  |
| 0 | 273  | 124 PITG_16484 |
| 0 | 16   | 4 NA           |
| 0 | 383  | 154 NA         |
| 0 | 8    | 4 PITG_13017   |
| 0 | 124  | 176 PITG_03245 |
| 0 | 41   | 4 PITG_11386   |
| 0 | 23   | 2 PITG_18634   |
| 0 | 67   | 11 PITG_06204  |
| 0 | 209  | 113 PITG_14605 |
| 0 | 2    | 4 PITG_08736   |
| 0 | 310  | 79 NA          |
| 0 | 191  | 55 PITG_03741  |
| 2 | 165  | 587 PITG_09526 |
| 0 | 86   | 30 PITG_10312  |
| 0 | 49   | 62 PITG_00855  |
| 0 | 236  | 175 PITG_13393 |
| 0 | 18   | 55 PITG_04002  |
| 0 | 57   | 24 NA          |
| 0 | 0    | 0 PITG_10686   |
| 0 | 368  | 503 PITG_10916 |
| 0 | 0    | 2 PITG_04108   |
| 0 | 2051 | 167 PITG_03020 |
| 0 | 284  | 138 PITG_02285 |
| 0 | 27   | 0 PITG_07915   |
| 0 | 2    | 10 PITG_09394  |
| 0 | 364  | 770 NA         |
| 0 | 139  | 169 PITG_09626 |
| 0 | 9    | 26 PITG_04427  |
| 0 | 83   | 56 PITG_02562  |
| 0 | 364  | 187 PITG_00151 |
| 0 | 120  | 6 NA           |
| 0 | 4    | 11 PITG_10375  |
| 0 | 2    | 0 PITG_05079   |
| 0 | 20   | 17 NA          |
| 0 | 6    | 26 PITG_13176  |
| 0 | 27   | 20 PITG_13060  |
| 0 | 6    | 9 NA           |
| 0 | 318  | 57 PITG_11870  |
| 0 | 6    | 6 NA           |
| 0 | 24   | 18 PITG_11198  |
| 0 | 248  | 637 PITG_17527 |

|      |      |                 |
|------|------|-----------------|
| 0    | 241  | 289 PITG_09556  |
| 0    | 0    | 0 NA            |
| 0    | 49   | 152 PITG_16058  |
| 0    | 110  | 114 PITG_03061  |
| 0    | 268  | 100 PITG_08304  |
| 0    | 0    | 0 PITG_11437    |
| 0    | 118  | 102 PITG_03333  |
| 0    | 2    | 0 NA            |
| 0    | 12   | 5 PITG_03991    |
| 0    | 169  | 64 PITG_09744   |
| 0    | 2    | 0 NA            |
| 0    | 34   | 50 PITG_04934   |
| 0    | 108  | 51 PITG_13399   |
| 0    | 309  | 68 PITG_01937   |
| 0    | 8    | 0 NA            |
| 0    | 65   | 61 PITG_14465   |
| 2    | 501  | 1220 PITG_13312 |
| 0    | 1059 | 460 PITG_19814  |
| 0    | 598  | 385 PITG_19063  |
| 0    | 272  | 461 PITG_04010  |
| 0    | 48   | 12 NA           |
| 6    | 1811 | 1977 PITG_09345 |
| 0    | 30   | 4 PITG_05175    |
| 0    | 798  | 1943 PITG_06320 |
| 0    | 312  | 162 PITG_07349  |
| 0    | 16   | 16 PITG_19532   |
| 3654 | 18   | 266 NA          |
| 0    | 10   | 0 PITG_20140    |
| 0    | 180  | 9 PITG_10202    |
| 2    | 268  | 103 PITG_06723  |
| 0    | 5    | 3 PITG_06259    |
| 0    | 8    | 10 PITG_06772   |
| 0    | 556  | 479 PITG_03344  |
| 0    | 0    | 2 PITG_02744    |
| 0    | 256  | 539 PITG_17005  |
| 0    | 49   | 69 PITG_00280   |
| 0    | 90   | 21 NA           |
| 0    | 32   | 55 PITG_03425   |
| 0    | 0    | 0 NA            |
| 0    | 210  | 76 PITG_08548   |
| 0    | 13   | 26 PITG_01108   |
| 0    | 230  | 48 PITG_13396   |
| 0    | 567  | 622 PITG_02038  |
| 0    | 0    | 0 PITG_08558    |
| 0    | 779  | 232 PITG_12578  |
| 0    | 21   | 8 PITG_17703    |
| 0    | 76   | 58 PITG_10388   |

|    |      |                 |
|----|------|-----------------|
| 0  | 12   | 3 PITG_02371    |
| 0  | 24   | 44 PITG_17028   |
| 0  | 311  | 239 PITG_17263  |
| 0  | 26   | 6 PITG_12513    |
| 0  | 63   | 19 PITG_05781   |
| 0  | 5    | 5 PITG_11977    |
| 0  | 278  | 845 PITG_15118  |
| 0  | 89   | 34 PITG_12500   |
| 0  | 651  | 884 PITG_00702  |
| 0  | 8    | 6 PITG_01366    |
| 0  | 162  | 57 PITG_10899   |
| 0  | 0    | 0 NA            |
| 0  | 397  | 912 PITG_17452  |
| 0  | 1821 | 1844 PITG_05240 |
| 0  | 76   | 90 PITG_15100   |
| 0  | 2    | 2 PITG_14401    |
| 0  | 49   | 11 PITG_09819   |
| 0  | 4    | 30 NA           |
| 0  | 302  | 878 PITG_09556  |
| 0  | 66   | 8 PITG_16213    |
| 0  | 620  | 606 PITG_14604  |
| 0  | 2    | 5 PITG_18707    |
| 0  | 21   | 41 PITG_22418   |
| 0  | 10   | 4 PITG_06387    |
| 0  | 840  | 1756 PITG_03221 |
| 0  | 56   | 9 PITG_08374    |
| 0  | 33   | 150 PITG_19161  |
| 0  | 10   | 9 PITG_04468    |
| 0  | 835  | 218 NA          |
| 0  | 8    | 32 PITG_18298   |
| 0  | 103  | 85 PITG_11189   |
| 0  | 167  | 98 PITG_09298   |
| 0  | 283  | 341 PITG_13596  |
| 0  | 93   | 96 PITG_15954   |
| 0  | 773  | 1564 PITG_16005 |
| 0  | 58   | 15 PITG_00964   |
| 0  | 37   | 23 PITG_09248   |
| 0  | 120  | 80 PITG_05412   |
| 0  | 206  | 44 NA           |
| 0  | 53   | 106 PITG_05553  |
| 22 | 6    | 2010 NA         |
| 0  | 63   | 169 PITG_17239  |
| 0  | 0    | 4 PITG_05369    |
| 0  | 567  | 603 PITG_20188  |
| 0  | 240  | 61 PITG_00809   |
| 0  | 218  | 633 PITG_11063  |
| 0  | 223  | 54 PITG_00857   |

|   |      |                 |
|---|------|-----------------|
| 0 | 136  | 46 PITG_03038   |
| 0 | 1555 | 669 PITG_06385  |
| 0 | 0    | 0 NA            |
| 0 | 253  | 703 PITG_03738  |
| 0 | 1441 | 2520 PITG_03477 |
| 0 | 77   | 90 PITG_18306   |
| 4 | 595  | 1698 PITG_02053 |
| 0 | 31   | 57 PITG_02856   |
| 0 | 420  | 1053 PITG_02567 |
| 0 | 82   | 102 PITG_14557  |
| 0 | 29   | 3 NA            |
| 0 | 857  | 337 PITG_05839  |
| 0 | 12   | 2 PITG_04590    |
| 0 | 1075 | 491 PITG_09793  |
| 0 | 4    | 2 PITG_15470    |
| 0 | 864  | 115 PITG_06545  |
| 0 | 614  | 414 PITG_08392  |
| 0 | 9    | 6 NA            |
| 0 | 176  | 139 PITG_08571  |
| 0 | 464  | 332 PITG_09744  |
| 0 | 228  | 285 PITG_13918  |
| 0 | 58   | 11 PITG_14577   |
| 0 | 466  | 133 PITG_15416  |
| 0 | 0    | 0 PITG_03256    |
| 0 | 26   | 53 PITG_19886   |
| 0 | 97   | 88 PITG_22946   |
| 0 | 425  | 292 PITG_11638  |
| 0 | 317  | 453 PITG_01318  |
| 0 | 0    | 0 NA            |
| 0 | 118  | 49 PITG_07574   |
| 0 | 177  | 55 PITG_08252   |
| 0 | 281  | 108 PITG_20156  |
| 0 | 194  | 488 PITG_00930  |
| 0 | 12   | 0 NA            |
| 0 | 46   | 20 PITG_01407   |
| 0 | 17   | 5 NA            |
| 0 | 621  | 268 PITG_02046  |
| 0 | 24   | 0 PITG_14594    |
| 0 | 1477 | 1913 PITG_19669 |
| 0 | 7    | 0 PITG_18298    |
| 2 | 615  | 61 PITG_10715   |
| 0 | 226  | 102 NA          |
| 0 | 17   | 19 PITG_16476   |
| 0 | 35   | 34 NA           |
| 0 | 107  | 158 PITG_00770  |
| 0 | 239  | 166 PITG_06319  |
| 0 | 86   | 192 PITG_08881  |



|   |      |                 |
|---|------|-----------------|
| 0 | 138  | 221 PITG_18452  |
| 2 | 2484 | 3090 PITG_01922 |
| 0 | 4    | 16 PITG_21627   |
| 0 | 800  | 433 PITG_00867  |
| 0 | 0    | 0 PITG_04614    |
| 0 | 365  | 224 PITG_00747  |
| 0 | 17   | 0 PITG_14456    |
| 2 | 372  | 384 PITG_06731  |
| 0 | 18   | 78 PITG_10461   |
| 0 | 550  | 209 PITG_11323  |
| 0 | 67   | 46 PITG_14198   |
| 0 | 1718 | 145 PITG_01697  |
| 0 | 207  | 164 PITG_01285  |
| 0 | 12   | 38 PITG_07846   |
| 0 | 0    | 0 NA            |
| 0 | 181  | 259 PITG_03473  |
| 0 | 8    | 36 PITG_19846   |
| 0 | 348  | 664 PITG_09555  |
| 0 | 4    | 2 PITG_16461    |
| 0 | 1067 | 923 PITG_05593  |
| 0 | 0    | 49 PITG_22065   |
| 0 | 2200 | 701 PITG_10543  |
| 0 | 510  | 311 PITG_08701  |
| 0 | 341  | 228 PITG_08042  |
| 0 | 434  | 351 PITG_17012  |
| 0 | 108  | 99 PITG_07574   |
| 0 | 0    | 0 NA            |
| 0 | 25   | 2 NA            |
| 0 | 192  | 81 PITG_18382   |
| 0 | 271  | 492 PITG_17007  |
| 0 | 263  | 69 PITG_09835   |
| 0 | 2    | 7 PITG_13803    |
| 0 | 12   | 0 PITG_16766    |
| 0 | 0    | 0 NA            |
| 0 | 51   | 6 PITG_01145    |
| 0 | 116  | 338 PITG_03226  |
| 0 | 0    | 0 NA            |
| 0 | 0    | 14 PITG_11594   |
| 0 | 703  | 1214 PITG_19008 |
| 0 | 861  | 927 PITG_12299  |
| 0 | 183  | 168 PITG_11323  |
| 0 | 37   | 135 PITG_04921  |
| 0 | 80   | 173 PITG_09224  |
| 0 | 26   | 12 PITG_15927   |
| 0 | 996  | 1015 PITG_02423 |
| 0 | 112  | 230 PITG_17543  |
| 0 | 6    | 20 PITG_02923   |

|   |      |                 |
|---|------|-----------------|
| 0 | 1676 | 2389 PITG_11290 |
| 0 | 684  | 341 PITG_09706  |
| 0 | 361  | 134 PITG_17091  |
| 0 | 105  | 31 PITG_12530   |
| 0 | 0    | 0 NA            |
| 0 | 171  | 120 NA          |
| 6 | 859  | 2462 PITG_06415 |
| 0 | 31   | 0 PITG_03563    |
| 0 | 1566 | 1815 PITG_20795 |
| 0 | 755  | 1042 PITG_10913 |
| 0 | 8    | 105 PITG_12526  |
| 2 | 216  | 229 PITG_00733  |
| 0 | 273  | 258 PITG_02527  |
| 0 | 9    | 3 NA            |
| 0 | 14   | 8 PITG_08392    |
| 0 | 1059 | 2286 PITG_02578 |
| 0 | 116  | 29 PITG_09789   |
| 0 | 355  | 215 PITG_16921  |
| 0 | 18   | 0 PITG_06474    |
| 0 | 138  | 50 PITG_10064   |
| 0 | 4    | 0 PITG_02657    |
| 0 | 369  | 333 PITG_11690  |
| 0 | 120  | 2 NA            |
| 0 | 10   | 4 PITG_23282    |
| 0 | 116  | 32 PITG_16433   |
| 0 | 0    | 5 PITG_16352    |
| 0 | 0    | 2 PITG_08473    |
| 0 | 69   | 47 PITG_02024   |
| 0 | 666  | 793 NA          |
| 0 | 2    | 7 PITG_12534    |
| 0 | 54   | 100 NA          |
| 0 | 17   | 100 PITG_18934  |
| 0 | 452  | 307 PITG_07380  |
| 0 | 611  | 1614 PITG_17406 |
| 0 | 19   | 4 PITG_06677    |
| 0 | 26   | 18 PITG_09241   |
| 0 | 49   | 8 PITG_03054    |
| 0 | 18   | 29 PITG_16335   |
| 0 | 283  | 203 PITG_16999  |
| 0 | 25   | 64 PITG_21501   |
| 0 | 883  | 1028 PITG_05840 |
| 0 | 12   | 5 NA            |
| 0 | 2    | 22 PITG_09360   |
| 0 | 43   | 8 NA            |
| 0 | 911  | 746 PITG_00702  |
| 0 | 94   | 92 PITG_18274   |
| 0 | 62   | 19 NA           |

|   |      |                 |
|---|------|-----------------|
| 2 | 901  | 505 PITG_15697  |
| 0 | 27   | 12 PITG_06917   |
| 0 | 65   | 104 PITG_09996  |
| 0 | 264  | 74 PITG_04229   |
| 0 | 8    | 8 NA            |
| 0 | 5    | 6 PITG_09604    |
| 0 | 96   | 65 PITG_01925   |
| 0 | 4    | 0 PITG_11272    |
| 0 | 21   | 0 PITG_06022    |
| 0 | 35   | 34 PITG_02319   |
| 0 | 4    | 5 PITG_14806    |
| 0 | 860  | 397 PITG_01292  |
| 0 | 10   | 4 NA            |
| 0 | 17   | 2 PITG_06204    |
| 0 | 2    | 0 PITG_13284    |
| 0 | 41   | 34 PITG_00724   |
| 0 | 159  | 140 PITG_11690  |
| 0 | 0    | 0 PITG_00067    |
| 0 | 392  | 1404 PITG_01752 |
| 0 | 0    | 2 PITG_09962    |
| 0 | 637  | 90 PITG_15118   |
| 0 | 31   | 70 PITG_01408   |
| 0 | 405  | 18 PITG_04640   |
| 0 | 26   | 18 PITG_03763   |
| 4 | 600  | 1547 PITG_08959 |
| 0 | 23   | 62 PITG_12292   |
| 0 | 12   | 16 PITG_03695   |
| 0 | 2    | 14 NA           |
| 0 | 88   | 30 PITG_19167   |
| 0 | 24   | 0 NA            |
| 0 | 108  | 73 PITG_16207   |
| 0 | 8    | 2 PITG_09954    |
| 0 | 76   | 11 PITG_08294   |
| 0 | 122  | 46 PITG_12747   |
| 0 | 225  | 364 PITG_17326  |
| 0 | 19   | 73 PITG_04457   |
| 2 | 578  | 1032 PITG_09706 |
| 0 | 91   | 36 PITG_01744   |
| 0 | 20   | 11 PITG_13286   |
| 2 | 3436 | 3055 PITG_01248 |
| 0 | 120  | 92 PITG_18623   |
| 0 | 3    | 9 PITG_14441    |
| 0 | 572  | 321 PITG_18534  |
| 0 | 473  | 190 PITG_11689  |
| 0 | 782  | 889 PITG_04843  |
| 0 | 20   | 27 PITG_14619   |
| 0 | 26   | 7 NA            |

|   |     |                 |
|---|-----|-----------------|
| 0 | 67  | 11 NA           |
| 0 | 73  | 46 PITG_00284   |
| 0 | 2   | 0 PITG_21056    |
| 0 | 44  | 81 PITG_17007   |
| 0 | 177 | 20 PITG_03096   |
| 0 | 224 | 30 NA           |
| 0 | 12  | 4 PITG_19191    |
| 0 | 268 | 486 PITG_13681  |
| 0 | 106 | 84 PITG_18712   |
| 0 | 0   | 0 NA            |
| 0 | 77  | 16 PITG_15046   |
| 0 | 12  | 2 PITG_00795    |
| 0 | 101 | 163 PITG_05377  |
| 0 | 128 | 346 PITG_00133  |
| 0 | 378 | 265 PITG_09846  |
| 0 | 3   | 14 PITG_13855   |
| 0 | 79  | 99 PITG_05980   |
| 0 | 33  | 3 PITG_02905    |
| 0 | 703 | 478 PITG_11926  |
| 0 | 118 | 85 PITG_03168   |
| 0 | 90  | 8 NA            |
| 0 | 199 | 144 PITG_06635  |
| 0 | 295 | 614 PITG_00279  |
| 0 | 21  | 0 PITG_16062    |
| 0 | 326 | 178 PITG_16346  |
| 0 | 4   | 16 PITG_20081   |
| 0 | 0   | 0 PITG_05170    |
| 0 | 20  | 38 NA           |
| 0 | 57  | 4 PITG_09772    |
| 2 | 611 | 574 PITG_11926  |
| 0 | 115 | 40 NA           |
| 0 | 518 | 159 PITG_15727  |
| 0 | 97  | 78 PITG_02458   |
| 0 | 5   | 0 PITG_11296    |
| 0 | 63  | 2 PITG_01525    |
| 0 | 51  | 46 PITG_23159   |
| 0 | 9   | 2 PITG_14054    |
| 0 | 559 | 128 PITG_18317  |
| 0 | 330 | 292 PITG_09721  |
| 0 | 129 | 105 PITG_22959  |
| 2 | 75  | 27 PITG_10068   |
| 0 | 382 | 73 NA           |
| 0 | 605 | 861 PITG_09553  |
| 0 | 90  | 126 PITG_12120  |
| 0 | 3   | 4 PITG_16114    |
| 2 | 475 | 1058 PITG_22135 |
| 0 | 50  | 37 PITG_12113   |

|   |      |                 |
|---|------|-----------------|
| 2 | 520  | 861 PITG_00058  |
| 0 | 26   | 6 PITG_12235    |
| 2 | 1741 | 272 PITG_08959  |
| 0 | 193  | 316 PITG_19851  |
| 0 | 46   | 8 PITG_17032    |
| 0 | 506  | 396 PITG_10887  |
| 0 | 88   | 92 NA           |
| 0 | 150  | 171 PITG_09284  |
| 0 | 102  | 76 PITG_09072   |
| 0 | 383  | 77 PITG_03168   |
| 2 | 503  | 325 PITG_00505  |
| 0 | 1159 | 546 PITG_11524  |
| 0 | 129  | 109 PITG_02960  |
| 0 | 11   | 43 PITG_05689   |
| 0 | 11   | 51 PITG_01746   |
| 0 | 677  | 297 PITG_03670  |
| 2 | 256  | 408 PITG_18104  |
| 0 | 925  | 1766 PITG_05434 |
| 0 | 12   | 23 PITG_05675   |
| 0 | 22   | 84 PITG_03346   |
| 0 | 6    | 2 PITG_21640    |
| 0 | 2    | 4 NA            |
| 0 | 176  | 93 PITG_17778   |
| 0 | 11   | 11 PITG_08301   |
| 0 | 131  | 47 NA           |
| 0 | 45   | 49 NA           |
| 0 | 0    | 10 PITG_12153   |
| 0 | 44   | 38 PITG_04535   |
| 0 | 159  | 62 PITG_09653   |
| 0 | 320  | 136 PITG_14111  |
| 0 | 397  | 261 PITG_04121  |
| 2 | 207  | 964 PITG_03916  |
| 0 | 8    | 4 PITG_09672    |
| 0 | 321  | 88 PITG_13997   |
| 0 | 207  | 83 PITG_03113   |
| 0 | 99   | 38 PITG_02119   |
| 0 | 11   | 6 PITG_18420    |
| 0 | 185  | 187 PITG_11704  |
| 0 | 14   | 4 NA            |
| 0 | 78   | 4 PITG_08941    |
| 0 | 25   | 11 NA           |
| 0 | 463  | 469 PITG_11215  |
| 0 | 165  | 728 PITG_04824  |
| 0 | 116  | 39 PITG_18797   |
| 0 | 33   | 6 PITG_19313    |
| 2 | 343  | 491 PITG_13500  |
| 0 | 68   | 0 PITG_11451    |

|    |      |                 |
|----|------|-----------------|
| 0  | 49   | 51 PITG_01775   |
| 0  | 14   | 4 NA            |
| 0  | 8    | 0 PITG_09702    |
| 0  | 7    | 16 PITG_06887   |
| 0  | 210  | 300 PITG_17730  |
| 0  | 169  | 304 PITG_04698  |
| 0  | 7    | 0 PITG_19965    |
| 0  | 0    | 0 PITG_03288    |
| 0  | 21   | 11 NA           |
| 0  | 0    | 0 PITG_05272    |
| 0  | 95   | 50 PITG_04181   |
| 0  | 2    | 14 PITG_05508   |
| 0  | 18   | 4 PITG_17332    |
| 0  | 233  | 1241 PITG_09563 |
| 0  | 89   | 18 PITG_00423   |
| 0  | 2    | 14 PITG_01257   |
| 0  | 101  | 239 PITG_17525  |
| 0  | 761  | 1004 PITG_01041 |
| 0  | 87   | 4 PITG_12439    |
| 0  | 6    | 2 PITG_03531    |
| 0  | 178  | 257 PITG_05516  |
| 15 | 2    | 25 NA           |
| 0  | 84   | 166 PITG_13116  |
| 0  | 4    | 4 NA            |
| 2  | 524  | 154 NA          |
| 0  | 2    | 0 PITG_21303    |
| 0  | 101  | 12 NA           |
| 0  | 662  | 1772 NA         |
| 0  | 6    | 36 PITG_19846   |
| 0  | 500  | 82 PITG_04846   |
| 0  | 1448 | 157 PITG_05840  |
| 0  | 43   | 18 PITG_10617   |
| 0  | 6    | 13 PITG_11424   |
| 0  | 112  | 144 NA          |
| 0  | 1467 | 1303 PITG_03392 |
| 0  | 23   | 29 NA           |
| 0  | 32   | 300 PITG_01862  |
| 0  | 2    | 0 PITG_06085    |
| 0  | 0    | 3 NA            |
| 0  | 68   | 19 PITG_00038   |
| 0  | 30   | 20 PITG_02924   |
| 0  | 135  | 188 NA          |
| 0  | 15   | 28 NA           |
| 0  | 257  | 85 PITG_01073   |
| 0  | 23   | 5 PITG_00809    |
| 0  | 206  | 55 PITG_05238   |
| 0  | 803  | 1128 PITG_12961 |

|    |      |                 |
|----|------|-----------------|
| 0  | 102  | 18 NA           |
| 0  | 5    | 8 NA            |
| 0  | 78   | 306 NA          |
| 0  | 13   | 128 PITG_02047  |
| 0  | 325  | 253 PITG_05902  |
| 0  | 26   | 0 PITG_12695    |
| 14 | 21   | 1826 NA         |
| 0  | 13   | 0 PITG_02157    |
| 0  | 24   | 18 PITG_05079   |
| 0  | 1064 | 2070 PITG_14727 |
| 2  | 998  | 680 PITG_09555  |
| 0  | 5    | 2 PITG_01851    |
| 0  | 7    | 77 PITG_05117   |
| 0  | 723  | 621 PITG_01447  |
| 0  | 537  | 10 PITG_16183   |
| 0  | 0    | 2 PITG_07292    |
| 0  | 1177 | 1334 PITG_12990 |
| 0  | 273  | 231 PITG_04846  |
| 0  | 294  | 234 PITG_01087  |
| 0  | 360  | 926 PITG_13919  |
| 0  | 62   | 43 PITG_14563   |
| 0  | 8    | 40 PITG_02917   |
| 0  | 495  | 439 PITG_11755  |
| 0  | 12   | 2 PITG_11044    |
| 0  | 2    | 6 PITG_09818    |
| 0  | 47   | 211 PITG_05542  |
| 0  | 807  | 242 NA          |
| 0  | 870  | 1928 PITG_17007 |
| 0  | 4    | 27 PITG_21962   |
| 0  | 0    | 2 PITG_05731    |
| 0  | 298  | 666 PITG_14850  |
| 0  | 983  | 415 PITG_03277  |
| 0  | 40   | 70 PITG_14113   |
| 0  | 0    | 2 PITG_01329    |
| 0  | 38   | 34 PITG_12105   |
| 0  | 86   | 243 PITG_10827  |
| 0  | 4160 | 3932 PITG_00156 |
| 0  | 4    | 6 PITG_03709    |
| 0  | 75   | 81 PITG_19164   |
| 0  | 2    | 14 PITG_00733   |
| 0  | 35   | 188 PITG_14173  |
| 0  | 0    | 6 NA            |
| 0  | 21   | 9 NA            |
| 0  | 60   | 16 NA           |
| 0  | 121  | 26 PITG_00984   |
| 0  | 2    | 2 NA            |
| 0  | 20   | 2 NA            |

|    |      |                 |
|----|------|-----------------|
| 0  | 0    | 2 PITG_07898    |
| 0  | 585  | 269 PITG_07808  |
| 0  | 6    | 0 NA            |
| 0  | 1825 | 2631 NA         |
| 0  | 1285 | 1398 PITG_09556 |
| 0  | 168  | 37 PITG_21000   |
| 0  | 115  | 40 NA           |
| 0  | 4    | 4 PITG_07978    |
| 0  | 25   | 14 PITG_19037   |
| 0  | 39   | 130 PITG_16973  |
| 0  | 153  | 18 PITG_01128   |
| 0  | 0    | 2 NA            |
| 0  | 299  | 296 PITG_00020  |
| 0  | 103  | 14 PITG_11119   |
| 0  | 19   | 13 PITG_20755   |
| 0  | 88   | 40 PITG_01819   |
| 0  | 499  | 150 PITG_02745  |
| 27 | 442  | 3501 NA         |
| 0  | 729  | 211 PITG_16429  |
| 0  | 153  | 4 PITG_06827    |
| 0  | 209  | 2 PITG_15358    |
| 2  | 2    | 2 PITG_16041    |
| 0  | 93   | 33 PITG_19299   |
| 0  | 96   | 37 PITG_18183   |
| 0  | 302  | 356 PITG_16670  |
| 0  | 2    | 0 PITG_02500    |
| 0  | 1474 | 2252 PITG_06237 |
| 0  | 2    | 2 PITG_05282    |
| 0  | 25   | 2 PITG_14564    |
| 0  | 0    | 10 PITG_09986   |
| 0  | 1384 | 748 PITG_15248  |
| 0  | 28   | 0 PITG_09016    |
| 0  | 60   | 263 PITG_08139  |
| 0  | 43   | 10 PITG_19098   |
| 0  | 33   | 26 PITG_16272   |
| 0  | 229  | 163 PITG_04611  |
| 0  | 141  | 57 PITG_19422   |
| 0  | 11   | 3 NA            |
| 0  | 2    | 0 PITG_06570    |
| 0  | 331  | 61 PITG_03460   |
| 0  | 3    | 28 NA           |
| 0  | 275  | 132 PITG_14479  |
| 0  | 0    | 0 PITG_03408    |
| 2  | 11   | 4 PITG_06963    |
| 85 | 13   | 123 NA          |
| 0  | 92   | 160 PITG_06636  |
| 0  | 8    | 16 PITG_12140   |



|   |      |                 |
|---|------|-----------------|
| 0 | 0    | 2 PITG_19245    |
| 0 | 579  | 142 PITG_18046  |
| 0 | 2    | 2 NA            |
| 0 | 6    | 91 PITG_17069   |
| 0 | 159  | 422 PITG_21378  |
| 0 | 57   | 132 PITG_11040  |
| 0 | 33   | 11 PITG_16382   |
| 0 | 50   | 49 PITG_00334   |
| 0 | 290  | 124 PITG_11656  |
| 0 | 167  | 295 PITG_22200  |
| 0 | 44   | 54 PITG_11247   |
| 0 | 113  | 33 NA           |
| 0 | 310  | 53 PITG_04497   |
| 0 | 73   | 34 PITG_13804   |
| 0 | 15   | 4 PITG_00842    |
| 0 | 6    | 3 PITG_04612    |
| 0 | 9    | 0 PITG_15787    |
| 0 | 707  | 766 PITG_07278  |
| 0 | 382  | 156 PITG_18752  |
| 0 | 57   | 29 PITG_00880   |
| 0 | 45   | 40 PITG_02737   |
| 0 | 362  | 257 PITG_01701  |
| 0 | 66   | 0 NA            |
| 0 | 31   | 88 PITG_17617   |
| 0 | 297  | 335 PITG_03900  |
| 0 | 100  | 205 PITG_09348  |
| 0 | 296  | 2 PITG_06408    |
| 0 | 575  | 1256 PITG_12158 |
| 0 | 4    | 5 PITG_06724    |
| 0 | 59   | 95 PITG_19361   |
| 4 | 3037 | 2030 PITG_12745 |
| 0 | 27   | 36 PITG_09707   |
| 0 | 232  | 41 PITG_15385   |
| 0 | 0    | 5 PITG_11098    |
| 0 | 214  | 207 PITG_00914  |
| 0 | 873  | 1485 PITG_06118 |
| 0 | 28   | 7 PITG_10168    |
| 0 | 1373 | 401 PITG_06619  |
| 0 | 39   | 37 PITG_00381   |
| 0 | 449  | 50 PITG_10974   |
| 0 | 9    | 26 PITG_03846   |
| 0 | 736  | 313 PITG_01438  |
| 0 | 387  | 494 PITG_14180  |
| 0 | 541  | 248 PITG_08346  |
| 0 | 34   | 21 PITG_15960   |
| 0 | 0    | 0 PITG_13258    |
| 0 | 47   | 51 PITG_13588   |

|   |      |                |
|---|------|----------------|
| 0 | 432  | 465 PITG_04824 |
| 0 | 327  | 163 PITG_17445 |
| 0 | 39   | 2 PITG_17028   |
| 0 | 0    | 0 PITG_02073   |
| 0 | 153  | 8 NA           |
| 0 | 11   | 8 NA           |
| 0 | 142  | 30 PITG_03753  |
| 0 | 8    | 14 PITG_11764  |
| 2 | 668  | 877 PITG_13676 |
| 0 | 481  | 14 PITG_09427  |
| 0 | 1322 | 396 PITG_12905 |
| 0 | 0    | 0 NA           |
| 0 | 161  | 16 NA          |
| 0 | 0    | 0 PITG_10374   |
| 0 | 1475 | 635 NA         |
| 0 | 67   | 17 PITG_16068  |
| 0 | 10   | 0 PITG_15820   |
| 0 | 178  | 166 NA         |
| 0 | 6    | 2 PITG_14581   |
| 0 | 73   | 29 NA          |
| 0 | 208  | 125 PITG_09907 |
| 0 | 543  | 65 PITG_10282  |
| 0 | 207  | 246 PITG_14231 |
| 0 | 3380 | 812 NA         |
| 0 | 1520 | 567 PITG_01417 |
| 0 | 0    | 0 PITG_03789   |
| 0 | 743  | 1296 NA        |
| 0 | 22   | 46 PITG_09579  |
| 0 | 149  | 426 PITG_17007 |
| 0 | 68   | 411 PITG_17007 |
| 0 | 290  | 133 PITG_04078 |
| 0 | 18   | 2 NA           |
| 0 | 235  | 30 NA          |
| 0 | 519  | 471 PITG_17406 |
| 0 | 39   | 31 PITG_14322  |
| 0 | 2    | 2 NA           |
| 0 | 0    | 4 PITG_12160   |
| 0 | 1498 | 345 PITG_18002 |
| 0 | 136  | 29 PITG_19036  |
| 0 | 168  | 105 PITG_15892 |
| 0 | 1000 | 538 PITG_01604 |
| 0 | 745  | 964 PITG_03020 |
| 0 | 0    | 2 NA           |
| 0 | 180  | 128 PITG_19870 |
| 0 | 823  | 39 PITG_10263  |
| 0 | 56   | 95 PITG_12288  |
| 0 | 75   | 79 PITG_07865  |

|   |      |                 |
|---|------|-----------------|
| 0 | 29   | 43 PITG_01775   |
| 0 | 41   | 23 PITG_05669   |
| 0 | 182  | 356 PITG_11766  |
| 0 | 572  | 798 PITG_11766  |
| 0 | 3    | 7 PITG_08746    |
| 0 | 33   | 28 NA           |
| 0 | 6    | 139 PITG_09760  |
| 0 | 4    | 4 PITG_11795    |
| 0 | 19   | 7 PITG_00718    |
| 0 | 13   | 0 NA            |
| 0 | 116  | 42 PITG_00401   |
| 0 | 4    | 11 NA           |
| 0 | 7    | 2 PITG_10921    |
| 4 | 768  | 2796 PITG_07173 |
| 0 | 1395 | 53 PITG_07173   |
| 0 | 17   | 19 NA           |
| 0 | 82   | 104 PITG_01649  |
| 0 | 377  | 58 PITG_10828   |
| 0 | 83   | 57 PITG_02580   |
| 0 | 305  | 128 NA          |
| 0 | 39   | 14 NA           |
| 0 | 60   | 22 PITG_07380   |
| 0 | 2    | 12 PITG_01138   |
| 2 | 2496 | 744 PITG_04522  |
| 0 | 164  | 25 PITG_04108   |
| 0 | 154  | 99 PITG_01845   |
| 0 | 2    | 0 PITG_10190    |
| 0 | 59   | 8 PITG_18574    |
| 0 | 30   | 0 PITG_20102    |
| 0 | 8    | 9 PITG_16343    |
| 0 | 3    | 0 PITG_00297    |
| 0 | 1568 | 1006 PITG_10185 |
| 0 | 32   | 0 PITG_22416    |
| 0 | 2    | 0 PITG_10154    |
| 0 | 66   | 19 PITG_15687   |
| 0 | 24   | 2 PITG_02553    |
| 0 | 329  | 103 PITG_10470  |
| 0 | 359  | 436 PITG_14275  |
| 0 | 27   | 8 PITG_15301    |
| 0 | 7    | 43 PITG_15687   |
| 0 | 1679 | 1863 PITG_20188 |
| 0 | 504  | 568 PITG_19855  |
| 0 | 94   | 456 PITG_22064  |
| 0 | 1796 | 832 PITG_15409  |
| 0 | 22   | 92 PITG_12462   |
| 0 | 19   | 11 PITG_10659   |
| 0 | 145  | 177 PITG_08090  |

|   |      |                 |
|---|------|-----------------|
| 0 | 9    | 27 PITG_13689   |
| 0 | 2146 | 661 PITG_09760  |
| 0 | 6    | 6 PITG_08331    |
| 0 | 12   | 0 PITG_18656    |
| 0 | 545  | 712 PITG_08409  |
| 0 | 0    | 0 NA            |
| 0 | 12   | 30 NA           |
| 0 | 21   | 11 PITG_15924   |
| 0 | 44   | 33 PITG_16257   |
| 0 | 31   | 75 PITG_06889   |
| 0 | 896  | 2291 PITG_00074 |
| 0 | 2219 | 1958 PITG_15526 |
| 0 | 14   | 10 NA           |
| 0 | 244  | 59 PITG_01777   |
| 0 | 147  | 82 PITG_13225   |
| 0 | 674  | 57 NA           |
| 0 | 2    | 16 PITG_02785   |
| 0 | 7    | 5 PITG_20319    |
| 0 | 27   | 68 PITG_01206   |
| 0 | 439  | 121 PITG_10017  |
| 0 | 82   | 0 NA            |
| 0 | 256  | 77 PITG_18072   |
| 0 | 95   | 119 PITG_16183  |
| 0 | 91   | 53 PITG_06149   |
| 0 | 1055 | 683 PITG_00333  |
| 0 | 322  | 355 PITG_03229  |
| 0 | 82   | 50 PITG_15518   |
| 0 | 40   | 80 PITG_03464   |
| 0 | 45   | 40 PITG_10447   |
| 0 | 852  | 724 PITG_12049  |
| 0 | 0    | 2 PITG_03662    |
| 0 | 19   | 102 PITG_06649  |
| 0 | 6    | 32 PITG_09910   |
| 0 | 67   | 4 PITG_02695    |
| 0 | 656  | 1201 PITG_06512 |
| 0 | 176  | 22 PITG_06757   |
| 0 | 2    | 0 PITG_17882    |
| 0 | 633  | 1383 PITG_20264 |
| 0 | 4994 | 3131 PITG_03712 |
| 0 | 12   | 3 PITG_06545    |
| 0 | 12   | 2 PITG_01594    |
| 0 | 12   | 27 PITG_08609   |
| 0 | 11   | 12 PITG_18656   |
| 0 | 287  | 115 PITG_09649  |
| 0 | 109  | 32 PITG_00584   |
| 0 | 199  | 190 PITG_15194  |
| 0 | 214  | 26 PITG_06663   |

|   |      |                 |
|---|------|-----------------|
| 0 | 136  | 105 PITG_09783  |
| 0 | 289  | 120 PITG_19870  |
| 0 | 1298 | 1577 PITG_13271 |
| 0 | 6    | 0 PITG_21056    |
| 0 | 12   | 10 PITG_02950   |
| 0 | 184  | 573 PITG_22658  |
| 0 | 265  | 134 PITG_19254  |
| 0 | 245  | 206 PITG_13178  |
| 0 | 20   | 16 PITG_10659   |
| 0 | 1929 | 578 PITG_13737  |
| 0 | 10   | 11 PITG_06022   |
| 0 | 6    | 49 PITG_08138   |
| 0 | 8    | 12 NA           |
| 0 | 14   | 6 PITG_20345    |
| 0 | 122  | 47 PITG_09548   |
| 0 | 40   | 238 PITG_08044  |
| 0 | 305  | 290 PITG_11975  |
| 0 | 234  | 15 PITG_16203   |
| 0 | 337  | 462 PITG_22135  |
| 0 | 49   | 40 PITG_05079   |
| 0 | 11   | 0 PITG_06502    |
| 0 | 68   | 8 PITG_00628    |
| 0 | 198  | 46 PITG_17404   |
| 0 | 190  | 872 PITG_10031  |
| 0 | 100  | 69 PITG_19690   |
| 0 | 15   | 9 PITG_11249    |
| 0 | 372  | 208 PITG_10878  |
| 0 | 118  | 96 PITG_09415   |
| 0 | 5    | 5 NA            |
| 0 | 201  | 240 PITG_08416  |
| 0 | 3    | 8 PITG_10594    |
| 0 | 18   | 2 PITG_14977    |
| 0 | 8    | 7 PITG_19146    |
| 0 | 32   | 20 PITG_15571   |
| 0 | 1120 | 444 PITG_03596  |
| 0 | 2    | 2 PITG_05260    |
| 2 | 136  | 248 PITG_18787  |
| 0 | 18   | 24 PITG_21932   |
| 0 | 869  | 823 PITG_05601  |
| 0 | 14   | 14 PITG_07242   |
| 0 | 81   | 40 PITG_17942   |
| 0 | 372  | 186 PITG_04530  |
| 0 | 2    | 0 NA            |
| 0 | 431  | 366 PITG_22959  |
| 4 | 1133 | 1869 PITG_06237 |
| 0 | 343  | 187 PITG_06852  |
| 0 | 586  | 655 PITG_00219  |

|   |      |                 |
|---|------|-----------------|
| 0 | 144  | 174 NA          |
| 0 | 5    | 5 PITG_19527    |
| 0 | 12   | 30 PITG_10715   |
| 0 | 743  | 73 PITG_00809   |
| 0 | 799  | 839 PITG_01389  |
| 0 | 5    | 0 NA            |
| 0 | 248  | 24 PITG_00213   |
| 0 | 55   | 52 NA           |
| 0 | 119  | 0 NA            |
| 0 | 2    | 6 NA            |
| 0 | 7    | 10 PITG_06898   |
| 0 | 181  | 130 PITG_16806  |
| 0 | 3    | 4 PITG_09782    |
| 0 | 23   | 7 PITG_09597    |
| 0 | 624  | 276 PITG_08185  |
| 0 | 136  | 178 PITG_08787  |
| 0 | 16   | 14 PITG_14743   |
| 0 | 63   | 23 PITG_13827   |
| 0 | 2    | 15 PITG_05386   |
| 0 | 24   | 10 PITG_11882   |
| 0 | 20   | 2 PITG_00163    |
| 0 | 3    | 12 PITG_14615   |
| 0 | 1071 | 388 PITG_00058  |
| 0 | 121  | 22 NA           |
| 0 | 0    | 81 NA           |
| 0 | 0    | 0 NA            |
| 0 | 21   | 5 PITG_14723    |
| 0 | 226  | 94 PITG_04102   |
| 0 | 2    | 9 PITG_03169    |
| 0 | 1098 | 1604 PITG_09609 |
| 0 | 2    | 0 PITG_03652    |
| 0 | 161  | 625 PITG_19017  |
| 0 | 2    | 6 PITG_05629    |
| 0 | 547  | 127 PITG_05489  |
| 2 | 911  | 1353 PITG_12528 |
| 0 | 2    | 0 NA            |
| 0 | 3    | 5 PITG_01288    |
| 0 | 0    | 0 NA            |
| 0 | 4    | 11 PITG_00383   |
| 0 | 276  | 162 PITG_14563  |
| 0 | 0    | 2 PITG_02561    |
| 2 | 559  | 983 PITG_00170  |
| 0 | 1633 | 366 NA          |
| 0 | 2    | 0 NA            |
| 0 | 228  | 252 PITG_07828  |
| 0 | 52   | 19 PITG_01470   |
| 0 | 89   | 44 PITG_09067   |

|    |      |                 |
|----|------|-----------------|
| 0  | 140  | 7 NA            |
| 10 | 21   | 1747 PITG_21737 |
| 0  | 31   | 2 PITG_03943    |
| 0  | 580  | 735 PITG_00518  |
| 0  | 47   | 169 PITG_19691  |
| 0  | 1213 | 33 PITG_12562   |
| 0  | 0    | 0 PITG_13306    |
| 0  | 11   | 15 PITG_03995   |
| 0  | 130  | 181 NA          |
| 0  | 96   | 4 PITG_02981    |
| 0  | 531  | 1113 PITG_08881 |
| 0  | 2    | 0 NA            |
| 0  | 369  | 511 PITG_10729  |
| 0  | 2    | 5 PITG_09309    |
| 0  | 11   | 7 PITG_10394    |
| 0  | 51   | 0 PITG_22303    |
| 0  | 17   | 0 NA            |
| 0  | 10   | 0 PITG_00553    |
| 0  | 6    | 2 PITG_10911    |
| 0  | 581  | 83 PITG_04539   |
| 0  | 306  | 342 PITG_00127  |
| 0  | 11   | 3 NA            |
| 0  | 2    | 0 PITG_05282    |
| 0  | 163  | 72 PITG_16469   |
| 0  | 3    | 10 NA           |
| 0  | 607  | 22 PITG_11293   |
| 0  | 0    | 14 PITG_00273   |
| 0  | 110  | 172 PITG_12877  |
| 0  | 441  | 284 PITG_17717  |
| 0  | 526  | 857 PITG_00804  |
| 0  | 110  | 40 PITG_10715   |
| 0  | 87   | 87 PITG_04501   |
| 0  | 670  | 274 PITG_15057  |
| 0  | 42   | 26 PITG_02626   |
| 0  | 400  | 294 PITG_07529  |
| 0  | 107  | 59 PITG_17931   |
| 0  | 23   | 24 PITG_14455   |
| 0  | 340  | 236 PITG_10083  |
| 0  | 115  | 164 PITG_14852  |
| 0  | 26   | 48 NA           |
| 0  | 272  | 39 NA           |
| 0  | 2    | 8 PITG_13968    |
| 0  | 10   | 15 PITG_05658   |
| 0  | 23   | 15 PITG_01073   |
| 0  | 78   | 12 NA           |
| 2  | 1455 | 628 PITG_06415  |
| 0  | 2    | 15 PITG_11725   |

|    |      |                 |
|----|------|-----------------|
| 0  | 145  | 101 PITG_22850  |
| 0  | 4    | 4 PITG_04922    |
| 15 | 16   | 64 NA           |
| 0  | 191  | 67 PITG_02579   |
| 2  | 850  | 559 PITG_14391  |
| 0  | 647  | 84 PITG_11063   |
| 0  | 20   | 2 PITG_20675    |
| 0  | 6    | 17 PITG_04497   |
| 0  | 2    | 3 PITG_20251    |
| 0  | 432  | 886 PITG_00194  |
| 0  | 55   | 26 PITG_17998   |
| 0  | 144  | 135 PITG_05631  |
| 0  | 6    | 13 PITG_11243   |
| 0  | 16   | 6 PITG_12699    |
| 0  | 55   | 8 NA            |
| 0  | 45   | 49 PITG_12226   |
| 0  | 30   | 212 PITG_16871  |
| 0  | 0    | 0 PITG_11584    |
| 0  | 0    | 2 NA            |
| 0  | 92   | 16 PITG_09954   |
| 0  | 20   | 8 PITG_05429    |
| 0  | 413  | 143 PITG_00269  |
| 0  | 34   | 16 PITG_08328   |
| 0  | 11   | 19 PITG_22928   |
| 0  | 2    | 0 PITG_03995    |
| 0  | 0    | 0 NA            |
| 0  | 60   | 2 PITG_01407    |
| 0  | 4    | 0 NA            |
| 0  | 123  | 43 PITG_02755   |
| 0  | 137  | 17 PITG_23006   |
| 0  | 39   | 13 PITG_04108   |
| 0  | 0    | 0 NA            |
| 0  | 110  | 28 PITG_03655   |
| 0  | 272  | 278 PITG_00979  |
| 0  | 13   | 161 PITG_07341  |
| 0  | 8    | 5 PITG_19142    |
| 0  | 4    | 5 PITG_12920    |
| 0  | 53   | 25 PITG_21183   |
| 2  | 2213 | 683 PITG_09699  |
| 2  | 490  | 1176 PITG_15117 |
| 0  | 0    | 2 PITG_00257    |
| 0  | 180  | 59 PITG_10118   |
| 0  | 5    | 2 PITG_15621    |
| 0  | 403  | 211 PITG_04002  |
| 0  | 41   | 31 NA           |
| 4  | 283  | 798 PITG_18052  |
| 0  | 14   | 17 PITG_11249   |



|    |      |                 |
|----|------|-----------------|
| 0  | 9    | 4 PITG_10932    |
| 0  | 280  | 64 PITG_18342   |
| 2  | 773  | 1311 NA         |
| 0  | 78   | 34 NA           |
| 0  | 11   | 28 PITG_12695   |
| 0  | 72   | 23 PITG_06677   |
| 0  | 69   | 74 PITG_12697   |
| 0  | 6    | 2 PITG_11208    |
| 0  | 223  | 107 PITG_21012  |
| 0  | 124  | 94 PITG_07030   |
| 0  | 54   | 0 PITG_21505    |
| 0  | 160  | 1119 PITG_15358 |
| 0  | 93   | 28 NA           |
| 0  | 5    | 6 PITG_15089    |
| 0  | 2    | 0 PITG_09449    |
| 0  | 22   | 17 PITG_17028   |
| 0  | 16   | 16 PITG_21600   |
| 0  | 129  | 95 PITG_11689   |
| 0  | 76   | 80 PITG_13832   |
| 0  | 27   | 63 PITG_01477   |
| 0  | 65   | 34 NA           |
| 0  | 1247 | 873 PITG_05660  |
| 0  | 1206 | 1928 PITG_00266 |
| 0  | 516  | 1127 PITG_03916 |
| 0  | 30   | 29 PITG_17264   |
| 0  | 29   | 0 PITG_08529    |
| 0  | 4    | 0 PITG_10239    |
| 0  | 36   | 7 PITG_05410    |
| 2  | 1355 | 1485 PITG_12299 |
| 0  | 11   | 6 PITG_16862    |
| 0  | 1225 | 1079 PITG_00631 |
| 10 | 334  | 708 PITG_22908  |
| 0  | 306  | 128 PITG_04820  |
| 0  | 424  | 28 PITG_11496   |
| 0  | 2    | 9 PITG_02418    |
| 0  | 1564 | 118 PITG_12886  |
| 0  | 2    | 0 PITG_05387    |
| 0  | 3256 | 1505 PITG_18316 |
| 0  | 324  | 210 PITG_08569  |
| 0  | 2    | 0 NA            |
| 0  | 1323 | 1864 PITG_09282 |
| 0  | 4    | 0 PITG_03995    |
| 0  | 2    | 6 PITG_05537    |
| 0  | 478  | 668 PITG_15890  |
| 0  | 0    | 0 NA            |
| 0  | 367  | 193 PITG_02960  |
| 0  | 306  | 181 PITG_10514  |

|   |      |                 |
|---|------|-----------------|
| 0 | 297  | 478 PITG_02921  |
| 0 | 182  | 229 PITG_12912  |
| 0 | 22   | 17 PITG_02227   |
| 0 | 63   | 6 PITG_01426    |
| 0 | 79   | 65 PITG_01511   |
| 0 | 1272 | 852 PITG_10005  |
| 0 | 1963 | 862 PITG_12749  |
| 0 | 3    | 3 PITG_03443    |
| 4 | 206  | 931 PITG_06290  |
| 0 | 273  | 134 PITG_02960  |
| 0 | 518  | 1295 PITG_11766 |
| 0 | 21   | 63 PITG_06272   |
| 0 | 0    | 6 PITG_12699    |
| 0 | 1360 | 811 PITG_12286  |
| 0 | 47   | 46 PITG_09090   |
| 0 | 62   | 362 PITG_18706  |
| 0 | 74   | 318 PITG_16005  |
| 0 | 5    | 21 PITG_11963   |
| 0 | 67   | 507 PITG_09963  |
| 0 | 41   | 9 PITG_17015    |
| 0 | 45   | 3 NA            |
| 0 | 13   | 2 PITG_17876    |
| 0 | 3    | 0 PITG_12100    |
| 0 | 18   | 23 PITG_11249   |
| 0 | 64   | 56 PITG_12151   |
| 0 | 544  | 1597 PITG_18931 |
| 0 | 115  | 83 PITG_17264   |
| 0 | 42   | 9 PITG_16104    |
| 2 | 518  | 1006 PITG_00764 |
| 0 | 4    | 0 NA            |
| 0 | 79   | 155 PITG_12104  |
| 0 | 77   | 68 PITG_10616   |
| 0 | 54   | 2 PITG_03391    |
| 0 | 36   | 2 PITG_20044    |
| 0 | 20   | 17 PITG_23180   |
| 0 | 0    | 14 PITG_11584   |
| 0 | 196  | 605 PITG_10193  |
| 0 | 22   | 2 PITG_01427    |
| 0 | 16   | 11 PITG_02849   |
| 0 | 10   | 0 NA            |
| 0 | 902  | 769 PITG_14195  |
| 0 | 7    | 0 PITG_21553    |
| 0 | 11   | 2 PITG_05186    |
| 0 | 581  | 853 PITG_12082  |
| 0 | 41   | 10 NA           |
| 0 | 797  | 1124 PITG_13132 |
| 0 | 65   | 94 PITG_12308   |

|   |      |                 |
|---|------|-----------------|
| 0 | 4    | 0 PITG_19855    |
| 0 | 2    | 0 PITG_14948    |
| 0 | 73   | 42 PITG_09426   |
| 0 | 133  | 383 NA          |
| 0 | 0    | 10 NA           |
| 0 | 5    | 9 PITG_04603    |
| 0 | 727  | 2806 PITG_19017 |
| 0 | 896  | 2161 PITG_00156 |
| 0 | 0    | 2 PITG_01860    |
| 0 | 0    | 0 PITG_12840    |
| 0 | 0    | 0 PITG_00634    |
| 0 | 0    | 0 NA            |
| 0 | 60   | 13 PITG_03832   |
| 0 | 1540 | 880 PITG_16757  |
| 0 | 0    | 4 PITG_02574    |
| 0 | 34   | 16 PITG_12151   |
| 0 | 64   | 37 PITG_05697   |
| 0 | 6    | 20 PITG_13659   |
| 0 | 51   | 9 PITG_03586    |
| 0 | 17   | 8 PITG_19886    |
| 0 | 156  | 151 PITG_21010  |
| 0 | 28   | 7 PITG_15229    |
| 0 | 10   | 0 PITG_01290    |
| 0 | 69   | 35 PITG_18976   |
| 0 | 125  | 53 PITG_09488   |
| 0 | 10   | 31 PITG_12948   |
| 0 | 0    | 0 PITG_00302    |
| 2 | 180  | 96 PITG_19979   |
| 0 | 28   | 86 PITG_05480   |
| 0 | 48   | 15 PITG_07794   |
| 0 | 119  | 40 PITG_13395   |
| 0 | 95   | 122 PITG_14917  |
| 0 | 2    | 0 NA            |
| 2 | 2    | 4 PITG_05468    |
| 0 | 295  | 169 PITG_00229  |
| 0 | 5    | 2 NA            |
| 0 | 60   | 281 PITG_00455  |
| 0 | 202  | 0 PITG_08781    |
| 0 | 4    | 0 PITG_13985    |
| 0 | 349  | 226 PITG_06579  |
| 0 | 143  | 26 PITG_07509   |
| 0 | 4    | 2 PITG_11193    |
| 0 | 388  | 153 PITG_08403  |
| 0 | 251  | 113 NA          |
| 0 | 84   | 23 NA           |
| 0 | 170  | 42 NA           |
| 0 | 2    | 4 PITG_09944    |

|    |      |                 |
|----|------|-----------------|
| 0  | 89   | 18 PITG_13980   |
| 0  | 420  | 252 PITG_19531  |
| 0  | 639  | 887 PITG_02502  |
| 0  | 27   | 8 PITG_18537    |
| 0  | 865  | 604 PITG_10169  |
| 0  | 25   | 21 PITG_16684   |
| 0  | 4    | 8 PITG_02770    |
| 0  | 126  | 50 PITG_00790   |
| 0  | 0    | 0 PITG_02432    |
| 0  | 0    | 5 NA            |
| 3  | 1006 | 456 PITG_06722  |
| 0  | 63   | 67 PITG_04181   |
| 0  | 206  | 4 PITG_15846    |
| 0  | 288  | 910 PITG_10887  |
| 0  | 12   | 8 PITG_16042    |
| 2  | 176  | 332 PITG_14456  |
| 0  | 5    | 23 PITG_00562   |
| 0  | 8    | 6 NA            |
| 0  | 62   | 19 PITG_05672   |
| 12 | 32   | 1285 NA         |
| 0  | 192  | 51 PITG_04174   |
| 2  | 532  | 856 NA          |
| 0  | 170  | 48 PITG_05174   |
| 0  | 100  | 84 PITG_09923   |
| 0  | 1143 | 814 PITG_09389  |
| 0  | 102  | 181 PITG_19907  |
| 0  | 421  | 1184 PITG_19669 |
| 0  | 575  | 173 PITG_08119  |
| 0  | 2    | 2 PITG_15486    |
| 0  | 376  | 623 PITG_10193  |
| 0  | 43   | 25 PITG_13397   |
| 0  | 0    | 0 NA            |
| 0  | 553  | 1520 PITG_00880 |
| 0  | 10   | 9 PITG_04443    |
| 0  | 722  | 396 PITG_13597  |
| 0  | 6    | 9 PITG_00931    |
| 0  | 2    | 17 PITG_04994   |
| 0  | 180  | 58 PITG_14557   |
| 0  | 33   | 142 PITG_18720  |
| 0  | 69   | 28 PITG_11107   |
| 0  | 10   | 7 NA            |
| 0  | 217  | 378 PITG_05171  |
| 0  | 2183 | 1238 PITG_07027 |
| 0  | 273  | 106 PITG_20799  |
| 0  | 10   | 6 PITG_11197    |
| 0  | 4    | 0 PITG_15497    |
| 0  | 11   | 4 NA            |

|    |      |                 |
|----|------|-----------------|
| 18 | 2    | 6 NA            |
| 0  | 3    | 0 PITG_01576    |
| 0  | 43   | 29 PITG_12307   |
| 0  | 331  | 290 PITG_19234  |
| 0  | 11   | 12 PITG_07545   |
| 0  | 628  | 266 PITG_10729  |
| 0  | 0    | 5 PITG_06963    |
| 0  | 31   | 42 PITG_02241   |
| 0  | 0    | 0 PITG_18845    |
| 0  | 40   | 154 PITG_00212  |
| 0  | 3    | 81 PITG_05386   |
| 0  | 8    | 0 PITG_14971    |
| 0  | 243  | 77 PITG_22810   |
| 0  | 22   | 2 NA            |
| 0  | 5    | 0 NA            |
| 3  | 1200 | 2542 PITG_09540 |
| 0  | 180  | 24 PITG_06992   |
| 0  | 62   | 32 PITG_02798   |
| 0  | 43   | 97 PITG_20562   |
| 0  | 1235 | 470 PITG_14391  |
| 0  | 884  | 139 PITG_08185  |
| 0  | 18   | 6 PITG_04426    |
| 0  | 117  | 29 PITG_20808   |
| 0  | 20   | 39 PITG_07201   |
| 0  | 13   | 14 PITG_22007   |
| 0  | 4    | 0 PITG_15534    |
| 0  | 336  | 213 PITG_01043  |
| 31 | 35   | 3042 NA         |
| 0  | 169  | 546 PITG_15117  |
| 0  | 184  | 201 PITG_03594  |
| 0  | 6603 | 3316 PITG_09297 |
| 0  | 2    | 2 NA            |
| 0  | 111  | 69 NA           |
| 0  | 3    | 0 NA            |
| 0  | 60   | 26 NA           |
| 0  | 3    | 0 PITG_01153    |
| 0  | 38   | 6 PITG_22165    |
| 0  | 62   | 104 PITG_19042  |
| 0  | 909  | 748 PITG_15118  |
| 0  | 518  | 518 PITG_01797  |
| 0  | 13   | 0 NA            |
| 0  | 0    | 0 NA            |
| 0  | 0    | 8 PITG_21174    |
| 0  | 4    | 44 PITG_21737   |
| 0  | 2    | 8 PITG_12346    |
| 15 | 39   | 576 PITG_08677  |
| 0  | 46   | 45 PITG_00994   |

|   |      |                 |
|---|------|-----------------|
| 0 | 1091 | 850 PITG_15359  |
| 0 | 235  | 55 PITG_06780   |
| 0 | 2    | 3 NA            |
| 0 | 578  | 362 PITG_09941  |
| 0 | 11   | 2 PITG_04443    |
| 0 | 47   | 8 PITG_02562    |
| 0 | 439  | 561 PITG_17993  |
| 0 | 28   | 12 PITG_01109   |
| 0 | 564  | 380 PITG_16671  |
| 0 | 437  | 1264 PITG_15117 |
| 0 | 40   | 524 PITG_11852  |
| 0 | 198  | 90 PITG_18463   |
| 0 | 78   | 14 NA           |
| 0 | 44   | 159 PITG_11474  |
| 0 | 208  | 1364 PITG_14913 |
| 0 | 11   | 3 NA            |
| 0 | 6    | 8 PITG_00350    |
| 0 | 4    | 2 PITG_03443    |
| 0 | 5    | 0 NA            |
| 0 | 2    | 0 NA            |
| 0 | 1867 | 1061 PITG_08834 |
| 0 | 209  | 235 PITG_12108  |
| 0 | 259  | 146 PITG_06759  |
| 0 | 0    | 0 PITG_13440    |
| 0 | 130  | 54 NA           |
| 0 | 227  | 149 PITG_13387  |
| 0 | 2    | 0 NA            |
| 0 | 55   | 166 PITG_08082  |
| 0 | 203  | 17 PITG_17400   |
| 0 | 3    | 4 PITG_16221    |
| 0 | 6    | 0 PITG_16338    |
| 0 | 1810 | 5180 PITG_18414 |
| 0 | 19   | 6 NA            |
| 0 | 38   | 70 PITG_06790   |
| 0 | 18   | 0 PITG_07026    |
| 0 | 0    | 0 PITG_11249    |
| 0 | 0    | 2 NA            |
| 0 | 53   | 11 PITG_03827   |
| 0 | 16   | 14 PITG_06923   |
| 0 | 7    | 4 NA            |
| 0 | 4    | 2 PITG_05126    |
| 0 | 0    | 0 PITG_03938    |
| 0 | 21   | 12 PITG_11249   |
| 0 | 97   | 112 PITG_06390  |
| 0 | 170  | 106 NA          |
| 0 | 8    | 5 PITG_00132    |
| 0 | 348  | 327 PITG_21257  |

|    |      |                 |
|----|------|-----------------|
| 0  | 161  | 9 PITG_10292    |
| 0  | 182  | 229 PITG_06635  |
| 0  | 183  | 150 PITG_00302  |
| 0  | 1102 | 168 PITG_09432  |
| 0  | 2    | 0 NA            |
| 0  | 0    | 0 PITG_11368    |
| 0  | 247  | 72 PITG_05375   |
| 0  | 23   | 64 PITG_08917   |
| 0  | 2069 | 520 PITG_19119  |
| 0  | 2    | 2 PITG_18959    |
| 0  | 52   | 15 PITG_13052   |
| 0  | 65   | 179 PITG_05537  |
| 0  | 2    | 0 PITG_17679    |
| 0  | 281  | 67 PITG_04627   |
| 0  | 70   | 110 PITG_03235  |
| 0  | 0    | 0 NA            |
| 0  | 2038 | 1211 PITG_09652 |
| 0  | 69   | 8 PITG_14991    |
| 0  | 193  | 139 PITG_15791  |
| 0  | 22   | 7 PITG_03166    |
| 0  | 48   | 16 PITG_13431   |
| 0  | 609  | 223 NA          |
| 0  | 432  | 1476 PITG_10198 |
| 0  | 118  | 145 PITG_02293  |
| 0  | 150  | 848 PITG_03098  |
| 0  | 83   | 7 PITG_00627    |
| 0  | 1051 | 993 PITG_16008  |
| 0  | 177  | 59 PITG_08327   |
| 0  | 104  | 221 PITG_12882  |
| 0  | 209  | 20 PITG_02371   |
| 0  | 2    | 4 NA            |
| 4  | 728  | 1372 PITG_10146 |
| 2  | 75   | 122 PITG_02327  |
| 0  | 17   | 220 PITG_14088  |
| 0  | 0    | 109 NA          |
| 0  | 8    | 0 PITG_07865    |
| 0  | 453  | 95 PITG_02615   |
| 0  | 32   | 66 PITG_11114   |
| 0  | 37   | 19 PITG_07052   |
| 2  | 741  | 1915 PITG_18052 |
| 0  | 119  | 27 PITG_01737   |
| 0  | 125  | 0 PITG_09563    |
| 83 | 6    | 46 NA           |
| 0  | 18   | 39 PITG_00864   |
| 0  | 30   | 16 NA           |
| 0  | 219  | 133 PITG_15138  |
| 0  | 396  | 0 PITG_10693    |

|     |      |                 |
|-----|------|-----------------|
| 2   | 1361 | 1297 PITG_14913 |
| 0   | 129  | 20 PITG_03314   |
| 0   | 110  | 94 PITG_17549   |
| 0   | 273  | 323 PITG_11244  |
| 30  | 27   | 303 NA          |
| 0   | 10   | 0 NA            |
| 0   | 275  | 89 PITG_00472   |
| 0   | 16   | 0 NA            |
| 357 | 0    | 20 NA           |
| 809 | 0    | 52 NA           |
| 0   | 277  | 459 PITG_20121  |
| 0   | 13   | 15 PITG_05926   |
| 0   | 14   | 57 PITG_08780   |
| 0   | 1080 | 227 NA          |
| 0   | 58   | 56 PITG_05318   |
| 0   | 4    | 0 PITG_00048    |
| 0   | 151  | 33 PITG_04380   |
| 0   | 19   | 25 PITG_14968   |
| 0   | 6    | 10 NA           |
| 0   | 133  | 45 PITG_17045   |
| 0   | 59   | 23 PITG_00782   |
| 0   | 23   | 84 PITG_01258   |
| 0   | 400  | 184 PITG_09832  |
| 0   | 390  | 69 PITG_06895   |
| 0   | 0    | 0 PITG_08661    |
| 0   | 470  | 811 PITG_10219  |
| 0   | 30   | 17 PITG_06457   |
| 0   | 5    | 0 PITG_14714    |
| 0   | 13   | 3 PITG_21314    |
| 0   | 563  | 561 PITG_02046  |
| 0   | 33   | 39 PITG_18923   |
| 0   | 429  | 525 PITG_07955  |
| 0   | 740  | 240 PITG_05496  |
| 0   | 122  | 22 PITG_04227   |
| 0   | 25   | 26 PITG_12747   |
| 0   | 29   | 12 PITG_20903   |
| 0   | 686  | 1013 PITG_09769 |
| 0   | 129  | 290 PITG_03472  |
| 0   | 50   | 95 PITG_09271   |
| 0   | 62   | 293 PITG_16311  |
| 0   | 1843 | 496 PITG_00997  |
| 0   | 36   | 28 PITG_09261   |
| 0   | 8    | 5 PITG_09900    |
| 0   | 12   | 6 PITG_14044    |
| 0   | 44   | 0 NA            |
| 0   | 0    | 2 PITG_13903    |
| 0   | 398  | 31 PITG_07663   |



|     |      |                 |
|-----|------|-----------------|
| 130 | 119  | 0 NA            |
| 0   | 16   | 53 PITG_14968   |
| 0   | 248  | 207 PITG_19177  |
| 0   | 80   | 29 PITG_03864   |
| 4   | 343  | 1043 PITG_00632 |
| 0   | 62   | 53 PITG_09090   |
| 0   | 107  | 80 PITG_19158   |
| 0   | 17   | 3 PITG_16740    |
| 2   | 257  | 131 PITG_13848  |
| 0   | 280  | 518 PITG_13335  |
| 0   | 184  | 587 PITG_06415  |
| 0   | 22   | 0 PITG_09836    |
| 0   | 16   | 2 PITG_16479    |
| 0   | 9    | 0 PITG_19737    |
| 0   | 89   | 23 PITG_14634   |
| 0   | 12   | 0 PITG_10449    |
| 0   | 262  | 198 PITG_19591  |
| 0   | 95   | 15 PITG_13803   |
| 0   | 0    | 0 PITG_00129    |
| 0   | 247  | 123 PITG_00668  |
| 0   | 242  | 51 NA           |
| 0   | 221  | 83 PITG_03075   |
| 0   | 142  | 552 PITG_13960  |
| 0   | 0    | 2 PITG_07239    |
| 0   | 443  | 395 PITG_02011  |
| 0   | 43   | 21 NA           |
| 0   | 195  | 63 PITG_13277   |
| 0   | 1074 | 94 PITG_11900   |
| 0   | 450  | 76 PITG_03584   |
| 0   | 24   | 9 PITG_17035    |
| 0   | 116  | 151 PITG_03464  |
| 0   | 246  | 24 PITG_20374   |
| 0   | 268  | 77 PITG_10064   |
| 0   | 171  | 154 PITG_00280  |
| 0   | 200  | 615 PITG_07671  |
| 0   | 38   | 38 NA           |
| 0   | 143  | 336 PITG_19557  |
| 0   | 4    | 6 NA            |
| 0   | 581  | 207 PITG_19121  |
| 0   | 486  | 640 PITG_13919  |
| 0   | 12   | 0 PITG_03659    |
| 0   | 21   | 18 PITG_05286   |
| 0   | 14   | 7 PITG_09891    |
| 0   | 9    | 11 PITG_17123   |
| 2   | 223  | 203 PITG_15653  |
| 0   | 947  | 882 PITG_10858  |
| 0   | 309  | 741 PITG_09760  |

|   |      |                 |
|---|------|-----------------|
| 0 | 875  | 978 PITG_00505  |
| 0 | 7    | 2 NA            |
| 0 | 431  | 405 PITG_05394  |
| 0 | 73   | 467 PITG_22135  |
| 0 | 93   | 386 PITG_05505  |
| 0 | 107  | 41 PITG_21827   |
| 0 | 468  | 472 PITG_08676  |
| 0 | 200  | 33 PITG_02672   |
| 0 | 185  | 140 PITG_11046  |
| 0 | 1125 | 64 PITG_11450   |
| 0 | 151  | 41 NA           |
| 0 | 36   | 24 PITG_18894   |
| 0 | 41   | 18 PITG_11612   |
| 0 | 8    | 3 PITG_19962    |
| 0 | 446  | 271 PITG_14456  |
| 0 | 0    | 0 PITG_13056    |
| 0 | 9    | 71 PITG_05520   |
| 0 | 27   | 45 PITG_07229   |
| 0 | 168  | 0 PITG_17005    |
| 0 | 716  | 420 PITG_18072  |
| 0 | 3    | 0 NA            |
| 0 | 408  | 748 PITG_18706  |
| 0 | 4    | 6 PITG_02227    |
| 0 | 12   | 51 PITG_13726   |
| 4 | 1989 | 3105 PITG_15697 |
| 0 | 469  | 367 PITG_18072  |
| 0 | 1281 | 858 PITG_17013  |
| 0 | 0    | 0 PITG_07531    |
| 0 | 217  | 82 PITG_13665   |
| 0 | 3    | 0 PITG_17137    |
| 0 | 12   | 6 PITG_11461    |
| 0 | 0    | 4 PITG_15022    |
| 0 | 997  | 856 PITG_12122  |
| 0 | 92   | 70 PITG_02491   |
| 0 | 257  | 348 PITG_18452  |
| 0 | 86   | 4 PITG_03519    |
| 0 | 18   | 5 NA            |
| 0 | 85   | 0 PITG_20055    |
| 0 | 13   | 0 NA            |
| 0 | 65   | 14 NA           |
| 0 | 724  | 236 PITG_10311  |
| 0 | 5    | 2 NA            |
| 0 | 502  | 250 PITG_08932  |
| 0 | 26   | 36 PITG_05282   |
| 0 | 1339 | 120 PITG_00833  |
| 0 | 41   | 12 NA           |
| 0 | 325  | 359 PITG_21510  |

|   |      |                 |
|---|------|-----------------|
| 0 | 1965 | 1909 PITG_17007 |
| 0 | 0    | 4 PITG_16041    |
| 0 | 144  | 675 PITG_09345  |
| 0 | 931  | 232 PITG_10861  |
| 0 | 2    | 0 PITG_16788    |
| 0 | 8    | 0 NA            |
| 0 | 220  | 224 PITG_15449  |
| 0 | 133  | 515 PITG_15117  |
| 0 | 10   | 8 NA            |
| 0 | 2    | 9 PITG_03620    |
| 0 | 18   | 9 NA            |
| 0 | 212  | 130 PITG_03938  |
| 0 | 0    | 0 PITG_18845    |
| 0 | 175  | 74 PITG_03988   |
| 0 | 657  | 1496 PITG_17261 |
| 0 | 236  | 364 PITG_19768  |
| 0 | 308  | 191 PITG_08725  |
| 0 | 37   | 2 NA            |
| 0 | 134  | 85 PITG_06849   |
| 2 | 51   | 43 NA           |
| 0 | 9    | 7 PITG_17349    |
| 0 | 28   | 21 NA           |
| 0 | 48   | 71 PITG_06152   |
| 0 | 21   | 9 PITG_10383    |
| 0 | 30   | 41 PITG_00284   |
| 0 | 114  | 64 PITG_06760   |
| 0 | 15   | 2 NA            |
| 0 | 239  | 59 PITG_03571   |
| 0 | 147  | 39 PITG_14097   |
| 0 | 8    | 12 PITG_03408   |
| 0 | 48   | 4 PITG_14564    |
| 0 | 55   | 17 PITG_03473   |
| 0 | 57   | 11 PITG_03169   |
| 0 | 7    | 38 PITG_14831   |
| 0 | 210  | 269 PITG_03410  |
| 0 | 463  | 795 PITG_00333  |
| 0 | 1645 | 1403 PITG_07027 |
| 0 | 8    | 15 PITG_07077   |
| 0 | 24   | 4 NA            |
| 0 | 9    | 15 NA           |
| 0 | 2    | 4 PITG_02294    |
| 0 | 12   | 8 NA            |
| 0 | 12   | 0 NA            |
| 0 | 81   | 17 PITG_22477   |
| 0 | 1343 | 685 PITG_09438  |
| 0 | 1025 | 107 PITG_10498  |
| 0 | 238  | 36 PITG_13157   |

|   |      |                 |
|---|------|-----------------|
| 0 | 83   | 78 PITG_06967   |
| 0 | 29   | 33 NA           |
| 0 | 183  | 172 PITG_01499  |
| 0 | 64   | 10 NA           |
| 0 | 191  | 407 PITG_00234  |
| 0 | 2    | 2 PITG_09675    |
| 0 | 28   | 43 PITG_10715   |
| 0 | 56   | 9 PITG_21144    |
| 0 | 734  | 221 PITG_11975  |
| 0 | 15   | 12 NA           |
| 0 | 245  | 435 PITG_13237  |
| 0 | 863  | 459 PITG_06415  |
| 0 | 332  | 54 PITG_10501   |
| 0 | 2    | 2 NA            |
| 0 | 37   | 14 PITG_16478   |
| 0 | 104  | 18 PITG_07281   |
| 0 | 8    | 2 PITG_20273    |
| 0 | 4    | 16 PITG_21517   |
| 0 | 279  | 331 PITG_15117  |
| 0 | 401  | 134 PITG_02912  |
| 2 | 1961 | 1482 PITG_18775 |
| 0 | 2    | 0 PITG_18174    |
| 0 | 2    | 25 NA           |
| 0 | 49   | 192 PITG_07028  |
| 0 | 43   | 27 PITG_12159   |
| 0 | 0    | 2 PITG_17987    |
| 0 | 30   | 6 PITG_02134    |
| 0 | 48   | 78 PITG_07455   |
| 0 | 11   | 9 PITG_11584    |
| 0 | 155  | 11 PITG_07993   |
| 0 | 0    | 0 PITG_00637    |
| 0 | 4    | 9 PITG_08514    |
| 0 | 149  | 33 PITG_17710   |
| 0 | 25   | 0 PITG_14208    |
| 0 | 15   | 19 PITG_05292   |
| 0 | 494  | 180 PITG_19690  |
| 0 | 0    | 0 PITG_19399    |
| 0 | 256  | 78 PITG_11009   |
| 0 | 152  | 231 PITG_18025  |
| 0 | 90   | 25 PITG_09241   |
| 0 | 863  | 314 PITG_07476  |
| 0 | 2    | 4 PITG_16063    |
| 0 | 8    | 6 NA            |
| 0 | 103  | 144 PITG_18951  |
| 0 | 15   | 2 PITG_00861    |
| 0 | 0    | 0 NA            |
| 0 | 49   | 51 NA           |

|   |      |                 |
|---|------|-----------------|
| 0 | 186  | 100 PITG_02971  |
| 0 | 9    | 9 PITG_04564    |
| 0 | 84   | 90 NA           |
| 0 | 305  | 85 PITG_20629   |
| 0 | 325  | 876 PITG_00693  |
| 0 | 48   | 59 PITG_01510   |
| 0 | 77   | 174 PITG_06094  |
| 0 | 113  | 158 PITG_10462  |
| 0 | 9    | 0 NA            |
| 0 | 2    | 6 PITG_00623    |
| 2 | 1231 | 1966 PITG_02053 |
| 0 | 482  | 573 PITG_01791  |
| 0 | 187  | 258 PITG_01698  |
| 0 | 2    | 0 PITG_10553    |
| 0 | 0    | 2 PITG_03678    |
| 0 | 129  | 42 PITG_04539   |
| 0 | 41   | 4 PITG_10392    |
| 0 | 10   | 2 NA            |
| 0 | 11   | 3 PITG_15518    |
| 2 | 831  | 2875 PITG_10941 |
| 0 | 168  | 80 PITG_06319   |
| 0 | 180  | 21 PITG_15637   |
| 0 | 521  | 533 PITG_04530  |
| 0 | 96   | 678 PITG_11244  |
| 0 | 5    | 9 PITG_04665    |
| 0 | 67   | 168 PITG_03353  |
| 0 | 2    | 9 NA            |
| 0 | 32   | 2 PITG_03978    |
| 0 | 131  | 57 NA           |
| 0 | 14   | 4 PITG_04555    |
| 0 | 5240 | 327 PITG_06741  |
| 0 | 6    | 12 PITG_05480   |
| 0 | 0    | 2 PITG_03411    |
| 0 | 6    | 0 NA            |
| 0 | 6    | 25 PITG_15280   |
| 0 | 76   | 137 PITG_11046  |
| 0 | 16   | 16 PITG_01811   |
| 0 | 2    | 4 PITG_11998    |
| 0 | 274  | 128 PITG_16648  |
| 0 | 1139 | 1245 PITG_20173 |
| 0 | 197  | 12 PITG_08295   |
| 0 | 255  | 190 PITG_07828  |
| 0 | 1016 | 1184 PITG_03335 |
| 0 | 32   | 20 NA           |
| 0 | 12   | 2 NA            |
| 0 | 860  | 1530 PITG_00921 |
| 0 | 30   | 14 PITG_07197   |

|   |      |                 |
|---|------|-----------------|
| 0 | 55   | 113 PITG_06976  |
| 0 | 1948 | 1902 PITG_12584 |
| 0 | 0    | 9 PITG_07898    |
| 0 | 878  | 2909 PITG_01072 |
| 0 | 6    | 17 PITG_07275   |
| 0 | 56   | 8 PITG_20202    |
| 0 | 0    | 0 NA            |
| 0 | 10   | 19 PITG_00170   |
| 0 | 260  | 428 PITG_08392  |
| 0 | 535  | 1362 PITG_09556 |
| 0 | 26   | 2 NA            |
| 0 | 287  | 250 PITG_03599  |
| 0 | 170  | 176 PITG_14267  |
| 0 | 109  | 42 PITG_22958   |
| 0 | 221  | 149 PITG_07705  |
| 0 | 674  | 22 PITG_07711   |
| 0 | 202  | 192 PITG_14274  |
| 0 | 174  | 67 PITG_15089   |
| 0 | 255  | 93 PITG_21596   |
| 0 | 477  | 695 PITG_18947  |
| 0 | 4    | 9 NA            |
| 9 | 2    | 539 NA          |
| 0 | 0    | 0 NA            |
| 0 | 943  | 1477 PITG_05171 |
| 0 | 3    | 2 PITG_11272    |
| 0 | 129  | 219 PITG_20192  |
| 0 | 0    | 0 NA            |
| 0 | 86   | 0 NA            |
| 0 | 41   | 13 PITG_06708   |
| 0 | 146  | 71 NA           |
| 0 | 62   | 239 PITG_00293  |
| 0 | 0    | 0 PITG_11431    |
| 0 | 8    | 2 PITG_11825    |
| 0 | 116  | 157 PITG_11323  |
| 0 | 102  | 143 PITG_01237  |
| 0 | 32   | 17 PITG_14108   |
| 0 | 11   | 14 NA           |
| 0 | 86   | 27 PITG_15846   |
| 0 | 89   | 33 PITG_02820   |
| 0 | 4    | 2 PITG_03623    |
| 0 | 117  | 87 PITG_06611   |
| 0 | 5    | 0 PITG_02979    |
| 0 | 2    | 6 PITG_10894    |
| 0 | 36   | 4 PITG_10894    |
| 0 | 37   | 9 NA            |
| 0 | 413  | 321 PITG_11099  |
| 0 | 9    | 2 NA            |

|     |      |                 |
|-----|------|-----------------|
| 0   | 111  | 31 PITG_19966   |
| 0   | 72   | 10 PITG_16128   |
| 0   | 131  | 36 NA           |
| 12  | 403  | 4227 PITG_06415 |
| 0   | 0    | 0 PITG_02104    |
| 0   | 206  | 641 PITG_13020  |
| 0   | 13   | 0 NA            |
| 0   | 1121 | 895 PITG_15485  |
| 0   | 3    | 4 PITG_07395    |
| 0   | 4    | 18 PITG_09296   |
| 4   | 2886 | 5811 PITG_06595 |
| 0   | 2    | 2 NA            |
| 0   | 10   | 6 PITG_00662    |
| 763 | 122  | 697 NA          |
| 0   | 6    | 115 PITG_05156  |
| 0   | 451  | 126 PITG_14669  |
| 0   | 10   | 10 PITG_19098   |
| 0   | 64   | 11 PITG_10821   |
| 0   | 2    | 0 PITG_18173    |
| 0   | 294  | 31 PITG_12593   |
| 0   | 0    | 0 PITG_04671    |
| 0   | 0    | 0 PITG_01076    |
| 0   | 3221 | 1108 PITG_03632 |
| 0   | 5    | 0 PITG_17021    |
| 0   | 10   | 8 PITG_11857    |
| 0   | 516  | 115 PITG_01325  |
| 2   | 118  | 188 PITG_13177  |
| 0   | 135  | 25 NA           |
| 0   | 151  | 77 PITG_19804   |
| 0   | 197  | 120 PITG_02286  |
| 0   | 0    | 2 PITG_15006    |
| 0   | 13   | 0 PITG_02156    |
| 0   | 528  | 386 PITG_09848  |
| 0   | 242  | 41 PITG_13428   |
| 0   | 51   | 14 PITG_21048   |
| 0   | 82   | 65 PITG_16228   |
| 0   | 11   | 14 PITG_19419   |
| 0   | 517  | 207 PITG_07028  |
| 0   | 92   | 51 PITG_00209   |
| 0   | 3    | 7 NA            |
| 0   | 906  | 17 PITG_19855   |
| 0   | 6    | 2 PITG_09386    |
| 0   | 14   | 2 PITG_07988    |
| 0   | 2    | 2 NA            |
| 0   | 180  | 178 NA          |
| 0   | 0    | 4 PITG_11816    |
| 0   | 44   | 86 PITG_02729   |

|      |      |                 |
|------|------|-----------------|
| 0    | 38   | 0 PITG_13528    |
| 0    | 0    | 0 NA            |
| 0    | 35   | 24 NA           |
| 2    | 0    | 0 NA            |
| 0    | 109  | 15 PITG_02094   |
| 0    | 0    | 0 NA            |
| 0    | 2    | 9 PITG_04553    |
| 0    | 32   | 0 PITG_01510    |
| 1731 | 2    | 40 NA           |
| 0    | 152  | 93 PITG_06242   |
| 0    | 4    | 212 PITG_06415  |
| 0    | 113  | 63 PITG_12837   |
| 0    | 713  | 184 NA          |
| 5    | 5268 | 4660 PITG_06514 |
| 0    | 70   | 30 PITG_14400   |
| 0    | 0    | 0 NA            |
| 0    | 49   | 83 PITG_13658   |
| 0    | 71   | 8 NA            |
| 2    | 654  | 1051 PITG_09556 |
| 0    | 118  | 54 PITG_05592   |
| 0    | 51   | 206 PITG_04698  |
| 0    | 10   | 2 PITG_16103    |
| 0    | 72   | 208 NA          |
| 0    | 0    | 0 PITG_03408    |
| 0    | 286  | 639 PITG_20746  |
| 0    | 77   | 4 PITG_14057    |
| 0    | 244  | 223 PITG_21174  |
| 0    | 236  | 64 PITG_18787   |
| 0    | 3    | 0 PITG_10420    |
| 0    | 37   | 9 PITG_18237    |
| 0    | 15   | 7 PITG_14257    |
| 0    | 911  | 1221 PITG_10202 |
| 0    | 419  | 74 PITG_11118   |
| 0    | 6    | 8 PITG_00659    |
| 0    | 218  | 70 PITG_07247   |
| 0    | 65   | 0 PITG_11249    |
| 0    | 0    | 2 PITG_06142    |
| 0    | 970  | 496 PITG_01270  |
| 0    | 21   | 0 NA            |
| 2    | 2506 | 3393 PITG_09431 |
| 0    | 0    | 4 PITG_12112    |
| 0    | 88   | 496 PITG_12682  |
| 0    | 45   | 81 PITG_22959   |
| 0    | 10   | 17 PITG_11612   |
| 0    | 6    | 16 PITG_13286   |
| 0    | 109  | 48 PITG_01577   |
| 0    | 89   | 48 PITG_00152   |



|   |      |                 |
|---|------|-----------------|
| 0 | 1174 | 781 PITG_06608  |
| 0 | 4    | 0 PITG_12796    |
| 0 | 153  | 28 PITG_05683   |
| 0 | 339  | 14 PITG_15249   |
| 0 | 2    | 4 PITG_02127    |
| 0 | 58   | 125 PITG_09874  |
| 0 | 74   | 45 PITG_16809   |
| 0 | 594  | 184 PITG_02320  |
| 0 | 15   | 18 PITG_22982   |
| 0 | 33   | 9 PITG_15925    |
| 0 | 6    | 11 PITG_11088   |
| 0 | 2    | 2 PITG_00051    |
| 0 | 870  | 994 PITG_03719  |
| 0 | 131  | 42 PITG_17264   |
| 0 | 446  | 51 NA           |
| 0 | 249  | 165 NA          |
| 0 | 0    | 0 PITG_07476    |
| 0 | 447  | 331 NA          |
| 0 | 14   | 31 PITG_09271   |
| 0 | 5    | 4 PITG_05149    |
| 0 | 11   | 10 PITG_19846   |
| 0 | 147  | 211 PITG_10887  |
| 0 | 246  | 152 PITG_06003  |
| 0 | 20   | 15 NA           |
| 0 | 188  | 106 PITG_05953  |
| 0 | 66   | 235 PITG_07790  |
| 0 | 1113 | 1615 PITG_15626 |
| 0 | 15   | 6 NA            |
| 0 | 103  | 122 PITG_03513  |
| 0 | 638  | 187 NA          |
| 0 | 61   | 69 PITG_05012   |
| 2 | 235  | 1062 PITG_00910 |
| 0 | 96   | 75 NA           |
| 0 | 0    | 10 NA           |
| 0 | 0    | 0 NA            |
| 0 | 6    | 25 PITG_13366   |
| 0 | 60   | 28 PITG_03005   |
| 0 | 110  | 11 PITG_11247   |
| 2 | 83   | 68 PITG_11247   |
| 0 | 7    | 8 PITG_10973    |
| 0 | 195  | 102 PITG_14362  |
| 0 | 19   | 34 PITG_17531   |
| 0 | 479  | 312 NA          |
| 3 | 3073 | 1976 PITG_15863 |
| 0 | 107  | 64 NA           |
| 0 | 3223 | 2879 PITG_10974 |
| 0 | 101  | 117 PITG_22406  |

|     |      |                 |
|-----|------|-----------------|
| 0   | 116  | 160 PITG_16853  |
| 0   | 328  | 313 PITG_15280  |
| 0   | 91   | 12 PITG_11179   |
| 0   | 534  | 182 PITG_17452  |
| 0   | 43   | 8 NA            |
| 0   | 22   | 10 PITG_13491   |
| 0   | 13   | 0 NA            |
| 0   | 1986 | 2630 PITG_15863 |
| 0   | 7    | 0 PITG_06268    |
| 0   | 307  | 8 PITG_15069    |
| 0   | 128  | 105 PITG_03828  |
| 0   | 0    | 0 PITG_08913    |
| 0   | 2    | 0 PITG_03053    |
| 0   | 111  | 29 NA           |
| 0   | 354  | 808 PITG_18052  |
| 0   | 5    | 2 PITG_20906    |
| 0   | 14   | 11 PITG_16038   |
| 0   | 85   | 49 PITG_09539   |
| 0   | 104  | 18 PITG_07111   |
| 0   | 1005 | 848 PITG_04681  |
| 0   | 5    | 0 NA            |
| 0   | 934  | 1045 PITG_11036 |
| 0   | 694  | 437 PITG_03020  |
| 0   | 557  | 527 PITG_00034  |
| 0   | 2    | 0 PITG_07102    |
| 0   | 647  | 50 PITG_08781   |
| 0   | 30   | 12 PITG_12987   |
| 0   | 527  | 778 PITG_00443  |
| 0   | 131  | 0 NA            |
| 0   | 4    | 2 PITG_16104    |
| 295 | 73   | 2517 NA         |
| 0   | 26   | 5 PITG_02457    |
| 0   | 56   | 17 PITG_03754   |
| 0   | 82   | 475 NA          |
| 0   | 93   | 184 PITG_06325  |
| 0   | 2    | 2 PITG_02203    |
| 0   | 0    | 4 PITG_20197    |
| 0   | 0    | 3 PITG_03629    |
| 0   | 92   | 172 PITG_14195  |
| 0   | 25   | 6 PITG_06903    |
| 0   | 1673 | 1204 PITG_02694 |
| 0   | 413  | 9 PITG_00910    |
| 2   | 1552 | 2390 PITG_02026 |
| 0   | 51   | 15 PITG_19850   |
| 0   | 92   | 348 PITG_15504  |
| 0   | 393  | 120 PITG_06594  |
| 0   | 16   | 4 PITG_18409    |

|   |      |                 |
|---|------|-----------------|
| 0 | 63   | 118 PITG_02458  |
| 0 | 267  | 131 PITG_00726  |
| 0 | 794  | 1935 PITG_10974 |
| 0 | 8    | 7 PITG_16137    |
| 0 | 70   | 523 PITG_07285  |
| 0 | 233  | 78 PITG_22810   |
| 0 | 5    | 7 PITG_07284    |
| 0 | 14   | 2 PITG_09598    |
| 0 | 450  | 0 PITG_08236    |
| 0 | 4    | 12 PITG_19175   |
| 0 | 2    | 0 PITG_13317    |
| 0 | 16   | 4 PITG_05467    |
| 0 | 7    | 10 PITG_20838   |
| 0 | 22   | 5 PITG_04134    |
| 0 | 826  | 515 PITG_00938  |
| 0 | 13   | 0 PITG_14979    |
| 0 | 4    | 4 NA            |
| 0 | 244  | 115 PITG_08765  |
| 0 | 36   | 27 PITG_00978   |
| 0 | 3011 | 39 PITG_14601   |
| 0 | 42   | 172 PITG_04843  |
| 0 | 2    | 0 PITG_06588    |
| 0 | 45   | 18 NA           |
| 0 | 13   | 35 PITG_03425   |
| 0 | 21   | 2 NA            |
| 0 | 0    | 0 PITG_16682    |
| 0 | 18   | 66 PITG_09556   |
| 0 | 31   | 34 NA           |
| 0 | 308  | 70 NA           |
| 2 | 1344 | 2497 PITG_12947 |
| 0 | 205  | 83 PITG_14573   |
| 0 | 101  | 45 PITG_07953   |
| 0 | 133  | 190 NA          |
| 0 | 418  | 365 PITG_12327  |
| 0 | 17   | 38 PITG_00495   |
| 0 | 34   | 0 PITG_11572    |
| 0 | 0    | 0 PITG_14057    |
| 2 | 1413 | 719 PITG_02267  |
| 0 | 0    | 0 NA            |
| 0 | 5    | 2 NA            |
| 6 | 2    | 6 NA            |
| 0 | 91   | 7 NA            |
| 0 | 20   | 46 NA           |
| 0 | 31   | 229 PITG_18306  |
| 0 | 0    | 0 PITG_00343    |
| 0 | 169  | 51 PITG_14465   |
| 0 | 48   | 6 NA            |

|   |      |                 |
|---|------|-----------------|
| 0 | 16   | 8 PITG_10045    |
| 0 | 10   | 4 PITG_10853    |
| 0 | 7    | 22 PITG_10534   |
| 0 | 0    | 0 PITG_21303    |
| 0 | 59   | 41 PITG_17455   |
| 0 | 551  | 806 PITG_10263  |
| 0 | 12   | 2 PITG_15150    |
| 0 | 473  | 140 NA          |
| 0 | 71   | 38 PITG_11522   |
| 0 | 544  | 329 PITG_00212  |
| 0 | 22   | 6 PITG_15470    |
| 0 | 150  | 32 PITG_00423   |
| 0 | 482  | 257 PITG_21395  |
| 0 | 77   | 55 PITG_10449   |
| 0 | 0    | 0 NA            |
| 0 | 14   | 17 PITG_00998   |
| 0 | 62   | 10 NA           |
| 0 | 14   | 9 PITG_14283    |
| 0 | 18   | 8 PITG_09307    |
| 0 | 6    | 12 NA           |
| 0 | 107  | 38 PITG_15865   |
| 0 | 6    | 0 PITG_12545    |
| 0 | 31   | 4 PITG_14626    |
| 0 | 209  | 150 PITG_19121  |
| 0 | 19   | 0 PITG_17884    |
| 0 | 3    | 8 PITG_15946    |
| 2 | 16   | 1051 PITG_21737 |
| 0 | 50   | 0 PITG_15868    |
| 0 | 28   | 50 PITG_15116   |
| 0 | 14   | 17 PITG_01451   |
| 0 | 12   | 60 PITG_21880   |
| 0 | 5    | 2 PITG_21289    |
| 0 | 85   | 19 NA           |
| 0 | 121  | 101 PITG_08660  |
| 0 | 0    | 0 PITG_05263    |
| 0 | 487  | 761 PITG_12041  |
| 0 | 9    | 0 NA            |
| 0 | 11   | 4 PITG_09581    |
| 0 | 356  | 3 NA            |
| 0 | 574  | 379 PITG_07947  |
| 0 | 14   | 55 PITG_20354   |
| 0 | 75   | 39 NA           |
| 0 | 25   | 0 NA            |
| 0 | 3    | 3 NA            |
| 0 | 54   | 125 PITG_03828  |
| 0 | 177  | 51 PITG_05289   |
| 0 | 1004 | 794 PITG_09655  |

|   |      |                 |
|---|------|-----------------|
| 0 | 10   | 4 NA            |
| 0 | 9    | 6 NA            |
| 0 | 107  | 220 PITG_06114  |
| 0 | 5    | 2 PITG_02626    |
| 0 | 293  | 274 PITG_14935  |
| 2 | 679  | 1418 PITG_06799 |
| 0 | 285  | 194 PITG_03642  |
| 0 | 145  | 61 NA           |
| 0 | 20   | 4 PITG_13397    |
| 0 | 120  | 10 PITG_16128   |
| 0 | 801  | 263 PITG_09451  |
| 0 | 10   | 9 NA            |
| 0 | 70   | 13 PITG_11612   |
| 0 | 27   | 7 PITG_21316    |
| 0 | 75   | 66 PITG_12327   |
| 0 | 107  | 113 PITG_00523  |
| 0 | 1251 | 554 PITG_02510  |
| 0 | 181  | 20 PITG_11106   |
| 0 | 4    | 8 PITG_11057    |
| 0 | 87   | 48 PITG_15406   |
| 0 | 0    | 2 NA            |
| 0 | 273  | 65 PITG_06244   |
| 0 | 67   | 25 PITG_10141   |
| 0 | 101  | 49 PITG_09450   |
| 0 | 972  | 1100 PITG_00492 |
| 0 | 0    | 2 PITG_19213    |
| 0 | 10   | 2 NA            |
| 0 | 4    | 7 PITG_04133    |
| 0 | 759  | 583 PITG_09556  |
| 0 | 269  | 111 PITG_12574  |
| 0 | 266  | 21 PITG_15365   |
| 0 | 128  | 88 PITG_14768   |
| 0 | 494  | 489 PITG_12881  |
| 0 | 4    | 2 PITG_03831    |
| 0 | 103  | 4 PITG_16020    |
| 0 | 1063 | 624 PITG_10940  |
| 0 | 10   | 4 PITG_13202    |
| 0 | 20   | 6 NA            |
| 0 | 36   | 40 PITG_12811   |
| 0 | 6    | 5 PITG_21005    |
| 0 | 275  | 138 PITG_08898  |
| 0 | 0    | 0 PITG_23029    |
| 0 | 7    | 5 NA            |
| 0 | 1262 | 1518 PITG_07999 |
| 0 | 30   | 23 PITG_18417   |
| 0 | 249  | 472 PITG_03477  |
| 0 | 0    | 0 PITG_04889    |

|    |      |                 |
|----|------|-----------------|
| 0  | 22   | 32 PITG_06772   |
| 0  | 0    | 2 NA            |
| 18 | 38   | 2368 NA         |
| 0  | 72   | 14 PITG_16211   |
| 0  | 394  | 526 PITG_02786  |
| 0  | 66   | 79 PITG_09537   |
| 0  | 38   | 11 NA           |
| 0  | 10   | 35 PITG_13152   |
| 0  | 0    | 0 PITG_06351    |
| 0  | 370  | 237 PITG_11405  |
| 0  | 0    | 2 PITG_06678    |
| 0  | 388  | 148 PITG_07340  |
| 0  | 24   | 29 PITG_09378   |
| 0  | 514  | 329 PITG_16833  |
| 0  | 67   | 123 PITG_12037  |
| 0  | 680  | 566 PITG_15568  |
| 0  | 18   | 0 PITG_11461    |
| 0  | 105  | 379 PITG_18052  |
| 0  | 61   | 18 PITG_12145   |
| 0  | 339  | 155 PITG_04725  |
| 0  | 151  | 123 PITG_05112  |
| 0  | 640  | 251 PITG_06851  |
| 0  | 223  | 125 PITG_15408  |
| 0  | 528  | 297 PITG_07572  |
| 0  | 519  | 242 PITG_13382  |
| 0  | 228  | 84 PITG_15089   |
| 0  | 0    | 0 PITG_23240    |
| 0  | 6    | 0 PITG_13249    |
| 0  | 154  | 408 PITG_22835  |
| 0  | 0    | 0 PITG_22431    |
| 0  | 192  | 261 PITG_08598  |
| 0  | 375  | 684 PITG_14850  |
| 0  | 2    | 8 PITG_21054    |
| 0  | 5    | 10 PITG_09753   |
| 0  | 0    | 2 NA            |
| 0  | 17   | 16 PITG_17359   |
| 0  | 38   | 64 PITG_12266   |
| 0  | 0    | 0 PITG_13544    |
| 0  | 32   | 30 PITG_00964   |
| 2  | 1269 | 2771 PITG_17921 |
| 0  | 52   | 30 PITG_03878   |
| 2  | 3277 | 1580 PITG_17007 |
| 0  | 69   | 28 PITG_05239   |
| 0  | 0    | 0 PITG_12140    |
| 0  | 2    | 6 PITG_21516    |
| 0  | 2    | 20 PITG_22065   |
| 0  | 2    | 0 PITG_17399    |

|    |      |                 |
|----|------|-----------------|
| 0  | 30   | 59 PITG_06891   |
| 0  | 0    | 0 NA            |
| 0  | 218  | 241 PITG_20186  |
| 0  | 1840 | 1994 PITG_01700 |
| 0  | 18   | 9 PITG_14874    |
| 0  | 0    | 14 PITG_11161   |
| 0  | 666  | 419 PITG_08673  |
| 0  | 135  | 97 PITG_10240   |
| 0  | 8    | 4 PITG_01614    |
| 0  | 178  | 278 PITG_00787  |
| 0  | 80   | 30 PITG_21184   |
| 0  | 230  | 58 PITG_02971   |
| 0  | 39   | 250 PITG_11171  |
| 0  | 35   | 33 PITG_00167   |
| 0  | 29   | 47 PITG_08425   |
| 0  | 10   | 2 PITG_03621    |
| 0  | 78   | 66 PITG_11215   |
| 0  | 445  | 470 PITG_08311  |
| 0  | 6    | 27 PITG_11650   |
| 0  | 40   | 2 NA            |
| 0  | 59   | 103 PITG_12946  |
| 0  | 472  | 20 NA           |
| 0  | 342  | 282 PITG_04398  |
| 0  | 0    | 0 NA            |
| 0  | 22   | 9 PITG_17049    |
| 0  | 125  | 9 PITG_05565    |
| 0  | 492  | 598 PITG_13204  |
| 0  | 69   | 14 PITG_17959   |
| 0  | 13   | 64 PITG_18452   |
| 0  | 56   | 46 PITG_17292   |
| 2  | 330  | 382 PITG_01922  |
| 0  | 51   | 30 PITG_08736   |
| 0  | 15   | 4 PITG_18475    |
| 0  | 0    | 0 NA            |
| 2  | 3635 | 2616 PITG_09345 |
| 0  | 33   | 28 PITG_17137   |
| 0  | 430  | 315 PITG_14980  |
| 0  | 43   | 28 NA           |
| 12 | 597  | 1089 NA         |
| 0  | 568  | 808 PITG_10031  |
| 0  | 1939 | 1743 PITG_07792 |
| 0  | 8    | 9 PITG_09270    |
| 0  | 284  | 293 PITG_09965  |
| 0  | 0    | 4 PITG_00661    |
| 0  | 78   | 23 PITG_03616   |
| 0  | 60   | 0 NA            |
| 0  | 511  | 653 PITG_06693  |

|   |      |                |
|---|------|----------------|
| 0 | 0    | 2 PITG_22064   |
| 0 | 9    | 15 PITG_05302  |
| 0 | 6    | 0 PITG_21556   |
| 0 | 87   | 93 PITG_08926  |
| 0 | 4    | 0 PITG_03017   |
| 2 | 21   | 155 PITG_13405 |
| 0 | 82   | 111 PITG_01398 |
| 0 | 115  | 213 PITG_08377 |
| 0 | 2    | 8 NA           |
| 0 | 1428 | 471 PITG_15568 |
| 0 | 2    | 13 PITG_00453  |
| 0 | 46   | 41 PITG_00578  |
| 0 | 131  | 119 PITG_03392 |
| 0 | 44   | 34 PITG_13435  |
| 0 | 284  | 671 PITG_08959 |
| 0 | 0    | 5 NA           |
| 0 | 258  | 57 PITG_07277  |
| 0 | 655  | 129 PITG_19422 |
| 0 | 494  | 186 PITG_01778 |
| 0 | 0    | 6 PITG_02400   |
| 0 | 374  | 156 PITG_03104 |
| 0 | 85   | 29 PITG_10213  |
| 0 | 274  | 294 PITG_02253 |
| 0 | 8    | 2 NA           |
| 0 | 0    | 6 PITG_12663   |
| 0 | 1276 | 1167 NA        |
| 0 | 189  | 86 PITG_05249  |
| 0 | 556  | 464 PITG_03916 |
| 0 | 12   | 58 PITG_06108  |
| 0 | 83   | 145 PITG_09783 |
| 0 | 6    | 0 PITG_01250   |
| 0 | 0    | 0 PITG_21618   |
| 0 | 249  | 536 PITG_09556 |
| 0 | 19   | 27 PITG_00140  |
| 0 | 288  | 411 PITG_00045 |
| 0 | 24   | 10 PITG_15885  |
| 0 | 4    | 22 PITG_06016  |
| 0 | 0    | 8 PITG_09411   |
| 0 | 134  | 23 PITG_10763  |
| 0 | 112  | 27 PITG_06150  |
| 0 | 5    | 2 PITG_04667   |
| 0 | 22   | 20 PITG_05781  |
| 0 | 176  | 100 PITG_04564 |
| 0 | 203  | 242 PITG_17445 |
| 0 | 0    | 8 PITG_02238   |
| 0 | 16   | 0 PITG_22037   |
| 0 | 19   | 0 NA           |



|   |      |                 |
|---|------|-----------------|
| 0 | 4    | 5 PITG_16208    |
| 0 | 0    | 33 NA           |
| 0 | 71   | 86 PITG_14939   |
| 0 | 6    | 0 NA            |
| 0 | 858  | 866 PITG_19282  |
| 0 | 2    | 2 PITG_05099    |
| 2 | 1766 | 2096 PITG_01248 |
| 0 | 99   | 760 PITG_22658  |
| 0 | 25   | 2 PITG_15973    |
| 0 | 290  | 264 PITG_18104  |
| 0 | 289  | 154 NA          |
| 0 | 0    | 0 NA            |
| 0 | 6    | 25 PITG_16333   |
| 0 | 214  | 270 PITG_17947  |
| 0 | 498  | 944 PITG_10263  |
| 0 | 2    | 6 PITG_03155    |
| 0 | 218  | 421 PITG_12561  |
| 0 | 1136 | 741 PITG_13728  |
| 0 | 226  | 9 PITG_22850    |
| 0 | 0    | 0 PITG_16221    |
| 8 | 1192 | 1683 PITG_18718 |
| 0 | 912  | 871 PITG_07972  |
| 0 | 47   | 40 PITG_22353   |
| 0 | 112  | 452 PITG_11009  |
| 0 | 103  | 73 NA           |
| 0 | 117  | 445 PITG_06408  |
| 0 | 452  | 556 PITG_11789  |
| 0 | 235  | 474 PITG_11452  |
| 0 | 12   | 32 PITG_06635   |
| 0 | 25   | 17 PITG_03318   |
| 0 | 363  | 704 PITG_19161  |
| 0 | 11   | 39 PITG_17049   |
| 0 | 0    | 4 PITG_17047    |
| 0 | 124  | 2 PITG_05546    |
| 0 | 53   | 4 PITG_06984    |
| 0 | 0    | 0 PITG_11089    |
| 0 | 148  | 58 PITG_20274   |
| 0 | 2    | 0 PITG_16020    |
| 0 | 339  | 1020 PITG_00234 |
| 0 | 91   | 6 PITG_12296    |
| 0 | 33   | 4 PITG_01871    |
| 0 | 336  | 138 PITG_12042  |
| 0 | 10   | 13 PITG_12574   |
| 0 | 0    | 0 NA            |
| 0 | 0    | 0 PITG_01528    |
| 0 | 154  | 77 NA           |
| 0 | 21   | 41 NA           |

|    |      |                 |
|----|------|-----------------|
| 0  | 196  | 186 PITG_18650  |
| 0  | 659  | 310 PITG_11767  |
| 0  | 287  | 66 PITG_06390   |
| 0  | 1865 | 1827 PITG_09547 |
| 0  | 16   | 98 PITG_13726   |
| 0  | 2    | 62 PITG_11890   |
| 0  | 95   | 0 PITG_12662    |
| 0  | 210  | 252 PITG_09528  |
| 0  | 13   | 2 PITG_10888    |
| 0  | 21   | 0 PITG_11594    |
| 0  | 489  | 533 PITG_01945  |
| 0  | 2    | 9 NA            |
| 0  | 92   | 203 PITG_01449  |
| 0  | 8    | 33 PITG_15786   |
| 0  | 995  | 315 NA          |
| 0  | 230  | 462 PITG_06689  |
| 0  | 287  | 176 PITG_12575  |
| 0  | 216  | 436 PITG_02092  |
| 0  | 150  | 40 PITG_20468   |
| 0  | 130  | 496 PITG_11975  |
| 0  | 35   | 29 NA           |
| 0  | 108  | 103 NA          |
| 0  | 0    | 0 PITG_08232    |
| 0  | 3    | 24 PITG_09066   |
| 18 | 79   | 103 NA          |
| 0  | 0    | 2 PITG_23029    |
| 0  | 37   | 8 PITG_02105    |
| 0  | 2    | 4 NA            |
| 0  | 42   | 26 PITG_08489   |
| 0  | 1329 | 367 PITG_09450  |
| 0  | 7    | 2 PITG_01174    |
| 0  | 2240 | 741 PITG_01004  |
| 0  | 25   | 5 PITG_03519    |
| 0  | 24   | 23 PITG_14109   |
| 0  | 75   | 220 PITG_17005  |
| 0  | 38   | 22 PITG_08736   |
| 0  | 268  | 190 PITG_03614  |
| 0  | 762  | 155 PITG_05616  |
| 0  | 2    | 2 PITG_02042    |
| 0  | 96   | 96 PITG_22848   |
| 0  | 14   | 5 PITG_11020    |
| 0  | 63   | 37 NA           |
| 0  | 140  | 58 PITG_06112   |
| 0  | 545  | 514 PITG_16008  |
| 0  | 244  | 7 PITG_06171    |
| 0  | 924  | 600 PITG_04843  |
| 0  | 538  | 473 PITG_22764  |

|     |      |                 |
|-----|------|-----------------|
| 0   | 8    | 0 NA            |
| 0   | 6    | 2 NA            |
| 0   | 73   | 34 PITG_01798   |
| 0   | 0    | 0 PITG_00312    |
| 0   | 1164 | 1830 PITG_01248 |
| 0   | 299  | 184 PITG_00058  |
| 0   | 432  | 375 PITG_05251  |
| 0   | 26   | 2 PITG_09193    |
| 0   | 89   | 130 PITG_06203  |
| 0   | 187  | 76 PITG_02280   |
| 0   | 187  | 92 PITG_01418   |
| 0   | 126  | 115 PITG_07162  |
| 0   | 51   | 46 PITG_21377   |
| 0   | 127  | 41 NA           |
| 0   | 4    | 0 PITG_15114    |
| 0   | 19   | 21 NA           |
| 0   | 708  | 2 PITG_06805    |
| 0   | 14   | 5 NA            |
| 0   | 9    | 8 PITG_00011    |
| 0   | 0    | 2 PITG_12151    |
| 0   | 7    | 6 NA            |
| 0   | 7    | 4 NA            |
| 0   | 0    | 0 PITG_11594    |
| 257 | 35   | 679 NA          |
| 0   | 606  | 196 PITG_00854  |
| 0   | 216  | 70 PITG_02124   |
| 0   | 412  | 701 PITG_06503  |
| 0   | 318  | 220 PITG_08701  |
| 0   | 619  | 293 PITG_00797  |
| 0   | 46   | 25 PITG_18028   |
| 0   | 28   | 26 PITG_14835   |
| 0   | 88   | 46 PITG_07194   |
| 0   | 7    | 8 NA            |
| 0   | 11   | 13 PITG_10838   |
| 0   | 0    | 6 PITG_10750    |
| 0   | 187  | 135 PITG_07476  |
| 0   | 10   | 4 PITG_16820    |
| 0   | 54   | 350 PITG_12562  |
| 0   | 257  | 110 PITG_00787  |
| 0   | 359  | 15 PITG_05855   |
| 0   | 215  | 493 PITG_17993  |
| 0   | 453  | 598 PITG_17069  |
| 0   | 20   | 112 PITG_11856  |
| 0   | 556  | 371 PITG_00359  |
| 0   | 862  | 1150 PITG_08210 |
| 0   | 0    | 2 PITG_21776    |
| 0   | 500  | 199 PITG_01698  |

|   |      |                 |
|---|------|-----------------|
| 0 | 9    | 4 PITG_10763    |
| 0 | 2    | 0 PITG_10763    |
| 0 | 31   | 2 PITG_02050    |
| 0 | 27   | 27 NA           |
| 0 | 0    | 0 NA            |
| 0 | 12   | 2 NA            |
| 0 | 6    | 0 PITG_03593    |
| 0 | 577  | 782 PITG_13977  |
| 0 | 30   | 38 PITG_03782   |
| 0 | 7    | 6 NA            |
| 0 | 226  | 34 PITG_14683   |
| 0 | 663  | 610 PITG_20562  |
| 0 | 258  | 325 PITG_12550  |
| 0 | 217  | 201 PITG_12694  |
| 0 | 11   | 6 NA            |
| 0 | 35   | 8 PITG_08018    |
| 0 | 359  | 215 PITG_19737  |
| 0 | 8    | 8 PITG_18813    |
| 0 | 4    | 2 PITG_08581    |
| 0 | 15   | 9 PITG_05689    |
| 0 | 89   | 89 PITG_16808   |
| 0 | 100  | 245 PITG_02282  |
| 0 | 23   | 14 PITG_06698   |
| 0 | 2    | 2 PITG_05805    |
| 0 | 431  | 352 PITG_01184  |
| 0 | 6    | 0 PITG_06296    |
| 2 | 324  | 851 PITG_05264  |
| 0 | 28   | 8 PITG_11689    |
| 0 | 59   | 8 NA            |
| 0 | 194  | 23 NA           |
| 0 | 1273 | 2020 PITG_04470 |
| 0 | 184  | 130 PITG_19041  |
| 0 | 67   | 16 PITG_01058   |
| 0 | 8    | 0 PITG_08018    |
| 0 | 2002 | 3933 PITG_08959 |
| 0 | 0    | 0 PITG_17944    |
| 0 | 60   | 5 PITG_19006    |
| 0 | 52   | 18 PITG_09789   |
| 0 | 143  | 47 PITG_01614   |
| 0 | 391  | 237 PITG_20686  |
| 0 | 5    | 2 PITG_05512    |
| 0 | 50   | 55 PITG_21012   |
| 0 | 114  | 52 NA           |
| 0 | 750  | 418 PITG_01604  |
| 0 | 898  | 1117 PITG_05434 |
| 0 | 562  | 1111 PITG_02526 |
| 0 | 109  | 128 PITG_12650  |

|    |      |                 |
|----|------|-----------------|
| 0  | 2    | 2 NA            |
| 0  | 120  | 45 PITG_01478   |
| 0  | 312  | 951 PITG_18931  |
| 0  | 3    | 2 PITG_02981    |
| 0  | 30   | 160 PITG_13927  |
| 0  | 5    | 0 NA            |
| 2  | 4217 | 2255 PITG_06815 |
| 0  | 29   | 81 PITG_03597   |
| 94 | 28   | 182 NA          |
| 0  | 0    | 0 PITG_08407    |
| 0  | 300  | 37 PITG_06518   |
| 0  | 0    | 0 NA            |
| 0  | 168  | 132 PITG_06748  |
| 0  | 829  | 1054 PITG_00431 |
| 0  | 106  | 315 PITG_02664  |
| 0  | 7    | 10 PITG_04777   |
| 0  | 435  | 573 PITG_19737  |
| 0  | 27   | 11 PITG_05450   |
| 0  | 135  | 539 PITG_18317  |
| 0  | 104  | 95 PITG_00406   |
| 0  | 27   | 0 NA            |
| 0  | 47   | 4 NA            |
| 0  | 0    | 6 PITG_03877    |
| 0  | 41   | 4 NA            |
| 0  | 238  | 313 PITG_17012  |
| 0  | 25   | 38 PITG_17608   |
| 0  | 13   | 4 PITG_11029    |
| 0  | 0    | 0 PITG_14792    |
| 0  | 0    | 2 PITG_10827    |
| 0  | 40   | 14 PITG_13505   |
| 0  | 79   | 63 PITG_18297   |
| 0  | 0    | 0 PITG_13434    |
| 0  | 4    | 0 PITG_01164    |
| 0  | 1107 | 338 PITG_05324  |
| 0  | 506  | 1171 PITG_10146 |
| 0  | 441  | 367 PITG_18420  |
| 0  | 57   | 60 NA           |
| 0  | 1712 | 1255 PITG_17007 |
| 0  | 50   | 8 PITG_09978    |
| 0  | 455  | 535 PITG_12154  |
| 0  | 4    | 0 PITG_17550    |
| 0  | 414  | 272 PITG_11205  |
| 0  | 2536 | 4645 PITG_03712 |
| 0  | 422  | 90 PITG_07996   |
| 0  | 67   | 118 NA          |
| 0  | 869  | 273 PITG_00045  |
| 0  | 30   | 26 PITG_20152   |

|   |      |                 |
|---|------|-----------------|
| 0 | 367  | 378 NA          |
| 0 | 5994 | 2909 PITG_16925 |
| 0 | 13   | 6 PITG_03429    |
| 0 | 23   | 8 NA            |
| 0 | 13   | 50 PITG_12747   |
| 0 | 14   | 0 PITG_16775    |
| 0 | 314  | 245 PITG_06171  |
| 0 | 138  | 48 PITG_14636   |
| 0 | 15   | 0 NA            |
| 0 | 1823 | 730 PITG_12486  |
| 0 | 26   | 22 PITG_19168   |
| 0 | 216  | 111 PITG_18000  |
| 2 | 380  | 513 PITG_17593  |
| 0 | 24   | 2 NA            |
| 0 | 27   | 0 PITG_17876    |
| 0 | 0    | 2 PITG_10624    |
| 0 | 10   | 8 PITG_15551    |
| 0 | 2070 | 2124 PITG_00234 |
| 0 | 48   | 25 PITG_22718   |
| 0 | 372  | 248 PITG_06748  |
| 0 | 220  | 10 PITG_11584   |
| 0 | 141  | 31 NA           |
| 0 | 50   | 35 PITG_07086   |
| 0 | 52   | 43 NA           |
| 0 | 56   | 41 PITG_13842   |
| 0 | 0    | 109 NA          |
| 0 | 539  | 650 PITG_16736  |
| 0 | 8    | 6 PITG_12686    |
| 0 | 109  | 26 NA           |
| 0 | 37   | 25 PITG_16731   |
| 0 | 243  | 62 PITG_11176   |
| 0 | 66   | 64 PITG_03245   |
| 0 | 21   | 12 PITG_03499   |
| 0 | 98   | 48 PITG_08509   |
| 0 | 18   | 8 PITG_06945    |
| 0 | 108  | 129 PITG_16855  |
| 0 | 11   | 0 PITG_17560    |
| 0 | 2    | 4 PITG_16920    |
| 4 | 623  | 483 PITG_12682  |
| 0 | 482  | 230 PITG_00689  |
| 0 | 34   | 0 PITG_18786    |
| 0 | 46   | 531 PITG_06415  |
| 0 | 4    | 0 PITG_17760    |
| 0 | 62   | 23 PITG_07815   |
| 0 | 12   | 0 NA            |
| 0 | 29   | 2 PITG_11119    |
| 0 | 4    | 29 PITG_01591   |

|    |      |                 |
|----|------|-----------------|
| 0  | 27   | 55 PITG_14380   |
| 0  | 63   | 39 NA           |
| 0  | 17   | 27 PITG_14055   |
| 0  | 155  | 88 PITG_01714   |
| 0  | 818  | 1088 PITG_09389 |
| 0  | 659  | 175 PITG_03850  |
| 0  | 2    | 0 PITG_14833    |
| 0  | 731  | 144 PITG_10806  |
| 0  | 658  | 262 PITG_08454  |
| 0  | 146  | 132 PITG_02627  |
| 0  | 3    | 2 PITG_20717    |
| 0  | 752  | 810 PITG_12049  |
| 0  | 9    | 10 PITG_13842   |
| 0  | 31   | 7 PITG_03825    |
| 0  | 18   | 17 PITG_20731   |
| 0  | 155  | 189 PITG_17719  |
| 0  | 12   | 2 PITG_07230    |
| 0  | 283  | 258 PITG_03653  |
| 0  | 6    | 0 NA            |
| 0  | 974  | 581 PITG_02537  |
| 0  | 14   | 4 NA            |
| 0  | 187  | 517 PITG_01833  |
| 0  | 22   | 0 PITG_18279    |
| 0  | 241  | 559 PITG_02256  |
| 0  | 156  | 1051 NA         |
| 0  | 164  | 27 PITG_06894   |
| 35 | 3548 | 1810 NA         |
| 0  | 15   | 11 PITG_17030   |
| 0  | 15   | 19 PITG_16555   |
| 0  | 22   | 10 NA           |
| 0  | 4    | 0 NA            |
| 0  | 0    | 0 NA            |
| 0  | 65   | 32 PITG_03586   |
| 0  | 16   | 2 PITG_08723    |
| 0  | 0    | 0 NA            |
| 0  | 24   | 31 PITG_10723   |
| 0  | 6    | 12 PITG_11540   |
| 0  | 413  | 595 PITG_12037  |
| 0  | 86   | 4 PITG_01719    |
| 0  | 30   | 55 PITG_12537   |
| 0  | 4    | 0 PITG_02927    |
| 0  | 189  | 86 PITG_10980   |
| 0  | 328  | 93 PITG_02976   |
| 0  | 0    | 2 PITG_15481    |
| 0  | 3    | 0 NA            |
| 0  | 71   | 27 PITG_15146   |
| 0  | 0    | 0 NA            |

|      |      |                 |
|------|------|-----------------|
| 0    | 113  | 23 NA           |
| 0    | 225  | 34 PITG_21505   |
| 0    | 12   | 15 NA           |
| 0    | 19   | 20 NA           |
| 0    | 51   | 11 PITG_08155   |
| 0    | 0    | 2 NA            |
| 0    | 71   | 102 PITG_00334  |
| 0    | 0    | 10 PITG_00291   |
| 0    | 488  | 664 PITG_13778  |
| 0    | 243  | 233 PITG_04958  |
| 0    | 367  | 1509 PITG_01082 |
| 0    | 2    | 15 PITG_14380   |
| 0    | 241  | 95 PITG_01539   |
| 0    | 104  | 27 PITG_05170   |
| 0    | 372  | 83 PITG_00216   |
| 0    | 48   | 8 PITG_02761    |
| 0    | 735  | 328 PITG_20384  |
| 0    | 28   | 0 PITG_13392    |
| 0    | 2    | 0 PITG_19177    |
| 0    | 76   | 5 PITG_00359    |
| 0    | 43   | 0 PITG_05672    |
| 0    | 31   | 20 PITG_03909   |
| 0    | 41   | 14 PITG_22354   |
| 0    | 9    | 2 NA            |
| 0    | 49   | 15 NA           |
| 0    | 68   | 41 PITG_11882   |
| 0    | 8    | 6 PITG_12296    |
| 0    | 663  | 193 PITG_00254  |
| 0    | 1236 | 370 PITG_10951  |
| 0    | 11   | 6 PITG_09296    |
| 0    | 2    | 13 PITG_11178   |
| 0    | 3    | 0 PITG_02501    |
| 0    | 0    | 0 PITG_08103    |
| 7    | 6    | 437 NA          |
| 0    | 11   | 6 PITG_01452    |
| 0    | 24   | 26 PITG_03623   |
| 0    | 1205 | 976 PITG_13729  |
| 0    | 19   | 2 PITG_06754    |
| 0    | 0    | 0 PITG_17142    |
| 0    | 372  | 212 PITG_14589  |
| 0    | 63   | 910 PITG_21393  |
| 0    | 25   | 5 PITG_13116    |
| 0    | 288  | 193 NA          |
| 0    | 336  | 50 PITG_08781   |
| 1474 | 42   | 130 NA          |
| 0    | 10   | 9 PITG_20077    |
| 0    | 252  | 122 PITG_12238  |



|   |      |                 |
|---|------|-----------------|
| 0 | 0    | 0 PITG_03620    |
| 0 | 0    | 0 NA            |
| 0 | 113  | 60 NA           |
| 0 | 7    | 0 PITG_11184    |
| 0 | 81   | 18 PITG_09482   |
| 0 | 37   | 35 PITG_07279   |
| 0 | 350  | 95 PITG_00167   |
| 0 | 35   | 18 NA           |
| 0 | 2    | 8 PITG_16458    |
| 0 | 82   | 44 PITG_10068   |
| 0 | 101  | 60 PITG_02695   |
| 0 | 115  | 123 PITG_11189  |
| 0 | 8    | 8 NA            |
| 0 | 116  | 174 PITG_05117  |
| 0 | 9    | 0 PITG_14225    |
| 0 | 9    | 18 PITG_00410   |
| 0 | 115  | 18 NA           |
| 0 | 113  | 36 PITG_08305   |
| 0 | 34   | 3 PITG_15926    |
| 0 | 302  | 182 NA          |
| 0 | 535  | 235 PITG_07476  |
| 0 | 131  | 60 NA           |
| 0 | 2    | 4 PITG_12439    |
| 0 | 0    | 3 PITG_05175    |
| 0 | 31   | 7 PITG_02658    |
| 0 | 58   | 2 PITG_06199    |
| 0 | 21   | 2 PITG_08393    |
| 0 | 4    | 4 PITG_22303    |
| 0 | 19   | 10 PITG_01679   |
| 0 | 344  | 66 PITG_00942   |
| 0 | 7    | 11 PITG_20350   |
| 0 | 10   | 6 PITG_05467    |
| 4 | 1066 | 2532 PITG_04522 |
| 0 | 6    | 13 PITG_02192   |
| 0 | 2    | 0 PITG_07848    |
| 0 | 98   | 0 PITG_11473    |
| 0 | 51   | 11 PITG_17997   |
| 0 | 260  | 135 PITG_21377  |
| 0 | 2    | 0 PITG_06429    |
| 0 | 996  | 48 PITG_07924   |
| 0 | 59   | 51 PITG_06483   |
| 0 | 29   | 9 PITG_13913    |
| 0 | 107  | 43 PITG_01777   |
| 0 | 2    | 14 PITG_13686   |
| 0 | 56   | 27 NA           |
| 0 | 8    | 0 PITG_07199    |
| 0 | 8    | 9 PITG_17709    |

|    |      |                 |
|----|------|-----------------|
| 0  | 179  | 19 NA           |
| 0  | 63   | 0 PITG_02975    |
| 0  | 2    | 0 PITG_05614    |
| 0  | 81   | 58 PITG_16205   |
| 0  | 36   | 108 PITG_11107  |
| 0  | 6    | 23 PITG_17883   |
| 0  | 2    | 0 NA            |
| 0  | 71   | 45 PITG_00063   |
| 0  | 226  | 743 PITG_18187  |
| 0  | 259  | 120 PITG_09430  |
| 0  | 41   | 10 PITG_07191   |
| 0  | 187  | 118 PITG_19049  |
| 0  | 2    | 0 PITG_12821    |
| 2  | 140  | 168 PITG_03792  |
| 0  | 8    | 0 PITG_19871    |
| 0  | 68   | 457 PITG_18306  |
| 0  | 72   | 26 PITG_03238   |
| 0  | 15   | 33 PITG_12820   |
| 0  | 2    | 0 PITG_11467    |
| 0  | 145  | 178 PITG_19038  |
| 0  | 6    | 2 NA            |
| 0  | 793  | 408 PITG_01094  |
| 0  | 13   | 16 PITG_14833   |
| 0  | 918  | 187 PITG_10470  |
| 62 | 21   | 24 NA           |
| 0  | 71   | 6 PITG_03435    |
| 0  | 399  | 305 PITG_15311  |
| 0  | 92   | 4 PITG_10735    |
| 0  | 723  | 1025 PITG_01208 |
| 0  | 168  | 0 PITG_18797    |
| 0  | 48   | 16 PITG_02449   |
| 0  | 6    | 40 PITG_03551   |
| 0  | 0    | 15 PITG_05854   |
| 0  | 43   | 30 PITG_10989   |
| 2  | 78   | 223 PITG_05676  |
| 0  | 96   | 129 PITG_21334  |
| 0  | 2    | 0 PITG_22353    |
| 0  | 49   | 253 PITG_19581  |
| 0  | 98   | 426 PITG_07400  |
| 0  | 2496 | 670 NA          |
| 0  | 305  | 185 NA          |
| 0  | 118  | 10 PITG_19767   |
| 0  | 17   | 29 PITG_02951   |
| 0  | 2    | 11 PITG_09388   |
| 0  | 7    | 5 PITG_19124    |
| 0  | 395  | 120 PITG_10263  |
| 0  | 452  | 513 PITG_00172  |

|   |      |                |
|---|------|----------------|
| 0 | 23   | 8 PITG_05727   |
| 0 | 0    | 6 PITG_22827   |
| 0 | 7    | 12 PITG_05565  |
| 0 | 2    | 9 PITG_04134   |
| 0 | 10   | 2 PITG_03497   |
| 0 | 472  | 225 PITG_09387 |
| 0 | 66   | 264 NA         |
| 0 | 63   | 6 PITG_07109   |
| 0 | 2    | 0 PITG_14272   |
| 0 | 513  | 515 PITG_07454 |
| 0 | 544  | 205 PITG_00631 |
| 0 | 6    | 22 PITG_06084  |
| 0 | 5    | 8 PITG_05772   |
| 0 | 1053 | 1657 NA        |
| 0 | 522  | 438 PITG_19590 |
| 0 | 43   | 388 PITG_04824 |
| 0 | 852  | 246 PITG_20193 |
| 0 | 122  | 118 PITG_02694 |
| 0 | 36   | 0 PITG_13544   |
| 0 | 66   | 80 PITG_08036  |
| 0 | 2    | 11 PITG_01782  |
| 0 | 292  | 201 PITG_01923 |
| 0 | 6    | 0 PITG_01374   |
| 0 | 4    | 0 PITG_01920   |
| 0 | 9    | 10 PITG_18393  |
| 0 | 241  | 237 PITG_15848 |
| 0 | 199  | 42 PITG_18366  |
| 0 | 9    | 24 NA          |
| 0 | 85   | 177 PITG_21393 |
| 0 | 0    | 0 PITG_07040   |
| 0 | 11   | 8 PITG_05500   |
| 0 | 0    | 21 NA          |
| 0 | 155  | 25 NA          |
| 0 | 18   | 10 PITG_04702  |
| 0 | 22   | 17 PITG_01342  |
| 0 | 0    | 0 NA           |
| 0 | 121  | 248 PITG_21395 |
| 0 | 37   | 41 PITG_09284  |
| 0 | 65   | 79 PITG_00461  |
| 0 | 53   | 18 PITG_03288  |
| 0 | 2    | 7 PITG_04108   |
| 0 | 311  | 94 PITG_06637  |
| 0 | 66   | 16 PITG_12575  |
| 0 | 0    | 9 PITG_05187   |
| 0 | 48   | 34 NA          |
| 0 | 9    | 8 PITG_13673   |
| 0 | 30   | 188 PITG_04603 |

|   |      |                 |
|---|------|-----------------|
| 0 | 69   | 24 PITG_06918   |
| 0 | 0    | 0 PITG_03830    |
| 0 | 13   | 17 PITG_08031   |
| 0 | 37   | 12 PITG_04874   |
| 0 | 2    | 0 PITG_16073    |
| 0 | 6    | 0 PITG_02440    |
| 0 | 16   | 20 PITG_14005   |
| 0 | 75   | 8 NA            |
| 0 | 327  | 174 PITG_08135  |
| 0 | 0    | 0 NA            |
| 0 | 82   | 9 PITG_20725    |
| 0 | 75   | 35 PITG_08613   |
| 0 | 262  | 105 NA          |
| 0 | 18   | 24 NA           |
| 0 | 630  | 2077 PITG_13500 |
| 0 | 52   | 18 PITG_03018   |
| 0 | 0    | 0 NA            |
| 0 | 2    | 2 PITG_04439    |
| 0 | 223  | 600 PITG_16749  |
| 0 | 24   | 13 PITG_16999   |
| 0 | 102  | 625 PITG_11766  |
| 0 | 350  | 261 PITG_23192  |
| 0 | 143  | 55 PITG_18067   |
| 0 | 661  | 1167 PITG_14195 |
| 0 | 2    | 0 PITG_13270    |
| 0 | 21   | 414 PITG_04687  |
| 0 | 530  | 461 PITG_05902  |
| 0 | 2    | 10 PITG_01065   |
| 0 | 87   | 29 PITG_06757   |
| 0 | 6    | 4 PITG_20593    |
| 0 | 136  | 14 PITG_19237   |
| 0 | 116  | 46 PITG_15872   |
| 0 | 1150 | 1465 PITG_10887 |
| 0 | 445  | 934 PITG_00613  |
| 0 | 751  | 1147 PITG_01922 |
| 0 | 53   | 6 NA            |
| 0 | 97   | 18 PITG_14381   |
| 0 | 208  | 132 PITG_04425  |
| 0 | 5    | 0 PITG_00854    |
| 0 | 236  | 239 PITG_05501  |
| 0 | 0    | 2 PITG_00294    |
| 0 | 78   | 6 PITG_04124    |
| 0 | 10   | 136 PITG_16041  |
| 0 | 4    | 11 PITG_12000   |
| 0 | 10   | 8 PITG_06365    |
| 0 | 27   | 4 NA            |
| 0 | 4    | 107 PITG_22065  |

|   |     |                 |
|---|-----|-----------------|
| 0 | 431 | 1094 PITG_06215 |
| 0 | 75  | 35 PITG_05990   |
| 0 | 109 | 39 PITG_07305   |
| 0 | 128 | 357 PITG_13041  |
| 0 | 41  | 0 PITG_04365    |
| 0 | 9   | 6 PITG_04990    |
| 0 | 4   | 0 NA            |
| 0 | 24  | 11 PITG_17942   |
| 2 | 546 | 506 PITG_03897  |
| 0 | 7   | 12 NA           |
| 0 | 20  | 6 PITG_13544    |
| 0 | 27  | 29 PITG_11584   |
| 0 | 0   | 2 PITG_17437    |
| 0 | 15  | 8 PITG_16472    |
| 0 | 207 | 131 PITG_21620  |
| 0 | 26  | 21 PITG_03876   |
| 0 | 15  | 0 PITG_00964    |
| 0 | 195 | 49 PITG_06917   |
| 0 | 100 | 41 PITG_01183   |
| 0 | 658 | 1033 PITG_19999 |
| 0 | 2   | 4 PITG_12530    |
| 0 | 942 | 2053 PITG_00156 |
| 0 | 857 | 147 PITG_08090  |
| 0 | 134 | 14 PITG_16326   |
| 0 | 2   | 13 PITG_00468   |
| 0 | 34  | 50 PITG_09827   |
| 0 | 0   | 4 PITG_17021    |
| 0 | 16  | 0 NA            |
| 0 | 2   | 0 NA            |
| 0 | 90  | 0 PITG_09793    |
| 0 | 37  | 3 PITG_08709    |
| 0 | 0   | 0 NA            |
| 0 | 120 | 89 PITG_15781   |
| 0 | 66  | 21 PITG_00320   |
| 0 | 194 | 179 PITG_12231  |
| 0 | 47  | 13 NA           |
| 0 | 0   | 4 PITG_01235    |
| 2 | 871 | 809 PITG_03294  |
| 0 | 30  | 3 NA            |
| 0 | 17  | 63 PITG_03226   |
| 0 | 19  | 60 PITG_09955   |
| 0 | 28  | 53 PITG_06772   |
| 0 | 864 | 414 PITG_19590  |
| 0 | 51  | 19 PITG_04175   |
| 0 | 127 | 47 PITG_01366   |
| 0 | 405 | 322 PITG_10998  |
| 0 | 80  | 109 PITG_12562  |

|    |      |                 |
|----|------|-----------------|
| 0  | 197  | 8 NA            |
| 0  | 7    | 2 NA            |
| 0  | 52   | 45 PITG_19022   |
| 0  | 8    | 8 PITG_08570    |
| 0  | 9    | 0 NA            |
| 0  | 9    | 31 PITG_16352   |
| 0  | 10   | 9 PITG_03852    |
| 0  | 273  | 247 PITG_04802  |
| 0  | 6    | 2 PITG_22687    |
| 0  | 1093 | 1180 PITG_11603 |
| 0  | 4    | 16 PITG_14924   |
| 0  | 0    | 6 PITG_06022    |
| 0  | 243  | 83 NA           |
| 0  | 8    | 4 PITG_05556    |
| 0  | 45   | 30 PITG_07302   |
| 0  | 82   | 173 PITG_16021  |
| 0  | 0    | 4 NA            |
| 0  | 118  | 2 PITG_07175    |
| 0  | 37   | 4 PITG_05263    |
| 0  | 0    | 3 PITG_05629    |
| 0  | 564  | 1525 PITG_05636 |
| 0  | 0    | 0 NA            |
| 0  | 61   | 37 PITG_15406   |
| 0  | 2    | 0 NA            |
| 49 | 342  | 5639 NA         |
| 0  | 427  | 144 PITG_21185  |
| 0  | 135  | 10 PITG_01516   |
| 0  | 17   | 47 PITG_12948   |
| 0  | 258  | 162 PITG_12575  |
| 0  | 66   | 15 NA           |
| 0  | 4    | 27 PITG_17257   |
| 0  | 6    | 4 PITG_03155    |
| 0  | 0    | 0 NA            |
| 0  | 208  | 130 PITG_08061  |
| 0  | 4    | 8 NA            |
| 0  | 224  | 58 PITG_06637   |
| 0  | 44   | 44 PITG_05395   |
| 0  | 0    | 3 PITG_06166    |
| 0  | 34   | 17 PITG_20999   |
| 0  | 43   | 51 PITG_01040   |
| 0  | 7    | 6 PITG_16043    |
| 0  | 283  | 138 NA          |
| 0  | 156  | 506 PITG_02567  |
| 0  | 14   | 11 PITG_04479   |
| 0  | 0    | 12 PITG_18433   |
| 0  | 2091 | 383 PITG_10940  |
| 0  | 23   | 17 NA           |

|   |      |                 |
|---|------|-----------------|
| 0 | 300  | 61 PITG_13041   |
| 0 | 191  | 192 PITG_12488  |
| 0 | 13   | 4 PITG_19175    |
| 0 | 46   | 0 PITG_04860    |
| 0 | 2    | 2 PITG_20767    |
| 0 | 4    | 6 PITG_13417    |
| 0 | 0    | 2 PITG_00350    |
| 0 | 49   | 0 PITG_20215    |
| 0 | 0    | 2 NA            |
| 0 | 221  | 99 NA           |
| 0 | 2    | 2 PITG_08886    |
| 2 | 1533 | 1881 PITG_14850 |
| 0 | 2    | 9 PITG_22262    |
| 0 | 21   | 6 PITG_01785    |
| 0 | 36   | 4 PITG_14009    |
| 0 | 692  | 860 PITG_09282  |
| 0 | 31   | 71 PITG_09282   |
| 0 | 13   | 3 PITG_03961    |
| 0 | 50   | 2 PITG_00052    |
| 0 | 108  | 33 PITG_22354   |
| 0 | 2    | 27 PITG_10827   |
| 0 | 141  | 18 PITG_01644   |
| 0 | 214  | 109 PITG_16999  |
| 0 | 556  | 7 NA            |
| 0 | 72   | 51 PITG_07325   |
| 0 | 30   | 20 PITG_03788   |
| 0 | 272  | 146 NA          |
| 2 | 134  | 59 PITG_10905   |
| 0 | 101  | 140 PITG_18655  |
| 0 | 261  | 398 PITG_02112  |
| 0 | 79   | 118 PITG_01138  |
| 0 | 8    | 9 PITG_05318    |
| 0 | 76   | 16 PITG_19865   |
| 0 | 5    | 0 NA            |
| 0 | 8    | 0 PITG_22303    |
| 0 | 2    | 4 PITG_14218    |
| 0 | 4    | 20 PITG_13038   |
| 0 | 2    | 2 PITG_00564    |
| 0 | 7    | 12 PITG_05405   |
| 0 | 58   | 6 PITG_21183    |
| 0 | 59   | 9 PITG_17400    |
| 0 | 7    | 36 PITG_07960   |
| 0 | 2    | 12 PITG_12264   |
| 0 | 64   | 27 PITG_08236   |
| 0 | 2    | 0 PITG_18106    |
| 0 | 313  | 260 PITG_14575  |
| 0 | 2    | 2 PITG_01224    |

|      |      |                 |
|------|------|-----------------|
| 0    | 160  | 74 PITG_02769   |
| 0    | 0    | 8 PITG_01782    |
| 1335 | 257  | 1303 NA         |
| 0    | 54   | 0 NA            |
| 0    | 367  | 85 PITG_10693   |
| 4    | 2052 | 1500 PITG_06595 |
| 0    | 56   | 124 PITG_02255  |
| 0    | 8    | 11 PITG_22204   |
| 0    | 8    | 6 NA            |
| 0    | 223  | 144 PITG_14835  |
| 0    | 4    | 10 PITG_15696   |
| 0    | 121  | 227 PITG_03460  |
| 0    | 10   | 8 PITG_17999    |
| 0    | 11   | 19 PITG_03519   |
| 7    | 754  | 1619 PITG_06415 |
| 0    | 0    | 4 PITG_16335    |
| 0    | 186  | 37 PITG_11225   |
| 0    | 86   | 32 PITG_20152   |
| 46   | 52   | 1916 NA         |
| 0    | 723  | 445 PITG_11118  |
| 0    | 24   | 24 NA           |
| 0    | 20   | 78 PITG_03670   |
| 0    | 137  | 133 PITG_04820  |
| 0    | 8    | 0 PITG_18186    |
| 0    | 27   | 49 PITG_16879   |
| 0    | 5    | 0 PITG_16879    |
| 0    | 18   | 18 NA           |
| 0    | 696  | 1547 PITG_09563 |
| 0    | 4    | 0 NA            |
| 0    | 27   | 0 PITG_13306    |
| 0    | 2    | 0 PITG_17400    |
| 0    | 14   | 13 PITG_01236   |
| 0    | 99   | 102 PITG_06890  |
| 0    | 826  | 521 NA          |
| 0    | 64   | 212 PITG_12037  |
| 0    | 6    | 58 PITG_13726   |
| 0    | 6    | 0 PITG_08504    |
| 0    | 0    | 8 PITG_03590    |
| 0    | 152  | 154 PITG_06237  |
| 0    | 0    | 2 NA            |
| 0    | 1146 | 472 PITG_03221  |
| 0    | 59   | 100 PITG_13341  |
| 0    | 175  | 399 PITG_02515  |
| 0    | 995  | 1121 PITG_09400 |
| 0    | 10   | 9 NA            |
| 0    | 27   | 23 PITG_13397   |
| 0    | 38   | 17 PITG_03163   |



|   |      |                 |
|---|------|-----------------|
| 0 | 32   | 277 PITG_05374  |
| 0 | 552  | 457 PITG_02303  |
| 0 | 219  | 162 PITG_01325  |
| 0 | 17   | 24 PITG_09428   |
| 0 | 24   | 4 PITG_12160    |
| 0 | 37   | 18 PITG_06759   |
| 0 | 65   | 54 PITG_04600   |
| 0 | 7    | 4 PITG_07933    |
| 0 | 44   | 7 PITG_11119    |
| 0 | 850  | 615 PITG_09431  |
| 0 | 6    | 4 PITG_01792    |
| 0 | 52   | 50 PITG_13114   |
| 0 | 15   | 151 PITG_01535  |
| 0 | 7    | 7 PITG_22165    |
| 0 | 11   | 51 PITG_12191   |
| 0 | 2    | 4 PITG_11119    |
| 0 | 4    | 5 PITG_10979    |
| 0 | 1131 | 109 PITG_15118  |
| 0 | 2643 | 1092 PITG_12682 |
| 0 | 584  | 781 NA          |
| 0 | 108  | 9 PITG_09453    |
| 0 | 124  | 8 PITG_12604    |
| 0 | 15   | 9 PITG_10601    |
| 0 | 2    | 4 NA            |
| 0 | 4    | 5 PITG_00990    |
| 0 | 10   | 0 NA            |
| 0 | 1525 | 256 PITG_07923  |
| 0 | 5    | 8 PITG_05627    |
| 0 | 600  | 219 PITG_06383  |
| 0 | 122  | 68 PITG_06917   |
| 0 | 782  | 634 PITG_06415  |
| 0 | 15   | 2 PITG_12110    |
| 0 | 12   | 8 PITG_02940    |
| 0 | 71   | 47 PITG_07088   |
| 0 | 159  | 22 PITG_00486   |
| 0 | 45   | 6 PITG_03710    |
| 0 | 46   | 66 PITG_11161   |
| 0 | 93   | 13 PITG_04718   |
| 0 | 242  | 849 PITG_17123  |
| 0 | 392  | 39 PITG_10269   |
| 0 | 23   | 8 PITG_19191    |
| 0 | 14   | 14 PITG_12988   |
| 0 | 78   | 160 PITG_04600  |
| 0 | 25   | 0 NA            |
| 0 | 26   | 23 PITG_10601   |
| 0 | 785  | 185 PITG_07201  |
| 0 | 19   | 12 PITG_12315   |

|   |     |                 |
|---|-----|-----------------|
| 0 | 818 | 1882 PITG_06237 |
| 0 | 0   | 14 NA           |
| 0 | 288 | 139 PITG_10152  |
| 0 | 75  | 43 PITG_21117   |
| 0 | 6   | 10 NA           |
| 2 | 433 | 1357 PITG_04640 |
| 0 | 71  | 87 PITG_21182   |
| 0 | 183 | 1247 PITG_10218 |
| 0 | 618 | 570 PITG_10218  |
| 0 | 44  | 23 PITG_17740   |
| 0 | 438 | 212 PITG_10921  |
| 0 | 151 | 30 PITG_06440   |
| 0 | 94  | 14 NA           |
| 0 | 0   | 2 NA            |
| 0 | 43  | 17 PITG_21351   |
| 0 | 119 | 196 PITG_05959  |
| 0 | 86  | 71 PITG_10007   |
| 0 | 64  | 129 PITG_06657  |
| 0 | 0   | 2 PITG_13546    |
| 0 | 522 | 539 PITG_12727  |
| 0 | 26  | 15 PITG_10026   |
| 0 | 15  | 2 PITG_06363    |
| 0 | 63  | 78 PITG_02273   |
| 0 | 2   | 4 NA            |
| 0 | 60  | 48 NA           |
| 0 | 2   | 0 PITG_00407    |
| 0 | 94  | 122 PITG_18233  |
| 0 | 620 | 594 PITG_05636  |
| 0 | 32  | 6 PITG_11108    |
| 0 | 165 | 221 PITG_13737  |
| 0 | 2   | 9 PITG_12224    |
| 0 | 78  | 0 PITG_01899    |
| 3 | 225 | 856 PITG_15118  |
| 0 | 445 | 285 PITG_13848  |
| 0 | 419 | 586 PITG_01292  |
| 0 | 11  | 0 PITG_21005    |
| 4 | 443 | 2095 PITG_15117 |
| 0 | 0   | 7 NA            |
| 0 | 802 | 563 PITG_02921  |
| 0 | 476 | 141 PITG_14946  |
| 0 | 211 | 282 PITG_21128  |
| 0 | 31  | 43 PITG_09505   |
| 0 | 90  | 17 NA           |
| 0 | 284 | 43 PITG_22839   |
| 0 | 23  | 7 PITG_16063    |
| 0 | 579 | 207 PITG_17949  |
| 2 | 233 | 839 PITG_06731  |

|   |      |                 |
|---|------|-----------------|
| 0 | 78   | 4 PITG_16386    |
| 0 | 136  | 27 PITG_18274   |
| 0 | 7    | 3 NA            |
| 0 | 8    | 6 PITG_06919    |
| 0 | 4    | 2 PITG_15062    |
| 0 | 63   | 2 PITG_13277    |
| 0 | 85   | 92 PITG_16358   |
| 0 | 195  | 151 PITG_02626  |
| 0 | 4    | 6 PITG_11249    |
| 0 | 270  | 3 PITG_22624    |
| 0 | 8    | 5 PITG_10856    |
| 0 | 14   | 17 PITG_04851   |
| 0 | 4    | 3 PITG_12798    |
| 0 | 16   | 17 PITG_10083   |
| 0 | 37   | 23 NA           |
| 0 | 417  | 215 NA          |
| 0 | 1114 | 2215 PITG_03392 |
| 0 | 98   | 2 PITG_10942    |
| 0 | 10   | 6 PITG_02231    |
| 0 | 50   | 14 PITG_04678   |
| 0 | 82   | 30 PITG_11466   |
| 0 | 21   | 12 NA           |
| 0 | 994  | 315 PITG_01698  |
| 0 | 16   | 27 PITG_02849   |
| 0 | 52   | 43 PITG_18342   |
| 0 | 13   | 0 PITG_18072    |
| 0 | 951  | 646 PITG_05601  |
| 0 | 138  | 39 PITG_02263   |
| 0 | 2    | 0 PITG_00844    |
| 0 | 30   | 10 NA           |
| 0 | 9    | 0 PITG_12682    |
| 0 | 89   | 48 PITG_14097   |
| 0 | 0    | 4 PITG_16557    |
| 2 | 1275 | 2523 PITG_04522 |
| 0 | 0    | 0 PITG_02254    |
| 0 | 495  | 342 PITG_17787  |
| 0 | 871  | 74 PITG_14282   |
| 0 | 14   | 65 PITG_00457   |
| 0 | 91   | 58 PITG_15852   |
| 0 | 4    | 6 PITG_18296    |
| 0 | 41   | 280 PITG_22016  |
| 0 | 346  | 266 PITG_15871  |
| 0 | 75   | 25 PITG_05748   |
| 0 | 16   | 11 PITG_15564   |
| 0 | 180  | 161 PITG_14181  |
| 0 | 58   | 13 PITG_10316   |
| 0 | 25   | 4 PITG_00283    |

|   |      |                 |
|---|------|-----------------|
| 0 | 17   | 0 PITG_20197    |
| 0 | 204  | 43 PITG_06189   |
| 0 | 114  | 0 PITG_11286    |
| 0 | 127  | 94 PITG_18728   |
| 0 | 1089 | 1068 PITG_00633 |
| 0 | 0    | 0 PITG_13188    |
| 0 | 389  | 602 PITG_14598  |
| 0 | 62   | 123 PITG_06674  |
| 0 | 8    | 14 PITG_06899   |
| 0 | 11   | 10 PITG_14590   |
| 0 | 91   | 17 PITG_07160   |
| 0 | 4    | 2 PITG_00989    |
| 0 | 644  | 194 PITG_07156  |
| 0 | 279  | 298 PITG_12886  |
| 0 | 6    | 2 PITG_08776    |
| 0 | 570  | 209 PITG_04977  |
| 0 | 84   | 348 PITG_08579  |
| 0 | 3    | 0 NA            |
| 0 | 17   | 0 PITG_16221    |
| 0 | 40   | 4 PITG_22947    |
| 0 | 14   | 21 PITG_04685   |
| 0 | 86   | 34 PITG_14214   |
| 0 | 24   | 133 PITG_13153  |
| 0 | 5    | 8 NA            |
| 0 | 23   | 7 NA            |
| 0 | 39   | 10 PITG_10796   |
| 0 | 6    | 5 NA            |
| 0 | 22   | 2 NA            |
| 0 | 331  | 329 PITG_16117  |
| 0 | 5    | 10 PITG_00970   |
| 0 | 318  | 492 PITG_02664  |
| 0 | 0    | 0 NA            |
| 0 | 9    | 8 NA            |
| 0 | 247  | 22 PITG_00995   |
| 0 | 467  | 127 PITG_19220  |
| 0 | 109  | 155 PITG_13152  |
| 0 | 94   | 94 PITG_10343   |
| 0 | 48   | 66 PITG_12462   |
| 0 | 7    | 0 PITG_01051    |
| 0 | 427  | 87 PITG_19270   |
| 0 | 30   | 44 PITG_07088   |
| 0 | 34   | 6 NA            |
| 0 | 9    | 8 PITG_02842    |
| 0 | 21   | 23 NA           |
| 0 | 162  | 480 PITG_09846  |
| 0 | 48   | 77 PITG_00931   |
| 0 | 0    | 2 PITG_00369    |

|   |      |                 |
|---|------|-----------------|
| 0 | 28   | 6 PITG_10183    |
| 0 | 380  | 369 PITG_11755  |
| 0 | 27   | 7 PITG_02758    |
| 0 | 31   | 30 PITG_01370   |
| 0 | 98   | 68 PITG_11789   |
| 0 | 296  | 287 PITG_12520  |
| 0 | 9    | 2 NA            |
| 0 | 20   | 6 NA            |
| 0 | 55   | 145 PITG_15846  |
| 0 | 407  | 208 PITG_16052  |
| 0 | 143  | 46 PITG_20727   |
| 0 | 52   | 34 PITG_03054   |
| 0 | 147  | 86 PITG_20116   |
| 0 | 2    | 20 PITG_08375   |
| 0 | 516  | 381 PITG_04010  |
| 0 | 669  | 49 PITG_18326   |
| 0 | 217  | 1026 PITG_15117 |
| 0 | 17   | 13 PITG_01360   |
| 0 | 149  | 242 NA          |
| 0 | 345  | 222 PITG_12561  |
| 0 | 11   | 6 NA            |
| 0 | 33   | 37 PITG_05154   |
| 0 | 402  | 599 PITG_02039  |
| 0 | 47   | 36 NA           |
| 0 | 2    | 11 PITG_18741   |
| 0 | 5    | 7 PITG_03300    |
| 0 | 39   | 13 PITG_06887   |
| 0 | 76   | 2 PITG_03402    |
| 0 | 61   | 74 PITG_01932   |
| 0 | 8    | 13 PITG_08781   |
| 0 | 29   | 15 PITG_12145   |
| 0 | 3    | 2 PITG_17869    |
| 0 | 176  | 450 PITG_01181  |
| 0 | 29   | 66 PITG_11205   |
| 0 | 17   | 29 PITG_02027   |
| 0 | 16   | 10 PITG_01127   |
| 0 | 5    | 41 PITG_08138   |
| 0 | 12   | 0 NA            |
| 0 | 245  | 95 PITG_21185   |
| 0 | 19   | 2 PITG_15688    |
| 0 | 13   | 2 NA            |
| 0 | 92   | 26 PITG_11468   |
| 0 | 785  | 1325 PITG_00156 |
| 0 | 69   | 0 PITG_16978    |
| 0 | 174  | 50 PITG_17683   |
| 0 | 1189 | 84 PITG_06545   |
| 0 | 9    | 33 PITG_03101   |

|   |      |                |
|---|------|----------------|
| 0 | 121  | 158 PITG_00020 |
| 0 | 0    | 4 PITG_03658   |
| 0 | 17   | 21 PITG_12154  |
| 0 | 0    | 2 PITG_00193   |
| 0 | 5    | 12 PITG_18728  |
| 0 | 114  | 414 PITG_22103 |
| 0 | 80   | 20 PITG_12159  |
| 0 | 73   | 41 PITG_10129  |
| 0 | 47   | 21 PITG_18417  |
| 0 | 426  | 796 PITG_00880 |
| 0 | 9    | 6 PITG_16813   |
| 0 | 64   | 80 PITG_13139  |
| 0 | 294  | 77 PITG_14170  |
| 0 | 2    | 2 PITG_10903   |
| 0 | 111  | 50 PITG_09244  |
| 0 | 0    | 0 PITG_17437   |
| 0 | 199  | 229 PITG_09348 |
| 0 | 125  | 65 PITG_16214  |
| 0 | 44   | 2 PITG_20717   |
| 0 | 302  | 208 PITG_12754 |
| 0 | 200  | 141 PITG_19746 |
| 0 | 1265 | 315 PITG_10878 |
| 0 | 6    | 8 PITG_11729   |
| 0 | 6    | 23 NA          |
| 0 | 0    | 0 PITG_09453   |
| 0 | 246  | 237 NA         |
| 0 | 22   | 107 PITG_17257 |
| 0 | 0    | 0 PITG_11437   |
| 0 | 29   | 18 PITG_15671  |
| 0 | 4    | 29 PITG_16798  |
| 0 | 13   | 18 PITG_07890  |
| 0 | 6    | 3 PITG_08742   |
| 0 | 26   | 4 PITG_08435   |
| 0 | 61   | 22 PITG_04714  |
| 0 | 886  | 6 NA           |
| 0 | 86   | 57 PITG_13616  |
| 0 | 12   | 33 PITG_05589  |
| 0 | 16   | 14 PITG_15642  |
| 0 | 93   | 419 PITG_11450 |
| 0 | 546  | 375 PITG_11450 |
| 0 | 134  | 45 PITG_11795  |
| 0 | 26   | 44 PITG_13435  |
| 0 | 2    | 6 NA           |
| 0 | 71   | 0 PITG_09727   |
| 0 | 906  | 24 PITG_08897  |
| 0 | 233  | 87 PITG_00587  |
| 0 | 149  | 219 PITG_18100 |

|    |      |                 |
|----|------|-----------------|
| 0  | 17   | 99 PITG_08376   |
| 0  | 163  | 17 PITG_01097   |
| 0  | 48   | 10 PITG_09376   |
| 0  | 110  | 0 PITG_15727    |
| 0  | 69   | 29 PITG_03775   |
| 0  | 0    | 0 PITG_00129    |
| 0  | 13   | 8 PITG_14728    |
| 0  | 650  | 218 PITG_07974  |
| 12 | 898  | 3816 PITG_11913 |
| 0  | 0    | 0 PITG_06480    |
| 0  | 172  | 483 PITG_17947  |
| 0  | 177  | 317 PITG_15250  |
| 0  | 348  | 278 PITG_03822  |
| 0  | 365  | 474 PITG_09538  |
| 0  | 18   | 0 NA            |
| 0  | 2263 | 1068 PITG_13737 |
| 0  | 0    | 0 PITG_06120    |
| 0  | 153  | 196 PITG_17007  |
| 0  | 28   | 29 PITG_11097   |
| 0  | 427  | 66 PITG_19213   |
| 0  | 211  | 173 PITG_00189  |
| 0  | 0    | 9 PITG_11186    |
| 0  | 26   | 9 PITG_01846    |
| 0  | 147  | 58 PITG_07939   |
| 0  | 11   | 0 PITG_01941    |
| 0  | 133  | 289 PITG_06237  |
| 0  | 5    | 0 PITG_10927    |
| 0  | 4    | 0 PITG_01387    |
| 0  | 9    | 5 PITG_20201    |
| 0  | 0    | 2 PITG_13019    |
| 0  | 338  | 151 PITG_05583  |
| 0  | 151  | 31 PITG_17455   |
| 0  | 708  | 1437 PITG_01535 |
| 0  | 18   | 44 PITG_06813   |
| 0  | 38   | 0 NA            |
| 0  | 64   | 32 PITG_14257   |
| 0  | 9    | 2 PITG_06705    |
| 0  | 370  | 13 PITG_10290   |
| 0  | 13   | 2 PITG_08575    |
| 0  | 22   | 26 NA           |
| 0  | 82   | 97 NA           |
| 0  | 241  | 129 PITG_06423  |
| 0  | 15   | 0 PITG_01216    |
| 0  | 237  | 122 PITG_08740  |
| 0  | 32   | 2 NA            |
| 0  | 82   | 47 PITG_09443   |
| 0  | 12   | 8 PITG_10022    |

|     |      |                 |
|-----|------|-----------------|
| 0   | 39   | 12 PITG_18797   |
| 0   | 53   | 7 NA            |
| 0   | 571  | 1155 PITG_03294 |
| 0   | 14   | 100 PITG_05552  |
| 0   | 0    | 4 PITG_03042    |
| 0   | 4    | 7 PITG_03008    |
| 191 | 4    | 42 NA           |
| 0   | 31   | 52 PITG_10715   |
| 0   | 465  | 243 PITG_12886  |
| 0   | 15   | 3 PITG_03874    |
| 0   | 2    | 0 PITG_17863    |
| 0   | 4    | 27 PITG_11584   |
| 0   | 231  | 343 PITG_02092  |
| 0   | 252  | 178 NA          |
| 0   | 161  | 127 PITG_14634  |
| 0   | 5    | 4 NA            |
| 0   | 0    | 0 PITG_01424    |
| 0   | 48   | 18 PITG_10853   |
| 0   | 41   | 20 NA           |
| 0   | 73   | 418 PITG_13960  |
| 0   | 35   | 6 PITG_11183    |
| 0   | 44   | 30 PITG_19147   |
| 0   | 391  | 356 PITG_17512  |
| 0   | 72   | 68 NA           |
| 0   | 96   | 43 PITG_03243   |
| 0   | 391  | 301 PITG_02586  |
| 0   | 62   | 31 PITG_07256   |
| 0   | 57   | 38 NA           |
| 0   | 116  | 158 PITG_19592  |
| 0   | 23   | 22 PITG_02927   |
| 0   | 151  | 33 PITG_12151   |
| 0   | 7    | 2 NA            |
| 0   | 133  | 377 PITG_10169  |
| 0   | 6    | 2 PITG_13546    |
| 0   | 258  | 98 PITG_14989   |
| 0   | 59   | 131 PITG_10451  |
| 0   | 8    | 10 PITG_12252   |
| 0   | 556  | 802 PITG_02483  |
| 0   | 99   | 3 PITG_02491    |
| 0   | 20   | 42 PITG_15329   |
| 0   | 1040 | 722 PITG_00314  |
| 0   | 43   | 0 PITG_14108    |
| 0   | 783  | 394 PITG_16898  |
| 0   | 616  | 1697 PITG_06595 |
| 0   | 315  | 31 NA           |
| 0   | 24   | 17 PITG_07282   |
| 0   | 12   | 22 PITG_07955   |



|   |     |                |
|---|-----|----------------|
| 0 | 2   | 12 PITG_13428  |
| 0 | 232 | 44 PITG_06762  |
| 0 | 102 | 44 NA          |
| 0 | 0   | 0 PITG_14413   |
| 0 | 132 | 50 PITG_06189  |
| 0 | 84  | 33 PITG_05423  |
| 0 | 137 | 201 PITG_06719 |
| 0 | 81  | 94 PITG_22522  |
| 0 | 0   | 0 PITG_03362   |
| 0 | 366 | 193 PITG_11734 |
| 0 | 0   | 0 PITG_02143   |
| 0 | 42  | 39 PITG_08701  |
| 0 | 14  | 4 PITG_12852   |
| 0 | 123 | 28 PITG_18928  |
| 0 | 792 | 979 PITG_05884 |
| 0 | 59  | 37 PITG_10998  |
| 0 | 244 | 42 PITG_17674  |
| 0 | 14  | 0 PITG_16183   |
| 0 | 102 | 499 PITG_03020 |
| 0 | 208 | 132 PITG_14578 |
| 0 | 5   | 2 PITG_13302   |
| 0 | 219 | 39 PITG_10715  |
| 0 | 427 | 509 PITG_01762 |
| 0 | 5   | 8 PITG_03955   |
| 0 | 2   | 2 NA           |
| 0 | 2   | 2 NA           |
| 0 | 38  | 19 PITG_01590  |
| 0 | 2   | 23 PITG_10866  |
| 0 | 705 | 204 PITG_10878 |
| 0 | 97  | 153 PITG_02010 |
| 0 | 0   | 7 PITG_04705   |
| 0 | 473 | 606 PITG_00527 |
| 0 | 20  | 11 PITG_04104  |
| 0 | 19  | 7 PITG_07109   |
| 0 | 22  | 20 NA          |
| 0 | 6   | 0 NA           |
| 0 | 10  | 4 PITG_03443   |
| 0 | 8   | 4 PITG_01111   |
| 0 | 33  | 29 PITG_03815  |
| 0 | 33  | 66 PITG_22848  |
| 0 | 474 | 229 PITG_01248 |
| 0 | 6   | 26 PITG_01950  |
| 0 | 16  | 22 NA          |
| 0 | 2   | 5 PITG_02371   |
| 0 | 166 | 237 PITG_01217 |
| 0 | 177 | 6 PITG_10857   |
| 0 | 553 | 2025 NA        |

|   |      |                 |
|---|------|-----------------|
| 0 | 161  | 117 PITG_13845  |
| 0 | 28   | 33 NA           |
| 0 | 124  | 38 PITG_05692   |
| 0 | 23   | 10 PITG_09355   |
| 0 | 4    | 6 PITG_12840    |
| 0 | 98   | 12 PITG_05170   |
| 0 | 19   | 8 PITG_05781    |
| 0 | 0    | 0 PITG_00257    |
| 0 | 0    | 9 NA            |
| 0 | 693  | 1011 PITG_11099 |
| 0 | 2    | 0 PITG_02439    |
| 0 | 66   | 26 NA           |
| 0 | 30   | 0 PITG_03042    |
| 0 | 129  | 55 PITG_01155   |
| 0 | 2    | 2 PITG_11426    |
| 0 | 0    | 0 PITG_00348    |
| 0 | 0    | 4 PITG_13397    |
| 0 | 35   | 76 PITG_07885   |
| 0 | 13   | 2 PITG_03054    |
| 0 | 0    | 0 PITG_07552    |
| 0 | 300  | 353 PITG_12864  |
| 0 | 4    | 11 PITG_11097   |
| 0 | 32   | 23 PITG_15384   |
| 0 | 132  | 52 PITG_02755   |
| 0 | 187  | 232 PITG_08119  |
| 0 | 52   | 10 PITG_05100   |
| 0 | 48   | 17 PITG_02658   |
| 0 | 1074 | 407 PITG_02467  |
| 0 | 25   | 156 NA          |
| 0 | 11   | 9 PITG_01815    |
| 0 | 867  | 130 PITG_07810  |
| 0 | 0    | 0 PITG_06021    |
| 0 | 13   | 8 PITG_19422    |
| 0 | 96   | 123 PITG_10888  |
| 0 | 31   | 2 PITG_18094    |
| 0 | 68   | 60 NA           |
| 0 | 59   | 138 PITG_05240  |
| 0 | 117  | 25 PITG_05429   |
| 0 | 567  | 2333 PITG_12808 |
| 0 | 94   | 44 PITG_00225   |
| 0 | 30   | 67 PITG_03501   |
| 0 | 54   | 19 NA           |
| 0 | 742  | 261 PITG_05628  |
| 0 | 89   | 17 PITG_02322   |
| 0 | 614  | 258 PITG_05545  |
| 0 | 92   | 54 PITG_09539   |
| 0 | 8    | 6 NA            |

|   |     |                 |
|---|-----|-----------------|
| 0 | 75  | 57 PITG_09567   |
| 0 | 12  | 0 PITG_05583    |
| 0 | 85  | 50 PITG_14885   |
| 0 | 59  | 86 NA           |
| 0 | 132 | 54 PITG_05589   |
| 0 | 435 | 512 PITG_02510  |
| 0 | 165 | 66 PITG_00587   |
| 0 | 53  | 82 PITG_00809   |
| 0 | 2   | 20 PITG_00654   |
| 0 | 272 | 208 PITG_17725  |
| 0 | 2   | 0 NA            |
| 0 | 966 | 1454 PITG_05374 |
| 0 | 6   | 6 PITG_01591    |
| 0 | 0   | 2 PITG_18327    |
| 0 | 7   | 5 PITG_10027    |
| 0 | 183 | 999 PITG_09563  |
| 0 | 210 | 143 NA          |
| 0 | 49  | 0 NA            |
| 0 | 310 | 751 PITG_13500  |
| 0 | 105 | 63 PITG_04547   |
| 0 | 41  | 102 PITG_01923  |
| 0 | 43  | 148 PITG_02252  |
| 0 | 31  | 10 PITG_10905   |
| 0 | 32  | 10 PITG_20311   |
| 0 | 38  | 9 PITG_05686    |
| 0 | 14  | 0 PITG_17142    |
| 0 | 0   | 12 PITG_18416   |
| 0 | 101 | 27 PITG_03655   |
| 0 | 15  | 0 NA            |
| 0 | 436 | 338 PITG_13204  |
| 0 | 225 | 172 PITG_05664  |
| 0 | 17  | 0 PITG_23029    |
| 0 | 0   | 4 PITG_06719    |
| 0 | 34  | 267 PITG_11099  |
| 0 | 32  | 49 PITG_06790   |
| 0 | 7   | 11 NA           |
| 0 | 613 | 916 PITG_03220  |
| 0 | 0   | 2 PITG_09453    |
| 0 | 102 | 29 NA           |
| 0 | 52  | 153 PITG_16048  |
| 0 | 94  | 33 PITG_20608   |
| 2 | 796 | 1623 PITG_03294 |
| 0 | 20  | 26 PITG_20593   |
| 0 | 388 | 171 PITG_15382  |
| 0 | 0   | 0 PITG_19418    |
| 0 | 328 | 12 PITG_07794   |
| 0 | 132 | 60 PITG_01788   |

|   |      |                 |
|---|------|-----------------|
| 0 | 14   | 16 PITG_05623   |
| 0 | 4    | 2 PITG_09098    |
| 0 | 163  | 51 NA           |
| 0 | 26   | 7 PITG_06088    |
| 0 | 28   | 27 PITG_20203   |
| 0 | 214  | 204 PITG_10416  |
| 0 | 46   | 12 NA           |
| 0 | 26   | 4 NA            |
| 3 | 524  | 1843 PITG_06237 |
| 0 | 9    | 10 PITG_19220   |
| 0 | 440  | 410 PITG_15605  |
| 0 | 606  | 407 PITG_07454  |
| 0 | 5    | 2 NA            |
| 0 | 51   | 2 NA            |
| 0 | 41   | 75 PITG_01525   |
| 0 | 29   | 15 PITG_06599   |
| 0 | 31   | 45 PITG_19180   |
| 0 | 15   | 0 PITG_02792    |
| 0 | 297  | 616 PITG_04843  |
| 0 | 70   | 162 PITG_04843  |
| 0 | 9    | 0 PITG_10806    |
| 0 | 21   | 7 PITG_02044    |
| 0 | 130  | 44 PITG_06025   |
| 0 | 37   | 48 PITG_16206   |
| 0 | 53   | 0 PITG_02712    |
| 0 | 15   | 50 PITG_00443   |
| 0 | 75   | 7 PITG_04719    |
| 0 | 64   | 20 PITG_01792   |
| 0 | 46   | 54 PITG_15194   |
| 0 | 8    | 26 PITG_19318   |
| 0 | 74   | 57 PITG_20728   |
| 0 | 25   | 0 PITG_09193    |
| 2 | 169  | 2409 PITG_11484 |
| 0 | 27   | 17 NA           |
| 0 | 1514 | 755 PITG_08199  |
| 0 | 493  | 716 PITG_12141  |
| 0 | 110  | 33 PITG_04937   |
| 0 | 2    | 4 PITG_00627    |
| 0 | 11   | 4 NA            |
| 0 | 178  | 30 PITG_18045   |
| 0 | 24   | 15 NA           |
| 0 | 67   | 131 PITG_01715  |
| 0 | 5    | 0 PITG_16459    |
| 0 | 22   | 41 PITG_17333   |
| 0 | 0    | 5 PITG_00148    |
| 0 | 111  | 211 PITG_16058  |
| 0 | 140  | 53 PITG_14108   |

|   |      |                 |
|---|------|-----------------|
| 0 | 26   | 8 PITG_13248    |
| 0 | 0    | 0 PITG_12173    |
| 0 | 27   | 53 PITG_09820   |
| 0 | 19   | 16 PITG_04567   |
| 0 | 36   | 2 PITG_09354    |
| 0 | 40   | 59 PITG_04048   |
| 0 | 29   | 2 NA            |
| 0 | 0    | 0 PITG_17137    |
| 0 | 4    | 0 NA            |
| 0 | 51   | 39 PITG_16093   |
| 0 | 5    | 9 PITG_03753    |
| 0 | 197  | 183 PITG_09992  |
| 0 | 0    | 4 PITG_15570    |
| 0 | 38   | 40 PITG_04905   |
| 0 | 15   | 4 PITG_01272    |
| 0 | 505  | 304 PITG_11110  |
| 0 | 193  | 202 PITG_09835  |
| 0 | 151  | 55 PITG_11131   |
| 0 | 152  | 4 NA            |
| 0 | 53   | 130 PITG_03039  |
| 0 | 341  | 38 PITG_15609   |
| 0 | 850  | 261 PITG_20465  |
| 0 | 0    | 0 NA            |
| 0 | 25   | 4 PITG_05867    |
| 0 | 0    | 4 PITG_12223    |
| 0 | 14   | 4 PITG_02328    |
| 0 | 12   | 15 PITG_11870   |
| 0 | 43   | 91 PITG_08599   |
| 0 | 7    | 2 NA            |
| 0 | 187  | 26 NA           |
| 0 | 866  | 159 PITG_01120  |
| 0 | 2    | 21 NA           |
| 0 | 0    | 7 PITG_04884    |
| 0 | 188  | 151 PITG_02662  |
| 0 | 172  | 135 PITG_20386  |
| 0 | 25   | 28 PITG_12259   |
| 0 | 2    | 0 PITG_19287    |
| 0 | 95   | 45 PITG_10822   |
| 0 | 121  | 52 PITG_11728   |
| 0 | 5    | 0 PITG_16114    |
| 0 | 18   | 0 PITG_20927    |
| 0 | 47   | 0 PITG_03790    |
| 0 | 6    | 8 NA            |
| 0 | 359  | 217 PITG_00623  |
| 0 | 1173 | 1193 PITG_05884 |
| 0 | 19   | 22 PITG_17706   |
| 0 | 3    | 21 PITG_11584   |

|   |     |                 |
|---|-----|-----------------|
| 0 | 4   | 2 PITG_17760    |
| 0 | 0   | 0 NA            |
| 0 | 240 | 484 PITG_17261  |
| 0 | 356 | 456 PITG_11099  |
| 0 | 4   | 6 PITG_05340    |
| 0 | 106 | 545 PITG_13370  |
| 0 | 93  | 61 PITG_03530   |
| 0 | 2   | 0 PITG_17883    |
| 0 | 0   | 2 NA            |
| 0 | 39  | 2 NA            |
| 0 | 124 | 76 PITG_15954   |
| 0 | 4   | 12 PITG_12001   |
| 0 | 0   | 2 NA            |
| 0 | 39  | 2 PITG_01722    |
| 0 | 310 | 21 PITG_04909   |
| 0 | 319 | 122 PITG_15149  |
| 0 | 16  | 34 PITG_01171   |
| 0 | 4   | 11 PITG_21219   |
| 0 | 104 | 323 PITG_20189  |
| 0 | 3   | 16 PITG_00939   |
| 0 | 41  | 46 PITG_00664   |
| 0 | 4   | 0 PITG_06429    |
| 0 | 83  | 0 PITG_12192    |
| 0 | 253 | 225 PITG_14609  |
| 0 | 26  | 15 PITG_06772   |
| 0 | 2   | 12 PITG_03038   |
| 0 | 180 | 73 PITG_05255   |
| 0 | 49  | 123 PITG_10595  |
| 0 | 2   | 5 PITG_17028    |
| 0 | 8   | 21 PITG_01826   |
| 0 | 85  | 87 PITG_19158   |
| 0 | 132 | 52 NA           |
| 0 | 3   | 13 NA           |
| 0 | 21  | 27 NA           |
| 0 | 2   | 2 PITG_11265    |
| 0 | 13  | 23 PITG_12428   |
| 0 | 157 | 368 PITG_11099  |
| 0 | 10  | 11 NA           |
| 0 | 9   | 6 PITG_14640    |
| 0 | 4   | 5 NA            |
| 0 | 2   | 5 PITG_03295    |
| 0 | 55  | 45 PITG_09944   |
| 0 | 0   | 6 PITG_07973    |
| 0 | 614 | 1196 PITG_00633 |
| 0 | 7   | 2 NA            |
| 0 | 222 | 157 PITG_01138  |
| 0 | 11  | 16 PITG_11690   |

|    |      |                 |
|----|------|-----------------|
| 0  | 100  | 0 NA            |
| 0  | 7    | 2 PITG_10784    |
| 0  | 2    | 12 PITG_10813   |
| 0  | 64   | 31 PITG_22165   |
| 0  | 0    | 237 PITG_06503  |
| 0  | 44   | 60 PITG_08876   |
| 0  | 0    | 8 PITG_22065    |
| 0  | 116  | 31 PITG_04895   |
| 0  | 62   | 11 PITG_21643   |
| 0  | 731  | 1115 PITG_01982 |
| 0  | 68   | 9 PITG_19735    |
| 0  | 13   | 0 NA            |
| 2  | 1898 | 4143 PITG_06514 |
| 0  | 17   | 22 PITG_08394   |
| 0  | 63   | 53 PITG_18233   |
| 0  | 273  | 135 PITG_12745  |
| 0  | 8    | 7 PITG_03778    |
| 0  | 20   | 0 PITG_05961    |
| 0  | 8    | 0 NA            |
| 0  | 2    | 0 PITG_18306    |
| 0  | 317  | 191 PITG_17952  |
| 0  | 123  | 2 PITG_04802    |
| 0  | 6    | 8 PITG_15820    |
| 0  | 86   | 27 PITG_16731   |
| 0  | 9    | 0 PITG_00297    |
| 0  | 14   | 5 NA            |
| 0  | 38   | 7 NA            |
| 0  | 0    | 0 PITG_03397    |
| 0  | 116  | 142 PITG_11286  |
| 0  | 23   | 10 NA           |
| 0  | 102  | 0 PITG_18912    |
| 0  | 10   | 8 PITG_08473    |
| 0  | 15   | 9 PITG_20803    |
| 11 | 4    | 91 NA           |
| 0  | 8    | 16 PITG_06732   |
| 0  | 0    | 0 PITG_00005    |
| 0  | 117  | 77 PITG_19065   |
| 0  | 0    | 0 NA            |
| 0  | 6    | 18 NA           |
| 0  | 97   | 24 PITG_16337   |
| 0  | 166  | 338 PITG_10142  |
| 0  | 0    | 2 PITG_13738    |
| 0  | 106  | 28 PITG_04478   |
| 0  | 22   | 10 NA           |
| 0  | 0    | 9 PITG_12796    |
| 0  | 2    | 10 PITG_16320   |
| 0  | 34   | 0 NA            |

|   |     |                 |
|---|-----|-----------------|
| 0 | 99  | 9 PITG_00795    |
| 0 | 0   | 4 PITG_17891    |
| 0 | 43  | 50 PITG_10345   |
| 0 | 7   | 24 PITG_19065   |
| 0 | 0   | 2 PITG_10450    |
| 0 | 31  | 0 PITG_14643    |
| 0 | 84  | 55 PITG_03616   |
| 0 | 5   | 2 PITG_06917    |
| 0 | 0   | 83 PITG_22894   |
| 0 | 141 | 49 PITG_17942   |
| 0 | 222 | 461 PITG_03460  |
| 0 | 11  | 2 NA            |
| 0 | 102 | 86 PITG_21581   |
| 0 | 169 | 91 PITG_00483   |
| 0 | 0   | 4 PITG_07865    |
| 0 | 8   | 0 PITG_18518    |
| 0 | 9   | 2 PITG_11572    |
| 0 | 290 | 940 PITG_12286  |
| 0 | 14  | 2 PITG_09747    |
| 0 | 337 | 15 PITG_22541   |
| 2 | 744 | 1623 PITG_20189 |
| 0 | 89  | 38 PITG_09770   |
| 0 | 0   | 4 PITG_18634    |
| 0 | 48  | 46 PITG_17600   |
| 0 | 39  | 18 PITG_20831   |
| 0 | 52  | 4 PITG_01145    |
| 0 | 262 | 193 PITG_06799  |
| 0 | 35  | 288 PITG_18934  |
| 0 | 52  | 14 PITG_04505   |
| 0 | 367 | 200 PITG_19054  |
| 0 | 0   | 0 NA            |
| 0 | 32  | 13 PITG_00626   |
| 0 | 35  | 25 PITG_15494   |
| 0 | 459 | 481 PITG_10219  |
| 0 | 0   | 2 PITG_06827    |
| 0 | 6   | 2 NA            |
| 0 | 10  | 6 NA            |
| 0 | 61  | 35 PITG_09820   |
| 0 | 30  | 167 PITG_08234  |
| 0 | 42  | 46 PITG_16921   |
| 0 | 146 | 37 PITG_07436   |
| 0 | 76  | 0 PITG_02494    |
| 0 | 23  | 0 PITG_11858    |
| 0 | 26  | 4 PITG_11250    |
| 0 | 287 | 193 PITG_14598  |
| 0 | 337 | 27 PITG_12082   |
| 0 | 16  | 12 PITG_08258   |



|     |     |                 |
|-----|-----|-----------------|
| 0   | 5   | 2 PITG_08736    |
| 0   | 57  | 9 PITG_12496    |
| 0   | 537 | 265 PITG_00208  |
| 0   | 72  | 50 PITG_09285   |
| 0   | 391 | 1555 PITG_13614 |
| 0   | 115 | 87 PITG_04000   |
| 0   | 77  | 61 PITG_13431   |
| 0   | 53  | 34 NA           |
| 0   | 0   | 0 NA            |
| 0   | 221 | 187 PITG_15846  |
| 0   | 73  | 149 PITG_11982  |
| 0   | 5   | 0 PITG_12173    |
| 0   | 35  | 33 PITG_02237   |
| 0   | 85  | 90 PITG_01480   |
| 0   | 298 | 576 PITG_01833  |
| 0   | 3   | 2 PITG_02480    |
| 0   | 22  | 2 NA            |
| 3   | 828 | 709 PITG_06722  |
| 0   | 22  | 11 PITG_17298   |
| 0   | 35  | 15 NA           |
| 0   | 747 | 151 PITG_12580  |
| 68  | 122 | 25 NA           |
| 0   | 0   | 0 PITG_12173    |
| 0   | 6   | 0 NA            |
| 0   | 5   | 5 PITG_01647    |
| 0   | 33  | 10 PITG_21209   |
| 0   | 865 | 2172 PITG_14083 |
| 0   | 20  | 7 PITG_02319    |
| 0   | 25  | 21 PITG_14816   |
| 0   | 6   | 9 PITG_22508    |
| 0   | 26  | 41 PITG_09726   |
| 789 | 0   | 101 NA          |
| 0   | 102 | 22 PITG_15960   |
| 0   | 95  | 356 NA          |
| 0   | 211 | 525 PITG_22103  |
| 0   | 46  | 65 PITG_00482   |
| 0   | 144 | 50 PITG_05282   |
| 0   | 0   | 2 PITG_12514    |
| 0   | 125 | 158 PITG_21055  |
| 0   | 49  | 16 NA           |
| 0   | 73  | 35 PITG_00262   |
| 0   | 34  | 20 PITG_03609   |
| 0   | 273 | 188 PITG_22462  |
| 0   | 49  | 29 NA           |
| 0   | 26  | 56 PITG_08142   |
| 2   | 559 | 1058 PITG_00266 |
| 0   | 31  | 34 PITG_12534   |

|     |      |                |
|-----|------|----------------|
| 0   | 141  | 168 PITG_06732 |
| 0   | 10   | 7 PITG_13836   |
| 3   | 335  | 413 PITG_03294 |
| 0   | 1558 | 964 PITG_08210 |
| 0   | 292  | 311 PITG_16735 |
| 0   | 51   | 12 PITG_01980  |
| 0   | 7    | 0 NA           |
| 0   | 299  | 73 PITG_03828  |
| 0   | 104  | 63 PITG_14389  |
| 0   | 2    | 0 NA           |
| 0   | 40   | 13 PITG_07279  |
| 0   | 222  | 113 NA         |
| 0   | 7    | 2 PITG_18822   |
| 0   | 210  | 106 NA         |
| 0   | 363  | 149 PITG_12310 |
| 0   | 18   | 6 NA           |
| 0   | 232  | 220 PITG_04842 |
| 0   | 534  | 282 PITG_03252 |
| 0   | 48   | 95 PITG_17254  |
| 0   | 0    | 8 PITG_08011   |
| 0   | 150  | 65 NA          |
| 0   | 107  | 84 PITG_14596  |
| 0   | 18   | 2 NA           |
| 0   | 84   | 20 PITG_14949  |
| 0   | 998  | 308 NA         |
| 0   | 21   | 10 NA          |
| 0   | 160  | 84 PITG_13165  |
| 0   | 1226 | 256 NA         |
| 0   | 107  | 223 PITG_13002 |
| 0   | 121  | 102 PITG_09253 |
| 0   | 270  | 111 PITG_20793 |
| 0   | 384  | 749 PITG_16736 |
| 0   | 2    | 0 PITG_03978   |
| 0   | 41   | 36 PITG_04881  |
| 0   | 2    | 0 PITG_07915   |
| 0   | 421  | 201 PITG_07107 |
| 0   | 389  | 257 PITG_01184 |
| 0   | 157  | 108 PITG_12254 |
| 0   | 4    | 0 NA           |
| 0   | 25   | 6 PITG_01926   |
| 0   | 13   | 14 NA          |
| 0   | 2    | 0 PITG_16221   |
| 0   | 380  | 555 PITG_06577 |
| 0   | 990  | 604 PITG_00314 |
| 668 | 24   | 827 NA         |
| 0   | 69   | 122 PITG_01778 |
| 0   | 226  | 68 PITG_09493  |

|    |      |                 |
|----|------|-----------------|
| 0  | 244  | 590 PITG_19129  |
| 0  | 149  | 192 PITG_04508  |
| 0  | 11   | 2 PITG_11584    |
| 0  | 2    | 2 PITG_10722    |
| 0  | 67   | 105 PITG_10932  |
| 0  | 33   | 11 PITG_16472   |
| 79 | 0    | 13 NA           |
| 0  | 26   | 27 PITG_04715   |
| 0  | 30   | 141 PITG_11244  |
| 0  | 1416 | 739 PITG_13807  |
| 0  | 2    | 7 PITG_14375    |
| 0  | 191  | 24 PITG_00842   |
| 0  | 14   | 0 PITG_03826    |
| 0  | 60   | 4 NA            |
| 0  | 247  | 328 PITG_15697  |
| 0  | 0    | 2 NA            |
| 0  | 80   | 46 PITG_05151   |
| 0  | 89   | 60 NA           |
| 0  | 44   | 68 PITG_04133   |
| 0  | 34   | 10 PITG_16320   |
| 0  | 450  | 530 PITG_05171  |
| 0  | 102  | 15 PITG_00151   |
| 0  | 27   | 36 PITG_05498   |
| 0  | 293  | 423 PITG_03477  |
| 0  | 7    | 6 NA            |
| 0  | 5    | 4 PITG_05395    |
| 0  | 185  | 61 NA           |
| 0  | 211  | 330 PITG_09699  |
| 0  | 1611 | 1820 PITG_06816 |
| 0  | 0    | 7 PITG_16326    |
| 0  | 518  | 742 PITG_10203  |
| 0  | 517  | 511 PITG_06649  |
| 0  | 0    | 0 PITG_01737    |
| 0  | 15   | 4 PITG_21600    |
| 0  | 8    | 11 NA           |
| 0  | 0    | 0 NA            |
| 0  | 284  | 174 PITG_06715  |
| 0  | 21   | 15 PITG_02732   |
| 0  | 0    | 0 PITG_12173    |
| 0  | 2268 | 885 PITG_10203  |
| 0  | 207  | 140 PITG_03513  |
| 2  | 185  | 633 PITG_03081  |
| 0  | 108  | 56 PITG_03990   |
| 0  | 130  | 1019 PITG_03353 |
| 0  | 0    | 2 PITG_03401    |
| 0  | 121  | 85 PITG_17273   |
| 0  | 0    | 0 PITG_12798    |

|   |      |                 |
|---|------|-----------------|
| 0 | 50   | 16 NA           |
| 0 | 36   | 45 PITG_21325   |
| 0 | 194  | 290 PITG_17257  |
| 0 | 176  | 267 PITG_12193  |
| 0 | 32   | 0 NA            |
| 0 | 5    | 0 PITG_14197    |
| 0 | 411  | 280 PITG_01932  |
| 0 | 196  | 235 PITG_04862  |
| 0 | 641  | 1311 PITG_08959 |
| 0 | 122  | 50 PITG_11019   |
| 0 | 10   | 23 PITG_09598   |
| 0 | 44   | 388 PITG_11852  |
| 0 | 2    | 2 PITG_03757    |
| 0 | 6    | 0 NA            |
| 0 | 6198 | 2818 PITG_09742 |
| 0 | 2    | 8 PITG_03782    |
| 0 | 8    | 9 NA            |
| 0 | 6    | 20 NA           |
| 0 | 12   | 9 PITG_11119    |
| 0 | 9    | 29 PITG_02785   |
| 0 | 115  | 136 PITG_02565  |
| 0 | 594  | 67 PITG_11656   |
| 0 | 118  | 72 PITG_12684   |
| 0 | 51   | 9 NA            |
| 0 | 59   | 0 NA            |
| 0 | 28   | 64 NA           |
| 0 | 18   | 100 PITG_21187  |
| 0 | 84   | 60 PITG_16720   |
| 0 | 222  | 37 PITG_04558   |
| 0 | 2    | 4 PITG_10141    |
| 0 | 499  | 191 PITG_02607  |
| 0 | 104  | 155 PITG_05011  |
| 0 | 15   | 4 PITG_09098    |
| 0 | 8    | 0 PITG_02761    |
| 0 | 137  | 64 PITG_21000   |
| 0 | 20   | 71 PITG_07053   |
| 0 | 148  | 71 PITG_01777   |
| 0 | 241  | 407 PITG_05690  |
| 0 | 0    | 0 PITG_16340    |
| 0 | 1057 | 519 NA          |
| 0 | 317  | 152 PITG_03177  |
| 0 | 3    | 2 PITG_20330    |
| 0 | 0    | 2 PITG_21644    |
| 0 | 132  | 44 PITG_16605   |
| 0 | 20   | 10 PITG_10931   |
| 0 | 130  | 194 PITG_09493  |
| 0 | 96   | 31 PITG_09770   |

|   |      |                 |
|---|------|-----------------|
| 0 | 0    | 4 NA            |
| 0 | 37   | 26 PITG_04568   |
| 0 | 13   | 0 NA            |
| 0 | 29   | 17 NA           |
| 0 | 109  | 39 NA           |
| 0 | 90   | 149 PITG_06967  |
| 0 | 130  | 215 PITG_15652  |
| 0 | 0    | 0 PITG_00020    |
| 0 | 175  | 334 PITG_00613  |
| 0 | 36   | 6 PITG_10715    |
| 0 | 21   | 30 PITG_17683   |
| 0 | 18   | 0 PITG_00516    |
| 0 | 0    | 0 NA            |
| 0 | 23   | 16 PITG_09705   |
| 0 | 10   | 41 PITG_11690   |
| 0 | 21   | 7 PITG_09098    |
| 0 | 12   | 14 PITG_15150   |
| 0 | 0    | 14 PITG_19164   |
| 0 | 2    | 7 PITG_11264    |
| 0 | 81   | 11 PITG_02949   |
| 0 | 292  | 368 PITG_12886  |
| 0 | 67   | 15 NA           |
| 0 | 10   | 14 PITG_12948   |
| 0 | 5    | 4 PITG_00469    |
| 0 | 12   | 19 PITG_15149   |
| 0 | 97   | 65 PITG_18432   |
| 0 | 9    | 4 PITG_13758    |
| 0 | 22   | 23 PITG_19041   |
| 0 | 11   | 33 PITG_15294   |
| 0 | 6    | 0 NA            |
| 0 | 8    | 12 PITG_23029   |
| 0 | 897  | 1396 PITG_03712 |
| 0 | 15   | 4 NA            |
| 0 | 6    | 2 NA            |
| 0 | 469  | 50 PITG_12179   |
| 0 | 2    | 0 PITG_11858    |
| 0 | 13   | 0 PITG_02729    |
| 0 | 84   | 7 PITG_18009    |
| 0 | 34   | 3 PITG_02624    |
| 0 | 13   | 6 PITG_10822    |
| 0 | 284  | 549 PITG_05303  |
| 0 | 24   | 9 NA            |
| 0 | 38   | 2 PITG_11461    |
| 0 | 447  | 343 PITG_20505  |
| 0 | 29   | 2 PITG_16978    |
| 0 | 5    | 2 PITG_02950    |
| 2 | 2410 | 6308 PITG_03712 |

|   |     |                |
|---|-----|----------------|
| 0 | 103 | 17 PITG_18458  |
| 0 | 93  | 86 NA          |
| 0 | 411 | 532 PITG_03916 |
| 0 | 93  | 126 PITG_04662 |
| 0 | 107 | 64 PITG_11182  |
| 0 | 559 | 214 PITG_01437 |
| 0 | 235 | 45 PITG_01048  |
| 0 | 428 | 820 PITG_07048 |
| 0 | 0   | 0 PITG_11977   |
| 0 | 0   | 4 NA           |
| 0 | 14  | 36 PITG_13939  |
| 0 | 6   | 12 PITG_04342  |
| 0 | 423 | 423 PITG_01031 |
| 0 | 74  | 24 PITG_06510  |
| 0 | 67  | 19 NA          |
| 0 | 17  | 25 PITG_08136  |
| 0 | 74  | 14 PITG_06692  |
| 0 | 16  | 14 NA          |
| 0 | 301 | 158 PITG_08801 |
| 0 | 37  | 29 PITG_04618  |
| 0 | 3   | 6 PITG_15912   |
| 2 | 22  | 34 PITG_13042  |
| 0 | 0   | 3 PITG_01282   |
| 0 | 38  | 2 PITG_15916   |
| 0 | 148 | 125 PITG_03802 |
| 0 | 57  | 20 NA          |
| 0 | 0   | 0 NA           |
| 0 | 12  | 0 NA           |
| 0 | 48  | 4 PITG_02018   |
| 0 | 138 | 174 PITG_00839 |
| 0 | 185 | 54 NA          |
| 0 | 257 | 249 PITG_00461 |
| 0 | 12  | 21 PITG_11221  |
| 0 | 5   | 7 PITG_17257   |
| 0 | 8   | 0 PITG_20675   |
| 0 | 4   | 12 PITG_02415  |
| 0 | 139 | 248 PITG_17445 |
| 0 | 2   | 2 NA           |
| 0 | 17  | 9 PITG_02770   |
| 0 | 2   | 0 PITG_03978   |
| 0 | 7   | 2 PITG_01457   |
| 0 | 0   | 2 PITG_11024   |
| 0 | 39  | 250 PITG_07340 |
| 0 | 87  | 122 PITG_16854 |
| 0 | 6   | 2 PITG_14267   |
| 0 | 343 | 426 PITG_17005 |
| 0 | 405 | 330 PITG_01771 |

|   |      |                 |
|---|------|-----------------|
| 0 | 0    | 0 PITG_04232    |
| 0 | 490  | 63 PITG_17947   |
| 0 | 8    | 10 PITG_04522   |
| 0 | 802  | 198 PITG_10806  |
| 0 | 109  | 115 PITG_07829  |
| 0 | 9    | 24 PITG_05476   |
| 0 | 29   | 13 PITG_20715   |
| 0 | 150  | 49 PITG_15906   |
| 0 | 15   | 4 PITG_03142    |
| 0 | 223  | 81 PITG_01034   |
| 0 | 84   | 40 PITG_20354   |
| 0 | 15   | 8 PITG_02756    |
| 0 | 78   | 64 PITG_00559   |
| 0 | 34   | 26 PITG_17329   |
| 2 | 616  | 934 PITG_00034  |
| 0 | 90   | 39 PITG_17601   |
| 0 | 11   | 10 PITG_15688   |
| 0 | 26   | 17 PITG_08751   |
| 0 | 498  | 124 PITG_10442  |
| 0 | 677  | 613 PITG_03221  |
| 0 | 1797 | 237 PITG_02510  |
| 0 | 2033 | 814 PITG_12154  |
| 0 | 47   | 9 PITG_01951    |
| 0 | 0    | 4 PITG_19229    |
| 0 | 386  | 303 NA          |
| 0 | 292  | 243 PITG_00505  |
| 0 | 464  | 350 PITG_16749  |
| 0 | 236  | 279 PITG_10715  |
| 0 | 0    | 2 PITG_01073    |
| 0 | 3    | 0 PITG_09598    |
| 0 | 101  | 364 PITG_12139  |
| 0 | 22   | 61 PITG_07786   |
| 0 | 886  | 683 NA          |
| 0 | 156  | 113 PITG_12299  |
| 0 | 541  | 478 PITG_10967  |
| 0 | 93   | 22 PITG_15846   |
| 0 | 38   | 40 PITG_17910   |
| 0 | 0    | 5 PITG_03942    |
| 0 | 40   | 9 PITG_10239    |
| 0 | 8    | 16 PITG_02637   |
| 0 | 161  | 76 PITG_16834   |
| 0 | 52   | 91 PITG_20766   |
| 0 | 4    | 0 NA            |
| 0 | 4    | 24 PITG_09772   |
| 0 | 44   | 21 PITG_07638   |
| 0 | 281  | 152 PITG_12488  |
| 0 | 226  | 1598 PITG_03700 |

|   |      |                 |
|---|------|-----------------|
| 0 | 0    | 2 NA            |
| 0 | 893  | 1879 PITG_18718 |
| 0 | 45   | 20 PITG_08329   |
| 0 | 412  | 725 PITG_19669  |
| 0 | 24   | 24 PITG_19804   |
| 0 | 8    | 22 PITG_16114   |
| 0 | 645  | 188 PITG_00733  |
| 0 | 305  | 584 PITG_03294  |
| 0 | 42   | 8 NA            |
| 0 | 48   | 45 PITG_03347   |
| 0 | 324  | 780 PITG_12562  |
| 0 | 53   | 63 PITG_19166   |
| 0 | 0    | 0 NA            |
| 0 | 13   | 6 PITG_14911    |
| 0 | 547  | 399 PITG_08265  |
| 0 | 54   | 27 PITG_17563   |
| 0 | 2    | 5 NA            |
| 0 | 8    | 13 PITG_01981   |
| 0 | 161  | 345 PITG_22959  |
| 0 | 8    | 0 PITG_01155    |
| 0 | 32   | 301 PITG_03873  |
| 0 | 1990 | 913 PITG_04906  |
| 3 | 280  | 179 PITG_11012  |
| 0 | 4    | 6 NA            |
| 0 | 8    | 2 PITG_18688    |
| 0 | 0    | 0 PITG_03995    |
| 0 | 11   | 4 NA            |
| 0 | 4    | 5 PITG_11273    |
| 0 | 13   | 2 NA            |
| 0 | 12   | 30 NA           |
| 0 | 2    | 4 NA            |
| 0 | 625  | 671 PITG_15409  |
| 0 | 25   | 2 NA            |
| 0 | 16   | 28 PITG_09360   |
| 2 | 300  | 711 PITG_09526  |
| 0 | 29   | 0 NA            |
| 0 | 0    | 0 PITG_03593    |
| 0 | 119  | 25 PITG_21133   |
| 0 | 56   | 0 NA            |
| 0 | 0    | 0 PITG_05260    |
| 0 | 30   | 55 PITG_01417   |
| 0 | 12   | 35 PITG_16009   |
| 0 | 119  | 75 PITG_20687   |
| 0 | 0    | 2 PITG_11584    |
| 0 | 67   | 0 NA            |
| 0 | 0    | 0 NA            |
| 2 | 490  | 953 PITG_17261  |



|   |      |                 |
|---|------|-----------------|
| 0 | 0    | 0 NA            |
| 0 | 8    | 2 PITG_02497    |
| 0 | 9    | 4 PITG_21579    |
| 0 | 0    | 4 PITG_10624    |
| 0 | 0    | 0 PITG_22164    |
| 0 | 27   | 0 PITG_20374    |
| 0 | 9    | 2 PITG_08769    |
| 0 | 17   | 7 PITG_00220    |
| 0 | 16   | 11 PITG_02607   |
| 0 | 64   | 30 NA           |
| 0 | 140  | 61 PITG_13428   |
| 0 | 62   | 14 PITG_00380   |
| 0 | 84   | 65 NA           |
| 0 | 0    | 4 PITG_14833    |
| 0 | 0    | 0 PITG_08504    |
| 0 | 146  | 13 PITG_19736   |
| 0 | 210  | 151 PITG_03571  |
| 0 | 2    | 2 NA            |
| 0 | 110  | 144 PITG_14885  |
| 0 | 0    | 4 PITG_17679    |
| 0 | 30   | 25 PITG_12695   |
| 0 | 531  | 74 PITG_16446   |
| 0 | 89   | 7 PITG_00218    |
| 0 | 0    | 0 PITG_11437    |
| 0 | 61   | 332 PITG_10827  |
| 0 | 130  | 172 PITG_04681  |
| 0 | 9    | 10 PITG_02292   |
| 2 | 42   | 5 PITG_12192    |
| 0 | 199  | 98 PITG_09940   |
| 0 | 2    | 0 PITG_05194    |
| 0 | 5    | 0 PITG_03467    |
| 2 | 9827 | 1094 PITG_04121 |
| 0 | 350  | 203 PITG_01516  |
| 0 | 8    | 2 PITG_02978    |
| 0 | 23   | 16 PITG_03756   |
| 0 | 777  | 795 PITG_17093  |
| 0 | 3    | 10 PITG_00188   |
| 0 | 276  | 202 NA          |
| 0 | 138  | 11 NA           |
| 0 | 12   | 16 PITG_11248   |
| 0 | 7    | 15 PITG_05391   |
| 0 | 319  | 313 PITG_06383  |
| 0 | 18   | 14 NA           |
| 0 | 4    | 18 PITG_03476   |
| 0 | 309  | 515 PITG_10263  |
| 0 | 35   | 58 PITG_01508   |
| 0 | 32   | 31 PITG_11690   |

|   |     |                 |
|---|-----|-----------------|
| 0 | 6   | 23 PITG_11690   |
| 0 | 55  | 40 PITG_14596   |
| 0 | 102 | 57 PITG_06303   |
| 0 | 481 | 309 PITG_02186  |
| 6 | 231 | 1569 PITG_04640 |
| 0 | 11  | 9 PITG_16018    |
| 2 | 7   | 4 PITG_05480    |
| 0 | 4   | 2 PITG_15100    |
| 0 | 19  | 30 PITG_09640   |
| 0 | 385 | 501 PITG_18089  |
| 0 | 16  | 136 PITG_12961  |
| 0 | 29  | 14 PITG_09700   |
| 0 | 274 | 265 PITG_12266  |
| 0 | 749 | 217 PITG_13041  |
| 0 | 5   | 21 NA           |
| 0 | 4   | 2 PITG_04442    |
| 0 | 186 | 214 PITG_19422  |
| 0 | 43  | 8 NA            |
| 0 | 3   | 2 PITG_08236    |
| 0 | 309 | 136 PITG_08444  |
| 0 | 853 | 1191 PITG_13312 |
| 0 | 140 | 146 PITG_15055  |
| 0 | 190 | 56 PITG_09890   |
| 2 | 98  | 1071 PITG_03221 |
| 0 | 4   | 2 PITG_11122    |
| 0 | 88  | 93 PITG_05855   |
| 0 | 27  | 2 PITG_05126    |
| 0 | 4   | 2 PITG_10390    |
| 0 | 83  | 54 PITG_11882   |
| 0 | 253 | 83 NA           |
| 0 | 18  | 43 PITG_09832   |
| 0 | 2   | 2 PITG_21182    |
| 0 | 71  | 19 PITG_07973   |
| 0 | 13  | 70 PITG_03712   |
| 0 | 14  | 11 NA           |
| 0 | 825 | 526 PITG_18052  |
| 0 | 167 | 95 PITG_03302   |
| 0 | 0   | 6 PITG_00482    |
| 0 | 129 | 19 NA           |
| 0 | 259 | 511 PITG_03020  |
| 0 | 0   | 4 PITG_02582    |
| 0 | 7   | 2 PITG_19191    |
| 0 | 2   | 2 PITG_18424    |
| 0 | 0   | 12 PITG_04283   |
| 0 | 673 | 242 PITG_00391  |
| 0 | 13  | 0 PITG_10569    |
| 0 | 370 | 899 PITG_16757  |

|     |      |                 |
|-----|------|-----------------|
| 0   | 541  | 286 PITG_14278  |
| 0   | 8    | 2 PITG_05187    |
| 0   | 89   | 252 PITG_20725  |
| 0   | 121  | 112 PITG_07953  |
| 0   | 13   | 0 NA            |
| 0   | 35   | 33 PITG_16814   |
| 0   | 712  | 159 PITG_15871  |
| 0   | 12   | 27 PITG_13832   |
| 0   | 163  | 263 PITG_20590  |
| 0   | 0    | 0 PITG_04670    |
| 0   | 25   | 17 PITG_03305   |
| 0   | 9    | 169 PITG_07340  |
| 0   | 163  | 78 PITG_17287   |
| 0   | 6    | 45 PITG_06108   |
| 0   | 61   | 27 PITG_15567   |
| 0   | 1576 | 662 PITG_09596  |
| 0   | 4    | 12 PITG_17137   |
| 0   | 49   | 81 PITG_00809   |
| 0   | 24   | 36 NA           |
| 0   | 14   | 10 PITG_12235   |
| 0   | 2    | 2 NA            |
| 0   | 4    | 4 PITG_12948    |
| 0   | 77   | 449 PITG_02594  |
| 0   | 202  | 949 PITG_09345  |
| 2   | 1726 | 2363 PITG_18048 |
| 0   | 0    | 0 PITG_02449    |
| 0   | 30   | 11 PITG_13658   |
| 0   | 15   | 7 PITG_00125    |
| 0   | 0    | 2 PITG_03879    |
| 0   | 25   | 9 NA            |
| 0   | 0    | 2 PITG_03620    |
| 0   | 19   | 10 PITG_15655   |
| 0   | 25   | 6 PITG_20906    |
| 0   | 6    | 109 PITG_18312  |
| 0   | 46   | 2 PITG_14640    |
| 0   | 471  | 669 PITG_05360  |
| 0   | 4    | 6 PITG_17557    |
| 438 | 4    | 165 NA          |
| 0   | 17   | 27 PITG_19886   |
| 0   | 0    | 4 PITG_20714    |
| 0   | 155  | 74 PITG_05861   |
| 0   | 64   | 66 PITG_14923   |
| 0   | 2    | 3 PITG_07199    |
| 2   | 1007 | 1312 PITG_12947 |
| 0   | 15   | 20 PITG_04010   |
| 0   | 0    | 12 PITG_20977   |
| 0   | 602  | 319 PITG_09434  |

|   |      |                 |
|---|------|-----------------|
| 5 | 183  | 608 PITG_04843  |
| 0 | 0    | 4 PITG_02951    |
| 0 | 36   | 6 PITG_13903    |
| 0 | 5    | 0 NA            |
| 0 | 32   | 121 PITG_14573  |
| 0 | 4    | 9 NA            |
| 0 | 9    | 10 PITG_16788   |
| 0 | 0    | 4 NA            |
| 0 | 55   | 14 NA           |
| 0 | 13   | 0 PITG_10942    |
| 0 | 77   | 430 PITG_08044  |
| 0 | 6    | 0 NA            |
| 0 | 139  | 317 PITG_19121  |
| 0 | 487  | 1508 PITG_09556 |
| 0 | 108  | 349 PITG_02022  |
| 0 | 23   | 0 PITG_02927    |
| 0 | 143  | 139 PITG_10926  |
| 0 | 168  | 168 PITG_20192  |
| 0 | 17   | 94 PITG_02162   |
| 0 | 161  | 51 PITG_00979   |
| 0 | 34   | 3 NA            |
| 0 | 1769 | 334 PITG_10463  |
| 0 | 11   | 0 PITG_04396    |
| 0 | 11   | 2 PITG_13185    |
| 0 | 3    | 0 NA            |
| 0 | 94   | 102 PITG_01417  |
| 0 | 25   | 8 NA            |
| 0 | 20   | 21 NA           |
| 0 | 12   | 45 PITG_16058   |
| 0 | 186  | 412 PITG_08703  |
| 0 | 146  | 28 PITG_12106   |
| 0 | 96   | 51 PITG_21602   |
| 0 | 6    | 4 NA            |
| 0 | 91   | 8 PITG_02024    |
| 0 | 43   | 6 PITG_14400    |
| 0 | 1176 | 350 PITG_03897  |
| 0 | 211  | 48 PITG_15863   |
| 2 | 2660 | 4921 PITG_04868 |
| 0 | 9    | 4 PITG_06669    |
| 0 | 16   | 6 PITG_04874    |
| 0 | 2    | 0 PITG_12173    |
| 0 | 8    | 0 PITG_06390    |
| 0 | 2    | 21 PITG_10765   |
| 0 | 0    | 0 PITG_05192    |
| 0 | 28   | 7 NA            |
| 0 | 0    | 7 PITG_03734    |
| 0 | 106  | 50 PITG_02710   |

|   |      |                 |
|---|------|-----------------|
| 0 | 0    | 0 PITG_22552    |
| 0 | 94   | 87 PITG_03811   |
| 0 | 36   | 5 NA            |
| 0 | 9    | 0 PITG_00463    |
| 0 | 155  | 581 PITG_10934  |
| 0 | 33   | 44 PITG_13757   |
| 0 | 169  | 102 PITG_01336  |
| 0 | 1026 | 1160 PITG_05660 |
| 0 | 37   | 24 NA           |
| 0 | 76   | 3 PITG_17559    |
| 0 | 236  | 63 PITG_17262   |
| 0 | 7    | 0 PITG_02075    |
| 0 | 11   | 34 NA           |
| 0 | 220  | 130 PITG_09936  |
| 0 | 18   | 15 NA           |
| 0 | 24   | 0 PITG_01183    |
| 0 | 0    | 0 PITG_01809    |
| 0 | 130  | 180 PITG_01788  |
| 0 | 64   | 55 PITG_08548   |
| 0 | 298  | 163 PITG_07077  |
| 0 | 1111 | 2372 PITG_04470 |
| 0 | 2    | 4 PITG_17345    |
| 0 | 19   | 58 PITG_00978   |
| 0 | 0    | 10 PITG_00808   |
| 0 | 53   | 66 PITG_02347   |
| 0 | 0    | 6 PITG_17074    |
| 0 | 24   | 4 PITG_00454    |
| 0 | 93   | 864 PITG_22135  |
| 0 | 17   | 6 NA            |
| 0 | 14   | 0 PITG_05245    |
| 0 | 202  | 18 NA           |
| 0 | 2    | 0 PITG_16904    |
| 0 | 321  | 120 NA          |
| 0 | 54   | 96 PITG_02253   |
| 0 | 493  | 71 PITG_05249   |
| 0 | 14   | 8 PITG_00945    |
| 0 | 94   | 162 PITG_17034  |
| 0 | 996  | 74 PITG_02706   |
| 0 | 580  | 307 PITG_08454  |
| 0 | 42   | 28 PITG_08304   |
| 0 | 0    | 4 PITG_04658    |
| 0 | 22   | 12 PITG_02336   |
| 2 | 1680 | 2411 PITG_06995 |
| 2 | 171  | 123 PITG_09508  |
| 0 | 11   | 0 PITG_13673    |
| 0 | 2    | 4 PITG_18342    |
| 0 | 0    | 0 PITG_11299    |

|   |      |                 |
|---|------|-----------------|
| 0 | 166  | 495 PITG_14180  |
| 2 | 394  | 1142 PITG_14179 |
| 0 | 62   | 10 PITG_19774   |
| 0 | 12   | 2 NA            |
| 0 | 27   | 32 NA           |
| 0 | 75   | 57 PITG_16666   |
| 0 | 18   | 20 PITG_05287   |
| 0 | 42   | 69 PITG_01477   |
| 0 | 251  | 490 PITG_01599  |
| 0 | 29   | 95 PITG_12915   |
| 0 | 26   | 4 NA            |
| 0 | 169  | 117 PITG_21176  |
| 0 | 3    | 2 PITG_16338    |
| 0 | 9    | 4 PITG_01154    |
| 0 | 1495 | 1274 PITG_21395 |
| 2 | 1124 | 507 PITG_09015  |
| 0 | 2    | 0 PITG_05423    |
| 0 | 3    | 2 PITG_20641    |
| 0 | 12   | 13 PITG_00257   |
| 0 | 6    | 14 PITG_12516   |
| 0 | 32   | 0 NA            |
| 0 | 198  | 75 PITG_16352   |
| 0 | 16   | 20 PITG_17884   |
| 0 | 1159 | 1113 PITG_16198 |
| 0 | 660  | 141 PITG_09907  |
| 0 | 11   | 2 PITG_20796    |
| 0 | 3    | 15 PITG_03226   |
| 0 | 11   | 7 PITG_17998    |
| 0 | 16   | 4 PITG_19160    |
| 0 | 0    | 18 NA           |
| 0 | 28   | 0 PITG_09669    |
| 0 | 0    | 0 PITG_06088    |
| 0 | 221  | 43 PITG_04685   |
| 0 | 0    | 0 PITG_21932    |
| 2 | 451  | 1455 PITG_09556 |
| 0 | 33   | 74 PITG_17452   |
| 0 | 31   | 499 PITG_10218  |
| 0 | 107  | 121 PITG_12818  |
| 0 | 4    | 0 NA            |
| 0 | 85   | 20 PITG_08083   |
| 0 | 244  | 310 PITG_05240  |
| 0 | 21   | 86 PITG_04038   |
| 0 | 52   | 229 PITG_08611  |
| 0 | 257  | 440 PITG_02948  |
| 0 | 192  | 230 PITG_08594  |
| 0 | 41   | 11 NA           |
| 0 | 129  | 83 NA           |

|   |      |                 |
|---|------|-----------------|
| 0 | 59   | 24 NA           |
| 0 | 0    | 2 PITG_00482    |
| 0 | 11   | 10 PITG_03496   |
| 0 | 26   | 30 PITG_01070   |
| 0 | 40   | 8 PITG_03702    |
| 0 | 40   | 23 PITG_12728   |
| 0 | 1525 | 1421 PITG_18354 |
| 0 | 2    | 0 PITG_06570    |
| 0 | 61   | 92 PITG_23111   |
| 0 | 46   | 22 PITG_10213   |
| 0 | 110  | 147 PITG_01398  |
| 0 | 7    | 10 PITG_04027   |
| 0 | 25   | 10 PITG_03416   |
| 0 | 26   | 56 PITG_18497   |
| 0 | 123  | 491 NA          |
| 0 | 43   | 15 PITG_18396   |
| 0 | 4    | 2 PITG_03341    |
| 0 | 0    | 0 NA            |
| 0 | 293  | 33 PITG_09428   |
| 0 | 0    | 0 PITG_03988    |
| 0 | 1362 | 1222 PITG_15017 |
| 0 | 519  | 278 PITG_03694  |
| 0 | 4    | 8 PITG_17492    |
| 0 | 2    | 8 PITG_17965    |
| 0 | 86   | 89 PITG_21377   |
| 0 | 80   | 55 PITG_12915   |
| 0 | 0    | 0 NA            |
| 0 | 14   | 0 PITG_16364    |
| 0 | 2    | 12 PITG_01750   |
| 0 | 8    | 6 NA            |
| 0 | 8    | 7 PITG_18377    |
| 0 | 17   | 0 PITG_17709    |
| 0 | 11   | 2 PITG_07991    |
| 0 | 44   | 37 PITG_10028   |
| 0 | 23   | 24 PITG_06979   |
| 0 | 0    | 3 PITG_05170    |
| 0 | 0    | 2 NA            |
| 0 | 31   | 63 PITG_07711   |
| 0 | 375  | 64 PITG_08042   |
| 0 | 150  | 457 PITG_04640  |
| 0 | 87   | 52 PITG_04506   |
| 0 | 0    | 2 NA            |
| 0 | 38   | 41 PITG_14000   |
| 0 | 804  | 944 PITG_09655  |
| 0 | 0    | 0 PITG_02487    |
| 0 | 201  | 90 PITG_09539   |
| 0 | 218  | 222 PITG_09504  |

|   |     |                 |
|---|-----|-----------------|
| 0 | 2   | 0 NA            |
| 0 | 35  | 59 PITG_04570   |
| 0 | 33  | 33 PITG_08781   |
| 0 | 0   | 0 PITG_00399    |
| 0 | 4   | 0 NA            |
| 0 | 83  | 22 PITG_15525   |
| 0 | 0   | 2 PITG_00193    |
| 0 | 2   | 3 PITG_19605    |
| 0 | 21  | 7 PITG_07046    |
| 0 | 230 | 64 NA           |
| 0 | 54  | 46 PITG_17489   |
| 2 | 120 | 178 PITG_03589  |
| 0 | 0   | 2 PITG_12140    |
| 0 | 439 | 1197 PITG_09655 |
| 0 | 361 | 223 PITG_16670  |
| 0 | 30  | 30 PITG_02075   |
| 0 | 33  | 29 PITG_03599   |
| 0 | 18  | 24 PITG_01514   |
| 0 | 61  | 10 PITG_06607   |
| 0 | 59  | 27 PITG_02292   |
| 0 | 159 | 63 PITG_07939   |
| 0 | 158 | 233 PITG_18100  |
| 0 | 11  | 0 NA            |
| 0 | 14  | 4 PITG_01858    |
| 0 | 0   | 4 PITG_16684    |
| 0 | 11  | 82 PITG_06731   |
| 0 | 52  | 45 PITG_08741   |
| 0 | 13  | 4 PITG_03318    |
| 0 | 91  | 60 PITG_10268   |
| 0 | 59  | 52 PITG_03221   |
| 0 | 0   | 0 NA            |
| 0 | 88  | 157 NA          |
| 0 | 53  | 83 PITG_09387   |
| 0 | 0   | 2 PITG_17437    |
| 0 | 56  | 6 NA            |
| 0 | 14  | 16 PITG_00495   |
| 0 | 2   | 2 NA            |
| 0 | 65  | 91 PITG_09964   |
| 0 | 46  | 24 PITG_19371   |
| 0 | 532 | 29 PITG_11689   |
| 0 | 111 | 115 PITG_03224  |
| 0 | 976 | 22 PITG_02022   |
| 0 | 473 | 188 PITG_17928  |
| 0 | 157 | 90 PITG_15836   |
| 0 | 118 | 32 PITG_07964   |
| 0 | 14  | 11 PITG_13644   |
| 0 | 69  | 6 PITG_04041    |



|    |      |                 |
|----|------|-----------------|
| 0  | 442  | 254 PITG_12854  |
| 0  | 63   | 41 PITG_10221   |
| 0  | 3    | 2 PITG_05993    |
| 0  | 169  | 307 PITG_10498  |
| 0  | 0    | 2 NA            |
| 0  | 3    | 8 PITG_04683    |
| 0  | 54   | 9 PITG_12172    |
| 0  | 214  | 208 PITG_10449  |
| 0  | 216  | 19 NA           |
| 0  | 1026 | 241 NA          |
| 0  | 14   | 4 NA            |
| 0  | 5    | 2 PITG_03468    |
| 0  | 1263 | 2120 PITG_14913 |
| 0  | 12   | 14 PITG_13826   |
| 0  | 148  | 27 PITG_02371   |
| 0  | 227  | 60 PITG_12753   |
| 0  | 33   | 68 PITG_03552   |
| 0  | 60   | 137 PITG_17908  |
| 0  | 15   | 18 PITG_03740   |
| 0  | 0    | 0 PITG_01308    |
| 0  | 91   | 36 PITG_03117   |
| 0  | 35   | 22 PITG_01713   |
| 0  | 16   | 10 PITG_17168   |
| 0  | 171  | 55 NA           |
| 0  | 2    | 0 PITG_12518    |
| 0  | 55   | 53 NA           |
| 0  | 393  | 41 PITG_16326   |
| 0  | 65   | 22 PITG_20034   |
| 0  | 25   | 0 PITG_17137    |
| 0  | 49   | 0 NA            |
| 0  | 16   | 10 NA           |
| 0  | 5    | 6 PITG_15571    |
| 0  | 2    | 51 PITG_02047   |
| 0  | 66   | 43 PITG_12256   |
| 0  | 147  | 32 NA           |
| 0  | 187  | 449 PITG_12864  |
| 0  | 53   | 17 PITG_01048   |
| 0  | 63   | 8 PITG_05410    |
| 0  | 0    | 0 PITG_13590    |
| 0  | 28   | 18 PITG_23273   |
| 33 | 27   | 343 NA          |
| 0  | 250  | 94 PITG_13458   |
| 0  | 22   | 0 PITG_15509    |
| 0  | 274  | 194 PITG_13381  |
| 0  | 13   | 19 PITG_01719   |
| 0  | 264  | 69 PITG_01932   |
| 0  | 12   | 33 PITG_08600   |

|      |     |                 |
|------|-----|-----------------|
| 2191 | 241 | 1273 NA         |
| 0    | 27  | 55 NA           |
| 0    | 270 | 494 PITG_17920  |
| 0    | 30  | 15 PITG_22848   |
| 0    | 105 | 53 PITG_19124   |
| 0    | 11  | 10 PITG_15871   |
| 0    | 0   | 8 PITG_15575    |
| 0    | 326 | 169 PITG_04011  |
| 0    | 424 | 119 PITG_03451  |
| 0    | 141 | 60 PITG_13861   |
| 0    | 270 | 605 PITG_04500  |
| 0    | 75  | 25 PITG_12676   |
| 0    | 111 | 12 NA           |
| 0    | 81  | 68 PITG_23005   |
| 0    | 120 | 133 PITG_15006  |
| 0    | 3   | 40 PITG_09748   |
| 2130 | 70  | 2053 PITG_12286 |
| 0    | 21  | 9 NA            |
| 0    | 81  | 152 PITG_07975  |
| 0    | 7   | 4 PITG_05197    |
| 0    | 17  | 6 PITG_02264    |
| 0    | 7   | 4 PITG_00218    |
| 0    | 540 | 175 PITG_08725  |
| 0    | 7   | 0 PITG_19849    |
| 0    | 0   | 0 NA            |
| 0    | 7   | 18 PITG_15100   |
| 0    | 138 | 91 PITG_13235   |
| 0    | 22  | 152 PITG_05373  |
| 0    | 430 | 207 PITG_10083  |
| 0    | 15  | 8 PITG_11999    |
| 0    | 23  | 0 PITG_04262    |
| 0    | 33  | 77 NA           |
| 0    | 31  | 183 PITG_00396  |
| 0    | 28  | 0 PITG_18891    |
| 0    | 0   | 0 PITG_04243    |
| 0    | 165 | 15 PITG_04662   |
| 0    | 0   | 0 PITG_05488    |
| 0    | 0   | 0 PITG_00324    |
| 0    | 4   | 14 PITG_14137   |
| 0    | 17  | 10 PITG_10136   |
| 0    | 39  | 0 NA            |
| 0    | 10  | 2 PITG_13529    |
| 0    | 0   | 0 PITG_03779    |
| 0    | 10  | 12 NA           |
| 0    | 15  | 33 PITG_05289   |
| 0    | 376 | 33 PITG_21187   |
| 0    | 198 | 47 PITG_10932   |

|   |     |                 |
|---|-----|-----------------|
| 0 | 66  | 81 PITG_03611   |
| 0 | 42  | 10 PITG_06765   |
| 0 | 10  | 9 PITG_03547    |
| 0 | 249 | 177 PITG_01778  |
| 0 | 79  | 76 PITG_10828   |
| 0 | 341 | 117 PITG_09298  |
| 0 | 102 | 99 PITG_18923   |
| 0 | 169 | 159 NA          |
| 0 | 146 | 12 NA           |
| 0 | 39  | 32 PITG_13249   |
| 0 | 71  | 2 NA            |
| 0 | 3   | 10 NA           |
| 0 | 818 | 277 PITG_17012  |
| 0 | 893 | 1535 PITG_18354 |
| 0 | 0   | 14 PITG_14111   |
| 0 | 0   | 0 PITG_12796    |
| 0 | 601 | 125 PITG_04937  |
| 0 | 2   | 6 NA            |
| 0 | 47  | 0 PITG_14497    |
| 0 | 709 | 675 PITG_09015  |
| 0 | 18  | 22 PITG_14970   |
| 0 | 146 | 85 PITG_04067   |
| 0 | 10  | 4 PITG_14717    |
| 0 | 161 | 183 PITG_19314  |
| 0 | 116 | 25 PITG_07310   |
| 0 | 49  | 9 PITG_11249    |
| 0 | 628 | 921 PITG_15654  |
| 0 | 689 | 47 PITG_01248   |
| 0 | 78  | 139 PITG_17359  |
| 0 | 683 | 485 PITG_01496  |
| 0 | 125 | 0 PITG_03115    |
| 0 | 7   | 20 PITG_23111   |
| 0 | 13  | 0 NA            |
| 0 | 0   | 8 PITG_09419    |
| 0 | 11  | 22 PITG_18728   |
| 0 | 10  | 24 PITG_10450   |
| 0 | 31  | 4 NA            |
| 0 | 40  | 8 NA            |
| 0 | 207 | 102 PITG_13427  |
| 0 | 0   | 0 NA            |
| 0 | 9   | 8 NA            |
| 0 | 129 | 139 PITG_12154  |
| 0 | 2   | 2 PITG_17816    |
| 0 | 286 | 620 PITG_17537  |
| 0 | 796 | 130 PITG_00234  |
| 0 | 31  | 60 PITG_04910   |
| 0 | 9   | 0 PITG_19603    |

|    |      |                 |
|----|------|-----------------|
| 0  | 106  | 23 PITG_01785   |
| 0  | 11   | 6 PITG_02796    |
| 0  | 180  | 412 PITG_17593  |
| 0  | 0    | 2 PITG_02770    |
| 0  | 207  | 279 PITG_03712  |
| 0  | 10   | 2 PITG_09311    |
| 0  | 5    | 5 PITG_12837    |
| 0  | 31   | 5 PITG_13803    |
| 0  | 46   | 37 PITG_02023   |
| 0  | 3    | 12 PITG_18423   |
| 0  | 109  | 44 PITG_02973   |
| 0  | 793  | 301 NA          |
| 81 | 10   | 179 NA          |
| 0  | 396  | 10 PITG_09748   |
| 0  | 93   | 21 PITG_18174   |
| 0  | 0    | 6 PITG_07199    |
| 0  | 0    | 0 PITG_03997    |
| 0  | 28   | 7 PITG_05729    |
| 0  | 0    | 8 PITG_16729    |
| 8  | 1695 | 1421 PITG_06722 |
| 0  | 12   | 100 PITG_18312  |
| 0  | 216  | 3 NA            |
| 0  | 62   | 29 PITG_15875   |
| 0  | 327  | 61 PITG_01781   |
| 0  | 225  | 113 NA          |
| 0  | 47   | 65 NA           |
| 0  | 316  | 603 PITG_01833  |
| 0  | 12   | 2 PITG_10952    |
| 0  | 101  | 17 PITG_09428   |
| 0  | 2    | 0 PITG_18316    |
| 2  | 537  | 1795 PITG_10198 |
| 0  | 21   | 78 PITG_03878   |
| 0  | 50   | 3 PITG_18624    |
| 0  | 0    | 0 PITG_03080    |
| 0  | 2    | 8 PITG_09978    |
| 2  | 352  | 491 PITG_00941  |
| 0  | 1268 | 39 PITG_11975   |
| 0  | 0    | 16 PITG_09346   |
| 0  | 275  | 344 PITG_17133  |
| 0  | 7    | 4 NA            |
| 0  | 95   | 86 PITG_09404   |
| 0  | 90   | 25 NA           |
| 0  | 81   | 140 NA          |
| 0  | 210  | 160 PITG_20203  |
| 0  | 2    | 0 PITG_05804    |
| 0  | 169  | 24 PITG_06776   |
| 0  | 118  | 13 PITG_02821   |

|   |      |                |
|---|------|----------------|
| 0 | 216  | 35 PITG_16484  |
| 0 | 124  | 13 NA          |
| 0 | 10   | 7 PITG_04665   |
| 0 | 394  | 107 PITG_17869 |
| 0 | 302  | 36 NA          |
| 0 | 12   | 24 PITG_10659  |
| 0 | 89   | 81 PITG_15486  |
| 0 | 0    | 2 NA           |
| 0 | 126  | 402 PITG_09721 |
| 0 | 135  | 50 NA          |
| 0 | 70   | 4 PITG_16511   |
| 0 | 62   | 37 PITG_16476  |
| 0 | 61   | 17 PITG_21525  |
| 0 | 0    | 2 PITG_03109   |
| 0 | 682  | 388 PITG_09939 |
| 0 | 14   | 8 PITG_15961   |
| 0 | 19   | 10 PITG_06599  |
| 0 | 4    | 0 NA           |
| 0 | 71   | 39 PITG_07173  |
| 0 | 301  | 423 PITG_00146 |
| 0 | 428  | 472 NA         |
| 0 | 57   | 6 PITG_16807   |
| 0 | 0    | 10 PITG_03468  |
| 0 | 263  | 459 PITG_00955 |
| 0 | 187  | 35 PITG_14462  |
| 0 | 421  | 0 NA           |
| 0 | 6    | 6 PITG_05894   |
| 0 | 314  | 475 PITG_00045 |
| 0 | 28   | 31 PITG_01607  |
| 0 | 763  | 545 PITG_03393 |
| 0 | 446  | 694 PITG_09400 |
| 0 | 130  | 130 PITG_11993 |
| 0 | 43   | 84 PITG_08496  |
| 0 | 6    | 7 PITG_12516   |
| 0 | 4    | 4 PITG_12523   |
| 0 | 57   | 7 PITG_14208   |
| 0 | 106  | 135 PITG_14669 |
| 0 | 31   | 4 PITG_14770   |
| 0 | 320  | 231 PITG_15496 |
| 0 | 165  | 103 PITG_15376 |
| 0 | 18   | 21 PITG_14949  |
| 0 | 7    | 0 PITG_07230   |
| 0 | 19   | 18 PITG_16433  |
| 0 | 41   | 21 PITG_14697  |
| 0 | 1123 | 938 PITG_15787 |
| 0 | 316  | 52 PITG_14637  |
| 0 | 1220 | 465 PITG_10715 |

|   |      |                 |
|---|------|-----------------|
| 0 | 35   | 35 PITG_03742   |
| 0 | 7    | 0 PITG_07338    |
| 0 | 300  | 175 PITG_15154  |
| 0 | 222  | 84 NA           |
| 0 | 133  | 87 NA           |
| 0 | 35   | 71 PITG_18728   |
| 0 | 44   | 35 PITG_16038   |
| 2 | 1288 | 2824 PITG_05156 |
| 0 | 11   | 16 PITG_20675   |
| 0 | 0    | 2 PITG_07210    |
| 0 | 37   | 31 PITG_06410   |
| 0 | 0    | 0 PITG_00129    |
| 0 | 2    | 4 NA            |
| 0 | 12   | 6 PITG_16226    |
| 0 | 244  | 136 PITG_08452  |
| 0 | 558  | 360 PITG_04603  |
| 0 | 6    | 0 NA            |
| 8 | 15   | 40 NA           |
| 0 | 7    | 9 PITG_17876    |
| 0 | 881  | 211 PITG_12528  |
| 0 | 54   | 24 NA           |
| 0 | 552  | 105 PITG_01950  |
| 0 | 16   | 3 NA            |
| 0 | 29   | 22 PITG_03658   |
| 0 | 2    | 4 PITG_17087    |
| 0 | 157  | 331 PITG_13177  |
| 0 | 218  | 129 PITG_01556  |
| 0 | 19   | 75 PITG_15280   |
| 0 | 10   | 2 PITG_12826    |
| 0 | 179  | 178 PITG_16329  |
| 0 | 3    | 15 PITG_05781   |
| 0 | 948  | 834 PITG_17007  |
| 0 | 21   | 0 PITG_13151    |
| 0 | 10   | 29 PITG_11110   |
| 0 | 86   | 8 PITG_11708    |
| 0 | 617  | 599 PITG_11304  |
| 0 | 90   | 97 PITG_12106   |
| 0 | 392  | 42 PITG_00263   |
| 0 | 442  | 2545 PITG_01940 |
| 0 | 200  | 310 PITG_00747  |
| 0 | 28   | 22 PITG_06847   |
| 0 | 17   | 30 PITG_06781   |
| 0 | 594  | 468 PITG_01365  |
| 0 | 532  | 0 NA            |
| 0 | 6    | 6 PITG_19537    |
| 0 | 19   | 4 PITG_05752    |
| 0 | 153  | 250 PITG_03449  |

|   |      |                 |
|---|------|-----------------|
| 0 | 14   | 13 NA           |
| 0 | 657  | 188 PITG_06967  |
| 0 | 117  | 0 NA            |
| 0 | 3117 | 416 PITG_09798  |
| 0 | 264  | 10 PITG_18650   |
| 0 | 488  | 177 PITG_03451  |
| 0 | 135  | 108 PITG_05545  |
| 0 | 11   | 0 PITG_10082    |
| 0 | 20   | 60 PITG_19854   |
| 0 | 261  | 54 NA           |
| 0 | 6    | 17 PITG_13391   |
| 0 | 526  | 59 PITG_20192   |
| 0 | 148  | 89 PITG_12913   |
| 0 | 4    | 0 PITG_11020    |
| 0 | 23   | 23 PITG_10888   |
| 0 | 2    | 0 PITG_14691    |
| 0 | 131  | 110 PITG_14605  |
| 0 | 322  | 5 PITG_19989    |
| 0 | 28   | 49 PITG_21313   |
| 0 | 157  | 285 PITG_13020  |
| 0 | 904  | 356 PITG_00716  |
| 0 | 40   | 44 NA           |
| 0 | 21   | 4 PITG_10250    |
| 0 | 30   | 35 PITG_15959   |
| 0 | 6    | 20 PITG_01470   |
| 0 | 327  | 82 NA           |
| 2 | 295  | 369 PITG_22848  |
| 0 | 190  | 173 PITG_20055  |
| 0 | 0    | 0 NA            |
| 0 | 297  | 46 PITG_11182   |
| 0 | 1125 | 67 PITG_14485   |
| 0 | 82   | 137 PITG_06149  |
| 2 | 773  | 1109 PITG_17007 |
| 0 | 10   | 0 PITG_14993    |
| 0 | 163  | 261 PITG_22135  |
| 0 | 6    | 0 PITG_01235    |
| 0 | 185  | 244 PITG_10207  |
| 0 | 47   | 11 PITG_18047   |
| 0 | 8    | 22 PITG_02050   |
| 0 | 64   | 38 NA           |
| 0 | 801  | 2221 PITG_03277 |
| 0 | 67   | 55 PITG_03018   |
| 0 | 4    | 3 PITG_02552    |
| 0 | 6    | 2 PITG_16269    |
| 0 | 147  | 25 PITG_18752   |
| 0 | 80   | 181 PITG_19166  |
| 0 | 656  | 1317 PITG_08834 |

|   |      |                 |
|---|------|-----------------|
| 0 | 8    | 21 PITG_12480   |
| 0 | 5    | 3 PITG_03830    |
| 0 | 78   | 2 NA            |
| 0 | 4    | 19 NA           |
| 0 | 256  | 118 PITG_15830  |
| 0 | 46   | 21 PITG_01559   |
| 0 | 27   | 23 PITG_16733   |
| 0 | 0    | 0 PITG_12336    |
| 0 | 470  | 64 NA           |
| 0 | 17   | 0 PITG_03063    |
| 0 | 51   | 30 PITG_21658   |
| 0 | 355  | 178 NA          |
| 0 | 60   | 11 PITG_02540   |
| 0 | 5    | 0 PITG_18656    |
| 0 | 60   | 312 PITG_11244  |
| 0 | 33   | 301 PITG_22848  |
| 0 | 2    | 0 NA            |
| 0 | 202  | 17 PITG_14208   |
| 0 | 380  | 137 PITG_02515  |
| 0 | 8    | 6 PITG_14557    |
| 0 | 22   | 11 NA           |
| 0 | 3    | 21 NA           |
| 0 | 30   | 90 PITG_09505   |
| 0 | 0    | 2 NA            |
| 0 | 94   | 35 NA           |
| 0 | 0    | 0 PITG_16338    |
| 0 | 54   | 45 PITG_07247   |
| 0 | 106  | 52 PITG_02533   |
| 0 | 101  | 45 PITG_08067   |
| 0 | 294  | 0 PITG_07197    |
| 0 | 66   | 6 PITG_01738    |
| 0 | 153  | 48 PITG_00622   |
| 0 | 25   | 45 PITG_18106   |
| 0 | 243  | 140 PITG_10711  |
| 0 | 160  | 81 NA           |
| 0 | 123  | 23 NA           |
| 2 | 1903 | 4101 PITG_02022 |
| 0 | 22   | 22 PITG_00725   |
| 0 | 16   | 0 NA            |
| 0 | 43   | 58 PITG_03860   |
| 0 | 20   | 20 PITG_07531   |
| 0 | 66   | 47 PITG_15630   |
| 0 | 904  | 536 PITG_00797  |
| 0 | 139  | 130 PITG_03229  |
| 0 | 297  | 115 PITG_03796  |
| 2 | 236  | 1159 PITG_18048 |
| 0 | 22   | 14 PITG_17672   |



|   |      |                 |
|---|------|-----------------|
| 0 | 4    | 6 PITG_13366    |
| 0 | 108  | 13 PITG_20081   |
| 0 | 58   | 98 PITG_09820   |
| 0 | 782  | 445 PITG_11226  |
| 0 | 12   | 8 PITG_16310    |
| 0 | 159  | 34 PITG_13245   |
| 0 | 1168 | 223 PITG_13682  |
| 0 | 164  | 27 PITG_02807   |
| 0 | 246  | 404 PITG_21257  |
| 0 | 372  | 69 PITG_04481   |
| 0 | 296  | 78 PITG_11364   |
| 0 | 28   | 51 PITG_09428   |
| 0 | 0    | 0 PITG_21313    |
| 0 | 65   | 101 PITG_12788  |
| 0 | 52   | 14 PITG_09584   |
| 0 | 470  | 44 NA           |
| 0 | 0    | 0 NA            |
| 0 | 1635 | 2142 PITG_06404 |
| 0 | 6    | 10 NA           |
| 0 | 11   | 0 NA            |
| 0 | 425  | 452 PITG_22135  |
| 0 | 56   | 56 PITG_01618   |
| 0 | 2    | 0 NA            |
| 0 | 91   | 184 PITG_01233  |
| 0 | 0    | 0 PITG_13083    |
| 0 | 400  | 117 PITG_07314  |
| 0 | 0    | 0 NA            |
| 0 | 2    | 0 PITG_13631    |
| 0 | 5    | 18 PITG_16179   |
| 0 | 0    | 6 PITG_14707    |
| 0 | 218  | 25 PITG_00833   |
| 0 | 0    | 4 PITG_00264    |
| 0 | 1455 | 1123 PITG_17007 |
| 0 | 5    | 7 PITG_19965    |
| 0 | 161  | 21 PITG_08876   |
| 0 | 134  | 216 PITG_10524  |
| 0 | 6    | 0 PITG_19088    |
| 0 | 114  | 36 PITG_13991   |
| 0 | 2    | 16 PITG_04572   |
| 3 | 812  | 2231 PITG_01041 |
| 0 | 11   | 0 NA            |
| 0 | 52   | 0 PITG_00662    |
| 0 | 75   | 29 PITG_05864   |
| 0 | 268  | 89 PITG_21879   |
| 0 | 85   | 88 PITG_12099   |
| 0 | 0    | 6 PITG_02234    |
| 0 | 58   | 5 PITG_15571    |

|   |      |                 |
|---|------|-----------------|
| 0 | 1732 | 2654 PITG_03712 |
| 0 | 283  | 118 PITG_13717  |
| 0 | 5    | 0 PITG_11249    |
| 0 | 75   | 45 PITG_14697   |
| 0 | 30   | 4 PITG_03882    |
| 0 | 29   | 7 PITG_00075    |
| 0 | 0    | 15 PITG_18312   |
| 0 | 96   | 42 PITG_03874   |
| 0 | 59   | 16 PITG_11675   |
| 0 | 2041 | 694 PITG_14601  |
| 0 | 0    | 0 NA            |
| 0 | 43   | 34 NA           |
| 0 | 76   | 25 PITG_05542   |
| 0 | 11   | 10 NA           |
| 0 | 5    | 2 PITG_02841    |
| 0 | 9    | 0 PITG_03700    |
| 0 | 1209 | 288 PITG_16363  |
| 0 | 6    | 0 NA            |
| 0 | 7    | 6 PITG_07905    |
| 0 | 288  | 411 PITG_00431  |
| 0 | 22   | 17 NA           |
| 0 | 53   | 12 PITG_01559   |
| 0 | 55   | 11 PITG_00140   |
| 0 | 133  | 25 PITG_10832   |
| 0 | 0    | 0 NA            |
| 0 | 21   | 0 NA            |
| 0 | 83   | 42 NA           |
| 0 | 191  | 69 PITG_17695   |
| 0 | 7    | 7 PITG_06705    |
| 0 | 154  | 100 PITG_07103  |
| 0 | 2    | 0 PITG_05410    |
| 0 | 677  | 1254 PITG_04726 |
| 0 | 46   | 154 PITG_06597  |
| 0 | 11   | 7 PITG_02841    |
| 0 | 53   | 9 NA            |
| 0 | 0    | 4 PITG_01457    |
| 0 | 62   | 22 PITG_00995   |
| 0 | 80   | 44 PITG_10007   |
| 0 | 104  | 89 PITG_00942   |
| 0 | 137  | 57 PITG_20792   |
| 0 | 47   | 30 NA           |
| 0 | 52   | 19 NA           |
| 0 | 46   | 30 PITG_09712   |
| 0 | 0    | 6 PITG_06335    |
| 0 | 74   | 71 PITG_01365   |
| 0 | 4    | 0 PITG_13544    |
| 0 | 0    | 2 NA            |

|     |      |                 |
|-----|------|-----------------|
| 0   | 26   | 85 PITG_00208   |
| 0   | 13   | 8 PITG_13488    |
| 0   | 104  | 105 PITG_06242  |
| 0   | 45   | 11 PITG_21416   |
| 0   | 183  | 210 PITG_00503  |
| 0   | 0    | 2 PITG_17883    |
| 0   | 24   | 301 PITG_06415  |
| 0   | 773  | 1606 PITG_03568 |
| 0   | 0    | 8 PITG_08304    |
| 178 | 27   | 437 NA          |
| 0   | 56   | 35 NA           |
| 0   | 1326 | 1130 NA         |
| 0   | 1818 | 331 PITG_22135  |
| 2   | 312  | 1122 PITG_18316 |
| 0   | 2    | 2 NA            |
| 0   | 0    | 0 PITG_05103    |
| 0   | 291  | 117 PITG_07865  |
| 0   | 26   | 14 PITG_00173   |
| 0   | 0    | 2 PITG_16904    |
| 0   | 317  | 105 PITG_06732  |
| 0   | 6    | 13 PITG_14441   |
| 0   | 51   | 68 NA           |
| 0   | 256  | 177 PITG_06108  |
| 0   | 0    | 0 NA            |
| 0   | 86   | 51 PITG_02196   |
| 0   | 127  | 181 PITG_05117  |
| 0   | 783  | 962 PITG_13500  |
| 0   | 4    | 0 NA            |
| 0   | 146  | 36 PITG_09437   |
| 0   | 10   | 0 PITG_06669    |
| 0   | 1338 | 1094 PITG_04726 |
| 0   | 24   | 8 PITG_17779    |
| 0   | 35   | 9 PITG_00494    |
| 0   | 80   | 91 NA           |
| 0   | 673  | 270 NA          |
| 0   | 10   | 0 PITG_03978    |
| 0   | 13   | 11 PITG_03657   |
| 0   | 46   | 57 PITG_04125   |
| 0   | 592  | 556 PITG_09955  |
| 0   | 31   | 8 NA            |
| 0   | 18   | 6 PITG_05683    |
| 0   | 28   | 4 NA            |
| 0   | 489  | 290 PITG_06950  |
| 0   | 49   | 178 PITG_01453  |
| 0   | 3    | 7 PITG_08693    |
| 0   | 136  | 45 PITG_01173   |
| 0   | 4    | 2 PITG_08605    |

|    |     |                |
|----|-----|----------------|
| 0  | 83  | 5 PITG_00641   |
| 0  | 66  | 21 PITG_07973  |
| 0  | 11  | 2 PITG_18027   |
| 0  | 9   | 0 PITG_07242   |
| 0  | 17  | 2 PITG_16555   |
| 0  | 13  | 39 PITG_16680  |
| 0  | 2   | 19 PITG_08690  |
| 0  | 100 | 13 PITG_11125  |
| 0  | 0   | 5 PITG_04977   |
| 0  | 63  | 23 PITG_20608  |
| 0  | 30  | 23 PITG_03462  |
| 0  | 219 | 125 NA         |
| 0  | 129 | 54 PITG_15924  |
| 0  | 15  | 11 PITG_01112  |
| 0  | 63  | 42 PITG_18236  |
| 0  | 9   | 0 PITG_09953   |
| 0  | 34  | 98 PITG_09964  |
| 0  | 0   | 0 PITG_08974   |
| 0  | 139 | 79 NA          |
| 0  | 47  | 16 PITG_20855  |
| 0  | 22  | 22 PITG_17706  |
| 0  | 158 | 38 PITG_17663  |
| 0  | 2   | 23 PITG_08599  |
| 0  | 22  | 24 NA          |
| 0  | 4   | 22 PITG_18452  |
| 0  | 25  | 21 PITG_20043  |
| 0  | 0   | 5 PITG_03300   |
| 0  | 11  | 14 NA          |
| 0  | 295 | 65 PITG_13665  |
| 0  | 16  | 12 PITG_03408  |
| 0  | 18  | 32 PITG_10154  |
| 0  | 149 | 135 PITG_17992 |
| 0  | 178 | 62 PITG_00756  |
| 0  | 26  | 2 PITG_01296   |
| 0  | 39  | 18 PITG_19111  |
| 0  | 301 | 112 PITG_09815 |
| 0  | 8   | 6 NA           |
| 0  | 202 | 36 PITG_14697  |
| 0  | 23  | 15 PITG_11676  |
| 0  | 125 | 44 PITG_01728  |
| 0  | 796 | 459 PITG_17747 |
| 0  | 57  | 0 PITG_12989   |
| 0  | 66  | 31 PITG_06991  |
| 0  | 3   | 5 PITG_02454   |
| 0  | 23  | 11 PITG_14176  |
| 0  | 27  | 23 PITG_01845  |
| 31 | 21  | 3201 NA        |

|   |     |                 |
|---|-----|-----------------|
| 0 | 0   | 0 NA            |
| 0 | 42  | 12 PITG_01932   |
| 0 | 53  | 112 PITG_08804  |
| 0 | 0   | 0 PITG_18173    |
| 0 | 83  | 230 PITG_16757  |
| 0 | 37  | 20 PITG_16120   |
| 0 | 0   | 19 NA           |
| 0 | 18  | 21 PITG_08304   |
| 0 | 0   | 0 PITG_15706    |
| 0 | 477 | 63 NA           |
| 0 | 57  | 43 PITG_08154   |
| 0 | 36  | 5 PITG_16812    |
| 0 | 76  | 73 PITG_08417   |
| 0 | 418 | 67 PITG_06449   |
| 0 | 3   | 2 NA            |
| 0 | 51  | 8 NA            |
| 0 | 3   | 2 PITG_06114    |
| 0 | 2   | 0 NA            |
| 0 | 13  | 0 NA            |
| 0 | 76  | 55 PITG_19775   |
| 0 | 2   | 2 PITG_03777    |
| 0 | 0   | 0 PITG_03408    |
| 0 | 2   | 0 PITG_02770    |
| 0 | 18  | 0 NA            |
| 0 | 10  | 9 PITG_15229    |
| 0 | 89  | 3 PITG_19098    |
| 0 | 12  | 8 PITG_17660    |
| 0 | 14  | 7 NA            |
| 0 | 108 | 70 PITG_01759   |
| 0 | 27  | 70 PITG_09090   |
| 0 | 2   | 0 PITG_16264    |
| 0 | 30  | 19 PITG_09285   |
| 0 | 52  | 45 PITG_08754   |
| 0 | 586 | 295 PITG_08462  |
| 0 | 406 | 710 PITG_15890  |
| 0 | 4   | 2 NA            |
| 0 | 552 | 470 PITG_04704  |
| 0 | 0   | 4 PITG_08305    |
| 4 | 141 | 1604 PITG_06305 |
| 0 | 18  | 14 NA           |
| 0 | 4   | 0 NA            |
| 0 | 365 | 52 PITG_10987   |
| 0 | 246 | 162 PITG_01557  |
| 0 | 7   | 0 PITG_20861    |
| 0 | 130 | 100 PITG_15195  |
| 0 | 2   | 12 PITG_07243   |
| 0 | 36  | 226 PITG_18048  |

|   |      |                 |
|---|------|-----------------|
| 0 | 207  | 278 PITG_01330  |
| 0 | 22   | 16 PITG_16183   |
| 0 | 17   | 47 PITG_02867   |
| 0 | 153  | 110 PITG_09427  |
| 0 | 58   | 70 PITG_00458   |
| 0 | 7    | 2 NA            |
| 0 | 115  | 28 PITG_01537   |
| 0 | 8    | 0 PITG_20727    |
| 0 | 0    | 0 NA            |
| 0 | 19   | 7 NA            |
| 0 | 430  | 457 NA          |
| 0 | 35   | 19 NA           |
| 0 | 28   | 18 PITG_07286   |
| 2 | 224  | 698 PITG_17921  |
| 0 | 1526 | 454 PITG_00062  |
| 0 | 28   | 29 PITG_10240   |
| 0 | 386  | 469 PITG_02664  |
| 0 | 19   | 44 PITG_07995   |
| 0 | 9    | 15 PITG_12194   |
| 0 | 842  | 1331 PITG_03712 |
| 0 | 2    | 2 PITG_03404    |
| 0 | 6    | 4 PITG_03076    |
| 0 | 0    | 0 PITG_04122    |
| 0 | 29   | 44 PITG_03764   |
| 0 | 92   | 96 PITG_08142   |
| 0 | 159  | 62 PITG_13382   |
| 0 | 6    | 17 PITG_05649   |
| 0 | 189  | 67 PITG_16183   |
| 0 | 112  | 280 PITG_04471  |
| 0 | 158  | 77 PITG_03936   |
| 0 | 324  | 272 PITG_03873  |
| 0 | 0    | 2 PITG_01608    |
| 0 | 13   | 7 PITG_17632    |
| 0 | 34   | 89 PITG_08599   |
| 0 | 786  | 565 PITG_17359  |
| 0 | 312  | 67 PITG_06003   |
| 0 | 12   | 20 PITG_15857   |
| 0 | 76   | 0 NA            |
| 0 | 157  | 104 PITG_08330  |
| 0 | 50   | 27 PITG_15920   |
| 0 | 48   | 322 PITG_11244  |
| 0 | 37   | 34 PITG_14398   |
| 0 | 2    | 6 PITG_01919    |
| 0 | 138  | 332 PITG_03694  |
| 0 | 48   | 506 PITG_11244  |
| 0 | 528  | 274 PITG_16766  |
| 0 | 23   | 22 PITG_08609   |

|   |      |                 |
|---|------|-----------------|
| 0 | 4    | 11 PITG_10096   |
| 0 | 3    | 93 PITG_16871   |
| 0 | 2254 | 1843 PITG_16382 |
| 0 | 29   | 0 NA            |
| 0 | 0    | 6 NA            |
| 0 | 13   | 26 PITG_02992   |
| 0 | 6    | 2 NA            |
| 0 | 18   | 19 PITG_04663   |
| 0 | 10   | 4 NA            |
| 0 | 7    | 0 PITG_19032    |
| 0 | 32   | 69 PITG_06597   |
| 0 | 490  | 99 PITG_09667   |
| 0 | 324  | 343 PITG_18934  |
| 0 | 145  | 140 PITG_02292  |
| 0 | 61   | 34 PITG_13347   |
| 0 | 5    | 0 PITG_19212    |
| 0 | 2    | 0 PITG_13558    |
| 0 | 87   | 137 PITG_08452  |
| 0 | 97   | 22 PITG_04678   |
| 0 | 37   | 2 NA            |
| 0 | 6    | 0 PITG_21932    |
| 0 | 52   | 16 NA           |
| 0 | 156  | 263 PITG_11063  |
| 0 | 2    | 0 NA            |
| 0 | 5    | 2 NA            |
| 0 | 46   | 14 PITG_12819   |
| 0 | 453  | 466 PITG_18052  |
| 0 | 12   | 3 PITG_18409    |
| 0 | 4    | 27 PITG_00594   |
| 0 | 260  | 155 PITG_17007  |
| 0 | 20   | 56 PITG_06860   |
| 0 | 2    | 0 PITG_02381    |
| 0 | 62   | 35 PITG_18369   |
| 0 | 0    | 0 NA            |
| 0 | 243  | 39 NA           |
| 0 | 12   | 200 PITG_10146  |
| 0 | 12   | 7 NA            |
| 0 | 596  | 566 PITG_08611  |
| 0 | 115  | 36 PITG_16484   |
| 0 | 210  | 98 PITG_02428   |
| 2 | 191  | 358 PITG_09404  |
| 0 | 2    | 3 NA            |
| 0 | 18   | 0 NA            |
| 0 | 190  | 143 PITG_22264  |
| 0 | 612  | 101 NA          |
| 0 | 276  | 27 PITG_01103   |
| 0 | 12   | 10 PITG_16114   |

|   |      |                 |
|---|------|-----------------|
| 0 | 0    | 2 PITG_23048    |
| 2 | 21   | 56 PITG_16430   |
| 0 | 22   | 9 NA            |
| 0 | 22   | 24 PITG_04611   |
| 0 | 0    | 0 PITG_14269    |
| 0 | 17   | 126 PITG_02293  |
| 0 | 33   | 31 PITG_17333   |
| 0 | 378  | 102 PITG_11563  |
| 0 | 65   | 72 PITG_22743   |
| 0 | 39   | 21 PITG_07501   |
| 0 | 747  | 648 PITG_00014  |
| 0 | 156  | 173 PITG_16161  |
| 0 | 42   | 18 PITG_12699   |
| 0 | 167  | 286 PITG_09556  |
| 0 | 3    | 10 PITG_00156   |
| 0 | 70   | 111 PITG_07153  |
| 0 | 2    | 0 PITG_06893    |
| 0 | 0    | 5 PITG_19153    |
| 0 | 612  | 142 PITG_20994  |
| 0 | 97   | 14 PITG_06127   |
| 0 | 5    | 8 PITG_01592    |
| 0 | 65   | 155 PITG_14941  |
| 0 | 54   | 13 PITG_10264   |
| 0 | 72   | 17 PITG_06424   |
| 0 | 493  | 203 PITG_06631  |
| 0 | 7    | 13 PITG_10141   |
| 0 | 29   | 11 PITG_02756   |
| 0 | 2    | 2 PITG_19516    |
| 0 | 0    | 4 PITG_12872    |
| 0 | 82   | 13 PITG_14465   |
| 0 | 519  | 245 PITG_05949  |
| 0 | 0    | 0 NA            |
| 0 | 51   | 16 NA           |
| 0 | 191  | 501 PITG_05171  |
| 0 | 39   | 27 PITG_04553   |
| 0 | 157  | 177 PITG_02114  |
| 0 | 2    | 2 PITG_06545    |
| 0 | 105  | 7 PITG_05598    |
| 0 | 4    | 6 PITG_03789    |
| 0 | 7    | 27 PITG_16446   |
| 0 | 87   | 91 PITG_18752   |
| 0 | 2    | 8 PITG_14722    |
| 0 | 722  | 2767 PITG_17708 |
| 0 | 834  | 613 PITG_07914  |
| 0 | 1099 | 192 PITG_18392  |
| 0 | 71   | 24 PITG_02547   |
| 2 | 25   | 545 PITG_06415  |



|   |      |                 |
|---|------|-----------------|
| 0 | 17   | 40 PITG_01498   |
| 0 | 211  | 629 PITG_17007  |
| 0 | 526  | 169 PITG_23160  |
| 0 | 426  | 144 PITG_07655  |
| 0 | 21   | 0 PITG_15537    |
| 0 | 5    | 12 PITG_19472   |
| 0 | 96   | 101 PITG_13727  |
| 0 | 140  | 12 PITG_14722   |
| 4 | 1403 | 1579 PITG_06722 |
| 0 | 162  | 76 PITG_00482   |
| 0 | 0    | 0 NA            |
| 0 | 77   | 127 PITG_17683  |
| 0 | 14   | 6 PITG_13366    |
| 0 | 108  | 23 PITG_11158   |
| 0 | 93   | 68 NA           |
| 0 | 148  | 165 NA          |
| 0 | 50   | 58 PITG_00594   |
| 0 | 28   | 197 PITG_10942  |
| 0 | 24   | 16 PITG_16104   |
| 0 | 380  | 675 PITG_10969  |
| 2 | 2    | 2 PITG_17617    |
| 0 | 3    | 3 PITG_12296    |
| 0 | 91   | 50 PITG_01128   |
| 0 | 604  | 379 PITG_08673  |
| 0 | 93   | 88 PITG_06967   |
| 0 | 76   | 69 PITG_05462   |
| 0 | 155  | 102 PITG_12684  |
| 0 | 0    | 4 PITG_08305    |
| 0 | 5    | 0 NA            |
| 0 | 40   | 6 NA            |
| 0 | 32   | 17 NA           |
| 0 | 80   | 163 PITG_06383  |
| 0 | 107  | 169 PITG_13806  |
| 0 | 121  | 339 PITG_17717  |
| 0 | 5    | 4 NA            |
| 0 | 156  | 196 PITG_15705  |
| 0 | 6    | 28 PITG_08043   |
| 0 | 673  | 190 PITG_08812  |
| 0 | 15   | 21 PITG_09066   |
| 0 | 370  | 597 PITG_13500  |
| 0 | 12   | 47 NA           |
| 0 | 7    | 6 PITG_18028    |
| 0 | 137  | 119 PITG_13622  |
| 0 | 56   | 3 NA            |
| 0 | 290  | 99 PITG_01244   |
| 0 | 57   | 18 PITG_11249   |
| 0 | 125  | 66 PITG_11274   |

|    |     |                |
|----|-----|----------------|
| 0  | 4   | 0 NA           |
| 0  | 25  | 19 PITG_21172  |
| 8  | 492 | 798 PITG_06722 |
| 0  | 19  | 49 PITG_21055  |
| 0  | 6   | 10 PITG_07933  |
| 0  | 23  | 40 PITG_13016  |
| 0  | 2   | 35 PITG_15033  |
| 0  | 0   | 0 NA           |
| 78 | 68  | 21 NA          |
| 0  | 43  | 250 PITG_09760 |
| 0  | 162 | 210 PITG_16156 |
| 0  | 0   | 0 PITG_12466   |
| 0  | 196 | 69 PITG_16649  |
| 0  | 4   | 5 PITG_20197   |
| 0  | 2   | 4 PITG_16918   |
| 0  | 571 | 315 PITG_03433 |
| 0  | 348 | 775 PITG_16966 |
| 0  | 69  | 62 PITG_03246  |
| 0  | 62  | 8 PITG_17416   |
| 0  | 6   | 14 PITG_07086  |
| 0  | 197 | 366 PITG_04824 |
| 0  | 8   | 0 NA           |
| 0  | 17  | 2 PITG_06220   |
| 0  | 139 | 95 PITG_07102  |
| 0  | 312 | 153 PITG_00133 |
| 0  | 35  | 17 PITG_03842  |
| 0  | 0   | 4 PITG_03901   |
| 0  | 8   | 15 PITG_01496  |
| 0  | 57  | 64 PITG_21556  |
| 0  | 140 | 176 PITG_02802 |
| 0  | 4   | 14 NA          |
| 0  | 167 | 228 PITG_21398 |
| 0  | 33  | 9 PITG_16067   |
| 0  | 38  | 0 NA           |
| 0  | 362 | 171 PITG_07853 |
| 0  | 0   | 0 PITG_12453   |
| 0  | 13  | 2 PITG_13393   |
| 0  | 161 | 194 PITG_09506 |
| 0  | 47  | 275 PITG_08444 |
| 0  | 6   | 5 PITG_18624   |
| 0  | 9   | 42 PITG_05781  |
| 0  | 521 | 458 PITG_16446 |
| 0  | 14  | 16 PITG_09278  |
| 0  | 33  | 15 PITG_10936  |
| 0  | 218 | 216 PITG_15365 |
| 0  | 63  | 16 PITG_03482  |
| 0  | 15  | 66 NA          |

|   |      |                 |
|---|------|-----------------|
| 0 | 6    | 0 PITG_02553    |
| 0 | 148  | 71 PITG_05112   |
| 0 | 59   | 30 PITG_11182   |
| 0 | 13   | 8 PITG_20223    |
| 0 | 22   | 28 PITG_19098   |
| 0 | 6    | 9 PITG_07153    |
| 0 | 33   | 3 PITG_15820    |
| 0 | 22   | 32 PITG_11111   |
| 0 | 4    | 0 PITG_15672    |
| 0 | 0    | 0 PITG_22468    |
| 0 | 403  | 99 PITG_03039   |
| 0 | 12   | 2 PITG_16348    |
| 0 | 2    | 6 PITG_17105    |
| 0 | 12   | 2 PITG_00238    |
| 0 | 59   | 15 NA           |
| 0 | 0    | 0 PITG_04023    |
| 0 | 44   | 3 NA            |
| 0 | 42   | 84 PITG_13225   |
| 0 | 4    | 32 PITG_18233   |
| 0 | 131  | 74 PITG_08980   |
| 0 | 20   | 20 PITG_01878   |
| 0 | 142  | 4 PITG_05244    |
| 0 | 109  | 174 PITG_11069  |
| 0 | 25   | 68 PITG_00882   |
| 0 | 8    | 2 PITG_05672    |
| 0 | 0    | 5 PITG_04658    |
| 0 | 308  | 180 PITG_14910  |
| 0 | 596  | 165 PITG_20686  |
| 0 | 0    | 5 NA            |
| 0 | 2124 | 3483 PITG_14696 |
| 0 | 2    | 0 PITG_12838    |
| 0 | 39   | 6 NA            |
| 0 | 480  | 274 NA          |
| 0 | 43   | 55 PITG_01382   |
| 0 | 2    | 0 NA            |
| 0 | 12   | 10 PITG_04777   |
| 0 | 8    | 0 NA            |
| 0 | 731  | 227 PITG_05171  |
| 0 | 4    | 2 PITG_06803    |
| 0 | 480  | 418 PITG_20743  |
| 0 | 403  | 70 PITG_05902   |
| 0 | 0    | 4 PITG_07046    |
| 0 | 8    | 6 NA            |
| 0 | 10   | 5 PITG_06007    |
| 0 | 333  | 34 PITG_05553   |
| 0 | 30   | 6 PITG_00226    |
| 0 | 15   | 15 PITG_05560   |

|   |      |                 |
|---|------|-----------------|
| 0 | 50   | 56 PITG_13225   |
| 0 | 5    | 2 PITG_15053    |
| 0 | 110  | 128 PITG_01950  |
| 0 | 130  | 165 PITG_08084  |
| 0 | 81   | 4 NA            |
| 0 | 0    | 0 NA            |
| 0 | 26   | 94 NA           |
| 0 | 63   | 162 PITG_03513  |
| 0 | 2    | 9 PITG_20174    |
| 0 | 212  | 39 PITG_16344   |
| 0 | 284  | 312 PITG_06383  |
| 0 | 14   | 35 PITG_18355   |
| 0 | 102  | 26 PITG_13438   |
| 0 | 234  | 149 PITG_03416  |
| 0 | 372  | 943 PITG_06604  |
| 0 | 17   | 2 PITG_16262    |
| 0 | 0    | 18 PITG_08526   |
| 0 | 197  | 218 PITG_12754  |
| 0 | 7    | 4 PITG_00861    |
| 0 | 812  | 609 PITG_03033  |
| 0 | 191  | 89 PITG_11470   |
| 0 | 238  | 123 PITG_18316  |
| 0 | 136  | 130 PITG_00029  |
| 0 | 90   | 10 PITG_14623   |
| 0 | 10   | 11 PITG_04665   |
| 0 | 452  | 59 PITG_00198   |
| 0 | 9    | 19 NA           |
| 0 | 133  | 45 PITG_17416   |
| 0 | 0    | 2 PITG_00133    |
| 0 | 80   | 30 PITG_03011   |
| 0 | 4    | 5 PITG_09090    |
| 0 | 0    | 0 PITG_04700    |
| 0 | 2    | 2 PITG_13167    |
| 0 | 571  | 231 PITG_08571  |
| 2 | 23   | 11 PITG_16975   |
| 0 | 50   | 244 PITG_00396  |
| 0 | 289  | 116 NA          |
| 0 | 29   | 4 PITG_03506    |
| 0 | 42   | 36 PITG_22848   |
| 0 | 299  | 229 PITG_02177  |
| 0 | 0    | 0 NA            |
| 0 | 90   | 0 NA            |
| 0 | 62   | 20 PITG_17769   |
| 0 | 4    | 19 PITG_10729   |
| 0 | 1298 | 5108 PITG_01072 |
| 0 | 558  | 271 PITG_01072  |
| 0 | 892  | 438 PITG_20105  |

|   |      |                 |
|---|------|-----------------|
| 0 | 6    | 11 NA           |
| 0 | 10   | 21 PITG_09597   |
| 0 | 32   | 24 PITG_09403   |
| 0 | 19   | 0 PITG_10488    |
| 0 | 290  | 14 NA           |
| 0 | 0    | 0 PITG_15190    |
| 0 | 13   | 17 PITG_09891   |
| 0 | 170  | 113 PITG_00577  |
| 0 | 3    | 0 PITG_03659    |
| 0 | 41   | 16 PITG_20201   |
| 0 | 22   | 17 PITG_16760   |
| 0 | 55   | 774 PITG_16760  |
| 0 | 54   | 6 PITG_08529    |
| 0 | 18   | 13 PITG_04283   |
| 0 | 4    | 12 PITG_03288   |
| 0 | 1424 | 746 PITG_08880  |
| 0 | 4732 | 2164 PITG_02222 |
| 0 | 304  | 375 PITG_13737  |
| 0 | 9    | 35 NA           |
| 0 | 6    | 19 PITG_03112   |
| 2 | 286  | 1097 PITG_10863 |
| 2 | 199  | 512 PITG_08834  |
| 0 | 6    | 0 PITG_19654    |
| 0 | 54   | 16 PITG_01579   |
| 0 | 73   | 18 PITG_02976   |
| 0 | 475  | 8 PITG_13097    |
| 0 | 0    | 2 PITG_10729    |
| 0 | 970  | 83 PITG_19568   |
| 0 | 2    | 8 PITG_05856    |
| 0 | 0    | 2 NA            |
| 0 | 134  | 100 PITG_07155  |
| 0 | 2    | 4 PITG_03032    |
| 0 | 67   | 11 PITG_06897   |
| 0 | 39   | 53 PITG_05501   |
| 0 | 297  | 239 PITG_06383  |
| 0 | 0    | 2 PITG_22021    |
| 0 | 145  | 18 PITG_11023   |
| 0 | 214  | 258 PITG_05240  |
| 0 | 11   | 2 PITG_10763    |
| 0 | 23   | 63 PITG_13237   |
| 0 | 67   | 24 PITG_20251   |
| 0 | 135  | 66 PITG_04000   |
| 0 | 44   | 35 PITG_20820   |
| 0 | 227  | 170 PITG_06889  |
| 0 | 127  | 114 PITG_03418  |
| 0 | 673  | 270 PITG_01771  |
| 0 | 132  | 149 PITG_05347  |

|    |     |                 |
|----|-----|-----------------|
| 0  | 0   | 0 PITG_10764    |
| 0  | 22  | 19 PITG_15039   |
| 0  | 6   | 46 PITG_18312   |
| 0  | 58  | 10 PITG_11816   |
| 0  | 17  | 29 NA           |
| 0  | 2   | 0 PITG_19860    |
| 0  | 952 | 703 PITG_11450  |
| 0  | 97  | 6 PITG_01416    |
| 0  | 0   | 7 NA            |
| 0  | 32  | 48 PITG_11965   |
| 0  | 6   | 8 PITG_08970    |
| 0  | 6   | 14 PITG_05007   |
| 0  | 45  | 112 PITG_06025  |
| 0  | 17  | 13 PITG_14812   |
| 0  | 281 | 44 NA           |
| 0  | 60  | 0 PITG_11701    |
| 0  | 43  | 23 PITG_05368   |
| 0  | 39  | 7 PITG_20381    |
| 0  | 411 | 43 PITG_12594   |
| 0  | 6   | 0 NA            |
| 0  | 0   | 2 NA            |
| 0  | 74  | 348 PITG_10218  |
| 0  | 83  | 27 PITG_09962   |
| 0  | 24  | 6 NA            |
| 0  | 3   | 0 PITG_12252    |
| 0  | 46  | 49 PITG_19470   |
| 0  | 32  | 30 PITG_05139   |
| 0  | 16  | 8 PITG_17209    |
| 0  | 121 | 66 PITG_09920   |
| 0  | 461 | 460 PITG_02607  |
| 0  | 0   | 11 PITG_00809   |
| 0  | 277 | 1202 PITG_15638 |
| 0  | 0   | 2 PITG_18296    |
| 0  | 60  | 4 NA            |
| 0  | 203 | 62 NA           |
| 0  | 0   | 0 NA            |
| 0  | 57  | 17 PITG_13376   |
| 0  | 92  | 12 NA           |
| 0  | 25  | 4 PITG_13392    |
| 14 | 27  | 337 NA          |
| 0  | 32  | 10 PITG_11321   |
| 3  | 980 | 1286 PITG_06237 |
| 0  | 41  | 87 PITG_16117   |
| 0  | 127 | 94 PITG_14391   |
| 0  | 139 | 41 NA           |
| 0  | 7   | 11 PITG_03416   |
| 0  | 32  | 12 NA           |

|   |      |                |
|---|------|----------------|
| 0 | 127  | 49 PITG_05238  |
| 0 | 99   | 42 PITG_08926  |
| 0 | 0    | 6 NA           |
| 0 | 222  | 113 NA         |
| 0 | 6    | 6 PITG_20201   |
| 0 | 4    | 110 PITG_05980 |
| 0 | 211  | 58 PITG_15055  |
| 0 | 101  | 10 PITG_06274  |
| 2 | 863  | 884 PITG_20795 |
| 0 | 23   | 37 PITG_10007  |
| 0 | 4    | 9 PITG_17333   |
| 0 | 5    | 13 PITG_17394  |
| 0 | 4    | 0 PITG_03224   |
| 0 | 46   | 0 PITG_02229   |
| 0 | 286  | 65 PITG_04375  |
| 0 | 208  | 0 PITG_20167   |
| 0 | 31   | 35 PITG_05300  |
| 0 | 150  | 310 PITG_11474 |
| 0 | 0    | 0 PITG_19022   |
| 0 | 79   | 46 PITG_04395  |
| 0 | 0    | 0 PITG_16221   |
| 0 | 11   | 8 PITG_08540   |
| 0 | 0    | 2 PITG_07115   |
| 0 | 4    | 8 PITG_00298   |
| 0 | 677  | 841 PITG_20037 |
| 0 | 8    | 12 PITG_15569  |
| 0 | 12   | 6 PITG_16103   |
| 0 | 2    | 2 NA           |
| 0 | 36   | 34 PITG_06012  |
| 0 | 0    | 5 PITG_03899   |
| 0 | 99   | 76 PITG_00334  |
| 0 | 2    | 2 NA           |
| 0 | 210  | 194 PITG_21827 |
| 0 | 28   | 33 PITG_00954  |
| 0 | 4    | 0 PITG_01722   |
| 0 | 88   | 37 PITG_10480  |
| 0 | 2    | 19 NA          |
| 0 | 8    | 4 PITG_02940   |
| 0 | 119  | 178 PITG_00297 |
| 0 | 19   | 4 NA           |
| 0 | 8    | 4 PITG_15509   |
| 0 | 19   | 4 PITG_05629   |
| 0 | 239  | 198 PITG_13972 |
| 0 | 2    | 0 PITG_01121   |
| 0 | 0    | 0 PITG_16956   |
| 0 | 82   | 532 PITG_12670 |
| 0 | 1055 | 338 NA         |

|   |      |                 |
|---|------|-----------------|
| 0 | 333  | 395 PITG_12154  |
| 0 | 198  | 135 PITG_07286  |
| 0 | 2    | 3 PITG_14151    |
| 0 | 22   | 0 PITG_12692    |
| 2 | 1056 | 3032 PITG_06771 |
| 0 | 20   | 25 PITG_01282   |
| 0 | 195  | 447 PITG_22016  |
| 0 | 908  | 1642 PITG_00527 |
| 0 | 135  | 22 PITG_01104   |
| 0 | 588  | 764 PITG_19023  |
| 0 | 351  | 452 PITG_06615  |
| 0 | 0    | 2 PITG_10479    |
| 0 | 66   | 23 NA           |
| 0 | 524  | 154 PITG_10028  |
| 0 | 15   | 22 PITG_16468   |
| 0 | 186  | 449 PITG_20589  |
| 0 | 0    | 2 PITG_21479    |
| 0 | 5    | 0 PITG_04936    |
| 0 | 62   | 165 PITG_11215  |
| 2 | 293  | 410 PITG_06025  |
| 0 | 0    | 2 PITG_12915    |
| 0 | 20   | 15 PITG_03136   |
| 0 | 113  | 194 PITG_02343  |
| 0 | 192  | 604 PITG_11766  |
| 0 | 38   | 44 NA           |
| 0 | 0    | 0 NA            |
| 0 | 449  | 473 PITG_09441  |
| 0 | 56   | 6 PITG_20208    |
| 0 | 28   | 30 PITG_03224   |
| 0 | 35   | 44 PITG_01748   |
| 0 | 21   | 39 PITG_06829   |
| 0 | 2    | 0 PITG_20128    |
| 0 | 180  | 85 PITG_01770   |
| 2 | 799  | 445 PITG_10916  |
| 2 | 374  | 236 PITG_17594  |
| 0 | 50   | 100 PITG_09428  |
| 0 | 262  | 506 PITG_19017  |
| 0 | 292  | 839 PITG_20189  |
| 0 | 28   | 51 PITG_00588   |
| 0 | 7    | 25 PITG_16021   |
| 0 | 0    | 4 PITG_04704    |
| 0 | 5    | 2 PITG_15731    |
| 0 | 261  | 51 PITG_11817   |
| 0 | 37   | 81 PITG_08692   |
| 0 | 7    | 26 PITG_17401   |
| 0 | 10   | 38 PITG_04242   |
| 0 | 55   | 43 PITG_20355   |



|   |     |                 |
|---|-----|-----------------|
| 0 | 64  | 55 PITG_00295   |
| 0 | 48  | 28 NA           |
| 0 | 56  | 44 PITG_18728   |
| 0 | 18  | 16 PITG_14002   |
| 0 | 71  | 7 NA            |
| 7 | 706 | 1503 PITG_17921 |
| 0 | 2   | 2 PITG_06912    |
| 0 | 18  | 36 PITG_02134   |
| 0 | 163 | 232 PITG_07053  |
| 0 | 24  | 0 PITG_20504    |
| 0 | 52  | 24 PITG_09554   |
| 0 | 2   | 0 PITG_17554    |
| 0 | 20  | 0 NA            |
| 0 | 24  | 2 PITG_11799    |
| 0 | 7   | 0 PITG_08964    |
| 0 | 60  | 12 PITG_20217   |
| 0 | 0   | 0 NA            |
| 0 | 283 | 29 NA           |
| 0 | 68  | 81 PITG_13405   |
| 0 | 4   | 9 PITG_03143    |
| 0 | 12  | 17 NA           |
| 0 | 43  | 54 PITG_15365   |
| 0 | 529 | 1097 PITG_11046 |
| 0 | 34  | 17 PITG_01390   |
| 0 | 0   | 7 PITG_02456    |
| 0 | 2   | 0 PITG_20273    |
| 0 | 253 | 476 PITG_00527  |
| 0 | 392 | 445 PITG_05125  |
| 0 | 188 | 108 NA          |
| 0 | 11  | 5 PITG_16720    |
| 0 | 8   | 2 PITG_02268    |
| 0 | 0   | 2 PITG_07165    |
| 0 | 19  | 6 PITG_06599    |
| 0 | 8   | 17 PITG_19153   |
| 0 | 11  | 17 PITG_09951   |
| 0 | 160 | 116 PITG_09427  |
| 0 | 45  | 67 PITG_16009   |
| 2 | 0   | 0 NA            |
| 0 | 36  | 34 PITG_02467   |
| 0 | 7   | 0 PITG_13366    |
| 0 | 41  | 4 PITG_01787    |
| 0 | 18  | 27 NA           |
| 0 | 111 | 77 PITG_20281   |
| 0 | 19  | 11 PITG_11977   |
| 0 | 31  | 30 NA           |
| 0 | 0   | 4 PITG_16794    |
| 0 | 18  | 0 PITG_02152    |

|   |      |                 |
|---|------|-----------------|
| 0 | 6    | 14 NA           |
| 0 | 6    | 7 NA            |
| 0 | 2    | 0 NA            |
| 0 | 118  | 25 PITG_05565   |
| 0 | 53   | 39 PITG_15872   |
| 0 | 94   | 53 PITG_20766   |
| 0 | 25   | 7 PITG_02027    |
| 0 | 275  | 117 PITG_15653  |
| 0 | 4    | 39 PITG_20102   |
| 0 | 7    | 28 PITG_14619   |
| 0 | 8    | 7 PITG_00989    |
| 0 | 24   | 123 PITG_12082  |
| 0 | 12   | 2 PITG_16469    |
| 0 | 106  | 233 PITG_11605  |
| 0 | 0    | 0 NA            |
| 0 | 17   | 25 PITG_18912   |
| 0 | 50   | 20 PITG_20130   |
| 0 | 96   | 227 PITG_14111  |
| 0 | 1028 | 551 NA          |
| 0 | 87   | 0 PITG_11795    |
| 0 | 16   | 2 PITG_02657    |
| 0 | 20   | 10 PITG_00680   |
| 0 | 153  | 67 PITG_12697   |
| 0 | 1072 | 756 PITG_00764  |
| 0 | 2    | 0 PITG_17081    |
| 0 | 11   | 5 PITG_14847    |
| 2 | 222  | 668 PITG_10193  |
| 0 | 4    | 0 PITG_00200    |
| 0 | 630  | 1874 PITG_03178 |
| 0 | 6    | 8 PITG_20152    |
| 0 | 124  | 4 PITG_19022    |
| 2 | 192  | 83 PITG_10952   |
| 0 | 15   | 13 NA           |
| 0 | 16   | 7 PITG_05687    |
| 0 | 141  | 120 NA          |
| 0 | 46   | 39 PITG_00782   |
| 0 | 157  | 400 PITG_20718  |
| 0 | 4500 | 2446 PITG_00156 |
| 0 | 294  | 96 PITG_08609   |
| 0 | 4    | 0 PITG_02718    |
| 0 | 8    | 12 NA           |
| 0 | 12   | 0 PITG_19901    |
| 0 | 836  | 1111 PITG_10005 |
| 0 | 6    | 12 PITG_15518   |
| 0 | 29   | 48 PITG_12141   |
| 0 | 266  | 94 PITG_16922   |
| 0 | 20   | 0 PITG_09835    |

|   |      |                 |
|---|------|-----------------|
| 0 | 295  | 194 PITG_13423  |
| 0 | 306  | 1074 PITG_17007 |
| 0 | 0    | 0 NA            |
| 0 | 11   | 41 PITG_05141   |
| 0 | 311  | 184 NA          |
| 0 | 6    | 0 PITG_19175    |
| 0 | 7    | 0 PITG_03757    |
| 0 | 176  | 55 PITG_08456   |
| 0 | 913  | 473 PITG_12041  |
| 0 | 2    | 0 PITG_09220    |
| 0 | 91   | 48 NA           |
| 0 | 39   | 15 PITG_00227   |
| 0 | 78   | 65 PITG_20611   |
| 0 | 243  | 50 PITG_00067   |
| 0 | 417  | 345 PITG_13826  |
| 0 | 637  | 306 NA          |
| 0 | 0    | 0 NA            |
| 0 | 336  | 88 NA           |
| 0 | 5    | 12 NA           |
| 0 | 618  | 907 PITG_09282  |
| 0 | 151  | 240 PITG_10207  |
| 0 | 153  | 93 PITG_09004   |
| 0 | 4    | 27 PITG_06863   |
| 0 | 2    | 0 PITG_09435    |
| 0 | 6    | 12 PITG_10922   |
| 0 | 31   | 14 PITG_01664   |
| 0 | 14   | 4 PITG_03562    |
| 0 | 6    | 0 PITG_03715    |
| 0 | 5    | 8 PITG_02467    |
| 0 | 203  | 379 PITG_04842  |
| 0 | 3    | 0 PITG_03109    |
| 0 | 11   | 6 PITG_11753    |
| 0 | 0    | 0 NA            |
| 0 | 283  | 146 NA          |
| 0 | 45   | 120 NA          |
| 0 | 80   | 7 NA            |
| 0 | 427  | 58 PITG_14723   |
| 0 | 0    | 0 PITG_04310    |
| 0 | 2    | 12 PITG_19223   |
| 0 | 1237 | 1767 PITG_14133 |
| 0 | 81   | 4 PITG_07874    |
| 0 | 22   | 48 PITG_14568   |
| 0 | 10   | 33 PITG_11119   |
| 0 | 80   | 112 PITG_06762  |
| 0 | 12   | 6 NA            |
| 0 | 951  | 38 PITG_01064   |
| 0 | 4    | 24 PITG_02623   |

|     |      |                 |
|-----|------|-----------------|
| 878 | 371  | 1441 NA         |
| 0   | 623  | 503 PITG_06662  |
| 0   | 260  | 100 PITG_01227  |
| 0   | 305  | 850 PITG_11569  |
| 0   | 1218 | 163 PITG_03712  |
| 0   | 9    | 4 PITG_07902    |
| 0   | 20   | 77 PITG_17359   |
| 0   | 190  | 77 PITG_13030   |
| 0   | 22   | 26 PITG_12318   |
| 0   | 101  | 479 NA          |
| 0   | 0    | 0 PITG_06038    |
| 0   | 0    | 0 PITG_00990    |
| 0   | 0    | 0 PITG_21639    |
| 0   | 45   | 4 PITG_02264    |
| 0   | 2    | 0 PITG_01282    |
| 0   | 46   | 291 PITG_21488  |
| 2   | 5    | 2 NA            |
| 0   | 362  | 252 PITG_07778  |
| 0   | 20   | 325 PITG_04824  |
| 0   | 51   | 84 NA           |
| 0   | 294  | 43 NA           |
| 0   | 27   | 197 PITG_21325  |
| 0   | 2    | 5 PITG_10164    |
| 0   | 1090 | 864 PITG_07173  |
| 0   | 3170 | 1324 PITG_00234 |
| 0   | 44   | 50 PITG_14816   |
| 0   | 5    | 30 NA           |
| 0   | 9    | 7 PITG_07703    |
| 0   | 123  | 144 PITG_14282  |
| 0   | 2    | 4 PITG_12279    |
| 0   | 23   | 7 NA            |
| 0   | 318  | 20 PITG_03719   |
| 0   | 79   | 71 PITG_04611   |
| 0   | 171  | 847 PITG_15407  |
| 0   | 2    | 0 PITG_08301    |
| 0   | 97   | 81 PITG_17782   |
| 0   | 7    | 42 PITG_03445   |
| 0   | 23   | 34 PITG_06247   |
| 0   | 84   | 202 PITG_00118  |
| 0   | 0    | 4 PITG_18642    |
| 0   | 49   | 17 PITG_12291   |
| 0   | 2    | 0 PITG_02381    |
| 0   | 0    | 51 PITG_00833   |
| 0   | 32   | 2 PITG_07983    |
| 2   | 324  | 970 PITG_18089  |
| 0   | 2    | 0 PITG_19850    |
| 0   | 11   | 20 PITG_12914   |

|   |      |                 |
|---|------|-----------------|
| 0 | 6    | 6 PITG_02895    |
| 0 | 303  | 187 PITG_14485  |
| 0 | 13   | 8 PITG_17131    |
| 0 | 23   | 15 PITG_13634   |
| 0 | 52   | 20 PITG_01614   |
| 0 | 19   | 21 PITG_04671   |
| 0 | 0    | 2 PITG_22552    |
| 0 | 723  | 762 PITG_08802  |
| 0 | 0    | 0 PITG_02347    |
| 0 | 14   | 49 PITG_05990   |
| 0 | 41   | 79 PITG_15641   |
| 0 | 2    | 0 PITG_01407    |
| 0 | 1755 | 1528 PITG_11903 |
| 0 | 61   | 21 PITG_02664   |
| 0 | 194  | 172 PITG_11592  |
| 0 | 246  | 53 PITG_19160   |
| 0 | 2    | 18 PITG_14640   |
| 0 | 4    | 0 PITG_01272    |
| 0 | 14   | 61 PITG_21176   |
| 0 | 55   | 8 PITG_01811    |
| 0 | 5    | 0 PITG_10763    |
| 0 | 4    | 2 PITG_18980    |
| 0 | 4    | 0 PITG_17370    |
| 0 | 5    | 4 PITG_10183    |
| 0 | 217  | 152 PITG_00334  |
| 0 | 2165 | 1084 PITG_20173 |
| 0 | 24   | 15 PITG_14605   |
| 0 | 17   | 9 PITG_17928    |
| 0 | 40   | 45 NA           |
| 0 | 0    | 0 NA            |
| 0 | 61   | 76 PITG_11430   |
| 0 | 178  | 20 PITG_06953   |
| 0 | 129  | 334 PITG_20725  |
| 0 | 353  | 344 PITG_19851  |
| 0 | 4    | 2 PITG_11405    |
| 0 | 208  | 71 PITG_01172   |
| 0 | 18   | 37 PITG_16999   |
| 0 | 32   | 21 PITG_05762   |
| 0 | 6    | 12 PITG_12439   |
| 0 | 57   | 102 PITG_16921  |
| 0 | 27   | 121 PITG_00146  |
| 0 | 8    | 20 PITG_03360   |
| 0 | 2    | 0 PITG_13397    |
| 0 | 40   | 34 PITG_06142   |
| 0 | 899  | 1842 PITG_10543 |
| 0 | 95   | 24 PITG_05286   |
| 0 | 51   | 259 PITG_12562  |

|   |      |                 |
|---|------|-----------------|
| 0 | 11   | 2 PITG_08827    |
| 0 | 485  | 1111 PITG_06995 |
| 0 | 0    | 5 PITG_20168    |
| 0 | 22   | 10 NA           |
| 0 | 237  | 621 PITG_08676  |
| 0 | 0    | 2 PITG_08072    |
| 6 | 4124 | 4961 PITG_04868 |
| 0 | 0    | 7 NA            |
| 0 | 22   | 16 PITG_01510   |
| 0 | 218  | 195 PITG_14239  |
| 0 | 4    | 8 PITG_01950    |
| 0 | 129  | 103 PITG_00931  |
| 0 | 57   | 11 NA           |
| 0 | 72   | 71 PITG_21151   |
| 0 | 4    | 0 NA            |
| 0 | 4    | 4 PITG_02841    |
| 0 | 179  | 106 PITG_01300  |
| 0 | 23   | 11 PITG_02582   |
| 0 | 9    | 2 PITG_02979    |
| 0 | 161  | 44 PITG_03005   |
| 0 | 44   | 25 PITG_05864   |
| 0 | 2    | 0 PITG_04003    |
| 2 | 94   | 4 PITG_00818    |
| 0 | 358  | 52 PITG_03585   |
| 0 | 87   | 44 PITG_00712   |
| 0 | 57   | 4 PITG_20767    |
| 0 | 21   | 27 PITG_14833   |
| 0 | 2    | 0 PITG_14948    |
| 0 | 1069 | 646 PITG_18731  |
| 0 | 6    | 6 PITG_00134    |
| 0 | 7    | 2 PITG_17746    |
| 0 | 432  | 762 PITG_14110  |
| 0 | 0    | 0 PITG_06502    |
| 0 | 3    | 0 PITG_15003    |
| 0 | 12   | 13 PITG_20381   |
| 0 | 148  | 2 NA            |
| 0 | 1752 | 1014 PITG_02191 |
| 0 | 0    | 4 PITG_10449    |
| 0 | 15   | 16 PITG_15920   |
| 0 | 157  | 61 NA           |
| 0 | 427  | 176 PITG_03799  |
| 0 | 9    | 0 PITG_01164    |
| 0 | 737  | 516 PITG_06428  |
| 0 | 16   | 33 NA           |
| 0 | 9    | 4 PITG_19850    |
| 0 | 238  | 98 PITG_05508   |
| 0 | 69   | 4 PITG_20855    |

|   |      |                 |
|---|------|-----------------|
| 0 | 0    | 0 PITG_10119    |
| 0 | 275  | 455 PITG_05498  |
| 0 | 134  | 51 NA           |
| 0 | 1155 | 1647 PITG_22658 |
| 0 | 8    | 14 PITG_20385   |
| 0 | 31   | 8 PITG_06403    |
| 0 | 132  | 70 PITG_02974   |
| 0 | 8    | 4 NA            |
| 0 | 13   | 2 PITG_05331    |
| 0 | 82   | 14 NA           |
| 0 | 0    | 10 NA           |
| 0 | 4    | 2 NA            |
| 0 | 0    | 0 PITG_09931    |
| 0 | 39   | 29 PITG_11588   |
| 0 | 18   | 81 PITG_02695   |
| 0 | 821  | 1245 PITG_01260 |
| 0 | 103  | 14 PITG_02037   |
| 0 | 2    | 2 PITG_17897    |
| 0 | 0    | 0 NA            |
| 0 | 51   | 10 PITG_05235   |
| 0 | 5    | 2 PITG_19364    |
| 0 | 91   | 423 PITG_05871  |
| 0 | 794  | 520 PITG_04908  |
| 0 | 7    | 21 PITG_03965   |
| 0 | 77   | 116 PITG_00695  |
| 0 | 4    | 2 PITG_16854    |
| 0 | 97   | 132 NA          |
| 0 | 0    | 0 PITG_01044    |
| 0 | 4    | 2 PITG_00257    |
| 0 | 0    | 4 PITG_02978    |
| 0 | 202  | 158 PITG_05553  |
| 0 | 82   | 18 NA           |
| 0 | 18   | 12 PITG_10139   |
| 0 | 9    | 8 PITG_10544    |
| 0 | 0    | 0 NA            |
| 0 | 51   | 34 PITG_12956   |
| 0 | 15   | 138 PITG_06863  |
| 0 | 1264 | 689 PITG_17013  |
| 0 | 4138 | 4168 PITG_15375 |
| 0 | 245  | 451 PITG_02467  |
| 0 | 91   | 137 PITG_02515  |
| 0 | 8    | 13 PITG_11805   |
| 0 | 20   | 0 PITG_19298    |
| 0 | 78   | 180 PITG_04041  |
| 0 | 59   | 170 PITG_16363  |
| 0 | 11   | 6 PITG_14833    |
| 0 | 2    | 9 PITG_20825    |

|   |     |                |
|---|-----|----------------|
| 0 | 5   | 4 NA           |
| 0 | 123 | 137 NA         |
| 0 | 77  | 5 PITG_04001   |
| 0 | 86  | 292 PITG_17123 |
| 0 | 33  | 28 PITG_04424  |
| 0 | 63  | 4 PITG_09566   |
| 0 | 7   | 0 PITG_09435   |
| 0 | 75  | 31 PITG_12882  |
| 0 | 9   | 0 PITG_00525   |
| 0 | 128 | 25 PITG_13239  |
| 0 | 9   | 2 NA           |
| 0 | 175 | 162 PITG_01950 |
| 0 | 4   | 12 PITG_12098  |
| 0 | 33  | 4 NA           |
| 0 | 314 | 389 PITG_20689 |
| 0 | 2   | 9 PITG_04283   |
| 0 | 229 | 151 PITG_00537 |
| 0 | 31  | 52 PITG_21517  |
| 0 | 137 | 63 PITG_00593  |
| 0 | 50  | 77 PITG_03246  |
| 0 | 806 | 477 PITG_02526 |
| 0 | 158 | 76 PITG_13373  |
| 0 | 117 | 122 PITG_02786 |
| 0 | 569 | 771 PITG_08959 |
| 0 | 0   | 6 PITG_06480   |
| 0 | 207 | 57 PITG_09986  |
| 0 | 68  | 41 PITG_03767  |
| 0 | 94  | 15 PITG_05727  |
| 0 | 60  | 48 PITG_12882  |
| 0 | 29  | 14 PITG_17359  |
| 0 | 74  | 37 PITG_02750  |
| 0 | 12  | 44 PITG_15846  |
| 0 | 24  | 0 NA           |
| 0 | 42  | 28 PITG_16854  |
| 0 | 31  | 28 PITG_02591  |
| 0 | 2   | 0 PITG_12996   |
| 0 | 0   | 2 PITG_19098   |
| 0 | 56  | 46 PITG_17700  |
| 0 | 147 | 104 PITG_09284 |
| 0 | 6   | 2 PITG_18543   |
| 0 | 89  | 140 PITG_02502 |
| 0 | 44  | 45 PITG_02973  |
| 0 | 69  | 48 PITG_05383  |
| 0 | 4   | 4 PITG_21579   |
| 0 | 86  | 63 PITG_20189  |
| 0 | 44  | 12 PITG_15960  |
| 0 | 6   | 4 PITG_03743   |



|   |      |                 |
|---|------|-----------------|
| 0 | 13   | 0 NA            |
| 0 | 51   | 2 PITG_00125    |
| 0 | 68   | 78 PITG_18882   |
| 0 | 123  | 61 PITG_06776   |
| 0 | 4    | 95 PITG_03881   |
| 0 | 33   | 42 PITG_15694   |
| 0 | 50   | 12 NA           |
| 0 | 11   | 19 PITG_06702   |
| 0 | 12   | 0 PITG_14991    |
| 0 | 78   | 93 PITG_20266   |
| 0 | 196  | 292 PITG_06075  |
| 0 | 109  | 801 PITG_17261  |
| 0 | 7    | 4 PITG_13038    |
| 0 | 170  | 16 PITG_03472   |
| 0 | 24   | 0 PITG_06706    |
| 0 | 52   | 560 PITG_12158  |
| 0 | 521  | 228 PITG_12164  |
| 0 | 4    | 18 PITG_14397   |
| 0 | 25   | 12 PITG_05326   |
| 0 | 16   | 0 PITG_10390    |
| 0 | 0    | 2 PITG_11122    |
| 0 | 11   | 4 PITG_15300    |
| 0 | 67   | 17 PITG_02849   |
| 0 | 260  | 61 PITG_09598   |
| 0 | 94   | 0 NA            |
| 2 | 474  | 282 NA          |
| 0 | 1294 | 2091 PITG_08881 |
| 0 | 25   | 2 NA            |
| 0 | 11   | 14 PITG_02197   |
| 0 | 0    | 0 PITG_06358    |
| 0 | 373  | 43 NA           |
| 0 | 79   | 30 PITG_19006   |
| 0 | 116  | 72 PITG_00169   |
| 0 | 9    | 35 NA           |
| 0 | 81   | 31 PITG_03902   |
| 0 | 24   | 40 PITG_01036   |
| 0 | 56   | 30 PITG_12661   |
| 0 | 342  | 212 NA          |
| 0 | 23   | 15 PITG_05609   |
| 0 | 0    | 0 PITG_15417    |
| 0 | 11   | 18 PITG_09665   |
| 0 | 77   | 274 PITG_18072  |
| 0 | 88   | 136 PITG_12053  |
| 0 | 294  | 89 PITG_07567   |
| 0 | 64   | 79 PITG_00750   |
| 0 | 2    | 2 PITG_12446    |
| 0 | 109  | 17 PITG_05727   |

|   |     |                |
|---|-----|----------------|
| 0 | 43  | 30 PITG_08183  |
| 0 | 41  | 137 PITG_15449 |
| 0 | 15  | 5 PITG_16364   |
| 0 | 14  | 15 PITG_17264  |
| 0 | 0   | 2 PITG_07896   |
| 0 | 0   | 4 PITG_01744   |
| 0 | 258 | 177 PITG_03850 |
| 0 | 6   | 0 PITG_15116   |
| 0 | 121 | 134 PITG_16833 |
| 0 | 6   | 26 PITG_07961  |
| 0 | 33  | 30 PITG_05737  |
| 0 | 126 | 22 NA          |
| 0 | 88  | 104 PITG_02628 |
| 0 | 8   | 7 PITG_19844   |
| 0 | 2   | 0 PITG_19623   |
| 0 | 465 | 761 PITG_06693 |
| 0 | 53  | 33 PITG_21132  |
| 0 | 23  | 22 PITG_00442  |
| 0 | 54  | 36 PITG_15502  |
| 0 | 775 | 640 PITG_14229 |
| 0 | 14  | 0 PITG_16783   |
| 0 | 43  | 3 PITG_09292   |
| 0 | 73  | 45 PITG_07815  |
| 0 | 465 | 272 PITG_10022 |
| 0 | 660 | 199 PITG_00020 |
| 0 | 11  | 0 PITG_09193   |
| 0 | 814 | 259 NA         |
| 0 | 34  | 20 PITG_16120  |
| 0 | 0   | 4 PITG_01920   |
| 0 | 66  | 0 PITG_03131   |
| 0 | 18  | 5 PITG_02799   |
| 0 | 268 | 192 PITG_01515 |
| 0 | 12  | 27 PITG_19298  |
| 0 | 0   | 0 PITG_05175   |
| 0 | 126 | 77 NA          |
| 0 | 115 | 55 PITG_03179  |
| 0 | 449 | 468 PITG_07975 |
| 0 | 25  | 8 PITG_14208   |
| 0 | 302 | 81 PITG_02039  |
| 0 | 121 | 75 PITG_07163  |
| 0 | 200 | 35 PITG_02626  |
| 0 | 15  | 0 NA           |
| 0 | 19  | 2 PITG_02284   |
| 0 | 5   | 0 PITG_10374   |
| 0 | 129 | 22 PITG_13302  |
| 0 | 3   | 10 PITG_11019  |
| 0 | 25  | 5 PITG_17727   |

|   |      |                 |
|---|------|-----------------|
| 0 | 54   | 21 PITG_20273   |
| 0 | 41   | 56 PITG_10723   |
| 0 | 0    | 0 NA            |
| 0 | 52   | 11 NA           |
| 0 | 53   | 15 NA           |
| 0 | 55   | 25 PITG_18376   |
| 0 | 7    | 2 PITG_14833    |
| 0 | 42   | 32 PITG_14640   |
| 0 | 493  | 710 PITG_08014  |
| 0 | 57   | 44 PITG_07917   |
| 0 | 121  | 111 PITG_13423  |
| 2 | 1384 | 1861 PITG_05156 |
| 0 | 264  | 119 PITG_10715  |
| 0 | 731  | 314 PITG_10715  |
| 0 | 166  | 113 PITG_00266  |
| 0 | 25   | 21 PITG_14113   |
| 0 | 9    | 45 PITG_07953   |
| 0 | 2    | 2 NA            |
| 0 | 0    | 0 PITG_00795    |
| 0 | 27   | 17 PITG_11264   |
| 0 | 0    | 0 PITG_22229    |
| 0 | 1321 | 254 PITG_05294  |
| 0 | 37   | 6 PITG_01063    |
| 0 | 62   | 83 PITG_05781   |
| 0 | 335  | 90 NA           |
| 0 | 110  | 88 PITG_13405   |
| 0 | 2    | 12 PITG_03821   |
| 0 | 16   | 10 PITG_04857   |
| 0 | 0    | 0 PITG_21598    |
| 0 | 8    | 4 PITG_13828    |
| 0 | 20   | 0 PITG_11223    |
| 0 | 0    | 2 PITG_13544    |
| 0 | 12   | 0 NA            |
| 0 | 68   | 106 PITG_03796  |
| 0 | 253  | 322 PITG_04603  |
| 0 | 357  | 134 PITG_12266  |
| 0 | 20   | 22 PITG_08011   |
| 0 | 2    | 0 PITG_00486    |
| 0 | 8    | 0 PITG_13747    |
| 0 | 124  | 43 PITG_15138   |
| 0 | 5    | 4 PITG_06289    |
| 0 | 563  | 1025 PITG_00941 |
| 0 | 10   | 3 PITG_03229    |
| 0 | 22   | 92 PITG_18712   |
| 4 | 134  | 1063 NA         |
| 0 | 117  | 177 PITG_13393  |
| 0 | 53   | 18 PITG_03916   |

|   |      |                |
|---|------|----------------|
| 0 | 19   | 0 PITG_02328   |
| 0 | 7    | 8 PITG_03025   |
| 0 | 74   | 24 PITG_04921  |
| 0 | 11   | 24 PITG_05614  |
| 0 | 29   | 95 PITG_00979  |
| 0 | 11   | 7 NA           |
| 0 | 138  | 122 PITG_09627 |
| 0 | 28   | 0 PITG_14269   |
| 0 | 21   | 18 PITG_13249  |
| 0 | 26   | 3 NA           |
| 0 | 4    | 2 NA           |
| 0 | 0    | 0 PITG_02757   |
| 0 | 0    | 3 PITG_09782   |
| 0 | 34   | 30 PITG_03763  |
| 0 | 4    | 11 PITG_05211  |
| 0 | 516  | 174 PITG_21556 |
| 0 | 227  | 89 PITG_01748  |
| 0 | 0    | 0 PITG_15821   |
| 0 | 267  | 132 PITG_16065 |
| 0 | 2    | 6 PITG_18474   |
| 0 | 1083 | 511 PITG_03843 |
| 0 | 0    | 2 NA           |
| 0 | 21   | 29 PITG_04712  |
| 0 | 17   | 31 PITG_16113  |
| 0 | 435  | 347 PITG_17244 |
| 0 | 2    | 0 PITG_21942   |
| 0 | 37   | 8 NA           |
| 0 | 5    | 2 PITG_23215   |
| 0 | 370  | 455 PITG_06203 |
| 0 | 74   | 17 PITG_03074  |
| 0 | 4    | 3 NA           |
| 0 | 23   | 0 PITG_11977   |
| 0 | 23   | 2 NA           |
| 0 | 6    | 53 PITG_05480  |
| 0 | 4    | 4 PITG_07166   |
| 0 | 69   | 32 PITG_02210  |
| 0 | 7    | 0 PITG_13276   |
| 0 | 1506 | 653 PITG_11304 |
| 0 | 143  | 34 PITG_05274  |
| 0 | 0    | 0 PITG_03443   |
| 0 | 2    | 2 PITG_00658   |
| 0 | 104  | 273 PITG_17747 |
| 0 | 118  | 0 PITG_01478   |
| 0 | 3    | 2 PITG_06913   |
| 0 | 45   | 61 NA          |
| 0 | 20   | 14 PITG_01719  |
| 0 | 36   | 0 PITG_11929   |

|   |     |                 |
|---|-----|-----------------|
| 0 | 45  | 58 PITG_15625   |
| 0 | 77  | 4 PITG_05480    |
| 0 | 7   | 11 PITG_11039   |
| 0 | 426 | 926 PITG_03719  |
| 0 | 2   | 3 PITG_11750    |
| 0 | 189 | 100 PITG_10269  |
| 0 | 38  | 53 PITG_04977   |
| 0 | 502 | 1038 PITG_08744 |
| 0 | 2   | 0 NA            |
| 0 | 15  | 14 PITG_13365   |
| 0 | 2   | 0 NA            |
| 0 | 203 | 55 PITG_17958   |
| 0 | 28  | 12 PITG_06556   |
| 0 | 8   | 2 PITG_00510    |
| 0 | 282 | 276 PITG_00689  |
| 0 | 82  | 19 PITG_19153   |
| 0 | 901 | 295 PITG_09848  |
| 0 | 0   | 0 PITG_03636    |
| 0 | 40  | 15 PITG_17690   |
| 0 | 86  | 85 PITG_09247   |
| 0 | 7   | 52 PITG_07153   |
| 0 | 64  | 53 PITG_20251   |
| 0 | 30  | 130 PITG_17257  |
| 0 | 47  | 2 NA            |
| 0 | 586 | 1122 NA         |
| 0 | 48  | 38 PITG_15503   |
| 0 | 12  | 0 PITG_00218    |
| 0 | 29  | 4 PITG_15039    |
| 0 | 6   | 2 PITG_02792    |
| 0 | 69  | 29 PITG_11125   |
| 0 | 35  | 42 PITG_13405   |
| 0 | 23  | 15 PITG_11804   |
| 0 | 46  | 20 PITG_17609   |
| 0 | 9   | 0 PITG_17627    |
| 0 | 167 | 861 PITG_02532  |
| 0 | 11  | 86 PITG_00882   |
| 0 | 54  | 4 NA            |
| 0 | 451 | 272 PITG_09832  |
| 0 | 349 | 108 PITG_22406  |
| 0 | 99  | 256 PITG_10167  |
| 0 | 14  | 0 PITG_04104    |
| 0 | 2   | 4 PITG_09594    |
| 0 | 58  | 135 PITG_08579  |
| 0 | 30  | 63 PITG_20676   |
| 0 | 245 | 119 NA          |
| 0 | 24  | 8 PITG_17928    |
| 0 | 49  | 44 PITG_01860   |

|   |      |                 |
|---|------|-----------------|
| 0 | 47   | 58 PITG_19422   |
| 0 | 15   | 0 PITG_03864    |
| 6 | 507  | 2017 PITG_10941 |
| 0 | 476  | 140 PITG_20203  |
| 0 | 10   | 0 PITG_14456    |
| 0 | 4    | 2 PITG_01450    |
| 0 | 43   | 98 PITG_18000   |
| 0 | 6    | 0 PITG_17675    |
| 0 | 381  | 353 PITG_13403  |
| 0 | 3    | 10 PITG_12228   |
| 0 | 595  | 872 PITG_12562  |
| 0 | 23   | 21 PITG_06776   |
| 0 | 70   | 227 NA          |
| 0 | 196  | 270 PITG_08489  |
| 0 | 29   | 146 PITG_00279  |
| 0 | 2    | 18 PITG_13666   |
| 0 | 22   | 28 PITG_05627   |
| 0 | 31   | 30 NA           |
| 0 | 30   | 20 PITG_12275   |
| 0 | 60   | 50 PITG_04746   |
| 0 | 70   | 76 PITG_01244   |
| 0 | 10   | 2 PITG_15672    |
| 0 | 4    | 0 PITG_02712    |
| 0 | 16   | 2 NA            |
| 0 | 54   | 64 PITG_14260   |
| 4 | 73   | 447 PITG_11244  |
| 0 | 20   | 0 PITG_02757    |
| 0 | 2    | 14 PITG_02562   |
| 0 | 212  | 0 PITG_05149    |
| 0 | 151  | 38 PITG_03561   |
| 0 | 83   | 6 PITG_05383    |
| 0 | 160  | 152 PITG_03948  |
| 0 | 5    | 0 PITG_05604    |
| 0 | 2    | 0 PITG_14239    |
| 0 | 69   | 19 NA           |
| 0 | 6    | 15 PITG_09493   |
| 0 | 77   | 6 PITG_13235    |
| 0 | 7    | 21 PITG_04226   |
| 0 | 41   | 2 NA            |
| 0 | 3    | 7 PITG_02562    |
| 0 | 0    | 0 PITG_00244    |
| 0 | 138  | 61 PITG_05328   |
| 0 | 11   | 29 PITG_13970   |
| 0 | 148  | 170 PITG_12288  |
| 0 | 1320 | 555 PITG_08702  |
| 0 | 150  | 44 PITG_06867   |
| 0 | 2    | 0 NA            |

|   |      |                 |
|---|------|-----------------|
| 0 | 12   | 0 NA            |
| 0 | 53   | 31 PITG_03841   |
| 0 | 1353 | 1439 PITG_15407 |
| 0 | 2    | 0 PITG_03519    |
| 0 | 2    | 7 PITG_13903    |
| 0 | 200  | 177 PITG_07384  |
| 0 | 5    | 0 PITG_03769    |
| 0 | 37   | 0 NA            |
| 0 | 40   | 9 PITG_03318    |
| 0 | 38   | 86 NA           |
| 0 | 8    | 0 PITG_10325    |
| 0 | 6    | 14 PITG_00676   |
| 0 | 1019 | 832 PITG_10913  |
| 0 | 114  | 75 PITG_17075   |
| 0 | 0    | 0 PITG_15166    |
| 0 | 34   | 17 PITG_06877   |
| 0 | 111  | 105 PITG_08183  |
| 0 | 24   | 2 PITG_20197    |
| 0 | 15   | 9 PITG_17568    |
| 9 | 0    | 2 NA            |
| 0 | 6    | 12 PITG_04427   |
| 0 | 46   | 176 PITG_17947  |
| 0 | 2    | 2 NA            |
| 0 | 7    | 14 PITG_10885   |
| 0 | 45   | 26 PITG_13666   |
| 0 | 150  | 2 NA            |
| 0 | 63   | 47 PITG_07874   |
| 0 | 22   | 0 PITG_19966    |
| 0 | 179  | 331 PITG_11063  |
| 0 | 172  | 145 PITG_03113  |
| 0 | 98   | 110 PITG_22381  |
| 0 | 691  | 204 PITG_23192  |
| 0 | 19   | 76 PITG_05245   |
| 0 | 275  | 321 PITG_07887  |
| 0 | 50   | 14 PITG_05381   |
| 0 | 44   | 100 PITG_01138  |
| 0 | 10   | 13 PITG_15912   |
| 0 | 4    | 2 PITG_21601    |
| 0 | 0    | 5 PITG_20834    |
| 0 | 38   | 7 PITG_11690    |
| 0 | 12   | 2 NA            |
| 0 | 0    | 4 NA            |
| 0 | 614  | 510 PITG_02578  |
| 0 | 32   | 0 PITG_01769    |
| 0 | 1489 | 1909 PITG_10543 |
| 0 | 140  | 18 PITG_03550   |
| 0 | 11   | 2 PITG_06593    |

|   |     |                 |
|---|-----|-----------------|
| 0 | 133 | 4 PITG_11179    |
| 0 | 660 | 1273 PITG_18392 |
| 0 | 373 | 824 PITG_17786  |
| 0 | 56  | 5 NA            |
| 0 | 97  | 35 PITG_21397   |
| 0 | 196 | 73 PITG_02482   |
| 0 | 143 | 202 PITG_22928  |
| 0 | 2   | 0 PITG_00171    |
| 0 | 25  | 30 PITG_13435   |
| 0 | 14  | 6 PITG_00713    |
| 0 | 2   | 0 PITG_09690    |
| 0 | 9   | 2 PITG_06708    |
| 0 | 32  | 0 PITG_01456    |
| 0 | 144 | 80 NA           |
| 0 | 6   | 3 PITG_16958    |
| 0 | 0   | 0 NA            |
| 0 | 572 | 69 PITG_20116   |
| 0 | 0   | 4 PITG_17540    |
| 0 | 76  | 57 PITG_03224   |
| 0 | 11  | 8 PITG_01622    |
| 0 | 201 | 36 PITG_09769   |
| 0 | 100 | 16 PITG_14988   |
| 0 | 383 | 56 NA           |
| 0 | 6   | 17 PITG_00858   |
| 0 | 4   | 18 NA           |
| 0 | 77  | 24 PITG_08544   |
| 0 | 174 | 12 PITG_02793   |
| 0 | 42  | 209 PITG_15006  |
| 0 | 11  | 9 PITG_07240    |
| 0 | 43  | 16 PITG_10857   |
| 0 | 20  | 3 NA            |
| 0 | 17  | 47 PITG_15852   |
| 0 | 201 | 52 PITG_22959   |
| 0 | 2   | 2 NA            |
| 0 | 2   | 3 PITG_22552    |
| 0 | 63  | 56 PITG_17693   |
| 0 | 0   | 0 PITG_03593    |
| 0 | 28  | 12 PITG_01526   |
| 0 | 249 | 233 PITG_15866  |
| 0 | 246 | 897 PITG_09760  |
| 0 | 486 | 1801 PITG_13014 |
| 0 | 29  | 80 PITG_05347   |
| 0 | 273 | 54 PITG_09443   |
| 0 | 4   | 0 PITG_15924    |
| 0 | 105 | 312 PITG_18824  |
| 0 | 0   | 0 NA            |
| 0 | 15  | 9 PITG_03606    |



|      |     |                 |
|------|-----|-----------------|
| 0    | 28  | 103 PITG_19049  |
| 0    | 37  | 46 PITG_01950   |
| 0    | 2   | 2 PITG_07230    |
| 0    | 6   | 0 NA            |
| 57   | 27  | 4487 NA         |
| 0    | 212 | 113 PITG_18963  |
| 3    | 0   | 0 NA            |
| 0    | 0   | 0 PITG_00453    |
| 0    | 31  | 40 PITG_02034   |
| 0    | 17  | 5 PITG_21492    |
| 0    | 14  | 15 PITG_11981   |
| 0    | 419 | 327 PITG_02343  |
| 2668 | 22  | 2467 NA         |
| 0    | 30  | 23 PITG_02337   |
| 0    | 19  | 10 PITG_13620   |
| 0    | 125 | 57 PITG_00839   |
| 0    | 48  | 31 NA           |
| 0    | 0   | 0 PITG_01426    |
| 0    | 18  | 22 PITG_17601   |
| 0    | 28  | 7 NA            |
| 0    | 323 | 1069 PITG_00804 |
| 0    | 361 | 678 PITG_18402  |
| 0    | 4   | 2 PITG_03468    |
| 0    | 30  | 59 PITG_01108   |
| 0    | 153 | 318 PITG_15377  |
| 0    | 4   | 2 PITG_04334    |
| 0    | 7   | 0 PITG_05839    |
| 0    | 94  | 150 PITG_03347  |
| 0    | 19  | 22 PITG_07655   |
| 0    | 940 | 2334 PITG_13551 |
| 0    | 3   | 16 PITG_04603   |
| 0    | 31  | 4 PITG_00144    |
| 0    | 536 | 622 PITG_03574  |
| 0    | 2   | 2 PITG_20571    |
| 0    | 226 | 27 PITG_21018   |
| 0    | 306 | 8 PITG_05250    |
| 0    | 27  | 41 PITG_01453   |
| 0    | 72  | 77 PITG_03956   |
| 0    | 29  | 8 NA            |
| 0    | 13  | 0 PITG_10250    |
| 0    | 3   | 0 NA            |
| 0    | 464 | 248 PITG_01504  |
| 0    | 61  | 8 NA            |
| 0    | 6   | 0 PITG_03657    |
| 0    | 0   | 10 PITG_02337   |
| 0    | 9   | 0 PITG_19871    |
| 0    | 0   | 0 PITG_05961    |

|     |      |                 |
|-----|------|-----------------|
| 0   | 30   | 2 PITG_02793    |
| 0   | 112  | 100 PITG_05289  |
| 0   | 11   | 5 PITG_00688    |
| 0   | 835  | 308 PITG_07955  |
| 0   | 4    | 2 PITG_02950    |
| 0   | 52   | 106 NA          |
| 0   | 34   | 0 NA            |
| 0   | 172  | 159 PITG_02598  |
| 2   | 1387 | 1476 PITG_10031 |
| 0   | 536  | 47 PITG_10498   |
| 3   | 1334 | 2850 PITG_06237 |
| 0   | 18   | 7 NA            |
| 0   | 52   | 47 NA           |
| 0   | 5    | 0 PITG_04700    |
| 0   | 236  | 80 PITG_18358   |
| 0   | 56   | 56 PITG_01508   |
| 0   | 2    | 2 PITG_06474    |
| 0   | 196  | 709 PITG_03098  |
| 0   | 91   | 15 PITG_03757   |
| 0   | 519  | 351 NA          |
| 0   | 0    | 7 PITG_19350    |
| 0   | 4    | 6 PITG_06274    |
| 0   | 369  | 190 PITG_02567  |
| 0   | 27   | 4 PITG_04777    |
| 0   | 33   | 29 PITG_05747   |
| 0   | 177  | 89 PITG_13368   |
| 419 | 19   | 604 NA          |
| 0   | 148  | 11 PITG_07151   |
| 0   | 13   | 9 PITG_06796    |
| 0   | 54   | 4 PITG_05079    |
| 0   | 180  | 64 PITG_11795   |
| 0   | 37   | 6 NA            |
| 0   | 22   | 0 NA            |
| 0   | 119  | 53 PITG_14888   |
| 0   | 37   | 39 PITG_09241   |
| 0   | 39   | 23 PITG_02134   |
| 0   | 2    | 0 PITG_18274    |
| 2   | 10   | 10 PITG_00590   |
| 0   | 117  | 302 PITG_11460  |
| 0   | 549  | 21 PITG_00319   |
| 0   | 46   | 80 PITG_12604   |
| 0   | 5    | 2 NA            |
| 0   | 57   | 8 PITG_01982    |
| 0   | 220  | 267 PITG_17257  |
| 0   | 6    | 12 PITG_11689   |
| 0   | 0    | 10 PITG_16478   |
| 0   | 383  | 76 PITG_09772   |

|    |      |                 |
|----|------|-----------------|
| 0  | 2    | 2 NA            |
| 0  | 5    | 5 PITG_01576    |
| 0  | 20   | 8 PITG_11122    |
| 0  | 39   | 75 PITG_04427   |
| 0  | 454  | 405 PITG_00279  |
| 0  | 0    | 0 PITG_01050    |
| 0  | 41   | 10 PITG_20321   |
| 0  | 123  | 2 PITG_07340    |
| 0  | 109  | 51 PITG_03751   |
| 0  | 30   | 6 PITG_01065    |
| 0  | 5    | 0 NA            |
| 0  | 65   | 33 PITG_01483   |
| 0  | 586  | 306 PITG_22764  |
| 0  | 39   | 99 PITG_20994   |
| 0  | 0    | 0 NA            |
| 0  | 0    | 3 PITG_03458    |
| 2  | 263  | 417 PITG_12599  |
| 0  | 6    | 42 PITG_01559   |
| 0  | 6    | 11 PITG_15270   |
| 0  | 140  | 187 PITG_03828  |
| 86 | 83   | 2495 PITG_08677 |
| 0  | 379  | 134 PITG_16925  |
| 0  | 184  | 437 PITG_00219  |
| 0  | 2    | 2 PITG_06392    |
| 0  | 0    | 12 PITG_21313   |
| 0  | 69   | 14 NA           |
| 0  | 4    | 0 PITG_17679    |
| 0  | 19   | 44 PITG_18183   |
| 0  | 1016 | 388 PITG_06604  |
| 0  | 35   | 5 PITG_02764    |
| 0  | 74   | 22 PITG_02319   |
| 0  | 8    | 0 PITG_02348    |
| 0  | 0    | 2 PITG_09962    |
| 0  | 16   | 33 PITG_01045   |
| 0  | 3    | 3 PITG_12110    |
| 0  | 50   | 65 PITG_09389   |
| 0  | 473  | 123 PITG_09384  |
| 0  | 25   | 34 PITG_09594   |
| 0  | 115  | 0 PITG_17695    |
| 0  | 72   | 38 PITG_09230   |
| 0  | 873  | 538 PITG_01496  |
| 0  | 1576 | 679 PITG_07792  |
| 0  | 8    | 0 PITG_01850    |
| 0  | 93   | 385 PITG_00172  |
| 0  | 0    | 0 NA            |
| 0  | 45   | 12 NA           |
| 0  | 0    | 0 PITG_14109    |

|    |     |                 |
|----|-----|-----------------|
| 0  | 18  | 43 PITG_10600   |
| 0  | 8   | 6 PITG_04701    |
| 0  | 63  | 51 PITG_15357   |
| 0  | 26  | 20 PITG_04443   |
| 0  | 13  | 7 PITG_05825    |
| 0  | 2   | 13 PITG_17987   |
| 0  | 138 | 102 NA          |
| 0  | 2   | 10 NA           |
| 0  | 18  | 6 NA            |
| 0  | 2   | 0 PITG_04023    |
| 0  | 72  | 7 PITG_02949    |
| 0  | 4   | 4 PITG_17359    |
| 0  | 76  | 66 PITG_05565   |
| 0  | 461 | 1452 PITG_15117 |
| 0  | 37  | 140 PITG_05007  |
| 0  | 10  | 0 NA            |
| 0  | 18  | 56 PITG_06232   |
| 0  | 4   | 7 PITG_02343    |
| 0  | 3   | 0 PITG_05729    |
| 0  | 265 | 109 PITG_05539  |
| 0  | 2   | 8 PITG_05500    |
| 0  | 62  | 253 PITG_00833  |
| 0  | 102 | 98 PITG_02283   |
| 0  | 73  | 125 PITG_02058  |
| 0  | 29  | 15 PITG_01153   |
| 0  | 7   | 26 NA           |
| 0  | 153 | 77 NA           |
| 0  | 4   | 0 NA            |
| 0  | 0   | 0 PITG_22827    |
| 0  | 10  | 2 PITG_02456    |
| 0  | 2   | 0 NA            |
| 0  | 372 | 540 PITG_19999  |
| 0  | 437 | 259 PITG_15311  |
| 20 | 6   | 0 NA            |
| 0  | 78  | 30 PITG_21018   |
| 0  | 124 | 232 PITG_07971  |
| 0  | 0   | 0 NA            |
| 0  | 152 | 9 PITG_13003    |
| 0  | 2   | 3 PITG_12694    |
| 0  | 78  | 57 PITG_15017   |
| 0  | 16  | 8 PITG_20503    |
| 0  | 2   | 0 NA            |
| 0  | 2   | 3 PITG_01171    |
| 0  | 4   | 0 PITG_06759    |
| 0  | 30  | 2 NA            |
| 0  | 4   | 2 PITG_09228    |
| 2  | 13  | 31 PITG_06860   |

|   |      |                |
|---|------|----------------|
| 0 | 57   | 101 PITG_08600 |
| 0 | 180  | 455 PITG_23005 |
| 0 | 6    | 11 PITG_03655  |
| 0 | 0    | 0 PITG_06688   |
| 0 | 76   | 35 PITG_11969  |
| 0 | 0    | 2 PITG_09444   |
| 0 | 32   | 50 PITG_05480  |
| 0 | 6    | 29 PITG_10967  |
| 0 | 55   | 0 PITG_01537   |
| 0 | 2    | 14 PITG_02035  |
| 0 | 107  | 2 PITG_05287   |
| 0 | 1052 | 966 PITG_22878 |
| 0 | 0    | 13 PITG_20115  |
| 0 | 4    | 0 PITG_03374   |
| 0 | 1031 | 584 PITG_04384 |
| 0 | 23   | 12 NA          |
| 0 | 221  | 12 PITG_20794  |
| 0 | 21   | 13 PITG_06944  |
| 0 | 106  | 130 NA         |
| 0 | 212  | 129 PITG_11171 |
| 0 | 280  | 169 PITG_03267 |
| 0 | 99   | 343 PITG_12483 |
| 0 | 43   | 25 PITG_04570  |
| 0 | 19   | 238 PITG_17261 |
| 0 | 113  | 36 PITG_01313  |
| 0 | 0    | 0 NA           |
| 0 | 168  | 70 PITG_00134  |
| 0 | 22   | 7 PITG_08955   |
| 0 | 4    | 24 PITG_10663  |
| 0 | 2    | 6 PITG_13747   |
| 0 | 207  | 82 PITG_02486  |
| 0 | 132  | 73 PITG_05989  |
| 0 | 2    | 6 PITG_03650   |
| 0 | 22   | 4 NA           |
| 0 | 6    | 0 PITG_12873   |
| 0 | 211  | 46 PITG_18045  |
| 0 | 141  | 30 PITG_12744  |
| 0 | 75   | 144 PITG_03376 |
| 0 | 42   | 30 PITG_02927  |
| 0 | 8    | 11 PITG_04376  |
| 0 | 406  | 25 PITG_07894  |
| 0 | 6    | 0 PITG_23197   |
| 0 | 367  | 311 PITG_10736 |
| 0 | 0    | 0 PITG_03995   |
| 0 | 24   | 16 PITG_03225  |
| 0 | 58   | 14 PITG_13066  |
| 0 | 67   | 60 PITG_09898  |

|   |     |                |
|---|-----|----------------|
| 0 | 6   | 0 PITG_06289   |
| 0 | 4   | 7 PITG_19865   |
| 0 | 0   | 0 PITG_20767   |
| 0 | 11  | 6 PITG_04452   |
| 0 | 267 | 267 PITG_02308 |
| 0 | 71  | 4 NA           |
| 0 | 17  | 0 PITG_20138   |
| 0 | 203 | 127 NA         |
| 0 | 5   | 0 PITG_08489   |
| 0 | 79  | 37 NA          |
| 0 | 0   | 2 NA           |
| 0 | 30  | 6 PITG_12852   |
| 0 | 172 | 51 PITG_05627  |
| 0 | 53  | 111 PITG_10616 |
| 0 | 0   | 0 PITG_06021   |
| 0 | 80  | 57 NA          |
| 0 | 101 | 20 PITG_16666  |
| 0 | 61  | 67 PITG_16864  |
| 0 | 44  | 103 PITG_16834 |
| 0 | 37  | 31 PITG_00703  |
| 0 | 30  | 20 PITG_04534  |
| 0 | 329 | 107 PITG_12912 |
| 0 | 15  | 2 PITG_18393   |
| 0 | 35  | 5 NA           |
| 0 | 17  | 125 PITG_12818 |
| 0 | 0   | 2 PITG_16315   |
| 0 | 68  | 9 PITG_01664   |
| 0 | 55  | 48 PITG_11980  |
| 0 | 81  | 101 PITG_18706 |
| 0 | 3   | 0 NA           |
| 0 | 275 | 176 PITG_19198 |
| 0 | 2   | 3 PITG_00193   |
| 0 | 402 | 77 PITG_11792  |
| 0 | 30  | 29 PITG_06912  |
| 0 | 334 | 501 PITG_14229 |
| 0 | 42  | 24 PITG_00456  |
| 0 | 102 | 53 PITG_02660  |
| 0 | 14  | 17 NA          |
| 0 | 6   | 4 PITG_02767   |
| 0 | 61  | 205 PITG_17993 |
| 0 | 205 | 461 PITG_09748 |
| 0 | 6   | 7 PITG_16383   |
| 0 | 33  | 137 PITG_15784 |
| 0 | 9   | 6 PITG_05692   |
| 0 | 13  | 2 PITG_08183   |
| 0 | 134 | 104 PITG_21172 |
| 0 | 51  | 715 PITG_06415 |

|    |      |                 |
|----|------|-----------------|
| 0  | 191  | 73 PITG_08926   |
| 0  | 16   | 9 PITG_08316    |
| 0  | 2    | 20 PITG_10141   |
| 0  | 13   | 5 PITG_12230    |
| 38 | 4    | 4 NA            |
| 0  | 14   | 12 PITG_16103   |
| 0  | 6    | 0 PITG_20374    |
| 0  | 0    | 2 PITG_13421    |
| 0  | 1137 | 1201 PITG_04487 |
| 2  | 116  | 578 PITG_02786  |
| 0  | 161  | 394 PITG_05688  |
| 0  | 30   | 16 PITG_18922   |
| 0  | 137  | 0 PITG_16475    |
| 0  | 6    | 2 PITG_13903    |
| 0  | 199  | 100 PITG_03661  |
| 0  | 178  | 142 PITG_13986  |
| 0  | 176  | 173 PITG_11099  |
| 0  | 137  | 66 NA           |
| 0  | 53   | 22 PITG_04715   |
| 0  | 11   | 66 PITG_20102   |
| 0  | 129  | 52 PITG_14111   |
| 0  | 73   | 8 PITG_03472    |
| 0  | 376  | 259 PITG_04958  |
| 0  | 12   | 2 PITG_08619    |
| 0  | 17   | 26 PITG_06025   |
| 0  | 7    | 2 PITG_14915    |
| 0  | 0    | 5 NA            |
| 0  | 2    | 0 PITG_05282    |
| 0  | 95   | 142 PITG_16198  |
| 0  | 43   | 9 PITG_04927    |
| 0  | 7    | 0 PITG_14415    |
| 0  | 29   | 20 NA           |
| 0  | 21   | 14 NA           |
| 0  | 52   | 36 PITG_01238   |
| 0  | 143  | 35 PITG_12962   |
| 0  | 5    | 0 NA            |
| 0  | 2    | 0 PITG_15669    |
| 0  | 116  | 29 PITG_03219   |
| 0  | 13   | 5 NA            |
| 0  | 480  | 289 NA          |
| 0  | 10   | 31 PITG_20717   |
| 0  | 60   | 136 PITG_08781  |
| 0  | 164  | 72 PITG_11496   |
| 0  | 5    | 22 PITG_02921   |
| 0  | 19   | 14 PITG_00845   |
| 0  | 28   | 105 PITG_02432  |
| 0  | 5    | 2 NA            |

|   |      |                 |
|---|------|-----------------|
| 0 | 49   | 0 PITG_02706    |
| 0 | 0    | 4 PITG_07327    |
| 0 | 107  | 105 PITG_06772  |
| 0 | 12   | 2 PITG_03715    |
| 2 | 70   | 265 PITG_07036  |
| 0 | 1515 | 693 PITG_00395  |
| 0 | 6    | 4 PITG_12107    |
| 0 | 182  | 241 PITG_15055  |
| 0 | 200  | 113 PITG_07077  |
| 0 | 48   | 19 PITG_19875   |
| 0 | 10   | 5 NA            |
| 0 | 6    | 2 NA            |
| 0 | 2    | 3 PITG_06829    |
| 0 | 12   | 7 PITG_05180    |
| 0 | 0    | 3 PITG_03659    |
| 0 | 225  | 233 PITG_18005  |
| 0 | 7    | 2 PITG_15877    |
| 0 | 27   | 8 NA            |
| 0 | 4    | 4 PITG_15706    |
| 0 | 2    | 4 PITG_15649    |
| 0 | 226  | 126 PITG_10822  |
| 0 | 41   | 8 NA            |
| 0 | 70   | 122 PITG_13607  |
| 0 | 44   | 29 PITG_04421   |
| 0 | 47   | 77 PITG_13165   |
| 0 | 39   | 14 PITG_17457   |
| 0 | 32   | 6 NA            |
| 2 | 23   | 12 PITG_09291   |
| 0 | 62   | 14 PITG_08683   |
| 0 | 61   | 7 PITG_01822    |
| 0 | 30   | 83 PITG_08173   |
| 0 | 91   | 87 PITG_06762   |
| 0 | 258  | 238 PITG_08236  |
| 0 | 0    | 0 PITG_04910    |
| 0 | 2    | 6 NA            |
| 0 | 133  | 47 PITG_11728   |
| 0 | 459  | 125 PITG_19362  |
| 0 | 22   | 22 PITG_02145   |
| 0 | 32   | 14 PITG_13672   |
| 0 | 12   | 61 PITG_09964   |
| 0 | 120  | 90 PITG_15657   |
| 0 | 8    | 0 PITG_05487    |
| 0 | 238  | 2775 PITG_01940 |
| 0 | 132  | 51 PITG_02401   |
| 0 | 6    | 0 PITG_05675    |
| 0 | 39   | 26 PITG_17706   |
| 0 | 47   | 49 PITG_04002   |



|     |     |                 |
|-----|-----|-----------------|
| 0   | 35  | 8 PITG_08135    |
| 0   | 458 | 1549 PITG_03856 |
| 0   | 26  | 19 PITG_12852   |
| 0   | 51  | 201 PITG_03244  |
| 0   | 60  | 18 PITG_10995   |
| 0   | 4   | 0 PITG_15820    |
| 0   | 0   | 0 PITG_15654    |
| 0   | 213 | 105 PITG_02911  |
| 0   | 0   | 0 PITG_12530    |
| 0   | 778 | 632 PITG_08409  |
| 0   | 51  | 29 PITG_15216   |
| 578 | 44  | 849 NA          |
| 0   | 221 | 78 PITG_17005   |
| 0   | 108 | 62 PITG_09144   |
| 0   | 7   | 15 PITG_16433   |
| 0   | 64  | 34 PITG_00703   |
| 0   | 10  | 0 PITG_14285    |
| 0   | 4   | 0 PITG_12459    |
| 0   | 58  | 17 PITG_04821   |
| 0   | 7   | 2 PITG_13544    |
| 2   | 858 | 1891 PITG_00203 |
| 0   | 3   | 2 PITG_08056    |
| 0   | 124 | 82 PITG_08980   |
| 0   | 306 | 89 PITG_01453   |
| 0   | 41  | 16 PITG_21908   |
| 0   | 9   | 5 PITG_09855    |
| 0   | 243 | 215 PITG_03711  |
| 0   | 50  | 15 PITG_03620   |
| 0   | 58  | 34 PITG_02943   |
| 0   | 322 | 261 PITG_15731  |
| 0   | 0   | 0 PITG_15642    |
| 0   | 0   | 2 PITG_15967    |
| 0   | 6   | 0 NA            |
| 0   | 106 | 248 PITG_11111  |
| 0   | 26  | 22 PITG_05383   |
| 0   | 55  | 23 PITG_19060   |
| 0   | 2   | 0 PITG_07301    |
| 0   | 0   | 2 PITG_08592    |
| 0   | 0   | 8 PITG_19205    |
| 0   | 5   | 2 NA            |
| 0   | 232 | 22 NA           |
| 0   | 0   | 0 NA            |
| 0   | 5   | 15 PITG_00712   |
| 0   | 9   | 12 PITG_05116   |
| 2   | 108 | 49 PITG_17673   |
| 0   | 14  | 8 PITG_01395    |
| 0   | 32  | 6 PITG_09388    |

|   |     |                |
|---|-----|----------------|
| 0 | 8   | 10 PITG_19405  |
| 0 | 421 | 107 PITG_19281 |
| 0 | 227 | 90 PITG_02600  |
| 0 | 111 | 25 PITG_16887  |
| 0 | 40  | 4 NA           |
| 0 | 22  | 43 PITG_21185  |
| 0 | 9   | 8 PITG_13103   |
| 0 | 8   | 2 PITG_03995   |
| 0 | 3   | 4 PITG_06457   |
| 0 | 194 | 137 PITG_01073 |
| 0 | 74  | 49 PITG_18245  |
| 0 | 89  | 64 PITG_03274  |
| 0 | 102 | 0 PITG_02048   |
| 0 | 20  | 74 PITG_01608  |
| 0 | 29  | 29 PITG_03715  |
| 0 | 0   | 0 PITG_10952   |
| 0 | 11  | 13 PITG_06322  |
| 0 | 59  | 23 PITG_13490  |
| 0 | 0   | 0 PITG_03925   |
| 0 | 30  | 31 PITG_16055  |
| 0 | 0   | 2 PITG_20152   |
| 0 | 0   | 0 NA           |
| 0 | 75  | 90 PITG_12843  |
| 0 | 137 | 69 PITG_17673  |
| 0 | 8   | 0 PITG_19046   |
| 0 | 31  | 20 PITG_17030  |
| 0 | 47  | 72 PITG_19690  |
| 0 | 95  | 407 PITG_11767 |
| 0 | 336 | 364 PITG_21607 |
| 0 | 51  | 157 PITG_17804 |
| 0 | 23  | 26 PITG_01607  |
| 0 | 0   | 2 NA           |
| 0 | 5   | 17 PITG_13434  |
| 0 | 11  | 36 PITG_19037  |
| 0 | 329 | 87 PITG_06802  |
| 0 | 168 | 71 PITG_01525  |
| 0 | 32  | 9 PITG_06121   |
| 0 | 28  | 31 NA          |
| 0 | 5   | 4 PITG_01285   |
| 0 | 28  | 42 PITG_05293  |
| 0 | 125 | 71 PITG_13855  |
| 0 | 49  | 41 PITG_04596  |
| 0 | 12  | 2 PITG_06390   |
| 0 | 22  | 7 PITG_01722   |
| 0 | 0   | 0 NA           |
| 0 | 2   | 38 PITG_12691  |
| 0 | 174 | 9 PITG_08375   |

|   |     |                 |
|---|-----|-----------------|
| 0 | 10  | 10 PITG_22865   |
| 0 | 73  | 97 PITG_04682   |
| 0 | 405 | 408 PITG_02948  |
| 0 | 26  | 29 PITG_03767   |
| 0 | 36  | 6 PITG_16329    |
| 0 | 17  | 0 NA            |
| 0 | 160 | 120 PITG_02856  |
| 0 | 0   | 2 PITG_00291    |
| 0 | 7   | 5 PITG_01188    |
| 0 | 0   | 0 NA            |
| 0 | 429 | 301 PITG_15365  |
| 0 | 62  | 48 PITG_13381   |
| 0 | 10  | 0 NA            |
| 0 | 0   | 0 PITG_03836    |
| 0 | 2   | 0 PITG_10952    |
| 0 | 161 | 47 PITG_11782   |
| 0 | 24  | 25 NA           |
| 0 | 37  | 4 PITG_04941    |
| 0 | 2   | 4 NA            |
| 0 | 175 | 476 PITG_07308  |
| 0 | 4   | 0 PITG_02593    |
| 0 | 4   | 2 PITG_03562    |
| 0 | 0   | 6 NA            |
| 0 | 53  | 40 PITG_06380   |
| 0 | 0   | 0 PITG_06593    |
| 0 | 14  | 17 PITG_16969   |
| 0 | 22  | 15 NA           |
| 0 | 252 | 139 PITG_12863  |
| 0 | 14  | 26 PITG_13052   |
| 2 | 40  | 153 PITG_05498  |
| 0 | 17  | 3 NA            |
| 0 | 260 | 326 PITG_05617  |
| 0 | 155 | 34 PITG_18189   |
| 0 | 33  | 0 NA            |
| 0 | 140 | 394 PITG_00189  |
| 0 | 5   | 7 PITG_00858    |
| 0 | 298 | 186 PITG_01897  |
| 0 | 36  | 371 PITG_17526  |
| 0 | 0   | 0 PITG_20706    |
| 0 | 15  | 0 PITG_15929    |
| 2 | 753 | 1124 PITG_15118 |
| 0 | 72  | 114 PITG_08218  |
| 0 | 24  | 2 PITG_17706    |
| 0 | 4   | 5 PITG_09896    |
| 0 | 541 | 586 PITG_05011  |
| 0 | 32  | 45 PITG_08569   |
| 0 | 974 | 569 PITG_18107  |

|   |      |                 |
|---|------|-----------------|
| 0 | 14   | 63 PITG_01036   |
| 0 | 99   | 186 PITG_19281  |
| 0 | 571  | 26 NA           |
| 0 | 584  | 175 NA          |
| 0 | 267  | 93 PITG_14575   |
| 0 | 162  | 258 PITG_06015  |
| 0 | 235  | 236 PITG_15090  |
| 0 | 104  | 108 PITG_20989  |
| 0 | 57   | 20 NA           |
| 0 | 20   | 6 PITG_14595    |
| 0 | 100  | 42 NA           |
| 0 | 16   | 10 PITG_03287   |
| 0 | 39   | 130 PITG_06566  |
| 0 | 372  | 67 PITG_01128   |
| 0 | 4    | 2 PITG_13815    |
| 0 | 17   | 2 PITG_08205    |
| 0 | 11   | 25 PITG_00229   |
| 0 | 2    | 4 PITG_08133    |
| 0 | 389  | 401 PITG_22946  |
| 2 | 191  | 421 PITG_19361  |
| 0 | 89   | 2 PITG_16137    |
| 0 | 4    | 0 PITG_15151    |
| 0 | 21   | 10 PITG_02927   |
| 0 | 79   | 59 PITG_08745   |
| 2 | 285  | 445 PITG_10858  |
| 0 | 2    | 0 PITG_14401    |
| 0 | 48   | 170 PITG_17804  |
| 0 | 3    | 14 NA           |
| 0 | 0    | 0 PITG_02792    |
| 0 | 2    | 6 PITG_11729    |
| 0 | 6    | 5 NA            |
| 0 | 36   | 2 PITG_00223    |
| 0 | 102  | 176 PITG_06731  |
| 0 | 87   | 84 PITG_02428   |
| 0 | 2    | 0 PITG_12824    |
| 0 | 232  | 92 PITG_16458   |
| 0 | 65   | 19 PITG_19313   |
| 0 | 2101 | 3536 PITG_07328 |
| 0 | 2    | 2 PITG_20251    |
| 0 | 4    | 0 PITG_11593    |
| 0 | 2    | 0 PITG_12935    |
| 0 | 338  | 104 PITG_00884  |
| 0 | 0    | 12 PITG_14083   |
| 0 | 1128 | 110 PITG_06672  |
| 0 | 12   | 11 NA           |
| 0 | 35   | 11 NA           |
| 0 | 408  | 2 PITG_03472    |

|   |      |                |
|---|------|----------------|
| 0 | 37   | 51 PITG_10899  |
| 0 | 0    | 2 PITG_00406   |
| 0 | 0    | 0 PITG_13616   |
| 0 | 106  | 32 PITG_01932  |
| 0 | 59   | 2 PITG_15998   |
| 0 | 1022 | 794 PITG_13769 |
| 0 | 23   | 13 NA          |
| 0 | 37   | 18 PITG_10509  |
| 0 | 14   | 25 PITG_15593  |
| 0 | 142  | 58 PITG_01511  |
| 0 | 4    | 2 NA           |
| 0 | 14   | 30 PITG_16791  |
| 0 | 10   | 243 PITG_06415 |
| 0 | 0    | 8 PITG_16132   |
| 0 | 39   | 2 PITG_15116   |
| 0 | 72   | 34 NA          |
| 0 | 74   | 36 PITG_17690  |
| 0 | 15   | 4 PITG_02977   |
| 0 | 418  | 927 PITG_15118 |
| 0 | 133  | 131 PITG_16446 |
| 0 | 343  | 55 PITG_01138  |
| 0 | 0    | 0 PITG_03374   |
| 0 | 68   | 33 PITG_01549  |
| 0 | 803  | 1936 NA        |
| 0 | 98   | 51 NA          |
| 0 | 68   | 43 PITG_07279  |
| 0 | 2    | 0 PITG_17831   |
| 0 | 902  | 667 PITG_08834 |
| 0 | 142  | 207 PITG_10524 |
| 0 | 16   | 2 NA           |
| 0 | 14   | 4 PITG_03952   |
| 0 | 123  | 72 PITG_18788  |
| 0 | 227  | 147 PITG_02586 |
| 0 | 0    | 0 PITG_00530   |
| 0 | 45   | 41 PITG_03815  |
| 0 | 139  | 65 PITG_12556  |
| 0 | 513  | 176 PITG_08135 |
| 0 | 2    | 25 PITG_03696  |
| 0 | 167  | 47 NA          |
| 0 | 48   | 77 PITG_09593  |
| 0 | 14   | 19 PITG_06767  |
| 0 | 8    | 46 NA          |
| 0 | 1299 | 738 PITG_02671 |
| 2 | 117  | 128 PITG_17254 |
| 0 | 130  | 6 PITG_06899   |
| 0 | 154  | 45 NA          |
| 0 | 2    | 2 NA           |

|   |      |                 |
|---|------|-----------------|
| 0 | 24   | 4 PITG_03143    |
| 0 | 12   | 14 PITG_07326   |
| 0 | 122  | 122 PITG_06979  |
| 2 | 256  | 1385 PITG_02532 |
| 0 | 15   | 11 PITG_13623   |
| 0 | 74   | 34 PITG_17683   |
| 0 | 2    | 0 PITG_18075    |
| 0 | 127  | 23 NA           |
| 0 | 187  | 125 PITG_13727  |
| 0 | 59   | 26 NA           |
| 0 | 15   | 7 PITG_03610    |
| 0 | 228  | 340 PITG_03148  |
| 0 | 0    | 0 NA            |
| 0 | 78   | 42 PITG_19536   |
| 0 | 111  | 2 NA            |
| 0 | 21   | 6 PITG_02657    |
| 0 | 63   | 9 NA            |
| 0 | 5    | 0 PITG_05519    |
| 0 | 115  | 55 PITG_03416   |
| 0 | 42   | 122 PITG_19184  |
| 0 | 19   | 2 PITG_00723    |
| 0 | 51   | 11 PITG_03775   |
| 0 | 0    | 0 PITG_20434    |
| 0 | 92   | 295 PITG_05582  |
| 0 | 0    | 8 PITG_01768    |
| 0 | 2968 | 191 NA          |
| 7 | 0    | 17 NA           |
| 0 | 0    | 0 PITG_13234    |
| 0 | 723  | 320 PITG_14047  |
| 0 | 89   | 86 PITG_08576   |
| 0 | 902  | 978 PITG_12288  |
| 0 | 124  | 3 PITG_06580    |
| 0 | 31   | 10 PITG_10008   |
| 0 | 70   | 45 PITG_17592   |
| 0 | 46   | 75 PITG_11474   |
| 0 | 23   | 48 PITG_22319   |
| 0 | 42   | 376 PITG_22065  |
| 0 | 50   | 33 PITG_01817   |
| 0 | 2    | 0 PITG_01048    |
| 0 | 64   | 75 PITG_14642   |
| 0 | 7    | 0 PITG_16221    |
| 0 | 0    | 0 PITG_17999    |
| 0 | 228  | 0 PITG_13015    |
| 0 | 54   | 62 PITG_04600   |
| 0 | 5    | 5 PITG_09875    |
| 0 | 27   | 41 PITG_02607   |
| 0 | 77   | 46 NA           |

|   |      |                 |
|---|------|-----------------|
| 0 | 22   | 7 PITG_11272    |
| 0 | 139  | 25 PITG_01206   |
| 0 | 77   | 122 PITG_02047  |
| 0 | 6    | 4 PITG_01647    |
| 0 | 104  | 30 PITG_08509   |
| 0 | 10   | 24 PITG_15671   |
| 0 | 611  | 174 PITG_18928  |
| 0 | 68   | 27 PITG_08138   |
| 0 | 481  | 391 PITG_19932  |
| 0 | 226  | 1233 PITG_10218 |
| 0 | 13   | 8 PITG_02826    |
| 0 | 3    | 0 NA            |
| 0 | 34   | 8 PITG_06877    |
| 0 | 4    | 0 PITG_03902    |
| 0 | 9    | 3 PITG_15874    |
| 0 | 625  | 151 NA          |
| 0 | 41   | 35 PITG_21314   |
| 0 | 2    | 0 PITG_02075    |
| 0 | 5    | 2 PITG_03562    |
| 0 | 183  | 143 NA          |
| 0 | 4    | 4 PITG_02244    |
| 0 | 8    | 2 PITG_12291    |
| 0 | 557  | 229 PITG_03148  |
| 0 | 10   | 0 PITG_17567    |
| 0 | 7    | 6 NA            |
| 0 | 25   | 2 PITG_15706    |
| 0 | 12   | 0 NA            |
| 0 | 726  | 125 NA          |
| 0 | 122  | 535 PITG_03700  |
| 0 | 124  | 404 PITG_03700  |
| 0 | 19   | 4 PITG_02500    |
| 0 | 15   | 2 PITG_12533    |
| 0 | 17   | 11 PITG_08473   |
| 0 | 27   | 19 PITG_02748   |
| 0 | 32   | 19 PITG_10763   |
| 0 | 157  | 70 PITG_02642   |
| 0 | 14   | 32 PITG_07874   |
| 0 | 234  | 388 PITG_01408  |
| 2 | 1110 | 944 NA          |
| 0 | 14   | 0 NA            |
| 0 | 0    | 0 NA            |
| 0 | 13   | 3 PITG_08095    |
| 0 | 529  | 48 NA           |
| 0 | 0    | 6 PITG_13060    |
| 0 | 224  | 297 PITG_05505  |
| 0 | 84   | 35 PITG_02564   |
| 0 | 192  | 310 PITG_19179  |

|   |      |                 |
|---|------|-----------------|
| 0 | 202  | 50 NA           |
| 0 | 1376 | 2100 PITG_03712 |
| 0 | 15   | 4 PITG_02203    |
| 0 | 4    | 18 PITG_11110   |
| 0 | 15   | 11 NA           |
| 0 | 0    | 0 NA            |
| 0 | 34   | 28 PITG_02661   |
| 0 | 0    | 0 PITG_08879    |
| 0 | 24   | 40 PITG_04715   |
| 0 | 0    | 0 PITG_02259    |
| 0 | 4    | 4 PITG_13103    |
| 0 | 25   | 119 PITG_15496  |
| 0 | 111  | 5 PITG_06832    |
| 0 | 0    | 0 NA            |
| 0 | 46   | 48 PITG_01652   |
| 0 | 86   | 18 PITG_11813   |
| 0 | 12   | 2 PITG_18296    |
| 0 | 17   | 197 PITG_06305  |
| 0 | 49   | 129 PITG_08044  |
| 0 | 7    | 0 PITG_06199    |
| 0 | 6    | 4 PITG_03048    |
| 0 | 12   | 14 PITG_07996   |
| 0 | 499  | 194 PITG_13679  |
| 0 | 461  | 170 NA          |
| 0 | 26   | 29 PITG_02597   |
| 0 | 24   | 67 PITG_02137   |
| 0 | 192  | 566 PITG_09793  |
| 0 | 0    | 0 PITG_06019    |
| 0 | 7    | 4 PITG_07111    |
| 0 | 2    | 4 PITG_03804    |
| 0 | 88   | 85 NA           |
| 0 | 0    | 0 PITG_11247    |
| 0 | 13   | 6 NA            |
| 0 | 6    | 0 NA            |
| 0 | 8    | 2 PITG_07298    |
| 0 | 14   | 26 PITG_15173   |
| 0 | 31   | 61 PITG_00295   |
| 0 | 2    | 2 PITG_23029    |
| 0 | 20   | 4 PITG_04664    |
| 0 | 62   | 4 PITG_19544    |
| 0 | 48   | 0 PITG_04321    |
| 0 | 7    | 18 PITG_12235   |
| 0 | 127  | 108 PITG_03380  |
| 0 | 117  | 108 PITG_01237  |
| 0 | 426  | 182 PITG_04481  |
| 0 | 42   | 56 PITG_17349   |
| 0 | 40   | 72 PITG_06150   |



|   |      |                |
|---|------|----------------|
| 2 | 418  | 410 PITG_17123 |
| 0 | 80   | 17 PITG_15470  |
| 0 | 275  | 31 PITG_11817  |
| 0 | 5    | 2 NA           |
| 0 | 143  | 241 PITG_11290 |
| 0 | 7    | 10 PITG_10053  |
| 0 | 0    | 2 PITG_14380   |
| 0 | 2    | 4 PITG_11038   |
| 0 | 274  | 373 PITG_00809 |
| 0 | 32   | 9 PITG_11231   |
| 0 | 17   | 12 PITG_02023  |
| 0 | 11   | 87 PITG_01233  |
| 0 | 3    | 0 PITG_21525   |
| 0 | 203  | 76 PITG_14917  |
| 0 | 6    | 2 PITG_17572   |
| 0 | 54   | 8 NA           |
| 0 | 1045 | 27 PITG_04125  |
| 0 | 101  | 22 PITG_10967  |
| 0 | 112  | 52 NA          |
| 0 | 106  | 53 PITG_08139  |
| 0 | 35   | 16 PITG_04225  |
| 0 | 35   | 6 PITG_02985   |
| 0 | 34   | 0 PITG_14993   |
| 0 | 4    | 0 NA           |
| 0 | 207  | 105 PITG_18662 |
| 0 | 65   | 83 PITG_02623  |
| 0 | 49   | 114 PITG_09384 |
| 0 | 0    | 2 NA           |
| 0 | 8    | 3 PITG_10418   |
| 0 | 93   | 652 PITG_03700 |
| 0 | 256  | 406 PITG_08959 |
| 0 | 17   | 7 PITG_03756   |
| 0 | 2    | 4 PITG_03599   |
| 0 | 52   | 0 PITG_06517   |
| 0 | 55   | 147 PITG_07314 |
| 0 | 70   | 2 PITG_15696   |
| 0 | 52   | 74 PITG_09698  |
| 0 | 8    | 2 NA           |
| 0 | 372  | 537 PITG_22765 |
| 0 | 7    | 2 PITG_17421   |
| 0 | 41   | 154 PITG_04065 |
| 0 | 23   | 20 PITG_00845  |
| 0 | 16   | 2 PITG_03610   |
| 0 | 106  | 375 PITG_07055 |
| 0 | 43   | 2 PITG_08883   |
| 0 | 40   | 24 PITG_09493  |
| 0 | 25   | 6 PITG_14275   |

|    |      |                 |
|----|------|-----------------|
| 0  | 202  | 130 PITG_02745  |
| 0  | 0    | 3 PITG_03902    |
| 0  | 143  | 15 PITG_12292   |
| 0  | 8    | 33 PITG_13116   |
| 0  | 34   | 10 PITG_18046   |
| 0  | 4    | 4 PITG_05815    |
| 0  | 2    | 2 PITG_06518    |
| 0  | 134  | 215 PITG_20193  |
| 0  | 23   | 2 PITG_01776    |
| 0  | 10   | 12 PITG_08304   |
| 0  | 35   | 0 PITG_16458    |
| 0  | 1707 | 1605 PITG_00156 |
| 0  | 72   | 85 PITG_17130   |
| 0  | 7    | 2 PITG_03700    |
| 0  | 13   | 102 PITG_17790  |
| 0  | 0    | 2 PITG_02002    |
| 0  | 409  | 232 PITG_12577  |
| 0  | 55   | 2 PITG_17882    |
| 0  | 537  | 524 PITG_06597  |
| 0  | 2    | 0 PITG_13827    |
| 0  | 94   | 76 PITG_01336   |
| 0  | 20   | 0 NA            |
| 0  | 0    | 3 PITG_15981    |
| 0  | 10   | 3 NA            |
| 0  | 11   | 0 NA            |
| 0  | 590  | 245 PITG_12049  |
| 0  | 326  | 102 PITG_20747  |
| 0  | 3    | 2 PITG_01395    |
| 0  | 3    | 0 PITG_00515    |
| 0  | 0    | 2 PITG_07034    |
| 0  | 36   | 8 PITG_05583    |
| 0  | 273  | 225 PITG_09748  |
| 0  | 8    | 2 PITG_06829    |
| 0  | 0    | 0 NA            |
| 0  | 45   | 0 PITG_15783    |
| 0  | 55   | 85 NA           |
| 0  | 431  | 175 PITG_06376  |
| 0  | 0    | 32 NA           |
| 24 | 4    | 49 NA           |
| 0  | 18   | 0 PITG_00125    |
| 0  | 324  | 193 PITG_20288  |
| 0  | 0    | 8 PITG_13672    |
| 2  | 368  | 534 PITG_12562  |
| 0  | 0    | 0 PITG_12140    |
| 0  | 0    | 0 PITG_10372    |
| 0  | 3    | 11 PITG_00038   |
| 0  | 18   | 31 PITG_21006   |

|   |      |                 |
|---|------|-----------------|
| 0 | 0    | 3 NA            |
| 0 | 21   | 4 PITG_07210    |
| 0 | 90   | 2 PITG_02820    |
| 0 | 205  | 198 PITG_06171  |
| 0 | 527  | 156 NA          |
| 0 | 45   | 38 PITG_16322   |
| 2 | 486  | 1307 PITG_13371 |
| 0 | 112  | 213 PITG_08495  |
| 0 | 170  | 154 PITG_01067  |
| 0 | 154  | 44 NA           |
| 0 | 27   | 24 PITG_11702   |
| 0 | 17   | 6 NA            |
| 0 | 97   | 0 PITG_05313    |
| 0 | 6    | 2 NA            |
| 0 | 190  | 261 PITG_02039  |
| 0 | 114  | 41 PITG_18651   |
| 0 | 197  | 91 PITG_19608   |
| 0 | 128  | 96 PITG_07121   |
| 0 | 3147 | 2024 PITG_16382 |
| 0 | 54   | 0 NA            |
| 0 | 281  | 91 PITG_12534   |
| 0 | 2    | 8 PITG_04603    |
| 0 | 67   | 35 PITG_05653   |
| 0 | 11   | 16 PITG_10936   |
| 0 | 829  | 546 PITG_12427  |
| 0 | 28   | 19 NA           |
| 0 | 36   | 12 PITG_04426   |
| 0 | 320  | 213 PITG_17929  |
| 0 | 2    | 9 PITG_15006    |
| 0 | 5    | 2 PITG_00935    |
| 0 | 15   | 21 PITG_10993   |
| 0 | 269  | 82 PITG_19005   |
| 0 | 7    | 0 PITG_14993    |
| 0 | 35   | 37 NA           |
| 0 | 18   | 0 PITG_12915    |
| 0 | 65   | 27 PITG_08613   |
| 0 | 66   | 11 NA           |
| 0 | 10   | 0 NA            |
| 0 | 27   | 5 PITG_21176    |
| 0 | 108  | 95 PITG_05141   |
| 0 | 0    | 0 PITG_15191    |
| 0 | 10   | 4 NA            |
| 0 | 4    | 2 PITG_02849    |
| 0 | 6    | 14 PITG_21171   |
| 0 | 0    | 2 NA            |
| 0 | 0    | 0 PITG_22087    |
| 0 | 34   | 4 PITG_00294    |

|   |      |                |
|---|------|----------------|
| 0 | 1663 | 549 PITG_05593 |
| 0 | 19   | 5 PITG_14415   |
| 0 | 4    | 56 PITG_11459  |
| 0 | 126  | 160 NA         |
| 0 | 17   | 25 NA          |
| 0 | 0    | 4 PITG_01817   |
| 0 | 63   | 91 PITG_08132  |
| 0 | 38   | 221 PITG_02344 |
| 0 | 588  | 727 PITG_08000 |
| 0 | 4    | 0 PITG_19516   |
| 0 | 296  | 328 PITG_07300 |
| 0 | 18   | 9 PITG_12530   |
| 0 | 555  | 687 PITG_18947 |
| 0 | 0    | 0 NA           |
| 0 | 0    | 22 PITG_04283  |
| 0 | 226  | 129 PITG_12191 |
| 0 | 19   | 23 PITG_14229  |
| 0 | 61   | 35 PITG_19163  |
| 0 | 2    | 0 PITG_13747   |
| 0 | 187  | 63 PITG_00401  |
| 0 | 15   | 3 PITG_08460   |
| 0 | 15   | 6 PITG_00855   |
| 0 | 7    | 0 PITG_02031   |
| 0 | 26   | 9 PITG_09067   |
| 0 | 6    | 0 NA           |
| 0 | 2    | 6 PITG_02529   |
| 2 | 670  | 642 PITG_03486 |
| 0 | 6    | 2 PITG_00945   |
| 0 | 61   | 11 PITG_00022  |
| 0 | 11   | 0 PITG_02805   |
| 0 | 118  | 0 PITG_05450   |
| 4 | 0    | 0 NA           |
| 0 | 95   | 25 PITG_00849  |
| 0 | 34   | 2 NA           |
| 0 | 180  | 4 PITG_02196   |
| 0 | 376  | 86 PITG_05412  |
| 0 | 413  | 872 PITG_11630 |
| 0 | 176  | 586 PITG_11116 |
| 0 | 18   | 4 NA           |
| 0 | 187  | 2 PITG_03698   |
| 0 | 399  | 502 PITG_19054 |
| 0 | 30   | 4 PITG_03016   |
| 0 | 211  | 95 PITG_01702  |
| 0 | 17   | 15 PITG_21400  |
| 0 | 18   | 0 NA           |
| 0 | 528  | 16 NA          |
| 0 | 328  | 37 PITG_17947  |

|   |      |                 |
|---|------|-----------------|
| 0 | 0    | 17 PITG_01867   |
| 0 | 24   | 21 PITG_13673   |
| 0 | 6    | 5 NA            |
| 0 | 2    | 2 PITG_20787    |
| 0 | 48   | 4 NA            |
| 0 | 8    | 12 PITG_19153   |
| 0 | 9    | 7 PITG_13804    |
| 0 | 335  | 452 PITG_07155  |
| 0 | 45   | 24 PITG_18038   |
| 0 | 28   | 42 PITG_02197   |
| 0 | 16   | 9 PITG_12252    |
| 0 | 2    | 0 PITG_21025    |
| 0 | 9    | 0 PITG_08984    |
| 0 | 78   | 34 PITG_21054   |
| 0 | 48   | 24 PITG_09895   |
| 0 | 165  | 13 NA           |
| 0 | 3    | 0 PITG_13590    |
| 0 | 7    | 10 PITG_19639   |
| 0 | 0    | 4 PITG_19589    |
| 0 | 0    | 12 PITG_07960   |
| 2 | 159  | 624 PITG_14913  |
| 0 | 13   | 11 PITG_09534   |
| 0 | 3    | 12 PITG_09001   |
| 0 | 2    | 3 PITG_03215    |
| 0 | 11   | 31 PITG_03828   |
| 0 | 6    | 3 PITG_00627    |
| 0 | 0    | 10 PITG_03409   |
| 0 | 4    | 3 PITG_11247    |
| 0 | 54   | 6 NA            |
| 0 | 79   | 0 PITG_16669    |
| 4 | 1893 | 2055 PITG_00074 |
| 0 | 17   | 4 PITG_11719    |
| 0 | 30   | 8 PITG_00450    |
| 0 | 441  | 25 PITG_08594   |
| 0 | 94   | 64 PITG_18633   |
| 0 | 0    | 2 PITG_03356    |
| 0 | 21   | 0 PITG_11410    |
| 0 | 0    | 2 PITG_08575    |
| 0 | 459  | 296 PITG_00854  |
| 0 | 74   | 62 PITG_01361   |
| 0 | 5    | 11 PITG_09144   |
| 0 | 91   | 10 PITG_06580   |
| 0 | 6    | 32 PITG_05151   |
| 0 | 0    | 0 NA            |
| 0 | 5    | 0 PITG_01741    |
| 0 | 69   | 0 PITG_00952    |
| 0 | 67   | 7 PITG_05366    |

|      |      |                 |
|------|------|-----------------|
| 0    | 49   | 77 PITG_04600   |
| 0    | 5    | 0 PITG_19877    |
| 0    | 78   | 152 PITG_00663  |
| 0    | 185  | 182 PITG_18000  |
| 0    | 151  | 86 PITG_07865   |
| 0    | 481  | 165 PITG_10715  |
| 0    | 12   | 29 PITG_04043   |
| 0    | 231  | 99 PITG_09452   |
| 0    | 60   | 0 NA            |
| 0    | 5    | 4 NA            |
| 0    | 73   | 39 PITG_03399   |
| 0    | 6    | 3 PITG_06988    |
| 0    | 277  | 134 PITG_02971  |
| 0    | 18   | 9 PITG_04746    |
| 0    | 53   | 48 PITG_12694   |
| 0    | 4    | 5 PITG_04479    |
| 0    | 1896 | 586 PITG_09400  |
| 0    | 27   | 6 PITG_18027    |
| 0    | 0    | 0 PITG_00416    |
| 2    | 688  | 2222 PITG_18052 |
| 0    | 318  | 325 PITG_13168  |
| 0    | 16   | 27 PITG_04481   |
| 0    | 4    | 0 NA            |
| 0    | 0    | 6 NA            |
| 0    | 5    | 14 PITG_13776   |
| 0    | 63   | 13 NA           |
| 0    | 7    | 5 NA            |
| 0    | 1866 | 1630 PITG_02026 |
| 0    | 989  | 1615 PITG_09798 |
| 0    | 79   | 26 PITG_12739   |
| 0    | 2    | 5 PITG_17028    |
| 1004 | 30   | 866 NA          |
| 0    | 387  | 871 PITG_06449  |
| 0    | 9    | 11 NA           |
| 0    | 1784 | 2152 PITG_11290 |
| 0    | 90   | 26 NA           |
| 6    | 0    | 4 NA            |
| 0    | 6    | 10 PITG_12753   |
| 0    | 0    | 0 PITG_02692    |
| 0    | 53   | 0 PITG_01683    |
| 0    | 111  | 90 PITG_15968   |
| 0    | 158  | 94 PITG_02729   |
| 0    | 37   | 28 PITG_04365   |
| 0    | 16   | 5 PITG_00732    |
| 0    | 34   | 14 PITG_00486   |
| 0    | 12   | 2 PITG_00989    |
| 0    | 0    | 0 PITG_23029    |

|   |     |                |
|---|-----|----------------|
| 0 | 19  | 26 PITG_19174  |
| 0 | 29  | 16 NA          |
| 0 | 0   | 14 NA          |
| 0 | 7   | 12 PITG_09292  |
| 0 | 54  | 24 PITG_17107  |
| 0 | 0   | 0 NA           |
| 0 | 69  | 2 PITG_02814   |
| 0 | 2   | 21 PITG_17273  |
| 0 | 0   | 0 PITG_03864   |
| 0 | 86  | 38 PITG_03130  |
| 0 | 149 | 220 PITG_20081 |
| 0 | 28  | 25 NA          |
| 0 | 0   | 0 PITG_07190   |
| 0 | 258 | 371 PITG_12578 |
| 0 | 16  | 11 PITG_01961  |
| 0 | 25  | 2 PITG_11321   |
| 0 | 990 | 224 PITG_09434 |
| 0 | 63  | 24 PITG_00699  |
| 0 | 301 | 206 PITG_01549 |
| 0 | 148 | 58 PITG_02729  |
| 0 | 135 | 33 NA          |
| 0 | 314 | 321 PITG_04831 |
| 0 | 13  | 4 PITG_18106   |
| 0 | 0   | 4 PITG_11267   |
| 0 | 14  | 10 NA          |
| 0 | 5   | 0 NA           |
| 0 | 2   | 0 PITG_09006   |
| 0 | 2   | 20 PITG_13366  |
| 0 | 12  | 2 PITG_08420   |
| 0 | 21  | 8 PITG_09364   |
| 0 | 64  | 34 NA          |
| 0 | 65  | 27 PITG_02533  |
| 0 | 11  | 0 NA           |
| 0 | 32  | 20 PITG_19939  |
| 0 | 179 | 219 PITG_18912 |
| 0 | 6   | 8 PITG_09819   |
| 0 | 0   | 0 NA           |
| 0 | 80  | 55 PITG_08016  |
| 0 | 71  | 42 PITG_00747  |
| 0 | 0   | 0 NA           |
| 0 | 48  | 43 PITG_16809  |
| 0 | 22  | 0 PITG_17393   |
| 0 | 28  | 0 PITG_21556   |
| 0 | 829 | 233 PITG_00172 |
| 0 | 81  | 139 PITG_04538 |
| 0 | 13  | 4 PITG_13844   |
| 0 | 0   | 13 PITG_02036  |

|     |     |                |
|-----|-----|----------------|
| 0   | 16  | 22 PITG_11594  |
| 0   | 56  | 2 PITG_10351   |
| 0   | 127 | 133 PITG_21278 |
| 0   | 800 | 313 PITG_10967 |
| 0   | 2   | 0 PITG_05176   |
| 0   | 170 | 158 PITG_06173 |
| 0   | 25  | 6 PITG_03709   |
| 2   | 407 | 944 PITG_15069 |
| 0   | 206 | 117 PITG_00855 |
| 0   | 4   | 2 NA           |
| 0   | 23  | 49 PITG_01737  |
| 0   | 114 | 156 NA         |
| 0   | 205 | 69 PITG_03741  |
| 0   | 11  | 9 PITG_10993   |
| 0   | 31  | 103 PITG_08740 |
| 0   | 96  | 62 PITG_00218  |
| 0   | 4   | 0 PITG_09890   |
| 0   | 23  | 15 PITG_03223  |
| 0   | 702 | 492 PITG_11959 |
| 0   | 20  | 14 NA          |
| 0   | 0   | 0 NA           |
| 0   | 7   | 6 PITG_00169   |
| 20  | 0   | 36 NA          |
| 0   | 64  | 5 NA           |
| 3   | 475 | 689 NA         |
| 0   | 536 | 381 PITG_21077 |
| 0   | 14  | 5 PITG_17945   |
| 0   | 147 | 124 PITG_15377 |
| 0   | 13  | 0 PITG_14917   |
| 0   | 8   | 16 PITG_15442  |
| 259 | 36  | 158 NA         |
| 0   | 30  | 52 PITG_02384  |
| 0   | 10  | 0 PITG_04670   |
| 0   | 613 | 551 PITG_01042 |
| 0   | 71  | 34 NA          |
| 0   | 10  | 9 PITG_21215   |
| 0   | 2   | 21 NA          |
| 0   | 168 | 164 PITG_20780 |
| 0   | 23  | 39 PITG_17245  |
| 0   | 468 | 129 PITG_09722 |
| 0   | 129 | 16 PITG_16117  |
| 0   | 242 | 621 PITG_12561 |
| 0   | 0   | 2 NA           |
| 0   | 2   | 0 PITG_11231   |
| 0   | 13  | 2 NA           |
| 0   | 267 | 566 PITG_11712 |
| 0   | 12  | 0 PITG_03160   |



|     |     |                 |
|-----|-----|-----------------|
| 0   | 21  | 4 NA            |
| 0   | 17  | 39 PITG_04538   |
| 469 | 0   | 223 NA          |
| 0   | 92  | 136 PITG_15640  |
| 0   | 32  | 29 NA           |
| 0   | 45  | 64 PITG_00770   |
| 0   | 0   | 0 PITG_13306    |
| 0   | 14  | 0 PITG_01775    |
| 0   | 95  | 26 PITG_17501   |
| 0   | 15  | 6 NA            |
| 0   | 91  | 102 NA          |
| 0   | 10  | 45 NA           |
| 0   | 14  | 19 PITG_16809   |
| 0   | 0   | 2 PITG_11592    |
| 0   | 25  | 17 PITG_16649   |
| 0   | 0   | 2 PITG_10539    |
| 0   | 9   | 11 PITG_02487   |
| 0   | 12  | 0 PITG_10911    |
| 0   | 0   | 0 NA            |
| 0   | 56  | 374 PITG_21488  |
| 0   | 2   | 9 NA            |
| 0   | 115 | 95 NA           |
| 0   | 7   | 2 PITG_09855    |
| 0   | 21  | 0 NA            |
| 0   | 297 | 171 PITG_12260  |
| 0   | 196 | 203 PITG_17517  |
| 0   | 398 | 708 PITG_19802  |
| 0   | 26  | 2 NA            |
| 0   | 0   | 45 NA           |
| 0   | 263 | 32 NA           |
| 0   | 0   | 0 PITG_08413    |
| 0   | 17  | 55 PITG_15960   |
| 0   | 5   | 4 PITG_04104    |
| 0   | 177 | 27 PITG_03778   |
| 0   | 37  | 6 PITG_08427    |
| 0   | 3   | 3 PITG_18543    |
| 0   | 8   | 5 PITG_01326    |
| 0   | 151 | 64 PITG_00178   |
| 0   | 178 | 157 PITG_16058  |
| 0   | 513 | 1034 PITG_17007 |
| 0   | 10  | 10 PITG_20081   |
| 0   | 72  | 40 PITG_02755   |
| 0   | 13  | 2 NA            |
| 0   | 140 | 103 PITG_20491  |
| 0   | 2   | 0 NA            |
| 0   | 26  | 10 PITG_04715   |
| 0   | 73  | 66 PITG_05592   |

|   |      |                 |
|---|------|-----------------|
| 0 | 81   | 120 PITG_14013  |
| 0 | 0    | 0 NA            |
| 0 | 3    | 2 PITG_22715    |
| 0 | 4    | 21 PITG_13167   |
| 0 | 2    | 5 PITG_04506    |
| 0 | 15   | 19 PITG_06289   |
| 0 | 21   | 34 NA           |
| 0 | 127  | 218 PITG_09965  |
| 0 | 6    | 8 PITG_10129    |
| 0 | 31   | 5 PITG_03166    |
| 0 | 36   | 0 PITG_02679    |
| 0 | 34   | 21 PITG_20217   |
| 0 | 68   | 18 PITG_21172   |
| 0 | 11   | 22 PITG_20173   |
| 0 | 2    | 2 PITG_03200    |
| 0 | 8    | 20 NA           |
| 0 | 0    | 0 PITG_16956    |
| 0 | 254  | 133 PITG_09890  |
| 0 | 1735 | 1064 PITG_19023 |
| 0 | 76   | 37 PITG_01848   |
| 0 | 9    | 8 PITG_00116    |
| 0 | 0    | 0 PITG_18507    |
| 0 | 0    | 0 PITG_04701    |
| 0 | 0    | 0 NA            |
| 0 | 50   | 121 NA          |
| 0 | 4    | 23 NA           |
| 2 | 203  | 1129 PITG_01752 |
| 0 | 17   | 6 NA            |
| 5 | 0    | 256 NA          |
| 0 | 81   | 33 PITG_10590   |
| 0 | 35   | 38 PITG_21886   |
| 2 | 0    | 2 PITG_04618    |
| 0 | 530  | 404 PITG_06851  |
| 0 | 64   | 12 PITG_04928   |
| 0 | 24   | 14 NA           |
| 0 | 4    | 11 PITG_11854   |
| 0 | 490  | 549 PITG_18089  |
| 0 | 29   | 22 NA           |
| 0 | 14   | 0 PITG_13201    |
| 0 | 0    | 4 PITG_05537    |
| 0 | 77   | 48 PITG_10648   |
| 0 | 18   | 20 PITG_04820   |
| 0 | 10   | 7 PITG_19045    |
| 0 | 134  | 270 NA          |
| 0 | 113  | 113 PITG_13159  |
| 0 | 163  | 85 NA           |
| 0 | 0    | 0 NA            |

|   |     |                |
|---|-----|----------------|
| 0 | 14  | 7 PITG_08093   |
| 0 | 179 | 92 PITG_00719  |
| 0 | 32  | 2 NA           |
| 0 | 13  | 2 PITG_01341   |
| 0 | 31  | 45 PITG_03753  |
| 0 | 5   | 4 NA           |
| 0 | 23  | 8 PITG_13558   |
| 3 | 82  | 88 PITG_13676  |
| 0 | 12  | 5 NA           |
| 0 | 24  | 10 PITG_00542  |
| 0 | 9   | 4 PITG_03111   |
| 0 | 94  | 61 PITG_06450  |
| 0 | 133 | 54 PITG_13041  |
| 0 | 32  | 13 PITG_10275  |
| 0 | 425 | 476 PITG_00183 |
| 0 | 37  | 72 PITG_14573  |
| 0 | 173 | 40 PITG_11723  |
| 0 | 90  | 99 PITG_03822  |
| 0 | 2   | 12 PITG_06664  |
| 0 | 2   | 0 NA           |
| 0 | 722 | 376 PITG_00820 |
| 0 | 123 | 57 NA          |
| 0 | 0   | 0 PITG_07727   |
| 0 | 92  | 154 PITG_22835 |
| 0 | 10  | 28 PITG_21023  |
| 0 | 9   | 16 PITG_05553  |
| 0 | 64  | 21 PITG_01920  |
| 0 | 48  | 55 PITG_00980  |
| 2 | 104 | 477 PITG_18052 |
| 0 | 57  | 25 PITG_14113  |
| 0 | 217 | 9 PITG_14609   |
| 0 | 213 | 110 PITG_01184 |
| 0 | 23  | 7 NA           |
| 0 | 12  | 0 NA           |
| 0 | 10  | 27 PITG_05781  |
| 0 | 5   | 9 PITG_00164   |
| 0 | 86  | 49 PITG_12119  |
| 0 | 14  | 41 PITG_20081  |
| 0 | 43  | 21 PITG_02384  |
| 0 | 2   | 0 NA           |
| 0 | 6   | 2 NA           |
| 0 | 6   | 7 PITG_01722   |
| 0 | 46  | 78 PITG_18707  |
| 2 | 104 | 462 PITG_05156 |
| 0 | 277 | 100 PITG_09593 |
| 0 | 7   | 12 PITG_14576  |
| 0 | 20  | 12 PITG_11816  |

|   |     |                |
|---|-----|----------------|
| 0 | 15  | 24 NA          |
| 0 | 206 | 22 PITG_17312  |
| 0 | 6   | 7 PITG_13775   |
| 0 | 2   | 17 PITG_05508  |
| 0 | 4   | 4 PITG_21509   |
| 0 | 2   | 3 PITG_18735   |
| 6 | 0   | 2 NA           |
| 0 | 109 | 8 PITG_00524   |
| 0 | 10  | 17 PITG_05737  |
| 0 | 5   | 11 PITG_15739  |
| 0 | 129 | 2 PITG_22522   |
| 0 | 735 | 144 PITG_12947 |
| 0 | 0   | 0 PITG_01677   |
| 0 | 11  | 7 PITG_18976   |
| 0 | 103 | 318 NA         |
| 0 | 18  | 8 NA           |
| 0 | 144 | 0 PITG_19450   |
| 0 | 39  | 82 PITG_08234  |
| 0 | 87  | 585 PITG_18052 |
| 0 | 51  | 26 PITG_20125  |
| 0 | 41  | 53 PITG_03561  |
| 0 | 84  | 274 PITG_12153 |
| 0 | 194 | 107 PITG_02327 |
| 0 | 2   | 0 PITG_09628   |
| 0 | 459 | 246 PITG_17730 |
| 0 | 492 | 900 PITG_09306 |
| 0 | 82  | 340 PITG_14237 |
| 0 | 0   | 2 PITG_07200   |
| 0 | 100 | 86 PITG_01748  |
| 0 | 300 | 578 PITG_11069 |
| 0 | 448 | 269 PITG_21380 |
| 0 | 34  | 0 NA           |
| 0 | 145 | 82 PITG_02043  |
| 0 | 0   | 12 PITG_08801  |
| 0 | 4   | 22 PITG_14637  |
| 0 | 18  | 7 NA           |
| 0 | 522 | 388 PITG_14615 |
| 0 | 6   | 0 NA           |
| 0 | 187 | 75 PITG_19180  |
| 0 | 88  | 298 PITG_18452 |
| 0 | 307 | 47 NA          |
| 0 | 45  | 7 PITG_21962   |
| 0 | 430 | 408 PITG_04500 |
| 0 | 20  | 48 PITG_11274  |
| 0 | 57  | 34 PITG_03330  |
| 0 | 37  | 6 PITG_00563   |
| 0 | 12  | 15 NA          |

|   |      |                |
|---|------|----------------|
| 0 | 101  | 87 PITG_01950  |
| 0 | 4    | 15 PITG_12933  |
| 0 | 5    | 3 PITG_14606   |
| 0 | 5    | 21 PITG_10119  |
| 0 | 6    | 2 PITG_02194   |
| 0 | 30   | 3 PITG_14918   |
| 0 | 206  | 150 PITG_09704 |
| 0 | 565  | 542 PITG_06649 |
| 2 | 336  | 483 PITG_07947 |
| 0 | 0    | 7 PITG_02642   |
| 0 | 120  | 27 NA          |
| 0 | 1306 | 975 PITG_20795 |
| 0 | 27   | 21 PITG_22427  |
| 0 | 17   | 2 NA           |
| 0 | 348  | 212 PITG_10152 |
| 0 | 0    | 9 NA           |
| 0 | 7    | 0 NA           |
| 0 | 14   | 3 NA           |
| 0 | 111  | 13 PITG_19147  |
| 0 | 3    | 0 NA           |
| 0 | 12   | 33 PITG_11782  |
| 0 | 8    | 10 NA          |
| 0 | 25   | 2 PITG_05816   |
| 0 | 37   | 20 PITG_17031  |
| 0 | 31   | 27 PITG_08314  |
| 0 | 4    | 2 PITG_10783   |
| 0 | 19   | 5 PITG_14169   |
| 0 | 58   | 217 PITG_11099 |
| 0 | 0    | 0 NA           |
| 0 | 0    | 2 PITG_19048   |
| 0 | 49   | 15 PITG_10499  |
| 0 | 5    | 7 PITG_00524   |
| 0 | 68   | 40 PITG_11470  |
| 0 | 5603 | 5939 NA        |
| 0 | 255  | 991 PITG_14180 |
| 0 | 63   | 83 PITG_04820  |
| 0 | 6    | 4 PITG_00406   |
| 0 | 161  | 278 PITG_07972 |
| 0 | 2194 | 723 PITG_13551 |
| 0 | 24   | 2 PITG_08826   |
| 0 | 132  | 9 NA           |
| 0 | 3263 | 997 PITG_11997 |
| 0 | 39   | 30 PITG_22687  |
| 0 | 64   | 21 PITG_19006  |
| 0 | 156  | 9 NA           |
| 0 | 9    | 4 PITG_13015   |
| 0 | 17   | 19 PITG_20463  |

|   |      |                 |
|---|------|-----------------|
| 0 | 101  | 9 NA            |
| 0 | 123  | 357 PITG_11139  |
| 0 | 9    | 0 PITG_08984    |
| 0 | 378  | 47 NA           |
| 0 | 3    | 0 NA            |
| 2 | 317  | 1171 PITG_18720 |
| 0 | 200  | 356 PITG_11405  |
| 0 | 30   | 4 PITG_04611    |
| 0 | 18   | 0 NA            |
| 0 | 2150 | 1168 PITG_03583 |
| 0 | 284  | 440 PITG_01401  |
| 0 | 0    | 7 NA            |
| 0 | 6    | 4 PITG_22428    |
| 0 | 64   | 39 PITG_09698   |
| 0 | 5    | 9 PITG_11169    |
| 0 | 2    | 0 NA            |
| 0 | 91   | 40 PITG_05255   |
| 0 | 410  | 79 PITG_05501   |
| 0 | 20   | 24 PITG_15053   |
| 7 | 576  | 4476 PITG_11913 |
| 0 | 2    | 0 PITG_04873    |
| 0 | 25   | 30 PITG_01932   |
| 0 | 7    | 7 NA            |
| 0 | 264  | 223 PITG_15492  |
| 0 | 11   | 4 PITG_17746    |
| 0 | 15   | 12 PITG_07852   |
| 0 | 6    | 7 PITG_21211    |
| 0 | 188  | 169 PITG_13139  |
| 0 | 4    | 13 PITG_02343   |
| 0 | 79   | 17 PITG_01951   |
| 0 | 107  | 169 PITG_15248  |
| 0 | 55   | 556 PITG_11069  |
| 0 | 54   | 26 PITG_05738   |
| 0 | 6    | 0 PITG_16474    |
| 0 | 43   | 67 NA           |
| 0 | 166  | 513 PITG_03353  |
| 0 | 4    | 0 PITG_06118    |
| 0 | 276  | 242 PITG_12049  |
| 0 | 45   | 15 PITG_02976   |
| 0 | 201  | 12 PITG_18396   |
| 0 | 51   | 27 NA           |
| 0 | 28   | 9 PITG_21872    |
| 0 | 958  | 247 PITG_06237  |
| 0 | 1516 | 333 PITG_06237  |
| 0 | 4    | 0 NA            |
| 0 | 54   | 10 PITG_02712   |
| 0 | 151  | 173 PITG_12691  |

|   |      |                |
|---|------|----------------|
| 0 | 6    | 8 PITG_22924   |
| 0 | 14   | 25 PITG_03303  |
| 0 | 0    | 2 NA           |
| 0 | 8    | 2 PITG_03569   |
| 0 | 40   | 22 PITG_06259  |
| 0 | 36   | 42 PITG_03505  |
| 0 | 53   | 32 PITG_13803  |
| 0 | 74   | 52 PITG_09626  |
| 0 | 11   | 0 PITG_02054   |
| 0 | 28   | 23 PITG_07160  |
| 0 | 9    | 14 PITG_15735  |
| 0 | 107  | 38 NA          |
| 0 | 528  | 287 PITG_05941 |
| 0 | 289  | 61 PITG_21128  |
| 0 | 42   | 5 PITG_19174   |
| 0 | 18   | 29 PITG_20087  |
| 0 | 143  | 78 PITG_05421  |
| 0 | 62   | 44 PITG_15694  |
| 0 | 227  | 55 PITG_11789  |
| 0 | 14   | 2 NA           |
| 0 | 23   | 8 PITG_00020   |
| 0 | 26   | 70 PITG_19237  |
| 0 | 66   | 37 PITG_12531  |
| 0 | 104  | 43 PITG_00198  |
| 0 | 184  | 66 PITG_01246  |
| 0 | 544  | 659 PITG_11603 |
| 0 | 2    | 11 PITG_08751  |
| 0 | 87   | 87 PITG_13751  |
| 0 | 15   | 46 PITG_00263  |
| 0 | 0    | 0 PITG_20197   |
| 0 | 216  | 224 PITG_02537 |
| 0 | 34   | 28 PITG_10061  |
| 0 | 311  | 58 NA          |
| 0 | 2    | 0 PITG_08693   |
| 0 | 4    | 4 PITG_15100   |
| 0 | 23   | 0 PITG_00882   |
| 0 | 65   | 63 PITG_16207  |
| 0 | 0    | 0 PITG_17026   |
| 0 | 2    | 15 PITG_11822  |
| 0 | 263  | 47 PITG_14391  |
| 0 | 29   | 41 PITG_00045  |
| 0 | 6    | 6 PITG_19115   |
| 0 | 26   | 18 PITG_13493  |
| 0 | 56   | 21 NA          |
| 0 | 68   | 42 PITG_05404  |
| 0 | 326  | 29 NA          |
| 0 | 1231 | 714 PITG_15492 |

|   |     |                |
|---|-----|----------------|
| 0 | 9   | 30 PITG_05289  |
| 0 | 18  | 52 PITG_10343  |
| 0 | 66  | 16 NA          |
| 0 | 43  | 11 NA          |
| 0 | 6   | 0 PITG_02325   |
| 0 | 5   | 4 PITG_15167   |
| 0 | 4   | 4 PITG_21049   |
| 0 | 19  | 0 NA           |
| 0 | 82  | 309 NA         |
| 0 | 30  | 18 PITG_00167  |
| 0 | 9   | 8 PITG_14863   |
| 0 | 182 | 219 PITG_22894 |
| 0 | 610 | 26 PITG_01833  |
| 0 | 10  | 2 NA           |
| 0 | 51  | 19 PITG_11183  |
| 0 | 107 | 40 PITG_18018  |
| 0 | 17  | 23 PITG_02971  |
| 0 | 573 | 477 PITG_18011 |
| 0 | 0   | 0 NA           |
| 0 | 0   | 14 PITG_17699  |
| 0 | 43  | 37 PITG_02893  |
| 0 | 143 | 49 PITG_00167  |
| 0 | 55  | 0 NA           |
| 0 | 187 | 131 NA         |
| 0 | 2   | 8 PITG_03076   |
| 0 | 8   | 11 NA          |
| 0 | 62  | 200 PITG_05183 |
| 0 | 24  | 60 PITG_17668  |
| 0 | 0   | 0 PITG_04232   |
| 0 | 447 | 95 PITG_08709  |
| 0 | 0   | 0 PITG_08913   |
| 0 | 2   | 2 PITG_01282   |
| 0 | 89  | 71 PITG_14462  |
| 0 | 76  | 86 PITG_08926  |
| 0 | 51  | 19 PITG_18474  |
| 0 | 0   | 35 PITG_03561  |
| 0 | 8   | 41 PITG_17600  |
| 0 | 3   | 2 NA           |
| 0 | 284 | 138 PITG_01822 |
| 0 | 38  | 28 PITG_12213  |
| 0 | 0   | 0 PITG_20047   |
| 0 | 29  | 0 NA           |
| 0 | 18  | 0 NA           |
| 0 | 116 | 6 PITG_01200   |
| 0 | 11  | 10 PITG_21183  |
| 0 | 12  | 2 NA           |
| 0 | 3   | 0 PITG_15191   |



|    |     |                |
|----|-----|----------------|
| 0  | 39  | 11 PITG_00530  |
| 0  | 130 | 71 PITG_05737  |
| 0  | 56  | 2 PITG_03391   |
| 0  | 0   | 0 PITG_21568   |
| 0  | 3   | 2 PITG_18173   |
| 0  | 2   | 0 PITG_05761   |
| 0  | 0   | 2 PITG_05552   |
| 0  | 23  | 56 PITG_18452  |
| 11 | 31  | 1168 NA        |
| 0  | 173 | 242 PITG_08025 |
| 0  | 10  | 27 PITG_17490  |
| 0  | 9   | 6 PITG_06673   |
| 0  | 29  | 61 PITG_22319  |
| 0  | 63  | 8 NA           |
| 0  | 608 | 205 PITG_17929 |
| 0  | 2   | 0 NA           |
| 0  | 45  | 27 NA          |
| 0  | 49  | 9 PITG_03369   |
| 0  | 112 | 150 PITG_09772 |
| 0  | 147 | 81 PITG_09748  |
| 0  | 12  | 0 PITG_10166   |
| 0  | 5   | 2 NA           |
| 0  | 0   | 8 NA           |
| 0  | 206 | 778 PITG_09655 |
| 0  | 86  | 10 PITG_00454  |
| 0  | 487 | 164 PITG_16680 |
| 0  | 572 | 388 PITG_03199 |
| 0  | 31  | 39 PITG_09067  |
| 0  | 0   | 0 NA           |
| 0  | 15  | 173 PITG_21378 |
| 0  | 37  | 24 NA          |
| 0  | 11  | 0 NA           |
| 0  | 333 | 30 PITG_17001  |
| 0  | 70  | 65 PITG_03130  |
| 0  | 0   | 2 PITG_10012   |
| 0  | 295 | 99 PITG_14608  |
| 0  | 33  | 71 PITG_01897  |
| 0  | 335 | 208 PITG_06566 |
| 0  | 5   | 3 PITG_16348   |
| 0  | 108 | 32 PITG_05818  |
| 0  | 5   | 0 PITG_02500   |
| 0  | 96  | 22 PITG_13839  |
| 0  | 5   | 10 NA          |
| 0  | 71  | 59 PITG_07256  |
| 0  | 12  | 27 PITG_11161  |
| 0  | 0   | 0 PITG_17599   |
| 0  | 74  | 286 PITG_07671 |

|   |     |                |
|---|-----|----------------|
| 0 | 27  | 25 PITG_05557  |
| 0 | 28  | 33 PITG_12650  |
| 0 | 95  | 81 PITG_11364  |
| 0 | 68  | 5 PITG_10650   |
| 0 | 3   | 7 PITG_03850   |
| 0 | 33  | 115 PITG_14180 |
| 0 | 394 | 346 NA         |
| 0 | 296 | 213 PITG_13139 |
| 0 | 38  | 26 PITG_01068  |
| 0 | 0   | 9 NA           |
| 0 | 4   | 5 PITG_20374   |
| 0 | 55  | 21 NA          |
| 0 | 16  | 9 PITG_11016   |
| 0 | 29  | 11 NA          |
| 0 | 86  | 16 PITG_02842  |
| 0 | 23  | 13 NA          |
| 0 | 18  | 20 NA          |
| 0 | 118 | 74 PITG_12913  |
| 0 | 24  | 4 PITG_09285   |
| 0 | 96  | 32 PITG_05423  |
| 0 | 5   | 2 PITG_15660   |
| 0 | 2   | 2 PITG_03127   |
| 0 | 183 | 81 PITG_05449  |
| 0 | 28  | 6 NA           |
| 0 | 4   | 6 PITG_08236   |
| 0 | 24  | 10 PITG_01395  |
| 0 | 0   | 0 PITG_07230   |
| 0 | 4   | 11 PITG_02348  |
| 0 | 48  | 37 NA          |
| 0 | 2   | 0 NA           |
| 0 | 0   | 0 PITG_02230   |
| 0 | 66  | 12 PITG_06690  |
| 0 | 88  | 10 PITG_06690  |
| 0 | 12  | 4 PITG_00051   |
| 0 | 24  | 18 PITG_04874  |
| 0 | 5   | 8 PITG_19208   |
| 0 | 152 | 16 NA          |
| 0 | 114 | 67 PITG_19665  |
| 0 | 112 | 247 PITG_21128 |
| 0 | 582 | 213 PITG_13575 |
| 2 | 217 | 899 PITG_06415 |
| 0 | 2   | 62 PITG_05301  |
| 0 | 19  | 9 PITG_03740   |
| 0 | 204 | 569 PITG_00941 |
| 0 | 5   | 25 PITG_06766  |
| 0 | 795 | 722 PITG_08744 |
| 0 | 99  | 40 PITG_12148  |

|   |     |                |
|---|-----|----------------|
| 0 | 8   | 12 PITG_06764  |
| 0 | 78  | 39 PITG_02401  |
| 0 | 50  | 15 PITG_14257  |
| 0 | 48  | 26 PITG_00408  |
| 0 | 33  | 14 PITG_03478  |
| 0 | 0   | 0 NA           |
| 0 | 41  | 45 NA          |
| 0 | 4   | 13 PITG_20744  |
| 0 | 17  | 17 PITG_01287  |
| 0 | 429 | 0 PITG_03583   |
| 0 | 7   | 0 NA           |
| 0 | 617 | 354 PITG_12904 |
| 0 | 10  | 0 PITG_01293   |
| 0 | 133 | 146 PITG_08061 |
| 0 | 0   | 6 PITG_08584   |
| 0 | 7   | 0 PITG_06922   |
| 0 | 28  | 7 PITG_02757   |
| 0 | 14  | 9 NA           |
| 0 | 153 | 58 PITG_23128  |
| 0 | 13  | 8 PITG_09642   |
| 0 | 9   | 4 PITG_14231   |
| 0 | 474 | 22 PITG_01862  |
| 0 | 41  | 86 PITG_21488  |
| 0 | 9   | 2 NA           |
| 0 | 3   | 0 PITG_17201   |
| 0 | 10  | 2 NA           |
| 0 | 708 | 794 PITG_00395 |
| 0 | 173 | 104 PITG_11750 |
| 0 | 17  | 8 NA           |
| 0 | 149 | 50 PITG_10903  |
| 0 | 3   | 26 PITG_15873  |
| 0 | 7   | 17 PITG_04682  |
| 0 | 673 | 453 PITG_10513 |
| 0 | 240 | 80 PITG_04712  |
| 0 | 32  | 14 PITG_01294  |
| 0 | 17  | 8 PITG_04861   |
| 0 | 281 | 65 PITG_01652  |
| 0 | 67  | 11 NA          |
| 0 | 50  | 81 PITG_09428  |
| 0 | 0   | 2 PITG_16741   |
| 0 | 0   | 4 NA           |
| 0 | 425 | 35 PITG_03379  |
| 0 | 24  | 36 PITG_07145  |
| 0 | 114 | 19 PITG_09296  |
| 0 | 63  | 0 PITG_11982   |
| 0 | 0   | 0 PITG_02348   |
| 0 | 98  | 12 PITG_19313  |

|     |     |                 |
|-----|-----|-----------------|
| 0   | 43  | 56 PITG_09287   |
| 0   | 148 | 41 PITG_02960   |
| 0   | 15  | 0 PITG_02659    |
| 0   | 90  | 552 PITG_15449  |
| 0   | 237 | 33 PITG_07238   |
| 0   | 23  | 8 PITG_17706    |
| 0   | 97  | 27 PITG_00319   |
| 0   | 149 | 118 PITG_10052  |
| 0   | 9   | 0 PITG_10806    |
| 0   | 42  | 27 PITG_04395   |
| 0   | 0   | 0 PITG_06088    |
| 0   | 0   | 0 PITG_00450    |
| 0   | 0   | 2 PITG_19212    |
| 0   | 0   | 0 PITG_05762    |
| 0   | 29  | 25 PITG_20794   |
| 0   | 40  | 21 PITG_06618   |
| 187 | 3   | 196 NA          |
| 0   | 39  | 2 NA            |
| 0   | 134 | 8 PITG_19113    |
| 0   | 94  | 37 PITG_02119   |
| 0   | 675 | 1192 PITG_00910 |
| 0   | 12  | 56 PITG_17884   |
| 0   | 281 | 41 PITG_00947   |
| 0   | 2   | 0 PITG_06227    |
| 0   | 124 | 178 NA          |
| 0   | 41  | 13 PITG_04715   |
| 0   | 20  | 19 NA           |
| 0   | 81  | 74 PITG_20619   |
| 0   | 149 | 55 PITG_08048   |
| 0   | 6   | 2 PITG_05103    |
| 0   | 516 | 455 PITG_16757  |
| 0   | 25  | 47 PITG_08781   |
| 0   | 2   | 0 PITG_15217    |
| 0   | 23  | 24 PITG_11561   |
| 0   | 21  | 0 NA            |
| 0   | 188 | 33 PITG_03399   |
| 0   | 2   | 0 NA            |
| 0   | 0   | 0 PITG_06142    |
| 0   | 23  | 19 PITG_14055   |
| 0   | 37  | 2 PITG_10763    |
| 0   | 43  | 4 PITG_07949    |
| 0   | 9   | 6 PITG_11110    |
| 0   | 50  | 4 NA            |
| 2   | 282 | 60 PITG_04534   |
| 0   | 14  | 12 PITG_06903   |
| 0   | 0   | 4 PITG_10196    |
| 0   | 4   | 6 NA            |

|   |     |                |
|---|-----|----------------|
| 0 | 328 | 462 PITG_02137 |
| 0 | 297 | 544 PITG_03477 |
| 0 | 26  | 67 PITG_02255  |
| 0 | 368 | 172 PITG_01041 |
| 0 | 0   | 0 PITG_01390   |
| 0 | 0   | 0 NA           |
| 0 | 131 | 41 NA          |
| 0 | 294 | 195 PITG_00623 |
| 0 | 14  | 2 NA           |
| 0 | 0   | 0 PITG_14107   |
| 0 | 72  | 37 PITG_12980  |
| 0 | 260 | 287 PITG_14935 |
| 0 | 14  | 2 PITG_00454   |
| 0 | 205 | 232 PITG_06969 |
| 0 | 2   | 0 NA           |
| 0 | 4   | 2 PITG_18417   |
| 0 | 40  | 2 NA           |
| 0 | 505 | 105 PITG_05154 |
| 0 | 18  | 3 PITG_15470   |
| 0 | 196 | 108 PITG_10987 |
| 0 | 7   | 7 PITG_16810   |
| 0 | 30  | 19 PITG_03576  |
| 0 | 0   | 20 PITG_22065  |
| 0 | 423 | 210 PITG_20794 |
| 0 | 25  | 4 PITG_09403   |
| 0 | 9   | 61 PITG_01947  |
| 0 | 148 | 5 PITG_06886   |
| 0 | 0   | 4 PITG_13752   |
| 0 | 56  | 23 NA          |
| 0 | 2   | 21 PITG_17999  |
| 0 | 180 | 185 PITG_01504 |
| 0 | 5   | 0 PITG_12673   |
| 0 | 6   | 5 PITG_06769   |
| 0 | 6   | 9 PITG_05259   |
| 0 | 9   | 29 PITG_18833  |
| 0 | 77  | 34 PITG_12739  |
| 0 | 27  | 23 PITG_00439  |
| 0 | 93  | 57 PITG_02796  |
| 0 | 924 | 202 PITG_01322 |
| 0 | 18  | 17 NA          |
| 0 | 225 | 32 PITG_08626  |
| 0 | 0   | 0 NA           |
| 0 | 163 | 332 PITG_10185 |
| 2 | 0   | 6 NA           |
| 0 | 12  | 28 PITG_17930  |
| 0 | 5   | 54 PITG_18298  |
| 0 | 10  | 2 NA           |

|   |       |                |
|---|-------|----------------|
| 0 | 10    | 0 PITG_22662   |
| 0 | 2     | 2 PITG_01477   |
| 0 | 76    | 107 PITG_04647 |
| 0 | 6     | 0 PITG_03832   |
| 0 | 281   | 874 PITG_01082 |
| 0 | 60    | 53 PITG_12984  |
| 0 | 18    | 25 PITG_01239  |
| 0 | 10    | 2 PITG_03860   |
| 0 | 8     | 14 PITG_03364  |
| 0 | 16    | 2 PITG_01847   |
| 0 | 5     | 2 NA           |
| 0 | 20    | 4 PITG_12604   |
| 0 | 53    | 178 PITG_03463 |
| 0 | 61    | 23 PITG_14473  |
| 0 | 30    | 3 PITG_11295   |
| 0 | 110   | 15 PITG_05557  |
| 0 | 30    | 6 PITG_17001   |
| 0 | 14    | 13 PITG_03042  |
| 0 | 6     | 5 NA           |
| 0 | 292   | 69 PITG_00236  |
| 0 | 27    | 13 PITG_03408  |
| 0 | 11    | 19 PITG_10817  |
| 0 | 9     | 4 PITG_01003   |
| 0 | 10235 | 354 NA         |
| 0 | 231   | 157 PITG_02683 |
| 0 | 95    | 298 PITG_00172 |
| 0 | 8     | 4 PITG_21006   |
| 0 | 286   | 152 PITG_03906 |
| 0 | 124   | 117 PITG_03545 |
| 0 | 37    | 84 PITG_07993  |
| 0 | 4     | 11 PITG_12983  |
| 0 | 31    | 12 NA          |
| 0 | 0     | 10 PITG_08023  |
| 0 | 29    | 57 PITG_01783  |
| 0 | 20    | 30 PITG_07232  |
| 0 | 49    | 56 PITG_02034  |
| 0 | 19    | 2 PITG_09987   |
| 0 | 4     | 2 NA           |
| 0 | 257   | 211 PITG_18884 |
| 0 | 2     | 9 PITG_11183   |
| 0 | 35    | 25 PITG_00215  |
| 0 | 2     | 0 PITG_00416   |
| 0 | 12    | 2 PITG_06740   |
| 0 | 2     | 2 PITG_23273   |
| 0 | 6     | 3 PITG_14808   |
| 0 | 144   | 67 NA          |
| 0 | 2     | 0 PITG_05446   |

|   |     |                |
|---|-----|----------------|
| 0 | 0   | 6 NA           |
| 0 | 49  | 50 PITG_10895  |
| 0 | 81  | 16 PITG_02945  |
| 0 | 299 | 207 PITG_23287 |
| 0 | 567 | 110 PITG_06359 |
| 0 | 2   | 3 PITG_02764   |
| 0 | 361 | 180 PITG_11975 |
| 0 | 93  | 62 PITG_00833  |
| 0 | 3   | 0 PITG_00421   |
| 0 | 28  | 0 PITG_08252   |
| 0 | 134 | 169 PITG_05938 |
| 0 | 2   | 0 NA           |
| 0 | 10  | 0 PITG_14580   |
| 0 | 168 | 39 PITG_05679  |
| 0 | 41  | 159 PITG_12238 |
| 0 | 40  | 7 PITG_12082   |
| 0 | 707 | 475 PITG_09596 |
| 0 | 2   | 0 PITG_15864   |
| 0 | 0   | 0 PITG_01050   |
| 0 | 3   | 8 PITG_03658   |
| 0 | 16  | 0 NA           |
| 0 | 35  | 14 PITG_21394  |
| 0 | 110 | 7 PITG_03557   |
| 0 | 4   | 3 PITG_03942   |
| 0 | 32  | 7 PITG_09655   |
| 0 | 173 | 154 PITG_18045 |
| 0 | 14  | 2 PITG_17868   |
| 0 | 9   | 9 PITG_17868   |
| 0 | 91  | 43 PITG_02586  |
| 0 | 122 | 162 PITG_20317 |
| 0 | 154 | 69 PITG_02193  |
| 0 | 4   | 2 NA           |
| 0 | 14  | 24 PITG_09415  |
| 0 | 49  | 48 PITG_09579  |
| 0 | 0   | 2 NA           |
| 0 | 89  | 39 PITG_17387  |
| 0 | 192 | 103 PITG_11929 |
| 0 | 9   | 2 PITG_03237   |
| 0 | 81  | 330 PITG_12288 |
| 0 | 25  | 0 NA           |
| 0 | 2   | 4 PITG_11035   |
| 0 | 2   | 0 PITG_09194   |
| 0 | 20  | 22 PITG_04934  |
| 0 | 7   | 2 PITG_21049   |
| 0 | 0   | 2 PITG_09194   |
| 0 | 5   | 6 PITG_00077   |
| 0 | 741 | 547 PITG_04384 |

|   |     |                 |
|---|-----|-----------------|
| 0 | 31  | 16 PITG_00655   |
| 0 | 436 | 176 PITG_18421  |
| 0 | 127 | 25 PITG_13492   |
| 0 | 64  | 6 PITG_17795    |
| 0 | 46  | 39 NA           |
| 0 | 62  | 126 PITG_07790  |
| 0 | 25  | 0 NA            |
| 0 | 4   | 15 PITG_04820   |
| 0 | 40  | 2 NA            |
| 6 | 9   | 15 NA           |
| 0 | 14  | 2 PITG_16720    |
| 0 | 14  | 6 PITG_01674    |
| 0 | 113 | 85 PITG_06767   |
| 0 | 116 | 36 PITG_17745   |
| 0 | 77  | 22 PITG_21872   |
| 0 | 153 | 59 NA           |
| 0 | 28  | 0 PITG_05854    |
| 0 | 111 | 78 PITG_12233   |
| 0 | 0   | 0 PITG_03444    |
| 0 | 337 | 290 PITG_17457  |
| 0 | 118 | 46 NA           |
| 0 | 644 | 815 PITG_08832  |
| 0 | 4   | 10 NA           |
| 0 | 152 | 36 NA           |
| 0 | 92  | 93 PITG_17869   |
| 0 | 6   | 9 PITG_00297    |
| 0 | 29  | 27 PITG_10936   |
| 0 | 62  | 337 PITG_12286  |
| 0 | 155 | 174 PITG_15194  |
| 0 | 0   | 0 NA            |
| 0 | 157 | 383 PITG_00708  |
| 0 | 2   | 0 PITG_10764    |
| 0 | 69  | 48 PITG_08675   |
| 0 | 5   | 5 PITG_09193    |
| 0 | 8   | 10 NA           |
| 0 | 48  | 30 PITG_09310   |
| 0 | 0   | 4 PITG_07071    |
| 0 | 44  | 62 PITG_12286   |
| 0 | 96  | 12 PITG_15216   |
| 0 | 7   | 3 PITG_03476    |
| 7 | 588 | 3165 PITG_04640 |
| 0 | 29  | 15 PITG_14194   |
| 0 | 48  | 4 PITG_08011    |
| 0 | 10  | 29 NA           |
| 0 | 670 | 117 NA          |
| 0 | 27  | 0 PITG_19150    |
| 0 | 42  | 20 PITG_18099   |



|    |     |                 |
|----|-----|-----------------|
| 0  | 2   | 11 PITG_00494   |
| 0  | 4   | 17 PITG_04717   |
| 0  | 19  | 14 PITG_18657   |
| 0  | 30  | 14 PITG_03408   |
| 10 | 85  | 227 NA          |
| 0  | 2   | 2 PITG_02567    |
| 0  | 519 | 646 PITG_19161  |
| 0  | 302 | 1662 PITG_19017 |
| 0  | 17  | 22 PITG_07886   |
| 0  | 33  | 0 PITG_06013    |
| 0  | 0   | 2 PITG_16257    |
| 0  | 4   | 8 PITG_15191    |
| 0  | 75  | 61 PITG_06479   |
| 0  | 21  | 2 NA            |
| 0  | 94  | 77 PITG_21328   |
| 0  | 56  | 79 NA           |
| 0  | 98  | 140 NA          |
| 0  | 902 | 144 PITG_17790  |
| 0  | 0   | 2 PITG_00887    |
| 0  | 7   | 11 NA           |
| 0  | 353 | 199 PITG_05240  |
| 81 | 0   | 43 NA           |
| 0  | 106 | 10 PITG_02283   |
| 0  | 6   | 0 NA            |
| 0  | 5   | 0 PITG_21908    |
| 0  | 224 | 39 PITG_03987   |
| 0  | 71  | 13 PITG_17690   |
| 0  | 162 | 47 NA           |
| 0  | 57  | 6 PITG_09873    |
| 0  | 376 | 264 PITG_06428  |
| 0  | 8   | 6 PITG_03804    |
| 0  | 11  | 36 PITG_21514   |
| 0  | 0   | 0 PITG_03054    |
| 0  | 94  | 94 PITG_09567   |
| 0  | 6   | 2 PITG_16161    |
| 0  | 158 | 175 PITG_20794  |
| 0  | 20  | 0 NA            |
| 0  | 116 | 316 PITG_00203  |
| 0  | 22  | 0 PITG_12120    |
| 0  | 13  | 11 PITG_18464   |
| 0  | 58  | 94 PITG_15071   |
| 0  | 2   | 0 PITG_16668    |
| 0  | 27  | 10 NA           |
| 0  | 16  | 21 PITG_14863   |
| 0  | 3   | 6 PITG_10022    |
| 0  | 2   | 12 NA           |
| 0  | 3   | 2 PITG_11437    |

|   |      |                |
|---|------|----------------|
| 0 | 252  | 101 NA         |
| 0 | 2    | 0 PITG_20350   |
| 0 | 14   | 24 PITG_01777  |
| 0 | 199  | 171 PITG_08696 |
| 0 | 27   | 17 PITG_16063  |
| 0 | 47   | 10 PITG_15494  |
| 2 | 98   | 52 PITG_09863  |
| 0 | 0    | 4 PITG_14249   |
| 0 | 111  | 4 PITG_04969   |
| 0 | 141  | 148 PITG_00216 |
| 0 | 1761 | 447 PITG_04802 |
| 0 | 2    | 2 PITG_10821   |
| 0 | 44   | 2 NA           |
| 0 | 0    | 0 PITG_15806   |
| 0 | 7    | 6 PITG_16741   |
| 0 | 29   | 19 PITG_02887  |
| 0 | 97   | 30 PITG_08131  |
| 0 | 25   | 44 PITG_03519  |
| 0 | 150  | 4 PITG_15134   |
| 0 | 6    | 2 PITG_20197   |
| 0 | 125  | 111 PITG_01555 |
| 0 | 116  | 159 PITG_13252 |
| 0 | 3    | 9 PITG_06424   |
| 0 | 44   | 35 PITG_11700  |
| 0 | 872  | 891 PITG_11630 |
| 0 | 52   | 39 PITG_06890  |
| 0 | 79   | 13 PITG_02024  |
| 0 | 191  | 92 PITG_13768  |
| 0 | 260  | 219 PITG_02058 |
| 0 | 94   | 80 PITG_14637  |
| 0 | 4    | 0 NA           |
| 0 | 52   | 34 PITG_13412  |
| 0 | 264  | 965 PITG_05171 |
| 0 | 5    | 13 PITG_07514  |
| 0 | 9    | 0 PITG_11286   |
| 0 | 0    | 6 PITG_22568   |
| 0 | 14   | 0 NA           |
| 0 | 30   | 6 PITG_19111   |
| 0 | 4    | 23 PITG_00067  |
| 0 | 535  | 157 NA         |
| 0 | 149  | 58 NA          |
| 0 | 28   | 15 PITG_02024  |
| 0 | 224  | 30 PITG_13641  |
| 0 | 35   | 71 PITG_03095  |
| 0 | 20   | 0 NA           |
| 0 | 11   | 0 PITG_05805   |
| 0 | 25   | 24 NA          |

|   |     |                |
|---|-----|----------------|
| 0 | 6   | 2 PITG_12160   |
| 0 | 0   | 27 PITG_05980  |
| 0 | 2   | 0 NA           |
| 0 | 80  | 0 PITG_00573   |
| 0 | 13  | 4 NA           |
| 0 | 6   | 2 NA           |
| 0 | 29  | 10 PITG_13258  |
| 0 | 34  | 9 PITG_18380   |
| 0 | 24  | 34 PITG_00482  |
| 0 | 0   | 4 PITG_04619   |
| 0 | 21  | 7 PITG_04746   |
| 0 | 10  | 4 PITG_01513   |
| 0 | 0   | 0 PITG_11119   |
| 0 | 2   | 22 PITG_00453  |
| 0 | 2   | 7 PITG_05127   |
| 0 | 375 | 747 PITG_01945 |
| 0 | 9   | 2 NA           |
| 0 | 2   | 0 NA           |
| 0 | 18  | 20 PITG_11887  |
| 0 | 21  | 58 PITG_06257  |
| 0 | 346 | 241 PITG_12580 |
| 0 | 70  | 33 PITG_08295  |
| 0 | 142 | 6 PITG_08138   |
| 0 | 6   | 2 NA           |
| 0 | 42  | 4 PITG_15916   |
| 0 | 8   | 2 PITG_08403   |
| 0 | 66  | 54 PITG_14641  |
| 0 | 11  | 12 PITG_06996  |
| 0 | 0   | 0 PITG_03593   |
| 0 | 0   | 0 PITG_13540   |
| 0 | 22  | 37 PITG_20081  |
| 0 | 224 | 23 PITG_03119  |
| 0 | 0   | 6 PITG_08046   |
| 0 | 13  | 0 NA           |
| 0 | 33  | 12 PITG_20178  |
| 0 | 88  | 2 NA           |
| 0 | 0   | 0 PITG_15621   |
| 0 | 159 | 48 NA          |
| 0 | 50  | 13 NA          |
| 0 | 9   | 2 PITG_02445   |
| 0 | 870 | 654 PITG_16311 |
| 0 | 38  | 0 PITG_15877   |
| 0 | 2   | 2 PITG_03999   |
| 0 | 20  | 3 PITG_00819   |
| 0 | 4   | 11 PITG_15864  |
| 0 | 104 | 87 PITG_15873  |
| 0 | 190 | 150 PITG_01580 |

|   |     |                 |
|---|-----|-----------------|
| 0 | 63  | 10 PITG_12128   |
| 0 | 6   | 2 PITG_03102    |
| 0 | 24  | 16 PITG_00275   |
| 0 | 2   | 0 PITG_03551    |
| 0 | 6   | 10 PITG_14257   |
| 0 | 11  | 18 PITG_20313   |
| 0 | 235 | 25 NA           |
| 2 | 521 | 2317 PITG_20188 |
| 0 | 24  | 16 NA           |
| 0 | 9   | 2 PITG_12989    |
| 0 | 25  | 88 PITG_16854   |
| 0 | 93  | 57 PITG_17947   |
| 0 | 25  | 37 PITG_21211   |
| 0 | 31  | 26 NA           |
| 0 | 20  | 27 PITG_17359   |
| 0 | 24  | 25 PITG_15196   |
| 0 | 58  | 235 PITG_14639  |
| 0 | 5   | 7 PITG_16067    |
| 0 | 113 | 4 PITG_08394    |
| 0 | 128 | 14 PITG_16093   |
| 0 | 16  | 4 PITG_13282    |
| 0 | 10  | 4 PITG_18254    |
| 0 | 6   | 2 NA            |
| 0 | 15  | 2 NA            |
| 0 | 16  | 7 PITG_08749    |
| 0 | 173 | 16 PITG_19761   |
| 0 | 119 | 89 NA           |
| 0 | 5   | 0 PITG_20319    |
| 0 | 192 | 0 PITG_11846    |
| 0 | 29  | 48 PITG_18707   |
| 0 | 46  | 54 PITG_02238   |
| 0 | 10  | 46 PITG_00695   |
| 0 | 678 | 414 PITG_08565  |
| 0 | 393 | 173 PITG_09748  |
| 0 | 91  | 96 PITG_19495   |
| 0 | 382 | 297 PITG_00280  |
| 0 | 218 | 1297 PITG_15697 |
| 0 | 266 | 332 PITG_14937  |
| 0 | 15  | 6 PITG_13673    |
| 0 | 279 | 31 NA           |
| 0 | 125 | 21 PITG_05328   |
| 0 | 0   | 0 PITG_14993    |
| 0 | 5   | 4 PITG_16264    |
| 0 | 0   | 4 PITG_04568    |
| 0 | 6   | 0 PITG_01811    |
| 0 | 127 | 104 PITG_17239  |
| 0 | 4   | 0 PITG_13228    |

|   |      |                 |
|---|------|-----------------|
| 0 | 140  | 2 NA            |
| 0 | 2    | 9 PITG_15235    |
| 0 | 17   | 23 PITG_10881   |
| 0 | 6    | 5 PITG_05177    |
| 0 | 8    | 0 PITG_16686    |
| 0 | 333  | 45 PITG_00697   |
| 0 | 15   | 7 PITG_00450    |
| 0 | 5    | 0 NA            |
| 0 | 86   | 52 PITG_17958   |
| 0 | 2    | 6 PITG_10857    |
| 0 | 4    | 7 PITG_01850    |
| 0 | 0    | 2 NA            |
| 0 | 5    | 2 PITG_17829    |
| 5 | 390  | 1448 PITG_06722 |
| 0 | 48   | 26 PITG_02695   |
| 0 | 10   | 0 PITG_05583    |
| 0 | 467  | 316 PITG_20994  |
| 0 | 20   | 13 PITG_21504   |
| 0 | 61   | 172 PITG_02745  |
| 0 | 4    | 4 PITG_11653    |
| 0 | 238  | 92 NA           |
| 0 | 728  | 485 PITG_16921  |
| 0 | 121  | 0 PITG_09932    |
| 0 | 18   | 2 PITG_15486    |
| 0 | 4    | 2 NA            |
| 0 | 11   | 0 PITG_02789    |
| 0 | 9    | 8 NA            |
| 0 | 14   | 2 NA            |
| 0 | 383  | 923 PITG_05498  |
| 0 | 18   | 8 PITG_13188    |
| 0 | 20   | 11 PITG_19886   |
| 0 | 16   | 6 PITG_03874    |
| 0 | 15   | 6 PITG_00486    |
| 0 | 20   | 75 PITG_05141   |
| 0 | 0    | 0 PITG_00049    |
| 0 | 4    | 4 PITG_07281    |
| 0 | 5    | 4 NA            |
| 0 | 51   | 17 PITG_08935   |
| 0 | 2    | 12 PITG_15961   |
| 0 | 35   | 32 PITG_14137   |
| 0 | 56   | 27 PITG_06845   |
| 0 | 93   | 35 PITG_12489   |
| 0 | 2    | 0 NA            |
| 0 | 0    | 0 PITG_02241    |
| 0 | 11   | 8 PITG_09505    |
| 0 | 1148 | 695 PITG_11996  |
| 0 | 537  | 335 NA          |

|   |      |                 |
|---|------|-----------------|
| 0 | 2    | 2 PITG_14381    |
| 0 | 6    | 2 NA            |
| 0 | 680  | 774 PITG_20105  |
| 0 | 2    | 9 PITG_04678    |
| 0 | 4    | 3 PITG_16982    |
| 0 | 4241 | 2162 PITG_20209 |
| 0 | 16   | 11 PITG_10819   |
| 0 | 0    | 0 NA            |
| 0 | 12   | 10 PITG_03655   |
| 0 | 20   | 116 PITG_21077  |
| 0 | 0    | 0 NA            |
| 2 | 37   | 413 PITG_19017  |
| 0 | 13   | 24 PITG_14640   |
| 0 | 43   | 52 PITG_14945   |
| 0 | 70   | 6 PITG_00970    |
| 0 | 0    | 0 PITG_03702    |
| 0 | 6    | 0 PITG_12124    |
| 0 | 82   | 0 PITG_09834    |
| 0 | 280  | 168 PITG_07827  |
| 0 | 27   | 13 PITG_21556   |
| 0 | 73   | 100 PITG_06619  |
| 0 | 159  | 10 PITG_03406   |
| 0 | 147  | 36 NA           |
| 0 | 5    | 8 PITG_20378    |
| 0 | 184  | 16 PITG_18385   |
| 0 | 15   | 49 PITG_09446   |
| 0 | 54   | 38 NA           |
| 0 | 24   | 7 PITG_10601    |
| 0 | 5    | 0 NA            |
| 0 | 263  | 49 PITG_03768   |
| 0 | 0    | 0 NA            |
| 0 | 0    | 0 PITG_09193    |
| 0 | 27   | 6 PITG_12593    |
| 0 | 48   | 3 NA            |
| 0 | 5    | 0 PITG_04509    |
| 0 | 7    | 2 NA            |
| 0 | 24   | 12 NA           |
| 0 | 19   | 6 PITG_08303    |
| 0 | 74   | 144 PITG_02684  |
| 0 | 4    | 6 PITG_00988    |
| 0 | 31   | 8 PITG_13622    |
| 0 | 273  | 151 PITG_16795  |
| 0 | 117  | 77 PITG_14913   |
| 0 | 37   | 5 PITG_00186    |
| 0 | 45   | 4 NA            |
| 0 | 15   | 2 PITG_13980    |
| 0 | 16   | 5 NA            |

|   |      |                 |
|---|------|-----------------|
| 0 | 0    | 2 PITG_13842    |
| 0 | 4    | 2 NA            |
| 0 | 8    | 4 PITG_15946    |
| 0 | 397  | 181 PITG_21398  |
| 0 | 23   | 17 PITG_04134   |
| 0 | 23   | 0 PITG_12326    |
| 0 | 157  | 0 PITG_08660    |
| 0 | 105  | 119 NA          |
| 0 | 103  | 21 PITG_18030   |
| 0 | 2    | 4 PITG_06437    |
| 0 | 30   | 0 PITG_16924    |
| 0 | 4    | 2 PITG_12192    |
| 0 | 4    | 8 PITG_09772    |
| 0 | 9521 | 1385 PITG_08812 |
| 0 | 6    | 27 PITG_07960   |
| 0 | 398  | 43 PITG_05682   |
| 0 | 206  | 20 PITG_01397   |
| 0 | 179  | 53 PITG_07256   |
| 0 | 9    | 27 PITG_14441   |
| 0 | 31   | 5 PITG_06749    |
| 0 | 0    | 0 PITG_03010    |
| 0 | 2    | 3 PITG_10392    |
| 0 | 13   | 19 PITG_07455   |
| 0 | 208  | 3 NA            |
| 0 | 302  | 130 PITG_17042  |
| 0 | 19   | 5 PITG_18274    |
| 0 | 14   | 31 PITG_16360   |
| 0 | 318  | 0 PITG_15973    |
| 0 | 75   | 27 PITG_03454   |
| 0 | 524  | 284 PITG_03712  |
| 0 | 3    | 4 PITG_10903    |
| 0 | 50   | 46 PITG_01036   |
| 0 | 0    | 0 PITG_12824    |
| 0 | 0    | 5 PITG_19984    |
| 0 | 4    | 12 PITG_02371   |
| 0 | 0    | 30 PITG_13001   |
| 0 | 5    | 0 NA            |
| 0 | 2    | 0 PITG_08487    |
| 0 | 7    | 2 NA            |
| 0 | 8    | 96 PITG_17539   |
| 0 | 0    | 11 PITG_12516   |
| 0 | 26   | 5 PITG_04468    |
| 0 | 161  | 196 PITG_06813  |
| 0 | 310  | 614 PITG_13500  |
| 0 | 25   | 19 PITG_10681   |
| 0 | 24   | 21 PITG_13783   |
| 0 | 343  | 240 PITG_17869  |

|   |      |                 |
|---|------|-----------------|
| 0 | 173  | 2 NA            |
| 0 | 163  | 86 PITG_08715   |
| 0 | 43   | 60 PITG_00182   |
| 0 | 198  | 203 PITG_08801  |
| 0 | 2    | 7 PITG_03934    |
| 0 | 496  | 853 PITG_11766  |
| 0 | 2    | 50 PITG_00071   |
| 0 | 85   | 31 PITG_06943   |
| 0 | 9    | 2 PITG_12048    |
| 0 | 0    | 0 PITG_19150    |
| 0 | 35   | 16 PITG_12356   |
| 0 | 2    | 2 PITG_01970    |
| 0 | 15   | 2 NA            |
| 0 | 43   | 2 NA            |
| 0 | 136  | 217 PITG_08659  |
| 0 | 74   | 7 PITG_05804    |
| 0 | 266  | 8 PITG_00625    |
| 0 | 5    | 4 PITG_18867    |
| 0 | 49   | 18 PITG_03054   |
| 0 | 20   | 9 PITG_09425    |
| 0 | 0    | 5 PITG_09930    |
| 0 | 5    | 0 PITG_10473    |
| 0 | 15   | 4 PITG_21171    |
| 0 | 66   | 37 PITG_01679   |
| 0 | 3    | 0 PITG_22830    |
| 0 | 1622 | 1479 PITG_00203 |
| 0 | 14   | 6 PITG_12356    |
| 0 | 7    | 7 PITG_05855    |
| 0 | 35   | 61 PITG_10729   |
| 0 | 3    | 4 NA            |
| 0 | 2    | 16 PITG_02627   |
| 0 | 0    | 2 PITG_18521    |
| 0 | 317  | 63 PITG_09998   |
| 0 | 19   | 6 PITG_11780    |
| 0 | 0    | 4 PITG_07281    |
| 0 | 6    | 4 PITG_14728    |
| 0 | 226  | 174 PITG_18912  |
| 0 | 83   | 229 NA          |
| 0 | 17   | 4 PITG_13835    |
| 0 | 44   | 19 NA           |
| 0 | 35   | 0 PITG_02372    |
| 0 | 18   | 9 PITG_13336    |
| 0 | 12   | 2 PITG_09849    |
| 0 | 24   | 0 PITG_09097    |
| 0 | 92   | 45 NA           |
| 0 | 262  | 29 PITG_17130   |
| 0 | 45   | 12 PITG_01044   |



|   |      |                |
|---|------|----------------|
| 0 | 98   | 331 PITG_18316 |
| 0 | 239  | 128 PITG_07711 |
| 0 | 52   | 30 PITG_20796  |
| 0 | 38   | 8 PITG_01006   |
| 0 | 3    | 0 PITG_09782   |
| 0 | 335  | 11 PITG_19865  |
| 0 | 39   | 48 PITG_21283  |
| 0 | 16   | 22 PITG_20903  |
| 0 | 89   | 4 PITG_19318   |
| 0 | 250  | 492 PITG_09939 |
| 0 | 24   | 4 NA           |
| 0 | 216  | 32 PITG_18410  |
| 0 | 8    | 8 PITG_07241   |
| 0 | 36   | 47 NA          |
| 0 | 25   | 31 PITG_12163  |
| 0 | 5    | 6 NA           |
| 0 | 48   | 25 NA          |
| 0 | 22   | 46 NA          |
| 0 | 20   | 34 PITG_09001  |
| 0 | 2    | 2 PITG_16257   |
| 0 | 15   | 0 PITG_19863   |
| 0 | 2    | 19 PITG_02401  |
| 0 | 310  | 239 PITG_11425 |
| 0 | 26   | 2 NA           |
| 0 | 62   | 14 PITG_21146  |
| 0 | 222  | 82 PITG_02034  |
| 0 | 9    | 4 PITG_17080   |
| 0 | 9    | 13 NA          |
| 0 | 12   | 8 PITG_04842   |
| 0 | 88   | 122 PITG_12839 |
| 0 | 20   | 23 PITG_01817  |
| 0 | 4    | 2 PITG_13833   |
| 0 | 364  | 57 PITG_08188  |
| 0 | 33   | 4 PITG_15571   |
| 0 | 30   | 17 PITG_00858  |
| 0 | 0    | 0 PITG_09876   |
| 0 | 84   | 68 PITG_19006  |
| 0 | 46   | 6 PITG_16085   |
| 0 | 1120 | 696 PITG_13977 |
| 0 | 4    | 2 PITG_02480   |
| 0 | 241  | 26 NA          |
| 0 | 58   | 96 PITG_22319  |
| 0 | 82   | 43 PITG_12696  |
| 0 | 2    | 2 PITG_02724   |
| 0 | 2    | 9 PITG_09278   |
| 0 | 45   | 15 PITG_13458  |
| 0 | 0    | 0 NA           |

|   |     |                 |
|---|-----|-----------------|
| 0 | 64  | 12 PITG_01127   |
| 0 | 804 | 674 PITG_09596  |
| 0 | 66  | 77 PITG_14478   |
| 0 | 11  | 2 PITG_11497    |
| 0 | 0   | 0 NA            |
| 0 | 565 | 1137 PITG_13132 |
| 0 | 46  | 70 PITG_07314   |
| 0 | 17  | 10 PITG_12462   |
| 0 | 6   | 11 NA           |
| 5 | 901 | 2964 PITG_06514 |
| 0 | 18  | 10 PITG_00965   |
| 0 | 11  | 2 NA            |
| 0 | 25  | 42 PITG_14109   |
| 0 | 3   | 78 PITG_18025   |
| 0 | 8   | 6 PITG_06142    |
| 0 | 0   | 0 NA            |
| 0 | 67  | 17 PITG_21283   |
| 0 | 44  | 56 PITG_01925   |
| 0 | 344 | 232 NA          |
| 0 | 0   | 0 NA            |
| 0 | 4   | 2 PITG_15960    |
| 0 | 71  | 53 PITG_09965   |
| 0 | 69  | 0 PITG_05500    |
| 2 | 258 | 207 PITG_03685  |
| 0 | 46  | 6 PITG_14613    |
| 0 | 0   | 2 PITG_00330    |
| 0 | 19  | 23 PITG_00689   |
| 0 | 365 | 516 PITG_06828  |
| 0 | 149 | 140 PITG_06146  |
| 0 | 2   | 0 PITG_07417    |
| 0 | 2   | 8 PITG_09261    |
| 0 | 8   | 0 NA            |
| 0 | 4   | 0 PITG_06302    |
| 0 | 83  | 38 PITG_01819   |
| 0 | 7   | 10 PITG_14602   |
| 0 | 2   | 0 NA            |
| 0 | 96  | 50 PITG_00423   |
| 0 | 2   | 2 PITG_03832    |
| 0 | 30  | 133 PITG_01453  |
| 0 | 8   | 13 PITG_02995   |
| 0 | 181 | 97 PITG_04651   |
| 0 | 6   | 9 PITG_13915    |
| 0 | 329 | 783 PITG_07999  |
| 0 | 6   | 10 PITG_13362   |
| 0 | 201 | 119 PITG_00682  |
| 0 | 4   | 0 PITG_16179    |
| 0 | 0   | 2 PITG_06942    |

|     |      |                 |
|-----|------|-----------------|
| 0   | 9    | 2 PITG_00024    |
| 0   | 4    | 11 NA           |
| 0   | 10   | 7 PITG_16062    |
| 0   | 0    | 2 PITG_09635    |
| 0   | 8    | 17 PITG_00174   |
| 0   | 156  | 53 PITG_19418   |
| 0   | 5    | 10 PITG_03599   |
| 0   | 70   | 18 PITG_10002   |
| 0   | 72   | 13 PITG_09837   |
| 0   | 202  | 173 PITG_09702  |
| 0   | 8    | 2 PITG_03374    |
| 0   | 92   | 670 PITG_00708  |
| 0   | 6    | 12 PITG_10903   |
| 0   | 180  | 56 NA           |
| 0   | 12   | 7 PITG_09374    |
| 0   | 101  | 0 PITG_12987    |
| 0   | 84   | 2 PITG_16114    |
| 0   | 11   | 26 PITG_09428   |
| 0   | 22   | 15 NA           |
| 0   | 69   | 0 PITG_11040    |
| 0   | 11   | 11 PITG_00939   |
| 0   | 0    | 2 PITG_03445    |
| 0   | 13   | 52 PITG_01233   |
| 0   | 27   | 0 PITG_02841    |
| 0   | 7    | 3 PITG_13345    |
| 0   | 0    | 0 PITG_17551    |
| 0   | 23   | 16 NA           |
| 0   | 2    | 10 PITG_10011   |
| 0   | 93   | 46 PITG_14394   |
| 0   | 1061 | 176 PITG_11900  |
| 0   | 19   | 34 NA           |
| 0   | 0    | 2 PITG_02227    |
| 0   | 0    | 2 PITG_19516    |
| 0   | 123  | 54 NA           |
| 0   | 389  | 1009 PITG_19129 |
| 0   | 0    | 5 NA            |
| 0   | 0    | 2 PITG_01058    |
| 0   | 107  | 34 PITG_11610   |
| 0   | 33   | 7 PITG_08984    |
| 0   | 20   | 27 PITG_17683   |
| 0   | 14   | 8 PITG_12124    |
| 0   | 2    | 0 NA            |
| 0   | 2    | 2 PITG_14181    |
| 0   | 197  | 262 PITG_07155  |
| 0   | 8    | 8 NA            |
| 0   | 13   | 4 PITG_14354    |
| 332 | 49   | 768 NA          |

|   |     |                |
|---|-----|----------------|
| 0 | 4   | 0 PITG_12162   |
| 2 | 372 | 682 PITG_09431 |
| 0 | 44  | 4 PITG_06556   |
| 4 | 145 | 806 PITG_13020 |
| 0 | 35  | 12 NA          |
| 0 | 294 | 9 PITG_05373   |
| 0 | 3   | 0 PITG_16863   |
| 0 | 332 | 13 NA          |
| 0 | 16  | 132 PITG_11690 |
| 0 | 104 | 21 PITG_00160  |
| 0 | 0   | 9 PITG_14441   |
| 0 | 226 | 217 PITG_09211 |
| 0 | 110 | 31 PITG_20381  |
| 0 | 2   | 10 NA          |
| 0 | 0   | 10 PITG_05989  |
| 0 | 2   | 2 PITG_08211   |
| 0 | 287 | 65 PITG_07924  |
| 0 | 4   | 5 PITG_02770   |
| 0 | 0   | 16 PITG_15623  |
| 0 | 99  | 35 PITG_13677  |
| 0 | 34  | 0 NA           |
| 0 | 48  | 96 PITG_05007  |
| 0 | 2   | 17 PITG_09964  |
| 0 | 7   | 10 NA          |
| 0 | 9   | 18 PITG_21393  |
| 0 | 56  | 85 PITG_04505  |
| 0 | 2   | 13 PITG_01809  |
| 0 | 43  | 12 PITG_07424  |
| 0 | 6   | 0 PITG_04935   |
| 0 | 0   | 2 PITG_17030   |
| 0 | 140 | 70 PITG_09655  |
| 0 | 13  | 8 PITG_07194   |
| 0 | 11  | 12 NA          |
| 0 | 308 | 284 PITG_02840 |
| 0 | 36  | 40 PITG_00442  |
| 0 | 4   | 4 PITG_04344   |
| 0 | 176 | 435 PITG_03784 |
| 0 | 22  | 5 PITG_20077   |
| 0 | 276 | 346 PITG_02182 |
| 0 | 160 | 13 NA          |
| 0 | 411 | 536 PITG_02902 |
| 0 | 3   | 7 PITG_00839   |
| 0 | 17  | 20 PITG_10461  |
| 0 | 0   | 7 PITG_08376   |
| 0 | 194 | 5 NA           |
| 0 | 15  | 0 PITG_10943   |
| 0 | 32  | 15 PITG_14593  |

|   |     |                 |
|---|-----|-----------------|
| 0 | 5   | 0 PITG_01525    |
| 0 | 0   | 0 PITG_19850    |
| 0 | 129 | 46 PITG_20792   |
| 0 | 68  | 0 PITG_20868    |
| 0 | 12  | 18 PITG_20675   |
| 0 | 19  | 8 PITG_13841    |
| 0 | 6   | 2 PITG_11920    |
| 0 | 0   | 9 PITG_17549    |
| 0 | 7   | 21 PITG_09768   |
| 0 | 130 | 177 PITG_09862  |
| 0 | 3   | 2 PITG_07531    |
| 0 | 16  | 16 PITG_05404   |
| 0 | 47  | 44 PITG_18464   |
| 0 | 2   | 0 NA            |
| 0 | 29  | 8 PITG_02728    |
| 0 | 95  | 439 NA          |
| 0 | 0   | 0 NA            |
| 0 | 212 | 95 PITG_06342   |
| 0 | 3   | 2 PITG_08092    |
| 0 | 114 | 40 PITG_18651   |
| 0 | 213 | 66 PITG_11923   |
| 0 | 14  | 0 PITG_04534    |
| 0 | 2   | 0 PITG_07302    |
| 0 | 65  | 11 PITG_04184   |
| 0 | 2   | 0 PITG_21075    |
| 0 | 333 | 1074 PITG_17516 |
| 0 | 78  | 8 PITG_04956    |
| 0 | 5   | 12 PITG_02347   |
| 0 | 45  | 94 PITG_00280   |
| 0 | 262 | 251 PITG_22865  |
| 0 | 96  | 141 PITG_03463  |
| 0 | 229 | 179 PITG_08780  |
| 0 | 350 | 11 NA           |
| 0 | 36  | 44 PITG_02449   |
| 0 | 37  | 33 NA           |
| 0 | 0   | 2 PITG_08740    |
| 0 | 35  | 25 PITG_21599   |
| 0 | 108 | 80 PITG_22743   |
| 0 | 106 | 47 PITG_01755   |
| 0 | 640 | 1059 PITG_15069 |
| 0 | 0   | 6 PITG_03620    |
| 0 | 841 | 494 PITG_09655  |
| 0 | 17  | 11 PITG_00370   |
| 0 | 19  | 27 PITG_11736   |
| 0 | 137 | 35 PITG_18633   |
| 0 | 0   | 0 PITG_17760    |
| 0 | 68  | 26 NA           |

|   |      |                 |
|---|------|-----------------|
| 0 | 0    | 2 PITG_11437    |
| 3 | 84   | 663 PITG_06415  |
| 0 | 5    | 32 PITG_17710   |
| 0 | 5    | 0 PITG_17760    |
| 0 | 335  | 170 PITG_21880  |
| 0 | 291  | 1123 PITG_11099 |
| 0 | 196  | 300 NA          |
| 0 | 18   | 25 PITG_05616   |
| 0 | 174  | 57 PITG_00986   |
| 0 | 8    | 6 NA            |
| 0 | 0    | 0 NA            |
| 0 | 121  | 29 PITG_00839   |
| 0 | 19   | 15 NA           |
| 0 | 23   | 6 PITG_02400    |
| 0 | 56   | 552 PITG_17034  |
| 0 | 0    | 0 PITG_03610    |
| 0 | 0    | 0 PITG_15669    |
| 0 | 56   | 13 PITG_13202   |
| 0 | 0    | 15 PITG_02856   |
| 0 | 2    | 2 PITG_02415    |
| 2 | 696  | 874 PITG_01248  |
| 0 | 0    | 0 NA            |
| 0 | 14   | 13 PITG_13915   |
| 0 | 178  | 283 NA          |
| 0 | 5    | 0 NA            |
| 0 | 64   | 30 PITG_20215   |
| 0 | 164  | 2 NA            |
| 0 | 0    | 0 PITG_08237    |
| 0 | 1080 | 772 PITG_16061  |
| 0 | 51   | 50 PITG_06849   |
| 0 | 291  | 411 PITG_17516  |
| 0 | 14   | 8 PITG_01953    |
| 0 | 226  | 127 PITG_01640  |
| 0 | 49   | 26 PITG_15566   |
| 0 | 0    | 0 PITG_18316    |
| 0 | 0    | 8 PITG_01920    |
| 0 | 5    | 2 PITG_14174    |
| 0 | 0    | 0 NA            |
| 0 | 54   | 33 PITG_02274   |
| 0 | 8    | 27 PITG_05385   |
| 0 | 2    | 0 PITG_02797    |
| 0 | 18   | 14 PITG_13659   |
| 0 | 58   | 15 PITG_21556   |
| 0 | 15   | 4 PITG_16978    |
| 0 | 5    | 2 PITG_02792    |
| 0 | 3    | 2 NA            |
| 0 | 99   | 45 PITG_09244   |

|    |     |                |
|----|-----|----------------|
| 0  | 0   | 3 NA           |
| 0  | 0   | 0 PITG_05635   |
| 0  | 0   | 0 NA           |
| 0  | 9   | 38 PITG_01477  |
| 2  | 873 | 486 PITG_00062 |
| 61 | 24  | 210 NA         |
| 0  | 29  | 35 PITG_02640  |
| 0  | 47  | 20 PITG_17706  |
| 0  | 235 | 56 PITG_13751  |
| 0  | 88  | 9 PITG_15661   |
| 0  | 23  | 9 PITG_03997   |
| 0  | 260 | 82 PITG_03530  |
| 0  | 42  | 58 PITG_17925  |
| 0  | 0   | 0 PITG_02288   |
| 0  | 173 | 99 PITG_15503  |
| 0  | 15  | 22 PITG_13762  |
| 0  | 211 | 178 PITG_06799 |
| 0  | 89  | 15 PITG_15623  |
| 0  | 8   | 47 PITG_09872  |
| 0  | 20  | 24 NA          |
| 0  | 7   | 2 PITG_19142   |
| 0  | 94  | 72 PITG_10715  |
| 0  | 2   | 18 PITG_03864  |
| 0  | 224 | 8 NA           |
| 0  | 293 | 234 PITG_18928 |
| 0  | 70  | 55 PITG_08660  |
| 0  | 2   | 4 PITG_17882   |
| 0  | 27  | 14 PITG_15912  |
| 0  | 0   | 0 PITG_18424   |
| 0  | 0   | 4 NA           |
| 0  | 220 | 97 PITG_08213  |
| 0  | 203 | 33 PITG_23287  |
| 0  | 13  | 27 PITG_01138  |
| 0  | 11  | 6 PITG_07279   |
| 0  | 224 | 142 PITG_14276 |
| 0  | 44  | 108 PITG_21393 |
| 0  | 23  | 6 NA           |
| 0  | 183 | 263 PITG_20041 |
| 0  | 60  | 9 PITG_19536   |
| 0  | 2   | 8 PITG_13372   |
| 0  | 167 | 234 PITG_01070 |
| 0  | 17  | 7 PITG_16114   |
| 0  | 263 | 44 PITG_16806  |
| 0  | 209 | 590 PITG_00850 |
| 0  | 134 | 53 PITG_19041  |
| 0  | 4   | 0 NA           |
| 0  | 59  | 94 PITG_19870  |

|     |      |                 |
|-----|------|-----------------|
| 0   | 104  | 33 PITG_18025   |
| 0   | 24   | 5 PITG_06757    |
| 0   | 16   | 21 PITG_11789   |
| 0   | 505  | 386 PITG_11775  |
| 0   | 222  | 360 PITG_01453  |
| 0   | 0    | 0 PITG_00286    |
| 0   | 10   | 21 PITG_03341   |
| 0   | 299  | 155 NA          |
| 0   | 22   | 12 PITG_01589   |
| 0   | 45   | 52 PITG_04665   |
| 801 | 688  | 2912 NA         |
| 0   | 0    | 0 NA            |
| 0   | 8    | 11 PITG_02340   |
| 0   | 42   | 23 PITG_09350   |
| 0   | 20   | 2 PITG_00407    |
| 0   | 2    | 7 PITG_00990    |
| 0   | 836  | 904 PITG_02039  |
| 0   | 6    | 2 PITG_17030    |
| 0   | 9011 | 3754 PITG_12277 |
| 0   | 4    | 0 PITG_05412    |
| 0   | 70   | 47 PITG_01711   |
| 0   | 772  | 489 PITG_14274  |
| 0   | 37   | 6 PITG_05149    |
| 0   | 70   | 5 PITG_01290    |
| 0   | 265  | 45 PITG_08136   |
| 0   | 19   | 41 PITG_02734   |
| 0   | 14   | 3 PITG_00809    |
| 0   | 38   | 52 PITG_00472   |
| 0   | 123  | 157 PITG_09609  |
| 0   | 14   | 0 PITG_04108    |
| 0   | 0    | 0 PITG_03988    |
| 0   | 20   | 12 NA           |
| 0   | 17   | 5 NA            |
| 0   | 35   | 4 PITG_09354    |
| 0   | 76   | 14 NA           |
| 0   | 7    | 0 NA            |
| 0   | 4    | 4 NA            |
| 0   | 6    | 8 PITG_07880    |
| 0   | 28   | 47 PITG_06762   |
| 0   | 2    | 4 PITG_17904    |
| 0   | 112  | 108 PITG_07589  |
| 0   | 175  | 115 PITG_04599  |
| 0   | 29   | 2 NA            |
| 0   | 12   | 29 PITG_09698   |
| 0   | 5    | 2 PITG_12106    |
| 0   | 229  | 0 PITG_15638    |
| 0   | 17   | 18 PITG_10813   |



|   |     |                |
|---|-----|----------------|
| 0 | 23  | 46 NA          |
| 0 | 91  | 36 PITG_19410  |
| 0 | 7   | 25 PITG_05508  |
| 0 | 6   | 8 PITG_01811   |
| 0 | 15  | 25 PITG_02467  |
| 0 | 16  | 14 PITG_02842  |
| 0 | 6   | 5 PITG_11812   |
| 0 | 134 | 123 PITG_19180 |
| 0 | 12  | 116 PITG_15235 |
| 0 | 31  | 25 PITG_18037  |
| 0 | 58  | 251 PITG_03150 |
| 0 | 59  | 27 PITG_16121  |
| 0 | 41  | 37 PITG_00808  |
| 0 | 97  | 179 PITG_21394 |
| 0 | 3   | 0 PITG_04133   |
| 0 | 0   | 9 PITG_13201   |
| 0 | 10  | 14 PITG_03408  |
| 0 | 4   | 2 PITG_13618   |
| 0 | 4   | 6 PITG_05502   |
| 0 | 57  | 2 PITG_11780   |
| 0 | 69  | 90 PITG_16071  |
| 0 | 10  | 32 PITG_00262  |
| 0 | 45  | 39 PITG_00225  |
| 2 | 5   | 12 NA          |
| 0 | 201 | 92 PITG_03373  |
| 0 | 0   | 0 PITG_19362   |
| 0 | 482 | 403 PITG_06322 |
| 0 | 0   | 0 NA           |
| 0 | 2   | 2 PITG_02157   |
| 0 | 4   | 9 PITG_19603   |
| 0 | 98  | 5 PITG_05655   |
| 0 | 0   | 0 PITG_08305   |
| 0 | 6   | 0 NA           |
| 0 | 2   | 5 PITG_01282   |
| 0 | 17  | 6 PITG_14641   |
| 0 | 2   | 0 PITG_09098   |
| 0 | 70  | 165 PITG_02565 |
| 0 | 0   | 0 PITG_10119   |
| 0 | 424 | 122 NA         |
| 0 | 5   | 2 PITG_18380   |
| 0 | 10  | 2 PITG_01186   |
| 0 | 22  | 23 PITG_13066  |
| 0 | 5   | 2 PITG_18015   |
| 0 | 25  | 30 PITG_05507  |
| 0 | 11  | 6 NA           |
| 0 | 2   | 2 PITG_09897   |
| 0 | 44  | 22 PITG_09890  |

|    |     |                 |
|----|-----|-----------------|
| 0  | 537 | 264 NA          |
| 0  | 57  | 19 PITG_12454   |
| 0  | 295 | 540 PITG_19814  |
| 0  | 17  | 5 PITG_09475    |
| 0  | 492 | 236 PITG_06425  |
| 0  | 301 | 249 PITG_21508  |
| 0  | 16  | 3 PITG_03435    |
| 15 | 2   | 13 NA           |
| 0  | 0   | 0 PITG_02208    |
| 0  | 65  | 25 PITG_20528   |
| 0  | 2   | 8 PITG_04701    |
| 0  | 19  | 2 PITG_03946    |
| 0  | 41  | 100 PITG_02293  |
| 0  | 215 | 156 PITG_03582  |
| 0  | 34  | 23 NA           |
| 0  | 266 | 7 NA            |
| 0  | 60  | 19 PITG_03577   |
| 0  | 88  | 51 PITG_03577   |
| 0  | 6   | 0 PITG_09526    |
| 0  | 18  | 19 PITG_18650   |
| 0  | 0   | 0 NA            |
| 0  | 37  | 6 PITG_04969    |
| 0  | 352 | 534 PITG_07843  |
| 0  | 6   | 6 PITG_04603    |
| 0  | 24  | 8 PITG_01390    |
| 0  | 4   | 0 NA            |
| 0  | 63  | 95 PITG_00401   |
| 0  | 123 | 309 PITG_01062  |
| 0  | 119 | 10 NA           |
| 0  | 4   | 0 PITG_15661    |
| 0  | 103 | 14 PITG_03959   |
| 0  | 44  | 25 PITG_03781   |
| 0  | 40  | 13 PITG_19205   |
| 0  | 21  | 3 PITG_03048    |
| 2  | 245 | 1025 PITG_17261 |
| 0  | 101 | 99 PITG_05953   |
| 0  | 31  | 36 PITG_03694   |
| 0  | 22  | 4 PITG_23143    |
| 0  | 119 | 83 PITG_04875   |
| 0  | 4   | 2 PITG_05196    |
| 0  | 48  | 13 PITG_17503   |
| 0  | 2   | 23 PITG_16083   |
| 0  | 6   | 4 PITG_11186    |
| 0  | 20  | 0 PITG_23277    |
| 0  | 40  | 24 PITG_08211   |
| 0  | 7   | 6 PITG_16008    |
| 0  | 2   | 0 PITG_01252    |

|   |      |                |
|---|------|----------------|
| 0 | 31   | 37 PITG_19875  |
| 0 | 54   | 53 PITG_18440  |
| 0 | 39   | 4 PITG_02023   |
| 0 | 265  | 337 PITG_15850 |
| 0 | 8    | 4 PITG_16207   |
| 0 | 73   | 79 PITG_05686  |
| 0 | 10   | 0 NA           |
| 0 | 250  | 75 PITG_11612  |
| 0 | 23   | 0 PITG_09833   |
| 0 | 100  | 42 PITG_16205  |
| 0 | 47   | 9 PITG_04512   |
| 0 | 19   | 15 PITG_03396  |
| 0 | 0    | 4 NA           |
| 0 | 270  | 700 PITG_01535 |
| 0 | 2    | 6 PITG_21398   |
| 0 | 68   | 153 PITG_05377 |
| 0 | 69   | 31 PITG_01267  |
| 0 | 7    | 15 PITG_07055  |
| 0 | 18   | 21 PITG_16930  |
| 0 | 40   | 27 NA          |
| 0 | 7    | 8 PITG_12453   |
| 0 | 111  | 232 PITG_11704 |
| 0 | 202  | 50 PITG_11254  |
| 0 | 0    | 2 NA           |
| 0 | 108  | 191 NA         |
| 0 | 1646 | 835 PITG_08881 |
| 0 | 83   | 119 PITG_17992 |
| 0 | 2    | 2 PITG_18707   |
| 0 | 6    | 2 PITG_18063   |
| 0 | 32   | 7 PITG_03166   |
| 0 | 21   | 37 PITG_20815  |
| 0 | 7    | 0 PITG_07021   |
| 0 | 8    | 0 NA           |
| 0 | 10   | 9 PITG_02329   |
| 0 | 0    | 0 NA           |
| 0 | 48   | 23 PITG_02977  |
| 0 | 23   | 137 PITG_08392 |
| 0 | 11   | 2 PITG_06576   |
| 0 | 188  | 113 PITG_04000 |
| 0 | 42   | 3 NA           |
| 0 | 66   | 0 PITG_00973   |
| 0 | 24   | 40 PITG_01245  |
| 0 | 0    | 0 PITG_02027   |
| 0 | 4    | 0 PITG_10743   |
| 0 | 64   | 62 NA          |
| 0 | 63   | 38 PITG_10736  |
| 2 | 108  | 88 PITG_07701  |

|     |     |                 |
|-----|-----|-----------------|
| 0   | 2   | 2 NA            |
| 0   | 110 | 25 PITG_03305   |
| 0   | 5   | 7 PITG_09220    |
| 0   | 4   | 6 NA            |
| 0   | 5   | 0 PITG_10576    |
| 0   | 0   | 15 PITG_06772   |
| 0   | 33  | 0 PITG_20638    |
| 0   | 34  | 0 PITG_18688    |
| 0   | 2   | 0 NA            |
| 0   | 41  | 7 PITG_15268    |
| 0   | 330 | 725 PITG_09955  |
| 0   | 128 | 133 PITG_08366  |
| 0   | 154 | 10 PITG_19668   |
| 0   | 388 | 116 PITG_20798  |
| 0   | 0   | 0 PITG_06517    |
| 0   | 177 | 263 PITG_09504  |
| 0   | 2   | 24 PITG_02027   |
| 0   | 34  | 34 PITG_21182   |
| 0   | 62  | 31 PITG_12327   |
| 0   | 0   | 31 PITG_17646   |
| 0   | 36  | 56 PITG_03830   |
| 0   | 15  | 10 PITG_15818   |
| 0   | 47  | 10 PITG_17998   |
| 0   | 14  | 10 PITG_14174   |
| 0   | 16  | 9 PITG_05315    |
| 0   | 97  | 19 PITG_03505   |
| 0   | 7   | 0 PITG_00380    |
| 0   | 312 | 179 PITG_11702  |
| 0   | 30  | 13 NA           |
| 0   | 106 | 34 PITG_14562   |
| 0   | 0   | 0 NA            |
| 0   | 0   | 0 PITG_17617    |
| 0   | 12  | 15 PITG_13302   |
| 0   | 2   | 7 PITG_10480    |
| 35  | 2   | 52 NA           |
| 231 | 421 | 966 NA          |
| 0   | 69  | 15 PITG_04421   |
| 0   | 320 | 357 PITG_11047  |
| 0   | 49  | 28 PITG_10935   |
| 0   | 0   | 0 PITG_14109    |
| 0   | 7   | 18 PITG_05672   |
| 0   | 2   | 22 PITG_10815   |
| 0   | 0   | 0 NA            |
| 0   | 377 | 55 PITG_09604   |
| 0   | 26  | 16 PITG_04973   |
| 0   | 5   | 3 PITG_03770    |
| 0   | 827 | 1397 PITG_03335 |

|     |      |                 |
|-----|------|-----------------|
| 0   | 13   | 0 PITG_02841    |
| 0   | 146  | 59 PITG_03454   |
| 0   | 0    | 0 PITG_14312    |
| 0   | 48   | 35 PITG_05738   |
| 0   | 6    | 74 NA           |
| 0   | 209  | 99 PITG_19531   |
| 0   | 116  | 61 NA           |
| 712 | 38   | 806 NA          |
| 0   | 2    | 0 PITG_00148    |
| 0   | 334  | 364 PITG_17787  |
| 0   | 9    | 12 PITG_02195   |
| 0   | 24   | 35 PITG_03804   |
| 0   | 108  | 17 NA           |
| 0   | 10   | 14 NA           |
| 0   | 18   | 32 PITG_10819   |
| 0   | 49   | 154 PITG_21187  |
| 0   | 397  | 71 PITG_02580   |
| 0   | 15   | 9 PITG_02571    |
| 0   | 5    | 0 NA            |
| 0   | 12   | 8 NA            |
| 0   | 50   | 19 PITG_13622   |
| 0   | 112  | 21 PITG_16058   |
| 0   | 26   | 48 PITG_11444   |
| 0   | 9    | 2 NA            |
| 0   | 89   | 0 PITG_22069    |
| 0   | 0    | 0 PITG_04575    |
| 0   | 7    | 0 PITG_14489    |
| 0   | 0    | 0 NA            |
| 0   | 27   | 4 PITG_04250    |
| 0   | 77   | 146 PITG_00566  |
| 0   | 144  | 241 PITG_06015  |
| 0   | 37   | 8 NA            |
| 0   | 6    | 18 NA           |
| 0   | 2469 | 1219 PITG_22878 |
| 0   | 45   | 4 PITG_02949    |
| 0   | 97   | 101 PITG_07047  |
| 0   | 0    | 6 PITG_13426    |
| 0   | 5    | 16 PITG_12598   |
| 0   | 57   | 2 PITG_02195    |
| 0   | 3    | 22 PITG_20815   |
| 0   | 24   | 7 PITG_00450    |
| 0   | 273  | 178 PITG_20296  |
| 0   | 11   | 6 NA            |
| 0   | 796  | 228 PITG_16207  |
| 4   | 434  | 991 NA          |
| 0   | 8    | 21 PITG_00380   |
| 0   | 217  | 68 PITG_21328   |

|   |     |                |
|---|-----|----------------|
| 0 | 55  | 52 PITG_17401  |
| 0 | 187 | 10 NA          |
| 0 | 34  | 4 PITG_16347   |
| 0 | 35  | 2 PITG_00854   |
| 0 | 101 | 76 PITG_15154  |
| 0 | 6   | 2 PITG_17359   |
| 0 | 8   | 10 PITG_17349  |
| 0 | 4   | 4 PITG_05387   |
| 0 | 168 | 250 PITG_17033 |
| 0 | 0   | 0 PITG_14950   |
| 0 | 90  | 72 PITG_05664  |
| 0 | 19  | 126 PITG_15235 |
| 0 | 86  | 43 PITG_11472  |
| 0 | 4   | 2 PITG_05621   |
| 0 | 9   | 12 PITG_00252  |
| 0 | 202 | 64 PITG_06822  |
| 0 | 7   | 22 PITG_16207  |
| 0 | 10  | 2 PITG_16262   |
| 0 | 12  | 0 PITG_07422   |
| 0 | 6   | 10 PITG_15138  |
| 0 | 89  | 30 PITG_00049  |
| 0 | 6   | 5 NA           |
| 0 | 36  | 9 NA           |
| 0 | 129 | 12 PITG_09521  |
| 0 | 14  | 9 PITG_07914   |
| 0 | 4   | 2 PITG_16263   |
| 0 | 82  | 11 PITG_03864  |
| 0 | 2   | 28 PITG_12108  |
| 0 | 55  | 186 PITG_18025 |
| 0 | 165 | 63 PITG_06739  |
| 0 | 15  | 3 NA           |
| 0 | 0   | 2 PITG_10993   |
| 0 | 0   | 0 NA           |
| 0 | 144 | 2 NA           |
| 0 | 0   | 0 NA           |
| 0 | 65  | 8 NA           |
| 0 | 36  | 25 NA          |
| 0 | 0   | 0 NA           |
| 0 | 43  | 21 PITG_02678  |
| 0 | 574 | 85 PITG_01411  |
| 0 | 0   | 2 PITG_05423   |
| 0 | 27  | 21 PITG_15817  |
| 0 | 2   | 5 PITG_06367   |
| 0 | 19  | 53 NA          |
| 0 | 12  | 2 NA           |
| 0 | 6   | 9 PITG_02916   |
| 0 | 459 | 412 PITG_05998 |

|   |      |                |
|---|------|----------------|
| 0 | 169  | 252 PITG_00765 |
| 0 | 5    | 0 PITG_11258   |
| 0 | 1730 | 618 PITG_01096 |
| 0 | 41   | 20 NA          |
| 0 | 14   | 2 PITG_03790   |
| 0 | 21   | 13 PITG_16332  |
| 0 | 8    | 0 NA           |
| 0 | 73   | 185 PITG_07285 |
| 0 | 7    | 4 PITG_17889   |
| 0 | 6    | 0 NA           |
| 0 | 3    | 10 PITG_02842  |
| 0 | 80   | 11 NA          |
| 0 | 30   | 33 PITG_03865  |
| 0 | 31   | 58 PITG_17748  |
| 0 | 19   | 11 NA          |
| 0 | 23   | 7 PITG_17106   |
| 2 | 391  | 294 PITG_19178 |
| 0 | 144  | 75 PITG_00506  |
| 0 | 780  | 687 PITG_14110 |
| 0 | 50   | 12 PITG_03520  |
| 0 | 3    | 0 PITG_00416   |
| 0 | 8    | 45 PITG_14727  |
| 0 | 15   | 10 PITG_12304  |
| 0 | 68   | 33 PITG_02415  |
| 0 | 14   | 45 PITG_08138  |
| 0 | 61   | 26 PITG_13493  |
| 0 | 246  | 132 PITG_19537 |
| 0 | 197  | 13 PITG_06943  |
| 0 | 0    | 0 PITG_15387   |
| 0 | 13   | 0 PITG_02391   |
| 0 | 3    | 0 PITG_03978   |
| 0 | 2    | 4 PITG_05103   |
| 0 | 222  | 101 PITG_19038 |
| 0 | 2    | 0 PITG_01404   |
| 0 | 6    | 11 PITG_16940  |
| 0 | 11   | 6 PITG_01761   |
| 0 | 20   | 8 PITG_14728   |
| 0 | 0    | 0 PITG_16720   |
| 0 | 103  | 53 PITG_09578  |
| 0 | 177  | 27 PITG_21144  |
| 0 | 10   | 6 PITG_19875   |
| 0 | 33   | 2 PITG_18712   |
| 0 | 73   | 2 PITG_15551   |
| 0 | 0    | 8 NA           |
| 0 | 52   | 4 NA           |
| 0 | 0    | 0 NA           |
| 0 | 4    | 7 NA           |

|      |     |                |
|------|-----|----------------|
| 0    | 10  | 2 PITG_12595   |
| 0    | 192 | 624 PITG_05301 |
| 0    | 16  | 2 PITG_01579   |
| 1165 | 6   | 785 NA         |
| 0    | 5   | 7 PITG_01719   |
| 0    | 30  | 2 NA           |
| 0    | 42  | 13 PITG_03701  |
| 0    | 0   | 2 PITG_19183   |
| 0    | 526 | 948 PITG_08744 |
| 0    | 6   | 10 PITG_09951  |
| 0    | 36  | 13 PITG_03843  |
| 0    | 99  | 27 PITG_10118  |
| 0    | 2   | 4 NA           |
| 0    | 167 | 29 PITG_11019  |
| 0    | 39  | 35 PITG_04956  |
| 0    | 4   | 0 PITG_03431   |
| 0    | 18  | 6 PITG_11708   |
| 0    | 0   | 0 PITG_15058   |
| 0    | 27  | 10 PITG_02923  |
| 0    | 8   | 0 NA           |
| 0    | 425 | 97 PITG_00655  |
| 0    | 4   | 4 PITG_03472   |
| 0    | 6   | 0 PITG_15091   |
| 0    | 2   | 7 PITG_01744   |
| 0    | 84  | 87 NA          |
| 0    | 14  | 0 PITG_00945   |
| 0    | 29  | 41 PITG_10164  |
| 0    | 194 | 329 PITG_15280 |
| 0    | 245 | 49 PITG_16894  |
| 0    | 99  | 49 PITG_11587  |
| 0    | 2   | 0 PITG_22126   |
| 0    | 40  | 21 NA          |
| 0    | 20  | 15 NA          |
| 0    | 90  | 27 PITG_18046  |
| 0    | 9   | 6 PITG_18063   |
| 0    | 225 | 7 NA           |
| 0    | 15  | 0 PITG_19709   |
| 0    | 594 | 518 PITG_19595 |
| 0    | 233 | 159 PITG_13275 |
| 0    | 4   | 2 PITG_05170   |
| 0    | 21  | 6 NA           |
| 0    | 507 | 66 NA          |
| 0    | 4   | 0 PITG_14585   |
| 0    | 8   | 2 NA           |
| 0    | 57  | 0 PITG_04295   |
| 0    | 0   | 0 NA           |
| 0    | 11  | 16 NA          |



|     |     |                |
|-----|-----|----------------|
| 0   | 35  | 18 PITG_03887  |
| 0   | 16  | 4 PITG_04376   |
| 0   | 232 | 81 PITG_01499  |
| 0   | 10  | 7 PITG_02842   |
| 0   | 55  | 26 PITG_07305  |
| 0   | 5   | 24 PITG_21055  |
| 0   | 31  | 5 NA           |
| 0   | 421 | 258 PITG_01238 |
| 0   | 157 | 195 PITG_15155 |
| 136 | 35  | 174 NA         |
| 0   | 10  | 4 PITG_03017   |
| 0   | 2   | 0 NA           |
| 0   | 494 | 136 NA         |
| 0   | 23  | 31 PITG_14637  |
| 0   | 5   | 0 PITG_03053   |
| 0   | 327 | 35 NA          |
| 0   | 0   | 4 PITG_17128   |
| 0   | 56  | 2 NA           |
| 0   | 8   | 8 PITG_11197   |
| 0   | 4   | 17 PITG_00049  |
| 0   | 30  | 5 NA           |
| 0   | 17  | 24 PITG_07298  |
| 0   | 6   | 0 NA           |
| 0   | 7   | 2 PITG_04678   |
| 0   | 36  | 6 PITG_03652   |
| 0   | 12  | 21 NA          |
| 0   | 2   | 5 PITG_09220   |
| 0   | 16  | 72 PITG_03348  |
| 0   | 152 | 66 PITG_03282  |
| 0   | 22  | 9 NA           |
| 0   | 6   | 0 PITG_06936   |
| 0   | 160 | 24 PITG_00809  |
| 0   | 7   | 109 PITG_03642 |
| 0   | 120 | 32 PITG_09349  |
| 0   | 7   | 3 PITG_03374   |
| 0   | 34  | 16 PITG_03408  |
| 0   | 8   | 13 PITG_00186  |
| 251 | 0   | 148 NA         |
| 0   | 92  | 36 PITG_13347  |
| 0   | 0   | 2 PITG_07953   |
| 0   | 20  | 31 PITG_21172  |
| 0   | 0   | 4 PITG_01920   |
| 0   | 14  | 36 PITG_04002  |
| 0   | 38  | 39 PITG_08452  |
| 0   | 44  | 0 NA           |
| 0   | 29  | 49 PITG_06597  |
| 0   | 3   | 6 NA           |

|   |     |                |
|---|-----|----------------|
| 0 | 0   | 2 PITG_05507   |
| 0 | 167 | 43 PITG_00947  |
| 0 | 393 | 648 PITG_10300 |
| 0 | 35  | 18 PITG_18046  |
| 0 | 324 | 486 PITG_06415 |
| 0 | 54  | 29 PITG_21727  |
| 0 | 21  | 17 PITG_18475  |
| 0 | 74  | 12 PITG_01595  |
| 0 | 32  | 36 PITG_03115  |
| 0 | 0   | 0 PITG_01076   |
| 0 | 77  | 0 PITG_19113   |
| 0 | 106 | 0 PITG_06566   |
| 0 | 4   | 5 PITG_08394   |
| 0 | 6   | 4 NA           |
| 0 | 2   | 2 PITG_03830   |
| 0 | 23  | 36 PITG_00954  |
| 0 | 444 | 436 PITG_17093 |
| 0 | 29  | 5 NA           |
| 0 | 56  | 186 PITG_06016 |
| 0 | 336 | 318 PITG_03433 |
| 0 | 6   | 21 PITG_11569  |
| 0 | 17  | 2 NA           |
| 0 | 68  | 44 PITG_07302  |
| 0 | 66  | 81 PITG_16814  |
| 0 | 10  | 13 PITG_02849  |
| 0 | 475 | 177 PITG_01947 |
| 0 | 137 | 187 PITG_18330 |
| 0 | 165 | 46 PITG_20795  |
| 0 | 24  | 93 PITG_16984  |
| 0 | 5   | 0 PITG_15502   |
| 0 | 99  | 79 PITG_11723  |
| 0 | 33  | 13 PITG_11250  |
| 0 | 17  | 2 NA           |
| 0 | 0   | 40 PITG_12939  |
| 0 | 0   | 0 PITG_20727   |
| 0 | 33  | 12 PITG_08602  |
| 0 | 0   | 0 NA           |
| 0 | 0   | 0 NA           |
| 0 | 16  | 7 PITG_17964   |
| 0 | 2   | 0 NA           |
| 0 | 55  | 56 PITG_01453  |
| 0 | 7   | 0 PITG_06829   |
| 0 | 29  | 9 PITG_11993   |
| 0 | 16  | 8 PITG_07699   |
| 0 | 347 | 502 PITG_07985 |
| 2 | 253 | 256 PITG_00397 |
| 0 | 204 | 24 PITG_19804  |

|   |      |                |
|---|------|----------------|
| 0 | 22   | 0 NA           |
| 0 | 161  | 0 PITG_09588   |
| 0 | 10   | 8 PITG_11296   |
| 0 | 0    | 4 PITG_19182   |
| 0 | 366  | 811 PITG_01042 |
| 0 | 6    | 0 PITG_19175   |
| 0 | 215  | 141 PITG_09282 |
| 0 | 124  | 127 PITG_05128 |
| 0 | 23   | 4 NA           |
| 0 | 203  | 142 PITG_12302 |
| 0 | 217  | 133 PITG_03234 |
| 0 | 5    | 0 PITG_15619   |
| 0 | 113  | 19 PITG_03630  |
| 0 | 8    | 36 PITG_10207  |
| 0 | 28   | 15 PITG_01153  |
| 0 | 6    | 4 PITG_04485   |
| 0 | 17   | 6 PITG_09931   |
| 0 | 2    | 4 PITG_02774   |
| 0 | 334  | 172 PITG_13324 |
| 0 | 148  | 85 PITG_06948  |
| 0 | 33   | 67 PITG_07960  |
| 0 | 2    | 9 PITG_01788   |
| 0 | 92   | 223 PITG_06647 |
| 0 | 28   | 18 PITG_14249  |
| 0 | 27   | 31 PITG_02135  |
| 0 | 4    | 2 PITG_06900   |
| 0 | 41   | 42 PITG_12676  |
| 0 | 13   | 4 PITG_21517   |
| 0 | 0    | 4 NA           |
| 0 | 930  | 22 NA          |
| 0 | 81   | 9 PITG_15749   |
| 0 | 6    | 2 PITG_07029   |
| 0 | 0    | 0 NA           |
| 0 | 1325 | 52 NA          |
| 0 | 2    | 2 PITG_00080   |
| 0 | 39   | 2 PITG_10887   |
| 0 | 0    | 4 PITG_19153   |
| 0 | 39   | 5 PITG_02020   |
| 0 | 5    | 6 PITG_07334   |
| 0 | 13   | 0 PITG_13651   |
| 0 | 63   | 89 PITG_03520  |
| 0 | 7    | 22 PITG_04996  |
| 0 | 11   | 4 PITG_11368   |
| 0 | 12   | 2 NA           |
| 0 | 240  | 147 PITG_20904 |
| 0 | 4    | 4 PITG_00198   |
| 0 | 31   | 66 PITG_09360  |

|   |     |                |
|---|-----|----------------|
| 0 | 18  | 32 PITG_19168  |
| 0 | 457 | 133 PITG_13768 |
| 0 | 8   | 4 PITG_02487   |
| 0 | 393 | 183 PITG_07923 |
| 0 | 0   | 3 NA           |
| 0 | 46  | 12 PITG_17769  |
| 0 | 5   | 2 PITG_04479   |
| 0 | 51  | 32 NA          |
| 0 | 10  | 12 NA          |
| 0 | 13  | 10 PITG_05611  |
| 0 | 8   | 0 NA           |
| 0 | 0   | 4 PITG_15447   |
| 0 | 0   | 4 PITG_12819   |
| 0 | 115 | 67 PITG_09452  |
| 0 | 309 | 17 NA          |
| 0 | 88  | 2 PITG_11253   |
| 0 | 299 | 102 PITG_05508 |
| 0 | 4   | 12 PITG_17930  |
| 0 | 6   | 0 PITG_01192   |
| 0 | 185 | 327 PITG_06995 |
| 0 | 25  | 0 NA           |
| 0 | 93  | 37 PITG_17668  |
| 0 | 22  | 43 PITG_22958  |
| 0 | 190 | 51 PITG_09537  |
| 0 | 51  | 14 PITG_21556  |
| 0 | 7   | 0 PITG_01044   |
| 0 | 0   | 0 PITG_08431   |
| 0 | 0   | 0 PITG_02752   |
| 0 | 47  | 6 PITG_15818   |
| 0 | 347 | 342 PITG_07999 |
| 0 | 154 | 40 PITG_02263  |
| 0 | 38  | 9 PITG_03821   |
| 0 | 2   | 5 NA           |
| 0 | 14  | 0 PITG_09953   |
| 0 | 14  | 2 NA           |
| 0 | 8   | 0 PITG_17452   |
| 0 | 178 | 26 PITG_01740  |
| 0 | 55  | 48 PITG_01832  |
| 0 | 19  | 6 PITG_14194   |
| 0 | 22  | 21 PITG_01073  |
| 0 | 0   | 4 PITG_16063   |
| 0 | 12  | 7 PITG_18413   |
| 0 | 535 | 491 NA         |
| 0 | 38  | 0 PITG_13992   |
| 0 | 23  | 10 NA          |
| 0 | 443 | 710 PITG_07885 |
| 0 | 20  | 48 PITG_02762  |

|   |      |                 |
|---|------|-----------------|
| 0 | 382  | 238 PITG_00396  |
| 0 | 18   | 9 PITG_14170    |
| 0 | 26   | 7 NA            |
| 0 | 101  | 55 PITG_18072   |
| 0 | 187  | 175 PITG_03449  |
| 0 | 83   | 53 PITG_18038   |
| 0 | 2    | 5 PITG_05559    |
| 0 | 8    | 8 PITG_09523    |
| 0 | 452  | 18 PITG_08744   |
| 0 | 458  | 206 PITG_03309  |
| 0 | 25   | 0 PITG_21505    |
| 0 | 119  | 1209 PITG_22157 |
| 0 | 23   | 0 PITG_18175    |
| 0 | 2    | 2 PITG_15140    |
| 4 | 454  | 688 PITG_03220  |
| 0 | 86   | 21 PITG_18028   |
| 0 | 8    | 8 PITG_10152    |
| 0 | 0    | 2 PITG_08305    |
| 0 | 71   | 67 PITG_16376   |
| 0 | 28   | 5 PITG_03586    |
| 0 | 2    | 26 PITG_12099   |
| 0 | 269  | 118 PITG_11437  |
| 0 | 68   | 36 PITG_12151   |
| 0 | 23   | 2 PITG_15920    |
| 0 | 6    | 6 PITG_18316    |
| 0 | 12   | 5 PITG_06996    |
| 0 | 72   | 9 PITG_17154    |
| 4 | 82   | 1146 PITG_10636 |
| 0 | 1218 | 746 PITG_02252  |
| 0 | 118  | 75 NA           |
| 0 | 184  | 69 PITG_15996   |
| 0 | 9    | 14 PITG_12983   |
| 0 | 69   | 16 PITG_17479   |
| 0 | 0    | 6 PITG_16468    |
| 0 | 112  | 41 PITG_22105   |
| 0 | 6    | 10 PITG_08516   |
| 2 | 127  | 92 PITG_07195   |
| 0 | 874  | 616 PITG_06430  |
| 0 | 12   | 13 PITG_01045   |
| 0 | 133  | 73 PITG_22459   |
| 0 | 0    | 0 PITG_14847    |
| 0 | 2    | 8 PITG_11887    |
| 0 | 2    | 10 PITG_12563   |
| 0 | 9    | 0 PITG_10293    |
| 0 | 37   | 191 PITG_17527  |
| 0 | 295  | 28 PITG_17230   |
| 0 | 2    | 2 PITG_14561    |

|   |     |                |
|---|-----|----------------|
| 0 | 161 | 12 PITG_00486  |
| 2 | 0   | 0 NA           |
| 0 | 2   | 15 PITG_06150  |
| 0 | 134 | 17 NA          |
| 0 | 14  | 10 NA          |
| 0 | 2   | 2 NA           |
| 0 | 104 | 39 PITG_09531  |
| 0 | 10  | 0 NA           |
| 0 | 32  | 14 PITG_02228  |
| 0 | 147 | 74 PITG_01103  |
| 0 | 2   | 5 PITG_02572   |
| 0 | 113 | 24 PITG_16864  |
| 0 | 18  | 8 PITG_11424   |
| 0 | 182 | 28 PITG_13174  |
| 0 | 7   | 0 PITG_13815   |
| 0 | 217 | 142 PITG_02755 |
| 0 | 83  | 4 PITG_03276   |
| 0 | 0   | 0 PITG_05993   |
| 0 | 2   | 0 PITG_02500   |
| 0 | 109 | 305 PITG_17273 |
| 0 | 0   | 2 NA           |
| 0 | 10  | 4 PITG_13775   |
| 0 | 57  | 51 NA          |
| 0 | 9   | 5 PITG_00839   |
| 0 | 300 | 418 PITG_05778 |
| 0 | 55  | 290 PITG_14237 |
| 0 | 2   | 0 NA           |
| 0 | 0   | 6 PITG_03473   |
| 0 | 46  | 8 NA           |
| 0 | 45  | 56 PITG_02732  |
| 0 | 7   | 0 PITG_02391   |
| 0 | 980 | 572 PITG_11524 |
| 0 | 653 | 322 PITG_00999 |
| 0 | 18  | 30 PITG_10183  |
| 0 | 90  | 79 PITG_03364  |
| 0 | 6   | 0 NA           |
| 0 | 20  | 48 PITG_08741  |
| 0 | 4   | 0 NA           |
| 0 | 10  | 0 PITG_15925   |
| 0 | 5   | 0 PITG_16257   |
| 0 | 19  | 21 NA          |
| 0 | 161 | 189 PITG_03956 |
| 0 | 549 | 63 PITG_09784  |
| 0 | 10  | 9 NA           |
| 0 | 0   | 0 PITG_15053   |
| 0 | 16  | 6 NA           |
| 0 | 482 | 414 PITG_18446 |

|   |     |                |
|---|-----|----------------|
| 0 | 106 | 43 PITG_17136  |
| 0 | 103 | 12 PITG_01581  |
| 0 | 12  | 10 PITG_02564  |
| 0 | 2   | 0 PITG_12699   |
| 0 | 180 | 9 PITG_05250   |
| 0 | 2   | 9 PITG_05757   |
| 0 | 196 | 20 PITG_13397  |
| 0 | 13  | 6 PITG_01925   |
| 0 | 38  | 2 NA           |
| 0 | 58  | 9 PITG_13512   |
| 0 | 81  | 2 PITG_20745   |
| 0 | 16  | 2 NA           |
| 0 | 121 | 73 PITG_21626  |
| 0 | 549 | 272 PITG_00218 |
| 0 | 149 | 79 PITG_03418  |
| 0 | 2   | 48 PITG_17326  |
| 0 | 58  | 307 PITG_15504 |
| 0 | 16  | 4 PITG_04680   |
| 0 | 2   | 9 PITG_06148   |
| 0 | 5   | 0 PITG_07245   |
| 0 | 27  | 15 PITG_01925  |
| 2 | 142 | 828 PITG_12745 |
| 0 | 0   | 0 PITG_21171   |
| 0 | 58  | 16 PITG_16322  |
| 0 | 385 | 498 PITG_14284 |
| 0 | 20  | 0 PITG_04076   |
| 0 | 2   | 2 PITG_07192   |
| 0 | 8   | 2 PITG_03136   |
| 0 | 45  | 4 PITG_20615   |
| 0 | 9   | 12 PITG_06896  |
| 0 | 68  | 40 PITG_12739  |
| 0 | 34  | 3 NA           |
| 0 | 343 | 265 PITG_13660 |
| 0 | 15  | 4 PITG_17332   |
| 0 | 153 | 77 PITG_18330  |
| 0 | 2   | 0 PITG_03624   |
| 0 | 0   | 2 PITG_18632   |
| 0 | 8   | 4 NA           |
| 0 | 330 | 911 PITG_04522 |
| 0 | 96  | 148 PITG_01411 |
| 0 | 62  | 34 PITG_12599  |
| 0 | 16  | 79 PITG_00695  |
| 0 | 3   | 0 NA           |
| 0 | 379 | 630 PITG_18054 |
| 0 | 103 | 88 PITG_00980  |
| 0 | 2   | 5 NA           |
| 0 | 2   | 0 PITG_12015   |

|    |     |                |
|----|-----|----------------|
| 0  | 0   | 0 NA           |
| 43 | 169 | 2964 NA        |
| 0  | 20  | 4 PITG_12587   |
| 0  | 279 | 267 PITG_05497 |
| 0  | 262 | 351 PITG_08600 |
| 0  | 4   | 11 PITG_05302  |
| 0  | 264 | 189 PITG_20354 |
| 0  | 22  | 9 PITG_02923   |
| 0  | 146 | 107 PITG_02177 |
| 0  | 2   | 0 PITG_19085   |
| 0  | 2   | 12 PITG_12176  |
| 0  | 289 | 96 PITG_02971  |
| 0  | 74  | 135 PITG_16161 |
| 0  | 0   | 0 PITG_04023   |
| 0  | 6   | 4 PITG_12100   |
| 0  | 41  | 44 PITG_16478  |
| 0  | 212 | 377 PITG_01253 |
| 0  | 54  | 71 PITG_02348  |
| 0  | 25  | 4 PITG_00724   |
| 0  | 22  | 7 PITG_05597   |
| 0  | 504 | 654 PITG_01450 |
| 0  | 29  | 42 PITG_15134  |
| 0  | 76  | 138 NA         |
| 0  | 54  | 97 PITG_14589  |
| 0  | 11  | 14 PITG_16940  |
| 0  | 2   | 0 PITG_02757   |
| 0  | 4   | 21 PITG_16078  |
| 0  | 11  | 3 NA           |
| 0  | 2   | 0 NA           |
| 0  | 21  | 16 PITG_03569  |
| 0  | 85  | 32 PITG_12517  |
| 0  | 45  | 0 PITG_05234   |
| 0  | 8   | 9 PITG_02210   |
| 0  | 66  | 30 PITG_09836  |
| 0  | 19  | 23 NA          |
| 0  | 2   | 0 NA           |
| 0  | 108 | 17 PITG_03594  |
| 0  | 16  | 0 PITG_17816   |
| 0  | 228 | 126 PITG_18002 |
| 0  | 6   | 20 PITG_05502  |
| 0  | 29  | 2 PITG_00627   |
| 0  | 18  | 35 PITG_21329  |
| 0  | 22  | 0 PITG_01429   |
| 0  | 217 | 103 PITG_21396 |
| 0  | 15  | 14 PITG_01019  |
| 0  | 163 | 318 PITG_05363 |
| 0  | 10  | 9 PITG_07110   |



|   |      |                |
|---|------|----------------|
| 0 | 22   | 0 PITG_17461   |
| 0 | 14   | 2 PITG_13971   |
| 0 | 94   | 66 PITG_08139  |
| 0 | 2218 | 897 PITG_10934 |
| 0 | 135  | 12 PITG_23304  |
| 0 | 18   | 2 PITG_15334   |
| 0 | 9    | 65 PITG_05537  |
| 0 | 0    | 2 NA           |
| 0 | 23   | 0 PITG_05537   |
| 0 | 216  | 75 PITG_00681  |
| 0 | 49   | 18 PITG_14389  |
| 0 | 13   | 8 NA           |
| 0 | 43   | 37 PITG_18922  |
| 0 | 0    | 0 PITG_14614   |
| 0 | 24   | 17 PITG_09296  |
| 0 | 17   | 0 PITG_20061   |
| 0 | 76   | 63 PITG_15365  |
| 0 | 16   | 2 PITG_05482   |
| 0 | 0    | 0 PITG_06660   |
| 0 | 336  | 94 PITG_12961  |
| 0 | 116  | 59 PITG_13588  |
| 0 | 12   | 24 NA          |
| 0 | 5    | 11 PITG_10901  |
| 0 | 120  | 29 PITG_02827  |
| 0 | 214  | 157 PITG_00787 |
| 0 | 14   | 0 PITG_04978   |
| 0 | 5    | 0 PITG_19095   |
| 0 | 61   | 2 PITG_21277   |
| 0 | 19   | 2 PITG_15259   |
| 0 | 5    | 4 PITG_21525   |
| 3 | 111  | 207 PITG_06986 |
| 0 | 16   | 161 PITG_00209 |
| 0 | 6    | 10 PITG_00858  |
| 0 | 8    | 4 NA           |
| 0 | 0    | 0 PITG_10006   |
| 0 | 20   | 27 PITG_08305  |
| 0 | 2    | 0 NA           |
| 0 | 0    | 0 PITG_10472   |
| 0 | 267  | 254 PITG_04937 |
| 0 | 0    | 0 PITG_04061   |
| 0 | 412  | 289 PITG_08761 |
| 0 | 128  | 22 PITG_02273  |
| 0 | 0    | 3 NA           |
| 0 | 22   | 2 NA           |
| 0 | 3    | 2 PITG_17090   |
| 0 | 2    | 2 NA           |
| 0 | 31   | 2 NA           |

|   |     |                 |
|---|-----|-----------------|
| 0 | 0   | 0 PITG_00722    |
| 0 | 14  | 8 PITG_12517    |
| 0 | 25  | 9 PITG_13060    |
| 0 | 298 | 154 PITG_06719  |
| 0 | 44  | 3 PITG_15050    |
| 0 | 0   | 2 PITG_03242    |
| 0 | 0   | 0 PITG_05412    |
| 0 | 2   | 3 PITG_00334    |
| 0 | 0   | 13 PITG_02867   |
| 0 | 62  | 5 PITG_14728    |
| 0 | 27  | 22 NA           |
| 0 | 9   | 4 PITG_00722    |
| 0 | 49  | 2 PITG_15981    |
| 0 | 30  | 0 PITG_08590    |
| 0 | 8   | 0 PITG_03097    |
| 0 | 4   | 17 PITG_03472   |
| 0 | 0   | 6 NA            |
| 0 | 11  | 4 NA            |
| 0 | 71  | 51 PITG_15391   |
| 0 | 216 | 143 NA          |
| 0 | 13  | 11 PITG_03562   |
| 0 | 6   | 3 PITG_08375    |
| 0 | 256 | 88 PITG_08576   |
| 0 | 14  | 12 PITG_00575   |
| 0 | 980 | 1226 PITG_18578 |
| 0 | 248 | 5 PITG_11817    |
| 0 | 21  | 0 PITG_09247    |
| 0 | 72  | 65 PITG_13919   |
| 0 | 342 | 338 PITG_12309  |
| 0 | 33  | 21 PITG_14723   |
| 0 | 16  | 17 PITG_06902   |
| 0 | 27  | 40 PITG_21556   |
| 0 | 7   | 6 PITG_06945    |
| 0 | 35  | 2 NA            |
| 0 | 56  | 23 PITG_06084   |
| 0 | 426 | 86 PITG_16648   |
| 0 | 6   | 19 PITG_12948   |
| 0 | 200 | 55 PITG_05627   |
| 0 | 12  | 0 NA            |
| 0 | 3   | 14 PITG_16900   |
| 0 | 2   | 0 PITG_07046    |
| 0 | 2   | 0 NA            |
| 0 | 94  | 16 PITG_09895   |
| 0 | 17  | 4 PITG_01314    |
| 0 | 163 | 121 PITG_16065  |
| 2 | 14  | 622 PITG_06415  |
| 0 | 595 | 199 PITG_21806  |

|   |     |                |
|---|-----|----------------|
| 0 | 21  | 13 PITG_03864  |
| 0 | 65  | 34 PITG_10937  |
| 0 | 0   | 4 PITG_00720   |
| 0 | 83  | 77 PITG_09578  |
| 0 | 2   | 5 PITG_01850   |
| 0 | 308 | 405 PITG_19178 |
| 0 | 80  | 23 PITG_06695  |
| 0 | 189 | 213 PITG_11605 |
| 0 | 67  | 4 PITG_06570   |
| 0 | 165 | 320 PITG_11703 |
| 0 | 10  | 53 PITG_05225  |
| 0 | 49  | 44 PITG_13842  |
| 0 | 5   | 0 NA           |
| 0 | 291 | 164 PITG_07038 |
| 0 | 112 | 101 NA         |
| 0 | 87  | 170 PITG_21333 |
| 0 | 538 | 94 PITG_18991  |
| 0 | 11  | 0 PITG_00850   |
| 0 | 27  | 38 PITG_02371  |
| 0 | 0   | 0 NA           |
| 0 | 17  | 2 PITG_03404   |
| 0 | 16  | 12 PITG_11410  |
| 0 | 91  | 38 PITG_13483  |
| 0 | 45  | 11 PITG_05239  |
| 0 | 85  | 315 PITG_11110 |
| 0 | 16  | 0 PITG_07995   |
| 0 | 4   | 6 PITG_21504   |
| 0 | 304 | 122 PITG_14941 |
| 0 | 4   | 2 PITG_11437   |
| 0 | 35  | 2 PITG_18005   |
| 0 | 4   | 0 NA           |
| 0 | 12  | 14 PITG_04658  |
| 0 | 97  | 154 PITG_00899 |
| 0 | 6   | 6 PITG_01104   |
| 0 | 39  | 34 PITG_17484  |
| 0 | 0   | 0 PITG_06148   |
| 0 | 24  | 14 PITG_02069  |
| 0 | 2   | 0 PITG_08120   |
| 0 | 94  | 211 PITG_17983 |
| 0 | 418 | 38 PITG_05326  |
| 0 | 49  | 43 PITG_02470  |
| 0 | 5   | 0 NA           |
| 0 | 2   | 0 PITG_06755   |
| 0 | 6   | 0 PITG_14006   |
| 0 | 141 | 18 PITG_07509  |
| 0 | 155 | 309 PITG_13341 |
| 0 | 255 | 16 NA          |

|   |     |                |
|---|-----|----------------|
| 0 | 0   | 9 PITG_16273   |
| 0 | 0   | 0 PITG_00809   |
| 0 | 2   | 25 PITG_15504  |
| 0 | 195 | 770 PITG_15771 |
| 0 | 4   | 0 PITG_20841   |
| 0 | 0   | 6 PITG_08811   |
| 0 | 13  | 8 NA           |
| 0 | 25  | 0 NA           |
| 0 | 5   | 2 PITG_15151   |
| 0 | 21  | 4 NA           |
| 0 | 22  | 5 NA           |
| 0 | 0   | 0 PITG_09428   |
| 0 | 12  | 45 PITG_15786  |
| 0 | 5   | 2 PITG_04011   |
| 0 | 29  | 14 NA          |
| 0 | 4   | 10 PITG_16121  |
| 0 | 28  | 0 PITG_15607   |
| 0 | 117 | 247 PITG_13849 |
| 0 | 22  | 4 PITG_01557   |
| 0 | 8   | 2 PITG_05727   |
| 0 | 33  | 214 PITG_01498 |
| 0 | 6   | 0 NA           |
| 0 | 150 | 20 PITG_13167  |
| 0 | 82  | 63 PITG_19606  |
| 0 | 64  | 12 PITG_01317  |
| 0 | 2   | 4 NA           |
| 0 | 9   | 2 PITG_18331   |
| 0 | 10  | 4 PITG_18543   |
| 0 | 21  | 2 NA           |
| 0 | 8   | 4 NA           |
| 0 | 24  | 7 PITG_17944   |
| 0 | 28  | 0 PITG_18779   |
| 0 | 9   | 2 PITG_07301   |
| 0 | 0   | 61 PITG_14088  |
| 0 | 38  | 0 PITG_03049   |
| 0 | 375 | 203 NA         |
| 0 | 199 | 296 PITG_01450 |
| 0 | 4   | 3 PITG_08366   |
| 0 | 8   | 4 PITG_17049   |
| 0 | 27  | 45 PITG_15655  |
| 0 | 56  | 29 PITG_23205  |
| 0 | 353 | 144 PITG_01285 |
| 0 | 7   | 4 PITG_16546   |
| 0 | 73  | 47 PITG_09641  |
| 0 | 5   | 2 PITG_03832   |
| 0 | 0   | 2 PITG_21763   |
| 0 | 23  | 16 PITG_09548  |

|   |      |                 |
|---|------|-----------------|
| 0 | 21   | 10 PITG_14415   |
| 0 | 94   | 94 NA           |
| 0 | 11   | 27 NA           |
| 0 | 137  | 112 NA          |
| 0 | 0    | 8 PITG_21887    |
| 0 | 16   | 527 PITG_10218  |
| 0 | 65   | 0 PITG_12947    |
| 0 | 2    | 4 NA            |
| 0 | 8    | 36 PITG_00839   |
| 0 | 19   | 0 PITG_13746    |
| 0 | 10   | 11 PITG_03038   |
| 0 | 28   | 0 PITG_05421    |
| 0 | 1136 | 610 PITG_06651  |
| 0 | 36   | 27 NA           |
| 0 | 4    | 6 NA            |
| 0 | 4    | 3 PITG_21418    |
| 0 | 675  | 104 PITG_14002  |
| 0 | 27   | 64 PITG_11877   |
| 0 | 32   | 8 PITG_09278    |
| 0 | 11   | 12 PITG_20714   |
| 0 | 5    | 0 NA            |
| 0 | 10   | 2 PITG_09288    |
| 0 | 148  | 261 PITG_03670  |
| 0 | 0    | 0 PITG_15883    |
| 0 | 71   | 228 PITG_18774  |
| 0 | 101  | 37 PITG_11473   |
| 0 | 5    | 13 PITG_13607   |
| 0 | 46   | 2 PITG_15906    |
| 0 | 9    | 9 PITG_21006    |
| 0 | 7    | 27 PITG_01535   |
| 0 | 4    | 7 PITG_01920    |
| 0 | 10   | 14 NA           |
| 0 | 16   | 5 PITG_01647    |
| 0 | 77   | 47 PITG_10895   |
| 0 | 21   | 6 PITG_19671    |
| 0 | 106  | 28 PITG_06673   |
| 0 | 66   | 5 NA            |
| 0 | 260  | 399 PITG_06771  |
| 0 | 3    | 0 PITG_17265    |
| 0 | 4850 | 2505 PITG_18578 |
| 0 | 428  | 150 NA          |
| 0 | 52   | 132 PITG_20970  |
| 0 | 48   | 52 PITG_09437   |
| 0 | 29   | 12 PITG_17280   |
| 0 | 2    | 2 PITG_18090    |
| 0 | 22   | 14 NA           |
| 0 | 39   | 11 NA           |

|   |     |                 |
|---|-----|-----------------|
| 0 | 13  | 23 PITG_01701   |
| 0 | 2   | 0 PITG_03234    |
| 0 | 81  | 37 PITG_04002   |
| 0 | 334 | 37 PITG_19055   |
| 0 | 38  | 33 PITG_14099   |
| 0 | 3   | 28 PITG_11460   |
| 0 | 4   | 48 PITG_00146   |
| 0 | 92  | 61 PITG_20928   |
| 0 | 25  | 127 PITG_09626  |
| 0 | 2   | 2 PITG_10888    |
| 0 | 0   | 0 NA            |
| 0 | 204 | 217 PITG_05356  |
| 0 | 13  | 0 PITG_15955    |
| 0 | 42  | 74 PITG_08025   |
| 0 | 9   | 13 PITG_02267   |
| 0 | 23  | 97 NA           |
| 0 | 243 | 13 PITG_03575   |
| 0 | 10  | 2 PITG_01138    |
| 0 | 9   | 21 PITG_09403   |
| 0 | 0   | 0 NA            |
| 0 | 178 | 116 PITG_09428  |
| 0 | 14  | 0 NA            |
| 0 | 66  | 38 PITG_00734   |
| 0 | 80  | 87 PITG_21111   |
| 0 | 8   | 2 NA            |
| 0 | 33  | 13 PITG_17611   |
| 0 | 159 | 109 PITG_18359  |
| 0 | 0   | 4 PITG_10011    |
| 0 | 0   | 2 PITG_16958    |
| 0 | 2   | 0 PITG_01084    |
| 6 | 97  | 2391 PITG_12139 |
| 0 | 38  | 8 PITG_04705    |
| 0 | 2   | 0 PITG_02792    |
| 0 | 0   | 3 PITG_08734    |
| 0 | 5   | 17 PITG_08236   |
| 0 | 30  | 6 NA            |
| 0 | 113 | 50 PITG_05461   |
| 0 | 11  | 27 PITG_00787   |
| 0 | 2   | 3 PITG_17402    |
| 0 | 119 | 41 PITG_12155   |
| 0 | 23  | 10 PITG_02761   |
| 0 | 2   | 31 NA           |
| 0 | 0   | 2 PITG_14561    |
| 0 | 11  | 0 PITG_06570    |
| 0 | 7   | 8 PITG_05560    |
| 0 | 13  | 2 PITG_22716    |
| 0 | 2   | 0 PITG_15820    |

|     |     |                 |
|-----|-----|-----------------|
| 0   | 141 | 66 PITG_16894   |
| 0   | 5   | 4 NA            |
| 0   | 29  | 0 PITG_10715    |
| 0   | 250 | 197 PITG_21174  |
| 0   | 11  | 6 PITG_12496    |
| 648 | 9   | 1381 PITG_18001 |
| 0   | 5   | 11 PITG_04910   |
| 0   | 287 | 225 PITG_11875  |
| 0   | 10  | 16 NA           |
| 0   | 0   | 0 NA            |
| 0   | 72  | 0 PITG_15857    |
| 0   | 10  | 8 NA            |
| 3   | 237 | 690 PITG_05156  |
| 0   | 2   | 2 PITG_14727    |
| 0   | 0   | 0 PITG_03900    |
| 0   | 2   | 0 NA            |
| 0   | 444 | 541 PITG_03392  |
| 0   | 8   | 2 PITG_03830    |
| 0   | 87  | 59 PITG_07570   |
| 0   | 23  | 7 NA            |
| 0   | 135 | 42 PITG_10129   |
| 2   | 356 | 240 PITG_07655  |
| 0   | 12  | 2 PITG_18074    |
| 0   | 4   | 0 PITG_03623    |
| 0   | 45  | 19 NA           |
| 0   | 204 | 323 PITG_10747  |
| 0   | 36  | 6 PITG_22358    |
| 0   | 312 | 411 NA          |
| 0   | 28  | 29 PITG_13262   |
| 0   | 201 | 125 PITG_06690  |
| 0   | 24  | 56 PITG_17287   |
| 0   | 13  | 11 PITG_16006   |
| 0   | 530 | 127 NA          |
| 0   | 37  | 0 NA            |
| 0   | 67  | 8 PITG_06708    |
| 0   | 154 | 97 PITG_14269   |
| 0   | 2   | 5 NA            |
| 0   | 57  | 57 PITG_14066   |
| 0   | 6   | 6 PITG_11750    |
| 0   | 0   | 0 PITG_12140    |
| 0   | 21  | 0 PITG_20197    |
| 0   | 114 | 40 PITG_01238   |
| 0   | 8   | 0 PITG_19581    |
| 0   | 72  | 124 PITG_02664  |
| 0   | 5   | 10 PITG_07200   |
| 0   | 403 | 551 PITG_09540  |
| 0   | 289 | 101 PITG_12646  |

|    |      |                 |
|----|------|-----------------|
| 0  | 5    | 2 NA            |
| 0  | 4    | 0 PITG_02973    |
| 93 | 123  | 519 NA          |
| 0  | 100  | 54 PITG_06921   |
| 0  | 13   | 2 PITG_13068    |
| 0  | 72   | 25 PITG_01270   |
| 0  | 39   | 4 NA            |
| 0  | 3    | 0 PITG_05672    |
| 0  | 143  | 2604 PITG_11891 |
| 0  | 21   | 17 PITG_03369   |
| 0  | 2    | 2 PITG_19418    |
| 0  | 122  | 69 PITG_00525   |
| 0  | 41   | 47 PITG_21132   |
| 0  | 169  | 242 PITG_04843  |
| 0  | 0    | 0 NA            |
| 0  | 29   | 8 PITG_03830    |
| 0  | 109  | 539 PITG_11244  |
| 0  | 4    | 4 PITG_09747    |
| 0  | 4    | 2 NA            |
| 0  | 166  | 7 NA            |
| 0  | 33   | 70 PITG_01964   |
| 0  | 1079 | 1524 PITG_13301 |
| 0  | 40   | 9 NA            |
| 0  | 4    | 0 NA            |
| 0  | 0    | 0 PITG_21190    |
| 0  | 44   | 4 PITG_11817    |
| 0  | 7    | 2 NA            |
| 0  | 7    | 7 PITG_05761    |
| 0  | 173  | 66 PITG_00067   |
| 0  | 4    | 4 NA            |
| 0  | 2    | 15 PITG_12140   |
| 0  | 32   | 38 PITG_13827   |
| 0  | 37   | 10 PITG_09230   |
| 0  | 0    | 6 PITG_02792    |
| 0  | 4    | 0 PITG_13505    |
| 0  | 9    | 22 PITG_07960   |
| 0  | 0    | 0 PITG_14111    |
| 0  | 77   | 86 PITG_13196   |
| 0  | 44   | 118 PITG_05112  |
| 0  | 2    | 0 PITG_00180    |
| 0  | 0    | 0 PITG_03143    |
| 0  | 24   | 14 PITG_12149   |
| 0  | 25   | 15 PITG_00024   |
| 0  | 100  | 66 PITG_12151   |
| 0  | 6    | 10 PITG_14935   |
| 0  | 10   | 3 PITG_16684    |
| 0  | 17   | 0 NA            |



|   |      |                |
|---|------|----------------|
| 0 | 106  | 17 PITG_08776  |
| 0 | 5    | 2 PITG_17867   |
| 0 | 70   | 19 PITG_01647  |
| 0 | 15   | 0 NA           |
| 0 | 37   | 13 PITG_15961  |
| 0 | 2    | 0 PITG_15500   |
| 0 | 2    | 4 PITG_03995   |
| 0 | 131  | 15 PITG_09260  |
| 0 | 92   | 168 PITG_05669 |
| 0 | 8    | 33 PITG_05128  |
| 0 | 6    | 2 PITG_10058   |
| 0 | 213  | 203 PITG_08787 |
| 0 | 103  | 207 PITG_09538 |
| 0 | 6    | 4 PITG_17895   |
| 0 | 45   | 20 PITG_11194  |
| 0 | 258  | 79 PITG_12099  |
| 0 | 28   | 14 PITG_06457  |
| 0 | 101  | 20 NA          |
| 0 | 5    | 0 NA           |
| 0 | 2328 | 1217 NA        |
| 0 | 27   | 15 PITG_06259  |
| 0 | 2    | 0 PITG_15191   |
| 0 | 99   | 55 PITG_09449  |
| 0 | 139  | 194 PITG_21128 |
| 0 | 80   | 0 PITG_01937   |
| 0 | 105  | 72 PITG_07967  |
| 0 | 3    | 0 PITG_03476   |
| 0 | 49   | 66 PITG_04712  |
| 0 | 24   | 105 PITG_09768 |
| 0 | 29   | 23 PITG_10275  |
| 0 | 15   | 7 PITG_01981   |
| 0 | 4    | 8 PITG_08504   |
| 0 | 2    | 2 PITG_00562   |
| 0 | 9    | 15 PITG_04564  |
| 0 | 12   | 22 PITG_11125  |
| 0 | 17   | 22 PITG_12042  |
| 0 | 38   | 8 PITG_08822   |
| 0 | 19   | 14 PITG_16005  |
| 0 | 53   | 115 PITG_10938 |
| 0 | 53   | 108 PITG_09724 |
| 0 | 79   | 59 PITG_06281  |
| 0 | 43   | 16 PITG_02322  |
| 0 | 25   | 31 PITG_01607  |
| 0 | 6    | 7 PITG_19142   |
| 0 | 161  | 41 PITG_09090  |
| 0 | 147  | 234 PITG_01453 |
| 0 | 0    | 0 PITG_15864   |

|   |     |                |
|---|-----|----------------|
| 0 | 764 | 295 PITG_12039 |
| 0 | 129 | 126 PITG_07155 |
| 0 | 0   | 3 PITG_02348   |
| 0 | 15  | 2 NA           |
| 0 | 12  | 55 PITG_02910  |
| 0 | 245 | 74 PITG_10871  |
| 0 | 0   | 4 PITG_01941   |
| 0 | 2   | 0 PITG_11555   |
| 0 | 6   | 170 PITG_12562 |
| 0 | 249 | 913 PITG_00693 |
| 0 | 273 | 67 PITG_10081  |
| 0 | 0   | 0 PITG_13661   |
| 0 | 64  | 320 PITG_06408 |
| 0 | 39  | 4 NA           |
| 0 | 4   | 12 PITG_16272  |
| 0 | 114 | 36 PITG_01504  |
| 0 | 9   | 8 PITG_00404   |
| 0 | 4   | 39 PITG_15573  |
| 0 | 6   | 20 PITG_11047  |
| 0 | 18  | 70 PITG_09964  |
| 0 | 4   | 4 PITG_20350   |
| 0 | 2   | 5 PITG_00309   |
| 0 | 15  | 8 PITG_13182   |
| 0 | 4   | 4 PITG_00180   |
| 0 | 6   | 2 PITG_11643   |
| 0 | 0   | 3 PITG_03947   |
| 0 | 207 | 64 PITG_13505  |
| 0 | 4   | 2 PITG_18316   |
| 0 | 60  | 15 PITG_00444  |
| 0 | 6   | 0 PITG_05249   |
| 0 | 0   | 0 PITG_07968   |
| 0 | 94  | 699 PITG_16760 |
| 0 | 17  | 2 PITG_02172   |
| 0 | 20  | 4 PITG_20790   |
| 0 | 0   | 0 NA           |
| 0 | 304 | 147 PITG_11206 |
| 0 | 2   | 6 PITG_12264   |
| 0 | 99  | 300 PITG_15449 |
| 0 | 135 | 55 PITG_00940  |
| 0 | 70  | 4 PITG_06184   |
| 0 | 17  | 4 PITG_08211   |
| 0 | 4   | 9 PITG_05386   |
| 0 | 0   | 4 PITG_09891   |
| 0 | 9   | 13 PITG_19245  |
| 0 | 19  | 0 NA           |
| 0 | 22  | 18 PITG_19160  |
| 0 | 5   | 10 PITG_07327  |

|   |     |                |
|---|-----|----------------|
| 0 | 28  | 42 PITG_07314  |
| 0 | 2   | 0 PITG_10993   |
| 0 | 0   | 4 PITG_02286   |
| 0 | 18  | 19 NA          |
| 0 | 4   | 41 PITG_09404  |
| 0 | 0   | 0 NA           |
| 0 | 31  | 6 NA           |
| 0 | 39  | 0 NA           |
| 0 | 206 | 199 PITG_19668 |
| 0 | 0   | 0 PITG_07293   |
| 0 | 17  | 2 PITG_22369   |
| 0 | 0   | 0 NA           |
| 0 | 11  | 39 PITG_16021  |
| 0 | 2   | 2 PITG_09995   |
| 0 | 28  | 0 NA           |
| 0 | 49  | 15 PITG_20173  |
| 0 | 252 | 905 PITG_13271 |
| 0 | 86  | 110 PITG_11329 |
| 0 | 8   | 2 NA           |
| 0 | 7   | 0 PITG_00200   |
| 0 | 39  | 19 PITG_10590  |
| 0 | 258 | 181 PITG_00884 |
| 0 | 17  | 2 PITG_02549   |
| 0 | 15  | 0 PITG_22353   |
| 0 | 95  | 124 PITG_14479 |
| 0 | 122 | 25 PITG_20714  |
| 0 | 5   | 10 PITG_04575  |
| 0 | 3   | 5 PITG_01407   |
| 0 | 0   | 4 PITG_11460   |
| 0 | 18  | 27 PITG_05616  |
| 0 | 18  | 21 PITG_00152  |
| 0 | 66  | 103 PITG_20201 |
| 0 | 0   | 4 PITG_02381   |
| 0 | 28  | 20 PITG_18574  |
| 0 | 20  | 36 PITG_16152  |
| 0 | 262 | 701 PITG_17093 |
| 0 | 187 | 73 PITG_03872  |
| 0 | 39  | 286 PITG_18306 |
| 0 | 448 | 66 PITG_16118  |
| 0 | 2   | 8 PITG_03519   |
| 0 | 2   | 6 PITG_09444   |
| 0 | 804 | 806 PITG_03392 |
| 0 | 39  | 23 PITG_00724  |
| 0 | 42  | 20 PITG_03703  |
| 0 | 0   | 0 PITG_05632   |
| 0 | 10  | 13 PITG_04956  |
| 0 | 124 | 51 PITG_16930  |

|   |      |                |
|---|------|----------------|
| 0 | 2    | 0 PITG_00416   |
| 0 | 12   | 22 PITG_06171  |
| 0 | 47   | 89 PITG_11065  |
| 0 | 77   | 45 PITG_15831  |
| 0 | 65   | 13 PITG_16903  |
| 0 | 285  | 558 PITG_03843 |
| 0 | 31   | 49 PITG_11869  |
| 0 | 5    | 6 PITG_02123   |
| 0 | 0    | 2 PITG_00718   |
| 0 | 30   | 0 PITG_05114   |
| 0 | 174  | 94 PITG_01034  |
| 0 | 43   | 77 PITG_02821  |
| 0 | 16   | 243 PITG_13919 |
| 0 | 0    | 0 PITG_02213   |
| 0 | 141  | 45 PITG_19877  |
| 0 | 2    | 3 PITG_13282   |
| 0 | 60   | 61 PITG_05255  |
| 0 | 248  | 113 PITG_01139 |
| 0 | 75   | 0 PITG_13347   |
| 0 | 12   | 10 PITG_19761  |
| 0 | 3    | 0 NA           |
| 0 | 53   | 32 PITG_01316  |
| 0 | 0    | 2 PITG_03390   |
| 0 | 6    | 8 NA           |
| 0 | 19   | 39 PITG_03486  |
| 0 | 357  | 161 PITG_16329 |
| 0 | 9    | 2 PITG_02208   |
| 0 | 130  | 24 PITG_03590  |
| 0 | 6    | 2 PITG_07976   |
| 0 | 30   | 147 NA         |
| 0 | 7    | 0 PITG_20350   |
| 0 | 148  | 103 PITG_21173 |
| 0 | 70   | 19 PITG_04921  |
| 0 | 56   | 15 PITG_17137  |
| 0 | 2    | 2 PITG_20503   |
| 0 | 8    | 8 PITG_00398   |
| 0 | 7    | 6 PITG_10888   |
| 0 | 8    | 10 PITG_11142  |
| 0 | 0    | 6 PITG_05644   |
| 0 | 37   | 12 PITG_02497  |
| 0 | 28   | 49 PITG_12228  |
| 0 | 317  | 722 PITG_02267 |
| 0 | 0    | 11 PITG_13345  |
| 0 | 97   | 20 PITG_17457  |
| 0 | 1173 | 442 PITG_06323 |
| 0 | 12   | 15 PITG_06007  |
| 0 | 116  | 23 PITG_22646  |

|   |     |                 |
|---|-----|-----------------|
| 0 | 247 | 71 PITG_14909   |
| 0 | 233 | 263 PITG_06566  |
| 0 | 194 | 46 PITG_15630   |
| 0 | 315 | 1232 PITG_19999 |
| 0 | 951 | 228 PITG_13657  |
| 0 | 8   | 4 PITG_15447    |
| 0 | 33  | 211 PITG_19871  |
| 0 | 46  | 28 NA           |
| 0 | 9   | 21 PITG_12662   |
| 0 | 5   | 4 PITG_18424    |
| 0 | 0   | 4 PITG_13616    |
| 0 | 10  | 10 PITG_19350   |
| 0 | 10  | 19 PITG_00964   |
| 0 | 366 | 242 PITG_01300  |
| 0 | 141 | 65 NA           |
| 0 | 125 | 27 NA           |
| 0 | 10  | 0 PITG_08322    |
| 0 | 3   | 15 PITG_12517   |
| 0 | 220 | 418 PITG_12562  |
| 0 | 2   | 10 PITG_03623   |
| 0 | 13  | 2 PITG_01290    |
| 0 | 3   | 0 PITG_02055    |
| 0 | 99  | 43 PITG_04065   |
| 0 | 0   | 0 PITG_04448    |
| 0 | 0   | 0 PITG_10012    |
| 0 | 10  | 10 PITG_11296   |
| 0 | 15  | 0 PITG_12470    |
| 0 | 0   | 0 NA            |
| 0 | 227 | 2 PITG_05009    |
| 0 | 490 | 275 PITG_06215  |
| 0 | 150 | 225 PITG_01702  |
| 0 | 6   | 2 PITG_01751    |
| 0 | 2   | 2 PITG_10813    |
| 0 | 20  | 2 PITG_10097    |
| 0 | 7   | 18 PITG_03142   |
| 0 | 11  | 9 PITG_15961    |
| 0 | 46  | 70 PITG_03513   |
| 0 | 0   | 2 PITG_07246    |
| 0 | 37  | 2 PITG_08926    |
| 0 | 92  | 48 NA           |
| 0 | 34  | 7 NA            |
| 0 | 14  | 0 PITG_18521    |
| 0 | 74  | 42 PITG_02821   |
| 0 | 0   | 2 PITG_12162    |
| 0 | 3   | 2 PITG_02024    |
| 0 | 85  | 0 PITG_20350    |
| 0 | 2   | 0 PITG_16137    |

|   |      |                |
|---|------|----------------|
| 0 | 9    | 0 NA           |
| 0 | 20   | 8 PITG_17944   |
| 0 | 17   | 4 PITG_17127   |
| 0 | 6    | 0 PITG_19150   |
| 0 | 103  | 177 PITG_18420 |
| 0 | 76   | 122 PITG_11712 |
| 0 | 92   | 142 PITG_03353 |
| 0 | 0    | 12 NA          |
| 0 | 8    | 0 PITG_01813   |
| 0 | 2    | 2 PITG_00818   |
| 0 | 4    | 27 PITG_03038  |
| 0 | 3    | 2 PITG_07354   |
| 0 | 39   | 8 PITG_14994   |
| 0 | 102  | 0 NA           |
| 0 | 34   | 10 PITG_12500  |
| 0 | 125  | 237 PITG_09289 |
| 0 | 6    | 2 PITG_00215   |
| 0 | 6    | 2 PITG_15672   |
| 0 | 30   | 12 PITG_07286  |
| 0 | 16   | 10 PITG_14274  |
| 0 | 51   | 10 PITG_05690  |
| 0 | 77   | 42 PITG_10140  |
| 0 | 0    | 0 PITG_17947   |
| 0 | 100  | 18 PITG_08305  |
| 0 | 78   | 0 PITG_02233   |
| 0 | 13   | 8 PITG_16458   |
| 0 | 17   | 22 PITG_13262  |
| 0 | 2    | 8 PITG_15006   |
| 0 | 58   | 18 PITG_06599  |
| 0 | 2    | 0 PITG_19800   |
| 0 | 212  | 267 PITG_06482 |
| 0 | 1631 | 876 PITG_04961 |
| 0 | 20   | 8 PITG_06982   |
| 0 | 188  | 98 PITG_02058  |
| 0 | 40   | 25 NA          |
| 0 | 17   | 30 PITG_03305  |
| 0 | 27   | 60 PITG_11586  |
| 0 | 128  | 50 PITG_00396  |
| 0 | 111  | 76 PITG_02974  |
| 0 | 37   | 0 NA           |
| 0 | 12   | 6 NA           |
| 0 | 8    | 40 PITG_09748  |
| 0 | 14   | 9 NA           |
| 2 | 528  | 195 PITG_01549 |
| 0 | 0    | 0 NA           |
| 0 | 53   | 0 PITG_10105   |
| 0 | 42   | 6 PITG_06740   |

|   |     |                |
|---|-----|----------------|
| 0 | 62  | 84 PITG_10707  |
| 0 | 6   | 12 PITG_15961  |
| 0 | 18  | 12 NA          |
| 0 | 62  | 31 PITG_07145  |
| 0 | 6   | 9 PITG_01970   |
| 0 | 4   | 0 PITG_03924   |
| 0 | 10  | 5 PITG_06480   |
| 0 | 39  | 12 NA          |
| 0 | 11  | 2 PITG_17348   |
| 0 | 13  | 0 NA           |
| 0 | 5   | 2 PITG_14129   |
| 0 | 2   | 0 PITG_20027   |
| 0 | 0   | 0 PITG_12259   |
| 0 | 161 | 181 PITG_01580 |
| 0 | 237 | 179 PITG_18650 |
| 0 | 91  | 337 PITG_16963 |
| 0 | 0   | 2 PITG_08145   |
| 0 | 65  | 332 PITG_20994 |
| 0 | 16  | 4 NA           |
| 0 | 12  | 9 NA           |
| 0 | 117 | 48 PITG_21643  |
| 0 | 87  | 51 PITG_19761  |
| 0 | 5   | 0 PITG_05668   |
| 0 | 90  | 112 PITG_12565 |
| 0 | 4   | 2 PITG_03443   |
| 0 | 39  | 74 NA          |
| 0 | 607 | 309 PITG_16925 |
| 0 | 42  | 26 PITG_15857  |
| 0 | 5   | 2 PITG_01683   |
| 0 | 11  | 13 PITG_09284  |
| 0 | 124 | 60 PITG_14967  |
| 0 | 13  | 6 NA           |
| 0 | 14  | 9 NA           |
| 0 | 6   | 2 PITG_08481   |
| 0 | 29  | 251 PITG_18934 |
| 0 | 93  | 36 PITG_18369  |
| 0 | 0   | 28 NA          |
| 0 | 14  | 70 NA          |
| 0 | 191 | 106 NA         |
| 0 | 12  | 6 PITG_08733   |
| 0 | 26  | 51 PITG_02082  |
| 0 | 2   | 16 NA          |
| 0 | 3   | 5 PITG_05616   |
| 0 | 15  | 17 PITG_02723  |
| 0 | 8   | 8 NA           |
| 0 | 19  | 2 PITG_16788   |
| 0 | 46  | 13 PITG_16770  |

|   |     |                 |
|---|-----|-----------------|
| 0 | 283 | 689 NA          |
| 0 | 7   | 7 PITG_14582    |
| 0 | 12  | 11 PITG_02213   |
| 0 | 809 | 870 PITG_11329  |
| 0 | 70  | 35 PITG_13196   |
| 0 | 0   | 0 PITG_14816    |
| 0 | 173 | 268 PITG_13737  |
| 0 | 6   | 0 PITG_19849    |
| 0 | 233 | 135 PITG_19349  |
| 0 | 177 | 89 PITG_05502   |
| 0 | 40  | 2 PITG_10519    |
| 0 | 10  | 0 NA            |
| 0 | 4   | 0 PITG_12840    |
| 0 | 175 | 154 PITG_11886  |
| 0 | 7   | 5 PITG_01952    |
| 0 | 12  | 12 PITG_16562   |
| 0 | 2   | 0 PITG_08736    |
| 0 | 7   | 2 PITG_08736    |
| 0 | 565 | 896 PITG_03712  |
| 0 | 32  | 6 NA            |
| 0 | 44  | 15 NA           |
| 0 | 285 | 717 PITG_12299  |
| 0 | 86  | 51 PITG_01777   |
| 0 | 11  | 11 PITG_05128   |
| 0 | 35  | 6 PITG_16274    |
| 0 | 4   | 4 PITG_21222    |
| 0 | 257 | 110 PITG_10957  |
| 0 | 14  | 71 PITG_03081   |
| 0 | 44  | 26 PITG_12350   |
| 0 | 6   | 20 PITG_00315   |
| 0 | 13  | 2 PITG_04030    |
| 0 | 0   | 0 PITG_03593    |
| 0 | 3   | 22 PITG_15033   |
| 0 | 28  | 4 NA            |
| 2 | 42  | 215 PITG_19161  |
| 0 | 102 | 7 PITG_05318    |
| 0 | 327 | 1409 PITG_17261 |
| 0 | 43  | 49 NA           |
| 0 | 0   | 2 NA            |
| 0 | 59  | 9 NA            |
| 0 | 44  | 5 PITG_13290    |
| 0 | 96  | 7 PITG_00973    |
| 0 | 368 | 146 PITG_13392  |
| 0 | 44  | 29 PITG_13620   |
| 0 | 0   | 0 PITG_18959    |
| 0 | 224 | 55 PITG_11293   |
| 0 | 26  | 5 NA            |



|   |     |                 |
|---|-----|-----------------|
| 0 | 53  | 3 NA            |
| 0 | 11  | 0 PITG_09881    |
| 0 | 357 | 142 PITG_05685  |
| 0 | 323 | 195 PITG_05638  |
| 0 | 13  | 9 PITG_16770    |
| 0 | 0   | 10 PITG_05395   |
| 0 | 13  | 10 NA           |
| 0 | 30  | 7 NA            |
| 0 | 10  | 0 PITG_23141    |
| 0 | 27  | 10 PITG_09252   |
| 0 | 188 | 88 PITG_18635   |
| 0 | 113 | 96 PITG_16855   |
| 0 | 49  | 88 PITG_03425   |
| 0 | 32  | 220 PITG_18005  |
| 0 | 0   | 4 PITG_13103    |
| 0 | 36  | 34 PITG_08032   |
| 0 | 36  | 21 PITG_17289   |
| 0 | 10  | 33 PITG_00665   |
| 0 | 901 | 1030 PITG_08702 |
| 0 | 0   | 0 NA            |
| 0 | 70  | 84 PITG_12676   |
| 0 | 122 | 16 PITG_00257   |
| 0 | 2   | 6 PITG_04567    |
| 0 | 45  | 5 NA            |
| 0 | 114 | 7 PITG_13505    |
| 0 | 172 | 156 PITG_00857  |
| 0 | 4   | 2 PITG_18632    |
| 0 | 82  | 47 PITG_10986   |
| 0 | 101 | 21 PITG_01871   |
| 0 | 13  | 2 PITG_15529    |
| 0 | 7   | 0 NA            |
| 0 | 183 | 101 PITG_02344  |
| 0 | 2   | 0 PITG_09782    |
| 0 | 6   | 22 NA           |
| 0 | 15  | 7 PITG_08304    |
| 0 | 24  | 7 PITG_01537    |
| 0 | 329 | 442 PITG_06215  |
| 0 | 16  | 12 PITG_02441   |
| 0 | 308 | 0 PITG_17947    |
| 0 | 2   | 17 PITG_06303   |
| 0 | 178 | 30 PITG_05449   |
| 0 | 2   | 14 PITG_13678   |
| 0 | 11  | 23 PITG_11426   |
| 0 | 40  | 14 PITG_17706   |
| 0 | 34  | 6 PITG_00330    |
| 0 | 17  | 10 PITG_09703   |
| 0 | 6   | 11 PITG_17479   |

|   |      |                 |
|---|------|-----------------|
| 0 | 4    | 4 PITG_21522    |
| 0 | 0    | 2 PITG_11405    |
| 0 | 4    | 5 PITG_05664    |
| 0 | 0    | 6 PITG_18656    |
| 0 | 512  | 793 PITG_10513  |
| 0 | 66   | 66 PITG_03860   |
| 0 | 16   | 4 PITG_00467    |
| 0 | 35   | 5 PITG_13188    |
| 0 | 4    | 4 NA            |
| 0 | 2    | 2 PITG_09194    |
| 0 | 103  | 9 PITG_00808    |
| 3 | 84   | 75 PITG_18860   |
| 0 | 17   | 32 PITG_16476   |
| 0 | 12   | 2 NA            |
| 0 | 5    | 5 PITG_09278    |
| 0 | 4    | 0 NA            |
| 0 | 2    | 11 PITG_05450   |
| 0 | 0    | 0 NA            |
| 0 | 8    | 5 NA            |
| 0 | 127  | 93 PITG_05688   |
| 0 | 262  | 404 PITG_09432  |
| 0 | 129  | 132 PITG_12574  |
| 0 | 5    | 6 PITG_11285    |
| 0 | 108  | 198 PITG_05480  |
| 0 | 54   | 40 PITG_03163   |
| 0 | 0    | 0 PITG_00075    |
| 0 | 187  | 24 PITG_13686   |
| 0 | 51   | 19 PITG_14267   |
| 0 | 55   | 21 PITG_00680   |
| 0 | 5    | 0 PITG_01850    |
| 0 | 3    | 14 PITG_03550   |
| 0 | 3    | 2 PITG_12226    |
| 0 | 62   | 16 NA           |
| 0 | 0    | 0 PITG_01407    |
| 0 | 4    | 5 PITG_11221    |
| 0 | 15   | 8 PITG_18543    |
| 0 | 15   | 15 PITG_08874   |
| 0 | 33   | 18 PITG_10750   |
| 0 | 6    | 18 PITG_19886   |
| 0 | 24   | 0 NA            |
| 0 | 7    | 3 PITG_17592    |
| 0 | 235  | 142 PITG_16464  |
| 0 | 96   | 117 PITG_21219  |
| 0 | 445  | 235 NA          |
| 0 | 37   | 26 PITG_12465   |
| 0 | 542  | 597 PITG_08802  |
| 0 | 1104 | 1166 PITG_17007 |

|   |     |                 |
|---|-----|-----------------|
| 0 | 209 | 81 PITG_03623   |
| 0 | 67  | 137 PITG_17174  |
| 0 | 148 | 6 PITG_07646    |
| 0 | 227 | 67 PITG_13912   |
| 0 | 6   | 2 PITG_06980    |
| 0 | 14  | 4 PITG_00719    |
| 0 | 24  | 89 PITG_23087   |
| 0 | 39  | 0 NA            |
| 0 | 16  | 2 NA            |
| 0 | 22  | 11 NA           |
| 0 | 143 | 105 PITG_01770  |
| 0 | 36  | 30 PITG_08584   |
| 0 | 177 | 358 PITG_19179  |
| 0 | 2   | 0 PITG_14286    |
| 0 | 41  | 64 PITG_21172   |
| 0 | 16  | 4 PITG_13915    |
| 0 | 2   | 2 PITG_09291    |
| 0 | 2   | 0 PITG_11296    |
| 0 | 2   | 0 PITG_01214    |
| 0 | 0   | 0 NA            |
| 0 | 20  | 115 PITG_17747  |
| 0 | 110 | 127 PITG_21880  |
| 0 | 4   | 0 NA            |
| 0 | 2   | 0 PITG_00791    |
| 0 | 301 | 957 PITG_06358  |
| 0 | 17  | 12 PITG_06979   |
| 0 | 102 | 53 PITG_19607   |
| 0 | 27  | 0 NA            |
| 0 | 90  | 8 PITG_00257    |
| 0 | 864 | 1424 PITG_00492 |
| 0 | 15  | 0 NA            |
| 0 | 15  | 20 PITG_16478   |
| 0 | 45  | 27 PITG_02849   |
| 0 | 366 | 14 PITG_00479   |
| 0 | 0   | 19 PITG_03401   |
| 0 | 86  | 33 PITG_01683   |
| 0 | 4   | 26 PITG_07455   |
| 0 | 121 | 87 PITG_20725   |
| 0 | 0   | 0 PITG_00257    |
| 0 | 20  | 7 PITG_07655    |
| 0 | 335 | 421 PITG_20139  |
| 0 | 103 | 25 PITG_11444   |
| 0 | 99  | 14 NA           |
| 0 | 39  | 24 PITG_17884   |
| 0 | 6   | 13 PITG_09703   |
| 0 | 58  | 56 NA           |
| 0 | 301 | 44 PITG_15817   |

|   |     |                |
|---|-----|----------------|
| 0 | 7   | 0 PITG_16900   |
| 0 | 0   | 2 PITG_05303   |
| 0 | 6   | 3 PITG_09751   |
| 0 | 170 | 67 PITG_14389  |
| 0 | 29  | 11 PITG_07896  |
| 0 | 684 | 378 PITG_00820 |
| 0 | 2   | 4 PITG_21398   |
| 0 | 17  | 38 PITG_11179  |
| 0 | 54  | 17 NA          |
| 0 | 4   | 2 NA           |
| 0 | 138 | 122 PITG_09722 |
| 0 | 84  | 86 PITG_11789  |
| 0 | 14  | 0 NA           |
| 0 | 9   | 36 PITG_05686  |
| 0 | 182 | 285 PITG_06604 |
| 0 | 2   | 6 PITG_02572   |
| 0 | 210 | 230 PITG_14466 |
| 0 | 8   | 2 PITG_00308   |
| 8 | 0   | 355 NA         |
| 0 | 21  | 47 NA          |
| 0 | 15  | 0 PITG_01519   |
| 0 | 29  | 10 PITG_02593  |
| 0 | 0   | 0 PITG_16221   |
| 0 | 23  | 0 NA           |
| 0 | 584 | 140 PITG_00676 |
| 0 | 33  | 9 PITG_13715   |
| 0 | 11  | 10 PITG_11368  |
| 0 | 27  | 10 PITG_19485  |
| 0 | 211 | 46 PITG_02260  |
| 0 | 19  | 15 PITG_11592  |
| 0 | 2   | 0 PITG_18508   |
| 0 | 17  | 0 NA           |
| 0 | 0   | 0 PITG_02259   |
| 0 | 20  | 9 PITG_11179   |
| 0 | 17  | 0 PITG_04340   |
| 0 | 4   | 0 NA           |
| 0 | 34  | 127 PITG_15496 |
| 0 | 4   | 4 PITG_07210   |
| 0 | 113 | 12 NA          |
| 0 | 72  | 205 PITG_07960 |
| 0 | 17  | 8 PITG_12695   |
| 0 | 159 | 246 NA         |
| 0 | 0   | 0 PITG_13052   |
| 0 | 20  | 22 PITG_16484  |
| 0 | 53  | 14 NA          |
| 0 | 5   | 0 PITG_09978   |
| 0 | 0   | 0 PITG_12196   |

|   |      |                 |
|---|------|-----------------|
| 0 | 4    | 0 NA            |
| 0 | 3    | 2 PITG_11701    |
| 0 | 59   | 0 PITG_03956    |
| 0 | 0    | 0 PITG_01919    |
| 0 | 4    | 5 PITG_11993    |
| 0 | 7    | 2 NA            |
| 0 | 0    | 0 NA            |
| 0 | 0    | 0 NA            |
| 0 | 112  | 17 PITG_20489   |
| 0 | 0    | 0 PITG_17329    |
| 0 | 2    | 0 PITG_00496    |
| 0 | 169  | 2349 PITG_11891 |
| 0 | 5    | 0 PITG_21005    |
| 0 | 124  | 8 PITG_01740    |
| 0 | 15   | 11 PITG_00991   |
| 0 | 112  | 47 PITG_02286   |
| 0 | 11   | 6 PITG_07242    |
| 0 | 3    | 0 PITG_20197    |
| 0 | 22   | 17 PITG_14816   |
| 0 | 177  | 164 NA          |
| 0 | 687  | 60 NA           |
| 0 | 104  | 87 PITG_10134   |
| 6 | 1242 | 2564 PITG_04640 |
| 0 | 16   | 9 PITG_00880    |
| 0 | 12   | 6 PITG_15566    |
| 0 | 4    | 40 PITG_11855   |
| 0 | 6    | 2 PITG_12252    |
| 0 | 20   | 0 NA            |
| 0 | 21   | 6 PITG_13713    |
| 0 | 33   | 27 PITG_03904   |
| 0 | 28   | 7 PITG_07046    |
| 0 | 30   | 12 PITG_08305   |
| 0 | 52   | 55 PITG_04994   |
| 0 | 16   | 43 PITG_18650   |
| 0 | 14   | 26 PITG_08469   |
| 0 | 0    | 0 PITG_03123    |
| 0 | 16   | 2 PITG_11286    |
| 0 | 11   | 23 PITG_06673   |
| 0 | 2    | 4 NA            |
| 0 | 8    | 0 PITG_05375    |
| 0 | 0    | 4 NA            |
| 0 | 7    | 9 PITG_02242    |
| 0 | 47   | 6 PITG_03901    |
| 0 | 129  | 0 PITG_01870    |
| 0 | 14   | 6 NA            |
| 0 | 405  | 152 PITG_22264  |
| 0 | 898  | 105 PITG_07985  |

|      |     |                |
|------|-----|----------------|
| 0    | 11  | 26 PITG_16741  |
| 0    | 73  | 29 PITG_02124  |
| 0    | 10  | 4 PITG_17003   |
| 0    | 4   | 2 PITG_02950   |
| 0    | 0   | 2 PITG_01407   |
| 0    | 128 | 8 PITG_01925   |
| 0    | 57  | 4 PITG_17572   |
| 0    | 315 | 163 PITG_13074 |
| 0    | 23  | 125 PITG_01181 |
| 0    | 59  | 50 PITG_14586  |
| 0    | 29  | 10 PITG_03937  |
| 0    | 2   | 4 PITG_00392   |
| 0    | 39  | 60 PITG_11723  |
| 0    | 85  | 465 PITG_07340 |
| 0    | 13  | 0 PITG_02288   |
| 0    | 0   | 0 PITG_01594   |
| 0    | 11  | 10 PITG_13775  |
| 0    | 227 | 53 PITG_13660  |
| 0    | 16  | 12 PITG_13660  |
| 0    | 41  | 0 NA           |
| 0    | 123 | 90 PITG_03822  |
| 0    | 12  | 4 PITG_05315   |
| 0    | 37  | 29 PITG_18455  |
| 0    | 340 | 80 PITG_09427  |
| 2    | 370 | 795 PITG_10263 |
| 0    | 2   | 0 PITG_18173   |
| 0    | 11  | 2 NA           |
| 1178 | 97  | 2113 NA        |
| 0    | 26  | 16 PITG_06938  |
| 0    | 29  | 31 PITG_11597  |
| 0    | 12  | 8 PITG_07795   |
| 0    | 37  | 6 PITG_01662   |
| 0    | 15  | 22 NA          |
| 0    | 0   | 2 PITG_06984   |
| 0    | 5   | 0 PITG_02757   |
| 0    | 26  | 5 PITG_18094   |
| 0    | 62  | 19 PITG_19046  |
| 0    | 38  | 17 PITG_18071  |
| 0    | 4   | 11 PITG_12598  |
| 0    | 121 | 57 PITG_03396  |
| 0    | 14  | 8 NA           |
| 0    | 130 | 80 PITG_18330  |
| 0    | 136 | 4 PITG_10980   |
| 0    | 39  | 21 PITG_14249  |
| 0    | 79  | 25 PITG_12579  |
| 0    | 21  | 7 PITG_19846   |
| 0    | 25  | 20 PITG_04959  |

|    |      |                 |
|----|------|-----------------|
| 0  | 77   | 76 PITG_08935   |
| 0  | 2    | 0 PITG_21075    |
| 6  | 40   | 444 NA          |
| 0  | 12   | 39 PITG_17600   |
| 0  | 0    | 2 NA            |
| 0  | 11   | 4 NA            |
| 0  | 15   | 86 PITG_02115   |
| 0  | 31   | 18 PITG_16071   |
| 0  | 428  | 375 PITG_08206  |
| 0  | 13   | 4 PITG_04242    |
| 0  | 12   | 6 PITG_00796    |
| 0  | 88   | 35 PITG_17601   |
| 0  | 172  | 28 PITG_08896   |
| 0  | 17   | 0 NA            |
| 0  | 18   | 79 NA           |
| 0  | 16   | 58 PITG_12696   |
| 0  | 2    | 6 PITG_16183    |
| 0  | 58   | 94 PITG_09599   |
| 0  | 0    | 2 NA            |
| 0  | 216  | 895 PITG_05464  |
| 3  | 667  | 1037 PITG_04522 |
| 0  | 1651 | 2131 PITG_06816 |
| 0  | 75   | 73 PITG_12599   |
| 0  | 2    | 3 NA            |
| 0  | 2    | 2 PITG_19469    |
| 0  | 7    | 21 PITG_00297   |
| 0  | 362  | 329 PITG_18774  |
| 0  | 59   | 10 PITG_17110   |
| 0  | 15   | 5 PITG_16973    |
| 0  | 0    | 2 PITG_07852    |
| 0  | 29   | 28 PITG_15779   |
| 0  | 67   | 3 PITG_16038    |
| 0  | 15   | 4 NA            |
| 38 | 504  | 4787 NA         |
| 0  | 2    | 4 PITG_16770    |
| 0  | 6    | 0 NA            |
| 0  | 34   | 9 PITG_01871    |
| 0  | 2    | 0 NA            |
| 0  | 4    | 0 PITG_15164    |
| 0  | 73   | 6 PITG_23159    |
| 0  | 5    | 0 PITG_05487    |
| 0  | 42   | 78 PITG_18788   |
| 0  | 159  | 124 PITG_02034  |
| 0  | 97   | 54 PITG_20502   |
| 0  | 13   | 6 PITG_02948    |
| 0  | 19   | 8 PITG_17695    |
| 0  | 177  | 50 NA           |

|   |     |                |
|---|-----|----------------|
| 0 | 8   | 9 PITG_16338   |
| 0 | 19  | 5 PITG_00486   |
| 0 | 4   | 5 NA           |
| 0 | 28  | 26 PITG_20773  |
| 0 | 216 | 92 PITG_10138  |
| 0 | 42  | 16 PITG_17140  |
| 0 | 58  | 16 PITG_16020  |
| 0 | 124 | 153 PITG_11090 |
| 0 | 16  | 4 NA           |
| 0 | 2   | 4 PITG_17779   |
| 0 | 8   | 0 PITG_05594   |
| 0 | 10  | 4 PITG_12264   |
| 0 | 64  | 213 PITG_11040 |
| 0 | 72  | 142 PITG_03555 |
| 0 | 171 | 95 PITG_02122  |
| 0 | 47  | 6 PITG_05610   |
| 0 | 30  | 20 NA          |
| 0 | 14  | 10 PITG_00274  |
| 0 | 4   | 2 PITG_05149   |
| 0 | 272 | 68 PITG_18360  |
| 0 | 900 | 460 PITG_13171 |
| 0 | 13  | 4 PITG_00688   |
| 0 | 21  | 28 PITG_09475  |
| 0 | 2   | 4 PITG_00882   |
| 0 | 2   | 5 PITG_00709   |
| 0 | 86  | 139 PITG_01287 |
| 0 | 4   | 2 PITG_16224   |
| 0 | 453 | 8 PITG_21110   |
| 0 | 37  | 4 PITG_12008   |
| 0 | 67  | 6 PITG_02949   |
| 0 | 48  | 10 PITG_13672  |
| 0 | 4   | 2 PITG_19146   |
| 0 | 105 | 95 PITG_05658  |
| 0 | 174 | 62 PITG_05552  |
| 0 | 17  | 9 PITG_06390   |
| 0 | 7   | 8 PITG_16021   |
| 0 | 44  | 43 PITG_04011  |
| 0 | 12  | 7 PITG_06740   |
| 0 | 31  | 30 PITG_00320  |
| 0 | 16  | 4 PITG_00406   |
| 2 | 656 | 995 PITG_16915 |
| 0 | 0   | 7 PITG_19234   |
| 0 | 53  | 12 PITG_03425  |
| 0 | 2   | 0 PITG_19485   |
| 0 | 84  | 54 PITG_01583  |
| 0 | 0   | 0 PITG_03501   |
| 0 | 0   | 0 PITG_00444   |



|    |     |                |
|----|-----|----------------|
| 0  | 4   | 0 PITG_10722   |
| 0  | 43  | 13 PITG_00656  |
| 0  | 8   | 2 NA           |
| 0  | 9   | 0 PITG_04359   |
| 0  | 99  | 51 PITG_13302  |
| 0  | 116 | 201 PITG_02282 |
| 0  | 0   | 12 PITG_04466  |
| 0  | 567 | 97 PITG_02286  |
| 0  | 9   | 0 PITG_16221   |
| 0  | 5   | 2 PITG_08804   |
| 0  | 0   | 6 PITG_19474   |
| 0  | 0   | 0 NA           |
| 0  | 14  | 4 PITG_16775   |
| 0  | 32  | 48 PITG_13151  |
| 0  | 174 | 72 PITG_17928  |
| 0  | 0   | 0 NA           |
| 0  | 3   | 0 NA           |
| 0  | 15  | 2 PITG_06898   |
| 0  | 344 | 62 NA          |
| 0  | 686 | 479 PITG_22765 |
| 0  | 31  | 86 PITG_11929  |
| 0  | 193 | 38 PITG_00402  |
| 0  | 63  | 8 PITG_01484   |
| 0  | 7   | 8 PITG_16916   |
| 0  | 162 | 116 NA         |
| 0  | 35  | 68 PITG_08609  |
| 0  | 92  | 4 PITG_02027   |
| 0  | 5   | 12 PITG_00204  |
| 0  | 2   | 2 NA           |
| 0  | 0   | 2 PITG_03864   |
| 2  | 104 | 759 PITG_06415 |
| 0  | 472 | 254 PITG_16916 |
| 0  | 62  | 17 PITG_12288  |
| 0  | 102 | 2 PITG_01224   |
| 0  | 35  | 32 PITG_21006  |
| 0  | 12  | 6 PITG_12110   |
| 0  | 177 | 493 PITG_19017 |
| 0  | 11  | 14 PITG_08546  |
| 0  | 488 | 499 PITG_20168 |
| 85 | 84  | 4098 NA        |
| 0  | 38  | 2 PITG_08886   |
| 0  | 97  | 117 PITG_06822 |
| 0  | 306 | 28 PITG_02586  |
| 0  | 4   | 4 NA           |
| 0  | 6   | 22 PITG_00622  |
| 0  | 16  | 4 NA           |
| 0  | 0   | 14 PITG_02737  |

|   |      |                 |
|---|------|-----------------|
| 0 | 22   | 72 PITG_06828   |
| 0 | 72   | 46 PITG_14944   |
| 0 | 75   | 30 NA           |
| 0 | 33   | 25 PITG_09863   |
| 0 | 5    | 8 PITG_00236    |
| 0 | 5    | 6 PITG_21277    |
| 0 | 130  | 167 NA          |
| 0 | 4    | 2 PITG_01677    |
| 0 | 40   | 6 PITG_00856    |
| 0 | 4    | 0 NA            |
| 0 | 142  | 23 PITG_02752   |
| 0 | 0    | 2 PITG_00383    |
| 0 | 19   | 9 PITG_15626    |
| 0 | 11   | 4 NA            |
| 0 | 16   | 9 PITG_08003    |
| 0 | 525  | 1077 PITG_06722 |
| 0 | 6    | 3 PITG_18786    |
| 0 | 26   | 17 PITG_09039   |
| 0 | 2    | 0 PITG_01457    |
| 0 | 295  | 72 NA           |
| 0 | 120  | 205 NA          |
| 0 | 0    | 2 PITG_06429    |
| 0 | 7    | 28 PITG_08025   |
| 0 | 2    | 11 PITG_19159   |
| 0 | 0    | 0 PITG_17388    |
| 0 | 96   | 28 NA           |
| 0 | 0    | 0 PITG_03665    |
| 0 | 23   | 22 PITG_05737   |
| 0 | 9    | 2 NA            |
| 0 | 60   | 244 NA          |
| 0 | 15   | 2 PITG_17128    |
| 0 | 71   | 20 PITG_03294   |
| 0 | 0    | 2 NA            |
| 0 | 21   | 10 PITG_11459   |
| 0 | 555  | 690 PITG_11244  |
| 0 | 29   | 64 PITG_07786   |
| 0 | 0    | 2 PITG_18257    |
| 0 | 137  | 34 PITG_10680   |
| 0 | 2547 | 298 PITG_12648  |
| 0 | 0    | 0 NA            |
| 0 | 16   | 2 PITG_08252    |
| 0 | 4    | 0 NA            |
| 0 | 10   | 68 PITG_03719   |
| 0 | 152  | 56 NA           |
| 0 | 150  | 62 PITG_00284   |
| 0 | 22   | 0 NA            |
| 0 | 91   | 138 PITG_09437  |

|   |      |                |
|---|------|----------------|
| 0 | 13   | 0 NA           |
| 0 | 102  | 401 PITG_14850 |
| 0 | 5    | 0 PITG_11295   |
| 0 | 12   | 4 NA           |
| 0 | 20   | 34 PITG_20331  |
| 0 | 69   | 130 PITG_04958 |
| 0 | 16   | 41 PITG_09640  |
| 0 | 66   | 64 PITG_07961  |
| 0 | 45   | 30 NA          |
| 0 | 243  | 358 PITG_05373 |
| 0 | 6    | 6 PITG_00945   |
| 0 | 29   | 20 PITG_20945  |
| 0 | 7    | 4 PITG_01107   |
| 0 | 45   | 39 PITG_17245  |
| 0 | 8    | 0 NA           |
| 0 | 33   | 47 PITG_15388  |
| 0 | 62   | 36 PITG_05804  |
| 0 | 101  | 158 PITG_07155 |
| 0 | 0    | 3 PITG_14792   |
| 0 | 4    | 10 PITG_00964  |
| 0 | 10   | 2 PITG_03158   |
| 0 | 157  | 93 PITG_01128  |
| 0 | 206  | 142 PITG_01555 |
| 0 | 178  | 212 PITG_13101 |
| 0 | 119  | 25 PITG_10450  |
| 0 | 9    | 17 NA          |
| 0 | 153  | 258 PITG_05861 |
| 0 | 23   | 16 PITG_17035  |
| 0 | 18   | 14 PITG_00754  |
| 0 | 11   | 21 PITG_16871  |
| 0 | 16   | 20 PITG_03603  |
| 0 | 8    | 0 NA           |
| 0 | 12   | 7 PITG_17672   |
| 0 | 40   | 52 PITG_07155  |
| 0 | 43   | 91 PITG_02607  |
| 0 | 16   | 3 NA           |
| 0 | 22   | 59 PITG_12260  |
| 0 | 197  | 126 PITG_20611 |
| 0 | 29   | 11 PITG_11133  |
| 0 | 110  | 100 PITG_17753 |
| 0 | 8    | 10 PITG_07808  |
| 0 | 0    | 0 NA           |
| 0 | 22   | 25 PITG_16798  |
| 0 | 334  | 292 PITG_22878 |
| 0 | 6    | 5 PITG_21525   |
| 0 | 2094 | 817 PITG_15485 |
| 0 | 105  | 189 PITG_07955 |

|   |     |                |
|---|-----|----------------|
| 0 | 6   | 0 PITG_17965   |
| 0 | 542 | 365 PITG_09280 |
| 0 | 200 | 61 PITG_02293  |
| 0 | 28  | 24 PITG_21380  |
| 0 | 167 | 71 NA          |
| 0 | 6   | 0 NA           |
| 0 | 42  | 33 PITG_13650  |
| 0 | 2   | 0 NA           |
| 0 | 13  | 101 PITG_00708 |
| 0 | 70  | 34 PITG_01833  |
| 0 | 0   | 0 NA           |
| 0 | 6   | 17 NA          |
| 0 | 4   | 6 PITG_07210   |
| 0 | 27  | 14 PITG_01405  |
| 0 | 7   | 0 PITG_19692   |
| 0 | 25  | 9 NA           |
| 0 | 19  | 8 NA           |
| 0 | 5   | 0 PITG_11858   |
| 0 | 31  | 0 PITG_02557   |
| 0 | 207 | 2 PITG_09475   |
| 0 | 446 | 183 PITG_15573 |
| 0 | 22  | 9 NA           |
| 0 | 28  | 0 PITG_20632   |
| 0 | 93  | 89 PITG_04802  |
| 0 | 34  | 11 PITG_19111  |
| 0 | 2   | 4 PITG_15779   |
| 0 | 0   | 0 NA           |
| 0 | 18  | 0 NA           |
| 0 | 2   | 0 PITG_18095   |
| 0 | 16  | 0 NA           |
| 0 | 27  | 155 PITG_01400 |
| 0 | 48  | 6 NA           |
| 0 | 19  | 83 PITG_00140  |
| 0 | 50  | 22 NA          |
| 0 | 2   | 3 PITG_00979   |
| 0 | 61  | 33 PITG_03267  |
| 0 | 0   | 2 PITG_16733   |
| 0 | 475 | 154 PITG_02670 |
| 0 | 47  | 38 PITG_08022  |
| 0 | 6   | 4 PITG_00359   |
| 0 | 0   | 2 PITG_06016   |
| 0 | 2   | 2 PITG_19223   |
| 0 | 50  | 16 PITG_11804  |
| 0 | 108 | 304 PITG_03796 |
| 0 | 76  | 25 PITG_18977  |
| 0 | 101 | 57 PITG_02494  |
| 0 | 19  | 25 PITG_03020  |

|   |      |                |
|---|------|----------------|
| 0 | 49   | 38 PITG_01285  |
| 0 | 193  | 64 PITG_19665  |
| 0 | 159  | 87 PITG_12648  |
| 0 | 4    | 7 PITG_06602   |
| 0 | 0    | 0 NA           |
| 0 | 53   | 8 NA           |
| 0 | 23   | 4 PITG_16132   |
| 0 | 4    | 9 PITG_02796   |
| 0 | 61   | 23 PITG_06257  |
| 0 | 34   | 0 PITG_12110   |
| 0 | 5    | 10 PITG_03939  |
| 0 | 27   | 71 PITG_03814  |
| 0 | 28   | 12 PITG_20148  |
| 0 | 182  | 100 PITG_22575 |
| 0 | 99   | 85 PITG_02046  |
| 0 | 2    | 5 PITG_10735   |
| 0 | 21   | 19 PITG_11584  |
| 0 | 49   | 19 NA          |
| 0 | 146  | 70 PITG_03483  |
| 0 | 463  | 390 PITG_19963 |
| 0 | 13   | 6 NA           |
| 0 | 12   | 15 PITG_15016  |
| 0 | 0    | 6 NA           |
| 0 | 4    | 8 PITG_07237   |
| 0 | 1177 | 124 PITG_01056 |
| 0 | 0    | 2 PITG_16854   |
| 0 | 28   | 36 PITG_02283  |
| 0 | 0    | 6 PITG_02503   |
| 0 | 7    | 14 NA          |
| 0 | 52   | 2 PITG_19768   |
| 0 | 47   | 100 PITG_04427 |
| 0 | 34   | 0 PITG_00444   |
| 2 | 161  | 750 PITG_03698 |
| 0 | 183  | 227 PITG_00682 |
| 0 | 0    | 8 PITG_12439   |
| 0 | 31   | 23 PITG_12289  |
| 0 | 7    | 2 PITG_03072   |
| 0 | 14   | 5 PITG_08365   |
| 0 | 3    | 22 PITG_00193  |
| 0 | 2    | 0 PITG_15749   |
| 0 | 23   | 54 PITG_14066  |
| 0 | 1316 | 760 PITG_07096 |
| 0 | 197  | 72 PITG_18706  |
| 0 | 132  | 4 NA           |
| 0 | 48   | 12 PITG_08022  |
| 0 | 0    | 4 PITG_01444   |
| 0 | 4    | 0 PITG_19846   |

|   |     |                |
|---|-----|----------------|
| 0 | 37  | 22 PITG_01042  |
| 0 | 76  | 36 NA          |
| 0 | 10  | 17 PITG_16005  |
| 0 | 16  | 7 PITG_15671   |
| 0 | 14  | 23 PITG_14181  |
| 0 | 11  | 2 PITG_07242   |
| 0 | 52  | 7 NA           |
| 0 | 56  | 0 PITG_11846   |
| 2 | 59  | 39 PITG_08481  |
| 0 | 74  | 37 PITG_19746  |
| 0 | 24  | 38 PITG_03355  |
| 0 | 0   | 0 PITG_19142   |
| 0 | 8   | 0 PITG_09787   |
| 0 | 0   | 12 PITG_05480  |
| 0 | 426 | 127 PITG_17455 |
| 0 | 43  | 2 NA           |
| 0 | 2   | 0 PITG_06319   |
| 0 | 46  | 18 PITG_05250  |
| 0 | 4   | 2 NA           |
| 0 | 10  | 10 PITG_00028  |
| 0 | 3   | 10 PITG_05894  |
| 0 | 160 | 79 PITG_21278  |
| 0 | 291 | 363 PITG_15605 |
| 0 | 0   | 4 PITG_09413   |
| 0 | 4   | 23 NA          |
| 0 | 53  | 8 NA           |
| 0 | 3   | 6 PITG_12239   |
| 0 | 242 | 74 PITG_04483  |
| 0 | 0   | 0 PITG_18797   |
| 0 | 376 | 231 PITG_03860 |
| 0 | 8   | 38 PITG_08138  |
| 0 | 86  | 2 PITG_14557   |
| 0 | 15  | 14 PITG_17334  |
| 0 | 54  | 23 PITG_08896  |
| 0 | 2   | 0 PITG_06267   |
| 0 | 0   | 3 PITG_12350   |
| 0 | 56  | 11 PITG_17945  |
| 0 | 6   | 2 PITG_00220   |
| 0 | 133 | 612 PITG_19535 |
| 0 | 312 | 366 PITG_02339 |
| 0 | 3   | 13 PITG_04427  |
| 0 | 4   | 5 NA           |
| 0 | 4   | 0 PITG_15541   |
| 0 | 370 | 182 PITG_13101 |
| 0 | 553 | 587 PITG_03098 |
| 0 | 9   | 14 PITG_02730  |
| 0 | 31  | 21 PITG_19111  |

|   |     |                |
|---|-----|----------------|
| 0 | 4   | 0 PITG_01754   |
| 0 | 0   | 0 PITG_01977   |
| 0 | 7   | 6 PITG_19850   |
| 0 | 93  | 91 PITG_06891  |
| 0 | 40  | 2 NA           |
| 0 | 170 | 85 PITG_13368  |
| 0 | 3   | 4 PITG_09278   |
| 0 | 113 | 0 NA           |
| 0 | 0   | 0 PITG_06996   |
| 0 | 35  | 7 PITG_14217   |
| 0 | 80  | 0 PITG_13185   |
| 0 | 104 | 90 PITG_10901  |
| 0 | 4   | 0 PITG_01271   |
| 0 | 0   | 0 PITG_14950   |
| 0 | 58  | 29 PITG_17663  |
| 0 | 25  | 0 PITG_05513   |
| 0 | 22  | 99 PITG_06427  |
| 0 | 386 | 164 PITG_11013 |
| 0 | 39  | 69 PITG_03459  |
| 0 | 308 | 141 PITG_14601 |
| 0 | 10  | 34 PITG_13393  |
| 0 | 48  | 18 PITG_11791  |
| 0 | 2   | 5 PITG_19037   |
| 0 | 33  | 10 PITG_09760  |
| 0 | 3   | 4 PITG_23048   |
| 0 | 68  | 46 PITG_02731  |
| 0 | 123 | 5 PITG_10023   |
| 0 | 126 | 94 PITG_15564  |
| 0 | 28  | 11 PITG_12819  |
| 0 | 9   | 8 PITG_08587   |
| 0 | 0   | 0 NA           |
| 0 | 0   | 0 PITG_13135   |
| 0 | 4   | 19 PITG_12797  |
| 0 | 7   | 7 PITG_03599   |
| 0 | 6   | 12 PITG_15550  |
| 0 | 0   | 0 NA           |
| 0 | 2   | 19 PITG_03520  |
| 0 | 123 | 46 PITG_14768  |
| 0 | 26  | 17 PITG_04226  |
| 0 | 0   | 0 NA           |
| 0 | 38  | 23 PITG_00454  |
| 0 | 16  | 22 PITG_01762  |
| 0 | 2   | 2 NA           |
| 0 | 23  | 42 PITG_11690  |
| 0 | 56  | 0 NA           |
| 0 | 335 | 602 PITG_01248 |
| 0 | 46  | 55 PITG_20192  |

|   |      |                |
|---|------|----------------|
| 0 | 13   | 19 PITG_20192  |
| 0 | 57   | 14 NA          |
| 0 | 6    | 0 NA           |
| 0 | 0    | 6 PITG_05727   |
| 0 | 6    | 18 PITG_14619  |
| 0 | 403  | 578 PITG_12727 |
| 0 | 157  | 27 PITG_07029  |
| 0 | 140  | 102 NA         |
| 0 | 8    | 12 PITG_15550  |
| 0 | 35   | 17 PITG_03117  |
| 0 | 0    | 2 PITG_11115   |
| 0 | 13   | 6 PITG_17883   |
| 0 | 49   | 28 PITG_06794  |
| 0 | 120  | 44 PITG_08612  |
| 0 | 112  | 75 PITG_12863  |
| 0 | 3    | 4 PITG_14231   |
| 0 | 0    | 2 PITG_10049   |
| 0 | 0    | 0 PITG_23029   |
| 0 | 2    | 0 PITG_16003   |
| 0 | 42   | 27 PITG_06285  |
| 0 | 262  | 101 PITG_05113 |
| 0 | 11   | 4 PITG_02752   |
| 0 | 311  | 110 NA         |
| 0 | 8    | 0 PITG_01639   |
| 0 | 6    | 10 PITG_14456  |
| 0 | 0    | 2 PITG_05781   |
| 0 | 60   | 29 PITG_03472  |
| 0 | 18   | 22 PITG_06003  |
| 0 | 59   | 15 PITG_18963  |
| 0 | 103  | 86 PITG_15195  |
| 0 | 2    | 7 PITG_17869   |
| 0 | 21   | 141 NA         |
| 0 | 5    | 17 PITG_12753  |
| 0 | 13   | 7 PITG_03467   |
| 0 | 374  | 107 NA         |
| 0 | 13   | 360 PITG_22657 |
| 0 | 247  | 736 PITG_18731 |
| 0 | 17   | 6 NA           |
| 0 | 75   | 22 PITG_13717  |
| 0 | 0    | 0 PITG_19841   |
| 0 | 1169 | 45 PITG_06146  |
| 0 | 27   | 4 PITG_02264   |
| 0 | 2    | 0 PITG_02234   |
| 0 | 15   | 19 NA          |
| 0 | 15   | 8 PITG_02336   |
| 0 | 361  | 397 PITG_09253 |
| 0 | 15   | 19 PITG_06424  |



|   |     |                |
|---|-----|----------------|
| 0 | 122 | 189 PITG_03277 |
| 0 | 3   | 2 PITG_17370   |
| 0 | 38  | 6 PITG_02336   |
| 0 | 21  | 332 PITG_16757 |
| 0 | 64  | 0 NA           |
| 0 | 26  | 10 NA          |
| 0 | 64  | 7 PITG_06204   |
| 0 | 76  | 23 NA          |
| 0 | 28  | 16 PITG_18656  |
| 0 | 29  | 14 PITG_18912  |
| 0 | 0   | 0 PITG_03924   |
| 0 | 52  | 2 NA           |
| 0 | 2   | 4 PITG_08532   |
| 0 | 108 | 369 PITG_10210 |
| 0 | 106 | 135 PITG_11111 |
| 0 | 95  | 16 NA          |
| 0 | 17  | 5 PITG_21041   |
| 0 | 2   | 2 PITG_18279   |
| 0 | 122 | 143 PITG_02239 |
| 0 | 174 | 29 NA          |
| 0 | 4   | 0 PITG_00844   |
| 0 | 13  | 18 PITG_04980  |
| 0 | 11  | 6 PITG_09092   |
| 0 | 9   | 8 PITG_19469   |
| 0 | 53  | 5 PITG_05326   |
| 0 | 180 | 170 NA         |
| 0 | 3   | 2 NA           |
| 0 | 56  | 9 PITG_09826   |
| 0 | 14  | 12 PITG_05305  |
| 0 | 125 | 152 PITG_21000 |
| 0 | 47  | 9 PITG_21807   |
| 0 | 4   | 2 NA           |
| 0 | 130 | 36 NA          |
| 0 | 76  | 0 PITG_10487   |
| 0 | 57  | 25 PITG_00402  |
| 0 | 0   | 0 PITG_00250   |
| 0 | 43  | 30 PITG_20194  |
| 0 | 8   | 0 NA           |
| 0 | 311 | 80 PITG_07703  |
| 0 | 42  | 23 PITG_07259  |
| 0 | 19  | 16 PITG_01848  |
| 0 | 371 | 461 PITG_01363 |
| 0 | 213 | 36 PITG_00943  |
| 0 | 42  | 11 PITG_03241  |
| 0 | 499 | 21 PITG_01366  |
| 0 | 3   | 0 PITG_18826   |
| 0 | 16  | 2 PITG_01679   |

|    |     |                |
|----|-----|----------------|
| 0  | 26  | 14 PITG_01504  |
| 0  | 22  | 0 PITG_20568   |
| 0  | 180 | 176 PITG_07827 |
| 0  | 10  | 22 PITG_16864  |
| 0  | 185 | 51 NA          |
| 0  | 46  | 46 PITG_18326  |
| 0  | 207 | 231 PITG_14563 |
| 0  | 150 | 117 PITG_06111 |
| 0  | 2   | 8 NA           |
| 0  | 0   | 0 PITG_15166   |
| 0  | 39  | 3 PITG_00213   |
| 0  | 185 | 68 PITG_01694  |
| 0  | 22  | 2 PITG_23176   |
| 0  | 462 | 324 PITG_10455 |
| 0  | 42  | 140 PITG_01398 |
| 0  | 3   | 0 PITG_18008   |
| 0  | 19  | 25 NA          |
| 0  | 7   | 15 PITG_03682  |
| 0  | 0   | 7 PITG_12946   |
| 0  | 3   | 5 PITG_17407   |
| 0  | 14  | 2 PITG_03519   |
| 0  | 139 | 66 PITG_05975  |
| 0  | 141 | 91 PITG_01514  |
| 0  | 20  | 9 NA           |
| 0  | 0   | 4 PITG_02694   |
| 0  | 116 | 23 PITG_20999  |
| 0  | 30  | 0 PITG_06142   |
| 0  | 146 | 147 NA         |
| 0  | 4   | 2 PITG_03966   |
| 0  | 16  | 25 PITG_06199  |
| 0  | 25  | 52 PITG_00319  |
| 0  | 0   | 0 PITG_06288   |
| 0  | 66  | 16 PITG_03609  |
| 0  | 0   | 0 PITG_00501   |
| 0  | 6   | 5 PITG_19153   |
| 0  | 0   | 0 PITG_01851   |
| 0  | 32  | 75 PITG_04824  |
| 0  | 102 | 115 PITG_03829 |
| 0  | 2   | 0 PITG_22277   |
| 0  | 2   | 2 PITG_12105   |
| 0  | 3   | 2 PITG_20374   |
| 0  | 90  | 69 PITG_23165  |
| 0  | 42  | 22 PITG_10445  |
| 0  | 2   | 6 PITG_16918   |
| 0  | 180 | 213 PITG_21556 |
| 15 | 8   | 16 NA          |
| 0  | 148 | 71 PITG_13015  |

|   |     |                |
|---|-----|----------------|
| 0 | 32  | 2 PITG_17884   |
| 0 | 6   | 25 PITG_22577  |
| 2 | 229 | 755 PITG_06237 |
| 0 | 8   | 2 PITG_07852   |
| 0 | 2   | 0 PITG_12173   |
| 0 | 31  | 9 PITG_14057   |
| 0 | 0   | 0 PITG_03636   |
| 0 | 0   | 2 PITG_04718   |
| 0 | 0   | 2 PITG_17021   |
| 0 | 200 | 30 PITG_06450  |
| 0 | 2   | 0 PITG_17672   |
| 0 | 564 | 130 PITG_01287 |
| 0 | 49  | 40 PITG_01932  |
| 0 | 57  | 182 PITG_02046 |
| 0 | 33  | 18 PITG_17883  |
| 0 | 58  | 127 PITG_19160 |
| 0 | 3   | 0 PITG_01192   |
| 0 | 16  | 0 NA           |
| 0 | 0   | 0 NA           |
| 0 | 2   | 11 PITG_03611  |
| 0 | 0   | 2 NA           |
| 0 | 44  | 29 PITG_16648  |
| 0 | 13  | 4 PITG_20787   |
| 0 | 24  | 10 PITG_13738  |
| 0 | 43  | 30 PITG_15294  |
| 0 | 37  | 6 PITG_22715   |
| 0 | 20  | 10 PITG_04959  |
| 0 | 51  | 0 PITG_16318   |
| 0 | 45  | 14 NA          |
| 0 | 25  | 10 PITG_12178  |
| 0 | 9   | 6 PITG_13679   |
| 0 | 49  | 50 PITG_10729  |
| 0 | 8   | 6 NA           |
| 0 | 2   | 0 PITG_15065   |
| 0 | 4   | 2 PITG_19605   |
| 0 | 5   | 36 PITG_17805  |
| 0 | 64  | 210 PITG_03763 |
| 0 | 0   | 4 PITG_19016   |
| 0 | 71  | 296 PITG_01266 |
| 0 | 65  | 137 PITG_01477 |
| 0 | 50  | 17 PITG_03669  |
| 0 | 0   | 0 NA           |
| 0 | 185 | 218 PITG_07036 |
| 0 | 5   | 3 PITG_01058   |
| 0 | 9   | 16 NA          |
| 0 | 19  | 49 PITG_14260  |
| 0 | 11  | 2 NA           |

|     |      |                 |
|-----|------|-----------------|
| 0   | 104  | 66 PITG_13153   |
| 0   | 13   | 7 PITG_19639    |
| 0   | 378  | 144 PITG_01599  |
| 0   | 13   | 6 PITG_16003    |
| 0   | 467  | 52 PITG_00483   |
| 2   | 74   | 732 NA          |
| 0   | 2    | 3 PITG_00140    |
| 0   | 28   | 6 PITG_04921    |
| 0   | 41   | 51 PITG_06716   |
| 0   | 2    | 2 PITG_17171    |
| 0   | 4    | 0 PITG_04861    |
| 0   | 4494 | 994 PITG_03933  |
| 0   | 355  | 199 PITG_20484  |
| 0   | 122  | 66 NA           |
| 0   | 11   | 0 PITG_18688    |
| 0   | 55   | 91 PITG_07328   |
| 0   | 108  | 3 PITG_00965    |
| 0   | 10   | 8 PITG_19096    |
| 0   | 17   | 37 PITG_12956   |
| 0   | 4    | 3 PITG_15621    |
| 0   | 15   | 17 NA           |
| 0   | 0    | 4 PITG_21303    |
| 0   | 81   | 92 NA           |
| 0   | 10   | 21 PITG_05672   |
| 0   | 95   | 273 PITG_00608  |
| 0   | 9    | 8 NA            |
| 0   | 5    | 4 PITG_00444    |
| 0   | 4    | 7 PITG_04588    |
| 0   | 592  | 242 PITG_03549  |
| 0   | 67   | 284 PITG_05539  |
| 0   | 49   | 65 PITG_00656   |
| 0   | 41   | 2 NA            |
| 0   | 5    | 7 PITG_09566    |
| 0   | 38   | 30 PITG_11106   |
| 0   | 209  | 0 PITG_09008    |
| 0   | 1231 | 1066 PITG_17828 |
| 0   | 17   | 13 NA           |
| 0   | 26   | 0 NA            |
| 0   | 13   | 6 PITG_03874    |
| 0   | 31   | 55 PITG_17947   |
| 0   | 83   | 3 PITG_22416    |
| 2   | 137  | 277 PITG_22135  |
| 311 | 57   | 381 NA          |
| 0   | 7    | 25 PITG_02285   |
| 0   | 149  | 435 PITG_20188  |
| 0   | 29   | 6 PITG_04133    |
| 0   | 56   | 0 NA            |

|   |     |                |
|---|-----|----------------|
| 0 | 11  | 2 PITG_18090   |
| 0 | 6   | 0 PITG_04954   |
| 0 | 117 | 6 NA           |
| 0 | 2   | 11 PITG_03405  |
| 0 | 7   | 18 NA          |
| 0 | 8   | 4 PITG_14854   |
| 0 | 53  | 18 PITG_07035  |
| 0 | 157 | 103 PITG_02286 |
| 0 | 35  | 2 NA           |
| 0 | 3   | 4 PITG_07874   |
| 0 | 6   | 2 PITG_11119   |
| 0 | 187 | 86 PITG_10600  |
| 0 | 107 | 2 NA           |
| 0 | 2   | 6 PITG_15652   |
| 0 | 2   | 4 PITG_07173   |
| 0 | 229 | 46 PITG_20608  |
| 0 | 0   | 0 PITG_10217   |
| 0 | 16  | 6 PITG_01761   |
| 0 | 673 | 518 PITG_20686 |
| 0 | 64  | 60 PITG_10134  |
| 0 | 50  | 51 PITG_06735  |
| 0 | 20  | 9 NA           |
| 0 | 53  | 4 NA           |
| 0 | 0   | 2 PITG_14237   |
| 0 | 545 | 53 PITG_00845  |
| 0 | 56  | 0 NA           |
| 0 | 161 | 96 PITG_20208  |
| 0 | 16  | 21 PITG_05408  |
| 0 | 589 | 406 PITG_02030 |
| 0 | 3   | 2 PITG_02796   |
| 0 | 47  | 29 PITG_00116  |
| 0 | 136 | 29 PITG_12565  |
| 0 | 11  | 19 PITG_20152  |
| 0 | 50  | 24 NA          |
| 0 | 120 | 75 PITG_01737  |
| 0 | 8   | 2 NA           |
| 0 | 99  | 61 NA          |
| 0 | 5   | 2 PITG_10927   |
| 0 | 0   | 0 NA           |
| 0 | 30  | 0 PITG_16107   |
| 0 | 11  | 18 PITG_08751  |
| 0 | 2   | 0 PITG_09016   |
| 0 | 47  | 56 PITG_21187  |
| 0 | 13  | 10 PITG_16526  |
| 0 | 10  | 0 NA           |
| 0 | 40  | 10 PITG_02415  |
| 0 | 10  | 8 PITG_00556   |

|   |     |                |
|---|-----|----------------|
| 0 | 11  | 0 PITG_10154   |
| 0 | 87  | 45 PITG_06658  |
| 0 | 48  | 0 NA           |
| 0 | 4   | 0 NA           |
| 0 | 18  | 0 NA           |
| 0 | 148 | 222 PITG_05434 |
| 0 | 66  | 18 PITG_01015  |
| 0 | 23  | 15 NA          |
| 0 | 7   | 12 PITG_16338  |
| 0 | 36  | 81 PITG_22433  |
| 0 | 0   | 0 NA           |
| 0 | 19  | 77 PITG_05953  |
| 0 | 43  | 35 PITG_11775  |
| 0 | 19  | 12 PITG_12120  |
| 0 | 57  | 45 PITG_06631  |
| 0 | 158 | 65 PITG_15593  |
| 0 | 46  | 46 PITG_12228  |
| 0 | 4   | 8 PITG_08993   |
| 0 | 0   | 2 PITG_13188   |
| 0 | 2   | 2 PITG_01830   |
| 0 | 22  | 13 PITG_13284  |
| 0 | 0   | 6 PITG_04725   |
| 0 | 13  | 6 NA           |
| 0 | 0   | 0 PITG_20675   |
| 0 | 4   | 6 NA           |
| 0 | 63  | 62 PITG_01617  |
| 0 | 31  | 2 PITG_15916   |
| 0 | 327 | 0 NA           |
| 0 | 120 | 67 PITG_09564  |
| 0 | 103 | 12 PITG_09835  |
| 0 | 4   | 3 NA           |
| 0 | 2   | 9 NA           |
| 5 | 85  | 413 PITG_00127 |
| 0 | 2   | 4 NA           |
| 0 | 0   | 0 NA           |
| 0 | 637 | 265 PITG_01846 |
| 0 | 33  | 0 PITG_06408   |
| 0 | 72  | 112 PITG_04661 |
| 0 | 172 | 171 PITG_12526 |
| 0 | 115 | 4 PITG_02706   |
| 0 | 134 | 77 PITG_10058  |
| 0 | 29  | 12 NA          |
| 0 | 16  | 0 NA           |
| 0 | 37  | 32 PITG_01663  |
| 0 | 46  | 13 NA          |
| 0 | 173 | 85 PITG_07829  |
| 0 | 307 | 38 PITG_11437  |

|    |     |                |
|----|-----|----------------|
| 0  | 29  | 0 PITG_12100   |
| 0  | 71  | 44 NA          |
| 0  | 88  | 0 PITG_20767   |
| 0  | 11  | 0 PITG_05245   |
| 0  | 0   | 2 NA           |
| 0  | 6   | 21 PITG_19298  |
| 0  | 6   | 4 PITG_02027   |
| 0  | 235 | 56 PITG_09253  |
| 0  | 49  | 24 NA          |
| 0  | 106 | 28 PITG_02976  |
| 0  | 5   | 4 PITG_13196   |
| 0  | 21  | 6 NA           |
| 0  | 2   | 4 PITG_17724   |
| 0  | 8   | 0 NA           |
| 0  | 22  | 17 PITG_13434  |
| 0  | 0   | 0 PITG_02949   |
| 0  | 69  | 26 PITG_02923  |
| 0  | 11  | 2 NA           |
| 0  | 11  | 0 NA           |
| 0  | 93  | 349 PITG_17326 |
| 0  | 15  | 13 PITG_05291  |
| 0  | 4   | 6 PITG_00180   |
| 0  | 876 | 92 PITG_12185  |
| 0  | 14  | 48 PITG_09285  |
| 0  | 32  | 17 PITG_17129  |
| 93 | 4   | 82 NA          |
| 0  | 6   | 39 PITG_16671  |
| 0  | 50  | 103 PITG_08755 |
| 0  | 19  | 47 PITG_12141  |
| 0  | 18  | 4 NA           |
| 0  | 31  | 28 PITG_17883  |
| 0  | 4   | 7 PITG_02901   |
| 0  | 49  | 10 PITG_14397  |
| 0  | 0   | 13 PITG_07865  |
| 0  | 21  | 7 NA           |
| 0  | 6   | 0 PITG_19098   |
| 0  | 338 | 183 PITG_03783 |
| 0  | 68  | 20 NA          |
| 0  | 21  | 10 PITG_11250  |
| 0  | 92  | 185 PITG_22878 |
| 0  | 0   | 67 PITG_03855  |
| 0  | 4   | 2 PITG_16326   |
| 0  | 0   | 0 NA           |
| 0  | 10  | 21 NA          |
| 0  | 35  | 35 PITG_09092  |
| 0  | 2   | 14 PITG_01591  |
| 0  | 0   | 0 PITG_17592   |

|    |     |                |
|----|-----|----------------|
| 0  | 13  | 2 PITG_20503   |
| 0  | 33  | 34 PITG_08538  |
| 0  | 10  | 6 PITG_07545   |
| 0  | 83  | 63 PITG_04875  |
| 2  | 103 | 33 PITG_17966  |
| 0  | 26  | 20 PITG_04002  |
| 0  | 2   | 8 PITG_08461   |
| 0  | 16  | 17 PITG_10134  |
| 0  | 38  | 8 PITG_17728   |
| 0  | 71  | 22 PITG_19527  |
| 0  | 227 | 266 PITG_17384 |
| 0  | 687 | 358 PITG_01082 |
| 0  | 7   | 8 PITG_00718   |
| 0  | 37  | 48 PITG_02003  |
| 0  | 50  | 62 PITG_22319  |
| 0  | 81  | 32 PITG_18055  |
| 0  | 26  | 12 NA          |
| 0  | 4   | 4 PITG_03988   |
| 0  | 6   | 27 PITG_03865  |
| 0  | 4   | 0 PITG_00857   |
| 0  | 0   | 0 NA           |
| 0  | 971 | 545 PITG_05125 |
| 18 | 0   | 2 NA           |
| 0  | 61  | 37 PITG_13620  |
| 0  | 47  | 6 NA           |
| 0  | 6   | 2 PITG_14728   |
| 0  | 6   | 17 NA          |
| 0  | 4   | 11 PITG_18707  |
| 0  | 2   | 2 PITG_17816   |
| 0  | 0   | 7 PITG_10838   |
| 0  | 27  | 5 PITG_14106   |
| 0  | 11  | 2 PITG_05507   |
| 0  | 449 | 147 NA         |
| 0  | 13  | 0 NA           |
| 0  | 66  | 31 PITG_18091  |
| 0  | 3   | 2 PITG_10315   |
| 0  | 4   | 8 NA           |
| 0  | 166 | 0 NA           |
| 0  | 9   | 4 PITG_08587   |
| 0  | 4   | 2 PITG_06129   |
| 0  | 6   | 0 PITG_09092   |
| 0  | 0   | 4 PITG_16925   |
| 0  | 48  | 22 PITG_14831  |
| 0  | 574 | 105 PITG_06691 |
| 0  | 114 | 14 PITG_14436  |
| 0  | 17  | 42 PITG_12663  |
| 0  | 56  | 51 PITG_09564  |



|   |      |                 |
|---|------|-----------------|
| 0 | 23   | 4 PITG_00300    |
| 0 | 4    | 7 PITG_03415    |
| 0 | 2    | 0 NA            |
| 0 | 106  | 8 PITG_14099    |
| 0 | 19   | 2 PITG_19449    |
| 0 | 6    | 0 NA            |
| 0 | 33   | 18 PITG_09782   |
| 0 | 888  | 1578 PITG_02022 |
| 0 | 37   | 5 NA            |
| 0 | 29   | 0 PITG_09388    |
| 0 | 23   | 30 PITG_02992   |
| 0 | 22   | 0 PITG_02021    |
| 0 | 8    | 32 PITG_14111   |
| 0 | 8    | 62 PITG_06507   |
| 0 | 36   | 51 NA           |
| 0 | 36   | 82 PITG_13178   |
| 0 | 170  | 83 PITG_00380   |
| 0 | 51   | 0 NA            |
| 0 | 13   | 0 PITG_14553    |
| 0 | 49   | 2 NA            |
| 0 | 3    | 28 PITG_00552   |
| 0 | 13   | 2 PITG_00016    |
| 0 | 27   | 39 PITG_16854   |
| 0 | 178  | 570 PITG_15117  |
| 0 | 270  | 13 NA           |
| 0 | 46   | 50 PITG_12254   |
| 0 | 0    | 4 PITG_13289    |
| 0 | 713  | 1545 PITG_12185 |
| 0 | 12   | 2 NA            |
| 0 | 142  | 171 PITG_04560  |
| 0 | 2    | 8 PITG_07967    |
| 0 | 301  | 111 PITG_17516  |
| 0 | 7    | 0 PITG_17866    |
| 0 | 0    | 0 PITG_19773    |
| 0 | 36   | 26 PITG_05009   |
| 0 | 0    | 0 PITG_00590    |
| 0 | 2    | 13 NA           |
| 0 | 11   | 2 NA            |
| 0 | 66   | 102 PITG_08403  |
| 0 | 0    | 0 PITG_16042    |
| 0 | 17   | 15 PITG_06426   |
| 0 | 43   | 232 PITG_08044  |
| 0 | 2    | 35 PITG_08809   |
| 0 | 31   | 14 PITG_02499   |
| 0 | 119  | 12 PITG_01082   |
| 0 | 5544 | 281 PITG_11997  |
| 0 | 82   | 13 PITG_20345   |

|      |      |                |
|------|------|----------------|
| 0    | 16   | 7 PITG_13007   |
| 0    | 3    | 2 PITG_02439   |
| 0    | 27   | 14 PITG_08439  |
| 0    | 21   | 5 NA           |
| 0    | 72   | 59 NA          |
| 0    | 77   | 130 PITG_02058 |
| 0    | 0    | 0 NA           |
| 0    | 26   | 16 PITG_13056  |
| 0    | 40   | 10 PITG_14588  |
| 0    | 19   | 16 PITG_19956  |
| 0    | 6    | 0 PITG_18867   |
| 0    | 4    | 20 PITG_07302  |
| 0    | 72   | 28 PITG_20032  |
| 0    | 529  | 426 PITG_18054 |
| 0    | 2    | 0 NA           |
| 0    | 525  | 752 PITG_07999 |
| 0    | 35   | 15 NA          |
| 0    | 10   | 0 NA           |
| 0    | 0    | 0 PITG_00369   |
| 0    | 18   | 10 NA          |
| 6106 | 2138 | 1706 NA        |
| 0    | 10   | 11 PITG_13423  |
| 0    | 4    | 4 NA           |
| 0    | 22   | 14 PITG_03223  |
| 0    | 13   | 2 PITG_09724   |
| 0    | 0    | 0 PITG_10686   |
| 0    | 34   | 42 PITG_09941  |
| 0    | 0    | 0 PITG_12563   |
| 0    | 17   | 7 NA           |
| 0    | 61   | 28 NA          |
| 0    | 213  | 39 PITG_21151  |
| 0    | 108  | 108 NA         |
| 0    | 16   | 8 PITG_09097   |
| 16   | 0    | 2 NA           |
| 0    | 7    | 2 PITG_16770   |
| 0    | 824  | 255 PITG_07380 |
| 0    | 0    | 2 PITG_08425   |
| 0    | 375  | 132 NA         |
| 0    | 50   | 108 PITG_01599 |
| 0    | 17   | 55 PITG_00431  |
| 0    | 190  | 169 PITG_16680 |
| 0    | 161  | 50 NA          |
| 0    | 26   | 11 NA          |
| 0    | 0    | 0 PITG_02324   |
| 0    | 2    | 0 PITG_04664   |
| 0    | 26   | 31 NA          |
| 0    | 3    | 22 PITG_04428  |

|     |     |                |
|-----|-----|----------------|
| 0   | 64  | 4 NA           |
| 0   | 74  | 6 PITG_11775   |
| 0   | 0   | 0 PITG_17359   |
| 0   | 110 | 8 PITG_16400   |
| 0   | 4   | 21 PITG_04603  |
| 2   | 91  | 244 NA         |
| 450 | 6   | 354 NA         |
| 0   | 0   | 0 PITG_06289   |
| 0   | 51  | 22 NA          |
| 0   | 5   | 24 PITG_02036  |
| 0   | 223 | 309 PITG_00592 |
| 0   | 0   | 0 PITG_01502   |
| 0   | 6   | 4 PITG_13678   |
| 0   | 5   | 12 PITG_08368  |
| 0   | 81  | 44 PITG_02109  |
| 0   | 0   | 42 NA          |
| 0   | 4   | 25 PITG_04530  |
| 0   | 15  | 18 PITG_04857  |
| 0   | 4   | 0 PITG_05961   |
| 0   | 23  | 19 PITG_03946  |
| 0   | 2   | 8 PITG_17768   |
| 0   | 0   | 0 NA           |
| 0   | 9   | 0 PITG_00350   |
| 0   | 9   | 18 PITG_15097  |
| 0   | 54  | 73 PITG_21059  |
| 0   | 62  | 64 PITG_00561  |
| 0   | 23  | 16 NA          |
| 0   | 11  | 6 PITG_16978   |
| 0   | 14  | 0 PITG_02127   |
| 0   | 37  | 7 PITG_03115   |
| 0   | 16  | 12 NA          |
| 0   | 2   | 0 PITG_16511   |
| 0   | 0   | 0 PITG_12004   |
| 0   | 12  | 4 PITG_02728   |
| 0   | 90  | 22 PITG_04048  |
| 0   | 2   | 2 PITG_03995   |
| 0   | 178 | 34 PITG_06479  |
| 0   | 11  | 24 PITG_10461  |
| 0   | 10  | 9 PITG_20043   |
| 0   | 24  | 2 NA           |
| 0   | 441 | 864 PITG_14362 |
| 0   | 45  | 12 NA          |
| 0   | 4   | 0 PITG_13815   |
| 0   | 2   | 4 PITG_02491   |
| 0   | 19  | 11 PITG_19147  |
| 0   | 4   | 2 PITG_00043   |
| 0   | 4   | 15 PITG_21000  |

|     |      |                |
|-----|------|----------------|
| 0   | 151  | 101 PITG_12108 |
| 0   | 11   | 6 PITG_03520   |
| 0   | 177  | 109 PITG_14000 |
| 0   | 3    | 2 PITG_12739   |
| 0   | 15   | 13 PITG_09836  |
| 0   | 2    | 0 PITG_14231   |
| 0   | 4    | 23 PITG_05141  |
| 0   | 70   | 31 PITG_12511  |
| 0   | 2    | 0 PITG_12683   |
| 0   | 0    | 0 PITG_11972   |
| 0   | 20   | 4 NA           |
| 0   | 146  | 12 NA          |
| 0   | 19   | 16 PITG_15116  |
| 0   | 112  | 100 PITG_11152 |
| 0   | 38   | 0 PITG_07866   |
| 0   | 2    | 6 PITG_16887   |
| 0   | 0    | 0 PITG_15569   |
| 0   | 5614 | 900 PITG_14624 |
| 0   | 0    | 0 PITG_03429   |
| 0   | 9    | 80 NA          |
| 0   | 58   | 16 PITG_02921  |
| 138 | 0    | 0 NA           |
| 0   | 6    | 10 PITG_18244  |
| 0   | 10   | 2 PITG_00143   |
| 0   | 0    | 4 PITG_19527   |
| 0   | 69   | 98 PITG_04608  |
| 0   | 42   | 6 PITG_17733   |
| 0   | 0    | 0 PITG_06474   |
| 0   | 9    | 10 PITG_07210  |
| 0   | 0    | 0 PITG_13397   |
| 0   | 9    | 2 PITG_03492   |
| 0   | 41   | 98 PITG_09874  |
| 0   | 160  | 52 PITG_15738  |
| 0   | 2    | 4 PITG_12140   |
| 140 | 16   | 6 NA           |
| 0   | 9    | 3 PITG_04936   |
| 0   | 136  | 12 PITG_19961  |
| 0   | 9    | 6 NA           |
| 0   | 13   | 0 PITG_16956   |
| 0   | 104  | 156 PITG_11036 |
| 0   | 187  | 7 PITG_01694   |
| 0   | 18   | 15 PITG_16183  |
| 0   | 29   | 27 PITG_16207  |
| 0   | 0    | 2 PITG_00271   |
| 0   | 127  | 48 PITG_19647  |
| 0   | 23   | 11 PITG_00307  |
| 0   | 6    | 0 PITG_00382   |

|    |     |                |
|----|-----|----------------|
| 0  | 4   | 2 NA           |
| 0  | 0   | 0 PITG_15229   |
| 0  | 27  | 10 PITG_03179  |
| 0  | 8   | 0 NA           |
| 2  | 173 | 79 PITG_14597  |
| 0  | 12  | 36 PITG_10461  |
| 0  | 102 | 12 NA          |
| 0  | 2   | 0 PITG_21851   |
| 0  | 0   | 15 PITG_21602  |
| 0  | 13  | 16 PITG_02448  |
| 0  | 61  | 29 PITG_00685  |
| 0  | 3   | 13 PITG_21010  |
| 0  | 13  | 0 NA           |
| 0  | 12  | 0 PITG_12663   |
| 13 | 0   | 9 NA           |
| 0  | 11  | 87 PITG_01478  |
| 0  | 21  | 19 PITG_05128  |
| 0  | 0   | 0 NA           |
| 0  | 7   | 4 PITG_01282   |
| 0  | 4   | 5 PITG_04973   |
| 0  | 33  | 16 NA          |
| 0  | 30  | 11 NA          |
| 0  | 131 | 68 PITG_01591  |
| 0  | 30  | 0 PITG_16462   |
| 0  | 11  | 7 NA           |
| 0  | 5   | 0 PITG_19863   |
| 0  | 4   | 2 PITG_06903   |
| 0  | 0   | 0 NA           |
| 0  | 8   | 0 PITG_00257   |
| 0  | 0   | 0 NA           |
| 0  | 34  | 5 NA           |
| 0  | 69  | 145 PITG_00492 |
| 0  | 42  | 27 PITG_14921  |
| 0  | 0   | 2 PITG_01878   |
| 0  | 207 | 133 PITG_00205 |
| 0  | 67  | 12 NA          |
| 0  | 77  | 2 NA           |
| 0  | 33  | 2 NA           |
| 0  | 40  | 400 PITG_06415 |
| 0  | 514 | 382 PITG_11929 |
| 0  | 4   | 27 PITG_20502  |
| 0  | 18  | 6 PITG_03422   |
| 0  | 134 | 89 PITG_03223  |
| 0  | 2   | 0 PITG_05559   |
| 0  | 25  | 2 PITG_09896   |
| 0  | 6   | 0 PITG_17441   |
| 0  | 2   | 3 PITG_04709   |

|   |     |                |
|---|-----|----------------|
| 0 | 200 | 401 PITG_19961 |
| 0 | 111 | 378 PITG_01184 |
| 0 | 4   | 42 PITG_05117  |
| 0 | 118 | 164 PITG_17546 |
| 0 | 0   | 2 NA           |
| 0 | 0   | 4 PITG_08018   |
| 0 | 116 | 0 NA           |
| 0 | 19  | 28 NA          |
| 0 | 486 | 193 PITG_15625 |
| 0 | 0   | 2 NA           |
| 0 | 5   | 2 NA           |
| 0 | 51  | 57 PITG_18741  |
| 0 | 77  | 0 PITG_17499   |
| 0 | 7   | 0 PITG_09376   |
| 0 | 0   | 2 PITG_12264   |
| 0 | 20  | 9 NA           |
| 0 | 28  | 0 NA           |
| 0 | 22  | 2 PITG_19095   |
| 0 | 7   | 6 PITG_01848   |
| 0 | 45  | 0 PITG_12693   |
| 0 | 2   | 10 PITG_00559  |
| 0 | 36  | 386 PITG_11374 |
| 0 | 38  | 50 PITG_15906  |
| 0 | 13  | 10 PITG_12933  |
| 0 | 106 | 170 PITG_13296 |
| 0 | 52  | 115 PITG_02923 |
| 0 | 13  | 10 PITG_12530  |
| 0 | 0   | 0 PITG_12948   |
| 0 | 22  | 26 PITG_00589  |
| 0 | 20  | 4 PITG_18432   |
| 0 | 20  | 4 PITG_01390   |
| 0 | 49  | 13 PITG_06127  |
| 0 | 2   | 0 NA           |
| 0 | 0   | 0 PITG_11822   |
| 0 | 0   | 2 PITG_05100   |
| 0 | 35  | 29 NA          |
| 0 | 0   | 0 PITG_17004   |
| 0 | 42  | 15 PITG_00965  |
| 0 | 95  | 7 PITG_03932   |
| 0 | 13  | 26 PITG_03661  |
| 0 | 22  | 10 PITG_08471  |
| 0 | 17  | 32 PITG_06380  |
| 0 | 0   | 4 PITG_03620   |
| 0 | 27  | 41 PITG_00978  |
| 0 | 15  | 4 PITG_08530   |
| 0 | 163 | 151 PITG_11612 |
| 0 | 11  | 15 NA          |

|   |      |                 |
|---|------|-----------------|
| 0 | 0    | 2 PITG_07262    |
| 0 | 2    | 5 PITG_13005    |
| 0 | 18   | 2 PITG_08540    |
| 0 | 359  | 234 PITG_22946  |
| 0 | 59   | 6 PITG_19022    |
| 0 | 2    | 2 PITG_04661    |
| 0 | 6    | 2 NA            |
| 0 | 203  | 307 PITG_13237  |
| 0 | 23   | 0 NA            |
| 0 | 4    | 6 PITG_06772    |
| 0 | 0    | 0 NA            |
| 0 | 4    | 6 PITG_08780    |
| 0 | 5    | 0 NA            |
| 0 | 25   | 4 PITG_03364    |
| 0 | 61   | 76 PITG_01182   |
| 0 | 9    | 0 NA            |
| 0 | 362  | 91 NA           |
| 0 | 35   | 76 PITG_01679   |
| 0 | 14   | 2 NA            |
| 0 | 15   | 19 PITG_05551   |
| 0 | 0    | 12 PITG_11197   |
| 0 | 55   | 28 PITG_13225   |
| 0 | 2    | 9 PITG_02553    |
| 0 | 13   | 14 PITG_13997   |
| 0 | 6    | 2 PITG_20287    |
| 0 | 29   | 11 NA           |
| 0 | 2    | 2 PITG_16338    |
| 0 | 29   | 12 PITG_02196   |
| 0 | 45   | 14 PITG_06896   |
| 0 | 79   | 21 PITG_11612   |
| 0 | 37   | 23 PITG_09702   |
| 0 | 4    | 2 PITG_02852    |
| 0 | 1611 | 3920 PITG_08844 |
| 0 | 369  | 490 PITG_12158  |
| 0 | 0    | 2 NA            |
| 0 | 42   | 6 PITG_12527    |
| 0 | 4    | 8 PITG_01325    |
| 0 | 34   | 5 PITG_12938    |
| 0 | 374  | 242 PITG_10998  |
| 0 | 141  | 127 PITG_17778  |
| 0 | 465  | 278 NA          |
| 0 | 10   | 9 PITG_18634    |
| 0 | 196  | 75 NA           |
| 0 | 22   | 3 NA            |
| 0 | 200  | 184 PITG_11648  |
| 0 | 27   | 68 PITG_07955   |
| 0 | 37   | 0 PITG_08406    |

|      |     |                 |
|------|-----|-----------------|
| 0    | 82  | 119 NA          |
| 0    | 51  | 3 NA            |
| 0    | 9   | 17 NA           |
| 0    | 16  | 23 PITG_04910   |
| 0    | 191 | 50 PITG_05989   |
| 0    | 0   | 36 PITG_18025   |
| 0    | 111 | 148 PITG_09873  |
| 0    | 514 | 816 PITG_06449  |
| 0    | 0   | 0 NA            |
| 0    | 6   | 5 PITG_21595    |
| 0    | 0   | 0 PITG_17668    |
| 0    | 37  | 6 PITG_06816    |
| 0    | 0   | 0 NA            |
| 0    | 4   | 5 PITG_06708    |
| 0    | 0   | 0 PITG_06708    |
| 0    | 21  | 79 PITG_16041   |
| 0    | 8   | 2 PITG_15541    |
| 0    | 16  | 15 PITG_08304   |
| 0    | 17  | 8 PITG_03623    |
| 2    | 903 | 1510 PITG_11099 |
| 0    | 11  | 3 PITG_08613    |
| 0    | 0   | 2 NA            |
| 0    | 0   | 2 PITG_05627    |
| 0    | 36  | 62 PITG_00787   |
| 0    | 37  | 58 PITG_02666   |
| 0    | 0   | 2 PITG_15062    |
| 0    | 79  | 56 PITG_00808   |
| 0    | 0   | 7 PITG_04181    |
| 0    | 12  | 41 PITG_03608   |
| 0    | 30  | 86 PITG_08295   |
| 0    | 18  | 23 PITG_00858   |
| 0    | 16  | 18 PITG_17925   |
| 0    | 13  | 20 PITG_01785   |
| 0    | 236 | 57 PITG_15466   |
| 21   | 0   | 21 NA           |
| 0    | 11  | 11 PITG_10729   |
| 0    | 380 | 2 PITG_06753    |
| 0    | 6   | 0 PITG_01030    |
| 0    | 137 | 253 PITG_17596  |
| 0    | 72  | 89 PITG_21111   |
| 0    | 155 | 182 PITG_08467  |
| 1042 | 16  | 157 NA          |
| 0    | 7   | 15 PITG_09393   |
| 0    | 19  | 10 PITG_07966   |
| 0    | 269 | 241 NA          |
| 0    | 4   | 2 PITG_02799    |
| 0    | 91  | 26 PITG_00995   |



|   |     |                |
|---|-----|----------------|
| 0 | 8   | 0 NA           |
| 0 | 6   | 8 PITG_08974   |
| 0 | 396 | 626 PITG_15076 |
| 0 | 27  | 37 PITG_11690  |
| 0 | 0   | 4 PITG_14792   |
| 0 | 6   | 0 PITG_03169   |
| 0 | 11  | 0 PITG_00568   |
| 0 | 14  | 0 PITG_01235   |
| 0 | 7   | 14 PITG_06978  |
| 0 | 26  | 0 PITG_05452   |
| 0 | 0   | 2 PITG_08640   |
| 0 | 18  | 33 PITG_12000  |
| 0 | 40  | 30 PITG_20264  |
| 0 | 12  | 13 PITG_16078  |
| 0 | 3   | 7 PITG_06759   |
| 0 | 119 | 224 PITG_18164 |
| 0 | 5   | 11 PITG_14917  |
| 0 | 50  | 59 NA          |
| 0 | 21  | 57 PITG_06171  |
| 0 | 275 | 297 PITG_20792 |
| 0 | 2   | 0 NA           |
| 0 | 39  | 21 PITG_01810  |
| 0 | 8   | 15 PITG_18359  |
| 0 | 27  | 21 PITG_19938  |
| 0 | 13  | 12 PITG_10885  |
| 0 | 0   | 6 PITG_04401   |
| 0 | 14  | 20 PITG_11775  |
| 0 | 2   | 0 NA           |
| 0 | 322 | 38 PITG_00169  |
| 0 | 220 | 148 PITG_11610 |
| 0 | 7   | 20 PITG_10017  |
| 0 | 64  | 12 PITG_11410  |
| 0 | 183 | 156 PITG_01330 |
| 0 | 4   | 6 PITG_07307   |
| 0 | 37  | 23 PITG_22688  |
| 0 | 2   | 0 PITG_12196   |
| 0 | 134 | 58 PITG_17725  |
| 0 | 3   | 19 PITG_17725  |
| 0 | 0   | 0 PITG_13546   |
| 0 | 7   | 8 NA           |
| 0 | 17  | 17 PITG_04225  |
| 0 | 4   | 40 PITG_03881  |
| 0 | 374 | 363 PITG_00219 |
| 0 | 6   | 15 PITG_13042  |
| 0 | 0   | 0 PITG_06593   |
| 0 | 27  | 0 NA           |
| 2 | 22  | 29 PITG_11888  |

|   |     |                |
|---|-----|----------------|
| 0 | 409 | 186 PITG_12161 |
| 0 | 17  | 14 PITG_04545  |
| 0 | 2   | 66 PITG_11966  |
| 0 | 4   | 4 PITG_06483   |
| 0 | 12  | 5 PITG_00437   |
| 0 | 12  | 8 PITG_10167   |
| 0 | 792 | 278 PITG_06595 |
| 0 | 14  | 23 PITG_10990  |
| 0 | 2   | 0 PITG_15443   |
| 0 | 7   | 2 NA           |
| 0 | 0   | 2 PITG_15875   |
| 0 | 3   | 2 PITG_06390   |
| 0 | 28  | 5 PITG_10460   |
| 0 | 0   | 0 PITG_03501   |
| 0 | 0   | 0 PITG_06480   |
| 0 | 0   | 11 PITG_00422  |
| 0 | 85  | 18 PITG_02849  |
| 0 | 164 | 130 PITG_18088 |
| 0 | 49  | 42 NA          |
| 0 | 19  | 7 NA           |
| 0 | 6   | 2 NA           |
| 0 | 4   | 0 PITG_22036   |
| 0 | 84  | 464 PITG_00455 |
| 0 | 2   | 6 PITG_17792   |
| 0 | 20  | 16 PITG_11612  |
| 0 | 7   | 0 PITG_17948   |
| 0 | 56  | 127 PITG_03546 |
| 0 | 2   | 55 PITG_04398  |
| 0 | 2   | 2 PITG_20507   |
| 0 | 119 | 16 PITG_03103  |
| 0 | 106 | 16 PITG_19472  |
| 0 | 252 | 24 PITG_15384  |
| 0 | 6   | 2 PITG_12298   |
| 0 | 968 | 345 PITG_10463 |
| 0 | 46  | 21 PITG_16433  |
| 0 | 179 | 655 PITG_02039 |
| 0 | 2   | 0 PITG_17772   |
| 0 | 207 | 104 PITG_08142 |
| 0 | 0   | 0 PITG_00782   |
| 0 | 18  | 8 PITG_08530   |
| 0 | 24  | 17 PITG_05504  |
| 0 | 0   | 4 NA           |
| 0 | 4   | 0 PITG_01271   |
| 0 | 65  | 123 PITG_10542 |
| 0 | 7   | 4 NA           |
| 0 | 30  | 14 PITG_01594  |
| 0 | 25  | 13 PITG_09669  |

|   |     |                |
|---|-----|----------------|
| 0 | 440 | 980 PITG_10941 |
| 0 | 50  | 44 NA          |
| 0 | 83  | 6 PITG_09428   |
| 0 | 10  | 0 PITG_09953   |
| 0 | 3   | 4 PITG_09483   |
| 0 | 5   | 0 NA           |
| 0 | 42  | 7 NA           |
| 0 | 492 | 753 PITG_14850 |
| 0 | 31  | 117 PITG_10169 |
| 0 | 41  | 2 PITG_10145   |
| 0 | 67  | 98 PITG_01313  |
| 0 | 10  | 25 PITG_08725  |
| 0 | 90  | 36 PITG_19371  |
| 0 | 9   | 2 PITG_07652   |
| 0 | 6   | 0 PITG_02470   |
| 0 | 0   | 0 NA           |
| 0 | 2   | 5 PITG_01528   |
| 0 | 162 | 77 NA          |
| 0 | 266 | 45 NA          |
| 0 | 2   | 0 PITG_06570   |
| 0 | 53  | 85 PITG_05212  |
| 0 | 6   | 8 PITG_16208   |
| 0 | 53  | 22 NA          |
| 0 | 72  | 79 PITG_13252  |
| 0 | 0   | 0 PITG_15833   |
| 0 | 102 | 72 PITG_05461  |
| 0 | 0   | 57 PITG_15731  |
| 0 | 10  | 18 NA          |
| 0 | 3   | 0 PITG_00324   |
| 0 | 0   | 0 PITG_09742   |
| 0 | 76  | 117 PITG_13319 |
| 0 | 2   | 16 PITG_14972  |
| 0 | 0   | 6 PITG_00180   |
| 0 | 64  | 8 PITG_23066   |
| 0 | 7   | 4 PITG_01871   |
| 0 | 25  | 50 PITG_13074  |
| 0 | 5   | 0 PITG_00845   |
| 0 | 194 | 42 PITG_01748  |
| 0 | 2   | 2 PITG_19032   |
| 0 | 99  | 83 PITG_00720  |
| 0 | 18  | 32 PITG_07866  |
| 0 | 16  | 8 PITG_00878   |
| 0 | 4   | 0 PITG_01138   |
| 0 | 16  | 2 PITG_06570   |
| 0 | 112 | 139 PITG_08571 |
| 0 | 156 | 76 PITG_17345  |
| 0 | 2   | 2 PITG_03360   |

|     |     |                |
|-----|-----|----------------|
| 0   | 2   | 2 PITG_09360   |
| 0   | 4   | 0 PITG_00180   |
| 0   | 41  | 2 PITG_05934   |
| 0   | 8   | 11 PITG_00719  |
| 0   | 5   | 8 NA           |
| 0   | 8   | 2 NA           |
| 0   | 20  | 12 NA          |
| 0   | 6   | 15 PITG_15848  |
| 0   | 71  | 55 PITG_09427  |
| 0   | 13  | 31 PITG_09640  |
| 0   | 8   | 6 PITG_19672   |
| 0   | 94  | 16 NA          |
| 0   | 78  | 29 PITG_17489  |
| 0   | 0   | 2 PITG_01774   |
| 0   | 72  | 20 PITG_05689  |
| 0   | 146 | 50 PITG_03604  |
| 0   | 61  | 54 PITG_14557  |
| 0   | 3   | 2 PITG_11169   |
| 0   | 389 | 263 PITG_07278 |
| 0   | 214 | 57 PITG_06992  |
| 0   | 11  | 4 PITG_15137   |
| 0   | 134 | 88 PITG_02984  |
| 0   | 59  | 35 PITG_09604  |
| 0   | 31  | 51 PITG_09296  |
| 2   | 155 | 337 PITG_17240 |
| 0   | 0   | 6 NA           |
| 0   | 41  | 46 NA          |
| 328 | 97  | 3919 NA        |
| 0   | 0   | 4 PITG_01591   |
| 0   | 24  | 19 PITG_13152  |
| 0   | 184 | 152 PITG_19761 |
| 0   | 15  | 23 NA          |
| 0   | 4   | 8 PITG_01290   |
| 0   | 322 | 43 PITG_02591  |
| 0   | 26  | 12 PITG_17378  |
| 0   | 8   | 4 NA           |
| 0   | 77  | 47 PITG_08532  |
| 0   | 876 | 15 NA          |
| 0   | 115 | 74 PITG_02971  |
| 0   | 11  | 0 PITG_03952   |
| 0   | 6   | 0 NA           |
| 0   | 45  | 15 NA          |
| 0   | 24  | 33 PITG_17287  |
| 0   | 70  | 231 PITG_02921 |
| 0   | 29  | 18 PITG_04668  |
| 0   | 459 | 75 PITG_09862  |
| 0   | 2   | 0 PITG_00854   |

|   |      |                |
|---|------|----------------|
| 0 | 0    | 2 PITG_12342   |
| 0 | 6    | 0 PITG_04337   |
| 0 | 20   | 23 PITG_00208  |
| 0 | 18   | 27 PITG_02923  |
| 0 | 555  | 828 PITG_12833 |
| 0 | 19   | 8 PITG_01722   |
| 0 | 394  | 47 PITG_10763  |
| 0 | 782  | 235 PITG_16735 |
| 0 | 129  | 127 PITG_17287 |
| 0 | 0    | 19 PITG_05762  |
| 0 | 19   | 28 PITG_00720  |
| 0 | 407  | 159 PITG_01217 |
| 0 | 33   | 84 PITG_02115  |
| 0 | 21   | 58 NA          |
| 0 | 100  | 22 PITG_01390  |
| 0 | 27   | 149 PITG_05498 |
| 0 | 10   | 19 NA          |
| 0 | 0    | 0 PITG_02303   |
| 0 | 10   | 198 PITG_10132 |
| 0 | 66   | 33 PITG_09770  |
| 0 | 277  | 117 PITG_19814 |
| 0 | 49   | 113 PITG_19814 |
| 0 | 399  | 214 PITG_09404 |
| 0 | 577  | 621 PITG_09345 |
| 0 | 67   | 22 PITG_04685  |
| 0 | 0    | 5 PITG_15762   |
| 0 | 5    | 6 PITG_05010   |
| 0 | 6961 | 612 PITG_02507 |
| 0 | 19   | 0 PITG_22038   |
| 0 | 12   | 22 PITG_09536  |
| 0 | 39   | 0 NA           |
| 0 | 52   | 24 NA          |
| 0 | 42   | 33 PITG_02626  |
| 0 | 2    | 0 NA           |
| 0 | 22   | 12 PITG_09447  |
| 0 | 12   | 0 NA           |
| 0 | 205  | 143 PITG_00593 |
| 0 | 22   | 4 NA           |
| 0 | 383  | 271 PITG_08594 |
| 0 | 0    | 2 PITG_15242   |
| 0 | 121  | 68 PITG_10971  |
| 0 | 21   | 67 PITG_13745  |
| 0 | 14   | 10 PITG_13567  |
| 0 | 68   | 9 NA           |
| 0 | 431  | 29 PITG_05561  |
| 0 | 583  | 165 PITG_12746 |
| 0 | 4    | 0 PITG_16267   |

|      |      |                 |
|------|------|-----------------|
| 0    | 8    | 2 PITG_03078    |
| 0    | 68   | 103 PITG_13041  |
| 0    | 123  | 46 PITG_05902   |
| 0    | 22   | 13 PITG_01981   |
| 0    | 2064 | 1196 PITG_12878 |
| 0    | 29   | 8 NA            |
| 0    | 179  | 213 PITG_07711  |
| 0    | 7    | 41 PITG_17257   |
| 0    | 4    | 6 PITG_16114    |
| 0    | 10   | 10 PITG_11525   |
| 0    | 2    | 2 NA            |
| 0    | 2    | 5 PITG_15294    |
| 0    | 0    | 10 PITG_00451   |
| 0    | 4    | 6 PITG_15387    |
| 0    | 2    | 4 PITG_15075    |
| 0    | 18   | 0 PITG_19849    |
| 0    | 26   | 4 PITG_02553    |
| 0    | 224  | 177 NA          |
| 0    | 106  | 101 PITG_11176  |
| 0    | 6    | 11 PITG_00297   |
| 0    | 29   | 10 PITG_21025   |
| 0    | 16   | 11 NA           |
| 0    | 66   | 28 PITG_21960   |
| 0    | 17   | 18 PITG_12980   |
| 1208 | 240  | 3003 NA         |
| 0    | 10   | 18 PITG_02575   |
| 0    | 23   | 7 NA            |
| 0    | 2    | 4 PITG_01405    |
| 0    | 2    | 2 PITG_02960    |
| 0    | 6    | 5 PITG_12695    |
| 0    | 13   | 11 PITG_18912   |
| 0    | 11   | 19 PITG_04133   |
| 0    | 0    | 7 PITG_00564    |
| 0    | 7    | 0 NA            |
| 0    | 0    | 0 PITG_00453    |
| 0    | 6    | 2 PITG_05858    |
| 0    | 206  | 176 PITG_06631  |
| 0    | 55   | 53 PITG_14231   |
| 0    | 135  | 52 PITG_10383   |
| 0    | 4    | 5 PITG_14393    |
| 0    | 0    | 0 PITG_07069    |
| 0    | 691  | 436 PITG_01698  |
| 0    | 17   | 6 PITG_03604    |
| 0    | 0    | 8 PITG_18749    |
| 0    | 0    | 0 NA            |
| 0    | 13   | 42 PITG_04820   |
| 0    | 0    | 0 PITG_11437    |

|   |     |                |
|---|-----|----------------|
| 0 | 58  | 98 PITG_14853  |
| 0 | 4   | 2 PITG_05869   |
| 0 | 526 | 27 PITG_11817  |
| 0 | 74  | 2 NA           |
| 0 | 44  | 0 NA           |
| 0 | 15  | 22 PITG_14750  |
| 0 | 433 | 192 PITG_10442 |
| 0 | 5   | 0 NA           |
| 0 | 5   | 16 NA          |
| 0 | 21  | 12 NA          |
| 0 | 9   | 3 PITG_10838   |
| 0 | 7   | 2 PITG_14911   |
| 0 | 2   | 4 PITG_00563   |
| 0 | 2   | 0 PITG_14401   |
| 0 | 26  | 4 PITG_06700   |
| 0 | 0   | 7 PITG_01245   |
| 0 | 37  | 16 PITG_14847  |
| 0 | 0   | 0 NA           |
| 0 | 23  | 2 PITG_05321   |
| 0 | 232 | 120 PITG_14584 |
| 0 | 77  | 64 PITG_09566  |
| 0 | 0   | 0 NA           |
| 0 | 20  | 20 NA          |
| 0 | 19  | 21 PITG_11080  |
| 0 | 28  | 58 PITG_18378  |
| 0 | 85  | 78 PITG_16854  |
| 0 | 45  | 28 PITG_04424  |
| 0 | 44  | 6 PITG_17383   |
| 0 | 337 | 222 PITG_02305 |
| 0 | 0   | 0 PITG_05446   |
| 0 | 10  | 6 NA           |
| 0 | 22  | 0 NA           |
| 0 | 20  | 8 NA           |
| 0 | 462 | 437 PITG_17034 |
| 0 | 13  | 2 NA           |
| 0 | 2   | 17 PITG_05127  |
| 0 | 145 | 69 PITG_13159  |
| 0 | 267 | 15 PITG_20105  |
| 0 | 22  | 14 PITG_16939  |
| 0 | 0   | 0 PITG_13103   |
| 0 | 2   | 4 PITG_03142   |
| 0 | 75  | 54 PITG_19532  |
| 0 | 41  | 21 NA          |
| 0 | 40  | 71 PITG_18833  |
| 0 | 29  | 54 PITG_23063  |
| 0 | 891 | 717 PITG_07059 |
| 0 | 6   | 4 PITG_13546   |

|    |      |                |
|----|------|----------------|
| 0  | 14   | 58 PITG_10932  |
| 0  | 0    | 0 PITG_16049   |
| 0  | 227  | 255 PITG_13679 |
| 0  | 0    | 0 PITG_04973   |
| 0  | 15   | 12 NA          |
| 0  | 22   | 7 PITG_17209   |
| 0  | 4    | 0 PITG_14218   |
| 0  | 20   | 3 PITG_12739   |
| 0  | 154  | 89 PITG_02486  |
| 0  | 0    | 0 PITG_10441   |
| 0  | 0    | 0 PITG_02027   |
| 0  | 18   | 11 PITG_19470  |
| 0  | 0    | 482 NA         |
| 0  | 19   | 10 NA          |
| 0  | 28   | 72 PITG_21176  |
| 0  | 509  | 282 PITG_04508 |
| 0  | 15   | 0 NA           |
| 0  | 2    | 0 PITG_08481   |
| 0  | 13   | 15 PITG_07995  |
| 0  | 2    | 4 NA           |
| 0  | 28   | 76 NA          |
| 0  | 7    | 8 PITG_08229   |
| 0  | 242  | 227 PITG_09315 |
| 0  | 89   | 408 PITG_02921 |
| 0  | 2    | 2 PITG_03775   |
| 0  | 2    | 16 PITG_04884  |
| 0  | 4    | 2 PITG_08526   |
| 0  | 24   | 2 PITG_00469   |
| 0  | 88   | 30 PITG_16733  |
| 0  | 6    | 10 PITG_03360  |
| 0  | 6    | 3 PITG_16492   |
| 0  | 4    | 124 PITG_04049 |
| 0  | 173  | 0 PITG_17795   |
| 0  | 9    | 0 PITG_14169   |
| 0  | 38   | 50 PITG_05318  |
| 0  | 0    | 2 NA           |
| 0  | 1383 | 350 PITG_17826 |
| 0  | 7    | 15 PITG_02075  |
| 0  | 194  | 273 PITG_01370 |
| 0  | 55   | 0 NA           |
| 0  | 35   | 7 PITG_17057   |
| 0  | 11   | 37 PITG_18011  |
| 0  | 156  | 103 PITG_13250 |
| 0  | 2    | 8 PITG_08611   |
| 0  | 10   | 5 PITG_18393   |
| 10 | 15   | 7 NA           |
| 0  | 2    | 7 PITG_04619   |



|   |      |                 |
|---|------|-----------------|
| 0 | 44   | 37 NA           |
| 0 | 84   | 48 PITG_14214   |
| 0 | 22   | 24 PITG_00584   |
| 0 | 70   | 17 PITG_00647   |
| 0 | 0    | 2 NA            |
| 0 | 69   | 64 PITG_20611   |
| 0 | 2    | 0 PITG_02659    |
| 0 | 116  | 60 PITG_16352   |
| 0 | 44   | 21 NA           |
| 0 | 456  | 345 NA          |
| 0 | 130  | 143 PITG_10715  |
| 0 | 2    | 14 NA           |
| 0 | 136  | 436 PITG_14180  |
| 0 | 11   | 10 PITG_05855   |
| 0 | 2    | 0 PITG_11179    |
| 0 | 161  | 147 PITG_10461  |
| 0 | 14   | 40 PITG_00647   |
| 0 | 10   | 13 PITG_09936   |
| 0 | 15   | 3 PITG_00431    |
| 0 | 5821 | 3214 PITG_08897 |
| 0 | 14   | 0 PITG_02927    |
| 0 | 73   | 103 PITG_12915  |
| 0 | 42   | 27 PITG_02145   |
| 0 | 5    | 44 PITG_06631   |
| 0 | 2    | 64 PITG_09872   |
| 0 | 6    | 7 PITG_15844    |
| 0 | 76   | 2 PITG_06001    |
| 0 | 2    | 2 NA            |
| 0 | 8    | 19 NA           |
| 0 | 7    | 6 NA            |
| 0 | 4    | 2 NA            |
| 0 | 11   | 5 PITG_00850    |
| 0 | 115  | 41 PITG_01428   |
| 0 | 17   | 6 PITG_10250    |
| 0 | 61   | 75 PITG_13458   |
| 0 | 193  | 78 PITG_01991   |
| 0 | 27   | 37 NA           |
| 0 | 11   | 17 PITG_05658   |
| 0 | 16   | 0 NA            |
| 0 | 2    | 0 NA            |
| 2 | 0    | 52 PITG_12697   |
| 0 | 4    | 2 PITG_10317    |
| 0 | 4    | 2 PITG_13677    |
| 0 | 55   | 11 PITG_11467   |
| 0 | 210  | 243 PITG_10715  |
| 0 | 147  | 248 PITG_20384  |
| 0 | 255  | 36 PITG_16968   |

|   |     |                |
|---|-----|----------------|
| 0 | 206 | 19 NA          |
| 0 | 11  | 40 PITG_02286  |
| 0 | 20  | 2 PITG_05597   |
| 0 | 25  | 14 PITG_16826  |
| 0 | 41  | 26 PITG_05939  |
| 0 | 4   | 2 PITG_02480   |
| 0 | 86  | 171 NA         |
| 0 | 0   | 0 PITG_12439   |
| 0 | 0   | 0 PITG_10927   |
| 0 | 712 | 138 NA         |
| 0 | 0   | 0 NA           |
| 0 | 125 | 0 PITG_18410   |
| 0 | 212 | 4 PITG_12233   |
| 0 | 0   | 7 PITG_14175   |
| 0 | 7   | 28 PITG_08997  |
| 0 | 30  | 18 PITG_03715  |
| 0 | 45  | 19 PITG_19939  |
| 0 | 118 | 3 PITG_16433   |
| 0 | 0   | 4 PITG_11805   |
| 0 | 80  | 96 PITG_21596  |
| 0 | 3   | 10 PITG_02927  |
| 0 | 0   | 4 PITG_09604   |
| 0 | 96  | 70 PITG_16648  |
| 0 | 164 | 114 PITG_05874 |
| 0 | 10  | 0 PITG_11648   |
| 0 | 276 | 18 NA          |
| 0 | 554 | 134 PITG_03177 |
| 0 | 32  | 0 NA           |
| 0 | 10  | 12 PITG_12050  |
| 0 | 11  | 7 PITG_16801   |
| 0 | 0   | 154 NA         |
| 0 | 48  | 12 PITG_13669  |
| 0 | 27  | 11 NA          |
| 0 | 35  | 19 PITG_14812  |
| 0 | 160 | 107 PITG_19254 |
| 0 | 67  | 6 NA           |
| 0 | 4   | 10 PITG_01526  |
| 0 | 2   | 12 PITG_18393  |
| 0 | 100 | 225 PITG_06813 |
| 0 | 83  | 81 PITG_19008  |
| 0 | 3   | 4 PITG_00952   |
| 0 | 57  | 9 PITG_18064   |
| 0 | 6   | 26 NA          |
| 0 | 0   | 0 PITG_01650   |
| 0 | 6   | 0 PITG_18521   |
| 0 | 155 | 113 PITG_19472 |
| 0 | 3   | 21 PITG_00067  |

|   |     |                |
|---|-----|----------------|
| 0 | 0   | 0 PITG_20503   |
| 0 | 139 | 113 PITG_07384 |
| 0 | 13  | 2 PITG_03103   |
| 0 | 4   | 0 PITG_03944   |
| 0 | 189 | 421 PITG_11116 |
| 0 | 0   | 21 PITG_02598  |
| 0 | 30  | 0 NA           |
| 0 | 0   | 0 PITG_14792   |
| 0 | 47  | 215 PITG_12562 |
| 0 | 7   | 23 PITG_11767  |
| 0 | 5   | 0 NA           |
| 0 | 0   | 0 PITG_15151   |
| 0 | 14  | 4 PITG_15116   |
| 0 | 263 | 595 PITG_01447 |
| 0 | 8   | 5 NA           |
| 0 | 0   | 4 PITG_22575   |
| 0 | 4   | 4 NA           |
| 0 | 7   | 70 PITG_14133  |
| 0 | 0   | 25 PITG_07995  |
| 0 | 15  | 12 PITG_07988  |
| 0 | 0   | 8 PITG_01207   |
| 0 | 115 | 111 PITG_03423 |
| 0 | 0   | 0 PITG_13172   |
| 0 | 0   | 0 NA           |
| 0 | 7   | 11 PITG_03569  |
| 0 | 10  | 0 PITG_21416   |
| 0 | 2   | 0 PITG_07099   |
| 0 | 25  | 7 PITG_00954   |
| 0 | 6   | 0 PITG_03806   |
| 0 | 20  | 2 PITG_13625   |
| 0 | 0   | 0 PITG_01244   |
| 0 | 53  | 147 PITG_07671 |
| 0 | 8   | 2 NA           |
| 0 | 2   | 0 PITG_17882   |
| 0 | 35  | 72 PITG_13250  |
| 0 | 6   | 10 NA          |
| 0 | 81  | 34 PITG_03656  |
| 0 | 33  | 2 PITG_00252   |
| 0 | 0   | 3 PITG_03624   |
| 0 | 0   | 2 PITG_17994   |
| 0 | 40  | 32 PITG_13314  |
| 0 | 12  | 8 PITG_14297   |
| 0 | 0   | 52 PITG_22065  |
| 0 | 0   | 4 PITG_19125   |
| 0 | 457 | 191 PITG_13372 |
| 0 | 2   | 5 NA           |
| 0 | 2   | 5 PITG_14057   |

|     |     |                |
|-----|-----|----------------|
| 0   | 42  | 10 PITG_02761  |
| 0   | 21  | 0 PITG_19916   |
| 0   | 73  | 754 PITG_01535 |
| 0   | 15  | 12 PITG_08421  |
| 0   | 24  | 15 PITG_19850  |
| 0   | 45  | 18 PITG_03563  |
| 0   | 20  | 233 PITG_17257 |
| 0   | 31  | 38 PITG_23281  |
| 0   | 27  | 19 PITG_13434  |
| 0   | 22  | 2 PITG_12296   |
| 0   | 135 | 67 PITG_00756  |
| 0   | 2   | 4 PITG_19863   |
| 0   | 128 | 30 PITG_02261  |
| 0   | 192 | 135 PITG_14601 |
| 0   | 19  | 49 PITG_09283  |
| 0   | 45  | 21 PITG_09444  |
| 0   | 47  | 28 PITG_07232  |
| 0   | 0   | 4 PITG_17332   |
| 0   | 148 | 768 PITG_10218 |
| 0   | 7   | 0 PITG_16018   |
| 0   | 21  | 14 PITG_09039  |
| 0   | 17  | 6 PITG_14605   |
| 0   | 363 | 98 PITG_02696  |
| 0   | 8   | 13 PITG_01121  |
| 0   | 106 | 61 PITG_07865  |
| 0   | 54  | 16 PITG_06948  |
| 0   | 22  | 17 PITG_17455  |
| 0   | 54  | 70 PITG_13634  |
| 0   | 0   | 0 PITG_13488   |
| 0   | 284 | 790 PITG_12947 |
| 0   | 9   | 10 PITG_19886  |
| 0   | 165 | 165 PITG_03267 |
| 0   | 26  | 0 PITG_05467   |
| 0   | 4   | 2 PITG_20527   |
| 0   | 25  | 13 PITG_08237  |
| 0   | 61  | 11 NA          |
| 0   | 17  | 13 PITG_13558  |
| 976 | 54  | 606 NA         |
| 0   | 71  | 85 PITG_05449  |
| 0   | 20  | 8 NA           |
| 0   | 10  | 147 PITG_03574 |
| 0   | 6   | 19 PITG_07103  |
| 0   | 214 | 65 PITG_18787  |
| 0   | 8   | 16 PITG_21879  |
| 0   | 35  | 22 PITG_05226  |
| 0   | 0   | 3 PITG_19286   |
| 0   | 149 | 37 PITG_08230  |

|    |     |                |
|----|-----|----------------|
| 0  | 37  | 13 PITG_01456  |
| 0  | 33  | 11 PITG_01920  |
| 0  | 4   | 0 NA           |
| 0  | 0   | 5 PITG_09089   |
| 0  | 50  | 34 PITG_02678  |
| 0  | 0   | 0 PITG_16081   |
| 0  | 16  | 43 PITG_15195  |
| 0  | 0   | 0 PITG_10743   |
| 0  | 170 | 207 NA         |
| 0  | 64  | 37 PITG_02415  |
| 0  | 15  | 5 PITG_02322   |
| 0  | 448 | 359 PITG_01846 |
| 0  | 46  | 215 PITG_09846 |
| 0  | 18  | 40 PITG_11046  |
| 0  | 34  | 32 PITG_07305  |
| 0  | 0   | 2 PITG_12326   |
| 0  | 0   | 0 PITG_06805   |
| 0  | 0   | 12 PITG_04834  |
| 0  | 11  | 0 PITG_04079   |
| 0  | 87  | 527 PITG_07155 |
| 0  | 0   | 2 NA           |
| 0  | 13  | 0 PITG_16049   |
| 0  | 72  | 17 PITG_01302  |
| 0  | 278 | 284 PITG_03486 |
| 0  | 130 | 6 PITG_15695   |
| 0  | 29  | 10 NA          |
| 0  | 11  | 0 PITG_10831   |
| 0  | 273 | 181 PITG_01551 |
| 0  | 24  | 4 PITG_12548   |
| 0  | 43  | 0 PITG_05738   |
| 38 | 0   | 176 NA         |
| 0  | 59  | 17 PITG_11438  |
| 0  | 8   | 8 PITG_23113   |
| 0  | 100 | 239 PITG_01862 |
| 0  | 3   | 4 PITG_11206   |
| 2  | 20  | 118 PITG_06322 |
| 0  | 0   | 4 NA           |
| 0  | 58  | 82 PITG_04333  |
| 0  | 2   | 12 PITG_01271  |
| 0  | 563 | 353 PITG_01477 |
| 0  | 244 | 156 PITG_14729 |
| 0  | 125 | 34 PITG_16937  |
| 0  | 5   | 0 NA           |
| 0  | 22  | 7 PITG_15916   |
| 0  | 58  | 80 PITG_10680  |
| 0  | 64  | 14 NA          |
| 0  | 12  | 18 PITG_11233  |

|   |     |                |
|---|-----|----------------|
| 0 | 132 | 230 PITG_02971 |
| 0 | 77  | 35 PITG_19850  |
| 0 | 51  | 4 PITG_20838   |
| 0 | 48  | 92 PITG_21010  |
| 0 | 0   | 2 PITG_12156   |
| 0 | 0   | 0 NA           |
| 0 | 4   | 6 PITG_17829   |
| 0 | 13  | 19 PITG_21185  |
| 0 | 41  | 24 PITG_02042  |
| 0 | 181 | 41 NA          |
| 0 | 13  | 10 NA          |
| 0 | 0   | 2 NA           |
| 0 | 470 | 488 PITG_15485 |
| 0 | 19  | 29 PITG_05622  |
| 0 | 8   | 0 PITG_15877   |
| 0 | 6   | 8 PITG_12463   |
| 0 | 47  | 16 PITG_01310  |
| 0 | 6   | 2 PITG_09690   |
| 0 | 50  | 39 PITG_15839  |
| 0 | 17  | 2 NA           |
| 0 | 3   | 0 PITG_05005   |
| 0 | 2   | 0 PITG_05629   |
| 0 | 23  | 13 PITG_07896  |
| 0 | 15  | 94 PITG_08346  |
| 0 | 0   | 0 PITG_10592   |
| 0 | 35  | 8 PITG_01747   |
| 0 | 9   | 0 PITG_07653   |
| 0 | 191 | 157 PITG_01691 |
| 0 | 55  | 50 PITG_12996  |
| 0 | 0   | 11 PITG_11291  |
| 0 | 49  | 57 PITG_19878  |
| 0 | 111 | 6 PITG_18657   |
| 0 | 18  | 6 PITG_05604   |
| 0 | 19  | 18 PITG_04917  |
| 0 | 35  | 11 NA          |
| 0 | 2   | 6 PITG_13511   |
| 0 | 80  | 38 PITG_08594  |
| 0 | 10  | 86 PITG_09393  |
| 0 | 118 | 38 PITG_17075  |
| 0 | 79  | 84 PITG_20086  |
| 0 | 0   | 0 PITG_18019   |
| 0 | 0   | 2 NA           |
| 0 | 6   | 0 PITG_12110   |
| 0 | 666 | 33 PITG_11612  |
| 0 | 103 | 44 PITG_15955  |
| 0 | 6   | 0 PITG_16178   |
| 0 | 25  | 3 PITG_05667   |

|     |     |                |
|-----|-----|----------------|
| 0   | 19  | 0 NA           |
| 0   | 11  | 4 NA           |
| 0   | 0   | 0 PITG_06142   |
| 0   | 2   | 4 PITG_03044   |
| 0   | 158 | 82 NA          |
| 0   | 10  | 0 PITG_08839   |
| 0   | 694 | 230 PITG_02399 |
| 0   | 258 | 920 PITG_09400 |
| 0   | 0   | 0 NA           |
| 0   | 0   | 14 NA          |
| 0   | 0   | 2 PITG_05500   |
| 0   | 71  | 25 NA          |
| 0   | 22  | 33 PITG_18393  |
| 0   | 39  | 21 NA          |
| 194 | 6   | 126 NA         |
| 0   | 8   | 10 PITG_01789  |
| 0   | 19  | 4 NA           |
| 0   | 4   | 6 PITG_13258   |
| 0   | 0   | 4 PITG_07865   |
| 0   | 15  | 9 PITG_00209   |
| 0   | 32  | 17 PITG_05589  |
| 2   | 4   | 2 NA           |
| 0   | 239 | 263 PITG_03860 |
| 0   | 147 | 290 PITG_22108 |
| 0   | 984 | 695 PITG_06791 |
| 0   | 56  | 12 PITG_03660  |
| 0   | 78  | 13 PITG_08067  |
| 0   | 2   | 0 NA           |
| 0   | 14  | 6 PITG_08570   |
| 0   | 6   | 2 PITG_19351   |
| 0   | 12  | 50 PITG_10938  |
| 0   | 0   | 0 NA           |
| 0   | 59  | 55 PITG_06259  |
| 0   | 4   | 5 NA           |
| 0   | 6   | 13 PITG_11155  |
| 0   | 17  | 6 PITG_06934   |
| 0   | 88  | 51 PITG_14169  |
| 0   | 2   | 15 NA          |
| 0   | 7   | 8 PITG_10865   |
| 0   | 19  | 12 PITG_03757  |
| 0   | 32  | 16 PITG_00561  |
| 0   | 9   | 2 NA           |
| 0   | 14  | 0 PITG_14785   |
| 0   | 30  | 34 PITG_09428  |
| 0   | 4   | 31 PITG_05240  |
| 0   | 0   | 2 PITG_03120   |
| 0   | 176 | 41 PITG_10695  |

|   |     |                |
|---|-----|----------------|
| 0 | 19  | 17 PITG_18824  |
| 0 | 0   | 0 PITG_05509   |
| 0 | 16  | 22 PITG_18650  |
| 0 | 149 | 264 PITG_14589 |
| 0 | 80  | 6 NA           |
| 0 | 15  | 9 PITG_12678   |
| 0 | 54  | 12 NA          |
| 0 | 172 | 0 PITG_16826   |
| 0 | 2   | 7 NA           |
| 0 | 23  | 2 PITG_15980   |
| 0 | 8   | 4 PITG_06917   |
| 0 | 326 | 250 PITG_17012 |
| 0 | 263 | 138 PITG_12289 |
| 0 | 0   | 0 PITG_11119   |
| 0 | 9   | 5 NA           |
| 0 | 753 | 221 PITG_11766 |
| 0 | 0   | 0 PITG_17936   |
| 0 | 0   | 0 NA           |
| 0 | 815 | 260 PITG_07807 |
| 0 | 13  | 0 PITG_17831   |
| 0 | 13  | 8 PITG_13546   |
| 0 | 22  | 4 PITG_09090   |
| 8 | 0   | 2 NA           |
| 0 | 204 | 18 PITG_19709  |
| 0 | 118 | 32 PITG_00337  |
| 0 | 0   | 0 PITG_17292   |
| 0 | 14  | 25 PITG_15959  |
| 0 | 19  | 4 PITG_07338   |
| 0 | 14  | 2 NA           |
| 0 | 10  | 16 PITG_12916  |
| 0 | 3   | 3 PITG_01520   |
| 0 | 18  | 2 NA           |
| 0 | 11  | 36 PITG_03436  |
| 0 | 2   | 0 NA           |
| 0 | 120 | 20 PITG_00912  |
| 0 | 100 | 23 NA          |
| 0 | 94  | 67 PITG_05540  |
| 0 | 57  | 0 PITG_14564   |
| 0 | 2   | 12 PITG_06635  |
| 0 | 30  | 46 NA          |
| 0 | 113 | 148 NA         |
| 0 | 2   | 6 NA           |
| 0 | 4   | 21 PITG_00947  |
| 0 | 5   | 0 PITG_11858   |
| 0 | 4   | 8 PITG_03438   |
| 0 | 31  | 134 PITG_01991 |
| 0 | 37  | 2 PITG_23322   |



|   |     |                |
|---|-----|----------------|
| 0 | 46  | 48 NA          |
| 0 | 29  | 6 PITG_00165   |
| 0 | 0   | 10 PITG_12110  |
| 0 | 0   | 29 PITG_13016  |
| 0 | 0   | 0 NA           |
| 0 | 12  | 0 NA           |
| 0 | 200 | 75 PITG_17609  |
| 0 | 2   | 2 NA           |
| 0 | 265 | 98 PITG_10290  |
| 0 | 4   | 21 PITG_13386  |
| 0 | 2   | 10 PITG_01082  |
| 0 | 11  | 0 PITG_10190   |
| 0 | 48  | 44 PITG_01602  |
| 0 | 0   | 5 PITG_12676   |
| 0 | 0   | 0 NA           |
| 0 | 25  | 0 PITG_03044   |
| 0 | 0   | 0 PITG_03501   |
| 0 | 2   | 2 PITG_05733   |
| 0 | 368 | 100 PITG_10069 |
| 0 | 0   | 5 PITG_03311   |
| 0 | 127 | 17 NA          |
| 0 | 2   | 0 PITG_06201   |
| 0 | 0   | 0 PITG_18657   |
| 0 | 10  | 10 PITG_05955  |
| 0 | 230 | 60 PITG_03703  |
| 0 | 127 | 349 PITG_19263 |
| 0 | 0   | 0 NA           |
| 0 | 10  | 3 PITG_03761   |
| 0 | 6   | 4 PITG_09836   |
| 0 | 22  | 7 PITG_07109   |
| 0 | 4   | 9 PITG_03008   |
| 0 | 6   | 11 PITG_13747  |
| 0 | 28  | 10 PITG_17045  |
| 0 | 0   | 6 PITG_08461   |
| 0 | 13  | 60 PITG_12834  |
| 0 | 6   | 0 NA           |
| 0 | 27  | 69 PITG_01940  |
| 0 | 66  | 503 PITG_06863 |
| 0 | 0   | 4 NA           |
| 0 | 39  | 40 PITG_03860  |
| 0 | 28  | 0 NA           |
| 0 | 188 | 258 PITG_02115 |
| 0 | 16  | 2 PITG_00475   |
| 0 | 237 | 62 PITG_03418  |
| 0 | 2   | 0 PITG_13173   |
| 0 | 6   | 42 PITG_08445  |
| 0 | 0   | 0 PITG_12984   |

|    |     |                |
|----|-----|----------------|
| 0  | 25  | 39 PITG_16924  |
| 0  | 31  | 40 PITG_11405  |
| 0  | 27  | 16 PITG_02040  |
| 0  | 0   | 0 PITG_15077   |
| 0  | 2   | 0 PITG_20253   |
| 95 | 0   | 206 NA         |
| 0  | 12  | 5 PITG_15836   |
| 0  | 70  | 72 PITG_00264  |
| 0  | 13  | 4 NA           |
| 0  | 0   | 0 PITG_21516   |
| 0  | 111 | 38 PITG_12524  |
| 0  | 2   | 0 PITG_12663   |
| 0  | 0   | 28 PITG_05512  |
| 0  | 2   | 0 PITG_03169   |
| 0  | 64  | 5 PITG_00626   |
| 0  | 2   | 0 NA           |
| 0  | 389 | 431 PITG_02252 |
| 2  | 56  | 943 PITG_05615 |
| 0  | 30  | 12 PITG_02895  |
| 0  | 4   | 15 NA          |
| 0  | 48  | 20 PITG_16299  |
| 0  | 109 | 49 PITG_02432  |
| 0  | 19  | 4 PITG_03946   |
| 0  | 186 | 60 PITG_06369  |
| 0  | 47  | 6 PITG_10004   |
| 0  | 42  | 22 PITG_14239  |
| 0  | 37  | 2 PITG_03874   |
| 0  | 6   | 2 PITG_16940   |
| 0  | 20  | 2 PITG_03939   |
| 0  | 470 | 192 PITG_00273 |
| 0  | 0   | 0 PITG_21767   |
| 0  | 0   | 0 PITG_11437   |
| 0  | 0   | 0 PITG_08984   |
| 0  | 2   | 2 PITG_11858   |
| 0  | 47  | 120 PITG_21488 |
| 0  | 115 | 141 PITG_00490 |
| 0  | 27  | 17 PITG_10045  |
| 0  | 13  | 15 NA          |
| 0  | 18  | 4 PITG_08595   |
| 0  | 30  | 10 PITG_16974  |
| 0  | 21  | 27 PITG_10664  |
| 0  | 7   | 4 NA           |
| 0  | 84  | 45 PITG_04133  |
| 0  | 7   | 0 PITG_08769   |
| 0  | 10  | 8 PITG_07071   |
| 0  | 19  | 7 NA           |
| 0  | 29  | 0 PITG_02725   |

|    |      |                 |
|----|------|-----------------|
| 0  | 40   | 61 PITG_00209   |
| 0  | 21   | 21 PITG_12753   |
| 0  | 31   | 7 PITG_14898    |
| 0  | 35   | 15 PITG_11999   |
| 0  | 63   | 25 PITG_00839   |
| 0  | 768  | 105 PITG_21851  |
| 0  | 6    | 4 PITG_06829    |
| 0  | 18   | 65 PITG_11552   |
| 0  | 16   | 2 PITG_16956    |
| 0  | 22   | 0 PITG_01858    |
| 0  | 16   | 12 PITG_21075   |
| 0  | 37   | 15 PITG_00169   |
| 0  | 0    | 0 PITG_00983    |
| 0  | 7    | 0 PITG_05670    |
| 0  | 0    | 5 PITG_01063    |
| 39 | 18   | 89 NA           |
| 0  | 22   | 2 PITG_02500    |
| 0  | 6    | 2 NA            |
| 0  | 13   | 6 NA            |
| 0  | 21   | 2 PITG_10341    |
| 0  | 16   | 5 PITG_08504    |
| 0  | 167  | 9 PITG_09873    |
| 0  | 230  | 350 PITG_14173  |
| 0  | 31   | 21 PITG_16833   |
| 0  | 69   | 22 PITG_01527   |
| 0  | 2    | 2 NA            |
| 0  | 2    | 0 PITG_10160    |
| 0  | 104  | 6 PITG_13803    |
| 0  | 178  | 123 PITG_11254  |
| 0  | 0    | 2 NA            |
| 0  | 3458 | 1573 PITG_02507 |
| 0  | 49   | 26 PITG_18786   |
| 0  | 39   | 109 PITG_17007  |
| 0  | 100  | 153 PITG_05688  |
| 0  | 32   | 24 PITG_00839   |
| 0  | 17   | 4 PITG_10152    |
| 0  | 19   | 16 PITG_08394   |
| 0  | 3    | 2 PITG_15228    |
| 0  | 3    | 3 PITG_02050    |
| 0  | 12   | 4 PITG_01715    |
| 0  | 33   | 2 NA            |
| 0  | 25   | 8 NA            |
| 0  | 151  | 2 PITG_06342    |
| 0  | 1272 | 635 PITG_02671  |
| 0  | 0    | 7 PITG_04910    |
| 0  | 14   | 4 PITG_10449    |
| 0  | 84   | 20 PITG_23128   |

|     |     |                |
|-----|-----|----------------|
| 0   | 60  | 115 PITG_02498 |
| 0   | 0   | 0 PITG_11857   |
| 0   | 11  | 39 PITG_06984  |
| 0   | 19  | 14 PITG_04956  |
| 0   | 19  | 4 PITG_05518   |
| 0   | 95  | 268 PITG_02112 |
| 0   | 139 | 433 PITG_01253 |
| 0   | 33  | 31 NA          |
| 0   | 219 | 110 PITG_01067 |
| 0   | 4   | 4 PITG_03473   |
| 0   | 21  | 9 PITG_14000   |
| 0   | 216 | 31 PITG_06056  |
| 0   | 0   | 2 NA           |
| 0   | 0   | 0 PITG_08305   |
| 0   | 4   | 10 PITG_11584  |
| 0   | 20  | 10 PITG_17361  |
| 0   | 7   | 0 PITG_05114   |
| 0   | 174 | 146 PITG_17273 |
| 0   | 220 | 175 PITG_00054 |
| 0   | 6   | 2 PITG_15150   |
| 0   | 9   | 0 NA           |
| 0   | 0   | 0 PITG_01977   |
| 0   | 71  | 61 PITG_16353  |
| 0   | 8   | 25 PITG_16809  |
| 0   | 0   | 6 PITG_04603   |
| 0   | 31  | 63 NA          |
| 0   | 57  | 18 NA          |
| 0   | 787 | 71 PITG_12286  |
| 0   | 15  | 10 PITG_20977  |
| 0   | 18  | 9 PITG_01814   |
| 0   | 69  | 45 PITG_17710  |
| 672 | 77  | 386 NA         |
| 0   | 22  | 4 PITG_20893   |
| 0   | 57  | 16 NA          |
| 0   | 19  | 2 PITG_05010   |
| 0   | 332 | 103 NA         |
| 0   | 6   | 0 PITG_07703   |
| 0   | 56  | 16 NA          |
| 0   | 0   | 4 PITG_03076   |
| 0   | 18  | 65 PITG_04712  |
| 0   | 27  | 3 PITG_11120   |
| 0   | 51  | 12 PITG_06754  |
| 0   | 70  | 59 PITG_12650  |
| 0   | 240 | 12 PITG_15948  |
| 0   | 30  | 36 PITG_15904  |
| 0   | 307 | 13 NA          |
| 0   | 14  | 0 NA           |

|     |      |                |
|-----|------|----------------|
| 0   | 17   | 2 PITG_06026   |
| 0   | 3    | 0 NA           |
| 0   | 3    | 0 NA           |
| 0   | 222  | 45 PITG_12973  |
| 0   | 0    | 2 PITG_12259   |
| 0   | 2    | 2 PITG_03646   |
| 0   | 1402 | 257 PITG_13267 |
| 0   | 6    | 7 NA           |
| 0   | 8    | 0 NA           |
| 0   | 6    | 6 PITG_03404   |
| 14  | 0    | 27 NA          |
| 0   | 424  | 234 PITG_00708 |
| 0   | 277  | 148 PITG_08002 |
| 0   | 31   | 71 PITG_04681  |
| 0   | 12   | 21 PITG_15625  |
| 0   | 3    | 5 PITG_06701   |
| 0   | 0    | 2 NA           |
| 0   | 0    | 7 PITG_12663   |
| 0   | 58   | 2 PITG_08585   |
| 0   | 12   | 2 NA           |
| 0   | 23   | 32 NA          |
| 0   | 111  | 47 PITG_02322  |
| 0   | 113  | 129 PITG_12760 |
| 0   | 0    | 4 PITG_02381   |
| 0   | 0    | 2 PITG_03898   |
| 0   | 4    | 18 PITG_18129  |
| 0   | 83   | 99 PITG_18519  |
| 0   | 14   | 6 PITG_01871   |
| 0   | 67   | 75 PITG_08196  |
| 0   | 21   | 2 NA           |
| 0   | 25   | 138 PITG_11856 |
| 0   | 4    | 17 PITG_09360  |
| 0   | 5    | 6 PITG_04619   |
| 0   | 0    | 0 PITG_03439   |
| 0   | 12   | 10 NA          |
| 0   | 35   | 0 PITG_14141   |
| 0   | 26   | 20 PITG_15442  |
| 0   | 0    | 2 NA           |
| 0   | 6    | 16 PITG_02796  |
| 0   | 4    | 0 PITG_03995   |
| 0   | 104  | 57 PITG_05691  |
| 0   | 123  | 0 NA           |
| 0   | 21   | 47 PITG_01146  |
| 725 | 29   | 976 NA         |
| 0   | 30   | 76 PITG_04725  |
| 0   | 10   | 14 PITG_17028  |
| 0   | 45   | 19 PITG_11522  |

|   |     |                |
|---|-----|----------------|
| 0 | 55  | 45 PITG_14169  |
| 0 | 6   | 16 NA          |
| 0 | 0   | 0 NA           |
| 0 | 159 | 74 NA          |
| 0 | 2   | 0 PITG_16457   |
| 0 | 33  | 0 NA           |
| 0 | 36  | 53 PITG_02672  |
| 0 | 12  | 27 PITG_17273  |
| 0 | 4   | 0 NA           |
| 0 | 14  | 35 PITG_23191  |
| 0 | 0   | 2 PITG_08305   |
| 0 | 27  | 19 PITG_05177  |
| 0 | 8   | 4 PITG_08213   |
| 0 | 18  | 0 PITG_19229   |
| 0 | 0   | 0 PITG_15846   |
| 0 | 20  | 2 PITG_00300   |
| 0 | 9   | 6 PITG_07241   |
| 0 | 26  | 6 PITG_02231   |
| 0 | 2   | 2 NA           |
| 0 | 5   | 2 PITG_02264   |
| 0 | 176 | 120 PITG_21765 |
| 0 | 2   | 0 PITG_05456   |
| 0 | 186 | 77 PITG_06322  |
| 0 | 9   | 7 PITG_03987   |
| 0 | 147 | 388 PITG_07036 |
| 0 | 4   | 11 PITG_15596  |
| 0 | 15  | 43 PITG_11612  |
| 0 | 0   | 0 NA           |
| 0 | 134 | 74 PITG_00559  |
| 0 | 25  | 7 PITG_02990   |
| 2 | 769 | 278 PITG_18534 |
| 0 | 35  | 35 PITG_20676  |
| 0 | 0   | 2 NA           |
| 0 | 91  | 35 PITG_03821  |
| 0 | 0   | 0 PITG_07200   |
| 0 | 9   | 5 PITG_19466   |
| 0 | 51  | 6 PITG_06806   |
| 0 | 56  | 2 NA           |
| 0 | 449 | 357 PITG_19932 |
| 0 | 0   | 2 PITG_12806   |
| 0 | 13  | 12 NA          |
| 0 | 21  | 36 PITG_08734  |
| 0 | 6   | 18 PITG_18063  |
| 0 | 25  | 0 PITG_12277   |
| 0 | 9   | 33 PITG_08725  |
| 0 | 38  | 12 PITG_08305  |
| 0 | 15  | 23 NA          |

|   |     |                |
|---|-----|----------------|
| 0 | 2   | 6 PITG_06832   |
| 0 | 21  | 62 PITG_04568  |
| 0 | 284 | 53 PITG_00155  |
| 0 | 2   | 0 PITG_00590   |
| 0 | 0   | 0 PITG_02329   |
| 0 | 6   | 2 NA           |
| 0 | 563 | 31 NA          |
| 0 | 18  | 4 NA           |
| 0 | 37  | 18 PITG_11410  |
| 0 | 55  | 27 PITG_01520  |
| 0 | 64  | 27 PITG_21316  |
| 0 | 21  | 7 PITG_06342   |
| 0 | 30  | 8 PITG_02657   |
| 0 | 11  | 0 PITG_10750   |
| 0 | 0   | 6 PITG_01788   |
| 0 | 4   | 31 NA          |
| 0 | 58  | 11 NA          |
| 0 | 4   | 12 PITG_01924  |
| 0 | 11  | 6 PITG_13174   |
| 0 | 60  | 6 PITG_16382   |
| 0 | 23  | 9 PITG_18105   |
| 0 | 0   | 0 PITG_15929   |
| 0 | 0   | 2 NA           |
| 0 | 42  | 14 PITG_06996  |
| 0 | 13  | 29 PITG_06920  |
| 0 | 16  | 0 NA           |
| 0 | 133 | 62 PITG_09273  |
| 0 | 4   | 0 PITG_00571   |
| 0 | 2   | 7 PITG_03155   |
| 0 | 21  | 0 NA           |
| 0 | 167 | 16 NA          |
| 0 | 40  | 39 PITG_07292  |
| 0 | 14  | 4 NA           |
| 0 | 204 | 39 NA          |
| 0 | 156 | 88 PITG_05128  |
| 0 | 3   | 0 PITG_21308   |
| 0 | 4   | 0 NA           |
| 0 | 110 | 13 PITG_03061  |
| 0 | 8   | 4 PITG_14566   |
| 0 | 105 | 152 PITG_07797 |
| 0 | 123 | 39 PITG_00809  |
| 0 | 29  | 56 PITG_11170  |
| 0 | 4   | 6 PITG_07168   |
| 0 | 14  | 0 NA           |
| 0 | 9   | 4 PITG_18024   |
| 0 | 313 | 400 PITG_00982 |
| 0 | 0   | 0 NA           |

|   |     |                 |
|---|-----|-----------------|
| 0 | 4   | 6 NA            |
| 0 | 8   | 20 NA           |
| 0 | 51  | 37 PITG_03547   |
| 0 | 2   | 5 PITG_17706    |
| 0 | 24  | 29 PITG_19298   |
| 0 | 19  | 2 NA            |
| 0 | 14  | 20 PITG_02210   |
| 0 | 36  | 14 PITG_10163   |
| 0 | 3   | 0 PITG_01792    |
| 0 | 0   | 0 PITG_18316    |
| 0 | 0   | 4 PITG_10134    |
| 0 | 39  | 6 NA            |
| 0 | 20  | 9 PITG_18868    |
| 0 | 48  | 164 PITG_20081  |
| 0 | 13  | 21 PITG_01528   |
| 0 | 11  | 12 NA           |
| 0 | 63  | 41 PITG_12128   |
| 0 | 2   | 2 NA            |
| 0 | 10  | 0 PITG_02127    |
| 0 | 18  | 2 PITG_01963    |
| 0 | 19  | 2 NA            |
| 0 | 25  | 101 PITG_12818  |
| 0 | 3   | 2 NA            |
| 0 | 0   | 2 PITG_00128    |
| 0 | 17  | 6 PITG_12496    |
| 0 | 18  | 4 PITG_02487    |
| 0 | 150 | 142 PITG_18731  |
| 0 | 30  | 0 PITG_03557    |
| 0 | 0   | 0 NA            |
| 0 | 63  | 10 PITG_01926   |
| 0 | 21  | 2 PITG_20370    |
| 0 | 31  | 9 PITG_03443    |
| 0 | 4   | 0 NA            |
| 0 | 22  | 11 PITG_01740   |
| 0 | 108 | 122 PITG_01913  |
| 0 | 63  | 24 PITG_20317   |
| 0 | 725 | 1685 PITG_05156 |
| 0 | 33  | 15 PITG_00651   |
| 0 | 5   | 2 PITG_03271    |
| 0 | 13  | 6 NA            |
| 0 | 34  | 102 NA          |
| 0 | 0   | 15 PITG_15006   |
| 0 | 23  | 426 NA          |
| 0 | 2   | 0 NA            |
| 0 | 4   | 7 PITG_00042    |
| 0 | 5   | 2 NA            |
| 0 | 22  | 7 PITG_09425    |



|   |     |                |
|---|-----|----------------|
| 0 | 7   | 3 PITG_00223   |
| 0 | 2   | 0 PITG_14702   |
| 0 | 18  | 58 PITG_15194  |
| 0 | 6   | 0 NA           |
| 0 | 25  | 27 NA          |
| 0 | 2   | 2 PITG_10827   |
| 0 | 101 | 2 PITG_16766   |
| 0 | 219 | 134 PITG_01851 |
| 0 | 0   | 0 NA           |
| 0 | 225 | 117 PITG_19411 |
| 0 | 195 | 138 PITG_12516 |
| 0 | 0   | 0 NA           |
| 0 | 227 | 15 PITG_09837  |
| 0 | 13  | 0 NA           |
| 0 | 149 | 206 PITG_18107 |
| 0 | 13  | 4 PITG_15774   |
| 0 | 6   | 19 PITG_06675  |
| 0 | 0   | 6 PITG_20203   |
| 0 | 17  | 18 PITG_10594  |
| 0 | 0   | 46 PITG_02917  |
| 0 | 6   | 2 PITG_03940   |
| 0 | 0   | 0 PITG_00450   |
| 0 | 6   | 0 PITG_09700   |
| 0 | 0   | 6 PITG_04377   |
| 0 | 20  | 15 PITG_05315  |
| 0 | 5   | 0 PITG_06323   |
| 0 | 7   | 8 PITG_19150   |
| 0 | 28  | 8 NA           |
| 0 | 46  | 4 PITG_18331   |
| 0 | 44  | 21 PITG_05338  |
| 0 | 33  | 5 PITG_13422   |
| 0 | 12  | 2 NA           |
| 0 | 81  | 13 NA          |
| 0 | 47  | 22 PITG_01034  |
| 0 | 0   | 0 PITG_16698   |
| 0 | 267 | 70 PITG_20999  |
| 0 | 10  | 10 PITG_16856  |
| 0 | 4   | 2 PITG_12178   |
| 0 | 13  | 0 NA           |
| 0 | 35  | 8 PITG_02995   |
| 0 | 6   | 0 NA           |
| 0 | 0   | 0 NA           |
| 0 | 11  | 0 PITG_12050   |
| 0 | 3   | 0 PITG_06416   |
| 0 | 273 | 133 PITG_03039 |
| 0 | 72  | 49 PITG_01233  |
| 0 | 0   | 12 PITG_10264  |

|   |      |                |
|---|------|----------------|
| 0 | 54   | 61 PITG_11724  |
| 0 | 31   | 3 PITG_05546   |
| 0 | 0    | 0 PITG_01740   |
| 0 | 83   | 62 PITG_14362  |
| 0 | 18   | 34 PITG_10388  |
| 0 | 73   | 67 PITG_03737  |
| 0 | 196  | 6 PITG_18824   |
| 0 | 74   | 30 PITG_10061  |
| 0 | 260  | 27 NA          |
| 0 | 3    | 3 PITG_15661   |
| 0 | 268  | 178 PITG_06691 |
| 0 | 44   | 82 PITG_16937  |
| 0 | 4    | 3 PITG_17816   |
| 0 | 105  | 71 PITG_20201  |
| 0 | 37   | 34 PITG_04822  |
| 0 | 20   | 42 PITG_06976  |
| 0 | 7    | 4 PITG_00204   |
| 0 | 70   | 36 PITG_08663  |
| 0 | 14   | 0 NA           |
| 0 | 259  | 322 PITG_13682 |
| 0 | 2    | 6 PITG_18452   |
| 0 | 169  | 34 PITG_18473  |
| 0 | 0    | 0 PITG_05193   |
| 0 | 0    | 0 PITG_11195   |
| 0 | 11   | 4 PITG_13317   |
| 0 | 27   | 43 NA          |
| 0 | 74   | 48 PITG_15738  |
| 0 | 210  | 13 NA          |
| 0 | 20   | 10 PITG_09419  |
| 0 | 2    | 6 PITG_00651   |
| 0 | 11   | 15 PITG_03287  |
| 0 | 14   | 0 PITG_17161   |
| 0 | 318  | 323 PITG_12288 |
| 0 | 0    | 0 PITG_00623   |
| 0 | 282  | 273 PITG_16984 |
| 0 | 24   | 33 PITG_17345  |
| 0 | 282  | 57 NA          |
| 0 | 41   | 37 PITG_14466  |
| 0 | 0    | 6 PITG_00560   |
| 0 | 3201 | 165 PITG_16893 |
| 0 | 1111 | 370 PITG_06651 |
| 0 | 13   | 17 NA          |
| 0 | 680  | 314 PITG_20388 |
| 0 | 7    | 4 PITG_03590   |
| 0 | 13   | 0 NA           |
| 0 | 16   | 6 PITG_15529   |
| 0 | 11   | 4 PITG_04468   |

|   |     |                |
|---|-----|----------------|
| 0 | 47  | 104 PITG_08495 |
| 0 | 100 | 5 PITG_03658   |
| 0 | 31  | 34 PITG_18862  |
| 0 | 0   | 2 PITG_12625   |
| 0 | 0   | 4 PITG_06892   |
| 0 | 4   | 15 PITG_03939  |
| 0 | 21  | 2 PITG_19422   |
| 0 | 0   | 0 PITG_16127   |
| 0 | 0   | 3 NA           |
| 0 | 9   | 8 PITG_04974   |
| 0 | 190 | 308 PITG_07717 |
| 0 | 4   | 10 PITG_00215  |
| 0 | 237 | 230 PITG_03783 |
| 0 | 331 | 295 PITG_07529 |
| 0 | 32  | 32 NA          |
| 0 | 117 | 11 PITG_05560  |
| 0 | 14  | 13 PITG_03423  |
| 0 | 346 | 17 NA          |
| 0 | 4   | 14 NA          |
| 0 | 4   | 2 NA           |
| 0 | 4   | 0 NA           |
| 0 | 0   | 0 PITG_19603   |
| 0 | 160 | 142 PITG_05367 |
| 0 | 0   | 0 NA           |
| 0 | 14  | 2 PITG_00646   |
| 0 | 104 | 45 PITG_18473  |
| 0 | 16  | 2 PITG_10521   |
| 0 | 5   | 0 PITG_06230   |
| 0 | 10  | 3 PITG_16474   |
| 0 | 191 | 42 PITG_13717  |
| 0 | 0   | 3 PITG_03942   |
| 0 | 2   | 5 PITG_01154   |
| 0 | 2   | 0 PITG_15994   |
| 0 | 2   | 0 NA           |
| 0 | 8   | 0 NA           |
| 0 | 133 | 133 PITG_22020 |
| 0 | 31  | 0 PITG_11207   |
| 0 | 32  | 33 PITG_21807  |
| 0 | 0   | 0 PITG_02529   |
| 0 | 14  | 0 NA           |
| 0 | 0   | 15 NA          |
| 0 | 84  | 68 PITG_04662  |
| 0 | 89  | 61 PITG_00625  |
| 0 | 60  | 152 PITG_00034 |
| 0 | 0   | 6 PITG_07916   |
| 0 | 6   | 2 NA           |
| 0 | 139 | 36 PITG_12279  |

|   |     |                |
|---|-----|----------------|
| 0 | 211 | 97 PITG_07924  |
| 0 | 28  | 34 PITG_03092  |
| 0 | 53  | 30 PITG_21146  |
| 0 | 0   | 0 PITG_08316   |
| 0 | 371 | 159 PITG_07349 |
| 0 | 7   | 6 PITG_10854   |
| 0 | 14  | 16 PITG_04108  |
| 0 | 0   | 6 PITG_16969   |
| 0 | 58  | 73 PITG_12300  |
| 0 | 39  | 54 PITG_05653  |
| 0 | 16  | 13 PITG_06150  |
| 0 | 318 | 212 PITG_09872 |
| 0 | 3   | 0 PITG_02796   |
| 0 | 2   | 0 PITG_03830   |
| 0 | 38  | 9 PITG_03318   |
| 0 | 2   | 14 PITG_02917  |
| 0 | 23  | 15 PITG_21049  |
| 0 | 28  | 40 PITG_03341  |
| 0 | 57  | 58 PITG_18000  |
| 0 | 11  | 0 PITG_16264   |
| 0 | 2   | 4 PITG_03169   |
| 0 | 96  | 47 PITG_17245  |
| 0 | 46  | 48 PITG_00974  |
| 0 | 38  | 33 PITG_00213  |
| 0 | 152 | 615 NA         |
| 0 | 0   | 0 NA           |
| 0 | 114 | 72 PITG_09705  |
| 0 | 2   | 6 PITG_16719   |
| 0 | 187 | 88 PITG_05292  |
| 0 | 784 | 880 PITG_12990 |
| 0 | 76  | 41 PITG_18050  |
| 0 | 18  | 5 PITG_13201   |
| 0 | 0   | 0 NA           |
| 0 | 2   | 2 PITG_10133   |
| 0 | 4   | 10 NA          |
| 0 | 47  | 17 PITG_11405  |
| 0 | 220 | 333 PITG_11702 |
| 0 | 104 | 40 PITG_09641  |
| 0 | 208 | 409 PITG_05998 |
| 0 | 0   | 2 PITG_00688   |
| 0 | 55  | 33 NA          |
| 0 | 21  | 13 PITG_12454  |
| 0 | 12  | 5 PITG_00989   |
| 0 | 4   | 0 NA           |
| 0 | 12  | 16 PITG_13201  |
| 0 | 67  | 4 PITG_09570   |
| 0 | 29  | 9 PITG_03369   |

|    |      |                |
|----|------|----------------|
| 0  | 7    | 25 PITG_01809  |
| 0  | 0    | 4 PITG_02520   |
| 0  | 294  | 102 PITG_20307 |
| 0  | 4    | 0 NA           |
| 0  | 5    | 11 NA          |
| 0  | 8    | 4 PITG_01937   |
| 0  | 4    | 6 PITG_04567   |
| 0  | 68   | 43 PITG_01097  |
| 0  | 0    | 2 PITG_14456   |
| 0  | 54   | 51 PITG_00625  |
| 0  | 17   | 0 PITG_01743   |
| 2  | 87   | 380 PITG_18053 |
| 10 | 2    | 16 NA          |
| 0  | 8    | 10 PITG_05855  |
| 0  | 8    | 20 NA          |
| 0  | 22   | 98 PITG_05508  |
| 0  | 0    | 19 PITG_10813  |
| 0  | 0    | 0 PITG_19153   |
| 0  | 23   | 25 PITG_17423  |
| 0  | 127  | 136 PITG_09576 |
| 9  | 142  | 2393 NA        |
| 0  | 189  | 48 PITG_09315  |
| 0  | 15   | 2 PITG_01180   |
| 0  | 156  | 56 PITG_16058  |
| 2  | 164  | 233 PITG_06722 |
| 0  | 63   | 58 PITG_21186  |
| 0  | 4    | 0 NA           |
| 0  | 0    | 2 PITG_17998   |
| 0  | 6    | 8 PITG_05731   |
| 0  | 72   | 67 PITG_00845  |
| 0  | 9    | 0 PITG_09767   |
| 0  | 209  | 81 PITG_18189  |
| 0  | 0    | 0 NA           |
| 0  | 6    | 5 PITG_11461   |
| 0  | 233  | 158 PITG_16358 |
| 0  | 186  | 42 PITG_08692  |
| 0  | 7    | 9 PITG_10447   |
| 0  | 74   | 83 PITG_02192  |
| 0  | 218  | 108 PITG_03560 |
| 0  | 64   | 12 PITG_04928  |
| 0  | 204  | 52 PITG_09724  |
| 0  | 39   | 5 PITG_00626   |
| 0  | 1044 | 582 PITG_17826 |
| 0  | 17   | 42 PITG_09296  |
| 0  | 109  | 151 PITG_11890 |
| 0  | 20   | 28 PITG_10384  |
| 37 | 45   | 3486 NA        |

|    |     |                |
|----|-----|----------------|
| 0  | 0   | 9 PITG_09852   |
| 0  | 2   | 11 PITG_13607  |
| 0  | 6   | 10 NA          |
| 0  | 15  | 2 PITG_02723   |
| 0  | 148 | 129 PITG_10715 |
| 0  | 4   | 6 PITG_12296   |
| 0  | 6   | 0 NA           |
| 0  | 16  | 0 NA           |
| 0  | 2   | 2 PITG_03865   |
| 0  | 0   | 0 NA           |
| 0  | 5   | 0 NA           |
| 0  | 235 | 140 NA         |
| 0  | 4   | 10 PITG_02924  |
| 0  | 28  | 63 PITG_08600  |
| 0  | 32  | 16 NA          |
| 0  | 5   | 0 NA           |
| 0  | 5   | 8 NA           |
| 0  | 12  | 0 NA           |
| 0  | 10  | 4 PITG_03499   |
| 0  | 41  | 2 NA           |
| 0  | 87  | 57 PITG_17965  |
| 0  | 230 | 88 PITG_22522  |
| 0  | 122 | 31 PITG_16469  |
| 0  | 0   | 5 PITG_11101   |
| 0  | 29  | 0 PITG_04679   |
| 0  | 21  | 28 NA          |
| 17 | 6   | 0 NA           |
| 0  | 13  | 0 PITG_16114   |
| 0  | 36  | 27 PITG_09440  |
| 0  | 54  | 6 PITG_00854   |
| 0  | 0   | 2 PITG_10784   |
| 0  | 4   | 8 PITG_01015   |
| 0  | 10  | 14 PITG_10723  |
| 0  | 4   | 0 PITG_10308   |
| 0  | 97  | 0 NA           |
| 0  | 546 | 182 PITG_12309 |
| 0  | 176 | 68 PITG_12739  |
| 0  | 3   | 2 PITG_05187   |
| 0  | 5   | 6 PITG_11203   |
| 0  | 27  | 26 PITG_18099  |
| 0  | 323 | 18 PITG_08467  |
| 0  | 97  | 57 PITG_18662  |
| 0  | 263 | 447 PITG_15904 |
| 0  | 249 | 144 PITG_15593 |
| 0  | 14  | 0 PITG_14225   |
| 0  | 2   | 0 NA           |
| 0  | 6   | 6 NA           |

|   |      |                |
|---|------|----------------|
| 0 | 43   | 26 PITG_00954  |
| 0 | 54   | 36 PITG_15394  |
| 0 | 47   | 8 NA           |
| 0 | 18   | 0 NA           |
| 0 | 58   | 2 PITG_18824   |
| 0 | 36   | 55 PITG_15466  |
| 0 | 7    | 24 PITG_00482  |
| 0 | 40   | 15 PITG_18543  |
| 0 | 32   | 47 PITG_19144  |
| 0 | 2    | 20 PITG_01283  |
| 0 | 0    | 0 NA           |
| 0 | 66   | 6 NA           |
| 0 | 1285 | 579 PITG_11329 |
| 0 | 319  | 269 PITG_06753 |
| 0 | 0    | 0 PITG_17359   |
| 0 | 87   | 9 PITG_01066   |
| 0 | 46   | 38 PITG_13381  |
| 0 | 11   | 0 PITG_05594   |
| 0 | 8    | 14 PITG_00323  |
| 0 | 17   | 55 PITG_08874  |
| 0 | 37   | 9 PITG_10624   |
| 0 | 40   | 53 PITG_09964  |
| 0 | 78   | 92 PITG_06695  |
| 0 | 87   | 22 PITG_06847  |
| 0 | 4    | 5 NA           |
| 0 | 283  | 311 PITG_13617 |
| 0 | 20   | 11 PITG_00454  |
| 0 | 202  | 236 PITG_16346 |
| 0 | 0    | 0 PITG_07994   |
| 0 | 118  | 16 NA          |
| 0 | 18   | 23 PITG_08469  |
| 0 | 115  | 88 PITG_09435  |
| 0 | 6    | 7 PITG_05412   |
| 0 | 44   | 2 NA           |
| 0 | 2    | 16 PITG_14727  |
| 0 | 0    | 0 PITG_02221   |
| 0 | 14   | 17 PITG_06906  |
| 0 | 19   | 11 NA          |
| 0 | 36   | 50 PITG_03477  |
| 0 | 0    | 0 NA           |
| 0 | 446  | 203 PITG_06594 |
| 0 | 4    | 41 PITG_22685  |
| 0 | 0    | 0 PITG_19088   |
| 0 | 65   | 291 PITG_01131 |
| 0 | 257  | 9 PITG_06242   |
| 0 | 7    | 0 NA           |
| 0 | 0    | 4 PITG_00978   |

|   |     |                |
|---|-----|----------------|
| 0 | 0   | 2 PITG_12855   |
| 0 | 43  | 171 PITG_02182 |
| 0 | 175 | 33 PITG_07938  |
| 0 | 0   | 5 PITG_10274   |
| 0 | 67  | 40 PITG_00833  |
| 0 | 43  | 157 PITG_03661 |
| 0 | 456 | 131 NA         |
| 0 | 2   | 7 PITG_19551   |
| 0 | 0   | 50 NA          |
| 0 | 55  | 47 PITG_04478  |
| 0 | 15  | 2 NA           |
| 0 | 41  | 49 PITG_07786  |
| 0 | 43  | 346 PITG_09831 |
| 0 | 2   | 5 NA           |
| 0 | 373 | 485 PITG_18187 |
| 0 | 2   | 2 PITG_00709   |
| 0 | 6   | 2 PITG_15354   |
| 0 | 7   | 0 PITG_15925   |
| 0 | 17  | 27 PITG_02349  |
| 0 | 84  | 521 PITG_19999 |
| 0 | 13  | 0 PITG_11805   |
| 0 | 108 | 76 PITG_12082  |
| 0 | 5   | 86 PITG_11152  |
| 0 | 21  | 65 PITG_08139  |
| 0 | 125 | 16 NA          |
| 0 | 11  | 8 NA           |
| 0 | 125 | 12 PITG_20202  |
| 0 | 128 | 83 NA          |
| 0 | 26  | 14 PITG_04973  |
| 0 | 56  | 51 PITG_12106  |
| 0 | 8   | 11 PITG_08530  |
| 0 | 0   | 6 NA           |
| 0 | 2   | 4 NA           |
| 0 | 23  | 5 PITG_11536   |
| 0 | 2   | 0 PITG_08690   |
| 0 | 0   | 2 PITG_07034   |
| 0 | 39  | 6 NA           |
| 0 | 20  | 49 PITG_06343  |
| 0 | 4   | 4 NA           |
| 0 | 36  | 4 PITG_22508   |
| 0 | 79  | 19 PITG_03811  |
| 0 | 251 | 39 PITG_05562  |
| 0 | 119 | 296 PITG_20590 |
| 0 | 60  | 5 NA           |
| 0 | 0   | 5 PITG_17928   |
| 0 | 648 | 333 PITG_18874 |
| 0 | 3   | 18 PITG_03337  |



|     |      |                 |
|-----|------|-----------------|
| 0   | 13   | 10 PITG_02228   |
| 0   | 19   | 10 PITG_19846   |
| 0   | 2    | 3 NA            |
| 0   | 3    | 0 PITG_01405    |
| 0   | 60   | 177 PITG_19017  |
| 0   | 427  | 144 PITG_13386  |
| 0   | 17   | 77 PITG_17287   |
| 0   | 822  | 831 PITG_03012  |
| 0   | 16   | 4 PITG_05727    |
| 0   | 8    | 20 PITG_10022   |
| 0   | 14   | 2 PITG_16076    |
| 0   | 20   | 22 PITG_10316   |
| 0   | 4    | 0 PITG_08154    |
| 2   | 341  | 1563 PITG_10941 |
| 0   | 36   | 33 NA           |
| 0   | 11   | 26 PITG_06260   |
| 0   | 1404 | 288 PITG_12520  |
| 0   | 68   | 19 PITG_21909   |
| 0   | 41   | 2 NA            |
| 0   | 2    | 10 PITG_00556   |
| 0   | 193  | 2 PITG_15781    |
| 0   | 8    | 5 PITG_12297    |
| 0   | 155  | 30 PITG_17093   |
| 0   | 39   | 10 PITG_12981   |
| 0   | 2    | 3 PITG_07436    |
| 0   | 49   | 8 PITG_06204    |
| 0   | 2309 | 1352 PITG_03933 |
| 0   | 6    | 14 PITG_04564   |
| 0   | 14   | 0 NA            |
| 0   | 61   | 18 PITG_09092   |
| 0   | 20   | 9 NA            |
| 317 | 69   | 749 NA          |
| 0   | 168  | 48 PITG_11273   |
| 0   | 187  | 185 PITG_19482  |
| 0   | 2    | 0 PITG_03146    |
| 0   | 130  | 100 PITG_10064  |
| 0   | 4    | 20 PITG_03815   |
| 0   | 8    | 13 PITG_12517   |
| 0   | 0    | 5 PITG_14792    |
| 0   | 2    | 5 PITG_02679    |
| 0   | 163  | 72 PITG_20306   |
| 0   | 0    | 4 PITG_01502    |
| 0   | 10   | 4 PITG_09543    |
| 0   | 19   | 0 PITG_07041    |
| 0   | 0    | 9 NA            |
| 0   | 44   | 0 PITG_01041    |
| 0   | 112  | 88 PITG_20081   |

|     |     |                |
|-----|-----|----------------|
| 0   | 12  | 24 PITG_19469  |
| 0   | 6   | 12 NA          |
| 0   | 2   | 2 PITG_03374   |
| 0   | 148 | 71 PITG_05413  |
| 0   | 2   | 0 NA           |
| 0   | 17  | 0 PITG_02585   |
| 236 | 21  | 327 NA         |
| 0   | 0   | 2 PITG_21481   |
| 0   | 15  | 9 PITG_18010   |
| 0   | 55  | 14 NA          |
| 0   | 13  | 2 NA           |
| 0   | 2   | 2 PITG_13248   |
| 0   | 0   | 0 PITG_15818   |
| 0   | 38  | 0 NA           |
| 0   | 0   | 2 PITG_03898   |
| 0   | 335 | 263 PITG_14001 |
| 0   | 15  | 18 PITG_08876  |
| 0   | 202 | 102 PITG_18951 |
| 0   | 2   | 2 PITG_11743   |
| 0   | 4   | 30 PITG_11460  |
| 0   | 52  | 132 PITG_03376 |
| 0   | 564 | 372 PITG_17007 |
| 0   | 513 | 10 NA          |
| 0   | 14  | 80 PITG_02740  |
| 0   | 7   | 5 PITG_04568   |
| 0   | 28  | 7 NA           |
| 0   | 52  | 148 PITG_03252 |
| 0   | 4   | 2 PITG_03223   |
| 0   | 2   | 3 PITG_14130   |
| 0   | 6   | 10 PITG_16105  |
| 0   | 2   | 2 PITG_00513   |
| 0   | 103 | 19 PITG_17767  |
| 0   | 5   | 0 NA           |
| 0   | 528 | 140 PITG_16089 |
| 0   | 3   | 0 NA           |
| 0   | 0   | 4 PITG_15755   |
| 0   | 8   | 0 NA           |
| 0   | 31  | 17 PITG_07286  |
| 0   | 0   | 5 PITG_04243   |
| 0   | 4   | 0 PITG_03911   |
| 0   | 220 | 102 PITG_01398 |
| 0   | 20  | 0 NA           |
| 0   | 320 | 223 PITG_06662 |
| 0   | 419 | 935 PITG_12833 |
| 0   | 46  | 35 PITG_05302  |
| 0   | 9   | 0 PITG_01121   |
| 0   | 14  | 0 PITG_00717   |

|   |     |                |
|---|-----|----------------|
| 0 | 6   | 21 PITG_05465  |
| 0 | 205 | 6 PITG_21186   |
| 0 | 163 | 105 PITG_14198 |
| 0 | 47  | 86 PITG_04564  |
| 0 | 7   | 4 PITG_07192   |
| 0 | 0   | 4 PITG_19152   |
| 0 | 49  | 32 PITG_06646  |
| 0 | 20  | 0 PITG_08241   |
| 0 | 2   | 4 PITG_00939   |
| 0 | 2   | 23 PITG_00931  |
| 0 | 247 | 24 PITG_02706  |
| 0 | 2   | 0 NA           |
| 0 | 390 | 195 PITG_06657 |
| 0 | 9   | 2 NA           |
| 0 | 147 | 56 PITG_03472  |
| 0 | 13  | 13 PITG_04971  |
| 0 | 27  | 15 PITG_00861  |
| 0 | 12  | 7 PITG_00391   |
| 0 | 7   | 2 NA           |
| 0 | 5   | 3 PITG_05469   |
| 0 | 2   | 8 PITG_15267   |
| 0 | 31  | 9 PITG_05863   |
| 0 | 219 | 47 PITG_13505  |
| 0 | 0   | 2 NA           |
| 0 | 6   | 0 PITG_10087   |
| 0 | 4   | 9 PITG_15832   |
| 0 | 10  | 27 PITG_03703  |
| 0 | 59  | 41 PITG_04661  |
| 0 | 62  | 20 NA          |
| 0 | 323 | 116 PITG_02308 |
| 0 | 29  | 48 PITG_07310  |
| 0 | 0   | 9 PITG_13654   |
| 0 | 15  | 24 PITG_04012  |
| 0 | 3   | 2 NA           |
| 0 | 15  | 6 NA           |
| 0 | 8   | 2 PITG_00809   |
| 0 | 155 | 528 PITG_17034 |
| 0 | 18  | 12 PITG_01058  |
| 0 | 10  | 10 PITG_16562  |
| 0 | 326 | 177 PITG_13275 |
| 0 | 179 | 210 PITG_05225 |
| 0 | 141 | 91 PITG_08578  |
| 0 | 90  | 72 PITG_07247  |
| 0 | 3   | 2 NA           |
| 0 | 100 | 2 PITG_12121   |
| 0 | 45  | 55 PITG_14988  |
| 0 | 133 | 88 NA          |

|   |      |                 |
|---|------|-----------------|
| 0 | 2    | 0 NA            |
| 0 | 109  | 0 NA            |
| 0 | 6    | 10 NA           |
| 0 | 37   | 0 PITG_03146    |
| 0 | 0    | 2 PITG_14257    |
| 0 | 0    | 2 PITG_20017    |
| 0 | 501  | 2007 PITG_18414 |
| 0 | 0    | 2 PITG_10184    |
| 0 | 37   | 67 PITG_15839   |
| 0 | 2    | 0 PITG_01919    |
| 0 | 2    | 29 PITG_19004   |
| 0 | 363  | 40 PITG_07436   |
| 0 | 13   | 4 PITG_02909    |
| 0 | 86   | 184 PITG_02910  |
| 0 | 953  | 167 PITG_04337  |
| 0 | 8    | 0 PITG_03755    |
| 0 | 7    | 7 PITG_04227    |
| 0 | 156  | 81 PITG_11975   |
| 0 | 72   | 36 NA           |
| 0 | 143  | 61 NA           |
| 0 | 123  | 43 PITG_00680   |
| 0 | 36   | 6 PITG_05254    |
| 0 | 123  | 21 NA           |
| 0 | 1238 | 798 PITG_13617  |
| 0 | 422  | 504 PITG_12141  |
| 0 | 112  | 141 PITG_16806  |
| 0 | 6    | 27 PITG_02973   |
| 0 | 68   | 109 PITG_13997  |
| 0 | 123  | 13 NA           |
| 0 | 11   | 9 PITG_03788    |
| 2 | 870  | 705 PITG_12037  |
| 2 | 422  | 160 PITG_21827  |
| 0 | 0    | 4 PITG_18393    |
| 0 | 59   | 412 PITG_11244  |
| 0 | 3    | 4 NA            |
| 0 | 0    | 2 PITG_02960    |
| 0 | 29   | 15 PITG_16067   |
| 0 | 2    | 5 PITG_02122    |
| 0 | 11   | 0 PITG_08851    |
| 0 | 13   | 2 PITG_05510    |
| 0 | 350  | 46 PITG_14609   |
| 0 | 11   | 0 NA            |
| 0 | 90   | 6 NA            |
| 0 | 4    | 0 PITG_05328    |
| 0 | 41   | 7 PITG_01953    |
| 0 | 0    | 0 PITG_18943    |
| 0 | 38   | 41 PITG_02285   |

|   |      |                 |
|---|------|-----------------|
| 0 | 0    | 2 PITG_03804    |
| 0 | 21   | 26 PITG_02695   |
| 0 | 21   | 8 PITG_16794    |
| 0 | 6    | 2 PITG_04568    |
| 0 | 0    | 0 PITG_04669    |
| 0 | 8    | 7 NA            |
| 0 | 25   | 12 PITG_00486   |
| 0 | 2589 | 1130 PITG_08812 |
| 0 | 14   | 8 PITG_03372    |
| 0 | 774  | 1677 PITG_10513 |
| 0 | 52   | 36 PITG_17137   |
| 0 | 9    | 30 PITG_08578   |
| 0 | 5    | 0 PITG_06182    |
| 0 | 30   | 19 PITG_11452   |
| 0 | 0    | 0 PITG_12211    |
| 0 | 96   | 10 NA           |
| 0 | 5    | 0 PITG_00590    |
| 0 | 24   | 0 PITG_21841    |
| 0 | 2    | 0 NA            |
| 0 | 6    | 44 PITG_04846   |
| 0 | 18   | 12 PITG_15300   |
| 0 | 14   | 18 PITG_04699   |
| 0 | 0    | 3 PITG_13258    |
| 0 | 13   | 5 NA            |
| 0 | 39   | 2 PITG_18070    |
| 0 | 2    | 10 PITG_05238   |
| 0 | 66   | 14 NA           |
| 0 | 652  | 74 PITG_09711   |
| 0 | 66   | 15 PITG_10680   |
| 0 | 0    | 0 PITG_12173    |
| 0 | 0    | 0 PITG_11406    |
| 0 | 66   | 81 PITG_17726   |
| 0 | 60   | 418 PITG_04958  |
| 0 | 1101 | 2217 PITG_06381 |
| 0 | 9    | 7 PITG_12140    |
| 0 | 4    | 7 PITG_06827    |
| 0 | 7    | 0 PITG_21509    |
| 0 | 69   | 8 PITG_02340    |
| 0 | 77   | 9 NA            |
| 0 | 18   | 33 PITG_18164   |
| 0 | 5    | 18 PITG_06919   |
| 0 | 18   | 127 NA          |
| 0 | 78   | 73 PITG_18018   |
| 0 | 7    | 7 PITG_00879    |
| 0 | 4    | 0 NA            |
| 0 | 0    | 8 PITG_18103    |
| 0 | 23   | 20 PITG_14714   |

|   |     |                |
|---|-----|----------------|
| 0 | 0   | 0 PITG_03103   |
| 0 | 15  | 19 NA          |
| 0 | 113 | 34 PITG_17959  |
| 0 | 66  | 46 NA          |
| 0 | 19  | 65 PITG_13767  |
| 0 | 0   | 2 PITG_13715   |
| 0 | 9   | 0 NA           |
| 0 | 59  | 198 PITG_02182 |
| 0 | 8   | 0 PITG_02529   |
| 0 | 0   | 0 PITG_07034   |
| 0 | 0   | 7 PITG_02968   |
| 0 | 86  | 109 PITG_18183 |
| 0 | 19  | 13 PITG_01681  |
| 0 | 14  | 12 PITG_17334  |
| 0 | 50  | 4 PITG_18274   |
| 0 | 2   | 4 PITG_12296   |
| 0 | 23  | 38 PITG_03550  |
| 0 | 484 | 942 PITG_10974 |
| 0 | 8   | 13 PITG_12931  |
| 0 | 27  | 44 PITG_15486  |
| 0 | 708 | 151 PITG_15155 |
| 0 | 4   | 4 PITG_09753   |
| 0 | 3   | 2 PITG_21014   |
| 0 | 0   | 4 PITG_22065   |
| 0 | 22  | 22 PITG_10857  |
| 0 | 2   | 9 PITG_02796   |
| 0 | 21  | 7 PITG_20115   |
| 0 | 8   | 2 PITG_09716   |
| 0 | 152 | 52 PITG_01171  |
| 0 | 12  | 4 PITG_01201   |
| 0 | 0   | 0 NA           |
| 0 | 6   | 6 PITG_00454   |
| 0 | 111 | 86 PITG_15967  |
| 0 | 127 | 48 PITG_03244  |
| 0 | 0   | 0 PITG_17834   |
| 0 | 80  | 259 PITG_05225 |
| 0 | 4   | 0 NA           |
| 0 | 36  | 10 PITG_01678  |
| 0 | 14  | 20 PITG_10460  |
| 0 | 22  | 7 NA           |
| 0 | 6   | 2 PITG_18037   |
| 0 | 49  | 10 PITG_22552  |
| 0 | 47  | 125 PITG_01447 |
| 0 | 546 | 18 NA          |
| 0 | 214 | 107 PITG_07711 |
| 0 | 13  | 0 NA           |
| 0 | 17  | 0 PITG_00561   |

|     |     |                |
|-----|-----|----------------|
| 0   | 26  | 0 NA           |
| 0   | 170 | 122 PITG_15251 |
| 0   | 29  | 0 PITG_10160   |
| 0   | 11  | 5 PITG_09446   |
| 0   | 16  | 2 PITG_09666   |
| 0   | 0   | 0 PITG_01426   |
| 0   | 9   | 11 PITG_16127  |
| 0   | 0   | 0 PITG_01063   |
| 0   | 83  | 10 PITG_18410  |
| 0   | 15  | 2 NA           |
| 0   | 2   | 0 NA           |
| 0   | 6   | 6 PITG_18090   |
| 0   | 17  | 46 PITG_00571  |
| 0   | 0   | 2 PITG_05320   |
| 0   | 15  | 5 PITG_09355   |
| 0   | 3   | 5 PITG_09505   |
| 0   | 31  | 52 PITG_03472  |
| 0   | 48  | 19 PITG_17021  |
| 0   | 17  | 53 PITG_21026  |
| 0   | 30  | 68 PITG_19049  |
| 0   | 35  | 23 PITG_12453  |
| 0   | 64  | 23 PITG_02733  |
| 0   | 0   | 11 PITG_01045  |
| 0   | 2   | 12 PITG_11368  |
| 0   | 151 | 139 PITG_23289 |
| 0   | 393 | 264 PITG_01507 |
| 0   | 9   | 21 PITG_18963  |
| 0   | 0   | 0 NA           |
| 0   | 48  | 57 NA          |
| 0   | 19  | 14 PITG_19127  |
| 0   | 45  | 48 PITG_07292  |
| 0   | 18  | 16 PITG_05476  |
| 0   | 4   | 0 PITG_04671   |
| 0   | 174 | 131 NA         |
| 0   | 17  | 0 PITG_10239   |
| 0   | 26  | 4 PITG_18693   |
| 0   | 35  | 32 PITG_17455  |
| 0   | 45  | 4 PITG_11169   |
| 0   | 0   | 2 PITG_00144   |
| 126 | 5   | 134 NA         |
| 0   | 64  | 71 PITG_08193  |
| 0   | 13  | 25 NA          |
| 0   | 6   | 0 PITG_03657   |
| 0   | 2   | 4 NA           |
| 0   | 281 | 89 NA          |
| 0   | 0   | 0 PITG_03995   |
| 0   | 0   | 0 PITG_17600   |

|     |     |                |
|-----|-----|----------------|
| 924 | 331 | 246 NA         |
| 0   | 91  | 15 PITG_04482  |
| 0   | 5   | 8 PITG_18707   |
| 0   | 129 | 19 PITG_09423  |
| 0   | 29  | 2 NA           |
| 0   | 32  | 0 NA           |
| 0   | 0   | 14 PITG_10462  |
| 0   | 5   | 5 PITG_02846   |
| 0   | 5   | 0 PITG_06274   |
| 0   | 132 | 170 PITG_18519 |
| 0   | 48  | 14 PITG_01185  |
| 0   | 25  | 6 PITG_06941   |
| 0   | 27  | 69 PITG_00622  |
| 0   | 674 | 418 PITG_11139 |
| 0   | 93  | 32 PITG_18385  |
| 0   | 116 | 62 PITG_02867  |
| 0   | 207 | 412 PITG_14485 |
| 0   | 76  | 0 NA           |
| 0   | 7   | 0 PITG_00819   |
| 0   | 3   | 0 NA           |
| 0   | 0   | 0 PITG_09193   |
| 0   | 8   | 10 NA          |
| 0   | 215 | 0 PITG_15776   |
| 0   | 10  | 8 PITG_06121   |
| 0   | 285 | 47 PITG_03971  |
| 0   | 267 | 284 PITG_11425 |
| 0   | 10  | 9 PITG_15518   |
| 0   | 19  | 4 PITG_01850   |
| 0   | 6   | 5 PITG_08018   |
| 0   | 2   | 0 NA           |
| 0   | 4   | 4 NA           |
| 0   | 8   | 12 NA          |
| 0   | 4   | 6 PITG_09962   |
| 0   | 9   | 8 PITG_22433   |
| 0   | 6   | 4 NA           |
| 0   | 6   | 2 NA           |
| 0   | 83  | 43 PITG_14249  |
| 0   | 0   | 58 NA          |
| 0   | 9   | 0 NA           |
| 0   | 18  | 7 PITG_08722   |
| 0   | 132 | 70 PITG_14248  |
| 0   | 11  | 48 PITG_11689  |
| 0   | 2   | 2 PITG_00646   |
| 0   | 251 | 730 PITG_05778 |
| 0   | 149 | 10 NA          |
| 0   | 203 | 60 PITG_15831  |
| 0   | 9   | 2 PITG_11980   |



|   |      |                |
|---|------|----------------|
| 0 | 15   | 2 NA           |
| 0 | 6    | 0 NA           |
| 0 | 43   | 24 PITG_05545  |
| 0 | 2    | 0 PITG_05233   |
| 0 | 79   | 17 PITG_12169  |
| 0 | 10   | 28 PITG_08741  |
| 0 | 43   | 0 NA           |
| 0 | 37   | 4 PITG_05176   |
| 0 | 7    | 0 PITG_10743   |
| 0 | 47   | 54 PITG_19622  |
| 0 | 2    | 9 PITG_14642   |
| 0 | 285  | 90 PITG_12191  |
| 0 | 53   | 40 PITG_04725  |
| 0 | 13   | 17 NA          |
| 0 | 80   | 33 PITG_12297  |
| 0 | 85   | 19 PITG_19622  |
| 0 | 122  | 18 NA          |
| 0 | 11   | 15 PITG_12169  |
| 0 | 2    | 18 PITG_01754  |
| 0 | 2    | 8 PITG_01408   |
| 0 | 4    | 3 PITG_05140   |
| 0 | 21   | 38 PITG_19889  |
| 0 | 437  | 17 PITG_22689  |
| 0 | 8    | 4 PITG_18977   |
| 0 | 3    | 0 PITG_06755   |
| 0 | 31   | 54 PITG_13842  |
| 0 | 0    | 0 PITG_12625   |
| 0 | 4    | 2 NA           |
| 0 | 0    | 2 NA           |
| 0 | 24   | 18 PITG_10534  |
| 0 | 28   | 8 PITG_08540   |
| 0 | 28   | 38 PITG_03520  |
| 0 | 24   | 17 PITG_14565  |
| 2 | 140  | 251 PITG_02664 |
| 0 | 4    | 19 PITG_15837  |
| 0 | 0    | 0 NA           |
| 0 | 21   | 38 PITG_00297  |
| 0 | 5    | 2 PITG_06408   |
| 0 | 10   | 37 PITG_01982  |
| 0 | 5    | 6 PITG_20527   |
| 0 | 2001 | 299 PITG_03958 |
| 0 | 2    | 4 PITG_14416   |
| 0 | 0    | 4 PITG_08305   |
| 0 | 6    | 0 NA           |
| 0 | 368  | 74 PITG_11710  |
| 0 | 4    | 0 PITG_17403   |
| 0 | 47   | 95 PITG_13399  |

|   |      |                |
|---|------|----------------|
| 0 | 6    | 4 PITG_03337   |
| 0 | 140  | 130 PITG_12157 |
| 0 | 146  | 2 PITG_11180   |
| 0 | 122  | 101 PITG_02706 |
| 0 | 6    | 6 NA           |
| 0 | 0    | 0 PITG_06517   |
| 0 | 50   | 59 PITG_00297  |
| 0 | 121  | 6 PITG_14935   |
| 0 | 168  | 136 PITG_13151 |
| 0 | 16   | 8 PITG_07169   |
| 0 | 9    | 0 PITG_07216   |
| 0 | 0    | 0 PITG_03995   |
| 0 | 18   | 8 NA           |
| 0 | 140  | 190 PITG_04102 |
| 0 | 7    | 0 NA           |
| 0 | 7    | 14 PITG_00419  |
| 0 | 0    | 3 PITG_05972   |
| 0 | 128  | 7 PITG_17382   |
| 0 | 47   | 21 PITG_16052  |
| 0 | 3    | 0 NA           |
| 0 | 9    | 8 NA           |
| 0 | 1006 | 348 PITG_00863 |
| 0 | 88   | 204 PITG_12154 |
| 0 | 87   | 30 NA          |
| 0 | 11   | 13 PITG_04882  |
| 0 | 1353 | 742 PITG_20037 |
| 0 | 4    | 2 PITG_16006   |
| 0 | 157  | 70 PITG_05366  |
| 0 | 109  | 23 NA          |
| 0 | 4    | 0 PITG_02244   |
| 0 | 56   | 19 PITG_06365  |
| 0 | 129  | 688 PITG_10195 |
| 0 | 0    | 0 PITG_01457   |
| 0 | 121  | 177 PITG_06731 |
| 0 | 2    | 0 PITG_14385   |
| 0 | 20   | 2 PITG_11285   |
| 0 | 120  | 179 PITG_08781 |
| 0 | 55   | 92 PITG_06906  |
| 0 | 6    | 0 PITG_20630   |
| 0 | 48   | 140 PITG_00514 |
| 0 | 214  | 163 PITG_15625 |
| 0 | 158  | 91 PITG_03199  |
| 0 | 176  | 135 PITG_06602 |
| 0 | 61   | 35 PITG_22687  |
| 0 | 14   | 10 PITG_13223  |
| 0 | 19   | 7 NA           |
| 0 | 5    | 10 PITG_03550  |

|   |     |                 |
|---|-----|-----------------|
| 0 | 11  | 10 PITG_08329   |
| 0 | 14  | 8 NA            |
| 0 | 4   | 0 PITG_15258    |
| 0 | 38  | 50 NA           |
| 0 | 13  | 20 PITG_03710   |
| 0 | 39  | 40 PITG_06692   |
| 0 | 27  | 61 PITG_02724   |
| 0 | 61  | 290 PITG_15359  |
| 0 | 16  | 5 PITG_05355    |
| 0 | 2   | 0 NA            |
| 0 | 5   | 3 PITG_02017    |
| 0 | 6   | 8 PITG_10022    |
| 0 | 18  | 25 NA           |
| 0 | 93  | 6 PITG_11243    |
| 0 | 7   | 0 PITG_04709    |
| 0 | 15  | 2 PITG_14973    |
| 0 | 84  | 14 PITG_21458   |
| 0 | 14  | 16 NA           |
| 0 | 83  | 12 PITG_12797   |
| 0 | 40  | 151 PITG_03150  |
| 0 | 196 | 1580 PITG_01072 |
| 0 | 36  | 129 PITG_17012  |
| 0 | 544 | 681 PITG_17007  |
| 0 | 16  | 2 PITG_12141    |
| 0 | 69  | 76 PITG_01932   |
| 0 | 9   | 8 PITG_08198    |
| 0 | 2   | 16 PITG_03445   |
| 0 | 29  | 7 PITG_13776    |
| 0 | 4   | 34 PITG_02238   |
| 2 | 25  | 23 PITG_11142   |
| 0 | 4   | 6 PITG_13139    |
| 0 | 4   | 28 PITG_08601   |
| 0 | 0   | 0 PITG_17830    |
| 0 | 33  | 46 PITG_19180   |
| 0 | 0   | 0 NA            |
| 0 | 12  | 0 PITG_13102    |
| 2 | 112 | 99 PITG_03115   |
| 0 | 11  | 4 NA            |
| 0 | 0   | 5 PITG_10845    |
| 0 | 13  | 5 PITG_18274    |
| 0 | 2   | 9 PITG_02003    |
| 0 | 17  | 8 PITG_12742    |
| 0 | 101 | 76 PITG_00594   |
| 0 | 18  | 13 PITG_01932   |
| 0 | 155 | 54 PITG_16126   |
| 0 | 0   | 0 PITG_12852    |
| 0 | 7   | 20 PITG_18372   |

|     |     |                |
|-----|-----|----------------|
| 0   | 10  | 6 PITG_18385   |
| 0   | 30  | 23 PITG_03376  |
| 0   | 0   | 4 PITG_15924   |
| 0   | 50  | 52 PITG_03345  |
| 0   | 0   | 0 NA           |
| 0   | 68  | 4 PITG_18712   |
| 0   | 2   | 4 PITG_03609   |
| 0   | 9   | 4 PITG_02329   |
| 0   | 13  | 4 NA           |
| 0   | 5   | 0 NA           |
| 0   | 2   | 0 NA           |
| 0   | 2   | 2 NA           |
| 0   | 23  | 2 PITG_09449   |
| 0   | 285 | 434 PITG_00461 |
| 0   | 0   | 0 PITG_22763   |
| 0   | 532 | 146 PITG_15848 |
| 0   | 179 | 205 PITG_10747 |
| 0   | 786 | 386 PITG_07846 |
| 0   | 58  | 52 PITG_03075  |
| 0   | 57  | 46 PITG_09566  |
| 284 | 93  | 223 NA         |
| 0   | 139 | 36 PITG_12353  |
| 0   | 0   | 4 PITG_10932   |
| 0   | 750 | 89 NA          |
| 0   | 0   | 0 PITG_07302   |
| 0   | 17  | 22 NA          |
| 0   | 0   | 0 PITG_01076   |
| 0   | 2   | 2 PITG_19603   |
| 0   | 2   | 7 PITG_00176   |
| 0   | 0   | 2 PITG_05675   |
| 0   | 12  | 2 NA           |
| 0   | 0   | 0 NA           |
| 0   | 12  | 28 PITG_07302  |
| 0   | 7   | 13 PITG_17035  |
| 0   | 14  | 0 PITG_09897   |
| 0   | 133 | 167 PITG_12105 |
| 0   | 0   | 0 NA           |
| 0   | 7   | 0 PITG_07262   |
| 0   | 88  | 52 PITG_08775  |
| 0   | 14  | 4 NA           |
| 0   | 375 | 149 PITG_13065 |
| 0   | 4   | 2 PITG_18473   |
| 0   | 10  | 2 PITG_04066   |
| 0   | 0   | 0 PITG_14257   |
| 0   | 120 | 70 PITG_16112  |
| 0   | 0   | 0 NA           |
| 0   | 17  | 4 PITG_03323   |

|   |      |                 |
|---|------|-----------------|
| 0 | 5    | 9 PITG_17439    |
| 0 | 48   | 17 NA           |
| 0 | 145  | 413 PITG_18316  |
| 0 | 91   | 30 PITG_05479   |
| 0 | 0    | 2 PITG_14744    |
| 0 | 2    | 0 PITG_12906    |
| 0 | 6    | 0 PITG_06416    |
| 0 | 9212 | 1657 PITG_04074 |
| 0 | 5    | 2 PITG_04579    |
| 0 | 2    | 0 NA            |
| 0 | 2    | 4 PITG_03275    |
| 0 | 0    | 0 PITG_05176    |
| 0 | 0    | 5 PITG_21176    |
| 0 | 0    | 14 PITG_03709   |
| 0 | 4    | 16 PITG_18174   |
| 0 | 1048 | 764 NA          |
| 0 | 5    | 2 PITG_17746    |
| 0 | 49   | 0 PITG_09588    |
| 0 | 16   | 28 PITG_11019   |
| 0 | 13   | 0 PITG_17705    |
| 0 | 22   | 40 PITG_09604   |
| 0 | 0    | 0 PITG_00657    |
| 0 | 8    | 56 PITG_08072   |
| 0 | 108  | 41 PITG_09435   |
| 0 | 0    | 0 PITG_03335    |
| 0 | 0    | 0 PITG_04158    |
| 0 | 0    | 9 PITG_12264    |
| 0 | 8    | 0 PITG_18246    |
| 0 | 2    | 7 PITG_17683    |
| 0 | 6    | 0 NA            |
| 0 | 0    | 12 PITG_18007   |
| 0 | 256  | 88 PITG_16922   |
| 0 | 12   | 12 PITG_06997   |
| 0 | 30   | 13 PITG_14176   |
| 0 | 4    | 4 NA            |
| 0 | 70   | 43 NA           |
| 0 | 123  | 56 PITG_04938   |
| 0 | 198  | 5 PITG_09964    |
| 0 | 2    | 0 NA            |
| 0 | 10   | 22 NA           |
| 0 | 52   | 30 PITG_02075   |
| 0 | 9    | 7 PITG_17560    |
| 0 | 38   | 0 PITG_03788    |
| 0 | 2    | 2 PITG_03324    |
| 0 | 13   | 4 PITG_19966    |
| 0 | 34   | 24 PITG_19411   |
| 0 | 4    | 4 PITG_03276    |

|     |      |                |
|-----|------|----------------|
| 0   | 0    | 0 PITG_10082   |
| 0   | 468  | 108 NA         |
| 0   | 23   | 32 PITG_00348  |
| 0   | 17   | 11 PITG_05762  |
| 0   | 4    | 0 PITG_06946   |
| 0   | 15   | 0 PITG_12855   |
| 0   | 2    | 3 PITG_05631   |
| 0   | 2    | 0 NA           |
| 0   | 0    | 0 PITG_07115   |
| 0   | 101  | 42 PITG_01728  |
| 0   | 16   | 54 PITG_22951  |
| 0   | 15   | 72 PITG_12526  |
| 0   | 13   | 0 PITG_05202   |
| 0   | 46   | 101 PITG_08804 |
| 0   | 11   | 0 PITG_09787   |
| 0   | 52   | 2 NA           |
| 0   | 4    | 6 PITG_19487   |
| 0   | 40   | 4 PITG_03288   |
| 0   | 345  | 11 PITG_14129  |
| 0   | 114  | 16 PITG_02902  |
| 0   | 67   | 332 PITG_11615 |
| 0   | 604  | 196 PITG_11071 |
| 0   | 2    | 0 PITG_10353   |
| 0   | 7    | 6 PITG_07046   |
| 0   | 357  | 39 PITG_11246  |
| 0   | 61   | 9 PITG_11795   |
| 0   | 72   | 26 PITG_03932  |
| 0   | 9    | 4 PITG_04973   |
| 0   | 2    | 4 NA           |
| 0   | 1737 | 555 PITG_13728 |
| 256 | 4    | 126 NA         |
| 0   | 0    | 2 PITG_15821   |
| 0   | 20   | 23 PITG_04746  |
| 0   | 73   | 61 NA          |
| 0   | 42   | 19 PITG_05683  |
| 0   | 4    | 2 PITG_17790   |
| 0   | 140  | 48 NA          |
| 0   | 4    | 3 NA           |
| 0   | 18   | 42 PITG_08594  |
| 0   | 55   | 12 PITG_07033  |
| 0   | 21   | 0 NA           |
| 0   | 0    | 0 NA           |
| 0   | 11   | 37 PITG_06829  |
| 0   | 145  | 219 PITG_07055 |
| 0   | 6    | 0 PITG_20434   |
| 0   | 8    | 17 PITG_18189  |
| 0   | 16   | 0 NA           |

|   |     |                |
|---|-----|----------------|
| 0 | 10  | 5 PITG_20374   |
| 0 | 3   | 4 PITG_03734   |
| 0 | 42  | 78 PITG_12739  |
| 0 | 47  | 15 PITG_22433  |
| 0 | 10  | 10 PITG_11106  |
| 0 | 118 | 48 PITG_04497  |
| 0 | 16  | 54 PITG_12151  |
| 0 | 287 | 727 PITG_11047 |
| 3 | 0   | 135 NA         |
| 0 | 0   | 0 NA           |
| 0 | 160 | 106 PITG_00941 |
| 0 | 5   | 8 PITG_18008   |
| 0 | 190 | 32 PITG_00458  |
| 0 | 15  | 59 PITG_05012  |
| 0 | 3   | 0 PITG_09277   |
| 0 | 21  | 14 PITG_01514  |
| 0 | 88  | 15 PITG_00042  |
| 0 | 4   | 8 PITG_06715   |
| 3 | 234 | 126 PITG_10886 |
| 0 | 0   | 0 PITG_22672   |
| 0 | 50  | 0 PITG_14214   |
| 0 | 4   | 0 NA           |
| 0 | 61  | 13 NA          |
| 0 | 26  | 16 PITG_21049  |
| 0 | 0   | 0 NA           |
| 0 | 6   | 2 PITG_13366   |
| 0 | 82  | 66 PITG_02453  |
| 0 | 88  | 12 PITG_08736  |
| 0 | 55  | 33 PITG_03017  |
| 0 | 45  | 15 PITG_00483  |
| 0 | 15  | 29 PITG_11561  |
| 0 | 2   | 6 PITG_11586   |
| 0 | 34  | 12 PITG_03804  |
| 0 | 84  | 329 PITG_10132 |
| 0 | 6   | 19 NA          |
| 0 | 44  | 64 PITG_05480  |
| 0 | 3   | 2 PITG_15406   |
| 0 | 592 | 374 PITG_14275 |
| 0 | 32  | 25 NA          |
| 0 | 0   | 4 PITG_11887   |
| 0 | 4   | 6 PITG_15470   |
| 0 | 2   | 6 PITG_01607   |
| 0 | 66  | 42 PITG_12348  |
| 0 | 24  | 59 PITG_03860  |
| 0 | 0   | 0 PITG_08964   |
| 0 | 0   | 2 NA           |
| 0 | 35  | 25 PITG_15567  |

|   |      |                 |
|---|------|-----------------|
| 0 | 178  | 194 PITG_17983  |
| 0 | 39   | 17 PITG_13249   |
| 0 | 3    | 8 PITG_13434    |
| 0 | 17   | 53 PITG_18951   |
| 0 | 4486 | 1590 PITG_15628 |
| 0 | 115  | 97 PITG_00234   |
| 0 | 74   | 3 PITG_08294    |
| 0 | 32   | 15 PITG_01438   |
| 0 | 38   | 28 PITG_09427   |
| 0 | 10   | 4 PITG_03800    |
| 0 | 46   | 3 NA            |
| 0 | 70   | 82 PITG_15867   |
| 0 | 2    | 17 PITG_00067   |
| 0 | 683  | 897 PITG_10132  |
| 0 | 76   | 27 PITG_12145   |
| 0 | 13   | 0 PITG_01722    |
| 0 | 2    | 4 PITG_19865    |
| 0 | 348  | 267 PITG_06748  |
| 0 | 53   | 15 NA           |
| 0 | 54   | 108 NA          |
| 0 | 23   | 19 PITG_16797   |
| 0 | 3    | 16 PITG_04458   |
| 0 | 36   | 25 PITG_05259   |
| 0 | 2    | 11 PITG_22165   |
| 0 | 6    | 17 PITG_17869   |
| 0 | 0    | 0 PITG_06900    |
| 0 | 6    | 3 PITG_15570    |
| 0 | 11   | 11 NA           |
| 0 | 2    | 2 PITG_10392    |
| 0 | 127  | 51 PITG_10168   |
| 0 | 6    | 22 PITG_02267   |
| 0 | 99   | 82 PITG_09712   |
| 0 | 30   | 29 PITG_00037   |
| 0 | 489  | 345 PITG_08206  |
| 0 | 29   | 3 NA            |
| 2 | 0    | 2 NA            |
| 0 | 5    | 0 NA            |
| 0 | 195  | 45 NA           |
| 0 | 6    | 15 PITG_07256   |
| 0 | 28   | 23 PITG_10750   |
| 0 | 0    | 4 PITG_08529    |
| 0 | 23   | 14 PITG_03163   |
| 0 | 0    | 0 NA            |
| 0 | 4    | 8 PITG_20081    |
| 0 | 99   | 42 PITG_04608   |
| 0 | 8    | 2 PITG_03562    |
| 0 | 335  | 1037 PITG_09596 |



|   |     |                |
|---|-----|----------------|
| 0 | 57  | 20 PITG_07354  |
| 0 | 2   | 13 PITG_18244  |
| 0 | 261 | 185 PITG_01557 |
| 0 | 179 | 128 PITG_17947 |
| 0 | 177 | 53 PITG_11768  |
| 0 | 10  | 15 PITG_06129  |
| 0 | 62  | 49 PITG_03365  |
| 0 | 2   | 0 PITG_01614   |
| 0 | 137 | 144 PITG_06596 |
| 0 | 0   | 0 NA           |
| 0 | 2   | 2 PITG_14917   |
| 0 | 4   | 3 PITG_09690   |
| 0 | 8   | 2 PITG_08587   |
| 0 | 78  | 25 NA          |
| 0 | 5   | 4 PITG_23006   |
| 0 | 18  | 32 PITG_10601  |
| 0 | 12  | 94 PITG_17786  |
| 0 | 24  | 6 PITG_05411   |
| 0 | 64  | 0 NA           |
| 0 | 54  | 15 NA          |
| 0 | 36  | 79 PITG_16328  |
| 0 | 4   | 19 PITG_16107  |
| 0 | 15  | 2 PITG_06289   |
| 0 | 69  | 4 NA           |
| 0 | 62  | 20 PITG_02237  |
| 0 | 46  | 8 NA           |
| 0 | 2   | 2 PITG_14707   |
| 0 | 134 | 8 PITG_18655   |
| 0 | 81  | 29 PITG_14198  |
| 0 | 69  | 19 PITG_08781  |
| 0 | 6   | 2 PITG_03804   |
| 0 | 5   | 2 PITG_20055   |
| 0 | 7   | 8 PITG_14640   |
| 0 | 2   | 0 NA           |
| 0 | 103 | 27 PITG_08304  |
| 0 | 53  | 33 PITG_04289  |
| 0 | 15  | 2 PITG_03757   |
| 0 | 2   | 3 NA           |
| 0 | 16  | 0 PITG_12668   |
| 0 | 57  | 41 PITG_01128  |
| 0 | 32  | 46 PITG_07256  |
| 0 | 25  | 7 NA           |
| 0 | 28  | 15 PITG_19045  |
| 0 | 0   | 4 PITG_13491   |
| 0 | 2   | 0 PITG_13903   |
| 0 | 17  | 0 PITG_13298   |
| 0 | 58  | 35 PITG_09950  |

|   |     |                 |
|---|-----|-----------------|
| 0 | 6   | 19 PITG_05637   |
| 0 | 50  | 44 PITG_13808   |
| 0 | 3   | 19 PITG_12504   |
| 0 | 7   | 27 PITG_00183   |
| 0 | 0   | 0 NA            |
| 0 | 22  | 45 PITG_08138   |
| 3 | 52  | 195 NA          |
| 0 | 178 | 58 PITG_01173   |
| 0 | 0   | 4 PITG_13563    |
| 0 | 28  | 2 PITG_04003    |
| 0 | 3   | 2 PITG_08867    |
| 0 | 6   | 4 PITG_18062    |
| 0 | 4   | 21 PITG_01823   |
| 0 | 105 | 151 PITG_13458  |
| 0 | 14  | 20 PITG_11926   |
| 0 | 66  | 50 PITG_01097   |
| 0 | 34  | 23 PITG_16365   |
| 0 | 10  | 4 PITG_17136    |
| 0 | 5   | 0 NA            |
| 2 | 122 | 108 PITG_16058  |
| 0 | 45  | 62 NA           |
| 0 | 78  | 155 PITG_07797  |
| 0 | 100 | 30 PITG_10058   |
| 0 | 2   | 4 PITG_14580    |
| 0 | 0   | 0 NA            |
| 0 | 22  | 4 NA            |
| 0 | 0   | 2 PITG_12318    |
| 0 | 573 | 954 PITG_12670  |
| 0 | 0   | 0 PITG_20204    |
| 0 | 25  | 12 PITG_09388   |
| 0 | 2   | 0 PITG_03902    |
| 0 | 2   | 5 PITG_17272    |
| 0 | 41  | 45 NA           |
| 0 | 39  | 19 PITG_13590   |
| 0 | 197 | 1136 PITG_01940 |
| 0 | 274 | 125 PITG_01839  |
| 0 | 60  | 11 PITG_19568   |
| 0 | 27  | 16 PITG_08374   |
| 0 | 0   | 0 PITG_08984    |
| 0 | 7   | 0 PITG_14176    |
| 6 | 397 | 2177 NA         |
| 0 | 437 | 382 PITG_02046  |
| 0 | 2   | 2 PITG_00128    |
| 0 | 2   | 0 PITG_10624    |
| 0 | 20  | 11 PITG_11405   |
| 0 | 2   | 2 PITG_00854    |
| 0 | 173 | 15 PITG_13015   |

|   |     |                |
|---|-----|----------------|
| 0 | 0   | 0 NA           |
| 0 | 9   | 0 NA           |
| 0 | 8   | 0 NA           |
| 0 | 8   | 2 NA           |
| 0 | 40  | 62 PITG_00947  |
| 0 | 0   | 2 PITG_14626   |
| 0 | 2   | 0 PITG_15642   |
| 0 | 2   | 2 NA           |
| 0 | 0   | 0 NA           |
| 0 | 180 | 2 NA           |
| 0 | 562 | 11 NA          |
| 0 | 16  | 39 PITG_14806  |
| 0 | 71  | 157 PITG_12266 |
| 0 | 2   | 4 NA           |
| 0 | 50  | 285 PITG_17069 |
| 0 | 2   | 13 PITG_12318  |
| 0 | 20  | 40 PITG_01728  |
| 0 | 5   | 4 PITG_09355   |
| 0 | 4   | 2 NA           |
| 0 | 2   | 0 PITG_16221   |
| 0 | 32  | 31 PITG_16257  |
| 0 | 261 | 251 NA         |
| 0 | 30  | 59 PITG_18834  |
| 0 | 122 | 3 NA           |
| 0 | 9   | 0 PITG_03865   |
| 0 | 42  | 50 PITG_05643  |
| 0 | 21  | 4 NA           |
| 0 | 122 | 20 PITG_19037  |
| 0 | 2   | 0 NA           |
| 0 | 742 | 780 PITG_11569 |
| 0 | 3   | 0 PITG_10250   |
| 0 | 2   | 8 PITG_11702   |
| 0 | 8   | 4 PITG_07865   |
| 0 | 132 | 133 PITG_03934 |
| 0 | 2   | 0 PITG_09594   |
| 0 | 50  | 31 PITG_03454  |
| 0 | 2   | 0 PITG_11207   |
| 0 | 30  | 19 PITG_17882  |
| 0 | 14  | 0 NA           |
| 0 | 7   | 2 PITG_03717   |
| 0 | 4   | 34 PITG_03373  |
| 0 | 20  | 29 PITG_03229  |
| 0 | 10  | 2 PITG_03832   |
| 0 | 13  | 0 PITG_12296   |
| 0 | 16  | 15 PITG_07968  |
| 0 | 164 | 925 PITG_06863 |
| 0 | 100 | 148 PITG_12973 |

|    |     |                |
|----|-----|----------------|
| 0  | 5   | 2 PITG_07319   |
| 0  | 0   | 0 PITG_01044   |
| 0  | 2   | 6 PITG_10263   |
| 0  | 119 | 330 PITG_16207 |
| 0  | 54  | 26 PITG_01127  |
| 0  | 30  | 0 PITG_17165   |
| 0  | 19  | 0 PITG_15694   |
| 0  | 17  | 0 PITG_17135   |
| 0  | 35  | 22 PITG_05221  |
| 0  | 15  | 4 PITG_01066   |
| 0  | 17  | 2 NA           |
| 0  | 4   | 4 PITG_19692   |
| 0  | 2   | 0 PITG_06794   |
| 0  | 125 | 41 PITG_07326  |
| 0  | 14  | 6 NA           |
| 0  | 4   | 0 PITG_04876   |
| 0  | 260 | 216 PITG_07810 |
| 22 | 122 | 1490 NA        |
| 0  | 7   | 7 PITG_02515   |
| 0  | 134 | 285 PITG_08601 |
| 0  | 0   | 0 PITG_09250   |
| 0  | 22  | 38 PITG_21140  |
| 0  | 202 | 127 PITG_01144 |
| 0  | 62  | 46 PITG_11690  |
| 0  | 4   | 14 PITG_17257  |
| 0  | 8   | 0 PITG_00440   |
| 0  | 161 | 492 PITG_11975 |
| 0  | 82  | 16 PITG_16228  |
| 0  | 8   | 0 PITG_20005   |
| 0  | 0   | 15 PITG_03678  |
| 0  | 21  | 2 PITG_05954   |
| 0  | 68  | 2 PITG_10827   |
| 0  | 0   | 0 NA           |
| 0  | 63  | 116 PITG_11735 |
| 0  | 89  | 51 PITG_01953  |
| 0  | 412 | 80 PITG_06802  |
| 0  | 3   | 3 NA           |
| 0  | 19  | 0 NA           |
| 0  | 0   | 2 NA           |
| 0  | 0   | 3 PITG_03169   |
| 0  | 4   | 0 PITG_17552   |
| 0  | 14  | 27 NA          |
| 0  | 59  | 4 PITG_15832   |
| 0  | 0   | 0 NA           |
| 0  | 0   | 2 NA           |
| 0  | 15  | 25 PITG_07868  |
| 0  | 31  | 23 PITG_17382  |

|   |     |                 |
|---|-----|-----------------|
| 0 | 2   | 29 PITG_10141   |
| 0 | 8   | 10 PITG_03525   |
| 0 | 56  | 21 PITG_06611   |
| 0 | 12  | 8 NA            |
| 0 | 4   | 0 NA            |
| 0 | 4   | 12 PITG_13202   |
| 0 | 14  | 4 PITG_06424    |
| 0 | 14  | 29 PITG_09508   |
| 0 | 16  | 123 PITG_15250  |
| 0 | 31  | 94 PITG_00395   |
| 0 | 4   | 8 PITG_04546    |
| 0 | 11  | 7 PITG_20385    |
| 0 | 177 | 19 PITG_18384   |
| 0 | 214 | 158 NA          |
| 0 | 37  | 267 PITG_06448  |
| 0 | 0   | 2 NA            |
| 0 | 0   | 0 PITG_09193    |
| 0 | 33  | 26 NA           |
| 0 | 14  | 25 PITG_11438   |
| 0 | 47  | 271 NA          |
| 0 | 155 | 178 PITG_00503  |
| 0 | 61  | 46 PITG_13767   |
| 0 | 15  | 10 PITG_00553   |
| 0 | 2   | 4 PITG_01802    |
| 0 | 2   | 0 PITG_12446    |
| 0 | 0   | 102 NA          |
| 0 | 43  | 29 NA           |
| 0 | 14  | 31 NA           |
| 0 | 9   | 5 PITG_04857    |
| 0 | 34  | 73 PITG_17936   |
| 0 | 4   | 94 PITG_06863   |
| 0 | 118 | 17 NA           |
| 0 | 35  | 8 PITG_21665    |
| 0 | 8   | 0 PITG_01647    |
| 0 | 49  | 9 PITG_19842    |
| 0 | 19  | 5 PITG_02371    |
| 0 | 8   | 22 PITG_12223   |
| 0 | 29  | 10 PITG_10488   |
| 0 | 263 | 398 PITG_15761  |
| 0 | 0   | 0 PITG_04861    |
| 0 | 907 | 1164 PITG_04868 |
| 0 | 11  | 7 PITG_02661    |
| 0 | 85  | 0 PITG_03643    |
| 0 | 56  | 126 NA          |
| 0 | 22  | 9 PITG_01792    |
| 0 | 10  | 0 NA            |
| 0 | 674 | 752 NA          |

|   |     |                |
|---|-----|----------------|
| 0 | 77  | 10 PITG_17795  |
| 0 | 155 | 81 PITG_15780  |
| 0 | 14  | 2 PITG_01495   |
| 0 | 2   | 0 NA           |
| 0 | 37  | 23 NA          |
| 0 | 37  | 4 PITG_07040   |
| 0 | 6   | 2 PITG_09849   |
| 0 | 235 | 85 PITG_05818  |
| 0 | 20  | 50 PITG_15954  |
| 0 | 61  | 75 PITG_15392  |
| 0 | 2   | 2 NA           |
| 0 | 12  | 4 NA           |
| 0 | 206 | 62 PITG_19591  |
| 0 | 0   | 0 NA           |
| 0 | 0   | 0 PITG_19143   |
| 0 | 8   | 0 PITG_01782   |
| 0 | 0   | 0 NA           |
| 0 | 397 | 747 PITG_04906 |
| 0 | 15  | 3 PITG_07965   |
| 0 | 114 | 124 PITG_01627 |
| 0 | 41  | 8 PITG_03601   |
| 0 | 117 | 152 PITG_18833 |
| 0 | 51  | 2 PITG_00795   |
| 0 | 72  | 17 PITG_07424  |
| 0 | 2   | 12 PITG_05112  |
| 0 | 64  | 41 PITG_15137  |
| 0 | 0   | 2 PITG_00662   |
| 0 | 11  | 13 PITG_17690  |
| 0 | 154 | 44 PITG_14582  |
| 0 | 0   | 2 PITG_09535   |
| 0 | 177 | 57 PITG_06471  |
| 0 | 72  | 61 PITG_14747  |
| 0 | 2   | 2 NA           |
| 0 | 5   | 2 PITG_07809   |
| 0 | 17  | 9 PITG_07423   |
| 0 | 49  | 8 PITG_03369   |
| 0 | 0   | 6 PITG_09295   |
| 0 | 39  | 54 PITG_09598  |
| 0 | 29  | 75 NA          |
| 0 | 11  | 5 NA           |
| 0 | 4   | 3 PITG_06570   |
| 0 | 0   | 5 PITG_06038   |
| 0 | 38  | 85 PITG_13842  |
| 0 | 17  | 6 PITG_09278   |
| 0 | 0   | 0 PITG_05423   |
| 0 | 0   | 0 NA           |
| 0 | 106 | 103 PITG_00178 |

|      |      |                 |
|------|------|-----------------|
| 0    | 207  | 42 PITG_14603   |
| 0    | 85   | 76 NA           |
| 0    | 6    | 8 PITG_00809    |
| 0    | 0    | 2 PITG_08067    |
| 0    | 36   | 37 PITG_03939   |
| 0    | 2    | 0 NA            |
| 0    | 85   | 93 PITG_00561   |
| 0    | 319  | 419 PITG_03235  |
| 0    | 0    | 4 PITG_14473    |
| 0    | 2    | 11 PITG_00636   |
| 0    | 169  | 17 PITG_22686   |
| 0    | 77   | 112 PITG_03226  |
| 26   | 4    | 38 NA           |
| 0    | 9    | 10 PITG_01582   |
| 0    | 56   | 8 PITG_12297    |
| 0    | 0    | 0 PITG_09977    |
| 0    | 22   | 0 NA            |
| 0    | 100  | 135 PITG_17617  |
| 0    | 76   | 14 PITG_14967   |
| 0    | 3    | 0 NA            |
| 0    | 4    | 9 PITG_09772    |
| 0    | 0    | 13 PITG_14935   |
| 0    | 2615 | 1542 PITG_03712 |
| 0    | 2    | 0 PITG_05631    |
| 0    | 19   | 29 PITG_03575   |
| 0    | 47   | 68 PITG_06281   |
| 0    | 19   | 20 PITG_00300   |
| 0    | 38   | 77 NA           |
| 0    | 30   | 2 PITG_16098    |
| 0    | 116  | 113 PITG_08002  |
| 0    | 28   | 2 NA            |
| 0    | 9    | 3 NA            |
| 0    | 54   | 39 PITG_11496   |
| 0    | 74   | 16 NA           |
| 0    | 24   | 20 PITG_01818   |
| 0    | 25   | 9 PITG_06772    |
| 0    | 63   | 21 PITG_02327   |
| 0    | 2    | 0 PITG_16036    |
| 1185 | 19   | 668 NA          |
| 0    | 0    | 0 PITG_14635    |
| 0    | 2    | 0 PITG_13654    |
| 0    | 24   | 4 NA            |
| 0    | 0    | 0 PITG_05668    |
| 0    | 7    | 0 NA            |
| 0    | 2    | 0 NA            |
| 0    | 4    | 15 PITG_03117   |
| 0    | 24   | 2 NA            |

|    |      |                |
|----|------|----------------|
| 0  | 28   | 29 PITG_04682  |
| 0  | 187  | 11 PITG_13622  |
| 0  | 234  | 142 PITG_00663 |
| 0  | 12   | 5 PITG_13660   |
| 0  | 0    | 3 NA           |
| 0  | 19   | 0 PITG_01738   |
| 0  | 0    | 0 NA           |
| 0  | 25   | 58 PITG_13102  |
| 0  | 32   | 11 PITG_08740  |
| 0  | 86   | 22 NA          |
| 0  | 0    | 4 PITG_13613   |
| 0  | 293  | 67 PITG_11592  |
| 0  | 2    | 0 PITG_05100   |
| 0  | 26   | 156 PITG_10828 |
| 0  | 3    | 18 PITG_01718  |
| 0  | 38   | 37 PITG_05423  |
| 0  | 2    | 4 PITG_03408   |
| 0  | 18   | 2 PITG_18959   |
| 0  | 0    | 0 PITG_05194   |
| 0  | 86   | 124 NA         |
| 0  | 170  | 142 PITG_01931 |
| 0  | 65   | 20 PITG_11010  |
| 0  | 23   | 53 PITG_04481  |
| 0  | 105  | 24 PITG_08366  |
| 0  | 4    | 6 PITG_20965   |
| 0  | 0    | 0 PITG_10012   |
| 0  | 18   | 24 PITG_00167  |
| 0  | 54   | 6 PITG_16085   |
| 0  | 4    | 6 PITG_02415   |
| 0  | 218  | 82 PITG_21643  |
| 0  | 89   | 89 PITG_20728  |
| 4  | 111  | 459 PITG_22908 |
| 0  | 27   | 11 PITG_03060  |
| 0  | 12   | 3 PITG_14919   |
| 0  | 24   | 207 PITG_01535 |
| 0  | 0    | 0 PITG_03610   |
| 0  | 174  | 110 PITG_13226 |
| 0  | 45   | 11 NA          |
| 0  | 11   | 2 NA           |
| 0  | 12   | 14 NA          |
| 0  | 13   | 19 PITG_11592  |
| 0  | 12   | 21 PITG_17021  |
| 0  | 9    | 103 PITG_17908 |
| 0  | 2    | 8 PITG_04243   |
| 0  | 13   | 32 PITG_12478  |
| 0  | 299  | 121 PITG_01619 |
| 37 | 1324 | 18 NA          |



|   |     |                |
|---|-----|----------------|
| 0 | 5   | 6 PITG_01919   |
| 0 | 12  | 10 NA          |
| 0 | 103 | 53 PITG_00965  |
| 0 | 0   | 4 PITG_00965   |
| 0 | 32  | 6 PITG_12889   |
| 0 | 3   | 11 NA          |
| 0 | 122 | 143 PITG_08082 |
| 0 | 52  | 12 PITG_04552  |
| 0 | 11  | 7 PITG_04336   |
| 2 | 96  | 190 NA         |
| 0 | 16  | 36 PITG_05818  |
| 0 | 0   | 6 NA           |
| 0 | 13  | 11 PITG_17795  |
| 0 | 3   | 2 PITG_19402   |
| 0 | 459 | 96 PITG_00914  |
| 0 | 19  | 30 PITG_10461  |
| 0 | 0   | 0 NA           |
| 0 | 33  | 2 NA           |
| 0 | 27  | 37 PITG_06780  |
| 0 | 2   | 0 PITG_05731   |
| 0 | 47  | 0 PITG_06664   |
| 0 | 20  | 2 PITG_20787   |
| 0 | 18  | 2 PITG_09680   |
| 0 | 0   | 0 PITG_11424   |
| 0 | 71  | 47 PITG_08031  |
| 0 | 6   | 0 NA           |
| 0 | 0   | 21 PITG_22065  |
| 0 | 3   | 2 NA           |
| 0 | 0   | 0 PITG_07046   |
| 0 | 2   | 5 PITG_02720   |
| 0 | 125 | 326 PITG_22870 |
| 0 | 5   | 2 PITG_00049   |
| 0 | 41  | 5 PITG_11410   |
| 0 | 0   | 0 NA           |
| 0 | 2   | 5 PITG_02227   |
| 0 | 18  | 21 PITG_00257  |
| 0 | 0   | 0 NA           |
| 0 | 6   | 16 PITG_12548  |
| 0 | 61  | 33 PITG_08383  |
| 0 | 4   | 4 PITG_08140   |
| 0 | 0   | 0 PITG_17455   |
| 0 | 0   | 2 PITG_11474   |
| 0 | 0   | 2 PITG_11466   |
| 0 | 76  | 0 PITG_01144   |
| 0 | 54  | 2 PITG_15091   |
| 0 | 2   | 2 PITG_05787   |
| 0 | 0   | 2 NA           |

|   |     |                |
|---|-----|----------------|
| 0 | 5   | 4 PITG_08473   |
| 0 | 4   | 5 PITG_04076   |
| 0 | 15  | 5 PITG_03472   |
| 0 | 174 | 43 PITG_12648  |
| 0 | 16  | 15 NA          |
| 0 | 2   | 2 PITG_01873   |
| 0 | 28  | 0 NA           |
| 0 | 6   | 3 NA           |
| 0 | 14  | 0 PITG_21872   |
| 0 | 2   | 3 NA           |
| 0 | 10  | 11 PITG_04678  |
| 0 | 13  | 6 PITG_08787   |
| 0 | 20  | 7 NA           |
| 0 | 41  | 33 NA          |
| 0 | 5   | 0 PITG_05103   |
| 0 | 224 | 36 PITG_07274  |
| 0 | 98  | 230 PITG_19199 |
| 0 | 0   | 61 PITG_22848  |
| 0 | 205 | 58 NA          |
| 0 | 0   | 2 NA           |
| 0 | 50  | 16 PITG_04006  |
| 0 | 0   | 0 PITG_16389   |
| 0 | 51  | 2 NA           |
| 0 | 50  | 37 PITG_12108  |
| 0 | 4   | 6 PITG_13188   |
| 0 | 0   | 0 PITG_02036   |
| 0 | 0   | 0 NA           |
| 0 | 6   | 6 NA           |
| 0 | 183 | 120 PITG_05521 |
| 0 | 91  | 89 PITG_20766  |
| 0 | 4   | 2 PITG_17421   |
| 0 | 2   | 0 PITG_20675   |
| 0 | 477 | 138 PITG_06783 |
| 0 | 17  | 9 PITG_03476   |
| 0 | 0   | 0 NA           |
| 0 | 4   | 0 PITG_01582   |
| 0 | 101 | 27 PITG_01390  |
| 0 | 101 | 389 PITG_04843 |
| 0 | 23  | 29 PITG_02912  |
| 0 | 0   | 17 PITG_13168  |
| 0 | 32  | 79 PITG_00164  |
| 0 | 7   | 10 PITG_14768  |
| 0 | 2   | 2 PITG_01508   |
| 0 | 2   | 0 PITG_00119   |
| 0 | 0   | 2 PITG_10449   |
| 0 | 252 | 67 PITG_10184  |
| 0 | 78  | 188 PITG_00693 |

|   |     |                |
|---|-----|----------------|
| 0 | 21  | 42 NA          |
| 0 | 11  | 6 PITG_14465   |
| 0 | 6   | 2 NA           |
| 0 | 6   | 16 NA          |
| 0 | 8   | 8 NA           |
| 0 | 112 | 229 PITG_04457 |
| 0 | 14  | 7 PITG_13672   |
| 2 | 652 | 222 PITG_10989 |
| 0 | 32  | 0 PITG_18000   |
| 0 | 12  | 4 PITG_01676   |
| 0 | 4   | 3 NA           |
| 0 | 2   | 5 PITG_21419   |
| 0 | 5   | 0 NA           |
| 0 | 462 | 338 PITG_09556 |
| 0 | 10  | 6 PITG_18424   |
| 0 | 4   | 10 NA          |
| 0 | 0   | 0 PITG_01314   |
| 0 | 43  | 37 PITG_17335  |
| 0 | 59  | 15 PITG_00225  |
| 0 | 36  | 17 PITG_06403  |
| 0 | 40  | 37 PITG_12694  |
| 0 | 909 | 446 PITG_03612 |
| 0 | 0   | 2 NA           |
| 0 | 0   | 2 PITG_05325   |
| 0 | 6   | 5 PITG_01271   |
| 0 | 4   | 2 PITG_00399   |
| 0 | 84  | 17 PITG_09092  |
| 0 | 23  | 57 PITG_04992  |
| 0 | 187 | 50 PITG_03416  |
| 0 | 14  | 27 PITG_05494  |
| 0 | 4   | 4 PITG_04421   |
| 0 | 6   | 0 PITG_15731   |
| 0 | 37  | 15 PITG_22450  |
| 0 | 2   | 3 PITG_20047   |
| 0 | 54  | 38 NA          |
| 0 | 0   | 4 PITG_16810   |
| 0 | 51  | 11 NA          |
| 0 | 174 | 405 PITG_13596 |
| 0 | 43  | 18 PITG_05517  |
| 0 | 204 | 237 PITG_14612 |
| 0 | 22  | 34 PITG_13490  |
| 6 | 6   | 6 NA           |
| 0 | 0   | 2 PITG_05600   |
| 0 | 32  | 37 PITG_01555  |
| 0 | 0   | 7 PITG_15868   |
| 0 | 4   | 9 PITG_12110   |
| 0 | 6   | 14 PITG_11675  |

|   |     |                |
|---|-----|----------------|
| 0 | 20  | 11 PITG_16206  |
| 0 | 12  | 96 PITG_08031  |
| 0 | 5   | 11 NA          |
| 0 | 98  | 0 NA           |
| 0 | 0   | 0 PITG_09040   |
| 0 | 6   | 5 PITG_00298   |
| 0 | 0   | 2 PITG_19849   |
| 0 | 26  | 9 PITG_03589   |
| 0 | 26  | 2 PITG_17792   |
| 0 | 58  | 16 NA          |
| 0 | 19  | 0 PITG_18127   |
| 0 | 30  | 8 PITG_15875   |
| 0 | 256 | 87 PITG_19746  |
| 0 | 160 | 7 PITG_00561   |
| 0 | 4   | 7 PITG_10423   |
| 0 | 10  | 11 NA          |
| 0 | 2   | 4 PITG_17568   |
| 0 | 26  | 4 PITG_05277   |
| 0 | 16  | 58 PITG_03836  |
| 0 | 65  | 25 PITG_04860  |
| 0 | 2   | 7 NA           |
| 0 | 31  | 28 PITG_03658  |
| 0 | 0   | 0 NA           |
| 0 | 0   | 4 PITG_15951   |
| 0 | 52  | 27 NA          |
| 0 | 21  | 14 PITG_06760  |
| 0 | 223 | 41 PITG_06760  |
| 0 | 3   | 4 PITG_03295   |
| 0 | 0   | 0 PITG_09705   |
| 0 | 27  | 5 PITG_12183   |
| 0 | 66  | 36 PITG_01203  |
| 0 | 64  | 31 PITG_07938  |
| 0 | 6   | 0 NA           |
| 0 | 2   | 0 PITG_15961   |
| 0 | 0   | 4 NA           |
| 0 | 9   | 0 NA           |
| 2 | 47  | 3 PITG_01229   |
| 0 | 224 | 178 PITG_03342 |
| 0 | 18  | 13 PITG_03130  |
| 0 | 258 | 79 PITG_00851  |
| 0 | 0   | 0 PITG_14731   |
| 0 | 0   | 4 PITG_06365   |
| 0 | 190 | 214 PITG_21886 |
| 0 | 56  | 60 PITG_19774  |
| 0 | 8   | 6 PITG_02794   |
| 0 | 2   | 0 PITG_15301   |
| 0 | 0   | 0 PITG_18943   |

|    |     |                |
|----|-----|----------------|
| 18 | 6   | 712 NA         |
| 0  | 12  | 2 PITG_10164   |
| 0  | 2   | 0 PITG_15736   |
| 0  | 126 | 179 PITG_11766 |
| 0  | 5   | 2 PITG_19865   |
| 0  | 0   | 0 PITG_16264   |
| 0  | 29  | 2 NA           |
| 0  | 0   | 3 PITG_00308   |
| 0  | 8   | 0 NA           |
| 0  | 54  | 0 PITG_10552   |
| 0  | 8   | 5 PITG_12760   |
| 0  | 2   | 4 PITG_13404   |
| 0  | 232 | 359 PITG_12164 |
| 0  | 302 | 227 PITG_08812 |
| 0  | 92  | 26 NA          |
| 0  | 27  | 16 PITG_10463  |
| 0  | 40  | 12 PITG_03751  |
| 0  | 64  | 199 PITG_00333 |
| 0  | 26  | 0 PITG_17831   |
| 0  | 59  | 6 PITG_08540   |
| 0  | 10  | 2 PITG_05855   |
| 0  | 2   | 2 PITG_07191   |
| 0  | 17  | 7 PITG_09035   |
| 0  | 4   | 0 NA           |
| 0  | 9   | 17 PITG_07567  |
| 0  | 2   | 0 PITG_09092   |
| 0  | 46  | 66 PITG_15593  |
| 0  | 0   | 0 PITG_08901   |
| 0  | 43  | 80 PITG_18297  |
| 0  | 216 | 118 PITG_03373 |
| 0  | 10  | 0 PITG_19142   |
| 0  | 327 | 495 PITG_10715 |
| 0  | 79  | 84 PITG_15640  |
| 0  | 76  | 21 PITG_16563  |
| 0  | 107 | 29 PITG_15924  |
| 0  | 6   | 0 PITG_06846   |
| 0  | 79  | 24 NA          |
| 0  | 21  | 2 PITG_06346   |
| 0  | 129 | 27 NA          |
| 0  | 66  | 136 PITG_13462 |
| 0  | 8   | 18 PITG_08305  |
| 0  | 245 | 764 PITG_17786 |
| 0  | 15  | 0 PITG_10399   |
| 0  | 36  | 15 PITG_13307  |
| 0  | 179 | 25 PITG_10830  |
| 6  | 0   | 9 NA           |
| 0  | 63  | 4 NA           |

|   |     |                |
|---|-----|----------------|
| 0 | 76  | 45 PITG_11615  |
| 0 | 112 | 52 PITG_10164  |
| 0 | 51  | 65 PITG_05291  |
| 0 | 18  | 34 PITG_05617  |
| 0 | 6   | 0 PITG_03898   |
| 0 | 60  | 36 NA          |
| 0 | 88  | 4 PITG_09951   |
| 0 | 3   | 8 PITG_02161   |
| 0 | 66  | 156 PITG_02741 |
| 0 | 30  | 35 PITG_02564  |
| 0 | 9   | 10 PITG_13039  |
| 0 | 7   | 18 PITG_03492  |
| 0 | 30  | 4 PITG_15874   |
| 0 | 93  | 37 PITG_02960  |
| 0 | 91  | 18 PITG_11773  |
| 0 | 35  | 26 PITG_07197  |
| 0 | 20  | 19 PITG_11233  |
| 0 | 8   | 2 PITG_14381   |
| 0 | 18  | 164 PITG_19263 |
| 0 | 8   | 2 PITG_16115   |
| 2 | 0   | 37 NA          |
| 0 | 446 | 839 PITG_15969 |
| 0 | 64  | 48 PITG_18288  |
| 0 | 83  | 69 PITG_19536  |
| 0 | 2   | 0 PITG_06274   |
| 0 | 27  | 14 PITG_05149  |
| 0 | 61  | 4 NA           |
| 0 | 4   | 0 NA           |
| 0 | 2   | 13 PITG_04910  |
| 0 | 354 | 237 PITG_08000 |
| 0 | 62  | 137 PITG_00967 |
| 0 | 19  | 27 PITG_08787  |
| 0 | 2   | 0 PITG_16068   |
| 0 | 2   | 0 NA           |
| 0 | 4   | 2 PITG_12677   |
| 0 | 50  | 72 PITG_13259  |
| 0 | 196 | 200 PITG_06223 |
| 0 | 59  | 32 NA          |
| 0 | 227 | 292 PITG_02740 |
| 0 | 5   | 9 PITG_18457   |
| 0 | 0   | 0 PITG_15259   |
| 0 | 13  | 2 NA           |
| 0 | 6   | 10 PITG_21400  |
| 0 | 13  | 26 PITG_08669  |
| 0 | 2   | 2 PITG_02203   |
| 0 | 8   | 8 PITG_12259   |
| 0 | 4   | 15 PITG_12191  |

|   |     |               |
|---|-----|---------------|
| 0 | 17  | 0 NA          |
| 0 | 0   | 0 PITG_15393  |
| 0 | 6   | 2 PITG_07890  |
| 0 | 15  | 23 PITG_04505 |
| 0 | 2   | 0 NA          |
| 0 | 3   | 7 PITG_06817  |
| 0 | 7   | 4 PITG_11286  |
| 0 | 53  | 15 NA         |
| 0 | 131 | 29 PITG_02793 |
| 0 | 28  | 8 PITG_01030  |
| 0 | 22  | 4 PITG_10838  |
| 0 | 0   | 0 PITG_19098  |
| 0 | 23  | 45 NA         |
| 0 | 6   | 23 NA         |
| 0 | 13  | 2 PITG_00381  |
| 0 | 39  | 16 PITG_17690 |
| 0 | 10  | 12 PITG_00662 |
| 0 | 60  | 24 PITG_02695 |
| 0 | 13  | 12 PITG_08738 |
| 0 | 57  | 2 NA          |
| 0 | 10  | 2 NA          |
| 0 | 43  | 36 NA         |
| 0 | 6   | 4 PITG_00075  |
| 0 | 30  | 2 NA          |
| 0 | 16  | 29 PITG_16433 |
| 0 | 0   | 0 PITG_08237  |
| 0 | 10  | 4 PITG_06369  |
| 0 | 0   | 2 NA          |
| 0 | 18  | 3 PITG_10023  |
| 0 | 66  | 32 NA         |
| 0 | 156 | 60 PITG_16009 |
| 0 | 138 | 83 PITG_04376 |
| 0 | 318 | 368 NA        |
| 0 | 62  | 16 NA         |
| 0 | 6   | 4 PITG_05600  |
| 0 | 17  | 8 PITG_12453  |
| 0 | 9   | 0 PITG_12987  |
| 0 | 2   | 3 PITG_02146  |
| 0 | 11  | 10 PITG_08305 |
| 0 | 10  | 3 PITG_13631  |
| 0 | 2   | 2 PITG_14626  |
| 0 | 40  | 31 PITG_21853 |
| 0 | 61  | 35 PITG_02820 |
| 0 | 18  | 24 PITG_07111 |
| 0 | 14  | 0 PITG_20311  |
| 0 | 65  | 12 PITG_14394 |
| 0 | 15  | 0 NA          |

|   |      |                  |
|---|------|------------------|
| 0 | 17   | 6 PITG_06819     |
| 0 | 26   | 2 NA             |
| 0 | 2    | 9 PITG_08189     |
| 0 | 0    | 3 PITG_07865     |
| 0 | 36   | 4 PITG_00698     |
| 0 | 40   | 17 PITG_08154    |
| 0 | 0    | 0 NA             |
| 0 | 1182 | 827 PITG_03873   |
| 0 | 2    | 2 PITG_13609     |
| 0 | 0    | 2 PITG_02456     |
| 0 | 6    | 6 PITG_00160     |
| 0 | 53   | 0 PITG_09355     |
| 0 | 2    | 4 PITG_03749     |
| 0 | 9    | 19 PITG_18174    |
| 0 | 0    | 4 PITG_10191     |
| 0 | 76   | 19 PITG_02755    |
| 0 | 5    | 0 NA             |
| 0 | 14   | 8 PITG_16274     |
| 0 | 6    | 0 NA             |
| 0 | 33   | 13 PITG_07120    |
| 0 | 5    | 4 PITG_15607     |
| 0 | 6    | 0 PITG_19002     |
| 0 | 58   | 14 NA            |
| 0 | 6451 | 10385 PITG_08844 |
| 0 | 23   | 5 PITG_06121     |
| 0 | 8    | 2 PITG_03562     |
| 0 | 18   | 7 PITG_02381     |
| 0 | 26   | 46 PITG_04994    |
| 0 | 6    | 0 NA             |
| 0 | 16   | 6 NA             |
| 0 | 7    | 0 NA             |
| 0 | 10   | 9 NA             |
| 0 | 0    | 0 PITG_04564     |
| 0 | 238  | 107 PITG_08189   |
| 0 | 0    | 2 PITG_03830     |
| 0 | 25   | 24 PITG_03576    |
| 0 | 68   | 114 NA           |
| 0 | 76   | 26 PITG_18973    |
| 0 | 448  | 294 PITG_05922   |
| 0 | 4    | 0 PITG_21618     |
| 0 | 12   | 79 PITG_08218    |
| 0 | 0    | 24 PITG_18025    |
| 0 | 18   | 6 PITG_19916     |
| 0 | 7    | 6 PITG_05008     |
| 0 | 10   | 26 PITG_00566    |
| 0 | 27   | 12 PITG_17986    |
| 0 | 39   | 88 PITG_05516    |



|   |      |                 |
|---|------|-----------------|
| 0 | 2558 | 4129 PITG_07355 |
| 0 | 43   | 86 PITG_20719   |
| 0 | 7    | 7 PITG_21908    |
| 0 | 133  | 2 NA            |
| 2 | 13   | 7 PITG_00939    |
| 0 | 4    | 6 PITG_13345    |
| 0 | 20   | 11 PITG_07301   |
| 0 | 128  | 104 PITG_13473  |
| 0 | 2    | 4 PITG_16546    |
| 0 | 10   | 44 PITG_08452   |
| 0 | 4    | 2 PITG_02245    |
| 0 | 312  | 115 PITG_10819  |
| 0 | 0    | 0 PITG_14163    |
| 0 | 272  | 697 PITG_18720  |
| 0 | 3    | 11 PITG_16938   |
| 0 | 79   | 31 PITG_18432   |
| 0 | 8    | 10 NA           |
| 0 | 127  | 235 PITG_06108  |
| 0 | 5    | 16 PITG_22200   |
| 0 | 4    | 3 PITG_18432    |
| 0 | 19   | 10 PITG_21222   |
| 0 | 2    | 0 NA            |
| 0 | 8    | 4 PITG_14835    |
| 0 | 26   | 3 PITG_03843    |
| 0 | 12   | 2 PITG_15384    |
| 0 | 7    | 14 PITG_01737   |
| 0 | 30   | 5 PITG_05326    |
| 0 | 0    | 0 PITG_05197    |
| 0 | 353  | 528 PITG_13500  |
| 0 | 68   | 28 PITG_12151   |
| 0 | 8    | 0 PITG_11161    |
| 0 | 2    | 3 PITG_06019    |
| 0 | 0    | 2 PITG_13666    |
| 0 | 19   | 4 PITG_18632    |
| 0 | 395  | 262 PITG_04337  |
| 0 | 83   | 68 PITG_16808   |
| 0 | 7    | 2 NA            |
| 0 | 100  | 11 PITG_12500   |
| 0 | 4    | 2 NA            |
| 0 | 17   | 45 PITG_13381   |
| 0 | 21   | 0 PITG_22989    |
| 0 | 95   | 51 PITG_12892   |
| 0 | 9    | 3 PITG_18298    |
| 0 | 2    | 0 PITG_17264    |
| 0 | 23   | 39 PITG_14853   |
| 0 | 81   | 10 PITG_20521   |
| 0 | 3    | 18 PITG_18175   |

|   |     |                |
|---|-----|----------------|
| 0 | 354 | 533 PITG_13753 |
| 0 | 12  | 8 PITG_06934   |
| 0 | 122 | 95 PITG_21602  |
| 0 | 0   | 0 PITG_11756   |
| 0 | 27  | 9 PITG_19516   |
| 0 | 129 | 101 PITG_19096 |
| 0 | 0   | 4 NA           |
| 0 | 48  | 35 NA          |
| 0 | 21  | 8 PITG_06220   |
| 0 | 2   | 0 PITG_12341   |
| 0 | 14  | 14 PITG_03103  |
| 0 | 4   | 0 PITG_03557   |
| 0 | 17  | 11 PITG_05282  |
| 0 | 40  | 24 PITG_20178  |
| 0 | 30  | 34 PITG_14914  |
| 0 | 43  | 83 PITG_00359  |
| 0 | 14  | 127 PITG_11116 |
| 0 | 4   | 0 PITG_03081   |
| 0 | 35  | 40 NA          |
| 0 | 441 | 521 PITG_01947 |
| 0 | 11  | 8 PITG_13393   |
| 0 | 75  | 56 PITG_21334  |
| 0 | 0   | 4 PITG_15116   |
| 0 | 170 | 67 PITG_07705  |
| 0 | 49  | 54 PITG_12813  |
| 0 | 88  | 51 NA          |
| 0 | 278 | 116 PITG_09253 |
| 0 | 57  | 50 PITG_14923  |
| 0 | 0   | 0 PITG_09669   |
| 0 | 6   | 7 NA           |
| 0 | 2   | 24 PITG_12514  |
| 0 | 94  | 261 PITG_06482 |
| 0 | 12  | 26 PITG_06107  |
| 0 | 262 | 913 NA         |
| 0 | 139 | 89 PITG_00967  |
| 0 | 0   | 2 PITG_10420   |
| 0 | 18  | 0 PITG_16085   |
| 0 | 0   | 0 NA           |
| 0 | 87  | 198 PITG_16311 |
| 0 | 37  | 12 PITG_12530  |
| 0 | 4   | 4 PITG_17959   |
| 0 | 22  | 10 PITG_20954  |
| 0 | 580 | 121 PITG_01701 |
| 0 | 0   | 2 PITG_15569   |
| 0 | 469 | 188 PITG_01830 |
| 0 | 208 | 63 PITG_10901  |
| 0 | 2   | 0 PITG_16956   |

|   |     |                |
|---|-----|----------------|
| 0 | 21  | 32 PITG_01920  |
| 0 | 13  | 0 NA           |
| 0 | 11  | 10 PITG_02596  |
| 0 | 19  | 19 PITG_00787  |
| 0 | 50  | 4 PITG_04973   |
| 0 | 8   | 7 PITG_17031   |
| 0 | 11  | 71 PITG_06827  |
| 0 | 11  | 13 PITG_03576  |
| 0 | 230 | 189 PITG_04376 |
| 0 | 5   | 4 PITG_01697   |
| 0 | 3   | 9 NA           |
| 0 | 13  | 2 PITG_13673   |
| 0 | 52  | 24 PITG_21556  |
| 0 | 13  | 5 PITG_01049   |
| 0 | 35  | 51 PITG_09665  |
| 0 | 63  | 13 NA          |
| 0 | 72  | 2 PITG_10648   |
| 0 | 31  | 0 PITG_13915   |
| 0 | 37  | 20 PITG_20773  |
| 0 | 19  | 9 NA           |
| 0 | 4   | 4 PITG_04676   |
| 0 | 2   | 7 PITG_01514   |
| 0 | 24  | 88 PITG_14941  |
| 0 | 124 | 61 PITG_07053  |
| 0 | 92  | 63 PITG_16036  |
| 0 | 43  | 75 NA          |
| 0 | 11  | 47 PITG_10343  |
| 0 | 22  | 19 PITG_18174  |
| 0 | 7   | 31 PITG_03594  |
| 0 | 0   | 0 PITG_17632   |
| 0 | 6   | 0 NA           |
| 0 | 12  | 3 NA           |
| 0 | 2   | 11 PITG_16999  |
| 0 | 4   | 0 NA           |
| 0 | 58  | 35 PITG_01386  |
| 0 | 33  | 0 PITG_01602   |
| 0 | 19  | 16 PITG_06353  |
| 0 | 4   | 21 PITG_07232  |
| 0 | 4   | 5 PITG_03311   |
| 0 | 24  | 12 PITG_20216  |
| 0 | 14  | 7 PITG_02502   |
| 0 | 219 | 654 PITG_19824 |
| 0 | 9   | 0 PITG_08473   |
| 0 | 26  | 18 PITG_05855  |
| 0 | 0   | 0 PITG_08103   |
| 0 | 4   | 0 NA           |
| 0 | 0   | 3 PITG_19168   |

|   |      |                |
|---|------|----------------|
| 0 | 2    | 14 PITG_17549  |
| 0 | 44   | 85 PITG_02145  |
| 0 | 6    | 15 PITG_11750  |
| 0 | 113  | 34 PITG_17501  |
| 0 | 0    | 0 PITG_14712   |
| 0 | 7    | 0 PITG_12119   |
| 0 | 33   | 20 PITG_03855  |
| 0 | 13   | 0 PITG_05451   |
| 0 | 38   | 14 NA          |
| 0 | 0    | 2 NA           |
| 0 | 40   | 0 NA           |
| 0 | 284  | 26 PITG_18072  |
| 0 | 363  | 437 PITG_04640 |
| 0 | 0    | 10 PITG_00210  |
| 0 | 8    | 14 NA          |
| 0 | 17   | 12 PITG_17928  |
| 0 | 2    | 0 PITG_08867   |
| 0 | 13   | 21 PITG_06822  |
| 0 | 36   | 16 PITG_15486  |
| 0 | 2    | 9 NA           |
| 0 | 0    | 0 NA           |
| 0 | 8    | 12 PITG_06677  |
| 0 | 48   | 35 PITG_00681  |
| 0 | 32   | 5 PITG_01681   |
| 0 | 1203 | 342 PITG_15900 |
| 0 | 29   | 67 PITG_16311  |
| 0 | 87   | 71 NA          |
| 0 | 123  | 11 PITG_17897  |
| 0 | 12   | 10 PITG_09090  |
| 0 | 8    | 29 PITG_01925  |
| 0 | 5    | 9 NA           |
| 0 | 418  | 166 PITG_10715 |
| 0 | 9    | 0 PITG_15925   |
| 0 | 0    | 4 PITG_05395   |
| 0 | 16   | 38 PITG_15641  |
| 0 | 16   | 0 NA           |
| 0 | 0    | 92 PITG_11244  |
| 0 | 0    | 2 PITG_16764   |
| 0 | 40   | 16 NA          |
| 0 | 134  | 326 PITG_14727 |
| 0 | 71   | 184 NA         |
| 0 | 10   | 0 NA           |
| 0 | 4    | 0 PITG_08471   |
| 0 | 2    | 3 PITG_14456   |
| 0 | 24   | 0 PITG_11387   |
| 0 | 57   | 45 PITG_10664  |
| 0 | 26   | 200 PITG_11877 |

|   |     |                |
|---|-----|----------------|
| 0 | 28  | 15 PITG_01678  |
| 0 | 0   | 0 NA           |
| 0 | 182 | 2 PITG_18062   |
| 0 | 2   | 4 PITG_08295   |
| 0 | 8   | 4 PITG_15268   |
| 0 | 181 | 36 NA          |
| 0 | 20  | 57 PITG_11425  |
| 0 | 230 | 933 PITG_09400 |
| 0 | 230 | 174 PITG_13758 |
| 0 | 5   | 0 PITG_21556   |
| 0 | 200 | 0 NA           |
| 0 | 8   | 8 PITG_14097   |
| 0 | 46  | 68 PITG_04658  |
| 0 | 12  | 6 NA           |
| 0 | 14  | 5 PITG_04486   |
| 0 | 36  | 47 PITG_15503  |
| 0 | 0   | 0 PITG_17867   |
| 0 | 20  | 3 NA           |
| 0 | 2   | 5 PITG_01335   |
| 0 | 4   | 2 PITG_19047   |
| 0 | 2   | 8 PITG_05168   |
| 0 | 92  | 39 PITG_20808  |
| 0 | 17  | 19 PITG_12472  |
| 0 | 3   | 4 NA           |
| 0 | 23  | 37 PITG_10269  |
| 0 | 38  | 94 PITG_08173  |
| 0 | 54  | 17 PITG_03819  |
| 0 | 0   | 2 PITG_03169   |
| 0 | 0   | 6 PITG_13775   |
| 0 | 22  | 68 PITG_12561  |
| 0 | 58  | 34 NA          |
| 0 | 0   | 4 PITG_04680   |
| 0 | 26  | 45 PITG_17952  |
| 0 | 6   | 4 PITG_04443   |
| 0 | 0   | 14 PITG_04910  |
| 0 | 0   | 0 PITG_09671   |
| 0 | 4   | 45 PITG_00748  |
| 0 | 0   | 0 PITG_06202   |
| 0 | 20  | 0 NA           |
| 0 | 3   | 20 PITG_11676  |
| 0 | 36  | 17 NA          |
| 0 | 13  | 6 PITG_19111   |
| 0 | 16  | 10 PITG_01405  |
| 0 | 0   | 2 NA           |
| 0 | 3   | 11 PITG_13165  |
| 0 | 2   | 27 PITG_11586  |
| 0 | 30  | 251 PITG_18025 |

|   |     |                |
|---|-----|----------------|
| 0 | 0   | 5 PITG_03443   |
| 0 | 133 | 350 PITG_00585 |
| 0 | 135 | 8 NA           |
| 0 | 21  | 31 PITG_02724  |
| 0 | 2   | 0 PITG_12516   |
| 0 | 18  | 36 PITG_15602  |
| 0 | 0   | 0 PITG_10308   |
| 0 | 6   | 13 PITG_05627  |
| 0 | 8   | 39 PITG_17568  |
| 0 | 4   | 2 PITG_18834   |
| 0 | 206 | 41 PITG_17990  |
| 0 | 4   | 0 PITG_17076   |
| 0 | 28  | 26 PITG_00857  |
| 0 | 48  | 39 PITG_16058  |
| 0 | 0   | 6 PITG_04466   |
| 0 | 39  | 21 NA          |
| 0 | 60  | 85 NA          |
| 0 | 68  | 61 PITG_01182  |
| 0 | 226 | 71 PITG_14276  |
| 0 | 57  | 18 PITG_08236  |
| 0 | 43  | 30 PITG_10990  |
| 0 | 69  | 17 PITG_16904  |
| 0 | 196 | 95 PITG_11496  |
| 0 | 136 | 54 PITG_02492  |
| 0 | 2   | 4 PITG_15755   |
| 0 | 175 | 23 PITG_01124  |
| 0 | 0   | 0 PITG_19611   |
| 0 | 42  | 11 NA          |
| 0 | 7   | 5 PITG_09566   |
| 0 | 0   | 0 PITG_19153   |
| 0 | 170 | 126 PITG_21829 |
| 0 | 17  | 27 PITG_13427  |
| 0 | 5   | 5 PITG_18473   |
| 0 | 2   | 0 PITG_14057   |
| 0 | 14  | 6 PITG_05669   |
| 0 | 13  | 40 PITG_02329  |
| 0 | 4   | 11 PITG_11451  |
| 0 | 56  | 13 PITG_00460  |
| 0 | 21  | 11 PITG_01606  |
| 0 | 3   | 0 PITG_03657   |
| 0 | 169 | 76 PITG_19041  |
| 0 | 16  | 2 NA           |
| 0 | 49  | 44 PITG_15694  |
| 0 | 146 | 14 PITG_17395  |
| 0 | 5   | 2 PITG_10817   |
| 0 | 4   | 2 PITG_11782   |
| 0 | 4   | 8 PITG_02044   |

|    |     |                 |
|----|-----|-----------------|
| 0  | 92  | 1523 PITG_19999 |
| 0  | 2   | 2 PITG_17804    |
| 0  | 2   | 3 PITG_17760    |
| 0  | 2   | 2 NA            |
| 0  | 8   | 0 PITG_14111    |
| 0  | 2   | 0 NA            |
| 0  | 7   | 4 PITG_01641    |
| 0  | 32  | 8 NA            |
| 0  | 170 | 26 NA           |
| 0  | 2   | 2 PITG_20637    |
| 0  | 5   | 0 PITG_05233    |
| 0  | 37  | 5 NA            |
| 0  | 2   | 0 PITG_19146    |
| 0  | 8   | 11 NA           |
| 0  | 0   | 5 NA            |
| 0  | 4   | 2 PITG_09818    |
| 0  | 5   | 6 PITG_04512    |
| 0  | 12  | 41 PITG_09782   |
| 0  | 2   | 2 PITG_13803    |
| 0  | 175 | 28 NA           |
| 0  | 6   | 13 PITG_09427   |
| 0  | 186 | 89 PITG_01649   |
| 0  | 32  | 73 PITG_12594   |
| 0  | 119 | 146 PITG_06619  |
| 0  | 2   | 0 PITG_09296    |
| 2  | 51  | 35 PITG_04579   |
| 0  | 213 | 81 PITG_09505   |
| 0  | 33  | 26 PITG_00778   |
| 38 | 0   | 72 NA           |
| 0  | 2   | 0 PITG_18897    |
| 0  | 18  | 11 PITG_23065   |
| 0  | 4   | 7 PITG_05128    |
| 0  | 135 | 100 NA          |
| 2  | 235 | 300 PITG_18931  |
| 0  | 53  | 11 PITG_01680   |
| 0  | 0   | 0 PITG_10124    |
| 0  | 16  | 19 PITG_11675   |
| 0  | 2   | 14 NA           |
| 0  | 16  | 26 PITG_09876   |
| 0  | 0   | 2 PITG_13362    |
| 0  | 0   | 0 PITG_14420    |
| 0  | 2   | 2 PITG_17769    |
| 0  | 21  | 41 PITG_15787   |
| 0  | 81  | 45 PITG_11029   |
| 0  | 0   | 0 NA            |
| 38 | 18  | 2578 NA         |
| 0  | 24  | 23 PITG_10795   |

|     |      |                |
|-----|------|----------------|
| 0   | 4    | 2 NA           |
| 308 | 0    | 66 NA          |
| 0   | 2    | 4 PITG_21317   |
| 0   | 20   | 28 PITG_06912  |
| 0   | 18   | 21 PITG_08295  |
| 0   | 0    | 9 NA           |
| 0   | 51   | 26 PITG_01293  |
| 0   | 0    | 0 PITG_16511   |
| 0   | 2320 | 347 PITG_17012 |
| 0   | 44   | 24 NA          |
| 0   | 19   | 5 PITG_21005   |
| 0   | 17   | 14 PITG_02735  |
| 0   | 6    | 3 PITG_06486   |
| 0   | 4    | 10 PITG_02572  |
| 0   | 66   | 0 PITG_11006   |
| 0   | 42   | 26 PITG_03237  |
| 0   | 158  | 372 PITG_00809 |
| 0   | 6    | 10 PITG_19158  |
| 0   | 427  | 208 PITG_10219 |
| 0   | 0    | 0 PITG_20284   |
| 0   | 11   | 3 PITG_19153   |
| 0   | 272  | 104 PITG_06231 |
| 0   | 0    | 4 PITG_05239   |
| 0   | 18   | 14 NA          |
| 0   | 119  | 183 PITG_09552 |
| 0   | 22   | 35 PITG_06358  |
| 0   | 38   | 4 NA           |
| 0   | 249  | 168 PITG_00980 |
| 0   | 7    | 4 PITG_19150   |
| 0   | 2    | 0 PITG_03755   |
| 0   | 212  | 90 PITG_03795  |
| 0   | 6    | 12 NA          |
| 0   | 13   | 38 PITG_17953  |
| 0   | 15   | 12 PITG_02337  |
| 0   | 41   | 176 PITG_17525 |
| 0   | 189  | 217 NA         |
| 0   | 5    | 3 PITG_04497   |
| 0   | 29   | 6 NA           |
| 0   | 4    | 0 PITG_09950   |
| 0   | 8    | 0 NA           |
| 0   | 121  | 50 PITG_00703  |
| 0   | 75   | 140 PITG_09655 |
| 0   | 17   | 12 PITG_03522  |
| 0   | 22   | 27 PITG_06205  |
| 0   | 21   | 9 PITG_13171   |
| 0   | 55   | 50 NA          |
| 0   | 28   | 9 PITG_05732   |



|      |     |                |
|------|-----|----------------|
| 0    | 11  | 63 PITG_07243  |
| 0    | 56  | 25 PITG_12172  |
| 0    | 45  | 17 NA          |
| 0    | 2   | 7 NA           |
| 0    | 0   | 0 PITG_17760   |
| 0    | 9   | 4 PITG_05825   |
| 0    | 2   | 8 PITG_13428   |
| 0    | 22  | 14 PITG_16439  |
| 0    | 11  | 16 PITG_05953  |
| 0    | 4   | 9 PITG_06943   |
| 0    | 8   | 40 PITG_01062  |
| 0    | 48  | 40 PITG_02849  |
| 0    | 417 | 479 NA         |
| 1779 | 29  | 1166 NA        |
| 0    | 33  | 35 PITG_19735  |
| 0    | 122 | 51 PITG_19804  |
| 0    | 209 | 8 NA           |
| 0    | 4   | 4 PITG_04746   |
| 0    | 45  | 22 PITG_05759  |
| 0    | 210 | 33 PITG_15539  |
| 0    | 39  | 15 PITG_01953  |
| 0    | 12  | 3 NA           |
| 0    | 10  | 8 PITG_08421   |
| 0    | 36  | 100 PITG_19245 |
| 0    | 129 | 54 PITG_08383  |
| 0    | 13  | 11 PITG_01592  |
| 0    | 171 | 90 PITG_14852  |
| 0    | 418 | 665 PITG_04831 |
| 0    | 6   | 6 PITG_20273   |
| 0    | 13  | 131 PITG_11966 |
| 0    | 23  | 19 PITG_04184  |
| 0    | 208 | 23 PITG_00078  |
| 0    | 187 | 67 PITG_06708  |
| 0    | 35  | 4 PITG_21400   |
| 0    | 2   | 0 PITG_07898   |
| 0    | 24  | 0 PITG_02213   |
| 0    | 0   | 0 NA           |
| 0    | 173 | 154 PITG_03614 |
| 0    | 211 | 355 PITG_08659 |
| 103  | 0   | 7 NA           |
| 0    | 384 | 433 PITG_08600 |
| 0    | 2   | 0 NA           |
| 0    | 0   | 0 PITG_13775   |
| 0    | 211 | 160 NA         |
| 0    | 94  | 217 PITG_11099 |
| 0    | 203 | 41 NA          |
| 0    | 0   | 0 PITG_20765   |

|   |     |                |
|---|-----|----------------|
| 0 | 418 | 89 PITG_00483  |
| 0 | 13  | 2 PITG_16681   |
| 0 | 65  | 29 PITG_18899  |
| 0 | 3   | 4 NA           |
| 0 | 9   | 14 PITG_10858  |
| 0 | 105 | 48 PITG_03988  |
| 0 | 23  | 349 PITG_11852 |
| 0 | 22  | 0 PITG_19997   |
| 0 | 2   | 2 PITG_08780   |
| 0 | 188 | 72 PITG_09923  |
| 0 | 26  | 52 PITG_09600  |
| 0 | 0   | 20 PITG_15006  |
| 0 | 145 | 150 PITG_05183 |
| 0 | 29  | 10 PITG_04839  |
| 0 | 24  | 6 PITG_05300   |
| 0 | 128 | 212 PITG_20384 |
| 0 | 11  | 6 PITG_18113   |
| 0 | 5   | 10 PITG_13397  |
| 0 | 89  | 15 PITG_13167  |
| 0 | 38  | 147 NA         |
| 0 | 29  | 0 PITG_03601   |
| 0 | 9   | 5 PITG_11302   |
| 0 | 209 | 28 PITG_02971  |
| 0 | 54  | 189 PITG_05373 |
| 0 | 3   | 4 PITG_00936   |
| 0 | 307 | 417 PITG_13178 |
| 0 | 6   | 13 PITG_17958  |
| 0 | 0   | 4 PITG_12128   |
| 0 | 345 | 75 PITG_00970  |
| 0 | 39  | 15 NA          |
| 0 | 10  | 197 PITG_07586 |
| 0 | 6   | 20 PITG_00193  |
| 0 | 26  | 14 PITG_10813  |
| 0 | 67  | 35 PITG_16958  |
| 0 | 2   | 0 PITG_15688   |
| 0 | 7   | 3 PITG_11080   |
| 0 | 18  | 14 PITG_01557  |
| 0 | 0   | 0 PITG_18322   |
| 0 | 12  | 55 PITG_03472  |
| 0 | 196 | 32 PITG_17230  |
| 0 | 0   | 0 PITG_13815   |
| 0 | 55  | 8 PITG_03006   |
| 0 | 0   | 0 PITG_03468   |
| 0 | 118 | 57 PITG_12308  |
| 0 | 33  | 22 PITG_08540  |
| 0 | 24  | 28 PITG_14217  |
| 0 | 38  | 0 PITG_03855   |

|   |     |                |
|---|-----|----------------|
| 0 | 0   | 0 PITG_07945   |
| 0 | 219 | 26 PITG_18358  |
| 0 | 41  | 3 NA           |
| 0 | 16  | 0 NA           |
| 0 | 91  | 28 PITG_20714  |
| 0 | 100 | 11 NA          |
| 0 | 130 | 99 PITG_11086  |
| 0 | 24  | 38 PITG_09863  |
| 0 | 7   | 2 NA           |
| 0 | 23  | 0 NA           |
| 0 | 54  | 19 PITG_17201  |
| 0 | 390 | 193 PITG_10951 |
| 0 | 118 | 65 PITG_19878  |
| 0 | 0   | 8 PITG_03594   |
| 0 | 36  | 23 PITG_15694  |
| 0 | 10  | 2 PITG_02866   |
| 0 | 138 | 58 PITG_17348  |
| 0 | 214 | 201 PITG_19065 |
| 0 | 7   | 2 PITG_12288   |
| 0 | 64  | 67 PITG_16127  |
| 0 | 16  | 0 NA           |
| 0 | 13  | 2 PITG_00568   |
| 0 | 37  | 0 PITG_00486   |
| 0 | 19  | 2 NA           |
| 0 | 26  | 13 PITG_16335  |
| 0 | 23  | 0 NA           |
| 0 | 13  | 48 PITG_00986  |
| 0 | 38  | 119 PITG_01031 |
| 0 | 120 | 379 PITG_09404 |
| 0 | 2   | 0 PITG_07697   |
| 0 | 8   | 56 PITG_08693  |
| 0 | 8   | 29 PITG_08383  |
| 0 | 8   | 9 PITG_05830   |
| 0 | 6   | 12 NA          |
| 0 | 14  | 6 PITG_17769   |
| 0 | 6   | 2 PITG_22159   |
| 0 | 23  | 2 PITG_09301   |
| 0 | 16  | 0 PITG_13039   |
| 0 | 0   | 0 PITG_17049   |
| 0 | 52  | 23 PITG_03819  |
| 0 | 63  | 40 PITG_13749  |
| 0 | 85  | 47 NA          |
| 0 | 0   | 2 NA           |
| 0 | 18  | 0 PITG_07730   |
| 0 | 8   | 0 PITG_05128   |
| 0 | 2   | 0 PITG_13815   |
| 0 | 7   | 0 NA           |

|   |     |                |
|---|-----|----------------|
| 0 | 5   | 0 NA           |
| 0 | 4   | 2 PITG_00080   |
| 0 | 2   | 2 PITG_10977   |
| 0 | 145 | 266 PITG_05539 |
| 0 | 21  | 6 NA           |
| 0 | 7   | 7 PITG_12162   |
| 0 | 11  | 0 PITG_10591   |
| 0 | 121 | 38 PITG_19223  |
| 0 | 36  | 10 PITG_00481  |
| 0 | 15  | 17 NA          |
| 0 | 4   | 2 PITG_01154   |
| 0 | 62  | 0 PITG_00734   |
| 0 | 139 | 106 PITG_14946 |
| 0 | 4   | 4 PITG_01053   |
| 0 | 8   | 30 PITG_11470  |
| 0 | 2   | 0 NA           |
| 0 | 8   | 0 PITG_05198   |
| 0 | 24  | 7 PITG_01216   |
| 0 | 2   | 0 NA           |
| 0 | 56  | 147 PITG_00681 |
| 0 | 20  | 7 NA           |
| 0 | 0   | 2 PITG_14123   |
| 0 | 18  | 2 PITG_13546   |
| 0 | 2   | 11 PITG_21334  |
| 0 | 3   | 6 PITG_01019   |
| 0 | 58  | 35 PITG_10499  |
| 0 | 2   | 0 NA           |
| 0 | 15  | 108 PITG_15033 |
| 0 | 2   | 0 PITG_11461   |
| 0 | 42  | 35 PITG_01982  |
| 0 | 0   | 0 PITG_19790   |
| 0 | 22  | 5 PITG_01946   |
| 0 | 82  | 120 PITG_22433 |
| 0 | 40  | 2 PITG_11888   |
| 0 | 2   | 6 PITG_06609   |
| 0 | 14  | 6 PITG_02664   |
| 0 | 12  | 17 PITG_12744  |
| 0 | 10  | 0 NA           |
| 0 | 9   | 0 NA           |
| 0 | 40  | 52 PITG_11107  |
| 0 | 0   | 0 PITG_03995   |
| 0 | 10  | 0 PITG_18537   |
| 0 | 7   | 2 PITG_13544   |
| 0 | 74  | 7 PITG_13268   |
| 0 | 2   | 13 PITG_10594  |
| 0 | 51  | 14 PITG_05500  |
| 0 | 102 | 18 PITG_15958  |

|     |     |                |
|-----|-----|----------------|
| 0   | 38  | 34 PITG_20714  |
| 0   | 2   | 2 PITG_08197   |
| 0   | 123 | 79 PITG_08188  |
| 0   | 23  | 22 PITG_16272  |
| 0   | 74  | 47 PITG_06152  |
| 0   | 0   | 0 PITG_00262   |
| 0   | 24  | 71 PITG_13386  |
| 0   | 253 | 10 PITG_06410  |
| 0   | 30  | 40 PITG_21816  |
| 0   | 2   | 2 PITG_13631   |
| 0   | 17  | 6 NA           |
| 0   | 50  | 29 PITG_08725  |
| 0   | 28  | 28 NA          |
| 0   | 66  | 7 PITG_06996   |
| 0   | 30  | 0 NA           |
| 0   | 2   | 0 NA           |
| 0   | 17  | 37 PITG_18744  |
| 146 | 62  | 489 NA         |
| 0   | 12  | 0 PITG_19287   |
| 0   | 25  | 35 PITG_17394  |
| 0   | 39  | 25 PITG_07247  |
| 0   | 14  | 9 PITG_01682   |
| 0   | 47  | 31 PITG_20306  |
| 0   | 65  | 13 PITG_01980  |
| 0   | 245 | 82 PITG_13324  |
| 0   | 29  | 20 PITG_14914  |
| 0   | 93  | 8 PITG_02277   |
| 2   | 454 | 207 PITG_11139 |
| 0   | 44  | 0 PITG_14005   |
| 0   | 11  | 16 PITG_20152  |
| 0   | 144 | 44 PITG_02664  |
| 0   | 73  | 51 PITG_05990  |
| 0   | 2   | 0 NA           |
| 0   | 48  | 17 PITG_01721  |
| 0   | 169 | 191 PITG_08765 |
| 0   | 82  | 22 NA          |
| 0   | 25  | 12 PITG_13483  |
| 0   | 0   | 8 NA           |
| 0   | 6   | 11 PITG_12980  |
| 0   | 42  | 55 PITG_11608  |
| 0   | 59  | 221 PITG_03445 |
| 0   | 3   | 4 PITG_15571   |
| 0   | 10  | 5 PITG_19153   |
| 0   | 72  | 12 NA          |
| 0   | 114 | 0 NA           |
| 0   | 0   | 0 PITG_18295   |
| 0   | 31  | 14 NA          |

|   |     |                |
|---|-----|----------------|
| 0 | 27  | 28 PITG_14829  |
| 0 | 17  | 4 NA           |
| 0 | 0   | 0 PITG_17270   |
| 0 | 69  | 38 NA          |
| 0 | 8   | 10 PITG_10593  |
| 0 | 14  | 10 NA          |
| 0 | 7   | 5 PITG_14619   |
| 0 | 165 | 35 PITG_07326  |
| 0 | 26  | 10 PITG_18959  |
| 0 | 65  | 143 PITG_16720 |
| 0 | 0   | 0 PITG_02552   |
| 0 | 75  | 0 PITG_13252   |
| 0 | 146 | 211 PITG_10887 |
| 0 | 5   | 4 PITG_07286   |
| 0 | 105 | 2 PITG_02124   |
| 0 | 87  | 125 PITG_11110 |
| 0 | 29  | 39 PITG_03238  |
| 0 | 23  | 10 NA          |
| 0 | 19  | 0 NA           |
| 0 | 5   | 2 PITG_08038   |
| 0 | 7   | 4 PITG_02109   |
| 0 | 229 | 47 PITG_22333  |
| 0 | 4   | 6 NA           |
| 0 | 83  | 17 PITG_15497  |
| 0 | 2   | 2 NA           |
| 0 | 13  | 45 PITG_22928  |
| 0 | 9   | 4 PITG_20904   |
| 0 | 187 | 210 PITG_08715 |
| 0 | 27  | 4 NA           |
| 0 | 2   | 2 PITG_15818   |
| 0 | 2   | 0 PITG_23029   |
| 0 | 36  | 13 NA          |
| 0 | 9   | 2 NA           |
| 0 | 9   | 7 PITG_11410   |
| 0 | 6   | 13 NA          |
| 0 | 22  | 10 PITG_02127  |
| 0 | 10  | 17 PITG_02973  |
| 0 | 39  | 115 PITG_00980 |
| 0 | 14  | 14 PITG_02731  |
| 0 | 0   | 0 PITG_22238   |
| 0 | 616 | 316 PITG_03948 |
| 0 | 0   | 2 NA           |
| 0 | 32  | 7 PITG_12576   |
| 0 | 23  | 4 PITG_07139   |
| 0 | 8   | 2 NA           |
| 0 | 15  | 4 NA           |
| 0 | 57  | 56 PITG_10987  |

|   |     |                |
|---|-----|----------------|
| 0 | 0   | 0 NA           |
| 0 | 22  | 15 PITG_17058  |
| 0 | 8   | 17 PITG_10026  |
| 0 | 8   | 2 PITG_01860   |
| 0 | 4   | 0 NA           |
| 0 | 32  | 5 PITG_11799   |
| 0 | 0   | 0 PITG_00840   |
| 0 | 0   | 2 PITG_02921   |
| 0 | 0   | 0 PITG_20525   |
| 0 | 57  | 19 PITG_02786  |
| 0 | 45  | 4 PITG_10183   |
| 0 | 6   | 0 PITG_05100   |
| 0 | 25  | 0 PITG_00038   |
| 0 | 29  | 2 PITG_16887   |
| 0 | 77  | 5 PITG_10484   |
| 0 | 9   | 0 PITG_08304   |
| 0 | 8   | 2 PITG_18289   |
| 0 | 56  | 51 PITG_05234  |
| 0 | 25  | 2 NA           |
| 0 | 14  | 9 PITG_11822   |
| 0 | 102 | 4 PITG_08197   |
| 0 | 3   | 0 NA           |
| 0 | 75  | 12 PITG_01419  |
| 0 | 30  | 25 PITG_13258  |
| 0 | 25  | 6 PITG_02457   |
| 0 | 6   | 3 NA           |
| 0 | 5   | 2 NA           |
| 0 | 134 | 49 PITG_20235  |
| 0 | 30  | 149 PITG_18851 |
| 0 | 59  | 17 NA          |
| 0 | 104 | 40 PITG_04505  |
| 0 | 100 | 0 PITG_20130   |
| 0 | 27  | 22 PITG_15998  |
| 0 | 2   | 4 PITG_00979   |
| 0 | 5   | 2 NA           |
| 0 | 7   | 9 PITG_05151   |
| 0 | 22  | 7 PITG_04579   |
| 0 | 243 | 241 PITG_11775 |
| 0 | 2   | 0 PITG_01314   |
| 0 | 9   | 2 PITG_16322   |
| 0 | 78  | 17 NA          |
| 0 | 18  | 3 NA           |
| 0 | 152 | 35 PITG_20468  |
| 0 | 87  | 121 PITG_00140 |
| 0 | 4   | 0 NA           |
| 0 | 4   | 13 PITG_00964  |
| 0 | 11  | 9 NA           |

|     |     |                |
|-----|-----|----------------|
| 0   | 0   | 10 PITG_10449  |
| 0   | 197 | 188 PITG_11767 |
| 0   | 34  | 4 NA           |
| 0   | 2   | 6 PITG_02706   |
| 2   | 246 | 221 PITG_00941 |
| 0   | 0   | 0 PITG_14210   |
| 0   | 215 | 204 PITG_02971 |
| 0   | 21  | 17 PITG_15518  |
| 0   | 54  | 37 PITG_13002  |
| 0   | 172 | 234 PITG_15627 |
| 2   | 272 | 489 PITG_12108 |
| 0   | 0   | 2 PITG_21181   |
| 0   | 0   | 2 PITG_04023   |
| 0   | 8   | 2 PITG_04590   |
| 0   | 6   | 0 PITG_08595   |
| 939 | 34  | 876 NA         |
| 0   | 2   | 9 NA           |
| 0   | 89  | 372 PITG_11712 |
| 0   | 76  | 8 PITG_06610   |
| 0   | 44  | 45 PITG_10141  |
| 0   | 49  | 4 PITG_12563   |
| 0   | 5   | 13 PITG_12140  |
| 2   | 56  | 8 PITG_06986   |
| 0   | 2   | 0 PITG_17036   |
| 0   | 187 | 122 PITG_15383 |
| 0   | 6   | 28 PITG_06649  |
| 0   | 19  | 20 PITG_02002  |
| 0   | 2   | 0 PITG_12318   |
| 0   | 10  | 5 PITG_05155   |
| 0   | 6   | 6 PITG_07851   |
| 0   | 12  | 4 PITG_10239   |
| 0   | 104 | 0 PITG_01152   |
| 0   | 17  | 12 PITG_06941  |
| 0   | 275 | 78 PITG_08330  |
| 0   | 592 | 80 PITG_17230  |
| 0   | 3   | 0 PITG_12821   |
| 0   | 180 | 0 NA           |
| 0   | 0   | 0 PITG_05175   |
| 0   | 15  | 6 NA           |
| 0   | 25  | 6 PITG_11922   |
| 0   | 8   | 21 PITG_16058  |
| 0   | 151 | 177 NA         |
| 0   | 181 | 12 NA          |
| 0   | 21  | 19 PITG_00734  |
| 0   | 37  | 18 PITG_12120  |
| 0   | 38  | 4 PITG_06980   |
| 0   | 84  | 27 NA          |



|     |     |               |
|-----|-----|---------------|
| 0   | 4   | 7 NA          |
| 0   | 6   | 4 PITG_01754  |
| 0   | 0   | 0 PITG_18328  |
| 0   | 7   | 7 PITG_14602  |
| 0   | 7   | 23 PITG_05907 |
| 0   | 17  | 9 PITG_03804  |
| 0   | 21  | 6 PITG_02971  |
| 0   | 8   | 0 NA          |
| 0   | 6   | 5 PITG_14918  |
| 0   | 7   | 12 PITG_17600 |
| 0   | 0   | 0 PITG_17568  |
| 0   | 10  | 8 PITG_04555  |
| 0   | 110 | 68 PITG_16814 |
| 0   | 85  | 15 PITG_10026 |
| 0   | 70  | 38 PITG_11780 |
| 0   | 16  | 19 PITG_14176 |
| 0   | 26  | 2 PITG_13300  |
| 709 | 23  | 2077 NA       |
| 0   | 44  | 51 PITG_02197 |
| 0   | 34  | 10 PITG_22552 |
| 0   | 41  | 0 PITG_16335  |
| 0   | 78  | 93 PITG_08570 |
| 0   | 33  | 8 PITG_02711  |
| 0   | 2   | 7 NA          |
| 0   | 5   | 2 PITG_19672  |
| 0   | 15  | 6 PITG_10832  |
| 0   | 29  | 18 PITG_00450 |
| 0   | 66  | 11 PITG_18409 |
| 0   | 53  | 18 PITG_18248 |
| 0   | 8   | 7 NA          |
| 0   | 39  | 8 PITG_16904  |
| 0   | 25  | 24 PITG_02729 |
| 0   | 252 | 61 PITG_16363 |
| 0   | 8   | 9 PITG_00963  |
| 0   | 91  | 17 NA         |
| 0   | 7   | 6 PITG_11981  |
| 0   | 13  | 2 PITG_03940  |
| 0   | 13  | 4 PITG_06911  |
| 0   | 0   | 0 PITG_14675  |
| 0   | 55  | 54 PITG_16058 |
| 0   | 17  | 5 PITG_01664  |
| 0   | 4   | 6 PITG_02330  |
| 0   | 132 | 72 PITG_02636 |
| 0   | 8   | 15 PITG_22398 |
| 0   | 2   | 3 PITG_06085  |
| 0   | 0   | 0 NA          |
| 0   | 48  | 71 PITG_20611 |

|   |     |                |
|---|-----|----------------|
| 0 | 0   | 0 PITG_05277   |
| 0 | 278 | 253 PITG_21026 |
| 0 | 6   | 8 PITG_00858   |
| 0 | 329 | 377 PITG_09282 |
| 0 | 421 | 30 NA          |
| 0 | 40  | 6 NA           |
| 0 | 88  | 124 PITG_20194 |
| 0 | 0   | 53 PITG_22562  |
| 0 | 8   | 8 PITG_12105   |
| 0 | 7   | 12 NA          |
| 0 | 17  | 35 PITG_05318  |
| 0 | 76  | 73 PITG_01090  |
| 0 | 28  | 40 PITG_13065  |
| 0 | 123 | 105 NA         |
| 0 | 0   | 0 NA           |
| 0 | 119 | 7 NA           |
| 0 | 10  | 0 NA           |
| 0 | 48  | 7 PITG_09305   |
| 0 | 2   | 2 NA           |
| 0 | 23  | 0 NA           |
| 0 | 39  | 8 NA           |
| 0 | 22  | 2 PITG_16818   |
| 0 | 211 | 443 PITG_07846 |
| 0 | 181 | 173 PITG_03360 |
| 0 | 41  | 39 PITG_02905  |
| 0 | 28  | 36 PITG_16456  |
| 0 | 6   | 0 NA           |
| 0 | 5   | 11 NA          |
| 0 | 98  | 360 PITG_01450 |
| 0 | 21  | 3 PITG_14623   |
| 0 | 44  | 42 PITG_05658  |
| 0 | 30  | 12 PITG_05748  |
| 0 | 15  | 2 PITG_06661   |
| 0 | 29  | 4 PITG_09448   |
| 0 | 41  | 4 NA           |
| 0 | 19  | 44 PITG_05508  |
| 0 | 33  | 4 PITG_19672   |
| 0 | 116 | 44 NA          |
| 0 | 7   | 2 NA           |
| 0 | 2   | 2 PITG_18316   |
| 0 | 0   | 7 PITG_11460   |
| 0 | 0   | 6 PITG_18106   |
| 0 | 2   | 4 PITG_02849   |
| 0 | 96  | 23 NA          |
| 0 | 2   | 5 PITG_17997   |
| 0 | 4   | 0 PITG_21416   |
| 0 | 29  | 27 PITG_07810  |

|   |     |                |
|---|-----|----------------|
| 0 | 3   | 0 NA           |
| 0 | 618 | 146 PITG_01056 |
| 0 | 4   | 4 NA           |
| 0 | 28  | 24 PITG_19402  |
| 0 | 0   | 0 NA           |
| 0 | 135 | 950 PITG_15375 |
| 0 | 0   | 0 PITG_03318   |
| 0 | 55  | 7 NA           |
| 0 | 3   | 0 NA           |
| 0 | 6   | 2 PITG_03374   |
| 0 | 0   | 0 PITG_15818   |
| 0 | 0   | 2 PITG_06695   |
| 0 | 3   | 0 PITG_01789   |
| 0 | 2   | 0 PITG_16224   |
| 0 | 26  | 18 PITG_05709  |
| 0 | 19  | 7 NA           |
| 0 | 4   | 0 PITG_06934   |
| 0 | 100 | 196 PITG_19557 |
| 0 | 42  | 12 NA          |
| 0 | 6   | 14 PITG_15852  |
| 0 | 2   | 2 PITG_08237   |
| 2 | 178 | 319 PITG_02344 |
| 0 | 15  | 0 NA           |
| 0 | 43  | 2 NA           |
| 0 | 0   | 0 PITG_04509   |
| 0 | 21  | 25 PITG_17745  |
| 0 | 15  | 19 PITG_08198  |
| 0 | 2   | 0 PITG_16340   |
| 0 | 0   | 0 NA           |
| 0 | 10  | 0 PITG_14833   |
| 0 | 6   | 0 PITG_01646   |
| 0 | 10  | 4 NA           |
| 0 | 2   | 0 NA           |
| 0 | 0   | 0 NA           |
| 0 | 111 | 192 PITG_20505 |
| 0 | 20  | 14 PITG_03142  |
| 0 | 60  | 25 PITG_15637  |
| 0 | 270 | 174 NA         |
| 0 | 0   | 0 PITG_10932   |
| 0 | 17  | 10 PITG_05686  |
| 0 | 21  | 4 NA           |
| 0 | 8   | 4 PITG_01317   |
| 0 | 5   | 21 PITG_02924  |
| 0 | 100 | 21 PITG_11161  |
| 0 | 22  | 27 PITG_18009  |
| 0 | 0   | 2 PITG_07289   |
| 0 | 14  | 2 PITG_14691   |

|   |     |                 |
|---|-----|-----------------|
| 0 | 59  | 13 PITG_15503   |
| 0 | 2   | 0 NA            |
| 0 | 25  | 2 NA            |
| 0 | 2   | 3 NA            |
| 0 | 0   | 0 NA            |
| 0 | 125 | 142 PITG_17273  |
| 0 | 5   | 2 NA            |
| 0 | 5   | 0 NA            |
| 0 | 33  | 2 PITG_00567    |
| 0 | 521 | 501 NA          |
| 0 | 284 | 134 PITG_12877  |
| 0 | 8   | 10 PITG_05781   |
| 0 | 55  | 89 PITG_14910   |
| 0 | 49  | 50 PITG_08528   |
| 0 | 6   | 42 PITG_19199   |
| 0 | 11  | 0 PITG_12211    |
| 0 | 58  | 4 PITG_16277    |
| 2 | 13  | 4 PITG_02850    |
| 0 | 18  | 0 NA            |
| 0 | 26  | 12 PITG_00119   |
| 0 | 7   | 23 PITG_14818   |
| 0 | 2   | 34 PITG_17498   |
| 0 | 5   | 2 PITG_03341    |
| 0 | 3   | 8 PITG_03947    |
| 0 | 33  | 46 PITG_10663   |
| 2 | 260 | 586 PITG_19008  |
| 0 | 0   | 0 PITG_16264    |
| 0 | 8   | 0 PITG_06898    |
| 0 | 4   | 4 PITG_03621    |
| 0 | 146 | 18 PITG_04334   |
| 0 | 6   | 6 PITG_14625    |
| 0 | 18  | 2 PITG_10345    |
| 0 | 18  | 47 PITG_01810   |
| 0 | 90  | 17 PITG_10502   |
| 0 | 20  | 0 PITG_02254    |
| 0 | 479 | 433 PITG_02902  |
| 0 | 698 | 2384 PITG_11046 |
| 0 | 47  | 10 PITG_05326   |
| 0 | 3   | 0 PITG_02927    |
| 0 | 2   | 24 NA           |
| 0 | 17  | 16 PITG_02951   |
| 0 | 44  | 30 PITG_02470   |
| 0 | 14  | 9 PITG_15311    |
| 0 | 71  | 121 PITG_13804  |
| 0 | 2   | 0 PITG_13397    |
| 0 | 224 | 82 PITG_02722   |
| 0 | 20  | 10 PITG_10141   |

|   |     |                |
|---|-----|----------------|
| 0 | 24  | 6 PITG_06660   |
| 0 | 129 | 53 PITG_01360  |
| 0 | 23  | 43 PITG_09564  |
| 0 | 26  | 27 NA          |
| 0 | 2   | 8 PITG_08235   |
| 0 | 18  | 0 NA           |
| 0 | 4   | 0 PITG_06219   |
| 0 | 0   | 0 PITG_16041   |
| 0 | 0   | 8 PITG_03267   |
| 0 | 121 | 53 PITG_18455  |
| 0 | 94  | 18 PITG_07029  |
| 0 | 2   | 12 PITG_04454  |
| 0 | 3   | 0 PITG_02274   |
| 0 | 115 | 63 PITG_05679  |
| 0 | 2   | 3 PITG_00563   |
| 0 | 52  | 97 PITG_05011  |
| 0 | 12  | 12 PITG_04718  |
| 0 | 0   | 9 PITG_09505   |
| 0 | 122 | 67 NA          |
| 0 | 14  | 27 NA          |
| 0 | 177 | 72 PITG_13151  |
| 0 | 0   | 8 PITG_00563   |
| 0 | 0   | 0 PITG_19106   |
| 0 | 6   | 9 PITG_19773   |
| 0 | 87  | 17 PITG_12234  |
| 0 | 11  | 4 PITG_09389   |
| 0 | 95  | 802 PITG_18731 |
| 0 | 119 | 0 PITG_03424   |
| 0 | 24  | 2 NA           |
| 0 | 32  | 12 PITG_01577  |
| 0 | 137 | 23 PITG_14766  |
| 0 | 13  | 2 NA           |
| 0 | 39  | 51 PITG_00188  |
| 0 | 7   | 14 PITG_07110  |
| 0 | 7   | 0 PITG_15706   |
| 0 | 4   | 2 PITG_21504   |
| 0 | 14  | 41 PITG_07308  |
| 0 | 15  | 14 PITG_05238  |
| 0 | 232 | 41 PITG_09478  |
| 0 | 11  | 4 PITG_22122   |
| 0 | 114 | 52 PITG_20766  |
| 0 | 6   | 7 PITG_08867   |
| 0 | 2   | 0 NA           |
| 0 | 42  | 11 PITG_13739  |
| 0 | 10  | 10 PITG_08232  |
| 0 | 3   | 0 PITG_05762   |
| 0 | 7   | 9 PITG_09450   |

|   |     |                |
|---|-----|----------------|
| 0 | 19  | 14 PITG_14194  |
| 0 | 0   | 2 PITG_03995   |
| 2 | 508 | 758 PITG_17516 |
| 0 | 680 | 117 PITG_12260 |
| 0 | 139 | 52 PITG_21133  |
| 0 | 9   | 2 PITG_16063   |
| 0 | 6   | 4 NA           |
| 0 | 45  | 143 PITG_18752 |
| 0 | 59  | 6 PITG_18657   |
| 0 | 4   | 15 PITG_01626  |
| 0 | 59  | 53 PITG_18359  |
| 0 | 4   | 4 PITG_03947   |
| 0 | 87  | 8 PITG_07543   |
| 0 | 10  | 4 PITG_17944   |
| 0 | 61  | 14 NA          |
| 0 | 4   | 6 PITG_09564   |
| 0 | 12  | 10 PITG_03833  |
| 0 | 36  | 30 PITG_22857  |
| 0 | 43  | 132 PITG_07038 |
| 0 | 5   | 29 NA          |
| 0 | 73  | 30 PITG_19516  |
| 0 | 3   | 2 PITG_15899   |
| 0 | 49  | 81 PITG_12300  |
| 0 | 6   | 10 PITG_22419  |
| 0 | 89  | 43 PITG_06966  |
| 0 | 7   | 57 PITG_15787  |
| 0 | 27  | 41 PITG_07191  |
| 0 | 25  | 33 PITG_02857  |
| 0 | 24  | 11 NA          |
| 0 | 97  | 70 PITG_20306  |
| 0 | 19  | 15 PITG_13397  |
| 0 | 23  | 23 PITG_05762  |
| 0 | 0   | 0 PITG_00403   |
| 0 | 24  | 60 PITG_09413  |
| 0 | 45  | 18 PITG_07702  |
| 0 | 200 | 74 PITG_09628  |
| 0 | 4   | 0 PITG_19991   |
| 0 | 112 | 12 NA          |
| 0 | 36  | 39 NA          |
| 0 | 0   | 0 PITG_03657   |
| 0 | 0   | 11 PITG_23178  |
| 0 | 0   | 5 PITG_15267   |
| 0 | 0   | 0 NA           |
| 0 | 58  | 11 PITG_09725  |
| 0 | 75  | 0 NA           |
| 0 | 65  | 4 NA           |
| 0 | 0   | 2 PITG_05261   |

|    |     |                |
|----|-----|----------------|
| 0  | 11  | 11 PITG_01584  |
| 38 | 51  | 22 NA          |
| 0  | 4   | 6 PITG_00577   |
| 0  | 4   | 3 PITG_03577   |
| 0  | 56  | 91 PITG_06578  |
| 0  | 51  | 100 PITG_04506 |
| 0  | 2   | 4 NA           |
| 0  | 2   | 2 PITG_04443   |
| 0  | 146 | 17 PITG_17795  |
| 0  | 14  | 0 PITG_17767   |
| 0  | 0   | 0 NA           |
| 0  | 173 | 288 PITG_13752 |
| 0  | 6   | 4 NA           |
| 0  | 30  | 4 PITG_13426   |
| 0  | 58  | 8 PITG_09585   |
| 0  | 22  | 44 NA          |
| 0  | 5   | 0 PITG_06452   |
| 0  | 45  | 56 PITG_11712  |
| 0  | 32  | 45 PITG_05404  |
| 0  | 9   | 49 PITG_01762  |
| 0  | 17  | 0 PITG_01188   |
| 0  | 359 | 141 PITG_20780 |
| 0  | 220 | 54 PITG_03531  |
| 0  | 0   | 0 PITG_17781   |
| 0  | 26  | 7 PITG_08295   |
| 0  | 54  | 88 PITG_00140  |
| 0  | 153 | 216 PITG_05363 |
| 0  | 15  | 16 PITG_16116  |
| 0  | 643 | 173 PITG_08671 |
| 0  | 53  | 40 PITG_13768  |
| 0  | 156 | 65 PITG_15960  |
| 0  | 25  | 0 PITG_06764   |
| 0  | 4   | 22 PITG_06731  |
| 0  | 457 | 245 PITG_19213 |
| 0  | 9   | 2 PITG_17946   |
| 0  | 13  | 9 PITG_19422   |
| 0  | 9   | 89 PITG_22848  |
| 0  | 31  | 19 PITG_10681  |
| 0  | 10  | 4 PITG_19286   |
| 0  | 0   | 2 PITG_14717   |
| 0  | 52  | 8 PITG_03715   |
| 0  | 33  | 2 PITG_19175   |
| 0  | 3   | 8 PITG_10894   |
| 0  | 0   | 8 PITG_10022   |
| 0  | 194 | 142 PITG_03934 |
| 0  | 10  | 6 PITG_16484   |
| 0  | 0   | 0 PITG_17760   |

|    |     |                |
|----|-----|----------------|
| 0  | 0   | 0 PITG_18332   |
| 0  | 11  | 5 PITG_20035   |
| 0  | 168 | 134 PITG_03801 |
| 0  | 0   | 2 NA           |
| 0  | 164 | 51 PITG_09144  |
| 0  | 90  | 45 PITG_01411  |
| 0  | 5   | 7 PITG_01719   |
| 0  | 46  | 24 PITG_11805  |
| 0  | 5   | 0 PITG_12433   |
| 0  | 32  | 10 PITG_01101  |
| 0  | 0   | 0 PITG_20634   |
| 0  | 0   | 2 NA           |
| 0  | 17  | 68 PITG_20994  |
| 0  | 24  | 50 PITG_02241  |
| 0  | 19  | 4 PITG_10450   |
| 0  | 23  | 23 PITG_02695  |
| 0  | 38  | 16 PITG_00888  |
| 0  | 3   | 2 PITG_03740   |
| 0  | 0   | 4 PITG_15961   |
| 0  | 106 | 30 NA          |
| 0  | 0   | 2 PITG_07573   |
| 0  | 94  | 135 PITG_01358 |
| 0  | 6   | 16 PITG_07960  |
| 0  | 65  | 9 PITG_16038   |
| 0  | 193 | 196 PITG_18720 |
| 0  | 28  | 14 PITG_09655  |
| 0  | 131 | 40 PITG_13483  |
| 0  | 130 | 304 NA         |
| 0  | 18  | 3 NA           |
| 0  | 0   | 5 NA           |
| 0  | 4   | 0 PITG_22626   |
| 0  | 4   | 4 PITG_12919   |
| 0  | 0   | 2 PITG_00440   |
| 0  | 584 | 466 PITG_13414 |
| 0  | 0   | 0 PITG_08746   |
| 0  | 72  | 23 PITG_08919  |
| 0  | 9   | 2 NA           |
| 0  | 83  | 67 PITG_09310  |
| 0  | 12  | 15 PITG_19180  |
| 0  | 200 | 17 NA          |
| 0  | 5   | 0 PITG_17370   |
| 0  | 45  | 0 NA           |
| 0  | 19  | 41 PITG_16833  |
| 0  | 429 | 491 PITG_01477 |
| 68 | 445 | 10 NA          |
| 0  | 6   | 0 PITG_12514   |
| 0  | 0   | 20 PITG_18046  |



|   |      |                 |
|---|------|-----------------|
| 0 | 102  | 103 PITG_04125  |
| 0 | 369  | 359 PITG_14946  |
| 0 | 21   | 2 PITG_18634    |
| 0 | 22   | 20 PITG_07228   |
| 0 | 140  | 83 PITG_09144   |
| 0 | 38   | 23 PITG_02895   |
| 0 | 47   | 46 PITG_04229   |
| 0 | 234  | 291 PITG_01556  |
| 0 | 138  | 21 NA           |
| 0 | 205  | 228 PITG_19448  |
| 0 | 0    | 2 PITG_03804    |
| 0 | 399  | 113 PITG_06119  |
| 0 | 102  | 9 PITG_02322    |
| 0 | 4    | 42 PITG_16720   |
| 0 | 127  | 128 PITG_15641  |
| 0 | 30   | 10 PITG_09983   |
| 0 | 27   | 178 NA          |
| 0 | 8    | 44 NA           |
| 0 | 115  | 39 PITG_01313   |
| 0 | 32   | 15 PITG_10196   |
| 0 | 45   | 6 PITG_06538    |
| 0 | 8    | 23 PITG_12454   |
| 0 | 8    | 48 PITG_13855   |
| 0 | 9    | 2 PITG_17876    |
| 0 | 0    | 10 PITG_05882   |
| 0 | 25   | 25 NA           |
| 0 | 2    | 6 PITG_17452    |
| 0 | 78   | 91 PITG_14608   |
| 0 | 288  | 175 PITG_19978  |
| 0 | 12   | 10 NA           |
| 0 | 96   | 33 PITG_01066   |
| 0 | 0    | 0 PITG_08305    |
| 0 | 18   | 2 PITG_21518    |
| 0 | 242  | 88 PITG_18623   |
| 0 | 29   | 37 PITG_13340   |
| 0 | 8    | 15 PITG_15688   |
| 0 | 0    | 0 PITG_13544    |
| 0 | 0    | 0 PITG_04047    |
| 0 | 297  | 552 PITG_06615  |
| 0 | 14   | 2 NA            |
| 0 | 17   | 16 NA           |
| 0 | 104  | 8 PITG_01239    |
| 0 | 7    | 0 PITG_16128    |
| 0 | 7    | 11 PITG_01768   |
| 0 | 24   | 29 PITG_00082   |
| 0 | 0    | 0 PITG_13173    |
| 2 | 3217 | 2455 PITG_04999 |

|   |     |                |
|---|-----|----------------|
| 0 | 46  | 37 NA          |
| 0 | 6   | 4 PITG_11146   |
| 0 | 310 | 322 PITG_11703 |
| 0 | 11  | 2 PITG_23180   |
| 0 | 13  | 16 PITG_05282  |
| 0 | 0   | 0 PITG_15610   |
| 0 | 82  | 42 PITG_03886  |
| 0 | 0   | 0 PITG_00129   |
| 0 | 0   | 4 PITG_11813   |
| 0 | 15  | 5 PITG_17673   |
| 0 | 0   | 2 PITG_19175   |
| 0 | 5   | 0 PITG_16044   |
| 0 | 7   | 5 PITG_18014   |
| 0 | 36  | 26 PITG_13775  |
| 0 | 14  | 4 PITG_04662   |
| 0 | 15  | 8 PITG_17081   |
| 0 | 121 | 70 PITG_08230  |
| 0 | 31  | 12 PITG_15967  |
| 0 | 558 | 134 PITG_01411 |
| 0 | 0   | 5 PITG_03374   |
| 0 | 6   | 5 PITG_03951   |
| 0 | 10  | 8 PITG_16071   |
| 0 | 21  | 4 NA           |
| 0 | 0   | 0 PITG_11799   |
| 0 | 0   | 4 NA           |
| 0 | 18  | 4 PITG_18432   |
| 0 | 2   | 4 NA           |
| 0 | 14  | 23 PITG_01283  |
| 0 | 0   | 0 PITG_07661   |
| 0 | 0   | 0 PITG_05505   |
| 0 | 2   | 0 PITG_19791   |
| 0 | 16  | 4 NA           |
| 0 | 13  | 0 PITG_02856   |
| 0 | 2   | 2 PITG_14757   |
| 0 | 0   | 0 PITG_10012   |
| 0 | 30  | 235 PITG_05959 |
| 0 | 83  | 17 PITG_01438  |
| 0 | 4   | 9 PITG_06963   |
| 0 | 9   | 17 PITG_17273  |
| 0 | 73  | 40 NA          |
| 0 | 15  | 73 PITG_04994  |
| 0 | 11  | 2 PITG_18657   |
| 0 | 22  | 6 PITG_09251   |
| 0 | 0   | 4 PITG_03466   |
| 0 | 2   | 2 PITG_01252   |
| 0 | 282 | 697 PITG_12185 |
| 0 | 0   | 18 PITG_07778  |

|   |     |                |
|---|-----|----------------|
| 0 | 27  | 0 PITG_19164   |
| 0 | 42  | 135 PITG_15755 |
| 0 | 11  | 35 PITG_13015  |
| 0 | 54  | 2 PITG_12547   |
| 0 | 2   | 0 NA           |
| 0 | 12  | 6 PITG_01030   |
| 0 | 14  | 0 NA           |
| 0 | 8   | 2 PITG_01019   |
| 0 | 43  | 6 PITG_16766   |
| 0 | 233 | 27 NA          |
| 0 | 49  | 0 NA           |
| 0 | 28  | 0 NA           |
| 0 | 0   | 0 NA           |
| 2 | 112 | 195 NA         |
| 0 | 45  | 2 NA           |
| 0 | 14  | 34 PITG_12521  |
| 0 | 51  | 32 PITG_14047  |
| 0 | 4   | 2 PITG_12269   |
| 0 | 0   | 2 PITG_13185   |
| 0 | 9   | 0 NA           |
| 0 | 9   | 0 PITG_10097   |
| 0 | 4   | 0 PITG_13590   |
| 0 | 23  | 14 PITG_17140  |
| 0 | 76  | 29 PITG_03329  |
| 0 | 74  | 10 PITG_13048  |
| 0 | 17  | 6 PITG_16826   |
| 0 | 295 | 133 PITG_02971 |
| 0 | 51  | 28 PITG_01073  |
| 0 | 2   | 0 PITG_17876   |
| 0 | 10  | 13 NA          |
| 0 | 0   | 2 PITG_09278   |
| 0 | 5   | 2 PITG_02017   |
| 0 | 21  | 18 PITG_18727  |
| 0 | 23  | 13 NA          |
| 0 | 6   | 0 NA           |
| 0 | 26  | 42 PITG_12537  |
| 0 | 46  | 60 PITG_12346  |
| 0 | 19  | 27 PITG_17869  |
| 0 | 50  | 32 PITG_03846  |
| 0 | 12  | 4 PITG_07822   |
| 0 | 25  | 17 PITG_07029  |
| 0 | 17  | 8 PITG_13364   |
| 0 | 0   | 29 PITG_19166  |
| 0 | 0   | 0 NA           |
| 0 | 26  | 0 PITG_01083   |
| 0 | 0   | 0 PITG_12084   |
| 0 | 52  | 69 PITG_01932  |

|   |      |                |
|---|------|----------------|
| 0 | 15   | 10 PITG_06452  |
| 0 | 131  | 55 PITG_21556  |
| 0 | 14   | 0 NA           |
| 0 | 35   | 2 NA           |
| 0 | 4    | 14 PITG_05193  |
| 0 | 75   | 350 PITG_07285 |
| 0 | 1091 | 337 PITG_06272 |
| 0 | 8    | 0 PITG_10624   |
| 0 | 144  | 2038 NA        |
| 0 | 11   | 15 PITG_04401  |
| 0 | 96   | 0 PITG_19615   |
| 0 | 5    | 6 PITG_02449   |
| 0 | 2    | 0 PITG_18786   |
| 0 | 11   | 2 PITG_05961   |
| 0 | 23   | 58 PITG_10905  |
| 0 | 3    | 0 NA           |
| 0 | 143  | 83 PITG_18458  |
| 0 | 5    | 2 PITG_18621   |
| 2 | 137  | 34 PITG_07302  |
| 0 | 7    | 0 PITG_18797   |
| 0 | 4    | 0 PITG_03109   |
| 0 | 89   | 42 PITG_02679  |
| 0 | 20   | 57 PITG_09863  |
| 0 | 43   | 24 PITG_03405  |
| 0 | 29   | 38 PITG_15661  |
| 0 | 0    | 2 PITG_15228   |
| 0 | 4    | 4 NA           |
| 0 | 74   | 39 PITG_12565  |
| 0 | 75   | 50 PITG_12648  |
| 2 | 263  | 279 PITG_16984 |
| 0 | 86   | 77 PITG_14112  |
| 0 | 72   | 7 PITG_05954   |
| 0 | 198  | 0 NA           |
| 0 | 71   | 47 PITG_03647  |
| 0 | 0    | 3 NA           |
| 0 | 12   | 2 PITG_01313   |
| 0 | 119  | 143 PITG_05666 |
| 0 | 37   | 4 PITG_11497   |
| 0 | 15   | 57 PITG_04708  |
| 0 | 6    | 9 NA           |
| 0 | 14   | 18 NA          |
| 0 | 0    | 4 PITG_03342   |
| 0 | 0    | 6 PITG_11728   |
| 0 | 3    | 5 PITG_13853   |
| 0 | 49   | 0 PITG_06762   |
| 0 | 96   | 67 NA          |
| 0 | 15   | 10 PITG_02177  |

|   |     |                |
|---|-----|----------------|
| 0 | 0   | 4 NA           |
| 0 | 8   | 8 PITG_13617   |
| 0 | 8   | 4 PITG_13103   |
| 0 | 39  | 3 NA           |
| 0 | 8   | 14 PITG_06406  |
| 0 | 0   | 0 PITG_19150   |
| 0 | 95  | 711 PITG_20465 |
| 0 | 0   | 4 PITG_02398   |
| 0 | 19  | 16 PITG_13421  |
| 0 | 72  | 26 PITG_01998  |
| 0 | 62  | 18 PITG_16809  |
| 0 | 4   | 0 NA           |
| 0 | 95  | 23 PITG_10384  |
| 0 | 0   | 0 NA           |
| 0 | 36  | 10 NA          |
| 0 | 7   | 7 NA           |
| 0 | 0   | 0 NA           |
| 0 | 14  | 0 PITG_05623   |
| 0 | 3   | 12 PITG_04104  |
| 0 | 11  | 11 NA          |
| 0 | 541 | 120 NA         |
| 0 | 0   | 0 PITG_14207   |
| 0 | 0   | 2 NA           |
| 0 | 68  | 11 PITG_19199  |
| 0 | 76  | 6 PITG_15926   |
| 0 | 290 | 47 PITG_20562  |
| 0 | 5   | 0 PITG_06770   |
| 2 | 2   | 31 PITG_03347  |
| 0 | 8   | 5 NA           |
| 0 | 202 | 276 PITG_12238 |
| 0 | 23  | 4 PITG_05259   |
| 0 | 217 | 234 PITG_07038 |
| 0 | 6   | 7 PITG_05961   |
| 0 | 29  | 11 PITG_14743  |
| 0 | 22  | 6 PITG_01438   |
| 0 | 15  | 2 NA           |
| 0 | 7   | 0 PITG_06390   |
| 0 | 15  | 2 NA           |
| 0 | 8   | 0 NA           |
| 0 | 10  | 2 NA           |
| 0 | 7   | 11 PITG_13775  |
| 0 | 445 | 267 PITG_17480 |
| 0 | 100 | 39 PITG_15394  |
| 0 | 6   | 4 PITG_06219   |
| 0 | 121 | 7 PITG_06012   |
| 0 | 7   | 2 PITG_09315   |
| 0 | 415 | 483 PITG_01322 |

|     |     |                |
|-----|-----|----------------|
| 0   | 66  | 74 PITG_13245  |
| 0   | 225 | 4 NA           |
| 0   | 4   | 11 PITG_16878  |
| 0   | 2   | 14 PITG_07289  |
| 0   | 16  | 12 PITG_05199  |
| 0   | 51  | 59 PITG_17239  |
| 0   | 37  | 130 PITG_17240 |
| 0   | 51  | 22 PITG_03999  |
| 0   | 0   | 2 PITG_10007   |
| 0   | 0   | 8 PITG_10058   |
| 0   | 44  | 21 PITG_17015  |
| 0   | 6   | 0 PITG_07193   |
| 0   | 49  | 37 PITG_20562  |
| 0   | 0   | 0 NA           |
| 0   | 5   | 2 PITG_07916   |
| 0   | 21  | 216 PITG_16591 |
| 0   | 2   | 0 PITG_02480   |
| 0   | 7   | 17 PITG_14949  |
| 0   | 0   | 0 PITG_01076   |
| 207 | 56  | 210 NA         |
| 0   | 10  | 42 PITG_09348  |
| 0   | 16  | 38 PITG_03348  |
| 0   | 69  | 39 PITG_07121  |
| 0   | 0   | 0 PITG_03756   |
| 0   | 742 | 807 PITG_18774 |
| 0   | 102 | 15 PITG_13257  |
| 0   | 6   | 2 PITG_08575   |
| 0   | 10  | 5 NA           |
| 335 | 19  | 301 NA         |
| 0   | 16  | 10 PITG_14944  |
| 0   | 0   | 2 PITG_08766   |
| 0   | 31  | 75 PITG_02636  |
| 0   | 108 | 223 PITG_11063 |
| 0   | 13  | 2 PITG_00795   |
| 0   | 177 | 723 PITG_13265 |
| 0   | 0   | 4 PITG_21171   |
| 0   | 151 | 184 NA         |
| 0   | 2   | 4 PITG_12146   |
| 0   | 0   | 0 NA           |
| 0   | 100 | 677 PITG_02053 |
| 0   | 0   | 11 PITG_01774  |
| 0   | 2   | 0 PITG_12545   |
| 0   | 43  | 0 NA           |
| 0   | 71  | 72 NA          |
| 0   | 901 | 299 PITG_06791 |
| 0   | 263 | 47 PITG_13228  |
| 0   | 19  | 44 PITG_11183  |

|   |     |                |
|---|-----|----------------|
| 0 | 26  | 18 PITG_10923  |
| 0 | 0   | 0 NA           |
| 0 | 5   | 9 PITG_16669   |
| 0 | 13  | 2 NA           |
| 0 | 5   | 0 PITG_02588   |
| 0 | 0   | 2 PITG_03514   |
| 0 | 0   | 0 NA           |
| 0 | 102 | 41 PITG_00158  |
| 0 | 22  | 44 PITG_02695  |
| 0 | 4   | 2 PITG_19152   |
| 0 | 76  | 18 PITG_09922  |
| 0 | 10  | 0 NA           |
| 0 | 14  | 24 NA          |
| 0 | 10  | 37 PITG_05395  |
| 0 | 2   | 4 PITG_13803   |
| 0 | 3   | 0 PITG_00972   |
| 0 | 6   | 14 PITG_14106  |
| 0 | 49  | 20 PITG_01614  |
| 0 | 122 | 328 PITG_12193 |
| 0 | 10  | 5 PITG_13826   |
| 0 | 3   | 4 PITG_01317   |
| 0 | 20  | 18 PITG_15387  |
| 0 | 54  | 0 NA           |
| 0 | 0   | 4 PITG_18707   |
| 0 | 3   | 6 PITG_04627   |
| 0 | 14  | 40 PITG_06358  |
| 0 | 2   | 7 PITG_14743   |
| 0 | 4   | 2 PITG_04549   |
| 0 | 13  | 2 PITG_11254   |
| 0 | 55  | 16 NA          |
| 0 | 135 | 21 PITG_04243  |
| 0 | 0   | 2 PITG_13719   |
| 0 | 0   | 0 PITG_00939   |
| 0 | 0   | 2 PITG_16221   |
| 0 | 36  | 16 PITG_01155  |
| 0 | 5   | 3 PITG_12169   |
| 0 | 40  | 4 NA           |
| 0 | 46  | 153 PITG_02255 |
| 0 | 0   | 0 NA           |
| 0 | 141 | 11 PITG_06615  |
| 0 | 28  | 43 PITG_04663  |
| 0 | 48  | 15 PITG_12285  |
| 0 | 9   | 4 NA           |
| 0 | 11  | 122 PITG_17527 |
| 0 | 4   | 8 PITG_03754   |
| 0 | 65  | 112 PITG_02109 |
| 0 | 8   | 0 PITG_06212   |

|   |     |                |
|---|-----|----------------|
| 0 | 24  | 46 PITG_09582  |
| 0 | 0   | 0 NA           |
| 0 | 2   | 13 PITG_16038  |
| 0 | 0   | 6 PITG_07047   |
| 0 | 6   | 12 PITG_14619  |
| 0 | 7   | 0 NA           |
| 0 | 4   | 0 PITG_20830   |
| 0 | 47  | 142 PITG_16894 |
| 0 | 53  | 51 PITG_11926  |
| 0 | 2   | 7 PITG_05509   |
| 0 | 3   | 2 PITG_07045   |
| 0 | 97  | 23 PITG_06849  |
| 0 | 43  | 26 PITG_16022  |
| 0 | 126 | 163 PITG_07810 |
| 0 | 2   | 4 NA           |
| 0 | 66  | 33 PITG_22743  |
| 0 | 161 | 26 PITG_12106  |
| 0 | 17  | 0 PITG_17967   |
| 0 | 64  | 35 PITG_08538  |
| 0 | 31  | 5 PITG_11323   |
| 0 | 33  | 24 NA          |
| 0 | 52  | 0 PITG_05742   |
| 0 | 0   | 8 PITG_14002   |
| 0 | 21  | 4 PITG_14221   |
| 0 | 231 | 62 PITG_13365  |
| 0 | 10  | 0 PITG_07279   |
| 0 | 39  | 86 NA          |
| 0 | 36  | 125 PITG_00899 |
| 7 | 21  | 9 NA           |
| 0 | 0   | 15 PITG_05238  |
| 0 | 300 | 787 PITG_09282 |
| 0 | 10  | 0 NA           |
| 0 | 4   | 0 PITG_03457   |
| 0 | 9   | 4 NA           |
| 0 | 112 | 15 PITG_19516  |
| 0 | 2   | 0 PITG_14920   |
| 0 | 5   | 3 PITG_02781   |
| 0 | 2   | 10 PITG_13042  |
| 0 | 2   | 4 PITG_06353   |
| 0 | 49  | 42 PITG_09566  |
| 0 | 14  | 4 PITG_04022   |
| 0 | 116 | 51 PITG_05174  |
| 0 | 23  | 7 NA           |
| 0 | 21  | 10 PITG_06088  |
| 0 | 87  | 32 PITG_01006  |
| 0 | 144 | 403 PITG_04522 |
| 0 | 0   | 4 PITG_08780   |



|   |      |                 |
|---|------|-----------------|
| 0 | 2    | 0 PITG_00302    |
| 0 | 76   | 38 NA           |
| 0 | 217  | 69 PITG_09992   |
| 0 | 392  | 49 NA           |
| 0 | 66   | 17 PITG_14923   |
| 0 | 144  | 76 PITG_03130   |
| 0 | 8    | 18 PITG_03034   |
| 0 | 42   | 2 PITG_17461    |
| 0 | 0    | 3 PITG_14707    |
| 0 | 2    | 9 PITG_03942    |
| 0 | 4    | 7 PITG_09376    |
| 0 | 24   | 28 PITG_02597   |
| 0 | 114  | 6 PITG_02337    |
| 0 | 10   | 36 PITG_04457   |
| 0 | 38   | 459 NA          |
| 2 | 2420 | 1550 PITG_04121 |
| 0 | 0    | 0 PITG_04910    |
| 0 | 180  | 179 PITG_03822  |
| 0 | 7    | 2 PITG_00989    |
| 0 | 5    | 27 PITG_21316   |
| 0 | 6    | 16 PITG_05757   |
| 0 | 40   | 18 NA           |
| 0 | 59   | 6 PITG_06898    |
| 0 | 41   | 12 NA           |
| 0 | 370  | 89 PITG_12082   |
| 0 | 9    | 8 PITG_06762    |
| 0 | 71   | 59 PITG_09435   |
| 0 | 0    | 4 PITG_09310    |
| 0 | 10   | 11 NA           |
| 0 | 643  | 502 PITG_12185  |
| 0 | 2    | 13 PITG_08740   |
| 0 | 85   | 51 PITG_09998   |
| 0 | 5    | 0 NA            |
| 0 | 14   | 2 NA            |
| 0 | 22   | 2 PITG_06545    |
| 0 | 8    | 0 NA            |
| 0 | 0    | 0 NA            |
| 0 | 19   | 67 PITG_16959   |
| 0 | 12   | 10 PITG_08301   |
| 0 | 19   | 2 NA            |
| 0 | 19   | 21 PITG_10167   |
| 0 | 28   | 18 NA           |
| 0 | 11   | 13 PITG_12938   |
| 8 | 96   | 557 NA          |
| 2 | 258  | 795 PITG_06771  |
| 0 | 449  | 708 PITG_03098  |
| 0 | 37   | 13 NA           |

|   |     |                |
|---|-----|----------------|
| 0 | 74  | 4 PITG_21827   |
| 0 | 2   | 2 PITG_13291   |
| 0 | 165 | 16 PITG_20344  |
| 0 | 217 | 257 PITG_08802 |
| 0 | 7   | 9 PITG_01813   |
| 0 | 10  | 7 PITG_04619   |
| 0 | 4   | 0 PITG_08604   |
| 0 | 2   | 13 PITG_19006  |
| 0 | 0   | 9 PITG_00791   |
| 0 | 13  | 2 PITG_15868   |
| 0 | 15  | 11 NA          |
| 0 | 7   | 4 PITG_07046   |
| 0 | 5   | 0 NA           |
| 0 | 0   | 0 NA           |
| 0 | 24  | 0 NA           |
| 0 | 279 | 159 PITG_16648 |
| 0 | 62  | 79 PITG_05421  |
| 0 | 10  | 53 PITG_05056  |
| 0 | 12  | 4 NA           |
| 0 | 8   | 14 PITG_11437  |
| 0 | 2   | 12 PITG_04466  |
| 0 | 2   | 11 PITG_03472  |
| 0 | 0   | 2 PITG_20055   |
| 0 | 10  | 0 PITG_13590   |
| 0 | 94  | 37 PITG_06976  |
| 0 | 392 | 180 PITG_18452 |
| 0 | 18  | 13 PITG_08851  |
| 0 | 492 | 23 PITG_11700  |
| 0 | 11  | 0 NA           |
| 0 | 87  | 223 PITG_06889 |
| 0 | 42  | 2 PITG_04453   |
| 0 | 43  | 20 PITG_02494  |
| 0 | 4   | 0 PITG_08669   |
| 0 | 49  | 53 NA          |
| 0 | 7   | 46 PITG_03347  |
| 0 | 2   | 0 PITG_02054   |
| 0 | 19  | 2 PITG_20711   |
| 0 | 61  | 79 PITG_07809  |
| 0 | 0   | 0 PITG_04973   |
| 0 | 0   | 4 PITG_12513   |
| 0 | 6   | 0 PITG_05461   |
| 0 | 0   | 3 NA           |
| 0 | 47  | 4 NA           |
| 0 | 12  | 27 PITG_21665  |
| 0 | 5   | 0 NA           |
| 0 | 8   | 35 NA          |
| 0 | 66  | 4 PITG_00167   |

|     |      |                |
|-----|------|----------------|
| 0   | 150  | 38 PITG_12662  |
| 0   | 8    | 2 NA           |
| 0   | 18   | 8 PITG_05687   |
| 0   | 224  | 51 PITG_09528  |
| 0   | 336  | 57 PITG_10570  |
| 0   | 7    | 0 PITG_15661   |
| 0   | 2    | 0 PITG_11114   |
| 0   | 140  | 96 PITG_12300  |
| 0   | 2    | 2 PITG_12821   |
| 0   | 0    | 2 PITG_01720   |
| 0   | 35   | 41 PITG_09936  |
| 0   | 2    | 4 PITG_00067   |
| 0   | 578  | 399 PITG_06828 |
| 0   | 218  | 21 NA          |
| 0   | 44   | 0 PITG_09698   |
| 0   | 0    | 2 PITG_04125   |
| 0   | 0    | 0 PITG_12989   |
| 0   | 58   | 131 PITG_09964 |
| 0   | 78   | 25 NA          |
| 0   | 4    | 4 PITG_16974   |
| 0   | 24   | 18 PITG_15242  |
| 0   | 0    | 0 PITG_05187   |
| 0   | 25   | 60 PITG_00152  |
| 0   | 237  | 139 PITG_20792 |
| 0   | 0    | 0 PITG_12446   |
| 0   | 251  | 307 PITG_10147 |
| 0   | 6    | 5 PITG_13273   |
| 0   | 4    | 2 NA           |
| 0   | 9    | 8 PITG_07543   |
| 0   | 0    | 3 PITG_13196   |
| 0   | 8    | 18 NA          |
| 0   | 9    | 13 PITG_14441  |
| 0   | 19   | 2 NA           |
| 0   | 0    | 0 PITG_07071   |
| 0   | 9    | 34 PITG_05282  |
| 737 | 66   | 1625 NA        |
| 0   | 50   | 68 PITG_09944  |
| 0   | 0    | 0 NA           |
| 0   | 23   | 30 PITG_00494  |
| 0   | 2    | 5 PITG_03678   |
| 0   | 21   | 20 NA          |
| 0   | 9    | 10 NA          |
| 0   | 33   | 0 PITG_05686   |
| 0   | 34   | 33 PITG_03166  |
| 0   | 7980 | 206 PITG_13807 |
| 0   | 0    | 9 PITG_00078   |
| 0   | 2    | 8 PITG_01400   |

|     |     |                |
|-----|-----|----------------|
| 0   | 0   | 0 NA           |
| 0   | 101 | 2 PITG_22404   |
| 0   | 14  | 65 PITG_18720  |
| 0   | 2   | 0 PITG_21156   |
| 0   | 138 | 19 PITG_18038  |
| 0   | 0   | 2 PITG_06609   |
| 0   | 0   | 73 PITG_13003  |
| 0   | 28  | 40 PITG_00333  |
| 0   | 0   | 0 PITG_01871   |
| 0   | 240 | 40 PITG_13066  |
| 0   | 173 | 75 PITG_15755  |
| 0   | 0   | 0 PITG_12548   |
| 0   | 4   | 2 NA           |
| 0   | 7   | 2 PITG_15269   |
| 549 | 173 | 1763 NA        |
| 0   | 6   | 18 PITG_18420  |
| 0   | 47  | 91 PITG_02277  |
| 0   | 52  | 21 PITG_04860  |
| 0   | 32  | 93 PITG_13159  |
| 0   | 0   | 4 PITG_07865   |
| 0   | 49  | 151 PITG_14466 |
| 4   | 12  | 329 NA         |
| 0   | 15  | 0 NA           |
| 0   | 4   | 0 PITG_21173   |
| 0   | 8   | 0 NA           |
| 0   | 3   | 4 PITG_12151   |
| 0   | 20  | 5 PITG_04539   |
| 0   | 0   | 7 PITG_02239   |
| 0   | 2   | 2 PITG_00274   |
| 0   | 28  | 67 PITG_10921  |
| 0   | 0   | 0 PITG_04232   |
| 0   | 103 | 177 PITG_05434 |
| 0   | 3   | 0 PITG_00828   |
| 0   | 0   | 2 PITG_10209   |
| 0   | 4   | 7 NA           |
| 0   | 42  | 2 PITG_01484   |
| 0   | 0   | 0 PITG_16269   |
| 0   | 10  | 22 PITG_05245  |
| 0   | 57  | 25 PITG_05396  |
| 0   | 289 | 737 PITG_04906 |
| 0   | 0   | 2 PITG_03322   |
| 0   | 5   | 9 NA           |
| 0   | 14  | 18 PITG_17805  |
| 0   | 142 | 145 NA         |
| 0   | 0   | 0 PITG_13903   |
| 0   | 0   | 5 PITG_20207   |
| 0   | 4   | 8 PITG_02842   |

|   |      |                 |
|---|------|-----------------|
| 0 | 0    | 0 PITG_15140    |
| 0 | 5    | 0 PITG_06701    |
| 0 | 4    | 5 PITG_15596    |
| 0 | 53   | 2 PITG_01740    |
| 0 | 16   | 0 PITG_03475    |
| 0 | 0    | 4 PITG_03748    |
| 0 | 18   | 0 PITG_02503    |
| 0 | 15   | 22 PITG_10649   |
| 0 | 0    | 2 PITG_03492    |
| 0 | 33   | 28 PITG_23176   |
| 0 | 3    | 0 NA            |
| 0 | 181  | 67 PITG_07880   |
| 0 | 107  | 91 PITG_12676   |
| 0 | 65   | 6 NA            |
| 0 | 9    | 9 PITG_04881    |
| 2 | 0    | 4 PITG_06222    |
| 0 | 0    | 2 PITG_05128    |
| 0 | 0    | 6 PITG_10794    |
| 0 | 5100 | 2253 PITG_07355 |
| 0 | 2    | 2 NA            |
| 0 | 0    | 0 NA            |
| 0 | 38   | 16 NA           |
| 0 | 2    | 0 PITG_19880    |
| 0 | 26   | 13 PITG_17035   |
| 0 | 18   | 62 PITG_16879   |
| 0 | 208  | 35 PITG_08514   |
| 0 | 15   | 75 PITG_06631   |
| 0 | 30   | 11 PITG_20321   |
| 0 | 0    | 2 PITG_13773    |
| 0 | 13   | 32 PITG_10926   |
| 0 | 29   | 38 PITG_04715   |
| 0 | 0    | 0 PITG_17031    |
| 0 | 115  | 15 PITG_01123   |
| 0 | 28   | 11 PITG_16055   |
| 0 | 10   | 8 NA            |
| 0 | 0    | 0 PITG_03333    |
| 0 | 71   | 22 PITG_03560   |
| 0 | 12   | 0 NA            |
| 0 | 79   | 29 PITG_19247   |
| 0 | 170  | 154 NA          |
| 0 | 19   | 21 PITG_01083   |
| 0 | 10   | 6 PITG_13677    |
| 0 | 7    | 2 PITG_21010    |
| 0 | 0    | 2 PITG_00226    |
| 0 | 13   | 17 PITG_02767   |
| 0 | 66   | 0 PITG_06708    |
| 0 | 11   | 8 PITG_08607    |

|   |     |                |
|---|-----|----------------|
| 0 | 0   | 0 PITG_09531   |
| 0 | 27  | 2 PITG_07245   |
| 0 | 18  | 0 NA           |
| 0 | 62  | 31 PITG_19055  |
| 0 | 12  | 3 NA           |
| 0 | 12  | 2 NA           |
| 0 | 136 | 123 PITG_21047 |
| 0 | 16  | 11 PITG_03225  |
| 0 | 0   | 0 PITG_05175   |
| 0 | 105 | 19 PITG_10064  |
| 0 | 14  | 9 PITG_12140   |
| 0 | 4   | 4 PITG_06963   |
| 0 | 30  | 0 NA           |
| 0 | 0   | 3 PITG_02230   |
| 0 | 52  | 14 PITG_00857  |
| 0 | 89  | 66 PITG_16063  |
| 0 | 11  | 0 NA           |
| 0 | 2   | 2 PITG_07731   |
| 0 | 9   | 4 PITG_01404   |
| 0 | 2   | 0 PITG_16614   |
| 0 | 2   | 2 PITG_18328   |
| 0 | 27  | 74 PITG_06657  |
| 0 | 156 | 33 PITG_10895  |
| 0 | 2   | 2 PITG_00490   |
| 0 | 163 | 33 PITG_13826  |
| 0 | 2   | 4 PITG_07707   |
| 0 | 24  | 30 PITG_01125  |
| 0 | 9   | 19 NA          |
| 0 | 0   | 8 PITG_20928   |
| 0 | 72  | 8 NA           |
| 0 | 3   | 0 NA           |
| 0 | 85  | 0 PITG_02697   |
| 0 | 44  | 128 PITG_17359 |
| 0 | 52  | 9 PITG_10164   |
| 0 | 53  | 5 PITG_05187   |
| 0 | 9   | 0 NA           |
| 0 | 15  | 35 PITG_19961  |
| 0 | 62  | 13 PITG_18962  |
| 0 | 54  | 37 PITG_03792  |
| 0 | 0   | 6 PITG_08693   |
| 0 | 22  | 0 NA           |
| 0 | 2   | 4 PITG_01107   |
| 0 | 0   | 0 PITG_09447   |
| 0 | 0   | 0 PITG_00125   |
| 0 | 0   | 2 NA           |
| 0 | 214 | 14 PITG_10484  |
| 0 | 5   | 4 PITG_06979   |

|   |     |                |
|---|-----|----------------|
| 0 | 4   | 2 PITG_04569   |
| 0 | 29  | 11 PITG_03225  |
| 0 | 23  | 3 PITG_01722   |
| 0 | 2   | 0 PITG_08677   |
| 0 | 4   | 2 PITG_16462   |
| 0 | 0   | 2 PITG_18397   |
| 0 | 184 | 68 PITG_02446  |
| 0 | 2   | 0 PITG_10888   |
| 0 | 0   | 0 PITG_09722   |
| 0 | 11  | 2 PITG_04486   |
| 0 | 2   | 0 NA           |
| 0 | 31  | 4 PITG_02737   |
| 0 | 8   | 4 PITG_05286   |
| 0 | 27  | 0 NA           |
| 0 | 0   | 2 PITG_10882   |
| 0 | 0   | 0 PITG_00945   |
| 0 | 95  | 21 PITG_01591  |
| 0 | 9   | 15 NA          |
| 0 | 20  | 13 PITG_09388  |
| 0 | 12  | 6 PITG_07857   |
| 0 | 0   | 13 PITG_08874  |
| 0 | 12  | 2 NA           |
| 0 | 264 | 0 NA           |
| 0 | 26  | 4 PITG_05668   |
| 0 | 73  | 2 PITG_07905   |
| 0 | 22  | 14 PITG_06403  |
| 0 | 26  | 8 PITG_03457   |
| 0 | 22  | 36 PITG_13423  |
| 0 | 169 | 222 PITG_08718 |
| 0 | 2   | 0 NA           |
| 0 | 0   | 0 PITG_17599   |
| 0 | 2   | 4 PITG_04661   |
| 0 | 35  | 25 PITG_01809  |
| 0 | 92  | 93 PITG_16757  |
| 0 | 0   | 0 PITG_16904   |
| 0 | 0   | 0 PITG_13366   |
| 0 | 63  | 31 PITG_09991  |
| 0 | 147 | 99 PITG_07809  |
| 0 | 2   | 12 PITG_09640  |
| 0 | 27  | 4 PITG_15671   |
| 0 | 55  | 0 PITG_11612   |
| 0 | 14  | 13 PITG_20215  |
| 0 | 0   | 0 NA           |
| 0 | 73  | 61 NA          |
| 0 | 97  | 45 PITG_02745  |
| 0 | 230 | 30 PITG_10937  |
| 0 | 2   | 0 PITG_17777   |

|   |      |                 |
|---|------|-----------------|
| 0 | 13   | 4 PITG_10615    |
| 0 | 24   | 69 PITG_15329   |
| 0 | 17   | 52 PITG_19004   |
| 0 | 138  | 57 NA           |
| 0 | 4    | 0 NA            |
| 0 | 0    | 2 PITG_19804    |
| 0 | 135  | 19 PITG_13896   |
| 0 | 45   | 4 PITG_04839    |
| 0 | 548  | 478 PITG_11975  |
| 0 | 187  | 149 PITG_08173  |
| 0 | 29   | 17 PITG_05658   |
| 0 | 0    | 0 PITG_17265    |
| 0 | 90   | 443 PITG_11099  |
| 0 | 0    | 2 NA            |
| 0 | 214  | 140 PITG_02793  |
| 0 | 151  | 54 PITG_21186   |
| 0 | 47   | 79 PITG_14888   |
| 0 | 16   | 33 PITG_00733   |
| 0 | 20   | 2 PITG_00054    |
| 0 | 41   | 0 PITG_10715    |
| 0 | 2    | 18 PITG_10838   |
| 0 | 51   | 466 NA          |
| 0 | 200  | 27 PITG_04634   |
| 0 | 5    | 2 PITG_13918    |
| 0 | 142  | 415 PITG_06146  |
| 0 | 1234 | 1477 PITG_03433 |
| 0 | 19   | 22 PITG_00839   |
| 0 | 2    | 0 PITG_07915    |
| 0 | 94   | 184 PITG_05006  |
| 0 | 20   | 24 PITG_00132   |
| 0 | 49   | 73 PITG_13159   |
| 0 | 2    | 0 NA            |
| 0 | 2    | 18 PITG_02205   |
| 0 | 16   | 16 PITG_17416   |
| 0 | 0    | 4 PITG_04579    |
| 0 | 2    | 0 NA            |
| 0 | 54   | 33 PITG_08725   |
| 0 | 0    | 6 PITG_09891    |
| 0 | 142  | 44 PITG_16812   |
| 0 | 37   | 81 NA           |
| 0 | 5    | 4 NA            |
| 0 | 14   | 28 PITG_20562   |
| 0 | 159  | 158 PITG_13392  |
| 0 | 10   | 2 NA            |
| 0 | 26   | 0 PITG_06749    |
| 0 | 10   | 7 PITG_03761    |
| 0 | 7    | 65 PITG_00571   |



|      |     |                |
|------|-----|----------------|
| 0    | 57  | 46 PITG_03427  |
| 0    | 32  | 28 PITG_03609  |
| 0    | 22  | 6 NA           |
| 0    | 66  | 3 PITG_04746   |
| 0    | 2   | 2 PITG_12678   |
| 0    | 0   | 0 NA           |
| 0    | 158 | 14 PITG_03744  |
| 0    | 111 | 86 PITG_20264  |
| 0    | 35  | 20 PITG_18473  |
| 0    | 46  | 31 PITG_08584  |
| 0    | 0   | 0 PITG_03111   |
| 0    | 22  | 9 PITG_12548   |
| 0    | 0   | 15 PITG_16071  |
| 0    | 14  | 7 PITG_10184   |
| 0    | 8   | 8 PITG_07896   |
| 0    | 13  | 34 PITG_04603  |
| 0    | 6   | 10 PITG_05644  |
| 0    | 83  | 441 PITG_05938 |
| 0    | 32  | 24 PITG_19488  |
| 0    | 33  | 25 PITG_11813  |
| 1913 | 42  | 139 NA         |
| 0    | 7   | 2 PITG_18543   |
| 0    | 44  | 158 PITG_15771 |
| 0    | 12  | 2 NA           |
| 0    | 14  | 2 NA           |
| 0    | 3   | 0 PITG_15167   |
| 0    | 184 | 92 PITG_13159  |
| 0    | 4   | 43 PITG_10827  |
| 0    | 11  | 2 PITG_07279   |
| 0    | 0   | 2 PITG_00416   |
| 0    | 48  | 35 PITG_17936  |
| 0    | 0   | 86 NA          |
| 0    | 14  | 9 NA           |
| 0    | 5   | 0 NA           |
| 126  | 330 | 316 NA         |
| 0    | 7   | 4 PITG_11572   |
| 0    | 10  | 2 PITG_16062   |
| 0    | 49  | 13 PITG_05738  |
| 0    | 19  | 12 PITG_20055  |
| 0    | 10  | 48 PITG_13997  |
| 0    | 76  | 81 PITG_01924  |
| 0    | 4   | 0 NA           |
| 0    | 17  | 16 PITG_12938  |
| 0    | 88  | 43 PITG_08745  |
| 0    | 0   | 2 PITG_00501   |
| 0    | 3   | 0 PITG_04435   |
| 0    | 14  | 0 NA           |

|   |     |                 |
|---|-----|-----------------|
| 0 | 0   | 0 PITG_05672    |
| 0 | 17  | 35 PITG_17499   |
| 0 | 28  | 22 PITG_01121   |
| 0 | 10  | 43 PITG_03101   |
| 0 | 2   | 0 PITG_18712    |
| 0 | 2   | 0 PITG_06941    |
| 0 | 86  | 46 PITG_16893   |
| 0 | 0   | 0 PITG_08424    |
| 0 | 36  | 21 NA           |
| 0 | 2   | 0 PITG_01298    |
| 0 | 38  | 16 PITG_08774   |
| 0 | 0   | 0 NA            |
| 0 | 0   | 0 PITG_17437    |
| 0 | 6   | 0 PITG_10961    |
| 0 | 895 | 1085 PITG_13763 |
| 0 | 4   | 12 PITG_08588   |
| 0 | 11  | 4 PITG_17795    |
| 0 | 54  | 35 PITG_01563   |
| 0 | 227 | 6 PITG_18720    |
| 0 | 6   | 17 PITG_21393   |
| 0 | 6   | 0 PITG_11050    |
| 0 | 13  | 24 PITG_09932   |
| 0 | 6   | 8 PITG_17012    |
| 0 | 2   | 21 PITG_20688   |
| 0 | 20  | 0 PITG_14968    |
| 0 | 0   | 0 NA            |
| 0 | 170 | 15 PITG_05248   |
| 0 | 13  | 26 PITG_12663   |
| 0 | 79  | 82 PITG_04977   |
| 0 | 15  | 22 PITG_09604   |
| 0 | 0   | 0 NA            |
| 0 | 15  | 10 PITG_16801   |
| 0 | 48  | 6 PITG_13669    |
| 0 | 0   | 0 PITG_06570    |
| 0 | 7   | 14 PITG_15926   |
| 0 | 0   | 6 PITG_16224    |
| 0 | 266 | 225 PITG_11143  |
| 2 | 69  | 110 PITG_16930  |
| 0 | 16  | 14 PITG_07302   |
| 0 | 48  | 0 PITG_21873    |
| 0 | 205 | 23 PITG_06343   |
| 0 | 54  | 17 PITG_05353   |
| 0 | 2   | 0 NA            |
| 0 | 173 | 79 PITG_08154   |
| 0 | 491 | 58 PITG_06231   |
| 0 | 170 | 18 PITG_01317   |
| 0 | 4   | 6 NA            |

|    |     |                |
|----|-----|----------------|
| 0  | 13  | 10 NA          |
| 0  | 36  | 2 PITG_03759   |
| 0  | 80  | 35 PITG_05694  |
| 0  | 188 | 363 PITG_21410 |
| 0  | 4   | 0 PITG_03648   |
| 0  | 156 | 25 PITG_02826  |
| 0  | 110 | 42 PITG_17039  |
| 0  | 0   | 0 PITG_02778   |
| 0  | 3   | 4 PITG_17080   |
| 0  | 25  | 2 NA           |
| 0  | 4   | 5 PITG_15619   |
| 0  | 8   | 5 PITG_10921   |
| 0  | 7   | 2 PITG_14812   |
| 0  | 6   | 4 PITG_02797   |
| 0  | 197 | 96 PITG_02922  |
| 0  | 7   | 8 PITG_11286   |
| 0  | 886 | 627 PITG_00997 |
| 0  | 14  | 0 PITG_17829   |
| 0  | 2   | 0 PITG_04022   |
| 0  | 16  | 23 PITG_21504  |
| 0  | 23  | 44 NA          |
| 0  | 23  | 55 PITG_04395  |
| 0  | 9   | 4 NA           |
| 0  | 259 | 18 PITG_07977  |
| 63 | 31  | 109 NA         |
| 0  | 13  | 2 NA           |
| 0  | 47  | 22 NA          |
| 0  | 0   | 0 PITG_03060   |
| 0  | 2   | 20 PITG_08653  |
| 0  | 460 | 299 PITG_13726 |
| 0  | 24  | 20 PITG_06185  |
| 0  | 92  | 207 PITG_18330 |
| 0  | 113 | 93 PITG_02010  |
| 0  | 2   | 0 PITG_01083   |
| 0  | 172 | 71 PITG_05653  |
| 0  | 80  | 98 PITG_17263  |
| 0  | 111 | 42 PITG_13771  |
| 0  | 0   | 7 PITG_21127   |
| 0  | 277 | 502 PITG_07155 |
| 0  | 3   | 2 PITG_11728   |
| 0  | 27  | 20 PITG_04283  |
| 0  | 30  | 2 PITG_17908   |
| 0  | 0   | 12 PITG_18025  |
| 0  | 135 | 83 PITG_19851  |
| 0  | 4   | 10 PITG_17592  |
| 0  | 97  | 84 PITG_20797  |
| 0  | 93  | 36 NA          |

|    |     |                |
|----|-----|----------------|
| 0  | 4   | 61 PITG_00807  |
| 0  | 175 | 45 PITG_10648  |
| 0  | 573 | 273 PITG_08671 |
| 34 | 0   | 42 NA          |
| 0  | 8   | 12 PITG_15518  |
| 0  | 8   | 40 PITG_07110  |
| 0  | 18  | 3 NA           |
| 0  | 21  | 0 PITG_13052   |
| 0  | 10  | 0 NA           |
| 0  | 242 | 176 PITG_08959 |
| 0  | 7   | 4 PITG_04869   |
| 0  | 12  | 0 PITG_02718   |
| 0  | 0   | 0 PITG_09572   |
| 0  | 41  | 2 PITG_19125   |
| 0  | 26  | 83 PITG_19247  |
| 0  | 45  | 14 PITG_21328  |
| 0  | 66  | 22 PITG_11064  |
| 0  | 0   | 0 PITG_05010   |
| 0  | 39  | 62 PITG_01470  |
| 0  | 0   | 0 PITG_19098   |
| 0  | 22  | 25 NA          |
| 0  | 118 | 70 NA          |
| 0  | 0   | 0 PITG_17262   |
| 0  | 0   | 0 NA           |
| 0  | 112 | 29 PITG_01798  |
| 0  | 0   | 0 PITG_19149   |
| 0  | 0   | 0 NA           |
| 0  | 7   | 0 NA           |
| 0  | 86  | 142 PITG_02971 |
| 0  | 79  | 29 PITG_17335  |
| 0  | 10  | 0 PITG_02304   |
| 0  | 23  | 50 NA          |
| 0  | 56  | 5 PITG_05816   |
| 0  | 0   | 4 PITG_11594   |
| 0  | 64  | 164 PITG_12111 |
| 0  | 59  | 25 PITG_05323  |
| 0  | 4   | 7 PITG_05100   |
| 0  | 25  | 24 NA          |
| 0  | 17  | 10 PITG_08926  |
| 0  | 5   | 2 PITG_15856   |
| 0  | 14  | 83 PITG_08425  |
| 0  | 6   | 6 PITG_17884   |
| 0  | 5   | 0 NA           |
| 0  | 29  | 18 PITG_04027  |
| 0  | 0   | 9 PITG_01453   |
| 0  | 0   | 0 PITG_09785   |
| 0  | 8   | 0 NA           |

|   |     |                 |
|---|-----|-----------------|
| 0 | 197 | 1419 PITG_12158 |
| 0 | 9   | 2 PITG_05510    |
| 0 | 70  | 2 PITG_01300    |
| 0 | 8   | 21 NA           |
| 0 | 46  | 114 PITG_08693  |
| 0 | 24  | 2 NA            |
| 0 | 438 | 416 PITG_00183  |
| 0 | 75  | 92 PITG_15625   |
| 0 | 183 | 329 PITG_02498  |
| 0 | 17  | 21 PITG_05610   |
| 0 | 0   | 0 PITG_11437    |
| 0 | 7   | 2 NA            |
| 0 | 205 | 211 PITG_02634  |
| 0 | 2   | 0 NA            |
| 0 | 119 | 196 PITG_15553  |
| 0 | 85  | 65 PITG_00051   |
| 0 | 54  | 18 PITG_18417   |
| 0 | 0   | 4 PITG_01272    |
| 0 | 4   | 2 PITG_03988    |
| 0 | 12  | 0 NA            |
| 0 | 18  | 20 PITG_16358   |
| 0 | 205 | 125 PITG_06107  |
| 0 | 19  | 40 PITG_17695   |
| 0 | 4   | 2 PITG_12124    |
| 0 | 92  | 44 NA           |
| 0 | 0   | 4 PITG_14949    |
| 0 | 5   | 4 NA            |
| 0 | 16  | 31 PITG_04000   |
| 0 | 10  | 3 NA            |
| 0 | 4   | 0 PITG_22126    |
| 0 | 29  | 0 PITG_01085    |
| 0 | 10  | 4 NA            |
| 0 | 2   | 41 PITG_11729   |
| 0 | 175 | 66 PITG_01718   |
| 0 | 299 | 335 PITG_11638  |
| 0 | 18  | 4 PITG_02397    |
| 0 | 0   | 20 PITG_21380   |
| 0 | 2   | 0 PITG_06900    |
| 0 | 4   | 4 PITG_07455    |
| 0 | 32  | 33 PITG_08653   |
| 0 | 155 | 84 PITG_02730   |
| 0 | 9   | 4 PITG_21492    |
| 0 | 2   | 0 PITG_05446    |
| 0 | 186 | 93 NA           |
| 0 | 33  | 0 PITG_06740    |
| 0 | 14  | 5 PITG_19046    |
| 0 | 26  | 126 PITG_03486  |

|   |      |                 |
|---|------|-----------------|
| 0 | 34   | 375 PITG_12158  |
| 0 | 826  | 154 PITG_15382  |
| 0 | 8    | 4 PITG_16456    |
| 0 | 17   | 11 PITG_12350   |
| 0 | 74   | 12 PITG_15961   |
| 0 | 4    | 2 PITG_08316    |
| 0 | 101  | 4 PITG_10239    |
| 0 | 42   | 0 PITG_07047    |
| 0 | 8    | 0 NA            |
| 0 | 15   | 12 PITG_08749   |
| 0 | 21   | 7 PITG_09375    |
| 0 | 9    | 4 NA            |
| 0 | 7    | 3 PITG_04179    |
| 0 | 105  | 36 PITG_06662   |
| 0 | 23   | 21 PITG_16671   |
| 0 | 17   | 12 PITG_03294   |
| 0 | 14   | 11 PITG_09835   |
| 0 | 14   | 2 NA            |
| 0 | 56   | 143 PITG_00297  |
| 0 | 76   | 28 PITG_05599   |
| 0 | 3    | 0 PITG_21409    |
| 0 | 3    | 53 PITG_23093   |
| 0 | 13   | 2 PITG_21114    |
| 0 | 315  | 13 PITG_18800   |
| 0 | 0    | 0 PITG_05805    |
| 0 | 6    | 2 NA            |
| 0 | 6    | 2 PITG_02500    |
| 0 | 3452 | 3454 PITG_09297 |
| 0 | 70   | 211 PITG_16871  |
| 0 | 75   | 7 NA            |
| 0 | 0    | 2 PITG_05429    |
| 0 | 183  | 234 PITG_11877  |
| 0 | 7    | 10 PITG_05332   |
| 0 | 8    | 0 NA            |
| 0 | 76   | 12 PITG_17986   |
| 0 | 17   | 16 PITG_06507   |
| 0 | 0    | 0 NA            |
| 0 | 12   | 21 PITG_08653   |
| 0 | 2    | 2 PITG_15100    |
| 0 | 102  | 18 PITG_17767   |
| 0 | 47   | 9 PITG_15539    |
| 0 | 2    | 0 PITG_05326    |
| 0 | 50   | 88 PITG_05874   |
| 0 | 89   | 47 PITG_19774   |
| 0 | 380  | 231 NA          |
| 0 | 0    | 0 NA            |
| 0 | 2    | 0 NA            |

|   |     |                |
|---|-----|----------------|
| 0 | 29  | 13 PITG_20374  |
| 0 | 0   | 2 PITG_17600   |
| 0 | 14  | 2 NA           |
| 0 | 60  | 2 PITG_15832   |
| 0 | 2   | 13 PITG_18316  |
| 0 | 0   | 2 PITG_17997   |
| 0 | 9   | 19 PITG_17700  |
| 0 | 58  | 17 PITG_03160  |
| 0 | 6   | 6 NA           |
| 0 | 53  | 3 NA           |
| 0 | 36  | 4 PITG_00496   |
| 0 | 187 | 30 PITG_14363  |
| 0 | 6   | 0 PITG_02744   |
| 0 | 45  | 0 PITG_10796   |
| 0 | 214 | 16 PITG_03736  |
| 0 | 4   | 17 PITG_05616  |
| 0 | 10  | 0 PITG_22323   |
| 0 | 2   | 0 PITG_02642   |
| 0 | 18  | 14 PITG_09092  |
| 0 | 102 | 150 PITG_01913 |
| 0 | 2   | 4 PITG_15967   |
| 0 | 0   | 9 PITG_02344   |
| 0 | 2   | 10 PITG_16049  |
| 0 | 11  | 17 NA          |
| 0 | 0   | 5 PITG_13376   |
| 0 | 6   | 0 NA           |
| 0 | 151 | 39 PITG_05244  |
| 0 | 11  | 0 PITG_10049   |
| 0 | 141 | 105 PITG_19418 |
| 0 | 0   | 0 PITG_03882   |
| 0 | 8   | 0 PITG_14993   |
| 0 | 12  | 0 PITG_04700   |
| 0 | 2   | 7 PITG_17897   |
| 0 | 2   | 5 PITG_18747   |
| 0 | 25  | 53 PITG_03163  |
| 0 | 15  | 2 PITG_02820   |
| 0 | 0   | 13 PITG_03355  |
| 0 | 2   | 0 NA           |
| 0 | 6   | 4 PITG_05201   |
| 0 | 60  | 119 PITG_04229 |
| 0 | 0   | 0 NA           |
| 0 | 4   | 8 PITG_03044   |
| 0 | 5   | 6 PITG_02688   |
| 0 | 6   | 0 PITG_00115   |
| 0 | 208 | 36 NA          |
| 3 | 105 | 121 PITG_09393 |
| 0 | 204 | 81 PITG_06112  |

|   |     |                |
|---|-----|----------------|
| 0 | 51  | 28 NA          |
| 0 | 16  | 13 PITG_17597  |
| 0 | 2   | 11 PITG_00206  |
| 0 | 3   | 17 PITG_17568  |
| 0 | 9   | 8 PITG_17395   |
| 0 | 14  | 6 PITG_04336   |
| 0 | 4   | 2 PITG_07046   |
| 0 | 45  | 346 PITG_12562 |
| 0 | 5   | 2 NA           |
| 0 | 25  | 4 PITG_07991   |
| 0 | 35  | 56 PITG_11959  |
| 0 | 5   | 6 PITG_08661   |
| 0 | 61  | 6 PITG_00116   |
| 0 | 73  | 7 PITG_03876   |
| 0 | 33  | 2 PITG_02492   |
| 0 | 5   | 8 PITG_05318   |
| 0 | 40  | 8 PITG_03844   |
| 0 | 6   | 2 PITG_02400   |
| 0 | 175 | 9 PITG_17883   |
| 0 | 0   | 0 NA           |
| 0 | 2   | 2 PITG_04028   |
| 0 | 120 | 130 PITG_04599 |
| 0 | 282 | 701 PITG_03433 |
| 0 | 12  | 6 NA           |
| 0 | 31  | 58 PITG_01701  |
| 0 | 0   | 9 PITG_11000   |
| 0 | 2   | 4 NA           |
| 0 | 814 | 118 PITG_08000 |
| 0 | 18  | 41 PITG_17110  |
| 0 | 0   | 8 PITG_02642   |
| 0 | 376 | 281 PITG_12648 |
| 0 | 36  | 15 NA          |
| 0 | 87  | 25 PITG_06780  |
| 0 | 4   | 5 PITG_02968   |
| 0 | 58  | 7 PITG_22277   |
| 0 | 14  | 6 PITG_02457   |
| 0 | 0   | 0 PITG_13848   |
| 0 | 5   | 0 NA           |
| 0 | 9   | 4 PITG_06424   |
| 0 | 4   | 11 PITG_15365  |
| 0 | 129 | 162 PITG_06131 |
| 0 | 74  | 34 NA          |
| 0 | 4   | 8 PITG_14239   |
| 0 | 19  | 7 PITG_17012   |
| 0 | 6   | 2 PITG_17501   |
| 0 | 442 | 35 NA          |
| 2 | 91  | 170 PITG_16833 |



|     |     |                |
|-----|-----|----------------|
| 2   | 58  | 146 NA         |
| 0   | 48  | 12 PITG_01003  |
| 0   | 126 | 91 NA          |
| 0   | 2   | 4 NA           |
| 0   | 339 | 92 PITG_00348  |
| 0   | 10  | 3 PITG_15552   |
| 0   | 149 | 81 PITG_17726  |
| 0   | 4   | 5 PITG_04902   |
| 0   | 244 | 141 NA         |
| 0   | 5   | 4 PITG_13920   |
| 0   | 0   | 0 PITG_20283   |
| 0   | 7   | 6 PITG_21944   |
| 0   | 0   | 0 NA           |
| 0   | 2   | 0 PITG_10929   |
| 0   | 13  | 4 PITG_16210   |
| 0   | 546 | 148 PITG_09779 |
| 0   | 15  | 15 NA          |
| 0   | 15  | 2 PITG_15649   |
| 550 | 109 | 471 NA         |
| 0   | 15  | 33 PITG_17130  |
| 0   | 56  | 29 NA          |
| 0   | 0   | 2 PITG_03562   |
| 0   | 2   | 4 PITG_00694   |
| 0   | 2   | 3 PITG_10134   |
| 0   | 11  | 4 PITG_16834   |
| 0   | 9   | 73 PITG_00133  |
| 0   | 19  | 51 PITG_18951  |
| 0   | 0   | 0 PITG_03604   |
| 0   | 3   | 11 PITG_02259  |
| 0   | 0   | 6 PITG_01836   |
| 0   | 371 | 106 PITG_03673 |
| 0   | 34  | 0 NA           |
| 0   | 29  | 18 NA          |
| 0   | 0   | 64 PITG_10195  |
| 0   | 0   | 0 PITG_01756   |
| 0   | 0   | 0 PITG_03374   |
| 0   | 57  | 47 PITG_04505  |
| 0   | 22  | 9 PITG_08453   |
| 0   | 0   | 2 PITG_02348   |
| 0   | 4   | 2 PITG_06714   |
| 0   | 0   | 7 PITG_00077   |
| 0   | 4   | 2 PITG_13488   |
| 0   | 51  | 0 PITG_16264   |
| 0   | 13  | 9 NA           |
| 0   | 17  | 12 PITG_22541  |
| 0   | 26  | 4 PITG_02017   |
| 0   | 9   | 2 PITG_13915   |

|   |     |                |
|---|-----|----------------|
| 0 | 5   | 6 PITG_04712   |
| 0 | 0   | 2 NA           |
| 0 | 0   | 0 PITG_13188   |
| 0 | 28  | 13 PITG_17091  |
| 0 | 0   | 2 PITG_02203   |
| 0 | 40  | 0 PITG_07312   |
| 0 | 32  | 30 PITG_11799  |
| 0 | 50  | 0 NA           |
| 0 | 3   | 0 PITG_17557   |
| 0 | 0   | 0 NA           |
| 0 | 17  | 6 PITG_01871   |
| 0 | 182 | 90 PITG_01770  |
| 0 | 114 | 152 PITG_17091 |
| 0 | 34  | 169 PITG_18934 |
| 0 | 817 | 38 PITG_02706  |
| 0 | 0   | 4 NA           |
| 0 | 10  | 11 NA          |
| 0 | 58  | 22 PITG_21556  |
| 0 | 212 | 73 NA          |
| 0 | 2   | 0 PITG_01380   |
| 0 | 46  | 65 PITG_14249  |
| 0 | 9   | 10 PITG_06918  |
| 0 | 19  | 10 PITG_11155  |
| 0 | 31  | 7 PITG_16036   |
| 0 | 0   | 13 PITG_02724  |
| 0 | 120 | 351 NA         |
| 0 | 3   | 12 PITG_05500  |
| 0 | 38  | 10 PITG_12530  |
| 0 | 6   | 2 PITG_04134   |
| 0 | 33  | 2 PITG_09676   |
| 0 | 50  | 8 PITG_17943   |
| 0 | 32  | 22 PITG_02537  |
| 0 | 13  | 8 PITG_17131   |
| 0 | 4   | 2 PITG_01188   |
| 0 | 73  | 32 PITG_09604  |
| 0 | 234 | 310 PITG_04382 |
| 0 | 221 | 85 PITG_02912  |
| 0 | 2   | 0 PITG_17332   |
| 0 | 7   | 0 PITG_19160   |
| 0 | 27  | 14 PITG_01740  |
| 0 | 0   | 0 PITG_00257   |
| 0 | 2   | 0 NA           |
| 2 | 21  | 6 PITG_14109   |
| 0 | 6   | 4 PITG_06943   |
| 0 | 0   | 0 PITG_01257   |
| 0 | 2   | 10 PITG_04820  |
| 0 | 196 | 51 PITG_15959  |

|   |      |                |
|---|------|----------------|
| 0 | 0    | 0 PITG_23160   |
| 0 | 4    | 7 PITG_10898   |
| 0 | 4    | 2 PITG_10905   |
| 0 | 14   | 33 PITG_01846  |
| 0 | 10   | 7 NA           |
| 0 | 2    | 5 PITG_17394   |
| 0 | 49   | 29 PITG_15779  |
| 0 | 20   | 75 PITG_15863  |
| 0 | 855  | 859 PITG_04834 |
| 0 | 76   | 48 PITG_03815  |
| 0 | 0    | 8 PITG_00970   |
| 0 | 0    | 0 PITG_16680   |
| 0 | 9    | 0 PITG_18075   |
| 0 | 10   | 0 PITG_09967   |
| 0 | 0    | 3 PITG_12239   |
| 0 | 0    | 4 PITG_12517   |
| 0 | 16   | 37 PITG_12098  |
| 0 | 212  | 106 PITG_18834 |
| 0 | 0    | 0 PITG_01617   |
| 0 | 2    | 2 PITG_06248   |
| 0 | 28   | 0 PITG_15391   |
| 0 | 8    | 14 PITG_02446  |
| 0 | 0    | 5 PITG_12852   |
| 0 | 17   | 0 NA           |
| 0 | 10   | 8 PITG_05550   |
| 0 | 9    | 6 NA           |
| 0 | 8    | 0 PITG_05627   |
| 0 | 27   | 0 PITG_21074   |
| 0 | 7    | 9 PITG_13971   |
| 0 | 247  | 227 PITG_08352 |
| 0 | 446  | 70 PITG_11463  |
| 0 | 2    | 0 NA           |
| 0 | 36   | 18 PITG_10301  |
| 0 | 2    | 4 PITG_00500   |
| 0 | 11   | 60 PITG_04010  |
| 0 | 89   | 11 PITG_16339  |
| 0 | 16   | 9 PITG_21210   |
| 0 | 1556 | 654 PITG_17675 |
| 0 | 32   | 6 PITG_19804   |
| 0 | 10   | 9 PITG_03302   |
| 0 | 0    | 2 PITG_07854   |
| 0 | 78   | 59 PITG_02927  |
| 0 | 4    | 8 PITG_14208   |
| 0 | 2    | 11 PITG_04564  |
| 0 | 7    | 0 PITG_12048   |
| 0 | 25   | 31 PITG_14110  |
| 0 | 24   | 19 PITG_01361  |

|   |      |                |
|---|------|----------------|
| 0 | 166  | 14 NA          |
| 0 | 10   | 2 PITG_11594   |
| 0 | 4    | 0 NA           |
| 0 | 197  | 87 PITG_06970  |
| 0 | 33   | 33 NA          |
| 0 | 123  | 63 PITG_13745  |
| 0 | 17   | 18 PITG_11765  |
| 0 | 0    | 0 PITG_11286   |
| 0 | 0    | 0 PITG_15445   |
| 0 | 0    | 0 PITG_20787   |
| 0 | 0    | 0 PITG_02480   |
| 0 | 126  | 15 PITG_00888  |
| 0 | 6    | 4 NA           |
| 0 | 278  | 42 PITG_01410  |
| 0 | 5    | 0 NA           |
| 0 | 33   | 63 PITG_06242  |
| 0 | 6    | 0 PITG_15267   |
| 0 | 26   | 88 PITG_03246  |
| 0 | 69   | 24 PITG_05761  |
| 0 | 8    | 22 PITG_11274  |
| 0 | 678  | 335 PITG_00613 |
| 0 | 69   | 51 PITG_13415  |
| 0 | 2    | 2 PITG_10722   |
| 0 | 30   | 0 PITG_01145   |
| 0 | 50   | 17 PITG_14354  |
| 0 | 39   | 15 NA          |
| 0 | 19   | 2 PITG_23128   |
| 0 | 278  | 156 PITG_09979 |
| 0 | 24   | 11 PITG_17560  |
| 0 | 62   | 46 PITG_00459  |
| 0 | 0    | 0 PITG_19875   |
| 0 | 12   | 0 NA           |
| 0 | 90   | 53 PITG_11605  |
| 0 | 5    | 91 PITG_10218  |
| 0 | 4    | 2 PITG_02242   |
| 0 | 4    | 2 NA           |
| 0 | 0    | 0 PITG_03038   |
| 0 | 2542 | 485 PITG_17826 |
| 0 | 2    | 12 PITG_21620  |
| 0 | 60   | 78 PITG_09508  |
| 0 | 52   | 53 NA          |
| 0 | 85   | 23 PITG_07660  |
| 0 | 9    | 2 PITG_17783   |
| 0 | 11   | 45 PITG_00864  |
| 0 | 4    | 0 NA           |
| 0 | 197  | 194 PITG_10199 |
| 0 | 8    | 29 PITG_08685  |

|     |      |                 |
|-----|------|-----------------|
| 0   | 2    | 29 PITG_21185   |
| 0   | 3    | 15 PITG_09296   |
| 0   | 2    | 0 PITG_05311    |
| 0   | 50   | 28 PITG_00880   |
| 0   | 0    | 0 PITG_05517    |
| 0   | 71   | 2 PITG_18050    |
| 0   | 9    | 5 PITG_13832    |
| 0   | 22   | 0 NA            |
| 0   | 0    | 0 PITG_01003    |
| 0   | 0    | 2 PITG_12224    |
| 0   | 32   | 26 PITG_16812   |
| 0   | 2    | 2 NA            |
| 0   | 4    | 12 NA           |
| 0   | 69   | 39 PITG_07096   |
| 0   | 20   | 14 PITG_09092   |
| 214 | 6    | 289 NA          |
| 0   | 18   | 29 PITG_12661   |
| 0   | 0    | 2 PITG_22311    |
| 0   | 2180 | 1589 PITG_17002 |
| 0   | 39   | 6 NA            |
| 0   | 304  | 134 PITG_02109  |
| 0   | 43   | 13 NA           |
| 0   | 115  | 128 PITG_05690  |
| 0   | 46   | 31 PITG_04680   |
| 0   | 18   | 61 PITG_15228   |
| 0   | 2    | 18 PITG_14173   |
| 0   | 5    | 11 PITG_03098   |
| 0   | 0    | 4 PITG_09640    |
| 0   | 0    | 4 PITG_11221    |
| 0   | 11   | 6 PITG_06143    |
| 0   | 4    | 0 PITG_08504    |
| 0   | 156  | 124 NA          |
| 0   | 13   | 65 PITG_11065   |
| 0   | 2    | 19 PITG_12739   |
| 0   | 5    | 11 PITG_18999   |
| 0   | 35   | 19 PITG_10989   |
| 0   | 4    | 0 PITG_02723    |
| 0   | 47   | 6 PITG_06184    |
| 0   | 28   | 2 PITG_05329    |
| 0   | 2    | 6 PITG_14835    |
| 0   | 4    | 2 PITG_18543    |
| 0   | 25   | 59 PITG_03160   |
| 0   | 30   | 61 PITG_16071   |
| 41  | 4    | 11 NA           |
| 0   | 61   | 43 PITG_02664   |
| 0   | 0    | 0 NA            |
| 0   | 2    | 13 PITG_03577   |

|   |     |                |
|---|-----|----------------|
| 0 | 19  | 3 PITG_04902   |
| 0 | 10  | 38 PITG_00193  |
| 0 | 0   | 6 PITG_14991   |
| 0 | 52  | 89 NA          |
| 0 | 12  | 2 PITG_17816   |
| 0 | 30  | 23 PITG_16468  |
| 0 | 2   | 0 PITG_15807   |
| 0 | 3   | 3 NA           |
| 0 | 159 | 32 PITG_17690  |
| 0 | 4   | 38 PITG_10821  |
| 0 | 0   | 0 PITG_18797   |
| 0 | 21  | 126 PITG_02282 |
| 0 | 22  | 25 NA          |
| 0 | 90  | 23 NA          |
| 0 | 2   | 2 PITG_10058   |
| 0 | 4   | 4 NA           |
| 0 | 103 | 68 PITG_03160  |
| 0 | 0   | 10 PITG_07765  |
| 0 | 33  | 13 NA          |
| 0 | 6   | 6 PITG_15249   |
| 0 | 12  | 11 PITG_19111  |
| 0 | 0   | 9 PITG_04538   |
| 0 | 6   | 2 PITG_21046   |
| 0 | 10  | 3 NA           |
| 0 | 12  | 18 PITG_01740  |
| 0 | 185 | 129 PITG_13269 |
| 0 | 8   | 20 PITG_12504  |
| 0 | 2   | 11 PITG_11143  |
| 0 | 362 | 466 PITG_11450 |
| 0 | 75  | 54 PITG_13492  |
| 0 | 15  | 8 PITG_03590   |
| 0 | 6   | 3 PITG_02657   |
| 0 | 56  | 0 PITG_00450   |
| 0 | 142 | 140 PITG_10081 |
| 0 | 19  | 23 PITG_02454  |
| 0 | 33  | 93 PITG_15496  |
| 0 | 8   | 13 PITG_11461  |
| 0 | 95  | 12 PITG_14944  |
| 0 | 33  | 17 PITG_05421  |
| 0 | 57  | 44 PITG_20217  |
| 0 | 66  | 4 PITG_03756   |
| 0 | 34  | 0 PITG_12149   |
| 0 | 0   | 12 PITG_11329  |
| 0 | 6   | 56 PITG_11329  |
| 0 | 16  | 2 PITG_05560   |
| 0 | 85  | 15 PITG_03951  |
| 0 | 239 | 57 PITG_03178  |

|   |      |                 |
|---|------|-----------------|
| 0 | 13   | 14 PITG_03379   |
| 0 | 1143 | 1533 PITG_15017 |
| 0 | 0    | 6 PITG_11433    |
| 0 | 56   | 2 PITG_03144    |
| 0 | 4    | 2 PITG_00469    |
| 0 | 0    | 294 NA          |
| 0 | 44   | 20 PITG_17884   |
| 0 | 0    | 0 NA            |
| 0 | 124  | 44 PITG_06867   |
| 0 | 16   | 9 PITG_16720    |
| 0 | 0    | 0 NA            |
| 0 | 4    | 2 PITG_22126    |
| 0 | 2    | 0 NA            |
| 0 | 0    | 19 PITG_15731   |
| 0 | 3    | 0 PITG_14267    |
| 0 | 84   | 69 PITG_20055   |
| 0 | 4    | 10 PITG_05509   |
| 0 | 157  | 31 PITG_03821   |
| 0 | 81   | 20 PITG_01386   |
| 0 | 4    | 16 PITG_11466   |
| 0 | 31   | 2 PITG_18410    |
| 0 | 345  | 379 PITG_10921  |
| 0 | 186  | 291 PITG_19930  |
| 0 | 15   | 30 PITG_02506   |
| 0 | 2    | 6 PITG_11136    |
| 0 | 23   | 13 NA           |
| 0 | 51   | 12 NA           |
| 0 | 4    | 7 PITG_03990    |
| 0 | 75   | 0 PITG_01450    |
| 0 | 2    | 0 PITG_03988    |
| 0 | 5    | 0 PITG_13276    |
| 0 | 43   | 0 NA            |
| 0 | 941  | 562 PITG_03712  |
| 0 | 26   | 10 PITG_02732   |
| 0 | 0    | 22 PITG_13177   |
| 0 | 0    | 11 PITG_14636   |
| 0 | 76   | 25 PITG_06328   |
| 0 | 313  | 369 PITG_08416  |
| 0 | 72   | 147 NA          |
| 0 | 4    | 0 PITG_06827    |
| 0 | 2    | 4 PITG_16183    |
| 0 | 25   | 15 PITG_02114   |
| 0 | 140  | 9 PITG_03592    |
| 0 | 2    | 2 PITG_03658    |
| 0 | 6    | 2 NA            |
| 0 | 0    | 2 PITG_10045    |
| 0 | 0    | 2 PITG_16117    |

|   |      |                 |
|---|------|-----------------|
| 0 | 2    | 0 PITG_01477    |
| 0 | 0    | 0 PITG_15961    |
| 0 | 599  | 238 PITG_00166  |
| 0 | 10   | 4 PITG_05627    |
| 0 | 21   | 26 PITG_09378   |
| 0 | 14   | 0 PITG_01664    |
| 0 | 187  | 55 PITG_03267   |
| 0 | 2    | 9 PITG_14441    |
| 0 | 2    | 0 PITG_17347    |
| 0 | 118  | 61 PITG_10899   |
| 0 | 65   | 2 NA            |
| 0 | 34   | 20 PITG_01418   |
| 0 | 2    | 0 NA            |
| 0 | 15   | 5 NA            |
| 0 | 78   | 266 PITG_17747  |
| 0 | 3    | 0 NA            |
| 0 | 19   | 0 NA            |
| 0 | 0    | 3 PITG_02146    |
| 0 | 12   | 47 PITG_20537   |
| 0 | 60   | 156 PITG_13785  |
| 0 | 8    | 28 PITG_02526   |
| 0 | 27   | 7 NA            |
| 0 | 1203 | 1021 PITG_03583 |
| 0 | 43   | 8 PITG_00559    |
| 0 | 3    | 20 NA           |
| 0 | 28   | 0 PITG_02728    |
| 0 | 0    | 2 PITG_11143    |
| 0 | 0    | 0 NA            |
| 0 | 0    | 2 NA            |
| 0 | 1176 | 609 PITG_07096  |
| 0 | 0    | 3 NA            |
| 0 | 2    | 17 PITG_00140   |
| 0 | 7    | 6 PITG_17437    |
| 0 | 35   | 271 PITG_17983  |
| 0 | 12   | 41 PITG_13257   |
| 0 | 48   | 34 PITG_15602   |
| 0 | 6    | 0 PITG_03268    |
| 0 | 230  | 100 PITG_08734  |
| 0 | 13   | 0 NA            |
| 0 | 83   | 37 PITG_07995   |
| 0 | 135  | 14 PITG_14515   |
| 0 | 35   | 24 PITG_15817   |
| 0 | 15   | 35 PITG_11233   |
| 0 | 24   | 42 PITG_08663   |
| 0 | 0    | 3 NA            |
| 0 | 4    | 0 PITG_06013    |
| 0 | 0    | 18 NA           |



|   |     |                |
|---|-----|----------------|
| 0 | 9   | 0 NA           |
| 0 | 55  | 57 NA          |
| 0 | 11  | 0 PITG_12834   |
| 0 | 279 | 96 PITG_12687  |
| 0 | 79  | 62 PITG_07745  |
| 0 | 140 | 573 PITG_14008 |
| 0 | 4   | 2 NA           |
| 0 | 0   | 0 PITG_03372   |
| 0 | 0   | 6 PITG_18720   |
| 0 | 90  | 34 NA          |
| 0 | 21  | 3 PITG_02664   |
| 0 | 0   | 4 NA           |
| 0 | 0   | 0 NA           |
| 0 | 2   | 0 PITG_21336   |
| 0 | 29  | 0 NA           |
| 0 | 2   | 0 PITG_09951   |
| 0 | 31  | 0 PITG_06238   |
| 0 | 4   | 5 PITG_01314   |
| 0 | 0   | 0 PITG_13083   |
| 0 | 67  | 21 PITG_18322  |
| 0 | 4   | 24 PITG_00212  |
| 0 | 562 | 238 PITG_15627 |
| 0 | 17  | 11 PITG_18741  |
| 0 | 15  | 4 PITG_01652   |
| 0 | 114 | 8 PITG_11710   |
| 0 | 0   | 2 NA           |
| 0 | 15  | 8 PITG_06342   |
| 0 | 13  | 4 PITG_00039   |
| 0 | 16  | 0 PITG_03839   |
| 0 | 2   | 4 PITG_03343   |
| 0 | 22  | 48 PITG_14640  |
| 0 | 18  | 17 NA          |
| 0 | 0   | 0 PITG_03924   |
| 0 | 6   | 2 PITG_06911   |
| 0 | 219 | 114 PITG_05690 |
| 0 | 2   | 5 PITG_12121   |
| 0 | 101 | 36 PITG_00734  |
| 0 | 10  | 0 PITG_01317   |
| 0 | 18  | 0 NA           |
| 0 | 13  | 6 PITG_21557   |
| 0 | 0   | 2 PITG_15852   |
| 0 | 721 | 147 PITG_20209 |
| 0 | 22  | 59 PITG_09389  |
| 0 | 12  | 39 PITG_19037  |
| 0 | 157 | 39 PITG_08548  |
| 0 | 16  | 6 PITG_02928   |
| 0 | 2   | 18 PITG_16797  |

|   |     |                |
|---|-----|----------------|
| 0 | 34  | 41 PITG_10952  |
| 0 | 2   | 2 PITG_02292   |
| 0 | 3   | 0 PITG_16224   |
| 0 | 22  | 2 NA           |
| 0 | 9   | 6 PITG_13421   |
| 0 | 58  | 93 PITG_08142  |
| 0 | 31  | 24 PITG_01798  |
| 0 | 10  | 6 PITG_12109   |
| 0 | 10  | 18 PITG_14835  |
| 0 | 0   | 0 PITG_10473   |
| 0 | 12  | 65 PITG_00442  |
| 0 | 114 | 18 PITG_06025  |
| 0 | 13  | 0 NA           |
| 0 | 10  | 0 PITG_17360   |
| 0 | 374 | 270 PITG_13657 |
| 0 | 273 | 90 PITG_17928  |
| 0 | 193 | 56 PITG_02043  |
| 0 | 136 | 25 NA          |
| 0 | 72  | 126 NA         |
| 0 | 51  | 11 PITG_03818  |
| 0 | 25  | 44 PITG_20685  |
| 0 | 140 | 100 PITG_08514 |
| 0 | 0   | 6 PITG_17961   |
| 0 | 9   | 4 NA           |
| 0 | 8   | 34 PITG_01386  |
| 0 | 18  | 29 PITG_16719  |
| 4 | 0   | 0 NA           |
| 0 | 48  | 17 PITG_13367  |
| 0 | 4   | 7 PITG_04115   |
| 0 | 0   | 15 PITG_08599  |
| 0 | 0   | 2 PITG_15847   |
| 0 | 14  | 6 PITG_07852   |
| 0 | 32  | 8 PITG_17733   |
| 0 | 24  | 38 PITG_02452  |
| 0 | 8   | 2 PITG_19184   |
| 0 | 9   | 4 PITG_02783   |
| 0 | 10  | 0 PITG_18634   |
| 0 | 2   | 6 PITG_02980   |
| 0 | 95  | 140 PITG_09506 |
| 0 | 73  | 74 PITG_02561  |
| 0 | 13  | 6 PITG_05328   |
| 0 | 28  | 51 PITG_14995  |
| 0 | 38  | 40 PITG_01182  |
| 0 | 12  | 19 PITG_00252  |
| 0 | 2   | 0 PITG_09995   |
| 0 | 124 | 0 PITG_08049   |
| 0 | 5   | 0 NA           |

|   |     |                |
|---|-----|----------------|
| 0 | 4   | 4 PITG_22555   |
| 0 | 10  | 10 PITG_19450  |
| 0 | 0   | 6 PITG_12183   |
| 0 | 28  | 0 PITG_20111   |
| 0 | 27  | 8 PITG_02706   |
| 0 | 375 | 44 PITG_21528  |
| 0 | 4   | 0 PITG_09277   |
| 0 | 7   | 2 PITG_12686   |
| 0 | 4   | 0 PITG_19146   |
| 0 | 0   | 0 PITG_11143   |
| 0 | 3   | 16 PITG_14563  |
| 0 | 8   | 4 NA           |
| 0 | 40  | 0 PITG_02145   |
| 0 | 40  | 28 PITG_00965  |
| 0 | 102 | 12 PITG_14558  |
| 0 | 147 | 71 PITG_13065  |
| 0 | 16  | 0 PITG_09247   |
| 0 | 27  | 0 PITG_15270   |
| 0 | 2   | 2 PITG_06267   |
| 0 | 46  | 194 PITG_02745 |
| 0 | 12  | 6 PITG_18873   |
| 0 | 0   | 9 PITG_18187   |
| 0 | 0   | 15 PITG_14923  |
| 0 | 6   | 7 PITG_17489   |
| 0 | 20  | 8 PITG_17026   |
| 0 | 15  | 0 PITG_21940   |
| 0 | 3   | 0 PITG_03263   |
| 0 | 14  | 4 PITG_05495   |
| 0 | 130 | 8 PITG_15982   |
| 0 | 5   | 7 PITG_11194   |
| 0 | 0   | 9 PITG_00132   |
| 0 | 9   | 8 PITG_08530   |
| 0 | 22  | 2 PITG_01442   |
| 0 | 218 | 101 PITG_00999 |
| 0 | 54  | 0 PITG_01294   |
| 0 | 7   | 0 PITG_11728   |
| 0 | 8   | 21 PITG_13366  |
| 0 | 0   | 5 PITG_20117   |
| 0 | 2   | 9 PITG_02744   |
| 0 | 65  | 16 PITG_10184  |
| 0 | 9   | 17 NA          |
| 0 | 0   | 0 NA           |
| 0 | 74  | 8 PITG_12454   |
| 0 | 6   | 0 PITG_01576   |
| 4 | 111 | 24 NA          |
| 0 | 391 | 177 PITG_08489 |
| 0 | 13  | 4 PITG_14728   |

|   |     |                |
|---|-----|----------------|
| 0 | 104 | 107 NA         |
| 2 | 26  | 199 PITG_07036 |
| 0 | 2   | 4 PITG_10023   |
| 0 | 0   | 12 PITG_23201  |
| 0 | 0   | 2 PITG_10888   |
| 0 | 7   | 18 PITG_13016  |
| 0 | 0   | 2 PITG_11146   |
| 0 | 104 | 0 PITG_14548   |
| 0 | 141 | 78 PITG_00680  |
| 0 | 13  | 6 PITG_01127   |
| 0 | 66  | 161 PITG_12818 |
| 0 | 12  | 9 PITG_01379   |
| 0 | 4   | 0 PITG_21619   |
| 0 | 272 | 137 PITG_15593 |
| 0 | 27  | 13 PITG_00380  |
| 0 | 39  | 7 NA           |
| 0 | 37  | 13 PITG_00148  |
| 0 | 9   | 8 PITG_01044   |
| 0 | 37  | 19 PITG_02887  |
| 0 | 120 | 94 PITG_11982  |
| 0 | 0   | 0 PITG_03160   |
| 0 | 6   | 4 PITG_15442   |
| 0 | 0   | 3 PITG_05509   |
| 0 | 249 | 669 PITG_06514 |
| 0 | 80  | 48 PITG_05328  |
| 0 | 93  | 59 PITG_13415  |
| 0 | 131 | 32 NA          |
| 0 | 4   | 3 PITG_14441   |
| 0 | 4   | 8 PITG_06822   |
| 0 | 93  | 16 PITG_17279  |
| 0 | 7   | 2 PITG_13558   |
| 0 | 2   | 0 PITG_09242   |
| 0 | 150 | 21 NA          |
| 0 | 49  | 3 PITG_08154   |
| 0 | 17  | 656 PITG_21410 |
| 0 | 4   | 4 NA           |
| 0 | 173 | 296 PITG_01096 |
| 0 | 117 | 6 NA           |
| 0 | 38  | 63 PITG_17891  |
| 0 | 13  | 21 NA          |
| 0 | 2   | 2 NA           |
| 0 | 483 | 345 NA         |
| 0 | 2   | 0 PITG_02729   |
| 0 | 60  | 11 PITG_18459  |
| 0 | 7   | 2 PITG_15777   |
| 0 | 0   | 9 PITG_11161   |
| 0 | 4   | 10 PITG_13590  |

|   |     |                |
|---|-----|----------------|
| 0 | 0   | 0 NA           |
| 0 | 345 | 530 PITG_09624 |
| 0 | 236 | 120 PITG_03582 |
| 0 | 0   | 2 NA           |
| 0 | 12  | 9 PITG_15602   |
| 0 | 9   | 2 PITG_10725   |
| 0 | 4   | 0 PITG_16962   |
| 0 | 30  | 52 PITG_20194  |
| 0 | 14  | 11 NA          |
| 0 | 9   | 4 PITG_02994   |
| 0 | 2   | 0 PITG_14898   |
| 0 | 4   | 7 PITG_00078   |
| 0 | 56  | 16 PITG_01617  |
| 0 | 0   | 6 PITG_09637   |
| 0 | 43  | 4 NA           |
| 0 | 12  | 5 NA           |
| 0 | 2   | 0 PITG_20350   |
| 0 | 131 | 638 PITG_21410 |
| 0 | 55  | 4 NA           |
| 0 | 12  | 38 PITG_03016  |
| 0 | 73  | 19 PITG_07354  |
| 0 | 83  | 25 PITG_06776  |
| 0 | 0   | 0 PITG_00688   |
| 0 | 28  | 2 NA           |
| 0 | 0   | 0 PITG_19857   |
| 0 | 20  | 31 PITG_02867  |
| 0 | 24  | 19 PITG_06910  |
| 0 | 0   | 6 NA           |
| 0 | 11  | 3 PITG_18046   |
| 0 | 45  | 55 PITG_10871  |
| 0 | 49  | 51 PITG_17156  |
| 0 | 28  | 50 PITG_11813  |
| 0 | 27  | 2 PITG_18099   |
| 0 | 56  | 38 PITG_12106  |
| 0 | 95  | 31 PITG_14141  |
| 0 | 0   | 0 PITG_09930   |
| 0 | 98  | 12 PITG_11813  |
| 0 | 23  | 51 PITG_00453  |
| 0 | 89  | 26 NA          |
| 0 | 263 | 170 PITG_02802 |
| 0 | 195 | 0 PITG_05557   |
| 0 | 18  | 6 PITG_16492   |
| 0 | 208 | 66 PITG_18452  |
| 0 | 12  | 5 PITG_02608   |
| 0 | 4   | 0 PITG_08197   |
| 0 | 24  | 82 NA          |
| 0 | 13  | 10 PITG_09270  |

|   |      |                |
|---|------|----------------|
| 0 | 17   | 0 NA           |
| 0 | 4    | 0 NA           |
| 0 | 5    | 4 PITG_07880   |
| 0 | 0    | 0 PITG_11187   |
| 0 | 13   | 0 PITG_19048   |
| 0 | 4    | 51 PITG_04994  |
| 0 | 8    | 4 PITG_01335   |
| 0 | 12   | 4 PITG_19450   |
| 0 | 0    | 4 PITG_03571   |
| 0 | 2    | 12 PITG_21516  |
| 0 | 2    | 5 PITG_01647   |
| 0 | 28   | 5 PITG_04978   |
| 0 | 8    | 0 NA           |
| 0 | 43   | 0 PITG_04405   |
| 0 | 12   | 11 PITG_07543  |
| 0 | 162  | 78 PITG_03473  |
| 0 | 413  | 379 PITG_07710 |
| 0 | 248  | 138 PITG_13753 |
| 0 | 88   | 21 PITG_03415  |
| 0 | 22   | 7 NA           |
| 0 | 62   | 170 PITG_18833 |
| 0 | 0    | 13 PITG_18393  |
| 0 | 3    | 10 PITG_03302  |
| 0 | 3    | 9 PITG_07161   |
| 0 | 4    | 2 PITG_10141   |
| 0 | 0    | 0 PITG_18322   |
| 0 | 2596 | 526 PITG_11996 |
| 0 | 0    | 3 PITG_03995   |
| 0 | 0    | 2 PITG_06142   |
| 0 | 2    | 0 PITG_03374   |
| 0 | 4    | 0 PITG_05731   |
| 0 | 0    | 0 NA           |
| 0 | 0    | 2 PITG_16904   |
| 0 | 35   | 18 PITG_22857  |
| 0 | 0    | 14 PITG_18973  |
| 0 | 0    | 3 PITG_02780   |
| 0 | 215  | 178 PITG_15090 |
| 0 | 2    | 0 PITG_19175   |
| 0 | 18   | 33 PITG_06267  |
| 0 | 0    | 0 PITG_17669   |
| 0 | 2    | 0 PITG_01647   |
| 0 | 2    | 0 PITG_17695   |
| 0 | 53   | 6 PITG_11097   |
| 0 | 0    | 12 PITG_01862  |
| 0 | 66   | 14 NA          |
| 0 | 18   | 0 NA           |
| 0 | 29   | 26 PITG_08365  |

|   |     |                |
|---|-----|----------------|
| 0 | 0   | 4 PITG_13366   |
| 0 | 0   | 3 PITG_11221   |
| 0 | 4   | 2 PITG_16267   |
| 0 | 0   | 11 PITG_16745  |
| 0 | 31  | 49 PITG_00295  |
| 0 | 0   | 6 PITG_06829   |
| 0 | 189 | 213 NA         |
| 0 | 5   | 0 PITG_00179   |
| 0 | 0   | 0 NA           |
| 0 | 19  | 16 PITG_11736  |
| 0 | 3   | 0 PITG_13337   |
| 0 | 4   | 4 NA           |
| 0 | 0   | 4 PITG_11741   |
| 0 | 2   | 4 NA           |
| 0 | 2   | 10 PITG_07237  |
| 0 | 19  | 0 PITG_01864   |
| 0 | 30  | 5 NA           |
| 0 | 0   | 2 NA           |
| 0 | 14  | 6 PITG_17626   |
| 0 | 42  | 65 PITG_08599  |
| 0 | 190 | 120 PITG_14639 |
| 0 | 2   | 3 PITG_06120   |
| 0 | 94  | 88 PITG_11923  |
| 0 | 26  | 42 PITG_18973  |
| 0 | 85  | 53 PITG_07938  |
| 0 | 7   | 5 PITG_10590   |
| 0 | 53  | 36 PITG_02591  |
| 0 | 214 | 217 PITG_01146 |
| 0 | 74  | 35 PITG_15852  |
| 0 | 6   | 0 NA           |
| 0 | 23  | 8 PITG_22687   |
| 0 | 153 | 40 PITG_08572  |
| 0 | 7   | 2 PITG_17684   |
| 0 | 0   | 2 PITG_08367   |
| 0 | 2   | 0 NA           |
| 0 | 211 | 113 PITG_05141 |
| 0 | 0   | 0 PITG_17882   |
| 0 | 9   | 10 PITG_22858  |
| 0 | 0   | 0 PITG_12880   |
| 0 | 305 | 108 NA         |
| 0 | 0   | 4 PITG_15571   |
| 0 | 12  | 2 PITG_01626   |
| 0 | 8   | 2 PITG_08197   |
| 0 | 4   | 0 PITG_01429   |
| 0 | 224 | 115 PITG_05255 |
| 0 | 29  | 26 PITG_15139  |
| 0 | 7   | 2 PITG_01251   |

|     |     |                |
|-----|-----|----------------|
| 0   | 32  | 0 PITG_14005   |
| 0   | 4   | 0 NA           |
| 0   | 0   | 0 NA           |
| 0   | 73  | 2 PITG_01722   |
| 0   | 53  | 47 PITG_13758  |
| 0   | 8   | 10 PITG_20319  |
| 0   | 97  | 22 PITG_03238  |
| 0   | 8   | 90 NA          |
| 0   | 23  | 13 NA          |
| 0   | 0   | 4 PITG_17249   |
| 0   | 15  | 197 PITG_11855 |
| 0   | 3   | 8 PITG_03410   |
| 0   | 6   | 2 PITG_05629   |
| 0   | 65  | 36 PITG_06218  |
| 0   | 14  | 23 PITG_09698  |
| 0   | 7   | 11 PITG_05487  |
| 0   | 31  | 10 PITG_04547  |
| 0   | 41  | 34 PITG_03643  |
| 0   | 32  | 55 PITG_08138  |
| 0   | 355 | 141 PITG_00706 |
| 0   | 88  | 5 PITG_17279   |
| 0   | 0   | 5 PITG_02467   |
| 0   | 6   | 12 PITG_16732  |
| 0   | 0   | 2 PITG_13367   |
| 0   | 0   | 0 PITG_12989   |
| 0   | 54  | 0 PITG_00747   |
| 206 | 4   | 175 NA         |
| 0   | 7   | 0 PITG_17360   |
| 0   | 4   | 4 PITG_13621   |
| 0   | 22  | 105 PITG_13153 |
| 0   | 53  | 205 PITG_00189 |
| 0   | 19  | 62 PITG_01330  |
| 0   | 0   | 21 PITG_13505  |
| 0   | 64  | 17 PITG_13413  |
| 0   | 5   | 0 PITG_10923   |
| 0   | 40  | 51 PITG_03545  |
| 0   | 30  | 2 PITG_12527   |
| 0   | 24  | 3 PITG_14712   |
| 0   | 20  | 2 PITG_14898   |
| 0   | 19  | 2 PITG_07839   |
| 0   | 5   | 9 PITG_03833   |
| 0   | 19  | 29 PITG_06890  |
| 0   | 22  | 4 PITG_07200   |
| 0   | 91  | 69 PITG_02628  |
| 0   | 378 | 546 PITG_11775 |
| 0   | 19  | 13 PITG_13460  |
| 0   | 26  | 0 NA           |



|    |     |                |
|----|-----|----------------|
| 0  | 15  | 14 NA          |
| 0  | 73  | 92 PITG_09507  |
| 68 | 0   | 2 NA           |
| 0  | 151 | 180 PITG_14576 |
| 0  | 59  | 22 PITG_20206  |
| 0  | 10  | 0 PITG_05193   |
| 0  | 9   | 4 NA           |
| 0  | 13  | 2 PITG_13746   |
| 0  | 110 | 14 PITG_06845  |
| 0  | 17  | 66 PITG_03348  |
| 0  | 43  | 10 PITG_05667  |
| 0  | 2   | 2 PITG_17627   |
| 0  | 0   | 2 NA           |
| 0  | 4   | 0 NA           |
| 0  | 6   | 0 PITG_18393   |
| 0  | 10  | 2 PITG_17370   |
| 0  | 3   | 2 NA           |
| 0  | 35  | 12 NA          |
| 0  | 7   | 0 PITG_21067   |
| 0  | 524 | 310 PITG_10969 |
| 0  | 0   | 0 PITG_11024   |
| 0  | 11  | 2 PITG_18461   |
| 0  | 48  | 14 NA          |
| 0  | 27  | 0 PITG_03094   |
| 0  | 2   | 2 PITG_17897   |
| 0  | 4   | 17 PITG_06479  |
| 0  | 69  | 32 PITG_05621  |
| 0  | 7   | 0 NA           |
| 0  | 0   | 2 PITG_19429   |
| 0  | 2   | 0 PITG_03788   |
| 0  | 23  | 20 PITG_02732  |
| 0  | 2   | 0 NA           |
| 0  | 5   | 4 NA           |
| 0  | 11  | 0 PITG_10734   |
| 0  | 0   | 0 PITG_09463   |
| 0  | 116 | 99 PITG_01793  |
| 0  | 55  | 10 PITG_12212  |
| 0  | 12  | 21 PITG_01439  |
| 0  | 489 | 118 PITG_19157 |
| 0  | 2   | 2 NA           |
| 0  | 4   | 0 PITG_16810   |
| 6  | 2   | 11 NA          |
| 0  | 25  | 20 PITG_14944  |
| 0  | 445 | 36 PITG_14533  |
| 0  | 6   | 4 NA           |
| 0  | 6   | 8 PITG_00663   |
| 0  | 88  | 94 PITG_15251  |

|     |     |                |
|-----|-----|----------------|
| 0   | 11  | 2 PITG_03079   |
| 0   | 22  | 14 PITG_03623  |
| 0   | 196 | 691 PITG_17034 |
| 0   | 77  | 4 PITG_01097   |
| 0   | 10  | 4 PITG_17568   |
| 0   | 4   | 18 PITG_12916  |
| 0   | 168 | 282 PITG_18354 |
| 0   | 77  | 0 NA           |
| 0   | 6   | 0 PITG_03468   |
| 0   | 5   | 5 NA           |
| 0   | 151 | 196 PITG_07103 |
| 0   | 85  | 27 PITG_17568  |
| 0   | 91  | 8 PITG_15467   |
| 0   | 21  | 61 PITG_20321  |
| 0   | 29  | 4 PITG_03851   |
| 0   | 57  | 22 PITG_00140  |
| 0   | 37  | 26 PITG_02447  |
| 0   | 82  | 17 PITG_18095  |
| 0   | 38  | 2 NA           |
| 0   | 114 | 0 PITG_06917   |
| 0   | 0   | 9 PITG_19037   |
| 0   | 80  | 0 PITG_21329   |
| 0   | 50  | 55 PITG_02349  |
| 0   | 56  | 26 PITG_01090  |
| 0   | 5   | 2 PITG_10865   |
| 0   | 18  | 44 PITG_09298  |
| 0   | 4   | 10 PITG_13896  |
| 0   | 33  | 23 PITG_12575  |
| 0   | 14  | 24 PITG_13773  |
| 0   | 0   | 0 PITG_16736   |
| 0   | 0   | 4 PITG_08405   |
| 0   | 127 | 60 PITG_12663  |
| 0   | 0   | 2 PITG_05729   |
| 0   | 0   | 0 PITG_17706   |
| 4   | 126 | 705 PITG_02409 |
| 0   | 118 | 57 PITG_08570  |
| 501 | 6   | 779 NA         |
| 0   | 97  | 439 PITG_09964 |
| 0   | 5   | 6 PITG_16072   |
| 0   | 41  | 66 PITG_06155  |
| 0   | 8   | 19 PITG_12470  |
| 0   | 11  | 6 PITG_01297   |
| 0   | 9   | 6 PITG_17928   |
| 0   | 15  | 10 PITG_03318  |
| 0   | 30  | 17 PITG_00020  |
| 0   | 241 | 210 PITG_13267 |
| 0   | 17  | 4 NA           |

|    |      |                 |
|----|------|-----------------|
| 0  | 71   | 29 PITG_04708   |
| 0  | 42   | 8 NA            |
| 0  | 31   | 14 NA           |
| 0  | 5    | 9 PITG_09956    |
| 0  | 7    | 8 PITG_01058    |
| 0  | 12   | 17 PITG_20539   |
| 0  | 13   | 0 NA            |
| 68 | 6    | 46 NA           |
| 0  | 37   | 2 NA            |
| 0  | 35   | 23 PITG_06700   |
| 0  | 0    | 5 NA            |
| 0  | 54   | 71 PITG_04895   |
| 0  | 2    | 2 PITG_13223    |
| 0  | 4    | 4 PITG_02050    |
| 0  | 192  | 128 PITG_00719  |
| 0  | 4    | 12 PITG_16083   |
| 0  | 2    | 0 NA            |
| 0  | 7    | 4 NA            |
| 0  | 12   | 0 PITG_21600    |
| 0  | 10   | 9 PITG_09089    |
| 0  | 11   | 0 NA            |
| 0  | 74   | 164 PITG_11496  |
| 0  | 0    | 0 PITG_10039    |
| 0  | 128  | 11 PITG_03422   |
| 0  | 13   | 0 PITG_05464    |
| 0  | 2    | 16 PITG_09566   |
| 0  | 2    | 4 PITG_03076    |
| 0  | 24   | 16 PITG_17708   |
| 0  | 0    | 0 PITG_11368    |
| 0  | 48   | 34 PITG_16792   |
| 0  | 131  | 67 PITG_15817   |
| 0  | 23   | 10 NA           |
| 0  | 2    | 2 PITG_03924    |
| 0  | 0    | 4 PITG_13851    |
| 0  | 0    | 2 PITG_06755    |
| 0  | 2    | 2 PITG_05193    |
| 0  | 0    | 0 PITG_14935    |
| 0  | 35   | 32 PITG_09296   |
| 2  | 1021 | 2184 PITG_07996 |
| 0  | 2245 | 5955 PITG_00149 |
| 0  | 9    | 78 PITG_12864   |
| 0  | 2    | 0 PITG_13164    |
| 0  | 20   | 2 PITG_13968    |
| 0  | 0    | 2 NA            |
| 0  | 0    | 0 PITG_19596    |
| 0  | 35   | 47 PITG_12348   |
| 0  | 6    | 5 PITG_13618    |

|   |     |                |
|---|-----|----------------|
| 0 | 162 | 245 PITG_06829 |
| 0 | 0   | 3 PITG_12239   |
| 0 | 53  | 4 PITG_14129   |
| 0 | 0   | 10 PITG_11198  |
| 0 | 9   | 15 PITG_06001  |
| 0 | 11  | 12 PITG_15050  |
| 0 | 0   | 4 NA           |
| 0 | 397 | 555 PITG_01752 |
| 0 | 6   | 0 PITG_11698   |
| 0 | 10  | 14 PITG_16978  |
| 0 | 2   | 0 PITG_21416   |
| 0 | 39  | 0 NA           |
| 0 | 19  | 4 PITG_20194   |
| 0 | 2   | 0 PITG_00050   |
| 0 | 7   | 23 PITG_22163  |
| 0 | 26  | 19 PITG_19964  |
| 0 | 17  | 9 PITG_03489   |
| 0 | 0   | 2 PITG_22529   |
| 0 | 6   | 8 NA           |
| 0 | 2   | 10 PITG_18004  |
| 0 | 39  | 62 PITG_12577  |
| 0 | 324 | 38 PITG_07277  |
| 0 | 2   | 0 PITG_17437   |
| 0 | 11  | 0 PITG_04132   |
| 0 | 141 | 18 PITG_10936  |
| 0 | 0   | 22 PITG_01535  |
| 0 | 11  | 23 PITG_00117  |
| 0 | 8   | 4 NA           |
| 0 | 6   | 8 PITG_03946   |
| 0 | 21  | 4 PITG_08305   |
| 0 | 11  | 0 PITG_00292   |
| 0 | 108 | 49 PITG_12648  |
| 0 | 2   | 44 PITG_02526  |
| 0 | 8   | 31 PITG_04538  |
| 0 | 8   | 5 PITG_19887   |
| 0 | 28  | 31 PITG_20156  |
| 0 | 34  | 14 NA          |
| 0 | 70  | 35 PITG_23205  |
| 0 | 6   | 0 NA           |
| 0 | 565 | 393 PITG_04704 |
| 0 | 40  | 105 PITG_00209 |
| 0 | 53  | 0 PITG_07343   |
| 0 | 59  | 0 PITG_00440   |
| 0 | 471 | 407 PITG_00877 |
| 0 | 6   | 4 NA           |
| 0 | 31  | 31 PITG_00577  |
| 0 | 277 | 386 PITG_05301 |

|    |     |                |
|----|-----|----------------|
| 0  | 79  | 9 NA           |
| 0  | 0   | 2 PITG_06121   |
| 0  | 6   | 2 PITG_12743   |
| 0  | 5   | 0 PITG_03773   |
| 0  | 7   | 2 PITG_07663   |
| 29 | 20  | 41 NA          |
| 0  | 180 | 456 PITG_01310 |
| 0  | 61  | 0 PITG_07301   |
| 0  | 31  | 72 PITG_01715  |
| 0  | 4   | 4 PITG_13031   |
| 0  | 290 | 87 PITG_04381  |
| 0  | 6   | 55 PITG_01762  |
| 2  | 0   | 9 NA           |
| 9  | 68  | 613 NA         |
| 0  | 17  | 8 PITG_14221   |
| 0  | 15  | 6 PITG_20236   |
| 0  | 49  | 5 PITG_05245   |
| 0  | 14  | 20 PITG_08230  |
| 0  | 2   | 2 NA           |
| 0  | 7   | 8 PITG_00160   |
| 0  | 0   | 2 PITG_01710   |
| 0  | 0   | 0 NA           |
| 0  | 4   | 4 NA           |
| 0  | 18  | 15 PITG_00500  |
| 0  | 0   | 0 NA           |
| 0  | 0   | 2 PITG_01991   |
| 0  | 218 | 79 PITG_03423  |
| 0  | 51  | 26 PITG_09449  |
| 0  | 54  | 14 PITG_23128  |
| 0  | 241 | 664 PITG_07843 |
| 0  | 27  | 29 PITG_06822  |
| 0  | 82  | 2 PITG_16227   |
| 0  | 344 | 2 PITG_10292   |
| 0  | 124 | 21 PITG_01754  |
| 0  | 3   | 7 PITG_02161   |
| 0  | 16  | 51 NA          |
| 0  | 2   | 2 PITG_15623   |
| 0  | 73  | 25 PITG_15857  |
| 0  | 13  | 26 PITG_12556  |
| 0  | 53  | 83 PITG_19767  |
| 0  | 28  | 38 PITG_19046  |
| 0  | 4   | 0 PITG_03995   |
| 0  | 23  | 18 PITG_01949  |
| 0  | 6   | 2 NA           |
| 0  | 16  | 19 PITG_07868  |
| 0  | 0   | 7 PITG_11888   |
| 0  | 76  | 31 PITG_09956  |

|    |     |                |
|----|-----|----------------|
| 0  | 90  | 0 PITG_08038   |
| 0  | 6   | 0 PITG_22062   |
| 0  | 12  | 17 PITG_16854  |
| 0  | 5   | 2 PITG_13017   |
| 0  | 2   | 2 NA           |
| 0  | 7   | 15 PITG_01647  |
| 45 | 17  | 36 NA          |
| 0  | 8   | 7 PITG_05357   |
| 0  | 2   | 11 PITG_16063  |
| 0  | 47  | 0 PITG_02209   |
| 0  | 0   | 0 PITG_01076   |
| 0  | 0   | 0 NA           |
| 0  | 190 | 41 PITG_18717  |
| 0  | 8   | 2 PITG_06802   |
| 0  | 0   | 0 PITG_19411   |
| 0  | 25  | 8 NA           |
| 0  | 89  | 6 PITG_20780   |
| 0  | 27  | 4 NA           |
| 0  | 12  | 2 NA           |
| 0  | 33  | 66 PITG_13469  |
| 0  | 15  | 2 NA           |
| 0  | 328 | 57 NA          |
| 0  | 0   | 0 NA           |
| 0  | 9   | 0 PITG_17760   |
| 0  | 3   | 0 PITG_05173   |
| 0  | 161 | 887 PITG_18706 |
| 0  | 15  | 2 NA           |
| 0  | 126 | 45 PITG_01206  |
| 0  | 6   | 12 PITG_03988  |
| 0  | 46  | 54 PITG_17767  |
| 0  | 241 | 182 PITG_13030 |
| 0  | 411 | 453 NA         |
| 0  | 362 | 104 PITG_00693 |
| 0  | 106 | 110 NA         |
| 0  | 23  | 11 PITG_01003  |
| 0  | 10  | 0 NA           |
| 0  | 9   | 9 PITG_03399   |
| 0  | 126 | 31 NA          |
| 0  | 184 | 174 NA         |
| 0  | 4   | 2 PITG_04701   |
| 0  | 60  | 8 PITG_15542   |
| 0  | 44  | 30 PITG_04708  |
| 0  | 30  | 8 PITG_10961   |
| 0  | 0   | 3 PITG_01046   |
| 0  | 30  | 10 PITG_05592  |
| 0  | 150 | 60 PITG_09772  |
| 0  | 2   | 0 PITG_07552   |

|   |     |                |
|---|-----|----------------|
| 0 | 29  | 54 PITG_08455  |
| 0 | 23  | 25 PITG_15139  |
| 0 | 9   | 8 PITG_09579   |
| 0 | 20  | 35 PITG_09936  |
| 0 | 0   | 0 NA           |
| 0 | 303 | 528 PITG_05505 |
| 0 | 17  | 0 PITG_16072   |
| 0 | 339 | 449 PITG_05617 |
| 0 | 25  | 7 PITG_05926   |
| 0 | 59  | 92 PITG_08660  |
| 0 | 2   | 24 NA          |
| 0 | 16  | 46 PITG_00632  |
| 0 | 0   | 0 NA           |
| 0 | 12  | 30 PITG_01193  |
| 0 | 2   | 5 PITG_05259   |
| 0 | 4   | 0 PITG_20251   |
| 0 | 67  | 32 PITG_08084  |
| 0 | 25  | 4 PITG_13762   |
| 0 | 17  | 7 PITG_17882   |
| 0 | 3   | 0 PITG_01811   |
| 0 | 25  | 10 PITG_06677  |
| 0 | 21  | 74 PITG_01718  |
| 0 | 53  | 4 PITG_09818   |
| 0 | 4   | 0 PITG_08613   |
| 0 | 50  | 16 PITG_01206  |
| 0 | 14  | 15 NA          |
| 0 | 127 | 38 PITG_06806  |
| 0 | 11  | 7 PITG_06675   |
| 0 | 30  | 18 PITG_00482  |
| 0 | 69  | 77 PITG_12488  |
| 0 | 266 | 38 NA          |
| 0 | 0   | 0 PITG_02330   |
| 0 | 4   | 7 PITG_00661   |
| 0 | 45  | 10 NA          |
| 0 | 146 | 69 PITG_23128  |
| 0 | 576 | 166 PITG_08696 |
| 0 | 4   | 4 PITG_00238   |
| 0 | 4   | 13 PITG_06753  |
| 0 | 119 | 376 PITG_09706 |
| 0 | 150 | 657 NA         |
| 0 | 2   | 8 PITG_21068   |
| 0 | 11  | 2 PITG_17927   |
| 0 | 0   | 2 PITG_19849   |
| 0 | 4   | 6 PITG_03260   |
| 0 | 3   | 2 PITG_17948   |
| 0 | 23  | 13 PITG_12753  |
| 0 | 6   | 19 PITG_01740  |

|    |      |                |
|----|------|----------------|
| 0  | 90   | 74 PITG_00656  |
| 0  | 6    | 5 NA           |
| 0  | 55   | 0 PITG_00158   |
| 0  | 25   | 0 NA           |
| 0  | 34   | 15 NA          |
| 0  | 2    | 4 PITG_02363   |
| 0  | 62   | 0 NA           |
| 0  | 10   | 17 PITG_05339  |
| 0  | 86   | 0 PITG_08218   |
| 0  | 11   | 71 PITG_05781  |
| 0  | 3088 | 263 NA         |
| 0  | 49   | 22 NA          |
| 0  | 18   | 68 PITG_13912  |
| 0  | 672  | 404 PITG_08810 |
| 0  | 111  | 100 NA         |
| 0  | 78   | 413 PITG_00375 |
| 66 | 0    | 0 NA           |
| 0  | 184  | 228 PITG_21047 |
| 0  | 2    | 6 PITG_00723   |
| 0  | 138  | 260 PITG_19023 |
| 0  | 42   | 13 PITG_15784  |
| 0  | 38   | 46 PITG_16854  |
| 0  | 18   | 8 PITG_10065   |
| 0  | 33   | 24 PITG_00680  |
| 0  | 31   | 16 PITG_23143  |
| 0  | 119  | 236 NA         |
| 0  | 57   | 29 PITG_11792  |
| 0  | 17   | 13 PITG_22638  |
| 0  | 2    | 3 PITG_11321   |
| 0  | 24   | 19 PITG_01193  |
| 0  | 29   | 312 PITG_16963 |
| 0  | 0    | 4 PITG_10961   |
| 0  | 22   | 4 PITG_07703   |
| 0  | 388  | 174 PITG_11143 |
| 0  | 8    | 6 PITG_08626   |
| 0  | 42   | 62 PITG_11406  |
| 0  | 12   | 66 PITG_11127  |
| 0  | 15   | 26 PITG_15602  |
| 0  | 8    | 30 PITG_00406  |
| 0  | 61   | 69 PITG_17245  |
| 0  | 0    | 0 PITG_03562   |
| 0  | 0    | 17 PITG_10993  |
| 0  | 52   | 73 PITG_02071  |
| 0  | 9    | 0 NA           |
| 0  | 2    | 0 PITG_12675   |
| 0  | 2    | 2 NA           |
| 0  | 6    | 18 PITG_13114  |



|   |     |                |
|---|-----|----------------|
| 0 | 4   | 2 PITG_09447   |
| 0 | 4   | 27 PITG_03549  |
| 0 | 8   | 20 PITG_20117  |
| 0 | 33  | 13 PITG_14553  |
| 0 | 7   | 0 PITG_06570   |
| 0 | 2   | 6 PITG_09508   |
| 0 | 2   | 0 NA           |
| 0 | 7   | 2 PITG_16013   |
| 0 | 7   | 4 PITG_20378   |
| 0 | 0   | 0 PITG_15958   |
| 0 | 12  | 26 PITG_03901  |
| 0 | 30  | 31 NA          |
| 0 | 4   | 10 PITG_03179  |
| 0 | 6   | 22 PITG_03452  |
| 0 | 5   | 0 NA           |
| 0 | 2   | 8 PITG_10729   |
| 0 | 21  | 5 NA           |
| 0 | 17  | 4 PITG_03034   |
| 0 | 68  | 14 PITG_02971  |
| 0 | 56  | 18 NA          |
| 0 | 58  | 36 PITG_00188  |
| 0 | 4   | 0 PITG_00832   |
| 0 | 16  | 25 PITG_10484  |
| 0 | 230 | 187 NA         |
| 0 | 6   | 13 PITG_17455  |
| 0 | 82  | 58 PITG_12593  |
| 0 | 122 | 18 NA          |
| 0 | 6   | 2 NA           |
| 0 | 14  | 8 PITG_11087   |
| 0 | 42  | 80 PITG_16116  |
| 0 | 18  | 10 PITG_08252  |
| 0 | 54  | 33 PITG_17381  |
| 2 | 31  | 66 PITG_01591  |
| 0 | 4   | 5 PITG_13345   |
| 0 | 0   | 0 PITG_06480   |
| 0 | 0   | 18 PITG_06015  |
| 0 | 33  | 148 PITG_11247 |
| 0 | 14  | 0 PITG_15958   |
| 0 | 6   | 7 PITG_08304   |
| 0 | 0   | 0 PITG_03778   |
| 0 | 3   | 6 PITG_00486   |
| 0 | 15  | 0 PITG_00486   |
| 0 | 382 | 80 PITG_16973  |
| 0 | 34  | 12 PITG_19615  |
| 0 | 8   | 4 PITG_10518   |
| 0 | 0   | 0 PITG_03842   |
| 0 | 142 | 50 PITG_09898  |

|   |     |                |
|---|-----|----------------|
| 0 | 4   | 31 PITG_04725  |
| 0 | 109 | 54 PITG_00850  |
| 0 | 72  | 15 PITG_18696  |
| 0 | 10  | 4 PITG_01153   |
| 0 | 14  | 18 PITG_09310  |
| 0 | 12  | 12 PITG_11186  |
| 0 | 50  | 54 PITG_11743  |
| 0 | 2   | 0 PITG_13188   |
| 0 | 6   | 7 PITG_20715   |
| 0 | 20  | 11 PITG_19044  |
| 0 | 121 | 35 PITG_03033  |
| 0 | 74  | 53 PITG_11086  |
| 0 | 123 | 155 PITG_09538 |
| 0 | 139 | 61 PITG_04003  |
| 0 | 0   | 3 PITG_05805   |
| 0 | 27  | 14 NA          |
| 0 | 0   | 0 PITG_04023   |
| 0 | 19  | 35 PITG_09906  |
| 0 | 102 | 7 PITG_09996   |
| 0 | 5   | 7 PITG_03163   |
| 0 | 0   | 2 PITG_03532   |
| 0 | 9   | 11 PITG_10062  |
| 0 | 14  | 18 PITG_17568  |
| 0 | 38  | 2 PITG_05395   |
| 0 | 2   | 2 PITG_13437   |
| 0 | 28  | 50 PITG_10663  |
| 0 | 85  | 58 PITG_05643  |
| 0 | 166 | 13 PITG_04215  |
| 0 | 25  | 0 NA           |
| 0 | 138 | 27 NA          |
| 0 | 15  | 8 PITG_06121   |
| 0 | 39  | 33 PITG_02762  |
| 0 | 42  | 2 PITG_16474   |
| 0 | 43  | 4 PITG_07744   |
| 0 | 25  | 6 PITG_19022   |
| 0 | 41  | 8 PITG_11433   |
| 0 | 26  | 12 NA          |
| 0 | 35  | 33 PITG_23111  |
| 0 | 4   | 4 PITG_10027   |
| 0 | 14  | 0 NA           |
| 0 | 25  | 0 NA           |
| 0 | 2   | 2 PITG_03054   |
| 0 | 0   | 80 NA          |
| 0 | 118 | 76 PITG_11567  |
| 0 | 0   | 3 NA           |
| 0 | 68  | 8 PITG_15251   |
| 0 | 12  | 49 PITG_14935  |

|      |     |                |
|------|-----|----------------|
| 0    | 36  | 0 PITG_03241   |
| 0    | 2   | 2 PITG_17209   |
| 0    | 29  | 0 PITG_22135   |
| 0    | 13  | 22 PITG_17986  |
| 0    | 19  | 10 PITG_00421  |
| 0    | 81  | 7 NA           |
| 0    | 2   | 0 NA           |
| 0    | 4   | 18 PITG_00725  |
| 0    | 10  | 18 PITG_16299  |
| 0    | 35  | 14 PITG_01142  |
| 0    | 18  | 4 PITG_03169   |
| 0    | 9   | 10 NA          |
| 0    | 76  | 70 PITG_14592  |
| 0    | 22  | 29 PITG_14743  |
| 2153 | 243 | 3680 NA        |
| 0    | 0   | 0 NA           |
| 0    | 2   | 24 PITG_09944  |
| 0    | 4   | 9 NA           |
| 0    | 0   | 0 NA           |
| 0    | 0   | 2 PITG_11701   |
| 0    | 4   | 0 PITG_18105   |
| 0    | 26  | 82 PITG_01087  |
| 0    | 20  | 15 NA          |
| 0    | 4   | 2 NA           |
| 0    | 13  | 39 PITG_00134  |
| 0    | 4   | 19 PITG_10026  |
| 896  | 828 | 200 NA         |
| 0    | 4   | 6 PITG_02671   |
| 0    | 83  | 61 PITG_02679  |
| 0    | 11  | 59 PITG_02867  |
| 0    | 49  | 14 PITG_03483  |
| 0    | 32  | 50 PITG_01680  |
| 0    | 0   | 0 PITG_04974   |
| 0    | 0   | 14 PITG_02344  |
| 0    | 20  | 32 PITG_04906  |
| 0    | 29  | 26 PITG_19422  |
| 0    | 0   | 4 PITG_03348   |
| 0    | 7   | 18 NA          |
| 0    | 17  | 4 PITG_14831   |
| 0    | 45  | 98 PITG_00333  |
| 0    | 66  | 13 PITG_10973  |
| 0    | 0   | 2 PITG_09453   |
| 0    | 16  | 28 PITG_03874  |
| 0    | 26  | 73 PITG_14697  |
| 0    | 30  | 20 PITG_00444  |
| 0    | 21  | 36 PITG_00626  |
| 0    | 228 | 157 PITG_07882 |

|   |     |                |
|---|-----|----------------|
| 0 | 100 | 87 PITG_18973  |
| 0 | 38  | 22 PITG_12156  |
| 0 | 6   | 15 PITG_04618  |
| 0 | 72  | 29 PITG_18459  |
| 0 | 19  | 176 PITG_13237 |
| 0 | 4   | 13 PITG_05658  |
| 0 | 128 | 0 PITG_21150   |
| 0 | 0   | 0 PITG_23281   |
| 0 | 87  | 9 PITG_09544   |
| 0 | 177 | 485 PITG_11099 |
| 0 | 56  | 2 PITG_00215   |
| 0 | 66  | 56 PITG_17617  |
| 0 | 18  | 12 PITG_03560  |
| 0 | 8   | 9 PITG_05815   |
| 0 | 58  | 19 PITG_15311  |
| 0 | 0   | 8 PITG_08213   |
| 0 | 0   | 3 PITG_08469   |
| 0 | 8   | 8 PITG_11470   |
| 0 | 23  | 8 PITG_14743   |
| 0 | 0   | 0 NA           |
| 0 | 0   | 6 PITG_19466   |
| 0 | 48  | 26 NA          |
| 0 | 0   | 0 NA           |
| 0 | 0   | 0 PITG_19863   |
| 0 | 22  | 5 PITG_20855   |
| 0 | 0   | 0 PITG_07852   |
| 0 | 54  | 0 PITG_13827   |
| 0 | 0   | 0 PITG_11561   |
| 0 | 207 | 52 PITG_16916  |
| 0 | 0   | 2 PITG_19153   |
| 0 | 15  | 2 NA           |
| 0 | 93  | 146 PITG_04566 |
| 0 | 14  | 12 PITG_07967  |
| 0 | 233 | 40 PITG_10388  |
| 0 | 18  | 0 NA           |
| 0 | 8   | 14 PITG_17137  |
| 0 | 98  | 44 PITG_08230  |
| 0 | 0   | 0 PITG_10020   |
| 0 | 87  | 4 PITG_01294   |
| 0 | 54  | 105 PITG_00254 |
| 0 | 18  | 0 PITG_10601   |
| 0 | 86  | 160 PITG_05394 |
| 0 | 66  | 26 NA          |
| 0 | 79  | 33 PITG_10061  |
| 0 | 20  | 0 PITG_01102   |
| 0 | 102 | 209 PITG_22865 |
| 0 | 0   | 0 NA           |

|     |     |                 |
|-----|-----|-----------------|
| 0   | 0   | 3 PITG_17706    |
| 0   | 172 | 299 PITG_17069  |
| 0   | 3   | 8 PITG_01953    |
| 0   | 0   | 0 PITG_21313    |
| 0   | 0   | 0 PITG_04876    |
| 0   | 0   | 2 PITG_14151    |
| 0   | 7   | 23 PITG_09092   |
| 0   | 5   | 7 PITG_05461    |
| 0   | 37  | 4 NA            |
| 0   | 18  | 4 PITG_09640    |
| 0   | 0   | 2 NA            |
| 0   | 10  | 4 NA            |
| 0   | 52  | 31 PITG_03469   |
| 0   | 9   | 4 PITG_14938    |
| 0   | 61  | 36 NA           |
| 0   | 2   | 4 PITG_01019    |
| 0   | 24  | 2 PITG_13040    |
| 0   | 23  | 19 PITG_02494   |
| 0   | 11  | 68 PITG_21071   |
| 0   | 94  | 21 NA           |
| 0   | 36  | 0 PITG_02943    |
| 0   | 9   | 2 PITG_08305    |
| 0   | 4   | 6 PITG_09635    |
| 0   | 3   | 0 PITG_05293    |
| 0   | 322 | 1469 PITG_11329 |
| 0   | 34  | 21 PITG_11912   |
| 0   | 41  | 12 PITG_14028   |
| 0   | 4   | 5 PITG_22827    |
| 0   | 5   | 2 PITG_03024    |
| 0   | 4   | 0 PITG_13840    |
| 0   | 7   | 32 PITG_12220   |
| 0   | 9   | 5 PITG_20527    |
| 0   | 70  | 104 PITG_02826  |
| 0   | 2   | 3 PITG_02239    |
| 216 | 34  | 207 NA          |
| 0   | 352 | 246 PITG_06075  |
| 0   | 0   | 6 PITG_21481    |
| 0   | 76  | 0 NA            |
| 399 | 99  | 1729 NA         |
| 0   | 33  | 6 PITG_09251    |
| 0   | 189 | 232 PITG_11521  |
| 0   | 59  | 49 PITG_01950   |
| 0   | 25  | 20 NA           |
| 0   | 8   | 5 PITG_08198    |
| 0   | 16  | 5 PITG_18459    |
| 0   | 58  | 100 PITG_10451  |
| 0   | 21  | 87 PITG_11425   |

|   |     |                |
|---|-----|----------------|
| 0 | 214 | 74 PITG_13473  |
| 0 | 51  | 409 PITG_17261 |
| 0 | 6   | 16 PITG_10388  |
| 0 | 57  | 55 PITG_21854  |
| 0 | 45  | 29 PITG_15467  |
| 0 | 19  | 21 PITG_11183  |
| 0 | 331 | 62 PITG_18463  |
| 0 | 0   | 0 PITG_04935   |
| 0 | 77  | 0 PITG_12221   |
| 0 | 2   | 2 PITG_04619   |
| 0 | 60  | 0 PITG_06570   |
| 0 | 2   | 4 PITG_04902   |
| 0 | 0   | 4 NA           |
| 0 | 12  | 12 PITG_11750  |
| 0 | 11  | 5 PITG_16257   |
| 7 | 10  | 70 NA          |
| 0 | 5   | 2 PITG_12523   |
| 0 | 4   | 11 NA          |
| 0 | 7   | 6 PITG_11743   |
| 0 | 10  | 7 PITG_03754   |
| 0 | 7   | 5 PITG_14247   |
| 0 | 2   | 2 PITG_06402   |
| 0 | 12  | 17 PITG_13202  |
| 0 | 38  | 7 PITG_02997   |
| 0 | 10  | 2 NA           |
| 0 | 28  | 24 PITG_06919  |
| 0 | 6   | 14 PITG_08129  |
| 0 | 8   | 6 PITG_05410   |
| 0 | 0   | 0 PITG_18977   |
| 0 | 252 | 37 NA          |
| 0 | 152 | 26 PITG_20337  |
| 0 | 2   | 0 PITG_05805   |
| 0 | 19  | 6 PITG_19849   |
| 0 | 2   | 0 NA           |
| 0 | 16  | 0 NA           |
| 0 | 13  | 29 PITG_05552  |
| 0 | 8   | 10 PITG_13939  |
| 0 | 0   | 0 PITG_21190   |
| 0 | 4   | 7 PITG_01627   |
| 0 | 27  | 10 PITG_01581  |
| 0 | 14  | 4 NA           |
| 0 | 120 | 16 NA          |
| 0 | 6   | 7 PITG_06853   |
| 0 | 2   | 2 PITG_20350   |
| 0 | 0   | 0 NA           |
| 0 | 8   | 2 PITG_00359   |
| 0 | 0   | 0 PITG_03135   |

|   |     |                |
|---|-----|----------------|
| 2 | 139 | 509 PITG_03178 |
| 0 | 14  | 0 PITG_05177   |
| 0 | 508 | 44 PITG_11612  |
| 0 | 35  | 155 PITG_01797 |
| 0 | 9   | 29 PITG_12537  |
| 0 | 9   | 2 PITG_00626   |
| 0 | 2   | 0 PITG_17161   |
| 0 | 38  | 0 PITG_10561   |
| 0 | 14  | 25 NA          |
| 0 | 19  | 17 PITG_05362  |
| 0 | 54  | 53 PITG_01182  |
| 0 | 19  | 22 PITG_02452  |
| 0 | 9   | 23 PITG_18359  |
| 0 | 0   | 0 NA           |
| 0 | 54  | 3 NA           |
| 0 | 2   | 4 NA           |
| 0 | 351 | 43 PITG_17410  |
| 0 | 53  | 20 PITG_13590  |
| 0 | 0   | 7 PITG_13901   |
| 0 | 0   | 2 PITG_03408   |
| 0 | 17  | 10 NA          |
| 0 | 2   | 0 PITG_01555   |
| 0 | 311 | 292 PITG_02305 |
| 0 | 15  | 5 NA           |
| 0 | 22  | 2 PITG_13819   |
| 0 | 71  | 61 NA          |
| 0 | 2   | 8 NA           |
| 0 | 2   | 15 PITG_04698  |
| 0 | 0   | 0 NA           |
| 0 | 2   | 0 NA           |
| 0 | 0   | 4 PITG_04394   |
| 0 | 0   | 0 PITG_10937   |
| 0 | 24  | 25 PITG_06387  |
| 0 | 401 | 58 PITG_17891  |
| 0 | 2   | 4 PITG_07701   |
| 0 | 4   | 2 NA           |
| 0 | 0   | 0 NA           |
| 0 | 2   | 4 PITG_04115   |
| 0 | 2   | 6 PITG_02244   |
| 0 | 0   | 22 PITG_04427  |
| 0 | 9   | 0 NA           |
| 0 | 8   | 10 PITG_07256  |
| 2 | 87  | 233 PITG_21540 |
| 0 | 2   | 0 PITG_11593   |
| 0 | 0   | 0 PITG_16887   |
| 0 | 118 | 32 PITG_13666  |
| 0 | 5   | 0 PITG_03832   |

|   |     |                |
|---|-----|----------------|
| 0 | 2   | 8 PITG_08310   |
| 0 | 22  | 9 PITG_05429   |
| 0 | 42  | 18 PITG_09873  |
| 0 | 228 | 7 NA           |
| 0 | 2   | 5 PITG_03263   |
| 0 | 0   | 0 PITG_04954   |
| 0 | 0   | 0 PITG_02286   |
| 0 | 32  | 45 PITG_18464  |
| 0 | 0   | 2 PITG_00809   |
| 0 | 0   | 0 NA           |
| 0 | 5   | 17 PITG_02724  |
| 0 | 5   | 2 PITG_18712   |
| 0 | 24  | 17 PITG_22069  |
| 0 | 16  | 26 PITG_00839  |
| 0 | 4   | 4 PITG_13819   |
| 0 | 14  | 0 NA           |
| 0 | 207 | 8 NA           |
| 0 | 134 | 48 PITG_02813  |
| 0 | 51  | 0 NA           |
| 0 | 90  | 9 NA           |
| 0 | 0   | 0 PITG_15957   |
| 0 | 23  | 2 PITG_00069   |
| 0 | 8   | 8 NA           |
| 0 | 0   | 2 PITG_12819   |
| 0 | 22  | 44 PITG_00882  |
| 0 | 0   | 14 PITG_07455  |
| 0 | 13  | 4 NA           |
| 0 | 9   | 4 NA           |
| 0 | 23  | 67 PITG_15735  |
| 0 | 126 | 145 PITG_16358 |
| 0 | 30  | 0 PITG_00646   |
| 0 | 7   | 4 PITG_03846   |
| 0 | 0   | 2 NA           |
| 0 | 4   | 6 PITG_00383   |
| 0 | 0   | 0 NA           |
| 0 | 24  | 15 PITG_17028  |
| 0 | 5   | 0 PITG_05513   |
| 0 | 24  | 7 NA           |
| 0 | 0   | 7 PITG_07898   |
| 0 | 21  | 0 PITG_10049   |
| 0 | 0   | 0 NA           |
| 0 | 81  | 2 PITG_02291   |
| 0 | 24  | 51 PITG_00656  |
| 0 | 308 | 137 PITG_05294 |
| 0 | 80  | 105 PITG_03483 |
| 0 | 3   | 0 PITG_08172   |
| 0 | 4   | 3 PITG_02415   |



|   |     |                |
|---|-----|----------------|
| 0 | 7   | 2 PITG_16984   |
| 0 | 24  | 0 PITG_00144   |
| 0 | 57  | 16 PITG_01992  |
| 0 | 12  | 4 PITG_02888   |
| 0 | 441 | 0 NA           |
| 0 | 401 | 190 PITG_17457 |
| 0 | 40  | 23 PITG_03397  |
| 0 | 19  | 18 PITG_11887  |
| 0 | 0   | 15 PITG_17750  |
| 0 | 5   | 0 NA           |
| 0 | 292 | 285 PITG_01947 |
| 0 | 93  | 92 PITG_18635  |
| 0 | 9   | 0 PITG_02707   |
| 0 | 15  | 8 PITG_15270   |
| 0 | 91  | 62 NA          |
| 0 | 52  | 29 NA          |
| 0 | 8   | 9 PITG_05318   |
| 0 | 50  | 2 PITG_07868   |
| 0 | 77  | 48 PITG_13070  |
| 0 | 4   | 5 PITG_00718   |
| 0 | 2   | 0 PITG_09566   |
| 0 | 2   | 2 PITG_00882   |
| 0 | 84  | 3 NA           |
| 0 | 22  | 11 PITG_01559  |
| 0 | 12  | 0 PITG_04579   |
| 0 | 0   | 0 PITG_03652   |
| 0 | 5   | 0 PITG_02077   |
| 0 | 9   | 11 PITG_02497  |
| 0 | 7   | 0 PITG_11722   |
| 0 | 8   | 23 PITG_01949  |
| 0 | 0   | 0 PITG_05282   |
| 0 | 21  | 4 NA           |
| 0 | 18  | 0 PITG_12319   |
| 0 | 9   | 10 PITG_09690  |
| 0 | 104 | 269 PITG_00708 |
| 0 | 15  | 12 PITG_09991  |
| 0 | 2   | 26 NA          |
| 0 | 20  | 61 PITG_07055  |
| 0 | 0   | 0 PITG_14792   |
| 0 | 12  | 0 NA           |
| 0 | 0   | 12 PITG_01762  |
| 0 | 4   | 15 PITG_13048  |
| 0 | 23  | 19 NA          |
| 0 | 120 | 74 PITG_17609  |
| 0 | 42  | 17 PITG_02274  |
| 0 | 117 | 128 PITG_03244 |
| 0 | 12  | 18 PITG_10105  |

|   |     |                |
|---|-----|----------------|
| 0 | 0   | 0 NA           |
| 0 | 0   | 8 PITG_14441   |
| 0 | 65  | 0 PITG_11272   |
| 0 | 45  | 82 NA          |
| 0 | 6   | 9 PITG_09477   |
| 0 | 0   | 0 NA           |
| 0 | 6   | 0 NA           |
| 0 | 19  | 0 PITG_17893   |
| 0 | 36  | 7 PITG_12346   |
| 0 | 2   | 4 PITG_04485   |
| 0 | 44  | 29 PITG_01073  |
| 0 | 2   | 0 NA           |
| 0 | 8   | 2 PITG_10903   |
| 0 | 7   | 16 PITG_09702  |
| 0 | 0   | 17 PITG_19235  |
| 0 | 2   | 2 NA           |
| 0 | 10  | 0 PITG_09819   |
| 0 | 0   | 2 PITG_06896   |
| 0 | 287 | 40 PITG_05746  |
| 0 | 79  | 29 PITG_16903  |
| 0 | 19  | 27 PITG_03142  |
| 0 | 4   | 33 PITG_06672  |
| 0 | 2   | 0 PITG_12239   |
| 0 | 8   | 2 PITG_10124   |
| 0 | 51  | 55 NA          |
| 0 | 82  | 51 PITG_12259  |
| 0 | 5   | 2 PITG_12221   |
| 0 | 8   | 7 PITG_21224   |
| 0 | 134 | 99 PITG_20502  |
| 0 | 6   | 0 PITG_01092   |
| 0 | 19  | 20 PITG_00132  |
| 0 | 11  | 4 PITG_13830   |
| 0 | 35  | 46 PITG_01280  |
| 0 | 32  | 21 PITG_01759  |
| 0 | 0   | 0 PITG_11461   |
| 0 | 9   | 0 PITG_15897   |
| 0 | 0   | 0 PITG_19022   |
| 0 | 2   | 2 PITG_12675   |
| 0 | 2   | 2 PITG_14381   |
| 0 | 5   | 6 NA           |
| 0 | 87  | 27 NA          |
| 0 | 31  | 2 PITG_01710   |
| 0 | 19  | 17 PITG_15875  |
| 0 | 4   | 33 PITG_04065  |
| 0 | 0   | 0 NA           |
| 0 | 4   | 5 PITG_03423   |
| 0 | 36  | 776 PITG_13002 |

|    |     |                |
|----|-----|----------------|
| 0  | 453 | 324 PITG_16966 |
| 0  | 8   | 11 PITG_17695  |
| 0  | 5   | 5 NA           |
| 0  | 0   | 18 PITG_12980  |
| 0  | 93  | 56 PITG_11563  |
| 0  | 291 | 291 PITG_07567 |
| 0  | 52  | 31 PITG_07938  |
| 0  | 27  | 25 PITG_00883  |
| 0  | 4   | 8 NA           |
| 0  | 37  | 15 PITG_00747  |
| 0  | 197 | 118 PITG_03427 |
| 0  | 70  | 105 NA         |
| 0  | 18  | 12 PITG_22369  |
| 0  | 13  | 4 PITG_03241   |
| 0  | 0   | 0 PITG_05729   |
| 0  | 14  | 0 NA           |
| 0  | 6   | 2 NA           |
| 0  | 463 | 246 PITG_12973 |
| 0  | 25  | 41 PITG_14568  |
| 0  | 109 | 81 PITG_12215  |
| 0  | 0   | 0 PITG_04554   |
| 0  | 2   | 0 PITG_00842   |
| 8  | 4   | 5 NA           |
| 0  | 12  | 3 PITG_03200   |
| 0  | 10  | 16 PITG_16023  |
| 0  | 69  | 59 NA          |
| 0  | 0   | 0 PITG_12318   |
| 0  | 3   | 2 PITG_01424   |
| 0  | 117 | 39 PITG_12000  |
| 0  | 4   | 10 PITG_03492  |
| 0  | 0   | 0 NA           |
| 32 | 12  | 112 NA         |
| 0  | 0   | 4 PITG_03804   |
| 0  | 12  | 15 NA          |
| 0  | 0   | 0 NA           |
| 0  | 41  | 24 NA          |
| 0  | 17  | 0 PITG_02556   |
| 0  | 77  | 2 PITG_10992   |
| 0  | 0   | 2 PITG_10012   |
| 0  | 0   | 4 PITG_03200   |
| 0  | 0   | 0 NA           |
| 0  | 16  | 2 NA           |
| 0  | 2   | 5 PITG_07201   |
| 10 | 0   | 17 NA          |
| 0  | 37  | 39 PITG_06819  |
| 0  | 53  | 28 PITG_01498  |
| 0  | 0   | 0 NA           |

|   |     |                |
|---|-----|----------------|
| 0 | 430 | 893 PITG_03598 |
| 0 | 13  | 4 PITG_03408   |
| 0 | 7   | 5 NA           |
| 0 | 2   | 0 PITG_06416   |
| 0 | 146 | 73 PITG_07053  |
| 0 | 0   | 0 NA           |
| 0 | 135 | 9 PITG_15948   |
| 0 | 41  | 88 PITG_21055  |
| 0 | 7   | 5 PITG_10831   |
| 0 | 103 | 13 PITG_13015  |
| 0 | 13  | 8 PITG_08221   |
| 0 | 0   | 2 PITG_22687   |
| 0 | 9   | 3 PITG_05782   |
| 0 | 76  | 44 PITG_03781  |
| 0 | 179 | 94 PITG_22459  |
| 0 | 2   | 0 PITG_02774   |
| 0 | 126 | 21 PITG_02739  |
| 0 | 718 | 169 PITG_15866 |
| 0 | 17  | 2 PITG_15119   |
| 0 | 26  | 0 PITG_18624   |
| 0 | 9   | 2 PITG_16958   |
| 0 | 0   | 0 NA           |
| 0 | 100 | 0 PITG_21602   |
| 0 | 23  | 14 PITG_20608  |
| 0 | 89  | 81 PITG_06895  |
| 0 | 2   | 6 PITG_17683   |
| 0 | 0   | 0 PITG_13544   |
| 0 | 31  | 7 NA           |
| 0 | 14  | 0 PITG_02457   |
| 0 | 77  | 8 PITG_06845   |
| 0 | 12  | 7 NA           |
| 0 | 8   | 30 PITG_03473  |
| 0 | 11  | 0 NA           |
| 0 | 18  | 20 PITG_01583  |
| 0 | 17  | 2 PITG_03658   |
| 0 | 7   | 0 PITG_20868   |
| 0 | 0   | 27 PITG_06016  |
| 0 | 7   | 2 PITG_07703   |
| 0 | 170 | 5 NA           |
| 0 | 9   | 4 PITG_13651   |
| 0 | 26  | 2 PITG_03416   |
| 0 | 132 | 219 PITG_11293 |
| 0 | 83  | 53 PITG_02338  |
| 0 | 0   | 0 PITG_19878   |
| 0 | 92  | 4 PITG_02866   |
| 0 | 0   | 2 NA           |
| 0 | 2   | 0 PITG_01666   |

|     |     |                |
|-----|-----|----------------|
| 0   | 167 | 53 PITG_15781  |
| 0   | 183 | 220 PITG_22572 |
| 0   | 7   | 3 PITG_19624   |
| 0   | 0   | 2 NA           |
| 0   | 328 | 187 PITG_08692 |
| 0   | 12  | 6 PITG_01871   |
| 15  | 0   | 11 NA          |
| 0   | 325 | 173 PITG_03420 |
| 0   | 5   | 0 PITG_10040   |
| 0   | 5   | 2 NA           |
| 0   | 8   | 24 PITG_11069  |
| 0   | 16  | 4 PITG_09459   |
| 0   | 102 | 11 PITG_10961  |
| 0   | 4   | 3 NA           |
| 0   | 0   | 2 PITG_20241   |
| 0   | 11  | 0 PITG_08136   |
| 0   | 220 | 35 PITG_03987  |
| 0   | 279 | 406 PITG_12904 |
| 0   | 20  | 2 PITG_03031   |
| 237 | 7   | 366 NA         |
| 0   | 19  | 2 PITG_20548   |
| 0   | 0   | 0 PITG_09977   |
| 0   | 16  | 2 NA           |
| 0   | 0   | 0 NA           |
| 0   | 4   | 0 PITG_07302   |
| 0   | 0   | 19 PITG_03841  |
| 0   | 77  | 32 PITG_17423  |
| 0   | 56  | 18 PITG_05989  |
| 0   | 2   | 7 PITG_19466   |
| 0   | 9   | 0 NA           |
| 0   | 13  | 4 NA           |
| 0   | 50  | 12 PITG_17460  |
| 0   | 0   | 2 PITG_20213   |
| 0   | 8   | 8 PITG_16684   |
| 0   | 26  | 8 PITG_20803   |
| 0   | 33  | 16 NA          |
| 0   | 210 | 130 PITG_02854 |
| 0   | 15  | 5 PITG_14355   |
| 0   | 52  | 22 PITG_00115  |
| 0   | 0   | 2 PITG_04973   |
| 0   | 86  | 301 PITG_09964 |
| 0   | 91  | 99 PITG_12661  |
| 0   | 49  | 143 PITG_05861 |
| 0   | 231 | 39 PITG_20966  |
| 0   | 18  | 11 NA          |
| 0   | 627 | 158 PITG_16894 |
| 0   | 68  | 86 PITG_10616  |

|   |     |                |
|---|-----|----------------|
| 0 | 200 | 21 NA          |
| 0 | 27  | 125 PITG_13832 |
| 0 | 5   | 2 NA           |
| 0 | 0   | 4 PITG_13803   |
| 0 | 5   | 0 PITG_00964   |
| 0 | 0   | 3 PITG_21942   |
| 0 | 72  | 135 NA         |
| 0 | 2   | 4 PITG_20534   |
| 0 | 2   | 2 PITG_20675   |
| 0 | 71  | 44 PITG_14707  |
| 0 | 337 | 8 PITG_01752   |
| 0 | 116 | 48 NA          |
| 0 | 27  | 3 NA           |
| 0 | 4   | 4 PITG_14257   |
| 0 | 23  | 16 PITG_03965  |
| 0 | 0   | 2 NA           |
| 0 | 401 | 4 PITG_01556   |
| 0 | 5   | 8 NA           |
| 0 | 5   | 2 PITG_17301   |
| 0 | 22  | 61 PITG_11993  |
| 0 | 59  | 58 PITG_03544  |
| 0 | 31  | 49 PITG_20216  |
| 0 | 14  | 17 PITG_04663  |
| 0 | 4   | 6 NA           |
| 0 | 31  | 14 NA          |
| 0 | 91  | 91 PITG_08809  |
| 0 | 7   | 6 PITG_13491   |
| 0 | 32  | 35 PITG_12946  |
| 0 | 8   | 6 PITG_08252   |
| 0 | 67  | 486 PITG_18402 |
| 0 | 5   | 4 PITG_09834   |
| 0 | 150 | 152 PITG_12154 |
| 0 | 20  | 15 NA          |
| 7 | 21  | 658 NA         |
| 0 | 10  | 4 PITG_10750   |
| 0 | 14  | 14 PITG_03015  |
| 0 | 16  | 6 PITG_07868   |
| 0 | 3   | 0 PITG_22286   |
| 0 | 4   | 3 PITG_16461   |
| 0 | 5   | 5 PITG_20274   |
| 0 | 11  | 2 PITG_07470   |
| 0 | 14  | 4 PITG_03425   |
| 0 | 4   | 4 NA           |
| 0 | 0   | 0 PITG_15891   |
| 2 | 29  | 546 PITG_01072 |
| 0 | 2   | 7 PITG_07865   |
| 0 | 16  | 4 PITG_09003   |

|   |     |                |
|---|-----|----------------|
| 0 | 0   | 2 PITG_16043   |
| 0 | 232 | 509 PITG_03546 |
| 0 | 2   | 17 PITG_18545  |
| 0 | 2   | 0 PITG_21409   |
| 0 | 8   | 2 PITG_03053   |
| 0 | 4   | 8 PITG_17549   |
| 0 | 0   | 6 NA           |
| 0 | 2   | 0 NA           |
| 0 | 0   | 4 NA           |
| 0 | 4   | 5 PITG_22164   |
| 0 | 0   | 2 PITG_13248   |
| 0 | 42  | 17 PITG_00116  |
| 0 | 5   | 16 PITG_03355  |
| 0 | 50  | 2 PITG_01847   |
| 0 | 0   | 0 PITG_15596   |
| 0 | 148 | 82 PITG_04038  |
| 0 | 4   | 6 PITG_03989   |
| 0 | 0   | 9 NA           |
| 0 | 169 | 212 PITG_18452 |
| 0 | 2   | 6 PITG_06903   |
| 0 | 148 | 232 PITG_20775 |
| 0 | 23  | 20 PITG_17568  |
| 0 | 567 | 689 PITG_17921 |
| 0 | 218 | 244 PITG_07791 |
| 0 | 11  | 16 PITG_06924  |
| 0 | 37  | 10 NA          |
| 0 | 10  | 2 NA           |
| 0 | 45  | 8 PITG_16865   |
| 0 | 2   | 0 PITG_01646   |
| 0 | 0   | 5 PITG_03710   |
| 0 | 0   | 0 PITG_11858   |
| 0 | 2   | 5 PITG_00163   |
| 0 | 54  | 11 PITG_07868  |
| 0 | 10  | 4 NA           |
| 0 | 471 | 342 PITG_00514 |
| 0 | 25  | 8 PITG_08394   |
| 0 | 6   | 6 PITG_00227   |
| 0 | 0   | 2 PITG_06457   |
| 0 | 20  | 4 PITG_09931   |
| 0 | 19  | 7 PITG_18342   |
| 0 | 17  | 4 NA           |
| 0 | 0   | 6 PITG_11993   |
| 0 | 20  | 9 PITG_17576   |
| 0 | 4   | 2 NA           |
| 0 | 59  | 78 PITG_19096  |
| 0 | 23  | 0 NA           |
| 0 | 8   | 35 PITG_03571  |

|     |     |                |
|-----|-----|----------------|
| 0   | 111 | 147 NA         |
| 0   | 202 | 103 NA         |
| 0   | 272 | 514 PITG_11775 |
| 0   | 11  | 0 PITG_03275   |
| 0   | 12  | 2 PITG_08605   |
| 0   | 27  | 5 PITG_11817   |
| 0   | 202 | 171 PITG_07195 |
| 0   | 26  | 9 NA           |
| 0   | 42  | 17 PITG_01997  |
| 0   | 8   | 8 PITG_21128   |
| 0   | 2   | 0 PITG_05311   |
| 0   | 17  | 4 PITG_00479   |
| 0   | 0   | 0 NA           |
| 0   | 16  | 0 PITG_20054   |
| 0   | 4   | 2 PITG_16263   |
| 0   | 0   | 0 PITG_09036   |
| 874 | 18  | 1538 NA        |
| 0   | 24  | 16 PITG_23065  |
| 0   | 4   | 6 PITG_08588   |
| 0   | 0   | 0 NA           |
| 0   | 28  | 30 PITG_13677  |
| 0   | 0   | 0 PITG_07552   |
| 0   | 80  | 10 PITG_17701  |
| 0   | 2   | 0 PITG_01155   |
| 0   | 161 | 8 PITG_14169   |
| 0   | 14  | 9 NA           |
| 0   | 2   | 2 NA           |
| 0   | 23  | 11 PITG_13102  |
| 0   | 3   | 20 PITG_00571  |
| 0   | 0   | 0 NA           |
| 0   | 14  | 2 NA           |
| 0   | 30  | 2 NA           |
| 0   | 41  | 16 PITG_07334  |
| 0   | 61  | 104 PITG_11886 |
| 0   | 6   | 2 PITG_08712   |
| 0   | 2   | 5 PITG_04590   |
| 0   | 6   | 20 NA          |
| 0   | 25  | 16 PITG_05955  |
| 0   | 391 | 30 PITG_02927  |
| 0   | 19  | 0 NA           |
| 0   | 0   | 0 PITG_12275   |
| 0   | 2   | 0 NA           |
| 0   | 31  | 9 PITG_17736   |
| 0   | 3   | 2 PITG_16015   |
| 0   | 0   | 12 PITG_09598  |
| 0   | 432 | 570 PITG_16327 |
| 0   | 8   | 13 PITG_06762  |



|   |     |                 |
|---|-----|-----------------|
| 0 | 0   | 0 NA            |
| 0 | 2   | 2 PITG_15819    |
| 0 | 0   | 9 PITG_02629    |
| 0 | 7   | 4 PITG_14078    |
| 0 | 401 | 103 NA          |
| 0 | 16  | 5 PITG_02718    |
| 0 | 16  | 0 PITG_12152    |
| 0 | 9   | 0 NA            |
| 0 | 10  | 5 NA            |
| 0 | 12  | 65 PITG_02925   |
| 0 | 5   | 2 PITG_02244    |
| 0 | 4   | 2 PITG_10921    |
| 0 | 29  | 2 NA            |
| 0 | 13  | 11 PITG_01674   |
| 0 | 95  | 13 NA           |
| 0 | 4   | 4 PITG_21994    |
| 0 | 17  | 49 PITG_00397   |
| 0 | 7   | 8 NA            |
| 0 | 6   | 5 PITG_14221    |
| 0 | 31  | 166 PITG_01144  |
| 0 | 2   | 0 PITG_08432    |
| 0 | 82  | 12 PITG_09082   |
| 0 | 5   | 0 NA            |
| 0 | 5   | 2 PITG_17361    |
| 0 | 5   | 0 NA            |
| 0 | 32  | 24 PITG_19450   |
| 0 | 806 | 1006 PITG_18706 |
| 0 | 0   | 2 PITG_03103    |
| 0 | 0   | 0 PITG_03103    |
| 0 | 21  | 8 PITG_12806    |
| 0 | 6   | 0 PITG_07565    |
| 0 | 12  | 11 NA           |
| 0 | 6   | 0 PITG_03158    |
| 0 | 2   | 0 PITG_00955    |
| 0 | 265 | 19 PITG_16968   |
| 0 | 0   | 0 NA            |
| 0 | 5   | 7 PITG_05395    |
| 0 | 115 | 40 PITG_16841   |
| 0 | 37  | 380 PITG_11855  |
| 0 | 9   | 0 NA            |
| 0 | 4   | 2 PITG_11146    |
| 0 | 8   | 17 PITG_12295   |
| 0 | 20  | 2 PITG_17349    |
| 0 | 11  | 8 NA            |
| 0 | 27  | 2 PITG_23142    |
| 0 | 64  | 6 NA            |
| 0 | 22  | 17 PITG_02415   |

|   |     |                |
|---|-----|----------------|
| 0 | 67  | 30 NA          |
| 0 | 22  | 6 PITG_09630   |
| 0 | 4   | 4 PITG_13666   |
| 0 | 68  | 123 PITG_00380 |
| 0 | 875 | 498 PITG_11621 |
| 0 | 15  | 0 NA           |
| 0 | 0   | 5 PITG_12140   |
| 0 | 365 | 117 PITG_21851 |
| 0 | 18  | 10 PITG_10625  |
| 0 | 2   | 2 PITG_14486   |
| 0 | 22  | 53 PITG_01349  |
| 2 | 18  | 82 PITG_12151  |
| 0 | 3   | 2 PITG_06416   |
| 0 | 8   | 14 PITG_19419  |
| 0 | 39  | 0 PITG_22383   |
| 0 | 0   | 3 PITG_12537   |
| 0 | 14  | 0 PITG_14215   |
| 0 | 107 | 90 PITG_09452  |
| 0 | 65  | 31 PITG_22450  |
| 0 | 13  | 0 PITG_17312   |
| 0 | 54  | 12 PITG_08679  |
| 0 | 7   | 22 PITG_19249  |
| 0 | 3   | 0 PITG_05597   |
| 0 | 0   | 0 NA           |
| 0 | 2   | 2 PITG_03604   |
| 0 | 4   | 5 PITG_15267   |
| 0 | 0   | 0 PITG_18296   |
| 0 | 15  | 26 PITG_00284  |
| 0 | 24  | 4 NA           |
| 0 | 6   | 4 PITG_12843   |
| 0 | 68  | 78 PITG_19054  |
| 0 | 9   | 10 NA          |
| 0 | 27  | 36 PITG_01066  |
| 0 | 6   | 14 NA          |
| 0 | 27  | 2 PITG_02717   |
| 0 | 57  | 74 PITG_04680  |
| 0 | 4   | 0 PITG_13607   |
| 0 | 129 | 16 PITG_18092  |
| 0 | 39  | 22 PITG_08932  |
| 0 | 0   | 0 PITG_22056   |
| 0 | 81  | 33 PITG_07289  |
| 0 | 14  | 3 PITG_19149   |
| 0 | 41  | 3 PITG_05817   |
| 0 | 0   | 0 PITG_17332   |
| 0 | 7   | 7 PITG_00380   |
| 0 | 24  | 10 PITG_09770  |
| 0 | 4   | 0 PITG_19143   |

|   |      |                 |
|---|------|-----------------|
| 0 | 0    | 2 PITG_09977    |
| 0 | 6    | 2 PITG_17164    |
| 0 | 5    | 31 PITG_15959   |
| 0 | 4    | 0 PITG_01674    |
| 0 | 2    | 4 PITG_18720    |
| 0 | 22   | 8 PITG_07109    |
| 0 | 38   | 75 PITG_09393   |
| 0 | 21   | 2 NA            |
| 0 | 110  | 55 PITG_02626   |
| 0 | 15   | 6 PITG_21940    |
| 0 | 2    | 0 PITG_15877    |
| 0 | 19   | 68 PITG_20759   |
| 0 | 0    | 4 PITG_00657    |
| 0 | 26   | 4 NA            |
| 0 | 22   | 27 PITG_00280   |
| 0 | 23   | 13 PITG_03792   |
| 0 | 5    | 5 PITG_12160    |
| 0 | 342  | 146 PITG_06114  |
| 0 | 14   | 59 NA           |
| 0 | 55   | 4 NA            |
| 0 | 0    | 0 PITG_17325    |
| 0 | 14   | 0 NA            |
| 0 | 0    | 0 NA            |
| 0 | 22   | 20 PITG_00176   |
| 0 | 4    | 9 NA            |
| 0 | 11   | 6 PITG_04612    |
| 0 | 136  | 5 PITG_10539    |
| 0 | 41   | 12 PITG_09273   |
| 4 | 164  | 1239 PITG_06722 |
| 0 | 2176 | 777 PITG_13807  |
| 0 | 14   | 12 PITG_20202   |
| 0 | 0    | 0 PITG_11466    |
| 0 | 17   | 0 PITG_07384    |
| 0 | 12   | 6 PITG_16360    |
| 0 | 147  | 171 PITG_11890  |
| 0 | 37   | 45 PITG_07243   |
| 0 | 2    | 5 PITG_21012    |
| 0 | 0    | 2 PITG_18538    |
| 0 | 4    | 2 NA            |
| 0 | 9    | 17 PITG_02973   |
| 0 | 37   | 8 PITG_03790    |
| 0 | 18   | 59 PITG_23273   |
| 0 | 31   | 13 PITG_11437   |
| 0 | 7    | 12 PITG_19128   |
| 0 | 36   | 11 PITG_13806   |
| 0 | 19   | 2 NA            |
| 0 | 442  | 144 PITG_15787  |

|   |     |                |
|---|-----|----------------|
| 0 | 0   | 0 PITG_03356   |
| 0 | 6   | 15 PITG_00725  |
| 0 | 145 | 42 PITG_07061  |
| 0 | 0   | 0 PITG_05934   |
| 0 | 53  | 0 NA           |
| 0 | 124 | 42 PITG_13256  |
| 0 | 11  | 11 PITG_00978  |
| 0 | 6   | 4 PITG_06353   |
| 0 | 2   | 8 PITG_12153   |
| 0 | 0   | 2 PITG_19037   |
| 0 | 3   | 6 PITG_04588   |
| 0 | 44  | 29 PITG_01246  |
| 0 | 11  | 7 PITG_17072   |
| 0 | 111 | 12 PITG_14868  |
| 0 | 12  | 58 PITG_16353  |
| 0 | 2   | 6 PITG_00939   |
| 0 | 5   | 2 PITG_03136   |
| 0 | 9   | 14 PITG_04270  |
| 0 | 35  | 10 NA          |
| 0 | 4   | 5 PITG_01582   |
| 0 | 412 | 791 PITG_15045 |
| 0 | 10  | 4 NA           |
| 0 | 0   | 0 PITG_10443   |
| 0 | 78  | 51 PITG_07992  |
| 0 | 9   | 4 PITG_01425   |
| 0 | 12  | 37 PITG_19096  |
| 0 | 25  | 35 NA          |
| 0 | 7   | 4 PITG_01272   |
| 0 | 81  | 2 PITG_14874   |
| 0 | 12  | 19 PITG_01678  |
| 0 | 38  | 26 PITG_04843  |
| 0 | 39  | 115 PITG_13832 |
| 0 | 0   | 0 PITG_06022   |
| 0 | 0   | 5 NA           |
| 0 | 4   | 2 PITG_03658   |
| 0 | 28  | 40 PITG_07964  |
| 0 | 23  | 0 PITG_09990   |
| 0 | 0   | 0 PITG_03103   |
| 0 | 10  | 14 PITG_17068  |
| 0 | 2   | 0 PITG_23029   |
| 0 | 7   | 8 PITG_18396   |
| 0 | 5   | 29 PITG_01689  |
| 0 | 114 | 67 PITG_16344  |
| 0 | 83  | 8 PITG_11064   |
| 0 | 89  | 54 PITG_00486  |
| 0 | 17  | 20 PITG_11926  |
| 0 | 414 | 117 NA         |

|   |     |               |
|---|-----|---------------|
| 0 | 23  | 0 NA          |
| 0 | 2   | 0 PITG_10005  |
| 0 | 93  | 55 PITG_16113 |
| 0 | 0   | 0 PITG_11722  |
| 0 | 0   | 0 NA          |
| 0 | 30  | 37 PITG_10289 |
| 0 | 5   | 5 PITG_07699  |
| 0 | 0   | 0 PITG_17948  |
| 0 | 67  | 36 PITG_10068 |
| 0 | 44  | 4 PITG_00501  |
| 0 | 15  | 33 PITG_16071 |
| 0 | 2   | 5 PITG_17457  |
| 0 | 6   | 11 PITG_09579 |
| 0 | 220 | 15 PITG_14129 |
| 0 | 0   | 0 PITG_19088  |
| 0 | 13  | 2 PITG_10815  |
| 0 | 0   | 2 NA          |
| 0 | 14  | 6 PITG_05008  |
| 0 | 77  | 31 PITG_11225 |
| 0 | 0   | 2 PITG_17330  |
| 0 | 0   | 0 PITG_13613  |
| 0 | 55  | 61 PITG_18440 |
| 0 | 0   | 0 PITG_15603  |
| 0 | 138 | 89 NA         |
| 0 | 5   | 4 PITG_21852  |
| 0 | 61  | 85 PITG_15968 |
| 0 | 78  | 32 PITG_05598 |
| 0 | 3   | 0 PITG_06902  |
| 0 | 329 | 9 PITG_13804  |
| 0 | 3   | 4 PITG_00594  |
| 0 | 2   | 12 PITG_18342 |
| 0 | 112 | 48 PITG_15519 |
| 0 | 250 | 48 PITG_15593 |
| 0 | 4   | 0 PITG_07154  |
| 0 | 46  | 11 PITG_12673 |
| 0 | 0   | 0 PITG_22763  |
| 0 | 4   | 6 PITG_16930  |
| 0 | 16  | 2 PITG_12325  |
| 0 | 4   | 2 PITG_18174  |
| 0 | 75  | 7 PITG_02952  |
| 0 | 81  | 22 PITG_00839 |
| 0 | 7   | 8 PITG_05817  |
| 0 | 12  | 3 NA          |
| 0 | 2   | 6 PITG_00787  |
| 0 | 5   | 16 PITG_03934 |
| 0 | 0   | 0 PITG_14505  |
| 0 | 10  | 18 PITG_17348 |

|     |     |                |
|-----|-----|----------------|
| 0   | 74  | 12 PITG_08746  |
| 0   | 0   | 0 PITG_02659   |
| 0   | 111 | 100 PITG_01703 |
| 423 | 65  | 760 NA         |
| 0   | 2   | 4 PITG_14633   |
| 0   | 0   | 0 PITG_12448   |
| 0   | 182 | 13 PITG_17348  |
| 0   | 44  | 16 PITG_05738  |
| 0   | 2   | 0 PITG_11298   |
| 0   | 18  | 10 PITG_03888  |
| 0   | 30  | 0 PITG_06283   |
| 0   | 6   | 0 PITG_16317   |
| 0   | 2   | 4 PITG_06281   |
| 0   | 156 | 9 PITG_03743   |
| 0   | 2   | 0 NA           |
| 0   | 0   | 12 PITG_08532  |
| 0   | 7   | 2 PITG_17112   |
| 0   | 7   | 10 NA          |
| 0   | 0   | 0 PITG_11594   |
| 0   | 45  | 2 NA           |
| 0   | 60  | 57 PITG_07795  |
| 0   | 141 | 153 PITG_22303 |
| 0   | 8   | 13 PITG_03903  |
| 0   | 17  | 4 NA           |
| 0   | 87  | 27 PITG_19470  |
| 0   | 123 | 92 PITG_05249  |
| 0   | 3   | 0 NA           |
| 0   | 4   | 4 PITG_01182   |
| 0   | 38  | 16 NA          |
| 0   | 2   | 0 PITG_09291   |
| 0   | 78  | 40 PITG_02729  |
| 0   | 89  | 57 PITG_01504  |
| 0   | 11  | 13 PITG_12523  |
| 0   | 202 | 90 PITG_19213  |
| 0   | 58  | 62 PITG_08213  |
| 0   | 13  | 2 PITG_16328   |
| 0   | 30  | 31 PITG_02198  |
| 0   | 2   | 0 NA           |
| 0   | 5   | 9 PITG_16797   |
| 0   | 31  | 20 PITG_03259  |
| 0   | 4   | 0 PITG_02475   |
| 0   | 9   | 0 PITG_00225   |
| 0   | 0   | 0 PITG_22077   |
| 0   | 46  | 19 PITG_11929  |
| 0   | 19  | 90 PITG_00124  |
| 0   | 2   | 6 PITG_06880   |
| 0   | 15  | 8 PITG_12691   |

|   |     |                |
|---|-----|----------------|
| 0 | 51  | 21 PITG_01033  |
| 0 | 30  | 16 PITG_12082  |
| 0 | 57  | 4 NA           |
| 0 | 98  | 30 PITG_02487  |
| 0 | 35  | 27 PITG_21626  |
| 0 | 12  | 11 PITG_17583  |
| 0 | 15  | 20 PITG_05410  |
| 0 | 0   | 0 PITG_02737   |
| 0 | 8   | 14 NA          |
| 0 | 38  | 51 PITG_17455  |
| 0 | 0   | 2 PITG_16042   |
| 0 | 90  | 102 PITG_01453 |
| 0 | 20  | 3 PITG_04934   |
| 0 | 2   | 6 PITG_02973   |
| 0 | 25  | 37 PITG_09666  |
| 0 | 4   | 16 PITG_09389  |
| 0 | 177 | 18 PITG_20206  |
| 0 | 21  | 42 PITG_03781  |
| 0 | 2   | 4 PITG_02203   |
| 0 | 24  | 0 NA           |
| 0 | 2   | 2 PITG_09483   |
| 0 | 16  | 12 PITG_16999  |
| 0 | 2   | 21 PITG_18417  |
| 0 | 0   | 2 PITG_17333   |
| 0 | 40  | 2 PITG_02210   |
| 0 | 3   | 0 PITG_18024   |
| 0 | 0   | 0 NA           |
| 0 | 9   | 0 PITG_08729   |
| 0 | 41  | 6 PITG_06997   |
| 0 | 70  | 7 PITG_12049   |
| 0 | 7   | 9 PITG_13631   |
| 0 | 2   | 0 PITG_05547   |
| 0 | 353 | 165 PITG_20794 |
| 0 | 2   | 0 PITG_04395   |
| 0 | 17  | 21 PITG_20378  |
| 0 | 4   | 0 PITG_11743   |
| 0 | 80  | 34 PITG_09817  |
| 0 | 260 | 180 PITG_07168 |
| 0 | 238 | 153 PITG_17785 |
| 0 | 63  | 19 PITG_06814  |
| 0 | 47  | 5 PITG_19046   |
| 0 | 2   | 5 PITG_00479   |
| 0 | 14  | 2 PITG_15672   |
| 0 | 12  | 0 NA           |
| 0 | 2   | 0 NA           |
| 0 | 90  | 46 PITG_20715  |
| 0 | 13  | 67 PITG_20717  |

|     |     |                |
|-----|-----|----------------|
| 0   | 11  | 15 PITG_20208  |
| 0   | 0   | 0 PITG_05099   |
| 0   | 0   | 0 NA           |
| 0   | 0   | 107 NA         |
| 0   | 149 | 73 NA          |
| 0   | 5   | 2 PITG_09642   |
| 0   | 23  | 25 PITG_15026  |
| 0   | 5   | 0 PITG_02796   |
| 0   | 8   | 6 NA           |
| 0   | 2   | 2 PITG_07889   |
| 0   | 2   | 2 PITG_06088   |
| 0   | 196 | 381 PITG_00229 |
| 0   | 0   | 0 PITG_03356   |
| 0   | 129 | 161 PITG_11090 |
| 0   | 9   | 2 PITG_01073   |
| 0   | 0   | 0 PITG_21591   |
| 0   | 0   | 10 PITG_02146  |
| 0   | 65  | 32 PITG_11723  |
| 0   | 357 | 150 PITG_06006 |
| 0   | 18  | 4 NA           |
| 0   | 122 | 96 NA          |
| 0   | 10  | 0 PITG_07200   |
| 0   | 337 | 93 PITG_15780  |
| 0   | 4   | 4 PITG_13970   |
| 0   | 169 | 40 NA          |
| 0   | 20  | 14 PITG_05667  |
| 0   | 8   | 5 PITG_15621   |
| 0   | 7   | 5 PITG_16205   |
| 0   | 16  | 0 NA           |
| 0   | 14  | 2 PITG_06259   |
| 0   | 258 | 57 PITG_02453  |
| 0   | 28  | 8 NA           |
| 0   | 4   | 0 PITG_00792   |
| 0   | 5   | 4 PITG_12677   |
| 0   | 27  | 11 NA          |
| 0   | 21  | 16 PITG_03701  |
| 0   | 17  | 15 PITG_10931  |
| 0   | 202 | 51 PITG_13365  |
| 654 | 167 | 1418 NA        |
| 0   | 11  | 0 NA           |
| 0   | 7   | 7 NA           |
| 0   | 960 | 519 PITG_01096 |
| 0   | 17  | 3 PITG_11752   |
| 0   | 0   | 2 PITG_08031   |
| 0   | 0   | 0 NA           |
| 0   | 36  | 23 NA          |
| 0   | 37  | 17 PITG_01583  |



|    |     |                 |
|----|-----|-----------------|
| 0  | 209 | 343 PITG_23287  |
| 0  | 0   | 0 PITG_14401    |
| 0  | 12  | 21 PITG_00787   |
| 0  | 25  | 9 PITG_03932    |
| 0  | 30  | 11 PITG_20745   |
| 0  | 61  | 156 PITG_08031  |
| 0  | 13  | 3 NA            |
| 0  | 6   | 10 PITG_15820   |
| 0  | 84  | 83 PITG_17607   |
| 0  | 0   | 0 PITG_00967    |
| 0  | 29  | 14 PITG_02260   |
| 0  | 4   | 2 PITG_13309    |
| 0  | 4   | 12 NA           |
| 96 | 0   | 2 NA            |
| 0  | 3   | 0 NA            |
| 0  | 0   | 0 NA            |
| 0  | 4   | 0 PITG_12428    |
| 0  | 0   | 0 PITG_17347    |
| 2  | 341 | 2195 PITG_15069 |
| 0  | 12  | 8 PITG_11461    |
| 0  | 0   | 2 PITG_03749    |
| 0  | 0   | 0 NA            |
| 8  | 10  | 24 NA           |
| 0  | 79  | 48 PITG_05413   |
| 0  | 2   | 2 NA            |
| 0  | 30  | 60 PITG_15496   |
| 0  | 41  | 312 PITG_17033  |
| 0  | 65  | 26 PITG_06966   |
| 0  | 4   | 0 NA            |
| 0  | 13  | 2 PITG_15820    |
| 0  | 6   | 2 PITG_05275    |
| 0  | 6   | 9 PITG_09423    |
| 0  | 2   | 0 NA            |
| 0  | 86  | 102 PITG_18358  |
| 0  | 7   | 32 PITG_00449   |
| 0  | 62  | 0 NA            |
| 0  | 77  | 98 PITG_11980   |
| 0  | 4   | 2 PITG_06803    |
| 0  | 205 | 114 PITG_00155  |
| 0  | 0   | 7 PITG_16328    |
| 0  | 0   | 11 PITG_06424   |
| 0  | 14  | 4 NA            |
| 0  | 16  | 35 PITG_04842   |
| 0  | 4   | 15 PITG_06772   |
| 0  | 48  | 22 PITG_10417   |
| 0  | 3   | 2 PITG_18543    |
| 0  | 261 | 762 PITG_11766  |

|   |     |                |
|---|-----|----------------|
| 0 | 86  | 112 PITG_14416 |
| 0 | 84  | 195 PITG_17753 |
| 0 | 33  | 54 PITG_02197  |
| 0 | 537 | 740 NA         |
| 0 | 3   | 8 PITG_05763   |
| 0 | 2   | 0 PITG_09819   |
| 0 | 6   | 2 PITG_21280   |
| 0 | 0   | 4 PITG_13843   |
| 0 | 8   | 4 PITG_10087   |
| 0 | 49  | 0 PITG_13887   |
| 0 | 118 | 42 NA          |
| 0 | 13  | 9 PITG_15642   |
| 0 | 6   | 0 PITG_03754   |
| 0 | 3   | 7 PITG_06581   |
| 0 | 12  | 14 PITG_03390  |
| 0 | 4   | 7 PITG_10792   |
| 0 | 86  | 8 NA           |
| 0 | 0   | 7 PITG_03246   |
| 0 | 7   | 2 NA           |
| 0 | 4   | 0 PITG_12349   |
| 0 | 83  | 234 PITG_04508 |
| 0 | 2   | 2 PITG_03476   |
| 0 | 8   | 5 PITG_03597   |
| 0 | 68  | 82 PITG_03492  |
| 0 | 34  | 2 PITG_03990   |
| 0 | 26  | 17 PITG_08028  |
| 0 | 33  | 2 NA           |
| 0 | 0   | 4 PITG_08584   |
| 0 | 9   | 12 PITG_10784  |
| 0 | 5   | 2 PITG_11365   |
| 0 | 127 | 41 PITG_17345  |
| 0 | 85  | 472 PITG_09216 |
| 0 | 0   | 2 PITG_02959   |
| 0 | 0   | 0 PITG_04134   |
| 0 | 736 | 440 PITG_09528 |
| 0 | 0   | 0 NA           |
| 0 | 2   | 0 PITG_02659   |
| 0 | 120 | 56 PITG_06739  |
| 0 | 30  | 7 PITG_05311   |
| 0 | 20  | 8 PITG_17493   |
| 0 | 2   | 24 PITG_18360  |
| 0 | 6   | 9 PITG_09036   |
| 0 | 85  | 68 PITG_18860  |
| 0 | 40  | 11 PITG_15497  |
| 0 | 10  | 4 PITG_01457   |
| 0 | 201 | 114 PITG_13128 |
| 0 | 9   | 16 PITG_06980  |

|     |     |                |
|-----|-----|----------------|
| 0   | 18  | 7 PITG_19237   |
| 0   | 61  | 0 NA           |
| 0   | 10  | 4 PITG_16066   |
| 0   | 27  | 16 PITG_14170  |
| 0   | 10  | 10 PITG_01728  |
| 0   | 2   | 4 PITG_12514   |
| 0   | 30  | 7 PITG_02531   |
| 425 | 21  | 811 NA         |
| 0   | 9   | 3 PITG_22989   |
| 0   | 502 | 632 PITG_20681 |
| 0   | 17  | 9 PITG_12646   |
| 0   | 2   | 20 PITG_00452  |
| 0   | 7   | 13 PITG_11291  |
| 0   | 4   | 0 PITG_06844   |
| 0   | 22  | 10 PITG_11430  |
| 0   | 25  | 22 PITG_13052  |
| 0   | 6   | 10 PITG_02720  |
| 0   | 34  | 12 PITG_10509  |
| 0   | 14  | 4 PITG_07102   |
| 0   | 29  | 14 PITG_00411  |
| 0   | 0   | 8 PITG_10901   |
| 0   | 3   | 13 PITG_18067  |
| 0   | 87  | 95 PITG_08403  |
| 0   | 0   | 2 PITG_13622   |
| 0   | 0   | 0 NA           |
| 0   | 215 | 93 NA          |
| 0   | 579 | 197 PITG_01793 |
| 0   | 9   | 14 PITG_06220  |
| 0   | 0   | 0 PITG_00556   |
| 0   | 61  | 14 NA          |
| 0   | 15  | 12 PITG_02637  |
| 0   | 5   | 0 PITG_09907   |
| 0   | 124 | 74 PITG_18242  |
| 0   | 0   | 2 PITG_16137   |
| 0   | 8   | 5 PITG_14497   |
| 0   | 28  | 33 PITG_18113  |
| 0   | 18  | 22 PITG_01153  |
| 0   | 17  | 67 PITG_17275  |
| 0   | 3   | 41 PITG_01947  |
| 112 | 13  | 2057 NA        |
| 158 | 327 | 1885 NA        |
| 0   | 27  | 10 PITG_00989  |
| 0   | 2   | 4 PITG_08817   |
| 0   | 13  | 12 PITG_06424  |
| 0   | 22  | 37 PITG_01317  |
| 0   | 26  | 0 PITG_11888   |
| 0   | 14  | 2 PITG_01952   |

|      |     |                |
|------|-----|----------------|
| 0    | 0   | 0 PITG_06289   |
| 0    | 0   | 0 NA           |
| 0    | 35  | 4 PITG_00077   |
| 0    | 2   | 0 PITG_10308   |
| 0    | 2   | 2 PITG_10444   |
| 0    | 10  | 7 PITG_14170   |
| 0    | 0   | 2 PITG_17021   |
| 0    | 0   | 0 PITG_10554   |
| 0    | 46  | 27 PITG_19514  |
| 0    | 4   | 4 PITG_10980   |
| 0    | 0   | 0 NA           |
| 0    | 23  | 79 PITG_04603  |
| 0    | 112 | 17 PITG_05653  |
| 0    | 2   | 0 PITG_15820   |
| 0    | 31  | 6 NA           |
| 0    | 3   | 2 NA           |
| 0    | 29  | 7 PITG_22127   |
| 0    | 515 | 298 PITG_20689 |
| 0    | 2   | 15 PITG_14831  |
| 0    | 428 | 493 NA         |
| 0    | 0   | 2 PITG_02228   |
| 0    | 0   | 3 PITG_21942   |
| 0    | 52  | 83 PITG_07247  |
| 0    | 5   | 0 PITG_03074   |
| 0    | 0   | 0 PITG_05149   |
| 0    | 0   | 0 PITG_02596   |
| 0    | 147 | 24 PITG_17387  |
| 0    | 38  | 4 PITG_11653   |
| 0    | 14  | 17 PITG_02043  |
| 0    | 29  | 39 PITG_22038  |
| 0    | 16  | 4 NA           |
| 0    | 5   | 2 NA           |
| 0    | 137 | 206 PITG_11729 |
| 0    | 30  | 2 NA           |
| 0    | 15  | 17 NA          |
| 0    | 4   | 12 PITG_02580  |
| 0    | 2   | 2 PITG_16337   |
| 0    | 13  | 23 NA          |
| 0    | 0   | 2 PITG_07852   |
| 1138 | 27  | 241 NA         |
| 0    | 74  | 43 PITG_14169  |
| 0    | 97  | 0 PITG_00559   |
| 0    | 0   | 0 NA           |
| 0    | 18  | 8 NA           |
| 0    | 2   | 3 PITG_15292   |
| 0    | 9   | 6 PITG_03374   |
| 0    | 10  | 37 PITG_13826  |

|   |     |                 |
|---|-----|-----------------|
| 0 | 13  | 2 PITG_17709    |
| 0 | 59  | 12 PITG_15982   |
| 0 | 0   | 0 PITG_00391    |
| 0 | 2   | 7 PITG_16834    |
| 0 | 13  | 9 PITG_04609    |
| 0 | 33  | 9 PITG_12901    |
| 0 | 241 | 415 PITG_19814  |
| 0 | 11  | 0 NA            |
| 0 | 31  | 55 NA           |
| 0 | 0   | 2 PITG_15566    |
| 0 | 0   | 0 PITG_07306    |
| 0 | 0   | 4 PITG_03940    |
| 0 | 2   | 2 PITG_10097    |
| 0 | 2   | 0 PITG_07423    |
| 0 | 21  | 9 PITG_13927    |
| 0 | 7   | 2 PITG_04023    |
| 0 | 24  | 37 PITG_11587   |
| 0 | 2   | 0 NA            |
| 0 | 9   | 6 PITG_12181    |
| 0 | 68  | 1044 PITG_22135 |
| 0 | 71  | 49 PITG_06424   |
| 0 | 42  | 16 PITG_20152   |
| 0 | 2   | 0 PITG_04885    |
| 0 | 26  | 4 PITG_05960    |
| 0 | 0   | 3 PITG_13488    |
| 0 | 24  | 20 PITG_01508   |
| 0 | 9   | 4 PITG_18372    |
| 0 | 0   | 2 PITG_08089    |
| 0 | 0   | 9 PITG_00381    |
| 0 | 98  | 12 NA           |
| 0 | 0   | 2 PITG_01815    |
| 9 | 4   | 0 NA            |
| 0 | 6   | 0 PITG_01792    |
| 0 | 0   | 4 PITG_04902    |
| 0 | 13  | 17 PITG_03966   |
| 0 | 2   | 0 PITG_12124    |
| 0 | 7   | 2 PITG_21144    |
| 0 | 8   | 15 NA           |
| 0 | 20  | 0 PITG_07282    |
| 0 | 2   | 4 PITG_07347    |
| 0 | 13  | 51 PITG_15243   |
| 0 | 62  | 14 PITG_08155   |
| 0 | 19  | 41 PITG_13393   |
| 0 | 25  | 2 PITG_18976    |
| 0 | 12  | 46 PITG_03081   |
| 0 | 30  | 26 PITG_13393   |
| 0 | 14  | 3 NA            |

|   |     |                |
|---|-----|----------------|
| 0 | 145 | 165 PITG_09815 |
| 0 | 0   | 9 PITG_08503   |
| 0 | 0   | 0 NA           |
| 0 | 8   | 27 PITG_11225  |
| 0 | 2   | 2 PITG_17329   |
| 0 | 5   | 2 PITG_10898   |
| 0 | 9   | 2 PITG_07212   |
| 0 | 14  | 13 PITG_20537  |
| 0 | 2   | 7 PITG_01654   |
| 0 | 33  | 37 PITG_03225  |
| 0 | 191 | 183 PITG_03353 |
| 0 | 6   | 2 NA           |
| 0 | 2   | 0 NA           |
| 0 | 10  | 4 PITG_15444   |
| 0 | 11  | 2 PITG_01920   |
| 0 | 13  | 77 PITG_16376  |
| 0 | 29  | 7 PITG_07829   |
| 0 | 54  | 29 PITG_02263  |
| 0 | 6   | 21 PITG_12753  |
| 0 | 2   | 5 PITG_16345   |
| 0 | 0   | 0 NA           |
| 0 | 2   | 6 PITG_05362   |
| 0 | 336 | 49 NA          |
| 0 | 4   | 0 PITG_10328   |
| 0 | 163 | 25 PITG_01783  |
| 0 | 504 | 147 PITG_04977 |
| 0 | 49  | 61 PITG_14586  |
| 0 | 84  | 29 PITG_10298  |
| 0 | 0   | 7 PITG_09792   |
| 0 | 214 | 108 PITG_20747 |
| 0 | 241 | 154 PITG_11563 |
| 0 | 14  | 13 PITG_11406  |
| 0 | 5   | 2 PITG_08305   |
| 0 | 0   | 0 PITG_07800   |
| 0 | 13  | 16 PITG_08028  |
| 0 | 4   | 4 PITG_09855   |
| 0 | 2   | 0 PITG_08039   |
| 0 | 2   | 0 NA           |
| 0 | 34  | 39 PITG_12051  |
| 0 | 214 | 14 PITG_01248  |
| 0 | 27  | 48 PITG_13416  |
| 0 | 25  | 74 PITG_06890  |
| 0 | 42  | 30 PITG_06476  |
| 0 | 308 | 173 PITG_04645 |
| 0 | 0   | 4 PITG_04691   |
| 0 | 4   | 4 PITG_11567   |
| 0 | 5   | 2 PITG_03657   |

|   |     |               |
|---|-----|---------------|
| 0 | 24  | 2 PITG_14807  |
| 0 | 36  | 26 NA         |
| 0 | 0   | 0 PITG_18257  |
| 0 | 34  | 48 PITG_04937 |
| 0 | 2   | 2 PITG_16854  |
| 0 | 26  | 88 PITG_13763 |
| 0 | 54  | 51 PITG_08131 |
| 0 | 4   | 0 PITG_13678  |
| 0 | 59  | 39 PITG_01997 |
| 0 | 7   | 22 PITG_01203 |
| 0 | 127 | 27 PITG_05317 |
| 0 | 10  | 4 NA          |
| 0 | 261 | 245 NA        |
| 0 | 12  | 2 PITG_07796  |
| 0 | 20  | 19 PITG_20521 |
| 0 | 5   | 4 PITG_12514  |
| 0 | 143 | 46 NA         |
| 0 | 7   | 4 NA          |
| 0 | 3   | 26 PITG_04863 |
| 0 | 10  | 0 PITG_08473  |
| 0 | 6   | 0 PITG_04108  |
| 0 | 64  | 36 PITG_02809 |
| 0 | 12  | 48 PITG_03130 |
| 0 | 7   | 5 NA          |
| 0 | 27  | 12 PITG_07053 |
| 0 | 0   | 0 PITG_13185  |
| 0 | 37  | 30 PITG_01653 |
| 0 | 0   | 0 PITG_17399  |
| 0 | 0   | 34 PITG_06863 |
| 0 | 13  | 27 PITG_05560 |
| 0 | 32  | 9 NA          |
| 0 | 0   | 0 PITG_15958  |
| 0 | 0   | 0 PITG_12453  |
| 0 | 2   | 4 PITG_03610  |
| 0 | 0   | 2 NA          |
| 0 | 0   | 0 PITG_11285  |
| 0 | 0   | 2 PITG_14863  |
| 0 | 0   | 12 PITG_05301 |
| 0 | 6   | 2 PITG_21941  |
| 0 | 42  | 35 PITG_09445 |
| 0 | 2   | 9 PITG_06274  |
| 0 | 8   | 20 NA         |
| 0 | 19  | 2 PITG_05559  |
| 0 | 42  | 32 PITG_00590 |
| 0 | 8   | 0 NA          |
| 0 | 0   | 0 PITG_06903  |
| 0 | 12  | 0 PITG_09193  |

|     |     |                |
|-----|-----|----------------|
| 0   | 2   | 5 PITG_02655   |
| 0   | 13  | 8 PITG_00209   |
| 0   | 0   | 8 NA           |
| 0   | 13  | 0 PITG_17360   |
| 0   | 13  | 9 PITG_16467   |
| 0   | 0   | 0 PITG_09816   |
| 0   | 6   | 0 PITG_16766   |
| 0   | 19  | 12 PITG_00466  |
| 0   | 6   | 42 PITG_21398  |
| 0   | 71  | 3 PITG_09243   |
| 0   | 12  | 13 PITG_19037  |
| 0   | 0   | 0 NA           |
| 0   | 29  | 25 PITG_19846  |
| 0   | 44  | 8 PITG_09780   |
| 0   | 2   | 5 PITG_11119   |
| 156 | 18  | 232 NA         |
| 0   | 0   | 2 PITG_16457   |
| 0   | 7   | 8 PITG_05629   |
| 0   | 65  | 46 PITG_19153  |
| 0   | 27  | 15 PITG_14588  |
| 0   | 27  | 62 PITG_03340  |
| 0   | 0   | 0 PITG_21316   |
| 0   | 17  | 70 PITG_04000  |
| 0   | 0   | 0 PITG_08712   |
| 0   | 9   | 2 PITG_04838   |
| 0   | 0   | 0 PITG_14483   |
| 0   | 6   | 5 PITG_00077   |
| 0   | 4   | 2 PITG_01614   |
| 0   | 5   | 2 PITG_11722   |
| 0   | 0   | 0 PITG_06635   |
| 0   | 54  | 0 PITG_09599   |
| 0   | 10  | 38 PITG_12428  |
| 0   | 18  | 16 PITG_16042  |
| 0   | 81  | 17 PITG_10454  |
| 0   | 22  | 24 PITG_14573  |
| 0   | 77  | 0 PITG_09538   |
| 0   | 188 | 103 PITG_08031 |
| 78  | 24  | 127 NA         |
| 0   | 0   | 0 PITG_05317   |
| 0   | 4   | 0 PITG_05687   |
| 0   | 37  | 27 NA          |
| 0   | 2   | 2 PITG_07279   |
| 0   | 6   | 2 PITG_17863   |
| 0   | 50  | 10 PITG_02227  |
| 0   | 0   | 15 PITG_17632  |
| 0   | 66  | 33 PITG_04882  |
| 0   | 14  | 4 NA           |



|    |     |                |
|----|-----|----------------|
| 0  | 21  | 0 NA           |
| 0  | 5   | 0 NA           |
| 0  | 19  | 0 NA           |
| 0  | 30  | 41 PITG_12191  |
| 0  | 50  | 6 PITG_09703   |
| 0  | 0   | 0 NA           |
| 0  | 33  | 21 PITG_08430  |
| 0  | 0   | 0 PITG_11648   |
| 0  | 54  | 77 PITG_03711  |
| 0  | 91  | 19 PITG_18738  |
| 0  | 2   | 7 PITG_00422   |
| 0  | 4   | 2 PITG_00320   |
| 0  | 2   | 0 PITG_08431   |
| 0  | 12  | 14 PITG_17495  |
| 0  | 6   | 16 PITG_11203  |
| 0  | 4   | 34 PITG_22557  |
| 0  | 53  | 31 PITG_01932  |
| 0  | 0   | 0 PITG_01588   |
| 0  | 6   | 40 PITG_14226  |
| 0  | 7   | 6 PITG_13336   |
| 0  | 45  | 2 PITG_08294   |
| 0  | 4   | 5 PITG_12286   |
| 0  | 0   | 8 NA           |
| 0  | 29  | 8 PITG_17690   |
| 0  | 15  | 32 PITG_15848  |
| 0  | 27  | 9 PITG_01712   |
| 0  | 9   | 24 PITG_09222  |
| 0  | 0   | 2 PITG_18279   |
| 59 | 4   | 96 NA          |
| 0  | 110 | 170 PITG_02362 |
| 0  | 529 | 58 NA          |
| 0  | 9   | 16 PITG_12819  |
| 0  | 6   | 7 PITG_02733   |
| 0  | 2   | 0 PITG_21640   |
| 0  | 9   | 8 PITG_07848   |
| 0  | 93  | 0 PITG_09906   |
| 0  | 64  | 94 PITG_18735  |
| 0  | 4   | 10 PITG_16446  |
| 0  | 0   | 2 NA           |
| 0  | 12  | 4 PITG_09930   |
| 0  | 2   | 4 PITG_05566   |
| 0  | 21  | 8 PITG_14722   |
| 0  | 4   | 0 NA           |
| 0  | 0   | 8 PITG_14380   |
| 0  | 4   | 2 PITG_00746   |
| 0  | 8   | 2 PITG_19362   |
| 0  | 4   | 2 PITG_03371   |

|   |     |                |
|---|-----|----------------|
| 0 | 0   | 17 PITG_14598  |
| 0 | 0   | 0 PITG_20350   |
| 0 | 103 | 66 PITG_15996  |
| 0 | 3   | 0 PITG_07381   |
| 0 | 36  | 11 PITG_21908  |
| 0 | 0   | 2 PITG_13276   |
| 0 | 0   | 0 PITG_02698   |
| 0 | 0   | 0 PITG_19153   |
| 0 | 8   | 6 PITG_01981   |
| 0 | 2   | 0 NA           |
| 0 | 77  | 131 PITG_14110 |
| 0 | 71  | 109 PITG_19298 |
| 0 | 6   | 10 PITG_11197  |
| 0 | 83  | 40 PITG_01932  |
| 0 | 16  | 48 PITG_14173  |
| 0 | 5   | 0 NA           |
| 0 | 7   | 3 PITG_16183   |
| 0 | 49  | 58 NA          |
| 0 | 32  | 26 NA          |
| 0 | 117 | 444 PITG_08834 |
| 0 | 82  | 23 PITG_07637  |
| 0 | 9   | 0 PITG_00190   |
| 0 | 170 | 118 NA         |
| 0 | 2   | 23 PITG_01318  |
| 0 | 38  | 0 PITG_22427   |
| 0 | 146 | 78 PITG_07102  |
| 0 | 2   | 0 PITG_11466   |
| 0 | 7   | 11 PITG_15731  |
| 0 | 24  | 2 PITG_02798   |
| 0 | 171 | 10 NA          |
| 0 | 0   | 0 PITG_10472   |
| 0 | 0   | 0 NA           |
| 0 | 0   | 0 PITG_12686   |
| 0 | 39  | 485 PITG_05498 |
| 0 | 51  | 4 PITG_00646   |
| 0 | 2   | 9 PITG_01087   |
| 0 | 2   | 7 PITG_15817   |
| 0 | 43  | 12 NA          |
| 0 | 2   | 13 PITG_05780  |
| 0 | 6   | 20 NA          |
| 0 | 0   | 4 NA           |
| 0 | 0   | 0 NA           |
| 0 | 87  | 32 PITG_06262  |
| 0 | 137 | 50 PITG_01937  |
| 0 | 53  | 12 PITG_00077  |
| 0 | 117 | 70 PITG_00839  |
| 0 | 3   | 0 NA           |

|   |      |                 |
|---|------|-----------------|
| 0 | 16   | 6 PITG_18073    |
| 0 | 7    | 2 NA            |
| 0 | 2    | 2 PITG_09354    |
| 0 | 2    | 2 PITG_13803    |
| 0 | 114  | 69 PITG_15996   |
| 0 | 16   | 0 NA            |
| 0 | 21   | 7 PITG_00308    |
| 0 | 7    | 0 PITG_01646    |
| 0 | 55   | 1130 PITG_02409 |
| 0 | 57   | 54 PITG_19128   |
| 0 | 0    | 0 PITG_05616    |
| 0 | 0    | 2 PITG_09956    |
| 0 | 14   | 12 PITG_11587   |
| 0 | 20   | 8 PITG_02562    |
| 0 | 1211 | 3393 PITG_16981 |
| 0 | 15   | 0 PITG_09782    |
| 0 | 81   | 46 PITG_14640   |
| 0 | 14   | 19 PITG_03179   |
| 0 | 0    | 2 PITG_10011    |
| 0 | 0    | 0 PITG_06772    |
| 0 | 15   | 2 PITG_00500    |
| 0 | 51   | 6 PITG_11540    |
| 0 | 116  | 76 PITG_01036   |
| 0 | 0    | 3 PITG_03501    |
| 0 | 40   | 10 PITG_03296   |
| 0 | 3    | 8 PITG_19128    |
| 0 | 2    | 11 PITG_05507   |
| 0 | 6    | 18 PITG_10481   |
| 0 | 4    | 6 PITG_01315    |
| 0 | 3    | 0 NA            |
| 0 | 116  | 206 PITG_03472  |
| 0 | 6    | 10 PITG_00980   |
| 0 | 96   | 27 NA           |
| 0 | 146  | 61 PITG_13749   |
| 0 | 4    | 2 PITG_08392    |
| 0 | 929  | 440 PITG_14624  |
| 0 | 7    | 0 PITG_12747    |
| 0 | 22   | 9 NA            |
| 0 | 33   | 6 PITG_10821    |
| 0 | 3    | 6 NA            |
| 0 | 4    | 0 PITG_17430    |
| 0 | 21   | 38 PITG_14808   |
| 0 | 25   | 5 PITG_16114    |
| 0 | 13   | 3 NA            |
| 0 | 16   | 43 PITG_07201   |
| 0 | 2    | 0 PITG_09910    |
| 0 | 17   | 42 NA           |

|    |      |                |
|----|------|----------------|
| 0  | 2    | 7 PITG_12876   |
| 0  | 36   | 22 PITG_03177  |
| 0  | 57   | 91 PITG_10729  |
| 0  | 7    | 16 PITG_11131  |
| 0  | 78   | 17 PITG_08364  |
| 0  | 0    | 0 PITG_00231   |
| 0  | 1609 | 651 PITG_13769 |
| 0  | 4    | 2 PITG_18094   |
| 0  | 0    | 4 PITG_14097   |
| 0  | 38   | 2 NA           |
| 2  | 220  | 361 PITG_08579 |
| 0  | 51   | 75 PITG_09722  |
| 0  | 0    | 0 PITG_18726   |
| 0  | 0    | 13 PITG_09846  |
| 0  | 84   | 21 PITG_04552  |
| 0  | 5    | 4 PITG_15146   |
| 0  | 8    | 4 PITG_02796   |
| 0  | 8    | 22 PITG_13804  |
| 0  | 60   | 22 NA          |
| 0  | 0    | 2 PITG_18014   |
| 0  | 63   | 56 PITG_17936  |
| 0  | 12   | 0 PITG_11162   |
| 0  | 10   | 19 PITG_01614  |
| 0  | 0    | 2 PITG_01614   |
| 0  | 106  | 4 NA           |
| 0  | 49   | 2 PITG_09250   |
| 0  | 11   | 46 PITG_04481  |
| 0  | 11   | 31 PITG_12961  |
| 0  | 14   | 4 PITG_09036   |
| 0  | 0    | 2 PITG_14473   |
| 0  | 10   | 3 NA           |
| 0  | 3    | 9 PITG_00486   |
| 0  | 0    | 0 PITG_08605   |
| 0  | 0    | 2 PITG_12453   |
| 0  | 2    | 8 PITG_02598   |
| 0  | 0    | 0 PITG_01450   |
| 0  | 121  | 102 PITG_04647 |
| 0  | 0    | 9 PITG_12160   |
| 0  | 26   | 10 PITG_13804  |
| 0  | 6    | 8 PITG_19869   |
| 0  | 3    | 8 PITG_03850   |
| 0  | 0    | 0 NA           |
| 0  | 72   | 46 PITG_09360  |
| 13 | 0    | 22 NA          |
| 0  | 8    | 0 NA           |
| 0  | 4    | 0 PITG_04861   |
| 0  | 11   | 0 NA           |

|   |     |                |
|---|-----|----------------|
| 0 | 0   | 2 PITG_14944   |
| 0 | 10  | 3 PITG_02927   |
| 0 | 29  | 79 PITG_18038  |
| 0 | 76  | 38 PITG_03837  |
| 0 | 0   | 2 PITG_13345   |
| 0 | 6   | 23 PITG_15360  |
| 0 | 0   | 0 PITG_10764   |
| 0 | 40  | 5 NA           |
| 0 | 77  | 28 PITG_08597  |
| 0 | 22  | 23 PITG_05444  |
| 0 | 2   | 4 PITG_04497   |
| 0 | 0   | 6 PITG_22742   |
| 0 | 126 | 33 PITG_10384  |
| 0 | 3   | 2 PITG_21336   |
| 0 | 23  | 83 PITG_15998  |
| 0 | 2   | 2 PITG_08935   |
| 0 | 13  | 20 NA          |
| 0 | 8   | 39 PITG_10664  |
| 0 | 0   | 6 PITG_01409   |
| 0 | 37  | 24 NA          |
| 2 | 4   | 215 PITG_11913 |
| 0 | 0   | 11 PITG_14400  |
| 0 | 27  | 26 PITG_11802  |
| 0 | 0   | 0 NA           |
| 0 | 8   | 18 PITG_06016  |
| 0 | 36  | 16 PITG_01251  |
| 0 | 4   | 25 PITG_01283  |
| 0 | 0   | 2 PITG_12742   |
| 0 | 4   | 15 PITG_03702  |
| 0 | 0   | 2 PITG_19242   |
| 0 | 0   | 2 NA           |
| 0 | 135 | 2 PITG_01335   |
| 0 | 0   | 0 PITG_11728   |
| 0 | 2   | 0 NA           |
| 0 | 179 | 246 PITG_05534 |
| 0 | 2   | 7 PITG_09962   |
| 0 | 5   | 3 PITG_16221   |
| 0 | 101 | 45 PITG_11813  |
| 0 | 0   | 0 PITG_16121   |
| 0 | 11  | 17 PITG_01925  |
| 0 | 57  | 9 PITG_13399   |
| 0 | 427 | 502 NA         |
| 0 | 0   | 6 PITG_15141   |
| 0 | 0   | 12 PITG_03874  |
| 0 | 21  | 15 PITG_00626  |
| 0 | 216 | 97 PITG_06388  |
| 0 | 9   | 4 PITG_03471   |

|   |     |                |
|---|-----|----------------|
| 0 | 123 | 36 PITG_06199  |
| 0 | 3   | 0 NA           |
| 0 | 14  | 14 PITG_02666  |
| 0 | 0   | 0 PITG_18274   |
| 0 | 215 | 598 PITG_02479 |
| 0 | 437 | 207 PITG_10707 |
| 0 | 18  | 20 PITG_10119  |
| 0 | 0   | 0 NA           |
| 0 | 0   | 0 PITG_16221   |
| 0 | 3   | 0 NA           |
| 0 | 8   | 5 NA           |
| 0 | 11  | 2 PITG_12425   |
| 0 | 4   | 6 NA           |
| 0 | 0   | 0 PITG_20533   |
| 0 | 2   | 0 NA           |
| 0 | 12  | 2 PITG_21000   |
| 0 | 10  | 18 PITG_00571  |
| 0 | 73  | 14 PITG_07545  |
| 0 | 2   | 8 PITG_00662   |
| 0 | 105 | 114 PITG_00140 |
| 0 | 15  | 2 PITG_09588   |
| 0 | 0   | 0 NA           |
| 0 | 0   | 0 PITG_11019   |
| 0 | 0   | 0 NA           |
| 0 | 80  | 31 PITG_20715  |
| 0 | 13  | 10 PITG_01342  |
| 0 | 8   | 2 PITG_06359   |
| 0 | 403 | 449 PITG_03873 |
| 0 | 43  | 23 PITG_05239  |
| 0 | 2   | 2 PITG_10023   |
| 0 | 28  | 59 PITG_17035  |
| 0 | 46  | 0 PITG_03435   |
| 0 | 5   | 19 PITG_09181  |
| 0 | 0   | 3 PITG_19037   |
| 0 | 213 | 137 PITG_05009 |
| 0 | 95  | 119 PITG_03860 |
| 0 | 32  | 25 PITG_09829  |
| 0 | 8   | 2 PITG_19745   |
| 0 | 22  | 3 PITG_05494   |
| 0 | 2   | 6 PITG_12357   |
| 0 | 55  | 2 NA           |
| 0 | 28  | 25 PITG_02487  |
| 0 | 7   | 10 NA          |
| 0 | 2   | 0 PITG_17287   |
| 0 | 4   | 0 NA           |
| 0 | 280 | 161 PITG_17351 |
| 0 | 6   | 0 NA           |

|    |     |                |
|----|-----|----------------|
| 0  | 32  | 5 PITG_11023   |
| 0  | 17  | 4 PITG_15696   |
| 0  | 22  | 17 PITG_11486  |
| 0  | 136 | 13 NA          |
| 0  | 2   | 2 PITG_06898   |
| 0  | 262 | 118 PITG_21829 |
| 0  | 0   | 7 PITG_22552   |
| 0  | 178 | 258 PITG_12483 |
| 0  | 35  | 6 NA           |
| 0  | 4   | 20 NA          |
| 0  | 95  | 37 NA          |
| 0  | 79  | 20 PITG_22686  |
| 0  | 43  | 62 PITG_03673  |
| 0  | 101 | 10 PITG_01756  |
| 0  | 30  | 11 PITG_08310  |
| 0  | 0   | 11 PITG_06982  |
| 0  | 0   | 2 PITG_13749   |
| 0  | 18  | 46 PITG_04846  |
| 47 | 10  | 63 NA          |
| 0  | 36  | 25 PITG_20831  |
| 0  | 56  | 3 NA           |
| 0  | 7   | 10 PITG_10133  |
| 0  | 29  | 23 PITG_07967  |
| 0  | 0   | 2 PITG_01065   |
| 0  | 22  | 40 PITG_19037  |
| 0  | 12  | 0 PITG_01302   |
| 0  | 38  | 31 NA          |
| 0  | 2   | 0 NA           |
| 0  | 18  | 10 PITG_03372  |
| 0  | 39  | 3 PITG_15874   |
| 0  | 11  | 0 PITG_03620   |
| 0  | 11  | 4 PITG_05856   |
| 0  | 2   | 0 PITG_04956   |
| 0  | 2   | 0 PITG_23273   |
| 0  | 0   | 0 PITG_18998   |
| 0  | 17  | 15 PITG_18464  |
| 0  | 15  | 42 NA          |
| 0  | 5   | 6 PITG_09284   |
| 0  | 84  | 87 PITG_08659  |
| 0  | 4   | 4 PITG_02050   |
| 0  | 95  | 43 PITG_00049  |
| 0  | 21  | 25 PITG_03832  |
| 0  | 144 | 64 PITG_06702  |
| 0  | 6   | 19 PITG_02027  |
| 0  | 3   | 4 PITG_16209   |
| 0  | 32  | 6 PITG_18424   |
| 0  | 9   | 2 PITG_05521   |

|     |     |                |
|-----|-----|----------------|
| 0   | 0   | 0 PITG_17834   |
| 0   | 0   | 0 NA           |
| 0   | 124 | 4 NA           |
| 0   | 2   | 6 PITG_02397   |
| 0   | 8   | 0 NA           |
| 0   | 5   | 9 PITG_01605   |
| 0   | 21  | 2 PITG_11600   |
| 0   | 0   | 0 NA           |
| 0   | 46  | 30 PITG_09273  |
| 0   | 6   | 9 PITG_03530   |
| 0   | 11  | 8 PITG_10901   |
| 0   | 2   | 0 NA           |
| 139 | 5   | 204 PITG_18052 |
| 0   | 0   | 20 PITG_07985  |
| 0   | 0   | 0 PITG_16389   |
| 0   | 56  | 0 NA           |
| 0   | 24  | 12 NA          |
| 0   | 112 | 47 PITG_05690  |
| 0   | 111 | 45 PITG_11496  |
| 0   | 13  | 4 NA           |
| 0   | 47  | 52 PITG_18037  |
| 0   | 21  | 0 NA           |
| 0   | 117 | 90 PITG_18104  |
| 0   | 26  | 31 PITG_16322  |
| 0   | 11  | 2 PITG_01257   |
| 0   | 14  | 4 NA           |
| 0   | 23  | 33 PITG_04712  |
| 0   | 3   | 0 PITG_02809   |
| 0   | 2   | 0 PITG_19887   |
| 0   | 57  | 20 PITG_10857  |
| 0   | 43  | 62 PITG_02958  |
| 0   | 4   | 0 NA           |
| 0   | 74  | 65 PITG_00943  |
| 0   | 14  | 0 PITG_18456   |
| 0   | 0   | 2 PITG_18695   |
| 0   | 46  | 28 PITG_20115  |
| 0   | 14  | 0 NA           |
| 0   | 5   | 4 PITG_00664   |
| 0   | 88  | 103 PITG_01222 |
| 0   | 16  | 21 PITG_11783  |
| 0   | 0   | 2 PITG_03268   |
| 0   | 4   | 0 PITG_12296   |
| 0   | 16  | 9 PITG_05282   |
| 0   | 90  | 86 PITG_09400  |
| 0   | 0   | 0 PITG_08103   |
| 0   | 20  | 0 PITG_17209   |
| 0   | 2   | 58 PITG_05505  |



|     |     |                 |
|-----|-----|-----------------|
| 0   | 2   | 2 PITG_07233    |
| 0   | 58  | 2 NA            |
| 0   | 0   | 0 PITG_12048    |
| 0   | 6   | 0 NA            |
| 0   | 8   | 8 PITG_12454    |
| 0   | 11  | 18 PITG_03472   |
| 0   | 117 | 40 NA           |
| 0   | 32  | 51 PITG_10068   |
| 0   | 183 | 161 PITG_01449  |
| 0   | 15  | 7 PITG_11653    |
| 0   | 28  | 32 PITG_15139   |
| 0   | 10  | 0 NA            |
| 0   | 225 | 2 PITG_06166    |
| 0   | 150 | 82 PITG_10345   |
| 0   | 3   | 4 PITG_06148    |
| 0   | 14  | 0 PITG_21121    |
| 0   | 28  | 71 PITG_07086   |
| 0   | 2   | 0 PITG_10764    |
| 0   | 83  | 2 PITG_09570    |
| 0   | 74  | 2 PITG_17907    |
| 0   | 32  | 44 NA           |
| 0   | 32  | 6 NA            |
| 0   | 140 | 43 PITG_11735   |
| 2   | 2   | 1096 PITG_21737 |
| 0   | 19  | 10 PITG_01932   |
| 0   | 38  | 17 NA           |
| 0   | 33  | 74 PITG_09216   |
| 0   | 0   | 0 PITG_17071    |
| 0   | 4   | 16 PITG_15006   |
| 0   | 0   | 8 NA            |
| 0   | 110 | 106 NA          |
| 0   | 537 | 331 PITG_01358  |
| 0   | 9   | 24 PITG_03555   |
| 0   | 2   | 2 PITG_15417    |
| 0   | 116 | 123 PITG_01222  |
| 0   | 18  | 9 PITG_05233    |
| 0   | 13  | 11 PITG_12916   |
| 0   | 6   | 8 NA            |
| 0   | 28  | 9 PITG_06127    |
| 0   | 0   | 0 NA            |
| 0   | 16  | 13 PITG_11010   |
| 0   | 11  | 11 PITG_14743   |
| 0   | 2   | 0 PITG_06289    |
| 0   | 0   | 0 PITG_01719    |
| 0   | 604 | 342 PITG_17167  |
| 527 | 41  | 1157 NA         |
| 0   | 0   | 0 PITG_06963    |

|     |     |                |
|-----|-----|----------------|
| 0   | 0   | 0 PITG_19146   |
| 0   | 188 | 88 PITG_19270  |
| 0   | 11  | 10 PITG_02628  |
| 0   | 11  | 2 PITG_10624   |
| 0   | 2   | 0 NA           |
| 0   | 2   | 2 PITG_02016   |
| 0   | 9   | 2 PITG_11804   |
| 0   | 53  | 11 PITG_03675  |
| 0   | 17  | 2 PITG_04384   |
| 0   | 158 | 30 PITG_12051  |
| 0   | 0   | 0 PITG_10921   |
| 0   | 107 | 0 PITG_02506   |
| 0   | 4   | 8 PITG_21557   |
| 0   | 435 | 43 NA          |
| 0   | 4   | 7 PITG_07905   |
| 0   | 33  | 27 PITG_09863  |
| 0   | 240 | 111 PITG_08326 |
| 0   | 5   | 2 PITG_17959   |
| 0   | 2   | 2 NA           |
| 0   | 0   | 5 NA           |
| 0   | 27  | 4 PITG_02398   |
| 0   | 40  | 9 PITG_15957   |
| 0   | 30  | 2 NA           |
| 0   | 13  | 2 NA           |
| 0   | 19  | 14 PITG_07976  |
| 0   | 6   | 5 NA           |
| 0   | 3   | 13 PITG_05772  |
| 245 | 2   | 149 NA         |
| 0   | 0   | 0 PITG_01019   |
| 0   | 6   | 7 NA           |
| 0   | 2   | 0 PITG_09989   |
| 0   | 18  | 17 PITG_17617  |
| 0   | 5   | 0 PITG_08095   |
| 0   | 18  | 9 PITG_12842   |
| 0   | 6   | 3 PITG_06390   |
| 0   | 0   | 2 PITG_04104   |
| 0   | 73  | 348 PITG_11244 |
| 0   | 30  | 5 NA           |
| 0   | 0   | 0 NA           |
| 0   | 5   | 2 PITG_11470   |
| 0   | 45  | 11 PITG_06916  |
| 0   | 0   | 0 PITG_18173   |
| 0   | 47  | 349 PITG_18984 |
| 0   | 0   | 5 PITG_04661   |
| 0   | 20  | 2 PITG_03769   |
| 0   | 11  | 7 PITG_11437   |
| 0   | 17  | 11 PITG_01878  |

|     |     |                |
|-----|-----|----------------|
| 0   | 0   | 0 NA           |
| 0   | 29  | 18 PITG_00309  |
| 0   | 104 | 17 NA          |
| 0   | 10  | 13 PITG_17416  |
| 0   | 4   | 0 PITG_21479   |
| 0   | 144 | 50 PITG_11817  |
| 0   | 181 | 43 NA          |
| 0   | 10  | 0 NA           |
| 0   | 32  | 26 PITG_03359  |
| 0   | 0   | 5 PITG_09423   |
| 0   | 38  | 14 PITG_06403  |
| 0   | 2   | 0 PITG_07865   |
| 0   | 58  | 12 PITG_16930  |
| 0   | 12  | 51 PITG_06979  |
| 0   | 8   | 4 PITG_07325   |
| 0   | 12  | 6 PITG_14712   |
| 0   | 123 | 41 PITG_03684  |
| 0   | 18  | 13 NA          |
| 0   | 11  | 2 PITG_07301   |
| 0   | 143 | 72 NA          |
| 0   | 55  | 8 PITG_01410   |
| 0   | 39  | 10 PITG_06121  |
| 0   | 4   | 0 PITG_17124   |
| 0   | 4   | 5 PITG_20675   |
| 0   | 4   | 0 PITG_03468   |
| 107 | 2   | 223 NA         |
| 0   | 2   | 7 PITG_18025   |
| 0   | 18  | 8 NA           |
| 0   | 2   | 2 PITG_05005   |
| 0   | 18  | 41 PITG_03938  |
| 0   | 4   | 0 PITG_01047   |
| 0   | 23  | 30 PITG_09449  |
| 0   | 0   | 2 PITG_21213   |
| 0   | 4   | 0 PITG_15550   |
| 0   | 18  | 8 PITG_18028   |
| 0   | 54  | 30 PITG_12530  |
| 0   | 0   | 0 PITG_05565   |
| 0   | 5   | 0 NA           |
| 0   | 90  | 165 PITG_19768 |
| 0   | 157 | 2 PITG_03039   |
| 0   | 43  | 21 PITG_10382  |
| 0   | 29  | 12 PITG_01427  |
| 0   | 21  | 0 NA           |
| 0   | 8   | 8 NA           |
| 0   | 16  | 44 PITG_14106  |
| 0   | 20  | 0 NA           |
| 0   | 11  | 8 PITG_02264   |

|     |     |                |
|-----|-----|----------------|
| 0   | 11  | 8 PITG_19159   |
| 0   | 71  | 39 PITG_04707  |
| 0   | 40  | 61 PITG_18509  |
| 0   | 2   | 2 PITG_19177   |
| 0   | 95  | 80 PITG_22839  |
| 0   | 63  | 28 NA          |
| 16  | 0   | 26 NA          |
| 0   | 17  | 9 PITG_10885   |
| 0   | 12  | 8 PITG_14267   |
| 0   | 36  | 26 NA          |
| 0   | 60  | 40 PITG_20528  |
| 0   | 0   | 0 PITG_05672   |
| 0   | 4   | 0 PITG_03804   |
| 0   | 334 | 61 NA          |
| 0   | 71  | 115 PITG_19930 |
| 0   | 23  | 22 NA          |
| 0   | 20  | 2 PITG_20787   |
| 877 | 217 | 54 NA          |
| 0   | 18  | 9 PITG_19450   |
| 0   | 6   | 2 PITG_20745   |
| 0   | 2   | 4 PITG_10308   |
| 0   | 48  | 46 PITG_07124  |
| 0   | 15  | 25 PITG_07727  |
| 0   | 5   | 4 PITG_21879   |
| 0   | 25  | 0 PITG_06332   |
| 0   | 0   | 0 PITG_00658   |
| 0   | 35  | 0 NA           |
| 0   | 82  | 57 NA          |
| 0   | 11  | 0 PITG_04442   |
| 0   | 40  | 0 PITG_06380   |
| 0   | 12  | 2 PITG_04677   |
| 0   | 29  | 0 NA           |
| 0   | 27  | 43 PITG_05653  |
| 0   | 79  | 25 PITG_17455  |
| 0   | 5   | 0 PITG_06390   |
| 0   | 22  | 7 PITG_02943   |
| 0   | 37  | 22 NA          |
| 0   | 0   | 10 PITG_17600  |
| 0   | 132 | 57 PITG_01206  |
| 0   | 100 | 173 PITG_18420 |
| 0   | 54  | 0 PITG_19728   |
| 0   | 29  | 0 PITG_02203   |
| 0   | 4   | 11 PITG_11608  |
| 0   | 3   | 2 PITG_14108   |
| 0   | 21  | 4 PITG_00808   |
| 0   | 7   | 32 PITG_10442  |
| 0   | 18  | 33 PITG_06920  |

|   |     |                |
|---|-----|----------------|
| 0 | 0   | 2 NA           |
| 0 | 0   | 0 PITG_15542   |
| 0 | 0   | 0 PITG_07230   |
| 0 | 33  | 10 NA          |
| 0 | 14  | 4 PITG_16257   |
| 0 | 203 | 26 PITG_09531  |
| 0 | 17  | 216 PITG_05156 |
| 0 | 11  | 14 NA          |
| 0 | 3   | 10 PITG_13673  |
| 0 | 218 | 88 PITG_15784  |
| 0 | 109 | 154 PITG_04391 |
| 0 | 14  | 21 PITG_17049  |
| 0 | 6   | 10 PITG_00066  |
| 0 | 4   | 2 PITG_21146   |
| 0 | 0   | 0 PITG_06182   |
| 0 | 45  | 31 NA          |
| 0 | 52  | 23 NA          |
| 0 | 16  | 12 PITG_05323  |
| 0 | 7   | 3 PITG_07767   |
| 0 | 8   | 5 PITG_10796   |
| 0 | 36  | 23 PITG_09419  |
| 0 | 2   | 0 PITG_21642   |
| 0 | 12  | 0 PITG_03335   |
| 0 | 9   | 11 PITG_02927  |
| 0 | 94  | 232 PITG_01797 |
| 0 | 11  | 15 PITG_12156  |
| 0 | 626 | 527 PITG_04121 |
| 0 | 0   | 0 PITG_08305   |
| 0 | 4   | 4 PITG_01469   |
| 0 | 42  | 41 PITG_04842  |
| 0 | 37  | 8 NA           |
| 0 | 36  | 10 PITG_12916  |
| 0 | 10  | 0 PITG_03980   |
| 0 | 11  | 16 PITG_08740  |
| 0 | 2   | 6 PITG_02796   |
| 0 | 34  | 6 PITG_06319   |
| 0 | 2   | 73 PITG_02115  |
| 0 | 8   | 18 PITG_02728  |
| 0 | 2   | 6 PITG_09220   |
| 0 | 23  | 0 PITG_11057   |
| 0 | 6   | 14 PITG_03032  |
| 0 | 2   | 4 PITG_11410   |
| 0 | 19  | 11 PITG_11410  |
| 0 | 338 | 173 PITG_23287 |
| 0 | 2   | 6 PITG_02427   |
| 0 | 0   | 0 PITG_04582   |
| 0 | 2   | 2 PITG_17663   |

|   |     |                |
|---|-----|----------------|
| 0 | 2   | 0 PITG_13774   |
| 0 | 40  | 2 PITG_22763   |
| 0 | 6   | 6 PITG_06862   |
| 0 | 56  | 26 PITG_07230  |
| 0 | 16  | 15 PITG_17999  |
| 0 | 11  | 13 PITG_08546  |
| 0 | 71  | 12 PITG_04533  |
| 0 | 0   | 2 PITG_11887   |
| 0 | 12  | 16 PITG_09039  |
| 0 | 4   | 4 PITG_01065   |
| 0 | 320 | 833 PITG_10132 |
| 0 | 13  | 4 PITG_12987   |
| 0 | 302 | 608 PITG_04640 |
| 0 | 2   | 0 PITG_17028   |
| 0 | 0   | 2 PITG_12256   |
| 0 | 4   | 11 PITG_03152  |
| 0 | 66  | 15 NA          |
| 0 | 504 | 455 PITG_06429 |
| 0 | 4   | 2 PITG_03225   |
| 0 | 17  | 8 PITG_01155   |
| 0 | 11  | 2 PITG_20727   |
| 0 | 4   | 0 PITG_22687   |
| 0 | 33  | 59 PITG_02281  |
| 0 | 84  | 217 PITG_16199 |
| 0 | 14  | 43 PITG_06107  |
| 0 | 2   | 0 NA           |
| 0 | 0   | 0 PITG_14107   |
| 0 | 2   | 0 PITG_07301   |
| 0 | 40  | 0 NA           |
| 0 | 16  | 10 NA          |
| 0 | 5   | 0 PITG_08850   |
| 0 | 75  | 0 PITG_02564   |
| 0 | 7   | 8 PITG_00257   |
| 0 | 0   | 2 PITG_02232   |
| 0 | 10  | 9 PITG_05804   |
| 0 | 3   | 2 NA           |
| 0 | 8   | 8 NA           |
| 0 | 45  | 10 PITG_07810  |
| 0 | 115 | 0 NA           |
| 0 | 4   | 0 PITG_14728   |
| 0 | 0   | 4 PITG_04405   |
| 0 | 173 | 56 PITG_09211  |
| 0 | 17  | 10 PITG_04443  |
| 0 | 7   | 2 PITG_10881   |
| 0 | 2   | 0 NA           |
| 0 | 107 | 109 PITG_23289 |
| 0 | 411 | 280 PITG_13112 |

|    |     |                |
|----|-----|----------------|
| 0  | 0   | 8 PITG_03909   |
| 0  | 0   | 0 PITG_19242   |
| 0  | 6   | 0 PITG_05354   |
| 34 | 2   | 106 NA         |
| 0  | 26  | 20 PITG_16375  |
| 0  | 2   | 0 NA           |
| 0  | 11  | 9 PITG_08584   |
| 0  | 15  | 4 NA           |
| 0  | 39  | 18 NA          |
| 0  | 3   | 3 PITG_06684   |
| 0  | 0   | 0 PITG_06203   |
| 0  | 5   | 0 PITG_08186   |
| 0  | 15  | 45 PITG_10729  |
| 0  | 0   | 2 PITG_12196   |
| 0  | 264 | 359 PITG_19993 |
| 0  | 19  | 9 PITG_04403   |
| 0  | 49  | 36 PITG_05955  |
| 0  | 41  | 8 PITG_18652   |
| 0  | 62  | 19 PITG_18913  |
| 0  | 44  | 14 PITG_01293  |
| 0  | 57  | 16 PITG_15981  |
| 0  | 9   | 11 PITG_13827  |
| 0  | 8   | 53 PITG_04283  |
| 0  | 15  | 42 PITG_00494  |
| 0  | 109 | 154 PITG_01322 |
| 0  | 8   | 0 NA           |
| 0  | 373 | 91 PITG_06388  |
| 0  | 59  | 37 PITG_01761  |
| 0  | 2   | 2 PITG_09435   |
| 0  | 219 | 2 NA           |
| 0  | 227 | 72 PITG_03161  |
| 0  | 14  | 30 PITG_05781  |
| 0  | 0   | 6 PITG_21077   |
| 0  | 13  | 0 NA           |
| 0  | 27  | 12 PITG_03757  |
| 0  | 2   | 6 PITG_22262   |
| 0  | 282 | 229 PITG_20168 |
| 0  | 46  | 2 PITG_11142   |
| 0  | 0   | 0 PITG_05117   |
| 0  | 0   | 2 PITG_10027   |
| 0  | 7   | 2 NA           |
| 0  | 24  | 16 PITG_16078  |
| 0  | 16  | 2 NA           |
| 0  | 35  | 10 PITG_11701  |
| 0  | 137 | 47 NA          |
| 0  | 2   | 4 PITG_07154   |
| 0  | 24  | 6 PITG_20374   |

|   |     |                 |
|---|-----|-----------------|
| 0 | 9   | 2 NA            |
| 0 | 9   | 19 PITG_09951   |
| 0 | 7   | 15 PITG_03423   |
| 0 | 45  | 26 PITG_00608   |
| 0 | 4   | 12 PITG_02754   |
| 0 | 2   | 2 PITG_01871    |
| 0 | 82  | 12 NA           |
| 0 | 55  | 56 PITG_17456   |
| 0 | 4   | 27 PITG_09413   |
| 0 | 2   | 8 PITG_19175    |
| 0 | 16  | 4 PITG_09523    |
| 0 | 0   | 0 NA            |
| 0 | 0   | 2 NA            |
| 0 | 382 | 1423 PITG_11327 |
| 0 | 57  | 0 PITG_22687    |
| 0 | 0   | 0 PITG_19108    |
| 0 | 6   | 31 PITG_20212   |
| 0 | 3   | 2 PITG_09881    |
| 0 | 26  | 0 NA            |
| 0 | 0   | 2 NA            |
| 0 | 4   | 2 PITG_17568    |
| 0 | 2   | 0 PITG_14743    |
| 0 | 0   | 0 PITG_07507    |
| 0 | 49  | 20 PITG_05317   |
| 0 | 25  | 13 PITG_13340   |
| 0 | 595 | 543 PITG_01694  |
| 0 | 22  | 5 PITG_13353    |
| 0 | 14  | 5 PITG_13272    |
| 0 | 17  | 5 NA            |
| 0 | 355 | 88 PITG_05113   |
| 0 | 175 | 56 PITG_21173   |
| 0 | 259 | 85 PITG_20313   |
| 0 | 0   | 0 PITG_07698    |
| 0 | 30  | 4 PITG_12453    |
| 0 | 2   | 0 PITG_02770    |
| 0 | 14  | 0 PITG_12676    |
| 0 | 4   | 12 PITG_03737   |
| 0 | 49  | 12 PITG_20906   |
| 0 | 6   | 11 PITG_09414   |
| 0 | 12  | 8 PITG_07171    |
| 0 | 49  | 23 PITG_04843   |
| 0 | 0   | 0 PITG_00828    |
| 0 | 32  | 18 PITG_03520   |
| 0 | 115 | 35 PITG_06796   |
| 0 | 114 | 18 PITG_07029   |
| 0 | 0   | 9 PITG_05128    |
| 0 | 20  | 93 PITG_00545   |



|   |     |                |
|---|-----|----------------|
| 0 | 41  | 485 PITG_13003 |
| 0 | 71  | 18 PITG_09376  |
| 0 | 7   | 0 PITG_21000   |
| 0 | 32  | 2 PITG_11008   |
| 0 | 198 | 253 PITG_13459 |
| 0 | 31  | 44 PITG_01825  |
| 0 | 191 | 28 PITG_16826  |
| 0 | 63  | 2 PITG_08993   |
| 0 | 60  | 63 PITG_02695  |
| 0 | 23  | 24 PITG_01109  |
| 0 | 86  | 30 NA          |
| 0 | 0   | 0 PITG_11296   |
| 0 | 25  | 28 NA          |
| 0 | 2   | 0 NA           |
| 0 | 0   | 4 PITG_17608   |
| 0 | 10  | 0 PITG_13434   |
| 0 | 3   | 2 PITG_21509   |
| 0 | 19  | 6 PITG_21184   |
| 0 | 18  | 14 PITG_04822  |
| 0 | 48  | 12 PITG_01663  |
| 0 | 35  | 394 PITG_09216 |
| 0 | 116 | 240 PITG_03392 |
| 0 | 48  | 15 PITG_03813  |
| 0 | 196 | 283 PITG_13809 |
| 0 | 6   | 7 PITG_01484   |
| 0 | 0   | 2 PITG_06003   |
| 0 | 0   | 4 PITG_20866   |
| 0 | 43  | 65 PITG_10240  |
| 0 | 11  | 6 NA           |
| 0 | 22  | 0 PITG_14614   |
| 0 | 17  | 18 PITG_01185  |
| 0 | 66  | 6 PITG_04395   |
| 0 | 18  | 12 PITG_02754  |
| 0 | 21  | 13 PITG_13097  |
| 0 | 6   | 9 NA           |
| 0 | 4   | 6 PITG_02021   |
| 0 | 4   | 6 PITG_13039   |
| 0 | 0   | 0 NA           |
| 0 | 0   | 2 NA           |
| 0 | 6   | 2 NA           |
| 2 | 4   | 0 NA           |
| 0 | 2   | 0 PITG_02596   |
| 0 | 432 | 365 PITG_00910 |
| 0 | 43  | 28 NA          |
| 0 | 90  | 39 PITG_11524  |
| 0 | 8   | 0 PITG_00294   |
| 0 | 74  | 49 PITG_15311  |

|      |     |                |
|------|-----|----------------|
| 0    | 16  | 23 PITG_05187  |
| 0    | 68  | 21 PITG_01759  |
| 0    | 21  | 14 PITG_08295  |
| 0    | 11  | 2 PITG_12356   |
| 0    | 0   | 0 PITG_00227   |
| 0    | 82  | 42 PITG_12797  |
| 0    | 30  | 6 PITG_17348   |
| 0    | 0   | 5 PITG_12887   |
| 0    | 2   | 0 NA           |
| 0    | 41  | 9 PITG_18928   |
| 0    | 0   | 0 PITG_14950   |
| 0    | 40  | 4 PITG_08038   |
| 0    | 2   | 8 PITG_21397   |
| 0    | 5   | 6 PITG_17997   |
| 0    | 40  | 22 NA          |
| 0    | 0   | 0 PITG_10921   |
| 0    | 4   | 12 PITG_07707  |
| 0    | 0   | 2 NA           |
| 0    | 60  | 16 PITG_05450  |
| 0    | 16  | 9 PITG_15783   |
| 0    | 18  | 0 PITG_05325   |
| 0    | 36  | 60 PITG_08481  |
| 0    | 2   | 4 PITG_21495   |
| 0    | 618 | 63 PITG_17230  |
| 0    | 4   | 54 NA          |
| 0    | 2   | 4 PITG_21336   |
| 0    | 0   | 0 PITG_21525   |
| 0    | 5   | 2 PITG_15924   |
| 1309 | 164 | 136 NA         |
| 0    | 16  | 18 PITG_16887  |
| 0    | 8   | 109 PITG_04603 |
| 0    | 10  | 4 PITG_18038   |
| 0    | 66  | 51 PITG_12662  |
| 0    | 6   | 4 NA           |
| 0    | 9   | 2 PITG_14730   |
| 0    | 20  | 41 PITG_04342  |
| 0    | 22  | 12 PITG_21282  |
| 0    | 0   | 2 PITG_19791   |
| 0    | 11  | 10 PITG_10819  |
| 0    | 50  | 33 PITG_04921  |
| 0    | 2   | 32 PITG_14976  |
| 0    | 87  | 0 NA           |
| 0    | 11  | 6 PITG_00413   |
| 0    | 16  | 13 PITG_13415  |
| 0    | 71  | 49 PITG_16854  |
| 0    | 6   | 25 PITG_21620  |
| 0    | 18  | 4 NA           |

|   |     |                |
|---|-----|----------------|
| 0 | 4   | 4 PITG_00299   |
| 0 | 114 | 47 PITG_03544  |
| 0 | 164 | 134 PITG_17947 |
| 0 | 5   | 3 PITG_19411   |
| 0 | 66  | 82 PITG_18053  |
| 0 | 4   | 23 PITG_17608  |
| 0 | 0   | 0 PITG_12675   |
| 0 | 0   | 0 PITG_16684   |
| 0 | 95  | 175 PITG_18735 |
| 0 | 18  | 0 PITG_03043   |
| 0 | 0   | 2 PITG_17760   |
| 0 | 7   | 2 PITG_04970   |
| 0 | 2   | 0 NA           |
| 0 | 21  | 6 NA           |
| 0 | 0   | 0 NA           |
| 0 | 78  | 19 PITG_18252  |
| 0 | 21  | 16 PITG_02017  |
| 0 | 12  | 10 PITG_12677  |
| 2 | 24  | 126 PITG_09506 |
| 0 | 6   | 7 PITG_11249   |
| 0 | 39  | 17 PITG_09789  |
| 0 | 13  | 21 PITG_08154  |
| 0 | 0   | 0 PITG_19146   |
| 0 | 0   | 2 PITG_11979   |
| 0 | 0   | 0 PITG_04974   |
| 0 | 10  | 20 PITG_03267  |
| 0 | 169 | 60 PITG_18882  |
| 0 | 24  | 0 NA           |
| 0 | 62  | 95 PITG_17012  |
| 0 | 3   | 4 PITG_18316   |
| 0 | 16  | 7 PITG_05202   |
| 0 | 2   | 0 PITG_06231   |
| 0 | 19  | 34 PITG_05589  |
| 0 | 0   | 6 PITG_00854   |
| 0 | 8   | 2 PITG_16918   |
| 0 | 7   | 0 PITG_03652   |
| 0 | 8   | 3 PITG_08684   |
| 0 | 0   | 2 PITG_17999   |
| 0 | 0   | 0 NA           |
| 0 | 34  | 0 NA           |
| 0 | 7   | 26 PITG_03828  |
| 0 | 2   | 0 PITG_05100   |
| 0 | 7   | 2 PITG_03523   |
| 0 | 17  | 31 PITG_01340  |
| 7 | 0   | 104 NA         |
| 0 | 44  | 15 PITG_04424  |
| 0 | 62  | 26 PITG_14114  |

|     |     |                |
|-----|-----|----------------|
| 0   | 5   | 4 PITG_15354   |
| 0   | 13  | 2 PITG_00300   |
| 0   | 31  | 73 PITG_08765  |
| 0   | 11  | 14 PITG_02679  |
| 0   | 93  | 54 PITG_18540  |
| 0   | 155 | 33 PITG_16353  |
| 0   | 176 | 58 PITG_17239  |
| 0   | 2   | 0 PITG_00369   |
| 0   | 19  | 68 NA          |
| 0   | 95  | 75 PITG_21277  |
| 0   | 0   | 8 NA           |
| 0   | 21  | 10 PITG_05760  |
| 0   | 10  | 0 PITG_00398   |
| 0   | 12  | 2 PITG_11179   |
| 0   | 26  | 10 PITG_02454  |
| 0   | 13  | 9 PITG_01400   |
| 0   | 5   | 21 PITG_08043  |
| 0   | 35  | 19 NA          |
| 0   | 6   | 3 NA           |
| 107 | 21  | 1340 NA        |
| 0   | 283 | 337 PITG_02115 |
| 0   | 79  | 14 PITG_18455  |
| 0   | 548 | 706 PITG_15492 |
| 0   | 0   | 0 PITG_06274   |
| 0   | 4   | 20 PITG_19850  |
| 0   | 44  | 6 PITG_03183   |
| 0   | 352 | 316 NA         |
| 0   | 22  | 5 NA           |
| 0   | 114 | 3 PITG_19741   |
| 0   | 21  | 102 PITG_18100 |
| 0   | 168 | 69 PITG_10499  |
| 0   | 276 | 97 PITG_07711  |
| 0   | 0   | 8 PITG_11158   |
| 0   | 2   | 4 NA           |
| 0   | 44  | 18 PITG_01412  |
| 0   | 3   | 2 PITG_21727   |
| 0   | 39  | 33 PITG_15267  |
| 0   | 64  | 6 PITG_15039   |
| 0   | 31  | 7 PITG_01366   |
| 0   | 0   | 6 PITG_12562   |
| 0   | 6   | 3 PITG_09285   |
| 0   | 4   | 0 PITG_06202   |
| 0   | 27  | 10 NA          |
| 0   | 2   | 4 PITG_09898   |
| 0   | 9   | 16 PITG_07775  |
| 0   | 0   | 3 NA           |
| 0   | 2   | 2 NA           |

|   |     |                |
|---|-----|----------------|
| 0 | 0   | 3 NA           |
| 0 | 0   | 0 NA           |
| 0 | 0   | 22 PITG_04125  |
| 0 | 14  | 12 PITG_03074  |
| 0 | 5   | 3 PITG_17004   |
| 0 | 6   | 2 NA           |
| 0 | 95  | 83 PITG_08762  |
| 0 | 0   | 0 PITG_04489   |
| 0 | 14  | 17 PITG_10664  |
| 0 | 0   | 30 PITG_00297  |
| 0 | 0   | 2 NA           |
| 0 | 39  | 44 PITG_04992  |
| 0 | 4   | 0 NA           |
| 0 | 14  | 27 PITG_20945  |
| 0 | 14  | 14 PITG_01450  |
| 0 | 3   | 2 PITG_15149   |
| 0 | 0   | 0 NA           |
| 0 | 19  | 20 PITG_14465  |
| 0 | 188 | 144 PITG_10715 |
| 0 | 8   | 21 PITG_01614  |
| 0 | 31  | 0 NA           |
| 0 | 2   | 4 NA           |
| 0 | 3   | 19 PITG_11470  |
| 0 | 4   | 0 NA           |
| 0 | 0   | 2 PITG_05245   |
| 0 | 136 | 43 PITG_09728  |
| 0 | 44  | 10 NA          |
| 0 | 2   | 0 PITG_22719   |
| 0 | 47  | 106 PITG_14975 |
| 0 | 12  | 9 NA           |
| 0 | 12  | 5 NA           |
| 0 | 38  | 10 PITG_08324  |
| 0 | 70  | 45 PITG_03471  |
| 0 | 342 | 26 PITG_07810  |
| 0 | 23  | 9 NA           |
| 0 | 92  | 42 PITG_11965  |
| 0 | 7   | 6 PITG_17617   |
| 0 | 38  | 45 PITG_07655  |
| 0 | 18  | 3 PITG_10389   |
| 0 | 0   | 0 PITG_03370   |
| 0 | 69  | 211 PITG_06358 |
| 0 | 8   | 2 PITG_17023   |
| 0 | 2   | 0 PITG_12913   |
| 0 | 128 | 335 PITG_14598 |
| 0 | 4   | 8 PITG_12489   |
| 0 | 48  | 37 PITG_14919  |
| 0 | 52  | 69 NA          |

|   |     |                |
|---|-----|----------------|
| 0 | 893 | 108 PITG_05154 |
| 0 | 69  | 23 PITG_03614  |
| 0 | 0   | 0 PITG_13988   |
| 0 | 4   | 4 NA           |
| 0 | 22  | 4 PITG_03804   |
| 0 | 10  | 0 PITG_08712   |
| 0 | 2   | 0 PITG_00694   |
| 0 | 214 | 246 PITG_03799 |
| 0 | 0   | 2 PITG_11587   |
| 0 | 115 | 10 PITG_09067  |
| 0 | 213 | 179 PITG_09779 |
| 0 | 32  | 23 PITG_17345  |
| 0 | 248 | 116 PITG_00585 |
| 0 | 0   | 14 NA          |
| 0 | 68  | 66 NA          |
| 0 | 0   | 2 PITG_09194   |
| 0 | 55  | 30 PITG_17928  |
| 0 | 127 | 16 NA          |
| 0 | 18  | 2 PITG_11490   |
| 0 | 42  | 15 PITG_17382  |
| 0 | 77  | 11 NA          |
| 0 | 25  | 9 PITG_09028   |
| 0 | 70  | 9 PITG_17074   |
| 0 | 2   | 13 NA          |
| 0 | 2   | 6 PITG_03789   |
| 0 | 4   | 10 PITG_00320  |
| 0 | 20  | 8 PITG_05992   |
| 0 | 17  | 2 PITG_03241   |
| 0 | 6   | 4 PITG_04701   |
| 0 | 12  | 0 PITG_03980   |
| 0 | 134 | 44 PITG_03044  |
| 0 | 22  | 2 PITG_09978   |
| 0 | 66  | 20 PITG_02582  |
| 0 | 2   | 4 NA           |
| 0 | 148 | 36 NA          |
| 0 | 0   | 10 PITG_04248  |
| 0 | 77  | 32 PITG_11587  |
| 0 | 6   | 66 PITG_03795  |
| 0 | 4   | 2 NA           |
| 0 | 159 | 185 PITG_19198 |
| 0 | 4   | 2 NA           |
| 0 | 20  | 17 PITG_05434  |
| 0 | 5   | 0 PITG_19459   |
| 0 | 14  | 3 PITG_00965   |
| 0 | 13  | 3 NA           |
| 0 | 0   | 2 PITG_02995   |
| 0 | 6   | 4 NA           |

|     |     |                |
|-----|-----|----------------|
| 0   | 10  | 16 NA          |
| 0   | 194 | 46 NA          |
| 0   | 27  | 46 PITG_06735  |
| 0   | 2   | 2 NA           |
| 0   | 3   | 2 NA           |
| 0   | 9   | 14 PITG_03624  |
| 0   | 21  | 22 PITG_08573  |
| 0   | 0   | 7 PITG_14707   |
| 0   | 138 | 18 NA          |
| 0   | 26  | 5 NA           |
| 0   | 4   | 3 PITG_17951   |
| 0   | 82  | 44 PITG_16804  |
| 0   | 47  | 32 PITG_17690  |
| 0   | 10  | 7 PITG_11719   |
| 0   | 0   | 4 NA           |
| 267 | 17  | 363 NA         |
| 0   | 4   | 0 NA           |
| 0   | 3   | 0 PITG_10460   |
| 0   | 39  | 2 PITG_00572   |
| 0   | 4   | 7 PITG_12466   |
| 0   | 16  | 0 PITG_21627   |
| 0   | 104 | 46 PITG_03115  |
| 0   | 402 | 257 PITG_22657 |
| 0   | 6   | 2 PITG_14861   |
| 0   | 0   | 6 PITG_07302   |
| 0   | 71  | 70 NA          |
| 0   | 4   | 2 NA           |
| 0   | 72  | 43 PITG_15216  |
| 0   | 4   | 6 PITG_02531   |
| 0   | 110 | 41 PITG_07887  |
| 0   | 202 | 28 PITG_21626  |
| 0   | 9   | 48 PITG_09846  |
| 0   | 61  | 34 PITG_03409  |
| 0   | 36  | 16 PITG_20999  |
| 0   | 16  | 10 PITG_07289  |
| 0   | 49  | 0 PITG_10837   |
| 0   | 0   | 0 NA           |
| 0   | 10  | 10 PITG_10520  |
| 0   | 94  | 27 PITG_09549  |
| 0   | 0   | 0 PITG_04232   |
| 0   | 22  | 9 PITG_01108   |
| 0   | 0   | 2 PITG_02463   |
| 0   | 4   | 0 PITG_03523   |
| 0   | 6   | 31 PITG_16214  |
| 0   | 9   | 27 NA          |
| 0   | 111 | 215 PITG_06608 |
| 0   | 9   | 16 PITG_10729  |

|     |      |                 |
|-----|------|-----------------|
| 0   | 0    | 5 PITG_08979    |
| 0   | 2    | 6 PITG_16054    |
| 0   | 141  | 29 PITG_09318   |
| 0   | 389  | 10 PITG_11238   |
| 0   | 91   | 12 PITG_07234   |
| 0   | 61   | 92 PITG_03379   |
| 0   | 13   | 4 PITG_18251    |
| 0   | 2    | 9 PITG_13841    |
| 0   | 14   | 58 PITG_20676   |
| 0   | 18   | 15 PITG_01953   |
| 0   | 11   | 2 PITG_10994    |
| 0   | 68   | 31 NA           |
| 0   | 35   | 6 PITG_17347    |
| 0   | 0    | 0 PITG_09999    |
| 0   | 4    | 0 PITG_13417    |
| 0   | 13   | 14 PITG_00333   |
| 0   | 0    | 0 PITG_00270    |
| 0   | 35   | 19 PITG_10857   |
| 0   | 5    | 16 PITG_17035   |
| 0   | 20   | 72 PITG_17166   |
| 0   | 6    | 0 NA            |
| 0   | 33   | 10 PITG_17071   |
| 0   | 6    | 4 NA            |
| 0   | 4    | 2 PITG_02381    |
| 0   | 2    | 0 PITG_01722    |
| 0   | 33   | 8 PITG_03075    |
| 0   | 157  | 44 PITG_01982   |
| 12  | 2    | 14 NA           |
| 0   | 15   | 0 NA            |
| 0   | 84   | 6 PITG_17110    |
| 0   | 0    | 0 NA            |
| 0   | 35   | 93 PITG_04500   |
| 0   | 40   | 67 PITG_19298   |
| 258 | 41   | 3 NA            |
| 0   | 0    | 0 NA            |
| 0   | 26   | 27 PITG_09452   |
| 0   | 53   | 0 PITG_05631    |
| 0   | 0    | 2 PITG_16210    |
| 0   | 1048 | 1133 PITG_10884 |
| 0   | 81   | 36 PITG_07289   |
| 0   | 6    | 6 PITG_00140    |
| 0   | 12   | 2 NA            |
| 0   | 0    | 0 PITG_15058    |
| 0   | 8    | 14 PITG_11486   |
| 0   | 70   | 59 NA           |
| 0   | 56   | 2 PITG_03411    |
| 0   | 66   | 6 PITG_10311    |



|   |     |                |
|---|-----|----------------|
| 0 | 26  | 0 PITG_05595   |
| 0 | 40  | 0 NA           |
| 0 | 2   | 2 PITG_06682   |
| 0 | 0   | 0 PITG_22057   |
| 0 | 0   | 6 NA           |
| 0 | 0   | 261 NA         |
| 0 | 3   | 2 PITG_00392   |
| 0 | 12  | 3 PITG_17867   |
| 0 | 48  | 28 PITG_10921  |
| 0 | 21  | 16 PITG_18999  |
| 0 | 7   | 0 NA           |
| 0 | 37  | 17 PITG_03955  |
| 0 | 144 | 46 PITG_00808  |
| 0 | 208 | 54 PITG_12946  |
| 0 | 55  | 50 PITG_01411  |
| 0 | 0   | 2 PITG_19863   |
| 0 | 22  | 2 NA           |
| 0 | 4   | 4 NA           |
| 0 | 88  | 38 PITG_16088  |
| 7 | 2   | 22 NA          |
| 0 | 0   | 0 NA           |
| 0 | 2   | 2 PITG_17705   |
| 0 | 7   | 24 NA          |
| 0 | 20  | 0 NA           |
| 0 | 2   | 0 PITG_17882   |
| 0 | 34  | 20 NA          |
| 0 | 0   | 2 PITG_09309   |
| 0 | 22  | 9 NA           |
| 0 | 41  | 42 PITG_11180  |
| 0 | 131 | 82 PITG_03886  |
| 0 | 8   | 9 PITG_10038   |
| 0 | 620 | 442 PITG_00962 |
| 0 | 0   | 2 NA           |
| 0 | 211 | 123 NA         |
| 0 | 2   | 0 PITG_00719   |
| 0 | 6   | 0 PITG_10023   |
| 0 | 4   | 2 PITG_00308   |
| 0 | 6   | 4 PITG_13792   |
| 0 | 3   | 2 PITG_13843   |
| 0 | 9   | 0 NA           |
| 0 | 2   | 6 PITG_14134   |
| 0 | 35  | 58 PITG_00426  |
| 0 | 10  | 0 PITG_17641   |
| 0 | 0   | 0 PITG_15656   |
| 0 | 4   | 2 PITG_03876   |
| 0 | 104 | 9 PITG_15602   |
| 0 | 15  | 19 PITG_14717  |

|   |     |                 |
|---|-----|-----------------|
| 0 | 2   | 2 PITG_14132    |
| 0 | 2   | 0 PITG_05331    |
| 0 | 68  | 36 PITG_12648   |
| 0 | 8   | 0 PITG_03754    |
| 0 | 53  | 86 NA           |
| 0 | 0   | 10 PITG_21846   |
| 0 | 321 | 86 PITG_03401   |
| 0 | 25  | 0 PITG_14724    |
| 0 | 84  | 0 NA            |
| 0 | 26  | 0 PITG_08302    |
| 0 | 19  | 17 PITG_00071   |
| 0 | 5   | 0 NA            |
| 0 | 0   | 2 PITG_01257    |
| 0 | 2   | 4 PITG_00562    |
| 0 | 59  | 0 PITG_11859    |
| 0 | 6   | 18 PITG_11536   |
| 0 | 10  | 2 NA            |
| 0 | 12  | 2 PITG_09836    |
| 0 | 57  | 32 PITG_05506   |
| 0 | 0   | 0 PITG_11817    |
| 0 | 0   | 0 NA            |
| 0 | 16  | 14 PITG_12472   |
| 0 | 111 | 45 PITG_03990   |
| 0 | 38  | 25 PITG_02661   |
| 0 | 22  | 18 PITG_20527   |
| 0 | 2   | 4 PITG_02981    |
| 0 | 12  | 4 PITG_04917    |
| 0 | 147 | 75 PITG_13505   |
| 0 | 0   | 2 PITG_23281    |
| 0 | 21  | 14 PITG_01605   |
| 0 | 32  | 48 NA           |
| 0 | 49  | 119 NA          |
| 0 | 3   | 21 PITG_05652   |
| 0 | 61  | 6 NA            |
| 0 | 12  | 49 PITG_17805   |
| 0 | 91  | 57 PITG_08184   |
| 0 | 497 | 2221 PITG_15069 |
| 0 | 22  | 9 PITG_09899    |
| 0 | 2   | 13 PITG_03347   |
| 0 | 9   | 9 PITG_09951    |
| 0 | 0   | 0 PITG_02596    |
| 0 | 38  | 40 PITG_10884   |
| 0 | 4   | 7 PITG_18091    |
| 0 | 2   | 4 PITG_17053    |
| 0 | 82  | 14 PITG_03846   |
| 0 | 5   | 0 PITG_10762    |
| 0 | 2   | 10 PITG_08305   |

|   |     |                |
|---|-----|----------------|
| 0 | 104 | 60 PITG_04992  |
| 0 | 6   | 4 NA           |
| 0 | 96  | 19 PITG_06796  |
| 0 | 45  | 21 PITG_15357  |
| 0 | 87  | 87 NA          |
| 0 | 63  | 43 PITG_03234  |
| 0 | 2   | 0 PITG_06267   |
| 0 | 18  | 8 PITG_19191   |
| 0 | 8   | 2 PITG_11364   |
| 0 | 62  | 44 NA          |
| 0 | 104 | 99 PITG_02502  |
| 0 | 2   | 11 PITG_12453  |
| 0 | 8   | 24 PITG_13558  |
| 0 | 23  | 4 PITG_01664   |
| 0 | 30  | 19 PITG_03332  |
| 0 | 4   | 2 PITG_06898   |
| 0 | 15  | 2 PITG_10911   |
| 0 | 67  | 38 PITG_03533  |
| 0 | 2   | 0 PITG_23159   |
| 0 | 80  | 9 NA           |
| 0 | 2   | 2 PITG_06856   |
| 0 | 111 | 0 NA           |
| 0 | 192 | 65 NA          |
| 0 | 46  | 86 PITG_15657  |
| 0 | 13  | 19 NA          |
| 0 | 2   | 0 PITG_11452   |
| 0 | 0   | 0 NA           |
| 0 | 6   | 4 PITG_09309   |
| 0 | 3   | 5 PITG_09564   |
| 0 | 0   | 0 PITG_17004   |
| 0 | 2   | 4 PITG_10462   |
| 0 | 16  | 2 PITG_19654   |
| 0 | 68  | 163 PITG_20689 |
| 0 | 2   | 0 PITG_05818   |
| 0 | 75  | 19 PITG_13483  |
| 0 | 41  | 58 PITG_04270  |
| 0 | 6   | 16 PITG_02526  |
| 0 | 0   | 4 PITG_13545   |
| 0 | 25  | 33 PITG_16352  |
| 0 | 0   | 4 PITG_04533   |
| 0 | 0   | 0 PITG_12296   |
| 0 | 290 | 143 PITG_15250 |
| 0 | 42  | 38 PITG_15042  |
| 0 | 4   | 2 PITG_14572   |
| 0 | 2   | 7 NA           |
| 0 | 6   | 8 PITG_06365   |
| 0 | 0   | 9 PITG_18050   |

|   |     |                |
|---|-----|----------------|
| 0 | 4   | 4 PITG_02696   |
| 0 | 6   | 5 PITG_14951   |
| 0 | 22  | 14 NA          |
| 0 | 26  | 4 PITG_03652   |
| 0 | 2   | 6 PITG_15686   |
| 0 | 97  | 11 PITG_03017  |
| 0 | 107 | 45 PITG_19875  |
| 0 | 2   | 0 PITG_02981   |
| 0 | 2   | 4 NA           |
| 0 | 15  | 29 PITG_08607  |
| 0 | 19  | 4 PITG_01437   |
| 0 | 9   | 7 PITG_11587   |
| 0 | 26  | 7 NA           |
| 0 | 301 | 134 PITG_20192 |
| 0 | 15  | 11 PITG_08173  |
| 0 | 0   | 8 PITG_03903   |
| 0 | 17  | 11 NA          |
| 0 | 2   | 0 PITG_14415   |
| 0 | 89  | 10 PITG_21502  |
| 0 | 4   | 26 PITG_08031  |
| 0 | 17  | 61 PITG_05653  |
| 0 | 4   | 6 PITG_12099   |
| 0 | 6   | 2 NA           |
| 0 | 0   | 7 PITG_07808   |
| 0 | 0   | 2 PITG_11461   |
| 0 | 19  | 0 NA           |
| 0 | 29  | 97 PITG_08601  |
| 0 | 3   | 27 PITG_17804  |
| 0 | 19  | 50 PITG_11895  |
| 0 | 18  | 10 PITG_13432  |
| 0 | 2   | 4 PITG_03292   |
| 0 | 251 | 228 PITG_07792 |
| 0 | 4   | 2 PITG_02651   |
| 0 | 0   | 2 NA           |
| 0 | 180 | 118 PITG_08578 |
| 0 | 40  | 7 PITG_12677   |
| 0 | 110 | 65 PITG_09748  |
| 0 | 4   | 0 PITG_21643   |
| 0 | 4   | 6 PITG_22541   |
| 0 | 4   | 4 PITG_13544   |
| 0 | 2   | 10 PITG_01436  |
| 0 | 0   | 0 PITG_16021   |
| 0 | 74  | 91 PITG_02722  |
| 0 | 6   | 0 PITG_01257   |
| 0 | 68  | 18 PITG_11070  |
| 0 | 2   | 2 NA           |
| 0 | 19  | 0 PITG_02764   |

|   |     |                |
|---|-----|----------------|
| 0 | 154 | 77 PITG_15281  |
| 0 | 3   | 5 PITG_13673   |
| 0 | 41  | 16 PITG_11081  |
| 0 | 31  | 0 PITG_10065   |
| 0 | 0   | 2 PITG_03827   |
| 0 | 23  | 199 PITG_13122 |
| 0 | 17  | 0 PITG_05323   |
| 0 | 3   | 12 PITG_20718  |
| 0 | 28  | 4 PITG_16271   |
| 0 | 3   | 0 NA           |
| 0 | 0   | 0 PITG_04232   |
| 0 | 0   | 0 NA           |
| 0 | 146 | 90 PITG_17387  |
| 0 | 0   | 27 PITG_22157  |
| 0 | 8   | 6 PITG_08935   |
| 0 | 0   | 8 PITG_05127   |
| 0 | 101 | 178 PITG_17947 |
| 0 | 31  | 11 PITG_05961  |
| 0 | 30  | 41 PITG_12105  |
| 0 | 8   | 13 NA          |
| 0 | 113 | 73 PITG_18409  |
| 0 | 5   | 0 PITG_19875   |
| 0 | 116 | 61 PITG_02146  |
| 0 | 86  | 85 PITG_21816  |
| 0 | 0   | 0 PITG_17597   |
| 0 | 9   | 6 PITG_14156   |
| 0 | 14  | 2 PITG_02496   |
| 0 | 6   | 5 PITG_03646   |
| 0 | 199 | 4 PITG_14152   |
| 0 | 21  | 40 PITG_13415  |
| 0 | 32  | 26 PITG_07628  |
| 0 | 21  | 4 NA           |
| 0 | 0   | 0 PITG_05423   |
| 0 | 2   | 0 PITG_02757   |
| 0 | 542 | 150 PITG_02616 |
| 0 | 50  | 844 PITG_05615 |
| 0 | 35  | 12 PITG_11083  |
| 0 | 2   | 8 PITG_15696   |
| 0 | 68  | 34 PITG_14833  |
| 0 | 28  | 2 PITG_20623   |
| 0 | 152 | 71 PITG_11463  |
| 0 | 7   | 6 NA           |
| 0 | 571 | 225 PITG_07671 |
| 0 | 0   | 0 PITG_19596   |
| 0 | 2   | 2 PITG_17043   |
| 0 | 22  | 71 PITG_17240  |
| 0 | 112 | 128 PITG_08173 |

|   |     |                |
|---|-----|----------------|
| 0 | 7   | 4 PITG_05114   |
| 0 | 0   | 4 PITG_00466   |
| 0 | 28  | 0 NA           |
| 0 | 0   | 4 PITG_15649   |
| 0 | 125 | 12 PITG_03259  |
| 0 | 17  | 14 PITG_16326  |
| 0 | 5   | 10 PITG_17560  |
| 0 | 4   | 10 PITG_15731  |
| 0 | 4   | 0 NA           |
| 0 | 10  | 6 NA           |
| 0 | 52  | 33 PITG_08681  |
| 0 | 65  | 9 PITG_14549   |
| 0 | 17  | 34 PITG_01591  |
| 0 | 16  | 2 PITG_00970   |
| 0 | 65  | 127 PITG_00269 |
| 0 | 134 | 111 PITG_02826 |
| 0 | 42  | 25 PITG_07702  |
| 0 | 2   | 0 NA           |
| 0 | 5   | 2 PITG_04974   |
| 0 | 51  | 10 PITG_00078  |
| 0 | 311 | 280 PITG_06662 |
| 0 | 17  | 5 PITG_17457   |
| 0 | 10  | 11 PITG_11690  |
| 0 | 6   | 4 PITG_01207   |
| 0 | 35  | 13 PITG_16128  |
| 0 | 0   | 4 PITG_19208   |
| 0 | 748 | 308 PITG_07923 |
| 0 | 73  | 41 PITG_02887  |
| 0 | 101 | 18 PITG_05599  |
| 0 | 315 | 35 PITG_02322  |
| 0 | 0   | 0 PITG_19956   |
| 0 | 10  | 8 PITG_13131   |
| 0 | 0   | 0 NA           |
| 0 | 7   | 9 PITG_11302   |
| 0 | 232 | 358 PITG_07924 |
| 0 | 9   | 2 PITG_21601   |
| 0 | 124 | 31 NA          |
| 0 | 17  | 0 PITG_15603   |
| 0 | 0   | 6 PITG_13258   |
| 0 | 2   | 0 PITG_14111   |
| 0 | 21  | 19 PITG_00492  |
| 0 | 8   | 16 PITG_01870  |
| 0 | 119 | 52 PITG_10184  |
| 0 | 2   | 9 PITG_02198   |
| 0 | 0   | 2 PITG_07660   |
| 0 | 8   | 7 PITG_07852   |
| 0 | 116 | 36 PITG_01793  |

|     |      |                  |
|-----|------|------------------|
| 0   | 38   | 12 PITG_03294    |
| 0   | 2    | 0 PITG_06288     |
| 0   | 12   | 4 PITG_06929     |
| 0   | 4    | 15 PITG_01846    |
| 0   | 20   | 14 PITG_05762    |
| 0   | 3    | 0 NA             |
| 0   | 214  | 148 PITG_07795   |
| 0   | 75   | 8 NA             |
| 0   | 37   | 36 PITG_22995    |
| 0   | 0    | 0 PITG_08421     |
| 0   | 44   | 201 PITG_17034   |
| 0   | 0    | 4 PITG_20284     |
| 0   | 4    | 5 PITG_02085     |
| 0   | 8    | 8 PITG_16101     |
| 0   | 4    | 0 NA             |
| 0   | 6    | 10 PITG_08011    |
| 0   | 20   | 2 NA             |
| 0   | 3    | 2 NA             |
| 0   | 59   | 4 PITG_14210     |
| 0   | 3    | 0 PITG_04664     |
| 0   | 4    | 0 NA             |
| 857 | 28   | 535 NA           |
| 0   | 0    | 5 PITG_14151     |
| 0   | 7    | 0 NA             |
| 0   | 27   | 15 PITG_02942    |
| 0   | 5    | 0 NA             |
| 0   | 28   | 14 PITG_00048    |
| 0   | 0    | 2 PITG_03348     |
| 0   | 18   | 47 PITG_06267    |
| 0   | 0    | 0 NA             |
| 0   | 13   | 0 NA             |
| 0   | 9    | 5 PITG_10993     |
| 0   | 0    | 0 PITG_03995     |
| 0   | 16   | 13 PITG_05940    |
| 0   | 22   | 20 PITG_02826    |
| 0   | 0    | 6 PITG_20115     |
| 0   | 0    | 0 NA             |
| 0   | 7    | 14 PITG_15006    |
| 0   | 4    | 2 PITG_16794     |
| 0   | 92   | 69 PITG_07080    |
| 0   | 106  | 33 PITG_20033    |
| 0   | 79   | 100 PITG_12687   |
| 0   | 3    | 0 PITG_19125     |
| 0   | 51   | 0 NA             |
| 0   | 20   | 4 PITG_00250     |
| 0   | 5241 | 12986 PITG_06741 |
| 0   | 3    | 0 PITG_07279     |

|   |      |                 |
|---|------|-----------------|
| 0 | 0    | 9 PITG_04658    |
| 0 | 46   | 7 NA            |
| 0 | 13   | 12 PITG_06272   |
| 0 | 17   | 6 PITG_01491    |
| 0 | 44   | 13 PITG_14968   |
| 0 | 21   | 8 PITG_01591    |
| 0 | 31   | 47 PITG_03278   |
| 0 | 72   | 62 NA           |
| 0 | 5    | 0 PITG_16459    |
| 0 | 12   | 11 PITG_02446   |
| 0 | 0    | 2 PITG_05326    |
| 0 | 17   | 15 PITG_21602   |
| 0 | 0    | 2 PITG_01520    |
| 0 | 32   | 27 PITG_06048   |
| 0 | 2    | 4 PITG_02197    |
| 0 | 93   | 38 NA           |
| 0 | 78   | 4 PITG_12531    |
| 0 | 0    | 2 PITG_10191    |
| 0 | 22   | 4 PITG_05079    |
| 0 | 0    | 0 PITG_06127    |
| 0 | 33   | 12 PITG_02093   |
| 0 | 14   | 0 PITG_02457    |
| 0 | 14   | 0 PITG_07286    |
| 0 | 19   | 15 PITG_16375   |
| 0 | 0    | 16 PITG_09394   |
| 0 | 206  | 45 PITG_05376   |
| 0 | 2    | 3 PITG_02345    |
| 0 | 23   | 8 PITG_02051    |
| 0 | 22   | 6 PITG_13775    |
| 0 | 27   | 13 PITG_17455   |
| 0 | 0    | 0 PITG_04629    |
| 0 | 422  | 315 PITG_01401  |
| 0 | 0    | 0 PITG_14626    |
| 0 | 158  | 30 PITG_07589   |
| 0 | 89   | 71 NA           |
| 0 | 182  | 129 PITG_01702  |
| 0 | 9    | 3 PITG_03755    |
| 0 | 64   | 4 PITG_02457    |
| 0 | 5    | 0 PITG_17865    |
| 0 | 46   | 72 PITG_03379   |
| 0 | 2    | 6 NA            |
| 0 | 1644 | 1081 PITG_04074 |
| 0 | 10   | 4 PITG_05151    |
| 0 | 11   | 13 PITG_06173   |
| 0 | 2    | 2 PITG_07852    |
| 0 | 0    | 11 PITG_12219   |
| 0 | 26   | 5 PITG_20830    |



|     |     |                |
|-----|-----|----------------|
| 0   | 28  | 50 PITG_21010  |
| 0   | 16  | 24 PITG_02629  |
| 0   | 4   | 6 PITG_05187   |
| 0   | 62  | 46 PITG_02067  |
| 0   | 23  | 113 PITG_14278 |
| 0   | 10  | 0 PITG_03610   |
| 0   | 47  | 54 PITG_02260  |
| 0   | 12  | 13 NA          |
| 0   | 59  | 66 NA          |
| 0   | 135 | 54 PITG_03696  |
| 0   | 4   | 18 PITG_01710  |
| 0   | 0   | 8 PITG_05377   |
| 0   | 58  | 137 PITG_06171 |
| 0   | 0   | 0 PITG_01427   |
| 0   | 2   | 6 PITG_16042   |
| 0   | 118 | 234 PITG_06323 |
| 0   | 110 | 11 PITG_02712  |
| 0   | 10  | 27 PITG_08997  |
| 0   | 41  | 13 PITG_05659  |
| 0   | 232 | 39 PITG_17925  |
| 0   | 7   | 10 PITG_13165  |
| 0   | 62  | 8 PITG_04874   |
| 725 | 300 | 13 NA          |
| 0   | 14  | 8 NA           |
| 0   | 25  | 19 PITG_16563  |
| 0   | 36  | 31 PITG_17869  |
| 0   | 175 | 97 PITG_18717  |
| 0   | 0   | 5 PITG_13939   |
| 0   | 8   | 13 PITG_10534  |
| 0   | 48  | 28 PITG_01991  |
| 0   | 0   | 4 PITG_17869   |
| 0   | 25  | 15 PITG_15539  |
| 0   | 119 | 327 PITG_15900 |
| 0   | 0   | 0 PITG_11299   |
| 0   | 7   | 14 NA          |
| 0   | 10  | 0 PITG_14127   |
| 0   | 668 | 331 PITG_14591 |
| 0   | 66  | 55 PITG_01257  |
| 0   | 6   | 3 PITG_03318   |
| 0   | 25  | 7 NA           |
| 0   | 28  | 0 PITG_13618   |
| 0   | 259 | 115 PITG_21764 |
| 0   | 75  | 50 PITG_10570  |
| 0   | 321 | 232 PITG_15134 |
| 0   | 71  | 230 PITG_13112 |
| 0   | 11  | 0 PITG_10837   |
| 0   | 6   | 12 NA          |

|     |     |                |
|-----|-----|----------------|
| 0   | 2   | 12 PITG_12753  |
| 0   | 14  | 10 NA          |
| 0   | 241 | 102 PITG_09711 |
| 0   | 34  | 34 PITG_00574  |
| 372 | 496 | 4642 NA        |
| 0   | 0   | 0 PITG_23029   |
| 0   | 0   | 0 PITG_02418   |
| 0   | 96  | 30 PITG_02732  |
| 0   | 11  | 0 PITG_08739   |
| 0   | 27  | 11 PITG_00193  |
| 0   | 2   | 8 PITG_21185   |
| 0   | 2   | 0 PITG_09477   |
| 0   | 93  | 32 NA          |
| 0   | 7   | 3 PITG_11291   |
| 0   | 0   | 7 PITG_03288   |
| 0   | 13  | 27 PITG_17076  |
| 0   | 2   | 8 PITG_13842   |
| 0   | 0   | 2 PITG_00336   |
| 0   | 38  | 8 PITG_05427   |
| 0   | 12  | 17 PITG_03369  |
| 0   | 5   | 2 PITG_19472   |
| 0   | 9   | 231 PITG_00608 |
| 0   | 0   | 6 NA           |
| 212 | 2   | 226 NA         |
| 0   | 9   | 2 PITG_19142   |
| 0   | 37  | 17 NA          |
| 0   | 4   | 6 PITG_19867   |
| 0   | 17  | 4 PITG_18748   |
| 173 | 4   | 125 NA         |
| 0   | 24  | 2 PITG_20273   |
| 0   | 11  | 54 NA          |
| 0   | 7   | 12 PITG_02123  |
| 0   | 50  | 28 PITG_03859  |
| 0   | 125 | 135 PITG_12141 |
| 0   | 71  | 2 NA           |
| 0   | 35  | 0 NA           |
| 0   | 2   | 0 NA           |
| 0   | 34  | 63 PITG_14558  |
| 0   | 98  | 36 PITG_03359  |
| 0   | 3   | 3 PITG_03599   |
| 0   | 6   | 0 PITG_03593   |
| 0   | 10  | 30 PITG_03842  |
| 0   | 44  | 24 NA          |
| 0   | 2   | 5 PITG_10006   |
| 0   | 85  | 18 NA          |
| 0   | 5   | 26 PITG_07342  |
| 0   | 0   | 0 PITG_08367   |

|   |     |                |
|---|-----|----------------|
| 0 | 16  | 34 PITG_01121  |
| 0 | 0   | 0 PITG_17781   |
| 0 | 25  | 6 PITG_10008   |
| 0 | 0   | 2 PITG_05559   |
| 0 | 52  | 10 PITG_02712  |
| 0 | 2   | 0 NA           |
| 0 | 47  | 5 PITG_03506   |
| 0 | 19  | 4 PITG_14129   |
| 0 | 72  | 33 PITG_11118  |
| 0 | 0   | 0 PITG_02560   |
| 0 | 0   | 2 PITG_19041   |
| 0 | 0   | 0 PITG_00572   |
| 0 | 4   | 21 PITG_03226  |
| 0 | 106 | 134 PITG_12310 |
| 0 | 71  | 75 PITG_04535  |
| 0 | 6   | 6 NA           |
| 0 | 11  | 9 PITG_07312   |
| 0 | 0   | 2 PITG_13801   |
| 0 | 64  | 31 PITG_22646  |
| 0 | 22  | 137 PITG_14243 |
| 0 | 52  | 4 PITG_00589   |
| 0 | 0   | 5 PITG_12224   |
| 0 | 11  | 4 PITG_12482   |
| 0 | 0   | 0 PITG_00468   |
| 0 | 103 | 60 PITG_02027  |
| 0 | 30  | 0 PITG_04028   |
| 0 | 4   | 4 PITG_12667   |
| 0 | 2   | 0 NA           |
| 0 | 45  | 27 PITG_08715  |
| 0 | 0   | 6 PITG_03275   |
| 0 | 5   | 15 PITG_18063  |
| 0 | 41  | 5 PITG_00016   |
| 0 | 115 | 34 PITG_16363  |
| 0 | 29  | 4 NA           |
| 0 | 0   | 3 PITG_10758   |
| 0 | 0   | 2 PITG_02796   |
| 0 | 0   | 6 PITG_00998   |
| 0 | 8   | 17 NA          |
| 0 | 3   | 3 PITG_15235   |
| 0 | 0   | 2 PITG_05405   |
| 0 | 78  | 8 PITG_20623   |
| 0 | 0   | 0 PITG_03818   |
| 0 | 6   | 29 PITG_13074  |
| 0 | 3   | 12 PITG_07201  |
| 0 | 23  | 2 NA           |
| 0 | 19  | 0 PITG_17370   |
| 0 | 40  | 85 PITG_13462  |

|   |     |                |
|---|-----|----------------|
| 0 | 9   | 15 PITG_12683  |
| 0 | 0   | 2 PITG_10011   |
| 0 | 3   | 6 PITG_19269   |
| 0 | 4   | 0 PITG_18091   |
| 0 | 2   | 17 PITG_00453  |
| 0 | 34  | 123 PITG_03594 |
| 0 | 20  | 8 PITG_20319   |
| 0 | 111 | 89 PITG_02684  |
| 0 | 0   | 0 NA           |
| 0 | 0   | 5 PITG_21509   |
| 0 | 109 | 28 PITG_09446  |
| 0 | 31  | 25 PITG_05429  |
| 0 | 13  | 0 PITG_03318   |
| 0 | 27  | 7 PITG_02194   |
| 0 | 21  | 12 PITG_15705  |
| 0 | 5   | 10 PITG_12867  |
| 0 | 3   | 20 PITG_09579  |
| 0 | 2   | 0 NA           |
| 0 | 0   | 0 PITG_02928   |
| 0 | 11  | 31 NA          |
| 0 | 30  | 29 PITG_00024  |
| 0 | 0   | 0 PITG_00257   |
| 0 | 34  | 247 PITG_21071 |
| 0 | 19  | 37 PITG_07099  |
| 0 | 0   | 2 PITG_10239   |
| 0 | 61  | 62 PITG_16113  |
| 0 | 56  | 15 NA          |
| 0 | 2   | 5 PITG_03260   |
| 0 | 86  | 209 PITG_13505 |
| 0 | 2   | 6 PITG_02089   |
| 0 | 8   | 5 PITG_03398   |
| 0 | 47  | 38 PITG_02769  |
| 0 | 0   | 2 PITG_03947   |
| 0 | 6   | 4 PITG_10821   |
| 0 | 0   | 6 PITG_11470   |
| 0 | 157 | 71 NA          |
| 0 | 2   | 0 PITG_13840   |
| 0 | 72  | 58 PITG_00029  |
| 0 | 4   | 11 PITG_04104  |
| 0 | 3   | 32 NA          |
| 0 | 48  | 13 PITG_05954  |
| 0 | 0   | 6 PITG_08316   |
| 0 | 57  | 80 PITG_00982  |
| 0 | 6   | 7 PITG_17959   |
| 0 | 90  | 10 PITG_04881  |
| 0 | 41  | 65 PITG_08734  |
| 0 | 0   | 0 NA           |

|   |     |                |
|---|-----|----------------|
| 0 | 28  | 13 PITG_12354  |
| 0 | 234 | 115 PITG_12295 |
| 0 | 0   | 3 PITG_00167   |
| 0 | 0   | 0 PITG_10239   |
| 0 | 74  | 30 PITG_08851  |
| 0 | 12  | 11 PITG_01370  |
| 0 | 27  | 10 NA          |
| 0 | 32  | 10 NA          |
| 0 | 5   | 0 PITG_02796   |
| 0 | 101 | 0 PITG_00128   |
| 0 | 0   | 4 PITG_13613   |
| 0 | 3   | 4 PITG_04532   |
| 0 | 0   | 4 PITG_07968   |
| 0 | 4   | 3 PITG_18951   |
| 0 | 19  | 33 PITG_07230  |
| 0 | 42  | 29 PITG_00164  |
| 0 | 2   | 0 NA           |
| 0 | 6   | 11 PITG_08692  |
| 0 | 6   | 4 PITG_13433   |
| 0 | 141 | 35 PITG_12648  |
| 0 | 162 | 168 PITG_20798 |
| 0 | 26  | 0 NA           |
| 0 | 0   | 6 PITG_12308   |
| 0 | 157 | 37 PITG_11612  |
| 0 | 2   | 10 PITG_00809  |
| 0 | 2   | 0 PITG_19046   |
| 0 | 2   | 2 PITG_07852   |
| 0 | 60  | 4 PITG_16841   |
| 0 | 125 | 3 PITG_01090   |
| 0 | 8   | 2 PITG_19669   |
| 0 | 23  | 6 PITG_03411   |
| 0 | 18  | 6 NA           |
| 0 | 0   | 2 PITG_11125   |
| 0 | 229 | 21 PITG_04505  |
| 0 | 4   | 9 PITG_21185   |
| 0 | 5   | 13 PITG_13831  |
| 0 | 0   | 10 PITG_13366  |
| 0 | 12  | 8 PITG_09437   |
| 0 | 22  | 9 PITG_01576   |
| 0 | 18  | 6 PITG_17407   |
| 2 | 64  | 100 PITG_18991 |
| 0 | 15  | 48 PITG_01317  |
| 0 | 274 | 80 NA          |
| 0 | 50  | 24 PITG_21329  |
| 0 | 4   | 43 PITG_20168  |
| 0 | 6   | 4 PITG_09250   |
| 0 | 10  | 36 PITG_17035  |

|   |     |                |
|---|-----|----------------|
| 0 | 13  | 0 NA           |
| 0 | 22  | 0 PITG_16930   |
| 0 | 2   | 4 PITG_05328   |
| 0 | 203 | 270 PITG_01569 |
| 0 | 0   | 11 PITG_08509  |
| 0 | 16  | 2 PITG_15603   |
| 0 | 8   | 0 NA           |
| 0 | 6   | 4 PITG_03562   |
| 0 | 194 | 286 PITG_00457 |
| 0 | 5   | 6 NA           |
| 0 | 0   | 5 PITG_17359   |
| 0 | 2   | 9 PITG_17663   |
| 0 | 31  | 48 PITG_14394  |
| 0 | 3   | 2 PITG_10815   |
| 0 | 0   | 0 NA           |
| 0 | 466 | 138 PITG_00058 |
| 0 | 85  | 132 PITG_21602 |
| 0 | 97  | 0 NA           |
| 0 | 0   | 0 PITG_17023   |
| 0 | 11  | 3 NA           |
| 0 | 20  | 19 PITG_01112  |
| 0 | 153 | 149 PITG_06111 |
| 0 | 8   | 2 PITG_12428   |
| 0 | 23  | 10 PITG_00039  |
| 0 | 0   | 0 PITG_15994   |
| 0 | 0   | 0 PITG_14415   |
| 0 | 0   | 5 PITG_07790   |
| 0 | 2   | 0 NA           |
| 0 | 201 | 60 PITG_11460  |
| 0 | 16  | 23 PITG_11451  |
| 0 | 103 | 104 PITG_13041 |
| 0 | 6   | 6 PITG_01426   |
| 0 | 33  | 74 PITG_19041  |
| 0 | 0   | 2 PITG_10372   |
| 0 | 0   | 2 PITG_16389   |
| 0 | 19  | 16 PITG_06322  |
| 0 | 12  | 22 PITG_01342  |
| 0 | 2   | 27 PITG_17007  |
| 0 | 0   | 5 PITG_18296   |
| 0 | 9   | 0 PITG_05761   |
| 0 | 13  | 21 PITG_17170  |
| 0 | 4   | 0 PITG_04483   |
| 0 | 2   | 0 PITG_22585   |
| 0 | 4   | 2 PITG_16360   |
| 0 | 14  | 29 PITG_08794  |
| 0 | 44  | 63 PITG_13558  |
| 0 | 0   | 2 PITG_17617   |

|   |     |                |
|---|-----|----------------|
| 0 | 50  | 27 PITG_01386  |
| 0 | 7   | 0 PITG_13406   |
| 0 | 9   | 0 PITG_22715   |
| 0 | 22  | 9 PITG_02093   |
| 0 | 28  | 3 NA           |
| 0 | 8   | 2 NA           |
| 0 | 24  | 46 PITG_10955  |
| 0 | 2   | 0 PITG_04062   |
| 0 | 8   | 43 PITG_01453  |
| 0 | 45  | 45 PITG_18322  |
| 0 | 15  | 78 PITG_02034  |
| 0 | 2   | 2 PITG_09277   |
| 0 | 29  | 4 PITG_23304   |
| 0 | 23  | 4 PITG_00996   |
| 0 | 15  | 11 PITG_17423  |
| 0 | 14  | 24 PITG_09566  |
| 0 | 0   | 0 NA           |
| 0 | 222 | 113 PITG_06647 |
| 0 | 4   | 2 PITG_06429   |
| 0 | 7   | 8 PITG_02516   |
| 0 | 386 | 167 NA         |
| 0 | 7   | 0 PITG_12852   |
| 0 | 0   | 0 PITG_06914   |
| 0 | 23  | 224 PITG_17537 |
| 0 | 46  | 24 PITG_07543  |
| 8 | 2   | 15 NA          |
| 0 | 0   | 11 PITG_07843  |
| 0 | 15  | 20 PITG_13792  |
| 0 | 6   | 5 NA           |
| 0 | 2   | 0 PITG_00233   |
| 0 | 0   | 2 PITG_06980   |
| 0 | 6   | 24 PITG_12226  |
| 0 | 29  | 66 PITG_13558  |
| 0 | 24  | 32 PITG_01777  |
| 0 | 0   | 0 PITG_03804   |
| 0 | 4   | 11 PITG_03750  |
| 0 | 31  | 18 NA          |
| 0 | 19  | 5 PITG_19746   |
| 0 | 5   | 0 PITG_03831   |
| 0 | 6   | 14 PITG_04111  |
| 0 | 246 | 209 PITG_15321 |
| 0 | 8   | 5 PITG_18951   |
| 0 | 4   | 0 PITG_15164   |
| 0 | 6   | 67 NA          |
| 0 | 39  | 8 PITG_12988   |
| 0 | 56  | 16 NA          |
| 0 | 4   | 17 PITG_13803  |

|   |     |                |
|---|-----|----------------|
| 0 | 2   | 0 PITG_22076   |
| 0 | 70  | 271 PITG_11997 |
| 0 | 63  | 26 PITG_17736  |
| 0 | 4   | 2 PITG_11929   |
| 0 | 25  | 12 PITG_09292  |
| 0 | 2   | 0 PITG_19115   |
| 0 | 4   | 5 NA           |
| 0 | 8   | 0 PITG_06963   |
| 0 | 146 | 37 NA          |
| 0 | 4   | 7 PITG_05368   |
| 0 | 2   | 0 PITG_00450   |
| 0 | 33  | 24 PITG_07307  |
| 0 | 110 | 286 PITG_19595 |
| 0 | 0   | 0 PITG_03804   |
| 0 | 0   | 0 PITG_18455   |
| 0 | 23  | 160 PITG_12808 |
| 0 | 246 | 383 PITG_00543 |
| 0 | 6   | 3 PITG_13043   |
| 0 | 101 | 81 NA          |
| 0 | 6   | 0 NA           |
| 0 | 0   | 0 PITG_10472   |
| 0 | 19  | 3 PITG_01674   |
| 0 | 15  | 7 PITG_20830   |
| 0 | 6   | 7 PITG_01154   |
| 0 | 2   | 2 PITG_03305   |
| 0 | 12  | 0 PITG_02427   |
| 0 | 42  | 24 PITG_06107  |
| 0 | 0   | 4 PITG_13804   |
| 0 | 0   | 0 NA           |
| 0 | 11  | 2 PITG_01815   |
| 0 | 8   | 28 PITG_19179  |
| 0 | 29  | 2 PITG_04990   |
| 0 | 5   | 0 NA           |
| 0 | 0   | 0 NA           |
| 0 | 0   | 0 NA           |
| 0 | 86  | 43 PITG_15071  |
| 0 | 158 | 150 PITG_00494 |
| 0 | 30  | 101 PITG_14216 |
| 0 | 4   | 2 PITG_02050   |
| 0 | 111 | 94 PITG_14260  |
| 0 | 107 | 32 PITG_06281  |
| 0 | 0   | 19 PITG_05226  |
| 0 | 6   | 2 PITG_12983   |
| 0 | 20  | 9 PITG_00152   |
| 0 | 6   | 0 NA           |
| 0 | 130 | 245 PITG_20505 |
| 0 | 209 | 91 PITG_18326  |



|    |      |                |
|----|------|----------------|
| 0  | 9    | 2 PITG_22687   |
| 0  | 21   | 17 PITG_03763  |
| 0  | 17   | 2 NA           |
| 0  | 0    | 0 PITG_10139   |
| 0  | 0    | 6 PITG_17250   |
| 0  | 30   | 19 NA          |
| 0  | 181  | 94 NA          |
| 0  | 0    | 4 PITG_07915   |
| 0  | 14   | 4 PITG_06254   |
| 0  | 42   | 88 PITG_21397  |
| 0  | 2    | 0 PITG_11900   |
| 0  | 209  | 37 PITG_18242  |
| 0  | 2    | 2 PITG_07305   |
| 2  | 1450 | 304 PITG_11997 |
| 0  | 0    | 0 NA           |
| 0  | 4    | 9 PITG_03898   |
| 0  | 0    | 0 PITG_02143   |
| 0  | 50   | 4 PITG_05902   |
| 0  | 5    | 0 PITG_07312   |
| 0  | 27   | 31 PITG_05282  |
| 0  | 9    | 0 PITG_02767   |
| 0  | 23   | 32 PITG_21278  |
| 0  | 79   | 40 PITG_00571  |
| 0  | 91   | 59 NA          |
| 28 | 0    | 71 NA          |
| 0  | 2    | 2 PITG_05560   |
| 0  | 12   | 6 PITG_03840   |
| 0  | 8    | 4 PITG_09899   |
| 0  | 49   | 55 PITG_05815  |
| 0  | 58   | 194 PITG_10083 |
| 0  | 19   | 3 PITG_05590   |
| 0  | 645  | 206 PITG_14126 |
| 0  | 9    | 9 PITG_03756   |
| 0  | 2    | 10 NA          |
| 0  | 2    | 9 PITG_03340   |
| 0  | 2    | 5 NA           |
| 0  | 186  | 3 PITG_14515   |
| 0  | 3    | 0 PITG_08770   |
| 0  | 0    | 2 PITG_00572   |
| 0  | 9    | 0 NA           |
| 0  | 6    | 4 PITG_15269   |
| 0  | 0    | 0 NA           |
| 0  | 11   | 4 PITG_01595   |
| 0  | 61   | 94 NA          |
| 0  | 5    | 31 PITG_14353  |
| 0  | 216  | 77 PITG_03938  |
| 0  | 2    | 35 PITG_00682  |

|     |      |                 |
|-----|------|-----------------|
| 0   | 6    | 4 PITG_17617    |
| 0   | 2    | 2 NA            |
| 0   | 0    | 0 NA            |
| 0   | 0    | 2 PITG_07848    |
| 0   | 0    | 0 PITG_18966    |
| 0   | 115  | 59 PITG_15502   |
| 0   | 9    | 7 PITG_06740    |
| 0   | 11   | 0 PITG_18861    |
| 131 | 0    | 6 NA            |
| 0   | 268  | 126 PITG_18644  |
| 0   | 111  | 76 PITG_06635   |
| 0   | 98   | 86 NA           |
| 0   | 186  | 474 PITG_10858  |
| 0   | 7    | 13 PITG_10827   |
| 0   | 2    | 2 PITG_08722    |
| 7   | 113  | 0 NA            |
| 0   | 21   | 2 PITG_19422    |
| 0   | 5    | 2 PITG_14863    |
| 0   | 7    | 0 NA            |
| 0   | 0    | 0 NA            |
| 0   | 0    | 0 NA            |
| 0   | 57   | 6 PITG_08530    |
| 0   | 0    | 2 PITG_01286    |
| 0   | 0    | 9 NA            |
| 0   | 22   | 2 PITG_09786    |
| 0   | 13   | 2 NA            |
| 0   | 2    | 0 PITG_06660    |
| 0   | 59   | 42 PITG_12120   |
| 0   | 92   | 94 PITG_14975   |
| 0   | 7    | 32 NA           |
| 7   | 27   | 22 NA           |
| 0   | 15   | 4 PITG_03288    |
| 0   | 30   | 75 PITG_01453   |
| 0   | 27   | 37 PITG_19551   |
| 0   | 2    | 12 NA           |
| 0   | 0    | 4 PITG_09310    |
| 0   | 53   | 35 PITG_11592   |
| 0   | 5    | 9 PITG_04038    |
| 0   | 4    | 0 PITG_03143    |
| 409 | 120  | 2189 NA         |
| 2   | 3601 | 2149 PITG_04999 |
| 0   | 20   | 6 PITG_00223    |
| 0   | 5    | 4 NA            |
| 0   | 62   | 2 PITG_00370    |
| 0   | 0    | 2 PITG_15408    |
| 0   | 8    | 39 PITG_00839   |
| 0   | 0    | 11 NA           |

|   |       |                 |
|---|-------|-----------------|
| 0 | 5     | 0 PITG_03707    |
| 0 | 0     | 6 PITG_09598    |
| 0 | 54    | 38 PITG_01683   |
| 0 | 7     | 6 PITG_03043    |
| 0 | 0     | 0 NA            |
| 0 | 31    | 14 PITG_11365   |
| 0 | 860   | 305 NA          |
| 0 | 4     | 8 PITG_00568    |
| 0 | 22    | 0 NA            |
| 0 | 0     | 2 PITG_03374    |
| 0 | 51    | 23 PITG_03965   |
| 0 | 159   | 184 PITG_16936  |
| 0 | 27    | 14 NA           |
| 0 | 90    | 28 PITG_02122   |
| 0 | 10    | 13 PITG_15783   |
| 0 | 51    | 73 PITG_01932   |
| 0 | 60    | 6 PITG_22666    |
| 0 | 2     | 2 NA            |
| 0 | 40    | 218 PITG_06969  |
| 0 | 258   | 104 PITG_23090  |
| 0 | 342   | 75 NA           |
| 0 | 76    | 139 PITG_09528  |
| 0 | 0     | 0 PITG_01802    |
| 0 | 36    | 24 PITG_19851   |
| 0 | 3     | 2 PITG_15929    |
| 0 | 31    | 15 PITG_17348   |
| 0 | 2     | 4 PITG_13432    |
| 0 | 18167 | 7060 PITG_04121 |
| 0 | 92    | 115 PITG_04505  |
| 0 | 15    | 6 NA            |
| 0 | 0     | 4 PITG_01233    |
| 0 | 0     | 11 PITG_08547   |
| 0 | 6     | 0 NA            |
| 0 | 2     | 0 PITG_10449    |
| 0 | 7     | 6 NA            |
| 0 | 2     | 7 PITG_05504    |
| 0 | 0     | 0 PITG_19466    |
| 0 | 36    | 16 PITG_08580   |
| 0 | 91    | 38 PITG_00338   |
| 0 | 22    | 21 PITG_11119   |
| 0 | 337   | 212 PITG_02696  |
| 0 | 0     | 4 PITG_01608    |
| 0 | 19    | 2 PITG_04037    |
| 0 | 13    | 7 PITG_21156    |
| 0 | 69    | 66 PITG_17942   |
| 0 | 11    | 2 NA            |
| 0 | 12    | 6 NA            |

|     |     |               |
|-----|-----|---------------|
| 0   | 0   | 2 NA          |
| 0   | 0   | 0 PITG_10591  |
| 0   | 58  | 27 PITG_17933 |
| 0   | 2   | 2 PITG_19886  |
| 0   | 26  | 10 PITG_09459 |
| 0   | 7   | 22 PITG_11750 |
| 0   | 2   | 0 PITG_18279  |
| 0   | 16  | 8 NA          |
| 0   | 14  | 3 PITG_02757  |
| 0   | 16  | 16 PITG_13512 |
| 0   | 0   | 0 PITG_03491  |
| 0   | 0   | 7 PITG_05832  |
| 155 | 4   | 91 NA         |
| 0   | 2   | 2 PITG_03169  |
| 0   | 7   | 17 PITG_02827 |
| 0   | 11  | 46 NA         |
| 0   | 66  | 0 PITG_04321  |
| 0   | 19  | 59 PITG_03799 |
| 0   | 13  | 0 NA          |
| 0   | 44  | 7 PITG_09782  |
| 0   | 14  | 7 PITG_17479  |
| 0   | 0   | 2 PITG_15242  |
| 0   | 69  | 116 NA        |
| 0   | 49  | 140 NA        |
| 0   | 5   | 2 PITG_02994  |
| 0   | 0   | 2 PITG_01457  |
| 0   | 4   | 4 PITG_09360  |
| 0   | 6   | 2 NA          |
| 0   | 4   | 5 PITG_15610  |
| 0   | 3   | 0 PITG_03514  |
| 0   | 14  | 7 NA          |
| 0   | 0   | 2 NA          |
| 0   | 21  | 0 NA          |
| 0   | 22  | 33 PITG_17568 |
| 0   | 47  | 9 NA          |
| 0   | 172 | 90 PITG_02575 |
| 0   | 37  | 12 PITG_11524 |
| 0   | 0   | 4 PITG_02285  |
| 0   | 6   | 2 NA          |
| 0   | 11  | 2 PITG_00973  |
| 0   | 5   | 0 PITG_02228  |
| 0   | 0   | 14 PITG_00038 |
| 0   | 3   | 0 PITG_03710  |
| 0   | 28  | 13 PITG_01818 |
| 0   | 0   | 0 NA          |
| 0   | 6   | 4 PITG_13527  |
| 0   | 10  | 0 PITG_08441  |

|   |     |                |
|---|-----|----------------|
| 0 | 2   | 0 PITG_15731   |
| 0 | 229 | 114 PITG_18963 |
| 0 | 27  | 0 PITG_11445   |
| 0 | 6   | 10 PITG_12326  |
| 0 | 18  | 46 PITG_17257  |
| 0 | 0   | 0 PITG_05597   |
| 0 | 33  | 0 NA           |
| 0 | 4   | 0 PITG_01782   |
| 0 | 6   | 13 PITG_20503  |
| 0 | 14  | 0 PITG_11960   |
| 0 | 4   | 4 PITG_01207   |
| 0 | 23  | 0 NA           |
| 0 | 7   | 3 PITG_14151   |
| 0 | 33  | 18 PITG_07991  |
| 0 | 25  | 7 PITG_20110   |
| 0 | 56  | 61 PITG_13721  |
| 0 | 7   | 8 PITG_13775   |
| 0 | 0   | 2 NA           |
| 0 | 0   | 0 NA           |
| 0 | 2   | 33 PITG_12834  |
| 0 | 175 | 91 PITG_03039  |
| 0 | 0   | 0 NA           |
| 0 | 4   | 2 NA           |
| 0 | 35  | 25 PITG_00574  |
| 0 | 32  | 19 PITG_09144  |
| 0 | 161 | 51 PITG_12648  |
| 0 | 969 | 4813 NA        |
| 0 | 29  | 0 PITG_03972   |
| 0 | 0   | 0 PITG_08031   |
| 0 | 29  | 2 NA           |
| 0 | 72  | 70 PITG_00209  |
| 0 | 28  | 53 PITG_01515  |
| 0 | 0   | 4 PITG_04956   |
| 0 | 2   | 0 PITG_21023   |
| 0 | 276 | 51 PITG_21010  |
| 0 | 7   | 31 PITG_05894  |
| 0 | 21  | 20 PITG_12834  |
| 0 | 30  | 37 PITG_04934  |
| 0 | 2   | 4 PITG_10645   |
| 0 | 0   | 2 PITG_01832   |
| 0 | 32  | 10 PITG_13421  |
| 0 | 14  | 31 PITG_18095  |
| 0 | 60  | 0 NA           |
| 0 | 20  | 0 NA           |
| 0 | 13  | 2 PITG_02054   |
| 0 | 30  | 53 PITG_20562  |
| 0 | 0   | 2 PITG_16981   |

|   |     |                |
|---|-----|----------------|
| 0 | 36  | 7 PITG_01111   |
| 0 | 578 | 339 PITG_00514 |
| 0 | 22  | 54 PITG_00712  |
| 0 | 9   | 31 PITG_07790  |
| 0 | 2   | 8 PITG_13596   |
| 0 | 2   | 2 PITG_15602   |
| 0 | 6   | 12 PITG_16020  |
| 0 | 60  | 96 PITG_15873  |
| 0 | 61  | 21 PITG_13273  |
| 0 | 0   | 12 PITG_09760  |
| 0 | 60  | 92 NA          |
| 0 | 102 | 0 NA           |
| 0 | 29  | 9 NA           |
| 0 | 9   | 4 PITG_08935   |
| 0 | 567 | 379 PITG_20562 |
| 0 | 70  | 106 NA         |
| 0 | 4   | 12 PITG_19422  |
| 0 | 104 | 42 PITG_01703  |
| 0 | 18  | 2 PITG_17853   |
| 0 | 4   | 11 PITG_13767  |
| 0 | 0   | 0 PITG_09377   |
| 0 | 20  | 18 NA          |
| 0 | 6   | 4 NA           |
| 0 | 13  | 83 PITG_06429  |
| 0 | 7   | 20 PITG_21962  |
| 0 | 107 | 79 PITG_02642  |
| 0 | 7   | 4 NA           |
| 0 | 6   | 4 PITG_14465   |
| 0 | 0   | 4 PITG_01183   |
| 0 | 10  | 6 PITG_04479   |
| 0 | 31  | 0 NA           |
| 0 | 28  | 8 PITG_01015   |
| 0 | 147 | 68 PITG_16073  |
| 0 | 0   | 0 NA           |
| 0 | 29  | 101 PITG_13111 |
| 0 | 29  | 0 NA           |
| 0 | 4   | 8 NA           |
| 0 | 27  | 0 PITG_12326   |
| 0 | 46  | 19 PITG_22439  |
| 0 | 47  | 13 NA          |
| 0 | 2   | 30 PITG_00693  |
| 0 | 23  | 2 PITG_16378   |
| 0 | 33  | 9 NA           |
| 0 | 0   | 0 PITG_03443   |
| 0 | 6   | 9 PITG_02146   |
| 0 | 43  | 14 PITG_00660  |
| 0 | 71  | 170 PITG_01478 |

|   |     |                 |
|---|-----|-----------------|
| 0 | 0   | 3 PITG_13399    |
| 0 | 4   | 0 PITG_03034    |
| 0 | 10  | 9 PITG_09098    |
| 0 | 4   | 2 PITG_08388    |
| 0 | 49  | 31 NA           |
| 0 | 6   | 25 NA           |
| 0 | 35  | 23 PITG_10343   |
| 0 | 15  | 6 PITG_00382    |
| 0 | 317 | 1444 PITG_02022 |
| 0 | 4   | 10 PITG_00733   |
| 0 | 0   | 3 PITG_13745    |
| 0 | 87  | 8 PITG_20295    |
| 0 | 29  | 4 NA            |
| 0 | 4   | 11 PITG_05652   |
| 0 | 0   | 7 PITG_12537    |
| 0 | 0   | 0 PITG_17977    |
| 0 | 44  | 93 PITG_11193   |
| 0 | 7   | 4 PITG_01870    |
| 0 | 108 | 53 PITG_11457   |
| 0 | 0   | 0 NA            |
| 0 | 11  | 18 PITG_02458   |
| 0 | 35  | 16 PITG_18416   |
| 0 | 13  | 14 PITG_06992   |
| 0 | 49  | 324 PITG_03700  |
| 0 | 4   | 2 PITG_08473    |
| 0 | 0   | 0 PITG_05825    |
| 0 | 2   | 16 PITG_05518   |
| 0 | 50  | 23 PITG_17594   |
| 0 | 11  | 4 PITG_20273    |
| 0 | 0   | 2 PITG_16137    |
| 0 | 0   | 0 PITG_05762    |
| 0 | 24  | 9 PITG_14460    |
| 0 | 0   | 0 PITG_04725    |
| 0 | 7   | 6 PITG_02172    |
| 0 | 13  | 0 PITG_02576    |
| 0 | 8   | 18 PITG_13491   |
| 0 | 324 | 204 PITG_13404  |
| 0 | 42  | 8 PITG_16799    |
| 0 | 36  | 119 PITG_02510  |
| 0 | 4   | 0 PITG_01772    |
| 0 | 55  | 30 PITG_12540   |
| 0 | 0   | 5 PITG_02796    |
| 0 | 0   | 2 PITG_21150    |
| 0 | 37  | 26 PITG_05287   |
| 0 | 943 | 472 PITG_01248  |
| 0 | 30  | 47 PITG_13804   |
| 0 | 0   | 0 PITG_21171    |

|   |     |                |
|---|-----|----------------|
| 0 | 26  | 0 PITG_02068   |
| 0 | 19  | 4 NA           |
| 0 | 44  | 37 PITG_11117  |
| 0 | 5   | 22 PITG_15739  |
| 0 | 86  | 0 PITG_13461   |
| 0 | 101 | 98 PITG_11792  |
| 0 | 237 | 48 PITG_21396  |
| 0 | 10  | 3 PITG_07968   |
| 0 | 0   | 4 PITG_03242   |
| 0 | 26  | 6 PITG_09790   |
| 0 | 44  | 22 PITG_09092  |
| 0 | 2   | 0 PITG_12151   |
| 0 | 340 | 279 PITG_01418 |
| 0 | 2   | 0 PITG_01457   |
| 0 | 61  | 39 PITG_01133  |
| 0 | 16  | 8 PITG_00476   |
| 0 | 0   | 2 PITG_05486   |
| 0 | 10  | 13 PITG_05685  |
| 0 | 4   | 8 PITG_00634   |
| 0 | 21  | 29 PITG_07546  |
| 0 | 6   | 4 PITG_17250   |
| 0 | 59  | 56 PITG_11723  |
| 0 | 10  | 28 PITG_02112  |
| 0 | 92  | 233 PITG_02856 |
| 0 | 3   | 12 PITG_05293  |
| 0 | 8   | 0 PITG_12326   |
| 0 | 2   | 7 NA           |
| 0 | 119 | 11 PITG_16791  |
| 0 | 0   | 0 PITG_03491   |
| 0 | 73  | 71 PITG_09131  |
| 0 | 5   | 4 PITG_15807   |
| 0 | 31  | 28 PITG_20498  |
| 0 | 0   | 25 PITG_19220  |
| 0 | 17  | 14 PITG_11158  |
| 0 | 9   | 33 PITG_15960  |
| 0 | 112 | 53 PITG_04666  |
| 0 | 57  | 11 PITG_08305  |
| 0 | 2   | 0 NA           |
| 0 | 2   | 6 NA           |
| 0 | 68  | 24 PITG_18322  |
| 0 | 12  | 197 PITG_09216 |
| 0 | 113 | 127 PITG_08659 |
| 0 | 13  | 2 NA           |
| 0 | 0   | 2 PITG_02082   |
| 0 | 26  | 0 PITG_01577   |
| 0 | 430 | 46 PITG_01577  |
| 0 | 25  | 4 NA           |



|   |     |                |
|---|-----|----------------|
| 0 | 198 | 263 PITG_03473 |
| 0 | 171 | 50 PITG_01578  |
| 0 | 5   | 23 PITG_02273  |
| 0 | 0   | 0 NA           |
| 0 | 64  | 70 NA          |
| 0 | 4   | 4 PITG_17455   |
| 0 | 5   | 2 PITG_14605   |
| 0 | 7   | 12 PITG_06890  |
| 0 | 0   | 4 NA           |
| 0 | 32  | 4 PITG_19693   |
| 0 | 11  | 6 PITG_04680   |
| 0 | 67  | 8 PITG_14028   |
| 0 | 207 | 90 NA          |
| 0 | 4   | 40 PITG_02242  |
| 0 | 0   | 0 NA           |
| 0 | 2   | 23 PITG_09298  |
| 0 | 101 | 28 PITG_08016  |
| 0 | 42  | 36 PITG_12749  |
| 0 | 0   | 9 PITG_04615   |
| 0 | 41  | 0 PITG_16179   |
| 0 | 34  | 0 NA           |
| 0 | 18  | 30 PITG_18912  |
| 0 | 4   | 5 PITG_00336   |
| 0 | 9   | 2 PITG_17423   |
| 0 | 4   | 0 PITG_03557   |
| 0 | 21  | 2 PITG_16681   |
| 0 | 44  | 124 PITG_20725 |
| 0 | 15  | 28 PITG_07093  |
| 0 | 9   | 11 PITG_14924  |
| 0 | 0   | 0 PITG_01154   |
| 0 | 15  | 3 PITG_11799   |
| 0 | 2   | 0 NA           |
| 0 | 5   | 27 PITG_03878  |
| 0 | 267 | 108 PITG_10989 |
| 0 | 14  | 12 PITG_03614  |
| 0 | 158 | 54 PITG_08366  |
| 0 | 5   | 0 NA           |
| 0 | 2   | 9 PITG_05668   |
| 0 | 9   | 2 PITG_06910   |
| 0 | 111 | 39 NA          |
| 0 | 2   | 2 PITG_09246   |
| 0 | 0   | 4 PITG_15569   |
| 0 | 60  | 42 PITG_10117  |
| 0 | 334 | 58 NA          |
| 0 | 3   | 0 NA           |
| 0 | 214 | 321 PITG_08001 |
| 0 | 34  | 15 PITG_05221  |

|     |     |                |
|-----|-----|----------------|
| 0   | 5   | 0 PITG_18015   |
| 0   | 2   | 12 PITG_04647  |
| 0   | 6   | 0 PITG_05505   |
| 0   | 3   | 4 PITG_03006   |
| 0   | 4   | 2 NA           |
| 0   | 451 | 182 PITG_10199 |
| 0   | 2   | 4 PITG_16798   |
| 0   | 181 | 44 PITG_00348  |
| 0   | 3   | 0 PITG_18943   |
| 0   | 0   | 0 NA           |
| 0   | 9   | 171 PITG_05884 |
| 0   | 39  | 25 PITG_04707  |
| 0   | 3   | 0 NA           |
| 0   | 39  | 10 PITG_11522  |
| 0   | 33  | 13 PITG_22198  |
| 0   | 3   | 4 PITG_03263   |
| 0   | 13  | 12 PITG_00441  |
| 0   | 2   | 8 PITG_21182   |
| 0   | 8   | 0 PITG_02717   |
| 0   | 6   | 24 NA          |
| 0   | 15  | 10 NA          |
| 0   | 2   | 2 PITG_11492   |
| 0   | 442 | 80 NA          |
| 188 | 52  | 369 NA         |
| 0   | 3   | 19 PITG_04824  |
| 0   | 863 | 651 NA         |
| 0   | 0   | 0 PITG_07302   |
| 0   | 4   | 17 PITG_11121  |
| 0   | 0   | 2 PITG_01647   |
| 0   | 7   | 2 PITG_16036   |
| 0   | 29  | 0 PITG_03155   |
| 0   | 26  | 2 PITG_00655   |
| 0   | 35  | 0 PITG_16198   |
| 0   | 92  | 4 PITG_11438   |
| 0   | 10  | 24 PITG_07567  |
| 0   | 4   | 4 PITG_21889   |
| 0   | 7   | 4 PITG_05830   |
| 0   | 12  | 4 PITG_07703   |
| 0   | 27  | 0 NA           |
| 0   | 7   | 24 PITG_03577  |
| 0   | 29  | 81 PITG_12300  |
| 0   | 42  | 65 PITG_05367  |
| 734 | 48  | 1071 NA        |
| 0   | 9   | 23 NA          |
| 0   | 11  | 2 NA           |
| 0   | 2   | 7 PITG_12338   |
| 0   | 6   | 8 NA           |

|   |     |                |
|---|-----|----------------|
| 0 | 17  | 5 NA           |
| 0 | 5   | 14 PITG_03160  |
| 0 | 77  | 9 PITG_03419   |
| 0 | 61  | 42 PITG_12540  |
| 0 | 3   | 2 PITG_10275   |
| 0 | 15  | 10 PITG_22404  |
| 0 | 55  | 108 PITG_13235 |
| 0 | 6   | 6 PITG_11728   |
| 0 | 4   | 0 PITG_16918   |
| 0 | 2   | 25 NA          |
| 0 | 18  | 28 PITG_10509  |
| 0 | 0   | 8 NA           |
| 0 | 4   | 0 PITG_23029   |
| 0 | 6   | 8 PITG_20498   |
| 0 | 31  | 6 PITG_12567   |
| 0 | 6   | 4 PITG_02796   |
| 0 | 112 | 32 PITG_03365  |
| 0 | 571 | 334 PITG_14683 |
| 0 | 17  | 8 NA           |
| 0 | 15  | 32 PITG_09951  |
| 0 | 26  | 104 PITG_14639 |
| 0 | 18  | 51 PITG_17790  |
| 0 | 2   | 2 PITG_02027   |
| 0 | 6   | 3 PITG_11203   |
| 0 | 8   | 6 PITG_10838   |
| 0 | 5   | 0 PITG_04568   |
| 0 | 7   | 4 PITG_06345   |
| 0 | 0   | 3 PITG_00284   |
| 0 | 3   | 4 NA           |
| 0 | 7   | 15 PITG_03355  |
| 0 | 6   | 3 PITG_08641   |
| 0 | 51  | 12 PITG_09664  |
| 0 | 77  | 4 PITG_20355   |
| 0 | 128 | 7 PITG_10145   |
| 0 | 0   | 4 NA           |
| 0 | 0   | 2 PITG_11466   |
| 0 | 4   | 4 NA           |
| 0 | 20  | 4 NA           |
| 0 | 49  | 27 PITG_07310  |
| 0 | 0   | 0 PITG_07102   |
| 0 | 7   | 0 PITG_10888   |
| 0 | 9   | 0 NA           |
| 0 | 18  | 5 NA           |
| 0 | 62  | 45 PITG_09450  |
| 0 | 124 | 67 PITG_02546  |
| 0 | 18  | 6 PITG_19056   |
| 0 | 229 | 175 PITG_11152 |

|      |     |                |
|------|-----|----------------|
| 0    | 0   | 0 NA           |
| 0    | 16  | 9 PITG_13259   |
| 0    | 10  | 4 NA           |
| 2811 | 65  | 441 NA         |
| 0    | 36  | 2 NA           |
| 0    | 0   | 0 PITG_05600   |
| 0    | 720 | 821 PITG_15969 |
| 0    | 414 | 834 PITG_15969 |
| 0    | 0   | 4 PITG_00323   |
| 0    | 22  | 23 PITG_16720  |
| 0    | 31  | 0 NA           |
| 0    | 9   | 0 PITG_08009   |
| 0    | 16  | 7 PITG_07099   |
| 0    | 12  | 11 PITG_07194  |
| 0    | 12  | 0 PITG_10133   |
| 0    | 43  | 10 PITG_08364  |
| 0    | 452 | 246 PITG_03906 |
| 0    | 16  | 11 PITG_08741  |
| 0    | 425 | 440 PITG_16967 |
| 0    | 4   | 5 PITG_02563   |
| 0    | 56  | 40 NA          |
| 0    | 0   | 49 PITG_08154  |
| 0    | 34  | 27 PITG_10992  |
| 0    | 0   | 0 PITG_05189   |
| 0    | 2   | 2 PITG_14816   |
| 0    | 319 | 47 PITG_15251  |
| 0    | 2   | 0 PITG_10887   |
| 0    | 92  | 5 PITG_21110   |
| 0    | 0   | 0 PITG_10911   |
| 0    | 0   | 0 PITG_19871   |
| 0    | 35  | 10 NA          |
| 0    | 0   | 0 NA           |
| 0    | 4   | 0 PITG_08481   |
| 0    | 15  | 0 PITG_09089   |
| 0    | 8   | 2 PITG_16183   |
| 0    | 85  | 17 PITG_11791  |
| 0    | 396 | 244 PITG_06503 |
| 0    | 2   | 0 NA           |
| 0    | 8   | 0 NA           |
| 0    | 18  | 19 PITG_15566  |
| 0    | 13  | 8 PITG_13490   |
| 0    | 138 | 197 PITG_06119 |
| 0    | 477 | 189 PITG_09315 |
| 0    | 336 | 310 PITG_04640 |
| 0    | 51  | 12 PITG_10864  |
| 0    | 0   | 0 NA           |
| 0    | 6   | 4 PITG_16745   |

|    |     |                |
|----|-----|----------------|
| 0  | 0   | 7 NA           |
| 0  | 2   | 5 PITG_05731   |
| 0  | 152 | 67 PITG_03364  |
| 0  | 309 | 43 PITG_17344  |
| 0  | 642 | 388 PITG_12663 |
| 0  | 2   | 2 PITG_01824   |
| 12 | 64  | 51 NA          |
| 0  | 6   | 6 PITG_13747   |
| 0  | 4   | 2 NA           |
| 0  | 111 | 0 PITG_02901   |
| 0  | 13  | 17 PITG_01031  |
| 0  | 2   | 2 PITG_04678   |
| 0  | 52  | 101 PITG_08394 |
| 0  | 29  | 22 PITG_09795  |
| 0  | 4   | 0 PITG_11262   |
| 0  | 2   | 40 PITG_14557  |
| 0  | 53  | 151 PITG_00622 |
| 0  | 2   | 10 PITG_18498  |
| 0  | 3   | 0 PITG_04861   |
| 0  | 13  | 2 PITG_16461   |
| 0  | 6   | 5 PITG_12140   |
| 0  | 67  | 0 NA           |
| 0  | 0   | 2 PITG_08305   |
| 0  | 0   | 0 NA           |
| 0  | 2   | 4 PITG_17965   |
| 0  | 2   | 15 PITG_12516  |
| 0  | 43  | 20 PITG_20791  |
| 0  | 2   | 8 PITG_12677   |
| 0  | 0   | 2 PITG_07865   |
| 0  | 5   | 4 PITG_12478   |
| 0  | 0   | 0 NA           |
| 0  | 8   | 2 PITG_05227   |
| 0  | 23  | 0 NA           |
| 0  | 28  | 36 PITG_14808  |
| 0  | 62  | 27 PITG_05521  |
| 0  | 19  | 9 PITG_17868   |
| 0  | 85  | 66 PITG_16126  |
| 0  | 0   | 5 PITG_03629   |
| 0  | 5   | 11 PITG_01425  |
| 0  | 85  | 0 NA           |
| 0  | 23  | 9 PITG_17600   |
| 0  | 151 | 249 PITG_11171 |
| 0  | 59  | 13 NA          |
| 0  | 19  | 21 PITG_01245  |
| 0  | 27  | 0 PITG_21048   |
| 0  | 4   | 2 PITG_22311   |
| 0  | 37  | 2 NA           |

|     |     |                |
|-----|-----|----------------|
| 0   | 6   | 2 PITG_01602   |
| 0   | 28  | 32 PITG_03855  |
| 0   | 0   | 0 PITG_00766   |
| 0   | 36  | 6 PITG_00456   |
| 0   | 22  | 79 PITG_06205  |
| 0   | 23  | 54 PITG_05991  |
| 0   | 23  | 10 NA          |
| 0   | 36  | 10 PITG_02739  |
| 0   | 53  | 10 PITG_07024  |
| 0   | 159 | 38 PITG_12291  |
| 0   | 14  | 7 PITG_05111   |
| 0   | 0   | 4 PITG_08181   |
| 0   | 0   | 2 NA           |
| 0   | 10  | 26 PITG_00225  |
| 0   | 29  | 20 PITG_12889  |
| 0   | 2   | 5 PITG_00961   |
| 0   | 63  | 30 NA          |
| 524 | 62  | 440 NA         |
| 0   | 0   | 2 PITG_16267   |
| 0   | 5   | 2 PITG_18067   |
| 0   | 310 | 191 PITG_01851 |
| 0   | 51  | 143 PITG_03220 |
| 0   | 10  | 6 PITG_07011   |
| 0   | 25  | 13 PITG_02827  |
| 0   | 5   | 2 PITG_00289   |
| 0   | 22  | 20 PITG_01584  |
| 0   | 0   | 4 PITG_13915   |
| 0   | 9   | 7 NA           |
| 0   | 25  | 38 PITG_06760  |
| 0   | 17  | 0 PITG_11829   |
| 0   | 4   | 24 NA          |
| 0   | 601 | 187 NA         |
| 0   | 49  | 22 PITG_22628  |
| 11  | 270 | 702 NA         |
| 0   | 5   | 38 PITG_16808  |
| 0   | 23  | 24 PITG_10264  |
| 0   | 56  | 10 PITG_01257  |
| 0   | 0   | 2 PITG_22924   |
| 0   | 12  | 15 NA          |
| 0   | 0   | 2 NA           |
| 0   | 35  | 10 PITG_17814  |
| 0   | 11  | 0 PITG_09880   |
| 0   | 27  | 0 NA           |
| 0   | 51  | 26 PITG_05907  |
| 0   | 31  | 2 NA           |
| 0   | 311 | 120 PITG_13970 |
| 0   | 3   | 4 PITG_16937   |

|     |      |                |
|-----|------|----------------|
| 0   | 0    | 2 NA           |
| 0   | 0    | 2 NA           |
| 0   | 177  | 49 PITG_03650  |
| 0   | 22   | 15 PITG_06390  |
| 0   | 93   | 114 PITG_00218 |
| 0   | 0    | 2 NA           |
| 0   | 129  | 94 PITG_06852  |
| 0   | 0    | 0 NA           |
| 0   | 0    | 4 PITG_12254   |
| 0   | 6    | 4 PITG_05355   |
| 0   | 2    | 2 PITG_13282   |
| 0   | 13   | 9 PITG_10325   |
| 0   | 14   | 9 NA           |
| 0   | 0    | 0 PITG_02717   |
| 0   | 87   | 122 PITG_08692 |
| 0   | 4    | 4 NA           |
| 0   | 15   | 21 PITG_16818  |
| 0   | 6    | 9 PITG_06454   |
| 0   | 0    | 4 PITG_05202   |
| 0   | 8    | 0 PITG_16010   |
| 0   | 30   | 0 PITG_13364   |
| 0   | 0    | 190 NA         |
| 0   | 2    | 6 PITG_22830   |
| 0   | 4    | 10 PITG_11405  |
| 0   | 6    | 11 PITG_05302  |
| 0   | 0    | 0 PITG_10794   |
| 0   | 0    | 0 PITG_01316   |
| 0   | 4    | 0 PITG_03408   |
| 0   | 8    | 271 PITG_11247 |
| 0   | 3    | 0 PITG_04023   |
| 0   | 76   | 23 PITG_01514  |
| 0   | 2    | 12 PITG_01367  |
| 158 | 61   | 168 NA         |
| 0   | 10   | 16 PITG_03753  |
| 0   | 9    | 2 PITG_13768   |
| 3   | 1028 | 2915 NA        |
| 0   | 2    | 2 NA           |
| 0   | 86   | 28 NA          |
| 0   | 0    | 0 PITG_10303   |
| 0   | 0    | 0 PITG_01626   |
| 0   | 19   | 41 PITG_07567  |
| 0   | 109  | 127 PITG_09600 |
| 0   | 10   | 6 PITG_00390   |
| 0   | 37   | 8 PITG_05504   |
| 0   | 145  | 32 PITG_08809  |
| 0   | 0    | 5 PITG_04034   |
| 0   | 5    | 0 PITG_18007   |

|   |     |                 |
|---|-----|-----------------|
| 0 | 18  | 8 NA            |
| 0 | 14  | 2 NA            |
| 0 | 0   | 0 PITG_05277    |
| 0 | 23  | 18 PITG_01738   |
| 0 | 2   | 2 PITG_12530    |
| 0 | 73  | 89 PITG_04564   |
| 0 | 57  | 15 PITG_09305   |
| 0 | 21  | 0 PITG_05752    |
| 0 | 4   | 0 NA            |
| 0 | 35  | 47 PITG_00793   |
| 0 | 4   | 0 PITG_17408    |
| 0 | 26  | 19 PITG_14123   |
| 0 | 0   | 18 PITG_18067   |
| 0 | 34  | 6 PITG_09700    |
| 0 | 14  | 0 NA            |
| 0 | 5   | 0 NA            |
| 0 | 10  | 39 PITG_04958   |
| 0 | 15  | 19 PITG_20319   |
| 0 | 0   | 0 PITG_19665    |
| 0 | 2   | 0 NA            |
| 0 | 15  | 11 PITG_13775   |
| 0 | 193 | 29 PITG_03951   |
| 0 | 0   | 2 PITG_14626    |
| 0 | 4   | 0 NA            |
| 0 | 3   | 17 PITG_13773   |
| 0 | 44  | 30 NA           |
| 0 | 3   | 5 PITG_09260    |
| 0 | 15  | 4 PITG_12469    |
| 0 | 17  | 4 PITG_05311    |
| 0 | 377 | 823 PITG_06376  |
| 0 | 145 | 52 NA           |
| 0 | 635 | 2836 PITG_06741 |
| 0 | 10  | 8 NA            |
| 0 | 4   | 4 PITG_15475    |
| 0 | 89  | 14 PITG_03092   |
| 0 | 2   | 2 PITG_08316    |
| 0 | 35  | 14 NA           |
| 0 | 18  | 6 PITG_18092    |
| 0 | 29  | 107 PITG_18045  |
| 0 | 14  | 3 NA            |
| 0 | 2   | 0 PITG_04023    |
| 0 | 35  | 37 PITG_19350   |
| 0 | 2   | 0 PITG_00201    |
| 0 | 11  | 11 PITG_01614   |
| 0 | 12  | 6 NA            |
| 0 | 12  | 2 PITG_06457    |
| 0 | 0   | 0 PITG_17004    |



|    |     |                |
|----|-----|----------------|
| 0  | 20  | 6 PITG_08026   |
| 0  | 4   | 8 NA           |
| 0  | 54  | 57 PITG_13927  |
| 0  | 8   | 0 PITG_10343   |
| 0  | 0   | 2 PITG_01046   |
| 0  | 4   | 0 PITG_14109   |
| 0  | 0   | 0 PITG_03732   |
| 0  | 5   | 0 NA           |
| 0  | 3   | 2 NA           |
| 0  | 21  | 0 PITG_19867   |
| 0  | 3   | 7 PITG_02185   |
| 0  | 7   | 2 PITG_18641   |
| 0  | 18  | 4 PITG_00720   |
| 0  | 178 | 291 PITG_19199 |
| 0  | 3   | 2 NA           |
| 0  | 25  | 19 PITG_13042  |
| 0  | 30  | 0 PITG_06938   |
| 0  | 41  | 44 PITG_01953  |
| 64 | 50  | 96 NA          |
| 0  | 20  | 7 PITG_09143   |
| 0  | 15  | 0 PITG_01836   |
| 0  | 11  | 13 PITG_05201  |
| 0  | 2   | 2 PITG_03476   |
| 0  | 30  | 8 PITG_18008   |
| 0  | 2   | 10 NA          |
| 0  | 0   | 0 PITG_00829   |
| 0  | 7   | 16 PITG_19041  |
| 0  | 10  | 2 PITG_09484   |
| 0  | 0   | 0 NA           |
| 0  | 2   | 0 PITG_06867   |
| 0  | 0   | 0 PITG_08451   |
| 0  | 16  | 18 PITG_06538  |
| 0  | 4   | 0 NA           |
| 0  | 11  | 0 PITG_06997   |
| 0  | 5   | 13 PITG_09310  |
| 0  | 3   | 5 PITG_05674   |
| 0  | 0   | 0 NA           |
| 0  | 13  | 13 NA          |
| 0  | 11  | 14 PITG_04582  |
| 0  | 33  | 5 PITG_10894   |
| 0  | 4   | 19 PITG_01949  |
| 0  | 0   | 2 PITG_14749   |
| 0  | 0   | 0 NA           |
| 0  | 11  | 17 PITG_02624  |
| 0  | 3   | 12 PITG_14595  |
| 0  | 196 | 68 PITG_10952  |
| 0  | 621 | 136 PITG_06689 |

|   |     |                |
|---|-----|----------------|
| 0 | 27  | 7 PITG_03422   |
| 0 | 60  | 35 PITG_10834  |
| 0 | 74  | 308 NA         |
| 0 | 19  | 27 PITG_10191  |
| 0 | 13  | 38 PITG_04002  |
| 0 | 7   | 4 PITG_06353   |
| 0 | 9   | 0 NA           |
| 0 | 0   | 2 PITG_07034   |
| 0 | 16  | 14 PITG_08446  |
| 0 | 4   | 12 PITG_00152  |
| 0 | 13  | 102 PITG_16981 |
| 0 | 6   | 0 PITG_12227   |
| 0 | 25  | 33 PITG_02976  |
| 0 | 10  | 2 PITG_05340   |
| 0 | 9   | 5 PITG_23006   |
| 2 | 50  | 112 PITG_04441 |
| 0 | 20  | 3 PITG_07139   |
| 0 | 4   | 0 PITG_17816   |
| 0 | 0   | 10 NA          |
| 0 | 0   | 4 PITG_18342   |
| 0 | 36  | 10 PITG_08411  |
| 0 | 8   | 0 NA           |
| 0 | 188 | 7 NA           |
| 0 | 6   | 8 PITG_12962   |
| 0 | 0   | 8 PITG_01239   |
| 0 | 15  | 15 PITG_01749  |
| 0 | 25  | 3 PITG_07281   |
| 0 | 12  | 0 NA           |
| 0 | 60  | 2 PITG_16669   |
| 0 | 19  | 5 PITG_12454   |
| 0 | 2   | 4 PITG_18055   |
| 0 | 16  | 8 PITG_02964   |
| 0 | 151 | 430 PITG_21393 |
| 0 | 12  | 0 PITG_04584   |
| 0 | 17  | 2 PITG_02073   |
| 0 | 36  | 6 PITG_15195   |
| 0 | 10  | 0 NA           |
| 0 | 34  | 58 PITG_11926  |
| 0 | 17  | 19 PITG_10898  |
| 0 | 6   | 0 NA           |
| 0 | 4   | 14 PITG_00456  |
| 0 | 13  | 20 PITG_17632  |
| 0 | 83  | 93 PITG_07960  |
| 0 | 4   | 0 NA           |
| 0 | 99  | 17 NA          |
| 0 | 221 | 175 PITG_05589 |
| 0 | 5   | 7 PITG_05375   |

|   |     |                |
|---|-----|----------------|
| 0 | 5   | 10 PITG_18788  |
| 0 | 2   | 0 PITG_06618   |
| 0 | 18  | 5 NA           |
| 0 | 42  | 32 PITG_03850  |
| 0 | 23  | 24 PITG_14818  |
| 0 | 0   | 0 PITG_08736   |
| 0 | 2   | 0 PITG_02041   |
| 0 | 4   | 0 NA           |
| 0 | 2   | 7 PITG_04663   |
| 0 | 4   | 0 NA           |
| 0 | 5   | 26 PITG_17068  |
| 0 | 6   | 32 PITG_14462  |
| 0 | 2   | 2 PITG_02624   |
| 0 | 0   | 14 PITG_06828  |
| 0 | 9   | 2 NA           |
| 0 | 9   | 0 PITG_10601   |
| 0 | 0   | 2 NA           |
| 0 | 4   | 0 NA           |
| 0 | 2   | 3 PITG_16924   |
| 0 | 2   | 11 PITG_07103  |
| 0 | 44  | 0 PITG_12162   |
| 0 | 50  | 35 PITG_00454  |
| 0 | 73  | 40 NA          |
| 0 | 17  | 12 PITG_02824  |
| 0 | 125 | 383 PITG_11329 |
| 0 | 12  | 2 PITG_06148   |
| 0 | 9   | 0 PITG_19603   |
| 0 | 4   | 8 PITG_01674   |
| 0 | 4   | 9 PITG_00590   |
| 0 | 33  | 7 PITG_09986   |
| 0 | 94  | 28 PITG_10593  |
| 0 | 480 | 231 NA         |
| 0 | 143 | 18 NA          |
| 0 | 50  | 298 NA         |
| 0 | 0   | 0 PITG_03455   |
| 0 | 0   | 2 PITG_11437   |
| 0 | 14  | 8 PITG_17139   |
| 0 | 90  | 21 PITG_15641  |
| 0 | 23  | 2 NA           |
| 0 | 2   | 2 PITG_10239   |
| 0 | 3   | 17 PITG_16724  |
| 0 | 19  | 3 NA           |
| 0 | 5   | 0 PITG_16688   |
| 0 | 4   | 0 NA           |
| 0 | 7   | 2 PITG_10762   |
| 0 | 59  | 60 PITG_10083  |
| 0 | 12  | 7 PITG_02177   |

|   |     |                |
|---|-----|----------------|
| 0 | 2   | 4 PITG_16105   |
| 0 | 0   | 14 PITG_09956  |
| 0 | 4   | 5 PITG_10566   |
| 0 | 17  | 58 PITG_06890  |
| 0 | 3   | 10 PITG_21132  |
| 0 | 26  | 2 PITG_20110   |
| 0 | 0   | 3 PITG_20203   |
| 0 | 2   | 0 PITG_06474   |
| 0 | 6   | 0 PITG_17137   |
| 0 | 43  | 6 PITG_05503   |
| 0 | 17  | 9 PITG_16940   |
| 0 | 6   | 2 NA           |
| 0 | 12  | 21 PITG_21186  |
| 0 | 0   | 4 PITG_03761   |
| 0 | 48  | 15 NA          |
| 0 | 178 | 167 PITG_12289 |
| 0 | 29  | 40 PITG_13273  |
| 0 | 157 | 40 PITG_10134  |
| 0 | 63  | 55 PITG_18694  |
| 0 | 43  | 13 NA          |
| 0 | 0   | 0 PITG_11437   |
| 0 | 44  | 0 NA           |
| 0 | 2   | 0 NA           |
| 0 | 37  | 7 PITG_15609   |
| 0 | 8   | 7 PITG_19181   |
| 0 | 5   | 31 PITG_10888  |
| 0 | 31  | 104 PITG_00787 |
| 0 | 9   | 11 PITG_15550  |
| 0 | 0   | 0 PITG_00129   |
| 0 | 2   | 0 PITG_18671   |
| 0 | 43  | 25 NA          |
| 0 | 0   | 2 NA           |
| 0 | 19  | 6 PITG_01950   |
| 0 | 10  | 26 PITG_10827  |
| 0 | 40  | 29 PITG_00284  |
| 0 | 18  | 9 PITG_00117   |
| 0 | 2   | 3 PITG_01614   |
| 0 | 0   | 0 PITG_15065   |
| 0 | 2   | 2 PITG_10301   |
| 0 | 0   | 3 PITG_01840   |
| 0 | 4   | 2 PITG_17421   |
| 0 | 159 | 12 PITG_19124  |
| 0 | 12  | 20 NA          |
| 0 | 5   | 12 NA          |
| 0 | 0   | 0 PITG_02348   |
| 0 | 0   | 6 PITG_02274   |
| 0 | 3   | 2 PITG_08679   |

|     |     |                |
|-----|-----|----------------|
| 0   | 49  | 73 PITG_21173  |
| 0   | 11  | 15 PITG_17201  |
| 0   | 41  | 205 PITG_17240 |
| 0   | 15  | 16 PITG_05245  |
| 0   | 47  | 49 PITG_08306  |
| 0   | 19  | 0 NA           |
| 0   | 27  | 245 NA         |
| 0   | 42  | 21 PITG_18207  |
| 0   | 6   | 13 PITG_03042  |
| 0   | 4   | 3 PITG_16042   |
| 0   | 18  | 4 PITG_16474   |
| 0   | 9   | 0 PITG_13618   |
| 0   | 88  | 177 PITG_08235 |
| 0   | 2   | 17 PITG_17273  |
| 0   | 0   | 0 PITG_07697   |
| 0   | 4   | 2 PITG_18024   |
| 0   | 11  | 2 PITG_15785   |
| 0   | 6   | 4 NA           |
| 0   | 3   | 2 PITG_21617   |
| 0   | 47  | 4 PITG_12494   |
| 0   | 7   | 16 PITG_00348  |
| 0   | 18  | 16 PITG_00426  |
| 0   | 95  | 94 PITG_12462  |
| 0   | 10  | 11 PITG_01790  |
| 0   | 6   | 21 NA          |
| 0   | 0   | 2 PITG_07852   |
| 0   | 59  | 24 PITG_08374  |
| 0   | 0   | 2 PITG_02036   |
| 0   | 0   | 8 NA           |
| 0   | 8   | 2 PITG_01850   |
| 0   | 170 | 335 PITG_22522 |
| 0   | 67  | 152 NA         |
| 0   | 118 | 77 PITG_17601  |
| 0   | 0   | 4 NA           |
| 0   | 16  | 5 PITG_16053   |
| 0   | 0   | 0 NA           |
| 0   | 6   | 6 NA           |
| 0   | 19  | 8 PITG_21186   |
| 111 | 4   | 197 NA         |
| 0   | 0   | 5 PITG_10134   |
| 0   | 2   | 5 PITG_03753   |
| 0   | 23  | 64 PITG_02887  |
| 0   | 4   | 42 PITG_06358  |
| 0   | 83  | 28 PITG_00402  |
| 2   | 43  | 2 NA           |
| 0   | 31  | 2 PITG_17390   |
| 0   | 0   | 4 PITG_20503   |

|     |     |               |
|-----|-----|---------------|
| 0   | 99  | 35 PITG_15329 |
| 0   | 42  | 4 PITG_13505  |
| 0   | 8   | 2 PITG_03532  |
| 0   | 3   | 7 PITG_15779  |
| 0   | 0   | 0 PITG_12915  |
| 0   | 30  | 48 PITG_14576 |
| 288 | 0   | 8 NA          |
| 0   | 0   | 0 PITG_10049  |
| 0   | 52  | 33 NA         |
| 0   | 13  | 39 PITG_02786 |
| 0   | 0   | 0 PITG_04339  |
| 0   | 15  | 30 PITG_03829 |
| 0   | 10  | 11 PITG_06303 |
| 0   | 132 | 11 PITG_05990 |
| 0   | 14  | 12 PITG_04113 |
| 0   | 2   | 0 PITG_04023  |
| 0   | 15  | 32 PITG_12840 |
| 0   | 13  | 0 PITG_03946  |
| 0   | 4   | 5 PITG_07047  |
| 0   | 3   | 7 PITG_01963  |
| 0   | 25  | 22 PITG_03322 |
| 0   | 76  | 17 PITG_08540 |
| 0   | 7   | 2 PITG_19527  |
| 0   | 10  | 2 NA          |
| 0   | 35  | 4 PITG_18027  |
| 0   | 6   | 8 PITG_13345  |
| 0   | 0   | 0 PITG_05387  |
| 0   | 2   | 0 PITG_19623  |
| 0   | 0   | 2 PITG_11119  |
| 0   | 4   | 2 PITG_00945  |
| 0   | 53  | 21 PITG_03902 |
| 0   | 132 | 40 PITG_09241 |
| 0   | 51  | 45 PITG_14249 |
| 0   | 2   | 5 PITG_07795  |
| 0   | 2   | 20 PITG_16999 |
| 0   | 5   | 23 PITG_02968 |
| 0   | 83  | 40 PITG_07121 |
| 0   | 3   | 0 NA          |
| 0   | 2   | 2 PITG_19865  |
| 0   | 2   | 6 PITG_12677  |
| 0   | 19  | 9 PITG_19113  |
| 0   | 9   | 10 PITG_12984 |
| 0   | 17  | 21 PITG_02453 |
| 0   | 20  | 5 NA          |
| 0   | 76  | 5 PITG_03959  |
| 0   | 0   | 12 NA         |
| 0   | 16  | 6 PITG_11922  |

|   |     |                |
|---|-----|----------------|
| 0 | 6   | 14 NA          |
| 0 | 16  | 4 PITG_03011   |
| 0 | 37  | 38 PITG_07232  |
| 0 | 69  | 24 PITG_06808  |
| 0 | 4   | 0 PITG_17627   |
| 0 | 383 | 152 PITG_20041 |
| 0 | 14  | 2 PITG_04931   |
| 0 | 5   | 4 NA           |
| 0 | 95  | 237 PITG_01184 |
| 0 | 15  | 4 PITG_11162   |
| 0 | 9   | 9 PITG_05532   |
| 0 | 8   | 45 PITG_13644  |
| 0 | 28  | 125 PITG_19531 |
| 0 | 4   | 24 PITG_14442  |
| 0 | 9   | 2 PITG_00509   |
| 0 | 5   | 0 PITG_00629   |
| 0 | 11  | 4 PITG_06216   |
| 0 | 35  | 6 NA           |
| 0 | 45  | 4 PITG_09818   |
| 0 | 94  | 128 PITG_04851 |
| 0 | 180 | 178 PITG_01139 |
| 0 | 0   | 0 NA           |
| 0 | 39  | 43 PITG_17609  |
| 0 | 4   | 55 PITG_18025  |
| 0 | 5   | 2 PITG_18632   |
| 0 | 20  | 84 PITG_14727  |
| 0 | 258 | 506 PITG_11766 |
| 0 | 166 | 228 NA         |
| 0 | 0   | 2 PITG_01606   |
| 0 | 7   | 0 PITG_06945   |
| 0 | 37  | 39 PITG_17549  |
| 0 | 52  | 10 PITG_01809  |
| 0 | 25  | 22 PITG_13273  |
| 0 | 0   | 129 NA         |
| 0 | 2   | 2 PITG_00496   |
| 0 | 135 | 41 PITG_02735  |
| 0 | 2   | 0 PITG_11466   |
| 0 | 2   | 0 NA           |
| 0 | 8   | 12 PITG_01453  |
| 0 | 56  | 7 PITG_11430   |
| 0 | 2   | 0 PITG_16649   |
| 0 | 97  | 19 PITG_01728  |
| 0 | 9   | 0 NA           |
| 0 | 4   | 6 PITG_08800   |
| 0 | 14  | 43 PITG_10552  |
| 0 | 0   | 0 NA           |
| 0 | 8   | 0 NA           |

|      |      |                 |
|------|------|-----------------|
| 0    | 45   | 2 NA            |
| 0    | 248  | 96 PITG_06889   |
| 0    | 30   | 14 NA           |
| 0    | 228  | 384 PITG_17825  |
| 0    | 8    | 2 PITG_03761    |
| 0    | 4    | 4 PITG_00215    |
| 0    | 7    | 9 PITG_18129    |
| 0    | 87   | 98 PITG_13968   |
| 2    | 0    | 0 NA            |
| 0    | 12   | 0 PITG_05340    |
| 0    | 13   | 47 PITG_03342   |
| 0    | 2    | 16 PITG_02244   |
| 0    | 0    | 0 PITG_06635    |
| 0    | 19   | 2 NA            |
| 2661 | 4    | 28 NA           |
| 0    | 3    | 0 PITG_11194    |
| 0    | 0    | 23 PITG_13658   |
| 0    | 0    | 6 PITG_18206    |
| 0    | 205  | 26 PITG_01242   |
| 0    | 41   | 5 NA            |
| 0    | 26   | 29 PITG_09932   |
| 0    | 14   | 42 NA           |
| 0    | 0    | 17 PITG_12537   |
| 0    | 51   | 14 NA           |
| 0    | 0    | 8 PITG_08708    |
| 0    | 3    | 0 PITG_11000    |
| 0    | 1158 | 1071 PITG_15999 |
| 0    | 2    | 0 NA            |
| 0    | 8    | 19 PITG_15503   |
| 0    | 18   | 44 PITG_09964   |
| 0    | 10   | 4 PITG_18063    |
| 0    | 81   | 87 PITG_21397   |
| 0    | 16   | 4 PITG_21397    |
| 0    | 75   | 4 PITG_03631    |
| 0    | 17   | 6 PITG_22517    |
| 0    | 0    | 0 PITG_04658    |
| 0    | 29   | 9 PITG_09655    |
| 0    | 51   | 55 PITG_02856   |
| 0    | 8    | 0 PITG_11486    |
| 0    | 2    | 0 PITG_11146    |
| 0    | 4    | 0 PITG_18251    |
| 0    | 9    | 0 PITG_05685    |
| 0    | 15   | 0 PITG_10760    |
| 0    | 893  | 300 PITG_01705  |
| 0    | 2    | 9 PITG_06609    |
| 0    | 64   | 28 NA           |
| 0    | 21   | 62 PITG_03737   |



|     |      |                 |
|-----|------|-----------------|
| 47  | 0    | 2 NA            |
| 0   | 28   | 89 PITG_15392   |
| 0   | 0    | 2 PITG_03630    |
| 0   | 2    | 2 PITG_16365    |
| 0   | 85   | 41 PITG_10593   |
| 0   | 6    | 2 PITG_00125    |
| 0   | 0    | 5 NA            |
| 0   | 9    | 0 PITG_13354    |
| 0   | 92   | 130 PITG_22381  |
| 0   | 7    | 2 PITG_12343    |
| 0   | 14   | 33 NA           |
| 0   | 21   | 13 PITG_03011   |
| 0   | 3    | 0 PITG_14934    |
| 0   | 23   | 2 NA            |
| 0   | 7    | 0 NA            |
| 0   | 11   | 25 NA           |
| 0   | 0    | 8 PITG_02561    |
| 0   | 2    | 2 PITG_19283    |
| 0   | 26   | 16 PITG_12234   |
| 0   | 9    | 2 NA            |
| 0   | 46   | 12 PITG_01754   |
| 0   | 0    | 30 PITG_03081   |
| 0   | 68   | 0 NA            |
| 0   | 10   | 4 PITG_11195    |
| 0   | 6    | 10 NA           |
| 0   | 2    | 14 PITG_17257   |
| 0   | 2    | 0 NA            |
| 0   | 15   | 27 PITG_13999   |
| 0   | 61   | 51 PITG_04499   |
| 0   | 2    | 28 NA           |
| 0   | 37   | 7 NA            |
| 59  | 2    | 21 NA           |
| 0   | 2    | 0 PITG_02146    |
| 0   | 276  | 466 PITG_07903  |
| 219 | 1107 | 3737 NA         |
| 0   | 196  | 62 PITG_05748   |
| 0   | 13   | 22 PITG_10792   |
| 0   | 30   | 18 PITG_09444   |
| 0   | 14   | 5 PITG_18867    |
| 0   | 20   | 6 PITG_11437    |
| 0   | 1769 | 1054 PITG_08812 |
| 0   | 0    | 37 NA           |
| 0   | 193  | 117 PITG_10063  |
| 0   | 2    | 0 PITG_03491    |
| 0   | 2    | 7 PITG_17965    |
| 0   | 17   | 74 PITG_11047   |
| 0   | 3    | 0 PITG_05731    |

|   |     |                |
|---|-----|----------------|
| 0 | 285 | 144 PITG_00321 |
| 0 | 12  | 21 PITG_04478  |
| 0 | 11  | 15 PITG_16121  |
| 0 | 3   | 2 PITG_06969   |
| 0 | 5   | 0 PITG_04893   |
| 0 | 8   | 69 NA          |
| 0 | 35  | 10 PITG_09978  |
| 0 | 200 | 89 PITG_04391  |
| 0 | 13  | 6 PITG_07083   |
| 0 | 2   | 2 PITG_02290   |
| 0 | 13  | 3 NA           |
| 0 | 0   | 0 PITG_18091   |
| 0 | 10  | 24 PITG_18106  |
| 0 | 2   | 2 PITG_06781   |
| 0 | 11  | 16 PITG_14000  |
| 0 | 113 | 3 PITG_11940   |
| 0 | 61  | 3 PITG_17788   |
| 0 | 0   | 2 PITG_01756   |
| 0 | 2   | 2 PITG_08515   |
| 0 | 48  | 3 PITG_07235   |
| 0 | 17  | 6 PITG_02564   |
| 0 | 28  | 7 PITG_22618   |
| 0 | 0   | 0 NA           |
| 0 | 562 | 246 PITG_06748 |
| 0 | 32  | 13 PITG_17997  |
| 0 | 2   | 6 NA           |
| 0 | 21  | 0 PITG_01526   |
| 0 | 26  | 24 PITG_15243  |
| 0 | 76  | 13 PITG_03146  |
| 0 | 2   | 0 PITG_00016   |
| 0 | 0   | 0 NA           |
| 0 | 4   | 14 PITG_04295  |
| 0 | 6   | 2 PITG_13571   |
| 0 | 0   | 0 PITG_21983   |
| 0 | 34  | 102 PITG_06358 |
| 0 | 0   | 0 PITG_01457   |
| 0 | 22  | 11 PITG_10268  |
| 0 | 0   | 0 NA           |
| 0 | 14  | 3 NA           |
| 0 | 9   | 0 PITG_22311   |
| 0 | 58  | 108 PITG_09724 |
| 0 | 18  | 6 PITG_09598   |
| 0 | 262 | 18 NA          |
| 0 | 37  | 32 PITG_18655  |
| 0 | 5   | 0 PITG_04232   |
| 0 | 28  | 14 PITG_15739  |
| 0 | 33  | 0 NA           |

|   |     |                |
|---|-----|----------------|
| 0 | 0   | 2 PITG_14818   |
| 0 | 17  | 20 PITG_19044  |
| 0 | 5   | 4 NA           |
| 0 | 0   | 5 NA           |
| 0 | 30  | 35 PITG_01608  |
| 0 | 0   | 0 NA           |
| 0 | 4   | 0 PITG_02415   |
| 0 | 0   | 2 PITG_18000   |
| 0 | 8   | 2 PITG_13774   |
| 0 | 2   | 4 PITG_16006   |
| 0 | 0   | 0 NA           |
| 0 | 70  | 2 NA           |
| 2 | 16  | 27 PITG_13846  |
| 0 | 8   | 0 PITG_13840   |
| 0 | 13  | 30 PITG_02736  |
| 0 | 2   | 4 PITG_08011   |
| 0 | 2   | 0 PITG_00748   |
| 0 | 4   | 5 PITG_19886   |
| 0 | 33  | 32 NA          |
| 0 | 31  | 14 PITG_07027  |
| 0 | 3   | 4 NA           |
| 0 | 0   | 0 NA           |
| 0 | 9   | 9 NA           |
| 0 | 6   | 2 NA           |
| 0 | 11  | 3 PITG_02541   |
| 0 | 11  | 8 PITG_05566   |
| 0 | 914 | 8 NA           |
| 0 | 0   | 0 PITG_14401   |
| 0 | 9   | 46 PITG_03340  |
| 0 | 16  | 103 PITG_11198 |
| 0 | 71  | 32 PITG_14808  |
| 0 | 52  | 77 PITG_03860  |
| 0 | 13  | 0 PITG_05170   |
| 0 | 223 | 53 NA          |
| 0 | 88  | 30 PITG_13771  |
| 0 | 17  | 11 PITG_17022  |
| 0 | 3   | 2 PITG_07063   |
| 0 | 0   | 12 PITG_05410  |
| 0 | 6   | 0 PITG_18171   |
| 0 | 7   | 12 PITG_13042  |
| 0 | 0   | 2 PITG_14599   |
| 0 | 0   | 0 PITG_01145   |
| 0 | 2   | 14 PITG_00067  |
| 0 | 11  | 0 PITG_16530   |
| 0 | 0   | 2 PITG_17072   |
| 0 | 154 | 80 NA          |
| 0 | 5   | 2 PITG_09897   |

|     |      |                |
|-----|------|----------------|
| 0   | 8    | 35 PITG_07960  |
| 0   | 14   | 2 NA           |
| 0   | 6    | 2 PITG_07973   |
| 0   | 2    | 6 PITG_06452   |
| 0   | 0    | 6 PITG_11698   |
| 0   | 2    | 18 PITG_09248  |
| 0   | 0    | 0 PITG_12140   |
| 0   | 2    | 6 NA           |
| 0   | 0    | 0 PITG_01001   |
| 0   | 0    | 0 PITG_07861   |
| 902 | 101  | 1348 NA        |
| 0   | 43   | 3 NA           |
| 0   | 2    | 0 PITG_18393   |
| 0   | 83   | 46 PITG_03799  |
| 0   | 6    | 3 NA           |
| 0   | 10   | 3 PITG_16012   |
| 0   | 409  | 468 PITG_13682 |
| 0   | 6    | 38 NA          |
| 0   | 57   | 69 NA          |
| 0   | 10   | 42 PITG_14084  |
| 0   | 0    | 2 PITG_11157   |
| 0   | 31   | 4 PITG_01840   |
| 0   | 15   | 15 PITG_07314  |
| 0   | 28   | 2 PITG_02079   |
| 0   | 10   | 0 PITG_10687   |
| 0   | 4    | 37 NA          |
| 0   | 66   | 34 PITG_16114  |
| 0   | 4    | 6 PITG_00424   |
| 0   | 2    | 0 PITG_16104   |
| 0   | 4    | 0 NA           |
| 0   | 108  | 25 PITG_10447  |
| 0   | 4    | 2 PITG_06476   |
| 0   | 113  | 45 PITG_20793  |
| 0   | 23   | 2 PITG_10455   |
| 0   | 10   | 4 PITG_06274   |
| 0   | 1614 | 337 PITG_13889 |
| 0   | 88   | 275 PITG_01223 |
| 0   | 20   | 2 NA           |
| 0   | 0    | 2 NA           |
| 0   | 32   | 52 PITG_04568  |
| 0   | 6    | 0 PITG_16440   |
| 0   | 121  | 163 PITG_04651 |
| 0   | 8    | 17 PITG_08585  |
| 0   | 17   | 0 PITG_01944   |
| 0   | 0    | 0 PITG_05565   |
| 0   | 0    | 2 PITG_02976   |
| 0   | 52   | 58 PITG_06652  |

|   |     |                |
|---|-----|----------------|
| 0 | 96  | 2 PITG_07905   |
| 0 | 80  | 92 PITG_18359  |
| 0 | 90  | 189 PITG_11180 |
| 0 | 4   | 0 NA           |
| 0 | 30  | 0 PITG_15873   |
| 0 | 6   | 0 PITG_10533   |
| 0 | 250 | 32 PITG_01648  |
| 0 | 14  | 15 PITG_19022  |
| 0 | 15  | 2 PITG_03547   |
| 0 | 35  | 45 PITG_08701  |
| 0 | 2   | 2 PITG_09818   |
| 0 | 0   | 19 PITG_07243  |
| 0 | 44  | 49 PITG_05531  |
| 0 | 0   | 0 NA           |
| 0 | 54  | 24 PITG_16476  |
| 0 | 6   | 8 PITG_14626   |
| 0 | 5   | 10 PITG_11133  |
| 0 | 55  | 37 PITG_10384  |
| 0 | 12  | 0 PITG_15062   |
| 0 | 67  | 39 PITG_08138  |
| 0 | 4   | 4 PITG_07926   |
| 0 | 355 | 146 NA         |
| 0 | 17  | 8 PITG_18301   |
| 0 | 0   | 0 PITG_04134   |
| 0 | 33  | 0 PITG_03621   |
| 0 | 0   | 0 PITG_19405   |
| 0 | 189 | 228 PITG_11621 |
| 0 | 272 | 67 PITG_14000  |
| 0 | 0   | 4 PITG_05250   |
| 0 | 485 | 328 PITG_00273 |
| 0 | 3   | 0 PITG_03996   |
| 0 | 20  | 0 NA           |
| 0 | 0   | 0 NA           |
| 0 | 29  | 27 PITG_04248  |
| 0 | 0   | 0 PITG_01164   |
| 0 | 14  | 0 NA           |
| 0 | 89  | 70 NA          |
| 0 | 4   | 0 PITG_03030   |
| 0 | 5   | 0 PITG_00134   |
| 0 | 8   | 31 PITG_09439  |
| 0 | 14  | 6 PITG_08592   |
| 0 | 6   | 10 PITG_09414  |
| 0 | 0   | 2 PITG_00187   |
| 0 | 206 | 271 PITG_03309 |
| 0 | 63  | 28 PITG_00225  |
| 0 | 44  | 12 PITG_06663  |
| 0 | 21  | 0 NA           |

|   |     |                |
|---|-----|----------------|
| 0 | 2   | 2 PITG_03560   |
| 0 | 54  | 269 PITG_22343 |
| 0 | 0   | 2 NA           |
| 0 | 22  | 9 NA           |
| 0 | 81  | 32 PITG_02135  |
| 0 | 4   | 7 PITG_01852   |
| 0 | 8   | 59 PITG_16798  |
| 0 | 36  | 13 PITG_07531  |
| 0 | 26  | 75 PITG_17289  |
| 0 | 51  | 0 PITG_10314   |
| 0 | 9   | 2 PITG_19175   |
| 0 | 2   | 2 PITG_08455   |
| 0 | 6   | 2 NA           |
| 0 | 2   | 4 PITG_05176   |
| 0 | 0   | 2 PITG_00722   |
| 6 | 2   | 2 NA           |
| 0 | 0   | 0 PITG_10429   |
| 0 | 151 | 77 PITG_12148  |
| 0 | 14  | 4 PITG_03018   |
| 0 | 29  | 6 PITG_00281   |
| 0 | 33  | 78 PITG_18359  |
| 0 | 2   | 0 NA           |
| 0 | 4   | 2 NA           |
| 0 | 0   | 46 PITG_23144  |
| 0 | 16  | 22 PITG_13406  |
| 0 | 11  | 6 PITG_19158   |
| 0 | 4   | 18 PITG_14561  |
| 0 | 0   | 19 PITG_03611  |
| 0 | 72  | 30 PITG_00649  |
| 0 | 4   | 2 NA           |
| 0 | 5   | 18 PITG_11451  |
| 0 | 0   | 2 PITG_15571   |
| 0 | 0   | 0 PITG_10161   |
| 0 | 24  | 16 PITG_03364  |
| 0 | 2   | 0 NA           |
| 0 | 5   | 2 NA           |
| 0 | 305 | 191 PITG_06753 |
| 0 | 39  | 68 PITG_14111  |
| 0 | 24  | 86 PITG_19005  |
| 0 | 0   | 29 PITG_06753  |
| 0 | 2   | 75 PITG_18312  |
| 0 | 32  | 20 PITG_01970  |
| 0 | 31  | 13 PITG_21962  |
| 0 | 66  | 0 NA           |
| 0 | 53  | 25 PITG_11914  |
| 0 | 0   | 5 NA           |
| 0 | 4   | 0 PITG_17933   |

|   |     |                |
|---|-----|----------------|
| 0 | 20  | 3 PITG_12843   |
| 0 | 8   | 14 PITG_08383  |
| 0 | 9   | 6 PITG_02797   |
| 0 | 30  | 16 NA          |
| 0 | 39  | 42 PITG_00134  |
| 0 | 2   | 19 NA          |
| 0 | 0   | 0 PITG_00389   |
| 0 | 0   | 0 NA           |
| 0 | 0   | 5 PITG_09092   |
| 0 | 11  | 3 PITG_02866   |
| 0 | 8   | 49 PITG_00359  |
| 0 | 4   | 6 PITG_00256   |
| 0 | 301 | 252 PITG_06359 |
| 0 | 24  | 9 NA           |
| 0 | 9   | 0 NA           |
| 0 | 12  | 38 PITG_02259  |
| 0 | 92  | 70 PITG_00716  |
| 0 | 13  | 2 NA           |
| 0 | 89  | 0 PITG_14557   |
| 0 | 45  | 73 PITG_02343  |
| 0 | 6   | 33 PITG_01762  |
| 0 | 27  | 9 NA           |
| 0 | 4   | 0 NA           |
| 0 | 62  | 0 PITG_20386   |
| 0 | 0   | 0 PITG_01282   |
| 0 | 5   | 5 PITG_09003   |
| 0 | 4   | 21 PITG_14380  |
| 0 | 78  | 7 NA           |
| 0 | 28  | 10 PITG_00020  |
| 0 | 14  | 19 NA          |
| 0 | 6   | 9 NA           |
| 0 | 2   | 2 PITG_01645   |
| 0 | 6   | 7 PITG_18424   |
| 0 | 103 | 385 PITG_15526 |
| 0 | 36  | 69 PITG_10383  |
| 0 | 7   | 23 PITG_11116  |
| 0 | 36  | 6 PITG_21853   |
| 0 | 0   | 19 PITG_06545  |
| 0 | 2   | 5 PITG_03944   |
| 0 | 9   | 0 PITG_03123   |
| 0 | 77  | 41 PITG_15833  |
| 0 | 2   | 3 PITG_09768   |
| 0 | 4   | 7 PITG_17028   |
| 0 | 35  | 2 PITG_16439   |
| 0 | 264 | 14 NA          |
| 0 | 0   | 0 PITG_04310   |
| 0 | 17  | 91 PITG_13980  |

|   |      |                 |
|---|------|-----------------|
| 0 | 127  | 0 PITG_11690    |
| 0 | 8    | 14 PITG_02290   |
| 0 | 26   | 12 PITG_05781   |
| 0 | 0    | 2 PITG_15149    |
| 0 | 5    | 0 NA            |
| 0 | 5    | 13 PITG_00664   |
| 0 | 0    | 0 PITG_03169    |
| 0 | 68   | 47 PITG_00295   |
| 0 | 15   | 46 PITG_00442   |
| 0 | 27   | 11 PITG_21006   |
| 0 | 0    | 0 PITG_03411    |
| 0 | 4839 | 3913 PITG_05392 |
| 0 | 64   | 12 PITG_15762   |
| 0 | 19   | 29 PITG_12343   |
| 0 | 2    | 0 PITG_02124    |
| 0 | 0    | 11 PITG_07829   |
| 0 | 54   | 128 PITG_02047  |
| 0 | 0    | 2 PITG_09747    |
| 0 | 42   | 6 NA            |
| 0 | 0    | 6 NA            |
| 0 | 2    | 2 PITG_15569    |
| 0 | 263  | 171 PITG_08709  |
| 0 | 13   | 70 PITG_11489   |
| 0 | 0    | 0 NA            |
| 0 | 222  | 0 NA            |
| 0 | 2    | 5 PITG_12480    |
| 0 | 0    | 5 NA            |
| 0 | 33   | 0 PITG_04618    |
| 0 | 2    | 0 PITG_10149    |
| 0 | 0    | 3 PITG_19055    |
| 0 | 0    | 2 PITG_08452    |
| 0 | 3    | 12 PITG_21699   |
| 0 | 60   | 46 PITG_09770   |
| 0 | 8    | 2 PITG_07034    |
| 0 | 64   | 306 PITG_22658  |
| 0 | 4    | 0 PITG_17161    |
| 2 | 6    | 85 PITG_01619   |
| 0 | 157  | 48 NA           |
| 0 | 6    | 2 NA            |
| 0 | 4    | 5 PITG_10351    |
| 0 | 0    | 0 PITG_17286    |
| 0 | 39   | 5 PITG_17430    |
| 0 | 0    | 0 PITG_16044    |
| 0 | 35   | 81 PITG_20928   |
| 0 | 87   | 78 PITG_18100   |
| 0 | 52   | 41 PITG_02268   |
| 0 | 20   | 2 PITG_14728    |



|     |      |                |
|-----|------|----------------|
| 0   | 18   | 4 PITG_02977   |
| 0   | 0    | 12 PITG_20296  |
| 0   | 121  | 7 NA           |
| 0   | 2    | 4 PITG_06822   |
| 0   | 2    | 5 PITG_18028   |
| 0   | 18   | 6 PITG_13307   |
| 0   | 9    | 31 NA          |
| 0   | 2    | 21 PITG_14831  |
| 0   | 63   | 56 PITG_07077  |
| 0   | 24   | 0 PITG_12151   |
| 0   | 19   | 20 PITG_12219  |
| 0   | 0    | 0 PITG_17498   |
| 0   | 2    | 0 NA           |
| 0   | 29   | 57 PITG_14919  |
| 0   | 2    | 0 NA           |
| 0   | 155  | 122 PITG_18064 |
| 0   | 2    | 4 PITG_11097   |
| 0   | 29   | 4 PITG_13839   |
| 0   | 941  | 48 PITG_10052  |
| 289 | 35   | 496 NA         |
| 0   | 9    | 6 PITG_12533   |
| 0   | 0    | 0 PITG_02119   |
| 0   | 14   | 35 PITG_03330  |
| 0   | 110  | 159 PITG_06430 |
| 0   | 0    | 0 NA           |
| 0   | 14   | 37 PITG_13757  |
| 0   | 3    | 2 PITG_07327   |
| 0   | 431  | 214 PITG_13459 |
| 0   | 43   | 0 PITG_04104   |
| 0   | 3    | 4 PITG_13345   |
| 833 | 9    | 623 NA         |
| 0   | 8    | 0 PITG_16155   |
| 0   | 2445 | 501 PITG_04121 |
| 0   | 10   | 6 PITG_01614   |
| 0   | 5    | 0 PITG_04555   |
| 0   | 22   | 50 PITG_15055  |
| 0   | 233  | 178 PITG_13769 |
| 0   | 9    | 4 PITG_09962   |
| 0   | 2    | 2 PITG_03015   |
| 0   | 44   | 27 NA          |
| 0   | 38   | 22 PITG_06149  |
| 0   | 53   | 17 PITG_22644  |
| 0   | 131  | 13 NA          |
| 0   | 0    | 2 PITG_12110   |
| 0   | 8    | 0 NA           |
| 0   | 0    | 2 PITG_01584   |
| 0   | 4    | 11 PITG_15267  |

|    |     |                |
|----|-----|----------------|
| 0  | 41  | 44 PITG_21011  |
| 0  | 56  | 166 PITG_07972 |
| 0  | 17  | 0 PITG_08156   |
| 0  | 285 | 75 NA          |
| 0  | 14  | 4 NA           |
| 0  | 15  | 10 PITG_09951  |
| 0  | 40  | 0 NA           |
| 0  | 188 | 34 PITG_11009  |
| 0  | 4   | 11 PITG_17137  |
| 0  | 84  | 15 PITG_01259  |
| 0  | 0   | 2 PITG_07905   |
| 0  | 6   | 4 NA           |
| 0  | 3   | 34 PITG_00664  |
| 0  | 0   | 2 NA           |
| 0  | 12  | 2 PITG_15807   |
| 0  | 10  | 0 NA           |
| 0  | 11  | 22 PITG_00287  |
| 0  | 9   | 4 PITG_09977   |
| 0  | 0   | 2 NA           |
| 0  | 34  | 18 PITG_21599  |
| 0  | 0   | 11 PITG_04283  |
| 0  | 2   | 6 PITG_11249   |
| 0  | 2   | 0 PITG_03375   |
| 0  | 13  | 2 PITG_13841   |
| 0  | 50  | 7 PITG_14847   |
| 0  | 12  | 2 NA           |
| 0  | 52  | 118 PITG_16871 |
| 0  | 51  | 15 PITG_16328  |
| 0  | 49  | 11 NA          |
| 0  | 0   | 0 PITG_15748   |
| 0  | 6   | 2 NA           |
| 0  | 101 | 54 PITG_17076  |
| 0  | 10  | 10 PITG_09780  |
| 0  | 2   | 2 PITG_11158   |
| 0  | 65  | 48 PITG_03852  |
| 0  | 98  | 62 PITG_20355  |
| 0  | 23  | 21 PITG_13070  |
| 0  | 0   | 2 PITG_05600   |
| 0  | 6   | 20 PITG_03340  |
| 0  | 166 | 102 PITG_09835 |
| 0  | 33  | 20 PITG_13202  |
| 0  | 27  | 11 PITG_05762  |
| 0  | 2   | 2 NA           |
| 0  | 0   | 0 NA           |
| 0  | 4   | 8 PITG_15637   |
| 0  | 88  | 53 PITG_21314  |
| 63 | 221 | 476 NA         |

|   |     |                |
|---|-----|----------------|
| 0 | 171 | 21 PITG_10715  |
| 0 | 43  | 2 NA           |
| 0 | 20  | 8 PITG_11527   |
| 0 | 0   | 4 NA           |
| 0 | 14  | 4 PITG_04523   |
| 0 | 0   | 0 PITG_03646   |
| 0 | 15  | 11 PITG_19053  |
| 0 | 4   | 0 PITG_23277   |
| 0 | 179 | 66 PITG_14683  |
| 0 | 11  | 0 NA           |
| 0 | 13  | 4 PITG_03482   |
| 0 | 0   | 0 PITG_02027   |
| 0 | 0   | 0 PITG_18671   |
| 0 | 6   | 10 PITG_21602  |
| 0 | 111 | 6 PITG_17966   |
| 0 | 0   | 0 NA           |
| 0 | 45  | 15 PITG_17021  |
| 0 | 139 | 65 PITG_09253  |
| 0 | 0   | 0 NA           |
| 0 | 0   | 0 NA           |
| 0 | 4   | 19 PITG_00693  |
| 0 | 30  | 2 PITG_09447   |
| 0 | 10  | 83 PITG_21077  |
| 0 | 543 | 118 PITG_20221 |
| 0 | 2   | 13 PITG_17289  |
| 0 | 20  | 2 NA           |
| 0 | 12  | 5 PITG_01154   |
| 0 | 2   | 0 PITG_07331   |
| 0 | 41  | 0 PITG_13302   |
| 0 | 0   | 2 NA           |
| 0 | 14  | 8 PITG_19774   |
| 0 | 43  | 54 NA          |
| 0 | 2   | 0 NA           |
| 0 | 61  | 0 PITG_01283   |
| 4 | 0   | 6 NA           |
| 0 | 3   | 6 PITG_05423   |
| 0 | 7   | 2 PITG_19025   |
| 0 | 46  | 4 NA           |
| 0 | 2   | 0 PITG_09723   |
| 0 | 0   | 2 PITG_16380   |
| 0 | 0   | 6 PITG_01607   |
| 0 | 5   | 4 PITG_17028   |
| 0 | 31  | 8 PITG_00441   |
| 0 | 25  | 28 PITG_12650  |
| 0 | 12  | 10 PITG_00176  |
| 0 | 2   | 17 PITG_13773  |
| 0 | 0   | 0 PITG_02720   |

|   |     |                |
|---|-----|----------------|
| 0 | 153 | 83 PITG_00269  |
| 0 | 15  | 23 PITG_10532  |
| 0 | 60  | 0 NA           |
| 0 | 10  | 32 PITG_16512  |
| 0 | 7   | 9 PITG_03467   |
| 0 | 6   | 4 PITG_15623   |
| 0 | 0   | 3 PITG_00712   |
| 0 | 8   | 2 PITG_19769   |
| 0 | 5   | 6 NA           |
| 0 | 16  | 80 PITG_09440  |
| 0 | 75  | 42 PITG_03576  |
| 0 | 29  | 62 PITG_14639  |
| 0 | 38  | 33 PITG_09782  |
| 0 | 39  | 131 PITG_05638 |
| 0 | 14  | 13 PITG_02506  |
| 0 | 16  | 19 PITG_00147  |
| 0 | 452 | 45 NA          |
| 0 | 31  | 15 PITG_19749  |
| 0 | 286 | 170 PITG_15540 |
| 0 | 452 | 283 PITG_13826 |
| 0 | 13  | 63 PITG_17617  |
| 0 | 21  | 4 PITG_04512   |
| 0 | 2   | 2 PITG_05126   |
| 0 | 4   | 2 NA           |
| 0 | 44  | 22 PITG_03505  |
| 0 | 7   | 0 NA           |
| 0 | 3   | 10 PITG_05672  |
| 0 | 0   | 0 PITG_01647   |
| 0 | 4   | 16 PITG_18446  |
| 0 | 33  | 15 PITG_00496  |
| 0 | 0   | 0 PITG_11296   |
| 0 | 9   | 30 PITG_00807  |
| 0 | 18  | 22 PITG_13775  |
| 0 | 0   | 26 NA          |
| 0 | 0   | 2 PITG_21939   |
| 0 | 6   | 2 PITG_08935   |
| 0 | 7   | 10 PITG_12663  |
| 0 | 2   | 0 PITG_06714   |
| 0 | 0   | 0 PITG_17332   |
| 0 | 20  | 36 PITG_08669  |
| 0 | 4   | 0 PITG_03888   |
| 0 | 9   | 6 PITG_19037   |
| 0 | 0   | 0 PITG_07697   |
| 0 | 0   | 2 PITG_13146   |
| 0 | 8   | 7 PITG_10460   |
| 0 | 2   | 10 PITG_03555  |
| 0 | 0   | 6 PITG_20077   |

|   |     |                |
|---|-----|----------------|
| 0 | 66  | 16 PITG_04905  |
| 0 | 125 | 130 PITG_05114 |
| 0 | 99  | 25 NA          |
| 0 | 17  | 21 PITG_21908  |
| 0 | 90  | 91 PITG_08749  |
| 0 | 3   | 2 PITG_00232   |
| 0 | 0   | 0 PITG_10675   |
| 0 | 20  | 29 NA          |
| 0 | 281 | 153 NA         |
| 0 | 166 | 62 PITG_21887  |
| 0 | 21  | 2 NA           |
| 0 | 22  | 14 PITG_03901  |
| 0 | 10  | 9 NA           |
| 0 | 32  | 14 PITG_06902  |
| 0 | 15  | 4 PITG_11496   |
| 0 | 2   | 21 PITG_11886  |
| 0 | 36  | 9 NA           |
| 0 | 12  | 5 PITG_06319   |
| 0 | 0   | 0 PITG_04396   |
| 0 | 17  | 54 PITG_09445  |
| 0 | 0   | 0 PITG_16478   |
| 0 | 18  | 76 PITG_03599  |
| 0 | 12  | 12 PITG_10120  |
| 0 | 24  | 8 PITG_22313   |
| 0 | 0   | 0 PITG_05505   |
| 0 | 7   | 16 PITG_16484  |
| 0 | 121 | 117 PITG_13745 |
| 0 | 0   | 7 PITG_08367   |
| 0 | 96  | 297 PITG_01365 |
| 0 | 15  | 2 PITG_17163   |
| 0 | 288 | 214 PITG_17952 |
| 0 | 6   | 63 PITG_04603  |
| 0 | 7   | 3 PITG_13486   |
| 2 | 51  | 28 PITG_08351  |
| 0 | 91  | 82 PITG_11431  |
| 0 | 31  | 2 PITG_08659   |
| 0 | 6   | 7 PITG_03872   |
| 0 | 4   | 4 PITG_15091   |
| 0 | 0   | 0 PITG_00134   |
| 0 | 12  | 8 PITG_14221   |
| 0 | 0   | 0 PITG_05001   |
| 0 | 0   | 0 PITG_11431   |
| 0 | 50  | 22 NA          |
| 0 | 20  | 0 PITG_03782   |
| 0 | 0   | 0 PITG_12625   |
| 0 | 31  | 5 NA           |
| 0 | 97  | 37 PITG_04709  |

|   |     |                |
|---|-----|----------------|
| 0 | 6   | 2 PITG_06688   |
| 0 | 44  | 33 PITG_18073  |
| 0 | 6   | 4 PITG_16999   |
| 0 | 40  | 15 PITG_12120  |
| 0 | 0   | 0 PITG_02821   |
| 0 | 21  | 12 PITG_14707  |
| 0 | 70  | 69 PITG_01643  |
| 0 | 0   | 0 PITG_03111   |
| 0 | 13  | 16 PITG_17084  |
| 0 | 19  | 0 PITG_10048   |
| 0 | 132 | 37 PITG_21219  |
| 0 | 45  | 106 PITG_18623 |
| 0 | 13  | 3 PITG_09471   |
| 0 | 26  | 2 PITG_11618   |
| 0 | 25  | 5 PITG_05510   |
| 0 | 108 | 171 PITG_10969 |
| 0 | 0   | 4 NA           |
| 0 | 0   | 0 NA           |
| 0 | 0   | 0 PITG_11119   |
| 0 | 99  | 43 PITG_13806  |
| 0 | 0   | 0 NA           |
| 0 | 0   | 0 PITG_06903   |
| 0 | 0   | 2 PITG_12840   |
| 0 | 305 | 146 PITG_11521 |
| 0 | 2   | 0 PITG_03761   |
| 0 | 0   | 10 PITG_17617  |
| 0 | 82  | 4 PITG_07276   |
| 0 | 0   | 0 NA           |
| 0 | 46  | 4 PITG_01387   |
| 0 | 0   | 0 PITG_15229   |
| 0 | 0   | 2 PITG_15820   |
| 0 | 2   | 0 PITG_13084   |
| 0 | 35  | 14 PITG_01840  |
| 0 | 11  | 2 PITG_19110   |
| 0 | 4   | 0 PITG_15833   |
| 0 | 0   | 0 PITG_00324   |
| 0 | 2   | 4 PITG_02851   |
| 0 | 403 | 253 PITG_07168 |
| 0 | 0   | 0 PITG_02770   |
| 0 | 2   | 6 PITG_04497   |
| 0 | 0   | 2 NA           |
| 0 | 28  | 15 PITG_08822  |
| 0 | 57  | 0 PITG_01480   |
| 0 | 17  | 35 NA          |
| 0 | 0   | 0 PITG_17684   |
| 0 | 5   | 11 PITG_17136  |
| 0 | 54  | 20 PITG_01607  |

|   |      |                 |
|---|------|-----------------|
| 0 | 2    | 0 PITG_07902    |
| 0 | 17   | 32 PITG_07923   |
| 0 | 0    | 4 PITG_09995    |
| 0 | 17   | 4 PITG_01045    |
| 0 | 11   | 35 PITG_13340   |
| 0 | 3    | 0 PITG_05303    |
| 0 | 2    | 49 PITG_19622   |
| 0 | 11   | 6 PITG_06862    |
| 0 | 75   | 0 PITG_11177    |
| 0 | 35   | 5 PITG_12234    |
| 0 | 7    | 22 PITG_01056   |
| 2 | 51   | 392 PITG_03477  |
| 0 | 448  | 602 PITG_03712  |
| 0 | 2    | 7 PITG_15926    |
| 0 | 2    | 2 PITG_15961    |
| 0 | 0    | 0 PITG_22684    |
| 0 | 0    | 0 PITG_12318    |
| 0 | 7    | 2 PITG_16317    |
| 0 | 0    | 0 PITG_17760    |
| 0 | 3    | 0 PITG_11584    |
| 0 | 121  | 23 PITG_11117   |
| 0 | 0    | 0 PITG_16487    |
| 0 | 9    | 40 PITG_11131   |
| 0 | 24   | 28 PITG_10289   |
| 0 | 0    | 10 NA           |
| 0 | 0    | 18 PITG_01539   |
| 0 | 7    | 4 NA            |
| 0 | 140  | 23 PITG_06602   |
| 0 | 9    | 4 NA            |
| 0 | 2    | 8 PITG_05611    |
| 0 | 15   | 13 PITG_03408   |
| 0 | 39   | 6 PITG_16065    |
| 0 | 0    | 4 PITG_11704    |
| 0 | 18   | 0 NA            |
| 0 | 35   | 28 PITG_02426   |
| 0 | 3    | 6 PITG_17706    |
| 0 | 28   | 39 PITG_04725   |
| 0 | 29   | 5 NA            |
| 0 | 0    | 0 PITG_20765    |
| 0 | 29   | 0 NA            |
| 0 | 0    | 0 PITG_03665    |
| 0 | 35   | 2 PITG_03987    |
| 0 | 1911 | 1046 PITG_01333 |
| 0 | 51   | 15 PITG_03544   |
| 0 | 275  | 81 PITG_09990   |
| 0 | 3    | 8 PITG_08305    |
| 0 | 0    | 2 PITG_04034    |

|    |     |                |
|----|-----|----------------|
| 0  | 141 | 9 PITG_19557   |
| 0  | 16  | 0 NA           |
| 0  | 2   | 0 PITG_07301   |
| 0  | 39  | 107 PITG_11247 |
| 0  | 0   | 2 PITG_03335   |
| 0  | 220 | 14 NA          |
| 0  | 67  | 55 PITG_12556  |
| 11 | 0   | 4 NA           |
| 0  | 27  | 26 PITG_02069  |
| 0  | 43  | 8 PITG_12563   |
| 0  | 69  | 30 PITG_02209  |
| 0  | 15  | 6 PITG_08252   |
| 0  | 25  | 32 PITG_09726  |
| 0  | 26  | 8 PITG_17597   |
| 0  | 27  | 9 PITG_14460   |
| 0  | 63  | 10 PITG_12105  |
| 0  | 16  | 17 PITG_05508  |
| 0  | 22  | 61 PITG_06602  |
| 0  | 4   | 0 PITG_06288   |
| 0  | 8   | 0 PITG_03659   |
| 0  | 15  | 12 PITG_00717  |
| 0  | 51  | 144 PITG_13614 |
| 0  | 2   | 0 NA           |
| 0  | 0   | 0 NA           |
| 0  | 0   | 2 NA           |
| 0  | 0   | 0 PITG_18067   |
| 0  | 12  | 8 PITG_00563   |
| 0  | 53  | 223 PITG_04501 |
| 0  | 11  | 7 PITG_01785   |
| 0  | 0   | 0 PITG_13779   |
| 0  | 12  | 24 PITG_21054  |
| 0  | 6   | 9 NA           |
| 0  | 14  | 0 PITG_14108   |
| 0  | 8   | 0 NA           |
| 0  | 10  | 29 PITG_03460  |
| 0  | 23  | 0 PITG_13007   |
| 0  | 0   | 0 NA           |
| 0  | 0   | 2 PITG_11887   |
| 0  | 15  | 54 PITG_00820  |
| 0  | 132 | 103 PITG_16156 |
| 0  | 15  | 3 PITG_05448   |
| 0  | 2   | 4 PITG_11285   |
| 0  | 12  | 2 PITG_17090   |
| 0  | 8   | 0 NA           |
| 0  | 2   | 0 PITG_17781   |
| 0  | 10  | 9 PITG_21853   |
| 0  | 10  | 5 PITG_08660   |



|   |     |                |
|---|-----|----------------|
| 0 | 368 | 200 PITG_08685 |
| 0 | 57  | 46 NA          |
| 0 | 7   | 0 NA           |
| 0 | 67  | 24 PITG_08688  |
| 0 | 20  | 51 PITG_14712  |
| 0 | 289 | 346 PITG_09628 |
| 0 | 0   | 0 PITG_06759   |
| 0 | 9   | 10 PITG_06896  |
| 0 | 19  | 30 PITG_06862  |
| 0 | 37  | 20 PITG_01578  |
| 0 | 21  | 11 PITG_04608  |
| 0 | 48  | 6 PITG_17439   |
| 0 | 0   | 6 PITG_15602   |
| 0 | 2   | 9 PITG_03530   |
| 0 | 82  | 15 PITG_04077  |
| 0 | 2   | 0 PITG_14141   |
| 0 | 258 | 782 PITG_15076 |
| 0 | 0   | 7 PITG_14561   |
| 0 | 2   | 3 PITG_01074   |
| 0 | 2   | 5 PITG_02564   |
| 0 | 17  | 15 PITG_00198  |
| 0 | 98  | 480 PITG_18731 |
| 0 | 125 | 80 PITG_04709  |
| 0 | 44  | 12 PITG_00998  |
| 0 | 6   | 20 NA          |
| 0 | 9   | 0 PITG_10863   |
| 0 | 24  | 23 PITG_20033  |
| 0 | 12  | 5 PITG_21941   |
| 0 | 534 | 82 PITG_01568  |
| 0 | 32  | 21 NA          |
| 0 | 12  | 37 PITG_09832  |
| 0 | 0   | 6 PITG_17461   |
| 0 | 2   | 26 PITG_18037  |
| 0 | 4   | 4 PITG_06106   |
| 0 | 8   | 4 PITG_02625   |
| 0 | 18  | 10 PITG_11161  |
| 0 | 48  | 10 PITG_00681  |
| 0 | 83  | 11 NA          |
| 0 | 13  | 9 PITG_15494   |
| 0 | 13  | 7 PITG_08473   |
| 0 | 95  | 47 PITG_20046  |
| 0 | 8   | 9 PITG_17651   |
| 0 | 129 | 49 NA          |
| 0 | 7   | 0 PITG_12840   |
| 0 | 25  | 2 PITG_02372   |
| 0 | 8   | 6 PITG_13488   |
| 0 | 12  | 33 PITG_02563  |

|   |     |                |
|---|-----|----------------|
| 0 | 6   | 0 PITG_17706   |
| 0 | 91  | 246 PITG_20775 |
| 0 | 2   | 0 NA           |
| 0 | 71  | 41 PITG_12811  |
| 0 | 23  | 4 PITG_12873   |
| 0 | 3   | 4 PITG_01153   |
| 0 | 0   | 3 PITG_03034   |
| 0 | 10  | 2 PITG_07211   |
| 0 | 0   | 0 NA           |
| 0 | 0   | 2 NA           |
| 0 | 8   | 6 NA           |
| 0 | 198 | 62 NA          |
| 0 | 12  | 4 PITG_15923   |
| 0 | 15  | 32 PITG_17334  |
| 0 | 2   | 0 PITG_17081   |
| 0 | 0   | 0 PITG_14194   |
| 0 | 10  | 135 PITG_11244 |
| 0 | 16  | 0 PITG_07073   |
| 0 | 38  | 11 NA          |
| 0 | 127 | 372 PITG_08702 |
| 0 | 2   | 12 PITG_20073  |
| 0 | 2   | 5 PITG_11272   |
| 0 | 3   | 0 NA           |
| 0 | 0   | 16 PITG_01446  |
| 0 | 152 | 43 PITG_11610  |
| 0 | 14  | 17 PITG_01822  |
| 0 | 56  | 0 NA           |
| 0 | 0   | 0 PITG_18891   |
| 0 | 0   | 0 PITG_17551   |
| 0 | 46  | 412 PITG_19017 |
| 0 | 0   | 5 PITG_14991   |
| 0 | 7   | 2 PITG_06817   |
| 0 | 15  | 4 PITG_17897   |
| 0 | 157 | 259 PITG_08744 |
| 0 | 28  | 5 PITG_07035   |
| 0 | 37  | 7 PITG_08941   |
| 0 | 323 | 152 PITG_20212 |
| 0 | 13  | 20 NA          |
| 0 | 11  | 13 NA          |
| 0 | 3   | 7 PITG_05326   |
| 0 | 44  | 28 PITG_14285  |
| 0 | 0   | 0 PITG_03815   |
| 0 | 5   | 0 PITG_11804   |
| 0 | 66  | 0 NA           |
| 0 | 0   | 2 PITG_19235   |
| 0 | 10  | 10 NA          |
| 0 | 4   | 0 PITG_05318   |

|    |     |                |
|----|-----|----------------|
| 0  | 9   | 30 PITG_03399  |
| 0  | 2   | 9 PITG_05480   |
| 0  | 0   | 7 PITG_03008   |
| 0  | 292 | 5 PITG_07199   |
| 0  | 5   | 3 PITG_04111   |
| 0  | 48  | 60 PITG_05007  |
| 0  | 2   | 10 PITG_18751  |
| 0  | 6   | 2 PITG_03829   |
| 0  | 18  | 11 PITG_17071  |
| 0  | 8   | 4 PITG_19532   |
| 0  | 108 | 111 PITG_08733 |
| 0  | 11  | 0 PITG_04590   |
| 0  | 97  | 90 PITG_14391  |
| 0  | 15  | 71 PITG_05367  |
| 0  | 2   | 6 PITG_20043   |
| 0  | 73  | 58 PITG_14248  |
| 0  | 8   | 8 PITG_08306   |
| 0  | 2   | 4 PITG_11594   |
| 0  | 0   | 0 PITG_21451   |
| 0  | 18  | 5 PITG_14106   |
| 0  | 0   | 0 PITG_02659   |
| 28 | 19  | 765 NA         |
| 0  | 7   | 10 PITG_14614  |
| 0  | 2   | 0 NA           |
| 0  | 242 | 86 PITG_16969  |
| 0  | 10  | 11 PITG_18008  |
| 0  | 2   | 0 PITG_21597   |
| 0  | 4   | 7 PITG_04270   |
| 0  | 54  | 49 PITG_08598  |
| 0  | 43  | 8 PITG_01622   |
| 0  | 32  | 4 PITG_08093   |
| 0  | 20  | 0 NA           |
| 0  | 34  | 2 PITG_11859   |
| 0  | 4   | 0 PITG_05701   |
| 0  | 17  | 2 PITG_11089   |
| 0  | 22  | 49 PITG_12219  |
| 0  | 0   | 10 NA          |
| 0  | 4   | 2 PITG_03736   |
| 0  | 14  | 2 PITG_09311   |
| 0  | 4   | 0 PITG_09897   |
| 0  | 5   | 10 PITG_01395  |
| 0  | 12  | 2 PITG_07102   |
| 0  | 39  | 12 PITG_01941  |
| 0  | 363 | 6 NA           |
| 0  | 7   | 5 PITG_03828   |
| 0  | 34  | 37 NA          |
| 0  | 0   | 0 NA           |

|   |      |                 |
|---|------|-----------------|
| 0 | 7    | 2 PITG_06942    |
| 0 | 4    | 0 PITG_15891    |
| 0 | 18   | 22 PITG_14975   |
| 0 | 0    | 0 PITG_11298    |
| 0 | 0    | 0 PITG_12441    |
| 0 | 2    | 0 NA            |
| 0 | 0    | 2 PITG_07385    |
| 0 | 49   | 2 PITG_19286    |
| 0 | 2    | 2 PITG_09477    |
| 0 | 0    | 0 PITG_05729    |
| 0 | 0    | 16 PITG_09006   |
| 0 | 4    | 19 PITG_17632   |
| 0 | 88   | 114 NA          |
| 0 | 1084 | 5045 PITG_00149 |
| 0 | 35   | 17 PITG_10183   |
| 0 | 45   | 0 PITG_10499    |
| 0 | 76   | 65 PITG_12326   |
| 0 | 46   | 23 PITG_01746   |
| 0 | 74   | 13 PITG_17416   |
| 0 | 0    | 2 NA            |
| 0 | 2    | 0 PITG_15832    |
| 0 | 0    | 4 PITG_09820    |
| 0 | 8    | 7 PITG_10831    |
| 0 | 19   | 5 PITG_11410    |
| 0 | 0    | 2 PITG_00450    |
| 0 | 53   | 23 PITG_11286   |
| 0 | 253  | 38 NA           |
| 0 | 0    | 2 PITG_07293    |
| 0 | 4    | 6 PITG_16977    |
| 0 | 7    | 52 NA           |
| 0 | 4    | 0 NA            |
| 0 | 15   | 109 PITG_13122  |
| 0 | 11   | 19 PITG_01740   |
| 0 | 143  | 250 PITG_05938  |
| 0 | 12   | 10 PITG_18095   |
| 0 | 8    | 73 PITG_00797   |
| 0 | 4    | 0 PITG_02273    |
| 0 | 5    | 0 PITG_10894    |
| 0 | 0    | 0 PITG_18300    |
| 0 | 29   | 0 PITG_01317    |
| 0 | 17   | 8 PITG_15885    |
| 0 | 36   | 23 PITG_00391   |
| 0 | 26   | 32 PITG_08241   |
| 0 | 27   | 14 PITG_02210   |
| 0 | 227  | 53 NA           |
| 0 | 10   | 14 PITG_02546   |
| 0 | 20   | 68 PITG_02666   |

|   |     |                |
|---|-----|----------------|
| 0 | 0   | 4 PITG_16038   |
| 0 | 19  | 6 NA           |
| 0 | 2   | 13 NA          |
| 0 | 201 | 17 PITG_01185  |
| 0 | 7   | 0 PITG_04421   |
| 0 | 2   | 4 NA           |
| 0 | 0   | 0 PITG_03757   |
| 0 | 4   | 0 PITG_16131   |
| 0 | 13  | 0 PITG_11153   |
| 0 | 11  | 4 NA           |
| 0 | 2   | 0 PITG_00416   |
| 0 | 6   | 2 PITG_03766   |
| 0 | 7   | 5 NA           |
| 0 | 2   | 38 PITG_01031  |
| 0 | 5   | 0 PITG_12855   |
| 0 | 5   | 0 PITG_06648   |
| 0 | 20  | 20 PITG_17814  |
| 0 | 163 | 171 PITG_06631 |
| 0 | 0   | 0 PITG_00250   |
| 0 | 12  | 0 PITG_10308   |
| 0 | 91  | 84 PITG_19608  |
| 0 | 6   | 2 PITG_13512   |
| 0 | 2   | 4 PITG_01691   |
| 0 | 33  | 15 PITG_23307  |
| 0 | 11  | 3 PITG_15748   |
| 0 | 102 | 105 PITG_14362 |
| 0 | 4   | 2 PITG_17292   |
| 0 | 0   | 6 PITG_11551   |
| 0 | 34  | 2 NA           |
| 0 | 42  | 8 PITG_11177   |
| 0 | 5   | 4 NA           |
| 0 | 263 | 128 PITG_03018 |
| 0 | 10  | 6 PITG_05194   |
| 0 | 45  | 3 NA           |
| 0 | 0   | 6 PITG_06753   |
| 0 | 4   | 4 PITG_18067   |
| 0 | 14  | 12 PITG_04048  |
| 0 | 153 | 98 PITG_09537  |
| 0 | 10  | 7 PITG_03611   |
| 0 | 2   | 6 PITG_10008   |
| 0 | 135 | 0 PITG_11483   |
| 0 | 2   | 4 PITG_02199   |
| 0 | 0   | 2 PITG_07234   |
| 0 | 25  | 0 PITG_06900   |
| 0 | 0   | 0 PITG_12761   |
| 0 | 14  | 0 PITG_00699   |
| 0 | 27  | 48 PITG_14173  |

|   |     |                |
|---|-----|----------------|
| 0 | 61  | 52 PITG_08425  |
| 0 | 69  | 14 PITG_11612  |
| 0 | 2   | 2 PITG_21517   |
| 0 | 21  | 2 PITG_03751   |
| 0 | 2   | 2 PITG_01063   |
| 0 | 26  | 28 PITG_02736  |
| 0 | 8   | 0 PITG_18421   |
| 0 | 8   | 4 PITG_01405   |
| 0 | 0   | 0 PITG_11437   |
| 0 | 8   | 25 PITG_23159  |
| 0 | 9   | 36 PITG_17925  |
| 0 | 7   | 5 NA           |
| 0 | 8   | 34 PITG_05507  |
| 0 | 73  | 584 PITG_10218 |
| 0 | 4   | 3 PITG_10481   |
| 0 | 12  | 2 NA           |
| 0 | 71  | 163 PITG_11459 |
| 0 | 25  | 0 PITG_09220   |
| 0 | 7   | 5 PITG_12980   |
| 0 | 18  | 10 PITG_01349  |
| 0 | 4   | 0 PITG_04701   |
| 0 | 28  | 23 NA          |
| 0 | 33  | 10 PITG_16474  |
| 0 | 0   | 4 PITG_18369   |
| 0 | 0   | 0 PITG_05731   |
| 0 | 9   | 16 PITG_01563  |
| 0 | 5   | 0 PITG_06850   |
| 0 | 28  | 30 PITG_08094  |
| 0 | 5   | 13 PITG_10087  |
| 0 | 4   | 2 NA           |
| 0 | 21  | 103 PITG_06889 |
| 0 | 17  | 41 PITG_12462  |
| 0 | 10  | 16 PITG_15850  |
| 0 | 6   | 4 NA           |
| 0 | 4   | 7 PITG_07034   |
| 0 | 7   | 0 NA           |
| 0 | 272 | 53 PITG_18099  |
| 0 | 64  | 16 PITG_03491  |
| 0 | 2   | 2 PITG_13262   |
| 0 | 2   | 3 NA           |
| 0 | 0   | 4 PITG_10539   |
| 0 | 22  | 0 NA           |
| 0 | 7   | 0 PITG_05128   |
| 0 | 8   | 0 PITG_17452   |
| 0 | 17  | 43 PITG_07199  |
| 0 | 2   | 12 PITG_00406  |
| 0 | 6   | 2 PITG_07852   |

|      |     |                |
|------|-----|----------------|
| 0    | 100 | 153 PITG_08692 |
| 0    | 2   | 3 PITG_10395   |
| 0    | 0   | 2 PITG_15541   |
| 0    | 3   | 0 NA           |
| 0    | 5   | 2 PITG_08104   |
| 0    | 55  | 6 PITG_01397   |
| 0    | 215 | 100 PITG_12661 |
| 0    | 2   | 2 PITG_16036   |
| 0    | 8   | 15 PITG_10969  |
| 0    | 2   | 0 PITG_08947   |
| 0    | 86  | 24 PITG_04077  |
| 0    | 2   | 0 PITG_16227   |
| 0    | 2   | 4 NA           |
| 0    | 0   | 4 NA           |
| 0    | 13  | 5 PITG_10650   |
| 0    | 0   | 0 NA           |
| 0    | 0   | 18 PITG_04682  |
| 0    | 35  | 32 PITG_00654  |
| 0    | 24  | 17 PITG_09366  |
| 0    | 28  | 40 PITG_15505  |
| 0    | 2   | 9 PITG_03318   |
| 0    | 34  | 63 PITG_11888  |
| 0    | 6   | 0 NA           |
| 0    | 0   | 0 PITG_19088   |
| 0    | 55  | 121 PITG_08693 |
| 0    | 43  | 2 PITG_17049   |
| 0    | 57  | 0 PITG_11728   |
| 0    | 0   | 0 PITG_05523   |
| 2    | 0   | 2 NA           |
| 0    | 9   | 13 PITG_09817  |
| 0    | 9   | 18 PITG_08440  |
| 0    | 17  | 0 PITG_09278   |
| 0    | 6   | 0 PITG_02809   |
| 1043 | 115 | 1579 NA        |
| 0    | 64  | 219 PITG_17174 |
| 0    | 26  | 0 PITG_13039   |
| 0    | 2   | 4 PITG_07250   |
| 0    | 6   | 6 PITG_00495   |
| 0    | 405 | 100 NA         |
| 0    | 0   | 0 NA           |
| 0    | 32  | 4 PITG_12813   |
| 0    | 13  | 2 PITG_18746   |
| 0    | 210 | 49 PITG_17396  |
| 0    | 14  | 10 NA          |
| 0    | 6   | 8 PITG_02867   |
| 0    | 130 | 6 NA           |
| 0    | 8   | 10 PITG_00140  |

|   |     |                 |
|---|-----|-----------------|
| 0 | 0   | 0 PITG_03636    |
| 0 | 10  | 10 PITG_06847   |
| 0 | 5   | 0 PITG_00190    |
| 0 | 7   | 0 PITG_02031    |
| 0 | 0   | 0 PITG_19088    |
| 0 | 0   | 0 PITG_00148    |
| 0 | 14  | 0 NA            |
| 0 | 129 | 0 PITG_12278    |
| 0 | 15  | 0 PITG_12984    |
| 0 | 24  | 9 PITG_03288    |
| 0 | 30  | 6 NA            |
| 0 | 2   | 0 PITG_18453    |
| 0 | 13  | 8 PITG_07102    |
| 0 | 0   | 4 PITG_19466    |
| 0 | 33  | 10 PITG_06698   |
| 0 | 9   | 0 NA            |
| 0 | 0   | 11 PITG_11890   |
| 0 | 25  | 6 PITG_15619    |
| 0 | 28  | 6 PITG_08686    |
| 0 | 49  | 23 PITG_09954   |
| 0 | 57  | 9 PITG_04746    |
| 0 | 3   | 2 PITG_13713    |
| 0 | 52  | 9 NA            |
| 0 | 562 | 1026 PITG_18920 |
| 0 | 113 | 60 PITG_15519   |
| 0 | 13  | 13 NA           |
| 0 | 89  | 18 NA           |
| 0 | 213 | 44 PITG_02046   |
| 0 | 129 | 55 PITG_10903   |
| 0 | 2   | 9 NA            |
| 0 | 3   | 4 NA            |
| 0 | 0   | 2 PITG_21724    |
| 0 | 4   | 0 PITG_09209    |
| 0 | 39  | 17 PITG_07274   |
| 0 | 15  | 12 PITG_17334   |
| 0 | 2   | 6 PITG_02728    |
| 0 | 12  | 20 PITG_14465   |
| 0 | 65  | 72 PITG_00622   |
| 0 | 11  | 2 PITG_03263    |
| 0 | 69  | 79 PITG_11625   |
| 0 | 17  | 4 PITG_10796    |
| 0 | 0   | 0 NA            |
| 0 | 28  | 66 PITG_00663   |
| 0 | 56  | 17 PITG_12001   |
| 0 | 154 | 62 NA           |
| 0 | 36  | 0 PITG_14131    |
| 0 | 0   | 2 NA            |



|      |      |                 |
|------|------|-----------------|
| 0    | 16   | 17 NA           |
| 0    | 44   | 38 NA           |
| 0    | 35   | 48 NA           |
| 0    | 2    | 5 PITG_14473    |
| 0    | 243  | 92 NA           |
| 0    | 6    | 0 NA            |
| 0    | 13   | 4 PITG_11410    |
| 0    | 2    | 0 PITG_09388    |
| 0    | 5    | 2 PITG_02888    |
| 0    | 332  | 278 NA          |
| 0    | 65   | 8 PITG_07292    |
| 0    | 0    | 0 PITG_07331    |
| 0    | 3070 | 26 NA           |
| 0    | 773  | 1310 PITG_08785 |
| 0    | 20   | 32 PITG_17602   |
| 0    | 36   | 6 NA            |
| 0    | 21   | 8 PITG_01932    |
| 0    | 24   | 11 PITG_19113   |
| 0    | 23   | 12 PITG_08011   |
| 0    | 17   | 2 NA            |
| 0    | 0    | 0 NA            |
| 0    | 15   | 15 PITG_19166   |
| 0    | 13   | 29 PITG_02103   |
| 1844 | 33   | 1772 NA         |
| 0    | 0    | 0 PITG_03287    |
| 0    | 26   | 0 NA            |
| 0    | 324  | 161 PITG_18100  |
| 7    | 0    | 7 NA            |
| 0    | 8    | 6 PITG_07286    |
| 0    | 23   | 8 PITG_13758    |
| 0    | 0    | 0 PITG_07573    |
| 0    | 7    | 5 PITG_00734    |
| 0    | 40   | 18 PITG_01683   |
| 0    | 2    | 8 PITG_15737    |
| 0    | 572  | 56 PITG_07030   |
| 0    | 29   | 37 PITG_11202   |
| 0    | 62   | 32 PITG_00665   |
| 0    | 49   | 22 PITG_20192   |
| 0    | 0    | 6 PITG_19436    |
| 0    | 2    | 0 PITG_03939    |
| 0    | 21   | 9 PITG_14194    |
| 0    | 35   | 36 PITG_23205   |
| 0    | 2    | 2 PITG_07874    |
| 0    | 43   | 11 PITG_20742   |
| 0    | 2    | 4 NA            |
| 0    | 2    | 2 NA            |
| 2    | 0    | 0 NA            |

|   |     |                |
|---|-----|----------------|
| 0 | 18  | 6 PITG_08827   |
| 0 | 9   | 3 PITG_04569   |
| 0 | 0   | 0 PITG_22688   |
| 0 | 65  | 4 PITG_08589   |
| 0 | 100 | 48 PITG_16865  |
| 0 | 5   | 10 PITG_18251  |
| 0 | 2   | 0 PITG_16389   |
| 0 | 13  | 15 PITG_08306  |
| 0 | 16  | 2 PITG_00545   |
| 0 | 52  | 47 PITG_23205  |
| 0 | 14  | 52 PITG_17884  |
| 0 | 123 | 14 NA          |
| 0 | 31  | 18 NA          |
| 0 | 8   | 77 PITG_07586  |
| 0 | 5   | 0 PITG_10927   |
| 0 | 2   | 2 PITG_15566   |
| 0 | 57  | 14 NA          |
| 0 | 25  | 0 NA           |
| 0 | 12  | 24 PITG_20717  |
| 0 | 29  | 20 PITG_14835  |
| 0 | 3   | 2 PITG_14622   |
| 0 | 16  | 6 NA           |
| 0 | 4   | 0 PITG_14021   |
| 0 | 0   | 11 PITG_03769  |
| 0 | 77  | 10 NA          |
| 0 | 4   | 0 NA           |
| 0 | 2   | 12 PITG_14226  |
| 0 | 2   | 3 PITG_11857   |
| 0 | 11  | 0 NA           |
| 0 | 85  | 106 PITG_01283 |
| 0 | 290 | 534 PITG_01524 |
| 0 | 20  | 12 PITG_00413  |
| 0 | 42  | 8 PITG_17403   |
| 0 | 2   | 17 PITG_01737  |
| 0 | 22  | 145 PITG_19961 |
| 0 | 879 | 54 NA          |
| 0 | 10  | 0 PITG_11119   |
| 0 | 4   | 0 PITG_03890   |
| 0 | 108 | 39 NA          |
| 0 | 4   | 0 PITG_06480   |
| 0 | 14  | 22 NA          |
| 0 | 4   | 4 NA           |
| 0 | 52  | 10 PITG_03751  |
| 0 | 0   | 0 PITG_15818   |
| 0 | 37  | 24 PITG_03979  |
| 0 | 132 | 25 PITG_02710  |
| 0 | 231 | 99 PITG_06146  |

|     |     |               |
|-----|-----|---------------|
| 0   | 3   | 0 NA          |
| 0   | 12  | 27 PITG_06705 |
| 15  | 0   | 4 NA          |
| 0   | 2   | 2 PITG_02731  |
| 0   | 4   | 2 PITG_12845  |
| 0   | 0   | 7 PITG_10921  |
| 0   | 68  | 84 PITG_08693 |
| 0   | 8   | 2 NA          |
| 0   | 30  | 18 PITG_13806 |
| 0   | 92  | 28 NA         |
| 0   | 50  | 35 PITG_18727 |
| 0   | 20  | 8 PITG_17022  |
| 0   | 3   | 0 PITG_18274  |
| 0   | 41  | 14 PITG_21626 |
| 0   | 15  | 2 NA          |
| 0   | 26  | 0 NA          |
| 0   | 12  | 10 PITG_15267 |
| 0   | 2   | 0 NA          |
| 0   | 7   | 4 PITG_01272  |
| 0   | 2   | 5 PITG_13745  |
| 0   | 3   | 0 NA          |
| 0   | 79  | 34 PITG_08083 |
| 0   | 42  | 30 NA         |
| 0   | 23  | 2 PITG_10763  |
| 0   | 53  | 39 PITG_00442 |
| 0   | 16  | 9 PITG_11029  |
| 0   | 118 | 14 NA         |
| 0   | 2   | 0 NA          |
| 0   | 0   | 0 PITG_05277  |
| 0   | 3   | 2 NA          |
| 0   | 7   | 47 PITG_02211 |
| 0   | 9   | 16 NA         |
| 0   | 3   | 13 PITG_05757 |
| 0   | 4   | 0 PITG_15140  |
| 0   | 124 | 26 NA         |
| 0   | 2   | 2 PITG_00134  |
| 0   | 12  | 4 PITG_01224  |
| 0   | 11  | 6 PITG_03743  |
| 0   | 49  | 14 PITG_02857 |
| 0   | 12  | 0 PITG_16770  |
| 0   | 7   | 21 PITG_04698 |
| 253 | 79  | 911 NA        |
| 0   | 9   | 0 NA          |
| 0   | 14  | 4 PITG_15912  |
| 0   | 26  | 16 PITG_20727 |
| 0   | 41  | 2 NA          |
| 0   | 108 | 2 PITG_17664  |

|   |     |                |
|---|-----|----------------|
| 0 | 53  | 10 PITG_03951  |
| 0 | 4   | 6 PITG_11993   |
| 0 | 0   | 2 PITG_15820   |
| 0 | 4   | 12 PITG_21909  |
| 0 | 35  | 10 NA          |
| 0 | 2   | 0 NA           |
| 0 | 17  | 14 PITG_19184  |
| 0 | 19  | 2 PITG_11159   |
| 0 | 31  | 53 NA          |
| 0 | 9   | 24 PITG_10995  |
| 0 | 2   | 2 PITG_03341   |
| 0 | 2   | 2 PITG_06898   |
| 0 | 4   | 6 PITG_00809   |
| 0 | 158 | 63 PITG_06047  |
| 0 | 126 | 448 PITG_13271 |
| 0 | 4   | 0 NA           |
| 0 | 13  | 0 NA           |
| 0 | 0   | 0 PITG_16221   |
| 0 | 17  | 8 NA           |
| 0 | 0   | 0 NA           |
| 0 | 39  | 121 PITG_06015 |
| 0 | 0   | 0 PITG_08473   |
| 0 | 90  | 70 PITG_13483  |
| 0 | 45  | 10 NA          |
| 0 | 0   | 0 NA           |
| 0 | 29  | 9 PITG_03846   |
| 0 | 24  | 9 NA           |
| 0 | 8   | 2 NA           |
| 0 | 111 | 30 PITG_11675  |
| 0 | 0   | 4 PITG_09665   |
| 0 | 172 | 0 NA           |
| 0 | 16  | 0 NA           |
| 0 | 20  | 0 NA           |
| 0 | 3   | 2 NA           |
| 0 | 7   | 2 NA           |
| 0 | 13  | 5 PITG_11993   |
| 0 | 272 | 351 NA         |
| 0 | 27  | 29 PITG_09990  |
| 0 | 6   | 5 PITG_11111   |
| 0 | 0   | 0 NA           |
| 0 | 15  | 2 PITG_11019   |
| 0 | 137 | 71 PITG_06281  |
| 0 | 0   | 0 PITG_20081   |
| 0 | 87  | 35 PITG_20800  |
| 0 | 3   | 0 PITG_03892   |
| 0 | 11  | 2 NA           |
| 0 | 62  | 23 PITG_10060  |

|    |      |                |
|----|------|----------------|
| 0  | 16   | 5 PITG_17004   |
| 0  | 84   | 99 PITG_21457  |
| 0  | 12   | 7 PITG_05465   |
| 0  | 58   | 2 NA           |
| 0  | 10   | 8 PITG_16899   |
| 0  | 14   | 10 NA          |
| 0  | 2    | 12 NA          |
| 0  | 19   | 0 PITG_10034   |
| 0  | 2    | 0 PITG_13654   |
| 0  | 0    | 0 PITG_18459   |
| 0  | 9    | 8 PITG_05855   |
| 0  | 467  | 48 PITG_16969  |
| 0  | 34   | 30 PITG_14131  |
| 0  | 4    | 16 PITG_08304  |
| 0  | 13   | 3 NA           |
| 0  | 0    | 13 PITG_11813  |
| 0  | 0    | 2 PITG_01457   |
| 0  | 3    | 2 PITG_04547   |
| 0  | 10   | 34 PITG_06827  |
| 0  | 6    | 9 NA           |
| 0  | 12   | 26 PITG_19966  |
| 0  | 0    | 0 PITG_03374   |
| 0  | 289  | 115 PITG_16156 |
| 0  | 11   | 6 PITG_22313   |
| 0  | 2    | 15 PITG_02810  |
| 0  | 36   | 7 NA           |
| 0  | 14   | 0 PITG_03529   |
| 0  | 5    | 10 PITG_06917  |
| 0  | 0    | 0 PITG_03169   |
| 0  | 0    | 0 PITG_07026   |
| 0  | 21   | 51 PITG_09985  |
| 0  | 20   | 2 PITG_17768   |
| 0  | 5    | 0 NA           |
| 0  | 2    | 3 PITG_11981   |
| 0  | 22   | 11 NA          |
| 0  | 2    | 2 PITG_13544   |
| 0  | 23   | 92 PITG_15553  |
| 0  | 27   | 35 PITG_05685  |
| 0  | 23   | 2 PITG_00713   |
| 46 | 0    | 33 NA          |
| 0  | 4    | 2 PITG_00262   |
| 0  | 1023 | 589 PITG_14726 |
| 0  | 21   | 25 PITG_00188  |
| 0  | 19   | 54 PITG_11767  |
| 0  | 5    | 0 PITG_18463   |
| 0  | 0    | 0 PITG_02289   |
| 0  | 5    | 5 PITG_05423   |

|     |     |               |
|-----|-----|---------------|
| 0   | 3   | 2 PITG_09680  |
| 0   | 23  | 21 PITG_02446 |
| 0   | 705 | 110 NA        |
| 0   | 25  | 37 NA         |
| 0   | 42  | 0 NA          |
| 0   | 2   | 7 PITG_16734  |
| 0   | 26  | 8 NA          |
| 0   | 2   | 4 NA          |
| 0   | 39  | 4 PITG_11077  |
| 0   | 46  | 0 NA          |
| 0   | 2   | 2 PITG_04718  |
| 0   | 131 | 58 PITG_17456 |
| 0   | 4   | 4 NA          |
| 0   | 0   | 2 PITG_09234  |
| 0   | 42  | 79 PITG_09221 |
| 0   | 18  | 6 NA          |
| 0   | 17  | 4 NA          |
| 0   | 18  | 25 PITG_13469 |
| 0   | 42  | 97 PITG_18474 |
| 0   | 0   | 0 NA          |
| 61  | 32  | 93 NA         |
| 0   | 7   | 0 PITG_03054  |
| 0   | 11  | 0 PITG_07281  |
| 0   | 18  | 0 NA          |
| 0   | 55  | 22 PITG_03656 |
| 0   | 6   | 5 PITG_13393  |
| 0   | 0   | 4 PITG_12534  |
| 0   | 5   | 69 PITG_00133 |
| 0   | 29  | 22 PITG_06259 |
| 0   | 407 | 336 NA        |
| 0   | 0   | 4 PITG_00180  |
| 0   | 126 | 32 PITG_08553 |
| 0   | 3   | 0 PITG_17142  |
| 0   | 14  | 13 PITG_20205 |
| 0   | 2   | 3 PITG_13796  |
| 0   | 42  | 28 PITG_01748 |
| 0   | 28  | 6 PITG_18542  |
| 0   | 17  | 5 PITG_08396  |
| 0   | 14  | 2 PITG_03478  |
| 0   | 6   | 38 PITG_03081 |
| 0   | 0   | 2 NA          |
| 0   | 58  | 38 PITG_19964 |
| 0   | 2   | 0 PITG_07983  |
| 0   | 0   | 22 PITG_17063 |
| 267 | 2   | 261 NA        |
| 0   | 0   | 0 NA          |
| 0   | 63  | 13 NA         |

|     |    |               |
|-----|----|---------------|
| 0   | 17 | 16 PITG_03347 |
| 0   | 89 | 64 PITG_00235 |
| 0   | 15 | 4 PITG_13346  |
| 0   | 7  | 7 PITG_08305  |
| 0   | 8  | 6 PITG_09956  |
| 0   | 40 | 17 PITG_18736 |
| 0   | 25 | 6 PITG_13910  |
| 0   | 11 | 2 PITG_09138  |
| 0   | 6  | 4 NA          |
| 0   | 5  | 2 PITG_06832  |
| 0   | 24 | 8 NA          |
| 0   | 13 | 19 PITG_06353 |
| 0   | 13 | 17 PITG_17768 |
| 0   | 31 | 40 PITG_13845 |
| 0   | 36 | 14 PITG_10069 |
| 0   | 2  | 3 PITG_04902  |
| 0   | 4  | 10 PITG_06227 |
| 0   | 8  | 0 PITG_06450  |
| 0   | 47 | 24 PITG_19537 |
| 0   | 4  | 29 PITG_05508 |
| 0   | 47 | 20 PITG_09401 |
| 0   | 32 | 18 PITG_07052 |
| 0   | 0  | 0 PITG_18453  |
| 0   | 2  | 10 PITG_13366 |
| 0   | 37 | 17 PITG_12919 |
| 0   | 15 | 20 PITG_02975 |
| 0   | 12 | 13 PITG_01591 |
| 0   | 21 | 54 PITG_02122 |
| 0   | 31 | 27 PITG_13679 |
| 0   | 19 | 29 PITG_00490 |
| 0   | 12 | 5 PITG_15851  |
| 0   | 31 | 10 PITG_03825 |
| 0   | 0  | 0 PITG_00180  |
| 0   | 35 | 91 PITG_09001 |
| 0   | 15 | 20 PITG_06328 |
| 0   | 74 | 65 PITG_10878 |
| 0   | 0  | 2 PITG_04974  |
| 0   | 78 | 13 NA         |
| 0   | 0  | 3 PITG_16316  |
| 0   | 5  | 0 PITG_04824  |
| 0   | 9  | 0 NA          |
| 0   | 42 | 27 PITG_13462 |
| 0   | 10 | 2 NA          |
| 194 | 57 | 150 NA        |
| 0   | 0  | 0 NA          |
| 0   | 0  | 5 NA          |
| 0   | 21 | 37 PITG_13422 |

|   |     |                |
|---|-----|----------------|
| 0 | 0   | 0 NA           |
| 0 | 2   | 0 PITG_13613   |
| 0 | 2   | 0 PITG_17095   |
| 0 | 0   | 0 PITG_04907   |
| 0 | 39  | 0 PITG_00808   |
| 0 | 2   | 2 PITG_17461   |
| 0 | 30  | 39 PITG_14485  |
| 0 | 0   | 0 PITG_18312   |
| 0 | 0   | 12 PITG_18312  |
| 0 | 6   | 12 PITG_18248  |
| 0 | 0   | 0 PITG_00284   |
| 0 | 12  | 9 PITG_17433   |
| 0 | 53  | 29 PITG_13114  |
| 0 | 9   | 22 PITG_08172  |
| 0 | 2   | 3 PITG_08189   |
| 0 | 0   | 7 NA           |
| 0 | 20  | 24 PITG_20815  |
| 0 | 28  | 2 PITG_10595   |
| 0 | 17  | 2 PITG_02482   |
| 0 | 85  | 49 PITG_13395  |
| 0 | 160 | 165 PITG_16553 |
| 0 | 6   | 2 PITG_11119   |
| 2 | 262 | 848 PITG_04640 |
| 0 | 30  | 56 PITG_12310  |
| 0 | 61  | 25 PITG_13620  |
| 0 | 4   | 0 NA           |
| 0 | 5   | 0 PITG_04973   |
| 0 | 17  | 30 PITG_10926  |
| 0 | 106 | 6 PITG_17728   |
| 0 | 53  | 213 PITG_08044 |
| 0 | 7   | 6 PITG_19615   |
| 0 | 4   | 22 PITG_19128  |
| 0 | 24  | 2 PITG_20787   |
| 0 | 2   | 14 NA          |
| 0 | 51  | 3 PITG_02001   |
| 0 | 72  | 0 PITG_22475   |
| 0 | 64  | 33 PITG_21178  |
| 0 | 106 | 18 PITG_01921  |
| 0 | 171 | 33 NA          |
| 0 | 2   | 5 PITG_16668   |
| 0 | 50  | 6 NA           |
| 0 | 2   | 2 NA           |
| 0 | 28  | 85 PITG_02769  |
| 0 | 12  | 10 PITG_16318  |
| 0 | 7   | 4 PITG_00713   |
| 0 | 0   | 19 PITG_17239  |
| 0 | 27  | 0 PITG_17103   |



|   |     |                |
|---|-----|----------------|
| 0 | 20  | 33 PITG_01583  |
| 0 | 37  | 11 PITG_02427  |
| 0 | 0   | 0 PITG_05128   |
| 0 | 2   | 11 PITG_02250  |
| 0 | 0   | 0 PITG_09483   |
| 0 | 173 | 94 NA          |
| 0 | 2   | 0 PITG_22157   |
| 0 | 52  | 17 PITG_10595  |
| 0 | 2   | 8 PITG_09278   |
| 0 | 5   | 4 PITG_11100   |
| 0 | 6   | 4 PITG_08393   |
| 0 | 43  | 8 PITG_10943   |
| 0 | 575 | 159 PITG_09211 |
| 0 | 2   | 0 PITG_03865   |
| 0 | 28  | 21 PITG_02371  |
| 0 | 2   | 2 PITG_04709   |
| 0 | 2   | 0 NA           |
| 0 | 20  | 2 PITG_20330   |
| 0 | 36  | 5 PITG_19311   |
| 0 | 36  | 3 NA           |
| 0 | 22  | 13 PITG_21665  |
| 0 | 0   | 0 PITG_03862   |
| 0 | 60  | 206 PITG_02409 |
| 0 | 0   | 2 PITG_05278   |
| 0 | 6   | 13 PITG_09393  |
| 0 | 0   | 2 PITG_11426   |
| 0 | 9   | 3 NA           |
| 0 | 33  | 2 PITG_15602   |
| 0 | 267 | 156 PITG_07793 |
| 6 | 3   | 19 NA          |
| 0 | 32  | 27 PITG_03267  |
| 0 | 32  | 0 PITG_00138   |
| 0 | 45  | 25 PITG_10813  |
| 0 | 20  | 19 PITG_00807  |
| 0 | 30  | 0 NA           |
| 0 | 164 | 91 PITG_02971  |
| 0 | 19  | 0 NA           |
| 0 | 30  | 19 PITG_06236  |
| 0 | 13  | 25 NA          |
| 0 | 27  | 8 PITG_20110   |
| 0 | 40  | 19 NA          |
| 0 | 2   | 0 NA           |
| 0 | 3   | 0 NA           |
| 0 | 27  | 0 PITG_11098   |
| 0 | 5   | 21 PITG_10901  |
| 0 | 0   | 7 PITG_00133   |
| 0 | 2   | 5 PITG_03269   |

|   |     |                |
|---|-----|----------------|
| 0 | 30  | 116 PITG_03642 |
| 0 | 5   | 6 PITG_09211   |
| 0 | 27  | 25 PITG_07810  |
| 0 | 0   | 26 PITG_14108  |
| 0 | 356 | 151 PITG_04685 |
| 0 | 69  | 5 PITG_20563   |
| 0 | 9   | 8 PITG_03372   |
| 0 | 2   | 2 PITG_19605   |
| 0 | 12  | 10 PITG_07102  |
| 0 | 94  | 26 NA          |
| 0 | 0   | 2 PITG_03374   |
| 0 | 259 | 591 PITG_14274 |
| 0 | 7   | 0 PITG_01335   |
| 0 | 94  | 17 PITG_01899  |
| 0 | 199 | 19 PITG_19318  |
| 0 | 2   | 0 NA           |
| 0 | 4   | 2 PITG_03640   |
| 0 | 8   | 4 PITG_05511   |
| 0 | 29  | 61 PITG_01332  |
| 0 | 22  | 24 PITG_01737  |
| 0 | 6   | 4 NA           |
| 0 | 0   | 0 PITG_20774   |
| 0 | 83  | 35 PITG_01056  |
| 0 | 25  | 10 PITG_07241  |
| 0 | 8   | 8 PITG_07053   |
| 0 | 34  | 0 NA           |
| 0 | 2   | 0 PITG_06347   |
| 0 | 0   | 2 PITG_03103   |
| 0 | 8   | 0 NA           |
| 0 | 243 | 109 PITG_19846 |
| 0 | 2   | 9 PITG_14181   |
| 0 | 25  | 26 PITG_02846  |
| 0 | 216 | 238 PITG_14568 |
| 0 | 98  | 11 NA          |
| 0 | 0   | 0 PITG_14972   |
| 2 | 2   | 3 NA           |
| 0 | 5   | 3 PITG_17617   |
| 0 | 18  | 48 NA          |
| 0 | 4   | 0 PITG_05546   |
| 0 | 2   | 0 PITG_19350   |
| 0 | 30  | 0 NA           |
| 0 | 6   | 7 NA           |
| 0 | 0   | 0 NA           |
| 0 | 0   | 0 NA           |
| 0 | 36  | 6 NA           |
| 0 | 19  | 15 PITG_11035  |
| 0 | 0   | 0 NA           |

|     |     |                 |
|-----|-----|-----------------|
| 0   | 0   | 2 NA            |
| 0   | 41  | 0 NA            |
| 0   | 283 | 57 PITG_14023   |
| 0   | 23  | 4 NA            |
| 0   | 6   | 7 NA            |
| 0   | 4   | 4 NA            |
| 0   | 25  | 0 PITG_03165    |
| 0   | 0   | 2 PITG_07765    |
| 0   | 0   | 0 PITG_10443    |
| 0   | 2   | 4 PITG_14722    |
| 0   | 203 | 228 PITG_16494  |
| 0   | 0   | 2 PITG_17075    |
| 0   | 0   | 6 PITG_12264    |
| 0   | 0   | 12 PITG_15006   |
| 0   | 0   | 8 PITG_03623    |
| 0   | 322 | 84 PITG_17230   |
| 0   | 17  | 19 PITG_06673   |
| 0   | 7   | 0 PITG_02328    |
| 0   | 16  | 51 PITG_08142   |
| 0   | 86  | 83 PITG_04375   |
| 0   | 18  | 8 PITG_17164    |
| 0   | 380 | 2164 PITG_12139 |
| 0   | 0   | 0 PITG_12326    |
| 0   | 0   | 7 PITG_02274    |
| 0   | 84  | 68 PITG_16894   |
| 0   | 27  | 3 NA            |
| 0   | 26  | 12 PITG_10884   |
| 0   | 33  | 2 PITG_17076    |
| 0   | 0   | 0 PITG_12319    |
| 0   | 4   | 0 NA            |
| 0   | 0   | 2 PITG_16472    |
| 0   | 257 | 238 PITG_11612  |
| 0   | 8   | 5 PITG_00454    |
| 0   | 55  | 94 PITG_20386   |
| 0   | 25  | 40 PITG_15392   |
| 0   | 0   | 4 NA            |
| 0   | 101 | 19 PITG_15134   |
| 0   | 32  | 56 PITG_04992   |
| 0   | 0   | 0 NA            |
| 0   | 16  | 16 PITG_08003   |
| 555 | 171 | 6297 NA         |
| 0   | 35  | 6 NA            |
| 0   | 11  | 19 PITG_14572   |
| 0   | 0   | 2 PITG_10935    |
| 0   | 577 | 493 PITG_06241  |
| 0   | 13  | 2 PITG_07210    |
| 0   | 8   | 7 NA            |

|   |     |                |
|---|-----|----------------|
| 0 | 28  | 7 NA           |
| 0 | 38  | 0 NA           |
| 0 | 7   | 8 PITG_05463   |
| 0 | 29  | 3 NA           |
| 0 | 6   | 2 NA           |
| 0 | 7   | 3 NA           |
| 0 | 2   | 0 PITG_02540   |
| 0 | 11  | 0 PITG_14944   |
| 0 | 2   | 6 PITG_11146   |
| 0 | 5   | 6 PITG_03710   |
| 0 | 28  | 173 PITG_01923 |
| 0 | 4   | 2 PITG_11161   |
| 0 | 124 | 2 PITG_02706   |
| 0 | 0   | 0 PITG_19182   |
| 0 | 19  | 18 NA          |
| 0 | 11  | 16 PITG_02260  |
| 0 | 17  | 44 PITG_00994  |
| 0 | 45  | 14 PITG_01001  |
| 0 | 350 | 89 PITG_18713  |
| 0 | 12  | 0 PITG_18301   |
| 0 | 0   | 23 PITG_15755  |
| 0 | 11  | 4 PITG_05467   |
| 0 | 19  | 2 PITG_00450   |
| 0 | 26  | 13 PITG_06343  |
| 0 | 2   | 4 PITG_20941   |
| 0 | 2   | 0 PITG_16208   |
| 0 | 0   | 8 PITG_11197   |
| 0 | 0   | 0 PITG_20043   |
| 0 | 104 | 294 PITG_00716 |
| 0 | 0   | 2 PITG_13939   |
| 0 | 9   | 3 PITG_04746   |
| 0 | 0   | 0 PITG_19605   |
| 0 | 0   | 0 PITG_09675   |
| 0 | 9   | 17 PITG_17359  |
| 0 | 4   | 8 PITG_20077   |
| 0 | 566 | 128 PITG_14284 |
| 0 | 3   | 2 NA           |
| 0 | 469 | 340 PITG_02008 |
| 0 | 58  | 31 PITG_01479  |
| 0 | 0   | 2 PITG_01721   |
| 0 | 4   | 8 PITG_16347   |
| 0 | 0   | 0 NA           |
| 0 | 4   | 0 NA           |
| 0 | 12  | 86 PITG_05694  |
| 0 | 0   | 0 NA           |
| 0 | 33  | 0 NA           |
| 0 | 3   | 7 PITG_14949   |

|      |      |                 |
|------|------|-----------------|
| 0    | 10   | 0 PITG_02050    |
| 0    | 2    | 0 PITG_12252    |
| 0    | 209  | 41 PITG_20053   |
| 0    | 153  | 135 PITG_09384  |
| 0    | 32   | 22 NA           |
| 0    | 16   | 0 NA            |
| 0    | 33   | 151 PITG_01608  |
| 0    | 0    | 10 PITG_01188   |
| 0    | 26   | 14 PITG_13422   |
| 0    | 9    | 16 PITG_03401   |
| 0    | 0    | 0 PITG_14730    |
| 0    | 38   | 0 PITG_07062    |
| 0    | 23   | 26 PITG_17012   |
| 0    | 3151 | 2394 PITG_04121 |
| 0    | 31   | 13 PITG_00233   |
| 0    | 13   | 12 PITG_03505   |
| 0    | 74   | 37 PITG_07029   |
| 0    | 6    | 9 PITG_11470    |
| 0    | 16   | 3 NA            |
| 0    | 19   | 16 PITG_19247   |
| 0    | 6    | 2 PITG_06618    |
| 0    | 118  | 69 PITG_03878   |
| 0    | 0    | 0 NA            |
| 0    | 5    | 0 NA            |
| 0    | 0    | 2 NA            |
| 0    | 20   | 12 PITG_22552   |
| 0    | 55   | 45 PITG_16666   |
| 7529 | 286  | 1440 NA         |
| 0    | 28   | 78 PITG_01619   |
| 0    | 7    | 2 PITG_02220    |
| 0    | 18   | 14 NA           |
| 0    | 65   | 21 PITG_20803   |
| 0    | 16   | 18 NA           |
| 0    | 2    | 0 PITG_00989    |
| 0    | 0    | 4 PITG_10164    |
| 0    | 2    | 0 PITG_05075    |
| 0    | 0    | 4 PITG_09278    |
| 0    | 33   | 0 PITG_05992    |
| 0    | 0    | 4 PITG_14257    |
| 0    | 14   | 17 PITG_08584   |
| 0    | 2    | 2 PITG_02774    |
| 0    | 25   | 25 PITG_03959   |
| 0    | 238  | 30 PITG_22277   |
| 0    | 0    | 0 NA            |
| 0    | 15   | 17 PITG_08655   |
| 0    | 124  | 30 PITG_19128   |
| 0    | 0    | 0 NA            |

|     |     |                |
|-----|-----|----------------|
| 0   | 45  | 55 PITG_12049  |
| 0   | 16  | 14 PITG_06943  |
| 0   | 26  | 3 NA           |
| 0   | 12  | 8 PITG_05461   |
| 0   | 36  | 10 NA          |
| 0   | 47  | 12 NA          |
| 0   | 46  | 18 NA          |
| 0   | 66  | 61 PITG_05975  |
| 0   | 4   | 11 NA          |
| 0   | 12  | 8 PITG_03027   |
| 0   | 4   | 0 PITG_04076   |
| 0   | 27  | 18 PITG_08695  |
| 0   | 176 | 63 PITG_04483  |
| 0   | 2   | 0 PITG_17869   |
| 0   | 27  | 5 NA           |
| 0   | 41  | 27 PITG_16274  |
| 0   | 55  | 121 PITG_21077 |
| 0   | 0   | 0 PITG_14111   |
| 0   | 0   | 21 PITG_18728  |
| 0   | 10  | 13 PITG_17632  |
| 166 | 12  | 67 NA          |
| 0   | 8   | 3 PITG_05126   |
| 0   | 6   | 2 NA           |
| 0   | 91  | 199 PITG_00400 |
| 0   | 10  | 25 PITG_16669  |
| 0   | 2   | 11 PITG_02525  |
| 0   | 11  | 15 PITG_00064  |
| 0   | 125 | 68 NA          |
| 4   | 326 | 749 PITG_12300 |
| 0   | 23  | 0 NA           |
| 0   | 6   | 0 PITG_07509   |
| 0   | 35  | 0 PITG_12852   |
| 0   | 13  | 0 PITG_02460   |
| 0   | 55  | 34 NA          |
| 0   | 150 | 3 NA           |
| 0   | 0   | 2 NA           |
| 0   | 271 | 174 PITG_21187 |
| 0   | 16  | 6 PITG_12307   |
| 0   | 0   | 4 PITG_20274   |
| 0   | 25  | 0 PITG_12077   |
| 0   | 64  | 6 PITG_05114   |
| 0   | 8   | 24 PITG_12220  |
| 0   | 30  | 35 PITG_00989  |
| 0   | 2   | 11 PITG_12342  |
| 0   | 2   | 10 NA          |
| 0   | 0   | 2 PITG_14602   |
| 0   | 46  | 27 PITG_01006  |

|     |     |                |
|-----|-----|----------------|
| 0   | 89  | 143 PITG_05502 |
| 0   | 53  | 24 NA          |
| 0   | 5   | 50 PITG_10022  |
| 353 | 10  | 447 NA         |
| 0   | 27  | 15 PITG_13185  |
| 0   | 2   | 3 PITG_03498   |
| 0   | 0   | 0 PITG_10149   |
| 0   | 118 | 11 NA          |
| 0   | 4   | 13 NA          |
| 0   | 12  | 4 PITG_12521   |
| 0   | 5   | 0 PITG_21509   |
| 0   | 68  | 24 PITG_08328  |
| 0   | 78  | 100 PITG_15629 |
| 0   | 37  | 23 PITG_00626  |
| 0   | 9   | 4 PITG_05610   |
| 0   | 4   | 0 PITG_15832   |
| 0   | 2   | 7 PITG_17706   |
| 0   | 0   | 6 NA           |
| 0   | 41  | 113 PITG_03433 |
| 0   | 5   | 13 PITG_05955  |
| 0   | 135 | 147 PITG_04560 |
| 0   | 525 | 249 PITG_14980 |
| 0   | 193 | 79 PITG_11463  |
| 0   | 0   | 4 PITG_11117   |
| 0   | 42  | 0 PITG_12876   |
| 0   | 32  | 46 PITG_07192  |
| 0   | 0   | 4 PITG_09752   |
| 0   | 495 | 214 PITG_13403 |
| 0   | 133 | 230 PITG_18360 |
| 0   | 0   | 0 PITG_21203   |
| 0   | 104 | 117 PITG_20033 |
| 0   | 3   | 10 PITG_02456  |
| 0   | 9   | 14 PITG_19247  |
| 0   | 0   | 0 PITG_04619   |
| 0   | 26  | 34 PITG_17925  |
| 0   | 23  | 2 PITG_06238   |
| 0   | 19  | 0 NA           |
| 0   | 5   | 0 NA           |
| 0   | 18  | 5 PITG_01603   |
| 0   | 437 | 418 PITG_01096 |
| 0   | 35  | 7 PITG_07660   |
| 0   | 0   | 0 PITG_03860   |
| 0   | 39  | 2 PITG_04992   |
| 0   | 4   | 16 PITG_12697  |
| 0   | 9   | 8 NA           |
| 0   | 7   | 51 PITG_03672  |
| 0   | 14  | 103 PITG_10461 |

|     |      |                |
|-----|------|----------------|
| 0   | 2    | 2 PITG_20506   |
| 0   | 32   | 440 PITG_03698 |
| 0   | 17   | 0 PITG_00260   |
| 0   | 12   | 15 PITG_03373  |
| 0   | 105  | 34 PITG_17965  |
| 0   | 4    | 4 PITG_05325   |
| 0   | 13   | 0 PITG_13606   |
| 0   | 10   | 18 PITG_08609  |
| 0   | 26   | 0 PITG_05315   |
| 0   | 2    | 0 PITG_01850   |
| 0   | 2    | 0 NA           |
| 0   | 0    | 0 PITG_19964   |
| 0   | 2    | 0 NA           |
| 0   | 5    | 2 PITG_02003   |
| 0   | 4    | 0 PITG_09684   |
| 0   | 7    | 5 PITG_04175   |
| 0   | 39   | 28 PITG_01287  |
| 0   | 70   | 0 NA           |
| 0   | 61   | 8 PITG_01397   |
| 0   | 14   | 8 NA           |
| 298 | 5    | 332 NA         |
| 0   | 41   | 31 PITG_07053  |
| 0   | 20   | 6 PITG_15616   |
| 0   | 10   | 22 PITG_04746  |
| 0   | 2    | 4 PITG_13819   |
| 0   | 0    | 0 PITG_04377   |
| 0   | 0    | 0 PITG_00564   |
| 0   | 11   | 16 PITG_11080  |
| 0   | 34   | 16 PITG_03563  |
| 0   | 53   | 40 PITG_01847  |
| 0   | 371  | 112 PITG_04558 |
| 0   | 9    | 2 PITG_01450   |
| 0   | 4    | 10 PITG_20502  |
| 0   | 20   | 10 PITG_14379  |
| 0   | 42   | 19 PITG_08584  |
| 0   | 32   | 44 PITG_03423  |
| 0   | 16   | 8 PITG_00274   |
| 0   | 110  | 28 PITG_03781  |
| 0   | 4    | 0 NA           |
| 0   | 16   | 13 PITG_02027  |
| 0   | 127  | 18 PITG_09906  |
| 0   | 81   | 44 PITG_00426  |
| 0   | 1559 | 742 PITG_19602 |
| 0   | 39   | 10 PITG_11246  |
| 0   | 0    | 9 PITG_05935   |
| 0   | 27   | 13 PITG_00211  |
| 0   | 62   | 6 PITG_03782   |



|      |     |               |
|------|-----|---------------|
| 0    | 12  | 22 PITG_14580 |
| 0    | 80  | 5 PITG_06204  |
| 0    | 65  | 16 PITG_13066 |
| 0    | 4   | 0 PITG_18396  |
| 0    | 13  | 0 NA          |
| 0    | 2   | 0 PITG_17345  |
| 0    | 11  | 2 NA          |
| 1229 | 4   | 69 NA         |
| 0    | 0   | 31 PITG_02344 |
| 0    | 20  | 0 PITG_00973  |
| 0    | 11  | 2 PITG_03369  |
| 0    | 0   | 0 NA          |
| 0    | 101 | 0 NA          |
| 0    | 6   | 3 PITG_13365  |
| 0    | 6   | 7 PITG_03242  |
| 0    | 41  | 14 PITG_13416 |
| 0    | 35  | 14 PITG_19257 |
| 0    | 2   | 11 PITG_16078 |
| 0    | 2   | 10 PITG_10932 |
| 0    | 4   | 0 NA          |
| 0    | 18  | 21 PITG_16320 |
| 0    | 0   | 5 PITG_14108  |
| 0    | 14  | 48 PITG_12526 |
| 0    | 0   | 4 PITG_12677  |
| 0    | 9   | 0 PITG_09463  |
| 0    | 2   | 0 PITG_19749  |
| 0    | 9   | 2 PITG_20350  |
| 0    | 14  | 54 PITG_02239 |
| 433  | 12  | 736 NA        |
| 0    | 0   | 0 NA          |
| 0    | 24  | 8 NA          |
| 0    | 2   | 2 NA          |
| 0    | 91  | 79 PITG_07882 |
| 0    | 30  | 34 PITG_05404 |
| 0    | 4   | 0 NA          |
| 0    | 5   | 9 PITG_12326  |
| 0    | 4   | 0 NA          |
| 0    | 27  | 17 NA         |
| 0    | 12  | 2 PITG_13544  |
| 0    | 14  | 12 NA         |
| 0    | 32  | 15 PITG_20381 |
| 0    | 22  | 52 PITG_01511 |
| 0    | 8   | 4 PITG_15836  |
| 0    | 13  | 2 NA          |
| 0    | 15  | 19 PITG_04857 |
| 0    | 11  | 2 PITG_07848  |
| 0    | 18  | 2 PITG_17572  |

|     |     |                |
|-----|-----|----------------|
| 0   | 7   | 17 PITG_06403  |
| 0   | 12  | 6 PITG_06084   |
| 0   | 4   | 0 PITG_19991   |
| 0   | 712 | 271 NA         |
| 0   | 0   | 0 NA           |
| 0   | 46  | 54 PITG_04601  |
| 0   | 22  | 26 PITG_13504  |
| 0   | 0   | 0 PITG_00828   |
| 0   | 2   | 50 NA          |
| 0   | 108 | 43 PITG_23063  |
| 0   | 0   | 2 PITG_09785   |
| 0   | 0   | 4 PITG_00067   |
| 0   | 4   | 0 NA           |
| 0   | 22  | 7 PITG_17461   |
| 0   | 80  | 6 NA           |
| 0   | 0   | 4 PITG_02781   |
| 0   | 0   | 2 NA           |
| 0   | 12  | 12 PITG_20274  |
| 0   | 0   | 0 PITG_19436   |
| 0   | 5   | 9 PITG_19850   |
| 0   | 10  | 4 PITG_03646   |
| 0   | 53  | 11 PITG_10552  |
| 0   | 38  | 14 PITG_08607  |
| 0   | 6   | 2 PITG_15602   |
| 0   | 7   | 0 PITG_01033   |
| 0   | 19  | 4 PITG_16088   |
| 0   | 2   | 2 PITG_01065   |
| 0   | 81  | 36 PITG_07011  |
| 0   | 161 | 149 PITG_12550 |
| 0   | 7   | 53 PITG_19472  |
| 0   | 45  | 13 PITG_11527  |
| 0   | 0   | 0 PITG_01407   |
| 0   | 4   | 0 PITG_13248   |
| 121 | 61  | 291 NA         |
| 0   | 0   | 0 NA           |
| 0   | 9   | 3 PITG_19159   |
| 0   | 9   | 6 PITG_06903   |
| 0   | 7   | 2 PITG_07767   |
| 0   | 10  | 9 PITG_12739   |
| 0   | 6   | 4 PITG_03804   |
| 0   | 24  | 7 PITG_19224   |
| 0   | 0   | 0 PITG_01076   |
| 0   | 124 | 34 NA          |
| 0   | 0   | 0 PITG_19605   |
| 0   | 4   | 4 PITG_08504   |
| 0   | 0   | 4 PITG_06557   |
| 0   | 53  | 34 PITG_10926  |

|   |     |                |
|---|-----|----------------|
| 0 | 25  | 2 PITG_11825   |
| 0 | 4   | 3 PITG_03318   |
| 0 | 16  | 33 PITG_03064  |
| 0 | 2   | 0 PITG_15920   |
| 0 | 4   | 34 PITG_09772  |
| 0 | 212 | 63 PITG_22303  |
| 0 | 72  | 34 PITG_12470  |
| 0 | 6   | 2 PITG_02191   |
| 0 | 52  | 250 PITG_00457 |
| 0 | 60  | 52 PITG_04242  |
| 0 | 10  | 0 PITG_19113   |
| 0 | 0   | 0 NA           |
| 0 | 0   | 2 PITG_01244   |
| 0 | 55  | 37 PITG_00402  |
| 0 | 7   | 2 NA           |
| 0 | 0   | 0 PITG_08447   |
| 0 | 224 | 95 PITG_11010  |
| 0 | 3   | 0 PITG_00860   |
| 0 | 30  | 22 PITG_15212  |
| 0 | 9   | 4 NA           |
| 0 | 0   | 0 PITG_06948   |
| 0 | 25  | 6 PITG_03621   |
| 0 | 0   | 8 PITG_09962   |
| 0 | 4   | 9 NA           |
| 0 | 44  | 0 PITG_03478   |
| 0 | 11  | 50 PITG_11767  |
| 0 | 0   | 3 PITG_02757   |
| 0 | 11  | 6 PITG_13336   |
| 0 | 10  | 0 PITG_04396   |
| 0 | 8   | 2 PITG_06609   |
| 0 | 35  | 15 NA          |
| 0 | 22  | 13 PITG_01271  |
| 0 | 5   | 4 PITG_01375   |
| 0 | 13  | 2 PITG_07239   |
| 0 | 38  | 19 PITG_01761  |
| 0 | 5   | 6 PITG_03678   |
| 0 | 44  | 117 PITG_13752 |
| 0 | 6   | 6 PITG_06150   |
| 0 | 16  | 12 NA          |
| 0 | 7   | 4 PITG_13302   |
| 0 | 15  | 34 PITG_07201  |
| 0 | 3   | 0 PITG_03270   |
| 0 | 95  | 31 NA          |
| 0 | 290 | 61 NA          |
| 0 | 42  | 116 NA         |
| 0 | 0   | 0 NA           |
| 0 | 2   | 0 PITG_03501   |

|   |     |                |
|---|-----|----------------|
| 0 | 4   | 0 PITG_03630   |
| 0 | 26  | 2 PITG_02380   |
| 0 | 2   | 7 PITG_13679   |
| 0 | 9   | 3 PITG_03414   |
| 0 | 13  | 9 NA           |
| 0 | 0   | 7 PITG_13404   |
| 0 | 12  | 6 PITG_02268   |
| 0 | 0   | 0 PITG_11323   |
| 0 | 27  | 28 PITG_22105  |
| 0 | 4   | 4 NA           |
| 0 | 47  | 2 PITG_01751   |
| 0 | 70  | 49 PITG_10729  |
| 0 | 30  | 45 PITG_10083  |
| 0 | 29  | 310 PITG_11929 |
| 0 | 0   | 0 PITG_02792   |
| 0 | 65  | 29 NA          |
| 0 | 0   | 35 PITG_12697  |
| 0 | 45  | 22 NA          |
| 0 | 5   | 0 PITG_17597   |
| 0 | 4   | 4 PITG_05480   |
| 0 | 11  | 0 PITG_01006   |
| 0 | 38  | 12 PITG_17000  |
| 0 | 0   | 2 PITG_01840   |
| 0 | 80  | 117 PITG_11198 |
| 0 | 6   | 2 PITG_15925   |
| 0 | 33  | 25 PITG_10888  |
| 0 | 0   | 0 PITG_02415   |
| 0 | 12  | 2 PITG_02031   |
| 0 | 12  | 34 PITG_01242  |
| 0 | 27  | 2 PITG_00861   |
| 0 | 0   | 4 PITG_07034   |
| 0 | 2   | 0 NA           |
| 6 | 0   | 7 NA           |
| 0 | 0   | 0 PITG_18977   |
| 0 | 14  | 9 PITG_18977   |
| 0 | 20  | 60 PITG_06802  |
| 0 | 0   | 0 PITG_05389   |
| 0 | 14  | 3 NA           |
| 0 | 12  | 8 PITG_13017   |
| 0 | 191 | 119 PITG_10449 |
| 0 | 44  | 14 PITG_00524  |
| 0 | 23  | 26 PITG_09089  |
| 0 | 101 | 64 PITG_19247  |
| 0 | 2   | 5 PITG_20197   |
| 0 | 4   | 0 PITG_05727   |
| 0 | 3   | 0 PITG_03952   |
| 0 | 7   | 3 PITG_00713   |

|   |     |                |
|---|-----|----------------|
| 0 | 0   | 5 PITG_08446   |
| 0 | 4   | 5 NA           |
| 0 | 9   | 12 PITG_02740  |
| 0 | 107 | 135 PITG_01946 |
| 0 | 10  | 2 PITG_01520   |
| 0 | 0   | 0 PITG_23063   |
| 0 | 65  | 6 PITG_05830   |
| 0 | 104 | 71 PITG_15623  |
| 0 | 45  | 127 PITG_03445 |
| 0 | 0   | 2 PITG_07898   |
| 0 | 0   | 3 PITG_10645   |
| 0 | 34  | 74 PITG_01370  |
| 0 | 72  | 373 PITG_15045 |
| 0 | 245 | 64 PITG_02623  |
| 0 | 8   | 9 PITG_11536   |
| 0 | 0   | 12 NA          |
| 0 | 161 | 64 PITG_13721  |
| 0 | 12  | 6 PITG_22924   |
| 0 | 14  | 19 PITG_13679  |
| 0 | 22  | 88 PITG_01737  |
| 2 | 322 | 49 NA          |
| 0 | 12  | 6 PITG_06917   |
| 0 | 15  | 7 PITG_11410   |
| 0 | 4   | 5 PITG_10058   |
| 0 | 15  | 7 PITG_02212   |
| 0 | 4   | 16 PITG_19846  |
| 0 | 9   | 0 PITG_03382   |
| 0 | 0   | 0 PITG_01335   |
| 0 | 0   | 0 PITG_14151   |
| 0 | 0   | 0 PITG_05597   |
| 0 | 27  | 65 PITG_02821  |
| 0 | 304 | 369 NA         |
| 0 | 4   | 16 PITG_15836  |
| 0 | 2   | 0 NA           |
| 0 | 4   | 4 PITG_16221   |
| 0 | 20  | 25 PITG_03423  |
| 0 | 0   | 0 PITG_05866   |
| 0 | 7   | 11 PITG_04079  |
| 0 | 11  | 13 NA          |
| 0 | 134 | 47 PITG_04174  |
| 0 | 0   | 0 PITG_13366   |
| 0 | 61  | 23 PITG_01998  |
| 0 | 18  | 0 PITG_11286   |
| 0 | 2   | 2 PITG_09936   |
| 0 | 0   | 0 PITG_15607   |
| 0 | 29  | 17 PITG_13504  |
| 0 | 8   | 4 PITG_09835   |

|    |     |                |
|----|-----|----------------|
| 0  | 91  | 0 NA           |
| 0  | 50  | 61 PITG_18752  |
| 0  | 10  | 5 PITG_07109   |
| 0  | 2   | 4 PITG_13376   |
| 0  | 5   | 4 PITG_11122   |
| 0  | 0   | 0 PITG_03135   |
| 0  | 35  | 32 PITG_17710  |
| 0  | 13  | 0 PITG_05463   |
| 0  | 20  | 0 NA           |
| 0  | 2   | 0 PITG_17492   |
| 0  | 4   | 2 PITG_14553   |
| 0  | 13  | 6 NA           |
| 0  | 8   | 5 PITG_17317   |
| 0  | 0   | 2 PITG_01646   |
| 0  | 0   | 2 PITG_02841   |
| 0  | 6   | 39 PITG_14637  |
| 0  | 9   | 0 PITG_02068   |
| 0  | 20  | 7 PITG_19042   |
| 0  | 14  | 2 PITG_09250   |
| 0  | 3   | 0 NA           |
| 0  | 0   | 2 PITG_02457   |
| 0  | 39  | 25 PITG_17242  |
| 0  | 64  | 110 PITG_16808 |
| 0  | 84  | 21 PITG_03396  |
| 0  | 8   | 0 NA           |
| 0  | 57  | 18 PITG_06740  |
| 0  | 4   | 2 PITG_21990   |
| 0  | 25  | 2 PITG_07858   |
| 0  | 66  | 29 NA          |
| 0  | 2   | 0 PITG_15973   |
| 0  | 4   | 46 PITG_05267  |
| 0  | 0   | 2 PITG_02036   |
| 0  | 2   | 4 PITG_11743   |
| 0  | 2   | 0 PITG_03189   |
| 91 | 41  | 793 NA         |
| 0  | 0   | 4 PITG_19350   |
| 0  | 55  | 0 NA           |
| 0  | 2   | 0 NA           |
| 0  | 135 | 123 NA         |
| 0  | 39  | 13 NA          |
| 0  | 3   | 0 PITG_07865   |
| 0  | 25  | 6 PITG_18473   |
| 0  | 0   | 0 NA           |
| 0  | 0   | 0 PITG_00782   |
| 0  | 27  | 16 PITG_01639  |
| 0  | 2   | 6 PITG_03379   |
| 0  | 4   | 4 PITG_05151   |

|   |      |                 |
|---|------|-----------------|
| 0 | 0    | 2 PITG_05293    |
| 0 | 0    | 2 PITG_17568    |
| 0 | 6    | 0 PITG_09767    |
| 0 | 22   | 8 PITG_00207    |
| 0 | 2    | 4 PITG_13999    |
| 0 | 0    | 0 NA            |
| 0 | 5    | 18 PITG_10058   |
| 0 | 5    | 3 NA            |
| 0 | 105  | 15 PITG_15695   |
| 0 | 141  | 70 PITG_18463   |
| 0 | 3    | 9 PITG_12988    |
| 0 | 2    | 0 PITG_14692    |
| 0 | 2    | 0 PITG_03862    |
| 0 | 0    | 0 PITG_19750    |
| 0 | 1890 | 1930 PITG_13807 |
| 0 | 3    | 7 PITG_11648    |
| 0 | 41   | 0 PITG_06259    |
| 0 | 6    | 0 PITG_05368    |
| 0 | 8    | 0 PITG_05103    |
| 0 | 380  | 185 PITG_11180  |
| 0 | 45   | 15 NA           |
| 6 | 195  | 5235 NA         |
| 0 | 2    | 4 PITG_14807    |
| 0 | 145  | 26 PITG_05239   |
| 0 | 13   | 13 PITG_04426   |
| 0 | 10   | 0 PITG_15417    |
| 0 | 0    | 0 PITG_16316    |
| 0 | 6    | 0 NA            |
| 0 | 295  | 98 PITG_01358   |
| 0 | 0    | 0 PITG_04588    |
| 0 | 16   | 0 NA            |
| 0 | 18   | 4 NA            |
| 0 | 0    | 4 PITG_07109    |
| 0 | 0    | 3 PITG_17568    |
| 0 | 0    | 0 PITG_15819    |
| 0 | 16   | 8 PITG_16900    |
| 0 | 0    | 0 NA            |
| 0 | 10   | 12 PITG_19237   |
| 0 | 0    | 2 PITG_07026    |
| 0 | 25   | 63 PITG_07047   |
| 0 | 0    | 0 NA            |
| 0 | 113  | 79 PITG_06410   |
| 0 | 0    | 0 PITG_19088    |
| 0 | 45   | 47 PITG_20717   |
| 0 | 9    | 9 PITG_10460    |
| 0 | 62   | 24 PITG_02850   |
| 0 | 11   | 2 PITG_22062    |

|   |     |                |
|---|-----|----------------|
| 0 | 17  | 0 NA           |
| 0 | 81  | 33 NA          |
| 0 | 8   | 13 PITG_08734  |
| 0 | 7   | 225 NA         |
| 0 | 110 | 413 PITG_17069 |
| 0 | 19  | 9 PITG_00237   |
| 0 | 0   | 0 PITG_13590   |
| 0 | 4   | 19 PITG_04698  |
| 0 | 75  | 60 PITG_13745  |
| 0 | 0   | 5 PITG_10138   |
| 0 | 3   | 0 PITG_10667   |
| 0 | 16  | 3 PITG_19175   |
| 0 | 5   | 8 PITG_21879   |
| 0 | 3   | 8 PITG_13258   |
| 0 | 9   | 24 PITG_03473  |
| 0 | 14  | 0 PITG_03773   |
| 0 | 21  | 2 PITG_10351   |
| 0 | 7   | 5 PITG_06642   |
| 0 | 0   | 0 PITG_05866   |
| 0 | 15  | 4 PITG_08157   |
| 0 | 16  | 24 PITG_07017  |
| 0 | 70  | 40 PITG_19836  |
| 0 | 2   | 5 PITG_16854   |
| 0 | 32  | 12 PITG_11233  |
| 0 | 6   | 2 PITG_05485   |
| 0 | 3   | 8 NA           |
| 0 | 7   | 6 PITG_10593   |
| 0 | 4   | 2 NA           |
| 0 | 19  | 2 PITG_21183   |
| 0 | 6   | 0 PITG_02027   |
| 0 | 2   | 0 NA           |
| 0 | 13  | 6 PITG_13284   |
| 0 | 28  | 41 PITG_13827  |
| 0 | 39  | 11 PITG_05409  |
| 0 | 4   | 2 NA           |
| 0 | 9   | 2 NA           |
| 0 | 20  | 12 PITG_03557  |
| 0 | 26  | 6 NA           |
| 0 | 2   | 2 PITG_19456   |
| 0 | 0   | 0 NA           |
| 0 | 0   | 0 NA           |
| 0 | 0   | 0 PITG_21516   |
| 0 | 8   | 4 PITG_10971   |
| 0 | 540 | 443 PITG_01270 |
| 0 | 48  | 56 PITG_02663  |
| 0 | 11  | 21 PITG_20203  |
| 0 | 56  | 19 PITG_13367  |



|   |     |                |
|---|-----|----------------|
| 0 | 246 | 130 PITG_03651 |
| 0 | 0   | 0 NA           |
| 0 | 44  | 38 PITG_03039  |
| 0 | 35  | 19 PITG_05509  |
| 0 | 2   | 5 PITG_03615   |
| 0 | 7   | 3 PITG_11750   |
| 0 | 0   | 2 NA           |
| 0 | 41  | 40 PITG_10926  |
| 0 | 56  | 20 PITG_10926  |
| 0 | 8   | 5 PITG_00819   |
| 0 | 7   | 6 PITG_21114   |
| 2 | 31  | 324 PITG_05156 |
| 0 | 4   | 6 PITG_02244   |
| 0 | 11  | 122 PITG_01940 |
| 0 | 286 | 675 PITG_18392 |
| 0 | 2   | 4 PITG_11689   |
| 0 | 555 | 568 PITG_04525 |
| 0 | 19  | 6 PITG_19087   |
| 0 | 0   | 7 PITG_17498   |
| 0 | 11  | 15 PITG_07021  |
| 0 | 13  | 22 PITG_09250  |
| 0 | 141 | 113 PITG_01932 |
| 0 | 2   | 2 PITG_01749   |
| 0 | 177 | 8 PITG_09549   |
| 0 | 4   | 4 PITG_20077   |
| 0 | 41  | 2 PITG_16538   |
| 0 | 18  | 19 NA          |
| 0 | 0   | 2 PITG_06992   |
| 0 | 5   | 6 PITG_00946   |
| 0 | 2   | 9 PITG_20260   |
| 0 | 2   | 4 NA           |
| 0 | 5   | 0 PITG_01651   |
| 0 | 102 | 2 PITG_01768   |
| 0 | 8   | 15 PITG_06424  |
| 0 | 12  | 15 PITG_14231  |
| 0 | 21  | 0 PITG_20945   |
| 0 | 2   | 6 PITG_22743   |
| 0 | 2   | 0 PITG_00188   |
| 0 | 4   | 11 NA          |
| 0 | 7   | 6 PITG_04917   |
| 0 | 0   | 2 PITG_12358   |
| 0 | 29  | 49 NA          |
| 0 | 9   | 5 NA           |
| 0 | 28  | 19 PITG_02854  |
| 0 | 2   | 0 PITG_14398   |
| 0 | 0   | 4 PITG_15039   |
| 0 | 0   | 0 PITG_02079   |

|   |     |                |
|---|-----|----------------|
| 0 | 174 | 71 PITG_08327  |
| 0 | 7   | 14 PITG_03646  |
| 0 | 12  | 21 PITG_08213  |
| 0 | 119 | 75 PITG_13939  |
| 0 | 0   | 0 PITG_03605   |
| 0 | 167 | 165 PITG_03267 |
| 0 | 9   | 6 PITG_10141   |
| 0 | 9   | 0 PITG_06984   |
| 0 | 7   | 106 PITG_04538 |
| 0 | 2   | 2 PITG_16322   |
| 0 | 6   | 10 NA          |
| 0 | 52  | 14 PITG_05248  |
| 0 | 40  | 32 NA          |
| 0 | 61  | 2 PITG_02263   |
| 0 | 6   | 0 PITG_22253   |
| 0 | 6   | 4 PITG_01276   |
| 0 | 78  | 25 PITG_12223  |
| 0 | 25  | 25 PITG_01471  |
| 0 | 15  | 158 PITG_02594 |
| 0 | 30  | 21 PITG_13111  |
| 0 | 22  | 22 PITG_08953  |
| 0 | 2   | 4 NA           |
| 0 | 216 | 55 PITG_19669  |
| 0 | 27  | 6 PITG_01683   |
| 0 | 46  | 32 PITG_19004  |
| 0 | 13  | 11 PITG_02679  |
| 0 | 2   | 2 PITG_12494   |
| 0 | 0   | 2 PITG_12914   |
| 0 | 0   | 2 PITG_11437   |
| 0 | 73  | 142 PITG_09224 |
| 0 | 0   | 3 NA           |
| 0 | 2   | 0 PITG_09201   |
| 0 | 18  | 2 NA           |
| 2 | 54  | 243 PITG_19961 |
| 0 | 4   | 2 PITG_04917   |
| 0 | 64  | 40 PITG_01343  |
| 0 | 21  | 15 PITG_02285  |
| 0 | 2   | 10 PITG_19064  |
| 0 | 15  | 0 PITG_02264   |
| 0 | 3   | 2 NA           |
| 0 | 2   | 2 PITG_11119   |
| 0 | 52  | 0 PITG_09950   |
| 0 | 29  | 27 PITG_18070  |
| 0 | 0   | 2 PITG_11884   |
| 0 | 55  | 2 PITG_02691   |
| 0 | 36  | 8 PITG_18753   |
| 0 | 9   | 4 PITG_18385   |

|     |      |                 |
|-----|------|-----------------|
| 0   | 7    | 2 PITG_20387    |
| 0   | 22   | 16 PITG_17512   |
| 0   | 25   | 6 PITG_00878    |
| 0   | 13   | 2 PITG_10308    |
| 0   | 36   | 6 PITG_16674    |
| 0   | 28   | 0 PITG_03940    |
| 0   | 11   | 7 PITG_02048    |
| 0   | 34   | 26 NA           |
| 107 | 0    | 115 NA          |
| 0   | 0    | 0 NA            |
| 0   | 21   | 9 NA            |
| 0   | 6    | 6 PITG_08305    |
| 0   | 84   | 12 PITG_10624   |
| 0   | 4    | 7 PITG_18046    |
| 0   | 7674 | 6543 PITG_15375 |
| 0   | 14   | 39 PITG_02755   |
| 0   | 50   | 54 PITG_16121   |
| 0   | 55   | 2 PITG_16078    |
| 0   | 69   | 77 PITG_15881   |
| 0   | 10   | 2 PITG_16271    |
| 0   | 12   | 18 PITG_03999   |
| 0   | 2    | 0 PITG_06088    |
| 0   | 2    | 6 NA            |
| 0   | 23   | 13 PITG_01641   |
| 0   | 0    | 0 NA            |
| 0   | 23   | 55 PITG_05405   |
| 0   | 94   | 54 PITG_13461   |
| 0   | 7    | 11 PITG_03772   |
| 0   | 0    | 0 PITG_02588    |
| 0   | 32   | 12 PITG_07971   |
| 0   | 9    | 4 PITG_03710    |
| 0   | 6    | 0 PITG_18316    |
| 0   | 722  | 15 PITG_10498   |
| 0   | 28   | 0 NA            |
| 0   | 149  | 38 PITG_18641   |
| 0   | 16   | 2 PITG_07865    |
| 0   | 6    | 0 PITG_07139    |
| 0   | 2    | 2 PITG_15758    |
| 0   | 14   | 18 PITG_16937   |
| 0   | 0    | 0 PITG_04940    |
| 0   | 4    | 0 PITG_16263    |
| 0   | 2    | 3 PITG_17479    |
| 0   | 2    | 0 PITG_02785    |
| 0   | 0    | 0 PITG_14580    |
| 0   | 3    | 6 PITG_13366    |
| 0   | 9    | 0 PITG_17849    |
| 0   | 6    | 6 PITG_14285    |

|    |     |                |
|----|-----|----------------|
| 0  | 9   | 11 PITG_00337  |
| 0  | 4   | 4 PITG_20152   |
| 0  | 16  | 26 PITG_17947  |
| 0  | 180 | 690 PITG_06263 |
| 0  | 38  | 88 NA          |
| 0  | 48  | 12 PITG_21397  |
| 0  | 0   | 2 PITG_06120   |
| 0  | 24  | 30 PITG_00845  |
| 27 | 16  | 768 NA         |
| 0  | 23  | 11 PITG_02197  |
| 0  | 19  | 10 PITG_00330  |
| 0  | 8   | 22 NA          |
| 0  | 4   | 4 PITG_07201   |
| 0  | 0   | 0 NA           |
| 0  | 2   | 2 PITG_15961   |
| 10 | 47  | 408 NA         |
| 0  | 30  | 27 PITG_02124  |
| 0  | 2   | 0 PITG_13803   |
| 0  | 0   | 0 NA           |
| 0  | 2   | 11 PITG_15688  |
| 0  | 3   | 16 PITG_20168  |
| 0  | 4   | 0 PITG_00257   |
| 0  | 18  | 14 PITG_09835  |
| 0  | 0   | 0 NA           |
| 0  | 0   | 0 NA           |
| 0  | 2   | 0 PITG_11050   |
| 0  | 254 | 4 PITG_06225   |
| 0  | 16  | 0 NA           |
| 0  | 71  | 48 PITG_07778  |
| 0  | 43  | 27 PITG_05531  |
| 0  | 34  | 2 PITG_12496   |
| 0  | 6   | 2 PITG_15570   |
| 0  | 0   | 6 PITG_04601   |
| 0  | 5   | 4 PITG_12518   |
| 0  | 2   | 6 PITG_14919   |
| 0  | 0   | 0 NA           |
| 0  | 0   | 0 PITG_16022   |
| 0  | 7   | 6 PITG_01340   |
| 0  | 0   | 5 PITG_10124   |
| 0  | 0   | 5 PITG_20503   |
| 0  | 4   | 4 PITG_05587   |
| 0  | 21  | 3 PITG_11080   |
| 0  | 8   | 2 PITG_04505   |
| 0  | 2   | 8 PITG_10534   |
| 0  | 2   | 2 PITG_16770   |
| 0  | 9   | 0 NA           |
| 0  | 32  | 16 PITG_08738  |

|   |     |                |
|---|-----|----------------|
| 2 | 401 | 625 PITG_17921 |
| 0 | 31  | 73 PITG_03763  |
| 0 | 4   | 0 PITG_16681   |
| 0 | 0   | 2 PITG_03792   |
| 0 | 0   | 2 PITG_01476   |
| 0 | 0   | 0 NA           |
| 0 | 4   | 4 NA           |
| 0 | 17  | 7 PITG_15629   |
| 0 | 35  | 14 PITG_03864  |
| 0 | 22  | 2 NA           |
| 0 | 7   | 11 PITG_09534  |
| 0 | 26  | 9 PITG_09401   |
| 0 | 6   | 2 PITG_03954   |
| 0 | 0   | 0 PITG_02812   |
| 0 | 27  | 49 PITG_17404  |
| 0 | 9   | 10 NA          |
| 0 | 4   | 13 PITG_15957  |
| 0 | 0   | 0 PITG_01282   |
| 0 | 6   | 8 PITG_08411   |
| 0 | 23  | 8 NA           |
| 0 | 151 | 47 PITG_03274  |
| 0 | 11  | 15 PITG_18712  |
| 0 | 73  | 38 PITG_13622  |
| 0 | 5   | 14 PITG_07036  |
| 0 | 90  | 0 NA           |
| 0 | 0   | 2 NA           |
| 0 | 12  | 5 NA           |
| 0 | 6   | 0 PITG_10392   |
| 0 | 254 | 13 PITG_21766  |
| 0 | 18  | 0 PITG_03701   |
| 0 | 3   | 6 PITG_15496   |
| 0 | 9   | 26 PITG_08346  |
| 0 | 2   | 2 PITG_11551   |
| 0 | 4   | 0 PITG_04823   |
| 0 | 18  | 11 PITG_20808  |
| 0 | 75  | 74 PITG_03740  |
| 0 | 28  | 4 PITG_09242   |
| 0 | 27  | 0 PITG_02531   |
| 0 | 13  | 2 PITG_12428   |
| 0 | 2   | 0 PITG_03356   |
| 0 | 0   | 2 PITG_03710   |
| 0 | 84  | 30 PITG_20767  |
| 0 | 24  | 15 PITG_10795  |
| 0 | 0   | 2 PITG_20077   |
| 4 | 0   | 4 NA           |
| 0 | 34  | 7 PITG_12115   |
| 0 | 6   | 0 PITG_17945   |

|    |     |                |
|----|-----|----------------|
| 0  | 68  | 28 PITG_12511  |
| 0  | 40  | 5 NA           |
| 0  | 9   | 8 PITG_01860   |
| 0  | 8   | 6 PITG_12521   |
| 0  | 13  | 6 PITG_03887   |
| 0  | 30  | 26 NA          |
| 0  | 16  | 23 PITG_14717  |
| 0  | 2   | 2 PITG_10921   |
| 0  | 2   | 6 PITG_16798   |
| 0  | 31  | 12 PITG_08364  |
| 0  | 0   | 0 PITG_21023   |
| 0  | 2   | 15 PITG_04590  |
| 0  | 54  | 179 PITG_17674 |
| 0  | 23  | 9 PITG_08851   |
| 0  | 2   | 4 PITG_10750   |
| 0  | 0   | 6 PITG_18312   |
| 0  | 29  | 29 PITG_01738  |
| 0  | 19  | 6 NA           |
| 0  | 18  | 0 PITG_03166   |
| 15 | 0   | 23 NA          |
| 0  | 51  | 41 PITG_08028  |
| 0  | 28  | 32 PITG_14937  |
| 0  | 3   | 2 PITG_13718   |
| 0  | 13  | 14 NA          |
| 0  | 2   | 4 PITG_12340   |
| 0  | 2   | 7 PITG_01343   |
| 0  | 0   | 0 PITG_13168   |
| 0  | 0   | 0 PITG_17549   |
| 0  | 8   | 34 PITG_16339  |
| 0  | 4   | 4 PITG_19766   |
| 0  | 32  | 8 PITG_08364   |
| 0  | 4   | 32 PITG_04618  |
| 0  | 0   | 0 PITG_14595   |
| 0  | 5   | 4 PITG_02282   |
| 0  | 2   | 0 NA           |
| 0  | 20  | 13 PITG_03590  |
| 0  | 80  | 6 NA           |
| 0  | 6   | 11 PITG_09296  |
| 0  | 283 | 150 NA         |
| 0  | 20  | 48 PITG_03532  |
| 0  | 4   | 34 PITG_17069  |
| 0  | 23  | 28 PITG_13412  |
| 0  | 2   | 10 PITG_02452  |
| 0  | 2   | 4 PITG_06002   |
| 0  | 6   | 2 PITG_05259   |
| 0  | 32  | 0 NA           |
| 0  | 103 | 101 PITG_13758 |

|   |     |                |
|---|-----|----------------|
| 0 | 17  | 5 PITG_00687   |
| 0 | 19  | 0 NA           |
| 0 | 52  | 26 PITG_21028  |
| 0 | 4   | 7 PITG_07889   |
| 0 | 61  | 13 NA          |
| 0 | 199 | 377 PITG_03784 |
| 0 | 7   | 2 PITG_17964   |
| 0 | 45  | 22 PITG_18091  |
| 0 | 37  | 14 PITG_17768  |
| 0 | 35  | 37 PITG_02134  |
| 0 | 7   | 4 NA           |
| 0 | 0   | 0 NA           |
| 0 | 4   | 13 PITG_10061  |
| 0 | 37  | 4 PITG_03119   |
| 0 | 55  | 35 PITG_04115  |
| 0 | 0   | 0 PITG_06288   |
| 0 | 22  | 6 NA           |
| 0 | 0   | 0 PITG_19915   |
| 0 | 13  | 59 PITG_18452  |
| 0 | 2   | 2 PITG_02555   |
| 0 | 0   | 8 PITG_11521   |
| 0 | 14  | 2 PITG_08093   |
| 0 | 20  | 12 PITG_02985  |
| 0 | 18  | 8 NA           |
| 0 | 2   | 4 PITG_02273   |
| 0 | 3   | 9 PITG_20548   |
| 0 | 6   | 14 PITG_19237  |
| 0 | 3   | 0 NA           |
| 0 | 4   | 6 PITG_04676   |
| 0 | 0   | 0 PITG_11161   |
| 0 | 108 | 27 NA          |
| 0 | 24  | 2 PITG_13850   |
| 0 | 29  | 8 PITG_03288   |
| 0 | 2   | 6 PITG_08141   |
| 0 | 37  | 63 PITG_13490  |
| 0 | 0   | 2 NA           |
| 0 | 0   | 9 PITG_10794   |
| 0 | 0   | 2 PITG_12988   |
| 0 | 23  | 2 NA           |
| 0 | 26  | 38 PITG_09679  |
| 0 | 0   | 0 PITG_12517   |
| 0 | 0   | 2 PITG_12826   |
| 0 | 153 | 98 PITG_07702  |
| 0 | 19  | 80 PITG_01515  |
| 0 | 0   | 0 PITG_16090   |
| 0 | 163 | 22 PITG_06962  |
| 0 | 14  | 6 PITG_13747   |

|   |     |                |
|---|-----|----------------|
| 0 | 5   | 10 PITG_00029  |
| 0 | 0   | 0 NA           |
| 0 | 5   | 0 NA           |
| 0 | 0   | 0 PITG_06702   |
| 0 | 45  | 24 PITG_05934  |
| 0 | 16  | 11 PITG_17936  |
| 0 | 5   | 19 PITG_21514  |
| 0 | 17  | 13 PITG_15249  |
| 0 | 106 | 151 PITG_06006 |
| 0 | 48  | 5 NA           |
| 0 | 24  | 7 NA           |
| 0 | 0   | 0 NA           |
| 0 | 48  | 2 PITG_05346   |
| 0 | 42  | 30 PITG_14967  |
| 0 | 36  | 20 NA          |
| 0 | 101 | 10 PITG_11890  |
| 0 | 4   | 8 PITG_18326   |
| 0 | 5   | 4 PITG_10821   |
| 0 | 138 | 35 PITG_11612  |
| 0 | 103 | 14 NA          |
| 0 | 5   | 9 PITG_18071   |
| 0 | 66  | 11 NA          |
| 0 | 8   | 2 NA           |
| 0 | 2   | 2 NA           |
| 0 | 48  | 85 NA          |
| 0 | 0   | 2 PITG_16799   |
| 0 | 4   | 2 PITG_05262   |
| 0 | 27  | 48 PITG_05935  |
| 0 | 18  | 38 PITG_12886  |
| 0 | 526 | 21 PITG_20562  |
| 0 | 46  | 91 PITG_14573  |
| 0 | 0   | 3 NA           |
| 0 | 4   | 4 PITG_02731   |
| 0 | 2   | 26 PITG_05822  |
| 0 | 5   | 0 PITG_13997   |
| 0 | 40  | 2 PITG_18824   |
| 0 | 8   | 6 PITG_12548   |
| 0 | 14  | 2 PITG_06682   |
| 0 | 0   | 5 PITG_10822   |
| 0 | 4   | 6 PITG_02145   |
| 0 | 2   | 2 NA           |
| 0 | 2   | 4 NA           |
| 0 | 12  | 18 PITG_16344  |
| 0 | 0   | 7 PITG_11594   |
| 0 | 4   | 4 PITG_09962   |
| 0 | 10  | 12 PITG_01074  |
| 0 | 2   | 159 NA         |



|   |     |                |
|---|-----|----------------|
| 0 | 2   | 3 PITG_15470   |
| 0 | 27  | 37 PITG_16114  |
| 0 | 46  | 24 PITG_04505  |
| 0 | 27  | 16 PITG_03079  |
| 0 | 2   | 0 PITG_19125   |
| 0 | 2   | 0 NA           |
| 0 | 5   | 7 NA           |
| 0 | 4   | 6 PITG_10888   |
| 0 | 2   | 0 PITG_17948   |
| 0 | 31  | 8 PITG_15621   |
| 0 | 2   | 2 PITG_11206   |
| 0 | 0   | 13 PITG_02002  |
| 0 | 8   | 0 PITG_19098   |
| 0 | 0   | 0 PITG_04674   |
| 0 | 116 | 316 PITG_16967 |
| 0 | 6   | 8 PITG_18279   |
| 0 | 78  | 26 PITG_07991  |
| 0 | 32  | 45 PITG_12576  |
| 0 | 83  | 221 PITG_13861 |
| 0 | 2   | 6 PITG_10014   |
| 0 | 31  | 12 PITG_16809  |
| 0 | 17  | 13 PITG_00290  |
| 0 | 10  | 9 PITG_11431   |
| 0 | 28  | 118 PITG_15392 |
| 0 | 38  | 13 NA          |
| 0 | 4   | 3 NA           |
| 0 | 6   | 0 PITG_18474   |
| 0 | 8   | 8 PITG_14565   |
| 0 | 80  | 94 NA          |
| 0 | 18  | 26 PITG_14259  |
| 0 | 4   | 58 PITG_03576  |
| 0 | 32  | 32 PITG_14743  |
| 0 | 285 | 251 PITG_14639 |
| 0 | 37  | 4 PITG_01294   |
| 0 | 18  | 0 PITG_14354   |
| 0 | 12  | 7 PITG_02857   |
| 0 | 40  | 36 PITG_09428  |
| 0 | 22  | 17 PITG_09211  |
| 0 | 7   | 4 PITG_13313   |
| 0 | 4   | 13 PITG_00349  |
| 0 | 28  | 17 PITG_05354  |
| 0 | 50  | 22 PITG_05326  |
| 0 | 0   | 0 NA           |
| 0 | 6   | 4 PITG_15062   |
| 0 | 14  | 13 PITG_05594  |
| 0 | 13  | 0 PITG_09737   |
| 0 | 0   | 2 PITG_15973   |

|   |     |                 |
|---|-----|-----------------|
| 0 | 2   | 2 PITG_12316    |
| 0 | 221 | 141 PITG_08326  |
| 0 | 82  | 392 PITG_14278  |
| 0 | 0   | 17 PITG_14175   |
| 0 | 14  | 16 PITG_20502   |
| 0 | 13  | 30 PITG_07277   |
| 0 | 6   | 86 PITG_05534   |
| 0 | 153 | 196 PITG_16477  |
| 0 | 12  | 7 PITG_03991    |
| 0 | 2   | 13 PITG_01019   |
| 0 | 0   | 0 PITG_06660    |
| 0 | 10  | 17 PITG_16901   |
| 0 | 17  | 35 PITG_10881   |
| 0 | 0   | 2 PITG_18695    |
| 0 | 192 | 61 PITG_14642   |
| 0 | 0   | 3 PITG_20379    |
| 0 | 72  | 230 PITG_01310  |
| 0 | 9   | 0 NA            |
| 0 | 38  | 9 NA            |
| 0 | 2   | 2 PITG_17994    |
| 0 | 7   | 0 NA            |
| 0 | 8   | 2 PITG_06899    |
| 0 | 11  | 23 PITG_08462   |
| 0 | 16  | 27 PITG_09349   |
| 0 | 169 | 73 PITG_20791   |
| 0 | 0   | 12 PITG_16360   |
| 0 | 15  | 2 PITG_02044    |
| 0 | 74  | 30 PITG_20203   |
| 4 | 350 | 1470 PITG_17921 |
| 0 | 4   | 0 PITG_13544    |
| 0 | 141 | 33 PITG_09595   |
| 0 | 513 | 391 PITG_17477  |
| 0 | 10  | 4 PITG_08752    |
| 0 | 0   | 0 PITG_11525    |
| 2 | 36  | 32 PITG_07730   |
| 0 | 4   | 5 PITG_18714    |
| 0 | 12  | 5 PITG_17312    |
| 0 | 231 | 16 PITG_03778   |
| 0 | 132 | 42 NA           |
| 0 | 4   | 3 NA            |
| 0 | 15  | 9 PITG_14239    |
| 0 | 29  | 2 NA            |
| 0 | 0   | 0 PITG_06296    |
| 0 | 8   | 4 NA            |
| 0 | 9   | 0 PITG_00324    |
| 0 | 4   | 0 PITG_14151    |
| 0 | 6   | 5 PITG_16720    |

|    |     |                |
|----|-----|----------------|
| 0  | 2   | 2 PITG_10308   |
| 10 | 0   | 3 NA           |
| 0  | 9   | 0 NA           |
| 0  | 18  | 15 NA          |
| 0  | 0   | 2 PITG_01192   |
| 0  | 139 | 41 PITG_02732  |
| 0  | 14  | 5 NA           |
| 0  | 14  | 18 PITG_00942  |
| 0  | 19  | 8 PITG_18297   |
| 0  | 7   | 2 PITG_02227   |
| 0  | 5   | 2 PITG_09818   |
| 0  | 332 | 72 PITG_18713  |
| 0  | 19  | 31 PITG_09910  |
| 0  | 29  | 40 PITG_19049  |
| 0  | 6   | 4 PITG_17706   |
| 0  | 78  | 18 PITG_17122  |
| 0  | 107 | 74 PITG_06205  |
| 0  | 3   | 0 PITG_11286   |
| 0  | 0   | 0 PITG_00709   |
| 14 | 4   | 23 NA          |
| 0  | 2   | 0 PITG_01003   |
| 0  | 102 | 35 PITG_05404  |
| 0  | 13  | 12 PITG_10594  |
| 0  | 13  | 2 PITG_08197   |
| 0  | 33  | 3 PITG_15616   |
| 0  | 26  | 12 PITG_06129  |
| 0  | 113 | 13 PITG_18863  |
| 0  | 4   | 2 PITG_05600   |
| 0  | 18  | 13 NA          |
| 0  | 89  | 49 PITG_05313  |
| 0  | 2   | 2 PITG_03590   |
| 0  | 0   | 0 PITG_00180   |
| 0  | 99  | 52 PITG_15927  |
| 0  | 53  | 4 NA           |
| 0  | 19  | 2 NA           |
| 0  | 0   | 0 NA           |
| 0  | 106 | 213 PITG_22020 |
| 0  | 2   | 4 PITG_00020   |
| 0  | 28  | 34 PITG_16775  |
| 0  | 12  | 9 PITG_20223   |
| 0  | 0   | 6 PITG_19153   |
| 0  | 119 | 175 PITG_02826 |
| 0  | 32  | 21 PITG_01491  |
| 0  | 8   | 0 PITG_07194   |
| 2  | 81  | 225 PITG_13655 |
| 0  | 0   | 0 PITG_06885   |
| 0  | 52  | 24 PITG_16799  |

|   |     |                |
|---|-----|----------------|
| 0 | 0   | 2 NA           |
| 0 | 4   | 2 PITG_07093   |
| 0 | 35  | 0 PITG_22541   |
| 0 | 21  | 13 PITG_02945  |
| 0 | 6   | 14 PITG_04547  |
| 0 | 6   | 2 PITG_16332   |
| 0 | 9   | 11 PITG_01138  |
| 0 | 2   | 0 PITG_07049   |
| 0 | 0   | 4 NA           |
| 0 | 2   | 24 PITG_18028  |
| 0 | 39  | 17 PITG_04497  |
| 0 | 53  | 49 PITG_13405  |
| 0 | 16  | 0 NA           |
| 0 | 2   | 0 PITG_07237   |
| 0 | 5   | 6 PITG_10009   |
| 0 | 2   | 0 NA           |
| 0 | 20  | 10 PITG_03112  |
| 0 | 14  | 4 PITG_02562   |
| 0 | 0   | 2 PITG_02397   |
| 0 | 5   | 0 PITG_17936   |
| 0 | 31  | 0 PITG_22644   |
| 0 | 24  | 0 PITG_06675   |
| 0 | 61  | 27 PITG_13270  |
| 0 | 18  | 23 PITG_21457  |
| 0 | 22  | 7 NA           |
| 0 | 22  | 14 PITG_13488  |
| 0 | 94  | 7 PITG_02480   |
| 0 | 36  | 59 NA          |
| 0 | 6   | 2 PITG_12514   |
| 0 | 78  | 0 PITG_19844   |
| 0 | 23  | 4 PITG_01341   |
| 0 | 19  | 12 PITG_00479  |
| 0 | 16  | 7 PITG_02135   |
| 0 | 2   | 2 PITG_00536   |
| 0 | 11  | 13 PITG_03828  |
| 0 | 2   | 4 PITG_15762   |
| 0 | 19  | 10 PITG_11540  |
| 0 | 118 | 248 NA         |
| 0 | 108 | 161 PITG_20994 |
| 0 | 0   | 2 PITG_03169   |
| 0 | 63  | 45 PITG_04483  |
| 0 | 94  | 53 PITG_03795  |
| 0 | 23  | 41 PITG_19586  |
| 0 | 808 | 167 PITG_12648 |
| 0 | 11  | 8 PITG_17049   |
| 0 | 11  | 10 PITG_02942  |
| 0 | 48  | 83 PITG_09920  |

|   |      |                 |
|---|------|-----------------|
| 0 | 14   | 0 PITG_15983    |
| 0 | 21   | 0 PITG_13317    |
| 0 | 0    | 4 PITG_03476    |
| 0 | 0    | 0 PITG_21028    |
| 0 | 364  | 63 PITG_14066   |
| 0 | 13   | 2 PITG_12234    |
| 0 | 2    | 2 PITG_05583    |
| 0 | 0    | 4 PITG_16023    |
| 0 | 24   | 14 NA           |
| 0 | 130  | 21 PITG_04596   |
| 0 | 4    | 2 PITG_10014    |
| 0 | 3342 | 3299 PITG_11241 |
| 0 | 2543 | 430 PITG_17230  |
| 0 | 0    | 0 PITG_08581    |
| 0 | 2    | 6 PITG_21010    |
| 0 | 19   | 0 NA            |
| 0 | 0    | 0 NA            |
| 0 | 0    | 4 PITG_01774    |
| 0 | 23   | 15 PITG_09543   |
| 0 | 24   | 7 NA            |
| 0 | 13   | 2 PITG_00911    |
| 0 | 2    | 4 PITG_07880    |
| 0 | 2    | 0 NA            |
| 0 | 0    | 5 NA            |
| 0 | 23   | 32 PITG_04569   |
| 0 | 9    | 0 PITG_05488    |
| 0 | 11   | 2 PITG_14921    |
| 0 | 21   | 11 NA           |
| 0 | 0    | 0 PITG_04321    |
| 0 | 12   | 12 PITG_17601   |
| 0 | 31   | 27 PITG_16042   |
| 0 | 25   | 12 PITG_04676   |
| 0 | 40   | 33 PITG_14910   |
| 0 | 2    | 0 PITG_12264    |
| 0 | 12   | 8 PITG_06611    |
| 0 | 35   | 240 PITG_02856  |
| 0 | 17   | 0 PITG_14169    |
| 0 | 0    | 10 PITG_05458   |
| 0 | 4    | 2 PITG_03200    |
| 0 | 15   | 83 PITG_16446   |
| 0 | 4    | 8 PITG_14863    |
| 0 | 29   | 6 PITG_10085    |
| 0 | 13   | 4 PITG_17709    |
| 0 | 12   | 0 PITG_15916    |
| 0 | 8    | 6 NA            |
| 0 | 25   | 3 PITG_14375    |
| 0 | 111  | 29 PITG_12648   |

|   |     |                |
|---|-----|----------------|
| 0 | 13  | 10 PITG_10163  |
| 0 | 2   | 2 NA           |
| 0 | 24  | 0 PITG_18371   |
| 0 | 2   | 9 PITG_11108   |
| 0 | 7   | 0 PITG_03233   |
| 0 | 71  | 40 PITG_08425  |
| 0 | 6   | 32 PITG_01400  |
| 0 | 5   | 7 PITG_02809   |
| 0 | 11  | 11 PITG_06814  |
| 0 | 5   | 13 PITG_08566  |
| 0 | 4   | 12 PITG_01711  |
| 0 | 5   | 7 PITG_18891   |
| 0 | 144 | 212 PITG_21620 |
| 0 | 14  | 19 PITG_09285  |
| 0 | 2   | 0 PITG_08175   |
| 0 | 236 | 48 PITG_00938  |
| 0 | 39  | 41 PITG_17074  |
| 0 | 2   | 2 PITG_02499   |
| 0 | 47  | 10 NA          |
| 0 | 0   | 0 PITG_14917   |
| 0 | 4   | 0 PITG_07866   |
| 0 | 41  | 64 PITG_14230  |
| 0 | 20  | 7 PITG_02846   |
| 0 | 5   | 6 NA           |
| 0 | 31  | 25 PITG_03789  |
| 2 | 2   | 108 PITG_16959 |
| 0 | 45  | 59 PITG_04131  |
| 0 | 32  | 27 NA          |
| 0 | 48  | 25 PITG_12343  |
| 0 | 2   | 4 PITG_01754   |
| 0 | 59  | 36 PITG_10285  |
| 0 | 5   | 2 PITG_09950   |
| 0 | 4   | 2 NA           |
| 0 | 11  | 23 PITG_01589  |
| 0 | 172 | 56 PITG_01153  |
| 0 | 4   | 4 PITG_22763   |
| 0 | 151 | 52 PITG_09507  |
| 0 | 2   | 0 PITG_17946   |
| 0 | 53  | 25 PITG_06328  |
| 0 | 25  | 12 PITG_07855  |
| 0 | 4   | 7 PITG_00594   |
| 0 | 16  | 7 PITG_14937   |
| 0 | 283 | 193 PITG_09428 |
| 0 | 0   | 2 PITG_01710   |
| 0 | 531 | 276 PITG_19761 |
| 0 | 215 | 107 PITG_05902 |
| 0 | 51  | 53 NA          |

|   |     |                |
|---|-----|----------------|
| 0 | 0   | 2 PITG_10240   |
| 0 | 0   | 2 PITG_10764   |
| 0 | 4   | 6 PITG_03472   |
| 0 | 2   | 0 PITG_15097   |
| 0 | 12  | 8 PITG_09261   |
| 0 | 0   | 3 PITG_18424   |
| 0 | 0   | 2 PITG_06753   |
| 0 | 194 | 142 PITG_05589 |
| 0 | 11  | 5 PITG_20384   |
| 0 | 0   | 4 PITG_13255   |
| 0 | 0   | 2 PITG_12111   |
| 0 | 20  | 0 PITG_16539   |
| 0 | 14  | 18 PITG_04857  |
| 0 | 34  | 27 PITG_06762  |
| 0 | 4   | 8 PITG_13488   |
| 0 | 5   | 5 NA           |
| 0 | 0   | 2 PITG_14181   |
| 0 | 4   | 9 PITG_08369   |
| 0 | 26  | 6 NA           |
| 0 | 373 | 283 PITG_13168 |
| 0 | 2   | 4 PITG_10602   |
| 0 | 0   | 0 PITG_16264   |
| 0 | 9   | 4 PITG_01953   |
| 0 | 2   | 11 PITG_01453  |
| 0 | 28  | 22 PITG_14514  |
| 0 | 10  | 19 PITG_05289  |
| 0 | 24  | 2 NA           |
| 0 | 3   | 4 PITG_03942   |
| 0 | 5   | 0 NA           |
| 0 | 43  | 12 PITG_04372  |
| 0 | 40  | 52 PITG_18650  |
| 0 | 0   | 2 PITG_00180   |
| 0 | 0   | 0 NA           |
| 0 | 2   | 3 PITG_05354   |
| 0 | 43  | 57 PITG_05551  |
| 0 | 6   | 0 PITG_19965   |
| 0 | 26  | 0 PITG_03570   |
| 0 | 3   | 4 PITG_02917   |
| 0 | 8   | 80 PITG_22742  |
| 0 | 4   | 13 NA          |
| 0 | 0   | 4 PITG_21660   |
| 0 | 9   | 4 PITG_03864   |
| 0 | 18  | 13 NA          |
| 0 | 4   | 4 PITG_13347   |
| 0 | 0   | 0 PITG_10520   |
| 0 | 11  | 2 NA           |
| 0 | 2   | 0 PITG_06917   |

|   |     |                |
|---|-----|----------------|
| 0 | 37  | 0 PITG_18475   |
| 0 | 10  | 6 PITG_04421   |
| 0 | 5   | 0 PITG_05263   |
| 0 | 12  | 8 NA           |
| 0 | 3   | 16 PITG_12598  |
| 0 | 2   | 0 PITG_03289   |
| 0 | 3   | 2 PITG_14561   |
| 0 | 4   | 0 PITG_16834   |
| 0 | 21  | 11 PITG_00125  |
| 0 | 2   | 4 PITG_05258   |
| 0 | 2   | 4 PITG_14131   |
| 0 | 2   | 3 NA           |
| 0 | 0   | 0 NA           |
| 0 | 23  | 19 PITG_03737  |
| 0 | 33  | 22 PITG_10837  |
| 0 | 0   | 11 PITG_13715  |
| 0 | 17  | 8 NA           |
| 0 | 54  | 36 PITG_16695  |
| 0 | 8   | 7 PITG_02055   |
| 0 | 135 | 114 PITG_07792 |
| 0 | 63  | 4 PITG_15354   |
| 0 | 0   | 2 PITG_15062   |
| 0 | 12  | 23 PITG_00038  |
| 0 | 27  | 14 PITG_11806  |
| 0 | 2   | 34 PITG_04010  |
| 0 | 34  | 16 PITG_01798  |
| 0 | 45  | 2 PITG_22689   |
| 0 | 23  | 0 NA           |
| 0 | 2   | 4 PITG_02421   |
| 0 | 4   | 0 NA           |
| 0 | 34  | 19 PITG_18379  |
| 0 | 103 | 67 PITG_14431  |
| 0 | 19  | 15 PITG_13679  |
| 0 | 245 | 202 PITG_15416 |
| 0 | 12  | 6 PITG_02227   |
| 0 | 2   | 14 PITG_06764  |
| 0 | 78  | 115 NA         |
| 0 | 374 | 153 PITG_01716 |
| 0 | 17  | 29 PITG_06129  |
| 0 | 12  | 17 PITG_11131  |
| 0 | 98  | 11 PITG_02637  |
| 0 | 0   | 0 PITG_03424   |
| 0 | 2   | 2 PITG_07210   |
| 0 | 27  | 4 PITG_01789   |
| 0 | 0   | 0 PITG_11259   |
| 0 | 2   | 2 PITG_11259   |
| 0 | 11  | 0 NA           |



|   |     |                |
|---|-----|----------------|
| 0 | 19  | 23 NA          |
| 0 | 5   | 18 PITG_05609  |
| 0 | 8   | 0 NA           |
| 0 | 3   | 0 PITG_01477   |
| 0 | 5   | 0 NA           |
| 0 | 490 | 133 PITG_08216 |
| 0 | 2   | 2 PITG_08431   |
| 0 | 10  | 70 PITG_03473  |
| 0 | 118 | 18 PITG_20386  |
| 0 | 20  | 90 PITG_08762  |
| 0 | 6   | 6 PITG_19362   |
| 6 | 0   | 8 NA           |
| 0 | 62  | 12 PITG_08663  |
| 0 | 9   | 3 PITG_18695   |
| 0 | 2   | 0 PITG_09387   |
| 0 | 128 | 44 PITG_11126  |
| 0 | 199 | 134 PITG_16328 |
| 0 | 21  | 0 NA           |
| 0 | 22  | 18 NA          |
| 0 | 4   | 2 PITG_20745   |
| 0 | 17  | 33 PITG_14975  |
| 0 | 6   | 6 PITG_13317   |
| 0 | 37  | 17 PITG_01689  |
| 0 | 40  | 4 PITG_08447   |
| 0 | 3   | 7 PITG_10888   |
| 0 | 42  | 35 PITG_07655  |
| 0 | 2   | 0 PITG_11405   |
| 0 | 33  | 4 PITG_03111   |
| 0 | 78  | 119 PITG_12288 |
| 0 | 99  | 29 PITG_04227  |
| 0 | 4   | 8 PITG_03850   |
| 0 | 2   | 0 PITG_02770   |
| 0 | 10  | 16 NA          |
| 0 | 23  | 11 PITG_08411  |
| 0 | 6   | 4 NA           |
| 0 | 34  | 2 PITG_01826   |
| 0 | 158 | 36 NA          |
| 0 | 2   | 4 PITG_12876   |
| 0 | 0   | 2 PITG_17947   |
| 0 | 23  | 6 PITG_01602   |
| 0 | 21  | 4 NA           |
| 0 | 18  | 0 PITG_16152   |
| 0 | 8   | 0 PITG_05403   |
| 0 | 0   | 24 PITG_16058  |
| 0 | 254 | 93 PITG_08016  |
| 0 | 117 | 15 PITG_03493  |
| 0 | 5   | 6 PITG_06240   |

|    |     |               |
|----|-----|---------------|
| 0  | 49  | 20 PITG_05521 |
| 0  | 2   | 0 PITG_13841  |
| 0  | 5   | 2 NA          |
| 0  | 14  | 4 PITG_10053  |
| 0  | 15  | 6 PITG_03898  |
| 0  | 6   | 2 PITG_06035  |
| 0  | 5   | 19 PITG_18342 |
| 0  | 0   | 5 PITG_17669  |
| 0  | 34  | 61 PITG_02575 |
| 0  | 0   | 14 PITG_12818 |
| 0  | 2   | 4 NA          |
| 0  | 5   | 0 NA          |
| 0  | 8   | 8 NA          |
| 0  | 18  | 3 PITG_05331  |
| 0  | 2   | 0 NA          |
| 0  | 0   | 2 PITG_11741  |
| 0  | 20  | 0 PITG_03544  |
| 24 | 389 | 1545 NA       |
| 54 | 42  | 461 NA        |
| 0  | 0   | 3 NA          |
| 0  | 0   | 4 PITG_00237  |
| 0  | 0   | 0 PITG_07985  |
| 0  | 18  | 18 PITG_13997 |
| 0  | 9   | 10 PITG_02229 |
| 0  | 135 | 38 PITG_05509 |
| 0  | 0   | 0 NA          |
| 0  | 0   | 0 PITG_08103  |
| 0  | 0   | 4 PITG_11877  |
| 0  | 10  | 14 PITG_20197 |
| 0  | 0   | 0 PITG_11122  |
| 0  | 29  | 20 PITG_11783 |
| 0  | 206 | 34 PITG_07199 |
| 0  | 51  | 26 PITG_02185 |
| 0  | 4   | 2 PITG_00215  |
| 0  | 0   | 0 NA          |
| 0  | 8   | 4 PITG_06484  |
| 0  | 2   | 0 PITG_04554  |
| 0  | 27  | 0 PITG_05346  |
| 0  | 37  | 0 NA          |
| 0  | 2   | 4 PITG_02156  |
| 0  | 13  | 4 PITG_07297  |
| 0  | 2   | 19 PITG_08403 |
| 0  | 29  | 11 PITG_03371 |
| 0  | 21  | 3 NA          |
| 0  | 39  | 47 PITG_12488 |
| 0  | 19  | 5 PITG_01674  |
| 0  | 30  | 34 PITG_22105 |

|   |     |               |
|---|-----|---------------|
| 0 | 0   | 6 NA          |
| 0 | 0   | 0 PITG_03458  |
| 0 | 0   | 12 PITG_05894 |
| 0 | 2   | 0 NA          |
| 0 | 41  | 7 PITG_15071  |
| 0 | 20  | 14 PITG_19691 |
| 0 | 18  | 2 PITG_10994  |
| 0 | 0   | 0 PITG_03789  |
| 0 | 5   | 0 PITG_02856  |
| 0 | 26  | 22 PITG_18633 |
| 0 | 8   | 8 PITG_12563  |
| 0 | 4   | 2 PITG_10625  |
| 0 | 18  | 9 NA          |
| 0 | 18  | 2 PITG_18657  |
| 0 | 35  | 0 PITG_12478  |
| 0 | 2   | 0 NA          |
| 0 | 91  | 38 PITG_21599 |
| 0 | 45  | 45 PITG_08425 |
| 0 | 0   | 0 NA          |
| 0 | 46  | 56 PITG_13007 |
| 0 | 10  | 4 NA          |
| 0 | 16  | 30 NA         |
| 0 | 4   | 10 PITG_02796 |
| 0 | 62  | 54 PITG_13767 |
| 0 | 59  | 34 PITG_14818 |
| 0 | 0   | 2 PITG_19364  |
| 0 | 2   | 4 NA          |
| 0 | 4   | 13 PITG_23272 |
| 0 | 63  | 5 NA          |
| 2 | 18  | 2 NA          |
| 0 | 0   | 5 NA          |
| 0 | 37  | 15 PITG_20637 |
| 0 | 4   | 4 PITG_10388  |
| 0 | 13  | 2 NA          |
| 0 | 2   | 2 PITG_16038  |
| 0 | 10  | 2 PITG_01390  |
| 0 | 19  | 8 PITG_10576  |
| 0 | 121 | 48 PITG_10940 |
| 0 | 10  | 7 PITG_08206  |
| 0 | 18  | 13 PITG_01603 |
| 0 | 20  | 10 NA         |
| 0 | 14  | 0 PITG_08230  |
| 0 | 19  | 2 PITG_13839  |
| 0 | 6   | 4 PITG_02781  |
| 0 | 57  | 35 PITG_16009 |
| 0 | 29  | 10 PITG_09921 |
| 0 | 4   | 0 PITG_02842  |

|     |     |                |
|-----|-----|----------------|
| 0   | 64  | 0 PITG_13895   |
| 0   | 9   | 23 PITG_19851  |
| 0   | 4   | 2 NA           |
| 0   | 60  | 10 NA          |
| 0   | 21  | 158 PITG_02112 |
| 0   | 13  | 17 PITG_07043  |
| 0   | 4   | 23 PITG_06173  |
| 0   | 32  | 20 PITG_08979  |
| 0   | 2   | 0 PITG_05247   |
| 0   | 20  | 2 PITG_05176   |
| 0   | 18  | 6 PITG_12692   |
| 0   | 0   | 0 NA           |
| 0   | 28  | 33 PITG_19422  |
| 0   | 73  | 28 PITG_03592  |
| 0   | 119 | 46 PITG_02750  |
| 0   | 0   | 0 PITG_05658   |
| 0   | 413 | 482 PITG_11118 |
| 0   | 27  | 10 PITG_06781  |
| 0   | 0   | 0 PITG_14748   |
| 0   | 0   | 0 NA           |
| 0   | 34  | 23 PITG_15819  |
| 0   | 21  | 20 PITG_08576  |
| 0   | 17  | 17 PITG_11445  |
| 0   | 7   | 0 NA           |
| 0   | 51  | 69 PITG_11813  |
| 0   | 26  | 17 PITG_07234  |
| 267 | 47  | 453 NA         |
| 0   | 10  | 0 PITG_00232   |
| 0   | 8   | 15 PITG_00931  |
| 0   | 21  | 9 PITG_03478   |
| 0   | 24  | 0 NA           |
| 0   | 0   | 16 PITG_04603  |
| 0   | 9   | 8 PITG_09665   |
| 0   | 3   | 4 PITG_18977   |
| 0   | 54  | 34 PITG_00683  |
| 0   | 0   | 0 PITG_09377   |
| 0   | 251 | 62 PITG_08749  |
| 0   | 33  | 6 PITG_11926   |
| 0   | 2   | 6 PITG_12987   |
| 0   | 12  | 10 PITG_15962  |
| 0   | 86  | 48 PITG_01342  |
| 0   | 106 | 49 PITG_15539  |
| 0   | 53  | 26 PITG_07851  |
| 0   | 14  | 6 NA           |
| 0   | 488 | 244 PITG_02162 |
| 0   | 2   | 0 NA           |
| 0   | 87  | 13 PITG_20568  |

|   |     |                 |
|---|-----|-----------------|
| 0 | 0   | 7 NA            |
| 0 | 17  | 2 PITG_11486    |
| 0 | 20  | 4 PITG_17556    |
| 0 | 131 | 0 NA            |
| 0 | 9   | 11 PITG_07851   |
| 0 | 0   | 0 NA            |
| 0 | 0   | 0 PITG_01097    |
| 0 | 0   | 0 PITG_18521    |
| 0 | 41  | 22 PITG_09437   |
| 0 | 0   | 0 PITG_09930    |
| 0 | 386 | 114 PITG_00999  |
| 0 | 0   | 4 PITG_13546    |
| 0 | 8   | 4 PITG_07239    |
| 0 | 6   | 14 PITG_06228   |
| 0 | 130 | 58 PITG_03829   |
| 0 | 36  | 72 PITG_06016   |
| 0 | 0   | 6 NA            |
| 0 | 2   | 0 PITG_08558    |
| 0 | 6   | 34 NA           |
| 0 | 4   | 4 PITG_00808    |
| 0 | 0   | 0 PITG_10040    |
| 0 | 615 | 1066 PITG_06430 |
| 0 | 28  | 8 PITG_08964    |
| 0 | 20  | 8 PITG_17015    |
| 0 | 2   | 9 PITG_13803    |
| 0 | 11  | 2 PITG_03006    |
| 0 | 7   | 2 PITG_09826    |
| 0 | 0   | 0 PITG_11728    |
| 0 | 0   | 11 PITG_16042   |
| 0 | 26  | 0 PITG_19422    |
| 0 | 16  | 0 PITG_11551    |
| 0 | 52  | 20 PITG_15640   |
| 0 | 2   | 0 PITG_12686    |
| 0 | 0   | 2 PITG_01737    |
| 0 | 26  | 0 NA            |
| 0 | 45  | 27 PITG_13686   |
| 0 | 8   | 17 PITG_18963   |
| 0 | 18  | 6 PITG_19862    |
| 0 | 0   | 20 PITG_10967   |
| 0 | 0   | 0 PITG_01020    |
| 0 | 72  | 94 PITG_21393   |
| 0 | 24  | 231 PITG_17069  |
| 0 | 42  | 2 PITG_19710    |
| 0 | 4   | 4 PITG_02419    |
| 0 | 12  | 55 PITG_00797   |
| 0 | 28  | 20 PITG_02227   |
| 0 | 49  | 9 PITG_14171    |

|   |      |                 |
|---|------|-----------------|
| 0 | 20   | 29 PITG_10994   |
| 0 | 7    | 2 PITG_20152    |
| 0 | 6    | 8 PITG_09899    |
| 0 | 12   | 12 NA           |
| 0 | 2    | 7 PITG_05510    |
| 0 | 8    | 0 PITG_03822    |
| 0 | 6    | 3 NA            |
| 0 | 0    | 2 NA            |
| 0 | 34   | 30 PITG_01653   |
| 0 | 29   | 0 PITG_14137    |
| 0 | 0    | 3 PITG_00622    |
| 0 | 0    | 0 PITG_12514    |
| 0 | 4    | 0 PITG_10097    |
| 0 | 5    | 2 NA            |
| 0 | 2    | 2 NA            |
| 0 | 6    | 2 PITG_02561    |
| 0 | 2    | 4 PITG_03318    |
| 0 | 222  | 164 PITG_14226  |
| 0 | 44   | 117 PITG_11638  |
| 0 | 296  | 278 PITG_06358  |
| 0 | 6    | 4 PITG_01099    |
| 0 | 47   | 104 PITG_13168  |
| 0 | 49   | 153 PITG_01938  |
| 0 | 0    | 2 PITG_15918    |
| 0 | 2    | 0 PITG_17142    |
| 0 | 23   | 53 PITG_16981   |
| 0 | 4    | 0 NA            |
| 0 | 55   | 4 PITG_01288    |
| 0 | 0    | 10 PITG_04860   |
| 0 | 22   | 172 PITG_08043  |
| 0 | 5    | 4 PITG_03777    |
| 0 | 110  | 105 PITG_03829  |
| 0 | 58   | 54 PITG_06171   |
| 0 | 17   | 10 PITG_11246   |
| 0 | 0    | 0 PITG_00440    |
| 0 | 153  | 45 PITG_15408   |
| 0 | 13   | 6 NA            |
| 0 | 88   | 64 PITG_10983   |
| 0 | 2    | 0 PITG_07531    |
| 0 | 2    | 2 PITG_18028    |
| 0 | 166  | 0 PITG_16317    |
| 0 | 0    | 0 PITG_02499    |
| 0 | 4    | 2 PITG_07808    |
| 0 | 0    | 2 PITG_19037    |
| 0 | 1702 | 2329 PITG_02507 |
| 0 | 132  | 69 PITG_03768   |
| 0 | 9    | 48 PITG_10083   |

|    |     |                |
|----|-----|----------------|
| 0  | 0   | 0 PITG_05173   |
| 25 | 9   | 11 NA          |
| 0  | 17  | 9 PITG_16105   |
| 0  | 23  | 4 PITG_12107   |
| 0  | 0   | 5 PITG_02036   |
| 0  | 18  | 0 PITG_21579   |
| 0  | 46  | 2 NA           |
| 0  | 7   | 81 PITG_00820  |
| 0  | 52  | 9 PITG_00391   |
| 0  | 213 | 458 PITG_09306 |
| 0  | 2   | 9 PITG_08293   |
| 0  | 183 | 38 PITG_00439  |
| 0  | 7   | 11 PITG_01614  |
| 0  | 145 | 19 PITG_00525  |
| 0  | 6   | 0 PITG_08303   |
| 0  | 576 | 586 PITG_03433 |
| 0  | 5   | 0 PITG_07141   |
| 0  | 0   | 26 PITG_16058  |
| 0  | 20  | 24 PITG_06303  |
| 0  | 0   | 0 PITG_15067   |
| 0  | 8   | 0 NA           |
| 0  | 53  | 37 PITG_05185  |
| 0  | 6   | 6 PITG_02285   |
| 0  | 23  | 9 PITG_08708   |
| 0  | 0   | 0 PITG_03901   |
| 0  | 11  | 11 PITG_08141  |
| 0  | 0   | 4 PITG_21602   |
| 0  | 6   | 18 PITG_13686  |
| 0  | 20  | 5 NA           |
| 0  | 60  | 30 NA          |
| 0  | 22  | 164 PITG_01862 |
| 0  | 27  | 0 PITG_17026   |
| 0  | 114 | 17 PITG_09725  |
| 0  | 5   | 14 PITG_18696  |
| 0  | 4   | 7 PITG_05796   |
| 0  | 20  | 6 PITG_09447   |
| 0  | 0   | 0 PITG_04865   |
| 0  | 2   | 0 PITG_04479   |
| 0  | 2   | 0 PITG_03154   |
| 0  | 95  | 7 PITG_23141   |
| 36 | 5   | 0 NA           |
| 0  | 67  | 175 PITG_23287 |
| 0  | 25  | 24 PITG_19224  |
| 0  | 0   | 4 PITG_03606   |
| 2  | 20  | 11 PITG_23320  |
| 0  | 50  | 9 PITG_10437   |
| 2  | 0   | 0 NA           |

|   |     |                |
|---|-----|----------------|
| 0 | 16  | 78 PITG_06863  |
| 0 | 109 | 0 NA           |
| 0 | 7   | 2 PITG_10217   |
| 0 | 82  | 0 PITG_11202   |
| 0 | 60  | 29 PITG_09505  |
| 0 | 73  | 5 PITG_09985   |
| 0 | 91  | 71 PITG_03860  |
| 0 | 2   | 7 NA           |
| 0 | 2   | 12 PITG_02327  |
| 0 | 15  | 36 NA          |
| 0 | 2   | 0 PITG_10470   |
| 0 | 85  | 10 PITG_03759  |
| 0 | 17  | 4 PITG_00174   |
| 0 | 17  | 48 PITG_02277  |
| 0 | 2   | 2 PITG_07032   |
| 0 | 10  | 24 PITG_07924  |
| 0 | 0   | 0 PITG_15817   |
| 0 | 4   | 0 NA           |
| 0 | 6   | 7 NA           |
| 0 | 6   | 0 PITG_11186   |
| 0 | 7   | 4 PITG_15925   |
| 0 | 270 | 246 PITG_19668 |
| 0 | 6   | 2 NA           |
| 0 | 58  | 56 PITG_00550  |
| 0 | 10  | 17 PITG_19691  |
| 0 | 14  | 9 PITG_15502   |
| 0 | 16  | 45 PITG_14980  |
| 0 | 85  | 14 NA          |
| 0 | 3   | 16 PITG_13300  |
| 0 | 52  | 2 PITG_16902   |
| 0 | 0   | 2 NA           |
| 0 | 9   | 2 PITG_03481   |
| 0 | 48  | 41 PITG_06149  |
| 0 | 15  | 35 PITG_16814  |
| 0 | 103 | 149 PITG_08704 |
| 0 | 5   | 9 NA           |
| 0 | 0   | 2 PITG_03703   |
| 0 | 12  | 17 PITG_01153  |
| 0 | 894 | 312 PITG_02011 |
| 0 | 22  | 12 NA          |
| 0 | 6   | 6 NA           |
| 0 | 22  | 23 PITG_05221  |
| 0 | 140 | 132 PITG_11712 |
| 0 | 8   | 18 PITG_00839  |
| 0 | 37  | 42 PITG_12194  |
| 0 | 9   | 2 PITG_06695   |
| 0 | 4   | 0 PITG_16561   |



|   |     |                |
|---|-----|----------------|
| 0 | 2   | 2 PITG_04185   |
| 0 | 84  | 0 NA           |
| 0 | 6   | 6 NA           |
| 0 | 151 | 84 PITG_01556  |
| 0 | 28  | 18 PITG_12577  |
| 0 | 8   | 0 PITG_16043   |
| 0 | 4   | 0 PITG_19636   |
| 0 | 290 | 15 NA          |
| 0 | 8   | 14 PITG_11587  |
| 0 | 36  | 28 PITG_17328  |
| 0 | 19  | 4 PITG_11804   |
| 0 | 101 | 93 PITG_02854  |
| 0 | 4   | 0 NA           |
| 0 | 20  | 74 PITG_21398  |
| 0 | 0   | 0 NA           |
| 0 | 198 | 47 PITG_21886  |
| 0 | 4   | 0 PITG_09954   |
| 0 | 79  | 18 PITG_06285  |
| 0 | 48  | 19 PITG_17457  |
| 0 | 0   | 3 PITG_05818   |
| 0 | 3   | 17 PITG_19124  |
| 0 | 3   | 2 PITG_03680   |
| 0 | 0   | 2 PITG_18459   |
| 0 | 38  | 0 PITG_00441   |
| 0 | 23  | 26 PITG_13991  |
| 0 | 69  | 6 NA           |
| 0 | 44  | 39 PITG_00453  |
| 0 | 56  | 19 PITG_18091  |
| 0 | 0   | 7 PITG_15033   |
| 0 | 28  | 7 NA           |
| 0 | 32  | 17 PITG_01588  |
| 0 | 6   | 10 NA          |
| 0 | 0   | 0 NA           |
| 0 | 0   | 0 NA           |
| 0 | 0   | 6 PITG_01349   |
| 0 | 32  | 81 PITG_10648  |
| 0 | 14  | 4 PITG_17945   |
| 0 | 15  | 37 PITG_11689  |
| 0 | 19  | 0 PITG_19670   |
| 0 | 4   | 36 PITG_20762  |
| 0 | 8   | 14 PITG_11405  |
| 0 | 0   | 2 PITG_22672   |
| 0 | 5   | 0 PITG_12529   |
| 0 | 4   | 14 PITG_18720  |
| 0 | 2   | 2 PITG_13970   |
| 0 | 11  | 19 PITG_03710  |
| 0 | 130 | 126 PITG_02537 |

|   |     |                 |
|---|-----|-----------------|
| 0 | 6   | 15 PITG_13415   |
| 0 | 4   | 0 NA            |
| 0 | 11  | 4 PITG_08602    |
| 0 | 208 | 43 PITG_02619   |
| 0 | 20  | 31 PITG_18055   |
| 0 | 58  | 10 PITG_00706   |
| 0 | 0   | 0 PITG_01557    |
| 0 | 53  | 57 PITG_22628   |
| 0 | 7   | 10 PITG_12517   |
| 0 | 2   | 0 PITG_13173    |
| 0 | 5   | 0 PITG_07118    |
| 0 | 115 | 201 PITG_13776  |
| 0 | 8   | 28 PITG_05012   |
| 0 | 0   | 8 PITG_04638    |
| 0 | 2   | 20 PITG_11743   |
| 0 | 17  | 24 PITG_11656   |
| 0 | 34  | 0 PITG_19286    |
| 0 | 0   | 7 PITG_00887    |
| 0 | 0   | 2 PITG_13544    |
| 0 | 4   | 0 NA            |
| 0 | 63  | 4 PITG_12291    |
| 0 | 19  | 3 PITG_02340    |
| 0 | 6   | 2 PITG_13819    |
| 0 | 0   | 2 PITG_03103    |
| 0 | 53  | 0 PITG_08822    |
| 0 | 0   | 0 PITG_03443    |
| 0 | 0   | 4 PITG_06898    |
| 0 | 589 | 1073 PITG_15398 |
| 0 | 0   | 2 PITG_05346    |
| 0 | 11  | 35 PITG_12961   |
| 0 | 379 | 344 PITG_19824  |
| 0 | 15  | 0 PITG_13493    |
| 0 | 24  | 8 NA            |
| 0 | 2   | 0 PITG_16257    |
| 0 | 9   | 0 PITG_19995    |
| 0 | 24  | 8 PITG_11825    |
| 0 | 11  | 2 NA            |
| 0 | 8   | 0 NA            |
| 0 | 2   | 2 NA            |
| 0 | 0   | 4 PITG_03601    |
| 0 | 30  | 45 PITG_18236   |
| 0 | 7   | 4 PITG_18624    |
| 0 | 0   | 3 PITG_18922    |
| 0 | 5   | 36 PITG_09508   |
| 0 | 0   | 4 PITG_07212    |
| 0 | 41  | 7 PITG_18274    |
| 0 | 22  | 7 PITG_06152    |

|   |     |                 |
|---|-----|-----------------|
| 0 | 319 | 109 PITG_00479  |
| 0 | 2   | 2 PITG_02231    |
| 0 | 0   | 0 NA            |
| 0 | 24  | 33 PITG_17022   |
| 0 | 53  | 47 PITG_07509   |
| 0 | 488 | 1024 PITG_13014 |
| 0 | 2   | 16 PITG_15057   |
| 0 | 48  | 31 PITG_15688   |
| 0 | 32  | 107 PITG_02909  |
| 0 | 72  | 84 PITG_09835   |
| 0 | 0   | 4 PITG_06917    |
| 0 | 51  | 0 PITG_13915    |
| 0 | 32  | 6 PITG_09671    |
| 0 | 2   | 58 NA           |
| 0 | 8   | 0 PITG_00211    |
| 0 | 2   | 2 PITG_17795    |
| 0 | 23  | 35 PITG_02905   |
| 0 | 31  | 6 PITG_06393    |
| 0 | 38  | 0 PITG_14114    |
| 0 | 123 | 33 PITG_12837   |
| 0 | 2   | 2 PITG_03455    |
| 0 | 787 | 435 PITG_19824  |
| 0 | 5   | 33 PITG_09426   |
| 0 | 2   | 2 PITG_13224    |
| 0 | 10  | 15 PITG_19773   |
| 0 | 142 | 109 PITG_06748  |
| 0 | 18  | 8 PITG_21886    |
| 0 | 0   | 0 NA            |
| 0 | 20  | 112 PITG_12961  |
| 0 | 2   | 5 PITG_12151    |
| 0 | 8   | 0 NA            |
| 0 | 47  | 0 PITG_09816    |
| 0 | 2   | 2 PITG_21581    |
| 0 | 87  | 14 PITG_00323   |
| 0 | 23  | 22 PITG_04725   |
| 0 | 113 | 139 PITG_09679  |
| 0 | 700 | 201 PITG_21077  |
| 0 | 141 | 329 PITG_08704  |
| 0 | 8   | 0 PITG_21190    |
| 0 | 7   | 10 NA           |
| 0 | 12  | 2 NA            |
| 0 | 0   | 2 PITG_15141    |
| 0 | 28  | 9 NA            |
| 0 | 16  | 2 PITG_02228    |
| 0 | 4   | 2 PITG_03946    |
| 0 | 2   | 2 PITG_06557    |
| 0 | 0   | 0 PITG_06968    |

|   |     |                |
|---|-----|----------------|
| 0 | 0   | 0 PITG_09898   |
| 0 | 8   | 0 NA           |
| 0 | 19  | 0 PITG_05955   |
| 0 | 3   | 3 PITG_01720   |
| 0 | 46  | 4 PITG_01335   |
| 0 | 245 | 34 PITG_06056  |
| 0 | 8   | 13 NA          |
| 0 | 9   | 13 NA          |
| 0 | 0   | 4 NA           |
| 0 | 2   | 3 PITG_01815   |
| 0 | 129 | 33 NA          |
| 0 | 51  | 30 PITG_16512  |
| 0 | 22  | 4 NA           |
| 0 | 10  | 0 PITG_19867   |
| 0 | 2   | 2 PITG_02849   |
| 0 | 0   | 0 PITG_12264   |
| 0 | 70  | 31 PITG_01932  |
| 0 | 0   | 0 NA           |
| 0 | 40  | 3 PITG_13661   |
| 0 | 29  | 19 PITG_11600  |
| 0 | 62  | 0 NA           |
| 0 | 37  | 38 NA          |
| 0 | 129 | 925 NA         |
| 0 | 2   | 2 PITG_14694   |
| 0 | 15  | 19 NA          |
| 0 | 550 | 418 NA         |
| 0 | 2   | 4 NA           |
| 0 | 0   | 0 NA           |
| 0 | 199 | 31 PITG_13114  |
| 0 | 11  | 12 PITG_04941  |
| 0 | 11  | 2 PITG_18024   |
| 0 | 3   | 11 PITG_00133  |
| 0 | 12  | 2 PITG_16049   |
| 0 | 22  | 11 PITG_11578  |
| 0 | 2   | 0 PITG_11437   |
| 0 | 0   | 0 PITG_17332   |
| 0 | 62  | 100 PITG_11431 |
| 0 | 0   | 0 PITG_08305   |
| 0 | 7   | 14 PITG_20117  |
| 0 | 115 | 6 NA           |
| 0 | 2   | 2 NA           |
| 0 | 5   | 11 PITG_18095  |
| 0 | 120 | 69 NA          |
| 0 | 6   | 0 PITG_03159   |
| 0 | 2   | 5 PITG_20820   |
| 0 | 0   | 5 PITG_09360   |
| 0 | 167 | 115 PITG_14440 |

|   |     |                |
|---|-----|----------------|
| 0 | 4   | 2 NA           |
| 0 | 6   | 2 PITG_03844   |
| 0 | 0   | 0 PITG_12446   |
| 0 | 17  | 14 PITG_16299  |
| 0 | 5   | 47 NA          |
| 0 | 61  | 331 PITG_09964 |
| 0 | 45  | 51 PITG_02575  |
| 0 | 2   | 26 PITG_12454  |
| 0 | 0   | 62 PITG_02349  |
| 0 | 0   | 10 PITG_10968  |
| 0 | 101 | 99 PITG_17753  |
| 0 | 99  | 49 PITG_15593  |
| 0 | 6   | 6 PITG_22383   |
| 0 | 462 | 47 PITG_12744  |
| 0 | 204 | 12 PITG_18735  |
| 0 | 70  | 16 PITG_20186  |
| 0 | 2   | 0 NA           |
| 0 | 5   | 0 PITG_00658   |
| 0 | 10  | 27 PITG_13939  |
| 0 | 0   | 0 PITG_15067   |
| 0 | 17  | 14 PITG_05683  |
| 0 | 14  | 0 PITG_03413   |
| 0 | 98  | 122 PITG_03644 |
| 0 | 0   | 0 NA           |
| 0 | 24  | 2 NA           |
| 0 | 2   | 2 PITG_17679   |
| 0 | 12  | 31 PITG_05539  |
| 0 | 0   | 0 NA           |
| 0 | 21  | 70 PITG_15496  |
| 0 | 9   | 14 PITG_16376  |
| 0 | 15  | 7 PITG_08609   |
| 0 | 0   | 2 PITG_04845   |
| 0 | 7   | 2 PITG_01145   |
| 0 | 0   | 0 PITG_11761   |
| 0 | 63  | 0 NA           |
| 0 | 0   | 6 PITG_02753   |
| 0 | 7   | 4 PITG_05520   |
| 0 | 6   | 4 NA           |
| 0 | 26  | 25 PITG_00038  |
| 0 | 4   | 16 PITG_02810  |
| 0 | 0   | 0 PITG_21640   |
| 0 | 11  | 8 NA           |
| 0 | 61  | 13 PITG_03696  |
| 0 | 0   | 0 PITG_00283   |
| 0 | 48  | 19 NA          |
| 0 | 0   | 2 PITG_12162   |
| 0 | 2   | 2 PITG_08359   |

|     |     |                |
|-----|-----|----------------|
| 0   | 15  | 2 PITG_10836   |
| 0   | 0   | 0 PITG_14107   |
| 0   | 18  | 0 NA           |
| 0   | 14  | 65 NA          |
| 0   | 39  | 39 PITG_02684  |
| 0   | 2   | 12 PITG_13607  |
| 0   | 0   | 0 PITG_00659   |
| 0   | 8   | 3 NA           |
| 0   | 31  | 21 PITG_20742  |
| 0   | 0   | 0 PITG_17997   |
| 0   | 14  | 9 PITG_18999   |
| 0   | 0   | 3 PITG_11451   |
| 0   | 2   | 4 PITG_01981   |
| 0   | 11  | 0 PITG_03839   |
| 0   | 19  | 2 NA           |
| 0   | 0   | 2 PITG_17997   |
| 0   | 33  | 19 NA          |
| 0   | 40  | 13 NA          |
| 0   | 0   | 2 PITG_03780   |
| 0   | 12  | 7 PITG_08801   |
| 0   | 597 | 115 PITG_13456 |
| 0   | 21  | 8 PITG_08093   |
| 0   | 0   | 0 PITG_17816   |
| 0   | 2   | 2 PITG_21597   |
| 0   | 2   | 4 PITG_16433   |
| 0   | 0   | 0 PITG_13158   |
| 0   | 85  | 31 NA          |
| 0   | 70  | 124 PITG_18288 |
| 0   | 13  | 41 PITG_10552  |
| 0   | 18  | 16 PITG_18973  |
| 0   | 113 | 56 PITG_12106  |
| 0   | 88  | 71 PITG_17156  |
| 0   | 11  | 25 NA          |
| 0   | 60  | 16 PITG_10345  |
| 0   | 2   | 4 PITG_00207   |
| 0   | 80  | 8 NA           |
| 0   | 33  | 5 PITG_13077   |
| 0   | 43  | 23 NA          |
| 0   | 0   | 0 PITG_17080   |
| 0   | 139 | 74 PITG_19607  |
| 0   | 20  | 13 PITG_06113  |
| 0   | 0   | 4 PITG_06223   |
| 0   | 79  | 30 NA          |
| 0   | 86  | 48 PITG_15780  |
| 0   | 7   | 16 PITG_10795  |
| 403 | 9   | 12 NA          |
| 0   | 26  | 9 PITG_11179   |

|      |     |                |
|------|-----|----------------|
| 0    | 0   | 2 PITG_04485   |
| 0    | 4   | 3 PITG_14520   |
| 0    | 397 | 149 PITG_07470 |
| 1796 | 158 | 1728 NA        |
| 0    | 5   | 0 PITG_15625   |
| 0    | 37  | 13 PITG_20386  |
| 0    | 18  | 30 PITG_17292  |
| 0    | 4   | 70 PITG_08173  |
| 0    | 0   | 36 PITG_12483  |
| 0    | 10  | 2 PITG_02291   |
| 0    | 9   | 3 NA           |
| 0    | 0   | 0 PITG_13899   |
| 0    | 38  | 62 PITG_18894  |
| 0    | 13  | 15 NA          |
| 0    | 16  | 4 PITG_14152   |
| 0    | 9   | 0 PITG_20034   |
| 0    | 0   | 0 NA           |
| 0    | 0   | 0 PITG_03501   |
| 0    | 25  | 27 NA          |
| 0    | 8   | 2 PITG_10859   |
| 0    | 38  | 2 NA           |
| 0    | 33  | 27 PITG_00664  |
| 0    | 10  | 8 PITG_06819   |
| 0    | 6   | 0 PITG_14107   |
| 0    | 0   | 0 NA           |
| 0    | 28  | 15 PITG_20909  |
| 0    | 67  | 45 PITG_10648  |
| 0    | 67  | 46 PITG_01139  |
| 0    | 4   | 2 PITG_12523   |
| 0    | 34  | 12 PITG_02810  |
| 0    | 29  | 0 PITG_07447   |
| 0    | 58  | 7 PITG_03756   |
| 0    | 31  | 14 PITG_06884  |
| 0    | 49  | 10 PITG_08681  |
| 0    | 0   | 4 PITG_02124   |
| 0    | 2   | 2 PITG_12548   |
| 0    | 28  | 17 NA          |
| 0    | 22  | 18 PITG_12871  |
| 0    | 31  | 0 PITG_03166   |
| 0    | 0   | 0 PITG_16024   |
| 0    | 2   | 16 PITG_18749  |
| 0    | 2   | 10 PITG_07903  |
| 0    | 238 | 20 NA          |
| 0    | 2   | 0 PITG_15876   |
| 0    | 0   | 0 PITG_10217   |
| 0    | 0   | 0 PITG_00939   |
| 0    | 43  | 26 PITG_02943  |

|     |     |                |
|-----|-----|----------------|
| 0   | 6   | 6 PITG_19128   |
| 0   | 4   | 21 PITG_03547  |
| 0   | 2   | 2 NA           |
| 0   | 26  | 0 PITG_02719   |
| 0   | 9   | 6 PITG_01405   |
| 0   | 2   | 0 PITG_18726   |
| 0   | 0   | 2 PITG_13488   |
| 0   | 29  | 79 PITG_03740  |
| 21  | 0   | 35 NA          |
| 0   | 21  | 19 PITG_01390  |
| 0   | 21  | 93 PITG_21077  |
| 0   | 0   | 0 PITG_17699   |
| 0   | 44  | 121 PITG_05657 |
| 0   | 23  | 0 NA           |
| 0   | 4   | 12 PITG_05614  |
| 0   | 4   | 4 PITG_03682   |
| 0   | 15  | 26 PITG_01045  |
| 0   | 41  | 7 NA           |
| 0   | 2   | 7 PITG_19313   |
| 0   | 47  | 4 NA           |
| 0   | 33  | 23 PITG_17239  |
| 0   | 34  | 4 PITG_05546   |
| 0   | 138 | 227 PITG_05502 |
| 0   | 0   | 0 NA           |
| 0   | 9   | 2 PITG_01153   |
| 0   | 26  | 19 NA          |
| 0   | 17  | 0 PITG_12573   |
| 0   | 270 | 324 PITG_02615 |
| 50  | 0   | 17 NA          |
| 0   | 2   | 2 NA           |
| 0   | 5   | 9 NA           |
| 0   | 81  | 5 PITG_16226   |
| 0   | 4   | 0 PITG_19125   |
| 0   | 17  | 10 PITG_10892  |
| 0   | 617 | 449 PITG_03948 |
| 0   | 0   | 2 PITG_12747   |
| 0   | 32  | 42 PITG_05234  |
| 0   | 68  | 0 PITG_05600   |
| 363 | 56  | 521 NA         |
| 0   | 42  | 29 PITG_20820  |
| 0   | 10  | 4 NA           |
| 0   | 61  | 18 NA          |
| 0   | 0   | 2 PITG_17334   |
| 0   | 24  | 13 NA          |
| 0   | 48  | 24 PITG_17089  |
| 0   | 22  | 4 PITG_06001   |
| 0   | 34  | 52 PITG_03850  |



|     |     |                |
|-----|-----|----------------|
| 0   | 537 | 269 PITG_07971 |
| 7   | 0   | 16 NA          |
| 0   | 0   | 0 PITG_19466   |
| 0   | 79  | 73 PITG_08369  |
| 0   | 0   | 7 PITG_19128   |
| 0   | 9   | 34 PITG_10289  |
| 0   | 9   | 0 NA           |
| 0   | 26  | 32 PITG_10383  |
| 0   | 14  | 32 PITG_20156  |
| 0   | 34  | 18 NA          |
| 0   | 27  | 3 PITG_17785   |
| 0   | 8   | 2 NA           |
| 0   | 0   | 2 PITG_14173   |
| 0   | 47  | 42 PITG_02673  |
| 0   | 2   | 5 PITG_05585   |
| 0   | 16  | 4 PITG_10784   |
| 0   | 14  | 4 NA           |
| 0   | 2   | 0 PITG_19085   |
| 0   | 4   | 4 PITG_03034   |
| 0   | 0   | 0 NA           |
| 0   | 4   | 16 PITG_08552  |
| 0   | 2   | 2 NA           |
| 0   | 13  | 28 PITG_19846  |
| 0   | 27  | 9 PITG_06384   |
| 0   | 16  | 0 NA           |
| 0   | 4   | 9 PITG_01810   |
| 0   | 40  | 32 PITG_00703  |
| 0   | 54  | 75 PITG_11457  |
| 0   | 2   | 0 PITG_10191   |
| 0   | 19  | 0 NA           |
| 0   | 0   | 4 PITG_09876   |
| 0   | 29  | 0 PITG_05321   |
| 0   | 5   | 0 PITG_03988   |
| 0   | 2   | 2 NA           |
| 0   | 4   | 0 PITG_05600   |
| 0   | 30  | 0 NA           |
| 0   | 21  | 4 PITG_13159   |
| 0   | 8   | 15 PITG_17884  |
| 0   | 7   | 2 PITG_00882   |
| 0   | 9   | 6 PITG_08581   |
| 0   | 5   | 3 PITG_18070   |
| 2   | 0   | 7 NA           |
| 482 | 62  | 1184 NA        |
| 0   | 0   | 2 PITG_15470   |
| 0   | 0   | 0 PITG_15570   |
| 0   | 7   | 7 PITG_11578   |
| 0   | 47  | 23 NA          |

|      |     |               |
|------|-----|---------------|
| 0    | 0   | 15 PITG_08045 |
| 0    | 18  | 8 PITG_17597  |
| 0    | 14  | 4 NA          |
| 0    | 0   | 0 PITG_17325  |
| 0    | 6   | 2 NA          |
| 0    | 2   | 0 NA          |
| 0    | 25  | 96 PITG_20347 |
| 0    | 5   | 2 PITG_07855  |
| 0    | 2   | 0 PITG_14123  |
| 0    | 67  | 5 NA          |
| 0    | 3   | 8 PITG_17076  |
| 0    | 0   | 0 PITG_02885  |
| 0    | 29  | 33 PITG_10052 |
| 0    | 61  | 56 PITG_12157 |
| 0    | 2   | 2 PITG_21114  |
| 0    | 21  | 0 NA          |
| 0    | 2   | 3 PITG_13317  |
| 0    | 3   | 0 PITG_17393  |
| 0    | 3   | 0 PITG_17682  |
| 0    | 9   | 20 PITG_03967 |
| 28   | 45  | 970 NA        |
| 0    | 8   | 2 NA          |
| 0    | 23  | 10 PITG_07744 |
| 0    | 4   | 0 PITG_09684  |
| 0    | 12  | 23 PITG_12347 |
| 0    | 2   | 3 PITG_12988  |
| 0    | 22  | 16 NA         |
| 0    | 12  | 3 PITG_13317  |
| 0    | 0   | 0 PITG_01683  |
| 0    | 2   | 2 PITG_21514  |
| 1570 | 10  | 1457 NA       |
| 0    | 49  | 0 PITG_00853  |
| 0    | 50  | 5 PITG_19175  |
| 0    | 2   | 5 PITG_00709  |
| 0    | 0   | 9 PITG_03658  |
| 0    | 0   | 0 NA          |
| 0    | 106 | 24 NA         |
| 0    | 0   | 0 PITG_06182  |
| 0    | 185 | 90 PITG_12295 |
| 0    | 3   | 4 NA          |
| 0    | 56  | 2 PITG_15223  |
| 0    | 21  | 0 PITG_01224  |
| 0    | 52  | 76 PITG_17942 |
| 0    | 7   | 7 PITG_16478  |
| 0    | 6   | 21 PITG_07795 |
| 0    | 35  | 8 PITG_03547  |
| 0    | 16  | 8 PITG_02244  |

|     |      |                 |
|-----|------|-----------------|
| 0   | 38   | 46 PITG_17042   |
| 0   | 87   | 26 PITG_15120   |
| 0   | 18   | 2 NA            |
| 0   | 2    | 2 PITG_13469    |
| 0   | 0    | 0 NA            |
| 0   | 7    | 0 PITG_16049    |
| 0   | 0    | 33 NA           |
| 0   | 33   | 10 PITG_00408   |
| 0   | 21   | 20 PITG_08230   |
| 0   | 0    | 2 PITG_03710    |
| 0   | 7    | 4 PITG_01343    |
| 0   | 0    | 0 NA            |
| 0   | 8    | 43 PITG_06050   |
| 0   | 84   | 60 PITG_21643   |
| 0   | 71   | 13 NA           |
| 0   | 24   | 0 PITG_02718    |
| 0   | 44   | 30 PITG_11822   |
| 0   | 4    | 0 PITG_22874    |
| 0   | 37   | 33 PITG_05886   |
| 0   | 2    | 2 PITG_10133    |
| 105 | 14   | 98 NA           |
| 0   | 73   | 10 PITG_02487   |
| 0   | 1464 | 2003 PITG_06741 |
| 0   | 34   | 39 PITG_10052   |
| 0   | 123  | 14 NA           |
| 0   | 18   | 6 NA            |
| 0   | 15   | 32 PITG_07035   |
| 0   | 67   | 36 PITG_03737   |
| 0   | 59   | 79 PITG_18833   |
| 0   | 14   | 13 PITG_11142   |
| 0   | 0    | 12 PITG_04977   |
| 0   | 0    | 0 PITG_13590    |
| 0   | 44   | 9 PITG_05461    |
| 0   | 17   | 7 PITG_18355    |
| 0   | 0    | 5 PITG_10995    |
| 0   | 35   | 19 PITG_00444   |
| 0   | 0    | 2 PITG_01929    |
| 0   | 112  | 92 PITG_22839   |
| 0   | 28   | 8 PITG_02922    |
| 0   | 15   | 16 PITG_02924   |
| 0   | 0    | 12 PITG_16801   |
| 0   | 14   | 0 NA            |
| 0   | 36   | 15 PITG_17108   |
| 0   | 86   | 6 PITG_14208    |
| 0   | 30   | 6 NA            |
| 0   | 0    | 2 PITG_11461    |
| 0   | 69   | 13 PITG_14257   |

|   |     |                |
|---|-----|----------------|
| 0 | 4   | 0 PITG_11050   |
| 4 | 288 | 2108 NA        |
| 0 | 16  | 9 NA           |
| 0 | 4   | 0 NA           |
| 0 | 22  | 12 PITG_21848  |
| 0 | 17  | 20 PITG_03425  |
| 0 | 0   | 2 PITG_05317   |
| 0 | 9   | 16 PITG_11438  |
| 0 | 92  | 100 PITG_04261 |
| 0 | 0   | 0 PITG_19474   |
| 0 | 0   | 2 PITG_20251   |
| 0 | 5   | 4 PITG_06593   |
| 0 | 44  | 179 PITG_10974 |
| 0 | 5   | 2 NA           |
| 0 | 0   | 0 PITG_19466   |
| 0 | 8   | 9 PITG_19046   |
| 0 | 8   | 4 NA           |
| 0 | 0   | 12 NA          |
| 0 | 2   | 4 PITG_09995   |
| 0 | 2   | 0 PITG_22923   |
| 0 | 4   | 11 PITG_22857  |
| 0 | 4   | 7 NA           |
| 0 | 9   | 29 PITG_00608  |
| 0 | 3   | 2 NA           |
| 0 | 106 | 2 PITG_02342   |
| 0 | 24  | 12 PITG_01458  |
| 0 | 72  | 33 PITG_11723  |
| 0 | 2   | 0 PITG_16479   |
| 0 | 2   | 6 PITG_16328   |
| 0 | 4   | 6 PITG_03658   |
| 0 | 0   | 0 NA           |
| 0 | 0   | 0 PITG_09166   |
| 0 | 5   | 0 NA           |
| 0 | 0   | 0 PITG_01450   |
| 0 | 9   | 2 PITG_19223   |
| 0 | 67  | 22 PITG_12353  |
| 0 | 5   | 2 NA           |
| 0 | 249 | 191 PITG_22433 |
| 0 | 126 | 94 PITG_12903  |
| 0 | 9   | 17 PITG_05012  |
| 0 | 0   | 8 NA           |
| 0 | 0   | 0 PITG_23049   |
| 0 | 17  | 0 PITG_11675   |
| 0 | 33  | 32 PITG_01245  |
| 0 | 2   | 4 PITG_00782   |
| 0 | 2   | 0 PITG_01737   |
| 0 | 6   | 4 NA           |

|     |      |                 |
|-----|------|-----------------|
| 0   | 2    | 2 PITG_10967    |
| 0   | 6    | 0 PITG_04405    |
| 0   | 4    | 2 PITG_03929    |
| 0   | 23   | 0 NA            |
| 0   | 0    | 0 PITG_18393    |
| 0   | 2    | 2 PITG_17869    |
| 0   | 4    | 0 PITG_01457    |
| 0   | 6    | 2 NA            |
| 0   | 27   | 88 PITG_00401   |
| 0   | 0    | 4 PITG_12521    |
| 0   | 50   | 24 PITG_22590   |
| 0   | 4    | 0 PITG_22672    |
| 0   | 1270 | 1137 PITG_10934 |
| 0   | 6    | 4 NA            |
| 334 | 16   | 624 NA          |
| 0   | 226  | 5 PITG_10664    |
| 0   | 2    | 0 PITG_17359    |
| 0   | 114  | 27 PITG_17503   |
| 0   | 2    | 0 NA            |
| 0   | 30   | 45 PITG_11795   |
| 0   | 0    | 0 NA            |
| 0   | 59   | 20 PITG_18050   |
| 0   | 13   | 22 PITG_11822   |
| 0   | 38   | 9 NA            |
| 0   | 0    | 2 PITG_03267    |
| 0   | 0    | 0 NA            |
| 0   | 51   | 61 NA           |
| 0   | 15   | 12 PITG_07843   |
| 0   | 90   | 26 PITG_03365   |
| 0   | 5    | 0 PITG_09870    |
| 0   | 0    | 2 PITG_00501    |
| 0   | 73   | 35 PITG_14013   |
| 0   | 29   | 8 PITG_06598    |
| 0   | 6    | 7 NA            |
| 0   | 10   | 32 PITG_01614   |
| 0   | 11   | 31 PITG_21176   |
| 0   | 32   | 22 PITG_03267   |
| 0   | 87   | 37 PITG_19164   |
| 0   | 2    | 2 PITG_06324    |
| 0   | 4    | 4 PITG_02536    |
| 0   | 18   | 20 PITG_11463   |
| 0   | 3    | 0 PITG_17898    |
| 0   | 5    | 4 PITG_09987    |
| 0   | 26   | 10 PITG_01761   |
| 0   | 0    | 0 PITG_15162    |
| 0   | 22   | 0 NA            |
| 0   | 10   | 74 PITG_07166   |

|   |     |                |
|---|-----|----------------|
| 0 | 173 | 69 PITG_16114  |
| 0 | 119 | 46 PITG_07080  |
| 0 | 0   | 0 NA           |
| 0 | 10  | 5 PITG_12104   |
| 0 | 4   | 0 PITG_01457   |
| 0 | 58  | 0 NA           |
| 0 | 10  | 8 PITG_05277   |
| 0 | 18  | 12 PITG_04231  |
| 0 | 25  | 21 PITG_01125  |
| 0 | 10  | 23 PITG_10140  |
| 0 | 6   | 0 PITG_08994   |
| 0 | 26  | 4 PITG_00787   |
| 2 | 252 | 683 PITG_10454 |
| 0 | 3   | 6 PITG_11594   |
| 0 | 4   | 0 PITG_07852   |
| 0 | 0   | 2 PITG_01962   |
| 0 | 0   | 2 NA           |
| 0 | 8   | 82 PITG_18446  |
| 0 | 8   | 0 NA           |
| 0 | 15  | 4 PITG_08514   |
| 0 | 35  | 15 NA          |
| 0 | 222 | 409 PITG_11997 |
| 0 | 10  | 0 PITG_16439   |
| 0 | 75  | 42 PITG_16116  |
| 0 | 0   | 2 PITG_19145   |
| 0 | 7   | 2 PITG_02566   |
| 2 | 2   | 9 PITG_14108   |
| 0 | 4   | 2 NA           |
| 0 | 18  | 19 PITG_07841  |
| 0 | 5   | 0 PITG_18316   |
| 0 | 14  | 33 PITG_22381  |
| 0 | 7   | 8 PITG_06942   |
| 0 | 0   | 2 NA           |
| 0 | 152 | 264 PITG_19823 |
| 0 | 75  | 10 PITG_07637  |
| 0 | 29  | 46 PITG_02053  |
| 0 | 19  | 7 PITG_03482   |
| 0 | 6   | 22 NA          |
| 0 | 9   | 0 PITG_21619   |
| 0 | 2   | 14 PITG_11259  |
| 0 | 0   | 2 PITG_01681   |
| 0 | 6   | 36 PITG_08704  |
| 0 | 34  | 39 PITG_10768  |
| 0 | 8   | 14 PITG_06986  |
| 0 | 28  | 68 PITG_03267  |
| 0 | 4   | 0 NA           |
| 0 | 2   | 2 NA           |

|   |     |                |
|---|-----|----------------|
| 0 | 21  | 0 NA           |
| 0 | 543 | 227 PITG_09249 |
| 0 | 51  | 5 NA           |
| 0 | 13  | 5 PITG_03967   |
| 0 | 7   | 2 NA           |
| 0 | 2   | 5 PITG_14272   |
| 0 | 2   | 2 PITG_10624   |
| 0 | 19  | 2 PITG_13282   |
| 0 | 216 | 35 PITG_17477  |
| 0 | 20  | 9 PITG_09067   |
| 0 | 9   | 6 PITG_04910   |
| 0 | 37  | 7 PITG_00857   |
| 0 | 0   | 0 PITG_04424   |
| 0 | 3   | 35 PITG_05552  |
| 0 | 208 | 145 PITG_04909 |
| 0 | 29  | 24 PITG_18236  |
| 0 | 0   | 0 PITG_00504   |
| 0 | 0   | 0 NA           |
| 0 | 0   | 5 PITG_10164   |
| 0 | 5   | 2 PITG_15382   |
| 0 | 10  | 15 PITG_20289  |
| 0 | 22  | 2 PITG_20350   |
| 0 | 4   | 0 PITG_18377   |
| 0 | 21  | 0 NA           |
| 0 | 6   | 4 PITG_17928   |
| 0 | 0   | 6 PITG_21185   |
| 0 | 4   | 8 PITG_18248   |
| 0 | 8   | 0 PITG_12174   |
| 0 | 13  | 3 PITG_09751   |
| 0 | 7   | 0 NA           |
| 0 | 23  | 23 PITG_01317  |
| 0 | 8   | 7 PITG_01754   |
| 0 | 12  | 10 PITG_09220  |
| 0 | 2   | 13 PITG_13255  |
| 0 | 77  | 37 PITG_15973  |
| 3 | 0   | 11 NA          |
| 0 | 90  | 20 PITG_06328  |
| 0 | 26  | 20 PITG_14123  |
| 0 | 14  | 8 PITG_03381   |
| 0 | 0   | 0 PITG_10097   |
| 0 | 2   | 2 PITG_06480   |
| 0 | 2   | 8 PITG_04427   |
| 0 | 23  | 40 PITG_02286  |
| 0 | 2   | 0 PITG_00440   |
| 0 | 3   | 2 PITG_15417   |
| 0 | 24  | 3 PITG_00996   |
| 0 | 9   | 21 PITG_20200  |

|    |     |                |
|----|-----|----------------|
| 0  | 20  | 0 PITG_01826   |
| 0  | 17  | 25 PITG_06817  |
| 0  | 0   | 0 NA           |
| 0  | 17  | 8 PITG_18372   |
| 0  | 0   | 7 PITG_10437   |
| 0  | 0   | 0 PITG_21516   |
| 0  | 0   | 2 NA           |
| 0  | 15  | 31 PITG_20498  |
| 0  | 0   | 2 PITG_09752   |
| 0  | 117 | 3 PITG_15874   |
| 0  | 803 | 151 PITG_17230 |
| 0  | 63  | 6 PITG_00297   |
| 0  | 72  | 7 NA           |
| 0  | 0   | 0 PITG_20077   |
| 0  | 3   | 10 PITG_08984  |
| 0  | 2   | 7 PITG_19048   |
| 0  | 50  | 0 PITG_18814   |
| 0  | 12  | 19 PITG_02973  |
| 0  | 0   | 2 NA           |
| 0  | 402 | 148 PITG_00982 |
| 0  | 11  | 7 PITG_02145   |
| 0  | 13  | 35 PITG_08032  |
| 0  | 67  | 125 NA         |
| 0  | 101 | 6 PITG_05516   |
| 0  | 8   | 11 PITG_14441  |
| 16 | 15  | 379 NA         |
| 0  | 10  | 18 PITG_10031  |
| 0  | 2   | 4 PITG_00163   |
| 0  | 10  | 2 PITG_01999   |
| 0  | 49  | 4 NA           |
| 0  | 41  | 0 NA           |
| 0  | 6   | 2 PITG_15443   |
| 0  | 0   | 9 PITG_06819   |
| 0  | 0   | 15 PITG_02786  |
| 0  | 6   | 12 PITG_17292  |
| 0  | 208 | 249 PITG_07455 |
| 0  | 11  | 30 PITG_03192  |
| 0  | 92  | 129 PITG_16161 |
| 0  | 0   | 0 PITG_14197   |
| 0  | 86  | 86 NA          |
| 0  | 50  | 9 PITG_08314   |
| 0  | 4   | 0 PITG_16042   |
| 0  | 0   | 4 PITG_14727   |
| 0  | 13  | 2 PITG_07309   |
| 0  | 14  | 10 NA          |
| 0  | 0   | 0 PITG_06304   |
| 0  | 2   | 2 PITG_13196   |



|      |     |                |
|------|-----|----------------|
| 1005 | 23  | 911 NA         |
| 0    | 0   | 3 PITG_03259   |
| 0    | 7   | 2 PITG_14005   |
| 0    | 3   | 0 PITG_15918   |
| 0    | 3   | 25 PITG_06863  |
| 0    | 0   | 0 PITG_00215   |
| 0    | 0   | 0 PITG_10027   |
| 0    | 0   | 7 PITG_06365   |
| 0    | 542 | 290 NA         |
| 0    | 0   | 0 PITG_17587   |
| 0    | 14  | 0 PITG_05298   |
| 0    | 16  | 4 PITG_22277   |
| 0    | 301 | 20 PITG_03309  |
| 0    | 0   | 0 NA           |
| 0    | 46  | 146 PITG_14975 |
| 0    | 35  | 7 PITG_11424   |
| 0    | 2   | 0 PITG_18652   |
| 0    | 143 | 159 PITG_14835 |
| 0    | 6   | 8 PITG_18028   |
| 0    | 4   | 5 NA           |
| 0    | 2   | 6 PITG_21181   |
| 0    | 21  | 3 PITG_08411   |
| 0    | 339 | 129 NA         |
| 0    | 60  | 8 PITG_12258   |
| 0    | 4   | 13 PITG_08715  |
| 0    | 7   | 0 PITG_08299   |
| 0    | 4   | 2 NA           |
| 0    | 12  | 2 PITG_04296   |
| 0    | 76  | 0 NA           |
| 0    | 0   | 14 NA          |
| 0    | 101 | 32 PITG_18899  |
| 0    | 259 | 536 PITG_07792 |
| 0    | 17  | 14 PITG_00411  |
| 0    | 48  | 30 PITG_12194  |
| 0    | 0   | 5 NA           |
| 0    | 101 | 11 PITG_07043  |
| 0    | 12  | 5 PITG_03233   |
| 0    | 9   | 2 PITG_08137   |
| 0    | 42  | 25 PITG_19989  |
| 0    | 0   | 0 NA           |
| 0    | 273 | 55 PITG_01931  |
| 0    | 172 | 135 NA         |
| 0    | 24  | 17 PITG_05658  |
| 0    | 0   | 4 PITG_20893   |
| 0    | 28  | 9 PITG_19709   |
| 0    | 0   | 9 PITG_03947   |
| 0    | 0   | 2 PITG_09261   |

|   |      |                |
|---|------|----------------|
| 0 | 273  | 97 PITG_10674  |
| 0 | 2    | 0 NA           |
| 0 | 4    | 20 PITG_00140  |
| 0 | 41   | 19 PITG_16337  |
| 0 | 67   | 36 PITG_03018  |
| 0 | 0    | 0 NA           |
| 0 | 7    | 4 PITG_12983   |
| 0 | 10   | 16 PITG_09665  |
| 0 | 9    | 42 PITG_01103  |
| 0 | 0    | 0 PITG_20830   |
| 0 | 28   | 24 PITG_15497  |
| 0 | 45   | 4 PITG_20787   |
| 0 | 0    | 4 PITG_11877   |
| 0 | 44   | 8 PITG_10923   |
| 0 | 22   | 8 PITG_05346   |
| 0 | 0    | 0 PITG_17753   |
| 0 | 0    | 0 PITG_05644   |
| 0 | 0    | 2 PITG_15649   |
| 0 | 147  | 98 PITG_20608  |
| 0 | 9    | 0 NA           |
| 0 | 0    | 0 PITG_05954   |
| 0 | 52   | 18 PITG_16801  |
| 0 | 0    | 0 NA           |
| 0 | 33   | 3 PITG_03825   |
| 0 | 2    | 2 PITG_19110   |
| 0 | 0    | 2 PITG_02740   |
| 0 | 0    | 0 PITG_03328   |
| 0 | 0    | 3 PITG_03659   |
| 0 | 22   | 2 PITG_04539   |
| 0 | 7    | 4 PITG_00762   |
| 0 | 21   | 5 PITG_07074   |
| 0 | 15   | 6 NA           |
| 0 | 31   | 110 PITG_05512 |
| 0 | 10   | 8 NA           |
| 0 | 0    | 0 PITG_10460   |
| 0 | 9    | 6 NA           |
| 0 | 0    | 0 PITG_05537   |
| 0 | 2269 | 909 PITG_19930 |
| 0 | 54   | 22 NA          |
| 0 | 2    | 0 PITG_19153   |
| 0 | 23   | 17 PITG_08540  |
| 0 | 2    | 2 PITG_00047   |
| 0 | 7    | 2 PITG_01065   |
| 0 | 8    | 6 PITG_12980   |
| 0 | 24   | 9 NA           |
| 0 | 1045 | 518 PITG_04382 |
| 0 | 17   | 141 PITG_08579 |

|   |     |                |
|---|-----|----------------|
| 0 | 4   | 2 NA           |
| 0 | 0   | 4 PITG_05869   |
| 0 | 18  | 5 NA           |
| 0 | 29  | 6 PITG_03458   |
| 0 | 66  | 29 PITG_00647  |
| 0 | 736 | 245 PITG_11997 |
| 0 | 13  | 4 PITG_17560   |
| 0 | 4   | 0 PITG_07194   |
| 0 | 34  | 112 PITG_16360 |
| 0 | 18  | 0 PITG_03078   |
| 0 | 12  | 27 PITG_17395  |
| 0 | 8   | 6 NA           |
| 0 | 24  | 4 NA           |
| 0 | 5   | 2 PITG_07326   |
| 0 | 36  | 29 PITG_13721  |
| 0 | 79  | 10 NA          |
| 0 | 0   | 0 NA           |
| 0 | 14  | 4 PITG_02797   |
| 0 | 10  | 59 PITG_14111  |
| 0 | 2   | 5 PITG_11405   |
| 0 | 471 | 261 PITG_11885 |
| 0 | 9   | 4 PITG_00525   |
| 0 | 15  | 0 NA           |
| 0 | 5   | 31 PITG_14592  |
| 0 | 7   | 14 PITG_02010  |
| 0 | 0   | 2 PITG_07327   |
| 0 | 0   | 0 PITG_13528   |
| 0 | 0   | 0 NA           |
| 0 | 7   | 4 PITG_17627   |
| 0 | 44  | 8 PITG_09285   |
| 0 | 135 | 0 PITG_02107   |
| 0 | 23  | 24 PITG_07804  |
| 0 | 2   | 6 PITG_00861   |
| 0 | 11  | 5 NA           |
| 0 | 5   | 2 PITG_01046   |
| 0 | 2   | 8 NA           |
| 0 | 0   | 0 PITG_02979   |
| 0 | 7   | 2 PITG_03408   |
| 0 | 0   | 0 PITG_17057   |
| 0 | 0   | 5 PITG_16207   |
| 0 | 9   | 2 PITG_09260   |
| 0 | 2   | 0 PITG_04584   |
| 0 | 4   | 10 PITG_03471  |
| 0 | 0   | 0 NA           |
| 0 | 10  | 0 PITG_12459   |
| 0 | 4   | 25 PITG_04907  |
| 0 | 0   | 0 NA           |

|   |     |                |
|---|-----|----------------|
| 0 | 4   | 4 PITG_13097   |
| 0 | 0   | 0 PITG_01850   |
| 0 | 0   | 6 PITG_04230   |
| 2 | 165 | 268 PITG_06591 |
| 0 | 15  | 4 PITG_03754   |
| 0 | 2   | 0 NA           |
| 0 | 6   | 17 PITG_00132  |
| 0 | 2   | 2 PITG_11750   |
| 0 | 13  | 7 PITG_17734   |
| 0 | 0   | 0 PITG_03300   |
| 0 | 10  | 18 PITG_11805  |
| 0 | 2   | 4 PITG_11485   |
| 0 | 129 | 37 PITG_00038  |
| 0 | 99  | 17 PITG_01302  |
| 0 | 49  | 9 PITG_00132   |
| 0 | 175 | 253 PITG_01146 |
| 0 | 2   | 8 PITG_13042   |
| 0 | 0   | 2 NA           |
| 0 | 14  | 19 PITG_08011  |
| 0 | 159 | 64 PITG_01899  |
| 0 | 17  | 30 PITG_09459  |
| 0 | 2   | 8 PITG_01769   |
| 0 | 32  | 9 NA           |
| 0 | 5   | 8 PITG_17928   |
| 0 | 4   | 10 PITG_05955  |
| 0 | 33  | 24 PITG_12531  |
| 0 | 0   | 2 NA           |
| 0 | 3   | 0 NA           |
| 0 | 5   | 8 PITG_11083   |
| 0 | 0   | 0 PITG_17026   |
| 0 | 8   | 0 PITG_02497   |
| 0 | 8   | 8 PITG_03241   |
| 0 | 13  | 25 PITG_04959  |
| 0 | 0   | 2 PITG_06274   |
| 0 | 15  | 25 PITG_00978  |
| 0 | 26  | 34 PITG_12813  |
| 0 | 2   | 25 PITG_10022  |
| 0 | 99  | 17 NA          |
| 0 | 16  | 0 PITG_22112   |
| 0 | 9   | 13 PITG_05254  |
| 0 | 10  | 0 NA           |
| 0 | 2   | 2 NA           |
| 0 | 7   | 2 PITG_17557   |
| 0 | 28  | 22 PITG_17563  |
| 0 | 36  | 54 PITG_07960  |
| 0 | 19  | 0 PITG_04634   |
| 0 | 10  | 31 PITG_16808  |

|    |     |                |
|----|-----|----------------|
| 0  | 94  | 144 PITG_05638 |
| 0  | 8   | 26 PITG_04242  |
| 0  | 0   | 0 PITG_12997   |
| 0  | 69  | 36 NA          |
| 0  | 4   | 6 PITG_02268   |
| 0  | 113 | 23 PITG_10002  |
| 0  | 11  | 0 PITG_01576   |
| 0  | 11  | 31 PITG_01400  |
| 0  | 4   | 8 PITG_10315   |
| 0  | 17  | 4 PITG_17441   |
| 0  | 7   | 9 PITG_15058   |
| 0  | 6   | 2 PITG_14176   |
| 0  | 5   | 14 PITG_06753  |
| 0  | 29  | 46 PITG_12687  |
| 0  | 91  | 34 NA          |
| 0  | 3   | 0 PITG_04705   |
| 0  | 16  | 45 PITG_03041  |
| 0  | 0   | 9 PITG_00590   |
| 0  | 11  | 0 NA           |
| 0  | 0   | 2 PITG_15929   |
| 0  | 52  | 20 PITG_13097  |
| 0  | 0   | 10 PITG_19488  |
| 0  | 32  | 0 NA           |
| 0  | 7   | 26 PITG_08736  |
| 0  | 2   | 0 PITG_20866   |
| 0  | 0   | 16 PITG_13029  |
| 0  | 38  | 18 PITG_09474  |
| 0  | 0   | 0 PITG_19457   |
| 0  | 10  | 0 PITG_05354   |
| 0  | 0   | 2 PITG_04028   |
| 0  | 4   | 0 PITG_18786   |
| 0  | 0   | 0 PITG_05935   |
| 0  | 6   | 2 NA           |
| 0  | 6   | 20 PITG_05450  |
| 0  | 31  | 0 PITG_03660   |
| 0  | 32  | 10 PITG_12234  |
| 0  | 12  | 4 PITG_13622   |
| 0  | 4   | 0 PITG_20009   |
| 0  | 9   | 17 PITG_20893  |
| 80 | 0   | 4 NA           |
| 2  | 51  | 162 NA         |
| 0  | 0   | 0 PITG_20319   |
| 0  | 12  | 4 PITG_02725   |
| 0  | 0   | 2 PITG_01003   |
| 0  | 0   | 0 PITG_01108   |
| 0  | 63  | 0 PITG_13855   |
| 0  | 16  | 28 PITG_06429  |

|     |     |                |
|-----|-----|----------------|
| 0   | 4   | 40 PITG_00152  |
| 0   | 0   | 0 PITG_18091   |
| 0   | 0   | 0 NA           |
| 0   | 154 | 347 PITG_06722 |
| 0   | 6   | 0 PITG_17041   |
| 0   | 12  | 4 PITG_01152   |
| 0   | 133 | 27 PITG_00215  |
| 0   | 10  | 7 NA           |
| 0   | 103 | 220 PITG_10711 |
| 0   | 272 | 19 NA          |
| 0   | 2   | 2 PITG_11750   |
| 0   | 15  | 23 PITG_13404  |
| 0   | 13  | 10 PITG_02770  |
| 0   | 0   | 4 PITG_11291   |
| 138 | 14  | 76 NA          |
| 0   | 95  | 14 PITG_12277  |
| 0   | 0   | 0 NA           |
| 0   | 7   | 20 PITG_10285  |
| 0   | 31  | 10 PITG_06764  |
| 0   | 15  | 2 PITG_17391   |
| 0   | 0   | 12 PITG_16121  |
| 0   | 9   | 0 NA           |
| 0   | 182 | 5 PITG_05595   |
| 0   | 3   | 3 NA           |
| 0   | 20  | 5 PITG_20045   |
| 0   | 17  | 2 PITG_01998   |
| 0   | 0   | 0 PITG_09605   |
| 0   | 0   | 0 PITG_15354   |
| 0   | 4   | 0 PITG_05260   |
| 0   | 0   | 0 NA           |
| 0   | 4   | 2 PITG_02796   |
| 0   | 0   | 0 NA           |
| 0   | 47  | 42 PITG_06479  |
| 0   | 20  | 72 PITG_19038  |
| 0   | 48  | 15 PITG_01579  |
| 0   | 0   | 5 PITG_14868   |
| 0   | 0   | 4 PITG_04506   |
| 0   | 4   | 2 PITG_04593   |
| 0   | 25  | 15 PITG_00128  |
| 0   | 0   | 0 NA           |
| 0   | 13  | 10 PITG_17058  |
| 0   | 18  | 20 NA          |
| 0   | 60  | 14 PITG_14565  |
| 0   | 133 | 119 PITG_06343 |
| 0   | 38  | 79 PITG_02002  |
| 0   | 22  | 4 PITG_08481   |
| 0   | 0   | 2 PITG_17883   |

|    |     |               |
|----|-----|---------------|
| 0  | 0   | 0 PITG_18090  |
| 0  | 0   | 2 PITG_05198  |
| 0  | 2   | 2 PITG_01457  |
| 0  | 2   | 2 NA          |
| 0  | 2   | 8 PITG_19459  |
| 0  | 3   | 4 PITG_00627  |
| 0  | 8   | 0 NA          |
| 0  | 2   | 0 PITG_21495  |
| 0  | 2   | 5 PITG_04494  |
| 0  | 0   | 0 PITG_10905  |
| 0  | 0   | 8 PITG_02821  |
| 0  | 0   | 0 PITG_13397  |
| 0  | 0   | 0 PITG_01962  |
| 0  | 3   | 0 PITG_00218  |
| 0  | 0   | 0 PITG_07109  |
| 0  | 13  | 6 PITG_06780  |
| 0  | 2   | 9 PITG_09039  |
| 0  | 0   | 3 PITG_01340  |
| 0  | 41  | 0 PITG_18728  |
| 0  | 0   | 0 NA          |
| 0  | 14  | 6 NA          |
| 0  | 139 | 72 PITG_13458 |
| 0  | 44  | 0 PITG_08826  |
| 0  | 6   | 2 PITG_12675  |
| 0  | 11  | 50 PITG_03095 |
| 0  | 2   | 2 PITG_03468  |
| 50 | 81  | 888 NA        |
| 0  | 4   | 6 PITG_17361  |
| 0  | 6   | 9 PITG_02826  |
| 0  | 76  | 24 PITG_01711 |
| 0  | 5   | 0 PITG_03547  |
| 0  | 9   | 9 PITG_18695  |
| 0  | 9   | 8 PITG_01387  |
| 0  | 42  | 0 NA          |
| 0  | 27  | 7 PITG_17898  |
| 0  | 88  | 0 NA          |
| 0  | 19  | 7 NA          |
| 0  | 5   | 4 PITG_03028  |
| 0  | 42  | 30 NA         |
| 0  | 7   | 0 NA          |
| 0  | 78  | 4 PITG_01826  |
| 0  | 0   | 2 PITG_01947  |
| 0  | 3   | 0 PITG_13920  |
| 0  | 3   | 2 NA          |
| 0  | 351 | 18 PITG_05360 |
| 0  | 32  | 22 PITG_00943 |
| 0  | 7   | 41 PITG_02793 |

|     |     |                |
|-----|-----|----------------|
| 0   | 7   | 2 PITG_09242   |
| 0   | 0   | 0 PITG_02766   |
| 0   | 29  | 2 PITG_20945   |
| 0   | 9   | 64 PITG_03550  |
| 0   | 32  | 23 PITG_07194  |
| 0   | 70  | 12 NA          |
| 0   | 0   | 4 PITG_15748   |
| 0   | 5   | 2 PITG_01069   |
| 0   | 6   | 0 PITG_20388   |
| 0   | 6   | 0 PITG_02398   |
| 0   | 0   | 2 NA           |
| 0   | 10  | 4 PITG_08137   |
| 0   | 4   | 16 NA          |
| 0   | 14  | 2 PITG_15925   |
| 0   | 0   | 0 PITG_15470   |
| 0   | 137 | 267 PITG_13003 |
| 0   | 2   | 4 PITG_17106   |
| 0   | 210 | 304 PITG_06376 |
| 0   | 6   | 0 PITG_12663   |
| 0   | 4   | 32 PITG_05669  |
| 0   | 3   | 5 PITG_16958   |
| 0   | 32  | 48 PITG_06324  |
| 0   | 2   | 10 PITG_01591  |
| 0   | 10  | 4 NA           |
| 0   | 40  | 19 PITG_12521  |
| 0   | 3   | 11 PITG_07201  |
| 0   | 192 | 22 PITG_11013  |
| 0   | 4   | 4 PITG_11760   |
| 0   | 6   | 2 PITG_03630   |
| 0   | 0   | 2 NA           |
| 0   | 543 | 149 PITG_18316 |
| 0   | 20  | 4 NA           |
| 0   | 60  | 0 NA           |
| 0   | 12  | 2 PITG_21727   |
| 0   | 67  | 27 PITG_12973  |
| 0   | 3   | 0 PITG_06929   |
| 0   | 2   | 2 NA           |
| 0   | 0   | 2 PITG_08197   |
| 0   | 5   | 0 PITG_08473   |
| 0   | 59  | 48 PITG_08758  |
| 0   | 15  | 0 PITG_06332   |
| 0   | 33  | 13 PITG_10992  |
| 0   | 6   | 9 NA           |
| 0   | 62  | 4 PITG_01185   |
| 240 | 53  | 1530 NA        |
| 0   | 8   | 19 PITG_10045  |
| 0   | 7   | 12 PITG_20266  |



|    |     |                |
|----|-----|----------------|
| 0  | 19  | 0 PITG_16918   |
| 0  | 160 | 42 NA          |
| 0  | 54  | 2 PITG_01682   |
| 0  | 6   | 4 PITG_01182   |
| 0  | 0   | 0 PITG_11829   |
| 0  | 4   | 0 NA           |
| 0  | 0   | 0 PITG_16071   |
| 0  | 4   | 0 PITG_11017   |
| 0  | 9   | 7 PITG_14979   |
| 0  | 71  | 79 PITG_16071  |
| 0  | 114 | 340 PITG_17790 |
| 0  | 10  | 17 PITG_10022  |
| 0  | 13  | 10 PITG_03260  |
| 0  | 2   | 2 PITG_15779   |
| 0  | 24  | 0 PITG_11410   |
| 0  | 6   | 0 NA           |
| 0  | 3   | 2 PITG_02794   |
| 0  | 232 | 100 PITG_16199 |
| 0  | 2   | 0 PITG_20562   |
| 0  | 8   | 12 PITG_15039  |
| 0  | 38  | 13 NA          |
| 0  | 21  | 5 PITG_10981   |
| 0  | 25  | 6 PITG_02791   |
| 0  | 4   | 6 NA           |
| 0  | 57  | 11 PITG_14553  |
| 0  | 24  | 32 PITG_15050  |
| 0  | 4   | 0 PITG_01591   |
| 0  | 2   | 8 PITG_03703   |
| 0  | 2   | 0 PITG_03408   |
| 0  | 7   | 0 PITG_17684   |
| 0  | 6   | 19 PITG_04048  |
| 0  | 2   | 3 NA           |
| 0  | 97  | 32 NA          |
| 0  | 9   | 14 NA          |
| 0  | 17  | 4 PITG_10301   |
| 0  | 417 | 107 NA         |
| 0  | 8   | 2 NA           |
| 0  | 24  | 5 NA           |
| 0  | 19  | 53 PITG_11459  |
| 0  | 4   | 5 PITG_04725   |
| 0  | 3   | 6 PITG_07243   |
| 0  | 29  | 8 PITG_16855   |
| 0  | 187 | 214 PITG_06659 |
| 0  | 0   | 3 NA           |
| 43 | 2   | 158 NA         |
| 0  | 21  | 0 NA           |
| 0  | 6   | 0 PITG_03127   |

|   |     |                |
|---|-----|----------------|
| 0 | 9   | 15 PITG_02762  |
| 0 | 10  | 13 PITG_06557  |
| 0 | 4   | 7 NA           |
| 0 | 10  | 3 NA           |
| 0 | 20  | 4 NA           |
| 0 | 2   | 5 PITG_01438   |
| 0 | 127 | 134 NA         |
| 0 | 219 | 47 PITG_06589  |
| 0 | 0   | 6 PITG_03467   |
| 0 | 31  | 8 PITG_15497   |
| 0 | 13  | 0 PITG_10390   |
| 0 | 0   | 2 PITG_03374   |
| 0 | 8   | 8 NA           |
| 0 | 0   | 4 NA           |
| 0 | 59  | 177 PITG_01814 |
| 0 | 17  | 3 PITG_08195   |
| 0 | 0   | 4 PITG_00756   |
| 0 | 9   | 22 PITG_11182  |
| 0 | 0   | 0 NA           |
| 0 | 0   | 0 NA           |
| 0 | 0   | 2 NA           |
| 0 | 0   | 8 NA           |
| 0 | 0   | 6 PITG_06114   |
| 0 | 74  | 26 PITG_01537  |
| 0 | 11  | 7 NA           |
| 0 | 60  | 25 PITG_10268  |
| 0 | 38  | 0 NA           |
| 0 | 0   | 0 PITG_16110   |
| 0 | 5   | 12 PITG_08019  |
| 0 | 6   | 20 PITG_05686  |
| 0 | 183 | 23 PITG_03180  |
| 0 | 0   | 8 PITG_00323   |
| 0 | 7   | 11 PITG_21873  |
| 0 | 11  | 0 NA           |
| 0 | 2   | 14 PITG_03547  |
| 0 | 0   | 3 NA           |
| 0 | 0   | 4 PITG_00302   |
| 0 | 12  | 20 PITG_17049  |
| 0 | 86  | 11 PITG_04567  |
| 0 | 92  | 39 PITG_12579  |
| 0 | 30  | 0 PITG_06129   |
| 0 | 65  | 12 NA          |
| 0 | 45  | 12 PITG_08461  |
| 0 | 108 | 116 PITG_05255 |
| 0 | 23  | 10 PITG_05559  |
| 0 | 24  | 9 NA           |
| 0 | 4   | 2 PITG_02480   |

|   |     |                |
|---|-----|----------------|
| 0 | 2   | 9 NA           |
| 0 | 5   | 4 NA           |
| 0 | 8   | 6 NA           |
| 0 | 4   | 4 PITG_01543   |
| 0 | 21  | 4 PITG_09795   |
| 0 | 0   | 6 NA           |
| 0 | 0   | 0 PITG_12180   |
| 0 | 4   | 17 PITG_22568  |
| 0 | 44  | 33 PITG_15503  |
| 0 | 83  | 0 NA           |
| 0 | 21  | 10 PITG_13850  |
| 0 | 11  | 13 PITG_02338  |
| 0 | 0   | 2 PITG_14398   |
| 0 | 176 | 312 PITG_06323 |
| 0 | 15  | 5 PITG_01471   |
| 0 | 18  | 26 PITG_01453  |
| 0 | 8   | 3 NA           |
| 0 | 289 | 9 PITG_14937   |
| 0 | 5   | 19 PITG_18702  |
| 0 | 86  | 4 PITG_18863   |
| 0 | 11  | 0 PITG_08473   |
| 0 | 8   | 12 NA          |
| 0 | 4   | 6 PITG_03078   |
| 0 | 3   | 0 PITG_20468   |
| 0 | 0   | 0 PITG_06288   |
| 0 | 12  | 27 PITG_05079  |
| 0 | 6   | 16 PITG_11701  |
| 0 | 53  | 11 PITG_21828  |
| 0 | 2   | 4 PITG_00081   |
| 0 | 2   | 2 PITG_01960   |
| 0 | 23  | 0 PITG_00750   |
| 0 | 2   | 10 PITG_13002  |
| 0 | 0   | 0 PITG_10911   |
| 0 | 61  | 45 PITG_06380  |
| 0 | 15  | 107 PITG_00189 |
| 0 | 6   | 27 PITG_05627  |
| 0 | 8   | 0 NA           |
| 0 | 4   | 2 PITG_02307   |
| 0 | 18  | 6 PITG_03737   |
| 0 | 23  | 22 NA          |
| 0 | 43  | 27 PITG_11131  |
| 0 | 15  | 0 PITG_19046   |
| 0 | 71  | 31 NA          |
| 0 | 72  | 5 PITG_13314   |
| 0 | 19  | 10 PITG_22394  |
| 0 | 2   | 7 NA           |
| 0 | 21  | 19 NA          |

|   |     |                |
|---|-----|----------------|
| 0 | 18  | 2 NA           |
| 0 | 156 | 68 NA          |
| 0 | 0   | 2 PITG_10921   |
| 0 | 9   | 20 PITG_04834  |
| 0 | 3   | 0 PITG_03142   |
| 0 | 217 | 115 PITG_12914 |
| 0 | 4   | 2 PITG_04861   |
| 0 | 9   | 0 NA           |
| 0 | 14  | 0 PITG_22922   |
| 0 | 25  | 88 PITG_19318  |
| 0 | 24  | 31 PITG_03016  |
| 0 | 18  | 62 PITG_03792  |
| 0 | 53  | 188 PITG_02022 |
| 0 | 17  | 59 PITG_08702  |
| 0 | 0   | 2 PITG_11525   |
| 0 | 0   | 0 PITG_16337   |
| 0 | 23  | 13 PITG_02824  |
| 0 | 11  | 4 PITG_04615   |
| 0 | 14  | 14 NA          |
| 0 | 143 | 107 PITG_14989 |
| 0 | 7   | 10 PITG_09001  |
| 0 | 2   | 7 PITG_19603   |
| 0 | 28  | 8 PITG_22415   |
| 0 | 35  | 20 PITG_11675  |
| 0 | 74  | 4 PITG_02787   |
| 0 | 0   | 2 PITG_10943   |
| 0 | 0   | 2 PITG_11461   |
| 0 | 9   | 0 NA           |
| 0 | 2   | 0 PITG_11623   |
| 0 | 7   | 0 PITG_17383   |
| 0 | 25  | 37 PITG_11926  |
| 0 | 4   | 4 PITG_01980   |
| 0 | 0   | 0 PITG_02418   |
| 0 | 0   | 14 PITG_12318  |
| 0 | 73  | 71 PITG_02281  |
| 0 | 0   | 0 PITG_10764   |
| 0 | 8   | 0 NA           |
| 0 | 159 | 273 PITG_09964 |
| 0 | 2   | 4 PITG_00160   |
| 0 | 0   | 4 NA           |
| 0 | 10  | 3 PITG_06609   |
| 0 | 0   | 3 PITG_10926   |
| 0 | 13  | 16 PITG_09937  |
| 0 | 17  | 24 PITG_07121  |
| 0 | 57  | 27 PITG_11044  |
| 0 | 0   | 4 PITG_00688   |
| 0 | 7   | 0 NA           |

|   |     |                |
|---|-----|----------------|
| 0 | 14  | 7 PITG_20202   |
| 0 | 0   | 3 PITG_03733   |
| 0 | 25  | 16 PITG_15862  |
| 0 | 7   | 4 NA           |
| 0 | 3   | 3 PITG_16264   |
| 0 | 42  | 54 PITG_04553  |
| 0 | 24  | 0 NA           |
| 0 | 95  | 17 PITG_16310  |
| 0 | 26  | 22 PITG_13435  |
| 0 | 83  | 75 PITG_01153  |
| 0 | 4   | 3 PITG_07821   |
| 0 | 0   | 2 PITG_08760   |
| 0 | 41  | 22 NA          |
| 0 | 50  | 85 PITG_05516  |
| 0 | 445 | 583 PITG_16327 |
| 0 | 2   | 3 NA           |
| 0 | 220 | 4 PITG_10499   |
| 0 | 11  | 4 PITG_17746   |
| 0 | 15  | 11 PITG_15783  |
| 0 | 4   | 24 PITG_05480  |
| 0 | 5   | 0 NA           |
| 0 | 0   | 2 PITG_05649   |
| 0 | 2   | 50 PITG_14727  |
| 0 | 14  | 0 NA           |
| 0 | 2   | 0 NA           |
| 0 | 196 | 306 PITG_02320 |
| 0 | 25  | 2 PITG_02497   |
| 0 | 4   | 0 NA           |
| 0 | 80  | 41 NA          |
| 0 | 7   | 51 PITG_02349  |
| 0 | 4   | 8 PITG_02597   |
| 0 | 0   | 2 PITG_16009   |
| 0 | 141 | 43 PITG_12113  |
| 0 | 4   | 2 PITG_01788   |
| 0 | 2   | 5 PITG_01919   |
| 0 | 0   | 0 PITG_08619   |
| 0 | 12  | 4 PITG_11723   |
| 0 | 15  | 2 PITG_06026   |
| 0 | 4   | 100 PITG_05998 |
| 0 | 8   | 43 PITG_01477  |
| 0 | 0   | 4 PITG_16344   |
| 0 | 0   | 0 PITG_03779   |
| 0 | 0   | 3 PITG_00770   |
| 0 | 0   | 2 PITG_03560   |
| 0 | 6   | 2 PITG_01873   |
| 0 | 19  | 71 PITG_03599  |
| 0 | 0   | 4 NA           |

|   |      |                 |
|---|------|-----------------|
| 0 | 3    | 0 PITG_19432    |
| 0 | 34   | 8 NA            |
| 0 | 2    | 0 PITG_12876    |
| 0 | 17   | 4 NA            |
| 0 | 4    | 0 PITG_02139    |
| 0 | 11   | 20 PITG_17384   |
| 0 | 17   | 2 PITG_12183    |
| 0 | 22   | 44 PITG_19851   |
| 0 | 9    | 26 PITG_11704   |
| 0 | 0    | 2 PITG_01315    |
| 0 | 0    | 0 NA            |
| 0 | 0    | 8 PITG_01682    |
| 0 | 0    | 0 PITG_11183    |
| 0 | 19   | 15 PITG_03904   |
| 0 | 19   | 4 PITG_15787    |
| 0 | 13   | 14 PITG_17140   |
| 0 | 31   | 17 PITG_00842   |
| 0 | 300  | 41 PITG_02650   |
| 0 | 27   | 17 PITG_01678   |
| 0 | 27   | 63 PITG_18452   |
| 0 | 126  | 53 PITG_09450   |
| 0 | 144  | 109 PITG_13832  |
| 0 | 3    | 2 NA            |
| 0 | 39   | 27 NA           |
| 0 | 9    | 6 PITG_06184    |
| 0 | 22   | 17 PITG_01718   |
| 0 | 10   | 9 PITG_14561    |
| 0 | 11   | 2 NA            |
| 0 | 3748 | 3147 PITG_04121 |
| 0 | 4    | 10 PITG_13920   |
| 0 | 27   | 2 NA            |
| 0 | 32   | 10 NA           |
| 0 | 121  | 6 PITG_19473    |
| 0 | 0    | 0 PITG_12514    |
| 0 | 0    | 6 PITG_17112    |
| 0 | 151  | 57 PITG_12646   |
| 0 | 0    | 2 PITG_03169    |
| 0 | 5    | 2 PITG_11286    |
| 0 | 26   | 45 PITG_01964   |
| 0 | 394  | 315 PITG_04831  |
| 0 | 164  | 29 PITG_15497   |
| 0 | 16   | 5 PITG_06662    |
| 0 | 54   | 70 NA           |
| 0 | 12   | 2 NA            |
| 0 | 17   | 2 PITG_19422    |
| 0 | 4    | 14 PITG_04115   |
| 0 | 0    | 2 PITG_12211    |

|    |     |                |
|----|-----|----------------|
| 0  | 77  | 44 PITG_03425  |
| 0  | 4   | 0 PITG_02205   |
| 0  | 30  | 24 PITG_02424  |
| 0  | 0   | 2 PITG_09920   |
| 0  | 0   | 6 PITG_08722   |
| 0  | 46  | 23 PITG_06343  |
| 0  | 29  | 2 PITG_07287   |
| 0  | 0   | 0 PITG_10460   |
| 0  | 0   | 0 NA           |
| 0  | 16  | 30 PITG_12154  |
| 0  | 177 | 310 PITG_03473 |
| 0  | 66  | 16 PITG_21502  |
| 0  | 17  | 77 PITG_08024  |
| 0  | 2   | 6 PITG_06780   |
| 0  | 72  | 54 PITG_03295  |
| 0  | 2   | 7 PITG_16052   |
| 0  | 62  | 40 PITG_11587  |
| 0  | 24  | 0 PITG_20830   |
| 0  | 9   | 2 PITG_10045   |
| 0  | 23  | 89 PITG_02910  |
| 0  | 5   | 6 PITG_02023   |
| 0  | 0   | 0 PITG_17948   |
| 0  | 2   | 2 PITG_19605   |
| 0  | 2   | 0 PITG_03623   |
| 0  | 0   | 5 PITG_16904   |
| 0  | 16  | 41 PITG_06342  |
| 0  | 2   | 18 PITG_02740  |
| 0  | 0   | 0 PITG_13715   |
| 0  | 43  | 0 PITG_19046   |
| 0  | 3   | 2 NA           |
| 0  | 4   | 0 PITG_19863   |
| 27 | 3   | 41 NA          |
| 0  | 7   | 4 PITG_05686   |
| 0  | 41  | 9 PITG_12121   |
| 0  | 13  | 22 NA          |
| 0  | 49  | 21 PITG_21146  |
| 0  | 23  | 11 PITG_16320  |
| 0  | 0   | 3 NA           |
| 0  | 13  | 30 PITG_06910  |
| 0  | 25  | 59 PITG_01502  |
| 0  | 24  | 37 PITG_07241  |
| 0  | 21  | 6 PITG_11182   |
| 0  | 5   | 4 PITG_21018   |
| 0  | 6   | 8 NA           |
| 0  | 7   | 8 NA           |
| 0  | 0   | 0 PITG_09310   |
| 0  | 0   | 0 NA           |

|   |     |                |
|---|-----|----------------|
| 0 | 0   | 0 PITG_22858   |
| 0 | 4   | 4 PITG_20767   |
| 0 | 109 | 51 PITG_19223  |
| 0 | 416 | 113 PITG_13456 |
| 0 | 2   | 7 PITG_10133   |
| 0 | 0   | 0 PITG_14590   |
| 0 | 11  | 0 PITG_03354   |
| 0 | 9   | 0 PITG_15925   |
| 0 | 41  | 25 PITG_11044  |
| 0 | 0   | 0 PITG_11369   |
| 2 | 31  | 0 NA           |
| 0 | 2   | 0 PITG_01075   |
| 0 | 4   | 6 PITG_14132   |
| 0 | 87  | 0 NA           |
| 0 | 0   | 2 NA           |
| 0 | 6   | 5 PITG_11122   |
| 0 | 24  | 12 PITG_02137  |
| 0 | 51  | 27 NA          |
| 0 | 4   | 2 NA           |
| 0 | 6   | 6 PITG_22430   |
| 0 | 35  | 59 PITG_08926  |
| 0 | 5   | 38 PITG_10207  |
| 0 | 42  | 10 PITG_00323  |
| 0 | 2   | 4 PITG_07100   |
| 0 | 6   | 5 NA           |
| 0 | 10  | 6 PITG_16137   |
| 0 | 18  | 0 PITG_01406   |
| 0 | 3   | 2 PITG_13376   |
| 0 | 0   | 2 PITG_03422   |
| 0 | 0   | 7 PITG_09072   |
| 0 | 0   | 0 NA           |
| 0 | 14  | 4 PITG_13422   |
| 0 | 2   | 2 PITG_06551   |
| 0 | 28  | 6 NA           |
| 0 | 2   | 2 PITG_17387   |
| 0 | 163 | 203 PITG_20041 |
| 0 | 4   | 2 NA           |
| 0 | 101 | 31 NA          |
| 0 | 18  | 11 NA          |
| 0 | 14  | 5 PITG_03236   |
| 0 | 6   | 32 PITG_02343  |
| 0 | 2   | 4 PITG_04705   |
| 0 | 4   | 0 PITG_03658   |
| 0 | 12  | 13 PITG_06283  |
| 0 | 5   | 0 PITG_18210   |
| 0 | 0   | 0 NA           |
| 0 | 37  | 18 NA          |



|   |     |                |
|---|-----|----------------|
| 0 | 60  | 45 PITG_07948  |
| 0 | 6   | 0 PITG_15417   |
| 0 | 0   | 5 PITG_00274   |
| 0 | 13  | 17 PITG_13622  |
| 0 | 0   | 6 PITG_13544   |
| 0 | 0   | 0 PITG_15981   |
| 0 | 5   | 0 PITG_23273   |
| 0 | 413 | 115 PITG_10886 |
| 0 | 32  | 0 NA           |
| 0 | 0   | 0 PITG_15164   |
| 0 | 0   | 0 NA           |
| 0 | 2   | 7 PITG_20809   |
| 0 | 3   | 4 NA           |
| 0 | 29  | 16 PITG_08411  |
| 0 | 14  | 0 PITG_05954   |
| 0 | 4   | 4 NA           |
| 0 | 29  | 11 PITG_03909  |
| 0 | 29  | 84 PITG_22865  |
| 0 | 103 | 4 PITG_21706   |
| 0 | 5   | 15 PITG_11766  |
| 0 | 36  | 24 PITG_02490  |
| 0 | 26  | 9 NA           |
| 0 | 0   | 0 PITG_13571   |
| 0 | 267 | 77 PITG_08795  |
| 0 | 10  | 6 PITG_07924   |
| 0 | 32  | 27 PITG_03821  |
| 0 | 17  | 28 PITG_18189  |
| 0 | 8   | 9 PITG_04712   |
| 0 | 6   | 3 PITG_02023   |
| 0 | 187 | 0 NA           |
| 0 | 10  | 5 NA           |
| 0 | 3   | 0 PITG_12264   |
| 0 | 8   | 11 PITG_10534  |
| 0 | 5   | 0 PITG_21556   |
| 0 | 5   | 4 NA           |
| 0 | 7   | 0 PITG_10007   |
| 0 | 61  | 35 NA          |
| 0 | 35  | 4 PITG_10990   |
| 0 | 10  | 4 PITG_00998   |
| 0 | 28  | 7 NA           |
| 0 | 4   | 6 PITG_09930   |
| 0 | 0   | 2 PITG_08446   |
| 0 | 13  | 14 PITG_07134  |
| 0 | 62  | 8 PITG_01646   |
| 0 | 68  | 367 PITG_05884 |
| 0 | 32  | 26 NA          |
| 0 | 70  | 2 PITG_16649   |

|   |      |                 |
|---|------|-----------------|
| 0 | 21   | 9 PITG_06708    |
| 0 | 6    | 2 PITG_20895    |
| 0 | 0    | 13 PITG_03234   |
| 0 | 6    | 6 NA            |
| 0 | 18   | 2 PITG_13827    |
| 0 | 26   | 6 PITG_19177    |
| 0 | 4    | 2 PITG_05173    |
| 0 | 0    | 0 PITG_10891    |
| 0 | 6    | 4 PITG_19204    |
| 0 | 10   | 15 PITG_15596   |
| 0 | 0    | 0 PITG_08811    |
| 0 | 55   | 10 PITG_02391   |
| 0 | 20   | 12 PITG_00349   |
| 0 | 152  | 26 PITG_09795   |
| 2 | 0    | 0 NA            |
| 0 | 0    | 0 PITG_12625    |
| 0 | 4    | 0 PITG_00300    |
| 0 | 14   | 17 PITG_03815   |
| 0 | 0    | 6 PITG_21075    |
| 0 | 4    | 28 PITG_14229   |
| 0 | 6    | 2 PITG_16826    |
| 0 | 6    | 24 PITG_00685   |
| 0 | 175  | 33 PITG_03246   |
| 0 | 9    | 0 PITG_02637    |
| 0 | 35   | 46 PITG_20717   |
| 0 | 3    | 0 NA            |
| 0 | 21   | 3 PITG_12234    |
| 0 | 106  | 45 PITG_02575   |
| 0 | 87   | 102 PITG_15540  |
| 0 | 2    | 0 PITG_07354    |
| 0 | 5    | 89 PITG_17983   |
| 0 | 26   | 13 PITG_04028   |
| 0 | 6    | 16 NA           |
| 0 | 2    | 4 PITG_02497    |
| 0 | 5    | 18 PITG_03555   |
| 0 | 53   | 26 PITG_12541   |
| 0 | 44   | 21 PITG_03561   |
| 0 | 7    | 0 PITG_03525    |
| 0 | 8    | 8 PITG_18973    |
| 0 | 0    | 0 PITG_19791    |
| 0 | 1184 | 1393 PITG_04121 |
| 0 | 21   | 19 NA           |
| 0 | 16   | 2 PITG_18004    |
| 6 | 62   | 1048 NA         |
| 0 | 13   | 4 NA            |
| 0 | 35   | 25 PITG_00067   |
| 0 | 29   | 125 PITG_02022  |

|   |      |                |
|---|------|----------------|
| 0 | 73   | 16 PITG_17003  |
| 0 | 3    | 0 PITG_07937   |
| 0 | 5    | 0 PITG_13750   |
| 0 | 123  | 64 PITG_07976  |
| 0 | 0    | 0 NA           |
| 0 | 25   | 10 PITG_01614  |
| 0 | 2    | 0 NA           |
| 0 | 27   | 3 PITG_16788   |
| 0 | 2    | 0 PITG_14925   |
| 0 | 22   | 31 PITG_14284  |
| 0 | 8    | 6 PITG_11813   |
| 0 | 2    | 11 PITG_12342  |
| 0 | 2    | 5 PITG_00048   |
| 0 | 0    | 2 PITG_21017   |
| 0 | 3    | 2 PITG_01109   |
| 0 | 13   | 2 NA           |
| 0 | 0    | 2 PITG_18788   |
| 0 | 5    | 0 NA           |
| 0 | 2    | 0 PITG_15762   |
| 0 | 14   | 18 PITG_00409  |
| 0 | 29   | 38 PITG_10659  |
| 0 | 5    | 7 PITG_13165   |
| 0 | 3    | 4 PITG_02707   |
| 0 | 1098 | 144 PITG_18382 |
| 0 | 14   | 8 PITG_16257   |
| 0 | 4    | 7 PITG_19640   |
| 0 | 14   | 20 PITG_10952  |
| 0 | 0    | 0 PITG_14566   |
| 0 | 239  | 41 NA          |
| 0 | 9    | 2 NA           |
| 0 | 0    | 5 PITG_04405   |
| 0 | 20   | 22 PITG_14561  |
| 0 | 0    | 0 PITG_10239   |
| 0 | 2    | 22 PITG_04010  |
| 0 | 0    | 11 PITG_17736  |
| 0 | 0    | 0 NA           |
| 0 | 42   | 26 NA          |
| 0 | 10   | 17 NA          |
| 0 | 3    | 0 NA           |
| 0 | 18   | 0 PITG_03073   |
| 0 | 2    | 8 NA           |
| 0 | 17   | 2 PITG_20042   |
| 0 | 43   | 7 PITG_00703   |
| 0 | 16   | 18 NA          |
| 0 | 924  | 282 PITG_17828 |
| 0 | 7    | 4 PITG_06402   |
| 0 | 460  | 178 NA         |

|    |     |                |
|----|-----|----------------|
| 0  | 2   | 12 PITG_00413  |
| 28 | 10  | 92 NA          |
| 0  | 13  | 4 NA           |
| 0  | 2   | 5 PITG_01457   |
| 0  | 0   | 0 PITG_11128   |
| 0  | 13  | 8 PITG_11131   |
| 0  | 31  | 4 PITG_01848   |
| 0  | 68  | 20 PITG_10212  |
| 0  | 4   | 0 PITG_21601   |
| 0  | 16  | 124 PITG_10198 |
| 0  | 39  | 26 PITG_05317  |
| 0  | 4   | 5 PITG_01048   |
| 0  | 10  | 0 PITG_03329   |
| 0  | 2   | 2 PITG_05197   |
| 0  | 0   | 0 PITG_19863   |
| 0  | 155 | 168 PITG_05006 |
| 0  | 3   | 0 PITG_08222   |
| 0  | 39  | 106 PITG_12108 |
| 0  | 0   | 0 PITG_13803   |
| 0  | 25  | 15 PITG_16116  |
| 0  | 7   | 4 PITG_05799   |
| 0  | 12  | 23 NA          |
| 0  | 25  | 49 PITG_02663  |
| 0  | 0   | 2 PITG_18734   |
| 0  | 0   | 4 PITG_19160   |
| 0  | 6   | 10 PITG_12465  |
| 0  | 8   | 13 PITG_10648  |
| 0  | 4   | 3 NA           |
| 0  | 80  | 2 NA           |
| 0  | 21  | 10 PITG_00658  |
| 0  | 11  | 0 PITG_21988   |
| 0  | 4   | 9 PITG_10471   |
| 0  | 11  | 16 PITG_17499  |
| 0  | 104 | 26 PITG_08935  |
| 0  | 0   | 2 PITG_00440   |
| 0  | 32  | 2 NA           |
| 0  | 23  | 16 PITG_02284  |
| 0  | 11  | 55 PITG_07166  |
| 0  | 17  | 11 PITG_05056  |
| 0  | 28  | 22 PITG_00206  |
| 0  | 5   | 2 PITG_06814   |
| 0  | 83  | 2 PITG_11705   |
| 0  | 33  | 53 PITG_08898  |
| 0  | 4   | 4 PITG_12194   |
| 0  | 103 | 56 PITG_18230  |
| 0  | 4   | 2 PITG_09664   |
| 0  | 41  | 12 PITG_03015  |

|   |     |                 |
|---|-----|-----------------|
| 0 | 8   | 0 PITG_11712    |
| 0 | 62  | 74 NA           |
| 0 | 36  | 0 PITG_07287    |
| 0 | 15  | 4 NA            |
| 0 | 7   | 8 PITG_00809    |
| 0 | 19  | 13 PITG_12235   |
| 0 | 0   | 5 PITG_15293    |
| 0 | 13  | 30 NA           |
| 0 | 376 | 89 PITG_20156   |
| 0 | 2   | 0 PITG_10044    |
| 0 | 3   | 2 PITG_00680    |
| 0 | 74  | 0 NA            |
| 0 | 0   | 0 NA            |
| 0 | 2   | 0 PITG_09477    |
| 0 | 5   | 7 NA            |
| 0 | 6   | 4 NA            |
| 0 | 51  | 0 NA            |
| 0 | 55  | 6 NA            |
| 0 | 2   | 0 PITG_15738    |
| 0 | 647 | 1700 PITG_02507 |
| 0 | 25  | 2 PITG_06894    |
| 0 | 41  | 5 PITG_09403    |
| 0 | 2   | 0 PITG_07575    |
| 0 | 6   | 6 PITG_00138    |
| 0 | 397 | 72 PITG_03584   |
| 0 | 2   | 2 PITG_01003    |
| 0 | 18  | 2 NA            |
| 0 | 16  | 11 PITG_01365   |
| 0 | 46  | 52 PITG_01839   |
| 0 | 38  | 9 PITG_06902    |
| 0 | 5   | 25 PITG_20815   |
| 0 | 46  | 39 NA           |
| 0 | 53  | 9 PITG_06257    |
| 0 | 4   | 0 PITG_08305    |
| 0 | 21  | 19 PITG_21816   |
| 0 | 6   | 6 NA            |
| 0 | 117 | 90 PITG_06149   |
| 0 | 48  | 23 PITG_04712   |
| 0 | 37  | 100 PITG_12788  |
| 0 | 0   | 0 PITG_11294    |
| 0 | 20  | 19 NA           |
| 0 | 2   | 3 PITG_13043    |
| 0 | 5   | 0 PITG_04646    |
| 0 | 0   | 0 PITG_10758    |
| 0 | 5   | 4 PITG_10993    |
| 0 | 10  | 49 PITG_13112   |
| 0 | 116 | 4 NA            |

|     |     |                |
|-----|-----|----------------|
| 0   | 9   | 14 NA          |
| 218 | 48  | 1111 NA        |
| 0   | 0   | 0 NA           |
| 0   | 29  | 7 PITG_12178   |
| 0   | 213 | 116 PITG_21389 |
| 0   | 5   | 6 PITG_00578   |
| 0   | 30  | 6 NA           |
| 0   | 4   | 2 PITG_18250   |
| 0   | 28  | 20 PITG_17030  |
| 0   | 0   | 8 NA           |
| 0   | 9   | 0 PITG_14822   |
| 0   | 7   | 6 NA           |
| 0   | 247 | 138 PITG_02621 |
| 0   | 0   | 0 PITG_05389   |
| 0   | 24  | 9 PITG_18416   |
| 0   | 0   | 2 NA           |
| 0   | 6   | 0 PITG_00227   |
| 0   | 14  | 11 PITG_03902  |
| 0   | 2   | 11 NA          |
| 0   | 96  | 122 PITG_11926 |
| 0   | 31  | 64 PITG_02854  |
| 229 | 56  | 170 NA         |
| 0   | 51  | 14 NA          |
| 0   | 4   | 4 PITG_13270   |
| 0   | 79  | 14 PITG_13969  |
| 0   | 24  | 13 PITG_08022  |
| 0   | 0   | 2 PITG_01326   |
| 0   | 14  | 2 PITG_05233   |
| 81  | 35  | 33 NA          |
| 0   | 23  | 0 NA           |
| 0   | 7   | 14 PITG_09940  |
| 0   | 265 | 176 NA         |
| 0   | 12  | 12 PITG_07436  |
| 0   | 26  | 8 PITG_13157   |
| 0   | 22  | 12 PITG_16214  |
| 0   | 2   | 0 PITG_00887   |
| 0   | 0   | 0 NA           |
| 0   | 0   | 2 PITG_05395   |
| 0   | 59  | 10 NA          |
| 0   | 59  | 81 PITG_00747  |
| 0   | 11  | 17 PITG_00651  |
| 0   | 3   | 2 PITG_15964   |
| 0   | 2   | 2 PITG_16788   |
| 0   | 9   | 3 NA           |
| 0   | 0   | 0 PITG_00686   |
| 0   | 8   | 15 PITG_13235  |
| 0   | 26  | 24 PITG_15637  |

|    |     |                |
|----|-----|----------------|
| 0  | 237 | 226 PITG_00809 |
| 0  | 3   | 4 PITG_02744   |
| 0  | 0   | 2 PITG_05532   |
| 0  | 0   | 0 PITG_19863   |
| 0  | 19  | 17 PITG_01644  |
| 0  | 17  | 0 NA           |
| 0  | 93  | 53 PITG_16344  |
| 0  | 0   | 5 PITG_07865   |
| 0  | 21  | 0 PITG_08009   |
| 14 | 2   | 12 NA          |
| 0  | 17  | 27 PITG_02067  |
| 0  | 6   | 9 PITG_00714   |
| 0  | 25  | 34 PITG_21886  |
| 0  | 98  | 41 PITG_04905  |
| 0  | 17  | 4 PITG_05260   |
| 0  | 68  | 34 PITG_00763  |
| 0  | 54  | 12 PITG_18091  |
| 0  | 8   | 2 NA           |
| 0  | 4   | 6 PITG_09579   |
| 0  | 4   | 10 NA          |
| 0  | 17  | 2 PITG_13906   |
| 0  | 51  | 0 PITG_01899   |
| 0  | 0   | 5 PITG_19474   |
| 0  | 36  | 9 PITG_02626   |
| 0  | 0   | 0 PITG_11225   |
| 0  | 21  | 6 NA           |
| 0  | 22  | 6 PITG_22858   |
| 0  | 9   | 17 NA          |
| 0  | 70  | 17 PITG_16461  |
| 0  | 0   | 6 PITG_09956   |
| 0  | 13  | 0 NA           |
| 0  | 5   | 8 PITG_14561   |
| 0  | 21  | 7 PITG_21396   |
| 0  | 74  | 40 PITG_08708  |
| 0  | 4   | 0 PITG_18542   |
| 0  | 11  | 13 NA          |
| 0  | 8   | 0 PITG_10265   |
| 0  | 4   | 2 NA           |
| 0  | 2   | 0 PITG_03356   |
| 0  | 51  | 10 PITG_01159  |
| 0  | 24  | 0 NA           |
| 0  | 5   | 9 PITG_13669   |
| 0  | 0   | 2 PITG_22687   |
| 0  | 283 | 302 PITG_11071 |
| 0  | 33  | 5 PITG_22113   |
| 0  | 2   | 0 PITG_16337   |
| 0  | 18  | 28 PITG_03472  |

|   |     |               |
|---|-----|---------------|
| 0 | 2   | 10 PITG_01427 |
| 0 | 7   | 3 PITG_01063  |
| 0 | 5   | 8 PITG_01183  |
| 0 | 0   | 4 PITG_00127  |
| 0 | 68  | 22 PITG_12291 |
| 0 | 5   | 23 PITG_04627 |
| 0 | 20  | 10 PITG_18092 |
| 0 | 10  | 24 PITG_01480 |
| 0 | 22  | 0 NA          |
| 0 | 9   | 6 PITG_09753  |
| 0 | 4   | 11 PITG_09876 |
| 0 | 0   | 0 NA          |
| 0 | 0   | 0 PITG_06900  |
| 0 | 27  | 2 PITG_16479  |
| 0 | 250 | 19 PITG_06894 |
| 0 | 22  | 28 PITG_19514 |
| 0 | 84  | 11 PITG_14807 |
| 0 | 9   | 0 NA          |
| 0 | 2   | 6 PITG_19175  |
| 0 | 52  | 38 PITG_12428 |
| 0 | 0   | 2 PITG_05260  |
| 0 | 4   | 4 PITG_02348  |
| 0 | 37  | 13 PITG_16810 |
| 0 | 24  | 14 PITG_11016 |
| 0 | 56  | 32 PITG_15787 |
| 0 | 5   | 4 PITG_09639  |
| 0 | 48  | 89 PITG_19418 |
| 0 | 4   | 5 PITG_08746  |
| 0 | 45  | 23 PITG_07256 |
| 7 | 12  | 1661 NA       |
| 0 | 2   | 13 NA         |
| 0 | 0   | 0 PITG_18788  |
| 0 | 2   | 4 PITG_14816  |
| 0 | 0   | 0 NA          |
| 0 | 6   | 4 PITG_08136  |
| 0 | 2   | 0 NA          |
| 0 | 24  | 31 PITG_01508 |
| 0 | 0   | 0 NA          |
| 0 | 26  | 0 PITG_03469  |
| 0 | 18  | 8 PITG_04552  |
| 0 | 42  | 15 NA         |
| 0 | 4   | 0 PITG_09086  |
| 0 | 49  | 83 PITG_12696 |
| 0 | 23  | 11 PITG_01257 |
| 0 | 18  | 51 PITG_16328 |
| 0 | 95  | 46 PITG_07589 |
| 0 | 2   | 5 NA          |



|   |     |                |
|---|-----|----------------|
| 0 | 8   | 35 PITG_17804  |
| 0 | 5   | 24 PITG_13596  |
| 0 | 17  | 11 PITG_01751  |
| 0 | 0   | 0 PITG_00782   |
| 0 | 23  | 0 PITG_03200   |
| 0 | 4   | 2 PITG_11728   |
| 0 | 53  | 20 PITG_11232  |
| 0 | 0   | 2 PITG_10443   |
| 0 | 7   | 4 PITG_05244   |
| 0 | 2   | 5 PITG_13317   |
| 0 | 7   | 0 PITG_04396   |
| 0 | 64  | 6 PITG_00308   |
| 0 | 4   | 4 PITG_06984   |
| 0 | 11  | 7 PITG_07041   |
| 0 | 10  | 10 PITG_06822  |
| 0 | 241 | 689 PITG_10929 |
| 0 | 0   | 2 PITG_17863   |
| 0 | 12  | 5 NA           |
| 0 | 0   | 5 PITG_07335   |
| 0 | 20  | 6 PITG_17907   |
| 0 | 0   | 8 PITG_03659   |
| 0 | 16  | 15 PITG_00525  |
| 0 | 20  | 8 PITG_03560   |
| 0 | 73  | 42 PITG_16430  |
| 0 | 45  | 20 PITG_11817  |
| 0 | 4   | 31 PITG_11249  |
| 0 | 83  | 43 NA          |
| 0 | 157 | 17 PITG_05772  |
| 0 | 20  | 10 NA          |
| 0 | 5   | 0 PITG_01471   |
| 0 | 5   | 3 PITG_12038   |
| 0 | 33  | 19 NA          |
| 0 | 20  | 23 PITG_12697  |
| 0 | 2   | 0 PITG_16325   |
| 0 | 19  | 41 PITG_06170  |
| 0 | 403 | 101 PITG_15593 |
| 0 | 0   | 0 PITG_16221   |
| 0 | 27  | 51 PITG_10831  |
| 0 | 0   | 8 PITG_21144   |
| 0 | 12  | 4 PITG_01526   |
| 0 | 53  | 18 NA          |
| 0 | 0   | 0 NA           |
| 0 | 2   | 2 PITG_10845   |
| 0 | 0   | 2 PITG_15406   |
| 0 | 39  | 24 PITG_02035  |
| 0 | 9   | 4 PITG_02580   |
| 0 | 40  | 2 PITG_18027   |

|   |     |                |
|---|-----|----------------|
| 0 | 19  | 0 PITG_09698   |
| 0 | 0   | 0 NA           |
| 0 | 15  | 4 NA           |
| 0 | 4   | 6 PITG_11146   |
| 0 | 25  | 31 PITG_08607  |
| 0 | 79  | 57 PITG_06155  |
| 0 | 15  | 2 PITG_05560   |
| 0 | 52  | 60 PITG_08046  |
| 0 | 2   | 2 PITG_18040   |
| 0 | 5   | 2 PITG_11153   |
| 0 | 0   | 2 PITG_17117   |
| 0 | 30  | 115 PITG_18420 |
| 0 | 18  | 251 PITG_21488 |
| 0 | 0   | 7 PITG_17869   |
| 0 | 36  | 32 NA          |
| 0 | 0   | 0 NA           |
| 0 | 2   | 0 NA           |
| 0 | 0   | 13 NA          |
| 0 | 23  | 6 NA           |
| 0 | 301 | 179 PITG_19823 |
| 0 | 2   | 2 NA           |
| 0 | 5   | 6 PITG_03931   |
| 0 | 21  | 19 PITG_18366  |
| 0 | 3   | 2 PITG_13910   |
| 0 | 0   | 5 PITG_06342   |
| 0 | 2   | 0 PITG_12196   |
| 0 | 66  | 49 PITG_14874  |
| 0 | 5   | 4 PITG_07898   |
| 0 | 39  | 7 PITG_11985   |
| 0 | 17  | 8 PITG_13571   |
| 0 | 13  | 29 PITG_12535  |
| 0 | 7   | 16 PITG_05405  |
| 0 | 11  | 6 PITG_07493   |
| 0 | 8   | 13 PITG_04842  |
| 0 | 110 | 87 PITG_11993  |
| 0 | 28  | 7 PITG_13827   |
| 0 | 0   | 2 PITG_02194   |
| 0 | 19  | 53 PITG_14592  |
| 0 | 0   | 2 PITG_04603   |
| 0 | 4   | 0 PITG_01457   |
| 0 | 27  | 5 NA           |
| 0 | 14  | 28 PITG_05504  |
| 0 | 33  | 10 PITG_06769  |
| 0 | 7   | 12 PITG_02343  |
| 0 | 82  | 7 PITG_02506   |
| 0 | 35  | 25 PITG_02711  |
| 0 | 56  | 122 PITG_07828 |

|   |     |                 |
|---|-----|-----------------|
| 0 | 61  | 28 PITG_17910   |
| 0 | 11  | 6 PITG_16097    |
| 0 | 2   | 0 PITG_11594    |
| 0 | 75  | 68 PITG_08679   |
| 0 | 3   | 2 PITG_22413    |
| 0 | 25  | 20 PITG_03236   |
| 0 | 21  | 692 PITG_00149  |
| 0 | 24  | 31 PITG_03754   |
| 0 | 68  | 43 NA           |
| 0 | 9   | 5 PITG_04842    |
| 0 | 0   | 0 PITG_15116    |
| 0 | 17  | 2 PITG_14108    |
| 0 | 53  | 43 PITG_18095   |
| 0 | 4   | 6 PITG_12742    |
| 0 | 18  | 21 PITG_07326   |
| 0 | 0   | 2 PITG_13624    |
| 0 | 0   | 0 PITG_03295    |
| 0 | 10  | 2 PITG_02482    |
| 0 | 9   | 16 PITG_18037   |
| 0 | 0   | 5 PITG_00330    |
| 0 | 20  | 2 PITG_15785    |
| 0 | 46  | 6 PITG_02032    |
| 0 | 25  | 6 NA            |
| 0 | 3   | 2 PITG_01871    |
| 0 | 0   | 0 NA            |
| 0 | 9   | 0 NA            |
| 0 | 0   | 4 PITG_16478    |
| 0 | 21  | 2 PITG_03825    |
| 0 | 96  | 58 PITG_00182   |
| 0 | 59  | 63 PITG_02683   |
| 0 | 0   | 0 NA            |
| 0 | 6   | 0 PITG_08587    |
| 0 | 5   | 2 PITG_17951    |
| 0 | 4   | 2 PITG_00955    |
| 0 | 6   | 2 PITG_02731    |
| 0 | 65  | 14 PITG_06677   |
| 0 | 9   | 21 NA           |
| 0 | 15  | 0 PITG_04970    |
| 0 | 2   | 4 PITG_12548    |
| 0 | 0   | 4 PITG_19115    |
| 0 | 432 | 1213 PITG_07056 |
| 0 | 0   | 4 NA            |
| 0 | 15  | 35 PITG_09726   |
| 0 | 0   | 2 NA            |
| 0 | 41  | 16 PITG_00525   |
| 0 | 24  | 42 PITG_01428   |
| 0 | 12  | 3 PITG_03241    |

|     |     |                |
|-----|-----|----------------|
| 0   | 13  | 8 PITG_13068   |
| 0   | 47  | 20 PITG_13783  |
| 0   | 6   | 0 NA           |
| 0   | 0   | 0 PITG_08900   |
| 0   | 4   | 4 PITG_02561   |
| 0   | 5   | 13 PITG_00284  |
| 0   | 3   | 2 NA           |
| 0   | 39  | 53 PITG_07270  |
| 0   | 394 | 311 PITG_19993 |
| 0   | 4   | 2 PITG_21640   |
| 0   | 41  | 59 NA          |
| 0   | 30  | 0 PITG_08087   |
| 0   | 24  | 20 NA          |
| 0   | 0   | 0 NA           |
| 0   | 46  | 29 PITG_10258  |
| 0   | 8   | 55 PITG_01791  |
| 0   | 2   | 0 PITG_04718   |
| 0   | 67  | 80 PITG_07168  |
| 0   | 13  | 10 PITG_02161  |
| 0   | 40  | 18 PITG_01784  |
| 0   | 4   | 3 PITG_03944   |
| 0   | 3   | 2 PITG_06402   |
| 0   | 0   | 6 NA           |
| 0   | 0   | 0 PITG_01110   |
| 0   | 2   | 2 PITG_11701   |
| 0   | 30  | 89 PITG_21055  |
| 0   | 2   | 7 PITG_17602   |
| 0   | 16  | 4 PITG_00796   |
| 182 | 15  | 165 NA         |
| 0   | 0   | 0 PITG_03085   |
| 0   | 2   | 6 PITG_14210   |
| 0   | 17  | 17 NA          |
| 0   | 16  | 0 NA           |
| 0   | 5   | 7 PITG_19220   |
| 393 | 598 | 2881 NA        |
| 0   | 5   | 23 PITG_00622  |
| 0   | 0   | 5 PITG_06440   |
| 0   | 36  | 29 PITG_19532  |
| 0   | 18  | 2 PITG_15964   |
| 0   | 2   | 5 PITG_10196   |
| 0   | 2   | 11 PITG_11466  |
| 0   | 0   | 0 PITG_07445   |
| 0   | 2   | 4 NA           |
| 0   | 30  | 10 PITG_13665  |
| 0   | 127 | 3 PITG_11803   |
| 0   | 2   | 0 PITG_09899   |
| 0   | 2   | 0 NA           |

|   |     |                 |
|---|-----|-----------------|
| 0 | 0   | 0 PITG_04838    |
| 0 | 95  | 13 PITG_17282   |
| 0 | 12  | 8 PITG_16016    |
| 0 | 8   | 2 PITG_05921    |
| 0 | 10  | 7 PITG_18868    |
| 0 | 16  | 6 PITG_16315    |
| 0 | 8   | 6 PITG_02561    |
| 0 | 29  | 7 PITG_01713    |
| 0 | 0   | 0 NA            |
| 0 | 20  | 2 NA            |
| 0 | 0   | 2 PITG_13242    |
| 0 | 2   | 2 PITG_05289    |
| 0 | 0   | 0 PITG_00844    |
| 0 | 77  | 300 PITG_14639  |
| 0 | 0   | 0 NA            |
| 0 | 31  | 2 PITG_07083    |
| 0 | 664 | 1892 PITG_08795 |
| 0 | 67  | 26 PITG_17382   |
| 0 | 27  | 34 PITG_03616   |
| 0 | 2   | 6 NA            |
| 0 | 6   | 8 PITG_06406    |
| 0 | 0   | 0 PITG_11276    |
| 0 | 7   | 10 PITG_17137   |
| 0 | 44  | 9 PITG_15241    |
| 0 | 41  | 21 PITG_09528   |
| 0 | 9   | 8 NA            |
| 0 | 2   | 7 NA            |
| 0 | 129 | 86 PITG_13831   |
| 0 | 7   | 4 PITG_04682    |
| 0 | 29  | 6 PITG_17241    |
| 0 | 0   | 2 PITG_16364    |
| 0 | 104 | 17 PITG_17897   |
| 0 | 4   | 0 NA            |
| 0 | 11  | 4 NA            |
| 0 | 0   | 0 NA            |
| 0 | 4   | 5 PITG_17012    |
| 0 | 2   | 0 PITG_19640    |
| 0 | 2   | 6 PITG_19152    |
| 0 | 89  | 253 PITG_04398  |
| 0 | 90  | 13 PITG_11256   |
| 0 | 3   | 9 PITG_11743    |
| 0 | 13  | 2 PITG_01250    |
| 0 | 8   | 8 PITG_04568    |
| 0 | 0   | 4 NA            |
| 0 | 94  | 14 PITG_13157   |
| 0 | 57  | 0 NA            |
| 0 | 0   | 0 PITG_15413    |

|   |     |                |
|---|-----|----------------|
| 0 | 28  | 20 PITG_18174  |
| 0 | 0   | 2 NA           |
| 0 | 3   | 0 PITG_09906   |
| 0 | 550 | 227 PITG_15408 |
| 0 | 30  | 14 PITG_02905  |
| 0 | 0   | 0 PITG_06517   |
| 0 | 20  | 32 NA          |
| 0 | 0   | 16 PITG_12151  |
| 0 | 6   | 17 PITG_12187  |
| 0 | 7   | 12 PITG_09862  |
| 0 | 7   | 0 NA           |
| 0 | 321 | 295 PITG_07903 |
| 0 | 22  | 7 PITG_01336   |
| 0 | 0   | 0 NA           |
| 0 | 12  | 2 PITG_14415   |
| 0 | 0   | 0 PITG_06345   |
| 0 | 24  | 5 PITG_08037   |
| 0 | 134 | 43 PITG_07853  |
| 0 | 0   | 9 PITG_02022   |
| 0 | 2   | 0 PITG_17003   |
| 0 | 10  | 4 PITG_13029   |
| 0 | 2   | 0 PITG_06345   |
| 0 | 21  | 0 PITG_12296   |
| 0 | 38  | 6 PITG_04679   |
| 0 | 21  | 16 PITG_18050  |
| 0 | 7   | 0 NA           |
| 0 | 13  | 6 PITG_01283   |
| 0 | 14  | 42 PITG_17452  |
| 0 | 52  | 14 PITG_05692  |
| 0 | 23  | 13 NA          |
| 0 | 203 | 27 PITG_14596  |
| 0 | 39  | 13 NA          |
| 0 | 19  | 33 PITG_09543  |
| 0 | 0   | 2 PITG_01450   |
| 0 | 2   | 9 PITG_18045   |
| 0 | 4   | 2 PITG_06884   |
| 0 | 0   | 0 PITG_00129   |
| 0 | 0   | 0 PITG_11627   |
| 0 | 30  | 31 NA          |
| 0 | 3   | 29 PITG_01783  |
| 0 | 20  | 2 PITG_11741   |
| 0 | 2   | 0 NA           |
| 0 | 4   | 2 PITG_10097   |
| 0 | 11  | 12 PITG_06754  |
| 0 | 7   | 7 PITG_01065   |
| 0 | 51  | 0 PITG_04296   |
| 0 | 2   | 0 PITG_04584   |

|   |     |                 |
|---|-----|-----------------|
| 0 | 2   | 0 PITG_19737    |
| 0 | 0   | 2 PITG_10239    |
| 0 | 0   | 4 NA            |
| 0 | 24  | 58 PITG_11433   |
| 0 | 8   | 0 PITG_00233    |
| 0 | 7   | 6 PITG_17439    |
| 0 | 4   | 0 PITG_21852    |
| 0 | 7   | 50 PITG_02252   |
| 0 | 2   | 0 PITG_16204    |
| 0 | 2   | 11 PITG_06114   |
| 0 | 5   | 2 PITG_10901    |
| 0 | 6   | 0 NA            |
| 0 | 20  | 2 NA            |
| 0 | 50  | 2 PITG_19956    |
| 0 | 2   | 12 PITG_10932   |
| 0 | 77  | 44 PITG_06832   |
| 0 | 0   | 0 NA            |
| 0 | 191 | 30 PITG_05880   |
| 0 | 4   | 0 PITG_09291    |
| 0 | 7   | 2 PITG_15672    |
| 0 | 2   | 0 PITG_01386    |
| 0 | 8   | 11 PITG_09278   |
| 0 | 0   | 0 NA            |
| 0 | 0   | 4 PITG_00299    |
| 0 | 0   | 0 NA            |
| 0 | 65  | 38 PITG_01847   |
| 0 | 172 | 195 PITG_16894  |
| 0 | 2   | 4 PITG_06849    |
| 0 | 2   | 12 NA           |
| 0 | 66  | 21 PITG_10701   |
| 0 | 0   | 0 PITG_11154    |
| 0 | 703 | 511 PITG_13327  |
| 0 | 88  | 82 NA           |
| 0 | 0   | 4 PITG_05423    |
| 0 | 3   | 3 PITG_05149    |
| 0 | 46  | 80 PITG_07302   |
| 0 | 4   | 0 NA            |
| 0 | 5   | 0 PITG_03375    |
| 0 | 8   | 8 PITG_03828    |
| 0 | 51  | 23 PITG_04648   |
| 0 | 4   | 0 NA            |
| 0 | 23  | 4 PITG_15818    |
| 0 | 16  | 13 PITG_05592   |
| 0 | 953 | 2917 PITG_06741 |
| 0 | 2   | 0 PITG_03475    |
| 0 | 10  | 21 PITG_08780   |
| 0 | 5   | 0 PITG_15706    |

|   |    |                |
|---|----|----------------|
| 0 | 7  | 5 NA           |
| 0 | 4  | 0 PITG_09675   |
| 0 | 3  | 2 PITG_04232   |
| 0 | 11 | 4 PITG_07940   |
| 0 | 0  | 0 NA           |
| 0 | 4  | 7 PITG_11405   |
| 0 | 2  | 2 NA           |
| 0 | 0  | 0 PITG_19146   |
| 0 | 2  | 8 NA           |
| 0 | 43 | 267 PITG_06741 |
| 0 | 6  | 36 PITG_06741  |
| 0 | 2  | 0 PITG_06885   |
| 0 | 0  | 0 PITG_20205   |
| 0 | 52 | 2 PITG_21581   |
| 0 | 20 | 2 PITG_17945   |
| 0 | 0  | 0 PITG_08189   |
| 0 | 11 | 24 PITG_16328  |
| 0 | 11 | 28 PITG_17076  |
| 0 | 2  | 12 PITG_09642  |
| 0 | 4  | 0 PITG_07257   |
| 0 | 9  | 0 PITG_01520   |
| 0 | 42 | 11 PITG_21593  |
| 0 | 6  | 5 PITG_11506   |
| 0 | 34 | 26 NA          |
| 0 | 2  | 0 PITG_02050   |
| 0 | 2  | 7 PITG_15629   |
| 0 | 8  | 8 PITG_16478   |
| 0 | 50 | 20 PITG_19648  |
| 0 | 0  | 0 NA           |
| 0 | 32 | 0 PITG_16439   |
| 0 | 22 | 94 NA          |
| 0 | 0  | 4 PITG_16009   |
| 0 | 0  | 0 NA           |
| 0 | 0  | 3 PITG_12160   |
| 0 | 6  | 4 NA           |
| 0 | 0  | 0 PITG_00809   |
| 0 | 2  | 4 PITG_03457   |
| 0 | 3  | 0 PITG_19818   |
| 0 | 0  | 0 PITG_19153   |
| 0 | 88 | 31 PITG_10591  |
| 0 | 0  | 0 PITG_02274   |
| 0 | 5  | 78 PITG_06693  |
| 0 | 7  | 4 PITG_13488   |
| 0 | 0  | 2 PITG_00594   |
| 0 | 43 | 0 PITG_08019   |
| 0 | 76 | 20 PITG_04723  |
| 0 | 6  | 27 PITG_06356  |



|   |     |                |
|---|-----|----------------|
| 0 | 0   | 6 PITG_18024   |
| 0 | 15  | 15 PITG_12987  |
| 0 | 22  | 3 NA           |
| 0 | 20  | 2 PITG_01991   |
| 0 | 0   | 2 PITG_07046   |
| 0 | 7   | 12 PITG_16023  |
| 0 | 6   | 18 NA          |
| 0 | 0   | 0 PITG_11161   |
| 0 | 8   | 5 PITG_11122   |
| 0 | 11  | 10 PITG_12275  |
| 0 | 454 | 24 PITG_11863  |
| 0 | 6   | 0 NA           |
| 0 | 44  | 68 PITG_07961  |
| 0 | 19  | 43 PITG_15957  |
| 0 | 19  | 0 PITG_13848   |
| 0 | 7   | 0 NA           |
| 0 | 14  | 4 PITG_02531   |
| 0 | 35  | 2 PITG_19550   |
| 0 | 9   | 0 NA           |
| 0 | 9   | 9 PITG_16317   |
| 0 | 4   | 36 PITG_13226  |
| 0 | 4   | 2 NA           |
| 0 | 14  | 4 NA           |
| 0 | 6   | 9 PITG_15806   |
| 0 | 28  | 25 PITG_03398  |
| 0 | 21  | 28 NA          |
| 0 | 26  | 11 PITG_00883  |
| 0 | 38  | 78 PITG_10147  |
| 0 | 2   | 16 PITG_09404  |
| 0 | 4   | 0 NA           |
| 0 | 2   | 14 PITG_19158  |
| 0 | 4   | 2 PITG_01850   |
| 0 | 2   | 2 NA           |
| 0 | 7   | 2 PITG_02184   |
| 0 | 30  | 0 PITG_15439   |
| 0 | 4   | 20 PITG_10831  |
| 0 | 2   | 0 PITG_14260   |
| 0 | 0   | 0 PITG_13527   |
| 0 | 0   | 0 PITG_04666   |
| 0 | 0   | 0 PITG_18080   |
| 0 | 3   | 2 PITG_16433   |
| 0 | 0   | 0 PITG_00129   |
| 0 | 33  | 19 PITG_03754  |
| 0 | 2   | 2 PITG_00067   |
| 0 | 0   | 5 PITG_18312   |
| 0 | 583 | 136 PITG_13324 |
| 0 | 164 | 119 PITG_06094 |

|   |     |                |
|---|-----|----------------|
| 0 | 6   | 45 PITG_03473  |
| 2 | 248 | 231 PITG_02039 |
| 0 | 15  | 0 PITG_03380   |
| 0 | 8   | 5 PITG_10758   |
| 0 | 151 | 94 PITG_07923  |
| 0 | 0   | 0 NA           |
| 0 | 0   | 2 NA           |
| 0 | 0   | 0 PITG_22716   |
| 0 | 60  | 15 PITG_10165  |
| 0 | 2   | 0 NA           |
| 0 | 0   | 7 PITG_20374   |
| 0 | 9   | 0 PITG_03832   |
| 0 | 54  | 0 PITG_05856   |
| 0 | 0   | 0 PITG_03789   |
| 0 | 11  | 11 NA          |
| 0 | 2   | 0 PITG_15288   |
| 0 | 28  | 36 PITG_20629  |
| 0 | 0   | 0 NA           |
| 0 | 26  | 30 PITG_02902  |
| 0 | 97  | 48 PITG_02901  |
| 0 | 86  | 180 PITG_15409 |
| 0 | 3   | 18 PITG_08740  |
| 0 | 5   | 0 PITG_12140   |
| 0 | 2   | 12 PITG_02122  |
| 0 | 7   | 0 PITG_13068   |
| 0 | 0   | 2 PITG_18696   |
| 0 | 23  | 0 NA           |
| 0 | 10  | 4 NA           |
| 0 | 69  | 50 PITG_07865  |
| 0 | 48  | 20 PITG_01409  |
| 0 | 10  | 7 PITG_00833   |
| 0 | 119 | 122 PITG_02634 |
| 0 | 12  | 9 PITG_02227   |
| 0 | 10  | 8 PITG_00383   |
| 0 | 155 | 566 PITG_21187 |
| 0 | 0   | 2 PITG_15783   |
| 0 | 13  | 19 NA          |
| 0 | 21  | 13 PITG_21873  |
| 0 | 5   | 9 PITG_12914   |
| 0 | 0   | 0 PITG_11437   |
| 0 | 64  | 7 PITG_00845   |
| 0 | 2   | 0 PITG_05594   |
| 0 | 242 | 160 PITG_17063 |
| 0 | 4   | 8 PITG_01477   |
| 0 | 0   | 0 NA           |
| 0 | 4   | 15 PITG_14595  |
| 0 | 37  | 16 PITG_11386  |

|   |     |                |
|---|-----|----------------|
| 0 | 18  | 9 PITG_17597   |
| 0 | 33  | 143 PITG_11692 |
| 0 | 2   | 2 PITG_17792   |
| 0 | 21  | 50 PITG_03768  |
| 0 | 0   | 0 PITG_06719   |
| 0 | 2   | 6 PITG_04529   |
| 0 | 2   | 9 PITG_01416   |
| 0 | 7   | 2 PITG_03944   |
| 0 | 43  | 4 PITG_03333   |
| 0 | 0   | 0 NA           |
| 0 | 7   | 33 PITG_02661  |
| 0 | 0   | 0 PITG_10686   |
| 0 | 2   | 0 NA           |
| 0 | 0   | 0 PITG_06182   |
| 0 | 0   | 2 NA           |
| 0 | 2   | 4 PITG_17736   |
| 0 | 2   | 2 NA           |
| 0 | 6   | 4 PITG_07029   |
| 0 | 77  | 63 NA          |
| 0 | 0   | 0 NA           |
| 0 | 12  | 15 PITG_05338  |
| 0 | 4   | 12 PITG_19450  |
| 0 | 26  | 13 PITG_01579  |
| 0 | 241 | 77 PITG_01591  |
| 0 | 0   | 0 PITG_10154   |
| 0 | 0   | 18 PITG_03223  |
| 0 | 63  | 35 PITG_15807  |
| 0 | 6   | 0 PITG_20159   |
| 0 | 0   | 12 PITG_12574  |
| 0 | 5   | 27 PITG_03244  |
| 0 | 0   | 0 NA           |
| 0 | 5   | 0 PITG_13815   |
| 0 | 0   | 6 NA           |
| 0 | 0   | 2 PITG_08056   |
| 0 | 220 | 175 PITG_11013 |
| 0 | 17  | 2 PITG_19767   |
| 0 | 37  | 5 NA           |
| 0 | 0   | 0 NA           |
| 0 | 3   | 32 PITG_13415  |
| 0 | 70  | 16 NA          |
| 0 | 5   | 2 PITG_05855   |
| 0 | 6   | 21 PITG_03156  |
| 0 | 2   | 0 PITG_19625   |
| 0 | 11  | 0 PITG_02195   |
| 0 | 127 | 82 PITG_05686  |
| 0 | 16  | 23 PITG_09505  |
| 0 | 253 | 140 PITG_12648 |

|     |     |                |
|-----|-----|----------------|
| 0   | 9   | 49 PITG_06429  |
| 0   | 4   | 10 PITG_11272  |
| 0   | 2   | 17 PITG_18786  |
| 0   | 8   | 4 PITG_16798   |
| 0   | 13  | 4 PITG_13620   |
| 0   | 106 | 26 PITG_00888  |
| 0   | 18  | 8 PITG_15912   |
| 0   | 226 | 122 PITG_17499 |
| 0   | 62  | 26 NA          |
| 93  | 49  | 162 NA         |
| 0   | 59  | 2 NA           |
| 0   | 0   | 4 NA           |
| 0   | 2   | 2 PITG_07226   |
| 0   | 2   | 0 PITG_05519   |
| 0   | 120 | 147 PITG_13845 |
| 0   | 7   | 0 PITG_01511   |
| 0   | 6   | 6 PITG_15293   |
| 0   | 4   | 7 PITG_11585   |
| 0   | 44  | 21 NA          |
| 0   | 19  | 0 NA           |
| 0   | 41  | 92 PITG_08932  |
| 0   | 9   | 11 PITG_09360  |
| 0   | 8   | 29 PITG_11890  |
| 20  | 262 | 2435 NA        |
| 0   | 48  | 48 PITG_15394  |
| 0   | 30  | 6 PITG_03522   |
| 0   | 0   | 4 PITG_00754   |
| 0   | 28  | 32 PITG_21018  |
| 0   | 104 | 183 PITG_10289 |
| 0   | 37  | 2 PITG_10949   |
| 0   | 11  | 4 NA           |
| 0   | 9   | 21 NA          |
| 0   | 22  | 0 NA           |
| 0   | 10  | 0 PITG_22924   |
| 0   | 2   | 2 PITG_01153   |
| 0   | 0   | 2 PITG_11981   |
| 0   | 4   | 6 PITG_03864   |
| 0   | 7   | 0 PITG_06390   |
| 0   | 9   | 10 PITG_13490  |
| 0   | 0   | 0 PITG_07765   |
| 0   | 46  | 0 PITG_06706   |
| 0   | 87  | 26 PITG_01777  |
| 0   | 5   | 49 PITG_06016  |
| 182 | 5   | 663 NA         |
| 0   | 2   | 5 PITG_22958   |
| 0   | 46  | 15 PITG_14557  |
| 0   | 31  | 0 PITG_07902   |

|   |     |                |
|---|-----|----------------|
| 0 | 0   | 0 NA           |
| 0 | 17  | 5 PITG_17024   |
| 0 | 7   | 2 PITG_15672   |
| 0 | 0   | 3 PITG_03818   |
| 0 | 61  | 11 PITG_11765  |
| 0 | 17  | 8 PITG_09474   |
| 0 | 103 | 82 PITG_11286  |
| 0 | 11  | 32 PITG_05679  |
| 0 | 6   | 2 PITG_08197   |
| 0 | 4   | 2 NA           |
| 0 | 16  | 22 PITG_19964  |
| 0 | 253 | 96 NA          |
| 0 | 8   | 7 PITG_21848   |
| 0 | 10  | 0 PITG_14626   |
| 0 | 4   | 0 PITG_15958   |
| 0 | 2   | 0 PITG_08822   |
| 0 | 15  | 6 PITG_17587   |
| 0 | 36  | 53 PITG_16483  |
| 0 | 2   | 0 PITG_20803   |
| 0 | 13  | 8 PITG_01626   |
| 0 | 84  | 123 PITG_11604 |
| 0 | 10  | 12 PITG_00648  |
| 0 | 32  | 13 NA          |
| 0 | 0   | 0 NA           |
| 0 | 5   | 27 PITG_02082  |
| 0 | 30  | 17 NA          |
| 0 | 3   | 4 PITG_02562   |
| 0 | 0   | 0 NA           |
| 0 | 2   | 4 PITG_11451   |
| 0 | 4   | 2 PITG_02927   |
| 0 | 2   | 0 PITG_17672   |
| 0 | 7   | 2 PITG_06173   |
| 0 | 4   | 4 PITG_02052   |
| 0 | 32  | 22 PITG_15696  |
| 0 | 9   | 2 PITG_16088   |
| 0 | 71  | 6 PITG_00179   |
| 0 | 217 | 87 PITG_11612  |
| 0 | 2   | 2 PITG_18377   |
| 0 | 7   | 20 PITG_01358  |
| 0 | 28  | 18 PITG_03850  |
| 0 | 5   | 4 PITG_17993   |
| 0 | 26  | 10 PITG_16228  |
| 0 | 17  | 17 PITG_22982  |
| 0 | 13  | 8 PITG_03737   |
| 0 | 19  | 5 NA           |
| 0 | 213 | 61 PITG_02813  |
| 0 | 104 | 133 PITG_16871 |

|    |     |                |
|----|-----|----------------|
| 0  | 427 | 88 PITG_15408  |
| 0  | 8   | 2 NA           |
| 0  | 0   | 0 PITG_13590   |
| 0  | 2   | 4 NA           |
| 0  | 2   | 27 PITG_15640  |
| 0  | 24  | 20 PITG_02628  |
| 0  | 97  | 28 PITG_11022  |
| 0  | 2   | 2 PITG_01811   |
| 0  | 0   | 2 NA           |
| 0  | 9   | 19 PITG_00300  |
| 0  | 2   | 4 PITG_12160   |
| 0  | 129 | 43 NA          |
| 0  | 0   | 2 PITG_12872   |
| 0  | 11  | 0 NA           |
| 0  | 0   | 0 PITG_01920   |
| 0  | 5   | 4 PITG_02920   |
| 0  | 0   | 0 PITG_14169   |
| 0  | 2   | 2 NA           |
| 0  | 11  | 0 NA           |
| 0  | 16  | 0 NA           |
| 0  | 69  | 8 NA           |
| 0  | 24  | 8 PITG_00495   |
| 0  | 24  | 23 PITG_11804  |
| 0  | 32  | 0 PITG_16005   |
| 0  | 44  | 5 NA           |
| 0  | 4   | 14 PITG_12843  |
| 0  | 3   | 0 PITG_09193   |
| 0  | 2   | 3 PITG_04722   |
| 0  | 4   | 0 NA           |
| 0  | 0   | 0 PITG_03562   |
| 0  | 0   | 4 PITG_07166   |
| 0  | 0   | 0 NA           |
| 0  | 2   | 0 PITG_10011   |
| 0  | 23  | 5 PITG_02531   |
| 0  | 5   | 0 PITG_17345   |
| 0  | 98  | 148 PITG_17790 |
| 0  | 140 | 19 PITG_04131  |
| 0  | 8   | 14 PITG_05385  |
| 36 | 5   | 25 NA          |
| 0  | 4   | 15 PITG_05282  |
| 0  | 48  | 2 PITG_10857   |
| 0  | 15  | 6 NA           |
| 0  | 82  | 25 PITG_04114  |
| 0  | 0   | 6 PITG_19175   |
| 0  | 104 | 25 PITG_02733  |
| 0  | 0   | 0 PITG_11437   |
| 0  | 41  | 28 PITG_19350  |

|   |    |                |
|---|----|----------------|
| 0 | 3  | 2 PITG_06782   |
| 0 | 20 | 18 PITG_16022  |
| 0 | 70 | 8 PITG_21887   |
| 0 | 0  | 0 PITG_01121   |
| 0 | 0  | 8 PITG_21829   |
| 0 | 4  | 2 NA           |
| 0 | 0  | 0 PITG_06129   |
| 0 | 25 | 43 PITG_04384  |
| 0 | 37 | 79 NA          |
| 0 | 2  | 0 PITG_01188   |
| 0 | 6  | 4 NA           |
| 0 | 44 | 7 PITG_20831   |
| 0 | 6  | 6 PITG_14221   |
| 0 | 0  | 7 PITG_15571   |
| 0 | 2  | 13 PITG_18007  |
| 0 | 0  | 0 PITG_01516   |
| 0 | 0  | 0 PITG_16024   |
| 0 | 0  | 0 NA           |
| 0 | 5  | 5 PITG_17112   |
| 0 | 11 | 29 PITG_00067  |
| 0 | 0  | 8 PITG_04599   |
| 0 | 0  | 2 PITG_12988   |
| 0 | 47 | 10 PITG_04211  |
| 0 | 9  | 0 PITG_08325   |
| 0 | 0  | 3 PITG_20731   |
| 0 | 18 | 43 PITG_22069  |
| 0 | 23 | 18 PITG_00225  |
| 0 | 2  | 2 PITG_02228   |
| 0 | 81 | 138 PITG_10922 |
| 0 | 0  | 0 PITG_06457   |
| 0 | 25 | 16 PITG_02027  |
| 0 | 41 | 2 PITG_11129   |
| 0 | 6  | 3 PITG_13920   |
| 0 | 7  | 30 PITG_11540  |
| 0 | 36 | 0 PITG_07043   |
| 0 | 0  | 7 PITG_16800   |
| 0 | 13 | 4 PITG_19212   |
| 0 | 13 | 40 PITG_00632  |
| 0 | 2  | 6 PITG_07809   |
| 0 | 8  | 4 PITG_09588   |
| 0 | 2  | 2 NA           |
| 0 | 8  | 27 PITG_08019  |
| 0 | 0  | 2 NA           |
| 0 | 0  | 0 NA           |
| 0 | 13 | 2 PITG_00323   |
| 0 | 2  | 2 NA           |
| 0 | 2  | 0 PITG_12545   |

|    |     |               |
|----|-----|---------------|
| 0  | 15  | 0 PITG_20205  |
| 0  | 7   | 8 PITG_16887  |
| 0  | 23  | 22 PITG_01049 |
| 0  | 8   | 18 PITG_07790 |
| 0  | 17  | 2 PITG_01777  |
| 0  | 2   | 12 PITG_11690 |
| 0  | 27  | 43 NA         |
| 0  | 22  | 20 PITG_01250 |
| 0  | 44  | 38 PITG_19422 |
| 0  | 0   | 0 PITG_04294  |
| 0  | 2   | 0 PITG_10460  |
| 0  | 15  | 27 PITG_19005 |
| 0  | 3   | 10 PITG_21026 |
| 0  | 2   | 0 PITG_00077  |
| 0  | 4   | 0 PITG_09262  |
| 0  | 0   | 6 PITG_14456  |
| 0  | 2   | 3 NA          |
| 0  | 17  | 0 PITG_08532  |
| 0  | 0   | 0 PITG_00228  |
| 0  | 6   | 0 NA          |
| 0  | 17  | 7 PITG_00880  |
| 0  | 295 | 78 PITG_08235 |
| 0  | 0   | 2 PITG_12224  |
| 0  | 0   | 2 NA          |
| 26 | 6   | 157 NA        |
| 0  | 6   | 6 PITG_06040  |
| 0  | 198 | 37 PITG_15875 |
| 0  | 2   | 0 PITG_10399  |
| 0  | 6   | 24 PITG_00938 |
| 0  | 133 | 6 PITG_19149  |
| 0  | 19  | 5 PITG_22828  |
| 0  | 12  | 8 PITG_09727  |
| 0  | 4   | 0 PITG_14613  |
| 0  | 114 | 14 NA         |
| 0  | 17  | 4 PITG_18007  |
| 0  | 0   | 5 PITG_12987  |
| 0  | 7   | 0 PITG_03959  |
| 0  | 6   | 13 PITG_00577 |
| 0  | 3   | 5 PITG_01785  |
| 0  | 40  | 49 PITG_14947 |
| 0  | 37  | 46 PITG_15063 |
| 0  | 33  | 3 NA          |
| 0  | 52  | 28 NA         |
| 0  | 162 | 6 PITG_17607  |
| 0  | 34  | 4 NA          |
| 0  | 6   | 0 PITG_16863  |
| 0  | 4   | 0 NA          |



|    |      |                |
|----|------|----------------|
| 0  | 0    | 0 NA           |
| 0  | 22   | 6 PITG_01594   |
| 0  | 18   | 6 NA           |
| 0  | 0    | 0 PITG_09985   |
| 0  | 151  | 90 PITG_12327  |
| 0  | 17   | 20 PITG_01290  |
| 0  | 51   | 37 PITG_09243  |
| 0  | 0    | 0 PITG_16137   |
| 0  | 69   | 31 PITG_16798  |
| 0  | 6    | 2 PITG_09477   |
| 0  | 9    | 0 NA           |
| 0  | 2    | 0 PITG_12235   |
| 0  | 8    | 0 PITG_15875   |
| 0  | 0    | 7 PITG_07153   |
| 0  | 2    | 0 PITG_07289   |
| 0  | 0    | 4 PITG_03779   |
| 0  | 42   | 7 PITG_09423   |
| 0  | 50   | 55 PITG_06828  |
| 0  | 43   | 0 NA           |
| 0  | 45   | 2 PITG_14353   |
| 0  | 1148 | 536 PITG_02429 |
| 0  | 0    | 0 PITG_19474   |
| 0  | 50   | 56 PITG_16365  |
| 0  | 65   | 16 NA          |
| 0  | 51   | 6 PITG_05197   |
| 0  | 6    | 14 PITG_00636  |
| 0  | 21   | 34 PITG_18464  |
| 0  | 0    | 0 PITG_01520   |
| 0  | 113  | 121 PITG_13112 |
| 0  | 16   | 12 PITG_09003  |
| 0  | 11   | 6 NA           |
| 0  | 10   | 8 PITG_14108   |
| 0  | 0    | 0 PITG_02895   |
| 0  | 4    | 5 PITG_05238   |
| 0  | 2    | 5 PITG_15641   |
| 0  | 50   | 34 PITG_19004  |
| 0  | 48   | 0 PITG_07470   |
| 0  | 81   | 0 PITG_01878   |
| 0  | 7    | 18 PITG_13595  |
| 0  | 21   | 10 PITG_03764  |
| 0  | 55   | 33 PITG_03736  |
| 0  | 11   | 5 PITG_01457   |
| 0  | 16   | 72 PITG_00545  |
| 0  | 15   | 0 PITG_17552   |
| 0  | 31   | 22 PITG_06602  |
| 23 | 0    | 0 NA           |
| 0  | 5    | 8 PITG_18010   |

|   |     |                |
|---|-----|----------------|
| 0 | 36  | 33 PITG_01683  |
| 0 | 12  | 2 PITG_09588   |
| 0 | 2   | 0 PITG_17383   |
| 0 | 7   | 7 PITG_05346   |
| 0 | 8   | 147 PITG_09831 |
| 0 | 13  | 26 PITG_14608  |
| 0 | 8   | 35 PITG_13473  |
| 0 | 279 | 91 NA          |
| 0 | 11  | 19 NA          |
| 0 | 140 | 9 NA           |
| 0 | 0   | 2 PITG_10058   |
| 0 | 22  | 19 PITG_08295  |
| 0 | 0   | 2 PITG_21336   |
| 0 | 2   | 29 PITG_14750  |
| 0 | 15  | 3 PITG_08348   |
| 0 | 119 | 57 PITG_04831  |
| 0 | 78  | 24 PITG_09554  |
| 0 | 6   | 2 NA           |
| 0 | 42  | 27 PITG_17664  |
| 0 | 20  | 14 PITG_16495  |
| 0 | 19  | 19 PITG_11895  |
| 0 | 5   | 3 NA           |
| 0 | 54  | 2 PITG_03446   |
| 0 | 569 | 201 PITG_09384 |
| 0 | 45  | 332 PITG_03098 |
| 0 | 0   | 0 NA           |
| 0 | 4   | 15 PITG_15735  |
| 0 | 2   | 10 PITG_09954  |
| 0 | 6   | 5 PITG_03114   |
| 0 | 0   | 14 PITG_12693  |
| 0 | 53  | 2 PITG_02666   |
| 0 | 72  | 14 PITG_06847  |
| 0 | 10  | 15 PITG_10857  |
| 0 | 23  | 4 PITG_16439   |
| 0 | 32  | 6 PITG_00048   |
| 0 | 24  | 0 PITG_08374   |
| 0 | 2   | 4 PITG_01182   |
| 0 | 0   | 2 PITG_19146   |
| 0 | 6   | 5 PITG_17907   |
| 0 | 0   | 0 PITG_12914   |
| 0 | 13  | 3 PITG_10065   |
| 0 | 0   | 0 PITG_04562   |
| 0 | 17  | 8 PITG_21023   |
| 0 | 22  | 7 PITG_17549   |
| 0 | 19  | 44 PITG_12820  |
| 0 | 24  | 8 NA           |
| 0 | 0   | 0 NA           |

|   |     |                |
|---|-----|----------------|
| 0 | 7   | 6 PITG_03445   |
| 0 | 20  | 2 PITG_17128   |
| 0 | 3   | 0 NA           |
| 0 | 15  | 38 PITG_11656  |
| 0 | 3   | 0 PITG_03463   |
| 0 | 2   | 10 PITG_21908  |
| 0 | 62  | 49 PITG_23159  |
| 0 | 110 | 134 PITG_06968 |
| 0 | 4   | 0 NA           |
| 0 | 0   | 0 PITG_06757   |
| 0 | 477 | 312 PITG_15552 |
| 0 | 63  | 12 PITG_15806  |
| 0 | 4   | 2 PITG_10750   |
| 0 | 0   | 0 PITG_03443   |
| 0 | 20  | 11 NA          |
| 0 | 7   | 0 PITG_03752   |
| 0 | 47  | 20 PITG_01405  |
| 0 | 5   | 8 NA           |
| 0 | 10  | 4 PITG_07976   |
| 0 | 49  | 21 PITG_19950  |
| 0 | 7   | 6 PITG_01123   |
| 0 | 8   | 2 NA           |
| 0 | 2   | 8 PITG_12517   |
| 0 | 14  | 0 PITG_03836   |
| 0 | 6   | 4 PITG_14919   |
| 0 | 0   | 0 PITG_16468   |
| 0 | 26  | 4 NA           |
| 0 | 23  | 12 PITG_12873  |
| 0 | 21  | 20 PITG_18541  |
| 0 | 32  | 14 PITG_00486  |
| 0 | 0   | 4 PITG_05781   |
| 0 | 155 | 51 PITG_09528  |
| 0 | 22  | 4 PITG_16114   |
| 0 | 0   | 8 PITG_22763   |
| 0 | 418 | 88 PITG_04645  |
| 0 | 0   | 4 PITG_11862   |
| 0 | 8   | 0 PITG_06900   |
| 0 | 12  | 4 PITG_19124   |
| 0 | 16  | 2 NA           |
| 0 | 23  | 81 PITG_07110  |
| 0 | 28  | 54 PITG_14269  |
| 0 | 27  | 14 PITG_03621  |
| 0 | 0   | 6 PITG_10120   |
| 0 | 18  | 11 PITG_03411  |
| 0 | 64  | 38 PITG_11437  |
| 0 | 9   | 30 PITG_17329  |
| 0 | 7   | 4 NA           |

|   |     |                |
|---|-----|----------------|
| 0 | 29  | 27 PITG_17897  |
| 0 | 15  | 2 PITG_15946   |
| 0 | 11  | 13 PITG_00939  |
| 0 | 29  | 31 PITG_17990  |
| 0 | 2   | 0 PITG_22541   |
| 0 | 43  | 22 NA          |
| 0 | 2   | 5 PITG_01683   |
| 0 | 7   | 0 PITG_10317   |
| 0 | 51  | 10 PITG_01066  |
| 0 | 0   | 0 NA           |
| 0 | 6   | 21 PITG_16720  |
| 0 | 50  | 32 PITG_08935  |
| 0 | 14  | 12 PITG_01836  |
| 0 | 3   | 31 PITG_03075  |
| 0 | 17  | 28 NA          |
| 0 | 25  | 13 PITG_02787  |
| 0 | 0   | 0 NA           |
| 0 | 35  | 20 PITG_01639  |
| 0 | 66  | 29 PITG_11524  |
| 0 | 25  | 0 PITG_12211   |
| 0 | 2   | 4 NA           |
| 0 | 2   | 4 PITG_05260   |
| 0 | 2   | 3 PITG_00556   |
| 0 | 0   | 0 NA           |
| 0 | 0   | 8 PITG_06199   |
| 0 | 0   | 11 PITG_10022  |
| 0 | 18  | 17 PITG_00590  |
| 0 | 46  | 13 PITG_11530  |
| 0 | 34  | 6 PITG_07991   |
| 0 | 5   | 0 PITG_00655   |
| 0 | 0   | 0 PITG_21908   |
| 0 | 51  | 17 PITG_21048  |
| 0 | 11  | 9 PITG_06733   |
| 0 | 68  | 57 PITG_12504  |
| 0 | 9   | 2 NA           |
| 0 | 212 | 103 PITG_08454 |
| 0 | 26  | 0 PITG_18632   |
| 0 | 0   | 7 PITG_20174   |
| 0 | 52  | 158 PITG_19961 |
| 0 | 0   | 0 PITG_15602   |
| 0 | 0   | 0 PITG_18543   |
| 0 | 2   | 8 PITG_12988   |
| 0 | 0   | 0 PITG_10683   |
| 0 | 2   | 2 PITG_03455   |
| 0 | 0   | 0 PITG_00201   |
| 0 | 0   | 2 PITG_13491   |
| 0 | 0   | 0 PITG_01848   |

|   |     |                |
|---|-----|----------------|
| 0 | 11  | 5 PITG_07851   |
| 0 | 0   | 2 PITG_06695   |
| 0 | 0   | 12 PITG_16649  |
| 0 | 47  | 32 PITG_14553  |
| 0 | 67  | 122 PITG_19590 |
| 0 | 48  | 36 PITG_01997  |
| 0 | 0   | 2 PITG_13775   |
| 0 | 55  | 27 PITG_00710  |
| 0 | 10  | 0 PITG_11760   |
| 0 | 2   | 0 PITG_17004   |
| 0 | 33  | 38 PITG_03336  |
| 0 | 18  | 13 PITG_13066  |
| 0 | 0   | 0 PITG_16256   |
| 0 | 4   | 7 PITG_05717   |
| 0 | 15  | 6 PITG_03482   |
| 0 | 27  | 9 PITG_11010   |
| 0 | 9   | 2 PITG_08037   |
| 0 | 4   | 17 PITG_13842  |
| 0 | 22  | 20 PITG_07271  |
| 0 | 56  | 4 PITG_05886   |
| 0 | 34  | 10 PITG_03754  |
| 0 | 3   | 0 NA           |
| 0 | 184 | 13 PITG_05595  |
| 0 | 35  | 25 PITG_02735  |
| 0 | 10  | 0 PITG_02324   |
| 0 | 2   | 0 PITG_04011   |
| 0 | 51  | 46 PITG_07917  |
| 0 | 76  | 16 PITG_03302  |
| 0 | 102 | 44 PITG_08804  |
| 0 | 8   | 18 PITG_12478  |
| 0 | 2   | 15 PITG_08566  |
| 0 | 128 | 21 PITG_15629  |
| 0 | 0   | 0 PITG_05538   |
| 0 | 135 | 60 NA          |
| 0 | 34  | 141 PITG_01477 |
| 0 | 6   | 5 PITG_11531   |
| 0 | 5   | 14 PITG_11286  |
| 0 | 0   | 0 PITG_02842   |
| 0 | 7   | 28 PITG_00183  |
| 0 | 29  | 41 PITG_00049  |
| 0 | 98  | 107 PITG_03401 |
| 0 | 4   | 22 PITG_18882  |
| 0 | 54  | 7 NA           |
| 0 | 16  | 15 PITG_18421  |
| 0 | 6   | 2 NA           |
| 0 | 41  | 21 PITG_04773  |
| 0 | 50  | 16 PITG_07551  |

|    |     |                |
|----|-----|----------------|
| 0  | 191 | 215 PITG_11009 |
| 0  | 0   | 0 NA           |
| 0  | 17  | 10 PITG_22611  |
| 0  | 6   | 6 PITG_00687   |
| 0  | 48  | 72 PITG_00293  |
| 0  | 0   | 0 PITG_18274   |
| 0  | 87  | 22 PITG_15217  |
| 0  | 46  | 72 PITG_20156  |
| 0  | 6   | 0 PITG_13529   |
| 13 | 44  | 43 NA          |
| 0  | 11  | 59 PITG_11170  |
| 0  | 4   | 3 PITG_11368   |
| 0  | 22  | 0 NA           |
| 0  | 42  | 20 PITG_09505  |
| 0  | 36  | 10 PITG_16365  |
| 0  | 0   | 0 NA           |
| 0  | 54  | 16 NA          |
| 0  | 7   | 2 PITG_17137   |
| 0  | 9   | 32 PITG_13826  |
| 0  | 3   | 2 PITG_11024   |
| 0  | 9   | 13 NA          |
| 0  | 8   | 12 PITG_05685  |
| 0  | 40  | 7 NA           |
| 0  | 22  | 2 PITG_17639   |
| 0  | 111 | 81 PITG_07030  |
| 0  | 28  | 19 PITG_03469  |
| 0  | 36  | 9 NA           |
| 0  | 6   | 2 PITG_07422   |
| 0  | 85  | 22 PITG_12279  |
| 0  | 5   | 0 PITG_08914   |
| 0  | 52  | 36 PITG_05939  |
| 0  | 0   | 0 PITG_13421   |
| 0  | 28  | 5 NA           |
| 0  | 3   | 4 NA           |
| 0  | 98  | 9 PITG_21334   |
| 0  | 6   | 2 PITG_01981   |
| 0  | 6   | 0 NA           |
| 0  | 43  | 316 NA         |
| 0  | 6   | 17 PITG_21451  |
| 0  | 28  | 2 PITG_11750   |
| 0  | 4   | 0 NA           |
| 0  | 4   | 5 PITG_02424   |
| 0  | 11  | 2 PITG_08769   |
| 0  | 182 | 7 PITG_13068   |
| 0  | 7   | 7 PITG_10734   |
| 0  | 12  | 2 PITG_03165   |
| 0  | 0   | 0 PITG_17816   |

|    |     |                |
|----|-----|----------------|
| 0  | 0   | 8 PITG_10817   |
| 0  | 32  | 10 PITG_15573  |
| 0  | 26  | 9 PITG_05300   |
| 0  | 2   | 0 NA           |
| 0  | 0   | 4 PITG_07765   |
| 0  | 23  | 10 PITG_17040  |
| 0  | 8   | 8 PITG_18183   |
| 0  | 31  | 7 PITG_16272   |
| 0  | 3   | 8 PITG_03657   |
| 13 | 12  | 16 NA          |
| 0  | 0   | 10 NA          |
| 0  | 4   | 2 PITG_08689   |
| 0  | 50  | 4 PITG_10268   |
| 0  | 2   | 0 NA           |
| 0  | 15  | 10 PITG_10532  |
| 0  | 5   | 0 PITG_02530   |
| 0  | 18  | 22 PITG_01424  |
| 2  | 0   | 0 NA           |
| 0  | 0   | 14 PITG_15844  |
| 0  | 0   | 0 NA           |
| 0  | 203 | 29 PITG_03651  |
| 0  | 12  | 9 PITG_10308   |
| 0  | 0   | 0 NA           |
| 0  | 4   | 27 PITG_02593  |
| 0  | 135 | 35 NA          |
| 0  | 23  | 0 NA           |
| 0  | 116 | 10 PITG_00683  |
| 0  | 68  | 12 PITG_01418  |
| 0  | 0   | 6 NA           |
| 0  | 90  | 119 PITG_09628 |
| 0  | 14  | 2 PITG_01577   |
| 0  | 6   | 0 NA           |
| 0  | 2   | 13 PITG_03144  |
| 44 | 0   | 4 NA           |
| 0  | 0   | 0 PITG_13397   |
| 0  | 8   | 0 PITG_18542   |
| 0  | 0   | 0 PITG_07795   |
| 0  | 15  | 2 PITG_06829   |
| 0  | 28  | 19 NA          |
| 0  | 73  | 17 PITG_03702  |
| 0  | 2   | 7 PITG_18359   |
| 0  | 0   | 2 NA           |
| 0  | 5   | 7 PITG_14380   |
| 0  | 5   | 0 PITG_13677   |
| 0  | 2   | 2 PITG_21077   |
| 0  | 39  | 24 NA          |
| 0  | 17  | 33 PITG_09832  |

|    |     |                |
|----|-----|----------------|
| 0  | 3   | 0 PITG_09222   |
| 0  | 9   | 11 PITG_00440  |
| 0  | 108 | 102 PITG_09593 |
| 0  | 227 | 123 NA         |
| 0  | 26  | 39 PITG_14561  |
| 0  | 14  | 6 PITG_06954   |
| 0  | 204 | 160 PITG_20766 |
| 0  | 0   | 2 PITG_01362   |
| 0  | 6   | 0 PITG_06887   |
| 0  | 0   | 0 PITG_03179   |
| 0  | 19  | 35 PITG_04567  |
| 0  | 4   | 2 PITG_02783   |
| 0  | 8   | 19 PITG_15625  |
| 0  | 3   | 2 PITG_00809   |
| 0  | 8   | 0 PITG_04467   |
| 0  | 6   | 4 PITG_03670   |
| 0  | 2   | 2 NA           |
| 0  | 3   | 9 PITG_22719   |
| 0  | 57  | 76 PITG_05383  |
| 0  | 24  | 39 PITG_01770  |
| 0  | 8   | 2 PITG_03308   |
| 0  | 17  | 0 PITG_00961   |
| 0  | 5   | 0 PITG_09995   |
| 0  | 12  | 5 PITG_15167   |
| 0  | 11  | 15 PITG_08038  |
| 0  | 17  | 143 PITG_11047 |
| 0  | 11  | 17 PITG_22035  |
| 0  | 164 | 119 PITG_02683 |
| 0  | 45  | 13 PITG_01703  |
| 0  | 10  | 4 PITG_12192   |
| 0  | 241 | 43 PITG_21528  |
| 0  | 2   | 2 PITG_15912   |
| 40 | 8   | 165 NA         |
| 0  | 2   | 0 NA           |
| 0  | 15  | 11 PITG_16766  |
| 0  | 268 | 336 PITG_18375 |
| 0  | 0   | 4 PITG_20040   |
| 0  | 2   | 6 PITG_17925   |
| 0  | 50  | 11 PITG_02927  |
| 0  | 64  | 16 NA          |
| 0  | 0   | 0 PITG_09962   |
| 0  | 14  | 11 PITG_02720  |
| 0  | 0   | 0 PITG_10683   |
| 0  | 3   | 3 PITG_03390   |
| 0  | 52  | 7 NA           |
| 0  | 14  | 5 PITG_11648   |
| 0  | 0   | 4 PITG_12887   |



|   |    |               |
|---|----|---------------|
| 0 | 61 | 68 PITG_06558 |
| 0 | 4  | 12 PITG_00654 |
| 0 | 0  | 0 PITG_13620  |
| 0 | 8  | 16 NA         |
| 0 | 2  | 24 PITG_03642 |
| 0 | 11 | 6 PITG_10201  |
| 0 | 27 | 16 PITG_09446 |
| 0 | 10 | 14 PITG_00090 |
| 0 | 10 | 6 NA          |
| 0 | 4  | 4 PITG_05412  |
| 0 | 10 | 15 PITG_06708 |
| 0 | 12 | 6 PITG_01839  |
| 0 | 35 | 32 PITG_01438 |
| 0 | 4  | 22 PITG_14014 |
| 0 | 4  | 2 PITG_03523  |
| 0 | 5  | 8 PITG_00281  |
| 0 | 3  | 0 NA          |
| 0 | 0  | 14 PITG_13157 |
| 0 | 0  | 0 NA          |
| 0 | 4  | 17 PITG_00274 |
| 0 | 7  | 2 PITG_05659  |
| 0 | 2  | 4 NA          |
| 0 | 0  | 2 PITG_12265  |
| 0 | 0  | 2 NA          |
| 0 | 10 | 26 NA         |
| 0 | 16 | 0 NA          |
| 0 | 34 | 25 PITG_00989 |
| 0 | 5  | 2 PITG_00012  |
| 0 | 6  | 23 PITG_08452 |
| 0 | 0  | 15 PITG_01153 |
| 0 | 0  | 0 PITG_15065  |
| 0 | 6  | 17 PITG_20745 |
| 0 | 5  | 7 NA          |
| 0 | 19 | 52 PITG_11648 |
| 0 | 2  | 0 PITG_02340  |
| 0 | 8  | 19 PITG_17869 |
| 0 | 0  | 2 PITG_03865  |
| 0 | 29 | 30 PITG_07247 |
| 0 | 12 | 10 PITG_05423 |
| 0 | 5  | 0 PITG_01368  |
| 0 | 49 | 24 PITG_20235 |
| 0 | 28 | 7 PITG_01490  |
| 0 | 0  | 0 NA          |
| 0 | 3  | 2 NA          |
| 0 | 0  | 0 PITG_10973  |
| 0 | 8  | 10 PITG_05565 |
| 0 | 3  | 4 NA          |

|    |     |               |
|----|-----|---------------|
| 0  | 0   | 0 PITG_03492  |
| 0  | 4   | 11 PITG_03408 |
| 0  | 12  | 0 PITG_18977  |
| 0  | 8   | 3 PITG_03756  |
| 0  | 19  | 0 NA          |
| 0  | 10  | 0 NA          |
| 0  | 79  | 18 NA         |
| 0  | 29  | 12 NA         |
| 0  | 6   | 16 PITG_19851 |
| 0  | 275 | 31 NA         |
| 0  | 53  | 2 PITG_15240  |
| 0  | 27  | 26 PITG_06710 |
| 0  | 23  | 5 PITG_02927  |
| 0  | 0   | 2 PITG_12855  |
| 0  | 68  | 0 PITG_04577  |
| 0  | 22  | 8 PITG_00470  |
| 0  | 0   | 2 PITG_07154  |
| 34 | 2   | 0 NA          |
| 0  | 0   | 6 PITG_08752  |
| 0  | 77  | 63 PITG_09783 |
| 0  | 6   | 4 PITG_02213  |
| 0  | 9   | 4 PITG_00030  |
| 0  | 10  | 8 PITG_16038  |
| 0  | 347 | 46 PITG_05366 |
| 0  | 12  | 4 NA          |
| 0  | 370 | 51 NA         |
| 0  | 0   | 0 NA          |
| 0  | 82  | 38 PITG_17077 |
| 0  | 6   | 7 NA          |
| 0  | 0   | 0 NA          |
| 0  | 0   | 2 PITG_03652  |
| 0  | 37  | 39 PITG_16446 |
| 0  | 0   | 0 PITG_05194  |
| 0  | 17  | 7 NA          |
| 0  | 9   | 5 PITG_06420  |
| 0  | 12  | 15 PITG_06808 |
| 0  | 7   | 2 NA          |
| 0  | 0   | 20 PITG_14397 |
| 0  | 31  | 0 NA          |
| 0  | 2   | 0 NA          |
| 0  | 3   | 6 PITG_00590  |
| 0  | 40  | 22 PITG_05551 |
| 0  | 10  | 0 PITG_09791  |
| 0  | 7   | 2 NA          |
| 0  | 13  | 41 PITG_13607 |
| 3  | 5   | 29 NA         |
| 0  | 43  | 12 NA         |

|   |     |                |
|---|-----|----------------|
| 0 | 43  | 11 PITG_21853  |
| 0 | 5   | 2 PITG_02143   |
| 0 | 6   | 31 PITG_03095  |
| 0 | 6   | 8 PITG_06708   |
| 0 | 7   | 0 NA           |
| 0 | 7   | 8 NA           |
| 0 | 6   | 6 PITG_21842   |
| 0 | 140 | 65 NA          |
| 0 | 0   | 0 NA           |
| 0 | 182 | 46 PITG_07570  |
| 0 | 591 | 392 PITG_02352 |
| 0 | 0   | 0 PITG_13767   |
| 0 | 161 | 193 PITG_03273 |
| 0 | 6   | 0 NA           |
| 0 | 0   | 4 NA           |
| 0 | 8   | 5 PITG_12521   |
| 0 | 2   | 2 PITG_15228   |
| 0 | 0   | 2 PITG_05594   |
| 0 | 59  | 14 PITG_12195  |
| 0 | 4   | 2 PITG_03952   |
| 0 | 49  | 2 PITG_20388   |
| 0 | 4   | 4 PITG_19125   |
| 0 | 10  | 14 PITG_05249  |
| 0 | 2   | 0 PITG_07841   |
| 0 | 25  | 22 PITG_03764  |
| 0 | 4   | 0 PITG_22840   |
| 0 | 50  | 69 PITG_16864  |
| 0 | 0   | 0 NA           |
| 0 | 11  | 6 PITG_12514   |
| 0 | 16  | 0 PITG_17488   |
| 0 | 40  | 16 NA          |
| 0 | 5   | 0 PITG_11735   |
| 0 | 4   | 5 NA           |
| 0 | 17  | 5 PITG_08775   |
| 0 | 29  | 8 NA           |
| 0 | 3   | 9 PITG_14175   |
| 0 | 0   | 4 PITG_22126   |
| 0 | 32  | 4 NA           |
| 0 | 0   | 0 PITG_05170   |
| 0 | 245 | 77 PITG_13228  |
| 0 | 2   | 0 NA           |
| 0 | 4   | 0 PITG_02264   |
| 0 | 172 | 12 PITG_02144  |
| 0 | 2   | 0 PITG_20506   |
| 0 | 56  | 17 PITG_13378  |
| 0 | 17  | 4 PITG_02448   |
| 0 | 4   | 16 PITG_08597  |

|   |     |                |
|---|-----|----------------|
| 0 | 14  | 12 PITG_23128  |
| 0 | 4   | 2 PITG_17168   |
| 0 | 0   | 0 PITG_15925   |
| 0 | 10  | 16 PITG_04977  |
| 0 | 27  | 0 PITG_04467   |
| 0 | 0   | 0 PITG_00440   |
| 0 | 11  | 2 PITG_09874   |
| 0 | 2   | 0 PITG_00140   |
| 0 | 0   | 6 PITG_00646   |
| 0 | 0   | 4 PITG_06962   |
| 0 | 72  | 24 PITG_12521  |
| 0 | 95  | 18 PITG_17719  |
| 0 | 9   | 7 PITG_09387   |
| 0 | 25  | 21 PITG_04842  |
| 0 | 0   | 4 PITG_11623   |
| 0 | 12  | 16 PITG_10534  |
| 0 | 32  | 6 PITG_01097   |
| 0 | 68  | 24 PITG_09296  |
| 0 | 20  | 43 PITG_18174  |
| 0 | 2   | 4 PITG_01189   |
| 0 | 40  | 56 PITG_00439  |
| 0 | 10  | 2 NA           |
| 0 | 7   | 8 PITG_00882   |
| 0 | 5   | 2 PITG_09089   |
| 0 | 4   | 4 PITG_08481   |
| 0 | 4   | 0 PITG_09381   |
| 0 | 2   | 43 PITG_02663  |
| 0 | 8   | 12 PITG_10191  |
| 0 | 4   | 2 PITG_09942   |
| 0 | 21  | 60 NA          |
| 0 | 28  | 36 PITG_18067  |
| 0 | 85  | 219 PITG_18414 |
| 0 | 12  | 13 PITG_02023  |
| 0 | 103 | 26 PITG_03951  |
| 0 | 6   | 5 PITG_01860   |
| 0 | 30  | 0 PITG_16363   |
| 0 | 2   | 0 NA           |
| 0 | 0   | 4 PITG_08470   |
| 0 | 65  | 31 PITG_05644  |
| 0 | 0   | 0 PITG_11643   |
| 0 | 73  | 9 PITG_11452   |
| 0 | 14  | 0 NA           |
| 0 | 19  | 0 PITG_03998   |
| 0 | 0   | 2 PITG_13317   |
| 0 | 0   | 16 PITG_13841  |
| 0 | 14  | 8 PITG_00349   |
| 0 | 192 | 25 NA          |

|   |     |                |
|---|-----|----------------|
| 0 | 25  | 14 NA          |
| 0 | 91  | 325 PITG_01654 |
| 2 | 304 | 288 PITG_11247 |
| 0 | 4   | 6 PITG_05357   |
| 0 | 15  | 0 PITG_13801   |
| 0 | 8   | 2 NA           |
| 0 | 88  | 68 PITG_04457  |
| 0 | 16  | 37 PITG_02343  |
| 0 | 7   | 4 PITG_21219   |
| 0 | 10  | 0 PITG_04629   |
| 0 | 11  | 6 PITG_05168   |
| 0 | 4   | 32 PITG_11883  |
| 0 | 26  | 23 PITG_05935  |
| 0 | 12  | 0 PITG_17879   |
| 0 | 8   | 0 NA           |
| 0 | 8   | 2 NA           |
| 0 | 60  | 42 PITG_02103  |
| 0 | 46  | 0 PITG_10017   |
| 0 | 0   | 13 PITG_19846  |
| 0 | 9   | 23 PITG_16675  |
| 0 | 6   | 12 PITG_08740  |
| 0 | 0   | 11 PITG_00311  |
| 0 | 12  | 0 NA           |
| 0 | 0   | 2 PITG_01588   |
| 0 | 22  | 5 PITG_00469   |
| 0 | 74  | 20 NA          |
| 0 | 0   | 4 PITG_15444   |
| 0 | 2   | 0 PITG_16131   |
| 0 | 7   | 5 PITG_17239   |
| 0 | 2   | 2 PITG_06829   |
| 0 | 122 | 15 PITG_13483  |
| 0 | 7   | 17 PITG_15807  |
| 0 | 18  | 17 NA          |
| 0 | 4   | 4 NA           |
| 0 | 10  | 58 PITG_04334  |
| 0 | 5   | 2 PITG_07242   |
| 0 | 71  | 85 NA          |
| 0 | 19  | 4 PITG_02739   |
| 0 | 13  | 0 PITG_05328   |
| 0 | 8   | 7 PITG_08031   |
| 0 | 9   | 19 NA          |
| 0 | 3   | 4 PITG_04725   |
| 0 | 12  | 4 PITG_06574   |
| 0 | 0   | 0 NA           |
| 0 | 0   | 0 PITG_16117   |
| 0 | 96  | 124 PITG_10858 |
| 0 | 15  | 13 PITG_06648  |

|   |      |                 |
|---|------|-----------------|
| 0 | 0    | 2 PITG_03362    |
| 0 | 4    | 0 NA            |
| 0 | 66   | 62 PITG_11139   |
| 0 | 64   | 117 PITG_01365  |
| 0 | 32   | 42 PITG_02526   |
| 0 | 8    | 0 PITG_03864    |
| 0 | 6    | 2 NA            |
| 0 | 40   | 2 PITG_19773    |
| 0 | 24   | 16 PITG_06906   |
| 0 | 8    | 5 PITG_00712    |
| 0 | 155  | 60 PITG_08800   |
| 0 | 13   | 2 PITG_13424    |
| 0 | 114  | 55 PITG_00965   |
| 0 | 0    | 2 PITG_07531    |
| 0 | 34   | 7 PITG_12820    |
| 0 | 35   | 25 PITG_13920   |
| 0 | 2    | 0 NA            |
| 0 | 0    | 0 PITG_06913    |
| 0 | 98   | 116 PITG_12577  |
| 2 | 0    | 0 NA            |
| 0 | 29   | 17 PITG_15518   |
| 0 | 4    | 0 PITG_03501    |
| 0 | 55   | 0 PITG_07300    |
| 0 | 2    | 3 PITG_22364    |
| 0 | 0    | 0 PITG_03008    |
| 0 | 0    | 2 PITG_16015    |
| 0 | 143  | 502 PITG_00397  |
| 0 | 42   | 0 PITG_01949    |
| 0 | 70   | 12 PITG_01997   |
| 0 | 8140 | 1865 PITG_14567 |
| 0 | 55   | 38 PITG_01173   |
| 0 | 35   | 20 NA           |
| 0 | 27   | 9 NA            |
| 0 | 6    | 2 PITG_04093    |
| 0 | 0    | 2 PITG_04501    |
| 0 | 2    | 25 PITG_05520   |
| 0 | 30   | 18 PITG_19544   |
| 0 | 0    | 2 PITG_09824    |
| 0 | 7    | 2 PITG_17087    |
| 0 | 113  | 50 PITG_02280   |
| 0 | 20   | 10 PITG_07924   |
| 0 | 5    | 13 NA           |
| 0 | 6    | 2 PITG_13620    |
| 0 | 5    | 2 PITG_17168    |
| 0 | 175  | 40 PITG_07053   |
| 0 | 7    | 0 NA            |
| 0 | 115  | 31 PITG_15267   |

|    |     |                |
|----|-----|----------------|
| 0  | 23  | 14 PITG_19781  |
| 0  | 15  | 18 PITG_04114  |
| 0  | 15  | 68 PITG_14598  |
| 0  | 73  | 6 PITG_14129   |
| 0  | 2   | 2 NA           |
| 0  | 54  | 85 PITG_05326  |
| 0  | 17  | 51 PITG_06679  |
| 2  | 69  | 61 NA          |
| 0  | 4   | 2 PITG_13345   |
| 0  | 20  | 44 PITG_13773  |
| 0  | 0   | 0 NA           |
| 0  | 34  | 0 NA           |
| 0  | 28  | 4 NA           |
| 0  | 2   | 4 PITG_18743   |
| 0  | 7   | 6 PITG_01354   |
| 0  | 50  | 11 PITG_15212  |
| 0  | 18  | 12 PITG_03011  |
| 0  | 0   | 2 PITG_03475   |
| 0  | 12  | 2 PITG_01813   |
| 0  | 7   | 45 PITG_20406  |
| 0  | 2   | 4 PITG_03560   |
| 0  | 31  | 42 PITG_05922  |
| 0  | 2   | 2 NA           |
| 0  | 22  | 7 PITG_03457   |
| 0  | 9   | 4 PITG_06282   |
| 0  | 15  | 40 PITG_04038  |
| 0  | 6   | 21 PITG_00297  |
| 0  | 34  | 0 PITG_17976   |
| 0  | 0   | 4 PITG_03987   |
| 0  | 4   | 2 PITG_08412   |
| 0  | 41  | 53 PITG_15393  |
| 0  | 0   | 4 NA           |
| 0  | 22  | 20 PITG_22522  |
| 0  | 2   | 12 PITG_10443  |
| 0  | 30  | 19 PITG_02810  |
| 0  | 0   | 56 NA          |
| 0  | 66  | 22 NA          |
| 0  | 33  | 18 PITG_21000  |
| 0  | 78  | 20 PITG_18656  |
| 0  | 15  | 6 PITG_13887   |
| 0  | 7   | 4 PITG_05867   |
| 0  | 103 | 8 NA           |
| 38 | 0   | 62 NA          |
| 0  | 62  | 453 PITG_22951 |
| 0  | 8   | 0 PITG_14141   |
| 0  | 4   | 5 PITG_21939   |
| 0  | 27  | 2 NA           |

|   |      |                |
|---|------|----------------|
| 0 | 79   | 50 PITG_14284  |
| 0 | 2    | 13 PITG_03575  |
| 0 | 2    | 0 PITG_10898   |
| 0 | 22   | 158 PITG_01814 |
| 0 | 15   | 2 NA           |
| 0 | 6    | 12 PITG_14917  |
| 0 | 13   | 36 PITG_09364  |
| 0 | 0    | 0 PITG_16264   |
| 0 | 8    | 0 NA           |
| 0 | 2    | 2 PITG_01457   |
| 0 | 12   | 0 PITG_11470   |
| 0 | 4    | 4 PITG_00516   |
| 0 | 9    | 18 PITG_00754  |
| 0 | 9    | 18 PITG_19153  |
| 0 | 0    | 0 PITG_18695   |
| 0 | 2    | 12 PITG_10834  |
| 0 | 4    | 5 PITG_23143   |
| 0 | 0    | 0 NA           |
| 0 | 39   | 24 PITG_07896  |
| 0 | 0    | 8 PITG_13767   |
| 0 | 230  | 108 PITG_16469 |
| 0 | 0    | 0 NA           |
| 0 | 38   | 4 PITG_09246   |
| 0 | 4    | 0 PITG_04249   |
| 0 | 19   | 12 PITG_08715  |
| 0 | 0    | 5 NA           |
| 0 | 0    | 0 PITG_12173   |
| 0 | 155  | 68 NA          |
| 0 | 15   | 0 NA           |
| 0 | 79   | 18 PITG_04175  |
| 0 | 2    | 4 PITG_03753   |
| 0 | 24   | 20 NA          |
| 0 | 32   | 0 PITG_20249   |
| 0 | 6    | 10 PITG_00834  |
| 0 | 0    | 6 PITG_13767   |
| 0 | 10   | 19 PITG_18894  |
| 0 | 37   | 22 PITG_05797  |
| 0 | 0    | 0 NA           |
| 0 | 13   | 4 PITG_07047   |
| 0 | 0    | 2 PITG_05325   |
| 0 | 12   | 2 PITG_10617   |
| 0 | 2    | 2 PITG_12439   |
| 0 | 4    | 3 PITG_13747   |
| 0 | 1680 | 1140 NA        |
| 0 | 0    | 0 NA           |
| 0 | 6    | 33 PITG_03473  |
| 0 | 0    | 8 PITG_11424   |



|   |     |                |
|---|-----|----------------|
| 0 | 84  | 3 PITG_20818   |
| 0 | 15  | 24 PITG_13855  |
| 0 | 0   | 2 PITG_17930   |
| 0 | 12  | 11 PITG_14816  |
| 0 | 4   | 5 PITG_16939   |
| 0 | 4   | 8 PITG_05565   |
| 0 | 0   | 4 PITG_07286   |
| 0 | 7   | 2 PITG_17728   |
| 0 | 10  | 20 PITG_00396  |
| 0 | 5   | 7 PITG_01155   |
| 0 | 5   | 24 PITG_15848  |
| 0 | 18  | 0 PITG_03260   |
| 0 | 14  | 7 PITG_01754   |
| 0 | 0   | 2 NA           |
| 0 | 0   | 0 PITG_20687   |
| 2 | 21  | 14 PITG_13056  |
| 0 | 12  | 6 PITG_01576   |
| 0 | 4   | 7 PITG_07302   |
| 0 | 72  | 6 NA           |
| 0 | 40  | 104 PITG_03353 |
| 0 | 0   | 10 PITG_02400  |
| 0 | 2   | 4 PITG_02401   |
| 0 | 404 | 490 PITG_19824 |
| 0 | 50  | 17 PITG_01426  |
| 0 | 392 | 241 NA         |
| 0 | 10  | 4 NA           |
| 0 | 6   | 7 PITG_00143   |
| 0 | 2   | 6 PITG_17359   |
| 0 | 118 | 29 PITG_05683  |
| 0 | 6   | 0 PITG_03530   |
| 0 | 2   | 0 PITG_02503   |
| 0 | 0   | 0 NA           |
| 0 | 0   | 4 PITG_19098   |
| 0 | 211 | 476 PITG_09400 |
| 0 | 62  | 35 PITG_21886  |
| 0 | 77  | 20 NA          |
| 0 | 27  | 6 PITG_01537   |
| 0 | 90  | 74 PITG_10052  |
| 0 | 2   | 4 PITG_08365   |
| 0 | 0   | 0 PITG_08471   |
| 0 | 34  | 11 NA          |
| 0 | 4   | 73 PITG_01938  |
| 0 | 6   | 0 PITG_12489   |
| 0 | 4   | 39 PITG_00716  |
| 0 | 397 | 136 PITG_19817 |
| 0 | 259 | 6 NA           |
| 0 | 0   | 0 PITG_20830   |

|   |     |                |
|---|-----|----------------|
| 0 | 19  | 15 PITG_06406  |
| 0 | 4   | 22 PITG_14239  |
| 0 | 60  | 45 PITG_08403  |
| 0 | 13  | 47 PITG_09241  |
| 0 | 198 | 19 PITG_05150  |
| 0 | 23  | 4 NA           |
| 0 | 4   | 3 PITG_18543   |
| 0 | 6   | 0 NA           |
| 0 | 46  | 0 NA           |
| 0 | 19  | 8 PITG_02857   |
| 0 | 5   | 0 NA           |
| 0 | 3   | 0 PITG_16849   |
| 0 | 45  | 83 PITG_10561  |
| 0 | 9   | 11 PITG_00071  |
| 0 | 536 | 154 PITG_20221 |
| 0 | 18  | 2 PITG_20117   |
| 0 | 8   | 0 PITG_19351   |
| 0 | 29  | 36 PITG_08032  |
| 0 | 47  | 39 PITG_16376  |
| 0 | 6   | 14 NA          |
| 0 | 2   | 0 PITG_13979   |
| 0 | 38  | 32 PITG_17501  |
| 0 | 73  | 59 PITG_01617  |
| 0 | 0   | 2 PITG_20610   |
| 0 | 8   | 11 PITG_03883  |
| 0 | 9   | 14 NA          |
| 0 | 0   | 0 PITG_17549   |
| 0 | 0   | 4 NA           |
| 0 | 9   | 30 PITG_04002  |
| 0 | 614 | 229 PITG_15408 |
| 0 | 12  | 6 PITG_15543   |
| 0 | 32  | 15 PITG_11369  |
| 0 | 16  | 33 PITG_06673  |
| 0 | 47  | 0 PITG_03336   |
| 0 | 0   | 2 PITG_16359   |
| 0 | 45  | 2 PITG_01787   |
| 0 | 15  | 26 PITG_22555  |
| 0 | 2   | 2 PITG_02733   |
| 0 | 2   | 0 PITG_06966   |
| 0 | 45  | 45 PITG_12128  |
| 0 | 59  | 0 PITG_17021   |
| 0 | 0   | 2 PITG_05552   |
| 0 | 2   | 0 NA           |
| 0 | 41  | 34 PITG_03149  |
| 0 | 9   | 0 NA           |
| 0 | 56  | 32 NA          |
| 0 | 0   | 11 PITG_16257  |

|    |     |                |
|----|-----|----------------|
| 0  | 27  | 24 NA          |
| 0  | 6   | 0 PITG_02842   |
| 0  | 11  | 6 PITG_03801   |
| 0  | 34  | 143 PITG_01400 |
| 0  | 4   | 13 PITG_22568  |
| 0  | 17  | 2 PITG_03429   |
| 0  | 116 | 31 PITG_21219  |
| 0  | 10  | 0 PITG_22383   |
| 3  | 0   | 2 NA           |
| 0  | 10  | 13 PITG_16207  |
| 0  | 16  | 12 PITG_14379  |
| 0  | 19  | 11 PITG_00858  |
| 0  | 6   | 2 PITG_11119   |
| 0  | 4   | 2 PITG_17359   |
| 0  | 79  | 16 PITG_07087  |
| 0  | 24  | 44 PITG_04564  |
| 0  | 272 | 71 NA          |
| 6  | 0   | 4 NA           |
| 0  | 0   | 4 PITG_01737   |
| 0  | 5   | 0 NA           |
| 0  | 6   | 19 PITG_05500  |
| 0  | 0   | 0 PITG_06730   |
| 2  | 8   | 17 NA          |
| 0  | 15  | 25 PITG_04682  |
| 0  | 4   | 36 PITG_15761  |
| 0  | 161 | 27 NA          |
| 0  | 5   | 0 PITG_04664   |
| 0  | 23  | 16 PITG_03351  |
| 0  | 22  | 0 PITG_08442   |
| 0  | 5   | 19 PITG_08348  |
| 0  | 20  | 234 PITG_13020 |
| 0  | 89  | 5 PITG_02067   |
| 0  | 5   | 4 NA           |
| 0  | 10  | 14 PITG_03401  |
| 62 | 9   | 123 NA         |
| 0  | 2   | 14 PITG_18538  |
| 0  | 355 | 602 PITG_21187 |
| 0  | 6   | 0 PITG_17360   |
| 0  | 7   | 35 NA          |
| 0  | 19  | 4 PITG_09377   |
| 0  | 2   | 2 PITG_02565   |
| 0  | 200 | 200 PITG_02429 |
| 0  | 0   | 0 PITG_03864   |
| 0  | 8   | 0 PITG_10162   |
| 0  | 7   | 2 NA           |
| 0  | 2   | 3 PITG_13165   |
| 0  | 41  | 11 PITG_12516  |

|    |     |                |
|----|-----|----------------|
| 0  | 2   | 0 PITG_02712   |
| 0  | 87  | 2 PITG_01976   |
| 0  | 0   | 0 NA           |
| 0  | 4   | 0 PITG_01953   |
| 0  | 65  | 84 PITG_13461  |
| 0  | 0   | 2 NA           |
| 0  | 175 | 36 PITG_14198  |
| 0  | 0   | 0 PITG_00566   |
| 0  | 8   | 5 PITG_14712   |
| 0  | 18  | 11 PITG_11121  |
| 0  | 14  | 12 PITG_00391  |
| 0  | 14  | 19 NA          |
| 0  | 9   | 0 PITG_16323   |
| 0  | 306 | 308 PITG_18002 |
| 0  | 39  | 42 PITG_01832  |
| 0  | 10  | 24 PITG_09791  |
| 0  | 0   | 0 PITG_19153   |
| 0  | 15  | 86 PITG_06448  |
| 0  | 13  | 2 PITG_03049   |
| 0  | 4   | 0 PITG_08643   |
| 0  | 0   | 0 NA           |
| 0  | 18  | 31 PITG_05889  |
| 0  | 0   | 2 PITG_16299   |
| 25 | 53  | 1171 NA        |
| 0  | 10  | 34 PITG_05502  |
| 0  | 237 | 150 PITG_12537 |
| 0  | 4   | 3 PITG_03111   |
| 0  | 8   | 0 NA           |
| 0  | 146 | 107 PITG_01056 |
| 0  | 20  | 6 PITG_03114   |
| 0  | 26  | 6 PITG_03049   |
| 0  | 11  | 6 NA           |
| 0  | 2   | 27 PITG_14473  |
| 0  | 16  | 30 PITG_12470  |
| 0  | 0   | 2 PITG_07531   |
| 0  | 19  | 10 NA          |
| 0  | 98  | 54 PITG_09644  |
| 0  | 15  | 2 PITG_01605   |
| 0  | 0   | 0 NA           |
| 0  | 4   | 0 NA           |
| 0  | 196 | 127 PITG_00706 |
| 0  | 61  | 9 PITG_00706   |
| 0  | 83  | 23 PITG_15496  |
| 0  | 63  | 10 NA          |
| 0  | 30  | 12 PITG_00878  |
| 0  | 13  | 2 NA           |
| 0  | 0   | 0 NA           |

|   |     |                |
|---|-----|----------------|
| 0 | 15  | 7 PITG_21879   |
| 0 | 5   | 17 PITG_03757  |
| 0 | 0   | 0 PITG_08787   |
| 0 | 13  | 0 PITG_02213   |
| 0 | 45  | 2 PITG_20384   |
| 0 | 0   | 0 NA           |
| 0 | 0   | 0 PITG_15951   |
| 0 | 2   | 2 PITG_05805   |
| 0 | 49  | 67 PITG_13015  |
| 0 | 63  | 0 NA           |
| 0 | 9   | 19 PITG_08953  |
| 0 | 52  | 24 NA          |
| 0 | 5   | 2 NA           |
| 0 | 2   | 21 PITG_14816  |
| 0 | 8   | 2 PITG_17485   |
| 0 | 5   | 40 PITG_18067  |
| 0 | 21  | 2 NA           |
| 0 | 33  | 17 NA          |
| 0 | 0   | 2 PITG_01180   |
| 0 | 3   | 12 PITG_17965  |
| 0 | 0   | 0 PITG_05675   |
| 0 | 4   | 3 NA           |
| 0 | 2   | 4 PITG_13819   |
| 0 | 0   | 0 NA           |
| 0 | 9   | 5 PITG_11719   |
| 0 | 15  | 13 PITG_03117  |
| 0 | 70  | 6 PITG_07880   |
| 0 | 0   | 2 PITG_09309   |
| 0 | 5   | 4 PITG_21077   |
| 0 | 24  | 6 PITG_14916   |
| 0 | 21  | 29 PITG_11886  |
| 0 | 47  | 2 PITG_09931   |
| 0 | 15  | 18 PITG_12728  |
| 0 | 83  | 8 PITG_12699   |
| 0 | 11  | 8 PITG_04582   |
| 0 | 16  | 23 PITG_20174  |
| 0 | 28  | 48 PITG_08142  |
| 0 | 4   | 8 PITG_03267   |
| 0 | 0   | 0 NA           |
| 0 | 9   | 0 PITG_03871   |
| 0 | 0   | 3 PITG_17370   |
| 0 | 5   | 0 PITG_04619   |
| 0 | 31  | 6 PITG_06942   |
| 0 | 2   | 2 NA           |
| 0 | 2   | 2 PITG_00309   |
| 0 | 0   | 0 NA           |
| 0 | 136 | 223 PITG_14180 |

|   |     |                |
|---|-----|----------------|
| 0 | 46  | 23 PITG_02237  |
| 0 | 270 | 191 PITG_02303 |
| 0 | 16  | 10 PITG_02924  |
| 0 | 0   | 0 PITG_15603   |
| 0 | 18  | 15 PITG_18095  |
| 0 | 12  | 27 PITG_00495  |
| 0 | 0   | 2 PITG_09065   |
| 0 | 3   | 4 PITG_18019   |
| 0 | 8   | 0 PITG_03652   |
| 0 | 11  | 13 NA          |
| 0 | 4   | 0 PITG_03225   |
| 0 | 20  | 32 PITG_04907  |
| 0 | 0   | 2 PITG_07279   |
| 0 | 10  | 0 NA           |
| 0 | 29  | 8 PITG_18999   |
| 0 | 2   | 0 PITG_08746   |
| 0 | 38  | 0 NA           |
| 0 | 6   | 2 PITG_10821   |
| 0 | 0   | 0 NA           |
| 0 | 0   | 2 PITG_04538   |
| 0 | 5   | 2 NA           |
| 0 | 8   | 30 PITG_06986  |
| 0 | 23  | 18 PITG_05532  |
| 0 | 0   | 4 PITG_00556   |
| 0 | 117 | 175 PITG_16727 |
| 0 | 0   | 0 NA           |
| 0 | 0   | 2 PITG_08640   |
| 0 | 0   | 0 NA           |
| 0 | 0   | 26 PITG_01036  |
| 0 | 698 | 495 PITG_13889 |
| 0 | 23  | 55 NA          |
| 0 | 26  | 25 PITG_01738  |
| 0 | 0   | 11 PITG_17589  |
| 0 | 20  | 8 PITG_05926   |
| 0 | 59  | 17 NA          |
| 0 | 33  | 0 NA           |
| 0 | 0   | 0 NA           |
| 0 | 14  | 0 PITG_18891   |
| 0 | 2   | 0 NA           |
| 0 | 0   | 17 PITG_13398  |
| 0 | 4   | 17 PITG_11703  |
| 0 | 105 | 69 PITG_07325  |
| 0 | 10  | 4 PITG_19047   |
| 0 | 0   | 0 NA           |
| 0 | 0   | 2 PITG_12178   |
| 0 | 2   | 4 PITG_03040   |
| 0 | 2   | 3 PITG_08492   |

|    |     |                |
|----|-----|----------------|
| 0  | 9   | 7 PITG_03183   |
| 0  | 36  | 37 PITG_07436  |
| 0  | 0   | 9 PITG_12257   |
| 0  | 33  | 35 PITG_04856  |
| 0  | 0   | 11 NA          |
| 0  | 0   | 6 PITG_01683   |
| 0  | 143 | 123 NA         |
| 0  | 12  | 12 PITG_08461  |
| 0  | 316 | 326 NA         |
| 0  | 43  | 2 NA           |
| 0  | 7   | 16 PITG_07995  |
| 0  | 7   | 12 PITG_08446  |
| 0  | 33  | 14 PITG_22689  |
| 0  | 18  | 2 PITG_09701   |
| 0  | 6   | 16 PITG_18409  |
| 0  | 77  | 21 PITG_09036  |
| 0  | 5   | 10 PITG_14561  |
| 0  | 6   | 0 PITG_02144   |
| 0  | 175 | 328 PITG_00979 |
| 0  | 5   | 24 PITG_21602  |
| 0  | 6   | 12 PITG_08540  |
| 0  | 11  | 17 PITG_20819  |
| 0  | 73  | 7 PITG_05355   |
| 0  | 17  | 0 PITG_07699   |
| 0  | 7   | 21 PITG_05685  |
| 0  | 0   | 2 PITG_00261   |
| 0  | 50  | 78 PITG_03101  |
| 0  | 2   | 0 PITG_07915   |
| 14 | 29  | 106 NA         |
| 0  | 7   | 16 PITG_10022  |
| 0  | 25  | 5 PITG_08304   |
| 0  | 0   | 4 PITG_16770   |
| 0  | 26  | 4 PITG_09598   |
| 0  | 7   | 0 PITG_03043   |
| 0  | 399 | 181 PITG_01441 |
| 0  | 20  | 11 PITG_19242  |
| 0  | 13  | 8 NA           |
| 0  | 19  | 0 PITG_16062   |
| 0  | 181 | 68 PITG_14273  |
| 0  | 4   | 6 PITG_04511   |
| 0  | 40  | 24 NA          |
| 0  | 2   | 0 PITG_13185   |
| 0  | 4   | 73 NA          |
| 0  | 41  | 12 PITG_08715  |
| 0  | 12  | 23 PITG_13042  |
| 0  | 2   | 9 PITG_05238   |
| 0  | 0   | 0 PITG_03017   |

|     |     |               |
|-----|-----|---------------|
| 0   | 0   | 0 PITG_11273  |
| 109 | 0   | 6 NA          |
| 0   | 4   | 7 PITG_15292  |
| 0   | 0   | 0 PITG_19790  |
| 0   | 2   | 0 NA          |
| 0   | 47  | 0 PITG_06119  |
| 0   | 0   | 17 PITG_05465 |
| 0   | 480 | 1699 NA       |
| 0   | 13  | 7 NA          |
| 0   | 36  | 8 PITG_21762  |
| 0   | 6   | 0 PITG_19965  |
| 0   | 4   | 10 NA         |
| 0   | 0   | 0 PITG_03560  |
| 0   | 16  | 10 NA         |
| 2   | 10  | 2215 NA       |
| 0   | 14  | 17 PITG_04242 |
| 0   | 2   | 0 PITG_05448  |
| 0   | 4   | 2 PITG_23178  |
| 0   | 3   | 2 PITG_17345  |
| 0   | 8   | 2 NA          |
| 0   | 3   | 4 PITG_10674  |
| 0   | 0   | 2 PITG_03288  |
| 0   | 0   | 4 PITG_13815  |
| 0   | 66  | 56 PITG_16199 |
| 0   | 0   | 0 PITG_12192  |
| 0   | 2   | 0 NA          |
| 0   | 29  | 37 PITG_01048 |
| 0   | 6   | 4 PITG_08657  |
| 0   | 5   | 10 PITG_10931 |
| 0   | 0   | 7 PITG_03530  |
| 0   | 84  | 7 PITG_00475  |
| 0   | 4   | 6 NA          |
| 0   | 27  | 29 PITG_01232 |
| 0   | 2   | 6 PITG_13258  |
| 0   | 26  | 20 PITG_01640 |
| 0   | 39  | 2 NA          |
| 0   | 38  | 13 NA         |
| 0   | 72  | 40 PITG_05009 |
| 0   | 17  | 6 PITG_06980  |
| 0   | 80  | 4 PITG_16331  |
| 0   | 7   | 16 NA         |
| 0   | 27  | 11 NA         |
| 0   | 29  | 3 PITG_10590  |
| 0   | 4   | 0 NA          |
| 0   | 0   | 2 NA          |
| 0   | 0   | 6 PITG_05627  |
| 0   | 11  | 0 PITG_04001  |



|   |     |                |
|---|-----|----------------|
| 0 | 17  | 12 PITG_08129  |
| 0 | 34  | 6 PITG_16042   |
| 0 | 2   | 37 PITG_04441  |
| 0 | 11  | 11 NA          |
| 0 | 2   | 0 PITG_00294   |
| 0 | 79  | 39 PITG_19311  |
| 0 | 6   | 2 NA           |
| 0 | 27  | 18 PITG_21457  |
| 0 | 0   | 0 PITG_10882   |
| 0 | 21  | 9 PITG_08446   |
| 0 | 3   | 4 PITG_18158   |
| 0 | 180 | 165 PITG_02561 |
| 0 | 53  | 17 PITG_18203  |
| 0 | 9   | 2 PITG_08643   |
| 0 | 24  | 24 PITG_17674  |
| 0 | 10  | 4 PITG_17997   |
| 0 | 36  | 27 PITG_18696  |
| 0 | 13  | 108 PITG_10952 |
| 0 | 0   | 6 PITG_21055   |
| 0 | 12  | 22 PITG_17592  |
| 0 | 24  | 2 PITG_04777   |
| 0 | 2   | 2 PITG_05468   |
| 0 | 4   | 0 PITG_02290   |
| 0 | 26  | 8 PITG_08769   |
| 0 | 42  | 39 PITG_02695  |
| 0 | 5   | 16 PITG_01427  |
| 0 | 7   | 4 PITG_05991   |
| 0 | 4   | 21 PITG_03006  |
| 0 | 8   | 2 PITG_10094   |
| 0 | 43  | 4 PITG_14925   |
| 0 | 22  | 14 PITG_11504  |
| 0 | 14  | 21 PITG_09707  |
| 0 | 105 | 45 PITG_14874  |
| 0 | 31  | 15 PITG_00269  |
| 0 | 2   | 3 PITG_13762   |
| 0 | 0   | 0 PITG_01328   |
| 0 | 2   | 2 PITG_12230   |
| 0 | 0   | 2 PITG_11887   |
| 0 | 5   | 22 PITG_21210  |
| 0 | 40  | 22 PITG_12541  |
| 0 | 828 | 593 PITG_15900 |
| 0 | 2   | 0 NA           |
| 0 | 6   | 2 PITG_05445   |
| 0 | 2   | 4 PITG_11405   |
| 0 | 5   | 70 PITG_04283  |
| 0 | 150 | 14 PITG_16813  |
| 0 | 6   | 0 PITG_09423   |

|     |     |               |
|-----|-----|---------------|
| 212 | 154 | 2319 NA       |
| 0   | 30  | 2 PITG_16474  |
| 0   | 5   | 2 PITG_02623  |
| 0   | 21  | 10 NA         |
| 0   | 15  | 2 PITG_20632  |
| 0   | 0   | 15 NA         |
| 0   | 125 | 27 PITG_01242 |
| 0   | 21  | 8 PITG_16938  |
| 0   | 6   | 6 PITG_03660  |
| 0   | 21  | 2 NA          |
| 0   | 0   | 5 PITG_00148  |
| 0   | 14  | 9 NA          |
| 0   | 21  | 2 PITG_11007  |
| 0   | 5   | 0 NA          |
| 0   | 0   | 0 PITG_00215  |
| 0   | 64  | 10 PITG_00350 |
| 0   | 52  | 14 PITG_01662 |
| 0   | 5   | 2 NA          |
| 0   | 46  | 6 PITG_13283  |
| 0   | 2   | 0 NA          |
| 0   | 2   | 0 PITG_03468  |
| 0   | 3   | 3 PITG_03939  |
| 0   | 33  | 9 NA          |
| 0   | 0   | 0 NA          |
| 0   | 55  | 26 PITG_02003 |
| 0   | 11  | 2 NA          |
| 0   | 2   | 28 PITG_02917 |
| 0   | 68  | 35 PITG_18381 |
| 0   | 18  | 2 PITG_00190  |
| 0   | 13  | 7 PITG_14380  |
| 0   | 2   | 37 PITG_12753 |
| 0   | 42  | 6 PITG_04685  |
| 0   | 2   | 4 PITG_02706  |
| 0   | 20  | 14 PITG_00495 |
| 0   | 71  | 87 PITG_07243 |
| 0   | 4   | 2 PITG_07707  |
| 0   | 10  | 8 PITG_02997  |
| 0   | 0   | 0 PITG_18316  |
| 0   | 181 | 65 PITG_03345 |
| 0   | 14  | 4 PITG_07046  |
| 0   | 0   | 4 PITG_05490  |
| 0   | 124 | 83 PITG_16073 |
| 0   | 0   | 0 PITG_10460  |
| 0   | 0   | 0 PITG_20111  |
| 0   | 18  | 69 PITG_02621 |
| 2   | 2   | 19 NA         |
| 0   | 9   | 6 NA          |

|   |     |                |
|---|-----|----------------|
| 0 | 26  | 65 PITG_00297  |
| 0 | 9   | 0 PITG_04539   |
| 0 | 83  | 0 PITG_11170   |
| 0 | 48  | 13 NA          |
| 0 | 0   | 0 PITG_04448   |
| 0 | 18  | 0 PITG_06648   |
| 0 | 5   | 0 PITG_15259   |
| 0 | 55  | 0 PITG_18868   |
| 0 | 16  | 22 PITG_21141  |
| 0 | 8   | 34 PITG_04663  |
| 0 | 20  | 14 PITG_05557  |
| 0 | 72  | 28 PITG_10997  |
| 0 | 35  | 21 PITG_06694  |
| 0 | 25  | 7 PITG_02626   |
| 0 | 12  | 0 PITG_02228   |
| 0 | 2   | 8 PITG_03763   |
| 0 | 29  | 2 NA           |
| 0 | 10  | 3 PITG_04644   |
| 0 | 6   | 0 NA           |
| 0 | 2   | 4 PITG_01852   |
| 0 | 12  | 32 PITG_02491  |
| 0 | 78  | 28 PITG_03588  |
| 0 | 5   | 9 PITG_06733   |
| 0 | 4   | 6 PITG_09439   |
| 0 | 2   | 12 PITG_00391  |
| 0 | 339 | 133 PITG_14729 |
| 0 | 0   | 2 PITG_16723   |
| 0 | 101 | 100 PITG_03423 |
| 0 | 4   | 4 PITG_04709   |
| 0 | 261 | 154 PITG_11225 |
| 0 | 0   | 0 NA           |
| 0 | 0   | 0 PITG_12346   |
| 0 | 42  | 15 NA          |
| 0 | 14  | 6 PITG_06677   |
| 0 | 57  | 83 PITG_08327  |
| 0 | 3   | 8 NA           |
| 0 | 28  | 5 PITG_19044   |
| 0 | 12  | 2 NA           |
| 0 | 31  | 4 PITG_17767   |
| 0 | 2   | 11 PITG_04746  |
| 0 | 6   | 22 PITG_11366  |
| 0 | 49  | 34 PITG_07238  |
| 0 | 7   | 0 PITG_07272   |
| 0 | 0   | 0 PITG_01871   |
| 0 | 40  | 30 PITG_15926  |
| 0 | 0   | 2 NA           |
| 0 | 5   | 7 PITG_01398   |

|    |     |                |
|----|-----|----------------|
| 0  | 0   | 2 PITG_05331   |
| 0  | 10  | 16 PITG_12469  |
| 0  | 29  | 66 PITG_12161  |
| 0  | 0   | 0 PITG_17137   |
| 0  | 4   | 5 PITG_04001   |
| 0  | 197 | 133 PITG_13581 |
| 0  | 9   | 2 NA           |
| 0  | 103 | 25 PITG_08028  |
| 0  | 0   | 8 PITG_10664   |
| 24 | 2   | 20 NA          |
| 0  | 7   | 8 PITG_02027   |
| 0  | 170 | 59 PITG_16795  |
| 0  | 65  | 88 PITG_01718  |
| 0  | 233 | 56 PITG_00402  |
| 0  | 0   | 4 PITG_08724   |
| 0  | 6   | 5 PITG_01622   |
| 0  | 45  | 4 PITG_09655   |
| 0  | 2   | 0 PITG_07145   |
| 0  | 16  | 27 PITG_00982  |
| 0  | 30  | 26 PITG_22353  |
| 0  | 0   | 0 PITG_14456   |
| 0  | 2   | 0 PITG_18372   |
| 0  | 4   | 15 PITG_07053  |
| 0  | 13  | 0 PITG_03147   |
| 0  | 4   | 0 PITG_03902   |
| 0  | 15  | 8 PITG_13903   |
| 0  | 9   | 15 PITG_16671  |
| 0  | 2   | 6 PITG_05991   |
| 0  | 114 | 339 PITG_11959 |
| 0  | 78  | 16 NA          |
| 0  | 19  | 4 PITG_03015   |
| 0  | 10  | 7 PITG_02156   |
| 0  | 19  | 16 PITG_14816  |
| 0  | 41  | 21 NA          |
| 0  | 20  | 11 PITG_13625  |
| 0  | 4   | 2 NA           |
| 0  | 0   | 0 NA           |
| 0  | 2   | 3 PITG_19860   |
| 0  | 0   | 0 NA           |
| 0  | 2   | 27 PITG_17700  |
| 0  | 0   | 4 NA           |
| 0  | 65  | 175 PITG_14587 |
| 0  | 0   | 2 PITG_03409   |
| 0  | 46  | 8 PITG_03965   |
| 0  | 5   | 0 NA           |
| 0  | 20  | 24 PITG_17045  |
| 0  | 79  | 212 PITG_12511 |

|     |     |                |
|-----|-----|----------------|
| 0   | 4   | 0 NA           |
| 0   | 0   | 0 NA           |
| 0   | 7   | 13 PITG_04453  |
| 0   | 529 | 235 PITG_02186 |
| 0   | 65  | 14 PITG_21556  |
| 0   | 2   | 0 PITG_00722   |
| 0   | 4   | 0 PITG_08154   |
| 0   | 50  | 87 PITG_13826  |
| 0   | 4   | 7 PITG_17330   |
| 0   | 6   | 5 PITG_05461   |
| 177 | 0   | 11 NA          |
| 0   | 77  | 12 PITG_05526  |
| 2   | 4   | 2 PITG_13397   |
| 0   | 0   | 4 PITG_07165   |
| 0   | 51  | 6 PITG_02787   |
| 0   | 13  | 2 PITG_08867   |
| 0   | 2   | 0 PITG_02914   |
| 0   | 51  | 106 PITG_02303 |
| 0   | 13  | 6 PITG_19745   |
| 0   | 4   | 0 PITG_05496   |
| 0   | 140 | 24 NA          |
| 0   | 27  | 7 PITG_04821   |
| 0   | 0   | 12 PITG_07111  |
| 0   | 3   | 23 PITG_14637  |
| 0   | 5   | 2 PITG_19448   |
| 0   | 0   | 0 PITG_13775   |
| 0   | 3   | 31 PITG_06437  |
| 0   | 5   | 4 PITG_04715   |
| 0   | 0   | 0 NA           |
| 0   | 164 | 165 PITG_03608 |
| 0   | 4   | 4 NA           |
| 0   | 6   | 21 PITG_09404  |
| 0   | 19  | 2 PITG_02692   |
| 0   | 0   | 0 PITG_21170   |
| 0   | 9   | 10 PITG_16065  |
| 0   | 2   | 2 PITG_15493   |
| 0   | 2   | 0 NA           |
| 0   | 14  | 24 PITG_10301  |
| 0   | 0   | 7 PITG_11817   |
| 0   | 0   | 6 PITG_06365   |
| 0   | 2   | 12 PITG_02515  |
| 0   | 11  | 8 PITG_06660   |
| 0   | 2   | 17 NA          |
| 0   | 7   | 0 NA           |
| 0   | 0   | 4 PITG_04746   |
| 0   | 2   | 2 PITG_03130   |
| 0   | 12  | 35 PITG_05658  |

|    |     |                |
|----|-----|----------------|
| 0  | 59  | 2 PITG_22689   |
| 0  | 9   | 105 PITG_10132 |
| 0  | 2   | 0 PITG_02464   |
| 0  | 2   | 69 PITG_01938  |
| 0  | 19  | 2 NA           |
| 0  | 9   | 8 PITG_05176   |
| 0  | 0   | 8 PITG_21394   |
| 0  | 9   | 4 PITG_07851   |
| 0  | 52  | 20 PITG_06766  |
| 0  | 9   | 17 PITG_06382  |
| 0  | 70  | 104 PITG_21011 |
| 0  | 7   | 0 PITG_02564   |
| 0  | 0   | 7 PITG_10395   |
| 0  | 9   | 15 PITG_22716  |
| 0  | 3   | 0 NA           |
| 0  | 13  | 5 NA           |
| 0  | 6   | 11 PITG_12988  |
| 0  | 2   | 0 PITG_18301   |
| 0  | 19  | 6 PITG_02624   |
| 0  | 21  | 25 PITG_00709  |
| 0  | 0   | 4 PITG_08405   |
| 0  | 2   | 2 PITG_19445   |
| 0  | 38  | 11 NA          |
| 0  | 11  | 8 PITG_01777   |
| 0  | 0   | 6 PITG_06907   |
| 0  | 95  | 14 PITG_14067  |
| 0  | 4   | 0 PITG_02027   |
| 0  | 6   | 13 PITG_04002  |
| 0  | 485 | 2 NA           |
| 0  | 27  | 0 PITG_02557   |
| 0  | 0   | 0 NA           |
| 0  | 17  | 23 NA          |
| 0  | 2   | 13 PITG_05504  |
| 0  | 14  | 3 PITG_11803   |
| 0  | 0   | 0 PITG_03791   |
| 0  | 22  | 43 PITG_13493  |
| 0  | 75  | 94 PITG_20118  |
| 0  | 6   | 0 PITG_06289   |
| 0  | 4   | 18 PITG_09665  |
| 0  | 0   | 0 PITG_12609   |
| 0  | 8   | 8 PITG_06129   |
| 0  | 60  | 30 PITG_00077  |
| 13 | 4   | 9 NA           |
| 0  | 15  | 15 PITG_11789  |
| 0  | 23  | 0 PITG_12675   |
| 0  | 0   | 6 PITG_14887   |
| 0  | 24  | 20 PITG_15089  |

|    |     |                |
|----|-----|----------------|
| 0  | 8   | 14 PITG_17032  |
| 0  | 15  | 6 PITG_12932   |
| 0  | 0   | 5 PITG_02082   |
| 0  | 4   | 0 NA           |
| 0  | 0   | 0 PITG_09453   |
| 0  | 4   | 8 PITG_04746   |
| 0  | 2   | 0 PITG_13651   |
| 0  | 0   | 2 NA           |
| 0  | 18  | 18 PITG_05449  |
| 0  | 71  | 66 PITG_04376  |
| 0  | 0   | 0 PITG_15067   |
| 21 | 0   | 5 NA           |
| 0  | 21  | 31 PITG_00490  |
| 0  | 33  | 6 PITG_18274   |
| 0  | 39  | 4 NA           |
| 0  | 27  | 9 PITG_13586   |
| 0  | 53  | 16 NA          |
| 0  | 2   | 2 NA           |
| 0  | 4   | 2 NA           |
| 0  | 8   | 101 PITG_16871 |
| 0  | 13  | 21 PITG_18662  |
| 0  | 42  | 7 NA           |
| 0  | 2   | 0 PITG_14626   |
| 8  | 0   | 16 NA          |
| 0  | 58  | 30 PITG_09376  |
| 0  | 7   | 6 NA           |
| 0  | 0   | 6 PITG_12984   |
| 0  | 22  | 25 PITG_03451  |
| 0  | 34  | 102 PITG_03802 |
| 0  | 4   | 0 PITG_01469   |
| 0  | 20  | 34 PITG_14968  |
| 0  | 2   | 4 PITG_16430   |
| 0  | 17  | 22 PITG_01860  |
| 0  | 2   | 0 PITG_16669   |
| 0  | 2   | 9 PITG_00211   |
| 0  | 2   | 14 PITG_00453  |
| 2  | 176 | 91 PITG_12648  |
| 0  | 10  | 6 PITG_21504   |
| 0  | 4   | 14 PITG_12507  |
| 0  | 4   | 6 NA           |
| 0  | 33  | 22 NA          |
| 0  | 2   | 4 PITG_01282   |
| 0  | 35  | 10 PITG_03152  |
| 0  | 183 | 96 NA          |
| 0  | 8   | 0 PITG_01520   |
| 0  | 2   | 23 PITG_18606  |
| 0  | 49  | 87 PITG_14002  |

|     |     |                |
|-----|-----|----------------|
| 0   | 4   | 0 PITG_17004   |
| 0   | 150 | 0 NA           |
| 0   | 15  | 0 NA           |
| 0   | 40  | 13 PITG_16088  |
| 0   | 63  | 20 PITG_06790  |
| 0   | 2   | 0 NA           |
| 0   | 13  | 10 PITG_02916  |
| 448 | 166 | 2742 NA        |
| 0   | 4   | 0 PITG_08329   |
| 0   | 0   | 2 PITG_19199   |
| 0   | 10  | 6 PITG_17557   |
| 0   | 22  | 10 PITG_08348  |
| 0   | 2   | 4 PITG_14111   |
| 0   | 2   | 0 PITG_07423   |
| 0   | 5   | 29 PITG_13235  |
| 0   | 36  | 10 PITG_07810  |
| 0   | 47  | 0 PITG_09671   |
| 0   | 70  | 142 PITG_02917 |
| 0   | 23  | 96 PITG_11116  |
| 0   | 156 | 36 PITG_22358  |
| 0   | 37  | 16 PITG_02720  |
| 0   | 29  | 151 PITG_03335 |
| 0   | 52  | 34 PITG_07546  |
| 0   | 20  | 9 NA           |
| 0   | 4   | 14 PITG_09956  |
| 0   | 12  | 9 NA           |
| 0   | 2   | 0 PITG_07210   |
| 0   | 33  | 0 NA           |
| 0   | 26  | 62 PITG_11702  |
| 0   | 19  | 108 PITG_12288 |
| 0   | 0   | 3 PITG_05761   |
| 0   | 4   | 30 PITG_22562  |
| 0   | 54  | 68 PITG_08669  |
| 0   | 0   | 0 PITG_14102   |
| 0   | 0   | 0 PITG_06502   |
| 0   | 2   | 2 PITG_19639   |
| 0   | 305 | 536 PITG_09306 |
| 335 | 10  | 420 NA         |
| 0   | 0   | 5 PITG_04227   |
| 0   | 0   | 0 PITG_12124   |
| 0   | 11  | 3 PITG_04725   |
| 0   | 8   | 2 PITG_19639   |
| 0   | 52  | 53 PITG_06006  |
| 0   | 40  | 18 PITG_01504  |
| 0   | 0   | 0 PITG_15856   |
| 0   | 7   | 2 PITG_09098   |
| 0   | 24  | 4 PITG_19152   |



|   |     |                |
|---|-----|----------------|
| 0 | 101 | 9 PITG_09428   |
| 0 | 2   | 2 PITG_00323   |
| 0 | 16  | 18 PITG_01206  |
| 0 | 64  | 34 PITG_17230  |
| 0 | 13  | 4 PITG_03390   |
| 0 | 2   | 10 PITG_13237  |
| 0 | 45  | 23 PITG_01927  |
| 0 | 20  | 3 PITG_03488   |
| 0 | 83  | 144 PITG_12648 |
| 0 | 56  | 47 PITG_16359  |
| 0 | 2   | 20 PITG_07298  |
| 0 | 2   | 0 PITG_00543   |
| 0 | 7   | 34 PITG_05922  |
| 0 | 0   | 6 PITG_17257   |
| 0 | 65  | 69 PITG_08679  |
| 0 | 41  | 12 PITG_02964  |
| 0 | 123 | 29 NA          |
| 0 | 0   | 9 PITG_01754   |
| 0 | 12  | 2 PITG_11179   |
| 0 | 0   | 0 NA           |
| 0 | 0   | 12 PITG_01326  |
| 0 | 50  | 132 PITG_18650 |
| 0 | 0   | 0 PITG_09042   |
| 0 | 58  | 29 PITG_00166  |
| 0 | 10  | 15 PITG_00223  |
| 0 | 4   | 2 PITG_03491   |
| 0 | 11  | 2 PITG_02905   |
| 0 | 2   | 2 NA           |
| 0 | 45  | 12 PITG_09364  |
| 0 | 9   | 6 PITG_16152   |
| 0 | 46  | 0 NA           |
| 0 | 3   | 0 PITG_15509   |
| 0 | 21  | 9 NA           |
| 0 | 30  | 8 NA           |
| 0 | 0   | 0 PITG_10460   |
| 0 | 241 | 60 PITG_06596  |
| 0 | 12  | 0 PITG_08864   |
| 0 | 0   | 4 PITG_03143   |
| 0 | 11  | 17 PITG_13747  |
| 0 | 11  | 18 PITG_06025  |
| 0 | 4   | 11 PITG_01100  |
| 0 | 16  | 5 NA           |
| 0 | 2   | 36 PITG_10921  |
| 0 | 6   | 4 PITG_16475   |
| 0 | 44  | 113 PITG_01223 |
| 0 | 0   | 0 PITG_22676   |
| 0 | 28  | 11 NA          |

|      |      |                |
|------|------|----------------|
| 0    | 528  | 297 PITG_16898 |
| 0    | 49   | 85 PITG_18720  |
| 0    | 4    | 0 NA           |
| 0    | 10   | 7 NA           |
| 0    | 2    | 0 PITG_11052   |
| 0    | 16   | 4 PITG_14078   |
| 0    | 22   | 36 NA          |
| 0    | 0    | 16 PITG_08874  |
| 0    | 444  | 756 PITG_12139 |
| 0    | 79   | 6 PITG_17978   |
| 0    | 11   | 14 PITG_15868  |
| 0    | 0    | 4 PITG_03650   |
| 0    | 0    | 0 PITG_07109   |
| 0    | 24   | 0 NA           |
| 0    | 10   | 7 NA           |
| 0    | 0    | 0 PITG_17155   |
| 0    | 2    | 2 PITG_12840   |
| 0    | 21   | 2 PITG_07311   |
| 0    | 94   | 15 PITG_03737  |
| 0    | 2    | 8 NA           |
| 0    | 3    | 2 PITG_00211   |
| 0    | 0    | 5 PITG_06519   |
| 84   | 21   | 306 NA         |
| 0    | 0    | 2 PITG_18882   |
| 0    | 0    | 4 PITG_07334   |
| 0    | 166  | 20 PITG_06791  |
| 0    | 6    | 20 PITG_10063  |
| 0    | 32   | 10 PITG_19868  |
| 0    | 51   | 57 PITG_01640  |
| 0    | 0    | 0 PITG_03143   |
| 0    | 0    | 21 PITG_04820  |
| 0    | 14   | 8 NA           |
| 0    | 0    | 0 PITG_16487   |
| 0    | 14   | 7 PITG_04676   |
| 0    | 87   | 167 PITG_10147 |
| 0    | 57   | 28 PITG_12428  |
| 0    | 69   | 67 PITG_14854  |
| 0    | 29   | 20 PITG_03965  |
| 0    | 2    | 0 PITG_13376   |
| 0    | 10   | 57 PITG_08001  |
| 0    | 2    | 0 PITG_04658   |
| 0    | 268  | 709 PITG_11327 |
| 0    | 15   | 4 NA           |
| 2183 | 1326 | 848 NA         |
| 2    | 6    | 13 NA          |
| 0    | 10   | 14 NA          |
| 0    | 4    | 0 PITG_02769   |

|     |    |                 |
|-----|----|-----------------|
| 0   | 11 | 4 PITG_04646    |
| 0   | 4  | 4 PITG_01224    |
| 0   | 0  | 0 PITG_01164    |
| 0   | 28 | 8 PITG_20637    |
| 0   | 0  | 0 PITG_00028    |
| 0   | 2  | 0 PITG_03898    |
| 0   | 5  | 27 PITG_21077   |
| 0   | 2  | 0 PITG_14818    |
| 2   | 71 | 1942 PITG_11484 |
| 0   | 66 | 109 PITG_12524  |
| 0   | 21 | 28 PITG_02371   |
| 0   | 88 | 41 PITG_19804   |
| 0   | 11 | 8 PITG_13234    |
| 0   | 2  | 0 PITG_01125    |
| 0   | 2  | 2 PITG_11122    |
| 0   | 2  | 0 PITG_15877    |
| 0   | 3  | 0 NA            |
| 0   | 62 | 12 PITG_07894   |
| 500 | 2  | 581 NA          |
| 0   | 6  | 6 PITG_06333    |
| 0   | 26 | 4 PITG_16757    |
| 0   | 2  | 0 PITG_05261    |
| 0   | 7  | 0 PITG_05731    |
| 0   | 8  | 7 PITG_01463    |
| 0   | 5  | 7 PITG_12913    |
| 0   | 0  | 4 PITG_03295    |
| 0   | 6  | 6 PITG_15785    |
| 0   | 10 | 5 PITG_06660    |
| 0   | 29 | 33 PITG_01153   |
| 0   | 2  | 2 PITG_05170    |
| 0   | 51 | 25 PITG_06692   |
| 0   | 0  | 2 PITG_19728    |
| 0   | 32 | 16 PITG_01313   |
| 0   | 90 | 35 PITG_06694   |
| 0   | 7  | 4 PITG_23065    |
| 0   | 0  | 3 PITG_06802    |
| 0   | 13 | 3 PITG_17560    |
| 0   | 14 | 4 NA            |
| 0   | 11 | 16 PITG_22340   |
| 0   | 20 | 5 PITG_00483    |
| 0   | 2  | 0 NA            |
| 0   | 4  | 2 PITG_17004    |
| 0   | 2  | 15 PITG_01608   |
| 0   | 29 | 32 NA           |
| 2   | 29 | 5 PITG_04468    |
| 0   | 0  | 0 NA            |
| 0   | 22 | 15 PITG_19735   |

|     |     |                |
|-----|-----|----------------|
| 0   | 0   | 11 PITG_08597  |
| 0   | 12  | 12 PITG_00441  |
| 0   | 101 | 46 PITG_12490  |
| 0   | 166 | 102 PITG_04499 |
| 0   | 4   | 2 PITG_11470   |
| 0   | 2   | 0 PITG_03461   |
| 0   | 0   | 2 PITG_13111   |
| 0   | 335 | 312 PITG_01318 |
| 0   | 19  | 7 NA           |
| 0   | 2   | 8 PITG_12259   |
| 0   | 4   | 4 PITG_11119   |
| 337 | 29  | 508 NA         |
| 0   | 13  | 0 NA           |
| 0   | 32  | 12 PITG_03651  |
| 0   | 34  | 127 PITG_12886 |
| 0   | 0   | 0 NA           |
| 0   | 8   | 6 PITG_10850   |
| 0   | 14  | 29 PITG_11869  |
| 0   | 0   | 0 PITG_11461   |
| 0   | 0   | 0 PITG_18987   |
| 0   | 35  | 42 PITG_18662  |
| 0   | 137 | 33 NA          |
| 0   | 32  | 25 PITG_15026  |
| 0   | 368 | 103 PITG_08416 |
| 0   | 26  | 4 NA           |
| 0   | 9   | 0 PITG_02571   |
| 0   | 7   | 2 PITG_08039   |
| 0   | 0   | 0 PITG_13826   |
| 0   | 0   | 3 PITG_02002   |
| 0   | 5   | 0 PITG_16310   |
| 0   | 26  | 0 NA           |
| 0   | 6   | 13 PITG_13340  |
| 0   | 2   | 0 PITG_16097   |
| 0   | 3   | 0 PITG_03872   |
| 0   | 5   | 2 NA           |
| 0   | 0   | 9 PITG_04134   |
| 0   | 25  | 5 PITG_03146   |
| 0   | 0   | 2 PITG_11119   |
| 0   | 3   | 0 PITG_07286   |
| 0   | 290 | 30 PITG_09426  |
| 0   | 0   | 0 PITG_14600   |
| 0   | 14  | 5 NA           |
| 0   | 11  | 5 PITG_08957   |
| 0   | 80  | 174 PITG_01947 |
| 0   | 21  | 21 PITG_13739  |
| 0   | 78  | 2 PITG_14692   |
| 0   | 5   | 4 PITG_04270   |

|   |     |                |
|---|-----|----------------|
| 0 | 21  | 45 NA          |
| 0 | 0   | 12 PITG_12683  |
| 0 | 39  | 13 NA          |
| 0 | 0   | 8 NA           |
| 0 | 0   | 0 PITG_04104   |
| 0 | 0   | 2 PITG_11231   |
| 0 | 0   | 2 NA           |
| 0 | 20  | 8 NA           |
| 0 | 58  | 60 PITG_05405  |
| 0 | 7   | 0 NA           |
| 0 | 4   | 4 PITG_02241   |
| 0 | 11  | 0 PITG_05609   |
| 0 | 3   | 11 PITG_03551  |
| 0 | 11  | 2 PITG_16318   |
| 0 | 20  | 2 PITG_08867   |
| 0 | 0   | 2 PITG_19175   |
| 0 | 6   | 2 PITG_00324   |
| 0 | 0   | 7 PITG_21150   |
| 0 | 31  | 9 PITG_21828   |
| 0 | 104 | 0 PITG_07833   |
| 0 | 0   | 5 PITG_16684   |
| 0 | 2   | 23 NA          |
| 0 | 11  | 0 PITG_11979   |
| 0 | 487 | 501 PITG_03875 |
| 0 | 0   | 2 PITG_17359   |
| 0 | 2   | 2 PITG_14003   |
| 0 | 0   | 16 PITG_03471  |
| 0 | 37  | 6 PITG_16766   |
| 0 | 4   | 23 PITG_04991  |
| 0 | 54  | 0 NA           |
| 0 | 32  | 12 NA          |
| 0 | 23  | 23 NA          |
| 0 | 7   | 0 PITG_00382   |
| 0 | 7   | 6 NA           |
| 0 | 13  | 12 PITG_03260  |
| 0 | 19  | 11 NA          |
| 0 | 2   | 6 NA           |
| 0 | 0   | 0 PITG_11057   |
| 0 | 18  | 13 NA          |
| 0 | 44  | 98 PITG_09937  |
| 0 | 4   | 29 PITG_02198  |
| 0 | 23  | 0 PITG_20568   |
| 0 | 8   | 25 PITG_02401  |
| 0 | 0   | 0 PITG_19863   |
| 0 | 55  | 2 PITG_17328   |
| 0 | 0   | 0 PITG_08473   |
| 0 | 2   | 0 PITG_01054   |

|   |     |                |
|---|-----|----------------|
| 0 | 132 | 25 NA          |
| 0 | 49  | 5 PITG_00350   |
| 0 | 2   | 2 PITG_16038   |
| 0 | 7   | 11 PITG_11491  |
| 0 | 3   | 5 PITG_20454   |
| 0 | 27  | 10 PITG_21516  |
| 0 | 24  | 46 PITG_17674  |
| 0 | 15  | 11 PITG_13590  |
| 0 | 0   | 0 NA           |
| 0 | 48  | 68 PITG_11012  |
| 0 | 17  | 23 PITG_05862  |
| 0 | 25  | 53 PITG_13395  |
| 0 | 0   | 0 PITG_04671   |
| 0 | 226 | 121 PITG_13128 |
| 0 | 0   | 2 PITG_17684   |
| 0 | 0   | 2 PITG_15077   |
| 0 | 45  | 35 PITG_11489  |
| 0 | 0   | 0 PITG_10443   |
| 0 | 21  | 9 PITG_17997   |
| 0 | 17  | 6 PITG_09381   |
| 0 | 65  | 35 PITG_17117  |
| 0 | 78  | 180 PITG_03095 |
| 0 | 8   | 6 PITG_05114   |
| 0 | 0   | 0 NA           |
| 0 | 0   | 0 PITG_06367   |
| 0 | 223 | 423 PITG_13404 |
| 0 | 7   | 12 PITG_10898  |
| 0 | 205 | 9 PITG_06740   |
| 0 | 4   | 0 PITG_01851   |
| 0 | 2   | 5 PITG_08787   |
| 0 | 9   | 47 PITG_14278  |
| 0 | 9   | 4 PITG_05423   |
| 0 | 27  | 8 NA           |
| 0 | 7   | 0 PITG_06988   |
| 0 | 12  | 8 NA           |
| 0 | 77  | 22 PITG_17455  |
| 0 | 34  | 44 PITG_03653  |
| 0 | 0   | 0 PITG_03476   |
| 0 | 7   | 4 PITG_00845   |
| 0 | 3   | 2 PITG_18424   |
| 0 | 4   | 7 PITG_00867   |
| 0 | 18  | 21 PITG_03850  |
| 0 | 15  | 0 PITG_11616   |
| 0 | 37  | 249 PITG_00663 |
| 0 | 0   | 0 PITG_04916   |
| 0 | 2   | 7 PITG_04564   |
| 0 | 13  | 8 PITG_10792   |

|   |     |                |
|---|-----|----------------|
| 0 | 2   | 3 PITG_02642   |
| 0 | 0   | 0 PITG_01836   |
| 0 | 25  | 6 PITG_11725   |
| 0 | 0   | 2 PITG_01250   |
| 0 | 8   | 4 PITG_11676   |
| 0 | 0   | 0 NA           |
| 0 | 16  | 2 PITG_19313   |
| 0 | 46  | 46 PITG_01770  |
| 0 | 23  | 3 NA           |
| 0 | 0   | 0 PITG_00444   |
| 0 | 10  | 0 NA           |
| 0 | 0   | 4 PITG_10524   |
| 0 | 6   | 43 PITG_12037  |
| 0 | 11  | 47 PITG_19606  |
| 0 | 81  | 146 PITG_12462 |
| 0 | 7   | 0 NA           |
| 0 | 4   | 0 PITG_07339   |
| 0 | 2   | 18 PITG_02115  |
| 0 | 0   | 24 PITG_09296  |
| 0 | 0   | 4 PITG_12760   |
| 0 | 4   | 0 PITG_18797   |
| 0 | 0   | 0 NA           |
| 0 | 6   | 4 NA           |
| 0 | 52  | 82 PITG_18354  |
| 0 | 0   | 0 PITG_08698   |
| 0 | 3   | 0 PITG_10751   |
| 0 | 34  | 14 PITG_08093  |
| 0 | 3   | 2 PITG_03757   |
| 0 | 2   | 9 PITG_16076   |
| 0 | 2   | 6 PITG_05587   |
| 0 | 4   | 0 PITG_01386   |
| 0 | 0   | 0 PITG_08984   |
| 0 | 5   | 13 PITG_22689  |
| 0 | 0   | 2 PITG_11748   |
| 0 | 0   | 0 PITG_07239   |
| 0 | 469 | 117 PITG_01249 |
| 0 | 11  | 19 PITG_22763  |
| 0 | 23  | 63 PITG_12157  |
| 0 | 6   | 2 NA           |
| 0 | 2   | 2 NA           |
| 0 | 66  | 31 PITG_00476  |
| 0 | 5   | 0 NA           |
| 0 | 273 | 51 NA          |
| 0 | 2   | 0 PITG_08885   |
| 0 | 11  | 2 PITG_07496   |
| 0 | 115 | 40 PITG_07470  |
| 0 | 2   | 4 PITG_07195   |

|   |     |                |
|---|-----|----------------|
| 0 | 80  | 26 PITG_10616  |
| 0 | 15  | 2 PITG_13840   |
| 0 | 8   | 2 PITG_09790   |
| 0 | 4   | 2 NA           |
| 0 | 34  | 3 PITG_12552   |
| 0 | 36  | 27 PITG_14751  |
| 0 | 57  | 35 NA          |
| 0 | 0   | 0 PITG_05987   |
| 0 | 2   | 0 PITG_23063   |
| 0 | 23  | 13 PITG_19470  |
| 0 | 12  | 8 PITG_16071   |
| 0 | 35  | 33 PITG_13182  |
| 0 | 2   | 2 NA           |
| 0 | 4   | 0 PITG_16009   |
| 0 | 28  | 9 PITG_08580   |
| 0 | 11  | 12 PITG_09899  |
| 0 | 59  | 14 PITG_13270  |
| 0 | 8   | 3 PITG_11080   |
| 0 | 0   | 17 PITG_14637  |
| 0 | 0   | 2 PITG_07327   |
| 0 | 29  | 7 PITG_11157   |
| 0 | 4   | 16 PITG_01349  |
| 0 | 18  | 8 PITG_13412   |
| 0 | 0   | 14 PITG_00954  |
| 0 | 0   | 2 NA           |
| 0 | 12  | 2 NA           |
| 0 | 0   | 2 PITG_14456   |
| 0 | 4   | 4 PITG_07703   |
| 0 | 34  | 10 PITG_17928  |
| 0 | 0   | 0 PITG_17359   |
| 0 | 19  | 0 PITG_13440   |
| 0 | 23  | 2 PITG_16976   |
| 0 | 11  | 17 PITG_13196  |
| 0 | 2   | 0 PITG_03453   |
| 0 | 0   | 2 PITG_02989   |
| 0 | 8   | 33 PITG_02022  |
| 0 | 44  | 21 PITG_05277  |
| 0 | 0   | 0 NA           |
| 0 | 116 | 39 PITG_17674  |
| 0 | 12  | 119 PITG_05998 |
| 0 | 11  | 2 PITG_02031   |
| 0 | 2   | 0 PITG_02485   |
| 0 | 0   | 2 PITG_17345   |
| 0 | 14  | 0 PITG_00069   |
| 0 | 14  | 5 PITG_15961   |
| 0 | 25  | 2 NA           |
| 0 | 28  | 5 PITG_11616   |



|   |     |                |
|---|-----|----------------|
| 0 | 0   | 0 NA           |
| 0 | 16  | 25 PITG_00442  |
| 0 | 4   | 0 NA           |
| 0 | 0   | 0 PITG_01957   |
| 0 | 22  | 2 PITG_10085   |
| 0 | 0   | 4 PITG_07006   |
| 0 | 0   | 0 PITG_19025   |
| 0 | 21  | 4 PITG_17292   |
| 0 | 8   | 4 PITG_11386   |
| 0 | 43  | 37 PITG_19419  |
| 0 | 79  | 111 PITG_00748 |
| 0 | 4   | 6 PITG_03042   |
| 0 | 197 | 4 NA           |
| 0 | 58  | 127 PITG_15281 |
| 0 | 0   | 4 PITG_13313   |
| 0 | 5   | 6 PITG_06861   |
| 0 | 14  | 12 NA          |
| 0 | 55  | 43 PITG_18475  |
| 0 | 17  | 5 PITG_11437   |
| 0 | 2   | 4 PITG_09388   |
| 0 | 13  | 14 PITG_03237  |
| 0 | 17  | 19 PITG_02725  |
| 0 | 0   | 0 NA           |
| 0 | 22  | 25 PITG_00568  |
| 0 | 4   | 2 PITG_17359   |
| 0 | 0   | 5 PITG_14284   |
| 0 | 41  | 10 NA          |
| 0 | 242 | 49 PITG_02736  |
| 0 | 5   | 21 PITG_03436  |
| 0 | 22  | 10 PITG_08205  |
| 0 | 0   | 3 PITG_16208   |
| 0 | 2   | 4 NA           |
| 0 | 9   | 11 PITG_17495  |
| 0 | 2   | 2 PITG_10083   |
| 0 | 19  | 74 PITG_08031  |
| 0 | 9   | 0 PITG_02227   |
| 0 | 5   | 0 PITG_04115   |
| 0 | 102 | 38 NA          |
| 0 | 2   | 16 PITG_02371  |
| 0 | 70  | 0 PITG_13234   |
| 0 | 0   | 21 NA          |
| 0 | 0   | 2 PITG_02241   |
| 0 | 0   | 0 NA           |
| 0 | 7   | 0 PITG_20488   |
| 0 | 176 | 70 NA          |
| 0 | 45  | 0 PITG_13842   |
| 0 | 4   | 2 PITG_20808   |

|   |     |                |
|---|-----|----------------|
| 0 | 17  | 0 PITG_11899   |
| 0 | 132 | 5 PITG_12212   |
| 0 | 18  | 0 NA           |
| 0 | 14  | 4 PITG_14574   |
| 0 | 5   | 12 PITG_15571  |
| 0 | 58  | 88 PITG_03466  |
| 0 | 77  | 36 NA          |
| 0 | 44  | 23 PITG_05740  |
| 0 | 16  | 16 PITG_14863  |
| 0 | 6   | 0 PITG_00903   |
| 0 | 9   | 4 PITG_15836   |
| 0 | 35  | 2 PITG_07470   |
| 0 | 0   | 3 PITG_02978   |
| 0 | 15  | 46 PITG_01810  |
| 0 | 69  | 17 PITG_00023  |
| 0 | 4   | 7 PITG_02694   |
| 0 | 59  | 4 NA           |
| 0 | 10  | 7 PITG_09073   |
| 0 | 2   | 3 NA           |
| 0 | 7   | 11 PITG_16179  |
| 0 | 4   | 2 PITG_02598   |
| 0 | 30  | 397 PITG_19961 |
| 0 | 11  | 13 NA          |
| 0 | 3   | 0 PITG_11206   |
| 0 | 122 | 10 PITG_15387  |
| 0 | 12  | 34 PITG_22848  |
| 0 | 0   | 2 PITG_01756   |
| 0 | 2   | 0 PITG_21170   |
| 0 | 6   | 8 PITG_15016   |
| 0 | 54  | 2 PITG_03223   |
| 0 | 0   | 0 PITG_09354   |
| 0 | 2   | 2 PITG_00476   |
| 0 | 0   | 0 PITG_07697   |
| 0 | 2   | 4 NA           |
| 0 | 15  | 2 NA           |
| 0 | 24  | 7 PITG_15072   |
| 0 | 18  | 7 PITG_10147   |
| 0 | 105 | 43 PITG_08751  |
| 0 | 23  | 4 PITG_01584   |
| 0 | 2   | 2 PITG_04466   |
| 0 | 64  | 143 PITG_08189 |
| 0 | 2   | 0 NA           |
| 0 | 8   | 23 PITG_07083  |
| 0 | 33  | 2 PITG_01405   |
| 0 | 6   | 10 PITG_17617  |
| 0 | 0   | 6 PITG_11960   |
| 0 | 2   | 2 PITG_16781   |

|   |     |                |
|---|-----|----------------|
| 0 | 31  | 23 PITG_03484  |
| 0 | 63  | 37 PITG_01960  |
| 0 | 0   | 0 PITG_00244   |
| 0 | 15  | 7 PITG_03885   |
| 0 | 4   | 0 NA           |
| 0 | 67  | 4 PITG_00858   |
| 0 | 0   | 0 NA           |
| 0 | 2   | 0 PITG_02895   |
| 0 | 14  | 162 PITG_05938 |
| 0 | 0   | 5 PITG_03571   |
| 0 | 86  | 10 PITG_20797  |
| 0 | 20  | 10 PITG_06390  |
| 0 | 2   | 24 PITG_05101  |
| 0 | 14  | 8 NA           |
| 0 | 2   | 0 NA           |
| 0 | 2   | 0 PITG_02418   |
| 0 | 6   | 0 NA           |
| 0 | 7   | 0 PITG_03915   |
| 0 | 163 | 56 PITG_14533  |
| 0 | 0   | 4 PITG_00561   |
| 0 | 3   | 0 PITG_02940   |
| 0 | 19  | 8 PITG_07573   |
| 0 | 82  | 17 PITG_11097  |
| 0 | 19  | 20 PITG_00482  |
| 0 | 13  | 0 NA           |
| 0 | 0   | 2 PITG_12548   |
| 0 | 0   | 2 PITG_05729   |
| 0 | 14  | 56 PITG_17695  |
| 0 | 2   | 0 PITG_15994   |
| 0 | 5   | 2 PITG_04600   |
| 0 | 8   | 0 PITG_17893   |
| 0 | 16  | 3 NA           |
| 0 | 101 | 18 PITG_03282  |
| 0 | 0   | 4 PITG_18922   |
| 0 | 7   | 0 PITG_14094   |
| 0 | 44  | 24 PITG_03795  |
| 0 | 9   | 4 PITG_15116   |
| 0 | 4   | 4 NA           |
| 0 | 0   | 2 PITG_06903   |
| 0 | 10  | 2 PITG_10625   |
| 0 | 11  | 0 PITG_03027   |
| 0 | 17  | 28 PITG_00133  |
| 0 | 78  | 55 PITG_03423  |
| 0 | 10  | 4 PITG_18279   |
| 0 | 4   | 0 PITG_19024   |
| 0 | 6   | 21 PITG_02572  |
| 0 | 19  | 5 PITG_02958   |

|   |     |                |
|---|-----|----------------|
| 0 | 243 | 26 NA          |
| 0 | 4   | 8 NA           |
| 0 | 15  | 0 PITG_00210   |
| 0 | 0   | 4 PITG_02400   |
| 0 | 4   | 10 PITG_04427  |
| 0 | 4   | 22 PITG_15195  |
| 0 | 2   | 30 PITG_13007  |
| 0 | 4   | 2 PITG_18690   |
| 0 | 2   | 8 PITG_12588   |
| 0 | 5   | 0 PITG_21877   |
| 0 | 0   | 0 NA           |
| 0 | 72  | 0 NA           |
| 0 | 0   | 6 PITG_06776   |
| 0 | 0   | 0 PITG_08314   |
| 0 | 21  | 12 PITG_15921  |
| 0 | 21  | 0 NA           |
| 0 | 10  | 13 PITG_06719  |
| 0 | 92  | 41 PITG_22301  |
| 0 | 11  | 27 PITG_13785  |
| 0 | 19  | 5 PITG_12571   |
| 0 | 73  | 55 NA          |
| 0 | 20  | 6 PITG_08446   |
| 0 | 0   | 0 NA           |
| 0 | 6   | 6 PITG_01553   |
| 0 | 11  | 0 PITG_01810   |
| 0 | 69  | 45 PITG_13042  |
| 0 | 249 | 58 PITG_17312  |
| 0 | 0   | 11 PITG_03590  |
| 0 | 23  | 0 PITG_00260   |
| 0 | 30  | 0 PITG_05434   |
| 0 | 6   | 6 PITG_02227   |
| 0 | 5   | 2 PITG_14171   |
| 0 | 8   | 0 PITG_03989   |
| 0 | 44  | 3 NA           |
| 0 | 45  | 0 NA           |
| 0 | 10  | 2 PITG_17004   |
| 0 | 10  | 23 PITG_10213  |
| 0 | 4   | 2 NA           |
| 0 | 6   | 18 PITG_08607  |
| 0 | 2   | 11 PITG_17908  |
| 0 | 18  | 30 PITG_02233  |
| 0 | 127 | 332 PITG_01363 |
| 0 | 0   | 0 NA           |
| 0 | 122 | 4 NA           |
| 0 | 7   | 0 NA           |
| 0 | 542 | 124 PITG_03348 |
| 0 | 12  | 8 PITG_13302   |

|     |     |                |
|-----|-----|----------------|
| 0   | 2   | 0 PITG_19153   |
| 0   | 37  | 182 PITG_21027 |
| 0   | 3   | 0 PITG_00330   |
| 0   | 14  | 21 PITG_16183  |
| 0   | 0   | 5 PITG_01998   |
| 0   | 24  | 36 PITG_02035  |
| 0   | 2   | 2 NA           |
| 0   | 17  | 0 PITG_05556   |
| 0   | 13  | 4 PITG_01223   |
| 0   | 89  | 12 NA          |
| 0   | 2   | 0 NA           |
| 0   | 0   | 2 PITG_18374   |
| 0   | 23  | 11 NA          |
| 0   | 8   | 0 PITG_01664   |
| 0   | 62  | 45 PITG_03365  |
| 0   | 252 | 307 PITG_13122 |
| 0   | 22  | 8 NA           |
| 0   | 0   | 0 NA           |
| 0   | 7   | 8 PITG_18902   |
| 0   | 4   | 2 PITG_19865   |
| 0   | 5   | 25 PITG_19557  |
| 0   | 23  | 12 PITG_12573  |
| 0   | 55  | 8 PITG_10617   |
| 0   | 3   | 4 NA           |
| 0   | 2   | 5 NA           |
| 0   | 99  | 14 PITG_13324  |
| 0   | 0   | 2 PITG_21212   |
| 351 | 165 | 2482 NA        |
| 0   | 37  | 108 PITG_00982 |
| 0   | 2   | 14 PITG_02924  |
| 0   | 57  | 5 PITG_08827   |
| 0   | 2   | 0 PITG_23029   |
| 0   | 5   | 0 PITG_08446   |
| 0   | 0   | 0 NA           |
| 0   | 2   | 9 PITG_06863   |
| 0   | 2   | 0 NA           |
| 0   | 4   | 4 PITG_11927   |
| 0   | 0   | 0 PITG_10124   |
| 0   | 15  | 8 NA           |
| 0   | 42  | 7 PITG_00160   |
| 0   | 50  | 24 PITG_15955  |
| 0   | 6   | 2 NA           |
| 0   | 3   | 6 PITG_17660   |
| 0   | 26  | 43 PITG_17479  |
| 0   | 2   | 6 PITG_02135   |
| 0   | 71  | 8 PITG_16378   |
| 0   | 6   | 0 PITG_09309   |

|      |     |                |
|------|-----|----------------|
| 0    | 45  | 8 NA           |
| 0    | 22  | 51 NA          |
| 0    | 20  | 0 NA           |
| 0    | 57  | 35 PITG_13368  |
| 0    | 12  | 18 NA          |
| 0    | 4   | 10 PITG_00456  |
| 0    | 66  | 2 PITG_07992   |
| 0    | 15  | 12 PITG_17068  |
| 0    | 2   | 0 PITG_16389   |
| 0    | 2   | 2 NA           |
| 0    | 0   | 0 NA           |
| 0    | 108 | 169 PITG_03944 |
| 0    | 290 | 240 PITG_06428 |
| 0    | 6   | 15 PITG_17058  |
| 0    | 128 | 145 PITG_22848 |
| 1510 | 4   | 174 PITG_15117 |
| 0    | 0   | 0 PITG_17437   |
| 0    | 12  | 4 PITG_15447   |
| 0    | 114 | 21 PITG_18016  |
| 0    | 324 | 290 PITG_14937 |
| 0    | 224 | 165 PITG_12599 |
| 0    | 2   | 0 PITG_02673   |
| 0    | 3   | 0 PITG_00791   |
| 0    | 41  | 172 PITG_12286 |
| 0    | 29  | 7 NA           |
| 0    | 27  | 30 PITG_06845  |
| 0    | 0   | 0 PITG_06759   |
| 0    | 9   | 25 PITG_01589  |
| 0    | 26  | 4 NA           |
| 0    | 4   | 0 NA           |
| 0    | 2   | 9 PITG_19886   |
| 0    | 28  | 68 NA          |
| 0    | 0   | 4 PITG_10250   |
| 0    | 9   | 0 PITG_03401   |
| 0    | 262 | 293 PITG_21022 |
| 0    | 42  | 6 NA           |
| 0    | 25  | 0 PITG_02531   |
| 0    | 4   | 0 NA           |
| 0    | 162 | 21 PITG_04882  |
| 0    | 237 | 210 PITG_03306 |
| 0    | 2   | 4 PITG_22021   |
| 0    | 103 | 52 NA          |
| 0    | 5   | 2 PITG_06911   |
| 0    | 4   | 5 PITG_19191   |
| 0    | 5   | 0 PITG_01941   |
| 0    | 88  | 62 PITG_00262  |
| 0    | 2   | 6 PITG_02451   |

|   |     |                |
|---|-----|----------------|
| 0 | 72  | 245 PITG_06241 |
| 0 | 38  | 149 PITG_03555 |
| 0 | 38  | 34 PITG_13809  |
| 0 | 55  | 61 NA          |
| 0 | 11  | 10 PITG_02135  |
| 0 | 4   | 0 NA           |
| 0 | 22  | 16 NA          |
| 0 | 0   | 0 PITG_06660   |
| 0 | 8   | 5 PITG_00315   |
| 0 | 4   | 2 PITG_11010   |
| 0 | 2   | 17 PITG_12526  |
| 0 | 2   | 2 PITG_11153   |
| 0 | 0   | 2 PITG_00410   |
| 0 | 0   | 3 PITG_04658   |
| 0 | 4   | 0 PITG_13661   |
| 0 | 4   | 5 PITG_20803   |
| 0 | 2   | 5 PITG_21176   |
| 0 | 4   | 0 PITG_06508   |
| 0 | 37  | 0 NA           |
| 0 | 0   | 4 PITG_02723   |
| 0 | 15  | 5 PITG_00128   |
| 0 | 0   | 4 PITG_13042   |
| 0 | 9   | 6 PITG_16068   |
| 0 | 369 | 174 PITG_18164 |
| 0 | 2   | 2 PITG_10888   |
| 0 | 18  | 115 PITG_05498 |
| 0 | 0   | 2 PITG_16668   |
| 0 | 126 | 16 NA          |
| 0 | 111 | 114 PITG_07036 |
| 0 | 2   | 2 PITG_05183   |
| 0 | 4   | 0 PITG_00894   |
| 0 | 805 | 249 PITG_05806 |
| 0 | 0   | 2 PITG_14109   |
| 0 | 11  | 8 PITG_11993   |
| 0 | 0   | 0 NA           |
| 0 | 78  | 55 PITG_14274  |
| 0 | 7   | 0 PITG_15779   |
| 0 | 13  | 11 PITG_03919  |
| 0 | 142 | 73 NA          |
| 0 | 2   | 2 PITG_01457   |
| 0 | 26  | 12 PITG_10994  |
| 0 | 5   | 0 PITG_03577   |
| 0 | 5   | 4 PITG_09504   |
| 0 | 11  | 0 PITG_03522   |
| 0 | 8   | 0 PITG_03311   |
| 0 | 0   | 0 PITG_12915   |
| 0 | 2   | 0 PITG_19436   |

|     |     |                |
|-----|-----|----------------|
| 0   | 7   | 4 NA           |
| 0   | 39  | 0 PITG_08408   |
| 0   | 25  | 0 NA           |
| 0   | 10  | 10 PITG_03532  |
| 0   | 3   | 2 PITG_11146   |
| 0   | 2   | 2 PITG_04547   |
| 0   | 0   | 17 PITG_06827  |
| 0   | 0   | 0 NA           |
| 0   | 0   | 3 PITG_04003   |
| 0   | 4   | 3 PITG_00704   |
| 0   | 2   | 2 PITG_19586   |
| 0   | 2   | 0 NA           |
| 0   | 80  | 66 PITG_10298  |
| 0   | 0   | 4 PITG_02228   |
| 0   | 12  | 0 NA           |
| 0   | 14  | 0 NA           |
| 0   | 29  | 4 PITG_08205   |
| 0   | 230 | 100 NA         |
| 0   | 172 | 114 PITG_18443 |
| 0   | 392 | 107 PITG_10459 |
| 0   | 6   | 22 PITG_08023  |
| 4   | 2   | 18 NA          |
| 0   | 235 | 136 PITG_00770 |
| 0   | 84  | 199 PITG_04006 |
| 0   | 126 | 37 PITG_13270  |
| 0   | 10  | 10 PITG_03085  |
| 0   | 2   | 3 PITG_00132   |
| 0   | 7   | 0 NA           |
| 0   | 0   | 2 PITG_04715   |
| 0   | 15  | 8 PITG_06695   |
| 0   | 20  | 20 NA          |
| 0   | 0   | 0 PITG_20027   |
| 0   | 70  | 54 PITG_12234  |
| 0   | 0   | 4 PITG_00939   |
| 0   | 2   | 6 PITG_13913   |
| 0   | 0   | 15 PITG_06981  |
| 0   | 15  | 5 NA           |
| 604 | 0   | 97 NA          |
| 0   | 6   | 4 NA           |
| 0   | 48  | 38 PITG_15963  |
| 0   | 32  | 6 NA           |
| 0   | 4   | 0 PITG_12110   |
| 0   | 25  | 25 PITG_03811  |
| 0   | 27  | 2 NA           |
| 0   | 13  | 2 NA           |
| 0   | 69  | 40 PITG_00664  |
| 0   | 21  | 227 PITG_13168 |



|     |     |                |
|-----|-----|----------------|
| 0   | 23  | 5 NA           |
| 0   | 4   | 4 PITG_03169   |
| 0   | 7   | 2 PITG_01963   |
| 0   | 374 | 64 PITG_03670  |
| 0   | 93  | 59 PITG_00264  |
| 0   | 9   | 9 PITG_02561   |
| 0   | 410 | 125 PITG_07031 |
| 0   | 137 | 10 NA          |
| 0   | 0   | 0 PITG_12229   |
| 0   | 10  | 0 NA           |
| 0   | 0   | 2 PITG_15961   |
| 0   | 2   | 0 NA           |
| 0   | 0   | 0 PITG_19013   |
| 0   | 0   | 2 PITG_01087   |
| 0   | 0   | 0 PITG_08883   |
| 0   | 14  | 6 PITG_17370   |
| 0   | 4   | 2 PITG_10981   |
| 0   | 3   | 2 PITG_11556   |
| 3   | 0   | 0 NA           |
| 0   | 10  | 14 PITG_21765  |
| 0   | 749 | 212 PITG_14584 |
| 0   | 0   | 2 PITG_03034   |
| 0   | 15  | 2 PITG_01602   |
| 0   | 0   | 27 PITG_03642  |
| 0   | 9   | 20 PITG_01719  |
| 0   | 17  | 21 PITG_07259  |
| 0   | 0   | 2 PITG_06120   |
| 0   | 16  | 0 PITG_01452   |
| 0   | 4   | 2 PITG_16207   |
| 0   | 10  | 2 PITG_00211   |
| 0   | 3   | 24 NA          |
| 0   | 9   | 13 PITG_21379  |
| 561 | 77  | 1035 NA        |
| 0   | 111 | 171 PITG_02853 |
| 0   | 3   | 0 NA           |
| 0   | 4   | 6 PITG_11406   |
| 0   | 11  | 0 NA           |
| 0   | 10  | 3 PITG_20468   |
| 0   | 133 | 39 PITG_04938  |
| 0   | 14  | 4 PITG_10903   |
| 0   | 14  | 2 PITG_07060   |
| 0   | 13  | 4 PITG_01102   |
| 0   | 5   | 7 NA           |
| 0   | 104 | 244 PITG_03712 |
| 0   | 11  | 4 NA           |
| 0   | 21  | 47 PITG_18452  |
| 0   | 20  | 14 PITG_12429  |

|   |     |                |
|---|-----|----------------|
| 0 | 13  | 8 PITG_14137   |
| 0 | 0   | 0 PITG_11164   |
| 0 | 0   | 0 PITG_11461   |
| 0 | 0   | 0 PITG_18232   |
| 0 | 3   | 36 PITG_04661  |
| 0 | 7   | 6 NA           |
| 0 | 4   | 4 PITG_21597   |
| 0 | 0   | 11 PITG_15006  |
| 0 | 15  | 28 PITG_13152  |
| 0 | 4   | 0 PITG_06480   |
| 0 | 2   | 0 PITG_11759   |
| 0 | 6   | 2 PITG_04028   |
| 0 | 14  | 0 PITG_08315   |
| 0 | 0   | 0 PITG_02728   |
| 0 | 5   | 6 PITG_03631   |
| 0 | 35  | 112 PITG_12119 |
| 0 | 12  | 2 NA           |
| 0 | 0   | 2 PITG_05597   |
| 0 | 0   | 3 PITG_03024   |
| 0 | 24  | 27 PITG_16099  |
| 0 | 0   | 2 PITG_20675   |
| 0 | 5   | 2 PITG_05858   |
| 0 | 46  | 17 PITG_00573  |
| 0 | 14  | 8 PITG_02415   |
| 0 | 2   | 7 NA           |
| 0 | 2   | 4 PITG_11689   |
| 0 | 13  | 0 NA           |
| 0 | 0   | 0 NA           |
| 0 | 55  | 0 PITG_14509   |
| 0 | 0   | 2 PITG_07111   |
| 0 | 21  | 8 NA           |
| 0 | 0   | 2 PITG_03370   |
| 0 | 181 | 75 NA          |
| 0 | 3   | 2 PITG_12355   |
| 0 | 21  | 4 PITG_17004   |
| 0 | 27  | 74 PITG_10039  |
| 0 | 31  | 47 PITG_06597  |
| 0 | 4   | 10 PITG_06610  |
| 0 | 30  | 44 PITG_07289  |
| 0 | 5   | 5 NA           |
| 0 | 0   | 3 PITG_13558   |
| 0 | 71  | 5 PITG_03819   |
| 0 | 0   | 5 PITG_09432   |
| 0 | 11  | 2 NA           |
| 0 | 4   | 14 NA          |
| 0 | 4   | 0 PITG_02564   |
| 0 | 7   | 16 NA          |

|   |      |                |
|---|------|----------------|
| 0 | 0    | 0 NA           |
| 0 | 1023 | 249 NA         |
| 0 | 481  | 702 PITG_01266 |
| 0 | 10   | 2 PITG_15610   |
| 0 | 12   | 25 PITG_07349  |
| 0 | 0    | 4 PITG_22165   |
| 0 | 12   | 29 PITG_11965  |
| 0 | 12   | 14 PITG_06946  |
| 0 | 13   | 2 PITG_00636   |
| 0 | 2    | 6 PITG_17866   |
| 0 | 108  | 53 NA          |
| 0 | 18   | 0 NA           |
| 0 | 0    | 4 PITG_01188   |
| 0 | 40   | 6 PITG_13718   |
| 0 | 0    | 0 PITG_07703   |
| 0 | 51   | 6 PITG_13844   |
| 0 | 13   | 9 PITG_03061   |
| 0 | 2    | 6 PITG_05233   |
| 0 | 4    | 8 PITG_07034   |
| 0 | 14   | 6 PITG_13771   |
| 0 | 19   | 2 NA           |
| 0 | 466  | 36 NA          |
| 0 | 14   | 4 PITG_16277   |
| 0 | 3    | 2 PITG_02126   |
| 0 | 0    | 9 PITG_01365   |
| 0 | 37   | 22 PITG_17110  |
| 0 | 31   | 16 PITG_09594  |
| 0 | 39   | 100 PITG_20288 |
| 0 | 45   | 4 PITG_01361   |
| 0 | 55   | 72 PITG_03406  |
| 0 | 0    | 2 PITG_03390   |
| 0 | 78   | 129 PITG_11206 |
| 0 | 3    | 24 PITG_00232  |
| 0 | 56   | 136 PITG_00400 |
| 0 | 9    | 4 PITG_10119   |
| 0 | 40   | 16 PITG_20031  |
| 0 | 4    | 0 NA           |
| 0 | 28   | 0 PITG_23063   |
| 0 | 2    | 8 NA           |
| 0 | 42   | 63 PITG_00732  |
| 0 | 0    | 34 PITG_03549  |
| 0 | 0    | 3 NA           |
| 0 | 77   | 0 PITG_00887   |
| 0 | 0    | 0 PITG_15129   |
| 0 | 33   | 19 PITG_15217  |
| 0 | 24   | 6 NA           |
| 0 | 38   | 0 PITG_04956   |

|   |     |                |
|---|-----|----------------|
| 0 | 13  | 5 PITG_13245   |
| 0 | 0   | 4 PITG_17081   |
| 0 | 22  | 6 PITG_16480   |
| 0 | 0   | 0 PITG_07200   |
| 0 | 51  | 452 PITG_18025 |
| 0 | 43  | 6 PITG_20522   |
| 0 | 34  | 4 PITG_06148   |
| 0 | 9   | 0 PITG_22339   |
| 0 | 30  | 16 NA          |
| 0 | 111 | 119 PITG_03164 |
| 0 | 9   | 4 PITG_02027   |
| 0 | 0   | 7 PITG_00458   |
| 0 | 5   | 6 NA           |
| 0 | 0   | 0 PITG_08104   |
| 0 | 7   | 6 PITG_18355   |
| 0 | 17  | 3 PITG_16924   |
| 0 | 0   | 0 PITG_07744   |
| 0 | 3   | 0 PITG_19863   |
| 0 | 4   | 2 NA           |
| 0 | 2   | 0 PITG_10516   |
| 0 | 4   | 11 PITG_01282  |
| 0 | 10  | 4 PITG_01046   |
| 0 | 2   | 14 PITG_01030  |
| 0 | 24  | 13 NA          |
| 0 | 163 | 19 PITG_02092  |
| 0 | 10  | 3 PITG_13905   |
| 0 | 4   | 0 PITG_16161   |
| 0 | 22  | 14 PITG_10735  |
| 0 | 2   | 3 PITG_02720   |
| 0 | 2   | 4 PITG_13342   |
| 0 | 0   | 2 PITG_02442   |
| 0 | 47  | 0 PITG_07663   |
| 0 | 170 | 90 PITG_17990  |
| 0 | 16  | 2 PITG_01858   |
| 0 | 39  | 2 PITG_22939   |
| 0 | 10  | 4 PITG_03142   |
| 0 | 0   | 17 PITG_22839  |
| 0 | 24  | 12 PITG_13174  |
| 0 | 60  | 110 PITG_15377 |
| 0 | 0   | 0 PITG_03457   |
| 0 | 244 | 100 PITG_00218 |
| 0 | 18  | 8 PITG_20994   |
| 0 | 42  | 6 PITG_10158   |
| 0 | 0   | 0 PITG_06898   |
| 0 | 0   | 0 PITG_13544   |
| 0 | 0   | 4 PITG_02867   |
| 0 | 2   | 5 PITG_03411   |

|     |     |                |
|-----|-----|----------------|
| 0   | 19  | 0 PITG_00192   |
| 0   | 0   | 4 PITG_07385   |
| 0   | 12  | 18 PITG_05227  |
| 0   | 11  | 0 NA           |
| 0   | 47  | 15 NA          |
| 0   | 4   | 22 PITG_20928  |
| 0   | 0   | 0 PITG_14727   |
| 0   | 6   | 10 PITG_16468  |
| 0   | 25  | 10 NA          |
| 0   | 2   | 0 PITG_12513   |
| 0   | 0   | 7 NA           |
| 0   | 0   | 0 NA           |
| 0   | 23  | 2 NA           |
| 0   | 25  | 6 PITG_05496   |
| 0   | 8   | 2 PITG_21507   |
| 0   | 4   | 23 PITG_14127  |
| 0   | 2   | 9 PITG_19603   |
| 0   | 5   | 0 NA           |
| 0   | 81  | 20 NA          |
| 0   | 13  | 6 PITG_08369   |
| 0   | 3   | 0 PITG_15672   |
| 0   | 0   | 4 PITG_17330   |
| 0   | 0   | 0 PITG_16854   |
| 140 | 9   | 148 NA         |
| 0   | 2   | 11 PITG_11782  |
| 0   | 48  | 59 PITG_13159  |
| 0   | 4   | 0 PITG_06754   |
| 0   | 3   | 15 PITG_01740  |
| 0   | 402 | 27 NA          |
| 0   | 0   | 0 PITG_04133   |
| 0   | 0   | 4 NA           |
| 0   | 0   | 0 PITG_05282   |
| 0   | 2   | 10 NA          |
| 0   | 2   | 0 NA           |
| 0   | 2   | 2 PITG_02259   |
| 0   | 15  | 12 PITG_06594  |
| 0   | 45  | 19 PITG_02927  |
| 0   | 436 | 155 PITG_16363 |
| 0   | 3   | 8 PITG_21316   |
| 0   | 4   | 0 PITG_13544   |
| 0   | 84  | 19 PITG_03212  |
| 0   | 49  | 107 PITG_07243 |
| 0   | 17  | 2 NA           |
| 0   | 3   | 0 PITG_07715   |
| 0   | 0   | 2 NA           |
| 0   | 5   | 8 NA           |
| 0   | 4   | 2 PITG_02400   |

|   |     |                |
|---|-----|----------------|
| 0 | 3   | 8 PITG_10058   |
| 0 | 125 | 77 PITG_20260  |
| 0 | 84  | 42 PITG_10957  |
| 0 | 98  | 156 PITG_08594 |
| 0 | 17  | 18 PITG_03777  |
| 0 | 10  | 3 NA           |
| 0 | 4   | 5 PITG_06698   |
| 0 | 21  | 17 PITG_06978  |
| 0 | 128 | 145 PITG_06205 |
| 0 | 0   | 0 PITG_16853   |
| 0 | 29  | 6 NA           |
| 0 | 0   | 5 PITG_05504   |
| 0 | 2   | 0 PITG_07331   |
| 0 | 0   | 2 PITG_03789   |
| 0 | 3   | 15 PITG_02624  |
| 0 | 0   | 37 PITG_21071  |
| 0 | 2   | 31 PITG_23165  |
| 0 | 11  | 0 PITG_02134   |
| 0 | 15  | 24 PITG_09817  |
| 0 | 3   | 10 PITG_02048  |
| 0 | 19  | 35 PITG_15968  |
| 0 | 0   | 0 NA           |
| 0 | 0   | 0 PITG_12514   |
| 0 | 10  | 0 NA           |
| 0 | 3   | 6 PITG_04956   |
| 0 | 8   | 0 NA           |
| 0 | 51  | 67 NA          |
| 0 | 114 | 119 PITG_12111 |
| 0 | 3   | 3 PITG_01594   |
| 0 | 153 | 93 PITG_07924  |
| 0 | 50  | 15 PITG_02320  |
| 0 | 0   | 14 NA          |
| 0 | 0   | 0 PITG_11977   |
| 0 | 2   | 4 PITG_05562   |
| 0 | 6   | 8 PITG_05502   |
| 0 | 18  | 0 PITG_18423   |
| 0 | 21  | 2 PITG_00481   |
| 0 | 82  | 8 PITG_06941   |
| 0 | 2   | 4 PITG_08023   |
| 0 | 15  | 0 NA           |
| 0 | 51  | 11 NA          |
| 0 | 9   | 2 PITG_00080   |
| 0 | 34  | 112 PITG_18662 |
| 0 | 12  | 0 PITG_11037   |
| 0 | 10  | 10 PITG_08137  |
| 0 | 122 | 10 PITG_05540  |
| 0 | 17  | 2 PITG_01324   |

|    |     |                |
|----|-----|----------------|
| 0  | 5   | 4 PITG_19854   |
| 0  | 0   | 0 PITG_06457   |
| 80 | 2   | 29 NA          |
| 0  | 3   | 0 PITG_10980   |
| 0  | 0   | 4 PITG_02762   |
| 0  | 3   | 2 PITG_03318   |
| 0  | 39  | 22 PITG_09039  |
| 0  | 0   | 0 NA           |
| 0  | 5   | 16 PITG_03379  |
| 0  | 2   | 9 PITG_00191   |
| 0  | 17  | 0 PITG_00476   |
| 0  | 4   | 4 PITG_13173   |
| 0  | 10  | 30 PITG_09885  |
| 0  | 10  | 5 PITG_21014   |
| 0  | 278 | 31 PITG_16853  |
| 0  | 59  | 30 PITG_14276  |
| 0  | 2   | 0 PITG_03493   |
| 0  | 16  | 85 PITG_03301  |
| 0  | 2   | 4 PITG_07044   |
| 0  | 8   | 65 PITG_15955  |
| 0  | 2   | 0 PITG_02290   |
| 0  | 44  | 7 PITG_07894   |
| 0  | 4   | 0 PITG_00257   |
| 0  | 2   | 5 PITG_09554   |
| 0  | 14  | 16 PITG_05010  |
| 0  | 32  | 10 PITG_18236  |
| 0  | 279 | 19 NA          |
| 0  | 9   | 14 PITG_15876  |
| 0  | 2   | 0 PITG_21183   |
| 0  | 72  | 84 PITG_06232  |
| 0  | 192 | 188 PITG_19176 |
| 0  | 19  | 4 PITG_12739   |
| 0  | 0   | 0 PITG_17164   |
| 0  | 14  | 12 PITG_10167  |
| 0  | 107 | 49 PITG_10212  |
| 0  | 0   | 0 PITG_00499   |
| 0  | 0   | 5 PITG_18384   |
| 0  | 42  | 3 PITG_03618   |
| 0  | 20  | 9 PITG_03102   |
| 0  | 2   | 6 PITG_03898   |
| 0  | 43  | 78 PITG_04270  |
| 0  | 12  | 32 PITG_09423  |
| 0  | 0   | 108 NA         |
| 0  | 6   | 0 PITG_19857   |
| 0  | 24  | 28 PITG_13064  |
| 0  | 0   | 0 PITG_12948   |
| 0  | 15  | 20 NA          |

|     |     |                 |
|-----|-----|-----------------|
| 0   | 29  | 10 PITG_18092   |
| 0   | 40  | 20 PITG_09932   |
| 0   | 4   | 34 PITG_06920   |
| 0   | 2   | 5 PITG_01036    |
| 0   | 33  | 41 PITG_13826   |
| 0   | 42  | 43 PITG_11783   |
| 0   | 46  | 12 NA           |
| 0   | 193 | 245 PITG_14282  |
| 0   | 36  | 56 PITG_11926   |
| 0   | 48  | 72 NA           |
| 0   | 4   | 8 NA            |
| 0   | 20  | 4 PITG_15228    |
| 0   | 8   | 6 PITG_15967    |
| 2   | 0   | 14 NA           |
| 0   | 3   | 6 PITG_02418    |
| 0   | 0   | 6 PITG_00220    |
| 0   | 26  | 4 PITG_05368    |
| 0   | 6   | 9 PITG_22404    |
| 0   | 16  | 0 PITG_00197    |
| 0   | 503 | 1549 PITG_17828 |
| 0   | 2   | 0 PITG_16797    |
| 0   | 0   | 0 PITG_00250    |
| 0   | 11  | 8 PITG_18634    |
| 0   | 0   | 0 PITG_02516    |
| 0   | 2   | 5 PITG_03237    |
| 0   | 2   | 4 PITG_20539    |
| 0   | 363 | 208 PITG_06783  |
| 0   | 4   | 16 PITG_11750   |
| 0   | 27  | 51 PITG_10134   |
| 0   | 298 | 442 PITG_04522  |
| 0   | 0   | 6 PITG_00400    |
| 0   | 4   | 9 PITG_07774    |
| 0   | 15  | 3 PITG_07892    |
| 0   | 12  | 15 PITG_02547   |
| 0   | 4   | 2 NA            |
| 0   | 18  | 4 NA            |
| 0   | 2   | 11 NA           |
| 0   | 0   | 0 PITG_00855    |
| 0   | 4   | 0 NA            |
| 0   | 23  | 0 PITG_09748    |
| 0   | 12  | 9 NA            |
| 0   | 4   | 23 PITG_05822   |
| 0   | 0   | 0 PITG_00454    |
| 0   | 8   | 45 PITG_17718   |
| 0   | 4   | 9 PITG_13488    |
| 241 | 249 | 589 NA          |
| 0   | 29  | 2 PITG_20808    |



|   |     |                |
|---|-----|----------------|
| 0 | 41  | 6 PITG_02123   |
| 0 | 66  | 11 PITG_16071  |
| 0 | 8   | 5 NA           |
| 0 | 0   | 2 PITG_02597   |
| 0 | 2   | 4 PITG_15393   |
| 0 | 27  | 0 NA           |
| 0 | 4   | 15 PITG_03767  |
| 0 | 9   | 2 PITG_00080   |
| 0 | 141 | 880 PITG_06449 |
| 0 | 57  | 53 PITG_03061  |
| 0 | 2   | 0 PITG_16792   |
| 0 | 0   | 0 PITG_19969   |
| 0 | 0   | 0 PITG_16298   |
| 0 | 56  | 82 PITG_00943  |
| 0 | 10  | 8 PITG_07545   |
| 0 | 0   | 2 NA           |
| 0 | 45  | 10 PITG_07233  |
| 0 | 8   | 20 PITG_15033  |
| 0 | 86  | 72 PITG_05991  |
| 0 | 5   | 7 PITG_06182   |
| 0 | 51  | 53 PITG_04535  |
| 0 | 7   | 4 PITG_02959   |
| 0 | 2   | 2 PITG_20970   |
| 0 | 2   | 2 PITG_11126   |
| 0 | 150 | 63 NA          |
| 0 | 33  | 165 NA         |
| 0 | 26  | 12 PITG_06764  |
| 0 | 5   | 4 PITG_10932   |
| 0 | 5   | 0 PITG_00163   |
| 0 | 2   | 2 PITG_03859   |
| 0 | 213 | 179 PITG_19578 |
| 0 | 8   | 28 PITG_00348  |
| 0 | 2   | 11 NA          |
| 0 | 173 | 195 PITG_00459 |
| 0 | 3   | 7 PITG_20839   |
| 0 | 2   | 7 PITG_19158   |
| 0 | 0   | 5 PITG_01664   |
| 0 | 3   | 8 PITG_19303   |
| 0 | 152 | 32 PITG_08751  |
| 0 | 111 | 69 NA          |
| 0 | 0   | 0 PITG_11856   |
| 0 | 150 | 7 NA           |
| 0 | 2   | 0 PITG_09866   |
| 0 | 2   | 5 PITG_08439   |
| 0 | 12  | 0 NA           |
| 0 | 41  | 47 PITG_11451  |
| 0 | 4   | 11 PITG_01081  |

|    |     |                 |
|----|-----|-----------------|
| 0  | 13  | 0 PITG_13827    |
| 0  | 44  | 18 PITG_08661   |
| 0  | 0   | 4 PITG_10758    |
| 0  | 6   | 2 PITG_11201    |
| 0  | 4   | 5 PITG_00220    |
| 0  | 9   | 2 NA            |
| 0  | 87  | 49 PITG_05690   |
| 0  | 0   | 0 PITG_17652    |
| 0  | 2   | 19 PITG_11926   |
| 0  | 0   | 7 PITG_16316    |
| 0  | 14  | 35 PITG_02211   |
| 0  | 46  | 437 PITG_12562  |
| 0  | 13  | 29 PITG_00035   |
| 0  | 4   | 12 PITG_00147   |
| 0  | 133 | 10 PITG_17884   |
| 0  | 393 | 2466 PITG_08795 |
| 0  | 33  | 0 PITG_01457    |
| 0  | 17  | 7 PITG_08197    |
| 0  | 18  | 18 PITG_06108   |
| 0  | 0   | 4 PITG_18713    |
| 0  | 16  | 4 PITG_16183    |
| 0  | 4   | 4 PITG_05469    |
| 0  | 2   | 6 PITG_16432    |
| 0  | 27  | 27 PITG_10600   |
| 0  | 6   | 2 NA            |
| 0  | 12  | 33 PITG_01873   |
| 0  | 7   | 0 PITG_08307    |
| 0  | 11  | 47 PITG_05404   |
| 0  | 47  | 4 NA            |
| 0  | 2   | 0 PITG_17057    |
| 0  | 7   | 0 PITG_02564    |
| 0  | 8   | 8 PITG_13717    |
| 0  | 19  | 12 PITG_13483   |
| 35 | 11  | 45 NA           |
| 0  | 0   | 7 PITG_04579    |
| 0  | 9   | 56 PITG_10147   |
| 0  | 8   | 0 NA            |
| 0  | 42  | 6 PITG_07894    |
| 0  | 73  | 33 PITG_01340   |
| 0  | 2   | 2 NA            |
| 0  | 2   | 0 PITG_05889    |
| 0  | 0   | 0 PITG_15242    |
| 0  | 26  | 50 PITG_10967   |
| 0  | 0   | 2 PITG_03608    |
| 0  | 63  | 6 PITG_15091    |
| 0  | 17  | 42 NA           |
| 0  | 6   | 15 PITG_01045   |

|    |     |               |
|----|-----|---------------|
| 0  | 36  | 0 PITG_08137  |
| 0  | 9   | 4 PITG_20610  |
| 0  | 13  | 16 PITG_16684 |
| 0  | 30  | 86 PITG_02856 |
| 0  | 0   | 2 PITG_05629  |
| 0  | 30  | 9 PITG_03659  |
| 0  | 6   | 0 NA          |
| 0  | 4   | 8 PITG_14697  |
| 0  | 4   | 9 NA          |
| 0  | 29  | 2 PITG_10502  |
| 0  | 0   | 0 PITG_03002  |
| 0  | 21  | 22 PITG_05487 |
| 0  | 38  | 18 PITG_00725 |
| 0  | 34  | 6 NA          |
| 0  | 10  | 41 PITG_03661 |
| 0  | 20  | 13 PITG_17361 |
| 0  | 0   | 11 PITG_14111 |
| 0  | 6   | 80 PITG_02785 |
| 0  | 5   | 9 PITG_12302  |
| 0  | 21  | 3 PITG_00680  |
| 0  | 12  | 0 PITG_18786  |
| 0  | 0   | 2 PITG_06666  |
| 0  | 5   | 2 NA          |
| 0  | 0   | 0 PITG_01622  |
| 0  | 7   | 11 PITG_20527 |
| 0  | 86  | 19 PITG_17592 |
| 0  | 23  | 0 PITG_02711  |
| 69 | 9   | 23 NA         |
| 0  | 65  | 16 PITG_14283 |
| 0  | 2   | 4 PITG_17592  |
| 0  | 21  | 13 PITG_17560 |
| 0  | 19  | 10 PITG_20528 |
| 0  | 0   | 0 PITG_12239  |
| 0  | 131 | 103 NA        |
| 0  | 90  | 41 PITG_03471 |
| 0  | 9   | 0 PITG_05291  |
| 0  | 21  | 0 PITG_08540  |
| 0  | 0   | 2 PITG_04180  |
| 0  | 30  | 57 PITG_03881 |
| 0  | 14  | 52 PITG_20502 |
| 0  | 0   | 0 NA          |
| 0  | 11  | 2 NA          |
| 0  | 18  | 92 PITG_19017 |
| 0  | 24  | 4 PITG_00178  |
| 0  | 0   | 3 PITG_12675  |
| 0  | 61  | 56 PITG_16798 |
| 0  | 7   | 10 PITG_10268 |

|    |     |                |
|----|-----|----------------|
| 0  | 2   | 3 PITG_10020   |
| 0  | 49  | 0 NA           |
| 0  | 10  | 8 PITG_05991   |
| 0  | 100 | 83 PITG_16916  |
| 0  | 16  | 17 PITG_08643  |
| 0  | 8   | 7 PITG_16009   |
| 0  | 7   | 12 PITG_06566  |
| 0  | 35  | 17 NA          |
| 0  | 0   | 0 PITG_03952   |
| 0  | 2   | 2 PITG_00500   |
| 0  | 11  | 33 NA          |
| 0  | 13  | 5 PITG_16208   |
| 0  | 0   | 16 NA          |
| 0  | 4   | 4 PITG_05559   |
| 0  | 11  | 2 PITG_09507   |
| 0  | 2   | 2 PITG_00496   |
| 0  | 16  | 2 PITG_01233   |
| 0  | 2   | 0 PITG_03409   |
| 0  | 0   | 0 PITG_00077   |
| 0  | 2   | 4 PITG_06982   |
| 0  | 7   | 14 PITG_03376  |
| 0  | 25  | 0 NA           |
| 0  | 82  | 302 PITG_21378 |
| 0  | 0   | 2 NA           |
| 0  | 15  | 0 PITG_21023   |
| 0  | 5   | 8 PITG_06390   |
| 0  | 78  | 51 PITG_12051  |
| 0  | 6   | 4 PITG_16161   |
| 0  | 342 | 636 PITG_16963 |
| 0  | 3   | 4 PITG_21853   |
| 0  | 0   | 16 PITG_04447  |
| 0  | 0   | 12 PITG_17683  |
| 0  | 2   | 2 PITG_06121   |
| 0  | 0   | 2 PITG_09753   |
| 0  | 4   | 0 PITG_02073   |
| 0  | 0   | 0 NA           |
| 0  | 8   | 22 PITG_14399  |
| 94 | 0   | 9 NA           |
| 0  | 17  | 12 PITG_13846  |
| 0  | 2   | 2 PITG_13289   |
| 0  | 15  | 0 NA           |
| 0  | 2   | 9 PITG_06516   |
| 0  | 0   | 8 NA           |
| 0  | 0   | 12 PITG_11796  |
| 0  | 3   | 0 NA           |
| 0  | 70  | 73 PITG_11118  |
| 0  | 0   | 2 NA           |

|   |     |               |
|---|-----|---------------|
| 0 | 48  | 3 PITG_01680  |
| 0 | 25  | 2 PITG_05560  |
| 0 | 9   | 0 PITG_12527  |
| 0 | 0   | 4 PITG_03740  |
| 0 | 0   | 2 NA          |
| 0 | 26  | 25 PITG_06149 |
| 0 | 6   | 2 NA          |
| 0 | 30  | 0 PITG_00911  |
| 0 | 2   | 2 PITG_22715  |
| 0 | 0   | 0 NA          |
| 0 | 0   | 0 NA          |
| 0 | 109 | 30 PITG_13621 |
| 0 | 8   | 0 NA          |
| 0 | 5   | 0 PITG_18396  |
| 0 | 7   | 7 PITG_17706  |
| 0 | 40  | 62 NA         |
| 0 | 16  | 9 PITG_01923  |
| 0 | 16  | 0 PITG_15085  |
| 0 | 37  | 2 PITG_03554  |
| 0 | 2   | 8 PITG_13257  |
| 0 | 99  | 52 PITG_08369 |
| 7 | 296 | 4328 NA       |
| 0 | 2   | 4 PITG_09250  |
| 0 | 27  | 11 PITG_05874 |
| 0 | 2   | 0 PITG_02998  |
| 0 | 8   | 27 PITG_03675 |
| 0 | 3   | 0 PITG_00330  |
| 0 | 35  | 6 PITG_15616  |
| 0 | 0   | 270 NA        |
| 0 | 6   | 5 PITG_21364  |
| 0 | 83  | 60 PITG_00748 |
| 0 | 5   | 0 PITG_12497  |
| 0 | 127 | 49 PITG_02810 |
| 0 | 0   | 0 PITG_08654  |
| 0 | 9   | 18 PITG_03549 |
| 0 | 2   | 2 NA          |
| 0 | 9   | 2 PITG_14257  |
| 0 | 11  | 3 PITG_00669  |
| 0 | 15  | 8 PITG_04612  |
| 0 | 0   | 6 PITG_13347  |
| 0 | 0   | 0 PITG_05326  |
| 0 | 6   | 2 PITG_10316  |
| 0 | 5   | 0 NA          |
| 0 | 98  | 38 PITG_02490 |
| 0 | 2   | 0 PITG_04664  |
| 0 | 31  | 27 NA         |
| 0 | 9   | 2 PITG_18397  |

|   |      |                |
|---|------|----------------|
| 0 | 17   | 2 NA           |
| 0 | 44   | 85 NA          |
| 0 | 2    | 8 PITG_09816   |
| 0 | 18   | 0 PITG_02024   |
| 0 | 8    | 0 NA           |
| 0 | 17   | 24 PITG_03909  |
| 0 | 87   | 9 PITG_20803   |
| 0 | 49   | 46 PITG_16326  |
| 0 | 26   | 22 PITG_13622  |
| 0 | 0    | 0 PITG_16826   |
| 0 | 11   | 0 NA           |
| 0 | 0    | 4 PITG_05509   |
| 0 | 2    | 4 PITG_09698   |
| 0 | 4    | 2 PITG_02032   |
| 0 | 23   | 0 NA           |
| 0 | 0    | 0 PITG_20675   |
| 0 | 23   | 10 PITG_06992  |
| 0 | 8    | 10 NA          |
| 0 | 2    | 0 PITG_03318   |
| 0 | 2    | 3 NA           |
| 0 | 8    | 11 PITG_07831  |
| 0 | 2    | 2 PITG_00470   |
| 0 | 8    | 12 PITG_17076  |
| 0 | 0    | 0 NA           |
| 0 | 0    | 0 PITG_02597   |
| 0 | 52   | 41 PITG_05653  |
| 0 | 34   | 5 NA           |
| 0 | 17   | 2 NA           |
| 0 | 0    | 4 PITG_12548   |
| 0 | 1022 | 169 PITG_04317 |
| 0 | 0    | 0 PITG_10601   |
| 0 | 25   | 4 PITG_02400   |
| 0 | 29   | 22 PITG_00845  |
| 9 | 6    | 19 NA          |
| 0 | 43   | 68 PITG_06507  |
| 0 | 10   | 0 NA           |
| 0 | 0    | 2 PITG_14108   |
| 0 | 15   | 17 NA          |
| 0 | 88   | 79 PITG_03696  |
| 0 | 4    | 10 PITG_12256  |
| 0 | 0    | 2 NA           |
| 0 | 175  | 50 NA          |
| 0 | 29   | 4 PITG_04527   |
| 0 | 10   | 6 PITG_07865   |
| 0 | 8    | 2 NA           |
| 0 | 0    | 2 PITG_05413   |
| 0 | 3    | 0 PITG_21170   |

|     |     |                |
|-----|-----|----------------|
| 0   | 5   | 0 NA           |
| 0   | 4   | 11 PITG_10285  |
| 0   | 13  | 25 PITG_10553  |
| 0   | 20  | 11 PITG_05548  |
| 0   | 4   | 0 PITG_10308   |
| 0   | 128 | 68 PITG_18099  |
| 0   | 126 | 4 NA           |
| 0   | 49  | 11 PITG_06913  |
| 0   | 11  | 3 PITG_05843   |
| 0   | 4   | 6 PITG_23160   |
| 202 | 38  | 344 NA         |
| 0   | 4   | 2 NA           |
| 0   | 35  | 12 NA          |
| 0   | 15  | 2 PITG_02231   |
| 0   | 18  | 2 PITG_16080   |
| 0   | 0   | 0 PITG_03323   |
| 0   | 0   | 0 NA           |
| 0   | 0   | 2 PITG_13398   |
| 0   | 0   | 11 NA          |
| 0   | 0   | 10 NA          |
| 0   | 60  | 12 PITG_05227  |
| 0   | 40  | 7 PITG_17690   |
| 0   | 250 | 149 PITG_21185 |
| 0   | 83  | 60 PITG_12106  |
| 0   | 2   | 2 PITG_14286   |
| 0   | 16  | 10 PITG_19037  |
| 0   | 66  | 0 PITG_13096   |
| 0   | 21  | 0 PITG_02291   |
| 0   | 0   | 0 PITG_03295   |
| 0   | 42  | 17 NA          |
| 0   | 31  | 17 PITG_13185  |
| 0   | 70  | 30 NA          |
| 0   | 4   | 3 PITG_10922   |
| 0   | 13  | 2 PITG_06402   |
| 0   | 0   | 0 PITG_00809   |
| 0   | 0   | 5 PITG_19790   |
| 0   | 62  | 5 PITG_20211   |
| 0   | 134 | 61 NA          |
| 0   | 13  | 3 NA           |
| 0   | 34  | 13 PITG_06803  |
| 0   | 5   | 2 PITG_08447   |
| 0   | 0   | 2 PITG_02563   |
| 0   | 40  | 11 PITG_20609  |
| 0   | 2   | 4 PITG_10721   |
| 0   | 28  | 0 PITG_09367   |
| 0   | 4   | 0 PITG_18085   |
| 0   | 0   | 0 PITG_02348   |

|      |     |                |
|------|-----|----------------|
| 0    | 9   | 39 PITG_09783  |
| 0    | 60  | 49 NA          |
| 0    | 24  | 11 PITG_19487  |
| 0    | 11  | 33 PITG_00490  |
| 0    | 7   | 5 PITG_05326   |
| 0    | 8   | 0 NA           |
| 0    | 61  | 87 PITG_00882  |
| 0    | 10  | 31 PITG_09876  |
| 0    | 22  | 14 PITG_00574  |
| 0    | 13  | 5 NA           |
| 0    | 40  | 38 PITG_21277  |
| 0    | 47  | 23 PITG_16113  |
| 0    | 219 | 81 PITG_03434  |
| 0    | 6   | 8 NA           |
| 0    | 2   | 0 NA           |
| 0    | 4   | 0 PITG_12938   |
| 0    | 2   | 4 PITG_22126   |
| 0    | 4   | 6 PITG_02565   |
| 0    | 45  | 2 PITG_21285   |
| 0    | 49  | 2 PITG_08587   |
| 0    | 12  | 15 PITG_02799  |
| 0    | 8   | 8 NA           |
| 0    | 5   | 3 PITG_03478   |
| 0    | 11  | 4 PITG_10483   |
| 0    | 72  | 4 PITG_11972   |
| 0    | 23  | 6 PITG_03288   |
| 0    | 6   | 2 PITG_10989   |
| 0    | 0   | 0 NA           |
| 1140 | 51  | 509 NA         |
| 0    | 42  | 196 PITG_14397 |
| 0    | 6   | 0 PITG_12340   |
| 0    | 3   | 7 PITG_01033   |
| 0    | 33  | 19 NA          |
| 0    | 4   | 6 PITG_13437   |
| 0    | 47  | 2 PITG_01679   |
| 0    | 42  | 24 PITG_04342  |
| 0    | 10  | 15 PITG_08032  |
| 0    | 3   | 2 PITG_03523   |
| 0    | 9   | 33 PITG_13622  |
| 0    | 300 | 469 PITG_00203 |
| 0    | 2   | 15 PITG_14130  |
| 0    | 0   | 8 PITG_06457   |
| 0    | 2   | 0 PITG_07068   |
| 0    | 2   | 6 PITG_02330   |
| 0    | 0   | 4 PITG_10827   |
| 0    | 9   | 0 NA           |
| 0    | 0   | 0 PITG_17346   |



|    |     |               |
|----|-----|---------------|
| 0  | 7   | 15 PITG_19842 |
| 0  | 23  | 18 PITG_07470 |
| 0  | 8   | 10 NA         |
| 0  | 108 | 79 PITG_06992 |
| 0  | 49  | 77 PITG_07964 |
| 0  | 2   | 2 PITG_15731  |
| 0  | 18  | 2 PITG_16066  |
| 14 | 0   | 34 NA         |
| 0  | 24  | 16 NA         |
| 0  | 32  | 4 PITG_17390  |
| 0  | 0   | 8 PITG_03422  |
| 0  | 7   | 5 PITG_00725  |
| 0  | 4   | 7 PITG_05423  |
| 0  | 4   | 8 PITG_12517  |
| 0  | 8   | 15 PITG_12151 |
| 0  | 2   | 12 PITG_12151 |
| 0  | 2   | 0 NA          |
| 0  | 8   | 4 PITG_10454  |
| 0  | 6   | 8 PITG_11461  |
| 0  | 14  | 6 PITG_03841  |
| 0  | 13  | 17 PITG_03774 |
| 0  | 17  | 12 PITG_10943 |
| 0  | 36  | 8 PITG_02809  |
| 0  | 6   | 0 PITG_13523  |
| 0  | 0   | 9 PITG_04179  |
| 0  | 3   | 2 PITG_18409  |
| 0  | 40  | 23 PITG_01640 |
| 0  | 42  | 44 PITG_12661 |
| 0  | 11  | 32 PITG_08369 |
| 0  | 15  | 2 NA          |
| 0  | 0   | 0 PITG_04935  |
| 0  | 19  | 90 PITG_03555 |
| 0  | 14  | 8 NA          |
| 0  | 0   | 2 PITG_04930  |
| 0  | 110 | 57 PITG_07868 |
| 0  | 20  | 0 PITG_06368  |
| 0  | 12  | 34 PITG_05366 |
| 0  | 226 | 90 NA         |
| 0  | 0   | 0 NA          |
| 0  | 15  | 12 PITG_16809 |
| 0  | 2   | 0 PITG_02556  |
| 0  | 2   | 0 NA          |
| 0  | 87  | 3 PITG_13270  |
| 0  | 2   | 0 PITG_05629  |
| 0  | 11  | 5 NA          |
| 0  | 0   | 4 PITG_22687  |
| 0  | 65  | 6 NA          |

|   |     |                |
|---|-----|----------------|
| 0 | 10  | 31 PITG_01639  |
| 0 | 5   | 0 PITG_11728   |
| 0 | 0   | 2 NA           |
| 0 | 32  | 5 PITG_08643   |
| 0 | 0   | 15 PITG_08787  |
| 0 | 10  | 39 PITG_15786  |
| 0 | 13  | 2 PITG_10016   |
| 0 | 25  | 17 PITG_05763  |
| 0 | 7   | 2 PITG_03478   |
| 0 | 0   | 0 PITG_05729   |
| 0 | 22  | 0 NA           |
| 0 | 120 | 83 NA          |
| 0 | 0   | 2 PITG_07476   |
| 0 | 25  | 37 PITG_10616  |
| 0 | 6   | 19 PITG_21602  |
| 0 | 0   | 3 NA           |
| 0 | 2   | 2 PITG_16364   |
| 0 | 4   | 0 PITG_06184   |
| 0 | 108 | 28 PITG_01852  |
| 0 | 0   | 0 NA           |
| 0 | 178 | 32 PITG_19551  |
| 0 | 6   | 10 PITG_10152  |
| 0 | 2   | 0 NA           |
| 0 | 2   | 2 PITG_16930   |
| 0 | 0   | 2 PITG_02594   |
| 0 | 16  | 37 NA          |
| 0 | 0   | 0 NA           |
| 0 | 23  | 13 PITG_10508  |
| 0 | 6   | 10 PITG_15567  |
| 0 | 4   | 0 PITG_13848   |
| 0 | 3   | 0 PITG_03872   |
| 0 | 4   | 0 NA           |
| 0 | 0   | 2 PITG_02574   |
| 0 | 16  | 82 PITG_03220  |
| 0 | 912 | 378 PITG_08844 |
| 0 | 0   | 0 PITG_03408   |
| 0 | 6   | 13 PITG_04705  |
| 0 | 19  | 9 PITG_05353   |
| 0 | 17  | 7 PITG_20216   |
| 0 | 0   | 2 NA           |
| 0 | 5   | 2 PITG_03327   |
| 0 | 50  | 0 NA           |
| 0 | 35  | 14 PITG_12524  |
| 0 | 10  | 112 PITG_19854 |
| 0 | 87  | 23 NA          |
| 0 | 6   | 5 PITG_11484   |
| 0 | 4   | 0 NA           |

|   |     |               |
|---|-----|---------------|
| 0 | 0   | 0 PITG_20097  |
| 0 | 0   | 2 NA          |
| 0 | 91  | 68 PITG_03418 |
| 0 | 14  | 0 PITG_00440  |
| 0 | 32  | 5 PITG_03364  |
| 0 | 2   | 4 PITG_01776  |
| 0 | 26  | 0 NA          |
| 0 | 4   | 2 PITG_11704  |
| 0 | 0   | 5 PITG_09181  |
| 0 | 2   | 3 NA          |
| 0 | 33  | 20 PITG_15217 |
| 0 | 0   | 0 PITG_00042  |
| 0 | 11  | 2 PITG_03264  |
| 0 | 14  | 2 PITG_01963  |
| 0 | 0   | 0 PITG_16798  |
| 0 | 4   | 0 PITG_04489  |
| 0 | 2   | 0 PITG_03924  |
| 0 | 11  | 2 PITG_02540  |
| 0 | 24  | 16 NA         |
| 0 | 6   | 4 NA          |
| 0 | 14  | 12 PITG_17049 |
| 0 | 251 | 2 PITG_05444  |
| 0 | 0   | 6 PITG_00757  |
| 0 | 4   | 7 NA          |
| 0 | 11  | 2 PITG_03761  |
| 0 | 0   | 0 PITG_04023  |
| 0 | 13  | 2 NA          |
| 0 | 13  | 15 PITG_01317 |
| 0 | 0   | 2 PITG_01710  |
| 0 | 24  | 32 PITG_03754 |
| 0 | 8   | 7 PITG_17246  |
| 0 | 22  | 8 PITG_09899  |
| 0 | 16  | 45 PITG_08669 |
| 0 | 13  | 0 PITG_22113  |
| 0 | 25  | 2 NA          |
| 0 | 6   | 32 PITG_18014 |
| 0 | 44  | 31 PITG_04609 |
| 0 | 5   | 2 PITG_18393  |
| 0 | 24  | 0 NA          |
| 0 | 25  | 19 PITG_08934 |
| 0 | 4   | 0 PITG_13473  |
| 0 | 0   | 0 PITG_17498  |
| 0 | 34  | 4 NA          |
| 0 | 6   | 2 PITG_03337  |
| 0 | 19  | 0 PITG_02608  |
| 0 | 8   | 7 PITG_13314  |
| 0 | 76  | 50 PITG_03577 |

|     |     |                |
|-----|-----|----------------|
| 0   | 11  | 4 PITG_04846   |
| 0   | 0   | 0 NA           |
| 0   | 4   | 9 PITG_03899   |
| 0   | 0   | 0 PITG_11977   |
| 0   | 0   | 33 PITG_18860  |
| 0   | 20  | 2 PITG_17230   |
| 0   | 0   | 2 PITG_09921   |
| 0   | 0   | 6 PITG_13546   |
| 0   | 26  | 15 NA          |
| 0   | 34  | 17 PITG_08826  |
| 0   | 0   | 9 PITG_10534   |
| 0   | 11  | 37 PITG_05318  |
| 0   | 5   | 5 PITG_10201   |
| 0   | 5   | 18 PITG_15962  |
| 0   | 5   | 0 PITG_14379   |
| 0   | 8   | 31 PITG_06921  |
| 0   | 15  | 10 PITG_17672  |
| 0   | 2   | 0 PITG_04115   |
| 0   | 0   | 0 PITG_17882   |
| 0   | 0   | 0 PITG_10460   |
| 0   | 11  | 0 NA           |
| 0   | 6   | 0 NA           |
| 0   | 0   | 2 PITG_00845   |
| 0   | 24  | 6 PITG_18393   |
| 0   | 100 | 36 NA          |
| 0   | 0   | 0 PITG_05752   |
| 0   | 3   | 12 PITG_05658  |
| 0   | 2   | 2 PITG_17492   |
| 0   | 10  | 3 PITG_11425   |
| 0   | 176 | 200 PITG_18662 |
| 0   | 25  | 11 PITG_20794  |
| 0   | 29  | 9 PITG_00064   |
| 0   | 32  | 8 PITG_00173   |
| 0   | 22  | 27 PITG_01238  |
| 0   | 5   | 5 PITG_01156   |
| 0   | 0   | 4 NA           |
| 0   | 18  | 25 PITG_18011  |
| 0   | 0   | 0 PITG_17557   |
| 0   | 11  | 17 PITG_01997  |
| 0   | 4   | 3 NA           |
| 0   | 0   | 2 PITG_17137   |
| 0   | 2   | 0 PITG_02194   |
| 256 | 6   | 243 NA         |
| 0   | 5   | 0 NA           |
| 0   | 19  | 38 PITG_10355  |
| 0   | 83  | 103 PITG_20562 |
| 202 | 2   | 208 NA         |

|   |     |               |
|---|-----|---------------|
| 0 | 4   | 10 PITG_09727 |
| 0 | 11  | 6 PITG_16920  |
| 0 | 0   | 8 PITG_06256  |
| 0 | 360 | 72 PITG_07959 |
| 0 | 0   | 0 NA          |
| 0 | 2   | 0 PITG_02856  |
| 0 | 4   | 10 PITG_07247 |
| 0 | 14  | 23 NA         |
| 0 | 2   | 18 PITG_03143 |
| 0 | 58  | 12 PITG_23143 |
| 0 | 45  | 15 NA         |
| 0 | 28  | 4 PITG_11862  |
| 0 | 5   | 2 PITG_03657  |
| 0 | 14  | 4 NA          |
| 0 | 17  | 2 PITG_05362  |
| 0 | 2   | 5 PITG_00830  |
| 0 | 60  | 13 NA         |
| 0 | 3   | 5 PITG_21132  |
| 0 | 21  | 4 PITG_10601  |
| 0 | 12  | 57 PITG_03549 |
| 0 | 93  | 9 NA          |
| 0 | 0   | 17 PITG_04457 |
| 0 | 0   | 0 PITG_00265  |
| 0 | 2   | 0 PITG_21400  |
| 0 | 4   | 2 PITG_11536  |
| 0 | 2   | 0 PITG_21017  |
| 0 | 44  | 6 PITG_16334  |
| 0 | 22  | 37 PITG_01325 |
| 0 | 2   | 0 PITG_12157  |
| 0 | 0   | 13 PITG_11452 |
| 0 | 10  | 4 PITG_01755  |
| 0 | 162 | 13 PITG_20413 |
| 0 | 9   | 17 PITG_03061 |
| 0 | 11  | 15 PITG_02027 |
| 0 | 19  | 4 PITG_07924  |
| 0 | 151 | 35 PITG_10884 |
| 0 | 4   | 6 PITG_15191  |
| 0 | 21  | 0 NA          |
| 0 | 2   | 6 PITG_18959  |
| 0 | 32  | 38 PITG_08417 |
| 0 | 13  | 0 PITG_16088  |
| 0 | 5   | 0 NA          |
| 0 | 31  | 22 PITG_08420 |
| 0 | 4   | 13 PITG_02156 |
| 0 | 81  | 8 PITG_15097  |
| 0 | 0   | 0 PITG_00350  |
| 0 | 4   | 2 NA          |

|      |     |                |
|------|-----|----------------|
| 0    | 2   | 10 PITG_17130  |
| 0    | 0   | 0 NA           |
| 0    | 35  | 2 PITG_22159   |
| 0    | 0   | 0 PITG_01164   |
| 0    | 9   | 0 NA           |
| 0    | 8   | 4 PITG_08009   |
| 0    | 47  | 15 PITG_03990  |
| 0    | 20  | 63 PITG_14589  |
| 0    | 47  | 23 PITG_18440  |
| 0    | 0   | 5 PITG_03351   |
| 0    | 3   | 0 PITG_00342   |
| 1393 | 690 | 582 NA         |
| 0    | 15  | 2 NA           |
| 0    | 2   | 0 PITG_00132   |
| 0    | 2   | 0 PITG_20272   |
| 0    | 11  | 0 PITG_07884   |
| 0    | 2   | 0 PITG_11286   |
| 0    | 7   | 0 PITG_07543   |
| 0    | 0   | 6 PITG_08411   |
| 0    | 25  | 7 PITG_11273   |
| 0    | 0   | 8 PITG_13258   |
| 0    | 19  | 0 PITG_01809   |
| 0    | 267 | 262 PITG_07999 |
| 0    | 599 | 61 PITG_11238  |
| 0    | 17  | 9 PITG_15774   |
| 0    | 2   | 0 PITG_19508   |
| 0    | 22  | 10 NA          |
| 0    | 8   | 12 PITG_12739  |
| 0    | 2   | 2 PITG_18297   |
| 0    | 12  | 4 PITG_02735   |
| 0    | 32  | 58 NA          |
| 0    | 4   | 13 PITG_00577  |
| 0    | 3   | 5 NA           |
| 0    | 76  | 61 PITG_15697  |
| 0    | 0   | 0 NA           |
| 0    | 19  | 10 PITG_03987  |
| 0    | 2   | 0 PITG_15642   |
| 0    | 124 | 14 PITG_14548  |
| 0    | 18  | 8 PITG_06424   |
| 0    | 4   | 4 PITG_08584   |
| 0    | 57  | 9 PITG_19607   |
| 0    | 8   | 2 PITG_07245   |
| 0    | 2   | 2 PITG_05197   |
| 0    | 88  | 111 PITG_14047 |
| 0    | 5   | 0 NA           |
| 0    | 53  | 0 PITG_11106   |
| 0    | 2   | 0 PITG_07445   |

|    |     |                |
|----|-----|----------------|
| 0  | 0   | 2 PITG_09211   |
| 0  | 0   | 0 PITG_16956   |
| 0  | 0   | 13 PITG_14175  |
| 0  | 0   | 2 NA           |
| 0  | 25  | 21 PITG_08746  |
| 0  | 2   | 0 NA           |
| 0  | 2   | 2 NA           |
| 0  | 37  | 2 PITG_02738   |
| 0  | 9   | 31 PITG_19213  |
| 0  | 0   | 0 PITG_16864   |
| 16 | 0   | 0 NA           |
| 0  | 28  | 111 PITG_02197 |
| 0  | 8   | 11 PITG_13055  |
| 0  | 8   | 14 NA          |
| 0  | 17  | 15 PITG_05315  |
| 0  | 8   | 13 PITG_08619  |
| 0  | 0   | 0 PITG_03803   |
| 0  | 80  | 18 PITG_15981  |
| 0  | 84  | 120 PITG_19581 |
| 0  | 0   | 0 PITG_14861   |
| 0  | 4   | 14 PITG_11689  |
| 0  | 3   | 0 PITG_21509   |
| 0  | 0   | 2 PITG_08993   |
| 0  | 15  | 12 PITG_02520  |
| 0  | 0   | 10 PITG_07852  |
| 0  | 102 | 65 NA          |
| 0  | 3   | 0 PITG_04588   |
| 0  | 2   | 0 PITG_14009   |
| 0  | 55  | 0 NA           |
| 0  | 17  | 0 PITG_18624   |
| 0  | 53  | 24 PITG_04638  |
| 0  | 0   | 7 PITG_16208   |
| 0  | 13  | 10 PITG_05590  |
| 0  | 86  | 27 PITG_14921  |
| 0  | 4   | 14 PITG_08001  |
| 0  | 23  | 9 PITG_20796   |
| 0  | 4   | 4 PITG_09698   |
| 0  | 27  | 42 PITG_10068  |
| 0  | 2   | 0 PITG_13544   |
| 0  | 0   | 2 PITG_12625   |
| 0  | 8   | 4 NA           |
| 0  | 75  | 159 PITG_08758 |
| 0  | 0   | 0 PITG_14385   |
| 0  | 5   | 4 PITG_13004   |
| 0  | 0   | 0 PITG_12843   |
| 0  | 2   | 6 NA           |
| 0  | 27  | 107 PITG_14747 |

|     |     |                |
|-----|-----|----------------|
| 0   | 2   | 2 PITG_23281   |
| 0   | 277 | 716 PITG_15553 |
| 0   | 9   | 7 PITG_02562   |
| 0   | 12  | 8 NA           |
| 0   | 12  | 9 NA           |
| 0   | 2   | 0 PITG_13654   |
| 0   | 4   | 18 PITG_04395  |
| 0   | 3   | 0 NA           |
| 0   | 12  | 12 PITG_03335  |
| 0   | 117 | 49 PITG_11457  |
| 0   | 2   | 0 PITG_09703   |
| 0   | 0   | 0 PITG_00133   |
| 0   | 75  | 0 NA           |
| 0   | 0   | 28 PITG_01515  |
| 0   | 14  | 0 PITG_09620   |
| 0   | 0   | 0 PITG_07426   |
| 2   | 4   | 4 NA           |
| 0   | 6   | 6 PITG_02203   |
| 0   | 29  | 5 NA           |
| 0   | 0   | 0 PITG_03017   |
| 0   | 3   | 0 PITG_15921   |
| 0   | 74  | 26 PITG_13814  |
| 0   | 0   | 0 NA           |
| 0   | 0   | 4 PITG_03169   |
| 0   | 0   | 0 PITG_09540   |
| 0   | 53  | 12 PITG_16042  |
| 0   | 2   | 0 PITG_16132   |
| 0   | 75  | 136 PITG_07153 |
| 0   | 11  | 21 PITG_08154  |
| 0   | 0   | 6 PITG_03821   |
| 0   | 4   | 0 PITG_10896   |
| 0   | 2   | 2 PITG_03919   |
| 0   | 4   | 0 PITG_01272   |
| 0   | 0   | 2 PITG_10105   |
| 0   | 4   | 2 PITG_17883   |
| 0   | 19  | 69 PITG_07286  |
| 0   | 10  | 4 PITG_04927   |
| 0   | 13  | 10 PITG_09528  |
| 0   | 5   | 4 PITG_18071   |
| 0   | 17  | 4 PITG_03813   |
| 0   | 2   | 0 PITG_06598   |
| 160 | 93  | 2019 NA        |
| 0   | 18  | 13 PITG_13992  |
| 0   | 278 | 20 NA          |
| 0   | 6   | 0 PITG_17600   |
| 0   | 2   | 0 PITG_17781   |
| 0   | 3   | 4 PITG_13184   |



|     |     |               |
|-----|-----|---------------|
| 0   | 0   | 16 PITG_01641 |
| 0   | 0   | 2 NA          |
| 401 | 25  | 383 NA        |
| 0   | 30  | 88 PITG_21283 |
| 0   | 17  | 0 NA          |
| 0   | 0   | 9 PITG_08734  |
| 0   | 84  | 23 NA         |
| 0   | 57  | 2 NA          |
| 0   | 12  | 31 NA         |
| 240 | 4   | 333 NA        |
| 0   | 4   | 2 PITG_03658  |
| 0   | 10  | 2 PITG_15502  |
| 0   | 0   | 36 NA         |
| 0   | 21  | 6 NA          |
| 0   | 102 | 29 PITG_06476 |
| 0   | 22  | 10 PITG_14562 |
| 0   | 22  | 7 PITG_00220  |
| 0   | 2   | 2 PITG_17335  |
| 0   | 0   | 0 PITG_14626  |
| 0   | 3   | 5 PITG_05377  |
| 0   | 13  | 18 PITG_10118 |
| 0   | 30  | 66 PITG_03855 |
| 0   | 8   | 2 NA          |
| 0   | 11  | 12 PITG_18788 |
| 0   | 13  | 91 NA         |
| 0   | 4   | 6 PITG_18416  |
| 0   | 0   | 0 PITG_19527  |
| 0   | 9   | 2 PITG_03165  |
| 0   | 94  | 69 NA         |
| 0   | 0   | 0 PITG_12518  |
| 0   | 0   | 0 PITG_12879  |
| 0   | 6   | 0 PITG_13317  |
| 0   | 29  | 14 NA         |
| 0   | 0   | 0 NA          |
| 26  | 0   | 10 NA         |
| 0   | 29  | 12 PITG_02679 |
| 0   | 29  | 0 PITG_10068  |
| 0   | 11  | 6 PITG_00845  |
| 0   | 2   | 2 NA          |
| 0   | 19  | 10 PITG_10440 |
| 0   | 0   | 4 PITG_14051  |
| 0   | 17  | 43 PITG_01778 |
| 0   | 190 | 18 PITG_17590 |
| 0   | 2   | 0 NA          |
| 0   | 0   | 51 PITG_16207 |
| 0   | 44  | 12 PITG_00698 |
| 0   | 31  | 14 NA         |

|     |      |               |
|-----|------|---------------|
| 0   | 8    | 0 PITG_01871  |
| 105 | 2    | 83 NA         |
| 0   | 42   | 0 NA          |
| 0   | 2    | 0 PITG_18067  |
| 0   | 13   | 6 PITG_11457  |
| 0   | 4    | 5 PITG_06121  |
| 0   | 5    | 0 PITG_17965  |
| 0   | 17   | 5 PITG_15783  |
| 0   | 2    | 0 NA          |
| 666 | 1240 | 179 NA        |
| 0   | 50   | 21 PITG_05325 |
| 0   | 7    | 13 PITG_05127 |
| 0   | 0    | 0 PITG_02677  |
| 0   | 7    | 0 NA          |
| 0   | 0    | 0 PITG_13421  |
| 0   | 2    | 6 PITG_20503  |
| 0   | 2    | 2 PITG_19161  |
| 0   | 47   | 4 NA          |
| 0   | 39   | 4 PITG_05183  |
| 0   | 2    | 4 PITG_13917  |
| 0   | 12   | 13 PITG_19005 |
| 2   | 0    | 6 PITG_16956  |
| 0   | 17   | 13 PITG_14279 |
| 0   | 53   | 13 PITG_11926 |
| 0   | 2    | 2 PITG_01811  |
| 0   | 2    | 59 PITG_09413 |
| 0   | 2    | 2 PITG_08230  |
| 0   | 19   | 10 NA         |
| 0   | 12   | 11 PITG_06484 |
| 0   | 0    | 2 PITG_06853  |
| 0   | 6    | 0 PITG_17040  |
| 0   | 30   | 10 PITG_16063 |
| 0   | 17   | 11 PITG_00676 |
| 0   | 40   | 25 PITG_01867 |
| 0   | 2    | 4 PITG_12949  |
| 0   | 4    | 9 PITG_08305  |
| 0   | 2    | 0 PITG_05632  |
| 0   | 14   | 19 PITG_08031 |
| 0   | 0    | 2 PITG_19461  |
| 0   | 2    | 4 PITG_03288  |
| 0   | 7    | 0 NA          |
| 0   | 11   | 8 PITG_05503  |
| 0   | 4    | 3 PITG_16918  |
| 0   | 59   | 3 PITG_03824  |
| 0   | 375  | 71 NA         |
| 0   | 54   | 33 PITG_05867 |
| 0   | 0    | 0 NA          |

|   |     |               |
|---|-----|---------------|
| 4 | 0   | 34 NA         |
| 0 | 0   | 0 PITG_14605  |
| 0 | 13  | 8 PITG_06832  |
| 0 | 11  | 0 PITG_00424  |
| 0 | 7   | 6 NA          |
| 0 | 353 | 116 NA        |
| 0 | 3   | 2 PITG_12810  |
| 0 | 0   | 2 PITG_07723  |
| 0 | 19  | 15 PITG_16378 |
| 0 | 0   | 7 PITG_05623  |
| 0 | 7   | 2 PITG_12428  |
| 0 | 0   | 0 PITG_06660  |
| 0 | 19  | 3 PITG_15134  |
| 0 | 0   | 0 PITG_15567  |
| 0 | 12  | 2 PITG_10213  |
| 0 | 30  | 49 NA         |
| 0 | 21  | 35 PITG_10160 |
| 0 | 0   | 2 NA          |
| 0 | 2   | 2 PITG_20711  |
| 0 | 57  | 37 PITG_10005 |
| 0 | 14  | 5 PITG_00858  |
| 0 | 0   | 5 PITG_08722  |
| 0 | 89  | 37 PITG_05690 |
| 0 | 2   | 0 PITG_00250  |
| 0 | 23  | 0 NA          |
| 0 | 18  | 6 PITG_20562  |
| 0 | 71  | 82 PITG_10983 |
| 0 | 2   | 10 PITG_09065 |
| 0 | 196 | 93 PITG_13405 |
| 0 | 15  | 32 PITG_13341 |
| 0 | 0   | 0 NA          |
| 0 | 4   | 6 PITG_05458  |
| 0 | 12  | 6 PITG_06700  |
| 0 | 118 | 89 PITG_05631 |
| 0 | 0   | 0 PITG_06288  |
| 0 | 0   | 2 PITG_06353  |
| 0 | 7   | 0 PITG_03102  |
| 0 | 6   | 0 NA          |
| 0 | 26  | 16 PITG_17928 |
| 0 | 0   | 0 NA          |
| 0 | 8   | 31 PITG_21055 |
| 0 | 0   | 0 NA          |
| 0 | 4   | 8 PITG_08572  |
| 0 | 2   | 6 NA          |
| 0 | 12  | 4 PITG_03756  |
| 0 | 0   | 7 PITG_16671  |
| 0 | 2   | 6 PITG_06827  |

|   |     |                |
|---|-----|----------------|
| 0 | 2   | 2 NA           |
| 0 | 16  | 73 PITG_15850  |
| 0 | 0   | 0 NA           |
| 0 | 11  | 16 PITG_13829  |
| 0 | 4   | 2 PITG_01744   |
| 0 | 56  | 0 NA           |
| 0 | 9   | 4 PITG_08056   |
| 0 | 0   | 0 PITG_05139   |
| 0 | 0   | 0 PITG_04718   |
| 0 | 10  | 4 PITG_10006   |
| 0 | 0   | 11 PITG_07281  |
| 0 | 4   | 0 PITG_10065   |
| 0 | 6   | 0 PITG_06598   |
| 0 | 36  | 159 PITG_12266 |
| 0 | 0   | 0 PITG_01354   |
| 0 | 5   | 0 PITG_11206   |
| 0 | 41  | 19 NA          |
| 0 | 41  | 102 PITG_14935 |
| 0 | 2   | 4 PITG_11264   |
| 0 | 2   | 0 NA           |
| 0 | 9   | 8 PITG_02744   |
| 0 | 0   | 0 PITG_04262   |
| 0 | 142 | 25 NA          |
| 0 | 2   | 2 PITG_10351   |
| 0 | 3   | 5 NA           |
| 0 | 41  | 16 PITG_10648  |
| 0 | 0   | 2 PITG_06190   |
| 0 | 6   | 2 PITG_00828   |
| 0 | 0   | 0 PITG_14385   |
| 0 | 139 | 2 PITG_18452   |
| 0 | 0   | 3 PITG_19085   |
| 0 | 41  | 26 PITG_07191  |
| 0 | 4   | 4 PITG_01678   |
| 0 | 12  | 5 NA           |
| 0 | 3   | 0 PITG_20203   |
| 0 | 190 | 0 NA           |
| 0 | 78  | 5 PITG_17043   |
| 0 | 0   | 0 PITG_02400   |
| 0 | 4   | 0 PITG_02692   |
| 0 | 69  | 59 PITG_03061  |
| 0 | 2   | 0 PITG_03945   |
| 0 | 40  | 16 NA          |
| 0 | 2   | 4 PITG_06429   |
| 0 | 33  | 5 PITG_18007   |
| 0 | 0   | 2 PITG_17679   |
| 0 | 11  | 13 PITG_11445  |
| 0 | 4   | 12 PITG_14699  |

|    |     |                |
|----|-----|----------------|
| 0  | 0   | 6 PITG_05260   |
| 0  | 0   | 2 PITG_18977   |
| 0  | 102 | 63 NA          |
| 0  | 2   | 12 PITG_07445  |
| 0  | 7   | 0 PITG_17664   |
| 0  | 27  | 19 PITG_04648  |
| 0  | 9   | 5 NA           |
| 0  | 217 | 7 PITG_18396   |
| 0  | 140 | 50 NA          |
| 0  | 5   | 0 PITG_03284   |
| 0  | 50  | 11 PITG_14657  |
| 0  | 2   | 6 PITG_22148   |
| 0  | 8   | 16 PITG_06358  |
| 18 | 0   | 2 NA           |
| 0  | 6   | 0 PITG_19149   |
| 0  | 0   | 6 PITG_17722   |
| 0  | 10  | 0 NA           |
| 0  | 164 | 26 NA          |
| 0  | 6   | 4 PITG_01898   |
| 0  | 2   | 0 PITG_02055   |
| 0  | 3   | 5 PITG_07279   |
| 0  | 0   | 0 PITG_16024   |
| 0  | 0   | 2 PITG_15606   |
| 0  | 0   | 0 PITG_01044   |
| 0  | 0   | 10 PITG_09089  |
| 0  | 4   | 2 PITG_13544   |
| 0  | 16  | 2 NA           |
| 0  | 89  | 123 PITG_08024 |
| 0  | 2   | 0 PITG_08640   |
| 0  | 0   | 2 PITG_00187   |
| 0  | 2   | 2 PITG_10105   |
| 0  | 0   | 6 PITG_16364   |
| 0  | 51  | 21 PITG_07197  |
| 0  | 0   | 0 NA           |
| 0  | 4   | 47 PITG_16058  |
| 0  | 0   | 4 PITG_18342   |
| 0  | 33  | 8 PITG_03322   |
| 0  | 373 | 103 PITG_11969 |
| 0  | 6   | 11 PITG_05332  |
| 0  | 26  | 2 PITG_11242   |
| 0  | 0   | 0 PITG_17057   |
| 0  | 16  | 0 NA           |
| 0  | 2   | 0 PITG_02229   |
| 0  | 6   | 0 NA           |
| 0  | 14  | 7 PITG_20502   |
| 0  | 2   | 67 PITG_15504  |
| 0  | 40  | 6 PITG_14390   |

|   |    |                |
|---|----|----------------|
| 0 | 5  | 26 PITG_08470  |
| 0 | 2  | 14 PITG_07275  |
| 0 | 64 | 18 NA          |
| 0 | 76 | 25 PITG_05010  |
| 0 | 0  | 4 PITG_19220   |
| 0 | 11 | 17 PITG_06129  |
| 0 | 22 | 19 PITG_03282  |
| 0 | 2  | 0 NA           |
| 0 | 4  | 6 PITG_02135   |
| 0 | 22 | 4 PITG_16137   |
| 0 | 9  | 2 PITG_01651   |
| 0 | 3  | 12 PITG_09665  |
| 0 | 12 | 11 PITG_15973  |
| 0 | 10 | 13 PITG_07011  |
| 0 | 14 | 10 PITG_00542  |
| 0 | 17 | 2 NA           |
| 0 | 8  | 21 PITG_21222  |
| 0 | 7  | 54 PITG_02793  |
| 0 | 18 | 50 PITG_01447  |
| 0 | 2  | 0 PITG_00555   |
| 0 | 0  | 57 PITG_03044  |
| 0 | 2  | 8 PITG_10623   |
| 0 | 25 | 51 NA          |
| 0 | 2  | 2 NA           |
| 0 | 6  | 14 PITG_03821  |
| 3 | 70 | 32 PITG_17348  |
| 0 | 17 | 14 PITG_06342  |
| 0 | 84 | 142 PITG_16469 |
| 0 | 0  | 0 PITG_04994   |
| 0 | 7  | 16 PITG_05551  |
| 0 | 0  | 8 PITG_20593   |
| 0 | 8  | 4 NA           |
| 0 | 11 | 23 PITG_03737  |
| 0 | 8  | 0 NA           |
| 0 | 0  | 0 NA           |
| 0 | 11 | 0 PITG_03872   |
| 0 | 3  | 17 NA          |
| 0 | 2  | 12 PITG_18050  |
| 0 | 47 | 29 PITG_02261  |
| 0 | 19 | 66 PITG_20775  |
| 0 | 2  | 3 PITG_11161   |
| 0 | 16 | 4 PITG_05815   |
| 0 | 44 | 19 PITG_06708  |
| 0 | 0  | 9 PITG_19672   |
| 0 | 11 | 0 PITG_03397   |
| 0 | 26 | 25 PITG_14381  |
| 0 | 5  | 5 PITG_01003   |

|   |     |                |
|---|-----|----------------|
| 0 | 81  | 27 PITG_17156  |
| 0 | 4   | 2 NA           |
| 0 | 2   | 0 PITG_10905   |
| 0 | 2   | 2 PITG_09425   |
| 0 | 2   | 5 NA           |
| 0 | 15  | 4 NA           |
| 0 | 6   | 2 PITG_20855   |
| 0 | 8   | 35 PITG_17527  |
| 0 | 48  | 63 PITG_14712  |
| 0 | 117 | 63 PITG_11071  |
| 0 | 0   | 0 PITG_05331   |
| 0 | 0   | 2 PITG_04644   |
| 0 | 4   | 4 PITG_03557   |
| 0 | 0   | 3 PITG_00188   |
| 0 | 42  | 17 PITG_03547  |
| 0 | 27  | 47 PITG_11489  |
| 0 | 4   | 8 PITG_10806   |
| 0 | 16  | 43 PITG_17952  |
| 0 | 61  | 6 PITG_11464   |
| 0 | 2   | 4 PITG_06963   |
| 0 | 4   | 20 PITG_13223  |
| 0 | 8   | 4 PITG_13284   |
| 0 | 11  | 4 PITG_04533   |
| 0 | 5   | 4 PITG_08170   |
| 0 | 17  | 10 PITG_03238  |
| 0 | 0   | 0 PITG_13590   |
| 0 | 62  | 82 PITG_20742  |
| 0 | 54  | 51 PITG_00169  |
| 0 | 66  | 35 PITG_18464  |
| 0 | 20  | 2 NA           |
| 0 | 72  | 153 PITG_03612 |
| 0 | 13  | 0 NA           |
| 0 | 303 | 24 PITG_12812  |
| 0 | 10  | 22 PITG_00808  |
| 0 | 2   | 2 PITG_05509   |
| 0 | 46  | 12 PITG_02857  |
| 0 | 0   | 2 PITG_09752   |
| 0 | 7   | 4 PITG_08301   |
| 0 | 147 | 65 PITG_04562  |
| 0 | 38  | 4 PITG_06782   |
| 0 | 0   | 0 PITG_16458   |
| 0 | 52  | 19 PITG_02107  |
| 0 | 2   | 0 PITG_10481   |
| 0 | 0   | 2 NA           |
| 0 | 2   | 16 PITG_01960  |
| 0 | 0   | 4 PITG_07765   |
| 0 | 7   | 8 PITG_03757   |

|   |     |                |
|---|-----|----------------|
| 0 | 10  | 2 PITG_10937   |
| 0 | 17  | 24 NA          |
| 0 | 0   | 0 PITG_03649   |
| 0 | 0   | 0 PITG_15961   |
| 0 | 0   | 0 NA           |
| 0 | 52  | 2 PITG_20568   |
| 0 | 2   | 2 PITG_13903   |
| 0 | 48  | 184 PITG_05551 |
| 0 | 19  | 9 PITG_03775   |
| 0 | 8   | 0 PITG_17346   |
| 0 | 75  | 18 PITG_00649  |
| 0 | 98  | 14 PITG_21888  |
| 0 | 3   | 2 PITG_16102   |
| 0 | 52  | 51 PITG_11139  |
| 0 | 27  | 35 PITG_06107  |
| 0 | 2   | 0 PITG_11049   |
| 0 | 2   | 2 NA           |
| 0 | 16  | 74 NA          |
| 0 | 16  | 3 NA           |
| 0 | 23  | 19 PITG_09376  |
| 0 | 2   | 0 PITG_19875   |
| 0 | 14  | 11 PITG_00039  |
| 0 | 27  | 107 PITG_01477 |
| 0 | 75  | 30 PITG_09998  |
| 0 | 28  | 30 PITG_20903  |
| 0 | 2   | 8 PITG_02286   |
| 0 | 4   | 2 PITG_18999   |
| 0 | 22  | 2 PITG_00501   |
| 0 | 171 | 64 PITG_15830  |
| 0 | 2   | 7 PITG_06863   |
| 0 | 43  | 44 PITG_00423  |
| 0 | 152 | 109 PITG_15335 |
| 0 | 60  | 9 NA           |
| 0 | 16  | 5 PITG_07731   |
| 0 | 21  | 0 NA           |
| 0 | 56  | 232 PITG_00189 |
| 0 | 31  | 9 PITG_19257   |
| 0 | 0   | 2 PITG_15875   |
| 0 | 28  | 8 PITG_08304   |
| 0 | 0   | 0 PITG_07697   |
| 0 | 6   | 0 PITG_10091   |
| 0 | 0   | 0 PITG_15731   |
| 0 | 46  | 2 NA           |
| 0 | 0   | 10 PITG_08781  |
| 0 | 10  | 8 PITG_19111   |
| 0 | 18  | 6 PITG_15619   |
| 0 | 19  | 8 NA           |



|   |     |                |
|---|-----|----------------|
| 0 | 179 | 23 PITG_21110  |
| 0 | 14  | 0 PITG_11999   |
| 0 | 2   | 2 NA           |
| 0 | 40  | 8 PITG_10695   |
| 0 | 6   | 8 PITG_14658   |
| 0 | 42  | 0 PITG_09676   |
| 0 | 10  | 21 PITG_17110  |
| 0 | 9   | 14 PITG_08514  |
| 0 | 3   | 0 NA           |
| 0 | 74  | 266 NA         |
| 0 | 32  | 13 NA          |
| 0 | 8   | 0 NA           |
| 0 | 39  | 28 NA          |
| 0 | 44  | 38 PITG_18288  |
| 0 | 27  | 0 NA           |
| 0 | 21  | 144 PITG_13296 |
| 0 | 4   | 0 PITG_12824   |
| 0 | 0   | 0 PITG_13613   |
| 0 | 2   | 0 PITG_19044   |
| 0 | 17  | 5 PITG_03398   |
| 0 | 83  | 138 PITG_02146 |
| 0 | 0   | 0 PITG_04976   |
| 0 | 189 | 419 PITG_01654 |
| 0 | 13  | 9 PITG_05780   |
| 0 | 4   | 179 PITG_02786 |
| 0 | 48  | 6 PITG_04927   |
| 0 | 6   | 0 NA           |
| 0 | 76  | 27 PITG_07321  |
| 0 | 5   | 6 PITG_12939   |
| 0 | 2   | 2 NA           |
| 0 | 23  | 2 PITG_13840   |
| 0 | 20  | 20 PITG_02624  |
| 0 | 0   | 6 PITG_04956   |
| 0 | 0   | 0 NA           |
| 0 | 2   | 2 PITG_04405   |
| 0 | 4   | 2 PITG_11087   |
| 0 | 852 | 605 PITG_00123 |
| 0 | 83  | 100 PITG_18288 |
| 0 | 0   | 2 PITG_06570   |
| 0 | 12  | 6 NA           |
| 0 | 65  | 4 PITG_13253   |
| 0 | 20  | 25 PITG_08754  |
| 0 | 2   | 4 PITG_11080   |
| 0 | 273 | 278 PITG_15321 |
| 0 | 16  | 2 NA           |
| 0 | 10  | 0 PITG_18853   |
| 0 | 18  | 0 PITG_18860   |

|   |     |                |
|---|-----|----------------|
| 0 | 0   | 2 PITG_07289   |
| 0 | 0   | 0 NA           |
| 0 | 10  | 0 PITG_06113   |
| 0 | 18  | 2 NA           |
| 0 | 11  | 0 NA           |
| 0 | 43  | 11 PITG_15528  |
| 0 | 0   | 0 PITG_03411   |
| 0 | 137 | 184 PITG_16853 |
| 0 | 0   | 0 PITG_19110   |
| 0 | 5   | 0 NA           |
| 0 | 8   | 6 PITG_03058   |
| 0 | 37  | 159 PITG_02286 |
| 0 | 13  | 44 PITG_02259  |
| 0 | 12  | 2 PITG_00308   |
| 0 | 2   | 10 PITG_01107  |
| 0 | 10  | 3 NA           |
| 0 | 41  | 0 PITG_16977   |
| 0 | 0   | 4 PITG_06647   |
| 0 | 19  | 17 PITG_09428  |
| 0 | 9   | 2 PITG_09092   |
| 0 | 24  | 13 PITG_19672  |
| 0 | 2   | 0 NA           |
| 0 | 29  | 29 PITG_02734  |
| 0 | 7   | 14 PITG_02340  |
| 0 | 0   | 2 PITG_06790   |
| 0 | 4   | 4 PITG_14609   |
| 0 | 0   | 2 PITG_01710   |
| 0 | 4   | 4 PITG_09211   |
| 0 | 2   | 0 PITG_17599   |
| 0 | 16  | 18 PITG_06328  |
| 0 | 13  | 3 PITG_12192   |
| 0 | 0   | 2 PITG_04615   |
| 0 | 13  | 0 NA           |
| 0 | 22  | 27 PITG_09751  |
| 0 | 0   | 0 PITG_05629   |
| 0 | 29  | 6 PITG_11618   |
| 0 | 4   | 0 NA           |
| 0 | 0   | 2 PITG_02446   |
| 0 | 231 | 121 PITG_08755 |
| 0 | 17  | 47 PITG_02808  |
| 0 | 6   | 8 PITG_01342   |
| 0 | 13  | 0 PITG_07510   |
| 0 | 13  | 4 PITG_06864   |
| 0 | 4   | 2 PITG_14399   |
| 0 | 4   | 3 PITG_03119   |
| 0 | 14  | 9 NA           |
| 0 | 0   | 3 PITG_05244   |

|     |     |               |
|-----|-----|---------------|
| 0   | 17  | 9 NA          |
| 0   | 25  | 0 PITG_11612  |
| 0   | 2   | 0 PITG_14441  |
| 0   | 0   | 0 PITG_10011  |
| 0   | 53  | 74 PITG_06205 |
| 0   | 16  | 2 NA          |
| 0   | 0   | 0 PITG_04158  |
| 0   | 10  | 0 PITG_10865  |
| 0   | 4   | 4 PITG_02330  |
| 0   | 9   | 21 PITG_02564 |
| 0   | 7   | 2 PITG_16269  |
| 0   | 4   | 2 NA          |
| 0   | 6   | 15 PITG_19470 |
| 0   | 5   | 8 PITG_03658  |
| 0   | 568 | 36 PITG_17230 |
| 0   | 6   | 29 PITG_21071 |
| 0   | 22  | 12 PITG_03620 |
| 0   | 50  | 15 PITG_11775 |
| 0   | 5   | 0 PITG_19615  |
| 0   | 8   | 43 PITG_17990 |
| 0   | 4   | 9 PITG_10461  |
| 0   | 5   | 0 PITG_16917  |
| 0   | 8   | 9 PITG_08699  |
| 0   | 11  | 23 PITG_19216 |
| 318 | 2   | 266 NA        |
| 4   | 12  | 27 NA         |
| 0   | 8   | 7 PITG_09425  |
| 0   | 0   | 0 PITG_06452  |
| 0   | 6   | 12 NA         |
| 0   | 5   | 9 PITG_01870  |
| 0   | 15  | 28 PITG_08295 |
| 0   | 74  | 6 PITG_09374  |
| 0   | 45  | 9 NA          |
| 0   | 49  | 0 NA          |
| 0   | 0   | 2 PITG_04561  |
| 0   | 6   | 4 PITG_19310  |
| 0   | 76  | 58 PITG_10507 |
| 0   | 0   | 0 NA          |
| 0   | 5   | 4 NA          |
| 0   | 0   | 0 PITG_07244  |
| 0   | 38  | 13 PITG_11483 |
| 0   | 0   | 0 NA          |
| 0   | 6   | 9 PITG_17282  |
| 0   | 5   | 4 PITG_17513  |
| 0   | 2   | 6 PITG_18168  |
| 0   | 25  | 15 NA         |
| 0   | 0   | 10 PITG_12852 |

|   |      |                |
|---|------|----------------|
| 0 | 0    | 0 PITG_12140   |
| 0 | 9    | 15 PITG_01738  |
| 0 | 8    | 4 PITG_05321   |
| 0 | 0    | 2 PITG_00148   |
| 0 | 185  | 33 PITG_12973  |
| 0 | 5    | 33 NA          |
| 0 | 35   | 2 PITG_05362   |
| 0 | 87   | 237 PITG_13265 |
| 0 | 64   | 2 PITG_19736   |
| 0 | 3    | 4 PITG_05168   |
| 0 | 7    | 0 NA           |
| 0 | 10   | 18 PITG_19472  |
| 0 | 102  | 2 PITG_19287   |
| 0 | 8    | 52 PITG_20489  |
| 0 | 0    | 0 PITG_01594   |
| 2 | 6    | 6 PITG_06862   |
| 0 | 7    | 2 PITG_09246   |
| 0 | 140  | 25 PITG_00947  |
| 0 | 8    | 6 PITG_13939   |
| 0 | 3    | 2 PITG_15551   |
| 0 | 2    | 2 PITG_10937   |
| 0 | 0    | 0 PITG_16930   |
| 0 | 2    | 2 NA           |
| 0 | 29   | 28 NA          |
| 0 | 90   | 338 PITG_04958 |
| 0 | 5    | 5 PITG_19867   |
| 3 | 0    | 2 NA           |
| 0 | 65   | 19 NA          |
| 0 | 2    | 2 PITG_10837   |
| 0 | 52   | 11 PITG_17031  |
| 0 | 10   | 22 PITG_06920  |
| 0 | 8    | 2 PITG_14181   |
| 0 | 7    | 18 PITG_16833  |
| 0 | 18   | 0 PITG_12283   |
| 0 | 9    | 0 PITG_17426   |
| 0 | 0    | 0 PITG_17928   |
| 0 | 35   | 5 NA           |
| 0 | 0    | 0 PITG_10687   |
| 0 | 0    | 0 NA           |
| 0 | 6    | 5 PITG_00315   |
| 0 | 7    | 4 PITG_20043   |
| 0 | 0    | 2 PITG_09995   |
| 0 | 1084 | 45 PITG_17230  |
| 0 | 45   | 11 PITG_04395  |
| 0 | 0    | 15 PITG_11143  |
| 0 | 9    | 153 NA         |
| 0 | 2    | 0 PITG_21640   |

|     |     |                |
|-----|-----|----------------|
| 0   | 74  | 35 PITG_18355  |
| 0   | 0   | 2 PITG_03987   |
| 0   | 831 | 172 NA         |
| 0   | 3   | 6 PITG_03152   |
| 0   | 13  | 50 PITG_04441  |
| 0   | 2   | 15 PITG_03401  |
| 0   | 31  | 40 PITG_20849  |
| 0   | 41  | 0 PITG_22587   |
| 0   | 82  | 7 PITG_01109   |
| 0   | 0   | 0 PITG_06682   |
| 0   | 21  | 4 PITG_01578   |
| 0   | 489 | 101 PITG_08569 |
| 0   | 26  | 9 PITG_12523   |
| 0   | 2   | 6 PITG_13715   |
| 0   | 5   | 36 NA          |
| 0   | 4   | 0 NA           |
| 0   | 4   | 0 NA           |
| 0   | 0   | 8 PITG_07804   |
| 0   | 4   | 10 NA          |
| 0   | 31  | 5 PITG_03276   |
| 0   | 2   | 0 NA           |
| 0   | 9   | 20 PITG_09965  |
| 0   | 0   | 4 PITG_19693   |
| 0   | 6   | 0 PITG_17965   |
| 0   | 6   | 7 PITG_10014   |
| 0   | 2   | 3 PITG_15602   |
| 0   | 2   | 12 PITG_03611  |
| 0   | 9   | 40 PITG_03737  |
| 0   | 0   | 3 PITG_16940   |
| 0   | 2   | 22 PITG_14002  |
| 0   | 6   | 0 NA           |
| 0   | 0   | 4 NA           |
| 0   | 2   | 7 PITG_05510   |
| 0   | 98  | 39 PITG_07745  |
| 0   | 0   | 0 PITG_21889   |
| 0   | 47  | 75 PITG_12330  |
| 0   | 7   | 7 PITG_10058   |
| 0   | 7   | 16 PITG_07062  |
| 0   | 2   | 0 PITG_07068   |
| 0   | 16  | 7 PITG_12220   |
| 0   | 2   | 16 PITG_00064  |
| 0   | 5   | 15 PITG_09891  |
| 146 | 60  | 2084 NA        |
| 0   | 6   | 0 PITG_20311   |
| 0   | 0   | 0 NA           |
| 0   | 30  | 12 PITG_06165  |
| 0   | 0   | 4 PITG_05221   |

|     |     |                 |
|-----|-----|-----------------|
| 0   | 8   | 18 PITG_08436   |
| 0   | 5   | 2 PITG_08195    |
| 0   | 0   | 0 PITG_04956    |
| 0   | 6   | 0 PITG_21988    |
| 0   | 3   | 4 PITG_03577    |
| 183 | 32  | 362 NA          |
| 0   | 10  | 9 PITG_09247    |
| 0   | 12  | 41 PITG_01103   |
| 0   | 2   | 4 NA            |
| 0   | 9   | 0 PITG_20765    |
| 0   | 9   | 27 PITG_04820   |
| 0   | 5   | 11 PITG_02135   |
| 0   | 2   | 0 PITG_05299    |
| 0   | 4   | 6 PITG_01957    |
| 0   | 106 | 44 PITG_18361   |
| 0   | 414 | 210 PITG_11012  |
| 0   | 9   | 10 PITG_03965   |
| 0   | 2   | 0 PITG_11183    |
| 4   | 0   | 4 NA            |
| 0   | 19  | 63 PITG_05394   |
| 0   | 12  | 45 PITG_02198   |
| 0   | 10  | 2 PITG_11100    |
| 0   | 2   | 0 PITG_08407    |
| 0   | 104 | 38 PITG_18364   |
| 0   | 2   | 6 PITG_18377    |
| 0   | 7   | 8 PITG_11888    |
| 0   | 2   | 2 PITG_07865    |
| 0   | 7   | 6 PITG_06001    |
| 0   | 6   | 0 PITG_13291    |
| 0   | 50  | 28 PITG_09728   |
| 0   | 2   | 0 PITG_21349    |
| 0   | 0   | 2 PITG_00215    |
| 0   | 0   | 5 PITG_07995    |
| 0   | 6   | 4 NA            |
| 0   | 71  | 6 PITG_06775    |
| 0   | 19  | 23 PITG_22716   |
| 0   | 30  | 2 NA            |
| 0   | 0   | 0 NA            |
| 0   | 6   | 18 PITG_07036   |
| 0   | 8   | 7 NA            |
| 0   | 47  | 110 PITG_17925  |
| 0   | 3   | 8 PITG_07302    |
| 0   | 939 | 1751 PITG_07999 |
| 0   | 7   | 0 PITG_20830    |
| 0   | 131 | 35 PITG_01516   |
| 0   | 2   | 14 PITG_03044   |
| 0   | 8   | 8 PITG_09381    |

|   |     |                |
|---|-----|----------------|
| 0 | 63  | 32 PITG_01721  |
| 0 | 7   | 32 PITG_20676  |
| 0 | 7   | 0 PITG_17994   |
| 0 | 4   | 2 PITG_13938   |
| 0 | 8   | 7 PITG_02021   |
| 0 | 27  | 21 PITG_12277  |
| 0 | 0   | 0 PITG_04185   |
| 0 | 0   | 0 PITG_06907   |
| 0 | 9   | 0 PITG_10721   |
| 0 | 18  | 146 PITG_14175 |
| 0 | 0   | 3 PITG_17049   |
| 0 | 21  | 3 PITG_17049   |
| 0 | 46  | 12 PITG_17495  |
| 0 | 13  | 0 PITG_13505   |
| 0 | 35  | 8 PITG_16563   |
| 3 | 0   | 0 PITG_08855   |
| 0 | 11  | 0 PITG_11807   |
| 0 | 2   | 0 PITG_14239   |
| 0 | 2   | 6 PITG_17072   |
| 0 | 4   | 2 PITG_04181   |
| 0 | 59  | 22 PITG_04842  |
| 0 | 0   | 0 PITG_13376   |
| 0 | 4   | 0 PITG_14717   |
| 0 | 0   | 0 PITG_08305   |
| 0 | 4   | 2 PITG_01663   |
| 0 | 6   | 0 NA           |
| 0 | 14  | 10 PITG_03744  |
| 0 | 7   | 20 PITG_03006  |
| 0 | 19  | 4 PITG_01818   |
| 0 | 22  | 30 PITG_19514  |
| 0 | 34  | 2 NA           |
| 0 | 7   | 6 NA           |
| 0 | 0   | 0 PITG_13527   |
| 0 | 16  | 15 NA          |
| 0 | 0   | 3 NA           |
| 0 | 6   | 0 NA           |
| 0 | 391 | 445 PITG_20041 |
| 0 | 0   | 2 PITG_10664   |
| 0 | 0   | 0 PITG_16200   |
| 0 | 0   | 0 PITG_03860   |
| 0 | 10  | 2 PITG_16079   |
| 0 | 94  | 56 PITG_12291  |
| 0 | 34  | 4 NA           |
| 0 | 10  | 4 PITG_12484   |
| 0 | 10  | 2 PITG_03547   |
| 0 | 0   | 3 PITG_00283   |
| 0 | 0   | 0 NA           |

|   |      |                 |
|---|------|-----------------|
| 0 | 100  | 2 PITG_16358    |
| 0 | 0    | 0 PITG_06664    |
| 0 | 16   | 46 PITG_01718   |
| 0 | 2    | 0 PITG_07426    |
| 0 | 4    | 2 PITG_15116    |
| 0 | 0    | 0 PITG_01203    |
| 0 | 0    | 0 PITG_10837    |
| 0 | 21   | 26 PITG_21014   |
| 0 | 15   | 4 PITG_13569    |
| 0 | 62   | 51 PITG_10524   |
| 0 | 22   | 0 PITG_05559    |
| 0 | 15   | 86 PITG_18712   |
| 0 | 10   | 2 PITG_00858    |
| 0 | 4    | 0 PITG_14863    |
| 0 | 122  | 47 PITG_01124   |
| 0 | 24   | 11 PITG_14806   |
| 0 | 0    | 2 PITG_15900    |
| 0 | 10   | 9 PITG_00500    |
| 0 | 0    | 0 PITG_18521    |
| 0 | 10   | 4 NA            |
| 0 | 0    | 2 PITG_10888    |
| 0 | 21   | 5 PITG_03826    |
| 0 | 10   | 0 PITG_16487    |
| 0 | 0    | 8 PITG_09505    |
| 0 | 31   | 19 PITG_09834   |
| 0 | 4    | 0 PITG_02796    |
| 0 | 307  | 162 PITG_10597  |
| 0 | 0    | 0 PITG_08393    |
| 0 | 0    | 21 PITG_13838   |
| 0 | 121  | 206 NA          |
| 0 | 2    | 14 PITG_01293   |
| 0 | 15   | 10 NA           |
| 0 | 161  | 32 PITG_07857   |
| 0 | 70   | 6 PITG_16365    |
| 0 | 23   | 15 PITG_20201   |
| 0 | 12   | 2 NA            |
| 0 | 22   | 0 NA            |
| 0 | 0    | 0 PITG_04725    |
| 9 | 28   | 132 NA          |
| 0 | 12   | 3 PITG_01063    |
| 0 | 17   | 6 PITG_13746    |
| 0 | 20   | 94 PITG_11116   |
| 0 | 4    | 16 PITG_10481   |
| 0 | 5204 | 6946 PITG_04074 |
| 0 | 11   | 2 PITG_15852    |
| 0 | 69   | 59 PITG_09549   |
| 0 | 0    | 0 PITG_02723    |



|   |     |                |
|---|-----|----------------|
| 0 | 5   | 0 NA           |
| 0 | 379 | 483 PITG_20212 |
| 0 | 51  | 9 PITG_01174   |
| 0 | 30  | 6 NA           |
| 0 | 2   | 2 PITG_10006   |
| 0 | 20  | 20 NA          |
| 0 | 0   | 0 NA           |
| 0 | 80  | 65 NA          |
| 0 | 11  | 10 PITG_19472  |
| 0 | 40  | 4 PITG_08412   |
| 0 | 12  | 2 PITG_11179   |
| 0 | 20  | 7 PITG_08741   |
| 0 | 238 | 132 PITG_07031 |
| 0 | 0   | 0 PITG_05830   |
| 0 | 2   | 0 PITG_19125   |
| 0 | 24  | 2 PITG_07815   |
| 0 | 0   | 0 NA           |
| 0 | 2   | 6 PITG_02289   |
| 0 | 8   | 2 PITG_07523   |
| 0 | 4   | 2 PITG_05761   |
| 0 | 16  | 15 PITG_08394  |
| 0 | 0   | 5 PITG_07102   |
| 0 | 12  | 20 PITG_13831  |
| 0 | 12  | 2 PITG_12989   |
| 0 | 6   | 5 PITG_11158   |
| 0 | 0   | 27 PITG_16312  |
| 0 | 2   | 0 NA           |
| 0 | 17  | 2 PITG_11220   |
| 0 | 21  | 4 NA           |
| 0 | 45  | 50 PITG_13157  |
| 0 | 47  | 10 PITG_21416  |
| 0 | 0   | 11 NA          |
| 0 | 43  | 4 PITG_03852   |
| 0 | 10  | 45 PITG_04682  |
| 0 | 15  | 2 NA           |
| 0 | 55  | 45 PITG_10463  |
| 0 | 4   | 8 PITG_05358   |
| 0 | 0   | 0 PITG_00408   |
| 0 | 0   | 5 PITG_03767   |
| 0 | 49  | 26 PITG_04114  |
| 0 | 13  | 15 PITG_03219  |
| 0 | 98  | 44 PITG_00479  |
| 0 | 12  | 13 NA          |
| 0 | 15  | 4 PITG_07241   |
| 0 | 0   | 0 NA           |
| 0 | 3   | 0 PITG_02598   |
| 0 | 0   | 11 PITG_12169  |

|      |     |                |
|------|-----|----------------|
| 0    | 24  | 10 PITG_01992  |
| 0    | 6   | 0 PITG_00537   |
| 0    | 16  | 20 PITG_21517  |
| 0    | 20  | 2 PITG_00983   |
| 0    | 38  | 44 PITG_05690  |
| 0    | 6   | 2 PITG_09534   |
| 0    | 30  | 26 PITG_19530  |
| 0    | 6   | 0 PITG_01749   |
| 0    | 16  | 12 PITG_09484  |
| 0    | 7   | 0 NA           |
| 0    | 0   | 0 PITG_04023   |
| 0    | 6   | 21 NA          |
| 0    | 6   | 2 PITG_04001   |
| 0    | 102 | 18 PITG_18381  |
| 0    | 0   | 0 PITG_14923   |
| 0    | 4   | 0 PITG_18027   |
| 0    | 2   | 4 PITG_08452   |
| 0    | 29  | 0 NA           |
| 0    | 104 | 109 PITG_08802 |
| 0    | 0   | 0 PITG_14861   |
| 0    | 537 | 154 PITG_08181 |
| 0    | 3   | 3 PITG_04426   |
| 0    | 4   | 2 PITG_14109   |
| 0    | 0   | 0 PITG_02716   |
| 0    | 14  | 0 NA           |
| 0    | 4   | 5 PITG_05313   |
| 0    | 0   | 3 PITG_07233   |
| 0    | 0   | 2 PITG_16344   |
| 0    | 13  | 2 PITG_21944   |
| 0    | 11  | 17 PITG_06596  |
| 0    | 50  | 49 PITG_02784  |
| 0    | 7   | 2 PITG_01920   |
| 0    | 175 | 384 NA         |
| 0    | 8   | 3 NA           |
| 0    | 39  | 4 NA           |
| 0    | 41  | 2 PITG_01772   |
| 0    | 28  | 0 PITG_09035   |
| 0    | 38  | 104 PITG_20794 |
| 0    | 0   | 0 PITG_13752   |
| 0    | 35  | 12 NA          |
| 0    | 0   | 0 PITG_16781   |
| 0    | 0   | 0 PITG_10378   |
| 0    | 40  | 2 PITG_17942   |
| 1421 | 125 | 1193 NA        |
| 0    | 11  | 0 NA           |
| 0    | 0   | 0 PITG_01152   |
| 0    | 0   | 7 PITG_03821   |

|     |     |                |
|-----|-----|----------------|
| 0   | 0   | 3 PITG_11802   |
| 0   | 14  | 85 PITG_11170  |
| 0   | 8   | 0 NA           |
| 0   | 14  | 9 NA           |
| 0   | 41  | 13 PITG_17023  |
| 769 | 20  | 708 NA         |
| 0   | 0   | 4 PITG_16684   |
| 0   | 11  | 11 PITG_04039  |
| 0   | 8   | 30 PITG_02724  |
| 0   | 8   | 53 PITG_10083  |
| 0   | 5   | 2 PITG_03592   |
| 0   | 80  | 12 PITG_09474  |
| 0   | 43  | 0 PITG_15154   |
| 0   | 0   | 2 PITG_00687   |
| 0   | 4   | 0 NA           |
| 0   | 5   | 2 PITG_18274   |
| 0   | 82  | 55 PITG_04485  |
| 0   | 13  | 0 PITG_09444   |
| 0   | 0   | 2 NA           |
| 0   | 5   | 4 NA           |
| 0   | 10  | 4 PITG_09996   |
| 0   | 136 | 159 PITG_14230 |
| 0   | 4   | 6 PITG_17287   |
| 0   | 3   | 6 PITG_03710   |
| 0   | 9   | 4 PITG_05627   |
| 0   | 48  | 8 PITG_20838   |
| 0   | 0   | 2 NA           |
| 0   | 11  | 77 PITG_12153  |
| 0   | 19  | 22 PITG_04333  |
| 0   | 23  | 25 PITG_10410  |
| 0   | 5   | 2 PITG_07109   |
| 0   | 0   | 0 PITG_08991   |
| 0   | 33  | 9 PITG_04628   |
| 0   | 3   | 23 PITG_00663  |
| 0   | 0   | 0 NA           |
| 0   | 29  | 74 PITG_14047  |
| 0   | 2   | 9 PITG_03169   |
| 0   | 0   | 2 PITG_14473   |
| 0   | 6   | 6 PITG_14835   |
| 0   | 14  | 63 PITG_16456  |
| 0   | 21  | 2 NA           |
| 0   | 2   | 2 PITG_17663   |
| 0   | 2   | 2 PITG_04889   |
| 0   | 2   | 4 PITG_22164   |
| 0   | 2   | 0 PITG_14717   |
| 0   | 128 | 6 PITG_16392   |
| 0   | 4   | 14 PITG_09536  |

|     |     |                |
|-----|-----|----------------|
| 0   | 12  | 0 PITG_08873   |
| 0   | 0   | 2 NA           |
| 0   | 120 | 48 PITG_02206  |
| 0   | 455 | 70 PITG_01568  |
| 0   | 246 | 99 PITG_16210  |
| 0   | 55  | 17 PITG_17040  |
| 0   | 15  | 22 PITG_03423  |
| 0   | 6   | 13 PITG_23007  |
| 0   | 4   | 2 PITG_02716   |
| 532 | 0   | 350 NA         |
| 0   | 13  | 7 PITG_06199   |
| 0   | 2   | 6 PITG_05559   |
| 0   | 3   | 4 PITG_17866   |
| 0   | 2   | 4 PITG_09956   |
| 0   | 2   | 6 PITG_08394   |
| 0   | 4   | 4 NA           |
| 0   | 0   | 0 NA           |
| 0   | 9   | 2 PITG_01809   |
| 0   | 3   | 28 PITG_02724  |
| 0   | 15  | 0 PITG_16904   |
| 0   | 37  | 30 PITG_20792  |
| 0   | 2   | 7 PITG_06429   |
| 0   | 60  | 22 PITG_05150  |
| 0   | 12  | 0 PITG_10087   |
| 0   | 2   | 8 PITG_06822   |
| 0   | 4   | 13 PITG_13666  |
| 0   | 5   | 6 PITG_11773   |
| 0   | 6   | 0 PITG_18092   |
| 0   | 0   | 0 NA           |
| 0   | 162 | 63 PITG_07476  |
| 0   | 45  | 263 PITG_11883 |
| 0   | 25  | 2 PITG_11812   |
| 0   | 4   | 0 NA           |
| 0   | 2   | 7 PITG_18656   |
| 0   | 35  | 5 NA           |
| 0   | 14  | 4 PITG_06148   |
| 0   | 12  | 11 PITG_05326  |
| 0   | 81  | 49 PITG_03388  |
| 0   | 15  | 2 NA           |
| 0   | 67  | 19 PITG_18016  |
| 0   | 79  | 31 PITG_14259  |
| 0   | 0   | 2 NA           |
| 0   | 0   | 0 PITG_13663   |
| 0   | 0   | 0 PITG_13523   |
| 0   | 35  | 19 PITG_03172  |
| 0   | 17  | 0 NA           |
| 0   | 4   | 3 PITG_01719   |

|   |     |                |
|---|-----|----------------|
| 0 | 64  | 64 PITG_11734  |
| 0 | 17  | 0 NA           |
| 0 | 16  | 2 PITG_02421   |
| 0 | 33  | 18 PITG_08669  |
| 0 | 4   | 32 PITG_19537  |
| 0 | 2   | 2 PITG_01860   |
| 0 | 0   | 0 PITG_21553   |
| 0 | 2   | 0 NA           |
| 0 | 31  | 0 NA           |
| 0 | 0   | 2 PITG_15016   |
| 0 | 8   | 5 PITG_15820   |
| 0 | 4   | 0 PITG_01647   |
| 0 | 0   | 0 PITG_04179   |
| 0 | 5   | 3 NA           |
| 0 | 2   | 0 PITG_01003   |
| 0 | 0   | 2 PITG_04700   |
| 0 | 6   | 7 PITG_06025   |
| 0 | 32  | 15 PITG_13968  |
| 0 | 167 | 45 PITG_15857  |
| 0 | 10  | 8 NA           |
| 0 | 66  | 105 PITG_02572 |
| 0 | 2   | 0 NA           |
| 0 | 4   | 3 PITG_13651   |
| 0 | 8   | 4 PITG_03874   |
| 0 | 6   | 13 PITG_01206  |
| 0 | 77  | 10 PITG_01846  |
| 0 | 0   | 0 PITG_18797   |
| 0 | 0   | 0 PITG_05170   |
| 0 | 24  | 11 PITG_00502  |
| 0 | 221 | 160 PITG_09783 |
| 0 | 40  | 15 NA          |
| 0 | 21  | 4 PITG_03331   |
| 0 | 17  | 10 NA          |
| 0 | 17  | 2 PITG_04596   |
| 0 | 5   | 10 NA          |
| 0 | 11  | 4 PITG_20528   |
| 0 | 66  | 34 PITG_02124  |
| 0 | 0   | 11 PITG_11291  |
| 0 | 2   | 2 NA           |
| 0 | 5   | 8 PITG_14717   |
| 0 | 5   | 0 PITG_10420   |
| 0 | 8   | 2 PITG_04579   |
| 0 | 5   | 0 PITG_11296   |
| 0 | 4   | 4 NA           |
| 0 | 66  | 129 PITG_11111 |
| 0 | 13  | 4 PITG_05304   |
| 0 | 0   | 0 PITG_22311   |

|    |     |                |
|----|-----|----------------|
| 0  | 15  | 0 PITG_02424   |
| 0  | 2   | 2 PITG_01201   |
| 0  | 17  | 2 PITG_08145   |
| 0  | 23  | 17 PITG_05079  |
| 0  | 0   | 4 PITG_05413   |
| 0  | 100 | 135 PITG_16382 |
| 0  | 3   | 0 PITG_16328   |
| 0  | 0   | 2 PITG_18312   |
| 0  | 0   | 2 PITG_06389   |
| 0  | 12  | 15 PITG_06918  |
| 0  | 45  | 29 PITG_09428  |
| 0  | 0   | 0 NA           |
| 0  | 0   | 0 PITG_00789   |
| 0  | 6   | 10 PITG_07030  |
| 0  | 123 | 26 PITG_05635  |
| 0  | 0   | 11 PITG_16322  |
| 0  | 54  | 41 PITG_12577  |
| 0  | 5   | 2 PITG_03018   |
| 0  | 5   | 11 PITG_11272  |
| 0  | 5   | 15 PITG_10058  |
| 0  | 37  | 48 NA          |
| 0  | 7   | 0 PITG_01520   |
| 0  | 3   | 0 NA           |
| 0  | 3   | 0 PITG_13439   |
| 0  | 0   | 10 PITG_02401  |
| 0  | 2   | 4 PITG_05340   |
| 0  | 2   | 14 PITG_06471  |
| 0  | 46  | 20 PITG_09873  |
| 0  | 14  | 16 PITG_12753  |
| 0  | 17  | 22 NA          |
| 0  | 88  | 115 PITG_05922 |
| 0  | 5   | 20 PITG_07083  |
| 0  | 39  | 73 PITG_01818  |
| 0  | 7   | 2 NA           |
| 0  | 9   | 24 PITG_05450  |
| 0  | 14  | 8 PITG_02400   |
| 0  | 6   | 0 NA           |
| 0  | 0   | 8 PITG_11753   |
| 0  | 6   | 4 PITG_01065   |
| 0  | 5   | 14 NA          |
| 0  | 3   | 20 PITG_00193  |
| 0  | 6   | 5 PITG_19791   |
| 83 | 583 | 350 NA         |
| 0  | 18  | 4 NA           |
| 0  | 0   | 2 PITG_08189   |
| 0  | 2   | 0 PITG_01595   |
| 0  | 0   | 0 PITG_08305   |

|   |      |                 |
|---|------|-----------------|
| 0 | 0    | 2 PITG_02529    |
| 0 | 0    | 4 PITG_04956    |
| 0 | 19   | 12 PITG_00460   |
| 0 | 218  | 221 PITG_13528  |
| 0 | 0    | 4 NA            |
| 0 | 4    | 6 PITG_18314    |
| 0 | 0    | 0 PITG_01749    |
| 0 | 0    | 10 NA           |
| 0 | 2    | 6 NA            |
| 0 | 25   | 6 NA            |
| 0 | 11   | 18 PITG_07470   |
| 0 | 4    | 0 NA            |
| 0 | 0    | 4 PITG_21688    |
| 0 | 57   | 4 PITG_01774    |
| 0 | 6    | 0 NA            |
| 0 | 18   | 0 NA            |
| 0 | 30   | 27 PITG_00961   |
| 0 | 45   | 46 PITG_01525   |
| 0 | 44   | 78 PITG_13368   |
| 0 | 2    | 2 PITG_03080    |
| 0 | 33   | 12 NA           |
| 0 | 0    | 3 PITG_19402    |
| 0 | 0    | 16 PITG_16104   |
| 0 | 0    | 3 PITG_12463    |
| 0 | 90   | 90 PITG_09628   |
| 0 | 56   | 12 NA           |
| 0 | 14   | 6 PITG_21184    |
| 0 | 44   | 31 PITG_01932   |
| 0 | 15   | 0 PITG_16463    |
| 0 | 115  | 183 PITG_20904  |
| 0 | 0    | 0 PITG_08992    |
| 0 | 10   | 28 PITG_18063   |
| 0 | 3    | 7 PITG_14770    |
| 0 | 95   | 70 PITG_06674   |
| 0 | 1313 | 1144 PITG_01096 |
| 0 | 0    | 2 PITG_17492    |
| 0 | 7    | 5 PITG_02531    |
| 0 | 25   | 18 PITG_16798   |
| 0 | 0    | 0 PITG_15140    |
| 0 | 2    | 8 PITG_10138    |
| 0 | 4    | 0 PITG_15783    |
| 0 | 0    | 2 PITG_21509    |
| 0 | 28   | 16 PITG_11272   |
| 0 | 4    | 56 PITG_11170   |
| 0 | 6    | 0 NA            |
| 0 | 38   | 0 NA            |
| 0 | 23   | 4 PITG_16227    |

|   |      |                 |
|---|------|-----------------|
| 0 | 214  | 95 PITG_11729   |
| 0 | 2639 | 2130 PITG_15628 |
| 0 | 0    | 0 PITG_16813    |
| 0 | 27   | 0 NA            |
| 0 | 21   | 11 PITG_07801   |
| 0 | 50   | 8 PITG_16199    |
| 0 | 0    | 0 NA            |
| 0 | 35   | 9 PITG_18088    |
| 0 | 6    | 7 NA            |
| 0 | 0    | 0 NA            |
| 0 | 0    | 10 PITG_22685   |
| 0 | 12   | 27 PITG_20088   |
| 0 | 4    | 0 PITG_11437    |
| 0 | 11   | 0 NA            |
| 0 | 40   | 16 NA           |
| 0 | 0    | 3 NA            |
| 0 | 26   | 0 NA            |
| 0 | 8    | 2 PITG_11578    |
| 0 | 43   | 14 PITG_06101   |
| 0 | 6    | 2 PITG_11038    |
| 0 | 79   | 216 PITG_16328  |
| 0 | 14   | 8 PITG_00658    |
| 0 | 14   | 12 PITG_07891   |
| 0 | 22   | 4 PITG_14172    |
| 0 | 61   | 48 NA           |
| 0 | 24   | 4 PITG_03946    |
| 0 | 28   | 20 PITG_14608   |
| 0 | 23   | 17 PITG_07077   |
| 0 | 0    | 0 PITG_21511    |
| 0 | 0    | 0 PITG_15058    |
| 0 | 0    | 0 NA            |
| 0 | 149  | 104 PITG_00571  |
| 0 | 14   | 7 PITG_08708    |
| 0 | 56   | 6 NA            |
| 0 | 0    | 2 PITG_16920    |
| 0 | 3    | 0 PITG_05353    |
| 0 | 4    | 0 PITG_11368    |
| 0 | 0    | 0 PITG_07852    |
| 0 | 13   | 0 PITG_07889    |
| 0 | 65   | 165 PITG_14278  |
| 0 | 17   | 0 PITG_11009    |
| 0 | 17   | 0 PITG_15243    |
| 0 | 5    | 0 PITG_15856    |
| 0 | 27   | 4 PITG_01578    |
| 0 | 18   | 27 PITG_13223   |
| 0 | 18   | 6 PITG_05354    |
| 0 | 201  | 21 PITG_09039   |



|   |     |                |
|---|-----|----------------|
| 0 | 20  | 4 PITG_09991   |
| 0 | 7   | 42 PITG_01404  |
| 0 | 4   | 2 NA           |
| 0 | 3   | 2 PITG_04554   |
| 0 | 5   | 0 PITG_00067   |
| 0 | 16  | 27 NA          |
| 0 | 4   | 13 PITG_00310  |
| 0 | 41  | 14 NA          |
| 0 | 12  | 13 PITG_13421  |
| 0 | 52  | 18 PITG_06818  |
| 0 | 33  | 14 PITG_12470  |
| 0 | 4   | 4 PITG_11194   |
| 0 | 2   | 2 NA           |
| 0 | 21  | 9 PITG_12913   |
| 0 | 53  | 13 PITG_05368  |
| 0 | 0   | 2 PITG_06551   |
| 0 | 2   | 4 PITG_07334   |
| 0 | 45  | 13 PITG_03883  |
| 0 | 34  | 0 NA           |
| 0 | 2   | 18 PITG_06862  |
| 0 | 9   | 5 PITG_03260   |
| 0 | 0   | 4 PITG_18695   |
| 0 | 26  | 36 PITG_21380  |
| 0 | 0   | 4 PITG_18458   |
| 0 | 0   | 0 PITG_15844   |
| 0 | 35  | 33 PITG_04980  |
| 0 | 5   | 12 PITG_09220  |
| 0 | 20  | 5 NA           |
| 0 | 2   | 0 PITG_16478   |
| 0 | 12  | 2 NA           |
| 0 | 50  | 12 NA          |
| 0 | 7   | 10 PITG_06319  |
| 0 | 0   | 4 PITG_04458   |
| 0 | 4   | 0 NA           |
| 0 | 0   | 4 PITG_11087   |
| 0 | 0   | 0 PITG_13167   |
| 0 | 4   | 10 PITG_20406  |
| 0 | 135 | 92 PITG_18235  |
| 0 | 5   | 17 PITG_12266  |
| 0 | 15  | 0 NA           |
| 0 | 9   | 11 PITG_05681  |
| 0 | 16  | 8 PITG_13747   |
| 0 | 2   | 0 PITG_10893   |
| 0 | 48  | 179 PITG_10543 |
| 0 | 21  | 27 PITG_00479  |
| 0 | 47  | 0 NA           |
| 0 | 2   | 2 PITG_11291   |

|   |     |                |
|---|-----|----------------|
| 0 | 4   | 2 PITG_01426   |
| 0 | 63  | 24 PITG_02774  |
| 0 | 12  | 0 PITG_14131   |
| 0 | 68  | 124 PITG_05512 |
| 0 | 43  | 8 PITG_10002   |
| 0 | 10  | 0 NA           |
| 0 | 0   | 5 PITG_08184   |
| 0 | 0   | 6 NA           |
| 0 | 45  | 23 PITG_09375  |
| 0 | 2   | 0 PITG_08530   |
| 0 | 30  | 5 PITG_15908   |
| 0 | 0   | 2 PITG_11587   |
| 0 | 0   | 0 PITG_03604   |
| 0 | 6   | 6 PITG_08587   |
| 0 | 25  | 20 PITG_02792  |
| 0 | 21  | 3 PITG_13153   |
| 0 | 0   | 0 NA           |
| 0 | 0   | 2 PITG_10472   |
| 0 | 0   | 2 PITG_02244   |
| 0 | 186 | 154 PITG_16808 |
| 0 | 25  | 24 PITG_08934  |
| 0 | 16  | 19 PITG_01663  |
| 0 | 0   | 0 PITG_00215   |
| 0 | 65  | 0 PITG_03179   |
| 0 | 200 | 27 PITG_10483  |
| 0 | 8   | 4 PITG_11157   |
| 0 | 7   | 2 PITG_00466   |
| 0 | 2   | 0 PITG_15606   |
| 0 | 25  | 7 PITG_16360   |
| 0 | 10  | 0 NA           |
| 0 | 2   | 0 PITG_03223   |
| 0 | 0   | 0 PITG_11466   |
| 0 | 0   | 0 PITG_13070   |
| 0 | 2   | 0 NA           |
| 0 | 33  | 12 PITG_04596  |
| 0 | 0   | 2 PITG_17112   |
| 0 | 55  | 84 PITG_07985  |
| 0 | 19  | 21 PITG_07077  |
| 0 | 41  | 38 PITG_00300  |
| 0 | 2   | 3 PITG_11976   |
| 0 | 4   | 4 PITG_01243   |
| 0 | 2   | 0 PITG_06946   |
| 0 | 14  | 4 PITG_12984   |
| 0 | 127 | 16 PITG_06507  |
| 0 | 0   | 0 PITG_07417   |
| 0 | 0   | 2 PITG_17239   |
| 0 | 39  | 88 PITG_04508  |

|     |     |                |
|-----|-----|----------------|
| 0   | 0   | 0 NA           |
| 0   | 11  | 0 PITG_08550   |
| 0   | 46  | 23 PITG_02576  |
| 0   | 2   | 2 PITG_05692   |
| 0   | 10  | 4 NA           |
| 0   | 0   | 0 PITG_04603   |
| 0   | 0   | 0 PITG_19886   |
| 0   | 3   | 6 PITG_08754   |
| 0   | 0   | 0 NA           |
| 0   | 2   | 0 PITG_13366   |
| 0   | 2   | 2 PITG_18342   |
| 0   | 5   | 0 PITG_08540   |
| 0   | 388 | 141 PITG_08417 |
| 0   | 2   | 0 PITG_08305   |
| 0   | 3   | 0 PITG_09477   |
| 0   | 23  | 45 PITG_21886  |
| 0   | 252 | 156 NA         |
| 0   | 31  | 8 NA           |
| 0   | 105 | 104 PITG_08692 |
| 0   | 12  | 11 PITG_10881  |
| 0   | 6   | 14 PITG_03423  |
| 0   | 55  | 115 PITG_20168 |
| 0   | 2   | 3 PITG_04724   |
| 0   | 0   | 0 PITG_02810   |
| 0   | 24  | 13 PITG_02990  |
| 0   | 0   | 0 PITG_18377   |
| 0   | 0   | 2 PITG_03938   |
| 0   | 73  | 331 PITG_07717 |
| 0   | 2   | 2 NA           |
| 0   | 24  | 10 PITG_08661  |
| 0   | 6   | 9 PITG_11424   |
| 2   | 42  | 44 PITG_17602  |
| 255 | 61  | 583 NA         |
| 0   | 2   | 0 PITG_05244   |
| 0   | 5   | 0 PITG_13417   |
| 0   | 15  | 2 PITG_05847   |
| 0   | 0   | 9 PITG_12496   |
| 0   | 3   | 4 NA           |
| 0   | 29  | 31 PITG_15998  |
| 0   | 2   | 8 PITG_16984   |
| 0   | 0   | 2 PITG_14124   |
| 0   | 3   | 58 PITG_09846  |
| 0   | 15  | 2 PITG_10186   |
| 0   | 2   | 0 PITG_16723   |
| 0   | 48  | 15 PITG_10499  |
| 0   | 37  | 2 NA           |
| 0   | 0   | 4 PITG_21182   |

|    |    |               |
|----|----|---------------|
| 0  | 27 | 6 NA          |
| 0  | 10 | 0 PITG_10213  |
| 0  | 20 | 11 PITG_13273 |
| 0  | 12 | 0 PITG_17963  |
| 0  | 9  | 68 PITG_11712 |
| 0  | 17 | 0 PITG_02126  |
| 0  | 2  | 2 PITG_07247  |
| 0  | 0  | 0 PITG_03946  |
| 0  | 56 | 39 PITG_19456 |
| 0  | 9  | 3 PITG_02851  |
| 0  | 3  | 7 PITG_06720  |
| 0  | 7  | 4 PITG_10027  |
| 0  | 7  | 8 PITG_16720  |
| 24 | 0  | 19 NA         |
| 0  | 2  | 4 PITG_00183  |
| 0  | 0  | 0 PITG_04474  |
| 0  | 44 | 0 PITG_09680  |
| 0  | 0  | 0 PITG_06355  |
| 0  | 10 | 0 PITG_05594  |
| 0  | 0  | 29 PITG_11116 |
| 0  | 36 | 11 NA         |
| 0  | 6  | 10 PITG_11914 |
| 0  | 4  | 4 PITG_19691  |
| 0  | 15 | 288 NA        |
| 0  | 11 | 2 PITG_02152  |
| 0  | 4  | 2 PITG_11019  |
| 0  | 19 | 6 PITG_15534  |
| 0  | 69 | 49 PITG_11926 |
| 0  | 16 | 20 PITG_03259 |
| 0  | 0  | 11 PITG_09724 |
| 0  | 15 | 11 PITG_07795 |
| 0  | 12 | 4 PITG_12963  |
| 0  | 0  | 0 PITG_00530  |
| 0  | 4  | 4 PITG_02230  |
| 0  | 4  | 42 PITG_11702 |
| 14 | 2  | 17 NA         |
| 0  | 71 | 35 PITG_22995 |
| 0  | 0  | 0 NA          |
| 0  | 18 | 53 PITG_17928 |
| 0  | 19 | 99 PITG_17230 |
| 0  | 2  | 0 PITG_01920  |
| 0  | 0  | 0 PITG_02288  |
| 0  | 2  | 5 PITG_20745  |
| 0  | 0  | 4 PITG_07165  |
| 0  | 6  | 6 PITG_05170  |
| 0  | 9  | 0 NA          |
| 0  | 68 | 19 PITG_09260 |

|     |      |                |
|-----|------|----------------|
| 0   | 39   | 2 PITG_13391   |
| 0   | 0    | 0 PITG_14483   |
| 0   | 27   | 266 PITG_13122 |
| 0   | 34   | 0 NA           |
| 0   | 2    | 10 PITG_01991  |
| 0   | 156  | 37 NA          |
| 0   | 37   | 8 PITG_07305   |
| 0   | 12   | 12 NA          |
| 0   | 21   | 2 PITG_16310   |
| 54  | 23   | 32 NA          |
| 0   | 8    | 2 PITG_17407   |
| 0   | 2    | 4 PITG_03265   |
| 0   | 10   | 8 PITG_03408   |
| 0   | 16   | 30 PITG_21028  |
| 0   | 406  | 35 PITG_10447  |
| 0   | 149  | 18 PITG_03005  |
| 0   | 26   | 62 PITG_12266  |
| 0   | 0    | 4 PITG_18237   |
| 18  | 7    | 25 NA          |
| 0   | 21   | 9 PITG_06966   |
| 0   | 0    | 0 PITG_20760   |
| 0   | 0    | 0 PITG_20350   |
| 0   | 35   | 23 NA          |
| 0   | 25   | 37 PITG_17109  |
| 0   | 78   | 229 PITG_08234 |
| 0   | 11   | 0 NA           |
| 0   | 0    | 8 PITG_05584   |
| 21  | 429  | 242 NA         |
| 0   | 2    | 0 NA           |
| 0   | 9    | 2 PITG_11461   |
| 0   | 134  | 162 PITG_18644 |
| 0   | 8    | 6 PITG_19164   |
| 0   | 5    | 13 PITG_14911  |
| 0   | 71   | 10 PITG_19149  |
| 209 | 1186 | 463 NA         |
| 0   | 25   | 35 PITG_11193  |
| 0   | 0    | 2 PITG_16862   |
| 0   | 25   | 10 PITG_01523  |
| 0   | 2    | 0 PITG_21211   |
| 0   | 6    | 2 PITG_00687   |
| 0   | 0    | 4 NA           |
| 0   | 6    | 2 PITG_09290   |
| 0   | 72   | 13 NA          |
| 0   | 0    | 4 NA           |
| 0   | 12   | 9 PITG_00878   |
| 0   | 2    | 2 NA           |
| 0   | 24   | 4 PITG_05854   |

|    |     |                |
|----|-----|----------------|
| 0  | 3   | 0 PITG_17907   |
| 0  | 6   | 0 PITG_01272   |
| 0  | 9   | 0 PITG_15731   |
| 0  | 11  | 8 PITG_13590   |
| 0  | 480 | 82 PITG_12161  |
| 0  | 2   | 0 PITG_07354   |
| 0  | 2   | 27 PITG_11116  |
| 0  | 18  | 8 PITG_10912   |
| 0  | 8   | 2 PITG_11286   |
| 0  | 54  | 20 NA          |
| 0  | 0   | 4 PITG_08189   |
| 28 | 0   | 20 NA          |
| 0  | 12  | 9 NA           |
| 0  | 101 | 8 NA           |
| 0  | 4   | 0 NA           |
| 0  | 2   | 0 PITG_19164   |
| 0  | 2   | 9 PITG_00140   |
| 0  | 2   | 0 PITG_03620   |
| 0  | 6   | 2 PITG_13620   |
| 0  | 4   | 21 PITG_06127  |
| 0  | 0   | 0 NA           |
| 0  | 10  | 11 NA          |
| 0  | 6   | 12 NA          |
| 0  | 4   | 3 PITG_19917   |
| 0  | 389 | 15 PITG_15616  |
| 0  | 17  | 2 PITG_10135   |
| 0  | 0   | 4 PITG_03755   |
| 0  | 0   | 0 PITG_18634   |
| 0  | 48  | 67 PITG_09599  |
| 0  | 5   | 36 PITG_21380  |
| 0  | 0   | 2 NA           |
| 0  | 108 | 57 PITG_15657  |
| 10 | 0   | 15 NA          |
| 0  | 6   | 4 PITG_05187   |
| 0  | 2   | 12 PITG_01188  |
| 0  | 21  | 30 PITG_18632  |
| 0  | 11  | 50 NA          |
| 0  | 139 | 147 PITG_03420 |
| 0  | 0   | 0 PITG_03335   |
| 0  | 27  | 7 PITG_12048   |
| 0  | 5   | 0 PITG_00955   |
| 0  | 209 | 205 PITG_17606 |
| 0  | 28  | 38 PITG_07168  |
| 0  | 0   | 9 PITG_13979   |
| 0  | 3   | 2 PITG_02477   |
| 0  | 24  | 2 NA           |
| 0  | 25  | 29 PITG_12226  |

|    |      |                |
|----|------|----------------|
| 0  | 0    | 0 PITG_00350   |
| 0  | 56   | 61 NA          |
| 0  | 0    | 14 PITG_10285  |
| 0  | 89   | 7 PITG_00808   |
| 0  | 18   | 0 NA           |
| 0  | 45   | 48 PITG_16333  |
| 0  | 5    | 9 PITG_11256   |
| 0  | 40   | 20 NA          |
| 2  | 0    | 0 NA           |
| 0  | 10   | 2 PITG_14911   |
| 0  | 6    | 2 PITG_02910   |
| 0  | 23   | 17 NA          |
| 0  | 49   | 46 PITG_16058  |
| 0  | 3    | 4 PITG_05467   |
| 0  | 4    | 6 PITG_11940   |
| 0  | 201  | 299 PITG_07024 |
| 0  | 2    | 0 PITG_05543   |
| 0  | 29   | 7 PITG_13234   |
| 0  | 0    | 0 PITG_06988   |
| 0  | 43   | 8 PITG_06988   |
| 0  | 6    | 2 PITG_13404   |
| 0  | 42   | 26 PITG_04939  |
| 0  | 9    | 0 PITG_03939   |
| 0  | 0    | 0 PITG_03675   |
| 0  | 12   | 53 PITG_00140  |
| 0  | 3    | 4 PITG_04701   |
| 0  | 3    | 4 PITG_06817   |
| 0  | 121  | 30 PITG_06674  |
| 0  | 1610 | 461 PITG_16893 |
| 0  | 154  | 194 PITG_02011 |
| 0  | 84   | 87 PITG_13831  |
| 37 | 5    | 75 NA          |
| 0  | 2    | 2 PITG_09246   |
| 0  | 3    | 0 NA           |
| 0  | 6    | 0 NA           |
| 0  | 41   | 27 PITG_12521  |
| 0  | 0    | 13 NA          |
| 0  | 0    | 2 PITG_12166   |
| 0  | 5    | 2 PITG_09089   |
| 0  | 2    | 2 PITG_16684   |
| 0  | 2    | 0 PITG_19177   |
| 0  | 2    | 5 PITG_11451   |
| 0  | 6    | 7 PITG_21504   |
| 0  | 74   | 74 PITG_14175  |
| 0  | 4    | 8 PITG_03653   |
| 0  | 0    | 0 NA           |
| 0  | 0    | 3 PITG_11461   |

|     |     |                |
|-----|-----|----------------|
| 746 | 15  | 308 NA         |
| 0   | 17  | 2 PITG_18027   |
| 0   | 2   | 0 PITG_16923   |
| 0   | 53  | 40 PITG_15996  |
| 0   | 19  | 26 PITG_10083  |
| 0   | 0   | 5 PITG_00990   |
| 0   | 2   | 2 PITG_11286   |
| 0   | 11  | 6 PITG_02719   |
| 0   | 3   | 0 PITG_06827   |
| 0   | 34  | 12 PITG_10499  |
| 0   | 22  | 3 PITG_19639   |
| 0   | 2   | 0 PITG_07279   |
| 0   | 0   | 9 PITG_10768   |
| 0   | 137 | 38 PITG_16161  |
| 0   | 2   | 3 NA           |
| 0   | 94  | 63 PITG_11789  |
| 0   | 0   | 0 PITG_01704   |
| 0   | 47  | 12 PITG_05226  |
| 0   | 0   | 5 PITG_06943   |
| 0   | 10  | 8 PITG_08421   |
| 0   | 14  | 4 PITG_14257   |
| 0   | 2   | 8 PITG_14722   |
| 0   | 3   | 8 PITG_05757   |
| 0   | 45  | 28 PITG_11083  |
| 0   | 3   | 4 NA           |
| 0   | 2   | 0 PITG_13609   |
| 0   | 23  | 26 PITG_01193  |
| 0   | 29  | 18 PITG_03483  |
| 0   | 57  | 223 PITG_14175 |
| 0   | 4   | 4 PITG_16799   |
| 0   | 0   | 0 NA           |
| 0   | 29  | 22 PITG_04372  |
| 0   | 3   | 2 PITG_03761   |
| 0   | 6   | 11 PITG_11286  |
| 0   | 6   | 2 NA           |
| 0   | 2   | 4 PITG_08189   |
| 0   | 9   | 4 PITG_14561   |
| 0   | 6   | 6 PITG_17287   |
| 0   | 2   | 0 PITG_00197   |
| 0   | 80  | 24 PITG_07338  |
| 0   | 0   | 0 PITG_01932   |
| 0   | 6   | 6 PITG_10556   |
| 0   | 107 | 2 PITG_19237   |
| 0   | 50  | 125 PITG_05183 |
| 0   | 7   | 7 PITG_07933   |
| 0   | 0   | 0 PITG_21619   |
| 0   | 2   | 7 PITG_18067   |



|     |     |                 |
|-----|-----|-----------------|
| 0   | 179 | 29 PITG_04599   |
| 0   | 8   | 2 PITG_12152    |
| 0   | 11  | 2 PITG_01326    |
| 0   | 16  | 3 NA            |
| 0   | 32  | 14 PITG_19781   |
| 0   | 6   | 0 NA            |
| 0   | 180 | 71 NA           |
| 0   | 29  | 4 PITG_00934    |
| 0   | 8   | 2 PITG_06358    |
| 0   | 23  | 29 PITG_06822   |
| 0   | 226 | 225 PITG_14282  |
| 0   | 2   | 8 PITG_05935    |
| 2   | 0   | 9 NA            |
| 0   | 0   | 0 PITG_13815    |
| 0   | 18  | 43 PITG_14126   |
| 0   | 16  | 21 PITG_20502   |
| 0   | 2   | 0 PITG_17549    |
| 4   | 160 | 2429 PITG_12139 |
| 0   | 2   | 2 PITG_03988    |
| 0   | 3   | 4 NA            |
| 0   | 34  | 46 PITG_12346   |
| 0   | 13  | 10 NA           |
| 0   | 15  | 15 PITG_10289   |
| 0   | 35  | 63 PITG_14707   |
| 0   | 57  | 19 NA           |
| 0   | 3   | 0 NA            |
| 0   | 33  | 0 PITG_21644    |
| 0   | 25  | 3 PITG_05975    |
| 0   | 37  | 2 PITG_05495    |
| 0   | 11  | 4 NA            |
| 0   | 46  | 5 PITG_00287    |
| 0   | 2   | 15 PITG_11029   |
| 164 | 6   | 170 NA          |
| 0   | 29  | 0 NA            |
| 0   | 8   | 22 NA           |
| 0   | 100 | 47 PITG_04242   |
| 0   | 0   | 2 NA            |
| 0   | 5   | 2 PITG_21176    |
| 0   | 6   | 0 NA            |
| 0   | 0   | 0 NA            |
| 0   | 2   | 0 PITG_20928    |
| 93  | 11  | 226 NA          |
| 0   | 20  | 14 PITG_06945   |
| 0   | 4   | 2 PITG_06720    |
| 0   | 31  | 119 PITG_03492  |
| 0   | 227 | 228 PITG_08184  |
| 0   | 6   | 10 PITG_00082   |

|     |     |                |
|-----|-----|----------------|
| 0   | 0   | 0 PITG_14489   |
| 0   | 7   | 4 PITG_01761   |
| 0   | 2   | 0 NA           |
| 0   | 79  | 4 PITG_09082   |
| 0   | 679 | 100 PITG_18578 |
| 0   | 20  | 28 PITG_17312  |
| 148 | 0   | 80 NA          |
| 0   | 0   | 0 NA           |
| 0   | 14  | 2 PITG_02814   |
| 0   | 31  | 10 PITG_06003  |
| 0   | 0   | 9 PITG_12514   |
| 0   | 11  | 71 PITG_22103  |
| 0   | 2   | 4 PITG_22038   |
| 0   | 0   | 2 NA           |
| 0   | 2   | 2 PITG_13803   |
| 0   | 2   | 13 PITG_04114  |
| 0   | 5   | 0 PITG_10488   |
| 0   | 3   | 10 PITG_20055  |
| 0   | 0   | 34 PITG_11702  |
| 0   | 0   | 4 PITG_05935   |
| 0   | 0   | 6 PITG_13367   |
| 0   | 33  | 4 PITG_11804   |
| 0   | 7   | 0 PITG_04718   |
| 0   | 0   | 0 PITG_14727   |
| 0   | 32  | 0 PITG_04394   |
| 0   | 2   | 4 NA           |
| 0   | 2   | 4 PITG_03763   |
| 0   | 4   | 2 PITG_07865   |
| 0   | 0   | 2 NA           |
| 0   | 0   | 0 PITG_20109   |
| 0   | 6   | 7 PITG_20762   |
| 0   | 5   | 2 PITG_12576   |
| 0   | 4   | 6 PITG_00830   |
| 0   | 2   | 25 PITG_13826  |
| 0   | 4   | 8 PITG_15463   |
| 0   | 0   | 2 NA           |
| 0   | 28  | 15 PITG_05989  |
| 0   | 0   | 2 PITG_00330   |
| 0   | 4   | 10 PITG_19886  |
| 0   | 8   | 6 NA           |
| 0   | 34  | 50 NA          |
| 0   | 9   | 6 PITG_15293   |
| 0   | 8   | 33 PITG_02565  |
| 0   | 22  | 2 PITG_03714   |
| 0   | 24  | 50 PITG_21377  |
| 0   | 2   | 2 PITG_10519   |
| 0   | 20  | 19 PITG_08774  |

|   |     |                 |
|---|-----|-----------------|
| 0 | 12  | 11 PITG_10980   |
| 0 | 21  | 4 PITG_17966    |
| 0 | 72  | 40 PITG_02342   |
| 0 | 0   | 0 PITG_09089    |
| 0 | 56  | 37 PITG_00140   |
| 0 | 2   | 5 PITG_13666    |
| 0 | 2   | 9 PITG_16491    |
| 0 | 6   | 17 PITG_10969   |
| 0 | 6   | 4 PITG_13168    |
| 0 | 7   | 0 PITG_11486    |
| 0 | 4   | 8 PITG_02239    |
| 0 | 2   | 0 PITG_09097    |
| 0 | 37  | 3 PITG_03397    |
| 0 | 6   | 32 PITG_12108   |
| 0 | 0   | 5 PITG_19281    |
| 0 | 0   | 0 PITG_07411    |
| 0 | 6   | 2 PITG_11417    |
| 0 | 12  | 13 PITG_01409   |
| 0 | 30  | 8 NA            |
| 0 | 0   | 0 PITG_13084    |
| 0 | 0   | 0 PITG_17171    |
| 0 | 0   | 0 NA            |
| 0 | 617 | 1019 PITG_11997 |
| 0 | 2   | 3 NA            |
| 0 | 2   | 0 PITG_07279    |
| 0 | 6   | 4 NA            |
| 0 | 26  | 11 PITG_03804   |
| 0 | 30  | 33 PITG_04651   |
| 0 | 4   | 2 NA            |
| 0 | 0   | 0 PITG_00888    |
| 0 | 0   | 0 PITG_13282    |
| 0 | 131 | 64 PITG_13030   |
| 0 | 2   | 0 PITG_12349    |
| 0 | 8   | 6 NA            |
| 0 | 24  | 14 PITG_01589   |
| 0 | 0   | 0 PITG_06685    |
| 0 | 5   | 0 NA            |
| 0 | 203 | 61 PITG_14945   |
| 0 | 43  | 38 PITG_07286   |
| 0 | 26  | 6 PITG_07241    |
| 0 | 0   | 2 PITG_10388    |
| 0 | 17  | 79 PITG_06981   |
| 0 | 2   | 0 PITG_13713    |
| 0 | 2   | 2 PITG_05955    |
| 0 | 7   | 2 PITG_19177    |
| 0 | 76  | 65 PITG_08801   |
| 0 | 53  | 15 PITG_01614   |

|    |     |                |
|----|-----|----------------|
| 0  | 13  | 3 NA           |
| 0  | 2   | 0 PITG_10308   |
| 0  | 126 | 199 NA         |
| 0  | 72  | 56 NA          |
| 0  | 0   | 2 PITG_17404   |
| 36 | 2   | 1931 NA        |
| 0  | 39  | 32 NA          |
| 0  | 0   | 0 PITG_01774   |
| 0  | 43  | 39 PITG_06895  |
| 0  | 2   | 5 PITG_17628   |
| 0  | 11  | 9 PITG_05293   |
| 0  | 4   | 25 PITG_05552  |
| 0  | 19  | 18 NA          |
| 0  | 2   | 0 PITG_16956   |
| 0  | 0   | 0 PITG_09477   |
| 0  | 4   | 15 PITG_10264  |
| 0  | 6   | 2 PITG_15530   |
| 0  | 0   | 2 PITG_22163   |
| 0  | 62  | 7 NA           |
| 0  | 4   | 2 PITG_06259   |
| 0  | 0   | 2 PITG_06818   |
| 0  | 54  | 40 PITG_00359  |
| 0  | 17  | 8 PITG_10509   |
| 0  | 0   | 8 PITG_01523   |
| 0  | 12  | 9 PITG_20386   |
| 0  | 2   | 4 PITG_01419   |
| 0  | 7   | 12 PITG_05168  |
| 0  | 0   | 0 PITG_20117   |
| 0  | 66  | 163 PITG_00229 |
| 0  | 30  | 3 PITG_05202   |
| 0  | 79  | 4 PITG_04289   |
| 0  | 4   | 8 PITG_17395   |
| 0  | 2   | 8 PITG_02572   |
| 0  | 13  | 2 PITG_01153   |
| 0  | 6   | 2 PITG_02052   |
| 0  | 0   | 4 PITG_17325   |
| 0  | 35  | 10 NA          |
| 0  | 2   | 2 PITG_11735   |
| 0  | 4   | 0 PITG_08530   |
| 0  | 9   | 0 PITG_19153   |
| 0  | 0   | 0 NA           |
| 0  | 2   | 6 PITG_14247   |
| 0  | 121 | 56 PITG_03582  |
| 0  | 0   | 4 PITG_11888   |
| 0  | 6   | 15 PITG_09829  |
| 0  | 0   | 0 PITG_15240   |
| 0  | 8   | 0 NA           |

|   |      |                 |
|---|------|-----------------|
| 0 | 6    | 12 PITG_16722   |
| 0 | 162  | 7 NA            |
| 0 | 58   | 7 PITG_08374    |
| 0 | 5743 | 3925 PITG_11241 |
| 0 | 26   | 16 PITG_14557   |
| 0 | 4    | 0 PITG_13915    |
| 2 | 20   | 22 PITG_13620   |
| 0 | 2    | 2 PITG_10419    |
| 0 | 4    | 0 PITG_09262    |
| 0 | 0    | 0 NA            |
| 0 | 2    | 9 PITG_05565    |
| 0 | 2    | 0 NA            |
| 0 | 14   | 8 PITG_16530    |
| 0 | 15   | 25 PITG_19877   |
| 0 | 0    | 3 PITG_06003    |
| 0 | 4    | 10 PITG_16668   |
| 0 | 3    | 8 PITG_08684    |
| 0 | 0    | 0 PITG_07154    |
| 0 | 64   | 103 PITG_06342  |
| 0 | 13   | 9 PITG_04479    |
| 0 | 12   | 28 PITG_01073   |
| 0 | 323  | 152 PITG_19007  |
| 0 | 15   | 6 NA            |
| 0 | 9    | 7 PITG_12462    |
| 0 | 6    | 4 PITG_05548    |
| 0 | 119  | 53 PITG_19349   |
| 0 | 15   | 15 PITG_13814   |
| 0 | 6    | 7 PITG_03409    |
| 0 | 13   | 6 PITG_14484    |
| 0 | 7    | 7 PITG_00334    |
| 0 | 2    | 0 NA            |
| 0 | 11   | 2 PITG_03901    |
| 0 | 14   | 0 PITG_06384    |
| 0 | 2    | 46 PITG_11883   |
| 0 | 168  | 23 NA           |
| 0 | 0    | 0 PITG_17483    |
| 0 | 0    | 0 PITG_01782    |
| 0 | 16   | 0 PITG_15539    |
| 0 | 0    | 8 NA            |
| 0 | 10   | 13 PITG_15496   |
| 0 | 0    | 0 PITG_11783    |
| 0 | 2    | 0 PITG_11286    |
| 0 | 3    | 4 PITG_17068    |
| 0 | 7    | 0 NA            |
| 0 | 0    | 2 PITG_19750    |
| 0 | 15   | 0 PITG_22383    |
| 0 | 0    | 0 PITG_21886    |

|   |     |                |
|---|-----|----------------|
| 0 | 4   | 6 PITG_00173   |
| 0 | 59  | 33 PITG_01825  |
| 0 | 10  | 12 NA          |
| 0 | 18  | 9 PITG_03396   |
| 0 | 10  | 11 PITG_17345  |
| 0 | 5   | 2 PITG_16476   |
| 0 | 6   | 3 PITG_05855   |
| 0 | 31  | 16 PITG_12108  |
| 0 | 2   | 16 NA          |
| 0 | 21  | 4 NA           |
| 0 | 0   | 0 PITG_01871   |
| 0 | 60  | 130 PITG_19472 |
| 0 | 0   | 0 PITG_14100   |
| 0 | 0   | 4 PITG_03370   |
| 0 | 7   | 67 PITG_03860  |
| 0 | 170 | 40 PITG_10674  |
| 0 | 11  | 9 PITG_14357   |
| 0 | 0   | 0 PITG_03408   |
| 0 | 0   | 0 PITG_03457   |
| 0 | 4   | 2 PITG_01991   |
| 0 | 22  | 36 NA          |
| 0 | 0   | 8 PITG_22286   |
| 0 | 3   | 2 PITG_14413   |
| 0 | 9   | 0 PITG_02978   |
| 0 | 10  | 22 PITG_14013  |
| 0 | 9   | 2 PITG_06363   |
| 0 | 2   | 2 PITG_05868   |
| 0 | 3   | 3 NA           |
| 0 | 15  | 57 NA          |
| 0 | 66  | 29 PITG_06356  |
| 0 | 5   | 2 NA           |
| 0 | 0   | 0 PITG_01453   |
| 0 | 0   | 9 PITG_12105   |
| 0 | 5   | 7 PITG_17908   |
| 0 | 0   | 6 PITG_06942   |
| 0 | 11  | 2 PITG_11138   |
| 0 | 0   | 8 PITG_04481   |
| 0 | 0   | 0 PITG_03570   |
| 0 | 57  | 71 PITG_17790  |
| 0 | 3   | 0 PITG_16024   |
| 0 | 27  | 6 PITG_06593   |
| 0 | 0   | 0 PITG_00853   |
| 0 | 0   | 0 PITG_11437   |
| 0 | 8   | 8 PITG_12342   |
| 0 | 0   | 2 PITG_05007   |
| 0 | 19  | 7 PITG_10062   |
| 0 | 0   | 0 NA           |

|   |     |                |
|---|-----|----------------|
| 0 | 0   | 0 PITG_14993   |
| 0 | 57  | 44 PITG_18361  |
| 0 | 0   | 0 PITG_15731   |
| 0 | 55  | 35 PITG_05862  |
| 0 | 2   | 0 PITG_05862   |
| 0 | 35  | 5 NA           |
| 0 | 14  | 2 PITG_03864   |
| 0 | 9   | 8 PITG_15146   |
| 0 | 4   | 12 PITG_11926  |
| 0 | 2   | 4 PITG_11403   |
| 0 | 0   | 2 PITG_00416   |
| 0 | 18  | 13 PITG_16461  |
| 0 | 9   | 8 PITG_12121   |
| 0 | 7   | 0 PITG_03152   |
| 0 | 9   | 15 NA          |
| 0 | 40  | 4 PITG_13283   |
| 0 | 14  | 26 PITG_07853  |
| 0 | 4   | 15 NA          |
| 0 | 3   | 12 PITG_18538  |
| 0 | 38  | 11 NA          |
| 0 | 0   | 0 PITG_01850   |
| 0 | 3   | 4 PITG_17700   |
| 0 | 6   | 0 PITG_02264   |
| 0 | 71  | 2 NA           |
| 0 | 17  | 0 PITG_13922   |
| 0 | 5   | 2 PITG_00701   |
| 0 | 6   | 2 NA           |
| 0 | 2   | 2 PITG_13840   |
| 0 | 0   | 15 PITG_13273  |
| 0 | 12  | 0 NA           |
| 0 | 44  | 55 PITG_21457  |
| 0 | 0   | 0 PITG_02679   |
| 0 | 7   | 0 PITG_18184   |
| 0 | 2   | 18 PITG_11743  |
| 0 | 76  | 115 PITG_20005 |
| 0 | 21  | 2 NA           |
| 0 | 123 | 38 PITG_17395  |
| 0 | 0   | 0 PITG_11750   |
| 0 | 28  | 2 PITG_04922   |
| 0 | 19  | 10 PITG_08059  |
| 0 | 0   | 7 PITG_03103   |
| 0 | 14  | 40 PITG_18189  |
| 0 | 0   | 4 PITG_01057   |
| 0 | 21  | 16 NA          |
| 0 | 6   | 4 PITG_12956   |
| 0 | 32  | 8 NA           |
| 0 | 31  | 0 NA           |

|    |     |                |
|----|-----|----------------|
| 0  | 16  | 4 PITG_08605   |
| 0  | 8   | 0 NA           |
| 0  | 103 | 51 NA          |
| 0  | 33  | 12 PITG_04702  |
| 0  | 30  | 0 PITG_07892   |
| 0  | 188 | 76 PITG_13256  |
| 0  | 4   | 2 PITG_06900   |
| 0  | 43  | 60 PITG_04333  |
| 0  | 7   | 6 PITG_11425   |
| 0  | 20  | 2 PITG_16024   |
| 0  | 2   | 0 PITG_02328   |
| 0  | 273 | 127 PITG_12104 |
| 0  | 2   | 7 NA           |
| 0  | 2   | 13 PITG_08440  |
| 0  | 0   | 4 PITG_11981   |
| 0  | 0   | 6 PITG_05346   |
| 0  | 21  | 6 PITG_01681   |
| 0  | 2   | 2 PITG_04579   |
| 0  | 72  | 11 PITG_02850  |
| 0  | 5   | 4 PITG_04242   |
| 0  | 0   | 0 PITG_03755   |
| 0  | 36  | 12 NA          |
| 0  | 0   | 0 NA           |
| 31 | 7   | 371 NA         |
| 0  | 30  | 4 PITG_17910   |
| 0  | 30  | 6 PITG_13068   |
| 0  | 20  | 13 PITG_14951  |
| 0  | 10  | 3 PITG_14951   |
| 0  | 18  | 4 PITG_08329   |
| 0  | 47  | 4 PITG_19984   |
| 0  | 10  | 2 PITG_14129   |
| 0  | 14  | 24 PITG_17706  |
| 0  | 17  | 13 PITG_18236  |
| 0  | 8   | 7 PITG_18067   |
| 0  | 28  | 26 NA          |
| 0  | 82  | 11 NA          |
| 0  | 9   | 0 NA           |
| 0  | 72  | 44 NA          |
| 0  | 78  | 0 PITG_18004   |
| 0  | 2   | 2 NA           |
| 0  | 5   | 6 PITG_13620   |
| 0  | 23  | 2 NA           |
| 0  | 70  | 81 PITG_18641  |
| 0  | 0   | 0 NA           |
| 0  | 10  | 29 NA          |
| 0  | 3   | 0 PITG_08538   |
| 0  | 69  | 140 PITG_18235 |



|     |    |                |
|-----|----|----------------|
| 0   | 21 | 6 PITG_18413   |
| 0   | 4  | 2 PITG_18024   |
| 851 | 2  | 717 NA         |
| 0   | 3  | 8 PITG_07166   |
| 0   | 55 | 2 PITG_17595   |
| 0   | 48 | 104 PITG_10600 |
| 0   | 0  | 0 PITG_03659   |
| 0   | 0  | 0 PITG_08144   |
| 0   | 31 | 49 PITG_07349  |
| 0   | 21 | 12 PITG_07284  |
| 0   | 2  | 0 PITG_17679   |
| 0   | 48 | 2 PITG_19672   |
| 0   | 2  | 7 PITG_18741   |
| 0   | 11 | 3 PITG_02940   |
| 0   | 10 | 14 PITG_03596  |
| 0   | 2  | 9 NA           |
| 0   | 8  | 15 PITG_06887  |
| 0   | 44 | 4 NA           |
| 0   | 0  | 5 PITG_15926   |
| 0   | 2  | 10 PITG_17075  |
| 0   | 0  | 0 PITG_18380   |
| 0   | 12 | 7 PITG_06182   |
| 0   | 58 | 9 PITG_10022   |
| 0   | 9  | 2 PITG_13282   |
| 0   | 0  | 2 PITG_00989   |
| 0   | 2  | 0 NA           |
| 0   | 6  | 0 NA           |
| 0   | 19 | 8 PITG_04485   |
| 0   | 88 | 11 PITG_00263  |
| 0   | 20 | 2 NA           |
| 0   | 2  | 2 PITG_00796   |
| 0   | 0  | 0 PITG_17049   |
| 0   | 21 | 21 PITG_15329  |
| 0   | 8  | 15 PITG_14462  |
| 0   | 2  | 0 PITG_12988   |
| 0   | 17 | 14 NA          |
| 0   | 88 | 36 PITG_00022  |
| 0   | 4  | 6 PITG_14549   |
| 0   | 8  | 0 PITG_11656   |
| 0   | 0  | 0 PITG_09477   |
| 0   | 12 | 0 PITG_06392   |
| 0   | 5  | 8 PITG_10097   |
| 0   | 0  | 0 PITG_01005   |
| 0   | 37 | 14 NA          |
| 0   | 0  | 3 PITG_09360   |
| 0   | 2  | 2 PITG_07240   |
| 0   | 0  | 0 PITG_17437   |

|     |     |                |
|-----|-----|----------------|
| 0   | 46  | 2 PITG_13131   |
| 0   | 5   | 4 PITG_13915   |
| 0   | 31  | 6 PITG_18973   |
| 0   | 0   | 0 NA           |
| 0   | 5   | 2 PITG_06289   |
| 0   | 0   | 0 NA           |
| 0   | 5   | 4 PITG_12346   |
| 0   | 32  | 57 PITG_21829  |
| 0   | 0   | 0 PITG_06035   |
| 0   | 0   | 0 PITG_22716   |
| 0   | 34  | 5 PITG_12100   |
| 0   | 14  | 2 NA           |
| 0   | 4   | 0 PITG_06900   |
| 0   | 74  | 597 PITG_15771 |
| 0   | 19  | 17 PITG_04718  |
| 0   | 21  | 21 PITG_21941  |
| 0   | 3   | 0 PITG_04115   |
| 0   | 42  | 219 PITG_22135 |
| 0   | 0   | 9 PITG_14231   |
| 0   | 12  | 4 PITG_21642   |
| 0   | 0   | 2 PITG_17370   |
| 0   | 13  | 2 PITG_10729   |
| 0   | 5   | 0 NA           |
| 162 | 2   | 148 NA         |
| 0   | 6   | 0 PITG_03201   |
| 0   | 0   | 3 PITG_16299   |
| 0   | 0   | 0 PITG_06929   |
| 0   | 9   | 0 NA           |
| 0   | 263 | 145 PITG_00203 |
| 0   | 105 | 2 PITG_09817   |
| 0   | 23  | 30 PITG_02724  |
| 0   | 6   | 5 PITG_01750   |
| 0   | 5   | 11 PITG_07072  |
| 0   | 191 | 125 PITG_01418 |
| 0   | 22  | 17 PITG_05990  |
| 0   | 9   | 6 PITG_06885   |
| 0   | 3   | 4 PITG_10881   |
| 0   | 0   | 0 NA           |
| 0   | 0   | 14 PITG_13618  |
| 0   | 24  | 2 PITG_17783   |
| 0   | 58  | 2 PITG_04626   |
| 0   | 36  | 13 NA          |
| 0   | 0   | 0 PITG_10239   |
| 0   | 15  | 3 PITG_08646   |
| 0   | 3   | 4 NA           |
| 0   | 4   | 0 PITG_00590   |
| 0   | 0   | 2 PITG_09296   |

|    |     |                |
|----|-----|----------------|
| 0  | 0   | 0 PITG_04691   |
| 0  | 3   | 0 NA           |
| 0  | 0   | 2 PITG_09270   |
| 0  | 25  | 2 PITG_05155   |
| 23 | 0   | 36 NA          |
| 0  | 20  | 14 PITG_05649  |
| 0  | 18  | 40 PITG_12291  |
| 0  | 2   | 0 NA           |
| 0  | 2   | 2 PITG_08410   |
| 0  | 2   | 7 PITG_00075   |
| 0  | 0   | 0 PITG_10957   |
| 0  | 0   | 14 PITG_13762  |
| 0  | 64  | 13 NA          |
| 0  | 168 | 221 PITG_08467 |
| 0  | 0   | 7 PITG_17935   |
| 0  | 12  | 12 PITG_02069  |
| 0  | 9   | 53 PITG_01815  |
| 0  | 43  | 2 PITG_09598   |
| 0  | 19  | 76 PITG_03234  |
| 0  | 447 | 399 PITG_14002 |
| 0  | 4   | 0 NA           |
| 0  | 20  | 10 PITG_06988  |
| 2  | 2   | 23 NA          |
| 0  | 27  | 6 PITG_20103   |
| 0  | 0   | 2 PITG_10460   |
| 0  | 25  | 66 PITG_11983  |
| 0  | 4   | 2 PITG_09270   |
| 0  | 14  | 6 PITG_15228   |
| 0  | 25  | 9 PITG_21219   |
| 0  | 4   | 0 PITG_00573   |
| 0  | 25  | 46 PITG_01744  |
| 0  | 11  | 6 PITG_06598   |
| 0  | 0   | 7 PITG_13422   |
| 0  | 43  | 69 PITG_10828  |
| 0  | 0   | 2 PITG_02534   |
| 0  | 56  | 34 PITG_21151  |
| 0  | 17  | 6 PITG_00298   |
| 0  | 8   | 2 NA           |
| 0  | 5   | 2 PITG_14973   |
| 0  | 3   | 2 PITG_01772   |
| 0  | 44  | 45 PITG_16376  |
| 0  | 120 | 78 PITG_01246  |
| 0  | 207 | 73 NA          |
| 0  | 6   | 0 PITG_13415   |
| 0  | 50  | 2 PITG_17237   |
| 0  | 0   | 5 PITG_16073   |
| 0  | 136 | 44 NA          |

|    |     |               |
|----|-----|---------------|
| 0  | 2   | 0 PITG_05622  |
| 0  | 6   | 5 PITG_01783  |
| 0  | 0   | 3 PITG_10082  |
| 0  | 10  | 42 PITG_11929 |
| 0  | 6   | 3 PITG_10384  |
| 0  | 30  | 0 PITG_00570  |
| 0  | 3   | 0 NA          |
| 0  | 7   | 11 PITG_17330 |
| 0  | 11  | 33 PITG_11489 |
| 0  | 5   | 0 PITG_07100  |
| 0  | 39  | 6 PITG_18379  |
| 0  | 43  | 25 PITG_00651 |
| 0  | 12  | 10 PITG_00163 |
| 0  | 0   | 0 PITG_03999  |
| 0  | 72  | 15 PITG_19410 |
| 0  | 19  | 2 PITG_05643  |
| 0  | 12  | 0 NA          |
| 0  | 6   | 11 PITG_10715 |
| 0  | 10  | 4 NA          |
| 0  | 11  | 29 PITG_02910 |
| 0  | 0   | 2 PITG_21886  |
| 0  | 0   | 0 PITG_11206  |
| 0  | 8   | 4 PITG_08301  |
| 0  | 10  | 0 PITG_03773  |
| 0  | 2   | 6 PITG_20803  |
| 0  | 57  | 0 PITG_01342  |
| 0  | 4   | 2 PITG_13103  |
| 0  | 18  | 10 PITG_02958 |
| 0  | 12  | 9 PITG_00970  |
| 0  | 26  | 2 PITG_01873  |
| 0  | 8   | 12 PITG_18882 |
| 0  | 33  | 37 PITG_11702 |
| 0  | 0   | 0 NA          |
| 0  | 2   | 2 PITG_17142  |
| 0  | 49  | 26 PITG_11022 |
| 0  | 534 | 63 PITG_13030 |
| 0  | 17  | 12 NA         |
| 0  | 34  | 7 NA          |
| 56 | 30  | 86 NA         |
| 0  | 9   | 5 NA          |
| 0  | 2   | 0 PITG_03180  |
| 0  | 2   | 3 NA          |
| 0  | 33  | 4 PITG_06396  |
| 0  | 0   | 0 PITG_10461  |
| 0  | 43  | 13 PITG_16107 |
| 0  | 0   | 4 PITG_07455  |
| 0  | 3   | 4 PITG_08754  |

|    |     |                |
|----|-----|----------------|
| 0  | 65  | 98 PITG_08528  |
| 0  | 2   | 6 NA           |
| 0  | 29  | 20 PITG_23158  |
| 0  | 10  | 45 PITG_09832  |
| 0  | 9   | 0 NA           |
| 0  | 16  | 12 PITG_07102  |
| 0  | 4   | 20 PITG_11459  |
| 0  | 0   | 0 PITG_23029   |
| 0  | 5   | 4 NA           |
| 0  | 12  | 22 PITG_14084  |
| 46 | 4   | 122 NA         |
| 0  | 9   | 0 PITG_01878   |
| 0  | 0   | 0 PITG_17599   |
| 0  | 37  | 2 PITG_02814   |
| 0  | 15  | 52 PITG_06048  |
| 0  | 24  | 13 NA          |
| 0  | 67  | 87 NA          |
| 0  | 45  | 11 PITG_07938  |
| 0  | 3   | 6 PITG_00845   |
| 0  | 7   | 21 PITG_03815  |
| 0  | 15  | 215 PITG_05498 |
| 0  | 14  | 4 NA           |
| 0  | 4   | 11 PITG_12115  |
| 0  | 0   | 0 PITG_02658   |
| 0  | 22  | 2 NA           |
| 0  | 4   | 4 PITG_02161   |
| 0  | 0   | 0 PITG_12173   |
| 0  | 14  | 0 NA           |
| 0  | 7   | 2 NA           |
| 0  | 0   | 0 PITG_08712   |
| 0  | 20  | 17 PITG_01639  |
| 0  | 0   | 5 PITG_08514   |
| 0  | 158 | 48 PITG_09726  |
| 0  | 6   | 8 NA           |
| 0  | 2   | 9 PITG_06844   |
| 0  | 24  | 31 NA          |
| 0  | 4   | 4 PITG_00496   |
| 0  | 21  | 0 PITG_17868   |
| 0  | 0   | 7 PITG_10060   |
| 0  | 11  | 7 PITG_09097   |
| 0  | 0   | 6 PITG_12166   |
| 0  | 25  | 4 PITG_10117   |
| 0  | 4   | 17 PITG_16833  |
| 0  | 11  | 15 PITG_22427  |
| 0  | 14  | 13 PITG_09700  |
| 0  | 6   | 0 PITG_00504   |
| 0  | 28  | 13 NA          |

|   |     |               |
|---|-----|---------------|
| 0 | 35  | 16 PITG_16899 |
| 0 | 76  | 0 PITG_04609  |
| 0 | 80  | 6 NA          |
| 0 | 34  | 27 PITG_00694 |
| 0 | 9   | 0 PITG_22127  |
| 0 | 15  | 14 PITG_02506 |
| 0 | 10  | 0 PITG_17081  |
| 0 | 6   | 3 PITG_03927  |
| 0 | 0   | 0 PITG_03241  |
| 0 | 73  | 57 NA         |
| 0 | 12  | 2 PITG_12989  |
| 0 | 3   | 0 PITG_12677  |
| 0 | 0   | 2 PITG_03478  |
| 0 | 11  | 8 NA          |
| 0 | 0   | 0 PITG_08655  |
| 0 | 12  | 7 PITG_08392  |
| 0 | 179 | 90 PITG_00886 |
| 0 | 11  | 17 PITG_15819 |
| 0 | 0   | 0 PITG_02927  |
| 0 | 0   | 0 PITG_03778  |
| 0 | 3   | 19 PITG_12258 |
| 0 | 48  | 0 PITG_00450  |
| 0 | 0   | 0 PITG_02143  |
| 0 | 25  | 6 PITG_06013  |
| 0 | 0   | 2 PITG_05395  |
| 0 | 10  | 26 PITG_02145 |
| 0 | 0   | 2 PITG_03057  |
| 0 | 9   | 0 NA          |
| 0 | 0   | 4 NA          |
| 0 | 0   | 5 PITG_01097  |
| 0 | 148 | 29 PITG_06056 |
| 0 | 47  | 4 NA          |
| 0 | 0   | 0 PITG_16345  |
| 0 | 0   | 2 NA          |
| 0 | 0   | 0 NA          |
| 0 | 119 | 3 NA          |
| 0 | 38  | 33 PITG_10484 |
| 0 | 23  | 9 PITG_04439  |
| 0 | 2   | 2 PITG_02781  |
| 0 | 2   | 7 PITG_06822  |
| 0 | 0   | 2 PITG_03865  |
| 0 | 2   | 2 PITG_02230  |
| 0 | 10  | 27 PITG_13405 |
| 0 | 6   | 11 PITG_10524 |
| 0 | 3   | 4 PITG_15494  |
| 0 | 34  | 30 NA         |
| 0 | 0   | 0 PITG_01100  |

|      |     |                |
|------|-----|----------------|
| 0    | 0   | 6 PITG_18057   |
| 0    | 4   | 3 NA           |
| 0    | 4   | 4 NA           |
| 0    | 8   | 5 NA           |
| 0    | 50  | 36 NA          |
| 1433 | 85  | 3348 NA        |
| 0    | 6   | 4 PITG_06358   |
| 0    | 169 | 15 NA          |
| 0    | 3   | 2 PITG_03622   |
| 0    | 52  | 31 PITG_15137  |
| 0    | 2   | 2 NA           |
| 0    | 4   | 4 NA           |
| 0    | 228 | 160 PITG_05394 |
| 0    | 17  | 23 PITG_19875  |
| 0    | 0   | 0 PITG_19177   |
| 0    | 8   | 2 PITG_17370   |
| 0    | 15  | 17 PITG_02228  |
| 0    | 0   | 6 PITG_07765   |
| 0    | 7   | 4 PITG_11028   |
| 0    | 6   | 0 PITG_12181   |
| 0    | 16  | 30 PITG_08184  |
| 0    | 6   | 0 NA           |
| 0    | 8   | 23 PITG_11959  |
| 0    | 51  | 8 NA           |
| 0    | 0   | 9 PITG_01154   |
| 0    | 4   | 4 PITG_01591   |
| 0    | 4   | 7 PITG_01924   |
| 0    | 78  | 10 NA          |
| 0    | 38  | 4 NA           |
| 0    | 27  | 6 PITG_07169   |
| 0    | 3   | 9 PITG_14887   |
| 0    | 48  | 130 NA         |
| 0    | 3   | 0 PITG_05282   |
| 0    | 34  | 14 NA          |
| 0    | 119 | 58 PITG_06503  |
| 0    | 7   | 9 NA           |
| 0    | 0   | 8 PITG_04384   |
| 0    | 64  | 101 PITG_07964 |
| 0    | 11  | 40 PITG_05508  |
| 0    | 20  | 9 PITG_14602   |
| 0    | 2   | 15 PITG_18088  |
| 0    | 6   | 2 PITG_00005   |
| 0    | 27  | 17 PITG_19823  |
| 0    | 0   | 2 PITG_12675   |
| 0    | 0   | 0 NA           |
| 0    | 0   | 4 NA           |
| 0    | 69  | 28 PITG_00454  |

|   |     |                |
|---|-----|----------------|
| 0 | 6   | 2 NA           |
| 0 | 0   | 0 PITG_14390   |
| 0 | 10  | 13 PITG_07700  |
| 0 | 15  | 0 PITG_21658   |
| 0 | 47  | 38 PITG_00808  |
| 0 | 26  | 4 PITG_10593   |
| 0 | 2   | 0 NA           |
| 0 | 0   | 0 NA           |
| 0 | 35  | 18 PITG_04842  |
| 0 | 5   | 3 PITG_12220   |
| 0 | 8   | 0 PITG_03959   |
| 0 | 21  | 6 PITG_01121   |
| 0 | 27  | 2 PITG_15388   |
| 0 | 6   | 19 PITG_10595  |
| 0 | 3   | 2 PITG_03570   |
| 0 | 4   | 6 PITG_00996   |
| 0 | 21  | 0 NA           |
| 0 | 0   | 12 NA          |
| 0 | 35  | 10 NA          |
| 0 | 34  | 0 PITG_02391   |
| 0 | 32  | 85 PITG_03670  |
| 0 | 5   | 2 PITG_04882   |
| 0 | 2   | 0 NA           |
| 0 | 52  | 0 NA           |
| 0 | 2   | 0 PITG_11410   |
| 0 | 13  | 11 PITG_16386  |
| 0 | 101 | 163 PITG_12286 |
| 0 | 14  | 35 PITG_02052  |
| 0 | 0   | 13 NA          |
| 0 | 182 | 392 PITG_11127 |
| 0 | 21  | 0 NA           |
| 0 | 5   | 3 NA           |
| 0 | 2   | 2 PITG_05757   |
| 0 | 88  | 33 PITG_00675  |
| 0 | 0   | 4 NA           |
| 0 | 25  | 5 PITG_15621   |
| 0 | 0   | 0 PITG_19095   |
| 0 | 4   | 10 PITG_01932  |
| 0 | 0   | 0 NA           |
| 0 | 2   | 0 PITG_03373   |
| 0 | 40  | 2 PITG_01898   |
| 0 | 49  | 38 PITG_06651  |
| 0 | 23  | 2 NA           |
| 0 | 2   | 0 PITG_09309   |
| 0 | 47  | 18 PITG_10343  |
| 0 | 6   | 0 PITG_13687   |
| 4 | 0   | 2 NA           |



|     |     |                 |
|-----|-----|-----------------|
| 0   | 7   | 21 PITG_05874   |
| 0   | 17  | 0 PITG_05644    |
| 0   | 0   | 6 PITG_12343    |
| 0   | 13  | 0 PITG_03266    |
| 0   | 8   | 8 PITG_21389    |
| 0   | 27  | 16 PITG_23158   |
| 0   | 66  | 41 NA           |
| 0   | 114 | 30 PITG_10772   |
| 0   | 2   | 2 NA            |
| 0   | 3   | 19 PITG_04283   |
| 0   | 181 | 78 PITG_08046   |
| 0   | 2   | 19 PITG_16038   |
| 0   | 43  | 15 NA           |
| 0   | 5   | 0 PITG_00262    |
| 0   | 8   | 2 PITG_20690    |
| 0   | 72  | 2 NA            |
| 0   | 6   | 0 PITG_04664    |
| 0   | 36  | 7 PITG_00408    |
| 0   | 155 | 35 PITG_14616   |
| 0   | 94  | 11 PITG_03398   |
| 0   | 11  | 10 PITG_03318   |
| 0   | 44  | 89 PITG_19531   |
| 0   | 2   | 10 PITG_05609   |
| 135 | 48  | 128 NA          |
| 0   | 106 | 51 PITG_20966   |
| 0   | 37  | 18 PITG_10447   |
| 0   | 40  | 27 PITG_05318   |
| 0   | 4   | 15 PITG_13976   |
| 0   | 4   | 23 PITG_23159   |
| 0   | 2   | 2 PITG_13146    |
| 0   | 27  | 0 NA            |
| 0   | 0   | 0 PITG_12160    |
| 0   | 2   | 0 PITG_12291    |
| 0   | 2   | 2 PITG_02608    |
| 0   | 4   | 0 PITG_19445    |
| 0   | 0   | 3 PITG_12174    |
| 0   | 9   | 0 PITG_14993    |
| 0   | 284 | 68 PITG_20966   |
| 0   | 0   | 0 PITG_03620    |
| 0   | 807 | 615 PITG_01096  |
| 0   | 0   | 0 NA            |
| 0   | 0   | 0 PITG_15261    |
| 0   | 759 | 2654 PITG_04121 |
| 0   | 6   | 13 PITG_13405   |
| 0   | 6   | 3 PITG_22944    |
| 0   | 0   | 2 PITG_02027    |
| 0   | 6   | 21 PITG_00980   |

|   |     |                |
|---|-----|----------------|
| 0 | 4   | 0 NA           |
| 0 | 4   | 8 PITG_18366   |
| 0 | 156 | 103 PITG_05622 |
| 0 | 47  | 88 PITG_06949  |
| 0 | 71  | 0 PITG_05694   |
| 0 | 3   | 0 PITG_12806   |
| 0 | 14  | 4 PITG_06559   |
| 0 | 6   | 6 PITG_16337   |
| 0 | 4   | 4 PITG_08184   |
| 0 | 0   | 2 PITG_17592   |
| 0 | 0   | 0 PITG_07279   |
| 0 | 2   | 34 PITG_03039  |
| 0 | 100 | 0 PITG_15417   |
| 0 | 2   | 0 PITG_19466   |
| 0 | 4   | 6 PITG_03318   |
| 0 | 2   | 16 PITG_12260  |
| 0 | 90  | 109 PITG_08702 |
| 0 | 37  | 13 PITG_11044  |
| 0 | 18  | 6 PITG_04124   |
| 0 | 30  | 18 PITG_05070  |
| 0 | 7   | 4 NA           |
| 0 | 2   | 58 PITG_01938  |
| 0 | 21  | 0 PITG_08900   |
| 0 | 0   | 0 PITG_12252   |
| 0 | 0   | 2 PITG_02642   |
| 0 | 18  | 0 NA           |
| 0 | 39  | 5 NA           |
| 0 | 8   | 7 NA           |
| 0 | 26  | 7 PITG_00038   |
| 0 | 0   | 38 NA          |
| 0 | 2   | 18 PITG_04670  |
| 0 | 3   | 2 NA           |
| 0 | 6   | 6 PITG_09899   |
| 0 | 6   | 8 PITG_08886   |
| 0 | 13  | 41 PITG_10058  |
| 0 | 12  | 34 PITG_00442  |
| 0 | 16  | 29 PITG_06828  |
| 0 | 9   | 12 PITG_05989  |
| 0 | 46  | 3 PITG_03458   |
| 0 | 6   | 13 PITG_01788  |
| 0 | 4   | 0 PITG_16433   |
| 0 | 7   | 0 NA           |
| 0 | 14  | 21 PITG_11225  |
| 0 | 13  | 4 PITG_01878   |
| 0 | 13  | 26 PITG_18623  |
| 0 | 4   | 11 PITG_08035  |
| 0 | 91  | 49 PITG_01614  |

|     |     |                |
|-----|-----|----------------|
| 0   | 243 | 120 PITG_09209 |
| 0   | 0   | 2 PITG_22126   |
| 0   | 2   | 0 NA           |
| 0   | 8   | 14 PITG_03427  |
| 0   | 2   | 0 PITG_01919   |
| 0   | 4   | 2 PITG_09930   |
| 0   | 21  | 0 NA           |
| 0   | 21  | 2 PITG_01789   |
| 0   | 5   | 2 PITG_19175   |
| 0   | 0   | 0 PITG_12194   |
| 0   | 29  | 6 PITG_15960   |
| 0   | 30  | 27 NA          |
| 0   | 83  | 102 PITG_04591 |
| 0   | 16  | 25 PITG_02912  |
| 0   | 2   | 2 PITG_02924   |
| 0   | 67  | 5 PITG_08708   |
| 0   | 0   | 0 NA           |
| 0   | 19  | 8 PITG_01526   |
| 0   | 13  | 2 PITG_05326   |
| 18  | 75  | 3087 NA        |
| 0   | 0   | 0 PITG_19791   |
| 0   | 11  | 7 PITG_06664   |
| 0   | 44  | 11 PITG_16538  |
| 0   | 67  | 129 NA         |
| 0   | 13  | 3 NA           |
| 0   | 9   | 4 PITG_02540   |
| 0   | 9   | 0 PITG_03772   |
| 0   | 22  | 0 PITG_09296   |
| 0   | 60  | 64 PITG_08295  |
| 0   | 0   | 0 NA           |
| 0   | 5   | 8 PITG_12224   |
| 0   | 8   | 7 NA           |
| 0   | 923 | 429 PITG_07853 |
| 0   | 14  | 0 PITG_02997   |
| 0   | 60  | 35 NA          |
| 0   | 68  | 46 PITG_02754  |
| 0   | 7   | 0 PITG_08729   |
| 0   | 27  | 4 NA           |
| 0   | 24  | 12 PITG_16364  |
| 0   | 4   | 10 PITG_02203  |
| 0   | 4   | 0 PITG_01111   |
| 137 | 90  | 139 NA         |
| 0   | 3   | 10 PITG_07194  |
| 0   | 2   | 0 PITG_04590   |
| 0   | 25  | 34 PITG_03314  |
| 0   | 0   | 0 NA           |
| 0   | 7   | 9 PITG_14847   |

|   |     |               |
|---|-----|---------------|
| 0 | 37  | 53 PITG_11329 |
| 0 | 7   | 2 PITG_18028  |
| 0 | 19  | 77 PITG_18360 |
| 0 | 74  | 11 PITG_13595 |
| 0 | 56  | 35 PITG_16055 |
| 0 | 0   | 4 NA          |
| 0 | 0   | 9 PITG_06424  |
| 0 | 4   | 0 NA          |
| 0 | 0   | 3 PITG_01111  |
| 0 | 10  | 16 PITG_02719 |
| 0 | 170 | 4 PITG_08082  |
| 0 | 7   | 7 PITG_07809  |
| 0 | 18  | 12 PITG_08801 |
| 0 | 8   | 4 PITG_08570  |
| 0 | 36  | 0 PITG_03359  |
| 0 | 11  | 4 PITG_21599  |
| 0 | 23  | 13 PITG_00842 |
| 0 | 2   | 4 PITG_14977  |
| 0 | 6   | 7 NA          |
| 0 | 0   | 4 PITG_02205  |
| 0 | 0   | 0 NA          |
| 0 | 18  | 9 NA          |
| 0 | 62  | 48 PITG_00177 |
| 0 | 36  | 17 PITG_11792 |
| 0 | 42  | 48 PITG_14173 |
| 0 | 2   | 4 PITG_01237  |
| 0 | 2   | 0 PITG_09447  |
| 0 | 13  | 32 PITG_21014 |
| 0 | 7   | 5 PITG_06988  |
| 0 | 2   | 12 PITG_11912 |
| 0 | 5   | 4 PITG_02384  |
| 0 | 50  | 53 NA         |
| 0 | 0   | 0 NA          |
| 0 | 4   | 0 PITG_03571  |
| 0 | 11  | 8 PITG_06538  |
| 0 | 13  | 0 PITG_00911  |
| 0 | 15  | 40 NA         |
| 0 | 6   | 0 PITG_16698  |
| 0 | 4   | 5 PITG_17559  |
| 0 | 2   | 2 PITG_17122  |
| 0 | 0   | 12 NA         |
| 0 | 79  | 52 PITG_03379 |
| 0 | 2   | 4 NA          |
| 0 | 15  | 43 PITG_15026 |
| 0 | 0   | 5 PITG_07916  |
| 0 | 10  | 0 NA          |
| 0 | 52  | 64 NA         |

|     |    |               |
|-----|----|---------------|
| 0   | 14 | 45 PITG_01752 |
| 0   | 82 | 61 PITG_06652 |
| 0   | 22 | 9 PITG_13913  |
| 0   | 0  | 10 PITG_10275 |
| 0   | 3  | 0 NA          |
| 0   | 58 | 81 PITG_00566 |
| 0   | 0  | 0 PITG_06129  |
| 0   | 3  | 2 PITG_00828  |
| 446 | 92 | 1408 NA       |
| 0   | 4  | 2 PITG_12855  |
| 0   | 56 | 4 PITG_05487  |
| 0   | 65 | 20 PITG_09891 |
| 0   | 45 | 9 PITG_12192  |
| 0   | 0  | 16 NA         |
| 0   | 0  | 4 PITG_10027  |
| 0   | 4  | 5 PITG_05314  |
| 0   | 4  | 21 PITG_17991 |
| 0   | 18 | 13 PITG_00694 |
| 0   | 76 | 36 PITG_03488 |
| 0   | 13 | 3 PITG_04482  |
| 0   | 48 | 28 PITG_14550 |
| 0   | 52 | 10 PITG_00991 |
| 0   | 8  | 8 PITG_08826  |
| 0   | 8  | 2 NA          |
| 0   | 41 | 13 PITG_08536 |
| 0   | 8  | 2 PITG_16801  |
| 0   | 7  | 0 PITG_10610  |
| 0   | 0  | 0 PITG_10986  |
| 0   | 24 | 0 PITG_01458  |
| 0   | 6  | 20 PITG_12454 |
| 0   | 18 | 2 NA          |
| 0   | 47 | 26 PITG_01246 |
| 0   | 24 | 0 PITG_13771  |
| 0   | 0  | 0 NA          |
| 0   | 10 | 11 PITG_16887 |
| 0   | 0  | 6 PITG_14223  |
| 0   | 17 | 2 NA          |
| 339 | 25 | 347 NA        |
| 0   | 17 | 17 PITG_20609 |
| 0   | 0  | 0 PITG_17669  |
| 0   | 40 | 79 PITG_07389 |
| 0   | 9  | 13 PITG_07124 |
| 0   | 9  | 8 NA          |
| 0   | 6  | 0 NA          |
| 0   | 16 | 10 PITG_04679 |
| 0   | 0  | 2 PITG_00352  |
| 0   | 41 | 24 PITG_01749 |

|     |     |                |
|-----|-----|----------------|
| 0   | 17  | 14 PITG_11525  |
| 0   | 0   | 0 PITG_08085   |
| 0   | 0   | 0 NA           |
| 0   | 0   | 42 PITG_06758  |
| 0   | 4   | 6 PITG_18129   |
| 0   | 4   | 4 PITG_08022   |
| 0   | 32  | 9 PITG_13493   |
| 0   | 0   | 0 NA           |
| 0   | 3   | 0 PITG_16347   |
| 0   | 4   | 2 NA           |
| 0   | 21  | 12 PITG_11369  |
| 0   | 0   | 0 NA           |
| 0   | 15  | 8 PITG_02696   |
| 0   | 26  | 0 PITG_01312   |
| 0   | 26  | 65 PITG_07959  |
| 0   | 2   | 0 PITG_03761   |
| 0   | 0   | 0 PITG_07952   |
| 0   | 11  | 4 PITG_14585   |
| 0   | 63  | 8 NA           |
| 0   | 0   | 0 NA           |
| 0   | 5   | 0 PITG_02885   |
| 0   | 23  | 2 PITG_06820   |
| 0   | 95  | 18 PITG_08295  |
| 0   | 0   | 2 PITG_01920   |
| 0   | 28  | 13 PITG_14217  |
| 0   | 12  | 26 PITG_03144  |
| 0   | 16  | 14 PITG_05510  |
| 0   | 10  | 14 PITG_11291  |
| 0   | 35  | 0 PITG_15440   |
| 111 | 103 | 364 NA         |
| 0   | 0   | 0 PITG_00336   |
| 0   | 34  | 124 PITG_02856 |
| 0   | 178 | 219 PITG_09280 |
| 0   | 2   | 0 PITG_06984   |
| 0   | 2   | 0 PITG_19142   |
| 0   | 6   | 7 NA           |
| 0   | 13  | 0 NA           |
| 0   | 13  | 2 NA           |
| 0   | 2   | 4 PITG_01104   |
| 0   | 6   | 8 PITG_12686   |
| 0   | 90  | 0 PITG_19310   |
| 0   | 5   | 0 NA           |
| 0   | 20  | 26 PITG_03987  |
| 0   | 2   | 4 PITG_10437   |
| 0   | 2   | 2 PITG_17719   |
| 0   | 40  | 3 PITG_12315   |
| 0   | 82  | 60 PITG_02787  |

|    |     |                |
|----|-----|----------------|
| 0  | 7   | 0 PITG_03932   |
| 0  | 20  | 6 NA           |
| 0  | 2   | 8 NA           |
| 0  | 17  | 10 NA          |
| 0  | 0   | 2 PITG_15518   |
| 0  | 3   | 0 NA           |
| 0  | 0   | 0 PITG_03609   |
| 0  | 32  | 9 PITG_17651   |
| 22 | 9   | 68 NA          |
| 0  | 4   | 0 NA           |
| 0  | 10  | 0 PITG_10590   |
| 0  | 88  | 14 PITG_07628  |
| 0  | 779 | 299 PITG_11875 |
| 0  | 51  | 54 NA          |
| 0  | 0   | 0 NA           |
| 0  | 16  | 30 PITG_09376  |
| 0  | 0   | 0 NA           |
| 0  | 125 | 67 PITG_08193  |
| 0  | 62  | 55 PITG_14180  |
| 0  | 0   | 0 PITG_08364   |
| 0  | 317 | 134 NA         |
| 0  | 0   | 0 PITG_00970   |
| 0  | 0   | 0 PITG_05346   |
| 0  | 32  | 2 PITG_06911   |
| 0  | 0   | 4 NA           |
| 0  | 24  | 0 PITG_01626   |
| 0  | 7   | 9 PITG_17617   |
| 0  | 17  | 33 PITG_17262  |
| 0  | 2   | 4 PITG_07865   |
| 0  | 0   | 0 PITG_03374   |
| 0  | 25  | 6 PITG_02185   |
| 0  | 2   | 0 PITG_12279   |
| 0  | 2   | 0 PITG_17990   |
| 0  | 5   | 0 PITG_20790   |
| 0  | 0   | 0 NA           |
| 0  | 2   | 22 PITG_04895  |
| 0  | 58  | 18 PITG_03032  |
| 0  | 0   | 2 PITG_13939   |
| 0  | 26  | 14 PITG_10029  |
| 0  | 26  | 4 NA           |
| 0  | 0   | 0 PITG_04661   |
| 0  | 11  | 2 PITG_08626   |
| 0  | 7   | 2 NA           |
| 0  | 0   | 4 PITG_03044   |
| 0  | 30  | 23 PITG_17563  |
| 0  | 0   | 2 PITG_18015   |
| 0  | 2   | 2 PITG_06088   |

|    |     |                |
|----|-----|----------------|
| 0  | 3   | 5 PITG_20803   |
| 0  | 0   | 8 PITG_02440   |
| 0  | 0   | 0 PITG_11888   |
| 0  | 11  | 5 PITG_04226   |
| 0  | 6   | 18 PITG_02968  |
| 0  | 39  | 38 PITG_04994  |
| 0  | 14  | 0 PITG_11117   |
| 0  | 3   | 0 PITG_17964   |
| 0  | 0   | 0 PITG_01920   |
| 0  | 0   | 4 PITG_20759   |
| 0  | 6   | 4 PITG_07230   |
| 0  | 2   | 0 PITG_06426   |
| 0  | 0   | 4 PITG_08154   |
| 0  | 0   | 2 PITG_09956   |
| 0  | 17  | 2 PITG_10265   |
| 0  | 32  | 6 NA           |
| 0  | 7   | 2 PITG_20803   |
| 0  | 8   | 14 PITG_03404  |
| 0  | 82  | 65 PITG_13427  |
| 0  | 0   | 0 PITG_08461   |
| 0  | 8   | 4 PITG_01293   |
| 0  | 4   | 0 PITG_03557   |
| 0  | 56  | 158 PITG_06410 |
| 0  | 7   | 2 NA           |
| 0  | 4   | 2 PITG_07905   |
| 0  | 24  | 7 PITG_06450   |
| 10 | 0   | 0 NA           |
| 0  | 2   | 0 PITG_01076   |
| 0  | 41  | 15 PITG_07809  |
| 0  | 0   | 0 PITG_02588   |
| 0  | 68  | 219 NA         |
| 0  | 38  | 87 NA          |
| 0  | 3   | 2 NA           |
| 0  | 42  | 2 NA           |
| 0  | 143 | 97 PITG_03342  |
| 0  | 2   | 2 NA           |
| 0  | 31  | 13 NA          |
| 0  | 10  | 49 PITG_03549  |
| 41 | 4   | 47 NA          |
| 0  | 0   | 0 PITG_06480   |
| 0  | 6   | 0 PITG_03127   |
| 0  | 40  | 16 PITG_12148  |
| 0  | 2   | 7 NA           |
| 0  | 2   | 9 PITG_20819   |
| 0  | 9   | 4 PITG_05499   |
| 0  | 4   | 2 PITG_03898   |
| 0  | 21  | 15 NA          |



|    |     |                |
|----|-----|----------------|
| 0  | 0   | 0 NA           |
| 0  | 15  | 2 PITG_03074   |
| 0  | 4   | 46 PITG_05332  |
| 0  | 23  | 13 PITG_02162  |
| 0  | 8   | 0 PITG_15097   |
| 0  | 0   | 2 PITG_05998   |
| 0  | 4   | 24 PITG_10664  |
| 0  | 0   | 2 PITG_04057   |
| 0  | 0   | 0 PITG_17944   |
| 0  | 4   | 2 PITG_17501   |
| 64 | 5   | 332 NA         |
| 0  | 0   | 10 PITG_05664  |
| 0  | 58  | 39 PITG_10871  |
| 0  | 17  | 2 PITG_08060   |
| 0  | 3   | 0 PITG_05998   |
| 0  | 5   | 2 PITG_02384   |
| 0  | 6   | 24 PITG_17499  |
| 0  | 0   | 0 PITG_08019   |
| 0  | 118 | 18 PITG_00574  |
| 0  | 342 | 144 PITG_01248 |
| 0  | 23  | 144 PITG_03694 |
| 0  | 4   | 19 PITG_20928  |
| 0  | 668 | 503 PITG_03433 |
| 0  | 2   | 2 PITG_03265   |
| 0  | 17  | 11 PITG_00664  |
| 0  | 0   | 56 NA          |
| 0  | 813 | 353 PITG_00937 |
| 0  | 4   | 0 PITG_14106   |
| 0  | 179 | 475 PITG_01450 |
| 0  | 0   | 4 PITG_13437   |
| 0  | 86  | 10 PITG_03337  |
| 0  | 2   | 0 NA           |
| 0  | 2   | 16 PITG_01330  |
| 0  | 6   | 9 PITG_14284   |
| 0  | 202 | 245 PITG_20681 |
| 0  | 217 | 57 PITG_20046  |
| 0  | 29  | 17 PITG_19191  |
| 0  | 4   | 2 PITG_11039   |
| 0  | 5   | 4 PITG_01121   |
| 0  | 20  | 20 PITG_00201  |
| 0  | 14  | 14 PITG_14573  |
| 0  | 0   | 2 PITG_17023   |
| 0  | 4   | 0 NA           |
| 0  | 28  | 2 PITG_01341   |
| 0  | 5   | 2 NA           |
| 0  | 8   | 30 PITG_00218  |
| 0  | 11  | 18 PITG_21006  |

|   |     |                |
|---|-----|----------------|
| 0 | 0   | 0 PITG_17370   |
| 0 | 0   | 2 PITG_10524   |
| 0 | 19  | 41 PITG_12980  |
| 0 | 59  | 73 NA          |
| 0 | 9   | 10 PITG_04262  |
| 0 | 7   | 16 PITG_09819  |
| 0 | 2   | 0 NA           |
| 0 | 12  | 25 PITG_02079  |
| 0 | 0   | 0 PITG_10191   |
| 0 | 0   | 2 NA           |
| 0 | 708 | 119 PITG_03979 |
| 0 | 2   | 2 PITG_21046   |
| 0 | 15  | 12 PITG_10832  |
| 0 | 6   | 4 PITG_03892   |
| 0 | 2   | 4 PITG_11285   |
| 0 | 21  | 9 PITG_20217   |
| 0 | 9   | 4 PITG_01923   |
| 0 | 9   | 6 PITG_03927   |
| 0 | 4   | 0 NA           |
| 0 | 266 | 200 NA         |
| 0 | 7   | 0 PITG_17353   |
| 0 | 4   | 4 PITG_19006   |
| 0 | 2   | 19 PITG_07925  |
| 0 | 0   | 0 PITG_12110   |
| 0 | 29  | 68 PITG_05884  |
| 0 | 2   | 0 PITG_10161   |
| 0 | 4   | 6 PITG_05338   |
| 0 | 0   | 11 NA          |
| 0 | 25  | 2 PITG_09991   |
| 0 | 55  | 12 PITG_03496  |
| 0 | 20  | 0 PITG_15818   |
| 0 | 9   | 0 PITG_02673   |
| 0 | 198 | 898 PITG_11997 |
| 0 | 2   | 0 NA           |
| 0 | 17  | 6 PITG_05238   |
| 0 | 4   | 4 PITG_04561   |
| 0 | 2   | 0 PITG_06805   |
| 0 | 81  | 50 NA          |
| 0 | 15  | 8 NA           |
| 0 | 87  | 8 PITG_08049   |
| 0 | 41  | 9 PITG_10268   |
| 0 | 2   | 0 PITG_11906   |
| 0 | 42  | 21 PITG_01058  |
| 0 | 5   | 10 PITG_09940  |
| 0 | 0   | 2 NA           |
| 0 | 0   | 0 PITG_09989   |
| 0 | 27  | 16 PITG_06911  |

|   |     |                |
|---|-----|----------------|
| 0 | 17  | 17 PITG_05500  |
| 0 | 2   | 2 NA           |
| 0 | 131 | 38 PITG_04685  |
| 0 | 87  | 96 NA          |
| 0 | 51  | 14 PITG_12889  |
| 0 | 8   | 3 PITG_01814   |
| 0 | 0   | 4 PITG_08469   |
| 0 | 83  | 2 NA           |
| 0 | 5   | 0 PITG_10430   |
| 0 | 39  | 2 NA           |
| 0 | 15  | 5 PITG_20295   |
| 0 | 0   | 3 PITG_15602   |
| 0 | 19  | 0 PITG_02372   |
| 0 | 11  | 10 PITG_04614  |
| 0 | 7   | 2 PITG_17405   |
| 0 | 11  | 12 PITG_07949  |
| 0 | 0   | 0 PITG_14057   |
| 0 | 27  | 22 PITG_02283  |
| 0 | 42  | 50 PITG_20125  |
| 0 | 345 | 127 PITG_00269 |
| 0 | 38  | 3 PITG_16923   |
| 0 | 8   | 0 NA           |
| 0 | 7   | 7 NA           |
| 0 | 170 | 12 PITG_17460  |
| 0 | 2   | 2 PITG_13103   |
| 0 | 0   | 0 PITG_04232   |
| 0 | 13  | 8 PITG_16439   |
| 0 | 12  | 8 PITG_00186   |
| 0 | 33  | 25 PITG_01349  |
| 0 | 2   | 0 PITG_00132   |
| 0 | 0   | 0 PITG_00722   |
| 0 | 0   | 0 PITG_01690   |
| 0 | 0   | 4 PITG_12140   |
| 0 | 8   | 0 PITG_12446   |
| 0 | 24  | 31 PITG_04003  |
| 0 | 0   | 0 PITG_16808   |
| 0 | 52  | 78 PITG_13029  |
| 0 | 0   | 0 PITG_02264   |
| 0 | 0   | 0 NA           |
| 0 | 19  | 7 PITG_16924   |
| 0 | 57  | 39 PITG_10828  |
| 0 | 13  | 9 PITG_13431   |
| 0 | 27  | 85 PITG_00682  |
| 0 | 0   | 0 PITG_12761   |
| 0 | 2   | 4 PITG_01774   |
| 0 | 305 | 42 PITG_06218  |
| 0 | 262 | 0 PITG_21626   |

|   |     |                |
|---|-----|----------------|
| 0 | 23  | 9 PITG_00160   |
| 0 | 35  | 11 PITG_08654  |
| 0 | 0   | 2 PITG_08183   |
| 0 | 57  | 21 PITG_10857  |
| 0 | 16  | 21 PITG_03282  |
| 0 | 6   | 64 PITG_14111  |
| 0 | 18  | 27 PITG_04709  |
| 0 | 5   | 0 PITG_06518   |
| 0 | 0   | 0 PITG_14483   |
| 0 | 0   | 2 NA           |
| 0 | 14  | 13 PITG_17109  |
| 0 | 368 | 164 PITG_17344 |
| 0 | 3   | 7 NA           |
| 0 | 2   | 10 NA          |
| 0 | 2   | 6 NA           |
| 0 | 118 | 26 NA          |
| 0 | 0   | 0 NA           |
| 0 | 37  | 41 PITG_04296  |
| 0 | 9   | 4 NA           |
| 0 | 41  | 15 PITG_01754  |
| 0 | 0   | 0 PITG_21176   |
| 0 | 0   | 2 PITG_05485   |
| 0 | 0   | 17 PITG_01477  |
| 0 | 55  | 52 PITG_06185  |
| 0 | 12  | 2 NA           |
| 0 | 0   | 0 NA           |
| 0 | 9   | 2 PITG_21879   |
| 0 | 2   | 0 PITG_03160   |
| 0 | 44  | 2 PITG_11491   |
| 0 | 34  | 56 PITG_03737  |
| 0 | 4   | 4 PITG_07546   |
| 0 | 247 | 194 PITG_18064 |
| 0 | 57  | 0 PITG_02016   |
| 0 | 176 | 66 NA          |
| 0 | 2   | 0 PITG_14441   |
| 0 | 0   | 0 NA           |
| 0 | 4   | 17 NA          |
| 0 | 0   | 0 PITG_13651   |
| 0 | 2   | 2 PITG_21255   |
| 0 | 0   | 2 NA           |
| 0 | 49  | 0 PITG_14717   |
| 0 | 24  | 31 PITG_03932  |
| 0 | 14  | 7 NA           |
| 0 | 8   | 0 PITG_03559   |
| 0 | 5   | 5 NA           |
| 0 | 0   | 0 PITG_04725   |
| 0 | 2   | 0 PITG_12266   |

|   |     |               |
|---|-----|---------------|
| 0 | 11  | 2 PITG_01463  |
| 0 | 17  | 11 NA         |
| 0 | 0   | 4 PITG_01154  |
| 0 | 0   | 6 PITG_12840  |
| 0 | 0   | 9 NA          |
| 0 | 5   | 10 PITG_09001 |
| 0 | 106 | 65 PITG_10384 |
| 0 | 46  | 6 PITG_03531  |
| 0 | 17  | 12 PITG_18015 |
| 0 | 10  | 2 PITG_08154  |
| 0 | 23  | 21 PITG_19113 |
| 0 | 0   | 0 PITG_15486  |
| 0 | 2   | 18 PITG_08181 |
| 0 | 23  | 21 PITG_00179 |
| 0 | 104 | 15 PITG_07853 |
| 0 | 0   | 0 NA          |
| 0 | 0   | 8 PITG_14642  |
| 0 | 0   | 0 NA          |
| 0 | 23  | 8 PITG_03408  |
| 0 | 0   | 0 NA          |
| 0 | 0   | 8 NA          |
| 0 | 0   | 0 NA          |
| 0 | 3   | 0 PITG_16203  |
| 0 | 3   | 6 PITG_05297  |
| 0 | 18  | 10 NA         |
| 0 | 0   | 2 PITG_12442  |
| 0 | 9   | 0 PITG_20381  |
| 0 | 7   | 2 PITG_04603  |
| 0 | 40  | 3 PITG_06805  |
| 0 | 71  | 18 PITG_06652 |
| 0 | 20  | 21 PITG_17928 |
| 0 | 14  | 0 NA          |
| 0 | 21  | 22 PITG_19036 |
| 0 | 11  | 11 PITG_02661 |
| 0 | 10  | 2 PITG_00370  |
| 0 | 20  | 24 PITG_00807 |
| 0 | 17  | 25 PITG_15920 |
| 0 | 18  | 2 PITG_05560  |
| 0 | 18  | 16 PITG_04508 |
| 0 | 0   | 2 PITG_11424  |
| 0 | 26  | 8 PITG_12350  |
| 0 | 13  | 0 NA          |
| 0 | 2   | 3 PITG_10443  |
| 0 | 2   | 5 NA          |
| 0 | 23  | 2 NA          |
| 0 | 30  | 2 PITG_18564  |
| 0 | 0   | 3 PITG_08394  |

|   |     |                 |
|---|-----|-----------------|
| 0 | 6   | 6 PITG_17897    |
| 0 | 2   | 0 PITG_14401    |
| 0 | 2   | 0 PITG_13225    |
| 0 | 0   | 2 PITG_17137    |
| 0 | 2   | 9 PITG_03006    |
| 5 | 4   | 8 NA            |
| 0 | 33  | 4 PITG_02754    |
| 0 | 23  | 27 PITG_18632   |
| 0 | 31  | 0 NA            |
| 0 | 468 | 1005 PITG_08785 |
| 0 | 0   | 0 PITG_04917    |
| 0 | 0   | 11 NA           |
| 0 | 12  | 2 PITG_19422    |
| 0 | 34  | 129 NA          |
| 0 | 2   | 9 PITG_13609    |
| 0 | 0   | 2 PITG_06108    |
| 0 | 0   | 7 PITG_17706    |
| 0 | 0   | 0 NA            |
| 0 | 104 | 52 PITG_03219   |
| 0 | 20  | 16 PITG_01195   |
| 0 | 9   | 7 PITG_21962    |
| 0 | 3   | 6 PITG_12825    |
| 0 | 4   | 0 PITG_15883    |
| 0 | 88  | 73 PITG_06359   |
| 0 | 4   | 5 PITG_10392    |
| 0 | 0   | 3 PITG_00501    |
| 0 | 28  | 2 PITG_04989    |
| 0 | 99  | 6 PITG_02016    |
| 0 | 6   | 2 PITG_06934    |
| 0 | 92  | 114 PITG_12599  |
| 0 | 0   | 0 NA            |
| 0 | 4   | 0 PITG_03610    |
| 0 | 6   | 22 PITG_06912   |
| 0 | 2   | 0 PITG_01088    |
| 0 | 37  | 4 NA            |
| 0 | 6   | 0 PITG_12880    |
| 0 | 555 | 55 PITG_14362   |
| 0 | 4   | 0 PITG_02940    |
| 0 | 55  | 10 NA           |
| 0 | 2   | 15 PITG_04691   |
| 0 | 16  | 0 PITG_08184    |
| 0 | 6   | 2 PITG_07312    |
| 0 | 10  | 2 PITG_11017    |
| 0 | 244 | 21 PITG_06578   |
| 0 | 38  | 23 PITG_08456   |
| 0 | 25  | 4 PITG_10758    |
| 0 | 83  | 15 PITG_05939   |

|     |     |                |
|-----|-----|----------------|
| 0   | 43  | 242 PITG_14568 |
| 0   | 2   | 6 PITG_02196   |
| 811 | 260 | 11 NA          |
| 0   | 8   | 0 PITG_07226   |
| 0   | 0   | 0 PITG_17492   |
| 0   | 2   | 2 PITG_18380   |
| 0   | 20  | 4 PITG_10517   |
| 0   | 2   | 29 PITG_17884  |
| 0   | 16  | 0 NA           |
| 0   | 14  | 6 PITG_06978   |
| 0   | 2   | 0 PITG_09035   |
| 0   | 6   | 2 PITG_07276   |
| 0   | 5   | 91 PITG_16981  |
| 0   | 130 | 13 PITG_19371  |
| 0   | 15  | 0 NA           |
| 0   | 0   | 6 PITG_09954   |
| 0   | 14  | 9 PITG_05354   |
| 0   | 23  | 18 PITG_12932  |
| 0   | 6   | 7 PITG_12235   |
| 0   | 10  | 18 PITG_17717  |
| 0   | 2   | 0 NA           |
| 0   | 0   | 0 NA           |
| 0   | 10  | 15 PITG_02259  |
| 0   | 40  | 10 PITG_07099  |
| 0   | 2   | 5 NA           |
| 0   | 34  | 0 NA           |
| 0   | 5   | 24 PITG_17539  |
| 0   | 51  | 78 PITG_20687  |
| 0   | 90  | 53 PITG_10345  |
| 0   | 24  | 0 NA           |
| 0   | 64  | 87 PITG_17965  |
| 0   | 37  | 28 PITG_17484  |
| 0   | 0   | 0 PITG_17437   |
| 0   | 201 | 451 PITG_04931 |
| 0   | 35  | 9 NA           |
| 0   | 43  | 2 PITG_01360   |
| 0   | 17  | 38 PITG_10312  |
| 0   | 2   | 8 PITG_03460   |
| 0   | 0   | 0 NA           |
| 0   | 43  | 10 PITG_01678  |
| 0   | 0   | 3 NA           |
| 0   | 0   | 0 PITG_09244   |
| 0   | 107 | 193 PITG_10498 |
| 0   | 369 | 963 PITG_08795 |
| 0   | 0   | 0 NA           |
| 0   | 29  | 7 PITG_13659   |
| 0   | 7   | 10 PITG_06396  |

|   |     |                |
|---|-----|----------------|
| 0 | 10  | 7 PITG_14169   |
| 0 | 8   | 12 PITG_17723  |
| 0 | 2   | 11 PITG_04553  |
| 0 | 10  | 20 PITG_13434  |
| 0 | 18  | 21 PITG_03081  |
| 0 | 0   | 2 PITG_09270   |
| 0 | 63  | 17 PITG_08654  |
| 0 | 61  | 2 PITG_11780   |
| 0 | 0   | 2 PITG_04671   |
| 0 | 6   | 5 NA           |
| 0 | 0   | 0 PITG_01231   |
| 0 | 15  | 18 NA          |
| 0 | 45  | 25 NA          |
| 0 | 73  | 15 PITG_03409  |
| 0 | 17  | 9 PITG_13641   |
| 0 | 12  | 2 PITG_12145   |
| 0 | 0   | 2 PITG_12824   |
| 0 | 44  | 2 NA           |
| 0 | 221 | 240 PITG_05685 |
| 0 | 2   | 0 NA           |
| 0 | 0   | 2 PITG_04270   |
| 0 | 17  | 5 NA           |
| 0 | 0   | 0 PITG_12625   |
| 0 | 27  | 12 NA          |
| 0 | 2   | 0 PITG_17867   |
| 0 | 0   | 9 NA           |
| 0 | 20  | 2 PITG_10166   |
| 0 | 5   | 0 PITG_02499   |
| 0 | 0   | 0 PITG_16264   |
| 0 | 35  | 2 PITG_02721   |
| 0 | 15  | 4 NA           |
| 0 | 65  | 11 NA          |
| 0 | 29  | 19 NA          |
| 0 | 0   | 2 PITG_10590   |
| 0 | 3   | 8 PITG_20088   |
| 0 | 3   | 18 PITG_13839  |
| 0 | 89  | 20 NA          |
| 0 | 32  | 12 PITG_03846  |
| 0 | 127 | 4 PITG_13920   |
| 0 | 0   | 0 PITG_09064   |
| 0 | 38  | 0 PITG_13971   |
| 0 | 62  | 45 PITG_01539  |
| 0 | 0   | 0 PITG_05635   |
| 0 | 0   | 0 PITG_14178   |
| 0 | 30  | 8 PITG_20236   |
| 0 | 4   | 4 PITG_22577   |
| 0 | 60  | 7 NA           |



|   |    |                |
|---|----|----------------|
| 0 | 42 | 12 NA          |
| 0 | 2  | 0 NA           |
| 0 | 8  | 0 PITG_13282   |
| 0 | 0  | 0 PITG_19153   |
| 0 | 28 | 12 PITG_22389  |
| 0 | 53 | 50 PITG_13727  |
| 0 | 31 | 83 PITG_11612  |
| 0 | 0  | 0 PITG_16009   |
| 0 | 14 | 12 PITG_06426  |
| 0 | 16 | 14 PITG_05638  |
| 0 | 0  | 2 PITG_12356   |
| 0 | 0  | 0 PITG_13620   |
| 0 | 41 | 9 PITG_03887   |
| 0 | 0  | 4 PITG_03183   |
| 0 | 5  | 6 PITG_17897   |
| 0 | 4  | 11 PITG_00458  |
| 0 | 2  | 4 PITG_05757   |
| 0 | 16 | 9 PITG_02739   |
| 0 | 4  | 2 NA           |
| 0 | 11 | 7 PITG_11044   |
| 0 | 18 | 8 NA           |
| 0 | 4  | 8 PITG_03102   |
| 0 | 4  | 0 PITG_12482   |
| 0 | 64 | 53 NA          |
| 0 | 41 | 23 NA          |
| 0 | 8  | 3 PITG_11291   |
| 0 | 17 | 14 PITG_11926  |
| 0 | 27 | 10 PITG_04699  |
| 0 | 45 | 2 PITG_13460   |
| 0 | 2  | 2 PITG_23160   |
| 0 | 25 | 384 PITG_18025 |
| 0 | 4  | 16 PITG_15998  |
| 0 | 15 | 22 NA          |
| 0 | 12 | 10 PITG_00577  |
| 0 | 2  | 2 PITG_01774   |
| 0 | 2  | 8 PITG_04179   |
| 0 | 4  | 0 PITG_18475   |
| 0 | 43 | 46 PITG_01361  |
| 0 | 22 | 29 PITG_09360  |
| 0 | 22 | 31 PITG_01932  |
| 0 | 43 | 75 PITG_04457  |
| 0 | 2  | 15 PITG_05637  |
| 0 | 90 | 44 NA          |
| 0 | 62 | 23 PITG_02277  |
| 0 | 7  | 2 PITG_08800   |
| 0 | 7  | 4 PITG_03428   |
| 0 | 0  | 0 NA           |

|   |     |                |
|---|-----|----------------|
| 0 | 68  | 146 PITG_06376 |
| 0 | 2   | 0 PITG_13421   |
| 0 | 0   | 12 NA          |
| 0 | 2   | 2 PITG_08089   |
| 0 | 72  | 5 PITG_21150   |
| 0 | 0   | 4 PITG_18490   |
| 0 | 20  | 12 PITG_19886  |
| 0 | 62  | 63 NA          |
| 0 | 31  | 8 PITG_05536   |
| 0 | 14  | 15 NA          |
| 0 | 7   | 2 PITG_20803   |
| 0 | 20  | 17 PITG_16812  |
| 0 | 114 | 42 NA          |
| 0 | 9   | 0 PITG_22486   |
| 0 | 2   | 0 PITG_07006   |
| 0 | 19  | 16 PITG_00994  |
| 0 | 4   | 5 PITG_10533   |
| 0 | 10  | 4 NA           |
| 0 | 0   | 4 PITG_05818   |
| 0 | 12  | 10 NA          |
| 0 | 0   | 2 NA           |
| 0 | 7   | 2 PITG_08473   |
| 0 | 0   | 2 PITG_03872   |
| 0 | 39  | 2 PITG_02927   |
| 0 | 2   | 2 PITG_11796   |
| 0 | 10  | 6 PITG_05221   |
| 0 | 34  | 34 PITG_07971  |
| 0 | 11  | 46 PITG_01127  |
| 0 | 0   | 4 PITG_03034   |
| 0 | 25  | 40 PITG_23159  |
| 0 | 0   | 2 PITG_05176   |
| 0 | 2   | 12 PITG_03782  |
| 0 | 0   | 0 PITG_02329   |
| 0 | 6   | 6 PITG_06396   |
| 0 | 243 | 171 NA         |
| 0 | 0   | 2 PITG_14456   |
| 0 | 0   | 11 PITG_06002  |
| 0 | 47  | 53 PITG_02338  |
| 0 | 2   | 0 NA           |
| 0 | 62  | 2 PITG_05226   |
| 0 | 0   | 0 PITG_17003   |
| 0 | 8   | 20 PITG_10022  |
| 0 | 0   | 0 PITG_17026   |
| 0 | 0   | 19 PITG_17257  |
| 0 | 5   | 0 PITG_09447   |
| 0 | 0   | 11 PITG_15655  |
| 0 | 29  | 25 PITG_01818  |

|     |     |               |
|-----|-----|---------------|
| 236 | 29  | 382 NA        |
| 0   | 167 | 23 PITG_08315 |
| 0   | 4   | 2 PITG_11940  |
| 0   | 148 | 27 PITG_12223 |
| 0   | 2   | 2 PITG_00223  |
| 0   | 19  | 38 PITG_07028 |
| 0   | 0   | 0 NA          |
| 0   | 13  | 2 NA          |
| 0   | 8   | 17 PITG_22958 |
| 0   | 79  | 30 PITG_18474 |
| 0   | 8   | 4 NA          |
| 0   | 12  | 64 PITG_21256 |
| 0   | 11  | 35 PITG_23191 |
| 0   | 2   | 6 PITG_04715  |
| 0   | 3   | 0 NA          |
| 0   | 8   | 12 PITG_07327 |
| 0   | 4   | 4 PITG_03360  |
| 0   | 0   | 2 PITG_07660  |
| 0   | 0   | 12 PITG_14923 |
| 0   | 0   | 0 NA          |
| 0   | 30  | 23 PITG_02912 |
| 2   | 24  | 49 PITG_06471 |
| 0   | 0   | 4 PITG_08329  |
| 0   | 16  | 11 PITG_14097 |
| 0   | 5   | 9 PITG_04458  |
| 0   | 5   | 8 PITG_18034  |
| 0   | 31  | 16 PITG_18358 |
| 0   | 12  | 0 PITG_15980  |
| 0   | 15  | 8 PITG_16691  |
| 0   | 4   | 2 PITG_01015  |
| 0   | 2   | 5 PITG_07470  |
| 0   | 17  | 4 PITG_13393  |
| 0   | 4   | 2 PITG_08333  |
| 0   | 66  | 0 NA          |
| 0   | 73  | 48 PITG_20797 |
| 0   | 0   | 0 PITG_17554  |
| 0   | 0   | 5 PITG_06917  |
| 0   | 0   | 0 NA          |
| 0   | 4   | 0 PITG_11410  |
| 0   | 10  | 18 PITG_11231 |
| 0   | 0   | 0 PITG_03492  |
| 0   | 35  | 8 PITG_10894  |
| 0   | 45  | 28 PITG_05591 |
| 0   | 52  | 32 PITG_02696 |
| 0   | 10  | 31 PITG_01949 |
| 0   | 23  | 19 PITG_22575 |
| 0   | 5   | 0 PITG_17698  |

|   |      |                |
|---|------|----------------|
| 0 | 4    | 0 PITG_11888   |
| 0 | 0    | 13 PITG_08394  |
| 0 | 42   | 4 PITG_18010   |
| 0 | 25   | 4 PITG_23143   |
| 0 | 4    | 7 PITG_18253   |
| 0 | 4    | 2 PITG_00855   |
| 0 | 10   | 38 PITG_08184  |
| 0 | 2    | 6 PITG_14854   |
| 0 | 0    | 0 PITG_08580   |
| 0 | 12   | 6 PITG_03370   |
| 0 | 0    | 5 PITG_04458   |
| 0 | 1049 | 768 PITG_20489 |
| 0 | 4    | 0 PITG_18923   |
| 0 | 11   | 12 PITG_00188  |
| 0 | 10   | 2 PITG_04954   |
| 0 | 0    | 24 PITG_00952  |
| 0 | 17   | 2 PITG_23201   |
| 0 | 7    | 10 PITG_02627  |
| 0 | 76   | 41 NA          |
| 0 | 152  | 52 NA          |
| 0 | 11   | 34 PITG_10140  |
| 0 | 36   | 0 PITG_18297   |
| 0 | 3    | 2 PITG_14285   |
| 0 | 8    | 0 PITG_04663   |
| 0 | 9    | 17 PITG_17885  |
| 0 | 171  | 144 PITG_10138 |
| 0 | 17   | 25 PITG_17457  |
| 0 | 0    | 2 PITG_00882   |
| 0 | 13   | 9 PITG_19850   |
| 0 | 0    | 0 NA           |
| 0 | 22   | 6 PITG_19036   |
| 0 | 2    | 0 PITG_13905   |
| 0 | 20   | 4 PITG_13434   |
| 0 | 2    | 4 PITG_10420   |
| 0 | 13   | 16 PITG_15057  |
| 0 | 0    | 0 PITG_15696   |
| 0 | 12   | 10 PITG_14707  |
| 0 | 0    | 0 PITG_11451   |
| 0 | 37   | 4 PITG_03015   |
| 0 | 11   | 66 PITG_17035  |
| 0 | 59   | 22 PITG_04717  |
| 0 | 5    | 13 PITG_02357  |
| 0 | 45   | 56 PITG_02277  |
| 0 | 0    | 6 PITG_03944   |
| 0 | 42   | 12 PITG_03049  |
| 0 | 509  | 448 PITG_13335 |
| 0 | 0    | 0 PITG_15656   |

|   |     |                |
|---|-----|----------------|
| 0 | 45  | 6 PITG_00216   |
| 0 | 0   | 0 PITG_06917   |
| 0 | 2   | 0 PITG_05326   |
| 0 | 6   | 2 PITG_17081   |
| 0 | 4   | 0 PITG_08295   |
| 0 | 2   | 2 NA           |
| 0 | 12  | 4 PITG_10602   |
| 0 | 50  | 18 PITG_00665  |
| 0 | 7   | 7 PITG_06404   |
| 0 | 0   | 14 PITG_10061  |
| 0 | 12  | 29 PITG_14744  |
| 0 | 10  | 0 PITG_16904   |
| 0 | 2   | 0 PITG_17332   |
| 0 | 13  | 14 PITG_14134  |
| 0 | 66  | 2 PITG_16781   |
| 0 | 6   | 2 PITG_09930   |
| 0 | 66  | 41 PITG_02597  |
| 0 | 3   | 0 PITG_17012   |
| 0 | 0   | 2 PITG_01832   |
| 0 | 0   | 0 PITG_12956   |
| 0 | 2   | 2 PITG_14055   |
| 0 | 65  | 128 PITG_04725 |
| 0 | 0   | 6 PITG_08974   |
| 0 | 5   | 169 NA         |
| 0 | 16  | 5 NA           |
| 0 | 0   | 3 PITG_11803   |
| 0 | 12  | 21 NA          |
| 0 | 0   | 2 PITG_19849   |
| 0 | 31  | 2 PITG_02629   |
| 0 | 34  | 13 PITG_13376  |
| 0 | 0   | 3 PITG_17876   |
| 0 | 20  | 0 PITG_21944   |
| 0 | 15  | 34 PITG_01691  |
| 0 | 0   | 2 PITG_05560   |
| 0 | 0   | 2 NA           |
| 0 | 0   | 0 PITG_16099   |
| 0 | 10  | 29 PITG_04603  |
| 0 | 24  | 2 PITG_18010   |
| 0 | 7   | 12 PITG_00660  |
| 0 | 59  | 3 PITG_14129   |
| 0 | 6   | 7 PITG_08473   |
| 0 | 7   | 2 PITG_03458   |
| 0 | 0   | 2 PITG_09923   |
| 0 | 61  | 9 PITG_07951   |
| 0 | 77  | 0 NA           |
| 0 | 187 | 232 PITG_14273 |
| 0 | 4   | 30 PITG_02561  |

|      |     |               |
|------|-----|---------------|
| 0    | 0   | 0 NA          |
| 0    | 8   | 4 PITG_08530  |
| 0    | 11  | 4 PITG_16126  |
| 0    | 34  | 6 NA          |
| 0    | 5   | 6 PITG_16012  |
| 0    | 0   | 2 PITG_13563  |
| 0    | 0   | 0 PITG_11862  |
| 0    | 11  | 2 NA          |
| 0    | 38  | 24 NA         |
| 0    | 131 | 114 NA        |
| 0    | 0   | 18 PITG_05657 |
| 0    | 9   | 3 NA          |
| 0    | 0   | 0 NA          |
| 0    | 23  | 68 PITG_11111 |
| 0    | 2   | 0 PITG_01717  |
| 0    | 45  | 10 NA         |
| 0    | 0   | 2 PITG_14109  |
| 0    | 5   | 52 PITG_11152 |
| 0    | 13  | 35 PITG_14573 |
| 0    | 4   | 4 NA          |
| 0    | 0   | 0 PITG_22229  |
| 0    | 32  | 14 PITG_11536 |
| 0    | 0   | 5 PITG_00939  |
| 0    | 15  | 6 PITG_04918  |
| 0    | 2   | 2 PITG_06827  |
| 0    | 0   | 0 PITG_05282  |
| 0    | 28  | 12 NA         |
| 0    | 62  | 66 PITG_01748 |
| 0    | 2   | 8 PITG_17348  |
| 0    | 8   | 0 PITG_20632  |
| 0    | 0   | 0 PITG_14109  |
| 1045 | 27  | 1052 NA       |
| 0    | 10  | 0 NA          |
| 0    | 12  | 10 PITG_18039 |
| 0    | 23  | 7 PITG_06897  |
| 0    | 6   | 5 PITG_05623  |
| 0    | 0   | 0 PITG_17360  |
| 0    | 7   | 0 PITG_16068  |
| 0    | 5   | 5 PITG_01553  |
| 0    | 44  | 78 NA         |
| 0    | 0   | 6 NA          |
| 178  | 330 | 1812 NA       |
| 0    | 10  | 4 PITG_16940  |
| 0    | 50  | 16 PITG_18409 |
| 0    | 0   | 0 PITG_16389  |
| 0    | 20  | 17 PITG_18377 |
| 0    | 2   | 2 PITG_15091  |

|    |      |                 |
|----|------|-----------------|
| 0  | 0    | 6 PITG_11470    |
| 0  | 60   | 15 NA           |
| 0  | 6    | 0 NA            |
| 0  | 26   | 25 PITG_15623   |
| 0  | 0    | 4 PITG_16441    |
| 0  | 0    | 0 PITG_08713    |
| 0  | 24   | 8 PITG_11203    |
| 0  | 16   | 7 PITG_16318    |
| 0  | 6    | 10 PITG_17997   |
| 0  | 6    | 0 PITG_14141    |
| 0  | 0    | 4 NA            |
| 0  | 607  | 311 PITG_07999  |
| 0  | 29   | 14 PITG_04846   |
| 0  | 3    | 0 PITG_04956    |
| 0  | 0    | 8 PITG_15731    |
| 0  | 150  | 132 PITG_07711  |
| 0  | 0    | 2 NA            |
| 0  | 23   | 0 PITG_02958    |
| 0  | 5608 | 2141 PITG_08844 |
| 0  | 0    | 0 NA            |
| 0  | 4    | 2 PITG_18461    |
| 0  | 25   | 5 NA            |
| 0  | 12   | 6 PITG_12840    |
| 0  | 16   | 17 NA           |
| 0  | 0    | 2 PITG_14572    |
| 0  | 0    | 4 NA            |
| 0  | 2    | 0 PITG_14723    |
| 0  | 46   | 77 PITG_14570   |
| 0  | 7    | 9 PITG_01608    |
| 22 | 0    | 0 NA            |
| 0  | 105  | 18 PITG_03402   |
| 0  | 17   | 2 PITG_03855    |
| 0  | 0    | 0 PITG_12919    |
| 0  | 3    | 0 NA            |
| 0  | 2    | 0 PITG_17677    |
| 0  | 2    | 3 PITG_08926    |
| 0  | 28   | 39 PITG_05274   |
| 0  | 10   | 18 PITG_06819   |
| 0  | 14   | 9 PITG_17893    |
| 0  | 4    | 35 PITG_16207   |
| 0  | 66   | 33 PITG_10384   |
| 0  | 2    | 4 PITG_10141    |
| 0  | 2    | 21 PITG_19813   |
| 0  | 15   | 0 PITG_14247    |
| 0  | 0    | 0 PITG_04903    |
| 0  | 0    | 4 PITG_13289    |
| 0  | 14   | 15 PITG_08661   |

|     |     |               |
|-----|-----|---------------|
| 0   | 8   | 12 PITG_15267 |
| 0   | 6   | 0 NA          |
| 0   | 12  | 0 PITG_05259  |
| 0   | 0   | 2 PITG_19449  |
| 0   | 22  | 19 NA         |
| 0   | 42  | 0 PITG_16491  |
| 0   | 14  | 2 PITG_15258  |
| 0   | 0   | 0 PITG_08367  |
| 0   | 2   | 0 PITG_01314  |
| 0   | 33  | 43 PITG_07993 |
| 0   | 13  | 12 PITG_05079 |
| 0   | 0   | 0 PITG_09818  |
| 0   | 44  | 25 PITG_07310 |
| 0   | 4   | 2 PITG_05326  |
| 0   | 7   | 2 PITG_11010  |
| 0   | 29  | 44 PITG_14385 |
| 0   | 18  | 31 PITG_12576 |
| 0   | 2   | 3 PITG_21601  |
| 0   | 0   | 4 PITG_18963  |
| 0   | 2   | 2 PITG_01074  |
| 0   | 0   | 11 PITG_07655 |
| 0   | 87  | 53 NA         |
| 0   | 31  | 24 PITG_03737 |
| 0   | 21  | 32 PITG_04000 |
| 0   | 11  | 11 PITG_13999 |
| 0   | 28  | 5 PITG_20044  |
| 0   | 0   | 0 PITG_00398  |
| 0   | 0   | 3 PITG_00284  |
| 0   | 13  | 6 PITG_03560  |
| 6   | 2   | 7 NA          |
| 0   | 29  | 4 PITG_04648  |
| 0   | 9   | 46 PITG_06171 |
| 0   | 55  | 25 PITG_06398 |
| 0   | 23  | 10 PITG_04401 |
| 176 | 9   | 147 NA        |
| 0   | 0   | 2 PITG_12489  |
| 0   | 37  | 14 PITG_16797 |
| 0   | 5   | 11 NA         |
| 0   | 104 | 20 PITG_02620 |
| 0   | 23  | 6 PITG_00315  |
| 0   | 6   | 4 PITG_10250  |
| 0   | 10  | 0 PITG_19867  |
| 0   | 0   | 0 PITG_17115  |
| 0   | 17  | 8 PITG_08722  |
| 0   | 4   | 21 PITG_00663 |
| 0   | 55  | 90 PITG_07828 |
| 0   | 24  | 20 PITG_05408 |



|    |     |                |
|----|-----|----------------|
| 0  | 58  | 15 NA          |
| 0  | 18  | 18 PITG_00665  |
| 0  | 7   | 2 NA           |
| 0  | 4   | 2 NA           |
| 0  | 549 | 303 PITG_06272 |
| 92 | 48  | 62 NA          |
| 0  | 6   | 2 PITG_03623   |
| 0  | 56  | 8 PITG_03656   |
| 0  | 90  | 4 PITG_07062   |
| 0  | 2   | 4 PITG_03154   |
| 0  | 5   | 4 PITG_03777   |
| 0  | 11  | 3 PITG_01650   |
| 0  | 42  | 72 PITG_02591  |
| 0  | 27  | 50 PITG_02182  |
| 0  | 9   | 2 PITG_04891   |
| 0  | 0   | 2 PITG_08383   |
| 0  | 2   | 0 PITG_00129   |
| 0  | 4   | 12 PITG_16228  |
| 0  | 8   | 9 PITG_15039   |
| 0  | 541 | 78 PITG_06503  |
| 0  | 4   | 2 PITG_22684   |
| 0  | 41  | 21 NA          |
| 0  | 2   | 0 PITG_15821   |
| 0  | 0   | 0 NA           |
| 0  | 60  | 48 PITG_22001  |
| 0  | 0   | 0 PITG_10460   |
| 0  | 68  | 14 PITG_06895  |
| 0  | 10  | 10 PITG_13882  |
| 0  | 2   | 37 PITG_00375  |
| 0  | 42  | 12 PITG_18800  |
| 0  | 4   | 0 PITG_03318   |
| 0  | 0   | 0 PITG_06142   |
| 0  | 0   | 0 PITG_05597   |
| 0  | 0   | 0 PITG_10980   |
| 0  | 2   | 4 PITG_10008   |
| 0  | 12  | 10 PITG_10921  |
| 0  | 459 | 235 PITG_19316 |
| 0  | 12  | 5 NA           |
| 0  | 0   | 3 PITG_01453   |
| 0  | 9   | 0 PITG_00626   |
| 0  | 6   | 4 NA           |
| 47 | 4   | 147 NA         |
| 0  | 0   | 2 NA           |
| 0  | 6   | 0 PITG_09648   |
| 0  | 0   | 0 PITG_17004   |
| 0  | 0   | 2 PITG_14176   |
| 0  | 4   | 4 PITG_11000   |

|   |     |               |
|---|-----|---------------|
| 5 | 8   | 8 NA          |
| 0 | 17  | 12 PITG_12326 |
| 0 | 22  | 16 PITG_13997 |
| 0 | 48  | 2 PITG_00173  |
| 0 | 0   | 0 NA          |
| 0 | 14  | 13 NA         |
| 0 | 4   | 0 PITG_00257  |
| 0 | 5   | 0 PITG_18374  |
| 0 | 21  | 37 PITG_02754 |
| 0 | 0   | 0 NA          |
| 0 | 22  | 8 NA          |
| 0 | 31  | 14 PITG_02810 |
| 0 | 2   | 2 NA          |
| 0 | 4   | 31 PITG_03306 |
| 0 | 0   | 0 NA          |
| 0 | 29  | 5 PITG_03827  |
| 0 | 2   | 0 PITG_01050  |
| 0 | 4   | 4 PITG_15300  |
| 0 | 2   | 0 NA          |
| 0 | 7   | 9 NA          |
| 0 | 50  | 10 PITG_04533 |
| 0 | 10  | 6 NA          |
| 0 | 4   | 2 PITG_02728  |
| 0 | 0   | 2 PITG_17399  |
| 0 | 0   | 2 PITG_04629  |
| 0 | 5   | 2 PITG_20387  |
| 0 | 12  | 13 PITG_01740 |
| 0 | 0   | 0 PITG_16337  |
| 0 | 0   | 0 PITG_18296  |
| 0 | 22  | 27 PITG_11822 |
| 0 | 116 | 6 PITG_17602  |
| 0 | 39  | 4 PITG_09770  |
| 0 | 117 | 6 NA          |
| 0 | 2   | 2 PITG_00023  |
| 0 | 2   | 4 PITG_04011  |
| 0 | 4   | 2 PITG_03006  |
| 0 | 15  | 0 NA          |
| 0 | 30  | 27 PITG_05362 |
| 0 | 7   | 0 NA          |
| 0 | 17  | 20 PITG_04644 |
| 0 | 2   | 0 PITG_05858  |
| 0 | 84  | 33 PITG_16333 |
| 0 | 17  | 7 PITG_18728  |
| 0 | 5   | 20 PITG_07985 |
| 0 | 12  | 14 PITG_04937 |
| 0 | 47  | 75 PITG_06369 |
| 0 | 3   | 5 PITG_01608  |

|   |      |                 |
|---|------|-----------------|
| 0 | 20   | 12 PITG_00845   |
| 0 | 9    | 2 PITG_15891    |
| 0 | 2    | 0 PITG_06152    |
| 0 | 2    | 0 PITG_16040    |
| 0 | 35   | 0 PITG_15247    |
| 0 | 0    | 0 PITG_09816    |
| 0 | 13   | 22 PITG_03846   |
| 0 | 2    | 0 NA            |
| 0 | 107  | 48 PITG_22628   |
| 0 | 21   | 0 NA            |
| 0 | 0    | 0 PITG_12988    |
| 0 | 25   | 512 PITG_13020  |
| 0 | 1590 | 1378 PITG_06381 |
| 0 | 2    | 4 PITG_05934    |
| 0 | 174  | 161 PITG_02320  |
| 0 | 8    | 0 PITG_08305    |
| 0 | 0    | 0 PITG_12346    |
| 0 | 2    | 0 PITG_19761    |
| 0 | 16   | 138 PITG_18712  |
| 0 | 0    | 0 PITG_15925    |
| 0 | 4    | 3 PITG_10969    |
| 0 | 0    | 0 PITG_22117    |
| 0 | 7    | 3 PITG_22313    |
| 0 | 2    | 2 NA            |
| 0 | 0    | 0 PITG_16020    |
| 0 | 4    | 4 PITG_08447    |
| 0 | 2    | 20 NA           |
| 0 | 18   | 26 PITG_03348   |
| 0 | 15   | 19 PITG_00998   |
| 0 | 0    | 0 PITG_03801    |
| 0 | 2    | 2 PITG_02531    |
| 0 | 59   | 21 PITG_08489   |
| 0 | 61   | 11 PITG_12234   |
| 0 | 8    | 18 PITG_16360   |
| 0 | 11   | 5 PITG_12234    |
| 0 | 62   | 34 PITG_01932   |
| 0 | 6    | 5 PITG_03610    |
| 0 | 8    | 4 NA            |
| 0 | 48   | 32 PITG_02910   |
| 0 | 0    | 0 NA            |
| 0 | 6    | 0 PITG_14702    |
| 0 | 109  | 17 PITG_18738   |
| 0 | 5    | 14 NA           |
| 0 | 4    | 3 PITG_00048    |
| 0 | 0    | 8 PITG_23007    |
| 0 | 16   | 37 PITG_03821   |
| 0 | 2    | 0 PITG_00408    |

|    |     |                |
|----|-----|----------------|
| 0  | 13  | 10 PITG_08237  |
| 0  | 0   | 0 PITG_16480   |
| 0  | 2   | 0 PITG_04421   |
| 0  | 35  | 7 PITG_02564   |
| 0  | 7   | 0 NA           |
| 0  | 0   | 0 PITG_17023   |
| 0  | 6   | 0 PITG_02574   |
| 0  | 17  | 66 PITG_06048  |
| 0  | 3   | 4 PITG_06897   |
| 0  | 6   | 0 NA           |
| 0  | 6   | 8 PITG_15696   |
| 0  | 2   | 2 PITG_14111   |
| 0  | 4   | 7 PITG_05623   |
| 0  | 9   | 2 PITG_15672   |
| 0  | 0   | 0 PITG_03947   |
| 0  | 16  | 0 PITG_16826   |
| 0  | 5   | 4 NA           |
| 0  | 96  | 151 PITG_10979 |
| 0  | 17  | 7 NA           |
| 0  | 19  | 9 PITG_19006   |
| 0  | 23  | 30 PITG_01737  |
| 0  | 0   | 0 PITG_13135   |
| 0  | 2   | 2 PITG_07293   |
| 0  | 0   | 4 PITG_07865   |
| 0  | 4   | 0 PITG_18671   |
| 0  | 4   | 13 PITG_21914  |
| 0  | 0   | 0 PITG_07703   |
| 0  | 7   | 79 PITG_11483  |
| 0  | 4   | 0 NA           |
| 0  | 2   | 4 PITG_03777   |
| 0  | 2   | 0 PITG_19472   |
| 0  | 4   | 2 PITG_04158   |
| 0  | 288 | 355 PITG_18375 |
| 0  | 3   | 2 PITG_01405   |
| 0  | 4   | 6 PITG_15394   |
| 0  | 0   | 0 PITG_00361   |
| 0  | 23  | 31 PITG_15998  |
| 0  | 0   | 0 PITG_11323   |
| 0  | 0   | 0 PITG_22717   |
| 61 | 50  | 58 NA          |
| 0  | 0   | 2 PITG_09248   |
| 0  | 40  | 4 NA           |
| 0  | 77  | 46 PITG_14683  |
| 0  | 4   | 3 PITG_14643   |
| 0  | 0   | 5 PITG_03778   |
| 0  | 79  | 31 PITG_16121  |
| 0  | 61  | 9 PITG_21121   |

|    |     |                |
|----|-----|----------------|
| 0  | 38  | 8 PITG_10663   |
| 0  | 18  | 10 PITG_11272  |
| 0  | 0   | 2 PITG_05487   |
| 0  | 4   | 12 NA          |
| 0  | 3   | 0 PITG_09654   |
| 0  | 3   | 0 NA           |
| 0  | 35  | 73 PITG_14230  |
| 0  | 29  | 11 PITG_02097  |
| 0  | 12  | 0 NA           |
| 0  | 0   | 0 PITG_03987   |
| 0  | 5   | 0 NA           |
| 0  | 0   | 2 PITG_12513   |
| 0  | 6   | 2 PITG_16016   |
| 0  | 30  | 17 PITG_21183  |
| 0  | 17  | 13 PITG_01436  |
| 0  | 0   | 0 PITG_02564   |
| 0  | 54  | 29 NA          |
| 0  | 7   | 8 NA           |
| 0  | 18  | 5 PITG_02636   |
| 0  | 132 | 188 PITG_04802 |
| 0  | 7   | 16 PITG_09665  |
| 0  | 0   | 4 NA           |
| 0  | 0   | 0 PITG_00080   |
| 0  | 0   | 3 PITG_10049   |
| 0  | 0   | 4 PITG_01782   |
| 0  | 12  | 13 PITG_13677  |
| 0  | 21  | 2 PITG_19997   |
| 0  | 17  | 2 PITG_12152   |
| 0  | 14  | 0 NA           |
| 0  | 0   | 0 PITG_13165   |
| 0  | 0   | 0 PITG_17004   |
| 0  | 0   | 4 PITG_07794   |
| 0  | 0   | 0 PITG_22124   |
| 0  | 29  | 52 PITG_04842  |
| 0  | 6   | 2 NA           |
| 0  | 20  | 2 PITG_00577   |
| 0  | 12  | 4 NA           |
| 0  | 4   | 3 NA           |
| 0  | 9   | 3 NA           |
| 0  | 287 | 280 PITG_12827 |
| 0  | 0   | 4 PITG_03533   |
| 0  | 49  | 109 PITG_13302 |
| 0  | 6   | 7 PITG_21879   |
| 0  | 0   | 2 NA           |
| 0  | 0   | 7 PITG_02397   |
| 0  | 2   | 0 PITG_01233   |
| 29 | 67  | 21 NA          |

|   |     |                |
|---|-----|----------------|
| 0 | 0   | 6 PITG_03840   |
| 0 | 0   | 0 NA           |
| 0 | 4   | 0 PITG_00469   |
| 0 | 9   | 2 PITG_02564   |
| 0 | 123 | 59 PITG_05291  |
| 0 | 0   | 4 PITG_16854   |
| 0 | 0   | 4 PITG_13284   |
| 0 | 0   | 3 PITG_12050   |
| 0 | 28  | 6 PITG_20868   |
| 0 | 4   | 5 NA           |
| 0 | 6   | 4 PITG_20909   |
| 0 | 16  | 33 PITG_19870  |
| 0 | 14  | 12 PITG_21457  |
| 0 | 10  | 10 PITG_05669  |
| 0 | 416 | 257 PITG_07996 |
| 0 | 17  | 10 PITG_06013  |
| 0 | 17  | 2 PITG_03295   |
| 0 | 8   | 0 PITG_16013   |
| 0 | 57  | 39 PITG_06056  |
| 0 | 0   | 8 PITG_21509   |
| 0 | 2   | 0 NA           |
| 0 | 2   | 0 PITG_02598   |
| 0 | 0   | 0 PITG_05456   |
| 0 | 2   | 2 PITG_04718   |
| 0 | 3   | 4 PITG_04579   |
| 0 | 0   | 0 NA           |
| 0 | 2   | 9 NA           |
| 0 | 12  | 7 PITG_02097   |
| 0 | 5   | 31 PITG_00152  |
| 0 | 13  | 2 PITG_03708   |
| 0 | 30  | 0 PITG_20568   |
| 0 | 0   | 0 PITG_18416   |
| 0 | 2   | 4 PITG_01233   |
| 0 | 14  | 20 PITG_08295  |
| 0 | 38  | 4 PITG_05688   |
| 0 | 32  | 10 PITG_00852  |
| 0 | 4   | 5 PITG_02789   |
| 0 | 93  | 38 PITG_12577  |
| 0 | 0   | 0 PITG_06410   |
| 0 | 2   | 5 PITG_02598   |
| 0 | 9   | 36 PITG_14278  |
| 0 | 4   | 8 NA           |
| 0 | 0   | 7 PITG_03999   |
| 0 | 12  | 9 PITG_11286   |
| 0 | 0   | 0 PITG_05176   |
| 0 | 8   | 4 NA           |
| 0 | 11  | 13 NA          |

|   |     |                |
|---|-----|----------------|
| 0 | 13  | 11 PITG_13393  |
| 0 | 17  | 9 PITG_11805   |
| 0 | 2   | 2 PITG_17549   |
| 0 | 84  | 26 PITG_07319  |
| 0 | 37  | 6 PITG_21110   |
| 0 | 6   | 9 PITG_14299   |
| 0 | 23  | 41 PITG_15392  |
| 0 | 48  | 0 NA           |
| 0 | 6   | 0 PITG_05825   |
| 0 | 0   | 0 PITG_17882   |
| 0 | 11  | 0 PITG_12107   |
| 0 | 2   | 0 PITG_03532   |
| 0 | 0   | 2 PITG_16864   |
| 0 | 13  | 0 PITG_01229   |
| 0 | 3   | 4 PITG_04453   |
| 0 | 139 | 29 PITG_00370  |
| 0 | 707 | 961 PITG_16893 |
| 0 | 14  | 12 PITG_14593  |
| 0 | 8   | 27 PITG_03944  |
| 0 | 2   | 8 PITG_06694   |
| 0 | 3   | 0 PITG_11728   |
| 0 | 15  | 28 PITG_03311  |
| 0 | 2   | 4 PITG_18867   |
| 0 | 0   | 2 PITG_12295   |
| 0 | 6   | 0 PITG_18423   |
| 0 | 8   | 8 PITG_03048   |
| 0 | 7   | 4 PITG_16138   |
| 0 | 46  | 27 NA          |
| 0 | 19  | 24 NA          |
| 0 | 0   | 0 NA           |
| 0 | 2   | 6 PITG_12535   |
| 0 | 0   | 2 PITG_08394   |
| 0 | 0   | 0 NA           |
| 0 | 5   | 0 PITG_04568   |
| 0 | 0   | 2 PITG_05559   |
| 0 | 129 | 129 PITG_05666 |
| 0 | 0   | 0 NA           |
| 0 | 18  | 0 PITG_19422   |
| 0 | 3   | 5 PITG_08456   |
| 0 | 5   | 2 NA           |
| 0 | 41  | 22 NA          |
| 0 | 0   | 0 NA           |
| 0 | 0   | 0 PITG_05559   |
| 0 | 7   | 18 PITG_18235  |
| 0 | 11  | 0 PITG_22676   |
| 0 | 7   | 9 PITG_17348   |
| 0 | 28  | 21 PITG_08326  |

|   |     |                |
|---|-----|----------------|
| 0 | 2   | 4 NA           |
| 0 | 0   | 8 PITG_23159   |
| 0 | 15  | 3 PITG_12124   |
| 0 | 0   | 0 PITG_13803   |
| 0 | 74  | 64 PITG_13257  |
| 0 | 0   | 0 PITG_06917   |
| 0 | 0   | 2 NA           |
| 0 | 8   | 7 PITG_19310   |
| 0 | 0   | 2 PITG_08305   |
| 0 | 31  | 28 PITG_22688  |
| 0 | 114 | 81 NA          |
| 0 | 3   | 6 PITG_12843   |
| 0 | 18  | 19 PITG_08196  |
| 0 | 7   | 6 PITG_20818   |
| 0 | 0   | 0 PITG_11225   |
| 0 | 12  | 68 PITG_19320  |
| 0 | 17  | 94 PITG_16959  |
| 0 | 12  | 2 PITG_14717   |
| 0 | 20  | 5 PITG_10989   |
| 0 | 5   | 7 PITG_02242   |
| 0 | 2   | 2 PITG_07952   |
| 0 | 0   | 0 PITG_00284   |
| 0 | 32  | 18 PITG_03303  |
| 0 | 10  | 5 NA           |
| 0 | 0   | 0 PITG_01005   |
| 0 | 2   | 5 PITG_20503   |
| 0 | 35  | 33 NA          |
| 0 | 0   | 9 PITG_17935   |
| 0 | 310 | 20 NA          |
| 0 | 11  | 6 PITG_02161   |
| 0 | 50  | 149 PITG_09280 |
| 0 | 4   | 0 PITG_18798   |
| 2 | 0   | 2 NA           |
| 0 | 71  | 49 PITG_02053  |
| 0 | 2   | 2 PITG_09675   |
| 0 | 0   | 0 PITG_17882   |
| 0 | 4   | 2 NA           |
| 2 | 0   | 10 PITG_17663  |
| 0 | 5   | 2 PITG_00490   |
| 0 | 0   | 13 PITG_11197  |
| 0 | 2   | 2 PITG_14898   |
| 0 | 8   | 2 PITG_01584   |
| 0 | 13  | 39 PITG_09296  |
| 0 | 71  | 56 PITG_05300  |
| 0 | 16  | 11 PITG_01048  |
| 0 | 0   | 0 PITG_02530   |
| 0 | 13  | 4 PITG_04902   |



|    |     |                |
|----|-----|----------------|
| 0  | 256 | 53 PITG_01203  |
| 0  | 4   | 13 PITG_02286  |
| 0  | 163 | 181 NA         |
| 0  | 2   | 19 PITG_06597  |
| 0  | 0   | 2 NA           |
| 0  | 0   | 2 PITG_13397   |
| 0  | 2   | 0 PITG_15871   |
| 0  | 0   | 0 PITG_09716   |
| 0  | 0   | 0 PITG_00705   |
| 0  | 0   | 4 PITG_19229   |
| 0  | 0   | 2 PITG_07767   |
| 0  | 11  | 4 PITG_20236   |
| 0  | 24  | 104 PITG_10819 |
| 0  | 16  | 22 PITG_11822  |
| 0  | 4   | 0 PITG_03665   |
| 0  | 5   | 6 PITG_02564   |
| 0  | 37  | 9 NA           |
| 0  | 13  | 0 PITG_04678   |
| 0  | 10  | 7 PITG_10534   |
| 18 | 0   | 5 NA           |
| 0  | 0   | 2 PITG_02959   |
| 0  | 31  | 5 NA           |
| 0  | 13  | 0 PITG_07809   |
| 0  | 10  | 15 PITG_03268  |
| 0  | 13  | 52 PITG_02303  |
| 0  | 7   | 4 PITG_13840   |
| 0  | 43  | 10 PITG_10045  |
| 0  | 49  | 0 PITG_07966   |
| 0  | 9   | 12 PITG_05450  |
| 0  | 4   | 8 PITG_00658   |
| 0  | 25  | 20 PITG_15566  |
| 0  | 54  | 4 NA           |
| 0  | 378 | 510 PITG_07996 |
| 0  | 2   | 6 PITG_03460   |
| 0  | 0   | 0 PITG_09954   |
| 0  | 5   | 0 PITG_01083   |
| 0  | 2   | 10 PITG_12264  |
| 0  | 13  | 18 PITG_11689  |
| 0  | 0   | 9 PITG_05635   |
| 0  | 17  | 11 PITG_03243  |
| 0  | 2   | 2 PITG_12050   |
| 0  | 187 | 271 PITG_12238 |
| 0  | 5   | 0 NA           |
| 0  | 4   | 6 PITG_01470   |
| 0  | 4   | 18 PITG_18641  |
| 0  | 4   | 4 PITG_05338   |
| 0  | 16  | 34 PITG_15831  |

|     |     |                |
|-----|-----|----------------|
| 0   | 211 | 83 NA          |
| 0   | 0   | 0 PITG_13651   |
| 0   | 8   | 0 PITG_17587   |
| 0   | 3   | 2 PITG_06898   |
| 8   | 15  | 556 NA         |
| 0   | 9   | 17 PITG_18099  |
| 0   | 0   | 0 PITG_06887   |
| 0   | 15  | 8 NA           |
| 0   | 2   | 14 PITG_16271  |
| 0   | 21  | 12 PITG_01641  |
| 0   | 0   | 15 PITG_02696  |
| 0   | 0   | 0 NA           |
| 0   | 6   | 7 PITG_21010   |
| 0   | 7   | 0 NA           |
| 0   | 0   | 5 PITG_12160   |
| 0   | 26  | 205 PITG_13551 |
| 0   | 17  | 13 PITG_07948  |
| 0   | 59  | 129 NA         |
| 0   | 27  | 31 PITG_21210  |
| 0   | 583 | 211 NA         |
| 0   | 18  | 39 PITG_16127  |
| 0   | 7   | 13 PITG_05679  |
| 0   | 6   | 6 PITG_08026   |
| 0   | 15  | 5 PITG_19145   |
| 0   | 8   | 8 PITG_02244   |
| 0   | 0   | 14 PITG_05104  |
| 0   | 14  | 57 PITG_07839  |
| 0   | 0   | 4 PITG_16684   |
| 11  | 6   | 21 NA          |
| 0   | 13  | 2 PITG_18688   |
| 0   | 0   | 15 PITG_14237  |
| 0   | 0   | 0 PITG_10625   |
| 0   | 54  | 20 PITG_09451  |
| 0   | 4   | 0 PITG_22840   |
| 0   | 4   | 24 PITG_10729  |
| 0   | 48  | 3 PITG_13625   |
| 376 | 82  | 382 NA         |
| 0   | 3   | 5 NA           |
| 0   | 7   | 4 PITG_00160   |
| 0   | 32  | 41 NA          |
| 0   | 257 | 35 PITG_19817  |
| 0   | 21  | 52 NA          |
| 0   | 16  | 0 NA           |
| 0   | 22  | 0 PITG_17992   |
| 0   | 232 | 10 PITG_17881  |
| 0   | 2   | 2 PITG_17673   |
| 0   | 38  | 32 NA          |

|     |     |               |
|-----|-----|---------------|
| 0   | 0   | 2 PITG_01092  |
| 0   | 3   | 7 PITG_15739  |
| 0   | 0   | 0 NA          |
| 0   | 0   | 0 NA          |
| 0   | 31  | 7 NA          |
| 0   | 11  | 6 NA          |
| 0   | 66  | 10 PITG_11203 |
| 0   | 46  | 18 PITG_12648 |
| 0   | 6   | 4 NA          |
| 0   | 18  | 0 NA          |
| 0   | 2   | 6 NA          |
| 0   | 28  | 33 PITG_04875 |
| 0   | 41  | 0 PITG_06363  |
| 0   | 8   | 5 PITG_17201  |
| 0   | 4   | 2 PITG_13833  |
| 0   | 32  | 39 PITG_02206 |
| 0   | 330 | 38 NA         |
| 0   | 0   | 0 PITG_11977  |
| 0   | 0   | 2 PITG_05458  |
| 0   | 7   | 2 PITG_17951  |
| 0   | 105 | 19 PITG_03846 |
| 0   | 14  | 6 NA          |
| 0   | 2   | 7 PITG_06329  |
| 0   | 320 | 120 NA        |
| 0   | 22  | 7 NA          |
| 0   | 0   | 0 NA          |
| 0   | 22  | 14 NA         |
| 0   | 22  | 8 PITG_06945  |
| 0   | 46  | 15 PITG_22689 |
| 0   | 4   | 6 PITG_20222  |
| 0   | 2   | 2 PITG_04991  |
| 0   | 4   | 0 PITG_17897  |
| 0   | 9   | 12 PITG_14987 |
| 0   | 97  | 2 PITG_03396  |
| 0   | 31  | 28 PITG_15998 |
| 0   | 0   | 0 PITG_04924  |
| 0   | 16  | 13 PITG_01850 |
| 0   | 11  | 11 PITG_15870 |
| 0   | 7   | 10 PITG_00986 |
| 0   | 0   | 0 PITG_07476  |
| 382 | 105 | 1002 NA       |
| 0   | 2   | 4 PITG_06256  |
| 0   | 158 | 0 NA          |
| 0   | 9   | 0 NA          |
| 0   | 6   | 8 PITG_00380  |
| 0   | 22  | 85 PITG_15045 |
| 0   | 61  | 29 PITG_13500 |

|     |    |                |
|-----|----|----------------|
| 0   | 26 | 0 NA           |
| 0   | 2  | 0 PITG_03902   |
| 0   | 5  | 0 PITG_11020   |
| 0   | 45 | 23 PITG_00300  |
| 0   | 9  | 65 NA          |
| 0   | 52 | 2 NA           |
| 0   | 2  | 0 NA           |
| 0   | 0  | 2 PITG_05858   |
| 0   | 98 | 33 NA          |
| 0   | 36 | 0 PITG_10836   |
| 0   | 73 | 35 PITG_11496  |
| 0   | 19 | 19 PITG_04104  |
| 0   | 9  | 2 PITG_01395   |
| 0   | 23 | 19 PITG_06247  |
| 0   | 0  | 0 PITG_08826   |
| 0   | 33 | 0 NA           |
| 0   | 14 | 21 PITG_09281  |
| 0   | 13 | 2 NA           |
| 0   | 66 | 62 PITG_13245  |
| 0   | 2  | 2 PITG_10450   |
| 0   | 66 | 26 PITG_13985  |
| 0   | 6  | 0 PITG_00574   |
| 0   | 0  | 0 PITG_11723   |
| 0   | 3  | 0 PITG_16207   |
| 453 | 94 | 210 PITG_00156 |
| 0   | 10 | 0 PITG_07100   |
| 0   | 7  | 4 NA           |
| 0   | 5  | 12 PITG_05504  |
| 0   | 2  | 4 NA           |
| 0   | 20 | 0 PITG_10564   |
| 0   | 6  | 2 PITG_11018   |
| 0   | 0  | 0 PITG_13255   |
| 0   | 2  | 39 PITG_01535  |
| 0   | 9  | 3 PITG_13512   |
| 0   | 41 | 19 PITG_02556  |
| 0   | 15 | 18 PITG_10015  |
| 0   | 6  | 15 PITG_00808  |
| 0   | 37 | 5 PITG_08586   |
| 0   | 20 | 37 PITG_10980  |
| 0   | 17 | 4 PITG_17164   |
| 0   | 4  | 23 PITG_02786  |
| 0   | 8  | 12 PITG_15649  |
| 0   | 0  | 8 PITG_05126   |
| 0   | 32 | 24 NA          |
| 0   | 5  | 0 NA           |
| 0   | 96 | 89 PITG_16893  |
| 0   | 0  | 0 PITG_11562   |

|   |     |                |
|---|-----|----------------|
| 0 | 43  | 18 PITG_00833  |
| 0 | 0   | 0 NA           |
| 0 | 17  | 6 NA           |
| 0 | 2   | 0 PITG_04910   |
| 0 | 0   | 2 NA           |
| 0 | 2   | 19 PITG_01616  |
| 0 | 6   | 0 PITG_01367   |
| 0 | 44  | 4 PITG_14460   |
| 0 | 8   | 0 PITG_09951   |
| 0 | 15  | 6 PITG_17840   |
| 0 | 0   | 14 PITG_17395  |
| 0 | 2   | 2 PITG_02744   |
| 0 | 14  | 8 PITG_05691   |
| 0 | 50  | 30 PITG_02696  |
| 0 | 9   | 20 NA          |
| 0 | 15  | 13 PITG_10509  |
| 0 | 32  | 8 PITG_02778   |
| 0 | 7   | 0 NA           |
| 0 | 11  | 8 NA           |
| 0 | 2   | 2 NA           |
| 0 | 0   | 0 PITG_22126   |
| 0 | 0   | 2 PITG_20374   |
| 0 | 0   | 0 PITG_02433   |
| 0 | 34  | 18 NA          |
| 0 | 4   | 4 PITG_15509   |
| 0 | 25  | 8 NA           |
| 0 | 45  | 0 PITG_04705   |
| 0 | 14  | 5 PITG_08456   |
| 0 | 6   | 8 PITG_08376   |
| 0 | 2   | 5 PITG_04023   |
| 0 | 69  | 25 NA          |
| 0 | 0   | 0 PITG_08514   |
| 0 | 0   | 4 PITG_18987   |
| 0 | 2   | 4 NA           |
| 0 | 0   | 7 PITG_13607   |
| 0 | 17  | 8 NA           |
| 0 | 10  | 20 PITG_17779  |
| 0 | 24  | 12 PITG_03990  |
| 0 | 7   | 2 NA           |
| 0 | 125 | 122 PITG_11605 |
| 0 | 49  | 11 PITG_02540  |
| 0 | 7   | 10 NA          |
| 0 | 22  | 4 NA           |
| 0 | 7   | 4 NA           |
| 0 | 18  | 194 PITG_09216 |
| 0 | 0   | 0 PITG_23063   |
| 0 | 12  | 46 PITG_19472  |

|   |      |                 |
|---|------|-----------------|
| 0 | 0    | 0 PITG_03336    |
| 0 | 7    | 2 PITG_15269    |
| 0 | 9    | 12 NA           |
| 0 | 4    | 10 PITG_15079   |
| 0 | 29   | 38 PITG_03048   |
| 0 | 0    | 2 PITG_05729    |
| 0 | 6    | 4 PITG_12238    |
| 0 | 660  | 208 PITG_06578  |
| 0 | 3    | 4 NA            |
| 0 | 10   | 17 PITG_04466   |
| 0 | 26   | 0 NA            |
| 0 | 3    | 0 PITG_02027    |
| 0 | 0    | 7 PITG_10921    |
| 0 | 12   | 2 PITG_10894    |
| 0 | 6    | 2 PITG_05429    |
| 0 | 3063 | 1278 PITG_00121 |
| 0 | 5    | 0 PITG_05411    |
| 0 | 47   | 76 PITG_12462   |
| 0 | 41   | 2 PITG_05177    |
| 0 | 15   | 0 PITG_12252    |
| 0 | 142  | 38 NA           |
| 0 | 4    | 0 PITG_02477    |
| 0 | 9    | 12 PITG_12489   |
| 0 | 23   | 5 NA            |
| 0 | 23   | 0 PITG_09243    |
| 0 | 2    | 8 PITG_01053    |
| 0 | 2    | 4 PITG_13391    |
| 0 | 28   | 0 PITG_00590    |
| 0 | 25   | 17 PITG_08898   |
| 0 | 0    | 0 PITG_17498    |
| 0 | 2    | 2 PITG_19639    |
| 0 | 284  | 48 PITG_11375   |
| 0 | 2    | 2 PITG_00233    |
| 0 | 9    | 11 PITG_14603   |
| 0 | 19   | 9 NA            |
| 0 | 20   | 12 PITG_13641   |
| 0 | 23   | 0 PITG_09997    |
| 0 | 0    | 5 PITG_17139    |
| 0 | 2    | 25 PITG_22267   |
| 0 | 11   | 0 PITG_05507    |
| 0 | 72   | 5 PITG_15509    |
| 0 | 8    | 4 PITG_10881    |
| 0 | 0    | 0 PITG_06780    |
| 0 | 33   | 777 NA          |
| 0 | 29   | 13 PITG_13483   |
| 0 | 3    | 0 NA            |
| 0 | 17   | 8 NA            |

|     |     |               |
|-----|-----|---------------|
| 0   | 125 | 25 PITG_03753 |
| 0   | 48  | 6 PITG_05381  |
| 0   | 35  | 9 PITG_20893  |
| 0   | 0   | 0 PITG_05480  |
| 45  | 89  | 749 NA        |
| 0   | 19  | 6 PITG_12195  |
| 0   | 2   | 0 NA          |
| 0   | 4   | 13 PITG_06753 |
| 0   | 96  | 79 PITG_20313 |
| 0   | 2   | 0 PITG_05286  |
| 0   | 2   | 4 PITG_17760  |
| 0   | 13  | 6 PITG_14375  |
| 0   | 2   | 4 PITG_17370  |
| 0   | 8   | 0 PITG_03169  |
| 0   | 7   | 8 PITG_18959  |
| 0   | 0   | 0 NA          |
| 0   | 0   | 0 NA          |
| 0   | 28  | 32 PITG_18326 |
| 0   | 0   | 16 PITG_12853 |
| 0   | 7   | 10 PITG_10008 |
| 0   | 6   | 71 NA         |
| 0   | 43  | 38 PITG_11650 |
| 0   | 12  | 92 PITG_06482 |
| 0   | 2   | 0 PITG_02230  |
| 0   | 31  | 20 PITG_08584 |
| 0   | 11  | 0 NA          |
| 0   | 144 | 21 PITG_06640 |
| 0   | 6   | 0 PITG_05987  |
| 0   | 11  | 5 PITG_15948  |
| 0   | 5   | 2 NA          |
| 0   | 63  | 17 PITG_05652 |
| 0   | 0   | 0 PITG_05798  |
| 0   | 56  | 81 PITG_04822 |
| 0   | 104 | 28 NA         |
| 0   | 5   | 2 PITG_10017  |
| 0   | 7   | 12 NA         |
| 0   | 16  | 39 PITG_00262 |
| 0   | 8   | 22 PITG_01607 |
| 0   | 5   | 0 PITG_20152  |
| 0   | 4   | 6 PITG_06945  |
| 0   | 7   | 10 PITG_18298 |
| 0   | 16  | 0 PITG_20491  |
| 0   | 7   | 2 PITG_01941  |
| 0   | 30  | 48 PITG_13575 |
| 0   | 2   | 0 NA          |
| 387 | 89  | 438 NA        |
| 0   | 0   | 0 NA          |

|   |      |                |
|---|------|----------------|
| 0 | 5    | 0 PITG_08160   |
| 0 | 0    | 0 NA           |
| 0 | 5    | 2 PITG_15762   |
| 0 | 189  | 220 PITG_01333 |
| 0 | 0    | 2 PITG_04344   |
| 0 | 0    | 2 PITG_03102   |
| 0 | 226  | 80 PITG_07826  |
| 0 | 0    | 0 PITG_15149   |
| 0 | 25   | 21 PITG_01125  |
| 0 | 2    | 0 PITG_15661   |
| 0 | 6    | 0 PITG_03169   |
| 0 | 20   | 36 PITG_04850  |
| 0 | 6    | 2 PITG_00411   |
| 0 | 4    | 6 NA           |
| 0 | 2    | 0 NA           |
| 0 | 3    | 0 NA           |
| 0 | 2    | 0 PITG_12699   |
| 0 | 8    | 14 PITG_18922  |
| 0 | 2    | 0 NA           |
| 0 | 2    | 11 NA          |
| 0 | 2    | 3 PITG_12853   |
| 0 | 61   | 6 PITG_04529   |
| 0 | 4    | 0 PITG_17437   |
| 0 | 75   | 2 PITG_10894   |
| 0 | 6    | 14 NA          |
| 0 | 12   | 0 NA           |
| 0 | 26   | 2 PITG_00190   |
| 0 | 0    | 0 NA           |
| 0 | 30   | 13 PITG_02945  |
| 0 | 4    | 4 PITG_06150   |
| 0 | 25   | 7 PITG_17075   |
| 0 | 4    | 6 PITG_03575   |
| 0 | 10   | 15 PITG_00770  |
| 0 | 60   | 430 PITG_06448 |
| 0 | 18   | 8 PITG_05315   |
| 0 | 2    | 2 PITG_04603   |
| 0 | 253  | 25 PITG_17477  |
| 0 | 9    | 15 PITG_08241  |
| 0 | 2004 | 1437 NA        |
| 0 | 2    | 8 PITG_00067   |
| 0 | 159  | 34 PITG_18030  |
| 0 | 0    | 0 PITG_12620   |
| 2 | 9    | 7 NA           |
| 0 | 0    | 31 PITG_08173  |
| 0 | 0    | 0 NA           |
| 0 | 38   | 12 PITG_04970  |
| 0 | 17   | 4 NA           |



|   |     |                |
|---|-----|----------------|
| 0 | 2   | 6 PITG_11201   |
| 0 | 21  | 6 PITG_13300   |
| 0 | 20  | 40 PITG_13991  |
| 0 | 21  | 2 PITG_20652   |
| 0 | 2   | 0 PITG_07916   |
| 0 | 0   | 2 PITG_14992   |
| 0 | 2   | 2 PITG_01429   |
| 0 | 17  | 24 PITG_18894  |
| 0 | 9   | 2 PITG_18004   |
| 0 | 4   | 57 NA          |
| 0 | 71  | 19 PITG_07145  |
| 0 | 2   | 0 PITG_08305   |
| 0 | 0   | 2 PITG_10049   |
| 0 | 0   | 0 PITG_08031   |
| 0 | 31  | 0 NA           |
| 0 | 10  | 0 NA           |
| 0 | 9   | 16 PITG_05502  |
| 0 | 2   | 0 NA           |
| 0 | 2   | 0 NA           |
| 0 | 7   | 8 NA           |
| 0 | 21  | 41 NA          |
| 0 | 2   | 21 PITG_02762  |
| 0 | 0   | 0 PITG_12761   |
| 0 | 4   | 7 PITG_02561   |
| 0 | 65  | 5 PITG_11009   |
| 0 | 23  | 0 NA           |
| 0 | 0   | 0 PITG_15407   |
| 0 | 0   | 9 PITG_08954   |
| 0 | 13  | 0 NA           |
| 0 | 4   | 9 PITG_12548   |
| 0 | 147 | 117 PITG_05551 |
| 0 | 0   | 2 PITG_02796   |
| 0 | 8   | 2 PITG_11242   |
| 0 | 37  | 0 PITG_00200   |
| 0 | 9   | 2 NA           |
| 0 | 0   | 0 PITG_04577   |
| 0 | 0   | 0 PITG_10675   |
| 0 | 0   | 0 NA           |
| 0 | 0   | 0 PITG_16203   |
| 0 | 6   | 6 PITG_01920   |
| 0 | 23  | 54 PITG_13415  |
| 0 | 0   | 7 PITG_08893   |
| 0 | 6   | 5 PITG_18509   |
| 0 | 6   | 27 PITG_00841  |
| 0 | 0   | 2 PITG_04705   |
| 0 | 6   | 6 NA           |
| 0 | 5   | 0 NA           |

|    |     |                |
|----|-----|----------------|
| 0  | 97  | 34 PITG_21314  |
| 15 | 2   | 9 NA           |
| 0  | 4   | 0 PITG_18094   |
| 0  | 65  | 117 PITG_21187 |
| 0  | 74  | 55 PITG_01361  |
| 0  | 9   | 0 PITG_06660   |
| 0  | 68  | 113 PITG_10470 |
| 0  | 0   | 2 PITG_00688   |
| 0  | 0   | 8 PITG_03948   |
| 0  | 2   | 0 PITG_22383   |
| 0  | 4   | 4 PITG_07973   |
| 0  | 0   | 2 PITG_11451   |
| 0  | 0   | 0 PITG_12757   |
| 0  | 0   | 0 PITG_05450   |
| 0  | 6   | 10 PITG_01367  |
| 0  | 0   | 4 PITG_22468   |
| 0  | 13  | 10 NA          |
| 0  | 14  | 2 NA           |
| 0  | 52  | 29 PITG_08573  |
| 0  | 2   | 8 PITG_00201   |
| 0  | 4   | 9 PITG_00577   |
| 0  | 4   | 8 PITG_15696   |
| 0  | 56  | 18 PITG_03031  |
| 0  | 23  | 12 NA          |
| 0  | 13  | 6 PITG_08040   |
| 0  | 2   | 2 NA           |
| 0  | 0   | 2 PITG_11010   |
| 0  | 10  | 11 NA          |
| 0  | 6   | 0 PITG_13979   |
| 0  | 138 | 97 PITG_15967  |
| 0  | 23  | 11 PITG_09534  |
| 0  | 492 | 127 PITG_07810 |
| 0  | 0   | 2 PITG_00466   |
| 0  | 7   | 0 NA           |
| 0  | 82  | 50 NA          |
| 0  | 34  | 27 NA          |
| 0  | 30  | 14 PITG_10061  |
| 0  | 35  | 23 PITG_11044  |
| 0  | 0   | 4 NA           |
| 0  | 2   | 0 PITG_08306   |
| 0  | 2   | 6 PITG_10838   |
| 0  | 4   | 3 PITG_01085   |
| 0  | 0   | 2 PITG_10993   |
| 0  | 2   | 5 NA           |
| 0  | 13  | 0 PITG_19615   |
| 0  | 27  | 4 PITG_12503   |
| 0  | 6   | 2 NA           |

|   |     |                |
|---|-----|----------------|
| 0 | 49  | 68 PITG_03095  |
| 0 | 0   | 3 PITG_14111   |
| 0 | 65  | 36 PITG_16695  |
| 0 | 62  | 4 PITG_13736   |
| 0 | 6   | 27 PITG_19606  |
| 0 | 12  | 25 PITG_00597  |
| 0 | 4   | 0 PITG_17365   |
| 0 | 17  | 2 PITG_11741   |
| 0 | 0   | 0 PITG_14890   |
| 0 | 45  | 49 PITG_21887  |
| 0 | 0   | 2 PITG_16999   |
| 0 | 27  | 6 PITG_06942   |
| 0 | 0   | 8 NA           |
| 0 | 595 | 481 PITG_05394 |
| 0 | 81  | 126 PITG_21397 |
| 0 | 9   | 2 NA           |
| 0 | 11  | 6 NA           |
| 0 | 0   | 6 PITG_10191   |
| 0 | 7   | 10 NA          |
| 0 | 8   | 3 PITG_02162   |
| 0 | 6   | 17 PITG_13991  |
| 0 | 2   | 2 PITG_05954   |
| 0 | 49  | 36 PITG_13679  |
| 0 | 10  | 2 PITG_17769   |
| 0 | 0   | 0 PITG_08103   |
| 0 | 10  | 36 PITG_17953  |
| 0 | 29  | 20 PITG_16326  |
| 0 | 102 | 0 PITG_14129   |
| 0 | 266 | 262 PITG_13675 |
| 0 | 25  | 4 PITG_01576   |
| 0 | 2   | 2 PITG_04710   |
| 0 | 28  | 8 NA           |
| 0 | 16  | 9 PITG_02024   |
| 0 | 2   | 2 NA           |
| 0 | 153 | 66 NA          |
| 0 | 0   | 0 PITG_03831   |
| 0 | 11  | 4 PITG_01782   |
| 0 | 32  | 24 PITG_01931  |
| 0 | 0   | 2 PITG_08221   |
| 0 | 0   | 0 PITG_03397   |
| 0 | 11  | 37 PITG_06649  |
| 0 | 12  | 16 PITG_11194  |
| 0 | 51  | 21 PITG_17457  |
| 0 | 4   | 2 PITG_00350   |
| 0 | 14  | 2 NA           |
| 0 | 5   | 11 PITG_13103  |
| 0 | 10  | 2 PITG_10017   |

|   |     |                |
|---|-----|----------------|
| 0 | 0   | 2 NA           |
| 0 | 16  | 13 PITG_04970  |
| 0 | 47  | 0 PITG_14217   |
| 0 | 18  | 5 PITG_09250   |
| 0 | 25  | 26 NA          |
| 0 | 4   | 4 PITG_19153   |
| 0 | 0   | 0 PITG_07898   |
| 0 | 170 | 287 PITG_06595 |
| 0 | 30  | 75 PITG_05694  |
| 0 | 0   | 4 PITG_01782   |
| 0 | 5   | 12 PITG_14593  |
| 0 | 2   | 4 PITG_10969   |
| 0 | 63  | 26 PITG_00846  |
| 0 | 14  | 37 PITG_19281  |
| 0 | 18  | 19 PITG_09907  |
| 0 | 0   | 5 PITG_07916   |
| 0 | 46  | 26 PITG_05644  |
| 0 | 4   | 9 NA           |
| 0 | 143 | 125 PITG_00720 |
| 0 | 137 | 47 NA          |
| 0 | 2   | 18 PITG_12797  |
| 0 | 7   | 0 NA           |
| 0 | 9   | 2 NA           |
| 0 | 4   | 0 PITG_03888   |
| 0 | 15  | 8 NA           |
| 0 | 125 | 65 PITG_08369  |
| 0 | 221 | 173 PITG_08898 |
| 0 | 6   | 4 NA           |
| 0 | 12  | 9 PITG_18899   |
| 0 | 7   | 0 PITG_17936   |
| 0 | 54  | 16 PITG_10845  |
| 0 | 5   | 5 PITG_11271   |
| 0 | 0   | 0 NA           |
| 0 | 2   | 2 PITG_10012   |
| 0 | 4   | 7 NA           |
| 0 | 2   | 0 NA           |
| 0 | 0   | 0 NA           |
| 0 | 2   | 0 NA           |
| 0 | 0   | 0 PITG_17829   |
| 0 | 9   | 0 PITG_00621   |
| 0 | 0   | 0 PITG_16257   |
| 0 | 2   | 10 PITG_06260  |
| 0 | 66  | 29 PITG_14467  |
| 0 | 4   | 4 PITG_03827   |
| 0 | 0   | 0 PITG_20767   |
| 0 | 46  | 0 PITG_21379   |
| 0 | 25  | 4 PITG_21156   |

|   |     |                |
|---|-----|----------------|
| 0 | 0   | 0 PITG_08002   |
| 0 | 2   | 0 PITG_00620   |
| 0 | 0   | 5 NA           |
| 0 | 48  | 9 PITG_09428   |
| 0 | 0   | 2 PITG_10667   |
| 0 | 0   | 0 PITG_13291   |
| 0 | 10  | 5 PITG_01920   |
| 0 | 2   | 2 NA           |
| 0 | 3   | 4 PITG_02739   |
| 0 | 52  | 34 PITG_13273  |
| 0 | 2   | 0 PITG_08338   |
| 0 | 2   | 0 NA           |
| 0 | 270 | 58 PITG_16363  |
| 0 | 20  | 26 PITG_07797  |
| 0 | 31  | 0 PITG_03518   |
| 0 | 0   | 6 PITG_16668   |
| 0 | 12  | 7 PITG_04892   |
| 0 | 0   | 0 PITG_04877   |
| 0 | 20  | 23 PITG_22839  |
| 2 | 2   | 8 NA           |
| 0 | 6   | 4 PITG_23160   |
| 0 | 14  | 30 PITG_21596  |
| 0 | 40  | 0 PITG_05239   |
| 0 | 12  | 36 PITG_20537  |
| 0 | 10  | 0 PITG_03709   |
| 0 | 36  | 82 PITG_10967  |
| 0 | 36  | 6 PITG_20488   |
| 0 | 18  | 6 PITG_12082   |
| 0 | 0   | 0 PITG_11461   |
| 0 | 0   | 3 NA           |
| 0 | 149 | 143 PITG_16757 |
| 0 | 2   | 2 PITG_03778   |
| 0 | 8   | 67 PITG_21059  |
| 0 | 2   | 0 PITG_03714   |
| 0 | 2   | 4 NA           |
| 0 | 2   | 4 PITG_05488   |
| 0 | 50  | 60 PITG_13745  |
| 0 | 9   | 6 PITG_19862   |
| 0 | 231 | 123 PITG_01056 |
| 0 | 0   | 0 PITG_02731   |
| 0 | 0   | 0 PITG_18726   |
| 0 | 2   | 4 PITG_07774   |
| 0 | 0   | 4 PITG_03675   |
| 0 | 63  | 54 NA          |
| 0 | 2   | 4 PITG_09064   |
| 0 | 0   | 4 PITG_02571   |
| 0 | 15  | 52 PITG_01349  |

|   |     |                |
|---|-----|----------------|
| 0 | 7   | 11 PITG_04970  |
| 0 | 57  | 64 PITG_16648  |
| 0 | 7   | 29 PITG_13558  |
| 0 | 39  | 3 PITG_17928   |
| 0 | 0   | 4 PITG_00688   |
| 3 | 0   | 5 NA           |
| 0 | 17  | 7 PITG_02067   |
| 0 | 36  | 0 PITG_10258   |
| 0 | 0   | 0 NA           |
| 0 | 117 | 50 PITG_04211  |
| 0 | 12  | 2 PITG_00687   |
| 0 | 0   | 8 NA           |
| 0 | 0   | 2 PITG_15518   |
| 0 | 0   | 4 PITG_06429   |
| 0 | 59  | 7 PITG_19487   |
| 0 | 2   | 21 PITG_03219  |
| 0 | 9   | 32 PITG_09181  |
| 0 | 37  | 14 PITG_11426  |
| 0 | 0   | 0 NA           |
| 0 | 4   | 16 NA          |
| 0 | 60  | 14 PITG_03478  |
| 0 | 13  | 0 PITG_02143   |
| 0 | 0   | 5 NA           |
| 0 | 8   | 4 PITG_17711   |
| 0 | 0   | 7 PITG_14231   |
| 0 | 12  | 2 PITG_21505   |
| 0 | 5   | 2 PITG_00065   |
| 0 | 39  | 6 PITG_08083   |
| 0 | 36  | 0 PITG_20610   |
| 0 | 11  | 11 PITG_01860  |
| 0 | 5   | 6 PITG_10317   |
| 0 | 13  | 15 NA          |
| 0 | 15  | 10 PITG_11648  |
| 0 | 0   | 2 NA           |
| 0 | 28  | 29 PITG_03491  |
| 0 | 21  | 4 NA           |
| 0 | 2   | 2 PITG_16055   |
| 0 | 28  | 0 PITG_13291   |
| 0 | 591 | 227 PITG_13968 |
| 0 | 0   | 2 NA           |
| 0 | 4   | 4 PITG_01569   |
| 0 | 0   | 0 PITG_18094   |
| 0 | 0   | 2 PITG_00330   |
| 0 | 0   | 2 PITG_14863   |
| 0 | 16  | 16 NA          |
| 6 | 19  | 160 NA         |
| 0 | 4   | 13 PITG_21716  |

|    |     |                |
|----|-----|----------------|
| 0  | 52  | 55 PITG_17577  |
| 0  | 9   | 4 NA           |
| 0  | 0   | 0 PITG_13174   |
| 0  | 13  | 0 PITG_02234   |
| 0  | 2   | 0 PITG_00792   |
| 0  | 2   | 4 PITG_06354   |
| 0  | 0   | 2 PITG_07279   |
| 0  | 17  | 4 PITG_18158   |
| 0  | 18  | 3 PITG_07240   |
| 0  | 13  | 21 PITG_01614  |
| 0  | 2   | 0 PITG_04590   |
| 0  | 0   | 3 PITG_10058   |
| 0  | 19  | 4 NA           |
| 0  | 0   | 0 NA           |
| 0  | 0   | 2 PITG_14111   |
| 0  | 0   | 0 PITG_04705   |
| 0  | 7   | 9 PITG_02492   |
| 0  | 0   | 18 PITG_18369  |
| 0  | 2   | 3 NA           |
| 0  | 45  | 0 PITG_20454   |
| 0  | 0   | 0 NA           |
| 0  | 3   | 8 PITG_08446   |
| 0  | 0   | 0 PITG_14231   |
| 0  | 24  | 17 NA          |
| 0  | 0   | 0 PITG_09035   |
| 0  | 0   | 0 NA           |
| 0  | 5   | 0 PITG_01124   |
| 0  | 0   | 0 PITG_13826   |
| 0  | 5   | 4 NA           |
| 0  | 22  | 30 PITG_11097  |
| 0  | 9   | 7 PITG_16770   |
| 0  | 2   | 29 PITG_10146  |
| 0  | 2   | 0 PITG_07510   |
| 0  | 0   | 2 PITG_10729   |
| 54 | 0   | 24 NA          |
| 0  | 5   | 2 PITG_20796   |
| 0  | 7   | 10 PITG_12843  |
| 0  | 0   | 6 PITG_00495   |
| 0  | 0   | 2 PITG_08619   |
| 0  | 28  | 0 NA           |
| 0  | 0   | 0 PITG_07279   |
| 0  | 15  | 7 PITG_12274   |
| 0  | 0   | 3 PITG_21602   |
| 0  | 50  | 21 PITG_00193  |
| 0  | 527 | 859 PITG_11997 |
| 0  | 0   | 0 PITG_03400   |
| 0  | 4   | 0 PITG_06792   |

|    |     |                |
|----|-----|----------------|
| 0  | 235 | 90 NA          |
| 0  | 2   | 2 PITG_10002   |
| 0  | 118 | 36 PITG_04609  |
| 0  | 90  | 29 PITG_12914  |
| 0  | 0   | 0 PITG_20831   |
| 0  | 2   | 4 PITG_06922   |
| 0  | 27  | 14 PITG_15906  |
| 0  | 0   | 2 PITG_03767   |
| 0  | 18  | 3 NA           |
| 0  | 13  | 21 PITG_11234  |
| 0  | 73  | 0 PITG_00846   |
| 0  | 39  | 8 PITG_01950   |
| 0  | 179 | 325 PITG_02029 |
| 0  | 8   | 11 NA          |
| 0  | 15  | 2 PITG_07808   |
| 0  | 13  | 0 NA           |
| 0  | 2   | 7 PITG_12753   |
| 0  | 29  | 0 PITG_01265   |
| 0  | 0   | 0 NA           |
| 0  | 9   | 2 NA           |
| 0  | 2   | 4 PITG_02229   |
| 0  | 10  | 0 PITG_14106   |
| 46 | 10  | 41 NA          |
| 0  | 56  | 48 PITG_09665  |
| 0  | 0   | 2 PITG_09986   |
| 0  | 2   | 0 PITG_09781   |
| 0  | 2   | 13 NA          |
| 0  | 587 | 410 PITG_16981 |
| 0  | 0   | 0 NA           |
| 0  | 0   | 2 PITG_11298   |
| 0  | 23  | 29 PITG_09243  |
| 0  | 109 | 224 PITG_10454 |
| 0  | 6   | 12 PITG_02580  |
| 0  | 0   | 0 NA           |
| 0  | 2   | 0 NA           |
| 0  | 6   | 0 NA           |
| 0  | 53  | 47 PITG_08456  |
| 0  | 19  | 2 PITG_17984   |
| 0  | 21  | 22 PITG_08237  |
| 0  | 13  | 31 PITG_10317  |
| 0  | 13  | 20 PITG_09895  |
| 0  | 2   | 8 NA           |
| 0  | 41  | 86 PITG_14563  |
| 0  | 0   | 2 PITG_14599   |
| 2  | 165 | 383 PITG_22848 |
| 0  | 6   | 18 PITG_17736  |
| 0  | 4   | 6 PITG_20201   |



|    |     |               |
|----|-----|---------------|
| 0  | 974 | 1421 NA       |
| 0  | 4   | 11 PITG_14375 |
| 0  | 0   | 0 NA          |
| 0  | 56  | 62 PITG_11273 |
| 0  | 0   | 0 NA          |
| 0  | 2   | 14 PITG_18458 |
| 0  | 10  | 10 PITG_06101 |
| 0  | 4   | 2 PITG_17891  |
| 0  | 90  | 58 PITG_01818 |
| 0  | 18  | 54 PITG_08346 |
| 0  | 66  | 18 PITG_06453 |
| 0  | 6   | 13 PITG_09244 |
| 0  | 83  | 3 PITG_15661  |
| 0  | 2   | 2 PITG_07655  |
| 0  | 4   | 7 NA          |
| 0  | 8   | 6 PITG_03965  |
| 73 | 15  | 22 NA         |
| 0  | 3   | 10 PITG_12162 |
| 6  | 2   | 47 NA         |
| 0  | 10  | 8 PITG_14658  |
| 0  | 2   | 0 PITG_15779  |
| 0  | 23  | 14 PITG_00456 |
| 0  | 7   | 0 PITG_04575  |
| 0  | 4   | 23 PITG_10264 |
| 0  | 0   | 0 NA          |
| 0  | 6   | 2 PITG_19526  |
| 0  | 0   | 0 PITG_15669  |
| 0  | 11  | 0 PITG_13715  |
| 0  | 0   | 0 PITG_08209  |
| 0  | 0   | 0 PITG_03442  |
| 0  | 6   | 5 PITG_22204  |
| 0  | 67  | 12 PITG_13111 |
| 0  | 19  | 6 PITG_17611  |
| 0  | 15  | 9 PITG_05990  |
| 0  | 2   | 4 NA          |
| 0  | 0   | 2 NA          |
| 0  | 0   | 7 NA          |
| 0  | 11  | 2 PITG_10645  |
| 0  | 19  | 4 NA          |
| 0  | 37  | 4 PITG_22353  |
| 0  | 2   | 4 PITG_01045  |
| 0  | 207 | 36 PITG_02634 |
| 0  | 32  | 7 NA          |
| 0  | 0   | 0 PITG_02050  |
| 0  | 10  | 13 PITG_15119 |
| 0  | 27  | 26 PITG_10519 |
| 0  | 25  | 0 PITG_13419  |

|   |      |                 |
|---|------|-----------------|
| 0 | 65   | 76 PITG_19505   |
| 0 | 2    | 0 NA            |
| 0 | 4    | 2 NA            |
| 0 | 9    | 0 NA            |
| 0 | 2105 | 1049 PITG_08880 |
| 0 | 2    | 4 PITG_07011    |
| 0 | 2    | 6 PITG_13997    |
| 0 | 2    | 0 PITG_06996    |
| 0 | 19   | 44 PITG_08365   |
| 0 | 4    | 28 PITG_03563   |
| 0 | 13   | 10 PITG_15762   |
| 0 | 9    | 13 PITG_19624   |
| 0 | 18   | 0 NA            |
| 0 | 10   | 0 PITG_01738    |
| 0 | 31   | 0 PITG_14189    |
| 0 | 5    | 0 PITG_03878    |
| 0 | 5    | 0 PITG_00887    |
| 0 | 0    | 8 NA            |
| 0 | 2    | 0 NA            |
| 0 | 19   | 92 PITG_00442   |
| 0 | 8    | 15 PITG_12326   |
| 0 | 4    | 21 PITG_16864   |
| 0 | 19   | 3 PITG_04701    |
| 0 | 0    | 0 PITG_08588    |
| 0 | 2    | 14 PITG_17092   |
| 0 | 20   | 10 PITG_20263   |
| 0 | 2    | 0 PITG_10083    |
| 0 | 17   | 0 PITG_14562    |
| 0 | 0    | 0 NA            |
| 0 | 19   | 18 PITG_20717   |
| 0 | 0    | 6 PITG_20311    |
| 0 | 0    | 4 PITG_12821    |
| 0 | 2    | 0 PITG_19143    |
| 0 | 4    | 0 PITG_03103    |
| 0 | 0    | 4 NA            |
| 0 | 0    | 0 NA            |
| 0 | 25   | 5 PITG_17978    |
| 0 | 6    | 25 PITG_14707   |
| 0 | 0    | 0 NA            |
| 0 | 17   | 30 PITG_13768   |
| 0 | 7    | 2 PITG_08626    |
| 0 | 10   | 0 PITG_11162    |
| 0 | 5    | 0 NA            |
| 0 | 0    | 2 NA            |
| 0 | 0    | 2 PITG_01619    |
| 0 | 0    | 0 PITG_10882    |
| 0 | 16   | 5 PITG_12441    |

|   |     |                |
|---|-----|----------------|
| 0 | 2   | 0 PITG_03323   |
| 0 | 0   | 0 PITG_20913   |
| 0 | 12  | 23 PITG_00509  |
| 0 | 11  | 16 PITG_12266  |
| 0 | 15  | 9 PITG_19461   |
| 0 | 2   | 0 PITG_04705   |
| 0 | 0   | 5 NA           |
| 0 | 7   | 4 PITG_10969   |
| 0 | 10  | 2 PITG_09423   |
| 0 | 22  | 2 NA           |
| 0 | 0   | 2 PITG_00302   |
| 0 | 3   | 2 PITG_02471   |
| 0 | 4   | 2 PITG_20117   |
| 0 | 10  | 8 NA           |
| 0 | 39  | 20 NA          |
| 0 | 2   | 2 PITG_14385   |
| 0 | 4   | 2 PITG_06867   |
| 0 | 0   | 2 NA           |
| 0 | 2   | 0 PITG_17695   |
| 0 | 8   | 16 PITG_15623  |
| 0 | 130 | 54 NA          |
| 0 | 0   | 0 NA           |
| 0 | 0   | 0 NA           |
| 0 | 10  | 0 NA           |
| 0 | 121 | 39 PITG_18747  |
| 0 | 18  | 4 PITG_12195   |
| 0 | 57  | 22 PITG_22718  |
| 0 | 2   | 2 NA           |
| 0 | 2   | 2 NA           |
| 0 | 43  | 106 PITG_22850 |
| 0 | 0   | 7 PITG_16272   |
| 0 | 9   | 2 NA           |
| 0 | 118 | 232 PITG_08802 |
| 0 | 19  | 0 NA           |
| 0 | 18  | 8 PITG_03923   |
| 0 | 16  | 6 PITG_13399   |
| 0 | 3   | 0 NA           |
| 0 | 2   | 8 NA           |
| 0 | 7   | 28 PITG_18973  |
| 0 | 209 | 155 PITG_06261 |
| 0 | 3   | 17 PITG_03408  |
| 0 | 0   | 22 PITG_06780  |
| 0 | 9   | 2 PITG_18316   |
| 0 | 0   | 0 PITG_02748   |
| 0 | 0   | 8 PITG_00594   |
| 0 | 2   | 2 PITG_03364   |
| 0 | 4   | 0 NA           |

|      |     |                |
|------|-----|----------------|
| 0    | 50  | 58 PITG_07948  |
| 0    | 0   | 0 PITG_09447   |
| 0    | 4   | 0 NA           |
| 0    | 88  | 39 PITG_05234  |
| 0    | 24  | 2 PITG_05487   |
| 0    | 0   | 0 PITG_06898   |
| 0    | 368 | 83 PITG_16963  |
| 0    | 17  | 26 PITG_14674  |
| 0    | 5   | 0 NA           |
| 0    | 14  | 72 PITG_02822  |
| 0    | 56  | 27 PITG_11753  |
| 0    | 0   | 0 NA           |
| 0    | 65  | 54 PITG_16538  |
| 0    | 15  | 20 NA          |
| 0    | 62  | 5 PITG_15241   |
| 0    | 2   | 23 PITG_01045  |
| 0    | 31  | 13 PITG_17769  |
| 0    | 139 | 189 PITG_16207 |
| 0    | 8   | 5 PITG_00972   |
| 1308 | 62  | 1755 NA        |
| 0    | 71  | 5 PITG_11459   |
| 0    | 0   | 0 NA           |
| 0    | 24  | 2 PITG_02079   |
| 0    | 7   | 2 NA           |
| 0    | 7   | 7 PITG_09288   |
| 0    | 3   | 0 PITG_11098   |
| 0    | 4   | 4 PITG_03751   |
| 0    | 62  | 6 PITG_19842   |
| 0    | 33  | 61 PITG_01997  |
| 0    | 9   | 0 PITG_16386   |
| 0    | 69  | 0 PITG_20632   |
| 0    | 0   | 0 PITG_04405   |
| 0    | 0   | 2 PITG_07976   |
| 0    | 23  | 12 PITG_06185  |
| 0    | 8   | 2 PITG_00077   |
| 0    | 0   | 0 PITG_03118   |
| 0    | 65  | 55 PITG_02822  |
| 0    | 5   | 9 PITG_16347   |
| 0    | 38  | 4 PITG_20820   |
| 0    | 12  | 41 PITG_14216  |
| 0    | 0   | 8 PITG_06813   |
| 0    | 0   | 4 PITG_04940   |
| 0    | 0   | 2 PITG_17882   |
| 0    | 10  | 39 PITG_11202  |
| 0    | 0   | 0 NA           |
| 0    | 0   | 0 PITG_13397   |
| 0    | 5   | 2 PITG_05511   |

|   |     |                |
|---|-----|----------------|
| 0 | 214 | 13 PITG_19978  |
| 0 | 26  | 30 PITG_02755  |
| 0 | 26  | 8 PITG_06545   |
| 0 | 0   | 2 PITG_16044   |
| 0 | 0   | 0 PITG_13365   |
| 0 | 63  | 14 PITG_11090  |
| 0 | 0   | 0 PITG_09690   |
| 0 | 2   | 4 PITG_04270   |
| 0 | 63  | 26 PITG_10450  |
| 0 | 9   | 3 PITG_03761   |
| 0 | 69  | 19 PITG_17404  |
| 0 | 39  | 3 NA           |
| 0 | 2   | 0 PITG_17352   |
| 0 | 0   | 2 PITG_09409   |
| 0 | 0   | 4 NA           |
| 0 | 28  | 15 PITG_15016  |
| 0 | 2   | 0 NA           |
| 0 | 5   | 0 PITG_18634   |
| 0 | 0   | 0 NA           |
| 0 | 15  | 73 PITG_03763  |
| 0 | 6   | 54 PITG_05225  |
| 0 | 248 | 105 PITG_14362 |
| 0 | 61  | 17 NA          |
| 0 | 2   | 2 PITG_09921   |
| 0 | 5   | 0 PITG_08460   |
| 0 | 3   | 0 PITG_17760   |
| 0 | 11  | 19 PITG_03006  |
| 0 | 2   | 2 NA           |
| 0 | 6   | 0 PITG_19364   |
| 0 | 12  | 8 NA           |
| 0 | 148 | 111 PITG_19842 |
| 0 | 24  | 0 PITG_18651   |
| 0 | 8   | 27 PITG_04726  |
| 0 | 2   | 4 PITG_08393   |
| 0 | 5   | 0 PITG_13344   |
| 0 | 0   | 0 NA           |
| 0 | 0   | 0 PITG_06698   |
| 0 | 21  | 5 PITG_03763   |
| 0 | 0   | 4 PITG_17022   |
| 0 | 39  | 0 NA           |
| 0 | 8   | 32 PITG_05685  |
| 0 | 18  | 17 PITG_19022  |
| 0 | 10  | 16 PITG_12256  |
| 0 | 23  | 19 PITG_13620  |
| 0 | 0   | 7 PITG_01710   |
| 0 | 2   | 2 PITG_06402   |
| 0 | 2   | 10 PITG_05409  |

|      |     |               |
|------|-----|---------------|
| 1203 | 8   | 125 NA        |
| 0    | 0   | 5 PITG_00140  |
| 0    | 0   | 0 NA          |
| 0    | 17  | 2 NA          |
| 0    | 57  | 13 PITG_03483 |
| 0    | 26  | 0 NA          |
| 0    | 0   | 0 PITG_03127  |
| 0    | 2   | 0 PITG_16225  |
| 0    | 0   | 7 PITG_06862  |
| 0    | 12  | 0 NA          |
| 0    | 98  | 72 PITG_06611 |
| 0    | 20  | 12 PITG_03736 |
| 0    | 0   | 0 PITG_21023  |
| 0    | 4   | 8 PITG_03661  |
| 0    | 6   | 0 NA          |
| 0    | 4   | 2 NA          |
| 0    | 2   | 0 PITG_05395  |
| 0    | 47  | 0 PITG_07884  |
| 0    | 0   | 8 PITG_13915  |
| 0    | 2   | 0 PITG_08067  |
| 0    | 26  | 29 PITG_03609 |
| 0    | 19  | 18 PITG_18416 |
| 0    | 4   | 4 PITG_10262  |
| 0    | 7   | 0 NA          |
| 0    | 0   | 14 PITG_03336 |
| 91   | 17  | 147 NA        |
| 0    | 25  | 2 NA          |
| 0    | 11  | 0 NA          |
| 0    | 13  | 2 PITG_13563  |
| 0    | 3   | 0 PITG_03929  |
| 0    | 140 | 50 NA         |
| 0    | 4   | 4 NA          |
| 0    | 6   | 13 NA         |
| 0    | 22  | 9 PITG_02745  |
| 0    | 4   | 7 PITG_13164  |
| 0    | 18  | 0 NA          |
| 0    | 40  | 28 PITG_20345 |
| 0    | 19  | 0 NA          |
| 0    | 0   | 5 PITG_16103  |
| 0    | 3   | 0 PITG_06345  |
| 0    | 10  | 2 NA          |
| 0    | 5   | 27 PITG_03095 |
| 0    | 0   | 0 PITG_11161  |
| 0    | 20  | 4 NA          |
| 0    | 44  | 48 PITG_01953 |
| 0    | 9   | 17 PITG_00818 |
| 0    | 16  | 2 NA          |

|    |     |                |
|----|-----|----------------|
| 0  | 7   | 17 PITG_01477  |
| 0  | 913 | 288 PITG_12039 |
| 0  | 4   | 2 PITG_03832   |
| 0  | 107 | 179 PITG_20186 |
| 0  | 32  | 4 PITG_08295   |
| 0  | 19  | 18 PITG_00590  |
| 0  | 2   | 2 PITG_15006   |
| 0  | 76  | 24 PITG_01283  |
| 0  | 12  | 21 PITG_01870  |
| 0  | 0   | 2 NA           |
| 0  | 6   | 2 PITG_02842   |
| 0  | 0   | 2 PITG_16854   |
| 0  | 95  | 276 NA         |
| 0  | 2   | 4 PITG_05480   |
| 0  | 43  | 0 NA           |
| 0  | 18  | 5 NA           |
| 0  | 78  | 184 PITG_05294 |
| 0  | 105 | 24 PITG_16893  |
| 0  | 7   | 7 PITG_12454   |
| 0  | 6   | 0 PITG_19485   |
| 0  | 4   | 50 PITG_17174  |
| 0  | 15  | 6 PITG_20502   |
| 0  | 6   | 4 NA           |
| 0  | 2   | 62 PITG_20386  |
| 0  | 23  | 4 PITG_00441   |
| 0  | 4   | 9 PITG_03028   |
| 2  | 8   | 395 NA         |
| 0  | 5   | 7 PITG_07055   |
| 0  | 164 | 103 NA         |
| 0  | 0   | 2 PITG_16958   |
| 0  | 7   | 2 PITG_05376   |
| 0  | 42  | 34 PITG_01386  |
| 0  | 29  | 2 PITG_05598   |
| 0  | 0   | 4 PITG_02524   |
| 0  | 2   | 0 PITG_03831   |
| 0  | 0   | 0 PITG_14392   |
| 0  | 13  | 32 NA          |
| 36 | 16  | 626 NA         |
| 0  | 5   | 0 NA           |
| 0  | 0   | 0 PITG_06347   |
| 0  | 2   | 0 NA           |
| 0  | 2   | 2 PITG_04482   |
| 0  | 0   | 102 PITG_18025 |
| 0  | 9   | 22 PITG_04603  |
| 0  | 3   | 5 NA           |
| 0  | 8   | 13 PITG_09247  |
| 0  | 5   | 9 PITG_07341   |

|   |     |                |
|---|-----|----------------|
| 0 | 0   | 2 PITG_13492   |
| 0 | 7   | 2 PITG_01003   |
| 0 | 567 | 170 PITG_07728 |
| 0 | 45  | 56 PITG_11712  |
| 0 | 16  | 31 PITG_09192  |
| 0 | 0   | 0 PITG_12459   |
| 0 | 13  | 2 NA           |
| 0 | 46  | 16 PITG_03606  |
| 0 | 118 | 29 PITG_00177  |
| 0 | 2   | 13 PITG_05007  |
| 0 | 39  | 56 PITG_16812  |
| 0 | 2   | 0 NA           |
| 0 | 2   | 9 PITG_09985   |
| 0 | 2   | 4 PITG_18671   |
| 0 | 0   | 0 PITG_12183   |
| 0 | 0   | 6 PITG_07286   |
| 0 | 0   | 0 NA           |
| 0 | 4   | 61 PITG_18005  |
| 0 | 16  | 50 PITG_01602  |
| 0 | 13  | 2 PITG_06962   |
| 0 | 36  | 10 NA          |
| 0 | 5   | 0 PITG_04044   |
| 0 | 6   | 8 NA           |
| 0 | 22  | 5 PITG_13853   |
| 0 | 0   | 0 PITG_18998   |
| 0 | 3   | 2 PITG_15959   |
| 0 | 0   | 0 NA           |
| 0 | 10  | 3 PITG_02561   |
| 0 | 4   | 0 NA           |
| 0 | 25  | 4 PITG_13827   |
| 0 | 15  | 16 PITG_07714  |
| 0 | 13  | 32 PITG_03244  |
| 0 | 9   | 70 PITG_09445  |
| 0 | 12  | 7 PITG_01953   |
| 0 | 24  | 33 NA          |
| 0 | 2   | 0 PITG_02050   |
| 0 | 13  | 57 PITG_11704  |
| 0 | 8   | 13 PITG_00078  |
| 2 | 121 | 150 PITG_17351 |
| 0 | 30  | 34 PITG_15280  |
| 0 | 2   | 5 PITG_05413   |
| 0 | 2   | 0 PITG_00789   |
| 0 | 11  | 13 PITG_05622  |
| 0 | 106 | 144 PITG_10926 |
| 0 | 0   | 0 NA           |
| 0 | 64  | 162 PITG_20118 |
| 0 | 11  | 10 PITG_03428  |



|    |     |               |
|----|-----|---------------|
| 0  | 2   | 8 PITG_10083  |
| 0  | 17  | 45 PITG_02968 |
| 0  | 2   | 3 PITG_04270  |
| 0  | 0   | 0 PITG_00381  |
| 0  | 379 | 51 PITG_07826 |
| 0  | 0   | 3 PITG_16280  |
| 0  | 30  | 4 PITG_12152  |
| 0  | 14  | 86 PITG_19053 |
| 0  | 6   | 0 PITG_02415  |
| 0  | 44  | 2 PITG_03864  |
| 0  | 4   | 2 PITG_04884  |
| 0  | 0   | 0 NA          |
| 0  | 0   | 0 NA          |
| 0  | 0   | 2 NA          |
| 0  | 84  | 0 NA          |
| 0  | 0   | 0 NA          |
| 0  | 48  | 8 NA          |
| 0  | 20  | 16 NA         |
| 0  | 85  | 7 NA          |
| 0  | 5   | 14 PITG_13257 |
| 0  | 6   | 2 PITG_05631  |
| 0  | 123 | 17 PITG_06690 |
| 0  | 50  | 0 NA          |
| 0  | 43  | 47 PITG_05922 |
| 0  | 0   | 3 PITG_21418  |
| 0  | 6   | 7 PITG_07865  |
| 0  | 28  | 7 NA          |
| 0  | 2   | 13 PITG_14704 |
| 0  | 0   | 9 PITG_09703  |
| 0  | 27  | 6 NA          |
| 0  | 47  | 17 PITG_02442 |
| 0  | 2   | 0 PITG_00343  |
| 0  | 4   | 0 NA          |
| 0  | 5   | 4 PITG_07879  |
| 0  | 60  | 0 PITG_11483  |
| 0  | 2   | 2 NA          |
| 0  | 18  | 40 PITG_17245 |
| 0  | 0   | 0 NA          |
| 0  | 0   | 0 PITG_01776  |
| 16 | 238 | 250 NA        |
| 0  | 4   | 2 PITG_14699  |
| 0  | 0   | 0 PITG_05961  |
| 0  | 15  | 4 PITG_07801  |
| 0  | 0   | 3 PITG_10893  |
| 0  | 18  | 2 NA          |
| 0  | 19  | 23 PITG_20199 |
| 0  | 4   | 0 PITG_17795  |

|    |     |                |
|----|-----|----------------|
| 0  | 9   | 0 PITG_01450   |
| 0  | 5   | 2 NA           |
| 0  | 0   | 2 PITG_15967   |
| 0  | 46  | 36 NA          |
| 0  | 39  | 2 PITG_02242   |
| 0  | 39  | 10 PITG_10501  |
| 0  | 0   | 0 PITG_23029   |
| 0  | 2   | 0 PITG_01802   |
| 0  | 2   | 43 PITG_10131  |
| 6  | 0   | 0 NA           |
| 0  | 6   | 0 PITG_10441   |
| 0  | 4   | 13 PITG_07117  |
| 0  | 0   | 0 PITG_12836   |
| 0  | 2   | 4 PITG_17361   |
| 0  | 21  | 27 PITG_07175  |
| 0  | 4   | 2 PITG_12108   |
| 0  | 0   | 0 PITG_11929   |
| 0  | 21  | 16 PITG_11926  |
| 0  | 132 | 27 PITG_02546  |
| 0  | 42  | 6 PITG_05879   |
| 0  | 4   | 0 PITG_10935   |
| 0  | 29  | 87 NA          |
| 0  | 12  | 7 PITG_06026   |
| 0  | 8   | 0 PITG_17863   |
| 0  | 0   | 0 PITG_10049   |
| 0  | 6   | 35 PITG_09817  |
| 0  | 0   | 0 PITG_07111   |
| 0  | 8   | 0 PITG_03408   |
| 0  | 40  | 6 PITG_20330   |
| 0  | 104 | 9 NA           |
| 0  | 0   | 4 PITG_05642   |
| 0  | 20  | 13 PITG_03275  |
| 0  | 18  | 3 PITG_15883   |
| 0  | 55  | 14 PITG_03751  |
| 0  | 19  | 10 PITG_18815  |
| 0  | 2   | 0 NA           |
| 0  | 30  | 115 PITG_13826 |
| 0  | 0   | 2 PITG_00383   |
| 0  | 4   | 14 PITG_13861  |
| 0  | 0   | 0 PITG_12158   |
| 0  | 35  | 9 PITG_07991   |
| 0  | 0   | 0 PITG_14231   |
| 0  | 24  | 2 NA           |
| 0  | 4   | 3 PITG_20202   |
| 22 | 0   | 7 NA           |
| 0  | 4   | 2 PITG_09193   |
| 0  | 197 | 1315 NA        |

|   |      |                 |
|---|------|-----------------|
| 0 | 11   | 6 PITG_11780    |
| 0 | 6    | 8 NA            |
| 0 | 35   | 11 PITG_06604   |
| 0 | 0    | 18 NA           |
| 0 | 36   | 4 NA            |
| 0 | 7    | 14 PITG_04184   |
| 0 | 23   | 4 NA            |
| 0 | 3    | 0 PITG_02812    |
| 0 | 63   | 12 PITG_18245   |
| 0 | 67   | 39 PITG_10442   |
| 0 | 19   | 7 PITG_07039    |
| 0 | 1112 | 847 PITG_15969  |
| 0 | 35   | 48 PITG_02547   |
| 0 | 5    | 2 PITG_06988    |
| 0 | 8    | 0 NA            |
| 0 | 4    | 4 PITG_03989    |
| 0 | 2    | 6 PITG_19153    |
| 0 | 19   | 58 PITG_16853   |
| 0 | 4    | 2 PITG_01084    |
| 0 | 8    | 25 PITG_19008   |
| 0 | 2    | 2 PITG_01639    |
| 0 | 14   | 5 NA            |
| 0 | 97   | 42 PITG_00023   |
| 0 | 0    | 0 PITG_19098    |
| 0 | 493  | 2472 PITG_12808 |
| 0 | 50   | 26 PITG_00309   |
| 0 | 2    | 11 NA           |
| 0 | 0    | 0 PITG_09703    |
| 0 | 3    | 5 PITG_10592    |
| 0 | 31   | 57 PITG_01867   |
| 0 | 0    | 11 PITG_18106   |
| 0 | 3    | 2 PITG_03288    |
| 0 | 21   | 26 PITG_06694   |
| 0 | 0    | 5 PITG_00473    |
| 0 | 65   | 8 PITG_23143    |
| 0 | 28   | 17 PITG_21017   |
| 0 | 17   | 21 PITG_08809   |
| 0 | 2    | 0 NA            |
| 0 | 54   | 14 PITG_06673   |
| 0 | 11   | 15 PITG_13415   |
| 0 | 0    | 4 PITG_17495    |
| 0 | 12   | 92 PITG_22839   |
| 0 | 0    | 2 NA            |
| 0 | 0    | 0 NA            |
| 0 | 2    | 0 NA            |
| 0 | 14   | 2 PITG_19622    |
| 0 | 29   | 41 NA           |

|     |    |               |
|-----|----|---------------|
| 0   | 3  | 4 PITG_01457  |
| 0   | 0  | 0 PITG_02774  |
| 0   | 0  | 2 NA          |
| 0   | 8  | 17 PITG_03837 |
| 0   | 9  | 15 PITG_09220 |
| 0   | 8  | 4 NA          |
| 0   | 56 | 14 NA         |
| 0   | 10 | 27 PITG_16113 |
| 0   | 9  | 0 PITG_15567  |
| 0   | 8  | 7 PITG_04546  |
| 0   | 0  | 4 PITG_16179  |
| 0   | 14 | 4 PITG_05116  |
| 0   | 6  | 34 PITG_09817 |
| 0   | 12 | 11 PITG_20240 |
| 0   | 17 | 5 NA          |
| 0   | 45 | 0 PITG_00763  |
| 0   | 5  | 6 PITG_14603  |
| 0   | 6  | 0 NA          |
| 0   | 53 | 71 PITG_03824 |
| 0   | 8  | 2 PITG_16024  |
| 0   | 0  | 0 NA          |
| 0   | 0  | 0 PITG_02264  |
| 0   | 2  | 43 PITG_18048 |
| 0   | 0  | 0 PITG_09671  |
| 0   | 6  | 10 PITG_08747 |
| 119 | 9  | 320 NA        |
| 349 | 0  | 608 NA        |
| 0   | 12 | 4 PITG_12394  |
| 0   | 0  | 6 NA          |
| 0   | 10 | 9 PITG_00441  |
| 0   | 5  | 2 NA          |
| 0   | 42 | 75 PITG_01691 |
| 0   | 11 | 11 PITG_01822 |
| 0   | 0  | 0 PITG_22596  |
| 0   | 4  | 44 PITG_18025 |
| 0   | 27 | 45 PITG_02303 |
| 0   | 3  | 0 PITG_01003  |
| 0   | 0  | 0 NA          |
| 0   | 0  | 2 PITG_03898  |
| 0   | 11 | 22 PITG_00299 |
| 0   | 12 | 14 PITG_12148 |
| 0   | 7  | 0 PITG_19351  |
| 0   | 20 | 2 PITG_09246  |
| 0   | 0  | 8 PITG_17769  |
| 0   | 4  | 2 NA          |
| 0   | 9  | 27 NA         |
| 0   | 6  | 12 PITG_03596 |

|   |     |                |
|---|-----|----------------|
| 0 | 0   | 4 PITG_17869   |
| 0 | 2   | 0 PITG_03757   |
| 0 | 10  | 4 NA           |
| 0 | 11  | 16 NA          |
| 0 | 12  | 2 NA           |
| 0 | 23  | 6 PITG_01871   |
| 0 | 71  | 66 PITG_00449  |
| 0 | 5   | 15 PITG_09089  |
| 0 | 0   | 7 PITG_07166   |
| 0 | 7   | 0 NA           |
| 0 | 38  | 0 PITG_07041   |
| 0 | 0   | 0 PITG_09682   |
| 0 | 5   | 2 NA           |
| 0 | 4   | 2 PITG_02440   |
| 0 | 14  | 4 NA           |
| 0 | 0   | 2 NA           |
| 0 | 2   | 0 PITG_10555   |
| 0 | 27  | 0 PITG_00165   |
| 0 | 2   | 10 PITG_03469  |
| 0 | 39  | 51 PITG_00998  |
| 0 | 0   | 2 PITG_11907   |
| 0 | 28  | 8 PITG_05177   |
| 0 | 83  | 28 PITG_14210  |
| 0 | 4   | 65 PITG_17174  |
| 0 | 16  | 31 PITG_11329  |
| 0 | 4   | 0 PITG_01776   |
| 0 | 9   | 2 NA           |
| 0 | 7   | 0 PITG_16440   |
| 0 | 22  | 4 PITG_02152   |
| 0 | 6   | 4 PITG_13487   |
| 0 | 0   | 13 PITG_15089  |
| 0 | 2   | 2 PITG_00986   |
| 0 | 45  | 4 NA           |
| 0 | 0   | 6 PITG_03288   |
| 0 | 3   | 0 PITG_13302   |
| 0 | 0   | 4 PITG_10449   |
| 0 | 0   | 5 NA           |
| 0 | 64  | 4 PITG_16669   |
| 0 | 0   | 18 PITG_20548  |
| 0 | 243 | 124 PITG_03278 |
| 0 | 0   | 0 PITG_17956   |
| 0 | 0   | 13 NA          |
| 0 | 36  | 71 PITG_14591  |
| 0 | 62  | 14 NA          |
| 0 | 0   | 0 PITG_01941   |
| 0 | 6   | 15 PITG_02347  |
| 0 | 11  | 6 PITG_06353   |

|     |     |               |
|-----|-----|---------------|
| 0   | 66  | 47 PITG_08425 |
| 0   | 10  | 2 PITG_08888  |
| 0   | 2   | 0 PITG_16208  |
| 0   | 31  | 12 PITG_11733 |
| 0   | 0   | 0 PITG_03408  |
| 0   | 37  | 67 PITG_01846 |
| 0   | 63  | 15 PITG_16090 |
| 0   | 0   | 2 PITG_11128  |
| 0   | 177 | 730 NA        |
| 0   | 6   | 2 PITG_21286  |
| 0   | 2   | 0 NA          |
| 0   | 0   | 0 PITG_02778  |
| 0   | 25  | 13 PITG_09876 |
| 0   | 6   | 35 NA         |
| 0   | 0   | 0 PITG_03611  |
| 0   | 0   | 0 NA          |
| 0   | 12  | 26 PITG_03119 |
| 0   | 16  | 11 PITG_06735 |
| 0   | 7   | 13 PITG_00500 |
| 0   | 14  | 46 PITG_10083 |
| 0   | 8   | 0 PITG_19615  |
| 0   | 2   | 2 NA          |
| 0   | 74  | 76 PITG_05313 |
| 0   | 10  | 14 NA         |
| 197 | 0   | 49 NA         |
| 0   | 7   | 9 PITG_14812  |
| 0   | 15  | 4 NA          |
| 0   | 7   | 0 PITG_03652  |
| 0   | 0   | 0 PITG_17997  |
| 0   | 10  | 25 PITG_16984 |
| 0   | 136 | 62 PITG_19350 |
| 0   | 2   | 4 PITG_03771  |
| 0   | 20  | 17 PITG_04475 |
| 0   | 0   | 4 NA          |
| 0   | 0   | 0 PITG_02143  |
| 0   | 41  | 4 NA          |
| 0   | 2   | 5 PITG_05534  |
| 0   | 12  | 2 PITG_07436  |
| 0   | 341 | 48 PITG_03878 |
| 0   | 2   | 0 PITG_08736  |
| 0   | 29  | 4 PITG_15267  |
| 0   | 117 | 0 PITG_00457  |
| 0   | 16  | 2 PITG_03396  |
| 0   | 7   | 2 PITG_16455  |
| 0   | 6   | 36 PITG_10384 |
| 13  | 2   | 11 NA         |
| 0   | 25  | 16 PITG_07939 |

|      |     |                |
|------|-----|----------------|
| 0    | 2   | 0 PITG_12318   |
| 0    | 2   | 2 NA           |
| 0    | 0   | 20 PITG_14127  |
| 0    | 10  | 0 PITG_01774   |
| 0    | 0   | 2 PITG_05170   |
| 0    | 8   | 0 PITG_10743   |
| 0    | 41  | 48 PITG_03678  |
| 0    | 44  | 58 PITG_07047  |
| 0    | 0   | 0 PITG_16049   |
| 0    | 17  | 58 PITG_10442  |
| 0    | 6   | 0 PITG_12284   |
| 0    | 140 | 10 NA          |
| 0    | 14  | 21 PITG_00077  |
| 0    | 2   | 6 PITG_09285   |
| 0    | 4   | 0 PITG_04629   |
| 0    | 7   | 2 PITG_10868   |
| 0    | 3   | 0 PITG_01316   |
| 0    | 8   | 2 PITG_17936   |
| 0    | 11  | 8 PITG_11272   |
| 0    | 0   | 2 PITG_01206   |
| 1606 | 71  | 1379 NA        |
| 0    | 32  | 68 NA          |
| 0    | 18  | 6 PITG_04028   |
| 0    | 11  | 12 PITG_03283  |
| 0    | 2   | 6 NA           |
| 0    | 45  | 11 PITG_04567  |
| 0    | 2   | 0 PITG_01076   |
| 0    | 2   | 4 NA           |
| 0    | 9   | 27 PITG_02205  |
| 0    | 28  | 6 NA           |
| 0    | 86  | 16 NA          |
| 0    | 17  | 11 PITG_14279  |
| 0    | 10  | 4 NA           |
| 0    | 6   | 2 PITG_16733   |
| 0    | 2   | 27 PITG_05274  |
| 0    | 100 | 130 PITG_20347 |
| 0    | 2   | 2 NA           |
| 0    | 2   | 3 PITG_18860   |
| 0    | 27  | 12 NA          |
| 0    | 13  | 24 PITG_03473  |
| 0    | 0   | 17 PITG_18999  |
| 0    | 13  | 13 NA          |
| 0    | 4   | 3 NA           |
| 10   | 11  | 0 NA           |
| 0    | 29  | 6 NA           |
| 0    | 2   | 2 NA           |
| 0    | 98  | 10 NA          |

|    |     |                |
|----|-----|----------------|
| 0  | 6   | 2 PITG_16669   |
| 0  | 64  | 2 NA           |
| 0  | 0   | 0 PITG_17325   |
| 0  | 5   | 9 NA           |
| 0  | 247 | 591 PITG_08880 |
| 0  | 6   | 13 PITG_11728  |
| 0  | 4   | 5 NA           |
| 0  | 0   | 97 NA          |
| 0  | 6   | 4 NA           |
| 0  | 10  | 13 PITG_10915  |
| 0  | 21  | 2 PITG_03423   |
| 0  | 2   | 3 PITG_06260   |
| 0  | 4   | 11 NA          |
| 0  | 2   | 46 PITG_16808  |
| 0  | 2   | 4 PITG_06304   |
| 0  | 5   | 0 PITG_06002   |
| 0  | 0   | 2 PITG_08742   |
| 0  | 4   | 2 PITG_08471   |
| 0  | 50  | 29 PITG_04270  |
| 0  | 17  | 0 NA           |
| 0  | 4   | 0 NA           |
| 0  | 0   | 2 PITG_03610   |
| 0  | 7   | 9 PITG_00437   |
| 0  | 21  | 7 PITG_05737   |
| 0  | 34  | 28 PITG_13905  |
| 0  | 9   | 0 PITG_20317   |
| 0  | 4   | 3 NA           |
| 0  | 2   | 4 PITG_05629   |
| 21 | 0   | 0 NA           |
| 0  | 135 | 21 PITG_07436  |
| 0  | 0   | 0 PITG_14613   |
| 0  | 2   | 4 PITG_01790   |
| 4  | 105 | 69 NA          |
| 0  | 2   | 0 PITG_13758   |
| 0  | 25  | 12 NA          |
| 0  | 23  | 12 PITG_00077  |
| 0  | 31  | 27 PITG_02754  |
| 0  | 12  | 28 PITG_06822  |
| 0  | 16  | 29 PITG_06342  |
| 0  | 4   | 2 PITG_03778   |
| 0  | 2   | 0 PITG_17893   |
| 0  | 0   | 0 NA           |
| 0  | 22  | 8 NA           |
| 0  | 4   | 26 PITG_09278  |
| 0  | 43  | 49 PITG_02731  |
| 0  | 9   | 2 PITG_19736   |
| 0  | 145 | 17 NA          |



|   |     |                |
|---|-----|----------------|
| 0 | 11  | 13 NA          |
| 0 | 8   | 4 NA           |
| 0 | 4   | 0 PITG_02397   |
| 0 | 8   | 9 PITG_22716   |
| 2 | 331 | 369 PITG_09282 |
| 0 | 11  | 0 PITG_19611   |
| 0 | 41  | 11 PITG_03617  |
| 0 | 33  | 2 PITG_14473   |
| 0 | 35  | 0 NA           |
| 0 | 91  | 47 PITG_13362  |
| 0 | 0   | 0 PITG_21313   |
| 0 | 49  | 16 PITG_10471  |
| 0 | 2   | 0 PITG_15065   |
| 0 | 2   | 0 NA           |
| 0 | 0   | 0 NA           |
| 0 | 12  | 15 PITG_03898  |
| 0 | 0   | 4 NA           |
| 0 | 2   | 0 PITG_12308   |
| 0 | 7   | 0 PITG_09505   |
| 0 | 2   | 8 PITG_14727   |
| 0 | 0   | 0 PITG_08480   |
| 0 | 17  | 20 PITG_01238  |
| 0 | 2   | 4 PITG_04475   |
| 0 | 6   | 0 NA           |
| 0 | 35  | 22 NA          |
| 0 | 51  | 23 PITG_02268  |
| 0 | 0   | 0 PITG_21915   |
| 0 | 0   | 0 NA           |
| 0 | 3   | 0 PITG_02273   |
| 0 | 75  | 23 PITG_11010  |
| 0 | 3   | 4 PITG_17944   |
| 0 | 90  | 7 PITG_12527   |
| 0 | 4   | 10 NA          |
| 0 | 479 | 205 PITG_18644 |
| 0 | 2   | 10 PITG_12915  |
| 0 | 12  | 2 PITG_20377   |
| 0 | 4   | 0 PITG_13103   |
| 0 | 3   | 5 PITG_15006   |
| 0 | 2   | 0 NA           |
| 0 | 53  | 2 PITG_15258   |
| 0 | 10  | 8 PITG_05545   |
| 0 | 12  | 0 NA           |
| 0 | 12  | 4 PITG_05595   |
| 0 | 75  | 2 NA           |
| 0 | 0   | 2 NA           |
| 0 | 14  | 23 PITG_02719  |
| 0 | 3   | 0 PITG_09995   |

|    |     |                |
|----|-----|----------------|
| 0  | 2   | 0 PITG_11437   |
| 0  | 105 | 61 PITG_10063  |
| 0  | 5   | 5 PITG_06260   |
| 0  | 40  | 4 NA           |
| 2  | 597 | 849 PITG_03598 |
| 0  | 0   | 6 PITG_06358   |
| 0  | 3   | 0 NA           |
| 0  | 6   | 9 PITG_04973   |
| 0  | 14  | 4 PITG_06943   |
| 0  | 2   | 0 PITG_11125   |
| 0  | 5   | 4 NA           |
| 0  | 14  | 7 PITG_07855   |
| 0  | 30  | 4 NA           |
| 0  | 6   | 10 PITG_00516  |
| 0  | 7   | 0 NA           |
| 0  | 6   | 11 PITG_06862  |
| 0  | 4   | 2 PITG_14770   |
| 0  | 6   | 8 PITG_06003   |
| 0  | 14  | 0 PITG_15134   |
| 0  | 4   | 6 PITG_08436   |
| 0  | 44  | 4 NA           |
| 0  | 9   | 4 PITG_18393   |
| 0  | 17  | 0 PITG_03405   |
| 0  | 4   | 2 NA           |
| 0  | 5   | 4 PITG_06708   |
| 0  | 14  | 11 PITG_09952  |
| 0  | 7   | 0 NA           |
| 0  | 5   | 3 PITG_11437   |
| 17 | 57  | 96 NA          |
| 0  | 46  | 0 PITG_00109   |
| 0  | 0   | 6 PITG_06507   |
| 0  | 0   | 0 PITG_15779   |
| 0  | 0   | 4 PITG_14249   |
| 0  | 15  | 4 NA           |
| 0  | 67  | 46 PITG_12835  |
| 0  | 6   | 0 PITG_09477   |
| 0  | 6   | 7 NA           |
| 0  | 51  | 23 PITG_14808  |
| 0  | 0   | 0 NA           |
| 0  | 12  | 2 PITG_03874   |
| 0  | 0   | 2 PITG_03841   |
| 0  | 0   | 0 PITG_11887   |
| 0  | 0   | 0 PITG_01003   |
| 0  | 0   | 2 NA           |
| 0  | 0   | 0 PITG_01774   |
| 0  | 37  | 28 PITG_04547  |
| 0  | 13  | 4 PITG_16675   |

|    |     |               |
|----|-----|---------------|
| 0  | 12  | 49 PITG_20490 |
| 0  | 0   | 8 PITG_08326  |
| 0  | 4   | 4 PITG_07916  |
| 0  | 6   | 6 PITG_18010  |
| 0  | 341 | 5 PITG_11612  |
| 0  | 2   | 0 NA          |
| 0  | 52  | 0 PITG_11256  |
| 0  | 5   | 2 NA          |
| 0  | 102 | 10 NA         |
| 0  | 17  | 13 PITG_09411 |
| 0  | 4   | 8 PITG_04457  |
| 0  | 31  | 20 NA         |
| 0  | 0   | 2 PITG_08388  |
| 0  | 12  | 3 PITG_02237  |
| 0  | 2   | 3 NA          |
| 0  | 15  | 8 PITG_00167  |
| 0  | 5   | 2 NA          |
| 0  | 46  | 19 PITG_00426 |
| 0  | 0   | 0 PITG_03318  |
| 0  | 10  | 0 PITG_08346  |
| 0  | 0   | 0 NA          |
| 0  | 148 | 47 NA         |
| 0  | 6   | 11 PITG_18416 |
| 93 | 16  | 119 NA        |
| 0  | 6   | 0 PITG_15820  |
| 0  | 4   | 2 NA          |
| 0  | 33  | 33 NA         |
| 0  | 41  | 2 NA          |
| 0  | 29  | 71 PITG_15900 |
| 0  | 4   | 10 PITG_03006 |
| 0  | 13  | 36 PITG_05508 |
| 0  | 130 | 29 PITG_03903 |
| 0  | 7   | 6 PITG_03874  |
| 0  | 20  | 5 PITG_11153  |
| 0  | 11  | 4 PITG_08184  |
| 0  | 2   | 2 PITG_08394  |
| 0  | 43  | 45 PITG_02992 |
| 0  | 4   | 0 PITG_16103  |
| 0  | 13  | 3 NA          |
| 0  | 9   | 9 PITG_07965  |
| 0  | 9   | 7 PITG_17936  |
| 0  | 12  | 3 PITG_07914  |
| 0  | 5   | 6 PITG_01591  |
| 0  | 0   | 2 PITG_13527  |
| 0  | 4   | 12 PITG_08366 |
| 0  | 4   | 2 PITG_18329  |
| 0  | 4   | 0 PITG_08473  |

|    |     |                |
|----|-----|----------------|
| 0  | 38  | 14 PITG_13413  |
| 0  | 2   | 0 NA           |
| 0  | 2   | 4 PITG_16770   |
| 0  | 123 | 133 PITG_06428 |
| 0  | 14  | 2 PITG_03777   |
| 0  | 0   | 152 NA         |
| 0  | 0   | 2 PITG_20152   |
| 0  | 415 | 209 PITG_20679 |
| 0  | 2   | 7 PITG_12275   |
| 0  | 2   | 9 NA           |
| 0  | 0   | 28 NA          |
| 0  | 13  | 4 PITG_09250   |
| 0  | 10  | 2 PITG_07240   |
| 0  | 6   | 12 PITG_01710  |
| 0  | 9   | 4 NA           |
| 0  | 22  | 16 PITG_03335  |
| 0  | 0   | 0 NA           |
| 0  | 5   | 0 NA           |
| 0  | 2   | 2 NA           |
| 0  | 7   | 0 PITG_19286   |
| 0  | 5   | 3 PITG_16773   |
| 0  | 95  | 5 PITG_17361   |
| 0  | 2   | 66 NA          |
| 0  | 94  | 109 PITG_06428 |
| 0  | 0   | 2 NA           |
| 0  | 26  | 4 PITG_01618   |
| 0  | 5   | 4 NA           |
| 0  | 0   | 10 PITG_10932  |
| 0  | 0   | 2 NA           |
| 0  | 82  | 24 PITG_12187  |
| 0  | 2   | 3 PITG_16042   |
| 0  | 20  | 24 PITG_01678  |
| 0  | 6   | 4 PITG_07703   |
| 0  | 73  | 42 PITG_03259  |
| 0  | 22  | 2 NA           |
| 0  | 37  | 189 PITG_14568 |
| 0  | 13  | 2 PITG_02208   |
| 0  | 8   | 4 PITG_09752   |
| 0  | 34  | 6 NA           |
| 0  | 0   | 8 PITG_12687   |
| 0  | 6   | 0 PITG_06600   |
| 0  | 7   | 17 PITG_17334  |
| 0  | 25  | 0 NA           |
| 10 | 0   | 0 NA           |
| 0  | 2   | 17 PITG_06766  |
| 0  | 2   | 5 PITG_12478   |
| 0  | 0   | 15 PITG_06802  |

|   |     |                |
|---|-----|----------------|
| 0 | 53  | 5 PITG_10060   |
| 0 | 63  | 89 PITG_10480  |
| 0 | 10  | 2 PITG_16015   |
| 0 | 43  | 69 PITG_01504  |
| 0 | 27  | 2 PITG_03656   |
| 0 | 35  | 12 PITG_20289  |
| 0 | 11  | 5 NA           |
| 0 | 659 | 15 NA          |
| 0 | 23  | 0 NA           |
| 0 | 9   | 0 NA           |
| 0 | 4   | 6 PITG_14923   |
| 0 | 4   | 8 PITG_09985   |
| 0 | 2   | 7 PITG_01193   |
| 0 | 0   | 6 PITG_01774   |
| 0 | 5   | 2 NA           |
| 0 | 56  | 115 PITG_09221 |
| 0 | 20  | 2 NA           |
| 0 | 2   | 0 PITG_16924   |
| 0 | 76  | 17 PITG_00166  |
| 0 | 4   | 6 PITG_05814   |
| 0 | 7   | 0 PITG_05633   |
| 0 | 5   | 2 PITG_01332   |
| 0 | 0   | 3 PITG_03804   |
| 0 | 9   | 4 PITG_10602   |
| 0 | 0   | 0 NA           |
| 0 | 11  | 6 PITG_00190   |
| 0 | 24  | 11 PITG_01860  |
| 0 | 2   | 0 PITG_05631   |
| 0 | 6   | 2 PITG_10722   |
| 0 | 0   | 4 PITG_10813   |
| 0 | 4   | 4 NA           |
| 0 | 13  | 3 PITG_15926   |
| 0 | 27  | 25 PITG_06662  |
| 0 | 6   | 2 PITG_13165   |
| 0 | 25  | 6 PITG_03947   |
| 0 | 16  | 12 PITG_13274  |
| 0 | 5   | 8 NA           |
| 0 | 48  | 6 PITG_01603   |
| 0 | 119 | 82 PITG_01502  |
| 0 | 11  | 9 PITG_02916   |
| 0 | 7   | 8 PITG_19096   |
| 0 | 22  | 14 PITG_11437  |
| 0 | 34  | 29 PITG_07914  |
| 0 | 2   | 0 PITG_15486   |
| 0 | 264 | 30 PITG_09287  |
| 0 | 38  | 0 PITG_11806   |
| 0 | 4   | 0 PITG_01290   |

|     |     |                 |
|-----|-----|-----------------|
| 0   | 2   | 19 PITG_18899   |
| 0   | 30  | 13 PITG_22662   |
| 0   | 7   | 22 PITG_09983   |
| 0   | 25  | 4 NA            |
| 0   | 2   | 0 PITG_02728    |
| 0   | 37  | 35 PITG_03590   |
| 0   | 5   | 30 PITG_16917   |
| 0   | 15  | 15 PITG_01678   |
| 0   | 3   | 7 PITG_12169    |
| 0   | 0   | 5 PITG_07865    |
| 0   | 0   | 0 PITG_10141    |
| 0   | 13  | 16 PITG_01138   |
| 0   | 26  | 0 PITG_11485    |
| 0   | 2   | 23 PITG_05664   |
| 0   | 2   | 2 PITG_15463    |
| 0   | 4   | 11 PITG_12342   |
| 0   | 19  | 11 NA           |
| 0   | 177 | 44 PITG_22383   |
| 0   | 4   | 6 NA            |
| 0   | 0   | 0 NA            |
| 0   | 0   | 2 NA            |
| 0   | 32  | 26 NA           |
| 0   | 17  | 15 PITG_08237   |
| 0   | 0   | 2 PITG_11153    |
| 0   | 31  | 40 PITG_18963   |
| 0   | 3   | 0 PITG_08864    |
| 0   | 2   | 5 PITG_11265    |
| 0   | 0   | 0 PITG_21640    |
| 0   | 4   | 0 NA            |
| 0   | 13  | 44 PITG_16680   |
| 0   | 2   | 2 PITG_17049    |
| 0   | 0   | 0 PITG_13631    |
| 0   | 0   | 2 NA            |
| 658 | 21  | 1065 PITG_06237 |
| 0   | 4   | 2 PITG_18064    |
| 0   | 0   | 0 PITG_03374    |
| 0   | 0   | 0 PITG_04232    |
| 0   | 13  | 5 PITG_19422    |
| 0   | 4   | 2 PITG_08012    |
| 0   | 2   | 5 PITG_01153    |
| 0   | 40  | 13 NA           |
| 0   | 0   | 0 PITG_13282    |
| 0   | 9   | 6 PITG_17611    |
| 0   | 7   | 21 PITG_04985   |
| 0   | 2   | 0 PITG_02124    |
| 0   | 8   | 4 PITG_13431    |
| 0   | 4   | 19 PITG_04990   |

|   |    |               |
|---|----|---------------|
| 0 | 16 | 16 PITG_19024 |
| 0 | 6  | 2 PITG_04973  |
| 0 | 0  | 15 PITG_12001 |
| 0 | 24 | 6 NA          |
| 0 | 4  | 21 PITG_10777 |
| 0 | 35 | 0 NA          |
| 0 | 8  | 0 PITG_00496  |
| 0 | 11 | 10 PITG_22477 |
| 0 | 15 | 30 PITG_11097 |
| 0 | 17 | 7 NA          |
| 0 | 6  | 9 PITG_03323  |
| 0 | 15 | 6 PITG_03754  |
| 0 | 73 | 11 PITG_18335 |
| 0 | 4  | 0 PITG_03514  |
| 0 | 16 | 15 PITG_08926 |
| 0 | 6  | 6 PITG_04482  |
| 0 | 4  | 2 NA          |
| 0 | 59 | 46 PITG_12648 |
| 0 | 13 | 15 PITG_06853 |
| 0 | 4  | 2 PITG_13428  |
| 0 | 24 | 83 PITG_00588 |
| 0 | 6  | 7 PITG_17560  |
| 0 | 2  | 2 PITG_08056  |
| 0 | 4  | 0 NA          |
| 0 | 0  | 5 PITG_03103  |
| 0 | 8  | 84 PITG_19129 |
| 0 | 14 | 18 PITG_13040 |
| 0 | 54 | 18 PITG_01682 |
| 0 | 21 | 0 PITG_10553  |
| 0 | 8  | 7 PITG_07848  |
| 0 | 14 | 57 PITG_04682 |
| 0 | 2  | 8 PITG_13527  |
| 0 | 4  | 2 NA          |
| 0 | 6  | 11 PITG_04723 |
| 0 | 23 | 10 PITG_20903 |
| 0 | 0  | 2 PITG_03017  |
| 0 | 2  | 2 PITG_16469  |
| 0 | 4  | 0 PITG_13017  |
| 0 | 0  | 0 PITG_10217  |
| 0 | 0  | 2 NA          |
| 0 | 0  | 0 PITG_11674  |
| 0 | 34 | 21 PITG_11232 |
| 0 | 4  | 2 PITG_14633  |
| 0 | 20 | 16 PITG_16649 |
| 0 | 20 | 50 PITG_06114 |
| 0 | 0  | 0 PITG_01154  |
| 0 | 0  | 17 PITG_08425 |

|   |     |                |
|---|-----|----------------|
| 0 | 2   | 0 PITG_05259   |
| 0 | 12  | 18 PITG_15566  |
| 0 | 43  | 19 PITG_17031  |
| 0 | 5   | 13 PITG_00413  |
| 0 | 7   | 4 PITG_03487   |
| 0 | 0   | 20 PITG_06448  |
| 8 | 0   | 11 NA          |
| 0 | 0   | 0 PITG_11405   |
| 0 | 607 | 249 NA         |
| 0 | 22  | 13 PITG_20498  |
| 0 | 25  | 0 PITG_11486   |
| 0 | 7   | 0 PITG_15758   |
| 0 | 0   | 4 PITG_14123   |
| 0 | 28  | 7 PITG_13260   |
| 0 | 336 | 387 PITG_11875 |
| 0 | 0   | 5 PITG_16315   |
| 0 | 10  | 4 PITG_07723   |
| 0 | 18  | 5 PITG_12105   |
| 0 | 15  | 5 PITG_06772   |
| 0 | 2   | 0 PITG_18373   |
| 0 | 7   | 6 PITG_02739   |
| 0 | 2   | 2 PITG_16054   |
| 0 | 151 | 70 NA          |
| 0 | 30  | 0 NA           |
| 0 | 28  | 13 PITG_11434  |
| 0 | 2   | 0 PITG_01936   |
| 0 | 37  | 0 PITG_08037   |
| 0 | 20  | 19 NA          |
| 0 | 4   | 6 PITG_08375   |
| 0 | 10  | 29 PITG_05658  |
| 0 | 398 | 491 NA         |
| 0 | 0   | 0 PITG_18720   |
| 0 | 4   | 10 NA          |
| 0 | 2   | 0 PITG_12252   |
| 0 | 0   | 2 NA           |
| 0 | 0   | 6 PITG_07514   |
| 0 | 186 | 126 PITG_19989 |
| 0 | 2   | 0 PITG_03143   |
| 0 | 0   | 2 PITG_20205   |
| 0 | 13  | 0 PITG_19774   |
| 0 | 28  | 2 PITG_19611   |
| 0 | 0   | 0 PITG_21425   |
| 0 | 92  | 63 PITG_01932  |
| 0 | 19  | 12 NA          |
| 0 | 0   | 7 PITG_11457   |
| 0 | 8   | 9 PITG_10916   |
| 0 | 30  | 5 NA           |



|     |     |               |
|-----|-----|---------------|
| 0   | 36  | 0 PITG_17690  |
| 0   | 43  | 10 PITG_19672 |
| 0   | 56  | 29 NA         |
| 0   | 2   | 2 PITG_02673  |
| 0   | 0   | 2 PITG_16797  |
| 0   | 18  | 12 PITG_03331 |
| 0   | 2   | 2 PITG_02818  |
| 0   | 49  | 39 NA         |
| 0   | 3   | 0 NA          |
| 0   | 7   | 4 PITG_14566  |
| 0   | 0   | 2 PITG_15288  |
| 0   | 13  | 20 NA         |
| 0   | 0   | 5 PITG_11861  |
| 0   | 2   | 6 PITG_03820  |
| 0   | 6   | 4 PITG_04555  |
| 0   | 33  | 361 NA        |
| 0   | 0   | 2 NA          |
| 0   | 5   | 6 PITG_00207  |
| 0   | 4   | 4 PITG_01727  |
| 0   | 63  | 7 PITG_13807  |
| 0   | 3   | 8 PITG_02027  |
| 0   | 0   | 4 PITG_09064  |
| 0   | 19  | 18 PITG_11676 |
| 493 | 57  | 1261 NA       |
| 0   | 2   | 2 PITG_13843  |
| 0   | 0   | 3 PITG_16680  |
| 0   | 0   | 8 PITG_11530  |
| 0   | 0   | 4 NA          |
| 0   | 22  | 0 PITG_02927  |
| 0   | 2   | 2 PITG_04903  |
| 0   | 2   | 4 PITG_03652  |
| 0   | 2   | 2 PITG_01722  |
| 0   | 48  | 91 PITG_02586 |
| 0   | 2   | 2 PITG_07699  |
| 0   | 105 | 89 PITG_02364 |
| 0   | 188 | 10 PITG_09983 |
| 0   | 2   | 0 PITG_02415  |
| 0   | 12  | 27 PITG_00206 |
| 0   | 2   | 0 PITG_00731  |
| 0   | 0   | 0 PITG_15191  |
| 0   | 18  | 0 PITG_00274  |
| 0   | 0   | 2 NA          |
| 0   | 0   | 6 PITG_01569  |
| 0   | 11  | 31 PITG_04601 |
| 0   | 35  | 36 PITG_00914 |
| 0   | 0   | 0 PITG_06031  |
| 0   | 56  | 16 PITG_03275 |

|   |     |                |
|---|-----|----------------|
| 0 | 4   | 6 PITG_11000   |
| 0 | 40  | 6 NA           |
| 0 | 0   | 0 PITG_07731   |
| 0 | 6   | 11 PITG_02115  |
| 0 | 0   | 4 NA           |
| 0 | 7   | 22 PITG_03330  |
| 0 | 14  | 54 PITG_01332  |
| 0 | 0   | 0 PITG_10743   |
| 0 | 12  | 0 PITG_00336   |
| 0 | 2   | 7 PITG_03246   |
| 0 | 0   | 0 PITG_03075   |
| 0 | 0   | 0 NA           |
| 0 | 4   | 2 NA           |
| 0 | 0   | 0 PITG_00440   |
| 0 | 0   | 0 NA           |
| 0 | 512 | 515 PITG_04281 |
| 0 | 0   | 2 PITG_02497   |
| 0 | 0   | 2 PITG_05278   |
| 0 | 3   | 4 PITG_15696   |
| 0 | 6   | 25 PITG_00938  |
| 0 | 30  | 20 PITG_11202  |
| 0 | 4   | 5 PITG_14129   |
| 0 | 26  | 51 PITG_03018  |
| 0 | 10  | 8 PITG_02736   |
| 0 | 15  | 11 PITG_00167  |
| 0 | 41  | 20 PITG_13739  |
| 0 | 6   | 0 PITG_20040   |
| 0 | 2   | 9 PITG_04661   |
| 0 | 2   | 0 NA           |
| 0 | 25  | 78 PITG_06131  |
| 0 | 12  | 8 PITG_01750   |
| 0 | 71  | 61 PITG_06970  |
| 0 | 32  | 42 PITG_21329  |
| 0 | 0   | 8 PITG_12478   |
| 0 | 3   | 23 PITG_02526  |
| 0 | 20  | 0 PITG_01495   |
| 0 | 7   | 7 PITG_01650   |
| 0 | 15  | 9 PITG_14239   |
| 0 | 25  | 12 PITG_11803  |
| 0 | 8   | 4 PITG_02964   |
| 0 | 63  | 14 PITG_12933  |
| 0 | 0   | 124 NA         |
| 0 | 3   | 44 PITG_01478  |
| 0 | 0   | 0 PITG_03234   |
| 0 | 11  | 2 PITG_17041   |
| 0 | 30  | 7 PITG_04588   |
| 0 | 13  | 9 PITG_03462   |

|   |     |                |
|---|-----|----------------|
| 0 | 0   | 7 PITG_05599   |
| 0 | 59  | 3 PITG_01602   |
| 0 | 0   | 2 PITG_11246   |
| 0 | 7   | 6 PITG_11761   |
| 0 | 0   | 2 PITG_14009   |
| 0 | 2   | 0 PITG_05597   |
| 0 | 7   | 2 NA           |
| 0 | 26  | 14 PITG_17513  |
| 0 | 2   | 4 PITG_21419   |
| 0 | 3   | 2 PITG_18304   |
| 0 | 4   | 8 PITG_10973   |
| 0 | 15  | 13 PITG_14223  |
| 0 | 48  | 67 PITG_16649  |
| 0 | 12  | 2 NA           |
| 0 | 11  | 4 PITG_07775   |
| 0 | 9   | 6 PITG_17457   |
| 0 | 0   | 0 NA           |
| 0 | 76  | 10 NA          |
| 0 | 5   | 34 PITG_18369  |
| 0 | 26  | 33 PITG_13622  |
| 0 | 6   | 38 PITG_13785  |
| 0 | 2   | 4 PITG_00250   |
| 0 | 5   | 4 PITG_17437   |
| 0 | 6   | 13 PITG_02973  |
| 0 | 4   | 5 PITG_12674   |
| 0 | 72  | 20 PITG_07790  |
| 0 | 0   | 12 PITG_11594  |
| 0 | 7   | 14 PITG_16900  |
| 0 | 9   | 10 PITG_06440  |
| 0 | 418 | 55 PITG_11463  |
| 0 | 4   | 4 PITG_19024   |
| 0 | 15  | 26 PITG_02371  |
| 0 | 6   | 2 PITG_19730   |
| 0 | 10  | 2 PITG_05600   |
| 0 | 0   | 2 PITG_09285   |
| 0 | 2   | 0 NA           |
| 2 | 122 | 338 PITG_18354 |
| 0 | 8   | 6 PITG_05423   |
| 0 | 65  | 35 PITG_03813  |
| 0 | 39  | 0 NA           |
| 0 | 21  | 5 NA           |
| 0 | 28  | 9 NA           |
| 0 | 11  | 5 NA           |
| 0 | 47  | 42 NA          |
| 0 | 37  | 26 PITG_19421  |
| 0 | 0   | 0 PITG_23159   |
| 0 | 0   | 6 PITG_16453   |

|     |     |                |
|-----|-----|----------------|
| 0   | 35  | 5 PITG_08393   |
| 0   | 0   | 8 PITG_09587   |
| 0   | 16  | 42 PITG_03018  |
| 0   | 0   | 2 PITG_13918   |
| 0   | 9   | 4 PITG_09943   |
| 0   | 2   | 9 PITG_06015   |
| 0   | 9   | 5 PITG_08481   |
| 0   | 5   | 6 PITG_10591   |
| 0   | 32  | 2 PITG_13468   |
| 2   | 5   | 13 NA          |
| 0   | 0   | 2 PITG_07455   |
| 0   | 6   | 0 PITG_00504   |
| 0   | 53  | 52 PITG_10648  |
| 0   | 0   | 0 PITG_06937   |
| 0   | 4   | 0 NA           |
| 0   | 2   | 0 PITG_19351   |
| 0   | 12  | 0 NA           |
| 0   | 11  | 6 PITG_01621   |
| 0   | 2   | 0 PITG_16079   |
| 0   | 0   | 2 PITG_02143   |
| 124 | 5   | 88 NA          |
| 0   | 13  | 3 PITG_01756   |
| 0   | 32  | 8 PITG_01317   |
| 0   | 4   | 2 PITG_03646   |
| 0   | 2   | 11 PITG_13296  |
| 0   | 8   | 8 PITG_04002   |
| 0   | 0   | 0 NA           |
| 0   | 15  | 63 PITG_21176  |
| 0   | 0   | 0 PITG_02381   |
| 0   | 41  | 18 PITG_18092  |
| 0   | 2   | 0 PITG_00400   |
| 0   | 2   | 4 PITG_10343   |
| 0   | 0   | 0 PITG_04564   |
| 0   | 0   | 0 PITG_10686   |
| 0   | 8   | 4 PITG_16546   |
| 0   | 202 | 127 PITG_10989 |
| 0   | 10  | 2 NA           |
| 0   | 29  | 33 PITG_17693  |
| 0   | 13  | 13 PITG_06003  |
| 0   | 4   | 8 PITG_18103   |
| 0   | 0   | 2 PITG_15602   |
| 2   | 20  | 36 PITG_19247  |
| 0   | 13  | 2 PITG_08145   |
| 0   | 0   | 2 PITG_08430   |
| 0   | 2   | 17 PITG_01146  |
| 0   | 0   | 2 PITG_10533   |
| 0   | 2   | 0 PITG_16977   |

|     |     |                |
|-----|-----|----------------|
| 0   | 0   | 10 PITG_00440  |
| 0   | 61  | 41 PITG_18326  |
| 0   | 72  | 33 PITG_09428  |
| 472 | 373 | 1592 NA        |
| 0   | 3   | 4 PITG_00164   |
| 0   | 45  | 18 PITG_06776  |
| 0   | 0   | 9 NA           |
| 0   | 0   | 0 PITG_18922   |
| 0   | 4   | 2 PITG_22810   |
| 0   | 2   | 2 NA           |
| 0   | 0   | 0 NA           |
| 0   | 0   | 2 NA           |
| 0   | 0   | 13 PITG_09393  |
| 0   | 80  | 11 NA          |
| 0   | 81  | 10 PITG_10499  |
| 0   | 2   | 6 PITG_21223   |
| 0   | 7   | 6 PITG_02981   |
| 0   | 26  | 26 PITG_03623  |
| 0   | 23  | 0 NA           |
| 0   | 14  | 10 PITG_03445  |
| 0   | 75  | 47 PITG_01153  |
| 0   | 78  | 26 PITG_05297  |
| 0   | 10  | 3 PITG_00670   |
| 0   | 6   | 3 PITG_08587   |
| 0   | 98  | 35 NA          |
| 0   | 9   | 26 PITG_04458  |
| 0   | 10  | 11 PITG_18416  |
| 0   | 2   | 17 PITG_03044  |
| 0   | 0   | 0 PITG_17557   |
| 0   | 22  | 16 PITG_14416  |
| 0   | 22  | 18 PITG_03359  |
| 0   | 167 | 51 PITG_19404  |
| 0   | 0   | 24 PITG_03332  |
| 0   | 67  | 10 PITG_20783  |
| 0   | 5   | 2 PITG_04701   |
| 0   | 14  | 249 PITG_13002 |
| 0   | 12  | 0 NA           |
| 0   | 2   | 2 PITG_13913   |
| 0   | 9   | 0 NA           |
| 0   | 21  | 22 PITG_19111  |
| 0   | 10  | 3 PITG_14743   |
| 0   | 8   | 4 NA           |
| 0   | 10  | 12 NA          |
| 0   | 11  | 15 PITG_12327  |
| 0   | 0   | 0 NA           |
| 0   | 6   | 2 PITG_00188   |
| 0   | 0   | 2 PITG_14441   |

|      |     |                |
|------|-----|----------------|
| 0    | 2   | 2 NA           |
| 0    | 0   | 7 PITG_13842   |
| 0    | 10  | 0 PITG_03149   |
| 0    | 2   | 6 PITG_09785   |
| 0    | 0   | 0 PITG_11567   |
| 0    | 42  | 2 PITG_17602   |
| 0    | 14  | 6 PITG_03865   |
| 0    | 4   | 2 NA           |
| 0    | 0   | 2 PITG_13146   |
| 0    | 11  | 9 PITG_06734   |
| 0    | 4   | 2 PITG_11877   |
| 0    | 24  | 6 NA           |
| 0    | 23  | 0 NA           |
| 0    | 23  | 2 PITG_02464   |
| 0    | 2   | 2 NA           |
| 0    | 10  | 28 PITG_11712  |
| 0    | 38  | 50 PITG_22450  |
| 0    | 21  | 14 PITG_19164  |
| 0    | 4   | 0 PITG_18751   |
| 0    | 11  | 0 NA           |
| 0    | 295 | 412 NA         |
| 1125 | 142 | 1069 NA        |
| 0    | 0   | 12 PITG_00529  |
| 0    | 18  | 0 PITG_10316   |
| 0    | 90  | 16 PITG_01644  |
| 0    | 36  | 32 PITG_06966  |
| 0    | 9   | 7 PITG_12932   |
| 0    | 101 | 171 PITG_11293 |
| 0    | 0   | 2 PITG_19692   |
| 0    | 35  | 4 PITG_01019   |
| 0    | 39  | 17 PITG_07888  |
| 0    | 10  | 8 PITG_12820   |
| 0    | 2   | 0 PITG_00911   |
| 0    | 11  | 10 NA          |
| 0    | 2   | 2 PITG_06898   |
| 0    | 2   | 4 NA           |
| 0    | 2   | 2 PITG_01691   |
| 0    | 46  | 12 PITG_15916  |
| 0    | 2   | 0 PITG_19037   |
| 0    | 127 | 18 PITG_11021  |
| 0    | 0   | 0 PITG_03362   |
| 0    | 4   | 0 NA           |
| 0    | 4   | 2 PITG_06714   |
| 0    | 2   | 0 NA           |
| 0    | 3   | 0 PITG_17557   |
| 0    | 2   | 9 PITG_05259   |
| 0    | 50  | 60 NA          |

|   |     |                |
|---|-----|----------------|
| 0 | 19  | 11 PITG_05683  |
| 0 | 19  | 11 PITG_06964  |
| 0 | 4   | 27 PITG_15195  |
| 0 | 14  | 23 PITG_02371  |
| 0 | 23  | 11 PITG_19115  |
| 0 | 8   | 0 NA           |
| 0 | 168 | 100 NA         |
| 0 | 32  | 11 NA          |
| 0 | 66  | 0 PITG_12234   |
| 0 | 4   | 2 NA           |
| 0 | 9   | 8 NA           |
| 0 | 2   | 0 PITG_10911   |
| 0 | 0   | 11 NA          |
| 0 | 28  | 10 PITG_16766  |
| 0 | 48  | 28 PITG_13174  |
| 0 | 17  | 16 PITG_03360  |
| 0 | 24  | 2 PITG_07682   |
| 0 | 24  | 10 PITG_12478  |
| 0 | 2   | 6 PITG_00323   |
| 0 | 9   | 14 PITG_11023  |
| 0 | 5   | 18 PITG_08851  |
| 6 | 25  | 475 NA         |
| 0 | 14  | 7 NA           |
| 0 | 10  | 2 PITG_07104   |
| 0 | 2   | 5 PITG_03478   |
| 0 | 26  | 330 PITG_16981 |
| 0 | 2   | 4 NA           |
| 0 | 18  | 17 PITG_09295  |
| 0 | 11  | 3 NA           |
| 0 | 0   | 13 PITG_02546  |
| 0 | 6   | 0 PITG_17021   |
| 0 | 13  | 41 PITG_05520  |
| 0 | 6   | 6 PITG_06913   |
| 0 | 4   | 2 PITG_03665   |
| 0 | 7   | 0 PITG_00858   |
| 0 | 5   | 0 NA           |
| 0 | 32  | 13 PITG_17348  |
| 0 | 4   | 4 PITG_12162   |
| 0 | 4   | 2 NA           |
| 0 | 5   | 4 PITG_07348   |
| 0 | 15  | 3 NA           |
| 0 | 2   | 4 PITG_04048   |
| 0 | 0   | 0 NA           |
| 0 | 10  | 9 PITG_12252   |
| 0 | 5   | 0 PITG_14724   |
| 0 | 14  | 101 PITG_01797 |
| 0 | 0   | 0 NA           |

|     |     |                |
|-----|-----|----------------|
| 0   | 0   | 0 PITG_02284   |
| 0   | 40  | 25 PITG_12648  |
| 0   | 12  | 0 PITG_11137   |
| 25  | 0   | 171 NA         |
| 0   | 5   | 0 PITG_19886   |
| 0   | 13  | 69 PITG_07161  |
| 0   | 0   | 0 PITG_06178   |
| 0   | 26  | 28 PITG_08087  |
| 0   | 0   | 0 PITG_22715   |
| 0   | 0   | 7 PITG_20537   |
| 0   | 7   | 25 PITG_17639  |
| 0   | 2   | 2 PITG_03944   |
| 0   | 0   | 3 PITG_18027   |
| 0   | 53  | 22 PITG_01128  |
| 0   | 7   | 16 PITG_14067  |
| 0   | 51  | 24 PITG_06403  |
| 0   | 2   | 0 NA           |
| 0   | 24  | 35 PITG_04547  |
| 0   | 9   | 3 PITG_12453   |
| 0   | 7   | 15 PITG_19537  |
| 0   | 0   | 9 NA           |
| 0   | 21  | 82 PITG_13404  |
| 111 | 25  | 668 NA         |
| 0   | 2   | 0 NA           |
| 486 | 20  | 946 NA         |
| 0   | 10  | 12 PITG_18073  |
| 0   | 101 | 78 PITG_11114  |
| 0   | 6   | 0 PITG_01015   |
| 0   | 31  | 27 PITG_01127  |
| 0   | 8   | 11 PITG_20200  |
| 0   | 0   | 2 PITG_04698   |
| 0   | 2   | 2 PITG_02280   |
| 0   | 2   | 0 PITG_06480   |
| 3   | 3   | 115 PITG_16959 |
| 0   | 9   | 4 PITG_02694   |
| 0   | 16  | 22 PITG_08601  |
| 0   | 15  | 8 NA           |
| 0   | 2   | 0 NA           |
| 0   | 12  | 10 PITG_07102  |
| 0   | 20  | 45 PITG_05434  |
| 0   | 2   | 0 PITG_13713   |
| 0   | 10  | 4 PITG_00399   |
| 0   | 0   | 2 NA           |
| 0   | 16  | 8 PITG_07865   |
| 0   | 2   | 0 PITG_06917   |
| 0   | 16  | 11 PITG_06829  |
| 0   | 2   | 2 NA           |



|    |     |                |
|----|-----|----------------|
| 0  | 0   | 0 PITG_02640   |
| 0  | 38  | 0 PITG_02415   |
| 0  | 18  | 2 PITG_19962   |
| 0  | 12  | 100 PITG_03792 |
| 0  | 13  | 14 NA          |
| 0  | 47  | 53 PITG_09349  |
| 27 | 4   | 27 NA          |
| 0  | 0   | 2 PITG_06274   |
| 0  | 117 | 68 PITG_15134  |
| 0  | 16  | 13 PITG_07314  |
| 0  | 43  | 54 PITG_05922  |
| 0  | 4   | 14 PITG_12119  |
| 0  | 28  | 11 PITG_00495  |
| 0  | 182 | 158 PITG_08352 |
| 0  | 2   | 2 NA           |
| 0  | 16  | 29 PITG_19419  |
| 0  | 25  | 37 PITG_00622  |
| 0  | 15  | 8 PITG_19151   |
| 0  | 20  | 2 NA           |
| 0  | 4   | 0 NA           |
| 0  | 5   | 5 PITG_00067   |
| 0  | 3   | 4 PITG_21727   |
| 0  | 4   | 2 PITG_01427   |
| 0  | 2   | 0 PITG_09867   |
| 0  | 40  | 2 PITG_05410   |
| 0  | 12  | 11 PITG_00703  |
| 0  | 0   | 0 NA           |
| 49 | 31  | 655 NA         |
| 0  | 79  | 16 PITG_21887  |
| 0  | 56  | 43 PITG_17568  |
| 0  | 4   | 4 NA           |
| 0  | 10  | 20 PITG_15731  |
| 0  | 14  | 2 PITG_16018   |
| 0  | 0   | 0 NA           |
| 0  | 12  | 2 PITG_07470   |
| 0  | 2   | 3 PITG_03939   |
| 0  | 28  | 10 PITG_02541  |
| 0  | 41  | 8 PITG_00225   |
| 0  | 17  | 2 NA           |
| 0  | 16  | 22 PITG_01762  |
| 0  | 9   | 0 NA           |
| 0  | 12  | 8 PITG_06817   |
| 0  | 308 | 193 PITG_16973 |
| 0  | 10  | 3 PITG_02454   |
| 0  | 14  | 26 PITG_14573  |
| 0  | 13  | 9 PITG_05300   |
| 0  | 54  | 8 PITG_00479   |

|   |     |                |
|---|-----|----------------|
| 0 | 0   | 0 PITG_16956   |
| 0 | 2   | 2 PITG_06660   |
| 0 | 0   | 84 PITG_19302  |
| 0 | 4   | 2 PITG_02143   |
| 0 | 5   | 11 PITG_21077  |
| 0 | 2   | 2 PITG_04561   |
| 0 | 11  | 2 NA           |
| 0 | 2   | 2 PITG_02191   |
| 0 | 14  | 0 NA           |
| 0 | 0   | 2 PITG_00894   |
| 0 | 36  | 31 PITG_09876  |
| 0 | 24  | 7 PITG_01953   |
| 0 | 0   | 0 NA           |
| 0 | 11  | 7 PITG_22958   |
| 0 | 4   | 5 NA           |
| 0 | 2   | 0 PITG_02731   |
| 0 | 12  | 2 PITG_16063   |
| 0 | 7   | 2 PITG_02023   |
| 0 | 0   | 2 PITG_15838   |
| 0 | 0   | 8 PITG_17287   |
| 0 | 72  | 6 PITG_09866   |
| 0 | 7   | 5 PITG_10134   |
| 0 | 95  | 93 PITG_09131  |
| 0 | 120 | 158 PITG_04994 |
| 0 | 849 | 461 PITG_01507 |
| 0 | 17  | 7 PITG_00167   |
| 0 | 10  | 0 PITG_14286   |
| 0 | 2   | 3 PITG_16903   |
| 0 | 6   | 4 NA           |
| 0 | 6   | 34 PITG_00413  |
| 0 | 4   | 7 PITG_11194   |
| 0 | 12  | 6 PITG_10271   |
| 0 | 20  | 7 PITG_12192   |
| 0 | 757 | 170 NA         |
| 0 | 0   | 2 PITG_13826   |
| 0 | 22  | 82 PITG_08043  |
| 0 | 13  | 15 PITG_00078  |
| 0 | 19  | 10 PITG_08351  |
| 0 | 5   | 0 PITG_01451   |
| 0 | 4   | 8 NA           |
| 0 | 17  | 6 PITG_18461   |
| 0 | 18  | 4 NA           |
| 0 | 0   | 0 PITG_08207   |
| 0 | 0   | 3 NA           |
| 0 | 4   | 9 PITG_02520   |
| 0 | 14  | 6 PITG_05190   |
| 0 | 0   | 0 NA           |

|     |     |                |
|-----|-----|----------------|
| 0   | 6   | 0 PITG_18053   |
| 0   | 3   | 4 PITG_05364   |
| 2   | 6   | 17 NA          |
| 0   | 8   | 18 PITG_15195  |
| 0   | 150 | 128 PITG_22303 |
| 0   | 21  | 5 PITG_20110   |
| 0   | 10  | 21 PITG_04934  |
| 0   | 6   | 0 PITG_20273   |
| 0   | 0   | 2 PITG_02731   |
| 0   | 37  | 29 PITG_16801  |
| 0   | 0   | 4 PITG_04746   |
| 0   | 24  | 28 PITG_12108  |
| 0   | 4   | 2 NA           |
| 0   | 0   | 2 PITG_01479   |
| 0   | 0   | 0 PITG_06038   |
| 0   | 2   | 0 PITG_07026   |
| 0   | 13  | 17 PITG_00116  |
| 0   | 4   | 6 PITG_07041   |
| 0   | 5   | 0 PITG_14392   |
| 0   | 168 | 30 NA          |
| 0   | 0   | 0 PITG_04395   |
| 330 | 4   | 486 NA         |
| 0   | 13  | 20 PITG_08776  |
| 0   | 0   | 0 PITG_03246   |
| 0   | 3   | 2 PITG_15661   |
| 0   | 0   | 2 PITG_15119   |
| 0   | 2   | 0 PITG_11157   |
| 0   | 2   | 2 PITG_06903   |
| 0   | 3   | 0 PITG_17137   |
| 0   | 13  | 4 PITG_07192   |
| 0   | 0   | 4 PITG_05987   |
| 0   | 11  | 16 PITG_04536  |
| 0   | 12  | 0 PITG_03318   |
| 0   | 5   | 17 PITG_08609  |
| 0   | 18  | 4 PITG_12000   |
| 0   | 0   | 2 PITG_09630   |
| 0   | 6   | 13 PITG_00078  |
| 0   | 5   | 0 PITG_07241   |
| 0   | 4   | 4 PITG_09426   |
| 0   | 29  | 21 NA          |
| 0   | 4   | 26 PITG_09360  |
| 0   | 0   | 0 PITG_03154   |
| 41  | 2   | 70 NA          |
| 0   | 2   | 5 PITG_00324   |
| 0   | 6   | 2 PITG_09473   |
| 0   | 39  | 9 PITG_04610   |
| 0   | 13  | 7 PITG_04889   |

|   |     |                 |
|---|-----|-----------------|
| 0 | 111 | 128 PITG_13324  |
| 0 | 14  | 3 PITG_19422    |
| 0 | 0   | 0 PITG_02588    |
| 0 | 7   | 12 PITG_02799   |
| 0 | 0   | 0 NA            |
| 0 | 12  | 18 PITG_04875   |
| 0 | 9   | 31 PITG_19199   |
| 0 | 17  | 19 PITG_01980   |
| 0 | 0   | 0 NA            |
| 0 | 7   | 0 NA            |
| 0 | 21  | 0 PITG_18276    |
| 0 | 589 | 1945 PITG_17828 |
| 0 | 54  | 4 PITG_01001    |
| 0 | 8   | 18 PITG_12478   |
| 0 | 2   | 13 NA           |
| 0 | 14  | 32 PITG_04725   |
| 0 | 3   | 2 PITG_15470    |
| 0 | 15  | 0 NA            |
| 0 | 21  | 0 PITG_21869    |
| 0 | 0   | 0 PITG_17883    |
| 0 | 2   | 0 PITG_15777    |
| 0 | 2   | 13 PITG_01870   |
| 0 | 20  | 18 PITG_09951   |
| 0 | 42  | 3 NA            |
| 0 | 0   | 2 PITG_00070    |
| 0 | 14  | 35 PITG_17240   |
| 0 | 46  | 89 PITG_12540   |
| 0 | 8   | 15 PITG_03117   |
| 0 | 6   | 13 PITG_19813   |
| 0 | 6   | 2 NA            |
| 0 | 111 | 33 NA           |
| 0 | 2   | 4 NA            |
| 0 | 12  | 4 PITG_19429    |
| 0 | 0   | 0 PITG_00809    |
| 0 | 4   | 7 PITG_15447    |
| 0 | 88  | 0 PITG_13402    |
| 0 | 2   | 6 PITG_10323    |
| 0 | 81  | 149 PITG_11293  |
| 0 | 23  | 4 PITG_11612    |
| 0 | 13  | 0 PITG_09035    |
| 0 | 0   | 0 PITG_17816    |
| 0 | 18  | 16 PITG_03791   |
| 0 | 17  | 12 PITG_00337   |
| 2 | 59  | 322 NA          |
| 0 | 9   | 10 NA           |
| 0 | 15  | 0 PITG_08597    |
| 0 | 6   | 11 NA           |

|   |     |                |
|---|-----|----------------|
| 0 | 0   | 0 PITG_01951   |
| 0 | 0   | 2 PITG_07243   |
| 0 | 0   | 0 PITG_15884   |
| 0 | 9   | 0 NA           |
| 0 | 0   | 5 PITG_01608   |
| 0 | 512 | 377 PITG_08181 |
| 0 | 9   | 10 PITG_07194  |
| 0 | 0   | 6 PITG_01850   |
| 0 | 16  | 7 PITG_00308   |
| 0 | 10  | 19 PITG_10601  |
| 0 | 6   | 8 PITG_09192   |
| 0 | 9   | 30 NA          |
| 0 | 2   | 0 PITG_13285   |
| 0 | 2   | 0 NA           |
| 0 | 85  | 132 PITG_19220 |
| 0 | 10  | 22 PITG_12990  |
| 0 | 18  | 15 PITG_05128  |
| 0 | 4   | 3 PITG_08104   |
| 0 | 4   | 5 PITG_02912   |
| 0 | 36  | 86 PITG_18360  |
| 0 | 358 | 2 NA           |
| 0 | 4   | 0 PITG_01666   |
| 0 | 0   | 2 PITG_07851   |
| 0 | 45  | 44 PITG_15862  |
| 0 | 0   | 3 NA           |
| 0 | 219 | 36 NA          |
| 0 | 2   | 5 PITG_00026   |
| 0 | 8   | 4 PITG_01201   |
| 0 | 0   | 2 NA           |
| 0 | 0   | 4 NA           |
| 0 | 51  | 15 PITG_08294  |
| 0 | 5   | 2 NA           |
| 0 | 7   | 15 NA          |
| 0 | 6   | 36 PITG_13176  |
| 0 | 39  | 0 PITG_08540   |
| 0 | 10  | 6 NA           |
| 0 | 0   | 17 PITG_00133  |
| 0 | 2   | 0 PITG_02456   |
| 0 | 14  | 2 PITG_11666   |
| 0 | 36  | 13 PITG_19216  |
| 0 | 12  | 5 PITG_03011   |
| 0 | 2   | 7 PITG_21133   |
| 0 | 371 | 35 PITG_14620  |
| 0 | 5   | 15 PITG_13300  |
| 0 | 7   | 0 PITG_09698   |
| 0 | 0   | 0 PITG_02863   |
| 0 | 0   | 0 PITG_16364   |

|     |     |                |
|-----|-----|----------------|
| 0   | 0   | 5 PITG_02264   |
| 0   | 0   | 4 PITG_09566   |
| 0   | 4   | 2 PITG_03952   |
| 0   | 0   | 2 PITG_04479   |
| 0   | 7   | 5 PITG_22477   |
| 731 | 52  | 1630 NA        |
| 0   | 0   | 0 NA           |
| 0   | 22  | 3 NA           |
| 0   | 14  | 6 PITG_06929   |
| 0   | 4   | 0 NA           |
| 0   | 12  | 0 PITG_04122   |
| 0   | 11  | 12 PITG_20903  |
| 0   | 38  | 41 PITG_03295  |
| 0   | 0   | 2 PITG_00440   |
| 0   | 18  | 24 PITG_07445  |
| 0   | 0   | 2 PITG_12343   |
| 0   | 30  | 192 PITG_11959 |
| 0   | 24  | 6 NA           |
| 0   | 3   | 0 PITG_14100   |
| 0   | 2   | 8 NA           |
| 0   | 119 | 23 PITG_01183  |
| 0   | 0   | 0 PITG_00252   |
| 0   | 0   | 2 PITG_10430   |
| 2   | 9   | 103 PITG_00164 |
| 0   | 5   | 7 PITG_02593   |
| 0   | 10  | 3 PITG_17076   |
| 0   | 17  | 15 PITG_16023  |
| 0   | 24  | 28 PITG_10921  |
| 0   | 5   | 0 PITG_19962   |
| 0   | 0   | 0 PITG_03740   |
| 0   | 154 | 52 PITG_22104  |
| 0   | 0   | 0 PITG_02482   |
| 0   | 11  | 17 PITG_18999  |
| 0   | 2   | 0 PITG_07915   |
| 0   | 15  | 4 PITG_04956   |
| 0   | 35  | 2 NA           |
| 0   | 9   | 0 PITG_12682   |
| 0   | 0   | 0 PITG_07302   |
| 0   | 14  | 18 PITG_14111  |
| 0   | 0   | 4 PITG_19533   |
| 0   | 2   | 0 NA           |
| 0   | 2   | 0 PITG_01076   |
| 0   | 9   | 52 PITG_09221  |
| 0   | 5   | 4 PITG_03111   |
| 0   | 2   | 4 PITG_05935   |
| 0   | 89  | 33 PITG_18747  |
| 0   | 18  | 24 PITG_00713  |

|      |     |                |
|------|-----|----------------|
| 0    | 43  | 27 PITG_04179  |
| 925  | 18  | 740 NA         |
| 0    | 3   | 7 PITG_10080   |
| 0    | 0   | 4 PITG_12119   |
| 0    | 9   | 5 PITG_17049   |
| 0    | 2   | 0 PITG_19735   |
| 0    | 5   | 2 PITG_10591   |
| 0    | 2   | 16 PITG_05692  |
| 0    | 13  | 0 NA           |
| 0    | 8   | 4 NA           |
| 0    | 17  | 4 PITG_17168   |
| 0    | 6   | 0 PITG_03763   |
| 0    | 4   | 2 PITG_07087   |
| 0    | 0   | 9 PITG_05104   |
| 0    | 18  | 2 NA           |
| 0    | 4   | 4 PITG_12224   |
| 0    | 2   | 2 NA           |
| 0    | 18  | 8 PITG_17292   |
| 0    | 0   | 0 PITG_07697   |
| 0    | 11  | 2 PITG_06127   |
| 0    | 6   | 0 PITG_22277   |
| 0    | 0   | 0 NA           |
| 0    | 0   | 12 PITG_14126  |
| 0    | 10  | 2 PITG_01774   |
| 0    | 0   | 16 PITG_23281  |
| 0    | 5   | 0 PITG_18279   |
| 0    | 124 | 75 PITG_01931  |
| 0    | 6   | 12 PITG_05128  |
| 0    | 0   | 0 PITG_16055   |
| 0    | 2   | 6 NA           |
| 0    | 0   | 0 PITG_10285   |
| 0    | 27  | 9 PITG_15101   |
| 0    | 0   | 0 PITG_08103   |
| 0    | 36  | 34 PITG_05506  |
| 0    | 6   | 2 PITG_05194   |
| 0    | 0   | 0 NA           |
| 231  | 18  | 373 NA         |
| 0    | 0   | 9 PITG_16795   |
| 1653 | 199 | 3565 NA        |
| 0    | 16  | 4 PITG_09790   |
| 0    | 119 | 102 PITG_02840 |
| 0    | 7   | 0 PITG_02307   |
| 0    | 6   | 0 PITG_01647   |
| 0    | 3   | 5 PITG_22164   |
| 0    | 0   | 2 PITG_06321   |
| 0    | 6   | 0 NA           |
| 0    | 4   | 0 PITG_18788   |

|     |      |                |
|-----|------|----------------|
| 0   | 0    | 2 PITG_08640   |
| 0   | 3    | 0 NA           |
| 0   | 0    | 21 PITG_14473  |
| 0   | 0    | 0 PITG_00809   |
| 0   | 125  | 37 NA          |
| 0   | 8    | 4 PITG_01526   |
| 0   | 14   | 6 PITG_19846   |
| 0   | 83   | 0 NA           |
| 0   | 4    | 0 PITG_21334   |
| 0   | 2    | 0 PITG_21075   |
| 0   | 6    | 3 PITG_15649   |
| 0   | 2    | 4 NA           |
| 0   | 16   | 12 PITG_12981  |
| 0   | 19   | 36 PITG_07237  |
| 0   | 0    | 0 PITG_04861   |
| 0   | 6    | 15 NA          |
| 0   | 4    | 4 PITG_08183   |
| 0   | 0    | 0 NA           |
| 0   | 74   | 52 NA          |
| 0   | 32   | 80 PITG_02043  |
| 0   | 11   | 0 PITG_22369   |
| 0   | 2    | 6 NA           |
| 0   | 2    | 3 PITG_03714   |
| 0   | 2    | 4 PITG_04104   |
| 432 | 85   | 549 NA         |
| 0   | 15   | 11 PITG_03431  |
| 0   | 28   | 6 PITG_11752   |
| 0   | 4    | 0 PITG_00844   |
| 0   | 4    | 2 PITG_13760   |
| 0   | 19   | 50 PITG_03423  |
| 0   | 0    | 0 NA           |
| 0   | 42   | 36 PITG_03303  |
| 0   | 2    | 0 PITG_14483   |
| 0   | 2    | 2 PITG_02975   |
| 0   | 2    | 5 NA           |
| 0   | 8    | 5 PITG_16365   |
| 0   | 40   | 0 NA           |
| 0   | 4    | 8 PITG_05761   |
| 0   | 29   | 0 PITG_17746   |
| 0   | 22   | 5 PITG_07259   |
| 0   | 2    | 16 PITG_04564  |
| 0   | 5    | 9 PITG_16809   |
| 0   | 4    | 0 PITG_16686   |
| 0   | 7    | 0 PITG_16459   |
| 0   | 2    | 2 PITG_17155   |
| 0   | 29   | 0 PITG_05326   |
| 0   | 1943 | 717 PITG_16727 |



|      |     |                |
|------|-----|----------------|
| 0    | 4   | 2 PITG_11393   |
| 0    | 8   | 4 PITG_17077   |
| 0    | 2   | 0 PITG_13838   |
| 0    | 61  | 135 PITG_20041 |
| 0    | 8   | 11 PITG_13911  |
| 0    | 2   | 14 PITG_13421  |
| 0    | 31  | 235 PITG_05539 |
| 0    | 125 | 125 PITG_14683 |
| 0    | 0   | 0 PITG_13713   |
| 2    | 27  | 27 NA          |
| 0    | 0   | 2 NA           |
| 0    | 11  | 11 PITG_13910  |
| 0    | 25  | 45 PITG_13669  |
| 0    | 17  | 2 PITG_00208   |
| 0    | 94  | 165 PITG_00765 |
| 0    | 6   | 8 PITG_05476   |
| 0    | 69  | 2 NA           |
| 0    | 27  | 2 NA           |
| 0    | 33  | 9 PITG_06911   |
| 0    | 0   | 2 NA           |
| 0    | 2   | 2 PITG_10221   |
| 0    | 41  | 0 PITG_03660   |
| 0    | 6   | 0 PITG_16137   |
| 0    | 2   | 2 PITG_11373   |
| 0    | 0   | 0 PITG_13546   |
| 0    | 2   | 3 NA           |
| 0    | 0   | 3 PITG_12938   |
| 10   | 6   | 48 NA          |
| 2270 | 597 | 512 NA         |
| 0    | 0   | 0 PITG_08994   |
| 0    | 2   | 12 PITG_03347  |
| 0    | 0   | 3 PITG_02210   |
| 0    | 9   | 8 PITG_02651   |
| 0    | 4   | 13 PITG_12548  |
| 0    | 12  | 18 PITG_11812  |
| 0    | 20  | 42 NA          |
| 0    | 0   | 2 PITG_02770   |
| 0    | 48  | 30 PITG_09446  |
| 0    | 4   | 4 PITG_00502   |
| 0    | 15  | 0 PITG_17455   |
| 0    | 20  | 12 PITG_03282  |
| 0    | 6   | 2 PITG_20160   |
| 0    | 0   | 12 NA          |
| 0    | 33  | 15 PITG_04489  |
| 0    | 10  | 0 PITG_03483   |
| 0    | 23  | 6 PITG_19886   |
| 0    | 3   | 7 PITG_07399   |

|     |     |                |
|-----|-----|----------------|
| 0   | 0   | 0 PITG_10449   |
| 0   | 21  | 2 NA           |
| 0   | 202 | 430 PITG_01260 |
| 0   | 2   | 0 PITG_00231   |
| 0   | 15  | 6 PITG_13927   |
| 0   | 139 | 91 PITG_13641  |
| 0   | 4   | 7 NA           |
| 0   | 8   | 0 PITG_01317   |
| 0   | 26  | 15 PITG_17361  |
| 0   | 6   | 48 PITG_09181  |
| 0   | 28  | 22 PITG_19532  |
| 0   | 12  | 0 NA           |
| 0   | 2   | 5 PITG_00732   |
| 0   | 22  | 2 PITG_18248   |
| 0   | 0   | 4 PITG_01719   |
| 0   | 43  | 0 PITG_18962   |
| 0   | 18  | 2 PITG_16376   |
| 0   | 2   | 8 PITG_21602   |
| 0   | 3   | 0 PITG_01996   |
| 0   | 2   | 0 NA           |
| 0   | 21  | 8 PITG_03260   |
| 0   | 17  | 2 PITG_04677   |
| 0   | 0   | 2 PITG_02027   |
| 0   | 67  | 13 PITG_00486  |
| 0   | 0   | 0 NA           |
| 0   | 10  | 0 PITG_03600   |
| 0   | 0   | 0 NA           |
| 0   | 8   | 0 PITG_02463   |
| 0   | 6   | 0 PITG_07507   |
| 0   | 2   | 30 PITG_04028  |
| 0   | 0   | 0 PITG_07035   |
| 0   | 0   | 2 PITG_01520   |
| 0   | 0   | 17 PITG_00704  |
| 0   | 2   | 0 PITG_01386   |
| 2   | 67  | 198 PITG_09218 |
| 0   | 0   | 0 PITG_12357   |
| 0   | 2   | 2 PITG_05226   |
| 0   | 16  | 6 NA           |
| 0   | 0   | 0 NA           |
| 0   | 0   | 5 PITG_10888   |
| 0   | 7   | 19 PITG_09504  |
| 123 | 4   | 164 NA         |
| 0   | 0   | 0 PITG_20502   |
| 0   | 8   | 27 PITG_08826  |
| 0   | 10  | 2 NA           |
| 0   | 40  | 26 PITG_06716  |
| 0   | 70  | 27 PITG_11197  |

|      |     |                |
|------|-----|----------------|
| 0    | 33  | 22 PITG_20384  |
| 0    | 0   | 0 NA           |
| 0    | 44  | 18 PITG_11823  |
| 0    | 0   | 0 PITG_05975   |
| 0    | 17  | 10 PITG_18033  |
| 0    | 0   | 0 NA           |
| 0    | 69  | 30 PITG_10595  |
| 0    | 0   | 0 PITG_20197   |
| 0    | 2   | 0 PITG_06118   |
| 0    | 34  | 2 PITG_19148   |
| 0    | 4   | 19 PITG_00430  |
| 0    | 2   | 2 PITG_07865   |
| 0    | 0   | 39 PITG_17869  |
| 0    | 2   | 2 NA           |
| 0    | 4   | 2 NA           |
| 0    | 26  | 0 NA           |
| 178  | 6   | 59 NA          |
| 3902 | 106 | 3119 NA        |
| 0    | 4   | 0 PITG_10124   |
| 0    | 8   | 0 PITG_19972   |
| 0    | 0   | 2 PITG_11498   |
| 0    | 0   | 3 PITG_08609   |
| 0    | 4   | 6 PITG_01520   |
| 0    | 2   | 6 PITG_19227   |
| 0    | 34  | 22 PITG_17953  |
| 0    | 92  | 145 PITG_17826 |
| 0    | 2   | 6 PITG_11098   |
| 0    | 14  | 0 PITG_13915   |
| 0    | 43  | 77 PITG_16274  |
| 0    | 0   | 0 PITG_09034   |
| 0    | 6   | 0 PITG_09247   |
| 0    | 0   | 0 PITG_18175   |
| 0    | 0   | 8 PITG_19247   |
| 217  | 53  | 446 NA         |
| 0    | 0   | 0 PITG_08186   |
| 0    | 9   | 0 PITG_14283   |
| 0    | 61  | 5 PITG_09341   |
| 0    | 11  | 17 PITG_12852  |
| 0    | 31  | 15 PITG_13406  |
| 0    | 8   | 0 PITG_01639   |
| 0    | 16  | 0 PITG_06929   |
| 0    | 0   | 145 NA         |
| 0    | 2   | 8 PITG_05733   |
| 0    | 9   | 8 PITG_16439   |
| 0    | 14  | 20 PITG_06379  |
| 0    | 0   | 2 PITG_02082   |
| 0    | 11  | 11 PITG_12330  |

|   |     |                 |
|---|-----|-----------------|
| 0 | 7   | 12 PITG_07193   |
| 0 | 74  | 22 PITG_22047   |
| 0 | 10  | 20 PITG_06884   |
| 0 | 0   | 0 NA            |
| 0 | 11  | 17 PITG_00291   |
| 0 | 64  | 18 PITG_07660   |
| 0 | 10  | 2 PITG_01297    |
| 0 | 2   | 2 PITG_03863    |
| 0 | 50  | 118 PITG_05657  |
| 0 | 13  | 5 NA            |
| 0 | 5   | 2 PITG_12563    |
| 0 | 0   | 0 NA            |
| 0 | 6   | 3 NA            |
| 0 | 2   | 0 PITG_01121    |
| 0 | 4   | 0 NA            |
| 0 | 2   | 2 PITG_09166    |
| 0 | 0   | 4 PITG_17030    |
| 0 | 2   | 8 PITG_07302    |
| 0 | 4   | 4 PITG_02796    |
| 0 | 0   | 6 PITG_21282    |
| 0 | 40  | 7 PITG_21556    |
| 0 | 134 | 4 NA            |
| 0 | 14  | 2 NA            |
| 0 | 4   | 5 NA            |
| 0 | 11  | 26 PITG_07302   |
| 0 | 14  | 114 PITG_22865  |
| 0 | 46  | 9 PITG_11272    |
| 0 | 9   | 8 PITG_17609    |
| 0 | 2   | 3 NA            |
| 0 | 2   | 2 NA            |
| 0 | 0   | 0 PITG_08351    |
| 0 | 0   | 5 PITG_10440    |
| 0 | 6   | 2 PITG_02676    |
| 0 | 2   | 0 PITG_05282    |
| 0 | 0   | 0 NA            |
| 0 | 43  | 4 NA            |
| 0 | 0   | 6 PITG_12306    |
| 0 | 5   | 0 PITG_00025    |
| 0 | 0   | 25 PITG_20534   |
| 0 | 0   | 0 PITG_00477    |
| 0 | 0   | 0 PITG_00320    |
| 0 | 540 | 2152 PITG_14530 |
| 0 | 24  | 19 PITG_09250   |
| 0 | 12  | 13 PITG_06303   |
| 0 | 32  | 7 PITG_21781    |
| 0 | 111 | 6 PITG_13746    |
| 0 | 0   | 0 PITG_14922    |

|    |     |                |
|----|-----|----------------|
| 0  | 0   | 4 NA           |
| 0  | 0   | 7 PITG_15602   |
| 0  | 0   | 0 PITG_15820   |
| 57 | 5   | 50 NA          |
| 0  | 7   | 0 PITG_14992   |
| 0  | 9   | 7 PITG_16826   |
| 0  | 3   | 0 PITG_18396   |
| 0  | 2   | 4 PITG_09089   |
| 0  | 2   | 2 PITG_02515   |
| 0  | 2   | 6 PITG_15891   |
| 0  | 6   | 3 PITG_01981   |
| 0  | 11  | 9 NA           |
| 0  | 2   | 0 PITG_05362   |
| 0  | 2   | 4 PITG_10952   |
| 0  | 2   | 5 PITG_08613   |
| 0  | 0   | 0 PITG_14861   |
| 0  | 9   | 25 PITG_18963  |
| 0  | 20  | 16 PITG_18999  |
| 0  | 19  | 11 PITG_20045  |
| 0  | 0   | 0 PITG_09378   |
| 0  | 26  | 31 PITG_11675  |
| 0  | 2   | 2 NA           |
| 0  | 112 | 35 NA          |
| 0  | 36  | 26 NA          |
| 0  | 6   | 19 PITG_03423  |
| 0  | 9   | 6 PITG_06735   |
| 0  | 3   | 4 PITG_16808   |
| 0  | 0   | 0 PITG_10351   |
| 0  | 4   | 2 PITG_20216   |
| 0  | 22  | 34 PITG_05479  |
| 0  | 2   | 7 PITG_13103   |
| 0  | 2   | 6 PITG_13103   |
| 0  | 0   | 0 PITG_09277   |
| 0  | 8   | 2 PITG_16315   |
| 0  | 3   | 4 PITG_21017   |
| 0  | 6   | 2 PITG_01405   |
| 0  | 12  | 2 PITG_18050   |
| 0  | 24  | 27 PITG_05595  |
| 0  | 53  | 32 NA          |
| 0  | 0   | 0 NA           |
| 0  | 13  | 2 PITG_03505   |
| 0  | 2   | 0 PITG_18014   |
| 0  | 5   | 4 PITG_01789   |
| 0  | 22  | 18 PITG_11000  |
| 0  | 15  | 9 PITG_11445   |
| 0  | 283 | 323 PITG_08000 |
| 0  | 2   | 4 PITG_14634   |

|      |     |                |
|------|-----|----------------|
| 0    | 3   | 0 NA           |
| 80   | 5   | 84 NA          |
| 0    | 4   | 2 PITG_00683   |
| 0    | 77  | 6 PITG_00256   |
| 0    | 4   | 4 PITG_06501   |
| 0    | 6   | 0 PITG_22529   |
| 0    | 7   | 2 PITG_05187   |
| 0    | 0   | 0 PITG_01250   |
| 0    | 0   | 2 PITG_05446   |
| 0    | 16  | 157 PITG_10022 |
| 0    | 9   | 4 PITG_05188   |
| 0    | 11  | 7 NA           |
| 0    | 0   | 4 PITG_14462   |
| 0    | 2   | 0 PITG_21480   |
| 0    | 15  | 2 PITG_04954   |
| 0    | 12  | 11 NA          |
| 0    | 0   | 0 PITG_12675   |
| 0    | 6   | 12 PITG_00882  |
| 0    | 10  | 26 PITG_13939  |
| 0    | 34  | 48 PITG_21279  |
| 0    | 2   | 0 PITG_06898   |
| 0    | 8   | 4 PITG_17652   |
| 0    | 0   | 0 PITG_17325   |
| 0    | 0   | 2 PITG_15874   |
| 0    | 0   | 45 NA          |
| 0    | 7   | 4 PITG_07890   |
| 0    | 23  | 20 PITG_02250  |
| 0    | 3   | 10 PITG_14014  |
| 0    | 11  | 7 PITG_23273   |
| 0    | 69  | 12 PITG_00066  |
| 0    | 3   | 0 PITG_02916   |
| 0    | 17  | 19 PITG_06912  |
| 0    | 109 | 433 PITG_14175 |
| 0    | 2   | 9 PITG_20637   |
| 0    | 0   | 5 PITG_03318   |
| 0    | 29  | 9 PITG_21962   |
| 0    | 4   | 0 NA           |
| 0    | 2   | 2 PITG_01358   |
| 0    | 16  | 18 PITG_02857  |
| 0    | 9   | 24 PITG_07030  |
| 0    | 20  | 4 PITG_08473   |
| 2037 | 18  | 150 NA         |
| 0    | 2   | 4 PITG_00333   |
| 0    | 22  | 0 NA           |
| 0    | 61  | 28 PITG_09220  |
| 0    | 0   | 0 PITG_00786   |
| 0    | 3   | 0 PITG_09389   |

|   |     |               |
|---|-----|---------------|
| 0 | 14  | 2 PITG_13433  |
| 0 | 9   | 6 PITG_06946  |
| 0 | 17  | 24 PITG_18056 |
| 0 | 2   | 0 PITG_18274  |
| 0 | 35  | 0 PITG_00888  |
| 0 | 4   | 16 PITG_01416 |
| 0 | 8   | 10 NA         |
| 0 | 0   | 6 PITG_05141  |
| 0 | 9   | 22 PITG_22861 |
| 0 | 0   | 0 PITG_02027  |
| 0 | 0   | 0 NA          |
| 0 | 41  | 39 PITG_06379 |
| 0 | 7   | 4 PITG_18364  |
| 0 | 56  | 22 PITG_05815 |
| 0 | 2   | 21 PITG_05975 |
| 0 | 99  | 5 PITG_11718  |
| 0 | 17  | 8 PITG_02172  |
| 0 | 245 | 2 NA          |
| 0 | 46  | 77 PITG_17404 |
| 0 | 63  | 37 PITG_12151 |
| 0 | 0   | 2 PITG_02244  |
| 0 | 5   | 0 NA          |
| 0 | 0   | 0 PITG_01086  |
| 0 | 0   | 11 PITG_16378 |
| 0 | 24  | 0 PITG_10651  |
| 0 | 2   | 6 PITG_19115  |
| 0 | 0   | 0 PITG_05005  |
| 0 | 0   | 0 NA          |
| 0 | 2   | 0 PITG_00756  |
| 0 | 0   | 0 PITG_16316  |
| 0 | 0   | 0 PITG_12810  |
| 0 | 0   | 6 PITG_07445  |
| 0 | 33  | 26 NA         |
| 0 | 2   | 2 PITG_07008  |
| 0 | 11  | 6 PITG_00687  |
| 0 | 2   | 0 PITG_05505  |
| 0 | 4   | 6 PITG_15731  |
| 0 | 21  | 29 PITG_12163 |
| 0 | 4   | 30 PITG_11855 |
| 0 | 18  | 0 NA          |
| 0 | 36  | 26 PITG_05991 |
| 0 | 0   | 18 PITG_09789 |
| 0 | 0   | 0 PITG_00416  |
| 0 | 7   | 32 PITG_13265 |
| 0 | 14  | 23 PITG_19160 |
| 0 | 0   | 2 PITG_10935  |
| 0 | 0   | 0 PITG_11748  |

|   |     |                |
|---|-----|----------------|
| 0 | 14  | 0 PITG_08597   |
| 0 | 2   | 6 PITG_08578   |
| 0 | 2   | 0 PITG_08936   |
| 0 | 12  | 3 PITG_10564   |
| 0 | 0   | 0 NA           |
| 0 | 0   | 2 PITG_05814   |
| 0 | 6   | 20 PITG_09585  |
| 0 | 0   | 2 PITG_13122   |
| 0 | 357 | 134 PITG_08758 |
| 0 | 4   | 11 PITG_07953  |
| 0 | 0   | 7 PITG_03703   |
| 0 | 0   | 2 NA           |
| 0 | 31  | 4 NA           |
| 0 | 5   | 6 NA           |
| 0 | 0   | 0 PITG_10011   |
| 0 | 6   | 8 PITG_04527   |
| 0 | 73  | 6 PITG_04702   |
| 0 | 3   | 4 PITG_17706   |
| 0 | 0   | 2 PITG_04421   |
| 0 | 0   | 0 PITG_12757   |
| 0 | 0   | 4 PITG_08607   |
| 0 | 69  | 34 PITG_08871  |
| 0 | 64  | 85 PITG_01504  |
| 0 | 40  | 27 NA          |
| 0 | 0   | 0 PITG_19550   |
| 0 | 14  | 22 PITG_15889  |
| 0 | 31  | 0 NA           |
| 0 | 2   | 4 PITG_17898   |
| 0 | 34  | 25 PITG_15223  |
| 0 | 663 | 528 PITG_07853 |
| 0 | 22  | 61 PITG_11489  |
| 0 | 0   | 2 PITG_21325   |
| 0 | 19  | 4 PITG_04112   |
| 0 | 3   | 14 PITG_13152  |
| 0 | 22  | 2 PITG_00388   |
| 0 | 38  | 4 PITG_05815   |
| 0 | 3   | 6 PITG_17394   |
| 0 | 95  | 12 NA          |
| 0 | 129 | 4 PITG_07284   |
| 0 | 9   | 16 PITG_19878  |
| 0 | 0   | 0 PITG_13073   |
| 0 | 28  | 14 NA          |
| 0 | 29  | 5 PITG_02623   |
| 0 | 3   | 2 PITG_02820   |
| 0 | 2   | 0 PITG_05559   |
| 0 | 2   | 2 PITG_13434   |
| 0 | 37  | 60 PITG_04000  |



|   |     |                |
|---|-----|----------------|
| 0 | 6   | 8 PITG_04936   |
| 0 | 16  | 4 PITG_05670   |
| 0 | 41  | 23 NA          |
| 0 | 2   | 2 PITG_04466   |
| 0 | 4   | 14 PITG_14743  |
| 0 | 12  | 2 PITG_17408   |
| 0 | 19  | 6 PITG_16128   |
| 0 | 82  | 20 NA          |
| 0 | 346 | 182 PITG_01415 |
| 0 | 0   | 0 NA           |
| 0 | 5   | 0 PITG_03152   |
| 0 | 4   | 10 PITG_04289  |
| 0 | 4   | 7 PITG_02763   |
| 0 | 19  | 7 PITG_12946   |
| 0 | 19  | 25 PITG_15850  |
| 0 | 9   | 12 PITG_20055  |
| 0 | 17  | 9 NA           |
| 0 | 2   | 0 PITG_18250   |
| 0 | 14  | 18 PITG_01326  |
| 0 | 0   | 0 PITG_11999   |
| 0 | 26  | 366 PITG_10543 |
| 0 | 0   | 2 PITG_02770   |
| 0 | 4   | 4 PITG_08176   |
| 0 | 2   | 2 NA           |
| 0 | 4   | 2 PITG_05559   |
| 0 | 18  | 2 NA           |
| 0 | 0   | 0 PITG_01046   |
| 0 | 125 | 45 PITG_18359  |
| 0 | 11  | 3 PITG_03408   |
| 0 | 2   | 4 PITG_14812   |
| 0 | 17  | 4 PITG_07087   |
| 0 | 7   | 26 PITG_21128  |
| 0 | 30  | 10 PITG_11764  |
| 0 | 2   | 0 NA           |
| 0 | 16  | 37 PITG_11496  |
| 0 | 4   | 6 PITG_13669   |
| 0 | 0   | 0 PITG_17884   |
| 0 | 12  | 2 NA           |
| 0 | 2   | 0 PITG_19150   |
| 0 | 102 | 32 NA          |
| 0 | 99  | 22 NA          |
| 0 | 0   | 4 PITG_18759   |
| 0 | 4   | 8 PITG_06285   |
| 0 | 6   | 2 PITG_16224   |
| 0 | 126 | 11 PITG_13757  |
| 0 | 2   | 9 NA           |
| 0 | 8   | 0 NA           |

|   |     |                |
|---|-----|----------------|
| 0 | 4   | 0 NA           |
| 0 | 33  | 2 PITG_11743   |
| 0 | 0   | 8 PITG_04591   |
| 0 | 56  | 2 PITG_20818   |
| 0 | 25  | 2 NA           |
| 0 | 54  | 0 PITG_01953   |
| 0 | 4   | 2 PITG_01963   |
| 0 | 4   | 2 PITG_10856   |
| 0 | 149 | 21 PITG_01932  |
| 0 | 12  | 12 PITG_10514  |
| 0 | 4   | 2 NA           |
| 0 | 0   | 3 NA           |
| 0 | 5   | 2 PITG_11555   |
| 0 | 3   | 25 PITG_06672  |
| 0 | 0   | 7 PITG_07165   |
| 0 | 2   | 0 PITG_15475   |
| 0 | 0   | 0 PITG_14441   |
| 0 | 9   | 15 PITG_19878  |
| 0 | 2   | 0 PITG_17437   |
| 0 | 2   | 6 PITG_05300   |
| 0 | 0   | 2 PITG_03369   |
| 0 | 2   | 0 PITG_23029   |
| 0 | 59  | 11 PITG_18861  |
| 0 | 0   | 6 PITG_08609   |
| 0 | 36  | 18 PITG_11098  |
| 0 | 48  | 39 PITG_08048  |
| 0 | 10  | 0 PITG_02264   |
| 0 | 6   | 0 PITG_11193   |
| 0 | 24  | 0 NA           |
| 0 | 32  | 25 PITG_02196  |
| 0 | 4   | 0 PITG_06333   |
| 0 | 0   | 2 PITG_00116   |
| 0 | 2   | 4 PITG_06793   |
| 0 | 141 | 35 PITG_11126  |
| 0 | 167 | 63 PITG_01276  |
| 0 | 12  | 0 PITG_16343   |
| 0 | 19  | 29 PITG_03778  |
| 0 | 4   | 0 PITG_04022   |
| 0 | 0   | 5 PITG_19964   |
| 0 | 47  | 12 PITG_17959  |
| 0 | 0   | 0 NA           |
| 0 | 0   | 0 PITG_17012   |
| 0 | 0   | 0 PITG_15832   |
| 0 | 389 | 793 PITG_10597 |
| 0 | 0   | 8 PITG_10310   |
| 0 | 4   | 2 NA           |
| 0 | 5   | 4 PITG_09039   |

|   |    |               |
|---|----|---------------|
| 0 | 4  | 2 PITG_01054  |
| 0 | 7  | 16 PITG_00998 |
| 0 | 0  | 0 PITG_03491  |
| 0 | 6  | 0 NA          |
| 0 | 4  | 0 NA          |
| 0 | 21 | 0 NA          |
| 0 | 5  | 0 PITG_22552  |
| 0 | 21 | 18 PITG_10509 |
| 0 | 59 | 26 PITG_18458 |
| 0 | 2  | 7 PITG_02562  |
| 0 | 2  | 4 NA          |
| 0 | 22 | 14 NA         |
| 0 | 8  | 11 PITG_07279 |
| 0 | 0  | 2 PITG_03169  |
| 0 | 19 | 0 PITG_02964  |
| 0 | 0  | 10 NA         |
| 0 | 2  | 11 PITG_20780 |
| 0 | 15 | 0 PITG_01919  |
| 0 | 6  | 4 NA          |
| 0 | 12 | 2 NA          |
| 0 | 2  | 6 NA          |
| 0 | 0  | 0 PITG_21597  |
| 0 | 72 | 46 PITG_18655 |
| 0 | 2  | 3 PITG_01453  |
| 0 | 0  | 14 PITG_12151 |
| 0 | 0  | 2 PITG_11035  |
| 0 | 7  | 0 PITG_12136  |
| 0 | 2  | 0 PITG_21598  |
| 0 | 56 | 8 PITG_16310  |
| 0 | 2  | 0 PITG_11125  |
| 0 | 0  | 0 PITG_18184  |
| 0 | 0  | 0 PITG_19860  |
| 0 | 55 | 5 NA          |
| 0 | 7  | 3 NA          |
| 0 | 0  | 0 NA          |
| 0 | 0  | 0 PITG_19070  |
| 0 | 6  | 0 PITG_01640  |
| 0 | 4  | 4 PITG_04227  |
| 0 | 0  | 2 PITG_09301  |
| 0 | 2  | 0 NA          |
| 0 | 3  | 0 PITG_07385  |
| 0 | 0  | 16 NA         |
| 0 | 16 | 2 NA          |
| 0 | 0  | 0 PITG_20283  |
| 0 | 2  | 8 PITG_01367  |
| 0 | 0  | 6 PITG_13918  |
| 0 | 0  | 0 NA          |

|   |     |                |
|---|-----|----------------|
| 0 | 9   | 18 NA          |
| 0 | 159 | 338 NA         |
| 0 | 0   | 0 NA           |
| 0 | 7   | 2 NA           |
| 0 | 5   | 12 PITG_17607  |
| 0 | 0   | 0 NA           |
| 0 | 56  | 48 NA          |
| 0 | 34  | 24 PITG_03454  |
| 0 | 6   | 19 PITG_00252  |
| 0 | 4   | 0 NA           |
| 0 | 12  | 24 PITG_19113  |
| 0 | 77  | 32 NA          |
| 0 | 43  | 22 NA          |
| 0 | 2   | 0 PITG_01152   |
| 0 | 2   | 0 NA           |
| 0 | 2   | 0 PITG_08883   |
| 0 | 0   | 2 PITG_03292   |
| 0 | 0   | 0 NA           |
| 0 | 9   | 15 PITG_12100  |
| 0 | 20  | 98 NA          |
| 0 | 3   | 2 PITG_03890   |
| 0 | 6   | 6 PITG_16441   |
| 0 | 12  | 7 PITG_05366   |
| 0 | 17  | 22 PITG_12871  |
| 0 | 6   | 2 NA           |
| 0 | 0   | 0 PITG_02254   |
| 0 | 10  | 6 NA           |
| 0 | 12  | 17 PITG_03860  |
| 0 | 10  | 2 PITG_01405   |
| 0 | 6   | 2 NA           |
| 0 | 95  | 110 PITG_15593 |
| 0 | 12  | 23 PITG_06631  |
| 0 | 24  | 6 PITG_17898   |
| 0 | 15  | 54 PITG_07949  |
| 0 | 18  | 35 PITG_08566  |
| 0 | 4   | 0 PITG_13544   |
| 0 | 5   | 2 PITG_14108   |
| 0 | 0   | 0 PITG_07170   |
| 0 | 2   | 0 NA           |
| 0 | 17  | 10 PITG_04842  |
| 0 | 82  | 34 PITG_06471  |
| 0 | 24  | 13 PITG_17814  |
| 0 | 18  | 2 PITG_17141   |
| 0 | 0   | 20 PITG_07032  |
| 0 | 0   | 2 PITG_06852   |
| 0 | 8   | 12 PITG_02195  |
| 0 | 0   | 4 PITG_02719   |

|     |     |               |
|-----|-----|---------------|
| 0   | 4   | 17 PITG_12000 |
| 0   | 2   | 8 PITG_00731  |
| 0   | 17  | 25 PITG_06171 |
| 0   | 53  | 14 PITG_14557 |
| 0   | 2   | 4 PITG_12516  |
| 0   | 0   | 0 PITG_11648  |
| 0   | 2   | 6 PITG_08324  |
| 0   | 116 | 4 PITG_06847  |
| 0   | 6   | 3 PITG_09792  |
| 0   | 14  | 5 PITG_03604  |
| 0   | 0   | 0 NA          |
| 0   | 14  | 47 PITG_10312 |
| 0   | 9   | 0 NA          |
| 0   | 16  | 2 NA          |
| 0   | 0   | 2 PITG_14441  |
| 0   | 4   | 5 PITG_02540  |
| 0   | 6   | 2 PITG_03522  |
| 0   | 2   | 14 NA         |
| 0   | 85  | 13 NA         |
| 0   | 0   | 6 PITG_14603  |
| 0   | 7   | 0 NA          |
| 0   | 4   | 11 PITG_03005 |
| 0   | 229 | 71 PITG_02024 |
| 0   | 4   | 4 PITG_00173  |
| 0   | 13  | 7 PITG_20977  |
| 0   | 2   | 2 PITG_01840  |
| 0   | 96  | 14 PITG_06855 |
| 0   | 2   | 2 PITG_00381  |
| 0   | 7   | 3 NA          |
| 0   | 31  | 7 NA          |
| 0   | 4   | 3 PITG_21944  |
| 0   | 0   | 2 PITG_02750  |
| 0   | 6   | 4 PITG_11106  |
| 0   | 0   | 2 PITG_02415  |
| 0   | 17  | 24 PITG_03792 |
| 0   | 14  | 14 NA         |
| 0   | 0   | 8 PITG_03379  |
| 0   | 7   | 13 PITG_12302 |
| 0   | 11  | 24 PITG_05315 |
| 0   | 0   | 0 NA          |
| 0   | 2   | 10 PITG_01913 |
| 0   | 2   | 7 PITG_09899  |
| 437 | 807 | 38 NA         |
| 0   | 12  | 9 NA          |
| 0   | 31  | 30 PITG_13650 |
| 0   | 2   | 4 NA          |
| 0   | 0   | 2 PITG_20239  |

|   |    |               |
|---|----|---------------|
| 0 | 0  | 0 PITG_02415  |
| 0 | 2  | 0 PITG_10443  |
| 0 | 16 | 7 PITG_09366  |
| 0 | 55 | 31 NA         |
| 0 | 5  | 8 PITG_12356  |
| 0 | 0  | 0 PITG_18432  |
| 0 | 2  | 8 PITG_00401  |
| 0 | 16 | 2 PITG_15849  |
| 0 | 4  | 2 PITG_13921  |
| 0 | 0  | 2 PITG_09680  |
| 0 | 8  | 8 PITG_03777  |
| 0 | 3  | 2 PITG_02697  |
| 0 | 10 | 2 NA          |
| 0 | 0  | 4 PITG_04705  |
| 0 | 29 | 9 PITG_20087  |
| 0 | 11 | 0 PITG_00911  |
| 0 | 5  | 6 PITG_05737  |
| 0 | 4  | 11 NA         |
| 0 | 6  | 62 NA         |
| 0 | 26 | 8 PITG_17560  |
| 0 | 4  | 25 NA         |
| 0 | 14 | 21 PITG_05446 |
| 0 | 37 | 30 PITG_02716 |
| 0 | 3  | 16 PITG_05854 |
| 0 | 0  | 0 PITG_00336  |
| 0 | 40 | 33 PITG_09248 |
| 0 | 11 | 6 PITG_04575  |
| 0 | 2  | 10 PITG_14134 |
| 0 | 51 | 2 PITG_05637  |
| 0 | 41 | 14 PITG_15832 |
| 0 | 23 | 0 PITG_12469  |
| 0 | 9  | 9 PITG_08392  |
| 0 | 2  | 0 PITG_02976  |
| 0 | 26 | 0 PITG_02036  |
| 0 | 0  | 27 PITG_01322 |
| 0 | 4  | 4 NA          |
| 0 | 5  | 0 PITG_08540  |
| 0 | 39 | 61 PITG_11483 |
| 0 | 25 | 23 PITG_17245 |
| 0 | 32 | 2 NA          |
| 0 | 0  | 7 PITG_21602  |
| 0 | 0  | 2 PITG_00945  |
| 0 | 4  | 3 PITG_06369  |
| 0 | 52 | 46 PITG_01563 |
| 0 | 11 | 0 NA          |
| 0 | 13 | 4 PITG_14207  |
| 0 | 74 | 29 PITG_02971 |

|    |     |                |
|----|-----|----------------|
| 0  | 9   | 4 PITG_12547   |
| 0  | 19  | 4 NA           |
| 0  | 8   | 0 PITG_10889   |
| 0  | 0   | 0 PITG_13828   |
| 0  | 0   | 0 PITG_03110   |
| 0  | 145 | 174 PITG_06829 |
| 0  | 47  | 7 PITG_23045   |
| 0  | 5   | 0 NA           |
| 0  | 23  | 2 PITG_03429   |
| 0  | 0   | 0 PITG_10082   |
| 0  | 61  | 36 PITG_13607  |
| 0  | 2   | 3 PITG_15874   |
| 0  | 2   | 13 PITG_10534  |
| 0  | 2   | 2 PITG_00324   |
| 0  | 2   | 5 PITG_05975   |
| 0  | 15  | 2 PITG_15146   |
| 0  | 0   | 0 PITG_07318   |
| 0  | 2   | 6 PITG_03650   |
| 0  | 0   | 2 PITG_21724   |
| 0  | 5   | 32 PITG_01335  |
| 0  | 0   | 0 NA           |
| 0  | 0   | 0 PITG_03560   |
| 0  | 49  | 34 PITG_15223  |
| 0  | 28  | 20 PITG_13272  |
| 0  | 11  | 6 PITG_11979   |
| 0  | 0   | 0 PITG_19038   |
| 0  | 5   | 0 PITG_12002   |
| 0  | 0   | 5 PITG_03938   |
| 0  | 12  | 2 PITG_01445   |
| 0  | 0   | 0 PITG_10499   |
| 0  | 2   | 2 PITG_05672   |
| 0  | 14  | 2 PITG_14224   |
| 0  | 11  | 7 PITG_02672   |
| 0  | 16  | 4 PITG_10490   |
| 0  | 0   | 4 PITG_04661   |
| 0  | 17  | 21 PITG_03504  |
| 0  | 0   | 2 PITG_14749   |
| 0  | 8   | 8 PITG_08331   |
| 0  | 7   | 34 NA          |
| 0  | 2   | 4 PITG_06402   |
| 0  | 12  | 2 PITG_14108   |
| 0  | 19  | 10 PITG_03473  |
| 0  | 0   | 7 PITG_10068   |
| 49 | 8   | 86 NA          |
| 0  | 2   | 0 PITG_16183   |
| 0  | 48  | 39 NA          |
| 0  | 23  | 14 PITG_11329  |

|   |     |                |
|---|-----|----------------|
| 0 | 9   | 14 PITG_12948  |
| 0 | 8   | 2 PITG_02625   |
| 0 | 0   | 14 PITG_07964  |
| 0 | 7   | 2 NA           |
| 0 | 2   | 21 PITG_21807  |
| 0 | 52  | 2 NA           |
| 0 | 18  | 0 PITG_03266   |
| 0 | 17  | 0 NA           |
| 0 | 2   | 0 PITG_20117   |
| 0 | 6   | 2 PITG_08587   |
| 0 | 50  | 51 PITG_15836  |
| 0 | 55  | 3 PITG_12579   |
| 0 | 26  | 4 PITG_09997   |
| 0 | 4   | 0 NA           |
| 0 | 21  | 91 PITG_11653  |
| 0 | 10  | 2 NA           |
| 0 | 105 | 56 PITG_16720  |
| 0 | 8   | 11 PITG_21067  |
| 0 | 10  | 18 PITG_00237  |
| 0 | 0   | 0 NA           |
| 0 | 13  | 22 PITG_05293  |
| 0 | 8   | 4 PITG_10138   |
| 0 | 32  | 20 PITG_20055  |
| 0 | 0   | 0 NA           |
| 0 | 0   | 0 NA           |
| 0 | 0   | 7 NA           |
| 0 | 12  | 16 PITG_12674  |
| 0 | 27  | 26 PITG_17942  |
| 0 | 15  | 14 PITG_10314  |
| 0 | 9   | 2 PITG_03337   |
| 0 | 54  | 37 PITG_16538  |
| 0 | 29  | 14 PITG_09428  |
| 0 | 0   | 2 PITG_08481   |
| 0 | 7   | 5 PITG_22763   |
| 0 | 2   | 0 PITG_09603   |
| 0 | 8   | 15 PITG_17348  |
| 0 | 18  | 99 PITG_18025  |
| 0 | 0   | 3 PITG_02824   |
| 0 | 28  | 71 PITG_16871  |
| 0 | 0   | 0 NA           |
| 0 | 15  | 4 PITG_20486   |
| 0 | 0   | 4 PITG_02258   |
| 0 | 4   | 0 PITG_17493   |
| 0 | 0   | 0 NA           |
| 0 | 13  | 7 PITG_07246   |
| 0 | 93  | 156 PITG_14563 |
| 0 | 2   | 0 PITG_17137   |



|   |     |                |
|---|-----|----------------|
| 0 | 42  | 0 NA           |
| 0 | 4   | 10 PITG_03278  |
| 0 | 0   | 4 PITG_02134   |
| 0 | 5   | 2 PITG_14484   |
| 0 | 365 | 40 PITG_16359  |
| 0 | 28  | 95 PITG_05631  |
| 0 | 0   | 4 PITG_01242   |
| 0 | 4   | 4 PITG_19369   |
| 0 | 8   | 20 PITG_21176  |
| 0 | 7   | 13 PITG_02453  |
| 0 | 9   | 2 NA           |
| 0 | 9   | 13 PITG_03934  |
| 0 | 2   | 0 PITG_02716   |
| 0 | 20  | 13 PITG_13007  |
| 0 | 0   | 4 NA           |
| 0 | 8   | 27 PITG_22958  |
| 0 | 0   | 9 PITG_20125   |
| 0 | 12  | 0 PITG_11761   |
| 0 | 4   | 0 NA           |
| 0 | 23  | 64 PITG_02992  |
| 0 | 15  | 7 PITG_06943   |
| 0 | 44  | 38 PITG_07420  |
| 0 | 23  | 12 NA          |
| 0 | 0   | 0 PITG_07445   |
| 0 | 4   | 0 NA           |
| 0 | 8   | 8 PITG_01543   |
| 0 | 3   | 7 PITG_09404   |
| 0 | 11  | 19 PITG_02286  |
| 0 | 7   | 0 NA           |
| 0 | 2   | 0 NA           |
| 0 | 11  | 5 PITG_00038   |
| 0 | 22  | 2 NA           |
| 0 | 46  | 4 PITG_18372   |
| 0 | 54  | 18 PITG_21316  |
| 0 | 4   | 0 PITG_20866   |
| 0 | 34  | 61 PITG_12326  |
| 0 | 9   | 0 NA           |
| 0 | 94  | 105 NA         |
| 0 | 23  | 7 NA           |
| 0 | 39  | 4 PITG_02191   |
| 0 | 0   | 2 NA           |
| 0 | 2   | 0 PITG_01121   |
| 0 | 26  | 27 PITG_11254  |
| 0 | 0   | 2 PITG_09535   |
| 0 | 110 | 108 PITG_21607 |
| 0 | 0   | 2 PITG_20330   |
| 0 | 3   | 0 PITG_19125   |

|    |     |                 |
|----|-----|-----------------|
| 0  | 9   | 2 PITG_13900    |
| 0  | 4   | 4 PITG_21888    |
| 0  | 0   | 0 PITG_02055    |
| 0  | 42  | 12 PITG_14548   |
| 0  | 7   | 2 PITG_05173    |
| 0  | 7   | 3 NA            |
| 0  | 30  | 14 NA           |
| 0  | 0   | 2 PITG_07988    |
| 2  | 8   | 6 PITG_06673    |
| 0  | 0   | 2 PITG_14156    |
| 0  | 42  | 11 PITG_09535   |
| 0  | 13  | 23 PITG_13726   |
| 0  | 22  | 32 PITG_02626   |
| 0  | 0   | 0 PITG_18459    |
| 0  | 16  | 26 PITG_13431   |
| 0  | 0   | 2 PITG_06390    |
| 0  | 4   | 0 PITG_00257    |
| 0  | 27  | 141 NA          |
| 0  | 27  | 0 NA            |
| 0  | 9   | 38 PITG_21077   |
| 0  | 0   | 0 PITG_03593    |
| 0  | 4   | 0 NA            |
| 0  | 2   | 0 PITG_10045    |
| 33 | 2   | 73 NA           |
| 0  | 0   | 63 PITG_06891   |
| 0  | 8   | 16 PITG_03831   |
| 0  | 0   | 0 PITG_11799    |
| 0  | 353 | 1045 PITG_13551 |
| 0  | 0   | 2 PITG_12821    |
| 0  | 119 | 13 PITG_03791   |
| 0  | 201 | 45 PITG_20079   |
| 0  | 15  | 0 NA            |
| 0  | 0   | 0 PITG_22613    |
| 0  | 2   | 20 PITG_07211   |
| 0  | 34  | 70 PITG_14987   |
| 0  | 0   | 0 PITG_04489    |
| 0  | 2   | 0 NA            |
| 0  | 248 | 113 PITG_15593  |
| 0  | 0   | 0 NA            |
| 0  | 4   | 6 PITG_10009    |
| 0  | 9   | 5 PITG_02264    |
| 0  | 0   | 6 PITG_19163    |
| 0  | 13  | 8 NA            |
| 0  | 27  | 6 NA            |
| 0  | 197 | 271 PITG_13402  |
| 0  | 0   | 7 PITG_21962    |
| 0  | 0   | 5 PITG_17080    |

|   |     |                |
|---|-----|----------------|
| 0 | 0   | 0 PITG_11010   |
| 0 | 10  | 18 PITG_04709  |
| 0 | 0   | 4 PITG_11119   |
| 0 | 72  | 28 PITG_12550  |
| 0 | 44  | 0 NA           |
| 0 | 0   | 0 PITG_03832   |
| 0 | 24  | 17 PITG_12919  |
| 0 | 17  | 27 PITG_15778  |
| 0 | 0   | 0 PITG_19208   |
| 4 | 2   | 6 NA           |
| 0 | 0   | 2 PITG_20687   |
| 0 | 6   | 0 PITG_16854   |
| 0 | 2   | 9 PITG_17335   |
| 0 | 2   | 2 PITG_00718   |
| 0 | 27  | 5 PITG_13558   |
| 0 | 6   | 0 NA           |
| 0 | 5   | 0 PITG_03942   |
| 0 | 0   | 4 PITG_14109   |
| 0 | 43  | 13 PITG_01419  |
| 0 | 665 | 326 PITG_16893 |
| 0 | 7   | 7 PITG_11806   |
| 0 | 15  | 4 PITG_13678   |
| 0 | 35  | 32 PITG_00273  |
| 0 | 0   | 2 PITG_03989   |
| 0 | 6   | 4 PITG_03382   |
| 0 | 7   | 0 PITG_02980   |
| 0 | 2   | 0 PITG_04861   |
| 0 | 16  | 3 PITG_04648   |
| 0 | 45  | 0 NA           |
| 0 | 28  | 9 PITG_01664   |
| 0 | 54  | 7 PITG_09826   |
| 0 | 13  | 4 NA           |
| 0 | 29  | 2 NA           |
| 0 | 30  | 10 PITG_14078  |
| 0 | 234 | 66 PITG_06949  |
| 0 | 0   | 6 PITG_02863   |
| 0 | 4   | 4 PITG_00746   |
| 0 | 44  | 101 PITG_10955 |
| 0 | 0   | 0 NA           |
| 0 | 92  | 41 PITG_18326  |
| 0 | 52  | 81 PITG_14947  |
| 0 | 10  | 4 PITG_21398   |
| 0 | 5   | 0 PITG_09360   |
| 0 | 6   | 4 PITG_03549   |
| 0 | 2   | 2 PITG_08699   |
| 0 | 0   | 0 NA           |
| 0 | 18  | 14 NA          |

|   |     |                |
|---|-----|----------------|
| 0 | 16  | 13 PITG_03563  |
| 0 | 9   | 6 PITG_12843   |
| 0 | 2   | 0 PITG_15776   |
| 0 | 21  | 83 NA          |
| 0 | 46  | 12 PITG_13609  |
| 0 | 29  | 14 PITG_00263  |
| 0 | 2   | 2 PITG_04448   |
| 0 | 0   | 0 PITG_19088   |
| 0 | 8   | 6 NA           |
| 0 | 6   | 4 PITG_11460   |
| 0 | 0   | 2 NA           |
| 0 | 0   | 0 PITG_17706   |
| 0 | 8   | 5 PITG_17804   |
| 0 | 12  | 2 PITG_05293   |
| 0 | 2   | 33 PITG_13020  |
| 0 | 140 | 0 PITG_01966   |
| 0 | 16  | 11 PITG_01109  |
| 0 | 0   | 0 PITG_06913   |
| 0 | 23  | 642 NA         |
| 0 | 0   | 0 NA           |
| 0 | 38  | 54 PITG_03018  |
| 0 | 0   | 0 NA           |
| 0 | 106 | 87 NA          |
| 0 | 0   | 0 PITG_02473   |
| 0 | 0   | 2 PITG_11164   |
| 0 | 2   | 11 NA          |
| 0 | 2   | 2 PITG_06256   |
| 0 | 9   | 10 NA          |
| 0 | 0   | 0 PITG_10160   |
| 0 | 6   | 2 PITG_12194   |
| 0 | 6   | 2 PITG_12428   |
| 0 | 0   | 4 PITG_12852   |
| 0 | 0   | 14 PITG_07790  |
| 0 | 42  | 36 PITG_03703  |
| 0 | 139 | 156 PITG_17486 |
| 0 | 28  | 28 PITG_01322  |
| 0 | 11  | 20 PITG_09270  |
| 0 | 44  | 30 PITG_03018  |
| 0 | 0   | 0 NA           |
| 0 | 7   | 2 PITG_14712   |
| 0 | 6   | 2 PITG_21601   |
| 0 | 19  | 5 PITG_08136   |
| 0 | 80  | 32 PITG_07715  |
| 0 | 125 | 11 PITG_04594  |
| 0 | 35  | 2 PITG_06040   |
| 0 | 0   | 0 PITG_10912   |
| 0 | 8   | 6 PITG_06608   |

|    |     |                |
|----|-----|----------------|
| 0  | 53  | 2 PITG_09834   |
| 0  | 2   | 75 PITG_02921  |
| 0  | 0   | 0 PITG_05170   |
| 0  | 28  | 13 PITG_09962  |
| 0  | 5   | 6 PITG_10250   |
| 2  | 114 | 1143 NA        |
| 0  | 76  | 11 PITG_09341  |
| 0  | 0   | 2 PITG_07062   |
| 0  | 0   | 4 NA           |
| 0  | 4   | 0 PITG_13096   |
| 0  | 46  | 9 NA           |
| 0  | 8   | 4 NA           |
| 0  | 108 | 57 PITG_03471  |
| 0  | 2   | 0 NA           |
| 0  | 13  | 2 NA           |
| 0  | 21  | 16 PITG_12797  |
| 0  | 7   | 0 NA           |
| 0  | 34  | 8 PITG_17933   |
| 0  | 20  | 6 PITG_04892   |
| 0  | 0   | 0 PITG_05485   |
| 0  | 37  | 0 NA           |
| 0  | 0   | 2 PITG_02694   |
| 0  | 10  | 0 PITG_17944   |
| 35 | 2   | 90 NA          |
| 0  | 4   | 10 PITG_16318  |
| 0  | 55  | 123 PITG_06969 |
| 0  | 19  | 0 PITG_00226   |
| 0  | 6   | 5 PITG_01559   |
| 0  | 10  | 13 PITG_02098  |
| 0  | 20  | 0 NA           |
| 0  | 80  | 0 PITG_12494   |
| 0  | 20  | 9 PITG_02261   |
| 0  | 5   | 0 PITG_09309   |
| 0  | 13  | 2 PITG_15022   |
| 0  | 0   | 27 PITG_03042  |
| 0  | 16  | 74 PITG_14179  |
| 0  | 90  | 128 PITG_03575 |
| 0  | 8   | 13 PITG_16456  |
| 0  | 4   | 0 NA           |
| 0  | 747 | 959 PITG_04121 |
| 39 | 9   | 6 NA           |
| 0  | 0   | 4 PITG_15951   |
| 0  | 0   | 4 PITG_04658   |
| 0  | 4   | 11 PITG_04579  |
| 0  | 4   | 0 PITG_10457   |
| 0  | 15  | 2 NA           |
| 0  | 6   | 14 PITG_05128  |

|   |     |                |
|---|-----|----------------|
| 0 | 50  | 28 PITG_09521  |
| 0 | 23  | 11 NA          |
| 0 | 307 | 108 PITG_03585 |
| 0 | 16  | 12 PITG_19065  |
| 0 | 3   | 0 NA           |
| 0 | 0   | 8 PITG_15569   |
| 0 | 70  | 104 PITG_05733 |
| 0 | 4   | 0 PITG_05413   |
| 0 | 10  | 19 PITG_00020  |
| 0 | 8   | 4 PITG_20823   |
| 0 | 0   | 0 PITG_16956   |
| 0 | 12  | 18 PITG_16834  |
| 2 | 176 | 487 PITG_15069 |
| 0 | 5   | 5 PITG_10117   |
| 0 | 23  | 0 PITG_15154   |
| 0 | 15  | 0 PITG_10293   |
| 2 | 37  | 73 PITG_21886  |
| 0 | 0   | 0 PITG_15060   |
| 0 | 225 | 27 NA          |
| 0 | 0   | 5 PITG_08305   |
| 0 | 2   | 4 PITG_09855   |
| 0 | 38  | 23 PITG_13367  |
| 0 | 2   | 4 PITG_19153   |
| 0 | 4   | 22 PITG_16365  |
| 0 | 0   | 2 PITG_14460   |
| 0 | 0   | 2 PITG_03112   |
| 0 | 2   | 0 PITG_18786   |
| 0 | 7   | 4 PITG_07110   |
| 0 | 6   | 7 PITG_06171   |
| 0 | 3   | 2 PITG_12162   |
| 0 | 117 | 0 PITG_11434   |
| 0 | 0   | 0 PITG_13135   |
| 0 | 34  | 11 PITG_22552  |
| 0 | 31  | 0 PITG_23170   |
| 0 | 8   | 0 PITG_06934   |
| 0 | 6   | 16 PITG_03278  |
| 0 | 20  | 13 PITG_01782  |
| 0 | 8   | 9 NA           |
| 0 | 14  | 18 PITG_22163  |
| 0 | 0   | 0 PITG_16684   |
| 0 | 26  | 9 PITG_21557   |
| 0 | 2   | 0 NA           |
| 0 | 8   | 15 PITG_16076  |
| 0 | 15  | 38 NA          |
| 0 | 21  | 18 PITG_03923  |
| 0 | 79  | 4 PITG_00516   |
| 0 | 22  | 58 PITG_08454  |

|   |     |               |
|---|-----|---------------|
| 0 | 0   | 0 PITG_10743  |
| 0 | 8   | 12 PITG_15195 |
| 0 | 60  | 15 PITG_09876 |
| 0 | 4   | 2 NA          |
| 0 | 9   | 2 NA          |
| 0 | 0   | 0 PITG_16023  |
| 0 | 5   | 0 NA          |
| 0 | 0   | 0 NA          |
| 0 | 6   | 2 PITG_06903  |
| 0 | 10  | 0 PITG_10082  |
| 0 | 5   | 6 PITG_03031  |
| 0 | 4   | 2 PITG_19402  |
| 0 | 2   | 0 PITG_03018  |
| 0 | 18  | 4 PITG_19878  |
| 0 | 0   | 7 PITG_16098  |
| 0 | 0   | 3 PITG_11197  |
| 0 | 0   | 3 PITG_16984  |
| 0 | 7   | 2 PITG_17076  |
| 0 | 9   | 0 NA          |
| 0 | 66  | 23 PITG_08425 |
| 0 | 2   | 19 PITG_02887 |
| 0 | 3   | 33 PITG_15955 |
| 0 | 2   | 10 PITG_17329 |
| 0 | 2   | 7 NA          |
| 0 | 10  | 0 NA          |
| 0 | 0   | 0 NA          |
| 0 | 14  | 4 NA          |
| 0 | 4   | 7 PITG_12675  |
| 0 | 17  | 0 PITG_15310  |
| 0 | 6   | 34 PITG_02740 |
| 0 | 88  | 61 PITG_06558 |
| 0 | 0   | 14 PITG_19350 |
| 0 | 78  | 31 NA         |
| 0 | 124 | 0 PITG_20608  |
| 0 | 2   | 3 PITG_00694  |
| 0 | 6   | 6 NA          |
| 0 | 2   | 2 PITG_06913  |
| 0 | 40  | 0 PITG_07336  |
| 0 | 0   | 13 NA         |
| 0 | 2   | 44 PITG_08425 |
| 0 | 21  | 0 PITG_17831  |
| 0 | 8   | 4 NA          |
| 0 | 63  | 0 NA          |
| 0 | 11  | 13 NA         |
| 0 | 20  | 24 PITG_14533 |
| 0 | 11  | 8 PITG_00989  |
| 0 | 46  | 4 PITG_10864  |

|     |     |                |
|-----|-----|----------------|
| 0   | 2   | 0 PITG_12548   |
| 0   | 14  | 0 PITG_21013   |
| 0   | 11  | 24 NA          |
| 0   | 26  | 10 PITG_03338  |
| 0   | 7   | 0 PITG_02467   |
| 0   | 45  | 12 NA          |
| 0   | 2   | 2 NA           |
| 0   | 6   | 4 NA           |
| 0   | 0   | 0 NA           |
| 0   | 27  | 16 NA          |
| 0   | 323 | 938 PITG_23187 |
| 0   | 22  | 38 PITG_21602  |
| 0   | 39  | 2 NA           |
| 0   | 33  | 32 PITG_12113  |
| 0   | 2   | 0 NA           |
| 0   | 2   | 6 PITG_17036   |
| 0   | 96  | 109 PITG_02002 |
| 0   | 18  | 0 PITG_02097   |
| 0   | 2   | 0 NA           |
| 0   | 9   | 0 NA           |
| 0   | 0   | 0 PITG_10764   |
| 0   | 21  | 18 PITG_03478  |
| 0   | 46  | 21 PITG_19153  |
| 0   | 0   | 0 NA           |
| 0   | 37  | 27 PITG_17058  |
| 0   | 0   | 0 PITG_10648   |
| 0   | 2   | 5 PITG_05100   |
| 0   | 2   | 4 PITG_18894   |
| 0   | 2   | 2 PITG_13631   |
| 0   | 0   | 8 NA           |
| 0   | 4   | 0 PITG_03934   |
| 0   | 3   | 7 NA           |
| 0   | 5   | 0 NA           |
| 0   | 46  | 10 PITG_00124  |
| 0   | 3   | 8 PITG_01101   |
| 0   | 20  | 0 NA           |
| 0   | 43  | 0 PITG_14616   |
| 0   | 14  | 5 PITG_09536   |
| 0   | 0   | 0 NA           |
| 0   | 0   | 0 PITG_21595   |
| 0   | 66  | 18 PITG_02001  |
| 0   | 0   | 0 NA           |
| 0   | 10  | 22 PITG_03571  |
| 155 | 5   | 263 NA         |
| 0   | 21  | 73 PITG_04663  |
| 0   | 18  | 13 PITG_07447  |
| 0   | 13  | 2 PITG_03842   |



|   |    |               |
|---|----|---------------|
| 0 | 4  | 0 PITG_00410  |
| 0 | 0  | 0 PITG_02199  |
| 0 | 10 | 6 PITG_03468  |
| 0 | 2  | 0 PITG_02221  |
| 0 | 3  | 8 PITG_12838  |
| 0 | 5  | 0 NA          |
| 0 | 4  | 0 PITG_09638  |
| 0 | 11 | 32 NA         |
| 0 | 2  | 6 PITG_09992  |
| 0 | 19 | 14 PITG_05450 |
| 0 | 10 | 16 PITG_08032 |
| 0 | 0  | 0 PITG_10932  |
| 0 | 49 | 6 PITG_20609  |
| 0 | 5  | 2 PITG_02292  |
| 0 | 35 | 28 PITG_07033 |
| 0 | 2  | 6 PITG_20208  |
| 0 | 20 | 24 PITG_13404 |
| 0 | 12 | 9 PITG_02728  |
| 0 | 18 | 8 PITG_05479  |
| 0 | 42 | 14 PITG_11170 |
| 0 | 0  | 0 PITG_18094  |
| 0 | 4  | 19 PITG_12470 |
| 0 | 35 | 28 PITG_00071 |
| 0 | 57 | 49 PITG_19472 |
| 0 | 0  | 2 PITG_05583  |
| 0 | 8  | 15 NA         |
| 0 | 7  | 6 NA          |
| 0 | 28 | 46 PITG_03471 |
| 0 | 5  | 2 PITG_02082  |
| 0 | 26 | 0 PITG_02264  |
| 0 | 25 | 15 PITG_19044 |
| 0 | 24 | 5 PITG_16058  |
| 0 | 2  | 0 NA          |
| 0 | 2  | 0 NA          |
| 0 | 11 | 6 NA          |
| 0 | 2  | 0 NA          |
| 0 | 28 | 24 PITG_03180 |
| 0 | 14 | 51 PITG_07286 |
| 0 | 6  | 0 PITG_05248  |
| 0 | 72 | 28 PITG_17601 |
| 0 | 7  | 0 PITG_10308  |
| 0 | 12 | 16 PITG_03883 |
| 0 | 13 | 6 PITG_01981  |
| 0 | 23 | 24 PITG_17993 |
| 0 | 0  | 5 PITG_16365  |
| 0 | 0  | 0 PITG_13661  |
| 0 | 0  | 0 PITG_18171  |

|   |     |                |
|---|-----|----------------|
| 0 | 75  | 105 PITG_00263 |
| 0 | 13  | 2 PITG_01840   |
| 0 | 10  | 0 PITG_09426   |
| 0 | 51  | 430 PITG_22951 |
| 0 | 115 | 27 PITG_06735  |
| 0 | 55  | 69 PITG_10968  |
| 0 | 2   | 2 PITG_19177   |
| 0 | 2   | 0 PITG_15864   |
| 0 | 3   | 4 PITG_12840   |
| 0 | 2   | 0 PITG_00809   |
| 0 | 4   | 2 PITG_04941   |
| 0 | 2   | 8 PITG_22486   |
| 0 | 2   | 0 PITG_17108   |
| 0 | 23  | 18 NA          |
| 0 | 61  | 31 PITG_11888  |
| 0 | 4   | 2 PITG_09008   |
| 0 | 6   | 7 PITG_06913   |
| 0 | 74  | 14 NA          |
| 0 | 0   | 0 PITG_00983   |
| 0 | 39  | 6 PITG_03163   |
| 0 | 2   | 4 PITG_09790   |
| 0 | 11  | 12 PITG_12192  |
| 0 | 2   | 10 PITG_02286  |
| 0 | 16  | 8 PITG_04701   |
| 0 | 8   | 16 PITG_03225  |
| 0 | 36  | 24 PITG_06554  |
| 0 | 2   | 8 PITG_01405   |
| 0 | 0   | 0 PITG_23191   |
| 0 | 21  | 39 PITG_00748  |
| 0 | 28  | 116 PITG_19281 |
| 0 | 8   | 2 PITG_03967   |
| 0 | 111 | 0 PITG_06948   |
| 0 | 9   | 7 PITG_18175   |
| 0 | 0   | 0 NA           |
| 0 | 0   | 0 NA           |
| 0 | 0   | 2 NA           |
| 0 | 2   | 2 PITG_21176   |
| 0 | 7   | 6 PITG_03451   |
| 0 | 847 | 409 PITG_04281 |
| 0 | 2   | 44 PITG_21398  |
| 0 | 24  | 4 PITG_01768   |
| 0 | 38  | 100 PITG_08252 |
| 0 | 0   | 4 PITG_00940   |
| 0 | 6   | 2 PITG_21398   |
| 0 | 22  | 27 PITG_02827  |
| 0 | 19  | 9 PITG_03240   |
| 0 | 12  | 6 PITG_12891   |

|   |    |               |
|---|----|---------------|
| 0 | 10 | 0 PITG_07072  |
| 0 | 11 | 7 PITG_22715  |
| 0 | 8  | 11 PITG_02561 |
| 0 | 0  | 0 PITG_18959  |
| 0 | 13 | 4 PITG_06390  |
| 0 | 0  | 0 PITG_02792  |
| 0 | 6  | 2 NA          |
| 0 | 0  | 2 NA          |
| 0 | 0  | 2 PITG_01920  |
| 0 | 0  | 0 NA          |
| 0 | 7  | 3 PITG_15649  |
| 0 | 50 | 0 PITG_06456  |
| 0 | 6  | 0 NA          |
| 0 | 11 | 4 PITG_13558  |
| 0 | 4  | 0 PITG_08981  |
| 0 | 4  | 0 NA          |
| 0 | 2  | 2 PITG_02945  |
| 0 | 11 | 21 PITG_11998 |
| 0 | 31 | 19 PITG_06240 |
| 0 | 2  | 2 PITG_00310  |
| 0 | 30 | 2 PITG_08589  |
| 0 | 98 | 7 NA          |
| 0 | 38 | 20 NA         |
| 0 | 2  | 12 PITG_13399 |
| 0 | 8  | 4 NA          |
| 0 | 12 | 0 PITG_19473  |
| 0 | 15 | 5 PITG_13223  |
| 0 | 67 | 7 PITG_02040  |
| 0 | 17 | 10 PITG_03621 |
| 0 | 12 | 4 PITG_03486  |
| 0 | 0  | 3 PITG_14832  |
| 0 | 0  | 9 PITG_14975  |
| 0 | 6  | 2 PITG_00231  |
| 0 | 10 | 11 PITG_15075 |
| 0 | 15 | 0 PITG_12728  |
| 0 | 52 | 44 PITG_03275 |
| 0 | 10 | 9 NA          |
| 0 | 49 | 2 NA          |
| 0 | 88 | 34 PITG_12469 |
| 0 | 20 | 38 PITG_13423 |
| 0 | 2  | 6 PITG_16214  |
| 0 | 30 | 9 PITG_15874  |
| 0 | 0  | 0 PITG_12342  |
| 0 | 7  | 22 PITG_10986 |
| 0 | 23 | 62 PITG_01123 |
| 0 | 3  | 3 PITG_08023  |
| 0 | 15 | 27 PITG_11875 |

|     |     |                |
|-----|-----|----------------|
| 0   | 59  | 36 PITG_13245  |
| 0   | 0   | 0 PITG_02127   |
| 0   | 15  | 2 NA           |
| 0   | 42  | 12 PITG_02506  |
| 0   | 49  | 76 PITG_02793  |
| 0   | 0   | 0 NA           |
| 0   | 6   | 6 NA           |
| 0   | 0   | 0 PITG_07201   |
| 0   | 9   | 3 NA           |
| 0   | 2   | 13 PITG_14485  |
| 0   | 35  | 0 PITG_03695   |
| 0   | 33  | 33 NA          |
| 57  | 7   | 115 NA         |
| 0   | 0   | 0 PITG_18867   |
| 0   | 0   | 0 PITG_01076   |
| 0   | 4   | 6 PITG_09425   |
| 0   | 39  | 37 PITG_14564  |
| 0   | 5   | 3 PITG_19607   |
| 0   | 70  | 17 PITG_13273  |
| 0   | 0   | 10 PITG_15391  |
| 0   | 35  | 0 NA           |
| 0   | 92  | 55 PITG_03737  |
| 0   | 2   | 2 NA           |
| 0   | 4   | 0 PITG_18380   |
| 22  | 186 | 3470 NA        |
| 0   | 3   | 4 PITG_02017   |
| 0   | 0   | 6 PITG_12843   |
| 0   | 6   | 2 PITG_16903   |
| 0   | 2   | 2 NA           |
| 0   | 5   | 35 PITG_07655  |
| 0   | 12  | 8 PITG_10265   |
| 0   | 10  | 7 PITG_13314   |
| 119 | 30  | 264 NA         |
| 0   | 70  | 41 PITG_07868  |
| 0   | 31  | 2 NA           |
| 0   | 2   | 0 PITG_06570   |
| 0   | 54  | 0 PITG_15869   |
| 0   | 13  | 16 PITG_12503  |
| 0   | 21  | 4 NA           |
| 0   | 9   | 9 PITG_03778   |
| 0   | 2   | 0 PITG_02559   |
| 0   | 22  | 0 PITG_08536   |
| 0   | 2   | 0 PITG_08301   |
| 0   | 10  | 132 PITG_06863 |
| 0   | 0   | 0 PITG_20289   |
| 0   | 6   | 2 PITG_12048   |
| 0   | 6   | 0 NA           |

|      |     |                |
|------|-----|----------------|
| 0    | 41  | 28 PITG_02205  |
| 0    | 34  | 21 PITG_20518  |
| 0    | 3   | 9 PITG_01207   |
| 0    | 9   | 20 PITG_13644  |
| 0    | 43  | 28 PITG_12153  |
| 0    | 2   | 0 NA           |
| 0    | 0   | 0 PITG_15970   |
| 0    | 33  | 9 PITG_06282   |
| 0    | 45  | 7 PITG_14397   |
| 0    | 11  | 602 PITG_12139 |
| 0    | 2   | 2 PITG_07865   |
| 0    | 4   | 2 PITG_01563   |
| 0    | 6   | 19 PITG_13016  |
| 0    | 4   | 0 NA           |
| 0    | 0   | 0 PITG_21114   |
| 0    | 46  | 8 PITG_11300   |
| 0    | 4   | 0 NA           |
| 0    | 2   | 11 PITG_13971  |
| 0    | 0   | 11 PITG_00571  |
| 0    | 0   | 6 PITG_05395   |
| 0    | 57  | 52 PITG_08594  |
| 0    | 8   | 9 PITG_11155   |
| 0    | 0   | 0 PITG_13579   |
| 0    | 4   | 2 PITG_05304   |
| 0    | 11  | 8 PITG_17736   |
| 0    | 0   | 0 PITG_07707   |
| 0    | 49  | 29 PITG_04558  |
| 0    | 10  | 18 PITG_12343  |
| 0    | 7   | 2 NA           |
| 0    | 91  | 7 NA           |
| 0    | 2   | 5 PITG_21316   |
| 0    | 5   | 0 PITG_22277   |
| 0    | 3   | 3 NA           |
| 0    | 0   | 0 NA           |
| 0    | 6   | 0 NA           |
| 0    | 0   | 7 PITG_17049   |
| 0    | 22  | 4 PITG_08396   |
| 0    | 52  | 46 PITG_03342  |
| 0    | 13  | 0 PITG_10420   |
| 0    | 0   | 8 PITG_00979   |
| 0    | 14  | 0 PITG_21523   |
| 0    | 5   | 7 NA           |
| 0    | 158 | 61 NA          |
| 0    | 4   | 12 PITG_13558  |
| 0    | 4   | 2 NA           |
| 1907 | 27  | 848 NA         |
| 0    | 19  | 8 NA           |

|   |     |                |
|---|-----|----------------|
| 0 | 42  | 15 PITG_07914  |
| 0 | 68  | 21 PITG_01245  |
| 0 | 21  | 2 PITG_05278   |
| 0 | 5   | 2 PITG_07301   |
| 0 | 0   | 2 PITG_03489   |
| 0 | 0   | 0 NA           |
| 0 | 6   | 10 PITG_16207  |
| 0 | 61  | 106 PITG_01502 |
| 0 | 10  | 0 NA           |
| 0 | 2   | 0 PITG_17360   |
| 0 | 103 | 10 PITG_10127  |
| 0 | 29  | 4 NA           |
| 0 | 19  | 15 PITG_13415  |
| 0 | 5   | 34 PITG_01125  |
| 0 | 31  | 28 PITG_01365  |
| 0 | 15  | 11 PITG_05560  |
| 0 | 0   | 2 PITG_14944   |
| 0 | 153 | 59 PITG_02572  |
| 0 | 22  | 56 PITG_18248  |
| 0 | 0   | 0 PITG_03311   |
| 0 | 0   | 0 PITG_04568   |
| 0 | 0   | 4 PITG_09072   |
| 0 | 8   | 4 PITG_07703   |
| 0 | 9   | 5 PITG_17107   |
| 0 | 3   | 0 PITG_02497   |
| 0 | 6   | 2 PITG_06861   |
| 0 | 12  | 6 NA           |
| 0 | 11  | 28 NA          |
| 0 | 33  | 13 PITG_16001  |
| 0 | 12  | 26 PITG_16339  |
| 0 | 2   | 7 PITG_14441   |
| 0 | 3   | 0 PITG_05781   |
| 0 | 0   | 0 NA           |
| 0 | 18  | 0 NA           |
| 0 | 181 | 30 PITG_13911  |
| 0 | 15  | 3 PITG_11108   |
| 0 | 0   | 2 NA           |
| 0 | 110 | 8 PITG_00525   |
| 0 | 3   | 0 NA           |
| 0 | 2   | 2 PITG_18393   |
| 0 | 33  | 58 PITG_10132  |
| 0 | 9   | 2 PITG_12356   |
| 0 | 5   | 4 PITG_05187   |
| 0 | 17  | 26 PITG_03095  |
| 0 | 33  | 28 PITG_03901  |
| 0 | 0   | 4 PITG_00287   |
| 0 | 69  | 2 NA           |

|    |     |                |
|----|-----|----------------|
| 0  | 4   | 0 PITG_07241   |
| 0  | 17  | 7 PITG_19766   |
| 0  | 20  | 6 NA           |
| 0  | 32  | 2 PITG_20893   |
| 0  | 4   | 0 PITG_05731   |
| 0  | 10  | 2 PITG_03899   |
| 0  | 20  | 14 PITG_06240  |
| 0  | 32  | 78 PITG_00682  |
| 0  | 4   | 4 PITG_02842   |
| 0  | 110 | 27 PITG_14898  |
| 0  | 15  | 10 PITG_03553  |
| 0  | 6   | 22 PITG_11799  |
| 0  | 0   | 2 PITG_11131   |
| 0  | 425 | 233 PITG_03149 |
| 0  | 2   | 0 NA           |
| 0  | 0   | 0 PITG_15509   |
| 0  | 7   | 2 PITG_16976   |
| 0  | 10  | 0 NA           |
| 0  | 4   | 0 PITG_23286   |
| 0  | 4   | 0 PITG_15961   |
| 0  | 4   | 4 PITG_00412   |
| 0  | 2   | 9 PITG_21023   |
| 0  | 17  | 7 PITG_19203   |
| 0  | 2   | 4 PITG_15564   |
| 0  | 21  | 2 PITG_14577   |
| 0  | 0   | 0 NA           |
| 0  | 2   | 19 NA          |
| 0  | 107 | 27 PITG_10674  |
| 60 | 23  | 19 NA          |
| 0  | 4   | 10 NA          |
| 0  | 40  | 30 NA          |
| 0  | 9   | 2 PITG_19458   |
| 0  | 8   | 29 PITG_10007  |
| 0  | 0   | 0 NA           |
| 0  | 30  | 5 PITG_07925   |
| 0  | 7   | 2 PITG_06907   |
| 0  | 3   | 0 NA           |
| 0  | 0   | 0 PITG_17587   |
| 0  | 5   | 10 PITG_00714  |
| 0  | 0   | 0 NA           |
| 0  | 10  | 0 PITG_07100   |
| 0  | 158 | 96 NA          |
| 0  | 41  | 28 PITG_12307  |
| 0  | 0   | 6 PITG_08690   |
| 0  | 3   | 0 PITG_00818   |
| 0  | 0   | 6 PITG_10724   |
| 0  | 21  | 2 NA           |

|   |     |                |
|---|-----|----------------|
| 0 | 8   | 2 PITG_05376   |
| 0 | 0   | 2 PITG_09785   |
| 0 | 71  | 17 NA          |
| 0 | 4   | 0 NA           |
| 0 | 2   | 0 PITG_05729   |
| 0 | 39  | 12 PITG_13015  |
| 0 | 51  | 11 NA          |
| 0 | 5   | 29 NA          |
| 0 | 6   | 12 PITG_09792  |
| 0 | 0   | 2 PITG_14580   |
| 0 | 2   | 4 PITG_09956   |
| 0 | 24  | 2 NA           |
| 0 | 6   | 3 PITG_14635   |
| 0 | 0   | 0 PITG_02725   |
| 0 | 22  | 27 PITG_10068  |
| 0 | 7   | 8 PITG_06982   |
| 0 | 4   | 6 PITG_13486   |
| 0 | 2   | 0 PITG_01045   |
| 0 | 2   | 6 PITG_02720   |
| 0 | 0   | 3 PITG_16472   |
| 0 | 8   | 16 PITG_08809  |
| 0 | 4   | 4 PITG_09477   |
| 0 | 3   | 36 PITG_19886  |
| 0 | 9   | 11 NA          |
| 0 | 0   | 0 NA           |
| 0 | 59  | 15 NA          |
| 0 | 26  | 12 NA          |
| 0 | 113 | 101 PITG_10806 |
| 0 | 39  | 28 NA          |
| 0 | 5   | 4 PITG_17021   |
| 0 | 7   | 0 PITG_05909   |
| 0 | 10  | 7 NA           |
| 0 | 2   | 8 PITG_18452   |
| 0 | 5   | 2 NA           |
| 0 | 0   | 6 PITG_07292   |
| 0 | 5   | 10 PITG_02790  |
| 0 | 18  | 2 PITG_16826   |
| 0 | 0   | 2 NA           |
| 0 | 0   | 0 PITG_03456   |
| 0 | 7   | 2 PITG_13803   |
| 0 | 68  | 33 NA          |
| 0 | 8   | 4 NA           |
| 0 | 0   | 0 PITG_13270   |
| 0 | 38  | 40 PITG_02740  |
| 0 | 3   | 0 PITG_17557   |
| 0 | 12  | 2 PITG_12453   |
| 0 | 0   | 5 PITG_05512   |



|    |     |                |
|----|-----|----------------|
| 0  | 0   | 10 PITG_11569  |
| 0  | 0   | 0 NA           |
| 16 | 4   | 46 NA          |
| 0  | 105 | 63 NA          |
| 0  | 7   | 3 NA           |
| 0  | 2   | 18 PITG_03043  |
| 0  | 0   | 0 NA           |
| 0  | 0   | 6 PITG_11403   |
| 0  | 4   | 2 NA           |
| 0  | 21  | 54 PITG_10345  |
| 0  | 66  | 126 NA         |
| 0  | 8   | 8 PITG_00839   |
| 0  | 107 | 131 PITG_14584 |
| 0  | 5   | 0 PITG_07411   |
| 0  | 0   | 0 NA           |
| 0  | 0   | 0 PITG_08103   |
| 0  | 4   | 6 PITG_03740   |
| 0  | 20  | 16 PITG_03837  |
| 0  | 4   | 11 PITG_00990  |
| 0  | 0   | 0 PITG_03265   |
| 0  | 8   | 7 PITG_17897   |
| 0  | 63  | 206 PITG_03098 |
| 0  | 2   | 0 PITG_05126   |
| 0  | 20  | 0 NA           |
| 0  | 0   | 0 NA           |
| 0  | 4   | 11 PITG_15267  |
| 0  | 4   | 4 PITG_11895   |
| 0  | 12  | 2 PITG_15666   |
| 0  | 13  | 7 PITG_18677   |
| 0  | 53  | 14 NA          |
| 0  | 6   | 2 PITG_07118   |
| 0  | 99  | 10 NA          |
| 0  | 23  | 40 PITG_02329  |
| 0  | 16  | 9 PITG_05817   |
| 0  | 30  | 17 PITG_17611  |
| 0  | 0   | 0 PITG_14163   |
| 0  | 3   | 2 PITG_04105   |
| 0  | 10  | 4 PITG_15967   |
| 0  | 0   | 2 PITG_02328   |
| 47 | 157 | 80 NA          |
| 0  | 16  | 41 NA          |
| 0  | 6   | 0 PITG_02268   |
| 0  | 2   | 0 PITG_18174   |
| 0  | 23  | 57 PITG_08154  |
| 0  | 17  | 4 PITG_11295   |
| 0  | 7   | 2 PITG_13848   |
| 0  | 0   | 0 PITG_01430   |

|   |      |                |
|---|------|----------------|
| 0 | 15   | 0 PITG_06452   |
| 0 | 7    | 20 PITG_00147  |
| 0 | 51   | 45 NA          |
| 0 | 27   | 13 PITG_13300  |
| 0 | 17   | 11 PITG_23066  |
| 0 | 0    | 2 NA           |
| 0 | 20   | 30 PITG_12151  |
| 0 | 2    | 25 PITG_22839  |
| 0 | 2    | 23 PITG_08001  |
| 0 | 2    | 0 PITG_08804   |
| 0 | 12   | 6 PITG_05634   |
| 0 | 0    | 0 PITG_08305   |
| 0 | 7    | 0 PITG_01438   |
| 0 | 82   | 35 PITG_18246  |
| 0 | 0    | 0 NA           |
| 0 | 2    | 0 PITG_03445   |
| 0 | 20   | 12 PITG_01073  |
| 0 | 0    | 5 PITG_10995   |
| 0 | 1242 | 110 PITG_04317 |
| 0 | 2    | 9 PITG_16468   |
| 0 | 2    | 2 PITG_08229   |
| 0 | 27   | 124 PITG_06970 |
| 0 | 8    | 2 PITG_07795   |
| 0 | 0    | 0 PITG_04003   |
| 0 | 14   | 25 PITG_03335  |
| 0 | 7    | 2 PITG_22159   |
| 0 | 40   | 23 PITG_06794  |
| 0 | 43   | 17 PITG_09680  |
| 0 | 21   | 9 NA           |
| 0 | 11   | 5 PITG_08473   |
| 0 | 0    | 0 PITG_08137   |
| 0 | 0    | 0 NA           |
| 0 | 4    | 8 PITG_13853   |
| 0 | 2    | 0 PITG_18687   |
| 0 | 7    | 3 PITG_17404   |
| 0 | 2    | 0 PITG_21018   |
| 0 | 0    | 0 PITG_01815   |
| 0 | 0    | 5 PITG_00110   |
| 0 | 0    | 5 PITG_03987   |
| 0 | 0    | 11 PITG_12949  |
| 0 | 9    | 7 PITG_21579   |
| 0 | 0    | 2 PITG_06943   |
| 0 | 0    | 0 PITG_00894   |
| 0 | 0    | 0 PITG_01395   |
| 0 | 72   | 6 PITG_04881   |
| 0 | 2    | 0 NA           |
| 0 | 4    | 4 PITG_12100   |

|     |      |                 |
|-----|------|-----------------|
| 0   | 67   | 41 PITG_03294   |
| 0   | 0    | 26 PITG_13861   |
| 0   | 2    | 0 PITG_06861    |
| 0   | 0    | 8 PITG_02628    |
| 0   | 2    | 13 PITG_02531   |
| 0   | 0    | 0 PITG_13376    |
| 0   | 5    | 4 PITG_00567    |
| 0   | 2    | 0 PITG_10891    |
| 0   | 492  | 682 PITG_08812  |
| 0   | 344  | 213 PITG_08812  |
| 0   | 9    | 2 PITG_01480    |
| 0   | 0    | 0 NA            |
| 0   | 2    | 2 NA            |
| 0   | 7    | 4 PITG_03610    |
| 0   | 24   | 16 PITG_10830   |
| 0   | 2    | 0 PITG_10399    |
| 0   | 1977 | 1037 PITG_08897 |
| 0   | 2    | 0 PITG_12439    |
| 0   | 20   | 19 PITG_15623   |
| 0   | 19   | 4 PITG_06144    |
| 0   | 0    | 0 NA            |
| 0   | 17   | 4 PITG_02050    |
| 0   | 2    | 2 NA            |
| 0   | 4    | 0 NA            |
| 0   | 13   | 4 PITG_18279    |
| 0   | 2    | 0 PITG_10087    |
| 0   | 2    | 4 PITG_09092    |
| 0   | 2    | 2 NA            |
| 0   | 4    | 4 NA            |
| 0   | 2    | 0 PITG_03804    |
| 0   | 4    | 9 PITG_04638    |
| 0   | 5    | 10 PITG_09413   |
| 0   | 140  | 127 PITG_00218  |
| 0   | 1108 | 749 PITG_00123  |
| 0   | 0    | 2 PITG_07141    |
| 0   | 2    | 4 PITG_11540    |
| 0   | 18   | 0 PITG_01053    |
| 0   | 3    | 2 PITG_13235    |
| 0   | 21   | 5 PITG_09082    |
| 0   | 3    | 2 PITG_09930    |
| 0   | 4    | 0 NA            |
| 0   | 154  | 64 PITG_18366   |
| 279 | 41   | 378 NA          |
| 0   | 28   | 2 NA            |
| 0   | 0    | 2 PITG_14001    |
| 0   | 0    | 0 NA            |
| 0   | 0    | 0 PITG_08504    |

|     |    |               |
|-----|----|---------------|
| 0   | 7  | 41 PITG_15705 |
| 0   | 2  | 3 PITG_06978  |
| 0   | 0  | 0 NA          |
| 0   | 3  | 2 PITG_08211  |
| 0   | 6  | 7 NA          |
| 0   | 2  | 11 PITG_03831 |
| 0   | 42 | 14 PITG_13321 |
| 0   | 29 | 12 NA         |
| 0   | 0  | 3 PITG_13827  |
| 0   | 14 | 14 PITG_01715 |
| 0   | 0  | 2 PITG_05170  |
| 0   | 4  | 0 PITG_18416  |
| 0   | 2  | 10 PITG_03453 |
| 0   | 13 | 11 PITG_12295 |
| 0   | 0  | 0 PITG_01076  |
| 0   | 0  | 0 PITG_10092  |
| 0   | 17 | 16 PITG_02134 |
| 0   | 2  | 0 PITG_05412  |
| 0   | 47 | 4 NA          |
| 0   | 35 | 10 PITG_01589 |
| 0   | 12 | 68 PITG_02115 |
| 0   | 2  | 10 PITG_12948 |
| 0   | 11 | 10 PITG_01750 |
| 0   | 0  | 0 NA          |
| 0   | 0  | 0 PITG_01846  |
| 0   | 2  | 0 PITG_10834  |
| 0   | 12 | 8 PITG_10334  |
| 0   | 6  | 0 PITG_13819  |
| 0   | 18 | 12 PITG_15926 |
| 0   | 11 | 4 NA          |
| 0   | 36 | 5 PITG_02866  |
| 0   | 47 | 0 PITG_01678  |
| 0   | 5  | 6 NA          |
| 0   | 11 | 0 PITG_00138  |
| 0   | 11 | 16 PITG_04725 |
| 351 | 0  | 13 NA         |
| 0   | 21 | 8 NA          |
| 0   | 37 | 11 PITG_18243 |
| 0   | 2  | 23 NA         |
| 0   | 14 | 4 PITG_01452  |
| 0   | 9  | 10 PITG_02122 |
| 0   | 0  | 5 PITG_12478  |
| 0   | 0  | 2 PITG_11295  |
| 0   | 0  | 5 NA          |
| 0   | 0  | 2 NA          |
| 0   | 2  | 5 PITG_11451  |
| 0   | 18 | 42 PITG_00676 |

|   |     |                |
|---|-----|----------------|
| 0 | 6   | 19 PITG_08003  |
| 0 | 10  | 12 PITG_03260  |
| 0 | 0   | 2 PITG_03267   |
| 0 | 0   | 2 NA           |
| 0 | 44  | 0 NA           |
| 0 | 203 | 288 PITG_06225 |
| 0 | 14  | 2 PITG_12318   |
| 0 | 0   | 3 PITG_01340   |
| 0 | 11  | 0 PITG_21887   |
| 0 | 38  | 42 PITG_01287  |
| 0 | 56  | 0 PITG_01332   |
| 0 | 0   | 4 PITG_05511   |
| 0 | 8   | 0 NA           |
| 0 | 0   | 0 PITG_16183   |
| 0 | 11  | 0 PITG_07074   |
| 0 | 3   | 4 PITG_16456   |
| 0 | 0   | 0 NA           |
| 0 | 0   | 2 PITG_13914   |
| 0 | 39  | 0 NA           |
| 0 | 3   | 6 PITG_01961   |
| 0 | 0   | 0 PITG_03987   |
| 0 | 0   | 0 NA           |
| 0 | 0   | 12 PITG_21181  |
| 0 | 5   | 6 PITG_12753   |
| 0 | 8   | 0 PITG_12183   |
| 0 | 10  | 39 PITG_00133  |
| 0 | 0   | 8 PITG_06657   |
| 0 | 29  | 13 NA          |
| 0 | 2   | 2 NA           |
| 0 | 14  | 0 NA           |
| 0 | 23  | 12 PITG_11007  |
| 0 | 11  | 8 NA           |
| 0 | 6   | 5 PITG_17784   |
| 0 | 13  | 8 NA           |
| 0 | 9   | 41 PITG_03549  |
| 0 | 4   | 2 PITG_13579   |
| 0 | 15  | 2 NA           |
| 0 | 5   | 4 NA           |
| 0 | 3   | 2 PITG_07165   |
| 0 | 0   | 0 PITG_06656   |
| 0 | 2   | 5 PITG_08504   |
| 0 | 31  | 7 PITG_09625   |
| 0 | 28  | 2 PITG_19429   |
| 0 | 10  | 0 PITG_00025   |
| 0 | 6   | 0 NA           |
| 0 | 2   | 7 PITG_04395   |
| 0 | 0   | 0 PITG_00744   |

|   |     |               |
|---|-----|---------------|
| 0 | 22  | 7 PITG_15696  |
| 0 | 0   | 4 PITG_10624  |
| 0 | 125 | 4 PITG_21220  |
| 0 | 9   | 3 PITG_20374  |
| 0 | 0   | 2 PITG_03710  |
| 0 | 0   | 2 PITG_22541  |
| 0 | 0   | 4 PITG_09585  |
| 0 | 10  | 0 NA          |
| 0 | 9   | 14 NA         |
| 0 | 7   | 4 PITG_06755  |
| 0 | 11  | 0 PITG_22383  |
| 0 | 21  | 13 PITG_01333 |
| 0 | 4   | 0 NA          |
| 0 | 0   | 10 PITG_05111 |
| 0 | 0   | 4 PITG_08028  |
| 0 | 0   | 0 NA          |
| 0 | 20  | 12 PITG_15542 |
| 0 | 0   | 0 NA          |
| 0 | 0   | 0 PITG_13432  |
| 0 | 0   | 0 PITG_16628  |
| 0 | 47  | 0 PITG_15062  |
| 0 | 141 | 26 PITG_12277 |
| 0 | 28  | 6 PITG_09450  |
| 0 | 26  | 8 PITG_23113  |
| 0 | 42  | 8 PITG_00338  |
| 0 | 38  | 7 PITG_04845  |
| 0 | 0   | 4 PITG_13558  |
| 0 | 0   | 0 PITG_06820  |
| 0 | 0   | 2 PITG_08747  |
| 0 | 0   | 0 PITG_05194  |
| 0 | 0   | 2 PITG_12140  |
| 0 | 0   | 4 PITG_16021  |
| 0 | 0   | 24 PITG_16021 |
| 0 | 6   | 0 PITG_11407  |
| 0 | 25  | 6 NA          |
| 0 | 20  | 18 PITG_00980 |
| 0 | 4   | 0 PITG_11287  |
| 0 | 7   | 0 PITG_06755  |
| 0 | 2   | 6 PITG_09261  |
| 0 | 26  | 0 NA          |
| 0 | 2   | 41 NA         |
| 0 | 8   | 19 PITG_10815 |
| 0 | 34  | 3 PITG_15062  |
| 2 | 3   | 4 PITG_11198  |
| 0 | 2   | 0 PITG_20634  |
| 0 | 0   | 2 PITG_01607  |
| 0 | 2   | 12 PITG_09937 |

|     |     |               |
|-----|-----|---------------|
| 0   | 7   | 2 PITG_10877  |
| 0   | 8   | 2 PITG_18624  |
| 0   | 2   | 0 NA          |
| 0   | 15  | 27 PITG_17928 |
| 0   | 33  | 37 PITG_03172 |
| 0   | 0   | 0 PITG_17679  |
| 0   | 3   | 2 PITG_15883  |
| 0   | 0   | 0 PITG_09584  |
| 0   | 0   | 7 PITG_08131  |
| 6   | 2   | 5 NA          |
| 0   | 5   | 0 PITG_11765  |
| 0   | 0   | 2 NA          |
| 0   | 0   | 10 PITG_08023 |
| 0   | 26  | 21 PITG_05233 |
| 0   | 0   | 0 NA          |
| 0   | 32  | 3 NA          |
| 0   | 0   | 0 NA          |
| 0   | 4   | 0 PITG_02659  |
| 0   | 7   | 10 PITG_19901 |
| 0   | 12  | 47 PITG_21394 |
| 94  | 11  | 92 NA         |
| 0   | 12  | 2 PITG_08738  |
| 0   | 8   | 21 PITG_07727 |
| 0   | 13  | 0 PITG_14127  |
| 0   | 0   | 0 NA          |
| 263 | 10  | 222 NA        |
| 0   | 0   | 0 PITG_15602  |
| 0   | 7   | 13 PITG_12108 |
| 0   | 217 | 12 NA         |
| 0   | 0   | 0 PITG_10561  |
| 0   | 8   | 3 PITG_02780  |
| 0   | 0   | 2 NA          |
| 0   | 12  | 17 PITG_01817 |
| 0   | 45  | 51 PITG_03360 |
| 0   | 2   | 2 PITG_01053  |
| 0   | 2   | 3 PITG_07029  |
| 0   | 2   | 0 NA          |
| 0   | 2   | 2 PITG_03370  |
| 0   | 0   | 0 PITG_03927  |
| 0   | 2   | 186 NA        |
| 0   | 5   | 2 PITG_06937  |
| 21  | 6   | 7 NA          |
| 0   | 4   | 8 PITG_08587  |
| 0   | 26  | 0 NA          |
| 0   | 4   | 9 PITG_01591  |
| 0   | 4   | 4 PITG_15891  |
| 0   | 0   | 0 PITG_11229  |

|     |     |                 |
|-----|-----|-----------------|
| 0   | 4   | 2 PITG_15075    |
| 0   | 4   | 0 PITG_16200    |
| 0   | 0   | 2 PITG_11461    |
| 0   | 10  | 4 PITG_09725    |
| 0   | 47  | 105 PITG_20386  |
| 0   | 6   | 2 PITG_07063    |
| 0   | 0   | 2 PITG_16004    |
| 0   | 35  | 32 PITG_02976   |
| 0   | 4   | 0 PITG_09138    |
| 0   | 53  | 3 PITG_15916    |
| 0   | 8   | 0 PITG_15240    |
| 0   | 5   | 0 PITG_15060    |
| 0   | 0   | 0 PITG_00262    |
| 435 | 0   | 8 NA            |
| 0   | 12  | 0 PITG_08559    |
| 0   | 518 | 1836 PITG_18920 |
| 0   | 2   | 2 PITG_02203    |
| 0   | 38  | 60 PITG_18912   |
| 0   | 10  | 0 NA            |
| 0   | 37  | 6 NA            |
| 0   | 452 | 31 PITG_05956   |
| 0   | 6   | 0 NA            |
| 0   | 2   | 0 PITG_00792    |
| 0   | 3   | 2 PITG_01870    |
| 0   | 51  | 35 PITG_14593   |
| 0   | 0   | 0 PITG_18474    |
| 0   | 2   | 4 PITG_06182    |
| 0   | 15  | 15 PITG_04603   |
| 0   | 31  | 75 PITG_18731   |
| 0   | 26  | 15 PITG_12152   |
| 0   | 16  | 0 NA            |
| 0   | 32  | 8 PITG_20046    |
| 0   | 2   | 0 PITG_10935    |
| 0   | 37  | 4 PITG_08551    |
| 0   | 4   | 2 PITG_00845    |
| 0   | 0   | 0 PITG_03525    |
| 0   | 3   | 6 PITG_10449    |
| 45  | 0   | 84 NA           |
| 0   | 53  | 50 PITG_17790   |
| 0   | 16  | 4 NA            |
| 0   | 2   | 0 NA            |
| 0   | 3   | 0 PITG_01084    |
| 0   | 157 | 98 PITG_15861   |
| 0   | 3   | 0 NA            |
| 0   | 7   | 0 PITG_16272    |
| 0   | 2   | 2 PITG_15836    |
| 0   | 6   | 13 PITG_11743   |



|      |     |                |
|------|-----|----------------|
| 0    | 2   | 0 PITG_11783   |
| 0    | 11  | 0 PITG_01406   |
| 0    | 44  | 25 PITG_20110  |
| 0    | 0   | 0 NA           |
| 0    | 4   | 10 PITG_08035  |
| 0    | 12  | 2 NA           |
| 0    | 4   | 2 PITG_02588   |
| 0    | 40  | 12 PITG_10136  |
| 0    | 0   | 0 NA           |
| 0    | 2   | 7 PITG_03443   |
| 0    | 4   | 0 PITG_03988   |
| 1386 | 6   | 1027 NA        |
| 0    | 8   | 60 PITG_05301  |
| 0    | 37  | 394 PITG_22669 |
| 0    | 56  | 11 PITG_13273  |
| 0    | 68  | 38 PITG_11980  |
| 0    | 2   | 0 PITG_17863   |
| 0    | 16  | 11 PITG_04705  |
| 0    | 0   | 2 PITG_00329   |
| 0    | 6   | 0 PITG_07070   |
| 0    | 0   | 0 PITG_04887   |
| 0    | 4   | 70 PITG_08425  |
| 0    | 8   | 8 PITG_11887   |
| 0    | 0   | 42 PITG_09831  |
| 0    | 53  | 13 PITG_21887  |
| 0    | 5   | 0 NA           |
| 0    | 9   | 6 PITG_05323   |
| 0    | 31  | 0 NA           |
| 0    | 9   | 16 PITG_19313  |
| 0    | 19  | 7 PITG_07923   |
| 0    | 4   | 5 NA           |
| 0    | 11  | 48 PITG_12108  |
| 0    | 7   | 0 PITG_04664   |
| 0    | 0   | 4 PITG_14452   |
| 0    | 0   | 6 PITG_11869   |
| 0    | 39  | 24 PITG_11612  |
| 0    | 18  | 5 PITG_04419   |
| 0    | 16  | 16 PITG_03716  |
| 0    | 85  | 4 PITG_17154   |
| 225  | 224 | 1617 NA        |
| 0    | 21  | 15 NA          |
| 0    | 5   | 4 NA           |
| 0    | 18  | 15 PITG_05323  |
| 306  | 199 | 1619 NA        |
| 0    | 38  | 217 PITG_10455 |
| 0    | 78  | 13 NA          |
| 0    | 0   | 0 PITG_02050   |

|     |     |               |
|-----|-----|---------------|
| 0   | 15  | 5 NA          |
| 0   | 121 | 67 PITG_17664 |
| 0   | 40  | 0 PITG_03965  |
| 0   | 2   | 23 PITG_17287 |
| 0   | 20  | 8 PITG_15475  |
| 492 | 239 | 5598 NA       |
| 0   | 64  | 0 PITG_09874  |
| 0   | 13  | 21 PITG_14808 |
| 0   | 20  | 4 NA          |
| 0   | 25  | 4 NA          |
| 0   | 2   | 0 NA          |
| 0   | 21  | 17 PITG_14274 |
| 0   | 3   | 3 PITG_03947  |
| 0   | 85  | 25 PITG_02042 |
| 0   | 0   | 2 PITG_02552  |
| 0   | 0   | 4 PITG_12308  |
| 0   | 0   | 0 PITG_13590  |
| 0   | 23  | 16 PITG_03136 |
| 0   | 86  | 30 PITG_08059 |
| 0   | 21  | 0 PITG_10815  |
| 0   | 0   | 4 PITG_12675  |
| 0   | 2   | 0 PITG_11888  |
| 0   | 2   | 2 PITG_08926  |
| 0   | 12  | 25 PITG_11704 |
| 0   | 11  | 0 PITG_08595  |
| 0   | 12  | 4 NA          |
| 0   | 2   | 19 PITG_03472 |
| 0   | 0   | 0 PITG_12077  |
| 0   | 4   | 4 PITG_03152  |
| 0   | 12  | 16 PITG_16809 |
| 0   | 4   | 18 PITG_07882 |
| 0   | 0   | 2 PITG_17080  |
| 0   | 0   | 0 NA          |
| 0   | 2   | 2 NA          |
| 0   | 0   | 4 PITG_21759  |
| 0   | 0   | 0 PITG_01450  |
| 0   | 155 | 96 PITG_06753 |
| 0   | 0   | 0 PITG_00734  |
| 0   | 6   | 8 PITG_01848  |
| 0   | 18  | 4 PITG_06924  |
| 0   | 159 | 37 NA         |
| 0   | 25  | 4 PITG_09930  |
| 0   | 6   | 0 NA          |
| 0   | 31  | 54 PITG_03493 |
| 8   | 7   | 25 NA         |
| 0   | 4   | 0 NA          |
| 0   | 36  | 34 PITG_02793 |

|     |    |               |
|-----|----|---------------|
| 0   | 13 | 21 PITG_15637 |
| 0   | 2  | 10 PITG_03429 |
| 0   | 2  | 4 PITG_02134  |
| 0   | 30 | 12 PITG_05070 |
| 0   | 15 | 28 PITG_15243 |
| 0   | 23 | 8 PITG_13239  |
| 0   | 0  | 0 PITG_08567  |
| 0   | 12 | 0 PITG_04342  |
| 0   | 9  | 57 PITG_01171 |
| 0   | 2  | 36 PITG_14747 |
| 0   | 53 | 67 NA         |
| 0   | 2  | 6 PITG_15569  |
| 0   | 4  | 7 NA          |
| 0   | 0  | 6 NA          |
| 0   | 10 | 8 PITG_21514  |
| 0   | 29 | 163 NA        |
| 0   | 2  | 6 PITG_11926  |
| 0   | 33 | 56 PITG_14937 |
| 0   | 2  | 0 PITG_11728  |
| 0   | 2  | 14 PITG_05564 |
| 0   | 36 | 26 PITG_12914 |
| 0   | 73 | 33 PITG_07660 |
| 0   | 0  | 4 PITG_05855  |
| 0   | 4  | 2 PITG_01259  |
| 0   | 4  | 0 PITG_16058  |
| 0   | 4  | 14 PITG_16344 |
| 0   | 0  | 0 PITG_00939  |
| 0   | 2  | 2 PITG_12984  |
| 0   | 4  | 0 NA          |
| 0   | 3  | 5 PITG_13488  |
| 0   | 17 | 13 PITG_07576 |
| 0   | 9  | 12 PITG_08056 |
| 0   | 24 | 2 NA          |
| 0   | 52 | 46 PITG_13289 |
| 0   | 2  | 0 PITG_00320  |
| 0   | 2  | 10 PITG_04421 |
| 0   | 0  | 0 PITG_07118  |
| 0   | 2  | 0 PITG_00308  |
| 0   | 84 | 0 NA          |
| 0   | 19 | 0 PITG_15388  |
| 0   | 0  | 0 PITG_14462  |
| 0   | 17 | 11 NA         |
| 654 | 57 | 426 NA        |
| 10  | 0  | 119 NA        |
| 0   | 0  | 0 PITG_16770  |
| 889 | 65 | 1158 NA       |
| 0   | 32 | 10 PITG_01242 |

|   |     |                |
|---|-----|----------------|
| 0 | 50  | 0 PITG_02528   |
| 8 | 0   | 3 NA           |
| 0 | 0   | 0 NA           |
| 0 | 30  | 0 NA           |
| 0 | 140 | 9 NA           |
| 0 | 2   | 4 NA           |
| 0 | 5   | 29 PITG_03360  |
| 0 | 0   | 0 PITG_03411   |
| 0 | 5   | 8 NA           |
| 0 | 2   | 2 PITG_14579   |
| 0 | 54  | 66 PITG_22339  |
| 0 | 110 | 205 PITG_06107 |
| 0 | 7   | 6 PITG_09250   |
| 0 | 10  | 8 PITG_12213   |
| 0 | 18  | 7 NA           |
| 0 | 0   | 4 PITG_08019   |
| 0 | 4   | 12 PITG_05507  |
| 0 | 51  | 33 PITG_01992  |
| 0 | 0   | 2 PITG_18538   |
| 0 | 38  | 2 PITG_01511   |
| 0 | 5   | 4 PITG_01520   |
| 0 | 2   | 0 NA           |
| 0 | 0   | 2 NA           |
| 0 | 99  | 42 PITG_02971  |
| 0 | 11  | 0 PITG_01317   |
| 0 | 0   | 3 PITG_14703   |
| 0 | 5   | 0 NA           |
| 0 | 14  | 38 PITG_04712  |
| 0 | 2   | 2 PITG_09477   |
| 0 | 19  | 0 PITG_19024   |
| 0 | 2   | 4 NA           |
| 0 | 13  | 26 PITG_15688  |
| 0 | 16  | 12 PITG_17156  |
| 0 | 7   | 6 PITG_11612   |
| 0 | 0   | 0 PITG_08414   |
| 0 | 20  | 8 PITG_05281   |
| 0 | 4   | 2 NA           |
| 0 | 38  | 14 NA          |
| 0 | 2   | 7 PITG_04718   |
| 0 | 16  | 3 NA           |
| 0 | 8   | 19 PITG_02197  |
| 0 | 0   | 0 PITG_22057   |
| 0 | 4   | 2 PITG_08587   |
| 0 | 4   | 4 PITG_19878   |
| 0 | 70  | 18 NA          |
| 0 | 9   | 2 PITG_13850   |
| 0 | 17  | 21 PITG_13030  |

|   |     |               |
|---|-----|---------------|
| 0 | 2   | 5 PITG_03792  |
| 0 | 2   | 0 PITG_08110  |
| 0 | 18  | 2 NA          |
| 0 | 6   | 25 PITG_15960 |
| 0 | 45  | 19 PITG_08198 |
| 0 | 10  | 4 PITG_21418  |
| 0 | 5   | 0 NA          |
| 0 | 15  | 10 PITG_05452 |
| 0 | 9   | 0 PITG_09424  |
| 0 | 2   | 0 PITG_11024  |
| 0 | 11  | 4 PITG_17387  |
| 0 | 4   | 21 PITG_07839 |
| 0 | 16  | 10 PITG_08534 |
| 0 | 2   | 2 PITG_15916  |
| 0 | 7   | 7 PITG_18251  |
| 0 | 0   | 0 PITG_03911  |
| 0 | 0   | 8 PITG_05221  |
| 0 | 0   | 10 PITG_04608 |
| 0 | 7   | 10 PITG_01970 |
| 0 | 11  | 4 PITG_03630  |
| 0 | 16  | 21 PITG_09827 |
| 0 | 62  | 8 NA          |
| 0 | 57  | 37 PITG_06047 |
| 0 | 4   | 2 PITG_11080  |
| 0 | 11  | 4 NA          |
| 0 | 5   | 2 PITG_11206  |
| 0 | 201 | 18 NA         |
| 0 | 0   | 5 PITG_04746  |
| 0 | 0   | 6 PITG_03821  |
| 0 | 15  | 0 NA          |
| 0 | 4   | 15 NA         |
| 0 | 8   | 0 NA          |
| 0 | 86  | 7 NA          |
| 0 | 0   | 2 PITG_08760  |
| 0 | 2   | 0 PITG_16797  |
| 0 | 0   | 0 PITG_07116  |
| 0 | 7   | 0 PITG_12048  |
| 0 | 11  | 58 PITG_13745 |
| 0 | 0   | 0 NA          |
| 0 | 12  | 32 PITG_10663 |
| 0 | 9   | 12 PITG_21047 |
| 0 | 90  | 31 PITG_13043 |
| 0 | 2   | 6 PITG_01614  |
| 0 | 4   | 0 PITG_03361  |
| 0 | 112 | 15 PITG_03119 |
| 0 | 59  | 0 PITG_15662  |
| 0 | 24  | 14 PITG_06880 |

|   |     |                |
|---|-----|----------------|
| 0 | 0   | 2 PITG_10645   |
| 2 | 19  | 17 PITG_09881  |
| 0 | 0   | 0 PITG_12213   |
| 0 | 0   | 4 PITG_01773   |
| 0 | 2   | 3 PITG_12342   |
| 0 | 0   | 0 PITG_12575   |
| 0 | 11  | 9 PITG_12516   |
| 0 | 43  | 44 NA          |
| 0 | 12  | 0 NA           |
| 0 | 206 | 311 PITG_20490 |
| 0 | 2   | 6 PITG_13618   |
| 0 | 3   | 2 PITG_01626   |
| 0 | 10  | 4 PITG_02867   |
| 0 | 50  | 31 PITG_06753  |
| 0 | 5   | 6 PITG_03831   |
| 0 | 2   | 8 PITG_09285   |
| 0 | 6   | 0 PITG_12956   |
| 0 | 2   | 0 NA           |
| 0 | 49  | 49 PITG_06356  |
| 2 | 13  | 2 PITG_04385   |
| 0 | 93  | 0 NA           |
| 0 | 2   | 27 PITG_19302  |
| 0 | 622 | 571 PITG_20490 |
| 0 | 7   | 2 PITG_18651   |
| 0 | 0   | 0 NA           |
| 0 | 21  | 17 PITG_11964  |
| 0 | 32  | 11 PITG_06173  |
| 0 | 15  | 20 PITG_05458  |
| 0 | 8   | 6 PITG_16903   |
| 0 | 5   | 7 PITG_03419   |
| 0 | 3   | 2 PITG_06885   |
| 0 | 4   | 2 PITG_07778   |
| 0 | 4   | 11 PITG_11437  |
| 0 | 5   | 24 PITG_18707  |
| 0 | 170 | 42 NA          |
| 0 | 0   | 2 PITG_17168   |
| 0 | 16  | 6 PITG_17080   |
| 0 | 11  | 7 PITG_00309   |
| 0 | 5   | 10 NA          |
| 0 | 8   | 4 PITG_06844   |
| 0 | 6   | 11 PITG_02267  |
| 0 | 2   | 2 NA           |
| 0 | 14  | 10 NA          |
| 0 | 8   | 0 NA           |
| 0 | 2   | 16 PITG_03651  |
| 0 | 64  | 19 PITG_06518  |
| 0 | 10  | 33 PITG_02128  |

|   |     |                |
|---|-----|----------------|
| 0 | 4   | 4 PITG_16810   |
| 0 | 51  | 10 PITG_09595  |
| 0 | 14  | 9 PITG_11472   |
| 0 | 2   | 2 PITG_05193   |
| 0 | 2   | 0 PITG_21026   |
| 0 | 6   | 0 PITG_12283   |
| 0 | 6   | 2 PITG_21648   |
| 0 | 20  | 2 PITG_02393   |
| 0 | 43  | 18 PITG_02696  |
| 0 | 2   | 8 NA           |
| 0 | 18  | 7 PITG_12161   |
| 0 | 0   | 0 PITG_05987   |
| 0 | 5   | 0 NA           |
| 0 | 6   | 0 PITG_22340   |
| 0 | 7   | 3 PITG_16770   |
| 0 | 3   | 0 PITG_10429   |
| 0 | 0   | 2 PITG_02184   |
| 0 | 6   | 10 NA          |
| 0 | 4   | 0 PITG_16788   |
| 0 | 33  | 3 NA           |
| 0 | 0   | 0 PITG_17348   |
| 0 | 37  | 6 PITG_07635   |
| 0 | 7   | 12 NA          |
| 0 | 0   | 2 PITG_19153   |
| 0 | 12  | 7 PITG_11822   |
| 0 | 726 | 530 PITG_16727 |
| 0 | 53  | 92 PITG_19237  |
| 0 | 0   | 2 PITG_16797   |
| 0 | 2   | 0 PITG_01044   |
| 0 | 157 | 25 NA          |
| 0 | 18  | 17 PITG_22035  |
| 0 | 4   | 0 NA           |
| 0 | 201 | 20 NA          |
| 0 | 3   | 4 PITG_02454   |
| 0 | 14  | 6 PITG_16448   |
| 0 | 15  | 32 NA          |
| 0 | 8   | 3 PITG_10481   |
| 0 | 0   | 0 PITG_02234   |
| 0 | 6   | 41 PITG_12119  |
| 0 | 15  | 12 PITG_03886  |
| 0 | 18  | 22 PITG_02673  |
| 0 | 17  | 0 NA           |
| 0 | 41  | 30 PITG_07976  |
| 0 | 4   | 4 PITG_01607   |
| 0 | 28  | 6 PITG_03240   |
| 0 | 57  | 46 PITG_14169  |
| 0 | 8   | 4 NA           |

|      |     |                 |
|------|-----|-----------------|
| 0    | 4   | 2 PITG_08037    |
| 0    | 15  | 11 PITG_13223   |
| 0    | 8   | 0 NA            |
| 0    | 15  | 40 PITG_11587   |
| 0    | 63  | 93 PITG_17262   |
| 0    | 0   | 2 PITG_03292    |
| 0    | 2   | 4 NA            |
| 0    | 14  | 3 NA            |
| 0    | 13  | 0 PITG_18976    |
| 0    | 0   | 0 PITG_04709    |
| 0    | 2   | 6 PITG_03318    |
| 0    | 2   | 28 NA           |
| 0    | 9   | 15 PITG_16052   |
| 0    | 0   | 0 PITG_03755    |
| 0    | 27  | 80 PITG_06015   |
| 0    | 6   | 0 NA            |
| 0    | 3   | 4 NA            |
| 0    | 13  | 38 PITG_00472   |
| 0    | 2   | 4 PITG_22989    |
| 0    | 0   | 5 PITG_01450    |
| 0    | 8   | 0 PITG_10184    |
| 0    | 0   | 0 PITG_13920    |
| 0    | 6   | 0 NA            |
| 0    | 0   | 0 PITG_19886    |
| 0    | 11  | 2 PITG_08473    |
| 0    | 5   | 9 PITG_02945    |
| 0    | 20  | 16 PITG_11437   |
| 0    | 14  | 9 PITG_02716    |
| 0    | 7   | 2 NA            |
| 0    | 0   | 5 PITG_20709    |
| 0    | 12  | 19 PITG_14134   |
| 0    | 2   | 0 PITG_10119    |
| 0    | 12  | 0 PITG_03929    |
| 0    | 39  | 7 PITG_03943    |
| 0    | 4   | 6 PITG_18396    |
| 0    | 20  | 19 PITG_13382   |
| 0    | 138 | 1117 PITG_11329 |
| 0    | 25  | 6 PITG_15607    |
| 0    | 27  | 5 PITG_19237    |
| 0    | 0   | 8 PITG_02846    |
| 0    | 2   | 0 PITG_12940    |
| 0    | 0   | 0 NA            |
| 0    | 4   | 0 PITG_08252    |
| 0    | 0   | 4 PITG_05305    |
| 0    | 43  | 2 NA            |
| 0    | 61  | 4 NA            |
| 1579 | 47  | 602 NA          |



|     |     |               |
|-----|-----|---------------|
| 0   | 7   | 2 PITG_13609  |
| 144 | 9   | 102 NA        |
| 0   | 107 | 7 NA          |
| 0   | 4   | 6 NA          |
| 0   | 35  | 2 PITG_08663  |
| 0   | 110 | 48 PITG_05955 |
| 0   | 3   | 0 PITG_08027  |
| 0   | 2   | 11 PITG_18912 |
| 0   | 31  | 74 PITG_09996 |
| 0   | 5   | 0 NA          |
| 0   | 0   | 0 PITG_03300  |
| 0   | 24  | 19 PITG_01970 |
| 0   | 7   | 21 PITG_07077 |
| 0   | 2   | 20 PITG_18189 |
| 0   | 55  | 64 PITG_10921 |
| 0   | 2   | 0 PITG_07898  |
| 0   | 19  | 76 PITG_01453 |
| 0   | 2   | 4 PITG_00037  |
| 0   | 0   | 3 PITG_14561  |
| 0   | 2   | 34 PITG_10857 |
| 0   | 4   | 0 NA          |
| 0   | 0   | 0 PITG_19624  |
| 0   | 4   | 0 NA          |
| 0   | 14  | 31 PITG_07282 |
| 0   | 14  | 2 PITG_03302  |
| 0   | 11  | 13 PITG_01559 |
| 0   | 0   | 4 PITG_16214  |
| 51  | 2   | 19 NA         |
| 0   | 42  | 18 PITG_00071 |
| 0   | 2   | 0 PITG_07456  |
| 0   | 2   | 2 PITG_05346  |
| 0   | 12  | 4 PITG_05667  |
| 0   | 2   | 6 PITG_15843  |
| 0   | 100 | 4 PITG_03590  |
| 0   | 6   | 5 PITG_05637  |
| 0   | 32  | 25 PITG_07194 |
| 0   | 91  | 93 PITG_17628 |
| 0   | 2   | 0 PITG_10065  |
| 0   | 0   | 0 NA          |
| 0   | 15  | 32 PITG_14727 |
| 0   | 10  | 8 PITG_00496  |
| 0   | 4   | 0 PITG_13172  |
| 0   | 15  | 2 PITG_08800  |
| 0   | 2   | 0 PITG_10161  |
| 0   | 9   | 4 PITG_17249  |
| 0   | 0   | 0 PITG_07021  |
| 0   | 2   | 25 NA         |

|      |     |                 |
|------|-----|-----------------|
| 0    | 6   | 11 PITG_05010   |
| 0    | 8   | 2 PITG_04555    |
| 0    | 6   | 5 PITG_17495    |
| 0    | 35  | 0 PITG_08326    |
| 0    | 18  | 0 PITG_04261    |
| 0    | 25  | 25 PITG_00998   |
| 0    | 0   | 2 PITG_00621    |
| 0    | 2   | 6 NA            |
| 0    | 9   | 5 PITG_12453    |
| 0    | 5   | 4 PITG_01127    |
| 0    | 11  | 6 PITG_02975    |
| 271  | 33  | 684 NA          |
| 0    | 35  | 73 PITG_09092   |
| 0    | 4   | 9 PITG_08675    |
| 0    | 22  | 16 PITG_02927   |
| 0    | 13  | 0 PITG_07426    |
| 6    | 370 | 1414 PITG_06722 |
| 0    | 4   | 11 PITG_05926   |
| 0    | 0   | 0 PITG_08572    |
| 0    | 0   | 2 PITG_10020    |
| 0    | 5   | 5 PITG_02024    |
| 0    | 2   | 6 PITG_06240    |
| 0    | 56  | 25 PITG_06056   |
| 0    | 23  | 6 PITG_11451    |
| 0    | 0   | 8 PITG_10442    |
| 0    | 60  | 16 PITG_01646   |
| 0    | 0   | 0 PITG_15300    |
| 0    | 291 | 0 NA            |
| 0    | 12  | 17 PITG_20629   |
| 0    | 60  | 32 PITG_10595   |
| 0    | 29  | 4 NA            |
| 0    | 12  | 10 PITG_11702   |
| 0    | 360 | 75 PITG_19293   |
| 0    | 0   | 4 PITG_00858    |
| 0    | 0   | 0 NA            |
| 0    | 127 | 9 PITG_11718    |
| 0    | 4   | 0 PITG_15541    |
| 0    | 2   | 0 PITG_02238    |
| 0    | 52  | 7 PITG_10026    |
| 0    | 13  | 2 NA            |
| 0    | 6   | 2 PITG_08774    |
| 0    | 15  | 21 PITG_10147   |
| 0    | 39  | 31 NA           |
| 0    | 6   | 10 NA           |
| 1113 | 19  | 77 NA           |
| 0    | 2   | 0 PITG_18959    |
| 0    | 43  | 2 PITG_02477    |

|   |      |               |
|---|------|---------------|
| 0 | 0    | 3 PITG_06638  |
| 0 | 0    | 0 PITG_09995  |
| 0 | 0    | 24 NA         |
| 0 | 4    | 8 PITG_01563  |
| 0 | 2    | 4 PITG_01717  |
| 0 | 6    | 4 PITG_06416  |
| 0 | 46   | 81 PITG_04547 |
| 0 | 3    | 0 PITG_11298  |
| 0 | 0    | 10 PITG_10932 |
| 0 | 5    | 8 PITG_12747  |
| 0 | 7    | 6 PITG_01156  |
| 0 | 221  | 96 PITG_01932 |
| 0 | 48   | 17 PITG_10635 |
| 2 | 2    | 2 PITG_10080  |
| 0 | 6    | 0 NA          |
| 0 | 4    | 18 PITG_03547 |
| 0 | 15   | 6 NA          |
| 0 | 4    | 5 PITG_02495  |
| 0 | 6    | 5 PITG_13152  |
| 0 | 4    | 2 PITG_03924  |
| 0 | 12   | 3 NA          |
| 0 | 1817 | 4 PITG_14663  |
| 0 | 27   | 10 PITG_13309 |
| 0 | 8    | 2 PITG_16478  |
| 0 | 7    | 12 PITG_07576 |
| 0 | 11   | 4 PITG_01271  |
| 0 | 7    | 0 PITG_06240  |
| 0 | 5    | 0 PITG_15267  |
| 0 | 12   | 5 PITG_06557  |
| 0 | 20   | 25 PITG_07191 |
| 0 | 13   | 5 PITG_09680  |
| 0 | 12   | 0 NA          |
| 0 | 48   | 63 PITG_11430 |
| 0 | 17   | 29 PITG_01146 |
| 4 | 16   | 74 NA         |
| 0 | 5    | 36 PITG_21295 |
| 0 | 10   | 24 PITG_21210 |
| 0 | 11   | 0 PITG_06922  |
| 0 | 2    | 0 PITG_09849  |
| 0 | 0    | 2 PITG_08233  |
| 0 | 2    | 2 PITG_00337  |
| 0 | 0    | 0 PITG_12015  |
| 0 | 172  | 8 PITG_15376  |
| 0 | 0    | 0 PITG_08533  |
| 0 | 2    | 4 NA          |
| 0 | 8    | 7 PITG_03565  |
| 0 | 2    | 0 PITG_13613  |

|   |      |                |
|---|------|----------------|
| 0 | 34   | 15 PITG_01784  |
| 0 | 4    | 0 PITG_02372   |
| 0 | 2    | 0 PITG_05193   |
| 0 | 15   | 6 PITG_19849   |
| 0 | 2    | 3 PITG_09770   |
| 0 | 2    | 5 NA           |
| 0 | 0    | 0 PITG_04564   |
| 0 | 0    | 5 PITG_00441   |
| 0 | 8    | 2 PITG_03201   |
| 0 | 123  | 15 PITG_17088  |
| 0 | 10   | 4 PITG_13893   |
| 0 | 2    | 2 NA           |
| 0 | 1355 | 551 PITG_10381 |
| 0 | 0    | 0 PITG_13544   |
| 0 | 322  | 6 PITG_02706   |
| 0 | 0    | 3 PITG_19849   |
| 0 | 2    | 0 NA           |
| 0 | 5    | 2 PITG_19673   |
| 0 | 11   | 3 PITG_02052   |
| 0 | 70   | 23 PITG_07911  |
| 0 | 2    | 9 PITG_00448   |
| 0 | 12   | 11 PITG_01798  |
| 0 | 7    | 13 PITG_02901  |
| 0 | 0    | 7 PITG_16364   |
| 0 | 25   | 8 PITG_13122   |
| 0 | 3    | 0 PITG_01664   |
| 0 | 0    | 4 PITG_09639   |
| 0 | 102  | 46 PITG_17891  |
| 0 | 67   | 45 PITG_13398  |
| 0 | 0    | 0 PITG_01450   |
| 0 | 6    | 4 PITG_01045   |
| 0 | 6    | 0 NA           |
| 0 | 4    | 17 PITG_10553  |
| 0 | 0    | 5 PITG_15493   |
| 0 | 45   | 0 NA           |
| 0 | 0    | 10 PITG_19750  |
| 0 | 2    | 0 PITG_01109   |
| 0 | 30   | 55 NA          |
| 0 | 12   | 12 PITG_07201  |
| 0 | 0    | 2 PITG_06817   |
| 0 | 5    | 3 PITG_02264   |
| 0 | 147  | 6948 NA        |
| 0 | 41   | 42 PITG_01322  |
| 0 | 0    | 0 PITG_05260   |
| 0 | 4    | 0 NA           |
| 0 | 4    | 11 PITG_15927  |
| 0 | 180  | 55 PITG_04296  |

|     |     |                |
|-----|-----|----------------|
| 0   | 0   | 0 PITG_18106   |
| 0   | 4   | 0 PITG_01754   |
| 0   | 7   | 4 NA           |
| 0   | 0   | 0 PITG_16044   |
| 0   | 75  | 21 NA          |
| 0   | 0   | 0 NA           |
| 0   | 35  | 2 NA           |
| 0   | 26  | 10 PITG_03737  |
| 0   | 16  | 9 PITG_16132   |
| 0   | 3   | 4 PITG_10420   |
| 0   | 12  | 6 NA           |
| 0   | 9   | 0 PITG_13111   |
| 0   | 313 | 298 NA         |
| 0   | 149 | 93 PITG_20105  |
| 0   | 11  | 19 PITG_03042  |
| 0   | 32  | 0 NA           |
| 171 | 6   | 190 NA         |
| 0   | 11  | 5 NA           |
| 0   | 27  | 12 PITG_06841  |
| 0   | 31  | 70 PITG_16591  |
| 0   | 2   | 0 PITG_20213   |
| 0   | 0   | 3 PITG_11273   |
| 0   | 6   | 0 PITG_11647   |
| 0   | 0   | 0 PITG_00946   |
| 0   | 18  | 0 PITG_01728   |
| 0   | 0   | 0 NA           |
| 0   | 5   | 0 PITG_05717   |
| 0   | 6   | 0 NA           |
| 0   | 5   | 8 PITG_12673   |
| 0   | 0   | 4 PITG_06896   |
| 0   | 4   | 4 PITG_06416   |
| 0   | 2   | 0 NA           |
| 0   | 82  | 0 PITG_03585   |
| 0   | 5   | 40 PITG_17936  |
| 0   | 0   | 0 NA           |
| 0   | 55  | 146 PITG_02458 |
| 0   | 2   | 3 PITG_00440   |
| 0   | 17  | 9 NA           |
| 0   | 0   | 4 PITG_01343   |
| 0   | 4   | 2 PITG_09310   |
| 0   | 2   | 0 PITG_05355   |
| 0   | 4   | 0 NA           |
| 0   | 4   | 2 PITG_12355   |
| 0   | 36  | 10 NA          |
| 0   | 2   | 2 PITG_01774   |
| 0   | 0   | 8 PITG_15294   |
| 0   | 2   | 4 PITG_12308   |

|     |     |               |
|-----|-----|---------------|
| 0   | 13  | 0 NA          |
| 0   | 2   | 0 PITG_04421  |
| 0   | 6   | 0 NA          |
| 0   | 30  | 16 PITG_06647 |
| 0   | 0   | 2 PITG_00840  |
| 0   | 2   | 2 PITG_06007  |
| 0   | 26  | 18 PITG_03886 |
| 0   | 2   | 0 NA          |
| 0   | 4   | 4 PITG_11914  |
| 0   | 4   | 2 PITG_01825  |
| 0   | 14  | 16 PITG_18959 |
| 0   | 4   | 14 PITG_00038 |
| 0   | 12  | 2 NA          |
| 0   | 7   | 0 PITG_03268  |
| 0   | 0   | 0 PITG_12518  |
| 0   | 29  | 0 PITG_14216  |
| 0   | 5   | 12 PITG_08031 |
| 0   | 0   | 2 PITG_19849  |
| 887 | 140 | 710 NA        |
| 0   | 4   | 17 PITG_09389 |
| 0   | 37  | 14 NA         |
| 0   | 0   | 9 PITG_07778  |
| 0   | 5   | 2 PITG_17158  |
| 0   | 8   | 18 PITG_11117 |
| 0   | 2   | 7 NA          |
| 0   | 12  | 11 PITG_05781 |
| 0   | 17  | 8 NA          |
| 0   | 0   | 0 NA          |
| 0   | 3   | 0 PITG_01370  |
| 0   | 5   | 29 NA         |
| 0   | 2   | 0 PITG_19878  |
| 110 | 2   | 143 NA        |
| 0   | 3   | 3 PITG_12433  |
| 0   | 9   | 2 NA          |
| 0   | 0   | 0 PITG_04863  |
| 0   | 0   | 0 PITG_16128  |
| 0   | 43  | 0 NA          |
| 0   | 33  | 8 PITG_00218  |
| 0   | 80  | 26 PITG_16476 |
| 0   | 226 | 64 PITG_06578 |
| 0   | 4   | 18 PITG_11090 |
| 0   | 3   | 2 NA          |
| 0   | 0   | 0 PITG_16854  |
| 0   | 2   | 2 PITG_16887  |
| 0   | 24  | 40 PITG_10729 |
| 0   | 10  | 4 PITG_15837  |
| 0   | 111 | 6 PITG_03419  |

|   |     |                |
|---|-----|----------------|
| 0 | 8   | 7 PITG_05168   |
| 0 | 0   | 0 PITG_21042   |
| 0 | 11  | 8 NA           |
| 0 | 0   | 0 PITG_03864   |
| 0 | 20  | 8 PITG_11525   |
| 0 | 2   | 6 PITG_20215   |
| 0 | 93  | 27 PITG_03418  |
| 0 | 2   | 2 PITG_12318   |
| 0 | 17  | 42 PITG_15608  |
| 0 | 0   | 4 PITG_11497   |
| 0 | 0   | 12 PITG_12913  |
| 0 | 4   | 9 PITG_14171   |
| 0 | 0   | 2 PITG_10343   |
| 0 | 0   | 2 PITG_08425   |
| 0 | 186 | 432 PITG_11653 |
| 0 | 0   | 0 PITG_00209   |
| 0 | 2   | 4 PITG_13775   |
| 0 | 0   | 7 NA           |
| 0 | 4   | 17 PITG_03836  |
| 0 | 180 | 11 NA          |
| 0 | 35  | 149 PITG_11152 |
| 0 | 80  | 18 NA          |
| 0 | 2   | 2 PITG_01063   |
| 0 | 4   | 0 NA           |
| 0 | 25  | 21 PITG_11588  |
| 0 | 22  | 12 PITG_12530  |
| 0 | 4   | 0 PITG_09978   |
| 0 | 0   | 0 PITG_05519   |
| 0 | 29  | 14 PITG_03564  |
| 0 | 0   | 0 NA           |
| 0 | 21  | 10 NA          |
| 0 | 15  | 10 PITG_00298  |
| 0 | 11  | 56 PITG_10050  |
| 0 | 0   | 0 PITG_10932   |
| 0 | 0   | 15 PITG_11457  |
| 0 | 6   | 0 NA           |
| 0 | 5   | 69 NA          |
| 0 | 2   | 0 PITG_02553   |
| 0 | 3   | 0 PITG_06075   |
| 0 | 11  | 2 PITG_15619   |
| 0 | 2   | 2 PITG_22369   |
| 0 | 0   | 2 PITG_17498   |
| 0 | 7   | 11 PITG_03401  |
| 0 | 2   | 2 PITG_17021   |
| 0 | 2   | 4 PITG_00778   |
| 0 | 40  | 7 NA           |
| 0 | 2   | 6 PITG_00704   |

|      |     |                |
|------|-----|----------------|
| 0    | 25  | 10 PITG_06757  |
| 0    | 0   | 33 PITG_11143  |
| 0    | 0   | 0 PITG_11702   |
| 0    | 11  | 9 NA           |
| 0    | 35  | 20 PITG_03753  |
| 0    | 11  | 11 PITG_02706  |
| 1124 | 2   | 29 NA          |
| 55   | 37  | 63 NA          |
| 0    | 212 | 52 PITG_17627  |
| 0    | 15  | 6 PITG_12213   |
| 0    | 5   | 4 PITG_11437   |
| 0    | 2   | 3 PITG_08901   |
| 0    | 8   | 12 PITG_00978  |
| 0    | 9   | 20 PITG_02661  |
| 0    | 10  | 12 PITG_01370  |
| 0    | 63  | 2 NA           |
| 0    | 0   | 0 PITG_04671   |
| 0    | 5   | 7 PITG_03871   |
| 0    | 13  | 0 NA           |
| 0    | 10  | 12 PITG_08392  |
| 0    | 30  | 47 PITG_18356  |
| 0    | 0   | 11 PITG_01375  |
| 0    | 0   | 4 PITG_12343   |
| 0    | 4   | 0 PITG_21000   |
| 0    | 0   | 4 NA           |
| 0    | 71  | 168 PITG_14130 |
| 0    | 0   | 0 PITG_12252   |
| 0    | 24  | 11 PITG_19844  |
| 0    | 4   | 7 PITG_17393   |
| 0    | 0   | 2 PITG_00343   |
| 0    | 32  | 29 PITG_12000  |
| 0    | 3   | 12 PITG_11467  |
| 0    | 168 | 65 NA          |
| 2    | 13  | 4 NA           |
| 0    | 0   | 0 PITG_21874   |
| 0    | 25  | 17 PITG_13827  |
| 0    | 33  | 8 PITG_02977   |
| 0    | 4   | 0 PITG_18690   |
| 0    | 0   | 0 PITG_03621   |
| 0    | 2   | 42 PITG_10442  |
| 0    | 32  | 6 NA           |
| 0    | 30  | 21 NA          |
| 0    | 0   | 0 PITG_10012   |
| 0    | 6   | 25 PITG_02239  |
| 0    | 6   | 2 PITG_16103   |
| 0    | 0   | 0 PITG_19441   |
| 0    | 4   | 0 PITG_00713   |



|      |     |               |
|------|-----|---------------|
| 0    | 61  | 2 NA          |
| 0    | 4   | 6 NA          |
| 0    | 0   | 0 PITG_01645  |
| 0    | 133 | 61 PITG_04006 |
| 0    | 4   | 0 PITG_13915  |
| 0    | 28  | 49 PITG_02975 |
| 0    | 4   | 6 PITG_12239  |
| 0    | 0   | 6 PITG_03292  |
| 0    | 45  | 75 PITG_16645 |
| 0    | 23  | 8 PITG_05644  |
| 4    | 0   | 39 NA         |
| 0    | 10  | 91 PITG_00375 |
| 0    | 2   | 2 PITG_15534  |
| 0    | 10  | 0 PITG_06638  |
| 0    | 0   | 2 PITG_18184  |
| 0    | 28  | 14 PITG_10167 |
| 0    | 2   | 3 PITG_06886  |
| 0    | 22  | 6 PITG_08698  |
| 0    | 0   | 9 PITG_09374  |
| 0    | 0   | 2 PITG_06274  |
| 0    | 9   | 8 PITG_17404  |
| 0    | 36  | 8 PITG_11495  |
| 180  | 47  | 526 NA        |
| 0    | 7   | 35 PITG_03472 |
| 1935 | 94  | 1866 NA       |
| 0    | 0   | 2 PITG_06610  |
| 0    | 4   | 0 PITG_08303  |
| 0    | 2   | 0 PITG_05796  |
| 0    | 4   | 56 PITG_03594 |
| 0    | 32  | 55 NA         |
| 0    | 129 | 8 PITG_17590  |
| 0    | 8   | 14 PITG_11567 |
| 0    | 2   | 11 PITG_16058 |
| 0    | 13  | 7 PITG_05815  |
| 0    | 2   | 12 PITG_00854 |
| 0    | 0   | 0 PITG_06897  |
| 0    | 57  | 68 PITG_01563 |
| 0    | 4   | 6 PITG_22149  |
| 0    | 0   | 0 PITG_03860  |
| 0    | 0   | 0 PITG_03533  |
| 0    | 2   | 0 NA          |
| 0    | 4   | 7 PITG_00302  |
| 0    | 2   | 4 PITG_15470  |
| 0    | 5   | 6 PITG_14951  |
| 0    | 0   | 0 PITG_21418  |
| 0    | 12  | 24 PITG_00808 |
| 0    | 0   | 0 PITG_03017  |

|    |     |                |
|----|-----|----------------|
| 0  | 0   | 0 PITG_01720   |
| 0  | 0   | 156 NA         |
| 0  | 2   | 0 PITG_20153   |
| 0  | 18  | 6 PITG_03557   |
| 0  | 2   | 0 PITG_05326   |
| 0  | 0   | 2 PITG_12930   |
| 0  | 9   | 6 PITG_17395   |
| 0  | 0   | 8 PITG_00979   |
| 0  | 27  | 10 PITG_17994  |
| 0  | 9   | 9 PITG_00421   |
| 0  | 38  | 9 PITG_02839   |
| 0  | 26  | 2 PITG_10268   |
| 0  | 23  | 8 PITG_06390   |
| 0  | 18  | 3 PITG_20429   |
| 0  | 0   | 0 PITG_22241   |
| 0  | 13  | 0 PITG_17907   |
| 0  | 0   | 2 NA           |
| 0  | 0   | 0 NA           |
| 14 | 2   | 61 NA          |
| 0  | 16  | 26 PITG_03473  |
| 0  | 0   | 0 PITG_07699   |
| 0  | 8   | 0 PITG_12230   |
| 0  | 0   | 0 PITG_03657   |
| 0  | 0   | 0 NA           |
| 0  | 2   | 4 PITG_23240   |
| 0  | 6   | 8 PITG_10420   |
| 0  | 11  | 27 PITG_06997  |
| 0  | 4   | 0 NA           |
| 0  | 589 | 176 PITG_01142 |
| 0  | 150 | 135 NA         |
| 0  | 44  | 6 PITG_20779   |
| 0  | 2   | 0 NA           |
| 0  | 3   | 0 PITG_15292   |
| 0  | 0   | 0 PITG_20043   |
| 0  | 2   | 0 NA           |
| 0  | 0   | 0 PITG_01527   |
| 0  | 6   | 3 NA           |
| 0  | 0   | 2 PITG_07279   |
| 0  | 7   | 2 PITG_11405   |
| 0  | 2   | 0 PITG_06002   |
| 0  | 86  | 3 PITG_02037   |
| 0  | 2   | 11 PITG_03563  |
| 0  | 16  | 9 NA           |
| 0  | 6   | 0 PITG_17652   |
| 0  | 13  | 15 PITG_15836  |
| 0  | 10  | 37 PITG_03700  |
| 0  | 0   | 0 NA           |

|   |     |               |
|---|-----|---------------|
| 0 | 18  | 65 PITG_04457 |
| 0 | 2   | 2 PITG_02821  |
| 0 | 11  | 22 PITG_02380 |
| 0 | 46  | 0 NA          |
| 0 | 57  | 8 PITG_07099  |
| 0 | 2   | 7 PITG_14641  |
| 0 | 12  | 4 PITG_00152  |
| 0 | 21  | 4 PITG_08723  |
| 0 | 41  | 41 PITG_02992 |
| 0 | 19  | 6 PITG_15228  |
| 0 | 0   | 2 PITG_04664  |
| 0 | 2   | 13 PITG_12259 |
| 0 | 6   | 2 PITG_18075  |
| 0 | 2   | 5 NA          |
| 0 | 15  | 37 PITG_01322 |
| 0 | 0   | 6 PITG_12174  |
| 0 | 409 | 21 PITG_14557 |
| 0 | 0   | 0 PITG_14415  |
| 0 | 0   | 0 NA          |
| 0 | 172 | 8 PITG_17230  |
| 0 | 6   | 8 PITG_03169  |
| 0 | 9   | 74 PITG_11569 |
| 0 | 24  | 10 NA         |
| 0 | 2   | 0 PITG_01153  |
| 0 | 13  | 31 PITG_06631 |
| 0 | 26  | 13 PITG_00167 |
| 0 | 0   | 0 PITG_12256  |
| 0 | 6   | 0 PITG_04838  |
| 0 | 33  | 14 NA         |
| 0 | 101 | 4 PITG_00215  |
| 0 | 153 | 63 PITG_03267 |
| 0 | 13  | 5 PITG_03623  |
| 0 | 3   | 54 PITG_01253 |
| 0 | 4   | 8 NA          |
| 0 | 31  | 8 PITG_07884  |
| 0 | 0   | 2 PITG_04889  |
| 0 | 15  | 5 NA          |
| 0 | 18  | 28 PITG_01153 |
| 0 | 0   | 6 PITG_11426  |
| 0 | 15  | 17 PITG_01283 |
| 0 | 6   | 2 PITG_00713  |
| 0 | 0   | 4 PITG_09827  |
| 0 | 15  | 2 PITG_05411  |
| 0 | 9   | 2 NA          |
| 0 | 0   | 2 PITG_01528  |
| 0 | 10  | 0 PITG_04843  |
| 0 | 2   | 3 NA          |

|    |     |                |
|----|-----|----------------|
| 0  | 29  | 12 NA          |
| 19 | 2   | 48 NA          |
| 0  | 4   | 11 PITG_06304  |
| 0  | 2   | 5 PITG_08183   |
| 0  | 15  | 2 NA           |
| 31 | 4   | 20 NA          |
| 0  | 5   | 0 PITG_03880   |
| 29 | 2   | 102 NA         |
| 0  | 91  | 120 PITG_18721 |
| 0  | 96  | 7 NA           |
| 0  | 2   | 2 PITG_19152   |
| 0  | 19  | 4 PITG_08056   |
| 0  | 13  | 0 PITG_01930   |
| 0  | 19  | 28 NA          |
| 0  | 11  | 8 PITG_00380   |
| 0  | 119 | 2 PITG_04499   |
| 0  | 11  | 0 NA           |
| 0  | 177 | 178 NA         |
| 0  | 7   | 18 PITG_17404  |
| 0  | 4   | 12 PITG_19166  |
| 0  | 42  | 9 PITG_08481   |
| 0  | 24  | 14 PITG_06629  |
| 0  | 33  | 14 PITG_21067  |
| 0  | 0   | 0 PITG_09005   |
| 0  | 58  | 39 PITG_01479  |
| 0  | 0   | 0 NA           |
| 98 | 24  | 135 NA         |
| 0  | 118 | 45 PITG_16922  |
| 0  | 0   | 2 PITG_03370   |
| 0  | 4   | 0 NA           |
| 0  | 0   | 2 NA           |
| 0  | 3   | 0 NA           |
| 0  | 4   | 2 PITG_00352   |
| 0  | 5   | 2 PITG_06749   |
| 0  | 21  | 13 NA          |
| 0  | 6   | 11 PITG_11369  |
| 0  | 4   | 2 PITG_04970   |
| 0  | 0   | 0 PITG_12993   |
| 0  | 0   | 2 PITG_01674   |
| 0  | 6   | 2 PITG_15925   |
| 0  | 6   | 14 PITG_14462  |
| 0  | 2   | 0 NA           |
| 0  | 0   | 0 PITG_07698   |
| 0  | 2   | 4 NA           |
| 0  | 43  | 140 PITG_15890 |
| 0  | 4   | 5 PITG_20251   |
| 0  | 6   | 4 PITG_14441   |

|    |     |               |
|----|-----|---------------|
| 0  | 13  | 6 NA          |
| 0  | 13  | 28 NA         |
| 0  | 2   | 14 PITG_10301 |
| 0  | 52  | 19 NA         |
| 0  | 5   | 27 PITG_16464 |
| 0  | 15  | 0 PITG_01639  |
| 0  | 0   | 0 PITG_08143  |
| 0  | 3   | 5 PITG_00148  |
| 0  | 2   | 0 PITG_17259  |
| 0  | 15  | 2 PITG_07699  |
| 0  | 17  | 24 PITG_08594 |
| 0  | 2   | 6 PITG_10031  |
| 0  | 4   | 0 PITG_20855  |
| 0  | 6   | 2 PITG_14207  |
| 0  | 62  | 9 PITG_02784  |
| 0  | 5   | 0 PITG_12112  |
| 0  | 0   | 0 NA          |
| 0  | 0   | 2 NA          |
| 0  | 8   | 6 PITG_06913  |
| 0  | 114 | 31 PITG_01360 |
| 0  | 36  | 27 PITG_19741 |
| 0  | 0   | 0 PITG_08769  |
| 0  | 38  | 69 PITG_13235 |
| 0  | 103 | 74 NA         |
| 0  | 22  | 40 PITG_15848 |
| 0  | 10  | 0 NA          |
| 0  | 2   | 6 NA          |
| 0  | 5   | 2 PITG_13554  |
| 0  | 0   | 0 PITG_18306  |
| 0  | 14  | 9 NA          |
| 0  | 2   | 0 NA          |
| 0  | 0   | 6 NA          |
| 0  | 27  | 16 PITG_11158 |
| 0  | 28  | 27 PITG_07110 |
| 0  | 49  | 2 PITG_02927  |
| 0  | 31  | 21 PITG_11433 |
| 0  | 21  | 14 PITG_15566 |
| 0  | 13  | 2 NA          |
| 0  | 0   | 7 PITG_19168  |
| 0  | 4   | 2 PITG_13298  |
| 0  | 0   | 6 PITG_11725  |
| 0  | 8   | 7 PITG_07976  |
| 0  | 14  | 15 PITG_03034 |
| 0  | 12  | 13 PITG_11656 |
| 12 | 277 | 1263 NA       |
| 0  | 2   | 2 PITG_02697  |
| 35 | 0   | 46 NA         |

|     |     |                |
|-----|-----|----------------|
| 0   | 31  | 24 PITG_01852  |
| 0   | 0   | 4 PITG_05366   |
| 0   | 0   | 0 NA           |
| 0   | 0   | 0 PITG_01349   |
| 0   | 2   | 0 PITG_18779   |
| 0   | 181 | 38 NA          |
| 0   | 9   | 5 PITG_19844   |
| 0   | 36  | 138 NA         |
| 0   | 78  | 286 NA         |
| 0   | 2   | 0 PITG_01626   |
| 0   | 2   | 26 PITG_16078  |
| 0   | 0   | 2 PITG_22529   |
| 0   | 2   | 0 PITG_01386   |
| 0   | 0   | 9 PITG_06832   |
| 0   | 6   | 5 PITG_07852   |
| 0   | 59  | 51 PITG_16376  |
| 0   | 4   | 9 PITG_11723   |
| 0   | 2   | 2 PITG_18606   |
| 0   | 7   | 2 PITG_06274   |
| 0   | 6   | 0 NA           |
| 0   | 5   | 11 PITG_03825  |
| 0   | 9   | 5 NA           |
| 0   | 0   | 0 PITG_09064   |
| 0   | 39  | 57 PITG_11142  |
| 0   | 9   | 0 PITG_06903   |
| 0   | 90  | 0 NA           |
| 0   | 0   | 0 PITG_09244   |
| 0   | 0   | 0 PITG_03122   |
| 0   | 135 | 152 PITG_13575 |
| 0   | 4   | 0 PITG_08803   |
| 0   | 0   | 2 PITG_11728   |
| 0   | 17  | 2 NA           |
| 0   | 0   | 2 PITG_08301   |
| 0   | 0   | 2 PITG_02810   |
| 0   | 18  | 6 PITG_20203   |
| 0   | 13  | 2 NA           |
| 291 | 0   | 667 NA         |
| 107 | 9   | 16 NA          |
| 0   | 0   | 0 NA           |
| 0   | 2   | 2 PITG_09698   |
| 0   | 10  | 69 PITG_09400  |
| 0   | 2   | 2 NA           |
| 0   | 90  | 25 PITG_05562  |
| 0   | 2   | 0 PITG_15602   |
| 0   | 24  | 4 NA           |
| 0   | 0   | 0 PITG_15820   |
| 0   | 2   | 6 PITG_11476   |

|   |     |                |
|---|-----|----------------|
| 0 | 42  | 7 NA           |
| 0 | 134 | 31 PITG_03558  |
| 0 | 4   | 0 PITG_08145   |
| 0 | 0   | 2 PITG_03300   |
| 0 | 21  | 43 PITG_03473  |
| 0 | 2   | 2 PITG_17783   |
| 0 | 0   | 2 PITG_02781   |
| 0 | 2   | 0 PITG_23201   |
| 0 | 0   | 0 NA           |
| 0 | 8   | 4 PITG_11551   |
| 0 | 2   | 9 PITG_17273   |
| 0 | 19  | 39 PITG_20907  |
| 0 | 0   | 0 PITG_00955   |
| 0 | 0   | 0 PITG_05781   |
| 0 | 20  | 4 PITG_13440   |
| 0 | 2   | 0 PITG_13255   |
| 0 | 2   | 4 PITG_09387   |
| 0 | 92  | 94 PITG_10321  |
| 0 | 2   | 13 PITG_20081  |
| 0 | 12  | 8 NA           |
| 0 | 7   | 2 PITG_18835   |
| 0 | 7   | 2 PITG_17004   |
| 0 | 3   | 2 PITG_18815   |
| 0 | 0   | 2 PITG_13544   |
| 0 | 7   | 0 PITG_03832   |
| 0 | 9   | 0 NA           |
| 0 | 12  | 10 NA          |
| 0 | 0   | 0 NA           |
| 0 | 8   | 16 PITG_18129  |
| 0 | 13  | 5 PITG_16439   |
| 0 | 0   | 0 PITG_21523   |
| 0 | 65  | 33 PITG_06992  |
| 0 | 7   | 12 PITG_14674  |
| 0 | 0   | 0 PITG_16478   |
| 0 | 7   | 2 PITG_03753   |
| 2 | 132 | 196 PITG_01227 |
| 0 | 0   | 0 PITG_09261   |
| 0 | 2   | 0 PITG_07655   |
| 0 | 2   | 11 PITG_12753  |
| 0 | 8   | 2 NA           |
| 0 | 7   | 24 PITG_08184  |
| 0 | 22  | 48 PITG_00797  |
| 0 | 13  | 21 PITG_00133  |
| 0 | 4   | 0 NA           |
| 0 | 4   | 8 PITG_20032   |
| 0 | 18  | 7 PITG_02024   |
| 0 | 2   | 17 NA          |

|   |     |               |
|---|-----|---------------|
| 0 | 0   | 2 PITG_02559  |
| 0 | 9   | 22 PITG_17767 |
| 0 | 5   | 4 NA          |
| 0 | 2   | 4 PITG_00323  |
| 0 | 35  | 2 PITG_14299  |
| 0 | 0   | 0 PITG_19991  |
| 0 | 2   | 0 NA          |
| 0 | 15  | 57 PITG_12520 |
| 0 | 13  | 0 PITG_03565  |
| 0 | 0   | 4 PITG_13165  |
| 0 | 4   | 3 NA          |
| 0 | 0   | 4 PITG_08305  |
| 0 | 29  | 0 PITG_10191  |
| 0 | 6   | 2 PITG_06402  |
| 0 | 176 | 4 NA          |
| 0 | 35  | 74 PITG_03360 |
| 0 | 36  | 7 PITG_03119  |
| 0 | 0   | 2 PITG_16184  |
| 0 | 52  | 17 PITG_03533 |
| 0 | 68  | 16 PITG_18662 |
| 0 | 0   | 0 PITG_08747  |
| 0 | 25  | 9 PITG_08628  |
| 0 | 56  | 6 PITG_03018  |
| 0 | 15  | 2 PITG_00499  |
| 0 | 23  | 6 NA          |
| 0 | 5   | 4 PITG_05188  |
| 0 | 3   | 0 PITG_12595  |
| 0 | 4   | 0 PITG_04242  |
| 0 | 4   | 0 PITG_11125  |
| 0 | 4   | 4 PITG_05960  |
| 0 | 24  | 10 PITG_15573 |
| 0 | 6   | 9 PITG_01097  |
| 0 | 0   | 0 PITG_15783  |
| 0 | 4   | 3 NA          |
| 0 | 10  | 22 PITG_17069 |
| 0 | 19  | 8 PITG_12513  |
| 0 | 2   | 0 PITG_08566  |
| 0 | 4   | 0 NA          |
| 0 | 6   | 0 PITG_16511  |
| 0 | 16  | 15 PITG_00787 |
| 0 | 4   | 2 PITG_02598  |
| 0 | 0   | 0 NA          |
| 0 | 38  | 5 NA          |
| 0 | 37  | 17 PITG_16969 |
| 0 | 63  | 8 PITG_01644  |
| 0 | 2   | 4 PITG_00308  |
| 0 | 0   | 0 NA          |



|    |    |                |
|----|----|----------------|
| 0  | 3  | 0 PITG_11286   |
| 0  | 29 | 21 PITG_05434  |
| 0  | 6  | 0 PITG_07988   |
| 0  | 8  | 7 NA           |
| 19 | 0  | 15 NA          |
| 0  | 7  | 5 PITG_14916   |
| 0  | 6  | 2 PITG_05987   |
| 0  | 16 | 2 PITG_03888   |
| 0  | 45 | 79 PITG_20221  |
| 0  | 3  | 2 PITG_06256   |
| 0  | 26 | 50 PITG_17404  |
| 0  | 12 | 2 PITG_19612   |
| 0  | 4  | 2 PITG_17591   |
| 0  | 37 | 2 NA           |
| 0  | 66 | 53 PITG_15154  |
| 0  | 48 | 2 NA           |
| 0  | 2  | 8 PITG_00861   |
| 0  | 0  | 0 PITG_14224   |
| 0  | 0  | 3 PITG_11525   |
| 0  | 0  | 0 PITG_04023   |
| 0  | 0  | 15 PITG_02467  |
| 0  | 38 | 73 PITG_14431  |
| 0  | 17 | 0 PITG_03600   |
| 0  | 45 | 45 PITG_00938  |
| 0  | 10 | 30 PITG_16183  |
| 0  | 9  | 0 PITG_16331   |
| 0  | 49 | 20 PITG_09474  |
| 0  | 0  | 2 NA           |
| 0  | 4  | 26 PITG_08157  |
| 0  | 0  | 2 PITG_12470   |
| 0  | 12 | 7 NA           |
| 0  | 6  | 0 PITG_00201   |
| 0  | 14 | 19 PITG_03733  |
| 0  | 0  | 2 PITG_00412   |
| 0  | 21 | 24 PITG_05692  |
| 0  | 0  | 4 PITG_05954   |
| 0  | 0  | 4 PITG_21620   |
| 0  | 0  | 2 NA           |
| 0  | 15 | 6 NA           |
| 0  | 18 | 120 PITG_08659 |
| 0  | 2  | 2 PITG_03276   |
| 0  | 10 | 11 PITG_17028  |
| 0  | 0  | 16 PITG_12678  |
| 0  | 19 | 0 NA           |
| 0  | 4  | 8 NA           |
| 0  | 0  | 0 PITG_21393   |
| 0  | 14 | 18 NA          |

|    |     |                |
|----|-----|----------------|
| 0  | 4   | 0 PITG_10764   |
| 0  | 11  | 4 PITG_01802   |
| 0  | 2   | 2 PITG_04485   |
| 0  | 116 | 2 NA           |
| 0  | 28  | 17 PITG_11126  |
| 0  | 176 | 202 PITG_16766 |
| 0  | 0   | 2 PITG_05855   |
| 29 | 4   | 51 NA          |
| 0  | 0   | 4 PITG_03710   |
| 17 | 4   | 13 NA          |
| 0  | 2   | 0 PITG_08683   |
| 0  | 6   | 0 NA           |
| 0  | 2   | 4 PITG_08236   |
| 0  | 184 | 24 PITG_16795  |
| 0  | 2   | 6 PITG_13778   |
| 0  | 13  | 8 PITG_03890   |
| 0  | 32  | 9 PITG_05761   |
| 0  | 2   | 2 PITG_02016   |
| 0  | 22  | 15 PITG_22763  |
| 0  | 0   | 0 PITG_02712   |
| 0  | 89  | 118 PITG_07882 |
| 0  | 0   | 0 PITG_15151   |
| 0  | 2   | 0 PITG_21223   |
| 0  | 99  | 6 PITG_17779   |
| 0  | 67  | 46 PITG_19056  |
| 0  | 323 | 8 PITG_17001   |
| 0  | 64  | 21 PITG_13159  |
| 0  | 20  | 28 PITG_06978  |
| 0  | 39  | 17 PITG_19966  |
| 0  | 4   | 0 PITG_16050   |
| 0  | 10  | 2 PITG_17906   |
| 0  | 0   | 0 NA           |
| 0  | 2   | 5 PITG_08822   |
| 0  | 0   | 4 PITG_03374   |
| 0  | 9   | 5 PITG_00228   |
| 0  | 15  | 20 PITG_00269  |
| 0  | 0   | 6 PITG_02439   |
| 0  | 51  | 53 NA          |
| 0  | 17  | 8 PITG_03454   |
| 0  | 7   | 17 PITG_17700  |
| 0  | 6   | 2 PITG_01784   |
| 0  | 20  | 46 PITG_02122  |
| 0  | 162 | 28 PITG_18018  |
| 0  | 8   | 5 PITG_09728   |
| 0  | 53  | 47 PITG_20266  |
| 0  | 6   | 0 PITG_11164   |
| 0  | 31  | 20 NA          |

|   |     |               |
|---|-----|---------------|
| 5 | 0   | 0 NA          |
| 0 | 4   | 0 NA          |
| 0 | 107 | 59 PITG_05304 |
| 0 | 5   | 0 NA          |
| 0 | 2   | 4 PITG_05669  |
| 0 | 2   | 8 NA          |
| 0 | 0   | 0 PITG_02774  |
| 0 | 0   | 0 NA          |
| 0 | 40  | 20 PITG_17557 |
| 0 | 2   | 0 PITG_12989  |
| 0 | 19  | 8 PITG_04977  |
| 0 | 3   | 0 PITG_14750  |
| 0 | 17  | 43 PITG_16058 |
| 0 | 0   | 0 PITG_16053  |
| 0 | 2   | 0 NA          |
| 0 | 7   | 25 PITG_03360 |
| 0 | 22  | 26 PITG_07551 |
| 0 | 2   | 19 PITG_07354 |
| 0 | 2   | 5 PITG_06502  |
| 0 | 158 | 45 PITG_06869 |
| 0 | 3   | 2 PITG_15062  |
| 0 | 2   | 2 PITG_03934  |
| 0 | 10  | 20 NA         |
| 0 | 36  | 9 NA          |
| 0 | 4   | 3 PITG_10018  |
| 0 | 17  | 9 NA          |
| 0 | 20  | 0 PITG_13838  |
| 0 | 44  | 8 PITG_01946  |
| 0 | 15  | 5 PITG_02731  |
| 0 | 5   | 10 PITG_12940 |
| 0 | 17  | 5 PITG_17557  |
| 0 | 2   | 16 PITG_18298 |
| 0 | 2   | 4 PITG_21222  |
| 0 | 3   | 19 NA         |
| 0 | 9   | 64 PITG_07286 |
| 0 | 0   | 2 PITG_10901  |
| 0 | 0   | 4 PITG_03444  |
| 0 | 25  | 4 NA          |
| 0 | 0   | 4 PITG_10967  |
| 0 | 0   | 0 PITG_18372  |
| 0 | 0   | 0 PITG_03813  |
| 0 | 3   | 16 PITG_13838 |
| 0 | 14  | 0 NA          |
| 0 | 30  | 29 PITG_08083 |
| 0 | 8   | 449 NA        |
| 0 | 52  | 0 PITG_15576  |
| 0 | 0   | 0 NA          |

|     |     |                |
|-----|-----|----------------|
| 0   | 0   | 0 PITG_06922   |
| 0   | 8   | 3 PITG_14067   |
| 0   | 6   | 3 PITG_20537   |
| 0   | 11  | 0 PITG_19485   |
| 0   | 18  | 4 PITG_06559   |
| 0   | 3   | 2 PITG_11623   |
| 0   | 0   | 0 PITG_08305   |
| 0   | 12  | 2 PITG_11098   |
| 0   | 0   | 4 PITG_05487   |
| 0   | 0   | 14 PITG_03550  |
| 0   | 0   | 0 NA           |
| 0   | 4   | 0 PITG_06393   |
| 0   | 56  | 111 PITG_01694 |
| 0   | 2   | 0 PITG_17053   |
| 0   | 6   | 31 PITG_02786  |
| 0   | 0   | 3 PITG_13721   |
| 0   | 2   | 15 PITG_05631  |
| 0   | 22  | 6 PITG_00077   |
| 0   | 0   | 0 NA           |
| 0   | 20  | 205 PITG_22343 |
| 0   | 2   | 0 PITG_08817   |
| 0   | 9   | 26 PITG_00967  |
| 0   | 0   | 2 PITG_09377   |
| 0   | 4   | 6 NA           |
| 0   | 27  | 14 NA          |
| 0   | 181 | 21 PITG_08306  |
| 6   | 9   | 13 NA          |
| 0   | 0   | 12 PITG_07655  |
| 0   | 2   | 3 NA           |
| 0   | 4   | 0 PITG_16058   |
| 0   | 13  | 22 PITG_19886  |
| 0   | 5   | 4 PITG_02624   |
| 0   | 0   | 3 PITG_16684   |
| 0   | 65  | 2 PITG_08964   |
| 0   | 2   | 7 NA           |
| 0   | 8   | 17 PITG_03733  |
| 0   | 23  | 28 PITG_08734  |
| 0   | 0   | 2 PITG_00215   |
| 0   | 10  | 0 NA           |
| 327 | 4   | 8 NA           |
| 0   | 20  | 7 PITG_03458   |
| 2   | 6   | 111 NA         |
| 0   | 0   | 3 PITG_03997   |
| 0   | 21  | 12 PITG_09664  |
| 0   | 19  | 22 PITG_00965  |
| 0   | 16  | 27 PITG_13641  |
| 0   | 25  | 13 PITG_01283  |

|   |     |               |
|---|-----|---------------|
| 0 | 12  | 16 PITG_00191 |
| 0 | 0   | 0 PITG_01457  |
| 0 | 0   | 2 PITG_09279  |
| 0 | 27  | 2 PITG_09753  |
| 0 | 0   | 0 NA          |
| 0 | 0   | 2 NA          |
| 0 | 0   | 0 PITG_13968  |
| 0 | 0   | 9 PITG_11264  |
| 0 | 56  | 29 PITG_03446 |
| 0 | 37  | 4 PITG_09366  |
| 0 | 7   | 0 NA          |
| 0 | 5   | 0 PITG_15779  |
| 0 | 6   | 0 PITG_22311  |
| 0 | 8   | 10 PITG_03265 |
| 0 | 39  | 47 PITG_17499 |
| 0 | 2   | 11 PITG_02259 |
| 0 | 0   | 2 PITG_20203  |
| 0 | 87  | 57 PITG_10081 |
| 0 | 12  | 65 PITG_11046 |
| 0 | 2   | 0 PITG_01109  |
| 0 | 19  | 6 PITG_14730  |
| 0 | 6   | 5 PITG_18892  |
| 0 | 4   | 4 PITG_16042  |
| 0 | 5   | 2 PITG_06988  |
| 0 | 0   | 7 PITG_03609  |
| 0 | 24  | 20 PITG_00746 |
| 0 | 10  | 0 PITG_16224  |
| 0 | 4   | 33 PITG_10462 |
| 0 | 22  | 0 PITG_06792  |
| 0 | 0   | 5 PITG_03024  |
| 0 | 22  | 12 PITG_03454 |
| 0 | 14  | 12 NA         |
| 0 | 4   | 10 NA         |
| 0 | 5   | 0 PITG_13979  |
| 0 | 0   | 3 PITG_14991  |
| 0 | 9   | 4 PITG_18298  |
| 0 | 20  | 8 PITG_05564  |
| 0 | 2   | 2 PITG_07991  |
| 0 | 138 | 78 PITG_00169 |
| 0 | 24  | 17 NA         |
| 0 | 32  | 12 PITG_01520 |
| 0 | 7   | 13 PITG_01283 |
| 0 | 2   | 12 PITG_03103 |
| 0 | 0   | 2 PITG_05631  |
| 0 | 8   | 0 PITG_02254  |
| 0 | 16  | 22 PITG_14937 |
| 0 | 109 | 19 PITG_15655 |

|   |    |               |
|---|----|---------------|
| 0 | 0  | 0 NA          |
| 0 | 4  | 8 PITG_03095  |
| 0 | 29 | 0 PITG_01232  |
| 0 | 2  | 0 PITG_01981  |
| 0 | 7  | 0 PITG_00463  |
| 0 | 0  | 0 PITG_10868  |
| 0 | 4  | 8 PITG_12797  |
| 0 | 0  | 0 PITG_03374  |
| 0 | 19 | 0 PITG_03915  |
| 0 | 6  | 11 NA         |
| 0 | 0  | 2 PITG_19402  |
| 0 | 4  | 27 PITG_16804 |
| 0 | 3  | 0 PITG_13240  |
| 0 | 19 | 6 PITG_16719  |
| 0 | 0  | 0 NA          |
| 0 | 0  | 0 PITG_20434  |
| 0 | 15 | 11 PITG_10898 |
| 0 | 80 | 51 PITG_00395 |
| 0 | 11 | 0 PITG_02457  |
| 0 | 17 | 19 PITG_09564 |
| 0 | 13 | 0 PITG_15837  |
| 0 | 2  | 12 PITG_15637 |
| 0 | 10 | 0 PITG_12958  |
| 0 | 4  | 0 PITG_00391  |
| 0 | 10 | 9 PITG_16271  |
| 0 | 3  | 2 NA          |
| 0 | 27 | 10 PITG_00762 |
| 0 | 33 | 2 PITG_17370  |
| 0 | 2  | 0 NA          |
| 0 | 2  | 2 PITG_15447  |
| 0 | 26 | 2 NA          |
| 0 | 2  | 7 PITG_09413  |
| 0 | 25 | 82 PITG_23111 |
| 0 | 12 | 11 PITG_03146 |
| 0 | 11 | 5 NA          |
| 0 | 0  | 2 PITG_18751  |
| 0 | 32 | 34 PITG_08031 |
| 0 | 0  | 19 NA         |
| 0 | 0  | 0 NA          |
| 0 | 0  | 2 NA          |
| 0 | 6  | 4 PITG_02532  |
| 0 | 21 | 21 PITG_02852 |
| 0 | 11 | 8 PITG_19809  |
| 0 | 20 | 0 PITG_16675  |
| 0 | 0  | 2 PITG_01405  |
| 0 | 0  | 4 NA          |
| 0 | 70 | 29 PITG_05519 |

|     |     |               |
|-----|-----|---------------|
| 0   | 12  | 6 PITG_07321  |
| 0   | 25  | 9 PITG_14637  |
| 0   | 0   | 0 PITG_14863  |
| 0   | 4   | 2 PITG_19179  |
| 0   | 12  | 44 PITG_07048 |
| 100 | 23  | 45 NA         |
| 0   | 2   | 2 PITG_03505  |
| 0   | 134 | 10 NA         |
| 0   | 386 | 162 NA        |
| 0   | 0   | 0 PITG_11470  |
| 0   | 19  | 15 PITG_19180 |
| 0   | 6   | 0 NA          |
| 0   | 15  | 2 NA          |
| 0   | 50  | 2 PITG_13732  |
| 0   | 23  | 24 PITG_20295 |
| 0   | 0   | 5 PITG_12100  |
| 0   | 4   | 2 PITG_06982  |
| 0   | 2   | 0 PITG_01395  |
| 0   | 8   | 23 PITG_02924 |
| 0   | 13  | 2 PITG_18998  |
| 0   | 4   | 2 PITG_12852  |
| 0   | 20  | 4 PITG_08301  |
| 0   | 75  | 33 PITG_17382 |
| 0   | 382 | 98 PITG_03164 |
| 0   | 260 | 112 NA        |
| 0   | 39  | 88 PITG_15605 |
| 0   | 2   | 10 PITG_16322 |
| 0   | 2   | 2 PITG_02477  |
| 0   | 26  | 17 PITG_03275 |
| 0   | 17  | 24 PITG_05740 |
| 0   | 4   | 2 PITG_03665  |
| 0   | 39  | 4 NA          |
| 0   | 0   | 0 NA          |
| 0   | 2   | 2 PITG_03506  |
| 0   | 0   | 0 PITG_18999  |
| 0   | 29  | 21 PITG_06939 |
| 0   | 0   | 0 PITG_03987  |
| 0   | 129 | 29 PITG_15335 |
| 0   | 0   | 0 PITG_06288  |
| 0   | 12  | 5 PITG_11886  |
| 0   | 21  | 0 NA          |
| 0   | 98  | 98 NA         |
| 0   | 4   | 2 PITG_15077  |
| 0   | 29  | 2 PITG_04700  |
| 0   | 17  | 2 NA          |
| 0   | 4   | 13 PITG_11229 |
| 0   | 33  | 7 PITG_05595  |

|    |      |                |
|----|------|----------------|
| 0  | 0    | 0 PITG_14123   |
| 6  | 11   | 1999 NA        |
| 0  | 5    | 0 NA           |
| 0  | 420  | 328 PITG_14362 |
| 0  | 136  | 16 PITG_17460  |
| 0  | 0    | 2 PITG_00620   |
| 0  | 1408 | 1555 NA        |
| 0  | 32   | 2 NA           |
| 0  | 29   | 6 PITG_03048   |
| 0  | 8    | 7 PITG_13571   |
| 0  | 12   | 17 PITG_19122  |
| 0  | 26   | 0 NA           |
| 0  | 14   | 4 PITG_16458   |
| 0  | 47   | 26 PITG_02971  |
| 0  | 2    | 2 PITG_07233   |
| 0  | 68   | 301 PITG_18100 |
| 0  | 0    | 4 PITG_10125   |
| 0  | 4    | 0 PITG_17137   |
| 0  | 50   | 104 PITG_11244 |
| 0  | 9    | 3 PITG_13672   |
| 0  | 111  | 360 PITG_08941 |
| 0  | 16   | 19 PITG_04242  |
| 0  | 7    | 28 PITG_18735  |
| 0  | 4    | 2 PITG_11194   |
| 0  | 24   | 36 PITG_00302  |
| 0  | 30   | 4 PITG_11369   |
| 37 | 9    | 52 NA          |
| 0  | 7    | 2 PITG_08760   |
| 0  | 2    | 4 PITG_14916   |
| 0  | 16   | 7 PITG_00315   |
| 0  | 2    | 7 PITG_22249   |
| 52 | 4    | 0 NA           |
| 0  | 85   | 19 NA          |
| 0  | 7    | 3 PITG_16036   |
| 0  | 6    | 4 PITG_19175   |
| 0  | 29   | 13 PITG_07040  |
| 0  | 2    | 2 PITG_19125   |
| 0  | 111  | 94 NA          |
| 0  | 2    | 5 PITG_15310   |
| 0  | 71   | 68 PITG_18738  |
| 0  | 30   | 18 PITG_18464  |
| 0  | 6    | 0 PITG_08470   |
| 0  | 2    | 2 PITG_02927   |
| 0  | 7    | 4 PITG_15475   |
| 0  | 18   | 8 NA           |
| 0  | 25   | 36 PITG_21146  |
| 0  | 0    | 0 PITG_02292   |



|    |      |                |
|----|------|----------------|
| 0  | 1353 | 387 NA         |
| 0  | 138  | 46 PITG_20362  |
| 3  | 0    | 7 NA           |
| 0  | 5    | 6 NA           |
| 0  | 9    | 0 PITG_16526   |
| 0  | 2    | 21 PITG_00689  |
| 0  | 0    | 0 PITG_19115   |
| 0  | 0    | 2 NA           |
| 0  | 0    | 2 PITG_06570   |
| 0  | 237  | 371 PITG_13372 |
| 0  | 22   | 0 PITG_12277   |
| 0  | 22   | 4 NA           |
| 0  | 815  | 535 PITG_20487 |
| 0  | 20   | 2 NA           |
| 0  | 24   | 29 PITG_11458  |
| 0  | 2    | 0 NA           |
| 0  | 0    | 0 PITG_13381   |
| 0  | 0    | 0 PITG_10784   |
| 0  | 26   | 12 PITG_10595  |
| 0  | 5    | 2 PITG_18656   |
| 0  | 0    | 0 PITG_05862   |
| 0  | 10   | 0 PITG_09285   |
| 0  | 0    | 0 NA           |
| 0  | 14   | 51 PITG_11845  |
| 0  | 4    | 0 NA           |
| 0  | 84   | 55 PITG_14111  |
| 0  | 11   | 13 PITG_05299  |
| 0  | 0    | 6 PITG_05326   |
| 0  | 2    | 6 PITG_21842   |
| 0  | 2    | 3 NA           |
| 0  | 0    | 2 PITG_02497   |
| 0  | 394  | 57 NA          |
| 17 | 22   | 0 NA           |
| 0  | 2    | 2 PITG_09877   |
| 0  | 17   | 0 NA           |
| 0  | 0    | 3 PITG_19257   |
| 0  | 46   | 17 NA          |
| 0  | 14   | 0 PITG_10989   |
| 0  | 6    | 0 PITG_01405   |
| 0  | 4    | 14 PITG_04283  |
| 0  | 15   | 4 NA           |
| 0  | 4    | 6 PITG_15962   |
| 0  | 23   | 5 PITG_03771   |
| 0  | 18   | 9 PITG_08850   |
| 0  | 41   | 20 PITG_01770  |
| 0  | 36   | 26 PITG_21178  |
| 0  | 0    | 0 NA           |

|   |     |               |
|---|-----|---------------|
| 0 | 2   | 0 PITG_22548  |
| 0 | 4   | 3 NA          |
| 0 | 11  | 2 PITG_12523  |
| 0 | 2   | 0 PITG_15731  |
| 0 | 8   | 2 PITG_06392  |
| 0 | 0   | 0 PITG_21005  |
| 0 | 4   | 28 PITG_07886 |
| 0 | 2   | 10 PITG_00770 |
| 0 | 43  | 83 PITG_06430 |
| 0 | 2   | 4 PITG_10590  |
| 0 | 2   | 3 PITG_10239  |
| 0 | 6   | 0 PITG_07856  |
| 0 | 2   | 0 PITG_01044  |
| 0 | 40  | 18 PITG_18874 |
| 0 | 2   | 2 PITG_21211  |
| 0 | 2   | 0 PITG_09364  |
| 0 | 2   | 0 PITG_12175  |
| 0 | 0   | 2 PITG_02696  |
| 0 | 10  | 8 PITG_00180  |
| 0 | 21  | 10 PITG_08901 |
| 0 | 116 | 59 NA         |
| 0 | 10  | 0 NA          |
| 0 | 3   | 8 PITG_09462  |
| 0 | 14  | 44 PITG_09243 |
| 0 | 10  | 6 PITG_12462  |
| 0 | 0   | 0 PITG_07301  |
| 0 | 84  | 99 PITG_15602 |
| 0 | 0   | 0 PITG_19036  |
| 0 | 27  | 2 PITG_06714  |
| 0 | 14  | 13 PITG_02016 |
| 0 | 3   | 8 PITG_08576  |
| 0 | 0   | 2 PITG_07241  |
| 0 | 0   | 0 PITG_11461  |
| 0 | 11  | 18 PITG_22839 |
| 0 | 0   | 4 PITG_10554  |
| 4 | 0   | 2 NA          |
| 0 | 17  | 0 PITG_01647  |
| 0 | 14  | 0 PITG_16887  |
| 0 | 27  | 29 PITG_20548 |
| 0 | 7   | 16 PITG_15550 |
| 0 | 21  | 7 PITG_01663  |
| 0 | 8   | 7 PITG_22191  |
| 0 | 77  | 65 PITG_12648 |
| 0 | 23  | 98 PITG_20559 |
| 0 | 4   | 2 NA          |
| 0 | 2   | 0 NA          |
| 0 | 9   | 6 PITG_08035  |

|   |     |                |
|---|-----|----------------|
| 0 | 0   | 3 PITG_12739   |
| 0 | 0   | 4 PITG_22177   |
| 0 | 8   | 15 PITG_08653  |
| 0 | 2   | 0 PITG_11125   |
| 0 | 6   | 2 PITG_18092   |
| 0 | 0   | 8 PITG_20928   |
| 0 | 0   | 0 PITG_20197   |
| 0 | 0   | 0 PITG_02654   |
| 0 | 0   | 8 PITG_02122   |
| 0 | 5   | 4 NA           |
| 0 | 5   | 0 PITG_06660   |
| 0 | 4   | 3 PITG_08901   |
| 0 | 7   | 0 PITG_01858   |
| 0 | 4   | 2 PITG_00369   |
| 0 | 20  | 2 NA           |
| 0 | 0   | 0 NA           |
| 0 | 2   | 0 PITG_12821   |
| 0 | 2   | 2 PITG_00955   |
| 0 | 90  | 18 PITG_19516  |
| 0 | 10  | 2 PITG_15119   |
| 0 | 0   | 6 PITG_06881   |
| 0 | 67  | 511 PITG_14175 |
| 0 | 0   | 0 PITG_00722   |
| 0 | 2   | 22 PITG_11425  |
| 0 | 13  | 5 PITG_13887   |
| 0 | 24  | 6 PITG_03294   |
| 0 | 57  | 3 NA           |
| 0 | 16  | 37 PITG_07923  |
| 0 | 189 | 551 PITG_13807 |
| 0 | 22  | 48 PITG_02909  |
| 0 | 4   | 2 PITG_01722   |
| 0 | 29  | 38 PITG_02529  |
| 0 | 18  | 4 NA           |
| 0 | 18  | 0 PITG_11405   |
| 0 | 84  | 18 PITG_21209  |
| 0 | 3   | 9 PITG_00460   |
| 0 | 2   | 0 PITG_17554   |
| 0 | 0   | 0 PITG_01608   |
| 0 | 27  | 7 PITG_02264   |
| 0 | 10  | 0 NA           |
| 0 | 0   | 16 PITG_03740  |
| 0 | 0   | 0 NA           |
| 0 | 5   | 0 PITG_09016   |
| 0 | 4   | 2 PITG_16468   |
| 0 | 19  | 0 PITG_11201   |
| 0 | 2   | 0 PITG_00589   |
| 0 | 19  | 25 NA          |

|   |     |                |
|---|-----|----------------|
| 0 | 9   | 22 PITG_19875  |
| 0 | 0   | 2 PITG_03034   |
| 0 | 5   | 8 NA           |
| 0 | 4   | 8 PITG_18734   |
| 0 | 4   | 0 PITG_08159   |
| 0 | 0   | 15 NA          |
| 0 | 0   | 0 PITG_03040   |
| 0 | 0   | 0 PITG_18728   |
| 0 | 18  | 6 NA           |
| 0 | 5   | 0 PITG_13574   |
| 0 | 58  | 0 PITG_12763   |
| 0 | 5   | 0 NA           |
| 0 | 12  | 18 PITG_02796  |
| 0 | 34  | 2 PITG_17031   |
| 0 | 22  | 12 PITG_17556  |
| 0 | 113 | 106 PITG_15117 |
| 0 | 4   | 6 PITG_04546   |
| 0 | 2   | 0 PITG_02202   |
| 0 | 6   | 67 PITG_10822  |
| 0 | 46  | 94 PITG_11460  |
| 0 | 2   | 0 NA           |
| 0 | 2   | 2 PITG_06769   |
| 0 | 7   | 21 PITG_07325  |
| 0 | 3   | 0 PITG_02016   |
| 0 | 17  | 8 PITG_04844   |
| 0 | 23  | 76 PITG_12266  |
| 0 | 0   | 8 PITG_19164   |
| 0 | 11  | 6 PITG_01710   |
| 0 | 0   | 0 PITG_09377   |
| 0 | 4   | 20 PITG_15267  |
| 0 | 126 | 7 PITG_05550   |
| 0 | 23  | 2 PITG_03461   |
| 0 | 0   | 19 PITG_12099  |
| 0 | 3   | 0 NA           |
| 0 | 39  | 33 NA          |
| 0 | 0   | 0 NA           |
| 0 | 6   | 10 PITG_14588  |
| 0 | 19  | 8 PITG_02732   |
| 0 | 10  | 6 NA           |
| 0 | 0   | 2 PITG_07104   |
| 0 | 11  | 4 NA           |
| 0 | 0   | 0 NA           |
| 0 | 2   | 2 NA           |
| 0 | 14  | 2 PITG_09852   |
| 0 | 6   | 6 PITG_17693   |
| 0 | 24  | 139 PITG_15850 |
| 0 | 26  | 18 PITG_02128  |

|   |     |                |
|---|-----|----------------|
| 0 | 28  | 15 NA          |
| 0 | 2   | 5 PITG_22810   |
| 0 | 35  | 11 PITG_04545  |
| 0 | 17  | 175 PITG_16161 |
| 0 | 131 | 94 PITG_01706  |
| 0 | 36  | 6 PITG_06648   |
| 0 | 17  | 47 NA          |
| 0 | 72  | 27 NA          |
| 0 | 9   | 17 PITG_07017  |
| 0 | 2   | 4 PITG_01769   |
| 0 | 17  | 9 PITG_18106   |
| 0 | 0   | 0 PITG_20503   |
| 0 | 3   | 13 PITG_18498  |
| 0 | 3   | 7 PITG_14094   |
| 0 | 2   | 8 PITG_00703   |
| 0 | 2   | 0 PITG_09166   |
| 0 | 14  | 13 PITG_10817  |
| 0 | 128 | 46 NA          |
| 0 | 6   | 2 PITG_04940   |
| 0 | 8   | 6 PITG_18236   |
| 0 | 17  | 47 PITG_17787  |
| 0 | 119 | 62 NA          |
| 0 | 6   | 0 PITG_05526   |
| 0 | 0   | 2 PITG_08329   |
| 0 | 4   | 0 PITG_02327   |
| 0 | 68  | 59 PITG_09144  |
| 0 | 8   | 30 PITG_16328  |
| 0 | 2   | 0 PITG_08926   |
| 0 | 8   | 26 PITG_20216  |
| 0 | 6   | 0 PITG_06610   |
| 0 | 5   | 8 PITG_17135   |
| 0 | 5   | 6 PITG_10524   |
| 0 | 2   | 4 PITG_06590   |
| 0 | 0   | 0 NA           |
| 0 | 0   | 0 PITG_00407   |
| 0 | 4   | 0 PITG_02464   |
| 0 | 0   | 3 NA           |
| 0 | 510 | 54 PITG_07923  |
| 0 | 23  | 26 PITG_02992  |
| 0 | 0   | 0 NA           |
| 0 | 13  | 7 PITG_10935   |
| 0 | 14  | 2 PITG_17853   |
| 0 | 15  | 6 PITG_13041   |
| 0 | 50  | 0 NA           |
| 0 | 0   | 2 PITG_11741   |
| 0 | 2   | 3 NA           |
| 0 | 4   | 13 PITG_14152  |

|     |     |               |
|-----|-----|---------------|
| 0   | 4   | 11 PITG_10664 |
| 0   | 0   | 0 PITG_03646  |
| 0   | 23  | 2 PITG_05590  |
| 0   | 2   | 4 PITG_05667  |
| 0   | 44  | 28 PITG_07868 |
| 0   | 5   | 4 PITG_17387  |
| 0   | 0   | 0 PITG_22087  |
| 0   | 0   | 6 PITG_17867  |
| 0   | 0   | 0 PITG_21802  |
| 0   | 0   | 0 PITG_03860  |
| 0   | 10  | 0 PITG_02711  |
| 0   | 4   | 5 PITG_11029  |
| 0   | 5   | 0 PITG_00894  |
| 0   | 0   | 0 PITG_06593  |
| 0   | 2   | 0 NA          |
| 0   | 10  | 26 PITG_11743 |
| 0   | 10  | 3 PITG_03480  |
| 0   | 32  | 0 PITG_19604  |
| 0   | 67  | 0 PITG_20293  |
| 0   | 21  | 0 PITG_08421  |
| 0   | 19  | 16 PITG_02288 |
| 0   | 5   | 4 NA          |
| 0   | 10  | 0 PITG_17128  |
| 0   | 6   | 0 PITG_13678  |
| 0   | 10  | 0 PITG_19916  |
| 0   | 14  | 10 PITG_14898 |
| 0   | 23  | 20 NA         |
| 0   | 0   | 2 PITG_10813  |
| 0   | 29  | 17 NA         |
| 0   | 8   | 0 PITG_10943  |
| 0   | 2   | 18 PITG_20977 |
| 105 | 6   | 66 NA         |
| 0   | 215 | 33 PITG_15746 |
| 0   | 0   | 0 PITG_00252  |
| 0   | 34  | 8 PITG_17933  |
| 0   | 2   | 0 PITG_06429  |
| 0   | 4   | 0 NA          |
| 0   | 0   | 5 PITG_04576  |
| 0   | 2   | 6 PITG_14579  |
| 0   | 4   | 0 PITG_03043  |
| 0   | 13  | 16 PITG_20745 |
| 0   | 40  | 9 PITG_18693  |
| 0   | 0   | 2 PITG_17908  |
| 0   | 19  | 9 PITG_11410  |
| 0   | 14  | 5 PITG_12446  |
| 0   | 0   | 2 PITG_14727  |
| 0   | 77  | 56 PITG_22303 |

|   |     |               |
|---|-----|---------------|
| 0 | 4   | 2 PITG_13721  |
| 0 | 3   | 2 NA          |
| 0 | 2   | 0 PITG_20316  |
| 0 | 2   | 7 PITG_03474  |
| 0 | 5   | 25 PITG_16808 |
| 0 | 67  | 8 PITG_07945  |
| 0 | 2   | 4 PITG_00147  |
| 0 | 4   | 9 PITG_03453  |
| 0 | 7   | 0 PITG_12222  |
| 0 | 14  | 2 PITG_19962  |
| 0 | 0   | 10 PITG_14750 |
| 2 | 6   | 22 PITG_12667 |
| 0 | 0   | 2 PITG_16770  |
| 0 | 111 | 94 PITG_19817 |
| 0 | 2   | 2 PITG_05423  |
| 0 | 47  | 27 PITG_06708 |
| 0 | 0   | 8 PITG_20714  |
| 0 | 2   | 3 PITG_04572  |
| 0 | 4   | 0 PITG_15509  |
| 0 | 0   | 0 PITG_12149  |
| 0 | 7   | 24 PITG_14217 |
| 0 | 0   | 8 PITG_10250  |
| 0 | 0   | 2 PITG_00134  |
| 0 | 6   | 8 PITG_06822  |
| 0 | 10  | 2 PITG_16476  |
| 0 | 0   | 0 PITG_04619  |
| 0 | 0   | 0 PITG_16487  |
| 0 | 9   | 4 PITG_12150  |
| 0 | 53  | 32 PITG_16113 |
| 0 | 7   | 2 PITG_11437  |
| 0 | 0   | 7 NA          |
| 0 | 44  | 39 PITG_06170 |
| 0 | 3   | 2 PITG_00809  |
| 0 | 5   | 0 PITG_05447  |
| 0 | 0   | 10 PITG_20197 |
| 0 | 12  | 12 PITG_03946 |
| 0 | 2   | 2 PITG_10764  |
| 0 | 3   | 8 PITG_11594  |
| 0 | 2   | 8 PITG_09089  |
| 0 | 29  | 19 PITG_19350 |
| 0 | 9   | 26 PITG_03987 |
| 2 | 30  | 40 PITG_04538 |
| 0 | 24  | 10 NA         |
| 0 | 8   | 2 PITG_18912  |
| 0 | 53  | 18 PITG_08093 |
| 0 | 2   | 4 PITG_02920  |
| 0 | 28  | 24 PITG_07007 |

|   |    |                |
|---|----|----------------|
| 0 | 0  | 0 PITG_19153   |
| 0 | 4  | 2 PITG_05692   |
| 0 | 2  | 2 PITG_20097   |
| 0 | 2  | 2 PITG_03815   |
| 0 | 8  | 5 NA           |
| 0 | 5  | 10 PITG_14550  |
| 0 | 9  | 7 PITG_08504   |
| 0 | 4  | 2 PITG_10616   |
| 0 | 4  | 6 PITG_04028   |
| 0 | 5  | 12 PITG_18328  |
| 0 | 2  | 0 NA           |
| 0 | 2  | 2 PITG_00940   |
| 0 | 2  | 5 PITG_17359   |
| 0 | 6  | 15 PITG_05907  |
| 0 | 29 | 141 PITG_13341 |
| 0 | 0  | 0 NA           |
| 0 | 16 | 4 PITG_05194   |
| 0 | 2  | 8 NA           |
| 0 | 23 | 0 NA           |
| 0 | 0  | 0 PITG_03821   |
| 0 | 0  | 6 PITG_02042   |
| 0 | 84 | 35 NA          |
| 0 | 30 | 0 PITG_14253   |
| 0 | 0  | 9 PITG_13775   |
| 0 | 0  | 0 PITG_22991   |
| 0 | 15 | 28 PITG_21014  |
| 0 | 29 | 28 PITG_19745  |
| 0 | 10 | 2 PITG_15149   |
| 0 | 12 | 2 PITG_08590   |
| 0 | 0  | 0 PITG_15065   |
| 0 | 24 | 43 PITG_05127  |
| 0 | 0  | 8 PITG_18184   |
| 0 | 4  | 2 PITG_08787   |
| 0 | 0  | 2 PITG_07149   |
| 0 | 8  | 0 PITG_03029   |
| 0 | 4  | 3 PITG_05781   |
| 0 | 0  | 8 NA           |
| 0 | 8  | 12 PITG_17549  |
| 0 | 9  | 3 NA           |
| 0 | 0  | 8 PITG_02343   |
| 0 | 54 | 37 PITG_00941  |
| 0 | 2  | 0 PITG_19201   |
| 0 | 12 | 26 PITG_15503  |
| 0 | 5  | 34 PITG_22562  |
| 0 | 15 | 43 PITG_15927  |
| 0 | 0  | 0 PITG_12108   |
| 0 | 6  | 2 PITG_07952   |



|     |     |                |
|-----|-----|----------------|
| 0   | 44  | 43 PITG_13806  |
| 952 | 4   | 740 NA         |
| 0   | 12  | 10 PITG_06114  |
| 0   | 3   | 8 NA           |
| 0   | 79  | 129 PITG_12661 |
| 0   | 10  | 2 PITG_11201   |
| 0   | 16  | 9 PITG_10168   |
| 0   | 2   | 4 PITG_09910   |
| 0   | 0   | 0 PITG_11019   |
| 0   | 2   | 0 PITG_10262   |
| 0   | 15  | 6 PITG_00627   |
| 0   | 19  | 18 PITG_19745  |
| 0   | 0   | 2 NA           |
| 0   | 0   | 0 PITG_09098   |
| 0   | 3   | 6 NA           |
| 0   | 73  | 17 NA          |
| 0   | 0   | 0 NA           |
| 0   | 6   | 2 PITG_06131   |
| 0   | 8   | 7 PITG_01088   |
| 0   | 10  | 10 PITG_03165  |
| 0   | 4   | 2 NA           |
| 0   | 20  | 10 PITG_20236  |
| 0   | 4   | 14 PITG_16131  |
| 0   | 2   | 0 PITG_14920   |
| 0   | 0   | 7 PITG_00215   |
| 245 | 0   | 51 NA          |
| 0   | 112 | 357 PITG_07996 |
| 0   | 12  | 0 NA           |
| 0   | 2   | 2 PITG_13836   |
| 0   | 8   | 11 PITG_10892  |
| 0   | 21  | 16 PITG_04401  |
| 0   | 2   | 2 PITG_03872   |
| 0   | 3   | 2 PITG_07915   |
| 0   | 8   | 6 PITG_03373   |
| 0   | 11  | 4 PITG_17131   |
| 0   | 7   | 0 PITG_08567   |
| 0   | 0   | 3 PITG_10105   |
| 0   | 6   | 42 PITG_01477  |
| 0   | 6   | 0 PITG_01114   |
| 0   | 4   | 0 PITG_15569   |
| 0   | 0   | 0 PITG_04023   |
| 0   | 0   | 2 PITG_01815   |
| 0   | 0   | 0 NA           |
| 0   | 13  | 8 PITG_09987   |
| 0   | 0   | 9 PITG_18044   |
| 0   | 2   | 0 PITG_06178   |
| 0   | 6   | 6 PITG_20173   |

|   |     |                |
|---|-----|----------------|
| 0 | 2   | 8 PITG_17071   |
| 0 | 8   | 7 PITG_19868   |
| 0 | 52  | 0 PITG_20906   |
| 0 | 0   | 0 PITG_03988   |
| 0 | 0   | 0 PITG_11292   |
| 0 | 18  | 19 NA          |
| 0 | 14  | 4 PITG_18175   |
| 0 | 2   | 4 PITG_10735   |
| 0 | 36  | 0 PITG_15737   |
| 0 | 7   | 13 PITG_06692  |
| 0 | 10  | 0 PITG_11708   |
| 0 | 2   | 2 PITG_16854   |
| 0 | 4   | 10 PITG_12302  |
| 0 | 2   | 4 PITG_01154   |
| 0 | 2   | 5 PITG_05672   |
| 0 | 28  | 18 PITG_03288  |
| 0 | 5   | 24 PITG_19537  |
| 0 | 31  | 5 NA           |
| 0 | 0   | 0 NA           |
| 0 | 28  | 9 NA           |
| 0 | 22  | 29 PITG_01127  |
| 0 | 20  | 11 NA          |
| 0 | 50  | 0 NA           |
| 0 | 17  | 4 NA           |
| 0 | 0   | 2 PITG_11964   |
| 0 | 42  | 5 PITG_08310   |
| 0 | 0   | 5 PITG_10735   |
| 0 | 11  | 10 PITG_07946  |
| 0 | 0   | 4 PITG_12497   |
| 0 | 4   | 4 PITG_19303   |
| 0 | 3   | 0 NA           |
| 0 | 2   | 15 PITG_13938  |
| 0 | 0   | 2 PITG_08780   |
| 0 | 0   | 2 PITG_14299   |
| 0 | 0   | 6 PITG_13546   |
| 0 | 10  | 12 PITG_17549  |
| 0 | 184 | 13 PITG_07020  |
| 0 | 0   | 0 NA           |
| 0 | 10  | 26 PITG_05408  |
| 0 | 7   | 5 PITG_21879   |
| 0 | 33  | 2 PITG_00409   |
| 0 | 2   | 2 NA           |
| 0 | 42  | 140 PITG_09432 |
| 0 | 0   | 0 NA           |
| 0 | 0   | 0 PITG_09035   |
| 0 | 6   | 6 PITG_04508   |
| 0 | 4   | 10 PITG_02454  |

|     |     |                |
|-----|-----|----------------|
| 0   | 18  | 2 PITG_12675   |
| 0   | 2   | 0 PITG_07233   |
| 0   | 2   | 6 PITG_02753   |
| 0   | 0   | 2 PITG_05302   |
| 0   | 15  | 90 NA          |
| 0   | 2   | 2 PITG_08926   |
| 0   | 4   | 11 PITG_13237  |
| 0   | 0   | 9 PITG_04453   |
| 0   | 2   | 4 PITG_06638   |
| 0   | 21  | 0 PITG_18104   |
| 0   | 4   | 12 PITG_17378  |
| 0   | 0   | 0 PITG_03872   |
| 0   | 9   | 3 PITG_14197   |
| 0   | 0   | 2 PITG_09387   |
| 0   | 4   | 8 PITG_01745   |
| 0   | 25  | 75 PITG_01067  |
| 0   | 36  | 31 PITG_07728  |
| 0   | 8   | 12 PITG_13558  |
| 607 | 0   | 83 NA          |
| 0   | 0   | 0 PITG_12517   |
| 0   | 13  | 7 PITG_14596   |
| 0   | 2   | 0 PITG_19151   |
| 0   | 4   | 6 PITG_19532   |
| 0   | 0   | 4 PITG_17484   |
| 0   | 9   | 14 NA          |
| 0   | 32  | 63 PITG_16207  |
| 0   | 8   | 8 NA           |
| 0   | 17  | 15 PITG_17092  |
| 0   | 0   | 42 PITG_22685  |
| 0   | 0   | 0 PITG_11158   |
| 0   | 0   | 2 PITG_10725   |
| 0   | 0   | 4 PITG_10926   |
| 0   | 7   | 9 PITG_00710   |
| 0   | 9   | 5 PITG_07916   |
| 0   | 0   | 0 NA           |
| 0   | 4   | 0 NA           |
| 0   | 0   | 2 PITG_08602   |
| 0   | 0   | 12 PITG_21166  |
| 0   | 3   | 3 PITG_16272   |
| 0   | 6   | 6 PITG_04990   |
| 0   | 31  | 4 NA           |
| 0   | 0   | 4 PITG_21223   |
| 0   | 12  | 4 PITG_17359   |
| 0   | 19  | 2 PITG_02863   |
| 0   | 703 | 620 PITG_07999 |
| 0   | 14  | 14 PITG_07839  |
| 0   | 2   | 3 PITG_10743   |

|   |     |               |
|---|-----|---------------|
| 0 | 5   | 9 PITG_21398  |
| 0 | 81  | 89 PITG_00970 |
| 0 | 0   | 0 NA          |
| 0 | 0   | 2 PITG_11578  |
| 0 | 2   | 0 PITG_14401  |
| 0 | 16  | 2 PITG_10443  |
| 0 | 6   | 5 PITG_03631  |
| 0 | 6   | 12 PITG_09247 |
| 0 | 0   | 8 PITG_14923  |
| 0 | 4   | 12 PITG_04846 |
| 0 | 0   | 0 NA          |
| 0 | 0   | 0 PITG_09598  |
| 0 | 15  | 8 PITG_08660  |
| 0 | 24  | 14 PITG_02003 |
| 0 | 103 | 48 NA         |
| 0 | 5   | 5 PITG_06516  |
| 0 | 0   | 2 PITG_03318  |
| 0 | 0   | 3 PITG_17292  |
| 0 | 9   | 5 PITG_19224  |
| 0 | 6   | 2 PITG_12223  |
| 0 | 5   | 6 PITG_08655  |
| 0 | 7   | 11 PITG_06802 |
| 0 | 0   | 0 PITG_08967  |
| 0 | 8   | 10 PITG_04553 |
| 0 | 21  | 29 PITG_03571 |
| 0 | 10  | 0 PITG_02739  |
| 0 | 113 | 10 PITG_14925 |
| 0 | 16  | 14 PITG_09751 |
| 0 | 44  | 22 NA         |
| 0 | 2   | 8 PITG_06557  |
| 0 | 0   | 0 PITG_07962  |
| 0 | 10  | 11 PITG_00292 |
| 0 | 13  | 15 PITG_17079 |
| 0 | 6   | 9 PITG_10270  |
| 0 | 13  | 0 NA          |
| 0 | 4   | 0 PITG_21638  |
| 0 | 7   | 19 PITG_05804 |
| 0 | 8   | 3 PITG_01955  |
| 0 | 20  | 0 PITG_08084  |
| 0 | 28  | 26 PITG_03651 |
| 0 | 56  | 12 PITG_02529 |
| 0 | 0   | 9 PITG_00809  |
| 2 | 74  | 26 PITG_17407 |
| 0 | 12  | 6 PITG_06853  |
| 0 | 5   | 43 PITG_15553 |
| 0 | 4   | 0 PITG_01057  |
| 0 | 3   | 0 PITG_10821  |

|   |     |                |
|---|-----|----------------|
| 0 | 5   | 7 PITG_19457   |
| 0 | 33  | 33 PITG_04600  |
| 0 | 55  | 18 PITG_06911  |
| 0 | 2   | 0 PITG_10351   |
| 0 | 4   | 2 PITG_02569   |
| 0 | 9   | 13 PITG_04992  |
| 0 | 0   | 0 PITG_10729   |
| 0 | 151 | 121 NA         |
| 0 | 0   | 4 PITG_21441   |
| 0 | 7   | 11 PITG_02205  |
| 0 | 0   | 16 NA          |
| 0 | 16  | 4 PITG_03942   |
| 0 | 4   | 25 PITG_13826  |
| 0 | 8   | 0 PITG_03945   |
| 0 | 69  | 16 PITG_12891  |
| 0 | 6   | 5 NA           |
| 0 | 7   | 14 PITG_02424  |
| 0 | 136 | 97 NA          |
| 0 | 0   | 2 PITG_13174   |
| 0 | 4   | 6 PITG_07102   |
| 0 | 11  | 5 NA           |
| 0 | 0   | 0 NA           |
| 0 | 5   | 0 PITG_05634   |
| 0 | 57  | 11 PITG_16114  |
| 0 | 49  | 28 PITG_07924  |
| 0 | 3   | 0 PITG_13527   |
| 0 | 74  | 70 PITG_06692  |
| 0 | 25  | 11 NA          |
| 0 | 13  | 3 NA           |
| 0 | 0   | 0 PITG_19025   |
| 0 | 4   | 34 PITG_03098  |
| 0 | 18  | 13 NA          |
| 0 | 6   | 6 NA           |
| 0 | 11  | 7 NA           |
| 0 | 2   | 12 PITG_07985  |
| 0 | 10  | 3 PITG_07284   |
| 0 | 29  | 67 PITG_07960  |
| 0 | 3   | 4 PITG_13828   |
| 0 | 0   | 0 PITG_05321   |
| 0 | 4   | 2 PITG_12683   |
| 0 | 8   | 8 NA           |
| 0 | 2   | 4 PITG_03903   |
| 0 | 15  | 0 PITG_21224   |
| 0 | 0   | 0 PITG_10743   |
| 0 | 267 | 418 PITG_01496 |
| 0 | 4   | 9 PITG_02545   |
| 0 | 14  | 17 NA          |

|     |      |                 |
|-----|------|-----------------|
| 0   | 26   | 5 PITG_05960    |
| 0   | 3    | 2 PITG_21993    |
| 0   | 34   | 8 NA            |
| 0   | 2    | 3 PITG_17262    |
| 0   | 0    | 0 PITG_15067    |
| 0   | 0    | 0 PITG_17554    |
| 0   | 3    | 2 PITG_22924    |
| 0   | 4    | 10 PITG_05494   |
| 0   | 0    | 11 PITG_09413   |
| 0   | 0    | 19 PITG_04333   |
| 0   | 0    | 2 PITG_07230    |
| 0   | 4    | 2 PITG_01395    |
| 0   | 0    | 2 PITG_08540    |
| 0   | 0    | 0 PITG_10274    |
| 0   | 2    | 0 PITG_07470    |
| 0   | 0    | 16 NA           |
| 0   | 99   | 225 PITG_02925  |
| 0   | 73   | 0 PITG_03458    |
| 0   | 29   | 10 PITG_13239   |
| 0   | 2    | 0 NA            |
| 0   | 0    | 0 PITG_15762    |
| 0   | 0    | 0 NA            |
| 0   | 6    | 34 NA           |
| 0   | 2    | 17 NA           |
| 0   | 0    | 0 NA            |
| 0   | 10   | 0 NA            |
| 0   | 10   | 6 PITG_02439    |
| 0   | 110  | 18 PITG_00075   |
| 0   | 42   | 2 PITG_16788    |
| 0   | 2    | 12 PITG_09702   |
| 0   | 6    | 2 PITG_06521    |
| 0   | 2    | 2 PITG_16022    |
| 0   | 0    | 0 PITG_17893    |
| 0   | 2059 | 3169 PITG_06741 |
| 737 | 82   | 1181 NA         |
| 0   | 0    | 0 PITG_10045    |
| 0   | 15   | 4 PITG_19867    |
| 0   | 2    | 0 PITG_08421    |
| 0   | 0    | 0 PITG_13910    |
| 0   | 3    | 0 PITG_18094    |
| 0   | 17   | 0 NA            |
| 0   | 14   | 2 PITG_06810    |
| 0   | 2    | 0 PITG_09435    |
| 0   | 16   | 17 PITG_09920   |
| 0   | 2    | 13 PITG_21644   |
| 0   | 9    | 8 PITG_04902    |
| 0   | 4    | 2 PITG_02848    |

|    |      |                |
|----|------|----------------|
| 0  | 10   | 5 PITG_00871   |
| 0  | 6    | 8 PITG_12915   |
| 0  | 16   | 16 PITG_13609  |
| 0  | 74   | 22 PITG_17479  |
| 0  | 7    | 2 PITG_04980   |
| 0  | 67   | 14 PITG_01419  |
| 0  | 0    | 0 PITG_18977   |
| 0  | 55   | 16 PITG_13202  |
| 0  | 9    | 0 PITG_06393   |
| 0  | 8    | 7 NA           |
| 0  | 2    | 2 PITG_03990   |
| 0  | 4    | 2 PITG_00675   |
| 0  | 15   | 7 PITG_02849   |
| 0  | 14   | 2 PITG_12340   |
| 0  | 0    | 5 PITG_09355   |
| 0  | 2    | 2 PITG_02050   |
| 0  | 0    | 0 PITG_22126   |
| 0  | 0    | 0 PITG_04593   |
| 0  | 3    | 10 PITG_03466  |
| 0  | 16   | 88 PITG_10039  |
| 0  | 16   | 0 NA           |
| 0  | 1482 | 612 PITG_04834 |
| 0  | 17   | 15 PITG_10899  |
| 0  | 16   | 7 PITG_16978   |
| 0  | 5    | 2 PITG_17508   |
| 0  | 2    | 19 PITG_11504  |
| 0  | 0    | 2 NA           |
| 0  | 27   | 4 PITG_11618   |
| 0  | 3    | 2 NA           |
| 0  | 14   | 17 PITG_10834  |
| 0  | 4    | 2 PITG_12356   |
| 0  | 60   | 18 PITG_08540  |
| 81 | 19   | 79 NA          |
| 0  | 8    | 2 PITG_03590   |
| 0  | 6    | 0 NA           |
| 0  | 6    | 17 PITG_01400  |
| 0  | 7    | 8 PITG_16280   |
| 0  | 4    | 2 PITG_13979   |
| 0  | 4    | 2 NA           |
| 0  | 60   | 0 PITG_13808   |
| 20 | 8    | 6 NA           |
| 0  | 4    | 4 PITG_12548   |
| 0  | 7    | 4 PITG_00308   |
| 0  | 11   | 0 PITG_03827   |
| 0  | 2    | 7 PITG_13157   |
| 0  | 31   | 8 PITG_15959   |
| 0  | 8    | 2 PITG_09684   |

|   |    |               |
|---|----|---------------|
| 0 | 16 | 25 PITG_10027 |
| 0 | 0  | 0 PITG_11143  |
| 0 | 2  | 6 PITG_16352  |
| 0 | 22 | 15 PITG_05633 |
| 0 | 3  | 0 NA          |
| 0 | 0  | 0 PITG_17142  |
| 0 | 4  | 0 NA          |
| 0 | 2  | 4 PITG_05658  |
| 0 | 0  | 0 PITG_08052  |
| 0 | 33 | 22 PITG_12105 |
| 0 | 67 | 17 PITG_12494 |
| 0 | 2  | 0 PITG_12191  |
| 0 | 19 | 20 NA         |
| 0 | 9  | 34 PITG_10147 |
| 0 | 20 | 0 NA          |
| 0 | 5  | 36 PITG_07154 |
| 0 | 5  | 12 PITG_14111 |
| 0 | 6  | 16 PITG_01932 |
| 0 | 5  | 0 PITG_15292  |
| 0 | 4  | 2 NA          |
| 0 | 2  | 0 PITG_02266  |
| 0 | 2  | 6 PITG_17568  |
| 0 | 22 | 4 PITG_00839  |
| 0 | 0  | 0 NA          |
| 0 | 11 | 6 NA          |
| 0 | 13 | 0 NA          |
| 0 | 0  | 18 PITG_22122 |
| 0 | 7  | 0 PITG_12112  |
| 0 | 4  | 3 NA          |
| 0 | 2  | 4 PITG_04564  |
| 0 | 19 | 18 PITG_18474 |
| 2 | 11 | 27 PITG_02586 |
| 0 | 0  | 4 PITG_12156  |
| 0 | 21 | 2 PITG_17439  |
| 0 | 0  | 6 PITG_23191  |
| 0 | 10 | 0 PITG_03945  |
| 0 | 2  | 0 PITG_00038  |
| 0 | 24 | 7 NA          |
| 0 | 0  | 0 NA          |
| 0 | 25 | 15 NA         |
| 0 | 4  | 2 PITG_03108  |
| 0 | 0  | 0 PITG_03610  |
| 0 | 18 | 10 PITG_10813 |
| 0 | 6  | 2 PITG_16462  |
| 0 | 0  | 5 PITG_11895  |
| 0 | 4  | 16 NA         |
| 0 | 0  | 0 PITG_08473  |



|   |     |                |
|---|-----|----------------|
| 0 | 10  | 0 PITG_18798   |
| 0 | 6   | 4 PITG_01591   |
| 0 | 30  | 12 PITG_11152  |
| 0 | 16  | 10 PITG_17081  |
| 0 | 23  | 121 PITG_12808 |
| 0 | 0   | 22 PITG_08023  |
| 0 | 0   | 0 PITG_05488   |
| 3 | 8   | 0 NA           |
| 0 | 0   | 0 PITG_11799   |
| 0 | 0   | 0 NA           |
| 0 | 2   | 2 NA           |
| 0 | 4   | 9 PITG_09098   |
| 0 | 33  | 21 NA          |
| 0 | 2   | 6 PITG_17347   |
| 0 | 2   | 3 PITG_07289   |
| 0 | 12  | 0 PITG_17863   |
| 0 | 62  | 8 PITG_03496   |
| 0 | 149 | 37 PITG_00155  |
| 0 | 0   | 8 NA           |
| 0 | 19  | 2 NA           |
| 0 | 0   | 7 PITG_03142   |
| 0 | 8   | 6 PITG_06710   |
| 0 | 90  | 6 NA           |
| 0 | 0   | 4 PITG_01850   |
| 0 | 0   | 7 PITG_00425   |
| 0 | 5   | 0 PITG_00516   |
| 0 | 0   | 0 PITG_02456   |
| 0 | 43  | 22 PITG_05427  |
| 0 | 28  | 84 PITG_07286  |
| 0 | 2   | 2 PITG_18508   |
| 0 | 4   | 2 PITG_09780   |
| 0 | 6   | 4 PITG_08305   |
| 0 | 35  | 39 PITG_08733  |
| 0 | 160 | 0 PITG_09504   |
| 0 | 9   | 2 PITG_10796   |
| 0 | 8   | 6 PITG_00816   |
| 0 | 5   | 2 PITG_18623   |
| 0 | 19  | 8 PITG_18393   |
| 0 | 3   | 3 PITG_08369   |
| 0 | 10  | 8 PITG_14005   |
| 0 | 20  | 2 PITG_10950   |
| 0 | 4   | 3 NA           |
| 0 | 2   | 2 PITG_15602   |
| 0 | 0   | 0 NA           |
| 0 | 6   | 19 PITG_19220  |
| 0 | 0   | 5 PITG_07230   |
| 0 | 0   | 3 PITG_18824   |

|   |     |                |
|---|-----|----------------|
| 0 | 4   | 9 PITG_09950   |
| 0 | 3   | 4 NA           |
| 0 | 4   | 2 NA           |
| 0 | 20  | 18 PITG_05922  |
| 0 | 0   | 2 PITG_13920   |
| 0 | 5   | 2 PITG_23178   |
| 0 | 6   | 14 PITG_10915  |
| 0 | 408 | 223 PITG_15552 |
| 0 | 0   | 7 PITG_04575   |
| 0 | 0   | 0 NA           |
| 0 | 20  | 10 PITG_18892  |
| 0 | 20  | 6 PITG_08295   |
| 0 | 0   | 21 PITG_08392  |
| 0 | 0   | 9 PITG_00562   |
| 0 | 0   | 0 NA           |
| 0 | 2   | 17 PITG_09247  |
| 0 | 2   | 0 PITG_11182   |
| 0 | 57  | 9 PITG_12235   |
| 0 | 48  | 4 PITG_05729   |
| 0 | 3   | 6 PITG_13715   |
| 0 | 80  | 0 PITG_08827   |
| 0 | 0   | 4 PITG_03529   |
| 0 | 18  | 12 PITG_12530  |
| 0 | 55  | 24 PITG_15042  |
| 0 | 6   | 12 NA          |
| 0 | 0   | 0 PITG_10097   |
| 0 | 67  | 24 PITG_05643  |
| 0 | 25  | 6 PITG_01232   |
| 0 | 11  | 15 PITG_00160  |
| 0 | 4   | 0 NA           |
| 0 | 27  | 5 PITG_15961   |
| 0 | 10  | 42 PITG_05461  |
| 0 | 0   | 0 PITG_09393   |
| 0 | 37  | 18 PITG_00315  |
| 0 | 13  | 26 PITG_16733  |
| 0 | 7   | 4 PITG_15847   |
| 0 | 2   | 9 PITG_10442   |
| 0 | 0   | 0 PITG_06288   |
| 0 | 23  | 22 NA          |
| 0 | 18  | 113 PITG_12286 |
| 0 | 5   | 6 PITG_06871   |
| 0 | 3   | 18 PITG_17022  |
| 0 | 6   | 12 PITG_13134  |
| 0 | 2   | 9 NA           |
| 0 | 5   | 0 PITG_21595   |
| 0 | 19  | 13 PITG_14239  |
| 0 | 2   | 0 PITG_15116   |

|    |     |                |
|----|-----|----------------|
| 0  | 34  | 33 PITG_15062  |
| 0  | 3   | 5 NA           |
| 0  | 5   | 0 PITG_19046   |
| 0  | 41  | 44 NA          |
| 0  | 7   | 0 NA           |
| 0  | 127 | 56 PITG_10664  |
| 0  | 5   | 7 PITG_04627   |
| 58 | 0   | 2 NA           |
| 0  | 2   | 2 PITG_13678   |
| 0  | 428 | 37 PITG_00877  |
| 0  | 2   | 2 PITG_20838   |
| 0  | 95  | 60 PITG_08172  |
| 0  | 10  | 0 PITG_12284   |
| 0  | 0   | 0 PITG_10487   |
| 0  | 12  | 2 PITG_08577   |
| 0  | 0   | 0 PITG_09086   |
| 0  | 11  | 2 NA           |
| 0  | 0   | 0 PITG_17245   |
| 0  | 11  | 9 PITG_12677   |
| 0  | 4   | 0 PITG_14979   |
| 0  | 0   | 2 PITG_03604   |
| 0  | 14  | 18 PITG_08383  |
| 0  | 20  | 2 PITG_02791   |
| 0  | 4   | 0 PITG_11816   |
| 0  | 4   | 7 PITG_16339   |
| 15 | 27  | 84 NA          |
| 0  | 4   | 5 PITG_11206   |
| 0  | 4   | 4 PITG_16512   |
| 0  | 3   | 0 NA           |
| 0  | 23  | 0 NA           |
| 0  | 331 | 418 PITG_14591 |
| 0  | 8   | 32 NA          |
| 0  | 0   | 2 NA           |
| 0  | 11  | 8 PITG_17942   |
| 0  | 2   | 2 PITG_21419   |
| 0  | 8   | 5 NA           |
| 0  | 9   | 0 PITG_03058   |
| 0  | 24  | 12 PITG_12285  |
| 0  | 87  | 5 PITG_20344   |
| 0  | 2   | 0 NA           |
| 0  | 35  | 4 NA           |
| 0  | 0   | 0 PITG_16810   |
| 0  | 11  | 4 PITG_03525   |
| 0  | 9   | 0 PITG_02231   |
| 0  | 2   | 0 NA           |
| 0  | 0   | 0 PITG_15445   |
| 0  | 4   | 2 PITG_17361   |

|    |     |                |
|----|-----|----------------|
| 0  | 2   | 2 PITG_05005   |
| 0  | 7   | 0 PITG_00224   |
| 0  | 0   | 0 NA           |
| 0  | 20  | 2 PITG_02958   |
| 0  | 0   | 0 PITG_04401   |
| 0  | 11  | 7 PITG_00228   |
| 0  | 2   | 4 PITG_10351   |
| 0  | 6   | 2 PITG_00809   |
| 0  | 2   | 0 PITG_01860   |
| 0  | 6   | 12 PITG_02778  |
| 0  | 6   | 2 NA           |
| 0  | 5   | 15 NA          |
| 0  | 5   | 21 PITG_08236  |
| 0  | 266 | 10 PITG_09478  |
| 0  | 3   | 17 PITG_05685  |
| 0  | 6   | 4 PITG_02942   |
| 0  | 10  | 26 NA          |
| 0  | 30  | 24 PITG_17130  |
| 0  | 17  | 28 PITG_00940  |
| 0  | 4   | 2 PITG_17159   |
| 0  | 2   | 2 PITG_09483   |
| 0  | 0   | 6 NA           |
| 0  | 17  | 53 PITG_19668  |
| 0  | 0   | 0 PITG_05598   |
| 0  | 9   | 2 PITG_02415   |
| 75 | 5   | 130 NA         |
| 0  | 0   | 2 PITG_16062   |
| 35 | 0   | 39 NA          |
| 0  | 6   | 2 PITG_00180   |
| 0  | 18  | 39 PITG_01031  |
| 0  | 63  | 72 PITG_02525  |
| 0  | 16  | 0 PITG_06953   |
| 0  | 180 | 268 PITG_15552 |
| 0  | 0   | 2 PITG_01588   |
| 0  | 512 | 349 PITG_13581 |
| 0  | 166 | 55 PITG_01055  |
| 0  | 2   | 0 PITG_19242   |
| 0  | 0   | 0 NA           |
| 0  | 21  | 0 PITG_00223   |
| 0  | 31  | 3 PITG_16495   |
| 0  | 2   | 2 PITG_17239   |
| 0  | 33  | 23 PITG_14602  |
| 0  | 4   | 2 NA           |
| 0  | 74  | 14 PITG_20377  |
| 0  | 0   | 2 PITG_05815   |
| 0  | 20  | 2 PITG_19429   |
| 0  | 18  | 96 NA          |

|   |     |                |
|---|-----|----------------|
| 0 | 2   | 0 PITG_09995   |
| 0 | 2   | 7 PITG_14831   |
| 0 | 12  | 27 PITG_00117  |
| 0 | 6   | 6 PITG_11750   |
| 0 | 14  | 0 PITG_05882   |
| 0 | 277 | 90 PITG_15593  |
| 0 | 5   | 4 PITG_05560   |
| 0 | 2   | 6 PITG_13715   |
| 0 | 0   | 0 PITG_05733   |
| 0 | 14  | 60 PITG_01599  |
| 0 | 19  | 17 PITG_08677  |
| 0 | 0   | 5 PITG_05866   |
| 0 | 11  | 0 NA           |
| 0 | 36  | 12 PITG_14198  |
| 0 | 5   | 2 NA           |
| 0 | 2   | 0 PITG_14141   |
| 0 | 0   | 0 NA           |
| 0 | 31  | 7 PITG_20046   |
| 0 | 10  | 15 PITG_12326  |
| 0 | 3   | 4 PITG_21759   |
| 0 | 2   | 0 PITG_08481   |
| 0 | 5   | 7 NA           |
| 0 | 4   | 18 PITG_04424  |
| 0 | 20  | 18 PITG_18207  |
| 0 | 21  | 0 PITG_00778   |
| 0 | 4   | 7 PITG_01067   |
| 0 | 0   | 4 PITG_01867   |
| 0 | 3   | 0 PITG_01738   |
| 0 | 6   | 7 PITG_02024   |
| 0 | 5   | 7 PITG_08394   |
| 0 | 11  | 12 NA          |
| 0 | 15  | 13 PITG_06094  |
| 0 | 2   | 0 PITG_10301   |
| 0 | 2   | 0 NA           |
| 0 | 60  | 58 PITG_11329  |
| 0 | 10  | 0 PITG_00236   |
| 0 | 62  | 147 PITG_03574 |
| 0 | 4   | 2 NA           |
| 0 | 2   | 0 PITG_18977   |
| 0 | 0   | 0 NA           |
| 0 | 12  | 5 PITG_01782   |
| 0 | 15  | 20 PITG_02495  |
| 0 | 2   | 0 PITG_15443   |
| 0 | 10  | 8 PITG_03876   |
| 0 | 0   | 2 PITG_03122   |
| 0 | 78  | 18 NA          |
| 0 | 4   | 0 NA           |

|     |     |                 |
|-----|-----|-----------------|
| 0   | 8   | 10 PITG_12837   |
| 0   | 4   | 7 PITG_06775    |
| 0   | 31  | 8 PITG_02943    |
| 0   | 102 | 88 PITG_02619   |
| 0   | 0   | 0 PITG_02546    |
| 0   | 28  | 9 PITG_10395    |
| 0   | 10  | 15 PITG_02628   |
| 0   | 2   | 0 PITG_16918    |
| 0   | 22  | 2 PITG_08374    |
| 0   | 5   | 2 PITG_02456    |
| 0   | 3   | 11 PITG_02556   |
| 0   | 10  | 0 PITG_20468    |
| 0   | 29  | 23 PITG_09506   |
| 0   | 0   | 9 PITG_16058    |
| 0   | 43  | 197 PITG_13655  |
| 0   | 6   | 2 PITG_22021    |
| 0   | 257 | 170 PITG_05879  |
| 0   | 8   | 4 NA            |
| 0   | 0   | 0 PITG_02968    |
| 0   | 8   | 8 PITG_21379    |
| 0   | 0   | 2 PITG_07426    |
| 648 | 36  | 1125 PITG_06799 |
| 0   | 115 | 6 PITG_18883    |
| 0   | 0   | 2 PITG_14272    |
| 0   | 62  | 91 PITG_19551   |
| 0   | 139 | 42 PITG_15549   |
| 0   | 13  | 7 PITG_02294    |
| 0   | 12  | 11 PITG_10160   |
| 0   | 2   | 3 NA            |
| 0   | 0   | 0 PITG_15621    |
| 0   | 5   | 3 PITG_22688    |
| 0   | 0   | 2 NA            |
| 0   | 6   | 51 PITG_02122   |
| 0   | 10  | 6 PITG_17639    |
| 0   | 4   | 2 PITG_04938    |
| 0   | 3   | 0 PITG_06913    |
| 0   | 0   | 0 PITG_20253    |
| 0   | 5   | 18 PITG_02564   |
| 0   | 0   | 0 PITG_00291    |
| 0   | 0   | 0 PITG_05583    |
| 0   | 16  | 6 PITG_14460    |
| 0   | 0   | 7 PITG_05115    |
| 0   | 13  | 2 PITG_17550    |
| 0   | 53  | 4 PITG_20502    |
| 0   | 0   | 4 PITG_12191    |
| 0   | 0   | 2 NA            |
| 0   | 2   | 0 PITG_18980    |

|   |     |                |
|---|-----|----------------|
| 0 | 8   | 6 PITG_18372   |
| 0 | 11  | 2 PITG_00973   |
| 0 | 4   | 0 PITG_03043   |
| 0 | 3   | 2 PITG_00476   |
| 0 | 5   | 2 PITG_07010   |
| 0 | 11  | 18 PITG_10900  |
| 0 | 3   | 3 NA           |
| 0 | 253 | 109 PITG_06205 |
| 0 | 61  | 18 NA          |
| 0 | 153 | 85 PITG_19054  |
| 0 | 5   | 0 NA           |
| 0 | 16  | 2 NA           |
| 0 | 45  | 11 PITG_17165  |
| 0 | 0   | 2 PITG_07302   |
| 0 | 7   | 0 NA           |
| 0 | 2   | 10 PITG_12914  |
| 0 | 0   | 4 PITG_14746   |
| 0 | 2   | 8 PITG_03155   |
| 0 | 6   | 0 PITG_03641   |
| 0 | 2   | 0 PITG_07808   |
| 0 | 0   | 0 PITG_02480   |
| 0 | 58  | 32 PITG_09950  |
| 0 | 0   | 3 PITG_08473   |
| 0 | 6   | 18 PITG_20203  |
| 0 | 0   | 2 PITG_00939   |
| 0 | 2   | 4 PITG_21316   |
| 0 | 76  | 54 PITG_17167  |
| 0 | 0   | 4 PITG_12110   |
| 0 | 6   | 0 PITG_06850   |
| 0 | 2   | 12 PITG_05669  |
| 0 | 10  | 4 PITG_00016   |
| 0 | 0   | 0 PITG_00670   |
| 0 | 0   | 2 PITG_08927   |
| 0 | 0   | 0 NA           |
| 0 | 17  | 0 NA           |
| 0 | 14  | 0 PITG_03866   |
| 0 | 7   | 5 PITG_12938   |
| 0 | 3   | 17 PITG_13157  |
| 0 | 0   | 0 NA           |
| 0 | 4   | 2 NA           |
| 0 | 7   | 0 NA           |
| 0 | 9   | 2 PITG_09250   |
| 0 | 4   | 4 PITG_19024   |
| 0 | 27  | 3 PITG_17663   |
| 0 | 0   | 0 PITG_18024   |
| 0 | 2   | 6 PITG_09998   |
| 0 | 21  | 14 NA          |

|    |     |               |
|----|-----|---------------|
| 0  | 10  | 2 PITG_18976  |
| 0  | 0   | 8 PITG_00350  |
| 0  | 2   | 2 NA          |
| 0  | 90  | 23 PITG_14548 |
| 0  | 7   | 0 PITG_10308  |
| 0  | 25  | 34 PITG_04497 |
| 0  | 4   | 2 PITG_19032  |
| 0  | 22  | 18 PITG_01033 |
| 0  | 3   | 0 NA          |
| 0  | 7   | 0 PITG_17946  |
| 0  | 5   | 4 PITG_06129  |
| 0  | 7   | 0 PITG_10525  |
| 0  | 27  | 8 PITG_02337  |
| 0  | 8   | 0 PITG_10735  |
| 0  | 11  | 2 PITG_17076  |
| 0  | 11  | 4 PITG_15737  |
| 0  | 12  | 4 PITG_20202  |
| 0  | 7   | 12 PITG_00649 |
| 0  | 2   | 7 PITG_14994  |
| 0  | 2   | 3 PITG_03017  |
| 0  | 20  | 4 PITG_07642  |
| 0  | 0   | 6 PITG_00882  |
| 0  | 7   | 0 PITG_05261  |
| 0  | 43  | 14 PITG_06880 |
| 0  | 11  | 6 PITG_04971  |
| 0  | 15  | 0 PITG_17994  |
| 0  | 3   | 18 PITG_13250 |
| 0  | 8   | 2 PITG_12674  |
| 0  | 2   | 0 PITG_03990  |
| 0  | 2   | 0 PITG_11366  |
| 0  | 2   | 2 PITG_10441  |
| 0  | 6   | 0 PITG_03980  |
| 0  | 225 | 32 PITG_20527 |
| 0  | 9   | 2 NA          |
| 0  | 119 | 2 PITG_17983  |
| 0  | 0   | 0 PITG_08586  |
| 0  | 7   | 13 PITG_20928 |
| 0  | 7   | 2 PITG_03746  |
| 0  | 0   | 2 NA          |
| 0  | 0   | 8 PITG_08643  |
| 29 | 8   | 16 NA         |
| 0  | 2   | 3 PITG_17695  |
| 0  | 2   | 21 PITG_08926 |
| 0  | 108 | 92 PITG_04627 |
| 0  | 0   | 0 NA          |
| 0  | 0   | 7 PITG_03146  |
| 0  | 2   | 2 PITG_00594  |



|     |     |                 |
|-----|-----|-----------------|
| 0   | 0   | 6 PITG_02268    |
| 0   | 15  | 7 PITG_03651    |
| 0   | 0   | 0 PITG_13040    |
| 0   | 30  | 6 PITG_10158    |
| 0   | 8   | 9 PITG_15916    |
| 0   | 5   | 4 PITG_03163    |
| 0   | 0   | 0 PITG_07865    |
| 0   | 41  | 9 NA            |
| 0   | 29  | 2 PITG_00479    |
| 0   | 0   | 0 PITG_13289    |
| 0   | 10  | 2 PITG_20610    |
| 0   | 42  | 0 PITG_09629    |
| 0   | 9   | 7 PITG_15875    |
| 0   | 0   | 9 NA            |
| 0   | 12  | 63 PITG_02526   |
| 0   | 0   | 2 PITG_21064    |
| 0   | 21  | 72 PITG_09413   |
| 0   | 55  | 25 NA           |
| 0   | 9   | 37 PITG_01584   |
| 0   | 2   | 0 PITG_03265    |
| 0   | 0   | 3 PITG_18882    |
| 0   | 3   | 11 PITG_01125   |
| 0   | 6   | 14 PITG_08801   |
| 0   | 10  | 2 PITG_08686    |
| 0   | 75  | 75 PITG_09473   |
| 0   | 6   | 0 NA            |
| 0   | 6   | 8 PITG_00936    |
| 0   | 6   | 0 PITG_12285    |
| 0   | 22  | 34 PITG_19006   |
| 0   | 0   | 2 PITG_13606    |
| 150 | 8   | 251 NA          |
| 0   | 0   | 2 PITG_15839    |
| 0   | 46  | 47 PITG_02092   |
| 0   | 2   | 8 PITG_13776    |
| 0   | 7   | 10 NA           |
| 2   | 128 | 1421 PITG_11327 |
| 0   | 0   | 0 PITG_17004    |
| 0   | 5   | 25 PITG_03545   |
| 0   | 12  | 8 PITG_19422    |
| 0   | 4   | 0 PITG_02497    |
| 0   | 11  | 3 PITG_20928    |
| 0   | 4   | 0 NA            |
| 0   | 82  | 36 PITG_21960   |
| 0   | 14  | 44 PITG_04875   |
| 0   | 24  | 25 PITG_09504   |
| 0   | 12  | 5 PITG_15173    |
| 0   | 62  | 34 NA           |

|    |     |                |
|----|-----|----------------|
| 0  | 2   | 5 NA           |
| 0  | 6   | 0 PITG_18091   |
| 0  | 10  | 6 PITG_22479   |
| 0  | 2   | 4 PITG_08017   |
| 0  | 0   | 4 NA           |
| 0  | 2   | 8 PITG_13048   |
| 0  | 2   | 0 PITG_01154   |
| 0  | 0   | 0 PITG_03135   |
| 0  | 197 | 64 PITG_05682  |
| 0  | 46  | 65 NA          |
| 0  | 4   | 0 NA           |
| 38 | 0   | 15 NA          |
| 0  | 4   | 4 PITG_07247   |
| 0  | 13  | 0 PITG_20468   |
| 0  | 30  | 33 PITG_07971  |
| 0  | 2   | 14 PITG_01183  |
| 0  | 4   | 2 NA           |
| 22 | 0   | 0 NA           |
| 0  | 60  | 6 PITG_05960   |
| 0  | 7   | 4 NA           |
| 0  | 14  | 2 NA           |
| 0  | 6   | 0 PITG_16939   |
| 0  | 34  | 156 PITG_05183 |
| 0  | 398 | 406 PITG_10454 |
| 0  | 0   | 0 PITG_20324   |
| 0  | 2   | 4 PITG_00590   |
| 0  | 0   | 0 PITG_20324   |
| 0  | 4   | 11 PITG_21175  |
| 0  | 13  | 4 PITG_08136   |
| 0  | 4   | 2 NA           |
| 0  | 0   | 0 PITG_03530   |
| 0  | 0   | 0 PITG_17491   |
| 0  | 0   | 2 NA           |
| 0  | 193 | 19 PITG_13264  |
| 0  | 16  | 49 PITG_14226  |
| 0  | 49  | 20 NA          |
| 0  | 2   | 0 PITG_10265   |
| 0  | 0   | 2 PITG_03620   |
| 0  | 20  | 5 NA           |
| 0  | 0   | 0 PITG_18210   |
| 0  | 49  | 30 PITG_16211  |
| 0  | 23  | 0 NA           |
| 0  | 2   | 5 PITG_02531   |
| 0  | 5   | 4 PITG_12521   |
| 0  | 30  | 6 NA           |
| 0  | 0   | 0 PITG_15470   |
| 0  | 43  | 15 PITG_01361  |

|   |    |               |
|---|----|---------------|
| 0 | 9  | 5 PITG_13512  |
| 0 | 4  | 9 PITG_09290  |
| 0 | 10 | 24 PITG_17361 |
| 0 | 4  | 7 PITG_21212  |
| 0 | 2  | 0 PITG_00291  |
| 0 | 39 | 25 NA         |
| 0 | 11 | 0 NA          |
| 0 | 26 | 11 PITG_16375 |
| 0 | 0  | 19 PITG_15705 |
| 0 | 0  | 2 PITG_11259  |
| 0 | 29 | 5 PITG_10498  |
| 0 | 0  | 10 PITG_15661 |
| 0 | 2  | 18 PITG_17936 |
| 0 | 57 | 28 PITG_02424 |
| 0 | 31 | 67 PITG_02293 |
| 0 | 3  | 6 PITG_03034  |
| 0 | 75 | 27 PITG_01128 |
| 0 | 0  | 10 PITG_05423 |
| 0 | 19 | 6 PITG_10590  |
| 0 | 0  | 4 PITG_01647  |
| 0 | 21 | 9 PITG_14717  |
| 0 | 2  | 6 PITG_04691  |
| 0 | 2  | 2 PITG_06925  |
| 0 | 2  | 0 PITG_02254  |
| 0 | 2  | 20 PITG_20174 |
| 0 | 0  | 0 PITG_05814  |
| 0 | 74 | 23 PITG_07061 |
| 0 | 0  | 0 PITG_07865  |
| 0 | 2  | 4 PITG_17933  |
| 0 | 2  | 2 PITG_19191  |
| 0 | 0  | 2 PITG_14835  |
| 0 | 2  | 0 PITG_05262  |
| 0 | 2  | 2 PITG_18276  |
| 0 | 0  | 0 PITG_10064  |
| 0 | 2  | 0 NA          |
| 0 | 4  | 5 PITG_01788  |
| 0 | 2  | 9 NA          |
| 0 | 0  | 0 PITG_13590  |
| 0 | 0  | 13 NA         |
| 0 | 7  | 2 PITG_12100  |
| 0 | 3  | 0 PITG_08602  |
| 0 | 27 | 15 PITG_08801 |
| 0 | 22 | 0 NA          |
| 0 | 23 | 20 PITG_12051 |
| 2 | 52 | 66 PITG_00409 |
| 0 | 2  | 0 NA          |
| 2 | 6  | 60 NA         |

|    |    |               |
|----|----|---------------|
| 0  | 14 | 2 PITG_01878  |
| 0  | 24 | 35 PITG_10973 |
| 0  | 0  | 2 PITG_15868  |
| 0  | 7  | 9 PITG_13415  |
| 0  | 7  | 0 PITG_05562  |
| 0  | 51 | 2 PITG_07310  |
| 0  | 11 | 10 PITG_11625 |
| 0  | 5  | 5 NA          |
| 0  | 0  | 0 NA          |
| 0  | 7  | 4 PITG_16722  |
| 0  | 12 | 9 PITG_10828  |
| 0  | 7  | 0 PITG_03980  |
| 0  | 24 | 24 NA         |
| 0  | 19 | 21 PITG_09505 |
| 0  | 0  | 2 NA          |
| 0  | 0  | 2 PITG_22346  |
| 0  | 2  | 8 PITG_05221  |
| 0  | 0  | 2 PITG_09855  |
| 0  | 75 | 69 PITG_07080 |
| 0  | 0  | 2 PITG_10921  |
| 0  | 0  | 2 PITG_04954  |
| 0  | 4  | 16 PITG_21215 |
| 0  | 2  | 0 PITG_20528  |
| 0  | 6  | 10 PITG_07707 |
| 0  | 2  | 12 PITG_17966 |
| 0  | 0  | 0 PITG_12252  |
| 0  | 9  | 16 PITG_10026 |
| 0  | 9  | 10 PITG_11122 |
| 0  | 9  | 22 PITG_01663 |
| 0  | 2  | 0 PITG_19750  |
| 0  | 13 | 0 PITG_09826  |
| 0  | 6  | 0 PITG_13715  |
| 0  | 8  | 2 PITG_16433  |
| 0  | 0  | 5 PITG_03702  |
| 0  | 19 | 6 PITG_03756  |
| 0  | 0  | 0 PITG_17347  |
| 0  | 2  | 0 PITG_00473  |
| 0  | 0  | 2 PITG_05502  |
| 0  | 0  | 4 PITG_07247  |
| 19 | 23 | 10 NA         |
| 0  | 6  | 27 PITG_15776 |
| 0  | 9  | 2 PITG_05652  |
| 0  | 14 | 4 NA          |
| 0  | 40 | 61 PITG_02671 |
| 0  | 0  | 14 NA         |
| 0  | 8  | 15 PITG_17724 |
| 0  | 18 | 17 PITG_22433 |

|     |     |                |
|-----|-----|----------------|
| 0   | 38  | 32 PITG_03483  |
| 0   | 0   | 0 PITG_13405   |
| 0   | 163 | 150 NA         |
| 0   | 2   | 4 PITG_19242   |
| 0   | 24  | 24 PITG_02867  |
| 0   | 2   | 0 NA           |
| 0   | 8   | 34 PITG_02827  |
| 0   | 4   | 4 PITG_20790   |
| 0   | 2   | 15 PITG_04564  |
| 0   | 8   | 18 PITG_14267  |
| 0   | 3   | 0 PITG_05412   |
| 0   | 11  | 6 PITG_00078   |
| 0   | 3   | 22 NA          |
| 2   | 3   | 31 PITG_11929  |
| 0   | 0   | 0 PITG_16826   |
| 0   | 427 | 311 PITG_10999 |
| 0   | 20  | 2 NA           |
| 0   | 26  | 17 PITG_19084  |
| 0   | 2   | 0 NA           |
| 0   | 4   | 0 NA           |
| 0   | 5   | 2 PITG_01110   |
| 0   | 0   | 11 PITG_14106  |
| 0   | 9   | 9 PITG_02942   |
| 0   | 28  | 14 PITG_13128  |
| 0   | 0   | 2 PITG_18690   |
| 0   | 0   | 0 PITG_02289   |
| 0   | 3   | 0 PITG_23284   |
| 0   | 3   | 11 PITG_01183  |
| 0   | 2   | 0 NA           |
| 0   | 10  | 2 PITG_07139   |
| 0   | 6   | 0 PITG_08326   |
| 0   | 11  | 21 PITG_16136  |
| 0   | 16  | 8 PITG_16852   |
| 0   | 3   | 4 PITG_14614   |
| 0   | 3   | 4 NA           |
| 0   | 0   | 4 PITG_21077   |
| 0   | 5   | 11 PITG_11157  |
| 0   | 24  | 12 NA          |
| 0   | 6   | 8 PITG_03301   |
| 133 | 22  | 264 NA         |
| 0   | 31  | 0 PITG_15167   |
| 0   | 4   | 2 PITG_11410   |
| 0   | 5   | 0 NA           |
| 0   | 4   | 2 PITG_10726   |
| 0   | 4   | 2 PITG_00221   |
| 0   | 0   | 0 NA           |
| 0   | 8   | 0 PITG_07470   |

|    |     |                |
|----|-----|----------------|
| 0  | 6   | 30 PITG_08425  |
| 0  | 2   | 0 PITG_09310   |
| 0  | 0   | 0 PITG_02698   |
| 0  | 22  | 24 PITG_03842  |
| 0  | 0   | 0 PITG_13284   |
| 0  | 86  | 4 PITG_05293   |
| 0  | 3   | 3 PITG_17137   |
| 0  | 0   | 2 PITG_03947   |
| 0  | 44  | 0 PITG_03458   |
| 0  | 6   | 4 PITG_13841   |
| 0  | 11  | 5 NA           |
| 0  | 2   | 3 NA           |
| 0  | 21  | 5 PITG_08481   |
| 0  | 0   | 2 PITG_00262   |
| 0  | 4   | 2 PITG_16984   |
| 0  | 6   | 0 PITG_04001   |
| 0  | 13  | 0 PITG_20568   |
| 0  | 18  | 0 NA           |
| 0  | 21  | 2 PITG_01353   |
| 0  | 6   | 8 PITG_01754   |
| 0  | 23  | 23 PITG_14852  |
| 0  | 41  | 20 PITG_00699  |
| 0  | 154 | 168 PITG_01932 |
| 44 | 0   | 2 NA           |
| 0  | 0   | 2 PITG_07008   |
| 0  | 12  | 3 PITG_00484   |
| 0  | 2   | 2 PITG_00416   |
| 0  | 159 | 26 PITG_18545  |
| 0  | 4   | 4 PITG_20507   |
| 0  | 54  | 0 PITG_17959   |
| 0  | 31  | 5 NA           |
| 0  | 31  | 8 PITG_09944   |
| 0  | 0   | 0 PITG_13150   |
| 0  | 20  | 189 PITG_18025 |
| 0  | 25  | 0 NA           |
| 0  | 2   | 0 PITG_21409   |
| 0  | 55  | 19 PITG_23158  |
| 0  | 4   | 40 PITG_22865  |
| 0  | 8   | 6 PITG_04273   |
| 0  | 49  | 2 PITG_00417   |
| 0  | 69  | 8 PITG_08669   |
| 14 | 0   | 8 NA           |
| 0  | 7   | 15 PITG_11521  |
| 0  | 41  | 43 PITG_05255  |
| 0  | 16  | 27 PITG_00147  |
| 0  | 2   | 2 PITG_00725   |
| 0  | 0   | 8 PITG_14297   |

|   |     |               |
|---|-----|---------------|
| 0 | 2   | 6 NA          |
| 0 | 16  | 0 PITG_06660  |
| 0 | 13  | 0 PITG_04448  |
| 0 | 2   | 2 PITG_13920  |
| 0 | 0   | 0 PITG_21727  |
| 0 | 3   | 8 PITG_03872  |
| 0 | 2   | 0 PITG_16904  |
| 0 | 0   | 4 PITG_20316  |
| 0 | 9   | 0 PITG_19047  |
| 0 | 26  | 32 PITG_00647 |
| 0 | 297 | 20 PITG_15746 |
| 0 | 0   | 0 PITG_02607  |
| 0 | 4   | 7 PITG_12548  |
| 0 | 49  | 36 PITG_00449 |
| 0 | 2   | 2 PITG_12675  |
| 0 | 9   | 13 PITG_04579 |
| 0 | 4   | 2 PITG_11437  |
| 0 | 29  | 11 PITG_08775 |
| 0 | 44  | 13 PITG_17795 |
| 4 | 0   | 25 NA         |
| 0 | 0   | 6 PITG_18891  |
| 0 | 0   | 8 PITG_18977  |
| 0 | 17  | 34 NA         |
| 0 | 0   | 7 PITG_07277  |
| 0 | 16  | 16 PITG_10449 |
| 0 | 28  | 6 NA          |
| 0 | 2   | 6 PITG_07034  |
| 0 | 16  | 22 PITG_08808 |
| 0 | 7   | 0 NA          |
| 0 | 17  | 0 NA          |
| 0 | 0   | 4 PITG_09875  |
| 0 | 41  | 35 NA         |
| 0 | 0   | 2 PITG_09098  |
| 0 | 32  | 10 PITG_00039 |
| 0 | 7   | 4 NA          |
| 0 | 8   | 6 NA          |
| 0 | 6   | 9 PITG_20324  |
| 0 | 13  | 8 PITG_10898  |
| 0 | 40  | 26 PITG_15807 |
| 0 | 11  | 14 PITG_20727 |
| 0 | 2   | 0 PITG_03656  |
| 0 | 17  | 4 PITG_20794  |
| 0 | 0   | 0 NA          |
| 0 | 8   | 0 NA          |
| 0 | 49  | 67 PITG_06694 |
| 0 | 32  | 22 PITG_12226 |
| 0 | 0   | 2 PITG_17399  |

|     |     |                |
|-----|-----|----------------|
| 0   | 9   | 0 NA           |
| 0   | 63  | 24 PITG_10987  |
| 0   | 30  | 17 PITG_12462  |
| 0   | 92  | 59 PITG_19612  |
| 0   | 25  | 6 NA           |
| 0   | 15  | 16 PITG_00037  |
| 0   | 100 | 34 PITG_10298  |
| 0   | 0   | 0 PITG_18614   |
| 0   | 2   | 0 PITG_06900   |
| 0   | 7   | 0 PITG_14465   |
| 0   | 2   | 0 PITG_00451   |
| 0   | 0   | 0 PITG_03219   |
| 0   | 8   | 4 PITG_14808   |
| 0   | 357 | 84 PITG_04003  |
| 0   | 14  | 27 PITG_07828  |
| 0   | 17  | 21 PITG_20767  |
| 0   | 520 | 596 PITG_14624 |
| 0   | 2   | 0 PITG_10142   |
| 0   | 9   | 4 NA           |
| 0   | 0   | 0 NA           |
| 0   | 118 | 85 PITG_10819  |
| 0   | 0   | 0 PITG_08085   |
| 0   | 8   | 6 PITG_05100   |
| 0   | 161 | 26 NA          |
| 0   | 8   | 8 PITG_01354   |
| 0   | 0   | 5 NA           |
| 0   | 31  | 7 NA           |
| 0   | 0   | 0 PITG_18373   |
| 0   | 0   | 0 PITG_06970   |
| 0   | 9   | 2 PITG_01951   |
| 0   | 0   | 0 PITG_09035   |
| 0   | 7   | 2 PITG_22404   |
| 0   | 0   | 2 PITG_07010   |
| 0   | 8   | 14 NA          |
| 0   | 2   | 10 PITG_00227  |
| 0   | 16  | 2 PITG_06982   |
| 0   | 29  | 27 PITG_11929  |
| 0   | 2   | 7 PITG_11194   |
| 0   | 42  | 61 PITG_18538  |
| 0   | 0   | 0 NA           |
| 0   | 8   | 19 PITG_06776  |
| 0   | 29  | 37 PITG_20378  |
| 0   | 10  | 7 PITG_06913   |
| 115 | 3   | 138 NA         |
| 0   | 0   | 0 PITG_01949   |
| 0   | 0   | 5 PITG_17359   |
| 0   | 6   | 27 PITG_14473  |



|   |      |                 |
|---|------|-----------------|
| 0 | 3484 | 2585 PITG_18578 |
| 0 | 14   | 12 PITG_13431   |
| 0 | 29   | 17 PITG_06114   |
| 0 | 4    | 2 PITG_02104    |
| 0 | 28   | 2 NA            |
| 0 | 18   | 2 PITG_03560    |
| 0 | 22   | 58 PITG_00663   |
| 0 | 4    | 8 PITG_08211    |
| 0 | 77   | 161 NA          |
| 0 | 4    | 2 PITG_11080    |
| 0 | 3    | 2 PITG_09064    |
| 0 | 0    | 6 PITG_05772    |
| 0 | 4    | 4 PITG_08605    |
| 0 | 0    | 0 PITG_11119    |
| 0 | 2    | 0 PITG_16962    |
| 0 | 9    | 9 PITG_00882    |
| 0 | 0    | 14 PITG_08584   |
| 0 | 57   | 37 PITG_04712   |
| 0 | 9    | 4 PITG_03027    |
| 0 | 42   | 17 PITG_03018   |
| 0 | 0    | 12 PITG_08420   |
| 0 | 83   | 23 NA           |
| 0 | 9    | 19 PITG_15761   |
| 0 | 4    | 6 PITG_16528    |
| 0 | 4    | 4 NA            |
| 0 | 8    | 4 PITG_16512    |
| 0 | 0    | 0 PITG_18940    |
| 0 | 2    | 0 PITG_05761    |
| 0 | 28   | 11 PITG_20965   |
| 0 | 17   | 0 PITG_11218    |
| 0 | 26   | 47 PITG_06828   |
| 0 | 24   | 12 PITG_03733   |
| 0 | 7    | 4 NA            |
| 0 | 4    | 4 NA            |
| 0 | 0    | 5 PITG_17032    |
| 0 | 100  | 14 PITG_05595   |
| 0 | 24   | 10 NA           |
| 0 | 4    | 2 NA            |
| 0 | 22   | 10 PITG_17022   |
| 0 | 2    | 2 PITG_16161    |
| 0 | 12   | 17 PITG_10117   |
| 0 | 25   | 66 PITG_19875   |
| 0 | 8    | 4 PITG_20820    |
| 0 | 5    | 2 PITG_22057    |
| 0 | 29   | 3 PITG_13111    |
| 0 | 0    | 0 PITG_05099    |
| 0 | 4    | 2 PITG_17608    |

|     |     |                |
|-----|-----|----------------|
| 0   | 2   | 0 PITG_02292   |
| 0   | 6   | 6 PITG_12593   |
| 0   | 39  | 117 PITG_07985 |
| 0   | 2   | 0 NA           |
| 0   | 5   | 0 NA           |
| 0   | 8   | 2 PITG_10119   |
| 0   | 5   | 6 PITG_11869   |
| 0   | 6   | 2 PITG_20717   |
| 0   | 0   | 2 PITG_13317   |
| 0   | 9   | 2 NA           |
| 0   | 8   | 8 PITG_12488   |
| 0   | 0   | 2 PITG_18274   |
| 0   | 2   | 2 NA           |
| 0   | 2   | 2 PITG_16461   |
| 0   | 103 | 0 NA           |
| 0   | 0   | 0 PITG_15924   |
| 0   | 83  | 17 NA          |
| 0   | 2   | 2 PITG_16901   |
| 0   | 11  | 0 PITG_10615   |
| 0   | 22  | 14 PITG_07923  |
| 0   | 0   | 2 PITG_05488   |
| 0   | 0   | 2 NA           |
| 0   | 5   | 4 PITG_05346   |
| 0   | 23  | 3 NA           |
| 0   | 4   | 4 PITG_00854   |
| 0   | 130 | 192 PITG_22343 |
| 0   | 11  | 4 PITG_07301   |
| 0   | 2   | 15 PITG_08392  |
| 0   | 0   | 2 PITG_11126   |
| 0   | 78  | 47 PITG_01899  |
| 0   | 0   | 3 NA           |
| 0   | 37  | 7 PITG_16977   |
| 0   | 95  | 54 PITG_01924  |
| 0   | 24  | 9 PITG_11497   |
| 0   | 7   | 39 NA          |
| 0   | 4   | 2 PITG_10865   |
| 0   | 6   | 0 NA           |
| 0   | 4   | 36 PITG_07011  |
| 0   | 14  | 20 PITG_19191  |
| 0   | 261 | 214 PITG_10052 |
| 0   | 0   | 0 PITG_00188   |
| 0   | 49  | 401 PITG_10031 |
| 0   | 2   | 2 PITG_21598   |
| 0   | 17  | 5 PITG_16745   |
| 0   | 0   | 0 PITG_13135   |
| 340 | 57  | 749 NA         |
| 0   | 876 | 126 PITG_14683 |

|     |     |                |
|-----|-----|----------------|
| 0   | 0   | 0 NA           |
| 0   | 3   | 0 PITG_02440   |
| 0   | 0   | 0 PITG_20568   |
| 0   | 2   | 13 PITG_00994  |
| 0   | 13  | 11 PITG_19846  |
| 0   | 2   | 2 PITG_15903   |
| 0   | 2   | 2 NA           |
| 0   | 24  | 12 PITG_12453  |
| 0   | 2   | 0 PITG_11038   |
| 0   | 2   | 0 PITG_09364   |
| 0   | 100 | 3 NA           |
| 0   | 0   | 2 PITG_17049   |
| 0   | 2   | 9 PITG_06304   |
| 0   | 7   | 4 PITG_19371   |
| 0   | 4   | 2 PITG_13527   |
| 0   | 7   | 0 PITG_05008   |
| 0   | 2   | 0 PITG_00658   |
| 0   | 129 | 113 PITG_02911 |
| 0   | 10  | 28 NA          |
| 0   | 12  | 4 PITG_05634   |
| 0   | 38  | 4 NA           |
| 0   | 0   | 46 NA          |
| 156 | 11  | 112 NA         |
| 0   | 4   | 4 PITG_14111   |
| 0   | 10  | 0 PITG_05614   |
| 0   | 7   | 0 PITG_12298   |
| 0   | 19  | 5 PITG_00648   |
| 0   | 3   | 2 PITG_10207   |
| 0   | 2   | 2 PITG_13284   |
| 0   | 0   | 0 PITG_09064   |
| 0   | 0   | 5 PITG_03428   |
| 0   | 0   | 2 PITG_03860   |
| 0   | 7   | 0 NA           |
| 0   | 6   | 7 PITG_00254   |
| 0   | 2   | 4 PITG_16854   |
| 0   | 0   | 0 PITG_00502   |
| 0   | 0   | 2 PITG_02968   |
| 0   | 2   | 0 PITG_09598   |
| 0   | 0   | 4 PITG_06598   |
| 0   | 4   | 14 PITG_02027  |
| 0   | 2   | 0 PITG_16271   |
| 0   | 9   | 63 PITG_00034  |
| 0   | 2   | 4 PITG_11587   |
| 0   | 2   | 6 PITG_10850   |
| 0   | 2   | 0 PITG_22687   |
| 0   | 20  | 6 PITG_02258   |
| 0   | 5   | 0 PITG_18250   |

|    |     |                |
|----|-----|----------------|
| 0  | 2   | 0 PITG_04232   |
| 0  | 0   | 2 PITG_22038   |
| 0  | 15  | 0 PITG_02637   |
| 0  | 6   | 2 NA           |
| 0  | 0   | 0 PITG_10430   |
| 0  | 0   | 4 PITG_01528   |
| 0  | 2   | 0 PITG_11291   |
| 0  | 0   | 8 NA           |
| 0  | 0   | 2 PITG_19749   |
| 0  | 7   | 22 PITG_18538  |
| 0  | 0   | 0 PITG_02418   |
| 0  | 0   | 3 PITG_13157   |
| 0  | 53  | 22 PITG_08395  |
| 0  | 2   | 4 PITG_09311   |
| 0  | 21  | 3 PITG_05323   |
| 0  | 5   | 15 NA          |
| 0  | 15  | 12 PITG_12279  |
| 0  | 2   | 4 PITG_03757   |
| 0  | 61  | 2 PITG_01063   |
| 0  | 8   | 9 PITG_08093   |
| 0  | 0   | 0 PITG_05410   |
| 0  | 129 | 4 PITG_05780   |
| 0  | 0   | 0 PITG_12518   |
| 0  | 9   | 41 PITG_11111  |
| 0  | 0   | 6 PITG_03789   |
| 48 | 4   | 18 NA          |
| 0  | 0   | 0 NA           |
| 0  | 118 | 154 PITG_12161 |
| 0  | 44  | 134 PITG_06741 |
| 0  | 29  | 97 PITG_04508  |
| 0  | 50  | 35 PITG_17556  |
| 0  | 15  | 6 PITG_21852   |
| 0  | 20  | 0 PITG_11305   |
| 0  | 8   | 14 PITG_04175  |
| 0  | 9   | 13 PITG_01370  |
| 0  | 0   | 4 PITG_15006   |
| 0  | 61  | 119 PITG_00593 |
| 0  | 6   | 8 NA           |
| 0  | 14  | 9 PITG_11087   |
| 0  | 0   | 4 PITG_00163   |
| 0  | 0   | 0 PITG_17641   |
| 0  | 0   | 14 PITG_00133  |
| 0  | 541 | 614 PITG_11238 |
| 0  | 2   | 2 NA           |
| 0  | 38  | 17 PITG_09944  |
| 0  | 0   | 0 NA           |
| 0  | 11  | 4 PITG_08235   |

|     |      |               |
|-----|------|---------------|
| 0   | 2    | 0 PITG_15062  |
| 0   | 4    | 4 PITG_00320  |
| 0   | 11   | 2 PITG_20317  |
| 0   | 0    | 17 PITG_02565 |
| 0   | 8    | 7 PITG_05568  |
| 0   | 165  | 29 PITG_04650 |
| 0   | 2    | 3 PITG_08186  |
| 0   | 4    | 4 PITG_13803  |
| 0   | 166  | 55 PITG_07099 |
| 0   | 5    | 0 NA          |
| 0   | 20   | 40 PITG_03561 |
| 0   | 0    | 7 PITG_15196  |
| 0   | 0    | 3 PITG_20675  |
| 0   | 0    | 0 PITG_17493  |
| 370 | 10   | 405 NA        |
| 0   | 16   | 28 NA         |
| 0   | 0    | 0 NA          |
| 0   | 0    | 0 PITG_10950  |
| 0   | 26   | 0 PITG_08446  |
| 0   | 9    | 35 PITG_17695 |
| 0   | 0    | 4 PITG_17012  |
| 2   | 8    | 30 PITG_11907 |
| 0   | 6    | 2 NA          |
| 0   | 10   | 65 PITG_15134 |
| 0   | 24   | 8 PITG_22668  |
| 0   | 7    | 9 PITG_12277  |
| 0   | 9    | 0 PITG_15885  |
| 0   | 4    | 0 PITG_00713  |
| 0   | 8    | 0 NA          |
| 7   | 1237 | 18 NA         |
| 0   | 10   | 2 PITG_05248  |
| 0   | 810  | 3662 NA       |
| 0   | 10   | 2 NA          |
| 0   | 6    | 4 PITG_03034  |
| 28  | 13   | 94 NA         |
| 0   | 0    | 0 PITG_03655  |
| 0   | 80   | 0 NA          |
| 0   | 13   | 0 PITG_07012  |
| 0   | 5    | 2 PITG_19875  |
| 0   | 4    | 0 NA          |
| 0   | 28   | 0 PITG_08534  |
| 0   | 0    | 4 PITG_19229  |
| 0   | 0    | 2 PITG_11080  |
| 0   | 89   | 57 PITG_08599 |
| 0   | 0    | 0 NA          |
| 0   | 0    | 2 PITG_00238  |
| 0   | 10   | 25 PITG_04977 |

|     |     |                |
|-----|-----|----------------|
| 0   | 0   | 0 NA           |
| 0   | 26  | 8 PITG_04549   |
| 0   | 7   | 3 PITG_04890   |
| 0   | 4   | 4 PITG_20908   |
| 0   | 2   | 0 PITG_11638   |
| 0   | 27  | 25 PITG_03423  |
| 0   | 32  | 51 PITG_02922  |
| 0   | 6   | 4 NA           |
| 0   | 0   | 2 PITG_22057   |
| 0   | 0   | 2 PITG_19167   |
| 0   | 0   | 17 PITG_11179  |
| 0   | 13  | 2 NA           |
| 0   | 216 | 42 NA          |
| 0   | 2   | 8 PITG_17663   |
| 0   | 511 | 593 PITG_01266 |
| 0   | 2   | 2 PITG_07839   |
| 0   | 0   | 9 PITG_19646   |
| 0   | 0   | 0 PITG_13397   |
| 0   | 19  | 2 PITG_14223   |
| 0   | 6   | 2 PITG_02920   |
| 0   | 248 | 61 NA          |
| 0   | 6   | 6 PITG_02734   |
| 0   | 0   | 2 PITG_17816   |
| 0   | 5   | 4 PITG_18008   |
| 0   | 3   | 0 PITG_15439   |
| 0   | 28  | 19 PITG_12148  |
| 0   | 6   | 4 PITG_08481   |
| 153 | 29  | 233 NA         |
| 0   | 2   | 2 NA           |
| 0   | 0   | 5 PITG_05278   |
| 0   | 9   | 0 PITG_08229   |
| 0   | 4   | 4 PITG_04230   |
| 0   | 2   | 0 PITG_01405   |
| 0   | 0   | 13 PITG_05685  |
| 0   | 36  | 171 PITG_16966 |
| 0   | 132 | 8 NA           |
| 0   | 8   | 2 PITG_01860   |
| 0   | 27  | 7 PITG_11723   |
| 0   | 17  | 2 NA           |
| 0   | 0   | 0 PITG_06202   |
| 0   | 27  | 0 PITG_07166   |
| 0   | 50  | 21 PITG_06915  |
| 0   | 36  | 6 PITG_20320   |
| 0   | 58  | 18 PITG_23066  |
| 0   | 16  | 9 PITG_15593   |
| 0   | 12  | 5 PITG_16317   |
| 0   | 150 | 56 PITG_15593  |

|    |     |                |
|----|-----|----------------|
| 0  | 94  | 116 PITG_18498 |
| 0  | 4   | 0 PITG_19672   |
| 0  | 17  | 0 PITG_19023   |
| 0  | 5   | 2 PITG_03017   |
| 0  | 0   | 2 PITG_00554   |
| 0  | 11  | 0 PITG_14132   |
| 0  | 11  | 23 PITG_01283  |
| 0  | 4   | 2 NA           |
| 0  | 21  | 6 PITG_04401   |
| 0  | 0   | 0 PITG_17992   |
| 0  | 24  | 44 PITG_05669  |
| 0  | 2   | 2 PITG_07852   |
| 0  | 0   | 0 PITG_03862   |
| 0  | 91  | 62 PITG_10050  |
| 0  | 18  | 0 PITG_14003   |
| 0  | 4   | 12 PITG_00495  |
| 0  | 35  | 4 PITG_05649   |
| 0  | 7   | 2 PITG_17661   |
| 0  | 0   | 50 PITG_00034  |
| 0  | 7   | 11 PITG_12000  |
| 0  | 4   | 0 PITG_22383   |
| 0  | 128 | 43 NA          |
| 0  | 0   | 0 PITG_15687   |
| 0  | 42  | 0 NA           |
| 0  | 174 | 74 PITG_03018  |
| 0  | 2   | 2 PITG_00651   |
| 0  | 15  | 4 PITG_03458   |
| 0  | 10  | 37 PITG_05226  |
| 0  | 18  | 8 PITG_03858   |
| 0  | 8   | 0 NA           |
| 0  | 2   | 0 NA           |
| 0  | 7   | 20 PITG_02666  |
| 0  | 27  | 4 PITG_19815   |
| 0  | 0   | 0 NA           |
| 0  | 4   | 2 NA           |
| 0  | 0   | 4 NA           |
| 0  | 4   | 20 PITG_02666  |
| 0  | 7   | 0 PITG_05642   |
| 0  | 57  | 11 PITG_11256  |
| 0  | 18  | 18 PITG_01041  |
| 0  | 4   | 36 PITG_10866  |
| 0  | 10  | 0 PITG_04590   |
| 0  | 2   | 8 PITG_03364   |
| 75 | 42  | 57 NA          |
| 0  | 38  | 6 PITG_19774   |
| 0  | 4   | 21 PITG_03532  |
| 0  | 2   | 3 PITG_18371   |

|     |     |               |
|-----|-----|---------------|
| 0   | 0   | 4 PITG_09066  |
| 0   | 5   | 4 NA          |
| 0   | 4   | 7 NA          |
| 0   | 2   | 0 NA          |
| 0   | 8   | 10 NA         |
| 0   | 0   | 4 PITG_04027  |
| 0   | 621 | 289 NA        |
| 0   | 0   | 0 PITG_15240  |
| 0   | 12  | 2 PITG_02054  |
| 0   | 8   | 4 NA          |
| 0   | 8   | 15 PITG_17077 |
| 0   | 0   | 28 PITG_01836 |
| 0   | 67  | 16 NA         |
| 0   | 2   | 0 NA          |
| 159 | 7   | 134 NA        |
| 0   | 16  | 8 PITG_11158  |
| 0   | 2   | 4 PITG_04561  |
| 0   | 0   | 2 PITG_21505  |
| 0   | 27  | 47 PITG_11044 |
| 0   | 4   | 2 PITG_09944  |
| 0   | 7   | 2 PITG_15929  |
| 0   | 10  | 12 NA         |
| 0   | 11  | 0 NA          |
| 0   | 0   | 0 PITG_20251  |
| 0   | 41  | 35 PITG_03560 |
| 0   | 16  | 18 PITG_19166 |
| 0   | 33  | 17 PITG_02529 |
| 0   | 34  | 0 PITG_13833  |
| 0   | 13  | 9 NA          |
| 0   | 36  | 2 NA          |
| 0   | 9   | 15 NA         |
| 0   | 4   | 0 PITG_16267  |
| 0   | 21  | 2 PITG_03388  |
| 0   | 4   | 17 PITG_03453 |
| 0   | 16  | 16 PITG_03482 |
| 0   | 4   | 4 NA          |
| 0   | 141 | 16 NA         |
| 0   | 5   | 2 PITG_18575  |
| 0   | 4   | 12 PITG_00725 |
| 0   | 6   | 15 PITG_00882 |
| 0   | 67  | 60 PITG_14066 |
| 0   | 44  | 4 NA          |
| 0   | 0   | 3 PITG_10711  |
| 0   | 25  | 235 NA        |
| 0   | 4   | 20 PITG_02426 |
| 18  | 0   | 35 NA         |
| 0   | 40  | 12 PITG_12428 |



|   |     |                |
|---|-----|----------------|
| 0 | 0   | 4 PITG_11089   |
| 0 | 6   | 0 PITG_18323   |
| 0 | 4   | 2 NA           |
| 0 | 4   | 119 PITG_10637 |
| 0 | 4   | 0 PITG_05305   |
| 0 | 4   | 19 PITG_05317  |
| 0 | 0   | 0 PITG_09487   |
| 0 | 164 | 15 PITG_03478  |
| 0 | 32  | 6 PITG_01777   |
| 0 | 0   | 2 PITG_20240   |
| 0 | 8   | 0 NA           |
| 0 | 5   | 2 PITG_13486   |
| 0 | 19  | 10 PITG_04875  |
| 0 | 21  | 11 PITG_03401  |
| 0 | 36  | 4 NA           |
| 0 | 46  | 61 PITG_00980  |
| 0 | 0   | 7 PITG_05467   |
| 0 | 91  | 9 NA           |
| 0 | 2   | 2 NA           |
| 0 | 2   | 0 PITG_03381   |
| 0 | 0   | 0 PITG_23029   |
| 0 | 6   | 0 PITG_08211   |
| 0 | 93  | 49 PITG_17015  |
| 0 | 6   | 7 NA           |
| 0 | 0   | 0 NA           |
| 0 | 20  | 20 PITG_01153  |
| 0 | 29  | 38 PITG_15057  |
| 0 | 0   | 0 PITG_19150   |
| 0 | 4   | 4 PITG_14174   |
| 0 | 6   | 15 PITG_01087  |
| 0 | 3   | 4 PITG_14744   |
| 0 | 0   | 0 NA           |
| 4 | 6   | 26 NA          |
| 0 | 0   | 0 PITG_06184   |
| 0 | 29  | 21 NA          |
| 0 | 46  | 8 PITG_18070   |
| 0 | 0   | 8 PITG_22611   |
| 0 | 53  | 0 PITG_15967   |
| 0 | 14  | 2 PITG_14381   |
| 0 | 0   | 0 PITG_13548   |
| 0 | 51  | 186 PITG_10063 |
| 0 | 0   | 2 PITG_03623   |
| 0 | 4   | 6 PITG_17345   |
| 0 | 0   | 6 PITG_08028   |
| 0 | 5   | 0 NA           |
| 0 | 14  | 3 PITG_01123   |
| 0 | 0   | 4 PITG_11926   |

|   |     |               |
|---|-----|---------------|
| 0 | 2   | 2 PITG_10519  |
| 0 | 4   | 6 PITG_03915  |
| 0 | 2   | 10 PITG_03112 |
| 0 | 26  | 18 PITG_05886 |
| 0 | 4   | 15 PITG_10004 |
| 0 | 0   | 0 PITG_01896  |
| 0 | 6   | 0 PITG_18457  |
| 0 | 12  | 21 PITG_09876 |
| 0 | 28  | 32 PITG_22839 |
| 0 | 0   | 4 PITG_15951  |
| 0 | 7   | 7 PITG_09587  |
| 0 | 0   | 0 PITG_06016  |
| 0 | 11  | 14 PITG_05740 |
| 0 | 5   | 2 PITG_01788  |
| 0 | 2   | 4 PITG_08663  |
| 0 | 2   | 0 PITG_08307  |
| 0 | 24  | 65 PITG_03594 |
| 0 | 12  | 2 NA          |
| 0 | 5   | 11 PITG_15921 |
| 0 | 0   | 0 PITG_14950  |
| 0 | 0   | 2 PITG_03160  |
| 0 | 2   | 0 NA          |
| 0 | 178 | 676 NA        |
| 0 | 0   | 0 PITG_08473  |
| 0 | 0   | 7 PITG_17990  |
| 0 | 4   | 2 PITG_05187  |
| 0 | 0   | 0 PITG_13979  |
| 0 | 0   | 0 PITG_07915  |
| 0 | 4   | 4 NA          |
| 0 | 4   | 2 NA          |
| 0 | 0   | 0 NA          |
| 0 | 14  | 12 PITG_15075 |
| 0 | 0   | 0 PITG_16902  |
| 0 | 25  | 60 PITG_02252 |
| 0 | 21  | 18 PITG_13434 |
| 0 | 0   | 2 NA          |
| 0 | 6   | 0 NA          |
| 0 | 10  | 8 NA          |
| 0 | 0   | 0 PITG_00882  |
| 0 | 4   | 27 PITG_08681 |
| 0 | 26  | 2 NA          |
| 0 | 25  | 2 PITG_07121  |
| 0 | 5   | 47 NA         |
| 0 | 41  | 70 NA         |
| 0 | 0   | 12 PITG_13439 |
| 0 | 4   | 15 PITG_06716 |
| 0 | 36  | 16 PITG_01063 |

|   |     |               |
|---|-----|---------------|
| 0 | 0   | 0 PITG_08195  |
| 0 | 0   | 0 PITG_15905  |
| 0 | 2   | 0 PITG_20805  |
| 0 | 0   | 0 PITG_04970  |
| 0 | 4   | 9 PITG_06832  |
| 0 | 0   | 0 PITG_00717  |
| 0 | 4   | 0 NA          |
| 0 | 0   | 2 PITG_02960  |
| 0 | 15  | 0 PITG_00965  |
| 0 | 0   | 2 NA          |
| 0 | 5   | 0 PITG_10838  |
| 0 | 2   | 0 NA          |
| 0 | 10  | 22 PITG_00506 |
| 0 | 2   | 0 NA          |
| 0 | 6   | 6 PITG_00324  |
| 0 | 0   | 5 PITG_09642  |
| 0 | 97  | 4 PITG_02042  |
| 0 | 4   | 16 PITG_15640 |
| 0 | 150 | 37 NA         |
| 0 | 0   | 9 PITG_14284  |
| 0 | 148 | 98 NA         |
| 0 | 6   | 2 PITG_21990  |
| 0 | 2   | 0 PITG_14231  |
| 0 | 12  | 5 PITG_01528  |
| 0 | 2   | 0 PITG_13173  |
| 0 | 2   | 2 PITG_02239  |
| 0 | 6   | 16 NA         |
| 0 | 27  | 30 PITG_13855 |
| 0 | 0   | 14 NA         |
| 0 | 7   | 11 PITG_11254 |
| 0 | 20  | 15 PITG_05856 |
| 0 | 5   | 6 PITG_03818  |
| 0 | 0   | 0 NA          |
| 0 | 2   | 0 PITG_20200  |
| 0 | 4   | 3 PITG_22122  |
| 0 | 53  | 25 PITG_06764 |
| 0 | 5   | 12 NA         |
| 0 | 6   | 8 PITG_08998  |
| 0 | 20  | 25 PITG_13159 |
| 0 | 2   | 2 PITG_02036  |
| 0 | 5   | 11 PITG_02280 |
| 0 | 0   | 8 NA          |
| 0 | 6   | 0 NA          |
| 0 | 10  | 9 NA          |
| 0 | 0   | 4 PITG_07833  |
| 0 | 0   | 0 PITG_00250  |
| 0 | 0   | 2 PITG_14123  |

|     |     |                |
|-----|-----|----------------|
| 0   | 18  | 20 PITG_17495  |
| 0   | 12  | 11 PITG_02499  |
| 0   | 2   | 0 PITG_08229   |
| 0   | 0   | 13 PITG_14398  |
| 0   | 28  | 4 PITG_12105   |
| 0   | 6   | 0 NA           |
| 0   | 0   | 14 PITG_01056  |
| 0   | 27  | 4 PITG_01757   |
| 0   | 4   | 5 PITG_16054   |
| 0   | 257 | 63 PITG_10844  |
| 0   | 13  | 0 PITG_03972   |
| 0   | 0   | 0 NA           |
| 0   | 2   | 10 PITG_07017  |
| 0   | 0   | 0 PITG_20384   |
| 0   | 7   | 4 NA           |
| 0   | 5   | 0 PITG_16053   |
| 0   | 10  | 17 NA          |
| 0   | 7   | 2 PITG_14743   |
| 0   | 0   | 0 NA           |
| 0   | 4   | 17 PITG_20201  |
| 0   | 17  | 20 NA          |
| 0   | 4   | 2 PITG_11146   |
| 0   | 38  | 89 PITG_15251  |
| 0   | 5   | 2 NA           |
| 0   | 0   | 0 PITG_16020   |
| 0   | 0   | 2 PITG_19142   |
| 0   | 67  | 17 NA          |
| 0   | 6   | 2 PITG_04421   |
| 0   | 5   | 6 NA           |
| 0   | 136 | 74 NA          |
| 0   | 0   | 2 PITG_19153   |
| 0   | 14  | 0 PITG_00070   |
| 0   | 0   | 0 PITG_09897   |
| 0   | 2   | 0 NA           |
| 0   | 11  | 8 PITG_20056   |
| 0   | 13  | 0 PITG_16809   |
| 0   | 3   | 10 PITG_15466  |
| 0   | 23  | 0 PITG_03804   |
| 535 | 26  | 993 NA         |
| 0   | 0   | 0 NA           |
| 0   | 7   | 2 NA           |
| 0   | 3   | 29 NA          |
| 0   | 0   | 0 PITG_06829   |
| 0   | 6   | 12 PITG_03143  |
| 0   | 645 | 493 PITG_10454 |
| 0   | 0   | 0 PITG_06980   |
| 0   | 0   | 6 PITG_12598   |

|     |     |                |
|-----|-----|----------------|
| 0   | 70  | 16 PITG_03236  |
| 0   | 0   | 0 NA           |
| 0   | 0   | 6 NA           |
| 0   | 20  | 82 NA          |
| 0   | 2   | 3 NA           |
| 0   | 2   | 0 NA           |
| 0   | 9   | 6 PITG_09944   |
| 0   | 0   | 0 PITG_04618   |
| 0   | 32  | 10 PITG_01326  |
| 0   | 0   | 2 PITG_00634   |
| 0   | 8   | 2 PITG_16128   |
| 0   | 18  | 33 PITG_21626  |
| 0   | 168 | 336 PITG_09445 |
| 0   | 0   | 0 PITG_04545   |
| 0   | 5   | 8 PITG_01174   |
| 0   | 17  | 12 PITG_02808  |
| 0   | 4   | 0 PITG_09599   |
| 0   | 10  | 0 NA           |
| 0   | 0   | 0 PITG_04478   |
| 0   | 6   | 0 PITG_05461   |
| 0   | 2   | 11 PITG_02642  |
| 0   | 4   | 4 PITG_02529   |
| 0   | 6   | 15 PITG_12326  |
| 0   | 0   | 0 PITG_00416   |
| 0   | 3   | 22 PITG_18187  |
| 0   | 61  | 95 PITG_06662  |
| 0   | 7   | 81 PITG_08741  |
| 0   | 22  | 2 PITG_10308   |
| 0   | 44  | 5 PITG_03074   |
| 0   | 2   | 0 PITG_10395   |
| 0   | 19  | 20 PITG_13791  |
| 0   | 0   | 0 PITG_03476   |
| 0   | 5   | 2 PITG_18798   |
| 6   | 0   | 0 NA           |
| 0   | 4   | 2 PITG_08643   |
| 19  | 0   | 0 NA           |
| 0   | 12  | 6 NA           |
| 0   | 2   | 2 PITG_01020   |
| 0   | 23  | 4 PITG_15602   |
| 0   | 8   | 2 PITG_07098   |
| 123 | 20  | 152 NA         |
| 0   | 3   | 6 NA           |
| 0   | 2   | 0 PITG_19286   |
| 0   | 18  | 9 PITG_14399   |
| 0   | 0   | 0 NA           |
| 0   | 67  | 47 PITG_06328  |
| 0   | 0   | 2 NA           |

|   |     |               |
|---|-----|---------------|
| 0 | 48  | 4 PITG_09073  |
| 0 | 15  | 18 PITG_11286 |
| 0 | 10  | 9 NA          |
| 0 | 0   | 21 NA         |
| 0 | 11  | 0 PITG_01858  |
| 0 | 0   | 0 NA          |
| 0 | 0   | 0 PITG_18824  |
| 0 | 5   | 3 PITG_11020  |
| 0 | 11  | 19 PITG_06924 |
| 0 | 4   | 0 PITG_04126  |
| 0 | 0   | 0 NA          |
| 0 | 0   | 2 PITG_11466  |
| 0 | 11  | 14 PITG_23007 |
| 0 | 81  | 38 PITG_21352 |
| 0 | 2   | 2 PITG_04700  |
| 0 | 6   | 4 PITG_15818  |
| 0 | 2   | 7 NA          |
| 0 | 0   | 4 NA          |
| 0 | 0   | 7 PITG_01606  |
| 0 | 0   | 2 PITG_05560  |
| 0 | 32  | 19 PITG_17975 |
| 0 | 69  | 2 NA          |
| 0 | 0   | 0 PITG_09951  |
| 0 | 19  | 56 PITG_10857 |
| 0 | 4   | 4 PITG_20302  |
| 0 | 5   | 2 PITG_15550  |
| 0 | 2   | 2 PITG_16887  |
| 0 | 2   | 0 PITG_19153  |
| 0 | 15  | 101 NA        |
| 0 | 10  | 2 PITG_16797  |
| 0 | 0   | 0 PITG_14247  |
| 0 | 57  | 45 NA         |
| 0 | 11  | 13 PITG_12433 |
| 0 | 19  | 7 NA          |
| 0 | 6   | 0 PITG_11088  |
| 0 | 0   | 0 PITG_00854  |
| 0 | 21  | 2 NA          |
| 0 | 2   | 2 PITG_00180  |
| 0 | 9   | 15 PITG_03253 |
| 0 | 3   | 12 PITG_00954 |
| 0 | 115 | 47 NA         |
| 0 | 2   | 0 PITG_20287  |
| 0 | 0   | 2 PITG_13713  |
| 0 | 19  | 6 PITG_06204  |
| 0 | 2   | 6 PITG_13841  |
| 0 | 11  | 27 PITG_19422 |
| 0 | 18  | 10 PITG_04718 |

|   |     |                |
|---|-----|----------------|
| 0 | 0   | 3 PITG_05226   |
| 0 | 27  | 0 PITG_15357   |
| 0 | 7   | 43 PITG_05274  |
| 0 | 4   | 2 PITG_10293   |
| 0 | 2   | 0 PITG_08926   |
| 0 | 17  | 5 PITG_20527   |
| 0 | 3   | 4 PITG_04725   |
| 0 | 14  | 15 PITG_20324  |
| 0 | 2   | 0 PITG_01941   |
| 0 | 31  | 18 PITG_03415  |
| 0 | 0   | 2 PITG_10343   |
| 0 | 10  | 14 PITG_00299  |
| 0 | 0   | 0 NA           |
| 0 | 6   | 7 PITG_22763   |
| 0 | 8   | 0 PITG_09898   |
| 0 | 11  | 22 PITG_02054  |
| 0 | 70  | 8 PITG_00989   |
| 0 | 0   | 2 PITG_13276   |
| 0 | 75  | 47 PITG_08494  |
| 0 | 0   | 10 PITG_01416  |
| 0 | 2   | 13 PITG_14259  |
| 0 | 2   | 4 PITG_17068   |
| 0 | 7   | 0 NA           |
| 0 | 3   | 16 NA          |
| 0 | 2   | 0 PITG_10874   |
| 0 | 2   | 2 NA           |
| 0 | 19  | 4 PITG_07026   |
| 0 | 0   | 0 PITG_22378   |
| 0 | 220 | 643 NA         |
| 0 | 0   | 2 PITG_05115   |
| 0 | 7   | 23 PITG_01108  |
| 0 | 4   | 4 PITG_04709   |
| 0 | 26  | 65 PITG_09951  |
| 0 | 2   | 7 PITG_12939   |
| 0 | 0   | 8 NA           |
| 0 | 8   | 25 PITG_20559  |
| 0 | 0   | 0 PITG_04022   |
| 0 | 0   | 0 PITG_16487   |
| 0 | 0   | 12 PITG_11110  |
| 0 | 2   | 20 PITG_04395  |
| 0 | 18  | 0 PITG_06982   |
| 0 | 9   | 0 PITG_15077   |
| 0 | 60  | 105 PITG_08172 |
| 0 | 0   | 2 PITG_17004   |
| 0 | 8   | 3 NA           |
| 0 | 21  | 2 PITG_05396   |
| 0 | 0   | 0 PITG_10729   |

|     |    |               |
|-----|----|---------------|
| 403 | 5  | 230 NA        |
| 0   | 2  | 9 PITG_09409  |
| 0   | 46 | 39 PITG_00349 |
| 0   | 7  | 0 NA          |
| 0   | 16 | 9 PITG_08446  |
| 0   | 0  | 2 PITG_03143  |
| 0   | 0  | 2 PITG_05692  |
| 0   | 15 | 18 PITG_01102 |
| 0   | 0  | 2 NA          |
| 0   | 4  | 5 NA          |
| 0   | 51 | 15 PITG_06574 |
| 0   | 0  | 0 NA          |
| 0   | 18 | 11 PITG_20692 |
| 0   | 0  | 2 NA          |
| 0   | 10 | 57 PITG_03549 |
| 0   | 6  | 7 PITG_05476  |
| 0   | 68 | 33 PITG_00413 |
| 0   | 11 | 19 PITG_17769 |
| 0   | 0  | 3 NA          |
| 0   | 2  | 20 PITG_14557 |
| 0   | 0  | 0 PITG_16336  |
| 0   | 33 | 94 PITG_08715 |
| 0   | 4  | 6 PITG_18244  |
| 0   | 4  | 2 PITG_13752  |
| 0   | 0  | 0 PITG_15994  |
| 0   | 2  | 2 PITG_13620  |
| 0   | 20 | 24 PITG_08758 |
| 0   | 13 | 0 NA          |
| 0   | 11 | 0 NA          |
| 0   | 2  | 0 PITG_00789  |
| 0   | 4  | 2 PITG_16006  |
| 0   | 0  | 2 PITG_16864  |
| 0   | 21 | 23 PITG_02096 |
| 0   | 68 | 31 PITG_00269 |
| 0   | 16 | 29 PITG_01453 |
| 0   | 0  | 0 PITG_01484  |
| 0   | 0  | 5 PITG_06828  |
| 0   | 4  | 3 PITG_04976  |
| 0   | 2  | 4 PITG_19242  |
| 0   | 2  | 0 NA          |
| 0   | 22 | 6 PITG_02042  |
| 0   | 93 | 73 PITG_03903 |
| 0   | 8  | 14 PITG_13969 |
| 0   | 0  | 0 PITG_16628  |
| 0   | 0  | 0 PITG_05668  |
| 0   | 5  | 10 PITG_01207 |
| 0   | 14 | 8 PITG_03767  |



|     |     |                |
|-----|-----|----------------|
| 0   | 0   | 4 PITG_19750   |
| 0   | 2   | 3 PITG_07226   |
| 0   | 2   | 0 NA           |
| 0   | 0   | 0 PITG_10524   |
| 0   | 6   | 23 PITG_04591  |
| 0   | 5   | 2 PITG_00262   |
| 0   | 10  | 0 NA           |
| 0   | 0   | 0 PITG_01614   |
| 0   | 6   | 2 PITG_00174   |
| 0   | 0   | 2 PITG_03532   |
| 0   | 0   | 0 NA           |
| 0   | 2   | 2 NA           |
| 0   | 4   | 11 PITG_15637  |
| 0   | 0   | 0 PITG_17370   |
| 0   | 5   | 13 PITG_16083  |
| 0   | 6   | 6 PITG_05346   |
| 0   | 5   | 0 PITG_03871   |
| 0   | 49  | 14 PITG_02496  |
| 0   | 149 | 149 PITG_00439 |
| 0   | 4   | 2 NA           |
| 0   | 12  | 4 PITG_08305   |
| 0   | 0   | 2 NA           |
| 0   | 0   | 2 PITG_09285   |
| 0   | 24  | 14 PITG_02563  |
| 0   | 3   | 26 PITG_05225  |
| 0   | 9   | 14 PITG_16352  |
| 0   | 4   | 0 NA           |
| 0   | 6   | 7 NA           |
| 0   | 8   | 9 PITG_06664   |
| 0   | 15  | 8 PITG_11437   |
| 0   | 32  | 22 PITG_07229  |
| 0   | 4   | 0 PITG_01647   |
| 0   | 19  | 30 PITG_05128  |
| 0   | 11  | 19 PITG_07744  |
| 0   | 69  | 84 PITG_15134  |
| 0   | 626 | 202 NA         |
| 274 | 3   | 179 NA         |
| 0   | 4   | 7 PITG_10141   |
| 0   | 4   | 2 NA           |
| 0   | 0   | 0 PITG_21213   |
| 0   | 15  | 33 PITG_00490  |
| 0   | 3   | 6 PITG_21626   |
| 0   | 0   | 2 NA           |
| 0   | 7   | 2 NA           |
| 0   | 41  | 30 PITG_15876  |
| 0   | 0   | 0 PITG_18028   |
| 0   | 0   | 0 PITG_03665   |

|    |     |               |
|----|-----|---------------|
| 0  | 48  | 17 PITG_05867 |
| 0  | 2   | 4 PITG_03044  |
| 0  | 0   | 6 NA          |
| 0  | 8   | 2 PITG_03630  |
| 0  | 2   | 2 PITG_14561  |
| 0  | 2   | 5 PITG_20284  |
| 0  | 15  | 76 PITG_03653 |
| 0  | 2   | 0 PITG_16719  |
| 0  | 54  | 51 PITG_17394 |
| 0  | 30  | 36 PITG_19773 |
| 0  | 8   | 10 PITG_04028 |
| 0  | 19  | 9 PITG_09426  |
| 0  | 475 | 0 PITG_10926  |
| 0  | 0   | 4 PITG_09780  |
| 0  | 0   | 7 PITG_06881  |
| 0  | 8   | 9 PITG_00320  |
| 0  | 51  | 41 PITG_08470 |
| 0  | 70  | 0 NA          |
| 0  | 0   | 2 PITG_04076  |
| 0  | 4   | 36 PITG_22562 |
| 0  | 18  | 8 PITG_21175  |
| 0  | 6   | 25 PITG_12099 |
| 0  | 0   | 7 PITG_08139  |
| 0  | 16  | 12 PITG_03136 |
| 81 | 2   | 379 NA        |
| 0  | 15  | 8 PITG_03965  |
| 0  | 4   | 4 PITG_08699  |
| 0  | 4   | 4 PITG_00150  |
| 0  | 13  | 13 PITG_00150 |
| 0  | 65  | 25 NA         |
| 0  | 2   | 6 PITG_09701  |
| 0  | 227 | 49 NA         |
| 0  | 0   | 4 NA          |
| 0  | 2   | 2 PITG_09988  |
| 0  | 3   | 0 PITG_01920  |
| 0  | 7   | 4 PITG_04715  |
| 0  | 2   | 2 PITG_14613  |
| 0  | 0   | 0 NA          |
| 0  | 2   | 2 PITG_14640  |
| 0  | 2   | 2 PITG_18507  |
| 0  | 0   | 0 NA          |
| 0  | 0   | 4 PITG_09995  |
| 0  | 2   | 0 PITG_07301  |
| 0  | 16  | 5 PITG_15539  |
| 0  | 5   | 6 PITG_01858  |
| 0  | 17  | 27 PITG_07033 |
| 0  | 9   | 4 PITG_02977  |

|     |     |               |
|-----|-----|---------------|
| 0   | 13  | 12 PITG_05486 |
| 0   | 6   | 12 PITG_00423 |
| 0   | 2   | 11 PITG_11825 |
| 0   | 4   | 13 PITG_18413 |
| 2   | 20  | 54 PITG_18100 |
| 0   | 0   | 0 NA          |
| 0   | 0   | 7 NA          |
| 0   | 2   | 2 NA          |
| 0   | 106 | 74 NA         |
| 0   | 2   | 2 PITG_13544  |
| 0   | 4   | 0 NA          |
| 0   | 3   | 0 PITG_02561  |
| 0   | 25  | 0 PITG_15553  |
| 0   | 2   | 5 NA          |
| 0   | 39  | 2 NA          |
| 0   | 19  | 31 PITG_01997 |
| 0   | 5   | 4 PITG_17012  |
| 0   | 0   | 5 PITG_01053  |
| 0   | 2   | 8 PITG_09791  |
| 124 | 19  | 149 NA        |
| 0   | 0   | 0 PITG_00006  |
| 0   | 0   | 8 PITG_06559  |
| 0   | 21  | 8 PITG_03288  |
| 0   | 0   | 2 PITG_22715  |
| 0   | 10  | 4 PITG_19465  |
| 0   | 0   | 2 PITG_14922  |
| 0   | 20  | 6 PITG_14114  |
| 0   | 18  | 26 PITG_21314 |
| 0   | 0   | 0 PITG_18004  |
| 0   | 7   | 2 PITG_11157  |
| 2   | 9   | 27 PITG_00482 |
| 0   | 4   | 0 NA          |
| 92  | 65  | 99 NA         |
| 0   | 4   | 0 PITG_00978  |
| 0   | 4   | 7 PITG_06672  |
| 0   | 28  | 40 PITG_00483 |
| 0   | 6   | 20 PITG_10087 |
| 0   | 0   | 7 PITG_21597  |
| 0   | 0   | 7 PITG_01203  |
| 0   | 2   | 36 PITG_13434 |
| 0   | 2   | 2 PITG_13579  |
| 0   | 221 | 37 PITG_01932 |
| 0   | 26  | 4 PITG_10213  |
| 0   | 526 | 21 PITG_20715 |
| 0   | 7   | 0 PITG_06539  |
| 0   | 6   | 4 PITG_10492  |
| 0   | 0   | 2 PITG_07139  |

|   |     |               |
|---|-----|---------------|
| 0 | 4   | 2 PITG_05856  |
| 0 | 10  | 27 PITG_17130 |
| 0 | 5   | 10 NA         |
| 0 | 6   | 17 PITG_04508 |
| 0 | 14  | 6 NA          |
| 0 | 22  | 61 PITG_20562 |
| 0 | 7   | 5 NA          |
| 0 | 2   | 2 PITG_05467  |
| 0 | 0   | 4 PITG_13558  |
| 0 | 7   | 5 NA          |
| 0 | 7   | 2 PITG_13300  |
| 0 | 6   | 4 PITG_16562  |
| 0 | 27  | 6 NA          |
| 0 | 10  | 16 PITG_10061 |
| 0 | 14  | 11 PITG_18244 |
| 0 | 57  | 25 PITG_04980 |
| 0 | 2   | 0 PITG_16269  |
| 0 | 0   | 3 NA          |
| 0 | 0   | 0 PITG_17003  |
| 0 | 165 | 40 PITG_12594 |
| 0 | 4   | 15 PITG_06781 |
| 0 | 9   | 8 PITG_07852  |
| 0 | 0   | 5 PITG_12239  |
| 0 | 0   | 2 PITG_03341  |
| 0 | 0   | 12 PITG_21776 |
| 0 | 2   | 4 PITG_13914  |
| 0 | 8   | 0 NA          |
| 0 | 0   | 2 PITG_08011  |
| 0 | 21  | 10 PITG_05644 |
| 0 | 4   | 0 PITG_12864  |
| 0 | 18  | 50 PITG_00133 |
| 0 | 31  | 17 NA         |
| 0 | 2   | 0 PITG_08230  |
| 0 | 10  | 32 PITG_13749 |
| 0 | 25  | 0 PITG_07924  |
| 0 | 6   | 4 NA          |
| 0 | 0   | 2 PITG_03790  |
| 0 | 16  | 0 PITG_06803  |
| 0 | 89  | 37 PITG_07194 |
| 0 | 9   | 10 PITG_06963 |
| 0 | 0   | 2 PITG_01386  |
| 0 | 28  | 8 NA          |
| 0 | 2   | 4 PITG_09220  |
| 0 | 3   | 7 PITG_11765  |
| 0 | 0   | 6 PITG_12948  |
| 0 | 3   | 0 PITG_17679  |
| 0 | 2   | 16 PITG_04333 |

|    |     |                |
|----|-----|----------------|
| 0  | 42  | 0 NA           |
| 0  | 0   | 2 PITG_06424   |
| 0  | 0   | 0 NA           |
| 0  | 4   | 4 PITG_08438   |
| 0  | 27  | 32 NA          |
| 0  | 27  | 2 PITG_06516   |
| 0  | 15  | 6 PITG_07707   |
| 0  | 208 | 30 PITG_09949  |
| 17 | 0   | 6 NA           |
| 0  | 4   | 0 PITG_01244   |
| 0  | 27  | 3 PITG_05499   |
| 0  | 4   | 7 PITG_14625   |
| 0  | 13  | 0 NA           |
| 0  | 88  | 100 PITG_19846 |
| 0  | 45  | 2 PITG_18010   |
| 0  | 0   | 8 PITG_01852   |
| 0  | 22  | 17 PITG_01030  |
| 0  | 0   | 8 PITG_17129   |
| 0  | 11  | 6 PITG_18634   |
| 15 | 0   | 2 NA           |
| 0  | 24  | 0 NA           |
| 0  | 2   | 0 NA           |
| 0  | 4   | 2 NA           |
| 0  | 4   | 7 NA           |
| 0  | 2   | 4 PITG_01288   |
| 0  | 44  | 18 PITG_08310  |
| 0  | 43  | 0 NA           |
| 0  | 114 | 80 PITG_07024  |
| 0  | 0   | 0 NA           |
| 0  | 9   | 2 PITG_05522   |
| 0  | 4   | 9 PITG_08584   |
| 0  | 16  | 0 PITG_16058   |
| 0  | 4   | 2 PITG_00983   |
| 0  | 2   | 0 NA           |
| 0  | 0   | 4 PITG_00989   |
| 0  | 71  | 23 PITG_01784  |
| 0  | 123 | 119 PITG_10384 |
| 0  | 17  | 21 NA          |
| 0  | 31  | 9 PITG_13839   |
| 0  | 3   | 5 PITG_03790   |
| 0  | 0   | 2 PITG_03780   |
| 0  | 2   | 9 PITG_01502   |
| 0  | 13  | 10 PITG_08609  |
| 0  | 0   | 5 NA           |
| 0  | 6   | 6 PITG_17036   |
| 0  | 0   | 3 NA           |
| 0  | 9   | 2 PITG_06929   |

|     |     |               |
|-----|-----|---------------|
| 0   | 4   | 2 PITG_13887  |
| 0   | 0   | 2 PITG_03696  |
| 0   | 11  | 4 PITG_00234  |
| 0   | 0   | 0 PITG_03611  |
| 0   | 0   | 0 NA          |
| 0   | 20  | 31 PITG_01947 |
| 0   | 15  | 53 PITG_17257 |
| 0   | 10  | 14 PITG_09751 |
| 0   | 24  | 0 PITG_10079  |
| 0   | 73  | 4 PITG_15497  |
| 0   | 73  | 4 PITG_12587  |
| 0   | 16  | 63 PITG_13679 |
| 0   | 2   | 4 PITG_06660  |
| 0   | 102 | 14 NA         |
| 0   | 7   | 11 PITG_16538 |
| 0   | 2   | 2 PITG_01108  |
| 0   | 115 | 8 PITG_02887  |
| 0   | 28  | 4 PITG_02799  |
| 0   | 0   | 4 PITG_13174  |
| 0   | 0   | 0 PITG_01429  |
| 0   | 0   | 0 PITG_17587  |
| 0   | 10  | 4 PITG_13830  |
| 0   | 34  | 9 PITG_11265  |
| 0   | 2   | 15 PITG_05366 |
| 0   | 2   | 8 PITG_20803  |
| 0   | 14  | 7 PITG_14279  |
| 0   | 4   | 0 PITG_15961  |
| 0   | 2   | 0 PITG_00254  |
| 0   | 39  | 13 PITG_12496 |
| 0   | 333 | 112 NA        |
| 0   | 9   | 13 PITG_04534 |
| 0   | 0   | 2 PITG_02935  |
| 9   | 0   | 0 NA          |
| 0   | 9   | 13 PITG_15912 |
| 0   | 40  | 27 NA         |
| 0   | 3   | 0 PITG_19158  |
| 0   | 9   | 2 PITG_05413  |
| 0   | 11  | 2 NA          |
| 0   | 7   | 17 PITG_12548 |
| 0   | 0   | 0 PITG_16732  |
| 0   | 0   | 0 PITG_03978  |
| 0   | 2   | 2 NA          |
| 136 | 0   | 30 NA         |
| 0   | 2   | 3 PITG_00197  |
| 0   | 78  | 0 PITG_02490  |
| 0   | 4   | 5 PITG_06903  |
| 0   | 6   | 4 PITG_11410  |

|   |     |               |
|---|-----|---------------|
| 0 | 7   | 5 PITG_11571  |
| 0 | 66  | 15 PITG_09998 |
| 0 | 21  | 57 PITG_19804 |
| 0 | 40  | 0 PITG_17279  |
| 0 | 8   | 0 PITG_07916  |
| 0 | 29  | 21 PITG_00851 |
| 0 | 0   | 4 PITG_17869  |
| 0 | 5   | 4 PITG_00140  |
| 0 | 0   | 0 PITG_00398  |
| 0 | 57  | 6 NA          |
| 0 | 2   | 0 NA          |
| 0 | 17  | 50 PITG_12661 |
| 0 | 5   | 8 PITG_01836  |
| 0 | 30  | 4 NA          |
| 0 | 12  | 0 PITG_02729  |
| 0 | 0   | 2 NA          |
| 0 | 0   | 0 PITG_17071  |
| 0 | 19  | 23 NA         |
| 0 | 0   | 4 PITG_01188  |
| 0 | 17  | 15 PITG_19096 |
| 0 | 4   | 7 PITG_03473  |
| 0 | 40  | 27 PITG_03980 |
| 0 | 2   | 2 PITG_02667  |
| 0 | 0   | 0 PITG_10449  |
| 0 | 15  | 8 PITG_06112  |
| 0 | 2   | 0 NA          |
| 0 | 7   | 0 PITG_08473  |
| 0 | 0   | 0 NA          |
| 0 | 0   | 0 PITG_00658  |
| 0 | 0   | 4 PITG_18424  |
| 0 | 347 | 43 NA         |
| 0 | 17  | 4 PITG_20760  |
| 0 | 0   | 13 PITG_03306 |
| 0 | 0   | 0 PITG_06352  |
| 0 | 0   | 4 PITG_03409  |
| 0 | 42  | 12 PITG_08032 |
| 0 | 10  | 17 NA         |
| 0 | 7   | 0 PITG_04880  |
| 0 | 7   | 8 PITG_11489  |
| 0 | 8   | 28 NA         |
| 0 | 0   | 0 PITG_00450  |
| 0 | 0   | 4 PITG_13843  |
| 0 | 39  | 9 PITG_02263  |
| 0 | 7   | 0 PITG_20350  |
| 0 | 2   | 0 PITG_03152  |
| 0 | 0   | 10 PITG_16386 |
| 0 | 5   | 2 PITG_03767  |

|   |     |               |
|---|-----|---------------|
| 0 | 11  | 2 PITG_05643  |
| 0 | 2   | 0 NA          |
| 0 | 5   | 6 PITG_09388  |
| 0 | 0   | 0 PITG_02208  |
| 0 | 53  | 34 PITG_06603 |
| 0 | 2   | 6 PITG_01663  |
| 0 | 19  | 37 PITG_08997 |
| 0 | 55  | 58 PITG_16107 |
| 0 | 0   | 0 NA          |
| 0 | 180 | 9 PITG_20791  |
| 0 | 2   | 0 PITG_06632  |
| 0 | 57  | 57 PITG_16098 |
| 0 | 2   | 6 PITG_13272  |
| 0 | 16  | 12 PITG_05005 |
| 0 | 0   | 0 PITG_02725  |
| 0 | 6   | 0 PITG_10783  |
| 0 | 6   | 35 PITG_01862 |
| 0 | 0   | 0 PITG_01386  |
| 0 | 9   | 6 PITG_01453  |
| 0 | 3   | 9 PITG_05940  |
| 0 | 2   | 0 PITG_17168  |
| 0 | 4   | 2 PITG_21595  |
| 0 | 0   | 2 NA          |
| 0 | 53  | 26 PITG_12285 |
| 0 | 0   | 0 NA          |
| 0 | 0   | 2 PITG_20204  |
| 0 | 2   | 0 PITG_14055  |
| 0 | 0   | 3 PITG_09953  |
| 0 | 0   | 0 PITG_15731  |
| 5 | 0   | 6 NA          |
| 0 | 34  | 14 PITG_03372 |
| 0 | 4   | 0 PITG_06319  |
| 0 | 5   | 9 PITG_03225  |
| 0 | 10  | 4 NA          |
| 0 | 0   | 2 PITG_03604  |
| 0 | 6   | 8 PITG_14637  |
| 0 | 4   | 9 PITG_13842  |
| 0 | 18  | 27 PITG_18410 |
| 0 | 2   | 2 PITG_21314  |
| 0 | 2   | 0 NA          |
| 0 | 0   | 0 PITG_01332  |
| 0 | 53  | 5 PITG_19769  |
| 0 | 10  | 0 PITG_15391  |
| 0 | 34  | 5 PITG_17457  |
| 0 | 29  | 0 NA          |
| 0 | 0   | 0 PITG_18332  |
| 0 | 0   | 2 PITG_08031  |



|    |     |                |
|----|-----|----------------|
| 0  | 2   | 4 PITG_20830   |
| 0  | 19  | 6 PITG_12983   |
| 0  | 14  | 19 PITG_01471  |
| 0  | 4   | 6 PITG_02213   |
| 0  | 2   | 4 PITG_01453   |
| 0  | 4   | 0 PITG_00271   |
| 0  | 2   | 6 PITG_12914   |
| 0  | 8   | 54 PITG_17123  |
| 0  | 0   | 0 PITG_03112   |
| 0  | 6   | 4 PITG_04893   |
| 0  | 21  | 2 PITG_16053   |
| 0  | 306 | 184 NA         |
| 0  | 21  | 8 PITG_04393   |
| 0  | 0   | 2 PITG_07975   |
| 0  | 2   | 3 PITG_13497   |
| 0  | 7   | 9 PITG_03753   |
| 0  | 6   | 2 PITG_03044   |
| 0  | 38  | 12 NA          |
| 0  | 11  | 13 PITG_03661  |
| 0  | 276 | 58 PITG_14621  |
| 0  | 0   | 0 PITG_07830   |
| 0  | 0   | 8 PITG_14134   |
| 0  | 0   | 4 NA           |
| 0  | 0   | 9 PITG_03119   |
| 0  | 12  | 4 PITG_08461   |
| 0  | 12  | 3 PITG_03318   |
| 0  | 9   | 0 NA           |
| 0  | 216 | 275 PITG_13761 |
| 0  | 18  | 4 PITG_03435   |
| 0  | 0   | 11 PITG_03351  |
| 0  | 28  | 38 PITG_21765  |
| 0  | 12  | 9 PITG_04934   |
| 0  | 6   | 0 NA           |
| 0  | 13  | 2 NA           |
| 0  | 2   | 15 PITG_05012  |
| 0  | 4   | 2 NA           |
| 0  | 12  | 8 NA           |
| 0  | 19  | 2 NA           |
| 0  | 6   | 0 NA           |
| 0  | 0   | 0 NA           |
| 0  | 17  | 0 NA           |
| 0  | 8   | 4 PITG_13371   |
| 0  | 5   | 7 PITG_13391   |
| 0  | 6   | 2 PITG_22148   |
| 0  | 0   | 2 PITG_03898   |
| 0  | 34  | 0 PITG_00226   |
| 56 | 0   | 67 NA          |

|   |    |                |
|---|----|----------------|
| 0 | 0  | 81 PITG_06016  |
| 0 | 2  | 3 PITG_12889   |
| 0 | 0  | 4 PITG_15961   |
| 0 | 82 | 100 PITG_10052 |
| 0 | 13 | 21 PITG_01781  |
| 0 | 0  | 0 PITG_18977   |
| 0 | 6  | 2 PITG_01301   |
| 0 | 2  | 0 PITG_15602   |
| 0 | 0  | 5 NA           |
| 0 | 13 | 0 PITG_11161   |
| 0 | 4  | 0 PITG_01450   |
| 0 | 2  | 0 PITG_02382   |
| 0 | 2  | 17 PITG_06609  |
| 0 | 0  | 0 PITG_15062   |
| 0 | 26 | 15 PITG_10857  |
| 0 | 0  | 2 PITG_04725   |
| 0 | 2  | 11 NA          |
| 6 | 28 | 288 NA         |
| 0 | 11 | 5 PITG_12165   |
| 0 | 2  | 0 NA           |
| 0 | 31 | 17 PITG_12113  |
| 0 | 7  | 0 PITG_01989   |
| 0 | 20 | 28 PITG_10831  |
| 5 | 4  | 4 NA           |
| 0 | 0  | 4 NA           |
| 0 | 0  | 2 PITG_13395   |
| 0 | 2  | 4 PITG_16984   |
| 0 | 27 | 9 NA           |
| 0 | 0  | 4 PITG_00699   |
| 0 | 0  | 4 PITG_18473   |
| 0 | 15 | 2 PITG_14097   |
| 0 | 0  | 0 PITG_06022   |
| 0 | 2  | 0 NA           |
| 0 | 0  | 0 PITG_17831   |
| 0 | 2  | 2 NA           |
| 0 | 2  | 0 PITG_01410   |
| 0 | 25 | 27 PITG_07194  |
| 0 | 0  | 6 PITG_05818   |
| 0 | 2  | 2 PITG_04405   |
| 7 | 2  | 4 NA           |
| 0 | 15 | 0 NA           |
| 0 | 0  | 0 PITG_03934   |
| 0 | 13 | 11 PITG_08229  |
| 0 | 0  | 3 PITG_11007   |
| 2 | 82 | 678 PITG_06722 |
| 0 | 2  | 2 NA           |
| 0 | 15 | 32 PITG_03075  |

|   |     |                |
|---|-----|----------------|
| 0 | 16  | 8 PITG_07124   |
| 0 | 5   | 3 PITG_18935   |
| 0 | 0   | 4 PITG_04533   |
| 0 | 0   | 0 PITG_06917   |
| 0 | 100 | 74 PITG_02001  |
| 0 | 38  | 39 PITG_04485  |
| 0 | 3   | 11 PITG_05311  |
| 0 | 89  | 170 PITG_14466 |
| 0 | 2   | 22 PITG_00746  |
| 0 | 0   | 16 PITG_00970  |
| 0 | 12  | 0 NA           |
| 0 | 29  | 12 PITG_15016  |
| 0 | 88  | 38 PITG_04535  |
| 0 | 2   | 4 PITG_09988   |
| 0 | 0   | 18 NA          |
| 0 | 2   | 2 PITG_00538   |
| 0 | 4   | 17 PITG_02343  |
| 0 | 43  | 23 PITG_10987  |
| 0 | 0   | 0 PITG_12489   |
| 0 | 69  | 23 NA          |
| 0 | 63  | 4 PITG_13505   |
| 0 | 24  | 19 PITG_05255  |
| 0 | 0   | 17 PITG_08083  |
| 0 | 19  | 70 PITG_00273  |
| 0 | 5   | 14 PITG_08552  |
| 0 | 8   | 0 PITG_07891   |
| 0 | 8   | 9 PITG_05234   |
| 0 | 17  | 0 NA           |
| 0 | 29  | 11 PITG_03480  |
| 0 | 0   | 0 PITG_10921   |
| 0 | 29  | 16 PITG_01569  |
| 0 | 4   | 6 NA           |
| 0 | 66  | 2 PITG_21495   |
| 0 | 2   | 14 PITG_16813  |
| 0 | 0   | 8 PITG_05965   |
| 0 | 0   | 3 PITG_02259   |
| 0 | 11  | 34 PITG_11929  |
| 0 | 12  | 29 PITG_07995  |
| 0 | 2   | 0 PITG_00460   |
| 0 | 19  | 28 PITG_01322  |
| 0 | 0   | 8 NA           |
| 0 | 0   | 2 PITG_04841   |
| 0 | 166 | 42 PITG_17814  |
| 0 | 2   | 0 PITG_16013   |
| 0 | 5   | 0 PITG_00050   |
| 0 | 4   | 3 NA           |
| 0 | 2   | 4 NA           |

|     |     |                |
|-----|-----|----------------|
| 0   | 13  | 13 PITG_05494  |
| 0   | 11  | 21 PITG_18297  |
| 0   | 24  | 12 PITG_21127  |
| 0   | 0   | 2 PITG_15779   |
| 0   | 18  | 24 PITG_03902  |
| 0   | 40  | 9 NA           |
| 0   | 2   | 0 PITG_09789   |
| 0   | 8   | 4 PITG_15973   |
| 0   | 0   | 13 PITG_06358  |
| 0   | 5   | 0 NA           |
| 0   | 0   | 7 NA           |
| 0   | 0   | 3 PITG_03017   |
| 0   | 31  | 0 PITG_20223   |
| 0   | 0   | 0 PITG_01740   |
| 0   | 3   | 6 PITG_16078   |
| 0   | 14  | 12 PITG_09281  |
| 0   | 4   | 3 PITG_21333   |
| 0   | 2   | 0 PITG_14413   |
| 0   | 0   | 0 PITG_20370   |
| 0   | 13  | 0 PITG_09028   |
| 0   | 0   | 4 PITG_17557   |
| 0   | 16  | 6 PITG_04538   |
| 0   | 7   | 4 PITG_17951   |
| 0   | 0   | 0 PITG_16649   |
| 0   | 3   | 0 PITG_02624   |
| 0   | 0   | 0 NA           |
| 0   | 14  | 7 PITG_03011   |
| 0   | 49  | 68 PITG_11965  |
| 0   | 0   | 8 PITG_22017   |
| 0   | 31  | 0 PITG_10080   |
| 0   | 3   | 2 PITG_00281   |
| 0   | 0   | 0 NA           |
| 0   | 0   | 6 PITG_14279   |
| 0   | 5   | 3 PITG_21627   |
| 271 | 5   | 335 NA         |
| 0   | 2   | 7 PITG_13336   |
| 0   | 0   | 0 PITG_06288   |
| 0   | 14  | 0 NA           |
| 0   | 4   | 7 NA           |
| 0   | 6   | 0 PITG_19485   |
| 0   | 325 | 340 PITG_13183 |
| 0   | 14  | 0 PITG_19098   |
| 0   | 12  | 4 NA           |
| 0   | 260 | 167 PITG_17546 |
| 0   | 2   | 6 NA           |
| 0   | 7   | 0 PITG_10345   |
| 0   | 6   | 2 PITG_03858   |

|   |     |               |
|---|-----|---------------|
| 0 | 2   | 2 PITG_17882  |
| 0 | 0   | 2 PITG_19917  |
| 0 | 82  | 80 PITG_07283 |
| 0 | 12  | 0 PITG_03011  |
| 0 | 28  | 0 NA          |
| 0 | 23  | 39 PITG_11625 |
| 0 | 123 | 39 PITG_11085 |
| 0 | 0   | 0 NA          |
| 0 | 24  | 4 PITG_07043  |
| 0 | 4   | 8 PITG_08664  |
| 0 | 27  | 2 PITG_18943  |
| 0 | 0   | 4 PITG_03804  |
| 0 | 64  | 98 PITG_06863 |
| 0 | 50  | 108 NA        |
| 0 | 4   | 0 PITG_10758  |
| 0 | 39  | 13 NA         |
| 0 | 16  | 4 PITG_10420  |
| 0 | 8   | 6 PITG_06688  |
| 0 | 6   | 2 NA          |
| 0 | 5   | 6 PITG_00911  |
| 0 | 0   | 2 NA          |
| 0 | 0   | 0 PITG_21255  |
| 0 | 23  | 0 PITG_11483  |
| 0 | 0   | 0 PITG_14055  |
| 0 | 0   | 8 PITG_05587  |
| 0 | 4   | 2 PITG_22919  |
| 0 | 13  | 39 PITG_14278 |
| 0 | 0   | 2 NA          |
| 0 | 0   | 5 PITG_08584  |
| 0 | 27  | 7 PITG_13913  |
| 0 | 0   | 3 PITG_00119  |
| 0 | 0   | 0 PITG_00482  |
| 0 | 11  | 6 PITG_05659  |
| 0 | 0   | 2 PITG_15152  |
| 0 | 20  | 7 NA          |
| 0 | 250 | 37 NA         |
| 0 | 4   | 0 PITG_01623  |
| 0 | 169 | 9 PITG_01956  |
| 0 | 16  | 11 PITG_06708 |
| 0 | 9   | 0 PITG_00070  |
| 0 | 10  | 7 PITG_13554  |
| 0 | 4   | 0 PITG_17093  |
| 0 | 0   | 0 NA          |
| 0 | 6   | 5 PITG_17699  |
| 0 | 23  | 5 PITG_12463  |
| 0 | 0   | 0 NA          |
| 0 | 2   | 0 PITG_01301  |

|   |     |                |
|---|-----|----------------|
| 0 | 2   | 2 NA           |
| 0 | 235 | 126 PITG_14274 |
| 0 | 9   | 0 NA           |
| 0 | 0   | 5 NA           |
| 0 | 0   | 0 NA           |
| 0 | 0   | 10 PITG_02598  |
| 0 | 17  | 19 PITG_09474  |
| 0 | 4   | 2 PITG_20766   |
| 0 | 9   | 17 PITG_11592  |
| 0 | 279 | 132 PITG_03608 |
| 0 | 19  | 4 PITG_01053   |
| 0 | 14  | 3 PITG_12914   |
| 0 | 12  | 0 PITG_11648   |
| 0 | 17  | 5 NA           |
| 0 | 31  | 0 PITG_00717   |
| 0 | 9   | 9 PITG_16113   |
| 0 | 120 | 87 PITG_08084  |
| 0 | 17  | 0 NA           |
| 0 | 20  | 35 PITG_10921  |
| 0 | 6   | 16 PITG_15267  |
| 0 | 20  | 33 PITG_16791  |
| 0 | 7   | 10 PITG_00334  |
| 0 | 0   | 3 PITG_19177   |
| 0 | 17  | 0 PITG_18099   |
| 0 | 25  | 2 PITG_04020   |
| 0 | 145 | 53 NA          |
| 0 | 0   | 0 NA           |
| 0 | 2   | 10 PITG_17592  |
| 0 | 4   | 0 PITG_11286   |
| 0 | 2   | 0 PITG_04845   |
| 0 | 0   | 2 PITG_08734   |
| 0 | 12  | 14 PITG_00880  |
| 0 | 18  | 7 PITG_10152   |
| 0 | 43  | 35 PITG_10400  |
| 0 | 6   | 2 PITG_04038   |
| 0 | 8   | 0 PITG_08295   |
| 0 | 0   | 0 PITG_02635   |
| 0 | 4   | 0 NA           |
| 0 | 0   | 15 PITG_11229  |
| 0 | 3   | 6 PITG_11194   |
| 0 | 6   | 4 PITG_19844   |
| 0 | 2   | 0 PITG_06685   |
| 0 | 3   | 6 PITG_17959   |
| 0 | 2   | 2 PITG_12843   |
| 0 | 7   | 0 NA           |
| 0 | 24  | 45 PITG_06259  |
| 0 | 46  | 51 PITG_20260  |

|   |     |                |
|---|-----|----------------|
| 0 | 17  | 7 PITG_17490   |
| 0 | 5   | 15 PITG_22569  |
| 0 | 7   | 2 PITG_08447   |
| 0 | 2   | 4 PITG_09409   |
| 0 | 4   | 0 PITG_14480   |
| 0 | 22  | 4 PITG_16227   |
| 0 | 149 | 154 PITG_22575 |
| 0 | 2   | 2 NA           |
| 0 | 2   | 7 PITG_12108   |
| 0 | 27  | 18 PITG_05079  |
| 0 | 10  | 10 PITG_03821  |
| 0 | 0   | 4 PITG_06929   |
| 0 | 8   | 8 NA           |
| 0 | 6   | 2 PITG_18011   |
| 0 | 8   | 10 PITG_01759  |
| 0 | 2   | 10 PITG_00174  |
| 0 | 3   | 19 PITG_10325  |
| 0 | 16  | 4 NA           |
| 0 | 12  | 16 PITG_07029  |
| 0 | 0   | 0 NA           |
| 0 | 0   | 0 PITG_16340   |
| 0 | 0   | 0 NA           |
| 0 | 6   | 4 NA           |
| 0 | 9   | 7 PITG_17997   |
| 0 | 0   | 0 NA           |
| 0 | 75  | 7 PITG_19254   |
| 0 | 12  | 6 PITG_03772   |
| 0 | 4   | 0 NA           |
| 0 | 0   | 11 NA          |
| 0 | 30  | 50 PITG_00395  |
| 0 | 10  | 15 PITG_21210  |
| 0 | 2   | 4 PITG_09484   |
| 0 | 0   | 4 PITG_06643   |
| 0 | 21  | 8 PITG_10981   |
| 0 | 72  | 40 PITG_22277  |
| 0 | 0   | 9 PITG_09450   |
| 0 | 2   | 2 PITG_19312   |
| 0 | 0   | 13 NA          |
| 0 | 0   | 0 PITG_20265   |
| 0 | 412 | 121 PITG_11985 |
| 0 | 0   | 0 NA           |
| 0 | 52  | 61 PITG_05780  |
| 0 | 6   | 10 PITG_07173  |
| 0 | 10  | 8 PITG_17107   |
| 0 | 134 | 255 PITG_01599 |
| 0 | 2   | 2 PITG_19766   |
| 0 | 186 | 121 PITG_15175 |

|    |      |                |
|----|------|----------------|
| 0  | 0    | 0 NA           |
| 0  | 22   | 3 NA           |
| 0  | 4    | 2 PITG_00573   |
| 0  | 56   | 6 NA           |
| 0  | 3    | 0 PITG_10743   |
| 0  | 25   | 14 PITG_00502  |
| 0  | 5    | 6 NA           |
| 0  | 0    | 8 PITG_19180   |
| 0  | 0    | 2 PITG_13892   |
| 0  | 10   | 30 NA          |
| 0  | 31   | 15 PITG_05128  |
| 0  | 80   | 10 NA          |
| 0  | 3    | 0 PITG_06600   |
| 0  | 21   | 11 NA          |
| 0  | 5    | 2 PITG_20731   |
| 0  | 2    | 2 PITG_08446   |
| 0  | 21   | 23 PITG_02975  |
| 0  | 14   | 4 PITG_02981   |
| 0  | 0    | 0 PITG_08471   |
| 0  | 0    | 2 PITG_10901   |
| 0  | 2    | 2 PITG_12675   |
| 0  | 80   | 2 PITG_03564   |
| 0  | 6    | 7 NA           |
| 0  | 7    | 21 PITG_19472  |
| 0  | 32   | 7 PITG_06981   |
| 0  | 15   | 27 PITG_06379  |
| 0  | 0    | 0 NA           |
| 18 | 0    | 481 NA         |
| 0  | 2    | 0 PITG_15136   |
| 0  | 5    | 4 NA           |
| 0  | 2    | 11 PITG_11494  |
| 0  | 8    | 0 NA           |
| 0  | 3    | 0 NA           |
| 0  | 9    | 27 PITG_03832  |
| 0  | 16   | 14 PITG_07924  |
| 0  | 10   | 14 PITG_06257  |
| 0  | 0    | 2 PITG_04421   |
| 0  | 0    | 12 PITG_04248  |
| 0  | 1254 | 593 PITG_17826 |
| 0  | 23   | 0 PITG_15774   |
| 0  | 4    | 0 PITG_05869   |
| 0  | 4    | 0 NA           |
| 0  | 12   | 4 PITG_17767   |
| 0  | 52   | 2 PITG_09305   |
| 0  | 13   | 0 PITG_01756   |
| 0  | 179  | 40 PITG_15881  |
| 0  | 45   | 32 PITG_17110  |



|     |     |                |
|-----|-----|----------------|
| 0   | 0   | 2 PITG_00016   |
| 0   | 12  | 2 PITG_07174   |
| 0   | 15  | 13 PITG_20273  |
| 0   | 0   | 0 NA           |
| 0   | 114 | 716 PITG_11997 |
| 0   | 8   | 2 NA           |
| 0   | 14  | 0 PITG_10418   |
| 0   | 9   | 0 PITG_04011   |
| 0   | 25  | 40 PITG_03987  |
| 0   | 2   | 10 PITG_06610  |
| 0   | 72  | 37 PITG_18509  |
| 0   | 2   | 0 PITG_21289   |
| 0   | 13  | 9 PITG_16040   |
| 0   | 6   | 3 PITG_02418   |
| 0   | 0   | 0 PITG_08855   |
| 182 | 4   | 45 NA          |
| 0   | 28  | 11 PITG_10615  |
| 0   | 4   | 8 PITG_19286   |
| 0   | 237 | 348 PITG_06748 |
| 0   | 6   | 6 PITG_16023   |
| 0   | 12  | 0 PITG_17158   |
| 199 | 17  | 185 NA         |
| 0   | 166 | 169 PITG_08216 |
| 0   | 2   | 0 PITG_19182   |
| 0   | 55  | 0 PITG_05223   |
| 0   | 7   | 0 NA           |
| 0   | 15  | 15 PITG_13622  |
| 0   | 24  | 30 PITG_05318  |
| 0   | 2   | 0 PITG_17461   |
| 0   | 2   | 0 NA           |
| 0   | 22  | 6 PITG_13768   |
| 0   | 10  | 100 PITG_02479 |
| 0   | 0   | 2 PITG_11444   |
| 0   | 8   | 10 PITG_05521  |
| 0   | 18  | 0 PITG_08817   |
| 0   | 23  | 2 PITG_04608   |
| 0   | 14  | 22 PITG_00896  |
| 0   | 4   | 4 NA           |
| 0   | 2   | 0 PITG_19350   |
| 0   | 7   | 0 NA           |
| 0   | 4   | 2 NA           |
| 0   | 25  | 2 PITG_07012   |
| 0   | 20  | 0 NA           |
| 0   | 8   | 2 PITG_02927   |
| 6   | 19  | 168 NA         |
| 0   | 25  | 0 PITG_01340   |
| 0   | 27  | 15 PITG_12260  |

|     |     |                |
|-----|-----|----------------|
| 0   | 226 | 60 PITG_02826  |
| 0   | 21  | 11 PITG_19639  |
| 0   | 4   | 20 PITG_16984  |
| 0   | 0   | 3 NA           |
| 0   | 0   | 122 NA         |
| 0   | 8   | 5 NA           |
| 0   | 0   | 0 NA           |
| 0   | 4   | 0 PITG_09483   |
| 0   | 197 | 129 PITG_01556 |
| 241 | 7   | 244 NA         |
| 0   | 12  | 56 PITG_01504  |
| 0   | 175 | 127 PITG_08758 |
| 0   | 7   | 2 PITG_12677   |
| 0   | 55  | 3 NA           |
| 0   | 0   | 0 PITG_09977   |
| 0   | 49  | 4 NA           |
| 0   | 2   | 0 NA           |
| 0   | 103 | 4 PITG_03493   |
| 0   | 14  | 17 PITG_23159  |
| 0   | 18  | 26 PITG_03653  |
| 0   | 2   | 4 NA           |
| 0   | 35  | 2 PITG_05494   |
| 0   | 11  | 49 NA          |
| 0   | 2   | 0 NA           |
| 0   | 4   | 2 PITG_00934   |
| 0   | 0   | 4 PITG_00590   |
| 0   | 14  | 0 PITG_04133   |
| 0   | 25  | 11 NA          |
| 0   | 81  | 23 PITG_14112  |
| 0   | 86  | 36 PITG_00846  |
| 0   | 45  | 10 PITG_13997  |
| 0   | 0   | 4 PITG_18250   |
| 0   | 6   | 0 PITG_09040   |
| 0   | 0   | 0 PITG_11461   |
| 0   | 48  | 4 NA           |
| 0   | 8   | 4 PITG_11648   |
| 0   | 7   | 14 PITG_12304  |
| 0   | 12  | 8 PITG_19969   |
| 0   | 4   | 32 PITG_12753  |
| 0   | 23  | 2 PITG_01301   |
| 0   | 0   | 0 PITG_01154   |
| 0   | 3   | 2 PITG_08088   |
| 0   | 17  | 9 PITG_09279   |
| 0   | 2   | 5 PITG_01754   |
| 0   | 2   | 0 NA           |
| 0   | 0   | 0 NA           |
| 0   | 5   | 2 PITG_02268   |

|    |     |                |
|----|-----|----------------|
| 0  | 10  | 4 PITG_00576   |
| 0  | 5   | 2 PITG_00444   |
| 0  | 8   | 7 NA           |
| 0  | 301 | 174 PITG_06715 |
| 0  | 11  | 52 PITG_19422  |
| 0  | 3   | 0 PITG_01994   |
| 0  | 18  | 13 PITG_02233  |
| 0  | 15  | 8 PITG_10664   |
| 0  | 0   | 0 PITG_20104   |
| 0  | 21  | 0 NA           |
| 0  | 53  | 48 PITG_17601  |
| 0  | 0   | 0 NA           |
| 0  | 2   | 0 PITG_07852   |
| 0  | 78  | 8 PITG_02128   |
| 0  | 12  | 7 PITG_16383   |
| 0  | 2   | 0 PITG_10173   |
| 0  | 12  | 0 PITG_19485   |
| 0  | 14  | 26 PITG_06452  |
| 0  | 4   | 7 PITG_00390   |
| 0  | 5   | 12 NA          |
| 0  | 8   | 0 PITG_16862   |
| 0  | 41  | 3 PITG_12173   |
| 0  | 23  | 22 PITG_05939  |
| 31 | 2   | 50 NA          |
| 0  | 11  | 21 PITG_07246  |
| 0  | 2   | 0 NA           |
| 0  | 23  | 18 PITG_18063  |
| 0  | 7   | 30 PITG_20156  |
| 0  | 12  | 16 PITG_03702  |
| 0  | 2   | 0 PITG_04497   |
| 0  | 4   | 11 PITG_02698  |
| 0  | 18  | 0 PITG_13201   |
| 0  | 0   | 0 NA           |
| 0  | 0   | 0 NA           |
| 0  | 11  | 15 PITG_18714  |
| 0  | 4   | 4 PITG_05298   |
| 0  | 2   | 2 PITG_06941   |
| 0  | 4   | 5 PITG_00734   |
| 0  | 8   | 23 PITG_08132  |
| 0  | 2   | 0 PITG_15240   |
| 0  | 0   | 17 PITG_04691  |
| 0  | 25  | 13 PITG_08206  |
| 0  | 10  | 4 PITG_12530   |
| 0  | 0   | 0 NA           |
| 0  | 9   | 3 PITG_11728   |
| 0  | 4   | 12 PITG_21017  |
| 0  | 2   | 2 NA           |

|   |     |                |
|---|-----|----------------|
| 0 | 3   | 0 PITG_15091   |
| 0 | 11  | 0 NA           |
| 0 | 49  | 19 NA          |
| 0 | 52  | 65 PITG_08294  |
| 0 | 6   | 0 PITG_11790   |
| 0 | 4   | 0 PITG_21514   |
| 0 | 120 | 149 PITG_14584 |
| 0 | 25  | 2 PITG_21841   |
| 0 | 3   | 6 PITG_18393   |
| 0 | 48  | 8 PITG_01416   |
| 0 | 0   | 0 NA           |
| 0 | 0   | 5 PITG_10932   |
| 0 | 0   | 0 NA           |
| 0 | 12  | 0 NA           |
| 0 | 2   | 2 PITG_23286   |
| 0 | 0   | 2 PITG_03957   |
| 0 | 40  | 16 PITG_04000  |
| 0 | 117 | 63 PITG_06106  |
| 0 | 0   | 0 NA           |
| 0 | 48  | 13 PITG_03268  |
| 0 | 2   | 0 PITG_04561   |
| 0 | 0   | 6 PITG_20882   |
| 0 | 22  | 17 NA          |
| 0 | 15  | 66 PITG_03678  |
| 0 | 0   | 0 NA           |
| 0 | 25  | 12 PITG_20331  |
| 0 | 33  | 21 PITG_01153  |
| 0 | 2   | 0 PITG_13846   |
| 0 | 34  | 22 NA          |
| 0 | 2   | 0 PITG_17313   |
| 0 | 5   | 4 PITG_03571   |
| 0 | 21  | 4 PITG_09311   |
| 0 | 51  | 338 NA         |
| 0 | 35  | 16 PITG_16114  |
| 0 | 41  | 25 NA          |
| 0 | 0   | 0 NA           |
| 0 | 30  | 0 NA           |
| 0 | 11  | 2 PITG_09028   |
| 0 | 24  | 37 PITG_17589  |
| 9 | 8   | 7 NA           |
| 0 | 0   | 2 PITG_09826   |
| 0 | 10  | 20 PITG_08643  |
| 0 | 20  | 0 NA           |
| 0 | 70  | 46 PITG_08917  |
| 0 | 40  | 24 NA          |
| 0 | 60  | 16 NA          |
| 0 | 4   | 11 PITG_16887  |

|     |      |                |
|-----|------|----------------|
| 0   | 902  | 394 PITG_13414 |
| 52  | 6    | 8 PITG_06415   |
| 0   | 19   | 83 PITG_08043  |
| 0   | 0    | 0 PITG_18249   |
| 0   | 5    | 7 PITG_08452   |
| 0   | 4    | 12 PITG_02561  |
| 0   | 16   | 28 PITG_14175  |
| 0   | 2    | 4 PITG_20503   |
| 290 | 23   | 235 NA         |
| 0   | 8    | 0 NA           |
| 0   | 53   | 91 PITG_17410  |
| 0   | 4    | 0 PITG_16020   |
| 0   | 101  | 69 PITG_09949  |
| 0   | 3    | 0 PITG_00705   |
| 0   | 6    | 0 NA           |
| 0   | 0    | 0 PITG_02304   |
| 0   | 57   | 5 PITG_02761   |
| 0   | 7    | 0 PITG_17137   |
| 0   | 18   | 5 PITG_10792   |
| 0   | 23   | 2 PITG_16331   |
| 0   | 34   | 16 PITG_10098  |
| 0   | 226  | 210 PITG_03433 |
| 0   | 11   | 2 NA           |
| 0   | 2    | 8 PITG_01641   |
| 0   | 10   | 55 PITG_02561  |
| 0   | 1667 | 628 PITG_01363 |
| 0   | 8    | 2 PITG_12260   |
| 0   | 13   | 6 PITG_12576   |
| 0   | 0    | 0 NA           |
| 0   | 12   | 11 PITG_01815  |
| 0   | 3    | 2 PITG_17460   |
| 17  | 0    | 7 NA           |
| 0   | 80   | 10 PITG_05526  |
| 0   | 0    | 0 PITG_16031   |
| 0   | 4    | 0 PITG_13620   |
| 0   | 3    | 11 PITG_11536  |
| 0   | 2    | 2 NA           |
| 0   | 0    | 0 NA           |
| 0   | 11   | 10 NA          |
| 0   | 18   | 15 PITG_08997  |
| 0   | 0    | 4 PITG_01001   |
| 0   | 4    | 8 NA           |
| 0   | 5    | 0 PITG_06963   |
| 0   | 2    | 8 PITG_13168   |
| 0   | 2    | 7 PITG_00845   |
| 0   | 2    | 2 PITG_06827   |
| 0   | 7    | 5 PITG_07248   |

|     |     |                |
|-----|-----|----------------|
| 0   | 2   | 14 PITG_03756  |
| 0   | 29  | 2 NA           |
| 0   | 8   | 6 NA           |
| 0   | 4   | 2 PITG_14743   |
| 0   | 110 | 0 PITG_03974   |
| 0   | 6   | 24 PITG_06649  |
| 0   | 2   | 2 PITG_07102   |
| 0   | 4   | 2 PITG_15967   |
| 0   | 0   | 0 PITG_08305   |
| 0   | 0   | 0 NA           |
| 0   | 6   | 6 PITG_07301   |
| 0   | 6   | 0 NA           |
| 0   | 6   | 2 PITG_16958   |
| 0   | 0   | 0 NA           |
| 0   | 5   | 4 PITG_00163   |
| 0   | 2   | 13 PITG_19966  |
| 0   | 7   | 16 PITG_13007  |
| 0   | 0   | 0 PITG_14109   |
| 0   | 21  | 25 NA          |
| 0   | 18  | 5 PITG_08295   |
| 0   | 23  | 20 PITG_08295  |
| 0   | 33  | 2 PITG_10002   |
| 0   | 0   | 0 PITG_10119   |
| 0   | 3   | 0 NA           |
| 0   | 0   | 0 PITG_00960   |
| 0   | 0   | 4 NA           |
| 0   | 0   | 2 PITG_09092   |
| 0   | 21  | 6 PITG_02580   |
| 0   | 0   | 0 PITG_19884   |
| 0   | 42  | 42 PITG_04985  |
| 0   | 2   | 2 PITG_13841   |
| 0   | 17  | 44 PITG_02533  |
| 0   | 16  | 12 PITG_00495  |
| 0   | 0   | 4 PITG_02842   |
| 0   | 5   | 6 PITG_06426   |
| 0   | 13  | 15 PITG_07145  |
| 0   | 0   | 0 PITG_19208   |
| 0   | 7   | 0 NA           |
| 0   | 29  | 8 NA           |
| 0   | 3   | 24 PITG_06695  |
| 0   | 8   | 10 PITG_03432  |
| 0   | 2   | 6 PITG_05780   |
| 0   | 454 | 139 PITG_08702 |
| 181 | 120 | 289 NA         |
| 0   | 0   | 0 PITG_01440   |
| 0   | 97  | 39 NA          |
| 0   | 11  | 0 PITG_19466   |

|    |     |               |
|----|-----|---------------|
| 0  | 5   | 0 PITG_00828  |
| 0  | 2   | 5 PITG_05538  |
| 0  | 14  | 4 PITG_16036  |
| 0  | 19  | 0 NA          |
| 0  | 9   | 31 PITG_17753 |
| 0  | 11  | 7 PITG_08800  |
| 0  | 20  | 15 NA         |
| 0  | 2   | 0 NA          |
| 0  | 6   | 5 PITG_18393  |
| 0  | 39  | 3 NA          |
| 0  | 22  | 12 PITG_02975 |
| 0  | 0   | 3 PITG_22355  |
| 0  | 3   | 21 PITG_04564 |
| 0  | 43  | 18 PITG_02096 |
| 0  | 2   | 0 PITG_03901  |
| 0  | 11  | 18 PITG_17439 |
| 0  | 3   | 15 PITG_17335 |
| 0  | 6   | 4 PITG_10314  |
| 0  | 0   | 9 PITG_15026  |
| 0  | 9   | 10 PITG_13438 |
| 22 | 2   | 23 NA         |
| 0  | 26  | 5 PITG_12341  |
| 0  | 7   | 4 PITG_05633  |
| 0  | 50  | 17 NA         |
| 0  | 19  | 6 NA          |
| 0  | 9   | 11 PITG_01949 |
| 0  | 0   | 0 PITG_09362  |
| 0  | 9   | 0 PITG_05340  |
| 0  | 161 | 12 PITG_20518 |
| 0  | 0   | 2 PITG_00391  |
| 0  | 0   | 0 PITG_07855  |
| 0  | 4   | 2 PITG_01815  |
| 0  | 0   | 4 NA          |
| 0  | 2   | 0 PITG_19859  |
| 0  | 3   | 4 PITG_05866  |
| 0  | 4   | 0 PITG_12273  |
| 0  | 23  | 46 PITG_18230 |
| 0  | 2   | 0 PITG_20374  |
| 0  | 2   | 0 PITG_12694  |
| 0  | 18  | 8 PITG_06762  |
| 0  | 103 | 153 NA        |
| 0  | 76  | 29 PITG_15311 |
| 0  | 0   | 0 PITG_12466  |
| 0  | 30  | 25 PITG_02281 |
| 0  | 0   | 4 PITG_11466  |
| 0  | 29  | 32 PITG_02001 |
| 0  | 0   | 2 PITG_09782  |

|    |     |                |
|----|-----|----------------|
| 0  | 5   | 0 PITG_05426   |
| 0  | 2   | 13 PITG_12318  |
| 0  | 17  | 0 PITG_10868   |
| 0  | 0   | 5 PITG_00335   |
| 0  | 47  | 23 PITG_08252  |
| 0  | 40  | 19 PITG_21914  |
| 96 | 12  | 155 NA         |
| 0  | 3   | 4 PITG_00274   |
| 0  | 31  | 5 PITG_18314   |
| 0  | 8   | 4 PITG_03755   |
| 0  | 3   | 14 PITG_06454  |
| 0  | 4   | 10 PITG_08351  |
| 0  | 4   | 0 PITG_03482   |
| 48 | 11  | 91 NA          |
| 0  | 0   | 2 PITG_03767   |
| 0  | 36  | 138 PITG_21187 |
| 0  | 12  | 2 NA           |
| 0  | 10  | 12 PITG_03532  |
| 0  | 0   | 0 PITG_16090   |
| 0  | 19  | 8 PITG_12484   |
| 0  | 8   | 0 PITG_04215   |
| 0  | 0   | 2 NA           |
| 0  | 0   | 0 PITG_03606   |
| 0  | 86  | 0 PITG_07661   |
| 0  | 37  | 12 PITG_03338  |
| 0  | 44  | 2 PITG_12348   |
| 0  | 2   | 0 PITG_19532   |
| 0  | 18  | 2 NA           |
| 0  | 21  | 18 PITG_06254  |
| 0  | 7   | 4 PITG_19514   |
| 0  | 108 | 591 PITG_22658 |
| 0  | 10  | 4 PITG_02337   |
| 0  | 10  | 0 NA           |
| 0  | 20  | 5 NA           |
| 0  | 7   | 0 PITG_14579   |
| 0  | 4   | 7 PITG_16344   |
| 0  | 0   | 2 NA           |
| 0  | 6   | 4 PITG_07661   |
| 0  | 2   | 2 NA           |
| 0  | 40  | 28 PITG_00456  |
| 0  | 3   | 0 PITG_02040   |
| 0  | 0   | 4 PITG_13745   |
| 0  | 2   | 7 PITG_12161   |
| 0  | 2   | 0 NA           |
| 0  | 43  | 6 PITG_15446   |
| 0  | 4   | 4 PITG_18248   |
| 0  | 0   | 0 PITG_12295   |



|   |     |                |
|---|-----|----------------|
| 0 | 8   | 4 PITG_09424   |
| 0 | 3   | 2 PITG_12211   |
| 0 | 10  | 5 PITG_19213   |
| 0 | 0   | 0 PITG_12446   |
| 0 | 85  | 43 PITG_03560  |
| 0 | 5   | 0 PITG_15077   |
| 4 | 0   | 2 NA           |
| 0 | 0   | 0 NA           |
| 0 | 22  | 4 PITG_00809   |
| 0 | 0   | 0 PITG_13303   |
| 0 | 0   | 4 PITG_01774   |
| 0 | 3   | 4 NA           |
| 0 | 3   | 41 PITG_17608  |
| 0 | 15  | 0 PITG_02571   |
| 0 | 0   | 0 PITG_02027   |
| 0 | 9   | 3 PITG_12297   |
| 0 | 15  | 3 PITG_05204   |
| 0 | 8   | 10 PITG_15518  |
| 0 | 0   | 6 PITG_19965   |
| 0 | 0   | 0 PITG_16820   |
| 0 | 8   | 16 PITG_11907  |
| 0 | 4   | 21 PITG_16649  |
| 0 | 59  | 171 PITG_06429 |
| 0 | 0   | 12 NA          |
| 0 | 0   | 5 PITG_05679   |
| 0 | 0   | 0 NA           |
| 0 | 0   | 0 PITG_22672   |
| 0 | 0   | 0 NA           |
| 0 | 17  | 4 PITG_00709   |
| 0 | 6   | 0 NA           |
| 0 | 4   | 6 NA           |
| 0 | 69  | 0 PITG_12221   |
| 0 | 0   | 2 PITG_12296   |
| 0 | 2   | 6 PITG_03472   |
| 0 | 20  | 0 PITG_00117   |
| 0 | 0   | 0 NA           |
| 0 | 10  | 14 PITG_01324  |
| 0 | 9   | 22 PITG_19234  |
| 0 | 2   | 0 PITG_21993   |
| 0 | 2   | 0 PITG_16476   |
| 0 | 0   | 2 PITG_19841   |
| 0 | 2   | 0 PITG_01057   |
| 0 | 124 | 24 PITG_18721  |
| 0 | 2   | 4 PITG_17279   |
| 0 | 10  | 7 PITG_03842   |
| 0 | 0   | 0 PITG_11119   |
| 0 | 30  | 50 PITG_02755  |

|   |    |               |
|---|----|---------------|
| 0 | 31 | 69 PITG_04875 |
| 0 | 0  | 8 PITG_04010  |
| 0 | 16 | 0 PITG_03192  |
| 0 | 37 | 10 PITG_17719 |
| 0 | 2  | 0 PITG_15618  |
| 0 | 50 | 62 NA         |
| 0 | 3  | 2 NA          |
| 0 | 5  | 7 PITG_09010  |
| 0 | 0  | 6 PITG_17057  |
| 0 | 4  | 16 PITG_22958 |
| 0 | 0  | 0 NA          |
| 0 | 39 | 30 PITG_21144 |
| 0 | 0  | 0 NA          |
| 0 | 7  | 0 PITG_05692  |
| 0 | 34 | 17 PITG_03032 |
| 0 | 4  | 2 PITG_00388  |
| 0 | 15 | 19 PITG_20041 |
| 0 | 2  | 6 PITG_03748  |
| 0 | 8  | 14 PITG_02863 |
| 0 | 8  | 22 PITG_09789 |
| 0 | 10 | 6 PITG_01526  |
| 0 | 0  | 0 NA          |
| 0 | 2  | 6 NA          |
| 0 | 0  | 2 NA          |
| 0 | 5  | 14 PITG_08594 |
| 0 | 0  | 3 PITG_07047  |
| 0 | 0  | 36 NA         |
| 0 | 2  | 0 PITG_20077  |
| 0 | 4  | 39 PITG_08346 |
| 0 | 2  | 0 PITG_01116  |
| 0 | 65 | 16 PITG_06934 |
| 0 | 16 | 42 PITG_05883 |
| 0 | 0  | 0 PITG_07991  |
| 0 | 40 | 24 PITG_20307 |
| 0 | 3  | 15 NA         |
| 0 | 30 | 2 PITG_15566  |
| 0 | 2  | 0 PITG_00083  |
| 0 | 2  | 0 PITG_03103  |
| 0 | 8  | 482 NA        |
| 0 | 99 | 67 PITG_04834 |
| 0 | 8  | 10 PITG_05763 |
| 0 | 5  | 0 PITG_03159  |
| 0 | 5  | 4 PITG_08679  |
| 0 | 4  | 26 PITG_04834 |
| 0 | 2  | 0 PITG_22672  |
| 0 | 21 | 18 NA         |
| 0 | 13 | 9 PITG_05732  |

|     |     |                |
|-----|-----|----------------|
| 0   | 4   | 13 PITG_05189  |
| 0   | 5   | 0 PITG_13298   |
| 0   | 5   | 2 PITG_05731   |
| 0   | 2   | 0 PITG_10547   |
| 0   | 9   | 10 PITG_07727  |
| 0   | 20  | 23 PITG_10258  |
| 0   | 0   | 6 PITG_02564   |
| 0   | 4   | 4 PITG_04443   |
| 0   | 0   | 0 NA           |
| 0   | 6   | 30 PITG_03423  |
| 0   | 3   | 0 NA           |
| 0   | 8   | 0 PITG_13915   |
| 0   | 0   | 0 PITG_10993   |
| 0   | 0   | 0 PITG_23141   |
| 0   | 0   | 2 NA           |
| 0   | 0   | 6 PITG_03939   |
| 0   | 0   | 2 PITG_06660   |
| 0   | 0   | 9 PITG_00391   |
| 0   | 8   | 16 PITG_22587  |
| 0   | 0   | 2 PITG_12621   |
| 0   | 0   | 0 PITG_19887   |
| 0   | 4   | 2 PITG_06913   |
| 0   | 2   | 6 PITG_08504   |
| 0   | 3   | 0 PITG_16440   |
| 0   | 0   | 0 PITG_10539   |
| 0   | 17  | 12 PITG_13861  |
| 2   | 12  | 17 PITG_18384  |
| 0   | 2   | 0 PITG_13276   |
| 0   | 17  | 6 PITG_10450   |
| 0   | 2   | 12 PITG_08446  |
| 0   | 188 | 46 PITG_21764  |
| 0   | 24  | 18 PITG_11504  |
| 130 | 13  | 166 NA         |
| 0   | 2   | 4 PITG_16332   |
| 0   | 106 | 62 PITG_11604  |
| 0   | 0   | 4 PITG_15393   |
| 0   | 2   | 6 PITG_00622   |
| 0   | 7   | 6 PITG_04682   |
| 0   | 22  | 2 NA           |
| 0   | 56  | 0 PITG_18748   |
| 0   | 2   | 2 NA           |
| 0   | 20  | 13 PITG_20585  |
| 0   | 189 | 266 PITG_06322 |
| 0   | 3   | 15 PITG_02286  |
| 0   | 6   | 10 PITG_21909  |
| 0   | 0   | 0 NA           |
| 0   | 37  | 6 PITG_08586   |

|     |     |                |
|-----|-----|----------------|
| 0   | 12  | 10 PITG_13838  |
| 0   | 12  | 19 PITG_06657  |
| 0   | 2   | 0 NA           |
| 0   | 12  | 4 PITG_05623   |
| 0   | 0   | 0 PITG_02995   |
| 0   | 5   | 20 PITG_19537  |
| 0   | 7   | 11 NA          |
| 0   | 2   | 9 PITG_04283   |
| 0   | 9   | 11 PITG_05679  |
| 0   | 3   | 4 PITG_10931   |
| 0   | 0   | 0 PITG_05277   |
| 0   | 0   | 0 PITG_08734   |
| 0   | 7   | 0 NA           |
| 0   | 74  | 6 NA           |
| 0   | 6   | 21 PITG_04996  |
| 0   | 0   | 13 PITG_18963  |
| 0   | 0   | 2 PITG_20110   |
| 0   | 0   | 4 PITG_11221   |
| 0   | 72  | 15 PITG_10981  |
| 0   | 0   | 6 PITG_18236   |
| 0   | 16  | 2 PITG_13174   |
| 0   | 23  | 2 PITG_11136   |
| 0   | 2   | 4 PITG_04122   |
| 0   | 6   | 23 PITG_01180  |
| 0   | 9   | 0 PITG_03328   |
| 0   | 0   | 7 PITG_10815   |
| 0   | 8   | 0 NA           |
| 0   | 7   | 0 NA           |
| 0   | 3   | 2 PITG_19175   |
| 0   | 0   | 3 PITG_10462   |
| 0   | 2   | 2 PITG_18007   |
| 0   | 11  | 0 NA           |
| 0   | 2   | 4 PITG_03200   |
| 0   | 4   | 6 PITG_18750   |
| 0   | 16  | 11 PITG_06814  |
| 0   | 0   | 11 PITG_01490  |
| 0   | 0   | 0 NA           |
| 0   | 8   | 0 PITG_16076   |
| 0   | 0   | 0 PITG_01187   |
| 0   | 0   | 6 NA           |
| 297 | 229 | 378 NA         |
| 0   | 41  | 5 PITG_01108   |
| 0   | 6   | 89 PITG_03244  |
| 0   | 9   | 3 PITG_09621   |
| 0   | 11  | 2 PITG_17550   |
| 0   | 26  | 12 PITG_17998  |
| 0   | 339 | 618 PITG_22406 |

|      |      |                |
|------|------|----------------|
| 0    | 18   | 17 PITG_13362  |
| 0    | 0    | 2 PITG_00412   |
| 0    | 17   | 0 NA           |
| 0    | 56   | 0 PITG_08419   |
| 0    | 41   | 17 PITG_22719  |
| 0    | 8    | 0 PITG_12290   |
| 0    | 72   | 0 PITG_20790   |
| 2    | 18   | 99 PITG_03549  |
| 0    | 8    | 2 PITG_00352   |
| 0    | 0    | 0 PITG_02230   |
| 6    | 0    | 9 NA           |
| 0    | 14   | 26 PITG_20146  |
| 38   | 7    | 44 NA          |
| 0    | 4    | 2 PITG_08374   |
| 0    | 0    | 2 PITG_07435   |
| 0    | 0    | 0 PITG_21419   |
| 0    | 2    | 0 PITG_15874   |
| 0    | 55   | 0 NA           |
| 0    | 2    | 0 PITG_08329   |
| 0    | 4    | 4 NA           |
| 0    | 2    | 0 PITG_03131   |
| 0    | 0    | 0 NA           |
| 0    | 59   | 62 PITG_10069  |
| 0    | 18   | 6 PITG_01390   |
| 0    | 4    | 7 PITG_07924   |
| 0    | 24   | 0 PITG_02667   |
| 0    | 33   | 6 NA           |
| 0    | 25   | 13 PITG_00961  |
| 0    | 5    | 21 PITG_14598  |
| 0    | 0    | 0 PITG_05176   |
| 0    | 7    | 4 PITG_23007   |
| 1141 | 4    | 357 NA         |
| 0    | 7    | 7 PITG_05683   |
| 0    | 18   | 12 PITG_10119  |
| 0    | 5    | 5 PITG_10265   |
| 0    | 41   | 41 PITG_12347  |
| 0    | 1222 | 126 PITG_05394 |
| 0    | 19   | 7 PITG_14170   |
| 0    | 10   | 48 PITG_12537  |
| 0    | 86   | 65 PITG_01931  |
| 0    | 18   | 0 NA           |
| 0    | 29   | 19 PITG_00590  |
| 0    | 4    | 0 PITG_02635   |
| 0    | 2    | 7 PITG_01257   |
| 70   | 6    | 120 NA         |
| 0    | 16   | 0 PITG_02994   |
| 0    | 2    | 0 NA           |

|   |     |               |
|---|-----|---------------|
| 0 | 25  | 49 PITG_09792 |
| 0 | 27  | 4 PITG_04486  |
| 0 | 16  | 2 NA          |
| 0 | 13  | 2 PITG_17876  |
| 0 | 4   | 0 PITG_19532  |
| 0 | 6   | 3 PITG_02329  |
| 0 | 0   | 0 PITG_10534  |
| 0 | 6   | 3 NA          |
| 0 | 10  | 22 NA         |
| 0 | 6   | 0 PITG_05856  |
| 0 | 132 | 20 PITG_13398 |
| 0 | 11  | 19 PITG_06991 |
| 0 | 3   | 2 PITG_10622  |
| 0 | 37  | 5 NA          |
| 0 | 41  | 12 PITG_15062 |
| 0 | 8   | 20 PITG_11922 |
| 0 | 2   | 0 PITG_03006  |
| 0 | 36  | 5 PITG_17931  |
| 0 | 6   | 0 PITG_20045  |
| 0 | 50  | 39 PITG_12326 |
| 0 | 26  | 9 PITG_14703  |
| 0 | 5   | 2 NA          |
| 0 | 49  | 19 PITG_00833 |
| 0 | 0   | 2 PITG_22570  |
| 0 | 9   | 2 PITG_00561  |
| 0 | 0   | 0 PITG_10308  |
| 0 | 12  | 28 PITG_18100 |
| 0 | 0   | 11 PITG_01737 |
| 2 | 19  | 46 PITG_11197 |
| 0 | 2   | 2 NA          |
| 0 | 11  | 0 PITG_03114  |
| 0 | 0   | 0 PITG_17936  |
| 0 | 2   | 0 NA          |
| 0 | 4   | 3 PITG_16863  |
| 0 | 20  | 0 NA          |
| 0 | 19  | 23 PITG_10507 |
| 0 | 147 | 65 PITG_17499 |
| 0 | 5   | 31 PITG_00476 |
| 0 | 35  | 14 PITG_01847 |
| 0 | 15  | 2 NA          |
| 0 | 16  | 4 PITG_11972  |
| 0 | 36  | 12 PITG_06718 |
| 0 | 2   | 0 PITG_02286  |
| 0 | 5   | 0 PITG_06755  |
| 0 | 2   | 0 NA          |
| 0 | 4   | 12 PITG_19182 |
| 0 | 21  | 21 PITG_03472 |

|    |     |                |
|----|-----|----------------|
| 0  | 64  | 14 NA          |
| 0  | 8   | 0 NA           |
| 0  | 6   | 3 PITG_02105   |
| 0  | 14  | 43 PITG_06428  |
| 0  | 2   | 0 PITG_03854   |
| 0  | 42  | 6 PITG_07174   |
| 0  | 4   | 0 NA           |
| 0  | 2   | 0 PITG_07230   |
| 0  | 205 | 961 PITG_22406 |
| 0  | 81  | 8 NA           |
| 0  | 90  | 252 PITG_11985 |
| 0  | 22  | 6 PITG_05643   |
| 0  | 12  | 3 PITG_01439   |
| 0  | 0   | 2 NA           |
| 0  | 7   | 0 NA           |
| 0  | 0   | 6 PITG_00116   |
| 0  | 0   | 0 PITG_13713   |
| 0  | 18  | 6 NA           |
| 0  | 2   | 3 PITG_03246   |
| 0  | 2   | 2 PITG_13298   |
| 0  | 17  | 8 NA           |
| 0  | 21  | 7 NA           |
| 0  | 5   | 4 PITG_16103   |
| 0  | 3   | 0 PITG_09664   |
| 0  | 10  | 6 PITG_17549   |
| 0  | 2   | 0 PITG_13167   |
| 0  | 0   | 0 NA           |
| 0  | 6   | 2 PITG_14549   |
| 0  | 6   | 0 PITG_00193   |
| 0  | 26  | 44 PITG_03061  |
| 0  | 6   | 5 PITG_07307   |
| 0  | 3   | 11 PITG_06454  |
| 37 | 0   | 2 NA           |
| 0  | 20  | 27 PITG_11610  |
| 0  | 2   | 0 PITG_12887   |
| 0  | 7   | 11 PITG_09036  |
| 0  | 0   | 6 PITG_16126   |
| 0  | 13  | 6 PITG_16053   |
| 0  | 23  | 0 NA           |
| 0  | 3   | 3 PITG_11491   |
| 0  | 5   | 3 PITG_20790   |
| 0  | 18  | 36 PITG_19646  |
| 0  | 83  | 0 PITG_03164   |
| 0  | 0   | 2 PITG_19223   |
| 0  | 9   | 6 PITG_00039   |
| 0  | 4   | 0 PITG_05629   |
| 0  | 0   | 0 PITG_22124   |

|    |     |               |
|----|-----|---------------|
| 0  | 6   | 0 NA          |
| 0  | 0   | 2 NA          |
| 0  | 4   | 0 NA          |
| 0  | 0   | 0 PITG_04289  |
| 0  | 10  | 4 PITG_18687  |
| 0  | 126 | 2 PITG_15867  |
| 74 | 6   | 170 NA        |
| 0  | 11  | 8 PITG_08090  |
| 0  | 20  | 17 PITG_21875 |
| 0  | 8   | 9 PITG_05260  |
| 0  | 2   | 2 PITG_20868  |
| 0  | 87  | 0 NA          |
| 0  | 0   | 2 PITG_11158  |
| 0  | 80  | 17 PITG_01374 |
| 0  | 7   | 43 PITG_03101 |
| 0  | 11  | 10 PITG_03621 |
| 0  | 0   | 0 PITG_07045  |
| 0  | 2   | 0 PITG_06819  |
| 0  | 0   | 0 NA          |
| 0  | 2   | 4 NA          |
| 0  | 9   | 38 PITG_13403 |
| 0  | 0   | 4 PITG_01653  |
| 0  | 142 | 58 NA         |
| 0  | 38  | 2 PITG_07284  |
| 0  | 4   | 4 PITG_00717  |
| 0  | 3   | 4 PITG_10268  |
| 0  | 17  | 55 PITG_00263 |
| 0  | 22  | 27 PITG_06753 |
| 0  | 0   | 6 PITG_05538  |
| 0  | 42  | 10 NA         |
| 0  | 7   | 0 PITG_04562  |
| 0  | 17  | 0 NA          |
| 0  | 4   | 15 PITG_19429 |
| 4  | 2   | 18 NA         |
| 0  | 2   | 2 PITG_06780  |
| 0  | 20  | 2 PITG_13111  |
| 0  | 8   | 3 PITG_10030  |
| 0  | 5   | 3 PITG_06782  |
| 0  | 9   | 2 NA          |
| 0  | 0   | 4 PITG_10213  |
| 0  | 6   | 0 PITG_02813  |
| 0  | 20  | 11 NA         |
| 0  | 48  | 12 PITG_11038 |
| 0  | 5   | 4 NA          |
| 0  | 23  | 13 PITG_01564 |
| 0  | 4   | 4 PITG_06708  |
| 0  | 222 | 41 PITG_20715 |



|     |     |                |
|-----|-----|----------------|
| 0   | 6   | 8 PITG_00036   |
| 0   | 10  | 0 PITG_02024   |
| 0   | 14  | 4 PITG_09444   |
| 0   | 0   | 0 PITG_10007   |
| 0   | 4   | 0 PITG_07874   |
| 0   | 7   | 4 PITG_14747   |
| 0   | 50  | 104 PITG_17965 |
| 0   | 0   | 9 PITG_11065   |
| 0   | 0   | 2 PITG_02598   |
| 0   | 42  | 35 PITG_09220  |
| 0   | 5   | 8 NA           |
| 0   | 20  | 15 PITG_01781  |
| 2   | 157 | 277 PITG_22475 |
| 0   | 3   | 61 NA          |
| 0   | 3   | 13 PITG_05128  |
| 0   | 13  | 2 PITG_11286   |
| 0   | 0   | 0 PITG_02586   |
| 0   | 2   | 9 PITG_19846   |
| 0   | 6   | 5 NA           |
| 0   | 0   | 30 PITG_00851  |
| 0   | 2   | 0 PITG_03135   |
| 0   | 3   | 4 PITG_01754   |
| 0   | 25  | 5 PITG_15762   |
| 0   | 10  | 59 NA          |
| 0   | 6   | 12 PITG_01663  |
| 0   | 5   | 0 NA           |
| 0   | 39  | 161 PITG_09289 |
| 0   | 4   | 37 NA          |
| 0   | 0   | 0 PITG_18652   |
| 0   | 0   | 5 NA           |
| 0   | 37  | 41 PITG_14703  |
| 0   | 4   | 2 PITG_03372   |
| 0   | 14  | 23 NA          |
| 0   | 4   | 9 PITG_05759   |
| 0   | 0   | 3 NA           |
| 0   | 22  | 5 PITG_03760   |
| 0   | 5   | 16 PITG_01457  |
| 0   | 2   | 0 NA           |
| 0   | 0   | 2 NA           |
| 239 | 0   | 4 NA           |
| 0   | 9   | 43 PITG_00863  |
| 0   | 3   | 0 PITG_12230   |
| 0   | 78  | 15 NA          |
| 0   | 0   | 0 NA           |
| 0   | 17  | 39 NA          |
| 0   | 12  | 15 PITG_16376  |
| 0   | 19  | 15 PITG_15250  |

|   |     |               |
|---|-----|---------------|
| 0 | 33  | 82 PITG_07036 |
| 0 | 3   | 13 PITG_00225 |
| 0 | 0   | 0 NA          |
| 0 | 5   | 7 PITG_21961  |
| 0 | 23  | 28 NA         |
| 0 | 0   | 2 PITG_11161  |
| 0 | 4   | 2 PITG_05989  |
| 0 | 15  | 9 PITG_20838  |
| 0 | 157 | 25 PITG_06160 |
| 0 | 21  | 23 PITG_09829 |
| 0 | 7   | 2 PITG_13850  |
| 0 | 7   | 3 PITG_03903  |
| 0 | 0   | 2 PITG_20203  |
| 0 | 0   | 0 PITG_21688  |
| 0 | 0   | 0 PITG_12454  |
| 0 | 16  | 33 PITG_11143 |
| 0 | 5   | 12 PITG_14217 |
| 0 | 3   | 0 PITG_10217  |
| 0 | 9   | 7 NA          |
| 0 | 0   | 0 PITG_04861  |
| 0 | 4   | 3 PITG_17746  |
| 0 | 44  | 43 PITG_10990 |
| 0 | 6   | 0 PITG_00502  |
| 0 | 0   | 0 NA          |
| 0 | 0   | 6 PITG_16052  |
| 0 | 59  | 15 PITG_08776 |
| 0 | 39  | 4 PITG_12305  |
| 0 | 2   | 2 NA          |
| 0 | 0   | 2 PITG_01991  |
| 0 | 8   | 31 PITG_05653 |
| 0 | 52  | 6 PITG_05068  |
| 0 | 24  | 11 PITG_08984 |
| 0 | 3   | 2 PITG_00524  |
| 0 | 0   | 0 NA          |
| 0 | 9   | 30 PITG_07861 |
| 0 | 5   | 5 PITG_03863  |
| 0 | 0   | 2 PITG_20731  |
| 0 | 0   | 0 NA          |
| 0 | 19  | 6 PITG_20855  |
| 0 | 5   | 11 PITG_14230 |
| 0 | 6   | 0 PITG_15164  |
| 0 | 2   | 0 PITG_06881  |
| 0 | 2   | 4 PITG_21944  |
| 0 | 2   | 0 PITG_15762  |
| 0 | 43  | 29 PITG_01280 |
| 0 | 41  | 81 PITG_00882 |
| 0 | 3   | 2 PITG_11236  |

|    |     |                |
|----|-----|----------------|
| 0  | 23  | 13 PITG_09222  |
| 0  | 0   | 0 PITG_14225   |
| 0  | 3   | 0 PITG_01871   |
| 75 | 0   | 6 NA           |
| 0  | 2   | 2 PITG_08460   |
| 0  | 20  | 8 PITG_17023   |
| 0  | 2   | 2 PITG_10191   |
| 0  | 0   | 2 NA           |
| 0  | 20  | 22 PITG_14173  |
| 0  | 0   | 94 PITG_11483  |
| 0  | 14  | 6 PITG_06609   |
| 0  | 45  | 33 PITG_10481  |
| 0  | 0   | 0 NA           |
| 0  | 2   | 5 PITG_00422   |
| 0  | 0   | 0 NA           |
| 0  | 0   | 0 PITG_14221   |
| 0  | 499 | 189 PITG_18443 |
| 0  | 49  | 46 PITG_08672  |
| 0  | 9   | 4 PITG_00313   |
| 0  | 9   | 4 PITG_02855   |
| 0  | 4   | 4 PITG_09260   |
| 0  | 11  | 3 PITG_17344   |
| 0  | 5   | 0 PITG_19174   |
| 0  | 20  | 0 PITG_07007   |
| 0  | 2   | 2 PITG_19257   |
| 85 | 16  | 31 NA          |
| 0  | 0   | 4 PITG_08864   |
| 0  | 2   | 2 PITG_09897   |
| 0  | 15  | 0 PITG_14717   |
| 0  | 12  | 8 PITG_14114   |
| 0  | 15  | 3 PITG_02424   |
| 0  | 2   | 0 PITG_15920   |
| 0  | 7   | 4 PITG_04549   |
| 0  | 0   | 0 PITG_07242   |
| 0  | 3   | 10 NA          |
| 0  | 7   | 5 PITG_00597   |
| 0  | 6   | 18 PITG_09404  |
| 0  | 12  | 6 PITG_19693   |
| 0  | 0   | 2 PITG_21939   |
| 0  | 2   | 0 PITG_00546   |
| 0  | 370 | 587 PITG_03433 |
| 0  | 2   | 0 NA           |
| 0  | 10  | 0 PITG_09995   |
| 0  | 0   | 0 PITG_03789   |
| 0  | 39  | 37 PITG_03750  |
| 0  | 2   | 23 PITG_00763  |
| 0  | 0   | 13 PITG_21210  |

|    |     |               |
|----|-----|---------------|
| 0  | 8   | 5 PITG_06749  |
| 0  | 11  | 13 PITG_16107 |
| 0  | 4   | 3 PITG_15867  |
| 0  | 2   | 3 PITG_12239  |
| 0  | 0   | 0 NA          |
| 0  | 16  | 2 PITG_09826  |
| 0  | 3   | 5 PITG_03443  |
| 0  | 2   | 0 PITG_02914  |
| 0  | 4   | 0 NA          |
| 0  | 27  | 6 PITG_12229  |
| 0  | 6   | 4 PITG_16687  |
| 0  | 67  | 20 PITG_09474 |
| 0  | 0   | 18 NA         |
| 0  | 8   | 0 NA          |
| 6  | 4   | 18 NA         |
| 0  | 25  | 10 PITG_03560 |
| 0  | 14  | 2 PITG_11085  |
| 0  | 253 | 9 PITG_22350  |
| 0  | 17  | 27 PITG_01379 |
| 0  | 6   | 29 PITG_03044 |
| 0  | 0   | 0 PITG_07531  |
| 0  | 0   | 0 PITG_10949  |
| 0  | 23  | 2 NA          |
| 27 | 10  | 24 NA         |
| 0  | 2   | 0 PITG_16208  |
| 0  | 2   | 0 NA          |
| 0  | 27  | 2 PITG_00323  |
| 0  | 9   | 0 PITG_01229  |
| 2  | 0   | 13 NA         |
| 0  | 7   | 6 PITG_19299  |
| 0  | 9   | 6 PITG_08801  |
| 0  | 41  | 6 NA          |
| 0  | 38  | 14 PITG_13070 |
| 0  | 55  | 106 NA        |
| 0  | 4   | 0 PITG_15509  |
| 0  | 5   | 6 NA          |
| 0  | 9   | 9 PITG_08708  |
| 0  | 4   | 20 PITG_16938 |
| 0  | 2   | 0 NA          |
| 0  | 0   | 0 PITG_05170  |
| 0  | 0   | 4 NA          |
| 0  | 7   | 0 PITG_09211  |
| 0  | 4   | 0 PITG_05940  |
| 0  | 11  | 9 PITG_12149  |
| 0  | 0   | 4 PITG_20330  |
| 0  | 0   | 0 PITG_02143  |
| 0  | 20  | 0 NA          |

|   |     |                |
|---|-----|----------------|
| 0 | 104 | 105 PITG_10289 |
| 0 | 0   | 0 NA           |
| 0 | 0   | 0 NA           |
| 0 | 0   | 0 NA           |
| 0 | 4   | 4 PITG_07655   |
| 0 | 2   | 4 PITG_08935   |
| 0 | 6   | 0 PITG_03599   |
| 0 | 7   | 10 PITG_20834  |
| 0 | 101 | 35 PITG_17881  |
| 0 | 26  | 25 PITG_19411  |
| 0 | 0   | 6 PITG_03863   |
| 0 | 10  | 2 PITG_03708   |
| 2 | 2   | 2 NA           |
| 0 | 2   | 4 PITG_21046   |
| 0 | 8   | 6 PITG_01920   |
| 0 | 6   | 20 PITG_07302  |
| 0 | 10  | 8 PITG_07821   |
| 0 | 0   | 0 PITG_00215   |
| 0 | 24  | 93 PITG_00770  |
| 0 | 10  | 53 NA          |
| 0 | 0   | 2 NA           |
| 0 | 0   | 0 NA           |
| 0 | 0   | 4 PITG_02162   |
| 0 | 72  | 24 PITG_02826  |
| 0 | 63  | 50 PITG_08295  |
| 0 | 0   | 0 NA           |
| 0 | 3   | 6 PITG_03471   |
| 0 | 32  | 2 PITG_12349   |
| 0 | 10  | 12 PITG_11365  |
| 0 | 0   | 0 NA           |
| 0 | 9   | 3 PITG_10351   |
| 0 | 128 | 22 PITG_19984  |
| 0 | 4   | 2 NA           |
| 7 | 11  | 49 NA          |
| 0 | 7   | 2 NA           |
| 0 | 21  | 0 PITG_18063   |
| 0 | 10  | 0 PITG_21184   |
| 0 | 0   | 0 PITG_10686   |
| 0 | 4   | 2 PITG_14136   |
| 0 | 2   | 6 PITG_07230   |
| 0 | 2   | 8 PITG_12124   |
| 0 | 0   | 4 PITG_05564   |
| 0 | 0   | 8 PITG_07289   |
| 0 | 20  | 35 PITG_19041  |
| 0 | 2   | 0 PITG_10481   |
| 0 | 129 | 65 PITG_08467  |
| 0 | 2   | 0 PITG_03123   |

|     |     |                |
|-----|-----|----------------|
| 0   | 22  | 2 NA           |
| 0   | 4   | 10 PITG_14722  |
| 0   | 2   | 15 PITG_15280  |
| 0   | 11  | 0 PITG_14169   |
| 0   | 0   | 0 PITG_15951   |
| 0   | 8   | 6 PITG_05595   |
| 0   | 0   | 0 PITG_09419   |
| 0   | 9   | 4 PITG_11477   |
| 0   | 2   | 0 PITG_00460   |
| 0   | 13  | 18 PITG_04405  |
| 0   | 2   | 0 PITG_11024   |
| 0   | 6   | 4 PITG_07212   |
| 0   | 22  | 14 NA          |
| 0   | 2   | 2 PITG_06724   |
| 0   | 0   | 18 PITG_15006  |
| 0   | 9   | 12 PITG_08677  |
| 0   | 0   | 2 PITG_00572   |
| 0   | 0   | 2 PITG_06963   |
| 0   | 10  | 8 PITG_14750   |
| 0   | 5   | 0 NA           |
| 0   | 291 | 447 PITG_13402 |
| 0   | 0   | 0 NA           |
| 0   | 15  | 53 PITG_01498  |
| 0   | 186 | 27 PITG_14277  |
| 0   | 33  | 0 PITG_20463   |
| 53  | 0   | 24 NA          |
| 0   | 16  | 0 NA           |
| 0   | 45  | 23 PITG_00413  |
| 0   | 0   | 2 PITG_05672   |
| 0   | 72  | 44 PITG_03180  |
| 0   | 12  | 21 PITG_03561  |
| 0   | 12  | 4 PITG_01293   |
| 0   | 0   | 0 PITG_09360   |
| 0   | 0   | 3 PITG_05987   |
| 0   | 4   | 16 PITG_03872  |
| 0   | 2   | 0 PITG_20251   |
| 0   | 0   | 8 PITG_07154   |
| 0   | 0   | 0 PITG_21336   |
| 110 | 4   | 215 NA         |
| 0   | 4   | 8 NA           |
| 305 | 50  | 438 NA         |
| 0   | 0   | 11 PITG_04603  |
| 0   | 6   | 11 PITG_09789  |
| 240 | 0   | 219 NA         |
| 0   | 2   | 13 PITG_11451  |
| 0   | 0   | 2 PITG_17660   |
| 0   | 2   | 55 PITG_19551  |

|   |     |                |
|---|-----|----------------|
| 0 | 21  | 12 PITG_01514  |
| 0 | 2   | 7 PITG_07543   |
| 0 | 6   | 33 PITG_08383  |
| 0 | 0   | 24 PITG_14385  |
| 0 | 0   | 0 PITG_00791   |
| 0 | 8   | 0 NA           |
| 0 | 0   | 0 PITG_10308   |
| 0 | 17  | 10 PITG_17750  |
| 0 | 0   | 2 PITG_12837   |
| 0 | 10  | 0 NA           |
| 0 | 3   | 2 PITG_01424   |
| 0 | 2   | 4 NA           |
| 0 | 2   | 0 PITG_02935   |
| 0 | 250 | 70 PITG_14274  |
| 0 | 13  | 17 PITG_22858  |
| 0 | 69  | 4 PITG_08197   |
| 0 | 14  | 4 PITG_00148   |
| 0 | 21  | 59 PITG_19144  |
| 0 | 0   | 0 PITG_00725   |
| 0 | 0   | 0 NA           |
| 0 | 18  | 0 PITG_18716   |
| 0 | 45  | 39 NA          |
| 0 | 0   | 6 PITG_02624   |
| 0 | 8   | 37 PITG_00681  |
| 0 | 0   | 2 PITG_06913   |
| 0 | 2   | 5 PITG_18049   |
| 0 | 10  | 2 PITG_17928   |
| 0 | 4   | 2 PITG_04671   |
| 0 | 4   | 8 PITG_21071   |
| 0 | 6   | 0 NA           |
| 0 | 2   | 0 PITG_16333   |
| 0 | 11  | 18 PITG_10926  |
| 0 | 8   | 22 PITG_17022  |
| 0 | 2   | 4 PITG_06129   |
| 0 | 6   | 2 PITG_07915   |
| 0 | 35  | 12 PITG_03296  |
| 0 | 38  | 122 PITG_03614 |
| 0 | 60  | 2 NA           |
| 0 | 7   | 2 PITG_14836   |
| 0 | 0   | 0 PITG_07645   |
| 0 | 15  | 95 PITG_16058  |
| 0 | 0   | 0 PITG_11748   |
| 0 | 0   | 7 PITG_14979   |
| 0 | 2   | 17 PITG_17137  |
| 0 | 0   | 2 NA           |
| 0 | 0   | 2 PITG_10141   |
| 0 | 2   | 0 PITG_00646   |

|    |     |                |
|----|-----|----------------|
| 0  | 30  | 2 PITG_17079   |
| 0  | 115 | 24 PITG_22718  |
| 0  | 2   | 18 PITG_03333  |
| 0  | 0   | 0 PITG_11119   |
| 0  | 4   | 2 PITG_10911   |
| 0  | 30  | 90 NA          |
| 9  | 0   | 2 NA           |
| 0  | 2   | 10 PITG_02082  |
| 0  | 21  | 0 PITG_17840   |
| 0  | 3   | 0 PITG_05433   |
| 0  | 0   | 0 PITG_12657   |
| 0  | 26  | 0 PITG_01387   |
| 0  | 2   | 0 PITG_02849   |
| 0  | 6   | 4 PITG_17361   |
| 0  | 0   | 2 PITG_02586   |
| 0  | 301 | 326 PITG_11243 |
| 0  | 13  | 21 PITG_10819  |
| 0  | 4   | 4 PITG_08874   |
| 0  | 6   | 11 PITG_04717  |
| 0  | 217 | 39 PITG_01499  |
| 0  | 5   | 2 NA           |
| 0  | 15  | 10 PITG_16375  |
| 71 | 15  | 61 NA          |
| 0  | 2   | 6 PITG_12077   |
| 0  | 6   | 2 PITG_13317   |
| 0  | 8   | 29 PITG_09986  |
| 0  | 4   | 2 PITG_14835   |
| 0  | 6   | 4 NA           |
| 0  | 13  | 25 NA          |
| 0  | 0   | 0 PITG_08487   |
| 0  | 8   | 13 PITG_11445  |
| 0  | 0   | 5 PITG_09247   |
| 0  | 2   | 0 PITG_04934   |
| 0  | 0   | 2 PITG_14399   |
| 0  | 8   | 20 PITG_05975  |
| 0  | 2   | 10 PITG_06943  |
| 0  | 5   | 0 NA           |
| 0  | 5   | 31 PITG_03432  |
| 0  | 0   | 0 PITG_15820   |
| 0  | 3   | 2 NA           |
| 0  | 70  | 3 NA           |
| 0  | 3   | 5 NA           |
| 0  | 4   | 8 PITG_02447   |
| 0  | 21  | 22 PITG_16036  |
| 0  | 0   | 4 NA           |
| 0  | 0   | 4 PITG_17140   |
| 0  | 0   | 0 PITG_10590   |



|     |     |               |
|-----|-----|---------------|
| 0   | 10  | 2 PITG_18519  |
| 0   | 15  | 19 NA         |
| 0   | 37  | 6 PITG_14973  |
| 0   | 4   | 2 PITG_01754  |
| 0   | 4   | 7 NA          |
| 0   | 2   | 11 PITG_06923 |
| 0   | 0   | 0 NA          |
| 0   | 4   | 8 PITG_01523  |
| 0   | 4   | 5 NA          |
| 0   | 7   | 4 PITG_08572  |
| 0   | 0   | 2 PITG_03287  |
| 0   | 2   | 2 PITG_23159  |
| 0   | 10  | 43 PITG_13176 |
| 0   | 17  | 2 NA          |
| 0   | 10  | 8 PITG_05780  |
| 136 | 832 | 1787 NA       |
| 0   | 3   | 0 PITG_05858  |
| 0   | 5   | 4 PITG_03780  |
| 0   | 2   | 4 PITG_03604  |
| 0   | 9   | 4 PITG_00330  |
| 0   | 11  | 0 PITG_15785  |
| 0   | 6   | 8 PITG_02730  |
| 0   | 12  | 2 PITG_09588  |
| 0   | 2   | 2 PITG_19938  |
| 0   | 0   | 0 PITG_06171  |
| 0   | 0   | 2 PITG_16969  |
| 0   | 0   | 4 NA          |
| 0   | 4   | 4 PITG_04443  |
| 0   | 2   | 2 PITG_11981  |
| 0   | 4   | 5 PITG_06767  |
| 0   | 0   | 0 PITG_18416  |
| 0   | 6   | 2 PITG_04589  |
| 0   | 0   | 2 PITG_06685  |
| 0   | 0   | 2 NA          |
| 0   | 0   | 25 NA         |
| 16  | 7   | 25 NA         |
| 0   | 51  | 15 PITG_18369 |
| 0   | 2   | 2 PITG_19865  |
| 0   | 15  | 6 PITG_00167  |
| 0   | 47  | 15 NA         |
| 0   | 27  | 30 PITG_01769 |
| 0   | 7   | 2 PITG_02576  |
| 0   | 8   | 17 PITG_18369 |
| 0   | 0   | 2 PITG_04691  |
| 0   | 67  | 28 PITG_09260 |
| 0   | 22  | 10 PITG_04289 |
| 0   | 2   | 0 PITG_17706  |

|   |    |                |
|---|----|----------------|
| 0 | 0  | 4 PITG_08579   |
| 0 | 0  | 4 PITG_23006   |
| 0 | 8  | 20 PITG_10817  |
| 0 | 2  | 2 PITG_03623   |
| 0 | 19 | 2 PITG_11998   |
| 0 | 33 | 53 PITG_12863  |
| 0 | 2  | 0 PITG_18229   |
| 0 | 0  | 0 NA           |
| 0 | 14 | 2 NA           |
| 0 | 2  | 0 PITG_21553   |
| 0 | 2  | 0 NA           |
| 0 | 33 | 4 PITG_20111   |
| 0 | 2  | 10 NA          |
| 0 | 4  | 2 PITG_19287   |
| 0 | 0  | 2 NA           |
| 0 | 0  | 12 PITG_13979  |
| 0 | 0  | 2 PITG_12548   |
| 0 | 4  | 10 PITG_17292  |
| 0 | 2  | 0 PITG_01790   |
| 0 | 0  | 2 PITG_07145   |
| 0 | 10 | 8 PITG_09862   |
| 0 | 88 | 140 PITG_00697 |
| 0 | 0  | 0 PITG_20374   |
| 0 | 66 | 95 PITG_02252  |
| 0 | 0  | 4 PITG_13309   |
| 0 | 8  | 0 NA           |
| 0 | 2  | 0 PITG_10743   |
| 0 | 4  | 38 PITG_17045  |
| 0 | 8  | 65 PITG_12797  |
| 0 | 35 | 20 PITG_14067  |
| 0 | 7  | 0 PITG_02637   |
| 0 | 2  | 0 PITG_10764   |
| 0 | 6  | 11 PITG_03236  |
| 0 | 20 | 73 PITG_10022  |
| 0 | 7  | 2 PITG_11038   |
| 0 | 9  | 9 PITG_07795   |
| 0 | 10 | 6 PITG_03429   |
| 0 | 14 | 10 NA          |
| 0 | 2  | 26 PITG_07164  |
| 0 | 30 | 14 PITG_03864  |
| 0 | 4  | 4 NA           |
| 0 | 0  | 0 NA           |
| 0 | 5  | 2 PITG_22858   |
| 0 | 8  | 3 NA           |
| 0 | 4  | 0 PITG_17030   |
| 0 | 40 | 77 PITG_04834  |
| 0 | 0  | 0 PITG_06380   |

|    |     |                |
|----|-----|----------------|
| 0  | 4   | 0 PITG_15820   |
| 0  | 2   | 3 PITG_03006   |
| 0  | 0   | 0 NA           |
| 0  | 6   | 22 PITG_12053  |
| 0  | 3   | 0 PITG_00392   |
| 0  | 83  | 2 PITG_06106   |
| 0  | 4   | 0 PITG_03562   |
| 0  | 31  | 2 PITG_08183   |
| 0  | 0   | 0 PITG_12973   |
| 0  | 7   | 16 PITG_00262  |
| 0  | 0   | 0 PITG_01354   |
| 0  | 4   | 0 NA           |
| 0  | 0   | 0 PITG_08049   |
| 0  | 30  | 18 PITG_17263  |
| 0  | 0   | 0 NA           |
| 0  | 16  | 16 PITG_09250  |
| 0  | 5   | 2 PITG_06963   |
| 0  | 2   | 12 PITG_21110  |
| 0  | 64  | 118 PITG_09873 |
| 0  | 0   | 0 PITG_03103   |
| 0  | 2   | 0 NA           |
| 0  | 120 | 242 PITG_01096 |
| 0  | 32  | 0 PITG_00143   |
| 0  | 15  | 6 PITG_17103   |
| 0  | 14  | 0 PITG_02958   |
| 0  | 0   | 9 PITG_08019   |
| 0  | 0   | 0 PITG_00659   |
| 0  | 130 | 6 PITG_07951   |
| 0  | 11  | 0 PITG_14007   |
| 0  | 2   | 2 NA           |
| 0  | 21  | 25 PITG_14439  |
| 0  | 10  | 0 PITG_01683   |
| 0  | 0   | 0 NA           |
| 0  | 4   | 0 NA           |
| 0  | 4   | 2 NA           |
| 0  | 3   | 2 PITG_13763   |
| 0  | 76  | 0 PITG_13763   |
| 0  | 6   | 7 PITG_04648   |
| 0  | 0   | 7 PITG_14111   |
| 0  | 0   | 6 PITG_12307   |
| 0  | 7   | 9 PITG_09211   |
| 79 | 4   | 67 NA          |
| 0  | 3   | 11 PITG_11122  |
| 0  | 86  | 24 PITG_02263  |
| 0  | 16  | 0 PITG_06402   |
| 0  | 4   | 49 PITG_03041  |
| 0  | 4   | 0 NA           |

|      |    |                |
|------|----|----------------|
| 0    | 7  | 12 PITG_20463  |
| 0    | 0  | 0 PITG_20017   |
| 0    | 3  | 2 PITG_02284   |
| 0    | 12 | 8 PITG_07730   |
| 0    | 0  | 0 PITG_16478   |
| 0    | 0  | 3 PITG_11761   |
| 0    | 0  | 6 PITG_12256   |
| 0    | 8  | 4 PITG_11179   |
| 0    | 7  | 0 PITG_11537   |
| 0    | 2  | 5 PITG_12989   |
| 0    | 98 | 233 PITG_09282 |
| 0    | 0  | 0 PITG_11981   |
| 0    | 39 | 41 PITG_05998  |
| 0    | 0  | 0 PITG_01154   |
| 0    | 86 | 0 NA           |
| 0    | 78 | 0 PITG_20498   |
| 0    | 0  | 0 PITG_00005   |
| 0    | 16 | 4 PITG_06002   |
| 89   | 0  | 67 NA          |
| 0    | 0  | 0 PITG_02032   |
| 0    | 45 | 6 PITG_01335   |
| 195  | 0  | 403 NA         |
| 0    | 8  | 0 PITG_01526   |
| 0    | 2  | 0 PITG_00452   |
| 0    | 8  | 4 PITG_12874   |
| 0    | 22 | 15 PITG_04428  |
| 0    | 2  | 4 PITG_10044   |
| 0    | 3  | 0 PITG_09291   |
| 0    | 7  | 3 PITG_20731   |
| 0    | 2  | 2 PITG_08547   |
| 0    | 4  | 0 PITG_09999   |
| 0    | 14 | 5 PITG_04845   |
| 0    | 5  | 10 PITG_03779  |
| 0    | 10 | 0 NA           |
| 0    | 3  | 0 NA           |
| 0    | 41 | 5 PITG_11675   |
| 1685 | 31 | 1514 NA        |
| 0    | 2  | 6 PITG_03018   |
| 0    | 0  | 0 NA           |
| 0    | 2  | 2 PITG_00641   |
| 0    | 4  | 4 PITG_07145   |
| 0    | 6  | 6 NA           |
| 0    | 17 | 6 NA           |
| 0    | 38 | 29 PITG_01125  |
| 0    | 4  | 6 NA           |
| 0    | 0  | 2 PITG_09447   |
| 0    | 19 | 2 NA           |

|   |      |                |
|---|------|----------------|
| 0 | 0    | 0 PITG_14237   |
| 0 | 47   | 2 NA           |
| 0 | 47   | 15 PITG_18800  |
| 0 | 191  | 4 PITG_07099   |
| 0 | 0    | 22 PITG_03275  |
| 0 | 17   | 12 PITG_17663  |
| 0 | 11   | 49 PITG_11459  |
| 0 | 2    | 0 PITG_15408   |
| 0 | 29   | 4 NA           |
| 0 | 0    | 0 NA           |
| 0 | 0    | 0 NA           |
| 0 | 13   | 0 PITG_11476   |
| 0 | 19   | 4 PITG_00796   |
| 0 | 0    | 0 PITG_06903   |
| 3 | 0    | 0 NA           |
| 0 | 1422 | 939 PITG_08795 |
| 0 | 31   | 21 PITG_07874  |
| 0 | 4    | 0 PITG_02968   |
| 0 | 3    | 14 PITG_05631  |
| 0 | 2    | 0 PITG_06900   |
| 0 | 7    | 6 PITG_23158   |
| 0 | 6    | 2 PITG_06319   |
| 0 | 26   | 3 PITG_10315   |
| 0 | 16   | 25 PITG_03596  |
| 0 | 4    | 0 PITG_18233   |
| 0 | 5    | 5 NA           |
| 0 | 2    | 15 PITG_00132  |
| 0 | 8    | 0 PITG_00963   |
| 0 | 0    | 0 PITG_18416   |
| 0 | 24   | 15 PITG_21067  |
| 0 | 3    | 23 PITG_02730  |
| 0 | 2    | 8 PITG_22575   |
| 0 | 4    | 2 PITG_11741   |
| 0 | 801  | 733 PITG_18578 |
| 0 | 261  | 9 NA           |
| 0 | 0    | 0 PITG_07342   |
| 0 | 0    | 2 NA           |
| 0 | 26   | 52 PITG_04627  |
| 0 | 17   | 15 PITG_17992  |
| 0 | 16   | 4 PITG_16317   |
| 0 | 5    | 0 NA           |
| 0 | 8    | 0 PITG_06480   |
| 0 | 2    | 0 PITG_04562   |
| 0 | 0    | 4 PITG_00858   |
| 0 | 96   | 70 PITG_03944  |
| 0 | 49   | 29 PITG_03965  |
| 0 | 21   | 49 PITG_08234  |

|   |     |                 |
|---|-----|-----------------|
| 0 | 55  | 0 PITG_07991    |
| 0 | 0   | 0 PITG_12239    |
| 0 | 7   | 11 PITG_16272   |
| 0 | 5   | 8 NA            |
| 0 | 12  | 28 PITG_14416   |
| 0 | 0   | 0 PITG_14463    |
| 0 | 3   | 2 PITG_20313    |
| 0 | 0   | 0 PITG_14811    |
| 0 | 4   | 0 PITG_08602    |
| 0 | 7   | 0 PITG_21005    |
| 0 | 3   | 2 PITG_11158    |
| 0 | 0   | 0 PITG_06379    |
| 0 | 54  | 57 PITG_03791   |
| 2 | 946 | 3327 PITG_06741 |
| 0 | 8   | 12 PITG_17292   |
| 0 | 2   | 0 PITG_04022    |
| 0 | 0   | 0 NA            |
| 0 | 11  | 3 PITG_19048    |
| 0 | 20  | 33 PITG_09631   |
| 0 | 0   | 4 PITG_02458    |
| 0 | 12  | 6 PITG_05183    |
| 0 | 12  | 2 PITG_07095    |
| 0 | 0   | 6 PITG_02564    |
| 0 | 0   | 8 PITG_12524    |
| 0 | 2   | 2 PITG_11648    |
| 0 | 57  | 32 PITG_10061   |
| 0 | 36  | 31 PITG_19036   |
| 0 | 9   | 22 NA           |
| 0 | 3   | 0 PITG_17907    |
| 0 | 0   | 0 PITG_22036    |
| 0 | 36  | 2 NA            |
| 0 | 2   | 18 PITG_10926   |
| 0 | 20  | 19 PITG_17076   |
| 0 | 12  | 14 PITG_09092   |
| 0 | 5   | 6 PITG_07599    |
| 0 | 33  | 79 PITG_03575   |
| 0 | 37  | 4 PITG_20947    |
| 0 | 0   | 0 NA            |
| 0 | 2   | 2 NA            |
| 0 | 10  | 64 PITG_13168   |
| 0 | 0   | 2 PITG_02143    |
| 0 | 0   | 2 PITG_02850    |
| 0 | 18  | 7 PITG_05757    |
| 0 | 4   | 7 NA            |
| 0 | 0   | 7 PITG_14730    |
| 0 | 16  | 0 PITG_13620    |
| 0 | 6   | 4 NA            |

|    |     |               |
|----|-----|---------------|
| 0  | 21  | 28 PITG_12516 |
| 0  | 4   | 0 PITG_10514  |
| 0  | 14  | 31 PITG_10463 |
| 39 | 0   | 43 NA         |
| 0  | 25  | 13 NA         |
| 0  | 41  | 2 PITG_07074  |
| 0  | 27  | 2 NA          |
| 0  | 2   | 0 PITG_08935  |
| 0  | 4   | 9 PITG_01508  |
| 0  | 4   | 2 PITG_08559  |
| 0  | 0   | 4 PITG_03169  |
| 0  | 13  | 13 PITG_16675 |
| 0  | 2   | 2 PITG_09790  |
| 0  | 0   | 0 NA          |
| 0  | 21  | 5 PITG_02905  |
| 0  | 14  | 0 PITG_05763  |
| 0  | 12  | 26 PITG_13752 |
| 0  | 6   | 0 NA          |
| 0  | 6   | 0 PITG_14277  |
| 0  | 212 | 39 NA         |
| 0  | 2   | 0 NA          |
| 0  | 2   | 0 PITG_12183  |
| 0  | 2   | 0 NA          |
| 0  | 0   | 4 PITG_06853  |
| 0  | 2   | 5 PITG_08400  |
| 0  | 16  | 3 PITG_07338  |
| 0  | 2   | 0 NA          |
| 0  | 0   | 2 PITG_13713  |
| 0  | 4   | 5 PITG_12121  |
| 0  | 0   | 0 PITG_03646  |
| 0  | 10  | 15 PITG_08258 |
| 0  | 11  | 5 NA          |
| 0  | 0   | 2 NA          |
| 0  | 8   | 2 PITG_04227  |
| 0  | 14  | 7 PITG_10308  |
| 0  | 27  | 8 PITG_18243  |
| 0  | 11  | 11 PITG_20893 |
| 0  | 2   | 0 PITG_17485  |
| 0  | 25  | 0 NA          |
| 0  | 16  | 7 PITG_17486  |
| 0  | 0   | 0 PITG_02454  |
| 0  | 2   | 15 PITG_07282 |
| 0  | 0   | 0 NA          |
| 0  | 0   | 4 PITG_05198  |
| 0  | 2   | 93 PITG_18025 |
| 0  | 33  | 17 NA         |
| 0  | 5   | 25 PITG_11963 |

|   |     |               |
|---|-----|---------------|
| 0 | 0   | 2 PITG_13803  |
| 0 | 40  | 0 NA          |
| 0 | 12  | 4 PITG_22204  |
| 0 | 0   | 0 PITG_00215  |
| 0 | 4   | 2 PITG_22922  |
| 0 | 0   | 10 PITG_12264 |
| 0 | 0   | 0 PITG_02230  |
| 0 | 51  | 8 NA          |
| 0 | 0   | 8 PITG_03408  |
| 0 | 10  | 69 PITG_09404 |
| 0 | 2   | 0 PITG_12591  |
| 0 | 10  | 19 PITG_19005 |
| 0 | 0   | 4 PITG_11920  |
| 0 | 2   | 2 NA          |
| 0 | 63  | 33 NA         |
| 0 | 4   | 8 PITG_17928  |
| 0 | 82  | 23 NA         |
| 0 | 0   | 9 PITG_11424  |
| 0 | 17  | 10 PITG_01847 |
| 0 | 42  | 28 PITG_13462 |
| 0 | 0   | 2 PITG_01902  |
| 0 | 0   | 8 PITG_16684  |
| 0 | 6   | 0 PITG_06963  |
| 0 | 7   | 2 PITG_15571  |
| 0 | 0   | 0 PITG_13827  |
| 0 | 8   | 2 PITG_02020  |
| 0 | 0   | 6 NA          |
| 0 | 0   | 0 PITG_05103  |
| 0 | 3   | 4 NA          |
| 0 | 2   | 2 NA          |
| 0 | 7   | 4 PITG_21595  |
| 0 | 64  | 71 PITG_05638 |
| 0 | 0   | 2 PITG_13873  |
| 0 | 4   | 4 NA          |
| 0 | 46  | 6 NA          |
| 0 | 0   | 0 PITG_12625  |
| 0 | 0   | 3 PITG_16433  |
| 0 | 2   | 4 PITG_11050  |
| 0 | 145 | 17 PITG_10499 |
| 0 | 0   | 0 PITG_09785  |
| 0 | 3   | 2 PITG_01102  |
| 0 | 18  | 5 PITG_00528  |
| 0 | 2   | 0 NA          |
| 0 | 185 | 4 PITG_06519  |
| 0 | 57  | 10 PITG_03582 |
| 0 | 4   | 0 PITG_01711  |
| 0 | 16  | 2 NA          |



|    |    |               |
|----|----|---------------|
| 0  | 10 | 9 PITG_03260  |
| 0  | 28 | 6 PITG_03903  |
| 0  | 0  | 0 NA          |
| 0  | 3  | 0 PITG_06256  |
| 0  | 21 | 15 NA         |
| 0  | 25 | 0 NA          |
| 0  | 0  | 0 PITG_03269  |
| 0  | 20 | 10 PITG_01873 |
| 0  | 0  | 3 PITG_19242  |
| 0  | 2  | 4 PITG_16316  |
| 0  | 78 | 46 PITG_06475 |
| 0  | 10 | 397 NA        |
| 0  | 21 | 2 NA          |
| 0  | 6  | 0 PITG_15292  |
| 0  | 2  | 0 PITG_06570  |
| 0  | 15 | 0 NA          |
| 0  | 3  | 15 PITG_06452 |
| 0  | 2  | 0 PITG_07226  |
| 0  | 10 | 20 PITG_00809 |
| 0  | 5  | 18 PITG_05531 |
| 0  | 2  | 10 PITG_17589 |
| 0  | 2  | 0 PITG_21509  |
| 0  | 15 | 14 PITG_01674 |
| 0  | 0  | 0 PITG_14066  |
| 0  | 55 | 0 PITG_19065  |
| 0  | 23 | 23 PITG_00703 |
| 0  | 2  | 0 PITG_18027  |
| 0  | 58 | 84 PITG_11735 |
| 0  | 0  | 0 PITG_18441  |
| 0  | 0  | 2 PITG_15191  |
| 0  | 39 | 11 PITG_01559 |
| 0  | 2  | 0 PITG_01961  |
| 0  | 0  | 2 PITG_06304  |
| 0  | 11 | 0 PITG_21377  |
| 0  | 13 | 14 NA         |
| 0  | 47 | 35 PITG_01153 |
| 17 | 15 | 182 NA        |
| 0  | 2  | 0 PITG_06963  |
| 0  | 2  | 0 PITG_03870  |
| 0  | 97 | 8 PITG_01537  |
| 0  | 0  | 11 PITG_11169 |
| 0  | 0  | 0 NA          |
| 0  | 2  | 0 NA          |
| 0  | 0  | 4 PITG_08953  |
| 0  | 9  | 2 PITG_09201  |
| 0  | 2  | 10 PITG_21599 |
| 0  | 7  | 6 PITG_08135  |

|     |     |               |
|-----|-----|---------------|
| 0   | 4   | 2 NA          |
| 0   | 9   | 10 PITG_05234 |
| 0   | 8   | 4 NA          |
| 90  | 11  | 109 NA        |
| 0   | 20  | 8 PITG_18416  |
| 0   | 10  | 22 PITG_06380 |
| 0   | 16  | 61 PITG_11139 |
| 0   | 0   | 2 PITG_03978  |
| 0   | 2   | 2 PITG_17348  |
| 0   | 2   | 8 PITG_03027  |
| 0   | 3   | 0 NA          |
| 0   | 34  | 24 PITG_08851 |
| 0   | 20  | 40 PITG_01317 |
| 0   | 19  | 15 PITG_17985 |
| 0   | 4   | 0 PITG_17360  |
| 0   | 7   | 9 PITG_08301  |
| 0   | 11  | 2 PITG_19457  |
| 0   | 4   | 7 PITG_10006  |
| 0   | 24  | 2 NA          |
| 0   | 239 | 14 PITG_08099 |
| 0   | 3   | 3 PITG_03779  |
| 0   | 16  | 0 NA          |
| 0   | 23  | 0 PITG_04902  |
| 0   | 25  | 9 PITG_11780  |
| 0   | 4   | 9 PITG_00887  |
| 0   | 14  | 0 NA          |
| 0   | 47  | 46 PITG_11723 |
| 0   | 53  | 5 PITG_21914  |
| 0   | 9   | 4 PITG_17814  |
| 0   | 12  | 4 PITG_10065  |
| 0   | 0   | 4 NA          |
| 67  | 5   | 160 NA        |
| 0   | 4   | 4 PITG_17032  |
| 0   | 2   | 12 PITG_01253 |
| 0   | 0   | 0 PITG_13083  |
| 0   | 23  | 27 PITG_00495 |
| 121 | 15  | 82 NA         |
| 0   | 0   | 2 PITG_15637  |
| 0   | 0   | 2 NA          |
| 0   | 38  | 0 NA          |
| 0   | 0   | 10 PITG_16083 |
| 0   | 11  | 0 PITG_21222  |
| 0   | 6   | 4 PITG_14593  |
| 0   | 8   | 2 PITG_16073  |
| 0   | 2   | 6 PITG_14108  |
| 0   | 4   | 5 PITG_08654  |
| 0   | 24  | 2 NA          |

|    |    |               |
|----|----|---------------|
| 0  | 0  | 0 PITG_12174  |
| 0  | 40 | 7 NA          |
| 0  | 2  | 4 PITG_11733  |
| 0  | 0  | 40 PITG_06114 |
| 0  | 12 | 6 PITG_20927  |
| 0  | 24 | 7 PITG_07702  |
| 0  | 9  | 3 NA          |
| 0  | 6  | 41 PITG_00302 |
| 0  | 21 | 65 PITG_09932 |
| 0  | 0  | 6 PITG_17608  |
| 0  | 2  | 0 PITG_00563  |
| 0  | 0  | 0 NA          |
| 0  | 6  | 0 NA          |
| 0  | 7  | 8 NA          |
| 0  | 13 | 12 PITG_12537 |
| 0  | 9  | 3 PITG_13314  |
| 0  | 21 | 17 PITG_10590 |
| 0  | 15 | 11 PITG_05635 |
| 0  | 17 | 6 PITG_07971  |
| 0  | 0  | 0 PITG_02456  |
| 0  | 7  | 5 PITG_11286  |
| 0  | 16 | 12 PITG_11540 |
| 0  | 35 | 79 PITG_14278 |
| 0  | 6  | 2 NA          |
| 0  | 2  | 10 PITG_10479 |
| 0  | 33 | 24 PITG_12226 |
| 0  | 0  | 2 NA          |
| 0  | 2  | 10 PITG_15033 |
| 0  | 0  | 0 PITG_05261  |
| 0  | 0  | 2 PITG_07311  |
| 0  | 31 | 25 PITG_13971 |
| 0  | 15 | 4 PITG_12901  |
| 0  | 0  | 0 PITG_04421  |
| 0  | 5  | 5 NA          |
| 0  | 2  | 0 PITG_08331  |
| 0  | 6  | 5 PITG_12426  |
| 0  | 10 | 0 PITG_21522  |
| 0  | 2  | 4 PITG_18236  |
| 0  | 0  | 2 PITG_17292  |
| 87 | 6  | 61 NA         |
| 0  | 2  | 0 PITG_08956  |
| 0  | 2  | 0 NA          |
| 0  | 8  | 7 NA          |
| 0  | 2  | 0 NA          |
| 0  | 2  | 15 PITG_13804 |
| 0  | 0  | 0 PITG_10729  |
| 0  | 16 | 23 PITG_00049 |

|    |     |                |
|----|-----|----------------|
| 14 | 2   | 10 NA          |
| 0  | 4   | 0 PITG_10520   |
| 0  | 2   | 2 PITG_12876   |
| 0  | 36  | 2 PITG_06257   |
| 0  | 0   | 14 PITG_18895  |
| 0  | 2   | 0 NA           |
| 0  | 19  | 6 PITG_18800   |
| 0  | 3   | 2 PITG_08657   |
| 0  | 20  | 23 PITG_15050  |
| 0  | 11  | 36 PITG_04682  |
| 0  | 5   | 7 PITG_21915   |
| 0  | 12  | 18 PITG_01582  |
| 2  | 9   | 53 PITG_18498  |
| 0  | 2   | 0 PITG_16277   |
| 82 | 6   | 133 NA         |
| 0  | 21  | 13 PITG_14431  |
| 0  | 0   | 2 PITG_02067   |
| 0  | 2   | 0 NA           |
| 0  | 39  | 34 PITG_07868  |
| 0  | 0   | 2 PITG_22311   |
| 0  | 71  | 188 PITG_22433 |
| 0  | 16  | 0 PITG_03260   |
| 0  | 22  | 25 PITG_10881  |
| 0  | 2   | 0 PITG_08559   |
| 0  | 0   | 2 NA           |
| 0  | 0   | 0 PITG_04179   |
| 0  | 4   | 4 NA           |
| 0  | 4   | 2 NA           |
| 0  | 0   | 2 PITG_14566   |
| 0  | 517 | 164 PITG_13171 |
| 0  | 72  | 23 PITG_06257  |
| 0  | 0   | 14 PITG_04333  |
| 0  | 0   | 14 PITG_01878  |
| 0  | 13  | 0 NA           |
| 0  | 38  | 23 PITG_11386  |
| 0  | 0   | 8 PITG_22163   |
| 0  | 5   | 6 PITG_06708   |
| 0  | 10  | 6 PITG_20454   |
| 4  | 4   | 2 NA           |
| 0  | 7   | 4 PITG_21602   |
| 0  | 15  | 34 PITG_19166  |
| 0  | 2   | 2 PITG_10877   |
| 0  | 0   | 14 PITG_03999  |
| 0  | 0   | 0 PITG_06026   |
| 0  | 18  | 2 NA           |
| 0  | 0   | 4 PITG_00081   |
| 0  | 39  | 43 PITG_03860  |

|   |     |                |
|---|-----|----------------|
| 0 | 0   | 0 PITG_16079   |
| 0 | 7   | 10 NA          |
| 0 | 7   | 0 NA           |
| 0 | 6   | 61 PITG_18731  |
| 0 | 2   | 7 PITG_12683   |
| 0 | 5   | 0 NA           |
| 0 | 0   | 0 PITG_03305   |
| 0 | 0   | 0 PITG_12938   |
| 0 | 0   | 0 PITG_07040   |
| 0 | 27  | 72 PITG_02423  |
| 0 | 13  | 18 PITG_09273  |
| 0 | 630 | 203 PITG_18578 |
| 0 | 18  | 23 PITG_09950  |
| 0 | 115 | 65 PITG_02263  |
| 0 | 0   | 0 PITG_17161   |
| 0 | 0   | 0 PITG_11506   |
| 0 | 6   | 29 PITG_19038  |
| 0 | 0   | 0 PITG_10312   |
| 0 | 55  | 14 NA          |
| 0 | 0   | 0 PITG_11236   |
| 0 | 0   | 0 NA           |
| 0 | 0   | 0 NA           |
| 0 | 2   | 3 PITG_20217   |
| 0 | 8   | 6 PITG_15530   |
| 0 | 13  | 26 PITG_10400  |
| 0 | 9   | 4 PITG_09251   |
| 0 | 0   | 0 PITG_03710   |
| 0 | 0   | 0 PITG_00299   |
| 0 | 0   | 12 PITG_15033  |
| 0 | 2   | 4 PITG_02824   |
| 0 | 2   | 0 PITG_10460   |
| 0 | 154 | 196 PITG_02303 |
| 0 | 6   | 9 PITG_00176   |
| 0 | 7   | 2 NA           |
| 0 | 0   | 2 PITG_11540   |
| 0 | 40  | 208 PITG_22896 |
| 0 | 4   | 42 PITG_00457  |
| 0 | 0   | 2 PITG_03143   |
| 0 | 0   | 0 PITG_15097   |
| 0 | 7   | 0 PITG_21993   |
| 0 | 13  | 2 NA           |
| 0 | 2   | 5 PITG_07562   |
| 0 | 43  | 11 PITG_19527  |
| 0 | 10  | 4 PITG_11555   |
| 0 | 7   | 4 PITG_02328   |
| 0 | 33  | 7 NA           |
| 0 | 4   | 4 NA           |

|     |     |               |
|-----|-----|---------------|
| 0   | 18  | 2 PITG_08867  |
| 0   | 7   | 0 NA          |
| 0   | 0   | 2 PITG_15393  |
| 0   | 0   | 2 PITG_05282  |
| 0   | 0   | 0 NA          |
| 0   | 16  | 57 PITG_08306 |
| 0   | 43  | 24 PITG_02161 |
| 0   | 5   | 0 PITG_09923  |
| 0   | 6   | 8 PITG_10461  |
| 0   | 0   | 0 NA          |
| 0   | 4   | 8 PITG_15258  |
| 0   | 6   | 2 PITG_05690  |
| 0   | 36  | 16 PITG_06700 |
| 0   | 0   | 0 PITG_06238  |
| 0   | 4   | 10 PITG_01185 |
| 0   | 2   | 10 PITG_12153 |
| 0   | 59  | 6 PITG_12600  |
| 0   | 0   | 0 PITG_12050  |
| 0   | 0   | 2 PITG_02105  |
| 0   | 31  | 33 PITG_16968 |
| 0   | 30  | 15 PITG_10949 |
| 0   | 3   | 3 PITG_14727  |
| 0   | 2   | 0 PITG_14971  |
| 0   | 5   | 7 PITG_11795  |
| 0   | 0   | 0 NA          |
| 0   | 12  | 4 PITG_00169  |
| 0   | 31  | 4 PITG_04746  |
| 0   | 0   | 11 PITG_15839 |
| 0   | 13  | 9 PITG_01242  |
| 0   | 0   | 0 PITG_17554  |
| 0   | 0   | 2 PITG_05193  |
| 0   | 2   | 8 NA          |
| 0   | 36  | 0 PITG_14806  |
| 0   | 9   | 2 NA          |
| 268 | 34  | 408 NA        |
| 0   | 0   | 2 PITG_03965  |
| 0   | 2   | 0 PITG_10384  |
| 0   | 8   | 22 PITG_14239 |
| 0   | 0   | 0 NA          |
| 0   | 0   | 2 PITG_05503  |
| 0   | 34  | 70 PITG_08173 |
| 0   | 7   | 0 NA          |
| 0   | 198 | 213 NA        |
| 0   | 11  | 22 PITG_17089 |
| 0   | 2   | 0 PITG_10957  |
| 0   | 0   | 0 PITG_02582  |
| 0   | 5   | 2 PITG_03651  |

|   |     |                |
|---|-----|----------------|
| 0 | 4   | 0 NA           |
| 0 | 26  | 0 PITG_04839   |
| 0 | 4   | 8 PITG_17032   |
| 0 | 0   | 5 PITG_10784   |
| 0 | 0   | 0 PITG_07237   |
| 0 | 0   | 0 PITG_08994   |
| 0 | 4   | 2 PITG_13819   |
| 0 | 37  | 17 PITG_02067  |
| 0 | 17  | 86 PITG_10289  |
| 0 | 0   | 0 PITG_03737   |
| 0 | 0   | 7 PITG_10931   |
| 0 | 6   | 15 PITG_14398  |
| 0 | 0   | 0 PITG_01362   |
| 0 | 0   | 0 NA           |
| 0 | 3   | 9 PITG_11114   |
| 0 | 0   | 0 PITG_03804   |
| 0 | 2   | 5 PITG_21185   |
| 0 | 4   | 0 PITG_03011   |
| 0 | 13  | 10 PITG_02718  |
| 0 | 2   | 0 NA           |
| 0 | 35  | 0 PITG_01111   |
| 0 | 18  | 5 PITG_14831   |
| 0 | 0   | 12 PITG_04479  |
| 0 | 0   | 8 PITG_00389   |
| 0 | 0   | 4 NA           |
| 0 | 27  | 38 PITG_11998  |
| 0 | 33  | 12 PITG_05244  |
| 0 | 0   | 2 PITG_06935   |
| 0 | 13  | 0 PITG_09715   |
| 0 | 8   | 11 PITG_12105  |
| 0 | 8   | 0 PITG_05623   |
| 0 | 118 | 29 PITG_10971  |
| 0 | 39  | 6 PITG_10136   |
| 0 | 0   | 6 PITG_14014   |
| 0 | 11  | 3 PITG_17711   |
| 0 | 32  | 72 PITG_00348  |
| 0 | 9   | 21 PITG_02924  |
| 0 | 71  | 21 PITG_13500  |
| 0 | 10  | 6 NA           |
| 0 | 2   | 0 NA           |
| 0 | 30  | 64 NA          |
| 0 | 9   | 2 PITG_01878   |
| 0 | 85  | 223 PITG_02343 |
| 0 | 28  | 12 PITG_20907  |
| 0 | 17  | 0 PITG_14296   |
| 0 | 7   | 0 PITG_07663   |
| 0 | 6   | 4 NA           |

|     |      |                 |
|-----|------|-----------------|
| 0   | 60   | 51 PITG_05254   |
| 0   | 7    | 2 PITG_03741    |
| 0   | 4    | 6 PITG_05961    |
| 0   | 2    | 0 PITG_01252    |
| 0   | 3    | 0 PITG_00484    |
| 0   | 0    | 4 PITG_12053    |
| 0   | 16   | 50 PITG_17884   |
| 0   | 23   | 7 PITG_17383    |
| 0   | 25   | 0 PITG_16104    |
| 0   | 0    | 4 PITG_04564    |
| 0   | 6    | 9 PITG_00560    |
| 0   | 16   | 0 NA            |
| 0   | 19   | 15 PITG_15310   |
| 0   | 21   | 5 PITG_16357    |
| 0   | 8    | 4 PITG_04572    |
| 0   | 0    | 0 PITG_03761    |
| 0   | 2    | 0 NA            |
| 0   | 20   | 2 PITG_03112    |
| 0   | 2    | 7 PITG_05396    |
| 660 | 53   | 552 NA          |
| 0   | 27   | 0 PITG_02893    |
| 0   | 60   | 26 PITG_10268   |
| 0   | 4    | 4 PITG_02916    |
| 0   | 33   | 10 PITG_02546   |
| 0   | 2187 | 3943 PITG_04121 |
| 0   | 3    | 0 PITG_10648    |
| 0   | 4    | 0 PITG_20174    |
| 0   | 72   | 43 NA           |
| 0   | 13   | 18 PITG_14230   |
| 314 | 12   | 161 NA          |
| 0   | 32   | 67 PITG_21960   |
| 0   | 11   | 4 PITG_05727    |
| 0   | 2    | 21 PITG_06171   |
| 0   | 6    | 0 PITG_03400    |
| 105 | 108  | 327 NA          |
| 0   | 4    | 4 NA            |
| 0   | 23   | 4 PITG_19159    |
| 0   | 7    | 7 PITG_00850    |
| 0   | 43   | 59 PITG_04536   |
| 0   | 8    | 0 NA            |
| 0   | 28   | 24 NA           |
| 0   | 0    | 11 PITG_17035   |
| 0   | 26   | 6 PITG_18736    |
| 0   | 0    | 0 PITG_06844    |
| 0   | 63   | 20 PITG_02971   |
| 0   | 0    | 0 PITG_19351    |
| 0   | 18   | 21 NA           |



|      |    |                 |
|------|----|-----------------|
| 0    | 2  | 0 PITG_12162    |
| 0    | 2  | 9 PITG_01932    |
| 0    | 24 | 0 NA            |
| 0    | 0  | 0 PITG_10921    |
| 0    | 57 | 16 PITG_05539   |
| 0    | 2  | 39 PITG_03380   |
| 0    | 47 | 32 PITG_03672   |
| 0    | 14 | 296 PITG_07778  |
| 0    | 10 | 4 PITG_18251    |
| 0    | 0  | 0 PITG_05359    |
| 0    | 54 | 0 PITG_16056    |
| 0    | 2  | 2 PITG_17378    |
| 0    | 2  | 4 PITG_15625    |
| 1538 | 77 | 2156 PITG_06799 |
| 0    | 0  | 2 NA            |
| 0    | 0  | 0 PITG_18024    |
| 0    | 0  | 0 PITG_03830    |
| 0    | 7  | 6 PITG_05635    |
| 0    | 0  | 3 PITG_17076    |
| 0    | 2  | 10 NA           |
| 0    | 15 | 0 NA            |
| 0    | 2  | 0 PITG_06402    |
| 0    | 0  | 0 PITG_16200    |
| 0    | 15 | 4 NA            |
| 0    | 7  | 8 PITG_01313    |
| 0    | 60 | 18 PITG_09067   |
| 0    | 3  | 0 PITG_12547    |
| 0    | 2  | 0 NA            |
| 0    | 2  | 0 PITG_11285    |
| 0    | 13 | 11 PITG_07334   |
| 0    | 81 | 74 PITG_01280   |
| 0    | 0  | 2 PITG_05594    |
| 0    | 98 | 124 PITG_10321  |
| 0    | 0  | 0 PITG_03648    |
| 0    | 37 | 21 PITG_13419   |
| 0    | 21 | 11 PITG_20168   |
| 0    | 14 | 4 PITG_14114    |
| 0    | 2  | 6 PITG_07243    |
| 0    | 0  | 0 PITG_07072    |
| 0    | 74 | 26 NA           |
| 0    | 2  | 5 PITG_13236    |
| 0    | 2  | 6 PITG_03103    |
| 0    | 2  | 5 PITG_23304    |
| 0    | 0  | 4 NA            |
| 0    | 2  | 0 PITG_15817    |
| 0    | 0  | 5 PITG_07087    |
| 0    | 10 | 2 PITG_05395    |

|    |     |                 |
|----|-----|-----------------|
| 0  | 2   | 4 PITG_01626    |
| 0  | 161 | 28 NA           |
| 0  | 2   | 6 PITG_20316    |
| 0  | 36  | 27 PITG_19609   |
| 0  | 2   | 2 PITG_18094    |
| 0  | 47  | 2 PITG_06356    |
| 0  | 18  | 0 PITG_11895    |
| 0  | 4   | 0 NA            |
| 0  | 9   | 2 PITG_11169    |
| 0  | 2   | 49 PITG_13405   |
| 0  | 9   | 0 NA            |
| 0  | 8   | 22 PITG_06303   |
| 0  | 16  | 2 PITG_12213    |
| 0  | 10  | 5 PITG_00295    |
| 0  | 4   | 0 PITG_18276    |
| 0  | 0   | 14 PITG_01511   |
| 38 | 13  | 0 NA            |
| 0  | 2   | 0 PITG_17461    |
| 0  | 0   | 2 PITG_10022    |
| 0  | 234 | 99 PITG_17140   |
| 0  | 0   | 0 NA            |
| 0  | 0   | 2 PITG_16472    |
| 0  | 8   | 14 PITG_18999   |
| 0  | 5   | 5 NA            |
| 0  | 6   | 4 PITG_18103    |
| 0  | 36  | 22 PITG_13043   |
| 0  | 2   | 4 PITG_01957    |
| 0  | 0   | 0 PITG_03658    |
| 0  | 2   | 9 PITG_07312    |
| 0  | 12  | 12 PITG_15608   |
| 0  | 15  | 2 NA            |
| 0  | 2   | 4 PITG_14586    |
| 0  | 14  | 6 PITG_19550    |
| 0  | 0   | 7 PITG_06570    |
| 0  | 750 | 1598 PITG_11997 |
| 0  | 0   | 2 PITG_20503    |
| 0  | 34  | 57 PITG_16871   |
| 0  | 29  | 46 PITG_16766   |
| 0  | 14  | 0 NA            |
| 0  | 31  | 18 PITG_21599   |
| 0  | 4   | 2 PITG_01341    |
| 0  | 9   | 4 PITG_03111    |
| 0  | 0   | 3 PITG_11137    |
| 6  | 0   | 2 NA            |
| 0  | 68  | 19 PITG_06991   |
| 0  | 19  | 4 NA            |
| 0  | 2   | 0 PITG_03318    |

|      |     |                |
|------|-----|----------------|
| 0    | 123 | 28 NA          |
| 0    | 0   | 11 PITG_13848  |
| 0    | 4   | 2 PITG_12588   |
| 0    | 0   | 4 PITG_02234   |
| 0    | 6   | 7 PITG_11130   |
| 0    | 26  | 20 PITG_14641  |
| 0    | 8   | 7 PITG_14727   |
| 0    | 2   | 6 PITG_00656   |
| 0    | 6   | 0 PITG_03495   |
| 0    | 9   | 0 PITG_03147   |
| 0    | 0   | 0 PITG_07246   |
| 0    | 0   | 12 PITG_17387  |
| 0    | 9   | 0 NA           |
| 0    | 25  | 8 PITG_03685   |
| 0    | 33  | 2 PITG_05509   |
| 0    | 711 | 264 PITG_07921 |
| 0    | 182 | 62 PITG_13030  |
| 0    | 2   | 8 PITG_15075   |
| 0    | 53  | 2 NA           |
| 1043 | 2   | 12 NA          |
| 0    | 3   | 0 PITG_22684   |
| 0    | 7   | 34 PITG_21071  |
| 0    | 6   | 0 PITG_12459   |
| 0    | 6   | 0 NA           |
| 0    | 2   | 13 PITG_08643  |
| 0    | 4   | 0 NA           |
| 0    | 7   | 2 PITG_00809   |
| 0    | 20  | 49 PITG_01947  |
| 0    | 0   | 0 PITG_20159   |
| 0    | 6   | 0 PITG_00398   |
| 0    | 11  | 17 PITG_01088  |
| 0    | 25  | 25 PITG_19422  |
| 0    | 12  | 2 PITG_00043   |
| 0    | 35  | 0 PITG_20762   |
| 0    | 4   | 4 PITG_23160   |
| 0    | 2   | 4 PITG_15884   |
| 0    | 0   | 0 NA           |
| 0    | 2   | 4 PITG_01832   |
| 0    | 12  | 3 PITG_19610   |
| 0    | 0   | 7 PITG_01343   |
| 0    | 10  | 4 NA           |
| 0    | 34  | 56 PITG_10347  |
| 48   | 0   | 60 NA          |
| 0    | 0   | 2 NA           |
| 0    | 9   | 2 NA           |
| 0    | 3   | 2 PITG_17110   |
| 0    | 33  | 18 PITG_20672  |

|   |     |                |
|---|-----|----------------|
| 0 | 4   | 10 PITG_18207  |
| 0 | 0   | 0 PITG_10049   |
| 0 | 10  | 6 PITG_02585   |
| 0 | 22  | 6 PITG_10009   |
| 0 | 0   | 2 PITG_04061   |
| 0 | 6   | 31 PITG_10343  |
| 8 | 2   | 8 NA           |
| 0 | 0   | 7 NA           |
| 0 | 5   | 3 PITG_05757   |
| 0 | 9   | 2 PITG_16516   |
| 0 | 2   | 0 NA           |
| 0 | 0   | 0 PITG_13544   |
| 0 | 5   | 29 PITG_04618  |
| 0 | 19  | 4 PITG_00896   |
| 0 | 9   | 4 PITG_20526   |
| 0 | 133 | 48 NA          |
| 0 | 18  | 0 PITG_08754   |
| 0 | 0   | 0 PITG_16862   |
| 0 | 8   | 5 PITG_03041   |
| 0 | 2   | 0 PITG_13661   |
| 0 | 8   | 3 NA           |
| 0 | 63  | 38 NA          |
| 0 | 24  | 21 PITG_08019  |
| 0 | 42  | 66 PITG_00980  |
| 0 | 36  | 18 PITG_04847  |
| 0 | 8   | 16 PITG_03473  |
| 0 | 27  | 20 PITG_01953  |
| 0 | 33  | 43 PITG_10147  |
| 0 | 0   | 0 PITG_08305   |
| 0 | 56  | 0 PITG_01689   |
| 0 | 8   | 4 NA           |
| 0 | 17  | 5 PITG_02231   |
| 0 | 2   | 2 PITG_03646   |
| 0 | 2   | 0 PITG_15033   |
| 0 | 0   | 0 PITG_13303   |
| 0 | 16  | 0 NA           |
| 0 | 2   | 0 NA           |
| 0 | 27  | 4 PITG_09785   |
| 0 | 189 | 153 PITG_20849 |
| 0 | 11  | 2 PITG_09867   |
| 0 | 13  | 0 NA           |
| 0 | 0   | 0 PITG_13826   |
| 0 | 2   | 3 PITG_00460   |
| 0 | 2   | 16 PITG_04662  |
| 0 | 3   | 0 PITG_13673   |
| 0 | 12  | 2 NA           |
| 0 | 61  | 2 PITG_16899   |

|     |      |                 |
|-----|------|-----------------|
| 0   | 2    | 0 PITG_13399    |
| 0   | 0    | 2 PITG_18272    |
| 0   | 49   | 1012 PITG_19999 |
| 196 | 46   | 387 NA          |
| 0   | 7    | 0 PITG_01110    |
| 0   | 55   | 44 PITG_03533   |
| 0   | 7    | 22 PITG_20585   |
| 0   | 2    | 0 PITG_01682    |
| 0   | 86   | 131 NA          |
| 0   | 17   | 14 PITG_02636   |
| 0   | 2    | 10 PITG_03899   |
| 0   | 0    | 0 PITG_00053    |
| 0   | 0    | 6 PITG_03915    |
| 0   | 0    | 2 PITG_13558    |
| 0   | 235  | 219 PITG_14362  |
| 0   | 4    | 0 PITG_15062    |
| 0   | 0    | 2 PITG_07327    |
| 0   | 0    | 0 PITG_04710    |
| 0   | 0    | 4 PITG_06903    |
| 0   | 7    | 4 PITG_01569    |
| 0   | 359  | 455 PITG_01096  |
| 0   | 0    | 0 PITG_01416    |
| 0   | 39   | 21 PITG_20118   |
| 0   | 0    | 2 PITG_02761    |
| 0   | 24   | 21 PITG_13918   |
| 0   | 0    | 0 NA            |
| 0   | 43   | 88 PITG_15281   |
| 0   | 14   | 39 NA           |
| 0   | 0    | 0 PITG_00717    |
| 0   | 2    | 4 NA            |
| 0   | 0    | 5 PITG_02259    |
| 0   | 4    | 2 PITG_22557    |
| 0   | 12   | 0 NA            |
| 0   | 3    | 18 PITG_10449   |
| 0   | 0    | 2 PITG_17041    |
| 0   | 5    | 0 PITG_20830    |
| 0   | 0    | 2 PITG_03154    |
| 0   | 0    | 721 PITG_06503  |
| 0   | 0    | 0 NA            |
| 0   | 0    | 2 PITG_03340    |
| 0   | 45   | 23 PITG_07660   |
| 0   | 3    | 0 PITG_11430    |
| 0   | 21   | 58 PITG_19668   |
| 0   | 0    | 5 PITG_19025    |
| 0   | 2370 | 3986 PITG_06741 |
| 0   | 0    | 6 PITG_07846    |
| 0   | 0    | 2 PITG_04863    |

|      |     |                |
|------|-----|----------------|
| 0    | 12  | 2 PITG_16958   |
| 0    | 2   | 0 PITG_10164   |
| 0    | 0   | 6 NA           |
| 0    | 124 | 20 PITG_19473  |
| 2    | 32  | 20 PITG_14743  |
| 0    | 2   | 7 PITG_21187   |
| 0    | 0   | 4 PITG_11437   |
| 0    | 12  | 18 PITG_17556  |
| 0    | 2   | 5 PITG_11201   |
| 0    | 2   | 0 PITG_03385   |
| 0    | 0   | 2 PITG_18207   |
| 0    | 0   | 2 PITG_06088   |
| 0    | 4   | 3 PITG_03179   |
| 0    | 359 | 505 PITG_20397 |
| 0    | 13  | 22 PITG_14274  |
| 0    | 0   | 0 NA           |
| 0    | 54  | 13 NA          |
| 0    | 2   | 10 PITG_12192  |
| 0    | 3   | 9 PITG_07717   |
| 0    | 11  | 4 PITG_08935   |
| 0    | 2   | 4 PITG_19086   |
| 0    | 148 | 153 PITG_05922 |
| 0    | 6   | 6 PITG_04529   |
| 0    | 9   | 2 NA           |
| 0    | 5   | 20 PITG_03469  |
| 0    | 11  | 6 PITG_10896   |
| 0    | 0   | 0 PITG_03468   |
| 0    | 0   | 2 PITG_00688   |
| 0    | 141 | 27 PITG_00706  |
| 1088 | 4   | 2513 NA        |
| 0    | 2   | 2 PITG_09313   |
| 0    | 2   | 4 PITG_04725   |
| 0    | 2   | 23 PITG_01450  |
| 0    | 31  | 10 PITG_08668  |
| 0    | 124 | 86 PITG_18644  |
| 0    | 8   | 25 PITG_17701  |
| 0    | 0   | 5 PITG_02532   |
| 0    | 2   | 2 PITG_10002   |
| 0    | 12  | 7 NA           |
| 0    | 2   | 4 PITG_20007   |
| 0    | 137 | 29 NA          |
| 0    | 0   | 14 PITG_11587  |
| 0    | 0   | 2 PITG_18377   |
| 0    | 0   | 4 PITG_08031   |
| 0    | 5   | 0 PITG_02227   |
| 0    | 44  | 292 NA         |
| 0    | 2   | 12 PITG_02781  |

|    |    |                |
|----|----|----------------|
| 0  | 0  | 33 PITG_04386  |
| 53 | 23 | 181 NA         |
| 0  | 11 | 2 NA           |
| 0  | 0  | 0 NA           |
| 0  | 18 | 20 PITG_05584  |
| 0  | 15 | 68 PITG_20386  |
| 0  | 17 | 2 PITG_14275   |
| 0  | 0  | 5 PITG_14218   |
| 0  | 0  | 2 PITG_01386   |
| 0  | 2  | 0 PITG_09040   |
| 0  | 0  | 2 PITG_15408   |
| 0  | 4  | 6 NA           |
| 0  | 6  | 3 NA           |
| 10 | 6  | 23 NA          |
| 0  | 46 | 107 PITG_13861 |
| 0  | 8  | 21 PITG_05128  |
| 0  | 5  | 0 NA           |
| 0  | 8  | 2 PITG_15408   |
| 0  | 0  | 0 NA           |
| 0  | 3  | 2 PITG_04501   |
| 0  | 5  | 13 PITG_16966  |
| 0  | 3  | 0 PITG_19878   |
| 0  | 19 | 75 PITG_12691  |
| 0  | 37 | 15 PITG_16865  |
| 0  | 5  | 2 PITG_15152   |
| 0  | 0  | 0 PITG_00722   |
| 0  | 15 | 4 PITG_10208   |
| 0  | 0  | 12 PITG_07145  |
| 0  | 7  | 2 PITG_05008   |
| 0  | 0  | 3 PITG_08780   |
| 0  | 6  | 17 PITG_01193  |
| 0  | 40 | 21 PITG_10290  |
| 0  | 0  | 3 PITG_00043   |
| 0  | 8  | 7 PITG_14109   |
| 0  | 0  | 2 PITG_18094   |
| 0  | 9  | 6 PITG_06902   |
| 0  | 0  | 3 PITG_09675   |
| 0  | 5  | 2 PITG_23322   |
| 0  | 4  | 7 NA           |
| 0  | 2  | 7 PITG_00391   |
| 0  | 0  | 0 PITG_01230   |
| 0  | 5  | 2 PITG_04996   |
| 0  | 3  | 0 NA           |
| 0  | 5  | 2 PITG_07165   |
| 0  | 7  | 15 PITG_07275  |
| 0  | 13 | 7 PITG_17990   |
| 0  | 2  | 3 PITG_15146   |

|   |     |                |
|---|-----|----------------|
| 0 | 5   | 0 PITG_07006   |
| 0 | 110 | 23 NA          |
| 0 | 11  | 13 PITG_10164  |
| 0 | 0   | 0 PITG_03411   |
| 0 | 6   | 14 PITG_10022  |
| 0 | 2   | 4 PITG_19771   |
| 0 | 7   | 0 PITG_14553   |
| 0 | 43  | 33 PITG_21457  |
| 0 | 4   | 2 PITG_05005   |
| 0 | 0   | 4 PITG_04661   |
| 0 | 0   | 0 PITG_10487   |
| 0 | 21  | 33 PITG_09985  |
| 0 | 7   | 2 PITG_00328   |
| 0 | 11  | 5 NA           |
| 0 | 16  | 2 PITG_05346   |
| 0 | 2   | 0 PITG_20434   |
| 0 | 0   | 0 PITG_16532   |
| 0 | 12  | 7 PITG_14724   |
| 0 | 0   | 2 PITG_01138   |
| 0 | 26  | 142 PITG_04958 |
| 0 | 19  | 0 PITG_06406   |
| 0 | 2   | 0 PITG_22676   |
| 0 | 9   | 13 NA          |
| 0 | 60  | 50 PITG_20386  |
| 0 | 2   | 2 PITG_17816   |
| 0 | 8   | 0 PITG_07470   |
| 0 | 18  | 7 NA           |
| 0 | 6   | 45 PITG_08715  |
| 0 | 211 | 41 PITG_10844  |
| 0 | 0   | 2 PITG_09676   |
| 2 | 29  | 112 PITG_01450 |
| 0 | 2   | 0 PITG_02401   |
| 0 | 0   | 0 PITG_15672   |
| 0 | 6   | 0 NA           |
| 0 | 0   | 2 PITG_03952   |
| 0 | 11  | 0 PITG_03890   |
| 0 | 0   | 2 PITG_02467   |
| 0 | 35  | 20 PITG_07744  |
| 0 | 13  | 2 PITG_09816   |
| 0 | 2   | 67 PITG_06016  |
| 0 | 2   | 6 PITG_19750   |
| 0 | 2   | 0 PITG_00369   |
| 0 | 2   | 6 NA           |
| 6 | 2   | 15 NA          |
| 0 | 0   | 2 PITG_15924   |
| 0 | 51  | 19 NA          |
| 0 | 5   | 4 PITG_20723   |



|    |     |                |
|----|-----|----------------|
| 0  | 48  | 10 NA          |
| 0  | 0   | 0 PITG_10449   |
| 0  | 6   | 2 PITG_07237   |
| 0  | 2   | 0 PITG_00989   |
| 0  | 190 | 277 PITG_12749 |
| 0  | 9   | 6 PITG_03604   |
| 0  | 13  | 4 PITG_11764   |
| 0  | 6   | 8 PITG_04386   |
| 0  | 14  | 4 PITG_19422   |
| 0  | 4   | 2 NA           |
| 0  | 3   | 7 PITG_15735   |
| 0  | 16  | 0 NA           |
| 0  | 27  | 3 NA           |
| 0  | 0   | 0 PITG_11451   |
| 0  | 5   | 2 PITG_07545   |
| 0  | 3   | 0 NA           |
| 0  | 2   | 4 PITG_06829   |
| 0  | 15  | 15 PITG_03458  |
| 0  | 17  | 2 NA           |
| 0  | 3   | 10 PITG_02286  |
| 16 | 3   | 20 NA          |
| 0  | 10  | 0 NA           |
| 0  | 0   | 0 NA           |
| 0  | 12  | 0 PITG_01742   |
| 0  | 0   | 3 PITG_18295   |
| 0  | 6   | 4 PITG_02054   |
| 0  | 4   | 19 PITG_17965  |
| 5  | 2   | 27 NA          |
| 0  | 0   | 4 NA           |
| 0  | 16  | 7 PITG_13826   |
| 0  | 0   | 0 PITG_14480   |
| 0  | 56  | 12 PITG_03282  |
| 0  | 45  | 27 PITG_06664  |
| 0  | 4   | 2 PITG_09477   |
| 0  | 3   | 0 PITG_12913   |
| 0  | 3   | 0 PITG_13309   |
| 0  | 0   | 0 NA           |
| 0  | 6   | 2 NA           |
| 0  | 4   | 3 PITG_01647   |
| 0  | 6   | 5 PITG_11566   |
| 0  | 2   | 0 PITG_01044   |
| 0  | 5   | 0 NA           |
| 0  | 104 | 54 PITG_07270  |
| 0  | 77  | 47 PITG_17556  |
| 0  | 16  | 0 PITG_05667   |
| 0  | 0   | 0 NA           |
| 0  | 5   | 14 PITG_14573  |

|     |     |               |
|-----|-----|---------------|
| 0   | 0   | 15 NA         |
| 0   | 65  | 0 PITG_16492  |
| 0   | 0   | 6 PITG_14221  |
| 0   | 4   | 0 PITG_16537  |
| 0   | 10  | 38 PITG_01322 |
| 0   | 147 | 0 PITG_03259  |
| 0   | 17  | 2 PITG_05010  |
| 40  | 2   | 51 NA         |
| 0   | 0   | 19 PITG_00543 |
| 0   | 6   | 25 PITG_06358 |
| 0   | 0   | 0 NA          |
| 0   | 8   | 0 PITG_01848  |
| 0   | 8   | 2 PITG_13309  |
| 0   | 0   | 0 PITG_04994  |
| 0   | 11  | 9 PITG_17437  |
| 0   | 2   | 0 PITG_18867  |
| 0   | 13  | 15 PITG_02192 |
| 0   | 15  | 2 PITG_05780  |
| 0   | 12  | 23 PITG_06896 |
| 0   | 4   | 2 PITG_06863  |
| 0   | 7   | 0 PITG_16719  |
| 0   | 93  | 41 PITG_01578 |
| 0   | 4   | 2 PITG_19153  |
| 0   | 30  | 2 PITG_09483  |
| 0   | 11  | 2 PITG_09570  |
| 0   | 2   | 0 PITG_20253  |
| 0   | 4   | 0 PITG_10888  |
| 0   | 52  | 45 PITG_17495 |
| 0   | 0   | 9 PITG_00292  |
| 0   | 24  | 3 PITG_05465  |
| 0   | 23  | 18 PITG_15223 |
| 0   | 0   | 0 NA          |
| 0   | 0   | 2 NA          |
| 0   | 27  | 3 PITG_16723  |
| 0   | 0   | 0 PITG_19056  |
| 75  | 12  | 86 NA         |
| 498 | 33  | 906 NA        |
| 0   | 0   | 6 PITG_12463  |
| 0   | 5   | 4 PITG_09978  |
| 0   | 4   | 2 NA          |
| 0   | 0   | 4 NA          |
| 0   | 11  | 22 PITG_11651 |
| 0   | 20  | 6 PITG_09554  |
| 0   | 2   | 10 PITG_06424 |
| 0   | 0   | 4 PITG_13152  |
| 0   | 27  | 2 PITG_18274  |
| 0   | 2   | 0 NA          |

|      |      |                |
|------|------|----------------|
| 0    | 4    | 2 PITG_20834   |
| 0    | 23   | 33 PITG_11743  |
| 0    | 18   | 9 PITG_03980   |
| 0    | 38   | 7 PITG_23088   |
| 0    | 25   | 196 PITG_14175 |
| 0    | 0    | 8 PITG_04564   |
| 0    | 6    | 0 PITG_19283   |
| 0    | 2    | 19 PITG_03301  |
| 0    | 38   | 77 PITG_01680  |
| 0    | 0    | 2 PITG_10058   |
| 0    | 2    | 7 PITG_04647   |
| 0    | 4    | 0 PITG_04589   |
| 0    | 27   | 58 PITG_01932  |
| 0    | 12   | 2 PITG_02585   |
| 0    | 0    | 0 PITG_03577   |
| 0    | 1053 | 318 PITG_18644 |
| 0    | 57   | 18 NA          |
| 0    | 38   | 7 NA           |
| 0    | 16   | 0 PITG_12806   |
| 0    | 6    | 0 PITG_00337   |
| 0    | 11   | 2 PITG_21255   |
| 6169 | 89   | 664 NA         |
| 0    | 34   | 53 PITG_20192  |
| 0    | 0    | 10 PITG_20212  |
| 0    | 2    | 10 PITG_06781  |
| 0    | 7    | 12 PITG_03934  |
| 0    | 24   | 2 PITG_04395   |
| 0    | 8    | 0 PITG_10935   |
| 0    | 0    | 0 NA           |
| 0    | 0    | 2 PITG_06780   |
| 0    | 7    | 2 PITG_15134   |
| 0    | 5    | 8 PITG_02114   |
| 0    | 0    | 0 PITG_06719   |
| 0    | 0    | 0 PITG_13803   |
| 0    | 12   | 6 NA           |
| 0    | 66   | 16 PITG_05926  |
| 0    | 252  | 68 PITG_10211  |
| 0    | 0    | 0 PITG_07100   |
| 0    | 40   | 39 PITG_13462  |
| 0    | 0    | 2 PITG_19402   |
| 0    | 20   | 30 PITG_00273  |
| 0    | 0    | 2 PITG_15981   |
| 0    | 9    | 31 PITG_15393  |
| 0    | 2    | 0 PITG_15926   |
| 0    | 45   | 5 PITG_07964   |
| 0    | 245  | 18 PITG_12648  |
| 0    | 4    | 2 PITG_00323   |

|    |     |                |
|----|-----|----------------|
| 0  | 52  | 23 PITG_02096  |
| 0  | 2   | 0 PITG_13284   |
| 0  | 2   | 0 PITG_02194   |
| 0  | 38  | 25 PITG_09428  |
| 0  | 0   | 0 NA           |
| 0  | 7   | 10 PITG_07717  |
| 0  | 6   | 2 PITG_20507   |
| 0  | 26  | 4 PITG_07287   |
| 0  | 0   | 0 NA           |
| 0  | 6   | 2 NA           |
| 0  | 2   | 0 PITG_10097   |
| 0  | 20  | 17 PITG_01335  |
| 0  | 2   | 5 PITG_01480   |
| 0  | 10  | 4 NA           |
| 0  | 2   | 10 PITG_00160  |
| 0  | 22  | 2 PITG_04676   |
| 0  | 37  | 0 NA           |
| 0  | 3   | 6 PITG_05302   |
| 0  | 4   | 0 PITG_07302   |
| 0  | 2   | 2 PITG_12001   |
| 0  | 4   | 0 PITG_10460   |
| 0  | 3   | 5 PITG_12818   |
| 0  | 32  | 13 PITG_10098  |
| 0  | 13  | 0 NA           |
| 0  | 11  | 4 NA           |
| 0  | 2   | 5 PITG_02036   |
| 0  | 260 | 270 PITG_00962 |
| 0  | 0   | 2 PITG_08400   |
| 0  | 12  | 0 PITG_07200   |
| 0  | 0   | 0 PITG_17869   |
| 0  | 15  | 0 PITG_04599   |
| 0  | 7   | 4 PITG_05644   |
| 0  | 0   | 0 PITG_05782   |
| 0  | 2   | 4 PITG_17559   |
| 0  | 0   | 0 NA           |
| 0  | 11  | 0 NA           |
| 0  | 0   | 2 NA           |
| 0  | 11  | 42 PITG_02349  |
| 0  | 0   | 2 PITG_02757   |
| 0  | 2   | 2 PITG_22716   |
| 0  | 283 | 681 PITG_10934 |
| 0  | 45  | 12 PITG_11177  |
| 0  | 15  | 40 PITG_10301  |
| 0  | 2   | 0 PITG_00501   |
| 0  | 2   | 6 PITG_09855   |
| 70 | 2   | 28 NA          |
| 0  | 31  | 14 PITG_08935  |

|   |     |               |
|---|-----|---------------|
| 0 | 7   | 12 PITG_00651 |
| 0 | 24  | 16 PITG_21619 |
| 0 | 8   | 0 NA          |
| 0 | 15  | 4 PITG_01957  |
| 0 | 0   | 2 PITG_16357  |
| 0 | 34  | 0 PITG_04512  |
| 0 | 16  | 10 NA         |
| 0 | 0   | 5 PITG_17241  |
| 0 | 6   | 0 PITG_06351  |
| 0 | 98  | 31 PITG_04075 |
| 0 | 17  | 6 NA          |
| 0 | 17  | 47 PITG_13151 |
| 0 | 0   | 0 PITG_19857  |
| 0 | 41  | 81 PITG_17925 |
| 0 | 0   | 2 PITG_03388  |
| 0 | 2   | 4 PITG_03697  |
| 0 | 2   | 3 PITG_16878  |
| 0 | 0   | 0 PITG_01444  |
| 0 | 0   | 0 PITG_05305  |
| 0 | 3   | 10 PITG_10034 |
| 0 | 5   | 13 PITG_00594 |
| 0 | 6   | 9 PITG_08183  |
| 0 | 2   | 2 PITG_00858  |
| 0 | 5   | 17 PITG_05149 |
| 0 | 2   | 2 NA          |
| 0 | 7   | 2 NA          |
| 0 | 0   | 0 NA          |
| 0 | 0   | 0 PITG_17699  |
| 0 | 172 | 53 PITG_17606 |
| 0 | 4   | 2 PITG_12181  |
| 0 | 0   | 7 NA          |
| 0 | 4   | 2 PITG_17942  |
| 0 | 2   | 5 PITG_07311  |
| 0 | 22  | 0 NA          |
| 0 | 4   | 4 PITG_08683  |
| 0 | 4   | 8 NA          |
| 0 | 4   | 0 NA          |
| 0 | 0   | 8 NA          |
| 5 | 0   | 9 NA          |
| 0 | 0   | 2 PITG_06907  |
| 0 | 0   | 0 NA          |
| 0 | 9   | 4 PITG_22576  |
| 0 | 2   | 0 PITG_14441  |
| 0 | 6   | 0 NA          |
| 0 | 0   | 2 PITG_09435  |
| 0 | 4   | 2 PITG_11587  |
| 0 | 0   | 2 NA          |

|     |     |               |
|-----|-----|---------------|
| 0   | 2   | 0 PITG_01046  |
| 0   | 11  | 16 PITG_16788 |
| 0   | 27  | 0 PITG_11098  |
| 0   | 0   | 2 PITG_17672  |
| 0   | 14  | 21 PITG_10921 |
| 0   | 61  | 8 PITG_03039  |
| 0   | 15  | 39 PITG_15216 |
| 0   | 4   | 3 PITG_03389  |
| 0   | 2   | 13 PITG_10888 |
| 0   | 11  | 0 NA          |
| 0   | 0   | 0 PITG_17090  |
| 0   | 0   | 2 PITG_01153  |
| 0   | 20  | 0 PITG_07041  |
| 0   | 28  | 6 PITG_02585  |
| 0   | 0   | 0 PITG_10750  |
| 0   | 6   | 11 PITG_09423 |
| 0   | 25  | 0 NA          |
| 0   | 0   | 0 PITG_16799  |
| 0   | 0   | 7 PITG_03620  |
| 0   | 0   | 0 PITG_09394  |
| 0   | 0   | 0 NA          |
| 0   | 16  | 9 PITG_14580  |
| 0   | 0   | 5 PITG_09250  |
| 0   | 252 | 7 PITG_15860  |
| 0   | 0   | 6 PITG_03789  |
| 0   | 55  | 14 PITG_01603 |
| 0   | 0   | 6 PITG_09261  |
| 0   | 0   | 10 PITG_03836 |
| 0   | 0   | 0 PITG_17891  |
| 0   | 6   | 2 PITG_20331  |
| 0   | 7   | 0 NA          |
| 0   | 4   | 2 PITG_04505  |
| 0   | 2   | 6 PITG_19557  |
| 0   | 0   | 0 PITG_17023  |
| 0   | 2   | 11 PITG_02526 |
| 0   | 11  | 20 PITG_09923 |
| 0   | 0   | 2 PITG_15062  |
| 0   | 3   | 6 PITG_09248  |
| 0   | 22  | 14 PITG_01617 |
| 0   | 235 | 39 NA         |
| 24  | 2   | 138 NA        |
| 354 | 0   | 27 NA         |
| 0   | 0   | 4 PITG_15779  |
| 0   | 0   | 4 PITG_08394  |
| 0   | 5   | 14 NA         |
| 0   | 2   | 3 PITG_03701  |
| 0   | 4   | 19 PITG_11201 |

|   |    |               |
|---|----|---------------|
| 0 | 2  | 379 NA        |
| 0 | 0  | 0 PITG_09604  |
| 0 | 17 | 17 NA         |
| 0 | 3  | 0 PITG_10250  |
| 0 | 4  | 7 PITG_06716  |
| 0 | 24 | 18 PITG_08038 |
| 0 | 23 | 9 PITG_09881  |
| 0 | 6  | 4 NA          |
| 0 | 7  | 12 PITG_13473 |
| 0 | 0  | 0 NA          |
| 0 | 0  | 7 PITG_23178  |
| 0 | 6  | 0 PITG_11470  |
| 0 | 12 | 0 PITG_06151  |
| 0 | 0  | 0 NA          |
| 0 | 17 | 6 PITG_18100  |
| 0 | 12 | 39 PITG_18235 |
| 0 | 0  | 3 PITG_00535  |
| 0 | 0  | 0 PITG_20529  |
| 0 | 6  | 0 NA          |
| 0 | 30 | 4 PITG_01598  |
| 0 | 72 | 0 PITG_13055  |
| 0 | 4  | 0 NA          |
| 0 | 0  | 2 PITG_00274  |
| 0 | 3  | 0 PITG_14194  |
| 0 | 24 | 26 PITG_13803 |
| 0 | 4  | 0 PITG_14181  |
| 0 | 2  | 2 PITG_17028  |
| 0 | 4  | 9 PITG_05637  |
| 0 | 0  | 0 PITG_17706  |
| 0 | 26 | 0 PITG_04902  |
| 0 | 0  | 0 PITG_05458  |
| 0 | 32 | 15 NA         |
| 0 | 6  | 5 PITG_03203  |
| 0 | 6  | 2 PITG_20115  |
| 0 | 18 | 0 PITG_02268  |
| 0 | 5  | 12 PITG_21329 |
| 0 | 21 | 4 PITG_00963  |
| 2 | 35 | 54 PITG_13977 |
| 0 | 61 | 75 PITG_16161 |
| 0 | 6  | 8 NA          |
| 0 | 7  | 4 NA          |
| 0 | 2  | 0 PITG_04126  |
| 0 | 4  | 9 PITG_04527  |
| 0 | 0  | 3 PITG_03657  |
| 0 | 14 | 0 PITG_21887  |
| 0 | 9  | 4 PITG_17964  |
| 0 | 0  | 7 PITG_05461  |

|   |      |                 |
|---|------|-----------------|
| 0 | 11   | 4 PITG_11430    |
| 0 | 2    | 2 PITG_16797    |
| 0 | 39   | 8 PITG_12572    |
| 0 | 23   | 4 PITG_02035    |
| 0 | 6    | 2 PITG_05304    |
| 0 | 4    | 0 PITG_14833    |
| 0 | 0    | 24 PITG_09295   |
| 0 | 23   | 16 PITG_13437   |
| 0 | 9    | 8 PITG_01873    |
| 0 | 0    | 0 PITG_03295    |
| 0 | 1600 | 1196 PITG_04121 |
| 0 | 4    | 35 PITG_07839   |
| 0 | 2    | 0 PITG_21941    |
| 0 | 5    | 15 PITG_21517   |
| 0 | 0    | 10 PITG_18899   |
| 0 | 5    | 4 PITG_12111    |
| 0 | 0    | 0 PITG_01579    |
| 0 | 0    | 6 PITG_06894    |
| 0 | 0    | 0 PITG_15493    |
| 0 | 6    | 0 PITG_07046    |
| 0 | 2    | 0 PITG_02234    |
| 0 | 17   | 0 NA            |
| 0 | 0    | 0 PITG_07516    |
| 0 | 13   | 9 NA            |
| 0 | 22   | 31 NA           |
| 0 | 23   | 9 PITG_00942    |
| 0 | 18   | 0 PITG_07968    |
| 0 | 29   | 6 NA            |
| 0 | 0    | 2 PITG_15280    |
| 0 | 37   | 27 PITG_05423   |
| 0 | 0    | 0 PITG_05510    |
| 0 | 13   | 20 PITG_00117   |
| 0 | 0    | 2 PITG_19242    |
| 0 | 0    | 0 NA            |
| 0 | 35   | 17 PITG_13353   |
| 0 | 0    | 0 NA            |
| 0 | 3    | 4 PITG_06716    |
| 0 | 111  | 73 PITG_15385   |
| 0 | 18   | 6 PITG_10853    |
| 0 | 24   | 19 PITG_06558   |
| 0 | 34   | 0 PITG_08405    |
| 0 | 19   | 6 PITG_18028    |
| 0 | 2    | 4 NA            |
| 0 | 9    | 26 PITG_21181   |
| 0 | 0    | 2 PITG_13920    |
| 0 | 68   | 20 PITG_03305   |
| 0 | 19   | 56 PITG_06594   |



|     |     |               |
|-----|-----|---------------|
| 0   | 5   | 12 PITG_10922 |
| 0   | 5   | 15 PITG_02035 |
| 0   | 16  | 89 PITG_03696 |
| 0   | 0   | 2 PITG_00854  |
| 0   | 11  | 6 PITG_06772  |
| 0   | 6   | 8 PITG_01640  |
| 0   | 27  | 0 PITG_07041  |
| 0   | 5   | 2 PITG_13719  |
| 0   | 2   | 2 PITG_15544  |
| 0   | 0   | 0 PITG_06902  |
| 0   | 0   | 0 PITG_03646  |
| 0   | 0   | 0 PITG_06992  |
| 0   | 7   | 21 PITG_21626 |
| 0   | 6   | 7 NA          |
| 0   | 5   | 8 PITG_10857  |
| 0   | 4   | 2 PITG_00747  |
| 0   | 14  | 7 PITG_00978  |
| 0   | 0   | 0 PITG_17840  |
| 0   | 0   | 0 NA          |
| 0   | 10  | 2 NA          |
| 0   | 39  | 32 PITG_02281 |
| 0   | 0   | 16 PITG_18882 |
| 0   | 20  | 29 NA         |
| 0   | 0   | 3 PITG_11675  |
| 0   | 0   | 0 PITG_15463  |
| 0   | 2   | 0 PITG_01683  |
| 0   | 5   | 4 PITG_07455  |
| 0   | 19  | 5 PITG_09415  |
| 0   | 0   | 0 NA          |
| 0   | 258 | 2 PITG_10571  |
| 0   | 11  | 4 PITG_06521  |
| 0   | 41  | 50 PITG_03396 |
| 0   | 0   | 0 NA          |
| 376 | 11  | 212 NA        |
| 0   | 0   | 2 PITG_14247  |
| 0   | 2   | 3 PITG_02720  |
| 0   | 8   | 7 PITG_03233  |
| 0   | 8   | 13 NA         |
| 0   | 0   | 2 PITG_06088  |
| 0   | 33  | 22 PITG_19350 |
| 0   | 2   | 0 PITG_08393  |
| 0   | 0   | 0 PITG_20675  |
| 0   | 4   | 4 PITG_11804  |
| 0   | 0   | 9 PITG_14111  |
| 0   | 2   | 8 PITG_14717  |
| 0   | 8   | 21 PITG_03560 |
| 0   | 7   | 3 PITG_16900  |

|     |     |                |
|-----|-----|----------------|
| 0   | 2   | 9 PITG_01153   |
| 0   | 0   | 0 PITG_06827   |
| 0   | 2   | 4 PITG_20293   |
| 0   | 2   | 2 PITG_06450   |
| 0   | 8   | 6 PITG_07821   |
| 0   | 21  | 4 PITG_03781   |
| 0   | 2   | 0 PITG_00634   |
| 0   | 124 | 18 NA          |
| 0   | 2   | 2 NA           |
| 0   | 12  | 2 PITG_01555   |
| 0   | 9   | 15 PITG_17312  |
| 0   | 45  | 3 PITG_03337   |
| 0   | 6   | 2 PITG_12211   |
| 0   | 0   | 0 NA           |
| 0   | 2   | 0 NA           |
| 0   | 5   | 9 PITG_10022   |
| 0   | 7   | 8 PITG_00028   |
| 0   | 12  | 14 PITG_13679  |
| 0   | 147 | 51 PITG_02826  |
| 0   | 49  | 10 PITG_00169  |
| 672 | 77  | 127 NA         |
| 0   | 72  | 145 PITG_03433 |
| 0   | 0   | 0 NA           |
| 0   | 13  | 0 NA           |
| 0   | 0   | 0 NA           |
| 0   | 549 | 258 PITG_11987 |
| 0   | 0   | 0 NA           |
| 0   | 0   | 0 NA           |
| 0   | 2   | 0 NA           |
| 0   | 8   | 2 NA           |
| 0   | 6   | 5 NA           |
| 0   | 3   | 15 PITG_05691  |
| 0   | 9   | 2 PITG_16546   |
| 0   | 2   | 7 PITG_03696   |
| 0   | 57  | 27 NA          |
| 0   | 5   | 2 PITG_09725   |
| 48  | 6   | 148 NA         |
| 0   | 10  | 8 PITG_00257   |
| 0   | 48  | 11 PITG_16917  |
| 23  | 0   | 20 NA          |
| 0   | 2   | 0 NA           |
| 0   | 0   | 2 NA           |
| 0   | 6   | 0 PITG_03590   |
| 0   | 25  | 11 PITG_07868  |
| 0   | 50  | 0 PITG_17110   |
| 0   | 11  | 2 PITG_11017   |
| 0   | 4   | 4 PITG_02561   |

|     |    |               |
|-----|----|---------------|
| 0   | 0  | 4 NA          |
| 0   | 22 | 6 NA          |
| 90  | 0  | 32 NA         |
| 0   | 25 | 6 PITG_10994  |
| 0   | 15 | 6 PITG_00145  |
| 0   | 15 | 0 PITG_03733  |
| 0   | 20 | 23 PITG_16903 |
| 0   | 24 | 0 NA          |
| 0   | 16 | 17 PITG_10022 |
| 0   | 0  | 0 PITG_03169  |
| 0   | 27 | 15 PITG_21334 |
| 0   | 2  | 0 PITG_08977  |
| 0   | 0  | 2 NA          |
| 0   | 57 | 11 NA         |
| 0   | 74 | 15 PITG_00479 |
| 0   | 9  | 4 NA          |
| 0   | 0  | 0 PITG_07426  |
| 0   | 6  | 0 PITG_02407  |
| 0   | 2  | 0 PITG_10813  |
| 0   | 24 | 0 PITG_03566  |
| 0   | 4  | 0 PITG_08716  |
| 0   | 2  | 0 PITG_09253  |
| 0   | 6  | 6 PITG_14194  |
| 0   | 7  | 0 PITG_03146  |
| 0   | 5  | 2 PITG_19991  |
| 0   | 4  | 0 PITG_17164  |
| 0   | 6  | 2 PITG_02368  |
| 0   | 4  | 11 NA         |
| 0   | 0  | 0 NA          |
| 0   | 0  | 0 NA          |
| 0   | 7  | 8 NA          |
| 0   | 35 | 5 PITG_21144  |
| 115 | 14 | 143 NA        |
| 0   | 16 | 0 PITG_03082  |
| 0   | 6  | 0 PITG_05623  |
| 0   | 8  | 23 PITG_09783 |
| 0   | 43 | 6 NA          |
| 0   | 0  | 2 PITG_01864  |
| 0   | 2  | 6 PITG_01317  |
| 0   | 2  | 0 PITG_03832  |
| 0   | 5  | 0 PITG_05187  |
| 0   | 7  | 0 PITG_17560  |
| 0   | 2  | 5 PITG_18962  |
| 0   | 2  | 3 PITG_04133  |
| 0   | 28 | 12 NA         |
| 0   | 16 | 4 PITG_10816  |
| 0   | 24 | 25 PITG_19220 |

|   |     |                |
|---|-----|----------------|
| 0 | 6   | 0 PITG_17944   |
| 0 | 8   | 2 NA           |
| 0 | 10  | 4 PITG_10758   |
| 0 | 0   | 4 PITG_15807   |
| 0 | 0   | 0 PITG_15832   |
| 0 | 14  | 27 PITG_16271  |
| 0 | 2   | 6 PITG_23273   |
| 0 | 0   | 10 PITG_03360  |
| 0 | 2   | 6 PITG_01236   |
| 0 | 106 | 8 PITG_04821   |
| 0 | 5   | 5 NA           |
| 0 | 5   | 11 PITG_10553  |
| 0 | 4   | 25 PITG_06863  |
| 0 | 2   | 0 PITG_02457   |
| 0 | 9   | 2 NA           |
| 0 | 0   | 5 PITG_04889   |
| 0 | 0   | 6 PITG_03754   |
| 0 | 0   | 4 PITG_07916   |
| 0 | 41  | 57 PITG_16855  |
| 0 | 6   | 14 PITG_01001  |
| 0 | 0   | 0 PITG_17994   |
| 0 | 13  | 9 PITG_19064   |
| 0 | 10  | 8 PITG_04443   |
| 0 | 33  | 16 NA          |
| 0 | 57  | 21 PITG_17460  |
| 0 | 5   | 9 PITG_19557   |
| 0 | 10  | 14 NA          |
| 0 | 84  | 54 PITG_21829  |
| 0 | 0   | 0 PITG_12235   |
| 0 | 0   | 0 PITG_12650   |
| 0 | 2   | 4 NA           |
| 0 | 2   | 3 NA           |
| 0 | 284 | 479 PITG_00674 |
| 0 | 2   | 0 PITG_01930   |
| 0 | 7   | 0 NA           |
| 0 | 0   | 5 PITG_13184   |
| 0 | 0   | 14 PITG_08456  |
| 0 | 2   | 0 PITG_01083   |
| 0 | 0   | 4 PITG_14585   |
| 0 | 49  | 41 PITG_03446  |
| 0 | 0   | 0 PITG_07034   |
| 0 | 3   | 0 NA           |
| 0 | 41  | 22 NA          |
| 0 | 2   | 3 PITG_08460   |
| 0 | 8   | 0 PITG_09375   |
| 0 | 50  | 8 NA           |
| 0 | 2   | 0 PITG_05639   |

|     |    |               |
|-----|----|---------------|
| 0   | 0  | 2 PITG_14217  |
| 0   | 2  | 2 PITG_13558  |
| 0   | 43 | 12 PITG_04683 |
| 0   | 89 | 6 NA          |
| 0   | 62 | 6 PITG_11817  |
| 0   | 13 | 23 PITG_01511 |
| 0   | 0  | 2 NA          |
| 0   | 10 | 4 PITG_03866  |
| 0   | 5  | 0 PITG_19286  |
| 0   | 3  | 0 NA          |
| 0   | 4  | 0 PITG_14272  |
| 0   | 2  | 10 PITG_15922 |
| 0   | 0  | 2 PITG_13255  |
| 0   | 11 | 8 PITG_04133  |
| 0   | 3  | 2 NA          |
| 0   | 4  | 4 PITG_15656  |
| 0   | 0  | 7 PITG_06259  |
| 0   | 0  | 12 PITG_08688 |
| 552 | 30 | 1039 NA       |
| 0   | 5  | 5 NA          |
| 0   | 20 | 31 NA         |
| 0   | 2  | 0 PITG_18657  |
| 0   | 7  | 41 NA         |
| 0   | 2  | 10 PITG_02564 |
| 0   | 10 | 11 PITG_13721 |
| 0   | 6  | 0 NA          |
| 0   | 9  | 2 PITG_15855  |
| 0   | 6  | 11 PITG_23134 |
| 0   | 4  | 0 PITG_00231  |
| 0   | 10 | 0 NA          |
| 0   | 2  | 0 NA          |
| 0   | 0  | 2 PITG_06900  |
| 0   | 14 | 26 PITG_06351 |
| 0   | 9  | 18 PITG_12537 |
| 0   | 6  | 0 PITG_02981  |
| 0   | 10 | 12 PITG_09585 |
| 0   | 0  | 3 NA          |
| 0   | 15 | 6 NA          |
| 0   | 5  | 2 PITG_00187  |
| 0   | 4  | 11 PITG_15564 |
| 0   | 4  | 0 PITG_04242  |
| 0   | 9  | 0 NA          |
| 0   | 50 | 15 PITG_11038 |
| 0   | 16 | 4 PITG_09389  |
| 0   | 2  | 0 PITG_11121  |
| 0   | 2  | 0 PITG_17560  |
| 0   | 12 | 0 NA          |

|    |     |                |
|----|-----|----------------|
| 0  | 7   | 5 PITG_05832   |
| 0  | 40  | 97 PITG_01223  |
| 0  | 24  | 0 NA           |
| 0  | 0   | 0 PITG_12318   |
| 0  | 58  | 12 NA          |
| 0  | 11  | 7 PITG_06319   |
| 0  | 20  | 13 PITG_13426  |
| 0  | 0   | 2 PITG_03626   |
| 0  | 76  | 8 PITG_22677   |
| 0  | 14  | 28 PITG_02338  |
| 0  | 4   | 2 PITG_09956   |
| 0  | 11  | 11 PITG_08295  |
| 0  | 15  | 2 NA           |
| 0  | 0   | 0 PITG_10007   |
| 0  | 12  | 0 PITG_05674   |
| 0  | 2   | 18 PITG_01970  |
| 0  | 0   | 2 PITG_18007   |
| 0  | 5   | 5 PITG_08775   |
| 0  | 0   | 0 PITG_16733   |
| 0  | 3   | 0 PITG_02128   |
| 0  | 4   | 7 PITG_01756   |
| 0  | 6   | 4 NA           |
| 0  | 2   | 0 NA           |
| 0  | 4   | 26 PITG_15393  |
| 0  | 0   | 2 PITG_01471   |
| 0  | 10  | 4 PITG_22353   |
| 0  | 40  | 60 PITG_01087  |
| 0  | 18  | 9 NA           |
| 0  | 0   | 0 PITG_13135   |
| 0  | 2   | 0 PITG_19610   |
| 0  | 0   | 6 PITG_20347   |
| 0  | 26  | 14 PITG_03478  |
| 0  | 9   | 2 PITG_01963   |
| 0  | 200 | 54 PITG_14129  |
| 0  | 0   | 14 PITG_15449  |
| 0  | 0   | 0 PITG_03769   |
| 0  | 30  | 0 PITG_14657   |
| 0  | 30  | 38 PITG_03274  |
| 63 | 22  | 853 NA         |
| 0  | 8   | 2 PITG_12297   |
| 0  | 2   | 2 PITG_13406   |
| 0  | 0   | 6 PITG_10792   |
| 0  | 2   | 24 PITG_05552  |
| 0  | 2   | 2 PITG_03858   |
| 0  | 11  | 23 PITG_14131  |
| 0  | 125 | 131 PITG_01480 |
| 0  | 45  | 286 PITG_18414 |

|    |     |                |
|----|-----|----------------|
| 0  | 21  | 10 PITG_21216  |
| 0  | 76  | 114 PITG_09831 |
| 0  | 2   | 2 PITG_19208   |
| 0  | 25  | 6 NA           |
| 0  | 36  | 93 PITG_11653  |
| 0  | 2   | 0 PITG_03443   |
| 0  | 0   | 2 PITG_13687   |
| 47 | 21  | 34 NA          |
| 0  | 59  | 4 NA           |
| 0  | 27  | 4 PITG_13715   |
| 0  | 0   | 0 NA           |
| 0  | 3   | 2 PITG_02499   |
| 0  | 0   | 2 PITG_00069   |
| 0  | 19  | 44 PITG_17609  |
| 0  | 0   | 4 NA           |
| 0  | 16  | 38 PITG_15848  |
| 0  | 6   | 4 NA           |
| 0  | 0   | 20 PITG_06471  |
| 0  | 4   | 4 NA           |
| 0  | 5   | 6 PITG_16464   |
| 0  | 12  | 15 PITG_09349  |
| 0  | 0   | 0 PITG_04061   |
| 0  | 0   | 0 NA           |
| 0  | 14  | 48 PITG_10955  |
| 0  | 2   | 5 PITG_00746   |
| 0  | 4   | 5 PITG_02346   |
| 0  | 0   | 0 PITG_11267   |
| 0  | 0   | 0 NA           |
| 0  | 2   | 6 PITG_08681   |
| 26 | 4   | 500 NA         |
| 0  | 2   | 2 PITG_16495   |
| 0  | 48  | 9 PITG_00732   |
| 0  | 0   | 3 PITG_17028   |
| 0  | 0   | 0 PITG_18433   |
| 0  | 19  | 0 PITG_01682   |
| 0  | 14  | 22 PITG_03609  |
| 0  | 2   | 8 PITG_12818   |
| 0  | 8   | 5 PITG_03267   |
| 0  | 0   | 13 PITG_14380  |
| 0  | 0   | 2 NA           |
| 0  | 0   | 10 NA          |
| 0  | 2   | 0 NA           |
| 0  | 13  | 23 PITG_19056  |
| 0  | 0   | 2 PITG_13365   |
| 0  | 613 | 137 NA         |
| 0  | 14  | 16 PITG_01617  |
| 0  | 4   | 10 PITG_03947  |

|     |      |                |
|-----|------|----------------|
| 0   | 70   | 176 PITG_10416 |
| 0   | 41   | 20 PITG_13415  |
| 0   | 0    | 0 PITG_03318   |
| 0   | 91   | 2 NA           |
| 0   | 2    | 0 PITG_16090   |
| 0   | 20   | 79 PITG_01755  |
| 0   | 1057 | 359 PITG_16465 |
| 0   | 0    | 0 NA           |
| 0   | 4    | 4 PITG_01127   |
| 0   | 8    | 7 PITG_02268   |
| 0   | 4    | 10 PITG_07455  |
| 0   | 9    | 6 PITG_09780   |
| 0   | 2    | 0 PITG_17028   |
| 0   | 0    | 2 PITG_01426   |
| 0   | 0    | 2 PITG_19956   |
| 0   | 22   | 75 PITG_07710  |
| 18  | 0    | 6 NA           |
| 0   | 2    | 8 PITG_03531   |
| 0   | 0    | 5 PITG_13486   |
| 0   | 0    | 0 NA           |
| 0   | 4    | 14 NA          |
| 0   | 19   | 55 PITG_03388  |
| 139 | 186  | 647 NA         |
| 0   | 2    | 2 PITG_02799   |
| 0   | 2    | 0 PITG_02497   |
| 0   | 10   | 11 PITG_01549  |
| 0   | 7    | 2 PITG_11804   |
| 0   | 5    | 8 PITG_16546   |
| 0   | 13   | 6 PITG_03989   |
| 0   | 6    | 4 NA           |
| 0   | 5    | 10 PITG_11197  |
| 0   | 30   | 4 NA           |
| 0   | 6    | 9 PITG_18114   |
| 0   | 6    | 0 NA           |
| 0   | 12   | 0 PITG_02723   |
| 0   | 24   | 4 NA           |
| 4   | 0    | 0 NA           |
| 0   | 0    | 2 PITG_20201   |
| 0   | 0    | 4 PITG_13803   |
| 0   | 178  | 18 NA          |
| 0   | 28   | 4 PITG_20044   |
| 0   | 20   | 0 PITG_02343   |
| 0   | 0    | 0 PITG_06222   |
| 0   | 2    | 6 PITG_17683   |
| 0   | 61   | 0 NA           |
| 0   | 0    | 2 NA           |
| 0   | 16   | 2 PITG_03997   |



|      |    |               |
|------|----|---------------|
| 0    | 0  | 6 NA          |
| 0    | 2  | 6 NA          |
| 0    | 13 | 21 PITG_06247 |
| 0    | 14 | 8 PITG_19916  |
| 0    | 0  | 0 NA          |
| 0    | 7  | 0 NA          |
| 0    | 19 | 0 NA          |
| 0    | 0  | 6 PITG_09527  |
| 0    | 3  | 0 NA          |
| 0    | 2  | 0 PITG_11183  |
| 0    | 0  | 2 PITG_18977  |
| 0    | 25 | 4 PITG_06581  |
| 0    | 4  | 4 PITG_19516  |
| 0    | 4  | 2 PITG_00291  |
| 0    | 0  | 2 PITG_02820  |
| 0    | 2  | 0 PITG_06934  |
| 0    | 5  | 2 NA          |
| 0    | 3  | 4 PITG_08290  |
| 0    | 7  | 15 PITG_17495 |
| 0    | 2  | 2 PITG_07841  |
| 0    | 2  | 4 PITG_04707  |
| 0    | 7  | 7 PITG_03650  |
| 0    | 18 | 8 PITG_12290  |
| 0    | 2  | 2 NA          |
| 1848 | 37 | 1398 NA       |
| 0    | 4  | 4 PITG_01329  |
| 0    | 11 | 26 PITG_21394 |
| 0    | 25 | 2 PITG_10122  |
| 0    | 11 | 11 NA         |
| 0    | 0  | 3 PITG_13833  |
| 0    | 61 | 25 PITG_01193 |
| 0    | 2  | 4 NA          |
| 0    | 2  | 0 PITG_12225  |
| 0    | 0  | 0 PITG_01188  |
| 0    | 0  | 2 PITG_01579  |
| 0    | 12 | 42 PITG_00571 |
| 0    | 88 | 19 NA         |
| 0    | 0  | 6 PITG_17069  |
| 0    | 0  | 0 PITG_15951  |
| 0    | 2  | 7 NA          |
| 0    | 8  | 8 NA          |
| 0    | 2  | 27 PITG_14175 |
| 0    | 82 | 29 NA         |
| 0    | 7  | 0 PITG_23142  |
| 0    | 2  | 2 PITG_08530  |
| 0    | 0  | 0 NA          |
| 0    | 2  | 2 PITG_04917  |

|    |    |                |
|----|----|----------------|
| 0  | 10 | 2 NA           |
| 0  | 0  | 0 PITG_05672   |
| 0  | 0  | 0 NA           |
| 0  | 4  | 2 NA           |
| 7  | 43 | 179 NA         |
| 0  | 0  | 0 PITG_12865   |
| 0  | 60 | 36 PITG_13128  |
| 0  | 4  | 2 PITG_02259   |
| 2  | 0  | 2 PITG_00663   |
| 0  | 10 | 2 PITG_20293   |
| 0  | 68 | 15 PITG_15855  |
| 0  | 0  | 4 PITG_13399   |
| 0  | 0  | 6 PITG_18297   |
| 0  | 4  | 0 NA           |
| 0  | 18 | 0 NA           |
| 0  | 2  | 12 PITG_00191  |
| 0  | 9  | 2 PITG_04590   |
| 0  | 0  | 17 PITG_11689  |
| 0  | 2  | 4 PITG_14237   |
| 0  | 4  | 0 PITG_03650   |
| 0  | 9  | 0 NA           |
| 0  | 10 | 0 PITG_02532   |
| 0  | 19 | 17 PITG_01555  |
| 0  | 12 | 22 NA          |
| 0  | 6  | 0 PITG_18185   |
| 0  | 18 | 13 PITG_08091  |
| 0  | 14 | 6 NA           |
| 0  | 2  | 2 PITG_16137   |
| 0  | 12 | 30 PITG_00863  |
| 0  | 2  | 4 PITG_11413   |
| 0  | 0  | 0 PITG_12239   |
| 0  | 5  | 3 PITG_09483   |
| 0  | 2  | 12 PITG_02074  |
| 0  | 0  | 0 NA           |
| 0  | 0  | 9 PITG_03815   |
| 0  | 0  | 6 PITG_00284   |
| 0  | 0  | 0 PITG_01677   |
| 0  | 8  | 0 PITG_12145   |
| 68 | 30 | 71 PITG_01618  |
| 0  | 6  | 2 PITG_06367   |
| 0  | 6  | 23 PITG_03346  |
| 0  | 0  | 0 PITG_04921   |
| 0  | 0  | 9 PITG_08578   |
| 0  | 10 | 17 PITG_17035  |
| 0  | 4  | 4 PITG_19813   |
| 0  | 2  | 7 PITG_00577   |
| 0  | 46 | 170 PITG_14584 |

|   |      |                 |
|---|------|-----------------|
| 0 | 53   | 9 NA            |
| 0 | 0    | 0 PITG_00411    |
| 0 | 29   | 6 PITG_04549    |
| 0 | 0    | 3 PITG_02571    |
| 0 | 3    | 10 NA           |
| 0 | 45   | 29 PITG_03878   |
| 0 | 0    | 10 PITG_02244   |
| 0 | 0    | 0 PITG_04880    |
| 0 | 7    | 10 PITG_15625   |
| 0 | 25   | 17 PITG_05367   |
| 0 | 4    | 49 PITG_08425   |
| 0 | 0    | 2 PITG_07301    |
| 0 | 5    | 22 PITG_10317   |
| 0 | 2    | 4 PITG_13434    |
| 0 | 16   | 39 NA           |
| 0 | 11   | 6 PITG_16024    |
| 0 | 99   | 28 PITG_21451   |
| 0 | 2    | 21 PITG_20562   |
| 0 | 0    | 8 PITG_02161    |
| 0 | 4    | 0 NA            |
| 0 | 0    | 0 PITG_02495    |
| 0 | 2    | 0 NA            |
| 0 | 0    | 2 PITG_21688    |
| 0 | 70   | 3 PITG_06662    |
| 0 | 22   | 4 PITG_13030    |
| 0 | 3    | 2 PITG_19085    |
| 0 | 5    | 2 PITG_01477    |
| 0 | 1111 | 1699 PITG_07355 |
| 0 | 17   | 8 PITG_05562    |
| 0 | 2    | 0 NA            |
| 0 | 0    | 2 NA            |
| 0 | 8    | 5 PITG_18028    |
| 0 | 8    | 4 PITG_03411    |
| 0 | 0    | 2 PITG_15868    |
| 0 | 7    | 13 PITG_04644   |
| 0 | 4    | 10 PITG_16698   |
| 0 | 24   | 19 PITG_12120   |
| 0 | 3    | 2 PITG_08723    |
| 0 | 12   | 0 PITG_08664    |
| 0 | 9    | 0 PITG_05634    |
| 0 | 21   | 44 PITG_06379   |
| 0 | 2    | 0 NA            |
| 0 | 24   | 13 PITG_16112   |
| 0 | 15   | 16 PITG_06618   |
| 0 | 17   | 10 PITG_14944   |
| 0 | 8    | 15 PITG_09387   |
| 0 | 3    | 0 PITG_14430    |

|   |     |               |
|---|-----|---------------|
| 0 | 29  | 4 PITG_17767  |
| 0 | 0   | 2 PITG_20637  |
| 0 | 14  | 10 PITG_03429 |
| 0 | 7   | 4 PITG_09855  |
| 0 | 17  | 2 PITG_04711  |
| 0 | 24  | 10 PITG_12687 |
| 0 | 2   | 0 NA          |
| 0 | 47  | 48 PITG_06257 |
| 0 | 9   | 6 PITG_12549  |
| 0 | 12  | 15 PITG_11749 |
| 0 | 35  | 37 PITG_08801 |
| 0 | 18  | 11 PITG_17076 |
| 0 | 32  | 0 PITG_00032  |
| 0 | 20  | 9 PITG_20379  |
| 0 | 4   | 5 PITG_06238  |
| 4 | 0   | 2 NA          |
| 0 | 5   | 3 PITG_15565  |
| 0 | 9   | 3 NA          |
| 0 | 10  | 7 PITG_02571  |
| 0 | 4   | 2 PITG_00237  |
| 0 | 11  | 31 PITG_12962 |
| 0 | 6   | 0 PITG_08686  |
| 0 | 2   | 0 NA          |
| 0 | 2   | 6 PITG_17419  |
| 0 | 9   | 0 NA          |
| 0 | 0   | 10 PITG_04002 |
| 0 | 27  | 15 PITG_01386 |
| 0 | 11  | 7 PITG_13620  |
| 0 | 14  | 34 PITG_01719 |
| 0 | 6   | 19 PITG_06715 |
| 0 | 37  | 35 PITG_03488 |
| 0 | 0   | 0 NA          |
| 0 | 161 | 5 PITG_03669  |
| 0 | 6   | 7 PITG_06630  |
| 0 | 0   | 2 PITG_14602  |
| 0 | 68  | 25 NA         |
| 0 | 0   | 0 PITG_17699  |
| 0 | 2   | 4 PITG_01087  |
| 0 | 0   | 2 NA          |
| 0 | 21  | 22 PITG_10832 |
| 0 | 2   | 26 PITG_00482 |
| 0 | 2   | 0 NA          |
| 0 | 13  | 28 PITG_21127 |
| 0 | 16  | 27 NA         |
| 0 | 0   | 9 PITG_03550  |
| 0 | 2   | 0 PITG_21597  |
| 0 | 44  | 6 PITG_01034  |

|     |     |                 |
|-----|-----|-----------------|
| 0   | 6   | 0 PITG_16053    |
| 0   | 114 | 47 PITG_06212   |
| 0   | 2   | 26 PITG_00077   |
| 0   | 0   | 6 PITG_04709    |
| 0   | 76  | 10 PITG_12844   |
| 0   | 0   | 0 NA            |
| 0   | 4   | 19 PITG_10729   |
| 0   | 4   | 4 PITG_19939    |
| 0   | 4   | 10 PITG_03115   |
| 0   | 20  | 8 PITG_21110    |
| 0   | 0   | 0 PITG_13376    |
| 0   | 16  | 11 NA           |
| 0   | 14  | 2 PITG_17081    |
| 0   | 6   | 23 PITG_03599   |
| 0   | 0   | 0 PITG_15091    |
| 0   | 192 | 136 PITG_14568  |
| 0   | 4   | 4 PITG_16649    |
| 814 | 47  | 1965 PITG_09555 |
| 0   | 2   | 2 NA            |
| 0   | 6   | 4 PITG_20868    |
| 0   | 4   | 2 PITG_00648    |
| 0   | 9   | 18 PITG_17576   |
| 0   | 0   | 2 PITG_23006    |
| 0   | 0   | 0 NA            |
| 0   | 29  | 29 PITG_03288   |
| 0   | 6   | 4 PITG_08599    |
| 16  | 0   | 6 NA            |
| 0   | 10  | 17 PITG_06358   |
| 0   | 2   | 0 PITG_15060    |
| 0   | 0   | 2 NA            |
| 0   | 9   | 0 PITG_06476    |
| 27  | 51  | 115 NA          |
| 0   | 7   | 0 PITG_03942    |
| 0   | 0   | 0 PITG_10315    |
| 0   | 3   | 0 PITG_02806    |
| 0   | 11  | 4 NA            |
| 0   | 0   | 4 NA            |
| 0   | 47  | 0 NA            |
| 0   | 2   | 4 NA            |
| 0   | 0   | 0 PITG_16863    |
| 0   | 5   | 2 PITG_05198    |
| 0   | 2   | 4 PITG_18171    |
| 0   | 10  | 9 PITG_17021    |
| 0   | 0   | 2 PITG_00152    |
| 0   | 44  | 6 PITG_19078    |
| 0   | 4   | 14 PITG_05564   |
| 0   | 27  | 26 PITG_22719   |

|   |    |               |
|---|----|---------------|
| 0 | 0  | 2 PITG_03263  |
| 0 | 9  | 27 PITG_05778 |
| 0 | 33 | 4 PITG_09419  |
| 0 | 17 | 2 PITG_19532  |
| 0 | 2  | 2 PITG_05858  |
| 0 | 4  | 6 PITG_10980  |
| 0 | 4  | 0 NA          |
| 0 | 15 | 0 PITG_07169  |
| 0 | 8  | 11 PITG_08293 |
| 0 | 21 | 12 PITG_19247 |
| 0 | 0  | 11 PITG_13836 |
| 0 | 4  | 0 PITG_13228  |
| 0 | 90 | 95 PITG_03704 |
| 0 | 2  | 6 PITG_17407  |
| 0 | 19 | 2 PITG_20556  |
| 0 | 2  | 8 PITG_13490  |
| 0 | 14 | 2 PITG_01957  |
| 0 | 41 | 20 PITG_03837 |
| 0 | 0  | 0 NA          |
| 0 | 2  | 0 PITG_18019  |
| 0 | 6  | 2 NA          |
| 0 | 3  | 7 PITG_15649  |
| 0 | 0  | 0 PITG_03898  |
| 0 | 0  | 4 PITG_20251  |
| 0 | 28 | 0 PITG_03264  |
| 0 | 4  | 49 PITG_01400 |
| 0 | 16 | 9 PITG_00790  |
| 0 | 2  | 2 PITG_09453  |
| 0 | 26 | 8 PITG_09374  |
| 0 | 8  | 8 NA          |
| 5 | 19 | 163 NA        |
| 0 | 29 | 18 PITG_05690 |
| 0 | 5  | 4 PITG_19965  |
| 0 | 7  | 4 PITG_03419  |
| 0 | 0  | 0 NA          |
| 0 | 0  | 0 PITG_08440  |
| 0 | 32 | 0 PITG_02457  |
| 0 | 2  | 4 PITG_08059  |
| 0 | 10 | 0 PITG_15463  |
| 0 | 0  | 20 PITG_00273 |
| 0 | 3  | 0 PITG_15446  |
| 0 | 28 | 37 PITG_09008 |
| 0 | 42 | 0 PITG_20263  |
| 0 | 0  | 2 PITG_19749  |
| 2 | 0  | 0 NA          |
| 0 | 89 | 22 PITG_07080 |
| 0 | 0  | 4 PITG_17313  |

|   |    |               |
|---|----|---------------|
| 0 | 2  | 2 PITG_07250  |
| 0 | 8  | 2 PITG_17004  |
| 0 | 6  | 2 PITG_22431  |
| 0 | 16 | 20 PITG_14170 |
| 0 | 0  | 0 PITG_12196  |
| 0 | 0  | 0 NA          |
| 0 | 3  | 2 PITG_00867  |
| 0 | 13 | 2 PITG_08540  |
| 0 | 0  | 12 PITG_04038 |
| 0 | 27 | 2 NA          |
| 0 | 2  | 0 PITG_12980  |
| 0 | 2  | 0 PITG_05512  |
| 0 | 0  | 4 PITG_17006  |
| 0 | 2  | 2 NA          |
| 0 | 0  | 3 PITG_03788  |
| 0 | 0  | 17 PITG_09760 |
| 0 | 2  | 10 PITG_14972 |
| 8 | 0  | 9 NA          |
| 0 | 0  | 0 NA          |
| 0 | 13 | 14 NA         |
| 0 | 6  | 13 PITG_05480 |
| 0 | 41 | 3 PITG_12150  |
| 0 | 10 | 0 NA          |
| 0 | 17 | 6 PITG_13202  |
| 0 | 0  | 2 PITG_01627  |
| 0 | 0  | 0 NA          |
| 0 | 14 | 9 PITG_12195  |
| 0 | 22 | 0 PITG_03398  |
| 0 | 3  | 12 PITG_02905 |
| 0 | 39 | 40 PITG_02755 |
| 0 | 19 | 32 PITG_13644 |
| 0 | 19 | 12 PITG_08599 |
| 0 | 13 | 9 PITG_12987  |
| 0 | 10 | 10 PITG_08935 |
| 0 | 21 | 2 PITG_20527  |
| 0 | 5  | 17 PITG_06094 |
| 0 | 0  | 4 PITG_06557  |
| 0 | 12 | 2 PITG_15475  |
| 0 | 14 | 41 PITG_08540 |
| 0 | 3  | 4 PITG_02172  |
| 0 | 2  | 0 NA          |
| 0 | 0  | 0 PITG_08626  |
| 0 | 24 | 0 PITG_02980  |
| 0 | 3  | 21 PITG_05822 |
| 0 | 14 | 3 PITG_16365  |
| 0 | 30 | 0 PITG_03931  |
| 0 | 5  | 8 PITG_00762  |

|   |     |                |
|---|-----|----------------|
| 0 | 11  | 27 PITG_06594  |
| 0 | 2   | 0 PITG_07514   |
| 0 | 6   | 0 NA           |
| 0 | 9   | 6 PITG_14239   |
| 0 | 0   | 2 NA           |
| 0 | 78  | 29 PITG_17884  |
| 0 | 6   | 12 PITG_17884  |
| 0 | 4   | 5 PITG_08747   |
| 0 | 2   | 0 PITG_00330   |
| 0 | 0   | 4 PITG_02239   |
| 0 | 0   | 163 NA         |
| 0 | 0   | 0 PITG_12514   |
| 0 | 2   | 0 PITG_02323   |
| 0 | 12  | 12 PITG_05188  |
| 0 | 6   | 6 PITG_14603   |
| 0 | 4   | 3 PITG_03979   |
| 0 | 20  | 3 NA           |
| 0 | 4   | 6 PITG_13245   |
| 0 | 31  | 18 PITG_13111  |
| 0 | 46  | 23 PITG_17071  |
| 0 | 5   | 7 PITG_21579   |
| 0 | 8   | 132 PITG_07752 |
| 0 | 197 | 124 PITG_13029 |
| 0 | 19  | 15 PITG_20548  |
| 0 | 2   | 11 PITG_03837  |
| 0 | 15  | 116 PITG_05998 |
| 0 | 0   | 2 PITG_09439   |
| 0 | 0   | 2 PITG_16807   |
| 0 | 3   | 15 PITG_02839  |
| 0 | 3   | 0 PITG_00791   |
| 0 | 4   | 17 PITG_01815  |
| 0 | 13  | 5 PITG_06440   |
| 0 | 4   | 23 PITG_02688  |
| 0 | 7   | 19 PITG_02071  |
| 0 | 11  | 4 PITG_01756   |
| 0 | 2   | 0 PITG_01046   |
| 0 | 0   | 6 PITG_03311   |
| 0 | 4   | 6 PITG_12192   |
| 0 | 2   | 0 PITG_11674   |
| 0 | 4   | 14 PITG_01960  |
| 0 | 0   | 8 PITG_12154   |
| 0 | 8   | 37 NA          |
| 0 | 7   | 6 PITG_03702   |
| 0 | 2   | 0 PITG_13235   |
| 0 | 2   | 2 PITG_12145   |
| 0 | 28  | 278 PITG_16963 |
| 0 | 7   | 126 PITG_16963 |



|     |     |                |
|-----|-----|----------------|
| 0   | 3   | 0 PITG_13915   |
| 0   | 13  | 26 PITG_01453  |
| 0   | 11  | 21 PITG_03274  |
| 158 | 24  | 204 NA         |
| 0   | 21  | 14 NA          |
| 0   | 0   | 2 NA           |
| 0   | 2   | 3 PITG_05961   |
| 0   | 0   | 0 NA           |
| 0   | 113 | 278 PITG_22104 |
| 0   | 10  | 75 NA          |
| 0   | 17  | 7 PITG_05631   |
| 0   | 7   | 7 PITG_20534   |
| 0   | 35  | 11 PITG_07470  |
| 0   | 0   | 4 PITG_21598   |
| 0   | 30  | 20 PITG_01932  |
| 0   | 0   | 5 PITG_12838   |
| 0   | 57  | 10 PITG_00747  |
| 0   | 2   | 4 PITG_11020   |
| 0   | 2   | 0 PITG_20088   |
| 0   | 6   | 4 PITG_04954   |
| 0   | 10  | 2 NA           |
| 0   | 0   | 7 PITG_09393   |
| 26  | 16  | 16 NA          |
| 0   | 20  | 2 PITG_08588   |
| 0   | 14  | 21 PITG_08420  |
| 0   | 4   | 12 PITG_22989  |
| 0   | 25  | 26 PITG_18498  |
| 0   | 0   | 2 PITG_00632   |
| 0   | 4   | 0 NA           |
| 0   | 71  | 0 PITG_00396   |
| 0   | 32  | 4 NA           |
| 0   | 0   | 4 PITG_05501   |
| 0   | 0   | 0 NA           |
| 0   | 4   | 0 PITG_01250   |
| 0   | 0   | 0 PITG_15467   |
| 0   | 20  | 2 PITG_15777   |
| 0   | 17  | 0 NA           |
| 0   | 12  | 30 PITG_06924  |
| 0   | 18  | 0 PITG_17155   |
| 0   | 6   | 10 PITG_13558  |
| 0   | 2   | 5 PITG_18877   |
| 0   | 5   | 0 NA           |
| 0   | 0   | 0 NA           |
| 0   | 0   | 0 PITG_11698   |
| 0   | 6   | 0 PITG_01557   |
| 0   | 0   | 0 PITG_00663   |
| 0   | 51  | 2 NA           |

|   |     |                 |
|---|-----|-----------------|
| 0 | 72  | 80 PITG_03075   |
| 0 | 0   | 0 PITG_00308    |
| 0 | 2   | 0 PITG_02172    |
| 0 | 0   | 23 PITG_22557   |
| 0 | 8   | 7 PITG_16132    |
| 0 | 9   | 5 PITG_10058    |
| 0 | 11  | 3 NA            |
| 0 | 57  | 12 PITG_21149   |
| 0 | 16  | 13 PITG_16211   |
| 0 | 2   | 2 PITG_03152    |
| 0 | 69  | 0 PITG_19984    |
| 0 | 31  | 4 PITG_17695    |
| 0 | 29  | 10 PITG_02698   |
| 0 | 4   | 0 PITG_04678    |
| 0 | 6   | 5 PITG_16884    |
| 0 | 2   | 5 PITG_04603    |
| 0 | 0   | 0 NA            |
| 0 | 0   | 96 PITG_16871   |
| 0 | 822 | 3792 PITG_06741 |
| 0 | 0   | 2 PITG_12160    |
| 0 | 5   | 0 PITG_12237    |
| 0 | 0   | 0 PITG_17004    |
| 0 | 0   | 7 PITG_01619    |
| 0 | 30  | 17 NA           |
| 0 | 7   | 0 NA            |
| 0 | 8   | 2 PITG_08607    |
| 0 | 25  | 5 PITG_15661    |
| 0 | 2   | 2 PITG_02027    |
| 0 | 4   | 19 PITG_00150   |
| 0 | 5   | 0 PITG_03455    |
| 0 | 4   | 0 PITG_21178    |
| 0 | 31  | 100 PITG_00409  |
| 0 | 8   | 2 PITG_17750    |
| 0 | 94  | 0 PITG_01662    |
| 0 | 4   | 79 PITG_14854   |
| 0 | 4   | 83 PITG_10132   |
| 0 | 0   | 4 PITG_00734    |
| 0 | 20  | 46 PITG_10514   |
| 0 | 0   | 2 PITG_04619    |
| 0 | 54  | 2 PITG_16538    |
| 0 | 4   | 4 PITG_16557    |
| 0 | 0   | 0 PITG_02849    |
| 0 | 2   | 0 PITG_16223    |
| 0 | 32  | 7 PITG_09367    |
| 0 | 22  | 16 PITG_12527   |
| 0 | 9   | 4 PITG_12192    |
| 0 | 10  | 21 PITG_08827   |

|     |    |                |
|-----|----|----------------|
| 0   | 3  | 13 PITG_02446  |
| 150 | 14 | 7 NA           |
| 0   | 6  | 3 PITG_02697   |
| 0   | 0  | 0 PITG_22837   |
| 0   | 29 | 0 PITG_06402   |
| 0   | 18 | 9 PITG_08953   |
| 0   | 0  | 2 PITG_02371   |
| 0   | 0  | 9 PITG_06342   |
| 0   | 5  | 2 PITG_04579   |
| 0   | 0  | 0 PITG_17155   |
| 0   | 2  | 2 PITG_05326   |
| 0   | 4  | 4 PITG_01848   |
| 0   | 2  | 2 PITG_04668   |
| 0   | 2  | 0 PITG_05631   |
| 0   | 2  | 0 PITG_01871   |
| 0   | 2  | 2 PITG_04132   |
| 0   | 6  | 16 PITG_11182  |
| 0   | 17 | 2 PITG_13775   |
| 0   | 4  | 0 PITG_21173   |
| 0   | 6  | 17 PITG_19429  |
| 0   | 36 | 8 PITG_01069   |
| 0   | 11 | 4 NA           |
| 0   | 55 | 18 PITG_00486  |
| 0   | 7  | 15 PITG_16012  |
| 0   | 6  | 4 NA           |
| 0   | 3  | 0 NA           |
| 0   | 20 | 0 PITG_06238   |
| 0   | 0  | 12 NA          |
| 0   | 0  | 0 PITG_04506   |
| 18  | 6  | 93 NA          |
| 0   | 6  | 8 PITG_03561   |
| 0   | 25 | 29 PITG_12187  |
| 0   | 2  | 2 PITG_14973   |
| 0   | 23 | 13 PITG_02284  |
| 0   | 7  | 0 PITG_09747   |
| 80  | 9  | 0 NA           |
| 0   | 7  | 0 PITG_18461   |
| 0   | 0  | 2 PITG_08729   |
| 0   | 15 | 4 NA           |
| 0   | 0  | 8 PITG_09348   |
| 0   | 0  | 0 PITG_08367   |
| 0   | 0  | 0 PITG_11461   |
| 0   | 2  | 112 PITG_11484 |
| 0   | 24 | 0 PITG_15072   |
| 0   | 14 | 23 PITG_09985  |
| 0   | 36 | 5 NA           |
| 0   | 6  | 0 PITG_11531   |

|     |     |                |
|-----|-----|----------------|
| 0   | 4   | 4 PITG_09986   |
| 0   | 0   | 2 NA           |
| 0   | 0   | 4 PITG_05644   |
| 0   | 22  | 7 PITG_07910   |
| 0   | 6   | 10 PITG_02529  |
| 0   | 125 | 19 PITG_05667  |
| 0   | 10  | 7 PITG_00334   |
| 0   | 0   | 4 PITG_15569   |
| 0   | 8   | 6 PITG_19749   |
| 0   | 23  | 3 PITG_17032   |
| 0   | 0   | 2 PITG_17928   |
| 0   | 8   | 5 PITG_09388   |
| 0   | 0   | 4 PITG_10941   |
| 0   | 0   | 0 PITG_00473   |
| 0   | 0   | 7 NA           |
| 0   | 2   | 0 PITG_15874   |
| 0   | 4   | 8 NA           |
| 0   | 4   | 14 PITG_00424  |
| 0   | 4   | 0 NA           |
| 0   | 34  | 39 PITG_14640  |
| 0   | 0   | 6 PITG_10813   |
| 0   | 9   | 19 PITG_15069  |
| 0   | 292 | 184 PITG_13752 |
| 0   | 2   | 2 PITG_00078   |
| 0   | 2   | 8 PITG_08346   |
| 0   | 45  | 81 PITG_11926  |
| 0   | 6   | 0 PITG_14448   |
| 0   | 52  | 80 PITG_17039  |
| 0   | 15  | 9 PITG_04971   |
| 0   | 6   | 0 PITG_19149   |
| 0   | 18  | 21 PITG_20742  |
| 0   | 4   | 0 PITG_12149   |
| 0   | 12  | 31 PITG_13256  |
| 0   | 36  | 7 NA           |
| 0   | 19  | 81 PITG_10022  |
| 0   | 4   | 4 NA           |
| 0   | 18  | 10 PITG_18326  |
| 0   | 0   | 2 PITG_10610   |
| 0   | 3   | 0 NA           |
| 0   | 15  | 6 PITG_07823   |
| 0   | 0   | 0 PITG_13228   |
| 0   | 0   | 2 PITG_14134   |
| 0   | 7   | 0 PITG_10293   |
| 239 | 9   | 299 NA         |
| 0   | 4   | 4 PITG_21179   |
| 0   | 6   | 6 PITG_02238   |
| 0   | 3   | 2 PITG_08252   |

|     |     |                |
|-----|-----|----------------|
| 0   | 105 | 23 PITG_12600  |
| 0   | 5   | 9 PITG_14975   |
| 0   | 9   | 7 NA           |
| 0   | 4   | 2 PITG_03740   |
| 0   | 2   | 4 PITG_05490   |
| 0   | 54  | 25 PITG_07470  |
| 89  | 3   | 91 NA          |
| 0   | 4   | 0 NA           |
| 0   | 14  | 5 PITG_05757   |
| 0   | 2   | 2 PITG_07655   |
| 0   | 5   | 0 PITG_00597   |
| 339 | 29  | 349 NA         |
| 0   | 43  | 36 PITG_09631  |
| 0   | 2   | 6 PITG_00469   |
| 0   | 4   | 0 PITG_10743   |
| 0   | 0   | 4 PITG_12514   |
| 0   | 0   | 0 PITG_16054   |
| 0   | 2   | 4 PITG_11486   |
| 0   | 0   | 6 PITG_04037   |
| 0   | 0   | 2 PITG_22177   |
| 0   | 13  | 0 NA           |
| 0   | 6   | 4 PITG_18736   |
| 0   | 28  | 14 NA          |
| 0   | 9   | 3 PITG_01569   |
| 0   | 0   | 2 PITG_13305   |
| 0   | 2   | 0 PITG_00078   |
| 0   | 7   | 6 NA           |
| 0   | 6   | 2 PITG_20502   |
| 0   | 4   | 7 NA           |
| 0   | 6   | 2 PITG_01386   |
| 0   | 23  | 0 NA           |
| 0   | 3   | 0 PITG_12237   |
| 0   | 43  | 13 PITG_04905  |
| 0   | 0   | 9 PITG_22716   |
| 0   | 26  | 2 NA           |
| 0   | 16  | 23 NA          |
| 0   | 0   | 0 PITG_09034   |
| 0   | 66  | 35 PITG_16358  |
| 0   | 11  | 0 NA           |
| 0   | 0   | 2 PITG_19402   |
| 0   | 74  | 19 PITG_18519  |
| 0   | 343 | 367 PITG_23187 |
| 0   | 15  | 52 PITG_11111  |
| 0   | 2   | 2 PITG_08369   |
| 0   | 415 | 120 PITG_18644 |
| 0   | 6   | 2 PITG_05483   |
| 0   | 2   | 14 PITG_01711  |

|     |     |                |
|-----|-----|----------------|
| 0   | 22  | 5 PITG_15154   |
| 0   | 31  | 8 PITG_19989   |
| 0   | 250 | 97 PITG_20086  |
| 0   | 49  | 7 PITG_12350   |
| 0   | 42  | 0 NA           |
| 0   | 26  | 36 PITG_03156  |
| 0   | 10  | 0 PITG_16688   |
| 0   | 0   | 0 PITG_03040   |
| 0   | 5   | 0 PITG_18734   |
| 0   | 4   | 0 PITG_04012   |
| 0   | 11  | 2 NA           |
| 0   | 3   | 5 PITG_17271   |
| 0   | 33  | 268 PITG_13265 |
| 0   | 2   | 6 PITG_03778   |
| 0   | 30  | 5 PITG_04892   |
| 0   | 6   | 14 PITG_01607  |
| 0   | 34  | 55 PITG_11638  |
| 0   | 4   | 6 PITG_04588   |
| 0   | 53  | 0 PITG_00883   |
| 0   | 50  | 2 NA           |
| 0   | 12  | 19 NA          |
| 0   | 0   | 2 NA           |
| 0   | 0   | 0 NA           |
| 0   | 2   | 0 PITG_06682   |
| 65  | 0   | 16 NA          |
| 0   | 4   | 24 PITG_13644  |
| 0   | 0   | 0 PITG_22117   |
| 0   | 18  | 5 PITG_16527   |
| 0   | 33  | 12 PITG_19219  |
| 0   | 2   | 22 PITG_04725  |
| 104 | 36  | 70 NA          |
| 0   | 32  | 9 PITG_08095   |
| 0   | 10  | 6 NA           |
| 0   | 2   | 0 PITG_16930   |
| 0   | 2   | 0 PITG_16900   |
| 0   | 16  | 14 NA          |
| 0   | 21  | 6 NA           |
| 0   | 25  | 6 PITG_03707   |
| 0   | 39  | 4 PITG_03618   |
| 0   | 0   | 7 PITG_20257   |
| 0   | 85  | 28 NA          |
| 0   | 5   | 4 PITG_06796   |
| 0   | 2   | 2 PITG_07026   |
| 0   | 98  | 92 PITG_08612  |
| 0   | 8   | 0 NA           |
| 0   | 0   | 4 PITG_00476   |
| 0   | 8   | 20 PITG_16020  |

|    |     |               |
|----|-----|---------------|
| 0  | 6   | 2 NA          |
| 0  | 22  | 34 PITG_15860 |
| 0  | 7   | 0 PITG_00006  |
| 0  | 5   | 6 PITG_03818  |
| 0  | 0   | 2 PITG_08031  |
| 0  | 4   | 8 NA          |
| 0  | 0   | 0 PITG_08258  |
| 0  | 9   | 0 PITG_16009  |
| 0  | 7   | 0 PITG_03261  |
| 0  | 0   | 19 PITG_16152 |
| 0  | 0   | 2 PITG_05315  |
| 0  | 17  | 2 PITG_02866  |
| 0  | 16  | 2 PITG_17651  |
| 0  | 4   | 25 PITG_20796 |
| 0  | 8   | 40 PITG_13644 |
| 0  | 10  | 6 PITG_16562  |
| 0  | 8   | 2 PITG_15970  |
| 0  | 3   | 31 PITG_06108 |
| 0  | 12  | 13 PITG_01860 |
| 0  | 2   | 0 PITG_05331  |
| 0  | 6   | 25 PITG_18246 |
| 0  | 7   | 2 PITG_03756  |
| 0  | 2   | 9 PITG_09278  |
| 0  | 37  | 15 PITG_06356 |
| 0  | 4   | 4 PITG_10912  |
| 0  | 9   | 21 PITG_09287 |
| 51 | 120 | 184 NA        |
| 0  | 0   | 2 PITG_14600  |
| 0  | 78  | 407 NA        |
| 0  | 6   | 0 NA          |
| 0  | 7   | 6 PITG_13437  |
| 0  | 27  | 27 PITG_05551 |
| 0  | 4   | 0 NA          |
| 0  | 0   | 0 NA          |
| 0  | 7   | 26 PITG_07036 |
| 0  | 29  | 7 PITG_04403  |
| 0  | 124 | 83 PITG_11364 |
| 0  | 12  | 29 PITG_03459 |
| 0  | 2   | 0 PITG_18632  |
| 0  | 11  | 7 PITG_08643  |
| 0  | 166 | 81 PITG_16210 |
| 0  | 7   | 2 PITG_01952  |
| 0  | 153 | 64 PITG_13016 |
| 0  | 112 | 9 PITG_20593  |
| 0  | 2   | 0 PITG_20205  |
| 0  | 24  | 35 PITG_19038 |
| 0  | 9   | 3 PITG_15486  |

|   |    |                |
|---|----|----------------|
| 0 | 2  | 4 PITG_03594   |
| 0 | 2  | 0 PITG_17965   |
| 0 | 24 | 0 PITG_01211   |
| 0 | 3  | 0 PITG_18641   |
| 0 | 3  | 5 PITG_08736   |
| 0 | 43 | 18 PITG_07888  |
| 0 | 5  | 0 PITG_17387   |
| 0 | 71 | 15 PITG_10163  |
| 0 | 8  | 0 PITG_16729   |
| 0 | 2  | 0 PITG_09428   |
| 0 | 0  | 0 PITG_01963   |
| 0 | 0  | 4 PITG_10191   |
| 0 | 0  | 18 PITG_03710  |
| 0 | 5  | 0 PITG_17084   |
| 0 | 5  | 5 PITG_01074   |
| 0 | 2  | 5 PITG_16359   |
| 0 | 13 | 103 PITG_15504 |
| 0 | 2  | 22 PITG_04603  |
| 0 | 0  | 0 PITG_13226   |
| 0 | 0  | 2 PITG_09889   |
| 0 | 4  | 0 PITG_08393   |
| 0 | 29 | 6 PITG_00119   |
| 0 | 39 | 10 PITG_22253  |
| 0 | 4  | 2 PITG_09378   |
| 0 | 30 | 0 PITG_06939   |
| 0 | 41 | 4 PITG_09528   |
| 8 | 26 | 4 NA           |
| 0 | 27 | 2 PITG_16526   |
| 0 | 7  | 7 PITG_11592   |
| 0 | 2  | 2 PITG_05855   |
| 0 | 2  | 0 PITG_09851   |
| 0 | 0  | 2 PITG_07874   |
| 0 | 12 | 4 PITG_15570   |
| 0 | 4  | 5 PITG_17966   |
| 0 | 6  | 0 PITG_18175   |
| 0 | 5  | 8 PITG_10275   |
| 0 | 23 | 28 NA          |
| 0 | 10 | 25 PITG_16116  |
| 0 | 10 | 0 PITG_11155   |
| 0 | 6  | 7 PITG_14586   |
| 0 | 0  | 0 NA           |
| 0 | 0  | 2 PITG_08026   |
| 0 | 4  | 6 PITG_14097   |
| 0 | 16 | 31 PITG_09872  |
| 0 | 13 | 2 PITG_19419   |
| 0 | 8  | 8 PITG_12537   |
| 0 | 4  | 6 PITG_09787   |



|    |     |               |
|----|-----|---------------|
| 0  | 0   | 0 PITG_04538  |
| 0  | 7   | 0 NA          |
| 0  | 38  | 23 PITG_19006 |
| 0  | 19  | 13 PITG_00117 |
| 0  | 6   | 14 PITG_08024 |
| 0  | 24  | 12 PITG_17049 |
| 0  | 31  | 15 PITG_06772 |
| 0  | 8   | 3 PITG_07060  |
| 0  | 2   | 2 NA          |
| 0  | 30  | 26 PITG_01970 |
| 0  | 283 | 50 PITG_22795 |
| 0  | 23  | 2 NA          |
| 0  | 0   | 4 PITG_13613  |
| 0  | 0   | 7 PITG_03329  |
| 2  | 74  | 52 NA         |
| 0  | 20  | 10 NA         |
| 0  | 0   | 4 PITG_07007  |
| 0  | 0   | 0 PITG_02563  |
| 0  | 7   | 0 NA          |
| 0  | 0   | 2 PITG_21077  |
| 0  | 0   | 0 PITG_03830  |
| 0  | 0   | 0 PITG_00692  |
| 0  | 22  | 6 PITG_17289  |
| 0  | 0   | 12 PITG_19005 |
| 0  | 10  | 0 NA          |
| 0  | 6   | 4 PITG_18815  |
| 0  | 21  | 10 PITG_08205 |
| 0  | 24  | 28 PITG_13939 |
| 0  | 27  | 63 PITG_06986 |
| 0  | 0   | 6 PITG_16818  |
| 0  | 64  | 37 PITG_00880 |
| 0  | 29  | 0 PITG_09365  |
| 0  | 0   | 0 PITG_13827  |
| 0  | 0   | 6 PITG_10524  |
| 0  | 2   | 0 PITG_11010  |
| 0  | 0   | 0 PITG_02749  |
| 0  | 9   | 0 PITG_01520  |
| 0  | 25  | 7 PITG_17651  |
| 0  | 0   | 0 PITG_04489  |
| 16 | 0   | 3 NA          |
| 0  | 0   | 0 PITG_06480  |
| 0  | 54  | 19 PITG_13392 |
| 0  | 0   | 0 PITG_13083  |
| 0  | 0   | 0 PITG_13997  |
| 0  | 0   | 8 PITG_17589  |
| 38 | 3   | 58 NA         |
| 0  | 9   | 4 PITG_18456  |

|     |     |                |
|-----|-----|----------------|
| 0   | 3   | 7 PITG_07312   |
| 122 | 16  | 111 NA         |
| 0   | 2   | 8 PITG_13439   |
| 0   | 0   | 0 PITG_09097   |
| 0   | 42  | 12 NA          |
| 0   | 0   | 2 NA           |
| 0   | 31  | 20 NA          |
| 0   | 5   | 0 PITG_07916   |
| 0   | 28  | 20 PITG_20235  |
| 0   | 76  | 70 NA          |
| 0   | 0   | 4 PITG_10417   |
| 0   | 0   | 0 PITG_09483   |
| 0   | 8   | 11 PITG_12463  |
| 0   | 21  | 20 PITG_16841  |
| 0   | 22  | 2 PITG_03487   |
| 0   | 32  | 6 NA           |
| 0   | 5   | 14 PITG_00651  |
| 0   | 3   | 2 PITG_02497   |
| 0   | 0   | 0 NA           |
| 0   | 2   | 7 NA           |
| 0   | 22  | 21 PITG_02343  |
| 0   | 6   | 0 PITG_10508   |
| 0   | 59  | 10 PITG_09035  |
| 0   | 5   | 19 PITG_18080  |
| 0   | 8   | 5 NA           |
| 0   | 0   | 4 PITG_01852   |
| 0   | 0   | 4 NA           |
| 0   | 24  | 13 PITG_02947  |
| 0   | 2   | 0 PITG_05488   |
| 0   | 3   | 5 PITG_06424   |
| 0   | 2   | 12 PITG_02124  |
| 0   | 4   | 0 PITG_18463   |
| 0   | 0   | 0 PITG_17632   |
| 0   | 15  | 4 PITG_15629   |
| 0   | 0   | 0 PITG_01282   |
| 0   | 5   | 0 PITG_11796   |
| 0   | 18  | 5 NA           |
| 0   | 8   | 83 PITG_20970  |
| 0   | 2   | 0 PITG_09360   |
| 0   | 3   | 4 PITG_22203   |
| 0   | 11  | 22 PITG_02528  |
| 0   | 14  | 13 PITG_11139  |
| 0   | 287 | 134 PITG_15549 |
| 0   | 2   | 2 PITG_10264   |
| 0   | 13  | 13 NA          |
| 0   | 15  | 30 PITG_06992  |
| 0   | 26  | 23 PITG_19804  |

|   |    |               |
|---|----|---------------|
| 0 | 8  | 5 PITG_19229  |
| 0 | 7  | 24 PITG_03112 |
| 0 | 5  | 0 PITG_22687  |
| 0 | 12 | 9 NA          |
| 0 | 11 | 3 PITG_02052  |
| 0 | 0  | 2 PITG_03468  |
| 0 | 22 | 4 NA          |
| 0 | 2  | 13 PITG_04936 |
| 0 | 2  | 2 PITG_18464  |
| 0 | 38 | 50 PITG_16058 |
| 0 | 7  | 6 PITG_09898  |
| 0 | 5  | 0 NA          |
| 0 | 65 | 90 PITG_14440 |
| 0 | 0  | 0 PITG_08984  |
| 0 | 0  | 6 NA          |
| 0 | 2  | 8 PITG_17025  |
| 0 | 6  | 27 PITG_00980 |
| 0 | 13 | 0 NA          |
| 0 | 0  | 5 PITG_10758  |
| 0 | 11 | 3 PITG_14925  |
| 0 | 0  | 0 PITG_05298  |
| 0 | 0  | 2 PITG_06755  |
| 0 | 2  | 0 PITG_14436  |
| 0 | 35 | 4 PITG_14977  |
| 0 | 32 | 0 PITG_16357  |
| 0 | 16 | 6 PITG_15867  |
| 0 | 2  | 0 NA          |
| 0 | 24 | 46 PITG_04959 |
| 0 | 29 | 15 NA         |
| 0 | 4  | 16 PITG_08019 |
| 0 | 14 | 2 PITG_06829  |
| 0 | 23 | 59 PITG_10729 |
| 0 | 6  | 0 NA          |
| 0 | 41 | 6 PITG_12571  |
| 0 | 36 | 13 PITG_01932 |
| 3 | 0  | 0 NA          |
| 0 | 2  | 4 PITG_09522  |
| 0 | 0  | 19 PITG_01718 |
| 0 | 4  | 4 PITG_12903  |
| 0 | 0  | 0 NA          |
| 0 | 22 | 4 PITG_04553  |
| 0 | 0  | 0 PITG_07968  |
| 0 | 0  | 0 PITG_00399  |
| 0 | 8  | 12 PITG_11143 |
| 0 | 7  | 0 PITG_21014  |
| 0 | 3  | 0 PITG_19875  |
| 0 | 2  | 11 PITG_03565 |

|   |     |                |
|---|-----|----------------|
| 0 | 4   | 6 PITG_05504   |
| 0 | 15  | 10 PITG_04003  |
| 0 | 0   | 4 PITG_03505   |
| 0 | 10  | 5 PITG_19672   |
| 0 | 20  | 26 PITG_01322  |
| 0 | 0   | 0 PITG_17928   |
| 0 | 10  | 14 NA          |
| 0 | 28  | 12 NA          |
| 0 | 2   | 0 PITG_02134   |
| 0 | 5   | 4 NA           |
| 0 | 11  | 0 PITG_17348   |
| 0 | 10  | 0 PITG_02258   |
| 0 | 0   | 2 NA           |
| 0 | 9   | 13 PITG_07700  |
| 0 | 0   | 3 PITG_17262   |
| 0 | 15  | 4 PITG_14905   |
| 0 | 170 | 208 PITG_15154 |
| 0 | 2   | 2 PITG_19182   |
| 0 | 16  | 0 PITG_06967   |
| 0 | 0   | 4 PITG_07286   |
| 0 | 0   | 2 PITG_14853   |
| 0 | 5   | 0 PITG_16984   |
| 0 | 8   | 0 PITG_08197   |
| 0 | 14  | 2 PITG_18085   |
| 0 | 4   | 0 PITG_08736   |
| 0 | 0   | 6 PITG_06972   |
| 0 | 17  | 31 NA          |
| 0 | 2   | 2 PITG_23007   |
| 0 | 0   | 0 PITG_05631   |
| 0 | 0   | 0 PITG_00274   |
| 0 | 10  | 14 PITG_11675  |
| 0 | 2   | 2 NA           |
| 0 | 9   | 8 PITG_02731   |
| 0 | 31  | 65 PITG_16766  |
| 0 | 4   | 0 NA           |
| 0 | 37  | 17 PITG_10561  |
| 0 | 4   | 2 PITG_20537   |
| 0 | 16  | 9 PITG_13771   |
| 0 | 25  | 6 NA           |
| 0 | 35  | 42 PITG_10290  |
| 0 | 0   | 0 NA           |
| 0 | 10  | 0 PITG_10389   |
| 0 | 0   | 5 PITG_13064   |
| 0 | 28  | 4 PITG_03915   |
| 0 | 2   | 2 PITG_13544   |
| 0 | 15  | 8 PITG_03364   |
| 0 | 130 | 36 PITG_18066  |

|    |    |                |
|----|----|----------------|
| 0  | 17 | 2 NA           |
| 0  | 12 | 3 NA           |
| 0  | 6  | 39 PITG_16736  |
| 0  | 13 | 2 PITG_13988   |
| 0  | 33 | 219 PITG_15850 |
| 0  | 2  | 0 PITG_20977   |
| 0  | 4  | 0 PITG_11403   |
| 0  | 60 | 32 PITG_03307  |
| 0  | 0  | 2 PITG_17556   |
| 0  | 0  | 5 PITG_02683   |
| 0  | 6  | 0 PITG_13289   |
| 0  | 2  | 6 NA           |
| 0  | 22 | 4 PITG_07051   |
| 0  | 4  | 4 PITG_05278   |
| 0  | 0  | 2 PITG_05260   |
| 0  | 2  | 3 PITG_14951   |
| 0  | 14 | 32 PITG_07955  |
| 0  | 25 | 0 NA           |
| 0  | 16 | 16 PITG_20688  |
| 0  | 6  | 2 PITG_01647   |
| 0  | 12 | 0 NA           |
| 0  | 0  | 0 PITG_07655   |
| 0  | 14 | 2 PITG_15223   |
| 0  | 5  | 3 PITG_20251   |
| 0  | 3  | 15 PITG_03246  |
| 0  | 24 | 21 PITG_20977  |
| 0  | 24 | 13 PITG_05189  |
| 0  | 2  | 0 PITG_10010   |
| 0  | 25 | 0 PITG_02617   |
| 0  | 2  | 0 PITG_06867   |
| 0  | 2  | 2 PITG_14257   |
| 0  | 0  | 24 PITG_12215  |
| 0  | 0  | 2 PITG_01244   |
| 0  | 4  | 0 NA           |
| 0  | 0  | 0 PITG_18826   |
| 0  | 7  | 16 PITG_11461  |
| 69 | 9  | 454 NA         |
| 0  | 7  | 0 NA           |
| 0  | 25 | 43 PITG_05317  |
| 31 | 22 | 32 NA          |
| 0  | 0  | 0 PITG_08742   |
| 0  | 0  | 0 NA           |
| 0  | 3  | 2 PITG_13188   |
| 0  | 5  | 7 NA           |
| 0  | 4  | 2 PITG_06429   |
| 0  | 4  | 0 PITG_13157   |
| 0  | 2  | 0 PITG_12296   |

|     |     |                |
|-----|-----|----------------|
| 0   | 42  | 18 PITG_06773  |
| 0   | 4   | 9 PITG_00636   |
| 0   | 118 | 50 PITG_05621  |
| 0   | 0   | 0 PITG_03911   |
| 0   | 20  | 4 PITG_11812   |
| 0   | 16  | 46 PITG_13402  |
| 0   | 14  | 24 PITG_09950  |
| 0   | 2   | 0 PITG_04133   |
| 0   | 11  | 37 PITG_09349  |
| 0   | 7   | 10 PITG_04185  |
| 0   | 36  | 9 PITG_12175   |
| 0   | 17  | 13 PITG_05532  |
| 0   | 2   | 8 NA           |
| 0   | 0   | 2 PITG_18977   |
| 0   | 0   | 0 PITG_03095   |
| 0   | 0   | 0 PITG_03523   |
| 0   | 0   | 0 PITG_12162   |
| 0   | 11  | 7 PITG_03740   |
| 0   | 8   | 0 PITG_00228   |
| 0   | 10  | 21 PITG_18248  |
| 0   | 33  | 8 PITG_04289   |
| 0   | 0   | 5 PITG_06610   |
| 0   | 2   | 0 PITG_12213   |
| 0   | 2   | 2 PITG_01358   |
| 0   | 0   | 0 PITG_17936   |
| 0   | 2   | 2 PITG_17006   |
| 0   | 13  | 0 PITG_01490   |
| 0   | 25  | 0 PITG_12275   |
| 0   | 21  | 31 PITG_01947  |
| 0   | 0   | 2 PITG_06614   |
| 0   | 30  | 5 PITG_19254   |
| 0   | 0   | 0 PITG_01034   |
| 0   | 2   | 0 NA           |
| 0   | 18  | 0 NA           |
| 0   | 0   | 0 PITG_01848   |
| 0   | 104 | 0 PITG_15502   |
| 0   | 6   | 2 PITG_11272   |
| 0   | 2   | 0 PITG_06827   |
| 0   | 124 | 168 PITG_12577 |
| 0   | 5   | 5 PITG_08473   |
| 0   | 2   | 5 PITG_02036   |
| 0   | 0   | 4 NA           |
| 0   | 90  | 26 PITG_04562  |
| 0   | 4   | 4 PITG_14181   |
| 513 | 10  | 462 NA         |
| 0   | 14  | 13 PITG_08935  |
| 0   | 4   | 4 NA           |

|     |     |                |
|-----|-----|----------------|
| 0   | 160 | 133 NA         |
| 0   | 0   | 83 PITG_08601  |
| 0   | 6   | 14 PITG_14602  |
| 0   | 23  | 18 PITG_03432  |
| 0   | 0   | 0 PITG_02495   |
| 0   | 99  | 72 PITG_12577  |
| 0   | 2   | 0 PITG_06240   |
| 0   | 4   | 0 PITG_07562   |
| 0   | 9   | 3 PITG_08229   |
| 0   | 5   | 0 PITG_15649   |
| 0   | 16  | 8 PITG_20617   |
| 0   | 15  | 14 NA          |
| 0   | 4   | 3 NA           |
| 0   | 0   | 0 PITG_12855   |
| 0   | 0   | 4 PITG_16036   |
| 0   | 10  | 4 PITG_02254   |
| 0   | 4   | 2 PITG_16026   |
| 0   | 122 | 19 PITG_17017  |
| 0   | 21  | 11 PITG_01798  |
| 0   | 0   | 4 PITG_03458   |
| 0   | 33  | 14 PITG_07951  |
| 697 | 25  | 1384 NA        |
| 0   | 18  | 2 PITG_17087   |
| 5   | 0   | 2 NA           |
| 0   | 0   | 17 PITG_10462  |
| 0   | 0   | 0 PITG_09789   |
| 0   | 0   | 0 PITG_01774   |
| 0   | 24  | 4 PITG_18797   |
| 0   | 0   | 4 PITG_21727   |
| 0   | 7   | 2 PITG_11862   |
| 0   | 12  | 2 PITG_05763   |
| 0   | 2   | 4 PITG_01450   |
| 26  | 7   | 30 NA          |
| 0   | 4   | 5 PITG_16798   |
| 0   | 19  | 16 PITG_14066  |
| 0   | 33  | 6 NA           |
| 0   | 10  | 12 PITG_10083  |
| 0   | 16  | 192 PITG_00608 |
| 0   | 9   | 14 PITG_14514  |
| 0   | 9   | 8 PITG_14257   |
| 0   | 3   | 0 PITG_03659   |
| 0   | 7   | 33 PITG_06538  |
| 0   | 24  | 2 NA           |
| 0   | 3   | 0 PITG_05869   |
| 0   | 142 | 74 PITG_10384  |
| 0   | 0   | 11 PITG_01815  |
| 0   | 14  | 8 PITG_20994   |

|   |     |                |
|---|-----|----------------|
| 0 | 26  | 16 PITG_04179  |
| 0 | 3   | 0 PITG_01958   |
| 0 | 3   | 8 PITG_10986   |
| 0 | 0   | 0 PITG_05855   |
| 0 | 0   | 0 PITG_13831   |
| 0 | 0   | 2 NA           |
| 0 | 4   | 11 PITG_09599  |
| 0 | 59  | 21 PITG_19349  |
| 0 | 3   | 0 PITG_14484   |
| 0 | 2   | 0 NA           |
| 0 | 6   | 42 PITG_01450  |
| 0 | 2   | 4 PITG_13235   |
| 0 | 9   | 2 PITG_12677   |
| 0 | 6   | 0 PITG_18274   |
| 0 | 8   | 7 NA           |
| 0 | 11  | 4 PITG_08684   |
| 0 | 4   | 4 PITG_03236   |
| 0 | 15  | 0 NA           |
| 0 | 4   | 2 NA           |
| 2 | 40  | 14 PITG_13029  |
| 0 | 0   | 6 NA           |
| 0 | 13  | 32 PITG_08002  |
| 0 | 9   | 4 PITG_02110   |
| 0 | 17  | 42 PITG_03472  |
| 0 | 24  | 12 PITG_19387  |
| 0 | 9   | 0 PITG_00186   |
| 0 | 3   | 4 NA           |
| 0 | 15  | 17 NA          |
| 0 | 2   | 2 NA           |
| 0 | 0   | 9 PITG_05822   |
| 0 | 7   | 0 PITG_01111   |
| 0 | 0   | 0 NA           |
| 0 | 10  | 0 PITG_13367   |
| 0 | 0   | 0 PITG_15672   |
| 0 | 387 | 387 PITG_03612 |
| 0 | 2   | 5 PITG_10014   |
| 0 | 0   | 4 PITG_12319   |
| 0 | 5   | 0 NA           |
| 0 | 15  | 0 NA           |
| 0 | 0   | 0 PITG_11272   |
| 0 | 2   | 2 PITG_02143   |
| 0 | 0   | 0 NA           |
| 0 | 98  | 36 PITG_03588  |
| 0 | 2   | 0 PITG_13319   |
| 0 | 4   | 0 NA           |
| 0 | 17  | 12 PITG_20683  |
| 0 | 8   | 2 PITG_17080   |



|      |     |                |
|------|-----|----------------|
| 0    | 245 | 118 PITG_07717 |
| 923  | 10  | 98 NA          |
| 0    | 15  | 33 PITG_10450  |
| 0    | 21  | 16 PITG_01681  |
| 0    | 17  | 51 PITG_21581  |
| 0    | 343 | 98 PITG_04381  |
| 0    | 0   | 2 PITG_04603   |
| 0    | 0   | 0 PITG_04910   |
| 0    | 0   | 3 PITG_13803   |
| 0    | 4   | 2 PITG_08028   |
| 0    | 18  | 0 PITG_02464   |
| 0    | 0   | 2 PITG_11020   |
| 0    | 0   | 2 PITG_06274   |
| 0    | 2   | 17 PITG_05377  |
| 0    | 3   | 4 PITG_02290   |
| 0    | 0   | 0 PITG_07531   |
| 0    | 0   | 9 PITG_12598   |
| 0    | 3   | 2 NA           |
| 0    | 0   | 10 PITG_02044  |
| 0    | 26  | 5 PITG_07915   |
| 0    | 6   | 2 NA           |
| 0    | 2   | 0 PITG_08408   |
| 0    | 2   | 5 PITG_18328   |
| 0    | 25  | 4 PITG_00560   |
| 0    | 0   | 2 PITG_00477   |
| 0    | 11  | 6 PITG_05002   |
| 0    | 0   | 0 NA           |
| 0    | 10  | 0 PITG_08850   |
| 0    | 4   | 55 PITG_00807  |
| 2228 | 0   | 212 NA         |
| 0    | 0   | 0 PITG_07045   |
| 0    | 16  | 73 NA          |
| 0    | 10  | 17 PITG_18328  |
| 0    | 2   | 0 PITG_17554   |
| 0    | 4   | 0 PITG_18973   |
| 0    | 15  | 4 NA           |
| 982  | 0   | 32 NA          |
| 0    | 5   | 2 PITG_03832   |
| 0    | 93  | 38 PITG_12233  |
| 0    | 2   | 2 PITG_15875   |
| 0    | 2   | 10 PITG_08926  |
| 0    | 2   | 10 PITG_13029  |
| 0    | 6   | 8 PITG_02127   |
| 0    | 2   | 0 PITG_02932   |
| 0    | 29  | 27 PITG_02196  |
| 0    | 0   | 0 PITG_11016   |
| 0    | 16  | 92 PITG_04862  |

|     |     |               |
|-----|-----|---------------|
| 0   | 0   | 0 PITG_11884  |
| 0   | 0   | 0 PITG_04658  |
| 0   | 4   | 10 PITG_08867 |
| 0   | 39  | 57 PITG_19281 |
| 0   | 16  | 4 NA          |
| 0   | 0   | 5 PITG_05559  |
| 0   | 0   | 9 PITG_00163  |
| 0   | 2   | 3 PITG_17003  |
| 0   | 2   | 0 NA          |
| 0   | 0   | 3 PITG_00407  |
| 0   | 11  | 0 PITG_15228  |
| 0   | 47  | 17 PITG_13766 |
| 0   | 7   | 20 PITG_17068 |
| 0   | 0   | 0 NA          |
| 0   | 11  | 6 PITG_21351  |
| 0   | 7   | 0 NA          |
| 0   | 0   | 2 PITG_16810  |
| 112 | 6   | 177 NA        |
| 0   | 44  | 13 PITG_00315 |
| 0   | 131 | 68 PITG_16214 |
| 0   | 7   | 6 NA          |
| 0   | 6   | 30 PITG_02663 |
| 0   | 4   | 4 PITG_00171  |
| 0   | 2   | 0 PITG_19965  |
| 0   | 5   | 17 PITG_02924 |
| 0   | 0   | 0 PITG_11643  |
| 0   | 28  | 15 PITG_16745 |
| 0   | 17  | 0 PITG_13830  |
| 0   | 2   | 0 NA          |
| 0   | 37  | 4 PITG_12177  |
| 0   | 5   | 0 PITG_04746  |
| 0   | 0   | 3 PITG_03710  |
| 0   | 0   | 0 PITG_04057  |
| 0   | 5   | 5 PITG_01069  |
| 0   | 4   | 0 NA          |
| 0   | 2   | 0 NA          |
| 0   | 13  | 0 PITG_18301  |
| 0   | 0   | 48 PITG_02786 |
| 0   | 0   | 0 PITG_11437  |
| 0   | 0   | 0 PITG_07767  |
| 0   | 15  | 2 NA          |
| 0   | 42  | 5 NA          |
| 0   | 297 | 77 NA         |
| 0   | 7   | 4 PITG_01673  |
| 0   | 4   | 2 PITG_00687  |
| 0   | 0   | 0 PITG_15820  |
| 0   | 6   | 2 PITG_10449  |

|     |     |                |
|-----|-----|----------------|
| 0   | 171 | 223 PITG_00668 |
| 0   | 0   | 2 PITG_14006   |
| 0   | 20  | 6 PITG_17866   |
| 0   | 14  | 2 PITG_11674   |
| 0   | 2   | 4 PITG_02135   |
| 0   | 13  | 0 NA           |
| 0   | 49  | 15 PITG_08461  |
| 0   | 2   | 21 PITG_02917  |
| 0   | 14  | 37 PITG_03938  |
| 0   | 0   | 6 NA           |
| 0   | 169 | 138 PITG_16477 |
| 0   | 11  | 6 NA           |
| 0   | 15  | 9 PITG_14994   |
| 0   | 7   | 0 PITG_03899   |
| 0   | 4   | 22 NA          |
| 0   | 0   | 2 PITG_19533   |
| 0   | 59  | 15 PITG_04483  |
| 0   | 10  | 10 PITG_16114  |
| 0   | 5   | 2 PITG_04918   |
| 0   | 17  | 3 NA           |
| 0   | 0   | 2 NA           |
| 0   | 2   | 6 PITG_03390   |
| 0   | 63  | 67 PITG_18378  |
| 0   | 6   | 4 PITG_17265   |
| 0   | 0   | 4 PITG_04564   |
| 188 | 3   | 455 NA         |
| 0   | 9   | 0 PITG_05882   |
| 0   | 10  | 20 PITG_21166  |
| 0   | 17  | 32 NA          |
| 0   | 4   | 4 PITG_17160   |
| 0   | 0   | 0 PITG_15883   |
| 0   | 0   | 0 PITG_04820   |
| 0   | 2   | 9 NA           |
| 0   | 53  | 25 PITG_13270  |
| 0   | 2   | 4 PITG_06437   |
| 0   | 19  | 2 PITG_17021   |
| 0   | 45  | 0 NA           |
| 0   | 8   | 10 PITG_06611  |
| 0   | 10  | 4 PITG_18902   |
| 0   | 10  | 11 PITG_05818  |
| 0   | 23  | 10 PITG_13845  |
| 0   | 4   | 40 PITG_14557  |
| 0   | 0   | 3 NA           |
| 0   | 12  | 6 NA           |
| 0   | 9   | 0 NA           |
| 0   | 9   | 6 PITG_15505   |
| 341 | 41  | 907 NA         |

|    |     |               |
|----|-----|---------------|
| 0  | 0   | 0 PITG_09413  |
| 0  | 0   | 0 NA          |
| 0  | 7   | 2 PITG_06692  |
| 0  | 0   | 3 PITG_15228  |
| 0  | 2   | 4 PITG_21724  |
| 0  | 0   | 0 PITG_09292  |
| 0  | 12  | 3 PITG_03297  |
| 0  | 2   | 6 PITG_00524  |
| 0  | 0   | 5 PITG_10821  |
| 36 | 13  | 69 NA         |
| 0  | 39  | 4 NA          |
| 8  | 8   | 0 NA          |
| 0  | 15  | 8 NA          |
| 0  | 34  | 2 NA          |
| 0  | 5   | 0 NA          |
| 0  | 12  | 4 PITG_01961  |
| 0  | 4   | 8 PITG_19213  |
| 0  | 72  | 10 NA         |
| 0  | 13  | 12 NA         |
| 0  | 9   | 7 PITG_12933  |
| 0  | 236 | 18 PITG_08395 |
| 0  | 2   | 0 PITG_12148  |
| 0  | 35  | 4 PITG_00858  |
| 39 | 48  | 104 NA        |
| 0  | 0   | 2 PITG_20035  |
| 0  | 93  | 18 PITG_05902 |
| 0  | 4   | 0 NA          |
| 0  | 0   | 3 NA          |
| 0  | 4   | 0 PITG_02797  |
| 0  | 55  | 4 PITG_11329  |
| 0  | 0   | 6 PITG_14277  |
| 0  | 0   | 9 PITG_04133  |
| 0  | 27  | 71 PITG_14274 |
| 0  | 2   | 5 PITG_18940  |
| 0  | 68  | 46 NA         |
| 0  | 17  | 8 PITG_10898  |
| 0  | 0   | 0 PITG_04725  |
| 0  | 0   | 2 PITG_07385  |
| 0  | 6   | 6 PITG_11780  |
| 0  | 3   | 6 PITG_01692  |
| 0  | 5   | 5 PITG_05244  |
| 0  | 4   | 9 NA          |
| 0  | 8   | 2 PITG_12714  |
| 0  | 69  | 6 PITG_00190  |
| 0  | 30  | 19 NA         |
| 0  | 10  | 3 NA          |
| 0  | 4   | 4 PITG_05469  |

|     |    |               |
|-----|----|---------------|
| 0   | 27 | 32 PITG_01839 |
| 0   | 15 | 14 PITG_05655 |
| 0   | 3  | 4 NA          |
| 139 | 23 | 199 NA        |
| 2   | 2  | 0 NA          |
| 0   | 14 | 13 PITG_06329 |
| 0   | 57 | 67 PITG_08794 |
| 0   | 6  | 2 NA          |
| 0   | 0  | 4 PITG_13903  |
| 0   | 3  | 35 PITG_03501 |
| 0   | 20 | 4 PITG_18359  |
| 0   | 27 | 2 PITG_02024  |
| 0   | 61 | 0 PITG_02017  |
| 0   | 8  | 28 PITG_10083 |
| 0   | 19 | 15 PITG_08394 |
| 0   | 2  | 0 PITG_06846  |
| 0   | 0  | 5 PITG_14887  |
| 0   | 17 | 17 PITG_01154 |
| 0   | 7  | 10 PITG_16903 |
| 0   | 11 | 7 PITG_01778  |
| 0   | 3  | 4 NA          |
| 0   | 24 | 27 PITG_09279 |
| 0   | 6  | 0 PITG_04037  |
| 0   | 52 | 17 PITG_18798 |
| 0   | 26 | 9 NA          |
| 0   | 0  | 2 NA          |
| 0   | 3  | 3 PITG_03396  |
| 0   | 9  | 6 PITG_07349  |
| 0   | 2  | 4 PITG_04289  |
| 0   | 18 | 29 PITG_07795 |
| 0   | 0  | 10 PITG_17617 |
| 0   | 4  | 0 PITG_02723  |
| 0   | 2  | 4 PITG_12226  |
| 0   | 0  | 2 PITG_08013  |
| 0   | 4  | 10 NA         |
| 0   | 2  | 21 PITG_00744 |
| 0   | 2  | 2 NA          |
| 0   | 20 | 15 PITG_02895 |
| 0   | 6  | 4 NA          |
| 0   | 0  | 2 PITG_00231  |
| 0   | 0  | 0 PITG_13546  |
| 0   | 0  | 0 PITG_02380  |
| 0   | 0  | 8 PITG_10118  |
| 100 | 26 | 202 NA        |
| 0   | 0  | 0 PITG_10903  |
| 0   | 0  | 0 PITG_02264  |
| 0   | 0  | 2 PITG_08305  |

|   |     |               |
|---|-----|---------------|
| 0 | 116 | 59 NA         |
| 0 | 0   | 0 PITG_07848  |
| 0 | 7   | 4 PITG_00495  |
| 0 | 42  | 4 PITG_05547  |
| 0 | 39  | 0 PITG_02178  |
| 0 | 0   | 7 PITG_11124  |
| 0 | 4   | 0 PITG_08408  |
| 0 | 0   | 3 PITG_05450  |
| 0 | 8   | 25 PITG_10980 |
| 0 | 0   | 0 PITG_05742  |
| 0 | 0   | 8 PITG_05461  |
| 0 | 0   | 0 NA          |
| 0 | 0   | 0 NA          |
| 0 | 0   | 2 NA          |
| 0 | 9   | 48 PITG_10442 |
| 0 | 0   | 0 NA          |
| 0 | 12  | 10 PITG_13367 |
| 0 | 2   | 5 PITG_05856  |
| 0 | 14  | 99 PITG_17540 |
| 0 | 55  | 20 PITG_00466 |
| 0 | 6   | 2 PITG_04638  |
| 0 | 5   | 2 PITG_15644  |
| 0 | 2   | 0 NA          |
| 0 | 0   | 2 PITG_10821  |
| 0 | 0   | 0 PITG_14714  |
| 0 | 0   | 0 PITG_18977  |
| 0 | 4   | 2 NA          |
| 0 | 8   | 13 PITG_02347 |
| 0 | 16  | 22 PITG_10118 |
| 0 | 0   | 2 NA          |
| 0 | 14  | 17 PITG_01781 |
| 0 | 12  | 0 PITG_04439  |
| 0 | 2   | 4 PITG_08100  |
| 0 | 2   | 7 PITG_07243  |
| 0 | 5   | 2 PITG_04877  |
| 0 | 13  | 32 PITG_14141 |
| 0 | 0   | 0 PITG_12757  |
| 0 | 39  | 20 NA         |
| 0 | 0   | 21 PITG_08440 |
| 0 | 6   | 2 PITG_01152  |
| 0 | 35  | 17 PITG_21023 |
| 0 | 8   | 91 PITG_19932 |
| 0 | 0   | 0 PITG_14137  |
| 0 | 45  | 2 PITG_01605  |
| 0 | 5   | 0 PITG_02400  |
| 0 | 43  | 44 PITG_01703 |
| 0 | 4   | 4 PITG_03043  |

|    |     |                |
|----|-----|----------------|
| 0  | 4   | 0 PITG_09247   |
| 0  | 2   | 0 NA           |
| 0  | 113 | 15 NA          |
| 0  | 0   | 11 PITG_01608  |
| 0  | 6   | 2 PITG_23273   |
| 0  | 4   | 0 PITG_00361   |
| 0  | 5   | 27 PITG_11126  |
| 0  | 0   | 0 NA           |
| 0  | 10  | 50 PITG_10768  |
| 0  | 244 | 142 PITG_02621 |
| 0  | 65  | 25 PITG_06410  |
| 0  | 6   | 2 PITG_05732   |
| 30 | 0   | 8 NA           |
| 0  | 2   | 10 PITG_02597  |
| 0  | 7   | 8 PITG_03143   |
| 2  | 8   | 14 NA          |
| 0  | 51  | 10 NA          |
| 0  | 0   | 2 PITG_03459   |
| 0  | 0   | 0 PITG_18296   |
| 0  | 0   | 0 NA           |
| 0  | 26  | 10 PITG_04342  |
| 0  | 0   | 11 NA          |
| 0  | 4   | 2 PITG_02210   |
| 2  | 4   | 7 NA           |
| 0  | 20  | 19 PITG_06247  |
| 0  | 16  | 6 PITG_03563   |
| 0  | 11  | 43 PITG_03575  |
| 0  | 32  | 11 PITG_01595  |
| 0  | 4   | 3 PITG_15619   |
| 0  | 11  | 9 PITG_21763   |
| 0  | 0   | 0 PITG_02824   |
| 0  | 8   | 2 PITG_03846   |
| 0  | 2   | 2 PITG_09954   |
| 0  | 0   | 0 PITG_01961   |
| 0  | 2   | 2 NA           |
| 0  | 7   | 4 PITG_00077   |
| 0  | 5   | 0 PITG_20502   |
| 0  | 164 | 126 PITG_07573 |
| 0  | 11  | 4 NA           |
| 0  | 8   | 4 NA           |
| 0  | 49  | 2 NA           |
| 0  | 6   | 0 NA           |
| 0  | 6   | 7 NA           |
| 0  | 58  | 10 PITG_03782  |
| 0  | 8   | 20 PITG_19774  |
| 0  | 0   | 0 PITG_03008   |
| 0  | 4   | 2 PITG_05595   |

|     |    |               |
|-----|----|---------------|
| 680 | 21 | 461 NA        |
| 0   | 26 | 14 PITG_13793 |
| 0   | 0  | 0 PITG_02696  |
| 0   | 47 | 58 PITG_03574 |
| 0   | 6  | 4 PITG_03482  |
| 0   | 2  | 0 NA          |
| 0   | 4  | 13 PITG_03659 |
| 0   | 4  | 2 PITG_15918  |
| 0   | 26 | 4 PITG_18833  |
| 0   | 50 | 8 PITG_09829  |
| 0   | 0  | 0 PITG_04823  |
| 0   | 0  | 2 PITG_01229  |
| 0   | 28 | 0 PITG_02895  |
| 0   | 0  | 0 NA          |
| 0   | 55 | 4 PITG_02787  |
| 0   | 11 | 64 PITG_23111 |
| 0   | 2  | 5 PITG_10083  |
| 0   | 18 | 16 PITG_11386 |
| 0   | 0  | 0 PITG_17679  |
| 0   | 6  | 27 NA         |
| 0   | 0  | 4 PITG_10911  |
| 0   | 4  | 5 PITG_12463  |
| 0   | 3  | 0 PITG_02744  |
| 0   | 5  | 3 PITG_01624  |
| 0   | 8  | 22 PITG_03753 |
| 0   | 0  | 0 PITG_11857  |
| 0   | 14 | 62 PITG_14230 |
| 0   | 2  | 0 PITG_16527  |
| 0   | 0  | 0 PITG_08049  |
| 0   | 2  | 0 PITG_03043  |
| 0   | 0  | 13 PITG_09439 |
| 0   | 0  | 0 PITG_01450  |
| 0   | 9  | 8 PITG_03989  |
| 0   | 12 | 10 PITG_04485 |
| 0   | 8  | 0 NA          |
| 0   | 4  | 0 PITG_14606  |
| 0   | 2  | 7 PITG_03874  |
| 0   | 48 | 75 PITG_13826 |
| 0   | 0  | 2 PITG_03493  |
| 0   | 0  | 0 PITG_14977  |
| 0   | 0  | 0 PITG_17925  |
| 0   | 22 | 15 NA         |
| 0   | 0  | 13 PITG_18712 |
| 0   | 5  | 16 PITG_00140 |
| 0   | 0  | 0 PITG_14014  |
| 0   | 2  | 8 PITG_07021  |
| 0   | 6  | 72 PITG_12903 |



|   |     |               |
|---|-----|---------------|
| 0 | 5   | 15 PITG_10968 |
| 0 | 0   | 2 PITG_02754  |
| 0 | 13  | 28 PITG_02827 |
| 0 | 9   | 4 NA          |
| 0 | 4   | 14 PITG_15819 |
| 0 | 7   | 5 NA          |
| 0 | 6   | 28 PITG_14173 |
| 0 | 6   | 11 PITG_08607 |
| 0 | 3   | 5 NA          |
| 0 | 0   | 4 NA          |
| 0 | 8   | 6 NA          |
| 0 | 0   | 2 PITG_09789  |
| 0 | 0   | 0 PITG_08473  |
| 0 | 10  | 9 PITG_00573  |
| 0 | 0   | 0 PITG_07573  |
| 0 | 0   | 0 PITG_14973  |
| 0 | 13  | 14 PITG_02561 |
| 0 | 0   | 8 PITG_16483  |
| 0 | 59  | 41 NA         |
| 0 | 0   | 0 PITG_05423  |
| 0 | 2   | 0 NA          |
| 0 | 0   | 0 NA          |
| 0 | 6   | 15 PITG_09428 |
| 0 | 0   | 0 NA          |
| 0 | 0   | 0 PITG_15077  |
| 0 | 15  | 4 PITG_03618  |
| 0 | 0   | 2 PITG_12439  |
| 0 | 0   | 4 PITG_11472  |
| 0 | 0   | 0 PITG_02760  |
| 0 | 25  | 8 PITG_12149  |
| 0 | 4   | 6 NA          |
| 0 | 0   | 0 NA          |
| 0 | 39  | 17 NA         |
| 0 | 6   | 11 PITG_05538 |
| 0 | 15  | 12 PITG_14730 |
| 0 | 3   | 7 PITG_18891  |
| 0 | 7   | 0 PITG_03498  |
| 0 | 0   | 0 PITG_14223  |
| 0 | 2   | 6 PITG_12229  |
| 0 | 33  | 4 PITG_13791  |
| 0 | 263 | 150 NA        |
| 0 | 8   | 6 PITG_09940  |
| 0 | 0   | 0 NA          |
| 0 | 9   | 0 NA          |
| 0 | 10  | 11 PITG_03548 |
| 0 | 0   | 0 PITG_19461  |
| 0 | 9   | 23 PITG_18747 |

|     |    |                |
|-----|----|----------------|
| 0   | 73 | 5 PITG_10857   |
| 0   | 2  | 0 PITG_11424   |
| 0   | 0  | 0 PITG_14950   |
| 0   | 0  | 0 PITG_03411   |
| 0   | 0  | 3 PITG_03311   |
| 0   | 23 | 6 PITG_03630   |
| 0   | 0  | 2 PITG_02456   |
| 0   | 7  | 18 PITG_18322  |
| 0   | 2  | 0 PITG_17994   |
| 0   | 4  | 4 PITG_06782   |
| 0   | 15 | 7 PITG_07868   |
| 0   | 14 | 20 PITG_01784  |
| 0   | 32 | 29 PITG_18650  |
| 0   | 3  | 0 PITG_04497   |
| 0   | 0  | 2 PITG_15267   |
| 0   | 4  | 6 PITG_13079   |
| 0   | 5  | 4 PITG_00110   |
| 0   | 2  | 0 PITG_11728   |
| 0   | 63 | 0 PITG_04626   |
| 0   | 3  | 0 NA           |
| 0   | 15 | 2 PITG_20787   |
| 0   | 4  | 0 PITG_08397   |
| 0   | 0  | 0 PITG_02932   |
| 0   | 0  | 0 PITG_05869   |
| 0   | 0  | 0 PITG_00809   |
| 0   | 64 | 8 PITG_01852   |
| 0   | 4  | 2 PITG_04731   |
| 0   | 0  | 2 NA           |
| 0   | 14 | 0 NA           |
| 0   | 13 | 0 NA           |
| 0   | 11 | 16 PITG_01640  |
| 0   | 26 | 7 NA           |
| 0   | 26 | 20 PITG_12106  |
| 125 | 14 | 153 NA         |
| 0   | 46 | 35 PITG_09315  |
| 0   | 2  | 0 PITG_03757   |
| 0   | 6  | 0 PITG_03097   |
| 0   | 0  | 0 PITG_13397   |
| 0   | 0  | 0 NA           |
| 0   | 20 | 80 PITG_10083  |
| 0   | 4  | 12 PITG_18237  |
| 135 | 4  | 159 NA         |
| 0   | 4  | 3 NA           |
| 0   | 0  | 3 PITG_05818   |
| 0   | 30 | 287 PITG_13301 |
| 0   | 4  | 0 PITG_20866   |
| 3   | 0  | 13 NA          |

|     |     |                |
|-----|-----|----------------|
| 0   | 11  | 12 PITG_13362  |
| 0   | 10  | 6 PITG_08504   |
| 0   | 16  | 6 NA           |
| 0   | 0   | 0 NA           |
| 0   | 0   | 0 NA           |
| 0   | 0   | 2 PITG_18707   |
| 0   | 14  | 4 PITG_07830   |
| 0   | 6   | 6 PITG_04181   |
| 0   | 0   | 2 PITG_13417   |
| 0   | 7   | 6 NA           |
| 0   | 0   | 13 PITG_08031  |
| 0   | 11  | 23 PITG_07985  |
| 0   | 8   | 0 PITG_09678   |
| 0   | 9   | 4 PITG_00315   |
| 0   | 4   | 6 PITG_04564   |
| 0   | 0   | 0 PITG_18251   |
| 0   | 0   | 0 NA           |
| 0   | 0   | 2 PITG_10007   |
| 0   | 10  | 17 PITG_00720  |
| 0   | 2   | 0 PITG_17772   |
| 0   | 12  | 9 NA           |
| 0   | 26  | 24 PITG_21077  |
| 0   | 2   | 2 PITG_16732   |
| 0   | 6   | 17 NA          |
| 0   | 2   | 3 NA           |
| 0   | 2   | 8 NA           |
| 0   | 9   | 11 PITG_09630  |
| 411 | 8   | 522 NA         |
| 0   | 191 | 195 PITG_12153 |
| 0   | 2   | 2 PITG_10343   |
| 0   | 6   | 16 PITG_08235  |
| 0   | 93  | 27 PITG_17457  |
| 0   | 4   | 0 PITG_10173   |
| 0   | 35  | 27 PITG_03789  |
| 0   | 2   | 16 PITG_03453  |
| 0   | 6   | 15 PITG_04242  |
| 0   | 4   | 0 PITG_01819   |
| 0   | 31  | 16 PITG_02134  |
| 0   | 0   | 2 PITG_14197   |
| 0   | 55  | 77 PITG_13007  |
| 0   | 67  | 30 PITG_16801  |
| 0   | 28  | 31 PITG_16036  |
| 0   | 0   | 0 PITG_06758   |
| 0   | 9   | 2 PITG_16917   |
| 0   | 15  | 16 PITG_18038  |
| 0   | 117 | 71 PITG_18884  |
| 0   | 7   | 12 PITG_09564  |

|     |     |               |
|-----|-----|---------------|
| 0   | 0   | 0 PITG_02221  |
| 0   | 3   | 2 PITG_11363  |
| 0   | 12  | 10 PITG_00192 |
| 0   | 16  | 11 PITG_17460 |
| 377 | 37  | 1128 NA       |
| 0   | 4   | 4 PITG_02711  |
| 0   | 0   | 0 NA          |
| 0   | 5   | 4 NA          |
| 0   | 0   | 2 PITG_03702  |
| 0   | 0   | 2 PITG_01259  |
| 0   | 0   | 0 PITG_05429  |
| 0   | 0   | 9 PITG_07161  |
| 0   | 8   | 4 NA          |
| 0   | 16  | 6 PITG_15852  |
| 0   | 13  | 0 PITG_02328  |
| 0   | 9   | 4 PITG_05667  |
| 0   | 2   | 14 PITG_04248 |
| 0   | 17  | 0 NA          |
| 0   | 58  | 7 PITG_15119  |
| 0   | 0   | 28 PITG_21187 |
| 0   | 2   | 0 NA          |
| 0   | 0   | 4 PITG_17359  |
| 0   | 30  | 6 PITG_01379  |
| 0   | 4   | 5 NA          |
| 0   | 3   | 0 NA          |
| 0   | 0   | 2 PITG_03267  |
| 0   | 38  | 16 NA         |
| 0   | 38  | 4 NA          |
| 0   | 0   | 23 NA         |
| 0   | 2   | 10 PITG_09723 |
| 0   | 173 | 58 PITG_07087 |
| 45  | 0   | 0 NA          |
| 0   | 2   | 0 PITG_05193  |
| 0   | 4   | 0 PITG_09475  |
| 0   | 32  | 14 PITG_04588 |
| 0   | 18  | 8 PITG_09943  |
| 0   | 12  | 0 PITG_03524  |
| 0   | 15  | 17 PITG_03471 |
| 0   | 19  | 10 PITG_02529 |
| 0   | 0   | 0 PITG_06495  |
| 0   | 72  | 20 PITG_11196 |
| 6   | 0   | 9 NA          |
| 0   | 4   | 4 PITG_03753  |
| 0   | 26  | 6 PITG_00998  |
| 88  | 245 | 1865 NA       |
| 0   | 27  | 13 PITG_03864 |
| 0   | 6   | 5 NA          |

|    |     |                |
|----|-----|----------------|
| 0  | 3   | 4 PITG_16080   |
| 0  | 38  | 0 NA           |
| 0  | 17  | 70 PITG_08031  |
| 0  | 3   | 4 PITG_02547   |
| 0  | 17  | 2 PITG_03946   |
| 0  | 12  | 2 PITG_00369   |
| 0  | 5   | 0 NA           |
| 0  | 2   | 0 NA           |
| 0  | 5   | 2 PITG_14717   |
| 0  | 20  | 9 PITG_10838   |
| 0  | 21  | 10 NA          |
| 0  | 234 | 106 PITG_17230 |
| 0  | 0   | 2 PITG_02264   |
| 0  | 13  | 0 PITG_14951   |
| 0  | 3   | 7 PITG_03011   |
| 0  | 0   | 2 PITG_07301   |
| 0  | 4   | 11 PITG_08416  |
| 0  | 7   | 3 PITG_15417   |
| 0  | 2   | 3 PITG_21181   |
| 0  | 8   | 4 PITG_06829   |
| 0  | 18  | 53 PITG_10866  |
| 0  | 30  | 2 PITG_07902   |
| 0  | 9   | 0 PITG_17831   |
| 0  | 4   | 2 PITG_03530   |
| 0  | 0   | 0 NA           |
| 0  | 6   | 8 PITG_00078   |
| 0  | 34  | 2 PITG_14172   |
| 0  | 29  | 27 PITG_20609  |
| 0  | 2   | 2 PITG_03846   |
| 10 | 0   | 8 NA           |
| 0  | 0   | 0 PITG_10935   |
| 0  | 177 | 15 NA          |
| 0  | 13  | 53 PITG_16360  |
| 0  | 0   | 3 PITG_16333   |
| 0  | 7   | 0 PITG_18250   |
| 0  | 4   | 2 PITG_03311   |
| 0  | 0   | 3 PITG_07326   |
| 0  | 6   | 0 PITG_10831   |
| 0  | 0   | 4 PITG_05598   |
| 0  | 3   | 0 NA           |
| 0  | 18  | 33 PITG_01365  |
| 0  | 8   | 4 PITG_01451   |
| 0  | 6   | 0 PITG_12145   |
| 0  | 2   | 7 PITG_09228   |
| 0  | 0   | 0 PITG_08641   |
| 0  | 24  | 4 PITG_01479   |
| 0  | 0   | 0 PITG_20040   |

|     |     |                |
|-----|-----|----------------|
| 0   | 4   | 2 NA           |
| 0   | 810 | 115 NA         |
| 8   | 0   | 2 NA           |
| 0   | 3   | 4 NA           |
| 0   | 6   | 10 PITG_19168  |
| 0   | 9   | 2 PITG_06943   |
| 0   | 2   | 2 PITG_17883   |
| 0   | 4   | 4 PITG_12105   |
| 0   | 0   | 17 PITG_09413  |
| 0   | 12  | 21 NA          |
| 0   | 0   | 0 PITG_12356   |
| 0   | 0   | 0 PITG_17898   |
| 0   | 0   | 0 PITG_17049   |
| 0   | 2   | 3 NA           |
| 0   | 0   | 10 PITG_13002  |
| 0   | 19  | 0 NA           |
| 0   | 4   | 0 PITG_22839   |
| 0   | 0   | 0 PITG_13376   |
| 0   | 17  | 131 PITG_06863 |
| 0   | 20  | 10 PITG_08157  |
| 0   | 19  | 4 PITG_10212   |
| 0   | 7   | 8 PITG_19041   |
| 0   | 6   | 72 PITG_11926  |
| 0   | 4   | 9 PITG_20202   |
| 0   | 7   | 2 PITG_13834   |
| 0   | 6   | 2 PITG_17699   |
| 0   | 14  | 0 NA           |
| 0   | 35  | 20 PITG_03852  |
| 0   | 14  | 17 PITG_15954  |
| 0   | 17  | 13 NA          |
| 0   | 0   | 0 PITG_04877   |
| 110 | 72  | 220 NA         |
| 0   | 80  | 22 PITG_17986  |
| 608 | 60  | 817 NA         |
| 0   | 0   | 0 PITG_00743   |
| 0   | 34  | 4 NA           |
| 0   | 16  | 10 PITG_21915  |
| 0   | 15  | 4 PITG_07041   |
| 0   | 19  | 27 PITG_05234  |
| 0   | 24  | 10 PITG_16152  |
| 0   | 2   | 2 PITG_13631   |
| 0   | 0   | 0 NA           |
| 0   | 5   | 4 PITG_09751   |
| 441 | 112 | 896 NA         |
| 0   | 34  | 5 NA           |
| 0   | 5   | 19 PITG_05961  |
| 0   | 4   | 9 PITG_16107   |

|   |    |                |
|---|----|----------------|
| 0 | 18 | 0 NA           |
| 0 | 6  | 10 PITG_01479  |
| 0 | 5  | 35 PITG_19049  |
| 0 | 0  | 0 PITG_05741   |
| 0 | 10 | 6 PITG_21141   |
| 0 | 0  | 0 PITG_04613   |
| 0 | 6  | 2 PITG_15223   |
| 0 | 6  | 5 PITG_12663   |
| 0 | 2  | 7 PITG_19790   |
| 0 | 2  | 2 PITG_18749   |
| 0 | 0  | 5 PITG_15642   |
| 0 | 28 | 12 PITG_10795  |
| 0 | 4  | 6 PITG_12151   |
| 0 | 18 | 2 NA           |
| 0 | 12 | 16 PITG_02294  |
| 0 | 3  | 2 PITG_17673   |
| 0 | 2  | 20 PITG_06981  |
| 0 | 2  | 2 PITG_10533   |
| 0 | 2  | 2 NA           |
| 0 | 9  | 6 PITG_03571   |
| 0 | 6  | 4 PITG_23065   |
| 0 | 4  | 8 PITG_00482   |
| 0 | 0  | 2 PITG_17259   |
| 0 | 9  | 8 NA           |
| 0 | 12 | 51 PITG_16116  |
| 0 | 0  | 2 PITG_13165   |
| 0 | 25 | 220 PITG_08795 |
| 0 | 0  | 7 PITG_03006   |
| 0 | 4  | 5 NA           |
| 0 | 82 | 39 PITG_09992  |
| 0 | 6  | 2 NA           |
| 0 | 11 | 26 PITG_18236  |
| 0 | 0  | 0 PITG_12809   |
| 0 | 32 | 2 PITG_02758   |
| 0 | 23 | 9 PITG_04939   |
| 0 | 67 | 20 NA          |
| 0 | 0  | 9 NA           |
| 0 | 18 | 4 PITG_08241   |
| 0 | 0  | 2 NA           |
| 0 | 2  | 5 PITG_14579   |
| 0 | 75 | 26 PITG_18662  |
| 0 | 19 | 17 PITG_19204  |
| 0 | 4  | 6 PITG_15294   |
| 0 | 48 | 26 PITG_16098  |
| 0 | 0  | 3 PITG_17028   |
| 0 | 41 | 7 PITG_17485   |
| 0 | 0  | 3 NA           |

|   |     |               |
|---|-----|---------------|
| 0 | 0   | 4 PITG_02036  |
| 0 | 2   | 0 NA          |
| 0 | 15  | 12 NA         |
| 0 | 0   | 0 PITG_10645  |
| 0 | 4   | 0 PITG_14251  |
| 0 | 0   | 4 PITG_00020  |
| 0 | 0   | 11 PITG_07445 |
| 0 | 30  | 11 NA         |
| 0 | 4   | 0 NA          |
| 0 | 10  | 10 PITG_08452 |
| 0 | 0   | 0 NA          |
| 0 | 0   | 2 PITG_04705  |
| 0 | 15  | 3 PITG_06924  |
| 0 | 4   | 0 PITG_03300  |
| 0 | 14  | 25 PITG_19065 |
| 0 | 0   | 11 PITG_21077 |
| 0 | 3   | 4 PITG_08460  |
| 0 | 28  | 12 PITG_00947 |
| 0 | 23  | 10 PITG_13239 |
| 0 | 0   | 0 PITG_03887  |
| 0 | 4   | 0 PITG_03159  |
| 0 | 38  | 0 NA          |
| 0 | 2   | 0 PITG_05762  |
| 0 | 0   | 7 PITG_16163  |
| 0 | 2   | 2 PITG_18049  |
| 0 | 294 | 123 NA        |
| 0 | 3   | 9 PITG_23159  |
| 0 | 13  | 26 NA         |
| 0 | 6   | 17 PITG_01755 |
| 0 | 47  | 29 PITG_15705 |
| 0 | 22  | 6 PITG_19886  |
| 0 | 0   | 0 PITG_06780  |
| 0 | 7   | 2 PITG_19857  |
| 0 | 7   | 3 PITG_19085  |
| 0 | 5   | 4 PITG_03295  |
| 0 | 34  | 38 NA         |
| 0 | 2   | 0 NA          |
| 0 | 0   | 2 PITG_11856  |
| 0 | 9   | 7 PITG_08094  |
| 0 | 0   | 4 PITG_07744  |
| 0 | 3   | 5 PITG_21595  |
| 0 | 0   | 0 PITG_03472  |
| 0 | 0   | 6 NA          |
| 0 | 19  | 2 PITG_11254  |
| 0 | 2   | 0 PITG_08305  |
| 0 | 29  | 25 PITG_05692 |
| 0 | 2   | 0 PITG_20324  |



|    |     |               |
|----|-----|---------------|
| 0  | 0   | 4 NA          |
| 0  | 21  | 18 PITG_07804 |
| 0  | 6   | 5 PITG_12821  |
| 0  | 6   | 28 PITG_11578 |
| 0  | 15  | 6 PITG_11802  |
| 0  | 13  | 5 NA          |
| 0  | 0   | 4 PITG_15294  |
| 0  | 18  | 2 PITG_08572  |
| 0  | 12  | 27 PITG_08139 |
| 0  | 0   | 6 PITG_22857  |
| 0  | 8   | 0 PITG_16676  |
| 0  | 0   | 2 PITG_06792  |
| 0  | 4   | 2 NA          |
| 0  | 7   | 4 PITG_04044  |
| 0  | 103 | 11 NA         |
| 0  | 2   | 0 PITG_20374  |
| 0  | 42  | 35 PITG_05737 |
| 0  | 75  | 58 PITG_19761 |
| 0  | 2   | 13 PITG_14393 |
| 0  | 3   | 0 PITG_03369  |
| 26 | 2   | 41 NA         |
| 0  | 22  | 4 PITG_10080  |
| 0  | 31  | 4 NA          |
| 0  | 26  | 19 PITG_23143 |
| 0  | 41  | 2 NA          |
| 0  | 7   | 22 PITG_16317 |
| 0  | 4   | 0 PITG_09447  |
| 0  | 0   | 25 PITG_06482 |
| 0  | 3   | 0 PITG_05866  |
| 0  | 7   | 8 PITG_10134  |
| 0  | 19  | 16 PITG_16469 |
| 0  | 2   | 15 PITG_14697 |
| 0  | 3   | 0 PITG_21932  |
| 0  | 4   | 12 NA         |
| 0  | 0   | 0 PITG_08067  |
| 0  | 0   | 12 PITG_20503 |
| 0  | 2   | 3 PITG_05692  |
| 0  | 22  | 4 NA          |
| 0  | 12  | 7 PITG_10250  |
| 0  | 0   | 2 NA          |
| 0  | 30  | 52 PITG_21389 |
| 9  | 0   | 6 NA          |
| 0  | 8   | 10 PITG_15376 |
| 0  | 5   | 14 NA         |
| 0  | 6   | 12 PITG_01073 |
| 0  | 70  | 23 PITG_03282 |
| 0  | 6   | 2 PITG_05005  |

|     |     |               |
|-----|-----|---------------|
| 0   | 27  | 23 PITG_01036 |
| 0   | 2   | 4 PITG_15071  |
| 0   | 2   | 6 PITG_09873  |
| 0   | 25  | 5 PITG_20717  |
| 0   | 0   | 0 NA          |
| 0   | 15  | 4 PITG_11201  |
| 0   | 11  | 2 PITG_06304  |
| 0   | 67  | 37 PITG_21794 |
| 0   | 2   | 8 PITG_11704  |
| 0   | 23  | 2 PITG_03854  |
| 0   | 17  | 21 PITG_12663 |
| 2   | 224 | 1105 NA       |
| 0   | 2   | 5 PITG_15688  |
| 0   | 0   | 2 PITG_13405  |
| 0   | 6   | 2 PITG_18702  |
| 0   | 92  | 59 PITG_14987 |
| 0   | 75  | 4 PITG_01479  |
| 0   | 4   | 7 PITG_11525  |
| 0   | 0   | 10 PITG_06867 |
| 0   | 0   | 0 PITG_07892  |
| 0   | 0   | 2 PITG_12819  |
| 0   | 21  | 7 PITG_04839  |
| 0   | 10  | 2 NA          |
| 0   | 29  | 2 PITG_22555  |
| 0   | 26  | 2 NA          |
| 0   | 2   | 2 PITG_07902  |
| 0   | 0   | 13 PITG_20928 |
| 361 | 8   | 44 NA         |
| 0   | 5   | 8 PITG_00320  |
| 0   | 23  | 26 PITG_08196 |
| 0   | 6   | 0 NA          |
| 0   | 21  | 25 PITG_09432 |
| 0   | 2   | 0 PITG_17907  |
| 0   | 6   | 2 NA          |
| 0   | 83  | 22 NA         |
| 0   | 0   | 0 PITG_02203  |
| 0   | 2   | 0 PITG_14692  |
| 0   | 180 | 87 PITG_01703 |
| 0   | 6   | 6 PITG_12180  |
| 0   | 17  | 5 PITG_01644  |
| 0   | 0   | 2 PITG_02770  |
| 0   | 0   | 0 PITG_03593  |
| 0   | 15  | 2 NA          |
| 0   | 0   | 0 PITG_02134  |
| 0   | 0   | 9 PITG_03490  |
| 0   | 11  | 2 PITG_06867  |
| 0   | 2   | 0 PITG_12668  |

|     |    |               |
|-----|----|---------------|
| 0   | 12 | 11 PITG_09522 |
| 0   | 4  | 5 PITG_18027  |
| 0   | 8  | 12 PITG_15486 |
| 0   | 2  | 0 PITG_16137  |
| 0   | 3  | 0 PITG_09537  |
| 0   | 7  | 2 PITG_19461  |
| 0   | 6  | 4 PITG_23287  |
| 0   | 4  | 14 PITG_11047 |
| 0   | 16 | 29 PITG_06984 |
| 0   | 27 | 28 PITG_05594 |
| 0   | 6  | 2 PITG_08822  |
| 0   | 0  | 4 PITG_23204  |
| 0   | 2  | 2 PITG_05989  |
| 0   | 0  | 0 NA          |
| 0   | 19 | 2 PITG_13853  |
| 0   | 2  | 0 PITG_04978  |
| 0   | 2  | 0 PITG_13722  |
| 0   | 0  | 3 PITG_22036  |
| 0   | 4  | 12 PITG_09360 |
| 0   | 17 | 10 PITG_17298 |
| 0   | 11 | 0 PITG_01405  |
| 134 | 5  | 102 NA        |
| 0   | 0  | 0 PITG_11780  |
| 0   | 23 | 87 PITG_02586 |
| 0   | 8  | 10 PITG_14564 |
| 0   | 0  | 0 PITG_08941  |
| 0   | 50 | 25 PITG_15967 |
| 0   | 27 | 24 NA         |
| 0   | 4  | 0 NA          |
| 0   | 2  | 0 PITG_17239  |
| 0   | 33 | 0 PITG_00790  |
| 0   | 2  | 6 NA          |
| 0   | 25 | 85 PITG_03192 |
| 0   | 2  | 0 PITG_21128  |
| 0   | 4  | 5 PITG_20031  |
| 0   | 5  | 0 NA          |
| 0   | 24 | 0 NA          |
| 0   | 0  | 0 PITG_17601  |
| 0   | 9  | 14 PITG_06708 |
| 0   | 19 | 4 NA          |
| 0   | 2  | 0 PITG_02502  |
| 0   | 12 | 0 PITG_04670  |
| 0   | 70 | 23 PITG_06607 |
| 2   | 2  | 18 NA         |
| 0   | 16 | 0 PITG_20820  |
| 0   | 0  | 2 PITG_10898  |
| 0   | 0  | 0 PITG_18010  |

|   |     |                |
|---|-----|----------------|
| 0 | 2   | 11 PITG_03901  |
| 0 | 10  | 5 PITG_19024   |
| 0 | 969 | 551 PITG_14530 |
| 0 | 0   | 9 PITG_13842   |
| 0 | 117 | 10 NA          |
| 0 | 5   | 11 PITG_10191  |
| 0 | 4   | 13 PITG_04453  |
| 0 | 50  | 8 PITG_18355   |
| 0 | 2   | 6 NA           |
| 0 | 22  | 6 NA           |
| 0 | 0   | 14 PITG_10022  |
| 0 | 5   | 7 PITG_02697   |
| 0 | 25  | 26 PITG_03545  |
| 0 | 3   | 13 PITG_22958  |
| 0 | 0   | 0 PITG_02666   |
| 0 | 0   | 0 PITG_03043   |
| 0 | 51  | 8 PITG_00077   |
| 0 | 14  | 2 PITG_05742   |
| 0 | 50  | 36 NA          |
| 0 | 9   | 2 NA           |
| 0 | 7   | 9 PITG_08229   |
| 0 | 5   | 0 PITG_17883   |
| 0 | 25  | 7 PITG_10509   |
| 0 | 2   | 0 PITG_04709   |
| 0 | 2   | 2 PITG_10419   |
| 0 | 5   | 0 PITG_03152   |
| 0 | 23  | 14 NA          |
| 0 | 2   | 6 PITG_18868   |
| 0 | 30  | 26 PITG_01998  |
| 0 | 41  | 21 NA          |
| 0 | 38  | 17 NA          |
| 0 | 14  | 4 NA           |
| 0 | 4   | 7 PITG_04683   |
| 0 | 0   | 0 NA           |
| 0 | 2   | 25 PITG_03599  |
| 0 | 6   | 5 PITG_20672   |
| 0 | 2   | 0 PITG_03952   |
| 0 | 20  | 13 PITG_13368  |
| 0 | 4   | 14 PITG_08383  |
| 0 | 41  | 173 PITG_07164 |
| 0 | 8   | 24 PITG_00140  |
| 0 | 4   | 12 PITG_20710  |
| 0 | 0   | 0 PITG_01226   |
| 0 | 45  | 74 PITG_03571  |
| 0 | 2   | 13 PITG_00664  |
| 0 | 11  | 0 PITG_12981   |
| 0 | 4   | 25 PITG_01171  |

|      |     |                |
|------|-----|----------------|
| 0    | 0   | 0 PITG_22204   |
| 0    | 0   | 5 PITG_06907   |
| 0    | 73  | 0 NA           |
| 0    | 42  | 52 NA          |
| 0    | 2   | 0 PITG_04499   |
| 0    | 0   | 0 PITG_22919   |
| 0    | 0   | 6 PITG_00191   |
| 0    | 30  | 2 PITG_17457   |
| 0    | 10  | 8 PITG_07955   |
| 0    | 7   | 2 NA           |
| 0    | 4   | 0 PITG_18184   |
| 0    | 0   | 2 PITG_03571   |
| 0    | 35  | 19 PITG_08708  |
| 0    | 3   | 4 PITG_07988   |
| 0    | 2   | 0 PITG_05248   |
| 0    | 0   | 0 PITG_00410   |
| 1023 | 12  | 1657 NA        |
| 0    | 21  | 7 PITG_17733   |
| 2    | 82  | 4536 NA        |
| 0    | 52  | 20 PITG_11728  |
| 0    | 11  | 8 PITG_21528   |
| 0    | 2   | 8 PITG_01710   |
| 0    | 4   | 4 PITG_03975   |
| 217  | 51  | 312 NA         |
| 0    | 12  | 0 NA           |
| 0    | 58  | 134 PITG_17007 |
| 0    | 2   | 10 PITG_03303  |
| 0    | 6   | 2 PITG_08302   |
| 0    | 0   | 0 PITG_06805   |
| 0    | 0   | 0 PITG_10443   |
| 0    | 171 | 134 NA         |
| 2    | 7   | 0 NA           |
| 0    | 2   | 2 NA           |
| 0    | 18  | 8 PITG_20842   |
| 0    | 7   | 0 PITG_18296   |
| 0    | 11  | 9 PITG_15912   |
| 0    | 7   | 0 PITG_18062   |
| 0    | 111 | 30 NA          |
| 0    | 93  | 69 PITG_06672  |
| 0    | 335 | 149 PITG_04989 |
| 0    | 11  | 4 NA           |
| 0    | 29  | 3 PITG_10139   |
| 0    | 0   | 2 NA           |
| 0    | 11  | 12 PITG_02564  |
| 0    | 5   | 0 PITG_05598   |
| 0    | 0   | 4 PITG_18922   |
| 0    | 60  | 21 PITG_10834  |

|     |     |               |
|-----|-----|---------------|
| 0   | 7   | 2 PITG_00324  |
| 0   | 2   | 0 PITG_17883  |
| 0   | 22  | 2 NA          |
| 0   | 2   | 5 PITG_04590  |
| 0   | 11  | 21 PITG_11724 |
| 0   | 10  | 29 PITG_01342 |
| 0   | 0   | 5 PITG_17987  |
| 0   | 0   | 0 PITG_22126  |
| 0   | 0   | 2 PITG_13103  |
| 0   | 146 | 94 PITG_16199 |
| 0   | 4   | 3 PITG_03501  |
| 0   | 9   | 2 PITG_12100  |
| 0   | 0   | 0 PITG_17833  |
| 0   | 17  | 2 NA          |
| 0   | 0   | 4 PITG_02917  |
| 0   | 35  | 47 NA         |
| 0   | 2   | 0 PITG_12295  |
| 0   | 3   | 0 PITG_06598  |
| 0   | 22  | 2 PITG_17159  |
| 0   | 0   | 0 NA          |
| 0   | 0   | 2 PITG_11451  |
| 0   | 94  | 65 PITG_18712 |
| 103 | 10  | 150 NA        |
| 0   | 7   | 11 PITG_03555 |
| 0   | 2   | 2 NA          |
| 0   | 33  | 25 PITG_00710 |
| 0   | 5   | 6 PITG_05404  |
| 0   | 3   | 6 PITG_06903  |
| 0   | 0   | 2 PITG_02031  |
| 0   | 4   | 0 PITG_06862  |
| 0   | 0   | 0 PITG_08675  |
| 0   | 41  | 13 NA         |
| 0   | 0   | 2 NA          |
| 0   | 13  | 67 PITG_16161 |
| 0   | 448 | 65 PITG_01130 |
| 0   | 0   | 4 PITG_02346  |
| 0   | 4   | 3 PITG_13458  |
| 0   | 0   | 0 PITG_12506  |
| 0   | 4   | 9 NA          |
| 0   | 5   | 10 PITG_10022 |
| 0   | 24  | 22 NA         |
| 0   | 10  | 18 PITG_09431 |
| 0   | 2   | 8 NA          |
| 596 | 0   | 58 NA         |
| 0   | 0   | 0 PITG_02764  |
| 0   | 4   | 8 PITG_19310  |
| 0   | 4   | 7 PITG_10213  |

|   |     |                |
|---|-----|----------------|
| 0 | 27  | 12 PITG_03044  |
| 0 | 66  | 219 PITG_11483 |
| 0 | 487 | 397 NA         |
| 0 | 0   | 2 PITG_05687   |
| 0 | 8   | 0 NA           |
| 0 | 0   | 0 PITG_03939   |
| 0 | 0   | 2 NA           |
| 0 | 11  | 0 PITG_15140   |
| 0 | 7   | 9 PITG_14014   |
| 0 | 0   | 2 PITG_08888   |
| 0 | 79  | 26 PITG_08046  |
| 0 | 3   | 6 PITG_20494   |
| 0 | 81  | 69 PITG_05205  |
| 0 | 10  | 2 PITG_10150   |
| 0 | 6   | 5 NA           |
| 0 | 14  | 2 NA           |
| 0 | 9   | 8 PITG_01426   |
| 0 | 9   | 6 NA           |
| 0 | 2   | 5 PITG_10864   |
| 0 | 37  | 0 PITG_08532   |
| 0 | 2   | 21 PITG_04992  |
| 0 | 0   | 0 PITG_19991   |
| 0 | 0   | 14 PITG_08702  |
| 0 | 31  | 63 PITG_11158  |
| 0 | 11  | 9 PITG_14623   |
| 0 | 0   | 2 PITG_23007   |
| 0 | 78  | 17 NA          |
| 0 | 68  | 4 PITG_05562   |
| 0 | 0   | 4 PITG_10932   |
| 0 | 2   | 0 PITG_05412   |
| 0 | 14  | 2 NA           |
| 0 | 2   | 0 PITG_16120   |
| 0 | 10  | 6 PITG_05177   |
| 0 | 0   | 0 PITG_18049   |
| 0 | 12  | 13 PITG_11489  |
| 0 | 2   | 2 PITG_09816   |
| 0 | 9   | 0 PITG_06282   |
| 0 | 2   | 0 PITG_03863   |
| 0 | 5   | 27 PITG_13168  |
| 0 | 0   | 0 NA           |
| 0 | 10  | 5 PITG_00323   |
| 0 | 7   | 2 NA           |
| 0 | 0   | 0 PITG_06886   |
| 0 | 2   | 7 PITG_16798   |
| 0 | 49  | 34 PITG_06778  |
| 0 | 5   | 20 PITG_15836  |
| 0 | 8   | 3 PITG_13803   |

|    |     |                |
|----|-----|----------------|
| 0  | 0   | 0 PITG_04618   |
| 0  | 2   | 0 PITG_04348   |
| 0  | 17  | 2 PITG_08716   |
| 0  | 25  | 36 PITG_08740  |
| 0  | 0   | 3 PITG_05423   |
| 62 | 2   | 2 NA           |
| 0  | 22  | 59 PITG_06986  |
| 0  | 9   | 2 PITG_06754   |
| 0  | 5   | 5 NA           |
| 0  | 472 | 447 PITG_13968 |
| 0  | 5   | 16 PITG_16854  |
| 0  | 20  | 6 PITG_01201   |
| 0  | 2   | 3 PITG_10836   |
| 0  | 0   | 0 NA           |
| 0  | 10  | 2 NA           |
| 0  | 19  | 9 PITG_08072   |
| 0  | 3   | 0 PITG_22021   |
| 0  | 0   | 0 PITG_09920   |
| 15 | 0   | 9 NA           |
| 0  | 10  | 2 PITG_19175   |
| 0  | 0   | 4 PITG_18304   |
| 0  | 6   | 0 NA           |
| 0  | 8   | 15 PITG_01759  |
| 0  | 26  | 198 PITG_10934 |
| 0  | 0   | 2 PITG_13431   |
| 0  | 12  | 12 PITG_07343  |
| 0  | 2   | 34 PITG_20717  |
| 0  | 4   | 2 PITG_03767   |
| 0  | 23  | 48 PITG_07899  |
| 0  | 0   | 0 NA           |
| 0  | 14  | 11 NA          |
| 0  | 2   | 0 NA           |
| 0  | 0   | 0 PITG_08085   |
| 0  | 46  | 26 PITG_06262  |
| 0  | 47  | 23 PITG_10289  |
| 0  | 2   | 0 NA           |
| 0  | 0   | 0 PITG_11088   |
| 0  | 34  | 4 NA           |
| 0  | 0   | 0 PITG_18302   |
| 0  | 19  | 28 PITG_06454  |
| 0  | 65  | 18 PITG_15855  |
| 0  | 0   | 4 PITG_02728   |
| 0  | 4   | 0 PITG_17481   |
| 0  | 0   | 0 PITG_13651   |
| 0  | 2   | 7 PITG_09301   |
| 0  | 25  | 0 NA           |
| 0  | 10  | 8 PITG_01682   |



|   |    |                |
|---|----|----------------|
| 0 | 15 | 8 PITG_15280   |
| 0 | 30 | 4 NA           |
| 0 | 4  | 0 PITG_03263   |
| 0 | 4  | 0 NA           |
| 0 | 0  | 2 PITG_10784   |
| 0 | 0  | 2 PITG_00148   |
| 0 | 6  | 8 PITG_10967   |
| 0 | 0  | 2 NA           |
| 0 | 0  | 2 PITG_06677   |
| 0 | 5  | 8 PITG_18816   |
| 0 | 0  | 0 NA           |
| 0 | 15 | 3 NA           |
| 0 | 4  | 0 PITG_17893   |
| 0 | 0  | 4 PITG_14274   |
| 0 | 18 | 18 NA          |
| 0 | 2  | 4 PITG_06319   |
| 0 | 0  | 7 PITG_17135   |
| 0 | 6  | 10 PITG_04639  |
| 0 | 0  | 0 NA           |
| 0 | 0  | 0 PITG_11437   |
| 0 | 6  | 19 PITG_17925  |
| 0 | 0  | 4 PITG_15577   |
| 0 | 76 | 24 PITG_11578  |
| 0 | 28 | 33 NA          |
| 0 | 29 | 26 PITG_00169  |
| 0 | 4  | 2 PITG_07796   |
| 5 | 0  | 0 NA           |
| 0 | 4  | 4 PITG_03839   |
| 0 | 2  | 0 PITG_00828   |
| 0 | 0  | 0 NA           |
| 0 | 23 | 6 PITG_14089   |
| 0 | 0  | 18 NA          |
| 0 | 2  | 31 PITG_18731  |
| 0 | 57 | 17 PITG_03336  |
| 0 | 5  | 2 PITG_09961   |
| 0 | 15 | 65 PITG_03694  |
| 0 | 25 | 120 PITG_18025 |
| 0 | 2  | 0 PITG_03075   |
| 0 | 0  | 2 PITG_03419   |
| 0 | 0  | 2 PITG_15544   |
| 0 | 3  | 2 PITG_16462   |
| 0 | 45 | 4 PITG_06618   |
| 0 | 9  | 14 NA          |
| 0 | 5  | 2 PITG_20895   |
| 0 | 0  | 4 PITG_22616   |
| 0 | 38 | 22 PITG_03819  |
| 0 | 24 | 12 NA          |

|     |     |                |
|-----|-----|----------------|
| 0   | 12  | 0 PITG_15899   |
| 0   | 11  | 19 PITG_01815  |
| 0   | 51  | 12 NA          |
| 0   | 11  | 5 PITG_11797   |
| 0   | 11  | 2 PITG_21222   |
| 0   | 5   | 8 NA           |
| 0   | 10  | 9 PITG_01324   |
| 0   | 3   | 2 PITG_09953   |
| 0   | 0   | 0 PITG_07284   |
| 0   | 33  | 29 PITG_21277  |
| 0   | 0   | 0 PITG_10743   |
| 0   | 7   | 8 NA           |
| 0   | 4   | 2 PITG_11530   |
| 0   | 0   | 0 PITG_13285   |
| 0   | 5   | 8 NA           |
| 0   | 0   | 0 NA           |
| 0   | 9   | 24 PITG_19472  |
| 0   | 15  | 5 PITG_01069   |
| 0   | 10  | 30 PITG_01477  |
| 694 | 104 | 750 NA         |
| 0   | 17  | 110 PITG_17747 |
| 0   | 4   | 2 PITG_11121   |
| 0   | 22  | 7 NA           |
| 0   | 31  | 0 PITG_14021   |
| 0   | 0   | 0 PITG_10444   |
| 0   | 50  | 15 PITG_10184  |
| 0   | 2   | 2 PITG_15447   |
| 0   | 15  | 9 PITG_18624   |
| 0   | 353 | 83 PITG_20849  |
| 0   | 6   | 15 PITG_20766  |
| 0   | 2   | 13 NA          |
| 0   | 56  | 30 PITG_09260  |
| 0   | 0   | 0 NA           |
| 0   | 10  | 3 PITG_21219   |
| 0   | 54  | 54 PITG_21501  |
| 0   | 4   | 2 NA           |
| 0   | 0   | 0 PITG_15228   |
| 0   | 339 | 182 PITG_08685 |
| 0   | 0   | 0 PITG_16441   |
| 0   | 0   | 0 PITG_13979   |
| 0   | 0   | 0 NA           |
| 0   | 10  | 16 PITG_12662  |
| 0   | 0   | 0 PITG_02824   |
| 0   | 230 | 111 PITG_08612 |
| 0   | 0   | 0 PITG_07729   |
| 0   | 2   | 16 PITG_21187  |
| 0   | 22  | 20 PITG_17074  |

|     |    |                |
|-----|----|----------------|
| 0   | 4  | 0 NA           |
| 0   | 0  | 0 PITG_07531   |
| 0   | 15 | 12 PITG_00475  |
| 0   | 6  | 15 NA          |
| 0   | 5  | 0 PITG_00536   |
| 0   | 0  | 2 PITG_13546   |
| 0   | 19 | 21 PITG_17897  |
| 0   | 0  | 8 PITG_06148   |
| 0   | 6  | 12 PITG_15244  |
| 0   | 2  | 2 NA           |
| 0   | 0  | 0 PITG_12325   |
| 0   | 3  | 7 PITG_11146   |
| 0   | 10 | 2 PITG_03815   |
| 0   | 34 | 9 PITG_13030   |
| 0   | 2  | 0 NA           |
| 0   | 9  | 17 PITG_10940  |
| 0   | 17 | 4 PITG_03901   |
| 0   | 0  | 2 PITG_21393   |
| 0   | 0  | 2 PITG_19969   |
| 0   | 0  | 0 NA           |
| 0   | 3  | 0 PITG_11369   |
| 128 | 0  | 103 NA         |
| 0   | 2  | 0 PITG_07029   |
| 0   | 4  | 4 NA           |
| 0   | 0  | 0 NA           |
| 0   | 4  | 2 NA           |
| 0   | 7  | 0 NA           |
| 0   | 6  | 0 PITG_01203   |
| 0   | 6  | 0 PITG_05487   |
| 0   | 0  | 0 PITG_00913   |
| 0   | 2  | 2 PITG_01836   |
| 0   | 2  | 3 PITG_14279   |
| 0   | 0  | 12 NA          |
| 0   | 12 | 0 NA           |
| 0   | 7  | 45 PITG_01913  |
| 0   | 44 | 26 PITG_04179  |
| 0   | 0  | 2 PITG_05480   |
| 0   | 4  | 0 PITG_20234   |
| 0   | 11 | 0 PITG_21054   |
| 0   | 7  | 0 PITG_08589   |
| 0   | 2  | 2 PITG_15837   |
| 0   | 40 | 143 PITG_04398 |
| 0   | 14 | 0 PITG_16395   |
| 0   | 2  | 8 PITG_04954   |
| 0   | 14 | 32 PITG_12812  |
| 0   | 2  | 7 PITG_19281   |
| 0   | 0  | 5 PITG_18538   |

|   |    |               |
|---|----|---------------|
| 0 | 26 | 31 PITG_00221 |
| 0 | 30 | 30 PITG_10160 |
| 0 | 29 | 32 PITG_05780 |
| 0 | 6  | 2 PITG_03174  |
| 0 | 4  | 11 PITG_08425 |
| 0 | 20 | 0 PITG_05369  |
| 0 | 13 | 0 PITG_07956  |
| 0 | 32 | 36 PITG_13718 |
| 0 | 2  | 0 PITG_10932  |
| 0 | 2  | 2 PITG_07194  |
| 0 | 4  | 0 PITG_03835  |
| 0 | 6  | 0 PITG_13185  |
| 0 | 6  | 0 NA          |
| 0 | 0  | 0 PITG_00380  |
| 0 | 4  | 0 PITG_02397  |
| 0 | 6  | 2 PITG_19876  |
| 0 | 4  | 2 PITG_03265  |
| 0 | 0  | 8 PITG_05761  |
| 6 | 25 | 61 NA         |
| 0 | 26 | 18 PITG_09041 |
| 0 | 15 | 8 NA          |
| 0 | 2  | 23 PITG_14456 |
| 0 | 2  | 2 PITG_02658  |
| 0 | 5  | 12 PITG_02627 |
| 0 | 0  | 0 NA          |
| 0 | 2  | 2 PITG_18671  |
| 0 | 2  | 3 PITG_17869  |
| 0 | 0  | 2 NA          |
| 0 | 6  | 22 PITG_02729 |
| 0 | 2  | 0 NA          |
| 0 | 2  | 26 NA         |
| 0 | 8  | 15 PITG_15839 |
| 0 | 6  | 6 NA          |
| 0 | 7  | 2 PITG_06938  |
| 0 | 4  | 0 NA          |
| 0 | 0  | 2 NA          |
| 0 | 2  | 5 PITG_05594  |
| 0 | 26 | 0 PITG_22555  |
| 0 | 11 | 18 PITG_23159 |
| 0 | 75 | 41 PITG_09780 |
| 6 | 2  | 2 NA          |
| 0 | 6  | 22 PITG_03855 |
| 0 | 0  | 6 NA          |
| 0 | 12 | 17 PITG_08173 |
| 0 | 0  | 2 PITG_14441  |
| 0 | 14 | 0 NA          |
| 0 | 22 | 4 PITG_07423  |

|    |     |                |
|----|-----|----------------|
| 0  | 107 | 48 PITG_11567  |
| 0  | 10  | 2 NA           |
| 0  | 18  | 7 PITG_17986   |
| 0  | 2   | 3 NA           |
| 0  | 6   | 3 NA           |
| 0  | 128 | 18 PITG_10094  |
| 0  | 0   | 4 PITG_03840   |
| 0  | 6   | 0 NA           |
| 0  | 0   | 2 PITG_20714   |
| 0  | 0   | 10 PITG_19199  |
| 0  | 2   | 0 NA           |
| 0  | 7   | 10 NA          |
| 0  | 7   | 10 PITG_04180  |
| 0  | 13  | 8 NA           |
| 0  | 4   | 2 PITG_17036   |
| 0  | 6   | 13 PITG_00078  |
| 0  | 9   | 39 PITG_04384  |
| 0  | 2   | 8 PITG_03840   |
| 0  | 0   | 0 PITG_10558   |
| 0  | 5   | 2 PITG_00536   |
| 0  | 0   | 0 PITG_16268   |
| 0  | 60  | 59 PITG_00155  |
| 0  | 0   | 2 PITG_05609   |
| 0  | 20  | 12 PITG_11022  |
| 0  | 5   | 0 PITG_12663   |
| 0  | 5   | 8 PITG_02849   |
| 0  | 74  | 117 NA         |
| 0  | 0   | 2 PITG_08011   |
| 0  | 0   | 0 PITG_15899   |
| 0  | 3   | 0 PITG_03597   |
| 0  | 0   | 0 PITG_03571   |
| 0  | 21  | 2 PITG_03777   |
| 0  | 2   | 22 NA          |
| 0  | 30  | 11 NA          |
| 0  | 17  | 0 PITG_11803   |
| 0  | 3   | 0 PITG_05233   |
| 0  | 3   | 0 NA           |
| 2  | 19  | 330 PITG_00375 |
| 0  | 0   | 0 NA           |
| 0  | 2   | 2 PITG_07102   |
| 0  | 3   | 7 PITG_02229   |
| 0  | 7   | 0 PITG_18421   |
| 0  | 2   | 2 PITG_15737   |
| 0  | 5   | 15 PITG_09384  |
| 0  | 0   | 0 PITG_05281   |
| 0  | 45  | 66 PITG_11743  |
| 10 | 0   | 2 NA           |

|     |     |                |
|-----|-----|----------------|
| 0   | 53  | 32 PITG_05992  |
| 0   | 0   | 2 NA           |
| 0   | 2   | 3 PITG_11271   |
| 0   | 85  | 33 PITG_06847  |
| 0   | 19  | 9 NA           |
| 0   | 2   | 14 PITG_05637  |
| 0   | 4   | 37 PITG_02035  |
| 0   | 4   | 9 PITG_03853   |
| 0   | 65  | 2 NA           |
| 0   | 0   | 0 PITG_03408   |
| 0   | 0   | 0 PITG_03732   |
| 0   | 5   | 0 NA           |
| 0   | 6   | 2 PITG_02655   |
| 0   | 0   | 0 PITG_01238   |
| 0   | 0   | 2 PITG_00809   |
| 0   | 8   | 12 PITG_02145  |
| 0   | 30  | 2 PITG_14388   |
| 0   | 15  | 10 NA          |
| 0   | 0   | 0 PITG_14697   |
| 0   | 8   | 11 NA          |
| 0   | 6   | 2 PITG_05317   |
| 0   | 67  | 10 PITG_18099  |
| 0   | 5   | 2 NA           |
| 0   | 47  | 75 PITG_00940  |
| 0   | 0   | 0 PITG_01164   |
| 0   | 0   | 4 PITG_16799   |
| 0   | 6   | 6 PITG_03044   |
| 0   | 85  | 29 NA          |
| 230 | 24  | 229 NA         |
| 0   | 12  | 2 NA           |
| 0   | 0   | 2 PITG_14415   |
| 0   | 46  | 59 PITG_13371  |
| 0   | 7   | 8 PITG_11525   |
| 0   | 5   | 4 PITG_01365   |
| 0   | 42  | 0 PITG_05478   |
| 0   | 9   | 2 NA           |
| 0   | 7   | 5 PITG_01589   |
| 0   | 21  | 2 NA           |
| 0   | 3   | 0 PITG_03338   |
| 0   | 45  | 30 PITG_00938  |
| 0   | 30  | 15 PITG_09243  |
| 0   | 11  | 7 PITG_16770   |
| 0   | 122 | 215 PITG_11111 |
| 0   | 28  | 29 PITG_00273  |
| 0   | 0   | 2 PITG_17674   |
| 0   | 10  | 7 PITG_14593   |
| 0   | 0   | 9 PITG_11969   |

|     |     |               |
|-----|-----|---------------|
| 0   | 8   | 4 PITG_10923  |
| 0   | 31  | 35 PITG_02948 |
| 0   | 0   | 0 NA          |
| 0   | 12  | 92 PITG_11116 |
| 0   | 50  | 11 PITG_15119 |
| 0   | 5   | 2 PITG_05935  |
| 0   | 35  | 2 NA          |
| 0   | 2   | 15 PITG_17117 |
| 0   | 5   | 2 PITG_08418  |
| 0   | 27  | 32 PITG_12663 |
| 0   | 17  | 15 PITG_03547 |
| 0   | 13  | 0 NA          |
| 0   | 4   | 0 PITG_17399  |
| 0   | 15  | 2 PITG_00169  |
| 182 | 4   | 175 NA        |
| 0   | 24  | 0 NA          |
| 0   | 6   | 6 PITG_15292  |
| 0   | 158 | 36 PITG_00444 |
| 0   | 2   | 0 PITG_22672  |
| 0   | 176 | 67 PITG_06895 |
| 0   | 0   | 0 PITG_10539  |
| 0   | 2   | 2 PITG_10912  |
| 0   | 2   | 54 PITG_12176 |
| 0   | 50  | 18 PITG_10921 |
| 0   | 7   | 4 PITG_17080  |
| 0   | 14  | 7 PITG_10023  |
| 0   | 0   | 0 PITG_23304  |
| 0   | 0   | 0 PITG_03391  |
| 0   | 0   | 0 NA          |
| 0   | 0   | 2 PITG_19041  |
| 0   | 5   | 0 PITG_08394  |
| 0   | 2   | 0 PITG_11224  |
| 0   | 2   | 14 NA         |
| 0   | 0   | 0 PITG_04399  |
| 0   | 6   | 4 PITG_18076  |
| 0   | 3   | 0 PITG_05633  |
| 0   | 18  | 42 PITG_16358 |
| 0   | 4   | 2 PITG_03763  |
| 0   | 7   | 7 PITG_13038  |
| 0   | 0   | 2 PITG_01873  |
| 0   | 0   | 6 PITG_09475  |
| 0   | 23  | 0 NA          |
| 0   | 4   | 4 PITG_10894  |
| 0   | 9   | 4 PITG_12108  |
| 4   | 0   | 0 NA          |
| 0   | 49  | 16 PITG_13042 |
| 0   | 0   | 0 PITG_01607  |

|    |    |               |
|----|----|---------------|
| 0  | 11 | 0 NA          |
| 0  | 2  | 11 PITG_01490 |
| 0  | 59 | 27 PITG_16052 |
| 0  | 0  | 0 NA          |
| 0  | 15 | 24 NA         |
| 0  | 2  | 2 PITG_13393  |
| 0  | 0  | 0 PITG_09951  |
| 0  | 32 | 12 PITG_08503 |
| 0  | 4  | 4 PITG_10049  |
| 0  | 0  | 13 PITG_18860 |
| 0  | 2  | 4 PITG_08746  |
| 0  | 38 | 2 PITG_01602  |
| 0  | 2  | 4 PITG_05504  |
| 0  | 6  | 4 PITG_20945  |
| 0  | 0  | 0 PITG_17882  |
| 0  | 18 | 71 PITG_17404 |
| 0  | 57 | 23 PITG_02563 |
| 0  | 0  | 4 PITG_09360  |
| 0  | 0  | 14 PITG_06248 |
| 0  | 13 | 25 NA         |
| 0  | 58 | 85 PITG_08802 |
| 12 | 0  | 0 NA          |
| 0  | 42 | 16 PITG_16794 |
| 0  | 55 | 26 PITG_16680 |
| 0  | 4  | 7 PITG_01367  |
| 0  | 0  | 2 PITG_01974  |
| 0  | 6  | 9 PITG_06694  |
| 0  | 8  | 4 PITG_16006  |
| 0  | 24 | 8 PITG_03672  |
| 0  | 4  | 0 PITG_04725  |
| 0  | 0  | 2 PITG_10239  |
| 0  | 0  | 0 PITG_19125  |
| 0  | 32 | 70 PITG_22878 |
| 0  | 0  | 0 PITG_14094  |
| 0  | 10 | 12 PITG_09956 |
| 0  | 0  | 0 NA          |
| 0  | 5  | 2 PITG_21022  |
| 0  | 7  | 0 PITG_16890  |
| 0  | 35 | 27 PITG_03119 |
| 0  | 2  | 0 PITG_00450  |
| 0  | 11 | 12 NA         |
| 0  | 0  | 0 PITG_06704  |
| 72 | 42 | 9 NA          |
| 0  | 14 | 4 NA          |
| 0  | 0  | 0 NA          |
| 0  | 24 | 5 PITG_16968  |
| 0  | 33 | 14 NA         |



|    |     |               |
|----|-----|---------------|
| 0  | 2   | 4 PITG_11198  |
| 0  | 2   | 4 PITG_13172  |
| 0  | 49  | 16 PITG_04447 |
| 0  | 0   | 8 PITG_10061  |
| 0  | 0   | 4 PITG_08867  |
| 0  | 22  | 2 PITG_01458  |
| 0  | 2   | 6 PITG_17884  |
| 0  | 0   | 7 PITG_09920  |
| 2  | 32  | 693 NA        |
| 0  | 3   | 0 NA          |
| 0  | 5   | 11 PITG_13395 |
| 0  | 28  | 7 NA          |
| 0  | 67  | 8 PITG_04289  |
| 0  | 0   | 0 PITG_08613  |
| 0  | 12  | 96 PITG_00263 |
| 0  | 4   | 4 PITG_03753  |
| 0  | 2   | 2 PITG_03986  |
| 0  | 19  | 0 PITG_02569  |
| 0  | 0   | 0 PITG_07915  |
| 0  | 5   | 26 PITG_02146 |
| 0  | 5   | 0 PITG_04396  |
| 0  | 3   | 8 PITG_09862  |
| 0  | 22  | 24 PITG_02034 |
| 0  | 16  | 5 PITG_02017  |
| 0  | 6   | 4 PITG_22126  |
| 0  | 22  | 51 PITG_12577 |
| 0  | 0   | 2 PITG_02446  |
| 0  | 2   | 9 PITG_03987  |
| 0  | 13  | 0 PITG_07944  |
| 0  | 2   | 7 NA          |
| 0  | 151 | 0 PITG_18750  |
| 0  | 81  | 39 NA         |
| 0  | 19  | 12 PITG_13805 |
| 0  | 0   | 11 PITG_11796 |
| 0  | 4   | 17 PITG_11743 |
| 0  | 0   | 0 PITG_00771  |
| 0  | 5   | 2 PITG_07237  |
| 0  | 25  | 0 NA          |
| 0  | 2   | 0 NA          |
| 0  | 6   | 4 NA          |
| 0  | 24  | 20 PITG_08867 |
| 0  | 2   | 0 PITG_12821  |
| 0  | 3   | 15 PITG_09564 |
| 0  | 73  | 14 PITG_14493 |
| 93 | 69  | 445 NA        |
| 0  | 7   | 2 PITG_20808  |
| 0  | 2   | 0 PITG_03772  |

|    |     |                |
|----|-----|----------------|
| 0  | 0   | 2 PITG_08599   |
| 0  | 2   | 0 PITG_07709   |
| 88 | 3   | 20 NA          |
| 0  | 0   | 2 NA           |
| 0  | 9   | 42 PITG_14935  |
| 0  | 2   | 0 PITG_07385   |
| 0  | 9   | 2 PITG_01850   |
| 0  | 25  | 15 PITG_20034  |
| 0  | 23  | 0 PITG_03311   |
| 0  | 0   | 15 PITG_01153  |
| 0  | 0   | 6 PITG_05340   |
| 0  | 6   | 4 PITG_20043   |
| 0  | 2   | 0 PITG_18634   |
| 0  | 142 | 26 PITG_07093  |
| 0  | 48  | 25 PITG_10437  |
| 0  | 11  | 0 PITG_01424   |
| 0  | 6   | 34 PITG_19842  |
| 0  | 4   | 14 PITG_17114  |
| 0  | 3   | 0 PITG_13747   |
| 0  | 10  | 2 PITG_07937   |
| 0  | 2   | 0 PITG_03416   |
| 0  | 14  | 15 PITG_06706  |
| 0  | 250 | 2 PITG_17606   |
| 0  | 0   | 0 PITG_09483   |
| 0  | 0   | 2 NA           |
| 0  | 4   | 29 PITG_06753  |
| 0  | 2   | 5 NA           |
| 0  | 10  | 8 PITG_08294   |
| 0  | 2   | 4 PITG_02136   |
| 0  | 29  | 0 PITG_00970   |
| 0  | 14  | 11 PITG_08926  |
| 0  | 162 | 606 PITG_08795 |
| 0  | 4   | 16 NA          |
| 0  | 2   | 5 NA           |
| 0  | 5   | 7 PITG_15606   |
| 0  | 0   | 3 NA           |
| 0  | 0   | 2 PITG_10479   |
| 0  | 21  | 36 PITG_02252  |
| 0  | 16  | 38 PITG_10384  |
| 0  | 2   | 0 NA           |
| 0  | 61  | 22 NA          |
| 0  | 0   | 4 PITG_08141   |
| 0  | 4   | 5 PITG_08681   |
| 0  | 0   | 0 NA           |
| 0  | 0   | 2 NA           |
| 0  | 19  | 16 PITG_00284  |
| 0  | 3   | 2 NA           |

|   |     |               |
|---|-----|---------------|
| 0 | 19  | 9 PITG_08503  |
| 0 | 49  | 33 PITG_09415 |
| 0 | 5   | 36 PITG_18713 |
| 0 | 2   | 6 PITG_02027  |
| 0 | 0   | 2 PITG_11226  |
| 0 | 17  | 13 PITG_18014 |
| 0 | 23  | 15 NA         |
| 0 | 2   | 0 PITG_03514  |
| 0 | 31  | 30 PITG_15519 |
| 0 | 4   | 0 NA          |
| 0 | 2   | 10 NA         |
| 0 | 2   | 12 PITG_07965 |
| 0 | 15  | 4 PITG_11816  |
| 0 | 0   | 0 PITG_06474  |
| 0 | 4   | 6 PITG_15191  |
| 0 | 0   | 0 PITG_03902  |
| 6 | 122 | 1270 NA       |
| 0 | 2   | 0 PITG_17075  |
| 0 | 7   | 8 PITG_02146  |
| 0 | 11  | 16 PITG_00808 |
| 0 | 2   | 4 PITG_19886  |
| 0 | 13  | 10 NA         |
| 0 | 0   | 0 PITG_08654  |
| 0 | 18  | 0 PITG_13803  |
| 0 | 0   | 4 PITG_02975  |
| 0 | 6   | 11 PITG_05274 |
| 0 | 0   | 0 NA          |
| 0 | 8   | 2 PITG_19965  |
| 0 | 12  | 9 PITG_02787  |
| 0 | 0   | 6 PITG_03360  |
| 0 | 4   | 7 PITG_07192  |
| 0 | 6   | 4 PITG_13347  |
| 0 | 4   | 0 NA          |
| 0 | 4   | 9 PITG_08207  |
| 0 | 9   | 0 NA          |
| 0 | 26  | 9 PITG_16400  |
| 0 | 0   | 3 PITG_20350  |
| 0 | 15  | 11 PITG_14588 |
| 0 | 3   | 0 PITG_21908  |
| 0 | 2   | 2 PITG_06781  |
| 0 | 0   | 0 PITG_18696  |
| 0 | 3   | 0 PITG_11705  |
| 0 | 19  | 17 PITG_11700 |
| 0 | 26  | 4 NA          |
| 0 | 6   | 6 PITG_15607  |
| 0 | 9   | 0 NA          |
| 0 | 2   | 5 PITG_00500  |

|    |      |                |
|----|------|----------------|
| 0  | 2    | 7 NA           |
| 0  | 1007 | 159 PITG_07810 |
| 0  | 8    | 0 PITG_09450   |
| 0  | 0    | 0 PITG_03136   |
| 0  | 10   | 0 PITG_03915   |
| 0  | 0    | 4 NA           |
| 0  | 0    | 0 PITG_17568   |
| 0  | 2    | 2 PITG_04917   |
| 0  | 11   | 19 PITG_03549  |
| 0  | 14   | 9 PITG_01153   |
| 0  | 5    | 2 PITG_01873   |
| 0  | 2    | 0 PITG_19736   |
| 0  | 46   | 15 PITG_07031  |
| 0  | 21   | 10 PITG_09285  |
| 0  | 4    | 0 PITG_10533   |
| 0  | 2    | 23 PITG_16814  |
| 0  | 28   | 0 PITG_14375   |
| 0  | 4    | 0 NA           |
| 0  | 23   | 83 PITG_18474  |
| 0  | 0    | 0 PITG_05259   |
| 0  | 4    | 0 PITG_13523   |
| 0  | 0    | 4 PITG_17026   |
| 0  | 0    | 4 PITG_09852   |
| 0  | 29   | 4 PITG_04342   |
| 0  | 2    | 0 PITG_04396   |
| 0  | 4    | 0 NA           |
| 39 | 14   | 0 NA           |
| 0  | 0    | 4 PITG_17361   |
| 0  | 9    | 15 PITG_03709  |
| 0  | 2    | 0 NA           |
| 0  | 14   | 15 NA          |
| 0  | 11   | 8 PITG_15377   |
| 0  | 353  | 132 PITG_16089 |
| 0  | 8    | 16 PITG_07730  |
| 0  | 5    | 6 PITG_16322   |
| 0  | 3    | 10 NA          |
| 0  | 4    | 4 NA           |
| 0  | 0    | 0 PITG_12938   |
| 0  | 12   | 20 PITG_12914  |
| 0  | 10   | 4 NA           |
| 0  | 13   | 0 PITG_12682   |
| 0  | 68   | 22 PITG_02037  |
| 0  | 10   | 0 PITG_03242   |
| 0  | 3    | 0 PITG_05737   |
| 3  | 0    | 4 NA           |
| 0  | 7    | 3 PITG_21509   |
| 0  | 68   | 6 PITG_05737   |

|     |     |               |
|-----|-----|---------------|
| 0   | 6   | 42 PITG_17387 |
| 0   | 0   | 3 PITG_01815  |
| 0   | 0   | 0 PITG_03761  |
| 0   | 36  | 6 NA          |
| 0   | 4   | 4 PITG_04059  |
| 0   | 3   | 0 NA          |
| 0   | 2   | 7 PITG_10868  |
| 0   | 5   | 2 PITG_15505  |
| 0   | 16  | 0 NA          |
| 0   | 0   | 2 NA          |
| 0   | 3   | 0 PITG_07575  |
| 0   | 7   | 4 PITG_09851  |
| 0   | 0   | 7 PITG_09940  |
| 0   | 8   | 4 NA          |
| 0   | 14  | 7 PITG_20033  |
| 0   | 0   | 2 PITG_17076  |
| 0   | 5   | 0 NA          |
| 0   | 0   | 0 NA          |
| 0   | 58  | 5 PITG_02678  |
| 0   | 23  | 28 PITG_03075 |
| 0   | 0   | 4 PITG_11121  |
| 0   | 2   | 0 NA          |
| 0   | 19  | 25 PITG_19846 |
| 0   | 17  | 7 PITG_17492  |
| 2   | 182 | 6203 NA       |
| 0   | 4   | 0 NA          |
| 0   | 2   | 0 PITG_03734  |
| 0   | 2   | 0 PITG_00116  |
| 0   | 0   | 0 NA          |
| 0   | 3   | 2 PITG_00384  |
| 0   | 5   | 0 PITG_02759  |
| 0   | 2   | 6 PITG_09978  |
| 0   | 4   | 7 PITG_15267  |
| 0   | 5   | 0 PITG_03276  |
| 0   | 7   | 2 PITG_07857  |
| 0   | 2   | 2 NA          |
| 121 | 5   | 97 NA         |
| 0   | 18  | 2 PITG_10651  |
| 0   | 3   | 0 PITG_00444  |
| 0   | 10  | 16 PITG_16038 |
| 0   | 0   | 2 NA          |
| 0   | 9   | 0 PITG_02765  |
| 0   | 6   | 9 PITG_10338  |
| 0   | 0   | 7 PITG_10321  |
| 0   | 0   | 0 PITG_15883  |
| 0   | 10  | 10 PITG_10590 |
| 0   | 0   | 0 PITG_13903  |

|   |     |                |
|---|-----|----------------|
| 0 | 4   | 3 NA           |
| 0 | 11  | 5 PITG_10816   |
| 0 | 70  | 61 PITG_05531  |
| 0 | 4   | 0 NA           |
| 0 | 10  | 3 PITG_02016   |
| 0 | 0   | 0 PITG_05249   |
| 0 | 44  | 2 NA           |
| 0 | 58  | 37 PITG_01361  |
| 0 | 0   | 2 PITG_06259   |
| 0 | 0   | 0 PITG_00854   |
| 0 | 18  | 4 PITG_06792   |
| 0 | 136 | 120 PITG_14014 |
| 0 | 3   | 6 PITG_20331   |
| 0 | 77  | 42 PITG_09260  |
| 0 | 0   | 4 PITG_22391   |
| 0 | 5   | 2 PITG_13613   |
| 0 | 0   | 0 PITG_03102   |
| 0 | 2   | 0 NA           |
| 0 | 61  | 6 PITG_19174   |
| 0 | 2   | 0 PITG_06829   |
| 0 | 0   | 6 PITG_03374   |
| 0 | 31  | 21 PITG_00654  |
| 0 | 0   | 0 NA           |
| 0 | 22  | 11 NA          |
| 0 | 3   | 30 PITG_19247  |
| 0 | 2   | 9 PITG_12180   |
| 0 | 26  | 8 PITG_02268   |
| 0 | 4   | 4 PITG_06003   |
| 0 | 0   | 2 PITG_08189   |
| 0 | 3   | 4 PITG_01030   |
| 0 | 39  | 17 PITG_16512  |
| 0 | 157 | 66 PITG_01932  |
| 0 | 0   | 0 PITG_12446   |
| 0 | 17  | 11 NA          |
| 0 | 5   | 4 PITG_13440   |
| 0 | 2   | 0 PITG_03472   |
| 0 | 2   | 2 PITG_12988   |
| 0 | 8   | 0 PITG_00809   |
| 0 | 2   | 14 NA          |
| 0 | 2   | 0 NA           |
| 0 | 4   | 0 PITG_16055   |
| 0 | 0   | 0 NA           |
| 0 | 24  | 10 PITG_19429  |
| 0 | 4   | 9 PITG_19064   |
| 0 | 0   | 13 PITG_09251  |
| 0 | 0   | 0 PITG_16126   |
| 0 | 3   | 0 NA           |

|   |    |                |
|---|----|----------------|
| 0 | 0  | 0 PITG_01957   |
| 0 | 11 | 2 PITG_21046   |
| 0 | 9  | 10 PITG_06228  |
| 0 | 28 | 29 NA          |
| 0 | 19 | 9 PITG_06827   |
| 0 | 10 | 5 PITG_11795   |
| 0 | 3  | 0 NA           |
| 0 | 0  | 0 PITG_00828   |
| 0 | 0  | 0 PITG_17360   |
| 0 | 6  | 4 NA           |
| 0 | 0  | 0 NA           |
| 0 | 97 | 213 PITG_15900 |
| 0 | 0  | 0 PITG_01457   |
| 0 | 4  | 0 PITG_00361   |
| 0 | 4  | 0 PITG_08481   |
| 0 | 9  | 13 PITG_03841  |
| 0 | 44 | 15 PITG_10926  |
| 0 | 25 | 13 PITG_12973  |
| 0 | 15 | 0 NA           |
| 0 | 4  | 18 PITG_21626  |
| 0 | 18 | 8 PITG_07228   |
| 0 | 35 | 12 PITG_03429  |
| 0 | 7  | 7 PITG_16107   |
| 0 | 9  | 0 PITG_07246   |
| 0 | 4  | 4 PITG_18011   |
| 0 | 4  | 2 NA           |
| 0 | 12 | 59 PITG_21071  |
| 0 | 16 | 13 PITG_01754  |
| 0 | 4  | 22 PITG_14473  |
| 6 | 5  | 24 NA          |
| 0 | 0  | 4 PITG_15951   |
| 0 | 2  | 4 PITG_09247   |
| 0 | 25 | 2 NA           |
| 0 | 2  | 0 PITG_03901   |
| 0 | 48 | 15 PITG_02942  |
| 0 | 13 | 8 PITG_17439   |
| 0 | 4  | 7 NA           |
| 0 | 15 | 63 PITG_03530  |
| 0 | 40 | 6 PITG_03825   |
| 0 | 4  | 0 PITG_18906   |
| 0 | 0  | 6 PITG_19125   |
| 0 | 26 | 13 PITG_11926  |
| 0 | 28 | 47 PITG_02043  |
| 0 | 33 | 15 PITG_06907  |
| 0 | 4  | 4 PITG_03357   |
| 0 | 2  | 0 PITG_04022   |
| 0 | 8  | 4 PITG_11130   |

|   |     |               |
|---|-----|---------------|
| 0 | 13  | 2 PITG_05485  |
| 0 | 0   | 0 PITG_03351  |
| 0 | 13  | 0 PITG_05817  |
| 0 | 0   | 4 PITG_03109  |
| 0 | 0   | 0 PITG_09572  |
| 0 | 0   | 0 NA          |
| 0 | 4   | 21 PITG_19245 |
| 0 | 0   | 2 PITG_05672  |
| 0 | 145 | 0 PITG_15745  |
| 0 | 2   | 42 PITG_11425 |
| 0 | 48  | 28 PITG_19421 |
| 0 | 0   | 0 PITG_12358  |
| 0 | 0   | 2 NA          |
| 0 | 0   | 2 PITG_00026  |
| 0 | 0   | 0 PITG_07210  |
| 0 | 0   | 8 PITG_11653  |
| 0 | 4   | 4 PITG_23065  |
| 0 | 68  | 77 PITG_01953 |
| 0 | 22  | 60 PITG_11895 |
| 0 | 2   | 4 PITG_06007  |
| 0 | 0   | 13 PITG_05692 |
| 0 | 5   | 16 PITG_06007 |
| 0 | 49  | 33 PITG_20053 |
| 0 | 0   | 4 PITG_01508  |
| 0 | 2   | 2 PITG_06026  |
| 0 | 12  | 24 PITG_13353 |
| 0 | 0   | 6 PITG_00449  |
| 0 | 2   | 2 PITG_01003  |
| 0 | 0   | 0 NA          |
| 0 | 34  | 0 PITG_01644  |
| 0 | 6   | 20 PITG_20527 |
| 0 | 0   | 4 PITG_12980  |
| 0 | 0   | 2 PITG_13490  |
| 0 | 17  | 4 PITG_01370  |
| 0 | 0   | 0 PITG_19286  |
| 0 | 24  | 2 NA          |
| 0 | 11  | 39 NA         |
| 0 | 0   | 0 PITG_03646  |
| 0 | 6   | 20 PITG_12346 |
| 0 | 9   | 2 NA          |
| 0 | 42  | 12 PITG_06078 |
| 0 | 70  | 18 NA         |
| 0 | 57  | 140 NA        |
| 0 | 8   | 19 PITG_11254 |
| 0 | 39  | 31 NA         |
| 0 | 3   | 0 NA          |
| 0 | 0   | 2 NA          |



|   |     |                |
|---|-----|----------------|
| 0 | 2   | 0 PITG_22857   |
| 0 | 63  | 9 PITG_08663   |
| 0 | 323 | 113 PITG_14014 |
| 0 | 0   | 0 PITG_18987   |
| 0 | 0   | 4 PITG_11424   |
| 0 | 12  | 2 PITG_14723   |
| 0 | 22  | 13 PITG_04970  |
| 0 | 3   | 0 NA           |
| 0 | 2   | 2 PITG_07087   |
| 0 | 0   | 68 PITG_10132  |
| 0 | 20  | 0 PITG_08494   |
| 0 | 22  | 21 PITG_20463  |
| 0 | 3   | 10 PITG_01349  |
| 0 | 8   | 0 PITG_01682   |
| 0 | 5   | 2 NA           |
| 0 | 4   | 12 PITG_10060  |
| 0 | 2   | 0 NA           |
| 0 | 31  | 12 PITG_15869  |
| 0 | 0   | 4 PITG_14730   |
| 0 | 2   | 8 PITG_16058   |
| 0 | 16  | 0 PITG_02723   |
| 0 | 0   | 2 PITG_07239   |
| 0 | 5   | 9 PITG_06963   |
| 0 | 9   | 5 PITG_08663   |
| 0 | 2   | 4 PITG_03755   |
| 0 | 0   | 0 PITG_20251   |
| 0 | 4   | 0 NA           |
| 0 | 4   | 0 PITG_01053   |
| 0 | 6   | 13 PITG_04115  |
| 0 | 33  | 0 PITG_13853   |
| 0 | 0   | 0 NA           |
| 0 | 115 | 16 PITG_00710  |
| 0 | 16  | 4 NA           |
| 0 | 61  | 4 PITG_15290   |
| 0 | 11  | 2 PITG_15509   |
| 0 | 17  | 22 PITG_07061  |
| 0 | 4   | 15 PITG_17273  |
| 0 | 9   | 10 PITG_19886  |
| 0 | 2   | 2 PITG_17711   |
| 0 | 0   | 0 PITG_02839   |
| 0 | 0   | 6 PITG_01867   |
| 0 | 2   | 2 PITG_00424   |
| 0 | 4   | 0 NA           |
| 0 | 31  | 6 PITG_08172   |
| 0 | 5   | 4 PITG_17984   |
| 0 | 22  | 14 NA          |
| 0 | 0   | 19 NA          |

|      |     |                 |
|------|-----|-----------------|
| 0    | 3   | 8 PITG_07655    |
| 0    | 6   | 2 PITG_19026    |
| 0    | 2   | 22 NA           |
| 463  | 0   | 156 NA          |
| 0    | 7   | 0 PITG_13196    |
| 0    | 0   | 5 NA            |
| 0    | 9   | 30 PITG_10969   |
| 0    | 0   | 2 PITG_18868    |
| 0    | 2   | 2 PITG_07470    |
| 0    | 2   | 5 PITG_17549    |
| 0    | 2   | 2 PITG_01058    |
| 0    | 0   | 4 PITG_06482    |
| 0    | 0   | 6 PITG_12112    |
| 0    | 12  | 47 PITG_09875   |
| 0    | 4   | 0 PITG_04725    |
| 0    | 0   | 0 NA            |
| 0    | 8   | 7 PITG_19516    |
| 0    | 0   | 7 PITG_08734    |
| 0    | 0   | 6 PITG_01553    |
| 0    | 9   | 4 PITG_06929    |
| 0    | 28  | 9 NA            |
| 0    | 4   | 2 NA            |
| 0    | 4   | 8 PITG_07274    |
| 62   | 135 | 929 NA          |
| 0    | 13  | 18 NA           |
| 0    | 64  | 14 PITG_11616   |
| 0    | 50  | 11 PITG_07884   |
| 0    | 0   | 8 PITG_10133    |
| 0    | 12  | 7 PITG_13650    |
| 0    | 19  | 0 PITG_04608    |
| 0    | 0   | 0 PITG_10087    |
| 0    | 189 | 17 NA           |
| 179  | 0   | 231 NA          |
| 0    | 0   | 0 NA            |
| 0    | 12  | 0 NA            |
| 0    | 4   | 5 PITG_12216    |
| 6    | 8   | 0 NA            |
| 0    | 5   | 0 PITG_14730    |
| 0    | 2   | 3 PITG_11097    |
| 2402 | 7   | 1530 PITG_14696 |
| 0    | 155 | 37 PITG_05550   |
| 0    | 0   | 7 PITG_12110    |
| 0    | 2   | 0 PITG_14218    |
| 0    | 225 | 229 PITG_17486  |
| 0    | 12  | 0 NA            |
| 0    | 4   | 0 PITG_13317    |
| 0    | 5   | 0 NA            |

|   |     |                |
|---|-----|----------------|
| 0 | 11  | 0 PITG_01228   |
| 0 | 11  | 9 PITG_12931   |
| 0 | 0   | 4 PITG_08184   |
| 0 | 9   | 23 PITG_19281  |
| 0 | 0   | 0 NA           |
| 0 | 17  | 2 PITG_02372   |
| 0 | 17  | 0 PITG_14712   |
| 0 | 7   | 6 PITG_16865   |
| 0 | 9   | 4 PITG_21277   |
| 0 | 0   | 0 NA           |
| 0 | 3   | 4 PITG_13939   |
| 0 | 25  | 17 PITG_15923  |
| 0 | 14  | 2 NA           |
| 0 | 3   | 7 PITG_04992   |
| 0 | 0   | 4 PITG_03767   |
| 0 | 39  | 13 PITG_10165  |
| 0 | 18  | 146 PITG_10442 |
| 0 | 19  | 15 PITG_19749  |
| 0 | 0   | 0 PITG_23007   |
| 0 | 18  | 6 NA           |
| 0 | 3   | 2 PITG_15252   |
| 0 | 42  | 47 PITG_03919  |
| 0 | 0   | 3 NA           |
| 0 | 2   | 0 PITG_09139   |
| 0 | 0   | 0 PITG_09440   |
| 0 | 209 | 20 NA          |
| 0 | 6   | 24 PITG_00206  |
| 0 | 26  | 45 PITG_03594  |
| 0 | 2   | 6 PITG_15885   |
| 0 | 10  | 0 NA           |
| 0 | 10  | 12 PITG_02453  |
| 0 | 65  | 29 NA          |
| 0 | 11  | 50 PITG_03423  |
| 0 | 7   | 0 PITG_05869   |
| 0 | 2   | 0 NA           |
| 0 | 4   | 17 PITG_09360  |
| 0 | 0   | 0 NA           |
| 0 | 2   | 0 PITG_15292   |
| 0 | 0   | 0 PITG_05423   |
| 0 | 0   | 0 PITG_20463   |
| 0 | 15  | 2 NA           |
| 0 | 0   | 0 PITG_09855   |
| 0 | 0   | 0 PITG_15951   |
| 0 | 2   | 6 PITG_00173   |
| 0 | 0   | 0 NA           |
| 0 | 3   | 0 NA           |
| 0 | 6   | 11 PITG_11116  |

|   |    |                |
|---|----|----------------|
| 0 | 2  | 2 PITG_00308   |
| 0 | 0  | 0 PITG_11205   |
| 0 | 0  | 6 PITG_03112   |
| 0 | 10 | 8 PITG_08207   |
| 0 | 11 | 7 PITG_14674   |
| 0 | 20 | 114 PITG_04525 |
| 0 | 3  | 0 PITG_09630   |
| 0 | 7  | 0 NA           |
| 0 | 5  | 8 NA           |
| 0 | 0  | 0 PITG_08900   |
| 0 | 14 | 2 PITG_12077   |
| 0 | 8  | 37 PITG_11097  |
| 0 | 38 | 26 PITG_03864  |
| 0 | 2  | 0 PITG_08747   |
| 0 | 0  | 0 PITG_04122   |
| 0 | 0  | 17 PITG_13336  |
| 0 | 2  | 0 PITG_03029   |
| 0 | 6  | 4 PITG_22958   |
| 0 | 29 | 0 NA           |
| 0 | 0  | 2 PITG_03841   |
| 0 | 7  | 12 PITG_23159  |
| 0 | 10 | 2 PITG_11106   |
| 0 | 0  | 2 PITG_02571   |
| 0 | 8  | 2 PITG_00636   |
| 0 | 0  | 0 PITG_13651   |
| 0 | 4  | 2 PITG_04395   |
| 0 | 5  | 2 NA           |
| 0 | 11 | 2 NA           |
| 0 | 20 | 2 PITG_13796   |
| 0 | 70 | 28 NA          |
| 0 | 0  | 0 PITG_17997   |
| 0 | 8  | 5 NA           |
| 0 | 8  | 4 PITG_06753   |
| 0 | 10 | 26 PITG_11888  |
| 0 | 2  | 2 NA           |
| 0 | 43 | 18 PITG_15870  |
| 0 | 5  | 2 PITG_21914   |
| 0 | 78 | 4 NA           |
| 0 | 26 | 12 PITG_03744  |
| 0 | 0  | 0 PITG_03490   |
| 0 | 0  | 9 PITG_05282   |
| 0 | 0  | 13 PITG_22157  |
| 0 | 7  | 4 PITG_02134   |
| 0 | 8  | 4 PITG_18754   |
| 0 | 2  | 6 PITG_03011   |
| 0 | 15 | 4 PITG_05813   |
| 0 | 2  | 0 PITG_09598   |

|     |     |                |
|-----|-----|----------------|
| 0   | 22  | 0 PITG_03328   |
| 0   | 14  | 6 PITG_17250   |
| 0   | 5   | 15 PITG_09552  |
| 0   | 10  | 0 NA           |
| 0   | 0   | 2 PITG_06827   |
| 0   | 4   | 0 PITG_01640   |
| 0   | 3   | 0 PITG_14224   |
| 0   | 2   | 0 NA           |
| 0   | 0   | 5 PITG_12308   |
| 0   | 14  | 2 PITG_08589   |
| 0   | 13  | 0 NA           |
| 0   | 7   | 5 NA           |
| 0   | 0   | 0 PITG_08004   |
| 0   | 6   | 25 PITG_14727  |
| 0   | 0   | 2 PITG_14615   |
| 0   | 0   | 2 PITG_17072   |
| 0   | 149 | 190 PITG_11238 |
| 0   | 184 | 132 PITG_11239 |
| 0   | 62  | 0 NA           |
| 0   | 30  | 45 PITG_08022  |
| 0   | 28  | 87 PITG_03423  |
| 0   | 0   | 2 PITG_14007   |
| 0   | 2   | 3 PITG_01458   |
| 0   | 28  | 2 PITG_21114   |
| 0   | 9   | 12 PITG_13803  |
| 0   | 2   | 2 PITG_15737   |
| 0   | 11  | 0 NA           |
| 0   | 0   | 4 PITG_14728   |
| 573 | 17  | 838 NA         |
| 0   | 9   | 4 PITG_09603   |
| 0   | 8   | 2 PITG_05634   |
| 0   | 6   | 24 PITG_06972  |
| 0   | 0   | 11 PITG_20159  |
| 0   | 5   | 188 PITG_11243 |
| 0   | 0   | 0 PITG_14566   |
| 0   | 0   | 0 NA           |
| 0   | 37  | 28 PITG_01680  |
| 0   | 10  | 8 PITG_19459   |
| 0   | 0   | 4 PITG_16009   |
| 0   | 20  | 20 PITG_09564  |
| 0   | 14  | 20 PITG_14602  |
| 0   | 2   | 2 NA           |
| 0   | 9   | 15 PITG_10400  |
| 0   | 23  | 4 PITG_04650   |
| 0   | 0   | 2 PITG_09827   |
| 0   | 0   | 2 PITG_03813   |
| 0   | 0   | 10 PITG_00867  |

|   |     |               |
|---|-----|---------------|
| 0 | 2   | 6 PITG_02230  |
| 0 | 14  | 2 PITG_10418  |
| 0 | 0   | 5 PITG_12592  |
| 0 | 43  | 20 PITG_01203 |
| 0 | 2   | 5 NA          |
| 0 | 24  | 6 PITG_08576  |
| 0 | 4   | 0 PITG_13376  |
| 0 | 3   | 2 PITG_07926  |
| 0 | 0   | 0 PITG_17869  |
| 0 | 6   | 21 PITG_11097 |
| 0 | 5   | 0 NA          |
| 0 | 4   | 0 PITG_10292  |
| 0 | 17  | 2 PITG_10610  |
| 0 | 11  | 6 PITG_03778  |
| 0 | 4   | 4 NA          |
| 0 | 8   | 5 PITG_19860  |
| 0 | 163 | 28 PITG_20685 |
| 0 | 6   | 2 PITG_23178  |
| 0 | 6   | 0 NA          |
| 0 | 0   | 2 NA          |
| 0 | 44  | 33 PITG_13078 |
| 0 | 7   | 4 PITG_18409  |
| 0 | 32  | 19 PITG_16058 |
| 0 | 2   | 2 NA          |
| 0 | 0   | 10 PITG_10423 |
| 0 | 6   | 0 PITG_05627  |
| 0 | 25  | 10 PITG_19310 |
| 0 | 0   | 0 PITG_10124  |
| 0 | 2   | 9 PITG_07707  |
| 0 | 0   | 0 PITG_07865  |
| 0 | 2   | 2 PITG_03702  |
| 0 | 2   | 4 PITG_05737  |
| 0 | 10  | 0 PITG_04700  |
| 0 | 6   | 0 PITG_16766  |
| 0 | 24  | 13 PITG_20907 |
| 0 | 0   | 6 NA          |
| 0 | 29  | 39 PITG_02084 |
| 0 | 23  | 0 NA          |
| 0 | 2   | 3 PITG_00237  |
| 0 | 0   | 4 NA          |
| 0 | 33  | 19 PITG_02527 |
| 0 | 7   | 10 PITG_18359 |
| 0 | 41  | 0 PITG_23149  |
| 0 | 10  | 2 NA          |
| 0 | 2   | 2 PITG_10488  |
| 0 | 4   | 2 PITG_03269  |
| 0 | 8   | 3 PITG_06333  |

|     |      |                 |
|-----|------|-----------------|
| 0   | 16   | 0 PITG_20954    |
| 0   | 5    | 6 PITG_11795    |
| 0   | 9    | 2 PITG_16972    |
| 0   | 0    | 2 PITG_14123    |
| 0   | 2    | 2 PITG_08514    |
| 0   | 73   | 72 PITG_08184   |
| 0   | 5    | 25 PITG_08754   |
| 0   | 4    | 9 PITG_07039    |
| 0   | 2    | 2 NA            |
| 0   | 21   | 5 NA            |
| 0   | 16   | 0 NA            |
| 0   | 2    | 0 PITG_15762    |
| 0   | 2    | 0 PITG_11483    |
| 0   | 14   | 0 PITG_03328    |
| 0   | 21   | 0 NA            |
| 0   | 4    | 0 PITG_19148    |
| 0   | 0    | 0 PITG_05278    |
| 0   | 4    | 10 PITG_07916   |
| 0   | 7    | 2 PITG_15133    |
| 0   | 0    | 2 PITG_07201    |
| 0   | 2    | 12 PITG_16900   |
| 0   | 57   | 37 PITG_15998   |
| 0   | 4    | 22 PITG_00201   |
| 0   | 2    | 8 NA            |
| 0   | 0    | 0 PITG_14862    |
| 0   | 0    | 0 PITG_00695    |
| 0   | 0    | 7 PITG_03374    |
| 0   | 67   | 34 PITG_15955   |
| 39  | 5    | 16 NA           |
| 0   | 0    | 0 NA            |
| 0   | 4    | 10 PITG_08093   |
| 0   | 10   | 4 PITG_03223    |
| 0   | 7    | 0 PITG_03288    |
| 0   | 0    | 2 PITG_18423    |
| 0   | 130  | 57 PITG_13583   |
| 0   | 2    | 0 PITG_00482    |
| 0   | 2384 | 3625 PITG_20489 |
| 0   | 54   | 4 PITG_20160    |
| 0   | 3    | 0 PITG_08679    |
| 0   | 42   | 2 PITG_07912    |
| 546 | 166  | 860 NA          |
| 0   | 10   | 4 PITG_08172    |
| 0   | 0    | 0 PITG_07973    |
| 76  | 3    | 95 NA           |
| 0   | 0    | 2 PITG_23178    |
| 0   | 0    | 0 PITG_20896    |
| 0   | 104  | 30 PITG_12186   |

|   |     |                |
|---|-----|----------------|
| 0 | 16  | 0 PITG_07868   |
| 0 | 0   | 0 PITG_20040   |
| 0 | 31  | 13 PITG_11177  |
| 0 | 0   | 4 PITG_19038   |
| 0 | 2   | 4 NA           |
| 0 | 25  | 8 NA           |
| 0 | 4   | 26 PITG_08043  |
| 0 | 137 | 14 NA          |
| 0 | 0   | 2 NA           |
| 0 | 5   | 0 PITG_04104   |
| 0 | 4   | 4 NA           |
| 2 | 55  | 97 PITG_17512  |
| 0 | 0   | 8 PITG_17348   |
| 0 | 52  | 2 NA           |
| 0 | 26  | 10 PITG_20385  |
| 0 | 0   | 0 PITG_20525   |
| 0 | 6   | 0 PITG_16698   |
| 0 | 14  | 68 PITG_12041  |
| 0 | 2   | 0 PITG_12852   |
| 0 | 51  | 15 NA          |
| 0 | 79  | 109 PITG_14216 |
| 0 | 134 | 141 PITG_11243 |
| 0 | 15  | 14 PITG_04549  |
| 0 | 2   | 3 PITG_02230   |
| 0 | 0   | 2 PITG_09954   |
| 0 | 2   | 2 NA           |
| 0 | 0   | 2 NA           |
| 0 | 0   | 4 PITG_06986   |
| 0 | 7   | 26 PITG_13911  |
| 0 | 25  | 9 PITG_15496   |
| 0 | 10  | 24 PITG_03471  |
| 0 | 4   | 4 PITG_11675   |
| 0 | 2   | 4 PITG_19041   |
| 0 | 15  | 4 PITG_19530   |
| 0 | 15  | 6 PITG_02495   |
| 0 | 83  | 49 PITG_11202  |
| 0 | 19  | 18 NA          |
| 0 | 8   | 0 NA           |
| 0 | 0   | 2 PITG_15447   |
| 0 | 3   | 0 NA           |
| 0 | 107 | 58 PITG_14278  |
| 0 | 0   | 2 PITG_06345   |
| 0 | 4   | 17 PITG_02343  |
| 0 | 183 | 47 PITG_01932  |
| 0 | 24  | 25 PITG_06199  |
| 0 | 0   | 61 PITG_16871  |
| 0 | 77  | 69 PITG_22001  |



|     |     |               |
|-----|-----|---------------|
| 0   | 2   | 0 PITG_19182  |
| 0   | 2   | 0 PITG_05598  |
| 0   | 10  | 2 PITG_16067  |
| 0   | 23  | 13 PITG_13834 |
| 0   | 20  | 2 NA          |
| 0   | 13  | 13 PITG_13412 |
| 0   | 0   | 5 PITG_03757  |
| 0   | 4   | 2 PITG_11272  |
| 2   | 0   | 4 NA          |
| 0   | 8   | 0 NA          |
| 0   | 22  | 2 PITG_08294  |
| 0   | 4   | 6 PITG_07354  |
| 0   | 0   | 0 NA          |
| 0   | 56  | 12 NA         |
| 143 | 3   | 45 NA         |
| 0   | 9   | 5 PITG_07286  |
| 0   | 2   | 9 NA          |
| 0   | 7   | 0 PITG_09678  |
| 0   | 0   | 0 PITG_14136  |
| 0   | 0   | 6 PITG_11039  |
| 0   | 0   | 0 PITG_20932  |
| 0   | 2   | 7 PITG_18623  |
| 0   | 0   | 0 PITG_04841  |
| 0   | 4   | 4 NA          |
| 0   | 9   | 16 PITG_00408 |
| 0   | 8   | 10 PITG_12469 |
| 0   | 0   | 3 PITG_15119  |
| 0   | 2   | 0 PITG_00556  |
| 0   | 4   | 2 PITG_12340  |
| 0   | 48  | 4 NA          |
| 0   | 0   | 4 PITG_01523  |
| 0   | 4   | 8 PITG_17879  |
| 0   | 13  | 57 PITG_22572 |
| 0   | 8   | 6 PITG_10509  |
| 0   | 0   | 5 PITG_09535  |
| 0   | 0   | 6 PITG_15564  |
| 0   | 5   | 4 PITG_06937  |
| 0   | 0   | 0 PITG_23273  |
| 0   | 3   | 4 PITG_08888  |
| 0   | 15  | 6 PITG_07993  |
| 16  | 17  | 523 NA        |
| 0   | 0   | 0 PITG_17599  |
| 0   | 18  | 4 PITG_00747  |
| 0   | 27  | 27 PITG_02706 |
| 0   | 44  | 2 PITG_06663  |
| 0   | 4   | 0 NA          |
| 0   | 112 | 116 NA        |

|    |     |               |
|----|-----|---------------|
| 0  | 4   | 25 PITG_10831 |
| 0  | 14  | 3 PITG_05244  |
| 0  | 7   | 8 PITG_04175  |
| 52 | 206 | 11 NA         |
| 0  | 13  | 12 NA         |
| 0  | 0   | 0 PITG_13397  |
| 0  | 10  | 0 NA          |
| 0  | 4   | 2 PITG_04342  |
| 0  | 0   | 2 NA          |
| 0  | 0   | 2 PITG_18024  |
| 0  | 2   | 2 PITG_15039  |
| 0  | 6   | 0 PITG_17453  |
| 0  | 6   | 0 NA          |
| 0  | 7   | 24 PITG_07815 |
| 0  | 2   | 0 PITG_00238  |
| 0  | 0   | 2 PITG_16020  |
| 0  | 0   | 68 PITG_13201 |
| 0  | 2   | 8 PITG_08139  |
| 0  | 0   | 3 PITG_00524  |
| 2  | 287 | 3000 NA       |
| 0  | 5   | 0 NA          |
| 0  | 0   | 0 PITG_01774  |
| 0  | 0   | 2 NA          |
| 0  | 10  | 2 NA          |
| 0  | 2   | 0 PITG_02230  |
| 0  | 0   | 24 PITG_06673 |
| 0  | 0   | 18 PITG_09415 |
| 0  | 38  | 40 PITG_03627 |
| 0  | 0   | 4 PITG_18084  |
| 0  | 5   | 4 PITG_06319  |
| 0  | 20  | 24 PITG_10969 |
| 0  | 26  | 4 NA          |
| 0  | 2   | 2 NA          |
| 0  | 15  | 2 NA          |
| 0  | 0   | 6 PITG_01878  |
| 0  | 4   | 0 PITG_00012  |
| 0  | 8   | 4 NA          |
| 0  | 31  | 43 PITG_19773 |
| 0  | 0   | 0 NA          |
| 0  | 6   | 2 PITG_16179  |
| 0  | 0   | 3 PITG_02564  |
| 0  | 3   | 0 NA          |
| 5  | 2   | 4 NA          |
| 0  | 10  | 50 PITG_07286 |
| 0  | 0   | 7 PITG_08746  |
| 0  | 0   | 0 PITG_09954  |
| 0  | 8   | 2 PITG_10001  |

|    |     |               |
|----|-----|---------------|
| 0  | 8   | 15 PITG_06970 |
| 0  | 4   | 2 PITG_06903  |
| 0  | 0   | 0 PITG_07154  |
| 0  | 0   | 0 PITG_16976  |
| 0  | 10  | 4 PITG_19659  |
| 0  | 2   | 0 PITG_02730  |
| 0  | 4   | 3 PITG_15509  |
| 0  | 0   | 2 PITG_06239  |
| 0  | 78  | 30 NA         |
| 0  | 0   | 0 PITG_01588  |
| 0  | 0   | 0 PITG_11274  |
| 0  | 32  | 22 PITG_17242 |
| 0  | 82  | 27 NA         |
| 0  | 270 | 631 NA        |
| 0  | 22  | 7 PITG_12567  |
| 0  | 6   | 4 PITG_13830  |
| 0  | 16  | 8 PITG_01932  |
| 0  | 4   | 3 PITG_00283  |
| 0  | 3   | 12 PITG_13040 |
| 0  | 9   | 8 PITG_03966  |
| 0  | 0   | 0 PITG_01282  |
| 0  | 19  | 33 PITG_14248 |
| 0  | 99  | 55 PITG_07293 |
| 0  | 41  | 50 PITG_03971 |
| 0  | 13  | 20 PITG_23159 |
| 0  | 15  | 9 PITG_03521  |
| 0  | 0   | 2 PITG_01836  |
| 0  | 19  | 2 PITG_01921  |
| 0  | 33  | 26 PITG_10968 |
| 0  | 18  | 10 PITG_00281 |
| 0  | 7   | 0 PITG_08572  |
| 13 | 2   | 87 NA         |
| 0  | 3   | 0 PITG_16340  |
| 0  | 7   | 4 PITG_16783  |
| 0  | 3   | 0 NA          |
| 0  | 14  | 4 NA          |
| 0  | 0   | 0 PITG_09930  |
| 0  | 25  | 2 PITG_11651  |
| 0  | 3   | 7 PITG_12280  |
| 0  | 0   | 2 NA          |
| 0  | 22  | 4 PITG_16770  |
| 0  | 4   | 8 PITG_03740  |
| 0  | 2   | 0 PITG_13803  |
| 0  | 77  | 38 PITG_00448 |
| 0  | 0   | 0 PITG_07892  |
| 0  | 3   | 0 PITG_03179  |
| 0  | 2   | 2 PITG_11206  |

|     |    |               |
|-----|----|---------------|
| 0   | 4  | 0 PITG_04973  |
| 0   | 16 | 2 NA          |
| 0   | 31 | 9 PITG_05507  |
| 0   | 17 | 6 PITG_19224  |
| 0   | 13 | 28 PITG_10449 |
| 0   | 10 | 3 PITG_17876  |
| 0   | 0  | 2 PITG_03142  |
| 0   | 6  | 2 PITG_10351  |
| 0   | 31 | 39 PITG_06205 |
| 0   | 0  | 0 PITG_04861  |
| 0   | 0  | 0 PITG_11157  |
| 0   | 50 | 11 PITG_15869 |
| 0   | 0  | 2 NA          |
| 0   | 42 | 14 PITG_08172 |
| 0   | 8  | 4 PITG_08473  |
| 0   | 31 | 25 NA         |
| 0   | 11 | 4 PITG_04482  |
| 0   | 0  | 0 PITG_06570  |
| 0   | 0  | 4 NA          |
| 0   | 52 | 4 NA          |
| 0   | 0  | 0 NA          |
| 0   | 5  | 2 PITG_15062  |
| 0   | 29 | 22 PITG_01242 |
| 0   | 0  | 0 PITG_17669  |
| 0   | 8  | 9 PITG_16038  |
| 0   | 4  | 4 PITG_12326  |
| 0   | 4  | 0 NA          |
| 0   | 0  | 14 PITG_07201 |
| 0   | 12 | 7 NA          |
| 0   | 0  | 0 PITG_00064  |
| 0   | 2  | 5 NA          |
| 0   | 0  | 0 NA          |
| 0   | 0  | 0 PITG_02139  |
| 0   | 81 | 20 NA         |
| 0   | 8  | 2 PITG_13775  |
| 0   | 15 | 25 NA         |
| 0   | 65 | 27 PITG_22947 |
| 0   | 0  | 2 PITG_00840  |
| 0   | 4  | 0 PITG_01614  |
| 0   | 7  | 4 PITG_06803  |
| 350 | 11 | 543 NA        |
| 0   | 4  | 14 PITG_12342 |
| 0   | 31 | 25 PITG_06636 |
| 0   | 2  | 6 PITG_13913  |
| 0   | 76 | 2 NA          |
| 0   | 4  | 2 PITG_00473  |
| 0   | 26 | 10 PITG_14277 |

|   |     |                |
|---|-----|----------------|
| 0 | 6   | 18 PITG_16333  |
| 0 | 4   | 16 PITG_10894  |
| 0 | 9   | 4 NA           |
| 0 | 4   | 0 PITG_06618   |
| 0 | 2   | 4 PITG_18049   |
| 0 | 2   | 2 NA           |
| 0 | 17  | 14 PITG_07801  |
| 0 | 0   | 2 PITG_10602   |
| 0 | 7   | 0 PITG_14442   |
| 0 | 0   | 0 PITG_10026   |
| 0 | 0   | 8 PITG_21014   |
| 0 | 229 | 41 PITG_17480  |
| 0 | 0   | 2 PITG_18519   |
| 0 | 2   | 5 PITG_00191   |
| 0 | 30  | 7 PITG_15576   |
| 0 | 6   | 23 PITG_18712  |
| 0 | 14  | 7 PITG_09243   |
| 0 | 5   | 2 NA           |
| 0 | 87  | 9 NA           |
| 0 | 0   | 0 PITG_20715   |
| 0 | 26  | 12 NA          |
| 0 | 58  | 51 PITG_07810  |
| 0 | 21  | 6 PITG_07810   |
| 0 | 10  | 42 PITG_12113  |
| 0 | 19  | 0 PITG_03295   |
| 0 | 9   | 2 PITG_03301   |
| 0 | 2   | 2 PITG_13291   |
| 0 | 0   | 2 PITG_01424   |
| 0 | 3   | 7 PITG_03476   |
| 0 | 2   | 0 PITG_22253   |
| 0 | 7   | 5 PITG_04905   |
| 0 | 14  | 0 NA           |
| 0 | 5   | 8 PITG_03909   |
| 0 | 0   | 0 PITG_03008   |
| 0 | 83  | 74 PITG_20035  |
| 0 | 13  | 9 PITG_06946   |
| 0 | 9   | 6 PITG_11023   |
| 0 | 2   | 6 PITG_02195   |
| 0 | 0   | 0 PITG_16207   |
| 0 | 25  | 10 NA          |
| 0 | 478 | 654 PITG_15999 |
| 0 | 2   | 2 PITG_10097   |
| 0 | 13  | 16 PITG_18004  |
| 0 | 8   | 2 PITG_14603   |
| 0 | 4   | 0 PITG_21595   |
| 0 | 17  | 0 PITG_19046   |
| 0 | 6   | 10 PITG_12469  |

|     |     |                |
|-----|-----|----------------|
| 0   | 7   | 14 NA          |
| 0   | 10  | 6 PITG_00947   |
| 0   | 22  | 0 PITG_07653   |
| 0   | 30  | 32 PITG_03702  |
| 0   | 0   | 2 PITG_03064   |
| 0   | 4   | 2 PITG_12715   |
| 0   | 0   | 3 PITG_16020   |
| 0   | 32  | 20 PITG_07011  |
| 0   | 113 | 38 NA          |
| 0   | 2   | 2 PITG_02495   |
| 0   | 19  | 0 PITG_06938   |
| 0   | 0   | 4 PITG_23215   |
| 0   | 4   | 5 PITG_02531   |
| 0   | 11  | 0 NA           |
| 0   | 6   | 2 NA           |
| 0   | 0   | 0 PITG_16462   |
| 0   | 0   | 0 NA           |
| 0   | 30  | 0 PITG_13571   |
| 0   | 10  | 2 PITG_10794   |
| 0   | 6   | 6 PITG_00411   |
| 0   | 65  | 29 PITG_10312  |
| 0   | 0   | 12 PITG_06863  |
| 0   | 3   | 0 PITG_03267   |
| 0   | 0   | 0 NA           |
| 0   | 25  | 20 NA          |
| 0   | 4   | 2 PITG_23143   |
| 243 | 163 | 2488 NA        |
| 0   | 11  | 32 NA          |
| 0   | 13  | 15 NA          |
| 0   | 12  | 15 PITG_03414  |
| 0   | 0   | 9 PITG_03408   |
| 0   | 0   | 0 PITG_19544   |
| 0   | 4   | 2 PITG_08926   |
| 0   | 4   | 2 PITG_12797   |
| 0   | 2   | 2 PITG_08295   |
| 0   | 13  | 12 PITG_20502  |
| 0   | 9   | 2 PITG_16092   |
| 0   | 21  | 11 PITG_13971  |
| 0   | 13  | 2 PITG_03267   |
| 0   | 0   | 2 PITG_03771   |
| 0   | 253 | 251 PITG_07728 |
| 0   | 0   | 18 PITG_11039  |
| 0   | 7   | 5 PITG_08766   |
| 0   | 17  | 21 PITG_16207  |
| 0   | 26  | 36 PITG_11723  |
| 0   | 2   | 2 PITG_03341   |
| 0   | 2   | 5 PITG_12260   |

|     |     |               |
|-----|-----|---------------|
| 0   | 2   | 6 NA          |
| 0   | 2   | 36 PITG_14008 |
| 0   | 3   | 0 NA          |
| 0   | 0   | 0 PITG_15058  |
| 0   | 4   | 8 PITG_02730  |
| 0   | 0   | 0 PITG_05282  |
| 0   | 0   | 0 NA          |
| 0   | 11  | 5 NA          |
| 0   | 3   | 0 PITG_13663  |
| 0   | 0   | 0 PITG_03110  |
| 0   | 0   | 4 PITG_04506  |
| 0   | 6   | 2 PITG_02978  |
| 0   | 12  | 5 PITG_14284  |
| 0   | 21  | 17 PITG_03789 |
| 0   | 42  | 23 PITG_03018 |
| 0   | 0   | 0 NA          |
| 0   | 0   | 2 PITG_12699  |
| 0   | 63  | 12 NA         |
| 0   | 17  | 7 PITG_11242  |
| 0   | 16  | 25 PITG_06578 |
| 0   | 0   | 0 PITG_18272  |
| 0   | 0   | 7 PITG_07230  |
| 0   | 0   | 0 PITG_10058  |
| 0   | 0   | 0 PITG_07411  |
| 0   | 60  | 2 PITG_05329  |
| 193 | 245 | 3312 NA       |
| 0   | 0   | 9 PITG_07153  |
| 0   | 9   | 0 NA          |
| 0   | 19  | 2 PITG_16102  |
| 0   | 2   | 2 NA          |
| 0   | 2   | 0 PITG_17408  |
| 0   | 0   | 0 NA          |
| 0   | 0   | 2 PITG_09483  |
| 0   | 0   | 0 PITG_04973  |
| 0   | 4   | 2 PITG_14887  |
| 0   | 13  | 0 NA          |
| 0   | 5   | 43 PITG_16808 |
| 404 | 44  | 39 NA         |
| 0   | 0   | 0 PITG_10161  |
| 0   | 0   | 6 PITG_20287  |
| 0   | 4   | 0 PITG_00075  |
| 0   | 11  | 2 PITG_17422  |
| 0   | 5   | 5 PITG_02531  |
| 0   | 34  | 62 PITG_10384 |
| 0   | 4   | 2 NA          |
| 0   | 2   | 0 PITG_15301  |
| 0   | 22  | 4 PITG_14489  |

|   |     |                |
|---|-----|----------------|
| 0 | 13  | 18 PITG_19875  |
| 0 | 5   | 2 NA           |
| 0 | 2   | 0 PITG_07422   |
| 0 | 39  | 4 NA           |
| 0 | 5   | 0 NA           |
| 0 | 0   | 2 PITG_03703   |
| 0 | 4   | 2 NA           |
| 0 | 24  | 2 PITG_02372   |
| 0 | 4   | 17 PITG_08780  |
| 0 | 0   | 201 NA         |
| 0 | 38  | 70 PITG_16207  |
| 0 | 3   | 10 PITG_19429  |
| 0 | 0   | 4 PITG_16462   |
| 0 | 16  | 53 PITG_02752  |
| 0 | 15  | 82 PITG_18731  |
| 0 | 3   | 2 PITG_07888   |
| 0 | 14  | 2 NA           |
| 0 | 5   | 12 PITG_02487  |
| 0 | 14  | 29 PITG_14131  |
| 0 | 13  | 2 PITG_04674   |
| 0 | 8   | 0 NA           |
| 0 | 53  | 2 NA           |
| 0 | 4   | 0 PITG_21211   |
| 0 | 3   | 0 NA           |
| 0 | 2   | 3 PITG_13149   |
| 0 | 0   | 2 PITG_13801   |
| 0 | 25  | 11 NA          |
| 0 | 0   | 4 PITG_03040   |
| 0 | 0   | 0 PITG_08393   |
| 0 | 18  | 4 NA           |
| 0 | 68  | 21 PITG_15609  |
| 0 | 29  | 104 PITG_13151 |
| 0 | 3   | 2 PITG_03076   |
| 0 | 0   | 0 PITG_04023   |
| 0 | 8   | 6 PITG_01097   |
| 0 | 25  | 178 PITG_10819 |
| 0 | 9   | 10 PITG_02146  |
| 0 | 596 | 149 PITG_06672 |
| 0 | 21  | 73 PITG_21886  |
| 0 | 5   | 7 PITG_00955   |
| 0 | 8   | 4 PITG_10801   |
| 0 | 29  | 5 PITG_12120   |
| 0 | 5   | 11 PITG_00440  |
| 0 | 2   | 2 PITG_10301   |
| 0 | 8   | 4 PITG_12319   |
| 0 | 4   | 2 NA           |
| 0 | 0   | 4 PITG_03415   |



|   |     |                |
|---|-----|----------------|
| 0 | 0   | 2 PITG_17816   |
| 0 | 28  | 0 PITG_17248   |
| 0 | 44  | 18 PITG_05319  |
| 0 | 13  | 15 PITG_10445  |
| 0 | 14  | 0 PITG_21525   |
| 0 | 0   | 2 PITG_01932   |
| 0 | 6   | 2 PITG_19606   |
| 0 | 0   | 0 PITG_09477   |
| 0 | 0   | 0 PITG_16107   |
| 0 | 0   | 0 NA           |
| 0 | 63  | 35 PITG_10830  |
| 0 | 5   | 4 PITG_05623   |
| 0 | 0   | 2 PITG_04677   |
| 0 | 11  | 2 NA           |
| 0 | 178 | 108 PITG_17480 |
| 0 | 7   | 6 PITG_11804   |
| 0 | 4   | 6 PITG_06240   |
| 0 | 2   | 15 PITG_02786  |
| 0 | 3   | 19 PITG_05505  |
| 0 | 0   | 0 NA           |
| 0 | 5   | 0 PITG_00818   |
| 0 | 0   | 2 PITG_22719   |
| 0 | 14  | 9 NA           |
| 0 | 0   | 0 PITG_22122   |
| 0 | 5   | 2 PITG_01647   |
| 0 | 0   | 0 NA           |
| 0 | 0   | 0 PITG_15116   |
| 0 | 0   | 2 PITG_17049   |
| 0 | 2   | 4 PITG_16797   |
| 0 | 15  | 6 NA           |
| 0 | 69  | 90 PITG_02058  |
| 0 | 156 | 46 PITG_01793  |
| 0 | 0   | 0 PITG_08473   |
| 0 | 8   | 4 PITG_10645   |
| 0 | 0   | 2 PITG_12196   |
| 0 | 4   | 0 NA           |
| 0 | 13  | 12 PITG_18421  |
| 0 | 4   | 11 PITG_18084  |
| 0 | 0   | 0 PITG_10117   |
| 0 | 56  | 57 PITG_07096  |
| 0 | 3   | 0 PITG_04133   |
| 0 | 12  | 4 PITG_10380   |
| 0 | 8   | 31 NA          |
| 0 | 18  | 22 PITG_08404  |
| 0 | 0   | 4 PITG_08751   |
| 0 | 53  | 50 PITG_11734  |
| 0 | 0   | 4 PITG_12572   |

|    |     |               |
|----|-----|---------------|
| 0  | 2   | 0 PITG_09293  |
| 0  | 10  | 8 PITG_15779  |
| 0  | 13  | 4 PITG_00723  |
| 0  | 0   | 0 PITG_21523  |
| 0  | 0   | 0 NA          |
| 0  | 13  | 8 PITG_06424  |
| 0  | 5   | 6 PITG_01480  |
| 0  | 0   | 0 NA          |
| 0  | 4   | 4 PITG_17348  |
| 0  | 2   | 2 PITG_16103  |
| 0  | 0   | 0 PITG_17004  |
| 0  | 3   | 2 PITG_10813  |
| 0  | 9   | 18 PITG_03267 |
| 9  | 2   | 22 NA         |
| 0  | 2   | 14 PITG_01124 |
| 0  | 11  | 0 PITG_03328  |
| 0  | 2   | 0 PITG_02027  |
| 0  | 12  | 7 PITG_05518  |
| 0  | 13  | 10 PITG_12211 |
| 0  | 4   | 0 NA          |
| 0  | 232 | 30 NA         |
| 0  | 74  | 58 NA         |
| 0  | 16  | 2 PITG_01439  |
| 0  | 2   | 0 PITG_09313  |
| 24 | 0   | 5 NA          |
| 0  | 2   | 17 NA         |
| 0  | 21  | 2 PITG_14977  |
| 0  | 12  | 20 PITG_22450 |
| 0  | 108 | 39 PITG_03878 |
| 0  | 22  | 4 PITG_08803  |
| 0  | 5   | 7 NA          |
| 0  | 37  | 10 NA         |
| 0  | 2   | 9 PITG_09956  |
| 0  | 8   | 0 NA          |
| 0  | 27  | 2 PITG_05556  |
| 0  | 0   | 0 PITG_00911  |
| 0  | 19  | 3 PITG_01560  |
| 0  | 0   | 2 PITG_05298  |
| 0  | 10  | 56 PITG_22163 |
| 0  | 6   | 7 NA          |
| 0  | 12  | 8 PITG_02952  |
| 0  | 0   | 0 PITG_13979  |
| 0  | 14  | 6 PITG_00410  |
| 0  | 0   | 7 PITG_09450  |
| 0  | 0   | 20 PITG_14573 |
| 0  | 19  | 35 PITG_02561 |
| 0  | 29  | 69 NA         |

|   |     |                |
|---|-----|----------------|
| 0 | 0   | 4 PITG_11460   |
| 0 | 8   | 36 PITG_03824  |
| 0 | 20  | 11 PITG_07937  |
| 0 | 2   | 2 PITG_03560   |
| 0 | 2   | 2 NA           |
| 0 | 0   | 4 PITG_08316   |
| 0 | 21  | 45 PITG_11567  |
| 0 | 20  | 28 PITG_03348  |
| 0 | 17  | 23 PITG_18658  |
| 0 | 7   | 11 PITG_10481  |
| 0 | 14  | 19 PITG_05478  |
| 0 | 137 | 241 PITG_13785 |
| 0 | 5   | 4 PITG_17021   |
| 0 | 8   | 12 PITG_00818  |
| 0 | 4   | 6 NA           |
| 0 | 10  | 2 PITG_06898   |
| 0 | 11  | 0 NA           |
| 0 | 38  | 0 NA           |
| 0 | 0   | 6 PITG_16152   |
| 0 | 8   | 4 PITG_07063   |
| 0 | 13  | 4 PITG_18473   |
| 0 | 0   | 0 NA           |
| 0 | 0   | 7 PITG_00734   |
| 0 | 44  | 20 PITG_07715  |
| 0 | 6   | 11 PITG_10952  |
| 0 | 7   | 7 PITG_20893   |
| 0 | 0   | 0 PITG_10729   |
| 0 | 0   | 0 NA           |
| 0 | 4   | 0 PITG_03757   |
| 0 | 5   | 3 PITG_19419   |
| 0 | 3   | 2 PITG_01614   |
| 0 | 4   | 2 PITG_17933   |
| 0 | 10  | 2 PITG_11019   |
| 0 | 0   | 0 PITG_21409   |
| 0 | 0   | 0 NA           |
| 0 | 8   | 0 PITG_03451   |
| 0 | 0   | 2 PITG_17028   |
| 0 | 41  | 26 NA          |
| 0 | 45  | 0 PITG_11735   |
| 0 | 2   | 5 PITG_16054   |
| 0 | 10  | 6 NA           |
| 0 | 0   | 2 PITG_02531   |
| 0 | 4   | 10 PITG_08237  |
| 0 | 0   | 2 PITG_17404   |
| 0 | 30  | 2 NA           |
| 0 | 8   | 8 PITG_01953   |
| 0 | 85  | 35 PITG_01258  |

|    |     |               |
|----|-----|---------------|
| 0  | 2   | 2 NA          |
| 0  | 9   | 2 NA          |
| 0  | 23  | 14 PITG_12579 |
| 0  | 4   | 7 PITG_02981  |
| 0  | 10  | 0 PITG_10202  |
| 0  | 117 | 66 NA         |
| 0  | 32  | 6 NA          |
| 0  | 0   | 0 PITG_17882  |
| 0  | 0   | 7 NA          |
| 0  | 2   | 7 PITG_15748  |
| 0  | 0   | 4 PITG_09862  |
| 0  | 2   | 4 PITG_16006  |
| 0  | 48  | 12 PITG_13850 |
| 0  | 8   | 3 PITG_17273  |
| 0  | 26  | 0 PITG_17076  |
| 0  | 0   | 2 PITG_15856  |
| 0  | 22  | 8 NA          |
| 0  | 0   | 0 NA          |
| 0  | 24  | 5 PITG_15491  |
| 0  | 46  | 2 PITG_04939  |
| 0  | 79  | 38 NA         |
| 0  | 0   | 2 PITG_03409  |
| 0  | 2   | 5 PITG_13064  |
| 0  | 29  | 16 PITG_04990 |
| 0  | 0   | 4 PITG_01068  |
| 0  | 0   | 14 PITG_00648 |
| 0  | 0   | 0 PITG_04603  |
| 0  | 0   | 0 PITG_07381  |
| 0  | 0   | 0 NA          |
| 0  | 2   | 2 PITG_15852  |
| 0  | 2   | 2 PITG_04931  |
| 0  | 4   | 8 PITG_14573  |
| 0  | 0   | 17 PITG_03335 |
| 10 | 11  | 126 NA        |
| 0  | 25  | 30 PITG_05192 |
| 0  | 5   | 4 NA          |
| 0  | 8   | 0 PITG_03650  |
| 59 | 0   | 34 NA         |
| 0  | 25  | 21 PITG_01055 |
| 0  | 3   | 5 PITG_10553  |
| 0  | 15  | 14 PITG_14284 |
| 0  | 4   | 16 PITG_01991 |
| 0  | 0   | 8 PITG_17745  |
| 0  | 0   | 8 PITG_10600  |
| 0  | 2   | 2 PITG_01756  |
| 0  | 0   | 2 PITG_08609  |
| 0  | 0   | 6 PITG_17936  |

|   |      |                 |
|---|------|-----------------|
| 0 | 6    | 2 PITG_02637    |
| 0 | 8    | 13 PITG_09413   |
| 0 | 38   | 0 PITG_22859    |
| 0 | 2    | 15 PITG_00882   |
| 0 | 44   | 6 NA            |
| 0 | 10   | 6 PITG_20251    |
| 0 | 0    | 2 PITG_15921    |
| 0 | 0    | 2 PITG_21046    |
| 0 | 2    | 14 PITG_11225   |
| 0 | 19   | 50 NA           |
| 0 | 0    | 4 PITG_15089    |
| 0 | 2    | 7 PITG_06897    |
| 0 | 2    | 0 PITG_01076    |
| 0 | 18   | 7 PITG_06803    |
| 0 | 80   | 427 PITG_14175  |
| 0 | 17   | 10 PITG_21166   |
| 0 | 9    | 28 NA           |
| 0 | 216  | 22 NA           |
| 0 | 2    | 8 NA            |
| 0 | 0    | 8 PITG_10161    |
| 0 | 2    | 0 PITG_20344    |
| 0 | 7    | 0 NA            |
| 0 | 4    | 14 PITG_05149   |
| 0 | 2    | 8 PITG_19287    |
| 0 | 0    | 3 NA            |
| 0 | 3    | 4 NA            |
| 0 | 8    | 4 PITG_00176    |
| 0 | 48   | 0 NA            |
| 0 | 58   | 4 NA            |
| 0 | 18   | 38 PITG_08531   |
| 0 | 3    | 0 PITG_02273    |
| 0 | 29   | 20 PITG_02178   |
| 0 | 2023 | 1205 PITG_00121 |
| 0 | 43   | 117 PITG_16280  |
| 0 | 2    | 0 PITG_18075    |
| 0 | 10   | 0 PITG_11728    |
| 0 | 17   | 39 PITG_05819   |
| 0 | 8    | 34 PITG_17787   |
| 0 | 0    | 2 PITG_04845    |
| 0 | 0    | 2 NA            |
| 0 | 4    | 16 PITG_09428   |
| 0 | 7    | 5 PITG_05259    |
| 0 | 15   | 8 PITG_03265    |
| 0 | 0    | 10 PITG_03058   |
| 0 | 4    | 11 PITG_12000   |
| 0 | 98   | 51 PITG_04485   |
| 0 | 410  | 186 NA          |

|     |     |                |
|-----|-----|----------------|
| 0   | 0   | 2 PITG_12259   |
| 0   | 18  | 0 NA           |
| 0   | 21  | 18 PITG_16461  |
| 0   | 2   | 23 PITG_17287  |
| 0   | 0   | 0 PITG_10921   |
| 0   | 16  | 2 PITG_20903   |
| 0   | 46  | 130 PITG_11653 |
| 0   | 2   | 0 PITG_01005   |
| 0   | 0   | 0 NA           |
| 9   | 2   | 38 NA          |
| 0   | 0   | 0 NA           |
| 0   | 0   | 10 NA          |
| 0   | 2   | 0 PITG_08308   |
| 0   | 6   | 0 PITG_03633   |
| 0   | 20  | 6 PITG_20638   |
| 0   | 0   | 2 PITG_00450   |
| 0   | 10  | 3 NA           |
| 0   | 0   | 12 NA          |
| 0   | 8   | 4 PITG_05732   |
| 0   | 291 | 20 NA          |
| 0   | 24  | 19 PITG_18050  |
| 0   | 0   | 2 PITG_17950   |
| 0   | 0   | 0 PITG_20236   |
| 0   | 5   | 4 PITG_03620   |
| 0   | 2   | 12 PITG_08383  |
| 0   | 0   | 21 PITG_18056  |
| 0   | 24  | 2 NA           |
| 0   | 12  | 90 PITG_12161  |
| 0   | 12  | 10 NA          |
| 0   | 0   | 0 PITG_05633   |
| 0   | 47  | 59 PITG_04376  |
| 0   | 4   | 6 PITG_09985   |
| 0   | 0   | 0 PITG_08598   |
| 0   | 7   | 0 PITG_03389   |
| 0   | 2   | 2 NA           |
| 0   | 12  | 0 PITG_14979   |
| 0   | 0   | 4 PITG_03803   |
| 0   | 0   | 2 PITG_05479   |
| 277 | 12  | 445 NA         |
| 0   | 5   | 17 PITG_04011  |
| 0   | 4   | 6 PITG_16430   |
| 0   | 28  | 23 PITG_18366  |
| 0   | 7   | 2 PITG_04856   |
| 0   | 21  | 2 PITG_10388   |
| 0   | 2   | 3 PITG_13462   |
| 0   | 6   | 0 NA           |
| 0   | 2   | 11 PITG_12699  |

|    |     |                |
|----|-----|----------------|
| 0  | 2   | 0 NA           |
| 0  | 11  | 77 NA          |
| 0  | 0   | 2 PITG_00661   |
| 0  | 0   | 0 PITG_07865   |
| 62 | 23  | 1135 NA        |
| 0  | 17  | 17 PITG_01614  |
| 0  | 19  | 10 PITG_13803  |
| 0  | 9   | 7 NA           |
| 0  | 106 | 16 PITG_20608  |
| 0  | 2   | 2 PITG_12677   |
| 0  | 46  | 4 PITG_10949   |
| 0  | 6   | 21 PITG_04661  |
| 0  | 15  | 10 PITG_03499  |
| 0  | 101 | 35 NA          |
| 0  | 87  | 15 PITG_01153  |
| 6  | 15  | 199 NA         |
| 0  | 2   | 0 PITG_09780   |
| 0  | 0   | 2 PITG_21504   |
| 0  | 0   | 0 PITG_11083   |
| 0  | 6   | 2 PITG_09680   |
| 0  | 4   | 10 PITG_09770  |
| 0  | 39  | 0 NA           |
| 0  | 13  | 32 NA          |
| 0  | 0   | 4 NA           |
| 0  | 0   | 0 PITG_07102   |
| 0  | 0   | 2 PITG_11189   |
| 0  | 0   | 4 PITG_02547   |
| 0  | 7   | 4 PITG_02451   |
| 0  | 26  | 2 PITG_00417   |
| 0  | 0   | 0 PITG_16440   |
| 0  | 4   | 0 PITG_06182   |
| 0  | 0   | 2 PITG_10937   |
| 0  | 25  | 37 PITG_10921  |
| 0  | 20  | 0 PITG_01286   |
| 0  | 143 | 30 NA          |
| 0  | 2   | 15 PITG_22719  |
| 24 | 0   | 29 NA          |
| 0  | 4   | 30 NA          |
| 0  | 4   | 2 PITG_17439   |
| 0  | 32  | 9 PITG_02971   |
| 0  | 2   | 4 PITG_02796   |
| 0  | 134 | 7 NA           |
| 0  | 48  | 11 PITG_13604  |
| 0  | 3   | 2 PITG_05632   |
| 0  | 9   | 4 PITG_13939   |
| 0  | 6   | 2 NA           |
| 0  | 9   | 166 PITG_02022 |

|   |    |                |
|---|----|----------------|
| 0 | 2  | 0 PITG_10268   |
| 0 | 3  | 2 NA           |
| 0 | 9  | 0 PITG_03516   |
| 0 | 3  | 0 PITG_19658   |
| 0 | 3  | 6 PITG_15837   |
| 0 | 81 | 208 PITG_20689 |
| 0 | 5  | 11 PITG_17026  |
| 0 | 22 | 11 PITG_09644  |
| 0 | 37 | 15 NA          |
| 2 | 13 | 68 PITG_13250  |
| 0 | 0  | 0 PITG_03144   |
| 0 | 11 | 0 PITG_17767   |
| 0 | 0  | 2 PITG_17287   |
| 0 | 3  | 0 NA           |
| 0 | 12 | 6 NA           |
| 0 | 4  | 0 PITG_01817   |
| 0 | 6  | 10 NA          |
| 0 | 12 | 7 PITG_12691   |
| 0 | 10 | 2 PITG_14847   |
| 0 | 9  | 2 PITG_00665   |
| 0 | 0  | 8 PITG_07145   |
| 0 | 0  | 8 PITG_17348   |
| 0 | 7  | 6 NA           |
| 0 | 5  | 4 PITG_08547   |
| 0 | 2  | 0 PITG_05277   |
| 0 | 11 | 0 PITG_06631   |
| 0 | 12 | 6 PITG_03292   |
| 0 | 18 | 11 PITG_10015  |
| 0 | 7  | 4 PITG_08572   |
| 0 | 5  | 4 NA           |
| 0 | 16 | 29 PITG_06358  |
| 0 | 0  | 0 PITG_00413   |
| 0 | 0  | 0 PITG_03754   |
| 0 | 8  | 2 PITG_02575   |
| 0 | 26 | 0 PITG_11365   |
| 0 | 18 | 2 PITG_07436   |
| 0 | 3  | 3 NA           |
| 0 | 2  | 12 NA          |
| 0 | 0  | 0 PITG_14056   |
| 0 | 0  | 0 PITG_05757   |
| 0 | 41 | 120 PITG_01062 |
| 0 | 6  | 4 PITG_03592   |
| 0 | 2  | 9 PITG_16878   |
| 0 | 22 | 4 PITG_11161   |
| 0 | 60 | 3 PITG_05444   |
| 0 | 4  | 14 PITG_00167  |
| 0 | 0  | 2 NA           |



|      |     |               |
|------|-----|---------------|
| 0    | 3   | 2 PITG_01045  |
| 0    | 2   | 0 NA          |
| 0    | 4   | 7 PITG_07567  |
| 0    | 0   | 7 PITG_05509  |
| 0    | 11  | 14 NA         |
| 0    | 2   | 0 PITG_21852  |
| 0    | 51  | 51 PITG_06440 |
| 0    | 54  | 5 PITG_19581  |
| 11   | 28  | 120 NA        |
| 0    | 2   | 6 PITG_08461  |
| 0    | 0   | 0 NA          |
| 0    | 19  | 82 PITG_22035 |
| 0    | 3   | 0 PITG_10623  |
| 0    | 0   | 0 PITG_05176  |
| 0    | 53  | 24 PITG_16098 |
| 0    | 7   | 7 PITG_02347  |
| 0    | 0   | 15 PITG_03143 |
| 0    | 2   | 2 PITG_07589  |
| 0    | 15  | 49 PITG_19303 |
| 0    | 12  | 2 PITG_19002  |
| 0    | 79  | 74 PITG_06748 |
| 0    | 2   | 2 PITG_20213  |
| 0    | 12  | 19 PITG_16022 |
| 0    | 28  | 41 PITG_12749 |
| 0    | 0   | 0 NA          |
| 0    | 2   | 0 PITG_13826  |
| 3581 | 175 | 5308 NA       |
| 0    | 0   | 0 PITG_08206  |
| 0    | 0   | 0 PITG_03493  |
| 0    | 0   | 0 PITG_15509  |
| 0    | 31  | 25 PITG_13393 |
| 0    | 0   | 2 PITG_04973  |
| 0    | 2   | 6 NA          |
| 0    | 0   | 0 PITG_15026  |
| 0    | 2   | 0 PITG_18877  |
| 0    | 0   | 5 PITG_05328  |
| 0    | 9   | 18 PITG_05363 |
| 0    | 2   | 0 PITG_12232  |
| 0    | 3   | 4 PITG_02520  |
| 0    | 15  | 0 PITG_01483  |
| 0    | 0   | 0 NA          |
| 0    | 7   | 8 NA          |
| 0    | 8   | 13 PITG_09703 |
| 0    | 3   | 2 NA          |
| 0    | 0   | 0 PITG_00391  |
| 0    | 0   | 2 PITG_09943  |
| 0    | 6   | 9 NA          |

|     |     |               |
|-----|-----|---------------|
| 0   | 18  | 12 PITG_19096 |
| 0   | 2   | 4 PITG_14393  |
| 0   | 28  | 46 PITG_14111 |
| 0   | 4   | 2 PITG_11965  |
| 0   | 14  | 10 PITG_02718 |
| 0   | 4   | 2 NA          |
| 0   | 3   | 2 PITG_19242  |
| 514 | 199 | 876 NA        |
| 0   | 39  | 2 NA          |
| 0   | 25  | 2 PITG_04865  |
| 0   | 19  | 0 PITG_02592  |
| 0   | 0   | 0 NA          |
| 0   | 40  | 28 PITG_11587 |
| 0   | 53  | 7 PITG_15565  |
| 0   | 12  | 57 PITG_13324 |
| 0   | 44  | 2 PITG_00478  |
| 0   | 11  | 54 PITG_14557 |
| 0   | 4   | 2 PITG_01245  |
| 0   | 11  | 2 PITG_15544  |
| 0   | 37  | 7 PITG_01251  |
| 0   | 126 | 10 PITG_03643 |
| 0   | 6   | 12 PITG_16904 |
| 0   | 0   | 0 PITG_21869  |
| 0   | 11  | 0 NA          |
| 0   | 0   | 2 PITG_14123  |
| 0   | 0   | 2 PITG_06911  |
| 0   | 10  | 2 PITG_20563  |
| 0   | 6   | 0 PITG_05604  |
| 0   | 0   | 4 PITG_12140  |
| 0   | 13  | 10 NA         |
| 0   | 325 | 74 PITG_16853 |
| 0   | 11  | 0 PITG_02981  |
| 0   | 14  | 23 PITG_07868 |
| 0   | 5   | 2 PITG_03533  |
| 0   | 2   | 0 PITG_06570  |
| 0   | 53  | 41 PITG_10117 |
| 0   | 0   | 0 PITG_05560  |
| 0   | 2   | 0 PITG_16925  |
| 0   | 2   | 11 PITG_02667 |
| 0   | 11  | 6 PITG_18959  |
| 0   | 0   | 0 NA          |
| 0   | 5   | 4 PITG_11766  |
| 0   | 15  | 0 PITG_15537  |
| 0   | 0   | 13 PITG_08425 |
| 0   | 8   | 4 PITG_19532  |
| 0   | 80  | 84 PITG_04485 |
| 0   | 18  | 15 PITG_10321 |

|   |     |               |
|---|-----|---------------|
| 0 | 3   | 0 PITG_02418  |
| 0 | 0   | 0 PITG_18044  |
| 0 | 7   | 4 PITG_09448  |
| 2 | 38  | 39 PITG_17140 |
| 0 | 0   | 0 PITG_19857  |
| 0 | 0   | 14 PITG_19411 |
| 0 | 4   | 2 PITG_12489  |
| 0 | 11  | 32 PITG_17884 |
| 0 | 37  | 10 PITG_16001 |
| 0 | 0   | 4 PITG_06324  |
| 0 | 4   | 41 PITG_05498 |
| 0 | 78  | 34 PITG_11118 |
| 0 | 10  | 5 PITG_00871  |
| 0 | 9   | 0 PITG_08411  |
| 0 | 0   | 0 PITG_20374  |
| 0 | 19  | 14 PITG_10389 |
| 0 | 3   | 9 PITG_03767  |
| 0 | 0   | 2 NA          |
| 0 | 21  | 2 PITG_14393  |
| 0 | 9   | 4 PITG_02254  |
| 0 | 14  | 6 NA          |
| 0 | 12  | 7 NA          |
| 0 | 2   | 0 PITG_16068  |
| 0 | 0   | 13 PITG_10483 |
| 0 | 29  | 12 PITG_09866 |
| 0 | 51  | 3 PITG_01697  |
| 0 | 19  | 10 NA         |
| 0 | 4   | 4 PITG_00845  |
| 0 | 29  | 110 NA        |
| 0 | 29  | 6 NA          |
| 0 | 10  | 7 PITG_03039  |
| 0 | 14  | 14 PITG_14460 |
| 0 | 4   | 6 PITG_08599  |
| 0 | 4   | 0 PITG_00380  |
| 0 | 0   | 0 PITG_13188  |
| 0 | 0   | 3 PITG_19537  |
| 0 | 2   | 0 PITG_07902  |
| 0 | 15  | 14 PITG_05883 |
| 0 | 4   | 7 NA          |
| 0 | 22  | 10 PITG_00476 |
| 0 | 10  | 2 PITG_14048  |
| 0 | 0   | 0 PITG_07915  |
| 0 | 171 | 12 PITG_11699 |
| 0 | 6   | 4 PITG_01961  |
| 0 | 4   | 29 PITG_08038 |
| 0 | 323 | 214 NA        |
| 0 | 3   | 2 PITG_01272  |

|    |      |                 |
|----|------|-----------------|
| 0  | 4    | 0 PITG_01871    |
| 0  | 0    | 2 PITG_03813    |
| 0  | 17   | 13 PITG_12195   |
| 0  | 2    | 0 PITG_13663    |
| 0  | 0    | 0 PITG_16918    |
| 0  | 4    | 7 PITG_15696    |
| 0  | 0    | 0 PITG_14137    |
| 0  | 2    | 12 NA           |
| 0  | 64   | 73 NA           |
| 0  | 0    | 0 PITG_21571    |
| 0  | 21   | 4 NA            |
| 0  | 0    | 0 NA            |
| 0  | 0    | 0 NA            |
| 0  | 4    | 0 PITG_02495    |
| 0  | 9    | 8 PITG_00747    |
| 0  | 0    | 0 PITG_01993    |
| 0  | 0    | 2 PITG_21504    |
| 0  | 2    | 2 PITG_09378    |
| 0  | 2    | 10 PITG_18092   |
| 0  | 0    | 5 PITG_07192    |
| 0  | 0    | 2 PITG_06976    |
| 0  | 9    | 5 PITG_01225    |
| 0  | 4    | 2 PITG_19127    |
| 0  | 17   | 2 PITG_17997    |
| 0  | 0    | 0 PITG_06228    |
| 0  | 2    | 9 PITG_01444    |
| 0  | 6    | 4 PITG_03987    |
| 0  | 82   | 16 PITG_13319   |
| 0  | 5    | 4 NA            |
| 0  | 21   | 10 PITG_04439   |
| 0  | 6    | 0 PITG_08093    |
| 0  | 19   | 139 PITG_08082  |
| 0  | 4    | 6 PITG_00262    |
| 0  | 0    | 4 PITG_16331    |
| 0  | 70   | 118 PITG_01619  |
| 0  | 5    | 3 PITG_21176    |
| 0  | 31   | 17 PITG_06962   |
| 0  | 0    | 13 PITG_04599   |
| 0  | 0    | 0 NA            |
| 0  | 31   | 21 PITG_01283   |
| 0  | 0    | 0 PITG_16807    |
| 0  | 16   | 17 PITG_08002   |
| 0  | 0    | 0 PITG_21219    |
| 15 | 3    | 6 NA            |
| 0  | 6    | 2 PITG_07916    |
| 0  | 10   | 4 PITG_01603    |
| 0  | 1750 | 1542 PITG_09306 |

|     |    |                |
|-----|----|----------------|
| 0   | 22 | 23 PITG_11459  |
| 0   | 0  | 0 PITG_01097   |
| 0   | 2  | 0 NA           |
| 0   | 9  | 6 PITG_11271   |
| 0   | 6  | 2 PITG_00206   |
| 0   | 23 | 40 PITG_12082  |
| 0   | 19 | 0 PITG_10002   |
| 0   | 9  | 0 PITG_17551   |
| 0   | 0  | 0 PITG_12196   |
| 0   | 12 | 0 PITG_02728   |
| 0   | 12 | 12 PITG_19877  |
| 0   | 0  | 0 PITG_02821   |
| 0   | 44 | 79 PITG_07999  |
| 0   | 57 | 183 PITG_07999 |
| 0   | 6  | 0 PITG_21512   |
| 0   | 5  | 2 PITG_06776   |
| 11  | 0  | 12 NA          |
| 0   | 41 | 21 PITG_18650  |
| 0   | 4  | 0 NA           |
| 0   | 33 | 47 PITG_11689  |
| 0   | 0  | 0 NA           |
| 0   | 13 | 14 PITG_06991  |
| 0   | 9  | 15 PITG_17282  |
| 0   | 2  | 2 PITG_07262   |
| 0   | 2  | 0 PITG_17950   |
| 29  | 0  | 15 NA          |
| 0   | 4  | 0 PITG_15529   |
| 0   | 11 | 6 PITG_11587   |
| 0   | 12 | 11 PITG_02161  |
| 0   | 4  | 8 PITG_14473   |
| 0   | 17 | 6 PITG_10664   |
| 0   | 8  | 17 PITG_10167  |
| 0   | 23 | 9 PITG_22277   |
| 0   | 7  | 52 NA          |
| 0   | 4  | 2 NA           |
| 0   | 2  | 14 PITG_08216  |
| 80  | 28 | 0 NA           |
| 0   | 14 | 31 PITG_00349  |
| 0   | 10 | 14 PITG_04547  |
| 221 | 0  | 7 NA           |
| 13  | 0  | 19 NA          |
| 0   | 0  | 2 PITG_01463   |
| 0   | 7  | 0 PITG_13966   |
| 0   | 0  | 0 PITG_14420   |
| 0   | 0  | 0 PITG_00144   |
| 0   | 0  | 0 PITG_03289   |
| 0   | 33 | 64 PITG_07161  |

|     |    |               |
|-----|----|---------------|
| 0   | 22 | 15 PITG_18372 |
| 0   | 8  | 0 PITG_15062  |
| 0   | 0  | 38 PITG_18720 |
| 0   | 2  | 4 NA          |
| 0   | 0  | 0 PITG_02561  |
| 0   | 2  | 11 PITG_15467 |
| 0   | 4  | 2 PITG_02040  |
| 0   | 4  | 22 NA         |
| 0   | 9  | 17 PITG_18028 |
| 0   | 0  | 0 NA          |
| 0   | 15 | 0 NA          |
| 0   | 0  | 0 PITG_02203  |
| 0   | 0  | 0 NA          |
| 0   | 0  | 11 PITG_13804 |
| 0   | 4  | 0 PITG_18799  |
| 0   | 3  | 5 PITG_02322  |
| 0   | 26 | 20 NA         |
| 0   | 3  | 5 PITG_01751  |
| 0   | 3  | 2 NA          |
| 0   | 0  | 8 PITG_09726  |
| 0   | 2  | 11 PITG_06114 |
| 0   | 7  | 4 PITG_18416  |
| 0   | 8  | 3 PITG_14757  |
| 0   | 0  | 2 PITG_01386  |
| 0   | 0  | 8 PITG_00704  |
| 0   | 11 | 9 PITG_04880  |
| 0   | 87 | 40 PITG_03860 |
| 0   | 0  | 0 PITG_12566  |
| 0   | 7  | 2 NA          |
| 0   | 11 | 2 PITG_03381  |
| 0   | 6  | 10 PITG_17039 |
| 0   | 0  | 2 PITG_14747  |
| 0   | 0  | 0 NA          |
| 0   | 0  | 13 PITG_00188 |
| 0   | 4  | 25 PITG_01195 |
| 0   | 3  | 5 NA          |
| 0   | 4  | 0 PITG_00281  |
| 0   | 12 | 4 PITG_06084  |
| 0   | 4  | 14 PITG_20102 |
| 0   | 40 | 13 PITG_05509 |
| 0   | 4  | 0 NA          |
| 0   | 0  | 2 PITG_13223  |
| 0   | 52 | 11 NA         |
| 0   | 2  | 0 PITG_17168  |
| 460 | 20 | 1026 NA       |
| 0   | 0  | 0 PITG_01936  |
| 0   | 33 | 6 NA          |

|   |    |                |
|---|----|----------------|
| 0 | 51 | 793 PITG_22157 |
| 0 | 4  | 4 PITG_16179   |
| 0 | 4  | 36 PITG_10416  |
| 0 | 0  | 2 PITG_05512   |
| 0 | 0  | 0 NA           |
| 0 | 0  | 0 NA           |
| 0 | 0  | 0 NA           |
| 0 | 8  | 0 PITG_06997   |
| 0 | 0  | 5 NA           |
| 0 | 13 | 10 PITG_11773  |
| 0 | 0  | 2 PITG_21176   |
| 0 | 0  | 0 NA           |
| 0 | 2  | 0 PITG_08590   |
| 0 | 4  | 2 PITG_07100   |
| 0 | 0  | 2 PITG_08817   |
| 0 | 2  | 0 PITG_01263   |
| 0 | 0  | 2 PITG_02598   |
| 0 | 0  | 0 PITG_01719   |
| 0 | 0  | 6 PITG_01860   |
| 0 | 14 | 14 PITG_12326  |
| 0 | 4  | 37 PITG_00453  |
| 0 | 3  | 0 NA           |
| 0 | 5  | 2 PITG_05149   |
| 0 | 9  | 2 PITG_17601   |
| 0 | 3  | 0 PITG_12855   |
| 0 | 4  | 4 PITG_12053   |
| 0 | 0  | 7 PITG_13321   |
| 0 | 3  | 2 PITG_07099   |
| 0 | 2  | 7 NA           |
| 0 | 0  | 0 PITG_05627   |
| 0 | 0  | 0 NA           |
| 0 | 0  | 0 PITG_15672   |
| 0 | 0  | 2 NA           |
| 0 | 4  | 14 PITG_08680  |
| 0 | 4  | 16 PITG_07103  |
| 0 | 12 | 4 PITG_20289   |
| 0 | 12 | 16 PITG_21626  |
| 0 | 0  | 2 PITG_19115   |
| 0 | 8  | 2 PITG_17950   |
| 0 | 0  | 0 PITG_10979   |
| 0 | 0  | 2 NA           |
| 0 | 25 | 9 PITG_07184   |
| 0 | 30 | 13 PITG_10517  |
| 0 | 14 | 21 PITG_08045  |
| 0 | 0  | 2 NA           |
| 0 | 5  | 0 PITG_17979   |
| 0 | 56 | 0 PITG_01081   |

|      |     |                |
|------|-----|----------------|
| 0    | 2   | 0 PITG_20830   |
| 0    | 4   | 8 PITG_12572   |
| 0    | 52  | 166 PITG_20212 |
| 0    | 0   | 0 PITG_00125   |
| 0    | 0   | 3 PITG_12619   |
| 0    | 8   | 16 PITG_17639  |
| 0    | 31  | 19 PITG_08383  |
| 0    | 0   | 0 NA           |
| 0    | 4   | 5 PITG_17395   |
| 0    | 61  | 22 PITG_04875  |
| 0    | 7   | 9 PITG_08470   |
| 0    | 2   | 4 PITG_16207   |
| 0    | 7   | 21 PITG_06896  |
| 0    | 0   | 0 PITG_00324   |
| 0    | 0   | 6 NA           |
| 0    | 18  | 9 PITG_18279   |
| 0    | 0   | 0 NA           |
| 0    | 2   | 0 PITG_00148   |
| 0    | 31  | 62 PITG_01227  |
| 0    | 2   | 4 PITG_20714   |
| 0    | 0   | 13 PITG_04248  |
| 0    | 26  | 31 PITG_04547  |
| 0    | 0   | 0 PITG_12566   |
| 0    | 27  | 10 PITG_06426  |
| 76   | 0   | 3 NA           |
| 0    | 13  | 7 PITG_19928   |
| 0    | 6   | 0 PITG_20909   |
| 0    | 28  | 2 PITG_13044   |
| 0    | 0   | 0 PITG_12938   |
| 0    | 269 | 310 PITG_11997 |
| 200  | 7   | 393 NA         |
| 0    | 7   | 0 NA           |
| 0    | 2   | 14 PITG_00980  |
| 0    | 30  | 36 PITG_13435  |
| 0    | 11  | 12 PITG_16183  |
| 0    | 0   | 0 PITG_02697   |
| 0    | 9   | 6 NA           |
| 1316 | 35  | 1919 NA        |
| 0    | 3   | 2 PITG_06173   |
| 0    | 4   | 0 PITG_10264   |
| 0    | 20  | 4 PITG_07956   |
| 0    | 30  | 66 PITG_13419  |
| 0    | 2   | 0 NA           |
| 0    | 0   | 0 NA           |
| 0    | 37  | 19 NA          |
| 0    | 0   | 4 PITG_11122   |
| 0    | 0   | 0 NA           |



|     |     |                |
|-----|-----|----------------|
| 0   | 19  | 5 PITG_06978   |
| 0   | 9   | 6 PITG_18814   |
| 0   | 7   | 6 NA           |
| 0   | 108 | 85 PITG_09712  |
| 0   | 6   | 33 PITG_16199  |
| 0   | 49  | 9 PITG_18080   |
| 0   | 0   | 0 NA           |
| 0   | 40  | 36 NA          |
| 0   | 3   | 0 PITG_18726   |
| 0   | 67  | 39 PITG_03240  |
| 0   | 11  | 8 PITG_12105   |
| 0   | 2   | 0 PITG_09477   |
| 0   | 4   | 23 PITG_06923  |
| 0   | 11  | 0 PITG_02016   |
| 0   | 0   | 8 PITG_05311   |
| 0   | 5   | 23 PITG_01195  |
| 0   | 0   | 4 PITG_12302   |
| 0   | 44  | 12 PITG_03264  |
| 0   | 6   | 8 PITG_07881   |
| 0   | 0   | 6 NA           |
| 0   | 7   | 8 PITG_05556   |
| 0   | 22  | 7 PITG_05614   |
| 0   | 54  | 10 PITG_02826  |
| 0   | 13  | 2 PITG_20206   |
| 0   | 0   | 2 PITG_11100   |
| 0   | 17  | 14 PITG_22989  |
| 0   | 9   | 6 PITG_10118   |
| 0   | 0   | 0 NA           |
| 0   | 2   | 7 PITG_14580   |
| 0   | 10  | 0 PITG_09698   |
| 0   | 19  | 14 PITG_10969  |
| 0   | 10  | 2 PITG_01640   |
| 0   | 173 | 20 PITG_07024  |
| 0   | 2   | 0 PITG_17137   |
| 0   | 11  | 12 NA          |
| 246 | 11  | 274 NA         |
| 0   | 119 | 22 NA          |
| 0   | 66  | 125 PITG_00697 |
| 0   | 9   | 4 NA           |
| 435 | 384 | 283 NA         |
| 0   | 13  | 11 PITG_03980  |
| 0   | 0   | 0 PITG_04877   |
| 0   | 5   | 4 PITG_10388   |
| 0   | 3   | 24 PITG_09376  |
| 0   | 2   | 3 NA           |
| 0   | 6   | 0 NA           |
| 0   | 8   | 4 PITG_05511   |

|   |    |                |
|---|----|----------------|
| 0 | 18 | 23 PITG_08229  |
| 0 | 0  | 5 PITG_00757   |
| 0 | 0  | 4 PITG_00561   |
| 0 | 6  | 5 PITG_08394   |
| 0 | 10 | 13 PITG_01781  |
| 0 | 11 | 10 PITG_15329  |
| 0 | 6  | 27 PITG_13669  |
| 0 | 0  | 4 PITG_09950   |
| 0 | 29 | 2 PITG_17049   |
| 0 | 14 | 0 PITG_11410   |
| 0 | 0  | 0 PITG_00766   |
| 0 | 0  | 0 PITG_18433   |
| 0 | 40 | 6 PITG_14284   |
| 0 | 34 | 6 PITG_11203   |
| 0 | 0  | 0 PITG_07226   |
| 0 | 0  | 2 PITG_13412   |
| 0 | 0  | 0 PITG_17360   |
| 0 | 26 | 9 PITG_09211   |
| 0 | 5  | 2 PITG_03432   |
| 0 | 27 | 2 NA           |
| 0 | 6  | 0 PITG_03490   |
| 0 | 0  | 0 PITG_01978   |
| 0 | 4  | 4 NA           |
| 0 | 0  | 2 PITG_01076   |
| 0 | 7  | 7 PITG_17153   |
| 0 | 4  | 25 PITG_00676  |
| 0 | 0  | 2 NA           |
| 0 | 90 | 115 PITG_12577 |
| 0 | 6  | 4 NA           |
| 0 | 0  | 0 PITG_18174   |
| 0 | 19 | 6 PITG_16090   |
| 0 | 39 | 46 PITG_03018  |
| 0 | 0  | 0 PITG_05328   |
| 0 | 0  | 0 PITG_17461   |
| 0 | 6  | 2 PITG_09505   |
| 0 | 2  | 4 PITG_15924   |
| 0 | 0  | 3 NA           |
| 0 | 0  | 4 PITG_13228   |
| 0 | 3  | 2 PITG_06238   |
| 0 | 0  | 8 PITG_21875   |
| 0 | 3  | 13 PITG_17700  |
| 0 | 25 | 13 PITG_20216  |
| 0 | 2  | 9 PITG_01788   |
| 0 | 0  | 0 PITG_01188   |
| 0 | 51 | 9 PITG_02172   |
| 0 | 15 | 39 PITG_12113  |
| 0 | 17 | 7 NA           |

|   |     |                |
|---|-----|----------------|
| 0 | 0   | 4 PITG_15838   |
| 0 | 15  | 12 PITG_19294  |
| 0 | 0   | 0 PITG_08316   |
| 0 | 2   | 2 PITG_14562   |
| 0 | 10  | 2 NA           |
| 0 | 13  | 32 PITG_21601  |
| 0 | 4   | 2 PITG_13462   |
| 0 | 30  | 3 NA           |
| 0 | 0   | 10 PITG_02134  |
| 0 | 0   | 0 NA           |
| 0 | 0   | 0 PITG_02731   |
| 0 | 3   | 0 PITG_04453   |
| 0 | 2   | 7 PITG_01153   |
| 0 | 53  | 0 PITG_07011   |
| 0 | 6   | 4 PITG_03340   |
| 0 | 173 | 43 PITG_03278  |
| 0 | 4   | 0 PITG_00885   |
| 0 | 22  | 6 NA           |
| 0 | 0   | 2 PITG_10250   |
| 0 | 13  | 32 PITG_06871  |
| 0 | 10  | 0 PITG_10921   |
| 0 | 5   | 0 NA           |
| 0 | 21  | 16 PITG_18106  |
| 0 | 0   | 2 NA           |
| 0 | 4   | 4 PITG_10952   |
| 0 | 26  | 23 PITG_10516  |
| 0 | 0   | 2 PITG_14626   |
| 0 | 0   | 4 NA           |
| 0 | 10  | 106 PITG_11329 |
| 0 | 17  | 59 PITG_00850  |
| 0 | 2   | 0 NA           |
| 0 | 16  | 15 PITG_01549  |
| 0 | 2   | 0 NA           |
| 0 | 0   | 0 NA           |
| 0 | 36  | 32 PITG_03750  |
| 0 | 25  | 9 PITG_13736   |
| 0 | 2   | 3 PITG_01427   |
| 0 | 8   | 9 PITG_03497   |
| 0 | 0   | 2 PITG_21727   |
| 0 | 26  | 9 NA           |
| 0 | 0   | 2 NA           |
| 0 | 2   | 6 PITG_14600   |
| 0 | 14  | 19 PITG_05667  |
| 0 | 0   | 0 PITG_01683   |
| 0 | 303 | 219 NA         |
| 0 | 6   | 2 PITG_00809   |
| 0 | 2   | 0 PITG_14420   |

|    |     |               |
|----|-----|---------------|
| 0  | 13  | 88 PITG_08425 |
| 0  | 4   | 2 PITG_08093  |
| 0  | 3   | 7 PITG_09003  |
| 0  | 100 | 23 NA         |
| 0  | 0   | 8 NA          |
| 0  | 19  | 80 PITG_07567 |
| 0  | 0   | 0 PITG_10082  |
| 0  | 2   | 2 PITG_00882  |
| 0  | 2   | 2 PITG_02210  |
| 0  | 0   | 0 PITG_11119  |
| 0  | 0   | 0 NA          |
| 0  | 2   | 6 PITG_13070  |
| 0  | 2   | 6 PITG_22958  |
| 0  | 7   | 5 PITG_05244  |
| 0  | 23  | 11 NA         |
| 0  | 0   | 2 PITG_11020  |
| 0  | 0   | 0 PITG_00945  |
| 0  | 0   | 0 PITG_17124  |
| 0  | 0   | 0 NA          |
| 0  | 5   | 6 PITG_07191  |
| 0  | 15  | 0 NA          |
| 0  | 10  | 0 PITG_07944  |
| 0  | 16  | 20 PITG_12151 |
| 0  | 7   | 0 PITG_03514  |
| 0  | 0   | 0 PITG_00336  |
| 0  | 52  | 4 NA          |
| 0  | 4   | 0 PITG_20199  |
| 0  | 2   | 8 PITG_06011  |
| 0  | 0   | 0 PITG_14456  |
| 0  | 0   | 2 PITG_01852  |
| 0  | 3   | 9 PITG_01456  |
| 0  | 2   | 10 NA         |
| 0  | 13  | 11 PITG_18702 |
| 0  | 13  | 10 NA         |
| 0  | 2   | 0 PITG_05757  |
| 0  | 25  | 13 PITG_02697 |
| 82 | 32  | 0 NA          |
| 0  | 0   | 0 PITG_00148  |
| 0  | 90  | 4 NA          |
| 0  | 0   | 0 PITG_12699  |
| 0  | 11  | 0 NA          |
| 0  | 2   | 2 PITG_08470  |
| 0  | 0   | 10 PITG_18236 |
| 0  | 2   | 0 PITG_03523  |
| 0  | 3   | 0 PITG_14717  |
| 0  | 13  | 17 PITG_10480 |
| 0  | 5   | 8 NA          |

|    |    |               |
|----|----|---------------|
| 0  | 56 | 21 PITG_10145 |
| 0  | 19 | 16 PITG_14394 |
| 0  | 29 | 2 NA          |
| 0  | 11 | 0 PITG_03495  |
| 0  | 56 | 0 NA          |
| 0  | 8  | 6 NA          |
| 0  | 0  | 0 PITG_05277  |
| 0  | 6  | 4 PITG_17781  |
| 0  | 21 | 16 PITG_17230 |
| 0  | 28 | 28 PITG_06720 |
| 0  | 6  | 4 PITG_18298  |
| 87 | 0  | 12 NA         |
| 0  | 2  | 0 PITG_13774  |
| 0  | 17 | 20 PITG_04850 |
| 0  | 8  | 0 PITG_11137  |
| 0  | 2  | 2 NA          |
| 0  | 0  | 0 NA          |
| 0  | 21 | 28 PITG_09428 |
| 0  | 31 | 8 PITG_00385  |
| 0  | 7  | 2 PITG_00859  |
| 0  | 0  | 0 PITG_01520  |
| 0  | 0  | 0 PITG_12677  |
| 0  | 0  | 2 PITG_15820  |
| 0  | 4  | 2 PITG_08305  |
| 0  | 0  | 0 PITG_00646  |
| 0  | 0  | 0 PITG_06296  |
| 0  | 0  | 4 PITG_06986  |
| 0  | 32 | 18 NA         |
| 0  | 10 | 0 NA          |
| 0  | 2  | 0 PITG_17876  |
| 0  | 6  | 31 PITG_08383 |
| 0  | 2  | 0 PITG_15807  |
| 0  | 0  | 0 PITG_18008  |
| 0  | 8  | 14 PITG_05234 |
| 0  | 12 | 16 NA         |
| 0  | 10 | 2 NA          |
| 0  | 14 | 0 NA          |
| 0  | 9  | 7 PITG_01314  |
| 0  | 0  | 22 PITG_00396 |
| 0  | 0  | 0 NA          |
| 0  | 4  | 6 PITG_00188  |
| 0  | 3  | 8 PITG_00839  |
| 0  | 0  | 0 PITG_13298  |
| 0  | 0  | 10 NA         |
| 0  | 0  | 2 PITG_14730  |
| 0  | 13 | 8 PITG_04179  |
| 0  | 7  | 34 PITG_07717 |

|     |     |               |
|-----|-----|---------------|
| 403 | 58  | 172 NA        |
| 0   | 2   | 3 PITG_01376  |
| 0   | 0   | 0 PITG_05411  |
| 0   | 0   | 0 PITG_08481  |
| 0   | 64  | 23 PITG_02808 |
| 0   | 42  | 16 PITG_02799 |
| 0   | 8   | 2 PITG_19693  |
| 0   | 77  | 54 PITG_10483 |
| 0   | 4   | 2 PITG_02203  |
| 0   | 0   | 8 PITG_00983  |
| 6   | 25  | 3517 NA       |
| 0   | 19  | 4 PITG_06698  |
| 0   | 453 | 199 NA        |
| 0   | 5   | 0 NA          |
| 0   | 10  | 0 PITG_03260  |
| 0   | 0   | 20 PITG_09950 |
| 0   | 225 | 32 NA         |
| 0   | 20  | 7 PITG_04553  |
| 0   | 2   | 0 PITG_15097  |
| 0   | 50  | 0 PITG_05168  |
| 0   | 0   | 0 PITG_07312  |
| 0   | 7   | 18 PITG_17361 |
| 5   | 0   | 5 NA          |
| 0   | 140 | 19 PITG_13029 |
| 0   | 3   | 3 NA          |
| 0   | 3   | 5 PITG_18786  |
| 0   | 2   | 0 NA          |
| 0   | 7   | 0 PITG_00078  |
| 0   | 2   | 0 NA          |
| 0   | 5   | 5 PITG_18080  |
| 0   | 0   | 4 PITG_14565  |
| 0   | 71  | 11 PITG_02209 |
| 0   | 26  | 0 NA          |
| 0   | 27  | 11 PITG_14099 |
| 0   | 4   | 8 PITG_23160  |
| 0   | 2   | 2 PITG_11052  |
| 0   | 6   | 7 PITG_14353  |
| 0   | 0   | 2 PITG_09690  |
| 0   | 26  | 9 PITG_03565  |
| 0   | 0   | 2 PITG_04584  |
| 0   | 4   | 3 PITG_20319  |
| 0   | 5   | 2 PITG_13103  |
| 0   | 60  | 76 PITG_19065 |
| 0   | 0   | 4 PITG_07274  |
| 0   | 9   | 37 PITG_00820 |
| 0   | 0   | 6 PITG_18016  |
| 0   | 16  | 2 PITG_18867  |

|     |    |                |
|-----|----|----------------|
| 0   | 2  | 2 PITG_11089   |
| 0   | 3  | 11 PITG_06827  |
| 0   | 2  | 11 NA          |
| 0   | 2  | 8 PITG_18372   |
| 0   | 6  | 2 PITG_10014   |
| 0   | 5  | 2 PITG_18276   |
| 0   | 21 | 0 NA           |
| 0   | 15 | 5 PITG_09423   |
| 0   | 4  | 10 PITG_06429  |
| 0   | 11 | 9 NA           |
| 0   | 0  | 0 NA           |
| 0   | 0  | 0 PITG_11796   |
| 0   | 17 | 17 PITG_17767  |
| 0   | 37 | 17 PITG_17028  |
| 0   | 3  | 6 NA           |
| 0   | 4  | 0 PITG_03898   |
| 0   | 49 | 48 PITG_19418  |
| 0   | 0  | 0 PITG_18369   |
| 0   | 2  | 6 PITG_01412   |
| 0   | 5  | 24 NA          |
| 0   | 4  | 4 PITG_15509   |
| 0   | 2  | 4 PITG_00705   |
| 0   | 6  | 2 NA           |
| 0   | 0  | 0 NA           |
| 0   | 0  | 23 PITG_20928  |
| 0   | 7  | 0 PITG_16546   |
| 0   | 2  | 6 PITG_13434   |
| 0   | 0  | 0 PITG_02109   |
| 0   | 5  | 10 PITG_04481  |
| 0   | 15 | 28 PITG_03335  |
| 0   | 16 | 0 NA           |
| 0   | 23 | 2 NA           |
| 0   | 0  | 4 PITG_15240   |
| 0   | 2  | 9 PITG_16359   |
| 761 | 0  | 51 NA          |
| 0   | 9  | 4 PITG_07211   |
| 0   | 0  | 12 PITG_06912  |
| 0   | 5  | 0 PITG_00717   |
| 0   | 0  | 0 PITG_05194   |
| 0   | 5  | 11 NA          |
| 0   | 7  | 0 PITG_18393   |
| 0   | 14 | 4 NA           |
| 0   | 46 | 444 PITG_13014 |
| 0   | 0  | 0 PITG_03778   |
| 0   | 21 | 2 PITG_03952   |
| 0   | 14 | 8 PITG_03408   |
| 0   | 2  | 2 PITG_01457   |

|   |    |               |
|---|----|---------------|
| 0 | 0  | 0 PITG_02516  |
| 0 | 36 | 3 PITG_13999  |
| 0 | 4  | 2 NA          |
| 0 | 6  | 5 PITG_04709  |
| 0 | 38 | 20 NA         |
| 0 | 27 | 19 NA         |
| 0 | 5  | 14 PITG_06698 |
| 0 | 0  | 0 PITG_01789  |
| 0 | 7  | 2 NA          |
| 0 | 49 | 4 NA          |
| 0 | 40 | 25 PITG_16099 |
| 0 | 60 | 44 PITG_03342 |
| 0 | 2  | 11 PITG_03986 |
| 0 | 5  | 6 PITG_06898  |
| 0 | 2  | 5 NA          |
| 0 | 4  | 2 NA          |
| 0 | 30 | 58 PITG_01947 |
| 0 | 0  | 0 PITG_00147  |
| 0 | 4  | 11 PITG_01991 |
| 0 | 7  | 6 PITG_04732  |
| 0 | 0  | 0 PITG_09244  |
| 0 | 0  | 2 PITG_05282  |
| 0 | 0  | 0 PITG_14595  |
| 0 | 6  | 0 PITG_06964  |
| 0 | 40 | 0 PITG_17869  |
| 0 | 0  | 4 PITG_08367  |
| 0 | 0  | 0 PITG_08723  |
| 0 | 6  | 6 PITG_15505  |
| 0 | 2  | 2 PITG_02731  |
| 0 | 6  | 0 NA          |
| 0 | 74 | 86 PITG_09376 |
| 0 | 34 | 81 PITG_18025 |
| 0 | 5  | 6 PITG_01100  |
| 0 | 10 | 13 PITG_18014 |
| 0 | 31 | 26 PITG_17664 |
| 0 | 2  | 17 PITG_07795 |
| 0 | 28 | 0 NA          |
| 0 | 11 | 2 PITG_12987  |
| 0 | 12 | 7 PITG_13138  |
| 0 | 0  | 0 PITG_21077  |
| 0 | 0  | 0 PITG_13083  |
| 0 | 22 | 12 PITG_09712 |
| 0 | 0  | 2 PITG_10420  |
| 0 | 2  | 0 NA          |
| 0 | 32 | 13 PITG_19422 |
| 0 | 5  | 6 PITG_15779  |
| 0 | 2  | 0 PITG_12153  |



|     |     |                |
|-----|-----|----------------|
| 0   | 5   | 55 PITG_10921  |
| 0   | 0   | 4 PITG_05429   |
| 0   | 2   | 4 PITG_17673   |
| 0   | 18  | 8 PITG_19212   |
| 0   | 5   | 11 NA          |
| 0   | 2   | 4 PITG_08368   |
| 0   | 0   | 0 PITG_02018   |
| 0   | 0   | 0 PITG_19472   |
| 0   | 2   | 13 PITG_14854  |
| 0   | 3   | 2 NA           |
| 0   | 0   | 2 PITG_16311   |
| 0   | 0   | 3 PITG_04935   |
| 0   | 0   | 2 PITG_05547   |
| 0   | 3   | 4 PITG_17660   |
| 0   | 10  | 2 PITG_14757   |
| 0   | 0   | 3 PITG_03532   |
| 0   | 2   | 2 NA           |
| 0   | 15  | 2 NA           |
| 0   | 123 | 1912 NA        |
| 0   | 38  | 122 PITG_16156 |
| 0   | 2   | 2 PITG_19842   |
| 0   | 0   | 0 PITG_06732   |
| 0   | 11  | 3 PITG_02196   |
| 0   | 0   | 0 PITG_06903   |
| 0   | 0   | 0 PITG_00140   |
| 0   | 51  | 17 PITG_06978  |
| 0   | 2   | 0 PITG_18710   |
| 0   | 18  | 0 PITG_16021   |
| 0   | 11  | 2 PITG_00070   |
| 0   | 293 | 156 NA         |
| 0   | 0   | 0 PITG_18652   |
| 0   | 2   | 0 PITG_15821   |
| 0   | 4   | 4 PITG_00479   |
| 0   | 6   | 2 PITG_03400   |
| 0   | 54  | 47 PITG_04608  |
| 0   | 0   | 0 PITG_04105   |
| 0   | 63  | 2 PITG_20818   |
| 0   | 56  | 193 PITG_00571 |
| 0   | 0   | 0 PITG_00705   |
| 0   | 4   | 17 PITG_16975  |
| 0   | 249 | 28 PITG_04980  |
| 0   | 21  | 7 NA           |
| 0   | 19  | 2 PITG_02529   |
| 0   | 22  | 4 PITG_06107   |
| 0   | 6   | 4 NA           |
| 140 | 0   | 95 NA          |
| 0   | 22  | 82 PITG_07882  |

|    |    |                |
|----|----|----------------|
| 0  | 17 | 2 PITG_00075   |
| 0  | 7  | 6 PITG_12470   |
| 0  | 11 | 0 PITG_19762   |
| 0  | 2  | 0 NA           |
| 0  | 11 | 2 NA           |
| 0  | 0  | 2 PITG_05233   |
| 0  | 4  | 0 NA           |
| 0  | 0  | 3 PITG_03225   |
| 0  | 12 | 0 NA           |
| 0  | 5  | 0 PITG_14257   |
| 0  | 4  | 0 PITG_05587   |
| 0  | 24 | 0 NA           |
| 0  | 12 | 22 PITG_05653  |
| 0  | 27 | 11 PITG_13249  |
| 0  | 0  | 3 PITG_07655   |
| 0  | 8  | 0 PITG_07473   |
| 0  | 13 | 7 PITG_09073   |
| 0  | 2  | 8 PITG_03789   |
| 0  | 0  | 0 PITG_20032   |
| 18 | 7  | 16 NA          |
| 0  | 0  | 10 PITG_05520  |
| 0  | 16 | 0 PITG_03766   |
| 0  | 30 | 22 PITG_20203  |
| 0  | 4  | 13 NA          |
| 0  | 4  | 2 PITG_17882   |
| 0  | 75 | 86 PITG_13323  |
| 0  | 6  | 2 PITG_17077   |
| 0  | 0  | 0 PITG_20330   |
| 0  | 8  | 6 PITG_05173   |
| 0  | 0  | 7 PITG_20102   |
| 0  | 9  | 7 PITG_21179   |
| 0  | 40 | 11 PITG_08084  |
| 0  | 0  | 0 PITG_07165   |
| 0  | 15 | 9 PITG_03892   |
| 0  | 0  | 4 PITG_11743   |
| 0  | 27 | 31 PITG_03530  |
| 0  | 7  | 3 PITG_18297   |
| 0  | 4  | 2 NA           |
| 0  | 4  | 2 PITG_05560   |
| 0  | 62 | 0 PITG_00271   |
| 0  | 10 | 23 NA          |
| 0  | 0  | 2 PITG_04823   |
| 0  | 9  | 9 PITG_08304   |
| 0  | 50 | 120 PITG_02193 |
| 0  | 15 | 16 NA          |
| 0  | 2  | 62 PITG_20562  |
| 0  | 61 | 15 PITG_21110  |

|     |     |               |
|-----|-----|---------------|
| 0   | 0   | 2 NA          |
| 0   | 8   | 7 PITG_16199  |
| 0   | 48  | 67 PITG_08326 |
| 0   | 0   | 0 PITG_04861  |
| 0   | 2   | 2 PITG_18433  |
| 0   | 24  | 10 PITG_10845 |
| 0   | 4   | 6 PITG_17882  |
| 0   | 4   | 9 PITG_09241  |
| 0   | 25  | 21 PITG_20386 |
| 0   | 23  | 6 PITG_00854  |
| 0   | 20  | 5 PITG_03774  |
| 0   | 4   | 2 NA          |
| 0   | 94  | 21 PITG_03824 |
| 0   | 2   | 2 PITG_03491  |
| 0   | 0   | 6 PITG_07279  |
| 0   | 2   | 6 PITG_00630  |
| 0   | 24  | 28 PITG_00221 |
| 0   | 2   | 0 PITG_00854  |
| 0   | 7   | 2 NA          |
| 0   | 7   | 2 NA          |
| 0   | 4   | 0 PITG_03754  |
| 0   | 21  | 2 PITG_03478  |
| 0   | 0   | 0 PITG_19458  |
| 0   | 0   | 0 PITG_18184  |
| 0   | 9   | 3 NA          |
| 0   | 2   | 3 PITG_22477  |
| 0   | 6   | 0 PITG_11567  |
| 526 | 48  | 866 NA        |
| 0   | 7   | 4 PITG_16257  |
| 0   | 0   | 0 PITG_23305  |
| 0   | 0   | 7 PITG_11735  |
| 0   | 0   | 0 PITG_01048  |
| 0   | 0   | 8 PITG_00460  |
| 0   | 0   | 2 PITG_09985  |
| 0   | 10  | 20 PITG_05480 |
| 0   | 5   | 4 PITG_03941  |
| 0   | 2   | 4 PITG_00070  |
| 0   | 0   | 4 PITG_16179  |
| 0   | 14  | 0 PITG_12229  |
| 0   | 4   | 0 PITG_14602  |
| 0   | 13  | 4 PITG_02032  |
| 0   | 878 | 53 PITG_18382 |
| 0   | 25  | 12 PITG_07007 |
| 0   | 4   | 0 NA          |
| 0   | 24  | 14 PITG_06720 |
| 0   | 8   | 0 PITG_19916  |
| 0   | 27  | 0 PITG_17549  |

|     |    |               |
|-----|----|---------------|
| 0   | 15 | 6 PITG_02964  |
| 0   | 4  | 13 PITG_20762 |
| 0   | 2  | 8 PITG_09242  |
| 0   | 2  | 0 PITG_20317  |
| 0   | 0  | 2 PITG_13654  |
| 0   | 17 | 35 PITG_02807 |
| 0   | 2  | 0 PITG_14392  |
| 0   | 2  | 2 PITG_00734  |
| 255 | 32 | 688 NA        |
| 0   | 19 | 19 PITG_10158 |
| 0   | 0  | 0 PITG_00718  |
| 0   | 11 | 0 PITG_06502  |
| 0   | 2  | 37 NA         |
| 0   | 30 | 0 PITG_13320  |
| 0   | 2  | 17 PITG_20203 |
| 0   | 2  | 0 PITG_15155  |
| 0   | 53 | 18 PITG_10308 |
| 0   | 0  | 0 PITG_00496  |
| 0   | 0  | 0 NA          |
| 0   | 2  | 0 PITG_16649  |
| 0   | 3  | 2 PITG_17876  |
| 0   | 2  | 2 PITG_02561  |
| 0   | 44 | 41 NA         |
| 0   | 14 | 0 PITG_04336  |
| 0   | 49 | 36 PITG_06908 |
| 0   | 0  | 0 PITG_10943  |
| 0   | 0  | 4 PITG_13655  |
| 0   | 2  | 6 NA          |
| 0   | 8  | 5 NA          |
| 0   | 36 | 8 NA          |
| 0   | 4  | 20 PITG_12219 |
| 0   | 8  | 2 PITG_02290  |
| 0   | 2  | 0 PITG_22878  |
| 0   | 66 | 97 PITG_10147 |
| 0   | 20 | 0 PITG_12142  |
| 0   | 2  | 0 NA          |
| 0   | 8  | 2 PITG_03409  |
| 0   | 3  | 4 PITG_00309  |
| 0   | 19 | 3 PITG_08585  |
| 0   | 6  | 9 PITG_11125  |
| 0   | 8  | 2 PITG_09301  |
| 0   | 4  | 0 PITG_01756  |
| 0   | 0  | 0 NA          |
| 0   | 0  | 8 PITG_17999  |
| 0   | 21 | 2 PITG_09748  |
| 0   | 5  | 2 PITG_11964  |
| 0   | 6  | 17 PITG_18474 |

|    |     |                |
|----|-----|----------------|
| 0  | 72  | 16 PITG_08023  |
| 10 | 9   | 2 NA           |
| 0  | 0   | 3 PITG_10124   |
| 0  | 0   | 0 NA           |
| 0  | 44  | 0 NA           |
| 0  | 2   | 9 PITG_16211   |
| 0  | 0   | 2 NA           |
| 0  | 109 | 20 NA          |
| 0  | 2   | 0 PITG_08967   |
| 0  | 15  | 0 NA           |
| 0  | 22  | 5 PITG_03617   |
| 0  | 0   | 0 PITG_02744   |
| 0  | 0   | 6 PITG_20562   |
| 0  | 0   | 0 PITG_00809   |
| 0  | 14  | 4 PITG_07510   |
| 12 | 8   | 406 NA         |
| 0  | 12  | 19 PITG_06793  |
| 0  | 29  | 68 PITG_03360  |
| 0  | 0   | 0 PITG_01683   |
| 0  | 4   | 17 PITG_16365  |
| 27 | 2   | 58 NA          |
| 0  | 59  | 3 PITG_16135   |
| 0  | 17  | 14 NA          |
| 0  | 4   | 6 PITG_22038   |
| 0  | 28  | 7 NA           |
| 0  | 0   | 0 PITG_10986   |
| 0  | 14  | 12 PITG_08469  |
| 0  | 74  | 30 PITG_03365  |
| 0  | 2   | 8 PITG_15819   |
| 0  | 0   | 0 PITG_22378   |
| 0  | 2   | 7 PITG_15570   |
| 0  | 20  | 6 PITG_12484   |
| 0  | 15  | 9 PITG_18652   |
| 0  | 12  | 209 PITG_05156 |
| 0  | 34  | 5 PITG_13367   |
| 0  | 13  | 69 PITG_02586  |
| 0  | 3   | 9 NA           |
| 0  | 0   | 2 PITG_04718   |
| 0  | 21  | 26 PITG_16358  |
| 0  | 11  | 0 PITG_06452   |
| 0  | 21  | 39 PITG_04562  |
| 0  | 24  | 25 PITG_03444  |
| 0  | 16  | 7 PITG_19769   |
| 0  | 2   | 2 NA           |
| 0  | 28  | 17 PITG_00943  |
| 0  | 0   | 2 NA           |
| 0  | 23  | 4 PITG_11300   |

|    |     |                |
|----|-----|----------------|
| 0  | 0   | 0 PITG_20507   |
| 0  | 5   | 0 PITG_04589   |
| 0  | 2   | 6 NA           |
| 0  | 17  | 12 PITG_03405  |
| 53 | 10  | 177 NA         |
| 0  | 12  | 2 NA           |
| 0  | 51  | 11 PITG_12297  |
| 0  | 59  | 28 PITG_07705  |
| 0  | 2   | 8 PITG_10995   |
| 0  | 2   | 23 PITG_11743  |
| 0  | 8   | 38 PITG_05635  |
| 0  | 0   | 4 NA           |
| 0  | 2   | 7 NA           |
| 0  | 37  | 11 PITG_13336  |
| 0  | 0   | 0 NA           |
| 0  | 2   | 6 NA           |
| 0  | 7   | 6 PITG_01259   |
| 0  | 0   | 2 PITG_17568   |
| 0  | 3   | 0 PITG_03496   |
| 0  | 49  | 53 PITG_13761  |
| 0  | 2   | 0 PITG_03514   |
| 0  | 2   | 0 PITG_06978   |
| 0  | 4   | 6 NA           |
| 0  | 7   | 11 PITG_16841  |
| 0  | 6   | 6 NA           |
| 0  | 9   | 16 NA          |
| 0  | 361 | 127 PITG_00674 |
| 0  | 0   | 0 PITG_16745   |
| 0  | 162 | 204 PITG_18851 |
| 0  | 14  | 4 PITG_07087   |
| 0  | 10  | 0 PITG_01830   |
| 0  | 28  | 2 PITG_00232   |
| 0  | 14  | 4 PITG_08839   |
| 0  | 2   | 0 PITG_02400   |
| 0  | 6   | 6 PITG_09780   |
| 50 | 0   | 98 NA          |
| 0  | 2   | 17 PITG_13427  |
| 0  | 5   | 6 PITG_13029   |
| 0  | 0   | 0 PITG_05260   |
| 0  | 4   | 2 NA           |
| 0  | 15  | 4 NA           |
| 0  | 21  | 22 PITG_10053  |
| 0  | 170 | 14 NA          |
| 0  | 4   | 2 PITG_03372   |
| 0  | 45  | 6 NA           |
| 0  | 8   | 4 PITG_16799   |
| 0  | 57  | 2 NA           |

|    |    |                |
|----|----|----------------|
| 0  | 51 | 117 PITG_00608 |
| 0  | 2  | 2 NA           |
| 0  | 9  | 0 NA           |
| 0  | 16 | 6 NA           |
| 0  | 23 | 0 PITG_13056   |
| 0  | 10 | 5 PITG_10096   |
| 0  | 5  | 0 PITG_03957   |
| 2  | 2  | 10 NA          |
| 0  | 4  | 10 PITG_17898  |
| 0  | 9  | 4 PITG_10885   |
| 0  | 4  | 2 PITG_11133   |
| 0  | 9  | 5 PITG_16920   |
| 0  | 2  | 17 PITG_13803  |
| 7  | 0  | 0 NA           |
| 0  | 0  | 2 PITG_03609   |
| 99 | 42 | 235 NA         |
| 0  | 19 | 367 PITG_17786 |
| 0  | 24 | 90 NA          |
| 0  | 34 | 2 PITG_02288   |
| 0  | 0  | 12 PITG_09404  |
| 0  | 0  | 7 PITG_03813   |
| 0  | 2  | 12 PITG_10058  |
| 0  | 2  | 6 PITG_15688   |
| 0  | 2  | 0 NA           |
| 6  | 2  | 37 NA          |
| 0  | 0  | 0 NA           |
| 0  | 0  | 2 PITG_13819   |
| 0  | 20 | 19 PITG_15505  |
| 0  | 14 | 2 PITG_08663   |
| 0  | 8  | 24 NA          |
| 0  | 0  | 6 NA           |
| 0  | 4  | 13 PITG_15294  |
| 0  | 2  | 2 NA           |
| 2  | 0  | 27 NA          |
| 0  | 2  | 10 PITG_05507  |
| 12 | 7  | 24 NA          |
| 0  | 39 | 0 NA           |
| 0  | 0  | 0 NA           |
| 0  | 2  | 0 PITG_18094   |
| 0  | 8  | 2 NA           |
| 8  | 0  | 0 NA           |
| 0  | 2  | 5 NA           |
| 0  | 17 | 2 PITG_00796   |
| 0  | 4  | 2 PITG_01646   |
| 0  | 0  | 0 NA           |
| 0  | 4  | 0 PITG_18824   |
| 0  | 2  | 2 PITG_09097   |

|      |     |               |
|------|-----|---------------|
| 0    | 32  | 6 PITG_11817  |
| 0    | 15  | 7 PITG_08179  |
| 0    | 6   | 0 NA          |
| 0    | 11  | 8 NA          |
| 0    | 12  | 0 NA          |
| 0    | 9   | 0 PITG_00894  |
| 0    | 0   | 2 NA          |
| 0    | 3   | 13 PITG_00215 |
| 0    | 2   | 0 NA          |
| 0    | 10  | 17 PITG_21962 |
| 0    | 41  | 21 PITG_03768 |
| 0    | 7   | 7 PITG_02228  |
| 0    | 0   | 2 PITG_03236  |
| 0    | 0   | 0 NA          |
| 0    | 2   | 4 PITG_10149  |
| 0    | 15  | 2 NA          |
| 0    | 4   | 2 PITG_11525  |
| 0    | 4   | 6 PITG_01527  |
| 0    | 17  | 4 NA          |
| 0    | 85  | 42 PITG_03346 |
| 0    | 9   | 2 PITG_11587  |
| 0    | 2   | 3 PITG_11037  |
| 0    | 7   | 0 PITG_05202  |
| 0    | 2   | 0 PITG_02596  |
| 0    | 4   | 2 NA          |
| 0    | 0   | 0 PITG_13354  |
| 0    | 19  | 7 PITG_13041  |
| 0    | 8   | 0 PITG_01836  |
| 0    | 2   | 6 NA          |
| 0    | 4   | 62 PITG_08416 |
| 0    | 0   | 0 PITG_00223  |
| 0    | 7   | 6 PITG_12818  |
| 0    | 0   | 0 PITG_05637  |
| 0    | 11  | 25 NA         |
| 0    | 6   | 4 PITG_04918  |
| 0    | 0   | 0 PITG_03740  |
| 0    | 4   | 4 PITG_01782  |
| 0    | 5   | 0 NA          |
| 0    | 0   | 0 NA          |
| 0    | 3   | 0 PITG_04588  |
| 3295 | 25  | 489 NA        |
| 0    | 5   | 5 PITG_16207  |
| 0    | 0   | 0 PITG_10214  |
| 0    | 418 | 309 NA        |
| 0    | 8   | 0 PITG_12579  |
| 0    | 8   | 0 NA          |
| 0    | 66  | 9 PITG_19109  |



|     |     |                 |
|-----|-----|-----------------|
| 0   | 0   | 2 PITG_04564    |
| 0   | 0   | 0 PITG_15621    |
| 0   | 0   | 0 NA            |
| 0   | 2   | 7 PITG_03919    |
| 0   | 2   | 4 PITG_07889    |
| 0   | 0   | 0 PITG_05598    |
| 0   | 4   | 0 PITG_15542    |
| 0   | 30  | 32 PITG_05644   |
| 0   | 2   | 3 PITG_20239    |
| 0   | 0   | 17 PITG_06012   |
| 0   | 19  | 4 PITG_15610    |
| 0   | 35  | 3 NA            |
| 0   | 2   | 2 PITG_10895    |
| 0   | 0   | 2 PITG_05332    |
| 0   | 0   | 2 PITG_19809    |
| 0   | 2   | 0 NA            |
| 0   | 0   | 0 PITG_13283    |
| 0   | 49  | 15 PITG_13077   |
| 0   | 13  | 6 NA            |
| 0   | 4   | 5 PITG_18474    |
| 0   | 0   | 17 NA           |
| 0   | 10  | 2 NA            |
| 0   | 8   | 0 PITG_14251    |
| 0   | 4   | 15 PITG_13336   |
| 0   | 0   | 2 NA            |
| 0   | 27  | 66 PITG_15057   |
| 0   | 82  | 44 NA           |
| 0   | 0   | 0 PITG_10821    |
| 0   | 9   | 6 PITG_19046    |
| 0   | 66  | 7 PITG_11186    |
| 0   | 62  | 81 PITG_13427   |
| 0   | 0   | 3 PITG_17026    |
| 94  | 8   | 134 NA          |
| 195 | 12  | 241 NA          |
| 0   | 2   | 2 PITG_09665    |
| 0   | 0   | 9 PITG_17129    |
| 0   | 666 | 1457 PITG_11997 |
| 0   | 4   | 41 PITG_13016   |
| 0   | 0   | 2 PITG_12547    |
| 0   | 6   | 5 PITG_07793    |
| 0   | 0   | 13 PITG_13041   |
| 0   | 0   | 0 PITG_15058    |
| 0   | 5   | 16 PITG_01991   |
| 0   | 0   | 2 PITG_13491    |
| 0   | 2   | 0 PITG_10743    |
| 0   | 14  | 12 PITG_18798   |
| 0   | 4   | 3 PITG_05499    |

|   |    |               |
|---|----|---------------|
| 0 | 0  | 2 PITG_21310  |
| 0 | 2  | 14 PITG_02867 |
| 0 | 63 | 39 NA         |
| 0 | 24 | 41 PITG_17986 |
| 0 | 2  | 0 NA          |
| 0 | 2  | 9 PITG_10250  |
| 0 | 61 | 65 PITG_18452 |
| 0 | 16 | 7 PITG_08028  |
| 0 | 2  | 2 PITG_03989  |
| 0 | 7  | 7 PITG_11926  |
| 0 | 0  | 2 NA          |
| 0 | 0  | 2 PITG_21727  |
| 0 | 0  | 0 NA          |
| 0 | 3  | 0 NA          |
| 0 | 11 | 14 PITG_21887 |
| 0 | 4  | 0 PITG_03454  |
| 0 | 0  | 0 PITG_17598  |
| 0 | 8  | 2 NA          |
| 0 | 15 | 24 PITG_13749 |
| 0 | 2  | 2 PITG_11410  |
| 0 | 7  | 7 NA          |
| 0 | 5  | 0 NA          |
| 0 | 0  | 0 PITG_08189  |
| 0 | 0  | 0 PITG_19445  |
| 0 | 4  | 2 PITG_18759  |
| 0 | 4  | 0 PITG_01664  |
| 0 | 20 | 13 NA         |
| 0 | 2  | 0 PITG_04468  |
| 0 | 0  | 0 PITG_02144  |
| 0 | 0  | 0 PITG_02139  |
| 0 | 4  | 0 PITG_15779  |
| 0 | 4  | 4 NA          |
| 0 | 4  | 6 PITG_01090  |
| 0 | 46 | 2 NA          |
| 0 | 0  | 7 PITG_14109  |
| 0 | 6  | 41 PITG_13990 |
| 0 | 0  | 0 PITG_03118  |
| 0 | 0  | 0 PITG_04232  |
| 0 | 0  | 0 PITG_05614  |
| 0 | 3  | 2 PITG_16863  |
| 0 | 30 | 6 NA          |
| 0 | 4  | 0 PITG_21023  |
| 0 | 8  | 28 PITG_00989 |
| 0 | 8  | 2 PITG_01479  |
| 0 | 6  | 4 PITG_00524  |
| 0 | 0  | 0 PITG_17679  |
| 0 | 9  | 46 PITG_01825 |

|   |     |                |
|---|-----|----------------|
| 0 | 0   | 2 PITG_09950   |
| 0 | 0   | 0 PITG_08316   |
| 0 | 8   | 9 PITG_01336   |
| 0 | 0   | 0 PITG_13283   |
| 0 | 0   | 8 PITG_02546   |
| 0 | 10  | 0 NA           |
| 0 | 38  | 2 PITG_14365   |
| 0 | 0   | 4 PITG_14717   |
| 0 | 0   | 2 PITG_19213   |
| 0 | 119 | 64 NA          |
| 0 | 61  | 16 PITG_03656  |
| 0 | 15  | 0 NA           |
| 0 | 691 | 399 PITG_19103 |
| 0 | 0   | 2 PITG_08369   |
| 0 | 2   | 0 PITG_04532   |
| 0 | 0   | 2 PITG_14415   |
| 0 | 4   | 0 NA           |
| 0 | 4   | 17 PITG_04497  |
| 0 | 80  | 67 PITG_20977  |
| 0 | 2   | 4 PITG_11271   |
| 0 | 0   | 4 PITG_11122   |
| 0 | 7   | 10 PITG_01622  |
| 0 | 13  | 0 NA           |
| 0 | 2   | 0 PITG_17330   |
| 0 | 13  | 8 PITG_13988   |
| 0 | 0   | 0 PITG_19153   |
| 0 | 28  | 2 NA           |
| 0 | 5   | 0 NA           |
| 0 | 8   | 9 PITG_09505   |
| 0 | 6   | 0 PITG_06127   |
| 0 | 12  | 6 PITG_15967   |
| 0 | 2   | 4 NA           |
| 0 | 30  | 18 NA          |
| 0 | 2   | 0 PITG_14626   |
| 0 | 10  | 26 PITG_16365  |
| 0 | 0   | 0 PITG_07192   |
| 0 | 0   | 0 PITG_17137   |
| 0 | 2   | 2 PITG_15677   |
| 0 | 16  | 9 PITG_01019   |
| 0 | 4   | 10 NA          |
| 0 | 0   | 0 PITG_11298   |
| 0 | 2   | 6 PITG_09855   |
| 0 | 2   | 2 NA           |
| 0 | 75  | 15 PITG_04685  |
| 0 | 2   | 9 PITG_06001   |
| 0 | 145 | 15 NA          |
| 0 | 11  | 0 PITG_04676   |

|     |      |                 |
|-----|------|-----------------|
| 0   | 10   | 27 PITG_07124   |
| 0   | 0    | 6 PITG_15850    |
| 0   | 6    | 0 PITG_08358    |
| 0   | 14   | 684 PITG_11859  |
| 0   | 6    | 3 PITG_21316    |
| 0   | 0    | 2 PITG_13223    |
| 0   | 3    | 4 PITG_17457    |
| 0   | 7    | 2 PITG_12259    |
| 0   | 4    | 0 PITG_16336    |
| 0   | 23   | 4 PITG_09570    |
| 0   | 5    | 5 NA            |
| 0   | 0    | 13 PITG_17617   |
| 0   | 20   | 2 PITG_17457    |
| 0   | 35   | 0 NA            |
| 0   | 5    | 0 NA            |
| 0   | 174  | 62 PITG_10926   |
| 0   | 10   | 15 PITG_00028   |
| 0   | 2    | 8 PITG_02017    |
| 0   | 0    | 0 PITG_18370    |
| 0   | 0    | 2 PITG_03856    |
| 0   | 1318 | 1278 PITG_14412 |
| 0   | 4    | 9 PITG_10118    |
| 0   | 4    | 4 PITG_00142    |
| 0   | 11   | 4 NA            |
| 0   | 0    | 2 PITG_14380    |
| 0   | 6    | 18 PITG_19313   |
| 602 | 0    | 9 NA            |
| 0   | 0    | 0 PITG_12794    |
| 0   | 2    | 2 PITG_13255    |
| 0   | 0    | 6 NA            |
| 0   | 0    | 0 NA            |
| 0   | 2    | 8 PITG_15417    |
| 0   | 6    | 2 PITG_00315    |
| 0   | 17   | 4 NA            |
| 0   | 0    | 0 PITG_15669    |
| 0   | 55   | 16 PITG_19024   |
| 0   | 0    | 2 PITG_17163    |
| 0   | 4    | 28 PITG_13372   |
| 0   | 4    | 4 PITG_00484    |
| 0   | 0    | 4 PITG_02562    |
| 0   | 4    | 14 PITG_10715   |
| 0   | 8    | 4 PITG_13434    |
| 0   | 12   | 4 NA            |
| 0   | 8    | 2 PITG_02264    |
| 0   | 10   | 2 NA            |
| 0   | 0    | 2 PITG_05410    |
| 0   | 11   | 12 NA           |

|    |     |                |
|----|-----|----------------|
| 0  | 2   | 0 PITG_06101   |
| 0  | 717 | 372 PITG_01556 |
| 9  | 0   | 2 NA           |
| 0  | 4   | 4 PITG_05176   |
| 0  | 11  | 3 PITG_17313   |
| 0  | 6   | 17 PITG_01049  |
| 0  | 0   | 3 PITG_07154   |
| 0  | 2   | 0 PITG_01288   |
| 0  | 0   | 0 PITG_09782   |
| 0  | 21  | 13 NA          |
| 0  | 0   | 10 PITG_05192  |
| 0  | 22  | 9 PITG_16675   |
| 0  | 0   | 0 PITG_02328   |
| 0  | 2   | 0 PITG_15062   |
| 0  | 0   | 0 PITG_06040   |
| 0  | 7   | 9 NA           |
| 0  | 2   | 5 PITG_08095   |
| 0  | 13  | 7 PITG_03471   |
| 0  | 28  | 12 PITG_00719  |
| 0  | 0   | 4 PITG_18474   |
| 0  | 0   | 0 NA           |
| 0  | 19  | 7 PITG_02885   |
| 0  | 30  | 25 PITG_05879  |
| 0  | 2   | 0 PITG_02677   |
| 0  | 3   | 2 PITG_17927   |
| 0  | 0   | 5 PITG_21807   |
| 0  | 5   | 2 PITG_11643   |
| 0  | 29  | 10 PITG_17709  |
| 0  | 0   | 0 PITG_15081   |
| 0  | 10  | 6 PITG_08747   |
| 0  | 10  | 10 PITG_09782  |
| 0  | 4   | 15 PITG_23191  |
| 0  | 0   | 7 PITG_17745   |
| 0  | 2   | 13 NA          |
| 0  | 32  | 0 PITG_00576   |
| 14 | 0   | 0 NA           |
| 0  | 8   | 4 PITG_13924   |
| 0  | 0   | 2 PITG_12914   |
| 0  | 6   | 0 PITG_18008   |
| 0  | 0   | 0 PITG_06178   |
| 0  | 8   | 0 PITG_18624   |
| 0  | 25  | 11 PITG_01998  |
| 0  | 10  | 6 PITG_09081   |
| 0  | 16  | 42 PITG_05862  |
| 0  | 0   | 6 PITG_04570   |
| 0  | 11  | 37 PITG_00689  |
| 0  | 28  | 0 PITG_07976   |

|    |     |                |
|----|-----|----------------|
| 0  | 50  | 17 PITG_07913  |
| 0  | 13  | 2 PITG_06754   |
| 0  | 2   | 6 PITG_19281   |
| 0  | 3   | 0 PITG_13309   |
| 0  | 0   | 0 NA           |
| 0  | 4   | 5 PITG_00284   |
| 0  | 56  | 17 PITG_08609  |
| 0  | 8   | 10 PITG_03575  |
| 0  | 9   | 4 NA           |
| 0  | 6   | 0 NA           |
| 0  | 7   | 7 PITG_10117   |
| 0  | 0   | 2 PITG_01920   |
| 0  | 0   | 8 PITG_06982   |
| 0  | 15  | 57 PITG_11885  |
| 0  | 2   | 0 NA           |
| 0  | 0   | 0 PITG_19886   |
| 0  | 2   | 20 PITG_05822  |
| 0  | 0   | 0 PITG_04658   |
| 0  | 5   | 0 NA           |
| 0  | 120 | 7 PITG_11038   |
| 0  | 0   | 2 NA           |
| 0  | 0   | 0 PITG_20637   |
| 14 | 4   | 17 NA          |
| 0  | 0   | 26 PITG_01970  |
| 0  | 42  | 4 PITG_13901   |
| 0  | 2   | 2 PITG_03025   |
| 4  | 2   | 4 NA           |
| 0  | 0   | 2 PITG_00990   |
| 0  | 37  | 15 PITG_14389  |
| 0  | 2   | 0 PITG_10931   |
| 0  | 0   | 0 PITG_18274   |
| 0  | 9   | 0 PITG_05818   |
| 0  | 20  | 49 PITG_03824  |
| 0  | 0   | 0 NA           |
| 0  | 4   | 0 PITG_20676   |
| 0  | 2   | 2 PITG_14887   |
| 0  | 8   | 21 PITG_08368  |
| 0  | 0   | 0 NA           |
| 0  | 44  | 2 PITG_15247   |
| 0  | 3   | 2 PITG_13167   |
| 0  | 7   | 4 NA           |
| 0  | 5   | 2 PITG_10651   |
| 0  | 24  | 0 PITG_03991   |
| 0  | 7   | 0 PITG_17407   |
| 0  | 11  | 4 PITG_15243   |
| 0  | 0   | 0 NA           |
| 0  | 675 | 203 PITG_17167 |

|     |     |                |
|-----|-----|----------------|
| 0   | 7   | 5 PITG_12673   |
| 0   | 6   | 10 PITG_09818  |
| 0   | 7   | 5 PITG_10564   |
| 0   | 6   | 2 PITG_00705   |
| 0   | 46  | 20 PITG_00349  |
| 0   | 25  | 13 PITG_00273  |
| 0   | 12  | 7 NA           |
| 0   | 19  | 5 PITG_14283   |
| 0   | 0   | 0 PITG_05263   |
| 0   | 0   | 6 PITG_00263   |
| 0   | 0   | 0 PITG_06480   |
| 0   | 66  | 108 PITG_09655 |
| 0   | 0   | 2 PITG_05260   |
| 17  | 9   | 11 NA          |
| 0   | 0   | 12 PITG_01317  |
| 0   | 19  | 11 PITG_17439  |
| 0   | 87  | 39 PITG_14126  |
| 0   | 14  | 0 PITG_10213   |
| 0   | 0   | 6 PITG_13167   |
| 0   | 2   | 4 NA           |
| 330 | 73  | 245 NA         |
| 0   | 5   | 7 PITG_16433   |
| 0   | 4   | 0 PITG_15446   |
| 0   | 24  | 23 PITG_17987  |
| 0   | 5   | 0 PITG_01871   |
| 0   | 2   | 0 PITG_16331   |
| 0   | 7   | 5 NA           |
| 0   | 16  | 2 PITG_17403   |
| 0   | 17  | 2 PITG_03915   |
| 0   | 4   | 0 PITG_05404   |
| 0   | 13  | 13 PITG_00298  |
| 0   | 6   | 48 PITG_18446  |
| 0   | 8   | 10 PITG_02799  |
| 0   | 3   | 0 PITG_19174   |
| 0   | 10  | 2 PITG_13920   |
| 0   | 2   | 6 PITG_02863   |
| 0   | 8   | 2 PITG_10351   |
| 0   | 18  | 10 PITG_16818  |
| 0   | 13  | 4 PITG_02531   |
| 0   | 0   | 4 PITG_05692   |
| 0   | 119 | 91 PITG_08295  |
| 0   | 19  | 14 PITG_15607  |
| 0   | 17  | 0 PITG_18090   |
| 0   | 7   | 14 PITG_07297  |
| 0   | 44  | 7 PITG_22358   |
| 0   | 40  | 18 NA          |
| 0   | 17  | 12 PITG_11504  |

|    |    |                |
|----|----|----------------|
| 0  | 7  | 0 PITG_06867   |
| 0  | 2  | 0 PITG_08413   |
| 0  | 2  | 84 NA          |
| 0  | 0  | 5 PITG_01514   |
| 0  | 4  | 6 PITG_06705   |
| 0  | 5  | 4 PITG_00385   |
| 0  | 6  | 2 PITG_07074   |
| 0  | 3  | 0 PITG_00193   |
| 0  | 9  | 4 PITG_14210   |
| 0  | 2  | 4 PITG_20528   |
| 0  | 6  | 2 PITG_02450   |
| 0  | 0  | 0 PITG_06516   |
| 0  | 0  | 2 PITG_11862   |
| 0  | 4  | 0 NA           |
| 0  | 0  | 38 PITG_11989  |
| 0  | 34 | 0 PITG_21660   |
| 0  | 0  | 0 PITG_02418   |
| 0  | 33 | 442 PITG_08785 |
| 0  | 9  | 3 PITG_10061   |
| 0  | 19 | 0 NA           |
| 0  | 10 | 2 NA           |
| 0  | 10 | 11 PITG_17746  |
| 0  | 39 | 18 PITG_05760  |
| 0  | 2  | 2 PITG_01553   |
| 0  | 0  | 7 PITG_18298   |
| 0  | 31 | 9 PITG_03483   |
| 0  | 3  | 4 NA           |
| 0  | 4  | 13 PITG_08157  |
| 0  | 0  | 9 NA           |
| 0  | 14 | 0 NA           |
| 0  | 16 | 6 PITG_05291   |
| 0  | 11 | 5 PITG_03675   |
| 0  | 4  | 0 PITG_05553   |
| 0  | 0  | 0 PITG_12196   |
| 0  | 0  | 0 PITG_06698   |
| 0  | 0  | 0 NA           |
| 0  | 9  | 23 PITG_10167  |
| 0  | 0  | 14 PITG_04283  |
| 0  | 4  | 2 PITG_01229   |
| 0  | 5  | 15 PITG_06602  |
| 0  | 3  | 10 PITG_22763  |
| 0  | 18 | 31 PITG_14111  |
| 0  | 28 | 8 PITG_09387   |
| 0  | 19 | 9 NA           |
| 14 | 2  | 4 NA           |
| 0  | 0  | 2 PITG_08770   |
| 0  | 2  | 2 PITG_06259   |



|      |     |               |
|------|-----|---------------|
| 0    | 4   | 4 PITG_06088  |
| 0    | 12  | 17 PITG_04599 |
| 0    | 0   | 2 PITG_01920  |
| 0    | 2   | 2 PITG_09999  |
| 0    | 73  | 79 PITG_18721 |
| 0    | 191 | 126 NA        |
| 0    | 0   | 2 PITG_15740  |
| 0    | 18  | 17 PITG_03740 |
| 0    | 0   | 2 PITG_03620  |
| 0    | 6   | 0 PITG_05173  |
| 0    | 0   | 12 PITG_03993 |
| 0    | 9   | 0 PITG_02927  |
| 0    | 4   | 11 PITG_19234 |
| 0    | 14  | 5 PITG_00197  |
| 0    | 16  | 9 PITG_03557  |
| 0    | 4   | 6 PITG_11169  |
| 0    | 12  | 4 PITG_02337  |
| 0    | 0   | 0 PITG_03970  |
| 0    | 104 | 28 PITG_03406 |
| 0    | 14  | 13 PITG_06479 |
| 0    | 2   | 8 PITG_02471  |
| 0    | 0   | 4 PITG_12037  |
| 0    | 17  | 4 NA          |
| 0    | 57  | 75 PITG_01703 |
| 0    | 17  | 0 PITG_17792  |
| 0    | 42  | 60 PITG_17594 |
| 0    | 7   | 2 PITG_01044  |
| 0    | 17  | 4 NA          |
| 0    | 43  | 2 PITG_02442  |
| 0    | 0   | 0 PITG_06142  |
| 0    | 18  | 8 PITG_16930  |
| 0    | 10  | 7 PITG_00190  |
| 0    | 8   | 3 PITG_07230  |
| 0    | 9   | 0 PITG_06846  |
| 0    | 0   | 6 PITG_07795  |
| 4    | 0   | 15 NA         |
| 0    | 57  | 90 PITG_02730 |
| 0    | 2   | 11 PITG_13845 |
| 0    | 4   | 0 PITG_10882  |
| 0    | 0   | 15 PITG_02134 |
| 0    | 14  | 9 PITG_13202  |
| 0    | 0   | 2 PITG_10694  |
| 0    | 3   | 0 PITG_05258  |
| 0    | 2   | 4 PITG_09261  |
| 1076 | 2   | 136 NA        |
| 0    | 5   | 0 PITG_02655  |
| 0    | 0   | 0 NA          |

|    |     |               |
|----|-----|---------------|
| 0  | 11  | 6 PITG_10792  |
| 0  | 4   | 4 PITG_06424  |
| 0  | 0   | 0 NA          |
| 0  | 0   | 4 NA          |
| 0  | 5   | 2 PITG_06152  |
| 0  | 0   | 0 PITG_16225  |
| 37 | 4   | 51 NA         |
| 0  | 16  | 0 NA          |
| 0  | 2   | 2 PITG_01127  |
| 0  | 2   | 0 PITG_13285  |
| 0  | 3   | 3 NA          |
| 0  | 7   | 6 PITG_00874  |
| 0  | 10  | 2 PITG_18092  |
| 0  | 0   | 0 PITG_01326  |
| 0  | 0   | 2 NA          |
| 0  | 97  | 50 NA         |
| 0  | 2   | 11 PITG_05508 |
| 0  | 0   | 0 PITG_13590  |
| 0  | 82  | 28 PITG_00413 |
| 0  | 0   | 0 PITG_15300  |
| 0  | 11  | 10 PITG_12914 |
| 0  | 101 | 40 NA         |
| 0  | 3   | 2 PITG_04837  |
| 0  | 7   | 4 PITG_07289  |
| 58 | 4   | 33 NA         |
| 0  | 11  | 15 PITG_07868 |
| 0  | 0   | 0 PITG_03292  |
| 0  | 0   | 2 PITG_09360  |
| 0  | 7   | 6 PITG_00012  |
| 0  | 0   | 0 NA          |
| 0  | 55  | 46 PITG_04712 |
| 0  | 0   | 0 PITG_15003  |
| 0  | 69  | 0 NA          |
| 0  | 5   | 7 PITG_17703  |
| 0  | 5   | 11 PITG_07047 |
| 0  | 4   | 10 PITG_17953 |
| 0  | 2   | 0 NA          |
| 0  | 16  | 4 PITG_04250  |
| 0  | 0   | 2 PITG_03898  |
| 0  | 4   | 2 PITG_00469  |
| 0  | 8   | 0 PITG_09684  |
| 0  | 7   | 43 PITG_01718 |
| 0  | 0   | 2 PITG_16456  |
| 0  | 5   | 5 PITG_19466  |
| 0  | 2   | 0 PITG_10539  |
| 0  | 42  | 13 NA         |
| 0  | 4   | 0 PITG_03656  |

|     |     |                |
|-----|-----|----------------|
| 60  | 71  | 2398 NA        |
| 0   | 21  | 0 PITG_08095   |
| 0   | 27  | 0 PITG_10044   |
| 0   | 0   | 0 PITG_20790   |
| 0   | 37  | 203 PITG_14397 |
| 0   | 22  | 10 NA          |
| 0   | 11  | 0 PITG_02280   |
| 0   | 4   | 3 PITG_18712   |
| 0   | 677 | 168 PITG_04335 |
| 0   | 22  | 3 NA           |
| 0   | 0   | 0 PITG_21918   |
| 0   | 0   | 0 PITG_19605   |
| 0   | 0   | 13 NA          |
| 578 | 12  | 1004 NA        |
| 0   | 0   | 4 PITG_11578   |
| 0   | 4   | 0 PITG_12852   |
| 69  | 2   | 2998 NA        |
| 0   | 11  | 3 PITG_09770   |
| 0   | 105 | 79 PITG_01514  |
| 0   | 6   | 4 PITG_02457   |
| 0   | 14  | 2 NA           |
| 0   | 0   | 0 NA           |
| 0   | 0   | 9 NA           |
| 0   | 2   | 2 PITG_15290   |
| 0   | 4   | 0 PITG_02945   |
| 0   | 13  | 14 PITG_07034  |
| 0   | 2   | 18 PITG_12594  |
| 0   | 28  | 9 PITG_02233   |
| 0   | 9   | 35 PITG_08173  |
| 0   | 7   | 4 PITG_02818   |
| 0   | 2   | 0 NA           |
| 0   | 15  | 4 PITG_18393   |
| 0   | 11  | 0 PITG_14887   |
| 0   | 0   | 11 PITG_04683  |
| 0   | 28  | 0 PITG_03429   |
| 0   | 3   | 0 PITG_17999   |
| 0   | 4   | 2 NA           |
| 0   | 16  | 20 PITG_12195  |
| 0   | 31  | 22 PITG_18509  |
| 0   | 7   | 0 PITG_14585   |
| 0   | 4   | 0 NA           |
| 0   | 0   | 2 PITG_15981   |
| 0   | 0   | 0 PITG_02480   |
| 0   | 5   | 0 NA           |
| 0   | 24  | 0 PITG_17999   |
| 0   | 0   | 7 PITG_00037   |
| 34  | 4   | 54 NA          |

|    |     |               |
|----|-----|---------------|
| 0  | 39  | 6 PITG_03482  |
| 0  | 6   | 9 PITG_05116  |
| 0  | 37  | 24 PITG_11969 |
| 0  | 9   | 18 PITG_21601 |
| 0  | 4   | 0 PITG_14675  |
| 0  | 24  | 11 NA         |
| 0  | 7   | 0 NA          |
| 0  | 0   | 0 PITG_16076  |
| 0  | 14  | 0 PITG_08993  |
| 0  | 6   | 9 PITG_17560  |
| 0  | 0   | 4 PITG_11887  |
| 0  | 26  | 54 PITG_10147 |
| 0  | 2   | 5 PITG_11578  |
| 0  | 0   | 2 PITG_08964  |
| 0  | 0   | 0 PITG_07192  |
| 0  | 16  | 14 PITG_15844 |
| 0  | 3   | 16 NA         |
| 0  | 14  | 32 PITG_11180 |
| 0  | 4   | 2 PITG_11242  |
| 0  | 2   | 0 NA          |
| 0  | 0   | 0 PITG_10191  |
| 0  | 20  | 10 PITG_06638 |
| 0  | 19  | 19 PITG_19180 |
| 0  | 100 | 11 PITG_06508 |
| 78 | 28  | 968 NA        |
| 0  | 24  | 33 PITG_00273 |
| 0  | 6   | 24 PITG_16741 |
| 0  | 46  | 93 PITG_13372 |
| 0  | 2   | 10 PITG_01589 |
| 0  | 0   | 0 PITG_03934  |
| 0  | 2   | 0 PITG_17492  |
| 0  | 5   | 0 PITG_00187  |
| 0  | 0   | 4 PITG_17783  |
| 0  | 7   | 2 PITG_13491  |
| 0  | 0   | 2 PITG_17360  |
| 0  | 13  | 13 PITG_03351 |
| 0  | 2   | 0 NA          |
| 0  | 2   | 0 NA          |
| 20 | 0   | 33 NA         |
| 4  | 0   | 16 NA         |
| 0  | 0   | 0 PITG_01754  |
| 0  | 2   | 0 NA          |
| 0  | 0   | 2 PITG_06452  |
| 0  | 9   | 24 PITG_09270 |
| 0  | 0   | 2 PITG_14354  |
| 0  | 0   | 0 PITG_05331  |
| 0  | 9   | 2 PITG_09751  |

|     |     |                |
|-----|-----|----------------|
| 0   | 11  | 23 PITG_12687  |
| 0   | 2   | 3 PITG_08926   |
| 0   | 4   | 4 PITG_15022   |
| 0   | 2   | 0 PITG_03939   |
| 0   | 8   | 7 PITG_08581   |
| 0   | 6   | 18 PITG_04725  |
| 0   | 20  | 8 PITG_06487   |
| 0   | 15  | 2 PITG_16225   |
| 0   | 19  | 12 PITG_13272  |
| 0   | 0   | 2 PITG_09666   |
| 0   | 3   | 0 PITG_15442   |
| 0   | 0   | 0 PITG_13997   |
| 0   | 0   | 2 PITG_15833   |
| 0   | 121 | 9 NA           |
| 0   | 0   | 2 PITG_04466   |
| 0   | 12  | 5 PITG_10594   |
| 0   | 7   | 2 PITG_10911   |
| 0   | 9   | 6 PITG_18063   |
| 0   | 26  | 11 PITG_13905  |
| 0   | 0   | 4 PITG_11993   |
| 0   | 0   | 4 PITG_02800   |
| 0   | 2   | 2 PITG_20609   |
| 0   | 8   | 10 NA          |
| 0   | 0   | 0 NA           |
| 0   | 10  | 31 PITG_20562  |
| 0   | 0   | 0 PITG_03423   |
| 0   | 0   | 0 PITG_12691   |
| 0   | 4   | 6 PITG_00851   |
| 0   | 129 | 150 PITG_12286 |
| 0   | 10  | 15 PITG_01298  |
| 0   | 42  | 5 PITG_11812   |
| 171 | 2   | 291 NA         |
| 0   | 6   | 10 PITG_19870  |
| 334 | 5   | 4 NA           |
| 0   | 0   | 10 PITG_12742  |
| 0   | 0   | 2 NA           |
| 0   | 20  | 13 PITG_12692  |
| 0   | 0   | 0 PITG_09089   |
| 0   | 10  | 29 PITG_00746  |
| 0   | 2   | 0 PITG_03236   |
| 0   | 0   | 4 PITG_20241   |
| 0   | 11  | 2 PITG_03063   |
| 0   | 0   | 0 PITG_10905   |
| 0   | 42  | 18 PITG_20928  |
| 0   | 0   | 4 PITG_10119   |
| 0   | 28  | 12 PITG_03259  |
| 0   | 303 | 563 PITG_20485 |

|   |     |                |
|---|-----|----------------|
| 0 | 158 | 382 PITG_18446 |
| 0 | 4   | 3 PITG_02980   |
| 0 | 0   | 0 PITG_15475   |
| 0 | 9   | 5 PITG_09707   |
| 0 | 9   | 2 PITG_23160   |
| 0 | 46  | 6 PITG_07633   |
| 0 | 5   | 8 PITG_21842   |
| 0 | 6   | 16 PITG_18236  |
| 0 | 507 | 142 NA         |
| 0 | 0   | 2 PITG_10034   |
| 0 | 2   | 6 PITG_06673   |
| 0 | 0   | 0 PITG_02805   |
| 0 | 0   | 2 PITG_04671   |
| 0 | 4   | 15 NA          |
| 0 | 0   | 0 PITG_16204   |
| 0 | 0   | 2 NA           |
| 0 | 36  | 31 PITG_02495  |
| 0 | 6   | 4 NA           |
| 0 | 11  | 7 PITG_21149   |
| 0 | 2   | 0 PITG_09505   |
| 0 | 7   | 0 NA           |
| 0 | 0   | 0 PITG_21944   |
| 0 | 2   | 9 PITG_08314   |
| 0 | 10  | 2 PITG_13406   |
| 0 | 0   | 2 PITG_10275   |
| 0 | 480 | 187 PITG_11969 |
| 0 | 32  | 15 PITG_16183  |
| 0 | 0   | 2 PITG_07946   |
| 0 | 10  | 3 NA           |
| 0 | 8   | 0 PITG_07109   |
| 0 | 4   | 4 PITG_11765   |
| 0 | 0   | 0 PITG_21516   |
| 0 | 2   | 8 PITG_17674   |
| 0 | 15  | 2 PITG_20714   |
| 0 | 2   | 4 NA           |
| 0 | 10  | 5 PITG_19099   |
| 0 | 0   | 22 PITG_05552  |
| 0 | 4   | 11 PITG_12308  |
| 0 | 0   | 5 PITG_17965   |
| 2 | 0   | 20 NA          |
| 0 | 7   | 16 PITG_01112  |
| 0 | 24  | 37 PITG_06379  |
| 0 | 12  | 4 PITG_15394   |
| 0 | 0   | 4 PITG_16854   |
| 0 | 25  | 2 PITG_09440   |
| 0 | 4   | 7 PITG_00421   |
| 0 | 0   | 2 PITG_15006   |

|      |     |                |
|------|-----|----------------|
| 0    | 4   | 2 NA           |
| 0    | 17  | 16 PITG_18962  |
| 47   | 3   | 59 NA          |
| 0    | 2   | 2 PITG_16137   |
| 0    | 140 | 8 PITG_19349   |
| 0    | 0   | 2 PITG_10274   |
| 0    | 19  | 4 PITG_00576   |
| 0    | 2   | 13 NA          |
| 0    | 18  | 11 PITG_09443  |
| 0    | 39  | 8 PITG_14390   |
| 0    | 11  | 0 PITG_21144   |
| 0    | 6   | 4 NA           |
| 0    | 0   | 2 PITG_01867   |
| 0    | 0   | 0 NA           |
| 0    | 0   | 0 PITG_16225   |
| 0    | 0   | 6 PITG_02532   |
| 0    | 13  | 8 PITG_16179   |
| 0    | 2   | 0 PITG_03457   |
| 0    | 2   | 0 PITG_01584   |
| 0    | 2   | 0 PITG_20506   |
| 0    | 12  | 10 PITG_02698  |
| 0    | 10  | 3 PITG_02978   |
| 0    | 2   | 10 PITG_09285  |
| 0    | 0   | 2 PITG_02330   |
| 0    | 4   | 3 NA           |
| 0    | 2   | 10 PITG_06213  |
| 0    | 313 | 294 PITG_03875 |
| 0    | 41  | 26 PITG_00188  |
| 0    | 0   | 0 PITG_18274   |
| 0    | 2   | 2 PITG_13486   |
| 0    | 0   | 0 PITG_11567   |
| 1545 | 6   | 198 NA         |
| 0    | 0   | 0 NA           |
| 0    | 2   | 0 PITG_18826   |
| 0    | 18  | 8 PITG_10674   |
| 0    | 0   | 2 PITG_21598   |
| 0    | 2   | 0 PITG_19149   |
| 0    | 6   | 0 PITG_15774   |
| 0    | 0   | 0 PITG_22000   |
| 0    | 0   | 0 PITG_12993   |
| 0    | 0   | 0 PITG_00383   |
| 0    | 0   | 2 PITG_01920   |
| 0    | 5   | 15 PITG_15900  |
| 0    | 10  | 3 PITG_10039   |
| 0    | 123 | 100 PITG_03161 |
| 0    | 0   | 4 PITG_05188   |
| 0    | 0   | 4 PITG_14727   |

|      |      |                 |
|------|------|-----------------|
| 0    | 26   | 4 PITG_02985    |
| 0    | 4    | 6 PITG_06248    |
| 0    | 2    | 3 PITG_08724    |
| 0    | 0    | 0 PITG_00320    |
| 0    | 2    | 0 PITG_07983    |
| 0    | 10   | 21 PITG_12215   |
| 0    | 19   | 15 PITG_13620   |
| 0    | 78   | 369 PITG_11875  |
| 0    | 4    | 32 PITG_14937   |
| 0    | 0    | 8 NA            |
| 0    | 32   | 33 NA           |
| 0    | 8    | 34 PITG_03653   |
| 2012 | 2    | 95 NA           |
| 0    | 110  | 24 NA           |
| 0    | 540  | 653 NA          |
| 0    | 22   | 7 PITG_11812    |
| 0    | 27   | 4 PITG_01993    |
| 0    | 0    | 0 PITG_02134    |
| 0    | 9    | 17 PITG_18712   |
| 0    | 4042 | 4259 PITG_08845 |
| 0    | 4    | 12 NA           |
| 0    | 0    | 0 NA            |
| 0    | 26   | 15 PITG_00396   |
| 0    | 8    | 7 PITG_05940    |
| 0    | 0    | 4 PITG_11567    |
| 0    | 2    | 10 PITG_01741   |
| 0    | 0    | 2 NA            |
| 0    | 0    | 0 PITG_01953    |
| 0    | 93   | 5 PITG_03144    |
| 0    | 0    | 2 NA            |
| 0    | 3    | 2 PITG_13833    |
| 0    | 2    | 9 PITG_05194    |
| 0    | 18   | 3 PITG_17986    |
| 0    | 55   | 6 NA            |
| 0    | 2    | 8 PITG_14217    |
| 0    | 15   | 4 PITG_15779    |
| 0    | 0    | 6 PITG_01682    |
| 0    | 19   | 14 NA           |
| 0    | 34   | 30 PITG_03980   |
| 0    | 2    | 0 PITG_02780    |
| 0    | 34   | 0 PITG_19183    |
| 0    | 11   | 14 PITG_12887   |
| 0    | 0    | 0 PITG_20868    |
| 0    | 2    | 3 PITG_03031    |
| 0    | 9    | 11 NA           |
| 0    | 3    | 13 PITG_04553   |
| 0    | 23   | 5 PITG_01001    |



|   |     |               |
|---|-----|---------------|
| 0 | 5   | 0 PITG_18738  |
| 0 | 11  | 5 PITG_15837  |
| 0 | 155 | 62 PITG_07317 |
| 0 | 6   | 2 PITG_19303  |
| 0 | 0   | 2 PITG_11080  |
| 0 | 19  | 0 PITG_02595  |
| 0 | 2   | 0 NA          |
| 0 | 2   | 16 NA         |
| 0 | 14  | 4 PITG_05868  |
| 0 | 25  | 6 PITG_16354  |
| 0 | 12  | 6 PITG_09425  |
| 0 | 30  | 5 NA          |
| 0 | 4   | 2 NA          |
| 0 | 2   | 4 NA          |
| 0 | 0   | 10 NA         |
| 0 | 0   | 0 PITG_15967  |
| 0 | 4   | 0 PITG_02075  |
| 0 | 2   | 4 PITG_18479  |
| 0 | 11  | 2 PITG_03530  |
| 0 | 2   | 0 PITG_03803  |
| 0 | 6   | 5 NA          |
| 0 | 2   | 10 PITG_00510 |
| 0 | 35  | 0 NA          |
| 0 | 0   | 6 PITG_00148  |
| 0 | 558 | 56 PITG_05746 |
| 0 | 8   | 2 PITG_01069  |
| 0 | 0   | 2 PITG_12259  |
| 0 | 4   | 2 PITG_02520  |
| 0 | 2   | 0 PITG_14712  |
| 0 | 2   | 9 PITG_15026  |
| 0 | 4   | 8 PITG_20208  |
| 0 | 16  | 31 PITG_09295 |
| 0 | 5   | 4 PITG_11666  |
| 0 | 2   | 2 PITG_08575  |
| 0 | 7   | 0 PITG_16865  |
| 0 | 0   | 0 PITG_15962  |
| 0 | 16  | 9 PITG_09478  |
| 0 | 16  | 12 PITG_07707 |
| 0 | 17  | 14 PITG_08235 |
| 0 | 14  | 2 PITG_12462  |
| 0 | 38  | 39 PITG_22628 |
| 0 | 0   | 0 PITG_04701  |
| 0 | 23  | 16 PITG_14576 |
| 0 | 8   | 20 PITG_13435 |
| 0 | 0   | 0 PITG_08473  |
| 0 | 33  | 85 PITG_05154 |
| 0 | 2   | 3 PITG_14067  |

|   |    |               |
|---|----|---------------|
| 0 | 0  | 2 PITG_02750  |
| 0 | 4  | 16 PITG_13417 |
| 0 | 0  | 5 NA          |
| 0 | 36 | 17 PITG_01926 |
| 0 | 11 | 39 NA         |
| 0 | 0  | 2 PITG_03515  |
| 0 | 30 | 26 PITG_08653 |
| 0 | 8  | 7 PITG_18542  |
| 0 | 6  | 0 PITG_14992  |
| 0 | 0  | 2 PITG_22856  |
| 0 | 42 | 18 PITG_05323 |
| 0 | 2  | 0 PITG_04725  |
| 0 | 16 | 25 PITG_03355 |
| 0 | 4  | 2 PITG_02069  |
| 0 | 2  | 0 PITG_16326  |
| 0 | 2  | 2 PITG_07904  |
| 0 | 0  | 0 PITG_17265  |
| 0 | 10 | 10 PITG_03570 |
| 0 | 19 | 12 NA         |
| 0 | 11 | 13 PITG_07890 |
| 0 | 12 | 2 NA          |
| 0 | 8  | 2 PITG_00188  |
| 0 | 0  | 2 PITG_08734  |
| 0 | 37 | 30 PITG_00349 |
| 0 | 36 | 37 PITG_08454 |
| 0 | 25 | 5 PITG_08960  |
| 0 | 17 | 28 PITG_17329 |
| 0 | 5  | 2 PITG_16667  |
| 0 | 0  | 4 PITG_10903  |
| 0 | 8  | 6 PITG_17879  |
| 0 | 0  | 0 PITG_15779  |
| 0 | 2  | 0 NA          |
| 0 | 3  | 3 PITG_17876  |
| 0 | 12 | 0 PITG_23160  |
| 0 | 0  | 0 NA          |
| 0 | 32 | 42 NA         |
| 0 | 41 | 134 NA        |
| 0 | 2  | 22 PITG_20688 |
| 0 | 4  | 2 PITG_10420  |
| 0 | 2  | 5 NA          |
| 0 | 0  | 2 NA          |
| 0 | 0  | 2 PITG_00630  |
| 0 | 35 | 48 PITG_04651 |
| 0 | 8  | 2 NA          |
| 0 | 2  | 4 NA          |
| 0 | 4  | 2 PITG_05338  |
| 0 | 3  | 9 NA          |

|     |      |               |
|-----|------|---------------|
| 0   | 2132 | 3420 NA       |
| 343 | 102  | 2669 NA       |
| 0   | 10   | 4 NA          |
| 0   | 6    | 4 PITG_10518  |
| 0   | 6    | 2 PITG_19677  |
| 0   | 0    | 2 PITG_07275  |
| 0   | 0    | 2 PITG_02923  |
| 0   | 4    | 3 PITG_14272  |
| 0   | 0    | 2 PITG_04515  |
| 0   | 4    | 4 PITG_16066  |
| 0   | 30   | 0 PITG_03048  |
| 0   | 49   | 64 PITG_16968 |
| 0   | 0    | 0 PITG_13803  |
| 0   | 20   | 2 NA          |
| 0   | 30   | 12 PITG_03365 |
| 0   | 16   | 16 PITG_05274 |
| 0   | 9    | 7 NA          |
| 0   | 21   | 28 NA         |
| 0   | 0    | 0 PITG_01349  |
| 0   | 4    | 2 PITG_08544  |
| 0   | 7    | 2 PITG_05764  |
| 0   | 0    | 3 NA          |
| 0   | 0    | 5 NA          |
| 0   | 0    | 2 PITG_12821  |
| 0   | 0    | 2 PITG_05446  |
| 0   | 0    | 4 PITG_15408  |
| 0   | 2    | 2 PITG_00080  |
| 0   | 9    | 31 PITG_00295 |
| 0   | 2    | 0 PITG_16474  |
| 0   | 7    | 0 PITG_10896  |
| 0   | 3    | 0 PITG_00911  |
| 0   | 2    | 0 NA          |
| 0   | 8    | 6 PITG_03568  |
| 0   | 0    | 2 PITG_22922  |
| 0   | 4    | 0 PITG_17057  |
| 0   | 0    | 0 PITG_08471  |
| 0   | 0    | 0 PITG_11765  |
| 0   | 8    | 63 NA         |
| 0   | 0    | 15 PITG_05805 |
| 0   | 0    | 2 PITG_03990  |
| 0   | 5    | 2 PITG_02330  |
| 0   | 7    | 5 PITG_07310  |
| 4   | 0    | 2 NA          |
| 0   | 0    | 2 PITG_01047  |
| 0   | 2    | 2 PITG_07912  |
| 0   | 0    | 4 PITG_01769  |
| 0   | 3    | 5 PITG_13196  |

|   |     |               |
|---|-----|---------------|
| 0 | 13  | 12 PITG_02245 |
| 0 | 2   | 0 PITG_11675  |
| 0 | 0   | 0 PITG_09522  |
| 0 | 109 | 59 PITG_08327 |
| 0 | 11  | 0 PITG_21184  |
| 0 | 39  | 2 NA          |
| 0 | 6   | 11 PITG_01400 |
| 0 | 0   | 2 PITG_05202  |
| 0 | 35  | 23 NA         |
| 0 | 4   | 31 PITG_04508 |
| 0 | 0   | 0 PITG_03275  |
| 0 | 2   | 4 NA          |
| 0 | 2   | 2 PITG_09244  |
| 0 | 5   | 4 PITG_10895  |
| 0 | 0   | 0 NA          |
| 0 | 0   | 3 NA          |
| 0 | 12  | 7 PITG_03866  |
| 0 | 8   | 2 PITG_05300  |
| 0 | 2   | 6 PITG_00482  |
| 0 | 15  | 22 PITG_11114 |
| 0 | 15  | 0 NA          |
| 0 | 0   | 4 PITG_21215  |
| 0 | 115 | 97 PITG_14141 |
| 0 | 2   | 0 PITG_02231  |
| 0 | 6   | 2 PITG_07210  |
| 0 | 4   | 0 NA          |
| 0 | 0   | 2 PITG_03356  |
| 0 | 18  | 8 PITG_08072  |
| 0 | 14  | 9 PITG_19283  |
| 0 | 27  | 12 PITG_15736 |
| 0 | 2   | 0 PITG_10971  |
| 0 | 79  | 0 PITG_05506  |
| 0 | 3   | 0 PITG_11410  |
| 0 | 16  | 4 PITG_10539  |
| 0 | 6   | 6 PITG_14579  |
| 0 | 23  | 0 PITG_04931  |
| 0 | 8   | 37 PITG_16446 |
| 0 | 4   | 0 NA          |
| 0 | 4   | 0 PITG_13548  |
| 0 | 7   | 7 PITG_00299  |
| 0 | 0   | 0 NA          |
| 0 | 0   | 4 PITG_01127  |
| 0 | 26  | 0 NA          |
| 0 | 2   | 0 PITG_10460  |
| 0 | 7   | 9 PITG_01622  |
| 0 | 5   | 5 NA          |
| 0 | 0   | 0 PITG_00705  |

|      |     |               |
|------|-----|---------------|
| 0    | 0   | 0 PITG_15139  |
| 0    | 3   | 0 PITG_08653  |
| 0    | 0   | 2 PITG_19781  |
| 0    | 55  | 25 NA         |
| 0    | 0   | 4 PITG_00972  |
| 0    | 6   | 2 PITG_01332  |
| 0    | 0   | 4 PITG_06346  |
| 0    | 0   | 2 NA          |
| 0    | 0   | 0 NA          |
| 0    | 130 | 20 PITG_03647 |
| 0    | 5   | 0 PITG_08305  |
| 0    | 4   | 10 NA         |
| 0    | 64  | 0 PITG_06329  |
| 0    | 12  | 11 PITG_06899 |
| 0    | 0   | 3 PITG_05667  |
| 0    | 18  | 0 PITG_04566  |
| 0    | 0   | 0 PITG_11088  |
| 0    | 40  | 12 PITG_08295 |
| 0    | 2   | 0 PITG_01045  |
| 0    | 0   | 0 PITG_18015  |
| 0    | 5   | 0 NA          |
| 0    | 4   | 2 PITG_11157  |
| 0    | 0   | 2 NA          |
| 0    | 13  | 13 PITG_07277 |
| 0    | 0   | 0 PITG_05629  |
| 0    | 0   | 18 PITG_07960 |
| 0    | 10  | 2 PITG_07230  |
| 0    | 0   | 0 PITG_03311  |
| 0    | 47  | 9 NA          |
| 0    | 0   | 0 PITG_08258  |
| 0    | 26  | 10 PITG_07966 |
| 0    | 17  | 8 PITG_16104  |
| 0    | 0   | 4 PITG_16907  |
| 0    | 2   | 0 PITG_12673  |
| 0    | 0   | 0 NA          |
| 0    | 2   | 0 PITG_18409  |
| 0    | 3   | 59 PITG_05922 |
| 0    | 4   | 0 PITG_17456  |
| 0    | 84  | 14 NA         |
| 0    | 7   | 2 PITG_06011  |
| 0    | 2   | 3 NA          |
| 1279 | 11  | 98 NA         |
| 0    | 0   | 0 PITG_15242  |
| 0    | 23  | 77 PITG_15398 |
| 0    | 33  | 19 NA         |
| 0    | 13  | 14 PITG_01781 |
| 0    | 8   | 2 PITG_06853  |

|     |     |               |
|-----|-----|---------------|
| 0   | 49  | 26 PITG_20110 |
| 0   | 11  | 4 PITG_13048  |
| 0   | 25  | 12 PITG_00456 |
| 0   | 0   | 0 PITG_03110  |
| 0   | 2   | 0 PITG_08613  |
| 0   | 3   | 4 PITG_02635  |
| 0   | 4   | 6 NA          |
| 0   | 0   | 30 PITG_07752 |
| 0   | 0   | 0 PITG_04710  |
| 0   | 10  | 0 PITG_08545  |
| 0   | 9   | 28 NA         |
| 0   | 253 | 29 NA         |
| 0   | 0   | 0 PITG_19024  |
| 0   | 0   | 4 PITG_02400  |
| 0   | 15  | 7 PITG_04575  |
| 0   | 17  | 17 PITG_01582 |
| 0   | 0   | 2 PITG_10868  |
| 0   | 2   | 2 PITG_05326  |
| 0   | 0   | 2 PITG_05509  |
| 0   | 0   | 7 NA          |
| 0   | 16  | 0 PITG_05299  |
| 0   | 6   | 0 PITG_01452  |
| 0   | 4   | 6 PITG_13188  |
| 0   | 4   | 0 PITG_15642  |
| 0   | 2   | 12 PITG_16036 |
| 0   | 73  | 35 PITG_09983 |
| 0   | 3   | 2 PITG_00858  |
| 0   | 0   | 0 NA          |
| 0   | 4   | 7 NA          |
| 0   | 8   | 0 PITG_07235  |
| 0   | 2   | 6 PITG_04547  |
| 0   | 2   | 8 PITG_14579  |
| 0   | 2   | 0 NA          |
| 0   | 14  | 32 PITG_03661 |
| 0   | 35  | 28 PITG_03753 |
| 0   | 30  | 15 PITG_20774 |
| 0   | 32  | 9 NA          |
| 0   | 11  | 16 PITG_15553 |
| 0   | 0   | 0 PITG_15033  |
| 0   | 4   | 5 PITG_10486  |
| 0   | 0   | 0 PITG_13546  |
| 0   | 25  | 5 PITG_06262  |
| 0   | 5   | 0 PITG_02307  |
| 0   | 5   | 0 PITG_02203  |
| 0   | 9   | 7 NA          |
| 0   | 4   | 7 PITG_10343  |
| 460 | 21  | 675 NA        |

|   |     |                |
|---|-----|----------------|
| 0 | 12  | 4 PITG_01296   |
| 0 | 4   | 0 PITG_13228   |
| 0 | 19  | 9 PITG_17991   |
| 0 | 0   | 4 PITG_03649   |
| 0 | 2   | 10 PITG_05499  |
| 0 | 3   | 2 PITG_07230   |
| 0 | 0   | 18 NA          |
| 0 | 49  | 176 PITG_17516 |
| 0 | 4   | 5 PITG_10249   |
| 0 | 463 | 110 PITG_19078 |
| 0 | 0   | 0 PITG_13827   |
| 0 | 9   | 19 PITG_01932  |
| 0 | 37  | 322 PITG_20337 |
| 0 | 7   | 0 PITG_20895   |
| 0 | 4   | 2 PITG_05099   |
| 0 | 2   | 4 PITG_09447   |
| 0 | 7   | 0 NA           |
| 0 | 4   | 12 PITG_12516  |
| 0 | 0   | 2 PITG_23159   |
| 0 | 0   | 0 PITG_09790   |
| 0 | 57  | 121 PITG_11692 |
| 0 | 2   | 2 PITG_01978   |
| 0 | 0   | 0 PITG_14111   |
| 0 | 9   | 17 PITG_17958  |
| 0 | 0   | 2 PITG_02824   |
| 0 | 2   | 2 PITG_19766   |
| 0 | 47  | 14 PITG_16310  |
| 0 | 0   | 2 PITG_11121   |
| 0 | 13  | 14 NA          |
| 0 | 0   | 2 PITG_00417   |
| 0 | 208 | 104 PITG_15311 |
| 0 | 72  | 53 PITG_01173  |
| 0 | 2   | 0 NA           |
| 0 | 12  | 5 PITG_00071   |
| 0 | 6   | 0 NA           |
| 0 | 10  | 0 PITG_15847   |
| 0 | 2   | 6 NA           |
| 0 | 0   | 20 PITG_05512  |
| 0 | 2   | 0 NA           |
| 0 | 0   | 2 NA           |
| 0 | 5   | 9 PITG_12260   |
| 0 | 5   | 4 PITG_10448   |
| 0 | 0   | 18 PITG_19466  |
| 0 | 0   | 0 PITG_08186   |
| 0 | 32  | 8 PITG_07971   |
| 0 | 4   | 2 PITG_02497   |
| 0 | 5   | 4 PITG_06452   |

|   |    |               |
|---|----|---------------|
| 0 | 0  | 0 PITG_18316  |
| 0 | 28 | 2 PITG_12891  |
| 0 | 0  | 0 NA          |
| 0 | 0  | 3 PITG_03225  |
| 0 | 4  | 0 PITG_01153  |
| 0 | 12 | 25 PITG_08199 |
| 0 | 22 | 0 PITG_05740  |
| 0 | 0  | 2 PITG_01622  |
| 0 | 0  | 0 PITG_01777  |
| 0 | 4  | 0 PITG_03427  |
| 0 | 19 | 41 PITG_10050 |
| 0 | 28 | 0 PITG_00501  |
| 0 | 15 | 3 PITG_16969  |
| 0 | 7  | 0 NA          |
| 0 | 12 | 0 PITG_18129  |
| 0 | 0  | 2 PITG_10486  |
| 0 | 5  | 7 PITG_07827  |
| 0 | 20 | 3 NA          |
| 0 | 10 | 2 PITG_15891  |
| 0 | 49 | 23 PITG_02252 |
| 0 | 4  | 0 PITG_15820  |
| 0 | 3  | 2 NA          |
| 0 | 6  | 8 PITG_12161  |
| 0 | 32 | 2 NA          |
| 0 | 0  | 7 PITG_08827  |
| 0 | 4  | 3 NA          |
| 0 | 4  | 14 PITG_02001 |
| 0 | 0  | 0 NA          |
| 0 | 0  | 4 PITG_08140  |
| 0 | 0  | 0 PITG_14950  |
| 0 | 22 | 20 PITG_09922 |
| 0 | 0  | 2 NA          |
| 0 | 4  | 2 NA          |
| 0 | 4  | 2 PITG_21214  |
| 0 | 5  | 8 PITG_02161  |
| 0 | 7  | 10 PITG_15924 |
| 0 | 7  | 4 PITG_15779  |
| 0 | 5  | 4 PITG_18027  |
| 0 | 13 | 6 NA          |
| 0 | 6  | 3 PITG_01666  |
| 0 | 17 | 4 PITG_02105  |
| 0 | 29 | 0 PITG_02927  |
| 0 | 0  | 8 PITG_07073  |
| 0 | 24 | 20 PITG_08619 |
| 0 | 0  | 0 PITG_08307  |
| 0 | 0  | 2 PITG_16682  |
| 0 | 13 | 63 PITG_16477 |



|      |     |               |
|------|-----|---------------|
| 2740 | 23  | 64 NA         |
| 0    | 11  | 22 PITG_01932 |
| 0    | 0   | 2 NA          |
| 0    | 0   | 2 PITG_12156  |
| 0    | 0   | 2 NA          |
| 0    | 2   | 0 PITG_15417  |
| 0    | 0   | 2 NA          |
| 0    | 4   | 57 PITG_03824 |
| 0    | 8   | 6 PITG_08011  |
| 0    | 0   | 0 PITG_03408  |
| 0    | 0   | 0 PITG_01282  |
| 0    | 0   | 9 PITG_14744  |
| 0    | 161 | 6 PITG_22795  |
| 0    | 0   | 0 PITG_04379  |
| 0    | 0   | 0 PITG_21846  |
| 0    | 28  | 7 NA          |
| 0    | 5   | 13 NA         |
| 0    | 6   | 12 PITG_23142 |
| 583  | 77  | 341 NA        |
| 0    | 0   | 6 PITG_07072  |
| 0    | 0   | 2 PITG_01001  |
| 0    | 0   | 0 PITG_02124  |
| 0    | 9   | 7 PITG_18892  |
| 0    | 8   | 7 PITG_07865  |
| 0    | 2   | 0 PITG_21915  |
| 0    | 4   | 2 NA          |
| 0    | 0   | 6 PITG_19878  |
| 0    | 0   | 2 PITG_14071  |
| 0    | 0   | 0 PITG_01957  |
| 0    | 66  | 4 PITG_05643  |
| 0    | 58  | 10 PITG_15637 |
| 0    | 6   | 9 PITG_02343  |
| 0    | 0   | 5 PITG_10343  |
| 0    | 4   | 2 PITG_00662  |
| 0    | 0   | 26 PITG_00970 |
| 0    | 8   | 2 NA          |
| 0    | 25  | 19 NA         |
| 0    | 17  | 7 PITG_09944  |
| 0    | 4   | 0 PITG_09995  |
| 0    | 0   | 0 NA          |
| 0    | 0   | 2 PITG_07230  |
| 0    | 0   | 0 PITG_15140  |
| 0    | 0   | 0 NA          |
| 0    | 13  | 3 NA          |
| 0    | 48  | 47 PITG_13319 |
| 0    | 2   | 2 PITG_20502  |
| 0    | 11  | 18 PITG_15602 |

|   |     |                 |
|---|-----|-----------------|
| 0 | 2   | 4 PITG_04562    |
| 0 | 374 | 319 PITG_06449  |
| 0 | 97  | 53 PITG_13803   |
| 0 | 6   | 0 NA            |
| 0 | 409 | 32 PITG_02927   |
| 0 | 0   | 0 PITG_16530    |
| 0 | 0   | 5 PITG_12683    |
| 0 | 3   | 6 NA            |
| 0 | 2   | 10 PITG_08072   |
| 0 | 0   | 0 NA            |
| 0 | 12  | 7 PITG_15217    |
| 0 | 0   | 0 PITG_13615    |
| 0 | 0   | 4 PITG_05505    |
| 0 | 0   | 0 PITG_19516    |
| 0 | 2   | 20 PITG_01508   |
| 0 | 2   | 0 PITG_19966    |
| 0 | 0   | 0 PITG_15623    |
| 0 | 4   | 12 PITG_16132   |
| 0 | 28  | 59 PITG_05127   |
| 0 | 0   | 0 NA            |
| 0 | 0   | 2 PITG_10885    |
| 0 | 4   | 12 PITG_20528   |
| 0 | 6   | 5 NA            |
| 0 | 2   | 0 PITG_15058    |
| 0 | 11  | 6 NA            |
| 0 | 12  | 0 PITG_04230    |
| 0 | 9   | 2 PITG_06964    |
| 0 | 363 | 1158 PITG_15375 |
| 0 | 17  | 7 PITG_16161    |
| 0 | 13  | 5 NA            |
| 0 | 4   | 10 PITG_01710   |
| 0 | 8   | 4 PITG_11588    |
| 0 | 2   | 8 PITG_00193    |
| 0 | 0   | 0 PITG_12995    |
| 0 | 7   | 7 PITG_03253    |
| 0 | 11  | 34 PITG_02303   |
| 0 | 0   | 4 PITG_01332    |
| 0 | 2   | 3 PITG_01871    |
| 0 | 3   | 17 PITG_04506   |
| 0 | 2   | 5 PITG_03253    |
| 0 | 21  | 4 NA            |
| 0 | 2   | 0 PITG_07026    |
| 0 | 31  | 4 NA            |
| 0 | 2   | 4 PITG_00323    |
| 0 | 0   | 8 PITG_11039    |
| 0 | 2   | 2 PITG_18604    |
| 0 | 10  | 4 PITG_03737    |

|     |     |                |
|-----|-----|----------------|
| 0   | 14  | 17 PITG_13814  |
| 0   | 0   | 4 PITG_02536   |
| 0   | 0   | 0 PITG_09870   |
| 0   | 0   | 11 PITG_17639  |
| 0   | 4   | 0 PITG_07046   |
| 0   | 55  | 113 PITG_11457 |
| 0   | 0   | 8 PITG_00090   |
| 0   | 26  | 43 NA          |
| 0   | 15  | 3 PITG_15039   |
| 0   | 2   | 12 PITG_13826  |
| 0   | 218 | 115 PITG_18851 |
| 0   | 25  | 11 PITG_00476  |
| 0   | 2   | 2 PITG_09639   |
| 0   | 3   | 0 PITG_01584   |
| 10  | 2   | 2 NA           |
| 0   | 0   | 15 PITG_01991  |
| 0   | 4   | 6 PITG_10615   |
| 0   | 7   | 2 NA           |
| 0   | 117 | 30 NA          |
| 0   | 0   | 3 PITG_00845   |
| 0   | 55  | 80 PITG_07096  |
| 0   | 0   | 2 PITG_06405   |
| 0   | 0   | 2 PITG_02027   |
| 0   | 10  | 2 PITG_15075   |
| 0   | 2   | 2 PITG_15565   |
| 0   | 11  | 20 PITG_14766  |
| 0   | 21  | 24 PITG_01626  |
| 0   | 4   | 13 PITG_11467  |
| 0   | 2   | 2 NA           |
| 0   | 12  | 35 NA          |
| 0   | 5   | 2 PITG_10492   |
| 0   | 27  | 4 PITG_01740   |
| 0   | 90  | 20 NA          |
| 0   | 8   | 0 PITG_13848   |
| 0   | 0   | 0 NA           |
| 0   | 3   | 2 PITG_16044   |
| 0   | 33  | 4 PITG_01159   |
| 0   | 0   | 4 PITG_12840   |
| 388 | 30  | 670 NA         |
| 0   | 0   | 0 PITG_18127   |
| 0   | 12  | 6 PITG_00352   |
| 2   | 0   | 8 NA           |
| 0   | 2   | 0 PITG_13029   |
| 0   | 12  | 18 NA          |
| 0   | 7   | 14 PITG_02114  |
| 0   | 6   | 0 PITG_13969   |
| 0   | 4   | 0 PITG_17617   |

|   |     |               |
|---|-----|---------------|
| 0 | 0   | 0 PITG_16263  |
| 0 | 0   | 0 PITG_11650  |
| 0 | 2   | 0 PITG_12569  |
| 0 | 15  | 4 PITG_18779  |
| 0 | 0   | 0 PITG_02199  |
| 0 | 2   | 0 PITG_02757  |
| 0 | 13  | 19 PITG_01251 |
| 0 | 0   | 0 PITG_03987  |
| 0 | 22  | 11 PITG_13736 |
| 0 | 0   | 0 PITG_00874  |
| 0 | 33  | 38 PITG_19656 |
| 0 | 0   | 0 PITG_02499  |
| 0 | 0   | 17 PITG_17936 |
| 0 | 20  | 0 NA          |
| 0 | 18  | 23 PITG_02909 |
| 0 | 9   | 10 PITG_11410 |
| 0 | 0   | 0 PITG_03901  |
| 0 | 6   | 6 PITG_07836  |
| 0 | 2   | 0 PITG_04547  |
| 0 | 0   | 2 PITG_05509  |
| 0 | 0   | 2 PITG_08309  |
| 0 | 12  | 0 NA          |
| 0 | 15  | 0 PITG_05659  |
| 0 | 28  | 51 PITG_23160 |
| 0 | 4   | 0 PITG_00180  |
| 0 | 127 | 29 PITG_01640 |
| 0 | 9   | 12 PITG_07121 |
| 0 | 2   | 7 PITG_01257  |
| 0 | 2   | 4 PITG_12742  |
| 0 | 2   | 10 PITG_10461 |
| 0 | 14  | 3 PITG_02750  |
| 0 | 3   | 5 NA          |
| 0 | 31  | 37 PITG_01056 |
| 0 | 0   | 6 PITG_08873  |
| 0 | 0   | 4 PITG_06977  |
| 0 | 2   | 23 PITG_19055 |
| 0 | 4   | 2 NA          |
| 0 | 0   | 0 PITG_03500  |
| 0 | 0   | 0 PITG_08039  |
| 0 | 0   | 0 PITG_12521  |
| 0 | 22  | 23 PITG_16364 |
| 0 | 3   | 0 PITG_07302  |
| 0 | 23  | 30 PITG_01453 |
| 0 | 5   | 3 NA          |
| 0 | 16  | 2 NA          |
| 0 | 0   | 0 PITG_09921  |
| 0 | 2   | 26 PITG_11116 |

|     |     |                |
|-----|-----|----------------|
| 0   | 81  | 2 PITG_17806   |
| 0   | 6   | 7 PITG_19148   |
| 0   | 4   | 6 PITG_08095   |
| 0   | 2   | 3 PITG_08587   |
| 0   | 9   | 4 PITG_02794   |
| 0   | 15  | 7 PITG_06847   |
| 0   | 26  | 5 PITG_19167   |
| 0   | 0   | 0 NA           |
| 0   | 50  | 0 NA           |
| 0   | 9   | 2 NA           |
| 0   | 47  | 18 NA          |
| 0   | 14  | 13 PITG_18236  |
| 0   | 5   | 0 PITG_19467   |
| 0   | 2   | 4 PITG_01076   |
| 0   | 35  | 4 NA           |
| 0   | 13  | 29 PITG_13302  |
| 0   | 4   | 0 PITG_01111   |
| 0   | 31  | 16 PITG_10052  |
| 0   | 18  | 12 PITG_21182  |
| 0   | 20  | 40 PITG_08172  |
| 0   | 40  | 40 PITG_16058  |
| 0   | 2   | 2 PITG_05884   |
| 0   | 36  | 31 PITG_06924  |
| 0   | 0   | 4 PITG_06405   |
| 0   | 731 | 84 PITG_07633  |
| 0   | 394 | 206 PITG_08702 |
| 0   | 0   | 0 PITG_03179   |
| 0   | 165 | 179 PITG_14607 |
| 0   | 22  | 14 PITG_02134  |
| 0   | 0   | 0 PITG_00222   |
| 0   | 8   | 2 PITG_20839   |
| 0   | 5   | 0 NA           |
| 0   | 15  | 4 PITG_14717   |
| 0   | 2   | 25 PITG_08455  |
| 0   | 6   | 0 NA           |
| 0   | 0   | 23 PITG_03938  |
| 0   | 0   | 0 PITG_00789   |
| 0   | 0   | 0 PITG_22057   |
| 0   | 2   | 14 PITG_15505  |
| 0   | 0   | 0 PITG_19008   |
| 0   | 0   | 0 NA           |
| 0   | 212 | 83 NA          |
| 604 | 4   | 85 NA          |
| 0   | 0   | 0 PITG_04593   |
| 0   | 0   | 4 PITG_01683   |
| 0   | 2   | 2 PITG_05429   |
| 0   | 0   | 4 PITG_12797   |

|    |     |                |
|----|-----|----------------|
| 0  | 0   | 0 PITG_07140   |
| 0  | 15  | 5 PITG_12576   |
| 0  | 4   | 0 PITG_07074   |
| 0  | 10  | 9 PITG_00448   |
| 0  | 2   | 9 PITG_09669   |
| 0  | 6   | 10 PITG_00787  |
| 0  | 15  | 6 PITG_16709   |
| 0  | 45  | 15 NA          |
| 0  | 29  | 11 NA          |
| 0  | 4   | 0 NA           |
| 0  | 42  | 28 PITG_05128  |
| 0  | 0   | 0 PITG_08712   |
| 0  | 7   | 2 NA           |
| 0  | 0   | 4 NA           |
| 0  | 5   | 16 PITG_11225  |
| 0  | 38  | 108 PITG_12291 |
| 0  | 21  | 27 PITG_03490  |
| 0  | 0   | 0 PITG_17891   |
| 2  | 13  | 24 PITG_16684  |
| 0  | 0   | 0 PITG_00069   |
| 0  | 6   | 0 PITG_08736   |
| 0  | 2   | 0 NA           |
| 0  | 40  | 9 PITG_08241   |
| 0  | 2   | 5 NA           |
| 0  | 0   | 0 NA           |
| 0  | 2   | 0 NA           |
| 0  | 0   | 0 PITG_04126   |
| 85 | 73  | 193 NA         |
| 0  | 2   | 7 PITG_05298   |
| 0  | 8   | 2 NA           |
| 0  | 15  | 0 NA           |
| 0  | 2   | 0 PITG_01576   |
| 0  | 2   | 0 PITG_01336   |
| 0  | 0   | 0 PITG_19153   |
| 0  | 4   | 0 PITG_04232   |
| 0  | 3   | 0 NA           |
| 0  | 0   | 0 PITG_10743   |
| 0  | 0   | 0 PITG_06040   |
| 0  | 39  | 2 NA           |
| 0  | 0   | 0 PITG_16042   |
| 0  | 2   | 2 PITG_12913   |
| 0  | 8   | 0 PITG_00894   |
| 0  | 2   | 4 PITG_18027   |
| 0  | 2   | 3 NA           |
| 0  | 0   | 0 PITG_03821   |
| 0  | 6   | 19 PITG_17130  |
| 0  | 268 | 64 NA          |

|      |    |               |
|------|----|---------------|
| 0    | 0  | 0 PITG_03890  |
| 0    | 0  | 0 PITG_15044  |
| 0    | 8  | 9 PITG_19219  |
| 0    | 0  | 0 PITG_02124  |
| 0    | 0  | 6 PITG_03296  |
| 0    | 16 | 0 PITG_00809  |
| 0    | 2  | 0 PITG_21010  |
| 120  | 2  | 113 NA        |
| 0    | 8  | 4 PITG_09987  |
| 0    | 5  | 3 PITG_04978  |
| 1155 | 73 | 1046 NA       |
| 0    | 5  | 3 PITG_17660  |
| 0    | 0  | 3 PITG_04746  |
| 0    | 5  | 11 NA         |
| 0    | 0  | 3 PITG_08189  |
| 0    | 2  | 0 NA          |
| 0    | 23 | 39 PITG_06808 |
| 0    | 0  | 0 PITG_13848  |
| 0    | 15 | 2 PITG_02976  |
| 0    | 97 | 126 NA        |
| 0    | 16 | 34 PITG_10729 |
| 0    | 30 | 0 PITG_03365  |
| 0    | 31 | 12 PITG_03048 |
| 0    | 0  | 2 PITG_06934  |
| 0    | 0  | 2 PITG_00064  |
| 0    | 40 | 7 PITG_10117  |
| 0    | 0  | 0 NA          |
| 0    | 0  | 7 PITG_01823  |
| 0    | 16 | 14 PITG_07247 |
| 0    | 0  | 0 PITG_03572  |
| 0    | 6  | 14 PITG_10083 |
| 0    | 12 | 2 NA          |
| 0    | 6  | 3 PITG_10725  |
| 0    | 5  | 22 PITG_18045 |
| 0    | 12 | 15 PITG_19901 |
| 0    | 18 | 4 PITG_00772  |
| 0    | 6  | 13 PITG_01741 |
| 0    | 6  | 6 NA          |
| 0    | 0  | 2 NA          |
| 0    | 39 | 10 NA         |
| 0    | 4  | 4 PITG_03643  |
| 0    | 5  | 0 PITG_06199  |
| 0    | 9  | 0 PITG_00408  |
| 0    | 0  | 7 PITG_16022  |
| 0    | 0  | 8 PITG_08316  |
| 0    | 9  | 24 PITG_02209 |
| 0    | 0  | 0 NA          |

|    |      |                |
|----|------|----------------|
| 0  | 607  | 858 PITG_16061 |
| 0  | 12   | 0 PITG_03883   |
| 0  | 0    | 2 PITG_03837   |
| 0  | 13   | 34 PITG_02719  |
| 0  | 1808 | 4030 NA        |
| 0  | 12   | 22 PITG_17170  |
| 0  | 9    | 21 PITG_20081  |
| 0  | 0    | 0 PITG_19516   |
| 0  | 8    | 6 PITG_11806   |
| 0  | 0    | 7 NA           |
| 0  | 0    | 2 PITG_07531   |
| 0  | 2    | 10 PITG_12187  |
| 0  | 116  | 7 NA           |
| 0  | 2    | 4 PITG_12264   |
| 0  | 4    | 13 PITG_02719  |
| 0  | 36   | 0 PITG_17258   |
| 0  | 15   | 11 NA          |
| 0  | 105  | 38 PITG_10061  |
| 0  | 3    | 2 PITG_01073   |
| 0  | 6    | 2 NA           |
| 0  | 6    | 2 NA           |
| 0  | 0    | 2 NA           |
| 0  | 4    | 2 PITG_14415   |
| 0  | 0    | 0 PITG_00526   |
| 0  | 49   | 19 PITG_09220  |
| 0  | 3    | 6 PITG_04289   |
| 0  | 4    | 2 NA           |
| 0  | 16   | 11 PITG_03890  |
| 0  | 11   | 25 PITG_01691  |
| 0  | 0    | 7 NA           |
| 0  | 14   | 30 PITG_11111  |
| 0  | 0    | 0 PITG_08587   |
| 0  | 4    | 2 NA           |
| 0  | 54   | 15 NA          |
| 25 | 79   | 193 NA         |
| 0  | 12   | 4 PITG_11887   |
| 0  | 6    | 4 PITG_15959   |
| 0  | 3    | 0 NA           |
| 0  | 2    | 2 PITG_07948   |
| 0  | 0    | 0 NA           |
| 0  | 27   | 3 PITG_10002   |
| 0  | 0    | 7 NA           |
| 0  | 0    | 0 PITG_01871   |
| 0  | 2    | 17 PITG_17049  |
| 0  | 0    | 0 PITG_08460   |
| 16 | 0    | 25 NA          |
| 0  | 6    | 0 NA           |



|   |     |                |
|---|-----|----------------|
| 0 | 0   | 0 PITG_04243   |
| 0 | 0   | 4 NA           |
| 0 | 5   | 0 PITG_02294   |
| 0 | 7   | 5 PITG_00829   |
| 0 | 3   | 0 NA           |
| 0 | 6   | 6 PITG_03915   |
| 0 | 2   | 5 PITG_13268   |
| 0 | 41  | 69 PITG_05690  |
| 0 | 22  | 11 PITG_05354  |
| 0 | 0   | 5 PITG_09954   |
| 0 | 13  | 46 PITG_00140  |
| 0 | 19  | 0 NA           |
| 0 | 374 | 55 PITG_01130  |
| 0 | 6   | 4 PITG_08316   |
| 0 | 2   | 13 PITG_15755  |
| 0 | 0   | 0 PITG_09921   |
| 0 | 6   | 0 NA           |
| 0 | 14  | 11 PITG_08964  |
| 0 | 10  | 0 PITG_11080   |
| 0 | 10  | 2 PITG_21184   |
| 0 | 4   | 0 PITG_19127   |
| 0 | 29  | 51 PITG_04651  |
| 0 | 0   | 2 PITG_21223   |
| 0 | 3   | 4 NA           |
| 0 | 67  | 2 PITG_06254   |
| 0 | 5   | 5 PITG_21351   |
| 0 | 11  | 2 NA           |
| 0 | 0   | 0 PITG_01232   |
| 0 | 8   | 12 NA          |
| 0 | 0   | 0 PITG_05340   |
| 0 | 4   | 2 PITG_11234   |
| 0 | 4   | 4 PITG_08396   |
| 0 | 2   | 0 PITG_01588   |
| 0 | 0   | 5 PITG_16224   |
| 0 | 15  | 11 PITG_09729  |
| 0 | 2   | 2 PITG_14108   |
| 0 | 2   | 5 PITG_06259   |
| 0 | 2   | 0 NA           |
| 0 | 986 | 538 PITG_00674 |
| 0 | 0   | 0 PITG_03635   |
| 0 | 5   | 2 PITG_02515   |
| 0 | 13  | 23 NA          |
| 0 | 77  | 7 PITG_14198   |
| 0 | 0   | 4 PITG_10729   |
| 0 | 33  | 12 PITG_13833  |
| 0 | 37  | 7 PITG_00385   |
| 0 | 21  | 3 PITG_03568   |

|   |     |               |
|---|-----|---------------|
| 0 | 25  | 12 PITG_03180 |
| 0 | 2   | 0 PITG_03099  |
| 0 | 10  | 2 PITG_02530  |
| 0 | 17  | 2 PITG_01563  |
| 0 | 2   | 12 PITG_06410 |
| 0 | 0   | 6 NA          |
| 0 | 11  | 6 NA          |
| 0 | 7   | 6 PITG_17330  |
| 0 | 2   | 2 PITG_02673  |
| 0 | 2   | 0 PITG_00220  |
| 0 | 0   | 2 PITG_12675  |
| 0 | 4   | 4 PITG_18028  |
| 0 | 0   | 0 NA          |
| 0 | 2   | 0 PITG_17882  |
| 0 | 7   | 10 PITG_01654 |
| 0 | 59  | 35 PITG_16365 |
| 0 | 7   | 12 PITG_19603 |
| 0 | 2   | 0 NA          |
| 0 | 9   | 55 PITG_23093 |
| 0 | 0   | 0 PITG_11285  |
| 0 | 16  | 10 PITG_03618 |
| 0 | 13  | 56 PITG_03611 |
| 0 | 60  | 80 NA         |
| 0 | 89  | 11 PITG_16320 |
| 0 | 8   | 7 PITG_02624  |
| 0 | 53  | 43 PITG_03979 |
| 0 | 15  | 4 PITG_08386  |
| 0 | 0   | 0 PITG_21918  |
| 0 | 135 | 49 PITG_15967 |
| 0 | 13  | 2 PITG_17699  |
| 0 | 85  | 2 PITG_00460  |
| 0 | 68  | 20 PITG_03965 |
| 0 | 16  | 13 PITG_15119 |
| 0 | 2   | 20 PITG_07250 |
| 0 | 7   | 9 PITG_10916  |
| 0 | 2   | 2 PITG_08418  |
| 0 | 8   | 2 NA          |
| 0 | 5   | 5 PITG_05701  |
| 0 | 2   | 6 PITG_02793  |
| 0 | 12  | 2 NA          |
| 0 | 5   | 17 PITG_16791 |
| 0 | 0   | 13 PITG_06408 |
| 0 | 0   | 8 PITG_03710  |
| 0 | 5   | 26 PITG_07286 |
| 0 | 14  | 21 NA         |
| 0 | 21  | 23 PITG_07030 |
| 0 | 0   | 0 PITG_06934  |

|    |     |                |
|----|-----|----------------|
| 0  | 0   | 0 PITG_02623   |
| 0  | 41  | 0 NA           |
| 0  | 9   | 10 PITG_04722  |
| 0  | 4   | 4 PITG_03109   |
| 0  | 61  | 0 NA           |
| 0  | 11  | 5 PITG_10060   |
| 0  | 46  | 39 PITG_01717  |
| 0  | 18  | 12 NA          |
| 0  | 0   | 8 PITG_02338   |
| 0  | 9   | 4 NA           |
| 0  | 2   | 0 NA           |
| 0  | 10  | 0 PITG_03269   |
| 0  | 0   | 2 PITG_08048   |
| 0  | 55  | 37 PITG_01661  |
| 0  | 0   | 2 PITG_06793   |
| 0  | 8   | 4 PITG_10624   |
| 0  | 20  | 7 PITG_12195   |
| 0  | 0   | 2 PITG_15958   |
| 0  | 11  | 0 PITG_09350   |
| 0  | 6   | 13 PITG_02338  |
| 0  | 4   | 0 PITG_13437   |
| 0  | 17  | 22 NA          |
| 0  | 0   | 0 PITG_03593   |
| 0  | 10  | 22 PITG_06171  |
| 0  | 9   | 14 PITG_18067  |
| 85 | 102 | 26 NA          |
| 0  | 0   | 2 PITG_11728   |
| 0  | 0   | 10 PITG_06635  |
| 0  | 3   | 0 PITG_13658   |
| 0  | 7   | 2 PITG_15597   |
| 0  | 2   | 6 NA           |
| 0  | 12  | 4 PITG_02677   |
| 0  | 9   | 24 PITG_03575  |
| 0  | 4   | 4 PITG_16116   |
| 0  | 0   | 0 PITG_00187   |
| 0  | 6   | 8 PITG_17501   |
| 0  | 6   | 5 PITG_16038   |
| 0  | 7   | 0 PITG_09422   |
| 0  | 2   | 2 NA           |
| 0  | 19  | 10 PITG_18090  |
| 0  | 2   | 8 PITG_13348   |
| 0  | 2   | 22 PITG_02688  |
| 0  | 17  | 103 PITG_17123 |
| 0  | 0   | 2 NA           |
| 0  | 14  | 4 PITG_01065   |
| 0  | 0   | 4 PITG_20447   |
| 0  | 2   | 2 PITG_21759   |

|     |     |               |
|-----|-----|---------------|
| 0   | 4   | 11 PITG_04028 |
| 0   | 3   | 4 PITG_17930  |
| 0   | 6   | 0 NA          |
| 0   | 72  | 19 PITG_17891 |
| 0   | 0   | 23 PITG_08463 |
| 0   | 0   | 0 NA          |
| 0   | 6   | 28 PITG_08455 |
| 0   | 0   | 8 PITG_15542  |
| 0   | 43  | 82 PITG_02420 |
| 0   | 2   | 0 NA          |
| 0   | 0   | 2 PITG_08681  |
| 0   | 17  | 4 PITG_09377  |
| 0   | 128 | 40 PITG_17931 |
| 0   | 10  | 4 NA          |
| 0   | 3   | 0 PITG_04618  |
| 0   | 17  | 10 PITG_17242 |
| 0   | 12  | 0 PITG_10743  |
| 0   | 8   | 0 PITG_20745  |
| 0   | 0   | 2 PITG_13412  |
| 0   | 2   | 2 PITG_12178  |
| 0   | 3   | 2 PITG_13439  |
| 0   | 13  | 5 PITG_10615  |
| 0   | 0   | 7 PITG_04884  |
| 0   | 0   | 0 PITG_07331  |
| 0   | 12  | 0 PITG_06048  |
| 0   | 2   | 8 NA          |
| 0   | 4   | 4 NA          |
| 0   | 8   | 7 NA          |
| 0   | 2   | 6 PITG_11232  |
| 0   | 2   | 5 NA          |
| 0   | 29  | 35 PITG_14114 |
| 0   | 2   | 0 NA          |
| 0   | 0   | 12 PITG_00375 |
| 0   | 17  | 8 PITG_00808  |
| 0   | 4   | 20 NA         |
| 0   | 10  | 11 PITG_08135 |
| 0   | 2   | 3 NA          |
| 0   | 0   | 0 PITG_20507  |
| 0   | 0   | 7 PITG_21914  |
| 0   | 6   | 16 PITG_01108 |
| 0   | 13  | 9 PITG_02791  |
| 0   | 0   | 2 PITG_15006  |
| 0   | 2   | 2 PITG_07456  |
| 0   | 2   | 0 PITG_03143  |
| 974 | 487 | 393 NA        |
| 0   | 0   | 11 PITG_16981 |
| 0   | 11  | 2 PITG_06963  |

|    |     |                |
|----|-----|----------------|
| 0  | 0   | 0 PITG_05227   |
| 0  | 191 | 204 PITG_02399 |
| 0  | 10  | 2 PITG_21423   |
| 0  | 7   | 16 PITG_20032  |
| 0  | 0   | 2 PITG_19106   |
| 0  | 4   | 0 PITG_11566   |
| 0  | 0   | 2 PITG_07281   |
| 0  | 2   | 2 PITG_15868   |
| 0  | 0   | 0 PITG_16221   |
| 0  | 221 | 164 NA         |
| 0  | 0   | 0 PITG_13579   |
| 0  | 6   | 2 PITG_12519   |
| 0  | 22  | 12 NA          |
| 0  | 0   | 2 NA           |
| 0  | 0   | 0 PITG_10325   |
| 0  | 0   | 2 NA           |
| 0  | 25  | 7 PITG_05233   |
| 0  | 4   | 2 PITG_16930   |
| 0  | 0   | 0 PITG_08740   |
| 0  | 0   | 0 PITG_06202   |
| 0  | 0   | 0 PITG_18441   |
| 0  | 2   | 0 NA           |
| 0  | 2   | 3 PITG_00664   |
| 0  | 18  | 12 PITG_12302  |
| 0  | 6   | 2 PITG_17767   |
| 0  | 3   | 4 PITG_12598   |
| 0  | 2   | 0 NA           |
| 0  | 7   | 25 PITG_08919  |
| 0  | 75  | 10 PITG_04296  |
| 0  | 19  | 117 PITG_16311 |
| 10 | 0   | 8 NA           |
| 0  | 0   | 0 PITG_20647   |
| 0  | 0   | 6 PITG_18882   |
| 0  | 29  | 19 PITG_03415  |
| 0  | 71  | 81 PITG_01082  |
| 0  | 3   | 0 PITG_21190   |
| 0  | 14  | 6 PITG_00426   |
| 0  | 16  | 86 PITG_02526  |
| 0  | 2   | 2 PITG_03287   |
| 0  | 4   | 4 PITG_11146   |
| 0  | 16  | 0 NA           |
| 0  | 0   | 0 PITG_00215   |
| 0  | 23  | 19 PITG_06895  |
| 0  | 0   | 2 PITG_15779   |
| 0  | 6   | 2 PITG_05566   |
| 0  | 0   | 4 PITG_05227   |
| 0  | 0   | 0 PITG_15062   |

|   |    |               |
|---|----|---------------|
| 0 | 3  | 0 PITG_20803  |
| 0 | 0  | 0 PITG_01789  |
| 0 | 6  | 2 NA          |
| 0 | 2  | 2 PITG_02850  |
| 0 | 25 | 44 PITG_13600 |
| 0 | 26 | 0 PITG_08221  |
| 0 | 0  | 0 PITG_15569  |
| 0 | 0  | 0 PITG_03243  |
| 0 | 9  | 11 PITG_07646 |
| 0 | 2  | 0 PITG_03505  |
| 0 | 25 | 0 PITG_14108  |
| 0 | 0  | 0 PITG_03530  |
| 0 | 7  | 2 NA          |
| 0 | 2  | 2 PITG_11461  |
| 0 | 0  | 0 PITG_11461  |
| 0 | 0  | 0 NA          |
| 0 | 0  | 19 NA         |
| 0 | 12 | 20 PITG_00858 |
| 0 | 0  | 2 PITG_15844  |
| 0 | 23 | 9 NA          |
| 0 | 0  | 7 PITG_00649  |
| 0 | 19 | 5 PITG_14743  |
| 0 | 2  | 0 NA          |
| 0 | 2  | 2 PITG_05187  |
| 0 | 2  | 4 PITG_13738  |
| 0 | 19 | 0 PITG_13966  |
| 0 | 2  | 4 PITG_11748  |
| 0 | 55 | 6 NA          |
| 0 | 5  | 2 PITG_16136  |
| 0 | 4  | 2 PITG_18091  |
| 0 | 2  | 17 PITG_06832 |
| 0 | 20 | 32 PITG_11625 |
| 0 | 8  | 4 PITG_01257  |
| 0 | 15 | 12 NA         |
| 0 | 0  | 2 PITG_13255  |
| 0 | 0  | 2 PITG_15779  |
| 0 | 2  | 0 NA          |
| 0 | 2  | 7 PITG_17025  |
| 0 | 6  | 6 NA          |
| 0 | 18 | 13 PITG_21000 |
| 0 | 17 | 39 PITG_05922 |
| 0 | 60 | 60 PITG_05733 |
| 0 | 21 | 0 PITG_03600  |
| 0 | 2  | 2 PITG_10011  |
| 0 | 5  | 4 PITG_10602  |
| 0 | 31 | 0 NA          |
| 0 | 2  | 2 PITG_16012  |

|     |     |               |
|-----|-----|---------------|
| 0   | 9   | 2 NA          |
| 0   | 0   | 2 PITG_13819  |
| 0   | 2   | 9 PITG_04691  |
| 0   | 0   | 4 PITG_00148  |
| 0   | 8   | 16 PITG_07765 |
| 0   | 0   | 2 PITG_10593  |
| 0   | 5   | 0 PITG_06405  |
| 0   | 15  | 0 PITG_13792  |
| 0   | 11  | 9 PITG_16009  |
| 0   | 2   | 0 PITG_05260  |
| 0   | 0   | 2 PITG_06121  |
| 0   | 3   | 8 PITG_02812  |
| 0   | 2   | 4 PITG_13029  |
| 0   | 54  | 17 PITG_03236 |
| 0   | 0   | 4 NA          |
| 12  | 2   | 30 NA         |
| 0   | 24  | 32 PITG_11969 |
| 0   | 8   | 4 PITG_06440  |
| 0   | 0   | 0 NA          |
| 0   | 9   | 8 PITG_05075  |
| 0   | 4   | 0 PITG_22383  |
| 0   | 3   | 5 PITG_11138  |
| 151 | 33  | 663 NA        |
| 0   | 2   | 5 PITG_10921  |
| 0   | 2   | 2 PITG_00188  |
| 0   | 21  | 0 PITG_10008  |
| 0   | 17  | 39 NA         |
| 0   | 0   | 3 PITG_07510  |
| 0   | 2   | 0 NA          |
| 0   | 0   | 0 NA          |
| 0   | 9   | 2 PITG_01951  |
| 0   | 0   | 2 PITG_10986  |
| 0   | 4   | 17 PITG_01183 |
| 0   | 18  | 7 NA          |
| 0   | 106 | 49 NA         |
| 0   | 0   | 0 PITG_06642  |
| 2   | 10  | 141 NA        |
| 0   | 27  | 14 PITG_10136 |
| 0   | 67  | 27 PITG_03886 |
| 0   | 8   | 4 PITG_16209  |
| 0   | 6   | 8 PITG_09956  |
| 0   | 6   | 0 PITG_07230  |
| 0   | 4   | 2 PITG_04428  |
| 0   | 6   | 0 PITG_01932  |
| 0   | 3   | 14 PITG_13015 |
| 0   | 0   | 0 PITG_01097  |
| 0   | 14  | 5 NA          |

|   |    |               |
|---|----|---------------|
| 0 | 5  | 3 PITG_09413  |
| 0 | 0  | 5 PITG_12914  |
| 0 | 9  | 44 PITG_09832 |
| 0 | 5  | 3 PITG_00398  |
| 0 | 7  | 15 PITG_06886 |
| 0 | 0  | 4 NA          |
| 0 | 9  | 31 PITG_08733 |
| 0 | 0  | 0 PITG_13840  |
| 0 | 6  | 5 NA          |
| 0 | 18 | 6 PITG_05683  |
| 0 | 2  | 19 PITG_11926 |
| 0 | 2  | 12 PITG_04038 |
| 0 | 11 | 20 PITG_06841 |
| 0 | 8  | 10 NA         |
| 0 | 0  | 0 NA          |
| 0 | 7  | 3 PITG_00971  |
| 0 | 5  | 0 PITG_14695  |
| 0 | 0  | 2 PITG_02294  |
| 0 | 3  | 2 NA          |
| 0 | 2  | 0 PITG_03560  |
| 0 | 0  | 4 PITG_19886  |
| 0 | 0  | 2 PITG_16023  |
| 0 | 0  | 0 PITG_09666  |
| 0 | 7  | 8 PITG_01932  |
| 0 | 0  | 0 PITG_14489  |
| 0 | 9  | 2 NA          |
| 0 | 7  | 12 NA         |
| 0 | 0  | 0 PITG_21351  |
| 0 | 19 | 9 PITG_11780  |
| 0 | 0  | 2 PITG_14380  |
| 0 | 0  | 2 PITG_10935  |
| 0 | 0  | 0 PITG_16102  |
| 0 | 10 | 8 PITG_13558  |
| 0 | 0  | 2 PITG_19045  |
| 0 | 2  | 2 PITG_19813  |
| 0 | 0  | 0 PITG_13620  |
| 0 | 8  | 2 PITG_03506  |
| 0 | 0  | 8 PITG_17330  |
| 0 | 7  | 16 PITG_10301 |
| 0 | 14 | 64 PITG_20681 |
| 0 | 0  | 0 NA          |
| 0 | 16 | 11 PITG_16972 |
| 0 | 54 | 14 PITG_00117 |
| 0 | 0  | 2 PITG_04057  |
| 0 | 0  | 0 NA          |
| 0 | 4  | 0 NA          |
| 0 | 5  | 9 PITG_14278  |



|   |     |               |
|---|-----|---------------|
| 0 | 49  | 144 NA        |
| 0 | 11  | 2 PITG_00486  |
| 0 | 6   | 2 PITG_05079  |
| 0 | 16  | 2 PITG_20203  |
| 0 | 0   | 0 PITG_13903  |
| 0 | 4   | 8 PITG_07830  |
| 0 | 0   | 2 NA          |
| 0 | 5   | 4 PITG_06734  |
| 0 | 4   | 2 NA          |
| 0 | 5   | 14 PITG_10898 |
| 0 | 20  | 0 PITG_09840  |
| 0 | 3   | 2 PITG_02981  |
| 0 | 5   | 2 PITG_02979  |
| 0 | 2   | 3 PITG_03029  |
| 0 | 0   | 2 NA          |
| 0 | 0   | 2 NA          |
| 0 | 0   | 0 PITG_14625  |
| 0 | 3   | 3 PITG_10690  |
| 0 | 4   | 0 PITG_02921  |
| 0 | 21  | 7 NA          |
| 0 | 106 | 10 PITG_11612 |
| 0 | 5   | 0 NA          |
| 0 | 6   | 9 PITG_11444  |
| 0 | 4   | 10 PITG_04508 |
| 0 | 0   | 2 PITG_03008  |
| 0 | 4   | 9 PITG_09876  |
| 0 | 0   | 0 PITG_00167  |
| 0 | 14  | 12 PITG_20787 |
| 0 | 2   | 0 PITG_07029  |
| 0 | 0   | 0 PITG_21553  |
| 0 | 84  | 63 PITG_10543 |
| 0 | 10  | 2 PITG_17792  |
| 0 | 30  | 10 NA         |
| 0 | 41  | 0 NA          |
| 0 | 13  | 65 PITG_06693 |
| 0 | 0   | 4 PITG_19472  |
| 0 | 0   | 0 NA          |
| 0 | 0   | 0 NA          |
| 0 | 46  | 45 PITG_14141 |
| 0 | 78  | 52 PITG_00882 |
| 0 | 27  | 18 PITG_09792 |
| 0 | 7   | 4 PITG_03860  |
| 0 | 2   | 19 NA         |
| 0 | 4   | 2 PITG_18498  |
| 0 | 8   | 17 NA         |
| 0 | 0   | 2 NA          |
| 0 | 0   | 0 PITG_21556  |

|     |    |                |
|-----|----|----------------|
| 0   | 0  | 0 NA           |
| 0   | 2  | 2 PITG_04270   |
| 0   | 0  | 0 PITG_03110   |
| 0   | 4  | 22 NA          |
| 0   | 0  | 0 PITG_08305   |
| 0   | 2  | 0 PITG_05992   |
| 0   | 4  | 218 PITG_02409 |
| 0   | 48 | 16 PITG_02739  |
| 0   | 6  | 2 PITG_18652   |
| 0   | 32 | 15 NA          |
| 0   | 0  | 5 PITG_18409   |
| 0   | 2  | 0 PITG_11594   |
| 0   | 0  | 0 NA           |
| 0   | 0  | 0 NA           |
| 0   | 59 | 76 PITG_18659  |
| 0   | 20 | 0 PITG_15447   |
| 0   | 13 | 2 NA           |
| 0   | 84 | 37 NA          |
| 0   | 8  | 2 PITG_19422   |
| 0   | 2  | 4 PITG_00069   |
| 0   | 14 | 2 PITG_03423   |
| 0   | 0  | 4 NA           |
| 0   | 0  | 4 NA           |
| 0   | 2  | 2 PITG_10990   |
| 0   | 3  | 11 PITG_17298  |
| 0   | 4  | 6 PITG_18158   |
| 0   | 13 | 4 PITG_20386   |
| 0   | 4  | 0 PITG_08154   |
| 0   | 5  | 8 PITG_04334   |
| 0   | 0  | 0 PITG_00233   |
| 45  | 0  | 32 NA          |
| 0   | 2  | 0 NA           |
| 0   | 5  | 7 NA           |
| 0   | 64 | 10 PITG_05797  |
| 0   | 26 | 286 NA         |
| 0   | 0  | 2 PITG_08956   |
| 236 | 20 | 502 NA         |
| 0   | 19 | 7 NA           |
| 0   | 8  | 0 NA           |
| 0   | 2  | 2 PITG_09350   |
| 0   | 7  | 9 PITG_01087   |
| 0   | 4  | 2 PITG_19223   |
| 0   | 20 | 15 PITG_00953  |
| 0   | 52 | 97 PITG_12661  |
| 0   | 0  | 0 PITG_07923   |
| 0   | 7  | 0 PITG_04677   |
| 0   | 2  | 0 PITG_19098   |

|    |    |                |
|----|----|----------------|
| 0  | 2  | 4 PITG_02344   |
| 0  | 12 | 3 NA           |
| 0  | 0  | 0 PITG_01789   |
| 0  | 13 | 0 PITG_05319   |
| 0  | 8  | 2 PITG_00424   |
| 0  | 9  | 2 PITG_03405   |
| 15 | 0  | 17 NA          |
| 0  | 16 | 3 PITG_05331   |
| 0  | 0  | 0 PITG_01855   |
| 0  | 2  | 4 PITG_17840   |
| 0  | 12 | 10 PITG_05782  |
| 0  | 0  | 2 PITG_02744   |
| 0  | 2  | 8 PITG_04842   |
| 0  | 43 | 10 PITG_03223  |
| 0  | 17 | 2 PITG_11501   |
| 0  | 2  | 0 PITG_20040   |
| 0  | 61 | 28 PITG_05681  |
| 0  | 5  | 30 PITG_11775  |
| 0  | 5  | 41 PITG_04102  |
| 0  | 0  | 0 PITG_05546   |
| 0  | 0  | 8 PITG_17081   |
| 0  | 7  | 5 NA           |
| 0  | 21 | 41 PITG_02257  |
| 0  | 25 | 5 NA           |
| 0  | 0  | 0 PITG_13713   |
| 0  | 8  | 12 PITG_00410  |
| 0  | 4  | 6 NA           |
| 0  | 26 | 4 PITG_10849   |
| 0  | 7  | 0 PITG_09008   |
| 0  | 0  | 2 PITG_13366   |
| 0  | 0  | 0 PITG_00621   |
| 0  | 23 | 19 PITG_08386  |
| 0  | 2  | 2 NA           |
| 0  | 46 | 4 PITG_13732   |
| 0  | 23 | 0 PITG_18777   |
| 0  | 7  | 4 NA           |
| 0  | 9  | 12 PITG_15136  |
| 9  | 0  | 7 NA           |
| 0  | 2  | 4 PITG_19418   |
| 0  | 78 | 120 PITG_14937 |
| 0  | 0  | 0 PITG_15956   |
| 0  | 3  | 4 PITG_08742   |
| 0  | 11 | 3 PITG_05772   |
| 0  | 6  | 0 NA           |
| 0  | 66 | 102 PITG_05922 |
| 0  | 0  | 0 NA           |
| 0  | 2  | 4 PITG_11366   |

|      |     |               |
|------|-----|---------------|
| 0    | 2   | 4 PITG_13441  |
| 0    | 9   | 7 PITG_06367  |
| 0    | 7   | 8 PITG_14717  |
| 0    | 0   | 2 PITG_10986  |
| 0    | 0   | 0 PITG_03754  |
| 0    | 7   | 0 PITG_07169  |
| 0    | 0   | 0 PITG_01809  |
| 0    | 13  | 4 PITG_16904  |
| 0    | 0   | 2 PITG_12515  |
| 0    | 17  | 10 PITG_02809 |
| 0    | 59  | 13 PITG_06379 |
| 0    | 2   | 6 PITG_17201  |
| 0    | 0   | 0 NA          |
| 0    | 2   | 0 PITG_03864  |
| 0    | 33  | 14 NA         |
| 0    | 32  | 18 NA         |
| 1309 | 17  | 3698 NA       |
| 0    | 4   | 2 PITG_16326  |
| 0    | 0   | 0 NA          |
| 0    | 15  | 2 NA          |
| 6    | 0   | 20 NA         |
| 0    | 10  | 2 PITG_08926  |
| 0    | 7   | 9 PITG_00352  |
| 0    | 165 | 0 PITG_17556  |
| 0    | 8   | 0 PITG_02728  |
| 0    | 6   | 9 PITG_13771  |
| 0    | 20  | 24 PITG_03048 |
| 0    | 12  | 7 PITG_15739  |
| 0    | 0   | 0 PITG_19022  |
| 0    | 13  | 13 PITG_05989 |
| 0    | 10  | 4 PITG_13379  |
| 0    | 11  | 4 NA          |
| 0    | 0   | 2 PITG_20803  |
| 0    | 9   | 31 PITG_04564 |
| 0    | 7   | 11 PITG_10792 |
| 0    | 6   | 2 PITG_02134  |
| 0    | 0   | 3 PITG_18094  |
| 0    | 32  | 0 PITG_12855  |
| 0    | 0   | 4 PITG_01044  |
| 0    | 5   | 4 PITG_06283  |
| 0    | 0   | 0 PITG_05483  |
| 0    | 3   | 6 PITG_10044  |
| 0    | 0   | 2 PITG_03749  |
| 0    | 11  | 0 PITG_01953  |
| 0    | 67  | 44 PITG_06832 |
| 0    | 6   | 3 NA          |
| 0    | 21  | 37 NA         |

|   |     |               |
|---|-----|---------------|
| 0 | 33  | 3 NA          |
| 0 | 129 | 40 PITG_12353 |
| 0 | 0   | 0 PITG_02280  |
| 0 | 8   | 36 PITG_04508 |
| 0 | 4   | 0 PITG_04243  |
| 0 | 35  | 14 PITG_11653 |
| 0 | 0   | 0 PITG_18025  |
| 0 | 14  | 10 PITG_22585 |
| 0 | 5   | 0 PITG_19603  |
| 0 | 0   | 0 PITG_09098  |
| 0 | 0   | 2 PITG_02813  |
| 0 | 6   | 8 NA          |
| 0 | 6   | 15 PITG_21601 |
| 0 | 11  | 25 NA         |
| 0 | 0   | 0 PITG_06917  |
| 0 | 0   | 2 PITG_02797  |
| 0 | 2   | 13 PITG_00051 |
| 0 | 17  | 10 PITG_02739 |
| 0 | 17  | 5 NA          |
| 0 | 53  | 16 PITG_00479 |
| 0 | 2   | 0 PITG_15961  |
| 0 | 5   | 0 PITG_03014  |
| 0 | 0   | 2 PITG_03143  |
| 0 | 6   | 0 PITG_08132  |
| 0 | 15  | 4 PITG_14280  |
| 0 | 0   | 8 PITG_09587  |
| 0 | 9   | 14 PITG_07286 |
| 0 | 14  | 0 PITG_07470  |
| 0 | 0   | 2 PITG_13774  |
| 0 | 10  | 0 PITG_21476  |
| 0 | 4   | 5 PITG_09404  |
| 0 | 0   | 0 PITG_06545  |
| 0 | 3   | 2 NA          |
| 0 | 22  | 4 PITG_19101  |
| 0 | 4   | 6 PITG_13826  |
| 0 | 4   | 9 PITG_13237  |
| 0 | 14  | 2 PITG_03769  |
| 0 | 0   | 2 PITG_11461  |
| 0 | 2   | 4 PITG_19025  |
| 0 | 0   | 0 NA          |
| 0 | 0   | 4 PITG_02286  |
| 0 | 17  | 14 PITG_22924 |
| 0 | 0   | 0 PITG_17441  |
| 0 | 0   | 2 NA          |
| 0 | 0   | 0 PITG_07765  |
| 0 | 30  | 56 NA         |
| 0 | 0   | 5 PITG_01228  |

|     |     |                 |
|-----|-----|-----------------|
| 0   | 41  | 40 PITG_13289   |
| 0   | 13  | 2 PITG_11225    |
| 0   | 2   | 4 PITG_00188    |
| 0   | 10  | 2 PITG_22203    |
| 0   | 87  | 13 PITG_08015   |
| 0   | 0   | 0 PITG_15164    |
| 0   | 25  | 557 PITG_16981  |
| 0   | 0   | 0 PITG_17138    |
| 0   | 12  | 20 PITG_01133   |
| 0   | 46  | 61 PITG_03934   |
| 0   | 4   | 0 PITG_20320    |
| 0   | 3   | 0 PITG_14595    |
| 0   | 0   | 31 PITG_11782   |
| 0   | 0   | 0 PITG_16161    |
| 0   | 18  | 0 PITG_03296    |
| 0   | 46  | 3 PITG_20463    |
| 0   | 0   | 6 PITG_05598    |
| 0   | 15  | 7 PITG_16228    |
| 165 | 4   | 131 NA          |
| 0   | 2   | 0 PITG_22566    |
| 0   | 0   | 0 NA            |
| 0   | 7   | 5 PITG_02384    |
| 0   | 0   | 0 PITG_02730    |
| 0   | 705 | 2908 PITG_16981 |
| 0   | 21  | 2 NA            |
| 0   | 47  | 0 NA            |
| 0   | 9   | 8 PITG_14750    |
| 0   | 11  | 13 PITG_23159   |
| 0   | 171 | 48 PITG_17342   |
| 0   | 0   | 4 PITG_10121    |
| 509 | 275 | 3292 NA         |
| 0   | 4   | 2 PITG_01174    |
| 0   | 3   | 14 PITG_04725   |
| 0   | 48  | 20 NA           |
| 0   | 105 | 0 NA            |
| 0   | 0   | 0 NA            |
| 0   | 8   | 0 PITG_05294    |
| 0   | 56  | 6 PITG_02755    |
| 0   | 10  | 9 PITG_16378    |
| 0   | 0   | 7 PITG_18741    |
| 0   | 5   | 3 PITG_20819    |
| 0   | 21  | 0 PITG_02106    |
| 0   | 0   | 19 PITG_02344   |
| 0   | 0   | 0 PITG_07022    |
| 0   | 41  | 4 NA            |
| 0   | 5   | 19 PITG_02002   |
| 0   | 2   | 2 PITG_12183    |

|     |     |               |
|-----|-----|---------------|
| 0   | 2   | 0 NA          |
| 35  | 2   | 70 NA         |
| 0   | 7   | 5 PITG_18461  |
| 0   | 9   | 4 NA          |
| 0   | 2   | 2 PITG_17273  |
| 0   | 2   | 0 PITG_04615  |
| 0   | 4   | 2 PITG_02475  |
| 0   | 0   | 2 PITG_11161  |
| 23  | 10  | 0 NA          |
| 0   | 9   | 48 PITG_02286 |
| 0   | 0   | 2 PITG_17908  |
| 0   | 104 | 69 PITG_05591 |
| 0   | 43  | 99 PITG_04834 |
| 0   | 0   | 0 PITG_03432  |
| 0   | 4   | 4 PITG_01044  |
| 0   | 0   | 0 PITG_19863  |
| 0   | 0   | 4 PITG_11461  |
| 0   | 26  | 22 PITG_02793 |
| 0   | 2   | 13 PITG_20657 |
| 0   | 14  | 0 PITG_10762  |
| 0   | 0   | 2 PITG_02821  |
| 0   | 94  | 45 PITG_07096 |
| 0   | 3   | 2 PITG_03620  |
| 0   | 26  | 71 PITG_12577 |
| 734 | 623 | 7727 NA       |
| 0   | 12  | 0 NA          |
| 0   | 2   | 0 PITG_10921  |
| 0   | 0   | 0 NA          |
| 0   | 0   | 4 PITG_11020  |
| 0   | 60  | 30 NA         |
| 0   | 3   | 0 PITG_19180  |
| 0   | 15  | 5 PITG_21841  |
| 0   | 12  | 26 PITG_08980 |
| 0   | 2   | 2 PITG_11285  |
| 0   | 0   | 0 PITG_05227  |
| 0   | 6   | 2 NA          |
| 0   | 2   | 6 PITG_19158  |
| 0   | 8   | 3 PITG_13838  |
| 0   | 0   | 2 PITG_03163  |
| 0   | 0   | 0 PITG_03135  |
| 0   | 0   | 7 PITG_22021  |
| 0   | 10  | 8 PITG_13679  |
| 0   | 2   | 15 PITG_00164 |
| 0   | 58  | 43 PITG_10507 |
| 0   | 0   | 0 PITG_03180  |
| 0   | 15  | 6 PITG_17840  |
| 0   | 4   | 22 PITG_00064 |

|     |     |                |
|-----|-----|----------------|
| 0   | 21  | 15 PITG_20381  |
| 0   | 14  | 18 PITG_18961  |
| 0   | 19  | 3 PITG_12148   |
| 0   | 4   | 2 NA           |
| 0   | 4   | 0 PITG_02082   |
| 0   | 24  | 0 PITG_01644   |
| 0   | 45  | 93 PITG_11710  |
| 0   | 0   | 0 PITG_15053   |
| 0   | 17  | 0 PITG_01090   |
| 0   | 0   | 8 NA           |
| 0   | 2   | 9 PITG_10014   |
| 0   | 0   | 3 PITG_01740   |
| 0   | 15  | 57 PITG_19199  |
| 0   | 0   | 2 PITG_14181   |
| 0   | 2   | 5 PITG_02002   |
| 0   | 24  | 25 PITG_06828  |
| 0   | 26  | 4 NA           |
| 0   | 27  | 34 PITG_18862  |
| 0   | 0   | 4 PITG_18272   |
| 0   | 0   | 27 PITG_02161  |
| 0   | 202 | 273 PITG_11885 |
| 0   | 2   | 0 PITG_00250   |
| 0   | 19  | 18 PITG_03075  |
| 0   | 0   | 0 PITG_12761   |
| 0   | 5   | 6 PITG_17026   |
| 0   | 2   | 6 PITG_23284   |
| 0   | 0   | 0 PITG_02264   |
| 0   | 41  | 12 PITG_18092  |
| 0   | 5   | 2 PITG_03624   |
| 0   | 9   | 8 PITG_13581   |
| 0   | 110 | 20 PITG_15120  |
| 0   | 0   | 0 NA           |
| 120 | 0   | 93 NA          |
| 0   | 10  | 2 PITG_07230   |
| 0   | 2   | 7 PITG_23159   |
| 0   | 11  | 6 PITG_01878   |
| 0   | 4   | 2 PITG_14973   |
| 0   | 53  | 0 PITG_18304   |
| 0   | 0   | 0 PITG_10794   |
| 0   | 15  | 51 PITG_06114  |
| 0   | 2   | 5 PITG_12478   |
| 0   | 0   | 17 PITG_05404  |
| 0   | 6   | 8 PITG_21149   |
| 0   | 2   | 5 PITG_09782   |
| 0   | 3   | 0 PITG_19310   |
| 0   | 4   | 2 PITG_04703   |
| 0   | 2   | 0 PITG_07963   |



|     |    |                |
|-----|----|----------------|
| 0   | 4  | 4 PITG_06988   |
| 0   | 0  | 0 PITG_09020   |
| 0   | 7  | 18 NA          |
| 0   | 0  | 6 PITG_00148   |
| 0   | 0  | 3 PITG_07230   |
| 0   | 0  | 2 PITG_03471   |
| 0   | 38 | 17 PITG_15565  |
| 0   | 7  | 12 PITG_05111  |
| 0   | 0  | 0 PITG_16628   |
| 0   | 0  | 8 PITG_03601   |
| 0   | 75 | 14 NA          |
| 0   | 0  | 2 NA           |
| 0   | 0  | 0 PITG_07327   |
| 0   | 0  | 2 PITG_20503   |
| 0   | 0  | 0 PITG_08351   |
| 0   | 4  | 0 PITG_01224   |
| 0   | 5  | 4 PITG_07230   |
| 0   | 19 | 6 PITG_00648   |
| 0   | 0  | 4 PITG_02286   |
| 208 | 77 | 1519 NA        |
| 0   | 0  | 0 PITG_02731   |
| 0   | 0  | 2 PITG_00352   |
| 0   | 2  | 3 PITG_12213   |
| 0   | 0  | 4 PITG_11567   |
| 15  | 8  | 17 NA          |
| 0   | 6  | 0 PITG_17137   |
| 0   | 46 | 244 PITG_01062 |
| 0   | 4  | 0 PITG_21223   |
| 0   | 7  | 15 PITG_10553  |
| 0   | 7  | 9 PITG_12266   |
| 0   | 2  | 2 PITG_08089   |
| 0   | 2  | 4 PITG_16104   |
| 0   | 4  | 0 NA           |
| 0   | 14 | 23 PITG_08675  |
| 0   | 25 | 15 NA          |
| 0   | 4  | 6 NA           |
| 0   | 6  | 0 PITG_16447   |
| 0   | 2  | 0 PITG_08964   |
| 0   | 5  | 11 PITG_10481  |
| 0   | 11 | 119 PITG_02343 |
| 0   | 55 | 0 PITG_19868   |
| 0   | 3  | 2 PITG_15439   |
| 0   | 11 | 2 PITG_02372   |
| 0   | 0  | 2 PITG_08428   |
| 0   | 18 | 10 PITG_12514  |
| 0   | 0  | 2 PITG_01054   |
| 0   | 4  | 0 PITG_13975   |

|   |     |                |
|---|-----|----------------|
| 0 | 8   | 0 PITG_08730   |
| 0 | 5   | 0 PITG_02190   |
| 0 | 0   | 0 NA           |
| 0 | 0   | 0 PITG_04956   |
| 0 | 0   | 2 NA           |
| 0 | 2   | 5 NA           |
| 0 | 3   | 7 PITG_05423   |
| 0 | 0   | 2 PITG_01855   |
| 0 | 175 | 187 PITG_09209 |
| 0 | 14  | 19 PITG_20977  |
| 0 | 2   | 7 PITG_11617   |
| 0 | 0   | 4 PITG_00291   |
| 0 | 2   | 0 PITG_00955   |
| 0 | 2   | 0 NA           |
| 0 | 3   | 7 PITG_14277   |
| 0 | 0   | 11 PITG_05815  |
| 0 | 4   | 4 PITG_03490   |
| 4 | 8   | 2 NA           |
| 0 | 0   | 0 PITG_10518   |
| 0 | 0   | 3 PITG_19849   |
| 0 | 12  | 6 PITG_00224   |
| 0 | 16  | 0 PITG_05412   |
| 0 | 0   | 2 PITG_20378   |
| 0 | 0   | 0 PITG_06288   |
| 0 | 19  | 13 NA          |
| 0 | 10  | 2 NA           |
| 0 | 2   | 2 PITG_15570   |
| 0 | 0   | 2 PITG_16083   |
| 0 | 66  | 35 NA          |
| 0 | 4   | 2 PITG_13815   |
| 0 | 2   | 0 PITG_01051   |
| 0 | 0   | 0 NA           |
| 0 | 4   | 2 NA           |
| 0 | 86  | 37 PITG_00155  |
| 4 | 5   | 6 NA           |
| 0 | 3   | 0 PITG_02238   |
| 0 | 0   | 0 PITG_09995   |
| 0 | 0   | 0 PITG_12757   |
| 0 | 0   | 2 PITG_10447   |
| 0 | 24  | 10 PITG_09241  |
| 0 | 3   | 0 PITG_17250   |
| 0 | 6   | 19 PITG_17359  |
| 0 | 22  | 21 NA          |
| 0 | 18  | 14 PITG_03180  |
| 0 | 2   | 0 PITG_06120   |
| 0 | 0   | 2 PITG_06001   |
| 0 | 7   | 2 PITG_03243   |

|    |     |                |
|----|-----|----------------|
| 0  | 4   | 4 PITG_12104   |
| 0  | 0   | 0 PITG_11461   |
| 0  | 2   | 0 PITG_19459   |
| 0  | 2   | 10 PITG_17627  |
| 0  | 22  | 19 PITG_01953  |
| 0  | 2   | 0 NA           |
| 0  | 4   | 23 PITG_01222  |
| 0  | 70  | 29 PITG_07774  |
| 0  | 180 | 9 PITG_10971   |
| 0  | 135 | 63 PITG_22666  |
| 0  | 2   | 2 PITG_01409   |
| 0  | 0   | 7 PITG_17330   |
| 0  | 9   | 0 NA           |
| 0  | 0   | 0 NA           |
| 0  | 4   | 4 PITG_15791   |
| 0  | 39  | 0 PITG_11780   |
| 0  | 0   | 36 NA          |
| 0  | 28  | 4 PITG_06847   |
| 0  | 0   | 0 NA           |
| 2  | 12  | 85 NA          |
| 0  | 6   | 0 PITG_03165   |
| 0  | 62  | 15 NA          |
| 0  | 0   | 0 NA           |
| 0  | 0   | 0 PITG_18046   |
| 0  | 0   | 0 NA           |
| 0  | 0   | 0 PITG_13939   |
| 0  | 3   | 8 PITG_05509   |
| 0  | 7   | 0 NA           |
| 0  | 7   | 0 PITG_06402   |
| 0  | 20  | 34 PITG_06705  |
| 0  | 2   | 10 PITG_01813  |
| 0  | 4   | 0 PITG_23114   |
| 0  | 39  | 2 PITG_00981   |
| 0  | 2   | 0 PITG_01719   |
| 0  | 2   | 4 PITG_01430   |
| 0  | 3   | 2 PITG_16930   |
| 0  | 2   | 2 PITG_16003   |
| 0  | 9   | 2 PITG_09423   |
| 0  | 12  | 6 PITG_20148   |
| 0  | 3   | 0 NA           |
| 72 | 2   | 6 NA           |
| 0  | 22  | 60 PITG_00523  |
| 0  | 5   | 0 PITG_23304   |
| 0  | 0   | 0 NA           |
| 0  | 17  | 2 PITG_04989   |
| 0  | 0   | 8 PITG_13569   |
| 0  | 20  | 109 PITG_04071 |

|     |      |                |
|-----|------|----------------|
| 0   | 2    | 10 PITG_00144  |
| 0   | 27   | 6 PITG_10516   |
| 0   | 0    | 0 NA           |
| 0   | 0    | 2 PITG_02290   |
| 0   | 0    | 0 NA           |
| 0   | 6    | 6 PITG_17004   |
| 0   | 0    | 5 PITG_22555   |
| 0   | 5    | 3 PITG_12836   |
| 0   | 0    | 0 PITG_16062   |
| 0   | 8    | 11 NA          |
| 0   | 0    | 6 NA           |
| 0   | 22   | 14 NA          |
| 0   | 0    | 6 PITG_04283   |
| 0   | 2064 | 296 PITG_09306 |
| 0   | 2    | 2 PITG_03761   |
| 0   | 11   | 37 PITG_09287  |
| 0   | 0    | 4 PITG_06817   |
| 0   | 2    | 0 NA           |
| 0   | 20   | 2 NA           |
| 0   | 2    | 0 PITG_15830   |
| 0   | 2    | 3 PITG_08423   |
| 0   | 8    | 0 PITG_13678   |
| 0   | 25   | 40 PITG_21661  |
| 0   | 74   | 65 PITG_12541  |
| 0   | 11   | 0 PITG_04325   |
| 0   | 0    | 5 PITG_05667   |
| 0   | 23   | 31 PITG_14044  |
| 0   | 0    | 4 PITG_02808   |
| 154 | 2    | 186 NA         |
| 0   | 35   | 18 PITG_08732  |
| 8   | 0    | 2 NA           |
| 0   | 8    | 0 PITG_17103   |
| 0   | 3    | 7 PITG_20032   |
| 0   | 0    | 11 PITG_01036  |
| 0   | 10   | 13 PITG_20216  |
| 0   | 2    | 12 PITG_02286  |
| 0   | 4    | 0 PITG_05814   |
| 0   | 0    | 2 PITG_13395   |
| 0   | 4    | 0 PITG_10042   |
| 0   | 0    | 2 PITG_09376   |
| 4   | 0    | 27 NA          |
| 0   | 10   | 21 PITG_12840  |
| 0   | 5    | 2 PITG_19605   |
| 0   | 2    | 4 PITG_17889   |
| 0   | 16   | 10 PITG_08935  |
| 0   | 0    | 0 PITG_15140   |
| 0   | 0    | 0 NA           |

|      |     |                |
|------|-----|----------------|
| 0    | 9   | 34 PITG_15857  |
| 0    | 0   | 0 PITG_03316   |
| 0    | 2   | 0 PITG_07269   |
| 0    | 49  | 5 PITG_10030   |
| 0    | 3   | 0 NA           |
| 0    | 5   | 22 PITG_05354  |
| 0    | 0   | 0 PITG_05731   |
| 0    | 2   | 0 NA           |
| 0    | 2   | 0 NA           |
| 0    | 6   | 0 NA           |
| 0    | 0   | 0 PITG_04283   |
| 3575 | 104 | 321 NA         |
| 0    | 30  | 0 PITG_05601   |
| 0    | 2   | 6 NA           |
| 0    | 0   | 0 PITG_21807   |
| 0    | 99  | 171 PITG_02103 |
| 0    | 6   | 0 NA           |
| 0    | 0   | 0 NA           |
| 0    | 2   | 3 NA           |
| 0    | 13  | 2 NA           |
| 0    | 2   | 2 PITG_03453   |
| 0    | 0   | 0 NA           |
| 0    | 17  | 0 PITG_11207   |
| 0    | 21  | 0 PITG_10098   |
| 0    | 0   | 0 PITG_03605   |
| 0    | 11  | 6 PITG_14131   |
| 0    | 11  | 9 NA           |
| 0    | 2   | 8 PITG_04547   |
| 0    | 16  | 10 NA          |
| 0    | 5   | 4 PITG_17245   |
| 0    | 65  | 16 PITG_02650  |
| 0    | 126 | 74 PITG_22658  |
| 0    | 22  | 9 PITG_03459   |
| 0    | 0   | 0 NA           |
| 0    | 11  | 2 PITG_03181   |
| 0    | 2   | 2 NA           |
| 16   | 2   | 0 NA           |
| 0    | 19  | 10 NA          |
| 0    | 0   | 0 PITG_01314   |
| 0    | 2   | 10 PITG_07060  |
| 0    | 0   | 2 PITG_02002   |
| 0    | 2   | 14 NA          |
| 0    | 0   | 0 PITG_09954   |
| 0    | 4   | 0 NA           |
| 0    | 2   | 7 PITG_14385   |
| 0    | 46  | 2 NA           |
| 0    | 12  | 2 NA           |

|   |     |               |
|---|-----|---------------|
| 0 | 69  | 64 PITG_11521 |
| 0 | 4   | 5 PITG_10201  |
| 0 | 2   | 0 PITG_04902  |
| 0 | 7   | 17 PITG_01453 |
| 0 | 25  | 0 PITG_02752  |
| 0 | 2   | 0 PITG_04644  |
| 0 | 11  | 5 NA          |
| 0 | 323 | 0 PITG_08352  |
| 0 | 21  | 61 PITG_08455 |
| 0 | 0   | 2 PITG_00440  |
| 0 | 0   | 0 PITG_18251  |
| 0 | 5   | 6 NA          |
| 0 | 2   | 10 PITG_07104 |
| 0 | 276 | 96 PITG_17063 |
| 0 | 26  | 8 PITG_11566  |
| 0 | 2   | 2 PITG_04582  |
| 0 | 0   | 0 PITG_01469  |
| 0 | 11  | 0 PITG_09426  |
| 0 | 2   | 13 PITG_21398 |
| 0 | 0   | 22 PITG_12151 |
| 0 | 4   | 2 PITG_01083  |
| 0 | 12  | 10 PITG_03029 |
| 0 | 13  | 8 NA          |
| 0 | 0   | 0 PITG_13135  |
| 0 | 0   | 0 PITG_17745  |
| 0 | 0   | 5 PITG_10715  |
| 0 | 3   | 23 NA         |
| 0 | 4   | 4 PITG_08461  |
| 0 | 9   | 9 NA          |
| 0 | 0   | 0 PITG_08780  |
| 0 | 99  | 2 PITG_00221  |
| 0 | 0   | 0 PITG_11294  |
| 0 | 0   | 0 PITG_08648  |
| 0 | 13  | 6 PITG_02985  |
| 0 | 2   | 9 NA          |
| 0 | 0   | 2 NA          |
| 0 | 2   | 0 PITG_15553  |
| 0 | 11  | 6 PITG_08329  |
| 0 | 10  | 7 PITG_01719  |
| 0 | 0   | 0 NA          |
| 0 | 6   | 0 NA          |
| 0 | 2   | 0 PITG_08172  |
| 0 | 5   | 5 NA          |
| 0 | 17  | 30 PITG_08216 |
| 0 | 2   | 4 PITG_15731  |
| 0 | 2   | 5 PITG_18747  |
| 0 | 15  | 8 NA          |

|     |     |                |
|-----|-----|----------------|
| 0   | 15  | 5 PITG_00006   |
| 0   | 2   | 6 NA           |
| 0   | 5   | 6 PITG_00660   |
| 0   | 5   | 0 NA           |
| 0   | 0   | 0 PITG_09982   |
| 0   | 4   | 5 PITG_02531   |
| 614 | 4   | 1794 NA        |
| 219 | 0   | 649 NA         |
| 0   | 0   | 0 NA           |
| 0   | 0   | 0 NA           |
| 0   | 8   | 6 PITG_18873   |
| 0   | 4   | 6 NA           |
| 0   | 0   | 0 PITG_14709   |
| 0   | 3   | 4 NA           |
| 0   | 30  | 0 PITG_14484   |
| 0   | 9   | 7 PITG_07277   |
| 0   | 2   | 59 PITG_11249  |
| 0   | 0   | 0 PITG_17599   |
| 0   | 0   | 6 PITG_10813   |
| 0   | 559 | 773 PITG_17675 |
| 0   | 0   | 0 PITG_03715   |
| 0   | 24  | 15 PITG_18027  |
| 0   | 16  | 4 PITG_17072   |
| 0   | 7   | 0 NA           |
| 4   | 20  | 4 NA           |
| 0   | 42  | 0 PITG_17272   |
| 0   | 4   | 21 PITG_02887  |
| 0   | 4   | 4 PITG_03860   |
| 0   | 2   | 4 PITG_09682   |
| 0   | 93  | 19 PITG_21599  |
| 0   | 6   | 15 PITG_14919  |
| 0   | 4   | 12 NA          |
| 0   | 2   | 10 PITG_18034  |
| 0   | 2   | 0 NA           |
| 0   | 4   | 2 PITG_08607   |
| 0   | 42  | 112 NA         |
| 0   | 2   | 0 NA           |
| 0   | 2   | 4 NA           |
| 0   | 7   | 6 NA           |
| 0   | 5   | 2 PITG_17998   |
| 0   | 28  | 173 PITG_08024 |
| 0   | 12  | 12 PITG_03702  |
| 0   | 82  | 101 PITG_05922 |
| 0   | 2   | 0 PITG_08947   |
| 0   | 11  | 4 PITG_05691   |
| 0   | 7   | 6 PITG_12595   |
| 0   | 13  | 12 PITG_02957  |

|   |     |               |
|---|-----|---------------|
| 0 | 9   | 2 PITG_07948  |
| 0 | 2   | 20 PITG_05498 |
| 0 | 35  | 46 PITG_01313 |
| 0 | 0   | 0 PITG_17498  |
| 0 | 103 | 22 NA         |
| 0 | 12  | 18 PITG_09986 |
| 0 | 28  | 23 PITG_03496 |
| 0 | 5   | 5 PITG_07293  |
| 0 | 12  | 2 PITG_10943  |
| 0 | 4   | 0 NA          |
| 0 | 30  | 25 PITG_11965 |
| 0 | 0   | 3 PITG_10921  |
| 0 | 0   | 0 PITG_02796  |
| 0 | 0   | 0 NA          |
| 0 | 0   | 5 PITG_01444  |
| 0 | 0   | 0 NA          |
| 0 | 8   | 12 PITG_02242 |
| 0 | 6   | 2 PITG_11773  |
| 0 | 8   | 4 PITG_00516  |
| 0 | 8   | 4 PITG_13765  |
| 0 | 2   | 0 PITG_03788  |
| 0 | 12  | 2 NA          |
| 0 | 0   | 0 PITG_13544  |
| 0 | 6   | 0 PITG_03243  |
| 0 | 6   | 10 PITG_16207 |
| 0 | 73  | 51 PITG_14284 |
| 0 | 0   | 9 PITG_06929  |
| 0 | 0   | 6 PITG_22958  |
| 0 | 2   | 4 PITG_17264  |
| 0 | 13  | 0 PITG_17128  |
| 0 | 4   | 4 PITG_00178  |
| 0 | 5   | 0 PITG_01200  |
| 0 | 17  | 30 PITG_18623 |
| 0 | 5   | 4 PITG_07192  |
| 0 | 12  | 21 PITG_01203 |
| 0 | 0   | 6 PITG_07865  |
| 0 | 10  | 6 PITG_00577  |
| 0 | 0   | 0 PITG_03362  |
| 0 | 4   | 24 PITG_12914 |
| 0 | 10  | 0 NA          |
| 0 | 0   | 8 PITG_07034  |
| 0 | 2   | 2 PITG_12474  |
| 0 | 12  | 19 PITG_07894 |
| 0 | 38  | 22 NA         |
| 0 | 19  | 15 PITG_21336 |
| 0 | 7   | 0 PITG_03051  |
| 0 | 2   | 0 PITG_03892  |



|   |      |                 |
|---|------|-----------------|
| 0 | 12   | 15 NA           |
| 0 | 18   | 18 PITG_00458   |
| 0 | 0    | 0 PITG_20239    |
| 0 | 3    | 6 PITG_06106    |
| 0 | 2    | 3 PITG_00250    |
| 0 | 39   | 8 PITG_11735    |
| 0 | 52   | 5 NA            |
| 0 | 14   | 25 PITG_20316   |
| 0 | 0    | 2 PITG_14441    |
| 0 | 15   | 2 PITG_00635    |
| 0 | 0    | 0 NA            |
| 0 | 20   | 8 PITG_13882    |
| 0 | 32   | 188 PITG_02526  |
| 0 | 142  | 5 PITG_16792    |
| 0 | 0    | 0 PITG_16364    |
| 0 | 35   | 27 NA           |
| 0 | 9    | 0 NA            |
| 0 | 2    | 0 PITG_01083    |
| 0 | 26   | 0 NA            |
| 0 | 0    | 0 PITG_01774    |
| 0 | 9    | 21 NA           |
| 0 | 0    | 2 NA            |
| 0 | 0    | 0 NA            |
| 0 | 0    | 2 PITG_10313    |
| 0 | 4    | 0 PITG_17114    |
| 0 | 2    | 7 PITG_01913    |
| 0 | 2    | 2 PITG_03146    |
| 0 | 0    | 0 PITG_08368    |
| 0 | 15   | 0 PITG_19639    |
| 0 | 32   | 27 PITG_02349   |
| 0 | 3    | 0 PITG_22649    |
| 0 | 6    | 4 PITG_01233    |
| 0 | 0    | 0 PITG_17587    |
| 0 | 0    | 0 PITG_03397    |
| 0 | 0    | 2 NA            |
| 0 | 1555 | 1808 PITG_11903 |
| 0 | 36   | 33 PITG_03547   |
| 0 | 9    | 0 PITG_16686    |
| 0 | 0    | 0 PITG_01444    |
| 0 | 157  | 51 PITG_03559   |
| 0 | 18   | 16 PITG_12573   |
| 0 | 0    | 0 PITG_08359    |
| 0 | 0    | 2 PITG_20690    |
| 0 | 0    | 0 PITG_06202    |
| 0 | 8    | 27 PITG_01127   |
| 0 | 4    | 5 PITG_03400    |
| 0 | 2    | 0 NA            |

|      |    |               |
|------|----|---------------|
| 0    | 0  | 11 PITG_12687 |
| 0    | 4  | 2 PITG_01271  |
| 0    | 0  | 0 PITG_19605  |
| 0    | 3  | 2 NA          |
| 0    | 10 | 4 NA          |
| 0    | 9  | 13 PITG_07836 |
| 0    | 0  | 0 NA          |
| 0    | 11 | 19 PITG_01602 |
| 0    | 21 | 6 NA          |
| 0    | 0  | 2 PITG_05523  |
| 0    | 0  | 4 NA          |
| 0    | 39 | 6 PITG_07211  |
| 0    | 0  | 2 PITG_18624  |
| 0    | 6  | 10 NA         |
| 0    | 3  | 0 PITG_08031  |
| 0    | 0  | 4 PITG_00972  |
| 0    | 2  | 0 PITG_01697  |
| 0    | 14 | 0 NA          |
| 0    | 2  | 2 PITG_13773  |
| 0    | 15 | 2 PITG_20521  |
| 0    | 7  | 0 NA          |
| 0    | 8  | 16 PITG_05690 |
| 0    | 8  | 2 PITG_21212  |
| 0    | 0  | 0 PITG_15883  |
| 0    | 0  | 0 PITG_15140  |
| 0    | 2  | 10 NA         |
| 0    | 2  | 6 NA          |
| 0    | 12 | 5 NA          |
| 0    | 8  | 2 PITG_03825  |
| 0    | 0  | 3 PITG_22311  |
| 0    | 4  | 4 NA          |
| 0    | 12 | 8 PITG_13504  |
| 166  | 29 | 85 NA         |
| 3034 | 2  | 346 NA        |
| 0    | 4  | 0 PITG_00347  |
| 0    | 0  | 0 NA          |
| 0    | 2  | 0 PITG_08552  |
| 0    | 46 | 0 PITG_19764  |
| 0    | 45 | 6 NA          |
| 0    | 13 | 15 PITG_04842 |
| 0    | 7  | 61 PITG_15771 |
| 0    | 0  | 2 PITG_00389  |
| 0    | 13 | 3 PITG_03127  |
| 0    | 0  | 6 PITG_11912  |
| 0    | 11 | 19 PITG_08235 |
| 0    | 9  | 0 PITG_13617  |
| 27   | 67 | 671 NA        |

|   |     |               |
|---|-----|---------------|
| 0 | 13  | 4 PITG_10334  |
| 0 | 0   | 0 PITG_03327  |
| 0 | 0   | 2 NA          |
| 0 | 8   | 2 PITG_08746  |
| 0 | 4   | 11 PITG_11725 |
| 0 | 2   | 0 NA          |
| 0 | 2   | 0 PITG_12110  |
| 0 | 10  | 8 PITG_06574  |
| 0 | 2   | 0 PITG_06898  |
| 0 | 0   | 0 PITG_18090  |
| 0 | 5   | 4 PITG_10097  |
| 0 | 0   | 4 PITG_09753  |
| 0 | 10  | 0 NA          |
| 0 | 19  | 16 PITG_03180 |
| 0 | 0   | 0 NA          |
| 0 | 4   | 0 PITG_03767  |
| 0 | 2   | 0 NA          |
| 0 | 14  | 2 NA          |
| 0 | 0   | 2 PITG_00140  |
| 0 | 2   | 4 PITG_07279  |
| 0 | 0   | 2 NA          |
| 0 | 0   | 18 PITG_16183 |
| 0 | 7   | 2 PITG_10420  |
| 0 | 2   | 4 PITG_01490  |
| 0 | 0   | 0 PITG_14141  |
| 0 | 5   | 0 PITG_04709  |
| 0 | 0   | 2 PITG_01920  |
| 0 | 2   | 0 PITG_20674  |
| 0 | 7   | 0 PITG_20866  |
| 0 | 118 | 44 PITG_03414 |
| 0 | 0   | 2 NA          |
| 0 | 0   | 0 PITG_15602  |
| 0 | 0   | 0 PITG_17292  |
| 0 | 29  | 2 PITG_01225  |
| 0 | 4   | 0 PITG_11832  |
| 0 | 10  | 5 PITG_05867  |
| 0 | 2   | 6 PITG_08741  |
| 0 | 2   | 6 PITG_06889  |
| 0 | 16  | 7 PITG_05879  |
| 0 | 11  | 11 PITG_19989 |
| 0 | 0   | 14 PITG_00193 |
| 0 | 6   | 4 PITG_06643  |
| 0 | 2   | 8 NA          |
| 0 | 4   | 6 PITG_03790  |
| 0 | 10  | 0 PITG_08145  |
| 0 | 39  | 37 NA         |
| 0 | 10  | 3 PITG_02094  |

|     |     |                |
|-----|-----|----------------|
| 0   | 0   | 0 PITG_05742   |
| 0   | 0   | 16 NA          |
| 0   | 0   | 4 NA           |
| 0   | 2   | 2 PITG_08305   |
| 0   | 3   | 0 PITG_00945   |
| 0   | 17  | 4 PITG_20731   |
| 0   | 2   | 2 PITG_13344   |
| 0   | 24  | 16 PITG_14587  |
| 0   | 4   | 0 NA           |
| 0   | 30  | 4 NA           |
| 0   | 2   | 5 PITG_00302   |
| 0   | 12  | 0 PITG_02019   |
| 0   | 0   | 2 NA           |
| 0   | 52  | 14 NA          |
| 433 | 17  | 915 NA         |
| 0   | 0   | 6 PITG_10817   |
| 0   | 0   | 2 PITG_18977   |
| 0   | 7   | 12 PITG_10119  |
| 0   | 0   | 0 PITG_01330   |
| 0   | 0   | 4 PITG_10334   |
| 0   | 4   | 2 PITG_02229   |
| 0   | 8   | 91 NA          |
| 0   | 47  | 0 NA           |
| 0   | 7   | 20 PITG_00852  |
| 0   | 2   | 0 PITG_02213   |
| 0   | 35  | 18 PITG_13245  |
| 0   | 4   | 0 PITG_20820   |
| 0   | 54  | 18 NA          |
| 0   | 4   | 0 PITG_14137   |
| 0   | 6   | 2 PITG_00394   |
| 0   | 4   | 0 PITG_17075   |
| 0   | 22  | 14 PITG_00142  |
| 0   | 22  | 18 PITG_00039  |
| 0   | 2   | 2 PITG_00215   |
| 0   | 2   | 3 PITG_08393   |
| 0   | 0   | 2 PITG_12514   |
| 0   | 0   | 2 PITG_12292   |
| 0   | 72  | 46 NA          |
| 0   | 0   | 0 PITG_18049   |
| 0   | 280 | 171 PITG_10455 |
| 0   | 21  | 4 NA           |
| 0   | 2   | 4 PITG_12326   |
| 0   | 4   | 8 PITG_06428   |
| 0   | 10  | 0 NA           |
| 0   | 24  | 17 PITG_08454  |
| 0   | 41  | 28 PITG_11912  |
| 0   | 2   | 4 PITG_00422   |

|     |     |               |
|-----|-----|---------------|
| 0   | 2   | 14 PITG_09792 |
| 0   | 2   | 6 PITG_01626  |
| 0   | 29  | 39 PITG_08514 |
| 0   | 4   | 2 PITG_13395  |
| 0   | 32  | 2 PITG_14119  |
| 0   | 9   | 4 PITG_20273  |
| 0   | 3   | 2 PITG_17166  |
| 0   | 0   | 0 PITG_07842  |
| 0   | 0   | 2 NA          |
| 0   | 21  | 44 PITG_09376 |
| 0   | 4   | 4 PITG_18251  |
| 0   | 0   | 0 PITG_02553  |
| 0   | 107 | 33 NA         |
| 0   | 2   | 2 PITG_00049  |
| 0   | 23  | 14 PITG_06003 |
| 0   | 4   | 0 PITG_11184  |
| 0   | 12  | 12 PITG_17272 |
| 0   | 5   | 2 PITG_21133  |
| 0   | 11  | 10 PITG_14945 |
| 0   | 2   | 0 PITG_18999  |
| 0   | 24  | 2 PITG_15785  |
| 0   | 0   | 2 PITG_15569  |
| 0   | 0   | 0 PITG_17854  |
| 0   | 25  | 0 PITG_00220  |
| 0   | 0   | 2 NA          |
| 0   | 2   | 7 PITG_08578  |
| 0   | 24  | 6 PITG_18999  |
| 255 | 269 | 1581 NA       |
| 0   | 0   | 3 PITG_10058  |
| 0   | 5   | 4 PITG_05500  |
| 0   | 6   | 3 NA          |
| 0   | 2   | 4 NA          |
| 0   | 86  | 10 PITG_16899 |
| 0   | 2   | 2 PITG_03659  |
| 0   | 98  | 48 PITG_01104 |
| 6   | 2   | 4 NA          |
| 0   | 7   | 0 NA          |
| 0   | 2   | 0 PITG_12446  |
| 0   | 2   | 5 PITG_07656  |
| 0   | 0   | 0 NA          |
| 0   | 0   | 0 PITG_14137  |
| 0   | 4   | 14 PITG_10932 |
| 0   | 2   | 2 PITG_01711  |
| 593 | 2   | 134 NA        |
| 0   | 30  | 6 PITG_18457  |
| 0   | 4   | 2 PITG_17081  |
| 0   | 5   | 2 PITG_00299  |

|     |     |                |
|-----|-----|----------------|
| 0   | 123 | 52 NA          |
| 0   | 10  | 0 NA           |
| 0   | 0   | 0 PITG_22311   |
| 0   | 9   | 2 PITG_09426   |
| 0   | 5   | 4 PITG_07083   |
| 0   | 39  | 16 NA          |
| 0   | 6   | 0 PITG_02043   |
| 0   | 0   | 3 PITG_00470   |
| 0   | 7   | 2 NA           |
| 0   | 11  | 0 PITG_11407   |
| 0   | 35  | 7 NA           |
| 0   | 0   | 2 PITG_16981   |
| 0   | 0   | 0 PITG_03040   |
| 0   | 2   | 4 PITG_17994   |
| 0   | 8   | 5 PITG_10004   |
| 0   | 6   | 6 NA           |
| 689 | 10  | 48 NA          |
| 0   | 228 | 30 PITG_19505  |
| 0   | 5   | 18 PITG_00719  |
| 0   | 22  | 12 PITG_11812  |
| 0   | 2   | 0 PITG_05496   |
| 0   | 0   | 13 PITG_02349  |
| 0   | 2   | 0 PITG_21418   |
| 0   | 13  | 2 PITG_00312   |
| 0   | 4   | 2 PITG_04242   |
| 0   | 2   | 0 PITG_00662   |
| 0   | 4   | 8 PITG_11273   |
| 0   | 4   | 2 PITG_08770   |
| 0   | 8   | 30 PITG_02479  |
| 0   | 51  | 155 PITG_20212 |
| 0   | 8   | 0 PITG_02205   |
| 23  | 36  | 0 NA           |
| 0   | 3   | 3 PITG_14637   |
| 0   | 0   | 2 PITG_08900   |
| 0   | 2   | 6 PITG_02585   |
| 0   | 5   | 0 PITG_00819   |
| 0   | 18  | 2 PITG_00970   |
| 0   | 64  | 54 NA          |
| 0   | 6   | 2 PITG_01456   |
| 0   | 3   | 0 PITG_03505   |
| 0   | 24  | 7 PITG_01424   |
| 0   | 5   | 0 PITG_06963   |
| 0   | 2   | 4 PITG_03288   |
| 0   | 2   | 2 PITG_10905   |
| 0   | 0   | 0 PITG_18377   |
| 0   | 6   | 4 PITG_12547   |
| 0   | 0   | 2 PITG_03032   |

|    |     |               |
|----|-----|---------------|
| 0  | 2   | 4 PITG_14602  |
| 0  | 0   | 2 PITG_09247  |
| 0  | 5   | 16 PITG_01947 |
| 0  | 0   | 0 PITG_04421  |
| 0  | 2   | 2 NA          |
| 0  | 9   | 4 PITG_12678  |
| 0  | 0   | 2 NA          |
| 0  | 91  | 9 PITG_16213  |
| 0  | 9   | 12 PITG_19639 |
| 0  | 3   | 2 PITG_15961  |
| 0  | 0   | 0 PITG_00078  |
| 0  | 26  | 6 PITG_07700  |
| 0  | 7   | 6 PITG_10617  |
| 0  | 15  | 4 PITG_11258  |
| 0  | 2   | 2 PITG_01849  |
| 0  | 19  | 4 PITG_16346  |
| 0  | 0   | 0 NA          |
| 0  | 2   | 10 PITG_19044 |
| 0  | 0   | 6 PITG_11993  |
| 0  | 16  | 0 PITG_20999  |
| 0  | 2   | 2 PITG_12667  |
| 7  | 4   | 238 NA        |
| 0  | 11  | 31 PITG_15662 |
| 0  | 10  | 2 PITG_05180  |
| 0  | 0   | 0 PITG_10022  |
| 0  | 4   | 0 PITG_02292  |
| 0  | 0   | 0 PITG_00634  |
| 28 | 2   | 11 NA         |
| 0  | 13  | 4 PITG_07977  |
| 0  | 4   | 4 PITG_18067  |
| 0  | 16  | 20 PITG_04579 |
| 0  | 0   | 0 PITG_02450  |
| 0  | 6   | 17 PITG_05670 |
| 0  | 11  | 17 PITG_00472 |
| 0  | 182 | 41 PITG_05941 |
| 0  | 20  | 6 NA          |
| 0  | 2   | 0 NA          |
| 0  | 7   | 0 NA          |
| 0  | 13  | 15 PITG_11723 |
| 0  | 0   | 7 PITG_03927  |
| 0  | 71  | 17 NA         |
| 0  | 2   | 4 NA          |
| 0  | 2   | 0 NA          |
| 0  | 2   | 2 PITG_11425  |
| 0  | 3   | 2 PITG_10954  |
| 0  | 8   | 6 NA          |
| 0  | 51  | 37 PITG_18659 |

|     |     |                |
|-----|-----|----------------|
| 0   | 7   | 0 PITG_01452   |
| 0   | 4   | 7 PITG_03335   |
| 0   | 0   | 4 PITG_08785   |
| 13  | 0   | 5 NA           |
| 0   | 22  | 21 PITG_11656  |
| 0   | 0   | 6 NA           |
| 0   | 103 | 24 PITG_13511  |
| 0   | 4   | 0 PITG_04592   |
| 0   | 18  | 11 PITG_09504  |
| 0   | 32  | 21 PITG_20630  |
| 0   | 2   | 11 NA          |
| 0   | 4   | 21 PITG_11883  |
| 0   | 42  | 23 NA          |
| 0   | 0   | 0 PITG_07818   |
| 0   | 0   | 0 NA           |
| 0   | 2   | 0 PITG_08038   |
| 0   | 0   | 5 NA           |
| 0   | 4   | 2 PITG_05488   |
| 0   | 10  | 0 NA           |
| 0   | 0   | 0 NA           |
| 0   | 954 | 931 PITG_07059 |
| 107 | 87  | 237 NA         |
| 0   | 0   | 0 NA           |
| 0   | 5   | 78 PITG_03555  |
| 0   | 0   | 0 PITG_13103   |
| 0   | 0   | 4 PITG_11743   |
| 0   | 15  | 19 NA          |
| 58  | 9   | 138 NA         |
| 0   | 12  | 10 PITG_22541  |
| 0   | 2   | 4 PITG_00411   |
| 0   | 2   | 2 NA           |
| 0   | 68  | 15 NA          |
| 0   | 0   | 3 NA           |
| 0   | 11  | 0 PITG_03401   |
| 0   | 46  | 128 PITG_18375 |
| 0   | 50  | 11 PITG_10635  |
| 0   | 6   | 0 NA           |
| 0   | 2   | 2 PITG_12178   |
| 0   | 4   | 10 PITG_00222  |
| 0   | 5   | 7 PITG_23159   |
| 0   | 14  | 22 PITG_13416  |
| 0   | 0   | 0 PITG_03385   |
| 0   | 0   | 4 PITG_18366   |
| 0   | 2   | 9 PITG_19166   |
| 0   | 0   | 0 PITG_14239   |
| 0   | 2   | 2 PITG_18396   |
| 0   | 0   | 4 NA           |



|   |    |               |
|---|----|---------------|
| 0 | 0  | 0 PITG_03778  |
| 0 | 5  | 15 PITG_03909 |
| 0 | 2  | 6 NA          |
| 0 | 2  | 9 PITG_03085  |
| 0 | 4  | 0 NA          |
| 0 | 0  | 0 NA          |
| 0 | 0  | 0 PITG_13654  |
| 0 | 75 | 12 NA         |
| 0 | 0  | 12 PITG_06664 |
| 0 | 4  | 2 PITG_13235  |
| 0 | 50 | 29 PITG_15154 |
| 0 | 0  | 0 PITG_00215  |
| 0 | 0  | 0 PITG_18322  |
| 0 | 0  | 0 PITG_10265  |
| 0 | 4  | 8 PITG_03324  |
| 0 | 4  | 5 PITG_17403  |
| 0 | 59 | 4 PITG_10455  |
| 0 | 28 | 11 PITG_05355 |
| 0 | 4  | 0 NA          |
| 0 | 4  | 0 PITG_03031  |
| 0 | 4  | 5 PITG_16495  |
| 0 | 9  | 0 PITG_15046  |
| 0 | 2  | 2 PITG_07262  |
| 0 | 71 | 29 NA         |
| 0 | 23 | 27 PITG_10061 |
| 0 | 25 | 61 PITG_13753 |
| 0 | 2  | 0 PITG_01367  |
| 0 | 6  | 8 PITG_04644  |
| 0 | 16 | 38 NA         |
| 0 | 29 | 0 PITG_20205  |
| 0 | 2  | 6 PITG_01283  |
| 0 | 4  | 0 PITG_01252  |
| 0 | 9  | 8 NA          |
| 0 | 23 | 26 PITG_08411 |
| 0 | 0  | 4 PITG_03734  |
| 0 | 0  | 0 NA          |
| 0 | 5  | 0 PITG_13111  |
| 0 | 3  | 2 PITG_07923  |
| 0 | 19 | 17 PITG_01719 |
| 0 | 0  | 0 NA          |
| 0 | 18 | 7 PITG_20320  |
| 0 | 0  | 0 PITG_05411  |
| 0 | 5  | 2 PITG_20831  |
| 0 | 6  | 15 PITG_10016 |
| 0 | 0  | 0 PITG_16316  |
| 0 | 14 | 19 PITG_01508 |
| 0 | 44 | 0 PITG_18574  |

|     |     |               |
|-----|-----|---------------|
| 0   | 0   | 0 NA          |
| 0   | 49  | 73 PITG_06322 |
| 0   | 0   | 0 PITG_10097  |
| 0   | 2   | 14 PITG_03246 |
| 0   | 58  | 12 PITG_02249 |
| 0   | 5   | 0 PITG_06576  |
| 0   | 5   | 7 PITG_09415  |
| 0   | 6   | 12 PITG_00049 |
| 0   | 4   | 0 PITG_19997  |
| 0   | 2   | 2 PITG_08993  |
| 0   | 2   | 0 NA          |
| 0   | 11  | 16 NA         |
| 0   | 2   | 9 PITG_01759  |
| 0   | 0   | 8 PITG_14978  |
| 0   | 4   | 2 PITG_00655  |
| 0   | 3   | 8 PITG_05521  |
| 0   | 0   | 21 PITG_13726 |
| 0   | 0   | 0 PITG_17599  |
| 0   | 0   | 2 NA          |
| 0   | 20  | 10 PITG_16797 |
| 0   | 0   | 0 NA          |
| 22  | 0   | 19 NA         |
| 0   | 5   | 0 NA          |
| 0   | 6   | 15 PITG_10384 |
| 0   | 2   | 2 PITG_19022  |
| 0   | 7   | 74 PITG_10384 |
| 0   | 2   | 0 PITG_16209  |
| 0   | 5   | 2 NA          |
| 0   | 2   | 0 PITG_06088  |
| 800 | 4   | 281 NA        |
| 0   | 78  | 84 PITG_16512 |
| 0   | 17  | 11 PITG_09827 |
| 0   | 25  | 6 NA          |
| 0   | 0   | 2 PITG_12482  |
| 0   | 0   | 0 NA          |
| 0   | 0   | 0 PITG_05127  |
| 0   | 8   | 7 PITG_01044  |
| 0   | 14  | 0 PITG_17931  |
| 0   | 131 | 55 PITG_13415 |
| 0   | 0   | 0 NA          |
| 0   | 2   | 8 PITG_03618  |
| 0   | 11  | 0 PITG_08037  |
| 0   | 2   | 0 NA          |
| 0   | 2   | 0 PITG_19149  |
| 0   | 3   | 4 NA          |
| 0   | 0   | 0 PITG_13801  |
| 0   | 0   | 2 PITG_03934  |

|     |     |                |
|-----|-----|----------------|
| 0   | 0   | 0 NA           |
| 0   | 6   | 2 PITG_00454   |
| 0   | 0   | 0 NA           |
| 0   | 127 | 20 PITG_03584  |
| 0   | 2   | 0 PITG_13620   |
| 0   | 12  | 7 PITG_12470   |
| 0   | 7   | 9 PITG_01138   |
| 0   | 2   | 2 PITG_07886   |
| 0   | 23  | 15 NA          |
| 821 | 57  | 403 PITG_00156 |
| 0   | 31  | 0 PITG_06217   |
| 0   | 4   | 2 PITG_07071   |
| 0   | 9   | 5 PITG_15843   |
| 0   | 2   | 0 NA           |
| 0   | 4   | 9 PITG_10293   |
| 0   | 20  | 6 PITG_21593   |
| 0   | 5   | 5 PITG_08974   |
| 0   | 0   | 0 NA           |
| 0   | 10  | 2 PITG_15259   |
| 0   | 5   | 8 PITG_07237   |
| 0   | 14  | 0 PITG_11417   |
| 0   | 4   | 4 PITG_07211   |
| 0   | 8   | 2 PITG_09428   |
| 0   | 9   | 8 PITG_10119   |
| 0   | 2   | 6 PITG_17076   |
| 0   | 4   | 0 PITG_01049   |
| 0   | 2   | 2 NA           |
| 0   | 40  | 58 PITG_01680  |
| 0   | 0   | 2 NA           |
| 0   | 0   | 0 PITG_05478   |
| 0   | 0   | 0 PITG_17302   |
| 0   | 19  | 2 PITG_06881   |
| 0   | 27  | 0 PITG_07903   |
| 0   | 2   | 0 NA           |
| 0   | 2   | 16 PITG_22575  |
| 0   | 4   | 0 PITG_18624   |
| 0   | 2   | 0 PITG_14699   |
| 0   | 7   | 2 PITG_20202   |
| 0   | 23  | 2 PITG_20320   |
| 0   | 24  | 13 NA          |
| 0   | 0   | 13 PITG_12987  |
| 0   | 3   | 0 NA           |
| 40  | 0   | 73 NA          |
| 0   | 2   | 0 PITG_20745   |
| 0   | 0   | 4 PITG_03417   |
| 0   | 2   | 0 PITG_14483   |
| 0   | 9   | 19 PITG_12914  |

|    |     |               |
|----|-----|---------------|
| 22 | 94  | 2778 NA       |
| 0  | 0   | 0 PITG_10034  |
| 0  | 2   | 2 PITG_05814  |
| 0  | 70  | 96 PITG_01131 |
| 0  | 2   | 0 PITG_02928  |
| 0  | 2   | 2 PITG_12514  |
| 0  | 8   | 13 PITG_03759 |
| 0  | 2   | 4 NA          |
| 0  | 0   | 2 PITG_11188  |
| 0  | 54  | 0 PITG_05281  |
| 0  | 2   | 0 PITG_18424  |
| 0  | 0   | 0 NA          |
| 0  | 4   | 0 PITG_20203  |
| 0  | 4   | 7 PITG_23007  |
| 0  | 31  | 30 PITG_01258 |
| 0  | 10  | 55 PITG_18731 |
| 0  | 16  | 4 NA          |
| 0  | 43  | 40 NA         |
| 0  | 34  | 9 PITG_17703  |
| 0  | 0   | 0 NA          |
| 0  | 2   | 3 PITG_13491  |
| 0  | 12  | 0 PITG_19115  |
| 0  | 124 | 0 NA          |
| 0  | 0   | 0 NA          |
| 0  | 4   | 2 NA          |
| 0  | 6   | 8 PITG_04977  |
| 0  | 0   | 0 PITG_11854  |
| 2  | 16  | 73 NA         |
| 0  | 21  | 13 PITG_00191 |
| 0  | 15  | 5 PITG_18651  |
| 0  | 2   | 2 PITG_03529  |
| 0  | 0   | 0 PITG_10460  |
| 0  | 0   | 2 NA          |
| 0  | 2   | 0 PITG_13663  |
| 0  | 2   | 0 PITG_16686  |
| 0  | 0   | 0 NA          |
| 0  | 2   | 14 PITG_11578 |
| 0  | 19  | 8 PITG_15439  |
| 0  | 9   | 2 NA          |
| 0  | 9   | 15 PITG_12890 |
| 0  | 9   | 0 NA          |
| 0  | 6   | 2 PITG_03396  |
| 0  | 0   | 2 PITG_11271  |
| 0  | 5   | 0 PITG_19791  |
| 0  | 13  | 0 PITG_11157  |
| 0  | 16  | 0 PITG_18751  |
| 0  | 0   | 0 NA          |

|     |     |                |
|-----|-----|----------------|
| 0   | 2   | 0 PITG_16340   |
| 0   | 9   | 27 PITG_07455  |
| 235 | 29  | 265 NA         |
| 0   | 13  | 11 PITG_06871  |
| 0   | 2   | 4 PITG_16775   |
| 0   | 41  | 19 PITG_10819  |
| 0   | 29  | 19 PITG_17869  |
| 0   | 27  | 9 NA           |
| 0   | 19  | 26 NA          |
| 0   | 25  | 23 PITG_10462  |
| 0   | 0   | 0 PITG_09419   |
| 0   | 6   | 3 PITG_02666   |
| 0   | 0   | 2 PITG_08494   |
| 0   | 5   | 0 NA           |
| 0   | 7   | 5 PITG_11890   |
| 0   | 2   | 4 NA           |
| 0   | 0   | 21 PITG_05705  |
| 0   | 93  | 62 NA          |
| 0   | 2   | 4 PITG_05634   |
| 0   | 12  | 12 PITG_04600  |
| 0   | 2   | 2 PITG_03040   |
| 0   | 2   | 9 PITG_18377   |
| 0   | 35  | 7 NA           |
| 0   | 9   | 0 PITG_17867   |
| 0   | 0   | 0 PITG_13151   |
| 0   | 10  | 22 PITG_09089  |
| 0   | 2   | 0 PITG_14054   |
| 0   | 3   | 6 PITG_14436   |
| 0   | 75  | 121 PITG_02343 |
| 0   | 0   | 0 PITG_16722   |
| 0   | 2   | 8 PITG_02562   |
| 0   | 352 | 131 NA         |
| 0   | 405 | 141 PITG_11997 |
| 0   | 0   | 12 PITG_19041  |
| 0   | 4   | 4 PITG_11023   |
| 0   | 2   | 0 PITG_07302   |
| 92  | 12  | 361 NA         |
| 0   | 2   | 2 NA           |
| 0   | 4   | 0 PITG_07139   |
| 0   | 106 | 0 NA           |
| 0   | 0   | 0 PITG_13901   |
| 0   | 8   | 2 PITG_17639   |
| 0   | 84  | 96 PITG_11885  |
| 0   | 0   | 2 PITG_05079   |
| 0   | 3   | 19 PITG_11895  |
| 0   | 2   | 0 PITG_05300   |
| 0   | 0   | 2 PITG_01005   |

|     |     |               |
|-----|-----|---------------|
| 0   | 2   | 4 PITG_13017  |
| 0   | 0   | 3 PITG_13927  |
| 0   | 89  | 26 PITG_08532 |
| 0   | 4   | 2 NA          |
| 0   | 2   | 2 PITG_01407  |
| 0   | 0   | 0 PITG_03408  |
| 0   | 2   | 4 PITG_01326  |
| 0   | 5   | 4 PITG_01862  |
| 0   | 4   | 12 PITG_01774 |
| 0   | 18  | 9 PITG_06828  |
| 0   | 0   | 0 PITG_01800  |
| 0   | 0   | 0 PITG_04590  |
| 0   | 2   | 7 PITG_03703  |
| 0   | 0   | 2 PITG_05565  |
| 0   | 36  | 0 NA          |
| 0   | 4   | 0 PITG_09040  |
| 0   | 7   | 0 PITG_01621  |
| 0   | 9   | 0 NA          |
| 0   | 0   | 2 PITG_17883  |
| 0   | 2   | 7 PITG_05227  |
| 0   | 30  | 17 PITG_01250 |
| 0   | 0   | 5 PITG_01088  |
| 0   | 0   | 0 PITG_00263  |
| 0   | 13  | 12 PITG_18014 |
| 970 | 42  | 1088 NA       |
| 0   | 13  | 43 PITG_20186 |
| 0   | 4   | 6 PITG_02114  |
| 0   | 30  | 12 PITG_20330 |
| 0   | 28  | 2 PITG_13771  |
| 0   | 10  | 4 PITG_02818  |
| 0   | 0   | 0 PITG_03322  |
| 0   | 9   | 24 PITG_08734 |
| 0   | 2   | 0 PITG_06760  |
| 0   | 0   | 0 NA          |
| 0   | 2   | 3 PITG_02961  |
| 0   | 8   | 4 PITG_18759  |
| 0   | 8   | 0 PITG_01414  |
| 0   | 10  | 9 PITG_14913  |
| 0   | 116 | 54 PITG_02134 |
| 0   | 0   | 9 PITG_20790  |
| 0   | 30  | 9 PITG_14582  |
| 0   | 5   | 21 NA         |
| 0   | 0   | 2 PITG_19175  |
| 0   | 35  | 4 PITG_14399  |
| 0   | 15  | 2 PITG_10045  |
| 0   | 4   | 0 NA          |
| 0   | 11  | 2 PITG_02228  |

|   |    |               |
|---|----|---------------|
| 0 | 2  | 0 PITG_10729  |
| 0 | 5  | 28 PITG_00858 |
| 0 | 0  | 2 PITG_01046  |
| 0 | 0  | 0 NA          |
| 0 | 10 | 6 PITG_02096  |
| 0 | 6  | 4 PITG_12587  |
| 0 | 2  | 2 PITG_13173  |
| 0 | 2  | 4 PITG_00546  |
| 0 | 5  | 0 PITG_03547  |
| 0 | 0  | 0 PITG_13366  |
| 0 | 73 | 8 NA          |
| 0 | 13 | 4 PITG_01127  |
| 0 | 14 | 33 PITG_05366 |
| 0 | 6  | 6 PITG_03909  |
| 0 | 0  | 0 PITG_07956  |
| 0 | 0  | 10 PITG_02016 |
| 0 | 2  | 4 PITG_06755  |
| 0 | 19 | 16 NA         |
| 0 | 2  | 0 PITG_19790  |
| 0 | 7  | 0 PITG_16036  |
| 0 | 0  | 0 PITG_03288  |
| 0 | 2  | 2 PITG_12259  |
| 0 | 6  | 4 PITG_08211  |
| 0 | 6  | 2 PITG_16506  |
| 0 | 4  | 22 NA         |
| 0 | 14 | 13 PITG_02196 |
| 0 | 11 | 13 PITG_19641 |
| 0 | 2  | 0 PITG_03840  |
| 0 | 0  | 0 PITG_17023  |
| 0 | 4  | 2 NA          |
| 0 | 0  | 13 PITG_13845 |
| 0 | 2  | 23 PITG_02268 |
| 0 | 2  | 0 NA          |
| 0 | 31 | 0 NA          |
| 0 | 0  | 2 PITG_03842  |
| 0 | 0  | 2 PITG_06288  |
| 0 | 0  | 2 PITG_16200  |
| 0 | 31 | 2 PITG_15264  |
| 0 | 70 | 0 PITG_09679  |
| 0 | 30 | 24 PITG_01761 |
| 0 | 8  | 6 PITG_13803  |
| 0 | 0  | 0 PITG_08414  |
| 0 | 9  | 46 PITG_04980 |
| 0 | 5  | 2 PITG_05423  |
| 0 | 0  | 0 PITG_01314  |
| 0 | 0  | 9 NA          |
| 0 | 3  | 16 PITG_11234 |

|     |    |               |
|-----|----|---------------|
| 0   | 0  | 2 PITG_17325  |
| 0   | 2  | 0 PITG_05485  |
| 0   | 17 | 8 PITG_01783  |
| 0   | 0  | 4 PITG_04524  |
| 0   | 4  | 0 NA          |
| 0   | 14 | 22 PITG_18642 |
| 0   | 4  | 2 PITG_06867  |
| 0   | 5  | 2 NA          |
| 0   | 0  | 0 PITG_15065  |
| 209 | 21 | 3 NA          |
| 0   | 18 | 0 PITG_07436  |
| 0   | 2  | 0 PITG_09674  |
| 0   | 10 | 4 PITG_07801  |
| 0   | 68 | 33 PITG_00793 |
| 0   | 6  | 2 PITG_14007  |
| 0   | 86 | 53 PITG_20216 |
| 0   | 15 | 2 PITG_14923  |
| 0   | 12 | 2 NA          |
| 0   | 24 | 3 PITG_03734  |
| 0   | 11 | 38 PITG_08804 |
| 0   | 0  | 0 PITG_18296  |
| 0   | 17 | 20 PITG_15294 |
| 0   | 0  | 0 PITG_15602  |
| 0   | 77 | 23 PITG_03414 |
| 0   | 0  | 4 PITG_08049  |
| 0   | 0  | 2 NA          |
| 0   | 10 | 0 PITG_02637  |
| 0   | 28 | 2 NA          |
| 0   | 63 | 8 PITG_01317  |
| 0   | 2  | 6 NA          |
| 0   | 2  | 0 PITG_10556  |
| 0   | 4  | 11 PITG_18963 |
| 0   | 17 | 8 PITG_07191  |
| 0   | 2  | 0 PITG_10882  |
| 0   | 11 | 4 PITG_04892  |
| 0   | 0  | 0 PITG_17705  |
| 0   | 0  | 0 PITG_02069  |
| 0   | 2  | 2 PITG_03606  |
| 0   | 6  | 16 NA         |
| 0   | 0  | 0 PITG_18094  |
| 0   | 7  | 11 PITG_15039 |
| 0   | 0  | 0 PITG_22124  |
| 0   | 14 | 0 PITG_14136  |
| 0   | 2  | 7 PITG_14944  |
| 0   | 12 | 3 PITG_09671  |
| 0   | 38 | 18 PITG_02852 |
| 0   | 0  | 0 PITG_01301  |



|    |     |               |
|----|-----|---------------|
| 0  | 4   | 0 PITG_15544  |
| 0  | 0   | 19 NA         |
| 18 | 2   | 2 NA          |
| 0  | 3   | 2 PITG_04601  |
| 0  | 0   | 6 PITG_10015  |
| 0  | 0   | 21 NA         |
| 0  | 2   | 0 NA          |
| 0  | 2   | 9 PITG_03061  |
| 0  | 34  | 16 PITG_02528 |
| 0  | 2   | 0 NA          |
| 0  | 0   | 2 NA          |
| 0  | 0   | 0 PITG_23068  |
| 0  | 0   | 2 PITG_00283  |
| 0  | 0   | 0 PITG_02124  |
| 0  | 7   | 0 PITG_13321  |
| 0  | 6   | 2 PITG_16974  |
| 0  | 14  | 0 PITG_12592  |
| 0  | 2   | 2 NA          |
| 0  | 2   | 0 NA          |
| 0  | 2   | 0 PITG_09954  |
| 0  | 19  | 54 PITG_10769 |
| 0  | 6   | 8 PITG_03180  |
| 0  | 2   | 15 NA         |
| 0  | 17  | 2 NA          |
| 0  | 24  | 8 PITG_12145  |
| 0  | 9   | 2 PITG_03467  |
| 0  | 29  | 0 PITG_04971  |
| 0  | 13  | 20 PITG_17289 |
| 0  | 4   | 9 NA          |
| 0  | 137 | 14 NA         |
| 2  | 0   | 0 NA          |
| 0  | 12  | 6 PITG_11214  |
| 0  | 2   | 4 PITG_11039  |
| 0  | 0   | 0 PITG_06755  |
| 0  | 2   | 4 PITG_02575  |
| 0  | 12  | 12 NA         |
| 0  | 0   | 0 PITG_00336  |
| 0  | 8   | 6 PITG_22353  |
| 0  | 0   | 0 PITG_13276  |
| 0  | 302 | 3370 NA       |
| 0  | 0   | 5 PITG_15564  |
| 0  | 12  | 12 PITG_11705 |
| 0  | 4   | 19 PITG_09440 |
| 0  | 10  | 10 NA         |
| 0  | 4   | 73 PITG_15955 |
| 0  | 0   | 11 PITG_12326 |
| 0  | 0   | 2 PITG_01564  |

|     |     |                |
|-----|-----|----------------|
| 0   | 12  | 2 PITG_01387   |
| 0   | 33  | 67 PITG_08425  |
| 0   | 0   | 0 PITG_07510   |
| 0   | 18  | 3 PITG_15963   |
| 0   | 17  | 2 PITG_03987   |
| 84  | 129 | 727 NA         |
| 0   | 4   | 10 PITG_02114  |
| 0   | 2   | 2 PITG_11551   |
| 0   | 3   | 2 PITG_16364   |
| 0   | 5   | 2 PITG_03880   |
| 0   | 4   | 7 PITG_16818   |
| 0   | 0   | 2 PITG_00725   |
| 0   | 4   | 0 PITG_00078   |
| 0   | 0   | 8 PITG_02947   |
| 0   | 2   | 7 NA           |
| 0   | 6   | 2 PITG_07236   |
| 0   | 0   | 0 PITG_06827   |
| 0   | 24  | 2 NA           |
| 0   | 0   | 2 PITG_11286   |
| 0   | 5   | 0 PITG_20965   |
| 0   | 2   | 0 PITG_13613   |
| 0   | 0   | 4 PITG_07017   |
| 0   | 5   | 6 PITG_04533   |
| 0   | 2   | 11 PITG_22566  |
| 0   | 56  | 70 PITG_01142  |
| 0   | 6   | 51 PITG_15652  |
| 51  | 5   | 71 NA          |
| 0   | 12  | 2 PITG_17485   |
| 0   | 25  | 6 PITG_06393   |
| 0   | 24  | 8 NA           |
| 0   | 27  | 111 PITG_13301 |
| 0   | 0   | 3 PITG_02732   |
| 0   | 5   | 216 NA         |
| 444 | 0   | 405 NA         |
| 11  | 6   | 6 NA           |
| 0   | 2   | 2 PITG_17905   |
| 0   | 4   | 6 NA           |
| 0   | 8   | 0 PITG_10865   |
| 0   | 2   | 8 NA           |
| 0   | 10  | 93 PITG_08024  |
| 0   | 30  | 7 PITG_13298   |
| 0   | 7   | 4 PITG_17945   |
| 0   | 4   | 8 PITG_07810   |
| 0   | 0   | 2 NA           |
| 0   | 5   | 5 NA           |
| 0   | 3   | 9 PITG_02541   |
| 0   | 0   | 0 PITG_04158   |

|    |     |               |
|----|-----|---------------|
| 0  | 4   | 0 PITG_06429  |
| 0  | 0   | 2 PITG_01923  |
| 0  | 0   | 2 PITG_17361  |
| 0  | 0   | 6 PITG_13337  |
| 0  | 5   | 4 PITG_13417  |
| 0  | 7   | 0 NA          |
| 0  | 0   | 2 NA          |
| 0  | 5   | 2 PITG_05732  |
| 0  | 0   | 7 PITG_03789  |
| 0  | 31  | 9 PITG_07902  |
| 0  | 0   | 2 PITG_05832  |
| 0  | 0   | 2 PITG_14816  |
| 0  | 257 | 10 PITG_19624 |
| 0  | 2   | 2 PITG_05522  |
| 0  | 0   | 4 NA          |
| 0  | 7   | 6 PITG_15097  |
| 0  | 7   | 40 PITG_05254 |
| 0  | 4   | 0 PITG_19749  |
| 0  | 0   | 10 PITG_01689 |
| 0  | 0   | 0 PITG_10460  |
| 0  | 2   | 15 NA         |
| 0  | 2   | 10 NA         |
| 0  | 2   | 0 NA          |
| 0  | 2   | 2 PITG_00250  |
| 0  | 14  | 19 PITG_07851 |
| 0  | 2   | 3 PITG_07455  |
| 0  | 0   | 4 PITG_14835  |
| 0  | 0   | 2 PITG_09861  |
| 0  | 6   | 0 NA          |
| 0  | 6   | 26 PITG_08681 |
| 0  | 0   | 0 PITG_10764  |
| 0  | 57  | 2 PITG_22247  |
| 0  | 23  | 6 NA          |
| 0  | 27  | 19 PITG_17556 |
| 0  | 53  | 69 PITG_21457 |
| 0  | 0   | 2 PITG_11157  |
| 0  | 36  | 29 PITG_06939 |
| 0  | 0   | 0 NA          |
| 0  | 0   | 2 PITG_07531  |
| 0  | 0   | 6 NA          |
| 0  | 0   | 0 PITG_16958  |
| 73 | 0   | 2 NA          |
| 0  | 7   | 2 NA          |
| 0  | 4   | 24 PITG_10881 |
| 0  | 2   | 0 PITG_04179  |
| 0  | 90  | 24 NA         |
| 0  | 0   | 12 PITG_06863 |

|   |     |                |
|---|-----|----------------|
| 0 | 23  | 42 PITG_04324  |
| 0 | 48  | 37 PITG_07778  |
| 0 | 58  | 4 PITG_17079   |
| 0 | 0   | 0 PITG_10040   |
| 0 | 45  | 21 PITG_09318  |
| 0 | 16  | 2 PITG_13997   |
| 0 | 0   | 0 PITG_03501   |
| 0 | 6   | 2 PITG_01456   |
| 0 | 0   | 2 PITG_01588   |
| 0 | 4   | 10 PITG_18314  |
| 0 | 0   | 0 PITG_13417   |
| 0 | 18  | 4 PITG_21156   |
| 0 | 5   | 6 PITG_17746   |
| 0 | 2   | 0 NA           |
| 0 | 9   | 3 NA           |
| 0 | 6   | 7 PITG_02739   |
| 0 | 3   | 13 PITG_00066  |
| 0 | 3   | 16 PITG_09505  |
| 0 | 2   | 10 PITG_02786  |
| 0 | 2   | 2 NA           |
| 0 | 5   | 4 NA           |
| 0 | 18  | 30 NA          |
| 0 | 7   | 6 PITG_03623   |
| 0 | 0   | 0 PITG_03431   |
| 0 | 9   | 10 PITG_01652  |
| 0 | 15  | 0 PITG_10703   |
| 0 | 0   | 2 NA           |
| 0 | 4   | 4 PITG_18999   |
| 0 | 0   | 0 NA           |
| 0 | 2   | 2 PITG_04678   |
| 0 | 39  | 0 PITG_11886   |
| 0 | 0   | 0 PITG_00193   |
| 0 | 20  | 5 PITG_08935   |
| 0 | 2   | 17 PITG_10514  |
| 0 | 0   | 2 PITG_01850   |
| 0 | 50  | 15 NA          |
| 0 | 0   | 0 PITG_05170   |
| 0 | 3   | 9 NA           |
| 0 | 13  | 17 PITG_02867  |
| 0 | 2   | 0 NA           |
| 0 | 31  | 29 PITG_10715  |
| 0 | 0   | 0 NA           |
| 0 | 3   | 202 PITG_00149 |
| 0 | 18  | 0 PITG_06127   |
| 0 | 9   | 4 PITG_11444   |
| 0 | 766 | 313 PITG_11241 |
| 0 | 21  | 10 PITG_16809  |

|   |     |                |
|---|-----|----------------|
| 0 | 8   | 6 PITG_05079   |
| 0 | 72  | 8 PITG_02826   |
| 0 | 0   | 7 PITG_16055   |
| 0 | 3   | 2 NA           |
| 0 | 809 | 135 PITG_02357 |
| 0 | 23  | 26 PITG_06558  |
| 0 | 100 | 103 PITG_21794 |
| 0 | 2   | 2 PITG_03438   |
| 0 | 8   | 7 PITG_04547   |
| 0 | 7   | 6 PITG_00221   |
| 0 | 18  | 17 NA          |
| 0 | 33  | 7 NA           |
| 0 | 33  | 12 PITG_15321  |
| 0 | 0   | 7 PITG_19005   |
| 0 | 3   | 2 NA           |
| 0 | 37  | 15 NA          |
| 0 | 5   | 20 PITG_10022  |
| 0 | 0   | 2 NA           |
| 0 | 5   | 0 NA           |
| 0 | 0   | 0 PITG_22124   |
| 0 | 0   | 0 NA           |
| 0 | 4   | 0 NA           |
| 0 | 0   | 4 NA           |
| 0 | 0   | 2 NA           |
| 0 | 7   | 8 PITG_18372   |
| 0 | 8   | 7 NA           |
| 0 | 63  | 0 PITG_01185   |
| 0 | 0   | 3 PITG_00911   |
| 0 | 32  | 0 NA           |
| 0 | 0   | 2 PITG_13914   |
| 0 | 26  | 3 NA           |
| 0 | 2   | 6 PITG_08609   |
| 0 | 23  | 25 PITG_13029  |
| 0 | 7   | 0 PITG_03117   |
| 0 | 28  | 13 PITG_03296  |
| 0 | 11  | 18 PITG_00746  |
| 0 | 8   | 0 PITG_17683   |
| 0 | 4   | 2 PITG_09211   |
| 0 | 2   | 0 PITG_04975   |
| 0 | 2   | 6 PITG_12104   |
| 0 | 2   | 2 PITG_05404   |
| 0 | 5   | 3 PITG_17408   |
| 0 | 21  | 33 PITG_00797  |
| 0 | 0   | 0 PITG_17811   |
| 0 | 2   | 19 PITG_02813  |
| 0 | 13  | 5 PITG_21222   |
| 0 | 0   | 11 PITG_01976  |

|   |     |                |
|---|-----|----------------|
| 0 | 134 | 50 PITG_08295  |
| 0 | 2   | 0 PITG_23007   |
| 0 | 5   | 5 PITG_13718   |
| 0 | 14  | 11 PITG_14640  |
| 0 | 12  | 10 NA          |
| 0 | 15  | 19 NA          |
| 0 | 2   | 0 NA           |
| 0 | 9   | 2 PITG_11000   |
| 0 | 0   | 0 PITG_14484   |
| 0 | 34  | 4 PITG_16806   |
| 0 | 5   | 9 PITG_16383   |
| 0 | 4   | 0 PITG_04379   |
| 0 | 0   | 0 NA           |
| 0 | 0   | 9 PITG_12516   |
| 0 | 0   | 0 PITG_17883   |
| 0 | 24  | 36 NA          |
| 0 | 2   | 0 PITG_10117   |
| 0 | 0   | 10 PITG_03767  |
| 0 | 4   | 6 NA           |
| 0 | 0   | 0 PITG_05518   |
| 0 | 2   | 0 PITG_00515   |
| 0 | 30  | 9 PITG_03860   |
| 0 | 24  | 7 PITG_09851   |
| 0 | 7   | 2 PITG_20153   |
| 0 | 4   | 3 PITG_06796   |
| 0 | 0   | 0 NA           |
| 0 | 0   | 2 PITG_09285   |
| 0 | 2   | 4 PITG_07937   |
| 0 | 9   | 6 PITG_06797   |
| 0 | 0   | 5 PITG_02730   |
| 0 | 0   | 4 PITG_08430   |
| 0 | 0   | 7 PITG_00191   |
| 0 | 0   | 0 PITG_03609   |
| 0 | 24  | 5 PITG_12290   |
| 0 | 69  | 25 PITG_00439  |
| 0 | 8   | 0 PITG_03102   |
| 0 | 111 | 280 PITG_03273 |
| 0 | 16  | 7 NA           |
| 0 | 6   | 0 PITG_16103   |
| 0 | 4   | 0 PITG_10553   |
| 0 | 4   | 2 NA           |
| 0 | 0   | 0 PITG_14712   |
| 0 | 35  | 42 PITG_02952  |
| 0 | 3   | 2 NA           |
| 0 | 0   | 13 PITG_06658  |
| 0 | 5   | 4 PITG_14913   |
| 0 | 2   | 2 PITG_00983   |

|     |     |                |
|-----|-----|----------------|
| 2   | 0   | 8 PITG_19516   |
| 0   | 6   | 9 PITG_16105   |
| 0   | 83  | 13 NA          |
| 0   | 33  | 4 NA           |
| 0   | 16  | 16 PITG_16378  |
| 0   | 0   | 0 PITG_10460   |
| 0   | 2   | 2 NA           |
| 0   | 0   | 2 PITG_08741   |
| 0   | 12  | 4 PITG_02322   |
| 0   | 0   | 0 PITG_03408   |
| 0   | 9   | 35 PITG_11885  |
| 0   | 0   | 0 NA           |
| 0   | 9   | 9 NA           |
| 368 | 0   | 78 NA          |
| 0   | 423 | 132 PITG_03584 |
| 0   | 5   | 7 PITG_10442   |
| 0   | 11  | 61 PITG_19472  |
| 0   | 44  | 28 NA          |
| 0   | 4   | 0 PITG_01263   |
| 0   | 4   | 2 PITG_04589   |
| 0   | 15  | 17 PITG_20103  |
| 0   | 18  | 10 NA          |
| 0   | 42  | 26 PITG_12175  |
| 0   | 0   | 0 PITG_09988   |
| 0   | 64  | 10 PITG_15832  |
| 0   | 6   | 6 NA           |
| 0   | 12  | 21 PITG_00887  |
| 0   | 5   | 4 PITG_00274   |
| 0   | 28  | 2 PITG_12221   |
| 0   | 0   | 2 PITG_07888   |
| 0   | 3   | 3 PITG_19886   |
| 0   | 7   | 8 NA           |
| 0   | 6   | 0 PITG_15762   |
| 0   | 17  | 4 PITG_05381   |
| 0   | 13  | 2 PITG_01227   |
| 0   | 2   | 0 PITG_05672   |
| 0   | 14  | 17 PITG_08850  |
| 0   | 0   | 0 PITG_11832   |
| 0   | 7   | 4 NA           |
| 0   | 9   | 4 PITG_08575   |
| 0   | 11  | 19 PITG_01947  |
| 0   | 0   | 2 NA           |
| 0   | 2   | 0 NA           |
| 0   | 27  | 7 PITG_04937   |
| 0   | 4   | 9 NA           |
| 0   | 0   | 6 PITG_16383   |
| 0   | 2   | 5 NA           |

|    |     |               |
|----|-----|---------------|
| 0  | 2   | 2 PITG_11743  |
| 0  | 4   | 0 PITG_20507  |
| 0  | 5   | 2 PITG_18373  |
| 0  | 21  | 9 PITG_10648  |
| 0  | 0   | 4 PITG_14151  |
| 0  | 9   | 15 PITG_01818 |
| 0  | 2   | 3 PITG_13715  |
| 0  | 0   | 4 NA          |
| 0  | 2   | 0 PITG_00463  |
| 0  | 0   | 0 PITG_04710  |
| 0  | 0   | 11 PITG_22508 |
| 0  | 0   | 7 PITG_01450  |
| 0  | 0   | 2 NA          |
| 0  | 0   | 2 PITG_00504  |
| 0  | 2   | 0 NA          |
| 0  | 6   | 0 PITG_09381  |
| 12 | 0   | 22 NA         |
| 0  | 195 | 12 PITG_07007 |
| 0  | 0   | 0 NA          |
| 0  | 62  | 63 PITG_20362 |
| 0  | 8   | 14 NA         |
| 0  | 0   | 0 PITG_11296  |
| 0  | 2   | 2 NA          |
| 0  | 2   | 2 PITG_14635  |
| 0  | 7   | 9 PITG_08901  |
| 0  | 41  | 20 PITG_01006 |
| 0  | 2   | 0 PITG_04529  |
| 0  | 8   | 22 PITG_02010 |
| 0  | 30  | 19 PITG_11254 |
| 0  | 7   | 5 PITG_09780  |
| 12 | 0   | 0 NA          |
| 0  | 4   | 0 PITG_04712  |
| 0  | 0   | 0 PITG_17408  |
| 0  | 5   | 4 PITG_02723  |
| 0  | 20  | 17 PITG_09670 |
| 0  | 13  | 526 NA        |
| 0  | 13  | 30 PITG_01814 |
| 0  | 2   | 18 PITG_14602 |
| 0  | 44  | 28 PITG_09220 |
| 16 | 0   | 41 NA         |
| 0  | 4   | 8 PITG_11527  |
| 0  | 2   | 0 NA          |
| 0  | 16  | 16 NA         |
| 0  | 2   | 5 NA          |
| 0  | 25  | 0 PITG_05224  |
| 0  | 10  | 25 PITG_10952 |
| 0  | 7   | 0 NA          |



|   |      |                 |
|---|------|-----------------|
| 0 | 0    | 0 PITG_20128    |
| 0 | 104  | 37 PITG_01644   |
| 0 | 2    | 0 PITG_02038    |
| 0 | 0    | 0 PITG_16940    |
| 0 | 0    | 2 PITG_22566    |
| 4 | 0    | 2 NA            |
| 0 | 0    | 2 PITG_05423    |
| 0 | 7    | 5 PITG_19436    |
| 0 | 25   | 2 PITG_11064    |
| 0 | 0    | 0 PITG_10882    |
| 0 | 2    | 0 PITG_20463    |
| 0 | 106  | 17 PITG_02001   |
| 0 | 110  | 2 NA            |
| 0 | 17   | 0 PITG_02924    |
| 0 | 2    | 0 NA            |
| 0 | 0    | 0 PITG_06660    |
| 0 | 75   | 20 PITG_12838   |
| 0 | 17   | 0 PITG_03624    |
| 0 | 5    | 5 PITG_10509    |
| 0 | 1559 | 2379 PITG_04074 |
| 0 | 28   | 4 NA            |
| 7 | 13   | 11 NA           |
| 0 | 0    | 4 PITG_08206    |
| 0 | 3    | 2 PITG_11790    |
| 0 | 2    | 2 PITG_20463    |
| 0 | 0    | 0 PITG_12356    |
| 0 | 8    | 8 PITG_08693    |
| 0 | 4    | 5 PITG_15819    |
| 0 | 0    | 0 PITG_07915    |
| 0 | 71   | 0 PITG_16098    |
| 0 | 2    | 15 NA           |
| 0 | 36   | 0 PITG_00310    |
| 0 | 0    | 2 PITG_08679    |
| 0 | 70   | 2 PITG_21220    |
| 0 | 0    | 9 PITG_00952    |
| 0 | 0    | 0 PITG_05423    |
| 0 | 8    | 0 PITG_18833    |
| 0 | 30   | 68 PITG_14130   |
| 0 | 151  | 354 PITG_22406  |
| 0 | 8    | 6 PITG_14296    |
| 0 | 2    | 3 PITG_01053    |
| 0 | 4    | 4 PITG_00152    |
| 0 | 0    | 2 PITG_12454    |
| 0 | 44   | 115 PITG_18361  |
| 0 | 410  | 129 PITG_01441  |
| 7 | 0    | 10 NA           |
| 0 | 12   | 6 PITG_01525    |

|   |    |               |
|---|----|---------------|
| 0 | 64 | 4 PITG_20103  |
| 0 | 2  | 0 PITG_01949  |
| 0 | 6  | 8 PITG_16495  |
| 0 | 28 | 42 PITG_01222 |
| 0 | 8  | 2 PITG_07301  |
| 0 | 17 | 14 PITG_16852 |
| 0 | 9  | 2 NA          |
| 0 | 0  | 4 PITG_14593  |
| 0 | 0  | 0 NA          |
| 0 | 0  | 0 PITG_08723  |
| 0 | 4  | 2 PITG_01426  |
| 0 | 19 | 0 NA          |
| 0 | 11 | 38 PITG_22686 |
| 0 | 0  | 0 PITG_07892  |
| 0 | 0  | 2 PITG_18331  |
| 0 | 4  | 2 PITG_10022  |
| 0 | 0  | 4 PITG_07546  |
| 0 | 2  | 4 PITG_02673  |
| 0 | 0  | 2 NA          |
| 0 | 0  | 0 NA          |
| 0 | 0  | 2 PITG_09889  |
| 0 | 0  | 4 NA          |
| 0 | 8  | 2 PITG_05869  |
| 0 | 6  | 14 PITG_17495 |
| 0 | 6  | 9 PITG_03044  |
| 0 | 0  | 0 PITG_10888  |
| 0 | 0  | 0 NA          |
| 0 | 3  | 0 PITG_11461  |
| 3 | 0  | 0 NA          |
| 0 | 0  | 9 NA          |
| 0 | 35 | 11 NA         |
| 0 | 9  | 14 PITG_15957 |
| 0 | 5  | 2 PITG_11125  |
| 0 | 0  | 4 NA          |
| 0 | 8  | 6 PITG_09703  |
| 0 | 2  | 10 PITG_05644 |
| 0 | 3  | 4 PITG_06002  |
| 0 | 0  | 0 NA          |
| 0 | 0  | 21 PITG_11116 |
| 0 | 0  | 2 NA          |
| 0 | 0  | 0 PITG_07233  |
| 0 | 9  | 4 NA          |
| 0 | 2  | 5 PITG_00320  |
| 0 | 76 | 20 PITG_12540 |
| 0 | 0  | 0 PITG_09782  |
| 0 | 29 | 4 NA          |
| 0 | 4  | 0 NA          |

|   |    |               |
|---|----|---------------|
| 0 | 2  | 2 PITG_07978  |
| 0 | 54 | 63 PITG_03737 |
| 0 | 2  | 4 PITG_17943  |
| 0 | 0  | 6 PITG_10007  |
| 0 | 8  | 0 NA          |
| 0 | 68 | 70 PITG_13402 |
| 0 | 12 | 2 PITG_06255  |
| 0 | 7  | 0 NA          |
| 0 | 2  | 0 NA          |
| 0 | 4  | 0 NA          |
| 0 | 4  | 2 PITG_10394  |
| 0 | 3  | 2 PITG_15593  |
| 0 | 10 | 0 PITG_16204  |
| 0 | 55 | 4 NA          |
| 0 | 0  | 0 NA          |
| 0 | 19 | 12 PITG_18070 |
| 0 | 2  | 2 NA          |
| 0 | 19 | 52 PITG_17457 |
| 0 | 4  | 25 PITG_08383 |
| 0 | 12 | 0 NA          |
| 0 | 2  | 2 NA          |
| 0 | 0  | 2 PITG_11052  |
| 0 | 2  | 2 NA          |
| 0 | 0  | 0 PITG_17359  |
| 0 | 7  | 10 PITG_09448 |
| 0 | 2  | 8 NA          |
| 0 | 0  | 0 NA          |
| 0 | 28 | 20 PITG_20977 |
| 0 | 17 | 8 PITG_20046  |
| 0 | 0  | 3 PITG_09092  |
| 0 | 3  | 23 PITG_01584 |
| 0 | 13 | 11 NA         |
| 0 | 7  | 11 PITG_06303 |
| 0 | 2  | 0 NA          |
| 0 | 2  | 2 NA          |
| 0 | 28 | 21 PITG_08011 |
| 0 | 2  | 6 PITG_03934  |
| 0 | 4  | 0 PITG_17639  |
| 0 | 4  | 2 PITG_00732  |
| 0 | 18 | 4 PITG_13403  |
| 0 | 2  | 2 PITG_14066  |
| 0 | 2  | 4 PITG_13415  |
| 0 | 37 | 12 PITG_16922 |
| 0 | 2  | 0 PITG_18091  |
| 0 | 0  | 2 PITG_10817  |
| 0 | 6  | 2 PITG_15541  |
| 0 | 8  | 2 NA          |

|     |     |                |
|-----|-----|----------------|
| 0   | 11  | 12 PITG_00648  |
| 0   | 5   | 2 PITG_14137   |
| 0   | 4   | 22 PITG_07831  |
| 0   | 17  | 31 PITG_12537  |
| 0   | 14  | 4 NA           |
| 0   | 9   | 2 PITG_06945   |
| 0   | 4   | 8 PITG_07945   |
| 0   | 396 | 153 PITG_17230 |
| 0   | 33  | 8 PITG_05564   |
| 0   | 10  | 9 PITG_04847   |
| 0   | 10  | 8 PITG_13245   |
| 0   | 39  | 15 NA          |
| 0   | 2   | 7 PITG_08599   |
| 0   | 0   | 0 PITG_18004   |
| 0   | 0   | 0 PITG_00732   |
| 0   | 0   | 0 PITG_14889   |
| 0   | 0   | 4 PITG_08991   |
| 0   | 0   | 0 PITG_01188   |
| 0   | 8   | 18 NA          |
| 0   | 4   | 4 PITG_21887   |
| 0   | 3   | 8 PITG_04426   |
| 0   | 0   | 6 PITG_08421   |
| 0   | 0   | 4 PITG_12864   |
| 0   | 0   | 0 PITG_11981   |
| 0   | 13  | 29 NA          |
| 0   | 4   | 3 PITG_09664   |
| 0   | 4   | 4 PITG_12853   |
| 0   | 40  | 88 PITG_16363  |
| 0   | 13  | 4 PITG_01315   |
| 0   | 2   | 4 PITG_03701   |
| 0   | 24  | 9 PITG_16088   |
| 0   | 0   | 2 PITG_08011   |
| 0   | 0   | 0 PITG_00116   |
| 0   | 2   | 2 PITG_12919   |
| 0   | 21  | 7 PITG_13739   |
| 0   | 2   | 11 PITG_18091  |
| 0   | 2   | 5 PITG_06190   |
| 0   | 0   | 0 NA           |
| 0   | 0   | 0 PITG_11446   |
| 0   | 5   | 2 PITG_09816   |
| 0   | 2   | 8 PITG_04453   |
| 846 | 9   | 1021 NA        |
| 0   | 12  | 6 PITG_13793   |
| 0   | 0   | 9 PITG_13302   |
| 0   | 2   | 6 PITG_10830   |
| 0   | 9   | 19 PITG_15819  |
| 0   | 4   | 0 NA           |

|    |     |               |
|----|-----|---------------|
| 0  | 0   | 0 PITG_10574  |
| 0  | 26  | 72 PITG_03098 |
| 0  | 2   | 0 PITG_21727  |
| 0  | 0   | 0 PITG_17209  |
| 0  | 37  | 9 NA          |
| 0  | 5   | 8 PITG_11472  |
| 0  | 0   | 17 PITG_01878 |
| 0  | 8   | 31 PITG_03472 |
| 0  | 2   | 0 PITG_10479  |
| 0  | 21  | 0 PITG_03260  |
| 0  | 0   | 2 PITG_11711  |
| 0  | 2   | 10 PITG_00622 |
| 0  | 8   | 0 PITG_18279  |
| 0  | 47  | 18 PITG_00732 |
| 0  | 2   | 6 PITG_13416  |
| 0  | 6   | 6 PITG_14283  |
| 0  | 4   | 0 PITG_10894  |
| 0  | 8   | 9 PITG_18461  |
| 0  | 8   | 0 PITG_19402  |
| 0  | 12  | 3 NA          |
| 0  | 7   | 4 PITG_15463  |
| 0  | 0   | 2 PITG_07925  |
| 0  | 0   | 0 PITG_18754  |
| 0  | 0   | 5 PITG_17882  |
| 35 | 0   | 0 NA          |
| 0  | 2   | 5 NA          |
| 0  | 8   | 6 NA          |
| 0  | 0   | 0 PITG_19182  |
| 0  | 4   | 6 PITG_13844  |
| 0  | 6   | 4 PITG_00952  |
| 0  | 10  | 5 NA          |
| 0  | 21  | 21 PITG_02032 |
| 0  | 122 | 33 PITG_00065 |
| 0  | 2   | 0 PITG_06935  |
| 0  | 5   | 5 NA          |
| 0  | 6   | 2 PITG_04647  |
| 0  | 3   | 6 PITG_13164  |
| 0  | 44  | 9 PITG_03039  |
| 0  | 0   | 23 PITG_03661 |
| 0  | 19  | 0 PITG_11410  |
| 0  | 2   | 2 PITG_10576  |
| 0  | 3   | 2 PITG_08154  |
| 0  | 0   | 2 PITG_07259  |
| 0  | 100 | 13 NA         |
| 0  | 17  | 0 PITG_08690  |
| 0  | 13  | 0 PITG_03743  |
| 0  | 4   | 6 PITG_20216  |

|      |     |               |
|------|-----|---------------|
| 0    | 41  | 16 PITG_03614 |
| 0    | 0   | 5 PITG_17292  |
| 0    | 10  | 2 PITG_16669  |
| 1622 | 66  | 636 NA        |
| 0    | 50  | 20 PITG_01374 |
| 0    | 0   | 0 PITG_06402  |
| 0    | 4   | 13 PITG_23007 |
| 0    | 0   | 2 PITG_15891  |
| 0    | 6   | 5 PITG_01595  |
| 0    | 5   | 0 NA          |
| 0    | 16  | 8 PITG_17767  |
| 0    | 8   | 5 PITG_17072  |
| 0    | 27  | 2 PITG_08089  |
| 0    | 0   | 0 PITG_21380  |
| 0    | 15  | 6 PITG_20330  |
| 0    | 15  | 2 PITG_06631  |
| 0    | 8   | 0 NA          |
| 5    | 39  | 93 NA         |
| 0    | 38  | 43 PITG_00750 |
| 0    | 11  | 0 PITG_03864  |
| 0    | 9   | 0 PITG_03523  |
| 0    | 2   | 0 PITG_14385  |
| 0    | 18  | 8 PITG_20831  |
| 704  | 201 | 1195 NA       |
| 0    | 0   | 4 PITG_08664  |
| 0    | 0   | 0 PITG_02783  |
| 0    | 0   | 0 PITG_10042  |
| 0    | 43  | 2 PITG_10380  |
| 0    | 0   | 2 PITG_20207  |
| 0    | 5   | 2 PITG_05557  |
| 0    | 4   | 4 PITG_22449  |
| 0    | 3   | 0 PITG_12521  |
| 0    | 38  | 21 PITG_22859 |
| 0    | 0   | 0 NA          |
| 2    | 2   | 74 NA         |
| 0    | 15  | 4 PITG_06642  |
| 0    | 2   | 0 PITG_03304  |
| 26   | 2   | 17 NA         |
| 0    | 4   | 7 NA          |
| 0    | 4   | 6 PITG_01127  |
| 0    | 4   | 3 PITG_13828  |
| 0    | 5   | 0 PITG_21222  |
| 0    | 6   | 4 NA          |
| 81   | 9   | 198 NA        |
| 0    | 4   | 8 NA          |
| 0    | 10  | 9 PITG_05293  |
| 0    | 0   | 13 PITG_09348 |

|     |    |               |
|-----|----|---------------|
| 0   | 2  | 0 NA          |
| 0   | 2  | 4 PITG_15982  |
| 0   | 19 | 2 NA          |
| 0   | 2  | 0 PITG_03401  |
| 0   | 0  | 2 PITG_05346  |
| 0   | 0  | 0 PITG_17867  |
| 0   | 0  | 0 PITG_15097  |
| 0   | 30 | 6 NA          |
| 0   | 15 | 2 PITG_00990  |
| 0   | 0  | 0 PITG_08969  |
| 0   | 5  | 8 PITG_04529  |
| 0   | 4  | 6 PITG_17028  |
| 0   | 0  | 2 PITG_14549  |
| 0   | 10 | 5 NA          |
| 0   | 6  | 2 PITG_12821  |
| 0   | 2  | 12 PITG_18962 |
| 0   | 32 | 45 PITG_01259 |
| 0   | 0  | 4 NA          |
| 0   | 16 | 9 PITG_12683  |
| 0   | 8  | 58 PITG_20081 |
| 0   | 0  | 0 PITG_12173  |
| 0   | 9  | 2 PITG_13344  |
| 0   | 17 | 43 PITG_19005 |
| 0   | 0  | 25 PITG_01036 |
| 0   | 0  | 0 PITG_15470  |
| 0   | 6  | 3 PITG_00818  |
| 0   | 13 | 3 PITG_08470  |
| 0   | 4  | 2 PITG_02774  |
| 0   | 2  | 2 NA          |
| 0   | 0  | 3 NA          |
| 0   | 7  | 19 PITG_09792 |
| 0   | 7  | 2 PITG_10651  |
| 0   | 0  | 0 PITG_09288  |
| 0   | 4  | 7 PITG_17074  |
| 144 | 23 | 458 NA        |
| 0   | 12 | 17 PITG_11186 |
| 0   | 2  | 0 PITG_02582  |
| 0   | 0  | 0 PITG_15672  |
| 0   | 82 | 2 PITG_02541  |
| 20  | 32 | 1010 NA       |
| 0   | 43 | 40 PITG_01825 |
| 0   | 5  | 0 PITG_15868  |
| 0   | 5  | 0 PITG_09210  |
| 0   | 37 | 25 PITG_05192 |
| 0   | 0  | 3 PITG_09270  |
| 0   | 2  | 2 PITG_05709  |
| 0   | 2  | 0 NA          |

|     |      |                |
|-----|------|----------------|
| 0   | 0    | 2 PITG_07856   |
| 0   | 0    | 0 PITG_05799   |
| 0   | 11   | 0 PITG_11566   |
| 249 | 14   | 244 NA         |
| 0   | 9    | 2 NA           |
| 0   | 9    | 10 PITG_04990  |
| 0   | 5    | 2 PITG_07202   |
| 0   | 0    | 8 PITG_01173   |
| 0   | 2    | 2 PITG_08581   |
| 0   | 21   | 50 PITG_00029  |
| 0   | 22   | 31 PITG_15959  |
| 0   | 0    | 2 NA           |
| 0   | 8    | 14 PITG_00853  |
| 0   | 10   | 0 PITG_11525   |
| 0   | 0    | 8 PITG_07567   |
| 0   | 0    | 21 PITG_12119  |
| 0   | 125  | 73 PITG_14616  |
| 0   | 21   | 0 PITG_09795   |
| 0   | 26   | 24 NA          |
| 0   | 7    | 4 PITG_05151   |
| 0   | 5    | 8 NA           |
| 0   | 0    | 0 PITG_03863   |
| 0   | 0    | 0 PITG_19750   |
| 0   | 0    | 0 PITG_01097   |
| 0   | 10   | 2 PITG_10030   |
| 0   | 0    | 0 PITG_09938   |
| 0   | 1088 | 286 PITG_13327 |
| 0   | 0    | 0 PITG_12852   |
| 0   | 2    | 2 PITG_07246   |
| 0   | 2    | 12 PITG_05685  |
| 0   | 15   | 23 PITG_16969  |
| 0   | 0    | 0 PITG_02673   |
| 0   | 6    | 4 PITG_14274   |
| 0   | 13   | 17 PITG_20585  |
| 0   | 0    | 2 PITG_22839   |
| 0   | 0    | 0 NA           |
| 0   | 34   | 10 PITG_12826  |
| 0   | 0    | 0 PITG_04426   |
| 0   | 2    | 12 PITG_09862  |
| 0   | 2    | 0 PITG_03411   |
| 0   | 4    | 2 NA           |
| 0   | 4    | 0 PITG_16894   |
| 0   | 2    | 0 PITG_09375   |
| 0   | 6    | 2 PITG_13622   |
| 0   | 2    | 0 PITG_14137   |
| 0   | 0    | 0 PITG_14889   |
| 0   | 0    | 0 PITG_10150   |



|    |     |               |
|----|-----|---------------|
| 0  | 125 | 18 PITG_14436 |
| 0  | 7   | 2 PITG_18688  |
| 0  | 5   | 24 PITG_06673 |
| 15 | 0   | 27 NA         |
| 0  | 22  | 0 PITG_03771  |
| 0  | 9   | 6 PITG_06915  |
| 0  | 3   | 0 PITG_05275  |
| 0  | 56  | 0 PITG_01193  |
| 0  | 2   | 9 PITG_11406  |
| 0  | 3   | 0 PITG_16055  |
| 0  | 0   | 0 PITG_10795  |
| 0  | 2   | 2 NA          |
| 0  | 2   | 0 PITG_18032  |
| 0  | 8   | 0 PITG_12357  |
| 0  | 6   | 0 PITG_05939  |
| 0  | 11  | 16 PITG_10828 |
| 0  | 13  | 3 PITG_15593  |
| 0  | 6   | 4 PITG_10447  |
| 0  | 9   | 17 PITG_04600 |
| 0  | 15  | 5 PITG_18085  |
| 0  | 0   | 0 PITG_01340  |
| 0  | 0   | 5 PITG_02273  |
| 34 | 12  | 99 NA         |
| 0  | 26  | 25 PITG_11458 |
| 0  | 0   | 0 PITG_17893  |
| 0  | 9   | 4 PITG_06396  |
| 0  | 0   | 2 PITG_02457  |
| 0  | 7   | 6 NA          |
| 0  | 4   | 0 NA          |
| 0  | 22  | 6 NA          |
| 0  | 4   | 20 PITG_02917 |
| 0  | 0   | 6 PITG_00078  |
| 0  | 0   | 4 PITG_15097  |
| 0  | 13  | 25 PITG_14614 |
| 0  | 0   | 0 PITG_14746  |
| 0  | 0   | 18 PITG_17617 |
| 0  | 28  | 5 PITG_13344  |
| 0  | 8   | 21 PITG_00877 |
| 0  | 46  | 19 PITG_11021 |
| 0  | 9   | 2 PITG_03559  |
| 0  | 25  | 29 PITG_13055 |
| 0  | 12  | 25 PITG_16464 |
| 0  | 2   | 0 NA          |
| 0  | 0   | 0 PITG_08237  |
| 0  | 2   | 0 PITG_16224  |
| 0  | 8   | 0 NA          |
| 0  | 4   | 10 PITG_20295 |

|    |     |                |
|----|-----|----------------|
| 91 | 3   | 39 NA          |
| 0  | 57  | 0 PITG_16400   |
| 0  | 52  | 0 PITG_18232   |
| 0  | 14  | 73 PITG_04994  |
| 0  | 0   | 2 PITG_05658   |
| 0  | 0   | 14 PITG_01741  |
| 0  | 16  | 8 PITG_02924   |
| 0  | 0   | 4 PITG_01745   |
| 0  | 8   | 0 PITG_12530   |
| 0  | 5   | 10 PITG_02337  |
| 0  | 7   | 2 PITG_09983   |
| 0  | 2   | 36 PITG_16864  |
| 0  | 8   | 0 PITG_02052   |
| 0  | 4   | 0 PITG_02916   |
| 0  | 0   | 5 PITG_19473   |
| 0  | 2   | 4 NA           |
| 0  | 9   | 0 PITG_00508   |
| 0  | 2   | 0 NA           |
| 0  | 5   | 13 NA          |
| 0  | 2   | 13 PITG_13773  |
| 0  | 2   | 6 PITG_17869   |
| 0  | 0   | 0 PITG_15058   |
| 0  | 0   | 5 PITG_12433   |
| 0  | 18  | 5 PITG_16009   |
| 0  | 36  | 0 PITG_02646   |
| 0  | 0   | 2 PITG_07239   |
| 0  | 2   | 6 PITG_13460   |
| 0  | 35  | 2 PITG_00809   |
| 0  | 4   | 0 NA           |
| 0  | 0   | 5 PITG_21807   |
| 0  | 0   | 0 NA           |
| 0  | 13  | 2 PITG_07952   |
| 0  | 0   | 2 PITG_03117   |
| 0  | 0   | 0 PITG_17663   |
| 0  | 5   | 0 PITG_01332   |
| 0  | 33  | 12 NA          |
| 0  | 0   | 0 PITG_14056   |
| 0  | 0   | 9 PITG_03819   |
| 0  | 46  | 0 PITG_03158   |
| 0  | 0   | 2 PITG_01855   |
| 0  | 197 | 16 PITG_04905  |
| 0  | 7   | 0 NA           |
| 0  | 563 | 630 PITG_05394 |
| 0  | 0   | 2 PITG_02706   |
| 0  | 2   | 0 PITG_06152   |
| 0  | 2   | 8 PITG_03360   |
| 0  | 0   | 0 PITG_19781   |

|     |     |               |
|-----|-----|---------------|
| 0   | 2   | 11 PITG_05884 |
| 0   | 8   | 0 PITG_13029  |
| 0   | 2   | 0 PITG_19149  |
| 0   | 15  | 10 PITG_05369 |
| 0   | 61  | 8 PITG_17931  |
| 0   | 0   | 0 PITG_18370  |
| 10  | 25  | 57 NA         |
| 4   | 0   | 7 NA          |
| 0   | 98  | 6 PITG_03240  |
| 0   | 16  | 23 PITG_03490 |
| 0   | 4   | 0 PITG_05531  |
| 0   | 0   | 6 PITG_14642  |
| 0   | 2   | 0 PITG_03496  |
| 0   | 0   | 5 NA          |
| 0   | 10  | 4 NA          |
| 0   | 0   | 0 PITG_06363  |
| 0   | 7   | 0 PITG_09853  |
| 0   | 19  | 5 PITG_13309  |
| 0   | 2   | 0 PITG_00132  |
| 32  | 110 | 173 NA        |
| 0   | 2   | 0 PITG_00080  |
| 0   | 0   | 0 PITG_02269  |
| 0   | 0   | 2 PITG_03767  |
| 0   | 10  | 7 PITG_11470  |
| 0   | 2   | 14 PITG_13469 |
| 0   | 19  | 14 PITG_04821 |
| 0   | 13  | 16 PITG_02197 |
| 2   | 0   | 8 NA          |
| 4   | 36  | 565 NA        |
| 0   | 0   | 0 PITG_00717  |
| 645 | 6   | 393 NA        |
| 0   | 7   | 0 PITG_06695  |
| 0   | 2   | 4 PITG_04591  |
| 182 | 187 | 2224 NA       |
| 0   | 2   | 4 PITG_02754  |
| 0   | 0   | 2 PITG_13491  |
| 0   | 8   | 57 PITG_01400 |
| 0   | 0   | 3 PITG_14379  |
| 0   | 0   | 0 PITG_16879  |
| 0   | 0   | 0 NA          |
| 0   | 0   | 2 PITG_13826  |
| 0   | 4   | 0 PITG_01663  |
| 0   | 25  | 2 NA          |
| 0   | 192 | 97 PITG_02840 |
| 0   | 4   | 13 PITG_00664 |
| 0   | 9   | 17 PITG_14533 |
| 0   | 0   | 19 PITG_03561 |

|   |    |               |
|---|----|---------------|
| 0 | 23 | 23 PITG_06322 |
| 0 | 5  | 9 PITG_00299  |
| 0 | 7  | 2 NA          |
| 0 | 4  | 0 PITG_01677  |
| 0 | 21 | 4 PITG_06943  |
| 0 | 4  | 0 PITG_10460  |
| 0 | 0  | 5 PITG_14044  |
| 0 | 0  | 3 PITG_20044  |
| 0 | 0  | 0 PITG_08447  |
| 0 | 5  | 6 PITG_11775  |
| 0 | 8  | 0 PITG_05614  |
| 0 | 3  | 5 PITG_04003  |
| 0 | 0  | 0 NA          |
| 0 | 0  | 4 PITG_11676  |
| 0 | 29 | 0 PITG_00070  |
| 0 | 2  | 0 PITG_12156  |
| 0 | 8  | 7 NA          |
| 0 | 14 | 26 NA         |
| 0 | 27 | 8 PITG_19745  |
| 0 | 0  | 0 NA          |
| 0 | 2  | 0 PITG_12318  |
| 0 | 21 | 11 PITG_15503 |
| 0 | 10 | 2 PITG_08427  |
| 9 | 5  | 46 NA         |
| 0 | 0  | 0 PITG_06038  |
| 0 | 24 | 24 PITG_04480 |
| 0 | 2  | 4 NA          |
| 0 | 0  | 2 PITG_19182  |
| 0 | 5  | 4 PITG_17068  |
| 0 | 2  | 15 PITG_20463 |
| 0 | 23 | 3 NA          |
| 0 | 3  | 0 NA          |
| 0 | 0  | 7 PITG_12517  |
| 0 | 6  | 0 PITG_00046  |
| 0 | 0  | 5 NA          |
| 0 | 4  | 2 NA          |
| 0 | 3  | 7 PITG_00450  |
| 0 | 4  | 0 NA          |
| 0 | 7  | 0 PITG_14599  |
| 0 | 0  | 0 PITG_18397  |
| 7 | 0  | 21 NA         |
| 0 | 0  | 2 PITG_06849  |
| 0 | 2  | 0 PITG_05170  |
| 0 | 4  | 0 PITG_08019  |
| 0 | 0  | 5 PITG_04877  |
| 0 | 0  | 4 PITG_15569  |
| 0 | 0  | 4 PITG_01520  |

|   |     |                |
|---|-----|----------------|
| 0 | 5   | 0 PITG_00687   |
| 0 | 2   | 0 PITG_01782   |
| 0 | 4   | 4 PITG_15354   |
| 0 | 0   | 10 PITG_06695  |
| 0 | 276 | 145 PITG_02029 |
| 0 | 0   | 6 PITG_11675   |
| 0 | 30  | 45 PITG_18623  |
| 0 | 11  | 2 NA           |
| 0 | 4   | 2 PITG_10045   |
| 0 | 9   | 0 NA           |
| 0 | 8   | 0 PITG_19159   |
| 0 | 4   | 0 PITG_02329   |
| 0 | 18  | 39 PITG_05691  |
| 0 | 2   | 2 PITG_03740   |
| 0 | 0   | 0 PITG_19085   |
| 0 | 8   | 12 PITG_13579  |
| 0 | 0   | 0 PITG_10729   |
| 0 | 74  | 10 PITG_20672  |
| 0 | 2   | 4 PITG_14051   |
| 0 | 6   | 10 PITG_21215  |
| 0 | 2   | 0 PITG_09381   |
| 0 | 0   | 8 PITG_16476   |
| 0 | 0   | 0 NA           |
| 0 | 14  | 30 PITG_00877  |
| 0 | 66  | 86 PITG_13419  |
| 0 | 3   | 2 PITG_18712   |
| 0 | 9   | 19 PITG_09376  |
| 0 | 18  | 16 PITG_07247  |
| 0 | 2   | 0 PITG_02665   |
| 0 | 0   | 0 PITG_11157   |
| 0 | 0   | 0 PITG_13282   |
| 0 | 0   | 0 NA           |
| 0 | 21  | 40 PITG_15310  |
| 0 | 0   | 2 PITG_07154   |
| 0 | 2   | 0 PITG_22017   |
| 0 | 6   | 8 PITG_01768   |
| 0 | 4   | 2 PITG_01250   |
| 0 | 0   | 6 PITG_09006   |
| 0 | 0   | 0 PITG_09995   |
| 0 | 6   | 8 PITG_03592   |
| 0 | 10  | 10 PITG_06283  |
| 0 | 4   | 0 PITG_16456   |
| 0 | 5   | 5 PITG_02022   |
| 0 | 2   | 0 PITG_18006   |
| 0 | 6   | 10 PITG_03480  |
| 0 | 0   | 0 PITG_05412   |
| 0 | 0   | 0 PITG_00701   |

|   |     |               |
|---|-----|---------------|
| 0 | 2   | 4 PITG_05170  |
| 0 | 0   | 3 PITG_07334  |
| 0 | 0   | 8 PITG_03468  |
| 0 | 511 | 4 PITG_18578  |
| 0 | 0   | 0 PITG_02027  |
| 0 | 27  | 5 NA          |
| 0 | 4   | 9 NA          |
| 0 | 8   | 0 NA          |
| 0 | 4   | 0 PITG_11080  |
| 0 | 19  | 17 PITG_11323 |
| 0 | 0   | 0 NA          |
| 0 | 5   | 5 PITG_17361  |
| 0 | 0   | 2 PITG_08009  |
| 0 | 7   | 3 PITG_02210  |
| 0 | 3   | 2 PITG_03172  |
| 0 | 0   | 7 PITG_03030  |
| 0 | 5   | 0 PITG_03404  |
| 0 | 6   | 0 PITG_00989  |
| 0 | 13  | 2 PITG_17361  |
| 0 | 4   | 4 PITG_08367  |
| 0 | 24  | 16 PITG_06342 |
| 0 | 2   | 7 PITG_18433  |
| 0 | 35  | 29 PITG_15602 |
| 0 | 6   | 0 PITG_00361  |
| 0 | 14  | 18 PITG_22947 |
| 0 | 7   | 0 NA          |
| 0 | 0   | 4 PITG_18272  |
| 0 | 19  | 2 NA          |
| 0 | 0   | 7 PITG_06536  |
| 0 | 0   | 0 PITG_01789  |
| 0 | 0   | 0 PITG_19915  |
| 0 | 10  | 31 PITG_01826 |
| 0 | 4   | 2 NA          |
| 0 | 13  | 0 PITG_10844  |
| 0 | 7   | 2 PITG_07042  |
| 0 | 39  | 13 PITG_16664 |
| 0 | 18  | 16 PITG_07795 |
| 0 | 4   | 0 PITG_01154  |
| 0 | 11  | 6 PITG_15039  |
| 0 | 0   | 2 PITG_13486  |
| 0 | 0   | 2 PITG_04179  |
| 0 | 2   | 4 PITG_20945  |
| 0 | 0   | 2 NA          |
| 0 | 23  | 42 PITG_03822 |
| 0 | 6   | 2 NA          |
| 0 | 13  | 24 PITG_10315 |
| 0 | 5   | 0 PITG_02208  |

|    |     |               |
|----|-----|---------------|
| 0  | 2   | 0 PITG_01046  |
| 0  | 19  | 6 PITG_21889  |
| 0  | 6   | 2 PITG_07073  |
| 0  | 0   | 0 PITG_18624  |
| 0  | 0   | 2 PITG_06978  |
| 0  | 4   | 2 NA          |
| 0  | 0   | 9 NA          |
| 0  | 3   | 30 NA         |
| 0  | 13  | 6 NA          |
| 0  | 3   | 7 PITG_01332  |
| 0  | 8   | 11 PITG_08387 |
| 0  | 38  | 19 PITG_15046 |
| 0  | 2   | 9 PITG_08104  |
| 0  | 0   | 4 PITG_09832  |
| 0  | 2   | 5 PITG_18250  |
| 0  | 6   | 5 PITG_01128  |
| 0  | 0   | 2 NA          |
| 0  | 0   | 11 PITG_16078 |
| 0  | 0   | 0 PITG_15065  |
| 0  | 0   | 0 PITG_08572  |
| 0  | 18  | 19 PITG_13257 |
| 0  | 13  | 39 NA         |
| 0  | 0   | 2 PITG_00329  |
| 0  | 2   | 0 NA          |
| 0  | 5   | 2 PITG_08604  |
| 0  | 23  | 18 PITG_01508 |
| 0  | 0   | 6 PITG_02122  |
| 0  | 12  | 21 PITG_08801 |
| 84 | 7   | 285 NA        |
| 0  | 0   | 2 NA          |
| 0  | 2   | 6 PITG_08032  |
| 11 | 7   | 135 NA        |
| 0  | 3   | 0 PITG_11146  |
| 0  | 2   | 3 PITG_02679  |
| 0  | 9   | 5 NA          |
| 0  | 0   | 0 NA          |
| 0  | 0   | 0 NA          |
| 0  | 0   | 0 PITG_03804  |
| 0  | 0   | 0 PITG_00622  |
| 2  | 0   | 4 NA          |
| 0  | 0   | 0 PITG_09826  |
| 0  | 182 | 93 PITG_07717 |
| 0  | 0   | 0 PITG_02135  |
| 0  | 341 | 1162 NA       |
| 11 | 144 | 995 NA        |
| 0  | 14  | 0 NA          |
| 0  | 7   | 10 PITG_01691 |

|     |    |                |
|-----|----|----------------|
| 0   | 13 | 8 PITG_03018   |
| 0   | 27 | 8 PITG_22858   |
| 0   | 4  | 0 PITG_00687   |
| 0   | 10 | 6 PITG_01712   |
| 0   | 3  | 2 PITG_23215   |
| 125 | 32 | 10 NA          |
| 0   | 2  | 0 NA           |
| 0   | 4  | 0 PITG_14441   |
| 0   | 0  | 0 NA           |
| 0   | 2  | 4 PITG_02824   |
| 0   | 5  | 2 PITG_13486   |
| 0   | 5  | 0 PITG_01520   |
| 0   | 0  | 0 NA           |
| 0   | 10 | 6 PITG_01957   |
| 0   | 4  | 2 PITG_08587   |
| 0   | 4  | 11 PITG_04717  |
| 0   | 7  | 0 PITG_04044   |
| 0   | 0  | 0 PITG_00945   |
| 0   | 5  | 0 PITG_02461   |
| 0   | 12 | 16 PITG_00198  |
| 0   | 10 | 11 PITG_00566  |
| 0   | 4  | 2 PITG_04579   |
| 0   | 11 | 17 NA          |
| 0   | 4  | 4 PITG_15817   |
| 0   | 2  | 4 NA           |
| 0   | 58 | 175 PITG_05956 |
| 0   | 6  | 2 PITG_06610   |
| 0   | 9  | 29 PITG_10926  |
| 0   | 4  | 2 PITG_02620   |
| 0   | 18 | 12 PITG_05176  |
| 0   | 4  | 0 PITG_13122   |
| 0   | 27 | 46 PITG_07164  |
| 0   | 19 | 3 PITG_16491   |
| 0   | 2  | 22 PITG_01171  |
| 0   | 0  | 2 PITG_06452   |
| 0   | 0  | 0 PITG_11562   |
| 0   | 16 | 44 PITG_00543  |
| 0   | 18 | 18 PITG_09473  |
| 0   | 24 | 11 PITG_18274  |
| 0   | 2  | 2 NA           |
| 0   | 4  | 0 PITG_19364   |
| 0   | 8  | 5 PITG_04466   |
| 0   | 0  | 4 PITG_18656   |
| 9   | 2  | 3 NA           |
| 0   | 14 | 5 PITG_05486   |
| 0   | 2  | 0 PITG_13084   |
| 0   | 11 | 0 PITG_00828   |



|   |    |               |
|---|----|---------------|
| 0 | 62 | 76 NA         |
| 0 | 10 | 2 PITG_00681  |
| 0 | 11 | 6 NA          |
| 0 | 0  | 2 PITG_14225  |
| 0 | 4  | 0 PITG_12668  |
| 0 | 9  | 6 PITG_11635  |
| 0 | 41 | 4 PITG_11242  |
| 0 | 0  | 0 NA          |
| 0 | 0  | 0 NA          |
| 0 | 0  | 0 PITG_06402  |
| 0 | 20 | 4 PITG_21556  |
| 0 | 0  | 4 PITG_19153  |
| 0 | 0  | 3 PITG_09930  |
| 0 | 2  | 0 PITG_04232  |
| 0 | 4  | 9 PITG_13263  |
| 0 | 11 | 7 PITG_21660  |
| 0 | 0  | 4 PITG_14951  |
| 0 | 0  | 0 PITG_06897  |
| 0 | 22 | 31 PITG_03821 |
| 0 | 10 | 0 PITG_05478  |
| 0 | 3  | 6 PITG_15875  |
| 0 | 0  | 5 PITG_15806  |
| 0 | 14 | 2 PITG_01110  |
| 0 | 24 | 8 NA          |
| 0 | 38 | 35 PITG_00029 |
| 0 | 5  | 0 PITG_06545  |
| 0 | 2  | 0 PITG_17246  |
| 0 | 6  | 0 PITG_00389  |
| 0 | 0  | 3 PITG_16020  |
| 0 | 25 | 9 PITG_05304  |
| 0 | 57 | 26 PITG_10576 |
| 0 | 7  | 2 NA          |
| 0 | 12 | 0 PITG_18634  |
| 0 | 0  | 0 PITG_17028  |
| 0 | 0  | 0 NA          |
| 0 | 2  | 25 PITG_17805 |
| 0 | 95 | 38 PITG_02134 |
| 0 | 0  | 2 PITG_00441  |
| 0 | 0  | 0 NA          |
| 0 | 21 | 17 PITG_01995 |
| 0 | 24 | 2 NA          |
| 0 | 0  | 9 PITG_03635  |
| 0 | 28 | 12 NA         |
| 0 | 0  | 2 PITG_05505  |
| 0 | 2  | 6 PITG_21179  |
| 0 | 0  | 3 PITG_01301  |
| 0 | 6  | 0 NA          |

|   |    |               |
|---|----|---------------|
| 0 | 12 | 12 PITG_08383 |
| 0 | 0  | 5 PITG_06753  |
| 0 | 13 | 2 NA          |
| 0 | 10 | 0 NA          |
| 0 | 0  | 0 PITG_03593  |
| 0 | 0  | 0 PITG_13715  |
| 0 | 4  | 0 PITG_18696  |
| 0 | 10 | 2 PITG_19867  |
| 0 | 0  | 3 PITG_04849  |
| 0 | 5  | 0 NA          |
| 0 | 2  | 8 PITG_09081  |
| 0 | 13 | 2 NA          |
| 0 | 0  | 0 PITG_18826  |
| 0 | 2  | 2 PITG_02822  |
| 0 | 0  | 2 PITG_02774  |
| 0 | 2  | 12 PITG_18963 |
| 0 | 2  | 18 NA         |
| 0 | 0  | 2 PITG_11437  |
| 0 | 0  | 15 PITG_05733 |
| 0 | 2  | 11 PITG_16337 |
| 0 | 2  | 11 PITG_01102 |
| 0 | 12 | 6 PITG_18961  |
| 0 | 10 | 6 PITG_08955  |
| 0 | 0  | 4 PITG_06148  |
| 0 | 8  | 5 PITG_21166  |
| 0 | 2  | 2 PITG_01076  |
| 0 | 0  | 2 PITG_21639  |
| 0 | 0  | 2 PITG_12475  |
| 0 | 14 | 10 NA         |
| 0 | 0  | 6 PITG_16854  |
| 0 | 35 | 2 NA          |
| 0 | 0  | 0 PITG_01233  |
| 0 | 9  | 2 PITG_04359  |
| 0 | 2  | 0 PITG_03453  |
| 0 | 8  | 4 PITG_01584  |
| 0 | 0  | 7 PITG_06358  |
| 0 | 5  | 20 NA         |
| 0 | 0  | 0 NA          |
| 0 | 13 | 19 PITG_17701 |
| 0 | 5  | 21 PITG_05313 |
| 0 | 0  | 0 PITG_15228  |
| 0 | 32 | 5 PITG_05183  |
| 0 | 0  | 6 PITG_15006  |
| 0 | 36 | 34 PITG_15955 |
| 0 | 2  | 0 PITG_19107  |
| 0 | 2  | 3 PITG_22549  |
| 0 | 4  | 0 NA          |

|     |     |                |
|-----|-----|----------------|
| 0   | 109 | 12 NA          |
| 0   | 2   | 6 PITG_21908   |
| 0   | 0   | 0 PITG_13492   |
| 0   | 0   | 25 PITG_04283  |
| 0   | 11  | 7 PITG_16675   |
| 0   | 2   | 12 PITG_10595  |
| 0   | 12  | 9 NA           |
| 0   | 3   | 0 PITG_02145   |
| 0   | 8   | 2 PITG_03560   |
| 0   | 2   | 10 PITG_15637  |
| 0   | 0   | 0 PITG_02197   |
| 0   | 3   | 9 PITG_17170   |
| 0   | 2   | 9 PITG_16107   |
| 0   | 0   | 134 NA         |
| 0   | 12  | 9 PITG_07284   |
| 0   | 9   | 0 PITG_19127   |
| 0   | 4   | 5 PITG_17930   |
| 0   | 5   | 29 PITG_00938  |
| 0   | 2   | 0 PITG_02473   |
| 0   | 14  | 5 PITG_09792   |
| 0   | 6   | 4 PITG_11926   |
| 0   | 17  | 27 NA          |
| 0   | 15  | 12 PITG_08673  |
| 0   | 3   | 6 PITG_07244   |
| 0   | 2   | 0 NA           |
| 0   | 22  | 17 PITG_01283  |
| 0   | 6   | 8 PITG_05289   |
| 0   | 0   | 6 PITG_13042   |
| 0   | 446 | 378 PITG_18644 |
| 0   | 36  | 19 NA          |
| 0   | 7   | 0 NA           |
| 0   | 0   | 0 PITG_02329   |
| 0   | 5   | 2 PITG_17347   |
| 0   | 17  | 10 PITG_05340  |
| 0   | 2   | 9 PITG_00179   |
| 0   | 14  | 4 PITG_09707   |
| 835 | 22  | 481 NA         |
| 0   | 43  | 2 NA           |
| 0   | 0   | 4 PITG_20687   |
| 0   | 0   | 4 PITG_05737   |
| 0   | 0   | 0 NA           |
| 0   | 3   | 0 PITG_18726   |
| 0   | 0   | 0 PITG_05629   |
| 0   | 0   | 3 PITG_17131   |
| 0   | 5   | 4 PITG_04731   |
| 0   | 0   | 0 NA           |
| 0   | 16  | 0 PITG_07724   |

|     |     |                |
|-----|-----|----------------|
| 0   | 0   | 0 PITG_09951   |
| 0   | 4   | 0 PITG_08309   |
| 752 | 2   | 39 NA          |
| 0   | 13  | 7 PITG_06107   |
| 0   | 0   | 0 NA           |
| 0   | 8   | 16 PITG_09305  |
| 0   | 10  | 12 PITG_02664  |
| 0   | 29  | 113 NA         |
| 0   | 6   | 4 NA           |
| 0   | 12  | 2 NA           |
| 0   | 0   | 2 NA           |
| 0   | 8   | 4 NA           |
| 0   | 5   | 9 PITG_02924   |
| 0   | 7   | 2 PITG_20454   |
| 0   | 24  | 0 PITG_15606   |
| 0   | 2   | 0 PITG_19436   |
| 0   | 16  | 8 PITG_11926   |
| 0   | 12  | 0 PITG_10520   |
| 0   | 14  | 46 PITG_11457  |
| 0   | 2   | 6 PITG_15387   |
| 0   | 0   | 6 PITG_00171   |
| 0   | 10  | 14 PITG_03307  |
| 0   | 27  | 11 PITG_08536  |
| 0   | 6   | 22 PITG_02391  |
| 0   | 0   | 0 PITG_01430   |
| 0   | 4   | 2 PITG_17493   |
| 0   | 0   | 2 PITG_03753   |
| 0   | 8   | 5 NA           |
| 0   | 322 | 285 PITG_00877 |
| 0   | 2   | 0 PITG_10921   |
| 0   | 2   | 0 PITG_02806   |
| 0   | 4   | 0 NA           |
| 0   | 0   | 0 PITG_01679   |
| 0   | 0   | 0 NA           |
| 0   | 17  | 11 PITG_17106  |
| 0   | 0   | 0 PITG_11020   |
| 0   | 11  | 20 PITG_00460  |
| 0   | 10  | 9 PITG_12295   |
| 0   | 15  | 0 PITG_07245   |
| 0   | 7   | 0 PITG_09932   |
| 0   | 0   | 0 PITG_11817   |
| 0   | 6   | 4 PITG_16969   |
| 0   | 0   | 10 PITG_01949  |
| 0   | 2   | 20 PITG_05505  |
| 0   | 0   | 0 PITG_08460   |
| 0   | 0   | 0 PITG_01647   |
| 0   | 2   | 4 PITG_23277   |

|     |     |                |
|-----|-----|----------------|
| 0   | 8   | 9 PITG_02895   |
| 0   | 13  | 9 PITG_09703   |
| 0   | 5   | 11 PITG_01963  |
| 0   | 3   | 6 PITG_01871   |
| 0   | 0   | 24 PITG_07975  |
| 0   | 63  | 133 PITG_11081 |
| 0   | 72  | 20 PITG_03825  |
| 0   | 2   | 0 NA           |
| 0   | 0   | 4 PITG_05894   |
| 0   | 0   | 0 PITG_01457   |
| 0   | 234 | 125 NA         |
| 0   | 0   | 2 NA           |
| 0   | 2   | 0 PITG_07026   |
| 161 | 27  | 511 NA         |
| 0   | 28  | 0 PITG_06978   |
| 0   | 0   | 0 NA           |
| 0   | 4   | 15 PITG_18999  |
| 0   | 137 | 6 NA           |
| 0   | 20  | 64 PITG_03703  |
| 0   | 2   | 4 PITG_02738   |
| 0   | 0   | 8 PITG_07051   |
| 0   | 5   | 6 NA           |
| 0   | 0   | 2 PITG_17395   |
| 0   | 3   | 18 PITG_02343  |
| 0   | 46  | 2 NA           |
| 0   | 0   | 2 PITG_10903   |
| 0   | 5   | 4 NA           |
| 0   | 4   | 13 NA          |
| 0   | 114 | 2 NA           |
| 22  | 0   | 15 NA          |
| 0   | 0   | 0 PITG_09452   |
| 0   | 2   | 0 PITG_13569   |
| 0   | 0   | 0 NA           |
| 0   | 0   | 0 NA           |
| 0   | 11  | 27 PITG_02526  |
| 0   | 0   | 0 PITG_17142   |
| 0   | 0   | 16 PITG_14239  |
| 0   | 21  | 0 PITG_06846   |
| 8   | 0   | 2 NA           |
| 0   | 5   | 0 PITG_10760   |
| 0   | 2   | 2 PITG_06281   |
| 0   | 0   | 2 PITG_15447   |
| 0   | 40  | 19 PITG_15967  |
| 0   | 0   | 0 NA           |
| 0   | 0   | 2 PITG_11106   |
| 0   | 37  | 11 PITG_16840  |
| 0   | 7   | 5 PITG_12489   |

|     |     |                |
|-----|-----|----------------|
| 0   | 10  | 13 PITG_15408  |
| 118 | 2   | 121 NA         |
| 0   | 12  | 6 NA           |
| 0   | 57  | 41 PITG_11802  |
| 0   | 8   | 0 NA           |
| 0   | 0   | 0 PITG_12428   |
| 0   | 7   | 4 PITG_19022   |
| 0   | 2   | 2 PITG_11183   |
| 0   | 0   | 0 PITG_18257   |
| 0   | 16  | 12 PITG_15141  |
| 0   | 81  | 112 PITG_14466 |
| 0   | 208 | 84 NA          |
| 0   | 0   | 0 PITG_22037   |
| 0   | 8   | 4 PITG_14717   |
| 0   | 4   | 0 PITG_09377   |
| 0   | 32  | 149 NA         |
| 0   | 0   | 2 PITG_22077   |
| 0   | 0   | 0 PITG_15062   |
| 0   | 6   | 0 PITG_16097   |
| 0   | 7   | 0 PITG_18320   |
| 0   | 70  | 73 PITG_08758  |
| 0   | 0   | 0 PITG_00620   |
| 0   | 5   | 4 PITG_08774   |
| 0   | 29  | 15 PITG_02840  |
| 0   | 7   | 9 PITG_15373   |
| 0   | 2   | 0 PITG_20610   |
| 0   | 0   | 2 PITG_05781   |
| 0   | 5   | 4 PITG_01424   |
| 0   | 2   | 0 PITG_02800   |
| 0   | 2   | 12 PITG_06899  |
| 0   | 0   | 2 NA           |
| 0   | 0   | 0 PITG_14401   |
| 0   | 2   | 2 PITG_16020   |
| 0   | 4   | 15 PITG_01427  |
| 0   | 0   | 0 PITG_07852   |
| 0   | 9   | 0 NA           |
| 0   | 13  | 11 PITG_13771  |
| 0   | 18  | 21 PITG_01490  |
| 0   | 0   | 21 PITG_14257  |
| 0   | 0   | 2 PITG_10979   |
| 0   | 8   | 0 PITG_02032   |
| 0   | 2   | 2 PITG_08325   |
| 0   | 13  | 6 PITG_03355   |
| 0   | 6   | 0 NA           |
| 0   | 0   | 2 PITG_06920   |
| 0   | 6   | 3 NA           |
| 0   | 71  | 23 PITG_06453  |

|   |    |               |
|---|----|---------------|
| 0 | 0  | 0 PITG_01242  |
| 0 | 2  | 4 PITG_09770  |
| 0 | 6  | 2 PITG_06899  |
| 0 | 11 | 10 PITG_02850 |
| 0 | 2  | 5 PITG_14005  |
| 0 | 5  | 6 PITG_08529  |
| 0 | 0  | 2 PITG_10191  |
| 0 | 9  | 13 PITG_18977 |
| 0 | 0  | 0 PITG_10801  |
| 0 | 9  | 8 PITG_03483  |
| 0 | 28 | 15 PITG_06820 |
| 0 | 0  | 0 PITG_21336  |
| 0 | 2  | 0 NA          |
| 0 | 5  | 9 PITG_17998  |
| 0 | 10 | 5 NA          |
| 0 | 2  | 0 PITG_16958  |
| 0 | 11 | 15 PITG_04863 |
| 0 | 0  | 4 NA          |
| 0 | 7  | 2 PITG_11146  |
| 0 | 2  | 2 PITG_14948  |
| 0 | 2  | 0 NA          |
| 0 | 4  | 0 PITG_09066  |
| 0 | 19 | 0 PITG_13253  |
| 0 | 0  | 0 NA          |
| 0 | 10 | 0 PITG_18734  |
| 0 | 0  | 0 PITG_02576  |
| 0 | 2  | 2 NA          |
| 8 | 23 | 0 NA          |
| 7 | 0  | 4 NA          |
| 0 | 2  | 6 PITG_10461  |
| 0 | 0  | 0 PITG_10546  |
| 0 | 52 | 25 PITG_21644 |
| 0 | 9  | 4 NA          |
| 0 | 0  | 0 PITG_07841  |
| 0 | 37 | 82 PITG_19842 |
| 0 | 2  | 0 PITG_00945  |
| 0 | 8  | 2 NA          |
| 0 | 0  | 0 PITG_07978  |
| 2 | 0  | 16 NA         |
| 0 | 2  | 5 PITG_04992  |
| 0 | 28 | 18 PITG_01298 |
| 0 | 0  | 2 PITG_17556  |
| 0 | 2  | 0 NA          |
| 0 | 43 | 7 PITG_22035  |
| 0 | 2  | 0 PITG_22431  |
| 0 | 4  | 9 PITG_02707  |
| 0 | 2  | 0 PITG_19736  |

|     |      |                 |
|-----|------|-----------------|
| 0   | 2    | 0 PITG_02055    |
| 0   | 0    | 2 PITG_04718    |
| 0   | 8    | 4 NA            |
| 0   | 7    | 0 PITG_06760    |
| 0   | 13   | 57 NA           |
| 12  | 0    | 5 NA            |
| 0   | 21   | 31 PITG_05444   |
| 0   | 0    | 3 PITG_16079    |
| 0   | 0    | 0 PITG_17663    |
| 0   | 13   | 3 NA            |
| 0   | 8    | 0 PITG_10317    |
| 0   | 39   | 6 NA            |
| 0   | 0    | 0 PITG_03732    |
| 0   | 6    | 0 PITG_10993    |
| 0   | 0    | 0 PITG_20790    |
| 0   | 2    | 2 PITG_01452    |
| 11  | 0    | 41 NA           |
| 0   | 68   | 18 PITG_17361   |
| 0   | 0    | 0 PITG_10783    |
| 0   | 2    | 0 PITG_03435    |
| 0   | 3    | 3 PITG_10922    |
| 0   | 6    | 17 PITG_13077   |
| 0   | 13   | 21 PITG_08295   |
| 0   | 0    | 0 NA            |
| 0   | 2    | 7 NA            |
| 416 | 19   | 585 NA          |
| 0   | 2    | 2 PITG_12663    |
| 0   | 4    | 0 PITG_15062    |
| 0   | 0    | 0 PITG_01370    |
| 0   | 2    | 175 NA          |
| 0   | 2    | 0 PITG_19175    |
| 0   | 59   | 26 PITG_08750   |
| 0   | 2    | 4 PITG_02194    |
| 0   | 7    | 2 PITG_00996    |
| 0   | 89   | 41 NA           |
| 0   | 0    | 5 PITG_09995    |
| 0   | 0    | 0 PITG_04889    |
| 29  | 36   | 50 NA           |
| 0   | 14   | 38 PITG_19450   |
| 0   | 4    | 2 PITG_02673    |
| 0   | 2538 | 1444 PITG_17002 |
| 0   | 12   | 15 PITG_16500   |
| 0   | 22   | 10 PITG_07447   |
| 0   | 47   | 4 PITG_17831    |
| 0   | 24   | 22 NA           |
| 0   | 0    | 0 NA            |
| 0   | 0    | 0 PITG_02744    |



|     |     |                |
|-----|-----|----------------|
| 0   | 10  | 0 NA           |
| 0   | 22  | 4 PITG_01358   |
| 0   | 0   | 2 NA           |
| 0   | 5   | 0 PITG_05227   |
| 0   | 14  | 0 NA           |
| 0   | 109 | 243 PITG_11875 |
| 176 | 164 | 1126 NA        |
| 0   | 4   | 16 PITG_03225  |
| 0   | 13  | 7 PITG_03263   |
| 0   | 0   | 0 PITG_19857   |
| 0   | 7   | 5 PITG_08326   |
| 0   | 3   | 6 PITG_14579   |
| 0   | 42  | 0 PITG_04529   |
| 0   | 32  | 0 PITG_03585   |
| 43  | 22  | 293 NA         |
| 0   | 13  | 10 PITG_16360  |
| 0   | 0   | 0 PITG_00185   |
| 0   | 28  | 2 NA           |
| 0   | 2   | 0 PITG_10868   |
| 0   | 0   | 7 PITG_10006   |
| 0   | 10  | 2 PITG_13856   |
| 0   | 0   | 0 PITG_17348   |
| 0   | 2   | 0 NA           |
| 0   | 0   | 8 PITG_12192   |
| 0   | 2   | 7 PITG_08780   |
| 0   | 0   | 2 NA           |
| 767 | 6   | 176 NA         |
| 0   | 3   | 0 PITG_00854   |
| 0   | 2   | 0 PITG_00320   |
| 0   | 6   | 3 PITG_16385   |
| 0   | 7   | 4 PITG_09899   |
| 0   | 8   | 5 PITG_06296   |
| 0   | 149 | 5 PITG_17721   |
| 0   | 26  | 36 PITG_19746  |
| 0   | 23  | 7 NA           |
| 0   | 0   | 0 PITG_13268   |
| 0   | 8   | 4 PITG_03261   |
| 0   | 0   | 4 PITG_04570   |
| 0   | 38  | 7 NA           |
| 0   | 0   | 2 PITG_02997   |
| 0   | 16  | 12 PITG_14515  |
| 0   | 2   | 4 PITG_18067   |
| 0   | 0   | 7 PITG_08746   |
| 0   | 21  | 7 NA           |
| 0   | 13  | 3 PITG_22764   |
| 0   | 4   | 4 PITG_01920   |
| 0   | 38  | 37 NA          |

|     |    |               |
|-----|----|---------------|
| 0   | 6  | 6 PITG_08672  |
| 0   | 12 | 10 NA         |
| 0   | 10 | 0 NA          |
| 0   | 0  | 3 PITG_13437  |
| 0   | 4  | 8 PITG_00942  |
| 0   | 6  | 6 PITG_08733  |
| 0   | 28 | 8 PITG_02585  |
| 0   | 4  | 0 NA          |
| 0   | 2  | 5 PITG_07074  |
| 0   | 15 | 8 PITG_01750  |
| 0   | 4  | 11 PITG_22459 |
| 0   | 4  | 2 PITG_11783  |
| 0   | 0  | 0 NA          |
| 0   | 2  | 0 NA          |
| 0   | 27 | 48 PITG_02927 |
| 0   | 16 | 8 PITG_14886  |
| 996 | 0  | 43 NA         |
| 0   | 15 | 39 NA         |
| 0   | 5  | 2 PITG_17135  |
| 0   | 8  | 11 PITG_06556 |
| 0   | 32 | 38 PITG_09868 |
| 0   | 16 | 10 PITG_20868 |
| 0   | 7  | 2 NA          |
| 0   | 2  | 0 NA          |
| 0   | 38 | 58 PITG_15593 |
| 0   | 9  | 6 PITG_08207  |
| 0   | 6  | 4 PITG_08141  |
| 0   | 4  | 4 NA          |
| 0   | 22 | 2 PITG_10840  |
| 0   | 12 | 6 PITG_18322  |
| 0   | 14 | 5 PITG_04977  |
| 0   | 0  | 8 PITG_09090  |
| 0   | 2  | 32 PITG_08046 |
| 0   | 0  | 0 PITG_11727  |
| 0   | 28 | 44 PITG_20762 |
| 0   | 2  | 34 PITG_06991 |
| 0   | 6  | 2 PITG_17560  |
| 0   | 2  | 12 PITG_12180 |
| 0   | 45 | 2 PITG_05556  |
| 0   | 2  | 6 NA          |
| 0   | 69 | 51 PITG_08871 |
| 0   | 6  | 0 NA          |
| 0   | 2  | 6 PITG_01715  |
| 0   | 15 | 10 PITG_15414 |
| 0   | 8  | 4 PITG_10838  |
| 0   | 0  | 2 PITG_00911  |
| 0   | 2  | 0 PITG_02329  |

|   |     |                |
|---|-----|----------------|
| 0 | 7   | 6 PITG_19387   |
| 0 | 3   | 0 PITG_07236   |
| 0 | 0   | 0 PITG_15625   |
| 0 | 0   | 0 PITG_15267   |
| 0 | 2   | 5 NA           |
| 0 | 3   | 0 NA           |
| 0 | 2   | 8 PITG_16801   |
| 0 | 10  | 8 PITG_04115   |
| 0 | 0   | 2 PITG_17021   |
| 0 | 2   | 0 PITG_03987   |
| 0 | 14  | 2 NA           |
| 0 | 6   | 4 PITG_00260   |
| 0 | 5   | 4 PITG_01229   |
| 0 | 13  | 13 PITG_07194  |
| 0 | 0   | 0 PITG_07276   |
| 0 | 5   | 40 PITG_03305  |
| 0 | 13  | 3 PITG_07868   |
| 0 | 0   | 6 PITG_08026   |
| 0 | 7   | 7 NA           |
| 0 | 9   | 2 NA           |
| 0 | 61  | 103 PITG_15321 |
| 0 | 2   | 0 PITG_17632   |
| 0 | 5   | 6 PITG_09389   |
| 0 | 0   | 7 PITG_11232   |
| 0 | 2   | 6 PITG_02067   |
| 0 | 2   | 13 NA          |
| 0 | 6   | 2 NA           |
| 0 | 3   | 4 PITG_02229   |
| 0 | 0   | 0 PITG_16211   |
| 0 | 32  | 28 PITG_23160  |
| 0 | 0   | 0 NA           |
| 0 | 2   | 0 NA           |
| 0 | 4   | 0 PITG_13298   |
| 0 | 5   | 0 PITG_01520   |
| 0 | 5   | 4 PITG_03806   |
| 0 | 104 | 47 NA          |
| 0 | 18  | 2 PITG_06580   |
| 0 | 4   | 35 PITG_07955  |
| 0 | 7   | 12 PITG_07086  |
| 0 | 2   | 7 PITG_09665   |
| 0 | 78  | 89 PITG_11969  |
| 0 | 57  | 8 PITG_17961   |
| 0 | 0   | 4 PITG_06899   |
| 0 | 0   | 2 PITG_20060   |
| 0 | 16  | 3 NA           |
| 0 | 27  | 2 PITG_04037   |
| 0 | 5   | 4 PITG_01690   |

|   |     |                |
|---|-----|----------------|
| 0 | 26  | 42 PITG_22839  |
| 0 | 6   | 21 PITG_08746  |
| 0 | 2   | 0 PITG_03318   |
| 0 | 0   | 0 PITG_11858   |
| 0 | 0   | 7 PITG_15252   |
| 0 | 36  | 29 PITG_12315  |
| 0 | 105 | 78 PITG_15776  |
| 0 | 0   | 0 PITG_11424   |
| 0 | 13  | 8 PITG_04725   |
| 0 | 10  | 2 PITG_19126   |
| 0 | 10  | 2 PITG_21517   |
| 0 | 4   | 0 NA           |
| 0 | 20  | 8 PITG_15762   |
| 0 | 36  | 5 PITG_10724   |
| 0 | 4   | 0 PITG_16808   |
| 0 | 3   | 12 PITG_11940  |
| 0 | 15  | 0 NA           |
| 0 | 60  | 28 PITG_15310  |
| 0 | 2   | 34 PITG_14175  |
| 0 | 2   | 2 PITG_00430   |
| 0 | 0   | 11 PITG_03042  |
| 0 | 2   | 19 PITG_11573  |
| 0 | 5   | 3 PITG_15819   |
| 0 | 7   | 2 PITG_16904   |
| 0 | 2   | 0 PITG_18190   |
| 0 | 0   | 4 PITG_17348   |
| 0 | 5   | 0 PITG_13920   |
| 0 | 14  | 4 NA           |
| 0 | 75  | 14 PITG_14198  |
| 0 | 4   | 3 PITG_12876   |
| 0 | 6   | 11 PITG_07902  |
| 0 | 0   | 0 PITG_03709   |
| 0 | 19  | 38 PITG_03608  |
| 0 | 12  | 101 PITG_06449 |
| 0 | 71  | 65 PITG_13029  |
| 0 | 35  | 11 PITG_11960  |
| 0 | 28  | 21 PITG_12113  |
| 0 | 0   | 0 PITG_01719   |
| 0 | 6   | 0 PITG_06718   |
| 0 | 114 | 9 PITG_08241   |
| 0 | 0   | 0 PITG_00570   |
| 0 | 6   | 0 NA           |
| 0 | 3   | 0 PITG_03887   |
| 0 | 13  | 2 NA           |
| 0 | 0   | 4 PITG_21170   |
| 0 | 0   | 2 PITG_10923   |
| 0 | 0   | 2 PITG_17928   |

|    |     |                |
|----|-----|----------------|
| 0  | 0   | 0 NA           |
| 0  | 18  | 0 PITG_00553   |
| 0  | 0   | 4 PITG_17660   |
| 0  | 0   | 0 PITG_16770   |
| 0  | 2   | 0 PITG_04570   |
| 0  | 2   | 2 NA           |
| 0  | 6   | 31 PITG_10955  |
| 0  | 0   | 0 NA           |
| 0  | 9   | 16 PITG_01814  |
| 0  | 0   | 2 PITG_02718   |
| 0  | 10  | 10 PITG_20671  |
| 0  | 542 | 215 PITG_20221 |
| 0  | 6   | 0 NA           |
| 0  | 34  | 11 PITG_12169  |
| 0  | 7   | 7 PITG_10481   |
| 0  | 13  | 2 NA           |
| 0  | 0   | 2 NA           |
| 0  | 0   | 0 NA           |
| 0  | 4   | 25 PITG_15955  |
| 0  | 8   | 3 NA           |
| 0  | 0   | 5 PITG_14155   |
| 0  | 2   | 0 NA           |
| 17 | 0   | 10 NA          |
| 0  | 12  | 7 PITG_21022   |
| 0  | 2   | 9 PITG_03661   |
| 0  | 0   | 0 PITG_05729   |
| 0  | 28  | 5 PITG_17699   |
| 0  | 0   | 0 PITG_01809   |
| 0  | 0   | 0 PITG_18393   |
| 0  | 44  | 14 NA          |
| 0  | 2   | 3 PITG_21171   |
| 0  | 3   | 0 PITG_02208   |
| 0  | 4   | 5 PITG_00287   |
| 0  | 23  | 11 PITG_11652  |
| 0  | 7   | 23 PITG_17262  |
| 0  | 16  | 4 NA           |
| 0  | 31  | 9 PITG_21014   |
| 0  | 0   | 21 NA          |
| 0  | 25  | 10 PITG_05960  |
| 33 | 6   | 108 NA         |
| 0  | 0   | 0 PITG_05260   |
| 0  | 8   | 8 PITG_11410   |
| 0  | 2   | 6 PITG_06707   |
| 0  | 0   | 2 PITG_03200   |
| 0  | 4   | 0 PITG_00675   |
| 0  | 91  | 0 PITG_01966   |
| 0  | 2   | 0 PITG_09906   |

|      |     |               |
|------|-----|---------------|
| 0    | 2   | 0 PITG_00515  |
| 0    | 39  | 44 PITG_02343 |
| 1134 | 68  | 1030 NA       |
| 0    | 42  | 19 PITG_18106 |
| 0    | 0   | 0 PITG_03978  |
| 0    | 9   | 0 PITG_17279  |
| 0    | 9   | 2 PITG_16900  |
| 0    | 0   | 0 NA          |
| 0    | 0   | 6 PITG_08440  |
| 0    | 0   | 0 PITG_15301  |
| 0    | 36  | 2 NA          |
| 0    | 28  | 13 PITG_02728 |
| 0    | 194 | 184 NA        |
| 0    | 14  | 0 NA          |
| 6    | 0   | 7 NA          |
| 0    | 83  | 27 NA         |
| 0    | 6   | 0 PITG_02624  |
| 0    | 2   | 4 PITG_19113  |
| 0    | 0   | 0 PITG_17884  |
| 0    | 2   | 0 NA          |
| 0    | 0   | 0 PITG_08381  |
| 0    | 6   | 0 PITG_17158  |
| 0    | 2   | 2 PITG_11298  |
| 0    | 0   | 0 PITG_06322  |
| 0    | 4   | 7 PITG_18459  |
| 0    | 0   | 0 NA          |
| 0    | 2   | 2 PITG_11728  |
| 0    | 4   | 0 PITG_04352  |
| 0    | 4   | 15 PITG_03549 |
| 0    | 4   | 2 NA          |
| 0    | 2   | 10 PITG_13460 |
| 0    | 34  | 0 NA          |
| 0    | 4   | 32 PITG_09404 |
| 0    | 22  | 10 PITG_06363 |
| 0    | 6   | 0 PITG_11822  |
| 0    | 2   | 2 PITG_18632  |
| 0    | 14  | 5 NA          |
| 0    | 0   | 0 PITG_17527  |
| 0    | 0   | 0 PITG_04593  |
| 0    | 0   | 2 PITG_17549  |
| 0    | 15  | 27 PITG_06992 |
| 0    | 0   | 2 PITG_07939  |
| 0    | 10  | 39 PITG_07960 |
| 0    | 6   | 2 NA          |
| 0    | 10  | 2 PITG_08901  |
| 0    | 11  | 2 NA          |
| 0    | 0   | 29 PITG_07960 |

|    |     |                |
|----|-----|----------------|
| 0  | 0   | 3 NA           |
| 0  | 16  | 19 PITG_01109  |
| 0  | 0   | 8 PITG_17106   |
| 0  | 181 | 149 PITG_13968 |
| 0  | 0   | 2 PITG_05709   |
| 0  | 9   | 3 NA           |
| 0  | 0   | 5 PITG_15967   |
| 0  | 0   | 0 PITG_12159   |
| 0  | 10  | 20 PITG_12914  |
| 0  | 2   | 0 PITG_12196   |
| 0  | 14  | 21 PITG_08693  |
| 0  | 0   | 0 PITG_19860   |
| 0  | 14  | 24 PITG_01982  |
| 0  | 0   | 4 PITG_08011   |
| 0  | 10  | 0 PITG_16474   |
| 0  | 2   | 0 PITG_18028   |
| 0  | 4   | 10 PITG_14654  |
| 0  | 0   | 3 PITG_01719   |
| 0  | 5   | 2 PITG_15301   |
| 0  | 509 | 103 PITG_03627 |
| 0  | 5   | 0 NA           |
| 0  | 14  | 7 NA           |
| 0  | 12  | 6 PITG_03161   |
| 0  | 2   | 3 PITG_06267   |
| 0  | 4   | 0 PITG_11504   |
| 0  | 124 | 7 NA           |
| 0  | 0   | 0 PITG_03892   |
| 0  | 2   | 36 PITG_14852  |
| 35 | 14  | 280 NA         |
| 0  | 2   | 22 PITG_19179  |
| 0  | 18  | 11 NA          |
| 0  | 0   | 2 PITG_14564   |
| 0  | 0   | 4 PITG_18977   |
| 0  | 0   | 0 PITG_10850   |
| 0  | 4   | 0 PITG_06132   |
| 0  | 0   | 4 PITG_00762   |
| 0  | 2   | 7 NA           |
| 0  | 484 | 299 PITG_04957 |
| 0  | 2   | 5 PITG_02088   |
| 0  | 2   | 0 PITG_12265   |
| 0  | 19  | 2 PITG_11825   |
| 0  | 0   | 0 NA           |
| 0  | 8   | 2 PITG_04523   |
| 0  | 0   | 12 PITG_14557  |
| 0  | 5   | 0 NA           |
| 0  | 7   | 0 NA           |
| 0  | 7   | 4 PITG_01186   |

|      |     |                |
|------|-----|----------------|
| 0    | 5   | 23 NA          |
| 0    | 2   | 0 PITG_22204   |
| 0    | 104 | 34 PITG_04261  |
| 0    | 0   | 0 PITG_16015   |
| 0    | 0   | 2 NA           |
| 0    | 5   | 0 NA           |
| 0    | 33  | 4 PITG_05304   |
| 0    | 7   | 3 PITG_14108   |
| 0    | 2   | 0 PITG_15097   |
| 0    | 11  | 4 PITG_17508   |
| 0    | 2   | 2 PITG_16758   |
| 0    | 16  | 24 PITG_02084  |
| 0    | 0   | 2 NA           |
| 0    | 14  | 7 NA           |
| 0    | 17  | 0 NA           |
| 0    | 20  | 52 PITG_05183  |
| 11   | 2   | 11 NA          |
| 0    | 8   | 4 PITG_05595   |
| 0    | 12  | 0 PITG_17279   |
| 0    | 116 | 254 PITG_06741 |
| 0    | 87  | 14 PITG_12911  |
| 0    | 2   | 2 PITG_13185   |
| 0    | 8   | 4 NA           |
| 0    | 0   | 0 PITG_16764   |
| 0    | 2   | 0 PITG_11184   |
| 0    | 25  | 14 PITG_04724  |
| 7944 | 0   | 986 NA         |
| 0    | 9   | 18 PITG_17069  |
| 0    | 0   | 5 PITG_22689   |
| 0    | 2   | 0 PITG_12465   |
| 0    | 72  | 43 PITG_03886  |
| 0    | 2   | 0 PITG_07103   |
| 0    | 0   | 0 PITG_09638   |
| 0    | 0   | 6 PITG_14561   |
| 0    | 6   | 0 PITG_04588   |
| 0    | 8   | 2 PITG_14197   |
| 0    | 0   | 0 PITG_20208   |
| 2    | 3   | 6 NA           |
| 0    | 2   | 3 PITG_18326   |
| 0    | 0   | 0 PITG_14566   |
| 0    | 0   | 0 PITG_16103   |
| 0    | 15  | 8 PITG_03260   |
| 0    | 8   | 11 PITG_14176  |
| 0    | 2   | 0 PITG_15951   |
| 0    | 5   | 0 PITG_02532   |
| 0    | 2   | 0 PITG_17004   |
| 0    | 11  | 26 PITG_09631  |



|    |      |                |
|----|------|----------------|
| 0  | 17   | 2 NA           |
| 0  | 6    | 2 PITG_02492   |
| 0  | 3    | 2 PITG_17242   |
| 0  | 63   | 6 NA           |
| 0  | 0    | 2 PITG_01257   |
| 0  | 4    | 0 PITG_11437   |
| 0  | 7    | 5 PITG_04049   |
| 0  | 10   | 2 PITG_08329   |
| 0  | 7    | 20 PITG_01313  |
| 0  | 47   | 28 PITG_09983  |
| 0  | 20   | 10 PITG_04847  |
| 0  | 2    | 4 NA           |
| 0  | 1330 | 742 PITG_15968 |
| 0  | 0    | 0 NA           |
| 0  | 2    | 5 NA           |
| 0  | 2    | 6 PITG_02716   |
| 0  | 0    | 7 NA           |
| 0  | 0    | 0 PITG_14108   |
| 0  | 0    | 4 PITG_17592   |
| 0  | 82   | 52 NA          |
| 39 | 19   | 68 NA          |
| 0  | 0    | 0 PITG_05311   |
| 0  | 0    | 2 PITG_02824   |
| 0  | 18   | 4 PITG_17112   |
| 0  | 10   | 0 PITG_10762   |
| 0  | 2    | 0 PITG_14137   |
| 0  | 10   | 3 NA           |
| 0  | 118  | 149 PITG_10343 |
| 0  | 0    | 0 PITG_06545   |
| 0  | 5    | 0 PITG_19586   |
| 0  | 6    | 4 NA           |
| 0  | 9    | 0 PITG_05623   |
| 0  | 0    | 0 PITG_12819   |
| 0  | 42   | 7 NA           |
| 0  | 7    | 0 PITG_19859   |
| 0  | 4    | 0 PITG_22716   |
| 0  | 3    | 9 PITG_09703   |
| 0  | 5    | 2 PITG_02194   |
| 0  | 0    | 0 PITG_02264   |
| 0  | 5    | 0 PITG_01957   |
| 0  | 0    | 5 PITG_07201   |
| 0  | 0    | 5 PITG_18696   |
| 0  | 7    | 10 PITG_17077  |
| 0  | 0    | 2 PITG_16155   |
| 0  | 269  | 364 PITG_04957 |
| 0  | 30   | 15 PITG_07868  |
| 0  | 16   | 0 PITG_13264   |

|    |    |               |
|----|----|---------------|
| 0  | 22 | 5 PITG_01224  |
| 0  | 27 | 0 PITG_10186  |
| 0  | 0  | 2 PITG_10827  |
| 0  | 10 | 34 PITG_19531 |
| 0  | 14 | 0 PITG_18085  |
| 0  | 36 | 23 NA         |
| 0  | 59 | 23 PITG_11753 |
| 0  | 0  | 0 PITG_00430  |
| 0  | 0  | 0 NA          |
| 0  | 2  | 2 PITG_14207  |
| 0  | 2  | 4 PITG_10398  |
| 0  | 2  | 2 PITG_14561  |
| 0  | 5  | 0 NA          |
| 0  | 0  | 8 PITG_10980  |
| 0  | 0  | 5 PITG_02683  |
| 0  | 4  | 5 PITG_01047  |
| 0  | 0  | 2 PITG_07230  |
| 0  | 0  | 0 PITG_03076  |
| 0  | 0  | 0 PITG_09672  |
| 0  | 4  | 4 PITG_09185  |
| 0  | 6  | 0 PITG_08723  |
| 0  | 2  | 0 PITG_03620  |
| 0  | 2  | 7 PITG_01226  |
| 0  | 6  | 11 PITG_02575 |
| 0  | 4  | 2 PITG_02134  |
| 0  | 30 | 0 PITG_11286  |
| 0  | 5  | 4 PITG_05531  |
| 0  | 0  | 0 PITG_20647  |
| 0  | 0  | 4 PITG_02042  |
| 0  | 2  | 4 NA          |
| 0  | 22 | 31 PITG_01839 |
| 0  | 15 | 16 PITG_06646 |
| 0  | 11 | 6 PITG_08738  |
| 0  | 21 | 11 PITG_06667 |
| 0  | 2  | 2 NA          |
| 0  | 0  | 2 PITG_04646  |
| 0  | 0  | 0 PITG_03646  |
| 0  | 2  | 4 PITG_07274  |
| 0  | 12 | 17 PITG_11474 |
| 0  | 35 | 2 PITG_08672  |
| 0  | 0  | 0 PITG_03356  |
| 0  | 0  | 0 PITG_01754  |
| 10 | 22 | 4 NA          |
| 0  | 0  | 2 PITG_11368  |
| 0  | 0  | 4 NA          |
| 0  | 61 | 12 PITG_06367 |
| 0  | 2  | 0 PITG_08414  |

|   |    |               |
|---|----|---------------|
| 2 | 0  | 9 NA          |
| 0 | 14 | 4 PITG_16324  |
| 0 | 0  | 2 PITG_19991  |
| 0 | 2  | 0 NA          |
| 0 | 5  | 2 NA          |
| 0 | 2  | 0 PITG_01929  |
| 0 | 29 | 8 NA          |
| 0 | 9  | 26 NA         |
| 0 | 4  | 8 PITG_08926  |
| 0 | 0  | 8 NA          |
| 0 | 15 | 32 PITG_10083 |
| 0 | 0  | 2 PITG_13774  |
| 0 | 28 | 18 PITG_07470 |
| 0 | 0  | 0 NA          |
| 0 | 2  | 15 PITG_07286 |
| 0 | 41 | 24 PITG_02285 |
| 0 | 0  | 0 PITG_03457  |
| 0 | 89 | 18 NA         |
| 0 | 0  | 0 PITG_00147  |
| 0 | 2  | 11 PITG_01616 |
| 0 | 2  | 13 PITG_07201 |
| 0 | 6  | 6 PITG_09942  |
| 0 | 4  | 4 PITG_01902  |
| 0 | 8  | 2 PITG_05623  |
| 0 | 96 | 11 PITG_01826 |
| 0 | 22 | 10 PITG_08157 |
| 0 | 0  | 11 PITG_13365 |
| 0 | 0  | 7 PITG_07201  |
| 0 | 9  | 0 PITG_13226  |
| 0 | 48 | 20 PITG_08775 |
| 0 | 0  | 0 PITG_06613  |
| 0 | 0  | 0 PITG_04603  |
| 0 | 25 | 0 NA          |
| 0 | 2  | 2 NA          |
| 0 | 0  | 0 NA          |
| 0 | 49 | 33 PITG_08329 |
| 0 | 12 | 36 PITG_05293 |
| 0 | 2  | 0 NA          |
| 0 | 19 | 6 PITG_15912  |
| 0 | 0  | 0 PITG_23007  |
| 0 | 13 | 12 PITG_13841 |
| 0 | 36 | 0 PITG_03169  |
| 0 | 6  | 2 NA          |
| 0 | 10 | 14 PITG_13803 |
| 0 | 18 | 11 PITG_01982 |
| 0 | 13 | 6 NA          |
| 0 | 2  | 0 PITG_17028  |

|     |    |               |
|-----|----|---------------|
| 0   | 0  | 2 PITG_12160  |
| 0   | 10 | 43 PITG_09413 |
| 0   | 21 | 2 PITG_04725  |
| 0   | 2  | 0 PITG_02529  |
| 0   | 84 | 8 PITG_10845  |
| 0   | 5  | 6 PITG_07445  |
| 0   | 13 | 0 PITG_00282  |
| 0   | 2  | 3 PITG_00440  |
| 0   | 11 | 10 PITG_17723 |
| 0   | 2  | 3 PITG_13623  |
| 0   | 7  | 2 PITG_17423  |
| 0   | 16 | 21 PITG_06594 |
| 0   | 43 | 167 NA        |
| 0   | 6  | 10 PITG_02728 |
| 14  | 0  | 15 NA         |
| 0   | 0  | 10 PITG_17997 |
| 0   | 9  | 7 PITG_03453  |
| 0   | 0  | 8 PITG_02917  |
| 0   | 2  | 3 PITG_04547  |
| 0   | 68 | 94 PITG_21393 |
| 0   | 23 | 9 PITG_01832  |
| 0   | 39 | 6 NA          |
| 0   | 15 | 3 PITG_10343  |
| 0   | 0  | 0 PITG_12980  |
| 0   | 8  | 6 PITG_04725  |
| 0   | 41 | 18 PITG_11922 |
| 0   | 24 | 4 PITG_06929  |
| 90  | 0  | 24 NA         |
| 159 | 0  | 38 NA         |
| 0   | 16 | 4 PITG_10629  |
| 0   | 2  | 5 PITG_09698  |
| 0   | 4  | 29 PITG_09192 |
| 0   | 0  | 0 PITG_13523  |
| 0   | 4  | 2 PITG_08747  |
| 0   | 0  | 9 PITG_01182  |
| 490 | 66 | 1048 NA       |
| 0   | 28 | 15 PITG_07744 |
| 0   | 0  | 2 PITG_08680  |
| 0   | 2  | 4 PITG_03180  |
| 0   | 7  | 9 PITG_03473  |
| 0   | 18 | 21 NA         |
| 0   | 0  | 2 NA          |
| 0   | 0  | 2 NA          |
| 0   | 0  | 0 PITG_11131  |
| 0   | 4  | 0 PITG_07892  |
| 0   | 8  | 6 PITG_03280  |
| 0   | 18 | 18 PITG_04732 |

|    |     |                |
|----|-----|----------------|
| 0  | 19  | 13 PITG_07924  |
| 0  | 56  | 4 NA           |
| 0  | 0   | 0 PITG_09785   |
| 0  | 0   | 0 PITG_02016   |
| 0  | 12  | 17 PITG_00717  |
| 0  | 45  | 2 PITG_07206   |
| 0  | 17  | 18 PITG_03975  |
| 0  | 4   | 0 PITG_05565   |
| 0  | 4   | 0 PITG_15116   |
| 0  | 4   | 12 PITG_08326  |
| 0  | 6   | 12 PITG_16938  |
| 0  | 0   | 4 PITG_11647   |
| 0  | 6   | 14 PITG_07655  |
| 0  | 22  | 9 PITG_18755   |
| 0  | 28  | 27 NA          |
| 0  | 4   | 8 PITG_09930   |
| 14 | 10  | 279 NA         |
| 2  | 43  | 132 PITG_06322 |
| 0  | 2   | 48 PITG_14598  |
| 0  | 0   | 2 PITG_22865   |
| 0  | 2   | 0 PITG_10437   |
| 0  | 4   | 0 NA           |
| 0  | 0   | 0 PITG_19143   |
| 0  | 0   | 2 PITG_02867   |
| 0  | 0   | 2 PITG_21336   |
| 0  | 8   | 4 PITG_07925   |
| 99 | 23  | 0 NA           |
| 0  | 0   | 2 PITG_03973   |
| 0  | 11  | 2 NA           |
| 0  | 7   | 2 PITG_04881   |
| 0  | 3   | 4 PITG_00133   |
| 0  | 106 | 38 NA          |
| 0  | 0   | 6 PITG_05512   |
| 0  | 0   | 16 PITG_02051  |
| 0  | 0   | 8 NA           |
| 0  | 2   | 2 PITG_21284   |
| 0  | 4   | 10 PITG_15623  |
| 0  | 4   | 12 PITG_14972  |
| 0  | 0   | 0 NA           |
| 0  | 0   | 2 PITG_03901   |
| 0  | 14  | 14 PITG_15566  |
| 0  | 2   | 11 PITG_16900  |
| 0  | 4   | 0 PITG_07277   |
| 0  | 7   | 12 NA          |
| 0  | 2   | 0 PITG_14100   |
| 0  | 26  | 21 PITG_17105  |
| 0  | 2   | 0 PITG_09477   |

|     |    |                |
|-----|----|----------------|
| 0   | 34 | 13 PITG_11194  |
| 0   | 4  | 4 PITG_05618   |
| 0   | 0  | 0 PITG_12213   |
| 0   | 0  | 5 PITG_02348   |
| 0   | 17 | 0 NA           |
| 793 | 0  | 302 NA         |
| 0   | 0  | 8 PITG_13064   |
| 0   | 22 | 0 NA           |
| 0   | 8  | 0 PITG_01354   |
| 0   | 0  | 0 PITG_02082   |
| 0   | 0  | 6 PITG_03853   |
| 0   | 3  | 2 NA           |
| 0   | 13 | 4 NA           |
| 0   | 13 | 0 PITG_17487   |
| 0   | 0  | 2 PITG_18411   |
| 0   | 7  | 0 PITG_16923   |
| 0   | 2  | 0 NA           |
| 0   | 0  | 0 PITG_10590   |
| 0   | 0  | 0 NA           |
| 0   | 2  | 28 PITG_19932  |
| 0   | 3  | 0 PITG_08394   |
| 0   | 2  | 7 NA           |
| 0   | 0  | 0 PITG_02735   |
| 0   | 39 | 110 PITG_08454 |
| 0   | 33 | 6 PITG_20717   |
| 0   | 40 | 11 PITG_09289  |
| 0   | 0  | 2 PITG_05762   |
| 0   | 0  | 0 NA           |
| 0   | 4  | 5 PITG_11089   |
| 0   | 0  | 0 PITG_15077   |
| 0   | 12 | 10 PITG_00233  |
| 0   | 30 | 16 PITG_18518  |
| 0   | 18 | 0 NA           |
| 200 | 48 | 466 NA         |
| 0   | 24 | 4 NA           |
| 0   | 0  | 2 PITG_03570   |
| 0   | 22 | 28 PITG_16089  |
| 0   | 21 | 20 PITG_01088  |
| 0   | 3  | 2 PITG_06772   |
| 0   | 31 | 70 PITG_20463  |
| 0   | 20 | 3 PITG_13312   |
| 0   | 0  | 2 NA           |
| 0   | 4  | 7 NA           |
| 41  | 7  | 17 NA          |
| 0   | 2  | 4 PITG_14231   |
| 0   | 2  | 4 NA           |
| 0   | 2  | 4 PITG_18046   |

|    |     |               |
|----|-----|---------------|
| 0  | 29  | 18 PITG_01662 |
| 0  | 15  | 5 PITG_00694  |
| 0  | 2   | 2 PITG_05757  |
| 0  | 0   | 0 PITG_08993  |
| 0  | 6   | 0 PITG_01324  |
| 0  | 2   | 0 PITG_05867  |
| 0  | 0   | 5 NA          |
| 0  | 6   | 0 NA          |
| 0  | 4   | 0 NA          |
| 0  | 5   | 6 PITG_03777  |
| 0  | 2   | 2 NA          |
| 0  | 4   | 11 PITG_19849 |
| 0  | 45  | 0 PITG_05737  |
| 0  | 2   | 4 PITG_13423  |
| 0  | 0   | 6 PITG_17488  |
| 0  | 16  | 4 PITG_11618  |
| 0  | 3   | 11 PITG_10083 |
| 0  | 4   | 2 PITG_10856  |
| 0  | 0   | 2 NA          |
| 0  | 0   | 2 PITG_14573  |
| 0  | 2   | 0 PITG_00986  |
| 0  | 9   | 8 PITG_15267  |
| 0  | 0   | 5 PITG_11728  |
| 0  | 9   | 20 PITG_11504 |
| 0  | 6   | 8 PITG_05709  |
| 0  | 7   | 8 PITG_01750  |
| 0  | 7   | 12 PITG_03098 |
| 0  | 7   | 2 PITG_15021  |
| 0  | 7   | 25 PITG_03267 |
| 64 | 48  | 237 NA        |
| 0  | 0   | 0 NA          |
| 0  | 2   | 0 PITG_05874  |
| 0  | 107 | 19 NA         |
| 0  | 5   | 7 PITG_04671  |
| 0  | 0   | 0 PITG_13841  |
| 0  | 43  | 2 PITG_12291  |
| 0  | 13  | 16 PITG_03825 |
| 0  | 2   | 0 NA          |
| 0  | 21  | 5 NA          |
| 0  | 0   | 0 NA          |
| 0  | 2   | 10 PITG_18641 |
| 0  | 0   | 3 PITG_19781  |
| 0  | 2   | 9 PITG_09139  |
| 0  | 4   | 2 PITG_10533  |
| 0  | 18  | 4 PITG_10162  |
| 0  | 0   | 0 PITG_08482  |
| 0  | 42  | 11 PITG_06740 |

|     |      |                |
|-----|------|----------------|
| 0   | 2    | 0 PITG_03269   |
| 0   | 61   | 14 PITG_21960  |
| 0   | 3    | 2 NA           |
| 0   | 0    | 2 PITG_18049   |
| 0   | 17   | 55 PITG_02739  |
| 0   | 0    | 14 PITG_02391  |
| 0   | 0    | 0 PITG_18171   |
| 0   | 0    | 2 PITG_03143   |
| 0   | 16   | 0 PITG_17493   |
| 0   | 0    | 4 PITG_08754   |
| 0   | 2    | 0 PITG_06850   |
| 0   | 8    | 16 PITG_00206  |
| 0   | 2    | 2 PITG_05176   |
| 0   | 0    | 0 NA           |
| 0   | 2    | 0 NA           |
| 0   | 9    | 9 PITG_07916   |
| 0   | 15   | 26 PITG_08529  |
| 0   | 8    | 6 PITG_12107   |
| 0   | 2    | 0 PITG_06288   |
| 19  | 2    | 28 NA          |
| 0   | 8    | 4 PITG_02145   |
| 0   | 19   | 2 PITG_05469   |
| 0   | 11   | 4 PITG_00117   |
| 0   | 0    | 2 PITG_03800   |
| 0   | 0    | 0 PITG_05433   |
| 0   | 6    | 4 PITG_03522   |
| 0   | 11   | 7 PITG_06502   |
| 0   | 36   | 4 NA           |
| 0   | 0    | 2 PITG_17936   |
| 0   | 11   | 2 PITG_18459   |
| 0   | 8    | 5 PITG_11179   |
| 0   | 1616 | 236 PITG_19078 |
| 0   | 109  | 32 PITG_06923  |
| 0   | 2    | 0 PITG_02960   |
| 0   | 8    | 2 PITG_00710   |
| 0   | 74   | 7 PITG_00385   |
| 0   | 4    | 11 PITG_11741  |
| 0   | 17   | 8 PITG_11651   |
| 0   | 5    | 5 PITG_06452   |
| 0   | 0    | 2 PITG_10239   |
| 0   | 2    | 0 PITG_05419   |
| 0   | 3    | 6 PITG_19939   |
| 0   | 2    | 0 PITG_03675   |
| 0   | 6    | 2 NA           |
| 0   | 6    | 2 PITG_10118   |
| 0   | 10   | 11 PITG_16958  |
| 226 | 56   | 539 NA         |



|   |     |               |
|---|-----|---------------|
| 0 | 4   | 3 NA          |
| 0 | 2   | 0 PITG_19175  |
| 0 | 61  | 37 NA         |
| 0 | 0   | 0 NA          |
| 0 | 6   | 12 PITG_19036 |
| 0 | 0   | 0 NA          |
| 0 | 5   | 37 PITG_09536 |
| 0 | 4   | 24 PITG_03769 |
| 0 | 2   | 16 PITG_01713 |
| 0 | 29  | 0 PITG_15833  |
| 0 | 2   | 0 NA          |
| 0 | 2   | 2 PITG_05423  |
| 0 | 16  | 26 NA         |
| 0 | 10  | 2 PITG_03263  |
| 0 | 0   | 4 PITG_11437  |
| 0 | 0   | 0 NA          |
| 0 | 0   | 2 PITG_18614  |
| 0 | 0   | 4 PITG_11431  |
| 0 | 0   | 0 PITG_11869  |
| 0 | 2   | 2 NA          |
| 0 | 28  | 9 PITG_05234  |
| 0 | 11  | 7 PITG_20494  |
| 0 | 0   | 0 PITG_14218  |
| 0 | 0   | 2 PITG_00302  |
| 0 | 2   | 0 PITG_21860  |
| 0 | 0   | 2 NA          |
| 0 | 2   | 4 PITG_17897  |
| 0 | 5   | 0 PITG_18366  |
| 0 | 118 | 21 PITG_01644 |
| 0 | 20  | 33 PITG_06618 |
| 0 | 4   | 0 NA          |
| 0 | 4   | 7 PITG_11877  |
| 0 | 0   | 6 NA          |
| 0 | 0   | 0 NA          |
| 0 | 15  | 10 PITG_09318 |
| 0 | 0   | 0 NA          |
| 0 | 0   | 2 PITG_12439  |
| 0 | 48  | 13 PITG_19421 |
| 0 | 9   | 0 PITG_02723  |
| 0 | 3   | 0 PITG_19247  |
| 0 | 0   | 0 NA          |
| 0 | 2   | 0 PITG_03978  |
| 4 | 0   | 0 NA          |
| 0 | 4   | 35 PITG_04648 |
| 0 | 2   | 0 NA          |
| 0 | 2   | 2 PITG_14743  |
| 0 | 0   | 3 PITG_15924  |

|   |     |                |
|---|-----|----------------|
| 0 | 10  | 12 NA          |
| 0 | 6   | 0 NA           |
| 0 | 0   | 0 PITG_02294   |
| 0 | 19  | 2 PITG_20377   |
| 0 | 0   | 2 PITG_00384   |
| 0 | 4   | 2 NA           |
| 0 | 0   | 4 PITG_11476   |
| 0 | 3   | 6 PITG_18028   |
| 0 | 13  | 0 PITG_11286   |
| 0 | 17  | 39 PITG_02303  |
| 0 | 3   | 0 PITG_21781   |
| 0 | 2   | 0 NA           |
| 0 | 15  | 5 PITG_03221   |
| 0 | 7   | 7 NA           |
| 0 | 10  | 13 NA          |
| 0 | 12  | 10 PITG_05377  |
| 0 | 23  | 27 PITG_10663  |
| 0 | 130 | 144 PITG_19609 |
| 0 | 9   | 7 NA           |
| 0 | 11  | 0 NA           |
| 0 | 0   | 0 PITG_15603   |
| 0 | 4   | 0 PITG_00290   |
| 0 | 62  | 30 PITG_01265  |
| 0 | 2   | 8 PITG_11207   |
| 0 | 0   | 5 PITG_19969   |
| 0 | 4   | 9 PITG_10664   |
| 0 | 0   | 7 PITG_17344   |
| 0 | 26  | 64 PITG_08425  |
| 0 | 6   | 2 PITG_06988   |
| 0 | 0   | 28 PITG_02740  |
| 0 | 29  | 7 NA           |
| 0 | 2   | 2 NA           |
| 0 | 29  | 14 NA          |
| 0 | 9   | 15 PITG_17282  |
| 0 | 7   | 0 NA           |
| 0 | 8   | 8 PITG_15097   |
| 0 | 2   | 10 PITG_06649  |
| 0 | 80  | 170 PITG_14230 |
| 0 | 12  | 0 PITG_06345   |
| 0 | 15  | 38 PITG_03860  |
| 0 | 0   | 0 PITG_20527   |
| 0 | 10  | 21 NA          |
| 0 | 2   | 0 NA           |
| 0 | 4   | 16 PITG_10087  |
| 0 | 4   | 0 PITG_13527   |
| 0 | 13  | 37 PITG_15873  |
| 0 | 118 | 28 PITG_13267  |

|      |    |               |
|------|----|---------------|
| 0    | 0  | 2 PITG_18797  |
| 0    | 4  | 0 NA          |
| 0    | 51 | 19 PITG_08294 |
| 0    | 3  | 0 PITG_14178  |
| 0    | 0  | 2 PITG_04918  |
| 0    | 4  | 24 PITG_08445 |
| 0    | 52 | 9 PITG_06218  |
| 0    | 0  | 0 PITG_12699  |
| 0    | 0  | 0 NA          |
| 0    | 15 | 6 NA          |
| 0    | 2  | 4 PITG_15322  |
| 0    | 17 | 61 PITG_03594 |
| 0    | 3  | 0 PITG_17001  |
| 0    | 30 | 2 PITG_20844  |
| 0    | 0  | 2 PITG_06929  |
| 0    | 9  | 10 PITG_19047 |
| 0    | 0  | 2 PITG_04682  |
| 0    | 0  | 8 PITG_17395  |
| 0    | 0  | 0 PITG_00257  |
| 0    | 2  | 0 PITG_05757  |
| 454  | 9  | 567 NA        |
| 0    | 2  | 0 PITG_01301  |
| 0    | 2  | 0 PITG_02744  |
| 0    | 2  | 13 PITG_03472 |
| 0    | 21 | 4 PITG_19106  |
| 0    | 8  | 20 PITG_08230 |
| 0    | 2  | 0 PITG_10903  |
| 0    | 0  | 6 PITG_12884  |
| 0    | 2  | 2 PITG_07841  |
| 0    | 5  | 23 PITG_04619 |
| 0    | 30 | 0 PITG_01870  |
| 0    | 21 | 0 NA          |
| 0    | 0  | 8 PITG_16491  |
| 0    | 0  | 0 NA          |
| 0    | 0  | 2 PITG_12987  |
| 0    | 0  | 0 PITG_10058  |
| 0    | 0  | 5 NA          |
| 0    | 73 | 4 PITG_20563  |
| 0    | 7  | 0 PITG_00646  |
| 0    | 0  | 5 PITG_03883  |
| 0    | 0  | 2 PITG_00250  |
| 0    | 22 | 4 PITG_01579  |
| 0    | 0  | 4 PITG_03336  |
| 2204 | 3  | 260 NA        |
| 0    | 19 | 0 PITG_12987  |
| 0    | 2  | 5 PITG_03112  |
| 0    | 60 | 45 PITG_00698 |

|      |     |               |
|------|-----|---------------|
| 0    | 0   | 2 NA          |
| 0    | 38  | 8 PITG_03079  |
| 0    | 4   | 0 PITG_07868  |
| 0    | 0   | 0 PITG_14380  |
| 0    | 6   | 9 NA          |
| 0    | 20  | 0 PITG_11869  |
| 0    | 10  | 93 PITG_16894 |
| 0    | 0   | 2 PITG_04973  |
| 0    | 0   | 0 NA          |
| 0    | 4   | 0 NA          |
| 0    | 43  | 8 PITG_03978  |
| 0    | 40  | 5 NA          |
| 0    | 10  | 4 NA          |
| 0    | 19  | 2 PITG_19204  |
| 0    | 2   | 6 PITG_06610  |
| 0    | 2   | 6 PITG_10015  |
| 2    | 8   | 2 NA          |
| 0    | 26  | 2 PITG_02757  |
| 0    | 2   | 0 PITG_22021  |
| 0    | 2   | 0 PITG_13397  |
| 0    | 5   | 16 PITG_12691 |
| 0    | 7   | 4 PITG_12523  |
| 0    | 8   | 0 PITG_02916  |
| 65   | 39  | 528 NA        |
| 20   | 496 | 1672 NA       |
| 28   | 4   | 63 NA         |
| 3276 | 2   | 45 NA         |
| 0    | 10  | 2 PITG_02916  |
| 0    | 0   | 0 PITG_00134  |
| 0    | 0   | 0 PITG_16480  |
| 0    | 110 | 72 PITG_18065 |
| 0    | 3   | 0 PITG_10625  |
| 0    | 24  | 24 PITG_01458 |
| 0    | 14  | 10 PITG_16775 |
| 0    | 2   | 9 PITG_01559  |
| 0    | 18  | 4 PITG_00858  |
| 0    | 3   | 9 PITG_13440  |
| 0    | 10  | 0 PITG_06855  |
| 0    | 21  | 0 NA          |
| 0    | 6   | 0 NA          |
| 0    | 13  | 15 NA         |
| 0    | 0   | 0 PITG_14393  |
| 0    | 15  | 10 PITG_01508 |
| 0    | 2   | 2 PITG_07098  |
| 0    | 15  | 2 PITG_05299  |
| 0    | 9   | 16 PITG_09862 |
| 0    | 2   | 7 PITG_03860  |

|    |     |                |
|----|-----|----------------|
| 0  | 2   | 0 NA           |
| 0  | 23  | 30 PITG_18474  |
| 0  | 5   | 15 PITG_15564  |
| 0  | 0   | 0 NA           |
| 0  | 0   | 0 PITG_00050   |
| 2  | 0   | 2 NA           |
| 0  | 2   | 0 PITG_14887   |
| 33 | 12  | 39 NA          |
| 0  | 25  | 4 NA           |
| 0  | 11  | 0 PITG_08654   |
| 0  | 9   | 2 PITG_12128   |
| 0  | 15  | 244 PITG_14175 |
| 0  | 0   | 2 NA           |
| 0  | 26  | 0 PITG_08008   |
| 0  | 8   | 12 PITG_13609  |
| 0  | 0   | 9 PITG_04614   |
| 0  | 0   | 24 PITG_17287  |
| 0  | 53  | 6 NA           |
| 0  | 8   | 9 NA           |
| 0  | 4   | 0 PITG_20251   |
| 0  | 17  | 6 NA           |
| 0  | 6   | 27 PITG_05520  |
| 0  | 5   | 0 PITG_04685   |
| 0  | 3   | 0 PITG_17137   |
| 0  | 39  | 0 PITG_22000   |
| 0  | 11  | 19 PITG_05635  |
| 0  | 4   | 7 PITG_07017   |
| 0  | 0   | 0 PITG_17958   |
| 0  | 38  | 24 PITG_03499  |
| 0  | 18  | 27 PITG_08801  |
| 0  | 31  | 28 PITG_03423  |
| 0  | 0   | 0 PITG_18650   |
| 0  | 8   | 0 PITG_14484   |
| 0  | 4   | 4 PITG_03898   |
| 0  | 8   | 2 NA           |
| 0  | 2   | 5 PITG_02555   |
| 0  | 101 | 64 PITG_04847  |
| 0  | 4   | 37 PITG_20718  |
| 0  | 7   | 2 PITG_09956   |
| 0  | 10  | 0 PITG_15855   |
| 0  | 0   | 0 PITG_01615   |
| 0  | 4   | 2 NA           |
| 0  | 19  | 19 PITG_07999  |
| 0  | 9   | 10 PITG_07744  |
| 0  | 10  | 5 PITG_03152   |
| 0  | 17  | 16 NA          |
| 0  | 0   | 2 PITG_02267   |

|   |    |               |
|---|----|---------------|
| 0 | 12 | 18 PITG_03335 |
| 0 | 21 | 8 PITG_14375  |
| 0 | 7  | 15 PITG_02343 |
| 0 | 0  | 4 PITG_00226  |
| 0 | 11 | 18 NA         |
| 0 | 4  | 4 PITG_16555  |
| 0 | 89 | 38 PITG_16795 |
| 0 | 8  | 2 PITG_01952  |
| 0 | 0  | 0 PITG_05450  |
| 0 | 0  | 2 NA          |
| 0 | 31 | 48 PITG_10455 |
| 0 | 0  | 0 PITG_16732  |
| 0 | 0  | 2 PITG_15417  |
| 0 | 67 | 8 NA          |
| 0 | 9  | 14 PITG_04549 |
| 0 | 2  | 2 PITG_13715  |
| 0 | 7  | 7 NA          |
| 0 | 57 | 11 NA         |
| 0 | 4  | 0 PITG_19875  |
| 0 | 0  | 0 PITG_19175  |
| 0 | 3  | 7 PITG_06817  |
| 0 | 0  | 0 NA          |
| 0 | 12 | 15 PITG_21398 |
| 0 | 2  | 18 PITG_06705 |
| 0 | 2  | 2 NA          |
| 0 | 2  | 2 PITG_14674  |
| 0 | 6  | 0 NA          |
| 0 | 2  | 4 PITG_19056  |
| 0 | 2  | 4 PITG_17057  |
| 0 | 16 | 10 NA         |
| 0 | 73 | 4 NA          |
| 0 | 0  | 0 PITG_00501  |
| 0 | 0  | 4 PITG_07307  |
| 0 | 2  | 17 PITG_11111 |
| 0 | 8  | 50 PITG_03433 |
| 0 | 95 | 9 PITG_02774  |
| 0 | 0  | 6 PITG_00183  |
| 0 | 13 | 22 PITG_11712 |
| 0 | 20 | 11 NA         |
| 0 | 23 | 2 PITG_01644  |
| 0 | 8  | 12 PITG_09247 |
| 0 | 17 | 9 NA          |
| 0 | 2  | 0 PITG_07991  |
| 0 | 0  | 0 PITG_11020  |
| 0 | 2  | 15 PITG_08587 |
| 0 | 2  | 4 NA          |
| 0 | 4  | 0 PITG_19158  |

|   |     |                |
|---|-----|----------------|
| 0 | 11  | 5 PITG_14179   |
| 0 | 0   | 2 PITG_00704   |
| 0 | 0   | 0 NA           |
| 0 | 0   | 0 PITG_15854   |
| 0 | 0   | 0 PITG_13920   |
| 0 | 31  | 44 PITG_17262  |
| 0 | 62  | 6 PITG_12568   |
| 0 | 3   | 9 PITG_03414   |
| 0 | 0   | 4 PITG_22568   |
| 0 | 15  | 2 PITG_17425   |
| 0 | 0   | 5 PITG_02620   |
| 0 | 2   | 0 PITG_20717   |
| 0 | 2   | 2 PITG_19281   |
| 0 | 2   | 8 PITG_18396   |
| 0 | 11  | 2 PITG_04746   |
| 0 | 8   | 0 NA           |
| 0 | 7   | 4 PITG_06886   |
| 0 | 4   | 12 PITG_00263  |
| 0 | 7   | 0 PITG_02818   |
| 0 | 0   | 0 NA           |
| 0 | 0   | 2 NA           |
| 0 | 0   | 0 PITG_19863   |
| 0 | 2   | 0 PITG_09672   |
| 0 | 0   | 0 PITG_07118   |
| 0 | 12  | 4 PITG_20317   |
| 0 | 2   | 4 PITG_08083   |
| 0 | 4   | 2 NA           |
| 0 | 0   | 12 PITG_02027  |
| 0 | 3   | 0 PITG_17905   |
| 0 | 16  | 0 NA           |
| 0 | 0   | 0 PITG_09985   |
| 3 | 18  | 46 PITG_10447  |
| 0 | 21  | 25 PITG_12535  |
| 0 | 200 | 101 PITG_01358 |
| 0 | 8   | 0 PITG_17598   |
| 0 | 55  | 17 PITG_11794  |
| 0 | 6   | 0 PITG_13196   |
| 0 | 2   | 0 NA           |
| 0 | 161 | 150 PITG_13761 |
| 0 | 0   | 6 PITG_00254   |
| 0 | 135 | 89 PITG_16161  |
| 0 | 15  | 21 PITG_06013  |
| 0 | 11  | 6 NA           |
| 0 | 0   | 0 PITG_12151   |
| 0 | 2   | 0 PITG_07455   |
| 0 | 16  | 10 PITG_06902  |
| 0 | 8   | 9 PITG_00075   |

|      |     |               |
|------|-----|---------------|
| 0    | 0   | 0 PITG_04344  |
| 0    | 4   | 4 PITG_01937  |
| 0    | 3   | 4 PITG_04426  |
| 0    | 12  | 0 PITG_12674  |
| 0    | 2   | 2 PITG_06067  |
| 0    | 8   | 0 NA          |
| 0    | 14  | 14 PITG_18113 |
| 0    | 0   | 0 PITG_06345  |
| 0    | 5   | 0 PITG_07815  |
| 0    | 5   | 21 PITG_02453 |
| 0    | 0   | 2 NA          |
| 0    | 0   | 0 PITG_00659  |
| 0    | 9   | 7 PITG_18064  |
| 0    | 64  | 84 NA         |
| 0    | 8   | 14 PITG_16930 |
| 0    | 2   | 19 PITG_17130 |
| 0    | 28  | 5 PITG_10845  |
| 0    | 0   | 0 PITG_17360  |
| 0    | 4   | 4 PITG_13413  |
| 0    | 0   | 19 PITG_05591 |
| 0    | 2   | 4 PITG_02016  |
| 0    | 0   | 2 PITG_13173  |
| 0    | 12  | 31 PITG_13403 |
| 0    | 43  | 91 PITG_18316 |
| 0    | 3   | 2 PITG_15916  |
| 0    | 2   | 2 PITG_02679  |
| 0    | 25  | 32 PITG_09829 |
| 0    | 0   | 0 PITG_02482  |
| 0    | 20  | 10 PITG_12540 |
| 0    | 6   | 6 PITG_13042  |
| 0    | 2   | 4 PITG_14921  |
| 0    | 6   | 0 PITG_08956  |
| 990  | 145 | 785 NA        |
| 0    | 4   | 0 NA          |
| 0    | 17  | 24 PITG_00845 |
| 0    | 0   | 0 PITG_11368  |
| 0    | 6   | 4 PITG_21144  |
| 0    | 0   | 2 PITG_02027  |
| 0    | 56  | 3 PITG_09983  |
| 0    | 0   | 4 PITG_15470  |
| 1093 | 8   | 212 NA        |
| 0    | 12  | 0 NA          |
| 0    | 2   | 0 NA          |
| 0    | 2   | 0 PITG_19887  |
| 0    | 6   | 4 NA          |
| 0    | 9   | 9 PITG_00262  |
| 0    | 4   | 9 PITG_10574  |



|      |     |                |
|------|-----|----------------|
| 0    | 5   | 10 PITG_07853  |
| 0    | 10  | 2 NA           |
| 0    | 18  | 2 NA           |
| 0    | 5   | 7 PITG_05633   |
| 0    | 15  | 2 PITG_16462   |
| 0    | 6   | 10 PITG_01823  |
| 14   | 38  | 206 NA         |
| 0    | 0   | 0 PITG_04974   |
| 0    | 2   | 2 PITG_02054   |
| 0    | 4   | 3 PITG_19516   |
| 0    | 0   | 0 PITG_00637   |
| 0    | 51  | 110 PITG_11081 |
| 0    | 3   | 2 PITG_01537   |
| 0    | 2   | 13 NA          |
| 0    | 10  | 11 NA          |
| 0    | 2   | 0 PITG_09938   |
| 0    | 0   | 2 PITG_02547   |
| 0    | 58  | 2 PITG_03967   |
| 0    | 0   | 4 PITG_04562   |
| 0    | 0   | 4 PITG_18813   |
| 0    | 119 | 43 PITG_05847  |
| 0    | 3   | 7 PITG_05762   |
| 0    | 3   | 2 PITG_00819   |
| 0    | 12  | 2 PITG_17382   |
| 0    | 2   | 2 PITG_02917   |
| 0    | 4   | 0 PITG_14600   |
| 0    | 14  | 4 PITG_00622   |
| 0    | 4   | 38 PITG_02458  |
| 0    | 35  | 2 NA           |
| 0    | 5   | 4 NA           |
| 1023 | 45  | 1620 NA        |
| 0    | 33  | 8 PITG_02575   |
| 0    | 0   | 0 PITG_09664   |
| 0    | 9   | 4 PITG_19223   |
| 0    | 0   | 13 PITG_14591  |
| 0    | 11  | 23 PITG_10345  |
| 0    | 0   | 0 NA           |
| 0    | 4   | 4 PITG_04115   |
| 0    | 2   | 0 PITG_11273   |
| 0    | 13  | 2 PITG_13029   |
| 0    | 6   | 4 PITG_08387   |
| 0    | 2   | 39 PITG_02409  |
| 0    | 6   | 11 PITG_14918  |
| 767  | 48  | 1107 NA        |
| 0    | 5   | 5 PITG_01340   |
| 0    | 3   | 4 PITG_08738   |
| 0    | 24  | 22 PITG_03972  |

|    |     |                |
|----|-----|----------------|
| 0  | 0   | 0 NA           |
| 0  | 21  | 43 PITG_06970  |
| 0  | 8   | 16 PITG_10146  |
| 0  | 4   | 4 NA           |
| 0  | 2   | 8 PITG_07287   |
| 0  | 9   | 2 NA           |
| 0  | 4   | 0 PITG_02665   |
| 0  | 19  | 16 PITG_00562  |
| 22 | 8   | 9 NA           |
| 0  | 7   | 45 NA          |
| 0  | 19  | 44 PITG_03836  |
| 0  | 80  | 161 PITG_12037 |
| 0  | 8   | 7 NA           |
| 0  | 4   | 5 PITG_11780   |
| 0  | 0   | 0 NA           |
| 0  | 6   | 6 NA           |
| 0  | 0   | 8 PITG_02591   |
| 4  | 0   | 7 NA           |
| 0  | 0   | 3 PITG_18656   |
| 0  | 0   | 0 PITG_20525   |
| 0  | 0   | 0 PITG_05560   |
| 0  | 8   | 2 PITG_03980   |
| 0  | 2   | 2 NA           |
| 0  | 2   | 0 NA           |
| 0  | 2   | 2 PITG_11804   |
| 0  | 6   | 37 PITG_00273  |
| 0  | 5   | 4 PITG_18652   |
| 0  | 0   | 2 PITG_09566   |
| 0  | 0   | 4 PITG_21759   |
| 0  | 0   | 0 PITG_06231   |
| 58 | 144 | 2029 NA        |
| 0  | 0   | 0 PITG_17359   |
| 0  | 3   | 3 PITG_11728   |
| 0  | 2   | 0 PITG_00854   |
| 0  | 6   | 4 NA           |
| 0  | 20  | 0 PITG_12290   |
| 0  | 11  | 0 PITG_01944   |
| 0  | 0   | 7 PITG_05604   |
| 0  | 2   | 0 NA           |
| 0  | 2   | 26 PITG_06454  |
| 0  | 2   | 6 NA           |
| 0  | 4   | 0 PITG_03073   |
| 0  | 0   | 4 PITG_07230   |
| 0  | 10  | 8 PITG_18174   |
| 0  | 3   | 0 PITG_02764   |
| 0  | 21  | 24 PITG_02561  |
| 0  | 44  | 13 PITG_14389  |

|     |     |                |
|-----|-----|----------------|
| 0   | 10  | 6 PITG_03458   |
| 119 | 203 | 2 NA           |
| 0   | 0   | 2 PITG_07279   |
| 0   | 5   | 19 PITG_04458  |
| 0   | 0   | 0 PITG_15570   |
| 0   | 8   | 0 PITG_12211   |
| 0   | 12  | 4 PITG_09251   |
| 0   | 0   | 7 PITG_05512   |
| 0   | 0   | 18 PITG_00543  |
| 0   | 0   | 10 PITG_00558  |
| 0   | 4   | 2 NA           |
| 0   | 0   | 0 NA           |
| 0   | 0   | 0 PITG_21309   |
| 0   | 37  | 29 PITG_02342  |
| 0   | 7   | 4 PITG_13042   |
| 0   | 147 | 139 PITG_05956 |
| 0   | 38  | 0 PITG_06841   |
| 0   | 2   | 0 NA           |
| 0   | 6   | 14 PITG_10388  |
| 0   | 9   | 0 PITG_02620   |
| 0   | 39  | 20 PITG_20977  |
| 0   | 46  | 23 PITG_20977  |
| 0   | 6   | 0 PITG_12852   |
| 0   | 10  | 14 PITG_05643  |
| 0   | 382 | 354 PITG_05922 |
| 0   | 27  | 10 PITG_16037  |
| 0   | 2   | 0 NA           |
| 0   | 4   | 10 PITG_11295  |
| 0   | 7   | 8 NA           |
| 0   | 30  | 40 PITG_01759  |
| 0   | 5   | 18 PITG_08425  |
| 0   | 13  | 2 NA           |
| 0   | 0   | 2 NA           |
| 0   | 0   | 0 PITG_09638   |
| 0   | 0   | 2 PITG_03351   |
| 0   | 19  | 2 PITG_10881   |
| 0   | 24  | 4 PITG_07470   |
| 272 | 239 | 167 NA         |
| 0   | 0   | 0 PITG_17907   |
| 0   | 0   | 0 PITG_00406   |
| 0   | 2   | 0 PITG_19766   |
| 0   | 0   | 2 PITG_12524   |
| 0   | 4   | 0 PITG_02753   |
| 0   | 12  | 6 PITG_01840   |
| 0   | 2   | 0 PITG_18815   |
| 0   | 7   | 18 PITG_13826  |
| 0   | 7   | 16 PITG_19773  |

|   |     |               |
|---|-----|---------------|
| 0 | 4   | 0 PITG_16378  |
| 0 | 13  | 38 PITG_08295 |
| 0 | 2   | 6 PITG_03482  |
| 0 | 0   | 2 PITG_14399  |
| 0 | 0   | 9 PITG_13804  |
| 0 | 15  | 15 PITG_11625 |
| 0 | 12  | 14 PITG_07891 |
| 0 | 112 | 26 NA         |
| 0 | 5   | 0 PITG_18090  |
| 0 | 10  | 0 NA          |
| 0 | 2   | 6 PITG_14588  |
| 0 | 0   | 0 PITG_16031  |
| 0 | 10  | 36 PITG_08458 |
| 0 | 33  | 0 PITG_00185  |
| 0 | 10  | 13 PITG_12295 |
| 0 | 69  | 19 NA         |
| 0 | 11  | 2 PITG_13563  |
| 0 | 22  | 4 PITG_16228  |
| 0 | 7   | 0 PITG_01228  |
| 0 | 0   | 8 PITG_18538  |
| 0 | 0   | 3 PITG_16939  |
| 0 | 2   | 2 PITG_07963  |
| 0 | 2   | 2 PITG_22541  |
| 0 | 7   | 0 NA          |
| 0 | 17  | 12 PITG_02454 |
| 0 | 4   | 0 PITG_07562  |
| 0 | 2   | 2 PITG_13421  |
| 0 | 0   | 0 NA          |
| 0 | 5   | 7 PITG_01579  |
| 0 | 2   | 2 PITG_18641  |
| 0 | 5   | 0 PITG_01553  |
| 0 | 4   | 2 PITG_14228  |
| 0 | 10  | 15 PITG_10006 |
| 0 | 0   | 0 PITG_03225  |
| 0 | 18  | 5 PITG_11485  |
| 0 | 0   | 10 PITG_15655 |
| 0 | 2   | 5 PITG_06171  |
| 0 | 2   | 0 PITG_19956  |
| 0 | 2   | 4 PITG_02292  |
| 0 | 21  | 51 PITG_13178 |
| 0 | 0   | 0 NA          |
| 0 | 4   | 4 PITG_00218  |
| 0 | 0   | 0 PITG_13677  |
| 0 | 0   | 0 PITG_08237  |
| 0 | 31  | 19 PITG_03265 |
| 0 | 0   | 4 PITG_13103  |
| 0 | 0   | 7 NA          |

|     |     |               |
|-----|-----|---------------|
| 0   | 3   | 5 PITG_21418  |
| 0   | 0   | 2 PITG_02526  |
| 28  | 7   | 2 NA          |
| 0   | 4   | 4 PITG_11124  |
| 0   | 0   | 21 PITG_03555 |
| 0   | 2   | 4 PITG_02716  |
| 0   | 2   | 4 NA          |
| 0   | 0   | 0 PITG_17525  |
| 0   | 136 | 96 NA         |
| 0   | 25  | 6 PITG_15806  |
| 0   | 0   | 4 PITG_09956  |
| 0   | 8   | 3 PITG_03018  |
| 0   | 6   | 3 PITG_16054  |
| 0   | 3   | 20 PITG_15446 |
| 199 | 9   | 350 NA        |
| 0   | 2   | 2 NA          |
| 0   | 8   | 18 PITG_09360 |
| 0   | 0   | 0 PITG_03609  |
| 0   | 0   | 0 NA          |
| 0   | 0   | 2 PITG_00898  |
| 0   | 4   | 4 PITG_01850  |
| 0   | 28  | 39 PITG_21607 |
| 0   | 31  | 11 NA         |
| 0   | 2   | 0 PITG_04022  |
| 0   | 86  | 21 PITG_00809 |
| 0   | 27  | 11 PITG_21048 |
| 0   | 10  | 2 PITG_04709  |
| 0   | 3   | 8 PITG_16466  |
| 0   | 4   | 0 PITG_04725  |
| 0   | 9   | 10 PITG_04489 |
| 0   | 2   | 0 NA          |
| 0   | 13  | 16 PITG_10351 |
| 0   | 7   | 0 PITG_21595  |
| 0   | 0   | 0 NA          |
| 0   | 20  | 15 PITG_03015 |
| 0   | 6   | 13 PITG_10334 |
| 0   | 7   | 2 PITG_02778  |
| 0   | 10  | 3 PITG_02531  |
| 0   | 5   | 6 PITG_10451  |
| 0   | 2   | 4 PITG_01354  |
| 0   | 2   | 2 PITG_06231  |
| 0   | 0   | 2 PITG_03978  |
| 0   | 0   | 0 PITG_05469  |
| 0   | 0   | 0 PITG_01209  |
| 0   | 0   | 2 PITG_18710  |
| 0   | 8   | 4 PITG_00882  |
| 0   | 19  | 23 PITG_11625 |

|   |     |                |
|---|-----|----------------|
| 0 | 0   | 0 PITG_13313   |
| 0 | 100 | 52 PITG_14175  |
| 0 | 10  | 4 PITG_08588   |
| 0 | 19  | 2 NA           |
| 0 | 2   | 4 PITG_10853   |
| 0 | 19  | 5 PITG_13792   |
| 0 | 0   | 0 PITG_15470   |
| 0 | 0   | 0 PITG_09585   |
| 0 | 4   | 10 PITG_13173  |
| 0 | 0   | 2 NA           |
| 0 | 14  | 6 NA           |
| 0 | 30  | 8 NA           |
| 0 | 53  | 49 NA          |
| 0 | 5   | 0 NA           |
| 0 | 33  | 26 NA          |
| 0 | 34  | 15 NA          |
| 0 | 7   | 17 NA          |
| 0 | 25  | 48 PITG_21047  |
| 0 | 2   | 2 PITG_03590   |
| 0 | 0   | 9 PITG_08470   |
| 0 | 0   | 9 PITG_12837   |
| 0 | 8   | 0 NA           |
| 0 | 23  | 4 PITG_02848   |
| 0 | 12  | 9 NA           |
| 0 | 0   | 3 NA           |
| 0 | 4   | 4 PITG_04037   |
| 0 | 11  | 5 PITG_14484   |
| 0 | 5   | 22 PITG_00448  |
| 0 | 18  | 8 PITG_04695   |
| 0 | 6   | 2 NA           |
| 0 | 0   | 239 NA         |
| 0 | 0   | 2 PITG_02697   |
| 0 | 6   | 5 PITG_15569   |
| 0 | 0   | 4 PITG_00148   |
| 0 | 413 | 150 PITG_16494 |
| 0 | 5   | 9 PITG_04959   |
| 0 | 0   | 2 PITG_17404   |
| 0 | 0   | 0 PITG_05411   |
| 0 | 0   | 2 NA           |
| 0 | 0   | 0 PITG_04497   |
| 0 | 11  | 0 NA           |
| 0 | 8   | 18 PITG_16917  |
| 0 | 19  | 23 PITG_12577  |
| 0 | 0   | 6 PITG_17262   |
| 0 | 8   | 8 PITG_03030   |
| 0 | 2   | 4 NA           |
| 0 | 2   | 2 PITG_08179   |

|     |     |                |
|-----|-----|----------------|
| 0   | 25  | 13 NA          |
| 0   | 0   | 0 PITG_03947   |
| 0   | 22  | 7 PITG_06698   |
| 0   | 6   | 0 NA           |
| 0   | 214 | 36 PITG_11817  |
| 0   | 0   | 0 PITG_07898   |
| 0   | 5   | 0 PITG_09422   |
| 0   | 13  | 2 PITG_08405   |
| 0   | 8   | 8 PITG_07977   |
| 6   | 0   | 28 NA          |
| 0   | 5   | 0 PITG_03650   |
| 0   | 13  | 9 PITG_14151   |
| 0   | 0   | 13 PITG_08681  |
| 0   | 0   | 4 PITG_16386   |
| 0   | 0   | 0 NA           |
| 0   | 18  | 2 PITG_18422   |
| 0   | 2   | 6 NA           |
| 0   | 144 | 584 PITG_14530 |
| 0   | 0   | 0 PITG_05855   |
| 0   | 21  | 0 NA           |
| 0   | 11  | 3 PITG_03337   |
| 0   | 0   | 0 PITG_08093   |
| 0   | 7   | 5 PITG_05610   |
| 0   | 4   | 0 PITG_05282   |
| 0   | 27  | 22 PITG_04989  |
| 0   | 0   | 0 NA           |
| 0   | 7   | 2 PITG_05502   |
| 0   | 2   | 4 NA           |
| 480 | 23  | 658 NA         |
| 0   | 7   | 2 NA           |
| 0   | 3   | 0 PITG_11087   |
| 2   | 23  | 2 PITG_06554   |
| 0   | 6   | 15 PITG_11702  |
| 4   | 2   | 31 NA          |
| 0   | 15  | 0 NA           |
| 0   | 16  | 46 PITG_02586  |
| 0   | 10  | 12 PITG_05192  |
| 0   | 2   | 0 PITG_02401   |
| 0   | 6   | 47 PITG_19608  |
| 0   | 0   | 4 PITG_17627   |
| 2   | 0   | 4 NA           |
| 0   | 63  | 2 PITG_15948   |
| 0   | 7   | 0 PITG_10989   |
| 0   | 8   | 0 PITG_13661   |
| 0   | 7   | 16 PITG_12678  |
| 0   | 3   | 0 PITG_00894   |
| 0   | 0   | 0 PITG_19467   |

|   |     |                |
|---|-----|----------------|
| 0 | 63  | 65 NA          |
| 0 | 25  | 0 PITG_14551   |
| 0 | 12  | 12 PITG_03829  |
| 0 | 85  | 40 PITG_21363  |
| 0 | 6   | 2 NA           |
| 0 | 14  | 6 PITG_16126   |
| 0 | 0   | 3 NA           |
| 0 | 0   | 0 NA           |
| 0 | 9   | 8 PITG_16102   |
| 0 | 8   | 5 PITG_13486   |
| 0 | 0   | 8 NA           |
| 0 | 0   | 6 PITG_09247   |
| 0 | 5   | 6 PITG_03855   |
| 0 | 0   | 0 PITG_08302   |
| 0 | 0   | 0 PITG_08567   |
| 0 | 4   | 7 PITG_11329   |
| 0 | 2   | 0 PITG_04232   |
| 0 | 3   | 0 PITG_10334   |
| 0 | 0   | 2 PITG_01873   |
| 0 | 540 | 155 PITG_20413 |
| 0 | 17  | 30 PITG_11724  |
| 0 | 0   | 6 PITG_17767   |
| 0 | 4   | 2 NA           |
| 0 | 0   | 0 PITG_16775   |
| 0 | 0   | 0 PITG_14441   |
| 0 | 0   | 38 NA          |
| 0 | 2   | 6 PITG_17126   |
| 0 | 0   | 0 PITG_17492   |
| 0 | 0   | 2 PITG_14602   |
| 0 | 44  | 49 PITG_16806  |
| 0 | 84  | 4 PITG_01852   |
| 0 | 2   | 7 NA           |
| 0 | 2   | 4 PITG_03987   |
| 0 | 0   | 4 PITG_10792   |
| 0 | 6   | 0 PITG_03843   |
| 0 | 0   | 8 PITG_17767   |
| 0 | 5   | 0 NA           |
| 0 | 6   | 0 NA           |
| 0 | 6   | 10 PITG_06429  |
| 0 | 16  | 4 NA           |
| 0 | 0   | 0 PITG_21509   |
| 0 | 0   | 0 PITG_03838   |
| 0 | 0   | 2 PITG_12172   |
| 0 | 0   | 2 PITG_11137   |
| 0 | 0   | 0 PITG_08589   |
| 0 | 0   | 4 PITG_16272   |
| 0 | 6   | 2 NA           |



|     |     |                |
|-----|-----|----------------|
| 0   | 0   | 0 PITG_01553   |
| 0   | 0   | 0 PITG_04505   |
| 0   | 0   | 2 PITG_00944   |
| 0   | 0   | 0 NA           |
| 0   | 14  | 6 PITG_03416   |
| 0   | 47  | 8 NA           |
| 0   | 6   | 7 PITG_18696   |
| 0   | 31  | 40 PITG_03560  |
| 0   | 10  | 18 PITG_12291  |
| 0   | 14  | 19 PITG_22163  |
| 0   | 18  | 0 NA           |
| 0   | 0   | 0 PITG_20893   |
| 0   | 71  | 37 PITG_09376  |
| 0   | 0   | 0 PITG_11586   |
| 0   | 11  | 0 PITG_07941   |
| 0   | 0   | 2 PITG_17925   |
| 0   | 28  | 10 PITG_15408  |
| 0   | 13  | 8 PITG_01740   |
| 0   | 16  | 40 PITG_08306  |
| 0   | 2   | 4 PITG_07110   |
| 0   | 8   | 10 PITG_19932  |
| 0   | 4   | 194 NA         |
| 0   | 8   | 12 PITG_14472  |
| 0   | 0   | 0 NA           |
| 0   | 6   | 12 NA          |
| 0   | 0   | 3 PITG_04648   |
| 0   | 7   | 4 PITG_06296   |
| 0   | 14  | 17 PITG_10926  |
| 0   | 2   | 2 PITG_06941   |
| 0   | 2   | 11 PITG_20534  |
| 0   | 8   | 0 NA           |
| 0   | 12  | 9 PITG_18027   |
| 0   | 156 | 221 PITG_05922 |
| 19  | 0   | 35 NA          |
| 0   | 14  | 11 PITG_04508  |
| 0   | 2   | 10 PITG_19886  |
| 0   | 0   | 0 PITG_01047   |
| 0   | 0   | 0 PITG_15785   |
| 0   | 23  | 6 PITG_04226   |
| 0   | 40  | 6 NA           |
| 129 | 3   | 116 NA         |
| 0   | 2   | 17 PITG_21010  |
| 0   | 29  | 28 PITG_17230  |
| 0   | 10  | 13 PITG_11437  |
| 105 | 3   | 125 NA         |
| 0   | 0   | 0 PITG_10553   |
| 0   | 2   | 2 NA           |

|    |     |               |
|----|-----|---------------|
| 0  | 4   | 7 PITG_05259  |
| 0  | 0   | 0 PITG_11194  |
| 0  | 4   | 7 NA          |
| 27 | 6   | 132 NA        |
| 0  | 0   | 4 NA          |
| 0  | 6   | 5 PITG_04709  |
| 0  | 8   | 6 PITG_01815  |
| 0  | 7   | 0 PITG_06121  |
| 0  | 40  | 29 PITG_12537 |
| 0  | 11  | 0 PITG_13669  |
| 0  | 10  | 2 PITG_04837  |
| 0  | 0   | 0 PITG_03610  |
| 0  | 32  | 43 PITG_05772 |
| 0  | 8   | 15 PITG_14284 |
| 0  | 0   | 4 PITG_11187  |
| 0  | 0   | 2 PITG_11232  |
| 0  | 19  | 4 PITG_16773  |
| 0  | 0   | 0 NA          |
| 0  | 11  | 17 PITG_10926 |
| 0  | 2   | 8 PITG_12302  |
| 0  | 4   | 6 PITG_00081  |
| 0  | 10  | 0 NA          |
| 0  | 6   | 5 PITG_20157  |
| 0  | 2   | 12 PITG_05141 |
| 0  | 0   | 2 PITG_12319  |
| 0  | 6   | 0 NA          |
| 0  | 5   | 9 PITG_05221  |
| 0  | 0   | 0 PITG_02738  |
| 0  | 0   | 2 NA          |
| 0  | 0   | 0 PITG_09723  |
| 0  | 30  | 6 PITG_10838  |
| 0  | 13  | 0 PITG_00504  |
| 0  | 4   | 15 PITG_16107 |
| 0  | 0   | 0 PITG_07212  |
| 0  | 5   | 0 NA          |
| 0  | 207 | 2 NA          |
| 0  | 4   | 2 PITG_17944  |
| 0  | 0   | 0 PITG_13775  |
| 0  | 80  | 0 PITG_00442  |
| 0  | 3   | 3 NA          |
| 0  | 2   | 4 PITG_01234  |
| 0  | 0   | 6 PITG_17068  |
| 0  | 0   | 4 PITG_14111  |
| 0  | 7   | 6 PITG_09483  |
| 0  | 14  | 30 PITG_05016 |
| 0  | 34  | 19 PITG_09528 |
| 0  | 19  | 7 NA          |

|      |    |               |
|------|----|---------------|
| 0    | 18 | 21 PITG_06379 |
| 0    | 0  | 4 PITG_01691  |
| 0    | 14 | 13 PITG_14602 |
| 0    | 2  | 0 PITG_07833  |
| 0    | 26 | 11 PITG_14281 |
| 0    | 4  | 2 NA          |
| 0    | 5  | 2 PITG_13618  |
| 0    | 2  | 6 PITG_01715  |
| 0    | 66 | 45 PITG_07703 |
| 0    | 6  | 0 NA          |
| 5148 | 16 | 698 NA        |
| 0    | 2  | 2 PITG_08619  |
| 0    | 7  | 9 PITG_07314  |
| 0    | 0  | 4 PITG_22687  |
| 0    | 12 | 10 NA         |
| 0    | 5  | 11 PITG_19113 |
| 0    | 0  | 2 NA          |
| 0    | 5  | 53 PITG_03678 |
| 0    | 19 | 0 NA          |
| 0    | 4  | 2 NA          |
| 0    | 2  | 0 NA          |
| 0    | 0  | 2 PITG_03927  |
| 0    | 6  | 4 PITG_20808  |
| 0    | 74 | 10 PITG_21144 |
| 0    | 4  | 8 PITG_00225  |
| 0    | 0  | 0 PITG_15443  |
| 0    | 6  | 2 PITG_09477  |
| 0    | 49 | 29 PITG_14284 |
| 0    | 0  | 0 PITG_02290  |
| 63   | 0  | 61 NA         |
| 0    | 11 | 2 PITG_04643  |
| 0    | 0  | 2 PITG_20463  |
| 0    | 16 | 0 PITG_14573  |
| 0    | 2  | 4 PITG_11098  |
| 0    | 15 | 0 NA          |
| 0    | 16 | 7 PITG_12441  |
| 0    | 21 | 0 PITG_07839  |
| 0    | 7  | 0 PITG_09422  |
| 0    | 0  | 0 PITG_19126  |
| 0    | 0  | 0 PITG_17907  |
| 0    | 0  | 4 PITG_07279  |
| 0    | 4  | 0 PITG_12988  |
| 0    | 9  | 0 PITG_00038  |
| 0    | 0  | 0 PITG_15924  |
| 0    | 0  | 9 PITG_04611  |
| 0    | 10 | 28 NA         |
| 0    | 51 | 31 PITG_13395 |

|      |    |               |
|------|----|---------------|
| 0    | 9  | 9 PITG_10898  |
| 0    | 2  | 9 PITG_16865  |
| 4    | 37 | 37 NA         |
| 0    | 4  | 9 PITG_17769  |
| 0    | 3  | 0 NA          |
| 0    | 2  | 0 PITG_05813  |
| 0    | 5  | 4 PITG_08087  |
| 0    | 4  | 21 PITG_05367 |
| 0    | 0  | 4 NA          |
| 0    | 12 | 10 PITG_02735 |
| 0    | 33 | 6 PITG_20388  |
| 0    | 0  | 0 NA          |
| 1163 | 23 | 1215 NA       |
| 0    | 9  | 31 PITG_14558 |
| 0    | 4  | 16 PITG_08346 |
| 0    | 0  | 0 PITG_00408  |
| 0    | 0  | 0 PITG_04179  |
| 0    | 2  | 0 PITG_06491  |
| 0    | 16 | 8 NA          |
| 0    | 12 | 0 NA          |
| 0    | 0  | 0 PITG_20158  |
| 0    | 5  | 25 NA         |
| 0    | 0  | 2 PITG_19362  |
| 54   | 8  | 114 NA        |
| 0    | 0  | 0 PITG_07804  |
| 0    | 53 | 10 PITG_05517 |
| 0    | 10 | 0 PITG_17245  |
| 0    | 2  | 9 PITG_12469  |
| 0    | 0  | 2 PITG_01416  |
| 0    | 3  | 2 PITG_10080  |
| 0    | 0  | 2 PITG_03269  |
| 0    | 10 | 10 PITG_08514 |
| 0    | 6  | 5 PITG_20330  |
| 0    | 0  | 0 PITG_01809  |
| 0    | 8  | 10 PITG_21879 |
| 0    | 5  | 0 PITG_07830  |
| 0    | 0  | 3 PITG_17090  |
| 0    | 2  | 2 PITG_09413  |
| 0    | 0  | 4 PITG_15173  |
| 0    | 2  | 2 PITG_14722  |
| 0    | 39 | 8 PITG_23034  |
| 0    | 0  | 0 NA          |
| 0    | 3  | 15 PITG_03295 |
| 0    | 3  | 0 PITG_07730  |
| 0    | 2  | 2 PITG_07068  |
| 0    | 68 | 0 NA          |
| 0    | 4  | 4 PITG_15819  |

|   |    |               |
|---|----|---------------|
| 0 | 8  | 9 PITG_05274  |
| 0 | 24 | 4 NA          |
| 0 | 0  | 2 PITG_11090  |
| 0 | 13 | 2 NA          |
| 0 | 8  | 5 PITG_21006  |
| 0 | 0  | 0 PITG_06346  |
| 0 | 2  | 6 PITG_14111  |
| 0 | 46 | 41 PITG_20630 |
| 0 | 0  | 0 PITG_13658  |
| 0 | 24 | 20 PITG_05377 |
| 0 | 5  | 11 PITG_11038 |
| 0 | 4  | 2 NA          |
| 0 | 19 | 7 PITG_00940  |
| 0 | 0  | 0 PITG_00458  |
| 0 | 0  | 6 PITG_02241  |
| 0 | 2  | 2 PITG_16020  |
| 0 | 8  | 2 PITG_11077  |
| 0 | 2  | 4 PITG_16211  |
| 0 | 31 | 6 PITG_16976  |
| 0 | 15 | 0 PITG_01053  |
| 0 | 6  | 15 PITG_00999 |
| 0 | 0  | 2 PITG_03929  |
| 0 | 4  | 9 PITG_04700  |
| 0 | 11 | 10 PITG_05413 |
| 0 | 0  | 0 PITG_19177  |
| 0 | 6  | 9 NA          |
| 0 | 0  | 6 PITG_12471  |
| 0 | 7  | 2 NA          |
| 0 | 34 | 10 NA         |
| 0 | 4  | 8 NA          |
| 0 | 0  | 9 PITG_04283  |
| 0 | 90 | 4 PITG_15053  |
| 0 | 0  | 10 NA         |
| 0 | 2  | 0 PITG_12667  |
| 0 | 0  | 0 NA          |
| 0 | 0  | 4 PITG_02806  |
| 0 | 3  | 8 PITG_03621  |
| 0 | 25 | 8 PITG_15249  |
| 0 | 12 | 2 NA          |
| 0 | 6  | 6 PITG_07968  |
| 0 | 3  | 6 PITG_19875  |
| 0 | 0  | 2 PITG_03114  |
| 0 | 0  | 2 PITG_13397  |
| 0 | 12 | 6 PITG_13039  |
| 0 | 0  | 0 PITG_01954  |
| 0 | 21 | 30 PITG_07815 |
| 0 | 4  | 6 PITG_00746  |

|    |     |                |
|----|-----|----------------|
| 0  | 7   | 5 PITG_07767   |
| 0  | 2   | 0 PITG_02247   |
| 0  | 0   | 6 PITG_06659   |
| 0  | 6   | 0 NA           |
| 0  | 0   | 6 PITG_01710   |
| 0  | 3   | 2 PITG_08514   |
| 0  | 24  | 30 PITG_21599  |
| 0  | 162 | 40 NA          |
| 0  | 0   | 2 PITG_01897   |
| 0  | 2   | 2 PITG_18816   |
| 0  | 13  | 0 NA           |
| 0  | 105 | 8 PITG_01418   |
| 0  | 0   | 2 PITG_18749   |
| 0  | 8   | 0 PITG_09459   |
| 0  | 16  | 32 PITG_00647  |
| 0  | 2   | 2 PITG_01781   |
| 0  | 6   | 14 PITG_01622  |
| 0  | 0   | 0 NA           |
| 0  | 0   | 2 PITG_05935   |
| 0  | 2   | 0 PITG_19283   |
| 0  | 5   | 16 PITG_12548  |
| 0  | 2   | 0 NA           |
| 0  | 16  | 4 PITG_17361   |
| 0  | 9   | 0 PITG_14599   |
| 0  | 6   | 4 PITG_04680   |
| 0  | 4   | 0 PITG_07194   |
| 0  | 21  | 643 PITG_16981 |
| 0  | 2   | 2 PITG_01957   |
| 0  | 0   | 0 PITG_22687   |
| 0  | 0   | 0 PITG_04676   |
| 0  | 3   | 7 PITG_02478   |
| 86 | 0   | 45 NA          |
| 0  | 0   | 0 PITG_00717   |
| 0  | 6   | 0 NA           |
| 0  | 13  | 0 NA           |
| 0  | 8   | 6 PITG_20379   |
| 0  | 0   | 0 PITG_04310   |
| 0  | 2   | 2 PITG_08207   |
| 0  | 6   | 2 PITG_00460   |
| 0  | 20  | 3 PITG_03650   |
| 0  | 4   | 2 PITG_00065   |
| 0  | 4   | 0 PITG_20284   |
| 0  | 0   | 0 NA           |
| 0  | 6   | 82 PITG_02267  |
| 0  | 9   | 0 PITG_09527   |
| 0  | 0   | 0 NA           |
| 0  | 2   | 2 PITG_01920   |

|    |     |                |
|----|-----|----------------|
| 0  | 0   | 0 PITG_08093   |
| 0  | 4   | 2 PITG_09505   |
| 0  | 32  | 18 PITG_07879  |
| 0  | 25  | 4 NA           |
| 0  | 19  | 16 PITG_13040  |
| 0  | 4   | 0 PITG_09995   |
| 0  | 61  | 9 PITG_11838   |
| 0  | 45  | 58 PITG_22040  |
| 0  | 5   | 0 PITG_03264   |
| 0  | 0   | 2 PITG_18702   |
| 0  | 14  | 12 PITG_02450  |
| 0  | 0   | 0 PITG_18057   |
| 0  | 3   | 13 PITG_06986  |
| 0  | 9   | 7 PITG_17550   |
| 0  | 0   | 0 PITG_09450   |
| 0  | 37  | 7 PITG_02108   |
| 0  | 6   | 0 PITG_05550   |
| 0  | 63  | 17 PITG_17744  |
| 0  | 2   | 6 PITG_04342   |
| 0  | 15  | 7 PITG_15075   |
| 0  | 13  | 7 PITG_09840   |
| 0  | 23  | 0 PITG_06201   |
| 0  | 77  | 40 PITG_09137  |
| 0  | 4   | 14 PITG_06688  |
| 0  | 0   | 0 NA           |
| 0  | 12  | 9 NA           |
| 0  | 70  | 32 PITG_07192  |
| 0  | 2   | 0 PITG_01920   |
| 0  | 12  | 9 PITG_05989   |
| 0  | 20  | 4 PITG_16649   |
| 0  | 92  | 2 PITG_10409   |
| 0  | 0   | 0 NA           |
| 0  | 2   | 4 NA           |
| 0  | 0   | 0 PITG_19813   |
| 0  | 486 | 231 PITG_05922 |
| 0  | 2   | 0 NA           |
| 0  | 10  | 0 PITG_14198   |
| 81 | 6   | 169 NA         |
| 0  | 0   | 2 PITG_07865   |
| 0  | 33  | 8 PITG_07965   |
| 0  | 5   | 5 NA           |
| 0  | 0   | 0 PITG_12162   |
| 0  | 5   | 7 PITG_12326   |
| 0  | 0   | 2 PITG_12275   |
| 0  | 0   | 0 PITG_08187   |
| 0  | 21  | 36 NA          |
| 0  | 3   | 19 PITG_03624  |

|   |     |               |
|---|-----|---------------|
| 0 | 20  | 8 PITG_01103  |
| 0 | 2   | 8 PITG_04289  |
| 0 | 4   | 6 PITG_08978  |
| 0 | 2   | 2 NA          |
| 0 | 0   | 0 PITG_05364  |
| 0 | 0   | 6 PITG_22719  |
| 0 | 70  | 2 PITG_06398  |
| 0 | 0   | 6 PITG_03623  |
| 0 | 13  | 2 PITG_03892  |
| 0 | 4   | 2 PITG_02698  |
| 0 | 100 | 9 PITG_04709  |
| 0 | 8   | 4 PITG_10893  |
| 0 | 0   | 0 PITG_03011  |
| 0 | 2   | 4 PITG_19860  |
| 0 | 22  | 23 PITG_06762 |
| 0 | 0   | 0 PITG_01469  |
| 0 | 2   | 3 NA          |
| 0 | 0   | 0 NA          |
| 0 | 8   | 2 PITG_11008  |
| 0 | 4   | 4 PITG_08581  |
| 0 | 11  | 0 PITG_09930  |
| 0 | 0   | 0 NA          |
| 0 | 2   | 0 NA          |
| 0 | 2   | 0 PITG_11138  |
| 0 | 3   | 2 NA          |
| 0 | 7   | 2 PITG_09035  |
| 0 | 15  | 0 PITG_12537  |
| 0 | 5   | 20 PITG_00329 |
| 0 | 4   | 2 PITG_12338  |
| 0 | 51  | 20 PITG_19303 |
| 0 | 0   | 0 NA          |
| 0 | 15  | 4 PITG_22629  |
| 0 | 5   | 0 PITG_10239  |
| 0 | 46  | 43 PITG_16382 |
| 0 | 0   | 6 PITG_13016  |
| 0 | 0   | 0 NA          |
| 0 | 10  | 6 PITG_20110  |
| 0 | 18  | 0 PITG_05816  |
| 0 | 35  | 20 NA         |
| 0 | 2   | 8 PITG_08766  |
| 0 | 11  | 20 PITG_09281 |
| 0 | 0   | 2 PITG_19168  |
| 0 | 0   | 10 PITG_12269 |
| 0 | 0   | 4 PITG_17768  |
| 0 | 5   | 0 PITG_06480  |
| 0 | 14  | 0 NA          |
| 0 | 0   | 2 PITG_14441  |



|   |     |                |
|---|-----|----------------|
| 0 | 0   | 0 PITG_12938   |
| 0 | 18  | 0 PITG_08067   |
| 0 | 0   | 0 PITG_14970   |
| 0 | 2   | 8 PITG_09349   |
| 0 | 21  | 9 PITG_18652   |
| 0 | 0   | 0 PITG_13433   |
| 0 | 310 | 26 PITG_17342  |
| 0 | 4   | 0 NA           |
| 0 | 13  | 26 NA          |
| 0 | 4   | 0 PITG_10249   |
| 0 | 4   | 8 NA           |
| 0 | 0   | 5 PITG_03987   |
| 0 | 4   | 31 PITG_11926  |
| 0 | 3   | 4 PITG_04204   |
| 0 | 4   | 0 PITG_01214   |
| 0 | 15  | 0 PITG_19025   |
| 0 | 0   | 0 NA           |
| 0 | 0   | 0 PITG_21522   |
| 0 | 0   | 11 PITG_06764  |
| 0 | 8   | 7 PITG_15016   |
| 0 | 5   | 22 PITG_10301  |
| 0 | 6   | 12 PITG_20211  |
| 0 | 4   | 0 NA           |
| 0 | 21  | 35 PITG_07201  |
| 0 | 13  | 12 PITG_09092  |
| 0 | 20  | 7 PITG_02863   |
| 0 | 10  | 8 PITG_16090   |
| 0 | 0   | 0 PITG_05757   |
| 0 | 71  | 36 PITG_00896  |
| 0 | 5   | 6 PITG_15097   |
| 0 | 0   | 2 PITG_14599   |
| 0 | 3   | 10 PITG_00049  |
| 0 | 0   | 3 PITG_07041   |
| 0 | 0   | 0 PITG_02712   |
| 0 | 15  | 2 PITG_17513   |
| 0 | 0   | 6 PITG_04426   |
| 0 | 12  | 6 PITG_02372   |
| 0 | 15  | 8 PITG_07851   |
| 0 | 0   | 0 PITG_11206   |
| 0 | 14  | 8 PITG_17361   |
| 0 | 6   | 9 PITG_02740   |
| 0 | 3   | 2 NA           |
| 0 | 18  | 10 PITG_01543  |
| 0 | 0   | 7 PITG_12521   |
| 0 | 4   | 0 PITG_21523   |
| 0 | 26  | 26 PITG_12494  |
| 0 | 148 | 145 PITG_11987 |

|      |     |                |
|------|-----|----------------|
| 0    | 34  | 26 NA          |
| 0    | 2   | 2 PITG_13661   |
| 0    | 9   | 0 PITG_01386   |
| 0    | 0   | 0 PITG_16469   |
| 0    | 9   | 23 PITG_14175  |
| 0    | 0   | 5 PITG_06440   |
| 0    | 7   | 0 PITG_01774   |
| 0    | 36  | 27 PITG_10831  |
| 0    | 0   | 0 PITG_14399   |
| 0    | 4   | 0 PITG_19008   |
| 0    | 4   | 0 PITG_11020   |
| 0    | 12  | 0 PITG_17416   |
| 0    | 6   | 0 NA           |
| 0    | 6   | 3 NA           |
| 0    | 5   | 7 PITG_09010   |
| 0    | 10  | 65 PITG_17069  |
| 0    | 11  | 2 PITG_00725   |
| 0    | 2   | 0 PITG_17899   |
| 0    | 0   | 4 PITG_21727   |
| 0    | 3   | 0 PITG_10539   |
| 0    | 4   | 6 PITG_08237   |
| 0    | 57  | 0 PITG_15290   |
| 0    | 333 | 156 PITG_20221 |
| 0    | 2   | 4 NA           |
| 0    | 2   | 2 PITG_09992   |
| 0    | 38  | 6 PITG_10725   |
| 0    | 38  | 12 PITG_16469  |
| 0    | 3   | 0 PITG_01463   |
| 0    | 2   | 3 PITG_02712   |
| 0    | 12  | 18 PITG_08688  |
| 0    | 36  | 9 NA           |
| 0    | 2   | 0 NA           |
| 0    | 6   | 2 PITG_10325   |
| 0    | 22  | 12 PITG_18070  |
| 0    | 4   | 4 PITG_11674   |
| 0    | 5   | 2 PITG_18721   |
| 580  | 313 | 91 NA          |
| 0    | 10  | 13 NA          |
| 0    | 0   | 0 PITG_16682   |
| 0    | 0   | 2 PITG_00634   |
| 122  | 27  | 838 NA         |
| 0    | 14  | 0 PITG_01458   |
| 0    | 9   | 0 NA           |
| 1188 | 4   | 2019 NA        |
| 0    | 4   | 2 PITG_01317   |
| 0    | 9   | 0 NA           |
| 0    | 0   | 0 NA           |

|   |     |                |
|---|-----|----------------|
| 0 | 8   | 18 PITG_10343  |
| 0 | 22  | 9 NA           |
| 0 | 4   | 5 NA           |
| 0 | 24  | 12 PITG_16332  |
| 0 | 40  | 16 PITG_16326  |
| 0 | 12  | 5 PITG_08252   |
| 0 | 2   | 0 PITG_00407   |
| 0 | 12  | 5 PITG_02398   |
| 0 | 4   | 9 PITG_19111   |
| 0 | 122 | 145 PITG_07710 |
| 0 | 0   | 10 PITG_02420  |
| 0 | 2   | 0 PITG_06844   |
| 0 | 0   | 0 PITG_02731   |
| 0 | 2   | 8 NA           |
| 0 | 0   | 0 PITG_12326   |
| 0 | 38  | 6 PITG_12673   |
| 0 | 0   | 0 PITG_10049   |
| 0 | 0   | 0 NA           |
| 0 | 0   | 2 PITG_00440   |
| 0 | 12  | 29 PITG_22095  |
| 0 | 0   | 0 PITG_01852   |
| 0 | 0   | 2 PITG_13297   |
| 0 | 8   | 3 NA           |
| 0 | 0   | 2 PITG_04584   |
| 0 | 2   | 0 PITG_04940   |
| 0 | 4   | 2 PITG_10932   |
| 0 | 2   | 2 PITG_18422   |
| 0 | 13  | 0 PITG_02953   |
| 0 | 76  | 16 PITG_21140  |
| 0 | 2   | 9 PITG_05254   |
| 0 | 2   | 0 NA           |
| 0 | 14  | 0 PITG_21627   |
| 0 | 6   | 2 PITG_05244   |
| 0 | 57  | 9 PITG_15948   |
| 0 | 8   | 14 PITG_16799  |
| 0 | 11  | 3 PITG_18859   |
| 0 | 13  | 6 PITG_00469   |
| 0 | 68  | 17 NA          |
| 0 | 0   | 2 PITG_00828   |
| 0 | 0   | 0 NA           |
| 0 | 0   | 2 PITG_22997   |
| 0 | 8   | 0 PITG_01480   |
| 0 | 19  | 6 PITG_01514   |
| 0 | 13  | 2 NA           |
| 0 | 4   | 0 PITG_17161   |
| 0 | 3   | 0 PITG_03075   |
| 0 | 13  | 2 PITG_02733   |

|     |      |                |
|-----|------|----------------|
| 0   | 58   | 6 PITG_18099   |
| 0   | 0    | 8 PITG_00720   |
| 0   | 4    | 2 PITG_15899   |
| 0   | 7    | 4 PITG_19473   |
| 0   | 2    | 0 PITG_06031   |
| 0   | 0    | 0 PITG_06219   |
| 0   | 18   | 5 NA           |
| 0   | 10   | 28 PITG_13803  |
| 0   | 6    | 10 PITG_13990  |
| 0   | 38   | 18 PITG_07338  |
| 0   | 10   | 4 PITG_14005   |
| 0   | 14   | 17 PITG_13151  |
| 0   | 0    | 2 PITG_10161   |
| 0   | 45   | 68 PITG_03098  |
| 0   | 22   | 36 PITG_11775  |
| 0   | 6    | 0 PITG_11804   |
| 0   | 4    | 2 PITG_13151   |
| 0   | 11   | 19 PITG_06753  |
| 0   | 10   | 0 PITG_10288   |
| 0   | 42   | 13 PITG_18151  |
| 0   | 8    | 0 PITG_20061   |
| 0   | 257  | 2 NA           |
| 0   | 3    | 0 NA           |
| 0   | 6    | 4 PITG_09599   |
| 0   | 2    | 2 PITG_13913   |
| 34  | 2    | 21 NA          |
| 0   | 8    | 19 PITG_13493  |
| 0   | 0    | 4 PITG_16468   |
| 0   | 2    | 9 PITG_21047   |
| 0   | 3    | 0 PITG_03557   |
| 0   | 0    | 3 PITG_03523   |
| 0   | 0    | 0 PITG_01457   |
| 0   | 2    | 0 PITG_05258   |
| 27  | 16   | 243 NA         |
| 503 | 9    | 683 NA         |
| 0   | 1492 | 265 PITG_06689 |
| 0   | 0    | 0 NA           |
| 0   | 0    | 0 NA           |
| 0   | 0    | 0 PITG_19153   |
| 0   | 2    | 2 PITG_00994   |
| 0   | 19   | 11 NA          |
| 0   | 2    | 14 NA          |
| 0   | 0    | 0 PITG_16958   |
| 0   | 13   | 8 PITG_05674   |
| 0   | 46   | 6 PITG_01418   |
| 0   | 6    | 0 PITG_08481   |
| 14  | 0    | 36 NA          |

|    |    |               |
|----|----|---------------|
| 0  | 5  | 2 PITG_18210  |
| 0  | 0  | 0 PITG_10443  |
| 0  | 12 | 38 NA         |
| 0  | 62 | 47 PITG_19612 |
| 0  | 0  | 0 PITG_01429  |
| 0  | 0  | 21 PITG_07194 |
| 0  | 3  | 0 PITG_02134  |
| 0  | 0  | 4 PITG_00201  |
| 0  | 2  | 2 PITG_02744  |
| 0  | 0  | 7 PITG_17882  |
| 0  | 2  | 2 PITG_11153  |
| 0  | 0  | 4 PITG_14579  |
| 0  | 8  | 16 PITG_06924 |
| 0  | 8  | 0 NA          |
| 0  | 2  | 7 PITG_01740  |
| 0  | 8  | 16 PITG_16359 |
| 0  | 2  | 0 PITG_01410  |
| 0  | 0  | 0 PITG_18034  |
| 0  | 5  | 0 NA          |
| 44 | 4  | 124 NA        |
| 0  | 72 | 8 PITG_06640  |
| 0  | 9  | 6 PITG_03467  |
| 0  | 0  | 0 PITG_05523  |
| 0  | 0  | 2 PITG_15223  |
| 0  | 6  | 15 PITG_07856 |
| 0  | 6  | 49 PITG_07797 |
| 0  | 3  | 0 PITG_14948  |
| 0  | 2  | 2 PITG_10564  |
| 0  | 8  | 6 PITG_11525  |
| 0  | 58 | 12 PITG_01409 |
| 0  | 11 | 2 PITG_06992  |
| 0  | 0  | 4 PITG_11431  |
| 0  | 0  | 6 PITG_00417  |
| 0  | 0  | 0 PITG_06429  |
| 0  | 12 | 50 PITG_13402 |
| 0  | 5  | 2 PITG_09250  |
| 0  | 10 | 14 NA         |
| 0  | 3  | 3 PITG_03934  |
| 0  | 9  | 2 PITG_12223  |
| 0  | 0  | 3 PITG_13317  |
| 0  | 8  | 2 PITG_17073  |
| 0  | 6  | 3 PITG_13102  |
| 0  | 0  | 2 PITG_07083  |
| 0  | 0  | 2 PITG_10166  |
| 0  | 43 | 38 PITG_10384 |
| 0  | 2  | 4 PITG_01653  |
| 0  | 4  | 27 PITG_01087 |

|     |     |               |
|-----|-----|---------------|
| 0   | 6   | 4 NA          |
| 0   | 25  | 2 PITG_08183  |
| 0   | 9   | 0 PITG_03266  |
| 0   | 9   | 0 PITG_05419  |
| 0   | 4   | 14 PITG_09979 |
| 0   | 6   | 13 PITG_04724 |
| 0   | 0   | 4 PITG_03301  |
| 0   | 18  | 14 NA         |
| 0   | 50  | 95 PITG_02343 |
| 0   | 9   | 4 NA          |
| 0   | 0   | 4 NA          |
| 0   | 100 | 41 NA         |
| 0   | 10  | 0 NA          |
| 0   | 0   | 0 PITG_00664  |
| 0   | 34  | 7 PITG_03178  |
| 0   | 11  | 9 PITG_15924  |
| 0   | 9   | 0 NA          |
| 0   | 3   | 2 PITG_05340  |
| 0   | 2   | 0 PITG_15569  |
| 0   | 22  | 0 PITG_11008  |
| 0   | 397 | 3071 NA       |
| 0   | 2   | 0 PITG_13283  |
| 0   | 0   | 0 PITG_09664  |
| 0   | 16  | 11 PITG_14274 |
| 0   | 5   | 2 PITG_07247  |
| 0   | 12  | 16 PITG_03161 |
| 0   | 5   | 0 NA          |
| 0   | 2   | 0 PITG_11018  |
| 0   | 11  | 4 PITG_22037  |
| 0   | 6   | 4 PITG_08229  |
| 0   | 2   | 0 NA          |
| 0   | 8   | 9 PITG_16006  |
| 0   | 2   | 0 PITG_11437  |
| 0   | 4   | 0 NA          |
| 0   | 34  | 7 PITG_01563  |
| 0   | 2   | 18 NA         |
| 0   | 6   | 2 PITG_16098  |
| 0   | 4   | 2 NA          |
| 0   | 29  | 22 NA         |
| 0   | 7   | 2 PITG_01920  |
| 0   | 0   | 0 PITG_19863  |
| 0   | 0   | 4 PITG_03624  |
| 587 | 0   | 217 NA        |
| 0   | 2   | 12 PITG_09955 |
| 0   | 36  | 10 PITG_01717 |
| 0   | 33  | 56 PITG_23205 |
| 133 | 4   | 155 NA        |

|    |    |               |
|----|----|---------------|
| 0  | 0  | 17 PITG_05458 |
| 0  | 12 | 2 NA          |
| 0  | 0  | 0 NA          |
| 0  | 0  | 0 PITG_12919  |
| 0  | 8  | 0 NA          |
| 0  | 21 | 6 PITG_17951  |
| 0  | 2  | 0 PITG_02381  |
| 0  | 8  | 0 PITG_04582  |
| 0  | 6  | 19 PITG_01606 |
| 0  | 19 | 2 NA          |
| 0  | 17 | 2 NA          |
| 0  | 35 | 42 PITG_03348 |
| 0  | 0  | 2 PITG_03165  |
| 0  | 2  | 0 PITG_13790  |
| 0  | 18 | 2 PITG_18719  |
| 0  | 0  | 15 PITG_05894 |
| 0  | 0  | 2 PITG_13826  |
| 0  | 6  | 8 PITG_07326  |
| 0  | 0  | 0 PITG_18175  |
| 0  | 27 | 0 NA          |
| 0  | 7  | 0 PITG_20790  |
| 0  | 0  | 0 PITG_01790  |
| 0  | 56 | 74 PITG_02785 |
| 0  | 0  | 2 PITG_11161  |
| 0  | 4  | 10 NA         |
| 0  | 0  | 0 NA          |
| 0  | 6  | 6 PITG_06805  |
| 0  | 51 | 4 PITG_12175  |
| 0  | 0  | 14 NA         |
| 85 | 32 | 210 NA        |
| 0  | 8  | 7 PITG_00012  |
| 0  | 0  | 2 PITG_08301  |
| 93 | 0  | 2 NA          |
| 0  | 4  | 5 NA          |
| 2  | 0  | 2 NA          |
| 0  | 0  | 0 PITG_16001  |
| 0  | 4  | 0 PITG_12988  |
| 0  | 7  | 0 NA          |
| 0  | 27 | 3 PITG_01781  |
| 0  | 0  | 8 PITG_18999  |
| 0  | 2  | 0 PITG_13397  |
| 0  | 6  | 2 PITG_05674  |
| 0  | 0  | 0 NA          |
| 12 | 6  | 25 NA         |
| 0  | 15 | 12 PITG_20203 |
| 0  | 15 | 8 PITG_13417  |
| 0  | 51 | 14 PITG_02525 |

|     |    |               |
|-----|----|---------------|
| 0   | 0  | 0 PITG_01164  |
| 0   | 26 | 8 PITG_03423  |
| 0   | 4  | 19 PITG_02840 |
| 0   | 0  | 4 PITG_10481  |
| 0   | 4  | 0 PITG_11035  |
| 0   | 2  | 0 PITG_08305  |
| 0   | 0  | 0 PITG_22997  |
| 0   | 2  | 0 PITG_15065  |
| 0   | 0  | 4 PITG_18479  |
| 0   | 0  | 0 PITG_06963  |
| 0   | 15 | 4 NA          |
| 0   | 0  | 2 PITG_03304  |
| 0   | 0  | 0 PITG_17816  |
| 0   | 5  | 4 PITG_12516  |
| 0   | 38 | 7 PITG_19410  |
| 0   | 0  | 11 PITG_00840 |
| 364 | 39 | 943 NA        |
| 0   | 2  | 0 PITG_17076  |
| 0   | 10 | 38 PITG_10922 |
| 0   | 0  | 0 NA          |
| 0   | 23 | 16 PITG_12746 |
| 0   | 15 | 2 PITG_00567  |
| 0   | 0  | 2 NA          |
| 0   | 0  | 0 NA          |
| 0   | 2  | 0 PITG_20430  |
| 0   | 13 | 4 PITG_00961  |
| 0   | 0  | 2 NA          |
| 0   | 0  | 2 PITG_12794  |
| 0   | 0  | 4 PITG_21915  |
| 0   | 10 | 6 NA          |
| 0   | 13 | 4 PITG_04711  |
| 0   | 16 | 6 PITG_03701  |
| 0   | 3  | 0 PITG_21523  |
| 0   | 2  | 2 PITG_01920  |
| 0   | 2  | 6 PITG_12149  |
| 0   | 5  | 10 PITG_01590 |
| 0   | 0  | 0 PITG_05559  |
| 0   | 4  | 0 PITG_08329  |
| 0   | 0  | 3 PITG_11561  |
| 0   | 2  | 0 NA          |
| 0   | 8  | 13 PITG_01535 |
| 0   | 66 | 14 PITG_12177 |
| 0   | 0  | 5 PITG_03740  |
| 0   | 3  | 0 PITG_08994  |
| 0   | 14 | 4 PITG_14099  |
| 0   | 0  | 0 PITG_14744  |
| 0   | 6  | 4 PITG_05526  |



|   |     |               |
|---|-----|---------------|
| 0 | 113 | 32 PITG_01055 |
| 0 | 4   | 4 PITG_01754  |
| 0 | 7   | 0 NA          |
| 0 | 0   | 7 PITG_06259  |
| 0 | 25  | 0 PITG_11178  |
| 0 | 3   | 0 PITG_22404  |
| 0 | 0   | 4 PITG_10935  |
| 0 | 0   | 2 PITG_03593  |
| 0 | 6   | 0 NA          |
| 0 | 3   | 6 PITG_13905  |
| 0 | 0   | 19 PITG_15857 |
| 0 | 2   | 4 NA          |
| 0 | 4   | 5 PITG_17015  |
| 8 | 8   | 6 PITG_15973  |
| 0 | 65  | 2 PITG_17944  |
| 0 | 0   | 3 NA          |
| 0 | 0   | 7 PITG_10595  |
| 0 | 3   | 9 PITG_06342  |
| 0 | 4   | 9 PITG_11425  |
| 0 | 4   | 22 PITG_03814 |
| 0 | 2   | 3 NA          |
| 0 | 0   | 2 PITG_22364  |
| 0 | 17  | 2 PITG_09367  |
| 0 | 4   | 6 PITG_00163  |
| 0 | 0   | 2 PITG_17907  |
| 0 | 4   | 0 PITG_15451  |
| 0 | 11  | 23 PITG_03329 |
| 0 | 10  | 2 PITG_17041  |
| 0 | 12  | 27 PITG_07153 |
| 0 | 6   | 27 PITG_22765 |
| 0 | 2   | 2 NA          |
| 0 | 38  | 14 PITG_11878 |
| 0 | 2   | 35 PITG_12053 |
| 0 | 6   | 0 PITG_05882  |
| 0 | 10  | 25 PITG_04691 |
| 0 | 0   | 2 NA          |
| 0 | 20  | 19 PITG_00444 |
| 0 | 11  | 0 PITG_16978  |
| 0 | 29  | 4 PITG_06254  |
| 0 | 10  | 6 PITG_02921  |
| 0 | 11  | 2 NA          |
| 0 | 8   | 22 PITG_03112 |
| 0 | 0   | 4 PITG_06749  |
| 0 | 0   | 2 PITG_17287  |
| 0 | 5   | 0 PITG_17672  |
| 0 | 3   | 8 PITG_02531  |
| 0 | 4   | 8 PITG_03883  |

|     |     |               |
|-----|-----|---------------|
| 0   | 12  | 2 PITG_00444  |
| 0   | 75  | 36 PITG_16099 |
| 0   | 0   | 9 PITG_14221  |
| 0   | 0   | 10 PITG_15393 |
| 3   | 0   | 0 NA          |
| 0   | 2   | 6 PITG_08205  |
| 0   | 22  | 4 NA          |
| 0   | 2   | 0 PITG_19867  |
| 0   | 4   | 0 PITG_04022  |
| 0   | 0   | 6 PITG_05818  |
| 0   | 2   | 0 NA          |
| 0   | 0   | 14 PITG_20838 |
| 0   | 0   | 0 PITG_06050  |
| 0   | 2   | 0 PITG_00204  |
| 0   | 4   | 0 NA          |
| 0   | 5   | 12 PITG_08984 |
| 0   | 17  | 17 NA         |
| 0   | 2   | 0 NA          |
| 213 | 53  | 1257 NA       |
| 0   | 16  | 7 PITG_00935  |
| 0   | 4   | 0 PITG_04725  |
| 0   | 6   | 3 PITG_01754  |
| 0   | 3   | 4 PITG_02324  |
| 0   | 0   | 0 PITG_19886  |
| 0   | 17  | 12 PITG_08738 |
| 0   | 2   | 5 PITG_04674  |
| 0   | 8   | 2 PITG_04938  |
| 0   | 0   | 0 NA          |
| 0   | 0   | 8 PITG_01332  |
| 0   | 6   | 4 PITG_12530  |
| 0   | 0   | 5 PITG_02203  |
| 0   | 0   | 0 PITG_08236  |
| 2   | 4   | 15 PITG_00179 |
| 0   | 20  | 6 PITG_20965  |
| 0   | 16  | 7 PITG_16161  |
| 0   | 14  | 3 PITG_18057  |
| 0   | 3   | 0 NA          |
| 0   | 8   | 7 PITG_05490  |
| 0   | 137 | 23 NA         |
| 0   | 6   | 8 PITG_21626  |
| 0   | 25  | 4 PITG_17831  |
| 0   | 17  | 8 PITG_11038  |
| 0   | 0   | 6 NA          |
| 0   | 48  | 14 PITG_19055 |
| 0   | 0   | 13 PITG_00399 |
| 0   | 0   | 0 NA          |
| 0   | 0   | 4 PITG_15903  |

|   |    |                |
|---|----|----------------|
| 0 | 2  | 0 PITG_01005   |
| 0 | 42 | 19 PITG_15217  |
| 0 | 10 | 30 NA          |
| 0 | 0  | 0 PITG_02711   |
| 0 | 17 | 8 NA           |
| 0 | 6  | 3 PITG_04115   |
| 0 | 3  | 19 PITG_04457  |
| 0 | 35 | 26 PITG_09564  |
| 0 | 5  | 2 PITG_11476   |
| 0 | 0  | 6 PITG_07145   |
| 0 | 11 | 8 PITG_09301   |
| 0 | 0  | 5 PITG_14013   |
| 0 | 0  | 4 PITG_02280   |
| 0 | 38 | 51 PITG_16210  |
| 0 | 4  | 10 PITG_04133  |
| 0 | 0  | 24 NA          |
| 0 | 0  | 0 PITG_09977   |
| 0 | 10 | 4 PITG_06698   |
| 0 | 2  | 2 PITG_19458   |
| 0 | 0  | 0 NA           |
| 0 | 2  | 0 PITG_08540   |
| 0 | 4  | 0 NA           |
| 0 | 37 | 72 PITG_11656  |
| 0 | 4  | 5 PITG_16900   |
| 0 | 5  | 2 PITG_15481   |
| 0 | 2  | 5 PITG_08342   |
| 0 | 27 | 102 PITG_13861 |
| 0 | 2  | 4 PITG_20706   |
| 0 | 2  | 2 PITG_03934   |
| 0 | 0  | 0 PITG_05446   |
| 0 | 0  | 8 PITG_16808   |
| 0 | 2  | 5 PITG_02992   |
| 0 | 8  | 17 PITG_18129  |
| 0 | 0  | 5 PITG_10087   |
| 0 | 0  | 0 PITG_16962   |
| 0 | 4  | 9 PITG_02867   |
| 0 | 6  | 2 PITG_01743   |
| 0 | 4  | 0 PITG_08514   |
| 0 | 4  | 14 PITG_00333  |
| 0 | 4  | 4 PITG_08984   |
| 0 | 27 | 6 PITG_04629   |
| 0 | 4  | 0 NA           |
| 0 | 2  | 7 NA           |
| 0 | 0  | 5 PITG_07778   |
| 0 | 10 | 2 PITG_03997   |
| 0 | 16 | 2 PITG_11416   |
| 0 | 19 | 5 NA           |

|     |     |               |
|-----|-----|---------------|
| 0   | 0   | 0 PITG_14014  |
| 2   | 674 | 3254 NA       |
| 0   | 11  | 10 PITG_07851 |
| 158 | 16  | 86 NA         |
| 0   | 8   | 0 PITG_01237  |
| 0   | 0   | 3 PITG_01332  |
| 0   | 14  | 0 NA          |
| 0   | 7   | 6 PITG_07272  |
| 0   | 0   | 4 PITG_15967  |
| 0   | 3   | 12 PITG_10149 |
| 0   | 5   | 4 NA          |
| 0   | 0   | 0 PITG_09535  |
| 0   | 570 | 521 NA        |
| 0   | 18  | 25 PITG_07017 |
| 0   | 5   | 7 NA          |
| 0   | 10  | 2 PITG_07305  |
| 0   | 2   | 0 NA          |
| 0   | 4   | 5 PITG_02810  |
| 0   | 0   | 0 PITG_09675  |
| 0   | 3   | 10 PITG_12537 |
| 0   | 35  | 0 PITG_22947  |
| 0   | 5   | 6 PITG_03006  |
| 0   | 0   | 2 PITG_14692  |
| 0   | 6   | 0 PITG_09024  |
| 0   | 6   | 11 PITG_03433 |
| 0   | 6   | 2 PITG_04978  |
| 0   | 4   | 40 NA         |
| 0   | 77  | 28 PITG_02826 |
| 0   | 0   | 0 PITG_22527  |
| 0   | 23  | 0 PITG_20745  |
| 0   | 0   | 0 PITG_12166  |
| 0   | 3   | 2 PITG_06513  |
| 0   | 4   | 6 PITG_17627  |
| 0   | 27  | 8 PITG_17108  |
| 0   | 0   | 2 PITG_13920  |
| 0   | 6   | 12 PITG_03260 |
| 0   | 26  | 2 NA          |
| 0   | 0   | 0 NA          |
| 0   | 8   | 6 PITG_19164  |
| 0   | 0   | 0 PITG_01800  |
| 0   | 0   | 2 PITG_19969  |
| 0   | 0   | 0 NA          |
| 0   | 2   | 2 PITG_02867  |
| 23  | 15  | 61 NA         |
| 0   | 4   | 2 NA          |
| 0   | 4   | 0 PITG_04700  |
| 0   | 0   | 2 PITG_17734  |

|     |     |                |
|-----|-----|----------------|
| 0   | 0   | 5 PITG_00664   |
| 0   | 11  | 22 NA          |
| 0   | 8   | 0 NA           |
| 0   | 0   | 0 PITG_05762   |
| 0   | 111 | 71 PITG_07248  |
| 0   | 7   | 6 PITG_06345   |
| 0   | 27  | 16 PITG_17721  |
| 0   | 7   | 6 PITG_01817   |
| 0   | 0   | 0 PITG_16131   |
| 0   | 4   | 16 PITG_20490  |
| 0   | 11  | 4 PITG_12753   |
| 0   | 0   | 0 NA           |
| 660 | 32  | 817 NA         |
| 0   | 2   | 0 PITG_03863   |
| 0   | 0   | 0 PITG_05667   |
| 0   | 2   | 9 PITG_18509   |
| 0   | 47  | 55 PITG_17315  |
| 0   | 44  | 18 PITG_22339  |
| 174 | 14  | 188 NA         |
| 0   | 11  | 0 PITG_07287   |
| 0   | 2   | 6 PITG_11743   |
| 0   | 21  | 2 PITG_11075   |
| 0   | 26  | 6 PITG_08926   |
| 0   | 24  | 37 NA          |
| 0   | 0   | 2 PITG_08440   |
| 0   | 7   | 11 PITG_02286  |
| 0   | 13  | 3 PITG_10921   |
| 0   | 56  | 10 NA          |
| 0   | 9   | 0 NA           |
| 0   | 3   | 2 NA           |
| 0   | 6   | 4 PITG_11822   |
| 0   | 17  | 27 PITG_08025  |
| 0   | 16  | 0 PITG_04012   |
| 0   | 0   | 2 PITG_19350   |
| 0   | 42  | 38 PITG_15321  |
| 0   | 8   | 18 PITG_10022  |
| 0   | 0   | 0 NA           |
| 0   | 7   | 2 PITG_07338   |
| 0   | 4   | 2 PITG_05670   |
| 0   | 2   | 16 PITG_20907  |
| 0   | 138 | 173 PITG_13769 |
| 0   | 0   | 10 NA          |
| 0   | 4   | 5 PITG_10729   |
| 0   | 2   | 7 NA           |
| 0   | 0   | 0 NA           |
| 0   | 5   | 0 PITG_17437   |
| 0   | 154 | 68 PITG_00081  |

|    |    |               |
|----|----|---------------|
| 0  | 7  | 58 PITG_05733 |
| 0  | 2  | 7 PITG_03576  |
| 0  | 41 | 29 PITG_05295 |
| 0  | 8  | 19 PITG_03878 |
| 0  | 16 | 4 PITG_07040  |
| 0  | 7  | 63 PITG_04958 |
| 0  | 35 | 0 PITG_17956  |
| 0  | 0  | 2 PITG_14765  |
| 0  | 8  | 14 PITG_16546 |
| 0  | 2  | 2 PITG_05446  |
| 0  | 2  | 10 PITG_00163 |
| 0  | 0  | 2 PITG_08026  |
| 0  | 0  | 2 NA          |
| 0  | 4  | 2 PITG_16775  |
| 0  | 4  | 11 NA         |
| 0  | 0  | 0 PITG_20378  |
| 0  | 0  | 0 PITG_08679  |
| 0  | 0  | 0 PITG_15817  |
| 0  | 0  | 0 NA          |
| 0  | 2  | 14 PITG_07243 |
| 0  | 9  | 4 PITG_21875  |
| 0  | 3  | 10 PITG_13833 |
| 0  | 10 | 6 PITG_08198  |
| 0  | 2  | 4 PITG_14730  |
| 0  | 0  | 2 PITG_03645  |
| 0  | 0  | 4 PITG_07194  |
| 0  | 0  | 0 NA          |
| 0  | 10 | 22 PITG_10351 |
| 0  | 4  | 0 PITG_10078  |
| 0  | 0  | 0 NA          |
| 0  | 0  | 0 PITG_02564  |
| 83 | 5  | 206 NA        |
| 0  | 18 | 8 PITG_07345  |
| 0  | 16 | 82 PITG_14084 |
| 0  | 2  | 2 PITG_05239  |
| 0  | 3  | 2 PITG_00048  |
| 0  | 23 | 26 PITG_01045 |
| 0  | 24 | 2 PITG_05183  |
| 0  | 22 | 8 NA          |
| 0  | 0  | 2 PITG_03734  |
| 0  | 2  | 2 PITG_14887  |
| 0  | 13 | 26 PITG_08430 |
| 0  | 4  | 11 PITG_01923 |
| 0  | 4  | 0 NA          |
| 0  | 4  | 2 PITG_01353  |
| 0  | 67 | 59 PITG_11969 |
| 0  | 7  | 11 PITG_18377 |

|     |     |                |
|-----|-----|----------------|
| 0   | 2   | 3 PITG_16958   |
| 0   | 0   | 0 NA           |
| 133 | 14  | 198 NA         |
| 0   | 5   | 2 PITG_06002   |
| 23  | 0   | 0 NA           |
| 0   | 0   | 0 NA           |
| 0   | 2   | 6 NA           |
| 0   | 0   | 0 NA           |
| 0   | 10  | 9 PITG_13421   |
| 0   | 8   | 36 PITG_01153  |
| 0   | 15  | 17 PITG_02094  |
| 0   | 115 | 60 PITG_18658  |
| 0   | 12  | 23 PITG_03987  |
| 0   | 0   | 0 PITG_03120   |
| 0   | 0   | 0 PITG_22238   |
| 0   | 0   | 2 PITG_03832   |
| 0   | 4   | 2 NA           |
| 0   | 5   | 5 PITG_18862   |
| 0   | 0   | 0 PITG_03323   |
| 0   | 2   | 2 PITG_15360   |
| 0   | 4   | 10 PITG_14704  |
| 0   | 651 | 253 PITG_18578 |
| 0   | 0   | 2 PITG_16263   |
| 0   | 4   | 6 PITG_10394   |
| 0   | 2   | 0 PITG_17026   |
| 0   | 2   | 0 NA           |
| 0   | 8   | 0 PITG_08425   |
| 0   | 9   | 12 PITG_07890  |
| 0   | 4   | 16 PITG_06887  |
| 0   | 0   | 6 PITG_07201   |
| 0   | 10  | 11 PITG_02628  |
| 0   | 21  | 23 PITG_05992  |
| 0   | 12  | 8 PITG_08333   |
| 0   | 0   | 0 PITG_22961   |
| 0   | 4   | 18 PITG_10916  |
| 0   | 6   | 11 PITG_02258  |
| 0   | 4   | 12 NA          |
| 0   | 32  | 9 PITG_16022   |
| 0   | 0   | 7 PITG_01650   |
| 0   | 10  | 0 NA           |
| 0   | 8   | 2 NA           |
| 3   | 0   | 3 NA           |
| 0   | 0   | 2 PITG_17882   |
| 0   | 4   | 2 PITG_08095   |
| 0   | 2   | 0 NA           |
| 0   | 8   | 11 PITG_15705  |
| 0   | 138 | 32 PITG_07894  |

|     |     |               |
|-----|-----|---------------|
| 0   | 66  | 19 PITG_06218 |
| 0   | 24  | 37 NA         |
| 0   | 0   | 4 PITG_05559  |
| 0   | 5   | 3 PITG_17928  |
| 0   | 0   | 2 PITG_20714  |
| 0   | 2   | 2 PITG_11759  |
| 0   | 43  | 19 PITG_02706 |
| 0   | 0   | 0 PITG_12824  |
| 0   | 0   | 0 PITG_02939  |
| 0   | 88  | 49 NA         |
| 0   | 3   | 4 NA          |
| 0   | 16  | 2 PITG_10865  |
| 0   | 6   | 4 PITG_01045  |
| 0   | 3   | 0 NA          |
| 0   | 0   | 4 PITG_10729  |
| 0   | 10  | 2 PITG_01606  |
| 0   | 13  | 0 NA          |
| 0   | 9   | 0 NA          |
| 0   | 7   | 2 PITG_09462  |
| 0   | 21  | 18 NA         |
| 0   | 2   | 0 PITG_20152  |
| 0   | 2   | 0 PITG_16983  |
| 0   | 3   | 0 PITG_14229  |
| 577 | 2   | 29 NA         |
| 0   | 0   | 0 PITG_05180  |
| 11  | 0   | 35 NA         |
| 0   | 0   | 4 PITG_10524  |
| 0   | 2   | 0 PITG_08305  |
| 0   | 4   | 10 PITG_14614 |
| 0   | 0   | 5 PITG_17964  |
| 0   | 10  | 2 PITG_00323  |
| 0   | 0   | 2 PITG_09598  |
| 0   | 0   | 2 PITG_20285  |
| 0   | 2   | 3 PITG_00717  |
| 224 | 412 | 125 NA        |
| 0   | 18  | 4 PITG_06318  |
| 0   | 4   | 0 PITG_19867  |
| 0   | 0   | 0 PITG_06322  |
| 0   | 0   | 2 PITG_00641  |
| 0   | 0   | 18 PITG_17592 |
| 0   | 0   | 0 PITG_17982  |
| 0   | 2   | 7 PITG_12000  |
| 0   | 6   | 8 PITG_01770  |
| 0   | 23  | 0 NA          |
| 0   | 12  | 0 NA          |
| 0   | 4   | 0 PITG_00572  |
| 0   | 3   | 0 NA          |



|     |     |               |
|-----|-----|---------------|
| 0   | 182 | 42 PITG_16466 |
| 0   | 26  | 10 PITG_05358 |
| 0   | 24  | 4 PITG_19168  |
| 38  | 0   | 22 NA         |
| 0   | 0   | 0 PITG_06417  |
| 0   | 4   | 2 NA          |
| 0   | 0   | 2 NA          |
| 0   | 0   | 2 PITG_13168  |
| 0   | 0   | 0 NA          |
| 0   | 2   | 0 PITG_18279  |
| 0   | 2   | 4 PITG_11043  |
| 0   | 21  | 9 NA          |
| 0   | 15  | 36 PITG_07086 |
| 0   | 0   | 0 PITG_08211  |
| 0   | 2   | 9 PITG_02608  |
| 0   | 2   | 0 NA          |
| 0   | 4   | 11 PITG_18482 |
| 0   | 2   | 0 PITG_07698  |
| 0   | 0   | 2 NA          |
| 0   | 4   | 0 PITG_06238  |
| 0   | 9   | 5 PITG_08028  |
| 0   | 9   | 5 PITG_17457  |
| 0   | 2   | 2 PITG_16939  |
| 0   | 20  | 15 PITG_13235 |
| 0   | 14  | 15 PITG_18243 |
| 0   | 0   | 2 PITG_00734  |
| 0   | 9   | 13 PITG_07946 |
| 0   | 0   | 0 PITG_00067  |
| 0   | 2   | 11 PITG_20803 |
| 0   | 11  | 6 NA          |
| 0   | 0   | 0 PITG_12527  |
| 0   | 21  | 16 PITG_17869 |
| 0   | 0   | 0 PITG_09747  |
| 201 | 85  | 95 NA         |
| 0   | 0   | 4 PITG_06939  |
| 0   | 0   | 0 NA          |
| 0   | 5   | 11 NA         |
| 0   | 10  | 10 PITG_00787 |
| 0   | 0   | 0 PITG_16972  |
| 0   | 4   | 15 PITG_06322 |
| 0   | 86  | 18 PITG_18719 |
| 0   | 135 | 45 PITG_11013 |
| 0   | 0   | 2 PITG_13255  |
| 0   | 3   | 6 PITG_18057  |
| 0   | 5   | 2 NA          |
| 0   | 4   | 0 NA          |
| 0   | 26  | 6 PITG_00732  |

|      |     |               |
|------|-----|---------------|
| 0    | 94  | 20 PITG_03282 |
| 0    | 0   | 0 PITG_14602  |
| 0    | 2   | 19 PITG_03493 |
| 0    | 2   | 7 PITG_18735  |
| 0    | 20  | 10 PITG_03011 |
| 0    | 2   | 2 NA          |
| 0    | 4   | 2 NA          |
| 0    | 7   | 0 NA          |
| 0    | 2   | 0 PITG_16562  |
| 0    | 0   | 0 NA          |
| 0    | 0   | 0 PITG_06288  |
| 0    | 2   | 4 PITG_01790  |
| 0    | 0   | 6 NA          |
| 0    | 66  | 57 PITG_07964 |
| 0    | 3   | 0 PITG_19809  |
| 0    | 2   | 2 PITG_20787  |
| 0    | 2   | 0 PITG_02985  |
| 0    | 8   | 7 PITG_03144  |
| 0    | 2   | 4 PITG_21842  |
| 0    | 3   | 11 PITG_01156 |
| 0    | 2   | 10 PITG_09781 |
| 0    | 4   | 14 PITG_01616 |
| 0    | 21  | 4 PITG_13224  |
| 0    | 4   | 3 PITG_01121  |
| 0    | 7   | 0 PITG_17783  |
| 0    | 156 | 56 PITG_04650 |
| 0    | 2   | 2 NA          |
| 0    | 32  | 12 PITG_01195 |
| 0    | 8   | 10 NA         |
| 0    | 15  | 28 PITG_08295 |
| 0    | 9   | 2 PITG_20159  |
| 0    | 61  | 15 PITG_08404 |
| 0    | 0   | 6 PITG_20073  |
| 0    | 15  | 11 PITG_17935 |
| 0    | 0   | 0 PITG_14436  |
| 0    | 2   | 10 NA         |
| 2005 | 60  | 2382 NA       |
| 0    | 0   | 0 PITG_00148  |
| 0    | 5   | 0 PITG_09566  |
| 0    | 23  | 5 PITG_04724  |
| 0    | 64  | 16 NA         |
| 0    | 0   | 9 PITG_02075  |
| 0    | 0   | 4 PITG_17387  |
| 0    | 65  | 31 PITG_18714 |
| 0    | 2   | 4 PITG_17935  |
| 0    | 0   | 8 PITG_13167  |
| 281  | 5   | 381 NA        |

|   |     |               |
|---|-----|---------------|
| 0 | 6   | 11 PITG_04317 |
| 0 | 2   | 3 PITG_16818  |
| 0 | 4   | 2 NA          |
| 0 | 15  | 23 PITG_11000 |
| 0 | 9   | 5 NA          |
| 0 | 5   | 15 PITG_14920 |
| 0 | 126 | 24 PITG_05304 |
| 0 | 3   | 4 PITG_00407  |
| 0 | 24  | 13 PITG_01543 |
| 0 | 12  | 12 NA         |
| 0 | 2   | 0 PITG_16462  |
| 0 | 6   | 3 NA          |
| 0 | 9   | 0 PITG_00117  |
| 0 | 2   | 11 PITG_21176 |
| 0 | 0   | 18 NA         |
| 0 | 3   | 2 PITG_17882  |
| 0 | 0   | 0 PITG_00275  |
| 0 | 3   | 2 PITG_08470  |
| 0 | 0   | 3 PITG_17508  |
| 0 | 12  | 0 NA          |
| 0 | 0   | 6 NA          |
| 0 | 2   | 2 NA          |
| 0 | 20  | 23 PITG_18534 |
| 0 | 0   | 2 PITG_01424  |
| 0 | 6   | 12 PITG_08237 |
| 0 | 11  | 6 PITG_19095  |
| 0 | 0   | 9 PITG_00668  |
| 0 | 7   | 0 PITG_16801  |
| 0 | 7   | 6 PITG_12663  |
| 0 | 23  | 27 NA         |
| 0 | 0   | 4 PITG_15960  |
| 0 | 4   | 0 PITG_12880  |
| 0 | 0   | 7 PITG_21619  |
| 0 | 0   | 0 PITG_15534  |
| 0 | 3   | 0 PITG_05169  |
| 0 | 58  | 3 NA          |
| 0 | 112 | 407 NA        |
| 0 | 15  | 2 PITG_00454  |
| 0 | 0   | 0 NA          |
| 0 | 2   | 9 PITG_14044  |
| 0 | 0   | 74 PITG_02339 |
| 0 | 16  | 4 PITG_03057  |
| 0 | 0   | 0 PITG_01312  |
| 0 | 4   | 2 NA          |
| 0 | 0   | 0 PITG_10384  |
| 0 | 2   | 2 NA          |
| 0 | 2   | 0 PITG_14606  |

|   |     |               |
|---|-----|---------------|
| 0 | 0   | 12 PITG_09987 |
| 0 | 21  | 3 PITG_16037  |
| 0 | 7   | 26 PITG_19856 |
| 0 | 0   | 7 NA          |
| 0 | 31  | 14 PITG_00942 |
| 0 | 5   | 0 NA          |
| 0 | 4   | 0 NA          |
| 0 | 0   | 5 PITG_05226  |
| 0 | 7   | 16 PITG_01616 |
| 0 | 2   | 4 PITG_03909  |
| 0 | 7   | 6 PITG_05654  |
| 0 | 8   | 5 PITG_04857  |
| 0 | 10  | 4 PITG_10881  |
| 0 | 165 | 9 NA          |
| 0 | 6   | 0 PITG_05221  |
| 0 | 4   | 6 PITG_01769  |
| 0 | 8   | 370 NA        |
| 0 | 2   | 4 PITG_16440  |
| 0 | 0   | 4 PITG_00310  |
| 0 | 2   | 0 PITG_07193  |
| 0 | 8   | 4 PITG_12668  |
| 0 | 4   | 0 PITG_20202  |
| 0 | 5   | 28 NA         |
| 0 | 2   | 2 PITG_21010  |
| 0 | 2   | 10 PITG_03594 |
| 0 | 4   | 0 PITG_18891  |
| 0 | 17  | 2 PITG_15091  |
| 0 | 9   | 12 PITG_21626 |
| 0 | 5   | 2 PITG_10085  |
| 0 | 18  | 8 PITG_15875  |
| 0 | 20  | 19 PITG_05638 |
| 0 | 38  | 24 PITG_06981 |
| 0 | 0   | 5 PITG_06171  |
| 0 | 4   | 0 PITG_02433  |
| 0 | 0   | 0 PITG_05600  |
| 0 | 0   | 3 PITG_13607  |
| 0 | 9   | 0 PITG_03903  |
| 0 | 49  | 0 NA          |
| 0 | 0   | 3 PITG_02231  |
| 0 | 6   | 8 PITG_01242  |
| 0 | 4   | 15 PITG_14587 |
| 0 | 0   | 2 PITG_16352  |
| 0 | 0   | 8 PITG_22323  |
| 0 | 6   | 17 PITG_03590 |
| 0 | 4   | 0 NA          |
| 0 | 11  | 8 PITG_01717  |
| 0 | 7   | 45 PITG_05377 |

|    |     |                |
|----|-----|----------------|
| 0  | 3   | 0 PITG_15136   |
| 0  | 2   | 4 PITG_14602   |
| 0  | 11  | 0 PITG_11765   |
| 0  | 20  | 2 NA           |
| 0  | 7   | 0 PITG_09770   |
| 0  | 4   | 2 PITG_11158   |
| 0  | 6   | 8 PITG_03872   |
| 0  | 3   | 18 NA          |
| 0  | 0   | 149 PITG_13198 |
| 0  | 7   | 2 PITG_12674   |
| 0  | 2   | 6 PITG_05404   |
| 0  | 0   | 0 NA           |
| 0  | 20  | 36 PITG_06662  |
| 0  | 13  | 20 PITG_04668  |
| 0  | 0   | 4 PITG_19611   |
| 0  | 0   | 2 PITG_02482   |
| 0  | 6   | 2 PITG_21416   |
| 0  | 6   | 0 PITG_02460   |
| 0  | 6   | 4 PITG_19916   |
| 0  | 8   | 6 NA           |
| 0  | 2   | 0 PITG_00021   |
| 0  | 2   | 0 NA           |
| 0  | 5   | 8 NA           |
| 0  | 2   | 5 NA           |
| 50 | 0   | 10 NA          |
| 0  | 2   | 10 PITG_19851  |
| 0  | 5   | 0 PITG_16462   |
| 0  | 8   | 9 PITG_07193   |
| 0  | 14  | 2 PITG_07026   |
| 0  | 0   | 2 PITG_04661   |
| 0  | 4   | 14 PITG_11437  |
| 0  | 0   | 0 PITG_14992   |
| 0  | 5   | 0 PITG_00955   |
| 0  | 2   | 10 PITG_08022  |
| 0  | 0   | 0 PITG_06323   |
| 0  | 0   | 0 PITG_05368   |
| 0  | 2   | 24 PITG_23160  |
| 0  | 0   | 0 PITG_07339   |
| 0  | 24  | 39 PITG_05922  |
| 0  | 8   | 13 PITG_04011  |
| 0  | 385 | 18 PITG_06212  |
| 0  | 4   | 6 PITG_12338   |
| 0  | 0   | 4 PITG_07239   |
| 0  | 0   | 0 PITG_00026   |
| 0  | 0   | 0 PITG_18210   |
| 0  | 0   | 2 PITG_21269   |
| 0  | 0   | 139 PITG_06863 |

|   |     |               |
|---|-----|---------------|
| 0 | 0   | 0 PITG_00766  |
| 0 | 0   | 0 PITG_10921  |
| 0 | 7   | 0 NA          |
| 0 | 2   | 2 PITG_01553  |
| 0 | 0   | 2 PITG_03491  |
| 0 | 3   | 4 PITG_19459  |
| 0 | 2   | 2 PITG_09664  |
| 0 | 2   | 2 PITG_04132  |
| 0 | 2   | 2 PITG_16775  |
| 0 | 0   | 0 NA          |
| 0 | 8   | 29 PITG_01761 |
| 0 | 29  | 2 NA          |
| 0 | 7   | 4 PITG_01153  |
| 0 | 17  | 7 PITG_04971  |
| 0 | 15  | 2 NA          |
| 4 | 2   | 2 NA          |
| 0 | 2   | 6 PITG_10516  |
| 0 | 15  | 0 NA          |
| 0 | 29  | 66 PITG_05664 |
| 0 | 4   | 5 PITG_09625  |
| 0 | 86  | 35 PITG_06629 |
| 0 | 38  | 10 PITG_06924 |
| 0 | 15  | 6 PITG_16432  |
| 0 | 13  | 23 PITG_18055 |
| 0 | 0   | 13 PITG_01682 |
| 0 | 10  | 2 PITG_10715  |
| 0 | 7   | 8 PITG_03024  |
| 0 | 0   | 4 PITG_17137  |
| 0 | 2   | 6 NA          |
| 0 | 4   | 2 PITG_13458  |
| 0 | 0   | 0 PITG_10012  |
| 0 | 2   | 0 PITG_00710  |
| 0 | 3   | 2 PITG_09873  |
| 0 | 22  | 23 PITG_08059 |
| 0 | 2   | 0 PITG_04181  |
| 0 | 152 | 2 PITG_13960  |
| 0 | 3   | 2 PITG_03965  |
| 0 | 0   | 0 PITG_16468  |
| 2 | 0   | 2 NA          |
| 0 | 0   | 6 PITG_03348  |
| 0 | 0   | 0 NA          |
| 0 | 10  | 6 PITG_08435  |
| 0 | 2   | 2 NA          |
| 0 | 8   | 0 PITG_05813  |
| 0 | 9   | 6 NA          |
| 0 | 0   | 2 PITG_13991  |
| 0 | 0   | 2 NA          |

|     |    |               |
|-----|----|---------------|
| 0   | 5  | 21 PITG_19220 |
| 0   | 4  | 0 PITG_13659  |
| 0   | 28 | 22 PITG_12260 |
| 0   | 15 | 4 PITG_09281  |
| 0   | 2  | 10 PITG_00577 |
| 0   | 4  | 0 NA          |
| 0   | 0  | 0 PITG_01044  |
| 0   | 6  | 12 PITG_20775 |
| 0   | 4  | 2 PITG_18397  |
| 0   | 0  | 20 PITG_09295 |
| 0   | 5  | 0 PITG_03456  |
| 0   | 6  | 0 PITG_06643  |
| 0   | 0  | 0 PITG_20787  |
| 0   | 35 | 2 PITG_01822  |
| 0   | 0  | 2 PITG_22075  |
| 0   | 14 | 4 NA          |
| 0   | 2  | 0 PITG_11146  |
| 530 | 13 | 649 NA        |
| 0   | 0  | 0 NA          |
| 0   | 36 | 20 PITG_01128 |
| 0   | 0  | 0 PITG_20717  |
| 0   | 71 | 32 PITG_12403 |
| 0   | 0  | 2 PITG_00283  |
| 0   | 0  | 4 PITG_02050  |
| 0   | 12 | 43 PITG_08454 |
| 0   | 0  | 12 PITG_00424 |
| 0   | 2  | 0 PITG_19032  |
| 0   | 0  | 4 PITG_03287  |
| 0   | 0  | 2 PITG_13829  |
| 0   | 28 | 4 PITG_02454  |
| 0   | 4  | 2 PITG_03970  |
| 0   | 27 | 0 NA          |
| 2   | 0  | 0 NA          |
| 0   | 2  | 6 PITG_07830  |
| 0   | 28 | 20 PITG_06910 |
| 0   | 7  | 6 PITG_07248  |
| 0   | 12 | 11 PITG_08572 |
| 0   | 0  | 2 PITG_17128  |
| 0   | 2  | 8 NA          |
| 0   | 6  | 34 PITG_05685 |
| 0   | 0  | 0 PITG_05456  |
| 0   | 21 | 10 PITG_01152 |
| 0   | 0  | 0 PITG_00990  |
| 0   | 4  | 0 NA          |
| 0   | 2  | 0 PITG_10161  |
| 0   | 2  | 0 PITG_10164  |
| 0   | 72 | 17 NA         |

|   |     |                |
|---|-----|----------------|
| 0 | 0   | 0 PITG_06929   |
| 0 | 247 | 49 PITG_08875  |
| 0 | 2   | 4 PITG_18067   |
| 0 | 52  | 112 PITG_01507 |
| 0 | 0   | 0 PITG_00717   |
| 2 | 114 | 4903 NA        |
| 0 | 5   | 2 PITG_05659   |
| 0 | 0   | 0 PITG_18632   |
| 0 | 0   | 0 PITG_21114   |
| 0 | 2   | 4 PITG_09393   |
| 0 | 2   | 4 PITG_19849   |
| 0 | 2   | 0 PITG_05992   |
| 0 | 0   | 0 NA           |
| 0 | 20  | 23 PITG_16930  |
| 0 | 33  | 19 PITG_12121  |
| 0 | 3   | 9 PITG_00833   |
| 0 | 60  | 29 PITG_04115  |
| 0 | 0   | 3 NA           |
| 0 | 42  | 64 PITG_19404  |
| 0 | 5   | 7 PITG_02778   |
| 0 | 16  | 0 PITG_01044   |
| 0 | 0   | 0 PITG_04243   |
| 0 | 29  | 4 NA           |
| 0 | 4   | 9 PITG_04439   |
| 0 | 4   | 67 NA          |
| 0 | 4   | 4 PITG_12266   |
| 0 | 0   | 2 PITG_04485   |
| 0 | 28  | 15 PITG_09244  |
| 0 | 2   | 0 PITG_12149   |
| 0 | 0   | 4 PITG_21114   |
| 0 | 2   | 7 NA           |
| 0 | 14  | 10 PITG_11221  |
| 0 | 0   | 0 PITG_02230   |
| 0 | 85  | 16 NA          |
| 0 | 4   | 2 NA           |
| 0 | 0   | 0 PITG_02456   |
| 0 | 4   | 18 NA          |
| 0 | 6   | 2 PITG_21926   |
| 0 | 9   | 0 PITG_02106   |
| 0 | 4   | 45 PITG_20977  |
| 0 | 2   | 3 PITG_18065   |
| 0 | 27  | 6 PITG_18158   |
| 0 | 19  | 13 PITG_17495  |
| 0 | 9   | 4 PITG_13483   |
| 0 | 4   | 0 PITG_00659   |
| 0 | 13  | 6 NA           |
| 0 | 0   | 0 PITG_21255   |



|   |    |               |
|---|----|---------------|
| 0 | 7  | 5 PITG_15883  |
| 0 | 4  | 8 PITG_03043  |
| 0 | 4  | 6 PITG_00634  |
| 0 | 2  | 0 NA          |
| 0 | 0  | 0 PITG_01683  |
| 0 | 0  | 6 PITG_06454  |
| 0 | 20 | 7 PITG_07051  |
| 0 | 6  | 24 PITG_00140 |
| 0 | 11 | 0 PITG_01270  |
| 0 | 4  | 0 PITG_02266  |
| 0 | 11 | 0 PITG_00382  |
| 0 | 7  | 0 NA          |
| 0 | 2  | 2 PITG_02748  |
| 2 | 0  | 2 NA          |
| 0 | 14 | 4 PITG_08439  |
| 0 | 2  | 0 PITG_18076  |
| 0 | 0  | 0 PITG_19915  |
| 0 | 0  | 0 PITG_23049  |
| 0 | 6  | 9 PITG_10912  |
| 0 | 0  | 0 NA          |
| 0 | 0  | 2 PITG_15731  |
| 0 | 0  | 7 PITG_19158  |
| 0 | 2  | 2 NA          |
| 0 | 0  | 4 PITG_01416  |
| 0 | 2  | 3 PITG_01049  |
| 0 | 0  | 0 PITG_03241  |
| 0 | 24 | 6 PITG_02228  |
| 0 | 15 | 2 NA          |
| 0 | 6  | 0 PITG_18624  |
| 0 | 0  | 2 PITG_04603  |
| 0 | 0  | 0 PITG_06450  |
| 0 | 8  | 17 PITG_09432 |
| 0 | 0  | 2 PITG_11437  |
| 2 | 42 | 8 PITG_05300  |
| 0 | 0  | 2 PITG_02213  |
| 0 | 8  | 2 PITG_16863  |
| 0 | 0  | 0 PITG_14267  |
| 0 | 33 | 16 PITG_13819 |
| 0 | 0  | 2 PITG_14284  |
| 0 | 0  | 5 PITG_12793  |
| 0 | 45 | 6 PITG_06661  |
| 0 | 6  | 4 PITG_07301  |
| 0 | 5  | 4 PITG_03825  |
| 0 | 0  | 2 NA          |
| 0 | 0  | 5 PITG_07166  |
| 0 | 10 | 0 PITG_17632  |
| 0 | 34 | 2 PITG_10615  |

|     |     |                |
|-----|-----|----------------|
| 0   | 6   | 14 PITG_15970  |
| 0   | 2   | 0 PITG_03266   |
| 0   | 5   | 0 PITG_13663   |
| 0   | 5   | 6 PITG_08216   |
| 0   | 13  | 0 PITG_03462   |
| 0   | 4   | 6 PITG_09389   |
| 0   | 2   | 2 NA           |
| 0   | 12  | 5 PITG_02096   |
| 0   | 2   | 0 PITG_15062   |
| 0   | 0   | 2 PITG_02456   |
| 0   | 322 | 562 PITG_07999 |
| 0   | 8   | 21 PITG_16818  |
| 0   | 4   | 11 PITG_15785  |
| 0   | 0   | 0 PITG_02439   |
| 0   | 2   | 0 NA           |
| 0   | 0   | 0 NA           |
| 0   | 6   | 17 PITG_10600  |
| 0   | 4   | 6 PITG_01878   |
| 0   | 0   | 0 NA           |
| 0   | 4   | 11 PITG_12980  |
| 0   | 0   | 7 PITG_08761   |
| 0   | 0   | 0 PITG_18787   |
| 0   | 0   | 6 PITG_10006   |
| 0   | 5   | 0 PITG_05752   |
| 0   | 25  | 54 NA          |
| 0   | 2   | 0 NA           |
| 0   | 9   | 0 NA           |
| 0   | 7   | 6 PITG_08800   |
| 0   | 4   | 2 PITG_06775   |
| 0   | 4   | 17 PITG_01817  |
| 0   | 8   | 25 NA          |
| 0   | 0   | 0 PITG_03442   |
| 0   | 22  | 8 PITG_05595   |
| 0   | 2   | 0 PITG_17250   |
| 0   | 4   | 8 NA           |
| 0   | 10  | 7 PITG_06319   |
| 0   | 18  | 0 PITG_22339   |
| 0   | 0   | 4 PITG_06001   |
| 0   | 6   | 6 PITG_13579   |
| 259 | 17  | 227 NA         |
| 0   | 98  | 12 PITG_00981  |
| 0   | 11  | 2 NA           |
| 0   | 4   | 0 PITG_12838   |
| 0   | 23  | 7 NA           |
| 0   | 0   | 0 PITG_17683   |
| 0   | 0   | 2 PITG_17075   |
| 0   | 0   | 2 PITG_08455   |

|    |    |               |
|----|----|---------------|
| 0  | 0  | 8 PITG_05667  |
| 0  | 22 | 46 PITG_15267 |
| 0  | 24 | 5 PITG_02755  |
| 0  | 92 | 45 PITG_11969 |
| 0  | 2  | 28 PITG_08173 |
| 0  | 0  | 6 PITG_03837  |
| 0  | 2  | 4 PITG_16006  |
| 2  | 4  | 247 NA        |
| 0  | 11 | 29 PITG_06911 |
| 0  | 13 | 13 PITG_00562 |
| 0  | 28 | 13 PITG_17031 |
| 0  | 0  | 6 PITG_09930  |
| 0  | 21 | 26 PITG_05517 |
| 0  | 23 | 7 PITG_06749  |
| 2  | 4  | 18 NA         |
| 0  | 0  | 0 PITG_15228  |
| 0  | 5  | 4 NA          |
| 0  | 4  | 21 PITG_21720 |
| 0  | 38 | 29 PITG_14230 |
| 0  | 0  | 0 PITG_13135  |
| 0  | 15 | 4 PITG_20153  |
| 0  | 5  | 5 NA          |
| 0  | 9  | 0 PITG_17962  |
| 0  | 0  | 0 PITG_17589  |
| 0  | 4  | 2 NA          |
| 0  | 2  | 0 NA          |
| 0  | 4  | 0 NA          |
| 0  | 73 | 2 PITG_01728  |
| 0  | 4  | 0 PITG_13367  |
| 0  | 15 | 0 PITG_05547  |
| 0  | 0  | 0 PITG_02826  |
| 0  | 0  | 0 NA          |
| 13 | 5  | 11 NA         |
| 0  | 10 | 2 NA          |
| 0  | 14 | 2 PITG_00408  |
| 0  | 0  | 0 NA          |
| 2  | 0  | 87 NA         |
| 0  | 9  | 0 PITG_16862  |
| 0  | 2  | 0 NA          |
| 0  | 0  | 0 NA          |
| 0  | 5  | 2 PITG_12674  |
| 0  | 0  | 2 PITG_00440  |
| 0  | 17 | 2 NA          |
| 0  | 13 | 0 PITG_01174  |
| 0  | 0  | 3 PITG_19153  |
| 0  | 0  | 4 PITG_03159  |
| 0  | 4  | 4 PITG_01484  |

|     |     |               |
|-----|-----|---------------|
| 0   | 8   | 57 NA         |
| 0   | 9   | 4 NA          |
| 0   | 13  | 6 NA          |
| 0   | 0   | 2 PITG_18062  |
| 0   | 14  | 14 PITG_07853 |
| 0   | 0   | 9 PITG_13826  |
| 0   | 0   | 2 PITG_04879  |
| 0   | 2   | 3 NA          |
| 0   | 18  | 15 PITG_02971 |
| 0   | 0   | 0 PITG_10308  |
| 0   | 10  | 0 NA          |
| 0   | 10  | 0 PITG_10292  |
| 0   | 11  | 4 PITG_20458  |
| 0   | 13  | 15 PITG_07087 |
| 0   | 0   | 0 NA          |
| 0   | 6   | 6 PITG_01740  |
| 0   | 0   | 0 PITG_13620  |
| 0   | 2   | 0 PITG_15470  |
| 0   | 12  | 5 PITG_00294  |
| 0   | 10  | 30 PITG_03520 |
| 0   | 0   | 0 PITG_05548  |
| 0   | 2   | 51 NA         |
| 0   | 0   | 0 PITG_12809  |
| 0   | 6   | 2 NA          |
| 0   | 0   | 0 PITG_10058  |
| 0   | 0   | 0 PITG_13135  |
| 0   | 13  | 2 PITG_06661  |
| 0   | 51  | 0 NA          |
| 0   | 2   | 2 PITG_03435  |
| 0   | 2   | 0 PITG_19153  |
| 0   | 4   | 0 NA          |
| 0   | 0   | 4 PITG_09728  |
| 167 | 4   | 250 NA        |
| 0   | 27  | 15 PITG_18297 |
| 0   | 4   | 12 NA         |
| 0   | 100 | 7 PITG_03554  |
| 0   | 0   | 6 PITG_19164  |
| 0   | 7   | 5 PITG_08470  |
| 0   | 92  | 80 PITG_19602 |
| 0   | 0   | 2 PITG_16179  |
| 0   | 11  | 2 NA          |
| 0   | 12  | 3 PITG_19219  |
| 0   | 3   | 6 PITG_17370  |
| 0   | 12  | 0 NA          |
| 0   | 6   | 3 PITG_05211  |
| 0   | 3   | 2 NA          |
| 0   | 2   | 4 PITG_21215  |

|   |     |                |
|---|-----|----------------|
| 0 | 2   | 6 PITG_21255   |
| 0 | 2   | 4 PITG_01749   |
| 0 | 22  | 10 PITG_08037  |
| 0 | 9   | 6 NA           |
| 0 | 2   | 4 PITG_12131   |
| 0 | 6   | 2 PITG_12519   |
| 0 | 0   | 0 NA           |
| 0 | 2   | 4 NA           |
| 0 | 0   | 0 PITG_03860   |
| 0 | 4   | 5 PITG_21642   |
| 0 | 156 | 85 PITG_03979  |
| 0 | 5   | 4 PITG_16864   |
| 0 | 0   | 0 NA           |
| 0 | 2   | 11 PITG_01622  |
| 0 | 6   | 0 NA           |
| 0 | 58  | 456 NA         |
| 0 | 9   | 4 NA           |
| 0 | 18  | 10 PITG_06410  |
| 0 | 0   | 0 PITG_10675   |
| 0 | 8   | 0 PITG_00334   |
| 0 | 14  | 2 NA           |
| 0 | 2   | 11 NA          |
| 0 | 8   | 4 PITG_17090   |
| 0 | 2   | 8 PITG_11437   |
| 0 | 0   | 0 PITG_03266   |
| 0 | 0   | 0 PITG_06429   |
| 0 | 0   | 10 PITG_04958  |
| 0 | 2   | 0 NA           |
| 0 | 11  | 6 PITG_16480   |
| 0 | 16  | 4 NA           |
| 0 | 4   | 5 PITG_19875   |
| 0 | 9   | 4 PITG_03473   |
| 0 | 2   | 4 PITG_18624   |
| 0 | 2   | 0 PITG_13580   |
| 0 | 10  | 0 PITG_20110   |
| 0 | 7   | 6 PITG_00568   |
| 0 | 4   | 0 NA           |
| 0 | 13  | 0 PITG_09655   |
| 0 | 0   | 20 PITG_03360  |
| 0 | 6   | 0 NA           |
| 0 | 8   | 0 NA           |
| 0 | 356 | 164 PITG_05296 |
| 0 | 0   | 5 PITG_16798   |
| 0 | 2   | 0 NA           |
| 0 | 97  | 81 PITG_13115  |
| 0 | 0   | 0 PITG_02744   |
| 0 | 2   | 2 PITG_09089   |

|   |    |               |
|---|----|---------------|
| 0 | 2  | 0 NA          |
| 0 | 5  | 6 PITG_00709  |
| 0 | 15 | 3 NA          |
| 0 | 5  | 2 PITG_10518  |
| 0 | 2  | 2 PITG_12107  |
| 0 | 5  | 5 PITG_00069  |
| 0 | 2  | 4 PITG_01186  |
| 0 | 0  | 0 NA          |
| 0 | 6  | 30 PITG_10969 |
| 0 | 4  | 6 PITG_08597  |
| 0 | 8  | 2 PITG_14136  |
| 0 | 18 | 4 NA          |
| 0 | 36 | 0 PITG_10834  |
| 0 | 0  | 4 PITG_15015  |
| 0 | 11 | 20 PITG_00295 |
| 0 | 0  | 3 PITG_16316  |
| 0 | 19 | 6 PITG_15746  |
| 0 | 0  | 15 NA         |
| 0 | 2  | 4 PITG_03753  |
| 0 | 0  | 0 NA          |
| 0 | 2  | 3 PITG_16669  |
| 0 | 2  | 0 NA          |
| 0 | 8  | 2 PITG_17721  |
| 0 | 2  | 11 PITG_12260 |
| 0 | 2  | 0 PITG_09836  |
| 0 | 2  | 2 NA          |
| 0 | 20 | 3 PITG_17122  |
| 0 | 0  | 0 NA          |
| 0 | 0  | 4 PITG_05117  |
| 0 | 0  | 2 PITG_05583  |
| 0 | 96 | 10 NA         |
| 0 | 10 | 0 PITG_10249  |
| 0 | 2  | 2 NA          |
| 0 | 0  | 0 PITG_05346  |
| 0 | 5  | 6 PITG_00703  |
| 0 | 2  | 3 PITG_06986  |
| 0 | 4  | 5 PITG_22380  |
| 0 | 0  | 0 PITG_01046  |
| 0 | 4  | 2 PITG_23158  |
| 0 | 2  | 2 PITG_09277  |
| 0 | 0  | 3 PITG_18067  |
| 0 | 0  | 0 NA          |
| 0 | 4  | 2 PITG_01864  |
| 0 | 8  | 0 PITG_00440  |
| 0 | 16 | 4 PITG_17026  |
| 0 | 0  | 0 NA          |
| 0 | 4  | 9 PITG_03414  |

|   |     |               |
|---|-----|---------------|
| 0 | 7   | 9 PITG_09872  |
| 0 | 6   | 8 PITG_19607  |
| 0 | 0   | 0 PITG_09767  |
| 0 | 4   | 0 PITG_00270  |
| 0 | 0   | 4 NA          |
| 0 | 9   | 0 PITG_04701  |
| 0 | 37  | 32 PITG_01960 |
| 0 | 0   | 0 PITG_06841  |
| 0 | 0   | 0 PITG_03076  |
| 0 | 7   | 20 PITG_16833 |
| 0 | 0   | 2 PITG_02245  |
| 0 | 0   | 2 PITG_19469  |
| 0 | 0   | 0 PITG_12357  |
| 0 | 4   | 0 PITG_01036  |
| 0 | 0   | 2 NA          |
| 0 | 0   | 0 PITG_17882  |
| 0 | 2   | 4 PITG_17408  |
| 0 | 12  | 3 PITG_06821  |
| 0 | 2   | 6 PITG_18028  |
| 0 | 2   | 2 PITG_02126  |
| 0 | 19  | 9 PITG_02561  |
| 0 | 10  | 35 NA         |
| 0 | 47  | 2 NA          |
| 0 | 0   | 0 PITG_17257  |
| 0 | 0   | 2 PITG_16020  |
| 0 | 2   | 5 PITG_03570  |
| 0 | 0   | 2 PITG_09910  |
| 0 | 4   | 10 PITG_21602 |
| 0 | 4   | 7 PITG_20345  |
| 0 | 119 | 24 PITG_06607 |
| 0 | 14  | 9 PITG_13395  |
| 0 | 12  | 4 PITG_20355  |
| 0 | 44  | 4 PITG_05487  |
| 0 | 15  | 12 NA         |
| 0 | 0   | 0 PITG_08039  |
| 0 | 0   | 2 PITG_14817  |
| 0 | 0   | 2 NA          |
| 0 | 13  | 26 PITG_02495 |
| 0 | 4   | 0 NA          |
| 0 | 0   | 0 PITG_11080  |
| 0 | 0   | 0 NA          |
| 0 | 6   | 7 PITG_05609  |
| 0 | 11  | 4 PITG_18084  |
| 0 | 2   | 6 NA          |
| 0 | 0   | 9 PITG_03336  |
| 0 | 4   | 2 PITG_17407  |
| 0 | 0   | 2 NA          |

|     |     |                |
|-----|-----|----------------|
| 0   | 0   | 0 NA           |
| 0   | 24  | 0 PITG_07948   |
| 0   | 0   | 2 PITG_15883   |
| 0   | 0   | 0 PITG_02050   |
| 2   | 20  | 70 NA          |
| 0   | 2   | 0 PITG_09247   |
| 0   | 0   | 4 PITG_05128   |
| 0   | 5   | 2 PITG_00444   |
| 0   | 0   | 0 PITG_20217   |
| 0   | 4   | 0 PITG_17591   |
| 0   | 4   | 14 PITG_13992  |
| 6   | 0   | 0 NA           |
| 0   | 20  | 47 PITG_03934  |
| 0   | 6   | 2 NA           |
| 105 | 32  | 161 NA         |
| 0   | 0   | 2 NA           |
| 0   | 2   | 0 NA           |
| 0   | 8   | 4 NA           |
| 0   | 6   | 4 PITG_12128   |
| 0   | 4   | 10 PITG_00746  |
| 0   | 0   | 2 PITG_04474   |
| 0   | 2   | 4 PITG_11492   |
| 0   | 20  | 4 PITG_14424   |
| 0   | 4   | 0 PITG_18106   |
| 0   | 0   | 2 NA           |
| 0   | 2   | 0 PITG_04683   |
| 0   | 9   | 0 PITG_13134   |
| 0   | 8   | 6 NA           |
| 0   | 3   | 2 PITG_19611   |
| 0   | 14  | 0 PITG_01772   |
| 0   | 3   | 4 PITG_00128   |
| 0   | 14  | 7 PITG_18754   |
| 0   | 19  | 6 NA           |
| 403 | 14  | 457 NA         |
| 0   | 0   | 6 PITG_10119   |
| 0   | 178 | 116 PITG_00608 |
| 0   | 261 | 6 NA           |
| 0   | 0   | 2 PITG_18057   |
| 0   | 0   | 9 PITG_01923   |
| 0   | 2   | 4 PITG_05480   |
| 0   | 17  | 44 PITG_14385  |
| 0   | 5   | 11 PITG_15661  |
| 0   | 6   | 6 NA           |
| 560 | 17  | 405 NA         |
| 0   | 10  | 4 PITG_02666   |
| 0   | 9   | 22 PITG_08142  |
| 0   | 0   | 4 PITG_18977   |



|     |    |               |
|-----|----|---------------|
| 0   | 75 | 23 NA         |
| 0   | 0  | 3 PITG_08609  |
| 0   | 6  | 0 PITG_14582  |
| 0   | 0  | 2 PITG_08532  |
| 0   | 0  | 2 PITG_08446  |
| 53  | 4  | 76 NA         |
| 0   | 2  | 0 PITG_17165  |
| 2   | 0  | 4 NA          |
| 0   | 14 | 4 PITG_03774  |
| 0   | 7  | 9 PITG_13490  |
| 0   | 2  | 4 NA          |
| 0   | 7  | 9 PITG_10663  |
| 0   | 0  | 0 PITG_10981  |
| 0   | 0  | 0 NA          |
| 0   | 0  | 10 PITG_02524 |
| 0   | 0  | 2 PITG_05367  |
| 0   | 7  | 2 PITG_09139  |
| 0   | 45 | 36 PITG_08383 |
| 0   | 4  | 0 PITG_02708  |
| 0   | 0  | 2 PITG_15329  |
| 623 | 6  | 2344 NA       |
| 0   | 10 | 102 NA        |
| 0   | 4  | 3 PITG_01134  |
| 0   | 2  | 0 PITG_12757  |
| 0   | 0  | 4 PITG_04641  |
| 0   | 0  | 0 PITG_00664  |
| 0   | 0  | 0 NA          |
| 0   | 0  | 4 NA          |
| 0   | 12 | 0 PITG_05323  |
| 0   | 6  | 13 PITG_02230 |
| 0   | 0  | 0 NA          |
| 0   | 2  | 4 PITG_08926  |
| 0   | 5  | 11 PITG_00177 |
| 0   | 2  | 0 PITG_08172  |
| 0   | 0  | 2 PITG_09250  |
| 0   | 0  | 4 PITG_14757  |
| 0   | 2  | 4 PITG_05368  |
| 0   | 0  | 7 PITG_03555  |
| 0   | 4  | 0 PITG_17626  |
| 0   | 6  | 4 PITG_09220  |
| 0   | 2  | 0 PITG_01228  |
| 0   | 0  | 0 PITG_22687  |
| 0   | 4  | 26 PITG_09439 |
| 0   | 3  | 0 PITG_01154  |
| 0   | 2  | 2 PITG_01153  |
| 0   | 0  | 0 NA          |
| 0   | 21 | 6 NA          |

|     |     |                |
|-----|-----|----------------|
| 0   | 36  | 36 NA          |
| 0   | 8   | 0 NA           |
| 0   | 0   | 2 PITG_06963   |
| 0   | 2   | 0 NA           |
| 0   | 6   | 0 PITG_05540   |
| 0   | 35  | 22 PITG_05956  |
| 0   | 6   | 6 PITG_08456   |
| 0   | 12  | 9 PITG_10813   |
| 0   | 2   | 0 PITG_10430   |
| 0   | 5   | 0 NA           |
| 0   | 4   | 0 PITG_05099   |
| 0   | 4   | 0 PITG_15929   |
| 0   | 7   | 0 PITG_18537   |
| 0   | 20  | 2 NA           |
| 0   | 12  | 6 PITG_11369   |
| 17  | 22  | 46 NA          |
| 0   | 37  | 9 PITG_17767   |
| 0   | 3   | 0 PITG_11207   |
| 0   | 4   | 82 PITG_01400  |
| 0   | 0   | 4 PITG_01941   |
| 0   | 24  | 15 PITG_01640  |
| 0   | 0   | 0 NA           |
| 0   | 7   | 2 NA           |
| 0   | 2   | 0 PITG_11980   |
| 0   | 8   | 17 PITG_12962  |
| 0   | 0   | 0 NA           |
| 464 | 65  | 919 NA         |
| 0   | 15  | 18 PITG_22381  |
| 221 | 19  | 595 NA         |
| 0   | 2   | 11 PITG_02718  |
| 0   | 0   | 0 PITG_06900   |
| 0   | 116 | 102 PITG_00489 |
| 0   | 0   | 2 PITG_18696   |
| 0   | 2   | 2 PITG_22719   |
| 0   | 0   | 6 PITG_00717   |
| 0   | 4   | 4 PITG_09855   |
| 0   | 11  | 30 PITG_02778  |
| 0   | 0   | 0 NA           |
| 2   | 30  | 28 NA          |
| 0   | 7   | 0 PITG_18441   |
| 0   | 12  | 15 PITG_01030  |
| 0   | 2   | 2 PITG_20202   |
| 0   | 2   | 2 NA           |
| 0   | 4   | 12 PITG_18963  |
| 0   | 0   | 3 PITG_05362   |
| 0   | 6   | 0 PITG_08333   |
| 0   | 2   | 0 PITG_02760   |

|   |    |                |
|---|----|----------------|
| 0 | 0  | 5 PITG_03841   |
| 0 | 2  | 0 PITG_03011   |
| 0 | 2  | 9 PITG_04049   |
| 0 | 0  | 3 PITG_13829   |
| 0 | 0  | 2 NA           |
| 0 | 2  | 0 PITG_10040   |
| 0 | 0  | 4 PITG_15843   |
| 0 | 6  | 7 PITG_02439   |
| 0 | 4  | 4 PITG_07767   |
| 0 | 0  | 0 NA           |
| 0 | 17 | 2 NA           |
| 0 | 4  | 0 PITG_18279   |
| 0 | 0  | 2 PITG_10922   |
| 0 | 6  | 2 PITG_02750   |
| 0 | 28 | 8 PITG_14176   |
| 0 | 8  | 17 PITG_16061  |
| 0 | 2  | 2 PITG_21214   |
| 0 | 2  | 2 NA           |
| 0 | 40 | 22 PITG_09728  |
| 0 | 0  | 0 PITG_03804   |
| 0 | 0  | 6 PITG_03571   |
| 0 | 14 | 0 PITG_11161   |
| 0 | 0  | 2 PITG_16468   |
| 0 | 49 | 205 PITG_08715 |
| 0 | 2  | 5 PITG_04141   |
| 0 | 16 | 6 NA           |
| 0 | 36 | 43 PITG_03149  |
| 0 | 10 | 41 PITG_19551  |
| 0 | 0  | 0 PITG_13492   |
| 0 | 9  | 8 PITG_03472   |
| 0 | 0  | 2 NA           |
| 0 | 9  | 2 PITG_02540   |
| 0 | 2  | 5 PITG_08873   |
| 0 | 45 | 44 PITG_11567  |
| 0 | 69 | 70 PITG_01056  |
| 0 | 0  | 0 PITG_20324   |
| 0 | 0  | 2 PITG_13716   |
| 0 | 6  | 2 NA           |
| 0 | 9  | 0 NA           |
| 0 | 5  | 2 PITG_18657   |
| 0 | 2  | 6 NA           |
| 0 | 2  | 4 PITG_02420   |
| 0 | 0  | 9 NA           |
| 0 | 2  | 7 PITG_00654   |
| 0 | 7  | 2 NA           |
| 0 | 0  | 2 NA           |
| 0 | 7  | 5 PITG_19514   |

|     |    |               |
|-----|----|---------------|
| 0   | 2  | 10 NA         |
| 0   | 10 | 21 PITG_05404 |
| 0   | 0  | 0 PITG_01932  |
| 0   | 0  | 6 PITG_05128  |
| 0   | 17 | 13 PITG_17925 |
| 7   | 0  | 8 NA          |
| 0   | 2  | 2 NA          |
| 0   | 5  | 0 PITG_02372  |
| 0   | 4  | 2 PITG_19046  |
| 0   | 17 | 17 PITG_05590 |
| 237 | 4  | 337 NA        |
| 206 | 0  | 8 NA          |
| 0   | 4  | 3 PITG_13048  |
| 0   | 0  | 0 NA          |
| 19  | 25 | 10 NA         |
| 0   | 0  | 0 NA          |
| 0   | 0  | 20 PITG_13968 |
| 0   | 15 | 6 NA          |
| 0   | 34 | 8 PITG_14714  |
| 0   | 2  | 12 PITG_07655 |
| 0   | 6  | 2 PITG_00377  |
| 0   | 0  | 2 PITG_14461  |
| 2   | 0  | 10 NA         |
| 0   | 2  | 0 PITG_03593  |
| 0   | 83 | 22 PITG_16365 |
| 0   | 0  | 4 PITG_17155  |
| 0   | 2  | 0 NA          |
| 3   | 0  | 6 NA          |
| 0   | 10 | 6 NA          |
| 0   | 70 | 31 PITG_02784 |
| 0   | 30 | 6 PITG_03821  |
| 0   | 2  | 0 NA          |
| 0   | 2  | 12 PITG_11704 |
| 0   | 8  | 23 PITG_00651 |
| 0   | 36 | 4 PITG_17746  |
| 0   | 3  | 2 PITG_12699  |
| 0   | 4  | 45 PITG_22991 |
| 0   | 0  | 18 NA         |
| 0   | 4  | 4 PITG_00024  |
| 0   | 79 | 0 NA          |
| 0   | 0  | 7 PITG_00075  |
| 0   | 16 | 34 PITG_17498 |
| 0   | 11 | 0 NA          |
| 0   | 3  | 9 PITG_20674  |
| 0   | 2  | 2 PITG_16930  |
| 0   | 5  | 37 PITG_00448 |
| 0   | 5  | 2 PITG_11492  |

|   |     |                |
|---|-----|----------------|
| 0 | 2   | 4 PITG_15869   |
| 0 | 7   | 0 NA           |
| 0 | 2   | 0 PITG_13196   |
| 0 | 155 | 106 PITG_02008 |
| 0 | 0   | 0 PITG_06803   |
| 0 | 4   | 0 PITG_20138   |
| 0 | 0   | 2 PITG_03408   |
| 0 | 3   | 3 NA           |
| 0 | 0   | 0 PITG_07262   |
| 0 | 2   | 4 PITG_13283   |
| 0 | 2   | 5 NA           |
| 0 | 0   | 2 PITG_09950   |
| 4 | 2   | 2 NA           |
| 0 | 0   | 0 NA           |
| 0 | 4   | 8 PITG_01523   |
| 0 | 0   | 2 PITG_07205   |
| 0 | 2   | 0 PITG_21908   |
| 0 | 13  | 9 PITG_16376   |
| 0 | 19  | 48 PITG_13753  |
| 0 | 13  | 2 PITG_19862   |
| 0 | 4   | 2 PITG_13687   |
| 0 | 3   | 7 PITG_02666   |
| 0 | 8   | 2 PITG_13599   |
| 0 | 6   | 0 PITG_14600   |
| 0 | 4   | 2 PITG_04600   |
| 0 | 4   | 7 PITG_12223   |
| 0 | 11  | 5 PITG_11202   |
| 0 | 2   | 0 PITG_01804   |
| 0 | 17  | 6 PITG_00142   |
| 0 | 2   | 3 PITG_02202   |
| 0 | 0   | 2 NA           |
| 0 | 46  | 7 PITG_01603   |
| 0 | 0   | 2 PITG_11010   |
| 0 | 21  | 0 NA           |
| 0 | 10  | 3 PITG_00187   |
| 0 | 17  | 4 NA           |
| 0 | 2   | 0 NA           |
| 0 | 2   | 2 PITG_00659   |
| 0 | 0   | 14 PITG_15505  |
| 0 | 124 | 135 PITG_20041 |
| 0 | 2   | 2 NA           |
| 0 | 2   | 2 PITG_01035   |
| 0 | 30  | 0 NA           |
| 0 | 0   | 2 PITG_13146   |
| 0 | 11  | 9 PITG_03844   |
| 0 | 0   | 0 PITG_03865   |
| 0 | 7   | 2 PITG_12357   |

|   |    |               |
|---|----|---------------|
| 0 | 2  | 4 PITG_16224  |
| 0 | 19 | 2 PITG_02852  |
| 0 | 2  | 0 PITG_02540  |
| 0 | 11 | 12 PITG_08817 |
| 0 | 0  | 5 NA          |
| 0 | 20 | 16 PITG_01721 |
| 0 | 12 | 16 PITG_06830 |
| 0 | 0  | 0 PITG_15695  |
| 0 | 0  | 4 PITG_04001  |
| 0 | 7  | 4 PITG_11476  |
| 0 | 46 | 54 PITG_14362 |
| 0 | 18 | 17 PITG_10015 |
| 0 | 7  | 15 PITG_03903 |
| 0 | 10 | 8 NA          |
| 0 | 0  | 11 PITG_18538 |
| 0 | 25 | 2 NA          |
| 0 | 4  | 7 PITG_08764  |
| 0 | 5  | 0 PITG_18331  |

ched to each contigs. The last column contains the PITG gene number from the *P. infestans* database



































































































































































































































































































































































































































































































































































































































































































































































































































































































































































































































































































































































































































































































































































































































































































































































































































































































































































































































































































































































































































































































































































































































































































































































































































































































































































































































































































































































































































































































































































































































































































































































































































































that matched to the contigs.
