# Supplementary material
Source: PubMed Central journal article supplement (PMC6638658)
Supplement: MPP-13-454-s006.pdf [file MPP-13-454-s006.pdf]

**Table S2. Table showing the normalized counts (see materials and methods for details) for all the six li**

| <b>PITG #</b>                                                       | <b>P18 - Rep1</b> | <b>P18 - Rep2</b> | <b>T3 - Rep1</b> |
|---------------------------------------------------------------------|-------------------|-------------------|------------------|
| PITG_00005   Pi protein kinase, putative (1646 nt)                  | 0                 | 55                | 0                |
| PITG_00006   Pi hypothetical protein (830 nt)                       | 11                | 40                | 0                |
| PITG_00011   Pi conserved hypothetical protein (591 nt)             | 567               | 178               | 0                |
| PITG_00012   Pi conserved hypothetical protein (636 nt)             | 11                | 15                | 0                |
| PITG_00014   Pi 26S proteasome non-ATPase regulatory subunit 13,    | 30                | 81                | 3                |
| PITG_00015   Pi DNA-binding protein, putative (804 nt)              | 0                 | 11                | 0                |
| PITG_00016   Pi DNA-binding protein, putative (708 nt)              | 2                 | 22                | 0                |
| PITG_00020   Pi conserved hypothetical protein (2785 nt)            | 18                | 44                | 0                |
| PITG_00022   Pi Multidrug/Oligosaccharidyl-lipid/Polysaccharide (MC | 0                 | 4                 | 0                |
| PITG_00023   Pi mitoferrin-like protein (1812 nt)                   | 3                 | 18                | 0                |
| PITG_00024   Pi conserved hypothetical protein (1959 nt)            | 0                 | 4                 | 0                |
| PITG_00025   Pi conserved hypothetical protein (1831 nt)            | 1                 | 10                | 0                |
| PITG_00026   Pi ankyrin-like protein (1390 nt)                      | 3                 | 14                | 0                |
| PITG_00028   Pi aminoacylase-1, putative (1660 nt)                  | 1                 | 11                | 0                |
| PITG_00029   Pi aminoacylase-1, putative (1617 nt)                  | 4                 | 64                | 0                |
| PITG_00031   Pi conserved hypothetical protein (882 nt)             | 1                 | 18                | 0                |
| PITG_00033   Pi hypothetical protein (889 nt)                       | 0                 | 0                 | 0                |
| PITG_00034   Pi aldehyde dehydrogenase, putative (1971 nt)          | 16                | 65                | 4                |
| PITG_00035   Pi 60S ribosomal export protein NMD3, putative (1739   | 1                 | 13                | 0                |
| PITG_00037   Pi conserved hypothetical protein (1307 nt)            | 6                 | 10                | 0                |
| PITG_00038   Pi myb-like DNA-binding protein, putative (2903 nt)    | 5                 | 28                | 0                |
| PITG_00039   Pi telomere length regulation protein TEL2 (2330 nt)   | 1                 | 16                | 0                |
| PITG_00042   Pi conserved hypothetical protein (362 nt)             | 8                 | 18                | 0                |
| PITG_00043   Pi conserved hypothetical protein (2137 nt)            | 1                 | 11                | 0                |
| PITG_00045   Pi myosin-like protein (4243 nt)                       | 24                | 196               | 0                |
| PITG_00046   Pi sporangia induced conserved hypothetical protein (2 | 1                 | 0                 | 0                |
| PITG_00047   Pi conserved hypothetical protein (2806 nt)            | 0                 | 3                 | 0                |
| PITG_00048   Pi conserved hypothetical protein (1230 nt)            | 6                 | 15                | 0                |
| PITG_00049   Pi conserved hypothetical protein (1998 nt)            | 8                 | 23                | 0                |
| PITG_00051   Pi DNA-directed RNA polymerase III subunit RPC6, puta  | 5                 | 8                 | 0                |
| PITG_00054   Pi Mitochondrial Protein Translocase (MPT) Family (91: | 26                | 68                | 0                |
| PITG_00055   Pi conserved hypothetical protein (1335 nt)            | 0                 | 0                 | 0                |
| PITG_00058   Pi protease inhibitor EpiC4 (519 nt)                   | 197               | 362               | 4                |
| PITG_00060   Pi hypothetical protein (647 nt)                       | 0                 | 0                 | 0                |
| PITG_00062   Pi Mitochondrial Protein Translocase (MPT) Family (31: | 43                | 121               | 7                |
| PITG_00063   Pi mitogen activated protein kinase 7 (1520 nt)        | 0                 | 5                 | 0                |
| PITG_00064   Pi conserved hypothetical protein (1572 nt)            | 3                 | 14                | 0                |
| PITG_00065   Pi conserved hypothetical protein (2385 nt)            | 2                 | 11                | 0                |
| PITG_00066   Pi conserved hypothetical protein (3837 nt)            | 0                 | 17                | 0                |
| PITG_00067   Pi conserved hypothetical protein (2386 nt)            | 27                | 45                | 0                |
| PITG_00069   Pi conserved hypothetical protein (1759 nt)            | 4                 | 15                | 0                |
| PITG_00070   Pi conserved hypothetical protein (2152 nt)            | 1                 | 11                | 0                |
| PITG_00071   Pi DNA replication complex GINS protein PSF1 (1030 nt  | 9                 | 24                | 0                |
| PITG_00074   Pi conserved hypothetical protein (1263 nt)            | 32                | 139               | 27               |
| PITG_00075   Pi conserved hypothetical protein (4353 nt)            | 2                 | 3                 | 0                |

|                                                                      |     |     |     |
|----------------------------------------------------------------------|-----|-----|-----|
| PITG_00076   Pi hypothetical protein (680 nt)                        | 0   | 0   | 0   |
| PITG_00077   Pi ubiquitin-specific protease, putative (4536 nt)      | 2   | 19  | 0   |
| PITG_00078   Pi kinesin-like protein (2754 nt)                       | 6   | 40  | 0   |
| PITG_00080   Pi protein kinase (1285 nt)                             | 4   | 8   | 0   |
| PITG_00081   Pi protein kinase, putative (2507 nt)                   | 0   | 2   | 0   |
| PITG_00082   Pi monovalent Cation:Proton Antiporter-2 (CPA2) famil   | 1   | 16  | 0   |
| PITG_00083   Pi conserved hypothetical protein (957 nt)              | 0   | 13  | 0   |
| PITG_00088   Pi pre-mRNA-splicing factor cwc2, putative (1347 nt)    | 2   | 25  | 0   |
| PITG_00089   Pi GTP-binding protein SAR1 (955 nt)                    | 490 | 313 | 4   |
| PITG_00090   Pi vacuolar sorting protein SNF8 (980 nt)               | 4   | 24  | 0   |
| PITG_00094   Pi conserved hypothetical protein (4402 nt)             | 0   | 2   | 0   |
| PITG_00101   Pi HECT E3 ubiquitin ligase, putative (6796 nt)         | 0   | 2   | 0   |
| PITG_00107   Pi conserved hypothetical protein (1243 nt)             | 2   | 0   | 0   |
| PITG_00108   Pi phospholipase D, putative (1037 nt)                  | 4   | 14  | 0   |
| PITG_00109   Pi DEAD/DEAH box RNA helicase, putative (1557 nt)       | 2   | 6   | 0   |
| PITG_00110   Pi cytochrome c1 heme lyase, putative (823 nt)          | 2   | 14  | 0   |
| PITG_00115   Pi protein kinase, putative (1413 nt)                   | 11  | 42  | 0   |
| PITG_00116   Pi SUMO ligase, putative (2368 nt)                      | 11  | 24  | 0   |
| PITG_00117   Pi splicing factor 3A (1905 nt)                         | 3   | 15  | 0   |
| PITG_00118   Pi conserved hypothetical protein (624 nt)              | 44  | 76  | 1   |
| PITG_00119   Pi hypothetical protein (1089 nt)                       | 7   | 29  | 0   |
| PITG_00121   Pi sporangia induced predicted protein (1146 nt)        | 0   | 0   | 0   |
| PITG_00123   Pi sporangia induced hypothetical protein (453 nt)      | 3   | 19  | 0   |
| PITG_00124   Pi ser/thr kinase (1093 nt)                             | 0   | 5   | 0   |
| PITG_00125   Pi conserved hypothetical protein (1671 nt)             | 20  | 80  | 0   |
| PITG_00127   Pi estradiol 17-beta-dehydrogenase, putative (1259 nt)  | 31  | 70  | 4   |
| PITG_00128   Pi conserved hypothetical protein (675 nt)              | 16  | 23  | 0   |
| PITG_00129   Pi copine-like protein, putative (1517 nt)              | 13  | 97  | 0   |
| PITG_00132   Pi phosphoglycerate kinase (1321 nt)                    | 12  | 9   | 0   |
| PITG_00133   Pi phosphoserine aminotransferase, putative (11706 nt)  | 8   | 27  | 1   |
| PITG_00134   Pi COP9 signalosome complex subunit 3, putative (150:   | 11  | 28  | 0   |
| PITG_00138   Pi conserved hypothetical protein (525 nt)              | 15  | 58  | 0   |
| PITG_00140   Pi chromodomain-helicase-DNA-binding protein, putati    | 6   | 32  | 0   |
| PITG_00142   Pi ribosome biogenesis protein NEP1, putative (870 nt)  | 1   | 5   | 0   |
| PITG_00143   Pi nuclear migration protein nudC-like protein (973 nt) | 3   | 21  | 0   |
| PITG_00144   Pi conserved hypothetical protein (1314 nt)             | 7   | 6   | 0   |
| PITG_00146   Pi glucose-6-phosphate 1-dehydrogenase (1735 nt)        | 71  | 107 | 1   |
| PITG_00147   Pi conserved hypothetical protein (891 nt)              | 7   | 5   | 0   |
| PITG_00148   Pi programmed cell death 6-interacting protein, putati  | 7   | 20  | 0   |
| PITG_00149   Pi conserved hypothetical protein (5349 nt)             | 0   | 0   | 0   |
| PITG_00150   Pi conserved hypothetical protein (1395 nt)             | 4   | 33  | 0   |
| PITG_00151   Pi conserved hypothetical protein (429 nt)              | 63  | 101 | 0   |
| PITG_00152   Pi kinesin-like protein (4503 nt)                       | 3   | 32  | 0   |
| PITG_00155   Pi conserved hypothetical protein (1187 nt)             | 6   | 117 | 0   |
| PITG_00156   Pi beta-tubulin (1747 nt)                               | 17  | 34  | 107 |
| PITG_00158   Pi conserved hypothetical protein (551 nt)              | 8   | 29  | 0   |
| PITG_00160   Pi conserved hypothetical protein (8298 nt)             | 3   | 7   | 0   |

|            |                                                           |     |     |    |
|------------|-----------------------------------------------------------|-----|-----|----|
| PITG_00163 | Pi threonine dehydratase, mitochondrial precursor (15.    | 9   | 9   | 0  |
| PITG_00164 | Pi conserved hypothetical protein (1426 nt)               | 4   | 58  | 1  |
| PITG_00165 | Pi conserved hypothetical protein (1289 nt)               | 2   | 7   | 0  |
| PITG_00166 | Pi phosphoserine phosphatase (1163 nt)                    | 15  | 36  | 0  |
| PITG_00167 | Pi cAMP-specific 3',5'-cyclic phosphodiesterase, putativ  | 23  | 56  | 0  |
| PITG_00169 | Pi conserved hypothetical protein (2737 nt)               | 2   | 9   | 0  |
| PITG_00170 | Pi vacuolar-sorting receptor, putative (1963 nt)          | 65  | 190 | 3  |
| PITG_00171 | Pi conserved hypothetical protein (1383 nt)               | 2   | 9   | 0  |
| PITG_00172 | Pi proteasome subunit alpha, putative (933 nt)            | 17  | 129 | 5  |
| PITG_00173 | Pi vesicle-associated membrane protein, putative (848     | 6   | 9   | 0  |
| PITG_00174 | Pi hypothetical protein (348 nt)                          | 16  | 32  | 0  |
| PITG_00175 | Pi conserved hypothetical protein (1993 nt)               | 20  | 6   | 0  |
| PITG_00176 | Pi presenilin-like protein (1741 nt)                      | 0   | 13  | 0  |
| PITG_00177 | Pi allantoinase (1194 nt)                                 | 1   | 6   | 0  |
| PITG_00178 | Pi dual specificity tyrosine-phosphorylation-regulated k  | 8   | 50  | 0  |
| PITG_00179 | Pi 40S ribosomal protein S12, putative (958 nt)           | 862 | 610 | 83 |
| PITG_00180 | Pi conserved hypothetical protein (1967 nt)               | 14  | 9   | 0  |
| PITG_00182 | Pi conserved hypothetical protein (354 nt)                | 13  | 49  | 0  |
| PITG_00183 | Pi dynamin-2 (2133 nt)                                    | 12  | 57  | 1  |
| PITG_00185 | Pi Voltage-gated Ion Channel (VIC) Superfamily (3986 n    | 1   | 19  | 0  |
| PITG_00186 | Pi histone acetyltransferase, putative (1618 nt)          | 6   | 11  | 0  |
| PITG_00187 | Pi protein kinase, putative (1771 nt)                     | 1   | 14  | 0  |
| PITG_00188 | Pi kinesin-like protein (3667 nt)                         | 6   | 38  | 0  |
| PITG_00189 | Pi conserved hypothetical protein (1889 nt)               | 16  | 51  | 1  |
| PITG_00190 | Pi conserved hypothetical protein (1683 nt)               | 3   | 11  | 0  |
| PITG_00191 | Pi conserved hypothetical protein (1047 nt)               | 4   | 3   | 0  |
| PITG_00192 | Pi conserved hypothetical protein (2269 nt)               | 2   | 11  | 0  |
| PITG_00193 | Pi conserved hypothetical protein (2741 nt)               | 11  | 17  | 0  |
| PITG_00194 | Pi casein kinase II subunit, putative (1305 nt)           | 71  | 134 | 3  |
| PITG_00197 | Pi conserved hypothetical protein (2757 nt)               | 1   | 19  | 0  |
| PITG_00198 | Pi conserved hypothetical protein (472 nt)                | 11  | 120 | 0  |
| PITG_00200 | Pi conserved hypothetical protein (592 nt)                | 10  | 31  | 0  |
| PITG_00203 | Pi mitochondrial-processing peptidase subunit beta (14    | 26  | 112 | 13 |
| PITG_00204 | Pi kinesin heavy chain, putative (3202 nt)                | 1   | 11  | 0  |
| PITG_00205 | Pi conserved hypothetical protein (736 nt)                | 17  | 89  | 1  |
| PITG_00206 | Pi conserved hypothetical protein (1726 nt)               | 2   | 35  | 0  |
| PITG_00207 | Pi conserved hypothetical protein (1220 nt)               | 2   | 10  | 0  |
| PITG_00208 | Pi protein kinase, putative (2334 nt)                     | 25  | 88  | 0  |
| PITG_00209 | Pi Major Facilitator Superfamily (MFS) (1943 nt)          | 24  | 47  | 0  |
| PITG_00211 | Pi adenine phosphoribosyltransferase, putative (945 nt    | 7   | 39  | 0  |
| PITG_00212 | Pi conserved hypothetical protein (1458 nt)               | 161 | 162 | 0  |
| PITG_00213 | Pi hypothetical protein (1007 nt)                         | 75  | 422 | 0  |
| PITG_00215 | Pi calmodulin-binding transcription activator, putative   | 8   | 25  | 0  |
| PITG_00216 | Pi conserved hypothetical protein (685 nt)                | 18  | 40  | 2  |
| PITG_00218 | Pi ATP-binding Cassette (ABC) Superfamily (14365 nt)      | 8   | 105 | 0  |
| PITG_00219 | Pi glucan 1,3-beta-glucosidase, putative (1188 nt)        | 49  | 331 | 3  |
| PITG_00220 | Pi general transcription factor IIH subunit, putative (96 | 7   | 14  | 0  |

|            |                                                             |     |     |    |
|------------|-------------------------------------------------------------|-----|-----|----|
| PITG_00221 | Pi tryptophan synthase, putative (1147 nt)                  | 1   | 7   | 0  |
| PITG_00223 | Pi DNA repair and recombination protein RAD54 (3231 nt)     | 4   | 11  | 0  |
| PITG_00224 | Pi conserved hypothetical protein (3393 nt)                 | 3   | 9   | 0  |
| PITG_00225 | Pi sialin-like protein (1725 nt)                            | 13  | 25  | 0  |
| PITG_00226 | Pi kinesin-like protein (3531 nt)                           | 1   | 16  | 0  |
| PITG_00227 | Pi DEAD/DEAH box RNA helicase, putative (2079 nt)           | 3   | 10  | 0  |
| PITG_00229 | Pi 26S protease regulatory subunit S10B (1485 nt)           | 11  | 52  | 2  |
| PITG_00230 | Pi peptidyl-prolyl cis-trans isomerase, mitochondrial pr    | 1   | 0   | 0  |
| PITG_00231 | Pi eyes absent family protein (2157 nt)                     | 5   | 7   | 0  |
| PITG_00232 | Pi conserved hypothetical protein (691 nt)                  | 7   | 31  | 0  |
| PITG_00233 | Pi Major Facilitator Superfamily (MFS) (1776 nt)            | 3   | 17  | 0  |
| PITG_00234 | Pi conserved hypothetical protein (2020 nt)                 | 69  | 624 | 4  |
| PITG_00235 | Pi hypothetical protein (307 nt)                            | 7   | 65  | 0  |
| PITG_00236 | Pi cyclin-H, putative (1197 nt)                             | 11  | 21  | 0  |
| PITG_00237 | Pi 2OG-Fe(II) oxygenase superfamily protein (1345 nt)       | 2   | 21  | 0  |
| PITG_00244 | Pi hypothetical protein (2329 nt)                           | 4   | 42  | 0  |
| PITG_00250 | Pi conserved hypothetical protein (1791 nt)                 | 10  | 10  | 0  |
| PITG_00251 | Pi conserved hypothetical protein (1831 nt)                 | 307 | 323 | 0  |
| PITG_00252 | Pi conserved hypothetical protein (1134 nt)                 | 26  | 23  | 0  |
| PITG_00254 | Pi mitogen-activated protein kinase, putative (2165 nt)     | 7   | 38  | 0  |
| PITG_00255 | Pi conserved hypothetical protein (438 nt)                  | 2   | 18  | 0  |
| PITG_00256 | Pi conserved hypothetical protein (1551 nt)                 | 0   | 7   | 0  |
| PITG_00257 | Pi conserved hypothetical protein (2512 nt)                 | 30  | 34  | 0  |
| PITG_00259 | Pi conserved hypothetical protein (849 nt)                  | 5   | 1   | 0  |
| PITG_00260 | Pi conserved hypothetical protein (842 nt)                  | 10  | 1   | 0  |
| PITG_00262 | Pi nuclear pore complex protein Nup93-like protein (29      | 7   | 19  | 0  |
| PITG_00263 | Pi conserved hypothetical protein (4408 nt)                 | 6   | 82  | 0  |
| PITG_00264 | Pi Delta(3,5)-Delta(2,4)-dienoyl-CoA isomerase, putativ     | 7   | 65  | 0  |
| PITG_00266 | Pi 40S ribosomal protein S10 (596 nt)                       | 513 | 401 | 43 |
| PITG_00269 | Pi conserved hypothetical protein (2585 nt)                 | 8   | 39  | 0  |
| PITG_00271 | Pi conserved hypothetical protein (1164 nt)                 | 4   | 2   | 0  |
| PITG_00272 | Pi phosphatidylinositol kinase (1338 nt)                    | 184 | 126 | 1  |
| PITG_00273 | Pi N-acetylated-alpha-linked acidic dipeptidase-like pro    | 2   | 0   | 0  |
| PITG_00274 | Pi Ryanodine-Inositol 1,4,5-triphosphate Receptor Ca2       | 3   | 15  | 0  |
| PITG_00275 | Pi Iron(III)-zinc(II) purple acid phosphatase, putative (15 | 1   | 16  | 0  |
| PITG_00279 | Pi ubiquitin carboxyl-terminal hydrolase, putative (405     | 52  | 125 | 2  |
| PITG_00280 | Pi conserved hypothetical protein (1521 nt)                 | 10  | 147 | 1  |
| PITG_00281 | Pi Major Facilitator Superfamily (MFS) (1781 nt)            | 3   | 18  | 0  |
| PITG_00282 | Pi conserved hypothetical protein (678 nt)                  | 9   | 5   | 0  |
| PITG_00283 | Pi conserved hypothetical protein (1065 nt)                 | 9   | 17  | 0  |
| PITG_00284 | Pi phospholipase D, Pi-PXTM-PLD (5424 nt)                   | 2   | 28  | 0  |
| PITG_00287 | Pi formyl-coenzyme A transferase, putative (1335 nt)        | 1   | 12  | 0  |
| PITG_00289 | Pi glutamate carboxypeptidase, putative (2350 nt)           | 14  | 6   | 0  |
| PITG_00290 | Pi conserved hypothetical protein (504 nt)                  | 3   | 1   | 0  |
| PITG_00291 | Pi scavenger mRNA-decapping enzyme DcpS, putative (         | 5   | 19  | 0  |
| PITG_00292 | Pi hypothetical protein (493 nt)                            | 16  | 27  | 0  |
| PITG_00293 | Pi conserved hypothetical protein (378 nt)                  | 14  | 101 | 2  |

|            |                                                         |    |     |   |
|------------|---------------------------------------------------------|----|-----|---|
| PITG_00294 | Pi carbohydrate esterase, putative (1017 nt)            | 7  | 8   | 0 |
| PITG_00295 | Pi conserved hypothetical protein (1460 nt)             | 10 | 24  | 0 |
| PITG_00296 | Pi protein kinase, putative (1296 nt)                   | 3  | 20  | 0 |
| PITG_00297 | Pi conserved hypothetical protein (1760 nt)             | 46 | 403 | 0 |
| PITG_00298 | Pi conserved hypothetical protein (1380 nt)             | 3  | 11  | 0 |
| PITG_00299 | Pi alpha-1,3-mannosyltransferase, putative (4859 nt)    | 0  | 16  | 0 |
| PITG_00300 | Pi 3-oxoacyl-[acyl-carrier-protein] synthase, mitochond | 4  | 24  | 0 |
| PITG_00301 | Pi conserved hypothetical protein (2787 nt)             | 0  | 2   | 0 |
| PITG_00302 | Pi phenylalanyl-tRNA synthetase beta chain (2017 nt)    | 12 | 21  | 0 |
| PITG_00308 | Pi conserved hypothetical protein (2420 nt)             | 11 | 25  | 0 |
| PITG_00309 | Pi conserved hypothetical protein (1417 nt)             | 3  | 22  | 0 |
| PITG_00311 | Pi conserved hypothetical protein (728 nt)              | 1  | 15  | 0 |
| PITG_00312 | Pi conserved hypothetical protein (411 nt)              | 2  | 10  | 0 |
| PITG_00313 | Pi hypothetical protein (1989 nt)                       | 2  | 13  | 0 |
| PITG_00314 | Pi conserved hypothetical protein (853 nt)              | 52 | 80  | 2 |
| PITG_00315 | Pi transmembrane protein, putative (4152 nt)            | 2  | 6   | 0 |
| PITG_00319 | Pi conserved hypothetical protein (744 nt)              | 77 | 136 | 1 |
| PITG_00320 | Pi conserved hypothetical protein (1593 nt)             | 5  | 51  | 0 |
| PITG_00321 | Pi conserved hypothetical protein (1365 nt)             | 0  | 0   | 0 |
| PITG_00323 | Pi conserved hypothetical protein (3543 nt)             | 2  | 18  | 0 |
| PITG_00324 | Pi neutral ceramidase, putative (2144 nt)               | 3  | 31  | 0 |
| PITG_00328 | Pi conserved hypothetical protein (1449 nt)             | 0  | 13  | 0 |
| PITG_00330 | Pi phosphatidylinositol-4-phosphate-5-kinase (PI-PIPK-I | 1  | 29  | 0 |
| PITG_00332 | Pi Monovalent Cation:Proton Antiporter-1 (CPA1) Fami    | 0  | 1   | 0 |
| PITG_00333 | Pi dihydroflavonol-4-reductase, putative (3720 nt)      | 15 | 119 | 0 |
| PITG_00334 | Pi conserved hypothetical protein (3697 nt)             | 39 | 165 | 0 |
| PITG_00336 | Pi conserved hypothetical protein (3015 nt)             | 4  | 13  | 0 |
| PITG_00337 | Pi small mechanosensitive channel family protein, puta  | 6  | 36  | 0 |
| PITG_00338 | Pi conserved hypothetical protein (978 nt)              | 7  | 53  | 0 |
| PITG_00342 | Pi conserved hypothetical protein (1537 nt)             | 13 | 0   | 0 |
| PITG_00343 | Pi conserved hypothetical protein (2037 nt)             | 4  | 11  | 0 |
| PITG_00348 | Pi myosin-like protein (4175 nt)                        | 1  | 37  | 0 |
| PITG_00349 | Pi conserved hypothetical protein (1615 nt)             | 4  | 29  | 0 |
| PITG_00350 | Pi COP9 signalosome complex subunit 1, putative (147:   | 8  | 19  | 0 |
| PITG_00351 | Pi conserved hypothetical protein (2181 nt)             | 0  | 0   | 0 |
| PITG_00352 | Pi pyruvate dehydrogenase kinase-like protein (1277 nt) | 4  | 19  | 0 |
| PITG_00359 | Pi hypothetical protein (817 nt)                        | 16 | 160 | 0 |
| PITG_00361 | Pi conserved hypothetical protein (1984 nt)             | 1  | 14  | 0 |
| PITG_00362 | Pi conserved hypothetical protein (1377 nt)             | 1  | 0   | 0 |
| PITG_00369 | Pi conserved hypothetical protein (2439 nt)             | 3  | 12  | 0 |
| PITG_00370 | Pi conserved hypothetical protein (964 nt)              | 14 | 23  | 0 |
| PITG_00375 | Pi haustorium-specific membrane protein, putative (30   | 0  | 3   | 9 |
| PITG_00377 | Pi hypothetical protein (1021 nt)                       | 5  | 10  | 0 |
| PITG_00380 | Pi sphingosine-1-phosphate lyase, putative (1905 nt)    | 26 | 63  | 0 |
| PITG_00381 | Pi serine protease family S54, putative (1348 nt)       | 27 | 19  | 0 |
| PITG_00382 | Pi hypothetical protein (756 nt)                        | 5  | 14  | 0 |
| PITG_00383 | Pi conserved hypothetical protein (1121 nt)             | 19 | 11  | 0 |

|            |                                                                                    |     |     |     |
|------------|------------------------------------------------------------------------------------|-----|-----|-----|
| PITG_00385 | Pi conserved hypothetical protein (3214 nt)                                        | 0   | 11  | 0   |
| PITG_00388 | Pi conserved hypothetical protein (2188 nt)                                        | 2   | 10  | 0   |
| PITG_00389 | Pi conserved hypothetical protein (1735 nt)                                        | 2   | 17  | 0   |
| PITG_00390 | Pi conserved hypothetical protein (1591 nt)                                        | 76  | 175 | 0   |
| PITG_00391 | Pi conserved hypothetical protein (2680 nt)                                        | 20  | 72  | 0   |
| PITG_00392 | Pi serine protease family S33, putative (907 nt)                                   | 9   | 40  | 0   |
| PITG_00393 | Pi conserved hypothetical protein (880 nt)                                         | 0   | 3   | 0   |
| PITG_00395 | Pi cathepsin B, cysteine protease family C01A, putative                            | 5   | 5   | 0   |
| PITG_00396 | Pi aspartyl protease family A01B, putative (2059 nt)                               | 16  | 28  | 0   |
| PITG_00397 | Pi eukaryotic translation initiation factor 3 subunit C, p                         | 4   | 25  | 2   |
| PITG_00398 | Pi conserved hypothetical protein (1621 nt)                                        | 4   | 10  | 0   |
| PITG_00399 | Pi nuclear ribonuclease Z, putative (989 nt)                                       | 1   | 31  | 0   |
| PITG_00400 | Pi conserved hypothetical protein (796 nt)                                         | 10  | 107 | 0   |
| PITG_00401 | Pi ribosome maturation protein SBDS, putative (1127 n                              | 14  | 45  | 0   |
| PITG_00402 | Pi conserved hypothetical protein (1268 nt)                                        | 8   | 38  | 0   |
| PITG_00404 | Pi hypothetical protein (1637 nt)                                                  | 3   | 9   | 0   |
| PITG_00406 | Pi conserved hypothetical protein (1597 nt)                                        | 33  | 41  | 0   |
| PITG_00408 | Pi transmembrane protein, putative (3475 nt)                                       | 3   | 11  | 0   |
| PITG_00409 | Pi rho GDP-dissociation inhibitor (853 nt)                                         | 6   | 18  | 0   |
| PITG_00410 | Pi bystin (1269 nt)                                                                | 1   | 12  | 0   |
| PITG_00411 | Pi adaptin-like protein (762 nt)                                                   | 7   | 28  | 0   |
| PITG_00413 | Pi Proton-dependent Oligopeptide Transporter (POT) F                               | 3   | 32  | 0   |
| PITG_00416 | Pi calcium-dependent protein kinase, putative (2172 nt                             | 7   | 17  | 0   |
| PITG_00417 | Pi Patatin like protein (3525 nt)                                                  | 8   | 18  | 0   |
| PITG_00419 | Pi conserved hypothetical protein (964 nt)                                         | 5   | 10  | 0   |
| PITG_00420 | Pi F-box protein, putative (489 nt)                                                | 1   | 3   | 0   |
| PITG_00421 | Pi conserved hypothetical protein (5341 nt)                                        | 1   | 14  | 0   |
| PITG_00422 | Pi Zinc (Zn <sup>2+</sup> )-Iron (Fe <sup>2+</sup> ) Permease (ZIP) Family (1176 n | 3   | 17  | 0   |
| PITG_00423 | Pi conserved hypothetical protein (781 nt)                                         | 37  | 40  | 0   |
| PITG_00424 | Pi conserved hypothetical protein (1020 nt)                                        | 8   | 8   | 0   |
| PITG_00426 | Pi conserved hypothetical protein (2286 nt)                                        | 2   | 17  | 0   |
| PITG_00430 | Pi conserved hypothetical protein (2326 nt)                                        | 0   | 14  | 0   |
| PITG_00431 | Pi calcineurin-like phosphoesterase, putative (1687 nt)                            | 44  | 194 | 1   |
| PITG_00437 | Pi conserved hypothetical protein (1505 nt)                                        | 2   | 12  | 0   |
| PITG_00439 | Pi conserved hypothetical protein (1452 nt)                                        | 2   | 8   | 0   |
| PITG_00440 | Pi myotubularin-like protein (4762 nt)                                             | 6   | 12  | 0   |
| PITG_00441 | Pi conserved hypothetical protein (1546 nt)                                        | 6   | 20  | 0   |
| PITG_00442 | Pi cytochrome c/c1 heme lyase, putative (1233 nt)                                  | 6   | 27  | 0   |
| PITG_00443 | Pi 40S ribosomal protein S6 (1247 nt)                                              | 495 | 966 | 102 |
| PITG_00444 | Pi conserved hypothetical protein (3254 nt)                                        | 4   | 23  | 0   |
| PITG_00447 | Pi sporangia induced hypothetical protein (1163 nt)                                | 0   | 2   | 0   |
| PITG_00448 | Pi tRNA (cytosine-5-)-methyltransferase NSUN2, putati                              | 1   | 4   | 0   |
| PITG_00449 | Pi conserved hypothetical protein (1134 nt)                                        | 2   | 11  | 0   |
| PITG_00450 | Pi conserved hypothetical protein (6882 nt)                                        | 17  | 16  | 0   |
| PITG_00451 | Pi 2-oxoisovalerate dehydrogenase subunit beta, mitoc                              | 180 | 71  | 0   |
| PITG_00452 | Pi xylulose kinase, putative (1677 nt)                                             | 8   | 11  | 0   |
| PITG_00453 | Pi lipoamide acyltransferase component of branched-c                               | 10  | 31  | 1   |

|                                                                       |     |     |    |
|-----------------------------------------------------------------------|-----|-----|----|
| PITG_00454   Pi RCC1 and BTB domain-containing protein, putative (:   | 7   | 19  | 0  |
| PITG_00455   Pi conserved hypothetical protein (1185 nt)              | 43  | 84  | 0  |
| PITG_00456   Pi conserved hypothetical protein (736 nt)               | 10  | 34  | 0  |
| PITG_00457   Pi conserved hypothetical protein (1101 nt)              | 9   | 46  | 2  |
| PITG_00458   Pi dihydrolipoyllysine-residue acetyltransferase compo   | 15  | 17  | 0  |
| PITG_00459   Pi coatomer subunit zeta-1, putative (1166 nt)           | 23  | 68  | 3  |
| PITG_00460   Pi phosphatidylinositol-4-phosphate-5-kinase (Pi-PIPKC   | 2   | 26  | 0  |
| PITG_00461   Pi Mitochondrial Carrier (MC) Family (879 nt)            | 20  | 63  | 4  |
| PITG_00466   Pi conserved hypothetical protein (2946 nt)              | 0   | 18  | 0  |
| PITG_00467   Pi conserved hypothetical protein (720 nt)               | 1   | 4   | 0  |
| PITG_00468   Pi conserved hypothetical protein (862 nt)               | 3   | 16  | 0  |
| PITG_00469   Pi conserved hypothetical protein (1536 nt)              | 8   | 46  | 0  |
| PITG_00471   Pi pyridoxal biosynthesis lyase pdxS (1094 nt)           | 843 | 173 | 14 |
| PITG_00472   Pi pre-mRNA-splicing factor syf2 (1007 nt)               | 15  | 48  | 0  |
| PITG_00473   Pi tetratricopeptide repeat protein, putative (3075 nt)  | 2   | 10  | 0  |
| PITG_00475   Pi conserved hypothetical protein (749 nt)               | 6   | 12  | 0  |
| PITG_00476   Pi conserved hypothetical protein (3579 nt)              | 0   | 13  | 0  |
| PITG_00478   Pi conserved hypothetical protein (3441 nt)              | 1   | 0   | 0  |
| PITG_00479   Pi conserved hypothetical protein (2066 nt)              | 11  | 26  | 0  |
| PITG_00482   Pi conserved hypothetical protein (2025 nt)              | 12  | 34  | 0  |
| PITG_00483   Pi pumilio-like mating protein M90 (3326 nt)             | 3   | 16  | 0  |
| PITG_00486   Pi hypothetical protein (1155 nt)                        | 23  | 71  | 0  |
| PITG_00488   Pi conserved hypothetical protein (623 nt)               | 105 | 330 | 23 |
| PITG_00489   Pi conserved hypothetical protein (1605 nt)              | 0   | 1   | 0  |
| PITG_00490   Pi protein phosphatase 2C, putative (1562 nt)            | 16  | 21  | 1  |
| PITG_00492   Pi cytochrome c peroxidase, mitochondrial precursor (:   | 28  | 313 | 5  |
| PITG_00494   Pi Drug/Metabolite Transporter (DMT) Superfamily (15     | 11  | 39  | 0  |
| PITG_00495   Pi fat-free family protein (2988 nt)                     | 3   | 29  | 0  |
| PITG_00496   Pi 3'5'-cyclic nucleotide phosphodiesterase, putative (3 | 7   | 11  | 0  |
| PITG_00499   Pi ATP-dependent RNA helicase dbp4, putative (1628 n     | 2   | 11  | 0  |
| PITG_00500   Pi conserved hypothetical protein (537 nt)               | 10  | 23  | 0  |
| PITG_00501   Pi conserved hypothetical protein (2340 nt)              | 9   | 10  | 0  |
| PITG_00502   Pi conserved hypothetical protein (4136 nt)              | 4   | 5   | 0  |
| PITG_00503   Pi Rab32 family GTPase, putative (840 nt)                | 13  | 78  | 1  |
| PITG_00504   Pi conserved hypothetical protein (1469 nt)              | 5   | 10  | 0  |
| PITG_00505   Pi ubiquitin-conjugating enzyme E2, putative (444 nt)    | 645 | 669 | 16 |
| PITG_00506   Pi syntaxin 7-like protein (1139 nt)                     | 30  | 86  | 0  |
| PITG_00509   Pi conserved hypothetical protein (1200 nt)              | 4   | 11  | 0  |
| PITG_00510   Pi hypothetical protein (2755 nt)                        | 1   | 7   | 0  |
| PITG_00513   Pi myb-like DNA-binding protein, putative (725 nt)       | 14  | 0   | 0  |
| PITG_00514   Pi myb-like DNA-binding protein, putative (627 nt)       | 5   | 8   | 0  |
| PITG_00515   Pi hypothetical protein (1168 nt)                        | 11  | 25  | 0  |
| PITG_00516   Pi conserved hypothetical protein (717 nt)               | 22  | 11  | 0  |
| PITG_00518   Pi nucleoredoxin, putative (587 nt)                      | 131 | 344 | 14 |
| PITG_00523   Pi conserved hypothetical protein (723 nt)               | 8   | 24  | 0  |
| PITG_00524   Pi conserved hypothetical protein (2049 nt)              | 3   | 16  | 0  |
| PITG_00525   Pi protein kinase, putative (2482 nt)                    | 14  | 55  | 0  |

|            |                                                            |     |     |    |
|------------|------------------------------------------------------------|-----|-----|----|
| PITG_00527 | Pi luminal-binding protein 3 precursor (2088 nt)           | 106 | 559 | 48 |
| PITG_00530 | Pi conserved hypothetical protein (1328 nt)                | 99  | 36  | 0  |
| PITG_00535 | Pi hypothetical protein (891 nt)                           | 2   | 9   | 0  |
| PITG_00536 | Pi pre-mRNA-splicing factor CWC25-like protein (1726 nt)   | 9   | 19  | 0  |
| PITG_00537 | Pi ubiquitin-conjugating enzyme E2, putative (882 nt)      | 33  | 126 | 0  |
| PITG_00542 | Pi mediator of RNA polymerase II transcription subunit     | 15  | 15  | 0  |
| PITG_00543 | Pi formate-tetrahydrofolate ligase (2336 nt)               | 4   | 61  | 2  |
| PITG_00545 | Pi nucleoredoxin, putative (600 nt)                        | 16  | 182 | 0  |
| PITG_00546 | Pi myosin-like protein (4229 nt)                           | 1   | 15  | 0  |
| PITG_00550 | Pi conserved hypothetical protein (846 nt)                 | 53  | 26  | 0  |
| PITG_00552 | Pi memo-like protein (1522 nt)                             | 490 | 248 | 0  |
| PITG_00553 | Pi 2-oxoglutarate dehydrogenase E1 component, putative     | 3   | 12  | 0  |
| PITG_00554 | Pi conserved hypothetical protein (1203 nt)                | 8   | 13  | 0  |
| PITG_00555 | Pi conserved hypothetical protein (1105 nt)                | 0   | 12  | 0  |
| PITG_00556 | Pi conserved hypothetical protein (1274 nt)                | 11  | 47  | 0  |
| PITG_00559 | Pi protein phosphatase 2C, putative (2776 nt)              | 8   | 43  | 0  |
| PITG_00560 | Pi conserved hypothetical protein (1537 nt)                | 2   | 5   | 0  |
| PITG_00561 | Pi ubiquinone biosynthesis protein COQ9 (1245 nt)          | 19  | 24  | 0  |
| PITG_00562 | Pi Mitochondrial Tricarboxylate Carrier (MTC) Family (1    | 2   | 6   | 0  |
| PITG_00563 | Pi hypothetical protein (1348 nt)                          | 28  | 21  | 0  |
| PITG_00564 | Pi conserved hypothetical protein (1083 nt)                | 659 | 488 | 0  |
| PITG_00566 | Pi uroporphyrinogen decarboxylase, putative (1407 nt)      | 7   | 32  | 1  |
| PITG_00567 | Pi conserved hypothetical protein (1012 nt)                | 1   | 7   | 0  |
| PITG_00568 | Pi Drug/Metabolite Transporter (DMT) Superfamily (18       | 8   | 30  | 0  |
| PITG_00569 | Pi phosphatidylinositol kinase (PIK-B) (3526 nt)           | 0   | 0   | 0  |
| PITG_00570 | Pi phosphatidylserine synthase, putative (1368 nt)         | 3   | 8   | 0  |
| PITG_00571 | Pi bifunctional purine biosynthesis protein PURH, putative | 6   | 16  | 0  |
| PITG_00572 | Pi conserved hypothetical protein (700 nt)                 | 7   | 5   | 0  |
| PITG_00573 | Pi tyrosine-protein phosphatase, putative (577 nt)         | 8   | 23  | 0  |
| PITG_00574 | Pi endonuclease III-like, HhH-GPD superfamily base exc     | 3   | 29  | 0  |
| PITG_00577 | Pi conserved hypothetical protein (2944 nt)                | 6   | 36  | 0  |
| PITG_00578 | Pi metalloprotease family M38, putative (1299 nt)          | 71  | 81  | 3  |
| PITG_00582 | Pi secreted RxLR effector peptide, putative (648 nt)       | 0   | 0   | 1  |
| PITG_00584 | Pi oxidoreductase, putative (1591 nt)                      | 5   | 12  | 0  |
| PITG_00585 | Pi peroxiredoxin-like protein (1365 nt)                    | 21  | 91  | 3  |
| PITG_00587 | Pi hypothetical protein (631 nt)                           | 28  | 254 | 0  |
| PITG_00588 | Pi cathepsin, cysteine protease family C01A, putative (1   | 15  | 88  | 0  |
| PITG_00589 | Pi conserved hypothetical protein (442 nt)                 | 7   | 12  | 0  |
| PITG_00590 | Pi conserved hypothetical protein (3207 nt)                | 6   | 18  | 0  |
| PITG_00592 | Pi hypothetical protein (698 nt)                           | 149 | 277 | 8  |
| PITG_00593 | Pi monooxygenase, putative (665 nt)                        | 49  | 124 | 1  |
| PITG_00594 | Pi chaperone protein dnaJ, putative (1617 nt)              | 19  | 33  | 0  |
| PITG_00595 | Pi conserved hypothetical protein (2676 nt)                | 0   | 2   | 0  |
| PITG_00603 | Pi conserved hypothetical protein (543 nt)                 | 0   | 11  | 0  |
| PITG_00608 | Pi conserved hypothetical protein (1108 nt)                | 6   | 38  | 0  |
| PITG_00613 | Pi 26S protease regulatory subunit 8 (1558 nt)             | 30  | 102 | 3  |
| PITG_00614 | Pi protein kinase (570 nt)                                 | 0   | 0   | 0  |



|            |                                                               |      |     |    |
|------------|---------------------------------------------------------------|------|-----|----|
| PITG_00622 | Pi vacuolar protein sorting-associated protein 18 (4544       | 6    | 34  | 0  |
| PITG_00623 | Pi 4-aminobutyrate aminotransferase, putative (1276 r         | 55   | 117 | 0  |
| PITG_00624 | Pi hypothetical protein (627 nt)                              | 8    | 1   | 0  |
| PITG_00625 | Pi monooxygenase, putative (672 nt)                           | 104  | 65  | 2  |
| PITG_00626 | Pi conserved hypothetical protein (2004 nt)                   | 19   | 25  | 0  |
| PITG_00627 | Pi conserved hypothetical protein (859 nt)                    | 50   | 16  | 0  |
| PITG_00628 | Pi hypothetical protein (338 nt)                              | 181  | 33  | 0  |
| PITG_00630 | Pi conserved hypothetical protein (5242 nt)                   | 0    | 11  | 0  |
| PITG_00631 | Pi conserved hypothetical protein (479 nt)                    | 1054 | 567 | 52 |
| PITG_00632 | Pi dolichyl-diphosphooligosaccharide-protein glycosyltr       | 12   | 61  | 6  |
| PITG_00633 | Pi proteasome subunit alpha type-7, threonine proteas         | 46   | 169 | 8  |
| PITG_00634 | Pi gamma-tubulin complex component 4, putative (267           | 3    | 13  | 0  |
| PITG_00635 | Pi Ryanodine-Inositol 1,4,5-triphosphate Receptor Ca2         | 0    | 13  | 0  |
| PITG_00641 | Pi conserved hypothetical protein (893 nt)                    | 5    | 13  | 0  |
| PITG_00643 | Pi protein kinase, putative (2750 nt)                         | 0    | 0   | 0  |
| PITG_00646 | Pi protein kinase, putative (2411 nt)                         | 4    | 11  | 0  |
| PITG_00647 | Pi conserved hypothetical protein (2152 nt)                   | 4    | 16  | 0  |
| PITG_00648 | Pi periodic tryptophan protein, putative (1706 nt)            | 2    | 10  | 0  |
| PITG_00649 | Pi conserved hypothetical protein (1739 nt)                   | 1    | 21  | 0  |
| PITG_00651 | Pi centromere/kinetochore protein, putative (3303 nt)         | 2    | 24  | 0  |
| PITG_00654 | Pi DNA damage-inducible protein 1, putative (1999 nt)         | 9    | 40  | 0  |
| PITG_00655 | Pi conserved hypothetical protein (1033 nt)                   | 12   | 13  | 0  |
| PITG_00656 | Pi conserved hypothetical protein (699 nt)                    | 9    | 24  | 0  |
| PITG_00658 | Pi conserved hypothetical protein (1260 nt)                   | 19   | 20  | 0  |
| PITG_00659 | Pi conserved hypothetical protein (2015 nt)                   | 2    | 25  | 0  |
| PITG_00660 | Pi conserved hypothetical protein (5732 nt)                   | 1    | 1   | 0  |
| PITG_00662 | Pi conserved hypothetical protein (4077 nt)                   | 2    | 9   | 0  |
| PITG_00663 | Pi rRNA methyltransferase, putative (3915 nt)                 | 10   | 29  | 2  |
| PITG_00664 | Pi conserved hypothetical protein (3626 nt)                   | 3    | 17  | 0  |
| PITG_00665 | Pi conserved hypothetical protein (1144 nt)                   | 10   | 27  | 0  |
| PITG_00666 | Pi kinesin-like protein (3039 nt)                             | 0    | 2   | 0  |
| PITG_00668 | Pi conserved hypothetical protein (1176 nt)                   | 3    | 21  | 0  |
| PITG_00669 | Pi conserved hypothetical protein (696 nt)                    | 0    | 11  | 0  |
| PITG_00670 | Pi conserved hypothetical protein (998 nt)                    | 7    | 12  | 0  |
| PITG_00672 | Pi conserved hypothetical protein (2295 nt)                   | 0    | 0   | 0  |
| PITG_00674 | Pi carbonic anhydrase, putative (1051 nt)                     | 1    | 5   | 0  |
| PITG_00675 | Pi conserved hypothetical protein (3391 nt)                   | 3    | 10  | 0  |
| PITG_00676 | Pi transcription factor (2527 nt)                             | 15   | 50  | 0  |
| PITG_00680 | Pi conserved hypothetical protein (2351 nt)                   | 3    | 29  | 0  |
| PITG_00681 | Pi Rab1 family GTPase, putative (1353 nt)                     | 18   | 96  | 0  |
| PITG_00682 | Pi carbonic anhydrase, putative (1115 nt)                     | 4    | 35  | 0  |
| PITG_00683 | Pi conserved hypothetical protein (567 nt)                    | 12   | 38  | 0  |
| PITG_00685 | Pi conserved hypothetical protein (645 nt)                    | 6    | 41  | 0  |
| PITG_00687 | Pi serine protease family S09X, putative (1631 nt)            | 5    | 17  | 0  |
| PITG_00688 | Pi cytochrome oxidase assembly protein, putative (179         | 60   | 27  | 0  |
| PITG_00689 | Pi Mitochondrial Carrier (MC) Family (1053 nt)                | 15   | 26  | 0  |
| PITG_00693 | Pi plasma membrane H <sup>+</sup> -ATPase, putative (2898 nt) | 18   | 209 | 6  |

|            |                                                                                     |     |     |    |
|------------|-------------------------------------------------------------------------------------|-----|-----|----|
| PITG_00694 | Pi Sulfate Permease (SulP) Family (3015 nt)                                         | 5   | 4   | 0  |
| PITG_00695 | Pi importin, putative (3310 nt)                                                     | 7   | 27  | 2  |
| PITG_00697 | Pi conserved hypothetical protein (643 nt)                                          | 6   | 28  | 1  |
| PITG_00698 | Pi conserved hypothetical protein (997 nt)                                          | 2   | 6   | 0  |
| PITG_00699 | Pi dynactin subunit 5, putative (906 nt)                                            | 10  | 25  | 0  |
| PITG_00702 | Pi conserved hypothetical protein (700 nt)                                          | 61  | 218 | 10 |
| PITG_00703 | Pi 2,4-dienoyl-CoA reductase (2346 nt)                                              | 8   | 38  | 0  |
| PITG_00705 | Pi conserved hypothetical protein (759 nt)                                          | 3   | 29  | 0  |
| PITG_00706 | Pi isoamyl acetate-hydrolyzing esterase 1, putative (82                             | 10  | 22  | 0  |
| PITG_00708 | Pi thioredoxin, putative (984 nt)                                                   | 64  | 611 | 10 |
| PITG_00709 | Pi conserved hypothetical protein (2184 nt)                                         | 4   | 35  | 0  |
| PITG_00710 | Pi isoamyl acetate-hydrolyzing esterase, putative (823                              | 3   | 3   | 0  |
| PITG_00712 | Pi isoamyl acetate-hydrolyzing esterase, putative (987                              | 16  | 82  | 0  |
| PITG_00713 | Pi synaptic vesicle glycoprotein 2A, putative (1791 nt)                             | 4   | 11  | 0  |
| PITG_00716 | Pi thioredoxin, putative (734 nt)                                                   | 44  | 92  | 3  |
| PITG_00717 | Pi myosin-like protein (6654 nt)                                                    | 2   | 15  | 0  |
| PITG_00718 | Pi mono-ADP-ribosyltransferase sirtuin-6-like protein (:                            | 11  | 31  | 0  |
| PITG_00719 | Pi acetyl-coenzyme A synthetase (2013 nt)                                           | 7   | 46  | 0  |
| PITG_00720 | Pi acetyl-coenzyme A synthetase (1983 nt)                                           | 4   | 21  | 1  |
| PITG_00722 | Pi conserved hypothetical protein (1226 nt)                                         | 23  | 17  | 0  |
| PITG_00723 | Pi conserved hypothetical protein (465 nt)                                          | 13  | 13  | 0  |
| PITG_00724 | Pi conserved hypothetical protein (460 nt)                                          | 65  | 28  | 0  |
| PITG_00725 | Pi N-acetylglucosamine-1-phosphotransferase subunits                                | 4   | 21  | 0  |
| PITG_00726 | Pi conserved hypothetical protein (1015 nt)                                         | 97  | 141 | 0  |
| PITG_00732 | Pi phosphatidylinositol kinase (PIK-K) (4015 nt)                                    | 2   | 35  | 0  |
| PITG_00733 | Pi aspartyl protease family A22B, putative (1122 nt)                                | 39  | 57  | 2  |
| PITG_00734 | Pi conserved hypothetical protein (1974 nt)                                         | 6   | 14  | 0  |
| PITG_00743 | Pi N-acetylglucosamine-1-phosphotransferase subunits                                | 6   | 14  | 0  |
| PITG_00744 | Pi conserved hypothetical protein (1400 nt)                                         | 1   | 22  | 0  |
| PITG_00746 | Pi conserved hypothetical protein (1512 nt)                                         | 2   | 25  | 0  |
| PITG_00747 | Pi hydroxymethylglutaryl-CoA lyase, mitochondrial pre                               | 20  | 77  | 0  |
| PITG_00748 | Pi conserved hypothetical protein (6289 nt)                                         | 1   | 17  | 0  |
| PITG_00750 | Pi Zinc (Zn <sup>2+</sup> )-Iron (Fe <sup>2+</sup> ) Permease (ZIP) Family (984 nt) | 5   | 0   | 0  |
| PITG_00754 | Pi gamma-glutamyltranspeptidase, putative (1671 nt)                                 | 11  | 36  | 0  |
| PITG_00755 | Pi conserved hypothetical protein (2618 nt)                                         | 0   | 14  | 0  |
| PITG_00756 | Pi carboxypeptidase, putative (1449 nt)                                             | 9   | 123 | 0  |
| PITG_00757 | Pi gamma-glutamyltranspeptidase, putative (1670 nt)                                 | 1   | 24  | 0  |
| PITG_00761 | Pi protein kinase, putative (1140 nt)                                               | 102 | 441 | 0  |
| PITG_00762 | Pi conserved hypothetical protein (1108 nt)                                         | 3   | 17  | 0  |
| PITG_00763 | Pi conserved hypothetical protein (1209 nt)                                         | 2   | 15  | 0  |
| PITG_00764 | Pi V-type proton ATPase subunit H, putative (2110 nt)                               | 19  | 87  | 1  |
| PITG_00765 | Pi flagellar adenylate kinase (844 nt)                                              | 12  | 101 | 3  |
| PITG_00766 | Pi conserved hypothetical protein (2056 nt)                                         | 2   | 9   | 0  |
| PITG_00770 | Pi conserved hypothetical protein (3380 nt)                                         | 3   | 31  | 0  |
| PITG_00771 | Pi conserved hypothetical protein (664 nt)                                          | 0   | 11  | 0  |
| PITG_00772 | Pi Major Facilitator Superfamily (MFS) (1662 nt)                                    | 0   | 0   | 0  |
| PITG_00778 | Pi conserved hypothetical protein (819 nt)                                          | 5   | 9   | 0  |

|            |                                                          |     |      |    |
|------------|----------------------------------------------------------|-----|------|----|
| PITG_00782 | Pi conserved hypothetical protein (1044 nt)              | 19  | 82   | 0  |
| PITG_00787 | Pi CRM1 C terminal Exportin 1-like protein (3496 nt)     | 20  | 52   | 0  |
| PITG_00789 | Pi conserved hypothetical protein (393 nt)               | 19  | 17   | 0  |
| PITG_00790 | Pi conserved hypothetical protein (2195 nt)              | 0   | 4    | 0  |
| PITG_00792 | Pi conserved hypothetical protein (478 nt)               | 28  | 18   | 0  |
| PITG_00793 | Pi hypothetical protein (3031 nt)                        | 5   | 67   | 0  |
| PITG_00795 | Pi conserved hypothetical protein (983 nt)               | 102 | 62   | 0  |
| PITG_00796 | Pi conserved hypothetical protein (1363 nt)              | 5   | 7    | 0  |
| PITG_00797 | Pi WD domain-containing protein (2367 nt)                | 9   | 20   | 0  |
| PITG_00798 | Pi conserved hypothetical protein (4828 nt)              | 0   | 11   | 0  |
| PITG_00804 | Pi T-complex protein 1 subunit delta (1892 nt)           | 23  | 73   | 6  |
| PITG_00806 | Pi conserved hypothetical protein (911 nt)               | 46  | 77   | 0  |
| PITG_00807 | Pi conserved hypothetical protein (570 nt)               | 12  | 10   | 1  |
| PITG_00808 | Pi conserved hypothetical protein (1619 nt)              | 10  | 33   | 0  |
| PITG_00809 | Pi M96 mating-specific protein family (4618 nt)          | 22  | 134  | 0  |
| PITG_00816 | Pi conserved hypothetical protein (2086 nt)              | 1   | 3    | 0  |
| PITG_00818 | Pi conserved hypothetical protein (4546 nt)              | 2   | 14   | 0  |
| PITG_00819 | Pi conserved hypothetical protein (3717 nt)              | 3   | 13   | 0  |
| PITG_00820 | Pi conserved hypothetical protein (1224 nt)              | 13  | 53   | 0  |
| PITG_00827 | Pi prohibitin (1137 nt)                                  | 130 | 152  | 11 |
| PITG_00828 | Pi phosphatidylinositol kinase (PIK-5) (10555 nt)        | 1   | 12   | 0  |
| PITG_00829 | Pi conserved hypothetical protein (456 nt)               | 3   | 22   | 0  |
| PITG_00830 | Pi conserved hypothetical protein (798 nt)               | 10  | 19   | 0  |
| PITG_00833 | Pi conserved hypothetical protein (1007 nt)              | 157 | 2669 | 0  |
| PITG_00834 | Pi conserved hypothetical protein (740 nt)               | 14  | 1631 | 0  |
| PITG_00839 | Pi conserved hypothetical protein (797 nt)               | 81  | 1889 | 0  |
| PITG_00840 | Pi hypothetical protein (492 nt)                         | 3   | 152  | 0  |
| PITG_00841 | Pi conserved hypothetical protein (675 nt)               | 2   | 439  | 0  |
| PITG_00842 | Pi copine-like protein, putative (974 nt)                | 43  | 115  | 0  |
| PITG_00844 | Pi copine-like protein, putative (1103 nt)               | 6   | 101  | 0  |
| PITG_00845 | Pi 3'5'-cyclic nucleotide phosphodiesterase, putative (4 | 9   | 66   | 0  |
| PITG_00846 | Pi conserved hypothetical protein (1337 nt)              | 1   | 4    | 0  |
| PITG_00849 | Pi hypothetical protein (310 nt)                         | 19  | 36   | 0  |
| PITG_00850 | Pi thioredoxin-dependent peroxide reductase, putative    | 16  | 84   | 4  |
| PITG_00851 | Pi conserved hypothetical protein (1468 nt)              | 4   | 33   | 0  |
| PITG_00852 | Pi conserved hypothetical protein (734 nt)               | 2   | 41   | 0  |
| PITG_00853 | Pi conserved hypothetical protein (642 nt)               | 1   | 10   | 0  |
| PITG_00854 | Pi conserved hypothetical protein (3184 nt)              | 20  | 32   | 0  |
| PITG_00855 | Pi conserved hypothetical protein (1091 nt)              | 41  | 52   | 0  |
| PITG_00856 | Pi conserved hypothetical protein (733 nt)               | 159 | 51   | 0  |
| PITG_00857 | Pi conserved hypothetical protein (559 nt)               | 54  | 34   | 0  |
| PITG_00858 | Pi serine/threonine protein kinase (3299 nt)             | 9   | 21   | 0  |
| PITG_00859 | Pi hypothetical protein (759 nt)                         | 6   | 6    | 0  |
| PITG_00861 | Pi conserved hypothetical protein (1384 nt)              | 21  | 87   | 0  |
| PITG_00863 | Pi DEAD/DEAH box RNA helicase, putative (1236 nt)        | 5   | 32   | 0  |
| PITG_00864 | Pi conserved hypothetical protein (2433 nt)              | 0   | 9    | 0  |
| PITG_00867 | Pi conserved hypothetical protein (1749 nt)              | 29  | 67   | 0  |

|            |                                                           |     |     |    |
|------------|-----------------------------------------------------------|-----|-----|----|
| PITG_00868 | Pi naringenin,2-oxoglutarate 3-dioxygenase, putative (9   | 0   | 2   | 0  |
| PITG_00874 | Pi carbohydrate-binding protein, putative (1714 nt)       | 0   | 16  | 0  |
| PITG_00877 | Pi putative GPI anchor protein (1686 nt)                  | 0   | 2   | 0  |
| PITG_00878 | Pi 2OG-Fe(II) oxygenase superfamily protein (1082 nt)     | 2   | 20  | 0  |
| PITG_00879 | Pi 60S ribosomal protein L30, putative (976 nt)           | 35  | 0   | 0  |
| PITG_00880 | Pi conserved hypothetical protein (1523 nt)               | 375 | 261 | 38 |
| PITG_00882 | Pi ATP-binding Cassette (ABC) Superfamily (6129 nt)       | 4   | 32  | 0  |
| PITG_00883 | Pi hypothetical protein (455 nt)                          | 8   | 15  | 0  |
| PITG_00884 | Pi conserved hypothetical protein (441 nt)                | 64  | 92  | 2  |
| PITG_00886 | Pi conserved hypothetical protein (802 nt)                | 4   | 14  | 0  |
| PITG_00887 | Pi conserved hypothetical protein (1650 nt)               | 4   | 8   | 0  |
| PITG_00888 | Pi conserved hypothetical protein (992 nt)                | 19  | 37  | 0  |
| PITG_00891 | Pi conserved hypothetical protein (837 nt)                | 0   | 1   | 0  |
| PITG_00894 | Pi carbohydrate-binding protein, putative (1712 nt)       | 1   | 23  | 0  |
| PITG_00896 | Pi phosphatidylinositol-4-phosphate-5-kinase (Pi-PIPK-I   | 0   | 9   | 0  |
| PITG_00897 | Pi conserved hypothetical protein (1429 nt)               | 0   | 0   | 0  |
| PITG_00899 | Pi prefoldin subunit 3, putative (784 nt)                 | 7   | 32  | 0  |
| PITG_00910 | Pi EF-1 guanine nucleotide exchange domain-containin      | 106 | 241 | 53 |
| PITG_00911 | Pi conserved hypothetical protein (1817 nt)               | 9   | 5   | 0  |
| PITG_00912 | Pi 3-hydroxyisobutyrate dehydrogenase, putative (1590     | 211 | 83  | 1  |
| PITG_00913 | Pi 3-hydroxyisobutyrate dehydrogenase, putative (1079     | 3   | 10  | 0  |
| PITG_00914 | Pi nuclear transcription factor Y subunit, putative (737  | 53  | 73  | 0  |
| PITG_00919 | Pi Glycoside-Pentoside-Hexuronide (GPH):Cation Symp       | 3   | 0   | 0  |
| PITG_00921 | Pi phospholipase D, Pi-PLD-like-1 (1823 nt)               | 22  | 542 | 7  |
| PITG_00925 | Pi conserved hypothetical protein (1055 nt)               | 13  | 118 | 0  |
| PITG_00929 | Pi conserved hypothetical protein (862 nt)                | 0   | 1   | 0  |
| PITG_00930 | Pi conserved hypothetical protein (883 nt)                | 102 | 85  | 3  |
| PITG_00931 | Pi conserved hypothetical protein (1452 nt)               | 33  | 71  | 1  |
| PITG_00934 | Pi hypothetical protein (1213 nt)                         | 0   | 6   | 0  |
| PITG_00936 | Pi conserved hypothetical protein (963 nt)                | 2   | 14  | 0  |
| PITG_00937 | Pi sporangia induced hypothetical protein (2469 nt)       | 0   | 0   | 0  |
| PITG_00938 | Pi conserved hypothetical protein (5558 nt)               | 3   | 20  | 0  |
| PITG_00939 | Pi conserved hypothetical protein (2435 nt)               | 35  | 5   | 0  |
| PITG_00940 | Pi pre-mRNA polyadenylation factor, putative (1593 nt)    | 1   | 14  | 0  |
| PITG_00941 | Pi 60S ribosomal protein L21-1 (1002 nt)                  | 421 | 306 | 36 |
| PITG_00942 | Pi conserved hypothetical protein (2332 nt)               | 3   | 24  | 0  |
| PITG_00943 | Pi proline synthetase co-transcribed bacterial protein (1 | 14  | 40  | 1  |
| PITG_00945 | Pi conserved hypothetical protein (1286 nt)               | 21  | 17  | 0  |
| PITG_00947 | Pi conserved hypothetical protein (1852 nt)               | 7   | 34  | 0  |
| PITG_00952 | Pi conserved hypothetical protein (1707 nt)               | 2   | 10  | 0  |
| PITG_00953 | Pi trafficking protein particle complex subunit 6B (691 n | 1   | 26  | 0  |
| PITG_00954 | Pi conserved hypothetical protein (865 nt)                | 16  | 29  | 0  |
| PITG_00955 | Pi conserved hypothetical protein (2098 nt)               | 41  | 92  | 0  |
| PITG_00960 | Pi conserved hypothetical protein (2971 nt)               | 0   | 12  | 0  |
| PITG_00961 | Pi conserved hypothetical protein (551 nt)                | 5   | 18  | 0  |
| PITG_00962 | Pi conserved hypothetical protein (774 nt)                | 1   | 6   | 0  |
| PITG_00964 | Pi conserved hypothetical protein (1301 nt)               | 41  | 40  | 0  |

|            |                                                                                                     |     |     |    |
|------------|-----------------------------------------------------------------------------------------------------|-----|-----|----|
| PITG_00965 | Pi conserved hypothetical protein (1942 nt)                                                         | 18  | 27  | 0  |
| PITG_00967 | Pi conserved hypothetical protein (896 nt)                                                          | 7   | 33  | 2  |
| PITG_00970 | Pi conserved hypothetical protein (1122 nt)                                                         | 3   | 27  | 0  |
| PITG_00971 | Pi hypothetical protein (249 nt)                                                                    | 1   | 25  | 0  |
| PITG_00973 | Pi conserved hypothetical protein (1326 nt)                                                         | 16  | 95  | 0  |
| PITG_00974 | Pi YIPF6-like protein (969 nt)                                                                      | 8   | 75  | 0  |
| PITG_00978 | Pi conserved hypothetical protein (2853 nt)                                                         | 52  | 36  | 0  |
| PITG_00979 | Pi conserved hypothetical protein (2036 nt)                                                         | 12  | 87  | 0  |
| PITG_00980 | Pi nuclear cap-binding protein subunit, putative (2845 nt)                                          | 5   | 22  | 0  |
| PITG_00981 | Pi conserved hypothetical protein (1637 nt)                                                         | 5   | 2   | 0  |
| PITG_00982 | Pi conserved hypothetical protein (4269 nt)                                                         | 3   | 28  | 0  |
| PITG_00983 | Pi UDP-N-acetylglucosamine-peptide N-acetylglucosaminyl transferase (NAG-PTase), putative (1000 nt) | 2   | 11  | 0  |
| PITG_00984 | Pi serine hydrolase (FSH1), putative (889 nt)                                                       | 188 | 42  | 0  |
| PITG_00986 | Pi peroxiredoxin-4 (979 nt)                                                                         | 24  | 37  | 0  |
| PITG_00987 | Pi conserved hypothetical protein (243 nt)                                                          | 867 | 370 | 3  |
| PITG_00988 | Pi myb-like DNA-binding protein, putative (1056 nt)                                                 | 0   | 4   | 0  |
| PITG_00989 | Pi histone demethylase, putative (3052 nt)                                                          | 9   | 23  | 0  |
| PITG_00990 | Pi conserved hypothetical protein (891 nt)                                                          | 7   | 17  | 0  |
| PITG_00991 | Pi Amino Acid-Polyamine-Organocation (APC) Family (1000 nt)                                         | 2   | 12  | 0  |
| PITG_00994 | Pi conserved hypothetical protein (1176 nt)                                                         | 20  | 42  | 0  |
| PITG_00995 | Pi conserved hypothetical protein (537 nt)                                                          | 41  | 56  | 0  |
| PITG_00996 | Pi conserved hypothetical protein (973 nt)                                                          | 4   | 11  | 0  |
| PITG_00997 | Pi conserved hypothetical protein (645 nt)                                                          | 67  | 147 | 8  |
| PITG_00998 | Pi dynein heavy chain (12571 nt)                                                                    | 0   | 12  | 0  |
| PITG_00999 | Pi protein kinase, putative (1151 nt)                                                               | 19  | 40  | 0  |
| PITG_01001 | Pi conserved hypothetical protein (2731 nt)                                                         | 2   | 11  | 0  |
| PITG_01003 | Pi conserved hypothetical protein (2352 nt)                                                         | 5   | 21  | 0  |
| PITG_01004 | Pi hypothetical protein (405 nt)                                                                    | 402 | 164 | 12 |
| PITG_01005 | Pi conserved hypothetical protein (2452 nt)                                                         | 1   | 19  | 0  |
| PITG_01006 | Pi protein kinase, putative (1464 nt)                                                               | 5   | 38  | 0  |
| PITG_01015 | Pi protein kinase, putative, pseudogene (1641 nt)                                                   | 4   | 66  | 0  |
| PITG_01019 | Pi U3 small nucleolar RNA-associated protein, putative (1000 nt)                                    | 2   | 11  | 0  |
| PITG_01020 | Pi conserved hypothetical protein (693 nt)                                                          | 6   | 17  | 0  |
| PITG_01027 | Pi SF-assemblin, putative (1047 nt)                                                                 | 0   | 0   | 0  |
| PITG_01030 | Pi SWI4 1, Peter Pan-like protein suppressor (1480 nt)                                              | 2   | 15  | 0  |
| PITG_01031 | Pi conserved hypothetical protein (2295 nt)                                                         | 9   | 62  | 0  |
| PITG_01033 | Pi Cation Diffusion Facilitator (CDF) Family (1967 nt)                                              | 3   | 15  | 0  |
| PITG_01034 | Pi Mitochondrial Carrier (MC) Family (787 nt)                                                       | 38  | 48  | 0  |
| PITG_01036 | Pi phenylalanyl-tRNA synthetase alpha chain (1874 nt)                                               | 6   | 33  | 0  |
| PITG_01040 | Pi ras family GTPase, putative (985 nt)                                                             | 0   | 1   | 0  |
| PITG_01041 | Pi 60S acidic ribosomal protein P2, putative (558 nt)                                               | 338 | 333 | 27 |
| PITG_01042 | Pi 60S ribosomal protein L22, putative (776 nt)                                                     | 492 | 407 | 42 |
| PITG_01043 | Pi 3-phosphoinositide-dependent protein kinase, putative (1000 nt)                                  | 57  | 91  | 1  |
| PITG_01044 | Pi DNA repair protein RAD50, putative (3843 nt)                                                     | 5   | 18  | 0  |
| PITG_01045 | Pi tRNA pseudouridine synthase D (TruD), putative (2400 nt)                                         | 6   | 11  | 0  |
| PITG_01046 | Pi beta-lactamase-like protein (1095 nt)                                                            | 11  | 16  | 0  |
| PITG_01047 | Pi conserved hypothetical protein (1840 nt)                                                         | 1   | 14  | 0  |

|            |                                                          |     |     |    |
|------------|----------------------------------------------------------|-----|-----|----|
| PITG_01048 | Pi conserved hypothetical protein (990 nt)               | 14  | 18  | 0  |
| PITG_01049 | Pi conserved hypothetical protein (1147 nt)              | 3   | 29  | 0  |
| PITG_01050 | Pi Amino Acid-Polyamine-Organocation (APC) Family (1     | 6   | 7   | 0  |
| PITG_01051 | Pi Amino Acid-Polyamine-Organocation (APC) Family (1     | 5   | 10  | 0  |
| PITG_01053 | Pi Amino Acid-Polyamine-Organocation (APC) Family (1     | 2   | 10  | 0  |
| PITG_01054 | Pi conserved hypothetical protein (2179 nt)              | 1   | 11  | 0  |
| PITG_01055 | Pi conserved hypothetical protein (1823 nt)              | 0   | 0   | 0  |
| PITG_01056 | Pi myb-like DNA-binding protein, putative (1658 nt)      | 5   | 7   | 0  |
| PITG_01058 | Pi conserved hypothetical protein (1365 nt)              | 6   | 12  | 0  |
| PITG_01062 | Pi S-adenosylmethionine decarboxylase proenzyme, pu      | 2   | 23  | 2  |
| PITG_01063 | Pi conserved hypothetical protein (4588 nt)              | 10  | 1   | 0  |
| PITG_01064 | Pi conserved hypothetical protein (955 nt)               | 258 | 91  | 4  |
| PITG_01065 | Pi folylpolyglutamate synthase, putative (1754 nt)       | 10  | 18  | 0  |
| PITG_01066 | Pi conserved hypothetical protein (957 nt)               | 8   | 43  | 0  |
| PITG_01067 | Pi conserved hypothetical protein (2401 nt)              | 1   | 10  | 0  |
| PITG_01068 | Pi conserved hypothetical protein (1195 nt)              | 3   | 26  | 0  |
| PITG_01070 | Pi conserved hypothetical protein (1289 nt)              | 23  | 68  | 0  |
| PITG_01072 | Pi 5-methyltetrahydropteroyltriglutamate-homocysteir     | 23  | 160 | 48 |
| PITG_01073 | Pi conserved hypothetical protein (2492 nt)              | 13  | 36  | 0  |
| PITG_01074 | Pi conserved hypothetical protein (1684 nt)              | 0   | 47  | 0  |
| PITG_01075 | Pi conserved hypothetical protein (559 nt)               | 10  | 12  | 0  |
| PITG_01076 | Pi ATPase AFG2 protein (2272 nt)                         | 12  | 16  | 0  |
| PITG_01081 | Pi Drug/Metabolite Transporter (DMT) Superfamily (13     | 1   | 8   | 0  |
| PITG_01082 | Pi ran-specific GTPase-activating protein, putative (936 | 30  | 168 | 18 |
| PITG_01083 | Pi conserved hypothetical protein (2466 nt)              | 3   | 20  | 0  |
| PITG_01084 | Pi conserved hypothetical protein (1377 nt)              | 3   | 10  | 0  |
| PITG_01085 | Pi conserved hypothetical protein (411 nt)               | 9   | 6   | 0  |
| PITG_01086 | Pi conserved hypothetical protein (1296 nt)              | 919 | 171 | 1  |
| PITG_01087 | Pi cell division protease ftsH (2050 nt)                 | 17  | 45  | 0  |
| PITG_01088 | Pi sporangia induced dynein heavy chain (12490 nt)       | 1   | 4   | 0  |
| PITG_01090 | Pi 2Fe-2S ferredoxin, putative (1203 nt)                 | 31  | 27  | 0  |
| PITG_01094 | Pi 26S proteasome non-ATPase regulatory subunit 11,      | 49  | 140 | 3  |
| PITG_01096 | Pi ATP-binding Cassette (ABC) Superfamily (2979 nt)      | 2   | 6   | 0  |
| PITG_01097 | Pi conserved hypothetical protein (8792 nt)              | 2   | 21  | 0  |
| PITG_01098 | Pi ATP-binding Cassette (ABC) superfamily (273 nt)       | 0   | 3   | 0  |
| PITG_01100 | Pi aquaporin, putative (2207 nt)                         | 2   | 26  | 0  |
| PITG_01101 | Pi aquaporin, putative (894 nt)                          | 4   | 18  | 0  |
| PITG_01102 | Pi conserved hypothetical protein (1174 nt)              | 5   | 13  | 0  |
| PITG_01103 | Pi phosphatidylinositol synthase (PIS) (986 nt)          | 43  | 34  | 0  |
| PITG_01104 | Pi ubiquitin thioesterase otubain (727 nt)               | 4   | 17  | 0  |
| PITG_01107 | Pi conserved hypothetical protein (1743 nt)              | 44  | 5   | 0  |
| PITG_01108 | Pi conserved hypothetical protein (1694 nt)              | 5   | 20  | 0  |
| PITG_01109 | Pi palmitoyltransferase, putative (1538 nt)              | 4   | 14  | 0  |
| PITG_01111 | Pi 12-oxophytodienoate reductase, putative (1437 nt)     | 9   | 9   | 0  |
| PITG_01112 | Pi UDP-3-O-[3-hydroxymyristoyl] glucosamine N-acyltr     | 3   | 17  | 0  |
| PITG_01113 | Pi conserved hypothetical protein (1345 nt)              | 2   | 9   | 0  |
| PITG_01118 | Pi conserved hypothetical protein (1302 nt)              | 1   | 11  | 0  |

|            |                                                            |     |     |   |
|------------|------------------------------------------------------------|-----|-----|---|
| PITG_01119 | Pi conserved hypothetical protein (610 nt)                 | 177 | 86  | 1 |
| PITG_01120 | Pi conserved hypothetical protein (231 nt)                 | 105 | 70  | 3 |
| PITG_01121 | Pi ras family GTPase, putative (1832 nt)                   | 13  | 20  | 0 |
| PITG_01123 | Pi conserved hypothetical protein (654 nt)                 | 6   | 17  | 0 |
| PITG_01124 | Pi conserved hypothetical protein (816 nt)                 | 4   | 21  | 0 |
| PITG_01125 | Pi Drug/Metabolite Transporter (DMT) Superfamily (17       | 7   | 9   | 0 |
| PITG_01127 | Pi conserved hypothetical protein (2528 nt)                | 6   | 25  | 0 |
| PITG_01128 | Pi putative fatty-acid-CoA ligase, putative (2690 nt)      | 8   | 34  | 0 |
| PITG_01130 | Pi conserved hypothetical protein (1730 nt)                | 0   | 3   | 0 |
| PITG_01131 | Pi conserved hypothetical protein (1300 nt)                | 3   | 11  | 7 |
| PITG_01133 | Pi conserved hypothetical protein (1122 nt)                | 1   | 15  | 0 |
| PITG_01134 | Pi conserved hypothetical protein (9050 nt)                | 1   | 12  | 0 |
| PITG_01136 | Pi conserved hypothetical protein (3534 nt)                | 0   | 0   | 0 |
| PITG_01138 | Pi beta-galactosidase, putative (2469 nt)                  | 19  | 48  | 0 |
| PITG_01139 | Pi conserved hypothetical protein (744 nt)                 | 7   | 55  | 0 |
| PITG_01142 | Pi protein kinase, putative (1185 nt)                      | 0   | 11  | 0 |
| PITG_01143 | Pi conserved hypothetical protein (838 nt)                 | 0   | 0   | 0 |
| PITG_01144 | Pi conserved hypothetical protein (1097 nt)                | 28  | 33  | 1 |
| PITG_01145 | Pi hypothetical protein (807 nt)                           | 39  | 57  | 0 |
| PITG_01146 | Pi selenide, water dikinase, putative (1363 nt)            | 6   | 46  | 0 |
| PITG_01152 | Pi conserved hypothetical protein (2485 nt)                | 0   | 11  | 0 |
| PITG_01153 | Pi conserved hypothetical protein (11340 nt)               | 1   | 12  | 0 |
| PITG_01154 | Pi gamma-tubulin complex component, putative (3261         | 3   | 28  | 0 |
| PITG_01155 | Pi conserved hypothetical protein (1395 nt)                | 32  | 37  | 0 |
| PITG_01156 | Pi conserved hypothetical protein (1452 nt)                | 3   | 14  | 0 |
| PITG_01159 | Pi conserved hypothetical protein (720 nt)                 | 2   | 20  | 0 |
| PITG_01164 | Pi glucan 1,3-beta-glucosidase, putative (1119 nt)         | 5   | 67  | 0 |
| PITG_01170 | Pi potassium/sodium hyperpolarization-activated cyclic     | 0   | 2   | 0 |
| PITG_01171 | Pi signal recognition particle, putative (1536 nt)         | 13  | 38  | 0 |
| PITG_01172 | Pi methionine-R-sulfoxide reductase (799 nt)               | 48  | 61  | 0 |
| PITG_01173 | Pi palmitoyltransferase, putative (1089 nt)                | 4   | 55  | 0 |
| PITG_01174 | Pi conserved hypothetical protein (2147 nt)                | 1   | 15  | 0 |
| PITG_01180 | Pi cell division protein ftsZ (1445 nt)                    | 2   | 12  | 0 |
| PITG_01181 | Pi conserved hypothetical protein (1587 nt)                | 55  | 116 | 2 |
| PITG_01182 | Pi conserved hypothetical protein (2003 nt)                | 4   | 34  | 0 |
| PITG_01183 | Pi conserved hypothetical protein (3168 nt)                | 3   | 26  | 0 |
| PITG_01184 | Pi eukaryotic translation initiation factor 3 subunit G, p | 20  | 77  | 4 |
| PITG_01185 | Pi conserved hypothetical protein (709 nt)                 | 3   | 22  | 0 |
| PITG_01186 | Pi lipase, putative (1775 nt)                              | 1   | 78  | 0 |
| PITG_01187 | Pi dolichol kinase, putative (1034 nt)                     | 2   | 15  | 2 |
| PITG_01188 | Pi aspartate aminotransferase, putative (2034 nt)          | 3   | 38  | 0 |
| PITG_01189 | Pi hypothetical protein (2548 nt)                          | 9   | 23  | 0 |
| PITG_01192 | Pi Voltage-gated Ion Channel (VIC) Superfamily (3328 n     | 7   | 6   | 0 |
| PITG_01193 | Pi aspartate aminotransferase, putative (3124 nt)          | 2   | 30  | 0 |
| PITG_01195 | Pi aspartate aminotransferase, putative (2001 nt)          | 0   | 38  | 0 |
| PITG_01196 | Pi hypothetical protein (981 nt)                           | 2   | 0   | 0 |
| PITG_01199 | Pi conserved hypothetical protein (711 nt)                 | 0   | 4   | 0 |

|            |                                                             |     |     |    |
|------------|-------------------------------------------------------------|-----|-----|----|
| PITG_01200 | Pi conserved hypothetical protein (645 nt)                  | 4   | 9   | 0  |
| PITG_01201 | Pi ATP-dependent DNA helicase, putative (1947 nt)           | 6   | 14  | 0  |
| PITG_01203 | Pi mitogen-activated protein kinase, putative (2335 nt)     | 2   | 22  | 0  |
| PITG_01204 | Pi DNA mismatch repair protein, putative (2873 nt)          | 0   | 13  | 0  |
| PITG_01206 | Pi xaa-Pro aminopeptidase, putative (1660 nt)               | 12  | 23  | 0  |
| PITG_01208 | Pi trifunctional enzyme subunit beta, mitochondrial pre     | 50  | 380 | 0  |
| PITG_01211 | Pi transmembrane protein, putative (1710 nt)                | 0   | 1   | 0  |
| PITG_01216 | Pi hypothetical protein (1398 nt)                           | 1   | 9   | 0  |
| PITG_01217 | Pi transmembrane protein, putative (780 nt)                 | 6   | 26  | 1  |
| PITG_01218 | Pi conserved hypothetical protein (1353 nt)                 | 0   | 0   | 0  |
| PITG_01219 | Pi conserved hypothetical protein (1646 nt)                 | 0   | 1   | 0  |
| PITG_01222 | Pi Drug/Metabolite Transporter (DMT) Superfamily (14        | 1   | 82  | 0  |
| PITG_01223 | Pi conserved hypothetical protein (1177 nt)                 | 2   | 62  | 1  |
| PITG_01224 | Pi conserved hypothetical protein (821 nt)                  | 17  | 10  | 0  |
| PITG_01227 | Pi conserved hypothetical protein (677 nt)                  | 11  | 80  | 1  |
| PITG_01228 | Pi conserved hypothetical protein (801 nt)                  | 2   | 15  | 0  |
| PITG_01229 | Pi conserved hypothetical protein (1882 nt)                 | 15  | 17  | 0  |
| PITG_01230 | Pi hypothetical protein (1386 nt)                           | 7   | 8   | 0  |
| PITG_01231 | Pi conserved hypothetical protein (1274 nt)                 | 0   | 16  | 0  |
| PITG_01232 | Pi conserved hypothetical protein (2368 nt)                 | 1   | 16  | 0  |
| PITG_01233 | Pi transmembrane protein, putative (2335 nt)                | 8   | 56  | 0  |
| PITG_01235 | Pi conserved hypothetical protein (1011 nt)                 | 3   | 11  | 0  |
| PITG_01236 | Pi conserved hypothetical protein (927 nt)                  | 3   | 11  | 0  |
| PITG_01237 | Pi conserved hypothetical protein (1026 nt)                 | 15  | 72  | 1  |
| PITG_01238 | Pi hypothetical protein (1236 nt)                           | 7   | 216 | 0  |
| PITG_01239 | Pi conserved hypothetical protein (650 nt)                  | 32  | 93  | 0  |
| PITG_01241 | Pi conserved hypothetical protein (453 nt)                  | 12  | 6   | 0  |
| PITG_01242 | Pi condensin complex subunit 2, putative (2609 nt)          | 2   | 17  | 0  |
| PITG_01244 | Pi conserved hypothetical protein (1255 nt)                 | 29  | 66  | 0  |
| PITG_01245 | Pi chorismate mutase, putative (1976 nt)                    | 2   | 14  | 0  |
| PITG_01246 | Pi conserved hypothetical protein (1249 nt)                 | 13  | 48  | 0  |
| PITG_01247 | Pi conserved hypothetical protein (1880 nt)                 | 0   | 12  | 0  |
| PITG_01248 | Pi polyadenylate-binding protein 1-B (2432 nt)              | 70  | 255 | 19 |
| PITG_01249 | Pi conserved hypothetical protein (618 nt)                  | 2   | 2   | 0  |
| PITG_01250 | Pi regulator of chromosome condensation (RCC1)-like p       | 6   | 53  | 0  |
| PITG_01251 | Pi conserved hypothetical protein (756 nt)                  | 6   | 26  | 0  |
| PITG_01252 | Pi conserved hypothetical protein (2557 nt)                 | 1   | 19  | 0  |
| PITG_01253 | Pi aldehyde dehydrogenase, mitochondrial precursor (:       | 7   | 220 | 16 |
| PITG_01255 | Pi eukaryotic translation initiation factor 5, putative (1: | 15  | 73  | 1  |
| PITG_01257 | Pi nucleoporin NUP85-like protein (2211 nt)                 | 8   | 13  | 0  |
| PITG_01258 | Pi ras family GTPase, putative (807 nt)                     | 2   | 14  | 0  |
| PITG_01259 | Pi nuclear pore complex protein, putative (7703 nt)         | 0   | 15  | 0  |
| PITG_01260 | Pi S-phase kinase-associated protein 1A (999 nt)            | 29  | 236 | 6  |
| PITG_01265 | Pi conserved hypothetical protein (1336 nt)                 | 2   | 20  | 0  |
| PITG_01266 | Pi glycoside hydrolase, putative (1680 nt)                  | 0   | 1   | 0  |
| PITG_01267 | Pi glycoside hydrolase, putative (1419 nt)                  | 3   | 28  | 0  |
| PITG_01270 | Pi conserved hypothetical protein (1169 nt)                 | 120 | 213 | 1  |



|            |                                                            |    |     |   |
|------------|------------------------------------------------------------|----|-----|---|
| PITG_01271 | Pi protein kinase, putative (937 nt)                       | 20 | 21  | 0 |
| PITG_01272 | Pi lysosomal acid lipase/cholesteryl ester hydrolase, pu   | 13 | 36  | 0 |
| PITG_01273 | Pi PLAC8 family protein (315 nt)                           | 0  | 0   | 0 |
| PITG_01275 | Pi lipase, putative (1281 nt)                              | 0  | 11  | 0 |
| PITG_01276 | Pi conserved hypothetical protein (2314 nt)                | 0  | 1   | 0 |
| PITG_01277 | Pi hypothetical protein (834 nt)                           | 0  | 0   | 0 |
| PITG_01280 | Pi conserved hypothetical protein (1041 nt)                | 3  | 71  | 0 |
| PITG_01281 | Pi conserved hypothetical protein (544 nt)                 | 0  | 0   | 0 |
| PITG_01282 | Pi conserved hypothetical protein (1990 nt)                | 12 | 41  | 0 |
| PITG_01283 | Pi glycoside hydrolase, putative (8578 nt)                 | 1  | 17  | 0 |
| PITG_01284 | Pi conserved hypothetical protein (426 nt)                 | 0  | 5   | 0 |
| PITG_01285 | Pi transmembrane protein, putative (1246 nt)               | 43 | 102 | 0 |
| PITG_01287 | Pi conserved hypothetical protein (726 nt)                 | 39 | 41  | 0 |
| PITG_01288 | Pi conserved hypothetical protein (2401 nt)                | 2  | 17  | 0 |
| PITG_01290 | Pi peptidyl-prolyl cis-trans isomerase C (762 nt)          | 81 | 14  | 0 |
| PITG_01292 | Pi conserved hypothetical protein (664 nt)                 | 61 | 118 | 5 |
| PITG_01293 | Pi conserved hypothetical protein (1036 nt)                | 18 | 31  | 0 |
| PITG_01294 | Pi hypothetical protein (1032 nt)                          | 50 | 3   | 0 |
| PITG_01296 | Pi D-Tyr-tRNA(Tyr) deacylase (698 nt)                      | 3  | 2   | 0 |
| PITG_01297 | Pi conserved hypothetical protein (663 nt)                 | 2  | 9   | 0 |
| PITG_01298 | Pi conserved hypothetical protein (744 nt)                 | 0  | 21  | 0 |
| PITG_01300 | Pi DNA topoisomerase 2 DNA gyrase B (4764 nt)              | 18 | 80  | 1 |
| PITG_01301 | Pi conserved hypothetical protein (3616 nt)                | 2  | 11  | 0 |
| PITG_01302 | Pi conserved hypothetical protein (2376 nt)                | 3  | 54  | 0 |
| PITG_01308 | Pi conserved hypothetical protein (318 nt)                 | 2  | 56  | 0 |
| PITG_01310 | Pi peptidyl-prolyl isomerase FKBP12 (333 nt)               | 11 | 193 | 3 |
| PITG_01312 | Pi conserved hypothetical protein (1483 nt)                | 1  | 1   | 0 |
| PITG_01313 | Pi conserved hypothetical protein (1642 nt)                | 8  | 20  | 0 |
| PITG_01314 | Pi ubiquitin-specific protease, putative (1568 nt)         | 5  | 20  | 0 |
| PITG_01315 | Pi conserved hypothetical protein (527 nt)                 | 2  | 18  | 0 |
| PITG_01316 | Pi conserved hypothetical protein (708 nt)                 | 34 | 185 | 0 |
| PITG_01317 | Pi conserved hypothetical protein (3915 nt)                | 6  | 16  | 0 |
| PITG_01318 | Pi peptidyl-prolyl cis-trans isomerase, putative (1359 nt) | 8  | 60  | 2 |
| PITG_01322 | Pi myosin-like protein (3704 nt)                           | 6  | 71  | 0 |
| PITG_01324 | Pi conserved hypothetical protein (2328 nt)                | 1  | 10  | 0 |
| PITG_01325 | Pi myosin-like protein (1102 nt)                           | 32 | 67  | 0 |
| PITG_01328 | Pi conserved hypothetical protein (1343 nt)                | 0  | 32  | 0 |
| PITG_01329 | Pi septum formation protein Maf (860 nt)                   | 1  | 10  | 0 |
| PITG_01330 | Pi lysophospholipid acyltransferase, putative (1563 nt)    | 6  | 33  | 2 |
| PITG_01332 | Pi lysophospholipid acyltransferase, putative (1563 nt)    | 3  | 8   | 0 |
| PITG_01333 | Pi complement control module protein, putative (753 r      | 6  | 22  | 0 |
| PITG_01335 | Pi conserved hypothetical protein (2333 nt)                | 7  | 20  | 0 |
| PITG_01336 | Pi conserved hypothetical protein (1635 nt)                | 14 | 45  | 0 |
| PITG_01337 | Pi conserved hypothetical protein (4089 nt)                | 0  | 13  | 0 |
| PITG_01339 | Pi conserved hypothetical protein (1558 nt)                | 1  | 13  | 0 |
| PITG_01340 | Pi conserved hypothetical protein (2082 nt)                | 5  | 21  | 0 |
| PITG_01341 | Pi conserved hypothetical protein (1179 nt)                | 3  | 14  | 0 |

|            |                                                           |     |     |   |
|------------|-----------------------------------------------------------|-----|-----|---|
| PITG_01342 | Pi conserved hypothetical protein (2067 nt)               | 7   | 42  | 0 |
| PITG_01343 | Pi serine protease family S10, putative (1311 nt)         | 3   | 16  | 0 |
| PITG_01349 | Pi Type II (General) Secretory Pathway (IISP) Family (14  | 6   | 40  | 0 |
| PITG_01350 | Pi conserved hypothetical protein (2687 nt)               | 0   | 12  | 0 |
| PITG_01352 | Pi conserved hypothetical protein (987 nt)                | 0   | 30  | 0 |
| PITG_01353 | Pi UDP-N-acetylglucosamine transferase subunit, putat     | 6   | 11  | 0 |
| PITG_01356 | Pi ATP-binding Cassette (ABC) Superfamily (3687 nt)       | 3   | 10  | 0 |
| PITG_01358 | Pi conserved hypothetical protein (2202 nt)               | 8   | 43  | 0 |
| PITG_01360 | Pi conserved hypothetical protein (735 nt)                | 7   | 27  | 0 |
| PITG_01361 | Pi conserved hypothetical protein (2647 nt)               | 3   | 52  | 0 |
| PITG_01363 | Pi conserved hypothetical protein (1623 nt)               | 0   | 0   | 0 |
| PITG_01365 | Pi protein kinase, putative (3470 nt)                     | 22  | 105 | 0 |
| PITG_01366 | Pi conserved hypothetical protein (921 nt)                | 28  | 46  | 0 |
| PITG_01367 | Pi palmitoyltransferase, putative (1059 nt)               | 3   | 33  | 0 |
| PITG_01368 | Pi transmembrane protein, putative (1776 nt)              | 1   | 15  | 0 |
| PITG_01370 | Pi ATP-binding Cassette (ABC) Superfamily (4527 nt)       | 0   | 14  | 0 |
| PITG_01372 | Pi conserved hypothetical protein (914 nt)                | 0   | 4   | 0 |
| PITG_01375 | Pi conserved hypothetical protein (11548 nt)              | 0   | 12  | 0 |
| PITG_01376 | Pi conserved hypothetical protein (2266 nt)               | 0   | 16  | 0 |
| PITG_01379 | Pi conserved hypothetical protein (1668 nt)               | 6   | 29  | 0 |
| PITG_01382 | Pi ubiquitin family protein, putative (1724 nt)           | 43  | 70  | 1 |
| PITG_01386 | Pi phospholipase, putative (3507 nt)                      | 6   | 41  | 0 |
| PITG_01387 | Pi conserved hypothetical protein (1858 nt)               | 4   | 24  | 0 |
| PITG_01389 | Pi proteasome subunit beta type-5, putative (867 nt)      | 23  | 141 | 7 |
| PITG_01390 | Pi conserved hypothetical protein (2214 nt)               | 8   | 74  | 0 |
| PITG_01395 | Pi glycoside hydrolase, putative (1716 nt)                | 10  | 94  | 0 |
| PITG_01397 | Pi glycoside hydrolase, putative (1725 nt)                | 12  | 22  | 0 |
| PITG_01398 | Pi beta-glucosidase, putative (1749 nt)                   | 9   | 137 | 0 |
| PITG_01400 | Pi Argonaute3 (AGO3) (3810 nt)                            | 2   | 58  | 0 |
| PITG_01401 | Pi conserved hypothetical protein (1356 nt)               | 12  | 87  | 1 |
| PITG_01404 | Pi conserved hypothetical protein (3856 nt)               | 0   | 18  | 0 |
| PITG_01405 | Pi conserved hypothetical protein (1870 nt)               | 10  | 26  | 0 |
| PITG_01407 | Pi D-isomer specific 2-hydroxyacid dehydrogenase, put     | 108 | 16  | 0 |
| PITG_01408 | Pi D-isomer specific 2-hydroxyacid dehydrogenase, put     | 24  | 75  | 2 |
| PITG_01409 | Pi conserved hypothetical protein (1197 nt)               | 2   | 25  | 0 |
| PITG_01410 | Pi conserved hypothetical protein (1171 nt)               | 12  | 88  | 0 |
| PITG_01411 | Pi elongation of very long chain fatty acids protein, put | 17  | 92  | 0 |
| PITG_01412 | Pi Mitochondrial Tricarboxylate Carrier (MTC) Family (1   | 2   | 14  | 0 |
| PITG_01413 | Pi conserved hypothetical protein (1566 nt)               | 1   | 2   | 0 |
| PITG_01414 | Pi conserved hypothetical protein (785 nt)                | 3   | 14  | 0 |
| PITG_01415 | Pi conserved hypothetical protein (1455 nt)               | 0   | 0   | 0 |
| PITG_01416 | Pi sporangia induced TRP protein (1617 nt)                | 3   | 11  | 0 |
| PITG_01417 | Pi serine/threonine-protein phosphatase PP2A (960 nt)     | 84  | 190 | 4 |
| PITG_01418 | Pi choline/Carnitine O-acyltransferase, putative (2134 r  | 2   | 44  | 0 |
| PITG_01419 | Pi Major Facilitator Superfamily (MFS) (1956 nt)          | 1   | 51  | 0 |
| PITG_01424 | Pi conserved hypothetical protein (2122 nt)               | 5   | 9   | 0 |
| PITG_01425 | Pi coronin-like protein (3119 nt)                         | 0   | 12  | 0 |

|            |                                                         |    |     |   |
|------------|---------------------------------------------------------|----|-----|---|
| PITG_01426 | Pi conserved hypothetical protein (2715 nt)             | 5  | 14  | 0 |
| PITG_01427 | Pi DEAD/DEAH box RNA helicase, putative (1695 nt)       | 5  | 7   | 0 |
| PITG_01428 | Pi conserved hypothetical protein (728 nt)              | 13 | 59  | 0 |
| PITG_01429 | Pi serine protease family S33, putative (1941 nt)       | 2  | 21  | 0 |
| PITG_01430 | Pi glycoside hydrolase, putative (1770 nt)              | 1  | 14  | 0 |
| PITG_01434 | Pi conserved hypothetical protein (2721 nt)             | 0  | 3   | 0 |
| PITG_01436 | Pi conserved hypothetical protein (716 nt)              | 0  | 10  | 1 |
| PITG_01437 | Pi mediator of RNA polymerase II transcription subunit  | 18 | 28  | 0 |
| PITG_01438 | Pi conserved hypothetical protein (1296 nt)             | 36 | 38  | 0 |
| PITG_01439 | Pi conserved hypothetical protein (645 nt)              | 6  | 19  | 0 |
| PITG_01440 | Pi conserved hypothetical protein (1204 nt)             | 1  | 10  | 0 |
| PITG_01441 | Pi conserved hypothetical protein (360 nt)              | 1  | 17  | 0 |
| PITG_01442 | Pi conserved hypothetical protein (1890 nt)             | 0  | 8   | 0 |
| PITG_01444 | Pi Argonaute5 (AGO5) (2496 nt)                          | 0  | 16  | 0 |
| PITG_01445 | Pi protein kinase, putative (2103 nt)                   | 0  | 2   | 0 |
| PITG_01447 | Pi serine protease family S10, putative (1425 nt)       | 13 | 97  | 1 |
| PITG_01449 | Pi conserved hypothetical protein (350 nt)              | 22 | 90  | 0 |
| PITG_01450 | Pi HECT E3 ubiquitin ligase, putative (14519 nt)        | 2  | 50  | 0 |
| PITG_01451 | Pi GPI ethanolamine phosphate transferase, putative (2  | 0  | 13  | 0 |
| PITG_01452 | Pi conserved hypothetical protein (2655 nt)             | 1  | 23  | 0 |
| PITG_01453 | Pi ubiquitin-specific protease, putative (8843 nt)      | 3  | 50  | 0 |
| PITG_01456 | Pi histone acetyltransferase ESA1 (1913 nt)             | 1  | 15  | 0 |
| PITG_01457 | Pi conserved hypothetical protein (3662 nt)             | 8  | 19  | 0 |
| PITG_01458 | Pi pyruvate dehydrogenase (1731 nt)                     | 4  | 12  | 0 |
| PITG_01459 | Pi conserved hypothetical protein (2081 nt)             | 0  | 17  | 0 |
| PITG_01463 | Pi hypothetical protein (1847 nt)                       | 4  | 11  | 0 |
| PITG_01468 | Pi conserved hypothetical protein (663 nt)              | 0  | 28  | 0 |
| PITG_01469 | Pi conserved hypothetical protein (3400 nt)             | 3  | 11  | 0 |
| PITG_01470 | Pi syntaxin-like protein (1174 nt)                      | 8  | 42  | 0 |
| PITG_01471 | Pi beta-mannosidase, putative (2914 nt)                 | 0  | 12  | 0 |
| PITG_01477 | Pi myosin-like protein (5007 nt)                        | 8  | 75  | 1 |
| PITG_01478 | Pi conserved hypothetical protein (1301 nt)             | 5  | 73  | 0 |
| PITG_01479 | Pi pre-mRNA-splicing factor prp46, putative (2055 nt)   | 4  | 26  | 0 |
| PITG_01480 | Pi CBL-interacting serine/threonine-protein kinase, put | 5  | 32  | 0 |
| PITG_01483 | Pi conserved hypothetical protein (1109 nt)             | 5  | 18  | 0 |
| PITG_01484 | Pi beta-glucosidase, putative (1712 nt)                 | 3  | 23  | 0 |
| PITG_01489 | Pi hypothetical protein (765 nt)                        | 1  | 13  | 0 |
| PITG_01490 | Pi conserved hypothetical protein (8280 nt)             | 0  | 7   | 0 |
| PITG_01491 | Pi conserved hypothetical protein (1349 nt)             | 0  | 8   | 0 |
| PITG_01492 | Pi conserved hypothetical protein (429 nt)              | 0  | 19  | 1 |
| PITG_01493 | Pi conserved hypothetical protein (557 nt)              | 0  | 62  | 0 |
| PITG_01495 | Pi ribonuclease, putative (726 nt)                      | 6  | 63  | 0 |
| PITG_01496 | Pi glycoside hydrolase, putative (2531 nt)              | 7  | 83  | 0 |
| PITG_01498 | Pi ATP-binding cassette sub-family F member 2 (1895 n   | 9  | 44  | 1 |
| PITG_01499 | Pi charged multivesicular body protein 5, putative (105 | 15 | 103 | 0 |
| PITG_01502 | Pi Cullin-associated NEDD8-dissociated protein, putativ | 2  | 21  | 0 |
| PITG_01504 | Pi protein phosphatase PP2A regulatory subunit B (234   | 8  | 45  | 0 |

|                                                                                                   |    |     |   |
|---------------------------------------------------------------------------------------------------|----|-----|---|
| PITG_01507   Pi conserved hypothetical protein (2668 nt)                                          | 1  | 4   | 0 |
| PITG_01508   Pi conserved hypothetical protein (3416 nt)                                          | 4  | 32  | 0 |
| PITG_01509   Pi conserved hypothetical protein (1670 nt)                                          | 0  | 13  | 0 |
| PITG_01510   Pi conserved hypothetical protein (568 nt)                                           | 10 | 21  | 0 |
| PITG_01511   Pi conserved hypothetical protein (1649 nt)                                          | 10 | 47  | 0 |
| PITG_01512   Pi conserved hypothetical protein (864 nt)                                           | 0  | 0   | 0 |
| PITG_01513   Pi dynein light chain intermediate polypeptide, putative                             | 2  | 2   | 0 |
| PITG_01514   Pi protoporphyrinogen oxidase, putative (3680 nt)                                    | 6  | 14  | 0 |
| PITG_01515   Pi ras-related GTP-binding protein, putative (1521 nt)                               | 25 | 110 | 1 |
| PITG_01516   Pi conserved hypothetical protein (903 nt)                                           | 18 | 66  | 0 |
| PITG_01519   Pi hypothetical protein (2051 nt)                                                    | 1  | 6   | 0 |
| PITG_01520   Pi hypothetical protein (4181 nt)                                                    | 3  | 12  | 0 |
| PITG_01523   Pi Zinc (Zn <sup>2+</sup> )-Iron (Fe <sup>2+</sup> ) Permease (ZIP) Family (1029 nt) | 2  | 26  | 0 |
| PITG_01524   Pi RING-box protein 1 (724 nt)                                                       | 34 | 107 | 3 |
| PITG_01525   Pi conserved hypothetical protein (901 nt)                                           | 27 | 59  | 0 |
| PITG_01526   Pi dual specificity mitogen-activated protein kinase kinase                          | 5  | 27  | 0 |
| PITG_01527   Pi conserved hypothetical protein (1987 nt)                                          | 3  | 13  | 0 |
| PITG_01528   Pi cell division cycle 5-related protein, putative (2390 nt)                         | 2  | 17  | 0 |
| PITG_01535   Pi myosin-like protein (3890 nt)                                                     | 20 | 174 | 3 |
| PITG_01537   Pi conserved hypothetical protein (1356 nt)                                          | 11 | 44  | 0 |
| PITG_01539   Pi hypothetical protein (1499 nt)                                                    | 12 | 84  | 0 |
| PITG_01543   Pi NADPH-dependent diflavin oxidoreductase, putative                                 | 2  | 9   | 0 |
| PITG_01549   Pi succinate semialdehyde dehydrogenase, mitochondrial                               | 15 | 34  | 0 |
| PITG_01551   Pi conserved hypothetical protein (550 nt)                                           | 63 | 121 | 1 |
| PITG_01553   Pi HECT ubiquitin ligase, putative (2046 nt)                                         | 4  | 51  | 0 |
| PITG_01555   Pi conserved hypothetical protein (1642 nt)                                          | 4  | 40  | 0 |
| PITG_01556   Pi conserved hypothetical protein (1966 nt)                                          | 2  | 5   | 0 |
| PITG_01557   Pi conserved hypothetical protein (1647 nt)                                          | 29 | 82  | 0 |
| PITG_01559   Pi conserved hypothetical protein (1885 nt)                                          | 10 | 39  | 0 |
| PITG_01563   Pi conserved hypothetical protein (2711 nt)                                          | 3  | 32  | 0 |
| PITG_01564   Pi amino-acid acetyltransferase, putative (1704 nt)                                  | 1  | 17  | 0 |
| PITG_01568   Pi cGMP 3',5'-cyclic phosphodiesterase subunit delta, putative                       | 5  | 1   | 0 |
| PITG_01569   Pi nardilysin, putative (3690 nt)                                                    | 4  | 23  | 0 |
| PITG_01576   Pi protein kinase, putative (1593 nt)                                                | 6  | 22  | 0 |
| PITG_01577   Pi conserved hypothetical protein (1007 nt)                                          | 17 | 59  | 0 |
| PITG_01578   Pi conserved hypothetical protein (1235 nt)                                          | 4  | 38  | 0 |
| PITG_01579   Pi transcription factor, putative (1553 nt)                                          | 6  | 21  | 0 |
| PITG_01580   Pi conserved hypothetical protein (510 nt)                                           | 17 | 95  | 1 |
| PITG_01581   Pi mitotic spindle checkpoint component mad2 (1007 nt)                               | 17 | 32  | 0 |
| PITG_01582   Pi hypothetical protein (601 nt)                                                     | 4  | 25  | 0 |
| PITG_01583   Pi hypothetical protein (1278 nt)                                                    | 9  | 26  | 0 |
| PITG_01584   Pi conserved hypothetical protein (2506 nt)                                          | 5  | 25  | 0 |
| PITG_01588   Pi conserved hypothetical protein (3042 nt)                                          | 2  | 18  | 0 |
| PITG_01589   Pi conserved hypothetical protein (1385 nt)                                          | 5  | 23  | 0 |
| PITG_01590   Pi conserved hypothetical protein (1187 nt)                                          | 2  | 1   | 0 |
| PITG_01591   Pi conserved hypothetical protein (3637 nt)                                          | 8  | 36  | 0 |
| PITG_01592   Pi conserved hypothetical protein (554 nt)                                           | 7  | 33  | 0 |

|            |                                                                    |    |     |   |
|------------|--------------------------------------------------------------------|----|-----|---|
| PITG_01594 | Pi hypothetical protein (697 nt)                                   | 16 | 47  | 0 |
| PITG_01595 | Pi hypothetical protein (328 nt)                                   | 18 | 48  | 0 |
| PITG_01598 | Pi conserved hypothetical protein (2612 nt)                        | 0  | 3   | 0 |
| PITG_01599 | Pi coronin-like protein, putative (1952 nt)                        | 8  | 128 | 2 |
| PITG_01602 | Pi conserved hypothetical protein (2006 nt)                        | 8  | 9   | 0 |
| PITG_01603 | Pi conserved hypothetical protein (8629 nt)                        | 1  | 7   | 0 |
| PITG_01604 | Pi serine palmitoyltransferase, putative (1525 nt)                 | 37 | 70  | 1 |
| PITG_01605 | Pi serine palmitoyltransferase, putative (1455 nt)                 | 3  | 42  | 0 |
| PITG_01606 | Pi conserved hypothetical protein (3729 nt)                        | 1  | 11  | 0 |
| PITG_01607 | Pi actin-like protein (1324 nt)                                    | 34 | 27  | 0 |
| PITG_01608 | Pi Major Facilitator Superfamily (MFS) (1695 nt)                   | 19 | 25  | 2 |
| PITG_01614 | Pi carbon catabolite repressor protein, putative (4923 nt)         | 9  | 37  | 0 |
| PITG_01616 | Pi metalloprotease family M01, putative (2942 nt)                  | 1  | 54  | 0 |
| PITG_01617 | Pi conserved hypothetical protein (1226 nt)                        | 4  | 35  | 0 |
| PITG_01618 | Pi conserved hypothetical protein (773 nt)                         | 12 | 29  | 2 |
| PITG_01619 | Pi metalloprotease family M01, putative (3027 nt)                  | 6  | 67  | 0 |
| PITG_01622 | Pi myosin-like protein (4212 nt)                                   | 0  | 19  | 0 |
| PITG_01626 | Pi Drug/Metabolite Transporter (DMT) Superfamily (28 nt)           | 8  | 17  | 0 |
| PITG_01627 | Pi alcohol dehydrogenase, putative (1640 nt)                       | 36 | 47  | 0 |
| PITG_01639 | Pi Small Conductance Mechanosensitive Ion Channel (SMIC) (1000 nt) | 5  | 21  | 0 |
| PITG_01640 | Pi conserved hypothetical protein (4219 nt)                        | 3  | 40  | 0 |
| PITG_01641 | Pi serine protease family S54, putative (858 nt)                   | 4  | 24  | 0 |
| PITG_01643 | Pi conserved hypothetical protein (703 nt)                         | 2  | 18  | 0 |
| PITG_01644 | Pi sodium/hydrogen exchanger, putative (3211 nt)                   | 4  | 8   | 0 |
| PITG_01645 | Pi conserved hypothetical protein (1678 nt)                        | 1  | 12  | 0 |
| PITG_01646 | Pi hypothetical protein (2339 nt)                                  | 4  | 12  | 0 |
| PITG_01647 | Pi conserved hypothetical protein (1958 nt)                        | 18 | 16  | 0 |
| PITG_01648 | Pi conserved hypothetical protein (674 nt)                         | 11 | 17  | 0 |
| PITG_01649 | Pi AP-2 complex subunit sigma (767 nt)                             | 21 | 57  | 1 |
| PITG_01650 | Pi conserved hypothetical protein (1251 nt)                        | 4  | 14  | 0 |
| PITG_01651 | Pi conserved hypothetical protein (1088 nt)                        | 1  | 23  | 0 |
| PITG_01652 | Pi conserved hypothetical protein (1419 nt)                        | 9  | 33  | 0 |
| PITG_01653 | Pi GPI-anchored wall transfer protein 1, putative (2235 nt)        | 1  | 24  | 0 |
| PITG_01654 | Pi Delta(5) fatty acid desaturase, putative (1711 nt)              | 2  | 8   | 3 |
| PITG_01655 | Pi conserved hypothetical protein (910 nt)                         | 0  | 0   | 0 |
| PITG_01659 | Pi conserved hypothetical protein (736 nt)                         | 0  | 22  | 2 |
| PITG_01661 | Pi conserved hypothetical protein (1396 nt)                        | 0  | 3   | 0 |
| PITG_01662 | Pi conserved hypothetical protein (621 nt)                         | 4  | 7   | 0 |
| PITG_01663 | Pi conserved hypothetical protein (10315 nt)                       | 0  | 17  | 0 |
| PITG_01664 | Pi conserved hypothetical protein (1463 nt)                        | 31 | 44  | 0 |
| PITG_01671 | Pi conserved hypothetical protein (709 nt)                         | 2  | 8   | 0 |
| PITG_01674 | Pi conserved hypothetical protein (1571 nt)                        | 4  | 28  | 0 |
| PITG_01676 | Pi conserved hypothetical protein (1226 nt)                        | 0  | 21  | 0 |
| PITG_01677 | Pi conserved hypothetical protein (1394 nt)                        | 2  | 23  | 0 |
| PITG_01678 | Pi conserved hypothetical protein (1602 nt)                        | 5  | 14  | 0 |
| PITG_01679 | Pi conserved hypothetical protein (1438 nt)                        | 9  | 37  | 0 |
| PITG_01680 | Pi RNA-binding protein PNO1-like protein (892 nt)                  | 11 | 26  | 0 |

|            |                                                         |     |     |    |
|------------|---------------------------------------------------------|-----|-----|----|
| PITG_01681 | Pi conserved hypothetical protein (904 nt)              | 9   | 25  | 0  |
| PITG_01682 | Pi conserved hypothetical protein (2160 nt)             | 3   | 13  | 0  |
| PITG_01683 | Pi conserved hypothetical protein (3889 nt)             | 8   | 21  | 0  |
| PITG_01689 | Pi hydroxyacylglutathione hydrolase, putative (1066 nt) | 3   | 17  | 0  |
| PITG_01690 | Pi conserved hypothetical protein (1475 nt)             | 2   | 9   | 0  |
| PITG_01691 | Pi phosphatidylinositol-3,4,5-trisphosphate 3-phosphat  | 12  | 52  | 0  |
| PITG_01694 | Pi peptidyl-prolyl cis-trans isomerase 1 (686 nt)       | 31  | 59  | 13 |
| PITG_01697 | Pi importin alpha-2 subunit (2191 nt)                   | 40  | 12  | 0  |
| PITG_01698 | Pi small cysteine rich protein SCR76 (617 nt)           | 153 | 137 | 1  |
| PITG_01700 | Pi inositol-3-phosphate synthase, putative (4011 nt)    | 43  | 133 | 7  |
| PITG_01701 | Pi hypothetical protein (487 nt)                        | 57  | 166 | 2  |
| PITG_01702 | Pi conserved hypothetical protein (846 nt)              | 24  | 68  | 4  |
| PITG_01703 | Pi ADP-ribosylation factor GTPase-activating protein, p | 4   | 23  | 0  |
| PITG_01705 | Pi hypothetical protein (362 nt)                        | 79  | 128 | 4  |
| PITG_01706 | Pi conserved hypothetical protein (1809 nt)             | 0   | 0   | 0  |
| PITG_01708 | Pi hypothetical protein (874 nt)                        | 0   | 1   | 0  |
| PITG_01709 | Pi hypothetical protein (1063 nt)                       | 0   | 0   | 0  |
| PITG_01710 | Pi conserved hypothetical protein (2793 nt)             | 3   | 8   | 0  |
| PITG_01711 | Pi anthranilate synthase component I, putative (1603 n  | 7   | 14  | 0  |
| PITG_01713 | Pi conserved hypothetical protein (1559 nt)             | 0   | 2   | 0  |
| PITG_01714 | Pi conserved hypothetical protein (411 nt)              | 34  | 69  | 0  |
| PITG_01715 | Pi conserved hypothetical protein (1513 nt)             | 10  | 46  | 0  |
| PITG_01716 | Pi hypothetical protein (844 nt)                        | 0   | 2   | 0  |
| PITG_01717 | Pi dynein heavy chain (14029 nt)                        | 0   | 7   | 0  |
| PITG_01718 | Pi cryptochrome, putative (1734 nt)                     | 6   | 32  | 0  |
| PITG_01719 | Pi conserved hypothetical protein (3108 nt)             | 7   | 26  | 0  |
| PITG_01721 | Pi Drug/Metabolite Transporter (DMT) Superfamily (27    | 3   | 13  | 0  |
| PITG_01722 | Pi conserved hypothetical protein (1347 nt)             | 25  | 45  | 0  |
| PITG_01727 | Pi conserved hypothetical protein (1018 nt)             | 2   | 25  | 0  |
| PITG_01728 | Pi conserved hypothetical protein (1167 nt)             | 8   | 54  | 0  |
| PITG_01737 | Pi DNA damage-binding protein, putative (3453 nt)       | 9   | 31  | 0  |
| PITG_01738 | Pi conserved hypothetical protein (1434 nt)             | 4   | 32  | 0  |
| PITG_01740 | Pi conserved hypothetical protein (3507 nt)             | 7   | 39  | 0  |
| PITG_01741 | Pi conserved hypothetical protein (856 nt)              | 1   | 13  | 0  |
| PITG_01742 | Pi thymidine kinase (746 nt)                            | 0   | 2   | 0  |
| PITG_01743 | Pi conserved hypothetical protein (582 nt)              | 9   | 17  | 0  |
| PITG_01744 | Pi conserved hypothetical protein (1476 nt)             | 12  | 36  | 0  |
| PITG_01745 | Pi NEDD4-like ubiquitin ligase, putative (1968 nt)      | 3   | 16  | 0  |
| PITG_01746 | Pi HECT E3 ubiquitin ligase, putative (1985 nt)         | 9   | 44  | 0  |
| PITG_01747 | Pi conserved hypothetical protein (1101 nt)             | 10  | 30  | 0  |
| PITG_01748 | Pi mitochondrial inner membrane protein OXA1 (1920      | 11  | 28  | 0  |
| PITG_01749 | Pi conserved hypothetical protein (1656 nt)             | 4   | 16  | 0  |
| PITG_01750 | Pi RNA polymerase II-associated protein, putative (157  | 0   | 16  | 0  |
| PITG_01751 | Pi conserved hypothetical protein (682 nt)              | 5   | 10  | 0  |
| PITG_01752 | Pi transketolase (2256 nt)                              | 18  | 214 | 13 |
| PITG_01753 | Pi conserved hypothetical protein (659 nt)              | 0   | 17  | 0  |
| PITG_01754 | Pi conserved hypothetical protein (4202 nt)             | 5   | 22  | 0  |

|            |                                                          |    |     |   |
|------------|----------------------------------------------------------|----|-----|---|
| PITG_01755 | Pi conserved hypothetical protein (886 nt)               | 10 | 28  | 0 |
| PITG_01756 | Pi negative elongation factor, putative (2775 nt)        | 2  | 16  | 0 |
| PITG_01759 | Pi conserved hypothetical protein (2105 nt)              | 2  | 10  | 0 |
| PITG_01761 | Pi proline oxidase, putative (1716 nt)                   | 17 | 44  | 0 |
| PITG_01762 | Pi glycyl-tRNA synthetase (2046 nt)                      | 16 | 40  | 3 |
| PITG_01768 | Pi DAHP synthase (1203 nt)                               | 3  | 5   | 0 |
| PITG_01769 | Pi chorismate synthase (1434 nt)                         | 2  | 14  | 0 |
| PITG_01770 | Pi leukocyte receptor cluster member 8 (1942 nt)         | 4  | 60  | 0 |
| PITG_01771 | Pi monothiol glutaredoxin-5, mitochondrial precursor (   | 28 | 44  | 4 |
| PITG_01772 | Pi conserved hypothetical protein (705 nt)               | 8  | 20  | 0 |
| PITG_01774 | Pi conserved hypothetical protein (2628 nt)              | 5  | 16  | 0 |
| PITG_01775 | Pi protein phosphatase 2C, putative (1181 nt)            | 47 | 63  | 0 |
| PITG_01776 | Pi hypothetical protein (678 nt)                         | 13 | 21  | 0 |
| PITG_01777 | Pi presenilin-like protein (2926 nt)                     | 34 | 80  | 0 |
| PITG_01778 | Pi soluble pyridine nucleotide transhydrogenase, putat   | 11 | 30  | 0 |
| PITG_01781 | Pi heterogeneous nuclear ribonucleoprotein A1, putati    | 8  | 32  | 0 |
| PITG_01782 | Pi conserved hypothetical protein (2307 nt)              | 8  | 5   | 0 |
| PITG_01783 | Pi acetyl-CoA acetyltransferase (2146 nt)                | 29 | 60  | 3 |
| PITG_01784 | Pi conserved hypothetical protein (1626 nt)              | 2  | 12  | 0 |
| PITG_01785 | Pi conserved hypothetical protein (423 nt)               | 33 | 22  | 0 |
| PITG_01787 | Pi conserved hypothetical protein (1738 nt)              | 12 | 0   | 0 |
| PITG_01788 | Pi ubiquitin activating enzyme, E1 family, putative (129 | 26 | 32  | 1 |
| PITG_01789 | Pi conserved hypothetical protein (1283 nt)              | 10 | 24  | 0 |
| PITG_01790 | Pi conserved hypothetical protein (2401 nt)              | 0  | 16  | 0 |
| PITG_01791 | Pi protein disulfide-isomerase, putative (633 nt)        | 32 | 264 | 3 |
| PITG_01792 | Pi conserved hypothetical protein (639 nt)               | 19 | 19  | 0 |
| PITG_01793 | Pi conserved hypothetical protein (1992 nt)              | 2  | 5   | 0 |
| PITG_01796 | Pi potassium/sodium hyperpolarization-activated cyclic   | 5  | 4   | 0 |
| PITG_01797 | Pi 26S protease regulatory subunit 6A-A (1647 nt)        | 14 | 94  | 4 |
| PITG_01798 | Pi conserved hypothetical protein (1890 nt)              | 16 | 34  | 0 |
| PITG_01802 | Pi conserved hypothetical protein (2790 nt)              | 3  | 11  | 0 |
| PITG_01809 | Pi conserved hypothetical protein (1961 nt)              | 15 | 43  | 0 |
| PITG_01810 | Pi Drug/Metabolite Transporter (DMT) Superfamily (12     | 9  | 52  | 0 |
| PITG_01811 | Pi F-box protein, putative (1187 nt)                     | 36 | 89  | 0 |
| PITG_01813 | Pi tRNA (guanine-N(7)-)-methyltransferase, putative (9   | 2  | 12  | 0 |
| PITG_01814 | Pi conserved hypothetical protein (1520 nt)              | 4  | 63  | 0 |
| PITG_01815 | Pi conserved hypothetical protein (8368 nt)              | 0  | 28  | 0 |
| PITG_01816 | Pi conserved hypothetical protein (1913 nt)              | 0  | 1   | 0 |
| PITG_01817 | Pi conserved hypothetical protein (1015 nt)              | 2  | 16  | 0 |
| PITG_01818 | Pi homeodomain transcription factor, putative (2644 n    | 2  | 32  | 0 |
| PITG_01819 | Pi conserved hypothetical protein (1123 nt)              | 26 | 163 | 0 |
| PITG_01821 | Pi conserved hypothetical protein (1265 nt)              | 0  | 5   | 0 |
| PITG_01822 | Pi SNARE associated Golgi protein, putative (909 nt)     | 23 | 28  | 0 |
| PITG_01823 | Pi conserved hypothetical protein (847 nt)               | 3  | 6   | 0 |
| PITG_01824 | Pi protein kinase (1515 nt)                              | 74 | 3   | 0 |
| PITG_01825 | Pi conserved hypothetical protein (1123 nt)              | 4  | 25  | 0 |
| PITG_01826 | Pi conserved hypothetical protein (1431 nt)              | 5  | 209 | 0 |

|            |                                                           |     |     |    |
|------------|-----------------------------------------------------------|-----|-----|----|
| PITG_01830 | Pi conserved hypothetical protein (1556 nt)               | 14  | 108 | 0  |
| PITG_01832 | Pi protein kinase (2896 nt)                               | 5   | 28  | 0  |
| PITG_01833 | Pi 60S ribosomal protein L13, putative (1480 nt)          | 210 | 367 | 30 |
| PITG_01836 | Pi conserved hypothetical protein (3595 nt)               | 3   | 9   | 0  |
| PITG_01839 | Pi 4-coumarate-CoA ligase, putative (2069 nt)             | 5   | 35  | 0  |
| PITG_01840 | Pi conserved hypothetical protein (1414 nt)               | 12  | 14  | 0  |
| PITG_01845 | Pi conserved hypothetical protein (766 nt)                | 128 | 120 | 0  |
| PITG_01846 | Pi actin-related protein 2/3 complex subunit, putative (  | 42  | 90  | 1  |
| PITG_01847 | Pi conserved hypothetical protein (1573 nt)               | 8   | 32  | 0  |
| PITG_01848 | Pi dual specificity phosphatase, putative (2488 nt)       | 7   | 41  | 0  |
| PITG_01850 | Pi kinesin-like protein (7582 nt)                         | 3   | 18  | 0  |
| PITG_01851 | Pi homogentisate 1,2-dioxygenase (1839 nt)                | 6   | 49  | 0  |
| PITG_01852 | Pi dynein heavy chain (12653 nt)                          | 1   | 10  | 0  |
| PITG_01855 | Pi mannosyl-oligosaccharide alpha-1,2-mannosidase, p      | 2   | 15  | 0  |
| PITG_01857 | Pi conserved hypothetical protein (1186 nt)               | 1   | 10  | 0  |
| PITG_01858 | Pi Der1-like family, putative (1184 nt)                   | 8   | 10  | 0  |
| PITG_01859 | Pi conserved hypothetical protein (1535 nt)               | 0   | 0   | 0  |
| PITG_01860 | Pi transmembrane protein, putative (2746 nt)              | 2   | 25  | 0  |
| PITG_01862 | Pi glucose-6-phosphate isomerase (1997 nt)                | 33  | 130 | 9  |
| PITG_01864 | Pi conserved hypothetical protein (998 nt)                | 6   | 8   | 0  |
| PITG_01865 | Pi regulator of chromosome condensation (RCC1)-like p     | 0   | 0   | 0  |
| PITG_01867 | Pi splicing factor U2af large subunit, putative (2685 nt) | 2   | 25  | 0  |
| PITG_01868 | Pi conserved hypothetical protein (1683 nt)               | 0   | 0   | 0  |
| PITG_01869 | Pi alpha,alpha-trehalose-phosphate synthase [UDP-fori     | 0   | 21  | 0  |
| PITG_01870 | Pi conserved hypothetical protein (1468 nt)               | 4   | 16  | 0  |
| PITG_01871 | Pi protein kinase, putative (2817 nt)                     | 17  | 31  | 0  |
| PITG_01873 | Pi conserved hypothetical protein (2991 nt)               | 8   | 17  | 0  |
| PITG_01878 | Pi conserved hypothetical protein (4692 nt)               | 3   | 14  | 0  |
| PITG_01880 | Pi hypothetical protein (1956 nt)                         | 0   | 7   | 0  |
| PITG_01896 | Pi conserved hypothetical protein (2265 nt)               | 1   | 11  | 0  |
| PITG_01897 | Pi histone deacetylase, putative (1804 nt)                | 22  | 45  | 0  |
| PITG_01898 | Pi conserved hypothetical protein (734 nt)                | 3   | 17  | 0  |
| PITG_01899 | Pi conserved hypothetical protein (803 nt)                | 4   | 5   | 0  |
| PITG_01902 | Pi conserved hypothetical protein (781 nt)                | 1   | 20  | 0  |
| PITG_01913 | Pi dihydroorotate dehydrogenase, mitochondrial precu      | 5   | 23  | 1  |
| PITG_01919 | Pi Mitochondrial Carrier (MC) Family (1106 nt)            | 15  | 23  | 0  |
| PITG_01920 | Pi ubiquitin-specific protease, putative (5316 nt)        | 9   | 18  | 0  |
| PITG_01921 | Pi conserved hypothetical protein (890 nt)                | 1   | 20  | 0  |
| PITG_01922 | Pi 40S ribosomal protein SA (852 nt)                      | 146 | 311 | 44 |
| PITG_01923 | Pi conserved hypothetical protein (2375 nt)               | 4   | 63  | 0  |
| PITG_01924 | Pi twinfilin-like protein (1088 nt)                       | 5   | 24  | 0  |
| PITG_01925 | Pi transmembrane protein, putative (886 nt)               | 81  | 58  | 0  |
| PITG_01926 | Pi conserved hypothetical protein (1931 nt)               | 1   | 32  | 0  |
| PITG_01927 | Pi conserved hypothetical protein (1050 nt)               | 3   | 41  | 0  |
| PITG_01929 | Pi conserved hypothetical protein (2803 nt)               | 1   | 10  | 0  |
| PITG_01930 | Pi conserved hypothetical protein (2747 nt)               | 0   | 17  | 0  |
| PITG_01931 | Pi conserved hypothetical protein (1755 nt)               | 2   | 14  | 0  |



|            |                                                          |     |     |     |
|------------|----------------------------------------------------------|-----|-----|-----|
| PITG_01932 | Pi conserved hypothetical protein (19892 nt)             | 1   | 24  | 0   |
| PITG_01935 | Pi hypothetical protein (553 nt)                         | 6   | 14  | 0   |
| PITG_01937 | Pi myosin-like protein (1685 nt)                         | 11  | 54  | 0   |
| PITG_01938 | Pi glyceraldehyde-3-phosphate dehydrogenase (1025 n      | 36  | 180 | 55  |
| PITG_01940 | Pi triosephosphate isomerase/glyceraldehyde-3-phosp      | 89  | 815 | 115 |
| PITG_01941 | Pi conserved hypothetical protein (1713 nt)              | 4   | 15  | 0   |
| PITG_01942 | Pi conserved hypothetical protein (2181 nt)              | 2   | 1   | 0   |
| PITG_01943 | Pi 60S ribosomal protein L23 (623 nt)                    | 889 | 812 | 139 |
| PITG_01945 | Pi conserved hypothetical protein (1058 nt)              | 25  | 85  | 7   |
| PITG_01946 | Pi ras family GTPase, putative (641 nt)                  | 11  | 28  | 0   |
| PITG_01947 | Pi COPII coat assembly protein SEC16, putative (8683 n   | 4   | 34  | 0   |
| PITG_01949 | Pi glycosyl hydrolase, putative (2208 nt)                | 5   | 19  | 0   |
| PITG_01950 | Pi protein kinase, putative (2368 nt)                    | 38  | 79  | 0   |
| PITG_01951 | Pi conserved hypothetical protein (903 nt)               | 7   | 18  | 0   |
| PITG_01952 | Pi conserved hypothetical protein (1052 nt)              | 2   | 19  | 0   |
| PITG_01953 | Pi serine/threonine-protein phosphatase, putative (306   | 6   | 29  | 0   |
| PITG_01954 | Pi conserved hypothetical protein (1015 nt)              | 1   | 18  | 0   |
| PITG_01955 | Pi P-type ATPase (P-ATPase) Superfamily (4198 nt)        | 0   | 0   | 0   |
| PITG_01956 | Pi conserved hypothetical protein (2669 nt)              | 0   | 0   | 0   |
| PITG_01957 | Pi serine/threonine-protein phosphatase 2B catalytic s   | 2   | 14  | 0   |
| PITG_01960 | Pi conserved hypothetical protein (2080 nt)              | 1   | 16  | 0   |
| PITG_01961 | Pi DCN1-like protein (1100 nt)                           | 7   | 15  | 0   |
| PITG_01962 | Pi conserved hypothetical protein (1068 nt)              | 3   | 11  | 0   |
| PITG_01963 | Pi conserved hypothetical protein (2094 nt)              | 2   | 38  | 0   |
| PITG_01964 | Pi conserved hypothetical protein (676 nt)               | 18  | 90  | 1   |
| PITG_01966 | Pi conserved hypothetical protein (1154 nt)              | 0   | 25  | 0   |
| PITG_01970 | Pi enoyl-[acyl-carrier-protein] reductase [NADH], putat  | 8   | 34  | 0   |
| PITG_01974 | Pi conserved hypothetical protein (1305 nt)              | 0   | 16  | 0   |
| PITG_01976 | Pi DNA repair protein, putative (1680 nt)                | 3   | 10  | 0   |
| PITG_01977 | Pi conserved hypothetical protein (1218 nt)              | 18  | 4   | 0   |
| PITG_01979 | Pi conserved hypothetical protein (420 nt)               | 6   | 6   | 0   |
| PITG_01980 | Pi conserved hypothetical protein (418 nt)               | 1   | 6   | 0   |
| PITG_01981 | Pi conserved hypothetical protein (1011 nt)              | 31  | 30  | 0   |
| PITG_01982 | Pi conserved hypothetical protein (2435 nt)              | 20  | 77  | 1   |
| PITG_01989 | Pi hypothetical protein (249 nt)                         | 1   | 19  | 0   |
| PITG_01991 | Pi conserved hypothetical protein (3136 nt)              | 4   | 37  | 0   |
| PITG_01992 | Pi conserved hypothetical protein (531 nt)               | 5   | 20  | 0   |
| PITG_01993 | Pi transmembrane protein, putative (645 nt)              | 1   | 18  | 0   |
| PITG_01994 | Pi conserved hypothetical protein (290 nt)               | 2   | 18  | 0   |
| PITG_01995 | Pi hypothetical protein (138 nt)                         | 3   | 31  | 0   |
| PITG_01997 | Pi dynein 1 light intermediate chain, putative (1884 nt) | 4   | 43  | 0   |
| PITG_01998 | Pi Voltage-gated Ion Channel (VIC) Superfamily (1365 n   | 2   | 18  | 0   |
| PITG_01999 | Pi Voltage-gated Ion Channel (VIC) Superfamily (603 nt)  | 8   | 5   | 0   |
| PITG_02001 | Pi conserved hypothetical protein (1016 nt)              | 2   | 20  | 0   |
| PITG_02002 | Pi enhancer of mRNA-decapping protein, putative (342     | 2   | 17  | 0   |
| PITG_02003 | Pi conserved hypothetical protein (865 nt)               | 18  | 34  | 0   |
| PITG_02008 | Pi cleavage induced hypothetical protein (1557 nt)       | 0   | 0   | 0   |

|            |                                                         |     |     |     |
|------------|---------------------------------------------------------|-----|-----|-----|
| PITG_02010 | Pi conserved hypothetical protein (793 nt)              | 22  | 47  | 1   |
| PITG_02011 | Pi calcineurin subunit B, putative (1489 nt)            | 3   | 16  | 0   |
| PITG_02016 | Pi integrator complex subunit, putative (7581 nt)       | 0   | 12  | 0   |
| PITG_02017 | Pi conserved hypothetical protein (1481 nt)             | 3   | 12  | 0   |
| PITG_02018 | Pi hypothetical protein (644 nt)                        | 6   | 10  | 0   |
| PITG_02021 | Pi dysferlin-like protein (5806 nt)                     | 3   | 8   | 0   |
| PITG_02022 | Pi clathrin heavy chain (5547 nt)                       | 15  | 102 | 5   |
| PITG_02023 | Pi conserved hypothetical protein (1095 nt)             | 13  | 25  | 0   |
| PITG_02024 | Pi conserved hypothetical protein (1569 nt)             | 15  | 17  | 0   |
| PITG_02026 | Pi succinyl-CoA ligase subunit alpha, mitochondrial pre | 39  | 136 | 12  |
| PITG_02027 | Pi conserved hypothetical protein (6430 nt)             | 9   | 23  | 0   |
| PITG_02028 | Pi conserved hypothetical protein (2584 nt)             | 0   | 0   | 0   |
| PITG_02029 | Pi cleavage induced hypothetical protein (1963 nt)      | 0   | 0   | 0   |
| PITG_02030 | Pi cleavage induced hypothetical protein (1042 nt)      | 0   | 1   | 0   |
| PITG_02031 | Pi conserved hypothetical protein (2128 nt)             | 1   | 12  | 0   |
| PITG_02032 | Pi tRNA (guanine-N(1)-)-methyltransferase, putative (1  | 4   | 11  | 0   |
| PITG_02034 | Pi zinc transporter, putative (1230 nt)                 | 13  | 43  | 0   |
| PITG_02035 | Pi conserved hypothetical protein (1584 nt)             | 2   | 22  | 0   |
| PITG_02036 | Pi Equilibrative Nucleoside Transporter (ENT) Family (2 | 6   | 22  | 0   |
| PITG_02037 | Pi conserved hypothetical protein (534 nt)              | 4   | 20  | 0   |
| PITG_02038 | Pi fructose 1,6 bisphosphatase (1099 nt)                | 50  | 157 | 0   |
| PITG_02039 | Pi EF-1 guanine nucleotide exchange domain-containin    | 84  | 140 | 20  |
| PITG_02040 | Pi deoxyribonuclease TATDN1-like protein (1658 nt)      | 5   | 21  | 0   |
| PITG_02042 | Pi serine/threonine-protein phosphatase 4 regulatory s  | 5   | 14  | 0   |
| PITG_02043 | Pi SWI/SNF-related matrix-associated actin-dependent    | 13  | 31  | 0   |
| PITG_02044 | Pi conserved hypothetical protein (501 nt)              | 18  | 20  | 0   |
| PITG_02046 | Pi V-type proton ATPase 16 kDa proteolipid subunit, pu  | 129 | 174 | 6   |
| PITG_02047 | Pi conserved hypothetical protein (1553 nt)             | 5   | 21  | 1   |
| PITG_02048 | Pi conserved hypothetical protein (1263 nt)             | 4   | 12  | 0   |
| PITG_02049 | Pi citrate synthase, mitochondrial precursor (1693 nt)  | 22  | 124 | 9   |
| PITG_02050 | Pi putative chitin synthase (Chitin-UDP-GlcNac-transfer | 11  | 47  | 0   |
| PITG_02051 | Pi conserved hypothetical protein (476 nt)              | 3   | 7   | 0   |
| PITG_02052 | Pi conserved hypothetical protein (856 nt)              | 5   | 7   | 0   |
| PITG_02053 | Pi 40S ribosomal protein S8-2 (975 nt)                  | 340 | 422 | 104 |
| PITG_02054 | Pi DNA primase small subunit, putative (1497 nt)        | 3   | 11  | 0   |
| PITG_02055 | Pi conserved hypothetical protein (1756 nt)             | 2   | 18  | 0   |
| PITG_02058 | Pi conserved hypothetical protein (1499 nt)             | 15  | 120 | 5   |
| PITG_02059 | Pi conserved hypothetical protein (370 nt)              | 4   | 1   | 0   |
| PITG_02067 | Pi pre-mRNA-splicing factor cwc2, putative (1347 nt)    | 7   | 19  | 0   |
| PITG_02068 | Pi GTP-binding protein SAR1 (964 nt)                    | 123 | 114 | 10  |
| PITG_02069 | Pi vacuolar sorting protein SNF8 (980 nt)               | 9   | 26  | 0   |
| PITG_02071 | Pi protein kinase, putative (1360 nt)                   | 13  | 36  | 0   |
| PITG_02073 | Pi conserved hypothetical protein (14444 nt)            | 1   | 4   | 0   |
| PITG_02074 | Pi conserved hypothetical protein (975 nt)              | 0   | 7   | 0   |
| PITG_02075 | Pi 1-acyl-sn-glycerol-3-phosphate acyltransferase, puta | 19  | 52  | 0   |
| PITG_02076 | Pi conserved hypothetical protein (803 nt)              | 0   | 0   | 0   |
| PITG_02077 | Pi protein kinase, putative (2392 nt)                   | 6   | 10  | 0   |

|            |                                                          |    |     |   |
|------------|----------------------------------------------------------|----|-----|---|
| PITG_02079 | Pi conserved hypothetical protein (458 nt)               | 9  | 19  | 0 |
| PITG_02081 | Pi conserved hypothetical protein (1706 nt)              | 0  | 1   | 0 |
| PITG_02082 | Pi protein kinase, putative (1134 nt)                    | 4  | 32  | 0 |
| PITG_02084 | Pi golgi reassembly-stacking protein, putative (1053 nt) | 0  | 29  | 0 |
| PITG_02085 | Pi ATP-binding Cassette (ABC) Superfamily (4124 nt)      | 0  | 4   | 0 |
| PITG_02088 | Pi conserved hypothetical protein (3152 nt)              | 0  | 14  | 0 |
| PITG_02092 | Pi electron transfer flavoprotein-ubiquinone oxidoredu   | 10 | 107 | 1 |
| PITG_02093 | Pi pre-rRNA-processing protein ESF2 (732 nt)             | 1  | 8   | 0 |
| PITG_02094 | Pi dnaJ heat shock protein (994 nt)                      | 2  | 2   | 0 |
| PITG_02096 | Pi polycomb-like protein (1962 nt)                       | 2  | 18  | 0 |
| PITG_02097 | Pi hypothetical protein (2647 nt)                        | 10 | 28  | 0 |
| PITG_02098 | Pi ATP-binding Cassette (ABC) Superfamily (5086 nt)      | 0  | 58  | 0 |
| PITG_02103 | Pi glycoside hydrolase, putative (2430 nt)               | 2  | 21  | 0 |
| PITG_02104 | Pi conserved hypothetical protein (1808 nt)              | 20 | 18  | 0 |
| PITG_02105 | Pi uracil phosphoribosyltransferase, putative (815 nt)   | 15 | 31  | 0 |
| PITG_02107 | Pi conserved hypothetical protein (579 nt)               | 1  | 1   | 0 |
| PITG_02108 | Pi dynein light chain-like protein (485 nt)              | 2  | 0   | 0 |
| PITG_02109 | Pi conserved hypothetical protein (2412 nt)              | 12 | 186 | 0 |
| PITG_02111 | Pi conserved hypothetical protein (828 nt)               | 0  | 11  | 0 |
| PITG_02112 | Pi 3-hydroxyisobutyryl-CoA hydrolase, putative (1549 r   | 6  | 52  | 2 |
| PITG_02113 | Pi hypothetical protein (3721 nt)                        | 3  | 25  | 0 |
| PITG_02114 | Pi aspartyl aminopeptidase, putative (1389 nt)           | 4  | 37  | 0 |
| PITG_02115 | Pi propionyl-CoA carboxylase beta chain, mitochondria    | 16 | 84  | 1 |
| PITG_02116 | Pi protein kinase (449 nt)                               | 0  | 0   | 0 |
| PITG_02119 | Pi protein kinase, putative (1583 nt)                    | 48 | 190 | 0 |
| PITG_02122 | Pi glucosamine-fructose-6-phosphate aminotransferase     | 5  | 25  | 0 |
| PITG_02123 | Pi hypothetical protein (1595 nt)                        | 0  | 6   | 0 |
| PITG_02124 | Pi protein kinase, putative (2883 nt)                    | 8  | 59  | 0 |
| PITG_02126 | Pi conserved hypothetical protein (508 nt)               | 3  | 13  | 0 |
| PITG_02127 | Pi conserved hypothetical protein (873 nt)               | 6  | 24  | 0 |
| PITG_02128 | Pi conserved hypothetical protein (8356 nt)              | 0  | 6   | 0 |
| PITG_02134 | Pi conserved hypothetical protein (17245 nt)             | 0  | 13  | 0 |
| PITG_02135 | Pi conserved hypothetical protein (1876 nt)              | 7  | 16  | 0 |
| PITG_02137 | Pi serine/threonine-protein phosphatase 2A 65 kDa reg    | 19 | 69  | 2 |
| PITG_02138 | Pi conserved hypothetical protein (1800 nt)              | 0  | 11  | 0 |
| PITG_02139 | Pi conserved hypothetical protein (976 nt)               | 13 | 69  | 0 |
| PITG_02143 | Pi myb-like DNA-binding protein, putative (1070 nt)      | 13 | 37  | 0 |
| PITG_02144 | Pi conserved hypothetical protein (814 nt)               | 4  | 23  | 0 |
| PITG_02145 | Pi conserved hypothetical protein (1971 nt)              | 6  | 38  | 0 |
| PITG_02146 | Pi conserved hypothetical protein (4828 nt)              | 2  | 23  | 0 |
| PITG_02147 | Pi Voltage-gated Ion Channel (VIC) Superfamily (2985 n   | 0  | 2   | 0 |
| PITG_02148 | Pi conserved hypothetical protein (938 nt)               | 0  | 0   | 0 |
| PITG_02152 | Pi hypothetical protein (2048 nt)                        | 10 | 19  | 0 |
| PITG_02156 | Pi conserved hypothetical protein (541 nt)               | 9  | 50  | 0 |
| PITG_02157 | Pi conserved hypothetical protein (465 nt)               | 3  | 16  | 0 |
| PITG_02160 | Pi hypothetical protein (466 nt)                         | 0  | 11  | 0 |
| PITG_02161 | Pi conserved hypothetical protein (3408 nt)              | 0  | 22  | 0 |

|            |                                                          |    |     |   |
|------------|----------------------------------------------------------|----|-----|---|
| PITG_02162 | Pi ATP-dependent Clp protease ATP-binding subunit clp    | 10 | 44  | 0 |
| PITG_02167 | Pi conserved hypothetical protein (1490 nt)              | 0  | 0   | 0 |
| PITG_02172 | Pi hypothetical protein (1277 nt)                        | 3  | 30  | 0 |
| PITG_02177 | Pi metalloprotease family M48X, putative (1636 nt)       | 29 | 92  | 0 |
| PITG_02178 | Pi conserved hypothetical protein (1469 nt)              | 20 | 39  | 0 |
| PITG_02182 | Pi homoserine dehydrogenase, putative (1518 nt)          | 15 | 73  | 4 |
| PITG_02184 | Pi conserved hypothetical protein (518 nt)               | 1  | 16  | 0 |
| PITG_02185 | Pi conserved hypothetical protein (1272 nt)              | 2  | 12  | 0 |
| PITG_02186 | Pi FKBP-type peptidyl-prolyl cis-trans isomerase, putati | 6  | 13  | 1 |
| PITG_02190 | Pi conserved hypothetical protein (1627 nt)              | 0  | 9   | 0 |
| PITG_02191 | Pi proteasome subunit beta type-6, putative (2247 nt)    | 28 | 129 | 4 |
| PITG_02192 | Pi glutathione peroxidase 2 (1037 nt)                    | 20 | 43  | 0 |
| PITG_02193 | Pi conserved hypothetical protein (1009 nt)              | 1  | 17  | 0 |
| PITG_02194 | Pi conserved hypothetical protein (1662 nt)              | 9  | 15  | 0 |
| PITG_02195 | Pi conserved hypothetical protein (528 nt)               | 14 | 25  | 0 |
| PITG_02196 | Pi conserved hypothetical protein (1734 nt)              | 7  | 25  | 0 |
| PITG_02197 | Pi DNA topoisomerase, putative (2392 nt)                 | 8  | 28  | 0 |
| PITG_02198 | Pi homoserine kinase, putative (1289 nt)                 | 9  | 13  | 0 |
| PITG_02199 | Pi conserved hypothetical protein (2991 nt)              | 0  | 18  | 0 |
| PITG_02202 | Pi conserved hypothetical protein (1111 nt)              | 6  | 13  | 0 |
| PITG_02203 | Pi conserved hypothetical protein (2022 nt)              | 16 | 26  | 0 |
| PITG_02205 | Pi conserved hypothetical protein (1055 nt)              | 10 | 37  | 0 |
| PITG_02206 | Pi conserved hypothetical protein (456 nt)               | 13 | 66  | 0 |
| PITG_02208 | Pi conserved hypothetical protein (1974 nt)              | 3  | 17  | 0 |
| PITG_02209 | Pi hypothetical protein (836 nt)                         | 6  | 1   | 0 |
| PITG_02210 | Pi phenylalanine-4-hydroxylase, henna-like protein (19   | 16 | 39  | 1 |
| PITG_02211 | Pi UV excision repair protein RAD23 (1465 nt)            | 37 | 124 | 3 |
| PITG_02212 | Pi mitogen-activated protein kinase, putative (1318 nt)  | 0  | 0   | 0 |
| PITG_02213 | Pi serine protease family S10, putative (1950 nt)        | 12 | 8   | 0 |
| PITG_02220 | Pi hypothetical protein (1581 nt)                        | 5  | 17  | 0 |
| PITG_02221 | Pi thymidylate kinase (651 nt)                           | 9  | 2   | 0 |
| PITG_02222 | Pi conserved hypothetical protein (975 nt)               | 22 | 3   | 0 |
| PITG_02227 | Pi cleavage induced hypothetical protein (1578 nt)       | 14 | 25  | 0 |
| PITG_02228 | Pi conserved hypothetical protein (2007 nt)              | 10 | 31  | 0 |
| PITG_02229 | Pi conserved hypothetical protein (1303 nt)              | 5  | 11  | 0 |
| PITG_02230 | Pi conserved hypothetical protein (2093 nt)              | 4  | 26  | 0 |
| PITG_02233 | Pi conserved hypothetical protein (731 nt)               | 17 | 21  | 0 |
| PITG_02234 | Pi F-box protein, putative (2205 nt)                     | 3  | 10  | 0 |
| PITG_02237 | Pi conserved hypothetical protein (484 nt)               | 25 | 38  | 0 |
| PITG_02238 | Pi conserved hypothetical protein (5511 nt)              | 1  | 17  | 0 |
| PITG_02239 | Pi ATP-dependent hsl protease ATP-binding subunit hsl    | 18 | 41  | 0 |
| PITG_02241 | Pi conserved hypothetical protein (1095 nt)              | 11 | 87  | 0 |
| PITG_02242 | Pi conserved hypothetical protein (1385 nt)              | 2  | 30  | 0 |
| PITG_02244 | Pi conserved hypothetical protein (1359 nt)              | 14 | 17  | 0 |
| PITG_02245 | Pi D-2-hydroxyglutarate dehydrogenase, mitochondrial     | 6  | 14  | 0 |
| PITG_02249 | Pi hypothetical protein (415 nt)                         | 2  | 8   | 0 |
| PITG_02250 | Pi conserved hypothetical protein (780 nt)               | 0  | 6   | 0 |

|            |                                                        |     |     |    |
|------------|--------------------------------------------------------|-----|-----|----|
| PITG_02251 | Pi conserved hypothetical protein (420 nt)             | 1   | 8   | 0  |
| PITG_02252 | Pi conserved hypothetical protein (3288 nt)            | 8   | 70  | 0  |
| PITG_02253 | Pi isovaleryl-CoA dehydrogenase, putative (1538 nt)    | 100 | 112 | 0  |
| PITG_02254 | Pi conserved hypothetical protein (2198 nt)            | 9   | 6   | 0  |
| PITG_02255 | Pi histone H1, putative (731 nt)                       | 321 | 876 | 10 |
| PITG_02256 | Pi aspartate aminotransferase, mitochondrial precursor | 258 | 238 | 10 |
| PITG_02257 | Pi conserved hypothetical protein (309 nt)             | 0   | 0   | 0  |
| PITG_02258 | Pi conserved hypothetical protein (1072 nt)            | 7   | 6   | 0  |
| PITG_02259 | Pi hsp70-like protein (2266 nt)                        | 6   | 23  | 0  |
| PITG_02260 | Pi C2 domain-containing protein, putative (783 nt)     | 17  | 37  | 0  |
| PITG_02261 | Pi C2 domain-containing protein, putative (742 nt)     | 11  | 40  | 1  |
| PITG_02263 | Pi metal transporter, putative (1660 nt)               | 5   | 29  | 0  |
| PITG_02264 | Pi protein kinase, putative (4828 nt)                  | 6   | 30  | 0  |
| PITG_02267 | Pi coatomer subunit beta, putative (2979 nt)           | 9   | 57  | 1  |
| PITG_02268 | Pi conserved hypothetical protein (1552 nt)            | 7   | 22  | 0  |
| PITG_02269 | Pi conserved hypothetical protein (729 nt)             | 3   | 14  | 0  |
| PITG_02273 | Pi conserved hypothetical protein (1042 nt)            | 15  | 18  | 0  |
| PITG_02274 | Pi peroxisomal trans-2-enoyl-CoA reductase, putative ( | 63  | 8   | 0  |
| PITG_02275 | Pi peroxisomal trans-2-enoyl-CoA reductase, putative ( | 0   | 0   | 0  |
| PITG_02277 | Pi cyclopropane-fatty-acyl-phospholipid synthase (1439 | 6   | 25  | 3  |
| PITG_02280 | Pi conserved hypothetical protein (1966 nt)            | 14  | 54  | 0  |
| PITG_02281 | Pi conserved hypothetical protein (1434 nt)            | 7   | 81  | 0  |
| PITG_02282 | Pi acyl-CoA dehydrogenase, putative (2342 nt)          | 25  | 262 | 0  |
| PITG_02283 | Pi conserved hypothetical protein (719 nt)             | 36  | 91  | 1  |
| PITG_02284 | Pi xanthine dehydrogenase, putative (4353 nt)          | 0   | 4   | 0  |
| PITG_02285 | Pi conserved hypothetical protein (2074 nt)            | 35  | 59  | 0  |
| PITG_02286 | Pi chromatin-remodeling complex ATPase chain, putati   | 11  | 36  | 0  |
| PITG_02288 | Pi conserved hypothetical protein (1412 nt)            | 6   | 28  | 0  |
| PITG_02289 | Pi acetyl-coenzyme A transporter, putative (1608 nt)   | 1   | 10  | 0  |
| PITG_02290 | Pi conserved hypothetical protein (1941 nt)            | 4   | 12  | 0  |
| PITG_02291 | Pi conserved hypothetical protein (1800 nt)            | 2   | 7   | 0  |
| PITG_02292 | Pi protein phosphatase, putative (3132 nt)             | 36  | 53  | 0  |
| PITG_02293 | Pi conserved hypothetical protein (1190 nt)            | 17  | 41  | 1  |
| PITG_02294 | Pi conserved hypothetical protein (2285 nt)            | 2   | 10  | 0  |
| PITG_02303 | Pi ornithine decarboxylase 1 (1502 nt)                 | 4   | 5   | 0  |
| PITG_02304 | Pi anaphase-promoting complex subunit 7, putative (21  | 2   | 9   | 0  |
| PITG_02305 | Pi conserved hypothetical protein (864 nt)             | 20  | 78  | 13 |
| PITG_02306 | Pi hypothetical protein (1337 nt)                      | 0   | 1   | 0  |
| PITG_02307 | Pi alpha,alpha-trehalose-phosphate synthase [UDP-fori  | 1   | 10  | 0  |
| PITG_02308 | Pi conserved hypothetical protein (812 nt)             | 1   | 21  | 0  |
| PITG_02314 | Pi conserved hypothetical protein (1137 nt)            | 0   | 0   | 2  |
| PITG_02319 | Pi hypothetical protein (3391 nt)                      | 16  | 27  | 0  |
| PITG_02320 | Pi conserved hypothetical protein (1297 nt)            | 3   | 72  | 0  |
| PITG_02322 | Pi conserved hypothetical protein (1615 nt)            | 7   | 10  | 0  |
| PITG_02323 | Pi hypothetical protein (603 nt)                       | 11  | 14  | 0  |
| PITG_02324 | Pi hypothetical protein (598 nt)                       | 3   | 8   | 0  |
| PITG_02327 | Pi conserved hypothetical protein (1533 nt)            | 10  | 40  | 0  |

|            |                                                        |     |     |   |
|------------|--------------------------------------------------------|-----|-----|---|
| PITG_02328 | Pi conserved hypothetical protein (968 nt)             | 15  | 15  | 1 |
| PITG_02329 | Pi peptide-N(4)-(N-acetyl-beta-glucosaminy)asparagin   | 1   | 22  | 0 |
| PITG_02330 | Pi conserved hypothetical protein (1368 nt)            | 2   | 11  | 0 |
| PITG_02336 | Pi conserved hypothetical protein (1068 nt)            | 62  | 27  | 0 |
| PITG_02337 | Pi exonuclease, putative (1389 nt)                     | 13  | 34  | 0 |
| PITG_02338 | Pi conserved hypothetical protein (671 nt)             | 13  | 37  | 0 |
| PITG_02339 | Pi 26S proteasome non-ATPase regulatory subunit 12,    | 18  | 61  | 1 |
| PITG_02340 | Pi conserved hypothetical protein (3042 nt)            | 17  | 8   | 0 |
| PITG_02341 | Pi conserved hypothetical protein (678 nt)             | 0   | 0   | 0 |
| PITG_02342 | Pi conserved hypothetical protein (581 nt)             | 1   | 0   | 0 |
| PITG_02343 | Pi kinesin-like protein (5133 nt)                      | 2   | 18  | 0 |
| PITG_02344 | Pi 5-oxoprolinase (3842 nt)                            | 2   | 29  | 0 |
| PITG_02346 | Pi CCR4-NOT transcription complex subunit 7 (650 nt)   | 3   | 15  | 0 |
| PITG_02347 | Pi conserved hypothetical protein (1595 nt)            | 10  | 24  | 0 |
| PITG_02348 | Pi conserved hypothetical protein (1142 nt)            | 8   | 23  | 0 |
| PITG_02349 | Pi conserved hypothetical protein (1505 nt)            | 6   | 27  | 0 |
| PITG_02352 | Pi P-type ATPase (P-ATPase) Superfamily (3239 nt)      | 3   | 25  | 0 |
| PITG_02356 | Pi calcium-transporting ATPase 1, endoplasmic reticulu | 0   | 11  | 0 |
| PITG_02357 | Pi P-type ATPase (P-ATPase) Superfamily (3566 nt)      | 4   | 22  | 0 |
| PITG_02361 | Pi P-type ATPase (P-ATPase) Superfamily (2973 nt)      | 0   | 11  | 0 |
| PITG_02362 | Pi P-type ATPase (P-ATPase) Superfamily (2973 nt)      | 0   | 16  | 0 |
| PITG_02363 | Pi conserved hypothetical protein (495 nt)             | 6   | 58  | 0 |
| PITG_02364 | Pi P-type ATPase (P-ATPase) Superfamily (2332 nt)      | 0   | 17  | 0 |
| PITG_02368 | Pi polysaccharide lyase, putative (1621 nt)            | 13  | 8   | 0 |
| PITG_02371 | Pi conserved hypothetical protein (2112 nt)            | 9   | 22  | 0 |
| PITG_02372 | Pi conserved hypothetical protein (1359 nt)            | 8   | 24  | 0 |
| PITG_02380 | Pi C2 domain-containing protein, putative (762 nt)     | 6   | 20  | 0 |
| PITG_02381 | Pi conserved hypothetical protein (1985 nt)            | 16  | 126 | 0 |
| PITG_02382 | Pi conserved hypothetical protein (506 nt)             | 8   | 9   | 0 |
| PITG_02384 | Pi conserved hypothetical protein (1429 nt)            | 4   | 26  | 0 |
| PITG_02391 | Pi conserved hypothetical protein (1560 nt)            | 3   | 17  | 0 |
| PITG_02393 | Pi conserved hypothetical protein (1545 nt)            | 0   | 0   | 0 |
| PITG_02397 | Pi conserved hypothetical protein (848 nt)             | 6   | 19  | 0 |
| PITG_02398 | Pi conserved hypothetical protein (378 nt)             | 9   | 17  | 0 |
| PITG_02399 | Pi conserved hypothetical protein (760 nt)             | 5   | 11  | 0 |
| PITG_02400 | Pi protein kinase (3158 nt)                            | 3   | 22  | 0 |
| PITG_02401 | Pi phosphatidylinositol-3,4,5-trisphosphate 3-phosphat | 13  | 119 | 0 |
| PITG_02409 | Pi Folate-Biopterin Transporter (FBT) Family (1707 nt) | 2   | 8   | 5 |
| PITG_02415 | Pi conserved hypothetical protein (2036 nt)            | 15  | 35  | 0 |
| PITG_02416 | Pi conserved hypothetical protein (506 nt)             | 197 | 183 | 1 |
| PITG_02418 | Pi conserved hypothetical protein (1689 nt)            | 9   | 77  | 0 |
| PITG_02420 | Pi DNA-directed RNA polymerase I subunit RPA2, putat   | 0   | 12  | 0 |
| PITG_02423 | Pi cysteine protease family C01A, putative (2587 nt)   | 20  | 116 | 1 |
| PITG_02424 | Pi aldo/keto reductase family (935 nt)                 | 3   | 34  | 0 |
| PITG_02426 | Pi conserved hypothetical protein (1473 nt)            | 2   | 14  | 0 |
| PITG_02427 | Pi conserved hypothetical protein (1639 nt)            | 2   | 18  | 0 |
| PITG_02428 | Pi 15-hydroxyprostaglandin dehydrogenase [NAD+], pu    | 15  | 76  | 0 |

|            |                                                             |     |     |   |
|------------|-------------------------------------------------------------|-----|-----|---|
| PITG_02429 | Pi cAMP-dependent protein kinase catalytic subunit, pu      | 0   | 2   | 0 |
| PITG_02430 | Pi conserved hypothetical protein (1829 nt)                 | 4   | 16  | 0 |
| PITG_02432 | Pi dolichyl-P-Man:Man(5)GlcNAc(2)-PP-dolichyl manno         | 7   | 23  | 0 |
| PITG_02433 | Pi conserved hypothetical protein (1312 nt)                 | 16  | 16  | 0 |
| PITG_02439 | Pi conserved hypothetical protein (2130 nt)                 | 2   | 15  | 0 |
| PITG_02440 | Pi conserved hypothetical protein (1523 nt)                 | 7   | 9   | 0 |
| PITG_02441 | Pi hypothetical protein (2940 nt)                           | 0   | 4   | 0 |
| PITG_02442 | Pi cysteine protease family C02, putative (4133 nt)         | 0   | 17  | 0 |
| PITG_02446 | Pi cyclin-dependent kinase, putative (1646 nt)              | 10  | 33  | 0 |
| PITG_02447 | Pi conserved hypothetical protein (1248 nt)                 | 17  | 24  | 0 |
| PITG_02448 | Pi conserved hypothetical protein (378 nt)                  | 8   | 5   | 0 |
| PITG_02449 | Pi conserved hypothetical protein (1012 nt)                 | 46  | 28  | 0 |
| PITG_02452 | Pi conserved hypothetical protein (587 nt)                  | 3   | 18  | 0 |
| PITG_02453 | Pi conserved hypothetical protein (1095 nt)                 | 16  | 25  | 0 |
| PITG_02454 | Pi conserved hypothetical protein (2706 nt)                 | 3   | 12  | 0 |
| PITG_02456 | Pi conserved hypothetical protein (3667 nt)                 | 3   | 16  | 0 |
| PITG_02457 | Pi protein kinase (2695 nt)                                 | 16  | 19  | 0 |
| PITG_02458 | Pi conserved hypothetical protein (1512 nt)                 | 12  | 44  | 0 |
| PITG_02460 | Pi sporulation induced hypothetical protein (637 nt)        | 2   | 4   | 0 |
| PITG_02462 | Pi actin-like protein (1227 nt)                             | 0   | 0   | 0 |
| PITG_02464 | Pi conserved hypothetical protein (5435 nt)                 | 0   | 6   | 0 |
| PITG_02467 | Pi translocation protein SEC63 (1987 nt)                    | 42  | 93  | 1 |
| PITG_02470 | Pi conserved hypothetical protein (899 nt)                  | 14  | 77  | 0 |
| PITG_02471 | Pi cytochrome b5 reductase with F-box domain, putati        | 3   | 14  | 0 |
| PITG_02472 | Pi conserved hypothetical protein (873 nt)                  | 1   | 4   | 0 |
| PITG_02473 | Pi HECT E3 ubiquitin ligase, putative (1995 nt)             | 6   | 9   | 0 |
| PITG_02475 | Pi conserved hypothetical protein (501 nt)                  | 8   | 3   | 0 |
| PITG_02477 | Pi conserved hypothetical protein (773 nt)                  | 4   | 11  | 0 |
| PITG_02478 | Pi DEAD/DEAH box RNA helicase, putative (2331 nt)           | 11  | 12  | 0 |
| PITG_02479 | Pi T-complex protein 1 subunit theta (1856 nt)              | 9   | 52  | 4 |
| PITG_02480 | Pi conserved hypothetical protein (981 nt)                  | 37  | 15  | 0 |
| PITG_02482 | Pi ATP-dependent RNA helicase DHX8 (3493 nt)                | 8   | 13  | 0 |
| PITG_02483 | Pi 3-ketodihydrosphingosine reductase, putative (1073       | 87  | 63  | 6 |
| PITG_02486 | Pi conserved hypothetical protein (1050 nt)                 | 6   | 27  | 0 |
| PITG_02487 | Pi conserved hypothetical protein (939 nt)                  | 9   | 33  | 0 |
| PITG_02489 | Pi conserved hypothetical protein (1975 nt)                 | 1   | 11  | 0 |
| PITG_02490 | Pi conserved hypothetical protein (870 nt)                  | 3   | 18  | 0 |
| PITG_02491 | Pi conserved hypothetical protein (739 nt)                  | 9   | 19  | 0 |
| PITG_02492 | Pi microtubule-associated protein, putative (7118 nt)       | 2   | 4   | 0 |
| PITG_02493 | Pi eukaryotic translation initiation factor 1b, putative (} | 377 | 208 | 5 |
| PITG_02494 | Pi conserved hypothetical protein (1225 nt)                 | 22  | 25  | 0 |
| PITG_02495 | Pi phosphatidylinositol kinase (PIK-L4) (9150 nt)           | 1   | 14  | 0 |
| PITG_02496 | Pi conserved hypothetical protein (2508 nt)                 | 2   | 13  | 0 |
| PITG_02497 | Pi HECT E3 ubiquitin ligase, putative (2229 nt)             | 14  | 35  | 0 |
| PITG_02498 | Pi iron sulfur cluster assembly protein 1, mitochondrial    | 28  | 72  | 0 |
| PITG_02499 | Pi conserved hypothetical protein (1724 nt)                 | 11  | 37  | 0 |
| PITG_02500 | Pi conserved hypothetical protein (790 nt)                  | 77  | 38  | 0 |

|            |                                                                |      |     |    |
|------------|----------------------------------------------------------------|------|-----|----|
| PITG_02501 | Pi conserved hypothetical protein (986 nt)                     | 1269 | 755 | 0  |
| PITG_02502 | Pi T-complex protein 1 subunit zeta (3765 nt)                  | 20   | 52  | 3  |
| PITG_02503 | Pi FAD synthetase, putative (876 nt)                           | 9    | 7   | 0  |
| PITG_02506 | Pi conserved hypothetical protein (1835 nt)                    | 3    | 12  | 0  |
| PITG_02507 | Pi conserved hypothetical protein (972 nt)                     | 7    | 8   | 0  |
| PITG_02509 | Pi conserved hypothetical protein (730 nt)                     | 0    | 3   | 0  |
| PITG_02510 | Pi conserved hypothetical protein (1081 nt)                    | 199  | 384 | 0  |
| PITG_02515 | Pi LETM1 and EF-hand domain-containing protein 1, pu           | 11   | 33  | 1  |
| PITG_02516 | Pi conserved hypothetical protein (1328 nt)                    | 4    | 13  | 0  |
| PITG_02520 | Pi conserved hypothetical protein (2341 nt)                    | 1    | 21  | 0  |
| PITG_02521 | Pi conserved hypothetical protein (1199 nt)                    | 0    | 4   | 0  |
| PITG_02525 | Pi elicitor-like mating protein M25 (846 nt)                   | 1    | 19  | 0  |
| PITG_02526 | Pi dynein heavy chain (14109 nt)                               | 1    | 41  | 0  |
| PITG_02527 | Pi histone H2A variant 1 (654 nt)                              | 21   | 128 | 2  |
| PITG_02528 | Pi elongator complex protein, putative (2055 nt)               | 1    | 8   | 0  |
| PITG_02529 | Pi protein kinase, putative (4011 nt)                          | 2    | 20  | 0  |
| PITG_02530 | Pi conserved hypothetical protein (1675 nt)                    | 3    | 11  | 0  |
| PITG_02531 | Pi conserved hypothetical protein (4082 nt)                    | 3    | 24  | 0  |
| PITG_02532 | Pi Ca <sup>2+</sup> :Cation Antiporter (CaCA) Family (3392 nt) | 8    | 54  | 7  |
| PITG_02533 | Pi conserved hypothetical protein (845 nt)                     | 21   | 96  | 0  |
| PITG_02537 | Pi conserved hypothetical protein (1443 nt)                    | 65   | 189 | 0  |
| PITG_02540 | Pi integrator complex subunit, putative (2317 nt)              | 2    | 14  | 0  |
| PITG_02541 | Pi conserved hypothetical protein (2286 nt)                    | 2    | 9   | 0  |
| PITG_02546 | Pi ubiquitin carboxyl-terminal hydrolase, putative (2561       | 5    | 15  | 0  |
| PITG_02547 | Pi transcription initiation factor TFIID subunit 1, putativ    | 2    | 20  | 0  |
| PITG_02549 | Pi conserved hypothetical protein (401 nt)                     | 1    | 1   | 0  |
| PITG_02551 | Pi calmodulin-like protein (595 nt)                            | 0    | 0   | 0  |
| PITG_02552 | Pi conserved hypothetical protein (1095 nt)                    | 0    | 26  | 0  |
| PITG_02553 | Pi conserved hypothetical protein (1261 nt)                    | 17   | 12  | 0  |
| PITG_02555 | Pi conserved hypothetical protein (1587 nt)                    | 1    | 13  | 0  |
| PITG_02556 | Pi Major Facilitator Superfamily (MFS) (1790 nt)               | 3    | 8   | 0  |
| PITG_02559 | Pi conserved hypothetical protein (1807 nt)                    | 2    | 14  | 0  |
| PITG_02561 | Pi ubiquitin-specific protease, putative (8027 nt)             | 2    | 24  | 0  |
| PITG_02562 | Pi conserved hypothetical protein (1647 nt)                    | 22   | 75  | 0  |
| PITG_02563 | Pi conserved hypothetical protein (2174 nt)                    | 3    | 69  | 0  |
| PITG_02564 | Pi exosome complex exonuclease RRP6-like protein (48           | 12   | 20  | 0  |
| PITG_02565 | Pi protein kinase, putative (1170 nt)                          | 12   | 82  | 0  |
| PITG_02567 | Pi T-complex protein 1 subunit alpha (1841 nt)                 | 18   | 65  | 5  |
| PITG_02568 | Pi conserved hypothetical protein (1143 nt)                    | 1    | 0   | 0  |
| PITG_02569 | Pi Rab11 family GTPase, putative (1821 nt)                     | 1    | 1   | 0  |
| PITG_02570 | Pi conserved hypothetical protein (578 nt)                     | 0    | 31  | 0  |
| PITG_02571 | Pi conserved hypothetical protein (1114 nt)                    | 6    | 20  | 0  |
| PITG_02572 | Pi conserved hypothetical protein (3372 nt)                    | 2    | 14  | 0  |
| PITG_02575 | Pi alpha,alpha-trehalose-phosphate synthase [UDP-fori          | 3    | 32  | 0  |
| PITG_02576 | Pi protein phosphatase 2C, putative (1267 nt)                  | 3    | 8   | 0  |
| PITG_02577 | Pi conserved hypothetical protein (330 nt)                     | 0    | 29  | 0  |
| PITG_02578 | Pi 60S ribosomal protein L15-1 (621 nt)                        | 561  | 600 | 56 |



|                                                                          |     |     |   |
|--------------------------------------------------------------------------|-----|-----|---|
| PITG_02579   Pi enoyl-CoA hydratase/isomerase family, putative (1083 nt) | 79  | 77  | 0 |
| PITG_02580   Pi conserved hypothetical protein (1599 nt)                 | 14  | 34  | 0 |
| PITG_02582   Pi C2 domain-containing protein, putative (826 nt)          | 23  | 22  | 0 |
| PITG_02585   Pi conserved hypothetical protein (1448 nt)                 | 9   | 12  | 0 |
| PITG_02586   Pi conserved hypothetical protein (5388 nt)                 | 4   | 47  | 1 |
| PITG_02588   Pi conserved hypothetical protein (915 nt)                  | 14  | 16  | 0 |
| PITG_02591   Pi conserved hypothetical protein (1169 nt)                 | 16  | 32  | 0 |
| PITG_02592   Pi conserved hypothetical protein (565 nt)                  | 1   | 3   | 0 |
| PITG_02594   Pi glutamate decarboxylase (1660 nt)                        | 112 | 290 | 6 |
| PITG_02595   Pi conserved hypothetical protein (4154 nt)                 | 0   | 2   | 0 |
| PITG_02596   Pi DC12 family protein (1726 nt)                            | 2   | 16  | 0 |
| PITG_02597   Pi DnaJ subfamily B protein (1362 nt)                       | 4   | 22  | 0 |
| PITG_02598   Pi conserved hypothetical protein (2378 nt)                 | 20  | 49  | 0 |
| PITG_02600   Pi hypothetical protein (549 nt)                            | 35  | 127 | 0 |
| PITG_02607   Pi peroxisomal multifunctional enzyme, putative (1083 nt)   | 34  | 110 | 1 |
| PITG_02608   Pi autophagy-related protein, putative (1744 nt)            | 2   | 31  | 0 |
| PITG_02613   Pi conserved hypothetical protein (799 nt)                  | 8   | 19  | 0 |
| PITG_02615   Pi conserved hypothetical protein (1055 nt)                 | 19  | 138 | 0 |
| PITG_02616   Pi caltractin (763 nt)                                      | 13  | 9   | 0 |
| PITG_02617   Pi conserved hypothetical protein (1476 nt)                 | 1   | 6   | 0 |
| PITG_02619   Pi hypothetical protein (309 nt)                            | 3   | 9   | 0 |
| PITG_02620   Pi conserved hypothetical protein (1545 nt)                 | 3   | 7   | 0 |
| PITG_02621   Pi CTP synthase, putative (1809 nt)                         | 2   | 9   | 0 |
| PITG_02622   Pi conserved hypothetical protein (2367 nt)                 | 0   | 0   | 0 |
| PITG_02623   Pi aspartyl protease family A01B, putative (2187 nt)        | 6   | 27  | 0 |
| PITG_02624   Pi aspartyl protease family A01B, putative (1499 nt)        | 6   | 26  | 0 |
| PITG_02625   Pi conserved hypothetical protein (625 nt)                  | 4   | 13  | 0 |
| PITG_02626   Pi conserved hypothetical protein (1995 nt)                 | 15  | 57  | 0 |
| PITG_02627   Pi conserved hypothetical protein (1416 nt)                 | 21  | 62  | 0 |
| PITG_02628   Pi conserved hypothetical protein (1134 nt)                 | 10  | 33  | 0 |
| PITG_02629   Pi nucleolin, putative (1642 nt)                            | 3   | 10  | 1 |
| PITG_02634   Pi conserved hypothetical protein (761 nt)                  | 14  | 92  | 0 |
| PITG_02635   Pi conserved hypothetical protein (2136 nt)                 | 1   | 11  | 0 |
| PITG_02636   Pi conserved hypothetical protein (4157 nt)                 | 8   | 35  | 0 |
| PITG_02637   Pi hypothetical protein (2078 nt)                           | 3   | 38  | 0 |
| PITG_02638   Pi hypothetical protein (1487 nt)                           | 1   | 0   | 0 |
| PITG_02640   Pi conserved hypothetical protein (986 nt)                  | 62  | 68  | 0 |
| PITG_02642   Pi pyruvate dehydrogenase [lipoamide] (1222 nt)             | 29  | 33  | 0 |
| PITG_02646   Pi conserved hypothetical protein (1623 nt)                 | 0   | 0   | 0 |
| PITG_02650   Pi hypothetical protein (228 nt)                            | 2   | 4   | 0 |
| PITG_02654   Pi serine hydrolase (FSH1)-like protein, putative (858 nt)  | 17  | 14  | 0 |
| PITG_02655   Pi conserved hypothetical protein (804 nt)                  | 6   | 15  | 0 |
| PITG_02657   Pi conserved hypothetical protein (1664 nt)                 | 39  | 217 | 0 |
| PITG_02658   Pi conserved hypothetical protein (1370 nt)                 | 35  | 286 | 0 |
| PITG_02659   Pi serine hydrolase (FSH1)-like protein, putative (831 nt)  | 22  | 16  | 0 |
| PITG_02660   Pi conserved hypothetical protein (873 nt)                  | 100 | 84  | 0 |
| PITG_02661   Pi conserved hypothetical protein (2055 nt)                 | 2   | 21  | 0 |

|            |                                                          |     |     |    |
|------------|----------------------------------------------------------|-----|-----|----|
| PITG_02662 | Pi ubiquitin family protein, putative (1157 nt)          | 51  | 136 | 0  |
| PITG_02663 | Pi conserved hypothetical protein (1298 nt)              | 5   | 37  | 1  |
| PITG_02664 | Pi ATP-dependent RNA helicase DBP2, putative (2496 r     | 46  | 135 | 1  |
| PITG_02666 | Pi protein kinase, putative (3176 nt)                    | 4   | 10  | 0  |
| PITG_02667 | Pi conserved hypothetical protein (592 nt)               | 3   | 6   | 0  |
| PITG_02670 | Pi conserved hypothetical protein (869 nt)               | 14  | 50  | 0  |
| PITG_02671 | Pi cAMP-dependent protein kinase regulatory subunit (    | 5   | 26  | 0  |
| PITG_02672 | Pi ATP-dependent protease hslV (887 nt)                  | 14  | 34  | 0  |
| PITG_02673 | Pi conserved hypothetical protein (1392 nt)              | 4   | 19  | 0  |
| PITG_02677 | Pi DEAD/DEAH box RNA helicase, putative (1859 nt)        | 1   | 18  | 0  |
| PITG_02678 | Pi conserved hypothetical protein (1105 nt)              | 1   | 3   | 0  |
| PITG_02679 | Pi conserved hypothetical protein (3114 nt)              | 10  | 24  | 0  |
| PITG_02680 | Pi conserved hypothetical protein (3812 nt)              | 0   | 4   | 0  |
| PITG_02683 | Pi calcineurin-like phosphoesterase, putative (1396 nt)  | 5   | 28  | 0  |
| PITG_02684 | Pi peptidyl-tRNA hydrolase, putative (797 nt)            | 8   | 48  | 0  |
| PITG_02687 | Pi conserved hypothetical protein (601 nt)               | 0   | 0   | 0  |
| PITG_02688 | Pi conserved hypothetical protein (394 nt)               | 6   | 9   | 0  |
| PITG_02691 | Pi hypothetical protein (4334 nt)                        | 6   | 2   | 0  |
| PITG_02692 | Pi conserved hypothetical protein (1703 nt)              | 0   | 40  | 0  |
| PITG_02694 | Pi 60S ribosomal protein L23a (830 nt)                   | 452 | 759 | 78 |
| PITG_02695 | Pi striatin-3 family protein (2493 nt)                   | 26  | 49  | 0  |
| PITG_02696 | Pi vacuolar protein sorting-associated protein, putative | 2   | 20  | 0  |
| PITG_02697 | Pi ATP-binding Cassette (ABC) Superfamily (2563 nt)      | 4   | 2   | 0  |
| PITG_02698 | Pi conserved hypothetical protein (4793 nt)              | 0   | 17  | 0  |
| PITG_02706 | Pi NUK6 (2239 nt)                                        | 12  | 113 | 0  |
| PITG_02710 | Pi serine protease family S01A, putative (3352 nt)       | 25  | 56  | 0  |
| PITG_02711 | Pi oligopeptidase A, putative (2519 nt)                  | 2   | 13  | 0  |
| PITG_02712 | Pi conserved hypothetical protein (1495 nt)              | 12  | 65  | 0  |
| PITG_02713 | Pi brefeldin A-inhibited guanine nucleotide-exchange p   | 0   | 0   | 0  |
| PITG_02716 | Pi conserved hypothetical protein (1906 nt)              | 9   | 32  | 0  |
| PITG_02717 | Pi conserved hypothetical protein (922 nt)               | 4   | 17  | 0  |
| PITG_02718 | Pi conserved hypothetical protein (1648 nt)              | 1   | 11  | 0  |
| PITG_02719 | Pi conserved hypothetical protein (1040 nt)              | 2   | 19  | 0  |
| PITG_02720 | Pi conserved hypothetical protein (1338 nt)              | 3   | 34  | 0  |
| PITG_02721 | Pi tubulin polyglutamylase, putative (1992 nt)           | 1   | 0   | 0  |
| PITG_02722 | Pi conserved hypothetical protein (769 nt)               | 9   | 32  | 0  |
| PITG_02723 | Pi conserved hypothetical protein (1428 nt)              | 11  | 12  | 0  |
| PITG_02724 | Pi Cullin family protein, putative (2338 nt)             | 5   | 26  | 0  |
| PITG_02725 | Pi conserved hypothetical protein (1766 nt)              | 6   | 13  | 0  |
| PITG_02728 | Pi inositol-3,4-bisphosphate 4-phosphatase, putative (€  | 1   | 14  | 0  |
| PITG_02729 | Pi chromodomain protein, putative (1543 nt)              | 24  | 28  | 0  |
| PITG_02730 | Pi conserved hypothetical protein (4085 nt)              | 3   | 21  | 0  |
| PITG_02731 | Pi conserved hypothetical protein (3612 nt)              | 6   | 26  | 0  |
| PITG_02732 | Pi conserved hypothetical protein (1556 nt)              | 19  | 45  | 0  |
| PITG_02733 | Pi conserved hypothetical protein (1731 nt)              | 4   | 26  | 0  |
| PITG_02734 | Pi conserved hypothetical protein (387 nt)               | 7   | 64  | 0  |
| PITG_02735 | Pi 2,3-bisphosphoglycerate-dependent phosphoglycera      | 11  | 49  | 0  |

|            |                                                                        |    |     |    |
|------------|------------------------------------------------------------------------|----|-----|----|
| PITG_02736 | Pi U2 small nuclear ribonucleoprotein A', putative (137 nt)            | 4  | 23  | 0  |
| PITG_02737 | Pi conserved hypothetical protein (1280 nt)                            | 23 | 206 | 0  |
| PITG_02738 | Pi hypothetical protein (729 nt)                                       | 0  | 14  | 0  |
| PITG_02739 | Pi conserved hypothetical protein (1730 nt)                            | 6  | 22  | 0  |
| PITG_02740 | Pi acetolactate synthase, mitochondrial precursor (194 nt)             | 15 | 32  | 1  |
| PITG_02741 | Pi glutaredoxin (527 nt)                                               | 24 | 74  | 3  |
| PITG_02744 | Pi conserved hypothetical protein (2910 nt)                            | 6  | 15  | 0  |
| PITG_02745 | Pi casein kinase II subunit beta (1503 nt)                             | 40 | 109 | 0  |
| PITG_02748 | Pi conserved hypothetical protein (981 nt)                             | 10 | 142 | 0  |
| PITG_02750 | Pi NAD kinase, putative (1884 nt)                                      | 4  | 40  | 0  |
| PITG_02751 | Pi conserved hypothetical protein (2612 nt)                            | 1  | 3   | 0  |
| PITG_02752 | Pi ribosomal RNA methyltransferase nop2-like protein (1000 nt)         | 3  | 8   | 0  |
| PITG_02753 | Pi DNA polymerase zeta catalytic subunit, putative (567 nt)            | 0  | 14  | 0  |
| PITG_02754 | Pi conserved hypothetical protein (2880 nt)                            | 2  | 15  | 0  |
| PITG_02755 | Pi structural maintenance of chromosomes protein 5, $\gamma$ (1000 nt) | 6  | 45  | 0  |
| PITG_02756 | Pi conserved hypothetical protein (1271 nt)                            | 12 | 12  | 0  |
| PITG_02757 | Pi pyruvate kinase (2280 nt)                                           | 11 | 12  | 0  |
| PITG_02758 | Pi conserved hypothetical protein (1692 nt)                            | 1  | 7   | 0  |
| PITG_02759 | Pi hypothetical protein (278 nt)                                       | 11 | 7   | 0  |
| PITG_02760 | Pi oxidoreductase, putative (881 nt)                                   | 1  | 38  | 0  |
| PITG_02761 | Pi oxidoreductase, putative (1697 nt)                                  | 3  | 42  | 0  |
| PITG_02762 | Pi protein kinase, putative (2433 nt)                                  | 16 | 91  | 0  |
| PITG_02764 | Pi conserved hypothetical protein (967 nt)                             | 13 | 25  | 0  |
| PITG_02765 | Pi conserved hypothetical protein (901 nt)                             | 12 | 18  | 0  |
| PITG_02766 | Pi patatin-like phospholipase, putative (2211 nt)                      | 7  | 7   | 0  |
| PITG_02767 | Pi cysteine dioxygenase, putative (736 nt)                             | 49 | 13  | 0  |
| PITG_02769 | Pi conserved hypothetical protein (995 nt)                             | 27 | 59  | 0  |
| PITG_02770 | Pi calcineurin-like phosphoesterase, putative (2185 nt)                | 9  | 18  | 0  |
| PITG_02774 | Pi multiple inositol polyphosphate phosphatase, putative (1000 nt)     | 0  | 3   | 0  |
| PITG_02775 | Pi conserved hypothetical protein (2460 nt)                            | 0  | 16  | 0  |
| PITG_02776 | Pi multiple inositol polyphosphate phosphatase, putative (1000 nt)     | 2  | 11  | 0  |
| PITG_02778 | Pi conserved hypothetical protein (5595 nt)                            | 1  | 12  | 0  |
| PITG_02780 | Pi conserved hypothetical protein (6195 nt)                            | 1  | 10  | 0  |
| PITG_02781 | Pi conserved hypothetical protein (1596 nt)                            | 1  | 13  | 0  |
| PITG_02782 | Pi conserved hypothetical protein (978 nt)                             | 0  | 15  | 0  |
| PITG_02783 | Pi multiple inositol polyphosphate phosphatase 1, putative (1000 nt)   | 2  | 9   | 0  |
| PITG_02784 | Pi conserved hypothetical protein (1649 nt)                            | 3  | 2   | 0  |
| PITG_02785 | Pi fructose-bisphosphate aldolase (1314 nt)                            | 84 | 107 | 3  |
| PITG_02786 | Pi fructose-bisphosphate aldolase (1256 nt)                            | 47 | 317 | 24 |
| PITG_02787 | Pi conserved hypothetical protein (1719 nt)                            | 11 | 35  | 0  |
| PITG_02788 | Pi dynein 18 kDa light chain (447 nt)                                  | 0  | 0   | 0  |
| PITG_02789 | Pi E3 ubiquitin ligase, putative (1129 nt)                             | 0  | 15  | 0  |
| PITG_02791 | Pi conserved hypothetical protein (817 nt)                             | 7  | 23  | 0  |
| PITG_02792 | Pi conserved hypothetical protein (1898 nt)                            | 95 | 43  | 0  |
| PITG_02793 | Pi conserved hypothetical protein (3525 nt)                            | 32 | 26  | 0  |
| PITG_02794 | Pi conserved hypothetical protein (1986 nt)                            | 1  | 10  | 0  |
| PITG_02796 | Pi myosin-like protein (4929 nt)                                       | 17 | 86  | 0  |

|            |                                                         |    |     |   |
|------------|---------------------------------------------------------|----|-----|---|
| PITG_02797 | Pi ribosomal RNA large subunit methyltransferase N, pi  | 4  | 25  | 0 |
| PITG_02798 | Pi conserved hypothetical protein (513 nt)              | 22 | 71  | 0 |
| PITG_02799 | Pi conserved hypothetical protein (4349 nt)             | 0  | 15  | 0 |
| PITG_02800 | Pi conserved hypothetical protein (3207 nt)             | 1  | 11  | 0 |
| PITG_02802 | Pi stomatin-like protein (1226 nt)                      | 11 | 29  | 0 |
| PITG_02805 | Pi DNA mismatch repair protein Msh2, putative (2451 nt) | 2  | 12  | 0 |
| PITG_02807 | Pi conserved hypothetical protein (1441 nt)             | 21 | 35  | 0 |
| PITG_02809 | Pi conserved hypothetical protein (4665 nt)             | 12 | 9   | 0 |
| PITG_02810 | Pi cell division cycle protein 16 (2592 nt)             | 7  | 26  | 0 |
| PITG_02812 | Pi type I inositol-3,4-bisphosphate 4-phosphatase, puta | 2  | 13  | 0 |
| PITG_02813 | Pi conserved hypothetical protein (1230 nt)             | 7  | 29  | 0 |
| PITG_02814 | Pi conserved hypothetical protein (672 nt)              | 6  | 49  | 0 |
| PITG_02815 | Pi conserved hypothetical protein (653 nt)              | 1  | 0   | 0 |
| PITG_02818 | Pi conserved hypothetical protein (3640 nt)             | 2  | 2   | 0 |
| PITG_02819 | Pi conserved hypothetical protein (471 nt)              | 0  | 1   | 0 |
| PITG_02820 | Pi phosphatidylinositol-3,4,5-trisphosphate 3-phosphat  | 25 | 41  | 0 |
| PITG_02821 | Pi vacuolar-processing enzyme, putative (1425 nt)       | 15 | 49  | 0 |
| PITG_02822 | Pi conserved hypothetical protein (772 nt)              | 4  | 16  | 0 |
| PITG_02824 | Pi Sulfate Permease (SulP) Family (3174 nt)             | 3  | 18  | 0 |
| PITG_02826 | Pi DEAD/DEAH box RNA helicase, putative (2948 nt)       | 3  | 27  | 0 |
| PITG_02827 | Pi ras-like GTP-binding protein (1897 nt)               | 11 | 37  | 0 |
| PITG_02840 | Pi WD repeat-containing protein srw1 (2088 nt)          | 0  | 2   | 0 |
| PITG_02841 | Pi conserved hypothetical protein (1129 nt)             | 85 | 48  | 0 |
| PITG_02842 | Pi CDP-alcohol phosphatidyltransferase, putative (1754  | 30 | 39  | 0 |
| PITG_02846 | Pi para-hydroxybenzoate-polyprenyltransferase, putati   | 0  | 8   | 0 |
| PITG_02848 | Pi conserved hypothetical protein (929 nt)              | 1  | 11  | 0 |
| PITG_02849 | Pi conserved hypothetical protein (2260 nt)             | 15 | 49  | 0 |
| PITG_02850 | Pi conserved hypothetical protein (2391 nt)             | 5  | 20  | 0 |
| PITG_02852 | Pi aminoacylase, metalloprotease family M20A, putativ   | 1  | 28  | 0 |
| PITG_02853 | Pi 3,2-trans-enoyl-CoA isomerase, mitochondrial precu   | 38 | 131 | 0 |
| PITG_02854 | Pi aspartate-semialdehyde dehydrogenase, putative (1    | 5  | 13  | 1 |
| PITG_02855 | Pi conserved hypothetical protein (1233 nt)             | 0  | 0   | 0 |
| PITG_02856 | Pi DEAD/DEAH box RNA helicase, putative (2098 nt)       | 9  | 42  | 2 |
| PITG_02857 | Pi L-allo-threonine aldolase (1202 nt)                  | 8  | 8   | 0 |
| PITG_02858 | Pi L-allo-threonine aldolase (1256 nt)                  | 4  | 2   | 0 |
| PITG_02863 | Pi conserved hypothetical protein (3013 nt)             | 0  | 12  | 0 |
| PITG_02864 | Pi conserved hypothetical protein (2682 nt)             | 0  | 14  | 0 |
| PITG_02866 | Pi conserved hypothetical protein (453 nt)              | 20 | 8   | 0 |
| PITG_02867 | Pi ubiquitin conjugation factor E4, putative (3219 nt)  | 8  | 26  | 0 |
| PITG_02885 | Pi conserved hypothetical protein (1866 nt)             | 1  | 17  | 0 |
| PITG_02887 | Pi ribosome biogenesis protein BMS1 (3663 nt)           | 2  | 12  | 0 |
| PITG_02893 | Pi conserved hypothetical protein (1012 nt)             | 1  | 7   | 0 |
| PITG_02895 | Pi selenoprotein O, putative (1914 nt)                  | 3  | 18  | 0 |
| PITG_02901 | Pi glycoside hydrolase, putative (902 nt)               | 8  | 27  | 0 |
| PITG_02902 | Pi carbohydrate esterase, putative (1228 nt)            | 10 | 63  | 1 |
| PITG_02905 | Pi conserved hypothetical protein (1843 nt)             | 4  | 19  | 0 |
| PITG_02909 | Pi carbohydrate-binding protein, putative (1740 nt)     | 6  | 27  | 0 |

|            |                                                           |    |     |    |
|------------|-----------------------------------------------------------|----|-----|----|
| PITG_02910 | Pi conserved hypothetical protein (1409 nt)               | 10 | 162 | 0  |
| PITG_02911 | Pi conserved hypothetical protein (971 nt)                | 1  | 11  | 0  |
| PITG_02912 | Pi conserved hypothetical protein (1474 nt)               | 15 | 37  | 0  |
| PITG_02914 | Pi hypothetical protein (2357 nt)                         | 16 | 5   | 0  |
| PITG_02916 | Pi conserved hypothetical protein (1431 nt)               | 4  | 24  | 0  |
| PITG_02917 | Pi puromycin-sensitive aminopeptidase, putative (2655 nt) | 9  | 35  | 0  |
| PITG_02920 | Pi conserved hypothetical protein (466 nt)                | 5  | 23  | 0  |
| PITG_02921 | Pi valyl-tRNA synthetase (3210 nt)                        | 11 | 48  | 1  |
| PITG_02922 | Pi Polycystin Cation Channel (PCC) Family (3330 nt)       | 0  | 1   | 0  |
| PITG_02923 | Pi conserved hypothetical protein (2058 nt)               | 52 | 116 | 0  |
| PITG_02924 | Pi conserved hypothetical protein (1970 nt)               | 4  | 35  | 0  |
| PITG_02925 | Pi ketol-acid reductoisomerase (1703 nt)                  | 74 | 221 | 20 |
| PITG_02926 | Pi conserved hypothetical protein (657 nt)                | 0  | 37  | 0  |
| PITG_02927 | Pi hypothetical protein (700 nt)                          | 11 | 130 | 0  |
| PITG_02928 | Pi berberine-like protein (1530 nt)                       | 1  | 27  | 0  |
| PITG_02935 | Pi berberine-like protein (1524 nt)                       | 2  | 16  | 0  |
| PITG_02940 | Pi phosphoglycerate mutase family (840 nt)                | 8  | 13  | 0  |
| PITG_02942 | Pi conserved hypothetical protein (919 nt)                | 3  | 11  | 0  |
| PITG_02943 | Pi palmitoyltransferase, putative (1033 nt)               | 11 | 41  | 0  |
| PITG_02945 | Pi conserved hypothetical protein (1301 nt)               | 6  | 18  | 0  |
| PITG_02947 | Pi conserved hypothetical protein (814 nt)                | 2  | 21  | 0  |
| PITG_02948 | Pi conserved hypothetical protein (1305 nt)               | 10 | 95  | 0  |
| PITG_02949 | Pi conserved hypothetical protein (919 nt)                | 71 | 75  | 0  |
| PITG_02950 | Pi conserved hypothetical protein (684 nt)                | 34 | 43  | 0  |
| PITG_02951 | Pi phosphoglycerate mutase family (708 nt)                | 3  | 23  | 0  |
| PITG_02952 | Pi sporangia induced Bardet-Biedl syndrome 4 protein      | 2  | 1   | 0  |
| PITG_02953 | Pi conserved hypothetical protein (492 nt)                | 2  | 7   | 0  |
| PITG_02957 | Pi conserved hypothetical protein (1746 nt)               | 0  | 15  | 0  |
| PITG_02958 | Pi conserved hypothetical protein (864 nt)                | 15 | 41  | 0  |
| PITG_02960 | Pi mitogen-activated protein kinase kinase kinase, puta   | 57 | 68  | 0  |
| PITG_02961 | Pi choline dehydrogenase, putative (1843 nt)              | 1  | 10  | 0  |
| PITG_02964 | Pi carbohydrate-binding protein, putative (1075 nt)       | 3  | 38  | 1  |
| PITG_02968 | Pi choline dehydrogenase, putative (1861 nt)              | 4  | 14  | 0  |
| PITG_02970 | Pi hypothetical protein (586 nt)                          | 0  | 15  | 0  |
| PITG_02971 | Pi conserved hypothetical protein (2669 nt)               | 11 | 87  | 0  |
| PITG_02973 | Pi delta-1-pyrroline-5-carboxylate synthetase, putative   | 31 | 49  | 0  |
| PITG_02974 | Pi conserved hypothetical protein (318 nt)                | 79 | 140 | 0  |
| PITG_02975 | Pi conserved hypothetical protein (3032 nt)               | 4  | 21  | 0  |
| PITG_02976 | Pi conserved hypothetical protein (3591 nt)               | 2  | 30  | 0  |
| PITG_02977 | Pi conserved hypothetical protein (1039 nt)               | 39 | 30  | 0  |
| PITG_02978 | Pi Chloride Channel (ClC) Family (1830 nt)                | 4  | 11  | 0  |
| PITG_02979 | Pi conserved hypothetical protein (438 nt)                | 16 | 21  | 0  |
| PITG_02980 | Pi conserved hypothetical protein (899 nt)                | 2  | 12  | 0  |
| PITG_02981 | Pi conserved hypothetical protein (1555 nt)               | 14 | 10  | 0  |
| PITG_02984 | Pi conserved hypothetical protein (358 nt)                | 35 | 77  | 0  |
| PITG_02985 | Pi conserved hypothetical protein (1470 nt)               | 29 | 23  | 0  |
| PITG_02989 | Pi conserved hypothetical protein (1691 nt)               | 0  | 15  | 0  |

|            |                                                                        |     |     |   |
|------------|------------------------------------------------------------------------|-----|-----|---|
| PITG_02990 | Pi conserved hypothetical protein (1597 nt)                            | 2   | 13  | 0 |
| PITG_02992 | Pi tyrosyl-tRNA synthetase, putative (1698 nt)                         | 6   | 41  | 0 |
| PITG_02994 | Pi hypothetical protein (1187 nt)                                      | 5   | 26  | 0 |
| PITG_02995 | Pi conserved hypothetical protein (701 nt)                             | 57  | 57  | 0 |
| PITG_02997 | Pi conserved hypothetical protein (7869 nt)                            | 1   | 3   | 0 |
| PITG_02998 | Pi S-adenosyl-L-methionine-dependent methyltransferase (1000 nt)       | 1   | 29  | 0 |
| PITG_03002 | Pi patatin-like phospholipase, putative (2204 nt)                      | 1   | 16  | 0 |
| PITG_03005 | Pi conserved hypothetical protein (585 nt)                             | 24  | 26  | 0 |
| PITG_03006 | Pi protein kinase (1901 nt)                                            | 11  | 28  | 0 |
| PITG_03008 | Pi conserved hypothetical protein (1887 nt)                            | 5   | 52  | 0 |
| PITG_03011 | Pi F-box protein, putative (4337 nt)                                   | 2   | 23  | 0 |
| PITG_03012 | Pi conserved hypothetical protein (823 nt)                             | 182 | 554 | 7 |
| PITG_03014 | Pi F-box protein, putative (3548 nt)                                   | 1   | 11  | 0 |
| PITG_03015 | Pi aspartyl/Asparaginyl beta-hydroxylase, putative (1099 nt)           | 5   | 12  | 0 |
| PITG_03016 | Pi conserved hypothetical protein (640 nt)                             | 2   | 15  | 0 |
| PITG_03017 | Pi integrator complex subunit, putative (2706 nt)                      | 10  | 26  | 0 |
| PITG_03018 | Pi sporangia induced dynein heavy chain (12567 nt)                     | 1   | 24  | 0 |
| PITG_03019 | Pi conserved hypothetical protein (530 nt)                             | 0   | 12  | 0 |
| PITG_03020 | Pi cysteine protease family C01A, putative (1608 nt)                   | 141 | 492 | 1 |
| PITG_03024 | Pi hypothetical protein (588 nt)                                       | 2   | 18  | 0 |
| PITG_03025 | Pi hypothetical protein (891 nt)                                       | 6   | 20  | 0 |
| PITG_03027 | Pi UDP-N-acetylhexosamine pyrophosphorylase, putative (1000 nt)        | 7   | 14  | 0 |
| PITG_03028 | Pi pre-mRNA-splicing factor SF2 (928 nt)                               | 39  | 110 | 1 |
| PITG_03030 | Pi conserved hypothetical protein (1138 nt)                            | 2   | 26  | 0 |
| PITG_03031 | Pi conserved hypothetical protein (6147 nt)                            | 1   | 14  | 0 |
| PITG_03032 | Pi conserved hypothetical protein (2103 nt)                            | 1   | 20  | 0 |
| PITG_03033 | Pi conserved hypothetical protein (519 nt)                             | 123 | 177 | 7 |
| PITG_03034 | Pi cleavage induced conserved hypothetical protein (2000 nt)           | 8   | 11  | 0 |
| PITG_03038 | Pi Major Facilitator Superfamily (MFS) (1617 nt)                       | 91  | 63  | 0 |
| PITG_03039 | Pi conserved hypothetical protein (3607 nt)                            | 6   | 39  | 0 |
| PITG_03040 | Pi conserved hypothetical protein (2196 nt)                            | 3   | 11  | 0 |
| PITG_03041 | Pi Major Facilitator Superfamily (MFS) (1170 nt)                       | 3   | 13  | 0 |
| PITG_03042 | Pi Major Facilitator Superfamily (MFS) (1476 nt)                       | 6   | 13  | 0 |
| PITG_03043 | Pi hypothetical protein (2357 nt)                                      | 2   | 23  | 0 |
| PITG_03044 | Pi autophagy-related protein, putative (2441 nt)                       | 7   | 30  | 0 |
| PITG_03048 | Pi ubiquitin-conjugating enzyme E2, putative (1098 nt)                 | 3   | 26  | 0 |
| PITG_03049 | Pi cAMP-dependent protein kinase catalytic subunit, putative (1000 nt) | 1   | 13  | 0 |
| PITG_03050 | Pi conserved hypothetical protein (4071 nt)                            | 0   | 0   | 0 |
| PITG_03051 | Pi Drug/Metabolite Transporter (DMT) Superfamily (1300 nt)             | 0   | 0   | 0 |
| PITG_03052 | Pi Drug/Metabolite Transporter (DMT) Superfamily (5400 nt)             | 1   | 0   | 0 |
| PITG_03053 | Pi Drug/Metabolite Transporter (DMT) Superfamily (6700 nt)             | 38  | 13  | 0 |
| PITG_03054 | Pi conserved hypothetical protein (713 nt)                             | 72  | 26  | 0 |
| PITG_03056 | Pi DNA polymerase I, putative (4067 nt)                                | 1   | 10  | 0 |
| PITG_03057 | Pi ubiquitin-conjugating enzyme E2, putative (641 nt)                  | 4   | 16  | 0 |
| PITG_03058 | Pi cytochrome P450, putative (1587 nt)                                 | 14  | 22  | 0 |
| PITG_03060 | Pi alpha-1,2-glucosyltransferase, putative (1863 nt)                   | 3   | 27  | 0 |
| PITG_03061 | Pi conserved hypothetical protein (1746 nt)                            | 7   | 51  | 0 |

|            |                                                                   |     |     |   |
|------------|-------------------------------------------------------------------|-----|-----|---|
| PITG_03062 | Pi conserved hypothetical protein (1880 nt)                       | 0   | 0   | 0 |
| PITG_03063 | Pi conserved hypothetical protein (474 nt)                        | 7   | 5   | 0 |
| PITG_03064 | Pi kinesin-like protein (3993 nt)                                 | 0   | 1   | 0 |
| PITG_03072 | Pi conserved hypothetical protein (699 nt)                        | 2   | 29  | 0 |
| PITG_03074 | Pi diacylglycerol acyltransferase, putative (1160 nt)             | 6   | 11  | 0 |
| PITG_03075 | Pi Cullin family protein, putative (3486 nt)                      | 4   | 42  | 0 |
| PITG_03076 | Pi ATP-dependent helicase, RECQ family protein (2383 nt)          | 3   | 19  | 0 |
| PITG_03077 | Pi tubulin polyglutamylase, putative (2157 nt)                    | 1   | 4   | 0 |
| PITG_03078 | Pi triosephosphate isomerase (819 nt)                             | 15  | 1   | 0 |
| PITG_03079 | Pi hypothetical protein (1987 nt)                                 | 1   | 9   | 0 |
| PITG_03080 | Pi hypothetical protein (999 nt)                                  | 104 | 241 | 0 |
| PITG_03081 | Pi 26S proteasome non-ATPase regulatory subunit 2 (300 nt)        | 19  | 121 | 3 |
| PITG_03082 | Pi Outer Dynein Arm Light Chain 1 (1826 nt)                       | 2   | 5   | 0 |
| PITG_03083 | Pi nuclease precursor (725 nt)                                    | 1   | 20  | 0 |
| PITG_03085 | Pi conserved hypothetical protein (1413 nt)                       | 2   | 17  | 0 |
| PITG_03092 | Pi conserved hypothetical protein (441 nt)                        | 14  | 179 | 0 |
| PITG_03094 | Pi conserved hypothetical protein (607 nt)                        | 4   | 11  | 0 |
| PITG_03095 | Pi carbohydrate-binding protein, putative (3021 nt)               | 14  | 148 | 0 |
| PITG_03096 | Pi hypothetical protein (1264 nt)                                 | 268 | 353 | 0 |
| PITG_03097 | Pi conserved hypothetical protein (965 nt)                        | 17  | 7   | 0 |
| PITG_03098 | Pi carbamoyl-phosphate synthase [ammonia], putative (1000 nt)     | 3   | 65  | 7 |
| PITG_03099 | Pi hypothetical protein (966 nt)                                  | 1   | 15  | 0 |
| PITG_03101 | Pi conserved hypothetical protein (2590 nt)                       | 2   | 21  | 1 |
| PITG_03102 | Pi septum-promoting GTP-binding protein 1 (827 nt)                | 5   | 12  | 0 |
| PITG_03103 | Pi conserved hypothetical protein (1894 nt)                       | 8   | 40  | 0 |
| PITG_03104 | Pi conserved hypothetical protein (1542 nt)                       | 41  | 229 | 0 |
| PITG_03106 | Pi conserved hypothetical protein (2633 nt)                       | 0   | 0   | 0 |
| PITG_03109 | Pi conserved hypothetical protein (1054 nt)                       | 6   | 8   | 0 |
| PITG_03110 | Pi conserved hypothetical protein (2819 nt)                       | 0   | 12  | 0 |
| PITG_03111 | Pi conserved hypothetical protein (1474 nt)                       | 4   | 25  | 0 |
| PITG_03112 | Pi importin-like protein (3460 nt)                                | 2   | 15  | 0 |
| PITG_03113 | Pi conserved hypothetical protein (741 nt)                        | 107 | 89  | 0 |
| PITG_03114 | Pi conserved hypothetical protein (1276 nt)                       | 3   | 14  | 0 |
| PITG_03115 | Pi conserved hypothetical protein (1210 nt)                       | 12  | 82  | 0 |
| PITG_03117 | Pi U4/U6 small nuclear ribonucleoprotein Prp3, putative (1000 nt) | 5   | 31  | 0 |
| PITG_03118 | Pi mRNA decapping enzyme (1290 nt)                                | 9   | 4   | 0 |
| PITG_03119 | Pi conserved hypothetical protein (1770 nt)                       | 8   | 22  | 0 |
| PITG_03123 | Pi M96 mating-specific protein family (2036 nt)                   | 2   | 23  | 0 |
| PITG_03127 | Pi M96 mating-specific protein family (1130 nt)                   | 5   | 6   | 0 |
| PITG_03130 | Pi M96 mating-specific protein family (878 nt)                    | 11  | 51  | 0 |
| PITG_03131 | Pi M96 mating-specific protein family (2995 nt)                   | 7   | 3   | 0 |
| PITG_03135 | Pi lysosomal beta glucosidase, putative (2368 nt)                 | 2   | 12  | 0 |
| PITG_03142 | Pi hsp90-like protein (1411 nt)                                   | 30  | 16  | 0 |
| PITG_03143 | Pi indigoidine synthase A family protein, putative (2864 nt)      | 8   | 14  | 0 |
| PITG_03144 | Pi conserved hypothetical protein (1997 nt)                       | 4   | 14  | 0 |
| PITG_03146 | Pi conserved hypothetical protein (1749 nt)                       | 4   | 25  | 0 |
| PITG_03147 | Pi conserved hypothetical protein (849 nt)                        | 7   | 3   | 0 |

|                                                                          |      |      |     |
|--------------------------------------------------------------------------|------|------|-----|
| PITG_03148   Pi Rab7 family GTPase, putative (984 nt)                    | 81   | 111  | 1   |
| PITG_03149   Pi conserved hypothetical protein (910 nt)                  | 6    | 14   | 0   |
| PITG_03150   Pi proteasome subunit alpha type-3, putative (1000 nt)      | 25   | 142  | 7   |
| PITG_03152   Pi conserved hypothetical protein (6883 nt)                 | 1    | 21   | 0   |
| PITG_03154   Pi ubiquitin family protein, putative (977 nt)              | 3    | 11   | 0   |
| PITG_03155   Pi secreted RxLR effector peptide, putative (750 nt)        | 6    | 24   | 0   |
| PITG_03156   Pi pre-rRNA-processing protein TSR1 (2490 nt)               | 1    | 9    | 0   |
| PITG_03158   Pi tRNA isopentenyltransferase, putative (1380 nt)          | 9    | 5    | 0   |
| PITG_03159   Pi conserved hypothetical protein (555 nt)                  | 14   | 22   | 0   |
| PITG_03160   Pi ubiquitin family protein, putative (1188 nt)             | 18   | 46   | 0   |
| PITG_03161   Pi conserved hypothetical protein (3229 nt)                 | 0    | 0    | 0   |
| PITG_03162   Pi cleavage induced hypothetical protein (683 nt)           | 0    | 2    | 0   |
| PITG_03163   Pi conserved hypothetical protein (2087 nt)                 | 6    | 29   | 0   |
| PITG_03164   Pi conserved hypothetical protein (632 nt)                  | 3    | 5    | 0   |
| PITG_03165   Pi conserved hypothetical protein (1050 nt)                 | 4    | 17   | 0   |
| PITG_03166   Pi vesicle-associated membrane protein, putative (1044 nt)  | 53   | 37   | 0   |
| PITG_03168   Pi hypothetical protein (287 nt)                            | 35   | 43   | 0   |
| PITG_03169   Pi GPN-loop GTPase, putative (3919 nt)                      | 10   | 19   | 0   |
| PITG_03170   Pi SCP-like extracellular protein (558 nt)                  | 0    | 0    | 0   |
| PITG_03172   Pi conserved hypothetical protein (1120 nt)                 | 0    | 0    | 0   |
| PITG_03174   Pi conserved hypothetical protein (1364 nt)                 | 0    | 12   | 0   |
| PITG_03177   Pi conserved hypothetical protein (895 nt)                  | 29   | 68   | 1   |
| PITG_03178   Pi 60S ribosomal protein L9 (754 nt)                        | 271  | 347  | 49  |
| PITG_03179   Pi conserved hypothetical protein (2544 nt)                 | 3    | 19   | 0   |
| PITG_03180   Pi dynein heavy chain (13683 nt)                            | 0    | 10   | 0   |
| PITG_03181   Pi conserved hypothetical protein (2415 nt)                 | 0    | 0    | 0   |
| PITG_03183   Pi hypothetical protein (700 nt)                            | 31   | 30   | 0   |
| PITG_03192   Pi secreted RxLR effector peptide, putative (435 nt)        | 3    | 0    | 1   |
| PITG_03199   Pi ubiquitin-conjugating enzyme E2, putative (492 nt)       | 18   | 27   | 0   |
| PITG_03200   Pi conserved hypothetical protein (1599 nt)                 | 4    | 17   | 0   |
| PITG_03202   Pi hypothetical protein (671 nt)                            | 0    | 1    | 0   |
| PITG_03203   Pi exocyst complex component 4, putative (2990 nt)          | 0    | 1    | 0   |
| PITG_03211   Pi conserved hypothetical protein (457 nt)                  | 0    | 0    | 0   |
| PITG_03212   Pi hypothetical protein (405 nt)                            | 0    | 1    | 0   |
| PITG_03219   Pi geranylgeranyl transferase type-2 subunit beta (1074 nt) | 10   | 25   | 0   |
| PITG_03220   Pi proteasome subunit beta type-7, putative (1249 nt)       | 67   | 210  | 8   |
| PITG_03221   Pi 40S ribosomal protein S18 (948 nt)                       | 1386 | 1393 | 120 |
| PITG_03223   Pi conserved hypothetical protein (1665 nt)                 | 7    | 70   | 0   |
| PITG_03224   Pi conserved hypothetical protein (786 nt)                  | 37   | 25   | 0   |
| PITG_03225   Pi conserved hypothetical protein (1653 nt)                 | 5    | 37   | 0   |
| PITG_03226   Pi glutathione S-transferase, putative (1389 nt)            | 67   | 12   | 2   |
| PITG_03229   Pi glutathione S-transferase, putative (1267 nt)            | 72   | 147  | 0   |
| PITG_03233   Pi conserved hypothetical protein (996 nt)                  | 2    | 8    | 0   |
| PITG_03234   Pi DEAD/DEAH box RNA helicase, putative (3253 nt)           | 14   | 43   | 0   |
| PITG_03235   Pi 60S ribosomal protein L35a-4 (797 nt)                    | 928  | 731  | 63  |
| PITG_03236   Pi conserved hypothetical protein (2373 nt)                 | 2    | 18   | 0   |
| PITG_03237   Pi conserved hypothetical protein (433 nt)                  | 7    | 43   | 0   |



|                                                                     |     |      |    |
|---------------------------------------------------------------------|-----|------|----|
| PITG_03238   Pi conserved hypothetical protein (1371 nt)            | 18  | 52   | 0  |
| PITG_03239   Pi 60S ribosomal protein L27 (1037 nt)                 | 689 | 1041 | 77 |
| PITG_03240   Pi conserved hypothetical protein (5329 nt)            | 0   | 2    | 0  |
| PITG_03241   Pi conserved hypothetical protein (1528 nt)            | 21  | 27   | 0  |
| PITG_03242   Pi conserved hypothetical protein (1499 nt)            | 6   | 17   | 0  |
| PITG_03243   Pi conserved hypothetical protein (1556 nt)            | 22  | 93   | 0  |
| PITG_03244   Pi conserved hypothetical protein (1787 nt)            | 3   | 13   | 0  |
| PITG_03245   Pi conserved hypothetical protein (1426 nt)            | 49  | 105  | 0  |
| PITG_03246   Pi conserved hypothetical protein (2572 nt)            | 12  | 35   | 0  |
| PITG_03252   Pi alpha-soluble NSF attachment protein, putative (126 | 38  | 127  | 2  |
| PITG_03253   Pi conserved hypothetical protein (425 nt)             | 4   | 17   | 0  |
| PITG_03259   Pi conserved hypothetical protein (1300 nt)            | 4   | 13   | 0  |
| PITG_03260   Pi conserved hypothetical protein (2299 nt)            | 4   | 15   | 0  |
| PITG_03261   Pi conserved hypothetical protein (766 nt)             | 6   | 23   | 0  |
| PITG_03263   Pi conserved hypothetical protein (1480 nt)            | 3   | 18   | 0  |
| PITG_03265   Pi Monovalent Cation:Proton Antiporter-1 (CPA1) Fami   | 3   | 22   | 0  |
| PITG_03266   Pi conserved hypothetical protein (1069 nt)            | 4   | 17   | 0  |
| PITG_03267   Pi conserved hypothetical protein (7326 nt)            | 5   | 40   | 0  |
| PITG_03268   Pi conserved hypothetical protein (744 nt)             | 4   | 11   | 0  |
| PITG_03269   Pi conserved hypothetical protein (852 nt)             | 3   | 10   | 0  |
| PITG_03272   Pi conserved hypothetical protein (696 nt)             | 1   | 4    | 0  |
| PITG_03273   Pi conserved hypothetical protein (768 nt)             | 3   | 3    | 0  |
| PITG_03274   Pi elongation factor P, putative (944 nt)              | 8   | 15   | 1  |
| PITG_03275   Pi spastin and Fidgetin-like protein (1835 nt)         | 11  | 47   | 0  |
| PITG_03276   Pi U4/U6.U5 tri-snRNP-associated protein, putative (20 | 8   | 15   | 0  |
| PITG_03277   Pi pyruvate dehydrogenase E1 component subunit alpf    | 67  | 280  | 18 |
| PITG_03278   Pi sporangia induced hypothetical protein (2039 nt)    | 0   | 7    | 0  |
| PITG_03281   Pi hypothetical protein (1206 nt)                      | 1   | 7    | 0  |
| PITG_03282   Pi conserved hypothetical protein (3024 nt)            | 1   | 6    | 0  |
| PITG_03283   Pi conserved hypothetical protein (1315 nt)            | 1   | 13   | 0  |
| PITG_03285   Pi hypothetical protein (501 nt)                       | 0   | 14   | 0  |
| PITG_03286   Pi hypothetical protein (367 nt)                       | 0   | 11   | 0  |
| PITG_03287   Pi conserved hypothetical protein (1545 nt)            | 12  | 13   | 0  |
| PITG_03288   Pi myosin-like protein (4434 nt)                       | 3   | 26   | 0  |
| PITG_03292   Pi GTPase (1643 nt)                                    | 1   | 10   | 0  |
| PITG_03294   Pi 60S ribosomal protein L6, putative (1516 nt)        | 235 | 245  | 37 |
| PITG_03295   Pi copper-transporting ATPase, putative (3771 nt)      | 4   | 13   | 0  |
| PITG_03296   Pi conserved hypothetical protein (6272 nt)            | 1   | 2    | 0  |
| PITG_03297   Pi conserved hypothetical protein (2244 nt)            | 0   | 2    | 0  |
| PITG_03300   Pi U4/U6 small nuclear ribonucleoprotein Prp31 (1625   | 6   | 15   | 0  |
| PITG_03301   Pi DEAD/DEAH box RNA helicase, putative (1773 nt)      | 1   | 7    | 0  |
| PITG_03302   Pi conserved hypothetical protein (810 nt)             | 5   | 8    | 0  |
| PITG_03303   Pi conserved hypothetical protein (877 nt)             | 5   | 27   | 0  |
| PITG_03305   Pi peptidase, putative (2045 nt)                       | 3   | 23   | 0  |
| PITG_03306   Pi HSF-type DNA-binding protein, putative (755 nt)     | 5   | 27   | 0  |
| PITG_03307   Pi conserved hypothetical protein (1277 nt)            | 0   | 2    | 0  |
| PITG_03309   Pi Intraflagellar Transport Protein 140 (4726 nt)      | 0   | 0    | 0  |

|            |                                                           |     |     |    |
|------------|-----------------------------------------------------------|-----|-----|----|
| PITG_03311 | Pi regulator of chromosome condensation (RCC1)-like p     | 4   | 21  | 0  |
| PITG_03313 | Pi conserved hypothetical protein (1944 nt)               | 1   | 10  | 0  |
| PITG_03314 | Pi conserved hypothetical protein (755 nt)                | 15  | 17  | 0  |
| PITG_03316 | Pi hypothetical protein (459 nt)                          | 0   | 23  | 0  |
| PITG_03317 | Pi conserved hypothetical protein (904 nt)                | 1   | 13  | 0  |
| PITG_03318 | Pi conserved hypothetical protein (4708 nt)               | 9   | 21  | 0  |
| PITG_03322 | Pi prolyl-tRNA synthetase, putative (1936 nt)             | 6   | 12  | 0  |
| PITG_03323 | Pi integrator complex subunit, putative (2087 nt)         | 2   | 13  | 0  |
| PITG_03324 | Pi ATP-dependent RNA helicase, putative (2810 nt)         | 4   | 10  | 0  |
| PITG_03325 | Pi hypothetical protein (3096 nt)                         | 0   | 4   | 0  |
| PITG_03329 | Pi conserved hypothetical protein (947 nt)                | 6   | 19  | 0  |
| PITG_03330 | Pi conserved hypothetical protein (567 nt)                | 5   | 17  | 0  |
| PITG_03331 | Pi conserved hypothetical protein (582 nt)                | 6   | 13  | 0  |
| PITG_03332 | Pi phosphatidylinositol-4-phosphate 5-kinase, putative    | 2   | 25  | 0  |
| PITG_03333 | Pi conserved hypothetical protein (1859 nt)               | 71  | 88  | 15 |
| PITG_03335 | Pi callose synthase, putative (7947 nt)                   | 3   | 70  | 2  |
| PITG_03336 | Pi GTP-binding protein TypA/BipA, putative (2327 nt)      | 4   | 22  | 0  |
| PITG_03337 | Pi conserved hypothetical protein (3329 nt)               | 2   | 9   | 0  |
| PITG_03338 | Pi hypothetical protein (846 nt)                          | 5   | 10  | 0  |
| PITG_03339 | Pi conserved hypothetical protein (1065 nt)               | 65  | 102 | 0  |
| PITG_03340 | Pi conserved hypothetical protein (646 nt)                | 29  | 201 | 0  |
| PITG_03341 | Pi conserved hypothetical protein (1303 nt)               | 14  | 23  | 0  |
| PITG_03342 | Pi sorting and assembly machinery component 50 (197       | 8   | 45  | 0  |
| PITG_03344 | Pi H - or Na -translocating F-type, V-type and A-type AT  | 52  | 75  | 0  |
| PITG_03345 | Pi peptidyl-prolyl cis-trans isomerase E, putative (634 n | 8   | 32  | 0  |
| PITG_03346 | Pi cleavage induced hypothetical protein (1250 nt)        | 1   | 5   | 0  |
| PITG_03347 | Pi ribonucleoside-diphosphate reductase small chain (1    | 7   | 68  | 0  |
| PITG_03348 | Pi RNA polymerase-associated protein CTR9 (3501 nt)       | 4   | 37  | 0  |
| PITG_03351 | Pi DNA mismatch repair protein Msh6, putative (3789 nt)   | 0   | 13  | 0  |
| PITG_03353 | Pi 60S ribosomal protein L17-2 (752 nt)                   | 840 | 821 | 75 |
| PITG_03354 | Pi hypothetical protein (367 nt)                          | 8   | 23  | 0  |
| PITG_03355 | Pi conserved hypothetical protein (1254 nt)               | 17  | 25  | 0  |
| PITG_03356 | Pi conserved hypothetical protein (1164 nt)               | 13  | 7   | 0  |
| PITG_03359 | Pi conserved hypothetical protein (1441 nt)               | 5   | 11  | 0  |
| PITG_03360 | Pi AP-4 complex subunit epsilon, putative (3506 nt)       | 10  | 46  | 0  |
| PITG_03361 | Pi conserved hypothetical protein (1394 nt)               | 2   | 5   | 0  |
| PITG_03362 | Pi HECT E3 ubiquitin ligase, putative (2057 nt)           | 5   | 8   | 0  |
| PITG_03364 | Pi RNA polymerase II-associated factor 1 (1975 nt)        | 6   | 35  | 0  |
| PITG_03365 | Pi glucokinase, putative (1763 nt)                        | 4   | 30  | 0  |
| PITG_03369 | Pi conserved hypothetical protein (1287 nt)               | 30  | 43  | 0  |
| PITG_03370 | Pi conserved hypothetical protein (850 nt)                | 11  | 33  | 0  |
| PITG_03371 | Pi acyltransferase, putative (1770 nt)                    | 3   | 17  | 0  |
| PITG_03372 | Pi conserved hypothetical protein (1359 nt)               | 7   | 63  | 0  |
| PITG_03373 | Pi cell division protein ftsZ (2511 nt)                   | 4   | 26  | 0  |
| PITG_03374 | Pi conserved hypothetical protein (2227 nt)               | 45  | 14  | 0  |
| PITG_03375 | Pi conserved hypothetical protein (2260 nt)               | 1   | 13  | 0  |
| PITG_03376 | Pi endomembrane protein 70-like protein, putative (22     | 74  | 103 | 1  |

|            |                                                                       |     |     |    |
|------------|-----------------------------------------------------------------------|-----|-----|----|
| PITG_03379 | Pi conserved hypothetical protein (3157 nt)                           | 4   | 18  | 0  |
| PITG_03380 | Pi conserved hypothetical protein (388 nt)                            | 13  | 37  | 1  |
| PITG_03381 | Pi ferric reductase, putative (2685 nt)                               | 1   | 14  | 0  |
| PITG_03386 | Pi conserved hypothetical protein (726 nt)                            | 18  | 7   | 0  |
| PITG_03388 | Pi lectin, putative (1612 nt)                                         | 6   | 32  | 1  |
| PITG_03389 | Pi replication factor C subunit 4 (1123 nt)                           | 2   | 10  | 0  |
| PITG_03390 | Pi WD domain-containing protein, putative (1154 nt)                   | 1   | 14  | 0  |
| PITG_03391 | Pi conserved hypothetical protein (608 nt)                            | 20  | 13  | 0  |
| PITG_03392 | Pi Rab1 family GTPase (PiYpt1) (925 nt)                               | 129 | 985 | 16 |
| PITG_03393 | Pi autophagy-related protein, putative (1234 nt)                      | 98  | 375 | 1  |
| PITG_03396 | Pi conserved hypothetical protein (2455 nt)                           | 9   | 21  | 0  |
| PITG_03397 | Pi conserved hypothetical protein (1337 nt)                           | 6   | 18  | 0  |
| PITG_03398 | Pi histidyl-tRNA synthetase, putative (1038 nt)                       | 0   | 26  | 0  |
| PITG_03399 | Pi histidyl-tRNA synthetase, putative (1123 nt)                       | 6   | 17  | 0  |
| PITG_03400 | Pi crinkler (CRN) family protein, putative (1950 nt)                  | 3   | 10  | 0  |
| PITG_03401 | Pi chromodomain-helicase-DNA-binding protein, putative (1123 nt)      | 1   | 23  | 0  |
| PITG_03402 | Pi conserved hypothetical protein (2464 nt)                           | 0   | 21  | 0  |
| PITG_03404 | Pi conserved hypothetical protein (893 nt)                            | 7   | 23  | 0  |
| PITG_03405 | Pi conserved hypothetical protein (2472 nt)                           | 1   | 16  | 0  |
| PITG_03406 | Pi conserved hypothetical protein (606 nt)                            | 10  | 5   | 0  |
| PITG_03408 | Pi conserved hypothetical protein (4564 nt)                           | 18  | 23  | 0  |
| PITG_03409 | Pi serine protease family S10, putative (1713 nt)                     | 6   | 28  | 0  |
| PITG_03410 | Pi acetolactate synthase small subunit, putative (1042 nt)            | 94  | 51  | 2  |
| PITG_03411 | Pi lysosomal beta glucosidase, putative (2370 nt)                     | 7   | 7   | 0  |
| PITG_03413 | Pi conserved hypothetical protein (549 nt)                            | 1   | 20  | 0  |
| PITG_03414 | Pi cysteine protease family C01A, putative (1431 nt)                  | 3   | 11  | 0  |
| PITG_03415 | Pi cysteine protease family C01A, putative (1575 nt)                  | 2   | 37  | 0  |
| PITG_03416 | Pi cysteine protease family C01A, putative (1530 nt)                  | 21  | 56  | 0  |
| PITG_03418 | Pi conserved hypothetical protein (711 nt)                            | 14  | 51  | 0  |
| PITG_03419 | Pi flagellar protein, putative (4935 nt)                              | 0   | 4   | 0  |
| PITG_03420 | Pi 50S ribosomal protein L13 (423 nt)                                 | 27  | 49  | 4  |
| PITG_03422 | Pi conserved hypothetical protein (587 nt)                            | 30  | 25  | 0  |
| PITG_03423 | Pi dynein heavy chain (12423 nt)                                      | 3   | 0   | 0  |
| PITG_03424 | Pi GTPase, putative (1554 nt)                                         | 196 | 121 | 6  |
| PITG_03425 | Pi glycoside hydrolase, putative (2021 nt)                            | 18  | 84  | 0  |
| PITG_03427 | Pi tyrosine aminotransferase, putative (1933 nt)                      | 6   | 126 | 0  |
| PITG_03429 | Pi conserved hypothetical protein (959 nt)                            | 8   | 20  | 0  |
| PITG_03431 | Pi conserved hypothetical protein (1826 nt)                           | 2   | 51  | 0  |
| PITG_03432 | Pi conserved hypothetical protein (7002 nt)                           | 0   | 6   | 0  |
| PITG_03433 | Pi regulator of chromosome condensation (RCC1)-like protein (1123 nt) | 0   | 5   | 0  |
| PITG_03434 | Pi conserved hypothetical protein (1225 nt)                           | 7   | 2   | 0  |
| PITG_03435 | Pi conserved hypothetical protein (1046 nt)                           | 32  | 9   | 0  |
| PITG_03436 | Pi conserved hypothetical protein (1394 nt)                           | 2   | 20  | 0  |
| PITG_03437 | Pi conserved hypothetical protein (1021 nt)                           | 0   | 0   | 0  |
| PITG_03438 | Pi lipin-like protein (1587 nt)                                       | 23  | 32  | 0  |
| PITG_03440 | Pi malate synthase (1771 nt)                                          | 29  | 394 | 0  |
| PITG_03441 | Pi malate synthase (1822 nt)                                          | 180 | 300 | 0  |

|            |                                                                   |     |     |    |
|------------|-------------------------------------------------------------------|-----|-----|----|
| PITG_03443 | Pi lipin-like protein (1587 nt)                                   | 36  | 27  | 0  |
| PITG_03444 | Pi dynein heavy chain (13863 nt)                                  | 0   | 1   | 0  |
| PITG_03445 | Pi Holliday junction ATP-dependent DNA helicase ruvB              | 13  | 32  | 0  |
| PITG_03446 | Pi conserved hypothetical protein (756 nt)                        | 5   | 18  | 0  |
| PITG_03449 | Pi conserved hypothetical protein (372 nt)                        | 16  | 89  | 0  |
| PITG_03450 | Pi conserved hypothetical protein (1090 nt)                       | 0   | 7   | 0  |
| PITG_03451 | Pi conserved hypothetical protein (959 nt)                        | 35  | 119 | 0  |
| PITG_03453 | Pi phosphatidylinositol kinase (PIK-G1) (3466 nt)                 | 1   | 21  | 0  |
| PITG_03454 | Pi conserved hypothetical protein (1378 nt)                       | 26  | 225 | 0  |
| PITG_03455 | Pi conserved hypothetical protein (2339 nt)                       | 3   | 14  | 0  |
| PITG_03456 | Pi GPI ethanolamine phosphate transferase, putative (3101 nt)     | 23  | 0   | 0  |
| PITG_03457 | Pi conserved hypothetical protein (5820 nt)                       | 1   | 16  | 0  |
| PITG_03458 | Pi conserved hypothetical protein (3101 nt)                       | 3   | 15  | 0  |
| PITG_03459 | Pi COP9 signalosome complex subunit, putative (1255 nt)           | 3   | 21  | 0  |
| PITG_03460 | Pi seryl-tRNA synthetase (1365 nt)                                | 21  | 54  | 0  |
| PITG_03461 | Pi conserved hypothetical protein (839 nt)                        | 1   | 14  | 0  |
| PITG_03462 | Pi cysteine protease family C26, putative (1074 nt)               | 14  | 30  | 0  |
| PITG_03463 | Pi carbohydrate esterase, putative (894 nt)                       | 33  | 49  | 2  |
| PITG_03464 | Pi aldehyde dehydrogenase, putative (4060 nt)                     | 5   | 52  | 0  |
| PITG_03466 | Pi aldehyde dehydrogenase, putative (2196 nt)                     | 5   | 50  | 0  |
| PITG_03467 | Pi conserved hypothetical protein (1085 nt)                       | 6   | 31  | 0  |
| PITG_03468 | Pi endoplasmic oxidoreductin, putative (1549 nt)                  | 18  | 16  | 0  |
| PITG_03469 | Pi conserved hypothetical protein (1248 nt)                       | 7   | 16  | 0  |
| PITG_03471 | Pi conserved hypothetical protein (4608 nt)                       | 3   | 34  | 0  |
| PITG_03472 | Pi callose synthase, putative (6122 nt)                           | 13  | 93  | 0  |
| PITG_03473 | Pi callose synthase, putative (6163 nt)                           | 9   | 78  | 0  |
| PITG_03476 | Pi conserved hypothetical protein (1247 nt)                       | 14  | 29  | 0  |
| PITG_03477 | Pi 60S ribosomal protein L7a-2 (1307 nt)                          | 321 | 538 | 85 |
| PITG_03478 | Pi conserved hypothetical protein (4797 nt)                       | 3   | 14  | 0  |
| PITG_03480 | Pi conserved hypothetical protein (748 nt)                        | 2   | 9   | 0  |
| PITG_03482 | Pi conserved hypothetical protein (2693 nt)                       | 2   | 11  | 0  |
| PITG_03483 | Pi splicing factor U2af large subunit, putative (2239 nt)         | 8   | 37  | 0  |
| PITG_03484 | Pi conserved hypothetical protein (398 nt)                        | 0   | 2   | 0  |
| PITG_03485 | Pi hypothetical protein (1088 nt)                                 | 1   | 0   | 0  |
| PITG_03486 | Pi conserved hypothetical protein (662 nt)                        | 790 | 195 | 35 |
| PITG_03488 | Pi dynein heavy chain (13140 nt)                                  | 1   | 0   | 0  |
| PITG_03489 | Pi conserved hypothetical protein (1514 nt)                       | 2   | 16  | 0  |
| PITG_03490 | Pi conserved hypothetical protein (1776 nt)                       | 4   | 14  | 0  |
| PITG_03491 | Pi myosin-like protein (2468 nt)                                  | 4   | 16  | 0  |
| PITG_03492 | Pi exportin-2-like protein (3093 nt)                              | 3   | 31  | 0  |
| PITG_03493 | Pi amidophosphoribosyltransferase (1803 nt)                       | 4   | 10  | 0  |
| PITG_03494 | Pi conserved hypothetical protein (1327 nt)                       | 1   | 0   | 0  |
| PITG_03496 | Pi conserved hypothetical protein (1386 nt)                       | 2   | 16  | 0  |
| PITG_03497 | Pi separin, putative (3167 nt)                                    | 0   | 11  | 0  |
| PITG_03498 | Pi octanoyltransferase, putative (967 nt)                         | 5   | 6   | 0  |
| PITG_03499 | Pi phosphopantothienoylcysteine decarboxylase, putative (1000 nt) | 6   | 15  | 0  |
| PITG_03500 | Pi chromodomain-helicase-DNA-binding protein 1 (279 nt)           | 10  | 4   | 0  |

|            |                                                           |     |     |    |
|------------|-----------------------------------------------------------|-----|-----|----|
| PITG_03501 | Pi alcohol dehydrogenase, putative (3353 nt)              | 18  | 57  | 0  |
| PITG_03502 | Pi alcohol dehydrogenase, putative (873 nt)               | 0   | 5   | 0  |
| PITG_03504 | Pi conserved hypothetical protein (955 nt)                | 2   | 10  | 0  |
| PITG_03505 | Pi conserved hypothetical protein (3356 nt)               | 6   | 25  | 0  |
| PITG_03506 | Pi conserved hypothetical protein (1452 nt)               | 1   | 11  | 0  |
| PITG_03513 | Pi protein kinase, putative (1587 nt)                     | 39  | 92  | 0  |
| PITG_03514 | Pi DNA ligase, putative (2916 nt)                         | 3   | 13  | 0  |
| PITG_03515 | Pi conserved hypothetical protein (706 nt)                | 1   | 27  | 0  |
| PITG_03518 | Pi hypothetical protein (249 nt)                          | 15  | 5   | 0  |
| PITG_03519 | Pi conserved hypothetical protein (1339 nt)               | 60  | 92  | 0  |
| PITG_03520 | Pi conserved hypothetical protein (1531 nt)               | 26  | 45  | 0  |
| PITG_03521 | Pi conserved hypothetical protein (987 nt)                | 3   | 6   | 0  |
| PITG_03522 | Pi GPI-anchor transamidase, putative (1739 nt)            | 5   | 16  | 0  |
| PITG_03523 | Pi general transcription factor IIH subunit, putative (16 | 5   | 10  | 0  |
| PITG_03525 | Pi cleavage induced serine protease family S33, putativ   | 4   | 12  | 0  |
| PITG_03529 | Pi conserved hypothetical protein (756 nt)                | 9   | 9   | 0  |
| PITG_03530 | Pi alpha-amino adipic semialdehyde synthase, putative     | 8   | 88  | 0  |
| PITG_03531 | Pi conserved hypothetical protein (3480 nt)               | 8   | 20  | 0  |
| PITG_03532 | Pi conserved hypothetical protein (2049 nt)               | 10  | 21  | 0  |
| PITG_03533 | Pi endo-1,3(4)-beta-glucanase, putative (1717 nt)         | 1   | 9   | 0  |
| PITG_03544 | Pi conserved hypothetical protein (984 nt)                | 33  | 25  | 0  |
| PITG_03545 | Pi conserved hypothetical protein (1213 nt)               | 17  | 41  | 0  |
| PITG_03546 | Pi hsp70-like protein (1825 nt)                           | 4   | 24  | 4  |
| PITG_03547 | Pi conserved hypothetical protein (2473 nt)               | 3   | 30  | 0  |
| PITG_03548 | Pi nucleolar protein, putative (1579 nt)                  | 2   | 10  | 0  |
| PITG_03549 | Pi coatomer subunit gamma, putative (3611 nt)             | 7   | 40  | 1  |
| PITG_03550 | Pi histone H2B (493 nt)                                   | 119 | 70  | 5  |
| PITG_03551 | Pi histone H3 (411 nt)                                    | 14  | 24  | 53 |
| PITG_03552 | Pi histone H4 (523 nt)                                    | 63  | 116 | 3  |
| PITG_03554 | Pi endo-1,3(4)-beta-glucanase, putative (2036 nt)         | 0   | 3   | 0  |
| PITG_03555 | Pi importin-like protein (3240 nt)                        | 1   | 19  | 1  |
| PITG_03556 | Pi conserved hypothetical protein (1002 nt)               | 0   | 12  | 0  |
| PITG_03557 | Pi conserved hypothetical protein (1429 nt)               | 10  | 31  | 0  |
| PITG_03558 | Pi conserved hypothetical protein (1056 nt)               | 5   | 7   | 0  |
| PITG_03559 | Pi conserved hypothetical protein (1530 nt)               | 1   | 4   | 0  |
| PITG_03560 | Pi conserved hypothetical protein (12004 nt)              | 2   | 30  | 0  |
| PITG_03561 | Pi COP9 signalosome complex subunit 5, putative (122:     | 13  | 18  | 0  |
| PITG_03562 | Pi conserved hypothetical protein (3350 nt)               | 58  | 21  | 0  |
| PITG_03563 | Pi conserved hypothetical protein (1413 nt)               | 7   | 24  | 0  |
| PITG_03564 | Pi hypothetical protein (975 nt)                          | 3   | 15  | 0  |
| PITG_03565 | Pi hypothetical protein (851 nt)                          | 1   | 16  | 0  |
| PITG_03566 | Pi conserved hypothetical protein (1146 nt)               | 2   | 18  | 0  |
| PITG_03568 | Pi DEAD/DEAH box RNA helicase, putative (1945 nt)         | 20  | 142 | 8  |
| PITG_03569 | Pi conserved hypothetical protein (1653 nt)               | 4   | 22  | 0  |
| PITG_03570 | Pi conserved hypothetical protein (1365 nt)               | 7   | 8   | 0  |
| PITG_03571 | Pi phosphatidylinositol kinase (PIK-L3) (13852 nt)        | 1   | 20  | 0  |
| PITG_03574 | Pi serine/threonine-protein phosphatase 4 catalytic sul   | 25  | 126 | 1  |

|            |                                                           |     |     |    |
|------------|-----------------------------------------------------------|-----|-----|----|
| PITG_03575 | Pi anoctamin-like protein (2582 nt)                       | 2   | 40  | 0  |
| PITG_03576 | Pi RNA (guanine-9-)-methyltransferase domain-contain      | 7   | 20  | 0  |
| PITG_03577 | Pi vacuolar protein sorting-associated protein VTA1 (15   | 24  | 195 | 0  |
| PITG_03580 | Pi hypothetical protein (1000 nt)                         | 0   | 0   | 0  |
| PITG_03582 | Pi serine protease family S01B, putative (1386 nt)        | 9   | 68  | 0  |
| PITG_03583 | Pi putative secreted protein (462 nt)                     | 13  | 359 | 0  |
| PITG_03584 | Pi hypothetical protein (2286 nt)                         | 1   | 17  | 0  |
| PITG_03585 | Pi hypothetical protein (459 nt)                          | 7   | 21  | 0  |
| PITG_03586 | Pi trafficking protein particle complex subunit, putative | 23  | 16  | 0  |
| PITG_03587 | Pi Mitochondrial Protein Translocase (MPT) Family (37:    | 0   | 13  | 0  |
| PITG_03588 | Pi conserved hypothetical protein (481 nt)                | 2   | 34  | 0  |
| PITG_03589 | Pi conserved hypothetical protein (421 nt)                | 44  | 172 | 4  |
| PITG_03590 | Pi inositol hexakisphosphate and diphosphoinositol-pe     | 3   | 13  | 0  |
| PITG_03592 | Pi conserved hypothetical protein (3269 nt)               | 1   | 0   | 0  |
| PITG_03593 | Pi alanine aminotransferase 2 (1739 nt)                   | 20  | 52  | 0  |
| PITG_03594 | Pi protein transporter Sec31A, putative (4482 nt)         | 4   | 40  | 1  |
| PITG_03596 | Pi conserved hypothetical protein (1893 nt)               | 51  | 73  | 0  |
| PITG_03597 | Pi alanyl-tRNA synthetase domain-containing protein 1     | 42  | 37  | 0  |
| PITG_03598 | Pi 6-phosphofructokinase, putative (1636 nt)              | 2   | 54  | 4  |
| PITG_03599 | Pi alanine aminotransferase 2 (1500 nt)                   | 22  | 123 | 2  |
| PITG_03600 | Pi bardet-Biedl syndrome 2 protein (2234 nt)              | 0   | 2   | 0  |
| PITG_03601 | Pi inosine triphosphate pyrophosphatase (576 nt)          | 14  | 15  | 0  |
| PITG_03603 | Pi conserved hypothetical protein (647 nt)                | 3   | 37  | 0  |
| PITG_03604 | Pi conserved hypothetical protein (3116 nt)               | 6   | 19  | 0  |
| PITG_03605 | Pi 5-methylthioadenosine/S-adenosylhomocysteine de        | 2   | 10  | 0  |
| PITG_03606 | Pi conserved oligomeric Golgi complex subunit, putativ    | 5   | 10  | 0  |
| PITG_03608 | Pi serine/threonine-protein phosphatase 5 (1716 nt)       | 7   | 29  | 0  |
| PITG_03609 | Pi conserved hypothetical protein (3948 nt)               | 4   | 33  | 0  |
| PITG_03610 | Pi conserved hypothetical protein (1190 nt)               | 11  | 22  | 0  |
| PITG_03611 | Pi histone H2B (594 nt)                                   | 140 | 184 | 0  |
| PITG_03612 | Pi G-protein alpha subunit 1 (1608 nt)                    | 1   | 10  | 0  |
| PITG_03614 | Pi signal recognition particle receptor subunit alpha (21 | 4   | 29  | 0  |
| PITG_03616 | Pi conserved hypothetical protein (789 nt)                | 10  | 91  | 0  |
| PITG_03617 | Pi protein kinase (2278 nt)                               | 1   | 10  | 0  |
| PITG_03618 | Pi conserved hypothetical protein (2139 nt)               | 0   | 6   | 0  |
| PITG_03620 | Pi histidinol-phosphate aminotransferase, putative (18:   | 15  | 15  | 0  |
| PITG_03621 | Pi conserved hypothetical protein (1467 nt)               | 16  | 35  | 0  |
| PITG_03623 | Pi conserved hypothetical protein (2473 nt)               | 20  | 25  | 0  |
| PITG_03625 | Pi hypothetical protein (814 nt)                          | 0   | 2   | 0  |
| PITG_03627 | Pi conserved hypothetical protein (1434 nt)               | 0   | 1   | 0  |
| PITG_03629 | Pi conserved hypothetical protein (1655 nt)               | 1   | 14  | 0  |
| PITG_03630 | Pi conserved hypothetical protein (1908 nt)               | 1   | 10  | 0  |
| PITG_03631 | Pi conserved hypothetical protein (1670 nt)               | 0   | 14  | 0  |
| PITG_03632 | Pi H - or Na -translocating F-type, V-type and A-type AT  | 277 | 371 | 22 |
| PITG_03634 | Pi nucleoside diphosphate kinase, putative (1229 nt)      | 0   | 0   | 0  |
| PITG_03635 | Pi conserved hypothetical protein (3743 nt)               | 1   | 10  | 0  |
| PITG_03636 | Pi hypothetical protein (383 nt)                          | 18  | 16  | 0  |

|            |                                                                      |      |     |    |
|------------|----------------------------------------------------------------------|------|-----|----|
| PITG_03639 | Pi cellulose binding elicitor lectin (CBEL), putative (1030 nt)      | 569  | 584 | 0  |
| PITG_03641 | Pi conserved hypothetical protein (1581 nt)                          | 6    | 10  | 0  |
| PITG_03642 | Pi conserved hypothetical protein (1061 nt)                          | 16   | 76  | 0  |
| PITG_03643 | Pi 3-phosphoinositide-dependent protein kinase, putative (1030 nt)   | 4    | 16  | 0  |
| PITG_03644 | Pi Rab8 family GTPase, putative (688 nt)                             | 32   | 97  | 0  |
| PITG_03646 | Pi vacuolar protein-sorting-associated protein, putative (1030 nt)   | 10   | 28  | 0  |
| PITG_03647 | Pi hypothetical protein (351 nt)                                     | 11   | 6   | 0  |
| PITG_03648 | Pi hypothetical protein (919 nt)                                     | 10   | 13  | 0  |
| PITG_03649 | Pi conserved hypothetical protein (1999 nt)                          | 1    | 11  | 0  |
| PITG_03650 | Pi conserved hypothetical protein (2458 nt)                          | 3    | 16  | 0  |
| PITG_03651 | Pi phospholipase D, Pi-PXPH-PLD (3513 nt)                            | 3    | 26  | 0  |
| PITG_03652 | Pi conserved hypothetical protein (2266 nt)                          | 4    | 30  | 0  |
| PITG_03653 | Pi protein phosphatase 2 (2358 nt)                                   | 5    | 33  | 0  |
| PITG_03655 | Pi conserved hypothetical protein (1287 nt)                          | 65   | 41  | 0  |
| PITG_03656 | Pi inosine-5'-monophosphate dehydrogenase, putative (1030 nt)        | 8    | 17  | 0  |
| PITG_03657 | Pi kinesin-like protein (1304 nt)                                    | 40   | 29  | 0  |
| PITG_03658 | Pi phosphoglycerate mutase, putative (1801 nt)                       | 40   | 28  | 0  |
| PITG_03659 | Pi conserved hypothetical protein (836 nt)                           | 14   | 21  | 0  |
| PITG_03660 | Pi 60S ribosomal protein L6, putative (1049 nt)                      | 5    | 41  | 0  |
| PITG_03661 | Pi cysteinyl-tRNA synthetase, putative (2142 nt)                     | 6    | 39  | 1  |
| PITG_03662 | Pi calcineurin-like phosphoesterase, putative (1941 nt)              | 0    | 13  | 0  |
| PITG_03665 | Pi Amino Acid-Polyamine-Organocation (APC) Family (4000 nt)          | 1    | 21  | 0  |
| PITG_03669 | Pi conserved hypothetical protein (1037 nt)                          | 2    | 0   | 0  |
| PITG_03670 | Pi conserved hypothetical protein (1686 nt)                          | 21   | 89  | 0  |
| PITG_03672 | Pi RIO kinase (1579 nt)                                              | 6    | 24  | 0  |
| PITG_03673 | Pi conserved hypothetical protein (940 nt)                           | 2    | 11  | 0  |
| PITG_03675 | Pi DEAD/DEAH box RNA helicase, putative (1986 nt)                    | 12   | 26  | 0  |
| PITG_03678 | Pi kynurenine-oxoglutarate transaminase, putative (1200 nt)          | 3    | 33  | 0  |
| PITG_03679 | Pi conserved hypothetical protein (1258 nt)                          | 0    | 1   | 0  |
| PITG_03682 | Pi conserved hypothetical protein (567 nt)                           | 2    | 18  | 0  |
| PITG_03684 | Pi conserved hypothetical protein (962 nt)                           | 48   | 203 | 1  |
| PITG_03685 | Pi 2-amino-3-ketobutyrate coenzyme A ligase, mitochondrial (1030 nt) | 6    | 109 | 2  |
| PITG_03690 | Pi hypothetical protein (483 nt)                                     | 0    | 0   | 0  |
| PITG_03691 | Pi conserved hypothetical protein (1602 nt)                          | 0    | 0   | 0  |
| PITG_03692 | Pi Voltage-gated Ion Channel (VIC) Superfamily (1818 nt)             | 0    | 0   | 0  |
| PITG_03694 | Pi disulfide-isomerase, putative (1427 nt)                           | 23   | 89  | 2  |
| PITG_03695 | Pi hypothetical protein (706 nt)                                     | 3212 | 695 | 0  |
| PITG_03696 | Pi conserved hypothetical protein (2958 nt)                          | 7    | 25  | 0  |
| PITG_03698 | Pi enolase (1502 nt)                                                 | 114  | 237 | 42 |
| PITG_03700 | Pi enolase (1365 nt)                                                 | 103  | 271 | 57 |
| PITG_03701 | Pi kinesin-like protein (2486 nt)                                    | 2    | 11  | 0  |
| PITG_03702 | Pi conserved hypothetical protein (1477 nt)                          | 7    | 16  | 0  |
| PITG_03703 | Pi conserved hypothetical protein (1480 nt)                          | 13   | 39  | 0  |
| PITG_03704 | Pi conserved hypothetical protein (672 nt)                           | 0    | 1   | 0  |
| PITG_03707 | Pi voltage-gated potassium channel subunit beta-2 (1200 nt)          | 0    | 12  | 0  |
| PITG_03709 | Pi conserved hypothetical protein (694 nt)                           | 4    | 22  | 0  |
| PITG_03710 | Pi strumpellin, putative (3760 nt)                                   | 5    | 21  | 0  |

|            |                                                               |      |      |    |
|------------|---------------------------------------------------------------|------|------|----|
| PITG_03711 | Pi serine/threonine-protein phosphatase 2A regulatory         | 24   | 131  | 1  |
| PITG_03712 | Pi elongation factor 3, putative (3342 nt)                    | 86   | 415  | 6  |
| PITG_03715 | Pi conserved hypothetical protein (1000 nt)                   | 32   | 32   | 0  |
| PITG_03719 | Pi voltage-gated potassium channel subunit beta, putative     | 41   | 111  | 33 |
| PITG_03733 | Pi conserved hypothetical protein (1473 nt)                   | 3    | 20   | 0  |
| PITG_03734 | Pi conserved hypothetical protein (2353 nt)                   | 3    | 9    | 0  |
| PITG_03735 | Pi conserved hypothetical protein (2507 nt)                   | 1    | 4    | 0  |
| PITG_03736 | Pi conserved hypothetical protein (2031 nt)                   | 5    | 11   | 0  |
| PITG_03737 | Pi conserved hypothetical protein (3007 nt)                   | 5    | 36   | 0  |
| PITG_03738 | Pi 2-isopropylmalate synthase (2027 nt)                       | 110  | 101  | 2  |
| PITG_03739 | Pi conserved hypothetical protein (5650 nt)                   | 0    | 0    | 0  |
| PITG_03740 | Pi P-type ATPase (P-ATPase) Superfamily (3451 nt)             | 4    | 37   | 0  |
| PITG_03741 | Pi conserved hypothetical protein (699 nt)                    | 9    | 106  | 0  |
| PITG_03742 | Pi conserved hypothetical protein (909 nt)                    | 41   | 394  | 0  |
| PITG_03743 | Pi conserved hypothetical protein (1129 nt)                   | 10   | 5    | 0  |
| PITG_03744 | Pi conserved hypothetical protein (993 nt)                    | 14   | 19   | 0  |
| PITG_03748 | Pi conserved hypothetical protein (3027 nt)                   | 1    | 16   | 0  |
| PITG_03749 | Pi hypothetical protein (975 nt)                              | 1    | 17   | 0  |
| PITG_03750 | Pi endo-1,3(4)-beta-glucanase, putative (1797 nt)             | 2    | 23   | 0  |
| PITG_03751 | Pi nipped-B-like protein (7782 nt)                            | 4    | 9    | 0  |
| PITG_03752 | Pi conserved hypothetical protein (379 nt)                    | 12   | 13   | 0  |
| PITG_03753 | Pi ubiquitin carboxyl-terminal hydrolase and/or F-box protein | 14   | 23   | 0  |
| PITG_03754 | Pi protein kinase, putative (2697 nt)                         | 12   | 26   | 0  |
| PITG_03755 | Pi aspartate aminotransferase, putative (2506 nt)             | 4    | 15   | 0  |
| PITG_03756 | Pi kinesin-like protein (2314 nt)                             | 7    | 20   | 0  |
| PITG_03757 | Pi ATPase (2240 nt)                                           | 43   | 28   | 0  |
| PITG_03759 | Pi conserved hypothetical protein (1284 nt)                   | 2    | 20   | 0  |
| PITG_03761 | Pi conserved hypothetical protein (1349 nt)                   | 14   | 20   | 0  |
| PITG_03762 | Pi 60S ribosomal protein L38, putative (708 nt)               | 1198 | 1185 | 90 |
| PITG_03763 | Pi pre-mRNA-splicing factor SF2-like protein (1786 nt)        | 82   | 86   | 4  |
| PITG_03764 | Pi polyribonucleotide nucleotidyltransferase, putative (      | 0    | 8    | 0  |
| PITG_03766 | Pi conserved hypothetical protein (429 nt)                    | 11   | 15   | 0  |
| PITG_03767 | Pi conserved hypothetical protein (4755 nt)                   | 6    | 15   | 0  |
| PITG_03768 | Pi 50S ribosomal protein L4 (923 nt)                          | 13   | 14   | 0  |
| PITG_03769 | Pi hypothetical protein (713 nt)                              | 8    | 10   | 0  |
| PITG_03772 | Pi ADP-ribosylation factor-like protein (1588 nt)             | 3    | 14   | 0  |
| PITG_03773 | Pi protein kinase (2755 nt)                                   | 2    | 14   | 0  |
| PITG_03774 | Pi conserved hypothetical protein (3442 nt)                   | 2    | 13   | 0  |
| PITG_03775 | Pi protein kinase, putative (2426 nt)                         | 1    | 9    | 0  |
| PITG_03776 | Pi conserved hypothetical protein (3841 nt)                   | 2    | 10   | 0  |
| PITG_03777 | Pi conserved hypothetical protein (2315 nt)                   | 6    | 22   | 0  |
| PITG_03778 | Pi Poly(A) polymerase, putative (2233 nt)                     | 10   | 37   | 0  |
| PITG_03779 | Pi anaphase-promoting complex subunit, putative (632          | 1    | 13   | 0  |
| PITG_03781 | Pi conserved hypothetical protein (906 nt)                    | 15   | 27   | 0  |
| PITG_03782 | Pi conserved hypothetical protein (1064 nt)                   | 7    | 25   | 0  |
| PITG_03783 | Pi Mitochondrial Protein Translocase (MPT) Family (251        | 59   | 96   | 4  |
| PITG_03784 | Pi conserved hypothetical protein (905 nt)                    | 17   | 155  | 1  |



|            |                                                            |    |     |   |
|------------|------------------------------------------------------------|----|-----|---|
| PITG_03788 | Pi conserved hypothetical protein (1241 nt)                | 10 | 93  | 0 |
| PITG_03789 | Pi conserved hypothetical protein (7113 nt)                | 1  | 17  | 0 |
| PITG_03790 | Pi conserved hypothetical protein (1198 nt)                | 8  | 20  | 0 |
| PITG_03791 | Pi splicing factor, arginine/serine-rich, putative (1259 n | 2  | 8   | 0 |
| PITG_03792 | Pi 2,3-bisphosphoglycerate-independent phosphoglyce        | 11 | 36  | 0 |
| PITG_03795 | Pi conserved hypothetical protein (707 nt)                 | 24 | 28  | 0 |
| PITG_03796 | Pi conserved hypothetical protein (766 nt)                 | 14 | 34  | 1 |
| PITG_03797 | Pi conserved hypothetical protein (420 nt)                 | 0  | 4   | 0 |
| PITG_03799 | Pi eukaryotic initiation factor 4E, putative (1543 nt)     | 14 | 33  | 1 |
| PITG_03800 | Pi conserved hypothetical protein (644 nt)                 | 1  | 21  | 0 |
| PITG_03801 | Pi conserved hypothetical protein (1398 nt)                | 12 | 46  | 0 |
| PITG_03802 | Pi eukaryotic translation initiation factor 6 (934 nt)     | 22 | 147 | 1 |
| PITG_03803 | Pi conserved hypothetical protein (2148 nt)                | 2  | 15  | 0 |
| PITG_03804 | Pi myosin-like protein (4796 nt)                           | 12 | 49  | 0 |
| PITG_03806 | Pi aspartyl-tRNA synthetase, putative (1582 nt)            | 8  | 18  | 0 |
| PITG_03811 | Pi protein kinase (892 nt)                                 | 25 | 275 | 0 |
| PITG_03813 | Pi tripeptidyl-peptidase, putative (2252 nt)               | 1  | 11  | 0 |
| PITG_03814 | Pi D-cysteine desulhydrase, putative (1482 nt)             | 9  | 49  | 0 |
| PITG_03815 | Pi FAD-dependent oxidoreductase domain-containing p        | 25 | 12  | 0 |
| PITG_03818 | Pi U3 small nucleolar RNA-associated protein, putative     | 7  | 7   | 0 |
| PITG_03819 | Pi 26S proteasome non-ATPase regulatory subunit, put       | 3  | 78  | 0 |
| PITG_03820 | Pi conserved hypothetical protein (797 nt)                 | 2  | 9   | 0 |
| PITG_03821 | Pi conserved hypothetical protein (3044 nt)                | 9  | 29  | 0 |
| PITG_03822 | Pi conserved hypothetical protein (1792 nt)                | 7  | 66  | 0 |
| PITG_03823 | Pi conserved hypothetical protein (922 nt)                 | 1  | 7   | 0 |
| PITG_03824 | Pi conserved hypothetical protein (672 nt)                 | 5  | 32  | 0 |
| PITG_03825 | Pi myosin-like protein (2036 nt)                           | 2  | 26  | 0 |
| PITG_03826 | Pi conserved hypothetical protein (950 nt)                 | 6  | 17  | 0 |
| PITG_03827 | Pi conserved hypothetical protein (1240 nt)                | 5  | 17  | 0 |
| PITG_03828 | Pi conserved hypothetical protein (1679 nt)                | 46 | 94  | 0 |
| PITG_03829 | Pi conserved hypothetical protein (2808 nt)                | 5  | 30  | 0 |
| PITG_03830 | Pi 3'5'-cyclic nucleotide phosphodiesterase, putative (3   | 72 | 108 | 0 |
| PITG_03831 | Pi conserved hypothetical protein (2000 nt)                | 3  | 10  | 0 |
| PITG_03832 | Pi mitochondrial Rho GTPase, putative (2358 nt)            | 15 | 29  | 0 |
| PITG_03833 | Pi diacylglycerol O-acyltransferase, putative (2409 nt)    | 2  | 4   | 0 |
| PITG_03836 | Pi conserved hypothetical protein (1754 nt)                | 2  | 25  | 0 |
| PITG_03837 | Pi metalloprotease family M01, putative (2129 nt)          | 2  | 15  | 0 |
| PITG_03839 | Pi conserved hypothetical protein (777 nt)                 | 12 | 13  | 0 |
| PITG_03840 | Pi endomembrane protein 70-like protein, putative (30      | 1  | 10  | 0 |
| PITG_03841 | Pi endomembrane protein 70-like protein, putative (19      | 2  | 18  | 0 |
| PITG_03842 | Pi conserved hypothetical protein (4143 nt)                | 1  | 30  | 0 |
| PITG_03843 | Pi conserved hypothetical protein (1253 nt)                | 39 | 137 | 4 |
| PITG_03844 | Pi conserved hypothetical protein (1746 nt)                | 2  | 12  | 0 |
| PITG_03845 | Pi conserved hypothetical protein (5129 nt)                | 0  | 11  | 0 |
| PITG_03846 | Pi conserved hypothetical protein (1944 nt)                | 5  | 37  | 0 |
| PITG_03850 | Pi conserved hypothetical protein (2685 nt)                | 25 | 95  | 0 |
| PITG_03851 | Pi conserved hypothetical protein (1389 nt)                | 1  | 1   | 0 |

|            |                                                            |     |     |    |
|------------|------------------------------------------------------------|-----|-----|----|
| PITG_03852 | Pi Mitochondrial Protein Translocase (MPT) Family (72!     | 8   | 33  | 0  |
| PITG_03854 | Pi conserved hypothetical protein (1062 nt)                | 2   | 9   | 0  |
| PITG_03855 | Pi DNA-directed RNA polymerase I subunit RPA1, putat       | 2   | 12  | 0  |
| PITG_03856 | Pi peptidyl-prolyl cis-trans isomerase, putative (1789 nt) | 40  | 238 | 18 |
| PITG_03859 | Pi conserved hypothetical protein (1775 nt)                | 0   | 1   | 0  |
| PITG_03860 | Pi HECT E3 ubiquitin ligase, putative (15735 nt)           | 2   | 32  | 0  |
| PITG_03862 | Pi conserved hypothetical protein (360 nt)                 | 35  | 36  | 0  |
| PITG_03863 | Pi conserved hypothetical protein (2538 nt)                | 3   | 17  | 0  |
| PITG_03864 | Pi myotubularin-like protein (4123 nt)                     | 10  | 48  | 0  |
| PITG_03865 | Pi conserved hypothetical protein (1392 nt)                | 16  | 29  | 0  |
| PITG_03866 | Pi hypothetical protein (1045 nt)                          | 2   | 0   | 0  |
| PITG_03869 | Pi hypothetical protein (708 nt)                           | 0   | 1   | 0  |
| PITG_03871 | Pi conserved hypothetical protein (1305 nt)                | 3   | 14  | 0  |
| PITG_03872 | Pi kinesin-like protein (2811 nt)                          | 8   | 23  | 0  |
| PITG_03873 | Pi rab GDP dissociation inhibitor alpha (1530 nt)          | 16  | 83  | 4  |
| PITG_03874 | Pi actin-like protein (1385 nt)                            | 12  | 18  | 0  |
| PITG_03875 | Pi sporangia induced hypothetical protein (527 nt)         | 3   | 4   | 0  |
| PITG_03876 | Pi U3 small nucleolar RNA-interacting protein, putative    | 5   | 4   | 0  |
| PITG_03877 | Pi conserved hypothetical protein (1680 nt)                | 1   | 18  | 0  |
| PITG_03878 | Pi dynein intermediate chain 2 (2326 nt)                   | 2   | 21  | 0  |
| PITG_03879 | Pi conserved hypothetical protein (8263 nt)                | 0   | 11  | 0  |
| PITG_03881 | Pi histone H2A (420 nt)                                    | 142 | 172 | 0  |
| PITG_03882 | Pi histone H2A type 1 (529 nt)                             | 157 | 122 | 0  |
| PITG_03885 | Pi conserved hypothetical protein (2598 nt)                | 1   | 10  | 0  |
| PITG_03886 | Pi equilibrative Nucleoside Transporter (ENT) family (1!   | 2   | 11  | 0  |
| PITG_03887 | Pi conserved hypothetical protein (1367 nt)                | 13  | 17  | 0  |
| PITG_03888 | Pi conserved hypothetical protein (886 nt)                 | 21  | 37  | 0  |
| PITG_03890 | Pi conserved hypothetical protein (3515 nt)                | 0   | 6   | 0  |
| PITG_03891 | Pi conserved hypothetical protein (1556 nt)                | 1   | 18  | 0  |
| PITG_03892 | Pi conserved hypothetical protein (2067 nt)                | 2   | 16  | 0  |
| PITG_03897 | Pi conserved hypothetical protein (740 nt)                 | 33  | 100 | 3  |
| PITG_03898 | Pi serine protease family S01B, putative (1839 nt)         | 12  | 15  | 0  |
| PITG_03899 | Pi conserved hypothetical protein (2889 nt)                | 1   | 12  | 0  |
| PITG_03900 | Pi conserved hypothetical protein (1014 nt)                | 29  | 104 | 2  |
| PITG_03901 | Pi serine/threonine protein kinase (2295 nt)               | 4   | 21  | 0  |
| PITG_03902 | Pi conserved hypothetical protein (3060 nt)                | 5   | 19  | 0  |
| PITG_03903 | Pi conserved hypothetical protein (4364 nt)                | 2   | 22  | 0  |
| PITG_03906 | Pi Type II (General) Secretory Pathway (IISP) Family (16   | 41  | 79  | 3  |
| PITG_03909 | Pi thioredoxin-like protein (2815 nt)                      | 5   | 21  | 0  |
| PITG_03911 | Pi thioredoxin-like protein (1317 nt)                      | 6   | 36  | 0  |
| PITG_03915 | Pi glutamyl-tRNA(Gln) amidotransferase subunit, putat      | 6   | 11  | 0  |
| PITG_03916 | Pi ribosomal protein L28, putative (772 nt)                | 703 | 723 | 55 |
| PITG_03919 | Pi ribokinase, putative (1104 nt)                          | 4   | 15  | 0  |
| PITG_03923 | Pi conserved hypothetical protein (491 nt)                 | 0   | 183 | 0  |
| PITG_03924 | Pi alcohol dehydrogenase, putative (1236 nt)               | 11  | 87  | 0  |
| PITG_03925 | Pi hypothetical protein (699 nt)                           | 12  | 13  | 0  |
| PITG_03926 | Pi conserved hypothetical protein (816 nt)                 | 0   | 1   | 0  |

|            |                                                             |    |     |   |
|------------|-------------------------------------------------------------|----|-----|---|
| PITG_03927 | Pi conserved hypothetical protein (1626 nt)                 | 6  | 14  | 0 |
| PITG_03929 | Pi conserved hypothetical protein (1643 nt)                 | 5  | 23  | 0 |
| PITG_03930 | Pi zinc phosphodiesterase, putative (2918 nt)               | 0  | 3   | 0 |
| PITG_03931 | Pi conserved hypothetical protein (480 nt)                  | 1  | 5   | 0 |
| PITG_03932 | Pi conserved hypothetical protein (1226 nt)                 | 11 | 17  | 0 |
| PITG_03933 | Pi CTD small phosphatase-like protein, putative (1269 r     | 20 | 38  | 0 |
| PITG_03934 | Pi protein kinase, putative (2694 nt)                       | 6  | 32  | 0 |
| PITG_03936 | Pi ras protein let-60 (1206 nt)                             | 78 | 205 | 0 |
| PITG_03937 | Pi conserved hypothetical protein (812 nt)                  | 8  | 12  | 0 |
| PITG_03938 | Pi conserved hypothetical protein (2364 nt)                 | 11 | 24  | 0 |
| PITG_03939 | Pi conserved hypothetical protein (1931 nt)                 | 16 | 29  | 0 |
| PITG_03940 | Pi conserved hypothetical protein (773 nt)                  | 16 | 18  | 0 |
| PITG_03941 | Pi conserved hypothetical protein (2328 nt)                 | 0  | 1   | 0 |
| PITG_03942 | Pi plectin-like protein (4600 nt)                           | 18 | 4   | 0 |
| PITG_03943 | Pi conserved hypothetical protein (672 nt)                  | 6  | 4   | 0 |
| PITG_03944 | Pi conserved hypothetical protein (4045 nt)                 | 1  | 30  | 0 |
| PITG_03946 | Pi conserved hypothetical protein (1718 nt)                 | 17 | 34  | 0 |
| PITG_03947 | Pi conserved hypothetical protein (1666 nt)                 | 13 | 18  | 0 |
| PITG_03948 | Pi tubby-like protein (2140 nt)                             | 1  | 3   | 0 |
| PITG_03951 | Pi conserved hypothetical protein (921 nt)                  | 3  | 11  | 0 |
| PITG_03952 | Pi conserved hypothetical protein (906 nt)                  | 18 | 22  | 0 |
| PITG_03954 | Pi conserved hypothetical protein (995 nt)                  | 2  | 11  | 0 |
| PITG_03955 | Pi U3 small nucleolar RNA-associated protein, putative      | 2  | 4   | 0 |
| PITG_03956 | Pi conserved hypothetical protein (963 nt)                  | 9  | 18  | 2 |
| PITG_03957 | Pi conserved hypothetical protein (2017 nt)                 | 1  | 13  | 0 |
| PITG_03958 | Pi hypothetical protein (337 nt)                            | 18 | 30  | 0 |
| PITG_03959 | Pi conserved hypothetical protein (3276 nt)                 | 1  | 19  | 0 |
| PITG_03960 | Pi conserved hypothetical protein (1106 nt)                 | 1  | 5   | 0 |
| PITG_03961 | Pi conserved hypothetical protein (1104 nt)                 | 0  | 3   | 0 |
| PITG_03965 | Pi transmembrane protein, putative (1919 nt)                | 8  | 14  | 0 |
| PITG_03966 | Pi NhaC Na :H Antiporter (NhaC) Family (2306 nt)            | 4  | 11  | 0 |
| PITG_03967 | Pi conserved hypothetical protein (937 nt)                  | 4  | 17  | 0 |
| PITG_03970 | Pi conserved hypothetical protein (843 nt)                  | 1  | 13  | 0 |
| PITG_03971 | Pi acetyltransferase (GNAT) family, putative (541 nt)       | 31 | 57  | 0 |
| PITG_03972 | Pi acetyltransferase (GNAT) family, putative (453 nt)       | 6  | 14  | 0 |
| PITG_03973 | Pi conserved hypothetical protein (4616 nt)                 | 1  | 13  | 0 |
| PITG_03974 | Pi conserved hypothetical protein (1086 nt)                 | 0  | 0   | 0 |
| PITG_03975 | Pi conserved hypothetical protein (1161 nt)                 | 2  | 6   | 0 |
| PITG_03978 | Pi transcription initiation factor TFIID subunit 6, putativ | 9  | 9   | 0 |
| PITG_03979 | Pi conserved hypothetical protein (1152 nt)                 | 1  | 1   | 0 |
| PITG_03980 | Pi conserved hypothetical protein (1897 nt)                 | 2  | 9   | 0 |
| PITG_03986 | Pi bardet-Biedl syndrome 1 family protein (2368 nt)         | 0  | 2   | 0 |
| PITG_03987 | Pi DEAD/DEAH box RNA helicase, putative (7605 nt)           | 4  | 16  | 0 |
| PITG_03988 | Pi conserved hypothetical protein (2026 nt)                 | 38 | 31  | 0 |
| PITG_03989 | Pi conserved hypothetical protein (1648 nt)                 | 4  | 18  | 0 |
| PITG_03990 | Pi conserved hypothetical protein (1403 nt)                 | 8  | 41  | 0 |
| PITG_03991 | Pi hypothetical protein (303 nt)                            | 2  | 10  | 0 |

|            |                                                            |     |     |   |
|------------|------------------------------------------------------------|-----|-----|---|
| PITG_03992 | Pi ribulose-phosphate 3-epimerase (753 nt)                 | 0   | 12  | 0 |
| PITG_03993 | Pi eukaryotic translation initiation factor 3 subunit H, p | 5   | 20  | 0 |
| PITG_03995 | Pi ATP-dependent DNA helicase, putative (1613 nt)          | 118 | 24  | 0 |
| PITG_03996 | Pi conserved hypothetical protein (662 nt)                 | 7   | 5   | 0 |
| PITG_03997 | Pi conserved hypothetical protein (2059 nt)                | 8   | 8   | 0 |
| PITG_03998 | Pi conserved hypothetical protein (7252 nt)                | 0   | 4   | 0 |
| PITG_03999 | Pi eukaryotic initiation factor 4E, putative (1175 nt)     | 3   | 11  | 0 |
| PITG_04000 | Pi angio-associated migratory cell protein (1737 nt)       | 15  | 53  | 0 |
| PITG_04001 | Pi peptidase family U48, putative (1432 nt)                | 13  | 9   | 0 |
| PITG_04002 | Pi conserved hypothetical protein (3380 nt)                | 22  | 62  | 0 |
| PITG_04003 | Pi conserved hypothetical protein (19526 nt)               | 0   | 17  | 0 |
| PITG_04006 | Pi conserved hypothetical protein (3031 nt)                | 4   | 38  | 1 |
| PITG_04010 | Pi APS kinase/ATP sulfurylase/pyrophosphatase fusion       | 17  | 158 | 0 |
| PITG_04011 | Pi tetraacyldisaccharide 4'-kinase, putative (1161 nt)     | 9   | 52  | 0 |
| PITG_04012 | Pi elongator complex protein, putative (1256 nt)           | 0   | 13  | 0 |
| PITG_04020 | Pi hypothetical protein (575 nt)                           | 43  | 3   | 0 |
| PITG_04022 | Pi conserved hypothetical protein (1818 nt)                | 7   | 17  | 0 |
| PITG_04023 | Pi conserved hypothetical protein (1584 nt)                | 10  | 33  | 0 |
| PITG_04028 | Pi conserved hypothetical protein (2175 nt)                | 3   | 11  | 0 |
| PITG_04030 | Pi hypothetical protein (411 nt)                           | 2   | 23  | 0 |
| PITG_04032 | Pi conserved hypothetical protein (789 nt)                 | 0   | 5   | 0 |
| PITG_04034 | Pi SUMO protease, putative (3312 nt)                       | 32  | 38  | 0 |
| PITG_04038 | Pi conserved hypothetical protein (1405 nt)                | 5   | 19  | 0 |
| PITG_04041 | Pi conserved hypothetical protein (458 nt)                 | 101 | 74  | 1 |
| PITG_04043 | Pi conserved hypothetical protein (1359 nt)                | 22  | 113 | 0 |
| PITG_04044 | Pi conserved hypothetical protein (594 nt)                 | 1   | 19  | 0 |
| PITG_04047 | Pi hypothetical protein (740 nt)                           | 5   | 83  | 0 |
| PITG_04048 | Pi conserved hypothetical protein (1554 nt)                | 4   | 104 | 0 |
| PITG_04049 | Pi secreted RxLR effector peptide, putative (474 nt)       | 0   | 0   | 1 |
| PITG_04053 | Pi conserved hypothetical protein (670 nt)                 | 1   | 17  | 0 |
| PITG_04057 | Pi conserved hypothetical protein (1083 nt)                | 1   | 13  | 0 |
| PITG_04059 | Pi conserved hypothetical protein (1231 nt)                | 2   | 11  | 0 |
| PITG_04065 | Pi glycerol-3-phosphate dehydrogenase (1038 nt)            | 23  | 112 | 3 |
| PITG_04067 | Pi conserved hypothetical protein (985 nt)                 | 9   | 56  | 0 |
| PITG_04071 | Pi putative extracellular dioxygenase (1131 nt)            | 0   | 0   | 0 |
| PITG_04074 | Pi secreted RxLR effector peptide, putative (528 nt)       | 9   | 6   | 0 |
| PITG_04075 | Pi sporangia induced hypothetical protein (496 nt)         | 0   | 0   | 0 |
| PITG_04076 | Pi conserved hypothetical protein (714 nt)                 | 48  | 11  | 0 |
| PITG_04077 | Pi carbohydrate esterase, putative (699 nt)                | 4   | 0   | 0 |
| PITG_04078 | Pi Rab5 family GTPase, putative (745 nt)                   | 120 | 242 | 0 |
| PITG_04079 | Pi hypothetical protein (673 nt)                           | 8   | 2   | 0 |
| PITG_04102 | Pi conserved hypothetical protein (1084 nt)                | 2   | 9   | 0 |
| PITG_04104 | Pi conserved hypothetical protein (3886 nt)                | 6   | 31  | 0 |
| PITG_04105 | Pi conserved hypothetical protein (1224 nt)                | 1   | 15  | 0 |
| PITG_04108 | Pi conserved hypothetical protein (1432 nt)                | 51  | 77  | 0 |
| PITG_04111 | Pi conserved hypothetical protein (763 nt)                 | 2   | 17  | 0 |
| PITG_04112 | Pi transmembrane protein, putative (4285 nt)               | 0   | 1   | 0 |

|            |                                                         |    |     |    |
|------------|---------------------------------------------------------|----|-----|----|
| PITG_04113 | Pi conserved hypothetical protein (1646 nt)             | 10 | 14  | 0  |
| PITG_04114 | Pi small cellulose binding protein, putative (512 nt)   | 8  | 21  | 0  |
| PITG_04115 | Pi conserved hypothetical protein (2899 nt)             | 2  | 22  | 0  |
| PITG_04121 | Pi sorbitol dehydrogenase, putative (1080 nt)           | 30 | 132 | 0  |
| PITG_04124 | Pi glycoside hydrolase, putative (860 nt)               | 2  | 49  | 0  |
| PITG_04125 | Pi glycosyl transferase, putative (1548 nt)             | 38 | 635 | 14 |
| PITG_04129 | Pi cobalamin synthesis protein, putative (1680 nt)      | 0  | 0   | 0  |
| PITG_04130 | Pi cobalamin synthesis protein, putative (1715 nt)      | 0  | 0   | 0  |
| PITG_04131 | Pi glycoside hydrolase, putative (2221 nt)              | 9  | 309 | 0  |
| PITG_04132 | Pi conserved hypothetical protein (1047 nt)             | 2  | 28  | 0  |
| PITG_04133 | Pi conserved hypothetical protein (2291 nt)             | 9  | 40  | 0  |
| PITG_04134 | Pi conserved hypothetical protein (1923 nt)             | 10 | 57  | 0  |
| PITG_04135 | Pi glycoside hydrolase, putative (864 nt)               | 0  | 3   | 6  |
| PITG_04136 | Pi conserved hypothetical protein (1644 nt)             | 0  | 14  | 0  |
| PITG_04156 | Pi conserved hypothetical protein (1998 nt)             | 0  | 20  | 0  |
| PITG_04158 | Pi glycoside hydrolase, putative (897 nt)               | 5  | 55  | 0  |
| PITG_04174 | Pi hypothetical protein (696 nt)                        | 9  | 18  | 0  |
| PITG_04175 | Pi conserved hypothetical protein (1903 nt)             | 5  | 33  | 0  |
| PITG_04179 | Pi condensin-2 complex subunit H2, putative (2172 nt)   | 3  | 33  | 0  |
| PITG_04180 | Pi conserved hypothetical protein (1175 nt)             | 2  | 16  | 0  |
| PITG_04181 | Pi conserved hypothetical protein (1755 nt)             | 15 | 45  | 0  |
| PITG_04184 | Pi conserved hypothetical protein (1851 nt)             | 67 | 9   | 0  |
| PITG_04185 | Pi histone-lysine N-methyltransferase, putative (7129 r | 0  | 15  | 0  |
| PITG_04204 | Pi geranylgeranyl transferase type-2 subunit alpha, put | 0  | 20  | 0  |
| PITG_04211 | Pi conserved hypothetical protein (464 nt)              | 10 | 34  | 0  |
| PITG_04215 | Pi conserved hypothetical protein (2212 nt)             | 10 | 6   | 0  |
| PITG_04225 | Pi geranylgeranyl transferase type-2 subunit alpha, put | 16 | 41  | 0  |
| PITG_04226 | Pi geranylgeranyl transferase type-2 subunit alpha, put | 4  | 23  | 0  |
| PITG_04227 | Pi conserved hypothetical protein (917 nt)              | 18 | 43  | 0  |
| PITG_04229 | Pi conserved hypothetical protein (711 nt)              | 21 | 73  | 0  |
| PITG_04230 | Pi conserved hypothetical protein (970 nt)              | 2  | 20  | 0  |
| PITG_04231 | Pi conserved hypothetical protein (1248 nt)             | 1  | 1   | 0  |
| PITG_04232 | Pi conserved hypothetical protein (1917 nt)             | 5  | 31  | 0  |
| PITG_04242 | Pi phosphatase PTC7 family protein (2126 nt)            | 5  | 25  | 0  |
| PITG_04243 | Pi conserved hypothetical protein (932 nt)              | 21 | 39  | 0  |
| PITG_04248 | Pi NPP1-like protein (760 nt)                           | 14 | 0   | 0  |
| PITG_04255 | Pi glucosylceramidase, putative (1623 nt)               | 0  | 60  | 0  |
| PITG_04261 | Pi ATP-binding Cassette (ABC) Superfamily (2690 nt)     | 3  | 31  | 0  |
| PITG_04262 | Pi cysteine protease family C59, putative (1473 nt)     | 5  | 23  | 0  |
| PITG_04270 | Pi sulfatase-like protein (2505 nt)                     | 3  | 79  | 0  |
| PITG_04281 | Pi Cleavage induced conserved protein (432 nt)          | 1  | 0   | 0  |
| PITG_04283 | Pi conserved hypothetical protein (3545 nt)             | 8  | 39  | 0  |
| PITG_04288 | Pi conserved hypothetical protein (835 nt)              | 0  | 15  | 0  |
| PITG_04289 | Pi ATP-binding Cassette (ABC) Superfamily (3689 nt)     | 1  | 25  | 0  |
| PITG_04295 | Pi ATP-binding Cassette (ABC) Superfamily (1872 nt)     | 2  | 1   | 0  |
| PITG_04296 | Pi ATP-binding Cassette (ABC) Superfamily (1896 nt)     | 1  | 3   | 0  |
| PITG_04310 | Pi hypothetical protein (484 nt)                        | 7  | 13  | 0  |

|                                                                      |     |     |   |
|----------------------------------------------------------------------|-----|-----|---|
| PITG_04317   Pi Major Facilitator Superfamily (MFS) (1527 nt)        | 1   | 0   | 0 |
| PITG_04318   Pi conserved hypothetical protein (1698 nt)             | 0   | 23  | 0 |
| PITG_04320   Pi Major Facilitator Superfamily (MFS) (1530 nt)        | 0   | 0   | 0 |
| PITG_04321   Pi conserved hypothetical protein (1065 nt)             | 3   | 103 | 0 |
| PITG_04324   Pi conserved hypothetical protein (1751 nt)             | 0   | 2   | 0 |
| PITG_04325   Pi pectinesterase, putative (1053 nt)                   | 9   | 0   | 2 |
| PITG_04333   Pi 3-oxo-5-alpha-steroid 4-dehydrogenase, putative (97  | 7   | 14  | 1 |
| PITG_04334   Pi conserved hypothetical protein (1221 nt)             | 5   | 7   | 0 |
| PITG_04335   Pi AP-2 complex subunit alpha, putative (3043 nt)       | 0   | 1   | 0 |
| PITG_04336   Pi conserved hypothetical protein (999 nt)              | 6   | 14  | 0 |
| PITG_04337   Pi conserved hypothetical protein (480 nt)              | 32  | 38  | 1 |
| PITG_04339   Pi secreted RxLR effector peptide, putative (723 nt)    | 1   | 10  | 0 |
| PITG_04341   Pi transmembrane protein, putative (1410 nt)            | 0   | 0   | 0 |
| PITG_04342   Pi conserved hypothetical protein (1914 nt)             | 8   | 46  | 0 |
| PITG_04344   Pi protein kinase (3400 nt)                             | 2   | 11  | 0 |
| PITG_04345   Pi hypothetical protein (735 nt)                        | 4   | 11  | 0 |
| PITG_04348   Pi conserved hypothetical protein (3299 nt)             | 1   | 11  | 0 |
| PITG_04352   Pi conserved hypothetical protein (3282 nt)             | 1   | 10  | 0 |
| PITG_04359   Pi conserved hypothetical protein (1065 nt)             | 3   | 9   | 0 |
| PITG_04365   Pi cysteine protease family C48, putative (613 nt)      | 61  | 89  | 0 |
| PITG_04372   Pi conserved hypothetical protein (610 nt)              | 14  | 55  | 1 |
| PITG_04373   Pi secreted RxLR effector peptide, putative (426 nt)    | 49  | 366 | 1 |
| PITG_04375   Pi conserved hypothetical protein (805 nt)              | 11  | 118 | 0 |
| PITG_04376   Pi conserved hypothetical protein (2040 nt)             | 8   | 150 | 1 |
| PITG_04377   Pi conserved hypothetical protein (2048 nt)             | 0   | 14  | 0 |
| PITG_04378   Pi elicitor-like protein (723 nt)                       | 195 | 465 | 0 |
| PITG_04379   Pi putative GPI-anchored serine-rich hypothetical prote | 4   | 44  | 0 |
| PITG_04380   Pi hypothetical protein (740 nt)                        | 35  | 100 | 0 |
| PITG_04381   Pi conserved hypothetical protein (631 nt)              | 4   | 19  | 0 |
| PITG_04382   Pi 50S ribosomal protein L27 (478 nt)                   | 12  | 43  | 1 |
| PITG_04384   Pi ribosome biogenesis regulatory protein (970 nt)      | 25  | 51  | 0 |
| PITG_04385   Pi putative GPI-anchored acidic serine-threonine rich H | 0   | 27  | 2 |
| PITG_04390   Pi hypothetical protein (455 nt)                        | 0   | 12  | 0 |
| PITG_04391   Pi conserved hypothetical protein (1107 nt)             | 13  | 34  | 1 |
| PITG_04392   Pi conserved hypothetical protein (2196 nt)             | 4   | 6   | 0 |
| PITG_04393   Pi tubulin polyglutamylase, putative (1809 nt)          | 3   | 3   | 0 |
| PITG_04394   Pi conserved hypothetical protein (732 nt)              | 6   | 73  | 0 |
| PITG_04395   Pi pre-mRNA-processing protein, putative (2063 nt)      | 14  | 36  | 0 |
| PITG_04396   Pi conserved hypothetical protein (552 nt)              | 8   | 102 | 0 |
| PITG_04398   Pi Amino Acid/Auxin Permease (AAAP) Family (1608 nt)    | 5   | 53  | 2 |
| PITG_04399   Pi Amino Acid/Auxin Permease (AAAP) Family (1010 nt)    | 0   | 20  | 0 |
| PITG_04401   Pi conserved hypothetical protein (615 nt)              | 8   | 72  | 0 |
| PITG_04403   Pi hypothetical protein (796 nt)                        | 12  | 30  | 0 |
| PITG_04405   Pi conserved hypothetical protein (1606 nt)             | 7   | 38  | 0 |
| PITG_04421   Pi protein kinase (1613 nt)                             | 9   | 26  | 0 |
| PITG_04424   Pi SNARE associated Golgi protein, putative (918 nt)    | 13  | 27  | 0 |
| PITG_04425   Pi ubiquitin-conjugating enzyme E2, putative (785 nt)   | 76  | 81  | 0 |

|            |                                                          |    |     |   |
|------------|----------------------------------------------------------|----|-----|---|
| PITG_04426 | Pi DNA polymerase alpha-associated DNA helicase A, p     | 3  | 14  | 0 |
| PITG_04427 | Pi conserved hypothetical protein (1462 nt)              | 21 | 66  | 0 |
| PITG_04428 | Pi conserved hypothetical protein (1092 nt)              | 3  | 10  | 0 |
| PITG_04435 | Pi Crinkler (CRN) family protein (2520 nt)               | 37 | 30  | 0 |
| PITG_04439 | Pi hypothetical protein (2797 nt)                        | 1  | 24  | 0 |
| PITG_04441 | Pi 3-isopropylmalate dehydrogenase (1392 nt)             | 4  | 11  | 1 |
| PITG_04442 | Pi conserved hypothetical protein (417 nt)               | 16 | 7   | 0 |
| PITG_04443 | Pi Metal Ion (Mn2 -iron) Transporter (Nramp) Family (1   | 4  | 12  | 0 |
| PITG_04445 | Pi conserved hypothetical protein (1692 nt)              | 1  | 0   | 0 |
| PITG_04447 | Pi conserved hypothetical protein (2249 nt)              | 0  | 0   | 2 |
| PITG_04450 | Pi Zinc (Zn2 )-Iron (Fe2 ) Permease (ZIP) Family (1794 n | 0  | 0   | 0 |
| PITG_04453 | Pi conserved hypothetical protein (1413 nt)              | 4  | 12  | 0 |
| PITG_04454 | Pi sporangia induced hypothetical protein (1319 nt)      | 0  | 0   | 0 |
| PITG_04456 | Pi hypothetical protein (1641 nt)                        | 0  | 1   | 0 |
| PITG_04457 | Pi tripeptidyl-peptidase, putative (4697 nt)             | 1  | 30  | 0 |
| PITG_04458 | Pi protein kinase (1568 nt)                              | 2  | 25  | 0 |
| PITG_04464 | Pi conserved hypothetical protein (949 nt)               | 0  | 0   | 0 |
| PITG_04466 | Pi cystathionine gamma-synthase, putative (1575 nt)      | 3  | 13  | 0 |
| PITG_04467 | Pi conserved hypothetical protein (870 nt)               | 3  | 2   | 0 |
| PITG_04468 | Pi Mitochondrial Carrier (MC) Family (882 nt)            | 17 | 15  | 0 |
| PITG_04470 | Pi Argonaute1 (AGO1) (2784 nt)                           | 20 | 262 | 3 |
| PITG_04471 | Pi Argonaute2 (AGO2) (2784 nt)                           | 7  | 85  | 0 |
| PITG_04474 | Pi conserved hypothetical protein (1138 nt)              | 1  | 14  | 0 |
| PITG_04475 | Pi hypothetical protein (1193 nt)                        | 5  | 8   | 0 |
| PITG_04478 | Pi protein kinase (1275 nt)                              | 16 | 95  | 0 |
| PITG_04479 | Pi conserved hypothetical protein (1170 nt)              | 7  | 13  | 0 |
| PITG_04480 | Pi conserved hypothetical protein (883 nt)               | 1  | 2   | 0 |
| PITG_04481 | Pi conserved hypothetical protein (943 nt)               | 26 | 17  | 1 |
| PITG_04482 | Pi Drug/Metabolite Transporter (DMT) Superfamily (93     | 4  | 16  | 0 |
| PITG_04483 | Pi conserved hypothetical protein (2088 nt)              | 9  | 152 | 0 |
| PITG_04485 | Pi conserved hypothetical protein (6206 nt)              | 1  | 30  | 0 |
| PITG_04486 | Pi conserved hypothetical protein (537 nt)               | 2  | 16  | 0 |
| PITG_04487 | Pi conserved hypothetical protein (596 nt)               | 61 | 130 | 4 |
| PITG_04489 | Pi peroxisome assembly factor, putative (2828 nt)        | 1  | 15  | 0 |
| PITG_04490 | Pi conserved hypothetical protein (872 nt)               | 0  | 2   | 0 |
| PITG_04497 | Pi conserved hypothetical protein (3049 nt)              | 8  | 25  | 0 |
| PITG_04499 | Pi histone deacetylase, putative (1602 nt)               | 3  | 22  | 0 |
| PITG_04500 | Pi nucleosome assembly protein 1 (1225 nt)               | 11 | 82  | 3 |
| PITG_04501 | Pi hypothetical protein (338 nt)                         | 5  | 180 | 0 |
| PITG_04505 | Pi transmembrane protein, putative (1852 nt)             | 18 | 88  | 0 |
| PITG_04506 | Pi protein kinase (1653 nt)                              | 4  | 36  | 0 |
| PITG_04508 | Pi conserved hypothetical protein (3456 nt)              | 4  | 26  | 0 |
| PITG_04509 | Pi conserved hypothetical protein (2121 nt)              | 10 | 9   | 0 |
| PITG_04511 | Pi conserved hypothetical protein (1507 nt)              | 1  | 10  | 0 |
| PITG_04512 | Pi conserved hypothetical protein (1076 nt)              | 5  | 11  | 0 |
| PITG_04513 | Pi RIB72 protein (1656 nt)                               | 0  | 2   | 0 |
| PITG_04521 | Pi conserved hypothetical protein (1795 nt)              | 0  | 85  | 0 |

|            |                                                             |     |     |     |
|------------|-------------------------------------------------------------|-----|-----|-----|
| PITG_04522 | Pi peptidyl-prolyl cis-trans isomerase (683 nt)             | 239 | 787 | 134 |
| PITG_04523 | Pi conserved hypothetical protein (2736 nt)                 | 1   | 13  | 0   |
| PITG_04524 | Pi conserved hypothetical protein (473 nt)                  | 0   | 33  | 0   |
| PITG_04525 | Pi conserved hypothetical protein (982 nt)                  | 3   | 147 | 0   |
| PITG_04527 | Pi DNA replication licensing factor mcm4, putative (312 nt) | 1   | 11  | 0   |
| PITG_04529 | Pi formin-homology 2 domain-containing protein (5847 nt)    | 0   | 14  | 0   |
| PITG_04530 | Pi conserved hypothetical protein (1065 nt)                 | 69  | 181 | 1   |
| PITG_04532 | Pi conserved hypothetical protein (1101 nt)                 | 4   | 22  | 0   |
| PITG_04533 | Pi conserved hypothetical protein (1683 nt)                 | 2   | 24  | 0   |
| PITG_04534 | Pi vacuolar protein sorting-associated protein 28 (917 nt)  | 33  | 42  | 0   |
| PITG_04535 | Pi nuclear LIM factor interactor-interacting protein hyp    | 6   | 31  | 0   |
| PITG_04536 | Pi conserved hypothetical protein (1351 nt)                 | 1   | 2   | 0   |
| PITG_04538 | Pi splicing factor 3 subunit, putative (2042 nt)            | 4   | 55  | 0   |
| PITG_04539 | Pi conserved hypothetical protein (1156 nt)                 | 22  | 42  | 0   |
| PITG_04545 | Pi conserved hypothetical protein (1505 nt)                 | 3   | 26  | 0   |
| PITG_04546 | Pi conserved hypothetical protein (864 nt)                  | 2   | 9   | 0   |
| PITG_04547 | Pi conserved hypothetical protein (3742 nt)                 | 3   | 36  | 0   |
| PITG_04549 | Pi Ferroportin (FP) Family (1725 nt)                        | 0   | 16  | 0   |
| PITG_04552 | Pi conserved hypothetical protein (991 nt)                  | 9   | 42  | 0   |
| PITG_04553 | Pi conserved hypothetical protein (2658 nt)                 | 3   | 21  | 0   |
| PITG_04554 | Pi conserved hypothetical protein (862 nt)                  | 2   | 17  | 0   |
| PITG_04555 | Pi hypothetical protein (948 nt)                            | 10  | 27  | 0   |
| PITG_04558 | Pi hypothetical protein (2958 nt)                           | 1   | 0   | 0   |
| PITG_04560 | Pi conserved hypothetical protein (1001 nt)                 | 5   | 39  | 0   |
| PITG_04561 | Pi conserved hypothetical protein (1419 nt)                 | 4   | 11  | 0   |
| PITG_04562 | Pi mucin, putative (11178 nt)                               | 2   | 28  | 0   |
| PITG_04564 | Pi conserved hypothetical protein (4350 nt)                 | 6   | 37  | 0   |
| PITG_04566 | Pi hypothetical protein (132 nt)                            | 21  | 75  | 0   |
| PITG_04567 | Pi conserved hypothetical protein (885 nt)                  | 6   | 45  | 0   |
| PITG_04568 | Pi protein kinase (2281 nt)                                 | 12  | 60  | 0   |
| PITG_04569 | Pi conserved hypothetical protein (3737 nt)                 | 8   | 11  | 0   |
| PITG_04570 | Pi conserved hypothetical protein (1599 nt)                 | 18  | 72  | 0   |
| PITG_04571 | Pi conserved hypothetical protein (802 nt)                  | 2   | 5   | 0   |
| PITG_04572 | Pi conserved hypothetical protein (1193 nt)                 | 3   | 33  | 0   |
| PITG_04575 | Pi conserved hypothetical protein (1882 nt)                 | 1   | 18  | 0   |
| PITG_04576 | Pi conserved hypothetical protein (528 nt)                  | 7   | 15  | 0   |
| PITG_04577 | Pi conserved hypothetical protein (2403 nt)                 | 12  | 12  | 0   |
| PITG_04579 | Pi conserved hypothetical protein (2495 nt)                 | 5   | 15  | 0   |
| PITG_04582 | Pi conserved hypothetical protein (2387 nt)                 | 1   | 25  | 0   |
| PITG_04584 | Pi conserved hypothetical protein (1664 nt)                 | 30  | 4   | 0   |
| PITG_04588 | Pi Amino Acid/Auxin Permease (AAP) Family (1551 nt)         | 2   | 18  | 0   |
| PITG_04589 | Pi protein kinase (1190 nt)                                 | 2   | 23  | 0   |
| PITG_04590 | Pi conserved hypothetical protein (1771 nt)                 | 11  | 70  | 0   |
| PITG_04591 | Pi protein kinase (1318 nt)                                 | 21  | 37  | 0   |
| PITG_04593 | Pi conserved hypothetical protein (1849 nt)                 | 3   | 11  | 0   |
| PITG_04594 | Pi aspartyl-tRNA synthetase, putative (1215 nt)             | 9   | 9   | 0   |
| PITG_04596 | Pi hypothetical protein (3211 nt)                           | 19  | 27  | 0   |



|                                                                       |     |     |     |
|-----------------------------------------------------------------------|-----|-----|-----|
| PITG_04599   Pi sestrin-like protein (1761 nt)                        | 8   | 62  | 0   |
| PITG_04600   Pi conserved hypothetical protein (1983 nt)              | 10  | 22  | 0   |
| PITG_04601   Pi phosphoadenosine phosphosulfate reductase (1647       | 6   | 30  | 0   |
| PITG_04603   Pi conserved hypothetical protein (7600 nt)              | 11  | 48  | 0   |
| PITG_04608   Pi conserved hypothetical protein (2467 nt)              | 3   | 20  | 0   |
| PITG_04609   Pi hypothetical protein (-4T49) (529 nt)                 | 6   | 44  | 0   |
| PITG_04610   Pi dolichyl-diphosphooligosaccharide-protein glycosyltr  | 1   | 11  | 0   |
| PITG_04611   Pi protein kinase (1116 nt)                              | 29  | 100 | 0   |
| PITG_04612   Pi conserved hypothetical protein (2820 nt)              | 6   | 38  | 0   |
| PITG_04614   Pi DNA ligase, putative (1649 nt)                        | 2   | 24  | 0   |
| PITG_04615   Pi glucan 1,3-beta-glucosidase, putative (1681 nt)       | 1   | 38  | 0   |
| PITG_04618   Pi trimethyllysine dioxygenase, putative (1540 nt)       | 13  | 47  | 0   |
| PITG_04619   Pi protein kinase (3108 nt)                              | 4   | 13  | 0   |
| PITG_04626   Pi Amino Acid/Auxin Permease (AAAP) Family (1323 nt      | 4   | 15  | 0   |
| PITG_04627   Pi myosin-like protein (1315 nt)                         | 3   | 26  | 0   |
| PITG_04628   Pi conserved hypothetical protein (1167 nt)              | 2   | 7   | 0   |
| PITG_04629   Pi conserved hypothetical protein (1137 nt)              | 2   | 17  | 0   |
| PITG_04631   Pi conserved hypothetical protein (1040 nt)              | 6   | 6   | 0   |
| PITG_04634   Pi conserved hypothetical protein (3590 nt)              | 2   | 2   | 0   |
| PITG_04638   Pi conserved hypothetical protein (1703 nt)              | 3   | 14  | 0   |
| PITG_04639   Pi conserved hypothetical protein (1213 nt)              | 0   | 2   | 0   |
| PITG_04640   Pi translation elongation factor 1-alpha, putative (1448 | 113 | 534 | 254 |
| PITG_04641   Pi conserved hypothetical protein (1368 nt)              | 1   | 13  | 0   |
| PITG_04643   Pi conserved hypothetical protein (1093 nt)              | 7   | 13  | 0   |
| PITG_04644   Pi mRNA cap guanine-N7 methyltransferase, putative (     | 1   | 18  | 0   |
| PITG_04645   Pi conserved hypothetical protein (922 nt)               | 13  | 22  | 0   |
| PITG_04646   Pi ATP-binding Cassette (ABC) Superfamily (2265 nt)      | 4   | 10  | 0   |
| PITG_04647   Pi conserved hypothetical protein (1327 nt)              | 4   | 42  | 0   |
| PITG_04648   Pi conserved hypothetical protein (1624 nt)              | 2   | 27  | 0   |
| PITG_04650   Pi conserved hypothetical protein (856 nt)               | 2   | 5   | 0   |
| PITG_04651   Pi exportin-like protein (4306 nt)                       | 4   | 29  | 0   |
| PITG_04658   Pi methylcrotonoyl-CoA carboxylase subunit alpha, put    | 12  | 42  | 0   |
| PITG_04661   Pi L-aminoadipate-semialdehyde dehydrogenase large       | 4   | 26  | 0   |
| PITG_04662   Pi conserved hypothetical protein (1364 nt)              | 35  | 65  | 1   |
| PITG_04663   Pi conserved hypothetical protein (2069 nt)              | 26  | 69  | 0   |
| PITG_04664   Pi conserved hypothetical protein (1586 nt)              | 4   | 10  | 0   |
| PITG_04665   Pi ribose-5-phosphate isomerase (857 nt)                 | 25  | 18  | 0   |
| PITG_04666   Pi conserved hypothetical protein (1826 nt)              | 10  | 20  | 0   |
| PITG_04670   Pi conserved hypothetical protein (2953 nt)              | 3   | 12  | 0   |
| PITG_04671   Pi conserved hypothetical protein (981 nt)               | 16  | 8   | 0   |
| PITG_04674   Pi conserved hypothetical protein (1407 nt)              | 3   | 9   | 0   |
| PITG_04676   Pi conserved hypothetical protein (795 nt)               | 10  | 17  | 0   |
| PITG_04677   Pi protein kinase (1359 nt)                              | 0   | 23  | 0   |
| PITG_04678   Pi phosphatidylinositol-3,4,5-trisphosphate 3-phosphat   | 62  | 6   | 0   |
| PITG_04679   Pi conserved hypothetical protein (796 nt)               | 17  | 5   | 0   |
| PITG_04680   Pi phosphoinositol transporter (2048 nt)                 | 6   | 40  | 0   |
| PITG_04681   Pi serine/threonine-protein phosphatase PP1-gamma c      | 93  | 315 | 6   |

|            |                                                                     |     |      |   |
|------------|---------------------------------------------------------------------|-----|------|---|
| PITG_04682 | Pi protein kinase, putative (2628 nt)                               | 14  | 80   | 0 |
| PITG_04683 | Pi bifunctional fold protein (897 nt)                               | 4   | 12   | 0 |
| PITG_04685 | Pi hypothetical protein (1441 nt)                                   | 4   | 93   | 0 |
| PITG_04687 | Pi hypothetical protein (1162 nt)                                   | 2   | 0    | 9 |
| PITG_04690 | Pi pyridine nucleotide-disulphide oxidoreductase, puta              | 449 | 236  | 1 |
| PITG_04691 | Pi pyridine nucleotide-disulphide oxidoreductase, puta              | 4   | 11   | 0 |
| PITG_04695 | Pi conserved hypothetical protein (1557 nt)                         | 3   | 14   | 0 |
| PITG_04697 | Pi conserved hypothetical protein (2515 nt)                         | 0   | 0    | 0 |
| PITG_04698 | Pi arginine biosynthesis bifunctional protein argJ, putat           | 65  | 73   | 2 |
| PITG_04699 | Pi conserved hypothetical protein (489 nt)                          | 4   | 15   | 0 |
| PITG_04700 | Pi Transient Receptor Potential Ca <sup>2+</sup> Channel (TRP-CC) I | 3   | 29   | 0 |
| PITG_04701 | Pi cleavage induced conserved hypothetical protein (22              | 4   | 22   | 0 |
| PITG_04702 | Pi conserved hypothetical protein (677 nt)                          | 22  | 26   | 0 |
| PITG_04703 | Pi conserved hypothetical protein (603 nt)                          | 11  | 5    | 0 |
| PITG_04704 | Pi conserved hypothetical protein (1168 nt)                         | 35  | 75   | 2 |
| PITG_04705 | Pi conserved hypothetical protein (2356 nt)                         | 5   | 21   | 0 |
| PITG_04706 | Pi potential pseudogene (372 nt)                                    | 0   | 1    | 0 |
| PITG_04707 | Pi conserved hypothetical protein (657 nt)                          | 15  | 11   | 0 |
| PITG_04708 | Pi bifunctional fold protein (927 nt)                               | 11  | 26   | 0 |
| PITG_04709 | Pi DNA ligase, putative (12166 nt)                                  | 3   | 17   | 0 |
| PITG_04710 | Pi conserved hypothetical protein (998 nt)                          | 0   | 17   | 0 |
| PITG_04711 | Pi conserved hypothetical protein (569 nt)                          | 3   | 2    | 0 |
| PITG_04712 | Pi conserved hypothetical protein (3360 nt)                         | 7   | 35   | 0 |
| PITG_04714 | Pi conserved hypothetical protein (534 nt)                          | 57  | 342  | 0 |
| PITG_04715 | Pi pantothenate kinase, putative (1800 nt)                          | 16  | 41   | 0 |
| PITG_04717 | Pi conserved hypothetical protein (1232 nt)                         | 6   | 17   | 0 |
| PITG_04718 | Pi protein pelota (1472 nt)                                         | 11  | 19   | 0 |
| PITG_04719 | Pi trafficking protein particle complex subunit 2-like pro          | 50  | 18   | 0 |
| PITG_04721 | Pi dynein light chain/pantothenate kinase (377 nt)                  | 0   | 1    | 0 |
| PITG_04723 | Pi hypothetical protein (610 nt)                                    | 8   | 20   | 0 |
| PITG_04724 | Pi serine protease family S10, putative (1455 nt)                   | 2   | 10   | 0 |
| PITG_04725 | Pi conserved hypothetical protein (10266 nt)                        | 4   | 67   | 0 |
| PITG_04726 | Pi mitochondrial-processing peptidase subunit alpha, p              | 26  | 93   | 8 |
| PITG_04731 | Pi hypothetical protein (1162 nt)                                   | 3   | 19   | 0 |
| PITG_04732 | Pi conserved hypothetical protein (2596 nt)                         | 1   | 306  | 0 |
| PITG_04746 | Pi conserved hypothetical protein (2806 nt)                         | 15  | 23   | 0 |
| PITG_04773 | Pi conserved hypothetical protein (454 nt)                          | 25  | 44   | 0 |
| PITG_04774 | Pi conserved hypothetical protein (1414 nt)                         | 0   | 11   | 0 |
| PITG_04777 | Pi conserved hypothetical protein (1102 nt)                         | 99  | 168  | 0 |
| PITG_04800 | Pi conserved hypothetical protein (1200 nt)                         | 0   | 13   | 0 |
| PITG_04802 | Pi conserved hypothetical protein (1097 nt)                         | 149 | 1758 | 0 |
| PITG_04820 | Pi conserved hypothetical protein (1802 nt)                         | 46  | 66   | 0 |
| PITG_04821 | Pi conserved hypothetical protein (546 nt)                          | 7   | 5    | 0 |
| PITG_04822 | Pi inositol polyphosphate multikinase, putative (1122 n             | 7   | 29   | 0 |
| PITG_04824 | Pi conserved hypothetical protein (3821 nt)                         | 91  | 172  | 2 |
| PITG_04831 | Pi regulator of chromosome condensation (RCC1)-like p               | 10  | 58   | 2 |
| PITG_04833 | Pi conserved hypothetical protein (1761 nt)                         | 0   | 0    | 0 |

|                                                                      |     |      |    |
|----------------------------------------------------------------------|-----|------|----|
| PITG_04834   Pi conserved hypothetical protein (4770 nt)             | 1   | 7    | 0  |
| PITG_04839   Pi cleavage induced conserved hypothetical protein (19  | 6   | 53   | 0  |
| PITG_04842   Pi conserved hypothetical protein (5338 nt)             | 9   | 67   | 0  |
| PITG_04843   Pi 60S ribosomal protein L13, putative (1197 nt)        | 585 | 646  | 54 |
| PITG_04844   Pi folate-Biopterin Transporter (FBT) family (1518 nt)  | 0   | 12   | 0  |
| PITG_04845   Pi conserved hypothetical protein (1298 nt)             | 2   | 9    | 0  |
| PITG_04846   Pi conserved hypothetical protein (2670 nt)             | 16  | 57   | 0  |
| PITG_04847   Pi conserved hypothetical protein (1560 nt)             | 1   | 7    | 0  |
| PITG_04848   Pi conserved hypothetical protein (649 nt)              | 0   | 0    | 0  |
| PITG_04849   Pi conserved hypothetical protein (1595 nt)             | 0   | 1    | 0  |
| PITG_04850   Pi conserved hypothetical protein (1488 nt)             | 2   | 30   | 0  |
| PITG_04851   Pi arginase (1366 nt)                                   | 2   | 48   | 0  |
| PITG_04856   Pi Crinkler (CRN) family protein (2517 nt)              | 10  | 12   | 0  |
| PITG_04857   Pi impact-like protein (1370 nt)                        | 3   | 24   | 0  |
| PITG_04859   Pi Polycystin Cation Channel (PCC) Family (1653 nt)     | 0   | 3    | 0  |
| PITG_04860   Pi conserved hypothetical protein (944 nt)              | 4   | 32   | 0  |
| PITG_04861   Pi conserved hypothetical protein (1383 nt)             | 9   | 19   | 0  |
| PITG_04862   Pi RNA binding protein, putative (1307 nt)              | 65  | 61   | 1  |
| PITG_04863   Pi conserved hypothetical protein (2468 nt)             | 2   | 4    | 0  |
| PITG_04864   Pi conserved hypothetical protein (1203 nt)             | 0   | 12   | 0  |
| PITG_04865   Pi conserved hypothetical protein (858 nt)              | 3   | 4    | 0  |
| PITG_04866   Pi conserved hypothetical protein (574 nt)              | 0   | 0    | 0  |
| PITG_04867   Pi conserved hypothetical protein (4644 nt)             | 0   | 2    | 0  |
| PITG_04868   Pi ADP/ATP translocase, putative (933 nt)               | 81  | 378  | 85 |
| PITG_04871   Pi conserved hypothetical protein (2382 nt)             | 0   | 0    | 0  |
| PITG_04873   Pi conserved hypothetical protein (558 nt)              | 8   | 8    | 0  |
| PITG_04874   Pi carbohydrate esterase, putative (1146 nt)            | 38  | 18   | 0  |
| PITG_04875   Pi xaa-Pro aminopeptidase, putative (2111 nt)           | 13  | 68   | 0  |
| PITG_04876   Pi hypothetical protein (381 nt)                        | 8   | 19   | 0  |
| PITG_04877   Pi oxidase, putative (1849 nt)                          | 1   | 17   | 0  |
| PITG_04880   Pi Equilibrative Nucleoside Transporter (ENT) Family (1 | 1   | 12   | 0  |
| PITG_04881   Pi conserved hypothetical protein (1570 nt)             | 29  | 120  | 0  |
| PITG_04882   Pi 4-coumarate-CoA ligase, putative (1782 nt)           | 2   | 20   | 0  |
| PITG_04884   Pi conserved hypothetical protein (872 nt)              | 3   | 62   | 0  |
| PITG_04888   Pi kinesin-like protein (2334 nt)                       | 5   | 2    | 0  |
| PITG_04889   Pi conserved hypothetical protein (4476 nt)             | 1   | 11   | 0  |
| PITG_04891   Pi conserved hypothetical protein (1528 nt)             | 0   | 3    | 0  |
| PITG_04892   Pi conserved hypothetical protein (838 nt)              | 3   | 13   | 0  |
| PITG_04895   Pi conserved hypothetical protein (1584 nt)             | 11  | 106  | 0  |
| PITG_04902   Pi conserved hypothetical protein (1710 nt)             | 3   | 19   | 0  |
| PITG_04903   Pi conserved hypothetical protein (1386 nt)             | 5   | 9    | 0  |
| PITG_04905   Pi conserved hypothetical protein (1634 nt)             | 5   | 41   | 0  |
| PITG_04906   Pi glutaredoxin (479 nt)                                | 126 | 1091 | 26 |
| PITG_04907   Pi conserved hypothetical protein (652 nt)              | 4   | 32   | 0  |
| PITG_04908   Pi conserved hypothetical protein (1814 nt)             | 51  | 115  | 1  |
| PITG_04909   Pi conserved hypothetical protein (596 nt)              | 10  | 18   | 0  |
| PITG_04910   Pi serine/threonine protein kinase (2511 nt)            | 16  | 57   | 0  |

|            |                                                         |    |     |    |
|------------|---------------------------------------------------------|----|-----|----|
| PITG_04912 | Pi conserved hypothetical protein (1214 nt)             | 0  | 1   | 0  |
| PITG_04916 | Pi conserved hypothetical protein (2175 nt)             | 2  | 12  | 0  |
| PITG_04917 | Pi anaphase-promoting complex subunit, putative (213    | 1  | 13  | 0  |
| PITG_04918 | Pi alanyl-tRNA synthetase, putative (2754 nt)           | 0  | 11  | 0  |
| PITG_04919 | Pi conserved hypothetical protein (1984 nt)             | 0  | 15  | 0  |
| PITG_04921 | Pi hypothetical protein (456 nt)                        | 13 | 143 | 0  |
| PITG_04922 | Pi protein kinase (1188 nt)                             | 2  | 0   | 0  |
| PITG_04924 | Pi conserved hypothetical protein (1134 nt)             | 5  | 6   | 0  |
| PITG_04927 | Pi conserved hypothetical protein (1731 nt)             | 3  | 6   | 0  |
| PITG_04928 | Pi conserved hypothetical protein (1404 nt)             | 15 | 335 | 0  |
| PITG_04930 | Pi conserved hypothetical protein (526 nt)              | 0  | 24  | 0  |
| PITG_04931 | Pi conserved hypothetical protein (1322 nt)             | 5  | 39  | 2  |
| PITG_04934 | Pi enoyl-CoA hydratase/isomerase family, putative (18:  | 6  | 90  | 0  |
| PITG_04935 | Pi calcineurin-like phosphoesterase, putative (1806 nt) | 3  | 9   | 0  |
| PITG_04937 | Pi conserved hypothetical protein (615 nt)              | 16 | 119 | 0  |
| PITG_04938 | Pi calcium/calmodulin-dependent protein kinase, putat   | 2  | 22  | 0  |
| PITG_04939 | Pi Dicarboxylate/Amino Acid:Cation (Na or H ) Sympor    | 1  | 6   | 0  |
| PITG_04941 | Pi RNA polymerase II subunit A C-terminal domain pho:   | 13 | 16  | 0  |
| PITG_04948 | Pi conserved hypothetical protein (757 nt)              | 0  | 1   | 0  |
| PITG_04949 | Pi conserved hypothetical protein (1014 nt)             | 0  | 5   | 5  |
| PITG_04954 | Pi protein kinase (1494 nt)                             | 3  | 12  | 0  |
| PITG_04956 | Pi conserved hypothetical protein (2657 nt)             | 7  | 16  | 0  |
| PITG_04957 | Pi AP-2 complex subunit sigma-1 (439 nt)                | 1  | 1   | 0  |
| PITG_04958 | Pi coatomer subunit beta' (3231 nt)                     | 6  | 58  | 1  |
| PITG_04959 | Pi conserved hypothetical protein (741 nt)              | 5  | 34  | 0  |
| PITG_04961 | Pi crinkler (CRN) family protein, pseudogene (4915 nt)  | 32 | 386 | 0  |
| PITG_04967 | Pi conserved hypothetical protein (2153 nt)             | 0  | 3   | 0  |
| PITG_04969 | Pi conserved hypothetical protein (1865 nt)             | 7  | 320 | 0  |
| PITG_04970 | Pi conserved hypothetical protein (3710 nt)             | 0  | 13  | 0  |
| PITG_04971 | Pi conserved hypothetical protein (3105 nt)             | 0  | 11  | 0  |
| PITG_04973 | Pi conserved hypothetical protein (1469 nt)             | 16 | 17  | 0  |
| PITG_04974 | Pi conserved hypothetical protein (1077 nt)             | 21 | 25  | 0  |
| PITG_04976 | Pi conserved hypothetical protein (2466 nt)             | 0  | 2   | 0  |
| PITG_04977 | Pi conserved hypothetical protein (3445 nt)             | 15 | 182 | 19 |
| PITG_04978 | Pi conserved hypothetical protein (635 nt)              | 11 | 9   | 0  |
| PITG_04980 | Pi conserved hypothetical protein (31653 nt)            | 0  | 6   | 0  |
| PITG_04985 | Pi sorbitol dehydrogenase, putative (1175 nt)           | 2  | 12  | 0  |
| PITG_04989 | Pi sorbitol dehydrogenase, putative (1158 nt)           | 5  | 9   | 0  |
| PITG_04990 | Pi conserved hypothetical protein (813 nt)              | 3  | 12  | 0  |
| PITG_04991 | Pi conserved hypothetical protein (1547 nt)             | 1  | 14  | 0  |
| PITG_04992 | Pi arginyl-tRNA synthetase, putative (1618 nt)          | 13 | 28  | 0  |
| PITG_04994 | Pi conserved hypothetical protein (2863 nt)             | 53 | 198 | 0  |
| PITG_04996 | Pi conserved hypothetical protein (1200 nt)             | 38 | 132 | 1  |
| PITG_04998 | Pi MtN3-like protein (693 nt)                           | 0  | 15  | 0  |
| PITG_04999 | Pi MtN3-like protein (1252 nt)                          | 2  | 6   | 0  |
| PITG_05000 | Pi MtN3-like protein (849 nt)                           | 0  | 0   | 0  |
| PITG_05004 | Pi aspartyl protease family A01A, putative (1946 nt)    | 14 | 7   | 0  |

|            |                                                            |      |      |     |
|------------|------------------------------------------------------------|------|------|-----|
| PITG_05005 | Pi conserved hypothetical protein (1910 nt)                | 3    | 14   | 0   |
| PITG_05006 | Pi U1 small nuclear ribonucleoprotein A (865 nt)           | 8    | 49   | 1   |
| PITG_05007 | Pi glutaminyl-tRNA synthetase, putative (2013 nt)          | 16   | 29   | 0   |
| PITG_05008 | Pi conserved hypothetical protein (497 nt)                 | 7    | 14   | 0   |
| PITG_05009 | Pi conserved hypothetical protein (705 nt)                 | 25   | 28   | 0   |
| PITG_05010 | Pi conserved hypothetical protein (985 nt)                 | 9    | 39   | 0   |
| PITG_05011 | Pi 5A endo-1,4-beta-glucanase, putative (1696 nt)          | 93   | 398  | 1   |
| PITG_05012 | Pi conserved hypothetical protein (1562 nt)                | 14   | 61   | 0   |
| PITG_05016 | Pi conserved hypothetical protein (3060 nt)                | 0    | 35   | 0   |
| PITG_05056 | Pi GTP-binding protein, putative (1843 nt)                 | 4    | 30   | 0   |
| PITG_05068 | Pi secreted RxLR effector peptide, putative (378 nt)       | 0    | 9    | 2   |
| PITG_05070 | Pi conserved hypothetical protein (1421 nt)                | 1    | 51   | 0   |
| PITG_05071 | Pi deoxyribose-phosphate aldolase 1 (485 nt)               | 2    | 11   | 0   |
| PITG_05072 | Pi secreted RxLR effector peptide, putative, 3' partial (4 | 0    | 16   | 0   |
| PITG_05075 | Pi conserved hypothetical protein (3271 nt)                | 1    | 10   | 0   |
| PITG_05079 | Pi glycosyltransferase (6744 nt)                           | 2    | 30   | 0   |
| PITG_05099 | Pi conserved hypothetical protein (900 nt)                 | 5    | 15   | 0   |
| PITG_05100 | Pi conserved hypothetical protein (693 nt)                 | 29   | 30   | 0   |
| PITG_05103 | Pi conserved hypothetical protein (1077 nt)                | 56   | 34   | 0   |
| PITG_05104 | Pi conserved hypothetical protein (928 nt)                 | 13   | 2    | 0   |
| PITG_05111 | Pi conserved hypothetical protein (675 nt)                 | 2    | 1    | 0   |
| PITG_05112 | Pi protein kinase, putative (2275 nt)                      | 20   | 150  | 0   |
| PITG_05113 | Pi hypothetical protein (1175 nt)                          | 13   | 46   | 0   |
| PITG_05114 | Pi aspartyl protease family A01A, putative (1749 nt)       | 6    | 16   | 0   |
| PITG_05115 | Pi HECT E3 ubiquitin ligase, putative (2055 nt)            | 76   | 297  | 0   |
| PITG_05116 | Pi conserved hypothetical protein (814 nt)                 | 7    | 21   | 0   |
| PITG_05117 | Pi glycine amidinotransferase, mitochondrial precursor     | 48   | 84   | 0   |
| PITG_05125 | Pi hypothetical protein (632 nt)                           | 10   | 661  | 0   |
| PITG_05126 | Pi splicing factor 3A subunit, putative (735 nt)           | 6    | 3    | 7   |
| PITG_05127 | Pi fatty acid desaturase, putative (1421 nt)               | 3    | 24   | 0   |
| PITG_05128 | Pi conserved hypothetical protein (5333 nt)                | 4    | 31   | 0   |
| PITG_05135 | Pi hypothetical protein (463 nt)                           | 0    | 4    | 0   |
| PITG_05139 | Pi hypothetical protein (470 nt)                           | 27   | 37   | 0   |
| PITG_05140 | Pi L-threonine 3-dehydrogenase, putative (1071 nt)         | 64   | 202  | 1   |
| PITG_05141 | Pi actin-like protein (1487 nt)                            | 24   | 84   | 1   |
| PITG_05143 | Pi conserved hypothetical protein (498 nt)                 | 0    | 1    | 0   |
| PITG_05149 | Pi conserved hypothetical protein (2082 nt)                | 12   | 19   | 0   |
| PITG_05150 | Pi conserved hypothetical protein (2939 nt)                | 2    | 2    | 0   |
| PITG_05151 | Pi Amino Acid/Auxin Permease (AAP) Family (1545 nt)        | 18   | 93   | 0   |
| PITG_05154 | Pi conserved hypothetical protein (792 nt)                 | 28   | 46   | 0   |
| PITG_05155 | Pi conserved hypothetical protein (972 nt)                 | 5    | 14   | 0   |
| PITG_05156 | Pi secretory protein OPEL (1892 nt)                        | 32   | 1028 | 111 |
| PITG_05168 | Pi conserved hypothetical protein (1032 nt)                | 5    | 11   | 0   |
| PITG_05170 | Pi serine protease family S09X, putative (1823 nt)         | 17   | 29   | 0   |
| PITG_05171 | Pi 60S ribosomal protein L44 (673 nt)                      | 1245 | 771  | 42  |
| PITG_05173 | Pi conserved hypothetical protein (1588 nt)                | 3    | 13   | 0   |
| PITG_05174 | Pi conserved hypothetical protein (627 nt)                 | 29   | 20   | 0   |

|            |                                                             |     |      |   |
|------------|-------------------------------------------------------------|-----|------|---|
| PITG_05175 | Pi conserved hypothetical protein (1473 nt)                 | 220 | 70   | 1 |
| PITG_05176 | Pi histone deacetylase, putative (2432 nt)                  | 10  | 29   | 0 |
| PITG_05177 | Pi conserved hypothetical protein (1793 nt)                 | 3   | 23   | 0 |
| PITG_05180 | Pi hypothetical protein (1391 nt)                           | 4   | 23   | 0 |
| PITG_05182 | Pi hypothetical protein (287 nt)                            | 1   | 9    | 0 |
| PITG_05183 | Pi hypothetical protein (625 nt)                            | 8   | 27   | 0 |
| PITG_05185 | Pi conserved hypothetical protein (2003 nt)                 | 110 | 267  | 0 |
| PITG_05186 | Pi Ufm1-specific protease, putative (2070 nt)               | 2   | 9    | 0 |
| PITG_05187 | Pi sulfatase-like protein (3390 nt)                         | 5   | 16   | 0 |
| PITG_05188 | Pi conserved hypothetical protein (693 nt)                  | 1   | 15   | 0 |
| PITG_05189 | Pi conserved hypothetical protein (642 nt)                  | 2   | 23   | 0 |
| PITG_05190 | Pi conserved hypothetical protein (546 nt)                  | 11  | 11   | 0 |
| PITG_05192 | Pi conserved hypothetical protein (3165 nt)                 | 2   | 14   | 0 |
| PITG_05193 | Pi conserved hypothetical protein (1056 nt)                 | 25  | 13   | 0 |
| PITG_05194 | Pi conserved hypothetical protein (2265 nt)                 | 9   | 11   | 0 |
| PITG_05195 | Pi conserved hypothetical protein (381 nt)                  | 1   | 19   | 0 |
| PITG_05196 | Pi 2-nitropropane dioxygenase, putative (745 nt)            | 1   | 22   | 0 |
| PITG_05197 | Pi conserved hypothetical protein (2513 nt)                 | 2   | 12   | 0 |
| PITG_05198 | Pi conserved hypothetical protein (1917 nt)                 | 3   | 10   | 0 |
| PITG_05199 | Pi conserved hypothetical protein (1101 nt)                 | 2   | 5    | 0 |
| PITG_05201 | Pi voltage-gated potassium channel subunit beta, putative   | 9   | 32   | 0 |
| PITG_05202 | Pi voltage-gated potassium channel subunit beta, putative   | 12  | 16   | 0 |
| PITG_05203 | Pi ATP-binding Cassette (ABC) superfamily (3362 nt)         | 0   | 1    | 0 |
| PITG_05204 | Pi ATP-binding Cassette (ABC) superfamily (1497 nt)         | 0   | 1    | 0 |
| PITG_05205 | Pi ATP-binding Cassette (ABC) superfamily (610 nt)          | 1   | 4    | 0 |
| PITG_05211 | Pi ATP-binding Cassette (ABC) Superfamily (3861 nt)         | 2   | 34   | 0 |
| PITG_05212 | Pi Crinkler (CRN) family protein, missing secretion signal  | 254 | 1796 | 3 |
| PITG_05217 | Pi ATP-binding Cassette (ABC) Superfamily (1851 nt)         | 0   | 13   | 0 |
| PITG_05218 | Pi ATP-binding Cassette (ABC) Superfamily (1692 nt)         | 1   | 19   | 0 |
| PITG_05221 | Pi Mitochondrial Carrier (MC) Family (849 nt)               | 6   | 15   | 0 |
| PITG_05223 | Pi phosphatidylinositol-3,4,5-trisphosphate 5-phosphatase   | 0   | 0    | 0 |
| PITG_05225 | Pi 4-aminobutyrate aminotransferase, mitochondrial protein  | 11  | 139  | 2 |
| PITG_05226 | Pi conserved hypothetical protein (2029 nt)                 | 7   | 19   | 0 |
| PITG_05227 | Pi conserved hypothetical protein (2034 nt)                 | 4   | 36   | 0 |
| PITG_05233 | Pi CLIP-associating protein, putative (4598 nt)             | 2   | 20   | 0 |
| PITG_05234 | Pi conserved hypothetical protein (1855 nt)                 | 10  | 37   | 0 |
| PITG_05235 | Pi conserved hypothetical protein (399 nt)                  | 0   | 0    | 0 |
| PITG_05238 | Pi conserved hypothetical protein (1011 nt)                 | 10  | 24   | 0 |
| PITG_05239 | Pi conserved hypothetical protein (1290 nt)                 | 8   | 39   | 0 |
| PITG_05240 | Pi casein kinase, putative (1301 nt)                        | 117 | 311  | 4 |
| PITG_05244 | Pi conserved hypothetical protein (2844 nt)                 | 6   | 19   | 0 |
| PITG_05245 | Pi imidazole glycerol phosphate synthase hisHF, putative    | 40  | 65   | 1 |
| PITG_05248 | Pi conserved hypothetical protein (759 nt)                  | 2   | 32   | 0 |
| PITG_05249 | Pi conserved hypothetical protein (552 nt)                  | 210 | 371  | 0 |
| PITG_05250 | Pi tRNA (adenine-N(1)-)-methyltransferase catalytic subunit | 52  | 33   | 0 |
| PITG_05251 | Pi protein tyrosine phosphatase type IVA protein 1 (58:100) | 85  | 190  | 0 |
| PITG_05254 | Pi conserved hypothetical protein (765 nt)                  | 4   | 19   | 2 |

|                                                                       |     |     |    |
|-----------------------------------------------------------------------|-----|-----|----|
| PITG_05255   Pi hypothetical protein (1122 nt)                        | 64  | 207 | 0  |
| PITG_05259   Pi DNA excision repair protein ERCC-6 (3159 nt)          | 4   | 33  | 0  |
| PITG_05260   Pi pre-mRNA-splicing factor ATP-dependent RNA helica     | 4   | 12  | 0  |
| PITG_05261   Pi conserved hypothetical protein (682 nt)               | 7   | 11  | 0  |
| PITG_05262   Pi conserved hypothetical protein (621 nt)               | 15  | 4   | 0  |
| PITG_05263   Pi guanine deaminase, putative (1486 nt)                 | 33  | 5   | 0  |
| PITG_05264   Pi 10 kDa chaperonin (619 nt)                            | 167 | 365 | 43 |
| PITG_05267   Pi transmembrane protein, putative (1028 nt)             | 0   | 12  | 0  |
| PITG_05272   Pi conserved hypothetical protein (2186 nt)              | 4   | 8   | 0  |
| PITG_05274   Pi conserved hypothetical protein (3045 nt)              | 1   | 22  | 0  |
| PITG_05276   Pi hypothetical protein (732 nt)                         | 0   | 24  | 0  |
| PITG_05277   Pi conserved hypothetical protein (1301 nt)              | 8   | 38  | 0  |
| PITG_05278   Pi conserved hypothetical protein (2856 nt)              | 1   | 12  | 0  |
| PITG_05281   Pi hypothetical protein (841 nt)                         | 5   | 10  | 0  |
| PITG_05282   Pi phosphatidylinositol-4-phosphate-5-kinase (PIPK-D1,   | 14  | 53  | 0  |
| PITG_05283   Pi hypothetical protein (1701 nt)                        | 0   | 25  | 0  |
| PITG_05286   Pi conserved hypothetical protein (555 nt)               | 29  | 28  | 0  |
| PITG_05287   Pi conserved hypothetical protein (1000 nt)              | 12  | 35  | 0  |
| PITG_05288   Pi conserved hypothetical protein (1815 nt)              | 0   | 0   | 0  |
| PITG_05289   Pi conserved hypothetical protein (1216 nt)              | 33  | 30  | 1  |
| PITG_05290   Pi myosin-like protein (3290 nt)                         | 0   | 55  | 7  |
| PITG_05291   Pi Animal Inward Rectifier K Channel (IRK-C) Family (15  | 5   | 20  | 0  |
| PITG_05292   Pi hypothetical protein (861 nt)                         | 55  | 161 | 1  |
| PITG_05293   Pi conserved hypothetical protein (2351 nt)              | 7   | 46  | 0  |
| PITG_05294   Pi conserved hypothetical protein (1647 nt)              | 2   | 1   | 0  |
| PITG_05295   Pi conserved hypothetical protein (847 nt)               | 0   | 0   | 0  |
| PITG_05296   Pi cleavage induced hypothetical protein (1213 nt)       | 1   | 5   | 0  |
| PITG_05297   Pi conserved hypothetical protein (531 nt)               | 4   | 19  | 0  |
| PITG_05298   Pi conserved hypothetical protein (930 nt)               | 5   | 22  | 0  |
| PITG_05300   Pi methyltransferase (2289 nt)                           | 5   | 11  | 0  |
| PITG_05301   Pi translation elongation factor 1-alpha, putative (1898 | 8   | 61  | 2  |
| PITG_05302   Pi replication factor C subunit 5 (1129 nt)              | 15  | 45  | 0  |
| PITG_05303   Pi conserved hypothetical protein (1083 nt)              | 135 | 555 | 2  |
| PITG_05304   Pi Voltage-gated Ion Channel (VIC) Superfamily (4117 n   | 1   | 9   | 0  |
| PITG_05305   Pi conserved hypothetical protein (1732 nt)              | 2   | 3   | 0  |
| PITG_05307   Pi phosphoenolpyruvate carboxykinase, putative (1985     | 951 | 196 | 5  |
| PITG_05311   Pi kinetochore protein NUF2-like protein (1412 nt)       | 5   | 29  | 0  |
| PITG_05313   Pi undecaprenyl pyrophosphate synthetase, putative (1    | 8   | 41  | 6  |
| PITG_05315   Pi undecaprenyl pyrophosphate synthetase, putative (1    | 5   | 42  | 0  |
| PITG_05317   Pi transcriptional adapter 2-alpha, putative (2023 nt)   | 4   | 31  | 0  |
| PITG_05318   Pi N-(5'-phosphoribosyl)anthranilate isomerase indole-   | 10  | 36  | 0  |
| PITG_05319   Pi hypothetical protein (3149 nt)                        | 4   | 7   | 0  |
| PITG_05320   Pi conserved hypothetical protein (586 nt)               | 2   | 10  | 0  |
| PITG_05321   Pi conserved hypothetical protein (1515 nt)              | 5   | 9   | 0  |
| PITG_05323   Pi conserved hypothetical protein (741 nt)               | 17  | 15  | 0  |
| PITG_05324   Pi conserved hypothetical protein (675 nt)               | 131 | 101 | 0  |
| PITG_05325   Pi conserved hypothetical protein (992 nt)               | 54  | 73  | 0  |

|            |                                                                                    |     |     |    |
|------------|------------------------------------------------------------------------------------|-----|-----|----|
| PITG_05326 | Pi Poly(A) polymerase, putative (3459 nt)                                          | 15  | 29  | 0  |
| PITG_05328 | Pi conserved hypothetical protein (2246 nt)                                        | 13  | 199 | 0  |
| PITG_05329 | Pi conserved hypothetical protein (1933 nt)                                        | 4   | 14  | 0  |
| PITG_05331 | Pi conserved hypothetical protein (1294 nt)                                        | 5   | 32  | 0  |
| PITG_05332 | Pi Voltage-gated Ion Channel (VIC) Superfamily (3165 n                             | 0   | 13  | 0  |
| PITG_05334 | Pi conserved hypothetical protein (1455 nt)                                        | 0   | 1   | 0  |
| PITG_05338 | Pi protein kinase (2601 nt)                                                        | 1   | 20  | 0  |
| PITG_05340 | Pi protein kinase, putative (2767 nt)                                              | 2   | 11  | 0  |
| PITG_05346 | Pi cation-transporting ATPase, putative (4774 nt)                                  | 3   | 33  | 0  |
| PITG_05347 | Pi 1-aminocyclopropane-1-carboxylate deaminase (102                                | 37  | 97  | 4  |
| PITG_05353 | Pi HSF-type DNA-binding protein, putative (1950 nt)                                | 2   | 18  | 0  |
| PITG_05354 | Pi asparaginyl-tRNA synthetase (1709 nt)                                           | 3   | 14  | 0  |
| PITG_05355 | Pi conserved hypothetical protein (2512 nt)                                        | 4   | 14  | 0  |
| PITG_05356 | Pi maleylacetoacetate isomerase (660 nt)                                           | 12  | 122 | 3  |
| PITG_05358 | Pi conserved hypothetical protein (3236 nt)                                        | 0   | 11  | 0  |
| PITG_05360 | Pi conserved hypothetical protein (926 nt)                                         | 29  | 71  | 1  |
| PITG_05361 | Pi conserved hypothetical protein (1754 nt)                                        | 0   | 5   | 0  |
| PITG_05362 | Pi conserved hypothetical protein (2212 nt)                                        | 1   | 12  | 0  |
| PITG_05363 | Pi dihydrodipicolinate synthase, putative (1162 nt)                                | 16  | 39  | 2  |
| PITG_05364 | Pi conserved hypothetical protein (3070 nt)                                        | 1   | 14  | 0  |
| PITG_05365 | Pi serine/threonine protein kinase (718 nt)                                        | 0   | 13  | 0  |
| PITG_05366 | Pi branchpoint-bridging protein, putative (1940 nt)                                | 6   | 34  | 0  |
| PITG_05367 | Pi translational activator GCN1, putative (8268 nt)                                | 1   | 14  | 0  |
| PITG_05368 | Pi conserved hypothetical protein (1023 nt)                                        | 12  | 29  | 0  |
| PITG_05371 | Pi conserved hypothetical protein (1051 nt)                                        | 0   | 1   | 0  |
| PITG_05373 | Pi alcohol dehydrogenase class-3, putative (1242 nt)                               | 27  | 133 | 4  |
| PITG_05374 | Pi argininosuccinate synthase (1515 nt)                                            | 48  | 117 | 19 |
| PITG_05375 | Pi conserved hypothetical protein (810 nt)                                         | 9   | 27  | 0  |
| PITG_05376 | Pi mitogen-activated protein kinase organizer, putative                            | 8   | 31  | 0  |
| PITG_05377 | Pi methylenetetrahydrofolate reductase, putative (177                              | 7   | 12  | 0  |
| PITG_05379 | Pi conserved hypothetical protein (1508 nt)                                        | 0   | 8   | 0  |
| PITG_05381 | Pi protein phosphatase 2C, putative (1315 nt)                                      | 4   | 11  | 0  |
| PITG_05383 | Pi conserved hypothetical protein (724 nt)                                         | 25  | 42  | 0  |
| PITG_05385 | Pi Zinc (Zn <sup>2+</sup> )-Iron (Fe <sup>2+</sup> ) Permease (ZIP) Family (2746 n | 5   | 0   | 1  |
| PITG_05386 | Pi Zinc (Zn <sup>2+</sup> )-Iron (Fe <sup>2+</sup> ) Permease (ZIP) Family (2693 n | 28  | 114 | 0  |
| PITG_05387 | Pi ATP-binding Cassette (ABC) Superfamily (1371 nt)                                | 31  | 140 | 0  |
| PITG_05388 | Pi conserved hypothetical protein (1065 nt)                                        | 0   | 37  | 0  |
| PITG_05389 | Pi ATP-binding Cassette (ABC) Superfamily (836 nt)                                 | 20  | 79  | 0  |
| PITG_05391 | Pi histone H1, putative (1061 nt)                                                  | 288 | 84  | 0  |
| PITG_05392 | Pi conserved hypothetical protein (1245 nt)                                        | 10  | 3   | 0  |
| PITG_05394 | Pi conserved hypothetical protein (2421 nt)                                        | 0   | 1   | 0  |
| PITG_05395 | Pi conserved hypothetical protein (1404 nt)                                        | 15  | 12  | 0  |
| PITG_05396 | Pi hypothetical protein (768 nt)                                                   | 5   | 18  | 0  |
| PITG_05397 | Pi conserved hypothetical protein (3759 nt)                                        | 0   | 1   | 0  |
| PITG_05398 | Pi conserved hypothetical protein (4052 nt)                                        | 0   | 3   | 0  |
| PITG_05404 | Pi conserved hypothetical protein (3297 nt)                                        | 4   | 22  | 0  |
| PITG_05405 | Pi arginyl-tRNA synthetase, putative (2477 nt)                                     | 2   | 17  | 0  |



|            |                                                         |     |     |    |
|------------|---------------------------------------------------------|-----|-----|----|
| PITG_05408 | Pi transmembrane protein, putative (2470 nt)            | 3   | 10  | 0  |
| PITG_05409 | Pi conserved hypothetical protein (709 nt)              | 5   | 12  | 0  |
| PITG_05410 | Pi transmembrane protein, putative (1622 nt)            | 15  | 41  | 0  |
| PITG_05411 | Pi conserved hypothetical protein (1120 nt)             | 8   | 32  | 0  |
| PITG_05412 | Pi Ca2 :Cation Antiporter (CaCA) Family (2261 nt)       | 11  | 40  | 0  |
| PITG_05413 | Pi patatin-like phospholipase, putative (1423 nt)       | 9   | 34  | 0  |
| PITG_05420 | Pi conserved hypothetical protein (681 nt)              | 0   | 14  | 0  |
| PITG_05421 | Pi conserved hypothetical protein (1945 nt)             | 10  | 167 | 0  |
| PITG_05423 | Pi DNA-dependent protein kinase catalytic subunit, put  | 2   | 17  | 0  |
| PITG_05427 | Pi conserved hypothetical protein (2562 nt)             | 0   | 1   | 0  |
| PITG_05429 | Pi conserved hypothetical protein (2915 nt)             | 11  | 27  | 0  |
| PITG_05433 | Pi STIP-like protein (2466 nt)                          | 2   | 12  | 0  |
| PITG_05434 | Pi importin subunit beta, putative (3021 nt)            | 16  | 114 | 1  |
| PITG_05443 | Pi hypothetical protein (746 nt)                        | 0   | 18  | 0  |
| PITG_05444 | Pi conserved hypothetical protein (12213 nt)            | 1   | 6   | 0  |
| PITG_05446 | Pi pyridoxal-dependent decarboxylase, putative (3752    | 1   | 15  | 0  |
| PITG_05447 | Pi sporangia induced sperm flagellar protein (967 nt)   | 2   | 5   | 0  |
| PITG_05449 | Pi palmitoyltransferase, putative (1401 nt)             | 43  | 51  | 0  |
| PITG_05450 | Pi conserved hypothetical protein (1286 nt)             | 16  | 13  | 0  |
| PITG_05451 | Pi hypothetical protein (1565 nt)                       | 109 | 0   | 0  |
| PITG_05452 | Pi hypothetical cleavage-induced protein (2059 nt)      | 17  | 0   | 0  |
| PITG_05455 | Pi hypothetical protein (1667 nt)                       | 0   | 19  | 0  |
| PITG_05456 | Pi DNA mismatch repair protein mutS, putative (1891 r   | 1   | 25  | 0  |
| PITG_05457 | Pi regulator of chromosome condensation (RCC1)-like p   | 0   | 1   | 0  |
| PITG_05458 | Pi conserved hypothetical protein (1649 nt)             | 3   | 21  | 0  |
| PITG_05461 | Pi mitotic spindle assembly checkpoint protein MAD1,    | 6   | 24  | 0  |
| PITG_05462 | Pi aldehyde dehydrogenase family 7 member A1 (2327      | 91  | 80  | 0  |
| PITG_05463 | Pi HECT E3 ubiquitin ligase, putative (2473 nt)         | 30  | 4   | 0  |
| PITG_05464 | Pi conserved hypothetical protein (1043 nt)             | 16  | 153 | 11 |
| PITG_05465 | Pi L-gulonolactone oxidase, putative (1707 nt)          | 2   | 10  | 0  |
| PITG_05467 | Pi conserved hypothetical protein (987 nt)              | 17  | 20  | 0  |
| PITG_05468 | Pi conserved hypothetical protein (836 nt)              | 28  | 21  | 0  |
| PITG_05469 | Pi conserved hypothetical protein (1071 nt)             | 2   | 15  | 0  |
| PITG_05475 | Pi conserved hypothetical protein (1305 nt)             | 0   | 12  | 0  |
| PITG_05476 | Pi flavin-binding monooxygenase-like protein (1557 nt)  | 3   | 21  | 0  |
| PITG_05477 | Pi hypothetical protein (2208 nt)                       | 1   | 1   | 0  |
| PITG_05478 | Pi conserved hypothetical protein (2145 nt)             | 0   | 19  | 0  |
| PITG_05479 | Pi ubiquitin-activating enzyme (E1), putative (1981 nt) | 4   | 15  | 0  |
| PITG_05480 | Pi conserved hypothetical protein (3958 nt)             | 8   | 38  | 0  |
| PITG_05481 | Pi conserved hypothetical protein (1622 nt)             | 0   | 1   | 0  |
| PITG_05483 | Pi protein kinase, putative (1117 nt)                   | 3   | 8   | 0  |
| PITG_05485 | Pi peroxisomal acyl-coenzyme A oxidase, putative (226   | 2   | 20  | 0  |
| PITG_05486 | Pi acyl-CoA dehydrogenase/oxidase (2366 nt)             | 0   | 17  | 0  |
| PITG_05487 | Pi cyclin-dependent kinase, putative (1764 nt)          | 9   | 10  | 0  |
| PITG_05488 | Pi hypothetical protein (2284 nt)                       | 5   | 14  | 0  |
| PITG_05489 | Pi conserved hypothetical protein (408 nt)              | 161 | 123 | 1  |
| PITG_05490 | Pi conserved hypothetical protein (1609 nt)             | 0   | 15  | 0  |

|            |                                                         |    |     |   |
|------------|---------------------------------------------------------|----|-----|---|
| PITG_05491 | Pi conserved hypothetical protein (974 nt)              | 0  | 14  | 0 |
| PITG_05494 | Pi conserved hypothetical protein (1248 nt)             | 4  | 20  | 0 |
| PITG_05495 | Pi conserved hypothetical protein (1451 nt)             | 6  | 1   | 0 |
| PITG_05496 | Pi augments liver regeneration (811 nt)                 | 46 | 38  | 0 |
| PITG_05497 | Pi conserved hypothetical protein (904 nt)              | 26 | 105 | 3 |
| PITG_05498 | Pi heat shock protein 90, putative (2645 nt)            | 17 | 146 | 3 |
| PITG_05499 | Pi conserved hypothetical protein (2720 nt)             | 0  | 7   | 0 |
| PITG_05500 | Pi conserved hypothetical protein (1252 nt)             | 14 | 20  | 0 |
| PITG_05501 | Pi Non-selective Cation Channel-2 (NSCC2) Family (114   | 29 | 49  | 1 |
| PITG_05502 | Pi calcineurin-like phosphoesterase, putative (1922 nt) | 8  | 57  | 0 |
| PITG_05503 | Pi cyclin-C, putative (1179 nt)                         | 3  | 10  | 0 |
| PITG_05504 | Pi conserved hypothetical protein (1304 nt)             | 7  | 33  | 0 |
| PITG_05505 | Pi conserved hypothetical protein (2274 nt)             | 4  | 47  | 0 |
| PITG_05506 | Pi conserved hypothetical protein (747 nt)              | 6  | 23  | 0 |
| PITG_05507 | Pi conserved hypothetical protein (2671 nt)             | 2  | 15  | 0 |
| PITG_05508 | Pi polycomb protein, putative (2674 nt)                 | 15 | 34  | 0 |
| PITG_05509 | Pi conserved hypothetical protein (3108 nt)             | 5  | 20  | 0 |
| PITG_05510 | Pi hypothetical protein (1251 nt)                       | 6  | 22  | 0 |
| PITG_05511 | Pi Mitochondrial Carrier (MC) Family (1343 nt)          | 9  | 2   | 0 |
| PITG_05512 | Pi conserved hypothetical protein (1614 nt)             | 6  | 14  | 0 |
| PITG_05516 | Pi glutathione S-transferase omega-like protein (1319 r | 17 | 155 | 0 |
| PITG_05517 | Pi regulatory-associated protein of mTOR (4096 nt)      | 1  | 17  | 0 |
| PITG_05518 | Pi hypothetical protein (783 nt)                        | 5  | 14  | 0 |
| PITG_05519 | Pi phosphatidylinositol 4-phosphate 5-kinase D3 (PIPK-  | 3  | 11  | 0 |
| PITG_05520 | Pi glutamine-dependent NAD(+) synthetase, putative (2   | 5  | 30  | 0 |
| PITG_05521 | Pi protein kinase, putative (2191 nt)                   | 8  | 30  | 0 |
| PITG_05523 | Pi ubiquitin-specific protease, putative (2915 nt)      | 1  | 10  | 0 |
| PITG_05526 | Pi alpha-amylase, putative (2124 nt)                    | 0  | 44  | 0 |
| PITG_05531 | Pi conserved hypothetical protein (2270 nt)             | 1  | 33  | 0 |
| PITG_05532 | Pi conserved hypothetical protein (3062 nt)             | 2  | 11  | 0 |
| PITG_05534 | Pi nucleolar protein Nop56 (1854 nt)                    | 5  | 20  | 1 |
| PITG_05536 | Pi RNA pseudouridylate synthase, putative (2491 nt)     | 2  | 12  | 0 |
| PITG_05537 | Pi copper-transporting ATPase, putative (4125 nt)       | 24 | 132 | 0 |
| PITG_05538 | Pi conserved hypothetical protein (1354 nt)             | 2  | 22  | 0 |
| PITG_05539 | Pi carbon-nitrogen hydrolase, putative (1105 nt)        | 14 | 55  | 2 |
| PITG_05540 | Pi conserved hypothetical protein (824 nt)              | 7  | 45  | 0 |
| PITG_05541 | Pi dolichyl pyrophosphate Man9GlcNAc2 alpha-1,3-glu     | 3  | 9   | 0 |
| PITG_05542 | Pi 3-hydroxyacyl-CoA dehydrogenase, putative (984 nt)   | 11 | 57  | 1 |
| PITG_05545 | Pi conserved hypothetical protein (1936 nt)             | 22 | 128 | 0 |
| PITG_05546 | Pi conserved hypothetical protein (1299 nt)             | 19 | 21  | 0 |
| PITG_05549 | Pi conserved hypothetical protein (1577 nt)             | 0  | 13  | 0 |
| PITG_05550 | Pi conserved hypothetical protein (1173 nt)             | 9  | 11  | 0 |
| PITG_05551 | Pi ribose-phosphate pyrophosphokinase, putative (154    | 3  | 20  | 1 |
| PITG_05552 | Pi heat shock protein 75 kDa, mitochondrial precursor   | 13 | 22  | 1 |
| PITG_05553 | Pi D-lactate dehydrogenase, putative (1573 nt)          | 22 | 108 | 0 |
| PITG_05556 | Pi D-lactate dehydrogenase, putative (1794 nt)          | 2  | 10  | 0 |
| PITG_05557 | Pi Drug/Metabolite Transporter (DMT) Superfamily (11    | 12 | 14  | 0 |

|            |                                                                  |      |      |    |
|------------|------------------------------------------------------------------|------|------|----|
| PITG_05559 | Pi conserved hypothetical protein (2055 nt)                      | 10   | 15   | 0  |
| PITG_05560 | Pi conserved hypothetical protein (3430 nt)                      | 12   | 23   | 0  |
| PITG_05561 | Pi conserved hypothetical protein (1659 nt)                      | 74   | 189  | 8  |
| PITG_05562 | Pi conserved hypothetical protein (3050 nt)                      | 2    | 10   | 0  |
| PITG_05563 | Pi hypothetical protein (347 nt)                                 | 0    | 18   | 0  |
| PITG_05564 | Pi conserved hypothetical protein (1122 nt)                      | 2    | 16   | 0  |
| PITG_05565 | Pi conserved hypothetical protein (1806 nt)                      | 41   | 38   | 0  |
| PITG_05566 | Pi conserved hypothetical protein (479 nt)                       | 7    | 16   | 0  |
| PITG_05567 | Pi kinetochore protein NDC80 (917 nt)                            | 0    | 16   | 0  |
| PITG_05571 | Pi conserved hypothetical protein (985 nt)                       | 0    | 15   | 0  |
| PITG_05577 | Pi glutathione S-transferase, putative (2532 nt)                 | 2207 | 1830 | 11 |
| PITG_05582 | Pi glutathione S-transferase, putative (705 nt)                  | 686  | 1270 | 10 |
| PITG_05583 | Pi glutathione S-transferase, putative (2983 nt)                 | 30   | 85   | 0  |
| PITG_05584 | Pi hypothetical protein (1111 nt)                                | 15   | 174  | 0  |
| PITG_05586 | Pi DNA-(apurinic or apyrimidinic site) lyase, putative (1111 nt) | 1    | 15   | 0  |
| PITG_05587 | Pi protein kinase, putative (2287 nt)                            | 14   | 111  | 0  |
| PITG_05588 | Pi conserved hypothetical protein (882 nt)                       | 13   | 8    | 0  |
| PITG_05589 | Pi conserved hypothetical protein (1113 nt)                      | 19   | 115  | 0  |
| PITG_05590 | Pi conserved hypothetical protein (1202 nt)                      | 2    | 11   | 0  |
| PITG_05591 | Pi conserved hypothetical protein (1147 nt)                      | 1    | 21   | 0  |
| PITG_05592 | Pi conserved hypothetical protein (1082 nt)                      | 8    | 44   | 0  |
| PITG_05593 | Pi conserved hypothetical protein (459 nt)                       | 23   | 136  | 0  |
| PITG_05594 | Pi O-sialoglycoprotein endopeptidase, putative (5148 nt)         | 1    | 12   | 0  |
| PITG_05595 | Pi conserved hypothetical protein (5505 nt)                      | 2    | 10   | 0  |
| PITG_05597 | Pi conserved hypothetical protein (897 nt)                       | 12   | 30   | 0  |
| PITG_05598 | Pi conserved hypothetical protein (884 nt)                       | 15   | 26   | 0  |
| PITG_05599 | Pi conserved hypothetical protein (632 nt)                       | 8    | 40   | 0  |
| PITG_05600 | Pi metalloprotease family M67C, putative (2008 nt)               | 7    | 15   | 0  |
| PITG_05601 | Pi conserved hypothetical protein (1098 nt)                      | 57   | 123  | 1  |
| PITG_05604 | Pi conserved hypothetical protein (1808 nt)                      | 0    | 13   | 0  |
| PITG_05605 | Pi radial spoke head protein, putative (2076 nt)                 | 0    | 0    | 0  |
| PITG_05607 | Pi formin-homology 2 domain-containing protein (5376 nt)         | 0    | 0    | 0  |
| PITG_05608 | Pi transmembrane protein, putative (3096 nt)                     | 0    | 0    | 0  |
| PITG_05609 | Pi conserved hypothetical protein (1362 nt)                      | 4    | 27   | 0  |
| PITG_05610 | Pi conserved hypothetical protein (1132 nt)                      | 4    | 10   | 0  |
| PITG_05611 | Pi conserved hypothetical protein (1091 nt)                      | 43   | 282  | 0  |
| PITG_05614 | Pi conserved hypothetical protein (1206 nt)                      | 23   | 56   | 0  |
| PITG_05615 | Pi pyrophosphate-energized vacuolar membrane protein (1111 nt)   | 74   | 346  | 82 |
| PITG_05616 | Pi UDP-glucose 4-epimerase, putative (1607 nt)                   | 59   | 432  | 0  |
| PITG_05617 | Pi UDP-glucose 4-epimerase, putative (1400 nt)                   | 66   | 112  | 1  |
| PITG_05618 | Pi phosphatidylinositol 4-phosphate 5-kinase (PIP3/PIP2/PIP3K)   | 0    | 5    | 0  |
| PITG_05619 | Pi conserved hypothetical protein (1496 nt)                      | 0    | 0    | 0  |
| PITG_05621 | Pi conserved hypothetical protein (1835 nt)                      | 2    | 6    | 0  |
| PITG_05622 | Pi conserved hypothetical protein (1762 nt)                      | 9    | 23   | 0  |
| PITG_05623 | Pi conserved hypothetical protein (2699 nt)                      | 7    | 21   | 0  |
| PITG_05627 | Pi conserved hypothetical protein (2431 nt)                      | 28   | 48   | 0  |
| PITG_05628 | Pi hypothetical protein (806 nt)                                 | 195  | 282  | 1  |

|            |                                                          |     |     |    |
|------------|----------------------------------------------------------|-----|-----|----|
| PITG_05629 | Pi Poly(A) polymerase, putative (1901 nt)                | 15  | 20  | 0  |
| PITG_05631 | Pi myosin-like protein (6372 nt)                         | 2   | 50  | 0  |
| PITG_05633 | Pi conserved hypothetical protein (3358 nt)              | 3   | 16  | 0  |
| PITG_05634 | Pi hypothetical protein (1687 nt)                        | 3   | 13  | 0  |
| PITG_05635 | Pi conserved hypothetical protein (1845 nt)              | 2   | 15  | 0  |
| PITG_05636 | Pi transaldolase (1192 nt)                               | 39  | 390 | 16 |
| PITG_05637 | Pi S-adenosylmethionine mitochondrial carrier protein,   | 10  | 8   | 0  |
| PITG_05638 | Pi GTPase, putative (1931 nt)                            | 22  | 63  | 1  |
| PITG_05639 | Pi conserved hypothetical protein (810 nt)               | 0   | 18  | 0  |
| PITG_05642 | Pi WD domain-containing protein, putative (1283 nt)      | 2   | 3   | 0  |
| PITG_05643 | Pi hypothetical protein (3228 nt)                        | 5   | 23  | 0  |
| PITG_05644 | Pi phosphatidylinositol-3-phosphate 5-kinase (4944 nt)   | 1   | 20  | 0  |
| PITG_05649 | Pi glutamyl-tRNA synthetase, putative (2220 nt)          | 2   | 17  | 0  |
| PITG_05652 | Pi conserved hypothetical protein (519 nt)               | 7   | 29  | 0  |
| PITG_05653 | Pi protein kinase, putative (3478 nt)                    | 7   | 37  | 0  |
| PITG_05654 | Pi conserved hypothetical protein (623 nt)               | 4   | 16  | 0  |
| PITG_05655 | Pi conserved hypothetical protein (5861 nt)              | 1   | 3   | 0  |
| PITG_05656 | Pi WD domain-containing protein, putative (4811 nt)      | 0   | 1   | 0  |
| PITG_05657 | Pi conserved hypothetical protein (789 nt)               | 15  | 6   | 0  |
| PITG_05658 | Pi conserved hypothetical protein (2647 nt)              | 11  | 33  | 0  |
| PITG_05659 | Pi conserved hypothetical protein (1291 nt)              | 9   | 23  | 0  |
| PITG_05660 | Pi putative GPI-anchored serine rich tenascin-like glyco | 78  | 205 | 2  |
| PITG_05664 | Pi choline/Carnitine O-acyltransferase, putative (2092 r | 2   | 33  | 0  |
| PITG_05666 | Pi small nuclear ribonucleoprotein E (240 nt)            | 18  | 72  | 1  |
| PITG_05667 | Pi vacuolar protein sorting-associated protein, putative | 2   | 11  | 0  |
| PITG_05668 | Pi conserved hypothetical protein (1771 nt)              | 1   | 14  | 0  |
| PITG_05669 | Pi conserved hypothetical protein (2501 nt)              | 9   | 56  | 0  |
| PITG_05670 | Pi cleavage induced conserved hypothetical protein (12   | 23  | 14  | 0  |
| PITG_05672 | Pi conserved hypothetical protein (1898 nt)              | 66  | 21  | 0  |
| PITG_05673 | Pi hypothetical protein (795 nt)                         | 5   | 12  | 0  |
| PITG_05674 | Pi peroxisome assembly protein, putative (1244 nt)       | 2   | 22  | 0  |
| PITG_05675 | Pi histone, putative (441 nt)                            | 40  | 19  | 4  |
| PITG_05676 | Pi histone H4 (468 nt)                                   | 144 | 189 | 14 |
| PITG_05679 | Pi replication protein A 70 kDa DNA-binding subunit, pi  | 8   | 24  | 0  |
| PITG_05680 | Pi conserved hypothetical protein (676 nt)               | 3   | 9   | 0  |
| PITG_05681 | Pi conserved hypothetical protein (1802 nt)              | 5   | 8   | 0  |
| PITG_05682 | Pi conserved hypothetical protein (405 nt)               | 1   | 13  | 0  |
| PITG_05683 | Pi conserved hypothetical protein (1770 nt)              | 9   | 30  | 0  |
| PITG_05685 | Pi transcription elongation factor SPT5, putative (3647  | 5   | 36  | 0  |
| PITG_05686 | Pi conserved hypothetical protein (2021 nt)              | 10  | 75  | 0  |
| PITG_05687 | Pi conserved hypothetical protein (726 nt)               | 8   | 35  | 0  |
| PITG_05688 | Pi splicing factor U2AF 35 kDa subunit (1193 nt)         | 42  | 60  | 1  |
| PITG_05689 | Pi conserved hypothetical protein (1700 nt)              | 121 | 54  | 0  |
| PITG_05690 | Pi ubiquitin activating enzyme, E1 family, putative (333 | 7   | 78  | 0  |
| PITG_05691 | Pi conserved hypothetical protein (2217 nt)              | 4   | 28  | 0  |
| PITG_05692 | Pi histone-lysine N-methyltransferase, putative (3130 r  | 5   | 16  | 0  |
| PITG_05694 | Pi transcription elongation factor SPT4 (602 nt)         | 8   | 34  | 2  |

|            |                                                            |     |     |   |
|------------|------------------------------------------------------------|-----|-----|---|
| PITG_05696 | Pi NAD-dependent glycerol-3-phosphate dehydrogenas         | 0   | 13  | 0 |
| PITG_05697 | Pi Crinkler (CRN) family protein, pseudogene (862 nt)      | 107 | 237 | 0 |
| PITG_05701 | Pi NAD-dependent glycerol-3-phosphate dehydrogenas         | 9   | 15  | 0 |
| PITG_05705 | Pi ATP-binding Cassette (ABC) Superfamily (3956 nt)        | 0   | 32  | 1 |
| PITG_05708 | Pi conserved hypothetical protein (1346 nt)                | 0   | 0   | 0 |
| PITG_05709 | Pi adenylate kinase, putative (1064 nt)                    | 2   | 29  | 0 |
| PITG_05712 | Pi conserved hypothetical protein (471 nt)                 | 0   | 0   | 0 |
| PITG_05717 | Pi ATP-binding Cassette (ABC) Superfamily (718 nt)         | 9   | 21  | 0 |
| PITG_05727 | Pi conserved hypothetical protein (1947 nt)                | 42  | 55  | 0 |
| PITG_05729 | Pi conserved hypothetical protein (1581 nt)                | 8   | 62  | 0 |
| PITG_05731 | Pi origin recognition complex subunit, putative (1392 n    | 10  | 17  | 0 |
| PITG_05732 | Pi hypothetical protein (619 nt)                           | 8   | 22  | 0 |
| PITG_05733 | Pi glutathione gamma-glutamylcysteinyltransferase, pu      | 1   | 4   | 0 |
| PITG_05737 | Pi Transient Receptor Potential Ca2 Channel (TRP-CC) I     | 3   | 28  | 0 |
| PITG_05738 | Pi cleavage induced conserved hypothetical protein (56     | 47  | 57  | 0 |
| PITG_05740 | Pi conserved hypothetical protein (1906 nt)                | 3   | 26  | 0 |
| PITG_05742 | Pi RWP-RK domain-containing protein, putative (708 nt      | 6   | 19  | 0 |
| PITG_05746 | Pi conserved hypothetical protein (617 nt)                 | 0   | 3   | 0 |
| PITG_05747 | Pi conserved hypothetical protein (779 nt)                 | 1   | 5   | 0 |
| PITG_05748 | Pi conserved hypothetical protein (1156 nt)                | 14  | 79  | 0 |
| PITG_05749 | Pi conserved hypothetical protein (888 nt)                 | 0   | 0   | 0 |
| PITG_05752 | Pi conserved hypothetical protein (1549 nt)                | 3   | 8   | 0 |
| PITG_05757 | Pi structural maintenance of chromosomes protein, pu       | 2   | 19  | 0 |
| PITG_05759 | Pi conserved hypothetical protein (1146 nt)                | 2   | 16  | 0 |
| PITG_05760 | Pi conserved hypothetical protein (1210 nt)                | 3   | 14  | 0 |
| PITG_05761 | Pi transmembrane protein, putative (4754 nt)               | 1   | 30  | 0 |
| PITG_05762 | Pi Cullin family protein, putative (2268 nt)               | 7   | 50  | 0 |
| PITG_05763 | Pi conserved hypothetical protein (5005 nt)                | 0   | 15  | 0 |
| PITG_05772 | Pi conserved hypothetical protein (1603 nt)                | 7   | 22  | 0 |
| PITG_05778 | Pi conserved hypothetical protein (2026 nt)                | 10  | 171 | 4 |
| PITG_05779 | Pi neutral ceramidase, putative (696 nt)                   | 0   | 22  | 0 |
| PITG_05780 | Pi conserved hypothetical protein (1494 nt)                | 6   | 21  | 0 |
| PITG_05781 | Pi eukaryotic translation initiation factor 2-alpha kinase | 56  | 44  | 0 |
| PITG_05782 | Pi conserved hypothetical protein (1220 nt)                | 1   | 12  | 0 |
| PITG_05787 | Pi hypothetical protein (616 nt)                           | 8   | 17  | 0 |
| PITG_05796 | Pi ribosomal RNA-processing protein, putative (978 nt)     | 8   | 6   | 0 |
| PITG_05797 | Pi conserved hypothetical protein (937 nt)                 | 2   | 21  | 0 |
| PITG_05798 | Pi protein kinase, putative (2322 nt)                      | 1   | 13  | 0 |
| PITG_05799 | Pi conserved hypothetical protein (905 nt)                 | 1   | 10  | 0 |
| PITG_05804 | Pi conserved hypothetical protein (1129 nt)                | 9   | 28  | 0 |
| PITG_05805 | Pi tryptophan synthase (1338 nt)                           | 13  | 7   | 0 |
| PITG_05806 | Pi AP-2 complex subunit mu (2148 nt)                       | 0   | 0   | 0 |
| PITG_05813 | Pi conserved hypothetical protein (983 nt)                 | 2   | 16  | 0 |
| PITG_05814 | Pi conserved hypothetical protein (1799 nt)                | 1   | 13  | 0 |
| PITG_05815 | Pi ATP-binding Cassette (ABC) Superfamily (5469 nt)        | 1   | 28  | 0 |
| PITG_05816 | Pi conserved hypothetical protein (774 nt)                 | 4   | 16  | 0 |
| PITG_05817 | Pi aspartyl/Asparaginyl beta-hydroxylase, putative (942    | 8   | 24  | 0 |

|            |                                                         |     |     |   |
|------------|---------------------------------------------------------|-----|-----|---|
| PITG_05818 | Pi conserved hypothetical protein (2265 nt)             | 15  | 32  | 0 |
| PITG_05819 | Pi conserved hypothetical protein (348 nt)              | 1   | 11  | 0 |
| PITG_05822 | Pi conserved hypothetical protein (1647 nt)             | 3   | 34  | 0 |
| PITG_05825 | Pi conserved hypothetical protein (1258 nt)             | 6   | 16  | 0 |
| PITG_05830 | Pi conserved hypothetical protein (724 nt)              | 22  | 4   | 0 |
| PITG_05831 | Pi conserved hypothetical protein (1057 nt)             | 0   | 0   | 0 |
| PITG_05832 | Pi delta-1-pyrroline-5-carboxylate synthetase, putative | 9   | 16  | 0 |
| PITG_05835 | Pi sporangia induced conserved hypothetical protein (1  | 0   | 0   | 0 |
| PITG_05836 | Pi conserved hypothetical protein (1684 nt)             | 0   | 0   | 0 |
| PITG_05839 | Pi conserved hypothetical protein (542 nt)              | 378 | 82  | 1 |
| PITG_05840 | Pi cytochrome b-c1 complex subunit Rieske, putative (9  | 184 | 153 | 8 |
| PITG_05843 | Pi conserved hypothetical protein (1597 nt)             | 3   | 15  | 0 |
| PITG_05847 | Pi hypothetical protein (2153 nt)                       | 3   | 45  | 0 |
| PITG_05853 | Pi pterin-4-alpha-carbinolamine dehydratase (369 nt)    | 0   | 38  | 0 |
| PITG_05854 | Pi conserved hypothetical protein (512 nt)              | 13  | 10  | 0 |
| PITG_05855 | Pi protein kinase, putative (2558 nt)                   | 29  | 55  | 0 |
| PITG_05856 | Pi conserved hypothetical protein (2438 nt)             | 2   | 14  | 0 |
| PITG_05858 | Pi conserved hypothetical protein (1331 nt)             | 13  | 26  | 0 |
| PITG_05861 | Pi conserved hypothetical protein (1533 nt)             | 9   | 52  | 0 |
| PITG_05862 | Pi mitogen-activated protein kinase, putative (3958 nt) | 0   | 4   | 0 |
| PITG_05863 | Pi conserved hypothetical protein (654 nt)              | 0   | 2   | 0 |
| PITG_05864 | Pi conserved hypothetical protein (975 nt)              | 20  | 29  | 0 |
| PITG_05865 | Pi serine/threonine protein kinase (1321 nt)            | 0   | 0   | 0 |
| PITG_05866 | Pi conserved hypothetical protein (715 nt)              | 9   | 20  | 0 |
| PITG_05867 | Pi sister chromatid cohesion protein DCC1, putative (13 | 4   | 13  | 0 |
| PITG_05869 | Pi conserved hypothetical protein (2379 nt)             | 3   | 11  | 0 |
| PITG_05871 | Pi hypothetical protein (336 nt)                        | 36  | 27  | 6 |
| PITG_05874 | Pi conserved hypothetical protein (1037 nt)             | 6   | 37  | 0 |
| PITG_05879 | Pi hypothetical protein (704 nt)                        | 4   | 11  | 0 |
| PITG_05880 | Pi conserved hypothetical protein (1713 nt)             | 1   | 5   | 0 |
| PITG_05882 | Pi conserved hypothetical protein (952 nt)              | 5   | 11  | 0 |
| PITG_05883 | Pi bardet-Biedl syndrome 5 protein (1047 nt)            | 0   | 7   | 0 |
| PITG_05884 | Pi AP-2 complex subunit beta, putative (2760 nt)        | 6   | 34  | 1 |
| PITG_05886 | Pi peptidyl-prolyl cis-trans isomerase ppi1 (858 nt)    | 13  | 28  | 0 |
| PITG_05889 | Pi conserved hypothetical protein (4132 nt)             | 1   | 19  | 0 |
| PITG_05894 | Pi conserved hypothetical protein (1943 nt)             | 2   | 25  | 0 |
| PITG_05902 | Pi Major Facilitator Superfamily (MFS) (1749 nt)        | 38  | 42  | 1 |
| PITG_05907 | Pi conserved hypothetical protein (572 nt)              | 11  | 29  | 0 |
| PITG_05909 | Pi conserved hypothetical protein (1665 nt)             | 1   | 11  | 0 |
| PITG_05922 | Pi dynein heavy chain (13827 nt)                        | 0   | 8   | 0 |
| PITG_05926 | Pi conserved hypothetical protein (1496 nt)             | 8   | 41  | 0 |
| PITG_05934 | Pi conserved hypothetical protein (971 nt)              | 16  | 40  | 0 |
| PITG_05935 | Pi DEAD/DEAH box RNA helicase, putative (2533 nt)       | 3   | 21  | 0 |
| PITG_05938 | Pi conserved hypothetical protein (1148 nt)             | 6   | 85  | 5 |
| PITG_05939 | Pi carbonyl reductase, putative (744 nt)                | 4   | 17  | 0 |
| PITG_05940 | Pi spindle assembly protein, putative (2132 nt)         | 0   | 16  | 0 |
| PITG_05941 | Pi conserved hypothetical protein (1926 nt)             | 3   | 4   | 0 |

|                                                                                                   |     |     |    |
|---------------------------------------------------------------------------------------------------|-----|-----|----|
| PITG_05949   Pi conserved hypothetical protein (3151 nt)                                          | 0   | 0   | 0  |
| PITG_05953   Pi conserved hypothetical protein (765 nt)                                           | 50  | 70  | 0  |
| PITG_05954   Pi conserved hypothetical protein (1623 nt)                                          | 7   | 30  | 0  |
| PITG_05955   Pi serine protease family S09X, putative (1101 nt)                                   | 8   | 24  | 0  |
| PITG_05956   Pi conserved hypothetical protein (2443 nt)                                          | 0   | 0   | 0  |
| PITG_05959   Pi conserved hypothetical protein (588 nt)                                           | 4   | 416 | 0  |
| PITG_05960   Pi hypothetical protein (1290 nt)                                                    | 4   | 5   | 0  |
| PITG_05961   Pi conserved hypothetical protein (1560 nt)                                          | 10  | 20  | 0  |
| PITG_05975   Pi conserved hypothetical protein (1753 nt)                                          | 10  | 47  | 0  |
| PITG_05980   Pi secreted RxLR effector peptide, putative (486 nt)                                 | 50  | 4   | 10 |
| PITG_05988   Pi hypothetical protein (452 nt)                                                     | 16  | 8   | 0  |
| PITG_05989   Pi myb-like DNA-binding protein, putative (1912 nt)                                  | 8   | 45  | 0  |
| PITG_05990   Pi myb-like DNA-binding protein, putative (2043 nt)                                  | 15  | 55  | 0  |
| PITG_05991   Pi FKBP-type peptidyl-prolyl cis-trans isomerase, putative (1101 nt)                 | 9   | 12  | 0  |
| PITG_05992   Pi tetrapyrrole (Corrin/Porphyrin) Methylase, putative (1101 nt)                     | 3   | 23  | 0  |
| PITG_05993   Pi conserved hypothetical protein (1467 nt)                                          | 2   | 9   | 0  |
| PITG_05998   Pi ribonucleoside-diphosphate reductase large subunit (1101 nt)                      | 7   | 68  | 2  |
| PITG_06001   Pi ATP-binding Cassette (ABC) superfamily (1444 nt)                                  | 9   | 19  | 0  |
| PITG_06002   Pi mismatch repair endonuclease pms1, putative (3223 nt)                             | 2   | 23  | 0  |
| PITG_06003   Pi conserved hypothetical protein (2705 nt)                                          | 7   | 72  | 0  |
| PITG_06006   Pi conserved hypothetical protein (986 nt)                                           | 14  | 45  | 0  |
| PITG_06007   Pi Zinc (Zn <sup>2+</sup> )-Iron (Fe <sup>2+</sup> ) Permease (ZIP) Family (1320 nt) | 2   | 11  | 0  |
| PITG_06011   Pi 3'(2'),5'-bisphosphate nucleotidase, putative (2500 nt)                           | 2   | 2   | 0  |
| PITG_06012   Pi conserved hypothetical protein (669 nt)                                           | 8   | 22  | 0  |
| PITG_06013   Pi conserved hypothetical protein (744 nt)                                           | 11  | 64  | 0  |
| PITG_06014   Pi conserved hypothetical protein (1740 nt)                                          | 0   | 0   | 0  |
| PITG_06015   Pi glucokinase, putative (1401 nt)                                                   | 5   | 116 | 1  |
| PITG_06016   Pi glucokinase, putative (1245 nt)                                                   | 108 | 55  | 5  |
| PITG_06019   Pi glucokinase, putative (919 nt)                                                    | 130 | 85  | 0  |
| PITG_06021   Pi glucokinase, putative (1041 nt)                                                   | 318 | 87  | 0  |
| PITG_06022   Pi glucokinase, putative (1126 nt)                                                   | 220 | 39  | 0  |
| PITG_06023   Pi conserved hypothetical protein (1107 nt)                                          | 0   | 0   | 0  |
| PITG_06025   Pi conserved hypothetical protein (2390 nt)                                          | 37  | 95  | 0  |
| PITG_06026   Pi conserved hypothetical protein (1015 nt)                                          | 4   | 20  | 0  |
| PITG_06027   Pi hypothetical protein (1266 nt)                                                    | 0   | 107 | 0  |
| PITG_06031   Pi conserved hypothetical protein (2188 nt)                                          | 0   | 27  | 0  |
| PITG_06033   Pi conserved hypothetical protein (941 nt)                                           | 1   | 18  | 0  |
| PITG_06034   Pi conserved hypothetical protein (1369 nt)                                          | 2   | 13  | 0  |
| PITG_06035   Pi conserved hypothetical protein (1038 nt)                                          | 10  | 13  | 0  |
| PITG_06038   Pi conserved hypothetical protein (977 nt)                                           | 10  | 15  | 0  |
| PITG_06039   Pi conserved hypothetical protein (843 nt)                                           | 0   | 12  | 0  |
| PITG_06040   Pi conserved hypothetical protein (2080 nt)                                          | 6   | 11  | 0  |
| PITG_06046   Pi conserved hypothetical protein (547 nt)                                           | 5   | 15  | 0  |
| PITG_06047   Pi conserved hypothetical protein (905 nt)                                           | 3   | 7   | 0  |
| PITG_06048   Pi eukaryotic initiation factor 4A-III, putative (1420 nt)                           | 3   | 24  | 0  |
| PITG_06050   Pi Crinkler (CRN) family protein (1890 nt)                                           | 35  | 267 | 0  |
| PITG_06056   Pi hypothetical protein (2034 nt)                                                    | 18  | 24  | 0  |

|            |                                                        |     |     |   |
|------------|--------------------------------------------------------|-----|-----|---|
| PITG_06067 | Pi conserved hypothetical protein (1275 nt)            | 1   | 18  | 0 |
| PITG_06075 | Pi conserved hypothetical protein (3266 nt)            | 13  | 30  | 0 |
| PITG_06078 | Pi hypothetical protein (1057 nt)                      | 1   | 8   | 0 |
| PITG_06084 | Pi conserved hypothetical protein (1456 nt)            | 5   | 485 | 0 |
| PITG_06085 | Pi hypothetical protein (1199 nt)                      | 40  | 297 | 0 |
| PITG_06087 | Pi secreted RxLR effector peptide, putative (384 nt)   | 0   | 0   | 9 |
| PITG_06088 | Pi conserved hypothetical protein (1754 nt)            | 10  | 22  | 0 |
| PITG_06094 | Pi secreted RxLR effector peptide, putative (489 nt)   | 9   | 0   | 7 |
| PITG_06101 | Pi conserved hypothetical protein (1162 nt)            | 7   | 21  | 0 |
| PITG_06106 | Pi Intraflagellar Transport Protein 81 (2181 nt)       | 0   | 5   | 0 |
| PITG_06107 | Pi protein kinase, putative (1699 nt)                  | 2   | 4   | 0 |
| PITG_06108 | Pi dihydrolipoyllysine-residue acetyltransferase compo | 7   | 24  | 4 |
| PITG_06111 | Pi conserved hypothetical protein (409 nt)             | 18  | 61  | 1 |
| PITG_06112 | Pi hypothetical protein (481 nt)                       | 28  | 56  | 0 |
| PITG_06113 | Pi hypothetical protein (419 nt)                       | 24  | 33  | 0 |
| PITG_06114 | Pi conserved hypothetical protein (4443 nt)            | 5   | 42  | 0 |
| PITG_06118 | Pi V-type proton ATPase subunit B, putative (2559 nt)  | 10  | 102 | 9 |
| PITG_06119 | Pi conserved hypothetical protein (1070 nt)            | 6   | 31  | 1 |
| PITG_06120 | Pi conserved hypothetical protein (1155 nt)            | 4   | 53  | 0 |
| PITG_06121 | Pi conserved hypothetical protein (1154 nt)            | 9   | 25  | 0 |
| PITG_06127 | Pi conserved hypothetical protein (1166 nt)            | 19  | 33  | 0 |
| PITG_06129 | Pi conserved hypothetical protein (1938 nt)            | 7   | 44  | 0 |
| PITG_06131 | Pi conserved hypothetical protein (883 nt)             | 19  | 116 | 3 |
| PITG_06132 | Pi katanin p60 ATPase-containing subunit, putative (31 | 1   | 10  | 0 |
| PITG_06133 | Pi sugar fermentation stimulation protein (1179 nt)    | 3   | 12  | 0 |
| PITG_06139 | Pi conserved hypothetical protein (1730 nt)            | 0   | 0   | 0 |
| PITG_06142 | Pi copine-like protein (2275 nt)                       | 37  | 467 | 0 |
| PITG_06143 | Pi Voltage-gated Ion Channel (VIC) Superfamily (1038 n | 0   | 0   | 0 |
| PITG_06144 | Pi conserved hypothetical protein (421 nt)             | 2   | 2   | 0 |
| PITG_06146 | Pi conserved hypothetical protein (1188 nt)            | 38  | 18  | 0 |
| PITG_06148 | Pi conserved hypothetical protein (1498 nt)            | 3   | 10  | 0 |
| PITG_06149 | Pi conserved hypothetical protein (2283 nt)            | 3   | 46  | 0 |
| PITG_06150 | Pi conserved hypothetical protein (1446 nt)            | 24  | 46  | 0 |
| PITG_06151 | Pi conserved hypothetical protein (600 nt)             | 6   | 9   | 0 |
| PITG_06152 | Pi conserved hypothetical protein (901 nt)             | 23  | 35  | 0 |
| PITG_06155 | Pi conserved hypothetical protein (1230 nt)            | 15  | 8   | 0 |
| PITG_06158 | Pi conserved hypothetical protein (1241 nt)            | 0   | 14  | 0 |
| PITG_06160 | Pi HECT E3 ubiquitin ligase, putative (4422 nt)        | 0   | 1   | 0 |
| PITG_06165 | Pi conserved hypothetical protein (1561 nt)            | 3   | 16  | 0 |
| PITG_06166 | Pi conserved hypothetical protein (1116 nt)            | 0   | 0   | 0 |
| PITG_06167 | Pi conserved hypothetical protein (2883 nt)            | 0   | 0   | 0 |
| PITG_06170 | Pi conserved hypothetical protein (2517 nt)            | 1   | 35  | 0 |
| PITG_06171 | Pi splicing factor 3B subunit 1 (3778 nt)              | 9   | 41  | 0 |
| PITG_06173 | Pi conserved hypothetical protein (1052 nt)            | 19  | 38  | 0 |
| PITG_06176 | Pi conserved hypothetical protein (2960 nt)            | 0   | 14  | 0 |
| PITG_06178 | Pi conserved hypothetical protein (1210 nt)            | 1   | 21  | 0 |
| PITG_06182 | Pi conserved hypothetical protein (1473 nt)            | 123 | 41  | 0 |



|            |                                                                    |     |     |    |
|------------|--------------------------------------------------------------------|-----|-----|----|
| PITG_06184 | Pi conserved hypothetical protein (2648 nt)                        | 4   | 189 | 0  |
| PITG_06185 | Pi ADP-ribosylation factor 2 (1004 nt)                             | 8   | 27  | 0  |
| PITG_06189 | Pi conserved hypothetical protein (1399 nt)                        | 51  | 498 | 0  |
| PITG_06199 | Pi Cullin family protein, putative (3859 nt)                       | 28  | 22  | 0  |
| PITG_06201 | Pi TATA-box-binding protein (1101 nt)                              | 8   | 8   | 0  |
| PITG_06202 | Pi conserved hypothetical protein (818 nt)                         | 20  | 18  | 0  |
| PITG_06203 | Pi conserved hypothetical protein (764 nt)                         | 389 | 551 | 8  |
| PITG_06204 | Pi conserved hypothetical protein (2248 nt)                        | 196 | 135 | 0  |
| PITG_06205 | Pi ATP-binding Cassette (ABC) Superfamily (6175 nt)                | 2   | 23  | 0  |
| PITG_06212 | Pi conserved hypothetical protein (813 nt)                         | 1   | 0   | 13 |
| PITG_06213 | Pi Resistance-Nodulation-Cell Division (RND) Superfamily (1004 nt) | 1   | 20  | 0  |
| PITG_06215 | Pi conserved hypothetical protein (1249 nt)                        | 20  | 98  | 2  |
| PITG_06217 | Pi hypothetical protein (365 nt)                                   | 0   | 23  | 0  |
| PITG_06218 | Pi conserved hypothetical protein (677 nt)                         | 11  | 28  | 0  |
| PITG_06219 | Pi conserved hypothetical protein (1323 nt)                        | 24  | 57  | 0  |
| PITG_06220 | Pi conserved hypothetical protein (3013 nt)                        | 1   | 16  | 0  |
| PITG_06223 | Pi protein kinase, putative (1536 nt)                              | 6   | 66  | 0  |
| PITG_06225 | Pi flagellar radial spoke protein, putative (1437 nt)              | 1   | 2   | 0  |
| PITG_06227 | Pi carbohydrate-binding protein, putative (1080 nt)                | 10  | 122 | 0  |
| PITG_06228 | Pi hypothetical protein (641 nt)                                   | 1   | 72  | 0  |
| PITG_06231 | Pi anaphase-promoting complex subunit, putative (301 nt)           | 6   | 26  | 0  |
| PITG_06232 | Pi hypothetical protein (638 nt)                                   | 4   | 29  | 0  |
| PITG_06233 | Pi conserved hypothetical protein (811 nt)                         | 2   | 15  | 0  |
| PITG_06236 | Pi cleavage induced protein kinase (1250 nt)                       | 0   | 5   | 0  |
| PITG_06237 | Pi 60S ribosomal protein L8, putative (1172 nt)                    | 246 | 468 | 85 |
| PITG_06238 | Pi conserved hypothetical protein (736 nt)                         | 9   | 14  | 0  |
| PITG_06240 | Pi conserved hypothetical protein (1690 nt)                        | 4   | 20  | 0  |
| PITG_06241 | Pi conserved hypothetical protein (1025 nt)                        | 38  | 219 | 1  |
| PITG_06242 | Pi conserved hypothetical protein (797 nt)                         | 42  | 122 | 1  |
| PITG_06244 | Pi hypothetical protein (2175 nt)                                  | 150 | 141 | 0  |
| PITG_06247 | Pi conserved hypothetical protein (537 nt)                         | 2   | 46  | 0  |
| PITG_06248 | Pi ATP-binding Cassette (ABC) Superfamily (3961 nt)                | 0   | 2   | 0  |
| PITG_06256 | Pi conserved hypothetical protein (5536 nt)                        | 0   | 11  | 0  |
| PITG_06257 | Pi conserved hypothetical protein (6418 nt)                        | 0   | 14  | 0  |
| PITG_06258 | Pi conserved hypothetical protein (753 nt)                         | 0   | 12  | 0  |
| PITG_06259 | Pi calcium/calmodulin-dependent protein kinase, putative (1799 nt) | 4   | 30  | 0  |
| PITG_06260 | Pi dihydroxyacetone kinase, putative (1799 nt)                     | 1   | 19  | 0  |
| PITG_06261 | Pi conserved hypothetical protein (759 nt)                         | 0   | 0   | 0  |
| PITG_06262 | Pi U3 small nucleolar ribonucleoprotein protein IMP3 (1004 nt)     | 7   | 10  | 0  |
| PITG_06263 | Pi H/ACA ribonucleoprotein complex subunit 4 (2103 nt)             | 7   | 22  | 3  |
| PITG_06267 | Pi cysteine synthase, putative (1215 nt)                           | 6   | 29  | 0  |
| PITG_06272 | Pi conserved hypothetical protein (1471 nt)                        | 6   | 38  | 0  |
| PITG_06273 | Pi conserved hypothetical protein (922 nt)                         | 0   | 0   | 0  |
| PITG_06274 | Pi ubiquitin-specific protease, putative (2090 nt)                 | 17  | 46  | 0  |
| PITG_06281 | Pi conserved hypothetical protein (4655 nt)                        | 4   | 27  | 0  |
| PITG_06282 | Pi ubiquitin-specific protease, putative (1536 nt)                 | 1   | 24  | 0  |
| PITG_06283 | Pi beta-catenin-like protein (1851 nt)                             | 2   | 14  | 0  |

|            |                                                          |     |      |    |
|------------|----------------------------------------------------------|-----|------|----|
| PITG_06285 | Pi conserved hypothetical protein (998 nt)               | 1   | 28   | 0  |
| PITG_06288 | Pi protein kinase (2737 nt)                              | 4   | 21   | 0  |
| PITG_06289 | Pi conserved hypothetical protein (1754 nt)              | 31  | 33   | 0  |
| PITG_06290 | Pi secreted RxLR effector peptide, putative (483 nt)     | 184 | 1008 | 70 |
| PITG_06296 | Pi ATP-binding Cassette (ABC) Superfamily (5895 nt)      | 0   | 21   | 0  |
| PITG_06302 | Pi M96 mating-specific protein family (849 nt)           | 9   | 38   | 0  |
| PITG_06303 | Pi conserved hypothetical protein (2000 nt)              | 2   | 46   | 0  |
| PITG_06304 | Pi conserved hypothetical protein (2001 nt)              | 0   | 20   | 0  |
| PITG_06305 | Pi secreted RxLR effector peptide, putative (276 nt)     | 125 | 1194 | 82 |
| PITG_06309 | Pi Voltage-gated Ion Channel (VIC) Superfamily (2325 n   | 0   | 0    | 0  |
| PITG_06318 | Pi conserved hypothetical protein (2615 nt)              | 0   | 3    | 0  |
| PITG_06319 | Pi myotubularin-like protein (4485 nt)                   | 2   | 15   | 0  |
| PITG_06320 | Pi T-complex protein 1 subunit epsilon (1838 nt)         | 21  | 135  | 7  |
| PITG_06322 | Pi myosin-like protein (9897 nt)                         | 1   | 39   | 1  |
| PITG_06323 | Pi endomembrane protein 70-like protein, putative (21    | 29  | 136  | 0  |
| PITG_06324 | Pi hypothetical protein (1633 nt)                        | 8   | 74   | 0  |
| PITG_06325 | Pi conserved hypothetical protein (1299 nt)              | 304 | 872  | 19 |
| PITG_06327 | Pi chromodomain protein, putative (1504 nt)              | 0   | 0    | 0  |
| PITG_06328 | Pi Rab8 family GTPase, putative (2041 nt)                | 6   | 38   | 0  |
| PITG_06329 | Pi conserved hypothetical protein (457 nt)               | 7   | 8    | 0  |
| PITG_06332 | Pi sugar transporter, putative (1545 nt)                 | 6   | 13   | 0  |
| PITG_06333 | Pi hypothetical protein (919 nt)                         | 2   | 13   | 0  |
| PITG_06335 | Pi conserved hypothetical protein (3335 nt)              | 26  | 4    | 0  |
| PITG_06336 | Pi Glycoside-Pentoside-Hexuronide (GPH):Cation Symp      | 1   | 0    | 0  |
| PITG_06342 | Pi conserved hypothetical protein (4365 nt)              | 2   | 28   | 0  |
| PITG_06343 | Pi N-terminal acetyltransferase complex ARD1 subunit     | 11  | 37   | 0  |
| PITG_06345 | Pi conserved hypothetical protein (2853 nt)              | 4   | 21   | 0  |
| PITG_06346 | Pi conserved hypothetical protein (1456 nt)              | 3   | 8    | 0  |
| PITG_06351 | Pi U2 snRNP component IST3 (813 nt)                      | 6   | 16   | 0  |
| PITG_06353 | Pi conserved hypothetical protein (1707 nt)              | 5   | 13   | 0  |
| PITG_06354 | Pi conserved hypothetical protein (1754 nt)              | 0   | 12   | 0  |
| PITG_06355 | Pi conserved hypothetical protein (2869 nt)              | 0   | 15   | 0  |
| PITG_06356 | Pi conserved hypothetical protein (959 nt)               | 4   | 32   | 0  |
| PITG_06358 | Pi callose synthase, putative (7335 nt)                  | 2   | 78   | 0  |
| PITG_06359 | Pi conserved hypothetical protein (1237 nt)              | 5   | 66   | 1  |
| PITG_06360 | Pi conserved hypothetical protein (1029 nt)              | 0   | 6    | 0  |
| PITG_06363 | Pi conserved hypothetical protein (1885 nt)              | 0   | 25   | 0  |
| PITG_06365 | Pi conserved hypothetical protein (1917 nt)              | 7   | 93   | 0  |
| PITG_06367 | Pi conserved hypothetical protein (1007 nt)              | 4   | 21   | 0  |
| PITG_06369 | Pi myosin-like protein (840 nt)                          | 7   | 39   | 0  |
| PITG_06373 | Pi putative GPI-anchored serine-rich elicitor INL3b-like | 0   | 17   | 0  |
| PITG_06374 | Pi Lysosomal Cystine Transporter (LCT) Family (906 nt)   | 25  | 152  | 0  |
| PITG_06376 | Pi guanine nucleotide-binding protein G(I)/G(S)/G(T) su  | 9   | 69   | 0  |
| PITG_06379 | Pi serine/threonine protein kinase (1971 nt)             | 2   | 40   | 0  |
| PITG_06380 | Pi conserved hypothetical protein (6592 nt)              | 1   | 24   | 0  |
| PITG_06381 | Pi hypothetical protein (468 nt)                         | 8   | 23   | 18 |
| PITG_06382 | Pi conserved hypothetical protein (807 nt)               | 0   | 3    | 0  |

|            |                                                                         |     |      |     |
|------------|-------------------------------------------------------------------------|-----|------|-----|
| PITG_06383 | Pi conserved hypothetical protein (2769 nt)                             | 8   | 160  | 0   |
| PITG_06384 | Pi conserved hypothetical protein (868 nt)                              | 1   | 11   | 0   |
| PITG_06385 | Pi conserved hypothetical protein (899 nt)                              | 46  | 143  | 8   |
| PITG_06387 | Pi conserved hypothetical protein (583 nt)                              | 4   | 15   | 0   |
| PITG_06388 | Pi conserved hypothetical protein (857 nt)                              | 17  | 44   | 0   |
| PITG_06390 | Pi conserved hypothetical protein (3043 nt)                             | 28  | 42   | 0   |
| PITG_06392 | Pi hypothetical protein (1540 nt)                                       | 4   | 53   | 0   |
| PITG_06393 | Pi hypothetical protein (2765 nt)                                       | 1   | 16   | 0   |
| PITG_06394 | Pi conserved hypothetical protein (1365 nt)                             | 0   | 15   | 0   |
| PITG_06396 | Pi N-acetyltransferase, putative (546 nt)                               | 10  | 28   | 0   |
| PITG_06398 | Pi conserved hypothetical protein (1713 nt)                             | 0   | 6    | 0   |
| PITG_06402 | Pi formin-homology 2 domain-containing protein (3315 nt)                | 5   | 10   | 0   |
| PITG_06403 | Pi conserved hypothetical protein (1558 nt)                             | 5   | 43   | 0   |
| PITG_06404 | Pi conserved hypothetical protein (816 nt)                              | 127 | 932  | 34  |
| PITG_06405 | Pi conserved hypothetical protein (2593 nt)                             | 0   | 24   | 0   |
| PITG_06406 | Pi HECT E3 ubiquitin ligase, putative (648 nt)                          | 3   | 28   | 0   |
| PITG_06407 | Pi conserved hypothetical protein (600 nt)                              | 1   | 16   | 0   |
| PITG_06408 | Pi conserved hypothetical protein (1849 nt)                             | 45  | 238  | 7   |
| PITG_06410 | Pi conserved hypothetical protein (6512 nt)                             | 18  | 45   | 0   |
| PITG_06415 | Pi heat shock protein 90 (2300 nt)                                      | 256 | 1262 | 115 |
| PITG_06416 | Pi conserved hypothetical protein (2157 nt)                             | 7   | 10   | 0   |
| PITG_06417 | Pi conserved hypothetical protein (1845 nt)                             | 0   | 11   | 0   |
| PITG_06423 | Pi conserved hypothetical protein (420 nt)                              | 167 | 48   | 1   |
| PITG_06424 | Pi formin-homology 2 domain-containing protein (3877 nt)                | 9   | 48   | 0   |
| PITG_06425 | Pi conserved hypothetical protein (547 nt)                              | 9   | 8    | 0   |
| PITG_06426 | Pi conserved hypothetical protein (1035 nt)                             | 6   | 20   | 0   |
| PITG_06427 | Pi serine hydroxymethyltransferase, mitochondrial precursor (648 nt)    | 9   | 195  | 22  |
| PITG_06428 | Pi callose synthase, putative (6861 nt)                                 | 1   | 29   | 0   |
| PITG_06429 | Pi HECT E3 ubiquitin ligase, putative (14892 nt)                        | 1   | 32   | 0   |
| PITG_06430 | Pi conserved hypothetical protein (1141 nt)                             | 13  | 115  | 5   |
| PITG_06437 | Pi enoyl-CoA hydratase/isomerase family, putative (871 nt)              | 0   | 21   | 0   |
| PITG_06438 | Pi conserved hypothetical protein (1345 nt)                             | 0   | 16   | 0   |
| PITG_06440 | Pi eukaryotic translation initiation factor 2A, putative (648 nt)       | 4   | 20   | 0   |
| PITG_06448 | Pi pyruvate carboxylase, mitochondrial precursor (2075 nt)              | 1   | 82   | 1   |
| PITG_06449 | Pi pyruvate carboxylase, putative (738 nt)                              | 12  | 374  | 11  |
| PITG_06450 | Pi myosin-like protein (3489 nt)                                        | 2   | 30   | 0   |
| PITG_06452 | Pi formin-homology 2 domain-containing protein (2602 nt)                | 4   | 26   | 0   |
| PITG_06453 | Pi conserved hypothetical protein (363 nt)                              | 7   | 44   | 0   |
| PITG_06454 | Pi adenosylmethionine-8-amino-7-oxononanoate aminotransferase (1035 nt) | 1   | 39   | 0   |
| PITG_06456 | Pi maintenance of ploidy protein mob1 (780 nt)                          | 1   | 1    | 0   |
| PITG_06457 | Pi conserved hypothetical protein (1426 nt)                             | 14  | 52   | 0   |
| PITG_06471 | Pi conserved hypothetical protein (1972 nt)                             | 4   | 64   | 0   |
| PITG_06474 | Pi conserved hypothetical protein (1321 nt)                             | 12  | 204  | 0   |
| PITG_06475 | Pi conserved hypothetical protein (988 nt)                              | 6   | 18   | 1   |
| PITG_06476 | Pi carbohydrate-binding protein, putative (1213 nt)                     | 3   | 101  | 0   |
| PITG_06479 | Pi inositol oxygenase, putative (1762 nt)                               | 14  | 90   | 0   |
| PITG_06480 | Pi protein kinase, putative (6057 nt)                                   | 11  | 29   | 0   |

|            |                                                            |    |     |     |
|------------|------------------------------------------------------------|----|-----|-----|
| PITG_06482 | Pi eukaryotic translation initiation factor 3 subunit, put | 3  | 21  | 2   |
| PITG_06483 | Pi conserved hypothetical protein (1048 nt)                | 26 | 77  | 0   |
| PITG_06484 | Pi conserved hypothetical protein (480 nt)                 | 11 | 15  | 0   |
| PITG_06486 | Pi hypothetical protein (821 nt)                           | 2  | 38  | 0   |
| PITG_06487 | Pi conserved hypothetical protein (1194 nt)                | 11 | 5   | 0   |
| PITG_06494 | Pi conserved hypothetical protein (1341 nt)                | 0  | 2   | 0   |
| PITG_06495 | Pi M96 mating-specific protein family (531 nt)             | 1  | 10  | 0   |
| PITG_06501 | Pi conserved hypothetical protein (882 nt)                 | 3  | 11  | 0   |
| PITG_06502 | Pi conserved hypothetical protein (2315 nt)                | 0  | 26  | 0   |
| PITG_06503 | Pi hypothetical protein (1469 nt)                          | 21 | 528 | 0   |
| PITG_06506 | Pi conserved hypothetical protein (861 nt)                 | 8  | 1   | 0   |
| PITG_06507 | Pi conserved hypothetical protein (1096 nt)                | 9  | 15  | 0   |
| PITG_06508 | Pi conserved hypothetical protein (4042 nt)                | 0  | 10  | 0   |
| PITG_06510 | Pi conserved hypothetical protein (925 nt)                 | 54 | 120 | 0   |
| PITG_06512 | Pi conserved hypothetical protein (1622 nt)                | 35 | 249 | 0   |
| PITG_06513 | Pi hypothetical protein (577 nt)                           | 1  | 11  | 0   |
| PITG_06514 | Pi calmodulin (649 nt)                                     | 74 | 528 | 103 |
| PITG_06516 | Pi conserved hypothetical protein (757 nt)                 | 4  | 17  | 0   |
| PITG_06517 | Pi conserved hypothetical protein (1863 nt)                | 0  | 11  | 0   |
| PITG_06518 | Pi phospho-2-dehydro-3-deoxyheptonate aldolase (151        | 4  | 4   | 0   |
| PITG_06519 | Pi conserved hypothetical protein (1617 nt)                | 1  | 0   | 0   |
| PITG_06521 | Pi conserved hypothetical protein (5626 nt)                | 0  | 8   | 0   |
| PITG_06529 | Pi conserved hypothetical protein (2592 nt)                | 0  | 0   | 0   |
| PITG_06536 | Pi conserved hypothetical protein (2385 nt)                | 1  | 10  | 0   |
| PITG_06538 | Pi ATP-binding Cassette (ABC) Superfamily (501 nt)         | 7  | 25  | 0   |
| PITG_06539 | Pi conserved hypothetical protein (540 nt)                 | 1  | 31  | 0   |
| PITG_06545 | Pi exonuclease 1, putative (9349 nt)                       | 11 | 13  | 0   |
| PITG_06551 | Pi conserved hypothetical protein (1907 nt)                | 3  | 10  | 0   |
| PITG_06554 | Pi cytochrome P450, putative (4126 nt)                     | 1  | 12  | 2   |
| PITG_06556 | Pi transmembrane protein, putative (1556 nt)               | 1  | 26  | 0   |
| PITG_06557 | Pi cytochrome P450, putative (3892 nt)                     | 2  | 21  | 0   |
| PITG_06558 | Pi conserved hypothetical protein (1380 nt)                | 4  | 34  | 1   |
| PITG_06559 | Pi conserved hypothetical protein (1132 nt)                | 0  | 12  | 0   |
| PITG_06566 | Pi long-chain-fatty-acid-CoA ligase, putative (2152 nt)    | 17 | 107 | 1   |
| PITG_06570 | Pi long-chain-fatty-acid-CoA ligase, putative (2636 nt)    | 22 | 46  | 0   |
| PITG_06574 | Pi long-chain-fatty-acid-CoA ligase, putative (1887 nt)    | 0  | 31  | 0   |
| PITG_06575 | Pi transmembrane protein, putative (3054 nt)               | 1  | 12  | 0   |
| PITG_06576 | Pi conserved hypothetical protein (1092 nt)                | 0  | 13  | 0   |
| PITG_06577 | Pi conserved hypothetical protein (766 nt)                 | 83 | 142 | 0   |
| PITG_06578 | Pi protein kinase (1389 nt)                                | 2  | 12  | 0   |
| PITG_06579 | Pi conserved hypothetical protein (819 nt)                 | 32 | 94  | 1   |
| PITG_06580 | Pi conserved hypothetical protein (3943 nt)                | 0  | 1   | 0   |
| PITG_06589 | Pi conserved hypothetical protein (1167 nt)                | 6  | 28  | 0   |
| PITG_06591 | Pi berberine-like protein (1700 nt)                        | 0  | 0   | 50  |
| PITG_06593 | Pi conserved hypothetical protein (1815 nt)                | 6  | 18  | 0   |
| PITG_06594 | Pi serine/threonine protein phosphatase 2A (1888 nt)       | 7  | 33  | 1   |
| PITG_06595 | Pi ATP synthase subunit beta, putative (1595 nt)           | 51 | 358 | 82  |

|            |                                                                                        |     |     |   |
|------------|----------------------------------------------------------------------------------------|-----|-----|---|
| PITG_06596 | Pi conserved hypothetical protein (1272 nt)                                            | 3   | 33  | 1 |
| PITG_06597 | Pi protein phosphatase 2A regulatory B subunit, putative                               | 47  | 155 | 1 |
| PITG_06598 | Pi conserved hypothetical protein (1611 nt)                                            | 3   | 17  | 0 |
| PITG_06599 | Pi conserved hypothetical protein (984 nt)                                             | 9   | 98  | 0 |
| PITG_06602 | Pi conserved hypothetical protein (1790 nt)                                            | 12  | 37  | 0 |
| PITG_06603 | Pi hypothetical protein (468 nt)                                                       | 8   | 51  | 1 |
| PITG_06604 | Pi fumarate hydratase, mitochondrial precursor (2089 nt)                               | 4   | 53  | 3 |
| PITG_06605 | Pi conserved hypothetical protein (1433 nt)                                            | 0   | 2   | 0 |
| PITG_06606 | Pi UDP-N-acetylglucosamine-peptide N-acetylglucosaminyl transferase, putative          | 0   | 4   | 0 |
| PITG_06607 | Pi protein kinase, putative (2332 nt)                                                  | 0   | 2   | 0 |
| PITG_06608 | Pi ubiquitin-conjugating enzyme E2, putative (764 nt)                                  | 106 | 274 | 5 |
| PITG_06609 | Pi conserved hypothetical protein (1221 nt)                                            | 13  | 17  | 0 |
| PITG_06610 | Pi tRNA nucleotidyltransferase, putative (1847 nt)                                     | 13  | 14  | 0 |
| PITG_06611 | Pi vacuolar amino acid transporter, putative (1810 nt)                                 | 5   | 29  | 0 |
| PITG_06613 | Pi hypothetical protein (645 nt)                                                       | 0   | 14  | 0 |
| PITG_06614 | Pi conserved hypothetical protein (1416 nt)                                            | 2   | 9   | 0 |
| PITG_06615 | Pi H <sup>+</sup> - or Na <sup>+</sup> -translocating F-type, V-type and A-type ATPase | 12  | 100 | 1 |
| PITG_06618 | Pi conserved hypothetical protein (1107 nt)                                            | 2   | 17  | 0 |
| PITG_06619 | Pi ADP-ribosylation factor family (1012 nt)                                            | 57  | 270 | 5 |
| PITG_06629 | Pi conserved hypothetical protein (1112 nt)                                            | 0   | 4   | 0 |
| PITG_06630 | Pi conserved hypothetical protein (6368 nt)                                            | 0   | 6   | 0 |
| PITG_06631 | Pi conserved hypothetical protein (1938 nt)                                            | 21  | 134 | 0 |
| PITG_06632 | Pi conserved hypothetical protein (790 nt)                                             | 2   | 16  | 0 |
| PITG_06635 | Pi signal recognition particle, putative (2795 nt)                                     | 27  | 110 | 0 |
| PITG_06636 | Pi conserved hypothetical protein (606 nt)                                             | 11  | 33  | 0 |
| PITG_06637 | Pi Drug/Metabolite Transporter (DMT) Superfamily (1100 nt)                             | 13  | 62  | 0 |
| PITG_06638 | Pi lysocardiolipin acyltransferase, putative (1329 nt)                                 | 4   | 12  | 0 |
| PITG_06640 | Pi conserved hypothetical protein (1302 nt)                                            | 4   | 6   | 0 |
| PITG_06642 | Pi conserved hypothetical protein (1129 nt)                                            | 2   | 16  | 0 |
| PITG_06643 | Pi conserved hypothetical protein (1753 nt)                                            | 4   | 30  | 0 |
| PITG_06646 | Pi conserved hypothetical protein (4498 nt)                                            | 0   | 4   | 0 |
| PITG_06647 | Pi conserved hypothetical protein (1443 nt)                                            | 4   | 34  | 0 |
| PITG_06648 | Pi conserved hypothetical protein (759 nt)                                             | 2   | 13  | 0 |
| PITG_06649 | Pi adenyl cyclase-associated protein, putative (1414 nt)                               | 19  | 107 | 5 |
| PITG_06651 | Pi adiponectin receptor protein, putative (1700 nt)                                    | 6   | 29  | 0 |
| PITG_06652 | Pi conserved hypothetical protein (874 nt)                                             | 2   | 16  | 0 |
| PITG_06655 | Pi hypothetical protein (327 nt)                                                       | 0   | 0   | 0 |
| PITG_06657 | Pi thioredoxin-like protein (1092 nt)                                                  | 15  | 49  | 2 |
| PITG_06658 | Pi conserved hypothetical protein (433 nt)                                             | 19  | 42  | 0 |
| PITG_06659 | Pi conserved hypothetical protein (848 nt)                                             | 10  | 55  | 0 |
| PITG_06660 | Pi peroxisome biogenesis factor, putative (4144 nt)                                    | 3   | 22  | 0 |
| PITG_06661 | Pi Chloride Channel (ClC) Family (2119 nt)                                             | 0   | 4   | 0 |
| PITG_06662 | Pi conserved hypothetical protein (2303 nt)                                            | 5   | 34  | 0 |
| PITG_06663 | Pi hypothetical protein (1215 nt)                                                      | 6   | 34  | 0 |
| PITG_06664 | Pi conserved hypothetical protein (1578 nt)                                            | 4   | 16  | 0 |
| PITG_06666 | Pi kinesin-like protein (2770 nt)                                                      | 1   | 0   | 0 |
| PITG_06668 | Pi ATP-binding Cassette (ABC) Superfamily (8369 nt)                                    | 3   | 16  | 0 |

|            |                                                                                 |     |     |     |
|------------|---------------------------------------------------------------------------------|-----|-----|-----|
| PITG_06669 | Pi conserved hypothetical protein (1191 nt)                                     | 192 | 16  | 0   |
| PITG_06671 | Pi canalicular multispecific organic anion transporter, p                       | 0   | 18  | 0   |
| PITG_06672 | Pi P-type ATPase (P-ATPase) Superfamily (3138 nt)                               | 1   | 0   | 0   |
| PITG_06673 | Pi Major Facilitator Superfamily (MFS) (2166 nt)                                | 2   | 24  | 0   |
| PITG_06674 | Pi acetyl-CoA acetyltransferase IB (474 nt)                                     | 11  | 36  | 0   |
| PITG_06677 | Pi conserved hypothetical protein (1181 nt)                                     | 20  | 15  | 0   |
| PITG_06678 | Pi conserved hypothetical protein (1004 nt)                                     | 137 | 19  | 0   |
| PITG_06679 | Pi casein kinase II subunit beta (1229 nt)                                      | 87  | 132 | 0   |
| PITG_06680 | Pi conserved hypothetical protein (1031 nt)                                     | 1   | 10  | 0   |
| PITG_06682 | Pi conserved hypothetical protein (4348 nt)                                     | 0   | 10  | 0   |
| PITG_06684 | Pi conserved hypothetical protein (1592 nt)                                     | 1   | 25  | 0   |
| PITG_06686 | Pi conserved hypothetical protein (2067 nt)                                     | 4   | 15  | 0   |
| PITG_06689 | Pi sporangia induced conserved hypothetical protein (1                          | 1   | 9   | 0   |
| PITG_06690 | Pi conserved hypothetical protein (863 nt)                                      | 48  | 127 | 1   |
| PITG_06691 | Pi cell division control protein 42 (1236 nt)                                   | 24  | 81  | 0   |
| PITG_06692 | Pi serine protease family S09X, putative (1285 nt)                              | 10  | 24  | 0   |
| PITG_06693 | Pi trifunctional enzyme subunit alpha, putative (2244 n                         | 7   | 190 | 0   |
| PITG_06694 | Pi conserved hypothetical protein (1201 nt)                                     | 3   | 25  | 0   |
| PITG_06695 | Pi conserved hypothetical protein (1404 nt)                                     | 11  | 26  | 0   |
| PITG_06698 | Pi ATP-binding Cassette (ABC) Superfamily (2863 nt)                             | 3   | 19  | 0   |
| PITG_06700 | Pi cell division cycle protein 48 (2039 nt)                                     | 1   | 29  | 0   |
| PITG_06701 | Pi dual specificity protein kinase, putative (1580 nt)                          | 0   | 12  | 0   |
| PITG_06702 | Pi conserved hypothetical protein (1540 nt)                                     | 20  | 77  | 0   |
| PITG_06703 | Pi conserved hypothetical protein (490 nt)                                      | 0   | 13  | 0   |
| PITG_06705 | Pi conserved hypothetical protein (1633 nt)                                     | 4   | 22  | 0   |
| PITG_06706 | Pi conserved hypothetical protein (445 nt)                                      | 10  | 10  | 0   |
| PITG_06708 | Pi cyclin-dependent kinase, putative (2415 nt)                                  | 10  | 32  | 0   |
| PITG_06710 | Pi conserved hypothetical protein (1204 nt)                                     | 0   | 22  | 0   |
| PITG_06714 | Pi conserved hypothetical protein (3310 nt)                                     | 0   | 11  | 0   |
| PITG_06715 | Pi serine/threonine-protein phosphatase PP2A catalytic                          | 1   | 15  | 4   |
| PITG_06716 | Pi tafazzin-like protein (1282 nt)                                              | 3   | 13  | 0   |
| PITG_06718 | Pi tenascin-like protein (2301 nt)                                              | 0   | 2   | 0   |
| PITG_06719 | Pi glycerol-3-phosphate dehydrogenase, mitochondrial                            | 26  | 82  | 0   |
| PITG_06720 | Pi conserved hypothetical protein (5418 nt)                                     | 0   | 6   | 0   |
| PITG_06721 | Pi conserved hypothetical protein (649 nt)                                      | 0   | 2   | 0   |
| PITG_06722 | Pi translation elongation factor 1-alpha, putative (1528                        | 459 | 829 | 309 |
| PITG_06723 | Pi conserved hypothetical protein (973 nt)                                      | 72  | 164 | 0   |
| PITG_06725 | Pi conserved hypothetical protein (2837 nt)                                     | 0   | 0   | 0   |
| PITG_06726 | Pi Voltage-gated Ion Channel (VIC) Superfamily (866 nt)                         | 0   | 2   | 0   |
| PITG_06727 | Pi Voltage-gated Ion Channel (VIC) Superfamily (1441 n                          | 0   | 3   | 0   |
| PITG_06731 | Pi H <sup>-</sup> -translocating Pyrophosphatase (H <sup>-</sup> -PPase) Family | 40  | 126 | 8   |
| PITG_06732 | Pi acyl-CoA dehydrogenase, putative (1461 nt)                                   | 47  | 93  | 0   |
| PITG_06733 | Pi transmembrane protein, putative (2112 nt)                                    | 7   | 6   | 0   |
| PITG_06734 | Pi conserved hypothetical protein (2133 nt)                                     | 0   | 0   | 0   |
| PITG_06735 | Pi conserved hypothetical protein (1696 nt)                                     | 4   | 45  | 0   |
| PITG_06739 | Pi conserved hypothetical protein (493 nt)                                      | 42  | 40  | 1   |
| PITG_06740 | Pi conserved hypothetical protein (765 nt)                                      | 8   | 11  | 0   |

|                                                                                     |     |     |     |
|-------------------------------------------------------------------------------------|-----|-----|-----|
| PITG_06741   Pi conserved hypothetical protein (8256 nt)                            | 1   | 10  | 0   |
| PITG_06748   Pi myb-like DNA-binding protein, putative (2053 nt)                    | 5   | 40  | 0   |
| PITG_06749   Pi bifunctional dihydrofolate reductase-thymidylate synthase (4836 nt) | 3   | 17  | 0   |
| PITG_06753   Pi paired amphipathic helix protein Sin3, putative (4836 nt)           | 6   | 51  | 0   |
| PITG_06754   Pi conserved hypothetical protein (845 nt)                             | 8   | 21  | 0   |
| PITG_06755   Pi acyl-CoA dehydrogenase/oxidase (2491 nt)                            | 3   | 11  | 0   |
| PITG_06757   Pi conserved hypothetical protein (916 nt)                             | 35  | 182 | 0   |
| PITG_06758   Pi conserved hypothetical protein (654 nt)                             | 6   | 60  | 1   |
| PITG_06759   Pi conserved hypothetical protein (3396 nt)                            | 83  | 83  | 0   |
| PITG_06760   Pi conserved hypothetical protein (696 nt)                             | 16  | 48  | 0   |
| PITG_06762   Pi conserved hypothetical protein (2014 nt)                            | 40  | 40  | 0   |
| PITG_06764   Pi phosphatidylinositol transfer protein SFH5, putative (1815 nt)      | 7   | 18  | 0   |
| PITG_06765   Pi conserved hypothetical protein (760 nt)                             | 10  | 35  | 0   |
| PITG_06766   Pi conserved hypothetical protein (1797 nt)                            | 11  | 44  | 0   |
| PITG_06767   Pi transmembrane protein Gpr7-like protein (1815 nt)                   | 18  | 55  | 0   |
| PITG_06769   Pi conserved hypothetical protein (1080 nt)                            | 4   | 20  | 0   |
| PITG_06770   Pi hypothetical protein (444 nt)                                       | 1   | 10  | 0   |
| PITG_06771   Pi 40S ribosomal protein S24, putative (944 nt)                        | 360 | 640 | 102 |
| PITG_06772   Pi ATP-binding cassette sub-family F member 1 (2707 nt)                | 13  | 23  | 0   |
| PITG_06773   Pi regulator of chromosome condensation (RCC1), putative (1730 nt)     | 1   | 2   | 0   |
| PITG_06774   Pi conserved hypothetical protein (454 nt)                             | 0   | 14  | 0   |
| PITG_06775   Pi conserved hypothetical protein (398 nt)                             | 5   | 12  | 0   |
| PITG_06776   Pi RAC family serine/threonine-protein kinase (2717 nt)                | 4   | 20  | 0   |
| PITG_06778   Pi clusterin-associated protein 1 (1386 nt)                            | 0   | 5   | 0   |
| PITG_06780   Pi conserved hypothetical protein (1753 nt)                            | 18  | 45  | 0   |
| PITG_06781   Pi conserved hypothetical protein (859 nt)                             | 8   | 43  | 0   |
| PITG_06782   Pi serine protease family S33, putative (6984 nt)                      | 2   | 11  | 0   |
| PITG_06783   Pi quinolinate synthetase A protein, putative (1730 nt)                | 4   | 22  | 0   |
| PITG_06788   Pi exoglucanase 1 precursor (1575 nt)                                  | 0   | 2   | 0   |
| PITG_06790   Pi Ufm1-conjugating enzyme 1 (568 nt)                                  | 33  | 85  | 0   |
| PITG_06791   Pi conserved hypothetical protein (1442 nt)                            | 3   | 7   | 0   |
| PITG_06792   Pi conserved hypothetical protein (4242 nt)                            | 1   | 11  | 0   |
| PITG_06793   Pi conserved hypothetical protein (918 nt)                             | 3   | 21  | 0   |
| PITG_06794   Pi putative methyltransferase METT10D (1723 nt)                        | 3   | 19  | 0   |
| PITG_06796   Pi conserved hypothetical protein (1294 nt)                            | 5   | 15  | 0   |
| PITG_06799   Pi ribosomal protein L27 (785 nt)                                      | 177 | 241 | 89  |
| PITG_06802   Pi conserved hypothetical protein (1399 nt)                            | 8   | 23  | 0   |
| PITG_06803   Pi conserved hypothetical protein (2788 nt)                            | 0   | 12  | 0   |
| PITG_06804   Pi conserved hypothetical protein (16341 nt)                           | 0   | 1   | 0   |
| PITG_06805   Pi carbohydrate-binding protein, putative (1113 nt)                    | 36  | 58  | 0   |
| PITG_06806   Pi hypothetical protein (324 nt)                                       | 55  | 213 | 0   |
| PITG_06808   Pi trehalase, putative (1971 nt)                                       | 1   | 10  | 0   |
| PITG_06810   Pi conserved hypothetical protein (962 nt)                             | 2   | 5   | 0   |
| PITG_06813   Pi conserved hypothetical protein (932 nt)                             | 31  | 83  | 1   |
| PITG_06814   Pi tyrosine phosphatase, putative (2277 nt)                            | 25  | 109 | 5   |
| PITG_06815   Pi NADH dehydrogenase flavoprotein 1, mitochondrial (1079 nt)          | 40  | 155 | 8   |
| PITG_06816   Pi conserved hypothetical protein (1079 nt)                            | 3   | 26  | 0   |

|            |                                                          |    |     |   |
|------------|----------------------------------------------------------|----|-----|---|
| PITG_06817 | Pi inactive ubiquitin carboxyl-terminal hydrolase, putat | 4  | 27  | 0 |
| PITG_06818 | Pi conserved hypothetical protein (1546 nt)              | 0  | 23  | 0 |
| PITG_06819 | Pi transcription elongation factor, putative (1438 nt)   | 4  | 21  | 0 |
| PITG_06820 | Pi trehalase, putative (2103 nt)                         | 6  | 12  | 0 |
| PITG_06821 | Pi eukaryotic initiation factor 4E, putative (1997 nt)   | 1  | 23  | 0 |
| PITG_06822 | Pi sulfatase-like protein (3142 nt)                      | 15 | 50  | 0 |
| PITG_06827 | Pi DEAD/DEAH box RNA helicase, putative (2046 nt)        | 17 | 19  | 0 |
| PITG_06828 | Pi trehalose-phosphatase, putative (3522 nt)             | 9  | 49  | 0 |
| PITG_06829 | Pi conserved hypothetical protein (9345 nt)              | 4  | 24  | 0 |
| PITG_06830 | Pi ubiquitin-conjugating enzyme E2, putative (834 nt)    | 0  | 6   | 0 |
| PITG_06832 | Pi ubiquitin-specific protease, putative (5758 nt)       | 1  | 21  | 0 |
| PITG_06836 | Pi conserved hypothetical protein (769 nt)               | 3  | 9   | 0 |
| PITG_06841 | Pi conserved hypothetical protein (2425 nt)              | 3  | 31  | 0 |
| PITG_06844 | Pi hypothetical protein (1403 nt)                        | 8  | 23  | 0 |
| PITG_06845 | Pi riboflavin kinase (601 nt)                            | 23 | 41  | 0 |
| PITG_06846 | Pi Drug/Metabolite Transporter (DMT) Superfamily (90     | 9  | 8   | 0 |
| PITG_06847 | Pi conserved hypothetical protein (2232 nt)              | 3  | 12  | 0 |
| PITG_06849 | Pi conserved hypothetical protein (1628 nt)              | 12 | 53  | 0 |
| PITG_06850 | Pi conserved hypothetical protein (1271 nt)              | 8  | 8   | 0 |
| PITG_06851 | Pi conserved hypothetical protein (1061 nt)              | 7  | 63  | 0 |
| PITG_06852 | Pi ATP-binding Cassette (ABC) Superfamily (1918 nt)      | 12 | 30  | 0 |
| PITG_06853 | Pi conserved hypothetical protein (1980 nt)              | 2  | 9   | 0 |
| PITG_06854 | Pi conserved hypothetical protein (620 nt)               | 0  | 0   | 0 |
| PITG_06855 | Pi inorganic phosphate transporter, putative (1540 nt)   | 2  | 8   | 0 |
| PITG_06856 | Pi kinesin-like protein (1143 nt)                        | 0  | 15  | 0 |
| PITG_06860 | Pi ATP-binding Cassette (ABC) Superfamily (4112 nt)      | 11 | 694 | 0 |
| PITG_06861 | Pi conserved hypothetical protein (1298 nt)              | 2  | 9   | 0 |
| PITG_06862 | Pi ATP-binding Cassette (ABC) Superfamily (4122 nt)      | 3  | 306 | 0 |
| PITG_06863 | Pi ATP-binding Cassette (ABC) Superfamily (4098 nt)      | 6  | 113 | 0 |
| PITG_06864 | Pi cytosolic endo-beta-N-acetylglucosaminidase, putati   | 4  | 9   | 0 |
| PITG_06867 | Pi conserved hypothetical protein (1454 nt)              | 12 | 14  | 0 |
| PITG_06869 | Pi conserved hypothetical protein (1796 nt)              | 4  | 34  | 0 |
| PITG_06871 | Pi ankyrin-like protein (3315 nt)                        | 4  | 23  | 0 |
| PITG_06873 | Pi aspartyl-tRNA synthetase, putative (754 nt)           | 1  | 45  | 0 |
| PITG_06877 | Pi conserved hypothetical protein (2757 nt)              | 6  | 22  | 0 |
| PITG_06880 | Pi mitogen-activated protein kinase kinase kinase, puta  | 0  | 13  | 0 |
| PITG_06884 | Pi conserved hypothetical protein (1061 nt)              | 6  | 47  | 0 |
| PITG_06885 | Pi membrane-bound transcription factor site-1 proteas    | 0  | 12  | 0 |
| PITG_06886 | Pi conserved hypothetical protein (932 nt)               | 9  | 26  | 0 |
| PITG_06887 | Pi myosin-like protein (1178 nt)                         | 6  | 44  | 0 |
| PITG_06889 | Pi peptidase, putative (2249 nt)                         | 10 | 127 | 0 |
| PITG_06890 | Pi peptidase, putative (1581 nt)                         | 16 | 71  | 0 |
| PITG_06891 | Pi S-formylglutathione hydrolase, putative (911 nt)      | 4  | 42  | 1 |
| PITG_06893 | Pi conserved hypothetical protein (2139 nt)              | 4  | 16  | 0 |
| PITG_06894 | Pi O-sialoglycoprotein endopeptidase, putative (1740 n   | 5  | 18  | 0 |
| PITG_06895 | Pi conserved hypothetical protein (1823 nt)              | 8  | 59  | 0 |
| PITG_06896 | Pi proline iminopeptidase (1192 nt)                      | 7  | 26  | 0 |



|            |                                                           |     |     |   |
|------------|-----------------------------------------------------------|-----|-----|---|
| PITG_06897 | Pi conserved hypothetical protein (1969 nt)               | 4   | 12  | 0 |
| PITG_06898 | Pi conserved hypothetical protein (3454 nt)               | 9   | 14  | 0 |
| PITG_06899 | Pi conserved hypothetical protein (2743 nt)               | 5   | 12  | 0 |
| PITG_06900 | Pi beta-secretase, putative (2660 nt)                     | 12  | 21  | 0 |
| PITG_06901 | Pi conserved hypothetical protein (825 nt)                | 0   | 18  | 0 |
| PITG_06902 | Pi conserved hypothetical protein (6729 nt)               | 1   | 24  | 0 |
| PITG_06903 | Pi conserved hypothetical protein (2970 nt)               | 5   | 28  | 0 |
| PITG_06904 | Pi conserved hypothetical protein (885 nt)                | 0   | 0   | 0 |
| PITG_06906 | Pi conserved hypothetical protein (2088 nt)               | 25  | 259 | 0 |
| PITG_06907 | Pi regulator of chromosome condensation (RCC1)-like p     | 4   | 20  | 0 |
| PITG_06908 | Pi elicitin-like protein (522 nt)                         | 0   | 1   | 0 |
| PITG_06910 | Pi Mitochondrial Carrier (MC) Family (1056 nt)            | 1   | 16  | 0 |
| PITG_06911 | Pi translation initiation factor IF-2, putative (1972 nt) | 2   | 9   | 0 |
| PITG_06912 | Pi Amino Acid/Auxin Permease (AAP) Family (1493 nt)       | 5   | 24  | 0 |
| PITG_06913 | Pi conserved hypothetical protein (5405 nt)               | 2   | 9   | 0 |
| PITG_06915 | Pi flagella associated protein (1619 nt)                  | 2   | 0   | 0 |
| PITG_06916 | Pi conserved hypothetical protein (3997 nt)               | 0   | 1   | 0 |
| PITG_06917 | Pi Phosphatidylinositol-3-phosphate5- kinase (Fab-like;   | 8   | 20  | 0 |
| PITG_06918 | Pi conserved hypothetical protein (453 nt)                | 31  | 56  | 0 |
| PITG_06919 | Pi conserved hypothetical protein (1279 nt)               | 7   | 64  | 0 |
| PITG_06920 | Pi SEC1 family transporter SLY1 (1888 nt)                 | 2   | 29  | 0 |
| PITG_06921 | Pi conserved hypothetical protein (465 nt)                | 14  | 38  | 0 |
| PITG_06922 | Pi conserved hypothetical protein (651 nt)                | 9   | 8   | 0 |
| PITG_06923 | Pi conserved hypothetical protein (1964 nt)               | 1   | 6   | 0 |
| PITG_06924 | Pi conserved hypothetical protein (3833 nt)               | 1   | 15  | 0 |
| PITG_06926 | Pi cysteine protease family C01A, putative (1245 nt)      | 0   | 0   | 0 |
| PITG_06929 | Pi myotubularin-like protein (3693 nt)                    | 2   | 25  | 0 |
| PITG_06934 | Pi conserved hypothetical protein (2871 nt)               | 2   | 18  | 0 |
| PITG_06935 | Pi HSF-type DNA-binding, putative (1623 nt)               | 0   | 16  | 0 |
| PITG_06937 | Pi metalloprotease family M48X, putative (903 nt)         | 22  | 2   | 0 |
| PITG_06938 | Pi conserved hypothetical protein (957 nt)                | 2   | 10  | 0 |
| PITG_06939 | Pi conserved hypothetical protein (1181 nt)               | 1   | 8   | 0 |
| PITG_06941 | Pi conserved hypothetical protein (3400 nt)               | 3   | 23  | 0 |
| PITG_06942 | Pi conserved hypothetical protein (876 nt)                | 6   | 18  | 0 |
| PITG_06943 | Pi conserved hypothetical protein (1647 nt)               | 10  | 27  | 0 |
| PITG_06944 | Pi conserved hypothetical protein (547 nt)                | 1   | 18  | 0 |
| PITG_06945 | Pi conserved hypothetical protein (3461 nt)               | 1   | 14  | 0 |
| PITG_06946 | Pi conserved hypothetical protein (2130 nt)               | 1   | 16  | 0 |
| PITG_06948 | Pi ubiquitin-conjugating enzyme E2, putative (689 nt)     | 20  | 61  | 0 |
| PITG_06949 | Pi Intraflagellar Transport Protein 20 (713 nt)           | 1   | 7   | 0 |
| PITG_06950 | Pi histone H3.3 (880 nt)                                  | 192 | 271 | 4 |
| PITG_06953 | Pi histone H3.3 (528 nt)                                  | 108 | 61  | 0 |
| PITG_06962 | Pi endoglucanase, putative (1715 nt)                      | 7   | 9   | 1 |
| PITG_06963 | Pi cyclin-Y-like protein (2863 nt)                        | 5   | 11  | 0 |
| PITG_06964 | Pi protein kinase, putative (2352 nt)                     | 0   | 0   | 0 |
| PITG_06965 | Pi cleavage induced conserved hypothetical protein (45    | 0   | 1   | 0 |
| PITG_06966 | Pi conserved hypothetical protein (1446 nt)               | 13  | 32  | 0 |

|            |                                                           |     |     |    |
|------------|-----------------------------------------------------------|-----|-----|----|
| PITG_06967 | Pi conserved hypothetical protein (1460 nt)               | 23  | 19  | 0  |
| PITG_06968 | Pi conserved hypothetical protein (2451 nt)               | 13  | 29  | 1  |
| PITG_06969 | Pi oxidoreductase, putative (1123 nt)                     | 15  | 51  | 2  |
| PITG_06970 | Pi conserved hypothetical protein (3040 nt)               | 6   | 101 | 0  |
| PITG_06972 | Pi conserved hypothetical protein (631 nt)                | 22  | 23  | 0  |
| PITG_06976 | Pi conserved hypothetical protein (1373 nt)               | 21  | 313 | 0  |
| PITG_06978 | Pi metalloprotease family M20D, putative (2049 nt)        | 3   | 8   | 0  |
| PITG_06979 | Pi aspartate carbamoyltransferase (1271 nt)               | 15  | 24  | 0  |
| PITG_06980 | Pi conserved hypothetical protein (894 nt)                | 13  | 33  | 0  |
| PITG_06981 | Pi DEAD/DEAH box RNA helicase, putative (2637 nt)         | 3   | 10  | 0  |
| PITG_06982 | Pi short chain dehydrogenase, putative (1314 nt)          | 6   | 16  | 0  |
| PITG_06984 | Pi stromal cell-derived factor 2 precursor (957 nt)       | 8   | 19  | 0  |
| PITG_06986 | Pi 5'-3' exoribonuclease, putative (2994 nt)              | 3   | 30  | 0  |
| PITG_06987 | Pi conserved hypothetical protein (924 nt)                | 0   | 15  | 0  |
| PITG_06988 | Pi transmembrane protein, putative (1171 nt)              | 10  | 25  | 0  |
| PITG_06989 | Pi acyltransferase family (1139 nt)                       | 0   | 30  | 0  |
| PITG_06991 | Pi FHA domain-interacting nucleolar phosphoprotein, p     | 5   | 14  | 0  |
| PITG_06992 | Pi glucosidase 2 subunit beta, putative (3210 nt)         | 5   | 25  | 0  |
| PITG_06995 | Pi 60S ribosomal protein L4 (1327 nt)                     | 194 | 220 | 48 |
| PITG_06996 | Pi conserved hypothetical protein (807 nt)                | 32  | 26  | 0  |
| PITG_06997 | Pi conserved hypothetical protein (507 nt)                | 19  | 35  | 0  |
| PITG_07007 | Pi hypothetical protein (1026 nt)                         | 1   | 3   | 0  |
| PITG_07010 | Pi conserved hypothetical protein (1227 nt)               | 0   | 13  | 0  |
| PITG_07011 | Pi conserved hypothetical protein (1076 nt)               | 7   | 31  | 0  |
| PITG_07012 | Pi transmembrane protein, putative (3789 nt)              | 0   | 6   | 0  |
| PITG_07016 | Pi Voltage-gated Ion Channel (VIC) Superfamily (2668 n    | 0   | 0   | 0  |
| PITG_07020 | Pi conserved hypothetical protein (568 nt)                | 2   | 2   | 0  |
| PITG_07024 | Pi inosine-5'-monophosphate dehydrogenase 2 (1726 r       | 2   | 17  | 1  |
| PITG_07026 | Pi conserved hypothetical protein (2849 nt)               | 3   | 9   | 0  |
| PITG_07027 | Pi isocitrate lyase (1764 nt)                             | 9   | 152 | 0  |
| PITG_07028 | Pi peptidyl-prolyl cis-trans isomerase, putative (867 nt) | 52  | 53  | 1  |
| PITG_07029 | Pi palmitoyl-protein thioesterase 1, putative (1415 nt)   | 30  | 136 | 0  |
| PITG_07030 | Pi conserved hypothetical protein (1334 nt)               | 4   | 34  | 0  |
| PITG_07031 | Pi conserved hypothetical protein (2213 nt)               | 1   | 7   | 0  |
| PITG_07033 | Pi conserved hypothetical protein (555 nt)                | 13  | 31  | 0  |
| PITG_07034 | Pi myosin-like protein (4211 nt)                          | 2   | 27  | 0  |
| PITG_07035 | Pi CDK5 regulatory subunit-associated protein 1 (1875     | 2   | 14  | 0  |
| PITG_07036 | Pi ubiquitin activating enzyme, E1 family, putative (345  | 4   | 57  | 1  |
| PITG_07038 | Pi serine/threonine-protein phosphatase ppe1 (1248 n      | 10  | 49  | 0  |
| PITG_07039 | Pi N(4)-(Beta-N-acetylglucosaminy)-L-asparaginase, pu     | 3   | 16  | 0  |
| PITG_07041 | Pi conserved hypothetical protein (3501 nt)               | 16  | 8   | 0  |
| PITG_07042 | Pi conserved hypothetical protein (738 nt)                | 2   | 12  | 0  |
| PITG_07043 | Pi conserved hypothetical protein (333 nt)                | 13  | 26  | 0  |
| PITG_07044 | Pi conserved hypothetical protein (816 nt)                | 1   | 15  | 0  |
| PITG_07045 | Pi conserved hypothetical protein (3128 nt)               | 1   | 13  | 0  |
| PITG_07046 | Pi major vault protein (2627 nt)                          | 3   | 74  | 0  |
| PITG_07047 | Pi THO complex subunit, putative (2342 nt)                | 4   | 26  | 0  |

|            |                                                         |     |     |    |
|------------|---------------------------------------------------------|-----|-----|----|
| PITG_07048 | Pi superoxide dismutase, mitochondrial precursor (800   | 43  | 229 | 12 |
| PITG_07049 | Pi conserved hypothetical protein (1561 nt)             | 0   | 0   | 3  |
| PITG_07052 | Pi conserved hypothetical protein (443 nt)              | 4   | 14  | 0  |
| PITG_07053 | Pi conserved hypothetical protein (2053 nt)             | 13  | 51  | 0  |
| PITG_07054 | Pi conserved hypothetical protein (837 nt)              | 1   | 14  | 0  |
| PITG_07055 | Pi ribosomal protein S6 kinase, putative (2853 nt)      | 5   | 61  | 0  |
| PITG_07056 | Pi isocitrate dehydrogenase, mitochondrial precursor (  | 33  | 170 | 20 |
| PITG_07059 | Pi MADS-box transcription factor, putative (1697 nt)    | 0   | 1   | 0  |
| PITG_07060 | Pi hypothetical protein (943 nt)                        | 3   | 10  | 0  |
| PITG_07061 | Pi ubiquitin-conjugating enzyme E2, putative (1255 nt)  | 1   | 17  | 0  |
| PITG_07062 | Pi aspartyl/glutamyl-tRNA(Asn/Gln) amidotransferase s   | 2   | 12  | 0  |
| PITG_07063 | Pi conserved hypothetical protein (1003 nt)             | 3   | 12  | 0  |
| PITG_07065 | Pi conserved hypothetical protein (1494 nt)             | 0   | 0   | 0  |
| PITG_07071 | Pi conserved hypothetical protein (996 nt)              | 3   | 20  | 0  |
| PITG_07072 | Pi short chain dehydrogenase, putative (767 nt)         | 2   | 15  | 0  |
| PITG_07073 | Pi conserved hypothetical protein (1425 nt)             | 0   | 15  | 0  |
| PITG_07074 | Pi conserved hypothetical protein (4855 nt)             | 1   | 13  | 0  |
| PITG_07076 | Pi Voltage-gated Ion Channel (VIC) Superfamily (4657 n  | 0   | 0   | 0  |
| PITG_07077 | Pi lysophospholipid acyltransferase, putative (2152 nt) | 21  | 27  | 1  |
| PITG_07078 | Pi conserved hypothetical protein (2564 nt)             | 0   | 0   | 0  |
| PITG_07080 | Pi conserved hypothetical protein (1446 nt)             | 5   | 18  | 0  |
| PITG_07083 | Pi ubiquitin thioesterase OTU1-like protein (1069 nt)   | 9   | 13  | 0  |
| PITG_07086 | Pi Major Facilitator Superfamily (MFS) (1455 nt)        | 4   | 3   | 0  |
| PITG_07087 | Pi Major Facilitator Superfamily (MFS) (1425 nt)        | 5   | 1   | 0  |
| PITG_07088 | Pi Major Facilitator Superfamily (MFS) (1479 nt)        | 7   | 117 | 0  |
| PITG_07093 | Pi conserved hypothetical protein (1104 nt)             | 2   | 11  | 0  |
| PITG_07095 | Pi hypothetical protein (339 nt)                        | 6   | 0   | 0  |
| PITG_07096 | Pi protease inhibitor Epi11 (1335 nt)                   | 9   | 243 | 0  |
| PITG_07099 | Pi conserved hypothetical protein (1224 nt)             | 4   | 9   | 0  |
| PITG_07100 | Pi conserved hypothetical protein (1405 nt)             | 13  | 4   | 0  |
| PITG_07102 | Pi conserved hypothetical protein (3206 nt)             | 16  | 30  | 0  |
| PITG_07103 | Pi nuclear pore complex protein Nup155 (4625 nt)        | 2   | 17  | 0  |
| PITG_07104 | Pi ADP-ribosylation factor GTPase-activating protein, p | 5   | 10  | 0  |
| PITG_07107 | Pi conserved hypothetical protein (583 nt)              | 169 | 104 | 2  |
| PITG_07108 | Pi conserved hypothetical protein (1008 nt)             | 7   | 10  | 0  |
| PITG_07109 | Pi conserved hypothetical protein (2827 nt)             | 41  | 44  | 0  |
| PITG_07110 | Pi cleavage and polyadenylation specificity factor subu | 12  | 39  | 0  |
| PITG_07111 | Pi conserved hypothetical protein (1333 nt)             | 13  | 35  | 0  |
| PITG_07115 | Pi ATP-binding Cassette (ABC) Superfamily (4158 nt)     | 6   | 64  | 0  |
| PITG_07116 | Pi ATP-binding Cassette (ABC) Superfamily (1497 nt)     | 0   | 24  | 0  |
| PITG_07117 | Pi ATP-binding Cassette (ABC) Superfamily (1960 nt)     | 0   | 37  | 0  |
| PITG_07118 | Pi conserved hypothetical protein (3736 nt)             | 0   | 15  | 0  |
| PITG_07120 | Pi conserved hypothetical protein (2986 nt)             | 0   | 4   | 0  |
| PITG_07121 | Pi acyl-[acyl-carrier-protein]-UDP-N-acetylglucosamine  | 4   | 22  | 0  |
| PITG_07124 | Pi conserved hypothetical protein (542 nt)              | 4   | 6   | 0  |
| PITG_07128 | Pi conserved hypothetical protein (1116 nt)             | 0   | 6   | 0  |
| PITG_07129 | Pi conserved hypothetical protein (2982 nt)             | 0   | 1   | 0  |

|                                                                      |     |     |    |
|----------------------------------------------------------------------|-----|-----|----|
| PITG_07134   Pi ATP-binding Cassette (ABC) Superfamily (4101 nt)     | 1   | 18  | 0  |
| PITG_07135   Pi conserved hypothetical protein (771 nt)              | 1   | 12  | 0  |
| PITG_07136   Pi serine protease family S33, putative (984 nt)        | 0   | 0   | 0  |
| PITG_07139   Pi conserved hypothetical protein (1738 nt)             | 3   | 14  | 0  |
| PITG_07141   Pi methionyl-tRNA synthetase, putative (1621 nt)        | 0   | 14  | 0  |
| PITG_07143   Pi catalase-peroxidase, putative (2105 nt)              | 0   | 0   | 10 |
| PITG_07145   Pi malonyl-CoA decarboxylase (MCD), putative (2361 n    | 6   | 30  | 0  |
| PITG_07146   Pi conserved hypothetical protein (458 nt)              | 0   | 1   | 0  |
| PITG_07151   Pi conserved hypothetical protein (2220 nt)             | 1   | 0   | 0  |
| PITG_07153   Pi serine protease family S10, putative (1491 nt)       | 8   | 55  | 1  |
| PITG_07154   Pi serine carboxypeptidase, putative (1312 nt)          | 11  | 9   | 0  |
| PITG_07155   Pi conserved hypothetical protein (1334 nt)             | 43  | 568 | 15 |
| PITG_07156   Pi serine protease family S10, putative (1505 nt)       | 41  | 176 | 0  |
| PITG_07160   Pi serine protease family S10, putative (1817 nt)       | 86  | 51  | 0  |
| PITG_07161   Pi serine protease family S10, putative (1987 nt)       | 2   | 4   | 0  |
| PITG_07162   Pi sideroflexin-1-like protein (978 nt)                 | 12  | 27  | 1  |
| PITG_07163   Pi ubiquitin-fold modifier 1 precursor (515 nt)         | 30  | 47  | 0  |
| PITG_07164   Pi serine protease family S10, putative (1488 nt)       | 2   | 39  | 1  |
| PITG_07165   Pi serine protease family S10, putative (1536 nt)       | 5   | 25  | 0  |
| PITG_07166   Pi 2-amino-3-carboxymuconate-6-semialdehyde decarl      | 8   | 30  | 0  |
| PITG_07167   Pi conserved hypothetical protein (551 nt)              | 1   | 39  | 0  |
| PITG_07168   Pi Major Facilitator Superfamily (MFS) (1945 nt)        | 2   | 38  | 0  |
| PITG_07169   Pi Major Facilitator Superfamily (MFS) (1861 nt)        | 3   | 17  | 0  |
| PITG_07170   Pi conserved hypothetical protein (772 nt)              | 10  | 48  | 0  |
| PITG_07171   Pi calcineurin-like phosphoesterase, putative (987 nt)  | 0   | 13  | 0  |
| PITG_07173   Pi 40S ribosomal protein S15 (870 nt)                   | 462 | 749 | 64 |
| PITG_07174   Pi ribonuclease P protein subunit p30, putative (1028 n | 1   | 14  | 0  |
| PITG_07175   Pi conserved hypothetical protein (712 nt)              | 10  | 24  | 0  |
| PITG_07176   Pi conserved hypothetical protein (1854 nt)             | 0   | 11  | 0  |
| PITG_07184   Pi conserved hypothetical protein (1653 nt)             | 0   | 0   | 0  |
| PITG_07190   Pi conserved hypothetical protein (1667 nt)             | 2   | 409 | 0  |
| PITG_07191   Pi protein kinase, putative (1786 nt)                   | 2   | 23  | 0  |
| PITG_07192   Pi conserved hypothetical protein (4665 nt)             | 1   | 25  | 0  |
| PITG_07193   Pi conserved hypothetical protein (1507 nt)             | 3   | 19  | 0  |
| PITG_07194   Pi conserved hypothetical protein (3420 nt)             | 4   | 22  | 0  |
| PITG_07195   Pi AP-4 complex subunit sigma, putative (919 nt)        | 22  | 53  | 0  |
| PITG_07197   Pi 3-ketoacyl-CoA thiolase, mitochondrial (1353 nt)     | 66  | 202 | 0  |
| PITG_07199   Pi conserved hypothetical protein (724 nt)              | 22  | 20  | 0  |
| PITG_07200   Pi conserved hypothetical protein (1056 nt)             | 47  | 29  | 0  |
| PITG_07201   Pi UDP-glucose:glycoprotein glucosyltransferase, putat  | 7   | 26  | 0  |
| PITG_07206   Pi hypothetical protein (1386 nt)                       | 3   | 10  | 0  |
| PITG_07210   Pi protein kinase (2083 nt)                             | 9   | 18  | 0  |
| PITG_07211   Pi conserved hypothetical protein (1127 nt)             | 11  | 22  | 0  |
| PITG_07212   Pi conserved hypothetical protein (1568 nt)             | 2   | 20  | 0  |
| PITG_07216   Pi ATPase WRNIP1 (1628 nt)                              | 1   | 10  | 0  |
| PITG_07226   Pi conserved hypothetical protein (4561 nt)             | 1   | 11  | 0  |
| PITG_07227   Pi hypothetical protein (555 nt)                        | 1   | 14  | 0  |

|            |                                                           |     |      |    |
|------------|-----------------------------------------------------------|-----|------|----|
| PITG_07228 | Pi conserved hypothetical protein (869 nt)                | 2   | 6    | 0  |
| PITG_07229 | Pi conserved hypothetical protein (444 nt)                | 1   | 15   | 0  |
| PITG_07230 | Pi HECT E3 ubiquitin ligase, putative (8169 nt)           | 3   | 18   | 0  |
| PITG_07232 | Pi conserved hypothetical protein (1400 nt)               | 28  | 53   | 0  |
| PITG_07233 | Pi GPI inositol-deacylase, putative (2673 nt)             | 1   | 19   | 0  |
| PITG_07234 | Pi ligatin, putative (1807 nt)                            | 5   | 20   | 0  |
| PITG_07237 | Pi cell division cycle protein 20 (1675 nt)               | 3   | 22   | 0  |
| PITG_07238 | Pi conserved hypothetical protein (677 nt)                | 38  | 47   | 0  |
| PITG_07239 | Pi tartrate-resistant acid phosphatase type 5, putative ( | 11  | 17   | 0  |
| PITG_07240 | Pi 3-deoxy-manno-octulosonate cytidyltransferase, p       | 2   | 16   | 0  |
| PITG_07241 | Pi Monovalent Cation:Proton Antiporter-1 (CPA1) Fami      | 71  | 46   | 0  |
| PITG_07242 | Pi conserved hypothetical protein (639 nt)                | 24  | 66   | 0  |
| PITG_07243 | Pi conserved hypothetical protein (3002 nt)               | 5   | 59   | 0  |
| PITG_07245 | Pi conserved hypothetical protein (465 nt)                | 4   | 8    | 0  |
| PITG_07246 | Pi conserved hypothetical protein (1190 nt)               | 2   | 9    | 0  |
| PITG_07247 | Pi conserved hypothetical protein (4390 nt)               | 3   | 22   | 0  |
| PITG_07248 | Pi protein kinase (2918 nt)                               | 0   | 4    | 0  |
| PITG_07249 | Pi conserved hypothetical protein (1252 nt)               | 1   | 5    | 1  |
| PITG_07250 | Pi conserved hypothetical protein (1055 nt)               | 1   | 14   | 0  |
| PITG_07251 | Pi protein kinase (2493 nt)                               | 0   | 0    | 0  |
| PITG_07253 | Pi conserved hypothetical protein (300 nt)                | 0   | 1    | 0  |
| PITG_07256 | Pi conserved hypothetical protein (934 nt)                | 22  | 29   | 0  |
| PITG_07258 | Pi conserved hypothetical protein (1535 nt)               | 0   | 14   | 2  |
| PITG_07259 | Pi serine protease family S09X, putative (1149 nt)        | 1   | 15   | 0  |
| PITG_07263 | Pi conserved hypothetical protein (478 nt)                | 0   | 22   | 0  |
| PITG_07269 | Pi 60S ribosomal protein L7 (1385 nt)                     | 294 | 552  | 59 |
| PITG_07270 | Pi conserved hypothetical protein (4688 nt)               | 0   | 2    | 0  |
| PITG_07271 | Pi conserved hypothetical protein (4240 nt)               | 0   | 2    | 0  |
| PITG_07273 | Pi conserved hypothetical protein (726 nt)                | 0   | 1    | 0  |
| PITG_07274 | Pi mitogen-activated protein kinase (3258 nt)             | 2   | 21   | 0  |
| PITG_07275 | Pi conserved hypothetical protein (1680 nt)               | 0   | 15   | 0  |
| PITG_07276 | Pi exopolysaccharide phosphotransferase, putative (14     | 1   | 12   | 0  |
| PITG_07277 | Pi exopolysaccharide phosphotransferase, putative (16     | 3   | 10   | 0  |
| PITG_07278 | Pi protein kinase, putative (1325 nt)                     | 29  | 77   | 3  |
| PITG_07279 | Pi transmembrane protein, putative (4092 nt)              | 11  | 47   | 0  |
| PITG_07281 | Pi conserved hypothetical protein (2508 nt)               | 4   | 19   | 0  |
| PITG_07282 | Pi WD domain-containing protein (1083 nt)                 | 2   | 16   | 0  |
| PITG_07283 | Pi threonine dehydratase catabolic, putative (1560 nt)    | 1   | 63   | 0  |
| PITG_07284 | Pi SEC14 cytosolic factor, putative (2586 nt)             | 3   | 15   | 0  |
| PITG_07285 | Pi conserved hypothetical protein (1174 nt)               | 137 | 1105 | 5  |
| PITG_07286 | Pi phosphatidylinositol kinase (4304 nt)                  | 7   | 64   | 0  |
| PITG_07287 | Pi conserved hypothetical protein (771 nt)                | 3   | 14   | 0  |
| PITG_07289 | Pi phosphatidylinositol kinase (4167 nt)                  | 2   | 29   | 0  |
| PITG_07292 | Pi hcp beta-lactamase-like protein (963 nt)               | 5   | 24   | 0  |
| PITG_07293 | Pi conserved hypothetical protein (1493 nt)               | 0   | 14   | 0  |
| PITG_07295 | Pi conserved hypothetical protein (426 nt)                | 0   | 22   | 0  |
| PITG_07297 | Pi conserved hypothetical protein (1382 nt)               | 0   | 28   | 0  |

|                                                                        |     |      |    |
|------------------------------------------------------------------------|-----|------|----|
| PITG_07298   Pi protein kinase (2197 nt)                               | 27  | 14   | 0  |
| PITG_07300   Pi 60S ribosomal protein L35 (797 nt)                     | 561 | 634  | 64 |
| PITG_07301   Pi conserved hypothetical protein (4224 nt)               | 5   | 15   | 0  |
| PITG_07302   Pi histone acetyltransferase, putative (7584 nt)          | 4   | 25   | 0  |
| PITG_07305   Pi conserved hypothetical protein (1652 nt)               | 19  | 52   | 0  |
| PITG_07308   Pi rRNA 2'-O-methyltransferase fibrillarin, putative (98: | 22  | 50   | 9  |
| PITG_07310   Pi Putative beta-1,4-galactosyltransferase (1089 nt)      | 9   | 18   | 0  |
| PITG_07311   Pi DEAD/DEAH box RNA helicase, putative (2446 nt)         | 4   | 8    | 0  |
| PITG_07312   Pi TATA-box-binding protein (1101 nt)                     | 6   | 17   | 0  |
| PITG_07314   Pi conserved hypothetical protein (3093 nt)               | 16  | 67   | 0  |
| PITG_07317   Pi protein kinase (2850 nt)                               | 0   | 0    | 0  |
| PITG_07319   Pi calcium-activated potassium channel subunit alpha-     | 0   | 3    | 0  |
| PITG_07321   Pi conserved hypothetical protein (2618 nt)               | 1   | 6    | 0  |
| PITG_07325   Pi conserved hypothetical protein (1203 nt)               | 11  | 52   | 0  |
| PITG_07326   Pi conserved hypothetical protein (1795 nt)               | 9   | 35   | 0  |
| PITG_07327   Pi H/ACA ribonucleoprotein complex non-core subunit       | 13  | 8    | 0  |
| PITG_07328   Pi manganese superoxide dismutase (877 nt)                | 78  | 767  | 67 |
| PITG_07331   Pi conserved hypothetical protein (1314 nt)               | 12  | 11   | 0  |
| PITG_07334   Pi carbohydrate esterase, putative (969 nt)               | 5   | 15   | 0  |
| PITG_07335   Pi conserved hypothetical protein (1194 nt)               | 0   | 17   | 0  |
| PITG_07336   Pi hypothetical protein (2464 nt)                         | 0   | 3    | 0  |
| PITG_07338   Pi conserved hypothetical protein (1062 nt)               | 9   | 24   | 0  |
| PITG_07340   Pi conserved hypothetical protein (569 nt)                | 524 | 1296 | 35 |
| PITG_07341   Pi conserved hypothetical protein (819 nt)                | 35  | 553  | 2  |
| PITG_07342   Pi conserved hypothetical protein (761 nt)                | 6   | 168  | 0  |
| PITG_07343   Pi conserved hypothetical protein (2065 nt)               | 1   | 2    | 0  |
| PITG_07344   Pi conserved hypothetical protein (2091 nt)               | 0   | 0    | 0  |
| PITG_07345   Pi transmembrane protein, putative (2031 nt)              | 0   | 0    | 0  |
| PITG_07347   Pi conserved hypothetical protein (892 nt)                | 1   | 20   | 0  |
| PITG_07348   Pi conserved hypothetical protein (706 nt)                | 0   | 5    | 0  |
| PITG_07349   Pi gamma-glutamyl hydrolase, putative (954 nt)            | 12  | 46   | 0  |
| PITG_07354   Pi acylamino-acid-releasing enzyme (2435 nt)              | 2   | 22   | 0  |
| PITG_07355   Pi cleavage induced hypothetical protein (1265 nt)        | 3   | 3    | 0  |
| PITG_07366   Pi conserved hypothetical protein (522 nt)                | 55  | 0    | 0  |
| PITG_07380   Pi glutamate synthase, putative (1695 nt)                 | 48  | 42   | 0  |
| PITG_07381   Pi conserved hypothetical protein (1845 nt)               | 0   | 16   | 0  |
| PITG_07384   Pi isoamyl acetate-hydrolyzing esterase 1 (849 nt)        | 37  | 19   | 0  |
| PITG_07385   Pi Major Facilitator Superfamily (MFS) (1549 nt)          | 3   | 11   | 0  |
| PITG_07389   Pi conserved hypothetical protein (1305 nt)               | 0   | 0    | 0  |
| PITG_07395   Pi hypothetical protein (563 nt)                          | 1   | 19   | 0  |
| PITG_07400   Pi 2,3-bisphosphoglycerate-dependent phosphoglycera       | 258 | 111  | 4  |
| PITG_07406   Pi conserved hypothetical protein (1008 nt)               | 0   | 0    | 0  |
| PITG_07410   Pi conserved hypothetical protein (1287 nt)               | 0   | 0    | 0  |
| PITG_07411   Pi conserved hypothetical protein (1236 nt)               | 4   | 18   | 0  |
| PITG_07417   Pi conserved hypothetical protein (858 nt)                | 10  | 15   | 0  |
| PITG_07420   Pi hypothetical protein (1269 nt)                         | 11  | 27   | 0  |
| PITG_07422   Pi conserved hypothetical protein (1236 nt)               | 0   | 47   | 0  |

|            |                                                                          |     |     |    |
|------------|--------------------------------------------------------------------------|-----|-----|----|
| PITG_07423 | Pi conserved hypothetical protein (1173 nt)                              | 4   | 98  | 0  |
| PITG_07424 | Pi cytochrome P450, putative (1695 nt)                                   | 26  | 826 | 0  |
| PITG_07426 | Pi conserved hypothetical protein (1196 nt)                              | 9   | 18  | 0  |
| PITG_07433 | Pi conserved hypothetical protein (1193 nt)                              | 3   | 9   | 0  |
| PITG_07435 | Pi secreted RxLR effector peptide, putative (501 nt)                     | 4   | 22  | 0  |
| PITG_07436 | Pi hypothetical protein (1894 nt)                                        | 19  | 453 | 0  |
| PITG_07445 | Pi mucin-like protein (4439 nt)                                          | 1   | 24  | 0  |
| PITG_07447 | Pi conserved hypothetical protein (643 nt)                               | 7   | 26  | 0  |
| PITG_07454 | Pi conserved hypothetical protein (400 nt)                               | 18  | 503 | 0  |
| PITG_07455 | Pi P-type ATPase (P-ATPase) Superfamily (4047 nt)                        | 6   | 67  | 0  |
| PITG_07456 | Pi conserved hypothetical protein (1320 nt)                              | 2   | 11  | 0  |
| PITG_07458 | Pi Ammonium Transporter (Amt) Family (1395 nt)                           | 0   | 1   | 0  |
| PITG_07470 | Pi conserved hypothetical protein (3281 nt)                              | 8   | 31  | 0  |
| PITG_07473 | Pi EF hand containing protein, putative (1622 nt)                        | 8   | 24  | 0  |
| PITG_07476 | Pi conserved hypothetical protein (1568 nt)                              | 79  | 602 | 0  |
| PITG_07487 | Pi EF hand containing protein, putative (688 nt)                         | 0   | 3   | 0  |
| PITG_07493 | Pi Crinkler (CRN) family protein (561 nt)                                | 13  | 254 | 0  |
| PITG_07496 | Pi conserved hypothetical protein (468 nt)                               | 4   | 16  | 0  |
| PITG_07501 | Pi Crinkler (CRN) family protein (748 nt)                                | 61  | 529 | 0  |
| PITG_07507 | Pi Crinkler (CRN) family protein (564 nt)                                | 16  | 13  | 0  |
| PITG_07509 | Pi Crinkler (CRN) family protein, pseudogene (829 nt)                    | 96  | 154 | 0  |
| PITG_07510 | Pi hypothetical protein (1039 nt)                                        | 11  | 11  | 0  |
| PITG_07514 | Pi crinkler (CRN) family protein, pseudogene (695 nt)                    | 13  | 189 | 0  |
| PITG_07516 | Pi EF hand containing protein, putative (1368 nt)                        | 4   | 17  | 0  |
| PITG_07520 | Pi conserved hypothetical protein (970 nt)                               | 2   | 14  | 0  |
| PITG_07529 | Pi conserved hypothetical protein (536 nt)                               | 27  | 126 | 2  |
| PITG_07530 | Pi conserved hypothetical protein (1857 nt)                              | 20  | 50  | 0  |
| PITG_07531 | Pi conserved hypothetical protein (2090 nt)                              | 16  | 58  | 0  |
| PITG_07536 | Pi conserved hypothetical protein (811 nt)                               | 0   | 0   | 0  |
| PITG_07537 | Pi conserved hypothetical protein (1333 nt)                              | 0   | 1   | 0  |
| PITG_07543 | Pi hypothetical protein (728 nt)                                         | 20  | 36  | 0  |
| PITG_07545 | Pi Mitochondrial Carrier (MC) Family (1222 nt)                           | 19  | 9   | 0  |
| PITG_07546 | Pi replication protein A 32 kDa subunit, putative (780 nt)               | 6   | 33  | 1  |
| PITG_07551 | Pi N(6)-adenine-specific DNA methyltransferase 2, putative (1000 nt)     | 3   | 16  | 0  |
| PITG_07562 | Pi folate-Biopterin Transporter (FBT) family (1821 nt)                   | 2   | 21  | 3  |
| PITG_07565 | Pi folate-Biopterin Transporter (FBT) family (1775 nt)                   | 0   | 12  | 0  |
| PITG_07567 | Pi brefeldin A-inhibited guanine nucleotide-exchange protein 1 (1000 nt) | 1   | 23  | 0  |
| PITG_07570 | Pi conserved hypothetical protein (666 nt)                               | 6   | 43  | 0  |
| PITG_07572 | Pi conserved hypothetical protein (780 nt)                               | 42  | 52  | 0  |
| PITG_07573 | Pi conserved hypothetical protein (2598 nt)                              | 0   | 14  | 4  |
| PITG_07574 | Pi conserved hypothetical protein (1383 nt)                              | 129 | 101 | 0  |
| PITG_07575 | Pi haloacid dehalogenase-like hydrolase, putative (855 nt)               | 1   | 15  | 0  |
| PITG_07582 | Pi conserved hypothetical protein (1205 nt)                              | 2   | 0   | 48 |
| PITG_07586 | Pi conserved hypothetical protein (547 nt)                               | 3   | 0   | 1  |
| PITG_07589 | Pi conserved hypothetical protein (2082 nt)                              | 9   | 33  | 0  |
| PITG_07599 | Pi tubulin-specific chaperone E, putative (2085 nt)                      | 6   | 8   | 0  |
| PITG_07628 | Pi tubulin-specific chaperone E, putative (1808 nt)                      | 3   | 27  | 0  |

|            |                                                            |     |     |   |
|------------|------------------------------------------------------------|-----|-----|---|
| PITG_07633 | Pi conserved hypothetical protein (533 nt)                 | 10  | 0   | 0 |
| PITG_07635 | Pi conserved hypothetical protein (2342 nt)                | 0   | 0   | 0 |
| PITG_07636 | Pi serine protease family S15, putative (2178 nt)          | 0   | 29  | 0 |
| PITG_07637 | Pi transcription initiation factor TFIID subunit, putative | 16  | 51  | 0 |
| PITG_07638 | Pi phospholipase A2, putative (933 nt)                     | 148 | 60  | 0 |
| PITG_07642 | Pi hypothetical protein (222 nt)                           | 2   | 12  | 0 |
| PITG_07644 | Pi replication factor C subunit 1 (2845 nt)                | 0   | 11  | 0 |
| PITG_07646 | Pi conserved hypothetical protein (465 nt)                 | 4   | 41  | 0 |
| PITG_07652 | Pi mitogen-activated protein kinase, putative (3285 nt)    | 4   | 6   | 0 |
| PITG_07653 | Pi conserved hypothetical protein (786 nt)                 | 2   | 36  | 0 |
| PITG_07655 | Pi conserved hypothetical protein (12588 nt)               | 2   | 31  | 0 |
| PITG_07656 | Pi ubiquitin-specific protease, putative (2872 nt)         | 0   | 13  | 0 |
| PITG_07657 | Pi conserved hypothetical protein (1342 nt)                | 1   | 25  | 0 |
| PITG_07660 | Pi transmembrane protein, putative (1026 nt)               | 8   | 17  | 0 |
| PITG_07661 | Pi Major Facilitator Superfamily (MFS) (1689 nt)           | 1   | 16  | 0 |
| PITG_07663 | Pi major Facilitator Superfamily (MFS) (1692 nt)           | 4   | 152 | 0 |
| PITG_07671 | Pi NADP-specific glutamate dehydrogenase, putative (1      | 5   | 64  | 4 |
| PITG_07682 | Pi conserved hypothetical protein (3584 nt)                | 0   | 2   | 0 |
| PITG_07686 | Pi conserved hypothetical protein (1952 nt)                | 0   | 0   | 0 |
| PITG_07687 | Pi conserved hypothetical protein (2886 nt)                | 0   | 1   | 0 |
| PITG_07689 | Pi secreted RxLR effector peptide, putative (315 nt)       | 0   | 0   | 2 |
| PITG_07697 | Pi conserved hypothetical protein (840 nt)                 | 7   | 26  | 0 |
| PITG_07698 | Pi conserved hypothetical protein (867 nt)                 | 0   | 45  | 0 |
| PITG_07699 | Pi cytochrome P450, putative (1599 nt)                     | 7   | 14  | 0 |
| PITG_07700 | Pi conserved hypothetical protein (826 nt)                 | 3   | 27  | 0 |
| PITG_07701 | Pi ubiquinone/menaquinone biosynthesis methyltransf        | 11  | 36  | 0 |
| PITG_07702 | Pi UDP-N-acetylglucosamine-peptide N-acetylglucosam        | 2   | 56  | 0 |
| PITG_07703 | Pi conserved hypothetical protein (5210 nt)                | 1   | 46  | 0 |
| PITG_07705 | Pi conserved hypothetical protein (698 nt)                 | 3   | 24  | 0 |
| PITG_07707 | Pi conserved hypothetical protein (1962 nt)                | 2   | 22  | 0 |
| PITG_07708 | Pi hypothetical protein (659 nt)                           | 17  | 5   | 0 |
| PITG_07710 | Pi sugar transporter, putative (1536 nt)                   | 15  | 27  | 0 |
| PITG_07711 | Pi Major Facilitator Superfamily (MFS) (1383 nt)           | 60  | 47  | 0 |
| PITG_07714 | Pi ATP-binding Cassette (ABC) superfamily (4094 nt)        | 0   | 3   | 0 |
| PITG_07715 | Pi ATP-binding Cassette (ABC) Superfamily (3840 nt)        | 0   | 7   | 0 |
| PITG_07717 | Pi ATP-binding Cassette (ABC) Superfamily (4092 nt)        | 1   | 8   | 0 |
| PITG_07723 | Pi Major Facilitator Superfamily (MFS) (1533 nt)           | 2   | 22  | 0 |
| PITG_07727 | Pi conserved hypothetical protein (693 nt)                 | 6   | 64  | 0 |
| PITG_07728 | Pi conserved hypothetical protein (3552 nt)                | 0   | 9   | 0 |
| PITG_07730 | Pi conserved hypothetical protein (1130 nt)                | 3   | 14  | 0 |
| PITG_07731 | Pi protein kinase, putative (2749 nt)                      | 1   | 19  | 0 |
| PITG_07741 | Pi secreted RxLR effector peptide, putative (348 nt)       | 0   | 0   | 0 |
| PITG_07744 | Pi DEAD/DEAH box RNA helicase, putative (4125 nt)          | 0   | 16  | 0 |
| PITG_07745 | Pi conserved hypothetical protein (1141 nt)                | 5   | 40  | 0 |
| PITG_07752 | Pi conserved hypothetical protein (2454 nt)                | 0   | 0   | 0 |
| PITG_07758 | Pi conserved hypothetical protein (1114 nt)                | 3   | 71  | 0 |
| PITG_07765 | Pi conserved hypothetical protein (2670 nt)                | 3   | 20  | 0 |



|            |                                                          |    |     |    |
|------------|----------------------------------------------------------|----|-----|----|
| PITG_07767 | Pi conserved hypothetical protein (2458 nt)              | 4  | 12  | 0  |
| PITG_07772 | Pi conserved hypothetical protein (2037 nt)              | 0  | 21  | 0  |
| PITG_07774 | Pi conserved hypothetical protein (2334 nt)              | 3  | 24  | 0  |
| PITG_07775 | Pi splicing factor 3B subunit, putative (719 nt)         | 6  | 24  | 0  |
| PITG_07776 | Pi conserved hypothetical protein (829 nt)               | 0  | 17  | 0  |
| PITG_07778 | Pi conserved hypothetical protein (2697 nt)              | 7  | 80  | 0  |
| PITG_07786 | Pi hypothetical protein (438 nt)                         | 9  | 199 | 0  |
| PITG_07790 | Pi peroxisomal (S)-2-hydroxy-acid oxidase, putative (14  | 6  | 29  | 3  |
| PITG_07791 | Pi conserved hypothetical protein (698 nt)               | 22 | 106 | 2  |
| PITG_07792 | Pi ATP synthase subunit delta', putative (510 nt)        | 54 | 225 | 50 |
| PITG_07793 | Pi Outer Dynein Arm Light Chain 2 (550 nt)               | 2  | 16  | 0  |
| PITG_07794 | Pi conserved hypothetical protein (1375 nt)              | 92 | 154 | 0  |
| PITG_07795 | Pi myosin-like protein (2346 nt)                         | 9  | 20  | 0  |
| PITG_07796 | Pi myosin-like protein (2910 nt)                         | 4  | 8   | 0  |
| PITG_07797 | Pi methionyl-tRNA synthetase, putative (2231 nt)         | 2  | 19  | 0  |
| PITG_07801 | Pi conserved hypothetical protein (3748 nt)              | 0  | 20  | 0  |
| PITG_07804 | Pi conserved hypothetical protein (982 nt)               | 1  | 10  | 0  |
| PITG_07807 | Pi conserved hypothetical protein (1300 nt)              | 19 | 151 | 0  |
| PITG_07808 | Pi fidgetin-like protein (3137 nt)                       | 9  | 79  | 0  |
| PITG_07809 | Pi casein kinase I, putative (1634 nt)                   | 6  | 43  | 0  |
| PITG_07810 | Pi hypothetical protein (798 nt)                         | 6  | 24  | 0  |
| PITG_07815 | Pi conserved hypothetical protein (828 nt)               | 6  | 45  | 0  |
| PITG_07817 | Pi conserved hypothetical protein (6441 nt)              | 0  | 14  | 0  |
| PITG_07818 | Pi conserved hypothetical protein (551 nt)               | 0  | 13  | 0  |
| PITG_07820 | Pi guanine deaminase, putative (1335 nt)                 | 0  | 10  | 0  |
| PITG_07821 | Pi ATP-dependent RNA helicase, putative (5639 nt)        | 0  | 9   | 0  |
| PITG_07823 | Pi DNA topoisomerase 2 (2669 nt)                         | 1  | 25  | 0  |
| PITG_07826 | Pi hypothetical protein (464 nt)                         | 13 | 34  | 0  |
| PITG_07827 | Pi conserved hypothetical protein (426 nt)               | 50 | 124 | 2  |
| PITG_07828 | Pi serine carboxypeptidase-like family S10, putative (18 | 5  | 39  | 0  |
| PITG_07829 | Pi exosome complex exonuclease RRP43, putative (114      | 7  | 24  | 0  |
| PITG_07830 | Pi protein kinase (2166 nt)                              | 2  | 9   | 0  |
| PITG_07831 | Pi conserved hypothetical protein (766 nt)               | 0  | 2   | 0  |
| PITG_07832 | Pi conserved hypothetical protein (1376 nt)              | 0  | 0   | 0  |
| PITG_07833 | Pi similar to sea slug pheromone (795 nt)                | 0  | 0   | 20 |
| PITG_07837 | Pi conserved hypothetical protein (658 nt)               | 0  | 4   | 0  |
| PITG_07838 | Pi conserved hypothetical protein (1191 nt)              | 0  | 3   | 0  |
| PITG_07839 | Pi translation initiation factor eIF-2B subunit gamma, p | 3  | 19  | 0  |
| PITG_07841 | Pi glycyl-tRNA synthetase (1528 nt)                      | 5  | 10  | 0  |
| PITG_07843 | Pi protein disulfide-isomerase, putative (1657 nt)       | 8  | 100 | 2  |
| PITG_07846 | Pi glycylopeptide N-tetradecanoyltransferase 2 (1609 nt  | 15 | 115 | 2  |
| PITG_07847 | Pi conserved hypothetical protein (1047 nt)              | 0  | 0   | 0  |
| PITG_07848 | Pi conserved hypothetical protein (1029 nt)              | 24 | 36  | 0  |
| PITG_07851 | Pi protein kinase (1421 nt)                              | 7  | 24  | 0  |
| PITG_07852 | Pi conserved hypothetical protein (2288 nt)              | 19 | 20  | 0  |
| PITG_07853 | Pi conserved hypothetical protein (2058 nt)              | 1  | 4   | 0  |
| PITG_07855 | Pi Drug/Metabolite Transporter (DMT) Superfamily (14     | 2  | 19  | 0  |

|                                                                             |    |     |   |
|-----------------------------------------------------------------------------|----|-----|---|
| PITG_07856   Pi conserved hypothetical protein (1033 nt)                    | 1  | 14  | 0 |
| PITG_07857   Pi conserved hypothetical protein (1530 nt)                    | 0  | 11  | 0 |
| PITG_07858   Pi conserved hypothetical protein (1124 nt)                    | 2  | 9   | 0 |
| PITG_07861   Pi carbohydrate-binding protein, putative (1564 nt)            | 4  | 35  | 1 |
| PITG_07865   Pi autophagy-related protein, putative (8968 nt)               | 10 | 59  | 0 |
| PITG_07866   Pi thiamin pyrophosphokinase, putative (662 nt)                | 22 | 56  | 0 |
| PITG_07868   Pi conserved hypothetical protein (3591 nt)                    | 2  | 23  | 0 |
| PITG_07870   Pi conserved hypothetical protein (363 nt)                     | 1  | 20  | 0 |
| PITG_07874   Pi DNA topoisomerase 2 (5187 nt)                               | 2  | 34  | 0 |
| PITG_07878   Pi conserved hypothetical protein (1659 nt)                    | 0  | 0   | 0 |
| PITG_07879   Pi conserved hypothetical protein (1400 nt)                    | 1  | 14  | 0 |
| PITG_07880   Pi betaine aldehyde dehydrogenase (1476 nt)                    | 3  | 17  | 0 |
| PITG_07882   Pi conserved hypothetical protein (2100 nt)                    | 0  | 4   | 0 |
| PITG_07884   Pi XTP3-transactivated gene A protein (1704 nt)                | 5  | 14  | 0 |
| PITG_07885   Pi eukaryotic translation initiation factor 2 subunit alpha    | 83 | 96  | 5 |
| PITG_07886   Pi EF-hand domain-containing protein, putative (1866 nt)       | 0  | 0   | 0 |
| PITG_07887   Pi 26S proteasome non-ATPase regulatory subunit 6 (1.6         | 10 | 55  | 1 |
| PITG_07888   Pi conserved hypothetical protein (899 nt)                     | 4  | 11  | 0 |
| PITG_07889   Pi conserved hypothetical protein (1200 nt)                    | 3  | 11  | 0 |
| PITG_07890   Pi conserved hypothetical protein (2045 nt)                    | 2  | 17  | 0 |
| PITG_07891   Pi conserved hypothetical protein (487 nt)                     | 5  | 16  | 0 |
| PITG_07892   Pi conserved hypothetical protein (926 nt)                     | 2  | 21  | 0 |
| PITG_07894   Pi sulfatase-like protein (612 nt)                             | 20 | 21  | 0 |
| PITG_07895   Pi sulfatase-like protein (2741 nt)                            | 0  | 25  | 0 |
| PITG_07896   Pi sulfatase-like protein (2403 nt)                            | 1  | 63  | 0 |
| PITG_07898   Pi sulfatase-like protein (2445 nt)                            | 7  | 24  | 0 |
| PITG_07900   Pi Amino Acid/Auxin Permease (AAP) Family (1652 nt)            | 0  | 13  | 0 |
| PITG_07902   Pi chromodomain protein, putative (1692 nt)                    | 1  | 13  | 0 |
| PITG_07903   Pi 26S proteasome non-ATPase regulatory subunit, putative      | 8  | 65  | 3 |
| PITG_07905   Pi xylose isomerase 1 (1410 nt)                                | 22 | 41  | 0 |
| PITG_07910   Pi 5'-AMP-activated protein kinase catalytic subunit, putative | 0  | 2   | 0 |
| PITG_07911   Pi cytosolic 5'-nucleotidase III-like protein (1156 nt)        | 0  | 1   | 0 |
| PITG_07912   Pi Polycystin Cation Channel (PCC) Family (2838 nt)            | 0  | 4   | 0 |
| PITG_07913   Pi conserved hypothetical protein (668 nt)                     | 0  | 13  | 0 |
| PITG_07914   Pi synaptobrevin-like protein (1084 nt)                        | 52 | 110 | 2 |
| PITG_07915   Pi conserved hypothetical protein (2095 nt)                    | 4  | 21  | 0 |
| PITG_07916   Pi protein kinase, putative (1779 nt)                          | 5  | 14  | 0 |
| PITG_07917   Pi PLAC8 family protein (722 nt)                               | 8  | 88  | 0 |
| PITG_07921   Pi PLAC8 family protein (459 nt)                               | 0  | 1   | 0 |
| PITG_07922   Pi hypothetical protein (478 nt)                               | 3  | 2   | 0 |
| PITG_07923   Pi PLAC8 family protein (1717 nt)                              | 13 | 95  | 0 |
| PITG_07924   Pi Drug/Metabolite Transporter (DMT) Superfamily (17           | 17 | 68  | 0 |
| PITG_07925   Pi exportin-5-like protein (3724 nt)                           | 1  | 15  | 0 |
| PITG_07926   Pi glycoprotein-N-acetylgalactosamine 3-beta-galactosaminidase | 1  | 11  | 0 |
| PITG_07933   Pi F-box protein, putative (1205 nt)                           | 2  | 9   | 0 |
| PITG_07937   Pi conserved hypothetical protein (5262 nt)                    | 1  | 11  | 0 |
| PITG_07938   Pi conserved hypothetical protein (1065 nt)                    | 3  | 16  | 0 |

|            |                                                                                   |    |     |     |
|------------|-----------------------------------------------------------------------------------|----|-----|-----|
| PITG_07939 | Pi conserved hypothetical protein (2746 nt)                                       | 10 | 148 | 0   |
| PITG_07940 | Pi conserved hypothetical protein (1261 nt)                                       | 0  | 25  | 0   |
| PITG_07941 | Pi conserved hypothetical protein (114 nt)                                        | 1  | 18  | 0   |
| PITG_07943 | Pi phospholipid-transporting ATPase, putative (7899 nt)                           | 0  | 1   | 0   |
| PITG_07944 | Pi conserved hypothetical protein (1242 nt)                                       | 0  | 20  | 0   |
| PITG_07945 | Pi snRNA-activating protein complex subunit 3, putative                           | 4  | 23  | 0   |
| PITG_07946 | Pi conserved hypothetical protein (1648 nt)                                       | 4  | 27  | 0   |
| PITG_07947 | Pi secreted RxLR effector peptide, putative (462 nt)                              | 95 | 398 | 20  |
| PITG_07948 | Pi choline dehydrogenase, putative (2556 nt)                                      | 1  | 25  | 0   |
| PITG_07949 | Pi alpha-tubulin, putative (1407 nt)                                              | 2  | 67  | 0   |
| PITG_07950 | Pi Voltage-gated Ion Channel (VIC) Superfamily (2783 nt)                          | 0  | 3   | 0   |
| PITG_07951 | Pi conserved hypothetical protein (631 nt)                                        | 3  | 1   | 0   |
| PITG_07952 | Pi conserved hypothetical protein (1282 nt)                                       | 1  | 13  | 0   |
| PITG_07953 | Pi 3-ketoacyl-CoA thiolase A (1340 nt)                                            | 22 | 80  | 0   |
| PITG_07955 | Pi xaa-Pro dipeptidase, metalloprotease family M24B, I                            | 19 | 51  | 0   |
| PITG_07958 | Pi conserved hypothetical protein (1102 nt)                                       | 0  | 1   | 0   |
| PITG_07959 | Pi conserved hypothetical protein (1146 nt)                                       | 0  | 2   | 0   |
| PITG_07960 | Pi alpha-tubulin, putative (1576 nt)                                              | 30 | 136 | 17  |
| PITG_07961 | Pi cleavage induced tubulin alpha chain (1549 nt)                                 | 3  | 8   | 110 |
| PITG_07964 | Pi conserved hypothetical protein (1850 nt)                                       | 6  | 41  | 0   |
| PITG_07965 | Pi conserved hypothetical protein (952 nt)                                        | 3  | 12  | 0   |
| PITG_07967 | Pi protein kinase, putative (1453 nt)                                             | 14 | 210 | 0   |
| PITG_07968 | Pi protein kinase, putative (1581 nt)                                             | 3  | 79  | 0   |
| PITG_07971 | Pi conserved hypothetical protein (1467 nt)                                       | 9  | 37  | 0   |
| PITG_07972 | Pi conserved hypothetical protein (1173 nt)                                       | 49 | 179 | 8   |
| PITG_07973 | Pi Voltage-gated Ion Channel (VIC) Superfamily (1558 nt)                          | 19 | 48  | 0   |
| PITG_07974 | Pi conserved hypothetical protein (1801 nt)                                       | 28 | 67  | 1   |
| PITG_07975 | Pi methylcrotonoyl-CoA carboxylase beta chain, mitochondrial                      | 15 | 65  | 0   |
| PITG_07976 | Pi conserved hypothetical protein (1462 nt)                                       | 9  | 41  | 0   |
| PITG_07977 | Pi hypothetical protein (1123 nt)                                                 | 3  | 6   | 0   |
| PITG_07978 | Pi protein kinase, putative (1474 nt)                                             | 2  | 22  | 0   |
| PITG_07983 | Pi urease accessory protein, putative (1556 nt)                                   | 16 | 3   | 0   |
| PITG_07985 | Pi myosin-like protein (4915 nt)                                                  | 7  | 95  | 0   |
| PITG_07986 | Pi crinkler (CRN) family protein, pseudogene (1115 nt)                            | 0  | 15  | 0   |
| PITG_07988 | Pi sulfatase-like protein (2735 nt)                                               | 5  | 10  | 0   |
| PITG_07991 | Pi glutamate-cysteine ligase catalytic subunit, putative                          | 4  | 38  | 0   |
| PITG_07992 | Pi conserved hypothetical protein (612 nt)                                        | 0  | 0   | 0   |
| PITG_07993 | Pi methyltransferase WBSCR22 (1157 nt)                                            | 4  | 17  | 0   |
| PITG_07994 | Pi Dicarboxylate/Amino Acid:Cation (Na <sup>+</sup> or H <sup>+</sup> ) Symporter | 1  | 10  | 0   |
| PITG_07995 | Pi cyclin-dependent kinase, putative (918 nt)                                     | 14 | 27  | 0   |
| PITG_07996 | Pi alpha-tubulin (1698 nt)                                                        | 2  | 5   | 122 |
| PITG_07999 | Pi alpha-tubulin, putative (1757 nt)                                              | 8  | 17  | 34  |
| PITG_08000 | Pi glucosylceramidase (2040 nt)                                                   | 0  | 2   | 0   |
| PITG_08001 | Pi glucosylceramidase, putative (2022 nt)                                         | 4  | 43  | 1   |
| PITG_08002 | Pi glucosylceramidase, putative (1829 nt)                                         | 3  | 44  | 0   |
| PITG_08003 | Pi conserved hypothetical protein (939 nt)                                        | 4  | 20  | 0   |
| PITG_08004 | Pi glucosylceramidase, putative (2009 nt)                                         | 3  | 9   | 0   |

|            |                                                           |     |     |   |
|------------|-----------------------------------------------------------|-----|-----|---|
| PITG_08008 | Pi protein kinase, putative (2631 nt)                     | 0   | 1   | 0 |
| PITG_08009 | Pi conserved hypothetical protein (717 nt)                | 7   | 8   | 0 |
| PITG_08011 | Pi pre-mRNA-splicing factor RSE1 (3594 nt)                | 5   | 23  | 0 |
| PITG_08013 | Pi conserved hypothetical protein (879 nt)                | 2   | 10  | 0 |
| PITG_08014 | Pi proteasome subunit beta type-2, putative (770 nt)      | 24  | 157 | 7 |
| PITG_08015 | Pi Dynein 1b Light Intermediate Chain (1212 nt)           | 2   | 0   | 0 |
| PITG_08016 | Pi vesicle-trafficking protein SEC22b, putative (1146 nt) | 2   | 29  | 0 |
| PITG_08017 | Pi cell division cycle protein 123 (1114 nt)              | 0   | 13  | 0 |
| PITG_08018 | Pi conserved hypothetical protein (1362 nt)               | 41  | 112 | 0 |
| PITG_08019 | Pi conserved hypothetical protein (1655 nt)               | 5   | 41  | 0 |
| PITG_08022 | Pi threonine dehydratase, putative (2138 nt)              | 5   | 15  | 0 |
| PITG_08023 | Pi HECT E3 ubiquitin ligase, putative (6662 nt)           | 0   | 26  | 0 |
| PITG_08024 | Pi conserved hypothetical protein (1559 nt)               | 0   | 56  | 1 |
| PITG_08025 | Pi HECT E3 ubiquitin ligase, putative (3597 nt)           | 3   | 91  | 1 |
| PITG_08026 | Pi DEAD/DEAH box RNA helicase, putative (2571 nt)         | 2   | 2   | 0 |
| PITG_08028 | Pi cohesin subunit, putative (4711 nt)                    | 1   | 41  | 0 |
| PITG_08031 | Pi conserved hypothetical protein (7775 nt)               | 3   | 39  | 0 |
| PITG_08032 | Pi P-type ATPase (P-ATPase) Superfamily (3892 nt)         | 1   | 20  | 0 |
| PITG_08035 | Pi DNA repair protein radA (1626 nt)                      | 0   | 17  | 0 |
| PITG_08036 | Pi conserved hypothetical protein (596 nt)                | 17  | 34  | 0 |
| PITG_08037 | Pi conserved hypothetical protein (1024 nt)               | 6   | 17  | 0 |
| PITG_08038 | Pi sporangia induced hypothetical protein (973 nt)        | 8   | 8   | 0 |
| PITG_08040 | Pi conserved hypothetical protein (1004 nt)               | 1   | 19  | 0 |
| PITG_08042 | Pi protein kinase (1669 nt)                               | 100 | 153 | 0 |
| PITG_08043 | Pi conserved hypothetical protein (2615 nt)               | 10  | 86  | 1 |
| PITG_08044 | Pi conserved hypothetical protein (1360 nt)               | 66  | 550 | 3 |
| PITG_08045 | Pi dimethyladenosine transferase (1226 nt)                | 1   | 20  | 0 |
| PITG_08046 | Pi kinesin-like protein (3040 nt)                         | 0   | 5   | 0 |
| PITG_08048 | Pi conserved hypothetical protein (1083 nt)               | 6   | 18  | 0 |
| PITG_08049 | Pi Equilibrative Nucleoside Transporter (ENT) Family (4   | 1   | 11  | 0 |
| PITG_08050 | Pi conserved hypothetical protein (1734 nt)               | 0   | 16  | 0 |
| PITG_08051 | Pi conserved hypothetical protein (574 nt)                | 0   | 27  | 0 |
| PITG_08052 | Pi conserved hypothetical protein (438 nt)                | 5   | 21  | 0 |
| PITG_08056 | Pi carbohydrate esterase, putative (1567 nt)              | 1   | 18  | 0 |
| PITG_08059 | Pi conserved hypothetical protein (1164 nt)               | 0   | 4   | 0 |
| PITG_08060 | Pi conserved hypothetical protein (1197 nt)               | 2   | 9   | 0 |
| PITG_08061 | Pi hydroxyacyl-coenzyme A dehydrogenase, mitochond        | 7   | 100 | 0 |
| PITG_08067 | Pi Crinkler (CRN) family protein, pseudogene (1176 nt)    | 62  | 194 | 0 |
| PITG_08072 | Pi conserved hypothetical protein (1437 nt)               | 3   | 8   | 0 |
| PITG_08082 | Pi cytochrome b5 (444 nt)                                 | 10  | 79  | 7 |
| PITG_08083 | Pi conserved hypothetical protein (1055 nt)               | 9   | 65  | 0 |
| PITG_08084 | Pi conserved hypothetical protein (874 nt)                | 11  | 107 | 0 |
| PITG_08085 | Pi conserved hypothetical protein (526 nt)                | 3   | 107 | 0 |
| PITG_08087 | Pi RNA polymerase II-associated protein 1, putative (35   | 1   | 14  | 0 |
| PITG_08089 | Pi conserved hypothetical protein (1210 nt)               | 0   | 23  | 0 |
| PITG_08090 | Pi conserved hypothetical protein (3085 nt)               | 44  | 113 | 0 |
| PITG_08091 | Pi hypothetical protein (243 nt)                          | 2   | 28  | 0 |

|            |                                                            |     |     |   |
|------------|------------------------------------------------------------|-----|-----|---|
| PITG_08093 | Pi conserved hypothetical protein (2712 nt)                | 3   | 18  | 0 |
| PITG_08094 | Pi inorganic pyrophosphatase (889 nt)                      | 2   | 15  | 0 |
| PITG_08095 | Pi conserved hypothetical protein (1345 nt)                | 2   | 20  | 0 |
| PITG_08099 | Pi PLAC8 family protein (711 nt)                           | 0   | 0   | 0 |
| PITG_08103 | Pi hypothetical protein (333 nt)                           | 18  | 813 | 0 |
| PITG_08104 | Pi conserved hypothetical protein (611 nt)                 | 7   | 24  | 0 |
| PITG_08107 | Pi hypothetical protein (888 nt)                           | 0   | 0   | 0 |
| PITG_08110 | Pi conserved hypothetical protein (1126 nt)                | 24  | 6   | 0 |
| PITG_08119 | Pi oxidoreductase htatip2 (1434 nt)                        | 87  | 146 | 0 |
| PITG_08120 | Pi conserved hypothetical protein (821 nt)                 | 17  | 55  | 0 |
| PITG_08128 | Pi conserved hypothetical protein (1080 nt)                | 0   | 0   | 0 |
| PITG_08129 | Pi folic acid synthesis protein fol1, putative (1745 nt)   | 1   | 10  | 0 |
| PITG_08130 | Pi conserved hypothetical protein (358 nt)                 | 1   | 0   | 0 |
| PITG_08131 | Pi oxidoreductase htatip2-like protein (817 nt)            | 3   | 61  | 0 |
| PITG_08132 | Pi conserved hypothetical protein (1057 nt)                | 6   | 53  | 0 |
| PITG_08135 | Pi D-aspartate oxidase, putative (1354 nt)                 | 9   | 77  | 0 |
| PITG_08136 | Pi conserved hypothetical protein (1126 nt)                | 10  | 30  | 0 |
| PITG_08137 | Pi palmitoyltransferase, putative (726 nt)                 | 5   | 13  | 0 |
| PITG_08138 | Pi conserved hypothetical protein (1737 nt)                | 26  | 58  | 0 |
| PITG_08139 | Pi conserved hypothetical protein (5069 nt)                | 1   | 30  | 1 |
| PITG_08140 | Pi hypothetical protein (1142 nt)                          | 1   | 47  | 0 |
| PITG_08142 | Pi 5-methylthioadenosine/S-adenosylhomocysteine de         | 16  | 54  | 0 |
| PITG_08143 | Pi elicitin-like protein (459 nt)                          | 1   | 16  | 0 |
| PITG_08154 | Pi conserved hypothetical protein (1186 nt)                | 8   | 464 | 0 |
| PITG_08155 | Pi peptidyl-prolyl cis-trans isomerase, putative (1049 nt) | 1   | 11  | 0 |
| PITG_08156 | Pi conserved hypothetical protein (483 nt)                 | 4   | 3   | 0 |
| PITG_08157 | Pi queuine tRNA-ribosyltransferase domain-containing       | 2   | 30  | 0 |
| PITG_08159 | Pi conserved hypothetical protein (2251 nt)                | 0   | 17  | 0 |
| PITG_08168 | Pi fibronectin type III domain-containing protein (6283    | 0   | 11  | 0 |
| PITG_08172 | Pi conserved hypothetical protein (1247 nt)                | 6   | 33  | 0 |
| PITG_08173 | Pi DNA-directed RNA polymerase III subunit 127.6 kDa       | 3   | 13  | 0 |
| PITG_08175 | Pi hypothetical protein (415 nt)                           | 15  | 14  | 0 |
| PITG_08176 | Pi conserved hypothetical protein (747 nt)                 | 0   | 12  | 0 |
| PITG_08178 | Pi conserved hypothetical protein (2157 nt)                | 0   | 0   | 0 |
| PITG_08179 | Pi ATP-binding Cassette (ABC) Superfamily (4661 nt)        | 1   | 11  | 0 |
| PITG_08181 | Pi conserved hypothetical protein (2074 nt)                | 2   | 35  | 0 |
| PITG_08183 | Pi conserved hypothetical protein (1792 nt)                | 7   | 30  | 0 |
| PITG_08184 | Pi phosphatidylinositide phosphatase SAC1-like protein     | 7   | 26  | 0 |
| PITG_08185 | Pi conserved hypothetical protein (511 nt)                 | 122 | 359 | 0 |
| PITG_08186 | Pi conserved hypothetical protein (1872 nt)                | 1   | 13  | 0 |
| PITG_08187 | Pi ankyrin-like protein (1227 nt)                          | 0   | 13  | 0 |
| PITG_08188 | Pi conserved hypothetical protein (1701 nt)                | 8   | 27  | 1 |
| PITG_08189 | Pi pre-mRNA-splicing factor, Crooked neck-like protein     | 6   | 36  | 0 |
| PITG_08193 | Pi elicitin-like protein (357 nt)                          | 12  | 29  | 2 |
| PITG_08196 | Pi conserved hypothetical protein (836 nt)                 | 15  | 66  | 0 |
| PITG_08197 | Pi mitochondrial intermediate peptidase, putative (239     | 4   | 13  | 0 |
| PITG_08198 | Pi conserved hypothetical protein (1653 nt)                | 4   | 17  | 0 |

|            |                                                           |     |     |   |
|------------|-----------------------------------------------------------|-----|-----|---|
| PITG_08199 | Pi HSF-type DNA-binding, putative (928 nt)                | 17  | 103 | 0 |
| PITG_08202 | Pi conserved hypothetical protein (896 nt)                | 0   | 1   | 1 |
| PITG_08205 | Pi methionyl-tRNA formyltransferase, putative (1696 nt)   | 1   | 15  | 0 |
| PITG_08206 | Pi signal peptidase complex subunit 3, putative (1742 nt) | 8   | 51  | 1 |
| PITG_08207 | Pi conserved hypothetical protein (2934 nt)               | 1   | 19  | 0 |
| PITG_08209 | Pi conserved hypothetical protein (505 nt)                | 31  | 48  | 0 |
| PITG_08210 | Pi proteasome subunit beta type-3, putative (794 nt)      | 53  | 176 | 5 |
| PITG_08211 | Pi U2-associated splicing factor, putative (3263 nt)      | 2   | 24  | 0 |
| PITG_08213 | Pi carbohydrate-binding protein, putative (1134 nt)       | 19  | 158 | 0 |
| PITG_08216 | Pi WD domain-containing protein, putative (4192 nt)       | 0   | 15  | 0 |
| PITG_08218 | Pi conserved hypothetical protein (725 nt)                | 29  | 148 | 0 |
| PITG_08221 | Pi conserved hypothetical protein (1098 nt)               | 1   | 4   | 0 |
| PITG_08222 | Pi conserved hypothetical protein (1346 nt)               | 3   | 10  | 0 |
| PITG_08229 | Pi conserved hypothetical protein (3037 nt)               | 3   | 12  | 0 |
| PITG_08230 | Pi vacuolar protein sorting-associated protein, putative  | 0   | 19  | 0 |
| PITG_08232 | Pi conserved hypothetical protein (1707 nt)               | 3   | 16  | 0 |
| PITG_08233 | Pi conserved hypothetical protein (408 nt)                | 5   | 12  | 0 |
| PITG_08234 | Pi DnaJ subfamily C member 2 protein (1263 nt)            | 10  | 30  | 3 |
| PITG_08235 | Pi conserved hypothetical protein (1784 nt)               | 5   | 25  | 0 |
| PITG_08236 | Pi conserved hypothetical protein (1544 nt)               | 88  | 284 | 0 |
| PITG_08237 | Pi histone deacetylase, putative (2589 nt)                | 4   | 15  | 0 |
| PITG_08241 | Pi hypothetical protein (824 nt)                          | 19  | 40  | 0 |
| PITG_08252 | Pi hypothetical protein (1222 nt)                         | 6   | 266 | 0 |
| PITG_08258 | Pi cleavage induced hypothetical protein (788 nt)         | 3   | 22  | 0 |
| PITG_08265 | Pi conserved hypothetical protein (847 nt)                | 79  | 222 | 0 |
| PITG_08285 | Pi conserved hypothetical protein (1548 nt)               | 0   | 0   | 0 |
| PITG_08290 | Pi conserved hypothetical protein (958 nt)                | 2   | 14  | 0 |
| PITG_08293 | Pi conserved hypothetical protein (404 nt)                | 4   | 13  | 0 |
| PITG_08294 | Pi hypothetical protein (513 nt)                          | 26  | 30  | 0 |
| PITG_08295 | Pi dynein heavy chain (12098 nt)                          | 1   | 8   | 0 |
| PITG_08299 | Pi conserved hypothetical protein (2213 nt)               | 0   | 11  | 0 |
| PITG_08301 | Pi conserved hypothetical protein (1306 nt)               | 13  | 30  | 0 |
| PITG_08302 | Pi hypothetical protein (477 nt)                          | 7   | 6   | 0 |
| PITG_08303 | Pi conserved hypothetical protein (627 nt)                | 8   | 14  | 0 |
| PITG_08304 | Pi cGMP-dependent protein kinase, putative (4180 nt)      | 47  | 84  | 0 |
| PITG_08305 | Pi conserved hypothetical protein (8670 nt)               | 24  | 34  | 0 |
| PITG_08306 | Pi myosin-like protein (2379 nt)                          | 1   | 13  | 0 |
| PITG_08307 | Pi conserved hypothetical protein (839 nt)                | 2   | 15  | 0 |
| PITG_08309 | Pi myosin-like protein (2585 nt)                          | 0   | 13  | 0 |
| PITG_08310 | Pi conserved hypothetical protein (354 nt)                | 12  | 26  | 0 |
| PITG_08311 | Pi conserved hypothetical protein (622 nt)                | 644 | 427 | 0 |
| PITG_08314 | Pi ATP-binding Cassette (ABC) Superfamily (960 nt)        | 0   | 14  | 0 |
| PITG_08315 | Pi conserved hypothetical protein (719 nt)                | 0   | 6   | 0 |
| PITG_08316 | Pi ATP-dependent RNA helicase, putative (4308 nt)         | 2   | 10  | 0 |
| PITG_08320 | Pi conserved hypothetical protein (481 nt)                | 0   | 64  | 0 |
| PITG_08322 | Pi conserved hypothetical protein (552 nt)                | 385 | 0   | 2 |
| PITG_08324 | Pi conserved hypothetical protein (1028 nt)               | 10  | 18  | 0 |

|            |                                                               |    |     |   |
|------------|---------------------------------------------------------------|----|-----|---|
| PITG_08326 | Pi DNA polymerase alpha catalytic subunit, putative (463 nt)  | 2  | 18  | 0 |
| PITG_08327 | Pi ubiquitin-conjugating enzyme E2 (659 nt)                   | 23 | 59  | 0 |
| PITG_08328 | Pi ubiquitin-conjugating enzyme E2, putative (728 nt)         | 5  | 14  | 0 |
| PITG_08329 | Pi conserved hypothetical protein (4663 nt)                   | 2  | 13  | 0 |
| PITG_08330 | Pi conserved hypothetical protein (463 nt)                    | 23 | 40  | 0 |
| PITG_08331 | Pi conserved hypothetical protein (1413 nt)                   | 7  | 0   | 0 |
| PITG_08333 | Pi conserved hypothetical protein (1690 nt)                   | 0  | 18  | 0 |
| PITG_08334 | Pi conserved hypothetical protein (714 nt)                    | 0  | 0   | 0 |
| PITG_08346 | Pi carbohydrate-binding protein, putative (3089 nt)           | 22 | 36  | 4 |
| PITG_08348 | Pi conserved hypothetical protein (1583 nt)                   | 3  | 15  | 0 |
| PITG_08351 | Pi conserved hypothetical protein (1707 nt)                   | 3  | 11  | 0 |
| PITG_08352 | Pi conserved hypothetical protein (370 nt)                    | 12 | 16  | 0 |
| PITG_08357 | Pi conserved hypothetical protein (1458 nt)                   | 0  | 11  | 0 |
| PITG_08363 | Pi conserved hypothetical protein (5034 nt)                   | 0  | 4   | 0 |
| PITG_08364 | Pi conserved hypothetical protein (1424 nt)                   | 6  | 17  | 0 |
| PITG_08365 | Pi Voltage-gated Ion Channel (VIC) Superfamily (2646 nt)      | 1  | 5   | 0 |
| PITG_08366 | Pi parafibromin-like protein (1596 nt)                        | 14 | 33  | 0 |
| PITG_08367 | Pi conserved hypothetical protein (1429 nt)                   | 4  | 24  | 0 |
| PITG_08368 | Pi peptidyl-prolyl cis-trans isomerase-like protein (1620 nt) | 1  | 16  | 0 |
| PITG_08369 | Pi valyl-tRNA synthetase (3808 nt)                            | 2  | 13  | 0 |
| PITG_08373 | Pi serine hydrolase (FSH1)-like protein, putative (687 nt)    | 2  | 12  | 0 |
| PITG_08374 | Pi conserved hypothetical protein (2459 nt)                   | 2  | 19  | 0 |
| PITG_08375 | Pi conserved hypothetical protein (635 nt)                    | 33 | 30  | 0 |
| PITG_08376 | Pi conserved hypothetical protein (974 nt)                    | 42 | 211 | 0 |
| PITG_08377 | Pi conserved hypothetical protein (858 nt)                    | 58 | 408 | 0 |
| PITG_08382 | Pi ATP-binding Cassette (ABC) superfamily (665 nt)            | 0  | 1   | 0 |
| PITG_08383 | Pi DNA-directed RNA polymerase III largest subunit (463 nt)   | 1  | 16  | 0 |
| PITG_08386 | Pi hypothetical protein (516 nt)                              | 1  | 17  | 0 |
| PITG_08387 | Pi phosphatidylinositol kinase (PIK-H1) (3080 nt)             | 0  | 0   | 0 |
| PITG_08388 | Pi conserved hypothetical protein (2881 nt)                   | 3  | 11  | 0 |
| PITG_08392 | Pi FACT complex subunit SPT16, putative (3458 nt)             | 13 | 56  | 0 |
| PITG_08393 | Pi conserved hypothetical protein (1106 nt)                   | 7  | 12  | 0 |
| PITG_08394 | Pi conserved hypothetical protein (3215 nt)                   | 7  | 20  | 0 |
| PITG_08395 | Pi conserved hypothetical protein (1842 nt)                   | 7  | 1   | 0 |
| PITG_08396 | Pi conserved hypothetical protein (1226 nt)                   | 6  | 19  | 0 |
| PITG_08400 | Pi conserved hypothetical protein (1956 nt)                   | 1  | 10  | 0 |
| PITG_08403 | Pi conserved hypothetical protein (1685 nt)                   | 18 | 95  | 0 |
| PITG_08404 | Pi cleavage induced hypothetical protein (853 nt)             | 0  | 3   | 0 |
| PITG_08405 | Pi conserved hypothetical protein (5259 nt)                   | 2  | 8   | 0 |
| PITG_08406 | Pi conserved hypothetical protein (552 nt)                    | 8  | 12  | 0 |
| PITG_08408 | Pi conserved hypothetical protein (844 nt)                    | 9  | 6   | 0 |
| PITG_08409 | Pi conserved hypothetical protein (634 nt)                    | 4  | 11  | 0 |
| PITG_08410 | Pi conserved hypothetical protein (1389 nt)                   | 0  | 13  | 0 |
| PITG_08411 | Pi conserved hypothetical protein (1276 nt)                   | 5  | 28  | 0 |
| PITG_08412 | Pi hypothetical protein (476 nt)                              | 5  | 36  | 0 |
| PITG_08413 | Pi hypothetical protein (159 nt)                              | 4  | 14  | 0 |
| PITG_08416 | Pi conserved hypothetical protein (2411 nt)                   | 3  | 31  | 0 |

|            |                                                          |     |     |   |
|------------|----------------------------------------------------------|-----|-----|---|
| PITG_08417 | Pi conserved hypothetical protein (668 nt)               | 3   | 11  | 0 |
| PITG_08419 | Pi sporangia induced hypothetical protein (689 nt)       | 1   | 3   | 0 |
| PITG_08420 | Pi metalloprotease family M76, putative (912 nt)         | 9   | 19  | 0 |
| PITG_08421 | Pi peroxisomal multifunctional enzyme type 2, putative   | 12  | 16  | 0 |
| PITG_08423 | Pi kinesin-like protein (3419 nt)                        | 0   | 1   | 0 |
| PITG_08425 | Pi endothelin-converting enzyme 1, metalloprotease fa    | 5   | 60  | 0 |
| PITG_08427 | Pi conserved hypothetical protein (1161 nt)              | 3   | 1   | 0 |
| PITG_08430 | Pi conserved hypothetical protein (1350 nt)              | 5   | 18  | 0 |
| PITG_08431 | Pi diacylglycerol acyltransferase, putative (1263 nt)    | 3   | 13  | 0 |
| PITG_08436 | Pi conserved hypothetical protein (965 nt)               | 1   | 13  | 0 |
| PITG_08437 | Pi conserved hypothetical protein (1400 nt)              | 0   | 0   | 0 |
| PITG_08439 | Pi conserved hypothetical protein (821 nt)               | 2   | 10  | 0 |
| PITG_08441 | Pi conserved hypothetical protein (1173 nt)              | 11  | 1   | 0 |
| PITG_08442 | Pi conserved hypothetical protein (1035 nt)              | 2   | 17  | 0 |
| PITG_08444 | Pi conserved hypothetical protein (2342 nt)              | 39  | 125 | 2 |
| PITG_08445 | Pi cystathionine gamma-lyase (1227 nt)                   | 16  | 104 | 1 |
| PITG_08446 | Pi conserved hypothetical protein (3347 nt)              | 5   | 25  | 0 |
| PITG_08447 | Pi exonuclease, putative (2805 nt)                       | 3   | 15  | 0 |
| PITG_08451 | Pi conserved hypothetical protein (2212 nt)              | 18  | 13  | 0 |
| PITG_08452 | Pi conserved hypothetical protein (1493 nt)              | 13  | 47  | 0 |
| PITG_08453 | Pi conserved hypothetical protein (807 nt)               | 5   | 58  | 0 |
| PITG_08454 | Pi conserved hypothetical protein (2319 nt)              | 12  | 39  | 0 |
| PITG_08455 | Pi conserved hypothetical protein (3744 nt)              | 1   | 14  | 0 |
| PITG_08456 | Pi ankyrin-like protein (1932 nt)                        | 3   | 32  | 0 |
| PITG_08458 | Pi kinesin-like protein (2444 nt)                        | 0   | 0   | 0 |
| PITG_08460 | Pi lipin-like protein (2193 nt)                          | 15  | 5   | 0 |
| PITG_08461 | Pi conserved hypothetical protein (1221 nt)              | 2   | 25  | 0 |
| PITG_08462 | Pi actin-related protein 2/3 complex subunit 3, putative | 46  | 52  | 1 |
| PITG_08463 | Pi coatomer subunit epsilon, putative (879 nt)           | 0   | 40  | 0 |
| PITG_08465 | Pi conserved hypothetical protein (1183 nt)              | 43  | 68  | 0 |
| PITG_08467 | Pi diacylglycerol O-acyltransferase, putative (1179 nt)  | 14  | 130 | 0 |
| PITG_08469 | Pi conserved hypothetical protein (1791 nt)              | 8   | 42  | 0 |
| PITG_08470 | Pi diacylglycerol acyltransferase, putative (1215 nt)    | 6   | 50  | 0 |
| PITG_08471 | Pi protein kinase (1178 nt)                              | 12  | 56  | 0 |
| PITG_08473 | Pi conserved hypothetical protein (2967 nt)              | 10  | 31  | 0 |
| PITG_08475 | Pi conserved hypothetical protein (1101 nt)              | 0   | 4   | 0 |
| PITG_08480 | Pi ubiquitin, putative (2784 nt)                         | 22  | 6   | 0 |
| PITG_08481 | Pi regulator of chromosome condensation (RCC1)-like p    | 1   | 36  | 0 |
| PITG_08487 | Pi conserved hypothetical protein (1651 nt)              | 12  | 80  | 0 |
| PITG_08489 | Pi conserved hypothetical protein (944 nt)               | 27  | 78  | 0 |
| PITG_08492 | Pi cytochrome b5-like protein (914 nt)                   | 0   | 0   | 0 |
| PITG_08493 | Pi hypothetical protein (588 nt)                         | 0   | 3   | 0 |
| PITG_08494 | Pi conserved hypothetical protein (1132 nt)              | 0   | 4   | 0 |
| PITG_08495 | Pi hypothetical protein (1083 nt)                        | 13  | 69  | 2 |
| PITG_08496 | Pi conserved hypothetical protein (696 nt)               | 156 | 99  | 0 |
| PITG_08502 | Pi conserved hypothetical protein (477 nt)               | 0   | 18  | 0 |
| PITG_08503 | Pi conserved hypothetical protein (550 nt)               | 4   | 11  | 0 |



|            |                                                          |     |     |   |
|------------|----------------------------------------------------------|-----|-----|---|
| PITG_08504 | Pi conserved hypothetical protein (3268 nt)              | 1   | 21  | 0 |
| PITG_08505 | Pi conserved hypothetical protein (1578 nt)              | 0   | 13  | 0 |
| PITG_08506 | Pi conserved hypothetical protein (649 nt)               | 1   | 18  | 0 |
| PITG_08509 | Pi conserved hypothetical protein (828 nt)               | 55  | 486 | 2 |
| PITG_08514 | Pi conserved hypothetical protein (2772 nt)              | 8   | 27  | 0 |
| PITG_08516 | Pi alcohol dehydrogenase, putative (1689 nt)             | 18  | 12  | 0 |
| PITG_08526 | Pi conserved hypothetical protein (499 nt)               | 6   | 43  | 0 |
| PITG_08528 | Pi conserved hypothetical protein (764 nt)               | 5   | 67  | 0 |
| PITG_08530 | Pi conserved hypothetical protein (1872 nt)              | 12  | 21  | 0 |
| PITG_08531 | Pi conserved hypothetical protein (540 nt)               | 1   | 46  | 0 |
| PITG_08532 | Pi Drug/Metabolite Transporter (DMT) Superfamily (14     | 14  | 10  | 0 |
| PITG_08534 | Pi conserved hypothetical protein (969 nt)               | 2   | 6   | 0 |
| PITG_08536 | Pi conserved hypothetical protein (1168 nt)              | 4   | 122 | 0 |
| PITG_08537 | Pi conserved hypothetical protein (1025 nt)              | 124 | 124 | 0 |
| PITG_08538 | Pi conserved hypothetical protein (651 nt)               | 84  | 41  | 0 |
| PITG_08539 | Pi conserved hypothetical protein (755 nt)               | 1   | 10  | 0 |
| PITG_08540 | Pi conserved hypothetical protein (5615 nt)              | 9   | 18  | 0 |
| PITG_08541 | Pi conserved hypothetical protein (1195 nt)              | 0   | 15  | 0 |
| PITG_08543 | Pi conserved hypothetical protein (984 nt)               | 0   | 8   | 0 |
| PITG_08544 | Pi Solute:Sodium Symporter (SSS) Family (1159 nt)        | 0   | 6   | 0 |
| PITG_08545 | Pi Crinkler (CRN) family protein, pseudogene (1885 nt)   | 19  | 8   | 0 |
| PITG_08546 | Pi conserved hypothetical protein (1458 nt)              | 4   | 29  | 0 |
| PITG_08547 | Pi conserved hypothetical protein (363 nt)               | 7   | 40  | 0 |
| PITG_08548 | Pi conserved hypothetical protein (732 nt)               | 58  | 23  | 0 |
| PITG_08549 | Pi mitogen-activated protein kinase kinase kinase, puta  | 0   | 1   | 0 |
| PITG_08550 | Pi conserved hypothetical protein (804 nt)               | 4   | 12  | 0 |
| PITG_08551 | Pi conserved hypothetical protein (123 nt)               | 2   | 6   | 0 |
| PITG_08552 | Pi conserved hypothetical protein (2095 nt)              | 1   | 13  | 0 |
| PITG_08553 | Pi calcium/calmodulin dependent protein kinase, putat    | 7   | 14  | 0 |
| PITG_08558 | Pi pectin lyase, putative (2571 nt)                      | 5   | 7   | 0 |
| PITG_08559 | Pi conserved hypothetical protein (622 nt)               | 0   | 9   | 0 |
| PITG_08565 | Pi conserved hypothetical protein (624 nt)               | 20  | 88  | 8 |
| PITG_08566 | Pi conserved hypothetical protein (964 nt)               | 1   | 16  | 0 |
| PITG_08567 | Pi conserved hypothetical protein (2527 nt)              | 1   | 10  | 0 |
| PITG_08569 | Pi conserved hypothetical protein (1127 nt)              | 1   | 0   | 0 |
| PITG_08570 | Pi serine protease family S28, putative (1710 nt)        | 6   | 27  | 0 |
| PITG_08571 | Pi Drug/Metabolite Transporter (DMT) Superfamily (12     | 11  | 44  | 0 |
| PITG_08572 | Pi dual specificity tyrosine-phosphorylation-regulated k | 3   | 24  | 0 |
| PITG_08573 | Pi conserved hypothetical protein (629 nt)               | 5   | 40  | 0 |
| PITG_08576 | Pi conserved hypothetical protein (925 nt)               | 41  | 58  | 0 |
| PITG_08578 | Pi Mitochondrial Carrier (MC) Family (1068 nt)           | 15  | 41  | 1 |
| PITG_08579 | Pi isoleucyl-tRNA synthetase (3531 nt)                   | 5   | 31  | 2 |
| PITG_08580 | Pi conserved hypothetical protein (1236 nt)              | 4   | 15  | 0 |
| PITG_08581 | Pi serine racemase, putative (1456 nt)                   | 6   | 20  | 0 |
| PITG_08584 | Pi conserved hypothetical protein (1865 nt)              | 5   | 17  | 0 |
| PITG_08585 | Pi conserved hypothetical protein (807 nt)               | 18  | 52  | 0 |
| PITG_08586 | Pi conserved hypothetical protein (1322 nt)              | 3   | 12  | 0 |

|                                                                    |     |     |    |
|--------------------------------------------------------------------|-----|-----|----|
| PITG_08587   Pi histone acetyltransferase, putative (3984 nt)      | 5   | 12  | 0  |
| PITG_08588   Pi conserved hypothetical protein (1211 nt)           | 2   | 21  | 0  |
| PITG_08589   Pi hypothetical protein (1624 nt)                     | 8   | 13  | 0  |
| PITG_08590   Pi carbohydrate esterase, putative (888 nt)           | 9   | 6   | 0  |
| PITG_08591   Pi actin-depolymerizing factor, putative (744 nt)     | 218 | 343 | 45 |
| PITG_08592   Pi conserved hypothetical protein (833 nt)            | 1   | 1   | 0  |
| PITG_08594   Pi conserved hypothetical protein (1188 nt)           | 38  | 132 | 1  |
| PITG_08595   Pi conserved hypothetical protein (766 nt)            | 41  | 25  | 0  |
| PITG_08597   Pi conserved hypothetical protein (969 nt)            | 11  | 12  | 0  |
| PITG_08598   Pi 6-phosphogluconolactonase, putative (984 nt)       | 14  | 40  | 1  |
| PITG_08599   Pi thimet oligopeptidase (2500 nt)                    | 5   | 54  | 0  |
| PITG_08600   Pi vesicle-fusing ATPase, putative (2422 nt)          | 4   | 36  | 1  |
| PITG_08601   Pi conserved hypothetical protein (1233 nt)           | 55  | 222 | 2  |
| PITG_08602   Pi conserved hypothetical protein (1191 nt)           | 4   | 15  | 0  |
| PITG_08604   Pi Arsenical Resistance-3 (ACR3) Family (1188 nt)     | 1   | 10  | 0  |
| PITG_08605   Pi conserved hypothetical protein (1206 nt)           | 9   | 16  | 0  |
| PITG_08606   Pi conserved hypothetical protein (1804 nt)           | 0   | 7   | 0  |
| PITG_08607   Pi conserved hypothetical protein (2566 nt)           | 2   | 20  | 0  |
| PITG_08609   Pi endomembrane protein 70-like protein, putative (29 | 15  | 30  | 0  |
| PITG_08611   Pi cell 5A endo-1,4-betaglucanase, putative (1749 nt) | 69  | 428 | 0  |
| PITG_08612   Pi cell 5A endo-1,4-betaglucanase, putative (1789 nt) | 0   | 1   | 0  |
| PITG_08613   Pi cell 5A endo-1,4-betaglucanase, putative (1749 nt) | 25  | 251 | 0  |
| PITG_08619   Pi hypothetical protein (1839 nt)                     | 3   | 19  | 0  |
| PITG_08626   Pi conserved hypothetical protein (1020 nt)           | 14  | 23  | 0  |
| PITG_08627   Pi conserved hypothetical protein (691 nt)            | 1   | 2   | 0  |
| PITG_08628   Pi conserved hypothetical protein (1098 nt)           | 0   | 1   | 0  |
| PITG_08630   Pi hypothetical protein (864 nt)                      | 0   | 1   | 0  |
| PITG_08639   Pi conserved hypothetical protein (585 nt)            | 6   | 0   | 0  |
| PITG_08640   Pi phosphatidylinositol kinase (PIK-G3) (3186 nt)     | 2   | 12  | 0  |
| PITG_08643   Pi conserved hypothetical protein (1491 nt)           | 6   | 11  | 0  |
| PITG_08646   Pi polysaccharide lyase, putative (599 nt)            | 4   | 16  | 0  |
| PITG_08653   Pi mitochondrial import inner membrane translocase s  | 11  | 19  | 0  |
| PITG_08654   Pi conserved hypothetical protein (1176 nt)           | 7   | 18  | 0  |
| PITG_08655   Pi conserved hypothetical protein (764 nt)            | 2   | 17  | 0  |
| PITG_08657   Pi conserved hypothetical protein (1925 nt)           | 0   | 34  | 21 |
| PITG_08659   Pi conserved hypothetical protein (2330 nt)           | 5   | 296 | 12 |
| PITG_08660   Pi conserved hypothetical protein (589 nt)            | 22  | 180 | 1  |
| PITG_08661   Pi CDK5 regulatory subunit-associated protein 1 (1877 | 1   | 11  | 0  |
| PITG_08663   Pi plectin-like protein (3035 nt)                     | 5   | 16  | 0  |
| PITG_08664   Pi hypothetical protein (483 nt)                      | 1   | 35  | 0  |
| PITG_08668   Pi hypothetical protein (510 nt)                      | 1   | 16  | 0  |
| PITG_08669   Pi 3-methyl-2-oxobutanoate hydroxymethyltransferase   | 2   | 26  | 0  |
| PITG_08671   Pi conserved hypothetical protein (340 nt)            | 22  | 51  | 1  |
| PITG_08672   Pi conserved hypothetical protein (1201 nt)           | 1   | 13  | 0  |
| PITG_08673   Pi conserved hypothetical protein (1365 nt)           | 25  | 47  | 1  |
| PITG_08675   Pi conserved hypothetical protein (1420 nt)           | 8   | 25  | 0  |
| PITG_08676   Pi 26S proteasome non-ATPase regulatory subunit 14,   | 19  | 97  | 3  |

|                                                                          |     |      |     |
|--------------------------------------------------------------------------|-----|------|-----|
| PITG_08677   Pi inositol 2-dehydrogenase, putative (1170 nt)             | 16  | 19   | 166 |
| PITG_08679   Pi oxidoreductase family, putative (1247 nt)                | 7   | 39   | 0   |
| PITG_08681   Pi elongation factor G, mitochondrial precursor (2410 r     | 0   | 9    | 0   |
| PITG_08683   Pi conserved hypothetical protein (542 nt)                  | 4   | 14   | 0   |
| PITG_08684   Pi conserved hypothetical protein (549 nt)                  | 1   | 11   | 0   |
| PITG_08685   Pi conserved hypothetical protein (920 nt)                  | 1   | 3    | 0   |
| PITG_08686   Pi conserved hypothetical protein (1483 nt)                 | 0   | 18   | 0   |
| PITG_08687   Pi Mitochondrial Carrier (MC) Family (1084 nt)              | 0   | 14   | 0   |
| PITG_08688   Pi conserved hypothetical protein (432 nt)                  | 4   | 25   | 0   |
| PITG_08689   Pi hypothetical protein (982 nt)                            | 13  | 125  | 0   |
| PITG_08690   Pi conserved hypothetical protein (1245 nt)                 | 0   | 18   | 0   |
| PITG_08691   Pi conserved hypothetical protein (677 nt)                  | 0   | 9    | 0   |
| PITG_08692   Pi conserved hypothetical protein (1251 nt)                 | 19  | 83   | 0   |
| PITG_08693   Pi hook domain-containing protein (2751 nt)                 | 3   | 44   | 0   |
| PITG_08695   Pi extended synaptotagmin, putative (1264 nt)               | 0   | 5    | 0   |
| PITG_08696   Pi iron-sulfur cluster scaffold protein Nfu-like protein (1 | 8   | 55   | 1   |
| PITG_08699   Pi conserved hypothetical protein (755 nt)                  | 3   | 27   | 0   |
| PITG_08701   Pi conserved hypothetical protein (1445 nt)                 | 73  | 141  | 0   |
| PITG_08702   Pi conserved hypothetical protein (4001 nt)                 | 7   | 43   | 3   |
| PITG_08703   Pi conserved hypothetical protein (937 nt)                  | 746 | 1440 | 116 |
| PITG_08704   Pi fatty acid desaturase, putative (1374 nt)                | 1   | 16   | 2   |
| PITG_08708   Pi conserved hypothetical protein (3084 nt)                 | 1   | 14   | 0   |
| PITG_08709   Pi conserved hypothetical protein (782 nt)                  | 20  | 52   | 0   |
| PITG_08711   Pi hsp90-like protein (1250 nt)                             | 39  | 159  | 5   |
| PITG_08712   Pi conserved hypothetical protein (801 nt)                  | 9   | 19   | 0   |
| PITG_08713   Pi ADP-sugar pyrophosphatase, putative (831 nt)             | 2   | 11   | 0   |
| PITG_08714   Pi lysyl-tRNA synthetase (1990 nt)                          | 0   | 17   | 1   |
| PITG_08715   Pi conserved hypothetical protein (2483 nt)                 | 7   | 29   | 1   |
| PITG_08716   Pi hypothetical protein (568 nt)                            | 0   | 13   | 0   |
| PITG_08717   Pi conserved hypothetical protein (357 nt)                  | 1   | 3    | 0   |
| PITG_08718   Pi conserved hypothetical protein (942 nt)                  | 66  | 178  | 0   |
| PITG_08720   Pi conserved hypothetical protein (1254 nt)                 | 0   | 0    | 0   |
| PITG_08722   Pi conserved hypothetical protein (1333 nt)                 | 20  | 43   | 0   |
| PITG_08723   Pi conserved hypothetical protein (681 nt)                  | 18  | 22   | 0   |
| PITG_08724   Pi conserved hypothetical protein (792 nt)                  | 1   | 14   | 0   |
| PITG_08725   Pi protein kinase (2339 nt)                                 | 29  | 108  | 0   |
| PITG_08729   Pi conserved hypothetical protein (780 nt)                  | 6   | 58   | 0   |
| PITG_08732   Pi conserved hypothetical protein (1037 nt)                 | 0   | 15   | 0   |
| PITG_08733   Pi conserved hypothetical protein (1008 nt)                 | 7   | 103  | 0   |
| PITG_08734   Pi Chloride Channel (ClC) Family (2874 nt)                  | 8   | 26   | 0   |
| PITG_08736   Pi conserved hypothetical protein (2528 nt)                 | 18  | 70   | 0   |
| PITG_08738   Pi conserved hypothetical protein (941 nt)                  | 2   | 13   | 0   |
| PITG_08739   Pi conserved hypothetical protein (495 nt)                  | 7   | 10   | 0   |
| PITG_08740   Pi conserved hypothetical protein (2290 nt)                 | 7   | 43   | 0   |
| PITG_08741   Pi conserved hypothetical protein (2554 nt)                 | 1   | 25   | 0   |
| PITG_08742   Pi conserved hypothetical protein (972 nt)                  | 3   | 20   | 0   |
| PITG_08744   Pi long-chain-fatty-acid-CoA ligase (2516 nt)               | 52  | 438  | 11  |

|            |                                                                                    |     |     |    |
|------------|------------------------------------------------------------------------------------|-----|-----|----|
| PITG_08745 | Pi conserved hypothetical protein (558 nt)                                         | 20  | 78  | 0  |
| PITG_08746 | Pi conserved hypothetical protein (3138 nt)                                        | 2   | 19  | 0  |
| PITG_08747 | Pi Mitochondrial Carrier (MC) Family (3855 nt)                                     | 2   | 10  | 0  |
| PITG_08749 | Pi conserved hypothetical protein (1312 nt)                                        | 9   | 48  | 0  |
| PITG_08750 | Pi conserved hypothetical protein (543 nt)                                         | 0   | 1   | 0  |
| PITG_08751 | Pi protein phosphatase 2C, putative (1128 nt)                                      | 6   | 23  | 0  |
| PITG_08752 | Pi conserved hypothetical protein (696 nt)                                         | 3   | 17  | 0  |
| PITG_08753 | Pi tubulin-tyrosine ligase family, putative (1485 nt)                              | 0   | 3   | 0  |
| PITG_08754 | Pi conserved hypothetical protein (2329 nt)                                        | 1   | 14  | 0  |
| PITG_08755 | Pi myb-like DNA-binding protein, putative (987 nt)                                 | 0   | 3   | 0  |
| PITG_08757 | Pi Voltage-gated Ion Channel (VIC) Superfamily (1309 n                             | 0   | 0   | 0  |
| PITG_08758 | Pi Chloride Channel (ClC) Family (2575 nt)                                         | 0   | 8   | 0  |
| PITG_08759 | Pi conserved hypothetical protein (1095 nt)                                        | 0   | 16  | 0  |
| PITG_08761 | Pi nucleoside diphosphate kinase B (837 nt)                                        | 8   | 30  | 4  |
| PITG_08762 | Pi conserved hypothetical protein (397 nt)                                         | 8   | 58  | 2  |
| PITG_08765 | Pi RNA binding protein, putative (538 nt)                                          | 28  | 74  | 2  |
| PITG_08766 | Pi demethylmenaquinone methyltransferase, putative                                 | 2   | 13  | 0  |
| PITG_08768 | Pi hypothetical protein (1452 nt)                                                  | 0   | 25  | 0  |
| PITG_08769 | Pi demethylmenaquinone methyltransferase, putative                                 | 55  | 20  | 0  |
| PITG_08770 | Pi conserved hypothetical protein (1674 nt)                                        | 1   | 11  | 0  |
| PITG_08775 | Pi hypothetical protein (1536 nt)                                                  | 0   | 8   | 0  |
| PITG_08776 | Pi conserved hypothetical protein (1862 nt)                                        | 3   | 19  | 0  |
| PITG_08780 | Pi Sulfate Permease (SulP) Family (2805 nt)                                        | 8   | 52  | 0  |
| PITG_08781 | Pi conserved hypothetical protein (2114 nt)                                        | 47  | 129 | 0  |
| PITG_08785 | Pi conserved hypothetical protein (3335 nt)                                        | 1   | 3   | 0  |
| PITG_08787 | Pi crinkler (CRN) family protein, pseudogene (849 nt)                              | 263 | 654 | 2  |
| PITG_08793 | Pi conserved hypothetical protein (3312 nt)                                        | 0   | 0   | 0  |
| PITG_08794 | Pi hypothetical protein (739 nt)                                                   | 0   | 30  | 0  |
| PITG_08795 | Pi conserved hypothetical protein (2861 nt)                                        | 0   | 0   | 0  |
| PITG_08800 | Pi conserved hypothetical protein (1140 nt)                                        | 7   | 19  | 0  |
| PITG_08801 | Pi conserved hypothetical protein (4261 nt)                                        | 1   | 15  | 0  |
| PITG_08802 | Pi NAD-specific glutamate dehydrogenase, putative (31                              | 1   | 22  | 0  |
| PITG_08803 | Pi mannitol dehydrogenase, putative (4248 nt)                                      | 0   | 2   | 0  |
| PITG_08804 | Pi metalloprotease family M01, putative (2849 nt)                                  | 3   | 57  | 0  |
| PITG_08805 | Pi hypothetical protein (1049 nt)                                                  | 0   | 16  | 0  |
| PITG_08807 | Pi conserved hypothetical protein (618 nt)                                         | 0   | 1   | 0  |
| PITG_08808 | Pi calcyphosin-like protein (1653 nt)                                              | 0   | 21  | 0  |
| PITG_08809 | Pi 60S ribosomal protein L12, putative (1873 nt)                                   | 155 | 217 | 31 |
| PITG_08810 | Pi conserved hypothetical protein (765 nt)                                         | 31  | 105 | 5  |
| PITG_08811 | Pi Zinc (Zn <sup>2+</sup> )-Iron (Fe <sup>2+</sup> ) Permease (ZIP) Family (1342 n | 0   | 26  | 0  |
| PITG_08812 | Pi conserved hypothetical protein (1614 nt)                                        | 23  | 69  | 0  |
| PITG_08817 | Pi conserved hypothetical protein (1735 nt)                                        | 5   | 30  | 0  |
| PITG_08822 | Pi conserved hypothetical protein (1103 nt)                                        | 12  | 18  | 0  |
| PITG_08826 | Pi conserved hypothetical protein (1321 nt)                                        | 7   | 19  | 0  |
| PITG_08827 | Pi VAC14 family protein (2543 nt)                                                  | 3   | 13  | 0  |
| PITG_08831 | Pi ribonuclease 3, putative (1010 nt)                                              | 0   | 11  | 0  |
| PITG_08832 | Pi conserved hypothetical protein (856 nt)                                         | 35  | 86  | 1  |

|            |                                                          |      |     |    |
|------------|----------------------------------------------------------|------|-----|----|
| PITG_08834 | Pi ribosomal protein L37e, putative (1032 nt)            | 1000 | 905 | 57 |
| PITG_08839 | Pi conserved hypothetical protein (1515 nt)              | 0    | 1   | 0  |
| PITG_08840 | Pi conserved hypothetical protein (499 nt)               | 0    | 0   | 0  |
| PITG_08841 | Pi conserved hypothetical protein (129 nt)               | 0    | 0   | 0  |
| PITG_08843 | Pi mannitol dehydrogenase, putative (1065 nt)            | 0    | 0   | 0  |
| PITG_08844 | Pi mannitol dehydrogenase, putative (1696 nt)            | 7    | 1   | 0  |
| PITG_08845 | Pi mannitol dehydrogenase, putative (1065 nt)            | 3    | 1   | 0  |
| PITG_08850 | Pi mannitol dehydrogenase, putative (2060 nt)            | 1    | 6   | 0  |
| PITG_08851 | Pi FKBP-type peptidyl-prolyl cis-trans isomerase, putati | 7    | 49  | 0  |
| PITG_08864 | Pi conserved hypothetical protein (2365 nt)              | 1    | 7   | 0  |
| PITG_08867 | Pi mannitol dehydrogenase, putative (2842 nt)            | 59   | 71  | 0  |
| PITG_08871 | Pi conserved hypothetical protein (701 nt)               | 0    | 1   | 0  |
| PITG_08874 | Pi conserved hypothetical protein (1050 nt)              | 21   | 36  | 0  |
| PITG_08875 | Pi conserved hypothetical protein (1037 nt)              | 1    | 0   | 0  |
| PITG_08876 | Pi conserved hypothetical protein (655 nt)               | 21   | 48  | 0  |
| PITG_08879 | Pi hypothetical protein (510 nt)                         | 176  | 89  | 0  |
| PITG_08880 | Pi ADP-ribosylation factor family (2009 nt)              | 2    | 2   | 0  |
| PITG_08881 | Pi succinyl-CoA ligase beta-chain, mitochondrial precur  | 14   | 84  | 17 |
| PITG_08882 | Pi choline transporter-like protein (2436 nt)            | 0    | 0   | 0  |
| PITG_08883 | Pi conserved hypothetical protein (659 nt)               | 12   | 14  | 0  |
| PITG_08888 | Pi protein kinase, putative (2280 nt)                    | 0    | 28  | 0  |
| PITG_08893 | Pi conserved hypothetical protein (2893 nt)              | 1    | 3   | 0  |
| PITG_08896 | Pi conserved hypothetical protein (266 nt)               | 88   | 12  | 1  |
| PITG_08897 | Pi hypothetical protein (439 nt)                         | 27   | 2   | 0  |
| PITG_08898 | Pi protein kinase, putative (2098 nt)                    | 6    | 63  | 0  |
| PITG_08900 | Pi protein kinase (1363 nt)                              | 4    | 10  | 0  |
| PITG_08901 | Pi protein kinase, putative (1572 nt)                    | 3    | 12  | 0  |
| PITG_08902 | Pi pleiotropic drug resistance protein, putative (6261 n | 0    | 31  | 0  |
| PITG_08913 | Pi conserved hypothetical protein (435 nt)               | 17   | 108 | 0  |
| PITG_08916 | Pi kinesin-like protein (2333 nt)                        | 2    | 1   | 0  |
| PITG_08917 | Pi conserved hypothetical protein (1002 nt)              | 5    | 21  | 0  |
| PITG_08919 | Pi conserved hypothetical protein (1520 nt)              | 1    | 22  | 0  |
| PITG_08922 | Pi Rab11 family GTPase, putative (1075 nt)               | 0    | 0   | 0  |
| PITG_08926 | Pi adherence factor, putative (6279 nt)                  | 5    | 29  | 0  |
| PITG_08927 | Pi conserved hypothetical protein (657 nt)               | 0    | 11  | 0  |
| PITG_08928 | Pi conserved hypothetical protein (1172 nt)              | 2    | 3   | 0  |
| PITG_08932 | Pi conserved hypothetical protein (1781 nt)              | 84   | 176 | 1  |
| PITG_08933 | Pi calcium/calmodulin-dependent 3',5'-cyclic nucleotid   | 2    | 2   | 0  |
| PITG_08934 | Pi hypothetical protein (558 nt)                         | 3    | 7   | 0  |
| PITG_08935 | Pi acyl-CoA synthetase short-chain family member, put    | 6    | 54  | 0  |
| PITG_08936 | Pi hypothetical protein (2118 nt)                        | 0    | 14  | 0  |
| PITG_08938 | Pi hypothetical protein (605 nt)                         | 0    | 0   | 0  |
| PITG_08941 | Pi hypothetical protein (1080 nt)                        | 118  | 208 | 6  |
| PITG_08953 | Pi double-strand-break repair protein rad21 (2125 nt)    | 1    | 29  | 0  |
| PITG_08954 | Pi conserved hypothetical protein (2823 nt)              | 1    | 0   | 0  |
| PITG_08955 | Pi GTP cyclohydrolase I (972 nt)                         | 1    | 12  | 0  |
| PITG_08956 | Pi DNA repair protein REV1 (2935 nt)                     | 0    | 12  | 0  |

|                                                                       |     |     |    |
|-----------------------------------------------------------------------|-----|-----|----|
| PITG_08958   Pi protein kinase (537 nt)                               | 0   | 1   | 0  |
| PITG_08959   Pi 40S ribosomal protein S3-3 (841 nt)                   | 465 | 513 | 73 |
| PITG_08960   Pi myb-like DNA-binding protein, putative (1198 nt)      | 0   | 14  | 0  |
| PITG_08964   Pi Mitochondrial Carrier (MC) Family (1098 nt)           | 4   | 22  | 0  |
| PITG_08967   Pi protein kinase, putative (1830 nt)                    | 0   | 11  | 0  |
| PITG_08970   Pi conserved hypothetical protein (3475 nt)              | 0   | 11  | 0  |
| PITG_08974   Pi conserved hypothetical protein (4363 nt)              | 2   | 35  | 0  |
| PITG_08977   Pi hypothetical protein (419 nt)                         | 4   | 7   | 0  |
| PITG_08979   Pi vacuolar protein sorting-associated protein, putative | 0   | 0   | 0  |
| PITG_08980   Pi conserved hypothetical protein (1116 nt)              | 11  | 43  | 0  |
| PITG_08984   Pi protein kinase, putative (2467 nt)                    | 9   | 42  | 0  |
| PITG_08991   Pi insulin-degrading-like enzyme, metalloprotease fami   | 0   | 14  | 0  |
| PITG_08993   Pi conserved hypothetical protein (1098 nt)              | 1   | 17  | 0  |
| PITG_08994   Pi conserved hypothetical protein (1203 nt)              | 4   | 14  | 0  |
| PITG_08995   Pi conserved hypothetical protein (718 nt)               | 1   | 19  | 0  |
| PITG_08997   Pi ATP-dependent RNA helicase DBP5, putative (1507 r     | 1   | 30  | 0  |
| PITG_08998   Pi endoglucanase, putative (1107 nt)                     | 0   | 20  | 0  |
| PITG_09001   Pi conserved hypothetical protein (747 nt)               | 15  | 22  | 0  |
| PITG_09004   Pi conserved hypothetical protein (925 nt)               | 27  | 60  | 0  |
| PITG_09005   Pi conserved hypothetical protein (1933 nt)              | 1   | 10  | 0  |
| PITG_09006   Pi conserved hypothetical protein (3074 nt)              | 3   | 15  | 0  |
| PITG_09008   Pi conserved hypothetical protein (438 nt)               | 5   | 5   | 0  |
| PITG_09009   Pi conserved hypothetical protein (1516 nt)              | 0   | 2   | 0  |
| PITG_09010   Pi calcium/calmodulin-dependent protein kinase, putat    | 0   | 25  | 0  |
| PITG_09015   Pi NADH ubiquinone oxidoreductase, putative (846 nt)     | 30  | 69  | 3  |
| PITG_09016   Pi NADH ubiquinone oxidoreductase, putative (1031 nt)    | 73  | 18  | 0  |
| PITG_09024   Pi Metal Ion (Mn2 -iron) Transporter (Nramp) Family (2   | 2   | 6   | 0  |
| PITG_09028   Pi conserved hypothetical protein (761 nt)               | 5   | 19  | 0  |
| PITG_09030   Pi dynein light chain, putative (333 nt)                 | 0   | 1   | 0  |
| PITG_09034   Pi conserved hypothetical protein (3808 nt)              | 1   | 11  | 0  |
| PITG_09035   Pi conserved hypothetical protein (2904 nt)              | 1   | 28  | 0  |
| PITG_09036   Pi conserved hypothetical protein (789 nt)               | 7   | 34  | 0  |
| PITG_09039   Pi calcium/calmodulin-dependent protein kinase, putat    | 3   | 44  | 0  |
| PITG_09040   Pi conserved hypothetical protein (317 nt)               | 7   | 14  | 0  |
| PITG_09041   Pi conserved hypothetical protein (1113 nt)              | 2   | 12  | 0  |
| PITG_09042   Pi DEAD/DEAH box RNA helicase, putative (3199 nt)        | 0   | 11  | 0  |
| PITG_09061   Pi conserved hypothetical protein (771 nt)               | 0   | 0   | 0  |
| PITG_09064   Pi conserved hypothetical protein (1353 nt)              | 2   | 26  | 0  |
| PITG_09065   Pi conserved hypothetical protein (1125 nt)              | 7   | 73  | 0  |
| PITG_09066   Pi conserved hypothetical protein (1363 nt)              | 14  | 183 | 0  |
| PITG_09067   Pi M96 mating-specific protein family (2232 nt)          | 10  | 164 | 0  |
| PITG_09072   Pi conserved hypothetical protein (858 nt)               | 54  | 60  | 0  |
| PITG_09073   Pi hypothetical protein (1517 nt)                        | 3   | 7   | 0  |
| PITG_09081   Pi phosphatidylinositol-4-phosphate 5-kinase, putative   | 1   | 4   | 0  |
| PITG_09082   Pi conserved hypothetical protein (611 nt)               | 7   | 20  | 0  |
| PITG_09086   Pi conserved hypothetical protein (1263 nt)              | 4   | 12  | 0  |
| PITG_09089   Pi exportin-6-like protein (3714 nt)                     | 2   | 18  | 0  |

|            |                                                             |     |     |    |
|------------|-------------------------------------------------------------|-----|-----|----|
| PITG_09090 | Pi conserved hypothetical protein (1818 nt)                 | 57  | 126 | 0  |
| PITG_09092 | Pi nucleoside diphosphate kinase, putative (7716 nt)        | 3   | 26  | 0  |
| PITG_09097 | Pi conserved hypothetical protein (1199 nt)                 | 4   | 15  | 0  |
| PITG_09098 | Pi conserved hypothetical protein (1329 nt)                 | 16  | 23  | 0  |
| PITG_09121 | Pi conserved hypothetical protein (667 nt)                  | 1   | 0   | 0  |
| PITG_09131 | Pi conserved hypothetical protein (757 nt)                  | 29  | 47  | 0  |
| PITG_09137 | Pi conserved hypothetical protein (551 nt)                  | 0   | 0   | 0  |
| PITG_09138 | Pi conserved hypothetical protein (2648 nt)                 | 1   | 12  | 0  |
| PITG_09139 | Pi conserved hypothetical protein (1619 nt)                 | 3   | 26  | 0  |
| PITG_09143 | Pi hypothetical protein (607 nt)                            | 7   | 41  | 0  |
| PITG_09144 | Pi conserved hypothetical protein (1676 nt)                 | 5   | 65  | 0  |
| PITG_09166 | Pi conserved hypothetical protein (760 nt)                  | 10  | 11  | 0  |
| PITG_09181 | Pi conserved hypothetical protein (1067 nt)                 | 4   | 14  | 0  |
| PITG_09190 | Pi bzip transcription factor (1121 nt)                      | 3   | 20  | 0  |
| PITG_09192 | Pi mannan endo-1,4-beta-mannosidase, putative (1387         | 1   | 1   | 0  |
| PITG_09193 | Pi aquaporin, putative (942 nt)                             | 122 | 28  | 0  |
| PITG_09194 | Pi aquaporin, putative (713 nt)                             | 128 | 33  | 0  |
| PITG_09195 | Pi conserved hypothetical protein (907 nt)                  | 0   | 24  | 0  |
| PITG_09201 | Pi bzip transcription factor (1089 nt)                      | 2   | 15  | 0  |
| PITG_09208 | Pi aquaporin, putative (745 nt)                             | 0   | 0   | 0  |
| PITG_09209 | Pi conserved hypothetical protein (2025 nt)                 | 0   | 21  | 0  |
| PITG_09210 | Pi hypothetical protein (524 nt)                            | 2   | 19  | 0  |
| PITG_09211 | Pi conserved hypothetical protein (11748 nt)                | 1   | 101 | 0  |
| PITG_09216 | Pi secreted RxLR effector peptide, putative (528 nt)        | 5   | 0   | 21 |
| PITG_09218 | Pi secreted RxLR effector peptide, putative (498 nt)        | 2   | 0   | 26 |
| PITG_09220 | Pi conserved hypothetical protein (3458 nt)                 | 2   | 23  | 0  |
| PITG_09221 | Pi glutaredoxin, putative (722 nt)                          | 7   | 30  | 0  |
| PITG_09222 | Pi conserved hypothetical protein (914 nt)                  | 4   | 18  | 0  |
| PITG_09224 | Pi secreted RxLR effector peptide, putative (420 nt)        | 10  | 31  | 4  |
| PITG_09228 | Pi conserved hypothetical protein (1116 nt)                 | 10  | 6   | 0  |
| PITG_09230 | Pi conserved hypothetical protein (510 nt)                  | 14  | 61  | 0  |
| PITG_09241 | Pi conserved hypothetical protein (927 nt)                  | 11  | 40  | 0  |
| PITG_09242 | Pi conserved hypothetical protein (2321 nt)                 | 3   | 15  | 0  |
| PITG_09243 | Pi rRNA methyltransferase, putative (1370 nt)               | 6   | 25  | 0  |
| PITG_09244 | Pi conserved hypothetical protein (3048 nt)                 | 6   | 18  | 0  |
| PITG_09246 | Pi conserved hypothetical protein (532 nt)                  | 14  | 12  | 0  |
| PITG_09247 | Pi neurobeachin-like protein (8721 nt)                      | 3   | 17  | 0  |
| PITG_09248 | Pi Proton-dependent Oligopeptide Transporter (POT) F        | 3   | 19  | 0  |
| PITG_09249 | Pi sporangia induced hypothetical protein (706 nt)          | 1   | 2   | 0  |
| PITG_09250 | Pi transmembrane protein, putative (3761 nt)                | 1   | 16  | 0  |
| PITG_09252 | Pi conserved hypothetical protein (695 nt)                  | 0   | 1   | 0  |
| PITG_09253 | Pi conserved hypothetical protein (559 nt)                  | 27  | 44  | 0  |
| PITG_09260 | Pi conserved hypothetical protein (4938 nt)                 | 1   | 11  | 0  |
| PITG_09261 | Pi Equilibrative Nucleoside Transporter (ENT) Family (1     | 3   | 42  | 0  |
| PITG_09262 | Pi Equilibrative Nucleoside Transporter (ENT) Family (1     | 0   | 168 | 0  |
| PITG_09270 | Pi structural maintenance of chromosomes protein 6, $\zeta$ | 1   | 18  | 0  |
| PITG_09271 | Pi ornithine aminotransferase, mitochondrial precursor      | 115 | 120 | 1  |

|            |                                                             |     |     |    |
|------------|-------------------------------------------------------------|-----|-----|----|
| PITG_09272 | Pi hypothetical protein (472 nt)                            | 2   | 30  | 0  |
| PITG_09273 | Pi AMP deaminase 2 (1375 nt)                                | 3   | 24  | 0  |
| PITG_09277 | Pi conserved hypothetical protein (1076 nt)                 | 26  | 29  | 0  |
| PITG_09278 | Pi conserved hypothetical protein (1445 nt)                 | 21  | 31  | 0  |
| PITG_09279 | Pi bZIP transcription factor, putative (2459 nt)            | 3   | 47  | 0  |
| PITG_09280 | Pi bZIP transcription factor, putative (1708 nt)            | 12  | 96  | 0  |
| PITG_09281 | Pi conserved hypothetical protein (2811 nt)                 | 1   | 25  | 0  |
| PITG_09282 | Pi calcium-transporting ATPase 1, endoplasmic reticulu      | 11  | 192 | 4  |
| PITG_09283 | Pi conserved hypothetical protein (591 nt)                  | 67  | 105 | 0  |
| PITG_09284 | Pi actin, putative (1342 nt)                                | 36  | 78  | 1  |
| PITG_09285 | Pi conserved hypothetical protein (2445 nt)                 | 21  | 27  | 0  |
| PITG_09286 | Pi conserved hypothetical protein (1312 nt)                 | 7   | 10  | 0  |
| PITG_09287 | Pi sporangia induced hypothetical protein (576 nt)          | 8   | 24  | 0  |
| PITG_09289 | Pi eukaryotic translation initiation factor 3 subunit F, pi | 10  | 29  | 4  |
| PITG_09291 | Pi conserved hypothetical protein (604 nt)                  | 133 | 49  | 0  |
| PITG_09292 | Pi Dicer-like 1 (DCL1) (4995 nt)                            | 1   | 11  | 0  |
| PITG_09293 | Pi GAF domain-containing protein (2362 nt)                  | 1   | 10  | 0  |
| PITG_09295 | Pi Dicarboxylate/Amino Acid:Cation (Na or H ) Sympor        | 1   | 24  | 0  |
| PITG_09296 | Pi sterol 3-beta-glucosyltransferase, putative (6765 nt)    | 6   | 112 | 0  |
| PITG_09297 | Pi conserved hypothetical protein (697 nt)                  | 7   | 16  | 0  |
| PITG_09298 | Pi conserved hypothetical protein (885 nt)                  | 31  | 60  | 0  |
| PITG_09301 | Pi conserved hypothetical protein (597 nt)                  | 5   | 13  | 0  |
| PITG_09303 | Pi conserved hypothetical protein (583 nt)                  | 0   | 14  | 0  |
| PITG_09304 | Pi conserved hypothetical protein (1304 nt)                 | 12  | 52  | 2  |
| PITG_09305 | Pi DNA repair protein RAD51 (1465 nt)                       | 4   | 20  | 0  |
| PITG_09306 | Pi conserved hypothetical protein (1203 nt)                 | 3   | 6   | 0  |
| PITG_09307 | Pi conserved hypothetical protein (388 nt)                  | 186 | 43  | 0  |
| PITG_09309 | Pi conserved hypothetical protein (1971 nt)                 | 2   | 55  | 0  |
| PITG_09310 | Pi 6-phosphofructo-2-kinase/fructose-2,6-biphosphata:       | 13  | 47  | 0  |
| PITG_09312 | Pi conserved hypothetical protein (656 nt)                  | 0   | 0   | 0  |
| PITG_09315 | Pi conserved hypothetical protein (1081 nt)                 | 19  | 59  | 0  |
| PITG_09318 | Pi hypothetical protein (538 nt)                            | 5   | 25  | 0  |
| PITG_09320 | Pi ATP-binding Cassette (ABC) Superfamily (2251 nt)         | 5   | 8   | 0  |
| PITG_09321 | Pi conserved hypothetical protein (656 nt)                  | 2   | 2   | 0  |
| PITG_09341 | Pi conserved hypothetical protein (1148 nt)                 | 0   | 6   | 0  |
| PITG_09344 | Pi kinesin-like protein (2518 nt)                           | 1   | 0   | 0  |
| PITG_09345 | Pi 40S ribosomal protein S5-2 (1061 nt)                     | 861 | 805 | 98 |
| PITG_09346 | Pi conserved hypothetical protein (1107 nt)                 | 62  | 224 | 0  |
| PITG_09348 | Pi glutaredoxin, putative (1448 nt)                         | 6   | 32  | 1  |
| PITG_09349 | Pi translation elongation factor 1-alpha, putative (2423    | 3   | 30  | 0  |
| PITG_09350 | Pi aquaporin, putative (903 nt)                             | 9   | 292 | 0  |
| PITG_09354 | Pi aquaporin, putative (866 nt)                             | 53  | 327 | 0  |
| PITG_09355 | Pi aquaporin, putative (873 nt)                             | 38  | 7   | 0  |
| PITG_09360 | Pi conserved hypothetical protein (5277 nt)                 | 4   | 19  | 0  |
| PITG_09362 | Pi conserved hypothetical protein (2118 nt)                 | 1   | 11  | 0  |
| PITG_09364 | Pi conserved hypothetical protein (959 nt)                  | 5   | 27  | 0  |
| PITG_09365 | Pi conserved hypothetical protein (654 nt)                  | 1   | 20  | 0  |



|            |                                                           |      |     |    |
|------------|-----------------------------------------------------------|------|-----|----|
| PITG_09366 | Pi conserved hypothetical protein (703 nt)                | 5    | 16  | 0  |
| PITG_09367 | Pi sterol 3-beta-glucosyltransferase, putative (5031 nt)  | 4    | 5   | 0  |
| PITG_09374 | Pi conserved hypothetical protein (2997 nt)               | 2    | 10  | 0  |
| PITG_09375 | Pi cGMP-dependent protein kinase, putative (4972 nt)      | 1    | 3   | 0  |
| PITG_09376 | Pi conserved hypothetical protein (5603 nt)               | 2    | 20  | 0  |
| PITG_09377 | Pi ER degradation-enhancing alpha-mannosidase-like p      | 6    | 28  | 0  |
| PITG_09378 | Pi conserved hypothetical protein (1118 nt)               | 9    | 50  | 0  |
| PITG_09381 | Pi conserved hypothetical protein (921 nt)                | 4    | 56  | 0  |
| PITG_09383 | Pi aquaporin, putative (825 nt)                           | 0    | 1   | 0  |
| PITG_09384 | Pi aquaporin, putative (825 nt)                           | 4    | 1   | 0  |
| PITG_09386 | Pi aquaporin, putative (825 nt)                           | 7    | 15  | 0  |
| PITG_09387 | Pi aspartyl protease family A01A, putative (2760 nt)      | 38   | 103 | 0  |
| PITG_09388 | Pi GPN-loop GTPase 2, putative (1156 nt)                  | 37   | 16  | 0  |
| PITG_09389 | Pi trehalose-phosphatase, putative (3869 nt)              | 31   | 105 | 0  |
| PITG_09393 | Pi pyruvate kinase (1566 nt)                              | 5    | 34  | 1  |
| PITG_09400 | Pi pyruvate kinase (1889 nt)                              | 36   | 224 | 6  |
| PITG_09401 | Pi pre-mRNA-splicing factor ini1 (333 nt)                 | 47   | 97  | 1  |
| PITG_09402 | Pi phosphoglycerate kinase (981 nt)                       | 319  | 351 | 11 |
| PITG_09403 | Pi hypothetical protein (583 nt)                          | 79   | 184 | 0  |
| PITG_09404 | Pi myosin-like protein (4883 nt)                          | 3    | 62  | 2  |
| PITG_09413 | Pi sterol 3-beta-glucosyltransferase, putative (4590 nt)  | 2    | 15  | 0  |
| PITG_09414 | Pi conserved hypothetical protein (796 nt)                | 1    | 12  | 0  |
| PITG_09415 | Pi ethanolamine kinase, putative (1754 nt)                | 4    | 22  | 0  |
| PITG_09419 | Pi gamma-soluble NSF attachment protein, putative (29     | 2    | 19  | 0  |
| PITG_09422 | Pi conserved hypothetical protein (1463 nt)               | 0    | 12  | 0  |
| PITG_09423 | Pi conserved hypothetical protein (1862 nt)               | 8    | 30  | 0  |
| PITG_09424 | Pi conserved hypothetical protein (1191 nt)               | 2    | 9   | 0  |
| PITG_09426 | Pi conserved hypothetical protein (1331 nt)               | 10   | 29  | 0  |
| PITG_09427 | Pi conserved hypothetical protein (786 nt)                | 60   | 22  | 1  |
| PITG_09428 | Pi conserved hypothetical protein (966 nt)                | 58   | 197 | 2  |
| PITG_09430 | Pi trafficking protein particle complex subunit 2, putati | 31   | 55  | 0  |
| PITG_09431 | Pi 40S ribosomal protein S19-3 (946 nt)                   | 296  | 487 | 69 |
| PITG_09432 | Pi nucleolar protein NOP5 (1865 nt)                       | 39   | 28  | 2  |
| PITG_09434 | Pi conserved hypothetical protein (739 nt)                | 36   | 67  | 0  |
| PITG_09435 | Pi conserved hypothetical protein (3425 nt)               | 8    | 37  | 0  |
| PITG_09436 | Pi conserved hypothetical protein (709 nt)                | 123  | 137 | 3  |
| PITG_09437 | Pi conserved hypothetical protein (976 nt)                | 14   | 64  | 0  |
| PITG_09438 | Pi conserved hypothetical protein (579 nt)                | 255  | 193 | 11 |
| PITG_09439 | Pi conserved hypothetical protein (1563 nt)               | 13   | 13  | 0  |
| PITG_09440 | Pi conserved hypothetical protein (1025 nt)               | 2    | 12  | 1  |
| PITG_09441 | Pi Mitochondrial Protein Translocase (MPT) Family (399    | 140  | 89  | 7  |
| PITG_09442 | Pi 40S ribosomal protein S21 (659 nt)                     | 1029 | 556 | 76 |
| PITG_09443 | Pi prefoldin subunit 2, putative (589 nt)                 | 46   | 50  | 1  |
| PITG_09444 | Pi conserved hypothetical protein (1052 nt)               | 9    | 18  | 0  |
| PITG_09445 | Pi conserved hypothetical protein (633 nt)                | 128  | 214 | 25 |
| PITG_09446 | Pi conserved hypothetical protein (790 nt)                | 12   | 33  | 0  |
| PITG_09447 | Pi conserved hypothetical protein (4266 nt)               | 6    | 10  | 0  |

|                                                                           |      |     |    |
|---------------------------------------------------------------------------|------|-----|----|
| PITG_09448   Pi conserved hypothetical protein (2938 nt)                  | 1    | 12  | 0  |
| PITG_09449   Pi SCO1 family protein (916 nt)                              | 24   | 40  | 0  |
| PITG_09450   Pi conserved hypothetical protein (5480 nt)                  | 14   | 25  | 0  |
| PITG_09451   Pi conserved hypothetical protein (733 nt)                   | 62   | 98  | 4  |
| PITG_09452   Pi MMP37-like protein (895 nt)                               | 14   | 78  | 0  |
| PITG_09453   Pi conserved hypothetical protein (1145 nt)                  | 106  | 27  | 0  |
| PITG_09456   Pi nitroreductase family, putative (844 nt)                  | 4    | 16  | 0  |
| PITG_09459   Pi nitroreductase family, putative (1208 nt)                 | 15   | 23  | 0  |
| PITG_09462   Pi conserved hypothetical protein (1397 nt)                  | 1    | 11  | 0  |
| PITG_09463   Pi conserved hypothetical protein (1839 nt)                  | 71   | 0   | 0  |
| PITG_09467   Pi pectin lyase, putative (696 nt)                           | 0    | 24  | 0  |
| PITG_09468   Pi conserved hypothetical protein (1978 nt)                  | 11   | 7   | 0  |
| PITG_09470   Pi arabinan endo-1,5-alpha-L-arabinosidase A precursor       | 0    | 0   | 0  |
| PITG_09471   Pi F-box protein, putative (879 nt)                          | 0    | 2   | 0  |
| PITG_09472   Pi conserved hypothetical protein (707 nt)                   | 118  | 208 | 11 |
| PITG_09473   Pi conserved hypothetical protein (747 nt)                   | 1    | 3   | 0  |
| PITG_09474   Pi conserved hypothetical protein (945 nt)                   | 5    | 10  | 0  |
| PITG_09475   Pi conserved hypothetical protein (818 nt)                   | 13   | 15  | 0  |
| PITG_09477   Pi ATP-binding Cassette (ABC) Superfamily (5537 nt)          | 0    | 14  | 0  |
| PITG_09478   Pi conserved hypothetical protein (1284 nt)                  | 2    | 16  | 0  |
| PITG_09482   Pi conserved hypothetical protein (1825 nt)                  | 43   | 243 | 0  |
| PITG_09483   Pi conserved hypothetical protein (1458 nt)                  | 8    | 36  | 0  |
| PITG_09487   Pi conserved hypothetical protein (1230 nt)                  | 5    | 19  | 0  |
| PITG_09488   Pi small nuclear ribonucleoprotein Sm D3 (503 nt)            | 26   | 60  | 1  |
| PITG_09493   Pi Mitochondrial Protein Translocase (MPT) Family (684 nt)   | 36   | 52  | 0  |
| PITG_09495   Pi conserved hypothetical protein (594 nt)                   | 1    | 28  | 0  |
| PITG_09504   Pi methionine aminopeptidase, putative (1432 nt)             | 7    | 28  | 0  |
| PITG_09505   Pi centrosome-associated protein, putative (6330 nt)         | 2    | 18  | 0  |
| PITG_09506   Pi 30S ribosomal protein S5, putative (1158 nt)              | 8    | 22  | 2  |
| PITG_09507   Pi ADP-ribosylation factor-related protein, putative (93 nt) | 11   | 37  | 0  |
| PITG_09508   Pi ubiquitin carboxyl-terminal hydrolase, putative (101 nt)  | 10   | 30  | 0  |
| PITG_09512   Pi prohibitin-2 (1326 nt)                                    | 87   | 147 | 14 |
| PITG_09521   Pi conserved hypothetical protein (539 nt)                   | 33   | 21  | 1  |
| PITG_09522   Pi conserved hypothetical protein (2072 nt)                  | 5    | 6   | 0  |
| PITG_09523   Pi Rab32/38 family GTPase, putative (683 nt)                 | 11   | 7   | 0  |
| PITG_09526   Pi transcription factor BTF3-like protein (935 nt)           | 1562 | 295 | 47 |
| PITG_09528   Pi conserved hypothetical protein (1289 nt)                  | 10   | 121 | 0  |
| PITG_09531   Pi conserved hypothetical protein (981 nt)                   | 21   | 17  | 0  |
| PITG_09534   Pi conserved hypothetical protein (893 nt)                   | 4    | 12  | 0  |
| PITG_09535   Pi conserved hypothetical protein (1213 nt)                  | 3    | 12  | 0  |
| PITG_09536   Pi phosphoribosylaminoimidazole-succinocarboxamide           | 3    | 15  | 0  |
| PITG_09537   Pi conserved hypothetical protein (976 nt)                   | 13   | 65  | 0  |
| PITG_09538   Pi mitochondrial carnitine/acylcarnitine carrier protein     | 24   | 162 | 2  |
| PITG_09539   Pi hypothetical protein (665 nt)                             | 163  | 99  | 0  |
| PITG_09540   Pi 60S ribosomal protein L19-1 (774 nt)                      | 1117 | 946 | 74 |
| PITG_09543   Pi hypothetical protein (602 nt)                             | 8    | 34  | 0  |
| PITG_09544   Pi conserved hypothetical protein (757 nt)                   | 186  | 40  | 0  |

|            |                                                          |     |      |     |
|------------|----------------------------------------------------------|-----|------|-----|
| PITG_09547 | Pi conserved hypothetical protein (920 nt)               | 212 | 218  | 21  |
| PITG_09548 | Pi syntaxin-like protein (1222 nt)                       | 121 | 64   | 0   |
| PITG_09549 | Pi hypothetical protein (264 nt)                         | 29  | 35   | 0   |
| PITG_09552 | Pi conserved hypothetical protein (1583 nt)              | 914 | 334  | 69  |
| PITG_09553 | Pi conserved hypothetical protein (1008 nt)              | 33  | 206  | 18  |
| PITG_09554 | Pi conserved hypothetical protein (1804 nt)              | 6   | 69   | 0   |
| PITG_09555 | Pi ubiquitin-ribosomal fusion protein, putative (461 nt) | 178 | 176  | 126 |
| PITG_09556 | Pi guanine nucleotide-binding protein subunit beta-2-li  | 238 | 189  | 95  |
| PITG_09563 | Pi 40S ribosomal protein S9-1 (813 nt)                   | 905 | 1115 | 66  |
| PITG_09564 | Pi vacuolar protein sorting-associated protein 41 (3598  | 5   | 21   | 0   |
| PITG_09566 | Pi inositol monophosphatase, putative (2768 nt)          | 8   | 19   | 0   |
| PITG_09567 | Pi conserved hypothetical protein (796 nt)               | 20  | 37   | 0   |
| PITG_09570 | Pi hypothetical protein (1014 nt)                        | 27  | 25   | 0   |
| PITG_09572 | Pi conserved hypothetical protein (1890 nt)              | 1   | 12   | 0   |
| PITG_09576 | Pi orotidine 5'-phosphate decarboxylase, putative (168   | 26  | 66   | 1   |
| PITG_09578 | Pi vesicle transporter GOT1B-like protein (615 nt)       | 30  | 38   | 1   |
| PITG_09579 | Pi riboflavin biosynthesis protein ribBA, putative (1873 | 25  | 54   | 0   |
| PITG_09581 | Pi conserved hypothetical protein (3463 nt)              | 1   | 19   | 0   |
| PITG_09582 | Pi ATP phosphoribosyltransferase (900 nt)                | 12  | 19   | 1   |
| PITG_09584 | Pi hypothetical protein (885 nt)                         | 42  | 27   | 0   |
| PITG_09585 | Pi secreted RxLR effector peptide, putative (1020 nt)    | 6   | 13   | 0   |
| PITG_09587 | Pi mannose-P-dolichol utilization defect 1 protein (879  | 2   | 17   | 0   |
| PITG_09588 | Pi conserved hypothetical protein (1034 nt)              | 27  | 15   | 0   |
| PITG_09593 | Pi conserved hypothetical protein (812 nt)               | 29  | 42   | 0   |
| PITG_09594 | Pi conserved hypothetical protein (955 nt)               | 22  | 32   | 0   |
| PITG_09595 | Pi conserved hypothetical protein (783 nt)               | 2   | 1    | 0   |
| PITG_09596 | Pi nucleoside diphosphate kinase B (661 nt)              | 93  | 226  | 31  |
| PITG_09597 | Pi conserved hypothetical protein (1395 nt)              | 66  | 34   | 0   |
| PITG_09598 | Pi U4/U6.U5 tri-snRNP-associated protein, putative (22   | 23  | 49   | 0   |
| PITG_09599 | Pi 2OG-Fe(II) oxygenase superfamily protein (1014 nt)    | 11  | 13   | 0   |
| PITG_09600 | Pi conserved hypothetical protein (561 nt)               | 104 | 65   | 1   |
| PITG_09603 | Pi conserved hypothetical protein (519 nt)               | 8   | 19   | 0   |
| PITG_09604 | Pi conserved hypothetical protein (2560 nt)              | 18  | 53   | 0   |
| PITG_09605 | Pi conserved hypothetical protein (608 nt)               | 19  | 6    | 0   |
| PITG_09609 | Pi conserved hypothetical protein (769 nt)               | 79  | 94   | 0   |
| PITG_09620 | Pi protein kinase (354 nt)                               | 14  | 2    | 0   |
| PITG_09621 | Pi protein kinase (721 nt)                               | 8   | 57   | 0   |
| PITG_09624 | Pi conserved hypothetical protein (602 nt)               | 49  | 44   | 0   |
| PITG_09625 | Pi conserved hypothetical protein (1359 nt)              | 4   | 11   | 0   |
| PITG_09626 | Pi transcription factor BTF3-like protein (888 nt)       | 805 | 437  | 45  |
| PITG_09627 | Pi ribosomal protein L23, putative (958 nt)              | 41  | 45   | 2   |
| PITG_09628 | Pi conserved hypothetical protein (1141 nt)              | 13  | 72   | 0   |
| PITG_09629 | Pi Rab32/38 family GTPase, putative (663 nt)             | 34  | 13   | 0   |
| PITG_09631 | Pi conserved hypothetical protein (465 nt)               | 2   | 15   | 1   |
| PITG_09635 | Pi orotidine 5'-phosphate decarboxylase, putative (162   | 8   | 30   | 0   |
| PITG_09637 | Pi riboflavin biosynthesis protein ribBA (634 nt)        | 20  | 36   | 0   |
| PITG_09638 | Pi conserved hypothetical protein (812 nt)               | 3   | 9    | 0   |

|            |                                                            |     |     |    |
|------------|------------------------------------------------------------|-----|-----|----|
| PITG_09640 | Pi ATP phosphoribosyltransferase (974 nt)                  | 17  | 14  | 1  |
| PITG_09641 | Pi conserved hypothetical protein (444 nt)                 | 28  | 42  | 0  |
| PITG_09642 | Pi conserved hypothetical protein (506 nt)                 | 28  | 20  | 0  |
| PITG_09644 | Pi conserved hypothetical protein (474 nt)                 | 7   | 15  | 0  |
| PITG_09648 | Pi conserved hypothetical protein (512 nt)                 | 1   | 12  | 0  |
| PITG_09649 | Pi conserved hypothetical protein (472 nt)                 | 120 | 241 | 0  |
| PITG_09650 | Pi conserved hypothetical protein (639 nt)                 | 0   | 0   | 0  |
| PITG_09652 | Pi conserved hypothetical protein (536 nt)                 | 192 | 141 | 2  |
| PITG_09653 | Pi U6 snRNA-associated Sm-like protein LSm4, putative      | 28  | 43  | 0  |
| PITG_09655 | Pi putative tyrosine-protein phosphatase OCA1, putative    | 24  | 88  | 3  |
| PITG_09663 | Pi hypothetical protein (538 nt)                           | 0   | 21  | 0  |
| PITG_09664 | Pi protein kinase, putative (2462 nt)                      | 3   | 45  | 0  |
| PITG_09665 | Pi protein kinase, putative (2399 nt)                      | 4   | 50  | 0  |
| PITG_09666 | Pi conserved hypothetical protein (1146 nt)                | 2   | 12  | 0  |
| PITG_09667 | Pi sporangia induced bZIP regulated hypothetical protein   | 0   | 0   | 0  |
| PITG_09669 | Pi protein kinase (525 nt)                                 | 46  | 89  | 0  |
| PITG_09670 | Pi protein kinase (621 nt)                                 | 0   | 27  | 0  |
| PITG_09671 | Pi receptor-type tyrosine-protein phosphatase, putative    | 4   | 15  | 0  |
| PITG_09672 | Pi cytidylyltransferase (1352 nt)                          | 8   | 5   | 0  |
| PITG_09674 | Pi cytidylyltransferase (676 nt)                           | 0   | 17  | 0  |
| PITG_09675 | Pi phosphatidate cytidylyltransferase, putative (1488 nt)  | 20  | 8   | 0  |
| PITG_09676 | Pi conserved hypothetical protein (615 nt)                 | 9   | 4   | 0  |
| PITG_09679 | Pi conserved hypothetical protein (620 nt)                 | 7   | 15  | 0  |
| PITG_09680 | Pi conserved hypothetical protein (1291 nt)                | 1   | 15  | 0  |
| PITG_09681 | Pi transmembrane protein, putative (2182 nt)               | 1   | 10  | 1  |
| PITG_09682 | Pi conserved hypothetical protein (1069 nt)                | 2   | 21  | 0  |
| PITG_09684 | Pi hypothetical protein (636 nt)                           | 5   | 31  | 0  |
| PITG_09690 | Pi hypothetical protein (1701 nt)                          | 7   | 49  | 0  |
| PITG_09698 | Pi histidine biosynthesis trifunctional protein, putative  | 25  | 27  | 0  |
| PITG_09699 | Pi conserved hypothetical protein (656 nt)                 | 199 | 271 | 13 |
| PITG_09700 | Pi conserved hypothetical protein (1255 nt)                | 5   | 24  | 0  |
| PITG_09701 | Pi conserved hypothetical protein (489 nt)                 | 5   | 12  | 0  |
| PITG_09702 | Pi conserved hypothetical protein (1816 nt)                | 11  | 40  | 0  |
| PITG_09703 | Pi unc-45 family protein (3219 nt)                         | 1   | 14  | 0  |
| PITG_09704 | Pi dynein light chain Tctex-type, putative (467 nt)        | 48  | 23  | 0  |
| PITG_09705 | Pi SUMO-conjugating enzyme (SCE), putative (483 nt)        | 55  | 43  | 0  |
| PITG_09706 | Pi proteasome subunit beta, putative (818 nt)              | 127 | 223 | 7  |
| PITG_09707 | Pi mitochondrial import inner membrane translocase subunit | 8   | 15  | 0  |
| PITG_09708 | Pi conserved hypothetical protein (886 nt)                 | 0   | 2   | 0  |
| PITG_09710 | Pi conserved hypothetical protein (465 nt)                 | 8   | 0   | 0  |
| PITG_09711 | Pi hypothetical protein (274 nt)                           | 40  | 42  | 0  |
| PITG_09712 | Pi DNA-directed RNA polymerase I, II, and III subunit rho  | 12  | 14  | 0  |
| PITG_09714 | Pi conserved hypothetical protein (1011 nt)                | 0   | 11  | 0  |
| PITG_09715 | Pi conserved hypothetical protein (562 nt)                 | 0   | 0   | 0  |
| PITG_09721 | Pi conserved hypothetical protein (1031 nt)                | 68  | 139 | 2  |
| PITG_09722 | Pi thioredoxin H-type (1210 nt)                            | 35  | 56  | 0  |
| PITG_09723 | Pi conserved hypothetical protein (554 nt)                 | 8   | 23  | 0  |

|            |                                                                       |     |      |    |
|------------|-----------------------------------------------------------------------|-----|------|----|
| PITG_09724 | Pi conserved hypothetical protein (1302 nt)                           | 102 | 102  | 0  |
| PITG_09725 | Pi conserved hypothetical protein (1057 nt)                           | 10  | 29   | 0  |
| PITG_09726 | Pi phosphoribosylaminoimidazole carboxylase (1833 nt)                 | 7   | 13   | 0  |
| PITG_09728 | Pi exosome complex exonuclease RRP4 (1584 nt)                         | 10  | 14   | 0  |
| PITG_09729 | Pi conserved hypothetical protein (864 nt)                            | 0   | 12   | 0  |
| PITG_09737 | Pi hypothetical protein (1053 nt)                                     | 1   | 22   | 0  |
| PITG_09742 | Pi hypothetical protein (2594 nt)                                     | 99  | 354  | 0  |
| PITG_09744 | Pi CUG-BP- and ETR-3-like factor, putative (1645 nt)                  | 348 | 205  | 5  |
| PITG_09747 | Pi conserved hypothetical protein (1880 nt)                           | 2   | 20   | 0  |
| PITG_09748 | Pi CUG-BP- and ETR-3-like factor, putative (1607 nt)                  | 60  | 197  | 1  |
| PITG_09751 | Pi GPI mannosyltransferase 4, putative (1822 nt)                      | 3   | 19   | 0  |
| PITG_09752 | Pi conserved hypothetical protein (1140 nt)                           | 4   | 8    | 0  |
| PITG_09753 | Pi conserved hypothetical protein (945 nt)                            | 4   | 11   | 0  |
| PITG_09760 | Pi mucin-like protein (4777 nt)                                       | 22  | 151  | 6  |
| PITG_09765 | Pi hypothetical protein (1420 nt)                                     | 0   | 5    | 0  |
| PITG_09767 | Pi conserved hypothetical protein (1714 nt)                           | 14  | 301  | 0  |
| PITG_09768 | Pi dentin sialophosphoprotein-like protein (1715 nt)                  | 103 | 324  | 0  |
| PITG_09769 | Pi hypothetical protein (616 nt)                                      | 182 | 277  | 11 |
| PITG_09770 | Pi conserved hypothetical protein (1403 nt)                           | 17  | 38   | 0  |
| PITG_09772 | Pi conserved hypothetical protein (635 nt)                            | 184 | 310  | 1  |
| PITG_09779 | Pi conserved hypothetical protein (557 nt)                            | 24  | 28   | 0  |
| PITG_09780 | Pi conserved hypothetical protein (2136 nt)                           | 2   | 21   | 0  |
| PITG_09781 | Pi conserved hypothetical protein (448 nt)                            | 7   | 32   | 0  |
| PITG_09782 | Pi palmitoyltransferase, putative (2295 nt)                           | 7   | 20   | 0  |
| PITG_09783 | Pi conserved hypothetical protein (1687 nt)                           | 20  | 46   | 0  |
| PITG_09784 | Pi conserved hypothetical protein (465 nt)                            | 105 | 89   | 0  |
| PITG_09785 | Pi lipase maturation factor 2 (2229 nt)                               | 1   | 12   | 0  |
| PITG_09786 | Pi conserved hypothetical protein (953 nt)                            | 953 | 360  | 14 |
| PITG_09787 | Pi cytochrome P450, putative (1697 nt)                                | 89  | 27   | 0  |
| PITG_09789 | Pi conserved hypothetical protein (2931 nt)                           | 8   | 38   | 0  |
| PITG_09790 | Pi conserved hypothetical protein (856 nt)                            | 8   | 17   | 0  |
| PITG_09791 | Pi seryl-tRNA synthetase (1476 nt)                                    | 6   | 10   | 0  |
| PITG_09792 | Pi DEAD/DEAH box RNA helicase, putative (2065 nt)                     | 1   | 8    | 0  |
| PITG_09793 | Pi small cysteine rich protein SCR108 (1043 nt)                       | 365 | 1143 | 48 |
| PITG_09795 | Pi conserved hypothetical protein (553 nt)                            | 26  | 18   | 0  |
| PITG_09798 | Pi glucan 1,3-beta-glucosidase, putative (2238 nt)                    | 122 | 453  | 46 |
| PITG_09800 | Pi conserved hypothetical protein (1120 nt)                           | 8   | 22   | 0  |
| PITG_09815 | Pi anthranilate synthase component 2, putative (1155 nt)              | 7   | 24   | 0  |
| PITG_09816 | Pi conserved hypothetical protein (1536 nt)                           | 5   | 15   | 0  |
| PITG_09817 | Pi ribose-phosphate pyrophosphokinase (1247 nt)                       | 8   | 10   | 0  |
| PITG_09818 | Pi conserved hypothetical protein (3367 nt)                           | 4   | 18   | 0  |
| PITG_09819 | Pi conserved hypothetical protein (475 nt)                            | 36  | 11   | 0  |
| PITG_09820 | Pi regulator of chromosome condensation (RCC1)-like protein (1043 nt) | 11  | 47   | 0  |
| PITG_09821 | Pi polysaccharide lyase, putative (409 nt)                            | 2   | 6    | 0  |
| PITG_09826 | Pi conserved hypothetical protein (2803 nt)                           | 3   | 11   | 0  |
| PITG_09827 | Pi mitotic checkpoint protein, putative (786 nt)                      | 15  | 34   | 0  |
| PITG_09828 | Pi U6 snRNA-associated Sm-like protein LSm3, putative (1043 nt)       | 208 | 84   | 3  |

|            |                                                                |    |      |    |
|------------|----------------------------------------------------------------|----|------|----|
| PITG_09829 | Pi conserved hypothetical protein (1602 nt)                    | 3  | 11   | 0  |
| PITG_09831 | Pi conserved hypothetical protein (677 nt)                     | 4  | 0    | 12 |
| PITG_09832 | Pi adhesin protein, putative (2265 nt)                         | 7  | 28   | 5  |
| PITG_09834 | Pi conserved hypothetical protein (3282 nt)                    | 0  | 1    | 0  |
| PITG_09835 | Pi COP9 signalosome complex subunit, putative (1571 nt)        | 6  | 39   | 0  |
| PITG_09836 | Pi secreted RxLR effector peptide, putative (483 nt)           | 44 | 29   | 0  |
| PITG_09837 | Pi secreted RxLR effector peptide, putative (369 nt)           | 62 | 49   | 0  |
| PITG_09838 | Pi secreted RxLR effector peptide, putative (369 nt)           | 3  | 58   | 0  |
| PITG_09839 | Pi conserved hypothetical protein (3126 nt)                    | 1  | 2    | 0  |
| PITG_09840 | Pi conserved hypothetical protein (345 nt)                     | 3  | 4    | 0  |
| PITG_09846 | Pi prolyl-tRNA synthetase, putative (2542 nt)                  | 7  | 55   | 2  |
| PITG_09848 | Pi medium-chain specific acyl-CoA dehydrogenase, mitochondrial | 13 | 203  | 0  |
| PITG_09849 | Pi conserved hypothetical protein (987 nt)                     | 59 | 23   | 0  |
| PITG_09851 | Pi metalloprotease family M12A, putative (1182 nt)             | 0  | 13   | 0  |
| PITG_09852 | Pi conserved hypothetical protein (575 nt)                     | 1  | 31   | 0  |
| PITG_09861 | Pi secreted RxLR effector peptide, putative (702 nt)           | 0  | 11   | 0  |
| PITG_09862 | Pi conserved hypothetical protein (2193 nt)                    | 11 | 49   | 0  |
| PITG_09863 | Pi septum site-determining protein minD (1017 nt)              | 12 | 27   | 0  |
| PITG_09866 | Pi tRNA (adenine-N(1)-methyltransferase non-catalytic)         | 2  | 13   | 0  |
| PITG_09867 | Pi calcineurin-like phosphoesterase, putative (1895 nt)        | 3  | 9    | 0  |
| PITG_09868 | Pi hypothetical protein (977 nt)                               | 1  | 0    | 0  |
| PITG_09870 | Pi metalloprotease family M13, putative (2034 nt)              | 0  | 24   | 0  |
| PITG_09872 | Pi cell 5A endo-1,4-beta-glucanase (1920 nt)                   | 13 | 79   | 0  |
| PITG_09873 | Pi pre-mRNA-splicing factor SPF27, putative (2223 nt)          | 21 | 87   | 0  |
| PITG_09874 | Pi conserved hypothetical protein (1292 nt)                    | 5  | 19   | 2  |
| PITG_09875 | Pi AP-4 complex subunit mu-1, putative (1344 nt)               | 16 | 42   | 0  |
| PITG_09876 | Pi conserved hypothetical protein (4114 nt)                    | 1  | 17   | 0  |
| PITG_09880 | Pi conserved hypothetical protein (504 nt)                     | 4  | 16   | 0  |
| PITG_09881 | Pi ATP-binding Cassette (ABC) superfamily (1089 nt)            | 6  | 11   | 0  |
| PITG_09885 | Pi ATP-binding Cassette (ABC) Superfamily (1842 nt)            | 0  | 0    | 0  |
| PITG_09887 | Pi alternative oxidase, putative (913 nt)                      | 0  | 0    | 0  |
| PITG_09890 | Pi alternative oxidase, mitochondrial precursor (1034 nt)      | 21 | 1034 | 0  |
| PITG_09891 | Pi conserved hypothetical protein (1419 nt)                    | 21 | 77   | 0  |
| PITG_09895 | Pi conserved hypothetical protein (1317 nt)                    | 36 | 27   | 0  |
| PITG_09896 | Pi conserved hypothetical protein (324 nt)                     | 28 | 24   | 0  |
| PITG_09897 | Pi conserved hypothetical protein (781 nt)                     | 33 | 18   | 0  |
| PITG_09898 | Pi ras-like protein (1232 nt)                                  | 12 | 40   | 0  |
| PITG_09899 | Pi cleavage induced hypothetical protein (2638 nt)             | 2  | 14   | 0  |
| PITG_09900 | Pi 2Fe-2S ferredoxin, putative (545 nt)                        | 6  | 5    | 0  |
| PITG_09904 | Pi hypothetical protein (3114 nt)                              | 0  | 0    | 0  |
| PITG_09906 | Pi arabinogalactan endo-1,4-beta-galactosidase, putative       | 5  | 30   | 0  |
| PITG_09907 | Pi arabinogalactan endo-1,4-beta-galactosidase, putative       | 19 | 67   | 0  |
| PITG_09910 | Pi arabinogalactan endo-1,4-beta-galactosidase (1077 nt)       | 5  | 93   | 0  |
| PITG_09920 | Pi conserved hypothetical protein (1401 nt)                    | 5  | 32   | 0  |
| PITG_09921 | Pi conserved hypothetical protein (1779 nt)                    | 1  | 12   | 0  |
| PITG_09922 | Pi conserved hypothetical protein (938 nt)                     | 2  | 7    | 0  |
| PITG_09923 | Pi 6-phosphofructo-2-kinase/fructose-2,6-bisphosphatase        | 3  | 22   | 0  |

|            |                                                             |    |     |   |
|------------|-------------------------------------------------------------|----|-----|---|
| PITG_09930 | Pi type II inositol-3,4-bisphosphate 4-phosphatase, put     | 2  | 35  | 0 |
| PITG_09931 | Pi conserved hypothetical protein (759 nt)                  | 26 | 40  | 0 |
| PITG_09932 | Pi translation initiation factor eIF-2B subunit epsilon, pi | 5  | 21  | 0 |
| PITG_09936 | Pi conserved hypothetical protein (1312 nt)                 | 38 | 63  | 0 |
| PITG_09937 | Pi dolichol-phosphate mannosyltransferase (1075 nt)         | 8  | 35  | 1 |
| PITG_09939 | Pi conserved hypothetical protein (1099 nt)                 | 30 | 64  | 2 |
| PITG_09940 | Pi conserved hypothetical protein (2091 nt)                 | 16 | 29  | 0 |
| PITG_09941 | Pi myosin-like protein (2352 nt)                            | 25 | 74  | 2 |
| PITG_09944 | Pi hypothetical protein (1224 nt)                           | 1  | 24  | 0 |
| PITG_09949 | Pi conserved hypothetical protein (798 nt)                  | 2  | 48  | 1 |
| PITG_09950 | Pi conserved hypothetical protein (3267 nt)                 | 5  | 25  | 0 |
| PITG_09951 | Pi dicer-like, putative (2154 nt)                           | 12 | 21  | 0 |
| PITG_09952 | Pi radial spoke protein (872 nt)                            | 0  | 1   | 0 |
| PITG_09953 | Pi guanylate-binding protein, putative (2898 nt)            | 4  | 11  | 0 |
| PITG_09954 | Pi patatin-like phospholipase, putative (2300 nt)           | 9  | 21  | 0 |
| PITG_09955 | Pi acyl-CoA dehydrogenase family member 9, mitochor         | 12 | 148 | 0 |
| PITG_09956 | Pi pre-mRNA-processing factor, putative (2947 nt)           | 6  | 36  | 0 |
| PITG_09961 | Pi conserved hypothetical protein (853 nt)                  | 2  | 14  | 0 |
| PITG_09962 | Pi conserved hypothetical protein (2799 nt)                 | 4  | 71  | 0 |
| PITG_09963 | Pi cellulose synthase catalytic subunit, putative (4148 r   | 58 | 228 | 0 |
| PITG_09964 | Pi cellulose synthase 2 (3336 nt)                           | 40 | 208 | 0 |
| PITG_09965 | Pi protein transport Sec23/Sec24-like protein (2541 nt)     | 5  | 28  | 1 |
| PITG_09967 | Pi conserved hypothetical protein (807 nt)                  | 1  | 8   | 0 |
| PITG_09968 | Pi conserved hypothetical protein (1605 nt)                 | 1  | 10  | 0 |
| PITG_09977 | Pi conserved hypothetical protein (1929 nt)                 | 7  | 10  | 0 |
| PITG_09978 | Pi conserved hypothetical protein (1349 nt)                 | 12 | 22  | 0 |
| PITG_09979 | Pi conserved hypothetical protein (1417 nt)                 | 0  | 1   | 0 |
| PITG_09980 | Pi conserved hypothetical protein (784 nt)                  | 0  | 13  | 0 |
| PITG_09981 | Pi conserved hypothetical protein (1287 nt)                 | 7  | 5   | 0 |
| PITG_09983 | Pi protocadherin Fat-like protein (10467 nt)                | 0  | 4   | 0 |
| PITG_09985 | Pi pro-apoptotic serine protease nma111-like protein (      | 5  | 6   | 0 |
| PITG_09986 | Pi conserved hypothetical protein (2917 nt)                 | 5  | 22  | 0 |
| PITG_09987 | Pi tRNA pseudouridine synthase, putative (2048 nt)          | 3  | 14  | 0 |
| PITG_09990 | Pi dolichyldiphosphatase, putative (941 nt)                 | 20 | 42  | 0 |
| PITG_09991 | Pi dolichyldiphosphatase 1, putative (1104 nt)              | 4  | 15  | 0 |
| PITG_09992 | Pi conserved hypothetical protein (1949 nt)                 | 7  | 93  | 0 |
| PITG_09995 | Pi conserved hypothetical protein (1983 nt)                 | 13 | 11  | 0 |
| PITG_09996 | Pi conserved hypothetical protein (720 nt)                  | 13 | 63  | 0 |
| PITG_09997 | Pi phosphatidate cytidyltransferase, putative (1128 n       | 8  | 86  | 0 |
| PITG_09998 | Pi conserved hypothetical protein (862 nt)                  | 46 | 693 | 0 |
| PITG_10002 | Pi conserved hypothetical protein (1327 nt)                 | 11 | 11  | 0 |
| PITG_10004 | Pi selenoprotein W-related family, putative (695 nt)        | 2  | 8   | 0 |
| PITG_10005 | Pi conserved hypothetical protein (1921 nt)                 | 26 | 137 | 0 |
| PITG_10006 | Pi conserved hypothetical protein (1480 nt)                 | 4  | 18  | 0 |
| PITG_10007 | Pi diamminopimelate decarboxylase, putative (1584 nt)       | 18 | 36  | 0 |
| PITG_10008 | Pi protein kinase (2733 nt)                                 | 4  | 17  | 0 |
| PITG_10011 | Pi polyketide hydroxylase, putative (1876 nt)               | 8  | 15  | 0 |

|            |                                                            |     |     |    |
|------------|------------------------------------------------------------|-----|-----|----|
| PITG_10012 | Pi Drug/Metabolite Transporter (DMT) Superfamily (12       | 9   | 39  | 0  |
| PITG_10014 | Pi conserved hypothetical protein (828 nt)                 | 10  | 41  | 0  |
| PITG_10016 | Pi conserved hypothetical protein (1180 nt)                | 2   | 15  | 0  |
| PITG_10017 | Pi conserved hypothetical protein (1414 nt)                | 59  | 107 | 0  |
| PITG_10022 | Pi vacuolar protein sorting-associated protein 8 (5419 nt) | 10  | 41  | 0  |
| PITG_10023 | Pi chromodomain protein, putative (1050 nt)                | 11  | 10  | 0  |
| PITG_10026 | Pi phosphatidate cytidyltransferase, putative (1847 nt)    | 10  | 22  | 0  |
| PITG_10027 | Pi alpha-N-acetylglucosaminidase (NAGLU), putative (2      | 4   | 17  | 0  |
| PITG_10028 | Pi serine palmitoyltransferase, putative (1672 nt)         | 85  | 115 | 1  |
| PITG_10029 | Pi hypothetical protein (400 nt)                           | 2   | 14  | 0  |
| PITG_10030 | Pi conserved hypothetical protein (796 nt)                 | 2   | 5   | 0  |
| PITG_10031 | Pi lysosomal alpha-mannosidase, putative (3135 nt)         | 5   | 120 | 3  |
| PITG_10032 | Pi 6-phosphogluconate dehydrogenase (1661 nt)              | 347 | 245 | 18 |
| PITG_10034 | Pi fatty acyl-CoA reductase, putative (3991 nt)            | 1   | 10  | 0  |
| PITG_10038 | Pi SCP-like extracellular protein (1059 nt)                | 7   | 0   | 0  |
| PITG_10039 | Pi conserved hypothetical protein (693 nt)                 | 10  | 11  | 0  |
| PITG_10040 | Pi conserved hypothetical protein (701 nt)                 | 6   | 17  | 0  |
| PITG_10042 | Pi conserved hypothetical protein (384 nt)                 | 6   | 5   | 0  |
| PITG_10045 | Pi ser/thr kinase (4007 nt)                                | 1   | 16  | 0  |
| PITG_10048 | Pi conserved hypothetical protein (906 nt)                 | 3   | 13  | 0  |
| PITG_10049 | Pi protein kinase (2110 nt)                                | 4   | 42  | 0  |
| PITG_10050 | Pi alpha-N-acetylglucosaminidase (NAGLU), putative (2      | 0   | 16  | 0  |
| PITG_10052 | Pi choline/Carnitine O-acyltransferase, putative (1929 nt) | 4   | 16  | 0  |
| PITG_10053 | Pi conserved hypothetical protein (673 nt)                 | 4   | 25  | 0  |
| PITG_10058 | Pi conserved hypothetical protein (5932 nt)                | 2   | 34  | 0  |
| PITG_10059 | Pi conserved hypothetical protein (1483 nt)                | 0   | 14  | 0  |
| PITG_10060 | Pi conserved hypothetical protein (2022 nt)                | 1   | 27  | 0  |
| PITG_10061 | Pi regulator of chromosome condensation (RCC1), putative   | 4   | 33  | 0  |
| PITG_10062 | Pi protein kinase, putative (2188 nt)                      | 3   | 11  | 0  |
| PITG_10063 | Pi omega-3 fatty acid desaturase, endoplasmic reticulum    | 1   | 1   | 1  |
| PITG_10064 | Pi conserved hypothetical protein (1378 nt)                | 31  | 96  | 0  |
| PITG_10065 | Pi conserved hypothetical protein (1224 nt)                | 9   | 21  | 0  |
| PITG_10068 | Pi polycomb-like protein (3343 nt)                         | 2   | 19  | 0  |
| PITG_10069 | Pi conserved hypothetical protein (869 nt)                 | 11  | 31  | 0  |
| PITG_10076 | Pi conserved hypothetical protein (930 nt)                 | 0   | 0   | 0  |
| PITG_10079 | Pi conserved hypothetical protein (1312 nt)                | 3   | 4   | 0  |
| PITG_10080 | Pi uroporphyrinogen-III synthase, putative (874 nt)        | 8   | 7   | 0  |
| PITG_10081 | Pi conserved hypothetical protein (1329 nt)                | 16  | 44  | 0  |
| PITG_10082 | Pi conserved hypothetical protein (1668 nt)                | 8   | 11  | 0  |
| PITG_10083 | Pi chromodomain protein, putative (5912 nt)                | 7   | 56  | 0  |
| PITG_10085 | Pi conserved hypothetical protein (2970 nt)                | 6   | 38  | 0  |
| PITG_10087 | Pi conserved hypothetical protein (2755 nt)                | 3   | 24  | 0  |
| PITG_10094 | Pi Intraflagellar Transport Protein 88 (3210 nt)           | 0   | 0   | 0  |
| PITG_10096 | Pi conserved hypothetical protein (4107 nt)                | 0   | 2   | 0  |
| PITG_10097 | Pi conserved hypothetical protein (1596 nt)                | 7   | 19  | 0  |
| PITG_10098 | Pi conserved hypothetical protein (686 nt)                 | 8   | 17  | 0  |
| PITG_10105 | Pi exportin-T, putative (3093 nt)                          | 2   | 13  | 0  |



|            |                                                           |      |      |     |
|------------|-----------------------------------------------------------|------|------|-----|
| PITG_10107 | Pi Multidrug/Oligosaccharidyl-lipid/Polysaccharide (MC    | 1    | 2    | 0   |
| PITG_10117 | Pi ATP-binding Cassette (ABC) superfamily (5077 nt)       | 2    | 11   | 0   |
| PITG_10118 | Pi conserved hypothetical protein (1278 nt)               | 13   | 42   | 0   |
| PITG_10119 | Pi ubiquitin-specific protease, putative (5318 nt)        | 0    | 32   | 0   |
| PITG_10120 | Pi conserved hypothetical protein (1718 nt)               | 1    | 10   | 0   |
| PITG_10121 | Pi conserved hypothetical protein (738 nt)                | 0    | 46   | 0   |
| PITG_10122 | Pi Drug/Metabolite Transporter (DMT) Superfamily (10      | 6    | 6    | 0   |
| PITG_10123 | Pi Drug/Metabolite Transporter (DMT) Superfamily (36      | 1    | 12   | 0   |
| PITG_10124 | Pi Drug/Metabolite Transporter (DMT) Superfamily (12      | 26   | 16   | 0   |
| PITG_10127 | Pi ras family GTPase, putative (1150 nt)                  | 2    | 1    | 0   |
| PITG_10129 | Pi conserved hypothetical protein (891 nt)                | 30   | 95   | 1   |
| PITG_10131 | Pi conserved hypothetical protein (563 nt)                | 0    | 0    | 0   |
| PITG_10132 | Pi conserved hypothetical protein (3213 nt)               | 4    | 4    | 0   |
| PITG_10133 | Pi hypothetical protein (402 nt)                          | 27   | 6    | 0   |
| PITG_10134 | Pi signal peptide peptidase-like, aspartyl protease fami  | 11   | 18   | 0   |
| PITG_10136 | Pi conserved hypothetical protein (627 nt)                | 4    | 9    | 0   |
| PITG_10138 | Pi alkaline phytoceramidase (aPHC), putative (871 nt)     | 6    | 35   | 0   |
| PITG_10140 | Pi Mitochondrial Carrier (MC) Family (1097 nt)            | 1    | 21   | 0   |
| PITG_10141 | Pi conserved hypothetical protein (2682 nt)               | 14   | 41   | 0   |
| PITG_10142 | Pi conserved hypothetical protein (4210 nt)               | 18   | 70   | 3   |
| PITG_10145 | Pi conserved hypothetical protein (567 nt)                | 6    | 14   | 0   |
| PITG_10146 | Pi 40S ribosomal protein S2 (1222 nt)                     | 225  | 148  | 67  |
| PITG_10147 | Pi cell division protease ftsH (2771 nt)                  | 8    | 27   | 0   |
| PITG_10148 | Pi conserved hypothetical protein (880 nt)                | 128  | 96   | 1   |
| PITG_10149 | Pi mannosyl-oligosaccharide 1,2-alpha-mannosidase, p      | 29   | 9    | 0   |
| PITG_10150 | Pi conserved hypothetical protein (3680 nt)               | 7    | 6    | 0   |
| PITG_10152 | Pi calcium-binding atopy-related autoantigen-like prote   | 14   | 52   | 0   |
| PITG_10153 | Pi conserved hypothetical protein (868 nt)                | 482  | 108  | 0   |
| PITG_10154 | Pi conserved hypothetical protein (1158 nt)               | 160  | 36   | 0   |
| PITG_10158 | Pi conserved hypothetical protein (3450 nt)               | 2    | 10   | 0   |
| PITG_10160 | Pi NADPH-cytochrome P450 reductase, putative (2164        | 4    | 33   | 0   |
| PITG_10163 | Pi conserved hypothetical protein (2631 nt)               | 7    | 18   | 0   |
| PITG_10164 | Pi NAD-dependent histone deacetylase sir2-like proteir    | 5    | 27   | 0   |
| PITG_10165 | Pi conserved hypothetical protein (2226 nt)               | 0    | 4    | 0   |
| PITG_10167 | Pi eukaryotic translation initiation factor 4 gamma 2, pi | 4    | 31   | 0   |
| PITG_10168 | Pi conserved hypothetical protein (357 nt)                | 76   | 61   | 0   |
| PITG_10169 | Pi 26S protease regulatory subunit 7 (1450 nt)            | 41   | 109  | 4   |
| PITG_10173 | Pi NADPH-cytochrome P450 reductase, putative (2371        | 0    | 22   | 0   |
| PITG_10175 | Pi conserved hypothetical protein (1981 nt)               | 0    | 18   | 0   |
| PITG_10183 | Pi conserved hypothetical protein (872 nt)                | 12   | 23   | 0   |
| PITG_10184 | Pi conserved hypothetical protein (1195 nt)               | 15   | 19   | 0   |
| PITG_10185 | Pi conserved hypothetical protein (504 nt)                | 98   | 243  | 6   |
| PITG_10186 | Pi cell division control protein 45 (2414 nt)             | 0    | 15   | 0   |
| PITG_10190 | Pi conserved hypothetical protein (796 nt)                | 8    | 17   | 0   |
| PITG_10191 | Pi conserved hypothetical protein (2294 nt)               | 6    | 22   | 0   |
| PITG_10193 | Pi ubiquitin, putative (471 nt)                           | 1067 | 1107 | 167 |
| PITG_10195 | Pi acyl-CoA desaturase (1123 nt)                          | 12   | 39   | 7   |

|            |                                                                 |      |      |    |
|------------|-----------------------------------------------------------------|------|------|----|
| PITG_10196 | Pi conserved hypothetical protein (444 nt)                      | 7    | 22   | 0  |
| PITG_10198 | Pi adenosylhomocysteinase (1443 nt)                             | 11   | 87   | 35 |
| PITG_10199 | Pi conserved hypothetical protein (417 nt)                      | 3    | 1    | 0  |
| PITG_10201 | Pi conserved hypothetical protein (942 nt)                      | 3    | 17   | 0  |
| PITG_10202 | Pi hypothetical protein (698 nt)                                | 1308 | 896  | 84 |
| PITG_10203 | Pi conserved hypothetical protein (1104 nt)                     | 55   | 144  | 8  |
| PITG_10207 | Pi Mitochondrial Carrier (MC) Family (1035 nt)                  | 13   | 42   | 1  |
| PITG_10208 | Pi conserved hypothetical protein (551 nt)                      | 9    | 16   | 1  |
| PITG_10210 | Pi phosphoenolpyruvate carboxykinase (1839 nt)                  | 217  | 220  | 4  |
| PITG_10211 | Pi conserved hypothetical protein (697 nt)                      | 0    | 2    | 0  |
| PITG_10212 | Pi ADP-ribosylation factor family (634 nt)                      | 6    | 2    | 0  |
| PITG_10213 | Pi conserved hypothetical protein (1236 nt)                     | 11   | 236  | 0  |
| PITG_10214 | Pi conserved hypothetical protein (767 nt)                      | 11   | 18   | 0  |
| PITG_10217 | Pi glucan 1,3-beta-glucosidase, putative (3102 nt)              | 20   | 2    | 0  |
| PITG_10218 | Pi glucan 1,3-beta-glucosidase, putative (1915 nt)              | 18   | 193  | 18 |
| PITG_10219 | Pi V-type proton ATPase subunit E, putative (824 nt)            | 58   | 201  | 4  |
| PITG_10221 | Pi hypothetical protein (529 nt)                                | 27   | 23   | 0  |
| PITG_10226 | Pi Ammonium Transporter (Amt) Family (1557 nt)                  | 0    | 0    | 0  |
| PITG_10239 | Pi myosin heavy chain kinase, putative (2173 nt)                | 19   | 22   | 0  |
| PITG_10240 | Pi pirin, putative (1213 nt)                                    | 14   | 88   | 0  |
| PITG_10250 | Pi conserved hypothetical protein (2117 nt)                     | 4    | 16   | 0  |
| PITG_10256 | Pi conserved hypothetical protein (2930 nt)                     | 0    | 2    | 0  |
| PITG_10258 | Pi conserved hypothetical protein (381 nt)                      | 42   | 6    | 0  |
| PITG_10263 | Pi 60S ribosomal protein L37a, putative (825 nt)                | 1005 | 1131 | 95 |
| PITG_10264 | Pi D-3-phosphoglycerate dehydrogenase (1493 nt)                 | 5    | 20   | 0  |
| PITG_10265 | Pi conserved hypothetical protein (2322 nt)                     | 0    | 17   | 0  |
| PITG_10268 | Pi hypothetical protein (2199 nt)                               | 18   | 51   | 0  |
| PITG_10269 | Pi conserved hypothetical protein (749 nt)                      | 82   | 1447 | 0  |
| PITG_10271 | Pi conserved hypothetical protein (948 nt)                      | 1    | 15   | 0  |
| PITG_10272 | Pi conserved hypothetical protein (557 nt)                      | 0    | 17   | 0  |
| PITG_10274 | Pi acetyltransferase (GNAT) family, putative (871 nt)           | 7    | 20   | 0  |
| PITG_10275 | Pi conserved hypothetical protein (2856 nt)                     | 2    | 23   | 0  |
| PITG_10282 | Pi pre-mRNA branch site protein p14, putative (673 nt)          | 103  | 72   | 0  |
| PITG_10284 | Pi cellulose binding elicitor lectin (CBEL), putative (1639 nt) | 0    | 0    | 0  |
| PITG_10285 | Pi conserved hypothetical protein (2697 nt)                     | 2    | 26   | 0  |
| PITG_10287 | Pi adenylate cyclase, putative (4726 nt)                        | 0    | 2    | 0  |
| PITG_10289 | Pi DNA-dependent RNA polymerase, putative (3507 nt)             | 3    | 18   | 0  |
| PITG_10290 | Pi alcohol dehydrogenase, putative (1233 nt)                    | 6    | 343  | 0  |
| PITG_10291 | Pi conserved hypothetical protein (1955 nt)                     | 1    | 11   | 0  |
| PITG_10292 | Pi alcohol dehydrogenase, putative (1239 nt)                    | 21   | 7    | 0  |
| PITG_10293 | Pi alcohol dehydrogenase, putative (1967 nt)                    | 11   | 21   | 0  |
| PITG_10294 | Pi conserved hypothetical protein (899 nt)                      | 0    | 0    | 0  |
| PITG_10298 | Pi conserved hypothetical protein (577 nt)                      | 9    | 28   | 0  |
| PITG_10299 | Pi conserved hypothetical protein (479 nt)                      | 0    | 0    | 0  |
| PITG_10300 | Pi electron transfer flavoprotein subunit beta (890 nt)         | 43   | 139  | 5  |
| PITG_10301 | Pi homoserine O-acetyltransferase, putative (1212 nt)           | 3    | 37   | 0  |
| PITG_10302 | Pi Sulfate Permease (SulP) Family (2751 nt)                     | 0    | 13   | 0  |

|            |                                                                 |      |     |   |
|------------|-----------------------------------------------------------------|------|-----|---|
| PITG_10303 | Pi conserved hypothetical protein (992 nt)                      | 6    | 84  | 0 |
| PITG_10308 | Pi conserved hypothetical protein (2740 nt)                     | 9    | 94  | 0 |
| PITG_10310 | Pi myb-like DNA-binding protein, putative (699 nt)              | 0    | 15  | 0 |
| PITG_10311 | Pi myb-like DNA-binding domain, putative (2590 nt)              | 26   | 168 | 2 |
| PITG_10312 | Pi Patatin like protein (874 nt)                                | 3    | 31  | 0 |
| PITG_10314 | Pi conserved hypothetical protein (1568 nt)                     | 0    | 18  | 0 |
| PITG_10315 | Pi UDP-sugar pyrophosphorylase, putative (1913 nt)              | 1    | 26  | 0 |
| PITG_10316 | Pi RNA exonuclease 4 (1140 nt)                                  | 28   | 20  | 0 |
| PITG_10321 | Pi conserved hypothetical protein (1432 nt)                     | 8    | 3   | 0 |
| PITG_10323 | Pi hypothetical protein (382 nt)                                | 5    | 40  | 0 |
| PITG_10325 | Pi conserved hypothetical protein (2351 nt)                     | 11   | 21  | 0 |
| PITG_10326 | Pi hypothetical protein (2982 nt)                               | 0    | 86  | 0 |
| PITG_10328 | Pi conserved hypothetical protein (2733 nt)                     | 0    | 11  | 0 |
| PITG_10334 | Pi serine/threonine protein kinase (1221 nt)                    | 6    | 21  | 0 |
| PITG_10335 | Pi carnitine O-palmitoyltransferase 2, putative (823 nt)        | 3    | 51  | 0 |
| PITG_10343 | Pi conserved hypothetical protein (4480 nt)                     | 2    | 39  | 0 |
| PITG_10345 | Pi conserved hypothetical protein (2367 nt)                     | 6    | 55  | 0 |
| PITG_10347 | Pi secreted RxLR effector peptide, putative (1329 nt)           | 0    | 0   | 4 |
| PITG_10351 | Pi conserved hypothetical protein (3514 nt)                     | 4    | 25  | 0 |
| PITG_10352 | Pi sporangia induced hypothetical protein (731 nt)              | 138  | 188 | 0 |
| PITG_10353 | Pi conserved hypothetical protein (688 nt)                      | 89   | 21  | 0 |
| PITG_10355 | Pi conserved hypothetical protein (1203 nt)                     | 0    | 14  | 0 |
| PITG_10362 | Pi conserved hypothetical protein (867 nt)                      | 6190 | 85  | 0 |
| PITG_10364 | Pi conserved hypothetical protein (810 nt)                      | 1785 | 535 | 0 |
| PITG_10365 | Pi conserved hypothetical protein (819 nt)                      | 2413 | 486 | 0 |
| PITG_10369 | Pi Mitochondrial Protein Translocase (MPT) Family (390 nt)      | 1    | 52  | 4 |
| PITG_10372 | Pi conserved hypothetical protein (1547 nt)                     | 1845 | 52  | 0 |
| PITG_10373 | Pi conserved hypothetical protein (930 nt)                      | 2645 | 465 | 0 |
| PITG_10374 | Pi conserved hypothetical protein (915 nt)                      | 1208 | 170 | 0 |
| PITG_10375 | Pi conserved hypothetical protein (813 nt)                      | 990  | 210 | 0 |
| PITG_10378 | Pi conserved hypothetical protein (999 nt)                      | 2748 | 286 | 0 |
| PITG_10380 | Pi conserved hypothetical protein (1392 nt)                     | 0    | 0   | 0 |
| PITG_10381 | Pi SCP-like extracellular protein (2091 nt)                     | 1    | 4   | 0 |
| PITG_10382 | Pi conserved hypothetical protein (1263 nt)                     | 2    | 11  | 0 |
| PITG_10383 | Pi conserved hypothetical protein (1023 nt)                     | 20   | 48  | 0 |
| PITG_10384 | Pi hypothetical protein (1443 nt)                               | 10   | 110 | 0 |
| PITG_10388 | Pi myosin-like protein (2458 nt)                                | 3    | 30  | 0 |
| PITG_10389 | Pi conserved hypothetical protein (363 nt)                      | 5    | 5   | 0 |
| PITG_10390 | Pi conserved hypothetical protein (527 nt)                      | 104  | 8   | 0 |
| PITG_10392 | Pi conserved hypothetical protein (632 nt)                      | 100  | 20  | 0 |
| PITG_10393 | Pi conserved hypothetical protein (522 nt)                      | 0    | 12  | 0 |
| PITG_10394 | Pi nitric oxide synthase-interacting protein, putative (813 nt) | 4    | 15  | 0 |
| PITG_10395 | Pi conserved hypothetical protein (847 nt)                      | 2    | 21  | 0 |
| PITG_10399 | Pi glycoside hydrolase, putative (1473 nt)                      | 1    | 12  | 0 |
| PITG_10400 | Pi conserved hypothetical protein (501 nt)                      | 4    | 28  | 0 |
| PITG_10408 | Pi SCP-like extracellular protein (612 nt)                      | 0    | 13  | 0 |
| PITG_10409 | Pi SCP-like extracellular protein (603 nt)                      | 0    | 8   | 9 |

|            |                                                            |     |     |   |
|------------|------------------------------------------------------------|-----|-----|---|
| PITG_10410 | Pi SCP-like extracellular protein (1006 nt)                | 1   | 11  | 4 |
| PITG_10412 | Pi SCP-like extracellular protein (915 nt)                 | 0   | 2   | 0 |
| PITG_10413 | Pi SCP-like extracellular protein (549 nt)                 | 0   | 0   | 0 |
| PITG_10416 | Pi nuclear pore glycoprotein, putative (1609 nt)           | 4   | 36  | 0 |
| PITG_10417 | Pi conserved hypothetical protein (904 nt)                 | 13  | 47  | 0 |
| PITG_10419 | Pi ubiquitin-conjugating enzyme E2, putative (1070 nt)     | 1   | 19  | 0 |
| PITG_10420 | Pi conserved hypothetical protein (6036 nt)                | 1   | 15  | 0 |
| PITG_10421 | Pi conserved hypothetical protein (2203 nt)                | 0   | 3   | 0 |
| PITG_10422 | Pi conserved hypothetical protein (1180 nt)                | 1   | 10  | 0 |
| PITG_10423 | Pi conserved hypothetical protein (1419 nt)                | 1   | 16  | 0 |
| PITG_10429 | Pi SCP-like extracellular protein (694 nt)                 | 7   | 17  | 0 |
| PITG_10430 | Pi peroxisomal acyl-coenzyme A oxidase, putative (197      | 6   | 24  | 0 |
| PITG_10437 | Pi acyl-CoA dehydrogenase/oxidase (2174 nt)                | 2   | 18  | 0 |
| PITG_10440 | Pi conserved hypothetical protein (503 nt)                 | 5   | 26  | 0 |
| PITG_10441 | Pi conserved hypothetical protein (2635 nt)                | 1   | 14  | 0 |
| PITG_10442 | Pi conserved hypothetical protein (3895 nt)                | 7   | 57  | 0 |
| PITG_10443 | Pi peroxisomal acyl-coenzyme A oxidase, putative (200      | 6   | 27  | 0 |
| PITG_10445 | Pi DNA-directed RNA polymerase I, II, and III subunit RF   | 3   | 16  | 0 |
| PITG_10447 | Pi mitogen-activated protein kinase, putative (2007 nt)    | 4   | 36  | 0 |
| PITG_10449 | Pi ATP-binding Cassette (ABC) Superfamily (5896 nt)        | 4   | 72  | 0 |
| PITG_10450 | Pi protein kinase, putative (1742 nt)                      | 3   | 26  | 0 |
| PITG_10451 | Pi conserved hypothetical protein (6511 nt)                | 0   | 13  | 0 |
| PITG_10452 | Pi CAD protein (4584 nt)                                   | 0   | 11  | 1 |
| PITG_10454 | Pi carbamoyl-phosphate synthase [ammonia], putative        | 1   | 23  | 1 |
| PITG_10455 | Pi conserved hypothetical protein (2354 nt)                | 4   | 58  | 1 |
| PITG_10457 | Pi RNA-dependent RNA Polymerase1 (RDR1) (8085 nt)          | 0   | 14  | 0 |
| PITG_10459 | Pi conserved hypothetical protein (661 nt)                 | 88  | 250 | 0 |
| PITG_10460 | Pi conserved hypothetical protein (5694 nt)                | 15  | 26  | 0 |
| PITG_10461 | Pi conserved hypothetical protein (3195 nt)                | 4   | 34  | 0 |
| PITG_10462 | Pi conserved hypothetical protein (3594 nt)                | 7   | 43  | 0 |
| PITG_10463 | Pi conserved hypothetical protein (953 nt)                 | 27  | 44  | 0 |
| PITG_10470 | Pi conserved hypothetical protein (605 nt)                 | 105 | 629 | 1 |
| PITG_10471 | Pi conserved hypothetical protein (996 nt)                 | 0   | 39  | 0 |
| PITG_10472 | Pi conserved hypothetical protein (1187 nt)                | 1   | 19  | 0 |
| PITG_10473 | Pi conserved hypothetical protein (1473 nt)                | 4   | 13  | 0 |
| PITG_10474 | Pi hypothetical protein (1124 nt)                          | 0   | 1   | 0 |
| PITG_10475 | Pi kinesin-like protein (2201 nt)                          | 0   | 0   | 0 |
| PITG_10480 | Pi translation initiation factor eIF-2B subunit beta, puta | 1   | 21  | 0 |
| PITG_10481 | Pi conserved hypothetical protein (2053 nt)                | 6   | 16  | 0 |
| PITG_10482 | Pi pre-mRNA-splicing factor 18, putative (1063 nt)         | 0   | 15  | 0 |
| PITG_10483 | Pi conserved hypothetical protein (2773 nt)                | 0   | 10  | 0 |
| PITG_10484 | Pi axin interactor, putative (1221 nt)                     | 32  | 2   | 0 |
| PITG_10485 | Pi conserved hypothetical protein (1836 nt)                | 0   | 20  | 0 |
| PITG_10487 | Pi conserved hypothetical protein (1587 nt)                | 14  | 16  | 0 |
| PITG_10488 | Pi protein kinase, putative (1257 nt)                      | 23  | 17  | 0 |
| PITG_10490 | Pi hypothetical protein (1293 nt)                          | 3   | 6   | 0 |
| PITG_10492 | Pi lactation elevated protein 1 (1345 nt)                  | 1   | 11  | 0 |

|            |                                                                  |    |      |    |
|------------|------------------------------------------------------------------|----|------|----|
| PITG_10493 | Pi hypothetical protein (927 nt)                                 | 0  | 85   | 0  |
| PITG_10495 | Pi hypothetical protein (1115 nt)                                | 0  | 783  | 0  |
| PITG_10498 | Pi conserved hypothetical protein (658 nt)                       | 78 | 1039 | 0  |
| PITG_10499 | Pi conserved hypothetical protein (2133 nt)                      | 18 | 138  | 0  |
| PITG_10501 | Pi conserved hypothetical protein (404 nt)                       | 37 | 44   | 0  |
| PITG_10502 | Pi conserved hypothetical protein (676 nt)                       | 23 | 21   | 0  |
| PITG_10507 | Pi cleavage induced hypothetical protein (1441 nt)               | 0  | 6    | 0  |
| PITG_10508 | Pi programmed cell death protein 2, putative (1313 nt)           | 0  | 14   | 0  |
| PITG_10509 | Pi L-2-hydroxyglutarate dehydrogenase, putative (1415 nt)        | 6  | 13   | 0  |
| PITG_10513 | Pi proteasome subunit alpha type-6, putative (930 nt)            | 31 | 269  | 13 |
| PITG_10514 | Pi kinesin-like protein (1702 nt)                                | 2  | 53   | 0  |
| PITG_10516 | Pi tryptophanyl-tRNA synthetase (1319 nt)                        | 2  | 14   | 0  |
| PITG_10517 | Pi tenascin-like protein (2406 nt)                               | 0  | 14   | 0  |
| PITG_10518 | Pi bloom syndrome protein (3969 nt)                              | 0  | 20   | 0  |
| PITG_10519 | Pi pantoate beta-alanine ligase, putative (949 nt)               | 3  | 8    | 0  |
| PITG_10521 | Pi hypothetical protein (2059 nt)                                | 0  | 18   | 0  |
| PITG_10524 | Pi gastricsin, aspartyl protease family A01A, putative (2059 nt) | 5  | 33   | 1  |
| PITG_10526 | Pi conserved hypothetical protein (3273 nt)                      | 0  | 0    | 0  |
| PITG_10532 | Pi conserved hypothetical protein (490 nt)                       | 12 | 15   | 0  |
| PITG_10533 | Pi conserved hypothetical protein (1218 nt)                      | 8  | 21   | 0  |
| PITG_10534 | Pi conserved hypothetical protein (1580 nt)                      | 6  | 20   | 0  |
| PITG_10539 | Pi conserved hypothetical protein (650 nt)                       | 14 | 21   | 0  |
| PITG_10542 | Pi conserved hypothetical protein (1600 nt)                      | 1  | 0    | 9  |
| PITG_10543 | Pi conserved hypothetical protein (1087 nt)                      | 65 | 1922 | 17 |
| PITG_10544 | Pi putative GPI-anchored acidic protein (979 nt)                 | 0  | 19   | 0  |
| PITG_10547 | Pi hypothetical protein (524 nt)                                 | 3  | 11   | 0  |
| PITG_10552 | Pi hypothetical protein (1882 nt)                                | 14 | 25   | 5  |
| PITG_10553 | Pi Poly(ADP-ribose) glycohydrolase, putative (1659 nt)           | 3  | 31   | 0  |
| PITG_10555 | Pi conserved hypothetical protein (1371 nt)                      | 0  | 17   | 0  |
| PITG_10556 | Pi conserved hypothetical protein (1362 nt)                      | 2  | 38   | 0  |
| PITG_10557 | Pi conserved hypothetical protein (1088 nt)                      | 0  | 25   | 0  |
| PITG_10558 | Pi conserved hypothetical protein (2168 nt)                      | 0  | 28   | 0  |
| PITG_10561 | Pi conserved hypothetical protein (844 nt)                       | 1  | 25   | 0  |
| PITG_10564 | Pi conserved hypothetical protein (597 nt)                       | 6  | 8    | 0  |
| PITG_10566 | Pi hypothetical protein (296 nt)                                 | 7  | 31   | 0  |
| PITG_10569 | Pi hypothetical protein (341 nt)                                 | 3  | 28   | 0  |
| PITG_10570 | Pi hypothetical protein (974 nt)                                 | 12 | 50   | 0  |
| PITG_10571 | Pi hypothetical protein (357 nt)                                 | 0  | 0    | 0  |
| PITG_10574 | Pi RNA pseudouridylate synthase, putative (1084 nt)              | 1  | 10   | 0  |
| PITG_10576 | Pi conserved hypothetical protein (1213 nt)                      | 4  | 16   | 0  |
| PITG_10590 | Pi kynurenine-oxoglutarate transaminase, putative (1515 nt)      | 6  | 28   | 0  |
| PITG_10591 | Pi conserved hypothetical protein (2555 nt)                      | 1  | 14   | 0  |
| PITG_10592 | Pi DEAD/DEAH box RNA helicase, putative (2818 nt)                | 1  | 10   | 0  |
| PITG_10593 | Pi conserved hypothetical protein (1185 nt)                      | 2  | 10   | 0  |
| PITG_10594 | Pi conserved hypothetical protein (1834 nt)                      | 1  | 19   | 0  |
| PITG_10595 | Pi delta-1-pyrroline-5-carboxylate reductase, putative (1834 nt) | 6  | 17   | 0  |
| PITG_10597 | Pi hypothetical protein (1250 nt)                                | 47 | 527  | 3  |

|            |                                                           |     |     |    |
|------------|-----------------------------------------------------------|-----|-----|----|
| PITG_10600 | Pi conserved hypothetical protein (2646 nt)               | 6   | 41  | 1  |
| PITG_10601 | Pi molybdenum cofactor biosynthesis protein 1 A (154:     | 21  | 29  | 0  |
| PITG_10602 | Pi DNA repair protein, putative (1974 nt)                 | 2   | 13  | 0  |
| PITG_10610 | Pi conserved hypothetical protein (912 nt)                | 3   | 12  | 0  |
| PITG_10611 | Pi conserved hypothetical protein (973 nt)                | 0   | 0   | 0  |
| PITG_10615 | Pi conserved hypothetical protein (1117 nt)               | 4   | 14  | 0  |
| PITG_10616 | Pi endoplasmic reticulum-Golgi intermediate compartn      | 6   | 47  | 1  |
| PITG_10617 | Pi conserved hypothetical protein (4837 nt)               | 3   | 25  | 0  |
| PITG_10622 | Pi lipase, putative (689 nt)                              | 1   | 10  | 0  |
| PITG_10624 | Pi conserved hypothetical protein (1868 nt)               | 10  | 23  | 0  |
| PITG_10625 | Pi conserved hypothetical protein (978 nt)                | 2   | 11  | 0  |
| PITG_10629 | Pi conserved hypothetical protein (2612 nt)               | 6   | 6   | 0  |
| PITG_10635 | Pi conserved hypothetical protein (470 nt)                | 4   | 33  | 0  |
| PITG_10636 | Pi conserved hypothetical protein (1056 nt)               | 7   | 4   | 54 |
| PITG_10637 | Pi conserved hypothetical protein (1272 nt)               | 7   | 3   | 31 |
| PITG_10645 | Pi conserved hypothetical protein (3802 nt)               | 8   | 25  | 0  |
| PITG_10648 | Pi conserved hypothetical protein (1964 nt)               | 8   | 22  | 0  |
| PITG_10649 | Pi conserved hypothetical protein (1782 nt)               | 136 | 271 | 1  |
| PITG_10650 | Pi hypothetical protein (548 nt)                          | 6   | 23  | 0  |
| PITG_10651 | Pi conserved hypothetical protein (1140 nt)               | 1   | 2   | 0  |
| PITG_10659 | Pi conserved hypothetical protein (752 nt)                | 47  | 29  | 0  |
| PITG_10663 | Pi Multidrug/Oligosaccharidyl-lipid/Polysaccharide (MC    | 2   | 26  | 0  |
| PITG_10664 | Pi Intraflagellar Transport Protein 122 (4279 nt)         | 4   | 12  | 0  |
| PITG_10667 | Pi conserved hypothetical protein (2577 nt)               | 6   | 10  | 0  |
| PITG_10674 | Pi CorA Metal Ion Transporter (MIT) Family (2073 nt)      | 2   | 111 | 0  |
| PITG_10675 | Pi protein kinase, putative (1566 nt)                     | 1   | 17  | 0  |
| PITG_10676 | Pi transmembrane protein, putative (2010 nt)              | 0   | 13  | 0  |
| PITG_10680 | Pi conserved hypothetical protein (486 nt)                | 26  | 262 | 0  |
| PITG_10681 | Pi conserved hypothetical protein (1103 nt)               | 16  | 163 | 0  |
| PITG_10683 | Pi conserved hypothetical protein (966 nt)                | 7   | 54  | 0  |
| PITG_10686 | Pi conserved hypothetical protein (796 nt)                | 26  | 3   | 0  |
| PITG_10687 | Pi conserved hypothetical protein (468 nt)                | 6   | 61  | 0  |
| PITG_10690 | Pi conserved hypothetical protein (1609 nt)               | 2   | 15  | 0  |
| PITG_10693 | Pi conserved hypothetical protein (1256 nt)               | 136 | 725 | 0  |
| PITG_10695 | Pi conserved hypothetical protein (802 nt)                | 12  | 75  | 0  |
| PITG_10701 | Pi carbohydrate-binding protein, putative (1605 nt)       | 1   | 6   | 0  |
| PITG_10702 | Pi conserved hypothetical protein (790 nt)                | 1   | 12  | 0  |
| PITG_10707 | Pi PpiC-type peptidyl-prolyl cis-trans isomerase, putativ | 50  | 113 | 2  |
| PITG_10711 | Pi PpiC-type peptidyl-prolyl cis-trans isomerase, putativ | 27  | 90  | 0  |
| PITG_10715 | Pi hypothetical protein (1221 nt)                         | 25  | 450 | 0  |
| PITG_10721 | Pi transmembrane protein, putative (1707 nt)              | 1   | 16  | 0  |
| PITG_10722 | Pi conserved hypothetical protein (1447 nt)               | 24  | 10  | 0  |
| PITG_10723 | Pi conserved hypothetical protein (702 nt)                | 23  | 53  | 0  |
| PITG_10724 | Pi conserved hypothetical protein (8835 nt)               | 0   | 11  | 0  |
| PITG_10725 | Pi ribosomal RNA processing protein 1 (1804 nt)           | 0   | 12  | 0  |
| PITG_10729 | Pi conserved hypothetical protein (10174 nt)              | 5   | 55  | 0  |
| PITG_10735 | Pi conserved hypothetical protein (984 nt)                | 34  | 20  | 0  |

|            |                                                          |    |     |   |
|------------|----------------------------------------------------------|----|-----|---|
| PITG_10736 | Pi cysteine protease family C54, putative (1313 nt)      | 35 | 101 | 0 |
| PITG_10743 | Pi conserved hypothetical protein (7120 nt)              | 5  | 19  | 0 |
| PITG_10745 | Pi conserved hypothetical protein (615 nt)               | 0  | 0   | 0 |
| PITG_10747 | Pi conserved hypothetical protein (721 nt)               | 19 | 77  | 2 |
| PITG_10750 | Pi beta-glucan synthesis-associated protein, putative (2 | 10 | 103 | 0 |
| PITG_10751 | Pi conserved hypothetical protein (797 nt)               | 1  | 41  | 0 |
| PITG_10758 | Pi beta-glucan synthesis-associated protein, putative (2 | 2  | 11  | 0 |
| PITG_10762 | Pi transmembrane protein, putative (1989 nt)             | 3  | 13  | 0 |
| PITG_10763 | Pi lysocardiolipin acyltransferase, putative (1851 nt)   | 32 | 216 | 0 |
| PITG_10764 | Pi transmembrane protein, putative (1509 nt)             | 5  | 26  | 0 |
| PITG_10765 | Pi beta-glucan synthesis-associated protein, putative (2 | 80 | 367 | 0 |
| PITG_10768 | Pi conserved hypothetical protein (972 nt)               | 1  | 5   | 1 |
| PITG_10769 | Pi conserved hypothetical protein (911 nt)               | 0  | 0   | 0 |
| PITG_10772 | Pi putative GPI-anchored elicitin INL11b-like protein (5 | 1  | 22  | 1 |
| PITG_10783 | Pi CorA Metal Ion Transporter (MIT) Family (1620 nt)     | 4  | 9   | 0 |
| PITG_10784 | Pi conserved hypothetical protein (777 nt)               | 5  | 9   | 0 |
| PITG_10792 | Pi conserved hypothetical protein (1930 nt)              | 8  | 8   | 0 |
| PITG_10794 | Pi conserved oligomeric Golgi complex subunit 6, putat   | 1  | 18  | 0 |
| PITG_10795 | Pi conserved hypothetical protein (1944 nt)              | 3  | 17  | 0 |
| PITG_10796 | Pi conserved hypothetical protein (1721 nt)              | 28 | 13  | 0 |
| PITG_10799 | Pi conserved hypothetical protein (955 nt)               | 0  | 1   | 0 |
| PITG_10801 | Pi sister chromatid cohesion protein PDS5 (4001 nt)      | 0  | 17  | 0 |
| PITG_10806 | Pi conserved hypothetical protein (1542 nt)              | 20 | 96  | 0 |
| PITG_10813 | Pi endoplasmic reticulum metalloproteinase, putative (2  | 4  | 12  | 0 |
| PITG_10815 | Pi conserved hypothetical protein (1393 nt)              | 10 | 117 | 0 |
| PITG_10816 | Pi conserved hypothetical protein (867 nt)               | 3  | 8   | 0 |
| PITG_10817 | Pi nonsense transcript regulator (1299 nt)               | 1  | 18  | 0 |
| PITG_10819 | Pi midasin-like protein (18373 nt)                       | 1  | 8   | 0 |
| PITG_10821 | Pi ubiquitin-specific protease, putative (1423 nt)       | 18 | 27  | 0 |
| PITG_10822 | Pi Mitochondrial Protein Translocase (MPT) Family (65    | 40 | 36  | 1 |
| PITG_10827 | Pi nuclease, putative (2879 nt)                          | 33 | 55  | 1 |
| PITG_10828 | Pi conserved hypothetical protein (1943 nt)              | 15 | 84  | 0 |
| PITG_10830 | Pi cyclin-dependent kinase with F-box domain, putative   | 12 | 23  | 0 |
| PITG_10831 | Pi cyclin-dependent kinase with F-box domain, putative   | 2  | 27  | 0 |
| PITG_10832 | Pi protein recA (1647 nt)                                | 5  | 16  | 0 |
| PITG_10834 | Pi calcium-activated potassium channel subunit alpha-1   | 0  | 8   | 0 |
| PITG_10835 | Pi secreted RxLR effector peptide, putative (726 nt)     | 0  | 0   | 2 |
| PITG_10836 | Pi HECT E3 ubiquitin ligase, putative (2000 nt)          | 2  | 10  | 0 |
| PITG_10837 | Pi conserved hypothetical protein (3679 nt)              | 13 | 15  | 0 |
| PITG_10838 | Pi dolichyl-P-Man:Man(7)GlcNAc(2)-PP-dolichyl-alpha-1    | 6  | 33  | 0 |
| PITG_10844 | Pi conserved hypothetical protein (1937 nt)              | 2  | 27  | 0 |
| PITG_10845 | Pi conserved hypothetical protein (2676 nt)              | 2  | 26  | 0 |
| PITG_10846 | Pi lysosomal alpha-glucosidase, putative (3666 nt)       | 0  | 4   | 0 |
| PITG_10849 | Pi conserved hypothetical protein (2061 nt)              | 0  | 4   | 0 |
| PITG_10853 | Pi conserved hypothetical protein (2451 nt)              | 0  | 21  | 0 |
| PITG_10854 | Pi hypothetical protein (921 nt)                         | 6  | 0   | 0 |
| PITG_10856 | Pi conserved hypothetical protein (1031 nt)              | 1  | 21  | 0 |

|            |                                                                         |     |     |    |
|------------|-------------------------------------------------------------------------|-----|-----|----|
| PITG_10857 | Pi ubiquitin fusion degradation protein, putative (3949 nt)             | 11  | 30  | 0  |
| PITG_10858 | Pi glycine cleavage system H protein, mitochondrial precursor (1008 nt) | 99  | 299 | 20 |
| PITG_10860 | Pi conserved hypothetical protein (1061 nt)                             | 0   | 13  | 0  |
| PITG_10861 | Pi nuclear transcription factor Y subunit B-3 (700 nt)                  | 145 | 254 | 1  |
| PITG_10862 | Pi cytochrome c oxidase assembly protein COX11, mitochondrial (1008 nt) | 172 | 67  | 0  |
| PITG_10863 | Pi 60S ribosomal protein L32-1 (723 nt)                                 | 925 | 817 | 87 |
| PITG_10864 | Pi conserved hypothetical protein (1542 nt)                             | 1   | 15  | 0  |
| PITG_10865 | Pi dymeclin, putative (2772 nt)                                         | 1   | 14  | 0  |
| PITG_10866 | Pi spermidine synthase, putative (1070 nt)                              | 3   | 14  | 1  |
| PITG_10868 | Pi conserved hypothetical protein (1427 nt)                             | 6   | 9   | 0  |
| PITG_10870 | Pi conserved hypothetical protein (1393 nt)                             | 0   | 1   | 0  |
| PITG_10871 | Pi U1 small nuclear ribonucleoprotein C, putative (871 nt)              | 8   | 36  | 0  |
| PITG_10877 | Pi peptidyl-prolyl cis-trans isomerase, putative (765 nt)               | 4   | 8   | 0  |
| PITG_10878 | Pi conserved hypothetical protein (687 nt)                              | 134 | 97  | 3  |
| PITG_10881 | Pi kinesin-like protein (2499 nt)                                       | 2   | 22  | 0  |
| PITG_10882 | Pi conserved hypothetical protein (1014 nt)                             | 11  | 9   | 0  |
| PITG_10883 | Pi 26S proteasome non-ATPase regulatory subunit, putative (1008 nt)     | 31  | 73  | 1  |
| PITG_10884 | Pi protein kinase, putative (2730 nt)                                   | 2   | 17  | 0  |
| PITG_10885 | Pi conserved hypothetical protein (1708 nt)                             | 3   | 51  | 0  |
| PITG_10886 | Pi conserved hypothetical protein (470 nt)                              | 10  | 28  | 0  |
| PITG_10887 | Pi 40S ribosomal protein S11 (1081 nt)                                  | 582 | 455 | 56 |
| PITG_10888 | Pi Resistance-Nodulation-Cell Division (RND) Superfamily (1008 nt)      | 12  | 25  | 0  |
| PITG_10889 | Pi conserved hypothetical protein (3143 nt)                             | 1   | 11  | 0  |
| PITG_10891 | Pi inositol transporter, putative (1586 nt)                             | 2   | 12  | 0  |
| PITG_10892 | Pi hypothetical protein (1141 nt)                                       | 4   | 25  | 0  |
| PITG_10894 | Pi hypothetical protein (1440 nt)                                       | 4   | 19  | 0  |
| PITG_10895 | Pi conserved hypothetical protein (2655 nt)                             | 27  | 46  | 0  |
| PITG_10896 | Pi conserved hypothetical protein (1747 nt)                             | 6   | 2   | 0  |
| PITG_10897 | Pi Chloride Channel (ClC) Family (2473 nt)                              | 0   | 0   | 0  |
| PITG_10898 | Pi conserved hypothetical protein (1503 nt)                             | 1   | 17  | 0  |
| PITG_10899 | Pi protein kinase, putative (1146 nt)                                   | 17  | 46  | 0  |
| PITG_10900 | Pi conserved hypothetical protein (1587 nt)                             | 3   | 12  | 0  |
| PITG_10901 | Pi resistance-Nodulation-Cell Division (RND) superfamily (1008 nt)      | 2   | 33  | 0  |
| PITG_10903 | Pi probable adenosine deaminase, putative (1356 nt)                     | 22  | 28  | 0  |
| PITG_10905 | Pi conserved hypothetical protein (1815 nt)                             | 20  | 67  | 0  |
| PITG_10911 | Pi conserved hypothetical protein (1182 nt)                             | 9   | 46  | 0  |
| PITG_10912 | Pi conserved hypothetical protein (2094 nt)                             | 1   | 18  | 0  |
| PITG_10913 | Pi conserved hypothetical protein (841 nt)                              | 86  | 265 | 8  |
| PITG_10915 | Pi conserved hypothetical protein (1692 nt)                             | 0   | 0   | 0  |
| PITG_10916 | Pi eukaryotic translation initiation factor 3, putative (1008 nt)       | 30  | 44  | 3  |
| PITG_10921 | Pi conserved hypothetical protein (15721 nt)                            | 1   | 34  | 0  |
| PITG_10922 | Pi fatty acid synthase subunit alpha, putative (12163 nt)               | 0   | 16  | 0  |
| PITG_10923 | Pi apolipoprotein A-I-binding protein, putative (966 nt)                | 4   | 18  | 0  |
| PITG_10926 | Pi fatty acid synthase subunit alpha, putative (12098 nt)               | 0   | 15  | 0  |
| PITG_10927 | Pi conserved hypothetical protein (727 nt)                              | 74  | 5   | 0  |
| PITG_10929 | Pi proteasome subunit alpha, putative (964 nt)                          | 30  | 184 | 9  |
| PITG_10931 | Pi conserved hypothetical protein (2048 nt)                             | 7   | 17  | 0  |



|            |                                                          |     |     |    |
|------------|----------------------------------------------------------|-----|-----|----|
| PITG_10932 | Pi dipeptidyl peptidase, putative (2406 nt)              | 17  | 27  | 0  |
| PITG_10934 | Pi conserved hypothetical protein (1731 nt)              | 3   | 5   | 0  |
| PITG_10935 | Pi phosphatidylinositol kinase (PIK-I) (3717 nt)         | 2   | 26  | 0  |
| PITG_10936 | Pi hypothetical protein (739 nt)                         | 19  | 80  | 0  |
| PITG_10937 | Pi UDP-glucuronic acid decarboxylase 1 (1286 nt)         | 11  | 75  | 0  |
| PITG_10938 | Pi protein phosphatase 2C, putative (1237 nt)            | 81  | 169 | 0  |
| PITG_10939 | Pi conserved hypothetical protein (681 nt)               | 101 | 78  | 0  |
| PITG_10940 | Pi aldehyde dehydrogenase, mitochondrial precursor (:    | 16  | 58  | 0  |
| PITG_10941 | Pi elongation factor 2 (2909 nt)                         | 111 | 351 | 70 |
| PITG_10942 | Pi conserved hypothetical protein (1319 nt)              | 221 | 156 | 4  |
| PITG_10943 | Pi conserved hypothetical protein (1415 nt)              | 6   | 12  | 0  |
| PITG_10949 | Pi conserved hypothetical protein (829 nt)               | 4   | 6   | 0  |
| PITG_10950 | Pi conserved hypothetical protein (1773 nt)              | 7   | 15  | 0  |
| PITG_10951 | Pi succinate dehydrogenase iron-sulfur protein, mitoch   | 47  | 96  | 12 |
| PITG_10952 | Pi conserved hypothetical protein (3778 nt)              | 6   | 36  | 0  |
| PITG_10954 | Pi conserved hypothetical protein (1466 nt)              | 1   | 10  | 0  |
| PITG_10955 | Pi conserved hypothetical protein (1538 nt)              | 1   | 12  | 0  |
| PITG_10957 | Pi hypothetical protein (2152 nt)                        | 60  | 99  | 0  |
| PITG_10961 | Pi conserved hypothetical protein (1307 nt)              | 22  | 14  | 0  |
| PITG_10965 | Pi conserved hypothetical protein (2415 nt)              | 0   | 0   | 0  |
| PITG_10966 | Pi conserved hypothetical protein (672 nt)               | 0   | 0   | 0  |
| PITG_10967 | Pi ras GTPase-activating protein-binding protein, putati | 17  | 40  | 1  |
| PITG_10968 | Pi CCR4-NOT transcription complex subunit, putative (2   | 1   | 16  | 0  |
| PITG_10969 | Pi pre-mRNA-processing-splicing factor 8 (7384 nt)       | 2   | 26  | 0  |
| PITG_10971 | Pi protein kinase, putative (2405 nt)                    | 9   | 40  | 0  |
| PITG_10972 | Pi thioredoxin-like protein (1089 nt)                    | 56  | 253 | 10 |
| PITG_10973 | Pi conserved hypothetical protein (3557 nt)              | 0   | 20  | 0  |
| PITG_10974 | Pi elongation factor 1-gamma, putative (1420 nt)         | 167 | 332 | 29 |
| PITG_10977 | Pi flavin-binding monooxygenase-like protein (1563 nt)   | 2   | 12  | 0  |
| PITG_10979 | Pi elongation factor 1-gamma, putative (1555 nt)         | 5   | 38  | 2  |
| PITG_10980 | Pi phosphatidylinositol-4-phosphate-5-kinase (Pi-PIP-K-I | 9   | 79  | 0  |
| PITG_10981 | Pi conserved hypothetical protein (3176 nt)              | 0   | 4   | 0  |
| PITG_10983 | Pi conserved hypothetical protein (558 nt)               | 6   | 23  | 0  |
| PITG_10984 | Pi choline transporter-like protein (2525 nt)            | 0   | 0   | 0  |
| PITG_10986 | Pi nuclear transcription factor Y subunit, putative (998 | 6   | 13  | 4  |
| PITG_10987 | Pi Drug/Metabolite Transporter (DMT) Superfamily (14     | 10  | 34  | 0  |
| PITG_10989 | Pi down syndrome critical region protein 3 (1808 nt)     | 10  | 22  | 0  |
| PITG_10990 | Pi farnesyl pyrophosphate synthetase (1420 nt)           | 2   | 16  | 0  |
| PITG_10991 | Pi conserved hypothetical protein (1197 nt)              | 0   | 0   | 0  |
| PITG_10992 | Pi conserved hypothetical protein (417 nt)               | 32  | 15  | 0  |
| PITG_10993 | Pi CASP-like protein (2332 nt)                           | 7   | 18  | 0  |
| PITG_10994 | Pi mitochondrial inner membrane protease subunit, pu     | 6   | 21  | 0  |
| PITG_10995 | Pi conserved hypothetical protein (1065 nt)              | 31  | 39  | 0  |
| PITG_10997 | Pi hypothetical protein (2542 nt)                        | 0   | 0   | 0  |
| PITG_10998 | Pi Glycogen Synthase Kinase 3 beta (1776 nt)             | 30  | 56  | 0  |
| PITG_10999 | Pi endo-1,3(4)-beta-glucanase, putative (2238 nt)        | 0   | 0   | 0  |
| PITG_11000 | Pi ATP-dependent RNA helicase, putative (4637 nt)        | 0   | 11  | 0  |

|            |                                                        |    |     |   |
|------------|--------------------------------------------------------|----|-----|---|
| PITG_11007 | Pi conserved hypothetical protein (598 nt)             | 2  | 5   | 0 |
| PITG_11008 | Pi conserved hypothetical protein (663 nt)             | 3  | 3   | 0 |
| PITG_11009 | Pi conserved hypothetical protein (2119 nt)            | 18 | 69  | 2 |
| PITG_11010 | Pi conserved hypothetical protein (4156 nt)            | 2  | 22  | 0 |
| PITG_11011 | Pi conserved hypothetical protein (537 nt)             | 50 | 529 | 0 |
| PITG_11012 | Pi conserved hypothetical protein (1337 nt)            | 5  | 52  | 0 |
| PITG_11013 | Pi guanylate kinase (880 nt)                           | 7  | 20  | 0 |
| PITG_11016 | Pi conserved hypothetical protein (613 nt)             | 7  | 20  | 0 |
| PITG_11017 | Pi conserved hypothetical protein (837 nt)             | 2  | 15  | 0 |
| PITG_11018 | Pi conserved hypothetical protein (1026 nt)            | 3  | 19  | 0 |
| PITG_11019 | Pi conserved hypothetical protein (1664 nt)            | 29 | 81  | 0 |
| PITG_11020 | Pi conserved hypothetical protein (1377 nt)            | 8  | 26  | 0 |
| PITG_11021 | Pi conserved hypothetical protein (721 nt)             | 1  | 3   | 0 |
| PITG_11022 | Pi hypothetical protein (769 nt)                       | 7  | 26  | 0 |
| PITG_11023 | Pi conserved hypothetical protein (786 nt)             | 8  | 26  | 0 |
| PITG_11024 | Pi conserved hypothetical protein (534 nt)             | 10 | 35  | 0 |
| PITG_11025 | Pi hypothetical protein (1299 nt)                      | 0  | 0   | 0 |
| PITG_11027 | Pi conserved hypothetical protein (2652 nt)            | 0  | 0   | 0 |
| PITG_11028 | Pi mevalonate kinase, putative (1306 nt)               | 0  | 13  | 0 |
| PITG_11029 | Pi conserved hypothetical protein (1609 nt)            | 27 | 78  | 0 |
| PITG_11035 | Pi transmembrane protein, putative (1622 nt)           | 1  | 16  | 0 |
| PITG_11036 | Pi NADH dehydrogenase [ubiquinone] 1 alpha subcom      | 28 | 84  | 3 |
| PITG_11038 | Pi ATP-dependent helicase, putative (8102 nt)          | 1  | 13  | 0 |
| PITG_11039 | Pi conserved hypothetical protein (787 nt)             | 4  | 9   | 0 |
| PITG_11040 | Pi hypothetical protein (540 nt)                       | 57 | 32  | 3 |
| PITG_11043 | Pi conserved hypothetical protein (570 nt)             | 1  | 4   | 0 |
| PITG_11044 | Pi protein phosphatase, putative (1218 nt)             | 10 | 8   | 0 |
| PITG_11046 | Pi creatine kinase B-type (2280 nt)                    | 17 | 91  | 1 |
| PITG_11047 | Pi T-complex protein 1 subunit eta (2074 nt)           | 12 | 67  | 4 |
| PITG_11049 | Pi conserved hypothetical protein (1237 nt)            | 2  | 9   | 0 |
| PITG_11050 | Pi endo-1,3(4)-beta-glucanase, putative (2340 nt)      | 2  | 23  | 0 |
| PITG_11052 | Pi endo-1,3(4)-beta-glucanase, putative (2085 nt)      | 4  | 24  | 0 |
| PITG_11057 | Pi conserved hypothetical protein (2809 nt)            | 3  | 10  | 0 |
| PITG_11063 | Pi 26S proteasome non-ATPase regulatory subunit 7 (1   | 26 | 100 | 3 |
| PITG_11064 | Pi conserved hypothetical protein (1076 nt)            | 5  | 21  | 0 |
| PITG_11065 | Pi NAD-dependent malic enzyme, putative (2026 nt)      | 1  | 27  | 1 |
| PITG_11068 | Pi hypothetical protein (521 nt)                       | 0  | 0   | 0 |
| PITG_11069 | Pi villin-like protein (3045 nt)                       | 9  | 197 | 2 |
| PITG_11070 | Pi conserved hypothetical protein (958 nt)             | 16 | 48  | 0 |
| PITG_11071 | Pi conserved hypothetical protein (534 nt)             | 42 | 87  | 3 |
| PITG_11075 | Pi conserved hypothetical protein (1791 nt)            | 1  | 7   | 0 |
| PITG_11080 | Pi conserved hypothetical protein (1850 nt)            | 9  | 25  | 0 |
| PITG_11081 | Pi conserved hypothetical protein (519 nt)             | 3  | 33  | 0 |
| PITG_11083 | Pi conserved hypothetical protein (1864 nt)            | 5  | 13  | 0 |
| PITG_11084 | Pi transmembrane protein, putative (2352 nt)           | 1  | 11  | 0 |
| PITG_11085 | Pi phospholipid-transporting ATPase, putative (4464 nt | 0  | 3   | 0 |
| PITG_11086 | Pi HIT domain-containing protein, putative (592 nt)    | 10 | 33  | 0 |

|            |                                                            |     |     |    |
|------------|------------------------------------------------------------|-----|-----|----|
| PITG_11087 | Pi conserved hypothetical protein (2011 nt)                | 2   | 20  | 0  |
| PITG_11088 | Pi conserved hypothetical protein (797 nt)                 | 6   | 13  | 0  |
| PITG_11090 | Pi conserved hypothetical protein (1029 nt)                | 9   | 54  | 0  |
| PITG_11096 | Pi hypothetical protein (1086 nt)                          | 0   | 0   | 0  |
| PITG_11097 | Pi mannose-1-phosphate guanyltransferase alpha, puta       | 10  | 31  | 0  |
| PITG_11098 | Pi conserved hypothetical protein (2149 nt)                | 4   | 16  | 0  |
| PITG_11099 | Pi 60S ribosomal protein L18-2 (1333 nt)                   | 689 | 709 | 85 |
| PITG_11102 | Pi cGMP-dependent protein kinase, putative (2475 nt)       | 0   | 0   | 0  |
| PITG_11106 | Pi gamma-tubulin complex component, putative (3933         | 4   | 17  | 0  |
| PITG_11107 | Pi conserved hypothetical protein (939 nt)                 | 22  | 54  | 0  |
| PITG_11108 | Pi conserved hypothetical protein (929 nt)                 | 15  | 18  | 0  |
| PITG_11110 | Pi eukaryotic translation initiation factor 2 subunit 3 (1 | 44  | 46  | 2  |
| PITG_11111 | Pi leucyl-tRNA synthetase, cytoplasmic, putative (3405     | 4   | 26  | 0  |
| PITG_11114 | Pi conserved hypothetical protein (1834 nt)                | 2   | 19  | 0  |
| PITG_11116 | Pi NAD-specific glutamate dehydrogenase, putative (34      | 6   | 92  | 0  |
| PITG_11117 | Pi conserved hypothetical protein (1666 nt)                | 4   | 13  | 0  |
| PITG_11118 | Pi conserved hypothetical protein (1799 nt)                | 24  | 173 | 0  |
| PITG_11119 | Pi conserved hypothetical protein (3006 nt)                | 35  | 25  | 0  |
| PITG_11120 | Pi conserved hypothetical protein (957 nt)                 | 72  | 64  | 0  |
| PITG_11121 | Pi ATP-binding Cassette (ABC) Superfamily (3240 nt)        | 1   | 12  | 0  |
| PITG_11122 | Pi Amino Acid-Polyamine-Organocation (APC) Family (1       | 17  | 17  | 0  |
| PITG_11125 | Pi conserved hypothetical protein (1595 nt)                | 25  | 39  | 0  |
| PITG_11126 | Pi conserved hypothetical protein (2584 nt)                | 2   | 17  | 0  |
| PITG_11127 | Pi coatomer subunit delta, putative (2147 nt)              | 12  | 81  | 2  |
| PITG_11129 | Pi conserved hypothetical protein (973 nt)                 | 6   | 12  | 0  |
| PITG_11130 | Pi conserved hypothetical protein (4116 nt)                | 2   | 2   | 0  |
| PITG_11131 | Pi conserved hypothetical protein (1635 nt)                | 10  | 39  | 0  |
| PITG_11133 | Pi conserved hypothetical protein (1295 nt)                | 16  | 73  | 0  |
| PITG_11134 | Pi conserved hypothetical protein (804 nt)                 | 5   | 28  | 0  |
| PITG_11138 | Pi fumarate reductase flavoprotein subunit, putative (1    | 2   | 13  | 0  |
| PITG_11139 | Pi P-type ATPase (P-ATPase) Superfamily (3195 nt)          | 6   | 89  | 0  |
| PITG_11140 | Pi sodium-dependent phosphate transporter, putative        | 0   | 1   | 0  |
| PITG_11142 | Pi protein farnesyltransferase/geranylgeranyltransferase   | 5   | 28  | 0  |
| PITG_11143 | Pi AP-1 complex subunit gamma-1 (3986 nt)                  | 4   | 32  | 0  |
| PITG_11146 | Pi conserved hypothetical protein (2655 nt)                | 6   | 6   | 0  |
| PITG_11152 | Pi conserved hypothetical protein (1788 nt)                | 7   | 33  | 1  |
| PITG_11153 | Pi conserved hypothetical protein (1295 nt)                | 2   | 33  | 0  |
| PITG_11155 | Pi conserved hypothetical protein (1353 nt)                | 0   | 15  | 0  |
| PITG_11157 | Pi myotubularin-like protein (2970 nt)                     | 2   | 14  | 0  |
| PITG_11158 | Pi pre-mRNA-splicing factor SYF1-like protein (3102 nt)    | 3   | 16  | 0  |
| PITG_11159 | Pi phospholipid-transporting ATPase, putative (3816 nt)    | 7   | 0   | 0  |
| PITG_11161 | Pi 2-oxoisovalerate dehydrogenase alpha subunit, mito      | 14  | 49  | 0  |
| PITG_11162 | Pi hypothetical protein (567 nt)                           | 4   | 12  | 0  |
| PITG_11169 | Pi histone-binding protein RBBP7 (2601 nt)                 | 1   | 10  | 0  |
| PITG_11170 | Pi histone-binding protein RBBP4 (1632 nt)                 | 5   | 16  | 0  |
| PITG_11171 | Pi conserved hypothetical protein (1371 nt)                | 4   | 95  | 0  |
| PITG_11176 | Pi conserved hypothetical protein (669 nt)                 | 21  | 13  | 0  |

|            |                                                           |     |     |    |
|------------|-----------------------------------------------------------|-----|-----|----|
| PITG_11177 | Pi hypothetical protein (865 nt)                          | 3   | 13  | 0  |
| PITG_11178 | Pi molybdenum cofactor synthesis protein 2 large subu     | 3   | 26  | 0  |
| PITG_11179 | Pi conserved hypothetical protein (2068 nt)               | 23  | 29  | 0  |
| PITG_11180 | Pi conserved hypothetical protein (1669 nt)               | 8   | 18  | 0  |
| PITG_11181 | Pi conserved hypothetical protein (1836 nt)               | 1   | 1   | 0  |
| PITG_11182 | Pi conserved hypothetical protein (2220 nt)               | 20  | 122 | 0  |
| PITG_11183 | Pi conserved hypothetical protein (2028 nt)               | 12  | 63  | 0  |
| PITG_11184 | Pi conserved hypothetical protein (2305 nt)               | 1   | 11  | 0  |
| PITG_11185 | Pi hypothetical protein (579 nt)                          | 0   | 0   | 0  |
| PITG_11186 | Pi conserved hypothetical protein (2283 nt)               | 2   | 8   | 0  |
| PITG_11188 | Pi conserved hypothetical protein (1313 nt)               | 1   | 11  | 0  |
| PITG_11189 | Pi phosphoenolpyruvate carboxykinase (1804 nt)            | 73  | 207 | 0  |
| PITG_11193 | Pi conserved hypothetical protein (1244 nt)               | 5   | 42  | 0  |
| PITG_11194 | Pi conserved hypothetical protein (3661 nt)               | 2   | 17  | 0  |
| PITG_11195 | Pi conserved hypothetical protein (4033 nt)               | 0   | 11  | 0  |
| PITG_11196 | Pi conserved hypothetical protein (777 nt)                | 0   | 2   | 0  |
| PITG_11197 | Pi myosin-like protein (3912 nt)                          | 1   | 24  | 0  |
| PITG_11198 | Pi nucleolar GTP-binding protein 1 (2043 nt)              | 2   | 14  | 0  |
| PITG_11202 | Pi conserved hypothetical protein (1053 nt)               | 4   | 24  | 0  |
| PITG_11203 | Pi anoctamin-like protein (2730 nt)                       | 1   | 5   | 0  |
| PITG_11205 | Pi Rab2 family GTPase, putative (904 nt)                  | 79  | 204 | 0  |
| PITG_11206 | Pi conserved hypothetical protein (2315 nt)               | 20  | 43  | 0  |
| PITG_11214 | Pi conserved hypothetical protein (1440 nt)               | 2   | 9   | 0  |
| PITG_11215 | Pi DnaJ subfamily C protein (1936 nt)                     | 143 | 117 | 2  |
| PITG_11218 | Pi conserved hypothetical protein (935 nt)                | 1   | 6   | 0  |
| PITG_11219 | Pi conserved hypothetical protein (2744 nt)               | 0   | 11  | 0  |
| PITG_11221 | Pi conserved hypothetical protein (1878 nt)               | 5   | 6   | 0  |
| PITG_11223 | Pi conserved hypothetical protein (767 nt)                | 11  | 9   | 0  |
| PITG_11225 | Pi P-type ATPase (P-ATPase) Superfamily (4335 nt)         | 3   | 20  | 0  |
| PITG_11226 | Pi conserved hypothetical protein (1839 nt)               | 20  | 50  | 0  |
| PITG_11229 | Pi aldehyde dehydrogenase, putative (1548 nt)             | 1   | 31  | 0  |
| PITG_11231 | Pi conserved hypothetical protein (1045 nt)               | 4   | 28  | 0  |
| PITG_11232 | Pi conserved hypothetical protein (3141 nt)               | 1   | 22  | 0  |
| PITG_11233 | Pi conserved hypothetical protein (543 nt)                | 17  | 28  | 0  |
| PITG_11234 | Pi conserved hypothetical protein (2060 nt)               | 0   | 15  | 0  |
| PITG_11235 | Pi conserved hypothetical protein (741 nt)                | 0   | 1   | 0  |
| PITG_11236 | Pi protein kinase, putative (2277 nt)                     | 6   | 9   | 0  |
| PITG_11238 | Pi nuclear LIM factor interactor-interacting protein clea | 1   | 2   | 0  |
| PITG_11239 | Pi nuclear LIM factor interactor-interacting protein clea | 0   | 0   | 0  |
| PITG_11241 | Pi nuclear LIM factor interactor-interacting protein spo  | 2   | 29  | 0  |
| PITG_11242 | Pi conserved hypothetical protein (1236 nt)               | 4   | 17  | 0  |
| PITG_11243 | Pi hypothetical protein (1247 nt)                         | 31  | 8   | 0  |
| PITG_11244 | Pi heat shock 70 kDa protein (2279 nt)                    | 80  | 487 | 51 |
| PITG_11246 | Pi conserved hypothetical protein (1571 nt)               | 1   | 10  | 0  |
| PITG_11247 | Pi heat shock 70 kDa protein (2090 nt)                    | 388 | 304 | 43 |
| PITG_11248 | Pi hypothetical protein (786 nt)                          | 619 | 85  | 0  |
| PITG_11249 | Pi heat shock 70 kDa protein (2183 nt)                    | 427 | 142 | 9  |

|            |                                                            |     |     |    |
|------------|------------------------------------------------------------|-----|-----|----|
| PITG_11250 | Pi conserved hypothetical protein (600 nt)                 | 16  | 36  | 0  |
| PITG_11252 | Pi heat shock protein 70 (1965 nt)                         | 0   | 0   | 45 |
| PITG_11253 | Pi serine/threonine protein kinase (3351 nt)               | 2   | 0   | 0  |
| PITG_11254 | Pi exocyst complex component, putative (3439 nt)           | 5   | 16  | 0  |
| PITG_11256 | Pi conserved hypothetical protein (522 nt)                 | 6   | 38  | 0  |
| PITG_11258 | Pi conserved hypothetical protein (570 nt)                 | 13  | 0   | 0  |
| PITG_11259 | Pi conserved hypothetical protein (755 nt)                 | 47  | 40  | 0  |
| PITG_11262 | Pi conserved hypothetical protein (719 nt)                 | 12  | 0   | 1  |
| PITG_11264 | Pi conserved hypothetical protein (697 nt)                 | 5   | 21  | 0  |
| PITG_11265 | Pi conserved hypothetical protein (829 nt)                 | 6   | 27  | 0  |
| PITG_11267 | Pi conserved hypothetical protein (714 nt)                 | 30  | 2   | 0  |
| PITG_11271 | Pi conserved hypothetical protein (1236 nt)                | 4   | 12  | 0  |
| PITG_11272 | Pi histone demethylase, putative (6395 nt)                 | 5   | 17  | 0  |
| PITG_11273 | Pi ubiquitin-specific protease, putative (4337 nt)         | 2   | 17  | 0  |
| PITG_11274 | Pi long-chain-fatty-acid-CoA ligase, putative (2647 nt)    | 22  | 195 | 0  |
| PITG_11275 | Pi conserved hypothetical protein (573 nt)                 | 0   | 4   | 0  |
| PITG_11276 | Pi conserved hypothetical protein (507 nt)                 | 2   | 30  | 0  |
| PITG_11285 | Pi conserved hypothetical protein (1260 nt)                | 5   | 14  | 0  |
| PITG_11286 | Pi hypothetical protein (2926 nt)                          | 30  | 133 | 0  |
| PITG_11287 | Pi conserved hypothetical protein (616 nt)                 | 5   | 22  | 0  |
| PITG_11290 | Pi solute carrier family, facilitated glucose transporter, | 16  | 114 | 1  |
| PITG_11291 | Pi conserved hypothetical protein (2010 nt)                | 7   | 14  | 0  |
| PITG_11292 | Pi conserved hypothetical protein (802 nt)                 | 2   | 19  | 0  |
| PITG_11293 | Pi alcohol dehydrogenase, putative (1080 nt)               | 10  | 76  | 3  |
| PITG_11294 | Pi alcohol dehydrogenase, putative (1221 nt)               | 2   | 11  | 0  |
| PITG_11295 | Pi alcohol dehydrogenase, putative (1226 nt)               | 14  | 15  | 0  |
| PITG_11296 | Pi DNA mismatch repair protein Msh3, putative (3033 nt)    | 23  | 15  | 0  |
| PITG_11298 | Pi conserved hypothetical protein (696 nt)                 | 3   | 13  | 0  |
| PITG_11299 | Pi conserved hypothetical protein (327 nt)                 | 14  | 59  | 0  |
| PITG_11300 | Pi conserved hypothetical protein (923 nt)                 | 1   | 6   | 0  |
| PITG_11302 | Pi hypothetical protein (455 nt)                           | 7   | 44  | 1  |
| PITG_11304 | Pi conserved hypothetical protein (448 nt)                 | 36  | 109 | 1  |
| PITG_11305 | Pi hypothetical protein (755 nt)                           | 1   | 19  | 0  |
| PITG_11308 | Pi conserved hypothetical protein (4502 nt)                | 0   | 15  | 0  |
| PITG_11321 | Pi conserved hypothetical protein (1853 nt)                | 10  | 45  | 0  |
| PITG_11323 | Pi conserved hypothetical protein (2178 nt)                | 73  | 250 | 0  |
| PITG_11327 | Pi Annexin (Annexin) Family (2498 nt)                      | 7   | 426 | 16 |
| PITG_11329 | Pi Annexin (Annexin) Family (3825 nt)                      | 18  | 163 | 4  |
| PITG_11364 | Pi conserved hypothetical protein (936 nt)                 | 14  | 54  | 1  |
| PITG_11366 | Pi F-actin-capping protein subunit beta, putative (867 nt) | 3   | 13  | 0  |
| PITG_11368 | Pi conserved hypothetical protein (1143 nt)                | 28  | 36  | 0  |
| PITG_11369 | Pi conserved hypothetical protein (2107 nt)                | 5   | 29  | 0  |
| PITG_11373 | Pi ATP-binding Cassette (ABC) superfamily (5163 nt)        | 1   | 14  | 0  |
| PITG_11374 | Pi hypothetical protein (309 nt)                           | 139 | 157 | 1  |
| PITG_11375 | Pi conserved hypothetical protein (640 nt)                 | 2   | 0   | 0  |
| PITG_11386 | Pi hypothetical protein (2357 nt)                          | 42  | 170 | 0  |
| PITG_11387 | Pi conserved hypothetical protein (2136 nt)                | 14  | 32  | 0  |

|                                                                       |     |      |     |
|-----------------------------------------------------------------------|-----|------|-----|
| PITG_11396   Pi conserved hypothetical protein (3393 nt)              | 0   | 0    | 0   |
| PITG_11400   Pi cleavage induced hypothetical protein (1011 nt)       | 0   | 0    | 0   |
| PITG_11403   Pi WD domain-containing protein (1431 nt)                | 1   | 11   | 0   |
| PITG_11405   Pi conserved hypothetical protein (4792 nt)              | 12  | 36   | 0   |
| PITG_11406   Pi conserved hypothetical protein (1068 nt)              | 6   | 35   | 0   |
| PITG_11410   Pi hypothetical protein (1851 nt)                        | 11  | 38   | 0   |
| PITG_11411   Pi hypothetical protein (147 nt)                         | 0   | 11   | 0   |
| PITG_11417   Pi U4/U6.U5 small nuclear ribonucleoprotein 27 kDa pr    | 7   | 12   | 0   |
| PITG_11424   Pi conserved hypothetical protein (2382 nt)              | 8   | 23   | 0   |
| PITG_11425   Pi transcriptional repressor TUP1-like protein (2735 nt) | 8   | 54   | 0   |
| PITG_11426   Pi conserved hypothetical protein (1125 nt)              | 2   | 15   | 0   |
| PITG_11430   Pi conserved hypothetical protein (1414 nt)              | 13  | 35   | 0   |
| PITG_11431   Pi ubiquitin-specific protease, putative (3500 nt)       | 2   | 24   | 0   |
| PITG_11433   Pi conserved hypothetical protein (989 nt)               | 1   | 23   | 0   |
| PITG_11434   Pi conserved hypothetical protein (1099 nt)              | 1   | 8    | 0   |
| PITG_11437   Pi axonemal dynein heavy chain (12898 nt)                | 6   | 16   | 0   |
| PITG_11438   Pi hypothetical protein (689 nt)                         | 34  | 84   | 0   |
| PITG_11444   Pi conserved hypothetical protein (918 nt)               | 8   | 12   | 0   |
| PITG_11445   Pi sepiapterin reductase, putative (709 nt)              | 6   | 18   | 0   |
| PITG_11450   Pi conserved hypothetical protein (466 nt)               | 137 | 1164 | 8   |
| PITG_11451   Pi conserved hypothetical protein (2309 nt)              | 10  | 42   | 0   |
| PITG_11452   Pi conserved hypothetical protein (1201 nt)              | 59  | 103  | 3   |
| PITG_11457   Pi phosphoribosylformylglycinamide synthase (4128 nt)    | 0   | 5    | 0   |
| PITG_11458   Pi prostaglandin E synthase, putative (972 nt)           | 3   | 10   | 0   |
| PITG_11459   Pi conserved hypothetical protein (1659 nt)              | 3   | 23   | 0   |
| PITG_11460   Pi conserved hypothetical protein (1836 nt)              | 9   | 33   | 1   |
| PITG_11461   Pi HECT E3 ubiquitin ligase, putative (3357 nt)          | 36  | 16   | 0   |
| PITG_11462   Pi conserved hypothetical protein (1920 nt)              | 13  | 53   | 4   |
| PITG_11463   Pi carbohydrate-binding protein, putative (753 nt)       | 7   | 7    | 0   |
| PITG_11464   Pi pairing protein 2 family protein (1400 nt)            | 2   | 14   | 0   |
| PITG_11466   Pi tubby-like protein (1823 nt)                          | 47  | 34   | 0   |
| PITG_11467   Pi conserved hypothetical protein (1011 nt)              | 3   | 15   | 0   |
| PITG_11468   Pi peptide deformylase, putative (834 nt)                | 3   | 14   | 0   |
| PITG_11470   Pi calcium-dependent protein kinase, putative (1870 nt)  | 24  | 29   | 0   |
| PITG_11471   Pi Amino Acid-Polyamine-Organocation (APC) Family (1     | 0   | 41   | 0   |
| PITG_11472   Pi Intraflagellar Transport Protein 72/74 (1977 nt)      | 1   | 7    | 0   |
| PITG_11473   Pi hypothetical protein (240 nt)                         | 6   | 8    | 0   |
| PITG_11474   Pi conserved hypothetical protein (1686 nt)              | 25  | 65   | 1   |
| PITG_11476   Pi conserved hypothetical protein (1327 nt)              | 0   | 20   | 0   |
| PITG_11477   Pi conserved hypothetical protein (605 nt)               | 0   | 0    | 0   |
| PITG_11483   Pi hypothetical protein (2832 nt)                        | 1   | 176  | 0   |
| PITG_11484   Pi secreted RxLR effector peptide, putative (408 nt)     | 10  | 8    | 101 |
| PITG_11485   Pi conserved hypothetical protein (937 nt)               | 7   | 14   | 0   |
| PITG_11486   Pi protein-L-isoaspartate O-methyltransferase (795 nt)   | 5   | 26   | 0   |
| PITG_11489   Pi fatty-acid-CoA ligase, putative (3596 nt)             | 1   | 24   | 0   |
| PITG_11490   Pi conserved hypothetical protein (1911 nt)              | 0   | 0    | 0   |
| PITG_11491   Pi hypothetical protein (800 nt)                         | 6   | 17   | 0   |

|            |                                                                                     |      |     |    |
|------------|-------------------------------------------------------------------------------------|------|-----|----|
| PITG_11492 | Pi conserved hypothetical protein (795 nt)                                          | 2    | 16  | 0  |
| PITG_11494 | Pi Multidrug/Oligosaccharidyl-lipid/Polysaccharide (MC                              | 2    | 10  | 0  |
| PITG_11495 | Pi Multidrug/Oligosaccharidyl-lipid/Polysaccharide (MC                              | 1    | 0   | 0  |
| PITG_11496 | Pi conserved hypothetical protein (2009 nt)                                         | 6    | 13  | 0  |
| PITG_11497 | Pi transcriptional regulator ATRX (3819 nt)                                         | 1    | 18  | 0  |
| PITG_11498 | Pi conserved hypothetical protein (888 nt)                                          | 0    | 15  | 0  |
| PITG_11504 | Pi cleavage induced hypothetical protein (1043 nt)                                  | 1    | 2   | 0  |
| PITG_11506 | Pi hypothetical protein (475 nt)                                                    | 2    | 14  | 0  |
| PITG_11521 | Pi Zinc (Zn <sup>2+</sup> )-Iron (Fe <sup>2+</sup> ) Permease (ZIP) Family (997 nt) | 13   | 40  | 1  |
| PITG_11522 | Pi aspartyl protease family A01B, putative (1473 nt)                                | 0    | 3   | 0  |
| PITG_11524 | Pi serine protease family S10, putative (1662 nt)                                   | 20   | 33  | 0  |
| PITG_11525 | Pi serine protease family S10, putative (1638 nt)                                   | 4    | 19  | 0  |
| PITG_11526 | Pi conserved hypothetical protein (2882 nt)                                         | 0    | 0   | 0  |
| PITG_11527 | Pi conserved hypothetical protein (864 nt)                                          | 5    | 12  | 0  |
| PITG_11530 | Pi conserved hypothetical protein (1474 nt)                                         | 7    | 13  | 0  |
| PITG_11536 | Pi conserved hypothetical protein (522 nt)                                          | 10   | 53  | 0  |
| PITG_11538 | Pi conserved hypothetical protein (1390 nt)                                         | 3    | 0   | 0  |
| PITG_11540 | Pi conserved hypothetical protein (3669 nt)                                         | 8    | 13  | 0  |
| PITG_11548 | Pi conserved hypothetical protein (1535 nt)                                         | 0    | 14  | 0  |
| PITG_11551 | Pi Major Facilitator Superfamily (MFS) (504 nt)                                     | 8    | 9   | 0  |
| PITG_11552 | Pi conserved hypothetical protein (532 nt)                                          | 23   | 221 | 0  |
| PITG_11555 | Pi conserved hypothetical protein (960 nt)                                          | 2    | 14  | 0  |
| PITG_11556 | Pi conserved hypothetical protein (966 nt)                                          | 14   | 14  | 0  |
| PITG_11557 | Pi conserved hypothetical protein (807 nt)                                          | 1    | 18  | 0  |
| PITG_11558 | Pi beta-glucan synthesis-associated protein, putative (2                            | 0    | 15  | 0  |
| PITG_11561 | Pi nuclear prelamin A recognition factor-like protein (1                            | 20   | 23  | 0  |
| PITG_11562 | Pi myb-like DNA-binding protein, putative (880 nt)                                  | 3    | 76  | 0  |
| PITG_11563 | Pi conserved hypothetical protein (928 nt)                                          | 8    | 32  | 0  |
| PITG_11567 | Pi conserved hypothetical protein (6184 nt)                                         | 0    | 22  | 0  |
| PITG_11568 | Pi hypothetical protein (996 nt)                                                    | 0    | 26  | 1  |
| PITG_11569 | Pi metalloprotease family M17, putative (1605 nt)                                   | 6    | 63  | 2  |
| PITG_11571 | Pi Crinkler (CRN) family protein, pseudogene (4364 nt)                              | 3    | 45  | 0  |
| PITG_11572 | Pi conserved hypothetical protein (1158 nt)                                         | 1075 | 195 | 0  |
| PITG_11573 | Pi serine protease family S33, putative (1166 nt)                                   | 1    | 4   | 0  |
| PITG_11584 | Pi conserved hypothetical protein (1228 nt)                                         | 1231 | 479 | 0  |
| PITG_11585 | Pi conserved hypothetical protein (886 nt)                                          | 6    | 14  | 0  |
| PITG_11586 | Pi conserved hypothetical protein (456 nt)                                          | 12   | 15  | 1  |
| PITG_11587 | Pi inositol-3,4-bisphosphate 4-phosphatase, putative (3                             | 6    | 19  | 0  |
| PITG_11588 | Pi hypothetical cleavage-induced protein (1378 nt)                                  | 28   | 97  | 3  |
| PITG_11592 | Pi serine protease family S15, putative (2220 nt)                                   | 10   | 39  | 0  |
| PITG_11594 | Pi ubiquitin family protein, putative (2388 nt)                                     | 15   | 25  | 0  |
| PITG_11597 | Pi conserved hypothetical protein (654 nt)                                          | 21   | 39  | 0  |
| PITG_11600 | Pi carbohydrate-binding protein, putative (1070 nt)                                 | 12   | 54  | 0  |
| PITG_11603 | Pi peptidyl-prolyl cis-trans isomerase CYP19-4 precursc                             | 90   | 274 | 16 |
| PITG_11604 | Pi hypothetical protein (679 nt)                                                    | 10   | 18  | 0  |
| PITG_11605 | Pi aldehyde dehydrogenase, putative (1740 nt)                                       | 11   | 47  | 0  |
| PITG_11607 | Pi metalloprotease family M48X, putative (748 nt)                                   | 2    | 23  | 0  |

|            |                                                            |     |      |    |
|------------|------------------------------------------------------------|-----|------|----|
| PITG_11608 | Pi conserved hypothetical protein (927 nt)                 | 5   | 48   | 0  |
| PITG_11610 | Pi conserved hypothetical protein (3524 nt)                | 221 | 1032 | 0  |
| PITG_11612 | Pi conserved hypothetical protein (1277 nt)                | 39  | 295  | 0  |
| PITG_11615 | Pi homoserine dehydrogenase, putative (1519 nt)            | 22  | 98   | 5  |
| PITG_11616 | Pi conserved hypothetical protein (1011 nt)                | 0   | 3    | 0  |
| PITG_11617 | Pi alkylated DNA repair protein alkB (928 nt)              | 0   | 21   | 0  |
| PITG_11618 | Pi conserved hypothetical protein (1342 nt)                | 2   | 9    | 0  |
| PITG_11621 | Pi conserved hypothetical protein (881 nt)                 | 0   | 1    | 0  |
| PITG_11625 | Pi conserved hypothetical protein (3543 nt)                | 1   | 13   | 0  |
| PITG_11626 | Pi proteasome subunit beta type-6, putative (727 nt)       | 22  | 145  | 6  |
| PITG_11627 | Pi conserved hypothetical protein (1284 nt)                | 5   | 51   | 0  |
| PITG_11629 | Pi conserved hypothetical protein (503 nt)                 | 0   | 4    | 0  |
| PITG_11630 | Pi eukaryotic translation initiation factor 1A, putative ( | 40  | 295  | 10 |
| PITG_11638 | Pi voltage-gated potassium channel subunit beta, putat     | 4   | 37   | 2  |
| PITG_11643 | Pi voltage-gated potassium channel subunit beta, putat     | 13  | 7    | 19 |
| PITG_11647 | Pi conserved hypothetical protein (1107 nt)                | 0   | 1    | 0  |
| PITG_11648 | Pi chitobiosyldiphosphodolichol beta-mannosyltransfer      | 19  | 61   | 0  |
| PITG_11650 | Pi conserved hypothetical protein (915 nt)                 | 3   | 35   | 0  |
| PITG_11651 | Pi conserved hypothetical protein (773 nt)                 | 4   | 17   | 0  |
| PITG_11652 | Pi conserved hypothetical protein (2815 nt)                | 0   | 4    | 0  |
| PITG_11653 | Pi conserved hypothetical protein (4177 nt)                | 2   | 31   | 1  |
| PITG_11656 | Pi long-chain-fatty-acid-CoA ligase, putative (2143 nt)    | 10  | 26   | 0  |
| PITG_11662 | Pi ankyrin-like protein (2233 nt)                          | 0   | 49   | 0  |
| PITG_11666 | Pi transmembrane protein, putative (3344 nt)               | 4   | 61   | 0  |
| PITG_11674 | Pi conserved hypothetical protein (3607 nt)                | 0   | 15   | 0  |
| PITG_11675 | Pi conserved hypothetical protein (2970 nt)                | 3   | 28   | 0  |
| PITG_11676 | Pi conserved hypothetical protein (1299 nt)                | 4   | 85   | 0  |
| PITG_11677 | Pi diacylglycerol acyltransferase, putative (1479 nt)      | 0   | 10   | 0  |
| PITG_11680 | Pi conserved hypothetical protein (1246 nt)                | 0   | 12   | 0  |
| PITG_11689 | Pi putative GPI-anchored serine-rich hypothetical prote    | 56  | 254  | 1  |
| PITG_11690 | Pi conserved hypothetical protein (1864 nt)                | 126 | 276  | 2  |
| PITG_11692 | Pi conserved hypothetical protein (645 nt)                 | 6   | 194  | 0  |
| PITG_11699 | Pi hypothetical protein (1409 nt)                          | 1   | 11   | 0  |
| PITG_11700 | Pi conserved hypothetical protein (1427 nt)                | 6   | 14   | 0  |
| PITG_11701 | Pi CLPTM1-like membrane protein, putative (1971 nt)        | 2   | 15   | 0  |
| PITG_11702 | Pi conserved hypothetical protein (3018 nt)                | 7   | 57   | 0  |
| PITG_11703 | Pi lectin, putative (1278 nt)                              | 6   | 36   | 2  |
| PITG_11704 | Pi lectin, putative (1295 nt)                              | 7   | 54   | 1  |
| PITG_11705 | Pi conserved hypothetical protein (1608 nt)                | 2   | 10   | 0  |
| PITG_11708 | Pi conserved hypothetical protein (1914 nt)                | 17  | 31   | 0  |
| PITG_11710 | Pi conserved hypothetical protein (996 nt)                 | 15  | 51   | 0  |
| PITG_11712 | Pi neutral alpha-glucosidase, putative (3069 nt)           | 9   | 57   | 2  |
| PITG_11718 | Pi hypothetical protein (1646 nt)                          | 28  | 167  | 0  |
| PITG_11719 | Pi 4-hydroxyphenylpyruvate dioxygenase (1344 nt)           | 39  | 139  | 0  |
| PITG_11722 | Pi conserved hypothetical protein (392 nt)                 | 2   | 88   | 0  |
| PITG_11723 | Pi vacuolar protein sorting-associated protein, putative   | 0   | 19   | 0  |
| PITG_11724 | Pi conserved hypothetical protein (774 nt)                 | 4   | 41   | 0  |



|            |                                                             |     |     |    |
|------------|-------------------------------------------------------------|-----|-----|----|
| PITG_11725 | Pi conserved hypothetical protein (1143 nt)                 | 1   | 24  | 0  |
| PITG_11728 | Pi eukaryotic translation initiation factor 2-alpha kinase  | 5   | 30  | 0  |
| PITG_11729 | Pi conserved hypothetical protein (1065 nt)                 | 9   | 51  | 2  |
| PITG_11733 | Pi pantothenate kinase, putative (1865 nt)                  | 8   | 19  | 0  |
| PITG_11734 | Pi 50S ribosomal protein L3-2 (1111 nt)                     | 18  | 28  | 1  |
| PITG_11735 | Pi conserved hypothetical protein (4995 nt)                 | 2   | 19  | 0  |
| PITG_11736 | Pi conserved hypothetical protein (526 nt)                  | 87  | 48  | 0  |
| PITG_11741 | Pi conserved hypothetical protein (1761 nt)                 | 0   | 15  | 0  |
| PITG_11743 | Pi nuclear pore complex protein, putative (6165 nt)         | 2   | 32  | 0  |
| PITG_11748 | Pi Major Facilitator Superfamily (MFS) (1560 nt)            | 5   | 7   | 0  |
| PITG_11749 | Pi conserved hypothetical protein (1044 nt)                 | 1   | 2   | 0  |
| PITG_11750 | Pi serine/threonine protein phosphatase 2A 59 kDa reg       | 27  | 57  | 0  |
| PITG_11752 | Pi protein phosphatase 1L-like protein (3063 nt)            | 3   | 11  | 0  |
| PITG_11753 | Pi conserved hypothetical protein (951 nt)                  | 3   | 66  | 0  |
| PITG_11755 | Pi putative GPI-anchored serine-threonine rich hypoth       | 125 | 676 | 11 |
| PITG_11756 | Pi Voltage-gated Ion Channel (VIC) Superfamily (3301 n      | 1   | 2   | 0  |
| PITG_11760 | Pi HSF-type DNA-binding protein, putative (711 nt)          | 2   | 88  | 0  |
| PITG_11761 | Pi conserved hypothetical protein (1008 nt)                 | 2   | 27  | 0  |
| PITG_11764 | Pi conserved hypothetical protein (1584 nt)                 | 2   | 16  | 0  |
| PITG_11765 | Pi conserved hypothetical protein (5055 nt)                 | 3   | 17  | 0  |
| PITG_11766 | Pi 40S ribosomal protein S3a (1393 nt)                      | 620 | 780 | 89 |
| PITG_11767 | Pi phosphoacetylglucosamine mutase, putative (1967 r        | 18  | 184 | 3  |
| PITG_11768 | Pi conserved hypothetical protein (521 nt)                  | 47  | 76  | 0  |
| PITG_11773 | Pi protein phosphatase 2C, putative (2350 nt)               | 6   | 84  | 0  |
| PITG_11775 | Pi hypothetical protein (1765 nt)                           | 22  | 202 | 3  |
| PITG_11780 | Pi conserved hypothetical protein (5416 nt)                 | 4   | 24  | 0  |
| PITG_11782 | Pi calcium-binding protein, putative (3317 nt)              | 7   | 33  | 0  |
| PITG_11783 | Pi conserved hypothetical protein (1426 nt)                 | 7   | 36  | 0  |
| PITG_11789 | Pi conserved hypothetical protein (2341 nt)                 | 33  | 103 | 1  |
| PITG_11790 | Pi conserved hypothetical protein (306 nt)                  | 11  | 15  | 0  |
| PITG_11791 | Pi conserved hypothetical protein (309 nt)                  | 20  | 42  | 0  |
| PITG_11792 | Pi conserved hypothetical protein (1580 nt)                 | 31  | 113 | 0  |
| PITG_11794 | Pi conserved hypothetical protein (2011 nt)                 | 1   | 1   | 0  |
| PITG_11795 | Pi ATP-dependent RNA helicase SUPV3L1, putative (296        | 12  | 30  | 0  |
| PITG_11799 | Pi conserved hypothetical protein (2308 nt)                 | 6   | 24  | 0  |
| PITG_11802 | Pi conserved hypothetical protein (1997 nt)                 | 2   | 18  | 0  |
| PITG_11803 | Pi conserved hypothetical protein (1940 nt)                 | 4   | 4   | 0  |
| PITG_11804 | Pi conserved hypothetical protein (1414 nt)                 | 9   | 17  | 0  |
| PITG_11805 | Pi splicing factor, arginine/serine-rich, putative (950 nt) | 13  | 15  | 0  |
| PITG_11806 | Pi vacuolar protein sorting-associated protein 26B-A (7     | 6   | 24  | 0  |
| PITG_11807 | Pi serine protease, putative (1325 nt)                      | 16  | 2   | 0  |
| PITG_11812 | Pi DNA replication licensing factor Mcm2, putative (307     | 1   | 11  | 0  |
| PITG_11813 | Pi conserved hypothetical protein (2037 nt)                 | 6   | 8   | 0  |
| PITG_11816 | Pi conserved hypothetical protein (1444 nt)                 | 4   | 11  | 0  |
| PITG_11817 | Pi hypothetical protein (1959 nt)                           | 27  | 37  | 0  |
| PITG_11818 | Pi conserved hypothetical protein (1541 nt)                 | 0   | 0   | 0  |
| PITG_11822 | Pi conserved hypothetical protein (1137 nt)                 | 7   | 25  | 0  |

|            |                                                          |     |     |    |
|------------|----------------------------------------------------------|-----|-----|----|
| PITG_11823 | Pi hypothetical protein (954 nt)                         | 1   | 0   | 0  |
| PITG_11825 | Pi hypothetical protein (581 nt)                         | 8   | 18  | 0  |
| PITG_11827 | Pi conserved hypothetical protein (3059 nt)              | 0   | 11  | 0  |
| PITG_11829 | Pi hypothetical protein (859 nt)                         | 2   | 16  | 0  |
| PITG_11832 | Pi conserved hypothetical protein (1280 nt)              | 2   | 17  | 0  |
| PITG_11838 | Pi Major facilitator Superfamily (1301 nt)               | 0   | 0   | 0  |
| PITG_11845 | Pi conserved hypothetical protein (563 nt)               | 0   | 0   | 0  |
| PITG_11846 | Pi conserved hypothetical protein (3964 nt)              | 18  | 0   | 0  |
| PITG_11848 | Pi conserved hypothetical protein (1239 nt)              | 0   | 0   | 0  |
| PITG_11852 | Pi C2 domain-containing protein, putative (1283 nt)      | 67  | 886 | 9  |
| PITG_11853 | Pi C2 domain-containing protein, putative (1193 nt)      | 3   | 59  | 0  |
| PITG_11854 | Pi C2 domain-containing protein, putative (1331 nt)      | 15  | 140 | 0  |
| PITG_11855 | Pi C2 domain-containing protein, putative (1198 nt)      | 34  | 699 | 8  |
| PITG_11856 | Pi C2 domain-containing protein, putative (1173 nt)      | 15  | 95  | 0  |
| PITG_11857 | Pi C2 domain-containing protein, putative (1331 nt)      | 27  | 123 | 0  |
| PITG_11858 | Pi conserved hypothetical protein (1256 nt)              | 60  | 396 | 0  |
| PITG_11859 | Pi hypothetical protein (989 nt)                         | 3   | 8   | 0  |
| PITG_11862 | Pi conserved hypothetical protein (1503 nt)              | 6   | 13  | 0  |
| PITG_11863 | Pi transmembrane protein, putative (700 nt)              | 0   | 4   | 0  |
| PITG_11869 | Pi SUMO-activating enzyme (SAE), putative (1584 nt)      | 4   | 22  | 0  |
| PITG_11870 | Pi conserved hypothetical protein (1853 nt)              | 163 | 65  | 0  |
| PITG_11875 | Pi peptidase, putative (1983 nt)                         | 1   | 3   | 0  |
| PITG_11877 | Pi conserved hypothetical protein (1913 nt)              | 4   | 14  | 0  |
| PITG_11878 | Pi conserved hypothetical protein (723 nt)               | 1   | 1   | 0  |
| PITG_11879 | Pi hypothetical protein (1593 nt)                        | 0   | 0   | 0  |
| PITG_11881 | Pi conserved hypothetical protein (902 nt)               | 0   | 3   | 4  |
| PITG_11882 | Pi conserved hypothetical protein (901 nt)               | 86  | 190 | 0  |
| PITG_11883 | Pi conserved hypothetical protein (1266 nt)              | 1   | 9   | 8  |
| PITG_11885 | Pi cleavage induced hypothetical protein (1739 nt)       | 0   | 4   | 0  |
| PITG_11886 | Pi ubiquitin family protein, putative (1263 nt)          | 11  | 51  | 1  |
| PITG_11887 | Pi conserved hypothetical protein (2098 nt)              | 13  | 14  | 0  |
| PITG_11888 | Pi conserved hypothetical protein (3291 nt)              | 9   | 18  | 0  |
| PITG_11889 | Pi putative GPI-anchored serine-threonine rich hypoth    | 0   | 25  | 0  |
| PITG_11890 | Pi putative GPI-anchored serine-threonine rich hypoth    | 3   | 33  | 0  |
| PITG_11891 | Pi conserved hypothetical protein (1104 nt)              | 12  | 0   | 31 |
| PITG_11895 | Pi conserved hypothetical protein (3251 nt)              | 1   | 22  | 0  |
| PITG_11898 | Pi conserved hypothetical protein (1307 nt)              | 0   | 0   | 12 |
| PITG_11899 | Pi hypothetical protein (331 nt)                         | 20  | 0   | 0  |
| PITG_11900 | Pi protein kinase, putative (1337 nt)                    | 60  | 23  | 0  |
| PITG_11903 | Pi conserved hypothetical protein (1712 nt)              | 2   | 6   | 0  |
| PITG_11906 | Pi Proton-dependent Oligopeptide Transporter (POT) F     | 13  | 5   | 0  |
| PITG_11907 | Pi diphthine synthase (933 nt)                           | 4   | 23  | 0  |
| PITG_11910 | Pi serine protease family S08A, putative (1458 nt)       | 0   | 0   | 0  |
| PITG_11912 | Pi DNA replication licensing factor MCM7 (2607 nt)       | 1   | 13  | 0  |
| PITG_11913 | Pi heat shock cognate 70 kDa protein (2483 nt)           | 11  | 172 | 42 |
| PITG_11914 | Pi acetyltransferase (GNAT) family protein, putative (54 | 7   | 24  | 0  |
| PITG_11921 | Pi epoxide hydrolase, putative (890 nt)                  | 1   | 16  | 0  |

|            |                                                         |     |      |    |
|------------|---------------------------------------------------------|-----|------|----|
| PITG_11922 | Pi epoxide hydrolase, putative (993 nt)                 | 11  | 31   | 0  |
| PITG_11923 | Pi mitochondrial 39-S ribosomal protein L47, putative ( | 17  | 28   | 0  |
| PITG_11926 | Pi glu/Leu/Phe/Val dehydrogenase family, putative (30   | 12  | 57   | 0  |
| PITG_11927 | Pi conserved hypothetical protein (336 nt)              | 4   | 20   | 1  |
| PITG_11929 | Pi dihydrolipoyllysine-residue acetyltransferase compo  | 11  | 41   | 5  |
| PITG_11937 | Pi conserved hypothetical protein (1005 nt)             | 0   | 3    | 0  |
| PITG_11938 | Pi conserved hypothetical protein (747 nt)              | 0   | 1    | 0  |
| PITG_11940 | Pi chitin-binding protein, putative (816 nt)            | 4   | 0    | 0  |
| PITG_11955 | Pi conserved hypothetical protein (1249 nt)             | 547 | 0    | 2  |
| PITG_11959 | Pi conserved hypothetical protein (2156 nt)             | 6   | 57   | 1  |
| PITG_11960 | Pi Amino Acid-Polyamine-Organocation (APC) Family (1    | 1   | 12   | 0  |
| PITG_11963 | Pi ATP-binding Cassette (ABC) Superfamily (4113 nt)     | 0   | 3    | 0  |
| PITG_11964 | Pi conserved hypothetical protein (2189 nt)             | 0   | 12   | 0  |
| PITG_11965 | Pi conserved hypothetical protein (2073 nt)             | 3   | 24   | 0  |
| PITG_11966 | Pi chaperonin CPN60-1, mitochondrial precursor (1943    | 121 | 186  | 31 |
| PITG_11969 | Pi ATP-binding Cassette (ABC) Superfamily (4122 nt)     | 1   | 8    | 0  |
| PITG_11971 | Pi conserved hypothetical protein (926 nt)              | 1   | 13   | 0  |
| PITG_11972 | Pi pre-mRNA-splicing factor 38A, putative (625 nt)      | 7   | 10   | 0  |
| PITG_11975 | Pi conserved hypothetical protein (1393 nt)             | 214 | 1118 | 0  |
| PITG_11976 | Pi UDP-3-O-[3-hydroxymyristoyl] N-acetylglucosamine     | 10  | 4    | 0  |
| PITG_11977 | Pi conserved hypothetical protein (2109 nt)             | 81  | 38   | 0  |
| PITG_11978 | Pi conserved hypothetical protein (579 nt)              | 1   | 14   | 0  |
| PITG_11979 | Pi conserved hypothetical protein (585 nt)              | 5   | 23   | 0  |
| PITG_11980 | Pi conserved hypothetical protein (1370 nt)             | 4   | 36   | 0  |
| PITG_11981 | Pi conserved hypothetical protein (2355 nt)             | 3   | 30   | 0  |
| PITG_11982 | Pi conserved hypothetical protein (486 nt)              | 44  | 92   | 0  |
| PITG_11983 | Pi conserved hypothetical protein (920 nt)              | 1   | 10   | 0  |
| PITG_11985 | Pi hypothetical protein (309 nt)                        | 10  | 614  | 0  |
| PITG_11987 | Pi glycoside hydrolase, putative (2422 nt)              | 0   | 1    | 0  |
| PITG_11988 | Pi Mitochondrial Carrier (MC) Family (857 nt)           | 0   | 0    | 0  |
| PITG_11989 | Pi alcohol dehydrogenase, putative (982 nt)             | 0   | 0    | 0  |
| PITG_11993 | Pi glycoside hydrolase, putative (1617 nt)              | 9   | 34   | 0  |
| PITG_11996 | Pi conserved hypothetical protein (820 nt)              | 128 | 168  | 0  |
| PITG_11997 | Pi conserved hypothetical protein (798 nt)              | 25  | 104  | 0  |
| PITG_11998 | Pi chromatin modification-related protein EAF3, putati  | 2   | 21   | 0  |
| PITG_11999 | Pi conserved hypothetical protein (642 nt)              | 20  | 25   | 0  |
| PITG_12000 | Pi conserved hypothetical protein (1834 nt)             | 4   | 25   | 0  |
| PITG_12001 | Pi conserved hypothetical protein (879 nt)              | 11  | 20   | 0  |
| PITG_12003 | Pi conserved hypothetical protein (1960 nt)             | 0   | 14   | 0  |
| PITG_12004 | Pi conserved hypothetical protein (1823 nt)             | 28  | 4    | 0  |
| PITG_12008 | Pi hypothetical protein (276 nt)                        | 42  | 0    | 0  |
| PITG_12015 | Pi hypothetical protein (3961 nt)                       | 8   | 86   | 0  |
| PITG_12037 | Pi ferredoxin-dependent glutamate synthase, putative    | 3   | 55   | 0  |
| PITG_12039 | Pi conserved hypothetical protein (572 nt)              | 8   | 5    | 0  |
| PITG_12041 | Pi cysteine protease family C01A, putative (1131 nt)    | 17  | 135  | 1  |
| PITG_12042 | Pi hypothetical protein (677 nt)                        | 136 | 32   | 1  |
| PITG_12048 | Pi M96 mating-specific protein family (1390 nt)         | 6   | 17   | 0  |

|            |                                                           |     |     |     |
|------------|-----------------------------------------------------------|-----|-----|-----|
| PITG_12049 | Pi conserved hypothetical protein (683 nt)                | 107 | 354 | 11  |
| PITG_12050 | Pi queuine tRNA-ribosyltransferase (1284 nt)              | 3   | 14  | 0   |
| PITG_12051 | Pi conserved hypothetical protein (315 nt)                | 5   | 26  | 0   |
| PITG_12053 | Pi acetylornithine aminotransferase, mitochondrial pre    | 20  | 41  | 0   |
| PITG_12058 | Pi ATP-binding Cassette (ABC) Superfamily (2430 nt)       | 0   | 4   | 0   |
| PITG_12077 | Pi conserved hypothetical protein (1505 nt)               | 6   | 11  | 0   |
| PITG_12082 | Pi hypothetical protein (540 nt)                          | 72  | 455 | 0   |
| PITG_12084 | Pi Crinkler (CRN) family protein, pseudogene (2736 nt)    | 16  | 47  | 0   |
| PITG_12088 | Pi hypothetical protein (632 nt)                          | 4   | 144 | 0   |
| PITG_12098 | Pi Crinkler (CRN) family protein, pseudogene (1258 nt)    | 290 | 554 | 1   |
| PITG_12099 | Pi serine protease family S09A, putative (2235 nt)        | 4   | 46  | 0   |
| PITG_12100 | Pi conserved hypothetical protein (1683 nt)               | 8   | 17  | 0   |
| PITG_12103 | Pi conserved hypothetical protein (1092 nt)               | 0   | 1   | 0   |
| PITG_12104 | Pi ATP-dependent DNA helicase 2 subunit, putative (24     | 5   | 48  | 0   |
| PITG_12105 | Pi N-terminal kinase-like protein (2938 nt)               | 5   | 48  | 0   |
| PITG_12106 | Pi CDP-alcohol phosphatidyltransferase, putative (162C    | 20  | 38  | 0   |
| PITG_12107 | Pi conserved hypothetical protein (1621 nt)               | 3   | 16  | 0   |
| PITG_12108 | Pi conserved hypothetical protein (8734 nt)               | 3   | 80  | 0   |
| PITG_12110 | Pi peroxisomal targeting signal 1 receptor, putative (22  | 20  | 19  | 0   |
| PITG_12111 | Pi conserved hypothetical protein (2470 nt)               | 3   | 18  | 0   |
| PITG_12112 | Pi conserved hypothetical protein (4899 nt)               | 1   | 10  | 0   |
| PITG_12113 | Pi conserved hypothetical protein (1158 nt)               | 3   | 7   | 0   |
| PITG_12115 | Pi calmodulin-like protein (2661 nt)                      | 0   | 6   | 0   |
| PITG_12119 | Pi ATPase family AAA domain-containing protein 3A (1      | 3   | 14  | 1   |
| PITG_12120 | Pi NPL4-like protein (1332 nt)                            | 8   | 28  | 0   |
| PITG_12121 | Pi uridine kinase (984 nt)                                | 10  | 17  | 0   |
| PITG_12122 | Pi proteasome subunit alpha type-5, putative (964 nt)     | 96  | 179 | 8   |
| PITG_12123 | Pi sporangia induced myosin-like protein (1021 nt)        | 1   | 4   | 0   |
| PITG_12124 | Pi protein phosphatase 2C, putative (1356 nt)             | 8   | 37  | 0   |
| PITG_12128 | Pi F-box protein, putative (1121 nt)                      | 9   | 19  | 0   |
| PITG_12131 | Pi protease inhibitor Epi4 (957 nt)                       | 0   | 13  | 0   |
| PITG_12139 | Pi conserved hypothetical protein (1308 nt)               | 8   | 0   | 139 |
| PITG_12140 | Pi peroxisomal Lon protease (2784 nt)                     | 59  | 46  | 0   |
| PITG_12141 | Pi H - or Na -translocating F-type, V-type and A-type AT  | 25  | 102 | 1   |
| PITG_12142 | Pi conserved hypothetical protein (615 nt)                | 2   | 18  | 0   |
| PITG_12145 | Pi serine protease family S33, putative (1748 nt)         | 10  | 21  | 0   |
| PITG_12146 | Pi hypothetical protein (588 nt)                          | 0   | 11  | 0   |
| PITG_12148 | Pi conserved hypothetical protein (1929 nt)               | 5   | 104 | 0   |
| PITG_12149 | Pi conserved hypothetical protein (1073 nt)               | 7   | 14  | 0   |
| PITG_12150 | Pi conserved hypothetical protein (646 nt)                | 0   | 18  | 0   |
| PITG_12151 | Pi aspartyl-tRNA synthetase, putative (1714 nt)           | 24  | 39  | 1   |
| PITG_12152 | Pi ribonuclease HII (837 nt)                              | 7   | 18  | 0   |
| PITG_12153 | Pi myosin-like protein (4548 nt)                          | 2   | 33  | 0   |
| PITG_12154 | Pi conserved hypothetical protein (3494 nt)               | 14  | 51  | 1   |
| PITG_12155 | Pi flagellar peptidyl-prolyl cis-trans isomerase (884 nt) | 20  | 45  | 0   |
| PITG_12156 | Pi Annexin (Annexin) Family (1037 nt)                     | 5   | 39  | 0   |
| PITG_12157 | Pi conserved hypothetical protein (2196 nt)               | 3   | 43  | 0   |

|            |                                                                                    |    |     |    |
|------------|------------------------------------------------------------------------------------|----|-----|----|
| PITG_12158 | Pi Annexin (Annexin) Family (1140 nt)                                              | 22 | 236 | 25 |
| PITG_12159 | Pi Annexin (Annexin) Family (1310 nt)                                              | 7  | 26  | 0  |
| PITG_12160 | Pi protein kinase, putative (1510 nt)                                              | 19 | 17  | 0  |
| PITG_12161 | Pi delta-1-pyrroline-5-carboxylate synthetase (2324 nt)                            | 2  | 31  | 0  |
| PITG_12162 | Pi RNA-binding protein, putative (2493 nt)                                         | 18 | 6   | 0  |
| PITG_12163 | Pi conserved hypothetical protein (1014 nt)                                        | 2  | 13  | 0  |
| PITG_12164 | Pi conserved hypothetical protein (708 nt)                                         | 24 | 139 | 0  |
| PITG_12166 | Pi twinkle protein, putative (2264 nt)                                             | 0  | 11  | 0  |
| PITG_12169 | Pi polycomb-like protein (4401 nt)                                                 | 0  | 11  | 0  |
| PITG_12172 | Pi hypothetical protein (402 nt)                                                   | 26 | 86  | 0  |
| PITG_12173 | Pi conserved hypothetical protein (1693 nt)                                        | 19 | 48  | 0  |
| PITG_12174 | Pi conserved hypothetical protein (2057 nt)                                        | 2  | 15  | 0  |
| PITG_12175 | Pi conserved hypothetical protein (920 nt)                                         | 2  | 23  | 0  |
| PITG_12176 | Pi conserved hypothetical protein (2728 nt)                                        | 0  | 9   | 0  |
| PITG_12177 | Pi hypothetical protein (501 nt)                                                   | 1  | 27  | 0  |
| PITG_12178 | Pi conserved hypothetical protein (852 nt)                                         | 5  | 19  | 0  |
| PITG_12179 | Pi conserved hypothetical protein (519 nt)                                         | 33 | 111 | 0  |
| PITG_12182 | Pi conserved hypothetical protein (1267 nt)                                        | 22 | 161 | 0  |
| PITG_12183 | Pi double stranded RNA binding, putative (1215 nt)                                 | 9  | 21  | 0  |
| PITG_12185 | Pi 26S protease regulatory subunit 4 (1560 nt)                                     | 18 | 129 | 9  |
| PITG_12186 | Pi sporangia induced mitogen-activated protein kinase,                             | 0  | 0   | 0  |
| PITG_12187 | Pi diphthamide biosynthesis protein 1 (2303 nt)                                    | 2  | 11  | 0  |
| PITG_12191 | Pi conserved hypothetical protein (1947 nt)                                        | 18 | 73  | 0  |
| PITG_12192 | Pi conserved hypothetical protein (2599 nt)                                        | 10 | 23  | 0  |
| PITG_12193 | Pi 50S ribosomal protein L1 (1144 nt)                                              | 13 | 37  | 2  |
| PITG_12194 | Pi biotin-protein ligase, putative (1076 nt)                                       | 5  | 22  | 0  |
| PITG_12195 | Pi katanin p60 ATPase-containing subunit, putative (21                             | 1  | 3   | 0  |
| PITG_12196 | Pi conserved hypothetical protein (699 nt)                                         | 8  | 21  | 0  |
| PITG_12211 | Pi methionine aminopeptidase, putative (1152 nt)                                   | 4  | 28  | 0  |
| PITG_12212 | Pi conserved hypothetical protein (753 nt)                                         | 10 | 6   | 0  |
| PITG_12213 | Pi exonuclease 1, putative (1771 nt)                                               | 4  | 20  | 0  |
| PITG_12214 | Pi conserved hypothetical protein (1677 nt)                                        | 1  | 10  | 0  |
| PITG_12215 | Pi Zinc (Zn <sup>2+</sup> )-Iron (Fe <sup>2+</sup> ) Permease (ZIP) Family (1005 n | 1  | 2   | 0  |
| PITG_12219 | Pi Zinc (Zn <sup>2+</sup> )-Iron (Fe <sup>2+</sup> ) Permease (ZIP) Family (1002 n | 6  | 9   | 0  |
| PITG_12220 | Pi methionine aminopeptidase, putative (1137 nt)                                   | 2  | 15  | 0  |
| PITG_12221 | Pi conserved hypothetical protein (3529 nt)                                        | 1  | 1   | 0  |
| PITG_12222 | Pi sporangia induced conserved hypothetical protein (1                             | 0  | 0   | 0  |
| PITG_12223 | Pi SWI/SNF-related matrix-associated actin-dependent                               | 6  | 27  | 0  |
| PITG_12224 | Pi conserved hypothetical protein (928 nt)                                         | 9  | 25  | 0  |
| PITG_12226 | Pi Phosphatidylinositol kinase (PIK-L2) (7980 nt)                                  | 0  | 23  | 0  |
| PITG_12227 | Pi conserved hypothetical protein (1112 nt)                                        | 0  | 16  | 0  |
| PITG_12228 | Pi NADH-cytochrome b5 reductase, putative (900 nt)                                 | 35 | 47  | 1  |
| PITG_12229 | Pi DNA repair endonuclease XPF, putative (2919 nt)                                 | 2  | 10  | 0  |
| PITG_12230 | Pi phosphatidic acid phosphatase (999 nt)                                          | 7  | 13  | 0  |
| PITG_12231 | Pi phosphatidic acid phosphatase (1334 nt)                                         | 41 | 177 | 0  |
| PITG_12232 | Pi phosphatidic acid phosphatase, putative (726 nt)                                | 2  | 19  | 0  |
| PITG_12233 | Pi phosphatidic acid phosphatase (1195 nt)                                         | 3  | 17  | 0  |

|            |                                                          |     |     |     |
|------------|----------------------------------------------------------|-----|-----|-----|
| PITG_12234 | Pi phosphatidic acid phosphatase (1429 nt)               | 7   | 26  | 0   |
| PITG_12235 | Pi makorin-like protein (1010 nt)                        | 23  | 37  | 0   |
| PITG_12237 | Pi hypothetical protein (2161 nt)                        | 0   | 13  | 0   |
| PITG_12238 | Pi hypothetical protein (1348 nt)                        | 10  | 47  | 0   |
| PITG_12239 | Pi conserved hypothetical protein (1768 nt)              | 4   | 11  | 0   |
| PITG_12252 | Pi conserved hypothetical protein (4475 nt)              | 9   | 27  | 0   |
| PITG_12254 | Pi conserved hypothetical protein (1917 nt)              | 28  | 76  | 0   |
| PITG_12256 | Pi anoctamin-like protein (2882 nt)                      | 5   | 86  | 0   |
| PITG_12257 | Pi conserved hypothetical protein (588 nt)               | 5   | 16  | 0   |
| PITG_12258 | Pi conserved hypothetical protein (796 nt)               | 4   | 47  | 0   |
| PITG_12259 | Pi lysosomal Pro-X carboxypeptidase, putative (1629 nt)  | 5   | 30  | 0   |
| PITG_12260 | Pi protein transporter Sec24 (3758 nt)                   | 5   | 35  | 0   |
| PITG_12264 | Pi protoheme IX farnesyltransferase, putative (1439 nt)  | 57  | 14  | 0   |
| PITG_12265 | Pi nuclear prelamin A recognition factor-like protein (1 | 3   | 9   | 0   |
| PITG_12266 | Pi inositol-3,4-bisphosphate 4-phosphatase, putative (4  | 9   | 65  | 0   |
| PITG_12267 | Pi conserved hypothetical protein (2446 nt)              | 0   | 1   | 0   |
| PITG_12273 | Pi conserved hypothetical protein (1558 nt)              | 5   | 24  | 0   |
| PITG_12274 | Pi conserved hypothetical protein (567 nt)               | 4   | 13  | 0   |
| PITG_12275 | Pi conserved hypothetical protein (548 nt)               | 8   | 11  | 0   |
| PITG_12277 | Pi conserved hypothetical protein (5146 nt)              | 4   | 20  | 0   |
| PITG_12278 | Pi sterol O-acyltransferase, putative (1380 nt)          | 0   | 0   | 0   |
| PITG_12279 | Pi phosphoglycerate mutase family protein (823 nt)       | 23  | 13  | 0   |
| PITG_12283 | Pi conserved hypothetical protein (1842 nt)              | 1   | 11  | 0   |
| PITG_12284 | Pi hypothetical protein (1024 nt)                        | 0   | 14  | 0   |
| PITG_12285 | Pi polypyrimidine tract-binding protein, putative (2360  | 0   | 10  | 0   |
| PITG_12286 | Pi ADP-ribosylation factor family (932 nt)               | 25  | 150 | 69  |
| PITG_12288 | Pi ADP-ribosylation factor family (968 nt)               | 112 | 345 | 23  |
| PITG_12289 | Pi H - or Na -translocating F-type, V-type and A-type AT | 18  | 54  | 0   |
| PITG_12290 | Pi conserved hypothetical protein (1221 nt)              | 5   | 7   | 0   |
| PITG_12291 | Pi pre-mRNA-processing factor 39, putative (2886 nt)     | 3   | 33  | 0   |
| PITG_12292 | Pi rRNA-processing protein, putative (710 nt)            | 46  | 31  | 0   |
| PITG_12295 | Pi copine, putative (2872 nt)                            | 3   | 30  | 0   |
| PITG_12296 | Pi conserved hypothetical protein (1833 nt)              | 47  | 38  | 0   |
| PITG_12297 | Pi conserved hypothetical protein (2181 nt)              | 6   | 17  | 0   |
| PITG_12299 | Pi hypothetical protein (473 nt)                         | 595 | 444 | 114 |
| PITG_12300 | Pi phosphoribosylglycinamide synthetase, putative (34    | 2   | 21  | 2   |
| PITG_12301 | Pi conserved hypothetical protein (795 nt)               | 0   | 1   | 0   |
| PITG_12302 | Pi conserved hypothetical protein (1683 nt)              | 19  | 35  | 0   |
| PITG_12304 | Pi TATA-box-binding protein, putative (560 nt)           | 1   | 12  | 0   |
| PITG_12305 | Pi rRNA-processing protein FCF1 (928 nt)                 | 2   | 12  | 0   |
| PITG_12306 | Pi conserved hypothetical protein (986 nt)               | 0   | 11  | 0   |
| PITG_12307 | Pi conserved hypothetical protein (922 nt)               | 5   | 25  | 0   |
| PITG_12308 | Pi conserved hypothetical protein (1038 nt)              | 16  | 26  | 0   |
| PITG_12309 | Pi conserved hypothetical protein (234 nt)               | 36  | 161 | 3   |
| PITG_12310 | Pi conserved hypothetical protein (966 nt)               | 22  | 52  | 1   |
| PITG_12313 | Pi hypothetical protein (691 nt)                         | 0   | 0   | 0   |
| PITG_12315 | Pi conserved hypothetical protein (1244 nt)              | 3   | 13  | 0   |

|            |                                                         |     |     |    |
|------------|---------------------------------------------------------|-----|-----|----|
| PITG_12316 | Pi conserved hypothetical protein (839 nt)              | 1   | 11  | 0  |
| PITG_12317 | Pi conserved hypothetical protein (793 nt)              | 0   | 5   | 0  |
| PITG_12318 | Pi ATP-binding Cassette (ABC) Superfamily (2112 nt)     | 19  | 29  | 0  |
| PITG_12319 | Pi conserved hypothetical protein (1132 nt)             | 8   | 4   | 0  |
| PITG_12325 | Pi hypothetical protein (645 nt)                        | 8   | 4   | 0  |
| PITG_12326 | Pi phosphatidyl inositol kinase (PIK-A) (2963 nt)       | 5   | 29  | 0  |
| PITG_12327 | Pi conserved hypothetical protein (1781 nt)             | 20  | 79  | 0  |
| PITG_12330 | Pi cleavage and polyadenylation specificity factor subu | 0   | 29  | 0  |
| PITG_12331 | Pi cleavage and polyadenylation specificity factor subu | 1   | 17  | 0  |
| PITG_12336 | Pi Crinkler (CRN) family protein, pseudogene (491 nt)   | 216 | 103 | 0  |
| PITG_12338 | Pi sugar fermentation stimulation protein (1111 nt)     | 2   | 21  | 0  |
| PITG_12340 | Pi sulfite oxidase, putative (779 nt)                   | 4   | 11  | 0  |
| PITG_12342 | Pi sulfite oxidase, putative (1779 nt)                  | 2   | 17  | 0  |
| PITG_12343 | Pi conserved hypothetical protein (811 nt)              | 14  | 13  | 0  |
| PITG_12346 | Pi DNA replication licensing factor MCM3 (2717 nt)      | 1   | 13  | 0  |
| PITG_12347 | Pi conserved hypothetical protein (1221 nt)             | 1   | 11  | 1  |
| PITG_12348 | Pi conserved hypothetical protein (1089 nt)             | 6   | 34  | 0  |
| PITG_12349 | Pi conserved hypothetical protein (1049 nt)             | 1   | 23  | 0  |
| PITG_12350 | Pi conserved hypothetical protein (1215 nt)             | 8   | 109 | 0  |
| PITG_12353 | Pi conserved hypothetical protein (798 nt)              | 9   | 11  | 0  |
| PITG_12355 | Pi conserved hypothetical protein (1214 nt)             | 1   | 24  | 0  |
| PITG_12356 | Pi conserved hypothetical protein (843 nt)              | 27  | 27  | 0  |
| PITG_12357 | Pi gastricsin, putative (1410 nt)                       | 1   | 31  | 0  |
| PITG_12377 | Pi conserved hypothetical protein (465 nt)              | 2   | 14  | 0  |
| PITG_12394 | Pi conserved hypothetical protein (882 nt)              | 4   | 15  | 0  |
| PITG_12403 | Pi conserved hypothetical protein (1453 nt)             | 2   | 4   | 1  |
| PITG_12426 | Pi conserved hypothetical protein (1858 nt)             | 0   | 15  | 0  |
| PITG_12427 | Pi conserved hypothetical protein (402 nt)              | 116 | 242 | 11 |
| PITG_12428 | Pi conserved hypothetical protein (3124 nt)             | 3   | 23  | 0  |
| PITG_12429 | Pi conserved hypothetical protein (1003 nt)             | 0   | 19  | 0  |
| PITG_12439 | Pi conserved hypothetical protein (1266 nt)             | 25  | 23  | 0  |
| PITG_12440 | Pi conserved hypothetical protein (1557 nt)             | 0   | 17  | 0  |
| PITG_12441 | Pi conserved hypothetical protein (1074 nt)             | 2   | 15  | 0  |
| PITG_12446 | Pi conserved hypothetical protein (1687 nt)             | 8   | 19  | 0  |
| PITG_12450 | Pi hypothetical protein (887 nt)                        | 1   | 1   | 0  |
| PITG_12452 | Pi conserved hypothetical protein (567 nt)              | 0   | 2   | 0  |
| PITG_12453 | Pi conserved hypothetical protein (1539 nt)             | 20  | 50  | 0  |
| PITG_12454 | Pi GTP-binding protein, putative (2157 nt)              | 11  | 25  | 0  |
| PITG_12459 | Pi protein kinase (931 nt)                              | 2   | 24  | 0  |
| PITG_12462 | Pi aconitate hydratase, putative (2179 nt)              | 11  | 43  | 2  |
| PITG_12463 | Pi cleavage induced conserved hypothetical protein (13  | 8   | 21  | 0  |
| PITG_12465 | Pi adenylate kinase, putative (806 nt)                  | 11  | 21  | 0  |
| PITG_12466 | Pi Proton-dependent Oligopeptide Transporter (POT) F    | 1   | 50  | 0  |
| PITG_12469 | Pi conserved hypothetical protein (2089 nt)             | 2   | 9   | 0  |
| PITG_12470 | Pi glycerol-3-phosphate acyltransferase, putative (2523 | 2   | 15  | 0  |
| PITG_12472 | Pi palmitoyltransferase, putative (2460 nt)             | 0   | 23  | 0  |
| PITG_12478 | Pi conserved hypothetical protein (1470 nt)             | 6   | 16  | 0  |

|            |                                                             |      |      |    |
|------------|-------------------------------------------------------------|------|------|----|
| PITG_12480 | Pi conserved hypothetical protein (1597 nt)                 | 49   | 117  | 0  |
| PITG_12482 | Pi serine protease family S28, putative (1581 nt)           | 2    | 21   | 0  |
| PITG_12483 | Pi eukaryotic translation initiation factor 3, putative (14 | 8    | 37   | 3  |
| PITG_12484 | Pi conserved hypothetical protein (1401 nt)                 | 0    | 8    | 0  |
| PITG_12486 | Pi conserved hypothetical protein (1010 nt)                 | 600  | 1199 | 1  |
| PITG_12487 | Pi conserved hypothetical protein (606 nt)                  | 1219 | 1768 | 2  |
| PITG_12488 | Pi conserved hypothetical protein (974 nt)                  | 25   | 74   | 0  |
| PITG_12489 | Pi protein arginine N-methyltransferase, putative (2166     | 3    | 12   | 0  |
| PITG_12490 | Pi conserved hypothetical protein (1365 nt)                 | 4    | 7    | 0  |
| PITG_12494 | Pi transmembrane protein, putative (1423 nt)                | 8    | 23   | 0  |
| PITG_12496 | Pi conserved hypothetical protein (1593 nt)                 | 24   | 50   | 0  |
| PITG_12497 | Pi conserved hypothetical protein (1557 nt)                 | 9    | 7    | 0  |
| PITG_12498 | Pi conserved hypothetical protein (1583 nt)                 | 0    | 20   | 0  |
| PITG_12499 | Pi conserved hypothetical protein (1804 nt)                 | 2    | 23   | 0  |
| PITG_12500 | Pi conserved hypothetical protein (925 nt)                  | 22   | 28   | 0  |
| PITG_12502 | Pi conserved hypothetical protein (900 nt)                  | 0    | 0    | 0  |
| PITG_12503 | Pi conserved hypothetical protein (1477 nt)                 | 2    | 13   | 0  |
| PITG_12504 | Pi Mitochondrial Carrier (MC) Family (987 nt)               | 20   | 59   | 0  |
| PITG_12511 | Pi conserved hypothetical protein (1963 nt)                 | 2    | 5    | 0  |
| PITG_12513 | Pi conserved hypothetical protein (1590 nt)                 | 56   | 5    | 0  |
| PITG_12514 | Pi bifunctional aspartokinase/homoserine dehydrogenase      | 15   | 10   | 0  |
| PITG_12515 | Pi conserved hypothetical protein (884 nt)                  | 2    | 17   | 0  |
| PITG_12516 | Pi poly [ADP-ribose] polymerase 2, putative (2573 nt)       | 10   | 25   | 0  |
| PITG_12517 | Pi CAAX prenyl protease 1 (1458 nt)                         | 28   | 29   | 0  |
| PITG_12518 | Pi conserved hypothetical protein (2695 nt)                 | 2    | 15   | 0  |
| PITG_12519 | Pi conserved hypothetical protein (890 nt)                  | 0    | 11   | 0  |
| PITG_12520 | Pi conserved hypothetical protein (948 nt)                  | 46   | 67   | 2  |
| PITG_12521 | Pi vacuolar protein sorting-associated protein 35, putative | 7    | 24   | 0  |
| PITG_12522 | Pi conserved hypothetical protein (566 nt)                  | 0    | 0    | 0  |
| PITG_12523 | Pi conserved hypothetical protein (1376 nt)                 | 4    | 17   | 0  |
| PITG_12524 | Pi elongation factor 3, putative (3478 nt)                  | 1    | 2    | 0  |
| PITG_12525 | Pi conserved hypothetical protein (600 nt)                  | 2    | 24   | 0  |
| PITG_12526 | Pi conserved hypothetical protein (1578 nt)                 | 16   | 128  | 0  |
| PITG_12527 | Pi conserved hypothetical protein (1653 nt)                 | 6    | 30   | 0  |
| PITG_12528 | Pi conserved hypothetical protein (758 nt)                  | 160  | 411  | 32 |
| PITG_12529 | Pi conserved hypothetical protein (432 nt)                  | 5    | 18   | 0  |
| PITG_12530 | Pi conserved hypothetical protein (2579 nt)                 | 6    | 19   | 0  |
| PITG_12531 | Pi conserved hypothetical protein (231 nt)                  | 22   | 184  | 0  |
| PITG_12532 | Pi conserved hypothetical protein (588 nt)                  | 0    | 14   | 0  |
| PITG_12533 | Pi hypothetical protein (204 nt)                            | 34   | 300  | 0  |
| PITG_12534 | Pi 4-coumarate-CoA ligase, putative (2139 nt)               | 81   | 121  | 0  |
| PITG_12535 | Pi eukaryotic peptide chain release factor subunit 1 (13    | 1    | 7    | 0  |
| PITG_12537 | Pi autophagy-related protein 7 (2290 nt)                    | 3    | 44   | 0  |
| PITG_12540 | Pi gephyrin-like protein (2015 nt)                          | 2    | 31   | 0  |
| PITG_12541 | Pi conserved hypothetical protein (659 nt)                  | 9    | 47   | 0  |
| PITG_12545 | Pi croquemort-like mating protein M82, putative (2332       | 10   | 355  | 0  |
| PITG_12548 | Pi type I inositol-3,4-bisphosphate 4-phosphatase, puta     | 2    | 20   | 0  |



|                                                                       |     |      |     |
|-----------------------------------------------------------------------|-----|------|-----|
| PITG_12549   Pi conserved hypothetical protein (966 nt)               | 1   | 10   | 0   |
| PITG_12550   Pi conserved hypothetical protein (496 nt)               | 21  | 170  | 1   |
| PITG_12552   Pi conserved hypothetical protein (2793 nt)              | 0   | 2    | 0   |
| PITG_12555   Pi elicitin-like protein, putative (360 nt)              | 0   | 26   | 0   |
| PITG_12556   Pi elicitin-like INF6 (745 nt)                           | 16  | 21   | 0   |
| PITG_12561   Pi elicitin INF2A-like protein (567 nt)                  | 63  | 559  | 30  |
| PITG_12562   Pi elicitin-like protein (809 nt)                        | 225 | 1286 | 136 |
| PITG_12563   Pi Mitochondrial Carrier (MC) Family (1174 nt)           | 8   | 32   | 0   |
| PITG_12565   Pi conserved hypothetical protein (681 nt)               | 22  | 74   | 0   |
| PITG_12567   Pi sporangia induced conserved hypothetical protein (1   | 1   | 4    | 0   |
| PITG_12568   Pi sporangia induced parkin coregulated protein (1424    | 0   | 0    | 0   |
| PITG_12571   Pi conserved hypothetical protein (1395 nt)              | 2   | 1    | 0   |
| PITG_12572   Pi conserved hypothetical protein (2855 nt)              | 0   | 0    | 0   |
| PITG_12573   Pi conserved hypothetical protein (746 nt)               | 4   | 8    | 0   |
| PITG_12574   Pi Rab2 family GTPase, putative (695 nt)                 | 33  | 41   | 0   |
| PITG_12575   Pi autophagocytosis associated protein, putative (2043   | 67  | 126  | 0   |
| PITG_12576   Pi conserved hypothetical protein (1154 nt)              | 7   | 22   | 0   |
| PITG_12577   Pi sporangia induced dynein heavy chain (13723 nt)       | 1   | 10   | 0   |
| PITG_12578   Pi acyl-CoA desaturase 1 (1264 nt)                       | 50  | 109  | 1   |
| PITG_12579   Pi kinesin-like protein (2611 nt)                        | 0   | 5    | 0   |
| PITG_12580   Pi conserved hypothetical protein (401 nt)               | 52  | 78   | 0   |
| PITG_12584   Pi DNA binding protein, putative (1363 nt)               | 7   | 36   | 0   |
| PITG_12587   Pi conserved hypothetical protein (618 nt)               | 5   | 12   | 0   |
| PITG_12588   Pi phosphatidylinositol N-acetylglucosaminyltransferas   | 0   | 18   | 0   |
| PITG_12592   Pi conserved hypothetical protein (1758 nt)              | 0   | 29   | 0   |
| PITG_12593   Pi conserved hypothetical protein (766 nt)               | 38  | 56   | 0   |
| PITG_12594   Pi TRAF3-interacting protein, putative (2339 nt)         | 3   | 8    | 0   |
| PITG_12599   Pi elicitin-like protein (1765 nt)                       | 25  | 144  | 4   |
| PITG_12600   Pi flagellar radial spoke protein, putative (1137 nt)    | 3   | 10   | 0   |
| PITG_12604   Pi hypothetical protein (2702 nt)                        | 17  | 74   | 0   |
| PITG_12609   Pi Crinkler (CRN) family protein (1561 nt)               | 8   | 26   | 0   |
| PITG_12619   Pi Crinkler (CRN) family protein (1740 nt)               | 358 | 351  | 0   |
| PITG_12620   Pi conserved hypothetical protein (1680 nt)              | 0   | 21   | 0   |
| PITG_12624   Pi Crinkler (CRN) family protein, pseudogene (1751 nt)   | 2   | 16   | 0   |
| PITG_12625   Pi conserved hypothetical protein (2471 nt)              | 12  | 8    | 0   |
| PITG_12627   Pi crinkler (CRN) family protein, Gypsy-disrupted, pseuc | 3   | 15   | 0   |
| PITG_12646   Pi Crinkler (CRN) family protein (2186 nt)               | 80  | 148  | 0   |
| PITG_12648   Pi conserved hypothetical protein (1371 nt)              | 36  | 63   | 0   |
| PITG_12650   Pi Crinkler (CRN) family protein, pseudogene (2507 nt)   | 218 | 850  | 1   |
| PITG_12660   Pi conserved hypothetical protein (1298 nt)              | 0   | 1    | 0   |
| PITG_12661   Pi conserved hypothetical protein (1996 nt)              | 9   | 29   | 0   |
| PITG_12662   Pi conserved hypothetical protein (681 nt)               | 22  | 19   | 0   |
| PITG_12663   Pi conserved hypothetical protein (3610 nt)              | 7   | 27   | 0   |
| PITG_12667   Pi conserved hypothetical protein (1401 nt)              | 3   | 19   | 0   |
| PITG_12668   Pi conserved hypothetical protein (614 nt)               | 4   | 7    | 0   |
| PITG_12670   Pi conserved hypothetical protein (2070 nt)              | 64  | 271  | 3   |
| PITG_12673   Pi conserved hypothetical protein (1305 nt)              | 3   | 10   | 0   |

|            |                                                               |     |     |    |
|------------|---------------------------------------------------------------|-----|-----|----|
| PITG_12674 | Pi sedoheptulokinase-like protein (2089 nt)                   | 2   | 13  | 0  |
| PITG_12675 | Pi sedoheptulokinase, putative (5416 nt)                      | 9   | 13  | 0  |
| PITG_12676 | Pi cyclin-like protein (1923 nt)                              | 72  | 91  | 0  |
| PITG_12677 | Pi conserved hypothetical protein (2021 nt)                   | 7   | 21  | 0  |
| PITG_12678 | Pi ribosome production factor 1, putative (2107 nt)           | 7   | 14  | 0  |
| PITG_12682 | Pi cytochrome c (606 nt)                                      | 95  | 103 | 11 |
| PITG_12683 | Pi conserved hypothetical protein (994 nt)                    | 3   | 10  | 0  |
| PITG_12684 | Pi CSH (456 nt)                                               | 35  | 48  | 1  |
| PITG_12686 | Pi conserved hypothetical protein (930 nt)                    | 137 | 368 | 0  |
| PITG_12687 | Pi conserved hypothetical protein (1954 nt)                   | 7   | 33  | 0  |
| PITG_12691 | Pi conserved hypothetical protein (2388 nt)                   | 9   | 34  | 0  |
| PITG_12692 | Pi conserved hypothetical protein (1687 nt)                   | 4   | 6   | 0  |
| PITG_12693 | Pi conserved hypothetical protein (715 nt)                    | 432 | 97  | 0  |
| PITG_12694 | Pi protein transport protein SEC13 (1324 nt)                  | 54  | 52  | 1  |
| PITG_12695 | Pi conserved hypothetical protein (1068 nt)                   | 138 | 161 | 0  |
| PITG_12696 | Pi conserved hypothetical protein (881 nt)                    | 41  | 66  | 0  |
| PITG_12697 | Pi 30S ribosomal protein S9 (987 nt)                          | 15  | 25  | 1  |
| PITG_12699 | Pi serine/threonine protein kinase (3258 nt)                  | 3   | 23  | 0  |
| PITG_12714 | Pi hypothetical protein (300 nt)                              | 0   | 16  | 0  |
| PITG_12727 | Pi cysteine synthase (1160 nt)                                | 43  | 146 | 3  |
| PITG_12728 | Pi conserved hypothetical protein (342 nt)                    | 6   | 43  | 0  |
| PITG_12739 | Pi hypothetical protein (1072 nt)                             | 9   | 37  | 0  |
| PITG_12742 | Pi conserved hypothetical protein (1926 nt)                   | 2   | 16  | 0  |
| PITG_12744 | Pi caltractin-like protein (891 nt)                           | 27  | 28  | 0  |
| PITG_12745 | Pi 40S ribosomal protein S17, putative (840 nt)               | 197 | 129 | 75 |
| PITG_12746 | Pi conserved hypothetical protein (760 nt)                    | 29  | 30  | 1  |
| PITG_12747 | Pi conserved hypothetical protein (1334 nt)                   | 117 | 57  | 0  |
| PITG_12749 | Pi conserved hypothetical protein (1335 nt)                   | 30  | 176 | 2  |
| PITG_12753 | Pi importin subunit alpha, putative (1916 nt)                 | 16  | 22  | 0  |
| PITG_12754 | Pi dynein light chain 2B (588 nt)                             | 45  | 84  | 0  |
| PITG_12757 | Pi alpha-ketoglutarate-dependent sulfonate dioxygenase        | 2   | 28  | 0  |
| PITG_12760 | Pi DNA binding protein, putative (1159 nt)                    | 28  | 58  | 0  |
| PITG_12761 | Pi secreted RxLR effector peptide, putative (849 nt)          | 18  | 9   | 0  |
| PITG_12763 | Pi IQ and ubiquitin-like domain-containing protein, putative  | 1   | 0   | 0  |
| PITG_12788 | Pi 12-oxophytodienoate reductase, putative (1119 nt)          | 11  | 32  | 1  |
| PITG_12793 | Pi short chain dehydrogenase, putative (510 nt)               | 3   | 13  | 0  |
| PITG_12794 | Pi conserved hypothetical protein (4368 nt)                   | 0   | 12  | 0  |
| PITG_12796 | Pi short chain dehydrogenase, putative (958 nt)               | 227 | 22  | 0  |
| PITG_12797 | Pi regulator of nonsense transcripts 2, putative (3744 nt)    | 6   | 22  | 0  |
| PITG_12798 | Pi short chain dehydrogenase, putative (766 nt)               | 142 | 17  | 0  |
| PITG_12806 | Pi phospholipase D, Pi-sPLD-like-12 (1818 nt)                 | 4   | 23  | 0  |
| PITG_12808 | Pi Amino Acid/Auxin Permease (AAAP) Family (1485 nt)          | 5   | 53  | 15 |
| PITG_12809 | Pi phospholipase D, Pi-sPLD-like-11 (1798 nt)                 | 2   | 21  | 0  |
| PITG_12811 | Pi conserved hypothetical protein (658 nt)                    | 33  | 69  | 0  |
| PITG_12812 | Pi sporangia induced conserved hypothetical protein (1000 nt) | 0   | 5   | 0  |
| PITG_12813 | Pi phytanoyl-CoA dioxygenase domain-containing protein        | 2   | 27  | 0  |
| PITG_12818 | Pi glutamate carboxypeptidase, putative (2339 nt)             | 7   | 48  | 1  |

|            |                                                          |     |      |    |
|------------|----------------------------------------------------------|-----|------|----|
| PITG_12819 | Pi carbohydrate esterase, putative (1076 nt)             | 29  | 14   | 0  |
| PITG_12820 | Pi Mitochondrial Protein Translocase (MPT) Family (44:   | 15  | 20   | 0  |
| PITG_12821 | Pi conserved hypothetical protein (2837 nt)              | 8   | 20   | 0  |
| PITG_12824 | Pi glutamate carboxypeptidase, putative (2310 nt)        | 38  | 1    | 0  |
| PITG_12826 | Pi conserved hypothetical protein (678 nt)               | 2   | 8    | 0  |
| PITG_12827 | Pi sporulation induced hypothetical protein (582 nt)     | 4   | 3    | 0  |
| PITG_12833 | Pi conserved hypothetical protein (477 nt)               | 28  | 94   | 13 |
| PITG_12834 | Pi conserved hypothetical protein (572 nt)               | 11  | 15   | 0  |
| PITG_12835 | Pi conserved hypothetical protein (530 nt)               | 7   | 23   | 0  |
| PITG_12836 | Pi UDP-N-acetylglucosamine transferase subunit ALG14     | 2   | 13   | 0  |
| PITG_12837 | Pi N-carbamoylputrescine amidase (1332 nt)               | 10  | 11   | 0  |
| PITG_12838 | Pi conserved hypothetical protein (1399 nt)              | 3   | 5    | 0  |
| PITG_12839 | Pi conserved hypothetical protein (1318 nt)              | 37  | 53   | 0  |
| PITG_12840 | Pi conserved hypothetical protein (1923 nt)              | 4   | 34   | 0  |
| PITG_12841 | Pi conserved hypothetical protein (2114 nt)              | 1   | 0    | 0  |
| PITG_12842 | Pi conserved hypothetical protein (681 nt)               | 1   | 6    | 0  |
| PITG_12843 | Pi rab proteins geranylgeranyltransferase component A    | 24  | 49   | 0  |
| PITG_12844 | Pi conserved hypothetical protein (762 nt)               | 0   | 0    | 0  |
| PITG_12845 | Pi conserved hypothetical protein (680 nt)               | 0   | 5    | 0  |
| PITG_12852 | Pi conserved hypothetical protein (1682 nt)              | 33  | 28   | 0  |
| PITG_12853 | Pi conserved hypothetical protein (1224 nt)              | 2   | 19   | 0  |
| PITG_12854 | Pi Mitochondrial Carrier (MC) Family (1014 nt)           | 105 | 256  | 0  |
| PITG_12855 | Pi conserved hypothetical protein (1188 nt)              | 10  | 17   | 0  |
| PITG_12863 | Pi cyclin-dependent kinase regulatory subunit (1007 nt)  | 48  | 54   | 1  |
| PITG_12864 | Pi asparaginyl-tRNA synthetase (1531 nt)                 | 19  | 62   | 4  |
| PITG_12870 | Pi conserved hypothetical protein (1856 nt)              | 2   | 1    | 0  |
| PITG_12871 | Pi conserved hypothetical protein (2577 nt)              | 2   | 7    | 0  |
| PITG_12872 | Pi MtN3-like protein (974 nt)                            | 28  | 0    | 1  |
| PITG_12873 | Pi conserved hypothetical protein (2030 nt)              | 2   | 6    | 0  |
| PITG_12876 | Pi RNA-binding protein, putative (924 nt)                | 6   | 14   | 0  |
| PITG_12877 | Pi DNA-directed RNA polymerase I, II, and III subunit RF | 21  | 55   | 1  |
| PITG_12878 | Pi hypothetical protein similar to sexually induced prot | 2   | 1    | 0  |
| PITG_12880 | Pi conserved hypothetical protein (1857 nt)              | 2   | 9    | 0  |
| PITG_12881 | Pi dolichyl-diphosphooligosaccharide-protein glycosyltr  | 129 | 154  | 5  |
| PITG_12882 | Pi electron transfer flavoprotein subunit alpha, mitoch  | 344 | 197  | 4  |
| PITG_12883 | Pi conserved hypothetical protein (576 nt)               | 8   | 14   | 0  |
| PITG_12884 | Pi conserved hypothetical protein (570 nt)               | 5   | 10   | 0  |
| PITG_12886 | Pi conserved hypothetical protein (819 nt)               | 347 | 1519 | 0  |
| PITG_12887 | Pi conserved hypothetical protein (1840 nt)              | 4   | 10   | 0  |
| PITG_12889 | Pi conserved hypothetical protein (846 nt)               | 6   | 12   | 0  |
| PITG_12890 | Pi conserved hypothetical protein (1289 nt)              | 0   | 1    | 0  |
| PITG_12891 | Pi conserved hypothetical protein (1209 nt)              | 1   | 7    | 0  |
| PITG_12892 | Pi thioredoxin-like protein, putative (755 nt)           | 45  | 34   | 0  |
| PITG_12901 | Pi conserved hypothetical protein (926 nt)               | 1   | 10   | 0  |
| PITG_12902 | Pi conserved hypothetical protein (1108 nt)              | 3   | 9    | 0  |
| PITG_12903 | Pi protein kinase (2275 nt)                              | 0   | 6    | 0  |
| PITG_12904 | Pi conserved hypothetical protein (618 nt)               | 33  | 143  | 6  |

|            |                                                            |     |     |    |
|------------|------------------------------------------------------------|-----|-----|----|
| PITG_12905 | Pi transmembrane protein, putative (780 nt)                | 68  | 126 | 4  |
| PITG_12911 | Pi conserved hypothetical protein (511 nt)                 | 0   | 0   | 0  |
| PITG_12912 | Pi phosphatidylinositol transfer protein beta isoform (1   | 20  | 65  | 0  |
| PITG_12913 | Pi conserved hypothetical protein (2337 nt)                | 7   | 30  | 0  |
| PITG_12914 | Pi inositol polyphosphate 5-phosphatase, putative (269     | 6   | 30  | 0  |
| PITG_12915 | Pi sorting nexin, putative (1759 nt)                       | 16  | 72  | 0  |
| PITG_12916 | Pi cysteine protease family C01A, putative (1440 nt)       | 8   | 122 | 0  |
| PITG_12919 | Pi conserved hypothetical protein (3422 nt)                | 0   | 20  | 0  |
| PITG_12920 | Pi hypothetical protein (1569 nt)                          | 112 | 169 | 0  |
| PITG_12930 | Pi porphobilinogen deaminase (1313 nt)                     | 0   | 18  | 0  |
| PITG_12931 | Pi conserved hypothetical protein (3057 nt)                | 2   | 7   | 0  |
| PITG_12933 | Pi conserved hypothetical protein (366 nt)                 | 5   | 30  | 0  |
| PITG_12935 | Pi conserved hypothetical protein (399 nt)                 | 106 | 49  | 0  |
| PITG_12938 | Pi conserved hypothetical protein (489 nt)                 | 9   | 56  | 0  |
| PITG_12939 | Pi conserved hypothetical protein (3961 nt)                | 1   | 70  | 0  |
| PITG_12942 | Pi conserved hypothetical protein (1295 nt)                | 0   | 0   | 0  |
| PITG_12946 | Pi hydroxyacylglutathione hydrolase (839 nt)               | 17  | 23  | 0  |
| PITG_12947 | Pi 40S ribosomal protein S23, putative (952 nt)            | 403 | 704 | 81 |
| PITG_12948 | Pi conserved hypothetical protein (1899 nt)                | 40  | 71  | 0  |
| PITG_12949 | Pi conserved hypothetical protein (911 nt)                 | 2   | 18  | 0  |
| PITG_12950 | Pi cAMP-specific 3',5'-cyclic phosphodiesterase, putativ   | 0   | 0   | 0  |
| PITG_12956 | Pi conserved hypothetical protein (2474 nt)                | 3   | 25  | 0  |
| PITG_12958 | Pi conserved hypothetical protein (858 nt)                 | 7   | 12  | 0  |
| PITG_12959 | Pi conserved hypothetical protein (1061 nt)                | 0   | 2   | 0  |
| PITG_12960 | Pi conserved hypothetical protein (1742 nt)                | 1   | 10  | 0  |
| PITG_12961 | Pi alanyl-tRNA synthetase, mitochondrial precursor (30     | 11  | 88  | 2  |
| PITG_12962 | Pi histone deacetylase, putative (1113 nt)                 | 1   | 7   | 0  |
| PITG_12963 | Pi conserved hypothetical protein (2475 nt)                | 0   | 17  | 0  |
| PITG_12969 | Pi conserved hypothetical protein (1500 nt)                | 0   | 13  | 0  |
| PITG_12973 | Pi conserved hypothetical protein (2173 nt)                | 16  | 64  | 0  |
| PITG_12980 | Pi conserved hypothetical protein (2345 nt)                | 5   | 41  | 0  |
| PITG_12981 | Pi conserved hypothetical protein (2214 nt)                | 2   | 30  | 0  |
| PITG_12982 | Pi conserved hypothetical protein (1242 nt)                | 0   | 0   | 0  |
| PITG_12983 | Pi synaptic vesicle glycoprotein, putative (1994 nt)       | 1   | 25  | 0  |
| PITG_12984 | Pi conserved hypothetical protein (1215 nt)                | 22  | 44  | 0  |
| PITG_12987 | Pi kinesin-like protein (2238 nt)                          | 7   | 1   | 0  |
| PITG_12988 | Pi conserved hypothetical protein (2649 nt)                | 3   | 30  | 0  |
| PITG_12989 | Pi glutathione S-transferase theta, putative (785 nt)      | 51  | 41  | 0  |
| PITG_12990 | Pi glutathione transferase, theta class (787 nt)           | 94  | 605 | 19 |
| PITG_12993 | Pi serine/threonine protein kinase (1089 nt)               | 1   | 17  | 0  |
| PITG_12994 | Pi conserved hypothetical protein (4956 nt)                | 4   | 4   | 0  |
| PITG_12996 | Pi conserved hypothetical protein (1007 nt)                | 12  | 58  | 0  |
| PITG_12997 | Pi Major Facilitator Superfamily (MFS) (1509 nt)           | 0   | 22  | 0  |
| PITG_13001 | Pi glucose transporter, putative (1485 nt)                 | 0   | 0   | 27 |
| PITG_13002 | Pi Major Facilitator Superfamily (MFS) (1476 nt)           | 6   | 3   | 35 |
| PITG_13003 | Pi glucose transporter, putative (1559 nt)                 | 15  | 0   | 26 |
| PITG_13005 | Pi solute carrier family 2, facilitated glucose transporte | 28  | 9   | 0  |

|            |                                                          |     |     |    |
|------------|----------------------------------------------------------|-----|-----|----|
| PITG_13007 | Pi conserved hypothetical protein (1381 nt)              | 4   | 42  | 0  |
| PITG_13014 | Pi proliferation-associated protein, metalloprotease fai | 5   | 95  | 22 |
| PITG_13015 | Pi conserved hypothetical protein (1792 nt)              | 8   | 32  | 0  |
| PITG_13016 | Pi pescadillo-like protein (1896 nt)                     | 5   | 18  | 0  |
| PITG_13017 | Pi ATP-dependent RNA helicase, putative (3981 nt)        | 2   | 10  | 0  |
| PITG_13019 | Pi conserved hypothetical protein (1151 nt)              | 0   | 14  | 0  |
| PITG_13020 | Pi inorganic phosphate transporter, putative (1428 nt)   | 7   | 36  | 5  |
| PITG_13022 | Pi inorganic phosphate transporter, putative (1419 nt)   | 0   | 12  | 0  |
| PITG_13024 | Pi conserved hypothetical protein (1443 nt)              | 2   | 13  | 0  |
| PITG_13029 | Pi conserved hypothetical protein (10246 nt)             | 1   | 23  | 0  |
| PITG_13030 | Pi P-type ATPase (P-ATPase) Superfamily (3897 nt)        | 0   | 5   | 0  |
| PITG_13031 | Pi vaiable flagellar number 3 (2096 nt)                  | 4   | 11  | 0  |
| PITG_13038 | Pi conserved hypothetical protein (1433 nt)              | 8   | 4   | 0  |
| PITG_13039 | Pi conserved hypothetical protein (1839 nt)              | 2   | 23  | 0  |
| PITG_13040 | Pi conserved hypothetical protein (2508 nt)              | 1   | 11  | 0  |
| PITG_13041 | Pi RNA polymerase-associated protein RTF1 (3271 nt)      | 16  | 65  | 0  |
| PITG_13042 | Pi conserved hypothetical protein (5964 nt)              | 1   | 30  | 0  |
| PITG_13043 | Pi conserved hypothetical protein (2146 nt)              | 1   | 9   | 0  |
| PITG_13044 | Pi secreted RxLR effector peptide, putative (756 nt)     | 12  | 18  | 1  |
| PITG_13048 | Pi secreted RxLR effector peptide, putative (756 nt)     | 10  | 28  | 1  |
| PITG_13050 | Pi hypothetical protein (455 nt)                         | 0   | 21  | 0  |
| PITG_13052 | Pi glycoside hydrolase, putative (1197 nt)               | 29  | 178 | 0  |
| PITG_13055 | Pi conserved hypothetical protein (1328 nt)              | 1   | 20  | 0  |
| PITG_13056 | Pi Mitochondrial Carrier (MC) Family (1210 nt)           | 1   | 13  | 0  |
| PITG_13060 | Pi conserved hypothetical protein (964 nt)               | 118 | 91  | 0  |
| PITG_13064 | Pi conserved hypothetical protein (1384 nt)              | 5   | 15  | 0  |
| PITG_13065 | Pi myosin-like protein (5690 nt)                         | 1   | 10  | 0  |
| PITG_13066 | Pi hypothetical protein (816 nt)                         | 12  | 57  | 0  |
| PITG_13068 | Pi conserved hypothetical protein (737 nt)               | 4   | 24  | 0  |
| PITG_13070 | Pi conserved hypothetical protein (633 nt)               | 5   | 67  | 0  |
| PITG_13074 | Pi cysteine protease family C01A, putative (1277 nt)     | 20  | 89  | 0  |
| PITG_13077 | Pi geranylgeranyl pyrophosphate synthetase (1034 nt)     | 0   | 25  | 0  |
| PITG_13078 | Pi conserved hypothetical protein (592 nt)               | 5   | 29  | 0  |
| PITG_13079 | Pi peptidylprolyl isomerase domain and WD repeat-cor     | 0   | 15  | 0  |
| PITG_13083 | Pi conserved hypothetical protein (786 nt)               | 4   | 29  | 0  |
| PITG_13084 | Pi conserved hypothetical protein (795 nt)               | 2   | 45  | 0  |
| PITG_13096 | Pi conserved hypothetical protein (2588 nt)              | 3   | 11  | 0  |
| PITG_13097 | Pi conserved hypothetical protein (543 nt)               | 26  | 19  | 0  |
| PITG_13101 | Pi fimbrin-like protein (2444 nt)                        | 34  | 81  | 0  |
| PITG_13102 | Pi fimbrin-like protein (2322 nt)                        | 12  | 32  | 0  |
| PITG_13103 | Pi fimbrin-like protein (2695 nt)                        | 10  | 15  | 0  |
| PITG_13111 | Pi conserved hypothetical protein (3817 nt)              | 2   | 14  | 4  |
| PITG_13112 | Pi conserved hypothetical protein (1738 nt)              | 7   | 104 | 0  |
| PITG_13114 | Pi elicitin-like protein (1288 nt)                       | 8   | 24  | 0  |
| PITG_13115 | Pi conserved hypothetical protein (1254 nt)              | 0   | 0   | 0  |
| PITG_13116 | Pi triosephosphate isomerase (857 nt)                    | 51  | 97  | 1  |
| PITG_13120 | Pi transmembrane protein, putative (1527 nt)             | 0   | 12  | 0  |

|                                                                        |     |     |   |
|------------------------------------------------------------------------|-----|-----|---|
| PITG_13122   Pi ATP-binding Cassette (ABC) Superfamily (4446 nt)       | 1   | 141 | 0 |
| PITG_13128   Pi 7-dehydrocholesterol reductase (1375 nt)               | 1   | 14  | 0 |
| PITG_13132   Pi caltractin (659 nt)                                    | 23  | 158 | 2 |
| PITG_13134   Pi conserved hypothetical protein (543 nt)                | 1   | 15  | 0 |
| PITG_13135   Pi copper-transporting ATPase, putative (3057 nt)         | 2   | 29  | 0 |
| PITG_13138   Pi conserved hypothetical protein (2544 nt)               | 2   | 8   | 0 |
| PITG_13139   Pi threonine synthase (1587 nt)                           | 23  | 35  | 0 |
| PITG_13146   Pi RNA pseudouridylate synthase-like protein (1798 nt)    | 2   | 17  | 0 |
| PITG_13150   Pi phosphatidylinositol kinase (7680 nt)                  | 0   | 14  | 0 |
| PITG_13151   Pi protein transporter Sec24 (4393 nt)                    | 3   | 24  | 0 |
| PITG_13152   Pi conserved hypothetical protein (1680 nt)               | 17  | 133 | 0 |
| PITG_13153   Pi GTP-binding protein, putative (1780 nt)                | 19  | 59  | 0 |
| PITG_13155   Pi conserved hypothetical protein (921 nt)                | 0   | 26  | 0 |
| PITG_13157   Pi suppressor of necrosis 1, putative (1074 nt)           | 24  | 0   | 2 |
| PITG_13159   Pi conserved hypothetical protein (1943 nt)               | 14  | 78  | 0 |
| PITG_13160   Pi conserved hypothetical protein (930 nt)                | 1   | 0   | 0 |
| PITG_13164   Pi metalloprotease family M48X, putative (1196 nt)        | 2   | 15  | 0 |
| PITG_13165   Pi D-3-phosphoglycerate dehydrogenase, putative (192      | 11  | 20  | 0 |
| PITG_13167   Pi conserved hypothetical protein (1874 nt)               | 6   | 28  | 0 |
| PITG_13168   Pi conserved hypothetical protein (12990 nt)              | 2   | 47  | 0 |
| PITG_13171   Pi conserved hypothetical protein (1722 nt)               | 1   | 40  | 0 |
| PITG_13172   Pi GPI mannosyltransferase, putative (1365 nt)            | 1   | 12  | 0 |
| PITG_13173   Pi conserved hypothetical protein (1493 nt)               | 3   | 17  | 0 |
| PITG_13174   Pi translation initiation factor IF-2, putative (2742 nt) | 1   | 11  | 0 |
| PITG_13175   Pi ATP-binding Cassette (ABC) Superfamily (5847 nt)       | 0   | 0   | 0 |
| PITG_13176   Pi diaminopimelate decarboxylase, putative (1249 nt)      | 0   | 12  | 1 |
| PITG_13177   Pi elongation of very long chain fatty acids protein, put | 25  | 164 | 1 |
| PITG_13178   Pi elongation of very long chain fatty acids protein, put | 6   | 45  | 4 |
| PITG_13182   Pi conserved hypothetical protein (1085 nt)               | 1   | 21  | 0 |
| PITG_13183   Pi sporangia induced conserved hypothetical protein (6    | 0   | 1   | 0 |
| PITG_13185   Pi conserved hypothetical protein (1501 nt)               | 8   | 23  | 0 |
| PITG_13188   Pi conserved hypothetical protein (2010 nt)               | 9   | 12  | 0 |
| PITG_13196   Pi conserved hypothetical protein (1584 nt)               | 14  | 17  | 0 |
| PITG_13198   Pi conserved hypothetical protein (815 nt)                | 0   | 0   | 0 |
| PITG_13201   Pi conserved hypothetical protein (2461 nt)               | 23  | 13  | 0 |
| PITG_13202   Pi zinc transporter, putative (1965 nt)                   | 6   | 18  | 0 |
| PITG_13204   Pi conserved hypothetical protein (802 nt)                | 178 | 303 | 3 |
| PITG_13223   Pi cysteine desulfurase, putative (1380 nt)               | 3   | 16  | 0 |
| PITG_13224   Pi beclin-1-like protein (2184 nt)                        | 1   | 18  | 0 |
| PITG_13225   Pi conserved hypothetical protein (840 nt)                | 71  | 200 | 0 |
| PITG_13226   Pi conserved hypothetical protein (1765 nt)               | 8   | 212 | 0 |
| PITG_13228   Pi conserved hypothetical protein (2007 nt)               | 3   | 23  | 0 |
| PITG_13231   Pi cobalamin synthesis protein, putative (1371 nt)        | 0   | 0   | 0 |
| PITG_13234   Pi conserved hypothetical protein (1734 nt)               | 0   | 14  | 0 |
| PITG_13235   Pi putative P-type ATPase (2964 nt)                       | 2   | 24  | 0 |
| PITG_13237   Pi alpha-actinin-1, putative (3164 nt)                    | 5   | 67  | 1 |
| PITG_13239   Pi Mitochondrial Carrier (MC) Family (1073 nt)            | 4   | 17  | 0 |

|            |                                                          |     |      |    |
|------------|----------------------------------------------------------|-----|------|----|
| PITG_13240 | Pi conserved hypothetical protein (612 nt)               | 1   | 11   | 0  |
| PITG_13245 | Pi glycerophosphodiesterase, putative (3322 nt)          | 2   | 32   | 0  |
| PITG_13248 | Pi conserved hypothetical protein (1178 nt)              | 37  | 84   | 0  |
| PITG_13249 | Pi conserved hypothetical protein (1325 nt)              | 3   | 13   | 0  |
| PITG_13250 | Pi Mitochondrial Protein Translocase (MPT) Family (10    | 2   | 25   | 1  |
| PITG_13252 | Pi conserved hypothetical protein (1183 nt)              | 5   | 36   | 1  |
| PITG_13253 | Pi hypothetical protein (1914 nt)                        | 2   | 4    | 0  |
| PITG_13255 | Pi conserved hypothetical protein (3044 nt)              | 2   | 13   | 0  |
| PITG_13256 | Pi conserved hypothetical protein (995 nt)               | 7   | 47   | 1  |
| PITG_13257 | Pi peroxisomal hydratase-dehydrogenase-epimerase, p      | 4   | 38   | 0  |
| PITG_13258 | Pi Mitochondrial Carrier (MC) Family (894 nt)            | 29  | 46   | 0  |
| PITG_13259 | Pi conserved hypothetical protein (1083 nt)              | 1   | 19   | 0  |
| PITG_13260 | Pi tenascin-like protein (3393 nt)                       | 0   | 1    | 0  |
| PITG_13262 | Pi cystathionine beta-synthase (1582 nt)                 | 77  | 88   | 1  |
| PITG_13264 | Pi conserved hypothetical protein (1151 nt)              | 0   | 0    | 0  |
| PITG_13265 | Pi adenosine kinase (1038 nt)                            | 3   | 30   | 7  |
| PITG_13267 | Pi conserved hypothetical protein (1109 nt)              | 0   | 1    | 0  |
| PITG_13268 | Pi p21-activated protein kinase-interacting protein, put | 2   | 7    | 0  |
| PITG_13269 | Pi conserved hypothetical protein (1039 nt)              | 0   | 1    | 0  |
| PITG_13270 | Pi palmitoyltransferase, putative (1738 nt)              | 11  | 33   | 0  |
| PITG_13271 | Pi conserved hypothetical protein (366 nt)               | 121 | 1106 | 16 |
| PITG_13272 | Pi conserved hypothetical protein (768 nt)               | 3   | 25   | 0  |
| PITG_13273 | Pi conserved hypothetical protein (3811 nt)              | 0   | 19   | 0  |
| PITG_13274 | Pi hypothetical protein (558 nt)                         | 0   | 1    | 0  |
| PITG_13275 | Pi conserved hypothetical protein (954 nt)               | 18  | 34   | 1  |
| PITG_13276 | Pi conserved hypothetical protein (1167 nt)              | 3   | 8    | 0  |
| PITG_13277 | Pi conserved hypothetical protein (1592 nt)              | 11  | 89   | 0  |
| PITG_13282 | Pi ATP-binding Cassette (ABC) Superfamily (4764 nt)      | 1   | 120  | 0  |
| PITG_13283 | Pi ATP-binding Cassette (ABC) superfamily (897 nt)       | 6   | 16   | 0  |
| PITG_13284 | Pi conserved hypothetical protein (1246 nt)              | 9   | 25   | 0  |
| PITG_13285 | Pi hypothetical protein (1188 nt)                        | 0   | 13   | 0  |
| PITG_13286 | Pi conserved hypothetical protein (521 nt)               | 81  | 111  | 0  |
| PITG_13289 | Pi thioredoxin-like protein (1353 nt)                    | 3   | 27   | 0  |
| PITG_13290 | Pi conserved hypothetical protein (306 nt)               | 36  | 11   | 0  |
| PITG_13291 | Pi dolichyl pyrophosphate Glc1Man9GlcNAc2 alpha-1,3      | 3   | 14   | 0  |
| PITG_13296 | Pi aldose 1-epimerase, putative (947 nt)                 | 3   | 41   | 2  |
| PITG_13297 | Pi conserved hypothetical protein (1521 nt)              | 2   | 13   | 0  |
| PITG_13298 | Pi conserved hypothetical protein (2908 nt)              | 2   | 14   | 0  |
| PITG_13299 | Pi conserved hypothetical protein (1580 nt)              | 0   | 5    | 0  |
| PITG_13300 | Pi RNA-binding protein NOB1 (1601 nt)                    | 2   | 7    | 0  |
| PITG_13301 | Pi H - or Na -translocating F-type, V-type and A-type AT | 6   | 63   | 14 |
| PITG_13302 | Pi calcineurin-like phosphoesterase (2485 nt)            | 6   | 23   | 0  |
| PITG_13303 | Pi conserved hypothetical protein (1686 nt)              | 3   | 9    | 0  |
| PITG_13304 | Pi conserved hypothetical protein (810 nt)               | 1   | 0    | 0  |
| PITG_13305 | Pi aldose 1-epimerase, putative (903 nt)                 | 1   | 15   | 0  |
| PITG_13306 | Pi secreted RxLR effector peptide, putative (300 nt)     | 118 | 15   | 0  |
| PITG_13307 | Pi conserved hypothetical protein (737 nt)               | 161 | 84   | 0  |

|            |                                                         |     |     |    |
|------------|---------------------------------------------------------|-----|-----|----|
| PITG_13309 | Pi conserved hypothetical protein (1365 nt)             | 7   | 8   | 0  |
| PITG_13312 | Pi 40S ribosomal protein S25, putative (1154 nt)        | 773 | 832 | 83 |
| PITG_13314 | Pi conserved hypothetical protein (1006 nt)             | 6   | 43  | 0  |
| PITG_13316 | Pi conserved hypothetical protein (1400 nt)             | 0   | 0   | 0  |
| PITG_13317 | Pi conserved hypothetical protein (1118 nt)             | 22  | 26  | 0  |
| PITG_13319 | Pi myosin-like protein (3989 nt)                        | 1   | 22  | 0  |
| PITG_13320 | Pi conserved hypothetical protein (279 nt)              | 2   | 22  | 0  |
| PITG_13321 | Pi conserved hypothetical protein (1411 nt)             | 1   | 2   | 0  |
| PITG_13323 | Pi spore induced hypothetical protein (651 nt)          | 0   | 4   | 0  |
| PITG_13324 | Pi conserved hypothetical protein (1113 nt)             | 16  | 176 | 0  |
| PITG_13327 | Pi conserved hypothetical protein (852 nt)              | 1   | 0   | 0  |
| PITG_13335 | Pi conserved hypothetical protein (1147 nt)             | 11  | 140 | 0  |
| PITG_13336 | Pi DNA2-like helicase (4864 nt)                         | 0   | 23  | 0  |
| PITG_13337 | Pi conserved hypothetical protein (1459 nt)             | 0   | 18  | 0  |
| PITG_13340 | Pi Folate-Biopterin Transporter (FBT) Family (1773 nt)  | 2   | 25  | 0  |
| PITG_13341 | Pi 2,4-dienoyl-CoA reductase, mitochondrial precursor   | 17  | 200 | 0  |
| PITG_13342 | Pi conserved hypothetical protein (930 nt)              | 12  | 16  | 0  |
| PITG_13344 | Pi Cytochrome Oxidase Biogenesis (Oxa1) Family (1380    | 1   | 15  | 0  |
| PITG_13345 | Pi conserved hypothetical protein (1800 nt)             | 3   | 73  | 0  |
| PITG_13346 | Pi conserved hypothetical protein (1176 nt)             | 0   | 4   | 0  |
| PITG_13347 | Pi IMP-specific 5'-nucleotidase, putative (1463 nt)     | 7   | 68  | 0  |
| PITG_13353 | Pi hypothetical protein (375 nt)                        | 5   | 12  | 0  |
| PITG_13354 | Pi conserved hypothetical protein (2571 nt)             | 4   | 7   | 0  |
| PITG_13362 | Pi microtubule-associated protein, putative (7408 nt)   | 0   | 12  | 0  |
| PITG_13364 | Pi conserved hypothetical protein (708 nt)              | 16  | 21  | 0  |
| PITG_13365 | Pi Poly(U)-binding-splicing factor PUF60, putative (170 | 7   | 30  | 0  |
| PITG_13366 | Pi conserved hypothetical protein (3990 nt)             | 27  | 73  | 0  |
| PITG_13367 | Pi XRP2-like protein (1462 nt)                          | 10  | 7   | 0  |
| PITG_13368 | Pi cyclin-like protein (1846 nt)                        | 7   | 36  | 0  |
| PITG_13370 | Pi conserved hypothetical protein (1551 nt)             | 241 | 316 | 10 |
| PITG_13371 | Pi 60S ribosomal protein L31, putative (762 nt)         | 421 | 830 | 64 |
| PITG_13372 | Pi conserved hypothetical protein (845 nt)              | 4   | 23  | 0  |
| PITG_13373 | Pi conserved hypothetical protein (1037 nt)             | 17  | 296 | 0  |
| PITG_13376 | Pi conserved hypothetical protein (1462 nt)             | 6   | 31  | 0  |
| PITG_13378 | Pi conserved hypothetical protein (309 nt)              | 0   | 3   | 0  |
| PITG_13381 | Pi conserved hypothetical protein (1234 nt)             | 60  | 574 | 0  |
| PITG_13382 | Pi conserved hypothetical protein (1221 nt)             | 83  | 252 | 0  |
| PITG_13383 | Pi glycoprotein elicitor-like protein (967 nt)          | 1   | 17  | 0  |
| PITG_13386 | Pi conserved hypothetical protein (1314 nt)             | 1   | 22  | 0  |
| PITG_13387 | Pi conserved hypothetical protein (898 nt)              | 90  | 277 | 1  |
| PITG_13389 | Pi conserved hypothetical protein (962 nt)              | 0   | 7   | 0  |
| PITG_13390 | Pi conserved hypothetical protein (1345 nt)             | 0   | 5   | 0  |
| PITG_13391 | Pi trans-acting enoyl reductase, putative (1404 nt)     | 2   | 39  | 0  |
| PITG_13392 | Pi conserved hypothetical protein (677 nt)              | 29  | 99  | 0  |
| PITG_13393 | Pi RNA-binding protein, putative (1978 nt)              | 10  | 51  | 0  |
| PITG_13395 | Pi P-type ATPase (P-ATPase) Superfamily (5061 nt)       | 1   | 21  | 0  |
| PITG_13396 | Pi conserved hypothetical protein (587 nt)              | 338 | 297 | 1  |



|            |                                                          |    |     |   |
|------------|----------------------------------------------------------|----|-----|---|
| PITG_13397 | Pi protein kinase, putative (2544 nt)                    | 21 | 27  | 0 |
| PITG_13398 | Pi tubulin-tyrosine ligase family, putative (3275 nt)    | 0  | 16  | 0 |
| PITG_13399 | Pi asparagine synthetase (1788 nt)                       | 9  | 14  | 0 |
| PITG_13402 | Pi cystathionine beta-lyase (2009 nt)                    | 2  | 45  | 0 |
| PITG_13403 | Pi sphingolipid delta(4)-desaturase DES1-like protein (1 | 14 | 44  | 0 |
| PITG_13404 | Pi DNA-directed RNA polymerase II 135 kDa polypeptid     | 2  | 32  | 1 |
| PITG_13405 | Pi conserved hypothetical protein (2746 nt)              | 11 | 100 | 0 |
| PITG_13406 | Pi conserved hypothetical protein (1294 nt)              | 3  | 29  | 0 |
| PITG_13409 | Pi serine protease family S33, putative (1986 nt)        | 1  | 4   | 0 |
| PITG_13412 | Pi conserved hypothetical protein (1758 nt)              | 3  | 16  | 0 |
| PITG_13413 | Pi conserved hypothetical protein (1419 nt)              | 3  | 8   | 0 |
| PITG_13414 | Pi conserved hypothetical protein (1014 nt)              | 1  | 1   | 0 |
| PITG_13415 | Pi protein kinase, putative (2746 nt)                    | 4  | 19  | 0 |
| PITG_13416 | Pi ubiquinone biosynthesis protein COQ4 (849 nt)         | 6  | 15  | 0 |
| PITG_13417 | Pi conserved hypothetical protein (1464 nt)              | 5  | 20  | 0 |
| PITG_13419 | Pi conserved hypothetical protein (1043 nt)              | 2  | 10  | 0 |
| PITG_13421 | Pi tripeptidyl-peptidase, putative (2214 nt)             | 1  | 17  | 0 |
| PITG_13422 | Pi conserved hypothetical protein (2145 nt)              | 9  | 107 | 0 |
| PITG_13423 | Pi conserved hypothetical protein (1721 nt)              | 14 | 84  | 0 |
| PITG_13426 | Pi conserved hypothetical protein (2646 nt)              | 1  | 17  | 0 |
| PITG_13427 | Pi glutathione reductase (1624 nt)                       | 5  | 31  | 0 |
| PITG_13428 | Pi conserved hypothetical protein (792 nt)               | 31 | 79  | 0 |
| PITG_13430 | Pi conserved hypothetical protein (960 nt)               | 0  | 11  | 0 |
| PITG_13431 | Pi WD domain-containing protein, putative (1388 nt)      | 6  | 25  | 0 |
| PITG_13432 | Pi conserved hypothetical protein (1026 nt)              | 4  | 10  | 0 |
| PITG_13433 | Pi conserved hypothetical protein (1183 nt)              | 2  | 9   | 0 |
| PITG_13434 | Pi sel-1 family protein (1821 nt)                        | 6  | 31  | 0 |
| PITG_13435 | Pi conserved hypothetical protein (3146 nt)              | 1  | 16  | 0 |
| PITG_13436 | Pi conserved hypothetical protein (463 nt)               | 0  | 12  | 0 |
| PITG_13437 | Pi metalloprotease family M16C, putative (3147 nt)       | 0  | 13  | 0 |
| PITG_13438 | Pi conserved hypothetical protein (1355 nt)              | 34 | 114 | 0 |
| PITG_13439 | Pi conserved hypothetical protein (775 nt)               | 4  | 25  | 0 |
| PITG_13440 | Pi conserved hypothetical protein (1376 nt)              | 4  | 16  | 0 |
| PITG_13447 | Pi conserved hypothetical protein (1231 nt)              | 0  | 19  | 0 |
| PITG_13456 | Pi conserved hypothetical protein (391 nt)               | 3  | 0   | 0 |
| PITG_13458 | Pi protein kinase, putative (1992 nt)                    | 5  | 21  | 0 |
| PITG_13459 | Pi conserved hypothetical protein (676 nt)               | 13 | 21  | 1 |
| PITG_13460 | Pi conserved hypothetical protein (2227 nt)              | 3  | 18  | 0 |
| PITG_13461 | Pi sporangia induced deflagellation-inducible protein (4 | 6  | 24  | 0 |
| PITG_13462 | Pi carbohydrate-binding protein, putative (1542 nt)      | 3  | 76  | 0 |
| PITG_13464 | Pi conserved hypothetical protein (2037 nt)              | 0  | 11  | 0 |
| PITG_13468 | Pi hypothetical protein (2031 nt)                        | 22 | 25  | 0 |
| PITG_13469 | Pi hypothetical protein (765 nt)                         | 13 | 2   | 4 |
| PITG_13473 | Pi Major Facilitator Superfamily (MFS) (1559 nt)         | 7  | 0   | 0 |
| PITG_13483 | Pi conserved hypothetical protein (1657 nt)              | 9  | 80  | 0 |
| PITG_13484 | Pi crinkler (CRN) domain-containing protein (1987 nt)    | 0  | 12  | 0 |
| PITG_13486 | Pi dTDP-D-glucose 4,6-dehydratase, putative (1332 nt)    | 3  | 10  | 0 |

|                                                                       |     |     |    |
|-----------------------------------------------------------------------|-----|-----|----|
| PITG_13488   Pi serine protease family S08A, putative (1548 nt)       | 19  | 14  | 0  |
| PITG_13490   Pi urocanase, putative (2405 nt)                         | 13  | 76  | 1  |
| PITG_13491   Pi calcineurin-like phosphoesterase, putative (1645 nt)  | 8   | 87  | 0  |
| PITG_13492   Pi conserved hypothetical protein (1837 nt)              | 4   | 41  | 0  |
| PITG_13493   Pi conserved hypothetical protein (1342 nt)              | 10  | 32  | 0  |
| PITG_13494   Pi elicitor-like transglutaminase, putative (1278 nt)    | 0   | 0   | 0  |
| PITG_13496   Pi elicitor-like transglutaminase, putative (2063 nt)    | 0   | 4   | 0  |
| PITG_13497   Pi elicitor-like transglutaminase, putative (2006 nt)    | 5   | 102 | 0  |
| PITG_13499   Pi MtN3-like protein (779 nt)                            | 2   | 8   | 0  |
| PITG_13500   Pi 40S ribosomal protein S4 (1129 nt)                    | 606 | 814 | 64 |
| PITG_13503   Pi secreted RxLR effector peptide, putative (1678 nt)    | 2   | 5   | 0  |
| PITG_13504   Pi hypothetical protein (396 nt)                         | 7   | 30  | 0  |
| PITG_13505   Pi hypothetical protein (766 nt)                         | 34  | 95  | 0  |
| PITG_13509   Pi secreted RxLR effector peptide, putative (660 nt)     | 68  | 7   | 22 |
| PITG_13511   Pi phosphatidylinositol-4-phosphate-5-kinase (PIPK-D6,   | 2   | 0   | 0  |
| PITG_13512   Pi peptidyl-prolyl cis-trans isomerase B precursor (1169 | 3   | 18  | 0  |
| PITG_13520   Pi conserved hypothetical protein (559 nt)               | 0   | 1   | 7  |
| PITG_13523   Pi conserved hypothetical protein (1599 nt)              | 7   | 17  | 0  |
| PITG_13527   Pi conserved hypothetical protein (1548 nt)              | 4   | 16  | 0  |
| PITG_13528   Pi conserved hypothetical protein (1300 nt)              | 13  | 316 | 1  |
| PITG_13529   Pi secreted RxLR effector peptide, putative (489 nt)     | 30  | 24  | 0  |
| PITG_13539   Pi hypothetical protein (927 nt)                         | 2   | 33  | 0  |
| PITG_13540   Pi hypothetical protein (3066 nt)                        | 2   | 50  | 0  |
| PITG_13544   Pi conserved hypothetical protein (2742 nt)              | 25  | 15  | 0  |
| PITG_13545   Pi conserved hypothetical protein (1320 nt)              | 516 | 40  | 0  |
| PITG_13546   Pi sphingosine kinase, putative (1761 nt)                | 9   | 33  | 0  |
| PITG_13548   Pi conserved hypothetical protein (495 nt)               | 3   | 20  | 0  |
| PITG_13551   Pi creatine kinase, mitochondrial precursor (2465 nt)    | 1   | 4   | 0  |
| PITG_13554   Pi ATP-binding Cassette (ABC) Superfamily (1521 nt)      | 16  | 99  | 0  |
| PITG_13558   Pi ATP-binding Cassette (ABC) Superfamily (4053 nt)      | 5   | 85  | 0  |
| PITG_13560   Pi endoglucanase, putative (700 nt)                      | 0   | 0   | 5  |
| PITG_13562   Pi conserved hypothetical protein (1052 nt)              | 0   | 0   | 0  |
| PITG_13567   Pi endo-1,3(4)-beta-glucanase, putative (2700 nt)        | 10  | 17  | 0  |
| PITG_13569   Pi endo-1,3(4)-beta-glucanase, putative (2985 nt)        | 21  | 12  | 0  |
| PITG_13571   Pi endo-1,3(4)-beta-glucanase, putative (3132 nt)        | 20  | 10  | 0  |
| PITG_13574   Pi hypothetical protein (773 nt)                         | 5   | 11  | 0  |
| PITG_13575   Pi ATP-binding Cassette (ABC) Superfamily (4077 nt)      | 2   | 29  | 4  |
| PITG_13576   Pi ATP-binding Cassette (ABC) Superfamily (4047 nt)      | 0   | 31  | 0  |
| PITG_13579   Pi ATP-binding Cassette (ABC) Superfamily (4047 nt)      | 0   | 31  | 0  |
| PITG_13581   Pi ATP-binding Cassette (ABC) Superfamily (4050 nt)      | 0   | 0   | 0  |
| PITG_13582   Pi glycosyl hydrolase, putative (3124 nt)                | 0   | 24  | 0  |
| PITG_13583   Pi ATP-binding Cassette (ABC) Superfamily (4243 nt)      | 0   | 0   | 0  |
| PITG_13586   Pi pterin-4-alpha-carbinolamine dehydratase (416 nt)     | 5   | 39  | 0  |
| PITG_13588   Pi conserved hypothetical protein (317 nt)               | 16  | 53  | 0  |
| PITG_13590   Pi ATP-binding Cassette (ABC) superfamily (4143 nt)      | 6   | 74  | 0  |
| PITG_13595   Pi conserved hypothetical protein (714 nt)               | 3   | 3   | 0  |
| PITG_13596   Pi biotin synthase (1332 nt)                             | 26  | 134 | 6  |

|            |                                                             |      |      |     |
|------------|-------------------------------------------------------------|------|------|-----|
| PITG_13597 | Pi conserved hypothetical protein (861 nt)                  | 173  | 1296 | 0   |
| PITG_13600 | Pi eukaryotic translation initiation factor 3 subunit, put  | 92   | 52   | 3   |
| PITG_13601 | Pi cleavage induced hypothetical protein (1338 nt)          | 0    | 0    | 0   |
| PITG_13603 | Pi conserved hypothetical protein (683 nt)                  | 0    | 0    | 0   |
| PITG_13604 | Pi P-type ATPase (P-ATPase) Superfamily (4258 nt)           | 0    | 0    | 0   |
| PITG_13605 | Pi zinc phosphodiesterase ELAC protein 2, putative (10!     | 2    | 10   | 0   |
| PITG_13607 | Pi translation initiation factor eIF-2B subunit delta, put: | 8    | 25   | 0   |
| PITG_13609 | Pi conserved hypothetical protein (3362 nt)                 | 0    | 18   | 0   |
| PITG_13613 | Pi P-type ATPase (P-ATPase) Superfamily (2145 nt)           | 9    | 6    | 0   |
| PITG_13614 | Pi malate dehydrogenase, mitochondrial precursor (11        | 29   | 95   | 26  |
| PITG_13616 | Pi conserved hypothetical protein (983 nt)                  | 53   | 46   | 0   |
| PITG_13617 | Pi caltractin (633 nt)                                      | 53   | 101  | 0   |
| PITG_13618 | Pi WD repeat protein pop3 (1134 nt)                         | 5    | 21   | 0   |
| PITG_13619 | Pi conserved hypothetical protein (650 nt)                  | 0    | 13   | 0   |
| PITG_13620 | Pi conserved hypothetical protein (3219 nt)                 | 13   | 32   | 0   |
| PITG_13621 | Pi conserved hypothetical protein (511 nt)                  | 4    | 10   | 0   |
| PITG_13622 | Pi conserved hypothetical protein (2319 nt)                 | 17   | 32   | 0   |
| PITG_13623 | Pi conserved hypothetical protein (1004 nt)                 | 2    | 7    | 0   |
| PITG_13625 | Pi conserved hypothetical protein (672 nt)                  | 6    | 17   | 0   |
| PITG_13631 | Pi cytochrome P450, putative (1435 nt)                      | 13   | 11   | 0   |
| PITG_13634 | Pi conserved hypothetical protein (1968 nt)                 | 3    | 42   | 0   |
| PITG_13638 | Pi glucanase inhibitor protein 1 (777 nt)                   | 0    | 0    | 4   |
| PITG_13641 | Pi glucanase inhibitor protein, putative (771 nt)           | 17   | 80   | 13  |
| PITG_13644 | Pi conserved hypothetical protein (1181 nt)                 | 4    | 36   | 0   |
| PITG_13650 | Pi conserved hypothetical protein (693 nt)                  | 5    | 10   | 0   |
| PITG_13651 | Pi conserved hypothetical protein (915 nt)                  | 19   | 37   | 0   |
| PITG_13654 | Pi conserved hypothetical protein (627 nt)                  | 17   | 14   | 0   |
| PITG_13655 | Pi glucanase inhibitor protein, putative (774 nt)           | 2    | 0    | 45  |
| PITG_13657 | Pi conserved hypothetical protein (936 nt)                  | 6    | 61   | 1   |
| PITG_13658 | Pi methionine aminopeptidase, putative (834 nt)             | 23   | 65   | 0   |
| PITG_13659 | Pi conserved hypothetical protein (699 nt)                  | 9    | 35   | 0   |
| PITG_13660 | Pi conserved hypothetical protein (2658 nt)                 | 42   | 1126 | 0   |
| PITG_13661 | Pi conserved hypothetical protein (1053 nt)                 | 6    | 9    | 0   |
| PITG_13663 | Pi conserved hypothetical protein (1842 nt)                 | 3    | 18   | 0   |
| PITG_13665 | Pi conserved hypothetical protein (543 nt)                  | 81   | 124  | 0   |
| PITG_13666 | Pi conserved hypothetical protein (2062 nt)                 | 4    | 34   | 0   |
| PITG_13669 | Pi serine/threonine protein kinase (2411 nt)                | 3    | 21   | 0   |
| PITG_13671 | Pi glucanase inhibitor protein 3 (839 nt)                   | 370  | 111  | 0   |
| PITG_13672 | Pi conserved hypothetical protein (1059 nt)                 | 39   | 27   | 0   |
| PITG_13673 | Pi conserved hypothetical protein (2148 nt)                 | 105  | 95   | 0   |
| PITG_13674 | Pi conserved hypothetical protein (717 nt)                  | 0    | 0    | 0   |
| PITG_13675 | Pi conserved hypothetical protein (1029 nt)                 | 1    | 7    | 0   |
| PITG_13676 | Pi conserved hypothetical protein (555 nt)                  | 1284 | 579  | 37  |
| PITG_13677 | Pi phosphatidylinositol-4-phosphate-5-kinase (PIPK-D7,      | 11   | 134  | 0   |
| PITG_13678 | Pi conserved hypothetical protein (1343 nt)                 | 5    | 15   | 0   |
| PITG_13679 | Pi conserved hypothetical protein (2052 nt)                 | 18   | 92   | 0   |
| PITG_13681 | Pi 40S ribosomal protein S26, putative (675 nt)             | 1054 | 1507 | 107 |

|            |                                                          |     |      |     |
|------------|----------------------------------------------------------|-----|------|-----|
| PITG_13682 | Pi hypothetical protein (564 nt)                         | 90  | 189  | 17  |
| PITG_13683 | Pi NADH dehydrogenase flavoprotein 2, mitochondrial      | 41  | 114  | 8   |
| PITG_13686 | Pi Sulfate Permease (SulP) Family (3498 nt)              | 13  | 27   | 0   |
| PITG_13687 | Pi pre-mRNA-splicing factor ATP-dependent RNA helica     | 1   | 14   | 0   |
| PITG_13689 | Pi crinkler (CRN) family protein, Gypsy-disrupted, pseuc | 71  | 12   | 1   |
| PITG_13699 | Pi crinkler (CRN) family protein, pseudogene (2083 nt)   | 418 | 3376 | 110 |
| PITG_13713 | Pi MICAL-like protein (3165 nt)                          | 10  | 8    | 0   |
| PITG_13715 | Pi transmembrane protein, putative (3401 nt)             | 8   | 28   | 0   |
| PITG_13716 | Pi conserved hypothetical protein (1034 nt)              | 1   | 11   | 0   |
| PITG_13717 | Pi transmembrane protein, putative (1502 nt)             | 17  | 50   | 0   |
| PITG_13718 | Pi conserved hypothetical protein (1401 nt)              | 2   | 22   | 0   |
| PITG_13719 | Pi DNA excision repair protein ERCC-1 (946 nt)           | 2   | 16   | 0   |
| PITG_13721 | Pi alpha,alpha-trehalose-phosphate synthase [UDP-fori    | 2   | 24   | 0   |
| PITG_13722 | Pi conserved hypothetical protein (1657 nt)              | 2   | 10   | 0   |
| PITG_13724 | Pi cysteine protease family C48, putative (1388 nt)      | 4   | 5    | 0   |
| PITG_13726 | Pi Ca2 :Cation Antiporter (CaCA) Family (1305 nt)        | 6   | 36   | 0   |
| PITG_13727 | Pi conserved hypothetical protein (1417 nt)              | 7   | 44   | 0   |
| PITG_13728 | Pi NADH dehydrogenase [ubiquinone] iron-sulfur prote     | 24  | 95   | 3   |
| PITG_13729 | Pi conserved hypothetical protein (1097 nt)              | 117 | 215  | 2   |
| PITG_13730 | Pi Mitochondrial Carrier (MC) Family (1213 nt)           | 0   | 5    | 0   |
| PITG_13732 | Pi dual specificity phosphatase, putative (1324 nt)      | 1   | 7    | 0   |
| PITG_13736 | Pi diacylglycerol kinase (2249 nt)                       | 2   | 10   | 0   |
| PITG_13737 | Pi protoplast secreted protein 2 precursor (697 nt)      | 53  | 1528 | 2   |
| PITG_13738 | Pi conserved hypothetical protein (2194 nt)              | 0   | 25   | 0   |
| PITG_13739 | Pi conserved hypothetical protein (318 nt)               | 8   | 9    | 0   |
| PITG_13745 | Pi vacuolar protein sorting-associated protein, putative | 3   | 35   | 0   |
| PITG_13746 | Pi hypothetical protein (936 nt)                         | 8   | 11   | 0   |
| PITG_13747 | Pi Drug/Metabolite Transporter (DMT) Superfamily (12     | 19  | 22   | 0   |
| PITG_13748 | Pi ubiquitin-conjugating enzyme E2, putative (776 nt)    | 82  | 159  | 3   |
| PITG_13749 | Pi 2,3-bisphosphoglycerate-dependent phosphoglycera      | 8   | 14   | 1   |
| PITG_13750 | Pi conserved hypothetical protein (906 nt)               | 56  | 60   | 1   |
| PITG_13751 | Pi conserved hypothetical protein (920 nt)               | 7   | 25   | 1   |
| PITG_13752 | Pi conserved hypothetical protein (2768 nt)              | 2   | 25   | 0   |
| PITG_13753 | Pi choline/Carnitine O-acyltransferase, putative (2114 r | 7   | 111  | 0   |
| PITG_13755 | Pi phosphatidylinositol kinase (PIK-E3) (1488 nt)        | 0   | 0    | 0   |
| PITG_13756 | Pi conserved hypothetical protein (846 nt)               | 7   | 0    | 0   |
| PITG_13757 | Pi conserved hypothetical protein (1170 nt)              | 1   | 11   | 0   |
| PITG_13758 | Pi conserved hypothetical protein (1702 nt)              | 5   | 58   | 0   |
| PITG_13761 | Pi protoplast secreted protein 2 precursor (703 nt)      | 5   | 114  | 7   |
| PITG_13762 | Pi flavodoxin-like protein (800 nt)                      | 15  | 12   | 9   |
| PITG_13763 | Pi flavodoxin-like protein (725 nt)                      | 9   | 129  | 8   |
| PITG_13764 | Pi conserved hypothetical protein (780 nt)               | 0   | 19   | 0   |
| PITG_13766 | Pi WD repeat protein 35 (6588 nt)                        | 0   | 1    | 0   |
| PITG_13767 | Pi conserved hypothetical protein (2007 nt)              | 11  | 30   | 0   |
| PITG_13768 | Pi acyl-CoA-binding domain-containing protein, putativ   | 19  | 55   | 0   |
| PITG_13769 | Pi sporangia induced conserved hypothetical protein (9   | 7   | 4    | 0   |
| PITG_13771 | Pi conserved hypothetical protein (1194 nt)              | 7   | 13   | 0   |

|            |                                                            |    |     |   |
|------------|------------------------------------------------------------|----|-----|---|
| PITG_13772 | Pi conserved hypothetical protein (2493 nt)                | 2  | 18  | 0 |
| PITG_13773 | Pi conserved hypothetical protein (3030 nt)                | 2  | 16  | 0 |
| PITG_13774 | Pi conserved hypothetical protein (3318 nt)                | 0  | 21  | 0 |
| PITG_13775 | Pi phosphatidylinositol kinase (PIK-J) (3151 nt)           | 7  | 42  | 0 |
| PITG_13776 | Pi conserved hypothetical protein (829 nt)                 | 3  | 19  | 0 |
| PITG_13778 | Pi cell cycle-related kinase, putative (2870 nt)           | 68 | 146 | 1 |
| PITG_13783 | Pi conserved hypothetical protein (1158 nt)                | 12 | 35  | 0 |
| PITG_13785 | Pi conserved hypothetical protein (984 nt)                 | 0  | 17  | 2 |
| PITG_13791 | Pi conserved hypothetical protein (1320 nt)                | 1  | 21  | 0 |
| PITG_13792 | Pi ribonuclease H2 subunit A, putative (3246 nt)           | 1  | 16  | 0 |
| PITG_13794 | Pi conserved hypothetical protein (1424 nt)                | 0  | 0   | 0 |
| PITG_13795 | Pi conserved hypothetical protein (2454 nt)                | 0  | 0   | 0 |
| PITG_13796 | Pi conserved hypothetical protein (967 nt)                 | 0  | 15  | 0 |
| PITG_13801 | Pi conserved hypothetical protein (2132 nt)                | 9  | 2   | 0 |
| PITG_13802 | Pi conserved hypothetical protein (1184 nt)                | 0  | 10  | 0 |
| PITG_13803 | Pi Hect domain-containing protein, putative (5525 nt)      | 9  | 26  | 0 |
| PITG_13804 | Pi conserved hypothetical protein (2535 nt)                | 14 | 41  | 0 |
| PITG_13805 | Pi conserved hypothetical protein (1584 nt)                | 5  | 0   | 0 |
| PITG_13806 | Pi conserved hypothetical protein (3134 nt)                | 7  | 16  | 0 |
| PITG_13807 | Pi hypothetical protein (645 nt)                           | 56 | 359 | 0 |
| PITG_13808 | Pi conserved hypothetical protein (673 nt)                 | 2  | 17  | 0 |
| PITG_13809 | Pi Rab18 family GTPase, putative (955 nt)                  | 21 | 128 | 0 |
| PITG_13814 | Pi serine/threonine protein kinase (1146 nt)               | 0  | 0   | 0 |
| PITG_13815 | Pi conserved hypothetical protein (1398 nt)                | 55 | 27  | 0 |
| PITG_13819 | Pi conserved hypothetical protein (2376 nt)                | 5  | 34  | 0 |
| PITG_13825 | Pi ras family GTPase, putative (618 nt)                    | 0  | 0   | 0 |
| PITG_13826 | Pi hybrid signal transduction histidine kinase, putative ( | 2  | 46  | 0 |
| PITG_13827 | Pi conserved hypothetical protein (2988 nt)                | 10 | 21  | 0 |
| PITG_13828 | Pi histone H3 (698 nt)                                     | 4  | 21  | 0 |
| PITG_13829 | Pi conserved hypothetical protein (809 nt)                 | 3  | 19  | 0 |
| PITG_13831 | Pi tryptophanyl-tRNA synthetase (1691 nt)                  | 2  | 19  | 1 |
| PITG_13832 | Pi delta-aminolevulinic acid dehydratase, putative (108    | 7  | 29  | 3 |
| PITG_13833 | Pi conserved hypothetical protein (1674 nt)                | 5  | 10  | 0 |
| PITG_13834 | Pi vacuolar protein, putative (11155 nt)                   | 0  | 2   | 0 |
| PITG_13835 | Pi conserved hypothetical protein (934 nt)                 | 15 | 24  | 0 |
| PITG_13836 | Pi cleavage induced predicted protein (2174 nt)            | 2  | 16  | 0 |
| PITG_13838 | Pi polycomb protein EZH2, putative (2824 nt)               | 2  | 23  | 0 |
| PITG_13839 | Pi conserved hypothetical protein (511 nt)                 | 49 | 45  | 0 |
| PITG_13840 | Pi conserved hypothetical protein (1269 nt)                | 9  | 35  | 0 |
| PITG_13841 | Pi conserved hypothetical protein (3438 nt)                | 3  | 24  | 0 |
| PITG_13842 | Pi conserved hypothetical protein (2210 nt)                | 28 | 35  | 0 |
| PITG_13843 | Pi conserved hypothetical protein (456 nt)                 | 12 | 33  | 0 |
| PITG_13844 | Pi conserved hypothetical protein (2067 nt)                | 0  | 7   | 0 |
| PITG_13845 | Pi conserved hypothetical protein (2278 nt)                | 4  | 25  | 0 |
| PITG_13846 | Pi WD repeat protein 39 (1095 nt)                          | 5  | 15  | 0 |
| PITG_13848 | Pi conserved hypothetical protein (2816 nt)                | 11 | 29  | 0 |
| PITG_13849 | Pi GDP-mannose transporter, putative (1020 nt)             | 12 | 45  | 3 |

|                                                                      |     |      |    |
|----------------------------------------------------------------------|-----|------|----|
| PITG_13850   Pi hypothetical protein (2825 nt)                       | 1   | 2    | 0  |
| PITG_13853   Pi conserved hypothetical protein (1208 nt)             | 2   | 30   | 0  |
| PITG_13855   Pi phosphatidic acid phosphatase (890 nt)               | 13  | 27   | 0  |
| PITG_13860   Pi protein kinase, putative (1146 nt)                   | 0   | 22   | 0  |
| PITG_13861   Pi conserved hypothetical protein (1372 nt)             | 13  | 70   | 0  |
| PITG_13873   Pi alpha-glucosidase, putative (2582 nt)                | 0   | 14   | 0  |
| PITG_13881   Pi conserved hypothetical protein (954 nt)              | 0   | 0    | 0  |
| PITG_13882   Pi conserved hypothetical protein (2061 nt)             | 3   | 14   | 0  |
| PITG_13887   Pi AMP-binding enzyme, putative (1596 nt)               | 1   | 5    | 0  |
| PITG_13888   Pi 4-coumarate-CoA ligase, putative (1788 nt)           | 0   | 16   | 0  |
| PITG_13889   Pi 4-coumarate-CoA ligase, putative (2240 nt)           | 1   | 9    | 0  |
| PITG_13890   Pi hypothetical protein (319 nt)                        | 0   | 0    | 0  |
| PITG_13893   Pi conserved hypothetical protein (463 nt)              | 5   | 9    | 0  |
| PITG_13895   Pi sporangia induced conserved hypothetical protein (2  | 0   | 1    | 0  |
| PITG_13896   Pi conserved hypothetical protein (1500 nt)             | 2   | 32   | 0  |
| PITG_13899   Pi conserved hypothetical protein (886 nt)              | 1   | 11   | 0  |
| PITG_13900   Pi conserved hypothetical protein (759 nt)              | 2   | 11   | 0  |
| PITG_13901   Pi conserved hypothetical protein (3281 nt)             | 0   | 31   | 0  |
| PITG_13903   Pi conserved hypothetical protein (971 nt)              | 10  | 23   | 0  |
| PITG_13906   Pi hypothetical protein (1325 nt)                       | 1   | 5    | 0  |
| PITG_13907   Pi conserved hypothetical protein (483 nt)              | 0   | 0    | 0  |
| PITG_13908   Pi conserved hypothetical protein (775 nt)              | 0   | 0    | 0  |
| PITG_13909   Pi conserved hypothetical protein (1343 nt)             | 0   | 11   | 0  |
| PITG_13910   Pi conserved hypothetical protein (1120 nt)             | 3   | 25   | 0  |
| PITG_13911   Pi conserved hypothetical protein (745 nt)              | 1   | 22   | 0  |
| PITG_13912   Pi conserved hypothetical protein (368 nt)              | 22  | 98   | 0  |
| PITG_13913   Pi SUMO protease, putative (2081 nt)                    | 1   | 22   | 0  |
| PITG_13915   Pi conserved hypothetical protein (3859 nt)             | 11  | 30   | 0  |
| PITG_13918   Pi N-terminal acetyltransferase A complex subunit nat1  | 10  | 60   | 1  |
| PITG_13919   Pi conserved hypothetical protein (904 nt)              | 368 | 1457 | 39 |
| PITG_13920   Pi phosphatidylinositol kinase (PIK-D) (3069 nt)        | 4   | 14   | 0  |
| PITG_13922   Pi proline-rich protein 6 (411 nt)                      | 4   | 14   | 0  |
| PITG_13927   Pi conserved hypothetical protein (1113 nt)             | 6   | 33   | 0  |
| PITG_13934   Pi calcium-dependent protein kinase, putative (2099 nt) | 0   | 0    | 0  |
| PITG_13937   Pi hypothetical protein (666 nt)                        | 0   | 6    | 0  |
| PITG_13939   Pi conserved hypothetical protein (2961 nt)             | 4   | 35   | 0  |
| PITG_13960   Pi endoribonuclease L-PSP, putative (700 nt)            | 2   | 25   | 15 |
| PITG_13966   Pi conserved hypothetical protein (1026 nt)             | 13  | 18   | 0  |
| PITG_13968   Pi dynein heavy chain (13181 nt)                        | 0   | 5    | 0  |
| PITG_13969   Pi conserved hypothetical protein (545 nt)              | 9   | 7    | 0  |
| PITG_13970   Pi conserved hypothetical protein (2027 nt)             | 8   | 61   | 0  |
| PITG_13971   Pi conserved hypothetical protein (1801 nt)             | 9   | 35   | 0  |
| PITG_13972   Pi U6 snRNA-associated Sm-like protein LSm6, putative   | 78  | 92   | 2  |
| PITG_13975   Pi hypothetical protein (371 nt)                        | 9   | 6    | 0  |
| PITG_13976   Pi DEAD/DEAH box RNA helicase, putative (1502 nt)       | 2   | 9    | 0  |
| PITG_13977   Pi serine/threonine-protein phosphatase 6 regulatory s  | 17  | 120  | 1  |
| PITG_13979   Pi conserved hypothetical protein (829 nt)              | 5   | 38   | 0  |

|            |                                                                                     |    |     |    |
|------------|-------------------------------------------------------------------------------------|----|-----|----|
| PITG_13980 | Pi ARP2/3 complex 20 kDa subunit (1341 nt)                                          | 22 | 55  | 0  |
| PITG_13985 | Pi conserved hypothetical protein (1075 nt)                                         | 3  | 31  | 0  |
| PITG_13986 | Pi trafficking protein particle complex subunit 3 (1025 nt)                         | 54 | 65  | 0  |
| PITG_13988 | Pi conserved hypothetical protein (3543 nt)                                         | 0  | 12  | 0  |
| PITG_13990 | Pi conserved hypothetical protein (512 nt)                                          | 5  | 14  | 0  |
| PITG_13991 | Pi nicotinate phosphoribosyltransferase, putative (1834 nt)                         | 3  | 44  | 0  |
| PITG_13992 | Pi conserved hypothetical protein (834 nt)                                          | 1  | 20  | 0  |
| PITG_13997 | Pi serine/threonine protein kinase (3857 nt)                                        | 4  | 39  | 0  |
| PITG_13999 | Pi protein phosphatase 1 regulatory subunit, putative (1000 nt)                     | 2  | 17  | 0  |
| PITG_14000 | Pi conserved hypothetical protein (1313 nt)                                         | 5  | 36  | 0  |
| PITG_14001 | Pi mitogen-activated protein kinase, putative (1218 nt)                             | 7  | 30  | 0  |
| PITG_14002 | Pi conserved hypothetical protein (1497 nt)                                         | 10 | 96  | 0  |
| PITG_14003 | Pi conserved hypothetical protein (1725 nt)                                         | 6  | 7   | 0  |
| PITG_14005 | Pi conserved hypothetical protein (1653 nt)                                         | 7  | 302 | 0  |
| PITG_14008 | Pi conserved hypothetical protein (1706 nt)                                         | 12 | 76  | 6  |
| PITG_14009 | Pi pre-mRNA-splicing factor ATP-dependent RNA helicase (1000 nt)                    | 1  | 12  | 0  |
| PITG_14010 | Pi conserved hypothetical protein (1545 nt)                                         | 0  | 0   | 0  |
| PITG_14013 | Pi cytochrome P450, putative (1567 nt)                                              | 0  | 12  | 0  |
| PITG_14014 | Pi ATP-binding Cassette (ABC) Superfamily (4015 nt)                                 | 1  | 24  | 0  |
| PITG_14021 | Pi hypothetical protein (906 nt)                                                    | 0  | 5   | 0  |
| PITG_14023 | Pi conserved hypothetical protein (3526 nt)                                         | 0  | 22  | 0  |
| PITG_14028 | Pi conserved hypothetical protein (2018 nt)                                         | 2  | 13  | 0  |
| PITG_14044 | Pi transcription initiation factor TFIID subunit 2, putative (1000 nt)              | 1  | 25  | 0  |
| PITG_14047 | Pi conserved hypothetical protein (694 nt)                                          | 24 | 145 | 0  |
| PITG_14048 | Pi conserved hypothetical protein (947 nt)                                          | 6  | 7   | 0  |
| PITG_14050 | Pi conserved hypothetical protein (807 nt)                                          | 0  | 14  | 0  |
| PITG_14051 | Pi beta-glucan synthesis-associated protein, putative (2000 nt)                     | 0  | 13  | 0  |
| PITG_14054 | Pi secreted RxLR effector peptide, putative (690 nt)                                | 4  | 162 | 0  |
| PITG_14055 | Pi alcohol dehydrogenase, putative (1170 nt)                                        | 34 | 102 | 0  |
| PITG_14056 | Pi conserved hypothetical protein (1861 nt)                                         | 2  | 21  | 0  |
| PITG_14057 | Pi alcohol dehydrogenase, putative (1005 nt)                                        | 53 | 100 | 0  |
| PITG_14066 | Pi CUG-BP- and ETR-3-like factor, putative (1618 nt)                                | 6  | 16  | 0  |
| PITG_14067 | Pi zinc (Zn <sup>2+</sup> )-Iron (Fe <sup>2+</sup> ) Permease (ZIP) family (993 nt) | 6  | 29  | 0  |
| PITG_14078 | Pi conserved hypothetical protein (1769 nt)                                         | 7  | 26  | 0  |
| PITG_14083 | Pi glutathione reductase (1482 nt)                                                  | 20 | 408 | 13 |
| PITG_14084 | Pi catechol O-methyltransferase, putative (1111 nt)                                 | 1  | 1   | 0  |
| PITG_14087 | Pi conserved hypothetical protein (2506 nt)                                         | 0  | 1   | 0  |
| PITG_14088 | Pi conserved hypothetical protein (835 nt)                                          | 18 | 10  | 7  |
| PITG_14089 | Pi conserved hypothetical protein (1683 nt)                                         | 1  | 23  | 0  |
| PITG_14094 | Pi conserved hypothetical protein (1700 nt)                                         | 2  | 22  | 0  |
| PITG_14097 | Pi conserved hypothetical protein (1762 nt)                                         | 14 | 71  | 0  |
| PITG_14099 | Pi conserved hypothetical protein (728 nt)                                          | 6  | 17  | 0  |
| PITG_14100 | Pi conserved hypothetical protein (1340 nt)                                         | 0  | 28  | 0  |
| PITG_14104 | Pi conserved hypothetical protein (978 nt)                                          | 3  | 10  | 0  |
| PITG_14106 | Pi conserved hypothetical protein (1064 nt)                                         | 34 | 48  | 0  |
| PITG_14107 | Pi conserved hypothetical protein (573 nt)                                          | 11 | 10  | 0  |
| PITG_14108 | Pi conserved hypothetical protein (5027 nt)                                         | 29 | 21  | 0  |

|            |                                                          |    |     |    |
|------------|----------------------------------------------------------|----|-----|----|
| PITG_14109 | Pi conserved hypothetical protein (1654 nt)              | 20 | 30  | 0  |
| PITG_14110 | Pi endoplasmic reticulum-Golgi intermediate compartn     | 19 | 79  | 5  |
| PITG_14111 | Pi vacuolar protein sorting-associated protein, putative | 9  | 40  | 0  |
| PITG_14112 | Pi conserved hypothetical protein (965 nt)               | 1  | 7   | 0  |
| PITG_14113 | Pi conserved hypothetical protein (952 nt)               | 8  | 37  | 0  |
| PITG_14114 | Pi conserved hypothetical protein (1440 nt)              | 9  | 19  | 0  |
| PITG_14119 | Pi conserved hypothetical protein (647 nt)               | 0  | 1   | 0  |
| PITG_14123 | Pi calcineurin-like phosphoesterase, putative (1560 nt)  | 6  | 69  | 0  |
| PITG_14124 | Pi glycoside hydrolase, putative (927 nt)                | 1  | 59  | 0  |
| PITG_14126 | Pi potential polyprotein (1978 nt)                       | 8  | 204 | 0  |
| PITG_14127 | Pi conserved hypothetical protein (1123 nt)              | 12 | 119 | 0  |
| PITG_14129 | Pi hypothetical protein (710 nt)                         | 6  | 17  | 0  |
| PITG_14130 | Pi conserved hypothetical protein (1382 nt)              | 0  | 80  | 1  |
| PITG_14131 | Pi conserved hypothetical protein (1121 nt)              | 3  | 58  | 0  |
| PITG_14132 | Pi conserved hypothetical protein (715 nt)               | 3  | 11  | 0  |
| PITG_14133 | Pi programmed cell death protein, putative (1547 nt)     | 31 | 112 | 5  |
| PITG_14134 | Pi conserved hypothetical protein (2031 nt)              | 2  | 18  | 0  |
| PITG_14135 | Pi conserved hypothetical protein (593 nt)               | 0  | 14  | 0  |
| PITG_14136 | Pi tRNA-dihydrouridine synthase, putative (1339 nt)      | 0  | 14  | 0  |
| PITG_14137 | Pi histone-lysine N-methyltransferase, putative (4506 r  | 1  | 15  | 0  |
| PITG_14138 | Pi glycoside hydrolase, putative (1240 nt)               | 0  | 0   | 0  |
| PITG_14141 | Pi 1,3-beta-glucanosyltransferase, putative (1645 nt)    | 2  | 36  | 1  |
| PITG_14148 | Pi hypothetical protein (1080 nt)                        | 3  | 0   | 0  |
| PITG_14151 | Pi conserved hypothetical protein (3267 nt)              | 1  | 11  | 0  |
| PITG_14152 | Pi conserved hypothetical protein (667 nt)               | 5  | 6   | 0  |
| PITG_14155 | Pi nitrate reductase, putative (1765 nt)                 | 0  | 25  | 0  |
| PITG_14156 | Pi protein kinase, putative (2271 nt)                    | 0  | 19  | 0  |
| PITG_14163 | Pi Voltage-gated Ion Channel (VIC) Superfamily (1572 n   | 1  | 15  | 0  |
| PITG_14169 | Pi conserved hypothetical protein (3882 nt)              | 17 | 23  | 0  |
| PITG_14170 | Pi galactokinase, putative (1310 nt)                     | 58 | 44  | 0  |
| PITG_14171 | Pi Amino Acid-Polyamine-Organocation (APC) Family (1     | 1  | 14  | 0  |
| PITG_14172 | Pi conserved hypothetical protein (1397 nt)              | 2  | 12  | 0  |
| PITG_14173 | Pi endo-1,3(4)-beta-glucanase, putative (2623 nt)        | 13 | 73  | 2  |
| PITG_14174 | Pi conserved hypothetical protein (605 nt)               | 7  | 25  | 0  |
| PITG_14175 | Pi conserved hypothetical protein (8683 nt)              | 5  | 118 | 3  |
| PITG_14176 | Pi conserved hypothetical protein (1998 nt)              | 2  | 12  | 0  |
| PITG_14177 | Pi conserved hypothetical protein (401 nt)               | 0  | 0   | 0  |
| PITG_14178 | Pi conserved hypothetical protein (453 nt)               | 2  | 13  | 0  |
| PITG_14179 | Pi glutamine synthetase (841 nt)                         | 31 | 379 | 31 |
| PITG_14180 | Pi glutamine synthetase (1184 nt)                        | 40 | 203 | 25 |
| PITG_14181 | Pi long-chain fatty acid transporter, putative (2109 nt) | 7  | 31  | 0  |
| PITG_14182 | Pi conserved hypothetical protein (1586 nt)              | 0  | 0   | 0  |
| PITG_14188 | Pi kinesin-like protein KIF6 (2729 nt)                   | 1  | 1   | 0  |
| PITG_14189 | Pi conserved hypothetical protein (1729 nt)              | 5  | 9   | 0  |
| PITG_14194 | Pi carbohydrate esterase, putative (1356 nt)             | 4  | 49  | 0  |
| PITG_14195 | Pi enolase (1485 nt)                                     | 38 | 67  | 11 |
| PITG_14197 | Pi conserved hypothetical protein (1160 nt)              | 6  | 20  | 0  |



|            |                                                          |     |     |   |
|------------|----------------------------------------------------------|-----|-----|---|
| PITG_14198 | Pi pre-mRNA-splicing factor 38B, putative (2124 nt)      | 8   | 54  | 0 |
| PITG_14207 | Pi conserved hypothetical protein (1032 nt)              | 1   | 11  | 0 |
| PITG_14208 | Pi conserved hypothetical protein (544 nt)               | 127 | 46  | 0 |
| PITG_14210 | Pi Amino Acid/Auxin Permease (AAAP) Family (1597 nt)     | 1   | 4   | 0 |
| PITG_14214 | Pi conserved hypothetical protein (544 nt)               | 76  | 49  | 0 |
| PITG_14215 | Pi carbohydrate esterase, putative (945 nt)              | 0   | 23  | 0 |
| PITG_14216 | Pi methylthioribose-1-phosphate isomerase, putative (    | 4   | 27  | 1 |
| PITG_14217 | Pi conserved hypothetical protein (978 nt)               | 8   | 8   | 0 |
| PITG_14218 | Pi conserved hypothetical protein (2868 nt)              | 2   | 10  | 0 |
| PITG_14221 | Pi conserved hypothetical protein (1071 nt)              | 15  | 9   | 0 |
| PITG_14222 | Pi sporangia induced conserved hypothetical protein (1   | 0   | 1   | 0 |
| PITG_14223 | Pi conserved hypothetical protein (723 nt)               | 6   | 9   | 0 |
| PITG_14224 | Pi conserved hypothetical protein (1097 nt)              | 1   | 21  | 0 |
| PITG_14226 | Pi conserved hypothetical protein (1554 nt)              | 1   | 3   | 0 |
| PITG_14229 | Pi mannose-1-phosphate guanyltransferase beta, putat     | 30  | 97  | 1 |
| PITG_14230 | Pi calcium-transporting ATPase sarcoplasmic/endoplas     | 2   | 39  | 0 |
| PITG_14231 | Pi importin subunit alpha, putative (2162 nt)            | 49  | 52  | 0 |
| PITG_14237 | Pi glycoside hydrolase, putative (1854 nt)               | 5   | 7   | 3 |
| PITG_14239 | Pi Poly(A) polymerase, putative (3061 nt)                | 9   | 47  | 0 |
| PITG_14243 | Pi glycoside hydrolase, putative (1587 nt)               | 4   | 10  | 2 |
| PITG_14247 | Pi conserved hypothetical protein (4481 nt)              | 3   | 8   | 0 |
| PITG_14248 | Pi rRNA-processing protein EBP2, putative (1109 nt)      | 2   | 17  | 1 |
| PITG_14249 | Pi conserved hypothetical protein (1489 nt)              | 11  | 36  | 0 |
| PITG_14251 | Pi conserved hypothetical protein (1827 nt)              | 2   | 11  | 0 |
| PITG_14252 | Pi conserved hypothetical protein (2175 nt)              | 1   | 0   | 0 |
| PITG_14253 | Pi conserved hypothetical protein (1734 nt)              | 0   | 1   | 0 |
| PITG_14257 | Pi conserved hypothetical protein (2697 nt)              | 7   | 35  | 0 |
| PITG_14259 | Pi conserved hypothetical protein (483 nt)               | 15  | 22  | 0 |
| PITG_14260 | Pi FACT complex subunit SSRP1, putative (1614 nt)        | 39  | 73  | 0 |
| PITG_14267 | Pi Crinkler (CRN) family protein, pseudogene (1902 nt)   | 92  | 595 | 0 |
| PITG_14269 | Pi transmembrane protein, putative (1149 nt)             | 27  | 34  | 0 |
| PITG_14270 | Pi GPI-anchored leucine-rich lipoprotein (1437 nt)       | 0   | 19  | 0 |
| PITG_14272 | Pi hypothetical protein (1775 nt)                        | 2   | 21  | 0 |
| PITG_14273 | Pi conserved hypothetical protein (546 nt)               | 2   | 444 | 0 |
| PITG_14274 | Pi conserved hypothetical protein (1579 nt)              | 2   | 314 | 0 |
| PITG_14275 | Pi hypothetical protein (213 nt)                         | 6   | 342 | 0 |
| PITG_14276 | Pi conserved hypothetical protein (866 nt)               | 8   | 57  | 0 |
| PITG_14277 | Pi trichohyalin-like protein (1827 nt)                   | 0   | 11  | 0 |
| PITG_14278 | Pi eukaryotic translation initiation factor 4 gamma, put | 6   | 77  | 1 |
| PITG_14279 | Pi conserved hypothetical protein (1597 nt)              | 3   | 34  | 0 |
| PITG_14280 | Pi conserved hypothetical protein (667 nt)               | 0   | 11  | 0 |
| PITG_14281 | Pi sporangia induced conserved hypothetical protein (1   | 1   | 2   | 0 |
| PITG_14282 | Pi conserved hypothetical protein (701 nt)               | 33  | 77  | 2 |
| PITG_14283 | Pi malonyl CoA-acyl carrier protein transacylase, putati | 5   | 6   | 0 |
| PITG_14284 | Pi conserved hypothetical protein (5103 nt)              | 3   | 37  | 0 |
| PITG_14285 | Pi vesicle-associated membrane protein, putative (749    | 5   | 14  | 0 |
| PITG_14286 | Pi conserved hypothetical protein (1870 nt)              | 0   | 13  | 0 |

|            |                                                              |     |      |   |
|------------|--------------------------------------------------------------|-----|------|---|
| PITG_14288 | Pi polysaccharide lyase, putative (1681 nt)                  | 0   | 64   | 0 |
| PITG_14297 | Pi hypothetical protein (337 nt)                             | 57  | 3    | 0 |
| PITG_14299 | Pi conserved hypothetical protein (1286 nt)                  | 8   | 17   | 0 |
| PITG_14300 | Pi conserved hypothetical protein (1090 nt)                  | 0   | 21   | 0 |
| PITG_14312 | Pi methylenetetrahydrofolate dehydrogenase [NAD+],           | 583 | 135  | 0 |
| PITG_14322 | Pi methylenetetrahydrofolate dehydrogenase [NAD+],           | 2   | 11   | 1 |
| PITG_14352 | Pi methylenetetrahydrofolate dehydrogenase [NAD+],           | 0   | 15   | 0 |
| PITG_14353 | Pi F-actin-capping protein subunit alpha, putative (1198 nt) | 5   | 29   | 0 |
| PITG_14354 | Pi conserved hypothetical protein (2139 nt)                  | 70  | 1757 | 0 |
| PITG_14355 | Pi trans-1,2-dihydrobenzene-1,2-diol dehydrogenase, p        | 0   | 57   | 0 |
| PITG_14357 | Pi dimeric dihydrodiol dehydrogenase, putative (1155 nt)     | 1   | 2    | 1 |
| PITG_14358 | Pi trans-1,2-dihydrobenzene-1,2-diol dehydrogenase, p        | 1   | 8    | 0 |
| PITG_14362 | Pi vacuolar proton translocating ATPase A subunit, putative  | 7   | 43   | 0 |
| PITG_14363 | Pi conserved hypothetical protein (389 nt)                   | 18  | 24   | 0 |
| PITG_14365 | Pi conserved hypothetical protein (2070 nt)                  | 4   | 12   | 0 |
| PITG_14375 | Pi conserved hypothetical protein (1976 nt)                  | 4   | 26   | 0 |
| PITG_14379 | Pi conserved hypothetical protein (1828 nt)                  | 8   | 13   | 0 |
| PITG_14380 | Pi lon protease, putative (2559 nt)                          | 23  | 38   | 0 |
| PITG_14381 | Pi conserved hypothetical protein (793 nt)                   | 21  | 32   | 0 |
| PITG_14384 | Pi sodium/potassium-transporting ATPase subunit alpha        | 0   | 0    | 0 |
| PITG_14385 | Pi conserved hypothetical protein (4127 nt)                  | 2   | 18   | 0 |
| PITG_14388 | Pi cytochrome P450, putative (1581 nt)                       | 9   | 0    | 0 |
| PITG_14389 | Pi conserved hypothetical protein (767 nt)                   | 10  | 57   | 0 |
| PITG_14390 | Pi conserved hypothetical protein (799 nt)                   | 2   | 16   | 0 |
| PITG_14391 | Pi conserved hypothetical protein (854 nt)                   | 83  | 265  | 1 |
| PITG_14392 | Pi conserved hypothetical protein (2690 nt)                  | 0   | 17   | 0 |
| PITG_14393 | Pi calcium/calmodulin-dependent protein kinase, putative     | 0   | 14   | 0 |
| PITG_14394 | Pi conserved hypothetical protein (662 nt)                   | 4   | 42   | 0 |
| PITG_14397 | Pi proliferating cell nuclear antigen (1096 nt)              | 10  | 64   | 3 |
| PITG_14398 | Pi vacuolar amino acid transporter, putative (1761 nt)       | 3   | 18   | 0 |
| PITG_14399 | Pi pre-mRNA-processing factor, putative (1860 nt)            | 2   | 17   | 0 |
| PITG_14400 | Pi myb-like DNA-binding protein, putative (917 nt)           | 20  | 277  | 0 |
| PITG_14401 | Pi myb-like DNA-binding protein, putative (4060 nt)          | 10  | 111  | 0 |
| PITG_14402 | Pi conserved hypothetical protein (819 nt)                   | 0   | 0    | 0 |
| PITG_14412 | Pi carbonic anhydrase, putative (1128 nt)                    | 0   | 0    | 0 |
| PITG_14413 | Pi protein kinase, putative (2688 nt)                        | 3   | 12   | 0 |
| PITG_14415 | Pi conserved hypothetical protein (3134 nt)                  | 2   | 40   | 0 |
| PITG_14416 | Pi conserved hypothetical protein (1437 nt)                  | 10  | 67   | 0 |
| PITG_14420 | Pi conserved hypothetical protein (2520 nt)                  | 6   | 76   | 0 |
| PITG_14429 | Pi conserved hypothetical protein (751 nt)                   | 0   | 12   | 0 |
| PITG_14431 | Pi conserved hypothetical protein (1571 nt)                  | 1   | 6    | 0 |
| PITG_14435 | Pi conserved hypothetical protein (1786 nt)                  | 0   | 17   | 0 |
| PITG_14436 | Pi conserved hypothetical protein (1255 nt)                  | 0   | 30   | 0 |
| PITG_14439 | Pi conserved hypothetical protein (779 nt)                   | 20  | 128  | 6 |
| PITG_14440 | Pi conserved hypothetical protein (651 nt)                   | 6   | 47   | 0 |
| PITG_14441 | Pi cytoskeleton-associated protein, putative (5859 nt)       | 6   | 17   | 0 |
| PITG_14442 | Pi hypothetical protein (156 nt)                             | 6   | 22   | 0 |

|                                                                      |    |     |   |
|----------------------------------------------------------------------|----|-----|---|
| PITG_14448   Pi hypothetical protein (1081 nt)                       | 11 | 5   | 0 |
| PITG_14452   Pi conserved hypothetical protein (406 nt)              | 3  | 16  | 0 |
| PITG_14455   Pi Cation Diffusion Facilitator (CDF) Family (1155 nt)  | 89 | 94  | 0 |
| PITG_14456   Pi glutamyl-tRNA synthetase, putative (3088 nt)         | 35 | 51  | 1 |
| PITG_14459   Pi conserved hypothetical protein (849 nt)              | 0  | 0   | 0 |
| PITG_14460   Pi chromodomain protein, putative (1071 nt)             | 5  | 19  | 0 |
| PITG_14461   Pi actin-like protein (1370 nt)                         | 1  | 12  | 0 |
| PITG_14462   Pi AP-1 complex subunit mu, putative (2736 nt)          | 11 | 28  | 0 |
| PITG_14463   Pi protein kinase, putative (2115 nt)                   | 0  | 12  | 0 |
| PITG_14465   Pi conserved hypothetical protein (1814 nt)             | 30 | 64  | 0 |
| PITG_14466   Pi conserved hypothetical protein (1410 nt)             | 2  | 5   | 0 |
| PITG_14467   Pi conserved hypothetical protein (561 nt)              | 1  | 0   | 0 |
| PITG_14471   Pi conserved hypothetical protein (1146 nt)             | 3  | 8   | 0 |
| PITG_14473   Pi conserved hypothetical protein (2059 nt)             | 5  | 19  | 0 |
| PITG_14474   Pi conserved hypothetical protein (696 nt)              | 0  | 0   | 0 |
| PITG_14478   Pi NmrA-like family protein, putative (802 nt)          | 53 | 75  | 2 |
| PITG_14479   Pi conserved hypothetical protein (1394 nt)             | 97 | 95  | 0 |
| PITG_14483   Pi conserved hypothetical protein (1593 nt)             | 1  | 16  | 0 |
| PITG_14484   Pi conserved hypothetical protein (1905 nt)             | 3  | 12  | 0 |
| PITG_14485   Pi conserved hypothetical protein (2715 nt)             | 8  | 38  | 0 |
| PITG_14486   Pi MtN3-like protein (1577 nt)                          | 9  | 140 | 0 |
| PITG_14489   Pi conserved hypothetical protein (1783 nt)             | 3  | 75  | 0 |
| PITG_14493   Pi conserved hypothetical protein (946 nt)              | 5  | 37  | 0 |
| PITG_14497   Pi isoprenylcysteine carboxyl methyltransferase, putati | 55 | 28  | 0 |
| PITG_14505   Pi conserved hypothetical protein (389 nt)              | 14 | 11  | 0 |
| PITG_14509   Pi hypothetical protein (243 nt)                        | 16 | 139 | 0 |
| PITG_14514   Pi HSF-type DNA-binding protein, putative (627 nt)      | 2  | 18  | 0 |
| PITG_14515   Pi conserved hypothetical protein (2532 nt)             | 26 | 6   | 0 |
| PITG_14520   Pi conserved hypothetical protein (692 nt)              | 3  | 1   | 0 |
| PITG_14530   Pi conserved hypothetical protein (383 nt)              | 2  | 0   | 0 |
| PITG_14532   Pi conserved hypothetical protein (1551 nt)             | 0  | 7   | 0 |
| PITG_14533   Pi conserved hypothetical protein (677 nt)              | 5  | 16  | 0 |
| PITG_14548   Pi conserved hypothetical protein (485 nt)              | 30 | 26  | 0 |
| PITG_14549   Pi phosphatidic acid phosphatase (1026 nt)              | 26 | 39  | 0 |
| PITG_14550   Pi conserved hypothetical protein (609 nt)              | 2  | 6   | 0 |
| PITG_14551   Pi hypothetical protein (629 nt)                        | 2  | 2   | 0 |
| PITG_14553   Pi hypothetical protein (1295 nt)                       | 12 | 47  | 0 |
| PITG_14557   Pi conserved hypothetical protein (1092 nt)             | 42 | 42  | 0 |
| PITG_14558   Pi conserved hypothetical protein (774 nt)              | 7  | 40  | 0 |
| PITG_14561   Pi Chloride Channel (ClC) Family (2991 nt)              | 6  | 24  | 0 |
| PITG_14562   Pi conserved hypothetical protein (465 nt)              | 7  | 14  | 0 |
| PITG_14563   Pi ubiquinone biosynthesis monooxygenase, putative (:   | 7  | 22  | 3 |
| PITG_14564   Pi conserved hypothetical protein (1257 nt)             | 8  | 51  | 0 |
| PITG_14565   Pi conserved hypothetical protein (1448 nt)             | 4  | 23  | 0 |
| PITG_14566   Pi lariat debranching enzyme B (1542 nt)                | 7  | 13  | 0 |
| PITG_14567   Pi conserved hypothetical protein (387 nt)              | 13 | 54  | 0 |
| PITG_14568   Pi conserved hypothetical protein (1108 nt)             | 6  | 20  | 0 |

|                                                                                   |      |     |   |
|-----------------------------------------------------------------------------------|------|-----|---|
| PITG_14570   Pi conserved hypothetical protein (1274 nt)                          | 3    | 2   | 0 |
| PITG_14571   Pi conserved hypothetical protein (495 nt)                           | 190  | 223 | 0 |
| PITG_14572   Pi conserved hypothetical protein (794 nt)                           | 9    | 9   | 0 |
| PITG_14573   Pi AP-3 complex subunit delta, putative (3366 nt)                    | 8    | 33  | 0 |
| PITG_14574   Pi conserved hypothetical protein (1050 nt)                          | 1    | 14  | 0 |
| PITG_14575   Pi U6 snRNA-associated Sm-like protein, putative (321 nt)            | 61   | 59  | 4 |
| PITG_14576   Pi conserved hypothetical protein (1042 nt)                          | 13   | 108 | 0 |
| PITG_14577   Pi conserved hypothetical protein (608 nt)                           | 8    | 17  | 0 |
| PITG_14578   Pi phosducin-like protein (715 nt)                                   | 24   | 93  | 1 |
| PITG_14579   Pi conserved hypothetical protein (3101 nt)                          | 1    | 12  | 0 |
| PITG_14580   Pi conserved hypothetical protein (1702 nt)                          | 7    | 84  | 0 |
| PITG_14581   Pi conserved hypothetical protein (1445 nt)                          | 160  | 224 | 0 |
| PITG_14582   Pi sporangia induced hypothetical protein (657 nt)                   | 4    | 2   | 0 |
| PITG_14584   Pi microtubule -associated protein EB1 (1049 nt)                     | 11   | 33  | 1 |
| PITG_14585   Pi conserved hypothetical protein (948 nt)                           | 6    | 21  | 0 |
| PITG_14586   Pi 5'-AMP-activated protein kinase subunit beta, putative (1049 nt)  | 9    | 41  | 0 |
| PITG_14587   Pi conserved hypothetical protein (1670 nt)                          | 6    | 38  | 0 |
| PITG_14588   Pi sporangia induced hypothetical protein similar to en              | 6    | 32  | 0 |
| PITG_14589   Pi choline-phosphate cytidyltransferase B (1341 nt)                  | 26   | 67  | 0 |
| PITG_14591   Pi choline-phosphate cytidyltransferase B (955 nt)                   | 2    | 12  | 0 |
| PITG_14592   Pi hypothetical protein (608 nt)                                     | 25   | 46  | 0 |
| PITG_14593   Pi conserved hypothetical protein (1536 nt)                          | 3    | 11  | 0 |
| PITG_14594   Pi ubiquitin-conjugating enzyme E2, putative (604 nt)                | 1069 | 288 | 0 |
| PITG_14595   Pi conserved hypothetical protein (702 nt)                           | 26   | 11  | 0 |
| PITG_14596   Pi transcription initiation factor IIB, putative (927 nt)            | 13   | 24  | 0 |
| PITG_14597   Pi conserved hypothetical protein (279 nt)                           | 13   | 23  | 1 |
| PITG_14598   Pi prolyl endopeptidase, putative (2259 nt)                          | 9    | 59  | 1 |
| PITG_14599   Pi conserved hypothetical protein (2040 nt)                          | 2    | 11  | 0 |
| PITG_14601   Pi hypothetical protein (369 nt)                                     | 281  | 104 | 0 |
| PITG_14602   Pi conserved hypothetical protein (3807 nt)                          | 3    | 13  | 0 |
| PITG_14603   Pi carbohydrate-binding protein, putative (1596 nt)                  | 9    | 14  | 0 |
| PITG_14604   Pi hypothetical protein (571 nt)                                     | 101  | 150 | 6 |
| PITG_14605   Pi conserved hypothetical protein (1100 nt)                          | 65   | 59  | 0 |
| PITG_14606   Pi conserved hypothetical protein (705 nt)                           | 2    | 17  | 0 |
| PITG_14607   Pi conserved hypothetical protein (1089 nt)                          | 0    | 0   | 0 |
| PITG_14608   Pi 39S ribosomal protein L24, mitochondrial, putative (1089 nt)      | 18   | 19  | 1 |
| PITG_14609   Pi eukaryotic translation initiation factor 2 subunit beta (1089 nt) | 80   | 64  | 3 |
| PITG_14611   Pi conserved hypothetical protein (366 nt)                           | 4    | 15  | 0 |
| PITG_14612   Pi NADH dehydrogenase iron-sulfur protein 8, mitochondrial (366 nt)  | 160  | 115 | 7 |
| PITG_14613   Pi conserved hypothetical protein (1019 nt)                          | 9    | 2   | 0 |
| PITG_14614   Pi tubulin-specific chaperone C, putative (1365 nt)                  | 3    | 18  | 0 |
| PITG_14615   Pi conserved hypothetical protein (468 nt)                           | 61   | 154 | 3 |
| PITG_14616   Pi conserved hypothetical protein (654 nt)                           | 5    | 18  | 0 |
| PITG_14617   Pi conserved hypothetical protein (2167 nt)                          | 5    | 15  | 0 |
| PITG_14619   Pi conserved hypothetical protein (859 nt)                           | 46   | 41  | 0 |
| PITG_14620   Pi FKBP-type peptidyl-prolyl cis-trans isomerase, putative (859 nt)  | 5    | 0   | 0 |
| PITG_14621   Pi conserved hypothetical protein (414 nt)                           | 2    | 11  | 0 |

|            |                                                           |     |      |    |
|------------|-----------------------------------------------------------|-----|------|----|
| PITG_14623 | Pi mediator of RNA polymerase II transcription subunit    | 23  | 42   | 0  |
| PITG_14624 | Pi conserved hypothetical protein (801 nt)                | 4   | 1    | 0  |
| PITG_14625 | Pi methylosome protein 50, putative (998 nt)              | 2   | 10   | 0  |
| PITG_14626 | Pi dual specificity tyrosine-phosphorylation-regulated k  | 29  | 61   | 0  |
| PITG_14632 | Pi conserved hypothetical protein (1024 nt)               | 399 | 1020 | 2  |
| PITG_14633 | Pi conserved hypothetical protein (943 nt)                | 12  | 3    | 0  |
| PITG_14634 | Pi 1-(5-phosphoribosyl)-5-[(5-phosphoribosylamino)me      | 79  | 56   | 0  |
| PITG_14635 | Pi sporangia induced hypothetical protein (1302 nt)       | 3   | 5    | 0  |
| PITG_14636 | Pi COP9 signalosome complex subunit, putative (978 nt)    | 66  | 44   | 0  |
| PITG_14637 | Pi conserved hypothetical protein (2003 nt)               | 23  | 46   | 0  |
| PITG_14639 | Pi aminotransferase, putative (1949 nt)                   | 5   | 13   | 2  |
| PITG_14640 | Pi conserved hypothetical protein (3660 nt)               | 5   | 20   | 0  |
| PITG_14641 | Pi glutathione peroxidase, putative (973 nt)              | 25  | 15   | 0  |
| PITG_14642 | Pi GDP-L-fucose synthetase (963 nt)                       | 12  | 10   | 0  |
| PITG_14643 | Pi conserved hypothetical protein (385 nt)                | 4   | 10   | 0  |
| PITG_14652 | Pi conserved hypothetical protein (2239 nt)               | 7   | 7    | 0  |
| PITG_14654 | Pi conserved hypothetical protein (558 nt)                | 0   | 17   | 0  |
| PITG_14656 | Pi conserved hypothetical protein (2994 nt)               | 0   | 11   | 0  |
| PITG_14657 | Pi tubulin-specific chaperone E, putative (1808 nt)       | 3   | 36   | 0  |
| PITG_14663 | Pi conserved hypothetical protein (533 nt)                | 5   | 1    | 0  |
| PITG_14669 | Pi phospholipase A2, putative (938 nt)                    | 113 | 90   | 0  |
| PITG_14675 | Pi conserved hypothetical protein (1113 nt)               | 2   | 16   | 0  |
| PITG_14683 | Pi conserved hypothetical protein (1460 nt)               | 6   | 0    | 0  |
| PITG_14691 | Pi hypothetical protein (2751 nt)                         | 88  | 10   | 0  |
| PITG_14692 | Pi conserved hypothetical protein (455 nt)                | 9   | 44   | 0  |
| PITG_14695 | Pi conserved hypothetical protein (1320 nt)               | 3   | 11   | 0  |
| PITG_14696 | Pi serine hydroxymethyltransferase 1, mitochondrial pi    | 15  | 38   | 41 |
| PITG_14697 | Pi cystathionine beta-synthase (1831 nt)                  | 4   | 38   | 0  |
| PITG_14698 | Pi conserved hypothetical protein (1683 nt)               | 3   | 15   | 0  |
| PITG_14699 | Pi phosphatidylserine synthase, putative (1546 nt)        | 1   | 22   | 0  |
| PITG_14702 | Pi conserved hypothetical protein (384 nt)                | 5   | 7    | 0  |
| PITG_14703 | Pi calcium-dependent protein kinase, putative (1977 nt)   | 0   | 17   | 0  |
| PITG_14704 | Pi conserved hypothetical protein (804 nt)                | 1   | 24   | 0  |
| PITG_14707 | Pi SNF1-related protein kinase catalytic subunit alpha, i | 9   | 36   | 0  |
| PITG_14709 | Pi conserved hypothetical protein (572 nt)                | 2   | 13   | 0  |
| PITG_14712 | Pi cell division protease ftsH (1401 nt)                  | 5   | 20   | 0  |
| PITG_14714 | Pi hypothetical protein (670 nt)                          | 5   | 22   | 0  |
| PITG_14716 | Pi conserved hypothetical protein (841 nt)                | 2   | 67   | 0  |
| PITG_14717 | Pi conserved hypothetical protein (3989 nt)               | 11  | 25   | 0  |
| PITG_14720 | Pi aldose 1-epimerase, putative (963 nt)                  | 0   | 0    | 3  |
| PITG_14722 | Pi 12-oxophytodienoate reductase, putative (1155 nt)      | 35  | 60   | 0  |
| PITG_14723 | Pi conserved hypothetical protein (1040 nt)               | 55  | 235  | 0  |
| PITG_14724 | Pi hypothetical protein (279 nt)                          | 27  | 31   | 0  |
| PITG_14726 | Pi hypothetical protein (1975 nt)                         | 0   | 0    | 0  |
| PITG_14727 | Pi callose synthase, putative (6687 nt)                   | 10  | 171  | 1  |
| PITG_14728 | Pi conserved hypothetical protein (1368 nt)               | 13  | 36   | 0  |
| PITG_14729 | Pi 30S ribosomal protein S16, putative (494 nt)           | 15  | 28   | 2  |

|            |                                                                     |     |     |    |
|------------|---------------------------------------------------------------------|-----|-----|----|
| PITG_14730 | Pi nucleolar protein, putative (2642 nt)                            | 3   | 10  | 0  |
| PITG_14731 | Pi conserved hypothetical protein (2188 nt)                         | 19  | 23  | 0  |
| PITG_14739 | Pi PexRD8 family secreted RxLR effector peptide, putative           | 99  | 152 | 10 |
| PITG_14740 | Pi conserved hypothetical protein (1719 nt)                         | 0   | 0   | 0  |
| PITG_14743 | Pi conserved hypothetical protein (4802 nt)                         | 3   | 83  | 0  |
| PITG_14744 | Pi conserved hypothetical protein (1670 nt)                         | 1   | 11  | 0  |
| PITG_14746 | Pi conserved hypothetical protein (867 nt)                          | 1   | 10  | 0  |
| PITG_14747 | Pi conserved hypothetical protein (2999 nt)                         | 14  | 70  | 0  |
| PITG_14750 | Pi conserved hypothetical protein (1760 nt)                         | 2   | 21  | 0  |
| PITG_14751 | Pi conserved hypothetical protein (1574 nt)                         | 7   | 87  | 0  |
| PITG_14757 | Pi conserved hypothetical protein (3006 nt)                         | 1   | 11  | 0  |
| PITG_14765 | Pi GPI ethanolamine phosphate transferase, putative (2642 nt)       | 1   | 13  | 0  |
| PITG_14766 | Pi conserved hypothetical protein (775 nt)                          | 16  | 25  | 0  |
| PITG_14768 | Pi conserved hypothetical protein (848 nt)                          | 15  | 43  | 0  |
| PITG_14770 | Pi conserved hypothetical protein (1513 nt)                         | 8   | 24  | 0  |
| PITG_14792 | Pi conserved hypothetical protein (2590 nt)                         | 17  | 40  | 0  |
| PITG_14806 | Pi trafficking protein particle complex subunit, putative (2642 nt) | 17  | 40  | 0  |
| PITG_14807 | Pi tubulin gamma chain (1401 nt)                                    | 7   | 9   | 0  |
| PITG_14808 | Pi ferrochelatase, mitochondrial precursor (1340 nt)                | 9   | 20  | 0  |
| PITG_14812 | Pi conserved hypothetical protein (809 nt)                          | 16  | 22  | 0  |
| PITG_14816 | Pi conserved hypothetical protein (1632 nt)                         | 22  | 35  | 0  |
| PITG_14818 | Pi guanylate-binding protein, putative (1890 nt)                    | 3   | 26  | 0  |
| PITG_14822 | Pi conserved hypothetical protein (2339 nt)                         | 5   | 6   | 0  |
| PITG_14829 | Pi conserved hypothetical protein (649 nt)                          | 0   | 53  | 0  |
| PITG_14831 | Pi conserved hypothetical protein (1281 nt)                         | 20  | 32  | 1  |
| PITG_14832 | Pi hypothetical protein (809 nt)                                    | 0   | 1   | 0  |
| PITG_14833 | Pi conserved hypothetical protein (1892 nt)                         | 9   | 71  | 0  |
| PITG_14835 | Pi conserved hypothetical protein (2160 nt)                         | 18  | 42  | 0  |
| PITG_14836 | Pi conserved hypothetical protein (1128 nt)                         | 0   | 15  | 0  |
| PITG_14840 | Pi conserved hypothetical protein (2958 nt)                         | 0   | 0   | 0  |
| PITG_14845 | Pi conserved hypothetical protein (2881 nt)                         | 0   | 17  | 0  |
| PITG_14847 | Pi conserved hypothetical protein (943 nt)                          | 13  | 18  | 0  |
| PITG_14850 | Pi 40S ribosomal protein S7 (909 nt)                                | 373 | 370 | 39 |
| PITG_14851 | Pi hypothetical protein (400 nt)                                    | 5   | 15  | 0  |
| PITG_14852 | Pi lipoic acid synthetase, mitochondrial precursor (1242 nt)        | 5   | 17  | 0  |
| PITG_14853 | Pi exosome complex exonuclease MTR3-like protein (809 nt)           | 17  | 27  | 0  |
| PITG_14854 | Pi signal recognition particle, putative (1843 nt)                  | 6   | 28  | 0  |
| PITG_14855 | Pi conserved hypothetical protein (426 nt)                          | 132 | 65  | 0  |
| PITG_14861 | Pi conserved hypothetical protein (1617 nt)                         | 5   | 84  | 0  |
| PITG_14862 | Pi conserved hypothetical protein (1476 nt)                         | 1   | 60  | 0  |
| PITG_14863 | Pi NADH-ubiquinone oxidoreductase, putative (1508 nt)               | 9   | 24  | 0  |
| PITG_14868 | Pi hypothetical protein (1766 nt)                                   | 9   | 2   | 0  |
| PITG_14874 | Pi 6 snRNA-associated Sm-like protein, putative (900 nt)            | 12  | 41  | 0  |
| PITG_14885 | Pi DNA-directed RNA polymerase II 19 kDa polypeptide                | 39  | 35  | 3  |
| PITG_14886 | Pi conserved hypothetical protein (888 nt)                          | 3   | 9   | 0  |
| PITG_14887 | Pi conserved hypothetical protein (7911 nt)                         | 0   | 12  | 0  |
| PITG_14888 | Pi conserved hypothetical protein (707 nt)                          | 18  | 49  | 0  |

|                                                                        |     |     |    |
|------------------------------------------------------------------------|-----|-----|----|
| PITG_14898   Pi conserved hypothetical protein (1830 nt)               | 7   | 23  | 0  |
| PITG_14905   Pi conserved hypothetical protein (1760 nt)               | 7   | 0   | 0  |
| PITG_14908   Pi bzip controlled hypothetical protein (631 nt)          | 1   | 0   | 0  |
| PITG_14909   Pi conserved hypothetical protein (761 nt)                | 163 | 55  | 0  |
| PITG_14910   Pi conserved hypothetical protein (2328 nt)               | 95  | 68  | 1  |
| PITG_14911   Pi mitochondrial folate transporter/carrier, putative (1: | 15  | 9   | 0  |
| PITG_14913   Pi 40S ribosomal protein S16 (1118 nt)                    | 422 | 444 | 64 |
| PITG_14914   Pi conserved hypothetical protein (710 nt)                | 13  | 26  | 0  |
| PITG_14916   Pi conserved hypothetical protein (705 nt)                | 13  | 14  | 0  |
| PITG_14917   Pi thioredoxin-like protein (2028 nt)                     | 55  | 49  | 0  |
| PITG_14918   Pi riboflavin biosynthesis protein ribBA, putative (1193  | 1   | 12  | 0  |
| PITG_14919   Pi transmembrane protein, putative (1650 nt)              | 7   | 29  | 0  |
| PITG_14921   Pi conserved hypothetical protein (676 nt)                | 11  | 11  | 0  |
| PITG_14922   Pi conserved hypothetical protein (1532 nt)               | 0   | 12  | 0  |
| PITG_14923   Pi conserved hypothetical protein (2970 nt)               | 3   | 42  | 0  |
| PITG_14924   Pi conserved hypothetical protein (524 nt)                | 109 | 32  | 0  |
| PITG_14925   Pi conserved hypothetical protein (1667 nt)               | 9   | 23  | 0  |
| PITG_14934   Pi conserved hypothetical protein (1359 nt)               | 1   | 11  | 0  |
| PITG_14935   Pi Mitochondrial Carrier (MC) Family (1582 nt)            | 14  | 29  | 1  |
| PITG_14936   Pi ATP synthase subunit gamma, putative (1115 nt)         | 66  | 228 | 26 |
| PITG_14937   Pi conserved hypothetical protein (2201 nt)               | 3   | 6   | 0  |
| PITG_14938   Pi conserved hypothetical protein (474 nt)                | 1   | 0   | 0  |
| PITG_14939   Pi glucosidase, putative (1728 nt)                        | 16  | 63  | 2  |
| PITG_14941   Pi conserved hypothetical protein (1344 nt)               | 14  | 46  | 2  |
| PITG_14944   Pi conserved hypothetical protein (1707 nt)               | 10  | 20  | 0  |
| PITG_14945   Pi conserved hypothetical protein (806 nt)                | 1   | 5   | 0  |
| PITG_14946   Pi conserved hypothetical protein (1047 nt)               | 3   | 3   | 0  |
| PITG_14947   Pi conserved hypothetical protein (835 nt)                | 1   | 7   | 0  |
| PITG_14948   Pi conserved hypothetical protein (535 nt)                | 3   | 16  | 0  |
| PITG_14949   Pi conserved hypothetical protein (1160 nt)               | 37  | 100 | 0  |
| PITG_14950   Pi conserved hypothetical protein (456 nt)                | 34  | 19  | 0  |
| PITG_14951   Pi conserved hypothetical protein (3676 nt)               | 5   | 6   | 0  |
| PITG_14967   Pi conserved hypothetical protein (844 nt)                | 24  | 97  | 0  |
| PITG_14968   Pi cAMP-dependent protein kinase catalytic subunit alq    | 9   | 129 | 0  |
| PITG_14970   Pi protein kinase, putative (2617 nt)                     | 65  | 175 | 0  |
| PITG_14972   Pi protein kinase, putative (2515 nt)                     | 6   | 7   | 0  |
| PITG_14973   Pi conserved hypothetical protein (2286 nt)               | 3   | 11  | 0  |
| PITG_14975   Pi acetoacetyl-coenzyme A synthetase (2821 nt)            | 7   | 37  | 0  |
| PITG_14976   Pi pyridoxal phosphate phosphatase, putative (2429 nt     | 0   | 15  | 0  |
| PITG_14977   Pi conserved hypothetical protein (2240 nt)               | 2   | 15  | 0  |
| PITG_14978   Pi dolichyl-phosphate beta-glucosyltransferase, putativ   | 1   | 13  | 0  |
| PITG_14979   Pi palmitoyltransferase, putative (1047 nt)               | 7   | 18  | 0  |
| PITG_14980   Pi conserved hypothetical protein (1487 nt)               | 1   | 8   | 0  |
| PITG_14987   Pi conserved hypothetical protein (510 nt)                | 7   | 30  | 0  |
| PITG_14988   Pi prefoldin subunit, putative (546 nt)                   | 17  | 18  | 0  |
| PITG_14989   Pi conserved hypothetical protein (333 nt)                | 46  | 72  | 0  |
| PITG_14991   Pi peroxisomal targeting signal 2 receptor, putative (22  | 35  | 22  | 0  |

|                                                                      |     |      |     |
|----------------------------------------------------------------------|-----|------|-----|
| PITG_14992   Pi protein kinase, putative (3270 nt)                   | 1   | 20   | 0   |
| PITG_14993   Pi protein-L-isoaspartate O-methyltransferase, putative | 112 | 6    | 0   |
| PITG_14994   Pi conserved hypothetical protein (821 nt)              | 5   | 12   | 0   |
| PITG_14995   Pi conserved hypothetical protein (687 nt)              | 20  | 55   | 0   |
| PITG_14999   Pi hypothetical protein (1256 nt)                       | 0   | 0    | 0   |
| PITG_15006   Pi ATP-binding Cassette (ABC) Superfamily (2610 nt)     | 19  | 44   | 2   |
| PITG_15011   Pi hypothetical protein (1329 nt)                       | 1   | 7    | 0   |
| PITG_15016   Pi conserved hypothetical protein (1338 nt)             | 7   | 18   | 0   |
| PITG_15017   Pi protein phosphatase 2C, putative (1689 nt)           | 2   | 10   | 0   |
| PITG_15021   Pi conserved hypothetical protein (899 nt)              | 0   | 0    | 0   |
| PITG_15022   Pi conserved hypothetical protein (1507 nt)             | 5   | 17   | 0   |
| PITG_15026   Pi importin-like protein (3656 nt)                      | 0   | 13   | 0   |
| PITG_15033   Pi choline dehydrogenase, putative (1825 nt)            | 3   | 3    | 0   |
| PITG_15039   Pi secreted RxLR effector peptide, putative (1518 nt)   | 3   | 29   | 0   |
| PITG_15041   Pi conserved hypothetical protein (651 nt)              | 0   | 0    | 0   |
| PITG_15042   Pi sporangia-induced kinesin-like protein (1308 nt)     | 0   | 1    | 0   |
| PITG_15045   Pi trans-2-enoyl-CoA reductase, putative (1309 nt)      | 21  | 90   | 9   |
| PITG_15046   Pi conserved hypothetical protein (775 nt)              | 5   | 13   | 0   |
| PITG_15047   Pi conserved hypothetical protein (2076 nt)             | 0   | 0    | 0   |
| PITG_15050   Pi conserved hypothetical protein (1959 nt)             | 2   | 5    | 0   |
| PITG_15052   Pi conserved hypothetical protein (1236 nt)             | 1   | 1    | 1   |
| PITG_15053   Pi DNA replication licensing factor MCM6, putative (28  | 3   | 16   | 0   |
| PITG_15055   Pi conserved hypothetical protein (945 nt)              | 98  | 409  | 0   |
| PITG_15057   Pi cysteine desulfurase 1, mitochondrial precursor (158 | 8   | 36   | 0   |
| PITG_15058   Pi transmembrane protein, putative (4373 nt)            | 2   | 28   | 0   |
| PITG_15060   Pi conserved hypothetical protein (3840 nt)             | 5   | 25   | 0   |
| PITG_15062   Pi conserved hypothetical protein (3901 nt)             | 2   | 30   | 0   |
| PITG_15063   Pi conserved hypothetical protein (410 nt)              | 25  | 58   | 0   |
| PITG_15065   Pi conserved hypothetical protein (1365 nt)             | 8   | 19   | 0   |
| PITG_15067   Pi conserved hypothetical protein (1969 nt)             | 8   | 22   | 0   |
| PITG_15069   Pi conserved hypothetical protein (1006 nt)             | 69  | 336  | 165 |
| PITG_15071   Pi conserved hypothetical protein (1382 nt)             | 5   | 45   | 0   |
| PITG_15072   Pi serine protease family S33, putative (1449 nt)       | 3   | 19   | 0   |
| PITG_15075   Pi Major Facilitator Superfamily (MFS) (2391 nt)        | 1   | 17   | 0   |
| PITG_15076   Pi methylmalonate semialdehyde dehydrogenase [acyl      | 5   | 82   | 0   |
| PITG_15077   Pi serine protease family S33, putative (1402 nt)       | 4   | 25   | 0   |
| PITG_15079   Pi conserved hypothetical protein (818 nt)              | 5   | 23   | 0   |
| PITG_15085   Pi conserved hypothetical protein (1043 nt)             | 1   | 11   | 0   |
| PITG_15089   Pi ribosomal protein S6 kinase, putative (2109 nt)      | 8   | 35   | 0   |
| PITG_15090   Pi 50S ribosomal protein L11 (435 nt)                   | 10  | 32   | 1   |
| PITG_15091   Pi conserved hypothetical protein (1136 nt)             | 4   | 13   | 0   |
| PITG_15097   Pi conserved hypothetical protein (1695 nt)             | 5   | 15   | 0   |
| PITG_15100   Pi histidine ammonia-lyase (1846 nt)                    | 67  | 71   | 0   |
| PITG_15101   Pi conserved hypothetical protein (665 nt)              | 1   | 24   | 0   |
| PITG_15116   Pi Multidrug/Oligosaccharidyl-lipid/Polysaccharide (MC  | 29  | 62   | 0   |
| PITG_15117   Pi actin-like protein (1384 nt)                         | 85  | 627  | 147 |
| PITG_15118   Pi actin-like protein (578 nt)                          | 530 | 1454 | 141 |



|            |                                                        |     |     |   |
|------------|--------------------------------------------------------|-----|-----|---|
| PITG_15119 | Pi Multidrug/Oligosaccharidyl-lipid/Polysaccharide (MC | 3   | 13  | 0 |
| PITG_15120 | Pi Multidrug/Oligosaccharidyl-lipid/Polysaccharide (MC | 1   | 22  | 0 |
| PITG_15124 | Pi Multidrug/Oligosaccharidyl-lipid/Polysaccharide (MC | 4   | 30  | 0 |
| PITG_15129 | Pi conserved hypothetical protein (1772 nt)            | 12  | 2   | 0 |
| PITG_15133 | Pi conserved hypothetical protein (1393 nt)            | 10  | 2   | 0 |
| PITG_15134 | Pi conserved hypothetical protein (865 nt)             | 13  | 100 | 0 |
| PITG_15137 | Pi hypothetical protein (530 nt)                       | 21  | 17  | 0 |
| PITG_15138 | Pi conserved hypothetical protein (1231 nt)            | 44  | 98  | 0 |
| PITG_15139 | Pi phospholipid-transporting ATPase, putative (4176 nt | 0   | 11  | 0 |
| PITG_15140 | Pi conserved hypothetical protein (3796 nt)            | 0   | 24  | 0 |
| PITG_15141 | Pi conserved hypothetical protein (2175 nt)            | 1   | 17  | 0 |
| PITG_15146 | Pi conserved hypothetical protein (1896 nt)            | 17  | 24  | 0 |
| PITG_15149 | Pi conserved hypothetical protein (2030 nt)            | 24  | 115 | 0 |
| PITG_15150 | Pi chaperone clpB (1245 nt)                            | 166 | 43  | 0 |
| PITG_15151 | Pi conserved hypothetical protein (423 nt)             | 49  | 25  | 0 |
| PITG_15152 | Pi secreted RxLR effector peptide, putative (2283 nt)  | 2   | 13  | 0 |
| PITG_15154 | Pi conserved hypothetical protein (1444 nt)            | 11  | 62  | 0 |
| PITG_15155 | Pi conserved hypothetical protein (1255 nt)            | 13  | 94  | 0 |
| PITG_15162 | Pi secreted RxLR effector peptide, putative (510 nt)   | 73  | 10  | 0 |
| PITG_15164 | Pi conserved hypothetical protein (2019 nt)            | 8   | 16  | 0 |
| PITG_15166 | Pi secreted RxLR effector peptide, putative (519 nt)   | 238 | 12  | 0 |
| PITG_15167 | Pi hypothetical protein (1374 nt)                      | 1   | 24  | 0 |
| PITG_15173 | Pi conserved hypothetical protein (2982 nt)            | 2   | 25  | 0 |
| PITG_15175 | Pi conserved hypothetical protein (1117 nt)            | 1   | 7   | 0 |
| PITG_15190 | Pi conserved hypothetical protein (973 nt)             | 93  | 0   | 0 |
| PITG_15191 | Pi conserved hypothetical protein (990 nt)             | 8   | 22  | 0 |
| PITG_15194 | Pi Solute:Sodium Symporter (SSS) Family (1223 nt)      | 42  | 181 | 0 |
| PITG_15195 | Pi conserved hypothetical protein (2239 nt)            | 11  | 96  | 0 |
| PITG_15196 | Pi conserved hypothetical protein (1493 nt)            | 3   | 9   | 0 |
| PITG_15197 | Pi hypothetical protein (1477 nt)                      | 251 | 39  | 0 |
| PITG_15207 | Pi conserved hypothetical protein (3197 nt)            | 0   | 11  | 0 |
| PITG_15212 | Pi conserved hypothetical protein (836 nt)             | 10  | 545 | 0 |
| PITG_15214 | Pi conserved hypothetical protein (1016 nt)            | 0   | 0   | 0 |
| PITG_15216 | Pi S-phase kinase-associated protein 1A (615 nt)       | 9   | 63  | 0 |
| PITG_15217 | Pi ribonuclease, putative (1123 nt)                    | 2   | 13  | 0 |
| PITG_15223 | Pi conserved hypothetical protein (3428 nt)            | 1   | 9   | 0 |
| PITG_15228 | Pi transmembrane protein, putative (2191 nt)           | 4   | 36  | 0 |
| PITG_15229 | Pi conserved hypothetical protein (991 nt)             | 53  | 87  | 0 |
| PITG_15235 | Pi secreted RxLR effector peptide, putative (552 nt)   | 59  | 0   | 1 |
| PITG_15240 | Pi conserved hypothetical protein (2706 nt)            | 5   | 10  | 0 |
| PITG_15241 | Pi conserved hypothetical protein (2148 nt)            | 4   | 0   | 0 |
| PITG_15242 | Pi phosphate acetyltransferase (2448 nt)               | 10  | 22  | 0 |
| PITG_15243 | Pi phosphate acetyltransferase (2356 nt)               | 6   | 21  | 0 |
| PITG_15244 | Pi ATP-binding Cassette (ABC) Superfamily (4052 nt)    | 0   | 0   | 0 |
| PITG_15247 | Pi conserved hypothetical protein (567 nt)             | 5   | 34  | 0 |
| PITG_15248 | Pi catalase (1694 nt)                                  | 20  | 135 | 0 |
| PITG_15249 | Pi conserved hypothetical protein (788 nt)             | 14  | 16  | 0 |

|            |                                                         |     |     |    |
|------------|---------------------------------------------------------|-----|-----|----|
| PITG_15250 | Pi conserved hypothetical protein (672 nt)              | 10  | 43  | 2  |
| PITG_15251 | Pi conserved hypothetical protein (1309 nt)             | 11  | 33  | 0  |
| PITG_15252 | Pi conserved hypothetical protein (1635 nt)             | 0   | 14  | 0  |
| PITG_15253 | Pi ATP-binding Cassette (ABC) Superfamily (1364 nt)     | 0   | 0   | 0  |
| PITG_15254 | Pi conserved hypothetical protein (426 nt)              | 0   | 5   | 0  |
| PITG_15257 | Pi conserved hypothetical protein (1148 nt)             | 0   | 14  | 0  |
| PITG_15258 | Pi conserved hypothetical protein (2840 nt)             | 0   | 13  | 0  |
| PITG_15262 | Pi conserved hypothetical protein (2010 nt)             | 6   | 0   | 0  |
| PITG_15264 | Pi transmembrane protein, putative (1623 nt)            | 0   | 0   | 0  |
| PITG_15267 | Pi phospholipid-transporting ATPase, putative (5630 nt) | 2   | 20  | 0  |
| PITG_15268 | Pi conserved hypothetical protein (633 nt)              | 15  | 223 | 0  |
| PITG_15269 | Pi conserved hypothetical protein (700 nt)              | 6   | 102 | 0  |
| PITG_15270 | Pi conserved hypothetical protein (788 nt)              | 14  | 100 | 0  |
| PITG_15280 | Pi conserved hypothetical protein (3074 nt)             | 5   | 41  | 0  |
| PITG_15281 | Pi cell differentiation protein rcd1 (2005 nt)          | 12  | 39  | 0  |
| PITG_15290 | Pi IQ and AAA domain-containing protein, putative (28:  | 3   | 2   | 0  |
| PITG_15292 | Pi catalase (1541 nt)                                   | 4   | 14  | 0  |
| PITG_15293 | Pi conserved hypothetical protein (1851 nt)             | 1   | 11  | 0  |
| PITG_15294 | Pi histidinol dehydrogenase, putative (1676 nt)         | 3   | 23  | 0  |
| PITG_15301 | Pi protein kinase (929 nt)                              | 23  | 50  | 0  |
| PITG_15309 | Pi DNA mismatch repair protein mutS, putative (3242 r   | 1   | 19  | 0  |
| PITG_15310 | Pi actin-like protein (1413 nt)                         | 2   | 19  | 0  |
| PITG_15311 | Pi hypothetical protein (2765 nt)                       | 13  | 74  | 0  |
| PITG_15319 | Pi Voltage-gated Ion Channel (VIC) Superfamily (4882 n  | 0   | 1   | 0  |
| PITG_15320 | Pi Voltage-gated Ion Channel (VIC) Superfamily (2520 n  | 0   | 1   | 0  |
| PITG_15321 | Pi aminomethyltransferase (1298 nt)                     | 3   | 18  | 4  |
| PITG_15322 | Pi conserved hypothetical protein (1048 nt)             | 2   | 12  | 0  |
| PITG_15329 | Pi conserved hypothetical protein (1104 nt)             | 8   | 26  | 0  |
| PITG_15334 | Pi hypothetical protein (436 nt)                        | 0   | 1   | 0  |
| PITG_15335 | Pi thioredoxin/dynein outer arm protein (670 nt)        | 1   | 1   | 0  |
| PITG_15336 | Pi conserved hypothetical protein (639 nt)              | 0   | 2   | 0  |
| PITG_15337 | Pi secreted RxLR effector peptide, putative (501 nt)    | 0   | 0   | 0  |
| PITG_15354 | Pi hypothetical protein (362 nt)                        | 7   | 43  | 0  |
| PITG_15357 | Pi conserved hypothetical protein (567 nt)              | 27  | 43  | 0  |
| PITG_15358 | Pi calreticulin precursor (1415 nt)                     | 320 | 801 | 30 |
| PITG_15359 | Pi dihydrolipoyl dehydrogenase 1, mitochondrial precu   | 12  | 82  | 6  |
| PITG_15360 | Pi conserved hypothetical protein (542 nt)              | 8   | 32  | 0  |
| PITG_15365 | Pi conserved hypothetical protein (1466 nt)             | 53  | 85  | 0  |
| PITG_15367 | Pi Voltage-gated Ion Channel (VIC) Superfamily (1774 n  | 1   | 14  | 0  |
| PITG_15373 | Pi conserved hypothetical protein (637 nt)              | 0   | 12  | 0  |
| PITG_15375 | Pi conserved hypothetical protein (2035 nt)             | 4   | 0   | 0  |
| PITG_15376 | Pi conserved hypothetical protein (1641 nt)             | 0   | 1   | 0  |
| PITG_15377 | Pi conserved hypothetical protein (1667 nt)             | 5   | 102 | 2  |
| PITG_15379 | Pi conserved hypothetical protein (1531 nt)             | 0   | 11  | 0  |
| PITG_15382 | Pi alpha kinase (1681 nt)                               | 3   | 26  | 0  |
| PITG_15383 | Pi thioredoxin-like protein (456 nt)                    | 17  | 78  | 0  |
| PITG_15384 | Pi conserved hypothetical protein (351 nt)              | 6   | 54  | 0  |

|            |                                                                               |      |     |    |
|------------|-------------------------------------------------------------------------------|------|-----|----|
| PITG_15385 | Pi hypothetical protein (354 nt)                                              | 8    | 11  | 0  |
| PITG_15387 | Pi conserved hypothetical protein (2150 nt)                                   | 5    | 13  | 0  |
| PITG_15388 | Pi phenol acid carboxylase, putative (771 nt)                                 | 18   | 61  | 25 |
| PITG_15389 | Pi hypothetical protein (238 nt)                                              | 0    | 11  | 0  |
| PITG_15391 | Pi conserved hypothetical protein (2923 nt)                                   | 3    | 10  | 0  |
| PITG_15392 | Pi leukotriene A-4 hydrolase-like protein (2013 nt)                           | 4    | 54  | 1  |
| PITG_15393 | Pi eukaryotic translation initiation factor, putative (289 nt)                | 2    | 16  | 0  |
| PITG_15394 | Pi serine protease family S33, putative (984 nt)                              | 10   | 30  | 0  |
| PITG_15395 | Pi conserved hypothetical protein (751 nt)                                    | 1    | 0   | 0  |
| PITG_15398 | Pi conserved hypothetical protein (2334 nt)                                   | 0    | 10  | 0  |
| PITG_15406 | Pi Amino Acid/Auxin Permease (AAAP) Family (1470 nt)                          | 39   | 77  | 0  |
| PITG_15407 | Pi ribosomal protein L34 (647 nt)                                             | 1208 | 953 | 49 |
| PITG_15408 | Pi phosphatidylinositol kinase (PIK-L1) (9717 nt)                             | 2    | 25  | 0  |
| PITG_15409 | Pi conserved hypothetical protein (1103 nt)                                   | 35   | 240 | 0  |
| PITG_15410 | Pi conserved hypothetical protein (1616 nt)                                   | 0    | 15  | 0  |
| PITG_15411 | Pi conserved hypothetical protein (1101 nt)                                   | 2    | 17  | 0  |
| PITG_15414 | Pi sporangia induced 28 kDa inner dynein arm light chain (1000 nt)            | 0    | 0   | 0  |
| PITG_15416 | Pi conserved hypothetical protein (627 nt)                                    | 33   | 81  | 0  |
| PITG_15417 | Pi asparagine synthetase domain-containing protein, putative (1000 nt)        | 8    | 11  | 0  |
| PITG_15438 | Pi conserved hypothetical protein (469 nt)                                    | 2    | 12  | 0  |
| PITG_15440 | Pi conserved hypothetical protein (222 nt)                                    | 7    | 20  | 0  |
| PITG_15442 | Pi transmembrane protein, putative (1282 nt)                                  | 24   | 75  | 0  |
| PITG_15443 | Pi conserved hypothetical protein (876 nt)                                    | 4    | 17  | 0  |
| PITG_15444 | Pi conserved hypothetical protein (2945 nt)                                   | 2    | 16  | 0  |
| PITG_15445 | Pi conserved hypothetical protein (1188 nt)                                   | 12   | 12  | 0  |
| PITG_15446 | Pi conserved hypothetical protein (559 nt)                                    | 1    | 13  | 0  |
| PITG_15447 | Pi conserved hypothetical protein (2972 nt)                                   | 3    | 16  | 0  |
| PITG_15448 | Pi conserved hypothetical protein (569 nt)                                    | 0    | 1   | 0  |
| PITG_15449 | Pi branched-chain-amino-acid aminotransferase (1312 nt)                       | 37   | 136 | 10 |
| PITG_15459 | Pi GAF domain-containing protein (3303 nt)                                    | 0    | 0   | 0  |
| PITG_15462 | Pi GAF domain-containing protein (1812 nt)                                    | 0    | 11  | 0  |
| PITG_15463 | Pi lamin-like protein (1884 nt)                                               | 3    | 16  | 0  |
| PITG_15466 | Pi serine protease family S33, putative (1221 nt)                             | 18   | 34  | 0  |
| PITG_15467 | Pi conserved hypothetical protein (1091 nt)                                   | 17   | 64  | 2  |
| PITG_15470 | Pi conserved hypothetical protein (1371 nt)                                   | 52   | 10  | 0  |
| PITG_15471 | Pi conserved hypothetical protein (2307 nt)                                   | 0    | 0   | 0  |
| PITG_15473 | Pi conserved hypothetical protein (1992 nt)                                   | 0    | 0   | 0  |
| PITG_15476 | Pi malate dehydrogenase (1245 nt)                                             | 96   | 553 | 5  |
| PITG_15479 | Pi conserved hypothetical protein (1362 nt)                                   | 5    | 6   | 0  |
| PITG_15483 | Pi putative GPI-anchored serine-threonine rich hypothetical protein (1000 nt) | 140  | 255 | 0  |
| PITG_15485 | Pi conserved hypothetical protein (1711 nt)                                   | 22   | 52  | 0  |
| PITG_15486 | Pi general transcription factor IIH subunit, putative (1500 nt)               | 14   | 29  | 0  |
| PITG_15491 | Pi glutaredoxin (599 nt)                                                      | 0    | 0   | 0  |
| PITG_15492 | Pi peroxiredoxin-2 (777 nt)                                                   | 87   | 103 | 18 |
| PITG_15493 | Pi threonine aspartase, putative (1266 nt)                                    | 2    | 17  | 0  |
| PITG_15494 | Pi cytosine deaminase (438 nt)                                                | 25   | 11  | 0  |
| PITG_15496 | Pi acyl-CoA synthetase, putative (1889 nt)                                    | 6    | 29  | 0  |

|            |                                                           |     |     |    |
|------------|-----------------------------------------------------------|-----|-----|----|
| PITG_15497 | Pi conserved hypothetical protein (1797 nt)               | 18  | 13  | 0  |
| PITG_15500 | Pi conserved hypothetical protein (730 nt)                | 6   | 9   | 0  |
| PITG_15502 | Pi conserved hypothetical protein (894 nt)                | 5   | 61  | 0  |
| PITG_15503 | Pi conserved hypothetical protein (1359 nt)               | 60  | 86  | 0  |
| PITG_15504 | Pi thioredoxin peroxidase, putative (765 nt)              | 21  | 62  | 17 |
| PITG_15505 | Pi DNA polymerase epsilon catalytic subunit, putative (   | 0   | 13  | 0  |
| PITG_15509 | Pi SNF2 family helicase/ATPase and F-box protein, puta    | 2   | 12  | 0  |
| PITG_15518 | Pi conserved hypothetical protein (1535 nt)               | 22  | 45  | 0  |
| PITG_15519 | Pi conserved hypothetical protein (522 nt)                | 7   | 45  | 0  |
| PITG_15525 | Pi Rab21/Rab5 family GTPase, putative (747 nt)            | 67  | 87  | 0  |
| PITG_15526 | Pi ATP synthase subunit O, putative (696 nt)              | 64  | 220 | 24 |
| PITG_15528 | Pi hypothetical protein (242 nt)                          | 4   | 29  | 0  |
| PITG_15529 | Pi exosome complex exonuclease RRP45-like protein (1      | 1   | 13  | 0  |
| PITG_15531 | Pi glutathione S-transferase, putative (1086 nt)          | 35  | 297 | 1  |
| PITG_15534 | Pi conserved hypothetical protein (905 nt)                | 14  | 8   | 0  |
| PITG_15537 | Pi conserved hypothetical protein (786 nt)                | 46  | 0   | 0  |
| PITG_15538 | Pi conserved hypothetical protein (1715 nt)               | 0   | 16  | 0  |
| PITG_15539 | Pi conserved hypothetical protein (1063 nt)               | 30  | 111 | 0  |
| PITG_15540 | Pi conserved hypothetical protein (522 nt)                | 6   | 31  | 0  |
| PITG_15541 | Pi conserved hypothetical protein (778 nt)                | 7   | 22  | 0  |
| PITG_15542 | Pi conserved hypothetical protein (805 nt)                | 7   | 52  | 0  |
| PITG_15543 | Pi conserved hypothetical protein (1270 nt)               | 3   | 33  | 0  |
| PITG_15544 | Pi conserved hypothetical protein (588 nt)                | 2   | 9   | 0  |
| PITG_15547 | Pi Amino Acid-Polyamine-Organocation (APC) Family (9      | 0   | 0   | 0  |
| PITG_15549 | Pi Mitochondrial Carrier (MC) Family (1028 nt)            | 1   | 5   | 0  |
| PITG_15550 | Pi conserved hypothetical protein (987 nt)                | 16  | 38  | 0  |
| PITG_15551 | Pi hypothetical protein (517 nt)                          | 57  | 44  | 0  |
| PITG_15552 | Pi phosphatidylinositol-4-phosphate-5-kinase (PIPK-C) (   | 0   | 7   | 0  |
| PITG_15553 | Pi inorganic pyrophosphatase, putative (1909 nt)          | 9   | 115 | 3  |
| PITG_15564 | Pi conserved hypothetical protein (2655 nt)               | 2   | 20  | 0  |
| PITG_15565 | Pi conserved hypothetical protein (645 nt)                | 2   | 6   | 0  |
| PITG_15566 | Pi RNA polymerase I-specific transcription initiation fac | 5   | 11  | 0  |
| PITG_15567 | Pi conserved hypothetical protein (1461 nt)               | 173 | 246 | 0  |
| PITG_15568 | Pi conserved hypothetical protein (824 nt)                | 45  | 102 | 5  |
| PITG_15569 | Pi calpain-like protease (2958 nt)                        | 8   | 12  | 0  |
| PITG_15570 | Pi hypothetical protein (1060 nt)                         | 2   | 10  | 0  |
| PITG_15571 | Pi Mitochondrial Carrier (MC) Family (1806 nt)            | 11  | 19  | 0  |
| PITG_15572 | Pi conserved hypothetical protein (2690 nt)               | 0   | 0   | 0  |
| PITG_15573 | Pi cytochrome b ascorbate-dependent protein, putativ      | 24  | 58  | 0  |
| PITG_15576 | Pi glycoside hydrolase, putative (911 nt)                 | 0   | 0   | 0  |
| PITG_15577 | Pi hypothetical protein (1345 nt)                         | 1   | 0   | 0  |
| PITG_15582 | Pi conserved hypothetical protein (9886 nt)               | 0   | 5   | 0  |
| PITG_15593 | Pi conserved hypothetical protein (887 nt)                | 8   | 38  | 0  |
| PITG_15596 | Pi protein kinase (1075 nt)                               | 10  | 25  | 0  |
| PITG_15602 | Pi conserved hypothetical protein (1893 nt)               | 35  | 227 | 0  |
| PITG_15603 | Pi conserved hypothetical protein (1020 nt)               | 37  | 20  | 0  |
| PITG_15605 | Pi conserved hypothetical protein (1216 nt)               | 14  | 94  | 0  |

|            |                                                            |      |     |    |
|------------|------------------------------------------------------------|------|-----|----|
| PITG_15607 | Pi conserved hypothetical protein (2897 nt)                | 1    | 19  | 0  |
| PITG_15608 | Pi conserved hypothetical protein (1276 nt)                | 0    | 27  | 0  |
| PITG_15609 | Pi conserved hypothetical protein (544 nt)                 | 14   | 49  | 0  |
| PITG_15611 | Pi protein kinase (900 nt)                                 | 7    | 8   | 2  |
| PITG_15615 | Pi short/branched chain specific acyl-CoA dehydrogenase    | 121  | 373 | 0  |
| PITG_15616 | Pi protein kinase (861 nt)                                 | 2    | 1   | 0  |
| PITG_15619 | Pi protein kinase (957 nt)                                 | 7    | 39  | 0  |
| PITG_15620 | Pi Voltage-gated Ion Channel (VIC) Superfamily (3285 nt)   | 0    | 3   | 0  |
| PITG_15621 | Pi conserved hypothetical protein (2935 nt)                | 5    | 11  | 0  |
| PITG_15623 | Pi nucampholin (2183 nt)                                   | 8    | 17  | 0  |
| PITG_15625 | Pi dynein heavy chain (15033 nt)                           | 0    | 14  | 0  |
| PITG_15626 | Pi superoxide dismutase 2 (637 nt)                         | 180  | 137 | 32 |
| PITG_15627 | Pi conserved hypothetical protein (1153 nt)                | 8    | 60  | 0  |
| PITG_15628 | Pi conserved hypothetical protein (1316 nt)                | 4    | 3   | 0  |
| PITG_15629 | Pi conserved hypothetical protein (1197 nt)                | 3    | 39  | 0  |
| PITG_15630 | Pi conserved hypothetical protein (558 nt)                 | 23   | 94  | 0  |
| PITG_15637 | Pi abnormal spindle-like microcephaly-associated protein   | 1    | 15  | 0  |
| PITG_15638 | Pi conserved hypothetical protein (686 nt)                 | 1383 | 673 | 51 |
| PITG_15639 | Pi hypothetical protein (570 nt)                           | 227  | 530 | 47 |
| PITG_15640 | Pi peroxisomal 2,4-dienoyl-CoA reductase, putative (89 nt) | 18   | 48  | 0  |
| PITG_15641 | Pi conserved hypothetical protein (1283 nt)                | 14   | 26  | 0  |
| PITG_15642 | Pi conserved hypothetical protein (1448 nt)                | 29   | 45  | 0  |
| PITG_15644 | Pi glycoside hydrolase, putative (2049 nt)                 | 1    | 18  | 0  |
| PITG_15648 | Pi conserved hypothetical protein (1335 nt)                | 0    | 13  | 0  |
| PITG_15649 | Pi Mitochondrial Carrier (MC) Family (840 nt)              | 26   | 15  | 0  |
| PITG_15652 | Pi H/ACA ribonucleoprotein complex subunit, putative       | 12   | 28  | 0  |
| PITG_15653 | Pi small nuclear ribonucleoprotein G (381 nt)              | 82   | 49  | 3  |
| PITG_15654 | Pi conserved hypothetical protein (794 nt)                 | 180  | 215 | 2  |
| PITG_15655 | Pi conserved hypothetical protein (2621 nt)                | 1    | 0   | 0  |
| PITG_15656 | Pi conserved hypothetical protein (598 nt)                 | 187  | 96  | 0  |
| PITG_15657 | Pi conserved hypothetical protein (616 nt)                 | 14   | 42  | 1  |
| PITG_15658 | Pi hypothetical protein (2142 nt)                          | 0    | 22  | 0  |
| PITG_15659 | Pi ribonucleoside-diphosphate reductase small chain (1 nt) | 0    | 0   | 0  |
| PITG_15660 | Pi mitochondrial carnitine/acylcarnitine carrier protein   | 382  | 114 | 0  |
| PITG_15661 | Pi GMP reductase 2 (2054 nt)                               | 25   | 34  | 0  |
| PITG_15662 | Pi conserved hypothetical protein (1467 nt)                | 1    | 7   | 0  |
| PITG_15666 | Pi conserved hypothetical protein (895 nt)                 | 15   | 11  | 0  |
| PITG_15669 | Pi conserved hypothetical protein (1362 nt)                | 2    | 22  | 0  |
| PITG_15671 | Pi conserved hypothetical protein (306 nt)                 | 28   | 33  | 0  |
| PITG_15672 | Pi conserved hypothetical protein (1341 nt)                | 15   | 19  | 0  |
| PITG_15677 | Pi conserved hypothetical protein (1168 nt)                | 0    | 11  | 0  |
| PITG_15686 | Pi conserved hypothetical protein (1242 nt)                | 1    | 3   | 1  |
| PITG_15687 | Pi conserved hypothetical protein (743 nt)                 | 150  | 81  | 0  |
| PITG_15688 | Pi conserved hypothetical protein (2067 nt)                | 5    | 32  | 2  |
| PITG_15693 | Pi hypothetical protein (725 nt)                           | 2    | 16  | 0  |
| PITG_15694 | Pi dihydroorotase (1271 nt)                                | 25   | 42  | 0  |
| PITG_15695 | Pi conserved hypothetical protein (2460 nt)                | 14   | 29  | 0  |

|            |                                                            |      |     |    |
|------------|------------------------------------------------------------|------|-----|----|
| PITG_15696 | Pi TFIIF basal transcription factor complex helicase sub   | 7    | 21  | 0  |
| PITG_15697 | Pi 60S ribosomal protein L11, putative (880 nt)            | 400  | 536 | 63 |
| PITG_15705 | Pi dihydrolipoamide succinyltransferase, putative (173     | 10   | 31  | 1  |
| PITG_15706 | Pi conserved hypothetical protein (558 nt)                 | 131  | 13  | 0  |
| PITG_15711 | Pi conserved hypothetical protein (693 nt)                 | 2    | 20  | 0  |
| PITG_15723 | Pi 60S ribosomal protein L14, putative (718 nt)            | 1513 | 644 | 53 |
| PITG_15727 | Pi hypothetical protein (908 nt)                           | 932  | 0   | 9  |
| PITG_15731 | Pi ATP-binding Cassette (ABC) Superfamily (4094 nt)        | 18   | 103 | 0  |
| PITG_15735 | Pi protein kinase, putative (3069 nt)                      | 39   | 306 | 0  |
| PITG_15736 | Pi conserved hypothetical protein (812 nt)                 | 1    | 20  | 0  |
| PITG_15737 | Pi conserved hypothetical protein (528 nt)                 | 11   | 36  | 0  |
| PITG_15738 | Pi conserved hypothetical protein (965 nt)                 | 9    | 52  | 0  |
| PITG_15739 | Pi protein MYG1 (1098 nt)                                  | 2    | 13  | 0  |
| PITG_15744 | Pi conserved hypothetical protein (1112 nt)                | 0    | 0   | 0  |
| PITG_15745 | Pi adhesin-like protein (2106 nt)                          | 1    | 0   | 0  |
| PITG_15746 | Pi SCP-like extracellular protein, putative (1590 nt)      | 1    | 13  | 0  |
| PITG_15748 | Pi conserved hypothetical protein (1106 nt)                | 7    | 10  | 0  |
| PITG_15749 | Pi conserved hypothetical protein (1287 nt)                | 9    | 3   | 0  |
| PITG_15755 | Pi AP-3 complex subunit beta, putative (3254 nt)           | 4    | 24  | 0  |
| PITG_15758 | Pi conserved hypothetical protein (3908 nt)                | 0    | 0   | 0  |
| PITG_15759 | Pi conserved hypothetical protein (701 nt)                 | 0    | 0   | 0  |
| PITG_15761 | Pi conserved hypothetical protein (1032 nt)                | 30   | 115 | 0  |
| PITG_15762 | Pi conserved hypothetical protein (2506 nt)                | 2    | 16  | 0  |
| PITG_15771 | Pi hsp70-like protein (2743 nt)                            | 15   | 167 | 5  |
| PITG_15774 | Pi protein kinase (901 nt)                                 | 16   | 32  | 0  |
| PITG_15776 | Pi protein kinase, putative (867 nt)                       | 9    | 68  | 0  |
| PITG_15777 | Pi protein kinase (924 nt)                                 | 3    | 7   | 0  |
| PITG_15778 | Pi diphosphomevalonate decarboxylase (1344 nt)             | 1    | 10  | 0  |
| PITG_15779 | Pi conserved hypothetical protein (4641 nt)                | 2    | 17  | 0  |
| PITG_15780 | Pi radial spoke protein 11 (405 nt)                        | 15   | 16  | 0  |
| PITG_15781 | Pi WD domain-containing protein, putative (1246 nt)        | 36   | 39  | 0  |
| PITG_15783 | Pi conserved hypothetical protein (1379 nt)                | 15   | 19  | 0  |
| PITG_15784 | Pi polyadenylate-binding protein 2 (741 nt)                | 21   | 45  | 0  |
| PITG_15785 | Pi conserved hypothetical protein (1732 nt)                | 3    | 11  | 0  |
| PITG_15786 | Pi heat shock 70 kDa protein, mitochondrial precursor      | 75   | 140 | 7  |
| PITG_15787 | Pi conserved hypothetical protein (2141 nt)                | 53   | 86  | 0  |
| PITG_15791 | Pi glycoside hydrolase, putative (1428 nt)                 | 3    | 27  | 0  |
| PITG_15806 | Pi conserved hypothetical protein (1643 nt)                | 2    | 23  | 0  |
| PITG_15807 | Pi conserved hypothetical protein (2721 nt)                | 4    | 43  | 0  |
| PITG_15810 | Pi eukaryotic translation initiation factor 3 subunit A, p | 0    | 20  | 0  |
| PITG_15817 | Pi calpain-like protein (3729 nt)                          | 4    | 22  | 0  |
| PITG_15818 | Pi conserved hypothetical protein (1282 nt)                | 28   | 25  | 0  |
| PITG_15819 | Pi glutamyl-tRNA(Gln) amidotransferase subunit A, put      | 4    | 23  | 0  |
| PITG_15820 | Pi conserved hypothetical protein (2086 nt)                | 21   | 58  | 0  |
| PITG_15821 | Pi conserved hypothetical protein (564 nt)                 | 7    | 29  | 0  |
| PITG_15830 | Pi conserved hypothetical protein (651 nt)                 | 10   | 75  | 0  |
| PITG_15831 | Pi 5-formyltetrahydrofolate cyclo-ligase, putative (931    | 16   | 75  | 0  |

|            |                                                       |     |     |   |
|------------|-------------------------------------------------------|-----|-----|---|
| PITG_15832 | Pi conserved hypothetical protein (3253 nt)           | 12  | 9   | 0 |
| PITG_15833 | Pi conserved hypothetical protein (1646 nt)           | 8   | 60  | 0 |
| PITG_15836 | Pi hypothetical protein (1718 nt)                     | 2   | 25  | 0 |
| PITG_15837 | Pi chromodomain protein, putative (3178 nt)           | 0   | 13  | 0 |
| PITG_15838 | Pi conserved hypothetical protein (1857 nt)           | 0   | 14  | 0 |
| PITG_15839 | Pi conserved hypothetical protein (1039 nt)           | 13  | 22  | 0 |
| PITG_15843 | Pi acyltransferase family (1479 nt)                   | 0   | 11  | 1 |
| PITG_15844 | Pi conserved hypothetical protein (2118 nt)           | 1   | 21  | 0 |
| PITG_15846 | Pi conserved hypothetical protein (2814 nt)           | 35  | 295 | 0 |
| PITG_15847 | Pi conserved hypothetical protein (2463 nt)           | 2   | 9   | 0 |
| PITG_15848 | Pi conserved hypothetical protein (2917 nt)           | 6   | 41  | 0 |
| PITG_15849 | Pi hypothetical protein (264 nt)                      | 0   | 0   | 0 |
| PITG_15850 | Pi glycine dehydrogenase, mitochondrial precursor (33 | 4   | 68  | 6 |
| PITG_15851 | Pi conserved hypothetical protein (1463 nt)           | 0   | 3   | 0 |
| PITG_15852 | Pi transmembrane protein, putative (1124 nt)          | 12  | 37  | 0 |
| PITG_15855 | Pi conserved hypothetical protein (4697 nt)           | 1   | 4   | 0 |
| PITG_15856 | Pi conserved hypothetical protein (1310 nt)           | 1   | 23  | 0 |
| PITG_15857 | Pi conserved hypothetical protein (654 nt)            | 20  | 6   | 0 |
| PITG_15858 | Pi conserved hypothetical protein (1103 nt)           | 0   | 3   | 0 |
| PITG_15860 | Pi hypothetical protein (985 nt)                      | 2   | 12  | 0 |
| PITG_15861 | Pi conserved hypothetical protein (879 nt)            | 0   | 1   | 0 |
| PITG_15862 | Pi conserved hypothetical protein (927 nt)            | 0   | 7   | 0 |
| PITG_15863 | Pi conserved hypothetical protein (1556 nt)           | 72  | 312 | 2 |
| PITG_15864 | Pi conserved hypothetical protein (506 nt)            | 108 | 41  | 0 |
| PITG_15865 | Pi conserved hypothetical protein (1048 nt)           | 119 | 40  | 0 |
| PITG_15866 | Pi conserved hypothetical protein (1363 nt)           | 6   | 21  | 1 |
| PITG_15867 | Pi syntaxin-binding protein, putative (2129 nt)       | 0   | 5   | 0 |
| PITG_15868 | Pi DNA primase, putative (1617 nt)                    | 5   | 12  | 0 |
| PITG_15869 | Pi conserved hypothetical protein (1387 nt)           | 1   | 14  | 0 |
| PITG_15870 | Pi conserved hypothetical protein (903 nt)            | 0   | 10  | 0 |
| PITG_15871 | Pi nucleolar protein, putative (2417 nt)              | 88  | 52  | 0 |
| PITG_15872 | Pi conserved hypothetical protein (898 nt)            | 53  | 158 | 0 |
| PITG_15873 | Pi NADH-cytochrome b5 reductase (1043 nt)             | 19  | 85  | 1 |
| PITG_15874 | Pi conserved hypothetical protein (2007 nt)           | 9   | 8   | 0 |
| PITG_15875 | Pi conserved hypothetical protein (2397 nt)           | 11  | 39  | 0 |
| PITG_15876 | Pi conserved hypothetical protein (953 nt)            | 3   | 13  | 0 |
| PITG_15877 | Pi conserved hypothetical protein (396 nt)            | 72  | 5   | 0 |
| PITG_15878 | Pi conserved hypothetical protein (701 nt)            | 12  | 0   | 0 |
| PITG_15881 | Pi peptide methionine sulfoxide reductase (494 nt)    | 10  | 67  | 0 |
| PITG_15882 | Pi alpha,alpha-trehalose-phosphate synthase (3076 nt) | 1   | 12  | 0 |
| PITG_15883 | Pi myotubularin-like protein (3379 nt)                | 5   | 9   | 0 |
| PITG_15884 | Pi guanylate-binding protein, putative (2455 nt)      | 3   | 19  | 0 |
| PITG_15885 | Pi conserved hypothetical protein (1447 nt)           | 12  | 38  | 0 |
| PITG_15889 | Pi serine protease family S54, putative (1226 nt)     | 1   | 16  | 0 |
| PITG_15890 | Pi threonine protease family T01A, putative (858 nt)  | 35  | 162 | 9 |
| PITG_15891 | Pi palmitoyltransferase, putative (1557 nt)           | 7   | 20  | 0 |
| PITG_15892 | Pi calcium/calmodulin dependent protein kinase, putat | 30  | 90  | 0 |

|                                                                      |     |     |    |
|----------------------------------------------------------------------|-----|-----|----|
| PITG_15900   Pi ATP-binding Cassette (ABC) Superfamily (3873 nt)     | 1   | 2   | 0  |
| PITG_15903   Pi phosphoethanolamine N-methyltransferase (1532 nt)    | 1   | 19  | 2  |
| PITG_15904   Pi phosphoethanolamine N-methyltransferase, putative    | 25  | 176 | 3  |
| PITG_15906   Pi DNA repair protein RAD51 (1595 nt)                   | 12  | 91  | 0  |
| PITG_15908   Pi conserved hypothetical protein (5365 nt)             | 0   | 1   | 0  |
| PITG_15912   Pi Glycoside-Pentoside-Hexuronide (GPH):Cation Symp     | 13  | 13  | 0  |
| PITG_15916   Pi hypothetical protein (1789 nt)                       | 19  | 8   | 0  |
| PITG_15920   Pi conserved hypothetical protein (942 nt)              | 26  | 35  | 0  |
| PITG_15921   Pi hypothetical protein (663 nt)                        | 2   | 43  | 0  |
| PITG_15923   Pi conserved hypothetical protein (889 nt)              | 5   | 10  | 1  |
| PITG_15924   Pi conserved hypothetical protein (1916 nt)             | 23  | 13  | 0  |
| PITG_15925   Pi conserved hypothetical protein (1834 nt)             | 23  | 18  | 0  |
| PITG_15926   Pi conserved hypothetical protein (1808 nt)             | 20  | 6   | 0  |
| PITG_15927   Pi conserved hypothetical protein (2096 nt)             | 16  | 46  | 0  |
| PITG_15929   Pi paladin-like protein (3014 nt)                       | 3   | 12  | 0  |
| PITG_15946   Pi hypothetical protein (2795 nt)                       | 1   | 11  | 0  |
| PITG_15947   Pi hypothetical protein (912 nt)                        | 1   | 11  | 0  |
| PITG_15948   Pi serine protease family S33, putative (1622 nt)       | 0   | 2   | 0  |
| PITG_15951   Pi hypothetical protein (1263 nt)                       | 5   | 39  | 0  |
| PITG_15954   Pi SNARE associated Golgi protein, putative (970 nt)    | 61  | 62  | 1  |
| PITG_15955   Pi epoxide hydrolase, putative (1375 nt)                | 5   | 34  | 0  |
| PITG_15956   Pi epoxide hydrolase, putative (1137 nt)                | 16  | 0   | 0  |
| PITG_15957   Pi serine protease family S33, putative (1008 nt)       | 4   | 45  | 0  |
| PITG_15958   Pi serine protease family S33, putative (1068 nt)       | 6   | 68  | 0  |
| PITG_15959   Pi conserved hypothetical protein (1483 nt)             | 7   | 47  | 0  |
| PITG_15960   Pi conserved hypothetical protein (2469 nt)             | 6   | 21  | 0  |
| PITG_15961   Pi conserved hypothetical protein (3683 nt)             | 19  | 25  | 0  |
| PITG_15962   Pi conserved hypothetical protein (1744 nt)             | 2   | 37  | 0  |
| PITG_15963   Pi conserved hypothetical protein (1521 nt)             | 3   | 0   | 0  |
| PITG_15964   Pi conserved hypothetical protein (1639 nt)             | 2   | 0   | 0  |
| PITG_15967   Pi dynein heavy chain, outer arm (14271 nt)             | 0   | 21  | 0  |
| PITG_15968   Pi mucin-like protein (3491 nt)                         | 0   | 1   | 0  |
| PITG_15969   Pi conserved hypothetical protein (2656 nt)             | 2   | 6   | 0  |
| PITG_15973   Pi conserved hypothetical protein (1294 nt)             | 25  | 19  | 0  |
| PITG_15980   Pi glycoside hydrolase, putative (1332 nt)              | 3   | 12  | 0  |
| PITG_15981   Pi conserved hypothetical protein (1575 nt)             | 5   | 28  | 0  |
| PITG_15982   Pi histone-arginine methyltransferase, putative (1126 r | 3   | 13  | 0  |
| PITG_15983   Pi conserved hypothetical protein (977 nt)              | 33  | 15  | 0  |
| PITG_15985   Pi hypothetical protein (1063 nt)                       | 36  | 3   | 0  |
| PITG_15994   Pi conserved hypothetical protein (845 nt)              | 29  | 16  | 0  |
| PITG_15996   Pi hypothetical protein (656 nt)                        | 6   | 35  | 0  |
| PITG_15998   Pi phospholipase A-2-activating protein, putative (2794 | 8   | 33  | 0  |
| PITG_15999   Pi conserved hypothetical protein (784 nt)              | 2   | 32  | 0  |
| PITG_16001   Pi regulator of chromosome condensation (RCC1), puta    | 0   | 5   | 0  |
| PITG_16005   Pi methylmalonate-semialdehyde dehydrogenase, mitc      | 257 | 690 | 17 |
| PITG_16006   Pi conserved hypothetical protein (1989 nt)             | 3   | 16  | 0  |
| PITG_16008   Pi 40S ribosomal protein S27-like protein (935 nt)      | 759 | 929 | 38 |



|            |                                                            |     |     |    |
|------------|------------------------------------------------------------|-----|-----|----|
| PITG_16009 | Pi importin subunit alpha, putative (2553 nt)              | 15  | 40  | 0  |
| PITG_16010 | Pi conserved hypothetical protein (1197 nt)                | 4   | 13  | 0  |
| PITG_16014 | Pi conserved hypothetical protein (2154 nt)                | 1   | 11  | 0  |
| PITG_16015 | Pi ribonuclease, putative (1049 nt)                        | 2   | 33  | 0  |
| PITG_16016 | Pi cytochrome oxidase assembly protein, putative (142      | 2   | 18  | 0  |
| PITG_16017 | Pi deoxyribose-phosphate aldolase (1144 nt)                | 0   | 11  | 0  |
| PITG_16020 | Pi conserved hypothetical protein (1670 nt)                | 11  | 23  | 0  |
| PITG_16021 | Pi conserved hypothetical protein (1775 nt)                | 79  | 574 | 1  |
| PITG_16022 | Pi conserved hypothetical protein (1078 nt)                | 4   | 13  | 0  |
| PITG_16023 | Pi transcription initiation factor TFIID subunit, putative | 2   | 13  | 0  |
| PITG_16024 | Pi riboflavin synthase subunit alpha, putative (732 nt)    | 7   | 27  | 0  |
| PITG_16026 | Pi conserved hypothetical protein (1171 nt)                | 0   | 62  | 0  |
| PITG_16031 | Pi conserved hypothetical protein (1179 nt)                | 0   | 22  | 0  |
| PITG_16036 | Pi echinoderm microtubule-associated protein (7873 n       | 3   | 10  | 0  |
| PITG_16037 | Pi conserved hypothetical protein (393 nt)                 | 1   | 10  | 0  |
| PITG_16038 | Pi conserved hypothetical protein (2034 nt)                | 10  | 31  | 0  |
| PITG_16040 | Pi conserved hypothetical protein (701 nt)                 | 0   | 3   | 0  |
| PITG_16041 | Pi conserved hypothetical protein (1535 nt)                | 64  | 56  | 10 |
| PITG_16042 | Pi conserved hypothetical protein (1670 nt)                | 8   | 26  | 0  |
| PITG_16043 | Pi conserved hypothetical protein (1179 nt)                | 67  | 126 | 0  |
| PITG_16044 | Pi CRN domain-containing protein-containing protein (:     | 12  | 13  | 0  |
| PITG_16048 | Pi triosephosphate isomerase (843 nt)                      | 34  | 46  | 3  |
| PITG_16049 | Pi conserved hypothetical protein (882 nt)                 | 11  | 35  | 0  |
| PITG_16050 | Pi hypothetical protein (2981 nt)                          | 3   | 10  | 0  |
| PITG_16052 | Pi Animal Inward Rectifier K Channel (IRK-C) Family (15    | 31  | 34  | 0  |
| PITG_16053 | Pi conserved hypothetical protein (1032 nt)                | 5   | 17  | 0  |
| PITG_16054 | Pi 60S ribosomal export protein nmd3, putative (1500       | 6   | 11  | 0  |
| PITG_16055 | Pi lysosomal Pro-X carboxypeptidase, putative (1710 nt     | 10  | 13  | 0  |
| PITG_16056 | Pi cyclin-dependent kinase-like, putative (1947 nt)        | 4   | 0   | 0  |
| PITG_16057 | Pi enolase-like protein, putative (1713 nt)                | 0   | 1   | 0  |
| PITG_16058 | Pi conserved hypothetical protein (10877 nt)               | 5   | 53  | 0  |
| PITG_16061 | Pi sodium/potassium-transporting ATPase subunit alph       | 0   | 2   | 0  |
| PITG_16062 | Pi conserved hypothetical protein (1547 nt)                | 5   | 11  | 0  |
| PITG_16063 | Pi conserved hypothetical protein (1501 nt)                | 15  | 69  | 0  |
| PITG_16065 | Pi conserved hypothetical protein (643 nt)                 | 43  | 91  | 0  |
| PITG_16066 | Pi conserved hypothetical protein (978 nt)                 | 3   | 14  | 0  |
| PITG_16067 | Pi conserved hypothetical protein (1236 nt)                | 6   | 25  | 0  |
| PITG_16068 | Pi conserved hypothetical protein (744 nt)                 | 51  | 12  | 0  |
| PITG_16069 | Pi heat shock protein 101 (2853 nt)                        | 422 | 156 | 0  |
| PITG_16071 | Pi prenyltransferase-like protein, putative (2267 nt)      | 23  | 35  | 0  |
| PITG_16072 | Pi conserved hypothetical protein (850 nt)                 | 7   | 12  | 0  |
| PITG_16073 | Pi alcohol dehydrogenase, putative (1376 nt)               | 11  | 55  | 0  |
| PITG_16074 | Pi heat shock protein 101 (2766 nt)                        | 653 | 223 | 0  |
| PITG_16076 | Pi glyoxylate/hydroxypyruvate reductase A, putative (1     | 2   | 20  | 0  |
| PITG_16078 | Pi conserved hypothetical protein (3849 nt)                | 2   | 20  | 0  |
| PITG_16079 | Pi conserved hypothetical protein (926 nt)                 | 2   | 18  | 0  |
| PITG_16081 | Pi hypothetical protein (3123 nt)                          | 27  | 18  | 0  |

|            |                                                         |     |     |    |
|------------|---------------------------------------------------------|-----|-----|----|
| PITG_16083 | Pi glyoxylate/hydroxypyruvate reductase A, putative (1  | 8   | 7   | 1  |
| PITG_16085 | Pi conserved hypothetical protein (1283 nt)             | 26  | 19  | 0  |
| PITG_16088 | Pi conserved hypothetical protein (1690 nt)             | 1   | 14  | 0  |
| PITG_16089 | Pi conserved hypothetical protein (1434 nt)             | 3   | 3   | 0  |
| PITG_16090 | Pi conserved hypothetical protein (6724 nt)             | 0   | 13  | 0  |
| PITG_16092 | Pi Multidrug/Oligosaccharidyl-lipid/Polysaccharide (MC  | 0   | 2   | 0  |
| PITG_16093 | Pi conserved hypothetical protein (801 nt)              | 39  | 149 | 0  |
| PITG_16094 | Pi hypothetical protein (479 nt)                        | 0   | 0   | 0  |
| PITG_16097 | Pi Monovalent Cation:Proton Antiporter-1 (CPA1) Fami    | 0   | 13  | 0  |
| PITG_16098 | Pi D-isomer specific 2-hydroxyacid dehydrogenase, put   | 6   | 22  | 0  |
| PITG_16099 | Pi conserved hypothetical protein (4496 nt)             | 0   | 1   | 0  |
| PITG_16103 | Pi Major Facilitator Superfamily (MFS) (1347 nt)        | 5   | 9   | 0  |
| PITG_16104 | Pi cryptochrome, putative (2154 nt)                     | 4   | 9   | 0  |
| PITG_16105 | Pi conserved hypothetical protein (771 nt)              | 3   | 23  | 0  |
| PITG_16107 | Pi rRNA biogenesis protein rrp5 (5835 nt)               | 1   | 12  | 0  |
| PITG_16111 | Pi conserved hypothetical protein (1490 nt)             | 0   | 30  | 0  |
| PITG_16112 | Pi Intraflagellar Transport Protein 57 (1424 nt)        | 1   | 0   | 0  |
| PITG_16113 | Pi conserved hypothetical protein (1971 nt)             | 4   | 24  | 0  |
| PITG_16114 | Pi myb-like DNA-binding protein, putative (2249 nt)     | 14  | 39  | 0  |
| PITG_16115 | Pi conserved hypothetical protein (1116 nt)             | 2   | 10  | 0  |
| PITG_16116 | Pi conserved hypothetical protein (1453 nt)             | 4   | 27  | 0  |
| PITG_16117 | Pi conserved hypothetical protein (875 nt)              | 627 | 370 | 10 |
| PITG_16118 | Pi conserved hypothetical protein (2399 nt)             | 109 | 30  | 0  |
| PITG_16120 | Pi conserved hypothetical protein (756 nt)              | 12  | 92  | 0  |
| PITG_16121 | Pi conserved hypothetical protein (2156 nt)             | 3   | 24  | 0  |
| PITG_16126 | Pi Dicarboxylate/Amino Acid:Cation (Na or H ) Sympor    | 7   | 31  | 1  |
| PITG_16127 | Pi conserved hypothetical protein (893 nt)              | 4   | 32  | 0  |
| PITG_16128 | Pi conserved hypothetical protein (1035 nt)             | 21  | 52  | 0  |
| PITG_16129 | Pi conserved hypothetical protein (560 nt)              | 1   | 21  | 0  |
| PITG_16131 | Pi conserved hypothetical protein (734 nt)              | 0   | 20  | 0  |
| PITG_16132 | Pi phosphatidylinositide phosphatase SAC1 (2322 nt)     | 1   | 15  | 0  |
| PITG_16134 | Pi conserved hypothetical protein (1265 nt)             | 0   | 12  | 0  |
| PITG_16135 | Pi conserved hypothetical protein (1432 nt)             | 1   | 8   | 3  |
| PITG_16137 | Pi conserved hypothetical protein (1581 nt)             | 11  | 20  | 0  |
| PITG_16138 | Pi exosome complex exonuclease RRP42-like protein (ε    | 2   | 8   | 0  |
| PITG_16152 | Pi conserved hypothetical protein (2635 nt)             | 2   | 11  | 0  |
| PITG_16153 | Pi conserved hypothetical protein (965 nt)              | 2   | 27  | 0  |
| PITG_16156 | Pi conserved hypothetical protein (1174 nt)             | 5   | 110 | 0  |
| PITG_16161 | Pi hypothetical protein (2019 nt)                       | 15  | 285 | 0  |
| PITG_16163 | Pi conserved hypothetical protein (669 nt)              | 4   | 13  | 0  |
| PITG_16178 | Pi conserved hypothetical protein (3149 nt)             | 0   | 12  | 0  |
| PITG_16179 | Pi Rab3 GTPase-activating protein catalytic subunit, pu | 3   | 21  | 0  |
| PITG_16183 | Pi adhesin-like protein (5735 nt)                       | 10  | 41  | 0  |
| PITG_16184 | Pi protein kinase (1242 nt)                             | 16  | 4   | 0  |
| PITG_16190 | Pi hypothetical protein (2274 nt)                       | 0   | 0   | 0  |
| PITG_16198 | Pi 60S ribosomal protein L18a (1751 nt)                 | 333 | 478 | 56 |
| PITG_16199 | Pi conserved hypothetical protein (1818 nt)             | 0   | 1   | 0  |

|            |                                                          |    |     |    |
|------------|----------------------------------------------------------|----|-----|----|
| PITG_16200 | Pi conserved hypothetical protein (1905 nt)              | 10 | 7   | 0  |
| PITG_16203 | Pi purine nucleoside phosphorylase 1 (1238 nt)           | 24 | 78  | 0  |
| PITG_16204 | Pi protein kinase (4683 nt)                              | 0  | 40  | 0  |
| PITG_16205 | Pi conserved hypothetical protein (489 nt)               | 48 | 56  | 0  |
| PITG_16206 | Pi conserved hypothetical protein (651 nt)               | 12 | 9   | 4  |
| PITG_16207 | Pi pre-mRNA-splicing helicase BRR2, putative (6882 nt)   | 5  | 58  | 0  |
| PITG_16208 | Pi conserved hypothetical protein (1179 nt)              | 17 | 29  | 0  |
| PITG_16209 | Pi conserved hypothetical protein (1750 nt)              | 1  | 16  | 0  |
| PITG_16210 | Pi ubulin-tyrosine ligase-like protein (2111 nt)         | 4  | 36  | 0  |
| PITG_16211 | Pi conserved hypothetical protein (2250 nt)              | 5  | 36  | 0  |
| PITG_16213 | Pi protein kinase, putative (1315 nt)                    | 0  | 5   | 0  |
| PITG_16214 | Pi inactive ubiquitin carboxyl-terminal hydrolase, putat | 4  | 24  | 0  |
| PITG_16221 | Pi Crinkler (CRN) family protein (1982 nt)               | 77 | 85  | 0  |
| PITG_16223 | Pi conserved hypothetical protein (1095 nt)              | 2  | 12  | 0  |
| PITG_16224 | Pi conserved hypothetical protein (1772 nt)              | 3  | 17  | 0  |
| PITG_16225 | Pi HECT E3 ubiquitin ligase, putative (2427 nt)          | 1  | 13  | 0  |
| PITG_16226 | Pi conserved hypothetical protein (498 nt)               | 10 | 8   | 0  |
| PITG_16227 | Pi conserved hypothetical protein (456 nt)               | 9  | 14  | 0  |
| PITG_16228 | Pi conserved hypothetical protein (3169 nt)              | 19 | 40  | 0  |
| PITG_16256 | Pi conserved hypothetical protein (1489 nt)              | 0  | 27  | 0  |
| PITG_16257 | Pi conserved hypothetical protein (1794 nt)              | 15 | 44  | 0  |
| PITG_16258 | Pi hypothetical protein (522 nt)                         | 0  | 7   | 0  |
| PITG_16262 | Pi hypothetical protein (1312 nt)                        | 51 | 49  | 0  |
| PITG_16263 | Pi conserved hypothetical protein (929 nt)               | 8  | 9   | 0  |
| PITG_16264 | Pi conserved hypothetical protein (1408 nt)              | 22 | 20  | 0  |
| PITG_16267 | Pi Major Facilitator Superfamily (MFS) (1363 nt)         | 2  | 26  | 0  |
| PITG_16268 | Pi conserved hypothetical protein (1369 nt)              | 29 | 6   | 0  |
| PITG_16269 | Pi M96 mating-specific protein family (1527 nt)          | 5  | 13  | 0  |
| PITG_16271 | Pi M96 mating-specific protein family (1679 nt)          | 5  | 17  | 0  |
| PITG_16272 | Pi M96 mating-specific protein family (1792 nt)          | 15 | 71  | 0  |
| PITG_16273 | Pi M96 mating-specific protein family (1530 nt)          | 4  | 11  | 0  |
| PITG_16274 | Pi M96 mating-specific protein family (1200 nt)          | 15 | 179 | 0  |
| PITG_16277 | Pi conserved hypothetical protein (2222 nt)              | 14 | 19  | 0  |
| PITG_16278 | Pi conserved hypothetical protein (571 nt)               | 0  | 3   | 0  |
| PITG_16280 | Pi glutamate synthase, putative (3791 nt)                | 0  | 33  | 0  |
| PITG_16298 | Pi conserved hypothetical protein (2074 nt)              | 6  | 18  | 0  |
| PITG_16299 | Pi conserved hypothetical protein (2944 nt)              | 2  | 21  | 0  |
| PITG_16309 | Pi conserved hypothetical protein (931 nt)               | 2  | 20  | 0  |
| PITG_16310 | Pi conserved hypothetical protein (3710 nt)              | 6  | 4   | 0  |
| PITG_16311 | Pi ubiquitin family protein, putative (918 nt)           | 56 | 98  | 77 |
| PITG_16312 | Pi vacuolar protein sorting-associated protein 53 (2653  | 1  | 17  | 0  |
| PITG_16315 | Pi conserved hypothetical protein (783 nt)               | 6  | 6   | 0  |
| PITG_16316 | Pi conserved hypothetical protein (2640 nt)              | 4  | 11  | 0  |
| PITG_16317 | Pi regulator of microtubule dynamics protein, putative   | 5  | 15  | 0  |
| PITG_16318 | Pi transmembrane protein, putative (627 nt)              | 9  | 23  | 0  |
| PITG_16319 | Pi conserved hypothetical protein (791 nt)               | 0  | 11  | 0  |
| PITG_16320 | Pi conserved hypothetical protein (759 nt)               | 1  | 3   | 0  |

|                                                                       |    |     |   |
|-----------------------------------------------------------------------|----|-----|---|
| PITG_16321   Pi conserved hypothetical protein (660 nt)               | 0  | 0   | 0 |
| PITG_16322   Pi conserved hypothetical protein (2059 nt)              | 11 | 89  | 0 |
| PITG_16324   Pi conserved hypothetical protein (1098 nt)              | 1  | 1   | 0 |
| PITG_16326   Pi calcineurin-like phosphoesterase (2862 nt)            | 3  | 16  | 0 |
| PITG_16327   Pi conserved hypothetical protein (707 nt)               | 2  | 31  | 0 |
| PITG_16328   Pi tyrosyl-tRNA synthetase, putative (2457 nt)           | 6  | 36  | 1 |
| PITG_16329   Pi conserved hypothetical protein (2573 nt)              | 19 | 48  | 0 |
| PITG_16331   Pi conserved hypothetical protein (1864 nt)              | 3  | 14  | 0 |
| PITG_16332   Pi conserved hypothetical protein (585 nt)               | 18 | 22  | 0 |
| PITG_16333   Pi ATP-dependent hsl protease ATP-binding subunit hsl    | 3  | 10  | 0 |
| PITG_16334   Pi conserved hypothetical protein (1007 nt)              | 1  | 14  | 0 |
| PITG_16335   Pi conserved hypothetical protein (856 nt)               | 16 | 32  | 0 |
| PITG_16337   Pi ribosomal RNA methyltransferase, putative (971 nt)    | 22 | 31  | 0 |
| PITG_16338   Pi conserved hypothetical protein (1409 nt)              | 59 | 79  | 0 |
| PITG_16339   Pi protein kinase, putative (1542 nt)                    | 2  | 7   | 0 |
| PITG_16340   Pi conserved hypothetical protein (1657 nt)              | 4  | 9   | 0 |
| PITG_16344   Pi conserved hypothetical protein (2776 nt)              | 5  | 20  | 0 |
| PITG_16345   Pi conserved hypothetical protein (853 nt)               | 1  | 14  | 0 |
| PITG_16346   Pi conserved hypothetical protein (1339 nt)              | 11 | 25  | 0 |
| PITG_16347   Pi conserved hypothetical protein (1156 nt)              | 5  | 12  | 0 |
| PITG_16348   Pi crinkler (CRN) family protein, pseudogene (1519 nt)   | 20 | 93  | 0 |
| PITG_16352   Pi conserved hypothetical protein (1015 nt)              | 21 | 54  | 0 |
| PITG_16353   Pi conserved hypothetical protein (954 nt)               | 13 | 19  | 1 |
| PITG_16354   Pi conserved hypothetical protein (722 nt)               | 3  | 8   | 0 |
| PITG_16358   Pi RING Finger Ubiquitin ligase, putative (1245 nt)      | 9  | 27  | 0 |
| PITG_16359   Pi UTP-glucose-1-phosphate uridylyltransferase (1851 nt) | 5  | 23  | 0 |
| PITG_16360   Pi lysosomal Pro-X carboxypeptidase, putative (1824 nt)  | 7  | 31  | 0 |
| PITG_16363   Pi hypothetical protein (1392 nt)                        | 69 | 203 | 0 |
| PITG_16364   Pi conserved hypothetical protein (2133 nt)              | 4  | 30  | 0 |
| PITG_16365   Pi conserved hypothetical protein (5508 nt)              | 2  | 15  | 0 |
| PITG_16366   Pi conserved hypothetical protein (1368 nt)              | 54 | 105 | 5 |
| PITG_16375   Pi conserved hypothetical protein (624 nt)               | 5  | 20  | 0 |
| PITG_16376   Pi conserved hypothetical protein (2684 nt)              | 7  | 87  | 0 |
| PITG_16378   Pi conserved hypothetical protein (1377 nt)              | 7  | 20  | 0 |
| PITG_16382   Pi HAM34-like putative membrane protein, putative (3     | 5  | 9   | 0 |
| PITG_16383   Pi Major Facilitator Superfamily (MFS) (1536 nt)         | 3  | 0   | 0 |
| PITG_16385   Pi conserved hypothetical protein (1164 nt)              | 0  | 11  | 0 |
| PITG_16386   Pi Bola-like protein (541 nt)                            | 24 | 16  | 0 |
| PITG_16389   Pi crinkler (CRN) family protein, pseudogene (1467 nt)   | 57 | 109 | 0 |
| PITG_16392   Pi conserved hypothetical protein (2654 nt)              | 0  | 2   | 0 |
| PITG_16395   Pi conserved hypothetical protein (2016 nt)              | 1  | 3   | 0 |
| PITG_16400   Pi conserved hypothetical protein (489 nt)               | 1  | 16  | 0 |
| PITG_16406   Pi conserved hypothetical protein (928 nt)               | 0  | 3   | 0 |
| PITG_16429   Pi conserved hypothetical protein (682 nt)               | 74 | 71  | 1 |
| PITG_16430   Pi conserved hypothetical protein (2730 nt)              | 1  | 16  | 0 |
| PITG_16432   Pi conserved hypothetical protein (1620 nt)              | 0  | 5   | 0 |
| PITG_16433   Pi conserved hypothetical protein (1541 nt)              | 31 | 59  | 0 |

|                                                                     |    |     |   |
|---------------------------------------------------------------------|----|-----|---|
| PITG_16434   Pi conserved hypothetical protein (2661 nt)            | 0  | 0   | 0 |
| PITG_16439   Pi conserved hypothetical protein (1453 nt)            | 13 | 117 | 0 |
| PITG_16440   Pi protein kinase (1479 nt)                            | 0  | 17  | 0 |
| PITG_16446   Pi ribosomal protein S6 kinase, putative (2757 nt)     | 14 | 60  | 0 |
| PITG_16448   Pi hypothetical protein (1170 nt)                      | 0  | 16  | 0 |
| PITG_16452   Pi hypothetical protein (351 nt)                       | 6  | 7   | 0 |
| PITG_16453   Pi conserved hypothetical protein (2559 nt)            | 4  | 9   | 0 |
| PITG_16455   Pi conserved hypothetical protein (2559 nt)            | 4  | 12  | 0 |
| PITG_16456   Pi conserved hypothetical protein (2606 nt)            | 3  | 26  | 0 |
| PITG_16458   Pi conserved hypothetical protein (1230 nt)            | 61 | 50  | 0 |
| PITG_16459   Pi thyroid receptor-interacting protein 13 (1292 nt)   | 2  | 17  | 0 |
| PITG_16461   Pi protein kinase, putative (2618 nt)                  | 1  | 18  | 0 |
| PITG_16462   Pi conserved hypothetical protein (3268 nt)            | 1  | 11  | 0 |
| PITG_16464   Pi Sulfate Permease (SulP) Family (2097 nt)            | 1  | 45  | 0 |
| PITG_16465   Pi conserved hypothetical protein (722 nt)             | 1  | 0   | 0 |
| PITG_16466   Pi sporulation induced hypothetical protein (863 nt)   | 0  | 0   | 0 |
| PITG_16467   Pi hypothetical protein (456 nt)                       | 3  | 22  | 0 |
| PITG_16468   Pi conserved hypothetical protein (2126 nt)            | 8  | 28  | 0 |
| PITG_16469   Pi RMD5 family protein (2464 nt)                       | 9  | 88  | 0 |
| PITG_16472   Pi kazal serine protease inhibitor PbraEPI2 (981 nt)   | 25 | 63  | 0 |
| PITG_16473   Pi serine protease family S08A, putative (1422 nt)     | 0  | 0   | 0 |
| PITG_16474   Pi conserved hypothetical protein (1283 nt)            | 11 | 33  | 0 |
| PITG_16475   Pi conserved hypothetical protein (524 nt)             | 5  | 5   | 0 |
| PITG_16476   Pi receptor kinase, putative (2197 nt)                 | 2  | 13  | 0 |
| PITG_16477   Pi short-chain specific acyl-CoA dehydrogenase, mitoch | 2  | 30  | 0 |
| PITG_16478   Pi acyl-CoA dehydrogenase, putative (2462 nt)          | 6  | 58  | 0 |
| PITG_16479   Pi putative alpha mannosyltransferase (1764 nt)        | 10 | 12  | 0 |
| PITG_16483   Pi conserved hypothetical protein (1136 nt)            | 0  | 3   | 0 |
| PITG_16484   Pi conserved hypothetical protein (927 nt)             | 25 | 7   | 0 |
| PITG_16487   Pi cell 5A endo-1,4-beta-glucanase, putative (1995 nt) | 5  | 10  | 0 |
| PITG_16491   Pi conserved hypothetical protein (924 nt)             | 4  | 25  | 0 |
| PITG_16492   Pi conserved hypothetical protein (1126 nt)            | 9  | 19  | 0 |
| PITG_16494   Pi hypothetical protein (410 nt)                       | 0  | 4   | 0 |
| PITG_16495   Pi conserved hypothetical protein (2508 nt)            | 3  | 16  | 0 |
| PITG_16499   Pi cytochrome P450, putative (1572 nt)                 | 0  | 1   | 0 |
| PITG_16506   Pi conserved hypothetical protein (1704 nt)            | 0  | 15  | 0 |
| PITG_16511   Pi conserved hypothetical protein (4689 nt)            | 1  | 13  | 0 |
| PITG_16512   Pi conserved hypothetical protein (2003 nt)            | 3  | 8   | 0 |
| PITG_16526   Pi DNA-directed RNA polymerases III 12.5 kDa polypept  | 12 | 21  | 0 |
| PITG_16527   Pi bloom syndrome protein, DEAD/DEAH box helicase (    | 2  | 11  | 0 |
| PITG_16528   Pi hsp70-like protein (1904 nt)                        | 0  | 18  | 0 |
| PITG_16530   Pi aspartyl-tRNA synthetase, putative (2382 nt)        | 3  | 18  | 0 |
| PITG_16538   Pi conserved hypothetical protein (991 nt)             | 4  | 18  | 0 |
| PITG_16539   Pi conserved hypothetical protein (501 nt)             | 10 | 0   | 0 |
| PITG_16546   Pi conserved hypothetical protein (1347 nt)            | 4  | 31  | 0 |
| PITG_16553   Pi conserved hypothetical protein (802 nt)             | 0  | 7   | 0 |
| PITG_16555   Pi GTP-binding protein, putative (1846 nt)             | 6  | 26  | 0 |

|            |                                                         |     |      |   |
|------------|---------------------------------------------------------|-----|------|---|
| PITG_16556 | Pi elongation factor Tu GTP-binding domain-containing   | 0   | 15   | 0 |
| PITG_16557 | Pi conserved hypothetical protein (1549 nt)             | 5   | 24   | 0 |
| PITG_16559 | Pi glycoside hydrolase, putative (2511 nt)              | 0   | 0    | 0 |
| PITG_16562 | Pi conserved hypothetical protein (1333 nt)             | 3   | 34   | 0 |
| PITG_16563 | Pi conserved hypothetical protein (902 nt)              | 13  | 21   | 0 |
| PITG_16591 | Pi Crinkler (CRN) family protein (2658 nt)              | 127 | 1185 | 3 |
| PITG_16605 | Pi Crinkler (CRN) family protein, pseudogene (2513 nt)  | 565 | 1144 | 3 |
| PITG_16614 | Pi Crinkler (CRN) family protein (1281 nt)              | 17  | 70   | 1 |
| PITG_16628 | Pi hypothetical protein (1281 nt)                       | 12  | 20   | 0 |
| PITG_16645 | Pi conserved hypothetical protein (1371 nt)             | 3   | 24   | 0 |
| PITG_16648 | Pi conserved hypothetical protein (1191 nt)             | 12  | 72   | 0 |
| PITG_16649 | Pi chromosome transmission fidelity protein, putative ( | 3   | 15   | 0 |
| PITG_16651 | Pi conserved hypothetical protein (291 nt)              | 0   | 17   | 0 |
| PITG_16664 | Pi conserved hypothetical protein (682 nt)              | 2   | 0    | 0 |
| PITG_16666 | Pi conserved hypothetical protein (631 nt)              | 17  | 59   | 0 |
| PITG_16668 | Pi cyclin-like protein (1014 nt)                        | 3   | 8    | 0 |
| PITG_16669 | Pi transcription factor IIIB, putative (2114 nt)        | 9   | 17   | 0 |
| PITG_16670 | Pi conserved hypothetical protein (661 nt)              | 116 | 118  | 2 |
| PITG_16671 | Pi 26S proteasome non-ATPase regulatory subunit 3 (1    | 22  | 44   | 1 |
| PITG_16674 | Pi conserved hypothetical protein (1474 nt)             | 3   | 1    | 0 |
| PITG_16680 | Pi conserved hypothetical protein (1514 nt)             | 46  | 30   | 0 |
| PITG_16681 | Pi conserved hypothetical protein (414 nt)              | 11  | 16   | 0 |
| PITG_16682 | Pi conserved hypothetical protein (798 nt)              | 4   | 16   | 0 |
| PITG_16683 | Pi transmembrane protein, putative (2070 nt)            | 9   | 1    | 0 |
| PITG_16684 | Pi transmembrane protein, putative (2148 nt)            | 35  | 1    | 0 |
| PITG_16686 | Pi conserved hypothetical protein (549 nt)              | 5   | 13   | 0 |
| PITG_16687 | Pi conserved hypothetical protein (614 nt)              | 68  | 58   | 0 |
| PITG_16691 | Pi DNA polymerase alpha/epsilon subunit B, putative (1  | 0   | 15   | 0 |
| PITG_16695 | Pi N-acetyltransferase 5 (813 nt)                       | 5   | 15   | 0 |
| PITG_16709 | Pi conserved hypothetical protein (414 nt)              | 0   | 12   | 0 |
| PITG_16710 | Pi conserved hypothetical protein (2562 nt)             | 0   | 0    | 0 |
| PITG_16719 | Pi conserved hypothetical protein (701 nt)              | 4   | 16   | 0 |
| PITG_16720 | Pi conserved hypothetical protein (2485 nt)             | 6   | 32   | 0 |
| PITG_16721 | Pi conserved hypothetical protein (988 nt)              | 0   | 16   | 0 |
| PITG_16722 | Pi metalloprotease family M67A, putative (757 nt)       | 0   | 11   | 0 |
| PITG_16724 | Pi conserved hypothetical protein (887 nt)              | 0   | 8    | 0 |
| PITG_16727 | Pi conserved hypothetical protein (1484 nt)             | 0   | 0    | 0 |
| PITG_16729 | Pi acyltransferase family (1434 nt)                     | 2   | 7    | 0 |
| PITG_16731 | Pi conserved hypothetical protein (609 nt)              | 52  | 153  | 0 |
| PITG_16732 | Pi conserved hypothetical protein (803 nt)              | 2   | 25   | 0 |
| PITG_16733 | Pi conserved hypothetical protein (1673 nt)             | 7   | 32   | 0 |
| PITG_16734 | Pi protein kinase (1372 nt)                             | 1   | 11   | 0 |
| PITG_16735 | Pi conserved hypothetical protein (561 nt)              | 41  | 51   | 2 |
| PITG_16736 | Pi adenylosuccinate synthetase (1656 nt)                | 37  | 64   | 5 |
| PITG_16740 | Pi conserved hypothetical protein (1653 nt)             | 3   | 11   | 0 |
| PITG_16741 | Pi isoleucyl-tRNA synthetase (3159 nt)                  | 0   | 16   | 0 |
| PITG_16742 | Pi conserved hypothetical protein (513 nt)              | 0   | 22   | 0 |

|            |                                                           |     |     |    |
|------------|-----------------------------------------------------------|-----|-----|----|
| PITG_16745 | Pi conserved hypothetical protein (786 nt)                | 3   | 39  | 0  |
| PITG_16749 | Pi hypothetical protein (1503 nt)                         | 45  | 164 | 1  |
| PITG_16757 | Pi 40S ribosomal protein S15a (853 nt)                    | 345 | 364 | 25 |
| PITG_16760 | Pi elongation of very long chain fatty acids protein, put | 5   | 33  | 11 |
| PITG_16764 | Pi hypothetical protein (684 nt)                          | 0   | 15  | 0  |
| PITG_16766 | Pi hypothetical protein (1349 nt)                         | 50  | 84  | 0  |
| PITG_16770 | Pi conserved hypothetical protein (2520 nt)               | 8   | 13  | 0  |
| PITG_16775 | Pi conserved hypothetical protein (1307 nt)               | 4   | 20  | 0  |
| PITG_16781 | Pi hypothetical protein (706 nt)                          | 4   | 7   | 0  |
| PITG_16783 | Pi conserved hypothetical protein (1201 nt)               | 0   | 6   | 0  |
| PITG_16788 | Pi conserved hypothetical protein (1197 nt)               | 12  | 13  | 0  |
| PITG_16791 | Pi conserved hypothetical protein (1066 nt)               | 8   | 26  | 0  |
| PITG_16792 | Pi nucleolar GTP-binding protein 2 (1589 nt)              | 5   | 7   | 0  |
| PITG_16795 | Pi conserved hypothetical protein (2033 nt)               | 4   | 11  | 0  |
| PITG_16797 | Pi tubulin-specific chaperone D, putative (4440 nt)       | 2   | 34  | 0  |
| PITG_16798 | Pi phospholipase D; Pi-TM-PLD (2713 nt)                   | 19  | 51  | 0  |
| PITG_16799 | Pi inositol-3,4-bisphosphate 4-phosphatase, putative (3   | 2   | 25  | 0  |
| PITG_16800 | Pi conserved hypothetical protein (539 nt)                | 1   | 23  | 0  |
| PITG_16801 | Pi conserved hypothetical protein (4173 nt)               | 3   | 24  | 0  |
| PITG_16804 | Pi conserved hypothetical protein (1269 nt)               | 0   | 11  | 0  |
| PITG_16806 | Pi conserved hypothetical protein (707 nt)                | 20  | 78  | 0  |
| PITG_16807 | Pi 3-hydroxy-3-methylglutaryl-coenzyme A reductase, p     | 2   | 11  | 0  |
| PITG_16808 | Pi ATP-binding Cassette (ABC) Superfamily (3039 nt)       | 6   | 78  | 0  |
| PITG_16809 | Pi conserved hypothetical protein (2435 nt)               | 6   | 55  | 0  |
| PITG_16810 | Pi conserved hypothetical protein (1884 nt)               | 13  | 50  | 0  |
| PITG_16812 | Pi anaphase-promoting complex subunit 10 (692 nt)         | 10  | 31  | 0  |
| PITG_16813 | Pi Rio kinase (1437 nt)                                   | 4   | 11  | 0  |
| PITG_16814 | Pi conserved hypothetical protein (1704 nt)               | 14  | 56  | 0  |
| PITG_16818 | Pi conserved hypothetical protein (3006 nt)               | 2   | 15  | 0  |
| PITG_16820 | Pi conserved hypothetical protein (1218 nt)               | 1   | 16  | 0  |
| PITG_16826 | Pi conserved hypothetical protein (5579 nt)               | 8   | 47  | 0  |
| PITG_16833 | Pi conserved hypothetical protein (2406 nt)               | 13  | 74  | 1  |
| PITG_16834 | Pi exodeoxyribonuclease (1177 nt)                         | 33  | 60  | 0  |
| PITG_16840 | Pi conserved hypothetical protein (405 nt)                | 0   | 4   | 0  |
| PITG_16841 | Pi conserved hypothetical protein (694 nt)                | 7   | 26  | 0  |
| PITG_16842 | Pi conserved hypothetical protein (696 nt)                | 0   | 18  | 0  |
| PITG_16847 | Pi conserved hypothetical protein (2167 nt)               | 0   | 24  | 0  |
| PITG_16849 | Pi hypothetical protein (713 nt)                          | 13  | 178 | 0  |
| PITG_16852 | Pi hypothetical protein (297 nt)                          | 1   | 84  | 0  |
| PITG_16853 | Pi conserved hypothetical protein (1845 nt)               | 3   | 1   | 0  |
| PITG_16854 | Pi conserved hypothetical protein (4617 nt)               | 18  | 53  | 0  |
| PITG_16855 | Pi conserved hypothetical protein (925 nt)                | 18  | 51  | 1  |
| PITG_16856 | Pi hypoxanthine-guanine phosphoribosyltransferase, p      | 0   | 16  | 0  |
| PITG_16863 | Pi conserved hypothetical protein (1302 nt)               | 4   | 16  | 0  |
| PITG_16864 | Pi conserved hypothetical protein (2664 nt)               | 4   | 38  | 0  |
| PITG_16865 | Pi aldose 1-epimerase, putative (1429 nt)                 | 6   | 4   | 0  |
| PITG_16871 | Pi conserved hypothetical protein (1239 nt)               | 8   | 67  | 6  |

|            |                                                         |     |      |    |
|------------|---------------------------------------------------------|-----|------|----|
| PITG_16878 | Pi conserved hypothetical protein (562 nt)              | 3   | 32   | 0  |
| PITG_16879 | Pi conserved hypothetical protein (393 nt)              | 37  | 99   | 0  |
| PITG_16884 | Pi conserved hypothetical protein (1124 nt)             | 3   | 0    | 0  |
| PITG_16887 | Pi conserved hypothetical protein (2079 nt)             | 21  | 47   | 0  |
| PITG_16890 | Pi conserved hypothetical protein (1127 nt)             | 11  | 0    | 0  |
| PITG_16893 | Pi hypothetical protein (1418 nt)                       | 6   | 23   | 0  |
| PITG_16894 | Pi hypothetical protein (1312 nt)                       | 43  | 1270 | 2  |
| PITG_16898 | Pi hypothetical protein (426 nt)                        | 15  | 26   | 0  |
| PITG_16899 | Pi conserved hypothetical protein (1404 nt)             | 2   | 13   | 0  |
| PITG_16900 | Pi cleft lip and palate transmembrane family protein (2 | 3   | 20   | 0  |
| PITG_16903 | Pi hypothetical protein (2596 nt)                       | 0   | 10   | 0  |
| PITG_16904 | Pi protein kinase, putative (2597 nt)                   | 7   | 38   | 0  |
| PITG_16910 | Pi ATP-binding Cassette (ABC) Superfamily (1875 nt)     | 0   | 12   | 0  |
| PITG_16915 | Pi elongation factor Tu (560 nt)                        | 8   | 90   | 8  |
| PITG_16916 | Pi protein kinase, putative (1603 nt)                   | 16  | 273  | 0  |
| PITG_16917 | Pi conserved hypothetical protein (1539 nt)             | 1   | 6    | 0  |
| PITG_16918 | Pi conserved hypothetical protein (2688 nt)             | 1   | 19   | 0  |
| PITG_16920 | Pi conserved hypothetical protein (1662 nt)             | 2   | 13   | 0  |
| PITG_16921 | Pi conserved hypothetical protein (867 nt)              | 769 | 1375 | 3  |
| PITG_16922 | Pi conserved hypothetical protein (961 nt)              | 4   | 40   | 0  |
| PITG_16923 | Pi hypothetical protein (415 nt)                        | 18  | 6    | 0  |
| PITG_16924 | Pi conserved hypothetical protein (1645 nt)             | 7   | 19   | 0  |
| PITG_16925 | Pi hypothetical protein (582 nt)                        | 124 | 1439 | 8  |
| PITG_16928 | Pi conserved hypothetical protein (824 nt)              | 0   | 24   | 0  |
| PITG_16930 | Pi carbohydrate esterase, putative (2711 nt)            | 6   | 39   | 0  |
| PITG_16936 | Pi conserved hypothetical protein (498 nt)              | 6   | 16   | 0  |
| PITG_16937 | Pi foflypolyglutamate synthase, putative (1720 nt)      | 5   | 16   | 0  |
| PITG_16938 | Pi conserved hypothetical protein (504 nt)              | 1   | 15   | 0  |
| PITG_16939 | Pi conserved hypothetical protein (2557 nt)             | 0   | 37   | 0  |
| PITG_16940 | Pi tRNA guanosine-2'-O-methyltransferase, putative (1   | 15  | 39   | 0  |
| PITG_16942 | Pi conserved hypothetical protein (919 nt)              | 8   | 3    | 0  |
| PITG_16956 | Pi transglutaminase elicitor, putative (2508 nt)        | 6   | 52   | 0  |
| PITG_16958 | Pi transglutaminase elicitor-like protein (1734 nt)     | 7   | 46   | 7  |
| PITG_16959 | Pi transglutaminase elicitor M81D (1759 nt)             | 0   | 0    | 25 |
| PITG_16962 | Pi hypothetical protein (615 nt)                        | 4   | 13   | 0  |
| PITG_16963 | Pi transglutaminase elicitor M81C (2242 nt)             | 0   | 5    | 23 |
| PITG_16966 | Pi 2-oxoglutarate dehydrogenase E1 component, putat     | 13  | 72   | 3  |
| PITG_16967 | Pi cleavage induced hypothetical protein (2571 nt)      | 0   | 0    | 0  |
| PITG_16968 | Pi glucan 1,3-beta-glucosidase, putative (1377 nt)      | 0   | 50   | 0  |
| PITG_16969 | Pi conserved oligomeric Golgi complex subunit, putativ  | 4   | 64   | 0  |
| PITG_16972 | Pi conserved hypothetical protein (2086 nt)             | 0   | 25   | 0  |
| PITG_16973 | Pi dynein light chain (449 nt)                          | 20  | 22   | 0  |
| PITG_16974 | Pi conserved hypothetical protein (738 nt)              | 4   | 16   | 0  |
| PITG_16975 | Pi hypothetical protein (491 nt)                        | 5   | 17   | 0  |
| PITG_16976 | Pi conserved hypothetical protein (454 nt)              | 9   | 14   | 0  |
| PITG_16977 | Pi aurora-like protein kinase (1161 nt)                 | 7   | 6    | 0  |
| PITG_16978 | Pi crossover junction endonuclease MUS81-like proteir   | 7   | 20   | 0  |



|            |                                                          |     |      |    |
|------------|----------------------------------------------------------|-----|------|----|
| PITG_16981 | Pi thrombospondin-like protein (7212 nt)                 | 0   | 2    | 0  |
| PITG_16983 | Pi conserved hypothetical protein (1051 nt)              | 0   | 12   | 0  |
| PITG_16984 | Pi cellulose synthase 4 (3531 nt)                        | 5   | 72   | 1  |
| PITG_16999 | Pi conserved hypothetical protein (734 nt)               | 184 | 3098 | 0  |
| PITG_17000 | Pi hypothetical protein (288 nt)                         | 8   | 25   | 0  |
| PITG_17001 | Pi conserved hypothetical protein (913 nt)               | 4   | 10   | 0  |
| PITG_17002 | Pi conserved hypothetical protein (1054 nt)              | 1   | 2    | 0  |
| PITG_17003 | Pi choline/ethanolamine kinase, putative (1129 nt)       | 9   | 45   | 0  |
| PITG_17004 | Pi conserved hypothetical protein (3860 nt)              | 8   | 23   | 0  |
| PITG_17005 | Pi conserved hypothetical protein (1571 nt)              | 114 | 505  | 2  |
| PITG_17006 | Pi hypothetical protein (617 nt)                         | 6   | 24   | 0  |
| PITG_17007 | Pi cellulose synthase catalytic subunit [UDP-forming], p | 173 | 1177 | 17 |
| PITG_17012 | Pi conserved hypothetical protein (8696 nt)              | 21  | 57   | 0  |
| PITG_17013 | Pi conserved hypothetical protein (3313 nt)              | 117 | 147  | 5  |
| PITG_17015 | Pi conserved hypothetical protein (1119 nt)              | 7   | 8    | 0  |
| PITG_17017 | Pi hypothetical protein (969 nt)                         | 0   | 0    | 0  |
| PITG_17021 | Pi conserved hypothetical protein (1563 nt)              | 16  | 25   | 0  |
| PITG_17022 | Pi UDP-N-acetylglucosamine-dolichyl-phosphate N-ace      | 5   | 19   | 0  |
| PITG_17023 | Pi phosphoglycerate/bisphosphoglycerate mutase (117      | 7   | 17   | 0  |
| PITG_17026 | Pi palmitoyltransferase, putative (2162 nt)              | 5   | 49   | 0  |
| PITG_17027 | Pi conserved hypothetical protein (679 nt)               | 0   | 0    | 0  |
| PITG_17028 | Pi conserved hypothetical protein (7224 nt)              | 3   | 33   | 0  |
| PITG_17030 | Pi conserved hypothetical protein (1248 nt)              | 9   | 21   | 0  |
| PITG_17031 | Pi conserved hypothetical protein (828 nt)               | 4   | 0    | 0  |
| PITG_17032 | Pi anthranilate phosphoribosyltransferase, putative (11  | 6   | 11   | 0  |
| PITG_17033 | Pi Annexin (Annexin) Family (987 nt)                     | 130 | 2117 | 33 |
| PITG_17034 | Pi Annexin (Annexin) Family (987 nt)                     | 136 | 1631 | 22 |
| PITG_17035 | Pi conserved hypothetical protein (1584 nt)              | 9   | 21   | 0  |
| PITG_17036 | Pi conserved hypothetical protein (1052 nt)              | 4   | 21   | 0  |
| PITG_17037 | Pi calcineurin-like phosphoesterase (1581 nt)            | 3   | 18   | 0  |
| PITG_17039 | Pi conserved hypothetical protein (492 nt)               | 4   | 29   | 0  |
| PITG_17040 | Pi cellulose binding elicitor lectin, putative (1143 nt) | 8   | 11   | 0  |
| PITG_17041 | Pi cardiolipin synthetase, putative (1210 nt)            | 1   | 10   | 0  |
| PITG_17042 | Pi protein RER1A (736 nt)                                | 15  | 65   | 0  |
| PITG_17043 | Pi conserved hypothetical protein (769 nt)               | 0   | 11   | 0  |
| PITG_17045 | Pi mannitol dehydrogenase, putative (2012 nt)            | 12  | 40   | 2  |
| PITG_17047 | Pi ATP-binding Cassette (ABC) Superfamily (1380 nt)      | 9   | 19   | 0  |
| PITG_17049 | Pi ATP-binding Cassette (ABC) Superfamily (5337 nt)      | 14  | 31   | 0  |
| PITG_17053 | Pi ATP-binding Cassette (ABC) Superfamily (3639 nt)      | 4   | 22   | 0  |
| PITG_17055 | Pi endo-1,4-beta-xylanase, putative (1422 nt)            | 0   | 0    | 0  |
| PITG_17058 | Pi ATP-binding Cassette (ABC) Superfamily (3267 nt)      | 0   | 17   | 0  |
| PITG_17063 | Pi secreted RxLR effector peptide, putative (483 nt)     | 3   | 3    | 1  |
| PITG_17068 | Pi conserved hypothetical protein (4224 nt)              | 1   | 19   | 0  |
| PITG_17069 | Pi coatomer protein complex, putative (3808 nt)          | 4   | 47   | 4  |
| PITG_17070 | Pi CCAAT-binding transcription factor, putative (752 nt) | 0   | 11   | 0  |
| PITG_17071 | Pi malonyl-CoA decarboxylase (MCD), putative (2217 n     | 2   | 10   | 0  |
| PITG_17072 | Pi U4/U6 small nuclear ribonucleoprotein Prp4, putativ   | 2   | 13   | 0  |

|            |                                                          |     |     |    |
|------------|----------------------------------------------------------|-----|-----|----|
| PITG_17073 | Pi conserved hypothetical protein (2050 nt)              | 1   | 0   | 0  |
| PITG_17074 | Pi 3-demethylubiquinone-9 3-methyltransferase, putat     | 7   | 30  | 0  |
| PITG_17075 | Pi conserved hypothetical protein (3325 nt)              | 6   | 40  | 0  |
| PITG_17076 | Pi conserved hypothetical protein (2557 nt)              | 7   | 43  | 0  |
| PITG_17077 | Pi conserved hypothetical protein (1026 nt)              | 6   | 18  | 0  |
| PITG_17079 | Pi conserved hypothetical protein (6370 nt)              | 1   | 7   | 0  |
| PITG_17080 | Pi Ca2 :Cation Antiporter (CaCA) Family (1904 nt)        | 2   | 14  | 0  |
| PITG_17081 | Pi Voltage-gated Ion Channel (VIC) Superfamily (2685 n   | 6   | 16  | 0  |
| PITG_17088 | Pi conserved hypothetical protein (1389 nt)              | 0   | 4   | 0  |
| PITG_17089 | Pi conserved hypothetical protein (706 nt)               | 2   | 28  | 0  |
| PITG_17090 | Pi conserved hypothetical protein (1149 nt)              | 2   | 18  | 0  |
| PITG_17091 | Pi histone chaperone ASF1-like protein (2210 nt)         | 22  | 61  | 0  |
| PITG_17092 | Pi protein arginine N-methyltransferase 1 (1032 nt)      | 0   | 11  | 0  |
| PITG_17093 | Pi 60S ribosomal protein L24, putative (1177 nt)         | 435 | 686 | 66 |
| PITG_17103 | Pi hypothetical protein (652 nt)                         | 1   | 9   | 0  |
| PITG_17105 | Pi conserved hypothetical protein (1635 nt)              | 0   | 14  | 0  |
| PITG_17106 | Pi conserved hypothetical protein (825 nt)               | 4   | 15  | 0  |
| PITG_17107 | Pi aldehyde dehydrogenase, putative (1721 nt)            | 3   | 14  | 0  |
| PITG_17108 | Pi protein phosphatase 1 regulatory subunit 7, putative  | 0   | 1   | 0  |
| PITG_17109 | Pi CCAAT-binding transcription factor, putative (781 nt) | 3   | 42  | 0  |
| PITG_17110 | Pi conserved hypothetical protein (2299 nt)              | 3   | 24  | 0  |
| PITG_17111 | Pi conserved hypothetical protein (1298 nt)              | 0   | 12  | 0  |
| PITG_17112 | Pi conserved hypothetical protein (1715 nt)              | 3   | 15  | 0  |
| PITG_17114 | Pi conserved hypothetical protein (1473 nt)              | 6   | 7   | 0  |
| PITG_17116 | Pi conserved hypothetical protein (443 nt)               | 0   | 26  | 0  |
| PITG_17117 | Pi salicylate hydroxylase, putative (1304 nt)            | 5   | 12  | 0  |
| PITG_17122 | Pi Amino Acid/Auxin Permease (AAP) Family (1471 nt)      | 1   | 1   | 0  |
| PITG_17123 | Pi T-complex protein 1 subunit gamma (1738 nt)           | 12  | 87  | 4  |
| PITG_17125 | Pi conserved hypothetical protein (753 nt)               | 0   | 5   | 0  |
| PITG_17127 | Pi copper-transporting ATPase, putative (3363 nt)        | 1   | 12  | 0  |
| PITG_17128 | Pi conserved hypothetical protein (1338 nt)              | 2   | 10  | 0  |
| PITG_17129 | Pi copper-transporting ATPase, putative (3401 nt)        | 1   | 14  | 0  |
| PITG_17130 | Pi glyceraldehyde-3-phosphate dehydrogenase, putativ     | 2   | 16  | 0  |
| PITG_17131 | Pi conserved hypothetical protein (852 nt)               | 11  | 20  | 0  |
| PITG_17132 | Pi flagella associated protein (3083 nt)                 | 0   | 3   | 0  |
| PITG_17133 | Pi 6,7-dimethyl-8-ribityllumazine synthase (734 nt)      | 28  | 149 | 3  |
| PITG_17135 | Pi arginine n-methyltransferase, putative (1544 nt)      | 1   | 12  | 0  |
| PITG_17136 | Pi Rab8 family GTPase, putative (1009 nt)                | 24  | 51  | 0  |
| PITG_17137 | Pi conserved hypothetical protein (4551 nt)              | 8   | 35  | 0  |
| PITG_17138 | Pi conserved hypothetical protein (840 nt)               | 1   | 13  | 0  |
| PITG_17140 | Pi transmembrane protein, putative (1043 nt)             | 8   | 36  | 0  |
| PITG_17141 | Pi Major Facilitator Superfamily (MFS) (1374 nt)         | 1   | 11  | 0  |
| PITG_17142 | Pi Major Facilitator Superfamily (MFS) (1380 nt)         | 14  | 25  | 0  |
| PITG_17145 | Pi conserved hypothetical protein (2440 nt)              | 0   | 22  | 0  |
| PITG_17154 | Pi conserved hypothetical protein (1293 nt)              | 3   | 6   | 0  |
| PITG_17155 | Pi RNA 3'-terminal phosphate cyclase, putative (2034 n   | 2   | 14  | 0  |
| PITG_17156 | Pi conserved hypothetical protein (623 nt)               | 7   | 35  | 1  |

|                                                                                 |     |     |    |
|---------------------------------------------------------------------------------|-----|-----|----|
| PITG_17158   Pi conserved hypothetical protein (1415 nt)                        | 1   | 15  | 0  |
| PITG_17159   Pi conserved hypothetical protein (903 nt)                         | 10  | 20  | 0  |
| PITG_17160   Pi conserved hypothetical protein (1836 nt)                        | 3   | 3   | 0  |
| PITG_17161   Pi conserved hypothetical protein (2064 nt)                        | 9   | 35  | 0  |
| PITG_17162   Pi conserved hypothetical protein (3300 nt)                        | 0   | 1   | 0  |
| PITG_17163   Pi conserved hypothetical protein (1082 nt)                        | 8   | 45  | 0  |
| PITG_17164   Pi conserved hypothetical protein (889 nt)                         | 16  | 57  | 0  |
| PITG_17165   Pi peptidyl-prolyl cis-trans isomerase E (675 nt)                  | 6   | 16  | 0  |
| PITG_17166   Pi conserved hypothetical protein (1020 nt)                        | 4   | 56  | 0  |
| PITG_17167   Pi conserved hypothetical protein (802 nt)                         | 4   | 22  | 0  |
| PITG_17168   Pi conserved hypothetical protein (1145 nt)                        | 8   | 25  | 0  |
| PITG_17170   Pi peptidyl-tRNA hydrolase, putative (1208 nt)                     | 2   | 24  | 0  |
| PITG_17171   Pi hypothetical protein (506 nt)                                   | 0   | 16  | 0  |
| PITG_17172   Pi 2-dehydro-3-deoxyphosphooctonate aldolase (1295 nt)             | 0   | 11  | 0  |
| PITG_17174   Pi conserved hypothetical protein (1163 nt)                        | 6   | 70  | 2  |
| PITG_17195   Pi tetrahydrofolate dehydrogenase (2491 nt)                        | 4   | 7   | 0  |
| PITG_17201   Pi GTP-binding protein, putative (1843 nt)                         | 8   | 21  | 0  |
| PITG_17205   Pi elongation factor G, putative (3736 nt)                         | 0   | 12  | 0  |
| PITG_17209   Pi conserved hypothetical protein (1477 nt)                        | 10  | 18  | 0  |
| PITG_17230   Pi conserved hypothetical protein (1256 nt)                        | 20  | 92  | 0  |
| PITG_17237   Pi succinate dehydrogenase iron-sulfur protein (621 nt)            | 1   | 0   | 8  |
| PITG_17239   Pi calcineurin-like phosphoesterase, putative (2269 nt)            | 22  | 79  | 0  |
| PITG_17240   Pi eukaryotic translation initiation factor 3 subunit E-in         | 22  | 44  | 2  |
| PITG_17241   Pi leucine carboxyl methyltransferase, putative (1195 nt)          | 5   | 9   | 0  |
| PITG_17242   Pi conserved hypothetical protein (2469 nt)                        | 1   | 11  | 0  |
| PITG_17244   Pi zinc finger CDGSH domain-containing protein 1 (405 nt)          | 111 | 149 | 2  |
| PITG_17245   Pi conserved hypothetical protein (1389 nt)                        | 17  | 42  | 0  |
| PITG_17247   Pi sporangia induced conserved hypothetical protein (1389 nt)      | 0   | 3   | 0  |
| PITG_17248   Pi conserved hypothetical protein (2217 nt)                        | 0   | 3   | 0  |
| PITG_17249   Pi Chloride Channel (CIC) Family (2160 nt)                         | 2   | 12  | 0  |
| PITG_17254   Pi conserved hypothetical protein (674 nt)                         | 16  | 127 | 0  |
| PITG_17257   Pi carbohydrate esterase, putative (2028 nt)                       | 55  | 603 | 2  |
| PITG_17258   Pi conserved hypothetical protein (1386 nt)                        | 2   | 4   | 0  |
| PITG_17259   Pi conserved hypothetical protein (1384 nt)                        | 2   | 13  | 0  |
| PITG_17261   Pi 60S acidic ribosomal protein P0 (1350 nt)                       | 588 | 246 | 58 |
| PITG_17262   Pi ethanolamine-phosphate cytidylyltransferase, putative (1350 nt) | 6   | 30  | 0  |
| PITG_17263   Pi regulator of microtubule dynamics protein, putative (1350 nt)   | 89  | 53  | 0  |
| PITG_17264   Pi WD domain-containing protein, putative (2009 nt)                | 67  | 74  | 0  |
| PITG_17265   Pi conserved hypothetical protein (2028 nt)                        | 3   | 11  | 0  |
| PITG_17270   Pi conserved hypothetical protein (784 nt)                         | 5   | 10  | 0  |
| PITG_17272   Pi conserved hypothetical protein (1911 nt)                        | 2   | 4   | 0  |
| PITG_17273   Pi conserved hypothetical protein (3462 nt)                        | 2   | 31  | 0  |
| PITG_17275   Pi conserved hypothetical protein (2126 nt)                        | 144 | 215 | 0  |
| PITG_17279   Pi conserved hypothetical protein (1737 nt)                        | 21  | 192 | 0  |
| PITG_17280   Pi conserved hypothetical protein (5608 nt)                        | 0   | 11  | 0  |
| PITG_17282   Pi conserved hypothetical protein (5424 nt)                        | 1   | 17  | 0  |
| PITG_17285   Pi conserved hypothetical protein (1388 nt)                        | 1   | 1   | 1  |

|                                                                        |    |     |   |
|------------------------------------------------------------------------|----|-----|---|
| PITG_17286   Pi ATP-binding Cassette (ABC) Superfamily (5919 nt)       | 0  | 13  | 0 |
| PITG_17287   Pi AP-1 complex subunit beta, putative (2580 nt)          | 4  | 34  | 1 |
| PITG_17289   Pi deoxyuridine 5'-triphosphate nucleotidohydrolase (7    | 3  | 7   | 0 |
| PITG_17292   Pi protein kinase (2211 nt)                               | 10 | 25  | 0 |
| PITG_17297   Pi conserved hypothetical protein (3320 nt)               | 0  | 0   | 0 |
| PITG_17298   Pi tRNA (cytosine-5-)-methyltransferase, putative (256    | 3  | 8   | 0 |
| PITG_17301   Pi conserved hypothetical protein (380 nt)                | 6  | 25  | 0 |
| PITG_17302   Pi multicopper oxidase, putative (1814 nt)                | 0  | 17  | 0 |
| PITG_17304   Pi conserved hypothetical protein (980 nt)                | 0  | 25  | 0 |
| PITG_17312   Pi SUMO-activating enzyme (SAE), putative (1132 nt)       | 11 | 18  | 0 |
| PITG_17313   Pi conserved hypothetical protein (2714 nt)               | 1  | 12  | 0 |
| PITG_17314   Pi cysteine protease family C01A, putative (1077 nt)      | 0  | 0   | 0 |
| PITG_17315   Pi sporangia induced conserved hypothetical protein (2    | 0  | 0   | 0 |
| PITG_17317   Pi hypothetical protein (752 nt)                          | 0  | 28  | 0 |
| PITG_17325   Pi lipase, putative (1586 nt)                             | 11 | 13  | 0 |
| PITG_17326   Pi conserved hypothetical protein (852 nt)                | 28 | 381 | 0 |
| PITG_17328   Pi transmembrane protein, putative (738 nt)               | 1  | 11  | 0 |
| PITG_17329   Pi COP9 signalosome complex subunit, putative (1757       | 4  | 22  | 0 |
| PITG_17330   Pi pyridoxal kinase, putative (1406 nt)                   | 5  | 27  | 0 |
| PITG_17332   Pi conserved hypothetical protein (1138 nt)               | 28 | 26  | 0 |
| PITG_17333   Pi serine/threonine protein kinase (1905 nt)              | 81 | 62  | 0 |
| PITG_17334   Pi conserved hypothetical protein (720 nt)                | 15 | 28  | 0 |
| PITG_17335   Pi charged multivesicular body protein 2a (858 nt)        | 11 | 71  | 0 |
| PITG_17342   Pi Sporangia Induced Dynein Regulatory Complex Prote      | 0  | 1   | 0 |
| PITG_17344   Pi cleavage induced hypothetical protein (1552 nt)        | 7  | 5   | 0 |
| PITG_17345   Pi conserved hypothetical protein (2499 nt)               | 8  | 27  | 0 |
| PITG_17346   Pi conserved hypothetical protein (1201 nt)               | 0  | 11  | 0 |
| PITG_17347   Pi conserved hypothetical protein (1593 nt)               | 6  | 8   | 0 |
| PITG_17348   Pi myosin-like protein (4233 nt)                          | 5  | 38  | 0 |
| PITG_17349   Pi conserved hypothetical protein (1247 nt)               | 32 | 61  | 0 |
| PITG_17351   Pi conserved hypothetical protein (1969 nt)               | 9  | 68  | 0 |
| PITG_17359   Pi calcium/calmodulin-dependent protein kinase kinase     | 24 | 51  | 0 |
| PITG_17360   Pi 12-oxophytodienoate reductase, putative (1119 nt)      | 10 | 14  | 0 |
| PITG_17361   Pi mitogen-activated protein kinase, putative (2679 nt)   | 8  | 13  | 0 |
| PITG_17362   Pi conserved hypothetical protein (1039 nt)               | 0  | 0   | 0 |
| PITG_17370   Pi conserved hypothetical protein (1896 nt)               | 5  | 52  | 0 |
| PITG_17378   Pi 5'-nucleotidase domain-containing protein, putative    | 0  | 20  | 0 |
| PITG_17381   Pi conserved hypothetical protein (1000 nt)               | 2  | 58  | 0 |
| PITG_17382   Pi hypothetical protein (1380 nt)                         | 9  | 57  | 0 |
| PITG_17383   Pi hsp70-like protein (1525 nt)                           | 4  | 13  | 0 |
| PITG_17384   Pi conserved hypothetical protein (1190 nt)               | 28 | 59  | 1 |
| PITG_17387   Pi ras-specific guanine nucleotide-releasing factor, puta | 4  | 29  | 0 |
| PITG_17388   Pi conserved hypothetical protein (735 nt)                | 0  | 18  | 0 |
| PITG_17390   Pi protein kinase (2076 nt)                               | 0  | 1   | 0 |
| PITG_17391   Pi conserved hypothetical protein (912 nt)                | 1  | 17  | 0 |
| PITG_17392   Pi conserved hypothetical protein (504 nt)                | 4  | 8   | 0 |
| PITG_17393   Pi conserved hypothetical protein (564 nt)                | 27 | 3   | 0 |

|            |                                                           |     |     |    |
|------------|-----------------------------------------------------------|-----|-----|----|
| PITG_17394 | Pi developmentally-regulated GTP-binding protein 1 (1     | 2   | 8   | 0  |
| PITG_17395 | Pi 5'-AMP-activated protein kinase subunit gamma, put     | 7   | 19  | 0  |
| PITG_17396 | Pi syntaxin, putative (1273 nt)                           | 0   | 0   | 0  |
| PITG_17399 | Pi conserved hypothetical protein (454 nt)                | 25  | 12  | 0  |
| PITG_17400 | Pi conserved hypothetical protein (1270 nt)               | 591 | 240 | 0  |
| PITG_17401 | Pi conserved hypothetical protein (891 nt)                | 54  | 489 | 0  |
| PITG_17402 | Pi conserved hypothetical protein (402 nt)                | 3   | 10  | 0  |
| PITG_17403 | Pi conserved hypothetical protein (728 nt)                | 5   | 9   | 0  |
| PITG_17404 | Pi guanine nucleotide-binding protein (2549 nt)           | 5   | 14  | 0  |
| PITG_17405 | Pi conserved hypothetical protein (2008 nt)               | 1   | 21  | 0  |
| PITG_17406 | Pi enoyl-CoA hydratase, mitochondrial precursor (913 r    | 367 | 993 | 22 |
| PITG_17407 | Pi Poly(A) polymerase beta (2210 nt)                      | 2   | 18  | 0  |
| PITG_17410 | Pi protein kinase, putative (1201 nt)                     | 0   | 0   | 0  |
| PITG_17416 | Pi conserved hypothetical protein (1337 nt)               | 9   | 44  | 0  |
| PITG_17419 | Pi conserved hypothetical protein (835 nt)                | 0   | 1   | 0  |
| PITG_17421 | Pi hypothetical protein (1635 nt)                         | 8   | 41  | 0  |
| PITG_17422 | Pi hypothetical protein (1292 nt)                         | 13  | 0   | 0  |
| PITG_17423 | Pi conserved hypothetical protein (1189 nt)               | 6   | 65  | 0  |
| PITG_17426 | Pi conserved hypothetical protein (2090 nt)               | 8   | 8   | 0  |
| PITG_17430 | Pi conserved hypothetical protein (1075 nt)               | 7   | 12  | 0  |
| PITG_17433 | Pi hypothetical protein (845 nt)                          | 2   | 10  | 0  |
| PITG_17437 | Pi conserved hypothetical protein (1821 nt)               | 9   | 21  | 0  |
| PITG_17439 | Pi Ca2 :Cation Antiporter (CaCA) Family (1653 nt)         | 4   | 16  | 0  |
| PITG_17441 | Pi conserved hypothetical protein (522 nt)                | 5   | 26  | 0  |
| PITG_17445 | Pi glycerol kinase 1 (1685 nt)                            | 39  | 266 | 1  |
| PITG_17452 | Pi importin alpha-2 subunit (2296 nt)                     | 109 | 227 | 1  |
| PITG_17455 | Pi vacuolar protein sorting-associating protein, putative | 20  | 99  | 0  |
| PITG_17456 | Pi conserved hypothetical protein (817 nt)                | 12  | 144 | 0  |
| PITG_17457 | Pi conserved hypothetical protein (5056 nt)               | 6   | 52  | 0  |
| PITG_17460 | Pi DEAD/DEAH box RNA helicase, putative (2653 nt)         | 4   | 13  | 0  |
| PITG_17461 | Pi Rab11 family GTPase, putative (1359 nt)                | 7   | 14  | 0  |
| PITG_17477 | Pi conserved hypothetical protein (1125 nt)               | 1   | 0   | 0  |
| PITG_17478 | Pi conserved hypothetical protein (432 nt)                | 0   | 0   | 0  |
| PITG_17479 | Pi conserved hypothetical protein (1213 nt)               | 3   | 17  | 0  |
| PITG_17480 | Pi sodium-coupled neutral amino acid transporter, put:    | 2   | 27  | 0  |
| PITG_17481 | Pi conserved hypothetical protein (1544 nt)               | 1   | 11  | 0  |
| PITG_17484 | Pi Drug/Metabolite Transporter (DMT) Superfamily (13      | 4   | 34  | 0  |
| PITG_17485 | Pi conserved hypothetical protein (1744 nt)               | 5   | 15  | 0  |
| PITG_17486 | Pi conserved hypothetical protein (1200 nt)               | 0   | 1   | 0  |
| PITG_17487 | Pi conserved hypothetical protein (680 nt)                | 1   | 15  | 0  |
| PITG_17488 | Pi conserved hypothetical protein (866 nt)                | 1   | 11  | 0  |
| PITG_17489 | Pi conserved hypothetical protein (750 nt)                | 14  | 67  | 0  |
| PITG_17490 | Pi Mitochondrial Carrier (MC) Family (1161 nt)            | 1   | 10  | 0  |
| PITG_17492 | Pi hypothetical protein (2466 nt)                         | 2   | 19  | 0  |
| PITG_17493 | Pi conserved hypothetical protein (1904 nt)               | 2   | 9   | 0  |
| PITG_17494 | Pi protein kinase (491 nt)                                | 0   | 11  | 0  |
| PITG_17495 | Pi protein kinase, putative (1590 nt)                     | 3   | 24  | 0  |

|            |                                                        |     |      |    |
|------------|--------------------------------------------------------|-----|------|----|
| PITG_17496 | Pi glycoside hydrolase, putative (935 nt)              | 0   | 11   | 0  |
| PITG_17498 | Pi conserved hypothetical protein (721 nt)             | 6   | 95   | 0  |
| PITG_17499 | Pi Chromate Ion Transporter (CHR) Family (1580 nt)     | 4   | 30   | 0  |
| PITG_17501 | Pi glucosylceramidase, putative (1620 nt)              | 2   | 30   | 0  |
| PITG_17503 | Pi conserved hypothetical protein (997 nt)             | 4   | 24   | 0  |
| PITG_17508 | Pi glucosylceramidase, putative (1500 nt)              | 0   | 76   | 0  |
| PITG_17510 | Pi hypothetical protein (626 nt)                       | 0   | 3    | 0  |
| PITG_17512 | Pi calcium/calmodulin-dependent protein kinase, putat  | 2   | 20   | 0  |
| PITG_17513 | Pi conserved hypothetical protein (957 nt)             | 1   | 4    | 0  |
| PITG_17516 | Pi S-adenosylmethionine synthetase 2 (1547 nt)         | 41  | 477  | 88 |
| PITG_17517 | Pi crinkler (CRN) family protein, putative (1445 nt)   | 392 | 1139 | 23 |
| PITG_17520 | Pi conserved hypothetical protein (430 nt)             | 0   | 27   | 0  |
| PITG_17525 | Pi crinkler (CRN) family protein, pseudogene (1289 nt) | 301 | 978  | 18 |
| PITG_17526 | Pi crinkler (CRN) family protein, putative (1956 nt)   | 214 | 2309 | 41 |
| PITG_17527 | Pi crinkler (CRN) family protein, putative (1959 nt)   | 398 | 1029 | 25 |
| PITG_17531 | Pi crinkler (CRN) family protein, putative (2106 nt)   | 165 | 509  | 0  |
| PITG_17537 | Pi crinkler (CRN) family protein, pseudogene (1419 nt) | 616 | 2048 | 47 |
| PITG_17539 | Pi crinkler (CRN) family protein, putative (733 nt)    | 74  | 763  | 6  |
| PITG_17540 | Pi crinkler (CRN) family protein, putative (1962 nt)   | 330 | 1119 | 21 |
| PITG_17543 | Pi crinkler (CRN) family protein, pseudogene (1989 nt) | 261 | 1431 | 34 |
| PITG_17546 | Pi glycoside hydrolase, putative (2172 nt)             | 7   | 28   | 1  |
| PITG_17549 | Pi myosin-like protein (4388 nt)                       | 3   | 27   | 0  |
| PITG_17550 | Pi serine protease family S09A, putative (2451 nt)     | 1   | 12   | 0  |
| PITG_17552 | Pi myb-like DNA-binding protein, putative (773 nt)     | 40  | 36   | 0  |
| PITG_17554 | Pi myb-like DNA-binding protein, putative (640 nt)     | 3   | 41   | 0  |
| PITG_17556 | Pi conserved hypothetical protein (2867 nt)            | 2   | 20   | 0  |
| PITG_17557 | Pi hypothetical protein (787 nt)                       | 7   | 33   | 0  |
| PITG_17559 | Pi myb-like DNA-binding protein, putative (627 nt)     | 21  | 89   | 0  |
| PITG_17560 | Pi conserved hypothetical protein (1623 nt)            | 6   | 26   | 0  |
| PITG_17563 | Pi hypothetical protein (1433 nt)                      | 81  | 189  | 0  |
| PITG_17567 | Pi myb-like DNA-binding protein, putative (504 nt)     | 3   | 12   | 0  |
| PITG_17568 | Pi conserved hypothetical protein (2884 nt)            | 7   | 25   | 0  |
| PITG_17572 | Pi protein kinase (614 nt)                             | 8   | 22   | 0  |
| PITG_17576 | Pi protein kinase, putative (1986 nt)                  | 2   | 86   | 0  |
| PITG_17577 | Pi protein kinase, putative (2172 nt)                  | 3   | 27   | 0  |
| PITG_17580 | Pi protein kinase (333 nt)                             | 0   | 0    | 0  |
| PITG_17581 | Pi conserved hypothetical protein (640 nt)             | 0   | 5    | 0  |
| PITG_17583 | Pi protein kinase (1911 nt)                            | 0   | 14   | 0  |
| PITG_17587 | Pi conserved hypothetical protein (841 nt)             | 4   | 15   | 0  |
| PITG_17589 | Pi histidine acid phosphatase, putative (1155 nt)      | 1   | 11   | 0  |
| PITG_17590 | Pi conserved hypothetical protein (1071 nt)            | 12  | 5    | 0  |
| PITG_17592 | Pi mannosyl-oligosaccharide glucosidase, putative (267 | 5   | 22   | 0  |
| PITG_17593 | Pi conserved hypothetical protein (1209 nt)            | 29  | 80   | 5  |
| PITG_17594 | Pi conserved hypothetical protein (2173 nt)            | 13  | 79   | 0  |
| PITG_17595 | Pi conserved hypothetical protein (3198 nt)            | 3   | 7    | 0  |
| PITG_17596 | Pi conserved hypothetical protein (2142 nt)            | 26  | 523  | 0  |
| PITG_17597 | Pi conserved hypothetical protein (3204 nt)            | 8   | 32   | 0  |

|            |                                                          |    |     |   |
|------------|----------------------------------------------------------|----|-----|---|
| PITG_17599 | Pi poly [ADP-ribose] polymerase, putative (6232 nt)      | 1  | 82  | 0 |
| PITG_17600 | Pi conserved hypothetical protein (1505 nt)              | 16 | 22  | 0 |
| PITG_17601 | Pi conserved hypothetical protein (2071 nt)              | 3  | 34  | 0 |
| PITG_17602 | Pi conserved hypothetical protein (1236 nt)              | 9  | 23  | 0 |
| PITG_17606 | Pi cation-transporting ATPase, putative (3417 nt)        | 2  | 10  | 0 |
| PITG_17607 | Pi elongation factor Ts, putative (1047 nt)              | 10 | 5   | 0 |
| PITG_17608 | Pi spermine synthase, putative (1049 nt)                 | 2  | 4   | 1 |
| PITG_17609 | Pi conserved hypothetical protein (1112 nt)              | 10 | 38  | 0 |
| PITG_17611 | Pi hypothetical protein (540 nt)                         | 8  | 48  | 0 |
| PITG_17617 | Pi TFIIH basal transcription factor complex helicase XPE | 15 | 43  | 0 |
| PITG_17627 | Pi conserved hypothetical protein (3774 nt)              | 3  | 17  | 0 |
| PITG_17628 | Pi conserved hypothetical protein (1129 nt)              | 2  | 12  | 0 |
| PITG_17629 | Pi conserved hypothetical protein (593 nt)               | 0  | 2   | 0 |
| PITG_17631 | Pi conserved hypothetical protein (534 nt)               | 1  | 13  | 0 |
| PITG_17632 | Pi conserved hypothetical protein (1513 nt)              | 16 | 25  | 0 |
| PITG_17639 | Pi phosphatidylinositol kinase (1910 nt)                 | 0  | 5   | 0 |
| PITG_17641 | Pi conserved hypothetical protein (1358 nt)              | 7  | 4   | 0 |
| PITG_17646 | Pi conserved hypothetical protein (1773 nt)              | 2  | 0   | 0 |
| PITG_17650 | Pi conserved hypothetical protein (1603 nt)              | 0  | 9   | 0 |
| PITG_17651 | Pi conserved hypothetical protein (993 nt)               | 4  | 11  | 0 |
| PITG_17652 | Pi conserved hypothetical protein (878 nt)               | 8  | 14  | 0 |
| PITG_17660 | Pi Amino Acid-Polyamine-Organocation (APC) Family (1     | 2  | 12  | 0 |
| PITG_17663 | Pi conserved hypothetical protein (1866 nt)              | 14 | 53  | 0 |
| PITG_17664 | Pi conserved hypothetical protein (1731 nt)              | 1  | 59  | 0 |
| PITG_17668 | Pi conserved hypothetical protein (710 nt)               | 59 | 746 | 0 |
| PITG_17669 | Pi M96 mating-specific protein family (1476 nt)          | 1  | 16  | 0 |
| PITG_17672 | Pi conserved hypothetical protein (2875 nt)              | 14 | 10  | 0 |
| PITG_17673 | Pi M96 mating-specific protein family (2077 nt)          | 5  | 34  | 0 |
| PITG_17674 | Pi 5'-3' exoribonuclease 1, putative (4517 nt)           | 5  | 29  | 0 |
| PITG_17675 | Pi bzip regulated hypothetical protein (861 nt)          | 4  | 10  | 0 |
| PITG_17677 | Pi conserved hypothetical protein (1271 nt)              | 32 | 9   | 0 |
| PITG_17679 | Pi M96 mating-specific protein family (1339 nt)          | 16 | 29  | 0 |
| PITG_17681 | Pi conserved hypothetical protein (1737 nt)              | 4  | 1   | 0 |
| PITG_17683 | Pi conserved hypothetical protein (1717 nt)              | 19 | 56  | 0 |
| PITG_17684 | Pi conserved hypothetical protein (921 nt)               | 5  | 16  | 0 |
| PITG_17685 | Pi conserved hypothetical protein (1189 nt)              | 8  | 4   | 0 |
| PITG_17690 | Pi conserved hypothetical protein (2438 nt)              | 13 | 48  | 0 |
| PITG_17692 | Pi conserved hypothetical protein (1392 nt)              | 0  | 18  | 0 |
| PITG_17693 | Pi conserved hypothetical protein (1816 nt)              | 5  | 21  | 0 |
| PITG_17695 | Pi hypothetical protein (852 nt)                         | 14 | 322 | 0 |
| PITG_17696 | Pi hypothetical protein (551 nt)                         | 0  | 1   | 0 |
| PITG_17698 | Pi conserved hypothetical protein (1168 nt)              | 9  | 47  | 0 |
| PITG_17700 | Pi conserved hypothetical protein (1292 nt)              | 8  | 30  | 0 |
| PITG_17701 | Pi conserved hypothetical protein (790 nt)               | 9  | 23  | 0 |
| PITG_17703 | Pi conserved hypothetical protein (2997 nt)              | 3  | 8   | 0 |
| PITG_17704 | Pi conserved hypothetical protein (1413 nt)              | 0  | 0   | 0 |
| PITG_17705 | Pi protein kinase (1554 nt)                              | 3  | 16  | 0 |

|                                                                         |     |     |    |
|-------------------------------------------------------------------------|-----|-----|----|
| PITG_17706   Pi conserved hypothetical protein (2463 nt)                | 16  | 34  | 0  |
| PITG_17708   Pi conserved hypothetical protein (668 nt)                 | 75  | 332 | 57 |
| PITG_17709   Pi conserved hypothetical protein (2187 nt)                | 13  | 29  | 0  |
| PITG_17710   Pi charged multivesicular body protein 1b-2 (747 nt)       | 16  | 59  | 0  |
| PITG_17716   Pi voltage-dependent anion-selective channel protein,      | 41  | 119 | 20 |
| PITG_17717   Pi nuclear migration protein nudC, putative (1038 nt)      | 47  | 127 | 1  |
| PITG_17718   Pi conserved hypothetical protein (758 nt)                 | 0   | 0   | 0  |
| PITG_17719   Pi iron-sulfur cluster assembly protein, putative (901 nt) | 32  | 33  | 0  |
| PITG_17721   Pi conserved hypothetical protein (5449 nt)                | 0   | 6   | 0  |
| PITG_17722   Pi conserved hypothetical protein (1082 nt)                | 1   | 2   | 0  |
| PITG_17723   Pi conserved hypothetical protein (507 nt)                 | 5   | 13  | 0  |
| PITG_17725   Pi conserved hypothetical protein (695 nt)                 | 88  | 83  | 1  |
| PITG_17726   Pi conserved hypothetical protein (726 nt)                 | 19  | 32  | 0  |
| PITG_17727   Pi conserved hypothetical protein (521 nt)                 | 24  | 34  | 0  |
| PITG_17728   Pi conserved hypothetical protein (1491 nt)                | 15  | 10  | 0  |
| PITG_17730   Pi conserved hypothetical protein (489 nt)                 | 42  | 60  | 3  |
| PITG_17733   Pi conserved hypothetical protein (522 nt)                 | 15  | 22  | 0  |
| PITG_17734   Pi conserved hypothetical protein (3125 nt)                | 4   | 9   | 0  |
| PITG_17735   Pi conserved hypothetical protein (2304 nt)                | 0   | 1   | 0  |
| PITG_17736   Pi conserved hypothetical protein (1180 nt)                | 7   | 21  | 0  |
| PITG_17740   Pi conserved hypothetical protein (1389 nt)                | 104 | 207 | 0  |
| PITG_17741   Pi serine protease family S33, putative (4095 nt)          | 0   | 24  | 0  |
| PITG_17744   Pi conserved hypothetical protein (1778 nt)                | 1   | 0   | 0  |
| PITG_17745   Pi inositol hexakisphosphate and diphosphoinositol-pe      | 2   | 24  | 0  |
| PITG_17746   Pi conserved hypothetical protein (2850 nt)                | 3   | 8   | 0  |
| PITG_17747   Pi H - or Na -translocating F-type, V-type and A-type AT   | 25  | 106 | 0  |
| PITG_17748   Pi leucyl-tRNA synthetase, putative (2767 nt)              | 0   | 11  | 0  |
| PITG_17750   Pi conserved hypothetical protein (847 nt)                 | 0   | 15  | 0  |
| PITG_17753   Pi NADP-dependent malic enzyme (1617 nt)                   | 5   | 33  | 0  |
| PITG_17760   Pi Amino Acid/Auxin Permease (AAP) Family (1518 nt)        | 41  | 35  | 0  |
| PITG_17767   Pi conserved hypothetical protein (3923 nt)                | 8   | 12  | 0  |
| PITG_17768   Pi retinol dehydrogenase, putative (852 nt)                | 2   | 30  | 0  |
| PITG_17769   Pi conserved hypothetical protein (903 nt)                 | 10  | 52  | 0  |
| PITG_17771   Pi conserved hypothetical protein (798 nt)                 | 4   | 0   | 0  |
| PITG_17778   Pi calcium/calmodulin-dependent protein kinase II (145     | 9   | 151 | 0  |
| PITG_17779   Pi conserved hypothetical protein (1524 nt)                | 6   | 25  | 0  |
| PITG_17781   Pi conserved hypothetical protein (1531 nt)                | 7   | 37  | 0  |
| PITG_17782   Pi iron-sulfur cluster assembly protein, putative (525 nt) | 39  | 107 | 0  |
| PITG_17784   Pi conserved hypothetical protein (1308 nt)                | 8   | 15  | 0  |
| PITG_17785   Pi hypothetical protein (336 nt)                           | 54  | 47  | 1  |
| PITG_17786   Pi argininosuccinate lyase (1386 nt)                       | 6   | 39  | 10 |
| PITG_17787   Pi Arsenite-Antimonite (ArsAB) Efflux Family (1135 nt)     | 17  | 44  | 2  |
| PITG_17788   Pi coiled-coil domain-containing protein 94 (846 nt)       | 7   | 12  | 0  |
| PITG_17790   Pi 5-aminolevulinic synthase, putative (1828 nt)           | 8   | 22  | 0  |
| PITG_17791   Pi ubiquitin-specific protease, putative (8249 nt)         | 0   | 0   | 0  |
| PITG_17792   Pi F-box protein, putative (2409 nt)                       | 12  | 2   | 0  |
| PITG_17795   Pi hypothetical protein (1553 nt)                          | 14  | 17  | 0  |



|            |                                                          |     |     |    |
|------------|----------------------------------------------------------|-----|-----|----|
| PITG_17804 | Pi Amino Acid/Auxin Permease (AAP) Family (1545 nt)      | 35  | 4   | 4  |
| PITG_17805 | Pi Amino Acid/Auxin Permease (AAP) Family (1542 nt)      | 18  | 7   | 1  |
| PITG_17806 | Pi Amino Acid/Auxin Permease (AAP) Family (1452 nt)      | 0   | 0   | 0  |
| PITG_17811 | Pi patatin-like phospholipase, putative (1557 nt)        | 1   | 12  | 0  |
| PITG_17814 | Pi conserved hypothetical protein (2097 nt)              | 4   | 19  | 0  |
| PITG_17816 | Pi Crinkler (CRN) family protein, pseudogene (1701 nt)   | 26  | 36  | 0  |
| PITG_17824 | Pi conserved hypothetical protein (1995 nt)              | 0   | 22  | 0  |
| PITG_17825 | Pi conserved hypothetical protein (707 nt)               | 0   | 0   | 0  |
| PITG_17826 | Pi conserved hypothetical protein (2000 nt)              | 1   | 0   | 0  |
| PITG_17827 | Pi conserved hypothetical protein (794 nt)               | 0   | 17  | 0  |
| PITG_17828 | Pi putative GPI-anchored serine-threonine rich hypothet  | 2   | 2   | 0  |
| PITG_17829 | Pi Hypothetical protein (1383 nt)                        | 1   | 13  | 0  |
| PITG_17831 | Pi protein kinase, putative (1930 nt)                    | 2   | 23  | 0  |
| PITG_17833 | Pi hypothetical protein (632 nt)                         | 3   | 30  | 0  |
| PITG_17834 | Pi phospholipid hydroperoxide glutathione peroxidase,    | 14  | 19  | 0  |
| PITG_17838 | Pi PexRD8 family secreted RxLR effector peptide, putat   | 130 | 208 | 3  |
| PITG_17839 | Pi protein kinase (653 nt)                               | 3   | 11  | 0  |
| PITG_17840 | Pi protein kinase, putative (1829 nt)                    | 3   | 21  | 0  |
| PITG_17841 | Pi conserved hypothetical protein (1180 nt)              | 0   | 4   | 0  |
| PITG_17845 | Pi carbonic anhydrase, putative (535 nt)                 | 0   | 18  | 0  |
| PITG_17849 | Pi hypothetical protein (388 nt)                         | 5   | 23  | 0  |
| PITG_17853 | Pi conserved hypothetical protein (3488 nt)              | 17  | 1   | 0  |
| PITG_17854 | Pi conserved hypothetical protein (2622 nt)              | 25  | 3   | 0  |
| PITG_17855 | Pi conserved hypothetical protein (2509 nt)              | 0   | 3   | 0  |
| PITG_17863 | Pi MtN3-like protein (810 nt)                            | 10  | 32  | 0  |
| PITG_17867 | Pi conserved hypothetical protein (1769 nt)              | 19  | 4   | 0  |
| PITG_17868 | Pi conserved hypothetical protein (4540 nt)              | 4   | 17  | 0  |
| PITG_17869 | Pi conserved hypothetical protein (2888 nt)              | 59  | 150 | 0  |
| PITG_17876 | Pi transmembrane protein, putative (1588 nt)             | 16  | 22  | 0  |
| PITG_17877 | Pi hypothetical protein (516 nt)                         | 0   | 0   | 0  |
| PITG_17879 | Pi conserved hypothetical protein (970 nt)               | 3   | 25  | 0  |
| PITG_17881 | Pi conserved hypothetical protein (1136 nt)              | 1   | 0   | 0  |
| PITG_17882 | Pi regulator of chromosome condensation (RCC1)-like p    | 9   | 16  | 0  |
| PITG_17883 | Pi condensin complex subunit 3, putative (3779 nt)       | 7   | 17  | 0  |
| PITG_17884 | Pi conserved hypothetical protein (2967 nt)              | 24  | 90  | 0  |
| PITG_17885 | Pi conserved hypothetical protein (595 nt)               | 11  | 88  | 1  |
| PITG_17889 | Pi Crinkler (CRN) family protein (2472 nt)               | 3   | 22  | 0  |
| PITG_17891 | Pi conserved hypothetical protein (2335 nt)              | 5   | 73  | 0  |
| PITG_17893 | Pi conserved hypothetical protein (2310 nt)              | 4   | 16  | 0  |
| PITG_17895 | Pi conserved hypothetical protein (2092 nt)              | 4   | 12  | 0  |
| PITG_17897 | Pi protein kinase, putative (2910 nt)                    | 14  | 21  | 0  |
| PITG_17904 | Pi conserved hypothetical protein (483 nt)               | 0   | 15  | 0  |
| PITG_17907 | Pi choline/Carnitine O-acyltransferase, putative (2182 r | 3   | 23  | 0  |
| PITG_17908 | Pi urease accessory protein ureG, putative (1996 nt)     | 15  | 157 | 0  |
| PITG_17910 | Pi conserved hypothetical protein (1003 nt)              | 2   | 29  | 0  |
| PITG_17919 | Pi P-type ATPase (P-ATPase) Superfamily (1797 nt)        | 6   | 94  | 11 |
| PITG_17920 | Pi plasma membrane H <sup>+</sup> -ATPase (876 nt)       | 37  | 335 | 56 |

|                                                                                       |    |     |    |
|---------------------------------------------------------------------------------------|----|-----|----|
| PITG_17921   Pi P-type ATPase (P-ATPase) Superfamily (4365 nt)                        | 37 | 406 | 63 |
| PITG_17922   Pi hypothetical protein (395 nt)                                         | 0  | 15  | 0  |
| PITG_17925   Pi pentafunctional AROM polypeptide, putative (4738 nt)                  | 1  | 9   | 0  |
| PITG_17926   Pi conserved hypothetical protein (831 nt)                               | 89 | 65  | 0  |
| PITG_17927   Pi hypothetical protein (2235 nt)                                        | 7  | 8   | 0  |
| PITG_17928   Pi UDP-N-acetylglucosamine-peptide N-acetylglucosaminidase (2235 nt)     | 14 | 41  | 0  |
| PITG_17929   Pi signal peptidase complex catalytic subunit SEC11A, putative (2235 nt) | 52 | 96  | 2  |
| PITG_17930   Pi RNA pseudouridine synthase, putative (1218 nt)                        | 3  | 32  | 0  |
| PITG_17931   Pi conserved hypothetical protein (869 nt)                               | 1  | 40  | 0  |
| PITG_17933   Pi croquemort-like mating protein M82, putative (1869 nt)                | 0  | 40  | 0  |
| PITG_17935   Pi conserved hypothetical protein (1290 nt)                              | 5  | 12  | 0  |
| PITG_17936   Pi structural maintenance of chromosomes protein 4, putative (1290 nt)   | 5  | 26  | 0  |
| PITG_17942   Pi ubiquitin activating enzyme, E1 family, putative (177 nt)             | 9  | 24  | 0  |
| PITG_17943   Pi conserved hypothetical protein (1303 nt)                              | 3  | 5   | 0  |
| PITG_17944   Pi conserved hypothetical protein (3812 nt)                              | 13 | 21  | 0  |
| PITG_17945   Pi chitinase, putative (822 nt)                                          | 41 | 488 | 0  |
| PITG_17946   Pi hypothetical protein (692 nt)                                         | 20 | 18  | 0  |
| PITG_17947   Pi chitinase, putative (705 nt)                                          | 72 | 603 | 0  |
| PITG_17948   Pi conserved hypothetical protein (1056 nt)                              | 3  | 36  | 0  |
| PITG_17949   Pi PNS1-like protein (1539 nt)                                           | 26 | 369 | 0  |
| PITG_17951   Pi dicarboxylate/Amino Acid:Cation (Na or H) Symporter (1539 nt)         | 2  | 17  | 0  |
| PITG_17952   Pi Major Facilitator Superfamily (MFS) (2148 nt)                         | 15 | 73  | 0  |
| PITG_17953   Pi COP9 signalosome complex subunit 2 (1741 nt)                          | 2  | 28  | 0  |
| PITG_17954   Pi conserved hypothetical protein (2384 nt)                              | 0  | 0   | 0  |
| PITG_17956   Pi croquemort mating protein M82 (2302 nt)                               | 1  | 3   | 0  |
| PITG_17958   Pi heme/steroid binding domain-containing protein, putative (2302 nt)    | 15 | 35  | 0  |
| PITG_17959   Pi conserved hypothetical protein (1255 nt)                              | 8  | 19  | 0  |
| PITG_17960   Pi Dicarboxylate/Amino Acid:Cation (Na or H) Symporter (1255 nt)         | 0  | 3   | 0  |
| PITG_17961   Pi Dicarboxylate/Amino Acid:Cation (Na or H) Symporter (1255 nt)         | 1  | 1   | 0  |
| PITG_17965   Pi conserved hypothetical protein (3855 nt)                              | 3  | 22  | 0  |
| PITG_17966   Pi conserved hypothetical protein (525 nt)                               | 9  | 18  | 0  |
| PITG_17967   Pi conserved hypothetical protein (2693 nt)                              | 14 | 11  | 0  |
| PITG_17975   Pi dual 3',5'-cyclic-AMP and-GMP phosphodiesterase, putative (2693 nt)   | 0  | 0   | 0  |
| PITG_17976   Pi transmembrane protein, putative (3328 nt)                             | 4  | 2   | 0  |
| PITG_17978   Pi conserved hypothetical protein (1735 nt)                              | 5  | 19  | 0  |
| PITG_17981   Pi conserved hypothetical protein (771 nt)                               | 0  | 15  | 0  |
| PITG_17982   Pi conserved hypothetical protein (2353 nt)                              | 0  | 15  | 0  |
| PITG_17983   Pi adenylosuccinate lyase (1779 nt)                                      | 4  | 19  | 3  |
| PITG_17984   Pi conserved hypothetical protein (1317 nt)                              | 1  | 20  | 0  |
| PITG_17985   Pi conserved hypothetical protein (858 nt)                               | 0  | 18  | 0  |
| PITG_17986   Pi conserved hypothetical protein (1234 nt)                              | 5  | 27  | 0  |
| PITG_17990   Pi cell division protein kinase, putative (1253 nt)                      | 13 | 29  | 0  |
| PITG_17991   Pi CorA Metal Ion Transporter (MIT) Family (1434 nt)                     | 2  | 4   | 0  |
| PITG_17992   Pi P-3 complex subunit mu, putative (1447 nt)                            | 9  | 30  | 0  |
| PITG_17993   Pi conserved hypothetical protein (1987 nt)                              | 52 | 174 | 0  |
| PITG_17994   Pi Cyclin B (1718 nt)                                                    | 5  | 15  | 0  |
| PITG_17996   Pi conserved hypothetical protein (1524 nt)                              | 2  | 9   | 0  |

|            |                                                                                      |     |     |    |
|------------|--------------------------------------------------------------------------------------|-----|-----|----|
| PITG_17997 | Pi conserved hypothetical protein (2376 nt)                                          | 7   | 15  | 0  |
| PITG_17998 | Pi 3-hydroxyisobutyrate dehydrogenase, putative (2334 nt)                            | 3   | 14  | 0  |
| PITG_17999 | Pi 3-hydroxyisobutyrate dehydrogenase, putative (1290 nt)                            | 3   | 30  | 0  |
| PITG_18000 | Pi conserved hypothetical protein (872 nt)                                           | 52  | 79  | 0  |
| PITG_18001 | Pi ubiquitin, putative (625 nt)                                                      | 12  | 48  | 50 |
| PITG_18002 | Pi conserved hypothetical protein (1812 nt)                                          | 13  | 147 | 0  |
| PITG_18004 | Pi conserved hypothetical protein (2689 nt)                                          | 5   | 10  | 0  |
| PITG_18005 | Pi conserved hypothetical protein (1379 nt)                                          | 48  | 136 | 0  |
| PITG_18007 | Pi CDP-alcohol phosphatidyltransferase, putative (1560 nt)                           | 5   | 16  | 0  |
| PITG_18008 | Pi conserved hypothetical protein (1255 nt)                                          | 12  | 16  | 0  |
| PITG_18009 | Pi conserved hypothetical protein (495 nt)                                           | 8   | 35  | 0  |
| PITG_18010 | Pi conserved hypothetical protein (1491 nt)                                          | 4   | 17  | 0  |
| PITG_18011 | Pi conserved hypothetical protein (2051 nt)                                          | 51  | 232 | 1  |
| PITG_18014 | Pi conserved hypothetical protein (3807 nt)                                          | 0   | 13  | 0  |
| PITG_18015 | Pi glycosyl transferase, putative (1574 nt)                                          | 1   | 19  | 0  |
| PITG_18016 | Pi flagellar protein, putative (2007 nt)                                             | 4   | 16  | 0  |
| PITG_18017 | Pi conserved hypothetical protein (1021 nt)                                          | 0   | 9   | 0  |
| PITG_18018 | Pi ribosome-recycling factor, putative (995 nt)                                      | 2   | 17  | 0  |
| PITG_18024 | Pi conserved hypothetical protein (2420 nt)                                          | 10  | 17  | 0  |
| PITG_18025 | Pi fatty acid synthase subunit alpha, putative (12457 nt)                            | 2   | 48  | 3  |
| PITG_18027 | Pi histone acetyltransferase, putative (2887 nt)                                     | 5   | 18  | 0  |
| PITG_18028 | Pi conserved hypothetical protein (2296 nt)                                          | 8   | 28  | 0  |
| PITG_18030 | Pi conserved hypothetical protein (531 nt)                                           | 3   | 23  | 0  |
| PITG_18031 | Pi conserved hypothetical protein (1265 nt)                                          | 2   | 10  | 0  |
| PITG_18033 | Pi conserved hypothetical protein (366 nt)                                           | 12  | 23  | 0  |
| PITG_18034 | Pi conserved hypothetical protein (2719 nt)                                          | 0   | 16  | 0  |
| PITG_18035 | Pi conserved hypothetical protein (941 nt)                                           | 0   | 13  | 0  |
| PITG_18036 | Pi conserved hypothetical protein (863 nt)                                           | 0   | 13  | 0  |
| PITG_18037 | Pi ubiquitin family protein, putative (1724 nt)                                      | 28  | 49  | 0  |
| PITG_18038 | Pi conserved hypothetical protein (900 nt)                                           | 13  | 33  | 0  |
| PITG_18039 | Pi conserved hypothetical protein (1487 nt)                                          | 0   | 3   | 0  |
| PITG_18044 | Pi conserved hypothetical protein (1623 nt)                                          | 1   | 17  | 0  |
| PITG_18045 | Pi protein kinase, putative (1574 nt)                                                | 43  | 88  | 0  |
| PITG_18046 | Pi conserved hypothetical protein (2477 nt)                                          | 29  | 74  | 0  |
| PITG_18047 | Pi hypothetical protein (543 nt)                                                     | 19  | 6   | 0  |
| PITG_18048 | Pi aconitate hydratase, mitochondrial precursor (3034 nt)                            | 40  | 313 | 14 |
| PITG_18049 | Pi chromosome segregation protein, putative (3762 nt)                                | 1   | 14  | 0  |
| PITG_18050 | Pi conserved hypothetical protein (1456 nt)                                          | 7   | 40  | 0  |
| PITG_18052 | Pi 60S ribosomal protein L3 (1310 nt)                                                | 196 | 288 | 63 |
| PITG_18053 | Pi dolichyl-diphosphooligosaccharide-protein glycosyltransferase, putative (1000 nt) | 25  | 70  | 2  |
| PITG_18054 | Pi 50S ribosomal protein L7/L12, putative (614 nt)                                   | 23  | 76  | 14 |
| PITG_18055 | Pi mitochondrial inner membrane protease ATP23 (990 nt)                              | 1   | 26  | 0  |
| PITG_18056 | Pi conserved hypothetical protein (1078 nt)                                          | 0   | 15  | 0  |
| PITG_18057 | Pi conserved hypothetical protein (1127 nt)                                          | 2   | 15  | 0  |
| PITG_18062 | Pi conserved hypothetical protein (2532 nt)                                          | 11  | 8   | 0  |
| PITG_18063 | Pi bifunctional polynucleotide phosphatase/kinase, putative (1000 nt)                | 7   | 29  | 0  |
| PITG_18064 | Pi conserved hypothetical protein (1916 nt)                                          | 2   | 17  | 0  |

|            |                                                                      |      |      |    |
|------------|----------------------------------------------------------------------|------|------|----|
| PITG_18065 | Pi conserved hypothetical protein (4337 nt)                          | 0    | 0    | 0  |
| PITG_18066 | Pi conserved hypothetical protein (1681 nt)                          | 1    | 3    | 0  |
| PITG_18067 | Pi RAC family serine/threonine-protein kinase (3279 nt)              | 5    | 30   | 0  |
| PITG_18070 | Pi phospholipase, putative (3302 nt)                                 | 2    | 25   | 0  |
| PITG_18071 | Pi conserved hypothetical protein (1140 nt)                          | 10   | 40   | 0  |
| PITG_18072 | Pi conserved hypothetical protein (1370 nt)                          | 632  | 2083 | 29 |
| PITG_18073 | Pi cell division protein kinase, putative (1103 nt)                  | 4    | 16   | 0  |
| PITG_18076 | Pi phosphoglycerate mutase family (1280 nt)                          | 1    | 10   | 0  |
| PITG_18080 | Pi phosphoglycerate mutase (789 nt)                                  | 2    | 12   | 0  |
| PITG_18085 | Pi hypothetical protein (710 nt)                                     | 2    | 15   | 0  |
| PITG_18088 | Pi conserved hypothetical protein (1991 nt)                          | 29   | 81   | 0  |
| PITG_18089 | Pi protein transporter Sec61 subunit alpha, putative (1470 nt)       | 51   | 220  | 14 |
| PITG_18091 | Pi structural maintenance of chromosomes protein, putative (1470 nt) | 5    | 13   | 0  |
| PITG_18092 | Pi conserved hypothetical protein (4408 nt)                          | 2    | 4    | 0  |
| PITG_18094 | Pi conserved hypothetical protein (8494 nt)                          | 1    | 22   | 0  |
| PITG_18095 | Pi transmembrane protein, putative (886 nt)                          | 11   | 9    | 0  |
| PITG_18099 | Pi cysteine protease family C15, putative (1610 nt)                  | 6    | 25   | 1  |
| PITG_18100 | Pi conserved hypothetical protein (2674 nt)                          | 6    | 30   | 2  |
| PITG_18101 | Pi conserved hypothetical protein (2262 nt)                          | 19   | 14   | 0  |
| PITG_18103 | Pi Poly(A) RNA polymerase, putative (1470 nt)                        | 4    | 9    | 0  |
| PITG_18104 | Pi conserved hypothetical protein (875 nt)                           | 11   | 55   | 1  |
| PITG_18105 | Pi putative GPI mannosyltransferase (2326 nt)                        | 2    | 12   | 0  |
| PITG_18106 | Pi vacuolar protein sorting-associated protein, putative (1470 nt)   | 0    | 21   | 0  |
| PITG_18107 | Pi Der1-like family, putative (1230 nt)                              | 53   | 88   | 1  |
| PITG_18113 | Pi DNA-directed RNA polymerase II 36 kDa polypeptide (1470 nt)       | 5    | 19   | 0  |
| PITG_18114 | Pi conserved hypothetical protein (1212 nt)                          | 2    | 22   | 0  |
| PITG_18117 | Pi conserved hypothetical protein (1272 nt)                          | 2    | 61   | 0  |
| PITG_18118 | Pi conserved hypothetical protein (848 nt)                           | 2    | 105  | 0  |
| PITG_18119 | Pi conserved hypothetical protein (1968 nt)                          | 8    | 38   | 0  |
| PITG_18127 | Pi conserved hypothetical protein (5592 nt)                          | 18   | 22   | 0  |
| PITG_18129 | Pi cyclin-Y-like protein (1254 nt)                                   | 4    | 18   | 0  |
| PITG_18151 | Pi conserved hypothetical protein (2977 nt)                          | 7    | 15   | 0  |
| PITG_18155 | Pi conserved hypothetical protein (2637 nt)                          | 0    | 11   | 0  |
| PITG_18161 | Pi conserved hypothetical protein (1269 nt)                          | 2    | 29   | 1  |
| PITG_18164 | Pi conserved hypothetical protein (1270 nt)                          | 10   | 71   | 0  |
| PITG_18165 | Pi conserved hypothetical protein (611 nt)                           | 1404 | 1067 | 29 |
| PITG_18168 | Pi conserved hypothetical protein (1080 nt)                          | 0    | 11   | 0  |
| PITG_18169 | Pi conserved hypothetical protein (547 nt)                           | 0    | 0    | 0  |
| PITG_18171 | Pi mitochondrial 2-oxoglutarate/malate carrier protein (1470 nt)     | 14   | 8    | 0  |
| PITG_18172 | Pi conserved hypothetical protein (5101 nt)                          | 16   | 0    | 0  |
| PITG_18173 | Pi conserved hypothetical protein (792 nt)                           | 45   | 35   | 0  |
| PITG_18174 | Pi cleavage induced hypothetical protein (2413 nt)                   | 9    | 55   | 0  |
| PITG_18175 | Pi conserved hypothetical protein (1426 nt)                          | 6    | 22   | 0  |
| PITG_18183 | Pi maltose O-acetyltransferase (1036 nt)                             | 22   | 83   | 0  |
| PITG_18185 | Pi phospholipase D, Pi-sPLD-like-1 (1650 nt)                         | 6    | 9    | 0  |
| PITG_18187 | Pi sulfite reductase [NADPH] subunit beta, putative (450 nt)         | 2    | 162  | 0  |
| PITG_18189 | Pi conserved hypothetical protein (1595 nt)                          | 7    | 38   | 0  |

|            |                                                          |     |      |    |
|------------|----------------------------------------------------------|-----|------|----|
| PITG_18195 | Pi conserved hypothetical protein (766 nt)               | 0   | 0    | 0  |
| PITG_18201 | Pi avirulence-associated protein 3.4, putative (3419 nt) | 0   | 6    | 0  |
| PITG_18203 | Pi avirulence-associated protein 3.4, putative (3419 nt) | 2   | 7    | 0  |
| PITG_18204 | Pi conserved hypothetical protein (3115 nt)              | 1   | 24   | 0  |
| PITG_18206 | Pi conserved hypothetical protein (5849 nt)              | 1   | 9    | 0  |
| PITG_18207 | Pi conserved hypothetical protein (3419 nt)              | 3   | 14   | 0  |
| PITG_18209 | Pi glycoside hydrolase, putative (1428 nt)               | 0   | 23   | 0  |
| PITG_18210 | Pi conserved hypothetical protein (1489 nt)              | 2   | 12   | 0  |
| PITG_18227 | Pi conserved hypothetical protein (1032 nt)              | 4   | 11   | 0  |
| PITG_18230 | Pi glycoside hydrolase, putative (1426 nt)               | 1   | 27   | 0  |
| PITG_18232 | Pi avirulence-associated protein 3.4, putative (5892 nt) | 7   | 5    | 0  |
| PITG_18233 | Pi conserved hypothetical protein (756 nt)               | 82  | 235  | 1  |
| PITG_18235 | Pi transmembrane protein, putative (1125 nt)             | 9   | 24   | 0  |
| PITG_18236 | Pi conserved hypothetical protein (1431 nt)              | 7   | 13   | 0  |
| PITG_18237 | Pi replication factor C subunit 2 (998 nt)               | 5   | 16   | 0  |
| PITG_18242 | Pi conserved hypothetical protein (326 nt)               | 16  | 42   | 0  |
| PITG_18243 | Pi conserved hypothetical protein (567 nt)               | 8   | 6    | 0  |
| PITG_18245 | Pi conserved hypothetical protein (1596 nt)              | 6   | 16   | 0  |
| PITG_18246 | Pi conserved hypothetical protein (2709 nt)              | 2   | 12   | 0  |
| PITG_18248 | Pi acetate kinase (1405 nt)                              | 6   | 18   | 0  |
| PITG_18250 | Pi conserved hypothetical protein (933 nt)               | 1   | 18   | 0  |
| PITG_18251 | Pi peptide chain release factor 1 (1172 nt)              | 11  | 17   | 0  |
| PITG_18252 | Pi conserved hypothetical protein (736 nt)               | 14  | 84   | 0  |
| PITG_18254 | Pi conserved hypothetical protein (3885 nt)              | 4   | 12   | 0  |
| PITG_18257 | Pi conserved hypothetical protein (1514 nt)              | 1   | 22   | 0  |
| PITG_18272 | Pi conserved hypothetical protein (1840 nt)              | 8   | 18   | 0  |
| PITG_18274 | Pi serine protease, putative (3261 nt)                   | 13  | 33   | 0  |
| PITG_18276 | Pi conserved hypothetical protein (1704 nt)              | 2   | 19   | 0  |
| PITG_18288 | Pi endoribonuclease L-PSP, putative (697 nt)             | 10  | 53   | 0  |
| PITG_18289 | Pi ATP-binding Cassette (ABC) Superfamily (777 nt)       | 1   | 3    | 0  |
| PITG_18296 | Pi coproporphyrinogen III oxidase, mitochondrial precu   | 50  | 16   | 0  |
| PITG_18297 | Pi ATP-binding Cassette (ABC) Superfamily (1773 nt)      | 3   | 19   | 0  |
| PITG_18298 | Pi coproporphyrinogen III oxidase (1314 nt)              | 47  | 35   | 0  |
| PITG_18300 | Pi conserved hypothetical protein (573 nt)               | 11  | 2    | 0  |
| PITG_18301 | Pi conserved hypothetical protein (690 nt)               | 17  | 18   | 0  |
| PITG_18302 | Pi conserved hypothetical protein (558 nt)               | 4   | 36   | 0  |
| PITG_18304 | Pi conserved hypothetical protein (1410 nt)              | 2   | 6    | 0  |
| PITG_18306 | Pi conserved hypothetical protein (1823 nt)              | 977 | 2159 | 18 |
| PITG_18312 | Pi conserved hypothetical protein (1141 nt)              | 63  | 485  | 0  |
| PITG_18314 | Pi mitochondrial 2-oxoglutarate/malate carrier protein   | 4   | 9    | 0  |
| PITG_18316 | Pi phospholipid hydroperoxide glutathione peroxidase,    | 31  | 538  | 3  |
| PITG_18317 | Pi phospholipid hydroperoxide glutathione peroxidase,    | 152 | 171  | 0  |
| PITG_18320 | Pi conserved hypothetical protein (925 nt)               | 1   | 17   | 0  |
| PITG_18321 | Pi conserved hypothetical protein (873 nt)               | 2   | 10   | 0  |
| PITG_18322 | Pi hypothetical protein (4169 nt)                        | 5   | 20   | 0  |
| PITG_18323 | Pi conserved hypothetical protein (1158 nt)              | 0   | 18   | 0  |
| PITG_18326 | Pi conserved hypothetical protein (1353 nt)              | 10  | 7    | 0  |

|            |                                                          |    |     |    |
|------------|----------------------------------------------------------|----|-----|----|
| PITG_18328 | Pi conserved hypothetical protein (752 nt)               | 1  | 17  | 0  |
| PITG_18329 | Pi conserved hypothetical protein (975 nt)               | 1  | 21  | 0  |
| PITG_18330 | Pi conserved hypothetical protein (939 nt)               | 19 | 37  | 1  |
| PITG_18331 | Pi conserved hypothetical protein (8852 nt)              | 14 | 6   | 0  |
| PITG_18332 | Pi glycoside hydrolase, putative (1104 nt)               | 25 | 3   | 0  |
| PITG_18334 | Pi alcohol dehydrogenase, putative (1017 nt)             | 0  | 0   | 0  |
| PITG_18335 | Pi glycoside hydrolase, putative (1332 nt)               | 0  | 0   | 0  |
| PITG_18336 | Pi glycoside hydrolase, putative (1398 nt)               | 0  | 2   | 0  |
| PITG_18342 | Pi alcohol dehydrogenase, putative (980 nt)              | 41 | 19  | 0  |
| PITG_18354 | Pi succinate dehydrogenase flavoprotein subunit, mito    | 6  | 44  | 8  |
| PITG_18355 | Pi conserved hypothetical protein (1811 nt)              | 12 | 28  | 0  |
| PITG_18356 | Pi beta-glucan synthesis-associated protein KRE6 (2462   | 0  | 4   | 0  |
| PITG_18358 | Pi conserved hypothetical protein (1390 nt)              | 5  | 54  | 0  |
| PITG_18359 | Pi ubiquitin-specific protease, putative (2486 nt)       | 5  | 71  | 0  |
| PITG_18360 | Pi cAMP-dependent protein kinase regulatory subunit,     | 9  | 76  | 0  |
| PITG_18361 | Pi inositol oxygenase (918 nt)                           | 8  | 38  | 0  |
| PITG_18364 | Pi inositol oxygenase (885 nt)                           | 4  | 38  | 0  |
| PITG_18366 | Pi choline/Carnitine O-acyltransferase, putative (2555 r | 4  | 59  | 0  |
| PITG_18369 | Pi conserved hypothetical protein (1040 nt)              | 7  | 40  | 0  |
| PITG_18371 | Pi hypothetical protein (560 nt)                         | 2  | 6   | 0  |
| PITG_18372 | Pi myotubularin-like protein (4389 nt)                   | 1  | 17  | 0  |
| PITG_18374 | Pi lysophosphatidylcholine acyltransferase, putative (1  | 1  | 15  | 0  |
| PITG_18375 | Pi UDP-glucose 6-dehydrogenase (1490 nt)                 | 4  | 24  | 1  |
| PITG_18376 | Pi conserved hypothetical protein (635 nt)               | 56 | 29  | 0  |
| PITG_18377 | Pi adenylate kinase, putative (2776 nt)                  | 2  | 22  | 0  |
| PITG_18378 | Pi conserved hypothetical protein (1120 nt)              | 3  | 65  | 0  |
| PITG_18379 | Pi conserved hypothetical protein (387 nt)               | 1  | 1   | 0  |
| PITG_18380 | Pi conserved hypothetical protein (903 nt)               | 10 | 25  | 0  |
| PITG_18381 | Pi conserved hypothetical protein (1352 nt)              | 3  | 0   | 0  |
| PITG_18382 | Pi conserved hypothetical protein (806 nt)               | 10 | 9   | 0  |
| PITG_18383 | Pi conserved hypothetical protein (471 nt)               | 0  | 1   | 0  |
| PITG_18384 | Pi conserved hypothetical protein (688 nt)               | 13 | 32  | 0  |
| PITG_18385 | Pi conserved hypothetical protein (597 nt)               | 44 | 43  | 0  |
| PITG_18387 | Pi conserved hypothetical protein (2492 nt)              | 0  | 15  | 0  |
| PITG_18392 | Pi T-complex protein 1 subunit beta (1686 nt)            | 11 | 74  | 4  |
| PITG_18393 | Pi conserved hypothetical protein (1546 nt)              | 7  | 33  | 0  |
| PITG_18396 | Pi conserved hypothetical protein (2174 nt)              | 10 | 50  | 1  |
| PITG_18397 | Pi conserved hypothetical protein (1272 nt)              | 1  | 31  | 0  |
| PITG_18402 | Pi conserved hypothetical protein (1056 nt)              | 33 | 4   | 98 |
| PITG_18409 | Pi conserved hypothetical protein (2100 nt)              | 6  | 62  | 0  |
| PITG_18410 | Pi conserved hypothetical protein (711 nt)               | 91 | 24  | 0  |
| PITG_18411 | Pi conserved hypothetical protein (2239 nt)              | 5  | 10  | 0  |
| PITG_18412 | Pi pre-mRNA cleavage complex II protein Clp1, putative   | 4  | 27  | 0  |
| PITG_18413 | Pi conserved hypothetical protein (712 nt)               | 4  | 18  | 0  |
| PITG_18414 | Pi phosphoglucomutase (3392 nt)                          | 13 | 266 | 15 |
| PITG_18416 | Pi conserved hypothetical protein (2192 nt)              | 5  | 18  | 0  |
| PITG_18417 | Pi conserved hypothetical protein (1435 nt)              | 38 | 79  | 0  |

|            |                                                                                     |     |     |   |
|------------|-------------------------------------------------------------------------------------|-----|-----|---|
| PITG_18418 | Pi conserved hypothetical protein (1581 nt)                                         | 0   | 2   | 0 |
| PITG_18420 | Pi protein kinase, putative (1415 nt)                                               | 16  | 92  | 2 |
| PITG_18421 | Pi large subunit GTPase 1 (2385 nt)                                                 | 13  | 45  | 0 |
| PITG_18423 | Pi conserved hypothetical protein (5054 nt)                                         | 1   | 10  | 0 |
| PITG_18424 | Pi snurportin-like protein (1563 nt)                                                | 19  | 17  | 0 |
| PITG_18432 | Pi pre-mRNA cleavage complex II protein Clp1, putative                              | 28  | 65  | 0 |
| PITG_18433 | Pi conserved hypothetical protein (1884 nt)                                         | 10  | 7   | 0 |
| PITG_18435 | Pi uricase, putative (1137 nt)                                                      | 111 | 118 | 0 |
| PITG_18440 | Pi conserved hypothetical protein (778 nt)                                          | 13  | 71  | 0 |
| PITG_18443 | Pi conserved hypothetical protein (563 nt)                                          | 0   | 1   | 0 |
| PITG_18445 | Pi hypothetical protein (1604 nt)                                                   | 0   | 0   | 0 |
| PITG_18446 | Pi 26S protease regulatory subunit 6B (1345 nt)                                     | 5   | 38  | 8 |
| PITG_18449 | Pi conserved hypothetical protein (1009 nt)                                         | 1   | 0   | 0 |
| PITG_18452 | Pi thioredoxin reductase 1 (3219 nt)                                                | 16  | 55  | 0 |
| PITG_18455 | Pi conserved hypothetical protein (575 nt)                                          | 13  | 69  | 0 |
| PITG_18458 | Pi conserved hypothetical protein (2357 nt)                                         | 6   | 82  | 0 |
| PITG_18459 | Pi conserved hypothetical protein (1623 nt)                                         | 8   | 27  | 0 |
| PITG_18461 | Pi conserved hypothetical protein (2208 nt)                                         | 3   | 17  | 0 |
| PITG_18463 | Pi hypothetical protein (1921 nt)                                                   | 22  | 48  | 0 |
| PITG_18464 | Pi hypothetical protein (1786 nt)                                                   | 5   | 32  | 0 |
| PITG_18473 | Pi 3-phosphoinositide-dependent protein kinase, putative                            | 17  | 40  | 0 |
| PITG_18474 | Pi CCR4-NOT transcription complex subunit, putative (7                              | 1   | 23  | 0 |
| PITG_18475 | Pi conserved hypothetical protein (901 nt)                                          | 19  | 36  | 0 |
| PITG_18482 | Pi polysaccharide lyase, putative (1685 nt)                                         | 1   | 10  | 0 |
| PITG_18489 | Pi conserved hypothetical protein (630 nt)                                          | 0   | 6   | 0 |
| PITG_18497 | Pi Crinkler (CRN) family protein (1358 nt)                                          | 382 | 405 | 0 |
| PITG_18498 | Pi conserved hypothetical protein (5417 nt)                                         | 0   | 28  | 0 |
| PITG_18503 | Pi Crinkler (CRN) family protein (1363 nt)                                          | 410 | 526 | 1 |
| PITG_18505 | Pi conserved hypothetical protein (2997 nt)                                         | 0   | 0   | 0 |
| PITG_18508 | Pi Zinc (Zn <sup>2+</sup> )-Iron (Fe <sup>2+</sup> ) Permease (ZIP) Family (843 nt) | 0   | 15  | 0 |
| PITG_18509 | Pi exosome complex exonuclease RRP44, putative (324                                 | 1   | 14  | 0 |
| PITG_18518 | Pi translation initiation factor eIF-2B subunit alpha, putative                     | 5   | 28  | 0 |
| PITG_18519 | Pi conserved hypothetical protein (3053 nt)                                         | 6   | 30  | 0 |
| PITG_18521 | Pi conserved hypothetical protein (897 nt)                                          | 17  | 23  | 0 |
| PITG_18534 | Pi trans-1,2-dihydrobenzene-1,2-diol dehydrogenase, putative                        | 9   | 17  | 0 |
| PITG_18537 | Pi trans-1,2-dihydrobenzene-1,2-diol dehydrogenase, putative                        | 3   | 60  | 0 |
| PITG_18538 | Pi 3-isopropylmalate dehydratase large subunit, putative                            | 2   | 15  | 0 |
| PITG_18540 | Pi conserved hypothetical protein (568 nt)                                          | 5   | 55  | 0 |
| PITG_18541 | Pi conserved hypothetical protein (234 nt)                                          | 3   | 64  | 0 |
| PITG_18542 | Pi conserved hypothetical protein (851 nt)                                          | 5   | 17  | 0 |
| PITG_18543 | Pi conserved hypothetical protein (1311 nt)                                         | 25  | 99  | 0 |
| PITG_18545 | Pi tetrahydrofolate dehydrogenase (1038 nt)                                         | 1   | 7   | 0 |
| PITG_18564 | Pi conserved hypothetical protein (487 nt)                                          | 35  | 7   | 0 |
| PITG_18574 | Pi conserved hypothetical protein (922 nt)                                          | 5   | 16  | 0 |
| PITG_18575 | Pi conserved hypothetical protein (798 nt)                                          | 1   | 28  | 0 |
| PITG_18578 | Pi dual specificity protein phosphatase, putative (1540                             | 3   | 10  | 0 |
| PITG_18583 | Pi nonribosomal peptide synthetase, putative (4723 nt)                              | 0   | 4   | 0 |

|            |                                                         |    |     |    |
|------------|---------------------------------------------------------|----|-----|----|
| PITG_18602 | Pi conserved hypothetical protein (1387 nt)             | 0  | 22  | 0  |
| PITG_18603 | Pi conserved hypothetical protein (1088 nt)             | 3  | 2   | 0  |
| PITG_18606 | Pi conserved hypothetical protein (1720 nt)             | 0  | 22  | 0  |
| PITG_18614 | Pi conserved hypothetical protein (949 nt)              | 3  | 9   | 0  |
| PITG_18623 | Pi polycomb protein, putative (1447 nt)                 | 13 | 53  | 0  |
| PITG_18624 | Pi kinesin-like protein (3391 nt)                       | 5  | 14  | 0  |
| PITG_18632 | Pi ATPase (1497 nt)                                     | 4  | 26  | 0  |
| PITG_18633 | Pi tRNA pseudouridine synthase B, putative (1304 nt)    | 20 | 44  | 0  |
| PITG_18634 | Pi DNA topoisomerase, putative (3053 nt)                | 3  | 11  | 0  |
| PITG_18635 | Pi conserved hypothetical protein (621 nt)              | 18 | 60  | 0  |
| PITG_18641 | Pi conserved hypothetical protein (3909 nt)             | 1  | 23  | 0  |
| PITG_18642 | Pi conserved hypothetical protein (2079 nt)             | 1  | 21  | 0  |
| PITG_18644 | Pi conserved hypothetical protein (3472 nt)             | 1  | 15  | 0  |
| PITG_18649 | Pi SUMO protease, putative (666 nt)                     | 1  | 18  | 0  |
| PITG_18650 | Pi proteasomal ubiquitin receptor ADRM1-like protein    | 17 | 92  | 0  |
| PITG_18651 | Pi conserved hypothetical protein (2887 nt)             | 9  | 28  | 0  |
| PITG_18652 | Pi Cation Diffusion Facilitator (CDF) Family (1946 nt)  | 1  | 25  | 0  |
| PITG_18655 | Pi conserved hypothetical protein (1374 nt)             | 3  | 30  | 0  |
| PITG_18656 | Pi conserved hypothetical protein (3802 nt)             | 7  | 21  | 0  |
| PITG_18657 | Pi conserved hypothetical protein (645 nt)              | 14 | 23  | 0  |
| PITG_18658 | Pi conserved hypothetical protein (1286 nt)             | 1  | 20  | 0  |
| PITG_18659 | Pi conserved hypothetical protein (408 nt)              | 0  | 10  | 0  |
| PITG_18662 | Pi conserved hypothetical protein (641 nt)              | 20 | 241 | 0  |
| PITG_18671 | Pi ATP-binding Cassette (ABC) Superfamily (2077 nt)     | 8  | 15  | 0  |
| PITG_18677 | Pi conserved hypothetical protein (2072 nt)             | 28 | 58  | 0  |
| PITG_18678 | Pi transmembrane protein, putative (3121 nt)            | 0  | 0   | 0  |
| PITG_18680 | Pi cleavage induced conserved hypothetical protein (12  | 0  | 0   | 0  |
| PITG_18688 | Pi Poly(A) polymerase, putative (2034 nt)               | 4  | 23  | 0  |
| PITG_18690 | Pi conserved hypothetical protein (1140 nt)             | 0  | 11  | 0  |
| PITG_18693 | Pi hypothetical protein (1064 nt)                       | 8  | 14  | 0  |
| PITG_18694 | Pi conserved hypothetical protein (410 nt)              | 2  | 30  | 0  |
| PITG_18695 | Pi UDP-galactose transporter (1132 nt)                  | 3  | 11  | 0  |
| PITG_18696 | Pi replication factor C subunit, putative (3196 nt)     | 3  | 15  | 0  |
| PITG_18702 | Pi conserved hypothetical protein (1770 nt)             | 5  | 25  | 0  |
| PITG_18706 | Pi acetyl-CoA carboxylase, putative (8050 nt)           | 5  | 50  | 2  |
| PITG_18707 | Pi glycerol-3-phosphate O-acyltransferase, putative (23 | 17 | 58  | 0  |
| PITG_18709 | Pi conserved hypothetical protein (1109 nt)             | 0  | 0   | 0  |
| PITG_18712 | Pi conserved hypothetical protein (2161 nt)             | 7  | 33  | 0  |
| PITG_18713 | Pi Rab6 family GTPase, putative (937 nt)                | 4  | 27  | 0  |
| PITG_18714 | Pi intraflagellar Transport protein 80 (2304 nt)        | 0  | 6   | 0  |
| PITG_18717 | Pi H/ACA ribonucleoprotein complex subunit 3 (442 nt)   | 19 | 29  | 1  |
| PITG_18718 | Pi GTP-binding nuclear protein spi1 (1387 nt)           | 40 | 193 | 21 |
| PITG_18719 | Pi transmembrane protein, putative (1945 nt)            | 1  | 11  | 0  |
| PITG_18720 | Pi ATP-citrate synthase (3410 nt)                       | 7  | 74  | 8  |
| PITG_18721 | Pi conserved hypothetical protein (939 nt)              | 0  | 8   | 0  |
| PITG_18726 | Pi conserved hypothetical protein (1282 nt)             | 5  | 8   | 0  |
| PITG_18727 | Pi DNA-directed RNA polymerase II subunit J (786 nt)    | 8  | 71  | 0  |



|            |                                                          |     |     |    |
|------------|----------------------------------------------------------|-----|-----|----|
| PITG_18728 | Pi conserved hypothetical protein (2363 nt)              | 32  | 21  | 0  |
| PITG_18731 | Pi 26S proteasome non-ATPase regulatory subunit, put     | 8   | 95  | 3  |
| PITG_18735 | Pi vacuolar protein sorting-associated protein, putative | 2   | 31  | 0  |
| PITG_18736 | Pi conserved hypothetical protein (1934 nt)              | 1   | 6   | 0  |
| PITG_18738 | Pi hypothetical protein (906 nt)                         | 8   | 54  | 0  |
| PITG_18741 | Pi Amino Acid/Auxin Permease (AAAP) Family (1491 nt)     | 5   | 31  | 0  |
| PITG_18743 | Pi amino acid/auxin permease-like protein (706 nt)       | 0   | 22  | 0  |
| PITG_18744 | Pi amino acid/auxin permease-like protein (657 nt)       | 7   | 31  | 0  |
| PITG_18747 | Pi GlcNac transferase (1678 nt)                          | 2   | 23  | 0  |
| PITG_18748 | Pi conserved hypothetical protein (5857 nt)              | 0   | 4   | 0  |
| PITG_18749 | Pi conserved hypothetical protein (2573 nt)              | 2   | 18  | 0  |
| PITG_18750 | Pi conserved hypothetical protein (667 nt)               | 7   | 5   | 0  |
| PITG_18752 | Pi small nuclear ribonucleoprotein-associated protein,   | 16  | 69  | 2  |
| PITG_18753 | Pi conserved hypothetical protein (702 nt)               | 1   | 19  | 0  |
| PITG_18754 | Pi conserved hypothetical protein (817 nt)               | 2   | 13  | 0  |
| PITG_18756 | Pi conserved hypothetical protein (919 nt)               | 2   | 29  | 0  |
| PITG_18759 | Pi conserved hypothetical protein (1105 nt)              | 1   | 15  | 0  |
| PITG_18774 | Pi Mitochondrial Carrier (MC) Family (1038 nt)           | 120 | 199 | 18 |
| PITG_18775 | Pi conserved hypothetical protein (563 nt)               | 361 | 291 | 29 |
| PITG_18776 | Pi cytochrome c1, mitochondrial precursor (1368 nt)      | 85  | 215 | 11 |
| PITG_18779 | Pi conserved hypothetical protein (566 nt)               | 8   | 42  | 0  |
| PITG_18786 | Pi conserved hypothetical protein (1083 nt)              | 18  | 32  | 0  |
| PITG_18787 | Pi conserved hypothetical protein (1713 nt)              | 20  | 187 | 0  |
| PITG_18788 | Pi tubulin/FtsZ family (3005 nt)                         | 17  | 281 | 0  |
| PITG_18795 | Pi conserved hypothetical protein (966 nt)               | 8   | 3   | 0  |
| PITG_18797 | Pi conserved hypothetical protein (1978 nt)              | 26  | 86  | 0  |
| PITG_18800 | Pi conserved hypothetical protein (1069 nt)              | 1   | 13  | 0  |
| PITG_18801 | Pi conserved hypothetical protein (2091 nt)              | 0   | 0   | 0  |
| PITG_18813 | Pi conserved hypothetical protein (1749 nt)              | 1   | 16  | 0  |
| PITG_18814 | Pi conserved hypothetical protein (1219 nt)              | 3   | 14  | 0  |
| PITG_18815 | Pi conserved hypothetical protein (951 nt)               | 1   | 26  | 0  |
| PITG_18822 | Pi Crinkler (CRN) family protein, pseudogene (1859 nt)   | 96  | 44  | 0  |
| PITG_18824 | Pi crinkler (CRN) family protein, pseudogene (2748 nt)   | 112 | 304 | 1  |
| PITG_18826 | Pi Crinkler (CRN) family protein (1559 nt)               | 2   | 12  | 0  |
| PITG_18833 | Pi Crinkler (CRN) family protein (2362 nt)               | 131 | 693 | 2  |
| PITG_18834 | Pi crinkler (CRN) family protein (2548 nt)               | 162 | 833 | 2  |
| PITG_18835 | Pi crinkler (CRN) family protein, 5' partial (981 nt)    | 18  | 27  | 0  |
| PITG_18845 | Pi hypothetical protein (799 nt)                         | 656 | 101 | 0  |
| PITG_18851 | Pi conserved hypothetical protein (900 nt)               | 1   | 13  | 0  |
| PITG_18859 | Pi cGMP-dependent 3',5'-cGMP phosphodiesterase, pu       | 0   | 13  | 0  |
| PITG_18860 | Pi conserved hypothetical protein (988 nt)               | 10  | 34  | 0  |
| PITG_18861 | Pi conserved hypothetical protein (1158 nt)              | 8   | 5   | 0  |
| PITG_18862 | Pi conserved hypothetical protein (4505 nt)              | 1   | 14  | 0  |
| PITG_18863 | Pi conserved hypothetical protein (747 nt)               | 6   | 10  | 0  |
| PITG_18867 | Pi tRNA-dihydrouridine synthase, putative (732 nt)       | 5   | 31  | 0  |
| PITG_18868 | Pi tRNA-dihydrouridine synthase, putative (1470 nt)      | 3   | 15  | 0  |
| PITG_18873 | Pi conserved hypothetical protein (1696 nt)              | 5   | 12  | 0  |

|            |                                                            |     |     |     |
|------------|------------------------------------------------------------|-----|-----|-----|
| PITG_18874 | Pi conserved hypothetical protein (1275 nt)                | 8   | 19  | 0   |
| PITG_18877 | Pi conserved hypothetical protein (1024 nt)                | 7   | 6   | 0   |
| PITG_18882 | Pi transcription initiation factor TFIID subunit, putative | 4   | 36  | 0   |
| PITG_18883 | Pi conserved hypothetical protein (585 nt)                 | 4   | 8   | 0   |
| PITG_18884 | Pi conserved hypothetical protein (1702 nt)                | 9   | 21  | 0   |
| PITG_18891 | Pi uracil-DNA glycosylase (939 nt)                         | 8   | 27  | 0   |
| PITG_18894 | Pi vacuolar protein sorting-associated protein, putative   | 6   | 22  | 0   |
| PITG_18895 | Pi conserved hypothetical protein (1339 nt)                | 2   | 20  | 0   |
| PITG_18898 | Pi vacuolar protein sorting-associated protein, putative   | 4   | 21  | 0   |
| PITG_18899 | Pi vacuolar protein sorting-associated protein 53 (1598    | 10  | 23  | 0   |
| PITG_18902 | Pi conserved hypothetical protein (1976 nt)                | 2   | 27  | 0   |
| PITG_18906 | Pi ATP-binding Cassette (ABC) Superfamily (2690 nt)        | 1   | 21  | 0   |
| PITG_18912 | Pi nonsense transcript regulator (2567 nt)                 | 14  | 44  | 0   |
| PITG_18913 | Pi hypothetical protein (716 nt)                           | 1   | 2   | 0   |
| PITG_18920 | Pi conserved hypothetical protein (1307 nt)                | 1   | 0   | 0   |
| PITG_18922 | Pi conserved hypothetical protein (1842 nt)                | 27  | 38  | 0   |
| PITG_18923 | Pi putative GPI-anchored serine-rich hypothetical prote    | 305 | 236 | 0   |
| PITG_18928 | Pi conserved hypothetical protein (926 nt)                 | 39  | 40  | 0   |
| PITG_18931 | Pi hypothetical protein (699 nt)                           | 488 | 996 | 112 |
| PITG_18934 | Pi calreticulin precursor (1415 nt)                        | 218 | 971 | 35  |
| PITG_18935 | Pi dihydrolipoyl dehydrogenase 1, mitochondrial precu      | 1   | 11  | 0   |
| PITG_18943 | Pi conserved hypothetical protein (882 nt)                 | 13  | 35  | 0   |
| PITG_18947 | Pi hypothetical protein (746 nt)                           | 8   | 51  | 3   |
| PITG_18951 | Pi carbohydrate-binding protein, putative (2346 nt)        | 13  | 183 | 0   |
| PITG_18959 | Pi conserved hypothetical protein (999 nt)                 | 13  | 28  | 0   |
| PITG_18960 | Pi conserved hypothetical protein (897 nt)                 | 0   | 11  | 0   |
| PITG_18961 | Pi conserved hypothetical protein (1677 nt)                | 1   | 20  | 0   |
| PITG_18962 | Pi DNA repair protein, putative (2633 nt)                  | 2   | 23  | 0   |
| PITG_18963 | Pi conserved hypothetical protein (2541 nt)                | 4   | 16  | 0   |
| PITG_18966 | Pi conserved hypothetical protein (1660 nt)                | 2   | 16  | 0   |
| PITG_18973 | Pi conserved hypothetical protein (3057 nt)                | 5   | 37  | 0   |
| PITG_18975 | Pi conserved hypothetical protein (599 nt)                 | 2   | 15  | 0   |
| PITG_18976 | Pi RNA binding protein, putative (803 nt)                  | 4   | 15  | 0   |
| PITG_18977 | Pi HECT E3 ubiquitin ligase, putative (2660 nt)            | 5   | 30  | 0   |
| PITG_18980 | Pi hypothetical protein (3407 nt)                          | 6   | 20  | 0   |
| PITG_18984 | Pi conserved hypothetical protein (5340 nt)                | 2   | 3   | 2   |
| PITG_18987 | Pi hypothetical protein (354 nt)                           | 7   | 19  | 0   |
| PITG_18991 | Pi conserved hypothetical protein (647 nt)                 | 26  | 28  | 0   |
| PITG_18992 | Pi acyltransferase family (1344 nt)                        | 0   | 0   | 0   |
| PITG_18999 | Pi serine protease family S08A, putative (3690 nt)         | 3   | 15  | 0   |
| PITG_19004 | Pi conserved hypothetical protein (1214 nt)                | 24  | 29  | 0   |
| PITG_19005 | Pi conserved hypothetical protein (2137 nt)                | 9   | 18  | 0   |
| PITG_19006 | Pi conserved hypothetical protein (2670 nt)                | 4   | 18  | 0   |
| PITG_19007 | Pi conserved hypothetical protein (669 nt)                 | 14  | 43  | 2   |
| PITG_19008 | Pi nascent polypeptide-associated complex subunit alp      | 79  | 105 | 32  |
| PITG_19013 | Pi hypothetical protein (2144 nt)                          | 15  | 0   | 0   |
| PITG_19016 | Pi conserved hypothetical protein (714 nt)                 | 8   | 4   | 0   |

|            |                                                            |     |     |    |
|------------|------------------------------------------------------------|-----|-----|----|
| PITG_19017 | Pi 14-3-3 protein epsilon (1094 nt)                        | 102 | 671 | 74 |
| PITG_19022 | Pi conserved hypothetical protein (1632 nt)                | 16  | 39  | 0  |
| PITG_19023 | Pi NADH-cytochrome b5 reductase, putative (1093 nt)        | 57  | 136 | 4  |
| PITG_19024 | Pi conserved hypothetical protein (3528 nt)                | 3   | 20  | 0  |
| PITG_19025 | Pi conserved hypothetical protein (840 nt)                 | 7   | 20  | 0  |
| PITG_19032 | Pi conserved hypothetical protein (2686 nt)                | 13  | 10  | 0  |
| PITG_19036 | Pi serine/threonine-protein phosphatase ppe1 (1425 nt)     | 8   | 19  | 0  |
| PITG_19037 | Pi chromatin structure-remodeling complex subunit snr      | 7   | 26  | 0  |
| PITG_19038 | Pi conserved hypothetical protein (2066 nt)                | 13  | 27  | 0  |
| PITG_19040 | Pi conserved hypothetical protein (240 nt)                 | 0   | 0   | 0  |
| PITG_19041 | Pi protein kinase, putative (2401 nt)                      | 6   | 31  | 0  |
| PITG_19042 | Pi conserved hypothetical protein (1798 nt)                | 56  | 65  | 0  |
| PITG_19044 | Pi conserved hypothetical protein (1583 nt)                | 4   | 33  | 0  |
| PITG_19045 | Pi conserved hypothetical protein (949 nt)                 | 6   | 35  | 0  |
| PITG_19046 | Pi hypothetical protein (2029 nt)                          | 7   | 56  | 0  |
| PITG_19047 | Pi hypothetical protein (1680 nt)                          | 2   | 18  | 0  |
| PITG_19048 | Pi hypothetical protein (407 nt)                           | 1   | 19  | 0  |
| PITG_19049 | Pi conserved hypothetical protein (1310 nt)                | 21  | 56  | 1  |
| PITG_19053 | Pi hypothetical protein (291 nt)                           | 22  | 94  | 34 |
| PITG_19054 | Pi peroxisomal multifunctional enzyme, putative (1484 nt)  | 13  | 85  | 0  |
| PITG_19055 | Pi conserved hypothetical protein (1137 nt)                | 9   | 38  | 0  |
| PITG_19056 | Pi Cation Diffusion Facilitator (CDF) Family (1173 nt)     | 3   | 36  | 0  |
| PITG_19060 | Pi conserved hypothetical protein (321 nt)                 | 14  | 113 | 0  |
| PITG_19063 | Pi hypothetical protein (1057 nt)                          | 73  | 306 | 4  |
| PITG_19064 | Pi pre-mRNA-splicing factor ISY1 (859 nt)                  | 4   | 37  | 0  |
| PITG_19065 | Pi pyridine nucleotide-disulphide oxidoreductase, putative | 2   | 37  | 0  |
| PITG_19078 | Pi conserved hypothetical protein (1213 nt)                | 6   | 13  | 0  |
| PITG_19080 | Pi conserved hypothetical protein (872 nt)                 | 0   | 24  | 0  |
| PITG_19085 | Pi conserved hypothetical protein (1692 nt)                | 3   | 12  | 0  |
| PITG_19087 | Pi hypothetical protein (419 nt)                           | 2   | 1   | 0  |
| PITG_19088 | Pi conserved hypothetical protein (676 nt)                 | 130 | 27  | 0  |
| PITG_19093 | Pi conserved hypothetical protein (1419 nt)                | 0   | 1   | 0  |
| PITG_19094 | Pi conserved hypothetical protein (1027 nt)                | 0   | 1   | 0  |
| PITG_19095 | Pi conserved hypothetical protein (2048 nt)                | 5   | 15  | 0  |
| PITG_19096 | Pi phospho-2-dehydro-3-deoxyheptonate aldolase (151 nt)    | 6   | 9   | 0  |
| PITG_19098 | Pi conserved hypothetical protein (930 nt)                 | 242 | 357 | 0  |
| PITG_19099 | Pi elongator complex protein, putative (2965 nt)           | 2   | 11  | 0  |
| PITG_19100 | Pi Voltage-gated Ion Channel (VIC) Superfamily (1416 nt)   | 0   | 1   | 0  |
| PITG_19101 | Pi Voltage-gated Ion Channel (VIC) Superfamily (2045 nt)   | 0   | 1   | 0  |
| PITG_19103 | Pi conserved hypothetical protein (684 nt)                 | 0   | 2   | 0  |
| PITG_19105 | Pi conserved hypothetical protein (948 nt)                 | 19  | 6   | 0  |
| PITG_19107 | Pi conserved hypothetical protein (1288 nt)                | 2   | 26  | 0  |
| PITG_19108 | Pi conserved hypothetical protein (1839 nt)                | 0   | 16  | 0  |
| PITG_19109 | Pi conserved hypothetical protein (375 nt)                 | 6   | 33  | 0  |
| PITG_19110 | Pi conserved hypothetical protein (1772 nt)                | 1   | 18  | 0  |
| PITG_19111 | Pi conserved hypothetical protein (2034 nt)                | 29  | 82  | 0  |
| PITG_19113 | Pi conserved hypothetical protein (1761 nt)                | 11  | 18  | 0  |

|                                                                      |      |     |    |
|----------------------------------------------------------------------|------|-----|----|
| PITG_19117   Pi conserved hypothetical protein (1705 nt)             | 0    | 0   | 0  |
| PITG_19119   Pi conserved hypothetical protein (717 nt)              | 490  | 455 | 0  |
| PITG_19121   Pi 60S ribosomal protein L10 (848 nt)                   | 1521 | 937 | 64 |
| PITG_19122   Pi conserved hypothetical protein (1498 nt)             | 0    | 15  | 0  |
| PITG_19123   Pi conserved hypothetical protein (1327 nt)             | 1    | 6   | 0  |
| PITG_19124   Pi endoplasmic reticulum-Golgi intermediate compartn    | 15   | 25  | 0  |
| PITG_19125   Pi conserved hypothetical protein (1393 nt)             | 25   | 8   | 0  |
| PITG_19126   Pi conserved hypothetical protein (875 nt)              | 1    | 15  | 0  |
| PITG_19127   Pi conserved hypothetical protein (1513 nt)             | 3    | 18  | 0  |
| PITG_19128   Pi conserved hypothetical protein (1400 nt)             | 16   | 89  | 0  |
| PITG_19129   Pi ATP-dependent RNA helicase eIF4A, putative (1319 r   | 63   | 91  | 10 |
| PITG_19142   Pi alkylated DNA repair protein alkB-like protein (1118 | 26   | 20  | 0  |
| PITG_19143   Pi conserved hypothetical protein (907 nt)              | 4    | 13  | 0  |
| PITG_19144   Pi conserved hypothetical protein (840 nt)              | 0    | 4   | 0  |
| PITG_19145   Pi conserved hypothetical protein (491 nt)              | 7    | 11  | 0  |
| PITG_19146   Pi conserved hypothetical protein (900 nt)              | 19   | 51  | 0  |
| PITG_19147   Pi conserved hypothetical protein (450 nt)              | 40   | 36  | 0  |
| PITG_19148   Pi conserved hypothetical protein (798 nt)              | 1    | 14  | 0  |
| PITG_19149   Pi conserved hypothetical protein (2916 nt)             | 11   | 5   | 0  |
| PITG_19150   Pi hypothetical protein (1125 nt)                       | 30   | 27  | 0  |
| PITG_19152   Pi conserved hypothetical protein (792 nt)              | 11   | 22  | 0  |
| PITG_19153   Pi conserved hypothetical protein (8551 nt)             | 3    | 17  | 0  |
| PITG_19154   Pi conserved hypothetical protein (672 nt)              | 0    | 2   | 0  |
| PITG_19157   Pi conserved hypothetical protein (449 nt)              | 42   | 31  | 2  |
| PITG_19158   Pi conserved hypothetical protein (2102 nt)             | 9    | 21  | 0  |
| PITG_19159   Pi conserved hypothetical protein (1511 nt)             | 3    | 10  | 0  |
| PITG_19160   Pi conserved hypothetical protein (1462 nt)             | 29   | 24  | 4  |
| PITG_19161   Pi pyruvate dehydrogenase E1 component subunit bet:     | 39   | 103 | 8  |
| PITG_19163   Pi ATP-dependent RNA helicase, putative (1642 nt)       | 1    | 11  | 0  |
| PITG_19164   Pi Mitochondrial Protein Translocase (MPT) Family (16:  | 9    | 34  | 0  |
| PITG_19166   Pi conserved hypothetical protein (1499 nt)             | 21   | 27  | 0  |
| PITG_19167   Pi conserved hypothetical protein (942 nt)              | 3    | 13  | 0  |
| PITG_19168   Pi conserved hypothetical protein (2066 nt)             | 2    | 17  | 0  |
| PITG_19174   Pi phosphoglucomutase, putative (1969 nt)               | 5    | 19  | 0  |
| PITG_19175   Pi conserved hypothetical protein (2919 nt)             | 11   | 21  | 0  |
| PITG_19176   Pi conserved hypothetical protein (421 nt)              | 33   | 83  | 2  |
| PITG_19177   Pi conserved hypothetical protein (1173 nt)             | 25   | 38  | 0  |
| PITG_19178   Pi 13 kDa ribonucleoprotein-associated protein (613 nt  | 18   | 63  | 11 |
| PITG_19179   Pi mitochondrial import receptor subunit TOM70, puta    | 6    | 62  | 1  |
| PITG_19180   Pi conserved hypothetical protein (1550 nt)             | 20   | 27  | 0  |
| PITG_19181   Pi conserved hypothetical protein (678 nt)              | 2    | 5   | 0  |
| PITG_19182   Pi DNA cross-link repair protein, putative (2025 nt)    | 6    | 14  | 0  |
| PITG_19183   Pi conserved hypothetical protein (1447 nt)             | 4    | 14  | 0  |
| PITG_19184   Pi ER lumen protein retaining receptor (1036 nt)        | 19   | 29  | 0  |
| PITG_19191   Pi 2-oxoglutarate dehydrogenase, putative (3475 nt)     | 2    | 11  | 0  |
| PITG_19198   Pi conserved hypothetical protein (612 nt)              | 17   | 76  | 0  |
| PITG_19199   Pi arginine N-methyltransferase, putative (1377 nt)     | 6    | 48  | 1  |

|            |                                                            |     |     |   |
|------------|------------------------------------------------------------|-----|-----|---|
| PITG_19204 | Pi conserved hypothetical protein (1439 nt)                | 26  | 34  | 0 |
| PITG_19205 | Pi conserved hypothetical protein (3550 nt)                | 1   | 5   | 0 |
| PITG_19208 | Pi conserved hypothetical protein (1612 nt)                | 1   | 18  | 0 |
| PITG_19212 | Pi tubulin/FtsZ family protein, putative (1644 nt)         | 3   | 15  | 0 |
| PITG_19213 | Pi mitogen-activated protein kinase, putative (3606 nt)    | 3   | 32  | 0 |
| PITG_19216 | Pi conserved hypothetical protein (644 nt)                 | 0   | 21  | 0 |
| PITG_19219 | Pi conserved hypothetical protein (993 nt)                 | 1   | 5   | 0 |
| PITG_19220 | Pi conserved hypothetical protein (3632 nt)                | 2   | 34  | 0 |
| PITG_19223 | Pi conserved hypothetical protein (3603 nt)                | 1   | 12  | 0 |
| PITG_19224 | Pi conserved hypothetical protein (668 nt)                 | 2   | 10  | 0 |
| PITG_19229 | Pi conserved hypothetical protein (531 nt)                 | 10  | 15  | 0 |
| PITG_19234 | Pi choline/Carnitine O-acyltransferase, putative (2593 nt) | 11  | 73  | 0 |
| PITG_19235 | Pi serine/threonine protein kinase (1738 nt)               | 9   | 43  | 0 |
| PITG_19237 | Pi conserved hypothetical protein (1180 nt)                | 11  | 77  | 0 |
| PITG_19242 | Pi conserved hypothetical protein (2733 nt)                | 6   | 17  | 0 |
| PITG_19245 | Pi conserved hypothetical protein (698 nt)                 | 14  | 9   | 4 |
| PITG_19247 | Pi atlastin-like protein (2044 nt)                         | 7   | 58  | 0 |
| PITG_19249 | Pi conserved hypothetical protein (1432 nt)                | 1   | 3   | 0 |
| PITG_19251 | Pi palmitoyltransferase, putative (1431 nt)                | 0   | 12  | 0 |
| PITG_19254 | Pi conserved hypothetical protein (1271 nt)                | 4   | 51  | 0 |
| PITG_19257 | Pi calcineurin-like phosphoesterase, putative (4209 nt)    | 2   | 12  | 0 |
| PITG_19263 | Pi sulfite reductase [NADPH] flavoprotein component,       | 3   | 176 | 0 |
| PITG_19269 | Pi conserved hypothetical protein (1193 nt)                | 1   | 14  | 0 |
| PITG_19270 | Pi conserved hypothetical protein (1212 nt)                | 23  | 233 | 0 |
| PITG_19281 | Pi ATP-binding cassette sub-family E member 1 (2034 nt)    | 12  | 22  | 1 |
| PITG_19282 | Pi conserved hypothetical protein (926 nt)                 | 65  | 73  | 4 |
| PITG_19283 | Pi conserved hypothetical protein (695 nt)                 | 6   | 18  | 0 |
| PITG_19286 | Pi Major Facilitator Superfamily (MFS) (1368 nt)           | 8   | 13  | 0 |
| PITG_19287 | Pi conserved hypothetical protein (947 nt)                 | 2   | 6   | 0 |
| PITG_19293 | Pi hypothetical protein (339 nt)                           | 3   | 2   | 0 |
| PITG_19294 | Pi protein kinase (900 nt)                                 | 0   | 0   | 0 |
| PITG_19298 | Pi sugar phosphate exchanger, putative (1633 nt)           | 11  | 86  | 0 |
| PITG_19299 | Pi conserved hypothetical protein (715 nt)                 | 8   | 31  | 0 |
| PITG_19302 | Pi secreted RxLR effector peptide, putative (1524 nt)      | 0   | 0   | 0 |
| PITG_19303 | Pi conserved hypothetical protein (1424 nt)                | 2   | 568 | 0 |
| PITG_19310 | Pi conserved hypothetical protein (966 nt)                 | 7   | 14  | 0 |
| PITG_19311 | Pi conserved hypothetical protein (580 nt)                 | 7   | 30  | 0 |
| PITG_19313 | Pi conserved hypothetical protein (1116 nt)                | 26  | 31  | 0 |
| PITG_19314 | Pi replication factor C subunit 3 (1287 nt)                | 33  | 54  | 0 |
| PITG_19316 | Pi Crinkler (CRN) family protein, pseudogene (1872 nt)     | 47  | 200 | 0 |
| PITG_19318 | Pi Crinkler (CRN) family protein (2611 nt)                 | 260 | 307 | 1 |
| PITG_19320 | Pi Crinkler (CRN) family protein (846 nt)                  | 66  | 266 | 1 |
| PITG_19349 | Pi conserved hypothetical protein (1161 nt)                | 7   | 75  | 0 |
| PITG_19350 | Pi formin-homology 2 domain-containing protein (482 nt)    | 2   | 32  | 0 |
| PITG_19351 | Pi kinesin-like protein (1519 nt)                          | 4   | 10  | 0 |
| PITG_19361 | Pi myb-like DNA-binding protein, putative (1223 nt)        | 20  | 202 | 1 |
| PITG_19362 | Pi myb-like DNA-binding protein, putative (1042 nt)        | 32  | 249 | 0 |

|            |                                                        |      |     |    |
|------------|--------------------------------------------------------|------|-----|----|
| PITG_19363 | Pi conserved hypothetical protein (1697 nt)            | 0    | 4   | 0  |
| PITG_19364 | Pi pantothenate kinase, putative (1351 nt)             | 5    | 10  | 0  |
| PITG_19366 | Pi polysaccharide lyase, putative (1685 nt)            | 6    | 13  | 0  |
| PITG_19369 | Pi conserved hypothetical protein (780 nt)             | 4    | 27  | 0  |
| PITG_19371 | Pi GTP-binding protein, putative (1525 nt)             | 29   | 22  | 0  |
| PITG_19382 | Pi conserved hypothetical protein (1280 nt)            | 168  | 195 | 0  |
| PITG_19383 | Pi conserved hypothetical protein (927 nt)             | 0    | 12  | 0  |
| PITG_19399 | Pi methylenetetrahydrofolate dehydrogenase [NAD+],     | 1053 | 115 | 0  |
| PITG_19402 | Pi conserved hypothetical protein (1551 nt)            | 5    | 60  | 0  |
| PITG_19404 | Pi conserved hypothetical protein (402 nt)             | 30   | 317 | 0  |
| PITG_19405 | Pi conserved hypothetical protein (712 nt)             | 2    | 27  | 0  |
| PITG_19410 | Pi conserved hypothetical protein (684 nt)             | 10   | 38  | 0  |
| PITG_19411 | Pi conserved hypothetical protein (1390 nt)            | 7    | 41  | 0  |
| PITG_19415 | Pi hypothetical protein (525 nt)                       | 188  | 70  | 2  |
| PITG_19418 | Pi conserved hypothetical protein (2222 nt)            | 2    | 14  | 0  |
| PITG_19419 | Pi conserved hypothetical protein (1373 nt)            | 8    | 16  | 0  |
| PITG_19420 | Pi hypothetical protein (252 nt)                       | 0    | 20  | 0  |
| PITG_19421 | Pi hypothetical protein (264 nt)                       | 2    | 29  | 0  |
| PITG_19422 | Pi hypothetical protein (2352 nt)                      | 12   | 88  | 0  |
| PITG_19429 | Pi prephenate dehydratase, putative (2816 nt)          | 3    | 20  | 0  |
| PITG_19432 | Pi Amino Acid/Auxin Permease (AAP) Family (1455 nt)    | 0    | 14  | 0  |
| PITG_19436 | Pi sister chromatid cohesion protein PDS5 (4000 nt)    | 1    | 19  | 0  |
| PITG_19441 | Pi ATP-binding Cassette (ABC) Superfamily (3824 nt)    | 1    | 13  | 0  |
| PITG_19445 | Pi serine protease family S08A, putative (1096 nt)     | 5    | 16  | 0  |
| PITG_19448 | Pi 50S ribosomal protein L17, putative (1302 nt)       | 20   | 37  | 1  |
| PITG_19449 | Pi conserved hypothetical protein (831 nt)             | 15   | 18  | 0  |
| PITG_19450 | Pi cell division protein kinase 2 (1000 nt)            | 8    | 21  | 0  |
| PITG_19451 | Pi cleavage induced conserved hypothetical protein (55 | 0    | 0   | 0  |
| PITG_19456 | Pi protein kinase, putative (2099 nt)                  | 8    | 25  | 0  |
| PITG_19457 | Pi conserved hypothetical protein (512 nt)             | 10   | 10  | 0  |
| PITG_19458 | Pi protein kinase (1187 nt)                            | 4    | 11  | 0  |
| PITG_19459 | Pi protein kinase (1234 nt)                            | 4    | 31  | 0  |
| PITG_19461 | Pi conserved hypothetical protein (1566 nt)            | 5    | 15  | 0  |
| PITG_19462 | Pi metallophosphoesterase, putative (1778 nt)          | 0    | 11  | 0  |
| PITG_19465 | Pi hypothetical protein (492 nt)                       | 0    | 1   | 0  |
| PITG_19466 | Pi conserved hypothetical protein (1491 nt)            | 10   | 32  | 0  |
| PITG_19469 | Pi conserved hypothetical protein (926 nt)             | 4    | 13  | 0  |
| PITG_19470 | Pi conserved hypothetical protein (756 nt)             | 6    | 16  | 0  |
| PITG_19472 | Pi ubiquitin-specific protease, putative (8250 nt)     | 2    | 27  | 0  |
| PITG_19473 | Pi conserved hypothetical protein (5766 nt)            | 1    | 5   | 0  |
| PITG_19474 | Pi cobalamin adenosyltransferase, putative (704 nt)    | 36   | 14  | 0  |
| PITG_19482 | Pi ras protein let-60 (1186 nt)                        | 66   | 145 | 0  |
| PITG_19485 | Pi CREG-like protein (834 nt)                          | 5    | 44  | 0  |
| PITG_19487 | Pi conserved hypothetical protein (770 nt)             | 14   | 14  | 0  |
| PITG_19488 | Pi protein-S-isoprenylcysteine O-methyltransferase (82 | 42   | 47  | 0  |
| PITG_19489 | Pi conserved hypothetical protein (1287 nt)            | 0    | 18  | 0  |
| PITG_19495 | Pi glyceraldehyde-3-phosphate dehydrogenase, putativ   | 330  | 64  | 13 |

|            |                                                                                  |     |     |   |
|------------|----------------------------------------------------------------------------------|-----|-----|---|
| PITG_19505 | Pi conserved hypothetical protein (641 nt)                                       | 44  | 319 | 0 |
| PITG_19506 | Pi conserved hypothetical protein (2006 nt)                                      | 2   | 14  | 0 |
| PITG_19508 | Pi conserved hypothetical protein (2224 nt)                                      | 3   | 32  | 0 |
| PITG_19514 | Pi conserved hypothetical protein (1607 nt)                                      | 2   | 29  | 0 |
| PITG_19516 | Pi conserved hypothetical protein (2268 nt)                                      | 5   | 28  | 0 |
| PITG_19526 | Pi secreted RxLR effector peptide, putative (378 nt)                             | 1   | 22  | 0 |
| PITG_19527 | Pi conserved hypothetical protein (1086 nt)                                      | 4   | 24  | 0 |
| PITG_19530 | Pi conserved hypothetical protein (656 nt)                                       | 6   | 28  | 0 |
| PITG_19531 | Pi 50S ribosomal protein L25, putative (785 nt)                                  | 13  | 36  | 2 |
| PITG_19532 | Pi cleavage and polyadenylation specificity factor subunit 1, putative (1086 nt) | 6   | 25  | 0 |
| PITG_19533 | Pi cleavage and polyadenylation specificity factor subunit 2, putative (1086 nt) | 1   | 10  | 0 |
| PITG_19535 | Pi proteasome subunit beta, putative (696 nt)                                    | 91  | 181 | 4 |
| PITG_19536 | Pi conserved hypothetical protein (567 nt)                                       | 11  | 22  | 0 |
| PITG_19537 | Pi calnexin, putative (1746 nt)                                                  | 21  | 43  | 0 |
| PITG_19544 | Pi carbohydrate-binding protein, putative (594 nt)                               | 42  | 11  | 0 |
| PITG_19547 | Pi phosphatidylserine decarboxylase, putative (1121 nt)                          | 1   | 3   | 0 |
| PITG_19550 | Pi phosphatidylserine decarboxylase, putative (1442 nt)                          | 4   | 10  | 0 |
| PITG_19551 | Pi conserved hypothetical protein (1351 nt)                                      | 6   | 30  | 1 |
| PITG_19557 | Pi putative dolichyl-diphosphooligosaccharide-protein transferase (1056 nt)      | 15  | 56  | 3 |
| PITG_19568 | Pi crinkler (CRN) family protein, pseudogene (1056 nt)                           | 638 | 82  | 0 |
| PITG_19578 | Pi Crinkler (CRN) family protein, pseudogene (1347 nt)                           | 336 | 516 | 2 |
| PITG_19581 | Pi crinkler (CRN) family protein, pseudogene (2543 nt)                           | 93  | 795 | 3 |
| PITG_19586 | Pi crinkler (CRN) family protein, pseudogene (2457 nt)                           | 54  | 200 | 0 |
| PITG_19589 | Pi Crinkler (CRN) family protein (1818 nt)                                       | 4   | 10  | 0 |
| PITG_19590 | Pi conserved hypothetical protein (986 nt)                                       | 49  | 168 | 1 |
| PITG_19591 | Pi conserved hypothetical protein (666 nt)                                       | 25  | 71  | 0 |
| PITG_19592 | Pi Mitochondrial Protein Translocase (MPT) Family (390 nt)                       | 19  | 74  | 3 |
| PITG_19595 | Pi hypothetical protein (412 nt)                                                 | 96  | 391 | 1 |
| PITG_19602 | Pi putative GPI-anchored serine-threonine rich hypothetical protein (1056 nt)    | 1   | 1   | 0 |
| PITG_19603 | Pi conserved hypothetical protein (1995 nt)                                      | 5   | 17  | 0 |
| PITG_19604 | Pi elicitor-like protein (2043 nt)                                               | 1   | 3   | 0 |
| PITG_19605 | Pi conserved hypothetical protein (899 nt)                                       | 6   | 14  | 0 |
| PITG_19606 | Pi conserved hypothetical protein (1062 nt)                                      | 11  | 25  | 4 |
| PITG_19607 | Pi histone arginine demethylase, putative (3486 nt)                              | 2   | 53  | 0 |
| PITG_19608 | Pi ribosomal protein L7Ae/L30e/S12e/Gadd4, putative (1056 nt)                    | 10  | 18  | 2 |
| PITG_19609 | Pi dynein-like protein (1863 nt)                                                 | 0   | 9   | 0 |
| PITG_19611 | Pi conserved hypothetical protein (2220 nt)                                      | 2   | 11  | 0 |
| PITG_19612 | Pi conserved hypothetical protein (900 nt)                                       | 5   | 25  | 0 |
| PITG_19615 | Pi hypothetical protein (5192 nt)                                                | 16  | 23  | 0 |
| PITG_19618 | Pi hypothetical protein (654 nt)                                                 | 0   | 11  | 0 |
| PITG_19622 | Pi conserved hypothetical protein (4284 nt)                                      | 1   | 31  | 0 |
| PITG_19623 | Pi polygalacturonase, putative (1188 nt)                                         | 2   | 43  | 0 |
| PITG_19624 | Pi polygalacturonase, putative (1119 nt)                                         | 3   | 10  | 6 |
| PITG_19634 | Pi polygalacturonase, putative (651 nt)                                          | 2   | 9   | 0 |
| PITG_19636 | Pi polygalacturonase, putative (474 nt)                                          | 2   | 64  | 0 |
| PITG_19639 | Pi conserved hypothetical protein (2459 nt)                                      | 3   | 16  | 0 |
| PITG_19640 | Pi transmembrane protein, putative (8592 nt)                                     | 1   | 12  | 0 |

|            |                                                              |     |     |    |
|------------|--------------------------------------------------------------|-----|-----|----|
| PITG_19641 | Pi conserved hypothetical protein (4528 nt)                  | 0   | 4   | 0  |
| PITG_19642 | Pi conserved hypothetical protein (1156 nt)                  | 0   | 1   | 0  |
| PITG_19643 | Pi conserved hypothetical protein (945 nt)                   | 0   | 14  | 0  |
| PITG_19644 | Pi carbohydrate-binding protein, putative (2295 nt)          | 0   | 21  | 0  |
| PITG_19645 | Pi conserved hypothetical protein (1338 nt)                  | 0   | 12  | 0  |
| PITG_19646 | Pi pre-mRNA-processing factor 19, putative (1575 nt)         | 0   | 19  | 0  |
| PITG_19647 | Pi meiosis-specific nuclear structural protein 1, putative   | 0   | 1   | 0  |
| PITG_19648 | Pi conserved hypothetical protein (1292 nt)                  | 1   | 0   | 0  |
| PITG_19649 | Pi endopolygalacturonase, putative (967 nt)                  | 0   | 1   | 0  |
| PITG_19654 | Pi conserved hypothetical protein (451 nt)                   | 12  | 41  | 0  |
| PITG_19656 | Pi GMP synthase [glutamine-hydrolyzing], putative (14:       | 1   | 8   | 2  |
| PITG_19657 | Pi conserved hypothetical protein (2720 nt)                  | 9   | 3   | 0  |
| PITG_19658 | Pi ATP-binding Cassette (ABC) Superfamily (474 nt)           | 2   | 37  | 0  |
| PITG_19659 | Pi ATP-binding Cassette (ABC) Superfamily (3837 nt)          | 1   | 16  | 0  |
| PITG_19665 | Pi conserved hypothetical protein (2043 nt)                  | 24  | 172 | 0  |
| PITG_19668 | Pi conserved hypothetical protein (1234 nt)                  | 17  | 112 | 1  |
| PITG_19669 | Pi ubiquitin-like protein/ribosomal protein (737 nt)         | 577 | 885 | 89 |
| PITG_19672 | Pi hypothetical protein (1077 nt)                            | 22  | 20  | 0  |
| PITG_19674 | Pi conserved hypothetical protein (2583 nt)                  | 0   | 12  | 0  |
| PITG_19676 | Pi conserved hypothetical protein (856 nt)                   | 0   | 14  | 0  |
| PITG_19679 | Pi elongation factor G, putative (901 nt)                    | 0   | 24  | 0  |
| PITG_19690 | Pi conserved hypothetical protein (860 nt)                   | 30  | 51  | 0  |
| PITG_19691 | Pi conserved hypothetical protein (1303 nt)                  | 24  | 80  | 0  |
| PITG_19692 | Pi conserved hypothetical protein (1804 nt)                  | 3   | 8   | 0  |
| PITG_19693 | Pi conserved hypothetical protein (2062 nt)                  | 2   | 24  | 0  |
| PITG_19709 | Pi hypothetical protein (279 nt)                             | 27  | 25  | 0  |
| PITG_19710 | Pi conserved hypothetical protein (775 nt)                   | 1   | 8   | 0  |
| PITG_19728 | Pi cohesin subunit, putative (4725 nt)                       | 1   | 35  | 0  |
| PITG_19730 | Pi 2-acylglycerol O-acyltransferase, putative (1272 nt)      | 0   | 11  | 0  |
| PITG_19735 | Pi conserved hypothetical protein (1350 nt)                  | 4   | 34  | 0  |
| PITG_19736 | Pi alcohol dehydrogenase, putative (1016 nt)                 | 3   | 7   | 0  |
| PITG_19737 | Pi 3-mercaptopyruvate sulfurtransferase, putative (15C       | 312 | 153 | 0  |
| PITG_19741 | Pi conserved hypothetical protein (781 nt)                   | 36  | 56  | 4  |
| PITG_19745 | Pi conserved hypothetical protein (872 nt)                   | 2   | 20  | 0  |
| PITG_19746 | Pi conserved hypothetical protein (1407 nt)                  | 5   | 42  | 0  |
| PITG_19749 | Pi conserved hypothetical protein (1337 nt)                  | 2   | 21  | 0  |
| PITG_19750 | Pi conserved hypothetical protein (4204 nt)                  | 1   | 14  | 0  |
| PITG_19761 | Pi conserved hypothetical protein (1520 nt)                  | 69  | 230 | 2  |
| PITG_19763 | Pi conserved hypothetical protein (638 nt)                   | 0   | 0   | 0  |
| PITG_19764 | Pi conserved hypothetical protein (3585 nt)                  | 1   | 1   | 0  |
| PITG_19766 | Pi conserved hypothetical protein (1787 nt)                  | 5   | 22  | 0  |
| PITG_19767 | Pi ATP-dependent Clp protease proteolytic subunit, putative  | 106 | 84  | 1  |
| PITG_19768 | Pi conserved hypothetical protein (782 nt)                   | 122 | 104 | 6  |
| PITG_19769 | Pi conserved hypothetical protein (384 nt)                   | 3   | 19  | 0  |
| PITG_19771 | Pi mitochondrial inner membrane protease subunit 1, putative | 2   | 13  | 0  |
| PITG_19772 | Pi hypothetical protein (614 nt)                             | 439 | 191 | 5  |
| PITG_19773 | Pi serine/threonine protein kinase (2308 nt)                 | 1   | 13  | 0  |



|            |                                                           |     |     |    |
|------------|-----------------------------------------------------------|-----|-----|----|
| PITG_19774 | Pi mannose-6-phosphate isomerase, putative (1208 nt)      | 11  | 16  | 0  |
| PITG_19775 | Pi conserved hypothetical protein (554 nt)                | 88  | 43  | 0  |
| PITG_19780 | Pi eukaryotic translation initiation factor 1A (457 nt)   | 0   | 82  | 1  |
| PITG_19781 | Pi conserved hypothetical protein (4434 nt)               | 0   | 16  | 0  |
| PITG_19790 | Pi patatin-like phospholipase, putative (2204 nt)         | 2   | 18  | 0  |
| PITG_19791 | Pi conserved hypothetical protein (1354 nt)               | 8   | 13  | 0  |
| PITG_19797 | Pi amino acid/auxin permease-like protein (1191 nt)       | 13  | 0   | 0  |
| PITG_19800 | Pi secreted RxLR effector peptide, putative (621 nt)      | 15  | 42  | 0  |
| PITG_19802 | Pi dihydrolipoyl dehydrogenase, putative (690 nt)         | 26  | 151 | 14 |
| PITG_19804 | Pi hypothetical protein (1288 nt)                         | 33  | 122 | 0  |
| PITG_19809 | Pi conserved hypothetical protein (2673 nt)               | 2   | 18  | 0  |
| PITG_19813 | Pi conserved hypothetical protein (1907 nt)               | 2   | 13  | 0  |
| PITG_19814 | Pi conserved hypothetical protein (785 nt)                | 75  | 151 | 10 |
| PITG_19815 | Pi conserved hypothetical protein (3665 nt)               | 0   | 0   | 0  |
| PITG_19817 | Pi conserved hypothetical protein (951 nt)                | 10  | 30  | 0  |
| PITG_19818 | Pi conserved hypothetical protein (533 nt)                | 0   | 4   | 7  |
| PITG_19822 | Pi conserved hypothetical protein (973 nt)                | 0   | 15  | 0  |
| PITG_19823 | Pi conserved hypothetical protein (362 nt)                | 3   | 26  | 0  |
| PITG_19824 | Pi conserved hypothetical protein (1095 nt)               | 35  | 767 | 1  |
| PITG_19836 | Pi hypothetical protein (1303 nt)                         | 3   | 18  | 0  |
| PITG_19841 | Pi conserved hypothetical protein (911 nt)                | 0   | 15  | 0  |
| PITG_19842 | Pi conserved hypothetical protein (3047 nt)               | 2   | 43  | 0  |
| PITG_19844 | Pi conserved hypothetical protein (2022 nt)               | 3   | 36  | 0  |
| PITG_19846 | Pi conserved hypothetical protein (2183 nt)               | 10  | 48  | 0  |
| PITG_19849 | Pi protein kinase (2164 nt)                               | 4   | 15  | 0  |
| PITG_19850 | Pi conserved hypothetical protein (1578 nt)               | 21  | 56  | 0  |
| PITG_19851 | Pi myb-like DNA-binding protein, putative (2525 nt)       | 9   | 106 | 0  |
| PITG_19854 | Pi conserved hypothetical protein (1732 nt)               | 67  | 285 | 1  |
| PITG_19855 | Pi hypothetical protein (432 nt)                          | 308 | 982 | 10 |
| PITG_19856 | Pi conserved hypothetical protein (991 nt)                | 1   | 35  | 0  |
| PITG_19857 | Pi conserved hypothetical protein (2813 nt)               | 1   | 15  | 0  |
| PITG_19860 | Pi conserved hypothetical protein (1929 nt)               | 4   | 13  | 0  |
| PITG_19862 | Pi conserved hypothetical protein (2445 nt)               | 2   | 2   | 0  |
| PITG_19863 | Pi conserved hypothetical protein (2178 nt)               | 28  | 14  | 0  |
| PITG_19864 | Pi conserved hypothetical protein (923 nt)                | 274 | 467 | 0  |
| PITG_19865 | Pi carboxyvinyl-carboxyphosphonate phosphorylmutas        | 33  | 26  | 0  |
| PITG_19867 | Pi conserved hypothetical protein (1043 nt)               | 2   | 12  | 0  |
| PITG_19868 | Pi tRNA-dihydrouridine synthase, putative (1772 nt)       | 0   | 9   | 0  |
| PITG_19869 | Pi serine/threonine protein kinase (1548 nt)              | 0   | 3   | 0  |
| PITG_19870 | Pi bax inhibitor-like protein (1129 nt)                   | 47  | 80  | 0  |
| PITG_19871 | Pi cell division control protein 48 (2866 nt)             | 63  | 203 | 7  |
| PITG_19875 | Pi phosphoinositide 3-kinase regulatory subunit (6054 nt) | 2   | 28  | 0  |
| PITG_19876 | Pi conserved hypothetical protein (861 nt)                | 4   | 8   | 0  |
| PITG_19877 | Pi guanylate-binding protein, putative (2474 nt)          | 4   | 18  | 0  |
| PITG_19878 | Pi protein kinase, putative (2849 nt)                     | 3   | 49  | 0  |
| PITG_19879 | Pi conserved hypothetical protein (1407 nt)               | 3   | 3   | 0  |
| PITG_19880 | Pi hypothetical protein (285 nt)                          | 60  | 130 | 3  |

|            |                                                         |     |      |    |
|------------|---------------------------------------------------------|-----|------|----|
| PITG_19886 | Pi sphingosine kinase, putative (5332 nt)               | 6   | 21   | 0  |
| PITG_19887 | Pi conserved hypothetical protein (4715 nt)             | 0   | 22   | 0  |
| PITG_19889 | Pi Crinkler (CRN) family protein, pseudogene (2522 nt)  | 63  | 353  | 0  |
| PITG_19901 | Pi conserved hypothetical protein (708 nt)              | 4   | 17   | 0  |
| PITG_19905 | Pi calcium/calmodulin dependent protein kinase, putat   | 1   | 24   | 0  |
| PITG_19907 | Pi Rab21/Rab5 family GTPase, putative (908 nt)          | 87  | 173  | 0  |
| PITG_19915 | Pi conserved hypothetical protein (808 nt)              | 3   | 28   | 0  |
| PITG_19916 | Pi conserved hypothetical protein (1065 nt)             | 6   | 17   | 0  |
| PITG_19928 | Pi conserved hypothetical protein (648 nt)              | 4   | 19   | 0  |
| PITG_19930 | Pi conserved hypothetical protein (1199 nt)             | 1   | 3    | 0  |
| PITG_19931 | Pi conserved hypothetical protein (2001 nt)             | 4   | 11   | 0  |
| PITG_19932 | Pi nicotinate-nucleotide pyrophosphorylase, putative (1 | 14  | 71   | 1  |
| PITG_19939 | Pi glucosylceramidase, putative (2151 nt)               | 4   | 85   | 0  |
| PITG_19950 | Pi conserved hypothetical protein (435 nt)              | 15  | 63   | 0  |
| PITG_19956 | Pi conserved hypothetical protein (1681 nt)             | 6   | 12   | 0  |
| PITG_19959 | Pi hypothetical protein (984 nt)                        | 27  | 121  | 0  |
| PITG_19961 | Pi glyceraldehyde-3-phosphate dehydrogenase (669 nt)    | 118 | 400  | 76 |
| PITG_19962 | Pi conserved hypothetical protein (471 nt)              | 4   | 9    | 0  |
| PITG_19963 | Pi conserved hypothetical protein (1042 nt)             | 29  | 56   | 1  |
| PITG_19964 | Pi conserved hypothetical protein (831 nt)              | 7   | 39   | 0  |
| PITG_19965 | Pi conserved hypothetical protein (1744 nt)             | 7   | 16   | 0  |
| PITG_19966 | Pi carbohydrate-binding protein, putative (1062 nt)     | 9   | 50   | 0  |
| PITG_19967 | Pi conserved hypothetical protein (1981 nt)             | 0   | 0    | 0  |
| PITG_19972 | Pi conserved hypothetical protein (1973 nt)             | 0   | 4    | 0  |
| PITG_19977 | Pi haloacid dehalogenase-like hydrolase, putative (859  | 0   | 29   | 0  |
| PITG_19978 | Pi conserved hypothetical protein (497 nt)              | 4   | 9    | 75 |
| PITG_19979 | Pi conserved hypothetical protein (780 nt)              | 30  | 37   | 0  |
| PITG_19984 | Pi conserved hypothetical protein (1292 nt)             | 0   | 0    | 0  |
| PITG_19989 | Pi conserved hypothetical protein (1060 nt)             | 5   | 28   | 0  |
| PITG_19991 | Pi hypothetical protein (720 nt)                        | 10  | 22   | 0  |
| PITG_19993 | Pi GMP synthase [glutamine-hydrolyzing], putative (15   | 2   | 10   | 3  |
| PITG_19995 | Pi conserved hypothetical protein (983 nt)              | 0   | 14   | 0  |
| PITG_19997 | Pi transmembrane protein, putative (2844 nt)            | 0   | 6    | 0  |
| PITG_19999 | Pi 40S ribosomal protein S14 (808 nt)                   | 862 | 1356 | 89 |
| PITG_20005 | Pi ATP-binding Cassette (ABC) Superfamily (3483 nt)     | 9   | 96   | 13 |
| PITG_20009 | Pi conserved hypothetical protein (531 nt)              | 11  | 11   | 0  |
| PITG_20017 | Pi diacylglycerol O-acyltransferase, putative (1296 nt) | 6   | 7    | 0  |
| PITG_20024 | Pi hypothetical protein (816 nt)                        | 0   | 1    | 0  |
| PITG_20026 | Pi conserved hypothetical protein (387 nt)              | 0   | 5    | 0  |
| PITG_20027 | Pi Major Facilitator Superfamily (MFS) (1638 nt)        | 4   | 13   | 0  |
| PITG_20032 | Pi conserved hypothetical protein (2200 nt)             | 4   | 14   | 0  |
| PITG_20033 | Pi conserved hypothetical protein (1003 nt)             | 9   | 63   | 0  |
| PITG_20034 | Pi methyltransferase domain-containing protein, putat   | 4   | 20   | 0  |
| PITG_20035 | Pi conserved hypothetical protein (1113 nt)             | 6   | 43   | 0  |
| PITG_20037 | Pi hypothetical protein (1299 nt)                       | 17  | 10   | 0  |
| PITG_20040 | Pi conserved hypothetical protein (1107 nt)             | 6   | 15   | 0  |
| PITG_20041 | Pi conserved hypothetical protein (2287 nt)             | 4   | 40   | 0  |

|            |                                                                        |     |     |   |
|------------|------------------------------------------------------------------------|-----|-----|---|
| PITG_20043 | Pi conserved hypothetical protein (1810 nt)                            | 3   | 14  | 0 |
| PITG_20044 | Pi hypothetical protein (1462 nt)                                      | 5   | 11  | 0 |
| PITG_20045 | Pi hypothetical protein (793 nt)                                       | 8   | 20  | 0 |
| PITG_20046 | Pi conserved hypothetical protein (978 nt)                             | 10  | 63  | 0 |
| PITG_20047 | Pi 2-isopropylmalate synthase, putative (630 nt)                       | 26  | 4   | 0 |
| PITG_20053 | Pi conserved hypothetical protein (558 nt)                             | 0   | 5   | 0 |
| PITG_20055 | Pi ATP-binding Cassette (ABC) Superfamily (2164 nt)                    | 10  | 25  | 0 |
| PITG_20061 | Pi conserved hypothetical protein (681 nt)                             | 1   | 12  | 0 |
| PITG_20066 | Pi maltose O-acetyltransferase, putative (543 nt)                      | 0   | 0   | 0 |
| PITG_20073 | Pi pyruvate-flavodoxin oxidoreductase, putative (1733 nt)              | 0   | 58  | 0 |
| PITG_20074 | Pi flavodoxin-like protein (537 nt)                                    | 17  | 174 | 0 |
| PITG_20077 | Pi conserved hypothetical protein (1269 nt)                            | 14  | 29  | 0 |
| PITG_20078 | Pi conserved hypothetical protein (1193 nt)                            | 0   | 17  | 0 |
| PITG_20079 | Pi conserved hypothetical protein (1225 nt)                            | 12  | 178 | 0 |
| PITG_20080 | Pi carbohydrate-binding protein, putative (1664 nt)                    | 0   | 1   | 0 |
| PITG_20081 | Pi conserved hypothetical protein (5295 nt)                            | 5   | 46  | 0 |
| PITG_20086 | Pi conserved hypothetical protein (1361 nt)                            | 7   | 33  | 0 |
| PITG_20087 | Pi conserved hypothetical protein (729 nt)                             | 18  | 31  | 0 |
| PITG_20088 | Pi Sulfate Permease (SulP) Family (2784 nt)                            | 8   | 32  | 0 |
| PITG_20094 | Pi hypothetical protein (2087 nt)                                      | 0   | 0   | 0 |
| PITG_20102 | Pi conserved hypothetical protein (1556 nt)                            | 3   | 14  | 1 |
| PITG_20103 | Pi mitogen-activated protein kinase, putative (4065 nt)                | 1   | 11  | 0 |
| PITG_20105 | Pi putative methyltransferase, putative (851 nt)                       | 14  | 86  | 0 |
| PITG_20109 | Pi Voltage-gated Ion Channel (VIC) Superfamily (4534 nt)               | 1   | 14  | 0 |
| PITG_20110 | Pi conserved hypothetical protein (1747 nt)                            | 1   | 11  | 0 |
| PITG_20115 | Pi adenylate kinase, putative (1616 nt)                                | 2   | 5   | 0 |
| PITG_20116 | Pi 50S ribosomal protein L15 (847 nt)                                  | 42  | 25  | 1 |
| PITG_20117 | Pi 3-ketodihydrosphingosine reductase, putative (1075 nt)              | 26  | 25  | 0 |
| PITG_20118 | Pi 50S ribosomal protein L15 (753 nt)                                  | 10  | 61  | 3 |
| PITG_20120 | Pi hypothetical protein (234 nt)                                       | 1   | 17  | 0 |
| PITG_20121 | Pi conserved hypothetical protein (772 nt)                             | 50  | 84  | 0 |
| PITG_20125 | Pi conserved hypothetical protein (494 nt)                             | 35  | 78  | 0 |
| PITG_20128 | Pi transmembrane protein, putative (1342 nt)                           | 2   | 12  | 0 |
| PITG_20130 | Pi aldehyde dehydrogenase, putative (1370 nt)                          | 37  | 39  | 0 |
| PITG_20139 | Pi Resistance-Nodulation-Cell Division (RND) Superfamily (1500 nt)     | 6   | 274 | 2 |
| PITG_20140 | Pi conserved hypothetical protein (1737 nt)                            | 150 | 33  | 0 |
| PITG_20146 | Pi Drug/Metabolite Transporter (DMT) Superfamily (1500 nt)             | 6   | 23  | 1 |
| PITG_20148 | Pi conserved hypothetical protein (3544 nt)                            | 0   | 5   | 0 |
| PITG_20152 | Pi conserved hypothetical protein (6347 nt)                            | 2   | 21  | 0 |
| PITG_20153 | Pi Voltage-gated Ion Channel (VIC) Superfamily (8061 nt)               | 0   | 7   | 0 |
| PITG_20156 | Pi cAMP-dependent protein kinase catalytic subunit, putative (1500 nt) | 5   | 19  | 0 |
| PITG_20157 | Pi Axonemal Inner Arm I1 Intermediate Chain Dynein (ICAD) (1500 nt)    | 0   | 3   | 0 |
| PITG_20159 | Pi Voltage-gated Ion Channel (VIC) Superfamily (7118 nt)               | 0   | 14  | 0 |
| PITG_20160 | Pi conserved hypothetical protein (2291 nt)                            | 0   | 14  | 0 |
| PITG_20167 | Pi Crinkler (CRN) family protein, pseudogene (2511 nt)                 | 169 | 25  | 0 |
| PITG_20168 | Pi Crinkler (CRN) family protein, pseudogene (2557 nt)                 | 242 | 882 | 2 |
| PITG_20173 | Pi NADH ubiquinone oxidoreductase subunit, putative (1500 nt)          | 71  | 169 | 5 |

|            |                                                          |      |     |     |
|------------|----------------------------------------------------------|------|-----|-----|
| PITG_20174 | Pi carbohydrate-binding protein, putative (1564 nt)      | 3    | 37  | 0   |
| PITG_20178 | Pi conserved hypothetical protein (243 nt)               | 70   | 164 | 0   |
| PITG_20186 | Pi conserved hypothetical protein (927 nt)               | 3    | 83  | 0   |
| PITG_20188 | Pi 60S ribosomal protein L5 (1120 nt)                    | 761  | 786 | 110 |
| PITG_20189 | Pi 60S ribosomal protein L14, putative (710 nt)          | 657  | 776 | 57  |
| PITG_20192 | Pi ORM1-like protein (783 nt)                            | 43   | 354 | 2   |
| PITG_20193 | Pi Rab5 family GTPase, putative (872 nt)                 | 31   | 291 | 2   |
| PITG_20194 | Pi protein mago nashi (912 nt)                           | 1    | 27  | 8   |
| PITG_20195 | Pi transcription factor Dp-1 (1620 nt)                   | 2    | 12  | 0   |
| PITG_20196 | Pi hypothetical protein (555 nt)                         | 1105 | 572 | 0   |
| PITG_20197 | Pi histone acetyltransferase, putative (2061 nt)         | 8    | 35  | 0   |
| PITG_20199 | Pi Crinkler (CRN) family protein, pseudogene (770 nt)    | 1    | 0   | 0   |
| PITG_20200 | Pi vacuolar protein sorting-associated protein, putative | 0    | 26  | 0   |
| PITG_20201 | Pi Divalent Anion:Na Symporter (DASS) Family (2907 n     | 3    | 31  | 0   |
| PITG_20202 | Pi conserved hypothetical protein (1366 nt)              | 12   | 22  | 0   |
| PITG_20203 | Pi Hect-domain containing peotein, putative (7079 nt)    | 2    | 29  | 0   |
| PITG_20204 | Pi conserved hypothetical protein (6207 nt)              | 0    | 14  | 0   |
| PITG_20205 | Pi integrator complex subunit 3, putative (3387 nt)      | 2    | 16  | 0   |
| PITG_20206 | Pi ADP-ribosylation factor family (1099 nt)              | 8    | 39  | 0   |
| PITG_20208 | Pi conserved hypothetical protein (3284 nt)              | 18   | 31  | 0   |
| PITG_20209 | Pi conserved hypothetical protein (1670 nt)              | 24   | 23  | 1   |
| PITG_20211 | Pi phosphatidylinositol N-acetylglucosaminyltransferas   | 1    | 10  | 0   |
| PITG_20212 | Pi intraflagellar transport protein 172 (5418 nt)        | 0    | 29  | 0   |
| PITG_20215 | Pi conserved hypothetical protein (930 nt)               | 25   | 26  | 0   |
| PITG_20216 | Pi hypothetical protein (533 nt)                         | 3    | 65  | 0   |
| PITG_20217 | Pi hypothetical protein (878 nt)                         | 2    | 38  | 0   |
| PITG_20218 | Pi hypothetical protein (629 nt)                         | 0    | 19  | 0   |
| PITG_20221 | Pi sporangia induced phosphatidyl inositol kinase (1863  | 0    | 7   | 0   |
| PITG_20222 | Pi conserved hypothetical protein (1839 nt)              | 0    | 15  | 0   |
| PITG_20223 | Pi carbohydrate esterase, putative (470 nt)              | 2    | 36  | 0   |
| PITG_20230 | Pi Amino Acid/Auxin Permease (AAP) Family (1497 nt)      | 0    | 0   | 0   |
| PITG_20234 | Pi conserved hypothetical protein (1138 nt)              | 2    | 9   | 0   |
| PITG_20235 | Pi conserved hypothetical protein (1161 nt)              | 2    | 17  | 0   |
| PITG_20236 | Pi conserved hypothetical protein (1559 nt)              | 1    | 19  | 0   |
| PITG_20239 | Pi ATP-binding Cassette (ABC) Superfamily (5838 nt)      | 0    | 14  | 0   |
| PITG_20240 | Pi aspartyl-tRNA synthetase, putative (1045 nt)          | 6    | 24  | 0   |
| PITG_20241 | Pi transmembrane protein, putative (1626 nt)             | 0    | 63  | 0   |
| PITG_20247 | Pi hypothetical protein (2075 nt)                        | 0    | 12  | 0   |
| PITG_20248 | Pi conserved hypothetical protein (562 nt)               | 0    | 11  | 0   |
| PITG_20249 | Pi conserved hypothetical protein (1358 nt)              | 2    | 17  | 0   |
| PITG_20251 | Pi Sulfate Permease (SulP) Family (2784 nt)              | 22   | 27  | 0   |
| PITG_20253 | Pi Large Conductance Mechanosensitive Ion Channel (M     | 6    | 12  | 0   |
| PITG_20254 | Pi large conductance mechanosensitive channel, putati    | 0    | 30  | 0   |
| PITG_20260 | Pi ADP-ribosylation factor family (456 nt)               | 5    | 33  | 0   |
| PITG_20263 | Pi conserved hypothetical protein (549 nt)               | 0    | 17  | 0   |
| PITG_20264 | Pi 40S ribosomal protein S13 (784 nt)                    | 538  | 634 | 51  |
| PITG_20265 | Pi conserved hypothetical protein (3215 nt)              | 1    | 11  | 0   |

|            |                                                                        |    |     |    |
|------------|------------------------------------------------------------------------|----|-----|----|
| PITG_20266 | Pi proteasome assembly chaperone, putative (1413 nt)                   | 3  | 19  | 0  |
| PITG_20272 | Pi methylenetetrahydrofolate reductase, putative (831 nt)              | 1  | 37  | 0  |
| PITG_20273 | Pi conserved hypothetical protein (1789 nt)                            | 3  | 51  | 0  |
| PITG_20274 | Pi conserved hypothetical protein (1244 nt)                            | 12 | 67  | 0  |
| PITG_20281 | Pi GTP-dependent nucleic acid-binding protein engD (1413 nt)           | 15 | 61  | 1  |
| PITG_20284 | Pi hypothetical protein (998 nt)                                       | 0  | 15  | 0  |
| PITG_20285 | Pi adenylate kinase, putative (2334 nt)                                | 0  | 1   | 0  |
| PITG_20286 | Pi conserved hypothetical protein (891 nt)                             | 0  | 5   | 0  |
| PITG_20287 | Pi kinesin-like protein (1714 nt)                                      | 5  | 8   | 0  |
| PITG_20288 | Pi conserved hypothetical protein (1103 nt)                            | 38 | 51  | 1  |
| PITG_20289 | Pi carbohydrate-binding protein, putative (1402 nt)                    | 4  | 26  | 0  |
| PITG_20291 | Pi Ammonium Transporter (Amt) Family (1011 nt)                         | 0  | 1   | 0  |
| PITG_20293 | Pi hypothetical protein (228 nt)                                       | 13 | 9   | 0  |
| PITG_20295 | Pi conserved hypothetical protein (1230 nt)                            | 0  | 4   | 0  |
| PITG_20296 | Pi ATP-dependent Clp protease ATP-binding subunit clpX (1115 nt)       | 16 | 59  | 0  |
| PITG_20302 | Pi conserved hypothetical protein (1115 nt)                            | 0  | 40  | 0  |
| PITG_20306 | Pi transmembrane protein, putative (1668 nt)                           | 17 | 41  | 0  |
| PITG_20307 | Pi conserved hypothetical protein (1010 nt)                            | 10 | 40  | 0  |
| PITG_20311 | Pi conserved hypothetical protein (501 nt)                             | 28 | 28  | 0  |
| PITG_20313 | Pi Cation Diffusion Facilitator (CDF) Family (988 nt)                  | 9  | 31  | 0  |
| PITG_20316 | Pi exportin-like protein (2743 nt)                                     | 0  | 15  | 0  |
| PITG_20317 | Pi GTP-dependent nucleic acid-binding protein engD, p (1413 nt)        | 21 | 32  | 0  |
| PITG_20319 | Pi glycoside hydrolase, putative (984 nt)                              | 6  | 37  | 0  |
| PITG_20320 | Pi retinol dehydrogenase, putative (693 nt)                            | 2  | 26  | 0  |
| PITG_20321 | Pi retinol dehydrogenase, putative (1053 nt)                           | 19 | 125 | 0  |
| PITG_20324 | Pi conserved hypothetical protein (1335 nt)                            | 6  | 422 | 0  |
| PITG_20330 | Pi trafficking protein particle complex subunit 10, putative (1878 nt) | 2  | 13  | 0  |
| PITG_20331 | Pi conserved hypothetical protein (1878 nt)                            | 2  | 9   | 0  |
| PITG_20332 | Pi conserved hypothetical protein (4246 nt)                            | 0  | 2   | 0  |
| PITG_20333 | Pi conserved hypothetical protein (1223 nt)                            | 0  | 14  | 0  |
| PITG_20337 | Pi conserved hypothetical protein (1056 nt)                            | 41 | 6   | 76 |
| PITG_20344 | Pi conserved hypothetical protein (1577 nt)                            | 2  | 15  | 1  |
| PITG_20345 | Pi conserved hypothetical protein (1221 nt)                            | 18 | 95  | 1  |
| PITG_20347 | Pi Drug/Metabolite Transporter (DMT) Superfamily (1011 nt)             | 4  | 19  | 1  |
| PITG_20350 | Pi D-amino acid dehydrogenase small subunit, putative (1413 nt)        | 14 | 43  | 0  |
| PITG_20354 | Pi hypothetical protein (649 nt)                                       | 8  | 152 | 0  |
| PITG_20355 | Pi conserved hypothetical protein (555 nt)                             | 19 | 97  | 0  |
| PITG_20362 | Pi conserved hypothetical protein (1466 nt)                            | 0  | 232 | 0  |
| PITG_20370 | Pi Amino Acid/Auxin Permease (AAP) Family (1560 nt)                    | 3  | 20  | 0  |
| PITG_20374 | Pi conserved hypothetical protein (2933 nt)                            | 57 | 83  | 0  |
| PITG_20377 | Pi tRNA pseudouridine synthase (1476 nt)                               | 1  | 7   | 0  |
| PITG_20378 | Pi conserved hypothetical protein (1596 nt)                            | 3  | 17  | 0  |
| PITG_20379 | Pi conserved hypothetical protein (1779 nt)                            | 2  | 4   | 0  |
| PITG_20381 | Pi hypothetical protein (791 nt)                                       | 24 | 46  | 0  |
| PITG_20382 | Pi conserved hypothetical protein (492 nt)                             | 68 | 36  | 0  |
| PITG_20383 | Pi conserved hypothetical protein (1221 nt)                            | 72 | 192 | 2  |
| PITG_20384 | Pi conserved hypothetical protein (1483 nt)                            | 22 | 118 | 1  |

|            |                                                           |     |     |    |
|------------|-----------------------------------------------------------|-----|-----|----|
| PITG_20385 | Pi 3-oxo-5-alpha-steroid 4-dehydrogenase, putative (60    | 8   | 16  | 0  |
| PITG_20386 | Pi eukaryotic translation initiation factor 5B (2919 nt)  | 5   | 31  | 1  |
| PITG_20388 | Pi conserved hypothetical protein (1307 nt)               | 60  | 88  | 1  |
| PITG_20397 | Pi conserved hypothetical protein (1646 nt)               | 1   | 4   | 0  |
| PITG_20400 | Pi conserved hypothetical protein (652 nt)                | 17  | 33  | 0  |
| PITG_20406 | Pi hypothetical protein (2190 nt)                         | 3   | 89  | 0  |
| PITG_20412 | Pi putative GPI-anchored serine rich elicitor SOL13E-like | 40  | 117 | 4  |
| PITG_20413 | Pi putative GP-anchored serine-rich elicitor INL13-like p | 0   | 1   | 0  |
| PITG_20425 | Pi Crinkler (CRN) family protein, pseudogene (2573 nt)    | 111 | 357 | 1  |
| PITG_20434 | Pi hypothetical protein (587 nt)                          | 8   | 25  | 0  |
| PITG_20435 | Pi EF hand containing protein, putative (1097 nt)         | 0   | 1   | 0  |
| PITG_20458 | Pi conserved hypothetical protein (1046 nt)               | 1   | 0   | 0  |
| PITG_20463 | Pi vacuolar protein sorting-associated protein 33A, put   | 2   | 24  | 0  |
| PITG_20464 | Pi conserved hypothetical protein (991 nt)                | 0   | 0   | 0  |
| PITG_20465 | Pi fructokinase, putative (1073 nt)                       | 33  | 133 | 26 |
| PITG_20468 | Pi conserved hypothetical protein (714 nt)                | 19  | 16  | 0  |
| PITG_20484 | Pi conserved hypothetical protein (782 nt)                | 0   | 64  | 0  |
| PITG_20485 | Pi conserved hypothetical protein (2224 nt)               | 0   | 25  | 0  |
| PITG_20486 | Pi conserved hypothetical protein (420 nt)                | 10  | 4   | 0  |
| PITG_20487 | Pi conserved hypothetical protein (1031 nt)               | 2   | 217 | 6  |
| PITG_20488 | Pi conserved hypothetical protein (403 nt)                | 1   | 64  | 0  |
| PITG_20489 | Pi mucin-like protein (2163 nt)                           | 1   | 147 | 5  |
| PITG_20490 | Pi conserved hypothetical protein (928 nt)                | 0   | 74  | 1  |
| PITG_20491 | Pi fumarylacetoacetase (1806 nt)                          | 10  | 117 | 0  |
| PITG_20492 | Pi conserved hypothetical protein (2911 nt)               | 0   | 11  | 0  |
| PITG_20494 | Pi conserved hypothetical protein (384 nt)                | 6   | 28  | 0  |
| PITG_20496 | Pi conserved hypothetical protein (3585 nt)               | 0   | 24  | 0  |
| PITG_20498 | Pi conserved hypothetical protein (1405 nt)               | 10  | 64  | 0  |
| PITG_20502 | Pi histone-lysine N-methyltransferase, putative (9032 r   | 7   | 23  | 0  |
| PITG_20503 | Pi conserved hypothetical protein (1925 nt)               | 23  | 7   | 0  |
| PITG_20504 | Pi conserved hypothetical protein (1002 nt)               | 1   | 15  | 0  |
| PITG_20505 | Pi conserved hypothetical protein (637 nt)                | 26  | 44  | 0  |
| PITG_20506 | Pi conserved hypothetical protein (5792 nt)               | 1   | 10  | 0  |
| PITG_20518 | Pi sporangia induced hypothetical protein (1250 nt)       | 0   | 0   | 0  |
| PITG_20521 | Pi hypothetical protein (351 nt)                          | 2   | 16  | 0  |
| PITG_20522 | Pi conserved hypothetical protein (513 nt)                | 2   | 8   | 0  |
| PITG_20525 | Pi conserved hypothetical protein (737 nt)                | 1   | 17  | 0  |
| PITG_20526 | Pi conserved hypothetical protein (3370 nt)               | 0   | 5   | 0  |
| PITG_20527 | Pi DNA polymerase delta catalytic subunit (5630 nt)       | 1   | 12  | 0  |
| PITG_20528 | Pi conserved hypothetical protein (2340 nt)               | 5   | 18  | 0  |
| PITG_20529 | Pi conserved hypothetical protein (4934 nt)               | 0   | 27  | 0  |
| PITG_20533 | Pi conserved hypothetical protein (989 nt)                | 11  | 17  | 0  |
| PITG_20534 | Pi conserved hypothetical protein (859 nt)                | 0   | 26  | 0  |
| PITG_20537 | Pi conserved hypothetical protein (1243 nt)               | 5   | 5   | 0  |
| PITG_20539 | Pi conserved hypothetical protein (1868 nt)               | 2   | 8   | 0  |
| PITG_20548 | Pi conserved hypothetical protein (1859 nt)               | 3   | 27  | 0  |
| PITG_20556 | Pi hypothetical protein (1091 nt)                         | 31  | 0   | 0  |

|            |                                                            |     |     |   |
|------------|------------------------------------------------------------|-----|-----|---|
| PITG_20559 | Pi conserved hypothetical protein (991 nt)                 | 2   | 26  | 0 |
| PITG_20562 | Pi RAC family serine/threonine-protein kinase (4989 nt)    | 9   | 84  | 0 |
| PITG_20563 | Pi conserved hypothetical protein (2207 nt)                | 3   | 7   | 0 |
| PITG_20568 | Pi hypothetical protein (1211 nt)                          | 10  | 17  | 0 |
| PITG_20571 | Pi alkyldihydroxyacetonephosphate synthase, peroxiso       | 2   | 10  | 1 |
| PITG_20579 | Pi conserved hypothetical protein (669 nt)                 | 0   | 25  | 0 |
| PITG_20585 | Pi AhpC/TSA family Redoxin, putative (2885 nt)             | 10  | 64  | 2 |
| PITG_20589 | Pi cathepsin, cysteine protease family C01A, putative (:   | 45  | 122 | 1 |
| PITG_20590 | Pi cleavage induced conserved hypothetical protein (12     | 7   | 50  | 0 |
| PITG_20591 | Pi conserved hypothetical protein (1398 nt)                | 0   | 1   | 0 |
| PITG_20593 | Pi conserved hypothetical protein (1968 nt)                | 6   | 5   | 0 |
| PITG_20600 | Pi protein kinase (441 nt)                                 | 0   | 2   | 0 |
| PITG_20604 | Pi conserved hypothetical protein (480 nt)                 | 2   | 4   | 0 |
| PITG_20608 | Pi conserved hypothetical protein (1443 nt)                | 8   | 22  | 0 |
| PITG_20609 | Pi conserved hypothetical protein (1579 nt)                | 0   | 10  | 0 |
| PITG_20610 | Pi conserved hypothetical protein (1065 nt)                | 1   | 13  | 0 |
| PITG_20611 | Pi nucleoporin-like protein (1199 nt)                      | 42  | 140 | 0 |
| PITG_20615 | Pi conserved hypothetical protein (1342 nt)                | 107 | 115 | 0 |
| PITG_20617 | Pi conserved hypothetical protein (594 nt)                 | 0   | 8   | 0 |
| PITG_20619 | Pi pirin (1082 nt)                                         | 19  | 912 | 0 |
| PITG_20623 | Pi conserved hypothetical protein (405 nt)                 | 3   | 7   | 0 |
| PITG_20628 | Pi conserved hypothetical protein (4791 nt)                | 0   | 2   | 0 |
| PITG_20629 | Pi DNA-directed RNA polymerase III subunit RPC8, puta      | 12  | 17  | 0 |
| PITG_20630 | Pi Cation Diffusion Facilitator (CDF) Family (984 nt)      | 4   | 16  | 0 |
| PITG_20631 | Pi conserved hypothetical protein (813 nt)                 | 0   | 2   | 0 |
| PITG_20632 | Pi hypothetical protein (912 nt)                           | 3   | 7   | 0 |
| PITG_20633 | Pi Major Facilitator Superfamily (MFS) (441 nt)            | 0   | 12  | 0 |
| PITG_20637 | Pi conserved hypothetical protein (2541 nt)                | 3   | 10  | 0 |
| PITG_20638 | Pi hypothetical protein (1499 nt)                          | 2   | 6   | 0 |
| PITG_20641 | Pi Crinkler (CRN) family protein, pseudogene (2044 nt)     | 193 | 35  | 0 |
| PITG_20652 | Pi conserved hypothetical protein (615 nt)                 | 3   | 20  | 0 |
| PITG_20657 | Pi conserved hypothetical protein (760 nt)                 | 1   | 16  | 0 |
| PITG_20671 | Pi conserved hypothetical protein (649 nt)                 | 7   | 50  | 0 |
| PITG_20672 | Pi methyltransferase domain-containing protein, putat      | 5   | 15  | 0 |
| PITG_20675 | Pi conserved hypothetical protein (1808 nt)                | 36  | 22  | 0 |
| PITG_20676 | Pi beta-glucosidase, putative (2430 nt)                    | 1   | 14  | 0 |
| PITG_20679 | Pi conserved hypothetical protein (498 nt)                 | 3   | 197 | 0 |
| PITG_20681 | Pi ATP-binding Cassette (ABC) superfamily (2764 nt)        | 0   | 94  | 0 |
| PITG_20682 | Pi ATP-binding Cassette (ABC) Superfamily (1965 nt)        | 0   | 39  | 0 |
| PITG_20683 | Pi conserved hypothetical protein (855 nt)                 | 2   | 13  | 0 |
| PITG_20685 | Pi conserved hypothetical protein (393 nt)                 | 16  | 33  | 1 |
| PITG_20686 | Pi hypothetical protein (273 nt)                           | 41  | 66  | 5 |
| PITG_20687 | Pi ribulose-phosphate 3-epimerase (753 nt)                 | 18  | 42  | 0 |
| PITG_20689 | Pi eukaryotic translation initiation factor 3 subunit H, p | 19  | 36  | 3 |
| PITG_20692 | Pi EF hand containing protein, putative (1367 nt)          | 0   | 1   | 0 |
| PITG_20693 | Pi crinkler (CRN) family protein, pseudogene (2824 nt)     | 11  | 52  | 0 |
| PITG_20706 | Pi conserved hypothetical protein (1552 nt)                | 0   | 20  | 0 |

|            |                                                          |     |     |    |
|------------|----------------------------------------------------------|-----|-----|----|
| PITG_20709 | Pi conserved hypothetical protein (580 nt)               | 3   | 12  | 0  |
| PITG_20711 | Pi Folate-Biopterin Transporter (FBT) Family (981 nt)    | 7   | 5   | 0  |
| PITG_20714 | Pi putative E3 ubiquitin-protein ligase MARCH6 (memb     | 9   | 24  | 0  |
| PITG_20715 | Pi deoxyribodipyrimidine photolyase, putative (1763 nt)  | 2   | 6   | 0  |
| PITG_20716 | Pi conserved hypothetical protein (1027 nt)              | 0   | 0   | 0  |
| PITG_20717 | Pi conserved hypothetical protein (4711 nt)              | 11  | 60  | 0  |
| PITG_20718 | Pi conserved hypothetical protein (1161 nt)              | 22  | 53  | 2  |
| PITG_20719 | Pi conserved hypothetical protein (972 nt)               | 21  | 80  | 1  |
| PITG_20725 | Pi histone H3.3 type 1 (656 nt)                          | 122 | 239 | 9  |
| PITG_20727 | Pi conserved hypothetical protein (3130 nt)              | 22  | 69  | 0  |
| PITG_20728 | Pi conserved hypothetical protein (840 nt)               | 33  | 109 | 0  |
| PITG_20731 | Pi conserved hypothetical protein (4509 nt)              | 2   | 16  | 0  |
| PITG_20734 | Pi conserved hypothetical protein (785 nt)               | 68  | 116 | 0  |
| PITG_20739 | Pi hypothetical protein (558 nt)                         | 0   | 0   | 0  |
| PITG_20741 | Pi hypothetical protein (623 nt)                         | 0   | 0   | 0  |
| PITG_20742 | Pi conserved hypothetical protein (955 nt)               | 7   | 26  | 0  |
| PITG_20743 | Pi nuclear transport factor, putative (702 nt)           | 83  | 116 | 4  |
| PITG_20744 | Pi conserved hypothetical protein (641 nt)               | 3   | 0   | 0  |
| PITG_20745 | Pi Intraflagellar Transport Protein 52 (1678 nt)         | 19  | 8   | 0  |
| PITG_20746 | Pi protein enhancer of rudimentary (501 nt)              | 129 | 280 | 4  |
| PITG_20747 | Pi transcription elongation factor B polypeptide 1 (564  | 54  | 38  | 0  |
| PITG_20749 | Pi sporangia induced conserved hypothetical protein (9   | 1   | 0   | 0  |
| PITG_20755 | Pi conserved hypothetical protein (477 nt)               | 74  | 78  | 0  |
| PITG_20759 | Pi dihydroxy-acid dehydratase (1899 nt)                  | 40  | 61  | 2  |
| PITG_20760 | Pi peptidyl-prolyl cis-trans isomerase B precursor (715  | 12  | 8   | 0  |
| PITG_20762 | Pi conserved hypothetical protein (813 nt)               | 11  | 40  | 0  |
| PITG_20765 | Pi conserved hypothetical protein (728 nt)               | 1   | 13  | 0  |
| PITG_20766 | Pi protein kinase, putative (2115 nt)                    | 5   | 14  | 0  |
| PITG_20767 | Pi protein kinase, putative (1986 nt)                    | 13  | 63  | 0  |
| PITG_20770 | Pi protein kinase (747 nt)                               | 0   | 14  | 0  |
| PITG_20773 | Pi conserved hypothetical protein (1446 nt)              | 2   | 41  | 0  |
| PITG_20774 | Pi conserved hypothetical protein (2992 nt)              | 23  | 25  | 0  |
| PITG_20775 | Pi adenylate kinase, putative (1847 nt)                  | 12  | 29  | 7  |
| PITG_20777 | Pi hypothetical protein (584 nt)                         | 207 | 124 | 5  |
| PITG_20779 | Pi hypothetical protein (693 nt)                         | 1   | 16  | 0  |
| PITG_20780 | Pi ATPase (3841 nt)                                      | 1   | 27  | 0  |
| PITG_20783 | Pi hypothetical protein (1593 nt)                        | 2   | 16  | 0  |
| PITG_20787 | Pi conserved hypothetical protein (3251 nt)              | 4   | 18  | 0  |
| PITG_20790 | Pi DEAD/DEAH box RNA helicase, putative (1698 nt)        | 5   | 10  | 0  |
| PITG_20791 | Pi ADP-ribosylation factor family (689 nt)               | 3   | 3   | 0  |
| PITG_20792 | Pi soluble calcium-activated nucleotidase, putative (130 | 22  | 43  | 0  |
| PITG_20793 | Pi conserved hypothetical protein (361 nt)               | 53  | 63  | 0  |
| PITG_20794 | Pi conserved hypothetical protein (1264 nt)              | 20  | 66  | 0  |
| PITG_20795 | Pi ribosomal protein (659 nt)                            | 821 | 496 | 68 |
| PITG_20796 | Pi conserved hypothetical protein (688 nt)               | 58  | 24  | 0  |
| PITG_20797 | Pi tubulin-specific chaperone B, putative (928 nt)       | 4   | 25  | 0  |
| PITG_20798 | Pi ribosomal protein S17, putative (423 nt)              | 26  | 34  | 1  |



|            |                                                          |     |     |    |
|------------|----------------------------------------------------------|-----|-----|----|
| PITG_20799 | Pi conserved hypothetical protein (863 nt)               | 22  | 62  | 1  |
| PITG_20800 | Pi conserved hypothetical protein (1264 nt)              | 16  | 23  | 0  |
| PITG_20801 | Pi conserved hypothetical protein (1059 nt)              | 0   | 12  | 0  |
| PITG_20803 | Pi conserved hypothetical protein (1947 nt)              | 11  | 12  | 0  |
| PITG_20805 | Pi hypothetical protein (273 nt)                         | 3   | 101 | 0  |
| PITG_20808 | Pi serine/threonine protein kinase (1349 nt)             | 6   | 27  | 0  |
| PITG_20809 | Pi conserved hypothetical protein (747 nt)               | 1   | 10  | 0  |
| PITG_20815 | Pi ATP-binding Cassette (ABC) Superfamily (1008 nt)      | 49  | 851 | 0  |
| PITG_20818 | Pi conserved hypothetical protein (792 nt)               | 18  | 5   | 0  |
| PITG_20819 | Pi conserved hypothetical protein (1799 nt)              | 6   | 33  | 0  |
| PITG_20820 | Pi conserved hypothetical protein (3315 nt)              | 2   | 20  | 0  |
| PITG_20823 | Pi conserved hypothetical protein (943 nt)               | 1   | 19  | 0  |
| PITG_20824 | Pi aspartyl-tRNA synthetase, putative (659 nt)           | 3   | 12  | 0  |
| PITG_20825 | Pi conserved hypothetical protein (516 nt)               | 8   | 17  | 0  |
| PITG_20830 | Pi conserved hypothetical protein (3586 nt)              | 15  | 109 | 0  |
| PITG_20831 | Pi conserved hypothetical protein (4202 nt)              | 2   | 19  | 0  |
| PITG_20836 | Pi conserved hypothetical protein (1774 nt)              | 0   | 13  | 0  |
| PITG_20838 | Pi conserved hypothetical protein (1921 nt)              | 5   | 12  | 0  |
| PITG_20842 | Pi conserved hypothetical protein (522 nt)               | 0   | 4   | 0  |
| PITG_20844 | Pi conserved hypothetical protein (1697 nt)              | 0   | 1   | 0  |
| PITG_20849 | Pi alcohol dehydrogenase, putative (1090 nt)             | 1   | 8   | 0  |
| PITG_20854 | Pi conserved hypothetical protein (486 nt)               | 0   | 9   | 0  |
| PITG_20855 | Pi conserved hypothetical protein (1206 nt)              | 30  | 34  | 1  |
| PITG_20858 | Pi hypothetical protein (1227 nt)                        | 2   | 27  | 0  |
| PITG_20861 | Pi ATP-binding Cassette (ABC) Superfamily (474 nt)       | 3   | 11  | 0  |
| PITG_20866 | Pi beta-glucan synthesis-associated protein (2232 nt)    | 2   | 31  | 0  |
| PITG_20868 | Pi beta-glucan synthesis-associated protein, putative (2 | 2   | 47  | 0  |
| PITG_20893 | Pi conserved hypothetical protein (1325 nt)              | 6   | 14  | 0  |
| PITG_20895 | Pi beta-glucan synthesis-associated protein, putative (2 | 1   | 10  | 0  |
| PITG_20901 | Pi voltage-dependent anion-selective channel protein,    | 124 | 208 | 22 |
| PITG_20902 | Pi outer dynein arm-docking complex subunit 3 (803 nt)   | 0   | 0   | 0  |
| PITG_20903 | Pi exosome complex exonuclease RRP40, putative (152      | 10  | 20  | 0  |
| PITG_20904 | Pi small nuclear ribonucleoprotein Sm D1 (424 nt)        | 23  | 60  | 1  |
| PITG_20906 | Pi conserved hypothetical protein (433 nt)               | 20  | 23  | 0  |
| PITG_20907 | Pi cobalamin synthesis protein, putative (1297 nt)       | 2   | 29  | 0  |
| PITG_20908 | Pi conserved hypothetical protein (2363 nt)              | 1   | 15  | 0  |
| PITG_20909 | Pi conserved hypothetical protein (831 nt)               | 2   | 16  | 0  |
| PITG_20917 | Pi sulfatase-like protein (939 nt)                       | 0   | 0   | 0  |
| PITG_20927 | Pi trehalose-phosphatase, putative (2751 nt)             | 0   | 13  | 0  |
| PITG_20928 | Pi condensin complex subunit, putative (4274 nt)         | 4   | 29  | 0  |
| PITG_20931 | Pi conserved hypothetical protein (433 nt)               | 0   | 15  | 0  |
| PITG_20944 | Pi conserved hypothetical protein (1984 nt)              | 2   | 15  | 0  |
| PITG_20945 | Pi conserved hypothetical protein (735 nt)               | 3   | 12  | 0  |
| PITG_20947 | Pi conserved hypothetical protein (454 nt)               | 4   | 0   | 0  |
| PITG_20954 | Pi conserved hypothetical protein (948 nt)               | 2   | 22  | 0  |
| PITG_20966 | Pi hypothetical protein (1577 nt)                        | 8   | 12  | 0  |
| PITG_20970 | Pi triosephosphate isomerase/glyceraldehyde-3-phosp      | 13  | 132 | 32 |

|                                                                              |    |     |   |
|------------------------------------------------------------------------------|----|-----|---|
| PITG_20977   Pi conserved hypothetical protein (1610 nt)                     | 1  | 117 | 0 |
| PITG_20985   Pi fibronectin type III domain-containing protein (4156 nt)     | 0  | 5   | 0 |
| PITG_20987   Pi conserved hypothetical protein (455 nt)                      | 1  | 2   | 0 |
| PITG_20989   Pi conserved hypothetical protein (2292 nt)                     | 16 | 14  | 3 |
| PITG_20994   Pi conserved hypothetical protein (3079 nt)                     | 21 | 117 | 0 |
| PITG_20999   Pi conserved hypothetical protein (2109 nt)                     | 15 | 28  | 0 |
| PITG_21000   Pi conserved hypothetical protein (2349 nt)                     | 25 | 67  | 0 |
| PITG_21003   Pi conserved hypothetical protein (804 nt)                      | 0  | 11  | 0 |
| PITG_21005   Pi conserved hypothetical protein (1281 nt)                     | 11 | 20  | 0 |
| PITG_21006   Pi O-phosphoseryl-tRNA(Sec) selenium transferase, putative      | 9  | 60  | 0 |
| PITG_21010   Pi eukaryotic translation initiation factor 3 subunit, putative | 5  | 21  | 0 |
| PITG_21011   Pi 14 kDa zinc-binding protein (608 nt)                         | 36 | 38  | 0 |
| PITG_21012   Pi conserved hypothetical protein (931 nt)                      | 22 | 65  | 0 |
| PITG_21013   Pi kinesin-associated protein, putative (2124 nt)               | 0  | 6   | 0 |
| PITG_21014   Pi conserved hypothetical protein (2481 nt)                     | 2  | 17  | 0 |
| PITG_21017   Pi hydrocephalus-inducing protein, putative (13327 nt)          | 0  | 5   | 0 |
| PITG_21018   Pi expressed protein (1433 nt)                                  | 43 | 38  | 0 |
| PITG_21022   Pi P-type ATPase (P-ATPase) Superfamily (4173 nt)               | 0  | 9   | 0 |
| PITG_21023   Pi conserved hypothetical protein (1979 nt)                     | 6  | 32  | 0 |
| PITG_21024   Pi conserved hypothetical protein (2342 nt)                     | 14 | 224 | 0 |
| PITG_21026   Pi conserved hypothetical protein (2173 nt)                     | 13 | 80  | 1 |
| PITG_21027   Pi conserved hypothetical protein (1341 nt)                     | 34 | 158 | 6 |
| PITG_21028   Pi mannosyl-oligosaccharide glucosidase, putative (923 nt)      | 3  | 18  | 0 |
| PITG_21033   Pi conserved hypothetical protein (321 nt)                      | 0  | 0   | 0 |
| PITG_21037   Pi conserved hypothetical protein (401 nt)                      | 0  | 76  | 0 |
| PITG_21040   Pi conserved hypothetical protein (1900 nt)                     | 0  | 0   | 1 |
| PITG_21041   Pi conserved hypothetical protein (2342 nt)                     | 0  | 5   | 0 |
| PITG_21042   Pi conserved hypothetical protein (1237 nt)                     | 2  | 66  | 0 |
| PITG_21046   Pi glycoside hydrolase, putative (1012 nt)                      | 3  | 15  | 0 |
| PITG_21047   Pi conserved hypothetical protein (1099 nt)                     | 0  | 30  | 0 |
| PITG_21048   Pi conserved hypothetical protein (659 nt)                      | 9  | 24  | 0 |
| PITG_21049   Pi conserved hypothetical protein (466 nt)                      | 32 | 45  | 0 |
| PITG_21054   Pi conserved hypothetical protein (1243 nt)                     | 5  | 20  | 0 |
| PITG_21055   Pi LAG1 longevity assurance (1284 nt)                           | 14 | 39  | 0 |
| PITG_21056   Pi conserved hypothetical protein (309 nt)                      | 21 | 4   | 0 |
| PITG_21059   Pi conserved hypothetical protein (870 nt)                      | 2  | 52  | 4 |
| PITG_21065   Pi conserved hypothetical protein (2122 nt)                     | 0  | 0   | 0 |
| PITG_21067   Pi conserved hypothetical protein (1059 nt)                     | 2  | 18  | 0 |
| PITG_21071   Pi threonyl-tRNA synthetase (2235 nt)                           | 11 | 74  | 3 |
| PITG_21074   Pi conserved hypothetical protein (1617 nt)                     | 4  | 4   | 0 |
| PITG_21075   Pi conserved hypothetical protein (684 nt)                      | 11 | 20  | 0 |
| PITG_21077   Pi DNA-directed RNA polymerase II largest subunit (620 nt)      | 3  | 45  | 0 |
| PITG_21110   Pi Mitochondrial Carrier (MC) Family (1080 nt)                  | 4  | 5   | 0 |
| PITG_21111   Pi conserved hypothetical protein (614 nt)                      | 6  | 82  | 0 |
| PITG_21114   Pi conserved hypothetical protein (1530 nt)                     | 3  | 44  | 0 |
| PITG_21117   Pi malate synthase, glyoxysomal, putative (1780 nt)             | 61 | 329 | 0 |
| PITG_21121   Pi hypothetical protein (132 nt)                                | 78 | 143 | 0 |

|            |                                                         |    |     |   |
|------------|---------------------------------------------------------|----|-----|---|
| PITG_21127 | Pi adenine phosphoribosyltransferase, putative (624 nt) | 2  | 41  | 0 |
| PITG_21128 | Pi succinyl CoA transferase, putative (1914 nt)         | 38 | 265 | 0 |
| PITG_21132 | Pi conserved hypothetical protein (568 nt)              | 32 | 36  | 0 |
| PITG_21133 | Pi hypothetical protein (905 nt)                        | 4  | 28  | 0 |
| PITG_21140 | Pi conserved hypothetical protein (950 nt)              | 2  | 13  | 0 |
| PITG_21141 | Pi ATP-binding Cassette (ABC) superfamily (1744 nt)     | 0  | 3   | 0 |
| PITG_21144 | Pi conserved hypothetical protein (3569 nt)             | 1  | 19  | 0 |
| PITG_21146 | Pi conserved hypothetical protein (1271 nt)             | 8  | 39  | 0 |
| PITG_21149 | Pi conserved hypothetical protein (1645 nt)             | 0  | 13  | 0 |
| PITG_21150 | Pi Folate-Biopterin Transporter (FBT) Family (1554 nt)  | 5  | 10  | 0 |
| PITG_21151 | Pi Annexin (Annexin) Family (1009 nt)                   | 7  | 373 | 0 |
| PITG_21154 | Pi conserved hypothetical protein (1440 nt)             | 0  | 14  | 0 |
| PITG_21156 | Pi Drug/Metabolite Transporter (DMT) Superfamily (97    | 2  | 13  | 0 |
| PITG_21163 | Pi GAF domain-containing protein (2247 nt)              | 0  | 5   | 0 |
| PITG_21166 | Pi conserved hypothetical protein (1556 nt)             | 0  | 8   | 0 |
| PITG_21170 | Pi conserved hypothetical protein (446 nt)              | 13 | 14  | 0 |
| PITG_21171 | Pi conserved hypothetical protein (596 nt)              | 24 | 27  | 0 |
| PITG_21172 | Pi protein phosphatase 1E, putative (2060 nt)           | 42 | 60  | 0 |
| PITG_21173 | Pi nucleotide-binding protein 1 (1186 nt)               | 30 | 69  | 1 |
| PITG_21174 | Pi D-cysteine desulfhydrase, putative (1314 nt)         | 39 | 90  | 1 |
| PITG_21175 | Pi conserved hypothetical protein (796 nt)              | 2  | 10  | 0 |
| PITG_21176 | Pi transportin-like protein (3101 nt)                   | 14 | 39  | 0 |
| PITG_21178 | Pi conserved hypothetical protein (2751 nt)             | 2  | 11  | 0 |
| PITG_21179 | Pi conserved hypothetical protein (876 nt)              | 1  | 19  | 0 |
| PITG_21180 | Pi conserved hypothetical protein (1029 nt)             | 3  | 10  | 0 |
| PITG_21181 | Pi conserved hypothetical protein (3348 nt)             | 0  | 13  | 0 |
| PITG_21182 | Pi apoptosis-inducing factor 1, putative (1743 nt)      | 20 | 58  | 0 |
| PITG_21183 | Pi conserved hypothetical protein (2061 nt)             | 23 | 52  | 0 |
| PITG_21184 | Pi conserved hypothetical protein (1355 nt)             | 9  | 11  | 0 |
| PITG_21185 | Pi RPS6 protein kinase (2016 nt)                        | 12 | 48  | 0 |
| PITG_21186 | Pi conserved hypothetical protein (972 nt)              | 13 | 49  | 0 |
| PITG_21187 | Pi myoferlin-like protein (6294 nt)                     | 3  | 35  | 0 |
| PITG_21190 | Pi secreted RxLR effector peptide, putative (1020 nt)   | 3  | 35  | 0 |
| PITG_21196 | Pi hypothetical protein (397 nt)                        | 9  | 8   | 0 |
| PITG_21199 | Pi hypothetical protein (721 nt)                        | 0  | 11  | 0 |
| PITG_21202 | Pi conserved hypothetical protein (1899 nt)             | 2  | 1   | 0 |
| PITG_21203 | Pi conserved hypothetical protein (1229 nt)             | 5  | 43  | 0 |
| PITG_21208 | Pi conserved hypothetical protein (357 nt)              | 0  | 0   | 0 |
| PITG_21209 | Pi conserved hypothetical protein (1158 nt)             | 33 | 46  | 0 |
| PITG_21210 | Pi conserved hypothetical protein (1694 nt)             | 7  | 20  | 0 |
| PITG_21211 | Pi conserved hypothetical protein (1583 nt)             | 7  | 41  | 0 |
| PITG_21212 | Pi conserved hypothetical protein (1560 nt)             | 9  | 15  | 0 |
| PITG_21213 | Pi conserved hypothetical protein (394 nt)              | 9  | 19  | 0 |
| PITG_21215 | Pi transmembrane protein, putative (1222 nt)            | 2  | 22  | 0 |
| PITG_21216 | Pi hypothetical protein (306 nt)                        | 1  | 20  | 0 |
| PITG_21219 | Pi conserved hypothetical protein (1781 nt)             | 9  | 35  | 0 |
| PITG_21220 | Pi Rab28 family GTPase, putative (708 nt)               | 3  | 3   | 0 |

|            |                                                                                     |     |     |    |
|------------|-------------------------------------------------------------------------------------|-----|-----|----|
| PITG_21222 | Pi conserved hypothetical protein (2926 nt)                                         | 2   | 9   | 0  |
| PITG_21224 | Pi conserved hypothetical protein (879 nt)                                          | 68  | 18  | 0  |
| PITG_21238 | Pi secreted RxLR effector peptide, putative (384 nt)                                | 0   | 1   | 1  |
| PITG_21255 | Pi conserved hypothetical protein (2166 nt)                                         | 0   | 52  | 0  |
| PITG_21256 | Pi conserved hypothetical protein (478 nt)                                          | 1   | 106 | 0  |
| PITG_21257 | Pi conserved hypothetical protein (721 nt)                                          | 10  | 212 | 0  |
| PITG_21258 | Pi conserved hypothetical protein (1986 nt)                                         | 0   | 0   | 0  |
| PITG_21277 | Pi conserved hypothetical protein (1053 nt)                                         | 8   | 24  | 0  |
| PITG_21278 | Pi isochorismatase, putative (728 nt)                                               | 30  | 132 | 1  |
| PITG_21279 | Pi conserved hypothetical protein (526 nt)                                          | 4   | 30  | 0  |
| PITG_21280 | Pi conserved hypothetical protein (373 nt)                                          | 2   | 18  | 1  |
| PITG_21282 | Pi conserved hypothetical protein (393 nt)                                          | 9   | 39  | 0  |
| PITG_21283 | Pi conserved hypothetical protein (533 nt)                                          | 12  | 34  | 1  |
| PITG_21284 | Pi leukotriene A-4 hydrolase, putative (2778 nt)                                    | 0   | 14  | 0  |
| PITG_21285 | Pi hypothetical protein (794 nt)                                                    | 1   | 0   | 0  |
| PITG_21286 | Pi conserved hypothetical protein (466 nt)                                          | 0   | 17  | 0  |
| PITG_21289 | Pi polysaccharide lyase, putative (694 nt)                                          | 15  | 5   | 0  |
| PITG_21295 | Pi 12-oxophytodienoate reductase, putative (923 nt)                                 | 1   | 12  | 0  |
| PITG_21302 | Pi conserved hypothetical protein (513 nt)                                          | 1   | 1   | 0  |
| PITG_21303 | Pi secreted RxLR effector peptide, putative, 3' partial (6                          | 308 | 0   | 1  |
| PITG_21308 | Pi choline dehydrogenase, putative (1732 nt)                                        | 8   | 9   | 0  |
| PITG_21309 | Pi histone deacetylase, putative (1432 nt)                                          | 4   | 7   | 0  |
| PITG_21310 | Pi conserved hypothetical protein (440 nt)                                          | 0   | 17  | 0  |
| PITG_21312 | Pi conserved hypothetical protein (510 nt)                                          | 0   | 44  | 0  |
| PITG_21313 | Pi glucokinase, putative (933 nt)                                                   | 307 | 87  | 3  |
| PITG_21314 | Pi conserved hypothetical protein (1180 nt)                                         | 20  | 5   | 0  |
| PITG_21316 | Pi protein phosphatase methylesterase, putative (1485                               | 8   | 23  | 0  |
| PITG_21317 | Pi transmembrane protein, putative (840 nt)                                         | 3   | 14  | 0  |
| PITG_21325 | Pi crinkler (CRN) domain, pseudogene (1454 nt)                                      | 174 | 674 | 4  |
| PITG_21328 | Pi hypothetical protein (1028 nt)                                                   | 10  | 16  | 0  |
| PITG_21329 | Pi Zinc (Zn <sup>2+</sup> )-Iron (Fe <sup>2+</sup> ) Permease (ZIP) Family (657 nt) | 10  | 29  | 0  |
| PITG_21333 | Pi hypothetical protein (1330 nt)                                                   | 17  | 183 | 11 |
| PITG_21334 | Pi conserved hypothetical protein (1330 nt)                                         | 14  | 19  | 0  |
| PITG_21335 | Pi conserved hypothetical protein (737 nt)                                          | 0   | 15  | 1  |
| PITG_21336 | Pi patatin like protein (3426 nt)                                                   | 0   | 16  | 0  |
| PITG_21349 | Pi aspartyl-tRNA synthetase, putative (1043 nt)                                     | 6   | 52  | 0  |
| PITG_21351 | Pi conserved hypothetical protein (1050 nt)                                         | 3   | 16  | 0  |
| PITG_21352 | Pi conserved hypothetical protein (3558 nt)                                         | 1   | 1   | 0  |
| PITG_21363 | Pi putative GPI-anchored serine-threonine rich hypoth                               | 1   | 0   | 2  |
| PITG_21364 | Pi conserved hypothetical protein (1826 nt)                                         | 0   | 10  | 0  |
| PITG_21371 | Pi conserved hypothetical protein (599 nt)                                          | 0   | 1   | 0  |
| PITG_21372 | Pi protein kinase (774 nt)                                                          | 0   | 15  | 0  |
| PITG_21377 | Pi conserved hypothetical protein (1445 nt)                                         | 15  | 78  | 0  |
| PITG_21378 | Pi protein disulfide-isomerase, putative (1781 nt)                                  | 123 | 839 | 38 |
| PITG_21379 | Pi conserved hypothetical protein (589 nt)                                          | 2   | 5   | 0  |
| PITG_21380 | Pi conserved hypothetical protein (1311 nt)                                         | 9   | 42  | 0  |
| PITG_21384 | Pi hypothetical protein (1601 nt)                                                   | 0   | 1   | 0  |

|            |                                                            |     |      |    |
|------------|------------------------------------------------------------|-----|------|----|
| PITG_21389 | Pi conserved hypothetical protein (717 nt)                 | 17  | 21   | 0  |
| PITG_21393 | Pi eukaryotic translation initiation factor 3 subunit A, p | 4   | 42   | 3  |
| PITG_21394 | Pi cobalamin synthesis protein, putative (1194 nt)         | 11  | 44   | 0  |
| PITG_21395 | Pi CBL-interacting serine/threonine-protein kinase, put    | 53  | 256  | 4  |
| PITG_21396 | Pi conserved hypothetical protein (993 nt)                 | 4   | 33   | 0  |
| PITG_21397 | Pi ribose-phosphate pyrophosphokinase, putative (151       | 10  | 42   | 0  |
| PITG_21398 | Pi DEAD/DEAH box RNA helicase, putative (3288 nt)          | 4   | 32   | 0  |
| PITG_21400 | Pi protein kinase (1076 nt)                                | 18  | 24   | 0  |
| PITG_21409 | Pi hypothetical protein (1891 nt)                          | 1   | 10   | 0  |
| PITG_21410 | Pi elicitin-like protein INF4 (459 nt)                     | 14  | 2    | 30 |
| PITG_21416 | Pi conserved hypothetical protein (4115 nt)                | 5   | 9    | 0  |
| PITG_21418 | Pi conserved hypothetical protein (4089 nt)                | 5   | 12   | 0  |
| PITG_21419 | Pi conserved hypothetical protein (1162 nt)                | 4   | 12   | 0  |
| PITG_21437 | Pi conserved hypothetical protein (1202 nt)                | 0   | 11   | 0  |
| PITG_21442 | Pi EF hand containing protein, putative (631 nt)           | 0   | 4    | 0  |
| PITG_21451 | Pi conserved hypothetical protein (4362 nt)                | 0   | 4    | 0  |
| PITG_21457 | Pi choline transporter-like protein (2414 nt)              | 1   | 26   | 0  |
| PITG_21458 | Pi conserved hypothetical protein (2035 nt)                | 1   | 27   | 0  |
| PITG_21466 | Pi conserved hypothetical protein (485 nt)                 | 1   | 12   | 0  |
| PITG_21480 | Pi conserved hypothetical protein (605 nt)                 | 3   | 19   | 0  |
| PITG_21482 | Pi conserved hypothetical protein (1096 nt)                | 2   | 14   | 0  |
| PITG_21488 | Pi Annexin (Annexin) Family (1207 nt)                      | 92  | 1863 | 30 |
| PITG_21492 | Pi conserved hypothetical protein (2918 nt)                | 9   | 15   | 0  |
| PITG_21495 | Pi hypothetical protein (743 nt)                           | 4   | 11   | 0  |
| PITG_21501 | Pi calcium/calmodulin dependent protein kinase, putat      | 1   | 14   | 0  |
| PITG_21502 | Pi conserved hypothetical protein (417 nt)                 | 13  | 18   | 0  |
| PITG_21504 | Pi cyclin-dependent kinase, putative (1162 nt)             | 25  | 17   | 0  |
| PITG_21505 | Pi conserved hypothetical protein (651 nt)                 | 113 | 39   | 0  |
| PITG_21507 | Pi sterol 3-beta-glucosyltransferase, putative (3531 nt)   | 1   | 17   | 0  |
| PITG_21508 | Pi conserved hypothetical protein (466 nt)                 | 32  | 82   | 1  |
| PITG_21509 | Pi conserved hypothetical protein (1726 nt)                | 6   | 15   | 0  |
| PITG_21510 | Pi ubiquitin-conjugating enzyme E2, putative (882 nt)      | 46  | 142  | 0  |
| PITG_21511 | Pi myosin-like protein (2489 nt)                           | 0   | 17   | 0  |
| PITG_21514 | Pi conserved hypothetical protein (845 nt)                 | 13  | 11   | 0  |
| PITG_21516 | Pi memo-like protein (1521 nt)                             | 100 | 67   | 0  |
| PITG_21517 | Pi 2-oxoglutarate dehydrogenase E1 component, putat        | 69  | 61   | 0  |
| PITG_21518 | Pi conserved hypothetical protein (752 nt)                 | 8   | 8    | 0  |
| PITG_21522 | Pi conserved hypothetical protein (1510 nt)                | 0   | 30   | 0  |
| PITG_21523 | Pi cytochrome P450, putative (1965 nt)                     | 1   | 39   | 0  |
| PITG_21525 | Pi conserved hypothetical protein (3571 nt)                | 61  | 207  | 0  |
| PITG_21528 | Pi GAF domain-containing protein (2073 nt)                 | 7   | 8    | 0  |
| PITG_21531 | Pi carbohydrate-binding protein, putative (1688 nt)        | 0   | 29   | 0  |
| PITG_21535 | Pi conserved hypothetical protein (3847 nt)                | 0   | 2    | 0  |
| PITG_21536 | Pi HECT ubiquitin ligase, putative (1180 nt)               | 3   | 2    | 0  |
| PITG_21540 | Pi Resistance-Nodulation-Cell Division (RND) Superfami     | 3   | 196  | 1  |
| PITG_21544 | Pi conserved hypothetical protein (1151 nt)                | 0   | 71   | 0  |
| PITG_21552 | Pi sulfhydryl oxidase, putative (1480 nt)                  | 0   | 13   | 0  |

|            |                                                          |     |     |   |
|------------|----------------------------------------------------------|-----|-----|---|
| PITG_21553 | Pi thioredoxin-like protein (1306 nt)                    | 2   | 33  | 0 |
| PITG_21556 | Pi conserved hypothetical protein (1813 nt)              | 34  | 91  | 0 |
| PITG_21557 | Pi conserved hypothetical protein (685 nt)               | 17  | 18  | 0 |
| PITG_21568 | Pi histone H1, putative (779 nt)                         | 263 | 17  | 0 |
| PITG_21571 | Pi conserved hypothetical protein (1127 nt)              | 2   | 14  | 0 |
| PITG_21573 | Pi conserved hypothetical protein (441 nt)               | 1   | 17  | 0 |
| PITG_21579 | Pi adenylate kinase, putative (768 nt)                   | 9   | 14  | 0 |
| PITG_21581 | Pi conserved hypothetical protein (824 nt)               | 12  | 40  | 0 |
| PITG_21582 | Pi tetrahydrofolate dehydrogenase (998 nt)               | 0   | 23  | 2 |
| PITG_21584 | Pi hypothetical protein (2912 nt)                        | 0   | 0   | 0 |
| PITG_21590 | Pi conserved hypothetical protein (2627 nt)              | 1   | 1   | 0 |
| PITG_21591 | Pi conserved hypothetical protein (1045 nt)              | 0   | 7   | 0 |
| PITG_21593 | Pi conserved hypothetical protein (1785 nt)              | 2   | 18  | 0 |
| PITG_21595 | Pi conserved hypothetical protein (1718 nt)              | 4   | 12  | 0 |
| PITG_21596 | Pi actin-related protein 2/3 complex subunit, putative ( | 35  | 65  | 0 |
| PITG_21597 | Pi conserved hypothetical protein (1385 nt)              | 6   | 9   | 0 |
| PITG_21598 | Pi conserved hypothetical protein (1836 nt)              | 7   | 8   | 0 |
| PITG_21599 | Pi conserved hypothetical protein (1744 nt)              | 3   | 19  | 0 |
| PITG_21600 | Pi conserved hypothetical protein (1281 nt)              | 5   | 13  | 0 |
| PITG_21601 | Pi conserved hypothetical protein (5258 nt)              | 1   | 17  | 0 |
| PITG_21602 | Pi pro-apoptotic serine protease nma111-like protein (   | 11  | 24  | 0 |
| PITG_21607 | Pi serine protease family S10, putative (1508 nt)        | 12  | 146 | 0 |
| PITG_21617 | Pi cell division protein kinase, putative (2339 nt)      | 8   | 5   | 0 |
| PITG_21618 | Pi Voltage-gated Ion Channel (VIC) Superfamily (821 nt)  | 15  | 19  | 0 |
| PITG_21619 | Pi homoserine O-acetyltransferase, putative (927 nt)     | 4   | 8   | 0 |
| PITG_21620 | Pi fumarylacetoacetate (FAA) hydrolase, putative (1135   | 14  | 18  | 1 |
| PITG_21621 | Pi cysteine protease family (429 nt)                     | 0   | 1   | 0 |
| PITG_21626 | Pi ATP-binding cassette protein, putative (4435 nt)      | 10  | 21  | 0 |
| PITG_21627 | Pi conserved hypothetical protein (752 nt)               | 9   | 21  | 0 |
| PITG_21634 | Pi hypothetical protein (804 nt)                         | 0   | 11  | 0 |
| PITG_21639 | Pi M96 mating-specific protein family (1088 nt)          | 1   | 15  | 0 |
| PITG_21640 | Pi conserved hypothetical protein (926 nt)               | 56  | 25  | 0 |
| PITG_21642 | Pi conserved hypothetical protein (463 nt)               | 22  | 22  | 0 |
| PITG_21643 | Pi vacuolar protein sorting-associated protein 29 (650 r | 6   | 69  | 0 |
| PITG_21644 | Pi UDP-N-acetylglucosamine transporter, putative (174    | 3   | 10  | 0 |
| PITG_21648 | Pi RXLR effector family, putative (1819 nt)              | 14  | 0   | 0 |
| PITG_21658 | Pi conserved hypothetical protein (4189 nt)              | 75  | 291 | 0 |
| PITG_21660 | Pi trehalase, putative (2103 nt)                         | 2   | 13  | 0 |
| PITG_21661 | Pi eukaryotic initiation factor 4E, putative (903 nt)    | 9   | 52  | 1 |
| PITG_21665 | Pi conserved hypothetical protein (1266 nt)              | 1   | 10  | 0 |
| PITG_21667 | Pi conserved hypothetical protein (1008 nt)              | 1   | 0   | 0 |
| PITG_21668 | Pi F-box protein, putative (1142 nt)                     | 0   | 16  | 0 |
| PITG_21687 | Pi conserved hypothetical protein (533 nt)               | 0   | 16  | 0 |
| PITG_21688 | Pi conserved hypothetical protein (2520 nt)              | 2   | 9   | 0 |
| PITG_21699 | Pi conserved hypothetical protein (482 nt)               | 3   | 37  | 0 |
| PITG_21706 | Pi conserved hypothetical protein (1444 nt)              | 9   | 50  | 0 |
| PITG_21716 | Pi conserved hypothetical protein (534 nt)               | 0   | 15  | 0 |

|                                                                      |     |     |     |
|----------------------------------------------------------------------|-----|-----|-----|
| PITG_21718   Pi conserved hypothetical protein (599 nt)              | 0   | 15  | 0   |
| PITG_21720   Pi conserved hypothetical protein (1298 nt)             | 3   | 11  | 0   |
| PITG_21723   Pi ATP-binding Cassette (ABC) Superfamily (3223 nt)     | 0   | 27  | 0   |
| PITG_21724   Pi conserved hypothetical protein (2546 nt)             | 0   | 14  | 0   |
| PITG_21727   Pi conserved hypothetical protein (4364 nt)             | 4   | 34  | 0   |
| PITG_21737   Pi hypothetical protein (462 nt)                        | 117 | 4   | 449 |
| PITG_21759   Pi cytochrome P450, putative (2672 nt)                  | 1   | 23  | 1   |
| PITG_21762   Pi conserved hypothetical protein (1042 nt)             | 0   | 2   | 0   |
| PITG_21763   Pi conserved hypothetical protein (1462 nt)             | 1   | 5   | 0   |
| PITG_21764   Pi caltractin (690 nt)                                  | 4   | 7   | 0   |
| PITG_21765   Pi conserved hypothetical protein (1047 nt)             | 9   | 90  | 0   |
| PITG_21766   Pi conserved hypothetical protein (605 nt)              | 47  | 206 | 0   |
| PITG_21767   Pi similar to sea slug pheromone (795 nt)               | 0   | 39  | 0   |
| PITG_21773   Pi hypothetical protein (1354 nt)                       | 0   | 21  | 0   |
| PITG_21781   Pi conserved hypothetical protein (965 nt)              | 0   | 2   | 0   |
| PITG_21784   Pi conserved hypothetical protein (1308 nt)             | 0   | 21  | 0   |
| PITG_21794   Pi conserved hypothetical protein (683 nt)              | 2   | 1   | 0   |
| PITG_21802   Pi conserved hypothetical protein (3033 nt)             | 1   | 6   | 0   |
| PITG_21806   Pi fumarylacetoacetase (1812 nt)                        | 26  | 193 | 1   |
| PITG_21807   Pi conserved hypothetical protein (2911 nt)             | 2   | 25  | 0   |
| PITG_21811   Pi conserved hypothetical protein (378 nt)              | 0   | 0   | 0   |
| PITG_21816   Pi conserved hypothetical protein (1525 nt)             | 13  | 55  | 0   |
| PITG_21827   Pi Rab11 family GTPase, putative (730 nt)               | 12  | 15  | 8   |
| PITG_21828   Pi conserved hypothetical protein (836 nt)              | 3   | 11  | 0   |
| PITG_21829   Pi conserved hypothetical protein (786 nt)              | 35  | 50  | 0   |
| PITG_21841   Pi transmembrane protein, putative (587 nt)             | 11  | 11  | 0   |
| PITG_21842   Pi conserved hypothetical protein (859 nt)              | 11  | 9   | 0   |
| PITG_21848   Pi conserved hypothetical protein (413 nt)              | 16  | 8   | 0   |
| PITG_21851   Pi hypothetical protein (864 nt)                        | 39  | 312 | 0   |
| PITG_21852   Pi diphthamide biosynthesis protein, putative (1635 nt) | 1   | 11  | 0   |
| PITG_21853   Pi transmembrane protein, putative (1840 nt)            | 3   | 16  | 0   |
| PITG_21854   Pi cAMP protein kinase (1375 nt)                        | 0   | 1   | 0   |
| PITG_21872   Pi myosin-like protein (1703 nt)                        | 62  | 87  | 0   |
| PITG_21873   Pi conserved hypothetical protein (945 nt)              | 6   | 37  | 0   |
| PITG_21875   Pi conserved hypothetical protein (1070 nt)             | 0   | 11  | 0   |
| PITG_21876   Pi conserved hypothetical protein (991 nt)              | 0   | 0   | 0   |
| PITG_21877   Pi conserved hypothetical protein (665 nt)              | 1   | 23  | 0   |
| PITG_21879   Pi transmembrane protein Gpr7 (1715 nt)                 | 18  | 48  | 0   |
| PITG_21880   Pi conserved hypothetical protein (1177 nt)             | 23  | 55  | 0   |
| PITG_21886   Pi histidyl-tRNA synthetase (2747 nt)                   | 2   | 12  | 1   |
| PITG_21887   Pi Major Facilitator Superfamily (MFS) (1489 nt)        | 5   | 25  | 0   |
| PITG_21888   Pi hypothetical protein (942 nt)                        | 2   | 1   | 0   |
| PITG_21889   Pi conserved hypothetical protein (2801 nt)             | 1   | 11  | 0   |
| PITG_21894   Pi conserved hypothetical protein (630 nt)              | 0   | 30  | 0   |
| PITG_21908   Pi HECT E3 ubiquitin ligase, putative (1985 nt)         | 14  | 29  | 0   |
| PITG_21909   Pi conserved hypothetical protein (979 nt)              | 6   | 27  | 0   |
| PITG_21914   Pi conserved hypothetical protein (958 nt)              | 2   | 6   | 0   |

|            |                                                         |     |      |    |
|------------|---------------------------------------------------------|-----|------|----|
| PITG_21918 | Pi amino acid/auxin permease-like protein (561 nt)      | 3   | 37   | 0  |
| PITG_21923 | Pi conserved hypothetical protein (1163 nt)             | 0   | 0    | 0  |
| PITG_21926 | Pi conserved hypothetical protein (718 nt)              | 3   | 127  | 0  |
| PITG_21932 | Pi hypothetical protein (919 nt)                        | 99  | 89   | 0  |
| PITG_21937 | Pi conserved hypothetical protein (1908 nt)             | 0   | 0    | 0  |
| PITG_21939 | Pi conserved hypothetical protein (1147 nt)             | 6   | 13   | 0  |
| PITG_21940 | Pi cytochrome P450, putative (1575 nt)                  | 0   | 11   | 0  |
| PITG_21941 | Pi alpha-1,2 glucosyltransferase alg-10 (995 nt)        | 2   | 32   | 0  |
| PITG_21942 | Pi conserved hypothetical protein (532 nt)              | 1   | 20   | 0  |
| PITG_21944 | Pi conserved hypothetical protein (937 nt)              | 9   | 15   | 0  |
| PITG_21945 | Pi NmrA-like family protein, putative (1022 nt)         | 0   | 0    | 0  |
| PITG_21960 | Pi conserved hypothetical protein (777 nt)              | 10  | 39   | 0  |
| PITG_21961 | Pi conserved hypothetical protein (1683 nt)             | 2   | 2    | 0  |
| PITG_21962 | Pi alpha,alpha-trehalose-phosphate synthase [UDP-fori   | 2   | 24   | 0  |
| PITG_21963 | Pi Crinkler (CRN) family protein, pseudogene (1286 nt)  | 308 | 687  | 2  |
| PITG_21981 | Pi carbonic anhydrase, putative (857 nt)                | 0   | 15   | 0  |
| PITG_21983 | Pi hypothetical protein (2294 nt)                       | 41  | 7    | 0  |
| PITG_21987 | Pi protein phosphatase 2C, putative (735 nt)            | 135 | 60   | 0  |
| PITG_21988 | Pi conserved hypothetical protein (1305 nt)             | 18  | 2    | 0  |
| PITG_21993 | Pi conserved hypothetical protein (967 nt)              | 13  | 20   | 0  |
| PITG_21994 | Pi conserved hypothetical protein (901 nt)              | 13  | 18   | 0  |
| PITG_22000 | Pi conserved hypothetical protein (366 nt)              | 3   | 6    | 0  |
| PITG_22001 | Pi Major Facilitator Superfamily (MFS) (624 nt)         | 5   | 12   | 0  |
| PITG_22007 | Pi conserved hypothetical protein (436 nt)              | 84  | 143  | 0  |
| PITG_22016 | Pi conserved hypothetical protein (624 nt)              | 70  | 951  | 0  |
| PITG_22017 | Pi Crinkler (CRN) family protein (536 nt)               | 0   | 40   | 0  |
| PITG_22020 | Pi eukaryotic initiation factor 4E, putative (1651 nt)  | 11  | 61   | 3  |
| PITG_22021 | Pi HECT E3 ubiquitin ligase, putative (1995 nt)         | 3   | 10   | 0  |
| PITG_22022 | Pi cysteine protease family C01A, putative (1504 nt)    | 0   | 0    | 0  |
| PITG_22035 | Pi conserved hypothetical protein (1467 nt)             | 1   | 19   | 0  |
| PITG_22037 | Pi hypothetical protein (988 nt)                        | 4   | 1    | 0  |
| PITG_22038 | Pi conserved hypothetical protein (937 nt)              | 4   | 18   | 0  |
| PITG_22040 | Pi transmembrane protein, putative (556 nt)             | 6   | 24   | 0  |
| PITG_22047 | Pi E3 ubiquitin-protein ligase HERC, putative (1561 nt) | 0   | 1    | 0  |
| PITG_22053 | Pi NPP1-like protein (798 nt)                           | 5   | 6    | 1  |
| PITG_22056 | Pi conserved hypothetical protein (714 nt)              | 2   | 19   | 0  |
| PITG_22057 | Pi conserved hypothetical protein (1659 nt)             | 2   | 18   | 0  |
| PITG_22062 | Pi conserved hypothetical protein (874 nt)              | 239 | 100  | 0  |
| PITG_22064 | Pi conserved hypothetical protein (349 nt)              | 598 | 1831 | 22 |
| PITG_22065 | Pi conserved hypothetical protein (1121 nt)             | 262 | 694  | 8  |
| PITG_22069 | Pi arginase, putative (598 nt)                          | 12  | 34   | 0  |
| PITG_22075 | Pi conserved hypothetical protein (1121 nt)             | 0   | 17   | 0  |
| PITG_22076 | Pi conserved hypothetical protein (546 nt)              | 23  | 2    | 0  |
| PITG_22087 | Pi ATP-binding Cassette (ABC) Superfamily (4098 nt)     | 4   | 45   | 0  |
| PITG_22091 | Pi potential noncoding RNA (521 nt)                     | 0   | 0    | 0  |
| PITG_22094 | Pi conserved hypothetical protein (1454 nt)             | 0   | 11   | 0  |
| PITG_22095 | Pi beta-glucosidase, putative (1900 nt)                 | 0   | 6    | 0  |



|            |                                                          |     |     |    |
|------------|----------------------------------------------------------|-----|-----|----|
| PITG_22103 | Pi triosephosphate isomerase/glyceraldehyde-3-phosp      | 35  | 72  | 9  |
| PITG_22104 | Pi conserved hypothetical protein (482 nt)               | 2   | 0   | 38 |
| PITG_22105 | Pi conserved hypothetical protein (1578 nt)              | 25  | 63  | 0  |
| PITG_22108 | Pi conserved hypothetical protein (857 nt)               | 4   | 34  | 0  |
| PITG_22112 | Pi conserved hypothetical protein (1037 nt)              | 3   | 1   | 0  |
| PITG_22113 | Pi conserved hypothetical protein (1068 nt)              | 5   | 4   | 0  |
| PITG_22117 | Pi transglutaminase elicitor-like protein (1112 nt)      | 1   | 67  | 0  |
| PITG_22122 | Pi conserved hypothetical protein (1748 nt)              | 2   | 17  | 0  |
| PITG_22124 | Pi P-type ATPase (P-ATPase) Superfamily (3539 nt)        | 1   | 62  | 0  |
| PITG_22125 | Pi conserved hypothetical protein (519 nt)               | 0   | 16  | 0  |
| PITG_22126 | Pi conserved hypothetical protein (2049 nt)              | 3   | 26  | 0  |
| PITG_22127 | Pi conserved hypothetical protein (1097 nt)              | 4   | 18  | 0  |
| PITG_22129 | Pi conserved hypothetical protein (576 nt)               | 0   | 0   | 0  |
| PITG_22134 | Pi ATP-binding Cassette (ABC) Superfamily (1288 nt)      | 1   | 10  | 0  |
| PITG_22135 | Pi 60S ribosomal protein L10a-1 (895 nt)                 | 671 | 779 | 87 |
| PITG_22141 | Pi conserved hypothetical protein (1282 nt)              | 0   | 18  | 0  |
| PITG_22149 | Pi conserved hypothetical protein (1248 nt)              | 2   | 9   | 0  |
| PITG_22150 | Pi conserved hypothetical protein (976 nt)               | 0   | 0   | 0  |
| PITG_22157 | Pi Major Facilitator Superfamily (MFS) (1483 nt)         | 7   | 3   | 72 |
| PITG_22159 | Pi conserved hypothetical protein (1564 nt)              | 3   | 10  | 0  |
| PITG_22163 | Pi L-aminoadipate-semialdehyde dehydrogenase, putat      | 3   | 40  | 0  |
| PITG_22164 | Pi conserved hypothetical protein (502 nt)               | 5   | 14  | 0  |
| PITG_22165 | Pi conserved hypothetical protein (1306 nt)              | 70  | 84  | 0  |
| PITG_22191 | Pi conserved hypothetical protein (1022 nt)              | 3   | 11  | 0  |
| PITG_22198 | Pi conserved hypothetical protein (722 nt)               | 4   | 23  | 0  |
| PITG_22200 | Pi conserved hypothetical protein (955 nt)               | 112 | 110 | 3  |
| PITG_22203 | Pi conserved hypothetical protein (771 nt)               | 3   | 8   | 0  |
| PITG_22204 | Pi conserved hypothetical protein (829 nt)               | 2   | 17  | 0  |
| PITG_22238 | Pi conserved hypothetical protein (2150 nt)              | 0   | 24  | 0  |
| PITG_22241 | Pi conserved hypothetical protein (549 nt)               | 8   | 12  | 0  |
| PITG_22247 | Pi conserved hypothetical protein (2879 nt)              | 0   | 0   | 0  |
| PITG_22249 | Pi hypothetical protein (616 nt)                         | 6   | 39  | 2  |
| PITG_22253 | Pi hypothetical protein (633 nt)                         | 10  | 38  | 0  |
| PITG_22264 | Pi ribosomal protein S6 kinase alpha-5, putative (1950   | 33  | 85  | 0  |
| PITG_22267 | Pi conserved hypothetical protein (597 nt)               | 0   | 12  | 0  |
| PITG_22277 | Pi conserved hypothetical protein (1008 nt)              | 3   | 24  | 0  |
| PITG_22286 | Pi Crinkler (CRN) family protein, pseudogene (924 nt)    | 45  | 56  | 0  |
| PITG_22301 | Pi conserved hypothetical protein (1371 nt)              | 3   | 21  | 0  |
| PITG_22303 | Pi hypothetical protein (1440 nt)                        | 41  | 60  | 0  |
| PITG_22311 | Pi conserved hypothetical protein (2017 nt)              | 16  | 18  | 0  |
| PITG_22313 | Pi delta-1-pyrroline-5-carboxylate synthetase, putative  | 19  | 5   | 0  |
| PITG_22319 | Pi UDP-glucose 4-epimerase, putative (1287 nt)           | 52  | 65  | 0  |
| PITG_22323 | Pi ribosome biogenesis protein RLP24 (675 nt)            | 8   | 4   | 0  |
| PITG_22333 | Pi CTD small phosphatase-like protein, putative (957 nt) | 3   | 1   | 0  |
| PITG_22334 | Pi Amino Acid-Polyamine-Organocation (APC) Family (5     | 3   | 17  | 0  |
| PITG_22339 | Pi conserved hypothetical protein (937 nt)               | 2   | 28  | 0  |
| PITG_22340 | Pi conserved hypothetical protein (641 nt)               | 14  | 22  | 0  |

|            |                                                                                     |     |     |    |
|------------|-------------------------------------------------------------------------------------|-----|-----|----|
| PITG_22343 | Pi conserved hypothetical protein (921 nt)                                          | 4   | 8   | 4  |
| PITG_22350 | Pi hypothetical protein (288 nt)                                                    | 5   | 5   | 0  |
| PITG_22353 | Pi geranylgeranyl transferase type-1 subunit beta, puta                             | 6   | 37  | 0  |
| PITG_22354 | Pi hypothetical protein (586 nt)                                                    | 46  | 99  | 0  |
| PITG_22358 | Pi conserved hypothetical protein (1483 nt)                                         | 8   | 11  | 0  |
| PITG_22363 | Pi major Facilitator Superfamily (MFS)-like protein (448                            | 0   | 0   | 11 |
| PITG_22369 | Pi conserved hypothetical protein (2056 nt)                                         | 5   | 11  | 0  |
| PITG_22378 | Pi conserved hypothetical protein (1441 nt)                                         | 0   | 13  | 0  |
| PITG_22381 | Pi methylenetetrahydrofolate reductase, putative (184                               | 2   | 41  | 0  |
| PITG_22383 | Pi glycoside hydrolase, putative (1436 nt)                                          | 8   | 25  | 0  |
| PITG_22389 | Pi conserved hypothetical protein (1110 nt)                                         | 1   | 25  | 0  |
| PITG_22394 | Pi conserved hypothetical protein (1648 nt)                                         | 0   | 28  | 0  |
| PITG_22398 | Pi conserved hypothetical protein (596 nt)                                          | 28  | 40  | 0  |
| PITG_22404 | Pi conserved hypothetical protein (1419 nt)                                         | 6   | 25  | 0  |
| PITG_22406 | Pi conserved hypothetical protein (957 nt)                                          | 82  | 202 | 15 |
| PITG_22409 | Pi hypothetical protein (978 nt)                                                    | 18  | 40  | 0  |
| PITG_22413 | Pi hypothetical protein (1130 nt)                                                   | 18  | 4   | 0  |
| PITG_22414 | Pi conserved hypothetical protein (372 nt)                                          | 1   | 15  | 0  |
| PITG_22415 | Pi conserved hypothetical protein (482 nt)                                          | 11  | 9   | 0  |
| PITG_22416 | Pi conserved hypothetical protein (990 nt)                                          | 709 | 0   | 2  |
| PITG_22418 | Pi conserved hypothetical protein (481 nt)                                          | 7   | 29  | 0  |
| PITG_22419 | Pi hypothetical protein (461 nt)                                                    | 3   | 12  | 0  |
| PITG_22427 | Pi ubiquitin-specific protease, putative (777 nt)                                   | 3   | 16  | 0  |
| PITG_22428 | Pi conserved hypothetical protein (488 nt)                                          | 1   | 23  | 0  |
| PITG_22430 | Pi conserved hypothetical protein (673 nt)                                          | 6   | 21  | 0  |
| PITG_22431 | Pi conserved hypothetical protein (835 nt)                                          | 4   | 60  | 0  |
| PITG_22432 | Pi Zinc (Zn <sup>2+</sup> )-Iron (Fe <sup>2+</sup> ) Permease (ZIP) Family (981 nt) | 0   | 2   | 0  |
| PITG_22433 | Pi conserved hypothetical protein (1203 nt)                                         | 2   | 224 | 0  |
| PITG_22439 | Pi conserved hypothetical protein (330 nt)                                          | 14  | 49  | 0  |
| PITG_22450 | Pi conserved hypothetical protein (1316 nt)                                         | 6   | 52  | 0  |
| PITG_22453 | Pi conserved hypothetical protein (691 nt)                                          | 0   | 11  | 0  |
| PITG_22458 | Pi conserved hypothetical protein (451 nt)                                          | 0   | 9   | 0  |
| PITG_22459 | Pi HSF-type DNA-binding protein, putative (909 nt)                                  | 3   | 21  | 0  |
| PITG_22462 | Pi conserved hypothetical protein (337 nt)                                          | 12  | 64  | 9  |
| PITG_22468 | Pi conserved hypothetical protein (438 nt)                                          | 7   | 43  | 0  |
| PITG_22475 | Pi conserved hypothetical protein (956 nt)                                          | 1   | 13  | 46 |
| PITG_22477 | Pi conserved hypothetical protein (558 nt)                                          | 16  | 13  | 0  |
| PITG_22479 | Pi conserved hypothetical protein (512 nt)                                          | 0   | 1   | 0  |
| PITG_22486 | Pi conserved hypothetical protein (482 nt)                                          | 5   | 16  | 0  |
| PITG_22491 | Pi conserved hypothetical protein (687 nt)                                          | 3   | 27  | 0  |
| PITG_22505 | Pi conserved hypothetical protein (1198 nt)                                         | 1   | 13  | 0  |
| PITG_22508 | Pi conserved hypothetical protein (1300 nt)                                         | 1   | 14  | 0  |
| PITG_22510 | Pi conserved hypothetical protein (632 nt)                                          | 0   | 11  | 0  |
| PITG_22517 | Pi dynein heavy chain (1942 nt)                                                     | 1   | 0   | 0  |
| PITG_22522 | Pi conserved hypothetical protein (446 nt)                                          | 40  | 224 | 1  |
| PITG_22523 | Pi eukaryotic translation initiation factor 3 subunit A, p                          | 0   | 11  | 0  |
| PITG_22524 | Pi conserved hypothetical protein (1004 nt)                                         | 0   | 40  | 0  |

|                                                                                         |      |     |     |
|-----------------------------------------------------------------------------------------|------|-----|-----|
| PITG_22527   Pi conserved hypothetical protein (446 nt)                                 | 9    | 18  | 0   |
| PITG_22529   Pi conserved hypothetical protein (1086 nt)                                | 2    | 13  | 0   |
| PITG_22541   Pi 60S ribosomal export protein NMD3, putative (1203 nt)                   | 28   | 17  | 0   |
| PITG_22544   Pi conserved hypothetical protein (723 nt)                                 | 0    | 2   | 0   |
| PITG_22548   Pi hypothetical protein similar to phosphatidylinositol 3-kinase (1077 nt) | 0    | 18  | 0   |
| PITG_22549   Pi deoxyribose-phosphate aldolase 1 (860 nt)                               | 9    | 10  | 0   |
| PITG_22552   Pi hypothetical protein (1511 nt)                                          | 32   | 46  | 0   |
| PITG_22555   Pi conserved hypothetical protein (1343 nt)                                | 1    | 22  | 0   |
| PITG_22557   Pi amino acid/auxin permease-like protein (807 nt)                         | 6    | 25  | 0   |
| PITG_22562   Pi croquemort-like mating protein, putative (1555 nt)                      | 0    | 5   | 1   |
| PITG_22566   Pi conserved hypothetical protein (1366 nt)                                | 3    | 17  | 0   |
| PITG_22568   Pi nuclease, putative (1077 nt)                                            | 10   | 41  | 0   |
| PITG_22569   Pi geranylgeranyl transferase type-2 subunit beta (946 nt)                 | 5    | 13  | 0   |
| PITG_22572   Pi C-1-tetrahydrofolate synthase, putative (1111 nt)                       | 14   | 106 | 2   |
| PITG_22575   Pi Drug/Metabolite Transporter (DMT) Superfamily (1077 nt)                 | 3    | 17  | 0   |
| PITG_22577   Pi conserved hypothetical protein (357 nt)                                 | 23   | 23  | 0   |
| PITG_22585   Pi conserved hypothetical protein (980 nt)                                 | 8    | 3   | 0   |
| PITG_22587   Pi oxidoreductase, putative (487 nt)                                       | 5    | 20  | 0   |
| PITG_22590   Pi conserved hypothetical protein (436 nt)                                 | 1    | 21  | 0   |
| PITG_22598   Pi amino acid/auxin permease-like protein (282 nt)                         | 7    | 6   | 0   |
| PITG_22600   Pi conserved hypothetical protein (804 nt)                                 | 0    | 18  | 0   |
| PITG_22611   Pi protein recA (641 nt)                                                   | 3    | 19  | 0   |
| PITG_22616   Pi conserved hypothetical protein (1030 nt)                                | 0    | 21  | 0   |
| PITG_22618   Pi conserved hypothetical protein (656 nt)                                 | 8    | 13  | 0   |
| PITG_22624   Pi Major Facilitator Superfamily (MFS) (702 nt)                            | 28   | 207 | 0   |
| PITG_22625   Pi conserved hypothetical protein (982 nt)                                 | 6    | 30  | 0   |
| PITG_22626   Pi conserved hypothetical protein (808 nt)                                 | 0    | 22  | 0   |
| PITG_22628   Pi hypothetical protein (589 nt)                                           | 18   | 131 | 0   |
| PITG_22629   Pi conserved hypothetical protein (591 nt)                                 | 0    | 3   | 0   |
| PITG_22632   Pi polysaccharide lyase, putative (385 nt)                                 | 0    | 29  | 0   |
| PITG_22634   Pi conserved hypothetical protein (543 nt)                                 | 20   | 9   | 0   |
| PITG_22638   Pi conserved hypothetical protein (455 nt)                                 | 3    | 17  | 0   |
| PITG_22639   Pi conserved hypothetical protein (566 nt)                                 | 0    | 4   | 0   |
| PITG_22644   Pi conserved hypothetical protein (662 nt)                                 | 15   | 20  | 0   |
| PITG_22646   Pi conserved hypothetical protein (498 nt)                                 | 8    | 19  | 0   |
| PITG_22657   Pi elongation factor 1-alpha, putative (278 nt)                            | 151  | 567 | 158 |
| PITG_22658   Pi Annexin (Annexin) Family (594 nt)                                       | 21   | 663 | 28  |
| PITG_22662   Pi cyclin-dependent kinase, putative (1188 nt)                             | 5    | 13  | 0   |
| PITG_22666   Pi conserved hypothetical protein (654 nt)                                 | 23   | 83  | 1   |
| PITG_22667   Pi conserved hypothetical protein (1285 nt)                                | 0    | 0   | 0   |
| PITG_22668   Pi NPP1-like protein (1560 nt)                                             | 1    | 8   | 0   |
| PITG_22669   Pi NPP1-like protein, pseudogene (732 nt)                                  | 0    | 2   | 17  |
| PITG_22670   Pi PcF and SCR74-like cys-rich secreted peptide, putative (1344 nt)        | 1344 | 347 | 560 |
| PITG_22671   Pi protein kinase, putative, pseudogene (819 nt)                           | 4    | 29  | 0   |
| PITG_22672   Pi conserved hypothetical protein (3078 nt)                                | 3    | 9   | 0   |
| PITG_22675   Pi secreted RxLR effector peptide, putative (363 nt)                       | 0    | 0   | 1   |
| PITG_22676   Pi secreted RxLR effector peptide, putative (486 nt)                       | 25   | 4   | 0   |

|            |                                                               |     |      |    |
|------------|---------------------------------------------------------------|-----|------|----|
| PITG_22677 | Pi PcF and SCR74-like cys-rich secreted peptide, putativ      | 1   | 0    | 9  |
| PITG_22680 | Pi conserved hypothetical protein (318 nt)                    | 0   | 53   | 0  |
| PITG_22683 | Pi secreted RxLR effector peptide, putative (522 nt)          | 0   | 12   | 0  |
| PITG_22684 | Pi peptidyl-prolyl cis-trans isomerase, putative (1394 nt)    | 2   | 10   | 0  |
| PITG_22685 | Pi dihydroxy-acid dehydratase, putative (1869 nt)             | 29  | 62   | 2  |
| PITG_22686 | Pi protein kinase (8109 nt)                                   | 0   | 0    | 0  |
| PITG_22687 | Pi HECT E3 ubiquitin ligase, putative (2500 nt)               | 15  | 27   | 0  |
| PITG_22688 | Pi trans-aconitate 2-methyltransferase, putative (928 nt)     | 9   | 14   | 0  |
| PITG_22689 | Pi hypothetical protein (1677 nt)                             | 9   | 2    | 0  |
| PITG_22715 | Pi serine/threonine protein kinase (4687 nt)                  | 1   | 12   | 0  |
| PITG_22716 | Pi M96 mating-specific protein family (1613 nt)               | 5   | 21   | 0  |
| PITG_22717 | Pi elicitor-like protein (420 nt)                             | 9   | 10   | 0  |
| PITG_22718 | Pi conserved hypothetical protein (1518 nt)                   | 3   | 63   | 0  |
| PITG_22719 | Pi phosphatidylinositol kinase (PIK-G2) (4244 nt)             | 2   | 17   | 0  |
| PITG_22734 | Pi NPP1-like protein, 3' partial (567 nt)                     | 2   | 5    | 0  |
| PITG_22742 | Pi conserved hypothetical protein (459 nt)                    | 9   | 0    | 2  |
| PITG_22743 | Pi dihydrolipoyllysine-residue succinyltransferase complex    | 32  | 70   | 1  |
| PITG_22758 | Pi arabinofuranosidase (1062 nt)                              | 0   | 0    | 10 |
| PITG_22763 | Pi conserved oligomeric Golgi complex subunit, putative       | 3   | 12   | 0  |
| PITG_22764 | Pi cysteine synthase, putative (1625 nt)                      | 19  | 52   | 0  |
| PITG_22765 | Pi conserved hypothetical protein (937 nt)                    | 7   | 36   | 0  |
| PITG_22795 | Pi conserved hypothetical protein (1113 nt)                   | 0   | 0    | 0  |
| PITG_22802 | Pi secreted RxLR effector peptide, putative (225 nt)          | 15  | 0    | 0  |
| PITG_22810 | Pi conserved hypothetical protein (768 nt)                    | 19  | 20   | 0  |
| PITG_22816 | Pi secreted RxLR effector peptide, putative (246 nt)          | 1   | 11   | 3  |
| PITG_22817 | Pi conserved hypothetical protein (234 nt)                    | 0   | 0    | 0  |
| PITG_22823 | Pi expressed protein (507 nt)                                 | 0   | 22   | 0  |
| PITG_22827 | Pi Crinkler (CRN) family protein, pseudogene (304 nt)         | 28  | 17   | 0  |
| PITG_22828 | Pi secreted RxLR effector peptide, putative (408 nt)          | 6   | 20   | 0  |
| PITG_22830 | Pi Crinkler (CRN) family protein, pseudogene (498 nt)         | 74  | 123  | 0  |
| PITG_22831 | Pi Crinkler (CRN) family protein (1416 nt)                    | 3   | 9    | 0  |
| PITG_22835 | Pi Crinkler (CRN) family protein, pseudogene (2322 nt)        | 85  | 339  | 2  |
| PITG_22839 | Pi nuclear mitotic apparatus protein, putative (5941 nt)      | 1   | 22   | 0  |
| PITG_22840 | Pi peroxisomal (S)-2-hydroxy-acid oxidase, putative (12       | 1   | 26   | 0  |
| PITG_22846 | Pi elicitor-like protein (375 nt)                             | 0   | 0    | 0  |
| PITG_22848 | Pi Crinkler (CRN) family protein (1146 nt)                    | 444 | 1072 | 6  |
| PITG_22850 | Pi Crinkler (CRN) family protein, pseudogene (2401 nt)        | 263 | 370  | 0  |
| PITG_22851 | Pi conserved hypothetical protein (771 nt)                    | 0   | 13   | 0  |
| PITG_22856 | Pi Crinkler (CRN) family protein (2421 nt)                    | 12  | 22   | 0  |
| PITG_22857 | Pi DNA repair protein RAD5, SWI/SNF-related matrix-associated | 0   | 13   | 0  |
| PITG_22858 | Pi conserved hypothetical protein (1335 nt)                   | 2   | 12   | 0  |
| PITG_22859 | Pi conserved hypothetical protein (468 nt)                    | 1   | 14   | 0  |
| PITG_22860 | Pi Crinkler (CRN) family protein, pseudogene (237 nt)         | 76  | 146  | 0  |
| PITG_22861 | Pi conserved hypothetical protein (1655 nt)                   | 0   | 0    | 0  |
| PITG_22862 | Pi conserved hypothetical protein (762 nt)                    | 0   | 0    | 0  |
| PITG_22865 | Pi propionyl coenzyme A carboxylase (Pi-PCC1) (2295 nt)       | 10  | 58   | 0  |
| PITG_22870 | Pi avr2 secreted RxLR effector peptide, putative (351 nt)     | 1   | 0    | 3  |

|            |                                                            |     |      |     |
|------------|------------------------------------------------------------|-----|------|-----|
| PITG_22874 | Pi Crinkler (CRN) family protein, pseudogene (2555 nt)     | 0   | 17   | 0   |
| PITG_22878 | Pi zonadhesin-like protein (1343 nt)                       | 1   | 3    | 0   |
| PITG_22894 | Pi secreted RxLR effector peptide, putative (276 nt)       | 2   | 2    | 7   |
| PITG_22896 | Pi secreted RxLR effector peptide, putative (585 nt)       | 9   | 0    | 20  |
| PITG_22908 | Pi PcF and SCR74-like cys-rich secreted peptide, putativ   | 34  | 0    | 136 |
| PITG_22918 | Pi conserved hypothetical protein (1214 nt)                | 0   | 22   | 0   |
| PITG_22919 | Pi conserved hypothetical protein (674 nt)                 | 2   | 23   | 0   |
| PITG_22922 | Pi secreted RxLR effector peptide, putative (1467 nt)      | 11  | 1    | 0   |
| PITG_22924 | Pi conserved hypothetical protein (1410 nt)                | 2   | 14   | 0   |
| PITG_22927 | Pi hypothetical protein (834 nt)                           | 0   | 1    | 0   |
| PITG_22928 | Pi glutaryl-CoA dehydrogenase, putative (1897 nt)          | 51  | 67   | 0   |
| PITG_22931 | Pi conserved hypothetical protein (1266 nt)                | 5   | 0    | 0   |
| PITG_22933 | Pi secreted RxLR effector peptide, putative (483 nt)       | 42  | 33   | 1   |
| PITG_22939 | Pi Crinkler (CRN) family protein, pseudogene (1654 nt)     | 65  | 0    | 0   |
| PITG_22944 | Pi secreted peptide, putative, 3' partial (1327 nt)        | 0   | 0    | 0   |
| PITG_22946 | Pi acyl-protein thioesterase, putative (903 nt)            | 22  | 80   | 2   |
| PITG_22947 | Pi acyl-protein thioesterase, putative (817 nt)            | 1   | 0    | 0   |
| PITG_22951 | Pi similar to sea slug pheromone (261 nt)                  | 9   | 8    | 2   |
| PITG_22957 | Pi conserved hypothetical protein (1545 nt)                | 0   | 0    | 0   |
| PITG_22958 | Pi conserved hypothetical protein (1679 nt)                | 10  | 26   | 0   |
| PITG_22959 | Pi protein kinase, putative (1777 nt)                      | 53  | 727  | 0   |
| PITG_22961 | Pi conserved hypothetical protein (657 nt)                 | 5   | 6    | 1   |
| PITG_22982 | Pi conserved hypothetical protein (393 nt)                 | 1   | 11   | 0   |
| PITG_22989 | Pi mitogen-activated protein kinase kinase, putative (41   | 2   | 9    | 0   |
| PITG_22991 | Pi conserved hypothetical protein (1248 nt)                | 2   | 48   | 0   |
| PITG_22995 | Pi protease inhibitor Epi5 (267 nt)                        | 11  | 105  | 1   |
| PITG_22997 | Pi conserved hypothetical protein (957 nt)                 | 1   | 10   | 0   |
| PITG_23005 | Pi conserved hypothetical protein (630 nt)                 | 811 | 1654 | 59  |
| PITG_23007 | Pi histidine kinase (6042 nt)                              | 0   | 13   | 0   |
| PITG_23029 | Pi Crinkler (CRN) family protein, pseudogene (1794 nt)     | 53  | 24   | 0   |
| PITG_23034 | Pi Regulator of G protein signaling (2740 nt)              | 0   | 0    | 0   |
| PITG_23045 | Pi isoamyl acetate-hydrolyzing esterase, putative (735     | 6   | 0    | 0   |
| PITG_23048 | Pi secreted RxLR effector peptide, putative (483 nt)       | 47  | 20   | 0   |
| PITG_23049 | Pi cyst germination specific acidic repeat protein precu   | 0   | 39   | 0   |
| PITG_23058 | Pi conserved hypothetical protein (2172 nt)                | 0   | 0    | 0   |
| PITG_23063 | Pi Crinkler (CRN) family protein (585 nt)                  | 57  | 192  | 0   |
| PITG_23065 | Pi general transcription factor IIH subunit, putative (491 | 4   | 16   | 0   |
| PITG_23066 | Pi phosphatidylinositol 4-phosphate 5-kinase (PIP5K-D11    | 3   | 7    | 0   |
| PITG_23087 | Pi Crinkler (CRN) family protein (1296 nt)                 | 76  | 702  | 0   |
| PITG_23088 | Pi Crinkler (CRN) family protein (1302 nt)                 | 121 | 405  | 0   |
| PITG_23090 | Pi protein kinase, putative (2448 nt)                      | 8   | 73   | 0   |
| PITG_23093 | Pi NPP1-like protein, pseudogene (701 nt)                  | 1   | 0    | 2   |
| PITG_23109 | Pi protein kinase, putative (1847 nt)                      | 10  | 3    | 0   |
| PITG_23111 | Pi crinkler (CRN) family protein, putative (1296 nt)       | 361 | 1380 | 29  |
| PITG_23112 | Pi expressed protein (596 nt)                              | 174 | 39   | 0   |
| PITG_23113 | Pi GPN-loop GTPase 1 (1108 nt)                             | 3   | 12   | 0   |
| PITG_23128 | Pi katanin p80 subunit (2680 nt)                           | 5   | 18   | 0   |

|                                                                                        |     |      |    |
|----------------------------------------------------------------------------------------|-----|------|----|
| PITG_23134   Pi conserved hypothetical protein (390 nt)                                | 1   | 25   | 1  |
| PITG_23139   Pi conserved hypothetical protein (309 nt)                                | 0   | 13   | 0  |
| PITG_23141   Pi cyclin-dependent kinase, putative (1847 nt)                            | 3   | 5    | 0  |
| PITG_23142   Pi peptidylprolyl isomerase (2241 nt)                                     | 2   | 11   | 0  |
| PITG_23143   Pi protein kinase, putative (2392 nt)                                     | 5   | 76   | 0  |
| PITG_23144   Pi Crinkler (CRN) family protein, pseudogene (7122 nt)                    | 14  | 198  | 13 |
| PITG_23149   Pi conserved hypothetical protein (1170 nt)                               | 1   | 9    | 0  |
| PITG_23155   Pi Crinkler (CRN) family protein, pseudogene (1862 nt)                    | 21  | 195  | 0  |
| PITG_23158   Pi isocitrate dehydrogenase, putative (1269 nt)                           | 5   | 27   | 0  |
| PITG_23159   Pi HECT E3 ubiquitin ligase, putative (5214 nt)                           | 3   | 24   | 0  |
| PITG_23160   Pi histone deacetylase, putative (4814 nt)                                | 2   | 25   | 0  |
| PITG_23165   Pi Crinkler (CRN) family protein (1293 nt)                                | 212 | 435  | 0  |
| PITG_23170   Pi conserved hypothetical protein (660 nt)                                | 4   | 3    | 0  |
| PITG_23176   Pi 26S proteasome non-ATPase regulatory subunit, putative (1594 nt)       | 3   | 20   | 0  |
| PITG_23178   Pi kazal-type serine protease inhibitor, putative (1594 nt)               | 3   | 16   | 0  |
| PITG_23180   Pi Crinkler (CRN) family protein, pseudogene (594 nt)                     | 163 | 318  | 1  |
| PITG_23187   Pi conserved hypothetical protein (1458 nt)                               | 1   | 98   | 0  |
| PITG_23191   Pi conserved hypothetical protein (1333 nt)                               | 4   | 18   | 0  |
| PITG_23192   Pi small nuclear ribonucleoprotein F, putative (580 nt)                   | 67  | 83   | 0  |
| PITG_23197   Pi Crinkler (CRN) family protein, pseudogene (331 nt)                     | 0   | 22   | 0  |
| PITG_23198   Pi Crinkler (CRN) family protein, pseudogene (1143 nt)                    | 0   | 0    | 0  |
| PITG_23201   Pi conserved hypothetical protein (849 nt)                                | 0   | 30   | 0  |
| PITG_23205   Pi 4-nitrophenylphosphatase, putative (1508 nt)                           | 6   | 11   | 0  |
| PITG_23215   Pi secreted RxLR effector peptide, putative (486 nt)                      | 13  | 2    | 0  |
| PITG_23240   Pi conserved hypothetical protein (266 nt)                                | 4   | 11   | 0  |
| PITG_23270   Pi crinkler (CRN) family protein, pseudogene (1386 nt)                    | 6   | 0    | 0  |
| PITG_23272   Pi crinkler (CRN) family protein, gypsy-inserted pseudogene (1386 nt)     | 3   | 6    | 0  |
| PITG_23273   Pi Crinkler (CRN) family protein (2559 nt)                                | 24  | 67   | 0  |
| PITG_23274   Pi crinkler (CRN) family protein, 5' partial (1476 nt)                    | 22  | 164  | 0  |
| PITG_23277   Pi crinkler (CRN) domain, pseudogene (858 nt)                             | 0   | 17   | 0  |
| PITG_23281   Pi Crinkler (CRN) family protein, pseudogene (1825 nt)                    | 72  | 221  | 0  |
| PITG_23282   Pi Crinkler (CRN) family protein, pseudogene (4320 nt)                    | 78  | 160  | 0  |
| PITG_23284   Pi crinkler (CRN) domain, pseudogene (3069 nt)                            | 1   | 15   | 0  |
| PITG_23286   Pi crinkler (CRN) domain, pseudogene (2170 nt)                            | 2   | 10   | 0  |
| PITG_23287   Pi crinkler (CRN) domain, pseudogene (1182 nt)                            | 412 | 1772 | 9  |
| PITG_23289   Pi crinkler (CRN) domain, pseudogene (555 nt)                             | 136 | 344  | 0  |
| PITG_23304   Pi hypothetical protein (2835 nt)                                         | 5   | 17   | 0  |
| PITG_23305   Pi hypothetical protein (1044 nt)                                         | 1   | 88   | 0  |
| PITG_23307   Pi hypothetical cleavage-induced transcript lacking long 3' UTR (1044 nt) | 2   | 0    | 0  |
| PITG_23316   Pi cleavage induced predicted protein (1947 nt)                           | 0   | 0    | 0  |
| PITG_23320   Pi hypothetical cleavage induced protein (1848 nt)                        | 4   | 16   | 0  |
| PITG_23322   Pi hypothetical protein (1055 nt)                                         | 18  | 61   | 0  |

libraries that matched to the PITG genes of *P. infestans* database.

T3 - Rep2 T6 - Rep1 T6 - Rep2 Contig Length

|   |     |     |      |
|---|-----|-----|------|
| 0 | 0   | 0   | 151  |
| 0 | 7   | 1   | 95   |
| 0 | 31  | 4   | 600  |
| 0 | 4   | 2   | 128  |
| 0 | 55  | 60  | 1210 |
| 0 | 3   | 0   | 62   |
| 0 | 7   | 0   | 102  |
| 0 | 26  | 16  | 429  |
| 0 | 14  | 9   | 125  |
| 0 | 10  | 5   | 147  |
| 0 | 18  | 8   | 117  |
| 0 | 2   | 1   | 93   |
| 0 | 0   | 1   | 92   |
| 0 | 3   | 4   | 109  |
| 0 | 11  | 13  | 334  |
| 0 | 2   | 2   | 76   |
| 0 | 21  | 7   | 80   |
| 0 | 37  | 52  | 655  |
| 0 | 4   | 4   | 136  |
| 0 | 3   | 6   | 116  |
| 0 | 7   | 4   | 164  |
| 0 | 4   | 2   | 168  |
| 0 | 14  | 3   | 162  |
| 0 | 2   | 4   | 96   |
| 0 | 23  | 16  | 1737 |
| 0 | 14  | 4   | 82   |
| 0 | 10  | 2   | 78   |
| 0 | 5   | 2   | 147  |
| 0 | 10  | 7   | 163  |
| 0 | 10  | 7   | 155  |
| 0 | 22  | 22  | 493  |
| 0 | 44  | 2   | 95   |
| 0 | 300 | 253 | 195  |
| 0 | 23  | 5   | 68   |
| 0 | 333 | 130 | 359  |
| 0 | 12  | 9   | 108  |
| 0 | 3   | 5   | 137  |
| 0 | 10  | 6   | 133  |
| 0 | 8   | 4   | 119  |
| 0 | 11  | 6   | 246  |
| 0 | 3   | 2   | 109  |
| 0 | 4   | 2   | 87   |
| 0 | 17  | 11  | 145  |
| 0 | 128 | 200 | 1082 |
| 0 | 11  | 3   | 85   |

|     |     |     |     |
|-----|-----|-----|-----|
| 0   | 19  | 0   | 66  |
| 0   | 6   | 3   | 123 |
| 0   | 6   | 2   | 190 |
| 0   | 5   | 1   | 87  |
| 0   | 21  | 13  | 129 |
| 0   | 4   | 3   | 130 |
| 0   | 3   | 1   | 65  |
| 0   | 5   | 12  | 240 |
| 0   | 166 | 95  | 760 |
| 0   | 4   | 9   | 111 |
| 0   | 17  | 5   | 140 |
| 0   | 4   | 10  | 75  |
| 0   | 38  | 0   | 85  |
| 0   | 5   | 7   | 92  |
| 0   | 13  | 1   | 73  |
| 0   | 2   | 2   | 148 |
| 0   | 11  | 4   | 242 |
| 0   | 6   | 3   | 152 |
| 0   | 11  | 6   | 137 |
| 0   | 59  | 52  | 462 |
| 0   | 4   | 2   | 165 |
| 0   | 211 | 105 | 616 |
| 0   | 221 | 153 | 442 |
| 0   | 35  | 18  | 134 |
| 0   | 3   | 0   | 387 |
| 0   | 17  | 34  | 727 |
| 0   | 14  | 3   | 119 |
| 0   | 0   | 0   | 304 |
| 0   | 5   | 5   | 134 |
| 0   | 9   | 15  | 184 |
| 0   | 9   | 6   | 207 |
| 0   | 8   | 1   | 198 |
| 0   | 6   | 9   | 183 |
| 0   | 9   | 10  | 107 |
| 0   | 8   | 3   | 94  |
| 0   | 5   | 1   | 102 |
| 0   | 20  | 29  | 889 |
| 0   | 3   | 7   | 140 |
| 0   | 1   | 1   | 113 |
| 0   | 33  | 149 | 548 |
| 0   | 1   | 3   | 208 |
| 0   | 57  | 31  | 365 |
| 0   | 4   | 6   | 181 |
| 0   | 30  | 11  | 508 |
| 194 | 92  | 126 | 398 |
| 0   | 29  | 8   | 123 |
| 0   | 8   | 4   | 114 |



|   |     |     |      |
|---|-----|-----|------|
| 0 | 2   | 3   | 99   |
| 0 | 4   | 14  | 185  |
| 0 | 10  | 3   | 89   |
| 0 | 68  | 34  | 304  |
| 0 | 21  | 8   | 233  |
| 0 | 24  | 10  | 170  |
| 0 | 47  | 50  | 875  |
| 0 | 4   | 4   | 73   |
| 0 | 88  | 85  | 416  |
| 0 | 12  | 4   | 108  |
| 0 | 4   | 4   | 141  |
| 0 | 25  | 0   | 132  |
| 0 | 5   | 5   | 129  |
| 0 | 13  | 7   | 143  |
| 0 | 14  | 10  | 383  |
| 0 | 700 | 760 | 150  |
| 0 | 2   | 2   | 88   |
| 0 | 24  | 20  | 287  |
| 0 | 19  | 20  | 767  |
| 0 | 3   | 0   | 87   |
| 0 | 9   | 4   | 100  |
| 0 | 3   | 1   | 94   |
| 0 | 3   | 3   | 241  |
| 0 | 16  | 37  | 593  |
| 0 | 11  | 2   | 108  |
| 0 | 4   | 10  | 88   |
| 0 | 5   | 3   | 99   |
| 0 | 3   | 5   | 152  |
| 0 | 43  | 58  | 1327 |
| 0 | 3   | 1   | 129  |
| 0 | 28  | 6   | 296  |
| 0 | 6   | 0   | 129  |
| 0 | 106 | 144 | 595  |
| 0 | 1   | 1   | 79   |
| 0 | 40  | 31  | 538  |
| 0 | 5   | 6   | 203  |
| 0 | 9   | 5   | 137  |
| 0 | 24  | 16  | 706  |
| 0 | 9   | 15  | 347  |
| 0 | 4   | 2   | 235  |
| 0 | 38  | 28  | 686  |
| 0 | 38  | 7   | 281  |
| 0 | 8   | 2   | 116  |
| 0 | 45  | 19  | 409  |
| 0 | 20  | 11  | 239  |
| 0 | 46  | 58  | 823  |
| 0 | 8   | 3   | 97   |

|   |     |     |      |
|---|-----|-----|------|
| 0 | 12  | 6   | 183  |
| 0 | 4   | 1   | 104  |
| 0 | 4   | 1   | 130  |
| 0 | 13  | 7   | 208  |
| 0 | 3   | 1   | 100  |
| 0 | 4   | 4   | 150  |
| 0 | 23  | 30  | 603  |
| 0 | 12  | 4   | 72   |
| 0 | 2   | 1   | 90   |
| 0 | 9   | 6   | 114  |
| 0 | 4   | 4   | 98   |
| 0 | 176 | 135 | 474  |
| 0 | 22  | 16  | 390  |
| 0 | 20  | 5   | 151  |
| 0 | 3   | 3   | 160  |
| 0 | 0   | 0   | 226  |
| 0 | 3   | 1   | 85   |
| 0 | 0   | 0   | 1104 |
| 0 | 5   | 4   | 213  |
| 0 | 21  | 10  | 339  |
| 0 | 4   | 6   | 169  |
| 0 | 14  | 3   | 108  |
| 0 | 9   | 1   | 155  |
| 0 | 16  | 4   | 74   |
| 0 | 12  | 1   | 79   |
| 0 | 6   | 6   | 140  |
| 0 | 17  | 15  | 367  |
| 0 | 8   | 7   | 388  |
| 0 | 556 | 525 | 164  |
| 0 | 27  | 16  | 212  |
| 0 | 13  | 1   | 89   |
| 0 | 74  | 41  | 1175 |
| 0 | 27  | 25  | 162  |
| 0 | 1   | 1   | 101  |
| 0 | 3   | 1   | 205  |
| 0 | 24  | 36  | 1066 |
| 0 | 23  | 23  | 351  |
| 0 | 5   | 1   | 130  |
| 0 | 9   | 0   | 139  |
| 0 | 4   | 2   | 82   |
| 0 | 5   | 5   | 156  |
| 0 | 4   | 3   | 126  |
| 0 | 7   | 3   | 64   |
| 0 | 18  | 4   | 86   |
| 0 | 1   | 2   | 142  |
| 0 | 2   | 2   | 136  |
| 0 | 17  | 45  | 228  |

|   |     |    |     |
|---|-----|----|-----|
| 0 | 7   | 2  | 89  |
| 0 | 11  | 13 | 246 |
| 0 | 0   | 3  | 63  |
| 0 | 25  | 41 | 82  |
| 0 | 6   | 4  | 124 |
| 0 | 1   | 2  | 112 |
| 0 | 9   | 6  | 181 |
| 0 | 9   | 3  | 86  |
| 0 | 26  | 13 | 196 |
| 0 | 4   | 1  | 143 |
| 0 | 7   | 5  | 128 |
| 0 | 2   | 6  | 96  |
| 0 | 2   | 0  | 115 |
| 0 | 3   | 1  | 96  |
| 0 | 140 | 91 | 723 |
| 0 | 8   | 4  | 98  |
| 0 | 104 | 29 | 174 |
| 0 | 3   | 2  | 206 |
| 0 | 31  | 27 | 196 |
| 0 | 8   | 3  | 126 |
| 0 | 2   | 1  | 92  |
| 0 | 0   | 0  | 103 |
| 0 | 2   | 0  | 140 |
| 0 | 47  | 28 | 159 |
| 0 | 24  | 28 | 610 |
| 0 | 18  | 11 | 418 |
| 0 | 1   | 0  | 84  |
| 0 | 12  | 5  | 200 |
| 0 | 12  | 7  | 266 |
| 0 | 4   | 0  | 61  |
| 0 | 0   | 0  | 113 |
| 0 | 10  | 5  | 172 |
| 0 | 12  | 9  | 161 |
| 0 | 7   | 2  | 112 |
| 0 | 20  | 0  | 60  |
| 0 | 3   | 2  | 89  |
| 0 | 60  | 18 | 240 |
| 0 | 1   | 0  | 120 |
| 0 | 19  | 4  | 61  |
| 0 | 5   | 2  | 91  |
| 0 | 28  | 5  | 156 |
| 0 | 2   | 27 | 228 |
| 0 | 2   | 1  | 92  |
| 0 | 10  | 8  | 237 |
| 0 | 7   | 4  | 194 |
| 0 | 5   | 0  | 119 |
| 0 | 1   | 2  | 196 |

|   |     |     |     |
|---|-----|-----|-----|
| 0 | 11  | 5   | 119 |
| 0 | 5   | 0   | 108 |
| 0 | 1   | 1   | 113 |
| 0 | 19  | 30  | 778 |
| 0 | 22  | 12  | 312 |
| 0 | 1   | 1   | 174 |
| 0 | 10  | 3   | 58  |
| 0 | 96  | 68  | 487 |
| 0 | 34  | 29  | 202 |
| 0 | 8   | 20  | 326 |
| 0 | 3   | 1   | 91  |
| 0 | 0   | 3   | 107 |
| 0 | 10  | 26  | 269 |
| 0 | 17  | 13  | 381 |
| 0 | 38  | 11  | 281 |
| 0 | 7   | 2   | 187 |
| 0 | 11  | 7   | 339 |
| 0 | 7   | 2   | 108 |
| 0 | 12  | 16  | 228 |
| 0 | 3   | 4   | 125 |
| 0 | 5   | 3   | 199 |
| 0 | 8   | 7   | 184 |
| 0 | 0   | 0   | 91  |
| 0 | 11  | 1   | 135 |
| 0 | 3   | 8   | 168 |
| 0 | 8   | 3   | 60  |
| 0 | 4   | 3   | 121 |
| 0 | 0   | 3   | 151 |
| 0 | 33  | 13  | 229 |
| 0 | 1   | 3   | 123 |
| 0 | 9   | 6   | 147 |
| 0 | 1   | 2   | 127 |
| 0 | 55  | 53  | 655 |
| 0 | 3   | 4   | 98  |
| 0 | 21  | 16  | 203 |
| 0 | 3   | 1   | 110 |
| 0 | 6   | 2   | 150 |
| 0 | 12  | 16  | 240 |
| 0 | 866 | 931 | 207 |
| 0 | 10  | 4   | 125 |
| 0 | 41  | 7   | 94  |
| 0 | 8   | 11  | 102 |
| 0 | 22  | 13  | 214 |
| 0 | 6   | 1   | 112 |
| 0 | 19  | 17  | 534 |
| 0 | 1   | 6   | 99  |
| 0 | 3   | 7   | 266 |

|    |     |     |     |
|----|-----|-----|-----|
| 0  | 10  | 4   | 202 |
| 0  | 47  | 59  | 571 |
| 0  | 17  | 10  | 137 |
| 0  | 23  | 40  | 268 |
| 0  | 19  | 9   | 235 |
| 0  | 36  | 42  | 346 |
| 0  | 6   | 3   | 130 |
| 0  | 29  | 36  | 521 |
| 0  | 4   | 2   | 111 |
| 0  | 11  | 2   | 81  |
| 0  | 0   | 3   | 132 |
| 0  | 3   | 1   | 205 |
| 14 | 22  | 111 | 463 |
| 0  | 26  | 15  | 322 |
| 0  | 0   | 0   | 114 |
| 0  | 16  | 4   | 108 |
| 0  | 8   | 4   | 108 |
| 0  | 21  | 4   | 83  |
| 0  | 32  | 8   | 196 |
| 0  | 11  | 10  | 200 |
| 0  | 31  | 11  | 185 |
| 0  | 20  | 4   | 218 |
| 0  | 137 | 136 | 470 |
| 0  | 35  | 20  | 110 |
| 0  | 20  | 17  | 268 |
| 0  | 87  | 121 | 552 |
| 0  | 17  | 17  | 311 |
| 0  | 4   | 4   | 206 |
| 0  | 6   | 2   | 89  |
| 0  | 2   | 3   | 113 |
| 0  | 5   | 4   | 160 |
| 0  | 6   | 1   | 97  |
| 0  | 7   | 4   | 71  |
| 0  | 23  | 27  | 715 |
| 0  | 4   | 0   | 94  |
| 0  | 316 | 241 | 172 |
| 0  | 14  | 11  | 475 |
| 0  | 6   | 4   | 121 |
| 0  | 12  | 7   | 118 |
| 0  | 2   | 2   | 67  |
| 0  | 75  | 56  | 483 |
| 0  | 1   | 0   | 119 |
| 0  | 16  | 2   | 102 |
| 0  | 109 | 152 | 526 |
| 0  | 46  | 28  | 321 |
| 0  | 9   | 1   | 120 |
| 0  | 37  | 11  | 362 |

|   |    |     |     |
|---|----|-----|-----|
| 0 | 80 | 264 | 531 |
| 0 | 3  | 2   | 285 |
| 0 | 2  | 1   | 97  |
| 0 | 3  | 0   | 121 |
| 0 | 47 | 30  | 248 |
| 0 | 10 | 5   | 184 |
| 0 | 8  | 16  | 383 |
| 0 | 6  | 19  | 283 |
| 0 | 0  | 0   | 101 |
| 0 | 52 | 20  | 302 |
| 0 | 28 | 34  | 289 |
| 0 | 5  | 0   | 120 |
| 0 | 0  | 3   | 61  |
| 0 | 2  | 3   | 99  |
| 0 | 1  | 1   | 150 |
| 0 | 13 | 6   | 192 |
| 0 | 14 | 4   | 90  |
| 0 | 18 | 9   | 241 |
| 0 | 7  | 8   | 122 |
| 0 | 6  | 2   | 149 |
| 0 | 17 | 17  | 251 |
| 0 | 6  | 13  | 219 |
| 0 | 9  | 2   | 102 |
| 0 | 4  | 4   | 125 |
| 0 | 31 | 7   | 105 |
| 0 | 5  | 1   | 86  |
| 0 | 9  | 16  | 219 |
| 0 | 8  | 1   | 78  |
| 0 | 18 | 3   | 148 |
| 0 | 14 | 5   | 303 |
| 0 | 7  | 5   | 251 |
| 0 | 26 | 30  | 646 |
| 0 | 2  | 9   | 122 |
| 0 | 18 | 10  | 150 |
| 0 | 31 | 38  | 603 |
| 0 | 47 | 18  | 418 |
| 0 | 5  | 12  | 520 |
| 0 | 13 | 7   | 139 |
| 0 | 3  | 4   | 152 |
| 0 | 66 | 85  | 348 |
| 0 | 59 | 48  | 224 |
| 0 | 6  | 9   | 207 |
| 0 | 7  | 10  | 100 |
| 0 | 0  | 1   | 106 |
| 0 | 34 | 82  | 132 |
| 0 | 51 | 63  | 847 |
| 0 | 10 | 4   | 70  |

|   |     |     |     |
|---|-----|-----|-----|
| 0 | 5   | 8   | 218 |
| 0 | 25  | 16  | 637 |
| 0 | 23  | 1   | 81  |
| 0 | 63  | 19  | 244 |
| 0 | 9   | 3   | 306 |
| 0 | 13  | 3   | 162 |
| 0 | 20  | 4   | 264 |
| 0 | 1   | 4   | 92  |
| 0 | 938 | 578 | 217 |
| 0 | 19  | 34  | 928 |
| 0 | 97  | 129 | 872 |
| 0 | 1   | 2   | 84  |
| 0 | 2   | 1   | 92  |
| 0 | 13  | 4   | 140 |
| 0 | 15  | 0   | 60  |
| 0 | 6   | 0   | 104 |
| 0 | 9   | 10  | 162 |
| 0 | 3   | 5   | 110 |
| 0 | 8   | 5   | 151 |
| 0 | 3   | 4   | 143 |
| 0 | 7   | 6   | 302 |
| 0 | 31  | 8   | 135 |
| 0 | 14  | 14  | 282 |
| 0 | 8   | 3   | 186 |
| 0 | 1   | 0   | 136 |
| 0 | 7   | 4   | 82  |
| 0 | 3   | 2   | 96  |
| 0 | 13  | 18  | 331 |
| 0 | 6   | 6   | 129 |
| 0 | 12  | 8   | 239 |
| 0 | 11  | 2   | 69  |
| 0 | 24  | 24  | 179 |
| 0 | 23  | 1   | 114 |
| 0 | 2   | 0   | 80  |
| 0 | 12  | 1   | 78  |
| 0 | 78  | 55  | 526 |
| 0 | 7   | 4   | 98  |
| 0 | 31  | 12  | 517 |
| 0 | 14  | 6   | 205 |
| 0 | 33  | 28  | 219 |
| 0 | 23  | 28  | 282 |
| 0 | 16  | 4   | 348 |
| 0 | 10  | 10  | 129 |
| 0 | 5   | 2   | 89  |
| 0 | 4   | 2   | 215 |
| 0 | 37  | 28  | 363 |
| 0 | 17  | 35  | 998 |

|   |     |     |      |
|---|-----|-----|------|
| 0 | 8   | 8   | 95   |
| 0 | 3   | 9   | 155  |
| 0 | 49  | 32  | 232  |
| 0 | 17  | 9   | 134  |
| 0 | 11  | 5   | 152  |
| 0 | 130 | 136 | 599  |
| 0 | 9   | 5   | 212  |
| 0 | 0   | 0   | 119  |
| 0 | 97  | 44  | 142  |
| 0 | 106 | 130 | 216  |
| 0 | 1   | 2   | 131  |
| 0 | 26  | 13  | 130  |
| 0 | 5   | 5   | 337  |
| 0 | 7   | 5   | 92   |
| 0 | 151 | 108 | 154  |
| 0 | 3   | 1   | 96   |
| 0 | 2   | 2   | 122  |
| 0 | 13  | 9   | 213  |
| 0 | 12  | 11  | 171  |
| 0 | 0   | 0   | 110  |
| 0 | 7   | 2   | 136  |
| 0 | 15  | 8   | 233  |
| 0 | 4   | 4   | 123  |
| 0 | 25  | 13  | 926  |
| 0 | 3   | 2   | 196  |
| 0 | 38  | 20  | 384  |
| 0 | 10  | 5   | 130  |
| 0 | 1   | 5   | 95   |
| 0 | 0   | 2   | 110  |
| 0 | 3   | 6   | 147  |
| 0 | 25  | 20  | 259  |
| 0 | 4   | 8   | 136  |
| 0 | 14  | 14  | 150  |
| 0 | 1   | 2   | 171  |
| 0 | 2   | 0   | 68   |
| 0 | 10  | 4   | 731  |
| 0 | 0   | 1   | 103  |
| 0 | 0   | 1   | 1082 |
| 0 | 3   | 2   | 162  |
| 0 | 8   | 6   | 135  |
| 0 | 53  | 59  | 1492 |
| 0 | 20  | 32  | 647  |
| 0 | 0   | 0   | 73   |
| 0 | 10  | 12  | 167  |
| 0 | 1   | 3   | 62   |
| 0 | 16  | 4   | 72   |
| 0 | 7   | 4   | 172  |



|   |     |     |      |
|---|-----|-----|------|
| 0 | 3   | 2   | 441  |
| 0 | 13  | 18  | 435  |
| 0 | 0   | 0   | 76   |
| 0 | 17  | 9   | 113  |
| 0 | 2   | 0   | 74   |
| 0 | 10  | 8   | 156  |
| 0 | 11  | 1   | 269  |
| 0 | 7   | 2   | 95   |
| 0 | 53  | 36  | 421  |
| 0 | 19  | 0   | 104  |
| 0 | 26  | 59  | 1628 |
| 0 | 37  | 55  | 868  |
| 0 | 5   | 18  | 170  |
| 0 | 23  | 13  | 113  |
| 0 | 43  | 27  | 101  |
| 0 | 9   | 4   | 88   |
| 0 | 5   | 2   | 100  |
| 0 | 3   | 1   | 99   |
| 0 | 62  | 40  | 384  |
| 0 | 160 | 133 | 912  |
| 0 | 1   | 0   | 88   |
| 0 | 2   | 1   | 102  |
| 0 | 1   | 2   | 184  |
| 0 | 175 | 61  | 96   |
| 0 | 6   | 10  | 97   |
| 0 | 51  | 36  | 87   |
| 0 | 0   | 3   | 102  |
| 0 | 1   | 8   | 73   |
| 0 | 28  | 11  | 211  |
| 0 | 0   | 0   | 255  |
| 0 | 13  | 4   | 320  |
| 0 | 22  | 6   | 131  |
| 0 | 35  | 13  | 239  |
| 0 | 22  | 53  | 367  |
| 0 | 11  | 5   | 288  |
| 0 | 7   | 4   | 149  |
| 0 | 9   | 1   | 125  |
| 0 | 31  | 14  | 140  |
| 0 | 24  | 16  | 224  |
| 0 | 46  | 6   | 86   |
| 0 | 46  | 22  | 184  |
| 0 | 6   | 5   | 132  |
| 0 | 10  | 3   | 60   |
| 0 | 9   | 2   | 210  |
| 0 | 36  | 20  | 312  |
| 0 | 3   | 11  | 116  |
| 0 | 27  | 27  | 536  |

|   |     |     |      |
|---|-----|-----|------|
| 0 | 16  | 3   | 78   |
| 0 | 2   | 3   | 78   |
| 0 | 53  | 38  | 175  |
| 0 | 5   | 4   | 120  |
| 0 | 8   | 8   | 79   |
| 0 | 217 | 301 | 192  |
| 0 | 4   | 8   | 146  |
| 0 | 20  | 7   | 169  |
| 0 | 84  | 40  | 354  |
| 0 | 33  | 14  | 302  |
| 0 | 8   | 4   | 112  |
| 0 | 19  | 3   | 220  |
| 0 | 28  | 27  | 195  |
| 0 | 3   | 0   | 130  |
| 0 | 17  | 6   | 109  |
| 0 | 24  | 6   | 65   |
| 0 | 11  | 24  | 557  |
| 0 | 186 | 257 | 247  |
| 0 | 6   | 1   | 88   |
| 0 | 39  | 46  | 481  |
| 0 | 1   | 0   | 64   |
| 0 | 60  | 29  | 388  |
| 0 | 9   | 3   | 62   |
| 0 | 40  | 89  | 1785 |
| 0 | 11  | 4   | 1169 |
| 0 | 12  | 0   | 64   |
| 0 | 36  | 55  | 617  |
| 0 | 10  | 15  | 369  |
| 0 | 9   | 2   | 132  |
| 0 | 3   | 3   | 82   |
| 0 | 37  | 28  | 180  |
| 0 | 23  | 15  | 168  |
| 0 | 1   | 4   | 107  |
| 0 | 13  | 9   | 184  |
| 0 | 400 | 338 | 150  |
| 0 | 19  | 8   | 213  |
| 0 | 28  | 15  | 276  |
| 0 | 2   | 0   | 154  |
| 0 | 25  | 8   | 274  |
| 0 | 5   | 5   | 88   |
| 0 | 7   | 9   | 157  |
| 0 | 8   | 8   | 203  |
| 0 | 17  | 27  | 151  |
| 0 | 0   | 2   | 100  |
| 0 | 9   | 5   | 133  |
| 0 | 78  | 66  | 452  |
| 0 | 6   | 4   | 250  |

|   |     |     |      |
|---|-----|-----|------|
| 0 | 33  | 10  | 216  |
| 0 | 18  | 24  | 222  |
| 0 | 18  | 10  | 127  |
| 0 | 4   | 2   | 75   |
| 0 | 11  | 0   | 199  |
| 0 | 9   | 9   | 554  |
| 0 | 15  | 9   | 260  |
| 0 | 17  | 20  | 370  |
| 0 | 13  | 15  | 309  |
| 0 | 33  | 3   | 138  |
| 0 | 16  | 16  | 288  |
| 0 | 2   | 1   | 96   |
| 0 | 16  | 5   | 582  |
| 0 | 14  | 7   | 255  |
| 0 | 611 | 141 | 479  |
| 0 | 6   | 6   | 99   |
| 0 | 8   | 6   | 132  |
| 0 | 2   | 3   | 98   |
| 0 | 6   | 2   | 95   |
| 0 | 12  | 7   | 255  |
| 0 | 51  | 8   | 194  |
| 0 | 7   | 1   | 185  |
| 0 | 269 | 110 | 506  |
| 0 | 4   | 3   | 114  |
| 0 | 54  | 23  | 579  |
| 0 | 8   | 5   | 97   |
| 0 | 3   | 0   | 112  |
| 0 | 367 | 179 | 448  |
| 0 | 1   | 1   | 110  |
| 0 | 9   | 4   | 331  |
| 0 | 3   | 1   | 320  |
| 0 | 4   | 3   | 108  |
| 0 | 0   | 2   | 81   |
| 0 | 11  | 5   | 94   |
| 0 | 4   | 4   | 121  |
| 0 | 20  | 27  | 432  |
| 0 | 6   | 3   | 159  |
| 0 | 29  | 12  | 333  |
| 0 | 7   | 11  | 201  |
| 0 | 15  | 12  | 135  |
| 0 | 368 | 479 | 122  |
| 0 | 393 | 375 | 152  |
| 0 | 29  | 22  | 1045 |
| 0 | 2   | 0   | 105  |
| 0 | 3   | 6   | 129  |
| 0 | 1   | 1   | 95   |
| 0 | 2   | 2   | 89   |

|   |     |     |     |
|---|-----|-----|-----|
| 0 | 18  | 6   | 231 |
| 0 | 5   | 4   | 145 |
| 0 | 1   | 0   | 76  |
| 0 | 2   | 0   | 84  |
| 0 | 3   | 1   | 138 |
| 0 | 0   | 1   | 90  |
| 0 | 36  | 16  | 147 |
| 0 | 79  | 25  | 192 |
| 0 | 8   | 4   | 124 |
| 0 | 9   | 32  | 376 |
| 0 | 20  | 3   | 108 |
| 0 | 114 | 47  | 596 |
| 0 | 3   | 2   | 199 |
| 0 | 14  | 5   | 352 |
| 0 | 14  | 14  | 170 |
| 0 | 5   | 5   | 145 |
| 0 | 31  | 25  | 380 |
| 0 | 74  | 232 | 844 |
| 0 | 15  | 9   | 283 |
| 0 | 1   | 0   | 161 |
| 0 | 1   | 0   | 144 |
| 0 | 1   | 0   | 97  |
| 0 | 8   | 3   | 119 |
| 0 | 86  | 160 | 295 |
| 0 | 2   | 0   | 120 |
| 0 | 3   | 0   | 90  |
| 0 | 8   | 1   | 75  |
| 0 | 32  | 40  | 597 |
| 0 | 25  | 17  | 281 |
| 0 | 8   | 4   | 92  |
| 0 | 36  | 14  | 126 |
| 0 | 62  | 66  | 922 |
| 0 | 104 | 77  | 390 |
| 0 | 6   | 2   | 131 |
| 0 | 13  | 23  | 262 |
| 0 | 3   | 6   | 130 |
| 0 | 6   | 2   | 143 |
| 0 | 7   | 5   | 122 |
| 0 | 31  | 14  | 249 |
| 0 | 20  | 10  | 190 |
| 0 | 9   | 4   | 138 |
| 0 | 6   | 7   | 175 |
| 0 | 12  | 4   | 144 |
| 0 | 10  | 1   | 104 |
| 0 | 6   | 8   | 147 |
| 0 | 2   | 1   | 76  |
| 0 | 0   | 0   | 61  |

|   |     |    |     |
|---|-----|----|-----|
| 0 | 79  | 56 | 510 |
| 0 | 179 | 50 | 319 |
| 0 | 4   | 3  | 165 |
| 0 | 15  | 9  | 180 |
| 0 | 31  | 8  | 205 |
| 0 | 7   | 8  | 185 |
| 0 | 7   | 6  | 163 |
| 0 | 23  | 8  | 296 |
| 0 | 101 | 14 | 214 |
| 0 | 11  | 32 | 597 |
| 0 | 7   | 9  | 168 |
| 0 | 3   | 3  | 83  |
| 0 | 11  | 0  | 101 |
| 0 | 17  | 11 | 226 |
| 0 | 29  | 20 | 284 |
| 0 | 52  | 22 | 240 |
| 0 | 27  | 0  | 61  |
| 0 | 26  | 21 | 370 |
| 0 | 11  | 0  | 239 |
| 0 | 19  | 24 | 300 |
| 0 | 7   | 0  | 102 |
| 0 | 9   | 7  | 131 |
| 0 | 1   | 1  | 132 |
| 0 | 15  | 5  | 236 |
| 0 | 2   | 3  | 97  |
| 0 | 21  | 4  | 137 |
| 0 | 0   | 0  | 209 |
| 0 | 16  | 5  | 93  |
| 0 | 8   | 12 | 314 |
| 0 | 25  | 13 | 575 |
| 0 | 27  | 12 | 241 |
| 0 | 6   | 3  | 118 |
| 0 | 2   | 6  | 116 |
| 0 | 23  | 33 | 765 |
| 0 | 7   | 7  | 321 |
| 0 | 10  | 5  | 130 |
| 0 | 59  | 64 | 412 |
| 0 | 33  | 4  | 153 |
| 0 | 0   | 0  | 481 |
| 0 | 0   | 0  | 83  |
| 0 | 0   | 1  | 152 |
| 0 | 2   | 5  | 73  |
| 0 | 3   | 0  | 105 |
| 0 | 7   | 7  | 139 |
| 0 | 5   | 8  | 173 |
| 0 | 50  | 2  | 78  |
| 0 | 21  | 2  | 69  |

|   |     |     |      |
|---|-----|-----|------|
| 0 | 35  | 2   | 85   |
| 0 | 4   | 1   | 127  |
| 0 | 13  | 7   | 138  |
| 0 | 3   | 1   | 129  |
| 0 | 20  | 10  | 219  |
| 0 | 73  | 63  | 1417 |
| 0 | 22  | 4   | 81   |
| 0 | 8   | 4   | 114  |
| 0 | 40  | 27  | 715  |
| 0 | 8   | 3   | 62   |
| 0 | 15  | 10  | 98   |
| 0 | 8   | 10  | 585  |
| 0 | 8   | 22  | 286  |
| 0 | 17  | 1   | 140  |
| 0 | 39  | 32  | 276  |
| 0 | 2   | 0   | 112  |
| 0 | 7   | 0   | 142  |
| 0 | 1   | 0   | 78   |
| 0 | 0   | 0   | 79   |
| 0 | 6   | 6   | 162  |
| 0 | 5   | 10  | 252  |
| 0 | 6   | 3   | 114  |
| 0 | 1   | 2   | 126  |
| 0 | 20  | 23  | 217  |
| 0 | 49  | 32  | 159  |
| 0 | 14  | 5   | 321  |
| 0 | 0   | 3   | 58   |
| 0 | 13  | 5   | 136  |
| 0 | 18  | 8   | 284  |
| 0 | 6   | 5   | 190  |
| 0 | 29  | 14  | 330  |
| 0 | 1   | 3   | 64   |
| 0 | 255 | 251 | 394  |
| 0 | 91  | 30  | 303  |
| 0 | 4   | 2   | 188  |
| 0 | 10  | 5   | 179  |
| 0 | 2   | 1   | 98   |
| 0 | 11  | 28  | 530  |
| 0 | 150 | 101 | 1857 |
| 0 | 7   | 5   | 122  |
| 0 | 23  | 28  | 188  |
| 0 | 4   | 4   | 123  |
| 0 | 113 | 136 | 336  |
| 0 | 16  | 5   | 173  |
| 0 | 38  | 60  | 556  |
| 0 | 8   | 2   | 213  |
| 0 | 368 | 113 | 273  |

|   |     |     |     |
|---|-----|-----|-----|
| 0 | 5   | 3   | 119 |
| 0 | 2   | 1   | 197 |
| 0 | 13  | 6   | 58  |
| 0 | 0   | 0   | 71  |
| 0 | 18  | 12  | 109 |
| 0 | 12  | 11  | 104 |
| 0 | 20  | 13  | 281 |
| 0 | 21  | 6   | 114 |
| 0 | 1   | 2   | 205 |
| 0 | 7   | 8   | 140 |
| 0 | 30  | 17  | 152 |
| 0 | 34  | 19  | 444 |
| 0 | 74  | 35  | 198 |
| 0 | 4   | 0   | 102 |
| 0 | 11  | 4   | 187 |
| 0 | 108 | 83  | 587 |
| 0 | 8   | 4   | 242 |
| 0 | 34  | 3   | 149 |
| 0 | 26  | 3   | 89  |
| 0 | 4   | 6   | 132 |
| 0 | 4   | 6   | 123 |
| 0 | 71  | 38  | 185 |
| 0 | 2   | 1   | 89  |
| 0 | 8   | 1   | 203 |
| 0 | 0   | 0   | 116 |
| 0 | 44  | 93  | 191 |
| 0 | 10  | 5   | 77  |
| 0 | 20  | 15  | 125 |
| 0 | 1   | 1   | 80  |
| 0 | 5   | 3   | 117 |
| 0 | 7   | 5   | 301 |
| 0 | 11  | 5   | 175 |
| 0 | 61  | 74  | 266 |
| 0 | 23  | 18  | 307 |
| 0 | 3   | 2   | 102 |
| 0 | 35  | 14  | 537 |
| 0 | 0   | 0   | 87  |
| 0 | 0   | 1   | 77  |
| 0 | 14  | 18  | 456 |
| 0 | 5   | 7   | 117 |
| 0 | 419 | 275 | 208 |
| 0 | 9   | 2   | 142 |
| 0 | 22  | 15  | 220 |
| 0 | 2   | 1   | 90  |
| 0 | 0   | 1   | 84  |
| 0 | 7   | 4   | 139 |
| 0 | 6   | 0   | 140 |

|   |     |    |      |
|---|-----|----|------|
| 0 | 11  | 8  | 211  |
| 0 | 4   | 5  | 133  |
| 0 | 3   | 7  | 212  |
| 0 | 2   | 0  | 72   |
| 0 | 42  | 32 | 134  |
| 0 | 16  | 3  | 98   |
| 0 | 2   | 0  | 79   |
| 0 | 41  | 21 | 292  |
| 0 | 22  | 7  | 269  |
| 0 | 9   | 6  | 380  |
| 0 | 76  | 68 | 352  |
| 0 | 42  | 23 | 534  |
| 0 | 33  | 4  | 489  |
| 0 | 1   | 3  | 156  |
| 0 | 2   | 1  | 94   |
| 0 | 8   | 12 | 124  |
| 0 | 9   | 6  | 95   |
| 0 | 1   | 2  | 90   |
| 0 | 4   | 4  | 149  |
| 0 | 8   | 4  | 209  |
| 0 | 17  | 14 | 573  |
| 0 | 6   | 4  | 177  |
| 0 | 7   | 0  | 158  |
| 0 | 66  | 90 | 1028 |
| 0 | 9   | 3  | 327  |
| 0 | 1   | 1  | 356  |
| 0 | 38  | 4  | 235  |
| 0 | 13  | 14 | 698  |
| 0 | 4   | 14 | 339  |
| 0 | 37  | 39 | 952  |
| 0 | 0   | 2  | 103  |
| 0 | 7   | 2  | 134  |
| 0 | 6   | 3  | 198  |
| 0 | 36  | 37 | 519  |
| 0 | 11  | 4  | 140  |
| 0 | 34  | 6  | 181  |
| 0 | 70  | 25 | 328  |
| 0 | 4   | 4  | 150  |
| 0 | 18  | 0  | 72   |
| 0 | 4   | 0  | 103  |
| 0 | 50  | 34 | 285  |
| 0 | 7   | 4  | 117  |
| 0 | 100 | 63 | 633  |
| 0 | 31  | 17 | 313  |
| 0 | 11  | 3  | 227  |
| 0 | 3   | 3  | 103  |
| 0 | 2   | 3  | 131  |



|   |     |     |     |
|---|-----|-----|-----|
| 0 | 5   | 1   | 111 |
| 0 | 4   | 3   | 108 |
| 0 | 13  | 8   | 400 |
| 0 | 1   | 0   | 84  |
| 0 | 1   | 0   | 101 |
| 0 | 34  | 2   | 79  |
| 0 | 4   | 16  | 166 |
| 0 | 35  | 13  | 417 |
| 0 | 46  | 20  | 284 |
| 0 | 8   | 6   | 121 |
| 0 | 0   | 0   | 92  |
| 0 | 85  | 32  | 475 |
| 0 | 10  | 8   | 128 |
| 0 | 1   | 2   | 95  |
| 0 | 19  | 7   | 93  |
| 0 | 33  | 45  | 519 |
| 0 | 64  | 85  | 214 |
| 0 | 10  | 15  | 214 |
| 0 | 7   | 0   | 104 |
| 0 | 3   | 2   | 129 |
| 0 | 8   | 12  | 237 |
| 0 | 6   | 2   | 112 |
| 0 | 2   | 0   | 129 |
| 0 | 9   | 3   | 117 |
| 0 | 8   | 7   | 112 |
| 0 | 4   | 2   | 99  |
| 0 | 2   | 0   | 71  |
| 0 | 1   | 1   | 89  |
| 0 | 10  | 9   | 287 |
| 0 | 2   | 2   | 108 |
| 0 | 13  | 17  | 344 |
| 0 | 17  | 19  | 356 |
| 0 | 9   | 3   | 197 |
| 0 | 11  | 10  | 173 |
| 0 | 25  | 10  | 158 |
| 0 | 8   | 1   | 117 |
| 0 | 0   | 2   | 89  |
| 0 | 7   | 9   | 111 |
| 0 | 10  | 6   | 122 |
| 0 | 34  | 59  | 189 |
| 0 | 177 | 119 | 201 |
| 0 | 8   | 0   | 202 |
| 0 | 47  | 41  | 496 |
| 0 | 21  | 23  | 504 |
| 0 | 48  | 22  | 328 |
| 0 | 6   | 8   | 145 |
| 0 | 31  | 23  | 359 |

|   |     |     |     |
|---|-----|-----|-----|
| 0 | 37  | 36  | 278 |
| 0 | 15  | 7   | 213 |
| 0 | 2   | 0   | 79  |
| 0 | 14  | 12  | 176 |
| 0 | 11  | 8   | 289 |
| 0 | 29  | 2   | 84  |
| 0 | 18  | 6   | 82  |
| 0 | 15  | 9   | 188 |
| 0 | 33  | 33  | 364 |
| 0 | 59  | 23  | 176 |
| 0 | 9   | 4   | 115 |
| 0 | 3   | 1   | 107 |
| 0 | 2   | 4   | 146 |
| 0 | 126 | 106 | 476 |
| 0 | 23  | 14  | 230 |
| 0 | 5   | 2   | 154 |
| 0 | 6   | 3   | 124 |
| 0 | 1   | 2   | 119 |
| 0 | 14  | 45  | 692 |
| 0 | 21  | 4   | 207 |
| 0 | 20  | 10  | 375 |
| 0 | 5   | 3   | 112 |
| 0 | 33  | 18  | 306 |
| 0 | 51  | 50  | 406 |
| 0 | 1   | 0   | 188 |
| 0 | 20  | 15  | 218 |
| 0 | 66  | 41  | 171 |
| 0 | 24  | 16  | 280 |
| 0 | 8   | 5   | 230 |
| 0 | 11  | 7   | 152 |
| 0 | 2   | 5   | 117 |
| 0 | 79  | 20  | 155 |
| 0 | 16  | 16  | 124 |
| 0 | 6   | 1   | 136 |
| 0 | 43  | 7   | 176 |
| 0 | 23  | 7   | 232 |
| 0 | 10  | 3   | 171 |
| 0 | 24  | 22  | 729 |
| 0 | 19  | 3   | 140 |
| 0 | 4   | 5   | 148 |
| 0 | 12  | 9   | 372 |
| 0 | 4   | 5   | 151 |
| 0 | 1   | 1   | 102 |
| 0 | 8   | 6   | 173 |
| 0 | 7   | 5   | 96  |
| 0 | 9   | 8   | 223 |
| 0 | 2   | 2   | 175 |

|    |    |    |      |
|----|----|----|------|
| 0  | 4  | 1  | 148  |
| 0  | 12 | 2  | 206  |
| 0  | 7  | 4  | 89   |
| 0  | 25 | 32 | 543  |
| 0  | 18 | 10 | 130  |
| 0  | 10 | 3  | 92   |
| 0  | 58 | 31 | 1505 |
| 0  | 3  | 1  | 162  |
| 0  | 1  | 2  | 106  |
| 0  | 6  | 6  | 211  |
| 0  | 5  | 13 | 199  |
| 0  | 9  | 5  | 197  |
| 0  | 0  | 6  | 235  |
| 0  | 10 | 7  | 268  |
| 14 | 11 | 17 | 234  |
| 0  | 13 | 12 | 242  |
| 0  | 2  | 3  | 127  |
| 0  | 3  | 3  | 120  |
| 0  | 20 | 11 | 524  |
| 0  | 6  | 4  | 186  |
| 0  | 11 | 6  | 298  |
| 0  | 3  | 4  | 142  |
| 0  | 15 | 8  | 216  |
| 0  | 33 | 6  | 131  |
| 0  | 0  | 1  | 87   |
| 0  | 8  | 1  | 125  |
| 0  | 6  | 2  | 110  |
| 0  | 48 | 12 | 345  |
| 0  | 33 | 24 | 399  |
| 0  | 3  | 6  | 114  |
| 0  | 4  | 5  | 141  |
| 0  | 21 | 8  | 330  |
| 0  | 6  | 4  | 173  |
| 0  | 11 | 30 | 224  |
| 0  | 4  | 12 | 107  |
| 0  | 0  | 2  | 67   |
| 0  | 18 | 7  | 118  |
| 0  | 39 | 6  | 106  |
| 0  | 3  | 1  | 113  |
| 0  | 9  | 2  | 219  |
| 0  | 17 | 2  | 87   |
| 0  | 3  | 4  | 171  |
| 0  | 4  | 1  | 114  |
| 0  | 0  | 0  | 92   |
| 0  | 12 | 6  | 112  |
| 0  | 8  | 6  | 228  |
| 0  | 15 | 14 | 228  |

|   |     |     |      |
|---|-----|-----|------|
| 0 | 7   | 3   | 200  |
| 0 | 6   | 4   | 123  |
| 0 | 6   | 3   | 148  |
| 0 | 8   | 8   | 134  |
| 0 | 1   | 0   | 75   |
| 0 | 15  | 11  | 286  |
| 0 | 139 | 120 | 254  |
| 0 | 81  | 6   | 130  |
| 0 | 361 | 184 | 164  |
| 0 | 128 | 108 | 1098 |
| 0 | 113 | 53  | 145  |
| 0 | 47  | 39  | 380  |
| 0 | 23  | 15  | 367  |
| 0 | 226 | 96  | 233  |
| 0 | 18  | 22  | 167  |
| 0 | 4   | 7   | 69   |
| 0 | 13  | 0   | 60   |
| 0 | 4   | 5   | 112  |
| 0 | 7   | 5   | 127  |
| 0 | 22  | 6   | 101  |
| 0 | 36  | 18  | 439  |
| 0 | 9   | 16  | 196  |
| 0 | 37  | 28  | 413  |
| 0 | 10  | 7   | 114  |
| 0 | 10  | 13  | 232  |
| 0 | 4   | 4   | 165  |
| 0 | 6   | 4   | 121  |
| 0 | 6   | 0   | 215  |
| 0 | 1   | 3   | 120  |
| 0 | 23  | 8   | 211  |
| 0 | 6   | 8   | 191  |
| 0 | 10  | 6   | 164  |
| 0 | 8   | 3   | 258  |
| 0 | 2   | 7   | 98   |
| 0 | 16  | 0   | 73   |
| 0 | 5   | 1   | 137  |
| 0 | 5   | 5   | 211  |
| 0 | 1   | 1   | 132  |
| 0 | 5   | 7   | 476  |
| 0 | 15  | 4   | 140  |
| 0 | 24  | 12  | 454  |
| 0 | 6   | 6   | 116  |
| 0 | 5   | 4   | 121  |
| 0 | 11  | 4   | 89   |
| 0 | 31  | 72  | 863  |
| 0 | 2   | 2   | 188  |
| 0 | 5   | 2   | 134  |

|   |    |    |     |
|---|----|----|-----|
| 0 | 14 | 14 | 249 |
| 0 | 4  | 1  | 136 |
| 0 | 10 | 10 | 138 |
| 0 | 32 | 8  | 304 |
| 0 | 18 | 33 | 379 |
| 0 | 16 | 6  | 96  |
| 0 | 4  | 6  | 103 |
| 0 | 16 | 10 | 407 |
| 0 | 86 | 48 | 623 |
| 0 | 20 | 1  | 74  |
| 0 | 2  | 1  | 102 |
| 0 | 4  | 4  | 653 |
| 0 | 4  | 2  | 104 |
| 0 | 18 | 7  | 276 |
| 0 | 26 | 16 | 465 |
| 0 | 14 | 7  | 225 |
| 0 | 4  | 3  | 99  |
| 0 | 20 | 38 | 335 |
| 0 | 12 | 5  | 221 |
| 0 | 13 | 5  | 229 |
| 0 | 24 | 1  | 73  |
| 0 | 25 | 20 | 248 |
| 0 | 3  | 1  | 128 |
| 0 | 1  | 0  | 103 |
| 0 | 88 | 76 | 459 |
| 0 | 9  | 2  | 209 |
| 0 | 89 | 34 | 157 |
| 0 | 15 | 0  | 70  |
| 0 | 39 | 70 | 521 |
| 0 | 15 | 8  | 323 |
| 0 | 1  | 0  | 151 |
| 0 | 4  | 2  | 170 |
| 0 | 4  | 5  | 257 |
| 0 | 3  | 1  | 311 |
| 0 | 5  | 3  | 155 |
| 0 | 5  | 14 | 336 |
| 0 | 1  | 2  | 135 |
| 0 | 16 | 4  | 81  |
| 0 | 6  | 7  | 147 |
| 0 | 8  | 7  | 179 |
| 0 | 9  | 3  | 541 |
| 0 | 7  | 5  | 67  |
| 0 | 27 | 14 | 296 |
| 0 | 6  | 9  | 130 |
| 0 | 14 | 1  | 63  |
| 0 | 9  | 10 | 188 |
| 0 | 30 | 15 | 120 |

|   |     |     |     |
|---|-----|-----|-----|
| 0 | 33  | 15  | 504 |
| 0 | 6   | 5   | 154 |
| 0 | 169 | 255 | 157 |
| 0 | 2   | 2   | 104 |
| 0 | 15  | 13  | 224 |
| 0 | 6   | 2   | 139 |
| 0 | 13  | 7   | 616 |
| 0 | 42  | 25  | 294 |
| 0 | 13  | 8   | 180 |
| 0 | 3   | 2   | 186 |
| 0 | 2   | 1   | 110 |
| 0 | 18  | 11  | 331 |
| 0 | 8   | 5   | 98  |
| 0 | 0   | 0   | 94  |
| 0 | 7   | 0   | 83  |
| 0 | 7   | 0   | 116 |
| 0 | 11  | 1   | 70  |
| 0 | 3   | 3   | 154 |
| 0 | 36  | 49  | 444 |
| 0 | 5   | 0   | 96  |
| 0 | 7   | 4   | 66  |
| 0 | 4   | 7   | 155 |
| 0 | 15  | 4   | 149 |
| 0 | 0   | 0   | 91  |
| 0 | 14  | 5   | 128 |
| 0 | 6   | 1   | 179 |
| 0 | 3   | 3   | 124 |
| 0 | 4   | 3   | 121 |
| 0 | 9   | 2   | 83  |
| 0 | 1   | 0   | 70  |
| 0 | 30  | 16  | 313 |
| 0 | 6   | 1   | 102 |
| 0 | 52  | 14  | 174 |
| 0 | 1   | 1   | 89  |
| 0 | 10  | 16  | 272 |
| 0 | 1   | 0   | 107 |
| 0 | 2   | 2   | 142 |
| 0 | 16  | 3   | 167 |
| 0 | 253 | 339 | 450 |
| 0 | 9   | 12  | 382 |
| 0 | 12  | 12  | 250 |
| 0 | 26  | 16  | 199 |
| 0 | 10  | 6   | 219 |
| 0 | 16  | 8   | 272 |
| 0 | 0   | 0   | 83  |
| 0 | 4   | 4   | 115 |
| 0 | 32  | 19  | 281 |

|     |     |     |     |
|-----|-----|-----|-----|
| 0   | 19  | 13  | 151 |
| 0   | 6   | 2   | 90  |
| 0   | 18  | 4   | 244 |
| 0   | 19  | 122 | 72  |
| 0   | 75  | 518 | 233 |
| 0   | 3   | 1   | 124 |
| 0   | 14  | 2   | 85  |
| 105 | 912 | 796 | 333 |
| 0   | 49  | 73  | 873 |
| 0   | 39  | 20  | 206 |
| 0   | 12  | 13  | 212 |
| 0   | 4   | 7   | 152 |
| 0   | 30  | 17  | 323 |
| 0   | 13  | 2   | 183 |
| 0   | 3   | 0   | 107 |
| 0   | 10  | 6   | 219 |
| 0   | 5   | 2   | 97  |
| 0   | 16  | 2   | 77  |
| 0   | 27  | 6   | 93  |
| 0   | 3   | 2   | 100 |
| 0   | 5   | 8   | 161 |
| 0   | 3   | 2   | 128 |
| 0   | 0   | 0   | 86  |
| 0   | 1   | 0   | 211 |
| 0   | 4   | 8   | 642 |
| 0   | 18  | 0   | 111 |
| 0   | 5   | 7   | 211 |
| 0   | 0   | 1   | 106 |
| 0   | 15  | 4   | 139 |
| 0   | 5   | 3   | 97  |
| 0   | 2   | 2   | 72  |
| 0   | 16  | 5   | 205 |
| 0   | 5   | 2   | 206 |
| 0   | 59  | 42  | 400 |
| 0   | 2   | 0   | 127 |
| 0   | 6   | 7   | 228 |
| 0   | 25  | 10  | 173 |
| 0   | 5   | 1   | 109 |
| 0   | 5   | 2   | 169 |
| 0   | 9   | 6   | 131 |
| 0   | 11  | 9   | 232 |
| 0   | 11  | 6   | 179 |
| 0   | 11  | 2   | 89  |
| 0   | 23  | 10  | 178 |
| 0   | 3   | 6   | 186 |
| 0   | 8   | 6   | 246 |
| 0   | 31  | 49  | 251 |

|    |     |     |      |
|----|-----|-----|------|
| 0  | 16  | 20  | 278  |
| 0  | 60  | 35  | 472  |
| 0  | 6   | 2   | 117  |
| 0  | 9   | 4   | 131  |
| 0  | 13  | 1   | 87   |
| 0  | 2   | 2   | 85   |
| 0  | 78  | 118 | 584  |
| 0  | 8   | 6   | 194  |
| 0  | 31  | 9   | 146  |
| 0  | 123 | 145 | 1381 |
| 0  | 4   | 3   | 131  |
| 0  | 20  | 17  | 139  |
| 0  | 42  | 36  | 359  |
| 0  | 65  | 57  | 249  |
| 0  | 3   | 1   | 98   |
| 0  | 7   | 2   | 125  |
| 0  | 21  | 18  | 338  |
| 0  | 5   | 7   | 168  |
| 0  | 1   | 2   | 115  |
| 0  | 26  | 6   | 262  |
| 0  | 55  | 47  | 784  |
| 0  | 113 | 143 | 316  |
| 0  | 8   | 3   | 142  |
| 0  | 10  | 2   | 118  |
| 0  | 25  | 13  | 230  |
| 0  | 6   | 4   | 149  |
| 0  | 331 | 245 | 135  |
| 0  | 6   | 21  | 175  |
| 0  | 11  | 2   | 122  |
| 0  | 38  | 48  | 1572 |
| 0  | 1   | 0   | 210  |
| 0  | 6   | 9   | 128  |
| 0  | 5   | 4   | 135  |
| 19 | 356 | 611 | 188  |
| 0  | 5   | 5   | 115  |
| 0  | 3   | 2   | 108  |
| 0  | 26  | 25  | 511  |
| 0  | 30  | 1   | 108  |
| 0  | 14  | 7   | 169  |
| 24 | 44  | 59  | 413  |
| 0  | 6   | 6   | 134  |
| 0  | 11  | 12  | 367  |
| 0  | 10  | 2   | 90   |
| 0  | 6   | 6   | 95   |
| 0  | 4   | 3   | 272  |
| 0  | 16  | 16  | 189  |
| 0  | 5   | 0   | 79   |



|   |    |    |     |
|---|----|----|-----|
| 0 | 13 | 8  | 106 |
| 0 | 13 | 14 | 154 |
| 0 | 2  | 5  | 134 |
| 0 | 8  | 11 | 159 |
| 0 | 7  | 6  | 115 |
| 0 | 2  | 1  | 102 |
| 0 | 16 | 21 | 664 |
| 0 | 11 | 3  | 121 |
| 0 | 20 | 9  | 120 |
| 0 | 12 | 5  | 139 |
| 0 | 14 | 4  | 104 |
| 0 | 2  | 4  | 386 |
| 0 | 9  | 16 | 306 |
| 0 | 2  | 1  | 95  |
| 0 | 8  | 1  | 160 |
| 0 | 35 | 10 | 92  |
| 0 | 36 | 8  | 75  |
| 0 | 11 | 6  | 832 |
| 0 | 5  | 0  | 72  |
| 0 | 14 | 32 | 650 |
| 0 | 18 | 12 | 158 |
| 0 | 10 | 11 | 243 |
| 0 | 17 | 32 | 307 |
| 0 | 26 | 6  | 116 |
| 0 | 15 | 6  | 648 |
| 0 | 9  | 10 | 197 |
| 0 | 14 | 3  | 108 |
| 0 | 12 | 5  | 209 |
| 0 | 3  | 0  | 129 |
| 0 | 6  | 2  | 133 |
| 0 | 11 | 7  | 101 |
| 0 | 6  | 4  | 111 |
| 0 | 6  | 5  | 192 |
| 0 | 21 | 30 | 755 |
| 0 | 3  | 4  | 111 |
| 0 | 0  | 0  | 378 |
| 0 | 0  | 0  | 137 |
| 0 | 15 | 1  | 117 |
| 0 | 4  | 6  | 226 |
| 0 | 5  | 7  | 139 |
| 0 | 11 | 8  | 67  |
| 0 | 4  | 9  | 109 |
| 0 | 11 | 1  | 86  |
| 0 | 2  | 2  | 218 |
| 0 | 2  | 0  | 128 |
| 0 | 2  | 0  | 70  |
| 0 | 3  | 3  | 163 |

|   |     |     |     |
|---|-----|-----|-----|
| 0 | 20  | 13  | 307 |
| 0 | 22  | 11  | 92  |
| 0 | 6   | 2   | 167 |
| 0 | 27  | 17  | 469 |
| 0 | 27  | 8   | 123 |
| 0 | 19  | 36  | 520 |
| 0 | 2   | 1   | 120 |
| 0 | 12  | 4   | 125 |
| 0 | 107 | 57  | 470 |
| 0 | 2   | 10  | 144 |
| 0 | 114 | 65  | 391 |
| 0 | 15  | 8   | 353 |
| 0 | 17  | 15  | 169 |
| 0 | 3   | 1   | 113 |
| 0 | 9   | 3   | 181 |
| 0 | 14  | 6   | 202 |
| 0 | 8   | 10  | 246 |
| 0 | 10  | 10  | 255 |
| 0 | 2   | 1   | 87  |
| 0 | 1   | 4   | 74  |
| 0 | 2   | 1   | 150 |
| 0 | 5   | 6   | 129 |
| 0 | 12  | 8   | 314 |
| 0 | 4   | 0   | 86  |
| 0 | 28  | 11  | 109 |
| 0 | 7   | 3   | 191 |
| 0 | 30  | 48  | 587 |
| 0 | 11  | 4   | 92  |
| 0 | 5   | 2   | 93  |
| 0 | 2   | 1   | 106 |
| 0 | 0   | 0   | 83  |
| 0 | 348 | 252 | 917 |
| 0 | 6   | 3   | 170 |
| 0 | 6   | 2   | 164 |
| 0 | 5   | 1   | 112 |
| 0 | 0   | 0   | 122 |
| 0 | 17  | 6   | 199 |
| 0 | 3   | 0   | 76  |
| 0 | 22  | 11  | 172 |
| 0 | 2   | 5   | 117 |
| 0 | 8   | 17  | 299 |
| 0 | 2   | 4   | 343 |
| 0 | 2   | 4   | 139 |
| 0 | 2   | 3   | 135 |
| 0 | 2   | 4   | 149 |
| 0 | 19  | 9   | 280 |
| 0 | 8   | 5   | 105 |

|   |     |     |     |
|---|-----|-----|-----|
| 0 | 11  | 17  | 144 |
| 0 | 31  | 27  | 527 |
| 0 | 39  | 29  | 831 |
| 0 | 6   | 0   | 87  |
| 0 | 168 | 168 | 197 |
| 0 | 76  | 96  | 709 |
| 0 | 19  | 12  | 135 |
| 0 | 8   | 4   | 106 |
| 0 | 4   | 7   | 142 |
| 0 | 14  | 6   | 501 |
| 0 | 24  | 8   | 270 |
| 0 | 29  | 10  | 264 |
| 0 | 5   | 1   | 109 |
| 0 | 30  | 30  | 366 |
| 0 | 9   | 6   | 150 |
| 0 | 0   | 0   | 92  |
| 0 | 12  | 7   | 213 |
| 0 | 10  | 6   | 157 |
| 0 | 1   | 10  | 83  |
| 0 | 13  | 12  | 174 |
| 0 | 13  | 7   | 198 |
| 0 | 9   | 10  | 448 |
| 0 | 34  | 35  | 678 |
| 0 | 25  | 25  | 247 |
| 0 | 5   | 6   | 101 |
| 0 | 17  | 9   | 409 |
| 0 | 18  | 13  | 168 |
| 0 | 3   | 0   | 139 |
| 0 | 0   | 1   | 102 |
| 0 | 2   | 1   | 94  |
| 0 | 10  | 1   | 82  |
| 0 | 13  | 6   | 232 |
| 0 | 18  | 23  | 311 |
| 0 | 4   | 2   | 85  |
| 0 | 40  | 43  | 218 |
| 0 | 8   | 1   | 95  |
| 0 | 69  | 54  | 468 |
| 0 | 10  | 6   | 96  |
| 0 | 3   | 1   | 80  |
| 0 | 37  | 27  | 573 |
| 0 | 6   | 5   | 89  |
| 0 | 14  | 7   | 155 |
| 0 | 44  | 30  | 463 |
| 0 | 34  | 8   | 187 |
| 0 | 1   | 0   | 89  |
| 0 | 1   | 0   | 104 |
| 0 | 15  | 12  | 361 |

|   |     |     |      |
|---|-----|-----|------|
| 0 | 6   | 0   | 109  |
| 0 | 2   | 2   | 121  |
| 0 | 0   | 1   | 105  |
| 0 | 66  | 4   | 262  |
| 0 | 9   | 3   | 225  |
| 0 | 15  | 16  | 167  |
| 0 | 34  | 39  | 528  |
| 0 | 15  | 5   | 96   |
| 0 | 13  | 4   | 66   |
| 0 | 39  | 12  | 182  |
| 0 | 13  | 21  | 172  |
| 0 | 7   | 15  | 148  |
| 0 | 1   | 2   | 100  |
| 0 | 8   | 8   | 172  |
| 0 | 3   | 5   | 119  |
| 0 | 6   | 14  | 250  |
| 0 | 57  | 38  | 1020 |
| 0 | 11  | 14  | 282  |
| 0 | 183 | 33  | 222  |
| 0 | 7   | 5   | 223  |
| 0 | 19  | 22  | 237  |
| 0 | 1   | 2   | 187  |
| 0 | 22  | 17  | 382  |
| 0 | 2   | 0   | 203  |
| 0 | 12  | 6   | 183  |
| 0 | 9   | 0   | 102  |
| 0 | 4   | 4   | 133  |
| 0 | 1   | 0   | 378  |
| 0 | 3   | 0   | 61   |
| 0 | 5   | 6   | 164  |
| 0 | 9   | 4   | 106  |
| 0 | 15  | 3   | 89   |
| 0 | 2   | 2   | 149  |
| 0 | 6   | 1   | 121  |
| 0 | 123 | 136 | 254  |
| 0 | 3   | 1   | 122  |
| 0 | 4   | 2   | 545  |
| 0 | 7   | 69  | 424  |
| 0 | 8   | 4   | 170  |
| 0 | 256 | 76  | 402  |
| 0 | 0   | 0   | 322  |
| 0 | 4   | 8   | 112  |
| 0 | 67  | 50  | 648  |
| 0 | 11  | 6   | 134  |
| 0 | 5   | 6   | 195  |
| 0 | 3   | 6   | 133  |
| 0 | 17  | 11  | 823  |

|   |     |     |     |
|---|-----|-----|-----|
| 0 | 87  | 48  | 333 |
| 0 | 5   | 0   | 91  |
| 0 | 7   | 9   | 121 |
| 0 | 10  | 2   | 90  |
| 0 | 2   | 2   | 92  |
| 0 | 3   | 2   | 91  |
| 0 | 18  | 8   | 113 |
| 0 | 6   | 3   | 116 |
| 0 | 14  | 8   | 283 |
| 0 | 11  | 5   | 205 |
| 0 | 6   | 3   | 126 |
| 0 | 6   | 4   | 357 |
| 0 | 5   | 7   | 240 |
| 0 | 26  | 14  | 149 |
| 0 | 6   | 4   | 129 |
| 0 | 0   | 0   | 103 |
| 0 | 8   | 1   | 142 |
| 0 | 16  | 20  | 295 |
| 0 | 9   | 6   | 93  |
| 0 | 7   | 7   | 77  |
| 0 | 14  | 2   | 88  |
| 0 | 37  | 25  | 405 |
| 0 | 7   | 5   | 428 |
| 0 | 1   | 2   | 92  |
| 0 | 17  | 0   | 70  |
| 0 | 0   | 0   | 63  |
| 0 | 2   | 2   | 78  |
| 0 | 6   | 1   | 106 |
| 0 | 2   | 4   | 81  |
| 0 | 16  | 37  | 831 |
| 0 | 8   | 0   | 138 |
| 0 | 8   | 3   | 99  |
| 0 | 53  | 62  | 752 |
| 0 | 22  | 11  | 364 |
| 0 | 11  | 4   | 260 |
| 0 | 1   | 1   | 85  |
| 0 | 17  | 5   | 195 |
| 0 | 17  | 9   | 238 |
| 0 | 21  | 9   | 131 |
| 0 | 167 | 103 | 463 |
| 0 | 31  | 15  | 180 |
| 0 | 4   | 3   | 99  |
| 0 | 10  | 1   | 124 |
| 0 | 4   | 1   | 216 |
| 0 | 69  | 45  | 411 |
| 0 | 1   | 1   | 173 |
| 0 | 6   | 0   | 134 |

|   |     |     |     |
|---|-----|-----|-----|
| 0 | 4   | 0   | 168 |
| 0 | 26  | 41  | 455 |
| 0 | 4   | 1   | 92  |
| 0 | 12  | 6   | 131 |
| 0 | 596 | 296 | 431 |
| 0 | 50  | 20  | 191 |
| 0 | 236 | 97  | 432 |
| 0 | 15  | 16  | 386 |
| 0 | 0   | 1   | 111 |
| 0 | 3   | 3   | 131 |
| 0 | 5   | 8   | 87  |
| 0 | 10  | 9   | 215 |
| 0 | 8   | 14  | 162 |
| 0 | 56  | 58  | 305 |
| 0 | 8   | 4   | 112 |
| 0 | 5   | 2   | 134 |
| 0 | 4   | 0   | 87  |
| 0 | 4   | 2   | 127 |
| 0 | 19  | 56  | 372 |
| 0 | 14  | 9   | 433 |
| 0 | 99  | 56  | 531 |
| 0 | 7   | 1   | 116 |
| 0 | 13  | 3   | 96  |
| 0 | 9   | 5   | 125 |
| 0 | 4   | 4   | 121 |
| 0 | 15  | 2   | 118 |
| 0 | 18  | 16  | 103 |
| 0 | 0   | 0   | 134 |
| 0 | 5   | 1   | 116 |
| 0 | 1   | 4   | 98  |
| 0 | 8   | 3   | 102 |
| 0 | 0   | 0   | 76  |
| 0 | 5   | 7   | 149 |
| 0 | 6   | 4   | 206 |
| 0 | 3   | 2   | 327 |
| 0 | 7   | 4   | 117 |
| 0 | 8   | 15  | 378 |
| 3 | 21  | 43  | 721 |
| 0 | 85  | 4   | 110 |
| 0 | 16  | 1   | 79  |
| 0 | 0   | 0   | 128 |
| 0 | 4   | 2   | 143 |
| 0 | 8   | 9   | 147 |
| 0 | 11  | 8   | 187 |
| 0 | 10  | 4   | 142 |
| 0 | 10  | 6   | 99  |
| 0 | 591 | 766 | 257 |

|   |     |     |     |
|---|-----|-----|-----|
| 0 | 15  | 8   | 909 |
| 0 | 25  | 8   | 189 |
| 0 | 8   | 3   | 215 |
| 0 | 9   | 3   | 116 |
| 0 | 13  | 11  | 226 |
| 0 | 3   | 0   | 98  |
| 0 | 24  | 10  | 265 |
| 0 | 15  | 0   | 125 |
| 0 | 95  | 149 | 643 |
| 0 | 12  | 0   | 72  |
| 0 | 2   | 0   | 141 |
| 0 | 7   | 7   | 157 |
| 0 | 11  | 8   | 185 |
| 0 | 40  | 15  | 564 |
| 0 | 59  | 45  | 293 |
| 0 | 3   | 1   | 115 |
| 0 | 0   | 0   | 73  |
| 0 | 47  | 27  | 767 |
| 0 | 137 | 38  | 393 |
| 0 | 15  | 3   | 100 |
| 0 | 43  | 18  | 356 |
| 0 | 10  | 2   | 113 |
| 0 | 18  | 17  | 191 |
| 0 | 6   | 5   | 95  |
| 0 | 12  | 6   | 162 |
| 0 | 5   | 3   | 156 |
| 0 | 5   | 1   | 94  |
| 0 | 21  | 10  | 357 |
| 0 | 19  | 11  | 481 |
| 0 | 11  | 12  | 217 |
| 0 | 4   | 12  | 191 |
| 0 | 34  | 23  | 518 |
| 0 | 0   | 1   | 84  |
| 0 | 11  | 8   | 181 |
| 0 | 6   | 2   | 247 |
| 0 | 29  | 42  | 210 |
| 0 | 29  | 14  | 338 |
| 0 | 13  | 10  | 158 |
| 0 | 8   | 7   | 97  |
| 0 | 72  | 14  | 148 |
| 0 | 0   | 0   | 82  |
| 0 | 2   | 2   | 116 |
| 0 | 2   | 0   | 652 |
| 0 | 2   | 0   | 692 |
| 0 | 4   | 0   | 98  |
| 0 | 42  | 12  | 344 |
| 0 | 5   | 6   | 196 |

|   |     |     |     |
|---|-----|-----|-----|
| 0 | 53  | 35  | 473 |
| 0 | 4   | 10  | 314 |
| 0 | 31  | 41  | 386 |
| 0 | 6   | 7   | 117 |
| 0 | 7   | 4   | 96  |
| 0 | 43  | 23  | 756 |
| 0 | 96  | 55  | 391 |
| 0 | 20  | 8   | 246 |
| 0 | 4   | 5   | 122 |
| 0 | 2   | 0   | 79  |
| 0 | 23  | 10  | 125 |
| 0 | 8   | 5   | 160 |
| 0 | 22  | 6   | 95  |
| 0 | 17  | 13  | 339 |
| 0 | 20  | 25  | 268 |
| 0 | 3   | 8   | 167 |
| 0 | 1   | 8   | 161 |
| 0 | 23  | 4   | 130 |
| 0 | 1   | 0   | 130 |
| 0 | 437 | 595 | 105 |
| 0 | 14  | 15  | 335 |
| 0 | 9   | 6   | 131 |
| 0 | 11  | 4   | 86  |
| 0 | 1   | 2   | 111 |
| 0 | 65  | 7   | 222 |
| 0 | 33  | 10  | 148 |
| 0 | 6   | 3   | 121 |
| 0 | 11  | 1   | 164 |
| 0 | 10  | 3   | 95  |
| 0 | 5   | 6   | 144 |
| 0 | 6   | 1   | 98  |
| 0 | 4   | 2   | 101 |
| 0 | 6   | 7   | 127 |
| 0 | 2   | 2   | 207 |
| 0 | 40  | 2   | 86  |
| 0 | 29  | 16  | 508 |
| 0 | 6   | 1   | 101 |
| 0 | 2   | 7   | 154 |
| 0 | 4   | 1   | 113 |
| 0 | 3   | 1   | 106 |
| 0 | 18  | 12  | 253 |
| 0 | 6   | 6   | 123 |
| 0 | 3   | 3   | 151 |
| 0 | 14  | 7   | 256 |
| 0 | 9   | 3   | 161 |
| 0 | 7   | 10  | 238 |
| 0 | 16  | 7   | 277 |



|   |    |     |     |
|---|----|-----|-----|
| 0 | 20 | 8   | 165 |
| 0 | 6  | 5   | 238 |
| 0 | 10 | 1   | 90  |
| 0 | 11 | 6   | 196 |
| 0 | 16 | 19  | 306 |
| 0 | 17 | 44  | 356 |
| 0 | 2  | 2   | 86  |
| 0 | 56 | 39  | 251 |
| 0 | 2  | 1   | 471 |
| 0 | 8  | 4   | 220 |
| 0 | 18 | 0   | 65  |
| 0 | 11 | 7   | 106 |
| 0 | 5  | 1   | 102 |
| 0 | 5  | 5   | 167 |
| 0 | 17 | 10  | 293 |
| 0 | 5  | 2   | 196 |
| 0 | 5  | 0   | 108 |
| 0 | 7  | 4   | 88  |
| 0 | 3  | 0   | 110 |
| 0 | 2  | 0   | 232 |
| 0 | 9  | 1   | 208 |
| 0 | 11 | 9   | 603 |
| 0 | 6  | 0   | 162 |
| 0 | 7  | 0   | 125 |
| 0 | 0  | 0   | 64  |
| 0 | 6  | 5   | 221 |
| 0 | 16 | 13  | 354 |
| 0 | 4  | 2   | 111 |
| 0 | 19 | 8   | 109 |
| 0 | 3  | 0   | 151 |
| 0 | 8  | 0   | 71  |
| 0 | 8  | 5   | 99  |
| 0 | 1  | 2   | 92  |
| 0 | 2  | 1   | 105 |
| 0 | 1  | 1   | 92  |
| 0 | 1  | 1   | 81  |
| 0 | 19 | 9   | 161 |
| 0 | 11 | 31  | 106 |
| 0 | 40 | 116 | 145 |
| 0 | 17 | 5   | 194 |
| 0 | 23 | 6   | 130 |
| 0 | 1  | 0   | 103 |
| 0 | 7  | 2   | 243 |
| 0 | 3  | 1   | 262 |
| 0 | 12 | 10  | 196 |
| 0 | 2  | 1   | 87  |
| 0 | 3  | 2   | 334 |

|   |     |    |     |
|---|-----|----|-----|
| 0 | 2   | 1  | 139 |
| 0 | 15  | 5  | 503 |
| 0 | 4   | 3  | 125 |
| 0 | 1   | 1  | 89  |
| 0 | 17  | 15 | 595 |
| 0 | 3   | 2  | 86  |
| 0 | 29  | 10 | 308 |
| 0 | 17  | 6  | 125 |
| 0 | 8   | 5  | 293 |
| 0 | 1   | 0  | 88  |
| 0 | 21  | 7  | 232 |
| 0 | 9   | 0  | 253 |
| 0 | 285 | 0  | 106 |
| 0 | 13  | 3  | 91  |
| 0 | 40  | 14 | 154 |
| 0 | 14  | 4  | 243 |
| 0 | 9   | 7  | 260 |
| 0 | 8   | 14 | 231 |
| 0 | 2   | 3  | 97  |
| 0 | 29  | 15 | 206 |
| 0 | 12  | 8  | 236 |
| 0 | 36  | 24 | 180 |
| 0 | 3   | 1  | 184 |
| 0 | 7   | 3  | 198 |
| 0 | 6   | 5  | 115 |
| 0 | 8   | 1  | 86  |
| 0 | 8   | 4  | 240 |
| 0 | 7   | 2  | 174 |
| 0 | 11  | 4  | 222 |
| 0 | 45  | 41 | 622 |
| 0 | 20  | 19 | 199 |
| 0 | 12  | 4  | 115 |
| 0 | 12  | 26 | 294 |
| 0 | 14  | 7  | 149 |
| 0 | 10  | 2  | 74  |
| 0 | 3   | 2  | 113 |
| 0 | 0   | 0  | 77  |
| 0 | 20  | 2  | 134 |
| 0 | 6   | 7  | 216 |
| 0 | 2   | 1  | 123 |
| 0 | 9   | 10 | 135 |
| 0 | 22  | 15 | 219 |
| 0 | 7   | 4  | 119 |
| 0 | 16  | 7  | 172 |
| 0 | 56  | 55 | 367 |
| 0 | 9   | 6  | 151 |
| 0 | 7   | 17 | 217 |

|   |     |     |     |
|---|-----|-----|-----|
| 0 | 6   | 14  | 458 |
| 0 | 24  | 16  | 218 |
| 0 | 28  | 13  | 234 |
| 0 | 2   | 0   | 80  |
| 0 | 3   | 2   | 147 |
| 0 | 4   | 11  | 253 |
| 0 | 2   | 2   | 117 |
| 0 | 22  | 31  | 388 |
| 0 | 21  | 12  | 115 |
| 0 | 18  | 10  | 305 |
| 0 | 6   | 6   | 148 |
| 0 | 113 | 201 | 859 |
| 0 | 2   | 3   | 140 |
| 0 | 48  | 11  | 88  |
| 0 | 2   | 1   | 109 |
| 0 | 1   | 1   | 72  |
| 0 | 4   | 1   | 112 |
| 0 | 13  | 7   | 152 |
| 0 | 12  | 5   | 188 |
| 0 | 8   | 3   | 180 |
| 0 | 7   | 4   | 132 |
| 0 | 30  | 37  | 585 |
| 0 | 16  | 1   | 270 |
| 0 | 1   | 1   | 281 |
| 0 | 3   | 6   | 127 |
| 0 | 15  | 8   | 99  |
| 0 | 14  | 0   | 88  |
| 0 | 7   | 4   | 95  |
| 0 | 8   | 4   | 207 |
| 0 | 46  | 23  | 219 |
| 0 | 1   | 2   | 67  |
| 0 | 5   | 1   | 267 |
| 0 | 3   | 7   | 128 |
| 0 | 0   | 4   | 150 |
| 0 | 41  | 22  | 292 |
| 0 | 10  | 9   | 213 |
| 0 | 44  | 27  | 269 |
| 0 | 7   | 5   | 114 |
| 0 | 15  | 5   | 163 |
| 0 | 10  | 4   | 248 |
| 0 | 4   | 2   | 95  |
| 0 | 2   | 0   | 117 |
| 0 | 6   | 2   | 118 |
| 0 | 9   | 2   | 115 |
| 0 | 45  | 29  | 294 |
| 0 | 8   | 3   | 224 |
| 0 | 0   | 2   | 79  |

|   |     |     |     |
|---|-----|-----|-----|
| 0 | 7   | 3   | 107 |
| 0 | 6   | 9   | 361 |
| 0 | 5   | 1   | 161 |
| 0 | 3   | 1   | 288 |
| 0 | 10  | 2   | 88  |
| 0 | 0   | 0   | 145 |
| 0 | 3   | 0   | 102 |
| 0 | 29  | 7   | 318 |
| 0 | 4   | 4   | 171 |
| 0 | 0   | 1   | 280 |
| 0 | 5   | 2   | 134 |
| 0 | 307 | 238 | 328 |
| 0 | 4   | 1   | 70  |
| 0 | 12  | 3   | 140 |
| 0 | 10  | 13  | 146 |
| 0 | 6   | 2   | 149 |
| 0 | 8   | 6   | 149 |
| 0 | 2   | 3   | 95  |
| 0 | 145 | 114 | 390 |
| 0 | 1   | 2   | 165 |
| 0 | 2   | 2   | 146 |
| 0 | 4   | 2   | 125 |
| 0 | 45  | 26  | 619 |
| 0 | 4   | 4   | 116 |
| 0 | 4   | 2   | 96  |
| 0 | 4   | 3   | 143 |
| 0 | 250 | 115 | 339 |
| 0 | 2   | 3   | 104 |
| 0 | 11  | 7   | 459 |
| 0 | 24  | 11  | 211 |
| 0 | 0   | 0   | 78  |
| 0 | 2   | 10  | 327 |
| 0 | 4   | 6   | 116 |
| 0 | 2   | 1   | 115 |
| 0 | 9   | 11  | 133 |
| 0 | 16  | 7   | 106 |
| 0 | 12  | 6   | 144 |
| 0 | 18  | 7   | 97  |
| 0 | 14  | 7   | 102 |
| 0 | 33  | 42  | 233 |
| 0 | 2   | 0   | 102 |
| 0 | 10  | 4   | 191 |
| 0 | 13  | 5   | 94  |
| 0 | 6   | 10  | 50  |
| 0 | 3   | 3   | 128 |
| 0 | 2   | 3   | 144 |
| 0 | 13  | 10  | 227 |

|   |    |    |      |
|---|----|----|------|
| 0 | 15 | 3  | 83   |
| 0 | 14 | 2  | 85   |
| 0 | 9  | 6  | 106  |
| 0 | 8  | 2  | 84   |
| 0 | 16 | 3  | 133  |
| 0 | 10 | 7  | 262  |
| 0 | 0  | 0  | 107  |
| 0 | 10 | 4  | 95   |
| 0 | 7  | 2  | 90   |
| 0 | 13 | 5  | 99   |
| 0 | 17 | 0  | 212  |
| 0 | 24 | 54 | 595  |
| 0 | 15 | 5  | 97   |
| 0 | 3  | 11 | 90   |
| 0 | 2  | 2  | 167  |
| 0 | 11 | 4  | 486  |
| 0 | 16 | 2  | 86   |
| 0 | 11 | 10 | 519  |
| 0 | 55 | 6  | 319  |
| 0 | 7  | 0  | 68   |
| 0 | 18 | 43 | 452  |
| 0 | 0  | 0  | 86   |
| 0 | 3  | 10 | 198  |
| 0 | 5  | 2  | 109  |
| 0 | 5  | 1  | 160  |
| 0 | 22 | 9  | 1549 |
| 0 | 15 | 7  | 84   |
| 0 | 3  | 2  | 83   |
| 0 | 0  | 1  | 96   |
| 0 | 3  | 0  | 158  |
| 0 | 3  | 6  | 133  |
| 0 | 32 | 19 | 586  |
| 0 | 7  | 1  | 101  |
| 0 | 18 | 9  | 279  |
| 0 | 7  | 4  | 170  |
| 0 | 0  | 0  | 71   |
| 0 | 26 | 6  | 145  |
| 0 | 1  | 0  | 105  |
| 0 | 5  | 1  | 86   |
| 0 | 15 | 10 | 251  |
| 0 | 43 | 0  | 78   |
| 0 | 1  | 0  | 81   |
| 0 | 6  | 4  | 226  |
| 0 | 1  | 2  | 106  |
| 0 | 10 | 6  | 113  |
| 0 | 11 | 3  | 104  |
| 0 | 15 | 0  | 91   |

|   |      |      |     |
|---|------|------|-----|
| 0 | 46   | 33   | 837 |
| 0 | 77   | 31   | 288 |
| 0 | 70   | 110  | 455 |
| 0 | 2    | 1    | 113 |
| 0 | 0    | 1    | 95  |
| 0 | 4    | 2    | 115 |
| 0 | 3    | 8    | 99  |
| 0 | 15   | 2    | 76  |
| 0 | 2    | 0    | 150 |
| 0 | 8    | 6    | 250 |
| 0 | 19   | 10   | 127 |
| 0 | 25   | 11   | 159 |
| 0 | 6    | 6    | 174 |
| 0 | 54   | 22   | 287 |
| 0 | 8    | 1    | 111 |
| 0 | 16   | 5    | 167 |
| 0 | 125  | 40   | 200 |
| 0 | 3    | 2    | 146 |
| 0 | 8    | 9    | 71  |
| 0 | 35   | 11   | 110 |
| 0 | 0    | 0    | 101 |
| 0 | 67   | 23   | 333 |
| 0 | 258  | 401  | 200 |
| 0 | 7    | 3    | 120 |
| 0 | 7    | 5    | 108 |
| 0 | 12   | 1    | 71  |
| 0 | 10   | 3    | 166 |
| 0 | 9    | 18   | 153 |
| 0 | 163  | 65   | 236 |
| 0 | 2    | 1    | 122 |
| 0 | 21   | 10   | 264 |
| 0 | 8    | 7    | 109 |
| 0 | 42   | 5    | 88  |
| 0 | 34   | 14   | 181 |
| 0 | 16   | 7    | 240 |
| 0 | 107  | 114  | 315 |
| 0 | 1519 | 1198 | 136 |
| 0 | 8    | 4    | 270 |
| 0 | 17   | 15   | 314 |
| 0 | 4    | 4    | 167 |
| 0 | 24   | 29   | 340 |
| 0 | 31   | 25   | 433 |
| 0 | 8    | 3    | 100 |
| 0 | 14   | 13   | 157 |
| 0 | 469  | 633  | 189 |
| 0 | 6    | 2    | 137 |
| 0 | 5    | 3    | 257 |

|   |     |     |     |
|---|-----|-----|-----|
| 0 | 14  | 6   | 300 |
| 0 | 518 | 774 | 154 |
| 0 | 21  | 6   | 103 |
| 0 | 7   | 1   | 213 |
| 0 | 3   | 1   | 95  |
| 0 | 15  | 4   | 258 |
| 0 | 11  | 20  | 216 |
| 0 | 12  | 12  | 677 |
| 0 | 10  | 12  | 188 |
| 0 | 57  | 43  | 666 |
| 0 | 2   | 3   | 188 |
| 0 | 23  | 5   | 159 |
| 0 | 7   | 4   | 113 |
| 0 | 6   | 0   | 111 |
| 0 | 3   | 1   | 126 |
| 0 | 4   | 3   | 132 |
| 0 | 8   | 0   | 111 |
| 0 | 11  | 9   | 185 |
| 0 | 8   | 6   | 106 |
| 0 | 1   | 0   | 120 |
| 0 | 14  | 2   | 82  |
| 0 | 27  | 47  | 500 |
| 0 | 23  | 15  | 206 |
| 0 | 8   | 7   | 194 |
| 0 | 10  | 2   | 113 |
| 0 | 135 | 168 | 557 |
| 0 | 42  | 13  | 154 |
| 0 | 6   | 8   | 95  |
| 0 | 23  | 11  | 130 |
| 0 | 3   | 6   | 113 |
| 0 | 2   | 2   | 97  |
| 0 | 1   | 1   | 70  |
| 0 | 6   | 5   | 138 |
| 0 | 5   | 2   | 168 |
| 0 | 0   | 3   | 113 |
| 0 | 192 | 232 | 157 |
| 0 | 5   | 4   | 122 |
| 0 | 8   | 5   | 91  |
| 0 | 7   | 4   | 130 |
| 0 | 2   | 2   | 99  |
| 0 | 2   | 9   | 119 |
| 0 | 25  | 12  | 189 |
| 0 | 8   | 9   | 141 |
| 0 | 7   | 7   | 181 |
| 0 | 30  | 35  | 193 |
| 0 | 13  | 9   | 141 |
| 0 | 38  | 20  | 155 |

|   |     |     |     |
|---|-----|-----|-----|
| 0 | 3   | 3   | 151 |
| 0 | 2   | 1   | 85  |
| 0 | 28  | 9   | 185 |
| 0 | 0   | 0   | 130 |
| 0 | 3   | 3   | 120 |
| 0 | 4   | 2   | 142 |
| 0 | 4   | 2   | 110 |
| 0 | 2   | 1   | 103 |
| 0 | 2   | 2   | 108 |
| 0 | 11  | 1   | 72  |
| 0 | 8   | 5   | 131 |
| 0 | 7   | 8   | 335 |
| 0 | 11  | 5   | 159 |
| 0 | 3   | 4   | 146 |
| 0 | 112 | 96  | 326 |
| 0 | 15  | 23  | 229 |
| 0 | 5   | 5   | 139 |
| 0 | 9   | 5   | 97  |
| 0 | 20  | 4   | 107 |
| 0 | 38  | 22  | 689 |
| 0 | 11  | 11  | 168 |
| 0 | 3   | 4   | 175 |
| 0 | 18  | 17  | 374 |
| 0 | 112 | 64  | 703 |
| 0 | 29  | 15  | 386 |
| 0 | 7   | 14  | 168 |
| 2 | 5   | 15  | 394 |
| 0 | 14  | 13  | 189 |
| 0 | 3   | 4   | 129 |
| 0 | 776 | 707 | 125 |
| 0 | 5   | 0   | 119 |
| 0 | 15  | 7   | 176 |
| 0 | 1   | 0   | 91  |
| 0 | 16  | 9   | 153 |
| 0 | 17  | 15  | 199 |
| 0 | 14  | 0   | 95  |
| 0 | 0   | 0   | 78  |
| 0 | 12  | 9   | 231 |
| 0 | 22  | 9   | 283 |
| 0 | 9   | 3   | 210 |
| 0 | 1   | 1   | 136 |
| 0 | 5   | 2   | 120 |
| 0 | 3   | 2   | 244 |
| 0 | 23  | 14  | 167 |
| 0 | 4   | 0   | 114 |
| 0 | 0   | 0   | 103 |
| 0 | 60  | 42  | 692 |



|   |     |     |      |
|---|-----|-----|------|
| 0 | 17  | 9   | 148  |
| 0 | 15  | 16  | 302  |
| 0 | 3   | 2   | 97   |
| 0 | 27  | 0   | 113  |
| 0 | 5   | 6   | 196  |
| 0 | 4   | 1   | 94   |
| 0 | 3   | 3   | 95   |
| 0 | 29  | 0   | 105  |
| 0 | 273 | 357 | 221  |
| 0 | 118 | 69  | 678  |
| 0 | 15  | 6   | 144  |
| 0 | 9   | 2   | 132  |
| 0 | 17  | 7   | 105  |
| 0 | 21  | 9   | 255  |
| 0 | 2   | 1   | 90   |
| 0 | 7   | 3   | 151  |
| 0 | 12  | 2   | 105  |
| 0 | 5   | 3   | 137  |
| 0 | 7   | 4   | 115  |
| 0 | 38  | 16  | 210  |
| 0 | 4   | 2   | 140  |
| 0 | 6   | 4   | 164  |
| 0 | 32  | 28  | 506  |
| 0 | 6   | 2   | 97   |
| 0 | 10  | 1   | 88   |
| 0 | 21  | 8   | 119  |
| 0 | 10  | 3   | 191  |
| 0 | 21  | 10  | 294  |
| 0 | 31  | 15  | 442  |
| 0 | 14  | 4   | 95   |
| 0 | 51  | 35  | 449  |
| 0 | 21  | 3   | 136  |
| 0 | 14  | 15  | 119  |
| 0 | 42  | 51  | 543  |
| 0 | 11  | 11  | 393  |
| 0 | 15  | 8   | 432  |
| 0 | 8   | 3   | 162  |
| 0 | 1   | 0   | 216  |
| 0 | 5   | 7   | 98   |
| 0 | 34  | 42  | 200  |
| 0 | 158 | 58  | 138  |
| 0 | 17  | 2   | 99   |
| 0 | 5   | 7   | 138  |
| 0 | 25  | 7   | 204  |
| 0 | 0   | 1   | 322  |
| 0 | 58  | 104 | 1674 |
| 0 | 93  | 45  | 60   |

|   |     |     |      |
|---|-----|-----|------|
| 0 | 2   | 1   | 161  |
| 0 | 6   | 5   | 87   |
| 0 | 10  | 18  | 288  |
| 0 | 24  | 14  | 187  |
| 0 | 13  | 17  | 1235 |
| 0 | 21  | 5   | 132  |
| 0 | 51  | 17  | 365  |
| 0 | 1   | 3   | 118  |
| 0 | 15  | 7   | 319  |
| 0 | 1   | 1   | 89   |
| 0 | 3   | 0   | 65   |
| 0 | 2   | 1   | 113  |
| 0 | 10  | 2   | 99   |
| 0 | 8   | 9   | 294  |
| 0 | 25  | 30  | 342  |
| 0 | 5   | 0   | 105  |
| 0 | 9   | 4   | 413  |
| 0 | 8   | 17  | 589  |
| 0 | 11  | 15  | 482  |
| 0 | 8   | 12  | 210  |
| 0 | 4   | 2   | 143  |
| 0 | 1   | 1   | 133  |
| 0 | 7   | 5   | 171  |
| 0 | 9   | 8   | 201  |
| 0 | 14  | 9   | 269  |
| 0 | 13  | 13  | 238  |
| 0 | 2   | 2   | 135  |
| 0 | 300 | 651 | 157  |
| 0 | 11  | 2   | 134  |
| 0 | 10  | 5   | 91   |
| 0 | 13  | 3   | 127  |
| 0 | 15  | 9   | 163  |
| 0 | 28  | 12  | 108  |
| 0 | 13  | 12  | 72   |
| 0 | 730 | 377 | 121  |
| 0 | 13  | 9   | 103  |
| 0 | 1   | 2   | 101  |
| 0 | 3   | 6   | 130  |
| 0 | 4   | 2   | 113  |
| 0 | 2   | 6   | 172  |
| 0 | 16  | 10  | 128  |
| 0 | 12  | 1   | 73   |
| 0 | 9   | 4   | 148  |
| 0 | 5   | 2   | 87   |
| 0 | 3   | 1   | 97   |
| 0 | 9   | 7   | 166  |
| 0 | 4   | 0   | 70   |

|     |    |     |      |
|-----|----|-----|------|
| 0   | 4  | 7   | 154  |
| 0   | 9  | 2   | 72   |
| 0   | 5  | 7   | 99   |
| 0   | 6  | 3   | 129  |
| 0   | 4  | 2   | 116  |
| 0   | 11 | 14  | 873  |
| 0   | 1  | 0   | 96   |
| 0   | 0  | 0   | 94   |
| 0   | 28 | 0   | 60   |
| 0   | 7  | 3   | 319  |
| 0   | 7  | 8   | 304  |
| 0   | 10 | 4   | 93   |
| 0   | 6  | 1   | 160  |
| 0   | 2  | 0   | 102  |
| 0   | 3  | 2   | 146  |
| 0   | 4  | 1   | 93   |
| 0   | 14 | 6   | 428  |
| 0   | 23 | 6   | 112  |
| 0   | 5  | 7   | 219  |
| 0   | 12 | 8   | 110  |
| 0   | 26 | 12  | 198  |
| 0   | 11 | 12  | 335  |
| 0   | 10 | 29  | 569  |
| 0   | 6  | 5   | 184  |
| 0   | 2  | 6   | 95   |
| 0   | 19 | 25  | 249  |
| 16  | 20 | 31  | 141  |
| 115 | 9  | 141 | 324  |
| 22  | 4  | 18  | 465  |
| 0   | 29 | 2   | 95   |
| 0   | 3  | 15  | 191  |
| 0   | 2  | 0   | 75   |
| 0   | 13 | 2   | 134  |
| 0   | 30 | 7   | 140  |
| 0   | 19 | 5   | 127  |
| 0   | 6  | 4   | 143  |
| 0   | 12 | 11  | 263  |
| 0   | 4  | 1   | 170  |
| 0   | 8  | 6   | 212  |
| 0   | 23 | 2   | 169  |
| 0   | 10 | 5   | 96   |
| 0   | 8  | 0   | 138  |
| 0   | 44 | 70  | 1020 |
| 0   | 4  | 2   | 123  |
| 0   | 6  | 2   | 90   |
| 0   | 7  | 7   | 134  |
| 0   | 71 | 56  | 412  |

|   |     |     |     |
|---|-----|-----|-----|
| 0 | 11  | 10  | 223 |
| 0 | 10  | 12  | 165 |
| 0 | 16  | 11  | 165 |
| 0 | 147 | 0   | 68  |
| 0 | 27  | 14  | 568 |
| 0 | 367 | 221 | 262 |
| 0 | 76  | 16  | 228 |
| 0 | 101 | 26  | 280 |
| 0 | 16  | 5   | 297 |
| 0 | 1   | 1   | 93  |
| 0 | 48  | 20  | 155 |
| 0 | 41  | 50  | 162 |
| 0 | 12  | 4   | 122 |
| 0 | 20  | 5   | 84  |
| 0 | 1   | 0   | 157 |
| 0 | 10  | 17  | 215 |
| 0 | 47  | 24  | 544 |
| 0 | 2   | 6   | 442 |
| 0 | 34  | 60  | 775 |
| 0 | 18  | 26  | 220 |
| 0 | 11  | 5   | 70  |
| 0 | 7   | 4   | 155 |
| 0 | 8   | 17  | 128 |
| 0 | 10  | 3   | 151 |
| 0 | 0   | 0   | 68  |
| 0 | 4   | 2   | 117 |
| 0 | 17  | 14  | 299 |
| 0 | 3   | 2   | 175 |
| 0 | 3   | 0   | 122 |
| 0 | 16  | 32  | 113 |
| 0 | 51  | 37  | 383 |
| 0 | 17  | 15  | 345 |
| 0 | 14  | 8   | 444 |
| 0 | 5   | 3   | 109 |
| 0 | 9   | 3   | 104 |
| 0 | 3   | 2   | 131 |
| 0 | 9   | 3   | 154 |
| 0 | 23  | 8   | 163 |
| 0 | 16  | 0   | 68  |
| 0 | 67  | 17  | 174 |
| 0 | 0   | 1   | 83  |
| 0 | 11  | 3   | 111 |
| 0 | 6   | 4   | 110 |
| 0 | 621 | 334 | 375 |
| 0 | 10  | 2   | 101 |
| 0 | 0   | 2   | 105 |
| 0 | 0   | 0   | 104 |

|   |     |     |     |
|---|-----|-----|-----|
| 0 | 83  | 10  | 955 |
| 0 | 7   | 0   | 76  |
| 0 | 14  | 20  | 450 |
| 0 | 18  | 4   | 124 |
| 0 | 133 | 104 | 368 |
| 0 | 1   | 0   | 105 |
| 0 | 36  | 12  | 189 |
| 0 | 1   | 0   | 88  |
| 0 | 0   | 2   | 87  |
| 0 | 13  | 6   | 119 |
| 0 | 13  | 6   | 192 |
| 0 | 3   | 0   | 126 |
| 0 | 21  | 26  | 309 |
| 0 | 12  | 4   | 352 |
| 0 | 15  | 4   | 168 |
| 0 | 2   | 2   | 145 |
| 0 | 7   | 3   | 132 |
| 0 | 4   | 2   | 135 |
| 0 | 9   | 2   | 260 |
| 0 | 7   | 11  | 243 |
| 0 | 4   | 2   | 130 |
| 0 | 3   | 0   | 109 |
| 0 | 61  | 11  | 111 |
| 0 | 41  | 26  | 383 |
| 0 | 8   | 9   | 150 |
| 0 | 45  | 27  | 273 |
| 0 | 4   | 2   | 122 |
| 0 | 3   | 8   | 212 |
| 0 | 17  | 5   | 102 |
| 0 | 8   | 4   | 104 |
| 0 | 70  | 23  | 174 |
| 0 | 13  | 18  | 892 |
| 0 | 6   | 10  | 65  |
| 0 | 6   | 5   | 72  |
| 0 | 13  | 0   | 88  |
| 0 | 26  | 31  | 538 |
| 0 | 68  | 41  | 191 |
| 0 | 10  | 9   | 168 |
| 0 | 87  | 201 | 294 |
| 0 | 43  | 241 | 184 |
| 0 | 8   | 2   | 107 |
| 0 | 8   | 5   | 174 |
| 0 | 13  | 9   | 252 |
| 0 | 29  | 19  | 169 |
| 0 | 6   | 1   | 116 |
| 0 | 4   | 4   | 161 |
| 0 | 2   | 2   | 140 |

|    |      |     |      |
|----|------|-----|------|
| 0  | 29   | 19  | 625  |
| 0  | 540  | 530 | 282  |
| 0  | 8    | 3   | 248  |
| 26 | 46   | 66  | 693  |
| 0  | 4    | 5   | 110  |
| 0  | 2    | 3   | 83   |
| 0  | 5    | 7   | 93   |
| 0  | 15   | 4   | 116  |
| 0  | 9    | 8   | 321  |
| 0  | 22   | 37  | 1755 |
| 0  | 12   | 2   | 77   |
| 0  | 3    | 4   | 191  |
| 0  | 23   | 7   | 572  |
| 0  | 3    | 3   | 929  |
| 0  | 26   | 2   | 119  |
| 0  | 17   | 3   | 252  |
| 0  | 0    | 0   | 93   |
| 0  | 0    | 1   | 88   |
| 0  | 5    | 5   | 169  |
| 0  | 10   | 3   | 121  |
| 0  | 7    | 0   | 80   |
| 0  | 12   | 7   | 155  |
| 0  | 8    | 4   | 201  |
| 0  | 3    | 0   | 112  |
| 0  | 9    | 3   | 153  |
| 0  | 8    | 3   | 174  |
| 0  | 10   | 2   | 139  |
| 0  | 3    | 1   | 128  |
| 1  | 1006 | 953 | 279  |
| 0  | 41   | 41  | 175  |
| 0  | 5    | 6   | 143  |
| 0  | 12   | 1   | 89   |
| 0  | 3    | 3   | 156  |
| 0  | 28   | 14  | 209  |
| 0  | 6    | 5   | 114  |
| 0  | 4    | 1   | 115  |
| 0  | 3    | 0   | 78   |
| 0  | 13   | 3   | 117  |
| 0  | 9    | 4   | 111  |
| 0  | 11   | 5   | 78   |
| 0  | 5    | 2   | 153  |
| 0  | 13   | 2   | 176  |
| 0  | 2    | 2   | 94   |
| 0  | 20   | 8   | 302  |
| 0  | 13   | 5   | 152  |
| 0  | 80   | 58  | 239  |
| 0  | 30   | 66  | 615  |

|   |     |    |     |
|---|-----|----|-----|
| 0 | 5   | 2  | 340 |
| 0 | 1   | 3  | 105 |
| 0 | 8   | 1  | 115 |
| 0 | 18  | 8  | 185 |
| 0 | 10  | 16 | 275 |
| 0 | 34  | 22 | 256 |
| 0 | 30  | 33 | 519 |
| 0 | 2   | 9  | 73  |
| 0 | 37  | 26 | 500 |
| 0 | 2   | 1  | 85  |
| 0 | 9   | 9  | 207 |
| 0 | 11  | 14 | 790 |
| 0 | 0   | 1  | 88  |
| 0 | 2   | 1  | 237 |
| 0 | 3   | 1  | 135 |
| 0 | 10  | 6  | 653 |
| 0 | 7   | 4  | 103 |
| 0 | 4   | 13 | 225 |
| 0 | 12  | 11 | 154 |
| 0 | 5   | 2  | 111 |
| 0 | 19  | 7  | 176 |
| 0 | 2   | 3  | 110 |
| 0 | 8   | 5  | 238 |
| 0 | 28  | 25 | 443 |
| 0 | 11  | 1  | 76  |
| 0 | 16  | 16 | 237 |
| 0 | 11  | 4  | 162 |
| 0 | 6   | 0  | 135 |
| 0 | 7   | 1  | 168 |
| 0 | 33  | 23 | 243 |
| 0 | 21  | 18 | 220 |
| 0 | 6   | 3  | 511 |
| 0 | 1   | 3  | 113 |
| 0 | 4   | 2  | 142 |
| 0 | 12  | 10 | 97  |
| 0 | 4   | 6  | 198 |
| 0 | 5   | 5  | 138 |
| 0 | 6   | 2  | 106 |
| 0 | 5   | 4  | 88  |
| 0 | 3   | 5  | 111 |
| 0 | 2   | 3  | 155 |
| 0 | 109 | 82 | 262 |
| 0 | 5   | 2  | 124 |
| 0 | 1   | 0  | 67  |
| 0 | 10  | 4  | 237 |
| 0 | 23  | 12 | 385 |
| 0 | 12  | 1  | 72  |

|   |     |     |     |
|---|-----|-----|-----|
| 0 | 18  | 9   | 211 |
| 0 | 4   | 1   | 117 |
| 0 | 4   | 7   | 138 |
| 0 | 43  | 99  | 918 |
| 0 | 14  | 9   | 106 |
| 0 | 7   | 8   | 168 |
| 0 | 4   | 0   | 85  |
| 0 | 1   | 1   | 94  |
| 0 | 9   | 2   | 206 |
| 0 | 4   | 5   | 157 |
| 0 | 8   | 5   | 85  |
| 0 | 15  | 5   | 88  |
| 0 | 4   | 0   | 114 |
| 0 | 18  | 4   | 146 |
| 0 | 66  | 63  | 731 |
| 0 | 11  | 5   | 154 |
| 0 | 82  | 83  | 329 |
| 0 | 9   | 5   | 91  |
| 0 | 0   | 2   | 81  |
| 0 | 19  | 11  | 206 |
| 0 | 2   | 2   | 90  |
| 0 | 9   | 32  | 180 |
| 0 | 12  | 17  | 168 |
| 0 | 5   | 1   | 69  |
| 0 | 19  | 12  | 176 |
| 0 | 9   | 3   | 161 |
| 0 | 6   | 2   | 178 |
| 0 | 14  | 4   | 109 |
| 0 | 0   | 0   | 90  |
| 0 | 3   | 1   | 98  |
| 0 | 109 | 54  | 789 |
| 0 | 11  | 1   | 117 |
| 0 | 3   | 2   | 94  |
| 0 | 32  | 41  | 578 |
| 0 | 5   | 4   | 146 |
| 0 | 8   | 4   | 137 |
| 0 | 6   | 4   | 144 |
| 0 | 100 | 55  | 186 |
| 0 | 7   | 7   | 136 |
| 0 | 0   | 0   | 119 |
| 0 | 6   | 2   | 115 |
| 0 | 727 | 672 | 111 |
| 0 | 5   | 8   | 123 |
| 0 | 2   | 1   | 565 |
| 0 | 0   | 0   | 269 |
| 0 | 0   | 0   | 95  |
| 0 | 18  | 5   | 108 |



|   |     |     |      |
|---|-----|-----|------|
| 0 | 4   | 4   | 92   |
| 0 | 2   | 1   | 116  |
| 0 | 13  | 0   | 61   |
| 0 | 18  | 4   | 87   |
| 0 | 15  | 5   | 203  |
| 0 | 319 | 110 | 1065 |
| 0 | 10  | 11  | 146  |
| 0 | 94  | 46  | 167  |
| 0 | 11  | 4   | 125  |
| 0 | 12  | 9   | 193  |
| 0 | 4   | 3   | 164  |
| 0 | 7   | 3   | 90   |
| 0 | 9   | 4   | 71   |
| 0 | 6   | 3   | 82   |
| 0 | 15  | 1   | 163  |
| 0 | 6   | 9   | 177  |
| 0 | 6   | 2   | 210  |
| 0 | 1   | 2   | 122  |
| 0 | 54  | 39  | 293  |
| 0 | 30  | 8   | 223  |
| 0 | 5   | 0   | 105  |
| 0 | 1   | 2   | 81   |
| 0 | 7   | 5   | 99   |
| 0 | 20  | 22  | 293  |
| 0 | 1   | 2   | 99   |
| 0 | 209 | 57  | 629  |
| 0 | 9   | 2   | 140  |
| 0 | 8   | 16  | 97   |
| 0 | 55  | 21  | 127  |
| 0 | 14  | 7   | 137  |
| 0 | 2   | 4   | 115  |
| 0 | 9   | 5   | 131  |
| 0 | 2   | 3   | 92   |
| 0 | 52  | 22  | 313  |
| 0 | 17  | 3   | 154  |
| 0 | 1   | 1   | 67   |
| 0 | 27  | 2   | 81   |
| 0 | 6   | 5   | 86   |
| 0 | 5   | 0   | 103  |
| 0 | 95  | 23  | 193  |
| 0 | 8   | 5   | 100  |
| 0 | 6   | 10  | 104  |
| 0 | 9   | 4   | 119  |
| 0 | 8   | 4   | 249  |
| 0 | 2   | 1   | 135  |
| 0 | 15  | 6   | 164  |
| 0 | 13  | 3   | 123  |

|   |      |     |     |
|---|------|-----|-----|
| 0 | 0    | 7   | 65  |
| 0 | 0    | 12  | 96  |
| 0 | 3    | 1   | 169 |
| 0 | 1    | 1   | 70  |
| 0 | 6    | 2   | 83  |
| 0 | 10   | 1   | 66  |
| 0 | 6    | 5   | 118 |
| 0 | 23   | 19  | 298 |
| 0 | 9    | 1   | 119 |
| 0 | 14   | 13  | 474 |
| 0 | 6    | 4   | 116 |
| 0 | 13   | 15  | 161 |
| 0 | 13   | 16  | 759 |
| 0 | 14   | 9   | 248 |
| 0 | 4    | 2   | 103 |
| 0 | 43   | 3   | 58  |
| 0 | 2    | 0   | 94  |
| 0 | 0    | 0   | 136 |
| 0 | 5    | 5   | 128 |
| 0 | 3    | 2   | 132 |
| 0 | 53   | 9   | 71  |
| 0 | 0    | 1   | 190 |
| 0 | 8    | 12  | 187 |
| 0 | 36   | 35  | 326 |
| 0 | 12   | 4   | 687 |
| 0 | 3    | 0   | 114 |
| 0 | 1    | 1   | 71  |
| 0 | 3    | 3   | 387 |
| 0 | 6    | 40  | 143 |
| 0 | 4    | 1   | 114 |
| 0 | 0    | 1   | 88  |
| 0 | 4    | 0   | 119 |
| 0 | 14   | 21  | 545 |
| 0 | 12   | 12  | 253 |
| 0 | 9    | 25  | 140 |
| 0 | 1179 | 813 | 223 |
| 0 | 50   | 14  | 223 |
| 0 | 9    | 1   | 88  |
| 0 | 28   | 10  | 95  |
| 0 | 29   | 23  | 460 |
| 0 | 22   | 2   | 115 |
| 0 | 44   | 43  | 120 |
| 0 | 3    | 1   | 207 |
| 0 | 3    | 6   | 92  |
| 0 | 8    | 3   | 374 |
| 0 | 2    | 1   | 160 |
| 0 | 11   | 4   | 72  |

|   |      |      |     |
|---|------|------|-----|
| 0 | 5    | 4    | 146 |
| 0 | 19   | 10   | 193 |
| 0 | 4    | 3    | 131 |
| 0 | 4609 | 2595 | 73  |
| 0 | 4    | 0    | 342 |
| 0 | 85   | 16   | 360 |
| 0 | 0    | 16   | 129 |
| 0 | 0    | 32   | 131 |
| 0 | 39   | 8    | 621 |
| 0 | 3    | 2    | 84  |
| 0 | 6    | 4    | 165 |
| 0 | 1    | 1    | 366 |
| 0 | 3    | 36   | 87  |
| 0 | 0    | 0    | 78  |
| 0 | 3    | 1    | 87  |
| 0 | 0    | 0    | 157 |
| 0 | 75   | 23   | 161 |
| 0 | 5    | 3    | 170 |
| 0 | 5    | 3    | 133 |
| 0 | 2    | 1    | 114 |
| 0 | 10   | 8    | 237 |
| 0 | 11   | 5    | 261 |
| 0 | 0    | 1    | 118 |
| 0 | 11   | 6    | 60  |
| 0 | 23   | 8    | 233 |
| 0 | 86   | 5    | 101 |
| 0 | 20   | 12   | 125 |
| 0 | 7    | 3    | 181 |
| 0 | 16   | 4    | 241 |
| 0 | 51   | 23   | 347 |
| 0 | 3    | 1    | 104 |
| 0 | 10   | 3    | 86  |
| 0 | 0    | 0    | 110 |
| 0 | 9    | 9    | 161 |
| 0 | 8    | 2    | 171 |
| 0 | 4    | 10   | 111 |
| 0 | 13   | 2    | 69  |
| 0 | 28   | 17   | 187 |
| 0 | 2    | 2    | 84  |
| 0 | 3    | 5    | 255 |
| 0 | 108  | 73   | 625 |
| 0 | 1    | 7    | 193 |
| 0 | 0    | 0    | 59  |
| 0 | 6    | 2    | 132 |
| 0 | 11   | 9    | 86  |
| 0 | 21   | 8    | 133 |
| 0 | 0    | 0    | 129 |

|   |     |    |     |
|---|-----|----|-----|
| 0 | 108 | 18 | 181 |
| 0 | 10  | 7  | 90  |
| 0 | 24  | 4  | 81  |
| 0 | 6   | 0  | 629 |
| 0 | 9   | 14 | 125 |
| 0 | 12  | 1  | 95  |
| 0 | 7   | 12 | 198 |
| 0 | 13  | 7  | 138 |
| 0 | 50  | 59 | 429 |
| 0 | 4   | 1  | 108 |
| 0 | 167 | 52 | 270 |
| 0 | 0   | 1  | 64  |
| 0 | 11  | 5  | 107 |
| 0 | 6   | 4  | 197 |
| 0 | 1   | 1  | 70  |
| 0 | 0   | 0  | 72  |
| 0 | 2   | 2  | 90  |
| 0 | 0   | 2  | 80  |
| 0 | 3   | 0  | 84  |
| 0 | 39  | 14 | 100 |
| 0 | 9   | 4  | 371 |
| 0 | 12  | 7  | 502 |
| 0 | 20  | 8  | 903 |
| 0 | 18  | 19 | 493 |
| 0 | 0   | 0  | 104 |
| 0 | 10  | 1  | 697 |
| 0 | 0   | 0  | 109 |
| 0 | 27  | 10 | 498 |
| 0 | 54  | 15 | 582 |
| 0 | 107 | 69 | 592 |
| 0 | 73  | 50 | 308 |
| 0 | 6   | 1  | 118 |
| 0 | 3   | 1  | 107 |
| 0 | 19  | 15 | 793 |
| 0 | 11  | 9  | 97  |
| 0 | 12  | 4  | 218 |
| 0 | 5   | 1  | 364 |
| 0 | 9   | 6  | 177 |
| 0 | 2   | 0  | 150 |
| 0 | 18  | 29 | 497 |
| 0 | 0   | 0  | 103 |
| 0 | 6   | 4  | 143 |
| 0 | 9   | 3  | 163 |
| 0 | 2   | 1  | 191 |
| 0 | 5   | 2  | 154 |
| 0 | 9   | 6  | 273 |
| 0 | 25  | 23 | 385 |

|   |     |     |      |
|---|-----|-----|------|
| 0 | 3   | 2   | 104  |
| 0 | 4   | 12  | 262  |
| 0 | 4   | 5   | 136  |
| 0 | 4   | 0   | 70   |
| 0 | 4   | 1   | 120  |
| 0 | 7   | 14  | 237  |
| 0 | 4   | 0   | 106  |
| 0 | 4   | 3   | 141  |
| 0 | 21  | 17  | 102  |
| 0 | 8   | 15  | 177  |
| 0 | 6   | 8   | 113  |
| 0 | 4   | 4   | 111  |
| 0 | 27  | 10  | 96   |
| 0 | 12  | 2   | 75   |
| 0 | 5   | 12  | 253  |
| 0 | 0   | 5   | 123  |
| 0 | 14  | 9   | 76   |
| 0 | 1   | 4   | 133  |
| 0 | 14  | 0   | 103  |
| 0 | 6   | 2   | 148  |
| 0 | 56  | 104 | 2103 |
| 0 | 9   | 23  | 1202 |
| 0 | 0   | 1   | 76   |
| 0 | 6   | 9   | 135  |
| 0 | 6   | 3   | 345  |
| 0 | 3   | 3   | 155  |
| 0 | 40  | 8   | 96   |
| 0 | 46  | 21  | 261  |
| 0 | 9   | 2   | 141  |
| 0 | 18  | 7   | 392  |
| 0 | 6   | 5   | 152  |
| 0 | 10  | 2   | 145  |
| 0 | 117 | 93  | 1116 |
| 0 | 3   | 1   | 107  |
| 0 | 27  | 15  | 107  |
| 0 | 13  | 7   | 137  |
| 0 | 19  | 10  | 237  |
| 0 | 31  | 47  | 767  |
| 0 | 33  | 28  | 289  |
| 0 | 18  | 10  | 329  |
| 0 | 6   | 9   | 144  |
| 0 | 14  | 19  | 236  |
| 0 | 6   | 0   | 88   |
| 0 | 1   | 1   | 85   |
| 0 | 11  | 3   | 114  |
| 0 | 5   | 7   | 90   |
| 0 | 0   | 0   | 491  |

|   |     |     |     |
|---|-----|-----|-----|
| 0 | 735 | 882 | 129 |
| 0 | 2   | 1   | 96  |
| 0 | 0   | 3   | 144 |
| 0 | 16  | 24  | 742 |
| 0 | 2   | 3   | 98  |
| 0 | 6   | 1   | 112 |
| 0 | 65  | 59  | 402 |
| 0 | 2   | 1   | 75  |
| 0 | 8   | 2   | 137 |
| 0 | 42  | 12  | 255 |
| 0 | 14  | 11  | 349 |
| 0 | 15  | 13  | 119 |
| 0 | 4   | 11  | 333 |
| 0 | 37  | 6   | 334 |
| 0 | 5   | 1   | 152 |
| 0 | 2   | 3   | 86  |
| 0 | 6   | 6   | 208 |
| 0 | 6   | 3   | 105 |
| 0 | 13  | 3   | 193 |
| 0 | 4   | 4   | 152 |
| 0 | 1   | 0   | 88  |
| 0 | 4   | 2   | 123 |
| 0 | 49  | 14  | 328 |
| 0 | 20  | 24  | 285 |
| 0 | 1   | 1   | 109 |
| 0 | 6   | 4   | 132 |
| 0 | 5   | 7   | 186 |
| 0 | 26  | 35  | 204 |
| 0 | 16  | 7   | 178 |
| 0 | 4   | 5   | 265 |
| 0 | 10  | 10  | 115 |
| 0 | 5   | 6   | 291 |
| 0 | 17  | 1   | 69  |
| 0 | 1   | 2   | 215 |
| 0 | 2   | 3   | 154 |
| 0 | 10  | 5   | 95  |
| 0 | 17  | 2   | 100 |
| 0 | 4   | 3   | 134 |
| 0 | 4   | 4   | 141 |
| 0 | 3   | 0   | 66  |
| 0 | 5   | 2   | 138 |
| 0 | 3   | 0   | 119 |
| 0 | 1   | 1   | 206 |
| 0 | 36  | 20  | 295 |
| 0 | 1   | 0   | 80  |
| 0 | 125 | 11  | 100 |
| 0 | 13  | 4   | 174 |

|     |     |      |     |
|-----|-----|------|-----|
| 0   | 15  | 9    | 315 |
| 0   | 15  | 14   | 218 |
| 0   | 7   | 8    | 240 |
| 0   | 7   | 11   | 230 |
| 0   | 12  | 9    | 210 |
| 0   | 33  | 10   | 149 |
| 0   | 4   | 1    | 81  |
| 0   | 12  | 9    | 565 |
| 0   | 3   | 1    | 212 |
| 0   | 1   | 3    | 130 |
| 0   | 0   | 0    | 189 |
| 0   | 4   | 8    | 194 |
| 0   | 2   | 2    | 97  |
| 0   | 13  | 3    | 96  |
| 0   | 19  | 10   | 231 |
| 0   | 10  | 2    | 108 |
| 0   | 4   | 0    | 123 |
| 0   | 3   | 0    | 62  |
| 0   | 36  | 8    | 147 |
| 0   | 7   | 4    | 142 |
| 0   | 5   | 7    | 85  |
| 138 | 358 | 1025 | 109 |
| 0   | 0   | 0    | 110 |
| 0   | 3   | 2    | 138 |
| 0   | 2   | 4    | 143 |
| 0   | 81  | 25   | 207 |
| 0   | 2   | 1    | 93  |
| 0   | 13  | 14   | 205 |
| 0   | 6   | 4    | 146 |
| 0   | 36  | 10   | 168 |
| 0   | 12  | 13   | 223 |
| 0   | 1   | 4    | 222 |
| 0   | 4   | 6    | 163 |
| 0   | 31  | 20   | 187 |
| 0   | 3   | 7    | 365 |
| 0   | 3   | 1    | 87  |
| 0   | 10  | 12   | 258 |
| 0   | 20  | 9    | 273 |
| 0   | 7   | 4    | 109 |
| 0   | 2   | 3    | 107 |
| 0   | 4   | 3    | 92  |
| 0   | 7   | 3    | 119 |
| 0   | 5   | 0    | 120 |
| 0   | 10  | 3    | 142 |
| 0   | 19  | 4    | 96  |
| 0   | 4   | 4    | 272 |
| 0   | 97  | 105  | 570 |

|   |     |     |      |
|---|-----|-----|------|
| 0 | 7   | 7   | 426  |
| 0 | 6   | 5   | 132  |
| 0 | 49  | 19  | 179  |
| 0 | 2   | 58  | 707  |
| 0 | 9   | 30  | 1226 |
| 0 | 0   | 8   | 123  |
| 0 | 7   | 3   | 127  |
| 0 | 10  | 12  | 91   |
| 0 | 17  | 33  | 393  |
| 0 | 7   | 5   | 119  |
| 0 | 2   | 0   | 117  |
| 0 | 4   | 1   | 123  |
| 0 | 35  | 3   | 128  |
| 0 | 3   | 1   | 116  |
| 0 | 64  | 49  | 436  |
| 0 | 5   | 3   | 132  |
| 0 | 12  | 3   | 66   |
| 0 | 15  | 6   | 302  |
| 0 | 9   | 9   | 273  |
| 0 | 7   | 3   | 126  |
| 0 | 1   | 0   | 93   |
| 0 | 19  | 1   | 114  |
| 0 | 10  | 8   | 250  |
| 0 | 9   | 3   | 418  |
| 0 | 8   | 6   | 254  |
| 0 | 8   | 7   | 129  |
| 0 | 7   | 3   | 126  |
| 0 | 38  | 10  | 250  |
| 0 | 60  | 22  | 200  |
| 0 | 12  | 4   | 225  |
| 0 | 7   | 3   | 93   |
| 0 | 3   | 4   | 221  |
| 0 | 61  | 72  | 1091 |
| 0 | 3   | 2   | 104  |
| 0 | 7   | 9   | 77   |
| 0 | 7   | 3   | 209  |
| 0 | 13  | 6   | 315  |
| 0 | 2   | 0   | 86   |
| 0 | 11  | 4   | 111  |
| 0 | 13  | 5   | 263  |
| 0 | 323 | 125 | 149  |
| 0 | 14  | 12  | 339  |
| 0 | 31  | 6   | 151  |
| 0 | 10  | 9   | 397  |
| 0 | 32  | 65  | 765  |
| 0 | 49  | 53  | 630  |
| 0 | 17  | 3   | 79   |



|   |     |     |     |
|---|-----|-----|-----|
| 0 | 36  | 32  | 223 |
| 0 | 9   | 1   | 213 |
| 0 | 16  | 13  | 491 |
| 0 | 493 | 554 | 75  |
| 0 | 11  | 1   | 118 |
| 0 | 4   | 3   | 102 |
| 0 | 24  | 12  | 493 |
| 0 | 12  | 8   | 183 |
| 0 | 9   | 3   | 64  |
| 0 | 9   | 12  | 114 |
| 0 | 2   | 4   | 135 |
| 0 | 9   | 12  | 345 |
| 0 | 9   | 8   | 187 |
| 0 | 5   | 5   | 153 |
| 0 | 6   | 12  | 66  |
| 0 | 17  | 6   | 182 |
| 0 | 2   | 0   | 104 |
| 0 | 30  | 39  | 544 |
| 0 | 4   | 7   | 91  |
| 0 | 5   | 2   | 74  |
| 0 | 11  | 0   | 101 |
| 0 | 27  | 13  | 206 |
| 0 | 23  | 1   | 73  |
| 0 | 712 | 745 | 351 |
| 0 | 21  | 9   | 109 |
| 0 | 0   | 1   | 83  |
| 0 | 9   | 3   | 369 |
| 0 | 15  | 17  | 376 |
| 0 | 0   | 0   | 119 |
| 0 | 1   | 0   | 84  |
| 0 | 4   | 1   | 106 |
| 0 | 20  | 5   | 209 |
| 0 | 21  | 9   | 195 |
| 0 | 0   | 3   | 229 |
| 0 | 16  | 0   | 115 |
| 0 | 1   | 1   | 87  |
| 0 | 10  | 7   | 83  |
| 0 | 8   | 4   | 111 |
| 0 | 5   | 3   | 789 |
| 0 | 4   | 2   | 126 |
| 0 | 2   | 0   | 88  |
| 0 | 23  | 6   | 276 |
| 0 | 434 | 448 | 170 |
| 0 | 3   | 7   | 190 |
| 0 | 49  | 43  | 860 |
| 0 | 53  | 21  | 269 |
| 0 | 1   | 3   | 235 |

|   |     |     |      |
|---|-----|-----|------|
| 0 | 32  | 10  | 98   |
| 0 | 2   | 1   | 90   |
| 0 | 2   | 2   | 116  |
| 0 | 2   | 2   | 123  |
| 0 | 0   | 1   | 103  |
| 0 | 34  | 40  | 126  |
| 0 | 13  | 4   | 83   |
| 0 | 0   | 0   | 73   |
| 0 | 16  | 3   | 119  |
| 0 | 4   | 0   | 1355 |
| 0 | 1   | 0   | 74   |
| 0 | 14  | 27  | 168  |
| 0 | 6   | 6   | 226  |
| 0 | 1   | 1   | 97   |
| 0 | 44  | 20  | 394  |
| 0 | 14  | 5   | 238  |
| 0 | 17  | 6   | 116  |
| 0 | 8   | 4   | 168  |
| 0 | 19  | 5   | 87   |
| 0 | 13  | 2   | 136  |
| 0 | 3   | 1   | 108  |
| 0 | 8   | 6   | 102  |
| 0 | 80  | 70  | 468  |
| 0 | 15  | 28  | 351  |
| 0 | 8   | 11  | 173  |
| 0 | 72  | 52  | 923  |
| 0 | 13  | 1   | 98   |
| 0 | 3   | 0   | 1886 |
| 0 | 6   | 3   | 130  |
| 0 | 9   | 3   | 107  |
| 0 | 6   | 2   | 110  |
| 0 | 1   | 1   | 140  |
| 0 | 9   | 6   | 91   |
| 0 | 34  | 16  | 204  |
| 0 | 6   | 1   | 136  |
| 0 | 13  | 7   | 105  |
| 0 | 10  | 14  | 231  |
| 0 | 45  | 22  | 171  |
| 0 | 7   | 5   | 128  |
| 0 | 1   | 6   | 105  |
| 0 | 8   | 10  | 217  |
| 0 | 13  | 25  | 166  |
| 0 | 16  | 15  | 78   |
| 0 | 0   | 0   | 63   |
| 0 | 371 | 251 | 917  |
| 0 | 18  | 12  | 97   |
| 0 | 2   | 2   | 77   |

|    |      |     |      |
|----|------|-----|------|
| 0  | 2    | 1   | 104  |
| 0  | 17   | 25  | 493  |
| 0  | 10   | 12  | 245  |
| 0  | 4    | 2   | 142  |
| 0  | 58   | 21  | 234  |
| 0  | 9    | 4   | 141  |
| 0  | 131  | 111 | 740  |
| 0  | 4    | 8   | 309  |
| 0  | 3    | 6   | 433  |
| 0  | 7    | 17  | 183  |
| 0  | 20   | 6   | 203  |
| 0  | 12   | 6   | 243  |
| 0  | 6    | 2   | 198  |
| 0  | 5    | 0   | 74   |
| 0  | 1    | 1   | 84   |
| 0  | 4    | 2   | 173  |
| 0  | 0    | 0   | 119  |
| 0  | 5    | 1   | 159  |
| 0  | 3    | 0   | 231  |
| 0  | 0    | 6   | 122  |
| 0  | 8    | 7   | 90   |
| 0  | 9    | 11  | 685  |
| 0  | 79   | 24  | 386  |
| 0  | 15   | 12  | 136  |
| 0  | 63   | 37  | 1110 |
| 0  | 3    | 2   | 202  |
| 0  | 11   | 22  | 327  |
| 0  | 91   | 66  | 744  |
| 26 | 2    | 15  | 179  |
| 0  | 2    | 8   | 152  |
| 0  | 5    | 6   | 207  |
| 0  | 26   | 0   | 72   |
| 0  | 5    | 5   | 267  |
| 0  | 13   | 17  | 743  |
| 0  | 13   | 13  | 323  |
| 0  | 15   | 6   | 80   |
| 0  | 10   | 3   | 128  |
| 0  | 53   | 8   | 153  |
| 0  | 6    | 4   | 381  |
| 0  | 114  | 26  | 255  |
| 0  | 9    | 0   | 121  |
| 0  | 110  | 261 | 305  |
| 0  | 7    | 6   | 104  |
| 0  | 8    | 2   | 134  |
| 0  | 1333 | 706 | 77   |
| 0  | 1    | 0   | 107  |
| 0  | 34   | 11  | 416  |

|   |     |     |     |
|---|-----|-----|-----|
| 0 | 144 | 62  | 275 |
| 0 | 4   | 0   | 139 |
| 0 | 6   | 2   | 126 |
| 0 | 2   | 0   | 106 |
| 0 | 35  | 2   | 164 |
| 0 | 35  | 52  | 137 |
| 0 | 34  | 34  | 753 |
| 0 | 4   | 2   | 81  |
| 0 | 4   | 1   | 115 |
| 0 | 5   | 4   | 115 |
| 0 | 3   | 4   | 200 |
| 0 | 7   | 1   | 123 |
| 0 | 5   | 4   | 119 |
| 0 | 1   | 1   | 126 |
| 0 | 3   | 1   | 117 |
| 0 | 1   | 3   | 107 |
| 0 | 2   | 1   | 85  |
| 0 | 6   | 2   | 88  |
| 0 | 1   | 0   | 101 |
| 0 | 7   | 5   | 119 |
| 0 | 4   | 4   | 164 |
| 0 | 6   | 1   | 133 |
| 0 | 8   | 10  | 80  |
| 0 | 9   | 5   | 71  |
| 0 | 82  | 24  | 170 |
| 0 | 3   | 4   | 93  |
| 0 | 103 | 166 | 51  |
| 0 | 0   | 0   | 60  |
| 0 | 1   | 0   | 196 |
| 0 | 7   | 6   | 152 |
| 0 | 18  | 4   | 74  |
| 0 | 9   | 19  | 509 |
| 0 | 14  | 4   | 187 |
| 0 | 4   | 2   | 99  |
| 0 | 7   | 2   | 140 |
| 0 | 12  | 12  | 193 |
| 0 | 27  | 5   | 123 |
| 0 | 17  | 8   | 158 |
| 0 | 19  | 5   | 204 |
| 0 | 97  | 98  | 465 |
| 0 | 14  | 4   | 124 |
| 0 | 13  | 21  | 422 |
| 0 | 14  | 1   | 159 |
| 0 | 391 | 36  | 112 |
| 0 | 48  | 3   | 184 |
| 0 | 38  | 27  | 729 |
| 0 | 8   | 15  | 149 |

|   |     |     |     |
|---|-----|-----|-----|
| 0 | 88  | 56  | 117 |
| 0 | 4   | 1   | 124 |
| 0 | 1   | 1   | 100 |
| 0 | 1   | 0   | 112 |
| 0 | 3   | 1   | 89  |
| 0 | 9   | 0   | 72  |
| 0 | 194 | 169 | 488 |
| 0 | 0   | 11  | 150 |
| 0 | 0   | 0   | 71  |
| 0 | 7   | 7   | 139 |
| 0 | 1   | 2   | 89  |
| 0 | 4   | 1   | 198 |
| 0 | 3   | 1   | 87  |
| 0 | 16  | 5   | 104 |
| 0 | 4   | 3   | 204 |
| 0 | 0   | 0   | 97  |
| 0 | 13  | 5   | 192 |
| 0 | 11  | 3   | 245 |
| 0 | 30  | 3   | 110 |
| 0 | 18  | 13  | 255 |
| 0 | 0   | 17  | 84  |
| 0 | 12  | 7   | 154 |
| 0 | 50  | 27  | 136 |
| 0 | 5   | 4   | 191 |
| 0 | 69  | 26  | 257 |
| 0 | 39  | 22  | 151 |
| 0 | 29  | 21  | 234 |
| 0 | 14  | 11  | 126 |
| 0 | 2   | 2   | 110 |
| 0 | 9   | 6   | 128 |
| 0 | 12  | 30  | 436 |
| 0 | 4   | 6   | 197 |
| 0 | 48  | 51  | 485 |
| 0 | 16  | 5   | 119 |
| 0 | 14  | 2   | 85  |
| 0 | 696 | 175 | 279 |
| 0 | 3   | 2   | 136 |
| 0 | 18  | 11  | 233 |
| 0 | 7   | 4   | 154 |
| 0 | 9   | 5   | 201 |
| 0 | 10  | 10  | 180 |
| 0 | 16  | 3   | 118 |
| 0 | 0   | 0   | 99  |
| 0 | 5   | 0   | 107 |
| 0 | 17  | 6   | 135 |
| 0 | 142 | 43  | 777 |
| 0 | 60  | 19  | 273 |

|   |     |     |      |
|---|-----|-----|------|
| 0 | 14  | 4   | 174  |
| 0 | 9   | 3   | 446  |
| 0 | 11  | 1   | 97   |
| 0 | 3   | 0   | 125  |
| 0 | 3   | 4   | 101  |
| 0 | 15  | 2   | 84   |
| 0 | 6   | 3   | 130  |
| 0 | 4   | 2   | 110  |
| 0 | 2   | 0   | 138  |
| 0 | 8   | 14  | 724  |
| 0 | 6   | 2   | 114  |
| 0 | 5   | 3   | 109  |
| 0 | 11  | 2   | 116  |
| 0 | 25  | 33  | 411  |
| 0 | 4   | 2   | 111  |
| 0 | 87  | 69  | 409  |
| 0 | 8   | 5   | 79   |
| 0 | 5   | 3   | 121  |
| 0 | 18  | 30  | 596  |
| 0 | 1   | 1   | 76   |
| 0 | 1   | 0   | 61   |
| 0 | 19  | 7   | 205  |
| 0 | 4   | 10  | 136  |
| 0 | 11  | 3   | 153  |
| 0 | 26  | 3   | 76   |
| 0 | 31  | 47  | 422  |
| 0 | 70  | 135 | 911  |
| 0 | 15  | 5   | 172  |
| 0 | 25  | 6   | 132  |
| 0 | 6   | 17  | 185  |
| 0 | 3   | 9   | 86   |
| 0 | 9   | 3   | 162  |
| 0 | 23  | 15  | 252  |
| 0 | 3   | 11  | 117  |
| 0 | 0   | 3   | 685  |
| 0 | 0   | 0   | 1282 |
| 0 | 0   | 0   | 101  |
| 0 | 0   | 0   | 189  |
| 0 | 8   | 5   | 417  |
| 0 | 370 | 286 | 1278 |
| 0 | 78  | 58  | 311  |
| 0 | 5   | 6   | 124  |
| 0 | 12  | 5   | 120  |
| 0 | 22  | 2   | 72   |
| 0 | 3   | 8   | 59   |
| 0 | 6   | 7   | 195  |
| 0 | 4   | 8   | 137  |

|   |    |    |     |
|---|----|----|-----|
| 0 | 16 | 6  | 158 |
| 0 | 5  | 4  | 121 |
| 0 | 6  | 2  | 198 |
| 0 | 4  | 0  | 131 |
| 0 | 13 | 4  | 223 |
| 0 | 11 | 7  | 168 |
| 0 | 12 | 2  | 138 |
| 0 | 7  | 5  | 562 |
| 0 | 4  | 2  | 112 |
| 0 | 16 | 7  | 101 |
| 0 | 8  | 3  | 159 |
| 0 | 1  | 0  | 81  |
| 0 | 35 | 54 | 766 |
| 0 | 0  | 0  | 82  |
| 0 | 13 | 7  | 97  |
| 0 | 1  | 2  | 105 |
| 0 | 26 | 3  | 80  |
| 0 | 24 | 11 | 436 |
| 0 | 11 | 5  | 171 |
| 0 | 21 | 0  | 61  |
| 0 | 22 | 5  | 89  |
| 0 | 0  | 0  | 106 |
| 0 | 0  | 0  | 134 |
| 0 | 16 | 6  | 100 |
| 0 | 2  | 4  | 123 |
| 0 | 9  | 7  | 165 |
| 0 | 23 | 29 | 831 |
| 0 | 15 | 6  | 66  |
| 0 | 25 | 72 | 595 |
| 0 | 2  | 6  | 110 |
| 0 | 5  | 1  | 160 |
| 0 | 3  | 1  | 153 |
| 0 | 3  | 3  | 101 |
| 0 | 1  | 0  | 75  |
| 0 | 3  | 4  | 133 |
| 0 | 8  | 4  | 69  |
| 0 | 5  | 1  | 107 |
| 0 | 7  | 5  | 120 |
| 0 | 5  | 10 | 174 |
| 0 | 18 | 2  | 77  |
| 0 | 3  | 0  | 95  |
| 0 | 2  | 0  | 103 |
| 0 | 3  | 2  | 108 |
| 0 | 10 | 3  | 101 |
| 0 | 1  | 1  | 85  |
| 0 | 94 | 38 | 358 |
| 0 | 1  | 0  | 121 |

|   |    |    |     |
|---|----|----|-----|
| 0 | 4  | 0  | 121 |
| 0 | 5  | 3  | 177 |
| 0 | 14 | 4  | 74  |
| 0 | 62 | 18 | 298 |
| 0 | 56 | 54 | 491 |
| 0 | 40 | 61 | 415 |
| 0 | 9  | 4  | 103 |
| 0 | 10 | 4  | 149 |
| 0 | 34 | 18 | 500 |
| 0 | 12 | 17 | 252 |
| 0 | 6  | 2  | 130 |
| 0 | 4  | 5  | 148 |
| 0 | 13 | 30 | 249 |
| 0 | 23 | 9  | 240 |
| 0 | 4  | 4  | 139 |
| 0 | 17 | 14 | 241 |
| 0 | 9  | 5  | 116 |
| 0 | 5  | 2  | 147 |
| 0 | 4  | 2  | 107 |
| 0 | 4  | 13 | 219 |
| 0 | 15 | 18 | 605 |
| 0 | 4  | 3  | 122 |
| 0 | 4  | 3  | 134 |
| 0 | 9  | 2  | 84  |
| 0 | 9  | 12 | 250 |
| 0 | 18 | 10 | 149 |
| 0 | 0  | 0  | 84  |
| 0 | 6  | 0  | 171 |
| 0 | 6  | 5  | 203 |
| 0 | 4  | 2  | 102 |
| 0 | 25 | 24 | 201 |
| 0 | 5  | 2  | 113 |
| 0 | 1  | 4  | 812 |
| 0 | 2  | 5  | 136 |
| 0 | 26 | 43 | 360 |
| 0 | 22 | 8  | 257 |
| 0 | 0  | 2  | 87  |
| 0 | 16 | 27 | 523 |
| 0 | 27 | 13 | 668 |
| 0 | 18 | 0  | 111 |
| 0 | 0  | 4  | 81  |
| 0 | 29 | 6  | 163 |
| 0 | 13 | 18 | 248 |
| 0 | 12 | 13 | 189 |
| 0 | 19 | 10 | 609 |
| 0 | 9  | 2  | 149 |
| 0 | 23 | 6  | 155 |



|   |     |     |      |
|---|-----|-----|------|
| 0 | 2   | 1   | 108  |
| 0 | 8   | 2   | 136  |
| 0 | 84  | 62  | 1003 |
| 0 | 23  | 5   | 112  |
| 0 | 4   | 2   | 111  |
| 0 | 5   | 4   | 121  |
| 0 | 12  | 4   | 225  |
| 0 | 5   | 2   | 172  |
| 0 | 0   | 2   | 77   |
| 0 | 5   | 11  | 110  |
| 0 | 367 | 257 | 70   |
| 0 | 91  | 157 | 136  |
| 0 | 22  | 15  | 192  |
| 0 | 23  | 7   | 190  |
| 0 | 3   | 0   | 89   |
| 0 | 8   | 5   | 645  |
| 0 | 4   | 0   | 69   |
| 0 | 34  | 25  | 294  |
| 0 | 13  | 8   | 115  |
| 0 | 22  | 11  | 190  |
| 0 | 17  | 10  | 267  |
| 0 | 160 | 86  | 853  |
| 0 | 6   | 2   | 109  |
| 0 | 21  | 4   | 114  |
| 0 | 3   | 0   | 122  |
| 0 | 13  | 3   | 146  |
| 0 | 24  | 7   | 183  |
| 0 | 5   | 0   | 117  |
| 0 | 99  | 79  | 618  |
| 0 | 7   | 1   | 123  |
| 0 | 21  | 2   | 78   |
| 0 | 24  | 4   | 82   |
| 0 | 42  | 5   | 68   |
| 0 | 2   | 2   | 177  |
| 0 | 6   | 3   | 133  |
| 0 | 7   | 1   | 430  |
| 0 | 23  | 7   | 139  |
| 0 | 54  | 316 | 981  |
| 0 | 37  | 16  | 375  |
| 0 | 50  | 54  | 372  |
| 0 | 10  | 3   | 80   |
| 0 | 12  | 4   | 81   |
| 0 | 13  | 7   | 145  |
| 0 | 12  | 8   | 231  |
| 0 | 3   | 2   | 117  |
| 0 | 10  | 4   | 302  |
| 0 | 140 | 64  | 270  |

|    |     |     |      |
|----|-----|-----|------|
| 0  | 1   | 0   | 147  |
| 0  | 3   | 4   | 201  |
| 0  | 2   | 2   | 87   |
| 0  | 5   | 1   | 110  |
| 0  | 6   | 5   | 117  |
| 0  | 55  | 117 | 764  |
| 0  | 6   | 6   | 113  |
| 0  | 23  | 24  | 388  |
| 0  | 2   | 0   | 88   |
| 0  | 22  | 2   | 79   |
| 0  | 16  | 7   | 126  |
| 0  | 5   | 3   | 138  |
| 0  | 5   | 4   | 113  |
| 0  | 14  | 9   | 109  |
| 0  | 10  | 7   | 283  |
| 0  | 7   | 2   | 134  |
| 0  | 29  | 8   | 99   |
| 0  | 32  | 3   | 80   |
| 0  | 15  | 30  | 380  |
| 0  | 5   | 7   | 217  |
| 0  | 7   | 2   | 188  |
| 0  | 87  | 77  | 1304 |
| 0  | 10  | 11  | 270  |
| 0  | 39  | 43  | 316  |
| 0  | 9   | 4   | 94   |
| 0  | 2   | 0   | 102  |
| 0  | 3   | 6   | 493  |
| 0  | 6   | 6   | 113  |
| 0  | 6   | 3   | 133  |
| 0  | 5   | 0   | 78   |
| 0  | 5   | 2   | 157  |
| 21 | 1   | 24  | 250  |
| 57 | 6   | 51  | 416  |
| 0  | 10  | 5   | 201  |
| 0  | 13  | 2   | 91   |
| 0  | 16  | 5   | 157  |
| 0  | 108 | 19  | 273  |
| 0  | 20  | 5   | 172  |
| 0  | 12  | 12  | 201  |
| 0  | 9   | 7   | 321  |
| 0  | 4   | 1   | 182  |
| 0  | 18  | 28  | 558  |
| 0  | 12  | 6   | 400  |
| 0  | 25  | 23  | 365  |
| 0  | 8   | 5   | 171  |
| 0  | 8   | 5   | 137  |
| 0  | 25  | 23  | 147  |

|   |     |    |     |
|---|-----|----|-----|
| 0 | 0   | 0  | 66  |
| 0 | 15  | 9  | 211 |
| 0 | 3   | 1  | 119 |
| 0 | 1   | 11 | 178 |
| 0 | 10  | 14 | 78  |
| 0 | 3   | 3  | 169 |
| 0 | 20  | 5  | 74  |
| 0 | 4   | 3  | 95  |
| 0 | 12  | 2  | 240 |
| 0 | 2   | 0  | 191 |
| 0 | 1   | 0  | 101 |
| 0 | 7   | 2  | 138 |
| 0 | 10  | 20 | 169 |
| 0 | 12  | 6  | 152 |
| 0 | 23  | 8  | 204 |
| 0 | 5   | 5  | 126 |
| 0 | 10  | 2  | 88  |
| 0 | 100 | 15 | 140 |
| 0 | 20  | 18 | 175 |
| 0 | 13  | 4  | 572 |
| 0 | 12  | 0  | 81  |
| 0 | 5   | 1  | 78  |
| 0 | 1   | 2  | 109 |
| 0 | 4   | 3  | 170 |
| 0 | 7   | 3  | 119 |
| 0 | 2   | 1  | 151 |
| 0 | 3   | 3  | 204 |
| 0 | 3   | 3  | 119 |
| 0 | 13  | 7  | 124 |
| 0 | 15  | 33 | 743 |
| 0 | 0   | 2  | 86  |
| 0 | 15  | 6  | 130 |
| 0 | 8   | 9  | 249 |
| 0 | 3   | 1  | 109 |
| 0 | 2   | 2  | 84  |
| 0 | 3   | 3  | 98  |
| 0 | 11  | 4  | 161 |
| 0 | 1   | 1  | 99  |
| 0 | 1   | 1  | 90  |
| 0 | 11  | 5  | 194 |
| 0 | 2   | 2  | 94  |
| 0 | 58  | 29 | 227 |
| 0 | 6   | 1  | 80  |
| 0 | 3   | 1  | 94  |
| 0 | 5   | 4  | 157 |
| 0 | 13  | 0  | 130 |
| 0 | 8   | 2  | 119 |

|   |     |     |     |
|---|-----|-----|-----|
| 0 | 11  | 6   | 238 |
| 0 | 10  | 17  | 173 |
| 0 | 1   | 6   | 158 |
| 0 | 2   | 0   | 103 |
| 0 | 13  | 3   | 121 |
| 0 | 10  | 2   | 73  |
| 0 | 1   | 3   | 107 |
| 0 | 25  | 12  | 120 |
| 0 | 15  | 3   | 86  |
| 0 | 261 | 78  | 256 |
| 0 | 218 | 164 | 576 |
| 0 | 3   | 1   | 84  |
| 0 | 38  | 10  | 114 |
| 0 | 1   | 1   | 136 |
| 0 | 8   | 5   | 156 |
| 0 | 13  | 5   | 273 |
| 0 | 7   | 3   | 112 |
| 0 | 2   | 0   | 137 |
| 0 | 14  | 19  | 511 |
| 0 | 17  | 9   | 102 |
| 0 | 6   | 11  | 135 |
| 0 | 19  | 9   | 200 |
| 0 | 13  | 4   | 110 |
| 0 | 0   | 0   | 132 |
| 0 | 10  | 4   | 166 |
| 0 | 2   | 1   | 80  |
| 0 | 26  | 73  | 529 |
| 0 | 14  | 14  | 228 |
| 0 | 33  | 16  | 187 |
| 0 | 43  | 22  | 196 |
| 0 | 5   | 2   | 88  |
| 0 | 14  | 13  | 112 |
| 0 | 41  | 59  | 462 |
| 0 | 17  | 8   | 145 |
| 0 | 3   | 3   | 110 |
| 0 | 1   | 6   | 147 |
| 0 | 55  | 29  | 463 |
| 0 | 13  | 10  | 127 |
| 0 | 1   | 0   | 112 |
| 0 | 17  | 19  | 150 |
| 0 | 7   | 3   | 268 |
| 0 | 11  | 5   | 230 |
| 0 | 2   | 3   | 150 |
| 0 | 18  | 51  | 399 |
| 0 | 16  | 8   | 186 |
| 0 | 2   | 1   | 121 |
| 0 | 215 | 100 | 110 |

|   |     |    |     |
|---|-----|----|-----|
| 0 | 102 | 42 | 123 |
| 0 | 25  | 23 | 316 |
| 0 | 6   | 1  | 181 |
| 0 | 11  | 6  | 161 |
| 0 | 52  | 49 | 123 |
| 0 | 11  | 31 | 344 |
| 0 | 17  | 4  | 118 |
| 0 | 3   | 2  | 117 |
| 0 | 9   | 7  | 305 |
| 0 | 7   | 23 | 339 |
| 0 | 0   | 2  | 72  |
| 0 | 14  | 6  | 276 |
| 0 | 11  | 6  | 424 |
| 0 | 11  | 11 | 190 |
| 0 | 10  | 5  | 149 |
| 0 | 1   | 1  | 76  |
| 0 | 14  | 25 | 390 |
| 0 | 7   | 2  | 182 |
| 0 | 1   | 0  | 126 |
| 0 | 13  | 6  | 290 |
| 0 | 31  | 23 | 431 |
| 0 | 3   | 5  | 121 |
| 0 | 10  | 3  | 78  |
| 0 | 20  | 9  | 240 |
| 0 | 8   | 3  | 159 |
| 0 | 16  | 0  | 61  |
| 0 | 19  | 37 | 252 |
| 0 | 6   | 34 | 123 |
| 0 | 1   | 1  | 69  |
| 0 | 0   | 0  | 254 |
| 0 | 2   | 1  | 152 |
| 0 | 6   | 10 | 65  |
| 0 | 25  | 26 | 523 |
| 0 | 4   | 0  | 149 |
| 0 | 0   | 0  | 744 |
| 0 | 1   | 0  | 101 |
| 0 | 0   | 2  | 70  |
| 0 | 3   | 1  | 90  |
| 0 | 2   | 0  | 95  |
| 0 | 0   | 0  | 110 |
| 0 | 0   | 2  | 74  |
| 0 | 4   | 1  | 92  |
| 0 | 5   | 6  | 157 |
| 0 | 17  | 9  | 205 |
| 0 | 4   | 10 | 158 |
| 0 | 4   | 22 | 94  |
| 0 | 80  | 19 | 127 |

|    |     |    |     |
|----|-----|----|-----|
| 0  | 0   | 0  | 71  |
| 0  | 22  | 22 | 306 |
| 0  | 18  | 6  | 105 |
| 0  | 19  | 12 | 57  |
| 0  | 0   | 0  | 440 |
| 0  | 11  | 45 | 381 |
| 0  | 3   | 1  | 126 |
| 0  | 24  | 30 | 261 |
| 0  | 11  | 5  | 117 |
| 0  | 14  | 9  | 130 |
| 0  | 26  | 24 | 175 |
| 0  | 17  | 23 | 311 |
| 0  | 44  | 39 | 336 |
| 0  | 36  | 15 | 324 |
| 0  | 9   | 3  | 104 |
| 0  | 7   | 9  | 211 |
| 16 | 34  | 91 | 584 |
| 0  | 39  | 21 | 487 |
| 0  | 0   | 0  | 227 |
| 0  | 7   | 2  | 166 |
| 0  | 13  | 3  | 197 |
| 0  | 4   | 3  | 230 |
| 0  | 25  | 27 | 376 |
| 0  | 1   | 0  | 77  |
| 0  | 3   | 1  | 99  |
| 0  | 28  | 4  | 67  |
| 0  | 2   | 1  | 403 |
| 0  | 28  | 10 | 77  |
| 0  | 8   | 8  | 107 |
| 0  | 163 | 80 | 244 |
| 0  | 4   | 1  | 102 |
| 0  | 9   | 9  | 584 |
| 0  | 8   | 6  | 350 |
| 0  | 8   | 1  | 94  |
| 0  | 11  | 9  | 212 |
| 0  | 32  | 26 | 120 |
| 0  | 0   | 0  | 63  |
| 0  | 20  | 4  | 130 |
| 0  | 7   | 2  | 142 |
| 0  | 70  | 4  | 101 |
| 0  | 20  | 0  | 58  |
| 0  | 5   | 8  | 302 |
| 0  | 15  | 15 | 259 |
| 0  | 20  | 13 | 335 |
| 0  | 0   | 0  | 108 |
| 0  | 1   | 0  | 118 |
| 0  | 7   | 2  | 67  |

|    |     |     |     |
|----|-----|-----|-----|
| 0  | 2   | 0   | 617 |
| 0  | 12  | 14  | 288 |
| 0  | 45  | 12  | 368 |
| 0  | 8   | 7   | 157 |
| 0  | 9   | 0   | 73  |
| 0  | 2   | 0   | 130 |
| 0  | 75  | 119 | 176 |
| 0  | 68  | 22  | 233 |
| 0  | 12  | 12  | 178 |
| 0  | 85  | 5   | 161 |
| 0  | 0   | 1   | 133 |
| 0  | 53  | 77  | 779 |
| 0  | 45  | 10  | 140 |
| 0  | 56  | 12  | 216 |
| 0  | 1   | 0   | 114 |
| 0  | 4   | 3   | 117 |
| 0  | 12  | 18  | 512 |
| 0  | 50  | 35  | 171 |
| 0  | 0   | 0   | 668 |
| 0  | 1   | 2   | 275 |
| 0  | 36  | 8   | 128 |
| 0  | 14  | 20  | 225 |
| 0  | 1   | 5   | 80  |
| 0  | 5   | 7   | 166 |
| 60 | 330 | 557 | 147 |
| 0  | 9   | 1   | 95  |
| 0  | 5   | 5   | 120 |
| 0  | 86  | 71  | 727 |
| 0  | 52  | 26  | 257 |
| 0  | 190 | 45  | 143 |
| 0  | 8   | 9   | 198 |
| 0  | 19  | 26  | 184 |
| 0  | 1   | 1   | 88  |
| 0  | 6   | 5   | 127 |
| 0  | 5   | 1   | 73  |
| 0  | 5   | 5   | 176 |
| 0  | 0   | 3   | 123 |
| 0  | 43  | 41  | 372 |
| 0  | 16  | 7   | 207 |
| 2  | 38  | 48  | 353 |
| 0  | 2   | 5   | 167 |
| 0  | 68  | 33  | 317 |
| 0  | 17  | 10  | 76  |
| 0  | 6   | 2   | 189 |
| 0  | 14  | 9   | 220 |
| 0  | 9   | 1   | 112 |
| 0  | 5   | 4   | 121 |

|   |     |     |      |
|---|-----|-----|------|
| 0 | 10  | 3   | 176  |
| 0 | 0   | 0   | 101  |
| 0 | 1   | 0   | 242  |
| 1 | 53  | 242 | 384  |
| 0 | 2   | 0   | 85   |
| 0 | 2   | 0   | 257  |
| 0 | 5   | 5   | 256  |
| 0 | 1   | 3   | 131  |
| 0 | 21  | 248 | 362  |
| 0 | 17  | 8   | 80   |
| 0 | 24  | 8   | 93   |
| 0 | 17  | 9   | 135  |
| 0 | 58  | 103 | 1718 |
| 0 | 10  | 17  | 200  |
| 0 | 77  | 53  | 441  |
| 0 | 6   | 4   | 477  |
| 0 | 66  | 102 | 428  |
| 0 | 0   | 11  | 80   |
| 0 | 12  | 7   | 211  |
| 0 | 17  | 3   | 152  |
| 0 | 17  | 0   | 79   |
| 0 | 1   | 0   | 106  |
| 0 | 0   | 2   | 223  |
| 0 | 1   | 10  | 93   |
| 0 | 9   | 6   | 212  |
| 0 | 33  | 18  | 217  |
| 0 | 1   | 0   | 107  |
| 0 | 5   | 1   | 78   |
| 0 | 20  | 6   | 130  |
| 0 | 5   | 4   | 135  |
| 0 | 2   | 0   | 106  |
| 0 | 1   | 1   | 121  |
| 0 | 18  | 5   | 298  |
| 0 | 6   | 16  | 293  |
| 0 | 43  | 19  | 384  |
| 0 | 26  | 6   | 115  |
| 0 | 5   | 3   | 102  |
| 0 | 1   | 1   | 202  |
| 0 | 6   | 2   | 146  |
| 0 | 14  | 8   | 290  |
| 0 | 3   | 0   | 62   |
| 0 | 10  | 10  | 945  |
| 0 | 52  | 70  | 516  |
| 0 | 7   | 8   | 183  |
| 0 | 5   | 5   | 116  |
| 0 | 355 | 497 | 276  |
| 0 | 17  | 21  | 156  |



|   |     |     |     |
|---|-----|-----|-----|
| 0 | 25  | 23  | 942 |
| 0 | 7   | 2   | 140 |
| 0 | 249 | 125 | 642 |
| 0 | 10  | 7   | 123 |
| 0 | 54  | 17  | 357 |
| 0 | 12  | 5   | 222 |
| 0 | 2   | 0   | 169 |
| 0 | 6   | 1   | 120 |
| 0 | 1   | 2   | 93  |
| 0 | 6   | 2   | 139 |
| 0 | 15  | 11  | 126 |
| 0 | 5   | 1   | 94  |
| 0 | 9   | 5   | 284 |
| 0 | 249 | 325 | 334 |
| 0 | 0   | 1   | 106 |
| 0 | 6   | 3   | 151 |
| 0 | 4   | 0   | 73  |
| 0 | 34  | 62  | 165 |
| 0 | 14  | 10  | 149 |
| 2 | 260 | 607 | 151 |
| 0 | 1   | 0   | 107 |
| 0 | 0   | 0   | 70  |
| 0 | 88  | 37  | 297 |
| 0 | 14  | 8   | 291 |
| 0 | 69  | 33  | 708 |
| 0 | 4   | 3   | 149 |
| 0 | 46  | 72  | 542 |
| 0 | 18  | 16  | 207 |
| 0 | 8   | 10  | 170 |
| 0 | 85  | 100 | 480 |
| 0 | 2   | 6   | 128 |
| 0 | 3   | 1   | 120 |
| 0 | 9   | 6   | 134 |
| 0 | 2   | 20  | 334 |
| 0 | 80  | 135 | 329 |
| 0 | 8   | 4   | 172 |
| 0 | 2   | 2   | 175 |
| 0 | 20  | 6   | 327 |
| 0 | 1   | 3   | 173 |
| 0 | 19  | 15  | 138 |
| 0 | 6   | 1   | 226 |
| 0 | 8   | 5   | 285 |
| 0 | 0   | 0   | 462 |
| 0 | 31  | 18  | 247 |
| 0 | 7   | 2   | 218 |
| 0 | 10  | 6   | 292 |
| 0 | 1   | 0   | 141 |

|     |     |     |      |
|-----|-----|-----|------|
| 0   | 7   | 18  | 264  |
| 0   | 22  | 6   | 418  |
| 0   | 4   | 3   | 135  |
| 0   | 6   | 3   | 91   |
| 0   | 6   | 2   | 297  |
| 0   | 12  | 0   | 91   |
| 0   | 1   | 0   | 67   |
| 0   | 1   | 2   | 134  |
| 0   | 1   | 0   | 115  |
| 0   | 65  | 93  | 226  |
| 0   | 44  | 14  | 97   |
| 0   | 18  | 16  | 143  |
| 0   | 8   | 4   | 100  |
| 0   | 7   | 3   | 785  |
| 0   | 76  | 68  | 1058 |
| 0   | 1   | 8   | 67   |
| 122 | 309 | 418 | 327  |
| 0   | 4   | 1   | 142  |
| 0   | 2   | 0   | 104  |
| 0   | 26  | 3   | 129  |
| 0   | 29  | 9   | 84   |
| 0   | 10  | 2   | 110  |
| 0   | 20  | 6   | 86   |
| 0   | 1   | 2   | 74   |
| 0   | 7   | 6   | 179  |
| 0   | 9   | 7   | 194  |
| 0   | 49  | 5   | 106  |
| 0   | 2   | 1   | 96   |
| 0   | 3   | 2   | 140  |
| 0   | 4   | 1   | 135  |
| 0   | 1   | 2   | 119  |
| 0   | 22  | 16  | 153  |
| 0   | 6   | 3   | 118  |
| 0   | 27  | 26  | 570  |
| 0   | 4   | 0   | 175  |
| 0   | 12  | 4   | 139  |
| 0   | 0   | 0   | 94   |
| 0   | 5   | 0   | 103  |
| 0   | 209 | 81  | 655  |
| 0   | 53  | 21  | 269  |
| 0   | 50  | 41  | 682  |
| 0   | 21  | 4   | 92   |
| 0   | 24  | 12  | 632  |
| 0   | 27  | 25  | 351  |
| 0   | 2   | 1   | 116  |
| 0   | 33  | 18  | 280  |
| 67  | 285 | 440 | 421  |

|   |     |     |     |
|---|-----|-----|-----|
| 0 | 24  | 20  | 283 |
| 0 | 43  | 38  | 476 |
| 0 | 4   | 2   | 120 |
| 0 | 5   | 2   | 566 |
| 0 | 15  | 12  | 316 |
| 0 | 28  | 18  | 187 |
| 0 | 49  | 49  | 422 |
| 0 | 10  | 6   | 96  |
| 0 | 11  | 3   | 103 |
| 0 | 21  | 7   | 119 |
| 0 | 232 | 145 | 231 |
| 0 | 3   | 4   | 133 |
| 0 | 8   | 3   | 158 |
| 0 | 14  | 9   | 251 |
| 0 | 1   | 0   | 102 |
| 0 | 1   | 1   | 74  |
| 0 | 46  | 60  | 561 |
| 0 | 10  | 5   | 138 |
| 0 | 122 | 77  | 318 |
| 0 | 18  | 8   | 115 |
| 0 | 7   | 4   | 99  |
| 0 | 29  | 23  | 255 |
| 0 | 1   | 0   | 91  |
| 0 | 12  | 12  | 378 |
| 0 | 16  | 29  | 162 |
| 0 | 23  | 6   | 750 |
| 0 | 6   | 2   | 83  |
| 0 | 29  | 8   | 115 |
| 0 | 3   | 1   | 115 |
| 0 | 8   | 2   | 123 |
| 0 | 14  | 9   | 149 |
| 0 | 14  | 15  | 207 |
| 0 | 12  | 3   | 138 |
| 0 | 40  | 45  | 396 |
| 0 | 76  | 34  | 615 |
| 0 | 15  | 12  | 231 |
| 0 | 8   | 5   | 78  |
| 0 | 22  | 20  | 363 |
| 0 | 16  | 10  | 186 |
| 0 | 21  | 29  | 306 |
| 0 | 2   | 0   | 125 |
| 0 | 22  | 2   | 87  |
| 0 | 38  | 32  | 352 |
| 0 | 56  | 9   | 144 |
| 0 | 6   | 3   | 156 |
| 0 | 12  | 2   | 83  |
| 0 | 2   | 0   | 80  |

|    |      |      |     |
|----|------|------|-----|
| 0  | 1    | 0    | 451 |
| 0  | 0    | 0    | 65  |
| 0  | 44   | 20   | 158 |
| 0  | 6    | 6    | 219 |
| 0  | 20   | 16   | 440 |
| 0  | 11   | 4    | 243 |
| 0  | 0    | 2    | 88  |
| 0  | 46   | 24   | 768 |
| 0  | 1    | 0    | 79  |
| 0  | 11   | 3    | 99  |
| 0  | 1    | 1    | 77  |
| 0  | 7    | 0    | 101 |
| 0  | 97   | 47   | 573 |
| 0  | 105  | 34   | 95  |
| 0  | 98   | 43   | 449 |
| 0  | 15   | 8    | 202 |
| 0  | 21   | 34   | 906 |
| 0  | 11   | 11   | 159 |
| 0  | 13   | 11   | 171 |
| 0  | 4    | 2    | 121 |
| 0  | 5    | 3    | 189 |
| 0  | 3    | 1    | 109 |
| 0  | 8    | 5    | 437 |
| 0  | 0    | 2    | 95  |
| 0  | 3    | 7    | 208 |
| 0  | 14   | 3    | 117 |
| 0  | 14   | 5    | 197 |
| 0  | 4    | 10   | 109 |
| 0  | 2    | 0    | 103 |
| 6  | 17   | 23   | 281 |
| 0  | 8    | 8    | 213 |
| 0  | 11   | 3    | 98  |
| 0  | 13   | 11   | 332 |
| 0  | 7    | 4    | 113 |
| 0  | 39   | 30   | 349 |
| 65 | 1295 | 1188 | 97  |
| 0  | 40   | 9    | 849 |
| 0  | 14   | 0    | 116 |
| 0  | 15   | 0    | 125 |
| 0  | 8    | 6    | 58  |
| 0  | 17   | 35   | 681 |
| 0  | 18   | 11   | 631 |
| 0  | 7    | 7    | 114 |
| 0  | 8    | 6    | 105 |
| 0  | 13   | 8    | 200 |
| 0  | 47   | 19   | 301 |
| 0  | 37   | 7    | 94  |

|     |     |     |      |
|-----|-----|-----|------|
| 0   | 203 | 420 | 251  |
| 0   | 62  | 45  | 390  |
| 0   | 6   | 3   | 126  |
| 0   | 17  | 10  | 229  |
| 0   | 9   | 2   | 149  |
| 0   | 2   | 1   | 90   |
| 0   | 14  | 3   | 430  |
| 0   | 0   | 22  | 94   |
| 0   | 7   | 4   | 684  |
| 0   | 29  | 11  | 220  |
| 0   | 36  | 18  | 266  |
| 0   | 8   | 4   | 205  |
| 0   | 11  | 8   | 311  |
| 0   | 6   | 7   | 285  |
| 0   | 12  | 10  | 338  |
| 0   | 6   | 3   | 128  |
| 0   | 9   | 3   | 126  |
| 0   | 402 | 655 | 176  |
| 0   | 26  | 8   | 186  |
| 0   | 15  | 5   | 89   |
| 0   | 5   | 1   | 76   |
| 0   | 15  | 3   | 124  |
| 0   | 15  | 7   | 140  |
| 0   | 24  | 9   | 132  |
| 0   | 16  | 6   | 174  |
| 0   | 6   | 6   | 110  |
| 0   | 4   | 3   | 112  |
| 0   | 39  | 18  | 220  |
| 0   | 15  | 12  | 128  |
| 0   | 14  | 15  | 224  |
| 0   | 93  | 48  | 517  |
| 0   | 3   | 1   | 81   |
| 0   | 6   | 5   | 106  |
| 0   | 6   | 4   | 166  |
| 0   | 22  | 7   | 96   |
| 131 | 212 | 407 | 336  |
| 0   | 28  | 11  | 233  |
| 0   | 11  | 4   | 112  |
| 0   | 10  | 6   | 98   |
| 0   | 61  | 0   | 154  |
| 0   | 41  | 10  | 213  |
| 0   | 12  | 9   | 138  |
| 0   | 10  | 1   | 79   |
| 0   | 18  | 32  | 277  |
| 0   | 81  | 97  | 553  |
| 0   | 243 | 129 | 1735 |
| 0   | 155 | 187 | 531  |

|   |    |    |      |
|---|----|----|------|
| 0 | 4  | 3  | 129  |
| 0 | 7  | 4  | 112  |
| 0 | 5  | 6  | 146  |
| 0 | 6  | 4  | 116  |
| 0 | 7  | 5  | 107  |
| 0 | 8  | 7  | 304  |
| 0 | 7  | 6  | 128  |
| 0 | 17 | 18 | 385  |
| 0 | 8  | 10 | 140  |
| 0 | 17 | 7  | 100  |
| 0 | 5  | 4  | 139  |
| 0 | 2  | 2  | 77   |
| 0 | 8  | 5  | 138  |
| 0 | 2  | 1  | 91   |
| 0 | 26 | 7  | 251  |
| 0 | 7  | 0  | 99   |
| 0 | 17 | 5  | 197  |
| 0 | 10 | 5  | 461  |
| 0 | 4  | 0  | 70   |
| 0 | 40 | 22 | 1431 |
| 0 | 16 | 9  | 581  |
| 0 | 3  | 3  | 100  |
| 0 | 24 | 4  | 125  |
| 0 | 13 | 3  | 97   |
| 0 | 2  | 0  | 127  |
| 0 | 1  | 4  | 526  |
| 0 | 3  | 1  | 99   |
| 0 | 2  | 4  | 373  |
| 0 | 4  | 31 | 315  |
| 0 | 3  | 1  | 145  |
| 0 | 13 | 4  | 183  |
| 0 | 13 | 4  | 414  |
| 0 | 3  | 6  | 191  |
| 0 | 2  | 1  | 77   |
| 0 | 13 | 5  | 176  |
| 0 | 9  | 4  | 130  |
| 0 | 5  | 4  | 219  |
| 0 | 2  | 1  | 86   |
| 0 | 11 | 1  | 151  |
| 0 | 3  | 2  | 261  |
| 0 | 15 | 17 | 443  |
| 0 | 8  | 12 | 428  |
| 0 | 7  | 14 | 391  |
| 0 | 3  | 0  | 61   |
| 0 | 30 | 4  | 138  |
| 0 | 27 | 10 | 453  |
| 0 | 4  | 4  | 215  |

|    |     |     |      |
|----|-----|-----|------|
| 0  | 7   | 2   | 96   |
| 0  | 3   | 1   | 104  |
| 0  | 8   | 3   | 106  |
| 0  | 3   | 0   | 98   |
| 0  | 0   | 1   | 75   |
| 0  | 3   | 1   | 114  |
| 0  | 2   | 1   | 126  |
| 0  | 15  | 9   | 91   |
| 0  | 5   | 4   | 1003 |
| 0  | 3   | 2   | 144  |
| 0  | 10  | 7   | 195  |
| 0  | 9   | 7   | 183  |
| 0  | 7   | 4   | 143  |
| 0  | 3   | 5   | 208  |
| 0  | 4   | 1   | 108  |
| 0  | 8   | 5   | 106  |
| 0  | 16  | 4   | 106  |
| 0  | 10  | 4   | 123  |
| 0  | 10  | 8   | 338  |
| 0  | 4   | 3   | 486  |
| 0  | 2   | 6   | 152  |
| 0  | 17  | 14  | 220  |
| 0  | 6   | 1   | 94   |
| 0  | 13  | 20  | 175  |
| 0  | 7   | 5   | 121  |
| 0  | 20  | 3   | 78   |
| 0  | 2   | 2   | 148  |
| 0  | 4   | 1   | 171  |
| 0  | 1   | 1   | 81   |
| 0  | 4   | 1   | 71   |
| 0  | 6   | 2   | 102  |
| 0  | 6   | 6   | 132  |
| 0  | 4   | 1   | 121  |
| 0  | 8   | 3   | 114  |
| 0  | 11  | 3   | 192  |
| 0  | 7   | 5   | 156  |
| 0  | 4   | 3   | 113  |
| 0  | 2   | 1   | 117  |
| 0  | 33  | 14  | 212  |
| 0  | 50  | 27  | 155  |
| 21 | 129 | 104 | 126  |
| 0  | 93  | 9   | 104  |
| 0  | 23  | 5   | 142  |
| 0  | 3   | 1   | 109  |
| 0  | 20  | 4   | 84   |
| 0  | 18  | 1   | 81   |
| 0  | 14  | 6   | 237  |

|   |     |     |      |
|---|-----|-----|------|
| 0 | 48  | 27  | 347  |
| 0 | 13  | 15  | 84   |
| 0 | 19  | 36  | 389  |
| 0 | 15  | 17  | 252  |
| 0 | 34  | 14  | 229  |
| 0 | 7   | 8   | 589  |
| 0 | 7   | 5   | 102  |
| 0 | 15  | 16  | 253  |
| 0 | 6   | 3   | 129  |
| 0 | 5   | 9   | 121  |
| 0 | 5   | 3   | 113  |
| 0 | 6   | 5   | 117  |
| 0 | 5   | 10  | 156  |
| 0 | 1   | 0   | 85   |
| 0 | 7   | 2   | 112  |
| 0 | 0   | 0   | 120  |
| 0 | 11  | 10  | 193  |
| 0 | 18  | 9   | 166  |
| 0 | 235 | 344 | 364  |
| 0 | 11  | 2   | 134  |
| 0 | 10  | 5   | 130  |
| 0 | 35  | 6   | 117  |
| 0 | 2   | 1   | 74   |
| 0 | 12  | 7   | 126  |
| 0 | 6   | 5   | 108  |
| 0 | 8   | 5   | 70   |
| 0 | 68  | 16  | 190  |
| 0 | 23  | 32  | 241  |
| 0 | 4   | 2   | 86   |
| 0 | 114 | 78  | 1124 |
| 0 | 49  | 35  | 396  |
| 0 | 24  | 8   | 186  |
| 0 | 37  | 14  | 206  |
| 0 | 29  | 13  | 158  |
| 0 | 12  | 8   | 275  |
| 0 | 0   | 1   | 138  |
| 0 | 6   | 4   | 109  |
| 0 | 8   | 20  | 512  |
| 0 | 24  | 23  | 739  |
| 0 | 4   | 3   | 96   |
| 0 | 13  | 2   | 84   |
| 0 | 2   | 2   | 88   |
| 0 | 26  | 4   | 161  |
| 0 | 0   | 2   | 97   |
| 0 | 2   | 1   | 88   |
| 0 | 1   | 0   | 403  |
| 0 | 8   | 8   | 161  |



|   |     |     |      |
|---|-----|-----|------|
| 0 | 85  | 102 | 502  |
| 0 | 0   | 14  | 122  |
| 0 | 9   | 5   | 271  |
| 0 | 21  | 16  | 356  |
| 0 | 4   | 0   | 70   |
| 0 | 6   | 16  | 355  |
| 0 | 131 | 160 | 954  |
| 0 | 72  | 66  | 536  |
| 0 | 5   | 1   | 120  |
| 0 | 18  | 10  | 169  |
| 0 | 11  | 3   | 86   |
| 0 | 7   | 1   | 113  |
| 0 | 19  | 6   | 83   |
| 0 | 1   | 1   | 105  |
| 0 | 2   | 1   | 179  |
| 0 | 1   | 0   | 113  |
| 0 | 4   | 1   | 88   |
| 0 | 17  | 3   | 92   |
| 0 | 23  | 15  | 271  |
| 0 | 21  | 2   | 74   |
| 0 | 24  | 16  | 191  |
| 0 | 4   | 4   | 144  |
| 0 | 6   | 12  | 164  |
| 0 | 25  | 7   | 147  |
| 0 | 3   | 3   | 1450 |
| 0 | 18  | 13  | 143  |
| 0 | 19  | 3   | 62   |
| 0 | 100 | 59  | 347  |
| 0 | 28  | 7   | 169  |
| 0 | 3   | 0   | 91   |
| 0 | 8   | 5   | 211  |
| 0 | 7   | 9   | 162  |
| 0 | 5   | 5   | 76   |
| 0 | 126 | 32  | 526  |
| 0 | 17  | 3   | 79   |
| 0 | 7   | 1   | 338  |
| 0 | 9   | 16  | 215  |
| 0 | 7   | 2   | 170  |
| 0 | 0   | 0   | 374  |
| 0 | 0   | 0   | 100  |
| 0 | 0   | 1   | 144  |
| 0 | 0   | 0   | 89   |
| 0 | 19  | 5   | 164  |
| 0 | 21  | 14  | 189  |
| 0 | 7   | 10  | 144  |
| 0 | 8   | 9   | 115  |
| 0 | 19  | 0   | 66   |

|   |     |     |     |
|---|-----|-----|-----|
| 0 | 4   | 3   | 107 |
| 0 | 5   | 2   | 87  |
| 0 | 23  | 0   | 107 |
| 0 | 5   | 1   | 156 |
| 0 | 1   | 2   | 92  |
| 0 | 8   | 11  | 134 |
| 0 | 5   | 4   | 220 |
| 0 | 108 | 19  | 143 |
| 0 | 72  | 8   | 91  |
| 0 | 6   | 14  | 194 |
| 0 | 0   | 5   | 108 |
| 0 | 82  | 138 | 196 |
| 0 | 101 | 30  | 635 |
| 0 | 12  | 4   | 489 |
| 0 | 4   | 15  | 121 |
| 0 | 10  | 13  | 182 |
| 0 | 24  | 15  | 493 |
| 0 | 3   | 16  | 299 |
| 0 | 0   | 0   | 103 |
| 0 | 2   | 7   | 173 |
| 0 | 0   | 0   | 167 |
| 0 | 33  | 23  | 277 |
| 0 | 7   | 1   | 119 |
| 0 | 0   | 0   | 60  |
| 0 | 7   | 4   | 106 |
| 0 | 704 | 660 | 135 |
| 0 | 7   | 2   | 103 |
| 0 | 24  | 4   | 283 |
| 0 | 2   | 2   | 87  |
| 0 | 13  | 7   | 98  |
| 0 | 0   | 0   | 177 |
| 0 | 9   | 9   | 167 |
| 0 | 4   | 2   | 122 |
| 0 | 2   | 2   | 119 |
| 0 | 9   | 6   | 135 |
| 1 | 25  | 22  | 316 |
| 0 | 51  | 35  | 446 |
| 0 | 48  | 8   | 181 |
| 0 | 3   | 0   | 221 |
| 0 | 14  | 9   | 194 |
| 0 | 11  | 2   | 78  |
| 0 | 2   | 1   | 147 |
| 0 | 7   | 4   | 162 |
| 0 | 1   | 0   | 105 |
| 0 | 2   | 2   | 67  |
| 0 | 1   | 1   | 86  |
| 0 | 12  | 3   | 140 |

|   |     |     |     |
|---|-----|-----|-----|
| 0 | 21  | 7   | 132 |
| 0 | 9   | 10  | 160 |
| 0 | 2   | 2   | 112 |
| 0 | 10  | 9   | 327 |
| 0 | 2   | 1   | 129 |
| 0 | 11  | 4   | 157 |
| 0 | 2   | 4   | 145 |
| 0 | 28  | 12  | 380 |
| 0 | 1   | 0   | 142 |
| 0 | 5   | 2   | 93  |
| 0 | 12  | 4   | 239 |
| 0 | 3   | 1   | 224 |
| 0 | 3   | 6   | 357 |
| 0 | 8   | 0   | 124 |
| 0 | 3   | 2   | 106 |
| 0 | 8   | 6   | 222 |
| 0 | 18  | 11  | 125 |
| 0 | 16  | 3   | 103 |
| 0 | 11  | 4   | 109 |
| 0 | 17  | 0   | 58  |
| 0 | 17  | 2   | 86  |
| 0 | 21  | 12  | 261 |
| 0 | 2   | 0   | 91  |
| 0 | 15  | 6   | 171 |
| 0 | 2   | 0   | 81  |
| 0 | 282 | 452 | 392 |
| 0 | 18  | 9   | 138 |
| 0 | 13  | 9   | 95  |
| 0 | 12  | 4   | 104 |
| 0 | 8   | 4   | 134 |
| 0 | 4   | 9   | 163 |
| 0 | 8   | 7   | 136 |
| 0 | 27  | 8   | 140 |
| 0 | 50  | 58  | 885 |
| 0 | 5   | 3   | 167 |
| 0 | 5   | 2   | 121 |
| 0 | 3   | 6   | 127 |
| 0 | 9   | 7   | 248 |
| 0 | 11  | 2   | 119 |
| 0 | 180 | 212 | 280 |
| 0 | 11  | 10  | 229 |
| 0 | 14  | 2   | 128 |
| 0 | 4   | 4   | 128 |
| 0 | 11  | 8   | 171 |
| 0 | 7   | 5   | 116 |
| 0 | 0   | 3   | 62  |
| 0 | 2   | 1   | 133 |

|   |     |     |     |
|---|-----|-----|-----|
| 0 | 9   | 6   | 133 |
| 0 | 423 | 554 | 111 |
| 0 | 6   | 1   | 90  |
| 0 | 4   | 4   | 146 |
| 0 | 12  | 4   | 344 |
| 0 | 23  | 61  | 593 |
| 0 | 17  | 7   | 217 |
| 0 | 2   | 1   | 95  |
| 0 | 5   | 2   | 129 |
| 0 | 14  | 11  | 346 |
| 0 | 22  | 11  | 106 |
| 0 | 19  | 8   | 104 |
| 0 | 14  | 4   | 150 |
| 0 | 8   | 7   | 228 |
| 0 | 16  | 6   | 230 |
| 0 | 0   | 2   | 137 |
| 0 | 241 | 421 | 577 |
| 0 | 0   | 0   | 93  |
| 0 | 3   | 3   | 152 |
| 0 | 0   | 1   | 86  |
| 0 | 29  | 3   | 104 |
| 0 | 14  | 4   | 141 |
| 0 | 253 | 240 | 110 |
| 0 | 10  | 34  | 823 |
| 0 | 0   | 3   | 143 |
| 0 | 12  | 4   | 85  |
| 0 | 10  | 8   | 96  |
| 0 | 8   | 8   | 85  |
| 0 | 2   | 2   | 120 |
| 0 | 6   | 5   | 117 |
| 0 | 33  | 18  | 316 |
| 0 | 5   | 4   | 147 |
| 0 | 362 | 344 | 609 |
| 0 | 36  | 0   | 87  |
| 0 | 72  | 40  | 837 |
| 0 | 0   | 0   | 102 |
| 0 | 35  | 19  | 452 |
| 0 | 0   | 1   | 88  |
| 0 | 7   | 23  | 216 |
| 0 | 1   | 0   | 169 |
| 0 | 47  | 58  | 606 |
| 0 | 24  | 32  | 230 |
| 0 | 18  | 31  | 304 |
| 0 | 0   | 0   | 71  |
| 0 | 0   | 0   | 77  |
| 0 | 9   | 8   | 465 |
| 0 | 0   | 0   | 256 |

|   |     |    |      |
|---|-----|----|------|
| 0 | 2   | 0  | 291  |
| 0 | 4   | 2  | 1165 |
| 0 | 1   | 0  | 82   |
| 0 | 0   | 0  | 83   |
| 0 | 1   | 1  | 120  |
| 0 | 56  | 14 | 101  |
| 0 | 0   | 1  | 124  |
| 0 | 14  | 4  | 156  |
| 0 | 48  | 39 | 1157 |
| 0 | 6   | 8  | 354  |
| 0 | 1   | 2  | 80   |
| 0 | 11  | 12 | 100  |
| 0 | 29  | 12 | 91   |
| 0 | 16  | 0  | 91   |
| 0 | 159 | 67 | 137  |
| 0 | 21  | 14 | 98   |
| 0 | 7   | 5  | 53   |
| 0 | 7   | 1  | 67   |
| 0 | 33  | 17 | 118  |
| 0 | 4   | 0  | 61   |
| 0 | 41  | 10 | 204  |
| 0 | 5   | 2  | 72   |
| 0 | 2   | 8  | 46   |
| 0 | 8   | 0  | 103  |
| 0 | 0   | 0  | 98   |
| 0 | 71  | 57 | 508  |
| 0 | 0   | 0  | 148  |
| 0 | 1   | 1  | 213  |
| 0 | 13  | 0  | 95   |
| 0 | 8   | 5  | 69   |
| 0 | 16  | 5  | 168  |
| 0 | 8   | 3  | 174  |
| 0 | 11  | 11 | 218  |
| 0 | 8   | 5  | 271  |
| 0 | 2   | 3  | 192  |
| 0 | 9   | 0  | 65   |
| 0 | 10  | 14 | 164  |
| 0 | 19  | 8  | 500  |
| 0 | 125 | 34 | 558  |
| 0 | 8   | 5  | 146  |
| 0 | 10  | 6  | 1094 |
| 0 | 3   | 0  | 88   |
| 0 | 0   | 16 | 79   |
| 0 | 11  | 45 | 161  |
| 0 | 20  | 10 | 205  |
| 0 | 4   | 4  | 125  |
| 0 | 8   | 4  | 190  |

|   |     |     |     |
|---|-----|-----|-----|
| 0 | 994 | 115 | 39  |
| 0 | 23  | 3   | 88  |
| 0 | 0   | 0   | 62  |
| 0 | 20  | 4   | 388 |
| 0 | 27  | 13  | 159 |
| 0 | 29  | 3   | 98  |
| 0 | 1   | 2   | 109 |
| 0 | 14  | 1   | 291 |
| 0 | 12  | 0   | 103 |
| 0 | 5   | 0   | 115 |
| 0 | 8   | 6   | 145 |
| 0 | 2   | 3   | 101 |
| 0 | 0   | 1   | 95  |
| 0 | 17  | 5   | 217 |
| 0 | 11  | 0   | 112 |
| 0 | 15  | 0   | 338 |
| 0 | 29  | 42  | 607 |
| 0 | 24  | 2   | 99  |
| 0 | 12  | 0   | 77  |
| 0 | 14  | 9   | 101 |
| 0 | 1   | 31  | 458 |
| 0 | 0   | 0   | 126 |
| 0 | 0   | 0   | 133 |
| 0 | 4   | 0   | 121 |
| 0 | 6   | 5   | 105 |
| 0 | 8   | 8   | 309 |
| 0 | 8   | 5   | 395 |
| 0 | 6   | 2   | 193 |
| 0 | 48  | 25  | 215 |
| 0 | 3   | 3   | 150 |
| 0 | 0   | 3   | 58  |
| 0 | 34  | 36  | 539 |
| 0 | 166 | 80  | 163 |
| 0 | 17  | 7   | 125 |
| 0 | 12  | 7   | 112 |
| 0 | 15  | 24  | 216 |
| 0 | 1   | 1   | 89  |
| 0 | 2   | 5   | 212 |
| 0 | 33  | 20  | 153 |
| 0 | 5   | 4   | 139 |
| 0 | 5   | 1   | 121 |
| 0 | 1   | 12  | 82  |
| 0 | 5   | 4   | 110 |
| 0 | 13  | 9   | 296 |
| 0 | 5   | 21  | 169 |
| 0 | 9   | 0   | 198 |
| 0 | 5   | 3   | 103 |

|   |     |     |      |
|---|-----|-----|------|
| 0 | 4   | 1   | 94   |
| 0 | 0   | 0   | 61   |
| 0 | 4   | 6   | 125  |
| 0 | 3   | 4   | 201  |
| 0 | 3   | 1   | 99   |
| 0 | 9   | 13  | 325  |
| 0 | 3   | 7   | 800  |
| 0 | 8   | 18  | 308  |
| 0 | 40  | 51  | 610  |
| 0 | 330 | 261 | 252  |
| 0 | 70  | 37  | 278  |
| 0 | 40  | 12  | 349  |
| 0 | 17  | 10  | 205  |
| 0 | 3   | 1   | 112  |
| 0 | 5   | 13  | 193  |
| 0 | 4   | 3   | 110  |
| 0 | 12  | 6   | 139  |
| 0 | 65  | 20  | 1251 |
| 0 | 24  | 11  | 187  |
| 0 | 12  | 10  | 230  |
| 0 | 121 | 36  | 146  |
| 0 | 12  | 8   | 200  |
| 0 | 0   | 0   | 61   |
| 0 | 4   | 0   | 146  |
| 0 | 10  | 4   | 110  |
| 0 | 8   | 5   | 112  |
| 0 | 2   | 1   | 134  |
| 0 | 127 | 27  | 237  |
| 0 | 64  | 48  | 240  |
| 0 | 17  | 18  | 471  |
| 0 | 20  | 14  | 270  |
| 0 | 2   | 1   | 111  |
| 0 | 10  | 9   | 99   |
| 0 | 22  | 1   | 111  |
| 0 | 15  | 9   | 306  |
| 0 | 11  | 5   | 126  |
| 0 | 13  | 0   | 107  |
| 0 | 6   | 10  | 119  |
| 0 | 2   | 1   | 106  |
| 0 | 24  | 48  | 434  |
| 0 | 32  | 28  | 765  |
| 0 | 132 | 0   | 73   |
| 0 | 1   | 0   | 201  |
| 0 | 6   | 5   | 154  |
| 0 | 3   | 2   | 144  |
| 0 | 73  | 40  | 192  |
| 0 | 3   | 1   | 158  |

|   |     |    |     |
|---|-----|----|-----|
| 0 | 2   | 3  | 128 |
| 0 | 14  | 7  | 126 |
| 0 | 7   | 1  | 83  |
| 0 | 1   | 3  | 288 |
| 0 | 8   | 6  | 223 |
| 0 | 12  | 5  | 263 |
| 0 | 14  | 8  | 181 |
| 0 | 5   | 1  | 84  |
| 0 | 4   | 3  | 157 |
| 0 | 11  | 0  | 62  |
| 0 | 10  | 11 | 127 |
| 0 | 12  | 6  | 191 |
| 0 | 20  | 24 | 186 |
| 0 | 12  | 2  | 98  |
| 0 | 49  | 50 | 813 |
| 0 | 17  | 10 | 94  |
| 0 | 20  | 33 | 424 |
| 0 | 10  | 5  | 113 |
| 0 | 2   | 1  | 134 |
| 0 | 2   | 3  | 141 |
| 0 | 6   | 9  | 132 |
| 0 | 4   | 0  | 110 |
| 0 | 73  | 10 | 160 |
| 0 | 0   | 0  | 80  |
| 0 | 2   | 1  | 252 |
| 0 | 0   | 1  | 98  |
| 0 | 4   | 5  | 96  |
| 0 | 5   | 2  | 136 |
| 0 | 30  | 40 | 262 |
| 0 | 8   | 0  | 206 |
| 0 | 20  | 5  | 79  |
| 0 | 31  | 4  | 110 |
| 0 | 8   | 4  | 89  |
| 0 | 14  | 6  | 121 |
| 0 | 107 | 80 | 279 |
| 0 | 2   | 0  | 118 |
| 0 | 3   | 3  | 114 |
| 0 | 10  | 6  | 549 |
| 0 | 158 | 61 | 352 |
| 0 | 12  | 0  | 87  |
| 0 | 123 | 35 | 159 |
| 0 | 69  | 26 | 147 |
| 0 | 2   | 2  | 104 |
| 0 | 2   | 1  | 94  |
| 0 | 2   | 4  | 134 |
| 0 | 3   | 3  | 81  |
| 0 | 28  | 12 | 224 |



|     |     |     |     |
|-----|-----|-----|-----|
| 0   | 7   | 3   | 508 |
| 0   | 1   | 1   | 244 |
| 0   | 5   | 0   | 190 |
| 0   | 10  | 9   | 88  |
| 0   | 4   | 2   | 100 |
| 0   | 9   | 1   | 121 |
| 0   | 4   | 3   | 161 |
| 0   | 58  | 55  | 774 |
| 0   | 8   | 5   | 158 |
| 0   | 6   | 13  | 107 |
| 0   | 10  | 1   | 64  |
| 0   | 53  | 6   | 88  |
| 0   | 4   | 0   | 123 |
| 0   | 10  | 9   | 458 |
| 0   | 41  | 34  | 431 |
| 0   | 30  | 19  | 168 |
| 0   | 45  | 17  | 201 |
| 13  | 14  | 42  | 108 |
| 189 | 4   | 48  | 167 |
| 0   | 20  | 17  | 190 |
| 0   | 8   | 5   | 129 |
| 0   | 10  | 5   | 649 |
| 0   | 2   | 1   | 289 |
| 0   | 29  | 21  | 313 |
| 0   | 90  | 124 | 460 |
| 0   | 6   | 2   | 335 |
| 0   | 72  | 24  | 893 |
| 0   | 14  | 17  | 896 |
| 0   | 21  | 7   | 241 |
| 0   | 31  | 6   | 118 |
| 0   | 1   | 2   | 148 |
| 0   | 10  | 1   | 90  |
| 0   | 21  | 21  | 451 |
| 0   | 0   | 0   | 79  |
| 0   | 3   | 1   | 102 |
| 0   | 7   | 1   | 167 |
| 0   | 37  | 15  | 133 |
| 0   | 16  | 11  | 238 |
| 0   | 3   | 3   | 84  |
| 0   | 8   | 10  | 203 |
| 240 | 51  | 103 | 380 |
| 50  | 279 | 200 | 226 |
| 0   | 62  | 51  | 276 |
| 0   | 9   | 23  | 439 |
| 0   | 11  | 8   | 224 |
| 0   | 7   | 5   | 154 |
| 0   | 0   | 0   | 92  |

|   |    |     |     |
|---|----|-----|-----|
| 0 | 16 | 4   | 86  |
| 0 | 4  | 0   | 102 |
| 0 | 4  | 4   | 157 |
| 0 | 0  | 1   | 74  |
| 0 | 96 | 100 | 618 |
| 0 | 29 | 6   | 92  |
| 0 | 29 | 12  | 303 |
| 0 | 5  | 4   | 122 |
| 0 | 13 | 4   | 399 |
| 0 | 3  | 3   | 191 |
| 0 | 7  | 5   | 188 |
| 0 | 1  | 4   | 130 |
| 0 | 4  | 14  | 672 |
| 0 | 25 | 31  | 539 |
| 0 | 9  | 3   | 95  |
| 0 | 5  | 3   | 163 |
| 0 | 3  | 7   | 212 |
| 0 | 5  | 5   | 163 |
| 0 | 3  | 6   | 133 |
| 0 | 53 | 14  | 378 |
| 0 | 10 | 2   | 128 |
| 0 | 17 | 6   | 125 |
| 0 | 2  | 1   | 111 |
| 0 | 28 | 14  | 758 |
| 0 | 26 | 22  | 399 |
| 0 | 48 | 95  | 356 |
| 0 | 1  | 5   | 183 |
| 0 | 22 | 17  | 187 |
| 0 | 16 | 10  | 179 |
| 0 | 13 | 2   | 89  |
| 0 | 0  | 0   | 66  |
| 0 | 0  | 0   | 101 |
| 0 | 0  | 0   | 76  |
| 0 | 5  | 2   | 110 |
| 0 | 13 | 7   | 145 |
| 0 | 4  | 1   | 86  |
| 0 | 17 | 14  | 977 |
| 0 | 29 | 12  | 156 |
| 0 | 6  | 8   | 117 |
| 0 | 33 | 41  | 272 |
| 0 | 15 | 7   | 256 |
| 0 | 29 | 22  | 216 |
| 0 | 0  | 0   | 227 |
| 0 | 3  | 3   | 116 |
| 0 | 2  | 0   | 107 |
| 0 | 49 | 16  | 339 |
| 0 | 5  | 1   | 258 |

|   |     |    |     |
|---|-----|----|-----|
| 0 | 5   | 2  | 171 |
| 0 | 7   | 9  | 110 |
| 0 | 4   | 1  | 150 |
| 0 | 40  | 11 | 124 |
| 0 | 0   | 0  | 76  |
| 0 | 1   | 1  | 123 |
| 0 | 18  | 7  | 138 |
| 0 | 1   | 0  | 105 |
| 0 | 58  | 30 | 654 |
| 0 | 2   | 0  | 99  |
| 0 | 15  | 7  | 90  |
| 0 | 5   | 5  | 120 |
| 0 | 68  | 1  | 109 |
| 0 | 8   | 4  | 229 |
| 0 | 8   | 11 | 324 |
| 0 | 49  | 21 | 304 |
| 0 | 20  | 4  | 233 |
| 0 | 7   | 1  | 117 |
| 0 | 12  | 12 | 221 |
| 0 | 5   | 13 | 173 |
| 0 | 1   | 2  | 127 |
| 0 | 15  | 16 | 401 |
| 0 | 4   | 1  | 168 |
| 0 | 24  | 17 | 90  |
| 0 | 22  | 4  | 97  |
| 0 | 26  | 0  | 64  |
| 0 | 5   | 5  | 120 |
| 0 | 1   | 0  | 81  |
| 0 | 0   | 0  | 62  |
| 0 | 16  | 15 | 115 |
| 0 | 9   | 18 | 186 |
| 0 | 0   | 1  | 124 |
| 0 | 2   | 4  | 88  |
| 0 | 30  | 0  | 63  |
| 0 | 4   | 2  | 105 |
| 0 | 47  | 28 | 231 |
| 0 | 9   | 6  | 195 |
| 0 | 13  | 14 | 191 |
| 0 | 128 | 35 | 589 |
| 0 | 2   | 1  | 99  |
| 0 | 0   | 3  | 108 |
| 0 | 62  | 17 | 389 |
| 0 | 12  | 10 | 149 |
| 0 | 28  | 32 | 207 |
| 0 | 19  | 18 | 358 |
| 0 | 12  | 2  | 113 |
| 0 | 5   | 3  | 147 |

|   |     |     |     |
|---|-----|-----|-----|
| 0 | 176 | 61  | 316 |
| 0 | 6   | 6   | 113 |
| 0 | 8   | 2   | 120 |
| 0 | 37  | 29  | 212 |
| 0 | 1   | 2   | 102 |
| 0 | 0   | 0   | 70  |
| 0 | 165 | 144 | 731 |
| 0 | 6   | 2   | 115 |
| 0 | 25  | 11  | 388 |
| 0 | 17  | 13  | 158 |
| 0 | 20  | 20  | 302 |
| 0 | 9   | 2   | 111 |
| 0 | 1   | 0   | 100 |
| 0 | 5   | 3   | 102 |
| 0 | 9   | 5   | 115 |
| 0 | 3   | 3   | 93  |
| 0 | 1   | 1   | 74  |
| 0 | 18  | 33  | 291 |
| 0 | 17  | 14  | 213 |
| 0 | 34  | 13  | 253 |
| 0 | 3   | 3   | 122 |
| 0 | 58  | 20  | 62  |
| 0 | 25  | 14  | 129 |
| 0 | 3   | 2   | 126 |
| 0 | 58  | 37  | 839 |
| 0 | 37  | 5   | 111 |
| 0 | 4   | 8   | 47  |
| 0 | 3   | 7   | 130 |
| 0 | 37  | 11  | 105 |
| 0 | 14  | 9   | 143 |
| 0 | 2   | 0   | 93  |
| 0 | 4   | 2   | 143 |
| 0 | 8   | 0   | 90  |
| 0 | 12  | 3   | 85  |
| 0 | 10  | 5   | 378 |
| 0 | 5   | 2   | 175 |
| 0 | 12  | 8   | 212 |
| 0 | 3   | 0   | 119 |
| 0 | 0   | 1   | 93  |
| 0 | 12  | 4   | 241 |
| 0 | 707 | 333 | 224 |
| 0 | 8   | 5   | 128 |
| 0 | 26  | 5   | 123 |
| 0 | 2   | 3   | 121 |
| 0 | 0   | 3   | 129 |
| 0 | 11  | 0   | 84  |
| 0 | 12  | 5   | 110 |

|   |     |     |     |
|---|-----|-----|-----|
| 0 | 11  | 10  | 158 |
| 0 | 47  | 23  | 192 |
| 0 | 12  | 5   | 141 |
| 0 | 7   | 3   | 112 |
| 0 | 55  | 23  | 391 |
| 0 | 6   | 5   | 77  |
| 0 | 1   | 1   | 114 |
| 0 | 14  | 22  | 77  |
| 0 | 30  | 30  | 240 |
| 0 | 5   | 4   | 131 |
| 0 | 7   | 5   | 129 |
| 0 | 106 | 54  | 234 |
| 0 | 0   | 0   | 59  |
| 0 | 11  | 3   | 87  |
| 0 | 11  | 2   | 167 |
| 0 | 11  | 6   | 118 |
| 0 | 15  | 8   | 322 |
| 0 | 2   | 1   | 91  |
| 0 | 3   | 6   | 129 |
| 0 | 10  | 10  | 143 |
| 0 | 10  | 1   | 78  |
| 0 | 16  | 5   | 134 |
| 0 | 11  | 2   | 330 |
| 0 | 15  | 11  | 810 |
| 0 | 24  | 45  | 469 |
| 0 | 30  | 29  | 139 |
| 0 | 5   | 7   | 156 |
| 0 | 5   | 4   | 203 |
| 0 | 21  | 4   | 83  |
| 0 | 17  | 2   | 85  |
| 0 | 14  | 17  | 403 |
| 0 | 4   | 1   | 124 |
| 0 | 6   | 4   | 166 |
| 0 | 40  | 6   | 147 |
| 0 | 5   | 1   | 108 |
| 0 | 1   | 2   | 83  |
| 0 | 24  | 16  | 415 |
| 0 | 27  | 11  | 192 |
| 0 | 12  | 6   | 100 |
| 0 | 17  | 4   | 75  |
| 0 | 10  | 0   | 82  |
| 0 | 98  | 100 | 671 |
| 0 | 1   | 2   | 86  |
| 0 | 10  | 5   | 169 |
| 0 | 6   | 1   | 201 |
| 0 | 1   | 0   | 82  |
| 0 | 27  | 24  | 264 |

|   |     |    |     |
|---|-----|----|-----|
| 0 | 68  | 33 | 233 |
| 0 | 28  | 3  | 82  |
| 0 | 9   | 8  | 133 |
| 0 | 5   | 3  | 138 |
| 0 | 16  | 4  | 75  |
| 0 | 10  | 17 | 149 |
| 0 | 17  | 3  | 82  |
| 0 | 4   | 4  | 190 |
| 0 | 0   | 0  | 110 |
| 0 | 2   | 5  | 116 |
| 0 | 38  | 0  | 76  |
| 0 | 8   | 6  | 147 |
| 0 | 3   | 0  | 81  |
| 0 | 6   | 0  | 129 |
| 0 | 43  | 40 | 540 |
| 0 | 6   | 32 | 275 |
| 0 | 4   | 3  | 127 |
| 0 | 4   | 2  | 125 |
| 0 | 0   | 0  | 76  |
| 0 | 14  | 16 | 273 |
| 0 | 11  | 4  | 67  |
| 0 | 36  | 24 | 261 |
| 0 | 2   | 5  | 154 |
| 0 | 10  | 5  | 223 |
| 0 | 30  | 9  | 104 |
| 0 | 3   | 1  | 80  |
| 0 | 7   | 5  | 136 |
| 0 | 45  | 20 | 981 |
| 0 | 0   | 14 | 125 |
| 0 | 408 | 20 | 82  |
| 0 | 42  | 28 | 383 |
| 0 | 1   | 2  | 231 |
| 0 | 20  | 13 | 105 |
| 0 | 1   | 0  | 268 |
| 0 | 3   | 1  | 158 |
| 0 | 13  | 4  | 74  |
| 0 | 0   | 0  | 72  |
| 0 | 3   | 1  | 158 |
| 0 | 2   | 1  | 399 |
| 0 | 41  | 27 | 298 |
| 0 | 12  | 3  | 78  |
| 0 | 15  | 3  | 115 |
| 0 | 20  | 8  | 135 |
| 0 | 14  | 25 | 395 |
| 0 | 28  | 15 | 260 |
| 0 | 3   | 3  | 111 |
| 0 | 8   | 5  | 93  |

|   |    |    |     |
|---|----|----|-----|
| 0 | 2  | 2  | 132 |
| 0 | 1  | 1  | 81  |
| 0 | 0  | 1  | 96  |
| 0 | 14 | 8  | 418 |
| 0 | 11 | 6  | 185 |
| 0 | 4  | 7  | 138 |
| 0 | 1  | 2  | 212 |
| 0 | 10 | 13 | 532 |
| 0 | 5  | 2  | 157 |
| 0 | 3  | 10 | 156 |
| 0 | 19 | 8  | 121 |
| 0 | 8  | 6  | 99  |
| 0 | 4  | 1  | 262 |
| 0 | 39 | 19 | 632 |
| 0 | 16 | 11 | 201 |
| 0 | 1  | 1  | 83  |
| 0 | 11 | 4  | 152 |
| 0 | 1  | 0  | 71  |
| 0 | 17 | 12 | 96  |
| 0 | 12 | 9  | 155 |
| 0 | 11 | 0  | 89  |
| 0 | 4  | 4  | 217 |
| 0 | 1  | 4  | 120 |
| 0 | 62 | 24 | 230 |
| 0 | 16 | 5  | 80  |
| 0 | 6  | 0  | 82  |
| 0 | 42 | 4  | 87  |
| 0 | 1  | 2  | 106 |
| 0 | 80 | 20 | 157 |
| 0 | 1  | 0  | 78  |
| 0 | 11 | 0  | 109 |
| 0 | 92 | 78 | 582 |
| 0 | 2  | 8  | 144 |
| 0 | 0  | 0  | 70  |
| 0 | 69 | 34 | 166 |
| 0 | 9  | 7  | 165 |
| 0 | 32 | 19 | 867 |
| 0 | 6  | 2  | 137 |
| 0 | 12 | 8  | 290 |
| 0 | 24 | 12 | 319 |
| 0 | 16 | 13 | 327 |
| 0 | 7  | 20 | 297 |
| 0 | 6  | 2  | 186 |
| 0 | 2  | 1  | 124 |
| 0 | 5  | 5  | 184 |
| 0 | 10 | 3  | 163 |
| 0 | 10 | 0  | 110 |

|   |     |     |     |
|---|-----|-----|-----|
| 0 | 6   | 4   | 99  |
| 0 | 3   | 1   | 116 |
| 0 | 13  | 1   | 98  |
| 0 | 14  | 1   | 82  |
| 0 | 273 | 227 | 585 |
| 0 | 9   | 7   | 98  |
| 0 | 67  | 44  | 192 |
| 0 | 6   | 0   | 131 |
| 0 | 10  | 5   | 109 |
| 0 | 28  | 24  | 185 |
| 0 | 6   | 9   | 263 |
| 0 | 18  | 27  | 398 |
| 0 | 60  | 59  | 320 |
| 0 | 6   | 2   | 105 |
| 0 | 1   | 0   | 83  |
| 0 | 3   | 0   | 130 |
| 0 | 9   | 2   | 96  |
| 0 | 4   | 4   | 149 |
| 0 | 14  | 9   | 217 |
| 0 | 84  | 101 | 541 |
| 0 | 35  | 23  | 143 |
| 0 | 4   | 1   | 502 |
| 0 | 3   | 3   | 114 |
| 0 | 16  | 3   | 288 |
| 0 | 5   | 7   | 77  |
| 0 | 12  | 7   | 71  |
| 0 | 11  | 1   | 67  |
| 0 | 56  | 0   | 58  |
| 0 | 0   | 1   | 87  |
| 0 | 6   | 6   | 144 |
| 0 | 22  | 4   | 66  |
| 0 | 6   | 8   | 187 |
| 0 | 11  | 3   | 126 |
| 0 | 3   | 4   | 150 |
| 0 | 26  | 60  | 102 |
| 0 | 28  | 71  | 210 |
| 0 | 48  | 28  | 150 |
| 0 | 6   | 5   | 97  |
| 0 | 19  | 6   | 168 |
| 0 | 5   | 1   | 163 |
| 0 | 19  | 3   | 110 |
| 0 | 11  | 11  | 199 |
| 0 | 128 | 47  | 474 |
| 0 | 7   | 9   | 139 |
| 0 | 77  | 48  | 554 |
| 0 | 11  | 8   | 247 |
| 0 | 36  | 57  | 953 |



|   |      |      |      |
|---|------|------|------|
| 5 | 12   | 182  | 125  |
| 0 | 11   | 10   | 128  |
| 1 | 4    | 7    | 127  |
| 0 | 16   | 7    | 116  |
| 0 | 5    | 3    | 92   |
| 0 | 43   | 27   | 283  |
| 0 | 6    | 3    | 104  |
| 0 | 1    | 8    | 128  |
| 0 | 17   | 7    | 164  |
| 0 | 5    | 2    | 75   |
| 0 | 2    | 4    | 120  |
| 0 | 8    | 4    | 83   |
| 0 | 43   | 35   | 248  |
| 0 | 4    | 9    | 315  |
| 0 | 23   | 6    | 102  |
| 0 | 49   | 20   | 320  |
| 0 | 3    | 2    | 102  |
| 0 | 31   | 21   | 566  |
| 0 | 73   | 56   | 230  |
| 0 | 1226 | 1026 | 138  |
| 0 | 13   | 37   | 289  |
| 0 | 7    | 6    | 114  |
| 0 | 61   | 21   | 405  |
| 0 | 21   | 39   | 1181 |
| 0 | 2    | 0    | 99   |
| 0 | 2    | 0    | 76   |
| 0 | 0    | 5    | 152  |
| 0 | 14   | 20   | 270  |
| 0 | 6    | 5    | 114  |
| 0 | 13   | 4    | 121  |
| 0 | 100  | 60   | 550  |
| 0 | 34   | 14   | 175  |
| 0 | 5    | 2    | 209  |
| 0 | 6    | 1    | 100  |
| 0 | 1    | 2    | 81   |
| 0 | 24   | 12   | 665  |
| 0 | 1    | 0    | 361  |
| 0 | 8    | 8    | 134  |
| 0 | 15   | 11   | 378  |
| 0 | 10   | 8    | 156  |
| 0 | 6    | 2    | 150  |
| 0 | 6    | 4    | 168  |
| 0 | 6    | 0    | 82   |
| 0 | 8    | 8    | 235  |
| 0 | 6    | 12   | 150  |
| 0 | 2    | 2    | 99   |
| 0 | 109  | 155  | 486  |

|   |     |     |     |
|---|-----|-----|-----|
| 0 | 20  | 12  | 398 |
| 0 | 3   | 3   | 138 |
| 0 | 3   | 2   | 100 |
| 0 | 25  | 18  | 432 |
| 0 | 34  | 24  | 165 |
| 0 | 17  | 7   | 151 |
| 0 | 2   | 2   | 99  |
| 0 | 13  | 3   | 79  |
| 0 | 7   | 6   | 99  |
| 0 | 20  | 19  | 237 |
| 0 | 17  | 2   | 67  |
| 0 | 30  | 25  | 228 |
| 0 | 2   | 1   | 79  |
| 0 | 52  | 47  | 300 |
| 0 | 14  | 22  | 258 |
| 0 | 36  | 31  | 405 |
| 0 | 2   | 3   | 135 |
| 0 | 2   | 0   | 135 |
| 0 | 7   | 1   | 121 |
| 0 | 1   | 1   | 89  |
| 0 | 14  | 7   | 135 |
| 0 | 9   | 3   | 152 |
| 0 | 10  | 12  | 320 |
| 0 | 39  | 14  | 376 |
| 0 | 24  | 62  | 262 |
| 0 | 70  | 80  | 110 |
| 0 | 4   | 7   | 88  |
| 0 | 10  | 13  | 216 |
| 0 | 100 | 204 | 350 |
| 0 | 16  | 5   | 174 |
| 0 | 16  | 15  | 192 |
| 0 | 36  | 44  | 249 |
| 0 | 10  | 1   | 75  |
| 0 | 4   | 7   | 209 |
| 0 | 0   | 0   | 61  |
| 0 | 26  | 6   | 109 |
| 0 | 2   | 4   | 123 |
| 0 | 152 | 188 | 386 |
| 0 | 74  | 68  | 706 |
| 0 | 1   | 0   | 138 |
| 0 | 904 | 297 | 181 |
| 0 | 1   | 0   | 114 |
| 0 | 14  | 3   | 126 |
| 0 | 7   | 3   | 126 |
| 0 | 6   | 4   | 145 |
| 0 | 0   | 1   | 89  |
| 0 | 167 | 109 | 660 |

|   |      |      |     |
|---|------|------|-----|
| 0 | 756  | 670  | 102 |
| 0 | 21   | 10   | 96  |
| 0 | 10   | 6    | 80  |
| 0 | 664  | 2064 | 54  |
| 0 | 45   | 237  | 66  |
| 0 | 911  | 1051 | 400 |
| 0 | 789  | 867  | 176 |
| 0 | 6    | 5    | 100 |
| 0 | 9    | 5    | 242 |
| 0 | 1    | 23   | 256 |
| 0 | 12   | 5    | 71  |
| 0 | 16   | 12   | 142 |
| 0 | 4    | 7    | 260 |
| 0 | 51   | 40   | 227 |
| 0 | 22   | 10   | 326 |
| 0 | 4    | 1    | 693 |
| 0 | 295  | 186  | 426 |
| 0 | 125  | 148  | 710 |
| 0 | 7    | 5    | 100 |
| 0 | 8    | 0    | 128 |
| 0 | 2    | 1    | 134 |
| 0 | 6    | 5    | 112 |
| 0 | 69   | 15   | 162 |
| 0 | 1759 | 910  | 165 |
| 0 | 14   | 10   | 556 |
| 0 | 2    | 0    | 91  |
| 0 | 4    | 3    | 100 |
| 0 | 5    | 0    | 119 |
| 0 | 0    | 0    | 456 |
| 0 | 14   | 4    | 68  |
| 0 | 8    | 9    | 234 |
| 0 | 3    | 7    | 204 |
| 0 | 13   | 7    | 84  |
| 0 | 8    | 6    | 173 |
| 0 | 6    | 1    | 131 |
| 0 | 16   | 3    | 84  |
| 0 | 110  | 59   | 513 |
| 0 | 10   | 2    | 78  |
| 0 | 21   | 8    | 117 |
| 0 | 10   | 6    | 216 |
| 0 | 0    | 0    | 97  |
| 0 | 17   | 0    | 58  |
| 0 | 59   | 91   | 96  |
| 0 | 5    | 4    | 136 |
| 0 | 12   | 7    | 81  |
| 0 | 4    | 4    | 125 |
| 0 | 2    | 1    | 96  |

|   |     |     |     |
|---|-----|-----|-----|
| 0 | 5   | 7   | 102 |
| 0 | 500 | 756 | 169 |
| 0 | 5   | 1   | 109 |
| 0 | 10  | 4   | 142 |
| 0 | 3   | 1   | 107 |
| 0 | 1   | 2   | 109 |
| 0 | 1   | 1   | 191 |
| 0 | 0   | 0   | 108 |
| 0 | 29  | 9   | 134 |
| 0 | 19  | 14  | 341 |
| 0 | 2   | 1   | 164 |
| 0 | 4   | 4   | 142 |
| 0 | 6   | 1   | 93  |
| 0 | 1   | 0   | 92  |
| 0 | 3   | 13  | 557 |
| 0 | 5   | 13  | 172 |
| 0 | 3   | 8   | 125 |
| 0 | 16  | 11  | 192 |
| 0 | 19  | 16  | 544 |
| 0 | 0   | 0   | 67  |
| 0 | 0   | 2   | 116 |
| 0 | 45  | 6   | 111 |
| 0 | 16  | 7   | 104 |
| 0 | 1   | 2   | 137 |
| 0 | 133 | 86  | 684 |
| 0 | 13  | 1   | 61  |
| 0 | 19  | 3   | 98  |
| 0 | 10  | 2   | 134 |
| 0 | 19  | 14  | 84  |
| 0 | 0   | 0   | 79  |
| 0 | 4   | 1   | 123 |
| 0 | 8   | 3   | 214 |
| 0 | 11  | 4   | 199 |
| 0 | 2   | 0   | 110 |
| 0 | 4   | 2   | 168 |
| 0 | 2   | 5   | 114 |
| 0 | 5   | 8   | 67  |
| 0 | 0   | 1   | 112 |
| 0 | 0   | 0   | 435 |
| 0 | 0   | 1   | 676 |
| 0 | 8   | 3   | 667 |
| 0 | 21  | 10  | 301 |
| 0 | 17  | 7   | 119 |
| 0 | 11  | 5   | 95  |
| 0 | 23  | 2   | 252 |
| 0 | 1   | 0   | 71  |
| 0 | 2   | 3   | 139 |

|   |     |     |     |
|---|-----|-----|-----|
| 0 | 11  | 9   | 344 |
| 2 | 5   | 9   | 154 |
| 0 | 5   | 0   | 114 |
| 0 | 3   | 1   | 147 |
| 0 | 20  | 7   | 69  |
| 0 | 81  | 66  | 362 |
| 0 | 37  | 20  | 143 |
| 0 | 3   | 1   | 87  |
| 0 | 1   | 3   | 128 |
| 0 | 5   | 1   | 378 |
| 0 | 16  | 9   | 362 |
| 0 | 0   | 0   | 115 |
| 0 | 2   | 16  | 107 |
| 0 | 4   | 0   | 63  |
| 0 | 3   | 11  | 110 |
| 0 | 4   | 0   | 146 |
| 0 | 0   | 0   | 246 |
| 0 | 0   | 0   | 115 |
| 0 | 3   | 0   | 98  |
| 0 | 1   | 11  | 76  |
| 0 | 16  | 13  | 226 |
| 0 | 1   | 0   | 111 |
| 0 | 6   | 2   | 260 |
| 0 | 13  | 108 | 198 |
| 0 | 17  | 62  | 133 |
| 0 | 6   | 5   | 147 |
| 0 | 7   | 18  | 343 |
| 0 | 5   | 4   | 126 |
| 0 | 13  | 28  | 549 |
| 0 | 3   | 3   | 113 |
| 0 | 25  | 11  | 211 |
| 0 | 22  | 12  | 199 |
| 0 | 2   | 1   | 112 |
| 0 | 14  | 8   | 172 |
| 0 | 10  | 5   | 148 |
| 0 | 10  | 2   | 97  |
| 0 | 4   | 3   | 129 |
| 0 | 5   | 5   | 156 |
| 0 | 131 | 43  | 430 |
| 0 | 7   | 4   | 132 |
| 0 | 21  | 10  | 119 |
| 0 | 85  | 55  | 190 |
| 0 | 11  | 5   | 118 |
| 0 | 2   | 2   | 270 |
| 0 | 0   | 0   | 436 |
| 0 | 2   | 3   | 124 |
| 0 | 27  | 22  | 694 |

|   |     |     |     |
|---|-----|-----|-----|
| 0 | 4   | 3   | 94  |
| 0 | 10  | 6   | 178 |
| 0 | 7   | 2   | 134 |
| 0 | 3   | 3   | 161 |
| 0 | 4   | 4   | 173 |
| 0 | 41  | 29  | 537 |
| 0 | 3   | 4   | 188 |
| 0 | 61  | 87  | 641 |
| 0 | 11  | 7   | 613 |
| 0 | 14  | 13  | 486 |
| 0 | 5   | 4   | 237 |
| 0 | 2   | 0   | 92  |
| 0 | 42  | 20  | 140 |
| 0 | 27  | 39  | 340 |
| 0 | 5   | 1   | 297 |
| 0 | 3   | 2   | 105 |
| 0 | 0   | 0   | 75  |
| 0 | 1   | 8   | 135 |
| 0 | 3   | 2   | 427 |
| 0 | 774 | 521 | 649 |
| 0 | 25  | 14  | 417 |
| 0 | 6   | 3   | 86  |
| 0 | 0   | 0   | 64  |
| 0 | 27  | 49  | 779 |
| 0 | 16  | 4   | 125 |
| 0 | 200 | 162 | 388 |
| 0 | 7   | 1   | 427 |
| 0 | 0   | 0   | 230 |
| 0 | 5   | 4   | 246 |
| 0 | 16  | 7   | 98  |
| 0 | 47  | 24  | 408 |
| 0 | 21  | 6   | 186 |
| 0 | 0   | 0   | 60  |
| 0 | 21  | 2   | 101 |
| 0 | 25  | 6   | 132 |
| 0 | 9   | 4   | 85  |
| 0 | 983 | 964 | 136 |
| 0 | 5   | 12  | 718 |
| 0 | 12  | 21  | 360 |
| 0 | 8   | 7   | 231 |
| 0 | 4   | 1   | 515 |
| 0 | 3   | 0   | 480 |
| 0 | 10  | 4   | 96  |
| 0 | 3   | 5   | 146 |
| 0 | 1   | 2   | 85  |
| 0 | 6   | 4   | 250 |
| 0 | 31  | 0   | 87  |

|   |     |     |      |
|---|-----|-----|------|
| 0 | 15  | 6   | 124  |
| 0 | 12  | 2   | 108  |
| 0 | 6   | 5   | 92   |
| 0 | 11  | 6   | 100  |
| 0 | 9   | 8   | 142  |
| 0 | 2   | 0   | 150  |
| 0 | 4   | 4   | 231  |
| 0 | 5   | 1   | 117  |
| 0 | 80  | 61  | 251  |
| 0 | 73  | 34  | 284  |
| 0 | 4   | 1   | 123  |
| 0 | 23  | 17  | 269  |
| 0 | 8   | 3   | 159  |
| 0 | 27  | 27  | 574  |
| 0 | 6   | 15  | 151  |
| 0 | 129 | 160 | 300  |
| 0 | 22  | 6   | 191  |
| 0 | 33  | 68  | 1396 |
| 0 | 12  | 8   | 209  |
| 0 | 10  | 18  | 288  |
| 0 | 2   | 12  | 146  |
| 0 | 2   | 4   | 137  |
| 0 | 9   | 9   | 260  |
| 0 | 3   | 3   | 127  |
| 0 | 5   | 0   | 97   |
| 0 | 9   | 3   | 205  |
| 0 | 4   | 1   | 88   |
| 0 | 25  | 7   | 186  |
| 0 | 71  | 23  | 248  |
| 0 | 70  | 43  | 92   |
| 0 | 46  | 28  | 402  |
| 0 | 585 | 564 | 163  |
| 0 | 47  | 28  | 379  |
| 0 | 125 | 42  | 634  |
| 0 | 11  | 7   | 196  |
| 0 | 258 | 119 | 312  |
| 0 | 31  | 24  | 181  |
| 0 | 211 | 183 | 435  |
| 0 | 11  | 7   | 128  |
| 0 | 5   | 8   | 193  |
| 0 | 148 | 110 | 354  |
| 0 | 630 | 660 | 496  |
| 0 | 43  | 15  | 213  |
| 0 | 6   | 3   | 145  |
| 0 | 223 | 197 | 170  |
| 0 | 16  | 10  | 219  |
| 0 | 4   | 1   | 88   |

|   |     |     |      |
|---|-----|-----|------|
| 0 | 1   | 4   | 114  |
| 0 | 23  | 11  | 239  |
| 0 | 32  | 12  | 136  |
| 0 | 181 | 60  | 158  |
| 0 | 30  | 17  | 315  |
| 0 | 14  | 3   | 226  |
| 0 | 5   | 5   | 87   |
| 0 | 5   | 4   | 218  |
| 0 | 4   | 3   | 117  |
| 0 | 6   | 0   | 63   |
| 0 | 0   | 0   | 75   |
| 0 | 0   | 0   | 67   |
| 0 | 12  | 2   | 70   |
| 0 | 11  | 15  | 88   |
| 0 | 220 | 182 | 548  |
| 0 | 18  | 18  | 153  |
| 0 | 21  | 7   | 180  |
| 0 | 20  | 2   | 175  |
| 0 | 1   | 0   | 103  |
| 0 | 32  | 6   | 156  |
| 0 | 7   | 0   | 1277 |
| 0 | 2   | 0   | 123  |
| 0 | 1   | 1   | 107  |
| 0 | 19  | 13  | 444  |
| 0 | 24  | 18  | 415  |
| 0 | 0   | 0   | 98   |
| 0 | 22  | 21  | 323  |
| 0 | 6   | 6   | 143  |
| 0 | 17  | 29  | 304  |
| 0 | 16  | 10  | 354  |
| 0 | 14  | 17  | 188  |
| 0 | 133 | 125 | 1034 |
| 0 | 73  | 16  | 121  |
| 0 | 2   | 2   | 102  |
| 0 | 7   | 3   | 208  |
| 0 | 281 | 389 | 136  |
| 0 | 56  | 36  | 230  |
| 0 | 41  | 8   | 247  |
| 0 | 5   | 4   | 146  |
| 0 | 5   | 3   | 91   |
| 0 | 3   | 7   | 132  |
| 0 | 24  | 15  | 330  |
| 0 | 35  | 44  | 475  |
| 0 | 50  | 25  | 248  |
| 0 | 501 | 547 | 136  |
| 0 | 5   | 5   | 185  |
| 0 | 91  | 9   | 95   |



|     |     |     |      |
|-----|-----|-----|------|
| 0   | 344 | 219 | 543  |
| 0   | 10  | 6   | 483  |
| 0   | 54  | 14  | 208  |
| 0   | 518 | 496 | 121  |
| 0   | 117 | 167 | 513  |
| 0   | 9   | 3   | 278  |
| 186 | 242 | 623 | 101  |
| 61  | 280 | 494 | 184  |
| 0   | 839 | 955 | 117  |
| 0   | 7   | 7   | 179  |
| 0   | 7   | 7   | 146  |
| 0   | 18  | 16  | 465  |
| 0   | 33  | 1   | 110  |
| 0   | 0   | 0   | 74   |
| 0   | 8   | 14  | 1212 |
| 0   | 14  | 10  | 626  |
| 0   | 3   | 5   | 387  |
| 0   | 6   | 2   | 160  |
| 0   | 6   | 12  | 365  |
| 0   | 16  | 4   | 157  |
| 0   | 6   | 4   | 130  |
| 0   | 4   | 8   | 127  |
| 0   | 23  | 1   | 159  |
| 0   | 29  | 22  | 306  |
| 0   | 7   | 8   | 184  |
| 0   | 40  | 13  | 197  |
| 0   | 327 | 272 | 261  |
| 0   | 9   | 4   | 386  |
| 0   | 10  | 4   | 246  |
| 0   | 13  | 16  | 114  |
| 0   | 67  | 27  | 305  |
| 0   | 2   | 1   | 112  |
| 0   | 13  | 4   | 264  |
| 0   | 0   | 0   | 62   |
| 0   | 124 | 179 | 489  |
| 0   | 14  | 0   | 97   |
| 0   | 9   | 3   | 100  |
| 0   | 68  | 69  | 677  |
| 0   | 6   | 1   | 112  |
| 0   | 263 | 341 | 127  |
| 0   | 58  | 23  | 433  |
| 0   | 41  | 38  | 324  |
| 0   | 47  | 0   | 88   |
| 0   | 12  | 17  | 170  |
| 0   | 0   | 1   | 237  |
| 0   | 0   | 6   | 95   |
| 0   | 1   | 0   | 77   |

|   |     |     |     |
|---|-----|-----|-----|
| 0 | 4   | 8   | 193 |
| 0 | 27  | 13  | 316 |
| 0 | 4   | 4   | 125 |
| 0 | 23  | 14  | 245 |
| 0 | 4   | 1   | 93  |
| 0 | 52  | 17  | 648 |
| 0 | 10  | 8   | 74  |
| 0 | 422 | 251 | 482 |
| 0 | 33  | 12  | 477 |
| 0 | 73  | 91  | 269 |
| 0 | 0   | 0   | 74  |
| 0 | 2   | 1   | 160 |
| 0 | 3   | 5   | 253 |
| 0 | 5   | 5   | 117 |
| 0 | 75  | 22  | 148 |
| 0 | 19  | 8   | 216 |
| 0 | 12  | 8   | 123 |
| 0 | 8   | 2   | 127 |
| 0 | 3   | 1   | 89  |
| 0 | 1   | 0   | 75  |
| 0 | 1   | 0   | 95  |
| 0 | 19  | 0   | 110 |
| 0 | 34  | 29  | 198 |
| 0 | 8   | 3   | 119 |
| 0 | 3   | 6   | 87  |
| 0 | 1   | 0   | 114 |
| 0 | 3   | 0   | 124 |
| 0 | 1   | 1   | 113 |
| 0 | 9   | 7   | 166 |
| 0 | 419 | 231 | 297 |
| 0 | 4   | 2   | 258 |
| 0 | 5   | 2   | 119 |
| 0 | 10  | 13  | 276 |
| 0 | 2   | 3   | 109 |
| 0 | 86  | 34  | 318 |
| 0 | 14  | 13  | 243 |
| 0 | 87  | 110 | 528 |
| 0 | 7   | 7   | 239 |
| 0 | 14  | 5   | 108 |
| 0 | 58  | 5   | 93  |
| 0 | 154 | 30  | 288 |
| 0 | 24  | 18  | 283 |
| 0 | 0   | 3   | 101 |
| 0 | 17  | 0   | 75  |
| 0 | 28  | 43  | 798 |
| 0 | 34  | 16  | 479 |
| 0 | 0   | 2   | 130 |

|   |     |     |     |
|---|-----|-----|-----|
| 0 | 31  | 20  | 223 |
| 0 | 20  | 3   | 178 |
| 0 | 10  | 11  | 158 |
| 0 | 21  | 11  | 156 |
| 0 | 24  | 17  | 62  |
| 0 | 7   | 2   | 156 |
| 0 | 739 | 330 | 453 |
| 0 | 310 | 93  | 179 |
| 0 | 2   | 0   | 109 |
| 0 | 87  | 71  | 221 |
| 0 | 9   | 5   | 119 |
| 0 | 4   | 2   | 67  |
| 0 | 5   | 5   | 104 |
| 0 | 51  | 51  | 550 |
| 0 | 17  | 8   | 68  |
| 0 | 0   | 0   | 472 |
| 0 | 34  | 21  | 632 |
| 0 | 283 | 149 | 424 |
| 0 | 15  | 7   | 214 |
| 0 | 110 | 55  | 84  |
| 0 | 96  | 41  | 392 |
| 0 | 6   | 2   | 146 |
| 0 | 2   | 5   | 95  |
| 0 | 4   | 4   | 152 |
| 0 | 20  | 21  | 326 |
| 0 | 122 | 14  | 449 |
| 0 | 1   | 0   | 109 |
| 0 | 176 | 148 | 288 |
| 0 | 6   | 1   | 201 |
| 0 | 5   | 3   | 175 |
| 0 | 5   | 1   | 136 |
| 0 | 5   | 3   | 137 |
| 0 | 4   | 9   | 143 |
| 0 | 253 | 364 | 219 |
| 0 | 31  | 7   | 176 |
| 0 | 416 | 526 | 314 |
| 0 | 9   | 0   | 201 |
| 0 | 29  | 18  | 405 |
| 0 | 7   | 2   | 97  |
| 0 | 13  | 11  | 146 |
| 0 | 5   | 1   | 107 |
| 0 | 7   | 3   | 195 |
| 0 | 6   | 8   | 311 |
| 0 | 15  | 1   | 126 |
| 0 | 8   | 1   | 123 |
| 0 | 10  | 8   | 319 |
| 0 | 201 | 94  | 273 |

|   |    |    |      |
|---|----|----|------|
| 0 | 6  | 6  | 165  |
| 0 | 10 | 57 | 282  |
| 0 | 25 | 19 | 240  |
| 0 | 20 | 4  | 101  |
| 0 | 35 | 20 | 201  |
| 0 | 18 | 7  | 108  |
| 0 | 45 | 4  | 329  |
| 0 | 2  | 6  | 77   |
| 0 | 13 | 2  | 73   |
| 0 | 8  | 3  | 96   |
| 0 | 14 | 26 | 419  |
| 0 | 51 | 24 | 1383 |
| 0 | 4  | 0  | 178  |
| 0 | 3  | 1  | 91   |
| 0 | 3  | 3  | 95   |
| 0 | 0  | 2  | 71   |
| 0 | 26 | 8  | 286  |
| 0 | 14 | 12 | 233  |
| 0 | 11 | 2  | 136  |
| 0 | 4  | 1  | 83   |
| 0 | 34 | 20 | 84   |
| 0 | 1  | 0  | 106  |
| 0 | 11 | 11 | 505  |
| 0 | 24 | 16 | 206  |
| 0 | 11 | 15 | 242  |
| 0 | 31 | 21 | 326  |
| 0 | 3  | 5  | 152  |
| 0 | 3  | 0  | 128  |
| 0 | 5  | 3  | 104  |
| 0 | 11 | 10 | 77   |
| 0 | 31 | 13 | 211  |
| 0 | 21 | 8  | 581  |
| 0 | 3  | 3  | 360  |
| 0 | 24 | 7  | 366  |
| 0 | 6  | 1  | 203  |
| 0 | 2  | 0  | 147  |
| 0 | 10 | 5  | 306  |
| 0 | 6  | 2  | 116  |
| 0 | 4  | 2  | 188  |
| 0 | 17 | 12 | 73   |
| 0 | 15 | 4  | 136  |
| 0 | 41 | 13 | 435  |
| 0 | 1  | 2  | 272  |
| 0 | 7  | 7  | 256  |
| 0 | 3  | 1  | 122  |
| 0 | 17 | 7  | 151  |
| 0 | 11 | 6  | 172  |

|   |    |    |      |
|---|----|----|------|
| 0 | 1  | 0  | 151  |
| 0 | 13 | 1  | 153  |
| 0 | 13 | 8  | 266  |
| 0 | 12 | 9  | 286  |
| 0 | 6  | 15 | 219  |
| 0 | 63 | 59 | 734  |
| 0 | 14 | 11 | 117  |
| 0 | 17 | 23 | 1412 |
| 0 | 11 | 9  | 129  |
| 0 | 21 | 8  | 155  |
| 0 | 5  | 4  | 139  |
| 0 | 5  | 5  | 170  |
| 0 | 23 | 16 | 178  |
| 0 | 3  | 1  | 97   |
| 0 | 5  | 2  | 133  |
| 0 | 25 | 36 | 922  |
| 0 | 3  | 3  | 163  |
| 0 | 2  | 0  | 75   |
| 0 | 2  | 1  | 306  |
| 0 | 58 | 68 | 1056 |
| 0 | 65 | 72 | 431  |
| 0 | 12 | 16 | 292  |
| 0 | 17 | 3  | 87   |
| 0 | 1  | 2  | 100  |
| 0 | 1  | 1  | 82   |
| 0 | 6  | 2  | 144  |
| 0 | 30 | 30 | 260  |
| 0 | 2  | 0  | 73   |
| 0 | 2  | 0  | 78   |
| 0 | 15 | 8  | 111  |
| 0 | 6  | 8  | 112  |
| 0 | 12 | 6  | 145  |
| 0 | 5  | 3  | 121  |
| 0 | 40 | 16 | 309  |
| 0 | 14 | 6  | 178  |
| 0 | 16 | 10 | 339  |
| 0 | 1  | 1  | 95   |
| 0 | 20 | 18 | 259  |
| 0 | 8  | 0  | 322  |
| 0 | 47 | 14 | 262  |
| 0 | 22 | 4  | 135  |
| 0 | 7  | 5  | 118  |
| 0 | 58 | 54 | 918  |
| 0 | 2  | 3  | 128  |
| 0 | 6  | 5  | 273  |
| 0 | 4  | 1  | 128  |
| 0 | 1  | 3  | 95   |

|   |    |    |      |
|---|----|----|------|
| 0 | 0  | 0  | 122  |
| 0 | 1  | 3  | 129  |
| 0 | 7  | 7  | 100  |
| 0 | 32 | 15 | 297  |
| 0 | 9  | 12 | 266  |
| 0 | 16 | 1  | 118  |
| 0 | 9  | 4  | 153  |
| 0 | 2  | 2  | 152  |
| 0 | 43 | 26 | 654  |
| 0 | 14 | 4  | 102  |
| 0 | 7  | 4  | 118  |
| 0 | 36 | 58 | 765  |
| 0 | 36 | 92 | 1555 |
| 0 | 2  | 2  | 78   |
| 0 | 10 | 5  | 99   |
| 0 | 4  | 15 | 180  |
| 0 | 0  | 0  | 125  |
| 0 | 1  | 1  | 78   |
| 0 | 9  | 4  | 121  |
| 0 | 5  | 0  | 110  |
| 0 | 1  | 0  | 147  |
| 0 | 7  | 9  | 128  |
| 0 | 53 | 22 | 241  |
| 0 | 7  | 6  | 181  |
| 0 | 3  | 3  | 154  |
| 0 | 0  | 0  | 87   |
| 0 | 5  | 4  | 137  |
| 0 | 13 | 7  | 227  |
| 0 | 5  | 3  | 104  |
| 0 | 20 | 35 | 181  |
| 0 | 37 | 10 | 319  |
| 0 | 7  | 1  | 173  |
| 0 | 7  | 5  | 170  |
| 0 | 40 | 16 | 385  |
| 0 | 37 | 2  | 97   |
| 0 | 38 | 0  | 63   |
| 0 | 10 | 3  | 100  |
| 0 | 34 | 18 | 483  |
| 0 | 1  | 0  | 85   |
| 0 | 14 | 15 | 364  |
| 0 | 8  | 1  | 204  |
| 0 | 2  | 3  | 133  |
| 0 | 23 | 10 | 106  |
| 0 | 7  | 7  | 85   |
| 0 | 2  | 1  | 105  |
| 0 | 32 | 8  | 87   |
| 0 | 2  | 2  | 109  |

|     |     |      |      |
|-----|-----|------|------|
| 0   | 37  | 2    | 75   |
| 0   | 8   | 4    | 144  |
| 0   | 12  | 5    | 271  |
| 0   | 1   | 1    | 130  |
| 0   | 1   | 3    | 110  |
| 0   | 0   | 0    | 216  |
| 0   | 5   | 1    | 93   |
| 0   | 11  | 2    | 70   |
| 0   | 1   | 1    | 86   |
| 0   | 28  | 10   | 98   |
| 0   | 24  | 10   | 292  |
| 0   | 0   | 18   | 127  |
| 0   | 34  | 81   | 287  |
| 0   | 4   | 4    | 81   |
| 0   | 11  | 9    | 199  |
| 0   | 15  | 6    | 132  |
| 0   | 29  | 18   | 187  |
| 0   | 11  | 11   | 154  |
| 0   | 7   | 4    | 268  |
| 0   | 15  | 30   | 340  |
| 0   | 31  | 3    | 153  |
| 52  | 215 | 316  | 379  |
| 0   | 15  | 24   | 207  |
| 0   | 42  | 24   | 1366 |
| 0   | 8   | 3    | 133  |
| 0   | 7   | 1    | 66   |
| 0   | 27  | 15   | 357  |
| 0   | 4   | 1    | 832  |
| 0   | 6   | 2    | 291  |
| 0   | 9   | 4    | 106  |
| 0   | 6   | 5    | 163  |
| 0   | 11  | 4    | 116  |
| 0   | 8   | 5    | 159  |
| 0   | 15  | 5    | 94   |
| 0   | 11  | 9    | 225  |
| 0   | 25  | 9    | 221  |
| 0   | 55  | 77   | 672  |
| 0   | 1   | 0    | 104  |
| 0   | 0   | 0    | 77   |
| 0   | 10  | 5    | 139  |
| 0   | 34  | 11   | 144  |
| 0   | 156 | 174  | 427  |
| 0   | 7   | 0    | 108  |
| 0   | 2   | 0    | 134  |
| 0   | 2   | 3    | 133  |
| 228 | 566 | 1030 | 78   |
| 0   | 14  | 82   | 683  |

|    |      |      |     |
|----|------|------|-----|
| 0  | 10   | 7    | 113 |
| 45 | 24   | 111  | 571 |
| 0  | 100  | 58   | 224 |
| 0  | 1    | 2    | 101 |
| 0  | 1236 | 701  | 130 |
| 0  | 208  | 184  | 584 |
| 0  | 15   | 25   | 375 |
| 0  | 9    | 2    | 153 |
| 0  | 71   | 147  | 784 |
| 0  | 58   | 23   | 142 |
| 0  | 43   | 13   | 129 |
| 0  | 15   | 5    | 85  |
| 0  | 6    | 0    | 72  |
| 0  | 2    | 0    | 73  |
| 0  | 39   | 168  | 386 |
| 0  | 91   | 126  | 424 |
| 0  | 75   | 11   | 176 |
| 0  | 12   | 4    | 102 |
| 0  | 7    | 0    | 152 |
| 0  | 10   | 9    | 403 |
| 0  | 4    | 2    | 123 |
| 0  | 6    | 7    | 107 |
| 0  | 13   | 13   | 173 |
| 0  | 1456 | 1141 | 60  |
| 0  | 3    | 4    | 172 |
| 0  | 2    | 1    | 117 |
| 0  | 25   | 11   | 124 |
| 0  | 50   | 16   | 353 |
| 0  | 4    | 2    | 91  |
| 0  | 1    | 0    | 109 |
| 0  | 0    | 0    | 107 |
| 0  | 2    | 2    | 147 |
| 0  | 109  | 23   | 383 |
| 0  | 9    | 9    | 72  |
| 0  | 4    | 3    | 134 |
| 0  | 13   | 9    | 118 |
| 0  | 10   | 15   | 193 |
| 0  | 30   | 8    | 405 |
| 0  | 0    | 0    | 78  |
| 0  | 61   | 1    | 128 |
| 0  | 4    | 1    | 125 |
| 0  | 32   | 10   | 132 |
| 0  | 27   | 20   | 208 |
| 0  | 14   | 0    | 64  |
| 0  | 84   | 66   | 864 |
| 0  | 6    | 10   | 123 |
| 0  | 1    | 1    | 90  |



|   |     |     |     |
|---|-----|-----|-----|
| 0 | 0   | 0   | 199 |
| 0 | 4   | 1   | 163 |
| 0 | 0   | 2   | 124 |
| 0 | 148 | 44  | 149 |
| 0 | 13  | 13  | 202 |
| 0 | 5   | 3   | 134 |
| 0 | 2   | 1   | 118 |
| 0 | 15  | 5   | 108 |
| 0 | 27  | 31  | 190 |
| 0 | 0   | 2   | 214 |
| 0 | 3   | 3   | 129 |
| 0 | 0   | 0   | 69  |
| 0 | 1   | 0   | 104 |
| 0 | 4   | 2   | 147 |
| 0 | 5   | 5   | 129 |
| 0 | 5   | 7   | 194 |
| 0 | 10  | 7   | 392 |
| 0 | 5   | 11  | 172 |
| 0 | 3   | 2   | 131 |
| 0 | 273 | 102 | 652 |
| 0 | 3   | 0   | 65  |
| 0 | 5   | 10  | 174 |
| 0 | 83  | 0   | 55  |
| 0 | 18  | 21  | 257 |
| 0 | 24  | 18  | 231 |
| 0 | 1   | 8   | 184 |
| 0 | 12  | 1   | 55  |
| 0 | 201 | 21  | 104 |
| 0 | 27  | 7   | 98  |
| 0 | 14  | 8   | 156 |
| 0 | 12  | 12  | 50  |
| 0 | 20  | 2   | 80  |
| 0 | 168 | 91  | 449 |
| 0 | 16  | 7   | 95  |
| 0 | 13  | 10  | 290 |
| 0 | 76  | 56  | 55  |
| 0 | 11  | 7   | 160 |
| 0 | 8   | 3   | 113 |
| 0 | 5   | 0   | 212 |
| 0 | 6   | 1   | 127 |
| 0 | 2   | 2   | 97  |
| 0 | 4   | 3   | 123 |
| 0 | 2   | 2   | 141 |
| 0 | 3   | 1   | 90  |
| 0 | 9   | 9   | 204 |
| 0 | 3   | 3   | 103 |
| 0 | 26  | 3   | 172 |

|   |     |     |     |
|---|-----|-----|-----|
| 0 | 3   | 5   | 167 |
| 0 | 43  | 5   | 107 |
| 0 | 48  | 15  | 108 |
| 0 | 13  | 20  | 179 |
| 0 | 9   | 3   | 269 |
| 0 | 2   | 1   | 196 |
| 0 | 2   | 1   | 99  |
| 0 | 12  | 2   | 80  |
| 0 | 1   | 0   | 74  |
| 0 | 1   | 3   | 106 |
| 0 | 0   | 0   | 107 |
| 0 | 0   | 0   | 75  |
| 0 | 3   | 3   | 133 |
| 0 | 3   | 2   | 134 |
| 0 | 1   | 1   | 94  |
| 0 | 17  | 15  | 364 |
| 0 | 1   | 0   | 162 |
| 0 | 7   | 7   | 155 |
| 0 | 22  | 6   | 182 |
| 0 | 5   | 5   | 232 |
| 0 | 11  | 5   | 235 |
| 0 | 7   | 11  | 139 |
| 0 | 11  | 26  | 294 |
| 0 | 31  | 42  | 212 |
| 0 | 36  | 34  | 193 |
| 0 | 3   | 2   | 90  |
| 0 | 649 | 182 | 411 |
| 0 | 1   | 0   | 120 |
| 0 | 5   | 10  | 244 |
| 0 | 8   | 12  | 273 |
| 0 | 112 | 32  | 361 |
| 0 | 121 | 37  | 270 |
| 0 | 3   | 2   | 228 |
| 0 | 0   | 0   | 132 |
| 0 | 1   | 0   | 72  |
| 0 | 13  | 5   | 59  |
| 0 | 29  | 2   | 79  |
| 0 | 15  | 13  | 161 |
| 0 | 2   | 4   | 136 |
| 0 | 5   | 4   | 117 |
| 0 | 11  | 6   | 120 |
| 0 | 35  | 12  | 125 |
| 0 | 1   | 1   | 83  |
| 0 | 8   | 0   | 117 |
| 0 | 6   | 1   | 105 |
| 0 | 26  | 6   | 60  |
| 0 | 4   | 3   | 105 |

|   |     |     |     |
|---|-----|-----|-----|
| 0 | 0   | 0   | 71  |
| 0 | 0   | 4   | 71  |
| 0 | 301 | 79  | 102 |
| 0 | 80  | 16  | 98  |
| 0 | 85  | 14  | 216 |
| 0 | 22  | 3   | 259 |
| 0 | 23  | 23  | 182 |
| 0 | 3   | 2   | 101 |
| 0 | 10  | 6   | 166 |
| 0 | 127 | 190 | 511 |
| 0 | 7   | 6   | 579 |
| 0 | 5   | 3   | 119 |
| 0 | 14  | 5   | 128 |
| 0 | 1   | 0   | 111 |
| 0 | 12  | 7   | 113 |
| 0 | 5   | 1   | 85  |
| 0 | 10  | 15  | 184 |
| 0 | 0   | 17  | 69  |
| 0 | 5   | 7   | 193 |
| 0 | 1   | 0   | 155 |
| 0 | 3   | 5   | 212 |
| 0 | 13  | 0   | 123 |
| 0 | 17  | 25  | 432 |
| 0 | 220 | 311 | 298 |
| 0 | 4   | 4   | 123 |
| 0 | 2   | 0   | 86  |
| 0 | 19  | 14  | 135 |
| 0 | 2   | 4   | 145 |
| 0 | 0   | 0   | 90  |
| 0 | 1   | 0   | 168 |
| 0 | 2   | 0   | 88  |
| 0 | 0   | 0   | 89  |
| 0 | 17  | 15  | 123 |
| 0 | 8   | 4   | 82  |
| 0 | 2   | 3   | 148 |
| 0 | 4   | 0   | 263 |
| 0 | 77  | 20  | 265 |
| 0 | 83  | 31  | 104 |
| 0 | 1   | 2   | 87  |
| 0 | 12  | 4   | 164 |
| 0 | 10  | 4   | 140 |
| 0 | 5   | 4   | 122 |
| 0 | 2   | 0   | 79  |
| 0 | 12  | 6   | 156 |
| 0 | 5   | 5   | 136 |
| 0 | 14  | 12  | 201 |
| 0 | 113 | 150 | 216 |

|   |     |     |      |
|---|-----|-----|------|
| 0 | 15  | 16  | 185  |
| 0 | 6   | 3   | 232  |
| 0 | 4   | 2   | 113  |
| 0 | 5   | 0   | 101  |
| 0 | 3   | 13  | 60   |
| 0 | 10  | 3   | 126  |
| 0 | 15  | 19  | 270  |
| 0 | 10  | 3   | 193  |
| 0 | 3   | 0   | 128  |
| 0 | 5   | 1   | 130  |
| 0 | 4   | 1   | 108  |
| 0 | 8   | 3   | 60   |
| 0 | 25  | 6   | 124  |
| 0 | 8   | 120 | 953  |
| 0 | 3   | 61  | 458  |
| 0 | 2   | 0   | 142  |
| 0 | 18  | 10  | 213  |
| 0 | 34  | 39  | 1100 |
| 0 | 14  | 1   | 277  |
| 0 | 16  | 3   | 78   |
| 0 | 14  | 8   | 314  |
| 0 | 7   | 7   | 239  |
| 0 | 12  | 8   | 150  |
| 0 | 0   | 0   | 75   |
| 0 | 15  | 4   | 477  |
| 0 | 0   | 0   | 96   |
| 0 | 2   | 3   | 81   |
| 0 | 21  | 11  | 325  |
| 0 | 10  | 6   | 173  |
| 0 | 0   | 0   | 128  |
| 0 | 0   | 0   | 84   |
| 0 | 0   | 0   | 222  |
| 0 | 1   | 2   | 92   |
| 0 | 110 | 21  | 198  |
| 0 | 18  | 4   | 586  |
| 0 | 34  | 6   | 107  |
| 0 | 0   | 0   | 80   |
| 0 | 86  | 61  | 343  |
| 0 | 21  | 22  | 545  |
| 0 | 91  | 49  | 224  |
| 0 | 2   | 0   | 112  |
| 0 | 2   | 1   | 77   |
| 0 | 5   | 7   | 356  |
| 0 | 5   | 3   | 95   |
| 0 | 5   | 6   | 110  |
| 0 | 8   | 8   | 213  |
| 0 | 12  | 2   | 123  |

|   |    |    |     |
|---|----|----|-----|
| 0 | 26 | 25 | 848 |
| 0 | 2  | 0  | 99  |
| 0 | 18 | 5  | 88  |
| 0 | 35 | 48 | 540 |
| 0 | 2  | 1  | 386 |
| 0 | 1  | 0  | 98  |
| 0 | 7  | 4  | 94  |
| 0 | 2  | 0  | 102 |
| 0 | 19 | 3  | 261 |
| 0 | 0  | 0  | 139 |
| 0 | 2  | 7  | 906 |
| 0 | 5  | 13 | 172 |
| 0 | 7  | 20 | 147 |
| 0 | 13 | 36 | 168 |
| 0 | 4  | 0  | 72  |
| 0 | 5  | 3  | 85  |
| 0 | 4  | 6  | 107 |
| 0 | 2  | 1  | 127 |
| 0 | 6  | 5  | 110 |
| 0 | 15 | 3  | 96  |
| 0 | 55 | 14 | 161 |
| 0 | 0  | 0  | 123 |
| 0 | 59 | 15 | 352 |
| 0 | 3  | 4  | 141 |
| 0 | 3  | 3  | 292 |
| 0 | 6  | 1  | 118 |
| 0 | 1  | 4  | 154 |
| 0 | 11 | 13 | 159 |
| 0 | 7  | 4  | 154 |
| 0 | 24 | 17 | 276 |
| 0 | 5  | 15 | 359 |
| 0 | 23 | 16 | 366 |
| 0 | 28 | 11 | 227 |
| 0 | 5  | 7  | 154 |
| 0 | 13 | 8  | 159 |
| 0 | 11 | 6  | 114 |
| 0 | 0  | 14 | 113 |
| 0 | 5  | 3  | 89  |
| 0 | 11 | 2  | 98  |
| 0 | 7  | 3  | 127 |
| 0 | 18 | 6  | 180 |
| 0 | 9  | 2  | 145 |
| 0 | 12 | 1  | 82  |
| 0 | 14 | 4  | 97  |
| 0 | 7  | 3  | 112 |
| 0 | 13 | 4  | 65  |
| 0 | 3  | 2  | 88  |

|   |     |     |     |
|---|-----|-----|-----|
| 0 | 20  | 8   | 126 |
| 0 | 256 | 177 | 187 |
| 0 | 4   | 1   | 81  |
| 0 | 120 | 53  | 348 |
| 0 | 15  | 5   | 558 |
| 0 | 787 | 694 | 196 |
| 0 | 13  | 4   | 158 |
| 0 | 8   | 2   | 89  |
| 0 | 2   | 13  | 171 |
| 0 | 5   | 2   | 99  |
| 0 | 59  | 17  | 173 |
| 0 | 33  | 17  | 208 |
| 0 | 4   | 2   | 85  |
| 0 | 282 | 92  | 214 |
| 0 | 4   | 7   | 147 |
| 0 | 0   | 0   | 92  |
| 0 | 66  | 39  | 750 |
| 0 | 52  | 69  | 533 |
| 0 | 3   | 2   | 154 |
| 0 | 83  | 30  | 388 |
| 0 | 367 | 458 | 122 |
| 0 | 4   | 5   | 140 |
| 0 | 2   | 0   | 79  |
| 0 | 1   | 2   | 75  |
| 0 | 6   | 5   | 154 |
| 0 | 11  | 3   | 93  |
| 0 | 11  | 8   | 478 |
| 0 | 10  | 1   | 75  |
| 0 | 27  | 2   | 107 |
| 0 | 4   | 4   | 143 |
| 0 | 12  | 9   | 507 |
| 0 | 10  | 10  | 133 |
| 0 | 6   | 5   | 140 |
| 0 | 12  | 5   | 202 |
| 0 | 10  | 7   | 321 |
| 0 | 2   | 0   | 155 |
| 0 | 8   | 2   | 122 |
| 0 | 240 | 253 | 369 |
| 0 | 28  | 21  | 137 |
| 0 | 40  | 33  | 584 |
| 0 | 5   | 5   | 154 |
| 0 | 6   | 15  | 140 |
| 0 | 7   | 2   | 146 |
| 0 | 30  | 19  | 106 |
| 0 | 4   | 0   | 71  |
| 0 | 131 | 136 | 463 |
| 0 | 4   | 2   | 120 |

|    |     |     |      |
|----|-----|-----|------|
| 0  | 8   | 9   | 143  |
| 0  | 107 | 95  | 734  |
| 0  | 1   | 0   | 119  |
| 0  | 12  | 4   | 337  |
| 0  | 14  | 3   | 270  |
| 0  | 29  | 36  | 637  |
| 0  | 81  | 32  | 414  |
| 0  | 101 | 33  | 467  |
| 0  | 168 | 353 | 549  |
| 0  | 46  | 51  | 169  |
| 0  | 7   | 2   | 98   |
| 0  | 15  | 4   | 92   |
| 0  | 5   | 1   | 84   |
| 27 | 100 | 75  | 532  |
| 0  | 9   | 8   | 197  |
| 0  | 6   | 1   | 82   |
| 0  | 5   | 17  | 203  |
| 0  | 42  | 21  | 128  |
| 0  | 16  | 2   | 207  |
| 0  | 7   | 12  | 70   |
| 0  | 12  | 5   | 77   |
| 0  | 40  | 27  | 342  |
| 0  | 4   | 6   | 248  |
| 3  | 10  | 15  | 216  |
| 0  | 36  | 9   | 193  |
| 0  | 174 | 132 | 2341 |
| 0  | 5   | 5   | 116  |
| 0  | 278 | 369 | 327  |
| 0  | 4   | 1   | 90   |
| 0  | 14  | 24  | 111  |
| 0  | 10  | 5   | 294  |
| 0  | 10  | 3   | 101  |
| 0  | 31  | 27  | 185  |
| 0  | 13  | 2   | 69   |
| 11 | 3   | 11  | 257  |
| 0  | 32  | 11  | 438  |
| 0  | 56  | 23  | 200  |
| 0  | 9   | 7   | 165  |
| 0  | 34  | 0   | 75   |
| 0  | 36  | 10  | 136  |
| 0  | 1   | 2   | 125  |
| 0  | 10  | 5   | 191  |
| 0  | 5   | 3   | 222  |
| 0  | 27  | 5   | 93   |
| 0  | 32  | 23  | 846  |
| 0  | 34  | 35  | 185  |
| 0  | 2   | 2   | 104  |

|   |     |     |      |
|---|-----|-----|------|
| 0 | 8   | 3   | 130  |
| 0 | 14  | 2   | 77   |
| 0 | 34  | 29  | 295  |
| 0 | 15  | 6   | 127  |
| 0 | 10  | 7   | 646  |
| 0 | 28  | 17  | 676  |
| 0 | 57  | 24  | 405  |
| 0 | 5   | 2   | 144  |
| 0 | 4   | 0   | 134  |
| 0 | 2   | 1   | 98   |
| 0 | 13  | 5   | 259  |
| 0 | 1   | 0   | 101  |
| 0 | 38  | 8   | 115  |
| 0 | 24  | 9   | 170  |
| 0 | 12  | 3   | 180  |
| 0 | 0   | 0   | 174  |
| 0 | 14  | 0   | 64   |
| 0 | 12  | 1   | 74   |
| 0 | 1   | 2   | 102  |
| 0 | 9   | 8   | 335  |
| 0 | 3   | 3   | 106  |
| 0 | 81  | 77  | 794  |
| 0 | 8   | 2   | 107  |
| 0 | 0   | 4   | 101  |
| 0 | 22  | 41  | 275  |
| 0 | 12  | 2   | 73   |
| 0 | 18  | 12  | 164  |
| 0 | 74  | 108 | 580  |
| 0 | 18  | 37  | 588  |
| 0 | 0   | 0   | 102  |
| 0 | 1   | 0   | 127  |
| 0 | 0   | 1   | 85   |
| 0 | 4   | 1   | 95   |
| 0 | 69  | 80  | 378  |
| 0 | 18  | 5   | 240  |
| 0 | 2   | 9   | 176  |
| 0 | 2   | 9   | 81   |
| 0 | 8   | 24  | 1087 |
| 0 | 16  | 4   | 195  |
| 0 | 136 | 76  | 245  |
| 0 | 13  | 3   | 88   |
| 0 | 3   | 2   | 132  |
| 0 | 16  | 28  | 303  |
| 0 | 7   | 6   | 157  |
| 0 | 1   | 2   | 94   |
| 0 | 15  | 7   | 104  |
| 0 | 23  | 17  | 434  |



|   |     |     |     |
|---|-----|-----|-----|
| 0 | 3   | 2   | 96  |
| 0 | 3   | 3   | 81  |
| 0 | 18  | 19  | 255 |
| 0 | 13  | 5   | 74  |
| 0 | 8   | 6   | 269 |
| 0 | 6   | 1   | 108 |
| 0 | 825 | 813 | 83  |
| 0 | 28  | 30  | 205 |
| 0 | 10  | 3   | 131 |
| 0 | 8   | 10  | 582 |
| 0 | 15  | 5   | 113 |
| 0 | 22  | 25  | 452 |
| 0 | 9   | 19  | 256 |
| 0 | 8   | 11  | 136 |
| 0 | 7   | 26  | 282 |
| 0 | 13  | 5   | 222 |
| 0 | 56  | 35  | 430 |
| 0 | 6   | 2   | 151 |
| 0 | 14  | 13  | 643 |
| 0 | 1   | 3   | 100 |
| 0 | 3   | 3   | 126 |
| 0 | 9   | 3   | 181 |
| 0 | 11  | 5   | 123 |
| 0 | 16  | 36  | 545 |
| 0 | 10  | 1   | 94  |
| 0 | 7   | 4   | 93  |
| 0 | 7   | 5   | 305 |
| 0 | 4   | 1   | 453 |
| 0 | 0   | 3   | 84  |
| 0 | 1   | 1   | 95  |
| 0 | 21  | 17  | 590 |
| 0 | 19  | 6   | 66  |
| 0 | 9   | 7   | 265 |
| 0 | 12  | 11  | 192 |
| 0 | 1   | 1   | 106 |
| 0 | 25  | 21  | 332 |
| 0 | 2   | 0   | 194 |
| 0 | 4   | 2   | 103 |
| 0 | 3   | 1   | 119 |
| 0 | 7   | 5   | 126 |
| 0 | 26  | 2   | 71  |
| 0 | 8   | 5   | 121 |
| 0 | 6   | 0   | 147 |
| 0 | 11  | 4   | 101 |
| 0 | 7   | 15  | 179 |
| 0 | 14  | 24  | 562 |
| 0 | 37  | 18  | 313 |

|    |     |     |     |
|----|-----|-----|-----|
| 0  | 22  | 5   | 168 |
| 0  | 5   | 4   | 108 |
| 0  | 11  | 3   | 227 |
| 0  | 24  | 15  | 474 |
| 0  | 9   | 3   | 85  |
| 0  | 11  | 4   | 385 |
| 0  | 5   | 3   | 223 |
| 0  | 2   | 1   | 98  |
| 0  | 15  | 6   | 65  |
| 0  | 8   | 4   | 123 |
| 0  | 1   | 1   | 78  |
| 0  | 31  | 20  | 692 |
| 0  | 7   | 7   | 272 |
| 0  | 4   | 2   | 137 |
| 0  | 2   | 2   | 85  |
| 0  | 19  | 5   | 124 |
| 0  | 3   | 5   | 140 |
| 0  | 4   | 13  | 155 |
| 0  | 15  | 9   | 195 |
| 0  | 11  | 4   | 122 |
| 0  | 41  | 44  | 430 |
| 0  | 22  | 15  | 120 |
| 0  | 6   | 5   | 110 |
| 0  | 55  | 40  | 635 |
| 0  | 24  | 9   | 73  |
| 0  | 0   | 1   | 84  |
| 0  | 2   | 4   | 122 |
| 0  | 6   | 0   | 76  |
| 0  | 11  | 7   | 187 |
| 0  | 97  | 60  | 350 |
| 0  | 1   | 3   | 107 |
| 0  | 4   | 3   | 187 |
| 0  | 3   | 3   | 131 |
| 0  | 7   | 8   | 258 |
| 0  | 3   | 5   | 131 |
| 0  | 16  | 2   | 75  |
| 0  | 3   | 0   | 65  |
| 0  | 104 | 95  | 400 |
| 0  | 44  | 59  | 74  |
| 0  | 608 | 415 | 355 |
| 0  | 7   | 1   | 168 |
| 0  | 38  | 50  | 230 |
| 39 | 75  | 206 | 235 |
| 0  | 39  | 6   | 128 |
| 49 | 52  | 127 | 102 |
| 0  | 39  | 6   | 92  |
| 20 | 25  | 26  | 155 |

|     |     |     |      |
|-----|-----|-----|------|
| 0   | 7   | 2   | 348  |
| 101 | 0   | 68  | 410  |
| 0   | 30  | 4   | 70   |
| 0   | 15  | 10  | 153  |
| 0   | 21  | 3   | 160  |
| 0   | 14  | 2   | 68   |
| 0   | 10  | 3   | 185  |
| 0   | 2   | 0   | 80   |
| 0   | 2   | 3   | 170  |
| 0   | 5   | 5   | 218  |
| 0   | 0   | 2   | 92   |
| 0   | 3   | 4   | 127  |
| 0   | 4   | 2   | 110  |
| 0   | 6   | 4   | 138  |
| 0   | 6   | 4   | 1019 |
| 0   | 12  | 16  | 95   |
| 0   | 0   | 0   | 113  |
| 0   | 2   | 1   | 112  |
| 0   | 23  | 12  | 78   |
| 0   | 5   | 0   | 74   |
| 0   | 79  | 108 | 1369 |
| 0   | 2   | 3   | 98   |
| 0   | 0   | 0   | 82   |
| 0   | 52  | 28  | 436  |
| 0   | 0   | 0   | 71   |
| 0   | 6   | 1   | 167  |
| 0   | 1   | 0   | 104  |
| 0   | 0   | 0   | 102  |
| 0   | 0   | 0   | 221  |
| 0   | 12  | 2   | 96   |
| 0   | 11  | 10  | 69   |
| 0   | 121 | 71  | 873  |
| 0   | 23  | 1   | 67   |
| 0   | 3   | 3   | 92   |
| 0   | 5   | 0   | 109  |
| 0   | 41  | 29  | 300  |
| 0   | 90  | 415 | 171  |
| 0   | 87  | 142 | 144  |
| 0   | 43  | 18  | 295  |
| 0   | 2   | 9   | 121  |
| 0   | 4   | 1   | 137  |
| 0   | 6   | 3   | 198  |
| 0   | 0   | 1   | 84   |
| 0   | 21  | 183 | 575  |
| 0   | 111 | 18  | 255  |
| 0   | 17  | 8   | 101  |
| 0   | 9   | 0   | 103  |

|   |     |     |     |
|---|-----|-----|-----|
| 0 | 11  | 7   | 63  |
| 0 | 0   | 22  | 105 |
| 0 | 2   | 3   | 85  |
| 0 | 11  | 11  | 177 |
| 0 | 3   | 6   | 220 |
| 0 | 14  | 4   | 98  |
| 0 | 0   | 0   | 151 |
| 0 | 7   | 0   | 108 |
| 0 | 3   | 3   | 129 |
| 0 | 20  | 17  | 305 |
| 0 | 2   | 4   | 134 |
| 0 | 12  | 9   | 261 |
| 0 | 4   | 5   | 146 |
| 0 | 8   | 8   | 181 |
| 0 | 16  | 5   | 120 |
| 0 | 7   | 4   | 119 |
| 0 | 12  | 4   | 341 |
| 0 | 11  | 8   | 133 |
| 0 | 7   | 5   | 132 |
| 0 | 379 | 250 | 162 |
| 0 | 4   | 3   | 206 |
| 0 | 123 | 75  | 309 |
| 0 | 8   | 14  | 160 |
| 0 | 4   | 5   | 206 |
| 0 | 9   | 16  | 169 |
| 0 | 11  | 16  | 245 |
| 0 | 2   | 1   | 129 |
| 0 | 18  | 30  | 212 |
| 0 | 98  | 26  | 140 |
| 0 | 11  | 3   | 118 |
| 0 | 4   | 4   | 247 |
| 0 | 5   | 2   | 134 |
| 0 | 11  | 4   | 147 |
| 0 | 10  | 8   | 158 |
| 0 | 0   | 0   | 102 |
| 0 | 11  | 9   | 118 |
| 0 | 43  | 12  | 129 |
| 0 | 19  | 26  | 478 |
| 0 | 4   | 3   | 121 |
| 0 | 70  | 3   | 93  |
| 0 | 15  | 37  | 96  |
| 0 | 17  | 335 | 197 |
| 0 | 8   | 1   | 119 |
| 0 | 8   | 3   | 117 |
| 0 | 3   | 7   | 179 |
| 0 | 12  | 3   | 83  |
| 0 | 11  | 3   | 163 |

|   |     |     |     |
|---|-----|-----|-----|
| 0 | 2   | 2   | 106 |
| 0 | 0   | 5   | 100 |
| 0 | 25  | 10  | 75  |
| 0 | 31  | 16  | 216 |
| 0 | 3   | 3   | 118 |
| 0 | 0   | 2   | 80  |
| 0 | 9   | 11  | 132 |
| 0 | 5   | 1   | 142 |
| 0 | 37  | 30  | 175 |
| 0 | 14  | 14  | 119 |
| 0 | 88  | 53  | 350 |
| 0 | 3   | 2   | 127 |
| 0 | 17  | 10  | 105 |
| 0 | 19  | 10  | 93  |
| 0 | 4   | 2   | 119 |
| 0 | 8   | 6   | 130 |
| 0 | 27  | 0   | 126 |
| 0 | 5   | 5   | 125 |
| 0 | 0   | 0   | 95  |
| 0 | 5   | 2   | 85  |
| 0 | 4   | 8   | 529 |
| 0 | 9   | 0   | 109 |
| 0 | 2   | 1   | 119 |
| 0 | 1   | 2   | 92  |
| 0 | 0   | 1   | 69  |
| 0 | 4   | 7   | 185 |
| 0 | 0   | 0   | 252 |
| 0 | 37  | 16  | 637 |
| 0 | 4   | 5   | 118 |
| 0 | 11  | 6   | 162 |
| 0 | 33  | 60  | 361 |
| 0 | 6   | 1   | 181 |
| 0 | 12  | 6   | 120 |
| 0 | 7   | 6   | 158 |
| 0 | 47  | 20  | 110 |
| 0 | 3   | 2   | 76  |
| 0 | 4   | 14  | 164 |
| 0 | 8   | 6   | 136 |
| 0 | 49  | 54  | 369 |
| 0 | 15  | 9   | 234 |
| 0 | 2   | 2   | 176 |
| 0 | 8   | 9   | 340 |
| 0 | 17  | 7   | 140 |
| 0 | 159 | 136 | 489 |
| 0 | 70  | 28  | 372 |
| 0 | 17  | 22  | 358 |
| 0 | 9   | 0   | 105 |

|    |     |     |      |
|----|-----|-----|------|
| 0  | 7   | 9   | 362  |
| 0  | 243 | 72  | 76   |
| 0  | 100 | 34  | 105  |
| 0  | 22  | 56  | 220  |
| 0  | 27  | 7   | 104  |
| 0  | 1   | 0   | 101  |
| 0  | 12  | 2   | 111  |
| 0  | 109 | 58  | 392  |
| 0  | 7   | 13  | 184  |
| 0  | 67  | 95  | 1180 |
| 0  | 0   | 0   | 112  |
| 0  | 27  | 18  | 276  |
| 0  | 116 | 160 | 549  |
| 0  | 36  | 35  | 381  |
| 22 | 1   | 7   | 83   |
| 0  | 12  | 4   | 73   |
| 0  | 20  | 15  | 188  |
| 0  | 4   | 5   | 151  |
| 0  | 27  | 5   | 106  |
| 0  | 10  | 4   | 110  |
| 0  | 11  | 20  | 254  |
| 0  | 29  | 11  | 159  |
| 0  | 6   | 0   | 117  |
| 0  | 4   | 1   | 149  |
| 0  | 1   | 1   | 93   |
| 0  | 8   | 4   | 149  |
| 0  | 2   | 2   | 361  |
| 0  | 17  | 0   | 98   |
| 0  | 0   | 3   | 115  |
| 0  | 47  | 20  | 188  |
| 0  | 39  | 43  | 177  |
| 0  | 6   | 20  | 652  |
| 0  | 13  | 4   | 99   |
| 0  | 46  | 11  | 176  |
| 0  | 4   | 2   | 146  |
| 0  | 11  | 13  | 299  |
| 0  | 20  | 28  | 300  |
| 0  | 12  | 20  | 273  |
| 0  | 7   | 1   | 107  |
| 0  | 13  | 1   | 290  |
| 0  | 31  | 10  | 425  |
| 0  | 23  | 29  | 402  |
| 0  | 168 | 10  | 67   |
| 0  | 31  | 8   | 500  |
| 0  | 0   | 0   | 295  |
| 0  | 7   | 5   | 128  |
| 0  | 6   | 8   | 374  |

|   |     |     |      |
|---|-----|-----|------|
| 0 | 2   | 3   | 145  |
| 0 | 7   | 3   | 162  |
| 0 | 17  | 18  | 222  |
| 0 | 17  | 8   | 93   |
| 0 | 41  | 34  | 331  |
| 0 | 7   | 6   | 137  |
| 0 | 21  | 10  | 314  |
| 0 | 3   | 1   | 104  |
| 0 | 3   | 6   | 155  |
| 0 | 1   | 1   | 68   |
| 0 | 15  | 9   | 99   |
| 0 | 19  | 7   | 305  |
| 0 | 5   | 2   | 90   |
| 0 | 7   | 3   | 352  |
| 0 | 27  | 25  | 1585 |
| 0 | 12  | 0   | 75   |
| 0 | 0   | 0   | 541  |
| 0 | 3   | 2   | 109  |
| 0 | 5   | 3   | 139  |
| 0 | 7   | 3   | 127  |
| 0 | 782 | 769 | 86   |
| 0 | 26  | 27  | 532  |
| 0 | 36  | 14  | 350  |
| 0 | 5   | 1   | 301  |
| 0 | 67  | 86  | 186  |
| 0 | 8   | 2   | 179  |
| 0 | 15  | 11  | 138  |
| 0 | 6   | 4   | 279  |
| 0 | 85  | 51  | 308  |
| 0 | 4   | 2   | 99   |
| 0 | 23  | 4   | 244  |
| 0 | 25  | 8   | 445  |
| 0 | 15  | 7   | 92   |
| 0 | 16  | 5   | 235  |
| 0 | 4   | 2   | 124  |
| 0 | 6   | 5   | 142  |
| 0 | 19  | 1   | 107  |
| 0 | 9   | 4   | 144  |
| 0 | 9   | 7   | 132  |
| 0 | 8   | 2   | 161  |
| 0 | 14  | 0   | 75   |
| 0 | 7   | 3   | 120  |
| 0 | 16  | 10  | 193  |
| 0 | 10  | 3   | 99   |
| 0 | 84  | 11  | 118  |
| 0 | 6   | 6   | 60   |
| 0 | 7   | 7   | 167  |

|   |     |     |      |
|---|-----|-----|------|
| 0 | 23  | 7   | 169  |
| 0 | 11  | 3   | 219  |
| 0 | 0   | 0   | 78   |
| 0 | 4   | 0   | 92   |
| 0 | 0   | 0   | 85   |
| 0 | 17  | 7   | 107  |
| 0 | 15  | 29  | 159  |
| 0 | 100 | 0   | 124  |
| 0 | 51  | 21  | 154  |
| 0 | 16  | 93  | 391  |
| 0 | 0   | 2   | 129  |
| 0 | 0   | 1   | 457  |
| 0 | 7   | 75  | 212  |
| 0 | 2   | 11  | 424  |
| 0 | 2   | 0   | 234  |
| 0 | 2   | 0   | 299  |
| 0 | 10  | 66  | 263  |
| 0 | 2   | 0   | 116  |
| 0 | 237 | 178 | 185  |
| 0 | 2   | 3   | 177  |
| 0 | 20  | 8   | 510  |
| 0 | 49  | 59  | 412  |
| 0 | 10  | 24  | 173  |
| 0 | 33  | 13  | 69   |
| 0 | 33  | 0   | 60   |
| 0 | 6   | 11  | 100  |
| 0 | 11  | 6   | 511  |
| 0 | 3   | 26  | 168  |
| 0 | 29  | 36  | 244  |
| 0 | 13  | 13  | 251  |
| 0 | 3   | 3   | 133  |
| 0 | 6   | 5   | 150  |
| 0 | 0   | 0   | 80   |
| 0 | 16  | 18  | 286  |
| 0 | 15  | 241 | 1024 |
| 0 | 2   | 6   | 135  |
| 0 | 18  | 13  | 149  |
| 0 | 24  | 0   | 70   |
| 0 | 155 | 19  | 231  |
| 0 | 128 | 148 | 266  |
| 0 | 2   | 0   | 68   |
| 0 | 1   | 6   | 125  |
| 0 | 6   | 9   | 76   |
| 0 | 8   | 6   | 181  |
| 0 | 30  | 176 | 1203 |
| 0 | 16  | 7   | 158  |
| 0 | 0   | 0   | 87   |



|   |      |      |     |
|---|------|------|-----|
| 0 | 10   | 6    | 122 |
| 0 | 34   | 17   | 299 |
| 0 | 26   | 26   | 180 |
| 0 | 6    | 4    | 95  |
| 0 | 23   | 27   | 233 |
| 0 | 41   | 5    | 96  |
| 0 | 16   | 7    | 66  |
| 0 | 22   | 5    | 104 |
| 0 | 96   | 8    | 134 |
| 0 | 17   | 23   | 848 |
| 0 | 5    | 1    | 112 |
| 0 | 3    | 10   | 127 |
| 0 | 3    | 3    | 103 |
| 0 | 8    | 8    | 183 |
| 0 | 58   | 119  | 542 |
| 0 | 31   | 18   | 144 |
| 0 | 5    | 1    | 87  |
| 0 | 12   | 2    | 101 |
| 0 | 525  | 326  | 87  |
| 0 | 4    | 1    | 70  |
| 0 | 6    | 2    | 333 |
| 0 | 0    | 0    | 77  |
| 0 | 3    | 1    | 126 |
| 0 | 10   | 10   | 258 |
| 0 | 1    | 2    | 133 |
| 0 | 28   | 27   | 295 |
| 0 | 36   | 17   | 167 |
| 0 | 91   | 64   | 196 |
| 0 | 56   | 41   | 277 |
| 0 | 9    | 4    | 82  |
| 0 | 0    | 23   | 105 |
| 0 | 14   | 13   | 160 |
| 0 | 3120 | 1016 | 60  |
| 0 | 1054 | 706  | 88  |
| 0 | 6    | 7    | 166 |
| 0 | 6    | 2    | 241 |
| 0 | 7    | 6    | 175 |
| 0 | 8    | 9    | 109 |
| 0 | 2    | 1    | 89  |
| 0 | 0    | 0    | 101 |
| 0 | 52   | 5    | 71  |
| 0 | 0    | 0    | 121 |
| 0 | 18   | 23   | 338 |
| 0 | 148  | 51   | 377 |
| 0 | 60   | 56   | 773 |
| 0 | 103  | 28   | 295 |
| 0 | 3    | 2    | 109 |

|   |     |     |     |
|---|-----|-----|-----|
| 0 | 221 | 178 | 194 |
| 0 | 4   | 3   | 99  |
| 0 | 21  | 11  | 229 |
| 0 | 16  | 13  | 304 |
| 0 | 15  | 21  | 131 |
| 0 | 6   | 2   | 105 |
| 0 | 131 | 106 | 129 |
| 0 | 0   | 0   | 55  |
| 0 | 0   | 0   | 134 |
| 0 | 18  | 45  | 53  |
| 0 | 9   | 7   | 220 |
| 0 | 5   | 1   | 123 |
| 0 | 10  | 6   | 82  |
| 0 | 12  | 10  | 172 |
| 0 | 9   | 8   | 184 |
| 0 | 30  | 15  | 243 |
| 0 | 5   | 2   | 118 |
| 0 | 15  | 12  | 282 |
| 0 | 4   | 2   | 149 |
| 0 | 6   | 11  | 132 |
| 0 | 3   | 2   | 77  |
| 0 | 20  | 15  | 202 |
| 0 | 7   | 5   | 103 |
| 0 | 5   | 11  | 175 |
| 0 | 13  | 10  | 269 |
| 0 | 14  | 4   | 120 |
| 0 | 110 | 122 | 819 |
| 0 | 29  | 4   | 71  |
| 0 | 1   | 0   | 162 |
| 0 | 11  | 7   | 194 |
| 0 | 2   | 0   | 115 |
| 0 | 50  | 366 | 339 |
| 0 | 3   | 2   | 215 |
| 0 | 43  | 59  | 366 |
| 0 | 15  | 4   | 132 |
| 0 | 12  | 3   | 127 |
| 0 | 1   | 2   | 87  |
| 0 | 9   | 4   | 409 |
| 0 | 10  | 2   | 169 |
| 0 | 13  | 3   | 113 |
| 0 | 17  | 15  | 100 |
| 0 | 9   | 1   | 153 |
| 0 | 7   | 11  | 228 |
| 0 | 51  | 37  | 624 |
| 0 | 20  | 11  | 458 |
| 0 | 2   | 2   | 238 |
| 0 | 7   | 8   | 271 |

|   |     |     |      |
|---|-----|-----|------|
| 0 | 51  | 171 | 398  |
| 0 | 7   | 2   | 327  |
| 0 | 4   | 2   | 123  |
| 0 | 25  | 15  | 244  |
| 0 | 4   | 2   | 95   |
| 0 | 5   | 9   | 144  |
| 0 | 68  | 53  | 545  |
| 0 | 3   | 1   | 112  |
| 0 | 7   | 4   | 110  |
| 0 | 15  | 5   | 113  |
| 0 | 1   | 0   | 174  |
| 0 | 0   | 0   | 106  |
| 0 | 10  | 2   | 167  |
| 0 | 6   | 15  | 131  |
| 0 | 21  | 7   | 114  |
| 0 | 5   | 1   | 156  |
| 0 | 103 | 15  | 273  |
| 0 | 30  | 25  | 785  |
| 0 | 5   | 0   | 119  |
| 7 | 73  | 96  | 570  |
| 0 | 27  | 12  | 102  |
| 0 | 5   | 6   | 137  |
| 0 | 15  | 9   | 497  |
| 0 | 9   | 3   | 155  |
| 0 | 18  | 38  | 333  |
| 0 | 7   | 5   | 157  |
| 0 | 15  | 8   | 106  |
| 0 | 0   | 0   | 120  |
| 0 | 3   | 1   | 132  |
| 0 | 36  | 2   | 109  |
| 0 | 4   | 2   | 148  |
| 0 | 0   | 1   | 79   |
| 0 | 18  | 13  | 150  |
| 0 | 2   | 7   | 144  |
| 0 | 3   | 6   | 131  |
| 0 | 19  | 2   | 82   |
| 0 | 9   | 2   | 92   |
| 0 | 14  | 6   | 177  |
| 0 | 0   | 3   | 130  |
| 0 | 2   | 3   | 134  |
| 0 | 1   | 0   | 96   |
| 0 | 10  | 10  | 302  |
| 0 | 3   | 2   | 87   |
| 0 | 4   | 1   | 96   |
| 0 | 18  | 11  | 1256 |
| 0 | 1   | 0   | 94   |
| 0 | 28  | 9   | 171  |

|     |     |     |     |
|-----|-----|-----|-----|
| 0   | 20  | 6   | 190 |
| 0   | 6   | 2   | 234 |
| 0   | 0   | 0   | 102 |
| 0   | 50  | 60  | 228 |
| 0   | 1   | 2   | 85  |
| 0   | 1   | 0   | 114 |
| 0   | 9   | 10  | 783 |
| 0   | 2   | 3   | 315 |
| 0   | 1   | 3   | 97  |
| 0   | 6   | 4   | 194 |
| 0   | 5   | 5   | 157 |
| 0   | 21  | 12  | 214 |
| 0   | 7   | 8   | 142 |
| 0   | 1   | 1   | 84  |
| 0   | 10  | 11  | 326 |
| 0   | 8   | 5   | 73  |
| 0   | 0   | 0   | 107 |
| 0   | 4   | 3   | 84  |
| 0   | 7   | 3   | 153 |
| 0   | 186 | 78  | 242 |
| 0   | 23  | 9   | 109 |
| 0   | 21  | 6   | 188 |
| 0   | 3   | 0   | 84  |
| 0   | 7   | 0   | 106 |
| 0   | 9   | 3   | 133 |
| 128 | 81  | 220 | 232 |
| 25  | 229 | 210 | 124 |
| 0   | 50  | 34  | 313 |
| 0   | 10  | 2   | 91  |
| 0   | 15  | 9   | 252 |
| 0   | 16  | 7   | 338 |
| 0   | 13  | 7   | 169 |
| 0   | 5   | 0   | 243 |
| 0   | 14  | 4   | 113 |
| 0   | 764 | 985 | 142 |
| 0   | 14  | 30  | 328 |
| 0   | 11  | 2   | 72  |
| 0   | 28  | 13  | 167 |
| 0   | 6   | 5   | 111 |
| 0   | 10  | 6   | 101 |
| 0   | 3   | 2   | 127 |
| 0   | 9   | 6   | 235 |
| 0   | 11  | 11  | 180 |
| 0   | 116 | 68  | 381 |
| 0   | 35  | 24  | 468 |
| 0   | 22  | 9   | 66  |
| 0   | 17  | 9   | 129 |

|   |     |     |     |
|---|-----|-----|-----|
| 0 | 8   | 1   | 86  |
| 0 | 21  | 7   | 160 |
| 0 | 3   | 2   | 208 |
| 0 | 4   | 2   | 83  |
| 0 | 7   | 0   | 98  |
| 0 | 8   | 7   | 130 |
| 0 | 77  | 28  | 387 |
| 0 | 5   | 10  | 189 |
| 0 | 0   | 3   | 116 |
| 0 | 0   | 0   | 155 |
| 0 | 2   | 2   | 117 |
| 0 | 3   | 1   | 92  |
| 0 | 1   | 3   | 114 |
| 0 | 7   | 9   | 110 |
| 0 | 4   | 6   | 145 |
| 0 | 7   | 7   | 160 |
| 0 | 9   | 6   | 339 |
| 0 | 3   | 1   | 152 |
| 0 | 5   | 2   | 393 |
| 0 | 30  | 10  | 248 |
| 0 | 1   | 0   | 97  |
| 0 | 6   | 3   | 128 |
| 0 | 1   | 0   | 95  |
| 0 | 1   | 0   | 141 |
| 0 | 5   | 1   | 226 |
| 0 | 40  | 18  | 175 |
| 0 | 3   | 1   | 113 |
| 0 | 121 | 111 | 578 |
| 0 | 5   | 4   | 151 |
| 0 | 4   | 2   | 92  |
| 0 | 5   | 1   | 207 |
| 0 | 6   | 1   | 108 |
| 0 | 4   | 1   | 101 |
| 0 | 1   | 0   | 113 |
| 0 | 24  | 4   | 69  |
| 0 | 8   | 9   | 125 |
| 0 | 5   | 2   | 206 |
| 0 | 6   | 4   | 219 |
| 0 | 1   | 0   | 131 |
| 0 | 12  | 18  | 283 |
| 0 | 4   | 3   | 109 |
| 0 | 7   | 6   | 164 |
| 0 | 0   | 0   | 167 |
| 0 | 9   | 5   | 111 |
| 0 | 6   | 6   | 147 |
| 0 | 4   | 4   | 146 |
| 0 | 4   | 5   | 160 |

|   |     |     |      |
|---|-----|-----|------|
| 0 | 5   | 6   | 632  |
| 0 | 1   | 3   | 166  |
| 0 | 9   | 23  | 295  |
| 0 | 6   | 6   | 109  |
| 0 | 325 | 354 | 333  |
| 0 | 865 | 509 | 196  |
| 0 | 33  | 27  | 351  |
| 0 | 6   | 3   | 127  |
| 0 | 15  | 8   | 199  |
| 0 | 23  | 5   | 138  |
| 0 | 6   | 2   | 337  |
| 0 | 2   | 2   | 99   |
| 0 | 0   | 0   | 110  |
| 0 | 3   | 8   | 146  |
| 0 | 30  | 7   | 146  |
| 0 | 13  | 0   | 68   |
| 0 | 13  | 3   | 134  |
| 0 | 7   | 5   | 478  |
| 0 | 20  | 29  | 197  |
| 0 | 10  | 3   | 104  |
| 0 | 1   | 2   | 116  |
| 0 | 0   | 2   | 74   |
| 0 | 15  | 11  | 189  |
| 0 | 5   | 5   | 202  |
| 0 | 0   | 0   | 105  |
| 0 | 6   | 1   | 103  |
| 0 | 150 | 55  | 285  |
| 0 | 6   | 5   | 149  |
| 0 | 13  | 2   | 73   |
| 0 | 4   | 1   | 124  |
| 0 | 12  | 11  | 118  |
| 0 | 21  | 2   | 126  |
| 0 | 7   | 14  | 421  |
| 0 | 12  | 1   | 151  |
| 0 | 225 | 214 | 353  |
| 0 | 2   | 0   | 91   |
| 0 | 8   | 4   | 194  |
| 0 | 19  | 6   | 303  |
| 0 | 0   | 0   | 71   |
| 0 | 3   | 0   | 258  |
| 0 | 12  | 7   | 737  |
| 0 | 5   | 9   | 161  |
| 0 | 9   | 10  | 237  |
| 0 | 13  | 9   | 242  |
| 0 | 25  | 17  | 134  |
| 0 | 0   | 0   | 1099 |
| 0 | 2   | 2   | 137  |

|   |     |     |     |
|---|-----|-----|-----|
| 0 | 7   | 4   | 95  |
| 0 | 72  | 82  | 175 |
| 0 | 11  | 2   | 81  |
| 0 | 0   | 1   | 87  |
| 0 | 21  | 14  | 252 |
| 0 | 75  | 122 | 272 |
| 0 | 416 | 460 | 74  |
| 0 | 5   | 1   | 265 |
| 0 | 24  | 14  | 415 |
| 0 | 10  | 2   | 145 |
| 0 | 28  | 13  | 122 |
| 0 | 17  | 4   | 84  |
| 0 | 8   | 5   | 103 |
| 0 | 10  | 5   | 117 |
| 0 | 30  | 19  | 339 |
| 0 | 27  | 16  | 390 |
| 0 | 9   | 8   | 153 |
| 0 | 13  | 16  | 142 |
| 0 | 82  | 54  | 792 |
| 0 | 15  | 6   | 133 |
| 0 | 184 | 66  | 296 |
| 0 | 162 | 185 | 868 |
| 0 | 13  | 1   | 152 |
| 0 | 1   | 3   | 127 |
| 0 | 1   | 0   | 106 |
| 0 | 30  | 7   | 337 |
| 0 | 40  | 17  | 191 |
| 0 | 51  | 57  | 276 |
| 0 | 21  | 8   | 160 |
| 0 | 23  | 11  | 197 |
| 0 | 0   | 0   | 79  |
| 0 | 53  | 30  | 62  |
| 0 | 1   | 1   | 118 |
| 0 | 1   | 1   | 118 |
| 0 | 0   | 0   | 100 |
| 0 | 1   | 2   | 90  |
| 0 | 50  | 18  | 300 |
| 0 | 292 | 88  | 90  |
| 0 | 71  | 76  | 64  |
| 0 | 16  | 5   | 92  |
| 0 | 22  | 23  | 279 |
| 0 | 31  | 11  | 211 |
| 0 | 41  | 23  | 164 |
| 0 | 1   | 2   | 152 |
| 0 | 3   | 0   | 108 |
| 0 | 124 | 121 | 580 |
| 0 | 10  | 4   | 111 |

|     |     |     |      |
|-----|-----|-----|------|
| 0   | 4   | 2   | 108  |
| 0   | 2   | 1   | 122  |
| 0   | 24  | 16  | 429  |
| 0   | 5   | 3   | 119  |
| 0   | 3   | 4   | 127  |
| 0   | 261 | 170 | 157  |
| 0   | 2   | 5   | 117  |
| 0   | 29  | 18  | 463  |
| 0   | 4   | 5   | 117  |
| 0   | 13  | 10  | 221  |
| 0   | 12  | 16  | 266  |
| 0   | 7   | 5   | 91   |
| 0   | 52  | 39  | 174  |
| 0   | 20  | 23  | 338  |
| 0   | 17  | 6   | 258  |
| 0   | 22  | 12  | 409  |
| 0   | 12  | 14  | 211  |
| 0   | 5   | 2   | 116  |
| 0   | 1   | 0   | 110  |
| 0   | 40  | 48  | 1143 |
| 0   | 13  | 8   | 137  |
| 0   | 17  | 10  | 187  |
| 0   | 2   | 3   | 98   |
| 0   | 70  | 11  | 217  |
| 130 | 240 | 295 | 375  |
| 0   | 78  | 28  | 391  |
| 0   | 11  | 11  | 284  |
| 0   | 111 | 67  | 434  |
| 0   | 13  | 12  | 198  |
| 0   | 69  | 59  | 358  |
| 0   | 0   | 0   | 130  |
| 0   | 12  | 9   | 594  |
| 0   | 0   | 0   | 88   |
| 0   | 33  | 7   | 84   |
| 0   | 11  | 22  | 438  |
| 0   | 0   | 7   | 66   |
| 0   | 1   | 1   | 91   |
| 0   | 2   | 1   | 184  |
| 0   | 5   | 5   | 140  |
| 0   | 0   | 0   | 229  |
| 0   | 4   | 1   | 135  |
| 0   | 36  | 167 | 633  |
| 0   | 2   | 0   | 90   |
| 0   | 16  | 12  | 322  |
| 0   | 42  | 16  | 138  |
| 0   | 10  | 10  | 157  |
| 0   | 5   | 14  | 260  |



|   |     |     |      |
|---|-----|-----|------|
| 0 | 6   | 3   | 154  |
| 0 | 9   | 11  | 192  |
| 0 | 1   | 0   | 136  |
| 0 | 1   | 0   | 83   |
| 0 | 7   | 4   | 121  |
| 0 | 83  | 55  | 474  |
| 0 | 84  | 152 | 578  |
| 0 | 4   | 18  | 150  |
| 0 | 12  | 10  | 192  |
| 0 | 1   | 1   | 108  |
| 0 | 17  | 8   | 137  |
| 0 | 9   | 3   | 114  |
| 0 | 28  | 19  | 506  |
| 0 | 1   | 2   | 193  |
| 0 | 11  | 6   | 97   |
| 0 | 11  | 6   | 87   |
| 0 | 6   | 4   | 282  |
| 0 | 23  | 3   | 138  |
| 0 | 17  | 3   | 119  |
| 0 | 10  | 4   | 157  |
| 0 | 1   | 2   | 118  |
| 0 | 38  | 17  | 1195 |
| 0 | 6   | 0   | 96   |
| 0 | 42  | 28  | 311  |
| 0 | 17  | 30  | 583  |
| 0 | 7   | 4   | 97   |
| 0 | 4   | 7   | 122  |
| 0 | 0   | 3   | 82   |
| 0 | 7   | 5   | 109  |
| 0 | 6   | 2   | 99   |
| 0 | 45  | 35  | 430  |
| 0 | 213 | 154 | 552  |
| 0 | 2   | 0   | 86   |
| 0 | 103 | 62  | 627  |
| 0 | 97  | 108 | 355  |
| 0 | 0   | 0   | 68   |
| 0 | 1   | 2   | 85   |
| 0 | 452 | 221 | 123  |
| 0 | 4   | 3   | 119  |
| 0 | 16  | 6   | 115  |
| 0 | 10  | 7   | 96   |
| 0 | 11  | 4   | 110  |
| 0 | 56  | 30  | 167  |
| 0 | 7   | 2   | 95   |
| 0 | 0   | 0   | 63   |
| 0 | 8   | 20  | 186  |
| 0 | 123 | 104 | 364  |

|    |     |     |     |
|----|-----|-----|-----|
| 0  | 171 | 77  | 669 |
| 0  | 62  | 15  | 142 |
| 0  | 26  | 17  | 640 |
| 0  | 9   | 6   | 171 |
| 0  | 11  | 9   | 160 |
| 0  | 9   | 9   | 299 |
| 0  | 2   | 1   | 458 |
| 0  | 1   | 1   | 107 |
| 0  | 0   | 0   | 657 |
| 0  | 1   | 2   | 95  |
| 0  | 5   | 7   | 114 |
| 0  | 12  | 6   | 173 |
| 0  | 2   | 0   | 75  |
| 0  | 8   | 7   | 71  |
| 0  | 0   | 1   | 297 |
| 3  | 9   | 4   | 62  |
| 0  | 24  | 15  | 260 |
| 19 | 635 | 704 | 124 |
| 0  | 7   | 4   | 336 |
| 0  | 1   | 5   | 88  |
| 0  | 8   | 8   | 74  |
| 0  | 5   | 5   | 158 |
| 0  | 4   | 0   | 71  |
| 0  | 12  | 0   | 82  |
| 0  | 8   | 4   | 84  |
| 0  | 25  | 49  | 660 |
| 0  | 12  | 8   | 154 |
| 0  | 5   | 0   | 128 |
| 0  | 0   | 1   | 65  |
| 0  | 57  | 26  | 392 |
| 0  | 3   | 4   | 239 |
| 0  | 4   | 2   | 169 |
| 0  | 16  | 15  | 102 |
| 0  | 2   | 3   | 135 |
| 0  | 13  | 5   | 279 |
| 0  | 13  | 3   | 101 |
| 0  | 1   | 1   | 157 |
| 0  | 8   | 1   | 135 |
| 0  | 268 | 252 | 286 |
| 0  | 0   | 0   | 76  |
| 0  | 14  | 0   | 62  |
| 0  | 6   | 6   | 274 |
| 0  | 2   | 2   | 89  |
| 0  | 6   | 97  | 44  |
| 0  | 14  | 107 | 150 |
| 0  | 49  | 138 | 136 |
| 0  | 2   | 6   | 74  |

|   |    |     |     |
|---|----|-----|-----|
| 0 | 8  | 11  | 227 |
| 0 | 36 | 115 | 940 |
| 0 | 23 | 7   | 238 |
| 0 | 8  | 10  | 150 |
| 0 | 4  | 2   | 110 |
| 0 | 0  | 2   | 92  |
| 0 | 19 | 92  | 286 |
| 0 | 3  | 1   | 116 |
| 0 | 2  | 0   | 68  |
| 0 | 7  | 6   | 163 |
| 0 | 31 | 15  | 158 |
| 0 | 1  | 1   | 89  |
| 0 | 5  | 6   | 98  |
| 0 | 5  | 1   | 172 |
| 0 | 3  | 3   | 130 |
| 0 | 29 | 17  | 579 |
| 0 | 3  | 4   | 205 |
| 0 | 9  | 5   | 109 |
| 0 | 21 | 1   | 133 |
| 0 | 9  | 4   | 128 |
| 0 | 0  | 0   | 61  |
| 0 | 5  | 3   | 345 |
| 0 | 11 | 6   | 135 |
| 0 | 6  | 6   | 118 |
| 0 | 11 | 3   | 496 |
| 0 | 2  | 5   | 134 |
| 0 | 22 | 12  | 155 |
| 0 | 19 | 5   | 315 |
| 0 | 27 | 2   | 128 |
| 0 | 13 | 10  | 129 |
| 0 | 20 | 21  | 659 |
| 0 | 8  | 8   | 137 |
| 0 | 18 | 11  | 171 |
| 0 | 1  | 3   | 92  |
| 0 | 0  | 0   | 110 |
| 0 | 0  | 0   | 143 |
| 0 | 9  | 4   | 96  |
| 0 | 68 | 5   | 202 |
| 0 | 42 | 30  | 652 |
| 0 | 6  | 8   | 248 |
| 0 | 2  | 2   | 130 |
| 0 | 9  | 9   | 150 |
| 0 | 20 | 24  | 489 |
| 0 | 21 | 10  | 136 |
| 0 | 18 | 18  | 165 |
| 0 | 14 | 22  | 369 |
| 0 | 4  | 2   | 90  |

|   |     |     |     |
|---|-----|-----|-----|
| 0 | 7   | 20  | 617 |
| 0 | 27  | 17  | 164 |
| 0 | 101 | 167 | 674 |
| 0 | 9   | 2   | 153 |
| 0 | 0   | 0   | 96  |
| 0 | 16  | 2   | 112 |
| 0 | 19  | 16  | 572 |
| 0 | 0   | 0   | 103 |
| 0 | 0   | 1   | 90  |
| 0 | 9   | 10  | 211 |
| 0 | 9   | 10  | 396 |
| 0 | 12  | 18  | 519 |
| 0 | 0   | 0   | 95  |
| 0 | 34  | 13  | 108 |
| 0 | 21  | 16  | 293 |
| 0 | 0   | 11  | 120 |
| 0 | 0   | 1   | 116 |
| 0 | 8   | 7   | 235 |
| 0 | 7   | 2   | 176 |
| 0 | 4   | 7   | 184 |
| 0 | 53  | 36  | 573 |
| 0 | 1   | 1   | 88  |
| 0 | 1   | 0   | 105 |
| 0 | 9   | 4   | 123 |
| 0 | 23  | 19  | 126 |
| 0 | 2   | 10  | 179 |
| 0 | 12  | 25  | 710 |
| 0 | 34  | 45  | 366 |
| 0 | 7   | 5   | 223 |
| 0 | 57  | 53  | 407 |
| 0 | 8   | 2   | 134 |
| 0 | 3   | 2   | 126 |
| 0 | 8   | 6   | 146 |
| 0 | 0   | 93  | 160 |
| 0 | 9   | 15  | 103 |
| 0 | 10  | 4   | 154 |
| 0 | 82  | 79  | 455 |
| 0 | 6   | 6   | 133 |
| 0 | 3   | 3   | 129 |
| 0 | 19  | 16  | 298 |
| 0 | 14  | 6   | 468 |
| 0 | 22  | 5   | 159 |
| 0 | 8   | 10  | 83  |
| 0 | 9   | 4   | 122 |
| 0 | 8   | 9   | 176 |
| 0 | 8   | 16  | 465 |
| 0 | 14  | 3   | 187 |

|    |     |     |      |
|----|-----|-----|------|
| 0  | 3   | 4   | 86   |
| 0  | 8   | 7   | 191  |
| 0  | 4   | 1   | 286  |
| 0  | 13  | 7   | 179  |
| 0  | 13  | 19  | 190  |
| 0  | 17  | 16  | 295  |
| 0  | 18  | 3   | 100  |
| 0  | 1   | 2   | 92   |
| 0  | 34  | 15  | 314  |
| 0  | 12  | 9   | 251  |
| 0  | 4   | 4   | 162  |
| 0  | 9   | 10  | 172  |
| 0  | 14  | 1   | 98   |
| 0  | 10  | 14  | 644  |
| 0  | 29  | 6   | 101  |
| 0  | 12  | 52  | 492  |
| 0  | 84  | 23  | 257  |
| 0  | 9   | 2   | 114  |
| 0  | 47  | 28  | 272  |
| 0  | 19  | 5   | 171  |
| 0  | 202 | 354 | 275  |
| 0  | 7   | 4   | 135  |
| 0  | 12  | 7   | 165  |
| 0  | 4   | 11  | 86   |
| 0  | 35  | 21  | 782  |
| 0  | 1   | 1   | 100  |
| 0  | 16  | 6   | 370  |
| 0  | 0   | 0   | 448  |
| 0  | 6   | 1   | 144  |
| 0  | 3   | 2   | 138  |
| 0  | 0   | 0   | 76   |
| 0  | 2   | 2   | 582  |
| 0  | 4   | 5   | 187  |
| 0  | 34  | 3   | 128  |
| 0  | 5   | 0   | 87   |
| 0  | 12  | 26  | 283  |
| 0  | 0   | 1   | 179  |
| 0  | 4   | 1   | 90   |
| 0  | 13  | 4   | 109  |
| 0  | 6   | 5   | 111  |
| 37 | 33  | 78  | 1181 |
| 0  | 10  | 8   | 159  |
| 0  | 0   | 0   | 97   |
| 0  | 13  | 6   | 83   |
| 0  | 0   | 8   | 97   |
| 0  | 6   | 0   | 133  |
| 0  | 20  | 6   | 378  |

|   |     |     |     |
|---|-----|-----|-----|
| 0 | 5   | 2   | 96  |
| 0 | 735 | 729 | 212 |
| 0 | 7   | 2   | 233 |
| 0 | 21  | 4   | 66  |
| 0 | 4   | 1   | 124 |
| 0 | 6   | 5   | 179 |
| 0 | 30  | 16  | 236 |
| 0 | 11  | 6   | 79  |
| 0 | 27  | 17  | 317 |
| 0 | 313 | 140 | 60  |
| 0 | 197 | 102 | 214 |
| 0 | 126 | 158 | 126 |
| 0 | 6   | 3   | 143 |
| 0 | 1   | 0   | 91  |
| 0 | 3   | 5   | 184 |
| 0 | 12  | 19  | 665 |
| 0 | 1   | 3   | 118 |
| 0 | 9   | 2   | 113 |
| 0 | 0   | 1   | 285 |
| 0 | 14  | 1   | 87  |
| 0 | 9   | 3   | 225 |
| 0 | 8   | 4   | 204 |
| 0 | 10  | 0   | 88  |
| 0 | 5   | 8   | 119 |
| 0 | 15  | 1   | 115 |
| 0 | 18  | 6   | 236 |
| 0 | 7   | 4   | 362 |
| 0 | 14  | 5   | 131 |
| 0 | 17  | 12  | 257 |
| 0 | 107 | 132 | 601 |
| 0 | 352 | 612 | 244 |
| 0 | 41  | 41  | 229 |
| 0 | 15  | 9   | 985 |
| 0 | 4   | 1   | 144 |
| 0 | 16  | 3   | 249 |
| 0 | 29  | 14  | 435 |
| 0 | 68  | 43  | 501 |
| 0 | 0   | 1   | 93  |
| 0 | 29  | 23  | 512 |
| 0 | 19  | 22  | 541 |
| 0 | 10  | 6   | 88  |
| 0 | 30  | 6   | 108 |
| 0 | 2   | 2   | 196 |
| 0 | 77  | 40  | 162 |
| 0 | 12  | 12  | 266 |
| 0 | 6   | 5   | 134 |
| 0 | 35  | 9   | 587 |

|   |    |    |     |
|---|----|----|-----|
| 0 | 8  | 2  | 147 |
| 0 | 10 | 3  | 127 |
| 0 | 8  | 6  | 231 |
| 0 | 20 | 28 | 290 |
| 0 | 41 | 29 | 366 |
| 0 | 9  | 14 | 227 |
| 0 | 15 | 12 | 340 |
| 0 | 4  | 3  | 191 |
| 0 | 8  | 6  | 83  |
| 0 | 5  | 5  | 134 |
| 0 | 10 | 3  | 124 |
| 0 | 68 | 41 | 566 |
| 0 | 11 | 10 | 170 |
| 0 | 9  | 8  | 198 |
| 0 | 2  | 3  | 128 |
| 0 | 17 | 20 | 136 |
| 0 | 3  | 4  | 136 |
| 0 | 3  | 2  | 503 |
| 0 | 14 | 13 | 524 |
| 0 | 4  | 2  | 115 |
| 0 | 13 | 10 | 347 |
| 0 | 18 | 5  | 414 |
| 0 | 0  | 0  | 100 |
| 0 | 8  | 6  | 223 |
| 0 | 4  | 1  | 115 |
| 0 | 3  | 1  | 98  |
| 0 | 4  | 5  | 144 |
| 0 | 5  | 9  | 192 |
| 0 | 0  | 0  | 58  |
| 0 | 2  | 2  | 131 |
| 0 | 40 | 16 | 546 |
| 0 | 1  | 3  | 122 |
| 0 | 4  | 2  | 101 |
| 0 | 5  | 2  | 129 |
| 0 | 98 | 22 | 514 |
| 0 | 21 | 13 | 232 |
| 0 | 57 | 42 | 543 |
| 0 | 4  | 6  | 100 |
| 0 | 35 | 20 | 174 |
| 0 | 9  | 12 | 282 |
| 0 | 2  | 2  | 71  |
| 0 | 54 | 3  | 59  |
| 0 | 6  | 14 | 144 |
| 0 | 21 | 19 | 141 |
| 0 | 21 | 8  | 252 |
| 0 | 0  | 0  | 62  |
| 0 | 3  | 1  | 111 |

|   |     |     |     |
|---|-----|-----|-----|
| 0 | 3   | 3   | 128 |
| 0 | 4   | 4   | 364 |
| 0 | 1   | 1   | 272 |
| 0 | 9   | 5   | 191 |
| 0 | 8   | 6   | 301 |
| 0 | 20  | 18  | 163 |
| 0 | 147 | 103 | 101 |
| 0 | 2   | 2   | 39  |
| 0 | 14  | 1   | 85  |
| 0 | 609 | 775 | 104 |
| 0 | 13  | 0   | 91  |
| 0 | 6   | 5   | 189 |
| 0 | 64  | 30  | 91  |
| 0 | 37  | 162 | 816 |
| 0 | 30  | 10  | 103 |
| 0 | 6   | 4   | 129 |
| 0 | 13  | 25  | 201 |
| 0 | 5   | 0   | 79  |
| 0 | 2   | 2   | 99  |
| 0 | 67  | 51  | 198 |
| 0 | 3   | 0   | 197 |
| 0 | 0   | 2   | 69  |
| 0 | 0   | 0   | 248 |
| 0 | 3   | 0   | 119 |
| 0 | 23  | 10  | 280 |
| 0 | 1   | 1   | 136 |
| 0 | 1   | 0   | 63  |
| 0 | 86  | 119 | 321 |
| 0 | 8   | 4   | 134 |
| 0 | 3   | 5   | 177 |
| 0 | 20  | 11  | 178 |
| 0 | 36  | 6   | 105 |
| 0 | 6   | 5   | 133 |
| 0 | 5   | 4   | 96  |
| 0 | 8   | 2   | 148 |
| 0 | 4   | 0   | 107 |
| 0 | 17  | 15  | 147 |
| 0 | 3   | 0   | 128 |
| 0 | 6   | 3   | 86  |
| 0 | 48  | 57  | 129 |
| 0 | 0   | 0   | 100 |
| 0 | 21  | 17  | 76  |
| 0 | 7   | 3   | 202 |
| 0 | 22  | 15  | 364 |
| 0 | 1   | 0   | 227 |
| 0 | 15  | 5   | 134 |
| 0 | 19  | 32  | 603 |



|    |     |      |     |
|----|-----|------|-----|
| 0  | 130 | 123  | 482 |
| 0  | 69  | 34   | 744 |
| 0  | 21  | 48   | 535 |
| 0  | 17  | 1    | 63  |
| 0  | 22  | 8    | 110 |
| 0  | 1   | 2    | 103 |
| 0  | 7   | 10   | 219 |
| 0  | 4   | 4    | 121 |
| 0  | 1   | 1    | 87  |
| 0  | 57  | 146  | 713 |
| 0  | 14  | 4    | 386 |
| 0  | 235 | 120  | 245 |
| 0  | 3   | 2    | 128 |
| 0  | 0   | 0    | 60  |
| 0  | 12  | 6    | 165 |
| 0  | 28  | 7    | 105 |
| 0  | 17  | 10   | 197 |
| 0  | 9   | 2    | 118 |
| 0  | 9   | 3    | 142 |
| 0  | 2   | 1    | 115 |
| 0  | 10  | 9    | 307 |
| 0  | 22  | 1    | 83  |
| 0  | 25  | 10   | 324 |
| 0  | 2   | 9    | 215 |
| 0  | 8   | 7    | 191 |
| 0  | 2   | 0    | 147 |
| 0  | 5   | 0    | 106 |
| 0  | 7   | 27   | 404 |
| 0  | 68  | 25   | 486 |
| 0  | 9   | 12   | 175 |
| 0  | 5   | 3    | 134 |
| 0  | 32  | 24   | 494 |
| 0  | 5   | 0    | 93  |
| 0  | 1   | 0    | 83  |
| 0  | 53  | 15   | 337 |
| 0  | 5   | 3    | 180 |
| 0  | 6   | 4    | 148 |
| 0  | 0   | 0    | 637 |
| 0  | 7   | 3    | 223 |
| 0  | 20  | 6    | 292 |
| 0  | 22  | 2    | 75  |
| 0  | 59  | 45   | 185 |
| 30 | 625 | 392  | 200 |
| 0  | 2   | 1    | 767 |
| 0  | 3   | 2    | 130 |
| 0  | 21  | 15   | 367 |
| 1  | 956 | 1361 | 164 |

|   |     |     |      |
|---|-----|-----|------|
| 0 | 278 | 191 | 192  |
| 0 | 120 | 99  | 1012 |
| 0 | 16  | 5   | 260  |
| 0 | 1   | 0   | 84   |
| 0 | 8   | 25  | 106  |
| 1 | 161 | 862 | 129  |
| 0 | 3   | 0   | 86   |
| 0 | 2   | 1   | 169  |
| 0 | 1   | 0   | 89   |
| 0 | 28  | 9   | 485  |
| 0 | 6   | 11  | 160  |
| 0 | 3   | 1   | 97   |
| 0 | 7   | 5   | 169  |
| 0 | 1   | 0   | 88   |
| 0 | 13  | 0   | 69   |
| 0 | 30  | 35  | 263  |
| 0 | 16  | 13  | 409  |
| 0 | 178 | 80  | 803  |
| 0 | 131 | 104 | 569  |
| 0 | 8   | 3   | 79   |
| 0 | 13  | 2   | 91   |
| 0 | 10  | 3   | 98   |
| 0 | 387 | 204 | 157  |
| 0 | 3   | 3   | 139  |
| 0 | 25  | 11  | 120  |
| 0 | 7   | 8   | 199  |
| 0 | 16  | 1   | 112  |
| 0 | 4   | 3   | 140  |
| 0 | 84  | 72  | 659  |
| 0 | 16  | 14  | 179  |
| 0 | 18  | 16  | 470  |
| 0 | 22  | 12  | 273  |
| 0 | 14  | 20  | 209  |
| 0 | 21  | 26  | 727  |
| 0 | 4   | 7   | 98   |
| 0 | 12  | 0   | 66   |
| 0 | 10  | 11  | 236  |
| 0 | 20  | 15  | 241  |
| 0 | 87  | 133 | 78   |
| 0 | 5   | 5   | 179  |
| 0 | 129 | 164 | 100  |
| 0 | 3   | 1   | 138  |
| 0 | 9   | 10  | 115  |
| 0 | 7   | 10  | 237  |
| 0 | 38  | 15  | 321  |
| 0 | 151 | 90  | 495  |
| 0 | 20  | 7   | 142  |

|   |      |     |     |
|---|------|-----|-----|
| 0 | 0    | 0   | 80  |
| 0 | 2    | 6   | 142 |
| 0 | 1    | 0   | 119 |
| 0 | 2    | 2   | 171 |
| 0 | 13   | 22  | 145 |
| 0 | 101  | 72  | 390 |
| 0 | 9    | 4   | 263 |
| 0 | 11   | 25  | 312 |
| 0 | 5    | 2   | 140 |
| 0 | 4    | 2   | 121 |
| 0 | 9    | 6   | 86  |
| 0 | 19   | 11  | 78  |
| 0 | 5    | 0   | 120 |
| 0 | 3    | 0   | 76  |
| 0 | 12   | 31  | 198 |
| 0 | 8    | 5   | 136 |
| 0 | 12   | 7   | 265 |
| 0 | 16   | 10  | 118 |
| 0 | 25   | 13  | 189 |
| 0 | 1442 | 471 | 121 |
| 0 | 14   | 9   | 141 |
| 0 | 31   | 26  | 573 |
| 0 | 27   | 12  | 111 |
| 0 | 1    | 0   | 163 |
| 0 | 2    | 0   | 155 |
| 0 | 11   | 3   | 93  |
| 0 | 8    | 8   | 171 |
| 0 | 11   | 4   | 142 |
| 0 | 2    | 1   | 114 |
| 0 | 1    | 4   | 122 |
| 0 | 10   | 10  | 141 |
| 0 | 17   | 27  | 231 |
| 0 | 6    | 2   | 129 |
| 0 | 9    | 6   | 97  |
| 0 | 6    | 1   | 129 |
| 0 | 1    | 3   | 105 |
| 0 | 5    | 5   | 121 |
| 0 | 30   | 10  | 93  |
| 0 | 3    | 0   | 151 |
| 0 | 3    | 2   | 128 |
| 0 | 8    | 10  | 211 |
| 0 | 0    | 2   | 127 |
| 0 | 8    | 4   | 95  |
| 0 | 11   | 13  | 225 |
| 0 | 4    | 2   | 179 |
| 0 | 25   | 14  | 151 |
| 0 | 16   | 34  | 366 |

|   |     |     |     |
|---|-----|-----|-----|
| 0 | 14  | 3   | 94  |
| 0 | 7   | 2   | 125 |
| 0 | 16  | 12  | 244 |
| 0 | 0   | 0   | 101 |
| 0 | 21  | 22  | 270 |
| 0 | 0   | 1   | 82  |
| 0 | 22  | 21  | 191 |
| 0 | 5   | 1   | 121 |
| 0 | 16  | 2   | 68  |
| 0 | 1   | 1   | 66  |
| 0 | 99  | 59  | 246 |
| 0 | 46  | 5   | 164 |
| 0 | 7   | 2   | 136 |
| 0 | 23  | 5   | 92  |
| 0 | 12  | 6   | 222 |
| 0 | 5   | 2   | 88  |
| 0 | 6   | 2   | 72  |
| 0 | 1   | 0   | 123 |
| 0 | 3   | 1   | 129 |
| 0 | 11  | 2   | 80  |
| 0 | 15  | 7   | 99  |
| 0 | 9   | 4   | 62  |
| 0 | 0   | 0   | 60  |
| 0 | 5   | 2   | 96  |
| 0 | 16  | 5   | 235 |
| 0 | 37  | 19  | 237 |
| 0 | 5   | 3   | 140 |
| 0 | 5   | 1   | 146 |
| 0 | 7   | 14  | 596 |
| 0 | 427 | 500 | 199 |
| 0 | 7   | 1   | 102 |
| 0 | 10  | 0   | 75  |
| 0 | 9   | 17  | 164 |
| 0 | 50  | 17  | 142 |
| 0 | 24  | 6   | 308 |
| 0 | 4   | 6   | 164 |
| 0 | 26  | 71  | 233 |
| 0 | 14  | 0   | 91  |
| 0 | 16  | 17  | 119 |
| 0 | 14  | 4   | 164 |
| 0 | 15  | 11  | 310 |
| 0 | 8   | 6   | 217 |
| 0 | 108 | 49  | 341 |
| 0 | 6   | 0   | 66  |
| 0 | 0   | 3   | 103 |
| 0 | 35  | 31  | 988 |
| 0 | 1   | 2   | 110 |

|   |    |     |     |
|---|----|-----|-----|
| 0 | 19 | 12  | 393 |
| 0 | 13 | 6   | 128 |
| 0 | 38 | 19  | 687 |
| 0 | 3  | 3   | 128 |
| 0 | 15 | 14  | 107 |
| 0 | 6  | 5   | 226 |
| 0 | 7  | 5   | 153 |
| 0 | 9  | 6   | 199 |
| 0 | 5  | 4   | 139 |
| 0 | 29 | 13  | 299 |
| 0 | 39 | 23  | 433 |
| 0 | 37 | 19  | 401 |
| 0 | 7  | 0   | 78  |
| 0 | 3  | 1   | 343 |
| 0 | 9  | 32  | 808 |
| 0 | 3  | 2   | 93  |
| 0 | 22 | 3   | 77  |
| 0 | 8  | 12  | 180 |
| 0 | 11 | 13  | 151 |
| 0 | 12 | 2   | 99  |
| 0 | 21 | 7   | 112 |
| 0 | 20 | 3   | 214 |
| 0 | 3  | 5   | 174 |
| 0 | 59 | 26  | 556 |
| 0 | 6  | 3   | 113 |
| 0 | 0  | 0   | 89  |
| 0 | 2  | 1   | 98  |
| 0 | 0  | 0   | 674 |
| 0 | 1  | 2   | 381 |
| 0 | 0  | 0   | 87  |
| 0 | 5  | 0   | 273 |
| 0 | 24 | 11  | 162 |
| 0 | 9  | 4   | 177 |
| 0 | 5  | 1   | 194 |
| 0 | 45 | 151 | 994 |
| 0 | 9  | 20  | 147 |
| 0 | 16 | 2   | 90  |
| 0 | 2  | 29  | 613 |
| 0 | 10 | 2   | 211 |
| 0 | 1  | 1   | 92  |
| 0 | 8  | 3   | 406 |
| 0 | 20 | 6   | 135 |
| 0 | 0  | 0   | 102 |
| 0 | 0  | 0   | 79  |
| 0 | 9  | 7   | 190 |
| 0 | 1  | 0   | 99  |
| 0 | 11 | 5   | 157 |

|   |    |     |     |
|---|----|-----|-----|
| 0 | 4  | 4   | 148 |
| 0 | 41 | 50  | 796 |
| 0 | 13 | 11  | 206 |
| 0 | 14 | 10  | 242 |
| 0 | 16 | 15  | 240 |
| 0 | 16 | 8   | 123 |
| 0 | 16 | 0   | 101 |
| 0 | 1  | 1   | 215 |
| 0 | 0  | 0   | 106 |
| 0 | 76 | 33  | 165 |
| 0 | 1  | 3   | 303 |
| 0 | 41 | 5   | 195 |
| 0 | 12 | 26  | 101 |
| 0 | 7  | 5   | 229 |
| 0 | 3  | 1   | 89  |
| 0 | 93 | 110 | 720 |
| 0 | 5  | 5   | 100 |
| 0 | 2  | 1   | 99  |
| 0 | 4  | 0   | 98  |
| 0 | 3  | 2   | 123 |
| 0 | 23 | 17  | 98  |
| 0 | 13 | 6   | 221 |
| 0 | 72 | 10  | 85  |
| 0 | 2  | 2   | 90  |
| 0 | 32 | 2   | 135 |
| 0 | 1  | 4   | 75  |
| 0 | 0  | 2   | 107 |
| 0 | 0  | 0   | 102 |
| 0 | 26 | 10  | 135 |
| 0 | 28 | 11  | 185 |
| 0 | 9  | 8   | 112 |
| 0 | 14 | 7   | 105 |
| 0 | 15 | 23  | 430 |
| 0 | 4  | 3   | 95  |
| 0 | 24 | 45  | 336 |
| 0 | 8  | 4   | 147 |
| 0 | 35 | 31  | 214 |
| 0 | 3  | 0   | 81  |
| 0 | 94 | 275 | 148 |
| 0 | 63 | 130 | 284 |
| 0 | 13 | 11  | 169 |
| 0 | 34 | 10  | 108 |
| 0 | 17 | 8   | 69  |
| 0 | 6  | 1   | 117 |
| 0 | 4  | 3   | 202 |
| 0 | 55 | 71  | 985 |
| 0 | 3  | 0   | 125 |

|   |     |    |     |
|---|-----|----|-----|
| 0 | 29  | 9  | 288 |
| 0 | 4   | 1  | 116 |
| 0 | 58  | 6  | 100 |
| 0 | 13  | 7  | 114 |
| 0 | 27  | 10 | 264 |
| 0 | 7   | 2  | 136 |
| 0 | 8   | 13 | 458 |
| 0 | 10  | 6  | 153 |
| 0 | 3   | 1  | 89  |
| 0 | 4   | 2  | 135 |
| 0 | 12  | 0  | 147 |
| 0 | 4   | 4  | 83  |
| 0 | 4   | 0  | 103 |
| 0 | 18  | 22 | 231 |
| 0 | 58  | 48 | 782 |
| 0 | 8   | 15 | 342 |
| 0 | 15  | 13 | 269 |
| 0 | 5   | 25 | 233 |
| 0 | 17  | 8  | 240 |
| 0 | 4   | 29 | 464 |
| 0 | 2   | 1  | 95  |
| 0 | 15  | 11 | 176 |
| 0 | 10  | 8  | 194 |
| 0 | 2   | 0  | 99  |
| 0 | 62  | 3  | 59  |
| 0 | 18  | 15 | 113 |
| 0 | 6   | 3  | 177 |
| 0 | 13  | 9  | 238 |
| 0 | 31  | 14 | 360 |
| 0 | 20  | 17 | 351 |
| 0 | 15  | 12 | 210 |
| 0 | 2   | 1  | 110 |
| 0 | 2   | 0  | 142 |
| 0 | 22  | 18 | 819 |
| 0 | 36  | 28 | 219 |
| 0 | 42  | 34 | 472 |
| 0 | 31  | 15 | 412 |
| 0 | 12  | 4  | 126 |
| 0 | 16  | 22 | 506 |
| 0 | 3   | 3  | 186 |
| 0 | 7   | 3  | 126 |
| 0 | 14  | 9  | 117 |
| 0 | 127 | 62 | 277 |
| 0 | 12  | 5  | 97  |
| 0 | 15  | 11 | 200 |
| 0 | 8   | 6  | 122 |
| 0 | 2   | 0  | 99  |

|   |     |     |     |
|---|-----|-----|-----|
| 0 | 0   | 0   | 65  |
| 0 | 5   | 7   | 109 |
| 0 | 8   | 2   | 145 |
| 0 | 3   | 13  | 179 |
| 0 | 0   | 0   | 114 |
| 0 | 26  | 21  | 146 |
| 0 | 4   | 5   | 210 |
| 0 | 10  | 10  | 159 |
| 0 | 24  | 6   | 75  |
| 0 | 4   | 0   | 122 |
| 0 | 48  | 21  | 142 |
| 0 | 23  | 24  | 352 |
| 0 | 54  | 47  | 407 |
| 0 | 52  | 8   | 442 |
| 0 | 8   | 4   | 85  |
| 0 | 9   | 4   | 109 |
| 0 | 4   | 2   | 142 |
| 0 | 4   | 7   | 313 |
| 0 | 10  | 3   | 237 |
| 0 | 29  | 20  | 142 |
| 0 | 12  | 9   | 141 |
| 0 | 31  | 2   | 95  |
| 0 | 29  | 12  | 226 |
| 0 | 18  | 2   | 83  |
| 0 | 154 | 76  | 277 |
| 0 | 3   | 1   | 98  |
| 0 | 2   | 2   | 134 |
| 0 | 12  | 7   | 299 |
| 0 | 9   | 24  | 265 |
| 0 | 3   | 6   | 129 |
| 0 | 5   | 4   | 115 |
| 0 | 6   | 2   | 429 |
| 0 | 0   | 0   | 209 |
| 0 | 20  | 0   | 70  |
| 0 | 112 | 142 | 885 |
| 0 | 2   | 0   | 99  |
| 0 | 1   | 0   | 179 |
| 0 | 24  | 15  | 401 |
| 0 | 0   | 0   | 343 |
| 0 | 1   | 0   | 64  |
| 0 | 14  | 13  | 158 |
| 0 | 0   | 0   | 75  |
| 0 | 15  | 3   | 156 |
| 0 | 56  | 88  | 463 |
| 0 | 24  | 25  | 338 |
| 0 | 1   | 3   | 115 |
| 0 | 2   | 5   | 202 |



|   |      |     |     |
|---|------|-----|-----|
| 0 | 8    | 0   | 68  |
| 0 | 0    | 3   | 127 |
| 0 | 13   | 8   | 791 |
| 0 | 17   | 21  | 292 |
| 0 | 5    | 6   | 77  |
| 0 | 9    | 3   | 156 |
| 0 | 0    | 1   | 116 |
| 0 | 11   | 6   | 222 |
| 0 | 2    | 1   | 97  |
| 0 | 13   | 5   | 352 |
| 0 | 36   | 50  | 236 |
| 0 | 43   | 12  | 171 |
| 0 | 0    | 0   | 62  |
| 0 | 5    | 7   | 155 |
| 0 | 72   | 8   | 75  |
| 0 | 10   | 12  | 601 |
| 0 | 27   | 18  | 681 |
| 0 | 0    | 0   | 83  |
| 0 | 5    | 0   | 124 |
| 0 | 37   | 17  | 228 |
| 0 | 1    | 1   | 174 |
| 0 | 1    | 0   | 196 |
| 0 | 24   | 4   | 221 |
| 0 | 15   | 1   | 175 |
| 0 | 0    | 0   | 68  |
| 0 | 50   | 0   | 110 |
| 0 | 4    | 4   | 248 |
| 0 | 64   | 5   | 131 |
| 0 | 12   | 0   | 106 |
| 0 | 124  | 247 | 442 |
| 0 | 11   | 6   | 109 |
| 0 | 51   | 11  | 185 |
| 0 | 55   | 9   | 111 |
| 0 | 13   | 2   | 253 |
| 0 | 22   | 10  | 130 |
| 0 | 27   | 10  | 129 |
| 0 | 8    | 2   | 247 |
| 0 | 47   | 22  | 127 |
| 0 | 12   | 13  | 215 |
| 0 | 2    | 3   | 151 |
| 0 | 22   | 6   | 162 |
| 0 | 25   | 28  | 299 |
| 0 | 9    | 4   | 221 |
| 0 | 7    | 4   | 114 |
| 0 | 0    | 0   | 105 |
| 0 | 1612 | 364 | 171 |
| 0 | 44   | 72  | 125 |

|   |      |     |     |
|---|------|-----|-----|
| 0 | 27   | 30  | 129 |
| 0 | 102  | 45  | 774 |
| 0 | 1    | 2   | 176 |
| 0 | 7    | 9   | 229 |
| 0 | 3    | 2   | 101 |
| 0 | 94   | 57  | 308 |
| 0 | 33   | 32  | 218 |
| 0 | 13   | 2   | 221 |
| 0 | 23   | 19  | 697 |
| 0 | 1    | 1   | 114 |
| 0 | 1    | 1   | 299 |
| 0 | 10   | 2   | 985 |
| 0 | 66   | 15  | 121 |
| 0 | 64   | 40  | 335 |
| 0 | 5    | 1   | 107 |
| 0 | 7    | 8   | 235 |
| 0 | 14   | 12  | 258 |
| 0 | 8    | 4   | 205 |
| 0 | 28   | 30  | 521 |
| 0 | 69   | 59  | 254 |
| 0 | 11   | 17  | 212 |
| 0 | 6    | 5   | 132 |
| 0 | 78   | 29  | 341 |
| 0 | 4    | 3   | 110 |
| 0 | 25   | 10  | 296 |
| 0 | 32   | 16  | 284 |
| 0 | 17   | 28  | 581 |
| 0 | 2    | 2   | 88  |
| 0 | 2606 | 673 | 86  |
| 0 | 4    | 4   | 116 |
| 0 | 13   | 4   | 154 |
| 0 | 97   | 76  | 695 |
| 0 | 17   | 11  | 317 |
| 0 | 4    | 2   | 123 |
| 0 | 27   | 28  | 237 |
| 0 | 35   | 20  | 290 |
| 0 | 73   | 36  | 349 |
| 0 | 2    | 2   | 71  |
| 0 | 246  | 129 | 558 |
| 0 | 6    | 1   | 94  |
| 0 | 3    | 5   | 132 |
| 0 | 130  | 55  | 226 |
| 0 | 31   | 10  | 339 |
| 0 | 11   | 2   | 86  |
| 0 | 18   | 7   | 181 |
| 0 | 80   | 12  | 116 |
| 0 | 33   | 9   | 477 |

|    |     |     |      |
|----|-----|-----|------|
| 0  | 11  | 4   | 321  |
| 0  | 409 | 112 | 575  |
| 0  | 1   | 5   | 127  |
| 0  | 1   | 0   | 229  |
| 0  | 74  | 79  | 1159 |
| 0  | 7   | 3   | 88   |
| 0  | 17  | 14  | 445  |
| 0  | 5   | 7   | 78   |
| 0  | 16  | 7   | 438  |
| 0  | 15  | 9   | 219  |
| 0  | 17  | 32  | 379  |
| 0  | 7   | 6   | 165  |
| 0  | 22  | 15  | 180  |
| 0  | 18  | 11  | 175  |
| 0  | 12  | 3   | 99   |
| 0  | 1   | 3   | 104  |
| 0  | 1   | 6   | 227  |
| 0  | 0   | 0   | 72   |
| 0  | 11  | 3   | 207  |
| 0  | 474 | 222 | 310  |
| 0  | 43  | 20  | 639  |
| 0  | 2   | 0   | 74   |
| 0  | 201 | 95  | 122  |
| 0  | 3   | 0   | 201  |
| 0  | 23  | 1   | 84   |
| 0  | 3   | 0   | 78   |
| 61 | 49  | 122 | 1308 |
| 0  | 13  | 8   | 250  |
| 0  | 0   | 0   | 59   |
| 0  | 3   | 3   | 124  |
| 0  | 3   | 1   | 91   |
| 0  | 4   | 3   | 129  |
| 0  | 0   | 2   | 186  |
| 0  | 8   | 7   | 303  |
| 0  | 0   | 0   | 141  |
| 0  | 8   | 7   | 130  |
| 0  | 7   | 4   | 159  |
| 0  | 0   | 0   | 91   |
| 0  | 6   | 2   | 135  |
| 0  | 12  | 4   | 125  |
| 0  | 10  | 2   | 273  |
| 0  | 44  | 15  | 212  |
| 0  | 10  | 1   | 130  |
| 0  | 102 | 89  | 265  |
| 0  | 16  | 31  | 531  |
| 0  | 5   | 1   | 258  |
| 0  | 87  | 43  | 333  |

|   |     |     |     |
|---|-----|-----|-----|
| 0 | 1   | 2   | 126 |
| 0 | 0   | 0   | 96  |
| 0 | 70  | 87  | 413 |
| 0 | 27  | 3   | 86  |
| 0 | 2   | 2   | 407 |
| 0 | 1   | 5   | 124 |
| 0 | 1   | 1   | 106 |
| 0 | 21  | 10  | 489 |
| 0 | 2   | 4   | 123 |
| 0 | 8   | 7   | 291 |
| 0 | 1   | 1   | 102 |
| 0 | 1   | 2   | 76  |
| 0 | 27  | 7   | 265 |
| 0 | 25  | 14  | 338 |
| 0 | 6   | 2   | 190 |
| 0 | 0   | 0   | 217 |
| 0 | 8   | 5   | 246 |
| 0 | 10  | 2   | 96  |
| 0 | 9   | 8   | 222 |
| 0 | 6   | 4   | 122 |
| 0 | 5   | 6   | 221 |
| 0 | 4   | 5   | 138 |
| 0 | 8   | 4   | 125 |
| 0 | 2   | 1   | 367 |
| 0 | 12  | 10  | 155 |
| 0 | 11  | 1   | 109 |
| 0 | 4   | 2   | 245 |
| 0 | 12  | 10  | 297 |
| 0 | 3   | 2   | 125 |
| 0 | 70  | 1   | 72  |
| 0 | 9   | 14  | 92  |
| 0 | 9   | 3   | 129 |
| 0 | 374 | 430 | 203 |
| 0 | 10  | 12  | 158 |
| 0 | 17  | 18  | 182 |
| 0 | 16  | 19  | 189 |
| 0 | 6   | 10  | 200 |
| 0 | 24  | 7   | 279 |
| 0 | 0   | 0   | 272 |
| 0 | 0   | 0   | 204 |
| 0 | 3   | 4   | 122 |
| 0 | 23  | 4   | 117 |
| 0 | 26  | 10  | 253 |
| 0 | 17  | 17  | 543 |
| 0 | 3   | 3   | 127 |
| 0 | 1   | 2   | 97  |
| 0 | 15  | 12  | 363 |

|   |     |     |      |
|---|-----|-----|------|
| 0 | 12  | 3   | 164  |
| 0 | 10  | 2   | 144  |
| 0 | 92  | 1   | 75   |
| 0 | 134 | 38  | 184  |
| 0 | 76  | 33  | 282  |
| 0 | 7   | 4   | 85   |
| 9 | 394 | 550 | 136  |
| 0 | 6   | 5   | 310  |
| 0 | 6   | 2   | 104  |
| 0 | 17  | 7   | 356  |
| 0 | 3   | 3   | 151  |
| 0 | 5   | 6   | 175  |
| 0 | 16  | 6   | 156  |
| 0 | 0   | 1   | 113  |
| 0 | 5   | 4   | 228  |
| 0 | 21  | 16  | 297  |
| 0 | 25  | 2   | 165  |
| 0 | 2   | 0   | 89   |
| 0 | 25  | 29  | 200  |
| 0 | 134 | 207 | 1061 |
| 0 | 32  | 33  | 185  |
| 0 | 20  | 5   | 87   |
| 0 | 16  | 24  | 357  |
| 0 | 22  | 21  | 575  |
| 0 | 11  | 6   | 110  |
| 0 | 26  | 12  | 325  |
| 0 | 59  | 41  | 294  |
| 0 | 16  | 24  | 263  |
| 0 | 0   | 0   | 112  |
| 0 | 9   | 5   | 197  |
| 0 | 0   | 0   | 104  |
| 0 | 6   | 5   | 74   |
| 0 | 16  | 6   | 373  |
| 0 | 4   | 4   | 533  |
| 0 | 16  | 15  | 1118 |
| 0 | 1   | 4   | 94   |
| 0 | 5   | 2   | 96   |
| 0 | 11  | 14  | 288  |
| 0 | 2   | 7   | 120  |
| 0 | 8   | 1   | 112  |
| 0 | 0   | 2   | 113  |
| 0 | 6   | 2   | 92   |
| 0 | 51  | 34  | 284  |
| 0 | 14  | 16  | 181  |
| 0 | 17  | 8   | 414  |
| 0 | 39  | 20  | 503  |
| 0 | 10  | 2   | 196  |

|     |     |     |      |
|-----|-----|-----|------|
| 0   | 2   | 1   | 85   |
| 0   | 7   | 0   | 117  |
| 0   | 16  | 6   | 107  |
| 0   | 11  | 7   | 592  |
| 0   | 23  | 0   | 106  |
| 0   | 3   | 10  | 266  |
| 0   | 25  | 11  | 135  |
| 0   | 7   | 7   | 132  |
| 0   | 87  | 95  | 733  |
| 0   | 24  | 9   | 104  |
| 0   | 2   | 1   | 140  |
| 0   | 3   | 5   | 115  |
| 0   | 2   | 12  | 140  |
| 0   | 7   | 3   | 154  |
| 0   | 15  | 6   | 92   |
| 0   | 15  | 11  | 113  |
| 0   | 62  | 91  | 573  |
| 0   | 11  | 7   | 180  |
| 0   | 7   | 17  | 91   |
| 0   | 18  | 14  | 135  |
| 0   | 10  | 3   | 95   |
| 0   | 4   | 2   | 122  |
| 0   | 69  | 63  | 212  |
| 0   | 33  | 26  | 242  |
| 0   | 0   | 0   | 114  |
| 0   | 0   | 0   | 116  |
| 0   | 6   | 1   | 99   |
| 0   | 23  | 29  | 158  |
| 0   | 0   | 0   | 87   |
| 0   | 0   | 0   | 98   |
| 0   | 218 | 638 | 155  |
| 0   | 7   | 7   | 309  |
| 0   | 5   | 0   | 130  |
| 0   | 5   | 3   | 99   |
| 0   | 20  | 44  | 1060 |
| 0   | 0   | 0   | 104  |
| 0   | 1   | 2   | 135  |
| 0   | 7   | 2   | 76   |
| 0   | 12  | 6   | 198  |
| 0   | 44  | 41  | 503  |
| 0   | 9   | 0   | 129  |
| 0   | 5   | 3   | 105  |
| 0   | 4   | 3   | 641  |
| 0   | 11  | 2   | 103  |
| 0   | 3   | 2   | 261  |
| 128 | 97  | 342 | 138  |
| 1   | 891 | 984 | 91   |

|   |    |    |      |
|---|----|----|------|
| 0 | 10 | 3  | 157  |
| 0 | 38 | 9  | 254  |
| 0 | 39 | 1  | 124  |
| 0 | 0  | 0  | 80   |
| 0 | 5  | 1  | 78   |
| 0 | 69 | 41 | 114  |
| 0 | 18 | 10 | 231  |
| 0 | 23 | 12 | 417  |
| 0 | 7  | 7  | 114  |
| 0 | 0  | 0  | 102  |
| 0 | 2  | 2  | 93   |
| 0 | 13 | 6  | 157  |
| 0 | 12 | 5  | 460  |
| 0 | 2  | 1  | 433  |
| 0 | 0  | 0  | 181  |
| 0 | 1  | 1  | 97   |
| 0 | 29 | 20 | 330  |
| 0 | 49 | 19 | 373  |
| 0 | 0  | 0  | 91   |
| 0 | 2  | 0  | 91   |
| 0 | 0  | 0  | 203  |
| 0 | 6  | 4  | 143  |
| 0 | 3  | 4  | 166  |
| 0 | 39 | 28 | 296  |
| 0 | 0  | 0  | 61   |
| 0 | 1  | 2  | 93   |
| 0 | 12 | 14 | 808  |
| 0 | 7  | 8  | 399  |
| 0 | 3  | 4  | 87   |
| 0 | 54 | 10 | 400  |
| 0 | 0  | 0  | 78   |
| 0 | 4  | 1  | 825  |
| 0 | 8  | 13 | 67   |
| 0 | 18 | 9  | 306  |
| 0 | 15 | 5  | 196  |
| 0 | 8  | 5  | 105  |
| 0 | 2  | 2  | 201  |
| 0 | 2  | 1  | 239  |
| 0 | 3  | 26 | 238  |
| 0 | 5  | 1  | 95   |
| 0 | 24 | 5  | 101  |
| 0 | 9  | 4  | 130  |
| 0 | 5  | 8  | 148  |
| 0 | 13 | 8  | 86   |
| 0 | 11 | 1  | 302  |
| 0 | 82 | 61 | 1100 |
| 0 | 46 | 6  | 166  |

|   |     |     |      |
|---|-----|-----|------|
| 0 | 48  | 42  | 326  |
| 0 | 41  | 21  | 277  |
| 0 | 0   | 3   | 104  |
| 0 | 4   | 18  | 112  |
| 0 | 7   | 5   | 70   |
| 0 | 3   | 3   | 63   |
| 0 | 4   | 2   | 105  |
| 0 | 26  | 0   | 73   |
| 0 | 12  | 5   | 118  |
| 0 | 4   | 4   | 140  |
| 0 | 3   | 0   | 653  |
| 0 | 2   | 0   | 245  |
| 0 | 3   | 1   | 428  |
| 0 | 10  | 15  | 397  |
| 0 | 20  | 23  | 352  |
| 0 | 55  | 1   | 103  |
| 0 | 2   | 1   | 109  |
| 0 | 3   | 2   | 119  |
| 0 | 4   | 5   | 185  |
| 0 | 6   | 1   | 160  |
| 0 | 2   | 2   | 82   |
| 0 | 7   | 5   | 141  |
| 0 | 43  | 26  | 372  |
| 0 | 2   | 10  | 67   |
| 0 | 21  | 7   | 84   |
| 0 | 30  | 32  | 218  |
| 0 | 3   | 2   | 80   |
| 0 | 11  | 12  | 181  |
| 0 | 26  | 4   | 68   |
| 0 | 49  | 23  | 196  |
| 0 | 43  | 14  | 141  |
| 0 | 20  | 0   | 60   |
| 0 | 7   | 1   | 139  |
| 0 | 22  | 12  | 215  |
| 0 | 160 | 218 | 386  |
| 0 | 50  | 50  | 1138 |
| 0 | 3   | 5   | 165  |
| 0 | 41  | 27  | 355  |
| 0 | 0   | 0   | 105  |
| 0 | 3   | 4   | 97   |
| 0 | 532 | 579 | 353  |
| 0 | 36  | 23  | 108  |
| 0 | 11  | 17  | 787  |
| 0 | 0   | 0   | 68   |
| 0 | 82  | 18  | 221  |
| 0 | 29  | 15  | 658  |
| 0 | 39  | 6   | 191  |



|   |     |     |      |
|---|-----|-----|------|
| 0 | 62  | 20  | 273  |
| 0 | 9   | 5   | 97   |
| 0 | 8   | 5   | 337  |
| 0 | 0   | 0   | 61   |
| 0 | 23  | 9   | 131  |
| 0 | 6   | 14  | 379  |
| 0 | 2   | 6   | 143  |
| 0 | 15  | 9   | 273  |
| 0 | 13  | 4   | 125  |
| 0 | 38  | 63  | 249  |
| 0 | 7   | 4   | 398  |
| 0 | 631 | 661 | 141  |
| 0 | 23  | 10  | 140  |
| 0 | 123 | 82  | 676  |
| 0 | 0   | 0   | 103  |
| 0 | 1   | 0   | 84   |
| 0 | 47  | 12  | 147  |
| 0 | 76  | 35  | 464  |
| 0 | 10  | 1   | 87   |
| 0 | 0   | 2   | 71   |
| 0 | 16  | 0   | 213  |
| 0 | 5   | 3   | 266  |
| 0 | 1   | 0   | 90   |
| 0 | 0   | 0   | 124  |
| 0 | 0   | 0   | 74   |
| 0 | 5   | 3   | 153  |
| 0 | 1   | 0   | 102  |
| 0 | 4   | 81  | 938  |
| 0 | 18  | 49  | 494  |
| 0 | 14  | 3   | 81   |
| 0 | 7   | 2   | 90   |
| 0 | 2   | 1   | 120  |
| 0 | 18  | 8   | 215  |
| 0 | 14  | 4   | 187  |
| 0 | 7   | 2   | 124  |
| 0 | 35  | 4   | 74   |
| 0 | 7   | 15  | 113  |
| 0 | 60  | 121 | 1115 |
| 0 | 9   | 0   | 111  |
| 0 | 54  | 29  | 495  |
| 0 | 123 | 72  | 869  |
| 0 | 7   | 6   | 189  |
| 0 | 53  | 4   | 131  |
| 0 | 155 | 125 | 437  |
| 0 | 1   | 1   | 90   |
| 0 | 12  | 6   | 196  |
| 0 | 15  | 19  | 344  |

|   |     |     |      |
|---|-----|-----|------|
| 0 | 26  | 7   | 256  |
| 0 | 2   | 0   | 98   |
| 0 | 15  | 5   | 313  |
| 0 | 31  | 17  | 253  |
| 0 | 12  | 61  | 275  |
| 0 | 4   | 4   | 123  |
| 0 | 5   | 1   | 103  |
| 0 | 5   | 4   | 284  |
| 0 | 17  | 10  | 408  |
| 0 | 30  | 16  | 531  |
| 0 | 241 | 250 | 606  |
| 0 | 16  | 8   | 224  |
| 0 | 3   | 2   | 110  |
| 0 | 26  | 31  | 1051 |
| 0 | 5   | 1   | 101  |
| 0 | 26  | 0   | 67   |
| 0 | 7   | 2   | 78   |
| 0 | 26  | 5   | 282  |
| 0 | 28  | 26  | 483  |
| 0 | 2   | 0   | 123  |
| 0 | 5   | 1   | 265  |
| 0 | 2   | 0   | 111  |
| 0 | 2   | 2   | 97   |
| 0 | 24  | 0   | 75   |
| 0 | 58  | 20  | 298  |
| 0 | 3   | 4   | 124  |
| 0 | 16  | 3   | 133  |
| 0 | 41  | 36  | 272  |
| 0 | 22  | 41  | 425  |
| 0 | 5   | 6   | 139  |
| 0 | 13  | 4   | 110  |
| 0 | 6   | 4   | 159  |
| 0 | 60  | 34  | 305  |
| 0 | 143 | 70  | 491  |
| 0 | 1   | 2   | 99   |
| 0 | 1   | 1   | 121  |
| 0 | 7   | 4   | 147  |
| 0 | 43  | 3   | 60   |
| 0 | 45  | 28  | 364  |
| 0 | 18  | 6   | 98   |
| 0 | 9   | 3   | 62   |
| 0 | 10  | 8   | 110  |
| 0 | 106 | 54  | 113  |
| 0 | 2   | 3   | 156  |
| 0 | 19  | 20  | 77   |
| 0 | 5   | 0   | 85   |
| 0 | 24  | 27  | 786  |

|   |     |     |      |
|---|-----|-----|------|
| 0 | 10  | 3   | 153  |
| 0 | 5   | 7   | 262  |
| 0 | 59  | 12  | 159  |
| 0 | 2   | 0   | 85   |
| 0 | 71  | 86  | 1355 |
| 0 | 50  | 5   | 118  |
| 0 | 3   | 1   | 282  |
| 0 | 27  | 4   | 65   |
| 0 | 5   | 1   | 118  |
| 0 | 9   | 8   | 129  |
| 0 | 12  | 10  | 141  |
| 0 | 247 | 215 | 422  |
| 0 | 31  | 21  | 382  |
| 0 | 387 | 202 | 920  |
| 0 | 11  | 5   | 298  |
| 0 | 29  | 10  | 442  |
| 0 | 8   | 5   | 119  |
| 0 | 710 | 731 | 105  |
| 0 | 600 | 440 | 233  |
| 0 | 12  | 15  | 308  |
| 0 | 16  | 16  | 212  |
| 0 | 4   | 2   | 218  |
| 0 | 3   | 0   | 65   |
| 0 | 0   | 6   | 81   |
| 0 | 3   | 2   | 110  |
| 0 | 14  | 28  | 240  |
| 0 | 77  | 49  | 323  |
| 0 | 320 | 191 | 265  |
| 0 | 13  | 13  | 129  |
| 0 | 43  | 26  | 249  |
| 0 | 26  | 22  | 346  |
| 0 | 0   | 0   | 72   |
| 0 | 54  | 0   | 62   |
| 0 | 29  | 12  | 500  |
| 0 | 9   | 2   | 206  |
| 0 | 28  | 14  | 85   |
| 0 | 19  | 1   | 99   |
| 0 | 0   | 0   | 95   |
| 0 | 12  | 7   | 166  |
| 0 | 2   | 0   | 188  |
| 0 | 3   | 1   | 109  |
| 0 | 9   | 12  | 97   |
| 0 | 12  | 6   | 375  |
| 0 | 7   | 7   | 164  |
| 0 | 44  | 2   | 67   |
| 0 | 11  | 8   | 377  |
| 0 | 17  | 1   | 121  |

|   |     |     |     |
|---|-----|-----|-----|
| 0 | 4   | 3   | 124 |
| 0 | 452 | 584 | 138 |
| 0 | 10  | 15  | 238 |
| 0 | 7   | 0   | 138 |
| 0 | 12  | 5   | 98  |
| 0 | 789 | 535 | 240 |
| 0 | 202 | 20  | 273 |
| 0 | 8   | 7   | 361 |
| 0 | 15  | 13  | 958 |
| 0 | 13  | 4   | 126 |
| 0 | 9   | 2   | 125 |
| 0 | 19  | 8   | 209 |
| 0 | 4   | 5   | 137 |
| 0 | 14  | 4   | 62  |
| 0 | 36  | 0   | 87  |
| 0 | 36  | 9   | 166 |
| 0 | 2   | 4   | 96  |
| 0 | 20  | 2   | 77  |
| 0 | 5   | 8   | 167 |
| 0 | 8   | 5   | 79  |
| 0 | 29  | 9   | 129 |
| 0 | 75  | 38  | 439 |
| 0 | 7   | 2   | 114 |
| 0 | 35  | 51  | 515 |
| 0 | 12  | 2   | 85  |
| 0 | 48  | 12  | 285 |
| 0 | 11  | 2   | 89  |
| 0 | 2   | 6   | 137 |
| 0 | 3   | 3   | 113 |
| 0 | 64  | 24  | 300 |
| 0 | 64  | 29  | 446 |
| 0 | 6   | 2   | 151 |
| 0 | 19  | 16  | 493 |
| 0 | 4   | 0   | 101 |
| 0 | 37  | 62  | 731 |
| 0 | 79  | 53  | 358 |
| 0 | 19  | 14  | 336 |
| 0 | 4   | 2   | 134 |
| 0 | 3   | 2   | 159 |
| 0 | 0   | 11  | 59  |
| 0 | 10  | 5   | 137 |
| 0 | 7   | 1   | 142 |
| 0 | 4   | 5   | 138 |
| 0 | 2   | 0   | 160 |
| 0 | 0   | 0   | 144 |
| 0 | 46  | 19  | 310 |
| 0 | 22  | 10  | 437 |

|   |     |     |      |
|---|-----|-----|------|
| 0 | 10  | 2   | 100  |
| 0 | 8   | 2   | 286  |
| 0 | 7   | 8   | 195  |
| 0 | 1   | 3   | 119  |
| 0 | 0   | 1   | 104  |
| 0 | 7   | 11  | 130  |
| 0 | 0   | 4   | 111  |
| 0 | 1   | 2   | 106  |
| 0 | 17  | 12  | 555  |
| 0 | 1   | 1   | 87   |
| 0 | 18  | 13  | 229  |
| 0 | 21  | 0   | 80   |
| 0 | 9   | 22  | 441  |
| 0 | 12  | 7   | 93   |
| 0 | 11  | 8   | 232  |
| 0 | 11  | 4   | 88   |
| 0 | 1   | 0   | 89   |
| 0 | 31  | 15  | 129  |
| 0 | 85  | 93  | 262  |
| 0 | 40  | 5   | 224  |
| 0 | 36  | 38  | 179  |
| 0 | 13  | 8   | 134  |
| 0 | 186 | 166 | 710  |
| 0 | 17  | 3   | 265  |
| 0 | 11  | 4   | 934  |
| 0 | 37  | 18  | 376  |
| 0 | 25  | 15  | 113  |
| 0 | 5   | 1   | 109  |
| 0 | 19  | 4   | 157  |
| 0 | 19  | 7   | 104  |
| 0 | 59  | 24  | 259  |
| 0 | 47  | 11  | 386  |
| 0 | 11  | 13  | 371  |
| 0 | 11  | 1   | 108  |
| 0 | 15  | 4   | 218  |
| 0 | 6   | 6   | 132  |
| 0 | 8   | 0   | 114  |
| 0 | 0   | 0   | 80   |
| 0 | 21  | 9   | 586  |
| 0 | 3   | 2   | 82   |
| 0 | 3   | 0   | 76   |
| 0 | 0   | 0   | 92   |
| 0 | 6   | 3   | 193  |
| 0 | 1   | 7   | 114  |
| 0 | 54  | 89  | 565  |
| 0 | 1   | 1   | 114  |
| 0 | 17  | 9   | 1046 |

|   |     |     |     |
|---|-----|-----|-----|
| 0 | 44  | 39  | 197 |
| 0 | 2   | 10  | 113 |
| 0 | 66  | 34  | 964 |
| 0 | 13  | 6   | 361 |
| 0 | 18  | 2   | 77  |
| 0 | 8   | 4   | 142 |
| 0 | 18  | 3   | 122 |
| 0 | 7   | 4   | 231 |
| 0 | 1   | 2   | 180 |
| 0 | 10  | 5   | 94  |
| 0 | 13  | 5   | 145 |
| 0 | 5   | 0   | 133 |
| 0 | 14  | 6   | 141 |
| 0 | 9   | 7   | 332 |
| 0 | 1   | 1   | 86  |
| 0 | 2   | 2   | 87  |
| 0 | 1   | 0   | 69  |
| 0 | 46  | 10  | 111 |
| 0 | 0   | 1   | 118 |
| 0 | 40  | 22  | 274 |
| 0 | 14  | 19  | 167 |
| 0 | 0   | 0   | 60  |
| 0 | 3   | 3   | 182 |
| 0 | 14  | 1   | 231 |
| 0 | 11  | 6   | 268 |
| 0 | 14  | 10  | 158 |
| 0 | 5   | 2   | 131 |
| 0 | 1   | 2   | 197 |
| 0 | 32  | 19  | 102 |
| 0 | 9   | 5   | 72  |
| 0 | 7   | 6   | 133 |
| 0 | 58  | 58  | 258 |
| 0 | 466 | 310 | 698 |
| 0 | 36  | 4   | 125 |
| 0 | 3   | 0   | 104 |
| 0 | 13  | 3   | 175 |
| 0 | 12  | 3   | 212 |
| 0 | 26  | 0   | 53  |
| 0 | 146 | 62  | 272 |
| 0 | 0   | 0   | 124 |
| 0 | 27  | 14  | 280 |
| 0 | 8   | 9   | 248 |
| 0 | 113 | 124 | 342 |
| 0 | 11  | 3   | 98  |
| 0 | 59  | 130 | 370 |
| 0 | 2   | 2   | 136 |
| 0 | 870 | 546 | 131 |

|   |    |    |      |
|---|----|----|------|
| 0 | 7  | 5  | 202  |
| 0 | 8  | 2  | 96   |
| 0 | 1  | 5  | 100  |
| 0 | 3  | 0  | 113  |
| 0 | 4  | 1  | 121  |
| 0 | 3  | 1  | 78   |
| 0 | 6  | 2  | 143  |
| 0 | 26 | 21 | 220  |
| 0 | 9  | 6  | 117  |
| 0 | 1  | 3  | 144  |
| 0 | 3  | 2  | 115  |
| 0 | 3  | 1  | 199  |
| 0 | 0  | 0  | 90   |
| 0 | 8  | 5  | 111  |
| 0 | 12 | 2  | 141  |
| 0 | 6  | 4  | 222  |
| 0 | 7  | 4  | 64   |
| 0 | 4  | 14 | 411  |
| 0 | 6  | 3  | 160  |
| 0 | 5  | 3  | 518  |
| 0 | 1  | 0  | 98   |
| 0 | 5  | 18 | 553  |
| 0 | 2  | 0  | 189  |
| 3 | 18 | 3  | 154  |
| 0 | 32 | 17 | 334  |
| 0 | 7  | 0  | 127  |
| 0 | 1  | 1  | 119  |
| 0 | 7  | 6  | 113  |
| 0 | 35 | 1  | 68   |
| 0 | 11 | 10 | 88   |
| 0 | 9  | 11 | 197  |
| 0 | 29 | 37 | 227  |
| 0 | 5  | 0  | 132  |
| 0 | 6  | 4  | 305  |
| 0 | 45 | 25 | 210  |
| 0 | 4  | 1  | 112  |
| 0 | 8  | 3  | 147  |
| 0 | 9  | 2  | 238  |
| 0 | 15 | 11 | 1096 |
| 0 | 13 | 14 | 228  |
| 0 | 6  | 0  | 102  |
| 0 | 14 | 9  | 259  |
| 0 | 25 | 22 | 1164 |
| 0 | 2  | 2  | 133  |
| 0 | 2  | 3  | 145  |
| 0 | 2  | 1  | 96   |
| 0 | 0  | 0  | 70   |

|   |     |     |     |
|---|-----|-----|-----|
| 0 | 0   | 6   | 118 |
| 0 | 39  | 3   | 92  |
| 0 | 14  | 5   | 131 |
| 0 | 49  | 19  | 199 |
| 0 | 2   | 1   | 112 |
| 0 | 12  | 8   | 83  |
| 0 | 10  | 3   | 823 |
| 0 | 44  | 6   | 63  |
| 0 | 3   | 1   | 105 |
| 0 | 22  | 9   | 131 |
| 0 | 15  | 8   | 112 |
| 0 | 5   | 1   | 113 |
| 0 | 7   | 3   | 135 |
| 0 | 3   | 4   | 119 |
| 0 | 4   | 6   | 104 |
| 0 | 0   | 0   | 63  |
| 0 | 25  | 19  | 120 |
| 0 | 11  | 9   | 185 |
| 0 | 16  | 7   | 175 |
| 0 | 1   | 0   | 78  |
| 0 | 12  | 15  | 209 |
| 0 | 324 | 208 | 178 |
| 0 | 106 | 26  | 308 |
| 0 | 4   | 2   | 398 |
| 0 | 10  | 7   | 178 |
| 0 | 15  | 6   | 208 |
| 0 | 7   | 9   | 246 |
| 0 | 17  | 2   | 144 |
| 0 | 1   | 6   | 79  |
| 0 | 1   | 2   | 118 |
| 0 | 3   | 4   | 151 |
| 0 | 2   | 0   | 72  |
| 0 | 22  | 21  | 233 |
| 0 | 6   | 1   | 149 |
| 0 | 9   | 3   | 101 |
| 0 | 6   | 7   | 110 |
| 0 | 3   | 7   | 102 |
| 0 | 41  | 36  | 373 |
| 0 | 51  | 43  | 94  |
| 0 | 0   | 10  | 67  |
| 0 | 2   | 0   | 109 |
| 0 | 3   | 2   | 140 |
| 0 | 13  | 5   | 222 |
| 0 | 0   | 2   | 83  |
| 0 | 54  | 0   | 59  |
| 0 | 473 | 522 | 172 |
| 0 | 34  | 26  | 165 |



|     |    |     |     |
|-----|----|-----|-----|
| 0   | 2  | 0   | 80  |
| 0   | 16 | 2   | 426 |
| 0   | 0  | 0   | 152 |
| 0   | 23 | 12  | 202 |
| 0   | 8  | 12  | 248 |
| 0   | 12 | 12  | 277 |
| 0   | 2  | 2   | 123 |
| 0   | 3  | 1   | 93  |
| 0   | 23 | 11  | 202 |
| 0   | 4  | 2   | 168 |
| 0   | 19 | 5   | 109 |
| 0   | 11 | 7   | 169 |
| 0   | 1  | 0   | 246 |
| 0   | 2  | 0   | 103 |
| 0   | 1  | 1   | 104 |
| 0   | 1  | 0   | 83  |
| 0   | 19 | 1   | 108 |
| 0   | 20 | 1   | 107 |
| 0   | 18 | 9   | 177 |
| 0   | 0  | 0   | 103 |
| 0   | 4  | 3   | 184 |
| 0   | 24 | 6   | 160 |
| 0   | 2  | 0   | 581 |
| 0   | 1  | 1   | 83  |
| 0   | 4  | 0   | 135 |
| 0   | 1  | 0   | 139 |
| 0   | 0  | 0   | 78  |
| 0   | 1  | 0   | 97  |
| 0   | 3  | 3   | 157 |
| 0   | 6  | 4   | 307 |
| 0   | 1  | 1   | 95  |
| 0   | 8  | 6   | 416 |
| 0   | 7  | 0   | 101 |
| 0   | 43 | 45  | 124 |
| 0   | 4  | 12  | 146 |
| 0   | 0  | 0   | 61  |
| 0   | 4  | 3   | 135 |
| 0   | 1  | 1   | 73  |
| 0   | 20 | 4   | 124 |
| 168 | 81 | 457 | 214 |
| 0   | 0  | 6   | 107 |
| 0   | 3  | 2   | 81  |
| 0   | 0  | 0   | 101 |
| 0   | 12 | 3   | 117 |
| 0   | 11 | 4   | 118 |
| 0   | 3  | 3   | 151 |
| 0   | 25 | 8   | 144 |

|   |     |     |      |
|---|-----|-----|------|
| 0 | 3   | 11  | 61   |
| 0 | 3   | 2   | 368  |
| 0 | 20  | 5   | 84   |
| 0 | 19  | 5   | 142  |
| 0 | 53  | 72  | 431  |
| 0 | 9   | 13  | 266  |
| 0 | 25  | 15  | 749  |
| 0 | 7   | 1   | 132  |
| 0 | 13  | 2   | 179  |
| 0 | 9   | 9   | 130  |
| 0 | 7   | 3   | 103  |
| 0 | 12  | 9   | 131  |
| 0 | 9   | 3   | 157  |
| 0 | 10  | 4   | 305  |
| 0 | 10  | 21  | 144  |
| 0 | 0   | 0   | 94   |
| 0 | 12  | 9   | 172  |
| 0 | 0   | 1   | 173  |
| 0 | 27  | 20  | 348  |
| 0 | 4   | 3   | 124  |
| 0 | 17  | 4   | 45   |
| 0 | 20  | 12  | 220  |
| 0 | 24  | 16  | 274  |
| 0 | 7   | 3   | 106  |
| 0 | 35  | 27  | 209  |
| 0 | 18  | 4   | 263  |
| 0 | 10  | 11  | 188  |
| 0 | 291 | 92  | 78   |
| 0 | 2   | 1   | 189  |
| 0 | 8   | 7   | 137  |
| 0 | 36  | 50  | 1259 |
| 0 | 11  | 9   | 143  |
| 0 | 13  | 13  | 387  |
| 0 | 9   | 3   | 163  |
| 0 | 301 | 218 | 234  |
| 0 | 7   | 7   | 104  |
| 0 | 2   | 1   | 108  |
| 0 | 13  | 3   | 130  |
| 0 | 0   | 0   | 219  |
| 0 | 39  | 5   | 111  |
| 0 | 10  | 2   | 84   |
| 0 | 25  | 4   | 124  |
| 0 | 5   | 6   | 78   |
| 0 | 140 | 64  | 387  |
| 0 | 5   | 7   | 124  |
| 0 | 15  | 6   | 79   |
| 0 | 10  | 4   | 247  |

|   |    |    |     |
|---|----|----|-----|
| 0 | 16 | 3  | 78  |
| 0 | 6  | 1  | 278 |
| 0 | 1  | 0  | 121 |
| 0 | 29 | 25 | 444 |
| 0 | 11 | 4  | 143 |
| 0 | 1  | 1  | 114 |
| 0 | 2  | 2  | 115 |
| 0 | 6  | 6  | 114 |
| 0 | 3  | 9  | 142 |
| 0 | 20 | 10 | 284 |
| 0 | 4  | 2  | 96  |
| 0 | 4  | 3  | 155 |
| 0 | 2  | 1  | 92  |
| 0 | 11 | 13 | 194 |
| 0 | 93 | 50 | 292 |
| 0 | 35 | 10 | 120 |
| 0 | 5  | 5  | 176 |
| 0 | 6  | 4  | 174 |
| 0 | 21 | 12 | 341 |
| 0 | 3  | 1  | 219 |
| 0 | 11 | 7  | 103 |
| 0 | 8  | 1  | 164 |
| 0 | 30 | 4  | 90  |
| 0 | 13 | 8  | 123 |
| 0 | 15 | 20 | 288 |
| 0 | 2  | 2  | 278 |
| 0 | 7  | 0  | 105 |
| 0 | 15 | 17 | 151 |
| 0 | 39 | 14 | 269 |
| 0 | 1  | 1  | 93  |
| 0 | 5  | 4  | 125 |
| 0 | 29 | 2  | 84  |
| 0 | 96 | 59 | 318 |
| 0 | 5  | 2  | 103 |
| 0 | 15 | 6  | 93  |
| 0 | 5  | 3  | 120 |
| 0 | 6  | 1  | 94  |
| 0 | 20 | 15 | 124 |
| 0 | 17 | 6  | 91  |
| 0 | 3  | 0  | 95  |
| 0 | 2  | 2  | 138 |
| 0 | 2  | 0  | 222 |
| 0 | 23 | 8  | 190 |
| 0 | 33 | 0  | 60  |
| 0 | 2  | 2  | 144 |
| 0 | 37 | 43 | 182 |
| 0 | 6  | 4  | 190 |

|   |     |     |     |
|---|-----|-----|-----|
| 0 | 0   | 0   | 118 |
| 0 | 0   | 3   | 158 |
| 0 | 10  | 2   | 73  |
| 0 | 7   | 4   | 141 |
| 0 | 17  | 6   | 203 |
| 0 | 24  | 119 | 81  |
| 0 | 209 | 69  | 63  |
| 0 | 1   | 1   | 75  |
| 0 | 0   | 0   | 75  |
| 0 | 8   | 12  | 210 |
| 0 | 55  | 25  | 265 |
| 0 | 10  | 6   | 111 |
| 0 | 3   | 0   | 64  |
| 0 | 19  | 5   | 127 |
| 0 | 24  | 13  | 262 |
| 0 | 2   | 4   | 117 |
| 0 | 9   | 2   | 125 |
| 0 | 101 | 65  | 758 |
| 0 | 26  | 24  | 245 |
| 0 | 11  | 5   | 95  |
| 0 | 32  | 19  | 330 |
| 0 | 7   | 0   | 123 |
| 0 | 0   | 0   | 81  |
| 0 | 5   | 7   | 117 |
| 0 | 4   | 6   | 115 |
| 0 | 3   | 0   | 136 |
| 0 | 27  | 13  | 258 |
| 0 | 3   | 1   | 119 |
| 0 | 12  | 8   | 256 |
| 0 | 6   | 2   | 114 |
| 0 | 13  | 2   | 69  |
| 0 | 5   | 4   | 156 |
| 0 | 9   | 10  | 203 |
| 0 | 1   | 2   | 112 |
| 0 | 1   | 1   | 101 |
| 0 | 6   | 6   | 150 |
| 0 | 113 | 76  | 515 |
| 0 | 18  | 5   | 69  |
| 0 | 13  | 6   | 566 |
| 0 | 1   | 1   | 130 |
| 0 | 4   | 2   | 202 |
| 0 | 3   | 3   | 115 |
| 0 | 110 | 51  | 278 |
| 0 | 30  | 47  | 613 |
| 0 | 2   | 0   | 105 |
| 0 | 1   | 5   | 119 |
| 0 | 0   | 0   | 62  |

|   |     |     |     |
|---|-----|-----|-----|
| 0 | 4   | 3   | 142 |
| 0 | 38  | 53  | 886 |
| 0 | 407 | 264 | 136 |
| 0 | 9   | 83  | 455 |
| 0 | 0   | 3   | 178 |
| 0 | 112 | 54  | 77  |
| 0 | 4   | 2   | 138 |
| 0 | 6   | 4   | 139 |
| 0 | 14  | 1   | 84  |
| 0 | 15  | 2   | 76  |
| 0 | 9   | 2   | 122 |
| 0 | 11  | 10  | 206 |
| 0 | 13  | 6   | 113 |
| 0 | 32  | 14  | 192 |
| 0 | 3   | 3   | 128 |
| 0 | 14  | 9   | 209 |
| 0 | 3   | 2   | 136 |
| 0 | 2   | 3   | 147 |
| 0 | 8   | 5   | 178 |
| 0 | 20  | 21  | 145 |
| 0 | 43  | 25  | 290 |
| 0 | 5   | 2   | 92  |
| 0 | 7   | 10  | 259 |
| 0 | 6   | 4   | 309 |
| 0 | 3   | 1   | 343 |
| 0 | 21  | 11  | 186 |
| 0 | 12  | 3   | 145 |
| 0 | 12  | 13  | 269 |
| 0 | 3   | 3   | 116 |
| 0 | 1   | 1   | 118 |
| 0 | 8   | 1   | 139 |
| 0 | 21  | 27  | 396 |
| 0 | 11  | 9   | 351 |
| 0 | 21  | 3   | 145 |
| 0 | 16  | 5   | 235 |
| 0 | 0   | 0   | 74  |
| 0 | 0   | 0   | 104 |
| 0 | 1   | 0   | 273 |
| 0 | 6   | 4   | 206 |
| 0 | 54  | 32  | 229 |
| 0 | 16  | 13  | 187 |
| 0 | 33  | 33  | 214 |
| 0 | 1   | 4   | 103 |
| 0 | 2   | 0   | 115 |
| 0 | 5   | 7   | 293 |
| 0 | 16  | 8   | 124 |
| 0 | 16  | 58  | 161 |

|   |     |     |     |
|---|-----|-----|-----|
| 0 | 1   | 2   | 283 |
| 0 | 8   | 18  | 145 |
| 0 | 4   | 7   | 84  |
| 0 | 8   | 3   | 164 |
| 0 | 11  | 0   | 61  |
| 0 | 651 | 198 | 113 |
| 0 | 172 | 98  | 86  |
| 0 | 158 | 83  | 413 |
| 0 | 14  | 5   | 146 |
| 0 | 3   | 2   | 144 |
| 0 | 9   | 4   | 101 |
| 0 | 4   | 1   | 147 |
| 0 | 9   | 3   | 63  |
| 0 | 48  | 92  | 917 |
| 0 | 23  | 15  | 676 |
| 0 | 8   | 7   | 109 |
| 0 | 1   | 0   | 102 |
| 0 | 3   | 3   | 99  |
| 0 | 571 | 357 | 153 |
| 0 | 42  | 16  | 206 |
| 0 | 15  | 1   | 79  |
| 0 | 6   | 6   | 141 |
| 0 | 765 | 419 | 201 |
| 0 | 0   | 0   | 91  |
| 0 | 9   | 6   | 153 |
| 0 | 67  | 77  | 80  |
| 0 | 9   | 7   | 190 |
| 0 | 6   | 6   | 160 |
| 0 | 1   | 0   | 158 |
| 0 | 3   | 2   | 289 |
| 0 | 4   | 0   | 123 |
| 0 | 1   | 0   | 159 |
| 0 | 5   | 2   | 154 |
| 0 | 2   | 29  | 231 |
| 0 | 1   | 0   | 72  |
| 0 | 23  | 51  | 417 |
| 0 | 38  | 49  | 446 |
| 0 | 32  | 38  | 291 |
| 0 | 27  | 7   | 347 |
| 0 | 23  | 7   | 149 |
| 0 | 3   | 2   | 129 |
| 0 | 81  | 44  | 229 |
| 0 | 4   | 3   | 112 |
| 0 | 5   | 5   | 248 |
| 0 | 12  | 2   | 94  |
| 0 | 10  | 2   | 100 |
| 0 | 8   | 2   | 165 |

|   |     |     |      |
|---|-----|-----|------|
| 0 | 25  | 90  | 210  |
| 0 | 1   | 1   | 82   |
| 0 | 10  | 11  | 286  |
| 0 | 62  | 41  | 100  |
| 0 | 19  | 6   | 191  |
| 0 | 51  | 3   | 200  |
| 0 | 217 | 138 | 740  |
| 0 | 5   | 1   | 199  |
| 0 | 4   | 0   | 109  |
| 0 | 111 | 97  | 301  |
| 0 | 0   | 2   | 97   |
| 0 | 323 | 319 | 275  |
| 0 | 60  | 25  | 275  |
| 0 | 89  | 74  | 1349 |
| 0 | 15  | 8   | 156  |
| 0 | 46  | 12  | 127  |
| 0 | 8   | 3   | 160  |
| 0 | 7   | 7   | 176  |
| 0 | 4   | 1   | 129  |
| 0 | 2   | 1   | 194  |
| 0 | 66  | 4   | 114  |
| 0 | 2   | 2   | 155  |
| 0 | 3   | 2   | 245  |
| 0 | 16  | 5   | 141  |
| 0 | 7   | 4   | 101  |
| 0 | 104 | 281 | 100  |
| 0 | 75  | 192 | 222  |
| 0 | 5   | 9   | 222  |
| 0 | 0   | 1   | 114  |
| 0 | 0   | 0   | 58   |
| 0 | 38  | 13  | 173  |
| 0 | 18  | 4   | 92   |
| 0 | 5   | 0   | 98   |
| 0 | 40  | 24  | 552  |
| 0 | 27  | 3   | 120  |
| 0 | 21  | 27  | 122  |
| 0 | 6   | 12  | 62   |
| 0 | 6   | 5   | 124  |
| 0 | 1   | 4   | 95   |
| 0 | 8   | 3   | 78   |
| 0 | 4   | 6   | 116  |
| 0 | 49  | 26  | 348  |
| 0 | 2   | 3   | 133  |
| 6 | 11  | 30  | 299  |
| 0 | 1   | 1   | 63   |
| 0 | 8   | 4   | 95   |
| 0 | 1   | 1   | 105  |

|   |     |     |     |
|---|-----|-----|-----|
| 0 | 10  | 5   | 78  |
| 0 | 11  | 8   | 147 |
| 0 | 7   | 4   | 144 |
| 0 | 10  | 6   | 139 |
| 0 | 7   | 4   | 182 |
| 0 | 10  | 3   | 101 |
| 0 | 3   | 1   | 111 |
| 0 | 4   | 3   | 125 |
| 0 | 39  | 13  | 166 |
| 0 | 14  | 11  | 169 |
| 0 | 2   | 1   | 138 |
| 0 | 27  | 16  | 377 |
| 0 | 3   | 6   | 169 |
| 0 | 702 | 577 | 159 |
| 0 | 16  | 2   | 99  |
| 0 | 4   | 3   | 122 |
| 0 | 8   | 6   | 96  |
| 0 | 8   | 5   | 106 |
| 0 | 10  | 4   | 115 |
| 0 | 4   | 6   | 230 |
| 0 | 12  | 7   | 149 |
| 0 | 3   | 2   | 103 |
| 0 | 3   | 1   | 113 |
| 0 | 1   | 4   | 92  |
| 0 | 1   | 0   | 103 |
| 0 | 10  | 6   | 139 |
| 0 | 26  | 6   | 88  |
| 0 | 25  | 55  | 519 |
| 0 | 21  | 10  | 220 |
| 0 | 4   | 5   | 74  |
| 0 | 8   | 1   | 89  |
| 0 | 7   | 5   | 121 |
| 0 | 17  | 10  | 182 |
| 0 | 5   | 2   | 169 |
| 0 | 12  | 8   | 125 |
| 0 | 40  | 51  | 638 |
| 0 | 4   | 6   | 112 |
| 0 | 16  | 7   | 325 |
| 0 | 4   | 2   | 174 |
| 0 | 1   | 0   | 66  |
| 0 | 23  | 11  | 225 |
| 0 | 4   | 0   | 112 |
| 0 | 1   | 0   | 116 |
| 0 | 0   | 1   | 110 |
| 0 | 25  | 4   | 108 |
| 0 | 1   | 1   | 81  |
| 0 | 21  | 14  | 267 |



|    |     |     |     |
|----|-----|-----|-----|
| 0  | 3   | 0   | 107 |
| 0  | 3   | 0   | 125 |
| 0  | 6   | 6   | 66  |
| 0  | 1   | 0   | 162 |
| 0  | 9   | 4   | 74  |
| 0  | 2   | 0   | 248 |
| 0  | 7   | 1   | 171 |
| 0  | 10  | 1   | 150 |
| 0  | 3   | 11  | 233 |
| 0  | 68  | 31  | 493 |
| 0  | 5   | 1   | 135 |
| 0  | 3   | 5   | 112 |
| 0  | 0   | 0   | 68  |
| 0  | 1   | 0   | 68  |
| 0  | 6   | 22  | 433 |
| 0  | 0   | 0   | 82  |
| 0  | 6   | 4   | 155 |
| 0  | 2   | 1   | 96  |
| 0  | 6   | 1   | 124 |
| 0  | 444 | 105 | 67  |
| 16 | 24  | 20  | 75  |
| 0  | 14  | 15  | 278 |
| 0  | 37  | 31  | 574 |
| 0  | 5   | 1   | 103 |
| 0  | 11  | 6   | 99  |
| 0  | 83  | 61  | 498 |
| 0  | 15  | 14  | 205 |
| 0  | 11  | 2   | 80  |
| 0  | 6   | 5   | 93  |
| 0  | 2   | 1   | 99  |
| 0  | 13  | 18  | 606 |
| 0  | 26  | 46  | 275 |
| 0  | 13  | 1   | 95  |
| 0  | 0   | 1   | 82  |
| 0  | 368 | 539 | 163 |
| 0  | 13  | 9   | 196 |
| 0  | 58  | 21  | 464 |
| 0  | 10  | 6   | 417 |
| 0  | 1   | 1   | 86  |
| 0  | 0   | 0   | 86  |
| 0  | 12  | 6   | 75  |
| 0  | 10  | 16  | 201 |
| 0  | 46  | 20  | 734 |
| 0  | 33  | 3   | 102 |
| 0  | 3   | 2   | 126 |
| 0  | 4   | 3   | 106 |
| 0  | 0   | 16  | 60  |

|   |    |    |     |
|---|----|----|-----|
| 0 | 1  | 0  | 86  |
| 0 | 9  | 13 | 184 |
| 0 | 7  | 11 | 143 |
| 0 | 5  | 5  | 128 |
| 0 | 27 | 7  | 81  |
| 0 | 5  | 4  | 134 |
| 0 | 1  | 0  | 96  |
| 0 | 0  | 0  | 96  |
| 0 | 0  | 0  | 72  |
| 0 | 29 | 7  | 218 |
| 0 | 3  | 1  | 95  |
| 0 | 15 | 0  | 59  |
| 0 | 29 | 21 | 116 |
| 0 | 14 | 5  | 214 |
| 0 | 0  | 1  | 96  |
| 0 | 19 | 48 | 402 |
| 0 | 18 | 13 | 193 |
| 0 | 3  | 4  | 183 |
| 0 | 1  | 2  | 125 |
| 0 | 3  | 0  | 121 |
| 0 | 7  | 4  | 443 |
| 0 | 5  | 7  | 185 |
| 0 | 8  | 6  | 280 |
| 0 | 30 | 12 | 137 |
| 0 | 49 | 17 | 209 |
| 0 | 14 | 8  | 162 |
| 0 | 7  | 3  | 109 |
| 0 | 5  | 1  | 102 |
| 0 | 8  | 3  | 177 |
| 0 | 5  | 5  | 318 |
| 0 | 31 | 24 | 639 |
| 0 | 15 | 16 | 312 |
| 0 | 2  | 0  | 128 |
| 0 | 10 | 4  | 130 |
| 0 | 67 | 23 | 229 |
| 0 | 2  | 0  | 171 |
| 0 | 4  | 3  | 109 |
| 0 | 18 | 9  | 150 |
| 0 | 33 | 11 | 118 |
| 0 | 6  | 1  | 160 |
| 0 | 29 | 26 | 589 |
| 0 | 8  | 5  | 187 |
| 0 | 1  | 1  | 96  |
| 0 | 22 | 4  | 101 |
| 0 | 6  | 2  | 115 |
| 0 | 2  | 0  | 100 |
| 0 | 12 | 2  | 125 |

|   |     |     |     |
|---|-----|-----|-----|
| 0 | 6   | 10  | 149 |
| 0 | 15  | 5   | 151 |
| 0 | 44  | 15  | 149 |
| 0 | 1   | 0   | 91  |
| 0 | 28  | 16  | 378 |
| 0 | 25  | 26  | 482 |
| 0 | 1   | 3   | 100 |
| 0 | 19  | 4   | 98  |
| 0 | 11  | 11  | 162 |
| 0 | 0   | 0   | 135 |
| 0 | 193 | 224 | 392 |
| 0 | 6   | 2   | 118 |
| 0 | 40  | 31  | 180 |
| 0 | 11  | 3   | 325 |
| 0 | 24  | 12  | 116 |
| 0 | 2   | 1   | 152 |
| 0 | 15  | 2   | 72  |
| 0 | 6   | 3   | 299 |
| 0 | 5   | 0   | 170 |
| 0 | 5   | 0   | 148 |
| 0 | 5   | 3   | 138 |
| 0 | 1   | 0   | 102 |
| 0 | 8   | 4   | 125 |
| 0 | 2   | 0   | 160 |
| 0 | 23  | 24  | 836 |
| 0 | 44  | 52  | 369 |
| 0 | 22  | 9   | 210 |
| 0 | 30  | 24  | 564 |
| 0 | 22  | 13  | 192 |
| 0 | 24  | 4   | 125 |
| 0 | 5   | 0   | 107 |
| 0 | 152 | 61  | 184 |
| 0 | 11  | 7   | 118 |
| 0 | 12  | 10  | 180 |
| 0 | 34  | 18  | 342 |
| 0 | 5   | 1   | 78  |
| 0 | 4   | 5   | 215 |
| 0 | 9   | 0   | 131 |
| 0 | 40  | 35  | 201 |
| 0 | 6   | 1   | 99  |
| 0 | 8   | 1   | 81  |
| 0 | 8   | 4   | 558 |
| 0 | 8   | 4   | 107 |
| 0 | 4   | 1   | 114 |
| 0 | 6   | 1   | 108 |
| 0 | 3   | 3   | 126 |
| 0 | 7   | 6   | 183 |

|     |     |     |      |
|-----|-----|-----|------|
| 0   | 9   | 6   | 143  |
| 0   | 0   | 3   | 131  |
| 0   | 23  | 15  | 172  |
| 0   | 11  | 5   | 137  |
| 0   | 16  | 7   | 175  |
| 0   | 1   | 0   | 192  |
| 0   | 8   | 6   | 58   |
| 0   | 27  | 32  | 485  |
| 0   | 11  | 7   | 108  |
| 129 | 163 | 329 | 404  |
| 0   | 160 | 194 | 78   |
| 0   | 0   | 0   | 58   |
| 0   | 53  | 157 | 66   |
| 0   | 46  | 481 | 77   |
| 0   | 142 | 260 | 71   |
| 0   | 43  | 77  | 44   |
| 0   | 145 | 398 | 106  |
| 0   | 10  | 103 | 58   |
| 0   | 88  | 201 | 52   |
| 0   | 195 | 372 | 44   |
| 0   | 36  | 32  | 180  |
| 0   | 3   | 3   | 152  |
| 0   | 4   | 2   | 112  |
| 0   | 6   | 0   | 141  |
| 0   | 0   | 0   | 113  |
| 0   | 14  | 5   | 176  |
| 0   | 7   | 5   | 71   |
| 0   | 5   | 0   | 496  |
| 0   | 4   | 2   | 212  |
| 0   | 136 | 75  | 66   |
| 0   | 3   | 1   | 89   |
| 0   | 5   | 6   | 180  |
| 0   | 25  | 1   | 105  |
| 0   | 2   | 2   | 544  |
| 0   | 28  | 29  | 248  |
| 0   | 25  | 0   | 70   |
| 0   | 8   | 3   | 80   |
| 0   | 5   | 1   | 107  |
| 0   | 2   | 0   | 121  |
| 0   | 3   | 6   | 119  |
| 0   | 70  | 5   | 227  |
| 0   | 7   | 5   | 134  |
| 0   | 28  | 46  | 992  |
| 0   | 19  | 13  | 779  |
| 0   | 18  | 1   | 98   |
| 0   | 18  | 26  | 1056 |
| 0   | 6   | 3   | 200  |

|   |     |     |     |
|---|-----|-----|-----|
| 0 | 5   | 1   | 151 |
| 0 | 3   | 5   | 267 |
| 0 | 12  | 7   | 293 |
| 0 | 18  | 7   | 158 |
| 0 | 39  | 18  | 261 |
| 0 | 20  | 8   | 116 |
| 0 | 2   | 10  | 146 |
| 0 | 25  | 19  | 199 |
| 0 | 17  | 7   | 128 |
| 0 | 7   | 11  | 205 |
| 0 | 13  | 6   | 108 |
| 0 | 21  | 15  | 126 |
| 0 | 18  | 0   | 82  |
| 0 | 2   | 1   | 83  |
| 0 | 3   | 3   | 160 |
| 0 | 12  | 10  | 128 |
| 0 | 5   | 0   | 71  |
| 0 | 0   | 21  | 173 |
| 0 | 15  | 0   | 94  |
| 0 | 19  | 5   | 103 |
| 0 | 1   | 0   | 102 |
| 0 | 2   | 1   | 105 |
| 0 | 7   | 2   | 241 |
| 0 | 9   | 4   | 316 |
| 0 | 8   | 6   | 462 |
| 0 | 0   | 0   | 97  |
| 0 | 10  | 4   | 110 |
| 0 | 9   | 5   | 217 |
| 0 | 7   | 6   | 182 |
| 0 | 211 | 142 | 334 |
| 0 | 3   | 0   | 61  |
| 0 | 0   | 0   | 168 |
| 0 | 13  | 4   | 73  |
| 0 | 12  | 10  | 221 |
| 0 | 2   | 0   | 106 |
| 0 | 2   | 0   | 67  |
| 0 | 15  | 5   | 329 |
| 0 | 3   | 1   | 92  |
| 0 | 5   | 6   | 158 |
| 0 | 44  | 30  | 84  |
| 0 | 20  | 8   | 190 |
| 0 | 3   | 12  | 117 |
| 0 | 5   | 10  | 238 |
| 0 | 16  | 8   | 159 |
| 0 | 9   | 4   | 82  |
| 0 | 10  | 1   | 88  |
| 0 | 4   | 0   | 112 |

|   |     |     |      |
|---|-----|-----|------|
| 0 | 5   | 4   | 187  |
| 0 | 147 | 359 | 324  |
| 0 | 5   | 2   | 113  |
| 0 | 19  | 10  | 262  |
| 0 | 47  | 78  | 986  |
| 0 | 30  | 34  | 472  |
| 0 | 18  | 17  | 103  |
| 0 | 30  | 20  | 248  |
| 0 | 16  | 6   | 113  |
| 0 | 15  | 5   | 117  |
| 0 | 5   | 5   | 136  |
| 0 | 117 | 63  | 211  |
| 0 | 27  | 20  | 387  |
| 0 | 25  | 5   | 98   |
| 0 | 26  | 5   | 111  |
| 0 | 77  | 63  | 432  |
| 0 | 16  | 3   | 140  |
| 0 | 7   | 2   | 99   |
| 0 | 15  | 7   | 89   |
| 0 | 6   | 4   | 200  |
| 0 | 6   | 3   | 734  |
| 0 | 0   | 1   | 125  |
| 0 | 16  | 8   | 91   |
| 0 | 6   | 5   | 117  |
| 0 | 9   | 2   | 118  |
| 0 | 61  | 66  | 376  |
| 0 | 2   | 8   | 135  |
| 0 | 3   | 4   | 114  |
| 0 | 13  | 22  | 204  |
| 0 | 0   | 0   | 142  |
| 0 | 16  | 4   | 144  |
| 0 | 5   | 3   | 167  |
| 0 | 9   | 4   | 222  |
| 0 | 27  | 2   | 73   |
| 0 | 10  | 7   | 1481 |
| 0 | 19  | 13  | 184  |
| 0 | 0   | 0   | 206  |
| 0 | 22  | 13  | 524  |
| 0 | 7   | 4   | 70   |
| 0 | 112 | 45  | 221  |
| 0 | 22  | 72  | 583  |
| 0 | 44  | 40  | 388  |
| 0 | 13  | 0   | 141  |
| 0 | 46  | 30  | 258  |
| 0 | 9   | 7   | 85   |
| 0 | 9   | 1   | 82   |
| 0 | 32  | 3   | 169  |

|   |     |     |     |
|---|-----|-----|-----|
| 0 | 6   | 19  | 226 |
| 0 | 4   | 17  | 178 |
| 0 | 28  | 7   | 71  |
| 0 | 1   | 0   | 97  |
| 0 | 14  | 6   | 121 |
| 0 | 1   | 0   | 163 |
| 0 | 0   | 7   | 76  |
| 0 | 45  | 91  | 401 |
| 0 | 468 | 230 | 106 |
| 0 | 1   | 2   | 98  |
| 0 | 144 | 214 | 563 |
| 0 | 3   | 0   | 126 |
| 0 | 9   | 0   | 140 |
| 0 | 1   | 1   | 140 |
| 0 | 1   | 0   | 116 |
| 0 | 76  | 93  | 346 |
| 0 | 0   | 0   | 98  |
| 0 | 5   | 1   | 100 |
| 0 | 9   | 6   | 123 |
| 0 | 0   | 0   | 87  |
| 0 | 7   | 0   | 113 |
| 0 | 25  | 3   | 64  |
| 0 | 0   | 0   | 63  |
| 0 | 16  | 13  | 79  |
| 0 | 2   | 0   | 108 |
| 0 | 3   | 2   | 89  |
| 0 | 11  | 14  | 98  |
| 0 | 29  | 21  | 112 |
| 0 | 4   | 1   | 142 |
| 0 | 8   | 4   | 85  |
| 0 | 2   | 2   | 132 |
| 0 | 33  | 11  | 115 |
| 0 | 2   | 1   | 102 |
| 0 | 7   | 2   | 114 |
| 0 | 13  | 13  | 110 |
| 0 | 6   | 16  | 61  |
| 0 | 1   | 1   | 80  |
| 0 | 17  | 5   | 301 |
| 0 | 4   | 1   | 91  |
| 0 | 2   | 2   | 70  |
| 0 | 9   | 4   | 166 |
| 0 | 2   | 0   | 103 |
| 0 | 4   | 1   | 153 |
| 0 | 4   | 10  | 369 |
| 0 | 15  | 9   | 187 |
| 0 | 4   | 19  | 416 |
| 0 | 101 | 185 | 266 |

|   |    |     |      |
|---|----|-----|------|
| 0 | 73 | 165 | 574  |
| 0 | 0  | 0   | 77   |
| 0 | 9  | 11  | 154  |
| 0 | 41 | 17  | 1056 |
| 0 | 3  | 32  | 96   |
| 0 | 21 | 9   | 193  |
| 0 | 79 | 35  | 584  |
| 0 | 5  | 5   | 214  |
| 0 | 17 | 6   | 286  |
| 0 | 6  | 2   | 149  |
| 0 | 5  | 5   | 93   |
| 0 | 3  | 5   | 198  |
| 0 | 15 | 9   | 193  |
| 0 | 12 | 3   | 104  |
| 0 | 8  | 3   | 83   |
| 0 | 7  | 1   | 244  |
| 0 | 3  | 0   | 104  |
| 0 | 62 | 45  | 220  |
| 0 | 2  | 0   | 124  |
| 0 | 32 | 12  | 1620 |
| 0 | 3  | 1   | 190  |
| 0 | 14 | 13  | 676  |
| 0 | 4  | 7   | 219  |
| 0 | 19 | 0   | 62   |
| 0 | 8  | 3   | 85   |
| 0 | 20 | 10  | 186  |
| 0 | 18 | 5   | 192  |
| 0 | 9  | 2   | 107  |
| 0 | 17 | 5   | 80   |
| 0 | 7  | 8   | 144  |
| 0 | 25 | 7   | 172  |
| 0 | 11 | 0   | 89   |
| 0 | 41 | 8   | 102  |
| 0 | 34 | 0   | 99   |
| 0 | 9  | 2   | 120  |
| 0 | 0  | 0   | 72   |
| 0 | 0  | 0   | 112  |
| 0 | 15 | 30  | 460  |
| 0 | 4  | 1   | 99   |
| 0 | 1  | 2   | 121  |
| 0 | 16 | 8   | 184  |
| 0 | 27 | 14  | 177  |
| 0 | 7  | 7   | 170  |
| 0 | 12 | 13  | 247  |
| 0 | 23 | 40  | 628  |
| 0 | 3  | 1   | 120  |
| 0 | 1  | 2   | 95   |



|    |     |     |      |
|----|-----|-----|------|
| 0  | 6   | 3   | 127  |
| 0  | 8   | 4   | 114  |
| 0  | 2   | 3   | 173  |
| 0  | 36  | 37  | 229  |
| 96 | 10  | 250 | 250  |
| 0  | 58  | 22  | 1159 |
| 0  | 7   | 2   | 94   |
| 0  | 32  | 37  | 375  |
| 0  | 3   | 3   | 153  |
| 0  | 3   | 1   | 191  |
| 0  | 22  | 10  | 188  |
| 0  | 8   | 2   | 173  |
| 0  | 42  | 42  | 461  |
| 0  | 3   | 4   | 113  |
| 0  | 3   | 2   | 104  |
| 0  | 15  | 4   | 144  |
| 0  | 11  | 1   | 81   |
| 0  | 29  | 14  | 334  |
| 0  | 2   | 0   | 102  |
| 0  | 4   | 23  | 154  |
| 0  | 6   | 2   | 135  |
| 0  | 6   | 5   | 140  |
| 0  | 30  | 10  | 199  |
| 0  | 12  | 9   | 98   |
| 0  | 13  | 7   | 127  |
| 0  | 3   | 3   | 133  |
| 0  | 1   | 1   | 74   |
| 0  | 0   | 1   | 75   |
| 0  | 6   | 9   | 314  |
| 0  | 29  | 17  | 179  |
| 0  | 15  | 3   | 80   |
| 0  | 0   | 2   | 107  |
| 0  | 23  | 16  | 264  |
| 0  | 31  | 9   | 315  |
| 0  | 23  | 5   | 198  |
| 0  | 70  | 148 | 831  |
| 0  | 0   | 1   | 108  |
| 0  | 13  | 6   | 244  |
| 47 | 208 | 402 | 291  |
| 0  | 14  | 28  | 736  |
| 0  | 67  | 78  | 671  |
| 0  | 10  | 8   | 214  |
| 0  | 7   | 6   | 215  |
| 0  | 2   | 2   | 88   |
| 0  | 23  | 2   | 97   |
| 0  | 4   | 5   | 165  |
| 0  | 19  | 16  | 231  |

|   |     |     |     |
|---|-----|-----|-----|
| 0 | 18  | 16  | 128 |
| 0 | 23  | 9   | 117 |
| 0 | 4   | 4   | 181 |
| 0 | 5   | 2   | 137 |
| 0 | 6   | 4   | 221 |
| 0 | 584 | 443 | 181 |
| 0 | 5   | 4   | 124 |
| 0 | 10  | 3   | 93  |
| 0 | 7   | 7   | 96  |
| 0 | 19  | 1   | 96  |
| 0 | 25  | 10  | 538 |
| 0 | 45  | 97  | 716 |
| 0 | 6   | 3   | 118 |
| 0 | 13  | 5   | 115 |
| 0 | 1   | 0   | 108 |
| 0 | 15  | 9   | 144 |
| 0 | 34  | 10  | 190 |
| 0 | 20  | 30  | 289 |
| 0 | 12  | 5   | 116 |
| 0 | 6   | 2   | 100 |
| 0 | 34  | 38  | 492 |
| 0 | 10  | 3   | 127 |
| 0 | 2   | 2   | 121 |
| 0 | 132 | 58  | 364 |
| 0 | 7   | 5   | 138 |
| 0 | 5   | 4   | 109 |
| 0 | 2   | 5   | 96  |
| 0 | 0   | 4   | 68  |
| 0 | 0   | 0   | 75  |
| 0 | 3   | 0   | 107 |
| 0 | 2   | 3   | 179 |
| 0 | 12  | 3   | 166 |
| 0 | 3   | 2   | 114 |
| 0 | 4   | 7   | 154 |
| 0 | 25  | 21  | 651 |
| 0 | 294 | 329 | 226 |
| 0 | 1   | 1   | 97  |
| 0 | 27  | 26  | 133 |
| 0 | 2   | 0   | 91  |
| 0 | 13  | 0   | 60  |
| 0 | 0   | 0   | 228 |
| 0 | 4   | 3   | 267 |
| 0 | 3   | 2   | 143 |
| 0 | 13  | 13  | 295 |
| 0 | 7   | 2   | 107 |
| 0 | 7   | 16  | 482 |
| 0 | 14  | 8   | 394 |

|   |     |     |     |
|---|-----|-----|-----|
| 0 | 23  | 11  | 119 |
| 0 | 5   | 6   | 247 |
| 0 | 14  | 10  | 138 |
| 0 | 31  | 1   | 82  |
| 0 | 10  | 12  | 121 |
| 0 | 8   | 9   | 117 |
| 0 | 0   | 6   | 112 |
| 0 | 1   | 0   | 91  |
| 0 | 9   | 0   | 72  |
| 0 | 11  | 12  | 125 |
| 0 | 15  | 3   | 78  |
| 0 | 15  | 18  | 272 |
| 0 | 16  | 21  | 237 |
| 0 | 8   | 9   | 165 |
| 0 | 3   | 4   | 206 |
| 0 | 57  | 19  | 288 |
| 0 | 10  | 5   | 156 |
| 0 | 18  | 11  | 237 |
| 0 | 5   | 3   | 139 |
| 0 | 6   | 7   | 159 |
| 0 | 1   | 0   | 108 |
| 0 | 3   | 1   | 133 |
| 0 | 7   | 2   | 725 |
| 0 | 10  | 4   | 100 |
| 0 | 0   | 0   | 103 |
| 0 | 3   | 2   | 92  |
| 0 | 13  | 5   | 111 |
| 0 | 3   | 0   | 119 |
| 0 | 24  | 28  | 269 |
| 0 | 16  | 0   | 66  |
| 0 | 4   | 0   | 117 |
| 0 | 9   | 8   | 187 |
| 0 | 14  | 9   | 188 |
| 0 | 0   | 0   | 67  |
| 0 | 5   | 0   | 116 |
| 0 | 0   | 0   | 90  |
| 0 | 10  | 6   | 80  |
| 0 | 158 | 264 | 127 |
| 0 | 1   | 21  | 155 |
| 0 | 4   | 5   | 125 |
| 0 | 90  | 68  | 220 |
| 0 | 50  | 50  | 596 |
| 0 | 1   | 0   | 116 |
| 0 | 17  | 0   | 69  |
| 0 | 8   | 5   | 137 |
| 0 | 1   | 0   | 82  |
| 0 | 46  | 13  | 159 |

|    |     |     |      |
|----|-----|-----|------|
| 0  | 2   | 5   | 113  |
| 0  | 3   | 3   | 90   |
| 0  | 28  | 31  | 352  |
| 0  | 6   | 2   | 89   |
| 0  | 0   | 0   | 64   |
| 0  | 13  | 0   | 59   |
| 0  | 22  | 7   | 111  |
| 0  | 16  | 6   | 95   |
| 0  | 23  | 10  | 168  |
| 24 | 40  | 71  | 764  |
| 0  | 9   | 5   | 322  |
| 0  | 11  | 11  | 149  |
| 0  | 19  | 8   | 485  |
| 0  | 10  | 9   | 400  |
| 0  | 21  | 22  | 437  |
| 0  | 20  | 19  | 262  |
| 0  | 24  | 18  | 175  |
| 0  | 10  | 4   | 222  |
| 0  | 13  | 10  | 177  |
| 0  | 11  | 3   | 98   |
| 0  | 3   | 2   | 141  |
| 0  | 2   | 2   | 84   |
| 0  | 25  | 38  | 345  |
| 0  | 17  | 4   | 497  |
| 0  | 2   | 2   | 108  |
| 0  | 6   | 9   | 288  |
| 0  | 16  | 10  | 110  |
| 0  | 6   | 1   | 133  |
| 0  | 16  | 9   | 127  |
| 0  | 195 | 37  | 324  |
| 0  | 23  | 11  | 101  |
| 0  | 19  | 3   | 261  |
| 0  | 29  | 5   | 250  |
| 0  | 0   | 6   | 79   |
| 0  | 60  | 64  | 845  |
| 0  | 3   | 3   | 126  |
| 0  | 16  | 2   | 199  |
| 0  | 4   | 0   | 87   |
| 0  | 82  | 224 | 259  |
| 0  | 9   | 5   | 135  |
| 0  | 105 | 15  | 89   |
| 0  | 0   | 2   | 69   |
| 0  | 0   | 0   | 194  |
| 0  | 5   | 4   | 170  |
| 0  | 83  | 157 | 1120 |
| 0  | 5   | 4   | 140  |
| 0  | 10  | 6   | 506  |

|    |     |     |     |
|----|-----|-----|-----|
| 0  | 22  | 3   | 76  |
| 0  | 22  | 27  | 441 |
| 0  | 22  | 13  | 358 |
| 0  | 2   | 2   | 96  |
| 0  | 3   | 1   | 162 |
| 0  | 12  | 6   | 245 |
| 0  | 4   | 2   | 103 |
| 0  | 58  | 72  | 797 |
| 0  | 13  | 11  | 289 |
| 0  | 99  | 37  | 288 |
| 0  | 23  | 1   | 72  |
| 20 | 21  | 50  | 356 |
| 0  | 16  | 4   | 75  |
| 0  | 27  | 30  | 288 |
| 0  | 20  | 8   | 288 |
| 0  | 7   | 3   | 330 |
| 0  | 9   | 4   | 123 |
| 0  | 3   | 2   | 131 |
| 0  | 54  | 20  | 344 |
| 0  | 9   | 8   | 259 |
| 0  | 12  | 4   | 361 |
| 0  | 5   | 7   | 153 |
| 0  | 14  | 10  | 230 |
| 0  | 1   | 5   | 159 |
| 0  | 8   | 6   | 59  |
| 0  | 20  | 31  | 239 |
| 0  | 4   | 7   | 146 |
| 0  | 49  | 74  | 987 |
| 0  | 39  | 5   | 97  |
| 0  | 2   | 0   | 109 |
| 0  | 5   | 8   | 147 |
| 0  | 7   | 6   | 204 |
| 0  | 9   | 9   | 161 |
| 0  | 1   | 0   | 139 |
| 0  | 85  | 39  | 266 |
| 0  | 3   | 1   | 154 |
| 0  | 1   | 6   | 126 |
| 0  | 18  | 18  | 322 |
| 0  | 10  | 13  | 93  |
| 0  | 6   | 2   | 92  |
| 0  | 3   | 1   | 248 |
| 0  | 20  | 9   | 140 |
| 0  | 18  | 1   | 82  |
| 0  | 25  | 9   | 87  |
| 0  | 4   | 4   | 97  |
| 0  | 469 | 300 | 318 |
| 0  | 13  | 1   | 69  |

|   |     |     |     |
|---|-----|-----|-----|
| 0 | 11  | 13  | 180 |
| 0 | 68  | 0   | 95  |
| 0 | 0   | 2   | 107 |
| 0 | 0   | 0   | 122 |
| 0 | 19  | 16  | 203 |
| 0 | 4   | 0   | 107 |
| 0 | 5   | 3   | 152 |
| 0 | 13  | 6   | 472 |
| 0 | 5   | 0   | 114 |
| 0 | 23  | 14  | 601 |
| 0 | 6   | 6   | 146 |
| 0 | 3   | 3   | 124 |
| 0 | 54  | 26  | 394 |
| 0 | 2   | 2   | 144 |
| 0 | 34  | 26  | 201 |
| 0 | 14  | 4   | 205 |
| 0 | 4   | 3   | 116 |
| 0 | 18  | 14  | 210 |
| 0 | 5   | 3   | 119 |
| 0 | 20  | 3   | 121 |
| 0 | 12  | 6   | 250 |
| 0 | 28  | 17  | 156 |
| 0 | 115 | 93  | 65  |
| 0 | 2   | 1   | 100 |
| 0 | 6   | 2   | 107 |
| 0 | 55  | 12  | 87  |
| 0 | 43  | 54  | 233 |
| 0 | 5   | 1   | 95  |
| 0 | 1   | 0   | 105 |
| 0 | 18  | 3   | 121 |
| 0 | 14  | 8   | 237 |
| 0 | 2   | 2   | 95  |
| 0 | 5   | 3   | 139 |
| 0 | 6   | 6   | 96  |
| 0 | 14  | 30  | 273 |
| 0 | 3   | 6   | 330 |
| 0 | 12  | 1   | 62  |
| 1 | 9   | 14  | 225 |
| 0 | 33  | 11  | 344 |
| 0 | 7   | 8   | 99  |
| 0 | 58  | 22  | 310 |
| 1 | 93  | 161 | 744 |
| 0 | 13  | 3   | 123 |
| 0 | 17  | 40  | 325 |
| 0 | 30  | 21  | 155 |
| 0 | 2   | 0   | 98  |
| 0 | 10  | 7   | 341 |

|   |     |     |     |
|---|-----|-----|-----|
| 0 | 12  | 12  | 222 |
| 0 | 27  | 50  | 513 |
| 0 | 15  | 14  | 186 |
| 0 | 8   | 4   | 119 |
| 0 | 16  | 5   | 261 |
| 0 | 4   | 5   | 273 |
| 0 | 4   | 4   | 109 |
| 0 | 4   | 9   | 381 |
| 0 | 10  | 5   | 155 |
| 0 | 12  | 4   | 86  |
| 0 | 3   | 3   | 92  |
| 0 | 34  | 1   | 132 |
| 0 | 35  | 31  | 385 |
| 0 | 42  | 6   | 96  |
| 0 | 3   | 2   | 129 |
| 0 | 3   | 4   | 85  |
| 0 | 1   | 0   | 104 |
| 0 | 205 | 215 | 530 |
| 0 | 405 | 276 | 288 |
| 0 | 147 | 161 | 777 |
| 0 | 9   | 0   | 99  |
| 0 | 7   | 3   | 140 |
| 0 | 16  | 10  | 897 |
| 0 | 27  | 15  | 449 |
| 0 | 0   | 0   | 59  |
| 0 | 19  | 3   | 269 |
| 0 | 45  | 7   | 152 |
| 0 | 9   | 2   | 77  |
| 0 | 2   | 2   | 99  |
| 0 | 11  | 2   | 98  |
| 0 | 2   | 0   | 141 |
| 0 | 12  | 3   | 54  |
| 0 | 53  | 44  | 86  |
| 0 | 1   | 0   | 78  |
| 0 | 48  | 76  | 82  |
| 0 | 93  | 106 | 130 |
| 0 | 6   | 1   | 88  |
| 0 | 0   | 0   | 197 |
| 0 | 22  | 34  | 382 |
| 0 | 9   | 4   | 124 |
| 0 | 10  | 10  | 247 |
| 0 | 16  | 3   | 106 |
| 0 | 3   | 4   | 127 |
| 0 | 17  | 4   | 145 |
| 0 | 4   | 1   | 122 |
| 0 | 7   | 4   | 94  |
| 0 | 9   | 5   | 106 |

|   |     |     |      |
|---|-----|-----|------|
| 0 | 51  | 36  | 571  |
| 0 | 1   | 1   | 114  |
| 0 | 9   | 8   | 150  |
| 0 | 17  | 4   | 142  |
| 0 | 51  | 38  | 364  |
| 0 | 3   | 2   | 112  |
| 0 | 6   | 8   | 267  |
| 0 | 0   | 9   | 144  |
| 0 | 0   | 0   | 61   |
| 0 | 13  | 7   | 195  |
| 0 | 2   | 1   | 232  |
| 0 | 14  | 2   | 76   |
| 0 | 15  | 13  | 295  |
| 0 | 33  | 6   | 182  |
| 0 | 286 | 688 | 107  |
| 0 | 3   | 3   | 207  |
| 0 | 18  | 17  | 418  |
| 0 | 74  | 30  | 359  |
| 0 | 378 | 988 | 96   |
| 0 | 110 | 260 | 90   |
| 0 | 3   | 3   | 81   |
| 0 | 3   | 0   | 152  |
| 0 | 29  | 39  | 1755 |
| 0 | 7   | 7   | 760  |
| 0 | 6   | 4   | 100  |
| 0 | 2   | 1   | 90   |
| 0 | 5   | 5   | 115  |
| 0 | 7   | 3   | 130  |
| 0 | 13  | 11  | 193  |
| 0 | 1   | 1   | 106  |
| 0 | 6   | 5   | 177  |
| 0 | 6   | 5   | 93   |
| 0 | 10  | 4   | 192  |
| 0 | 3   | 2   | 125  |
| 0 | 1   | 1   | 78   |
| 0 | 8   | 27  | 206  |
| 0 | 0   | 0   | 130  |
| 0 | 62  | 19  | 338  |
| 0 | 18  | 4   | 94   |
| 0 | 6   | 4   | 142  |
| 0 | 9   | 11  | 250  |
| 0 | 16  | 16  | 124  |
| 0 | 11  | 7   | 168  |
| 0 | 46  | 36  | 567  |
| 0 | 86  | 191 | 187  |
| 0 | 0   | 0   | 80   |
| 0 | 1   | 2   | 68   |



|    |     |     |     |
|----|-----|-----|-----|
| 59 | 261 | 413 | 213 |
| 0  | 10  | 3   | 255 |
| 0  | 155 | 108 | 404 |
| 0  | 8   | 2   | 117 |
| 0  | 2   | 0   | 114 |
| 0  | 3   | 1   | 84  |
| 0  | 14  | 6   | 193 |
| 0  | 4   | 3   | 183 |
| 0  | 19  | 20  | 216 |
| 0  | 48  | 9   | 118 |
| 0  | 13  | 10  | 229 |
| 0  | 16  | 10  | 845 |
| 0  | 6   | 4   | 200 |
| 0  | 6   | 5   | 103 |
| 0  | 9   | 3   | 144 |
| 0  | 5   | 3   | 126 |
| 0  | 3   | 1   | 100 |
| 0  | 18  | 17  | 348 |
| 0  | 6   | 132 | 322 |
| 0  | 36  | 32  | 387 |
| 0  | 26  | 6   | 276 |
| 0  | 6   | 8   | 126 |
| 0  | 4   | 4   | 243 |
| 0  | 94  | 61  | 508 |
| 0  | 6   | 4   | 189 |
| 0  | 16  | 15  | 301 |
| 0  | 468 | 98  | 100 |
| 0  | 12  | 18  | 65  |
| 0  | 2   | 1   | 82  |
| 0  | 12  | 3   | 156 |
| 0  | 0   | 0   | 147 |
| 0  | 8   | 3   | 84  |
| 0  | 16  | 9   | 121 |
| 0  | 6   | 0   | 129 |
| 0  | 12  | 13  | 190 |
| 0  | 17  | 4   | 63  |
| 0  | 3   | 1   | 80  |
| 0  | 25  | 1   | 67  |
| 0  | 30  | 9   | 82  |
| 0  | 158 | 87  | 270 |
| 0  | 40  | 0   | 88  |
| 0  | 1   | 0   | 80  |
| 0  | 0   | 0   | 102 |
| 0  | 19  | 5   | 428 |
| 0  | 1   | 1   | 103 |
| 0  | 6   | 3   | 248 |
| 0  | 16  | 5   | 109 |

|   |     |     |     |
|---|-----|-----|-----|
| 0 | 12  | 5   | 58  |
| 0 | 185 | 81  | 710 |
| 0 | 594 | 574 | 114 |
| 0 | 1   | 2   | 116 |
| 0 | 10  | 1   | 73  |
| 0 | 19  | 6   | 296 |
| 0 | 4   | 1   | 91  |
| 0 | 3   | 2   | 94  |
| 0 | 4   | 1   | 133 |
| 0 | 7   | 5   | 355 |
| 4 | 118 | 82  | 599 |
| 0 | 2   | 1   | 166 |
| 0 | 0   | 0   | 103 |
| 0 | 5   | 15  | 139 |
| 0 | 7   | 3   | 100 |
| 0 | 0   | 0   | 202 |
| 0 | 18  | 5   | 313 |
| 0 | 4   | 3   | 104 |
| 0 | 18  | 1   | 93  |
| 0 | 3   | 0   | 174 |
| 0 | 2   | 1   | 186 |
| 0 | 3   | 2   | 112 |
| 0 | 0   | 11  | 90  |
| 0 | 99  | 39  | 404 |
| 0 | 7   | 7   | 188 |
| 0 | 6   | 3   | 111 |
| 8 | 13  | 13  | 375 |
| 0 | 36  | 66  | 517 |
| 0 | 6   | 6   | 154 |
| 0 | 10  | 8   | 158 |
| 0 | 24  | 23  | 258 |
| 0 | 10  | 5   | 156 |
| 0 | 5   | 5   | 155 |
| 0 | 5   | 2   | 155 |
| 0 | 4   | 1   | 123 |
| 0 | 45  | 44  | 213 |
| 0 | 12  | 9   | 163 |
| 2 | 60  | 64  | 387 |
| 0 | 13  | 25  | 259 |
| 0 | 18  | 14  | 234 |
| 0 | 7   | 4   | 135 |
| 0 | 0   | 0   | 101 |
| 0 | 11  | 4   | 141 |
| 0 | 13  | 11  | 394 |
| 0 | 6   | 4   | 111 |
| 0 | 41  | 34  | 519 |
| 0 | 16  | 31  | 243 |

|   |     |    |     |
|---|-----|----|-----|
| 0 | 28  | 8  | 327 |
| 0 | 9   | 5  | 95  |
| 0 | 0   | 1  | 131 |
| 0 | 4   | 1  | 119 |
| 0 | 19  | 8  | 231 |
| 0 | 9   | 8  | 123 |
| 0 | 10  | 5  | 120 |
| 0 | 10  | 8  | 183 |
| 0 | 9   | 4  | 110 |
| 0 | 9   | 5  | 188 |
| 0 | 2   | 2  | 113 |
| 0 | 10  | 13 | 466 |
| 0 | 20  | 6  | 215 |
| 0 | 25  | 16 | 192 |
| 0 | 2   | 2  | 94  |
| 0 | 4   | 13 | 168 |
| 0 | 8   | 10 | 222 |
| 0 | 4   | 23 | 100 |
| 0 | 2   | 1  | 74  |
| 0 | 24  | 11 | 320 |
| 0 | 7   | 3  | 105 |
| 0 | 4   | 18 | 559 |
| 0 | 1   | 3  | 90  |
| 0 | 37  | 10 | 819 |
| 0 | 18  | 16 | 250 |
| 0 | 100 | 71 | 729 |
| 0 | 5   | 1  | 108 |
| 0 | 6   | 0  | 120 |
| 0 | 20  | 1  | 105 |
| 0 | 149 | 22 | 134 |
| 0 | 44  | 18 | 161 |
| 0 | 6   | 9  | 368 |
| 0 | 11  | 5  | 181 |
| 0 | 0   | 21 | 130 |
| 0 | 21  | 22 | 70  |
| 0 | 17  | 5  | 117 |
| 0 | 21  | 6  | 206 |
| 0 | 14  | 4  | 163 |
| 0 | 19  | 14 | 710 |
| 0 | 61  | 31 | 750 |
| 0 | 119 | 55 | 68  |
| 0 | 6   | 35 | 189 |
| 0 | 39  | 15 | 213 |
| 0 | 5   | 4  | 144 |
| 0 | 3   | 1  | 88  |
| 0 | 8   | 18 | 960 |
| 0 | 28  | 14 | 357 |

|   |     |     |     |
|---|-----|-----|-----|
| 0 | 22  | 1   | 62  |
| 0 | 1   | 0   | 103 |
| 0 | 53  | 4   | 122 |
| 0 | 1   | 1   | 107 |
| 0 | 25  | 7   | 226 |
| 0 | 12  | 6   | 530 |
| 0 | 1   | 4   | 87  |
| 0 | 0   | 1   | 133 |
| 0 | 1   | 1   | 220 |
| 0 | 75  | 18  | 426 |
| 0 | 2   | 4   | 118 |
| 0 | 21  | 6   | 229 |
| 0 | 10  | 6   | 345 |
| 0 | 365 | 100 | 212 |
| 0 | 16  | 13  | 141 |
| 0 | 5   | 6   | 130 |
| 0 | 1   | 1   | 78  |
| 0 | 17  | 9   | 222 |
| 0 | 17  | 8   | 189 |
| 0 | 9   | 5   | 144 |
| 0 | 3   | 0   | 111 |
| 0 | 2   | 1   | 98  |
| 0 | 1   | 2   | 87  |
| 0 | 1   | 2   | 75  |
| 0 | 41  | 35  | 367 |
| 0 | 7   | 1   | 118 |
| 0 | 14  | 6   | 182 |
| 0 | 23  | 16  | 214 |
| 0 | 10  | 6   | 136 |
| 0 | 6   | 3   | 83  |
| 0 | 3   | 2   | 90  |
| 0 | 2   | 1   | 111 |
| 0 | 3   | 1   | 107 |
| 0 | 4   | 2   | 70  |
| 0 | 6   | 8   | 74  |
| 0 | 0   | 2   | 121 |
| 0 | 3   | 4   | 113 |
| 0 | 12  | 7   | 250 |
| 0 | 5   | 7   | 147 |
| 0 | 15  | 3   | 89  |
| 0 | 0   | 1   | 150 |
| 0 | 51  | 33  | 722 |
| 0 | 6   | 0   | 137 |
| 0 | 14  | 4   | 148 |
| 0 | 10  | 4   | 302 |
| 0 | 0   | 0   | 60  |
| 0 | 171 | 49  | 101 |

|   |     |     |     |
|---|-----|-----|-----|
| 0 | 405 | 147 | 36  |
| 0 | 9   | 6   | 98  |
| 0 | 0   | 1   | 150 |
| 0 | 6   | 7   | 166 |
| 0 | 10  | 3   | 151 |
| 0 | 4   | 1   | 126 |
| 0 | 10  | 3   | 123 |
| 0 | 7   | 5   | 318 |
| 0 | 39  | 34  | 296 |
| 0 | 8   | 5   | 210 |
| 0 | 0   | 2   | 110 |
| 0 | 183 | 133 | 568 |
| 0 | 19  | 10  | 371 |
| 0 | 12  | 13  | 283 |
| 0 | 28  | 6   | 80  |
| 0 | 16  | 0   | 114 |
| 0 | 9   | 4   | 86  |
| 0 | 18  | 19  | 214 |
| 0 | 15  | 21  | 438 |
| 0 | 425 | 38  | 121 |
| 0 | 155 | 130 | 137 |
| 0 | 52  | 95  | 80  |
| 0 | 37  | 35  | 48  |
| 0 | 0   | 4   | 89  |
| 0 | 66  | 44  | 548 |
| 0 | 33  | 19  | 351 |
| 0 | 22  | 30  | 514 |
| 0 | 225 | 257 | 156 |
| 0 | 254 | 120 | 239 |
| 0 | 1   | 1   | 107 |
| 0 | 17  | 2   | 85  |
| 0 | 1   | 0   | 114 |
| 0 | 9   | 13  | 335 |
| 0 | 6   | 3   | 330 |
| 0 | 30  | 22  | 324 |
| 0 | 41  | 21  | 148 |
| 0 | 3   | 3   | 96  |
| 0 | 20  | 13  | 270 |
| 0 | 17  | 1   | 118 |
| 0 | 0   | 0   | 62  |
| 0 | 12  | 11  | 212 |
| 0 | 0   | 0   | 169 |
| 0 | 17  | 2   | 147 |
| 0 | 11  | 0   | 104 |
| 0 | 1   | 0   | 145 |
| 0 | 4   | 3   | 131 |
| 0 | 2   | 2   | 91  |

|   |      |     |     |
|---|------|-----|-----|
| 0 | 7    | 9   | 139 |
| 0 | 7    | 4   | 81  |
| 0 | 13   | 42  | 113 |
| 0 | 22   | 51  | 163 |
| 0 | 18   | 51  | 277 |
| 0 | 2    | 4   | 157 |
| 0 | 26   | 10  | 142 |
| 0 | 52   | 12  | 108 |
| 0 | 17   | 3   | 165 |
| 0 | 3    | 0   | 178 |
| 0 | 19   | 23  | 224 |
| 0 | 23   | 7   | 63  |
| 0 | 2    | 0   | 138 |
| 0 | 4    | 1   | 96  |
| 0 | 10   | 4   | 296 |
| 0 | 38   | 32  | 347 |
| 0 | 1120 | 919 | 105 |
| 0 | 11   | 4   | 109 |
| 0 | 0    | 0   | 107 |
| 0 | 1    | 7   | 85  |
| 0 | 0    | 1   | 166 |
| 0 | 38   | 19  | 559 |
| 0 | 11   | 15  | 430 |
| 0 | 3    | 1   | 92  |
| 0 | 4    | 3   | 100 |
| 0 | 44   | 4   | 184 |
| 0 | 29   | 1   | 113 |
| 0 | 12   | 0   | 107 |
| 0 | 3    | 1   | 81  |
| 0 | 9    | 4   | 229 |
| 0 | 21   | 2   | 90  |
| 0 | 113  | 64  | 358 |
| 0 | 81   | 16  | 92  |
| 0 | 8    | 5   | 180 |
| 0 | 22   | 14  | 284 |
| 0 | 4    | 2   | 110 |
| 0 | 2    | 2   | 99  |
| 0 | 160  | 84  | 95  |
| 0 | 17   | 5   | 68  |
| 0 | 10   | 8   | 85  |
| 0 | 3    | 1   | 106 |
| 0 | 107  | 28  | 433 |
| 0 | 98   | 127 | 246 |
| 0 | 11   | 2   | 126 |
| 0 | 4    | 4   | 94  |
| 0 | 449  | 188 | 790 |
| 0 | 6    | 7   | 122 |

|   |     |     |     |
|---|-----|-----|-----|
| 0 | 15  | 9   | 177 |
| 0 | 29  | 16  | 387 |
| 0 | 12  | 58  | 170 |
| 0 | 2   | 3   | 100 |
| 0 | 1   | 1   | 92  |
| 0 | 1   | 0   | 93  |
| 0 | 0   | 0   | 65  |
| 0 | 1   | 0   | 190 |
| 0 | 68  | 121 | 584 |
| 0 | 48  | 19  | 148 |
| 0 | 4   | 1   | 111 |
| 0 | 1   | 4   | 81  |
| 0 | 156 | 133 | 246 |
| 0 | 13  | 2   | 81  |
| 0 | 57  | 19  | 337 |
| 0 | 9   | 24  | 41  |
| 0 | 1   | 1   | 78  |
| 0 | 25  | 24  | 618 |
| 0 | 513 | 551 | 87  |
| 0 | 16  | 9   | 343 |
| 0 | 0   | 2   | 92  |
| 0 | 7   | 6   | 192 |
| 0 | 5   | 1   | 154 |
| 0 | 9   | 8   | 283 |
| 0 | 2   | 1   | 109 |
| 0 | 6   | 3   | 308 |
| 0 | 21  | 18  | 402 |
| 0 | 40  | 46  | 683 |
| 0 | 220 | 152 | 157 |
| 0 | 4   | 5   | 171 |
| 0 | 0   | 0   | 95  |
| 0 | 1   | 1   | 106 |
| 0 | 13  | 4   | 86  |
| 0 | 0   | 0   | 118 |
| 0 | 162 | 62  | 744 |
| 0 | 27  | 2   | 193 |
| 0 | 6   | 0   | 105 |
| 0 | 16  | 7   | 125 |
| 0 | 12  | 2   | 77  |
| 0 | 36  | 25  | 300 |
| 0 | 59  | 98  | 661 |
| 0 | 4   | 5   | 149 |
| 0 | 3   | 0   | 107 |
| 0 | 7   | 5   | 149 |
| 0 | 4   | 3   | 207 |
| 0 | 17  | 0   | 62  |
| 0 | 300 | 90  | 281 |

|   |      |      |     |
|---|------|------|-----|
| 0 | 5    | 5    | 115 |
| 0 | 0    | 0    | 104 |
| 0 | 21   | 42   | 47  |
| 0 | 5    | 5    | 139 |
| 0 | 1    | 3    | 153 |
| 0 | 29   | 17   | 675 |
| 0 | 0    | 0    | 133 |
| 0 | 7    | 2    | 106 |
| 0 | 4    | 2    | 126 |
| 0 | 163  | 100  | 273 |
| 0 | 4    | 1    | 70  |
| 0 | 48   | 44   | 327 |
| 0 | 3    | 1    | 420 |
| 0 | 16   | 8    | 540 |
| 0 | 5    | 3    | 112 |
| 0 | 82   | 38   | 702 |
| 0 | 136  | 281  | 69  |
| 0 | 7    | 0    | 128 |
| 0 | 35   | 48   | 905 |
| 0 | 6    | 5    | 201 |
| 0 | 4    | 1    | 106 |
| 0 | 10   | 5    | 212 |
| 0 | 16   | 7    | 81  |
| 0 | 10   | 4    | 86  |
| 0 | 4    | 3    | 108 |
| 0 | 179  | 67   | 140 |
| 0 | 51   | 27   | 347 |
| 0 | 23   | 4    | 113 |
| 0 | 54   | 17   | 219 |
| 0 | 1    | 0    | 97  |
| 0 | 29   | 32   | 410 |
| 0 | 5    | 2    | 90  |
| 0 | 13   | 5    | 129 |
| 0 | 1107 | 1289 | 100 |
| 0 | 51   | 69   | 82  |
| 0 | 6    | 0    | 62  |
| 0 | 2    | 1    | 92  |
| 0 | 15   | 5    | 79  |
| 0 | 9    | 5    | 152 |
| 0 | 0    | 0    | 173 |
| 0 | 6    | 5    | 137 |
| 0 | 15   | 11   | 397 |
| 0 | 12   | 4    | 171 |
| 0 | 13   | 12   | 320 |
| 0 | 115  | 91   | 585 |
| 0 | 0    | 0    | 119 |
| 0 | 32   | 33   | 306 |



|   |     |     |      |
|---|-----|-----|------|
| 0 | 3   | 3   | 127  |
| 0 | 9   | 1   | 86   |
| 0 | 9   | 3   | 152  |
| 0 | 26  | 8   | 299  |
| 0 | 0   | 0   | 107  |
| 0 | 52  | 35  | 167  |
| 0 | 13  | 9   | 247  |
| 0 | 14  | 3   | 83   |
| 0 | 24  | 0   | 66   |
| 0 | 0   | 2   | 152  |
| 0 | 20  | 26  | 468  |
| 0 | 1   | 1   | 155  |
| 0 | 0   | 2   | 75   |
| 0 | 32  | 7   | 627  |
| 0 | 5   | 9   | 102  |
| 0 | 5   | 9   | 185  |
| 0 | 20  | 11  | 818  |
| 0 | 9   | 8   | 235  |
| 0 | 2   | 5   | 134  |
| 0 | 14  | 9   | 107  |
| 0 | 2   | 8   | 146  |
| 0 | 7   | 2   | 111  |
| 0 | 150 | 100 | 330  |
| 0 | 1   | 2   | 89   |
| 0 | 12  | 4   | 109  |
| 0 | 27  | 10  | 139  |
| 0 | 100 | 21  | 356  |
| 0 | 4   | 3   | 170  |
| 0 | 23  | 36  | 255  |
| 0 | 0   | 1   | 106  |
| 0 | 78  | 62  | 743  |
| 0 | 20  | 14  | 201  |
| 0 | 0   | 0   | 81   |
| 0 | 43  | 6   | 88   |
| 0 | 17  | 21  | 1930 |
| 0 | 3   | 0   | 118  |
| 0 | 5   | 14  | 201  |
| 0 | 39  | 16  | 121  |
| 0 | 4   | 3   | 108  |
| 0 | 11  | 2   | 88   |
| 0 | 38  | 21  | 160  |
| 0 | 7   | 5   | 93   |
| 0 | 2   | 1   | 102  |
| 0 | 12  | 3   | 116  |
| 0 | 139 | 0   | 76   |
| 0 | 117 | 142 | 84   |
| 0 | 151 | 106 | 446  |

|    |      |     |      |
|----|------|-----|------|
| 0  | 2    | 7   | 156  |
| 0  | 31   | 15  | 113  |
| 0  | 22   | 27  | 373  |
| 0  | 655  | 879 | 147  |
| 0  | 1176 | 728 | 110  |
| 0  | 87   | 50  | 180  |
| 0  | 55   | 25  | 891  |
| 21 | 9    | 34  | 318  |
| 0  | 2    | 0   | 82   |
| 0  | 31   | 7   | 243  |
| 0  | 2    | 1   | 181  |
| 0  | 11   | 11  | 215  |
| 0  | 2    | 4   | 124  |
| 0  | 7    | 7   | 226  |
| 0  | 14   | 3   | 150  |
| 0  | 8    | 5   | 174  |
| 0  | 1    | 0   | 92   |
| 0  | 5    | 3   | 111  |
| 0  | 22   | 5   | 171  |
| 0  | 19   | 6   | 247  |
| 0  | 285  | 148 | 1058 |
| 0  | 16   | 8   | 125  |
| 0  | 10   | 15  | 210  |
| 0  | 8    | 3   | 290  |
| 0  | 9    | 7   | 242  |
| 0  | 9    | 4   | 184  |
| 0  | 0    | 0   | 61   |
| 0  | 64   | 33  | 370  |
| 0  | 0    | 0   | 132  |
| 0  | 8    | 4   | 133  |
| 0  | 0    | 11  | 68   |
| 0  | 0    | 0   | 103  |
| 0  | 20   | 7   | 253  |
| 0  | 4    | 2   | 131  |
| 0  | 4    | 2   | 84   |
| 0  | 10   | 6   | 78   |
| 0  | 0    | 0   | 520  |
| 0  | 0    | 2   | 83   |
| 0  | 0    | 1   | 104  |
| 0  | 8    | 2   | 136  |
| 0  | 5    | 4   | 175  |
| 0  | 1    | 0   | 77   |
| 0  | 0    | 0   | 66   |
| 0  | 14   | 11  | 304  |
| 0  | 12   | 5   | 135  |
| 0  | 414  | 593 | 163  |
| 0  | 1    | 1   | 69   |

|   |     |     |      |
|---|-----|-----|------|
| 0 | 20  | 19  | 207  |
| 0 | 2   | 5   | 226  |
| 0 | 4   | 2   | 235  |
| 0 | 10  | 6   | 279  |
| 0 | 22  | 15  | 244  |
| 0 | 2   | 1   | 102  |
| 0 | 21  | 7   | 108  |
| 0 | 7   | 4   | 71   |
| 0 | 1   | 1   | 85   |
| 0 | 42  | 27  | 611  |
| 0 | 6   | 3   | 145  |
| 0 | 40  | 6   | 104  |
| 0 | 16  | 1   | 159  |
| 0 | 20  | 8   | 134  |
| 0 | 26  | 19  | 183  |
| 0 | 0   | 0   | 113  |
| 0 | 14  | 8   | 491  |
| 0 | 29  | 12  | 318  |
| 0 | 7   | 2   | 82   |
| 0 | 49  | 24  | 187  |
| 0 | 1   | 4   | 116  |
| 0 | 15  | 14  | 207  |
| 0 | 3   | 2   | 154  |
| 0 | 9   | 1   | 111  |
| 0 | 11  | 12  | 417  |
| 0 | 3   | 2   | 77   |
| 0 | 6   | 2   | 100  |
| 0 | 4   | 5   | 117  |
| 0 | 19  | 13  | 101  |
| 0 | 1   | 0   | 76   |
| 0 | 128 | 238 | 73   |
| 0 | 16  | 2   | 156  |
| 0 | 18  | 6   | 192  |
| 0 | 8   | 17  | 241  |
| 0 | 3   | 0   | 210  |
| 0 | 33  | 27  | 268  |
| 0 | 21  | 11  | 146  |
| 0 | 2   | 2   | 681  |
| 0 | 4   | 0   | 122  |
| 0 | 9   | 1   | 206  |
| 0 | 14  | 3   | 100  |
| 0 | 4   | 5   | 124  |
| 0 | 6   | 5   | 98   |
| 0 | 13  | 4   | 241  |
| 0 | 40  | 6   | 101  |
| 0 | 46  | 62  | 1433 |
| 0 | 43  | 32  | 318  |

|   |     |     |     |
|---|-----|-----|-----|
| 0 | 5   | 4   | 194 |
| 1 | 11  | 13  | 276 |
| 0 | 87  | 48  | 231 |
| 0 | 32  | 42  | 203 |
| 0 | 17  | 11  | 569 |
| 0 | 5   | 43  | 57  |
| 0 | 52  | 31  | 641 |
| 0 | 60  | 20  | 239 |
| 0 | 33  | 62  | 788 |
| 0 | 1   | 0   | 94  |
| 0 | 13  | 14  | 83  |
| 0 | 9   | 3   | 119 |
| 0 | 6   | 6   | 147 |
| 0 | 10  | 2   | 80  |
| 0 | 80  | 110 | 661 |
| 0 | 28  | 6   | 200 |
| 0 | 150 | 105 | 116 |
| 0 | 36  | 41  | 112 |
| 0 | 18  | 4   | 136 |
| 0 | 360 | 288 | 317 |
| 0 | 80  | 80  | 110 |
| 0 | 186 | 233 | 242 |
| 0 | 102 | 110 | 104 |
| 0 | 14  | 9   | 525 |
| 0 | 0   | 1   | 80  |
| 0 | 6   | 5   | 74  |
| 0 | 8   | 3   | 157 |
| 0 | 13  | 8   | 136 |
| 0 | 8   | 6   | 145 |
| 0 | 1   | 3   | 126 |
| 0 | 3   | 1   | 184 |
| 0 | 55  | 62  | 413 |
| 0 | 2   | 1   | 93  |
| 0 | 37  | 6   | 115 |
| 0 | 15  | 4   | 195 |
| 0 | 16  | 4   | 116 |
| 0 | 0   | 0   | 79  |
| 0 | 10  | 3   | 104 |
| 0 | 14  | 5   | 128 |
| 0 | 7   | 5   | 120 |
| 0 | 0   | 0   | 111 |
| 0 | 0   | 0   | 81  |
| 0 | 0   | 3   | 127 |
| 0 | 5   | 9   | 95  |
| 0 | 5   | 6   | 130 |
| 0 | 3   | 4   | 165 |
| 0 | 27  | 2   | 70  |

|   |     |     |      |
|---|-----|-----|------|
| 0 | 6   | 15  | 226  |
| 0 | 24  | 17  | 393  |
| 0 | 15  | 4   | 127  |
| 0 | 15  | 1   | 120  |
| 0 | 2   | 0   | 93   |
| 0 | 0   | 0   | 64   |
| 0 | 12  | 27  | 214  |
| 0 | 17  | 28  | 1338 |
| 0 | 13  | 28  | 440  |
| 0 | 24  | 7   | 85   |
| 0 | 10  | 4   | 121  |
| 0 | 20  | 5   | 72   |
| 0 | 32  | 2   | 98   |
| 0 | 36  | 11  | 271  |
| 0 | 17  | 8   | 130  |
| 0 | 7   | 2   | 98   |
| 0 | 39  | 20  | 379  |
| 0 | 30  | 4   | 71   |
| 0 | 9   | 5   | 105  |
| 0 | 11  | 6   | 1093 |
| 0 | 23  | 2   | 113  |
| 0 | 14  | 4   | 71   |
| 0 | 68  | 15  | 208  |
| 0 | 10  | 8   | 199  |
| 0 | 10  | 1   | 92   |
| 0 | 17  | 0   | 89   |
| 0 | 1   | 1   | 82   |
| 0 | 6   | 3   | 103  |
| 0 | 12  | 3   | 108  |
| 0 | 2   | 1   | 121  |
| 0 | 8   | 2   | 181  |
| 0 | 2   | 8   | 112  |
| 0 | 3   | 7   | 132  |
| 0 | 17  | 5   | 213  |
| 0 | 2   | 2   | 144  |
| 0 | 4   | 12  | 146  |
| 0 | 126 | 63  | 327  |
| 0 | 14  | 20  | 514  |
| 0 | 1   | 1   | 169  |
| 0 | 4   | 3   | 115  |
| 0 | 32  | 12  | 287  |
| 0 | 201 | 111 | 274  |
| 0 | 14  | 15  | 201  |
| 0 | 39  | 43  | 417  |
| 0 | 25  | 7   | 71   |
| 0 | 2   | 0   | 70   |
| 0 | 1   | 3   | 101  |

|    |     |     |     |
|----|-----|-----|-----|
| 0  | 0   | 3   | 64  |
| 0  | 5   | 1   | 178 |
| 0  | 9   | 5   | 152 |
| 0  | 38  | 9   | 161 |
| 0  | 9   | 6   | 62  |
| 0  | 14  | 6   | 293 |
| 0  | 12  | 28  | 628 |
| 0  | 7   | 14  | 611 |
| 25 | 76  | 84  | 170 |
| 0  | 12  | 5   | 196 |
| 0  | 17  | 15  | 457 |
| 0  | 2   | 2   | 107 |
| 0  | 304 | 95  | 208 |
| 0  | 8   | 4   | 118 |
| 0  | 28  | 6   | 154 |
| 0  | 11  | 10  | 194 |
| 0  | 70  | 72  | 593 |
| 0  | 5   | 9   | 123 |
| 0  | 12  | 3   | 108 |
| 0  | 110 | 117 | 294 |
| 0  | 76  | 29  | 351 |
| 0  | 17  | 5   | 76  |
| 0  | 2   | 2   | 549 |
| 0  | 26  | 23  | 607 |
| 0  | 5   | 1   | 150 |
| 0  | 11  | 15  | 132 |
| 0  | 3   | 0   | 76  |
| 0  | 21  | 16  | 197 |
| 0  | 9   | 2   | 213 |
| 0  | 0   | 0   | 110 |
| 0  | 8   | 7   | 270 |
| 0  | 10  | 4   | 143 |
| 0  | 15  | 33  | 289 |
| 0  | 228 | 209 | 351 |
| 0  | 12  | 1   | 140 |
| 0  | 14  | 7   | 178 |
| 0  | 31  | 4   | 97  |
| 0  | 6   | 1   | 116 |
| 0  | 7   | 1   | 103 |
| 0  | 41  | 13  | 253 |
| 0  | 27  | 18  | 597 |
| 0  | 61  | 25  | 312 |
| 0  | 51  | 28  | 275 |
| 0  | 996 | 862 | 131 |
| 0  | 17  | 11  | 185 |
| 0  | 16  | 11  | 236 |
| 0  | 81  | 42  | 336 |

|   |    |     |     |
|---|----|-----|-----|
| 0 | 34 | 13  | 797 |
| 0 | 31 | 18  | 276 |
| 0 | 5  | 0   | 104 |
| 0 | 11 | 4   | 109 |
| 0 | 16 | 0   | 77  |
| 0 | 15 | 5   | 172 |
| 0 | 0  | 2   | 153 |
| 0 | 3  | 8   | 326 |
| 0 | 31 | 3   | 97  |
| 0 | 9  | 8   | 199 |
| 0 | 5  | 2   | 158 |
| 0 | 1  | 3   | 125 |
| 0 | 10 | 18  | 82  |
| 0 | 1  | 6   | 136 |
| 0 | 8  | 1   | 85  |
| 0 | 5  | 3   | 144 |
| 0 | 2  | 2   | 95  |
| 0 | 11 | 5   | 117 |
| 0 | 13 | 6   | 138 |
| 0 | 11 | 1   | 72  |
| 0 | 33 | 19  | 236 |
| 0 | 8  | 3   | 120 |
| 0 | 15 | 2   | 147 |
| 0 | 0  | 0   | 68  |
| 0 | 5  | 1   | 59  |
| 0 | 1  | 0   | 186 |
| 0 | 6  | 1   | 173 |
| 0 | 9  | 4   | 130 |
| 0 | 5  | 2   | 119 |
| 0 | 88 | 125 | 703 |
| 0 | 18 | 4   | 108 |
| 0 | 10 | 7   | 153 |
| 0 | 38 | 35  | 313 |
| 0 | 19 | 3   | 162 |
| 0 | 4  | 6   | 147 |
| 0 | 2  | 2   | 96  |
| 0 | 4  | 3   | 98  |
| 0 | 13 | 4   | 92  |
| 0 | 4  | 2   | 87  |
| 0 | 11 | 8   | 147 |
| 0 | 0  | 0   | 106 |
| 0 | 3  | 3   | 79  |
| 0 | 9  | 5   | 117 |
| 0 | 41 | 4   | 89  |
| 0 | 7  | 2   | 136 |
| 0 | 58 | 14  | 268 |
| 0 | 14 | 64  | 114 |

|   |     |    |     |
|---|-----|----|-----|
| 0 | 6   | 8  | 135 |
| 0 | 16  | 6  | 127 |
| 0 | 4   | 8  | 71  |
| 0 | 17  | 27 | 122 |
| 0 | 24  | 21 | 600 |
| 0 | 28  | 9  | 185 |
| 0 | 13  | 8  | 368 |
| 0 | 0   | 0  | 93  |
| 0 | 5   | 0  | 104 |
| 0 | 4   | 4  | 291 |
| 0 | 12  | 10 | 138 |
| 0 | 72  | 16 | 334 |
| 0 | 18  | 12 | 366 |
| 0 | 31  | 5  | 116 |
| 0 | 3   | 3  | 130 |
| 0 | 9   | 6  | 95  |
| 0 | 38  | 10 | 175 |
| 0 | 17  | 15 | 188 |
| 0 | 4   | 2  | 188 |
| 0 | 10  | 7  | 97  |
| 0 | 17  | 18 | 341 |
| 0 | 15  | 78 | 233 |
| 0 | 6   | 5  | 164 |
| 0 | 2   | 14 | 113 |
| 0 | 1   | 0  | 180 |
| 0 | 0   | 11 | 94  |
| 0 | 16  | 5  | 95  |
| 0 | 0   | 0  | 127 |
| 0 | 3   | 3  | 115 |
| 0 | 19  | 27 | 320 |
| 0 | 17  | 4  | 224 |
| 0 | 6   | 3  | 248 |
| 0 | 5   | 4  | 187 |
| 0 | 10  | 21 | 261 |
| 0 | 5   | 0  | 74  |
| 0 | 12  | 27 | 99  |
| 0 | 10  | 4  | 91  |
| 0 | 9   | 5  | 188 |
| 0 | 22  | 40 | 418 |
| 0 | 13  | 0  | 68  |
| 0 | 4   | 2  | 137 |
| 0 | 16  | 13 | 231 |
| 0 | 55  | 6  | 152 |
| 0 | 15  | 15 | 403 |
| 0 | 3   | 1  | 133 |
| 0 | 85  | 73 | 968 |
| 0 | 100 | 10 | 37  |



|   |    |    |     |
|---|----|----|-----|
| 0 | 3  | 5  | 166 |
| 0 | 25 | 26 | 431 |
| 0 | 12 | 11 | 195 |
| 0 | 16 | 5  | 188 |
| 0 | 10 | 6  | 142 |
| 0 | 16 | 11 | 100 |
| 0 | 16 | 4  | 154 |
| 0 | 9  | 5  | 384 |
| 0 | 14 | 4  | 106 |
| 0 | 13 | 2  | 110 |
| 0 | 16 | 6  | 694 |
| 0 | 0  | 0  | 85  |
| 0 | 7  | 2  | 138 |
| 0 | 7  | 5  | 71  |
| 0 | 4  | 8  | 112 |
| 0 | 1  | 1  | 89  |
| 0 | 1  | 2  | 158 |
| 0 | 10 | 7  | 564 |
| 0 | 20 | 21 | 292 |
| 0 | 32 | 28 | 376 |
| 0 | 4  | 4  | 223 |
| 0 | 13 | 10 | 269 |
| 0 | 9  | 7  | 108 |
| 0 | 2  | 2  | 116 |
| 0 | 3  | 1  | 90  |
| 0 | 1  | 2  | 110 |
| 0 | 11 | 7  | 344 |
| 0 | 6  | 2  | 383 |
| 0 | 11 | 3  | 127 |
| 0 | 20 | 10 | 358 |
| 0 | 24 | 7  | 301 |
| 0 | 14 | 22 | 193 |
| 0 | 0  | 0  | 133 |
| 0 | 17 | 8  | 87  |
| 0 | 0  | 0  | 76  |
| 0 | 26 | 3  | 82  |
| 0 | 0  | 0  | 135 |
| 0 | 21 | 7  | 79  |
| 0 | 36 | 8  | 160 |
| 0 | 3  | 6  | 174 |
| 0 | 2  | 3  | 177 |
| 0 | 3  | 2  | 131 |
| 0 | 0  | 1  | 81  |
| 0 | 3  | 5  | 152 |
| 0 | 10 | 5  | 91  |
| 0 | 14 | 8  | 242 |
| 0 | 38 | 4  | 99  |

|   |     |     |      |
|---|-----|-----|------|
| 0 | 4   | 3   | 91   |
| 0 | 63  | 3   | 203  |
| 0 | 5   | 8   | 72   |
| 0 | 0   | 0   | 128  |
| 0 | 0   | 4   | 1345 |
| 0 | 10  | 12  | 2955 |
| 0 | 6   | 9   | 64   |
| 0 | 13  | 8   | 257  |
| 0 | 21  | 16  | 485  |
| 0 | 10  | 9   | 257  |
| 0 | 4   | 1   | 124  |
| 0 | 12  | 10  | 88   |
| 0 | 17  | 20  | 252  |
| 0 | 0   | 1   | 102  |
| 0 | 23  | 10  | 93   |
| 0 | 2   | 2   | 147  |
| 0 | 1   | 1   | 117  |
| 0 | 1   | 6   | 148  |
| 0 | 5   | 7   | 68   |
| 0 | 1   | 4   | 198  |
| 0 | 4   | 0   | 61   |
| 0 | 3   | 0   | 64   |
| 0 | 1   | 6   | 91   |
| 0 | 2   | 2   | 100  |
| 0 | 7   | 15  | 64   |
| 0 | 20  | 11  | 184  |
| 0 | 10  | 6   | 125  |
| 0 | 6   | 3   | 88   |
| 0 | 31  | 129 | 47   |
| 0 | 41  | 17  | 184  |
| 0 | 17  | 11  | 192  |
| 0 | 23  | 44  | 194  |
| 0 | 18  | 15  | 186  |
| 0 | 0   | 1   | 73   |
| 0 | 1   | 1   | 112  |
| 0 | 22  | 28  | 50   |
| 0 | 5   | 3   | 117  |
| 0 | 30  | 12  | 93   |
| 0 | 47  | 22  | 180  |
| 0 | 8   | 4   | 67   |
| 0 | 20  | 4   | 75   |
| 0 | 6   | 0   | 110  |
| 0 | 20  | 14  | 358  |
| 0 | 136 | 254 | 455  |
| 0 | 16  | 3   | 157  |
| 0 | 30  | 18  | 320  |
| 0 | 12  | 2   | 85   |

|   |    |     |      |
|---|----|-----|------|
| 0 | 28 | 19  | 295  |
| 0 | 10 | 40  | 221  |
| 0 | 16 | 17  | 215  |
| 0 | 90 | 104 | 607  |
| 0 | 34 | 12  | 352  |
| 0 | 23 | 25  | 312  |
| 0 | 11 | 13  | 240  |
| 0 | 8  | 3   | 150  |
| 0 | 1  | 0   | 82   |
| 0 | 36 | 181 | 304  |
| 0 | 10 | 1   | 115  |
| 0 | 4  | 3   | 88   |
| 0 | 0  | 1   | 117  |
| 0 | 2  | 0   | 90   |
| 0 | 14 | 2   | 74   |
| 0 | 8  | 4   | 108  |
| 0 | 15 | 16  | 237  |
| 0 | 6  | 4   | 159  |
| 0 | 4  | 2   | 81   |
| 0 | 2  | 0   | 98   |
| 0 | 0  | 0   | 75   |
| 0 | 48 | 263 | 85   |
| 0 | 10 | 2   | 107  |
| 0 | 9  | 0   | 144  |
| 0 | 16 | 17  | 215  |
| 0 | 29 | 4   | 172  |
| 0 | 5  | 4   | 190  |
| 0 | 39 | 5   | 158  |
| 0 | 1  | 1   | 99   |
| 0 | 40 | 27  | 817  |
| 0 | 1  | 0   | 123  |
| 0 | 50 | 45  | 538  |
| 0 | 0  | 1   | 88   |
| 0 | 3  | 7   | 116  |
| 0 | 6  | 6   | 92   |
| 0 | 16 | 13  | 456  |
| 0 | 5  | 0   | 108  |
| 0 | 0  | 0   | 146  |
| 0 | 0  | 0   | 131  |
| 0 | 6  | 1   | 507  |
| 0 | 47 | 11  | 165  |
| 0 | 5  | 1   | 58   |
| 0 | 8  | 3   | 81   |
| 0 | 32 | 3   | 96   |
| 0 | 10 | 10  | 3492 |
| 0 | 2  | 0   | 128  |
| 0 | 0  | 0   | 76   |

|   |     |     |     |
|---|-----|-----|-----|
| 0 | 0   | 0   | 108 |
| 0 | 36  | 17  | 164 |
| 0 | 17  | 3   | 162 |
| 0 | 0   | 0   | 80  |
| 0 | 7   | 0   | 95  |
| 0 | 1   | 3   | 245 |
| 0 | 6   | 2   | 111 |
| 0 | 13  | 11  | 269 |
| 0 | 0   | 7   | 68  |
| 0 | 5   | 118 | 248 |
| 0 | 6   | 5   | 90  |
| 0 | 11  | 2   | 76  |
| 0 | 8   | 3   | 205 |
| 0 | 3   | 1   | 98  |
| 0 | 19  | 17  | 507 |
| 0 | 2   | 1   | 82  |
| 0 | 0   | 0   | 68  |
| 0 | 11  | 6   | 214 |
| 0 | 6   | 3   | 128 |
| 0 | 3   | 2   | 114 |
| 0 | 9   | 9   | 246 |
| 0 | 21  | 23  | 736 |
| 0 | 3   | 2   | 79  |
| 0 | 0   | 0   | 133 |
| 0 | 5   | 3   | 89  |
| 0 | 22  | 24  | 227 |
| 0 | 11  | 9   | 96  |
| 0 | 21  | 8   | 160 |
| 0 | 5   | 2   | 177 |
| 0 | 0   | 0   | 79  |
| 0 | 0   | 0   | 78  |
| 0 | 1   | 0   | 115 |
| 0 | 2   | 0   | 122 |
| 0 | 44  | 18  | 217 |
| 0 | 12  | 5   | 97  |
| 0 | 1   | 1   | 164 |
| 0 | 111 | 33  | 186 |
| 0 | 3   | 2   | 99  |
| 0 | 11  | 17  | 227 |
| 0 | 5   | 5   | 107 |
| 0 | 11  | 5   | 78  |
| 0 | 0   | 2   | 108 |
| 0 | 0   | 4   | 68  |
| 0 | 0   | 0   | 86  |
| 0 | 0   | 5   | 107 |
| 0 | 48  | 1   | 108 |
| 0 | 5   | 4   | 105 |

|    |    |     |     |
|----|----|-----|-----|
| 0  | 0  | 0   | 124 |
| 0  | 2  | 7   | 98  |
| 0  | 3  | 3   | 58  |
| 0  | 0  | 1   | 87  |
| 0  | 3  | 2   | 132 |
| 2  | 7  | 734 | 134 |
| 0  | 2  | 3   | 176 |
| 0  | 24 | 11  | 135 |
| 0  | 7  | 6   | 96  |
| 0  | 86 | 42  | 221 |
| 0  | 36 | 29  | 144 |
| 0  | 60 | 3   | 423 |
| 0  | 0  | 0   | 92  |
| 0  | 0  | 0   | 126 |
| 0  | 13 | 1   | 83  |
| 0  | 0  | 0   | 109 |
| 0  | 61 | 40  | 127 |
| 0  | 4  | 7   | 90  |
| 0  | 56 | 33  | 630 |
| 0  | 5  | 5   | 138 |
| 0  | 49 | 11  | 151 |
| 0  | 8  | 9   | 505 |
| 22 | 26 | 25  | 347 |
| 0  | 17 | 3   | 185 |
| 0  | 37 | 24  | 248 |
| 0  | 34 | 3   | 103 |
| 0  | 19 | 3   | 126 |
| 0  | 11 | 6   | 130 |
| 0  | 95 | 18  | 397 |
| 0  | 3  | 1   | 88  |
| 0  | 12 | 6   | 112 |
| 0  | 25 | 27  | 229 |
| 0  | 20 | 5   | 191 |
| 0  | 17 | 5   | 140 |
| 0  | 5  | 4   | 119 |
| 0  | 6  | 5   | 101 |
| 0  | 4  | 1   | 95  |
| 0  | 17 | 7   | 209 |
| 0  | 24 | 19  | 618 |
| 0  | 17 | 18  | 176 |
| 0  | 22 | 9   | 163 |
| 0  | 29 | 8   | 85  |
| 0  | 5  | 2   | 97  |
| 0  | 1  | 1   | 86  |
| 0  | 4  | 2   | 221 |
| 0  | 9  | 4   | 276 |
| 0  | 10 | 4   | 130 |

|   |     |     |     |
|---|-----|-----|-----|
| 0 | 1   | 0   | 154 |
| 0 | 26  | 0   | 64  |
| 0 | 9   | 3   | 66  |
| 0 | 22  | 2   | 280 |
| 0 | 39  | 26  | 213 |
| 0 | 1   | 2   | 99  |
| 0 | 8   | 1   | 106 |
| 0 | 5   | 3   | 150 |
| 0 | 0   | 1   | 158 |
| 0 | 5   | 1   | 115 |
| 0 | 8   | 3   | 62  |
| 0 | 19  | 12  | 250 |
| 0 | 52  | 8   | 102 |
| 0 | 4   | 4   | 138 |
| 0 | 121 | 147 | 111 |
| 0 | 0   | 0   | 58  |
| 0 | 8   | 1   | 123 |
| 0 | 153 | 17  | 555 |
| 0 | 9   | 0   | 71  |
| 0 | 3   | 0   | 98  |
| 0 | 4   | 4   | 97  |
| 0 | 21  | 0   | 88  |
| 0 | 14  | 16  | 262 |
| 0 | 13  | 14  | 99  |
| 0 | 29  | 91  | 395 |
| 0 | 0   | 1   | 216 |
| 0 | 17  | 25  | 668 |
| 0 | 1   | 1   | 85  |
| 0 | 154 | 11  | 167 |
| 0 | 8   | 9   | 165 |
| 0 | 14  | 1   | 102 |
| 0 | 4   | 5   | 127 |
| 0 | 32  | 42  | 137 |
| 0 | 15  | 6   | 109 |
| 0 | 3   | 8   | 110 |
| 0 | 0   | 0   | 100 |
| 0 | 0   | 1   | 83  |
| 0 | 96  | 12  | 343 |
| 0 | 40  | 206 | 80  |
| 0 | 8   | 62  | 137 |
| 0 | 24  | 12  | 110 |
| 0 | 0   | 2   | 121 |
| 0 | 2   | 0   | 68  |
| 0 | 8   | 20  | 289 |
| 0 | 0   | 81  | 111 |
| 0 | 6   | 0   | 60  |
| 0 | 4   | 8   | 103 |

|   |     |     |     |
|---|-----|-----|-----|
| 0 | 14  | 43  | 777 |
| 0 | 41  | 55  | 177 |
| 0 | 16  | 9   | 347 |
| 0 | 35  | 73  | 218 |
| 0 | 21  | 4   | 97  |
| 0 | 11  | 2   | 90  |
| 0 | 0   | 0   | 87  |
| 0 | 1   | 2   | 141 |
| 0 | 0   | 0   | 125 |
| 0 | 1   | 2   | 85  |
| 0 | 0   | 0   | 160 |
| 0 | 11  | 4   | 118 |
| 0 | 9   | 2   | 76  |
| 0 | 2   | 5   | 91  |
| 0 | 660 | 771 | 74  |
| 0 | 0   | 0   | 74  |
| 0 | 5   | 3   | 104 |
| 0 | 32  | 33  | 133 |
| 0 | 20  | 278 | 91  |
| 0 | 8   | 0   | 113 |
| 0 | 2   | 7   | 257 |
| 0 | 1   | 1   | 135 |
| 0 | 12  | 13  | 157 |
| 0 | 5   | 2   | 78  |
| 0 | 23  | 9   | 143 |
| 0 | 25  | 47  | 220 |
| 0 | 1   | 0   | 124 |
| 0 | 3   | 1   | 127 |
| 0 | 0   | 2   | 118 |
| 0 | 1   | 0   | 95  |
| 0 | 35  | 20  | 110 |
| 0 | 2   | 8   | 82  |
| 0 | 8   | 1   | 167 |
| 0 | 58  | 28  | 342 |
| 0 | 0   | 4   | 101 |
| 0 | 15  | 3   | 154 |
| 0 | 8   | 5   | 37  |
| 0 | 13  | 7   | 134 |
| 0 | 94  | 49  | 99  |
| 0 | 0   | 0   | 111 |
| 0 | 7   | 2   | 186 |
| 0 | 15  | 25  | 255 |
| 0 | 3   | 2   | 86  |
| 0 | 91  | 18  | 250 |
| 0 | 3   | 3   | 97  |
| 0 | 17  | 21  | 85  |
| 0 | 9   | 9   | 81  |

|   |     |     |     |
|---|-----|-----|-----|
| 0 | 11  | 38  | 570 |
| 0 | 290 | 10  | 87  |
| 0 | 7   | 3   | 213 |
| 0 | 23  | 7   | 315 |
| 0 | 36  | 10  | 196 |
| 0 | 0   | 71  | 59  |
| 0 | 9   | 2   | 97  |
| 0 | 0   | 0   | 102 |
| 0 | 7   | 10  | 314 |
| 0 | 14  | 3   | 126 |
| 0 | 7   | 1   | 136 |
| 0 | 4   | 2   | 103 |
| 0 | 8   | 16  | 90  |
| 0 | 7   | 1   | 130 |
| 0 | 79  | 205 | 178 |
| 0 | 34  | 17  | 215 |
| 0 | 2   | 1   | 106 |
| 0 | 4   | 3   | 98  |
| 0 | 12  | 3   | 225 |
| 0 | 109 | 9   | 118 |
| 0 | 4   | 7   | 214 |
| 0 | 3   | 6   | 131 |
| 0 | 9   | 7   | 142 |
| 0 | 4   | 2   | 150 |
| 0 | 3   | 3   | 159 |
| 0 | 1   | 0   | 161 |
| 0 | 18  | 7   | 91  |
| 0 | 12  | 15  | 571 |
| 0 | 25  | 3   | 228 |
| 0 | 9   | 5   | 312 |
| 0 | 1   | 2   | 69  |
| 0 | 11  | 0   | 188 |
| 0 | 23  | 19  | 272 |
| 0 | 174 | 125 | 54  |
| 0 | 0   | 2   | 100 |
| 0 | 45  | 44  | 242 |
| 0 | 13  | 5   | 201 |
| 0 | 28  | 4   | 113 |
| 0 | 4   | 3   | 112 |
| 0 | 4   | 8   | 85  |
| 0 | 8   | 6   | 159 |
| 0 | 4   | 2   | 96  |
| 0 | 0   | 0   | 69  |
| 0 | 22  | 10  | 107 |
| 0 | 120 | 95  | 93  |
| 0 | 0   | 3   | 104 |
| 0 | 10  | 0   | 79  |



|   |     |      |     |
|---|-----|------|-----|
| 0 | 1   | 0    | 81  |
| 0 | 0   | 0    | 105 |
| 0 | 23  | 2    | 174 |
| 0 | 15  | 13   | 144 |
| 0 | 3   | 1    | 82  |
| 0 | 1   | 2    | 102 |
| 0 | 8   | 3    | 152 |
| 0 | 11  | 5    | 127 |
| 0 | 0   | 9    | 136 |
| 0 | 2   | 19   | 168 |
| 0 | 1   | 2    | 91  |
| 0 | 1   | 6    | 149 |
| 0 | 3   | 5    | 132 |
| 0 | 22  | 31   | 445 |
| 0 | 19  | 17   | 181 |
| 0 | 6   | 9    | 97  |
| 0 | 6   | 3    | 103 |
| 0 | 11  | 3    | 107 |
| 0 | 19  | 15   | 166 |
| 0 | 0   | 2    | 80  |
| 0 | 1   | 3    | 94  |
| 0 | 6   | 4    | 129 |
| 0 | 0   | 7    | 102 |
| 0 | 21  | 5    | 84  |
| 0 | 72  | 1    | 204 |
| 0 | 1   | 3    | 133 |
| 0 | 2   | 2    | 119 |
| 0 | 30  | 25   | 111 |
| 0 | 6   | 5    | 107 |
| 0 | 0   | 0    | 74  |
| 0 | 24  | 0    | 178 |
| 0 | 3   | 10   | 133 |
| 0 | 3   | 13   | 98  |
| 0 | 23  | 4    | 178 |
| 0 | 23  | 8    | 280 |
| 0 | 481 | 716  | 43  |
| 0 | 277 | 632  | 104 |
| 0 | 7   | 5    | 105 |
| 0 | 61  | 36   | 288 |
| 0 | 56  | 16   | 93  |
| 0 | 12  | 5    | 96  |
| 0 | 9   | 55   | 809 |
| 3 | 469 | 1780 | 111 |
| 0 | 2   | 2    | 137 |
| 0 | 1   | 0    | 86  |
| 0 | 1   | 20   | 97  |
| 0 | 4   | 0    | 62  |

|   |    |     |     |
|---|----|-----|-----|
| 0 | 22 | 9   | 127 |
| 0 | 30 | 100 | 204 |
| 0 | 10 | 2   | 175 |
| 0 | 1  | 0   | 127 |
| 0 | 11 | 29  | 365 |
| 0 | 27 | 13  | 95  |
| 0 | 5  | 2   | 184 |
| 0 | 7  | 5   | 157 |
| 0 | 39 | 4   | 135 |
| 0 | 3  | 1   | 98  |
| 0 | 3  | 3   | 164 |
| 0 | 0  | 0   | 74  |
| 0 | 12 | 3   | 441 |
| 0 | 2  | 3   | 131 |
| 0 | 5  | 9   | 174 |
| 0 | 2  | 29  | 146 |
| 0 | 31 | 25  | 412 |
| 0 | 5  | 46  | 190 |
| 0 | 5  | 4   | 101 |
| 0 | 90 | 61  | 214 |
| 0 | 49 | 47  | 445 |
| 0 | 67 | 8   | 112 |
| 0 | 0  | 0   | 58  |
| 0 | 37 | 12  | 324 |
| 0 | 9  | 19  | 290 |
| 0 | 0  | 13  | 90  |
| 0 | 0  | 0   | 124 |
| 0 | 0  | 2   | 129 |
| 0 | 4  | 2   | 110 |
| 0 | 5  | 7   | 39  |
| 0 | 2  | 0   | 101 |
| 0 | 21 | 48  | 579 |
| 0 | 8  | 8   | 171 |
| 0 | 4  | 0   | 90  |
| 0 | 19 | 1   | 98  |
| 0 | 87 | 140 | 105 |
| 0 | 91 | 47  | 151 |
| 0 | 0  | 7   | 110 |
| 0 | 0  | 2   | 93  |
| 0 | 4  | 3   | 117 |
| 0 | 13 | 6   | 111 |
| 0 | 14 | 5   | 171 |
| 0 | 1  | 4   | 175 |
| 0 | 17 | 27  | 145 |
| 0 | 2  | 14  | 116 |
| 0 | 9  | 19  | 301 |
| 0 | 14 | 69  | 299 |

|   |     |     |      |
|---|-----|-----|------|
| 0 | 4   | 0   | 75   |
| 0 | 143 | 98  | 403  |
| 0 | 19  | 31  | 477  |
| 0 | 17  | 88  | 234  |
| 0 | 21  | 56  | 1035 |
| 0 | 4   | 3   | 108  |
| 0 | 1   | 1   | 86   |
| 0 | 3   | 0   | 87   |
| 0 | 6   | 3   | 115  |
| 0 | 8   | 3   | 92   |
| 0 | 13  | 18  | 643  |
| 0 | 16  | 6   | 60   |
| 0 | 4   | 2   | 250  |
| 0 | 52  | 2   | 75   |
| 0 | 17  | 3   | 92   |
| 0 | 56  | 48  | 501  |
| 0 | 31  | 10  | 102  |
| 0 | 10  | 74  | 420  |
| 0 | 9   | 3   | 94   |
| 0 | 7   | 8   | 157  |
| 0 | 29  | 28  | 658  |
| 0 | 1   | 2   | 75   |
| 0 | 5   | 5   | 311  |
| 0 | 7   | 2   | 104  |
| 0 | 3   | 13  | 99   |
| 0 | 19  | 12  | 276  |
| 0 | 1   | 0   | 83   |
| 0 | 295 | 593 | 44   |
| 0 | 1   | 2   | 106  |
| 0 | 1   | 0   | 177  |
| 0 | 20  | 7   | 78   |
| 0 | 20  | 5   | 93   |
| 0 | 1   | 4   | 98   |
| 0 | 0   | 0   | 108  |
| 0 | 6   | 5   | 93   |
| 0 | 18  | 10  | 127  |
| 0 | 7   | 6   | 133  |
| 0 | 15  | 6   | 97   |
| 0 | 25  | 95  | 93   |
| 0 | 67  | 50  | 273  |
| 0 | 18  | 6   | 1470 |
| 0 | 1   | 15  | 129  |
| 0 | 3   | 0   | 59   |
| 0 | 121 | 267 | 55   |
| 0 | 81  | 9   | 43   |
| 0 | 3   | 3   | 107  |
| 0 | 15  | 6   | 261  |

|   |     |     |     |
|---|-----|-----|-----|
| 0 | 2   | 7   | 90  |
| 0 | 7   | 8   | 120 |
| 0 | 19  | 2   | 98  |
| 0 | 5   | 3   | 97  |
| 0 | 14  | 3   | 205 |
| 0 | 0   | 50  | 84  |
| 0 | 22  | 3   | 93  |
| 0 | 14  | 27  | 645 |
| 0 | 5   | 3   | 157 |
| 0 | 4   | 6   | 165 |
| 0 | 9   | 5   | 162 |
| 0 | 100 | 70  | 48  |
| 0 | 20  | 0   | 84  |
| 0 | 12  | 10  | 159 |
| 0 | 1   | 2   | 106 |
| 0 | 17  | 10  | 85  |
| 0 | 51  | 82  | 124 |
| 0 | 2   | 8   | 175 |
| 0 | 118 | 52  | 438 |
| 0 | 6   | 0   | 86  |
| 0 | 30  | 3   | 81  |
| 0 | 1   | 1   | 160 |
| 0 | 17  | 14  | 211 |
| 0 | 2   | 2   | 95  |
| 0 | 0   | 1   | 126 |
| 0 | 12  | 0   | 73  |
| 0 | 3   | 10  | 122 |
| 0 | 5   | 6   | 91  |
| 0 | 8   | 12  | 426 |
| 0 | 11  | 0   | 108 |
| 0 | 7   | 17  | 51  |
| 0 | 13  | 5   | 84  |
| 0 | 1   | 1   | 78  |
| 0 | 1   | 1   | 85  |
| 0 | 283 | 312 | 62  |
| 0 | 46  | 44  | 276 |
| 0 | 12  | 2   | 135 |
| 0 | 0   | 0   | 172 |
| 0 | 22  | 24  | 70  |
| 0 | 12  | 9   | 110 |
| 0 | 6   | 4   | 161 |
| 0 | 9   | 0   | 224 |
