# Supplementary material
Source: PubMed Central journal article supplement (PMC6638658)
Supplement: MPP-13-454-s007.pdf [file MPP-13-454-s007.pdf]

**Table S3. Table showing the results of differential gene analysis using edgeR for the pair T3 - P18. It has t**

| Gene ID (PITG #)                                     | logConc  | logFC    | p.value  | table.FDR | adjust.met |
|------------------------------------------------------|----------|----------|----------|-----------|------------|
| PITG_07996   Pi alpha-tubulin (1698 nt)              | -10.922  | 12.10115 | 8.29E-08 | 0.000864  | BH         |
| PITG_07961   Pi cleavage induced tubulin alpha c     | -10.7668 | 11.13896 | 2.78E-07 | 0.001449  | BH         |
| PITG_11252   Pi heat shock protein 70 (1965 nt)      | -28.0793 | 43.87341 | 1.43E-06 | 0.004967  | BH         |
| PITG_00156   Pi beta-tubulin (1747 nt)               | -9.61369 | 8.891388 | 2.24E-06 | 0.005845  | BH         |
| PITG_03551   Pi histone H3 (411 nt)                  | -10.1976 | 8.493734 | 1.06E-05 | 0.022061  | BH         |
| PITG_07999   Pi alpha-tubulin, putative (1757 nt)    | -11.104  | 7.999833 | 1.57E-05 | 0.027355  | BH         |
| PITG_18001   Pi ubiquitin, putative (625 nt)         | -10.093  | 7.792657 | 2.40E-05 | 0.034516  | BH         |
| PITG_14696   Pi serine hydroxymethyltransferase      | -10.4398 | 7.247172 | 2.65E-05 | 0.034516  | BH         |
| PITG_16311   Pi ubiquitin family protein, putative   | -8.915   | 7.026142 | 6.51E-05 | 0.073473  | BH         |
| PITG_17237   Pi succinate dehydrogenase iron-su      | -14.1747 | 10.67757 | 7.05E-05 | 0.073473  | BH         |
| PITG_08677   Pi inositol 2-dehydrogenase, putati     | -11.0281 | 6.880704 | 8.75E-05 | 0.08294   | BH         |
| PITG_12286   Pi ADP-ribosylation factor family (9    | -9.15165 | 6.755777 | 0.000112 | 0.097608  | BH         |
| PITG_03695   Pi hypothetical protein (706 nt)        | -28.6567 | -42.7186 | 0.000129 | 0.103472  | BH         |
| PITG_11643   Pi voltage-gated potassium channe       | -11.6801 | 6.839305 | 0.000139 | 0.103778  | BH         |
| PITG_04640   Pi translation elongation factor 1-a    | -7.97405 | 5.253256 | 0.000172 | 0.119229  | BH         |
| PITG_05126   Pi splicing factor 3A subunit, putati   | -12.2195 | 8.082581 | 0.000183 | 0.119229  | BH         |
| PITG_10198   Pi adenosylhomocysteinase (1443         | -10.3183 | 6.174552 | 0.000247 | 0.13877   | BH         |
| PITG_02501   Pi conserved hypothetical protein (     | -29.2212 | -41.5897 | 0.000249 | 0.13877   | BH         |
| PITG_09555   Pi ubiquitin-ribosomal fusion prote     | -8.1327  | 5.874925 | 0.000272 | 0.13877   | BH         |
| PITG_10365   Pi conserved hypothetical protein (     | -28.8676 | -42.2969 | 0.000277 | 0.13877   | BH         |
| PITG_10364   Pi conserved hypothetical protein (     | -29.056  | -41.9201 | 0.000279 | 0.13877   | BH         |
| PITG_10373   Pi conserved hypothetical protein (     | -28.8092 | -42.4138 | 0.000294 | 0.139391  | BH         |
| PITG_12886   Pi conserved hypothetical protein (     | -29.5368 | -40.9585 | 0.000387 | 0.175409  | BH         |
| PITG_21827   Pi Rab11 family GTPase, putative (      | -11.6297 | 6.455588 | 0.000417 | 0.177278  | BH         |
| PITG_11584   Pi conserved hypothetical protein (     | -29.2986 | -41.4348 | 0.000425 | 0.177278  | BH         |
| PITG_20196   Pi hypothetical protein (555 nt)        | -29.3414 | -41.3493 | 0.000485 | 0.194379  | BH         |
| PITG_16999   Pi conserved hypothetical protein (     | -29.2268 | -41.5784 | 0.000515 | 0.195555  | BH         |
| PITG_20194   Pi protein mago nashi (912 nt)          | -11.8803 | 6.838551 | 0.000525 | 0.195555  | BH         |
| PITG_10378   Pi conserved hypothetical protein (     | -28.8038 | -42.4244 | 0.000564 | 0.20266   | BH         |
| PITG_12487   Pi conserved hypothetical protein (     | -10.8546 | -5.51475 | 0.000628 | 0.21821   | BH         |
| PITG_00833   Pi conserved hypothetical protein (     | -29.3351 | -41.3619 | 0.000725 | 0.235326  | BH         |
| PITG_06799   Pi ribosomal protein L27 (785 nt)       | -8.31018 | 5.214616 | 0.000744 | 0.235326  | BH         |
| PITG_13301   Pi H - or Na -translocating F-type, v   | -10.7864 | 6.319425 | 0.000753 | 0.235326  | BH         |
| PITG_03639   Pi cellulose binding elicitor lectin (C | -29.6959 | -40.6404 | 0.00078  | 0.235326  | BH         |
| PITG_10362   Pi conserved hypothetical protein (     | -28.247  | -43.5381 | 0.00079  | 0.235326  | BH         |
| PITG_12486   Pi conserved hypothetical protein (     | -11.7287 | -5.62278 | 0.000878 | 0.25443   | BH         |
| PITG_18446   Pi 26S protease regulatory subunit      | -11.5552 | 6.047155 | 0.000927 | 0.257864  | BH         |
| PITG_00564   Pi conserved hypothetical protein (     | -29.6572 | -40.7177 | 0.000986 | 0.257864  | BH         |
| PITG_15117   Pi actin-like protein (1384 nt)         | -8.07962 | 4.926512 | 0.001008 | 0.257864  | BH         |
| PITG_03719   Pi voltage-gated potassium channe       | -10.2367 | 4.649321 | 0.001013 | 0.257864  | BH         |
| PITG_14594   Pi ubiquitin-conjugating enzyme E2      | -29.4348 | -41.1625 | 0.001044 | 0.257864  | BH         |
| PITG_04802   Pi conserved hypothetical protein (     | -29.6008 | -40.8305 | 0.001066 | 0.257864  | BH         |
| PITG_13597   Pi conserved hypothetical protein (     | -29.7586 | -40.5148 | 0.001066 | 0.257864  | BH         |
| PITG_18354   Pi succinate dehydrogenase flavop       | -11.3192 | 6.079695 | 0.001088 | 0.257864  | BH         |
| PITG_12745   Pi 40S ribosomal protein S17, puta      | -8.41275 | 5.343796 | 0.001199 | 0.271202  | BH         |

|            |                                       |          |          |          |          |    |
|------------|---------------------------------------|----------|----------|----------|----------|----|
| PITG_06595 | Pi ATP synthase subunit beta, puta    | -8.93547 | 4.796273 | 0.001222 | 0.271202 | BH |
| PITG_06514 | Pi calmodulin (649 nt)                | -8.271   | 5.01711  | 0.001222 | 0.271202 | BH |
| PITG_08311 | Pi conserved hypothetical protein (   | -29.6932 | -40.6457 | 0.001255 | 0.272706 | BH |
| PITG_10986 | Pi nuclear transcription factor Y sul | -12.4763 | 6.056461 | 0.00133  | 0.283059 | BH |
| PITG_11975 | Pi conserved hypothetical protein (   | -29.7978 | -40.4365 | 0.001359 | 0.283461 | BH |
| PITG_11610 | Pi conserved hypothetical protein (   | -29.8307 | -40.3707 | 0.00139  | 0.284166 | BH |
| PITG_18497 | Pi Crinkler (CRN) family protein (13  | -29.9758 | -40.0804 | 0.001504 | 0.298212 | BH |
| PITG_19119 | Pi conserved hypothetical protein (   | -29.8261 | -40.38   | 0.001519 | 0.298212 | BH |
| PITG_17516 | Pi S-adenosylmethionine synthetas     | -8.393   | 5.339242 | 0.001544 | 0.298212 | BH |
| PITG_10375 | Pi conserved hypothetical protein (   | -29.5072 | -41.0176 | 0.001795 | 0.329775 | BH |
| PITG_19864 | Pi conserved hypothetical protein (   | -30.0848 | -39.8626 | 0.001804 | 0.329775 | BH |
| PITG_07582 | Pi conserved hypothetical protein (   | -13.9203 | 8.794388 | 0.001824 | 0.329775 | BH |
| PITG_11572 | Pi conserved hypothetical protein (   | -29.4571 | -41.1179 | 0.001835 | 0.329775 | BH |
| PITG_06591 | Pi berberine-like protein (1700 nt)   | -29.742  | 40.54816 | 0.001866 | 0.329775 | BH |
| PITG_13655 | Pi glucanase inhibitor protein, puta  | -13.9652 | 8.707521 | 0.001947 | 0.331345 | BH |
| PITG_10374 | Pi conserved hypothetical protein (   | -29.3854 | -41.2613 | 0.001953 | 0.331345 | BH |
| PITG_06715 | Pi serine/threonine-protein phosph    | -13.1655 | 5.745937 | 0.001972 | 0.331345 | BH |
| PITG_12619 | Pi Crinkler (CRN) family protein (17  | -30.0407 | -39.9508 | 0.002002 | 0.331345 | BH |
| PITG_19399 | Pi methylenetetrahydrofolate dehy     | -29.4944 | -41.0434 | 0.002247 | 0.361642 | BH |
| PITG_22104 | Pi conserved hypothetical protein (   | -14.0821 | 8.481952 | 0.002254 | 0.361642 | BH |
| PITG_17400 | Pi conserved hypothetical protein (   | -29.8234 | -40.3852 | 0.002289 | 0.361661 | BH |
| PITG_16074 | Pi heat shock protein 101 (2766 nt    | -29.7697 | -40.4928 | 0.002334 | 0.363172 | BH |
| PITG_00839 | Pi conserved hypothetical protein (   | -29.607  | -40.8182 | 0.002415 | 0.366111 | BH |
| PITG_19978 | Pi conserved hypothetical protein (   | -12.4827 | 7.156511 | 0.002423 | 0.366111 | BH |
| PITG_00552 | Pi memo-like protein (1522 nt)        | -29.9314 | -40.1693 | 0.002565 | 0.382074 | BH |
| PITG_09556 | Pi guanine nucleotide-binding prot    | -8.66858 | 4.147958 | 0.002695 | 0.386681 | BH |
| PITG_10372 | Pi conserved hypothetical protein (   | -29.1156 | -41.801  | 0.002706 | 0.386681 | BH |
| PITG_03096 | Pi hypothetical protein (1264 nt)     | -30.1766 | -39.679  | 0.00279  | 0.386681 | BH |
| PITG_22850 | Pi Crinkler (CRN) family protein, ps  | -30.1719 | -39.6884 | 0.00279  | 0.386681 | BH |
| PITG_00251 | Pi conserved hypothetical protein (   | -30.1354 | -39.7613 | 0.002804 | 0.386681 | BH |
| PITG_23165 | Pi Crinkler (CRN) family protein (12  | -30.208  | -39.6161 | 0.002826 | 0.386681 | BH |
| PITG_10693 | Pi conserved hypothetical protein (   | -30.1143 | -39.8035 | 0.002893 | 0.386681 | BH |
| PITG_04378 | Pi elicitin-like protein (723 nt)     | -30.2137 | -39.6048 | 0.002922 | 0.386681 | BH |
| PITG_06722 | Pi translation elongation factor 1-a  | -7.63842 | 3.466725 | 0.00293  | 0.386681 | BH |
| PITG_14354 | Pi conserved hypothetical protein (   | -29.6636 | -40.705  | 0.00308  | 0.397495 | BH |
| PITG_10269 | Pi conserved hypothetical protein (   | -29.7795 | -40.4731 | 0.003088 | 0.397495 | BH |
| PITG_19098 | Pi conserved hypothetical protein (   | -30.2183 | -39.5955 | 0.003152 | 0.397865 | BH |
| PITG_22157 | Pi Major Facilitator Superfamily (M   | -12.512  | 7.097303 | 0.003167 | 0.397865 | BH |
| PITG_09218 | Pi secreted RxLR effector peptide,    | -14.3412 | 7.983441 | 0.003234 | 0.398143 | BH |
| PITG_17531 | Pi crinkler (CRN) family protein, pu  | -30.2312 | -39.5698 | 0.003246 | 0.398143 | BH |
| PITG_13001 | Pi glucose transporter, putative (14  | -30.1586 | 39.71487 | 0.003387 | 0.410623 | BH |
| PITG_05249 | Pi conserved hypothetical protein (   | -30.2652 | -39.5017 | 0.003594 | 0.426068 | BH |
| PITG_00011 | Pi conserved hypothetical protein (   | -29.8795 | -40.2731 | 0.003596 | 0.426068 | BH |
| PITG_16959 | Pi transglutaminase elicitor M81D     | -30.2094 | 39.61322 | 0.003637 | 0.426068 | BH |
| PITG_02510 | Pi conserved hypothetical protein (   | -30.2748 | -39.4825 | 0.003725 | 0.429862 | BH |
| PITG_16963 | Pi transglutaminase elicitor M81C     | -14.1165 | 7.209551 | 0.003752 | 0.429862 | BH |
| PITG_18845 | Pi hypothetical protein (799 nt)      | -29.822  | -40.3881 | 0.003823 | 0.433329 | BH |

|            |                                       |          |          |          |          |    |
|------------|---------------------------------------|----------|----------|----------|----------|----|
| PITG_16921 | Pi conserved hypothetical protein (   | -10.8586 | -4.44967 | 0.003867 | 0.433554 | BH |
| PITG_12139 | Pi conserved hypothetical protein (   | -12.0924 | 8.103386 | 0.003939 | 0.436976 | BH |
| PITG_18503 | Pi Crinkler (CRN) family protein (13  | -12.1401 | -4.80492 | 0.004096 | 0.449592 | BH |
| PITG_10498 | Pi conserved hypothetical protein (   | -29.9929 | -40.0462 | 0.004613 | 0.487053 | BH |
| PITG_07833 | Pi similar to sea slug pheromone (7   | -30.3563 | 39.31947 | 0.004668 | 0.487053 | BH |
| PITG_18923 | Pi putative GPI-anchored serine-ric   | -30.2051 | -39.6219 | 0.004709 | 0.487053 | BH |
| PITG_22475 | Pi conserved hypothetical protein (   | -12.9079 | 6.653334 | 0.004819 | 0.487053 | BH |
| PITG_10951 | Pi succinate dehydrogenase iron-su    | -10.3266 | 4.500196 | 0.004827 | 0.487053 | BH |
| PITG_14632 | Pi conserved hypothetical protein (   | -11.4676 | -4.28494 | 0.004852 | 0.487053 | BH |
| PITG_10153 | Pi conserved hypothetical protein (   | -30.0232 | -39.9857 | 0.004876 | 0.487053 | BH |
| PITG_14312 | Pi methylenetetrahydrofolate dehy     | -29.8836 | -40.2649 | 0.004881 | 0.487053 | BH |
| PITG_11248 | Pi hypothetical protein (786 nt)      | -29.869  | -40.294  | 0.004882 | 0.487053 | BH |
| PITG_10146 | Pi 40S ribosomal protein S2 (1222     | -8.89094 | 4.001065 | 0.004905 | 0.487053 | BH |
| PITG_19568 | Pi crinkler (CRN) family protein, pse | -29.85   | -40.3322 | 0.00496  | 0.48787  | BH |
| PITG_11484 | Pi secreted RxLR effector peptide,    | -11.9093 | 6.840669 | 0.005199 | 0.504978 | BH |
| PITG_12650 | Pi Crinkler (CRN) family protein, ps  | -12.1901 | -4.70597 | 0.00523  | 0.504978 | BH |
| PITG_18052 | Pi 60S ribosomal protein L3 (1310     | -8.87691 | 3.700372 | 0.005375 | 0.509976 | BH |
| PITG_22669 | Pi NPP1-like protein, pseudogene (    | -14.9256 | 8.036661 | 0.00538  | 0.509976 | BH |
| PITG_13660 | Pi conserved hypothetical protein (   | -29.988  | -40.0561 | 0.00548  | 0.514755 | BH |
| PITG_06237 | Pi 60S ribosomal protein L8, putati   | -8.44504 | 3.584396 | 0.005643 | 0.519365 | BH |
| PITG_17668 | Pi conserved hypothetical protein (   | -30.2262 | -39.5796 | 0.005664 | 0.519365 | BH |
| PITG_22016 | Pi conserved hypothetical protein (   | -30.0587 | -39.9147 | 0.005771 | 0.519365 | BH |
| PITG_15660 | Pi mitochondrial carnitine/acylcarr   | -30.1692 | -39.6938 | 0.005782 | 0.519365 | BH |
| PITG_01086 | Pi conserved hypothetical protein (   | -11.8469 | -5.45065 | 0.005799 | 0.519365 | BH |
| PITG_16069 | Pi heat shock protein 101 (2853 nt    | -30.0768 | -39.8785 | 0.005828 | 0.519365 | BH |
| PITG_12098 | Pi Crinkler (CRN) family protein, ps  | -12.2686 | -4.54311 | 0.005904 | 0.521733 | BH |
| PITG_01618 | Pi conserved hypothetical protein (   | -11.7829 | 5.278783 | 0.005973 | 0.522179 | BH |
| PITG_20815 | Pi ATP-binding Cassette (ABC) Sup     | -30.1608 | -39.7105 | 0.006031 | 0.522179 | BH |
| PITG_03441 | Pi malate synthase (1822 nt)          | -30.395  | -39.2421 | 0.006111 | 0.522179 | BH |
| PITG_12693 | Pi conserved hypothetical protein (   | -30.1021 | -39.8278 | 0.006162 | 0.522179 | BH |
| PITG_16605 | Pi Crinkler (CRN) family protein, ps  | -11.0392 | -4.08845 | 0.006215 | 0.522179 | BH |
| PITG_13671 | Pi glucanase inhibitor protein 3 (83  | -30.1918 | -39.6486 | 0.006217 | 0.522179 | BH |
| PITG_13002 | Pi Major Facilitator Superfamily (M   | -13.1011 | 6.298473 | 0.00626  | 0.522179 | BH |
| PITG_22959 | Pi protein kinase, putative (1777 ni  | -30.2532 | -39.5257 | 0.006552 | 0.542181 | BH |
| PITG_14267 | Pi Crinkler (CRN) family protein, ps  | -30.2945 | -39.4432 | 0.006646 | 0.545691 | BH |
| PITG_10636 | Pi conserved hypothetical protein (   | -12.6692 | 6.617321 | 0.006918 | 0.557084 | BH |
| PITG_12686 | Pi conserved hypothetical protein (   | -30.4221 | -39.1879 | 0.006928 | 0.557084 | BH |
| PITG_06118 | Pi V-type proton ATPase subunit B,    | -11.0331 | 4.431055 | 0.006946 | 0.557084 | BH |
| PITG_10637 | Pi conserved hypothetical protein (   | -13.0902 | 5.950436 | 0.007058 | 0.561795 | BH |
| PITG_23087 | Pi Crinkler (CRN) family protein (12  | -30.2319 | -39.5682 | 0.007354 | 0.573498 | BH |
| PITG_23088 | Pi Crinkler (CRN) family protein (13  | -30.4197 | -39.1927 | 0.007373 | 0.573498 | BH |
| PITG_06212 | Pi conserved hypothetical protein (   | -15.3662 | 8.229179 | 0.007387 | 0.573498 | BH |
| PITG_19382 | Pi conserved hypothetical protein (   | -30.5468 | -38.9386 | 0.007576 | 0.573498 | BH |
| PITG_13381 | Pi conserved hypothetical protein (   | -30.3817 | -39.2686 | 0.007597 | 0.573498 | BH |
| PITG_23289 | Pi crinkler (CRN) domain, pseudoge    | -30.451  | -39.1301 | 0.007655 | 0.573498 | BH |
| PITG_12082 | Pi hypothetical protein (540 nt)      | -30.4835 | -39.0651 | 0.007679 | 0.573498 | BH |
| PITG_17275 | Pi conserved hypothetical protein (   | -30.5894 | -38.8532 | 0.00782  | 0.573498 | BH |

|            |                                       |          |          |          |          |    |
|------------|---------------------------------------|----------|----------|----------|----------|----|
| PITG_00213 | Pi hypothetical protein (1007 nt)     | -30.5154 | -39.0014 | 0.007887 | 0.573498 | BH |
| PITG_07501 | Pi Crinkler (CRN) family protein (74  | -30.4269 | -39.1784 | 0.008006 | 0.573498 | BH |
| PITG_09998 | Pi conserved hypothetical protein (   | -30.2966 | -39.4389 | 0.008011 | 0.573498 | BH |
| PITG_00761 | Pi protein kinase, putative (1140 nt) | -30.4255 | -39.1812 | 0.008083 | 0.573498 | BH |
| PITG_15615 | Pi short/branched chain specific ac   | -30.4551 | -39.1219 | 0.008136 | 0.573498 | BH |
| PITG_19017 | Pi 14-3-3 protein epsilon (1094 nt)   | -8.5604  | 3.690729 | 0.008192 | 0.573498 | BH |
| PITG_05185 | Pi conserved hypothetical protein (   | -30.6199 | -38.7924 | 0.008207 | 0.573498 | BH |
| PITG_09649 | Pi conserved hypothetical protein (   | -30.626  | -38.78   | 0.008207 | 0.573498 | BH |
| PITG_04078 | Pi Rab5 family GTPase, putative (74   | -30.6246 | -38.7829 | 0.008207 | 0.573498 | BH |
| PITG_08185 | Pi conserved hypothetical protein (   | -30.4686 | -39.0949 | 0.008253 | 0.573498 | BH |
| PITG_19737 | Pi 3-mercaptopyruvate sulfurtransf    | -30.2615 | -39.509  | 0.008274 | 0.573498 | BH |
| PITG_07476 | Pi conserved hypothetical protein (   | -30.314  | -39.404  | 0.008305 | 0.573498 | BH |
| PITG_05675 | Pi histone, putative (441 nt)         | -11.0021 | 4.969644 | 0.008513 | 0.57988  | BH |
| PITG_18312 | Pi conserved hypothetical protein (   | -30.4714 | -39.0894 | 0.008547 | 0.57988  | BH |
| PITG_00834 | Pi conserved hypothetical protein (   | -29.7641 | -40.5039 | 0.008732 | 0.57988  | BH |
| PITG_08611 | Pi cell 5A endo-1,4-beta-glucanase,   | -30.5241 | -38.9839 | 0.008741 | 0.57988  | BH |
| PITG_15567 | Pi conserved hypothetical protein (   | -30.4711 | -39.0899 | 0.008761 | 0.57988  | BH |
| PITG_10765 | Pi beta-glucan synthesis-associated   | -30.5719 | -38.8884 | 0.008855 | 0.57988  | BH |
| PITG_04690 | Pi pyridine nucleotide-disulphide o   | -12.2584 | -4.59197 | 0.008872 | 0.57988  | BH |
| PITG_11898 | Pi conserved hypothetical protein (   | -30.6858 | 38.6605  | 0.00889  | 0.57988  | BH |
| PITG_14571 | Pi conserved hypothetical protein (   | -30.4551 | -39.1219 | 0.008898 | 0.57988  | BH |
| PITG_14601 | Pi hypothetical protein (369 nt)      | -30.3704 | -39.2913 | 0.009054 | 0.586343 | BH |
| PITG_17947 | Pi chitinase, putative (705 nt)       | -30.3274 | -39.3772 | 0.009112 | 0.586493 | BH |
| PITG_12854 | Pi Mitochondrial Carrier (MC) Fami    | -30.6517 | -38.7286 | 0.009174 | 0.586872 | BH |
| PITG_07960 | Pi alpha-tubulin, putative (1576 nt)  | -10.7404 | 3.622283 | 0.009261 | 0.588817 | BH |
| PITG_06021 | Pi glucokinase, putative (1041 nt)    | -30.3089 | -39.4144 | 0.009548 | 0.599868 | BH |
| PITG_22363 | Pi major Facilitator Superfamily (M   | -30.741  | 38.55012 | 0.009842 | 0.599868 | BH |
| PITG_05212 | Pi Crinkler (CRN) family protein, mi  | -11.0548 | -4.08649 | 0.009884 | 0.599868 | BH |
| PITG_11011 | Pi conserved hypothetical protein (   | -30.4535 | -39.1252 | 0.009969 | 0.599868 | BH |
| PITG_17401 | Pi conserved hypothetical protein (   | -30.4897 | -39.0528 | 0.009978 | 0.599868 | BH |
| PITG_10352 | Pi sporangia induced hypothetical     | -30.6464 | -38.7393 | 0.009979 | 0.599868 | BH |
| PITG_15055 | Pi conserved hypothetical protein (   | -30.4711 | -39.0898 | 0.009992 | 0.599868 | BH |
| PITG_06204 | Pi conserved hypothetical protein (   | -30.5456 | -38.9409 | 0.010114 | 0.599868 | BH |
| PITG_03611 | Pi histone H2B (594 nt)               | -30.6459 | -38.7404 | 0.010258 | 0.599868 | BH |
| PITG_08236 | Pi conserved hypothetical protein (   | -30.6651 | -38.7019 | 0.010267 | 0.599868 | BH |
| PITG_18317 | Pi phospholipid hydroperoxide glut    | -30.6268 | -38.7785 | 0.010269 | 0.599868 | BH |
| PITG_11244 | Pi heat shock 70 kDa protein (2279    | -9.07248 | 3.533056 | 0.010272 | 0.599868 | BH |
| PITG_03080 | Pi hypothetical protein (999 nt)      | -30.6778 | -38.6765 | 0.010295 | 0.599868 | BH |
| PITG_05697 | Pi Crinkler (CRN) family protein, ps  | -30.6739 | -38.6842 | 0.010295 | 0.599868 | BH |
| PITG_00212 | Pi conserved hypothetical protein (   | -30.6118 | -38.8086 | 0.010298 | 0.599868 | BH |
| PITG_09890 | Pi alternative oxidase, mitochondri   | -30.0746 | -39.8828 | 0.010523 | 0.60466  | BH |
| PITG_13545 | Pi conserved hypothetical protein (   | -30.0192 | -39.9936 | 0.010543 | 0.60466  | BH |
| PITG_06189 | Pi conserved hypothetical protein (   | -30.4867 | -39.0586 | 0.010554 | 0.60466  | BH |
| PITG_05616 | Pi UDP-glucose 4-epimerase, putat     | -30.5466 | -38.9389 | 0.010691 | 0.60916  | BH |
| PITG_14581 | Pi conserved hypothetical protein (   | -30.5319 | -38.9682 | 0.011019 | 0.613393 | BH |
| PITG_05391 | Pi histone H1, putative (1061 nt)     | -30.3752 | -39.2818 | 0.011063 | 0.613393 | BH |
| PITG_07143 | Pi catalase-peroxidase, putative (2:  | -30.8014 | 38.42939 | 0.011089 | 0.613393 | BH |

|            |                                      |          |          |          |          |    |
|------------|--------------------------------------|----------|----------|----------|----------|----|
| PITG_22758 | Pi arabinofuranosidase (1062 nt)     | -30.8014 | 38.42939 | 0.011089 | 0.613393 | BH |
| PITG_03881 | Pi histone H2A (420 nt)              | -30.6573 | -38.7175 | 0.01114  | 0.613393 | BH |
| PITG_21737 | Pi hypothetical protein (462 nt)     | -9.26495 | 5.858667 | 0.011166 | 0.613393 | BH |
| PITG_05676 | Pi histone H4 (468 nt)               | -9.13431 | 4.202047 | 0.011285 | 0.613393 | BH |
| PITG_11858 | Pi conserved hypothetical protein (  | -30.5914 | -38.8493 | 0.011297 | 0.613393 | BH |
| PITG_22062 | Pi conserved hypothetical protein (  | -30.4738 | -39.0845 | 0.01135  | 0.613393 | BH |
| PITG_07424 | Pi cytochrome P450, putative (169    | -30.2198 | -39.5925 | 0.01144  | 0.613393 | BH |
| PITG_15483 | Pi putative GPI-anchored serine-th   | -30.5478 | -38.9365 | 0.011489 | 0.613393 | BH |
| PITG_20168 | Pi Crinkler (CRN) family protein, ps | -11.6806 | -3.86469 | 0.011537 | 0.613393 | BH |
| PITG_09742 | Pi hypothetical protein (2594 nt)    | -30.5351 | -38.9619 | 0.011559 | 0.613393 | BH |
| PITG_21963 | Pi Crinkler (CRN) family protein, ps | -11.7058 | -3.8087  | 0.011589 | 0.613393 | BH |
| PITG_19318 | Pi Crinkler (CRN) family protein (26 | -12.4907 | -4.10488 | 0.011695 | 0.615902 | BH |
| PITG_09216 | Pi secreted RxLR effector peptide,   | -13.7576 | 6.249749 | 0.011863 | 0.620838 | BH |
| PITG_08377 | Pi conserved hypothetical protein (  | -30.581  | -38.87   | 0.011922 | 0.620838 | BH |
| PITG_13396 | Pi conserved hypothetical protein (  | -12.3711 | -4.35133 | 0.012145 | 0.620838 | BH |
| PITG_00375 | Pi haustorium-specific membrane      | -15.0535 | 6.672073 | 0.012185 | 0.620838 | BH |
| PITG_04687 | Pi hypothetical protein (1162 nt)    | -15.0403 | 6.645641 | 0.012185 | 0.620838 | BH |
| PITG_09768 | Pi dentin sialophosphoprotein-like   | -30.5626 | -38.9069 | 0.01241  | 0.620838 | BH |
| PITG_10542 | Pi conserved hypothetical protein (  | -15.6048 | 7.772146 | 0.012468 | 0.620838 | BH |
| PITG_22677 | Pi PcF and SCR74-like cys-rich secre | -15.6048 | 7.772146 | 0.012468 | 0.620838 | BH |
| PITG_05115 | Pi HECT E3 ubiquitin ligase, putativ | -30.6852 | -38.6618 | 0.012473 | 0.620838 | BH |
| PITG_21658 | Pi conserved hypothetical protein (  | -30.698  | -38.6361 | 0.012473 | 0.620838 | BH |
| PITG_10193 | Pi ubiquitin, putative (471 nt)      | -6.6747  | 3.577241 | 0.012576 | 0.620838 | BH |
| PITG_10459 | Pi conserved hypothetical protein (  | -30.7186 | -38.5948 | 0.012659 | 0.620838 | BH |
| PITG_17740 | Pi conserved hypothetical protein (  | -30.7324 | -38.5673 | 0.012659 | 0.620838 | BH |
| PITG_19889 | Pi Crinkler (CRN) family protein, ps | -30.6431 | -38.7458 | 0.012714 | 0.620838 | BH |
| PITG_12336 | Pi Crinkler (CRN) family protein, ps | -30.5309 | -38.9704 | 0.012721 | 0.620838 | BH |
| PITG_06087 | Pi secreted RxLR effector peptide,   | -30.868  | 38.29608 | 0.012757 | 0.620838 | BH |
| PITG_12695 | Pi conserved hypothetical protein (  | -30.6875 | -38.6571 | 0.012801 | 0.620838 | BH |
| PITG_11996 | Pi conserved hypothetical protein (  | -30.711  | -38.6102 | 0.012882 | 0.621841 | BH |
| PITG_20619 | Pi pirin (1082 nt)                   | -30.1643 | -39.7035 | 0.013106 | 0.629767 | BH |
| PITG_06244 | Pi hypothetical protein (2175 nt)    | -30.6781 | -38.676  | 0.013424 | 0.64206  | BH |
| PITG_17945 | Pi chitinase, putative (822 nt)      | -30.5254 | -38.9814 | 0.01358  | 0.646546 | BH |
| PITG_13382 | Pi conserved hypothetical protein (  | -30.7333 | -38.5656 | 0.013816 | 0.652399 | BH |
| PITG_03020 | Pi cysteine protease family C01A, p  | -12.554  | -3.97579 | 0.013828 | 0.652399 | BH |
| PITG_13807 | Pi hypothetical protein (645 nt)     | -30.6568 | -38.7185 | 0.01446  | 0.675208 | BH |
| PITG_04714 | Pi conserved hypothetical protein (  | -30.6794 | -38.6734 | 0.014488 | 0.675208 | BH |
| PITG_21117 | Pi malate synthase, glyoxysomal, p   | -30.6861 | -38.66   | 0.014543 | 0.675208 | BH |
| PITG_00987 | Pi conserved hypothetical protein (  | -11.0878 | -4.04335 | 0.01457  | 0.675208 | BH |
| PITG_19578 | Pi Crinkler (CRN) family protein, ps | -11.7671 | -3.68788 | 0.014872 | 0.686144 | BH |
| PITG_08787 | Pi crinkler (CRN) family protein, ps | -11.779  | -3.66228 | 0.01508  | 0.692689 | BH |
| PITG_01208 | Pi trifunctional enzyme subunit bet  | -30.645  | -38.7421 | 0.015203 | 0.69397  | BH |
| PITG_08103 | Pi hypothetical protein (333 nt)     | -30.2451 | -39.5418 | 0.015241 | 0.69397  | BH |
| PITG_10470 | Pi conserved hypothetical protein (  | -12.5061 | -4.0839  | 0.015522 | 0.701798 | BH |
| PITG_00297 | Pi conserved hypothetical protein (  | -30.6243 | -38.7836 | 0.015613 | 0.701798 | BH |
| PITG_03882 | Pi histone H2A type 1 (529 nt)       | -30.684  | -38.6642 | 0.015669 | 0.701798 | BH |
| PITG_12920 | Pi hypothetical protein (1569 nt)    | -30.7677 | -38.4966 | 0.015682 | 0.701798 | BH |

|            |                                      |          |          |          |          |    |
|------------|--------------------------------------|----------|----------|----------|----------|----|
| PITG_11323 | Pi conserved hypothetical protein (  | -30.7739 | -38.4843 | 0.016067 | 0.714435 | BH |
| PITG_06142 | Pi copine-like protein (2275 nt)     | -30.5634 | -38.9053 | 0.016102 | 0.714435 | BH |
| PITG_08265 | Pi conserved hypothetical protein (  | -30.8009 | -38.4304 | 0.016344 | 0.715675 | BH |
| PITG_11891 | Pi conserved hypothetical protein (  | -12.834  | 5.425173 | 0.016375 | 0.715675 | BH |
| PITG_17069 | Pi coatomer protein complex, puta    | -12.3388 | 4.096908 | 0.01639  | 0.715675 | BH |
| PITG_15656 | Pi conserved hypothetical protein (  | -30.6252 | -38.7817 | 0.016404 | 0.715675 | BH |
| PITG_05577 | Pi glutathione S-transferase, putati | -9.48248 | -3.94288 | 0.016583 | 0.720447 | BH |
| PITG_09354 | Pi aquaporin, putative (866 nt)      | -30.717  | -38.5982 | 0.017483 | 0.756425 | BH |
| PITG_09772 | Pi conserved hypothetical protein (  | -12.6381 | -3.80531 | 0.018022 | 0.773818 | BH |
| PITG_03742 | Pi conserved hypothetical protein (  | -30.6533 | -38.7255 | 0.018034 | 0.773818 | BH |
| PITG_22894 | Pi secreted RxLR effector peptide,   | -14.8229 | 5.580667 | 0.01844  | 0.780263 | BH |
| PITG_09539 | Pi hypothetical protein (665 nt)     | -30.6997 | -38.6328 | 0.018638 | 0.780263 | BH |
| PITG_03936 | Pi ras protein let-60 (1206 nt)      | -30.8369 | -38.3583 | 0.018716 | 0.780263 | BH |
| PITG_04777 | Pi conserved hypothetical protein (  | -30.8208 | -38.3906 | 0.018716 | 0.780263 | BH |
| PITG_05251 | Pi protein tyrosine phosphatase ty   | -30.8366 | -38.3589 | 0.018716 | 0.780263 | BH |
| PITG_11205 | Pi Rab2 family GTPase, putative (90  | -30.8347 | -38.3628 | 0.018716 | 0.780263 | BH |
| PITG_11882 | Pi conserved hypothetical protein (  | -30.8325 | -38.3672 | 0.018716 | 0.780263 | BH |
| PITG_19818 | Pi conserved hypothetical protein (  | -15.0172 | 5.966758 | 0.018805 | 0.780263 | BH |
| PITG_19160 | Pi conserved hypothetical protein (  | -11.8357 | 3.87257  | 0.018894 | 0.780263 | BH |
| PITG_08879 | Pi hypothetical protein (510 nt)     | -30.6711 | -38.69   | 0.018932 | 0.780263 | BH |
| PITG_23281 | Pi Crinkler (CRN) family protein, ps | -30.8311 | -38.3698 | 0.01915  | 0.782348 | BH |
| PITG_13520 | Pi conserved hypothetical protein (  | -15.9507 | 7.831175 | 0.019176 | 0.782348 | BH |
| PITG_08496 | Pi conserved hypothetical protein (  | -30.7243 | -38.5834 | 0.019208 | 0.782348 | BH |
| PITG_17596 | Pi conserved hypothetical protein (  | -30.5226 | -38.987  | 0.019292 | 0.78271  | BH |
| PITG_05628 | Pi hypothetical protein (806 nt)     | -12.6428 | -3.79821 | 0.019679 | 0.795317 | BH |
| PITG_17563 | Pi hypothetical protein (1433 nt)    | -30.8555 | -38.3211 | 0.020071 | 0.808046 | BH |
| PITG_01845 | Pi conserved hypothetical protein (  | -30.7933 | -38.4456 | 0.020162 | 0.808575 | BH |
| PITG_22908 | Pi PcF and SCR74-like cys-rich secre | -11.0414 | 5.934799 | 0.020275 | 0.809996 | BH |
| PITG_08042 | Pi protein kinase (1669 nt)          | -30.8454 | -38.3413 | 0.020527 | 0.810862 | BH |
| PITG_11189 | Pi phosphoenolpyruvate carboxyki     | -30.8541 | -38.3238 | 0.020527 | 0.810862 | BH |
| PITG_08537 | Pi conserved hypothetical protein (  | -30.8018 | -38.4285 | 0.02053  | 0.810862 | BH |
| PITG_18834 | Pi crinkler (CRN) family protein (25 | -11.8074 | -3.62047 | 0.020717 | 0.815164 | BH |
| PITG_23180 | Pi Crinkler (CRN) family protein, ps | -12.6774 | -3.72666 | 0.021006 | 0.819938 | BH |
| PITG_18402 | Pi conserved hypothetical protein (  | -11.2544 | 5.438284 | 0.021507 | 0.819938 | BH |
| PITG_09403 | Pi hypothetical protein (583 nt)     | -30.8742 | -38.2837 | 0.021557 | 0.819938 | BH |
| PITG_19907 | Pi Rab21/Rab5 family GTPase, puta    | -30.8615 | -38.3091 | 0.021557 | 0.819938 | BH |
| PITG_07509 | Pi Crinkler (CRN) family protein, ps | -30.8605 | -38.311  | 0.022035 | 0.819938 | BH |
| PITG_13225 | Pi conserved hypothetical protein (  | -30.8769 | -38.2784 | 0.022035 | 0.819938 | BH |
| PITG_19505 | Pi conserved hypothetical protein (  | -30.7633 | -38.5056 | 0.022212 | 0.819938 | BH |
| PITG_06503 | Pi hypothetical protein (1469 nt)    | -30.53   | -38.9722 | 0.022476 | 0.819938 | BH |
| PITG_21568 | Pi histone H1, putative (779 nt)     | -30.5101 | -39.0119 | 0.022516 | 0.819938 | BH |
| PITG_13307 | Pi conserved hypothetical protein (  | -30.7312 | -38.5698 | 0.022702 | 0.819938 | BH |
| PITG_00451 | Pi 2-oxoisovalerate dehydrogenase    | -30.6854 | -38.6613 | 0.0228   | 0.819938 | BH |
| PITG_09346 | Pi conserved hypothetical protein (  | -30.8677 | -38.2967 | 0.023012 | 0.819938 | BH |
| PITG_10938 | Pi protein phosphatase 2C, putativ   | -30.8962 | -38.2396 | 0.023189 | 0.819938 | BH |
| PITG_13737 | Pi protoplast secreted protein 2 pr  | -11.5919 | -4.12886 | 0.023196 | 0.819938 | BH |
| PITG_12796 | Pi short chain dehydrogenase, puta   | -30.6063 | -38.8196 | 0.023309 | 0.819938 | BH |

|            |                                        |          |          |          |          |    |
|------------|----------------------------------------|----------|----------|----------|----------|----|
| PITG_05324 | Pi conserved hypothetical protein (    | -30.8163 | -38.3995 | 0.023438 | 0.819938 | BH |
| PITG_07197 | Pi 3-ketoacyl-CoA thiolase, mitoch     | -30.8951 | -38.242  | 0.023691 | 0.819938 | BH |
| PITG_07794 | Pi conserved hypothetical protein (    | -30.878  | -38.2761 | 0.023691 | 0.819938 | BH |
| PITG_16363 | Pi hypothetical protein (1392 nt)      | -30.8796 | -38.273  | 0.023691 | 0.819938 | BH |
| PITG_04135 | Pi glycoside hydrolase, putative (86   | -15.3052 | 6.155161 | 0.023782 | 0.819938 | BH |
| PITG_09831 | Pi conserved hypothetical protein (    | -14.2985 | 5.888267 | 0.023793 | 0.819938 | BH |
| PITG_04961 | Pi crinkler (CRN) family protein, ps   | -30.6956 | -38.6408 | 0.023927 | 0.819938 | BH |
| PITG_16021 | Pi conserved hypothetical protein (    | -12.6078 | -3.88543 | 0.024056 | 0.819938 | BH |
| PITG_00726 | Pi conserved hypothetical protein (    | -30.8825 | -38.2671 | 0.024199 | 0.819938 | BH |
| PITG_05255 | Pi hypothetical protein (1122 nt)      | -30.8937 | -38.2448 | 0.024199 | 0.819938 | BH |
| PITG_03440 | Pi malate synthase (1771 nt)           | -30.6933 | -38.6454 | 0.024365 | 0.819938 | BH |
| PITG_15197 | Pi hypothetical protein (1477 nt)      | -30.5154 | -39.0013 | 0.024373 | 0.819938 | BH |
| PITG_10715 | Pi hypothetical protein (1221 nt)      | -30.6226 | -38.787  | 0.024398 | 0.819938 | BH |
| PITG_06860 | Pi ATP-binding Cassette (ABC) Sup      | -30.3687 | -39.2947 | 0.024474 | 0.819938 | BH |
| PITG_14723 | Pi conserved hypothetical protein (    | -30.8761 | -38.2799 | 0.024536 | 0.819938 | BH |
| PITG_18435 | Pi uricase, putative (1137 nt)         | -30.8676 | -38.2969 | 0.024536 | 0.819938 | BH |
| PITG_21410 | Pi elicitin-like protein INF4 (459 nt) | -12.6918 | 5.054775 | 0.024764 | 0.819938 | BH |
| PITG_15687 | Pi conserved hypothetical protein (    | -30.7775 | -38.4772 | 0.024771 | 0.819938 | BH |
| PITG_07574 | Pi conserved hypothetical protein (    | -30.8245 | -38.3831 | 0.024944 | 0.819938 | BH |
| PITG_22896 | Pi secreted RxLR effector peptide,     | -13.3414 | 5.28222  | 0.024949 | 0.819938 | BH |
| PITG_00390 | Pi conserved hypothetical protein (    | -30.9064 | -38.2193 | 0.024986 | 0.819938 | BH |
| PITG_21851 | Pi hypothetical protein (864 nt)       | -30.795  | -38.4421 | 0.02512  | 0.819938 | BH |
| PITG_09291 | Pi conserved hypothetical protein (    | -30.9116 | -38.2088 | 0.02523  | 0.819938 | BH |
| PITG_09963 | Pi cellulose synthase catalytic subu   | -30.8771 | -38.2778 | 0.02524  | 0.819938 | BH |
| PITG_05611 | Pi conserved hypothetical protein (    | -30.8347 | -38.3627 | 0.025477 | 0.819938 | BH |
| PITG_08119 | Pi oxidoreductase htatip2 (1434 nt     | -30.9176 | -38.197  | 0.025513 | 0.819938 | BH |
| PITG_10862 | Pi cytochrome c oxidase assembly       | -30.7197 | -38.5928 | 0.025681 | 0.819938 | BH |
| PITG_01943 | Pi 60S ribosomal protein L23 (623 r    | -7.32241 | 2.921997 | 0.025898 | 0.819938 | BH |
| PITG_10154 | Pi conserved hypothetical protein (    | -30.8198 | -38.3925 | 0.025901 | 0.819938 | BH |
| PITG_21525 | Pi conserved hypothetical protein (    | -30.9073 | -38.2175 | 0.026047 | 0.819938 | BH |
| PITG_15735 | Pi protein kinase, putative (3069 nt   | -30.806  | -38.4202 | 0.026078 | 0.819938 | BH |
| PITG_07454 | Pi conserved hypothetical protein (    | -30.5707 | -38.8907 | 0.026125 | 0.819938 | BH |
| PITG_20615 | Pi conserved hypothetical protein (    | -30.8915 | -38.2491 | 0.026312 | 0.819938 | BH |
| PITG_12747 | Pi conserved hypothetical protein (    | -30.9714 | -38.0894 | 0.026604 | 0.819938 | BH |
| PITG_18833 | Pi Crinkler (CRN) family protein (23   | -11.9465 | -3.34405 | 0.026708 | 0.819938 | BH |
| PITG_17326 | Pi conserved hypothetical protein (    | -30.7176 | -38.5968 | 0.026802 | 0.819938 | BH |
| PITG_23282 | Pi Crinkler (CRN) family protein, ps   | -30.9294 | -38.1732 | 0.026969 | 0.819938 | BH |
| PITG_05125 | Pi hypothetical protein (632 nt)       | -30.4049 | -39.2224 | 0.027029 | 0.819938 | BH |
| PITG_11612 | Pi conserved hypothetical protein (    | -30.8265 | -38.3791 | 0.027126 | 0.819938 | BH |
| PITG_06085 | Pi hypothetical protein (1199 nt)      | -30.8186 | -38.3948 | 0.027126 | 0.819938 | BH |
| PITG_02282 | Pi acyl-CoA dehydrogenase, putativ     | -30.958  | -38.1162 | 0.027142 | 0.819938 | BH |
| PITG_06906 | Pi conserved hypothetical protein (    | -30.9648 | -38.1025 | 0.027142 | 0.819938 | BH |
| PITG_09090 | Pi conserved hypothetical protein (    | -31.1289 | -37.7742 | 0.027172 | 0.819938 | BH |
| PITG_11386 | Pi hypothetical protein (2357 nt)      | -31.0959 | -37.8403 | 0.02723  | 0.819938 | BH |
| PITG_12942 | Pi conserved hypothetical protein (    | -30.8215 | 38.38902 | 0.027319 | 0.819938 | BH |
| PITG_02537 | Pi conserved hypothetical protein (    | -30.9275 | -38.1771 | 0.027522 | 0.819938 | BH |
| PITG_22007 | Pi conserved hypothetical protein (    | -30.9384 | -38.1554 | 0.027522 | 0.819938 | BH |

|            |                                       |          |          |          |          |    |
|------------|---------------------------------------|----------|----------|----------|----------|----|
| PITG_05689 | Pi conserved hypothetical protein (   | -30.9583 | -38.1156 | 0.027689 | 0.819938 | BH |
| PITG_11870 | Pi conserved hypothetical protein (   | -30.7559 | -38.5202 | 0.027811 | 0.819938 | BH |
| PITG_10763 | Pi lysocardiolipin acyltransferase, p | -31.0317 | -37.9688 | 0.027858 | 0.819938 | BH |
| PITG_08067 | Pi Crinkler (CRN) family protein, ps  | -30.9307 | -38.1706 | 0.028083 | 0.819938 | BH |
| PITG_09283 | Pi conserved hypothetical protein (   | -31.1274 | -37.7774 | 0.028228 | 0.819938 | BH |
| PITG_21516 | Pi memo-like protein (1521 nt)        | -31.0369 | -37.9584 | 0.028404 | 0.819938 | BH |
| PITG_06953 | Pi histone H3.3 (528 nt)              | -31.0085 | -38.0151 | 0.028408 | 0.819938 | BH |
| PITG_08613 | Pi cell 5A endo-1,4-betaD-glucanase,  | -30.9834 | -38.0653 | 0.028545 | 0.819938 | BH |
| PITG_14208 | Pi conserved hypothetical protein (   | -30.9468 | -38.1385 | 0.028612 | 0.819938 | BH |
| PITG_08154 | Pi conserved hypothetical protein (   | -30.6564 | -38.7192 | 0.028669 | 0.819938 | BH |
| PITG_06759 | Pi conserved hypothetical protein (   | -31.092  | -37.8482 | 0.028839 | 0.819938 | BH |
| PITG_06019 | Pi glucokinase, putative (919 nt)     | -30.8512 | -38.3297 | 0.028856 | 0.819938 | BH |
| PITG_07436 | Pi hypothetical protein (1894 nt)     | -30.6371 | -38.7579 | 0.028937 | 0.819938 | BH |
| PITG_06022 | Pi glucokinase, putative (1126 nt)    | -30.6039 | -38.8242 | 0.029154 | 0.819938 | BH |
| PITG_06723 | Pi conserved hypothetical protein (   | -30.9494 | -38.1333 | 0.029161 | 0.819938 | BH |
| PITG_08718 | Pi conserved hypothetical protein (   | -30.9471 | -38.138  | 0.029161 | 0.819938 | BH |
| PITG_12646 | Pi Crinkler (CRN) family protein (21  | -30.9465 | -38.1391 | 0.029161 | 0.819938 | BH |
| PITG_14970 | Pi protein kinase, putative (2617 nt) | -30.9588 | -38.1146 | 0.029161 | 0.819938 | BH |
| PITG_20178 | Pi conserved hypothetical protein (   | -30.9592 | -38.1137 | 0.029161 | 0.819938 | BH |
| PITG_14400 | Pi myb-like DNA-binding protein, p    | -30.9487 | -38.1347 | 0.029183 | 0.819938 | BH |
| PITG_06806 | Pi hypothetical protein (324 nt)      | -30.9223 | -38.1875 | 0.029228 | 0.819938 | BH |
| PITG_20425 | Pi Crinkler (CRN) family protein, ps  | -12.7621 | -3.55958 | 0.029247 | 0.819938 | BH |
| PITG_12676 | Pi cyclin-like protein (1923 nt)      | -31.1368 | -37.7586 | 0.029312 | 0.819938 | BH |
| PITG_03583 | Pi putative secreted protein (462 nt) | -30.8128 | -38.4066 | 0.02933  | 0.819938 | BH |
| PITG_04928 | Pi conserved hypothetical protein (   | -30.8502 | -38.3318 | 0.029355 | 0.819938 | BH |
| PITG_20140 | Pi conserved hypothetical protein (   | -30.868  | -38.2962 | 0.029355 | 0.819938 | BH |
| PITG_11985 | Pi hypothetical protein (309 nt)      | -30.4562 | -39.1196 | 0.029366 | 0.819938 | BH |
| PITG_06757 | Pi conserved hypothetical protein (   | -31.1046 | -37.8229 | 0.02939  | 0.819938 | BH |
| PITG_15166 | Pi secreted RxLR effector peptide, p  | -30.5869 | -38.8584 | 0.029466 | 0.819938 | BH |
| PITG_00795 | Pi conserved hypothetical protein (   | -31.0386 | -37.955  | 0.029518 | 0.819938 | BH |
| PITG_03552 | Pi histone H4 (523 nt)                | -10.3459 | 3.757447 | 0.029602 | 0.819938 | BH |
| PITG_06577 | Pi conserved hypothetical protein (   | -30.9454 | -38.1413 | 0.029742 | 0.819938 | BH |
| PITG_01316 | Pi conserved hypothetical protein (   | -31.1023 | -37.8276 | 0.029949 | 0.819938 | BH |
| PITG_06510 | Pi conserved hypothetical protein (   | -31.166  | -37.7001 | 0.029984 | 0.819938 | BH |
| PITG_02068 | Pi GTP-binding protein SAR1 (964 nt)  | -9.94505 | 3.374762 | 0.030117 | 0.819938 | BH |
| PITG_12288 | Pi ADP-ribosylation factor family (9  | -9.53327 | 2.946034 | 0.030191 | 0.819938 | BH |
| PITG_17949 | Pi PNS1-like protein (1539 nt)        | -30.7448 | -38.5426 | 0.030206 | 0.819938 | BH |
| PITG_13060 | Pi conserved hypothetical protein (   | -30.8918 | -38.2485 | 0.030317 | 0.819938 | BH |
| PITG_23063 | Pi Crinkler (CRN) family protein (58  | -30.9594 | -38.1132 | 0.030332 | 0.819938 | BH |
| PITG_06679 | Pi casein kinase II subunit beta (12  | -30.9485 | -38.1352 | 0.030332 | 0.819938 | BH |
| PITG_20167 | Pi Crinkler (CRN) family protein, ps  | -30.8037 | -38.4247 | 0.030332 | 0.819938 | BH |
| PITG_02253 | Pi isovaleryl-CoA dehydrogenase, p    | -30.9304 | -38.1714 | 0.030406 | 0.819938 | BH |
| PITG_00334 | Pi conserved hypothetical protein (   | -31.1283 | -37.7754 | 0.030426 | 0.819938 | BH |
| PITG_16221 | Pi Crinkler (CRN) family protein (19  | -31.1228 | -37.7864 | 0.030426 | 0.819938 | BH |
| PITG_02662 | Pi ubiquitin family protein, putative | -31.1375 | -37.7572 | 0.030542 | 0.819938 | BH |
| PITG_18005 | Pi conserved hypothetical protein (   | -31.1566 | -37.7188 | 0.030542 | 0.819938 | BH |
| PITG_05839 | Pi conserved hypothetical protein (   | -12.4775 | -4.18372 | 0.030545 | 0.819938 | BH |



|            |                                       |          |          |          |          |    |
|------------|---------------------------------------|----------|----------|----------|----------|----|
| PITG_13960 | Pi endoribonuclease L-PSP, putativ    | -13.1848 | 4.23306  | 0.030557 | 0.819938 | BH |
| PITG_15846 | Pi conserved hypothetical protein (   | -30.8432 | -38.3458 | 0.030649 | 0.819938 | BH |
| PITG_03454 | Pi conserved hypothetical protein (   | -31.0418 | -37.9484 | 0.030664 | 0.819938 | BH |
| PITG_13373 | Pi conserved hypothetical protein (   | -30.9213 | -38.1896 | 0.030865 | 0.819938 | BH |
| PITG_13003 | Pi glucose transporter, putative (15  | -12.7869 | 4.857253 | 0.03101  | 0.819938 | BH |
| PITG_00151 | Pi conserved hypothetical protein (   | -31.1649 | -37.7024 | 0.031107 | 0.819938 | BH |
| PITG_03339 | Pi conserved hypothetical protein (   | -31.1488 | -37.7344 | 0.031107 | 0.819938 | BH |
| PITG_21510 | Pi ubiquitin-conjugating enzyme E2    | -31.1516 | -37.729  | 0.031107 | 0.819938 | BH |
| PITG_09482 | Pi conserved hypothetical protein (   | -30.9137 | -38.2047 | 0.031212 | 0.819938 | BH |
| PITG_05011 | Pi 5A endo-1,4-beta-glucanase, put    | -12.7608 | -3.5659  | 0.031217 | 0.819938 | BH |
| PITG_19595 | Pi hypothetical protein (412 nt)      | -12.7614 | -3.56474 | 0.031217 | 0.819938 | BH |
| PITG_12533 | Pi hypothetical protein (204 nt)      | -30.8377 | -38.3567 | 0.031264 | 0.819938 | BH |
| PITG_06381 | Pi hypothetical protein (468 nt)      | -12.8447 | 4.043665 | 0.031351 | 0.819938 | BH |
| PITG_22624 | Pi Major Facilitator Superfamily (M   | -31.0776 | -37.8768 | 0.031376 | 0.819938 | BH |
| PITG_04949 | Pi conserved hypothetical protein (   | -15.0763 | 5.239724 | 0.031391 | 0.819938 | BH |
| PITG_19586 | Pi crinkler (CRN) family protein, ps  | -30.956  | -38.1201 | 0.031535 | 0.819938 | BH |
| PITG_21128 | Pi succinyl CoA transferase, putativ  | -30.8902 | -38.2517 | 0.031535 | 0.819938 | BH |
| PITG_02579 | Pi enoyl-CoA hydratase/isomerase      | -31.1335 | -37.7651 | 0.031569 | 0.819938 | BH |
| PITG_21121 | Pi hypothetical protein (132 nt)      | -30.9678 | -38.0965 | 0.03159  | 0.819938 | BH |
| PITG_22860 | Pi Crinkler (CRN) family protein, ps  | -30.9709 | -38.0904 | 0.03159  | 0.819938 | BH |
| PITG_17695 | Pi hypothetical protein (852 nt)      | -30.8805 | -38.2711 | 0.0316   | 0.819938 | BH |
| PITG_06182 | Pi conserved hypothetical protein (   | -30.9783 | -38.0756 | 0.031743 | 0.819938 | BH |
| PITG_14909 | Pi conserved hypothetical protein (   | -30.7733 | -38.4854 | 0.031775 | 0.819938 | BH |
| PITG_10861 | Pi nuclear transcription factor Y sul | -12.7975 | -3.48636 | 0.031895 | 0.819938 | BH |
| PITG_02658 | Pi conserved hypothetical protein (   | -30.8608 | -38.3104 | 0.031973 | 0.819938 | BH |
| PITG_02974 | Pi conserved hypothetical protein (   | -30.9697 | -38.0926 | 0.032202 | 0.819938 | BH |
| PITG_17926 | Pi conserved hypothetical protein (   | -31.106  | -37.8202 | 0.03226  | 0.819938 | BH |
| PITG_06084 | Pi conserved hypothetical protein (   | -30.6352 | -38.7616 | 0.032401 | 0.819938 | BH |
| PITG_19404 | Pi conserved hypothetical protein (   | -30.8219 | -38.3882 | 0.03253  | 0.819938 | BH |
| PITG_16894 | Pi hypothetical protein (1312 nt)     | -11.7265 | -3.85981 | 0.032579 | 0.819938 | BH |
| PITG_06669 | Pi conserved hypothetical protein (   | -30.7316 | -38.5689 | 0.032637 | 0.819938 | BH |
| PITG_02416 | Pi conserved hypothetical protein (   | -12.7488 | -3.5947  | 0.032654 | 0.819938 | BH |
| PITG_16591 | Pi Crinkler (CRN) family protein (26  | -11.4005 | -3.40884 | 0.032807 | 0.819938 | BH |
| PITG_00984 | Pi serine hydrolase (FSH1), putativ   | -30.7036 | -38.6249 | 0.032815 | 0.819938 | BH |
| PITG_03038 | Pi Major Facilitator Superfamily (M   | -31.0994 | -37.8332 | 0.032857 | 0.819938 | BH |
| PITG_03340 | Pi conserved hypothetical protein (   | -31.088  | -37.8561 | 0.032857 | 0.819938 | BH |
| PITG_19270 | Pi conserved hypothetical protein (   | -31.0381 | -37.956  | 0.033052 | 0.819938 | BH |
| PITG_00623 | Pi 4-aminobutyrate aminotransfer      | -31.1686 | -37.6949 | 0.033188 | 0.819938 | BH |
| PITG_03393 | Pi autophagy-related protein, puta    | -12.7752 | -3.53586 | 0.033233 | 0.819938 | BH |
| PITG_02053 | Pi 40S ribosomal protein S8-2 (975    | -8.79842 | 2.454004 | 0.033247 | 0.819938 | BH |
| PITG_10649 | Pi conserved hypothetical protein (   | -12.8008 | -3.47988 | 0.033357 | 0.819938 | BH |
| PITG_09307 | Pi conserved hypothetical protein (   | -30.709  | -38.6141 | 0.033618 | 0.819938 | BH |
| PITG_12935 | Pi conserved hypothetical protein (   | -31.0497 | -37.9328 | 0.03367  | 0.819938 | BH |
| PITG_15212 | Pi conserved hypothetical protein (   | -30.5389 | -38.9543 | 0.033726 | 0.819938 | BH |
| PITG_02923 | Pi conserved hypothetical protein (   | -31.1918 | -37.6485 | 0.033781 | 0.819938 | BH |
| PITG_08781 | Pi conserved hypothetical protein (   | -31.1848 | -37.6626 | 0.033781 | 0.819938 | BH |
| PITG_10017 | Pi conserved hypothetical protein (   | -31.1729 | -37.6864 | 0.033781 | 0.819938 | BH |

|            |                                       |          |          |          |          |    |
|------------|---------------------------------------|----------|----------|----------|----------|----|
| PITG_16389 | Pi crinkler (CRN) family protein, ps  | -31.18   | -37.6721 | 0.033781 | 0.819938 | BH |
| PITG_15865 | Pi conserved hypothetical protein (   | -31.0014 | -38.0294 | 0.033911 | 0.819938 | BH |
| PITG_09767 | Pi conserved hypothetical protein (   | -30.9246 | -38.1828 | 0.033996 | 0.819938 | BH |
| PITG_09724 | Pi conserved hypothetical protein (   | -30.943  | -38.1462 | 0.034039 | 0.819938 | BH |
| PITG_04425 | Pi ubiquitin-conjugating enzyme E2    | -31.1408 | -37.7505 | 0.034043 | 0.819938 | BH |
| PITG_20755 | Pi conserved hypothetical protein (   | -31.1627 | -37.7067 | 0.034043 | 0.819938 | BH |
| PITG_04994 | Pi conserved hypothetical protein (   | -30.9655 | -38.1011 | 0.034086 | 0.819938 | BH |
| PITG_14669 | Pi phospholipase A2, putative (938    | -30.9169 | -38.1982 | 0.034137 | 0.819938 | BH |
| PITG_05303 | Pi conserved hypothetical protein (   | -12.0468 | -3.13598 | 0.034187 | 0.819938 | BH |
| PITG_18788 | Pi tubulin/FtsZ family (3005 nt)      | -30.9544 | -38.1233 | 0.034247 | 0.819938 | BH |
| PITG_08701 | Pi conserved hypothetical protein (   | -30.9981 | -38.036  | 0.03429  | 0.819938 | BH |
| PITG_03229 | Pi glutathione S-transferase, putati  | -30.9888 | -38.0544 | 0.03429  | 0.819938 | BH |
| PITG_10957 | Pi hypothetical protein (2152 nt)     | -31.1912 | -37.6498 | 0.034382 | 0.819938 | BH |
| PITG_07638 | Pi phospholipase A2, putative (933    | -30.8239 | -38.3843 | 0.034489 | 0.819938 | BH |
| PITG_12545 | Pi croquemort-like mating protein     | -30.8327 | -38.3668 | 0.034703 | 0.819938 | BH |
| PITG_11247 | Pi heat shock 70 kDa protein (2090    | -8.56138 | 2.96092  | 0.034838 | 0.819938 | BH |
| PITG_20337 | Pi conserved hypothetical protein (   | -11.2668 | 4.75107  | 0.034861 | 0.819938 | BH |
| PITG_09544 | Pi conserved hypothetical protein (   | -30.7139 | -38.6044 | 0.034981 | 0.819938 | BH |
| PITG_20611 | Pi nucleoporin-like protein (1199 n   | -31.184  | -37.6641 | 0.034991 | 0.819938 | BH |
| PITG_11552 | Pi conserved hypothetical protein (   | -31.0692 | -37.8937 | 0.035037 | 0.819938 | BH |
| PITG_19824 | Pi conserved hypothetical protein (   | -12.5293 | -4.08022 | 0.035042 | 0.819938 | BH |
| PITG_13673 | Pi conserved hypothetical protein (   | -30.9441 | -38.144  | 0.035341 | 0.819938 | BH |
| PITG_21766 | Pi conserved hypothetical protein (   | -30.9771 | -38.078  | 0.035382 | 0.819938 | BH |
| PITG_20324 | Pi conserved hypothetical protein (   | -30.7293 | -38.5734 | 0.035386 | 0.819938 | BH |
| PITG_09194 | Pi aquaporin, putative (713 nt)       | -30.9715 | -38.0891 | 0.035552 | 0.819938 | BH |
| PITG_12534 | Pi 4-coumarate-CoA ligase, putativ    | -31.0047 | -38.0227 | 0.035586 | 0.819938 | BH |
| PITG_13665 | Pi conserved hypothetical protein (   | -30.9974 | -38.0373 | 0.035586 | 0.819938 | BH |
| PITG_15525 | Pi Rab21/Rab5 family GTPase, puta     | -31.1815 | -37.6691 | 0.035607 | 0.819938 | BH |
| PITG_16093 | Pi conserved hypothetical protein (   | -31.1761 | -37.6799 | 0.035607 | 0.819938 | BH |
| PITG_10495 | Pi hypothetical protein (1115 nt)     | -30.3065 | -39.4191 | 0.035686 | 0.819938 | BH |
| PITG_06050 | Pi Crinkler (CRN) family protein (18  | -30.8996 | -38.2329 | 0.035694 | 0.819938 | BH |
| PITG_03104 | Pi conserved hypothetical protein (   | -30.9541 | -38.124  | 0.036004 | 0.819938 | BH |
| PITG_03113 | Pi conserved hypothetical protein (   | -30.9478 | -38.1365 | 0.036004 | 0.819938 | BH |
| PITG_09784 | Pi conserved hypothetical protein (   | -30.9577 | -38.1168 | 0.036004 | 0.819938 | BH |
| PITG_19178 | Pi 13 kDa ribonucleoprotein-associ    | -12.1623 | 2.729592 | 0.036139 | 0.819938 | BH |
| PITG_16161 | Pi hypothetical protein (2019 nt)     | -30.9552 | -38.1216 | 0.036218 | 0.819938 | BH |
| PITG_18662 | Pi conserved hypothetical protein (   | -31.0343 | -37.9634 | 0.036223 | 0.819938 | BH |
| PITG_22165 | Pi conserved hypothetical protein (   | -31.1708 | -37.6906 | 0.03623  | 0.819938 | BH |
| PITG_23192 | Pi small nuclear ribonucleoprotein    | -31.1941 | -37.6439 | 0.03623  | 0.819938 | BH |
| PITG_20641 | Pi Crinkler (CRN) family protein, ps  | -30.6974 | -38.6374 | 0.036251 | 0.819938 | BH |
| PITG_16916 | Pi protein kinase, putative (1603 nt) | -30.9778 | -38.0765 | 0.036519 | 0.823203 | BH |
| PITG_18824 | Pi crinkler (CRN) family protein, ps  | -12.8256 | -3.43034 | 0.036553 | 0.823203 | BH |
| PITG_00856 | Pi conserved hypothetical protein (   | -30.7961 | -38.4399 | 0.036656 | 0.823728 | BH |
| PITG_13560 | Pi endoglucanase, putative (700 nt    | -31.2375 | 37.55712 | 0.036801 | 0.823739 | BH |
| PITG_10409 | Pi SCP-like extracellular protein (60 | -14.3964 | 5.355264 | 0.036814 | 0.823739 | BH |
| PITG_19303 | Pi conserved hypothetical protein (   | -30.5321 | -38.9678 | 0.037055 | 0.827339 | BH |
| PITG_19482 | Pi ras protein let-60 (1186 nt)       | -31.0254 | -37.9813 | 0.037298 | 0.830178 | BH |

|            |                                       |          |          |          |          |    |
|------------|---------------------------------------|----------|----------|----------|----------|----|
| PITG_14855 | Pi conserved hypothetical protein (   | -30.8827 | -38.2668 | 0.037446 | 0.830178 | BH |
| PITG_12480 | Pi conserved hypothetical protein (   | -31.2093 | -37.6135 | 0.037483 | 0.830178 | BH |
| PITG_02949 | Pi conserved hypothetical protein (   | -31.1921 | -37.6478 | 0.0375   | 0.830178 | BH |
| PITG_13052 | Pi glycoside hydrolase, putative (11  | -31.1536 | -37.7249 | 0.037818 | 0.835445 | BH |
| PITG_03519 | Pi conserved hypothetical protein (   | -31.2137 | -37.6048 | 0.038123 | 0.838708 | BH |
| PITG_21505 | Pi conserved hypothetical protein (   | -31.0362 | -37.9596 | 0.038229 | 0.838708 | BH |
| PITG_19316 | Pi Crinkler (CRN) family protein, ps  | -30.9913 | -38.0496 | 0.038276 | 0.838708 | BH |
| PITG_15150 | Pi chaperone clpB (1245 nt)           | -30.783  | -38.4661 | 0.038301 | 0.838708 | BH |
| PITG_00045 | Pi myosin-like protein (4243 nt)      | -31.1325 | -37.7671 | 0.038414 | 0.838708 | BH |
| PITG_22848 | Pi Crinkler (CRN) family protein (11  | -10.7103 | -2.9908  | 0.03857  | 0.838708 | BH |
| PITG_21151 | Pi Annexin (Annexin) Family (1009     | -30.8112 | -38.4097 | 0.038657 | 0.838708 | BH |
| PITG_17993 | Pi conserved hypothetical protein (   | -31.0285 | -37.9751 | 0.038662 | 0.838708 | BH |
| PITG_04365 | Pi cysteine protease family C48, pu   | -31.2164 | -37.5992 | 0.03877  | 0.838708 | BH |
| PITG_21872 | Pi myosin-like protein (1703 nt)      | -31.2159 | -37.6002 | 0.03877  | 0.838708 | BH |
| PITG_21987 | Pi protein phosphatase 2C, putativ    | -30.8796 | -38.273  | 0.038858 | 0.838859 | BH |
| PITG_23112 | Pi expressed protein (596 nt)         | -30.7594 | -38.5134 | 0.039355 | 0.844424 | BH |
| PITG_13286 | Pi conserved hypothetical protein (   | -31.0295 | -37.9731 | 0.039356 | 0.844424 | BH |
| PITG_11719 | Pi 4-hydroxyphenylpyruvate dioxyg     | -31.2077 | -37.6167 | 0.039425 | 0.844424 | BH |
| PITG_06512 | Pi conserved hypothetical protein (   | -30.9384 | -38.1553 | 0.039451 | 0.844424 | BH |
| PITG_14479 | Pi conserved hypothetical protein (   | -30.984  | -38.0641 | 0.039671 | 0.844424 | BH |
| PITG_19088 | Pi conserved hypothetical protein (   | -30.9753 | -38.0816 | 0.039686 | 0.844424 | BH |
| PITG_15864 | Pi conserved hypothetical protein (   | -31.0592 | -37.9138 | 0.039687 | 0.844424 | BH |
| PITG_02737 | Pi conserved hypothetical protein (   | -31.1101 | -37.8118 | 0.039763 | 0.844424 | BH |
| PITG_08657 | Pi conserved hypothetical protein (   | -12.8646 | 4.445577 | 0.039924 | 0.846107 | BH |
| PITG_08376 | Pi conserved hypothetical protein (   | -30.9908 | -38.0504 | 0.040381 | 0.85124  | BH |
| PITG_12185 | Pi 26S protease regulatory subunit    | -11.3384 | 2.940003 | 0.040469 | 0.85124  | BH |
| PITG_00628 | Pi hypothetical protein (338 nt)      | -30.7435 | -38.5451 | 0.040522 | 0.85124  | BH |
| PITG_17869 | Pi conserved hypothetical protein (   | -31.0512 | -37.9296 | 0.040658 | 0.85124  | BH |
| PITG_17264 | Pi WD domain-containing protein,      | -31.2233 | -37.5855 | 0.040758 | 0.85124  | BH |
| PITG_02119 | Pi protein kinase, putative (1583 nt) | -31.0102 | -38.0117 | 0.04077  | 0.85124  | BH |
| PITG_19362 | Pi myb-like DNA-binding protein, p    | -30.953  | -38.1262 | 0.040891 | 0.85124  | BH |
| PITG_09548 | Pi syntaxin-like protein (1222 nt)    | -30.9358 | -38.1605 | 0.04104  | 0.85124  | BH |
| PITG_21932 | Pi hypothetical protein (919 nt)      | -30.988  | -38.0562 | 0.0411   | 0.85124  | BH |
| PITG_22830 | Pi Crinkler (CRN) family protein, ps  | -31.0374 | -37.9573 | 0.041372 | 0.85124  | BH |
| PITG_17333 | Pi serine/threonine protein kinase    | -31.1654 | -37.7013 | 0.041497 | 0.85124  | BH |
| PITG_15409 | Pi conserved hypothetical protein (   | -30.9586 | -38.1149 | 0.041636 | 0.85124  | BH |
| PITG_03245 | Pi conserved hypothetical protein (   | -31.2493 | -37.5335 | 0.041732 | 0.85124  | BH |
| PITG_08090 | Pi conserved hypothetical protein (   | -31.2588 | -37.5146 | 0.041732 | 0.85124  | BH |
| PITG_13617 | Pi caltractin (633 nt)                | -31.2337 | -37.5647 | 0.041732 | 0.85124  | BH |
| PITG_14057 | Pi alcohol dehydrogenase, putative    | -31.2371 | -37.558  | 0.041732 | 0.85124  | BH |
| PITG_02657 | Pi conserved hypothetical protein (   | -30.992  | -38.0481 | 0.041828 | 0.85124  | BH |
| PITG_02660 | Pi conserved hypothetical protein (   | -30.9948 | -38.0426 | 0.041828 | 0.85124  | BH |
| PITG_03577 | Pi vacuolar protein sorting-associat  | -31.1354 | -37.7613 | 0.04188  | 0.85124  | BH |
| PITG_15871 | Pi nucleolar protein, putative (241   | -31.1499 | -37.7324 | 0.04188  | 0.85124  | BH |
| PITG_17263 | Pi regulator of microtubule dynam     | -31.1405 | -37.7512 | 0.04188  | 0.85124  | BH |
| PITG_05959 | Pi conserved hypothetical protein (   | -30.7468 | -38.5386 | 0.042131 | 0.854437 | BH |
| PITG_14455 | Pi Cation Diffusion Facilitator (CDF  | -31.0288 | -37.9745 | 0.042217 | 0.854437 | BH |

|            |                                      |          |          |          |          |    |
|------------|--------------------------------------|----------|----------|----------|----------|----|
| PITG_11883 | Pi conserved hypothetical protein (  | -14.2611 | 4.792026 | 0.042339 | 0.854437 | BH |
| PITG_06976 | Pi conserved hypothetical protein (  | -30.8678 | -38.2966 | 0.042379 | 0.854437 | BH |
| PITG_02792 | Pi conserved hypothetical protein (  | -31.1317 | -37.7688 | 0.042562 | 0.854437 | BH |
| PITG_18822 | Pi Crinkler (CRN) family protein, ps | -31.1225 | -37.7871 | 0.042562 | 0.854437 | BH |
| PITG_09193 | Pi aquaporin, putative (942 nt)      | -31.0147 | -38.0027 | 0.042611 | 0.854437 | BH |
| PITG_01925 | Pi transmembrane protein, putativ    | -31.1777 | -37.6767 | 0.042893 | 0.857691 | BH |
| PITG_05307 | Pi phosphoenolpyruvate carboxyki     | -10.7697 | -3.41942 | 0.043032 | 0.857691 | BH |
| PITG_02853 | Pi 3,2-trans-enoyl-CoA isomerase, I  | -31.2413 | -37.5496 | 0.043103 | 0.857691 | BH |
| PITG_15503 | Pi conserved hypothetical protein (  | -31.2335 | -37.565  | 0.043103 | 0.857691 | BH |
| PITG_11274 | Pi long-chain-fatty-acid-CoA ligase, | -31.1481 | -37.7359 | 0.0433   | 0.858519 | BH |
| PITG_10939 | Pi conserved hypothetical protein (  | -31.004  | -38.024  | 0.043309 | 0.858519 | BH |
| PITG_11120 | Pi conserved hypothetical protein (  | -31.2207 | -37.5906 | 0.043518 | 0.861029 | BH |
| PITG_09964 | Pi cellulose synthase 2 (3336 nt)    | -31.0085 | -38.0151 | 0.043698 | 0.861986 | BH |
| PITG_07493 | Pi Crinkler (CRN) family protein (56 | -31.04   | -37.9521 | 0.043969 | 0.861986 | BH |
| PITG_23155 | Pi Crinkler (CRN) family protein, ps | -31.1546 | -37.723  | 0.044023 | 0.861986 | BH |
| PITG_04131 | Pi glycoside hydrolase, putative (22 | -30.931  | -38.17   | 0.044024 | 0.861986 | BH |
| PITG_03811 | Pi protein kinase (892 nt)           | -30.929  | -38.1741 | 0.044052 | 0.861986 | BH |
| PITG_15602 | Pi conserved hypothetical protein (  | -30.9888 | -38.0544 | 0.044062 | 0.861986 | BH |
| PITG_12575 | Pi autophagocytosis associated pro   | -31.069  | -37.8941 | 0.044422 | 0.865768 | BH |
| PITG_16043 | Pi conserved hypothetical protein (  | -31.069  | -37.8941 | 0.044422 | 0.865768 | BH |
| PITG_09350 | Pi aquaporin, putative (903 nt)      | -30.9692 | -38.0937 | 0.044944 | 0.870768 | BH |
| PITG_10168 | Pi conserved hypothetical protein (  | -31.2024 | -37.6273 | 0.044945 | 0.870768 | BH |
| PITG_11718 | Pi hypothetical protein (1646 nt)    | -31.194  | -37.6441 | 0.044945 | 0.870768 | BH |
| PITG_15872 | Pi conserved hypothetical protein (  | -31.0642 | -37.9037 | 0.045174 | 0.870768 | BH |
| PITG_10290 | Pi alcohol dehydrogenase, putative   | -30.8734 | -38.2852 | 0.045179 | 0.870768 | BH |
| PITG_14275 | Pi hypothetical protein (213 nt)     | -30.8755 | -38.2812 | 0.045179 | 0.870768 | BH |
| PITG_17005 | Pi conserved hypothetical protein (  | -12.1335 | -2.96443 | 0.045316 | 0.871788 | BH |
| PITG_10680 | Pi conserved hypothetical protein (  | -30.953  | -38.126  | 0.045426 | 0.872299 | BH |
| PITG_01819 | Pi conserved hypothetical protein (  | -31.2208 | -37.5905 | 0.045671 | 0.875135 | BH |
| PITG_07160 | Pi serine protease family S10, puta  | -31.1659 | -37.7002 | 0.045784 | 0.875135 | BH |
| PITG_15100 | Pi histidine ammonia-lyase (1846 n   | -31.2333 | -37.5655 | 0.045937 | 0.875135 | BH |
| PITG_12798 | Pi short chain dehydrogenase, puta   | -30.9384 | -38.1553 | 0.04641  | 0.875135 | BH |
| PITG_04969 | Pi conserved hypothetical protein (  | -30.9167 | -38.1987 | 0.046422 | 0.875135 | BH |
| PITG_12531 | Pi conserved hypothetical protein (  | -31.1815 | -37.6692 | 0.046527 | 0.875135 | BH |
| PITG_02841 | Pi conserved hypothetical protein (  | -31.1819 | -37.6683 | 0.046527 | 0.875135 | BH |
| PITG_11736 | Pi conserved hypothetical protein (  | -31.1685 | -37.6951 | 0.046527 | 0.875135 | BH |
| PITG_06678 | Pi conserved hypothetical protein (  | -30.9584 | -38.1152 | 0.046535 | 0.875135 | BH |
| PITG_00842 | Pi copine-like protein, putative (97 | -31.2593 | -37.5136 | 0.04663  | 0.875135 | BH |
| PITG_08018 | Pi conserved hypothetical protein (  | -31.2851 | -37.4619 | 0.04663  | 0.875135 | BH |
| PITG_00587 | Pi hypothetical protein (631 nt)     | -30.9613 | -38.1094 | 0.046991 | 0.875135 | BH |
| PITG_20725 | Pi histone H3.3 type 1 (656 nt)      | -9.72211 | 3.014223 | 0.047017 | 0.875135 | BH |
| PITG_00530 | Pi conserved hypothetical protein (  | -31.1267 | -37.7786 | 0.047018 | 0.875135 | BH |
| PITG_14634 | Pi 1-(5-phosphoribosyl)-5-[(5-phos   | -31.1976 | -37.6369 | 0.047147 | 0.875135 | BH |
| PITG_14924 | Pi conserved hypothetical protein (  | -31.0773 | -37.8775 | 0.047315 | 0.875135 | BH |
| PITG_15229 | Pi conserved hypothetical protein (  | -31.2824 | -37.4674 | 0.047356 | 0.875135 | BH |
| PITG_15365 | Pi conserved hypothetical protein (  | -31.2896 | -37.4529 | 0.047356 | 0.875135 | BH |
| PITG_15787 | Pi conserved hypothetical protein (  | -31.286  | -37.4602 | 0.047356 | 0.875135 | BH |

|            |                                      |          |          |          |          |    |
|------------|--------------------------------------|----------|----------|----------|----------|----|
| PITG_08218 | Pi conserved hypothetical protein (  | -31.2493 | -37.5334 | 0.047401 | 0.875135 | BH |
| PITG_01131 | Pi conserved hypothetical protein (  | -14.0404 | 4.028587 | 0.04741  | 0.875135 | BH |
| PITG_14273 | Pi conserved hypothetical protein (  | -30.7079 | -38.6163 | 0.047482 | 0.875135 | BH |
| PITG_03995 | Pi ATP-dependent DNA helicase, pu    | -31.0467 | -37.9387 | 0.047858 | 0.875135 | BH |
| PITG_11118 | Pi conserved hypothetical protein (  | -31.2024 | -37.6272 | 0.047897 | 0.875135 | BH |
| PITG_19665 | Pi conserved hypothetical protein (  | -31.2056 | -37.6208 | 0.047897 | 0.875135 | BH |
| PITG_18787 | Pi conserved hypothetical protein (  | -31.1856 | -37.6609 | 0.048039 | 0.875135 | BH |
| PITG_17279 | Pi conserved hypothetical protein (  | -31.1636 | -37.7049 | 0.048039 | 0.875135 | BH |
| PITG_20374 | Pi conserved hypothetical protein (  | -31.266  | -37.5001 | 0.048091 | 0.875135 | BH |
| PITG_16118 | Pi conserved hypothetical protein (  | -31.0827 | -37.8667 | 0.0481   | 0.875135 | BH |
| PITG_21517 | Pi 2-oxoglutarate dehydrogenase E    | -31.2527 | -37.5267 | 0.048145 | 0.875135 | BH |
| PITG_05462 | Pi aldehyde dehydrogenase family     | -31.0536 | -37.9249 | 0.048176 | 0.875135 | BH |
| PITG_00912 | Pi 3-hydroxyisobutyrate dehydroge    | -12.8423 | -3.43337 | 0.048327 | 0.875253 | BH |
| PITG_10282 | Pi pre-mRNA branch site protein p    | -31.0081 | -38.0159 | 0.04835  | 0.875253 | BH |
| PITG_15268 | Pi conserved hypothetical protein (  | -31.1112 | -37.8097 | 0.048575 | 0.877798 | BH |
| PITG_19775 | Pi conserved hypothetical protein (  | -31.1772 | -37.6777 | 0.048808 | 0.877892 | BH |
| PITG_02600 | Pi hypothetical protein (549 nt)     | -31.2775 | -37.477  | 0.048833 | 0.877892 | BH |
| PITG_16338 | Pi conserved hypothetical protein (  | -31.265  | -37.5022 | 0.048833 | 0.877892 | BH |
| PITG_15194 | Pi Solute:Sodium Symporter (SSS) f   | -31.0662 | -37.8998 | 0.049062 | 0.879475 | BH |
| PITG_00841 | Pi conserved hypothetical protein (  | -30.716  | -38.6002 | 0.049089 | 0.879475 | BH |
| PITG_16731 | Pi conserved hypothetical protein (  | -31.0834 | -37.8653 | 0.049445 | 0.882805 | BH |
| PITG_20734 | Pi conserved hypothetical protein (  | -31.0902 | -37.8516 | 0.049445 | 0.882805 | BH |
| PITG_14005 | Pi conserved hypothetical protein (  | -30.9564 | -38.1194 | 0.049842 | 0.888388 | BH |
| PITG_04373 | Pi secreted RxLR effector peptide,   | -12.9368 | -3.22875 | 0.050088 | 0.889499 | BH |
| PITG_21024 | Pi conserved hypothetical protein (  | -31.1145 | -37.803  | 0.050167 | 0.889499 | BH |
| PITG_02038 | Pi fructose 1,6 bisphosphatase (10'  | -31.0842 | -37.8636 | 0.050246 | 0.889499 | BH |
| PITG_03830 | Pi 3'5'-cyclic nucleotide phosphodi  | -31.0885 | -37.855  | 0.050246 | 0.889499 | BH |
| PITG_05175 | Pi conserved hypothetical protein (  | -12.8353 | -3.4543  | 0.050961 | 0.896738 | BH |
| PITG_02640 | Pi conserved hypothetical protein (  | -31.2811 | -37.4699 | 0.051105 | 0.896738 | BH |
| PITG_05387 | Pi ATP-binding Cassette (ABC) Sup    | -31.2621 | -37.508  | 0.051105 | 0.896738 | BH |
| PITG_07029 | Pi palmitoyl-protein thioesterase 1  | -31.2838 | -37.4645 | 0.051105 | 0.896738 | BH |
| PITG_01270 | Pi conserved hypothetical protein (  | -12.9298 | -3.22177 | 0.051448 | 0.896738 | BH |
| PITG_16050 | Pi hypothetical protein (2981 nt)    | -13.896  | 4.500813 | 0.051821 | 0.896738 | BH |
| PITG_06263 | Pi H/ACA ribonucleoprotein compl     | -13.3786 | 3.200067 | 0.051874 | 0.896738 | BH |
| PITG_10213 | Pi conserved hypothetical protein (  | -31.0993 | -37.8335 | 0.052165 | 0.896738 | BH |
| PITG_11881 | Pi conserved hypothetical protein (  | -15.5562 | 5.638057 | 0.052257 | 0.896738 | BH |
| PITG_01285 | Pi transmembrane protein, putativ    | -31.306  | -37.4202 | 0.052304 | 0.896738 | BH |
| PITG_02745 | Pi casein kinase II subunit beta (15 | -31.3039 | -37.4244 | 0.052304 | 0.896738 | BH |
| PITG_03828 | Pi conserved hypothetical protein (  | -31.3118 | -37.4085 | 0.052304 | 0.896738 | BH |
| PITG_06732 | Pi acyl-CoA dehydrogenase, putativ   | -31.3075 | -37.4171 | 0.052304 | 0.896738 | BH |
| PITG_15138 | Pi conserved hypothetical protein (  | -31.3129 | -37.4063 | 0.052304 | 0.896738 | BH |
| PITG_22354 | Pi hypothetical protein (586 nt)     | -31.2933 | -37.4455 | 0.052304 | 0.896738 | BH |
| PITG_13387 | Pi conserved hypothetical protein (  | -12.9318 | -3.21909 | 0.052369 | 0.896738 | BH |
| PITG_09609 | Pi conserved hypothetical protein (  | -31.0855 | -37.8611 | 0.052701 | 0.896738 | BH |
| PITG_00089 | Pi GTP-binding protein SAR1 (955 r   | -11.2546 | -2.95519 | 0.052764 | 0.896738 | BH |
| PITG_13341 | Pi 2,4-dienoyl-CoA reductase, mito   | -31.1657 | -37.7008 | 0.052781 | 0.896738 | BH |
| PITG_16766 | Pi hypothetical protein (1349 nt)    | -31.3171 | -37.3978 | 0.053079 | 0.896738 | BH |

|            |                                       |          |          |          |          |    |
|------------|---------------------------------------|----------|----------|----------|----------|----|
| PITG_17782 | Pi iron-sulfur cluster assembly prot  | -31.3194 | -37.3934 | 0.053079 | 0.896738 | BH |
| PITG_20121 | Pi conserved hypothetical protein (   | -31.3171 | -37.3978 | 0.053079 | 0.896738 | BH |
| PITG_00272 | Pi phosphatidylinositol kinase (133   | -12.8592 | -3.3815  | 0.053085 | 0.896738 | BH |
| PITG_07967 | Pi protein kinase, putative (1453 nt) | -31.1552 | -37.7217 | 0.053368 | 0.896738 | BH |
| PITG_08538 | Pi conserved hypothetical protein (   | -31.2111 | -37.61   | 0.053381 | 0.896738 | BH |
| PITG_14605 | Pi conserved hypothetical protein (   | -31.2903 | -37.4515 | 0.053449 | 0.896738 | BH |
| PITG_09453 | Pi conserved hypothetical protein (   | -31.109  | -37.8141 | 0.053463 | 0.896738 | BH |
| PITG_07190 | Pi conserved hypothetical protein (   | -30.7664 | -38.4993 | 0.053517 | 0.896738 | BH |
| PITG_12231 | Pi phosphatidic acid phosphatase (    | -31.0827 | -37.8667 | 0.053536 | 0.896738 | BH |
| PITG_07156 | Pi serine protease family S10, puta   | -31.0854 | -37.8613 | 0.053536 | 0.896738 | BH |
| PITG_10347 | Pi secreted RxLR effector peptide,    | -31.3778 | 37.27642 | 0.053537 | 0.896738 | BH |
| PITG_13638 | Pi glucanase inhibitor protein 1 (77  | -31.3778 | 37.27642 | 0.053537 | 0.896738 | BH |
| PITG_14214 | Pi conserved hypothetical protein (   | -31.242  | -37.5481 | 0.053579 | 0.896738 | BH |
| PITG_23274 | Pi crinkler (CRN) family protein, 5'  | -31.2463 | -37.5395 | 0.053579 | 0.896738 | BH |
| PITG_03451 | Pi conserved hypothetical protein (   | -31.3066 | -37.4189 | 0.053861 | 0.897143 | BH |
| PITG_12580 | Pi conserved hypothetical protein (   | -31.3236 | -37.3849 | 0.053861 | 0.897143 | BH |
| PITG_18000 | Pi conserved hypothetical protein (   | -31.3198 | -37.3925 | 0.053861 | 0.897143 | BH |
| PITG_17452 | Pi importin alpha-2 subunit (2296 r   | -12.945  | -3.1914  | 0.054185 | 0.900669 | BH |
| PITG_16687 | Pi conserved hypothetical protein (   | -31.2707 | -37.4907 | 0.054246 | 0.900669 | BH |
| PITG_05325 | Pi conserved hypothetical protein (   | -31.3263 | -37.3795 | 0.054651 | 0.904524 | BH |
| PITG_19804 | Pi hypothetical protein (1288 nt)     | -31.3114 | -37.4093 | 0.054651 | 0.904524 | BH |
| PITG_06374 | Pi Lysosomal Cystine Transporter (    | -31.2653 | -37.5015 | 0.055051 | 0.909691 | BH |
| PITG_00537 | Pi ubiquitin-conjugating enzyme E2    | -31.2966 | -37.4388 | 0.055449 | 0.911939 | BH |
| PITG_02960 | Pi mitogen-activated protein kinase   | -31.3208 | -37.3905 | 0.055449 | 0.911939 | BH |
| PITG_08867 | Pi mannitol dehydrogenase, putati     | -31.2936 | -37.4448 | 0.055449 | 0.911939 | BH |
| PITG_07096 | Pi protease inhibitor Epi11 (1335 n   | -31.0921 | -37.8479 | 0.05647  | 0.918645 | BH |
| PITG_04121 | Pi sorbitol dehydrogenase, putativ    | -31.2983 | -37.4355 | 0.057068 | 0.918645 | BH |
| PITG_11286 | Pi hypothetical protein (2926 nt)     | -31.2946 | -37.4428 | 0.057068 | 0.918645 | BH |
| PITG_15706 | Pi conserved hypothetical protein (   | -31.0032 | -38.0257 | 0.057595 | 0.918645 | BH |
| PITG_09848 | Pi medium-chain specific acyl-CoA     | -31.1831 | -37.6659 | 0.05784  | 0.918645 | BH |
| PITG_06323 | Pi endomembrane protein 70-like       | -31.2916 | -37.449  | 0.05789  | 0.918645 | BH |
| PITG_23287 | Pi crinkler (CRN) domain, pseudoge    | -10.2647 | -2.87547 | 0.058105 | 0.918645 | BH |
| PITG_01119 | Pi conserved hypothetical protein (   | -12.9418 | -3.22645 | 0.058155 | 0.918645 | BH |
| PITG_19581 | Pi crinkler (CRN) family protein, ps  | -11.6746 | -2.85591 | 0.058229 | 0.918645 | BH |
| PITG_12182 | Pi conserved hypothetical protein (   | -31.2566 | -37.519  | 0.058353 | 0.918645 | BH |
| PITG_00955 | Pi conserved hypothetical protein (   | -31.3611 | -37.3099 | 0.058912 | 0.918645 | BH |
| PITG_09669 | Pi protein kinase (525 nt)            | -31.3308 | -37.3705 | 0.058912 | 0.918645 | BH |
| PITG_11982 | Pi conserved hypothetical protein (   | -31.3357 | -37.3606 | 0.058912 | 0.918645 | BH |
| PITG_12754 | Pi dynein light chain 2B (588 nt)     | -31.3588 | -37.3145 | 0.058912 | 0.918645 | BH |
| PITG_16065 | Pi conserved hypothetical protein (   | -31.348  | -37.3361 | 0.058912 | 0.918645 | BH |
| PITG_18045 | Pi protein kinase, putative (1574 nt) | -31.3599 | -37.3122 | 0.058912 | 0.918645 | BH |
| PITG_07241 | Pi Monovalent Cation:Proton Antip     | -31.2905 | -37.4511 | 0.059199 | 0.918645 | BH |
| PITG_11977 | Pi conserved hypothetical protein (   | -31.2426 | -37.5469 | 0.05942  | 0.918645 | BH |
| PITG_20074 | Pi flavodoxin-like protein (537 nt)   | -31.2491 | -37.5339 | 0.05942  | 0.918645 | BH |
| PITG_10005 | Pi conserved hypothetical protein (   | -31.3116 | -37.4089 | 0.059556 | 0.918645 | BH |
| PITG_06474 | Pi conserved hypothetical protein (   | -31.1868 | -37.6585 | 0.059599 | 0.918645 | BH |
| PITG_05117 | Pi glycine amidinotransferase, mitc   | -31.3335 | -37.3651 | 0.059738 | 0.918645 | BH |

|            |                                       |          |          |          |          |    |
|------------|---------------------------------------|----------|----------|----------|----------|----|
| PITG_08304 | Pi cGMP-dependent protein kinase      | -31.3419 | -37.3484 | 0.059738 | 0.918645 | BH |
| PITG_09387 | Pi aspartyl protease family A01A, p   | -31.343  | -37.3461 | 0.059738 | 0.918645 | BH |
| PITG_14949 | Pi conserved hypothetical protein (   | -31.3634 | -37.3054 | 0.059738 | 0.918645 | BH |
| PITG_19870 | Pi bax inhibitor-like protein (1129 r | -31.3577 | -37.3168 | 0.059738 | 0.918645 | BH |
| PITG_13306 | Pi secreted RxLR effector peptide,    | -31.0702 | -37.8918 | 0.059952 | 0.918645 | BH |
| PITG_19624 | Pi polygalacturonase, putative (111   | -14.1809 | 3.922062 | 0.060258 | 0.918645 | BH |
| PITG_03344 | Pi H - or Na -translocating F-type, v | -31.3352 | -37.3618 | 0.060572 | 0.918645 | BH |
| PITG_03596 | Pi conserved hypothetical protein (   | -31.3514 | -37.3293 | 0.060572 | 0.918645 | BH |
| PITG_04108 | Pi conserved hypothetical protein (   | -31.3357 | -37.3607 | 0.060572 | 0.918645 | BH |
| PITG_12179 | Pi conserved hypothetical protein (   | -31.3537 | -37.3247 | 0.060572 | 0.918645 | BH |
| PITG_13438 | Pi conserved hypothetical protein (   | -31.3336 | -37.3649 | 0.060572 | 0.918645 | BH |
| PITG_20728 | Pi conserved hypothetical protein (   | -31.3617 | -37.3088 | 0.060572 | 0.918645 | BH |
| PITG_13324 | Pi conserved hypothetical protein (   | -31.2497 | -37.5327 | 0.061165 | 0.918645 | BH |
| PITG_12164 | Pi conserved hypothetical protein (   | -31.3203 | -37.3916 | 0.061254 | 0.918645 | BH |
| PITG_14047 | Pi conserved hypothetical protein (   | -31.298  | -37.4361 | 0.061254 | 0.918645 | BH |
| PITG_00914 | Pi nuclear transcription factor Y sul | -31.3346 | -37.3629 | 0.061413 | 0.918645 | BH |
| PITG_11792 | Pi conserved hypothetical protein (   | -31.3628 | -37.3065 | 0.061413 | 0.918645 | BH |
| PITG_00545 | Pi nucleoredoxin, putative (600 nt)   | -31.2296 | -37.573  | 0.062051 | 0.918645 | BH |
| PITG_11374 | Pi hypothetical protein (309 nt)      | -12.9542 | -3.17901 | 0.0621   | 0.918645 | BH |
| PITG_13986 | Pi trafficking protein particle comp  | -31.3576 | -37.3169 | 0.062262 | 0.918645 | BH |
| PITG_15761 | Pi conserved hypothetical protein (   | -31.3634 | -37.3053 | 0.062262 | 0.918645 | BH |
| PITG_14391 | Pi conserved hypothetical protein (   | -12.9748 | -3.1342  | 0.062278 | 0.918645 | BH |
| PITG_05582 | Pi glutathione S-transferase, putati  | -10.1707 | -2.78995 | 0.062605 | 0.918645 | BH |
| PITG_08252 | Pi hypothetical protein (1222 nt)     | -31.0485 | -37.935  | 0.062802 | 0.918645 | BH |
| PITG_05328 | Pi conserved hypothetical protein (   | -31.1957 | -37.6408 | 0.062855 | 0.918645 | BH |
| PITG_16274 | Pi M96 mating-specific protein far    | -31.2469 | -37.5383 | 0.062946 | 0.918645 | BH |
| PITG_04881 | Pi conserved hypothetical protein (   | -31.352  | -37.328  | 0.063119 | 0.918645 | BH |
| PITG_19042 | Pi conserved hypothetical protein (   | -31.3406 | -37.3508 | 0.063119 | 0.918645 | BH |
| PITG_06862 | Pi ATP-binding Cassette (ABC) Supe    | -30.9674 | -38.0974 | 0.063795 | 0.918645 | BH |
| PITG_11857 | Pi C2 domain-containing protein, p    | -31.3572 | -37.3178 | 0.063984 | 0.918645 | BH |
| PITG_01698 | Pi small cysteine rich protein SCR70  | -12.9396 | -3.21449 | 0.064111 | 0.918645 | BH |
| PITG_05489 | Pi conserved hypothetical protein (   | -12.9353 | -3.22674 | 0.06418  | 0.918645 | BH |
| PITG_02500 | Pi conserved hypothetical protein (   | -31.2726 | -37.4868 | 0.06445  | 0.918645 | BH |
| PITG_09066 | Pi conserved hypothetical protein (   | -31.2407 | -37.5507 | 0.064762 | 0.918645 | BH |
| PITG_02995 | Pi conserved hypothetical protein (   | -31.3639 | -37.3044 | 0.064856 | 0.918645 | BH |
| PITG_21257 | Pi conserved hypothetical protein (   | -31.1755 | -37.681  | 0.065101 | 0.918645 | BH |
| PITG_05112 | Pi protein kinase, putative (2275 nt  | -31.3114 | -37.4093 | 0.065642 | 0.918645 | BH |
| PITG_07807 | Pi conserved hypothetical protein (   | -31.3157 | -37.4007 | 0.066544 | 0.918645 | BH |
| PITG_18410 | Pi conserved hypothetical protein (   | -31.2169 | -37.5984 | 0.066571 | 0.918645 | BH |
| PITG_18951 | Pi carbohydrate-binding protein, pi   | -31.2481 | -37.536  | 0.066613 | 0.918645 | BH |
| PITG_00455 | Pi conserved hypothetical protein (   | -31.3762 | -37.2798 | 0.066648 | 0.918645 | BH |
| PITG_03513 | Pi protein kinase, putative (1587 nt  | -31.3785 | -37.2752 | 0.066648 | 0.918645 | BH |
| PITG_06025 | Pi conserved hypothetical protein (   | -31.3838 | -37.2646 | 0.066648 | 0.918645 | BH |
| PITG_08213 | Pi carbohydrate-binding protein, pi   | -31.29   | -37.4521 | 0.067454 | 0.918645 | BH |
| PITG_05537 | Pi copper-transporting ATPase, put    | -31.3471 | -37.3378 | 0.067521 | 0.918645 | BH |
| PITG_00806 | Pi conserved hypothetical protein (   | -31.3785 | -37.2751 | 0.067529 | 0.918645 | BH |
| PITG_04380 | Pi hypothetical protein (740 nt)      | -31.3808 | -37.2705 | 0.067529 | 0.918645 | BH |

|            |                                                               |          |          |          |          |    |
|------------|---------------------------------------------------------------|----------|----------|----------|----------|----|
| PITG_10736 | Pi cysteine protease family C54, pu                           | -31.3767 | -37.2787 | 0.067529 | 0.918645 | BH |
| PITG_11768 | Pi conserved hypothetical protein (                           | -31.3738 | -37.2844 | 0.067529 | 0.918645 | BH |
| PITG_14055 | Pi alcohol dehydrogenase, putative                            | -31.3814 | -37.2694 | 0.067529 | 0.918645 | BH |
| PITG_16879 | Pi conserved hypothetical protein (                           | -31.3674 | -37.2973 | 0.067529 | 0.918645 | BH |
| PITG_07514 | Pi crinkler (CRN) family protein, ps                          | -31.228  | -37.5762 | 0.067552 | 0.918645 | BH |
| PITG_10392 | Pi conserved hypothetical protein (                           | -31.1676 | -37.6968 | 0.06798  | 0.918645 | BH |
| PITG_05584 | Pi hypothetical protein (1111 nt)                             | -31.264  | -37.504  | 0.068121 | 0.918645 | BH |
| PITG_09389 | Pi trehalose-phosphatase, putative                            | -31.3956 | -37.2409 | 0.068417 | 0.918645 | BH |
| PITG_14989 | Pi conserved hypothetical protein (                           | -31.3994 | -37.2333 | 0.068417 | 0.918645 | BH |
| PITG_05593 | Pi conserved hypothetical protein (                           | -31.3399 | -37.3522 | 0.068425 | 0.918645 | BH |
| PITG_09837 | Pi secreted RxLR effector peptide,                            | -31.3528 | -37.3264 | 0.068425 | 0.918645 | BH |
| PITG_16458 | Pi conserved hypothetical protein (                           | -31.3574 | -37.3173 | 0.068425 | 0.918645 | BH |
| PITG_02109 | Pi conserved hypothetical protein (                           | -31.2453 | -37.5416 | 0.068501 | 0.918645 | BH |
| PITG_01407 | Pi D-isomer specific 2-hydroxyacid                            | -31.1278 | -37.7765 | 0.068887 | 0.918645 | BH |
| PITG_05516 | Pi glutathione S-transferase omega                            | -31.3169 | -37.3983 | 0.0693   | 0.918645 | BH |
| PITG_05953 | Pi conserved hypothetical protein (                           | -31.3721 | -37.288  | 0.069313 | 0.918645 | BH |
| PITG_15539 | Pi conserved hypothetical protein (                           | -31.3796 | -37.2729 | 0.069313 | 0.918645 | BH |
| PITG_22928 | Pi glutaryl-CoA dehydrogenase, pu                             | -31.3756 | -37.2809 | 0.069313 | 0.918645 | BH |
| PITG_00809 | Pi M96 mating-specific protein far                            | -31.3562 | -37.3197 | 0.069337 | 0.918645 | BH |
| PITG_09787 | Pi cytochrome P450, putative (169                             | -31.2213 | -37.5895 | 0.069458 | 0.918645 | BH |
| PITG_03550 | Pi histone H2B (493 nt)                                       | -10.3692 | 2.956135 | 0.069737 | 0.918645 | BH |
| PITG_19854 | Pi conserved hypothetical protein (                           | -13.0003 | -3.08818 | 0.069997 | 0.918645 | BH |
| PITG_03092 | Pi conserved hypothetical protein (                           | -31.2543 | -37.5236 | 0.070009 | 0.918645 | BH |
| PITG_17257 | Pi carbohydrate esterase, putative                            | -12.172  | -2.92201 | 0.07008  | 0.918645 | BH |
| PITG_14274 | Pi conserved hypothetical protein (                           | -30.9542 | -38.1237 | 0.070107 | 0.918645 | BH |
| PITG_08725 | Pi protein kinase (2339 nt)                                   | -31.4011 | -37.23   | 0.070217 | 0.918645 | BH |
| PITG_22319 | Pi UDP-glucose 4-epimerase, putat                             | -31.375  | -37.2821 | 0.070217 | 0.918645 | BH |
| PITG_04010 | Pi APS kinase/ATP sulfurlyase/pyro                            | -31.3058 | -37.4205 | 0.070235 | 0.918645 | BH |
| PITG_20793 | Pi conserved hypothetical protein (                           | -31.3744 | -37.2834 | 0.071128 | 0.918645 | BH |
| PITG_05386 | Pi Zinc (Zn <sup>2+</sup> )-Iron (Fe <sup>2+</sup> ) Permease | -31.3849 | -37.2622 | 0.071128 | 0.918645 | BH |
| PITG_00359 | Pi hypothetical protein (817 nt)                              | -31.3064 | -37.4193 | 0.071179 | 0.918645 | BH |
| PITG_11689 | Pi putative GPI-anchored serine-ric                           | -13.0988 | -2.89233 | 0.071397 | 0.918645 | BH |
| PITG_15654 | Pi conserved hypothetical protein (                           | -12.2885 | -2.65065 | 0.071918 | 0.918645 | BH |
| PITG_16849 | Pi hypothetical protein (713 nt)                              | -31.2652 | -37.5016 | 0.071932 | 0.918645 | BH |
| PITG_09072 | Pi conserved hypothetical protein (                           | -31.3779 | -37.2763 | 0.072047 | 0.918645 | BH |
| PITG_19959 | Pi hypothetical protein (984 nt)                              | -31.3652 | -37.3018 | 0.072047 | 0.918645 | BH |
| PITG_14636 | Pi COP9 signalosome complex subu                              | -31.3386 | -37.3549 | 0.072122 | 0.918645 | BH |
| PITG_10681 | Pi conserved hypothetical protein (                           | -31.2954 | -37.4413 | 0.072131 | 0.918645 | BH |
| PITG_18233 | Pi conserved hypothetical protein (                           | -13.0286 | -3.02542 | 0.072224 | 0.918645 | BH |
| PITG_08932 | Pi conserved hypothetical protein (                           | -13.1308 | -2.81979 | 0.072627 | 0.918645 | BH |
| PITG_01238 | Pi hypothetical protein (1236 nt)                             | -31.1834 | -37.6652 | 0.072975 | 0.918645 | BH |
| PITG_03655 | Pi conserved hypothetical protein (                           | -31.3589 | -37.3142 | 0.073066 | 0.918645 | BH |
| PITG_14126 | Pi potential polyprotein (1978 nt)                            | -31.2145 | -37.603  | 0.073435 | 0.918645 | BH |
| PITG_20079 | Pi conserved hypothetical protein (                           | -31.2729 | -37.4864 | 0.07389  | 0.918645 | BH |
| PITG_10353 | Pi conserved hypothetical protein (                           | -31.2413 | -37.5495 | 0.074383 | 0.918645 | BH |
| PITG_13226 | Pi conserved hypothetical protein (                           | -31.1891 | -37.654  | 0.074454 | 0.918645 | BH |
| PITG_02567 | Pi T-complex protein 1 subunit alpl                           | -12.2889 | 2.421487 | 0.07452  | 0.918645 | BH |



|            |                                               |          |          |          |          |    |
|------------|-----------------------------------------------|----------|----------|----------|----------|----|
| PITG_01811 | Pi F-box protein, putative (1187 nt)          | -31.4183 | -37.1956 | 0.07576  | 0.918645 | BH |
| PITG_01950 | Pi protein kinase, putative (2368 nt)         | -31.4436 | -37.145  | 0.07576  | 0.918645 | BH |
| PITG_13248 | Pi conserved hypothetical protein (1187 nt)   | -31.4308 | -37.1705 | 0.07576  | 0.918645 | BH |
| PITG_15406 | Pi Amino Acid/Auxin Permease (AAAP)           | -31.443  | -37.1462 | 0.07576  | 0.918645 | BH |
| PITG_18417 | Pi conserved hypothetical protein (1187 nt)   | -31.4436 | -37.145  | 0.07576  | 0.918645 | BH |
| PITG_09271 | Pi ornithine aminotransferase, mitochondrial  | -13.1108 | -2.86822 | 0.075762 | 0.918645 | BH |
| PITG_07285 | Pi conserved hypothetical protein (1187 nt)   | -11.1036 | -2.69795 | 0.076116 | 0.918645 | BH |
| PITG_21325 | Pi crinkler (CRN) domain, pseudogenized       | -11.4442 | -2.55157 | 0.076395 | 0.918645 | BH |
| PITG_07786 | Pi hypothetical protein (438 nt)              | -31.2237 | -37.5847 | 0.076418 | 0.918645 | BH |
| PITG_01239 | Pi conserved hypothetical protein (1187 nt)   | -31.4383 | -37.1555 | 0.076698 | 0.918645 | BH |
| PITG_13505 | Pi hypothetical protein (766 nt)              | -31.4108 | -37.2105 | 0.076698 | 0.918645 | BH |
| PITG_21556 | Pi conserved hypothetical protein (1187 nt)   | -31.4282 | -37.1757 | 0.076698 | 0.918645 | BH |
| PITG_05545 | Pi conserved hypothetical protein (1187 nt)   | -31.3804 | -37.2713 | 0.076759 | 0.918645 | BH |
| PITG_20382 | Pi conserved hypothetical protein (1187 nt)   | -31.353  | -37.326  | 0.076925 | 0.918645 | BH |
| PITG_03644 | Pi Rab8 family GTPase, putative (681 nt)      | -31.4207 | -37.1908 | 0.077644 | 0.918645 | BH |
| PITG_08465 | Pi conserved hypothetical protein (1187 nt)   | -31.445  | -37.1422 | 0.077644 | 0.918645 | BH |
| PITG_10064 | Pi conserved hypothetical protein (1187 nt)   | -31.4345 | -37.1632 | 0.077644 | 0.918645 | BH |
| PITG_04820 | Pi conserved hypothetical protein (1187 nt)   | -31.4253 | -37.1815 | 0.077644 | 0.918645 | BH |
| PITG_06631 | Pi conserved hypothetical protein (1187 nt)   | -31.3648 | -37.3026 | 0.077724 | 0.918645 | BH |
| PITG_07711 | Pi Major Facilitator Superfamily (MFS)        | -31.3783 | -37.2755 | 0.077724 | 0.918645 | BH |
| PITG_12140 | Pi peroxisomal Lon protease (2784 nt)         | -31.3914 | -37.2493 | 0.077724 | 0.918645 | BH |
| PITG_13809 | Pi Rab18 family GTPase, putative (681 nt)     | -31.3893 | -37.2536 | 0.077724 | 0.918645 | BH |
| PITG_10148 | Pi conserved hypothetical protein (1187 nt)   | -13.1045 | -2.88827 | 0.078074 | 0.918645 | BH |
| PITG_01775 | Pi protein phosphatase 2C, putative (1187 nt) | -31.4291 | -37.1739 | 0.078598 | 0.918645 | BH |
| PITG_04611 | Pi protein kinase (1116 nt)                   | -31.4357 | -37.1607 | 0.078598 | 0.918645 | BH |
| PITG_13392 | Pi conserved hypothetical protein (1187 nt)   | -31.4402 | -37.1518 | 0.078598 | 0.918645 | BH |
| PITG_01172 | Pi methionine-R-sulfoxide reductase (1187 nt) | -31.4284 | -37.1752 | 0.079559 | 0.918645 | BH |
| PITG_15248 | Pi catalase (1694 nt)                         | -31.3694 | -37.2932 | 0.079679 | 0.918645 | BH |
| PITG_22416 | Pi conserved hypothetical protein (1187 nt)   | -11.6702 | -4.11307 | 0.079737 | 0.918645 | BH |
| PITG_05140 | Pi L-threonine 3-dehydrogenase, putative      | -13.1671 | -2.74963 | 0.079759 | 0.918645 | BH |
| PITG_17908 | Pi urease accessory protein ureG, putative    | -31.3257 | -37.3807 | 0.079907 | 0.918645 | BH |
| PITG_06635 | Pi signal recognition particle, putative      | -31.4108 | -37.2105 | 0.080528 | 0.918645 | BH |
| PITG_02615 | Pi conserved hypothetical protein (1187 nt)   | -31.366  | -37.3    | 0.080669 | 0.918645 | BH |
| PITG_19320 | Pi Crinkler (CRN) family protein (84 nt)      | -13.0363 | -3.0149  | 0.081086 | 0.918645 | BH |
| PITG_04732 | Pi conserved hypothetical protein (1187 nt)   | -30.9777 | -38.0768 | 0.081655 | 0.918645 | BH |
| PITG_10499 | Pi conserved hypothetical protein (1187 nt)   | -31.3747 | -37.2826 | 0.081666 | 0.918645 | BH |
| PITG_11690 | Pi conserved hypothetical protein (1187 nt)   | -12.3571 | -2.50604 | 0.081759 | 0.918645 | BH |
| PITG_15149 | Pi conserved hypothetical protein (1187 nt)   | -31.417  | -37.1982 | 0.082488 | 0.918645 | BH |
| PITG_15388 | Pi phenol acid carboxylase, putative          | -11.9758 | 3.166328 | 0.082939 | 0.918645 | BH |
| PITG_14917 | Pi thioredoxin-like protein (2028 nt)         | -31.4153 | -37.2016 | 0.084478 | 0.918645 | BH |
| PITG_14509 | Pi hypothetical protein (243 nt)              | -31.3883 | -37.2554 | 0.084707 | 0.918645 | BH |
| PITG_20994 | Pi conserved hypothetical protein (1187 nt)   | -31.4364 | -37.1593 | 0.085484 | 0.918645 | BH |
| PITG_18011 | Pi conserved hypothetical protein (1187 nt)   | -13.1647 | -2.76049 | 0.085604 | 0.918645 | BH |
| PITG_03054 | Pi conserved hypothetical protein (1187 nt)   | -31.3583 | -37.3154 | 0.086097 | 0.918645 | BH |
| PITG_15531 | Pi glutathione S-transferase, putative        | -13.1078 | -2.89053 | 0.086297 | 0.918645 | BH |
| PITG_15069 | Pi conserved hypothetical protein (1187 nt)   | -9.53907 | 3.487762 | 0.086363 | 0.918645 | BH |
| PITG_09597 | Pi conserved hypothetical protein (1187 nt)   | -31.3785 | -37.2751 | 0.086775 | 0.918645 | BH |

|            |                                       |          |          |          |          |    |
|------------|---------------------------------------|----------|----------|----------|----------|----|
| PITG_11854 | Pi C2 domain-containing protein, p    | -31.3932 | -37.2458 | 0.086775 | 0.918645 | BH |
| PITG_10390 | Pi conserved hypothetical protein (   | -31.1775 | -37.6771 | 0.087156 | 0.918645 | BH |
| PITG_06693 | Pi trifunctional enzyme subunit alp   | -31.269  | -37.4941 | 0.087511 | 0.918645 | BH |
| PITG_05781 | Pi eukaryotic translation initiation  | -31.4277 | -37.1767 | 0.087521 | 0.918645 | BH |
| PITG_09705 | Pi SUMO-conjugating enzyme (SCE       | -31.4417 | -37.1486 | 0.087521 | 0.918645 | BH |
| PITG_11182 | Pi conserved hypothetical protein (   | -31.4239 | -37.1844 | 0.087521 | 0.918645 | BH |
| PITG_14170 | Pi galactokinase, putative (1310 nt   | -31.409  | -37.2141 | 0.087521 | 0.918645 | BH |
| PITG_15551 | Pi hypothetical protein (517 nt)      | -31.4183 | -37.1955 | 0.087521 | 0.918645 | BH |
| PITG_01777 | Pi presenilin-like protein (2926 nt)  | -31.4784 | -37.0754 | 0.087558 | 0.918645 | BH |
| PITG_02984 | Pi conserved hypothetical protein (   | -31.4825 | -37.0672 | 0.087558 | 0.918645 | BH |
| PITG_06790 | Pi Ufm1-conjugating enzyme 1 (56      | -31.465  | -37.1022 | 0.087558 | 0.918645 | BH |
| PITG_11438 | Pi hypothetical protein (689 nt)      | -31.4597 | -37.1127 | 0.087558 | 0.918645 | BH |
| PITG_12948 | Pi conserved hypothetical protein (   | -31.4606 | -37.111  | 0.087558 | 0.918645 | BH |
| PITG_13101 | Pi fimbrin-like protein (2444 nt)     | -31.4737 | -37.0848 | 0.087558 | 0.918645 | BH |
| PITG_14260 | Pi FACT complex subunit SSRP1, pu     | -31.4612 | -37.1097 | 0.087558 | 0.918645 | BH |
| PITG_15416 | Pi conserved hypothetical protein (   | -31.4837 | -37.0646 | 0.087558 | 0.918645 | BH |
| PITG_20125 | Pi conserved hypothetical protein (   | -31.4777 | -37.0766 | 0.087558 | 0.918645 | BH |
| PITG_22264 | Pi ribosomal protein S6 kinase alph   | -31.465  | -37.1022 | 0.087558 | 0.918645 | BH |
| PITG_22870 | Pi avr2 secreted RxLR effector pepi   | -16.3134 | 6.419337 | 0.087956 | 0.918645 | BH |
| PITG_20321 | Pi retinol dehydrogenase, putative    | -31.4202 | -37.1917 | 0.08855  | 0.918645 | BH |
| PITG_02177 | Pi metalloprotease family M48X, p     | -31.4722 | -37.0878 | 0.088565 | 0.918645 | BH |
| PITG_12696 | Pi conserved hypothetical protein (   | -31.4739 | -37.0843 | 0.088565 | 0.918645 | BH |
| PITG_15892 | Pi calcium/calmodulin dependent p     | -31.4715 | -37.0891 | 0.088565 | 0.918645 | BH |
| PITG_18306 | Pi conserved hypothetical protein (   | -9.48024 | -2.67492 | 0.088619 | 0.918645 | BH |
| PITG_14993 | Pi protein-L-isoaspartate O-methyl    | -31.1312 | -37.7697 | 0.089718 | 0.918645 | BH |
| PITG_04530 | Pi conserved hypothetical protein (   | -13.1887 | -2.70524 | 0.089751 | 0.918645 | BH |
| PITG_03095 | Pi carbohydrate-binding protein, pi   | -31.3693 | -37.2935 | 0.089937 | 0.918645 | BH |
| PITG_04921 | Pi hypothetical protein (456 nt)      | -31.3987 | -37.2348 | 0.089937 | 0.918645 | BH |
| PITG_08509 | Pi conserved hypothetical protein (   | -12.2967 | -2.66278 | 0.09032  | 0.918645 | BH |
| PITG_09872 | Pi cell 5A endo-1,4-beta-glucanase (  | -31.7349 | -36.5624 | 0.090532 | 0.918645 | BH |
| PITG_17594 | Pi conserved hypothetical protein (   | -31.7349 | -36.5624 | 0.090532 | 0.918645 | BH |
| PITG_05738 | Pi cleavage induced conserved hyp     | -31.4561 | -37.1199 | 0.0906   | 0.918645 | BH |
| PITG_22286 | Pi Crinkler (CRN) family protein, ps  | -31.4808 | -37.0706 | 0.0906   | 0.918645 | BH |
| PITG_22628 | Pi hypothetical protein (589 nt)      | -31.4037 | -37.2246 | 0.090633 | 0.918645 | BH |
| PITG_09748 | Pi CUG-BP- and ETR-3-like factor, p   | -13.1966 | -2.69065 | 0.090971 | 0.918645 | BH |
| PITG_18002 | Pi conserved hypothetical protein (   | -31.3821 | -37.2679 | 0.091008 | 0.918645 | BH |
| PITG_21303 | Pi secreted RxLR effector peptide,    | -12.7173 | -3.79922 | 0.091229 | 0.918645 | BH |
| PITG_08487 | Pi conserved hypothetical protein (   | -31.7425 | -36.5472 | 0.091463 | 0.918645 | BH |
| PITG_09067 | Pi M96 mating-specific protein far    | -31.3404 | -37.3512 | 0.091493 | 0.918645 | BH |
| PITG_02910 | Pi conserved hypothetical protein (   | -31.3482 | -37.3357 | 0.091493 | 0.918645 | BH |
| PITG_05421 | Pi conserved hypothetical protein (   | -31.3289 | -37.3742 | 0.091493 | 0.918645 | BH |
| PITG_11997 | Pi conserved hypothetical protein (   | -31.4563 | -37.1196 | 0.091628 | 0.918645 | BH |
| PITG_16205 | Pi conserved hypothetical protein (   | -31.4509 | -37.1303 | 0.091628 | 0.918645 | BH |
| PITG_17747 | Pi H - or Na -translocating F-type, v | -31.4472 | -37.1378 | 0.091628 | 0.918645 | BH |
| PITG_18543 | Pi conserved hypothetical protein (   | -31.4795 | -37.0732 | 0.091628 | 0.918645 | BH |
| PITG_01826 | Pi conserved hypothetical protein (   | -31.2197 | -37.5928 | 0.091749 | 0.918645 | BH |
| PITG_11692 | Pi conserved hypothetical protein (   | -31.2627 | -37.5067 | 0.092023 | 0.918645 | BH |

|            |                                       |          |          |          |          |    |
|------------|---------------------------------------|----------|----------|----------|----------|----|
| PITG_02409 | Pi Folate-Biopterin Transporter (FB   | -14.4992 | 4.095775 | 0.092334 | 0.918645 | BH |
| PITG_02565 | Pi protein kinase, putative (1170 nt) | -31.7291 | -36.574  | 0.0924   | 0.918645 | BH |
| PITG_03115 | Pi conserved hypothetical protein (   | -31.7291 | -36.574  | 0.0924   | 0.918645 | BH |
| PITG_08061 | Pi hydroxyacyl-coenzyme A dehydr      | -31.6824 | -36.6673 | 0.092653 | 0.918645 | BH |
| PITG_14231 | Pi importin subunit alpha, putative   | -31.4594 | -37.1133 | 0.092664 | 0.918645 | BH |
| PITG_12526 | Pi conserved hypothetical protein (   | -31.4353 | -37.1615 | 0.092746 | 0.918645 | BH |
| PITG_13152 | Pi conserved hypothetical protein (   | -31.4044 | -37.2233 | 0.092746 | 0.918645 | BH |
| PITG_17254 | Pi conserved hypothetical protein (   | -31.4397 | -37.1526 | 0.092746 | 0.918645 | BH |
| PITG_06423 | Pi conserved hypothetical protein (   | -13.0442 | -3.0392  | 0.092896 | 0.918645 | BH |
| PITG_09955 | Pi acyl-CoA dehydrogenase family      | -31.3869 | -37.2583 | 0.093175 | 0.918645 | BH |
| PITG_21607 | Pi serine protease family S10, puta   | -31.3952 | -37.2417 | 0.093175 | 0.918645 | BH |
| PITG_19053 | Pi hypothetical protein (291 nt)      | -11.5206 | 3.072907 | 0.093484 | 0.918645 | BH |
| PITG_08733 | Pi conserved hypothetical protein (   | -31.664  | -36.7041 | 0.093643 | 0.918645 | BH |
| PITG_13112 | Pi conserved hypothetical protein (   | -31.658  | -36.7162 | 0.093643 | 0.918645 | BH |
| PITG_01365 | Pi protein kinase, putative (3470 nt) | -31.4814 | -37.0692 | 0.093707 | 0.918645 | BH |
| PITG_09262 | Pi Equilibrative Nucleoside Transp    | -31.4132 | -37.2057 | 0.094241 | 0.918645 | BH |
| PITG_19298 | Pi sugar phosphate exchanger, put     | -31.7168 | -36.5986 | 0.094296 | 0.918645 | BH |
| PITG_05553 | Pi D-lactate dehydrogenase, putati    | -31.4674 | -37.0973 | 0.094758 | 0.918645 | BH |
| PITG_04043 | Pi conserved hypothetical protein (   | -31.4446 | -37.1429 | 0.094758 | 0.918645 | BH |
| PITG_16262 | Pi hypothetical protein (1312 nt)     | -31.4535 | -37.1251 | 0.094758 | 0.918645 | BH |
| PITG_04678 | Pi phosphatidylinositol-3,4,5-trisph  | -31.5467 | -36.9387 | 0.095037 | 0.918645 | BH |
| PITG_17445 | Pi glycerol kinase 1 (1685 nt)        | -13.1506 | -2.7986  | 0.095426 | 0.918645 | BH |
| PITG_15269 | Pi conserved hypothetical protein (   | -31.6834 | -36.6654 | 0.095645 | 0.918645 | BH |
| PITG_08536 | Pi conserved hypothetical protein (   | -31.5923 | -36.8476 | 0.096495 | 0.918645 | BH |
| PITG_13204 | Pi conserved hypothetical protein (   | -11.9306 | -2.30785 | 0.096515 | 0.918645 | BH |
| PITG_13616 | Pi conserved hypothetical protein (   | -31.4476 | -37.1369 | 0.096881 | 0.918645 | BH |
| PITG_22835 | Pi Crinkler (CRN) family protein, ps  | -12.394  | -2.43968 | 0.097675 | 0.918645 | BH |
| PITG_02767 | Pi cysteine dioxygenase, putative (   | -31.6661 | -36.6999 | 0.097679 | 0.918645 | BH |
| PITG_00209 | Pi Major Facilitator Superfamily (M   | -31.7963 | -36.4396 | 0.097888 | 0.918645 | BH |
| PITG_03416 | Pi cysteine protease family C01A, p   | -31.7768 | -36.4785 | 0.097888 | 0.918645 | BH |
| PITG_03460 | Pi seryl-tRNA synthetase (1365 nt)    | -31.7913 | -36.4495 | 0.097888 | 0.918645 | BH |
| PITG_03520 | Pi conserved hypothetical protein (   | -31.78   | -36.4721 | 0.097888 | 0.918645 | BH |
| PITG_06150 | Pi conserved hypothetical protein (   | -31.8037 | -36.4247 | 0.097888 | 0.918645 | BH |
| PITG_09598 | Pi U4/U6.U5 tri-snRNP-associated      | -31.7971 | -36.438  | 0.097888 | 0.918645 | BH |
| PITG_11107 | Pi conserved hypothetical protein (   | -31.776  | -36.4801 | 0.097888 | 0.918645 | BH |
| PITG_12496 | Pi conserved hypothetical protein (   | -31.7744 | -36.4833 | 0.097888 | 0.918645 | BH |
| PITG_16128 | Pi conserved hypothetical protein (   | -31.8061 | -36.4199 | 0.097888 | 0.918645 | BH |
| PITG_16352 | Pi conserved hypothetical protein (   | -31.7913 | -36.4495 | 0.097888 | 0.918645 | BH |
| PITG_17012 | Pi conserved hypothetical protein (   | -31.7697 | -36.4928 | 0.097888 | 0.918645 | BH |
| PITG_19850 | Pi conserved hypothetical protein (   | -31.7768 | -36.4785 | 0.097888 | 0.918645 | BH |
| PITG_20381 | Pi hypothetical protein (791 nt)      | -31.8037 | -36.4247 | 0.097888 | 0.918645 | BH |
| PITG_01722 | Pi conserved hypothetical protein (   | -31.7955 | -36.4412 | 0.097888 | 0.918645 | BH |
| PITG_12843 | Pi rab proteins geranylgeranyltrans   | -31.7816 | -36.4689 | 0.097888 | 0.918645 | BH |
| PITG_14592 | Pi hypothetical protein (608 nt)      | -31.7881 | -36.4559 | 0.097888 | 0.918645 | BH |
| PITG_15301 | Pi protein kinase (929 nt)            | -31.7897 | -36.4527 | 0.097888 | 0.918645 | BH |
| PITG_15485 | Pi conserved hypothetical protein (   | -31.7905 | -36.4511 | 0.097888 | 0.918645 | BH |
| PITG_21183 | Pi conserved hypothetical protein (   | -31.7752 | -36.4817 | 0.097888 | 0.918645 | BH |

|            |                                      |          |          |          |          |    |
|------------|--------------------------------------|----------|----------|----------|----------|----|
| PITG_05589 | Pi conserved hypothetical protein (  | -31.4648 | -37.1025 | 0.097954 | 0.918645 | BH |
| PITG_09652 | Pi conserved hypothetical protein (  | -12.3522 | -2.5404  | 0.098585 | 0.918645 | BH |
| PITG_04773 | Pi conserved hypothetical protein (  | -31.8029 | -36.4264 | 0.098822 | 0.918645 | BH |
| PITG_05383 | Pi conserved hypothetical protein (  | -31.818  | -36.3961 | 0.098822 | 0.918645 | BH |
| PITG_06390 | Pi conserved hypothetical protein (  | -31.7712 | -36.4897 | 0.098822 | 0.918645 | BH |
| PITG_09315 | Pi conserved hypothetical protein (  | -31.7856 | -36.4609 | 0.098822 | 0.918645 | BH |
| PITG_09641 | Pi conserved hypothetical protein (  | -31.7712 | -36.4897 | 0.098822 | 0.918645 | BH |
| PITG_09931 | Pi conserved hypothetical protein (  | -31.8172 | -36.3978 | 0.098822 | 0.918645 | BH |
| PITG_11648 | Pi chitobiosyldiphosphodolichol be   | -31.7713 | -36.4896 | 0.098822 | 0.918645 | BH |
| PITG_12504 | Pi Mitochondrial Carrier (MC) Fami   | -31.7705 | -36.4912 | 0.098822 | 0.918645 | BH |
| PITG_13153 | Pi GTP-binding protein, putative (1  | -31.7856 | -36.4609 | 0.098822 | 0.918645 | BH |
| PITG_14995 | Pi conserved hypothetical protein (  | -31.7995 | -36.4331 | 0.098822 | 0.918645 | BH |
| PITG_15357 | Pi conserved hypothetical protein (  | -31.7792 | -36.4737 | 0.098822 | 0.918645 | BH |
| PITG_15694 | Pi dihydroorotase (1271 nt)          | -31.818  | -36.3961 | 0.098822 | 0.918645 | BH |
| PITG_17683 | Pi conserved hypothetical protein (  | -31.8077 | -36.4166 | 0.098822 | 0.918645 | BH |
| PITG_20505 | Pi conserved hypothetical protein (  | -31.7873 | -36.4575 | 0.098822 | 0.918645 | BH |
| PITG_21182 | Pi apoptosis-inducing factor 1, puta | -31.7776 | -36.4769 | 0.098822 | 0.918645 | BH |
| PITG_09253 | Pi conserved hypothetical protein (  | -31.772  | -36.4881 | 0.098822 | 0.918645 | BH |
| PITG_10463 | Pi conserved hypothetical protein (  | -31.772  | -36.4881 | 0.098822 | 0.918645 | BH |
| PITG_13768 | Pi acyl-CoA-binding domain-contain   | -31.8153 | -36.4016 | 0.098822 | 0.918645 | BH |
| PITG_16760 | Pi elongation of very long chain fat | -13.0973 | 3.277087 | 0.098944 | 0.918645 | BH |
| PITG_16469 | Pi RMD5 family protein (2464 nt)     | -31.7319 | -36.5684 | 0.099156 | 0.918645 | BH |
| PITG_21765 | Pi conserved hypothetical protein (  | -31.7186 | -36.5948 | 0.099156 | 0.918645 | BH |
| PITG_12882 | Pi electron transfer flavoprotein su | -11.529  | -2.41393 | 0.099749 | 0.918645 | BH |
| PITG_18635 | Pi conserved hypothetical protein (  | -31.7937 | -36.4446 | 0.099761 | 0.918645 | BH |
| PITG_03501 | Pi alcohol dehydrogenase, putative   | -31.8161 | -36.3999 | 0.099761 | 0.918645 | BH |
| PITG_18922 | Pi conserved hypothetical protein (  | -31.8163 | -36.3995 | 0.099761 | 0.918645 | BH |
| PITG_22398 | Pi conserved hypothetical protein (  | -31.7856 | -36.4608 | 0.099761 | 0.918645 | BH |
| PITG_23322 | Pi hypothetical protein (1055 nt)    | -31.7864 | -36.4592 | 0.099761 | 0.918645 | BH |
| PITG_09463 | Pi conserved hypothetical protein (  | -31.4793 | -37.0735 | 0.099992 | 0.918645 | BH |
| PITG_10308 | Pi conserved hypothetical protein (  | -31.6929 | -36.6462 | 0.100149 | 0.918645 | BH |
| PITG_18342 | Pi alcohol dehydrogenase, putative   | -31.7387 | -36.5548 | 0.100149 | 0.918645 | BH |
| PITG_00506 | Pi syntaxin 7-like protein (1139 nt) | -31.4905 | -37.0512 | 0.100507 | 0.918645 | BH |
| PITG_01557 | Pi conserved hypothetical protein (  | -31.5205 | -36.9911 | 0.100507 | 0.918645 | BH |
| PITG_01714 | Pi conserved hypothetical protein (  | -31.5324 | -36.9674 | 0.100507 | 0.918645 | BH |
| PITG_05583 | Pi glutathione S-transferase, putati | -31.4953 | -37.0416 | 0.100507 | 0.918645 | BH |
| PITG_09434 | Pi conserved hypothetical protein (  | -31.5209 | -36.9903 | 0.100507 | 0.918645 | BH |
| PITG_11019 | Pi conserved hypothetical protein (  | -31.5255 | -36.981  | 0.100507 | 0.918645 | BH |
| PITG_13428 | Pi conserved hypothetical protein (  | -31.5142 | -37.0037 | 0.100507 | 0.918645 | BH |
| PITG_18088 | Pi conserved hypothetical protein (  | -31.5255 | -36.981  | 0.100507 | 0.918645 | BH |
| PITG_19111 | Pi conserved hypothetical protein (  | -31.5205 | -36.9911 | 0.100507 | 0.918645 | BH |
| PITG_12947 | Pi 40S ribosomal protein S23, puta   | -8.67003 | 1.822161 | 0.100565 | 0.918645 | BH |
| PITG_02842 | Pi CDP-alcohol phosphatidyltransfe   | -31.7624 | -36.5072 | 0.100707 | 0.918645 | BH |
| PITG_11368 | Pi conserved hypothetical protein (  | -31.8155 | -36.4012 | 0.100707 | 0.918645 | BH |
| PITG_19979 | Pi conserved hypothetical protein (  | -31.7767 | -36.4786 | 0.100707 | 0.918645 | BH |
| PITG_04076 | Pi conserved hypothetical protein (  | -31.692  | -36.6481 | 0.100789 | 0.918645 | BH |
| PITG_12148 | Pi conserved hypothetical protein (  | -31.6845 | -36.6632 | 0.100789 | 0.918645 | BH |

|            |                                       |          |          |          |          |    |
|------------|---------------------------------------|----------|----------|----------|----------|----|
| PITG_16068 | Pi conserved hypothetical protein (   | -31.646  | -36.7401 | 0.100789 | 0.918645 | BH |
| PITG_04483 | Pi conserved hypothetical protein (   | -31.3973 | -37.2374 | 0.101022 | 0.918645 | BH |
| PITG_07027 | Pi isocitrate lyase (1764 nt)         | -31.3973 | -37.2374 | 0.101022 | 0.918645 | BH |
| PITG_03530 | Pi alpha-aminoadipic semialdehyde     | -31.7463 | -36.5395 | 0.101149 | 0.918645 | BH |
| PITG_07917 | Pi PLAC8 family protein (722 nt)      | -31.7463 | -36.5395 | 0.101149 | 0.918645 | BH |
| PITG_20747 | Pi transcription elongation factor B  | -31.4746 | -37.0829 | 0.101217 | 0.918645 | BH |
| PITG_00724 | Pi conserved hypothetical protein (   | -31.4128 | -37.2064 | 0.101517 | 0.918645 | BH |
| PITG_09936 | Pi conserved hypothetical protein (   | -31.5196 | -36.993  | 0.101577 | 0.918645 | BH |
| PITG_22303 | Pi hypothetical protein (1440 nt)     | -31.5027 | -37.0267 | 0.101577 | 0.918645 | BH |
| PITG_00257 | Pi conserved hypothetical protein (   | -31.7987 | -36.4347 | 0.101659 | 0.918645 | BH |
| PITG_07314 | Pi conserved hypothetical protein (   | -31.7737 | -36.4847 | 0.101659 | 0.918645 | BH |
| PITG_09549 | Pi hypothetical protein (264 nt)      | -31.807  | -36.418  | 0.101659 | 0.918645 | BH |
| PITG_12973 | Pi conserved hypothetical protein (   | -31.7954 | -36.4413 | 0.101659 | 0.918645 | BH |
| PITG_13041 | Pi RNA polymerase-associated prot     | -31.7881 | -36.4559 | 0.101659 | 0.918645 | BH |
| PITG_21132 | Pi conserved hypothetical protein (   | -31.7538 | -36.5246 | 0.101659 | 0.918645 | BH |
| PITG_16156 | Pi conserved hypothetical protein (   | -31.6481 | -36.736  | 0.101841 | 0.918645 | BH |
| PITG_06289 | Pi conserved hypothetical protein (   | -31.7904 | -36.4512 | 0.102618 | 0.918645 | BH |
| PITG_07975 | Pi methylcrotonoyl-CoA carboxylas     | -31.8036 | -36.4248 | 0.102618 | 0.918645 | BH |
| PITG_08196 | Pi conserved hypothetical protein (   | -31.7963 | -36.4396 | 0.102618 | 0.918645 | BH |
| PITG_16052 | Pi Animal Inward Rectifier K Chanr    | -31.7831 | -36.4659 | 0.102618 | 0.918645 | BH |
| PITG_16063 | Pi conserved hypothetical protein (   | -31.7746 | -36.483  | 0.102618 | 0.918645 | BH |
| PITG_17042 | Pi protein RER1A (736 nt)             | -31.8036 | -36.4248 | 0.102618 | 0.918645 | BH |
| PITG_17456 | Pi conserved hypothetical protein (   | -31.4036 | -37.225  | 0.10265  | 0.918645 | BH |
| PITG_00208 | Pi protein kinase, putative (2334 nt) | -31.5333 | -36.9655 | 0.102653 | 0.918645 | BH |
| PITG_00995 | Pi conserved hypothetical protein (   | -31.5226 | -36.9869 | 0.102653 | 0.918645 | BH |
| PITG_08576 | Pi conserved hypothetical protein (   | -31.5126 | -37.007  | 0.102653 | 0.918645 | BH |
| PITG_10711 | Pi PpiC-type peptidyl-prolyl cis-tran | -31.5021 | -37.0279 | 0.102653 | 0.918645 | BH |
| PITG_12172 | Pi hypothetical protein (402 nt)      | -31.5326 | -36.9668 | 0.102653 | 0.918645 | BH |
| PITG_18797 | Pi conserved hypothetical protein (   | -31.5326 | -36.9668 | 0.102653 | 0.918645 | BH |
| PITG_21172 | Pi protein phosphatase 1E, putativ    | -31.4923 | -37.0475 | 0.102653 | 0.918645 | BH |
| PITG_11955 | Pi conserved hypothetical protein (   | -11.8555 | -3.73479 | 0.102874 | 0.918645 | BH |
| PITG_21926 | Pi conserved hypothetical protein (   | -31.5771 | -36.878  | 0.102993 | 0.918645 | BH |
| PITG_00319 | Pi conserved hypothetical protein (   | -13.252  | -2.57872 | 0.103021 | 0.918645 | BH |
| PITG_07341 | Pi conserved hypothetical protein (   | -12.2764 | -2.73114 | 0.103374 | 0.918645 | BH |
| PITG_04937 | Pi conserved hypothetical protein (   | -31.4762 | -37.0797 | 0.10343  | 0.918645 | BH |
| PITG_03715 | Pi conserved hypothetical protein (   | -31.7823 | -36.4676 | 0.103583 | 0.918645 | BH |
| PITG_16272 | Pi M96 mating-specific protein far    | -31.7605 | -36.5111 | 0.103583 | 0.918645 | BH |
| PITG_17489 | Pi conserved hypothetical protein (   | -31.8045 | -36.4231 | 0.103583 | 0.918645 | BH |
| PITG_17719 | Pi iron-sulfur cluster assembly prot  | -31.775  | -36.4821 | 0.103583 | 0.918645 | BH |
| PITG_03850 | Pi conserved hypothetical protein (   | -31.4986 | -37.035  | 0.103736 | 0.918645 | BH |
| PITG_05727 | Pi conserved hypothetical protein (   | -31.5169 | -36.9983 | 0.103736 | 0.918645 | BH |
| PITG_07572 | Pi conserved hypothetical protein (   | -31.5321 | -36.968  | 0.103736 | 0.918645 | BH |
| PITG_06094 | Pi secreted RxLR effector peptide,    | -14.0183 | 3.950931 | 0.103991 | 0.918645 | BH |
| PITG_22433 | Pi conserved hypothetical protein (   | -31.1928 | -37.6464 | 0.104534 | 0.918645 | BH |
| PITG_02381 | Pi conserved hypothetical protein (   | -31.4442 | -37.1437 | 0.104548 | 0.918645 | BH |
| PITG_05103 | Pi conserved hypothetical protein (   | -31.4732 | -37.0857 | 0.104548 | 0.918645 | BH |
| PITG_01981 | Pi conserved hypothetical protein (   | -31.8128 | -36.4065 | 0.104554 | 0.918645 | BH |

|            |                                       |          |          |          |          |    |
|------------|---------------------------------------|----------|----------|----------|----------|----|
| PITG_03183 | Pi hypothetical protein (700 nt)      | -31.8128 | -36.4065 | 0.104554 | 0.918645 | BH |
| PITG_04875 | Pi xaa-Pro aminopeptidase, putativ    | -31.8128 | -36.4064 | 0.104554 | 0.918645 | BH |
| PITG_08375 | Pi conserved hypothetical protein (   | -31.7814 | -36.4693 | 0.104554 | 0.918645 | BH |
| PITG_14097 | Pi conserved hypothetical protein (   | -31.7755 | -36.4812 | 0.104554 | 0.918645 | BH |
| PITG_14747 | Pi conserved hypothetical protein (   | -31.7826 | -36.4669 | 0.104554 | 0.918645 | BH |
| PITG_05449 | Pi palmitoyltransferase, putative (1  | -31.5263 | -36.9796 | 0.104827 | 0.918645 | BH |
| PITG_14967 | Pi conserved hypothetical protein (   | -31.4992 | -37.0336 | 0.104827 | 0.918645 | BH |
| PITG_15630 | Pi conserved hypothetical protein (   | -31.5246 | -36.983  | 0.104827 | 0.918645 | BH |
| PITG_13335 | Pi conserved hypothetical protein (   | -31.4301 | -37.1719 | 0.104939 | 0.918645 | BH |
| PITG_15470 | Pi conserved hypothetical protein (   | -31.6449 | -36.7422 | 0.105046 | 0.918645 | BH |
| PITG_06365 | Pi conserved hypothetical protein (   | -31.7272 | -36.5777 | 0.105221 | 0.918645 | BH |
| PITG_09992 | Pi conserved hypothetical protein (   | -31.7272 | -36.5777 | 0.105221 | 0.918645 | BH |
| PITG_01290 | Pi peptidyl-prolyl cis-trans isomera  | -31.3288 | -37.3746 | 0.105347 | 0.918645 | BH |
| PITG_02139 | Pi conserved hypothetical protein (   | -31.8054 | -36.4213 | 0.105532 | 0.918645 | BH |
| PITG_09628 | Pi conserved hypothetical protein (   | -31.7835 | -36.4652 | 0.105532 | 0.918645 | BH |
| PITG_13861 | Pi conserved hypothetical protein (   | -31.798  | -36.4361 | 0.105532 | 0.918645 | BH |
| PITG_18440 | Pi conserved hypothetical protein (   | -31.7907 | -36.4507 | 0.105532 | 0.918645 | BH |
| PITG_18455 | Pi conserved hypothetical protein (   | -31.8054 | -36.4213 | 0.105532 | 0.918645 | BH |
| PITG_06383 | Pi conserved hypothetical protein (   | -31.3734 | -37.2853 | 0.105695 | 0.918645 | BH |
| PITG_09016 | Pi NADH ubiquinone oxidoreductas      | -31.3819 | -37.2684 | 0.105695 | 0.918645 | BH |
| PITG_13912 | Pi conserved hypothetical protein (   | -31.5153 | -37.0015 | 0.105924 | 0.918645 | BH |
| PITG_14691 | Pi hypothetical protein (2751 nt)     | -31.287  | -37.4581 | 0.106074 | 0.918645 | BH |
| PITG_07985 | Pi myosin-like protein (4915 nt)      | -31.7141 | -36.6038 | 0.106258 | 0.918645 | BH |
| PITG_12513 | Pi conserved hypothetical protein (   | -31.6232 | -36.7857 | 0.10636  | 0.918645 | BH |
| PITG_12852 | Pi conserved hypothetical protein (   | -31.796  | -36.4401 | 0.106516 | 0.918645 | BH |
| PITG_15311 | Pi hypothetical protein (2765 nt)     | -31.7693 | -36.4936 | 0.106516 | 0.918645 | BH |
| PITG_02748 | Pi conserved hypothetical protein (   | -31.4308 | -37.1705 | 0.107261 | 0.918645 | BH |
| PITG_01607 | Pi actin-like protein (1324 nt)       | -31.7877 | -36.4566 | 0.107506 | 0.918645 | BH |
| PITG_10695 | Pi conserved hypothetical protein (   | -31.7772 | -36.4777 | 0.107506 | 0.918645 | BH |
| PITG_16648 | Pi conserved hypothetical protein (   | -31.799  | -36.4342 | 0.107506 | 0.918645 | BH |
| PITG_19865 | Pi carboxyvinyl-carboxyphosphona      | -31.811  | -36.4101 | 0.107506 | 0.918645 | BH |
| PITG_20679 | Pi conserved hypothetical protein (   | -31.2753 | -37.4816 | 0.107778 | 0.918645 | BH |
| PITG_08467 | Pi diacylglycerol O-acyltransferase,  | -31.4456 | -37.1409 | 0.107947 | 0.918645 | BH |
| PITG_19772 | Pi hypothetical protein (614 nt)      | -11.252  | -2.41638 | 0.108091 | 0.918645 | BH |
| PITG_17455 | Pi vacuolar protein sorting-associat  | -31.5317 | -36.9687 | 0.10814  | 0.918645 | BH |
| PITG_11116 | Pi NAD-specific glutamate dehydro     | -31.7484 | -36.5353 | 0.108352 | 0.918645 | BH |
| PITG_07939 | Pi conserved hypothetical protein (   | -31.405  | -37.2221 | 0.108434 | 0.918645 | BH |
| PITG_03443 | Pi lipin-like protein (1587 nt)       | -31.7572 | -36.5176 | 0.108504 | 0.918645 | BH |
| PITG_03544 | Pi conserved hypothetical protein (   | -31.8186 | -36.395  | 0.108504 | 0.918645 | BH |
| PITG_09895 | Pi conserved hypothetical protein (   | -31.7572 | -36.5176 | 0.108504 | 0.918645 | BH |
| PITG_19234 | Pi choline/Carnitine O-acyltransfer   | -31.8072 | -36.4176 | 0.108504 | 0.918645 | BH |
| PITG_06184 | Pi conserved hypothetical protein (   | -31.296  | -37.4401 | 0.108574 | 0.918645 | BH |
| PITG_19129 | Pi ATP-dependent RNA helicase eIF     | -11.3881 | 1.976597 | 0.108828 | 0.918645 | BH |
| PITG_08689 | Pi hypothetical protein (982 nt)      | -31.4784 | -37.0754 | 0.109095 | 0.918645 | BH |
| PITG_09624 | Pi conserved hypothetical protein (   | -31.4973 | -37.0376 | 0.109258 | 0.918645 | BH |
| PITG_13839 | Pi conserved hypothetical protein (   | -31.4924 | -37.0473 | 0.109258 | 0.918645 | BH |
| PITG_13778 | Pi cell cycle-related kinase, putativ | -13.2745 | -2.53237 | 0.10928  | 0.918645 | BH |

|            |                                       |          |          |          |          |    |
|------------|---------------------------------------|----------|----------|----------|----------|----|
| PITG_03374 | Pi conserved hypothetical protein (   | -31.7145 | -36.6031 | 0.109411 | 0.918645 | BH |
| PITG_17498 | Pi conserved hypothetical protein (   | -31.7283 | -36.5755 | 0.109411 | 0.918645 | BH |
| PITG_10937 | Pi UDP-glucuronic acid decarboxyla    | -31.7926 | -36.447  | 0.109507 | 0.918645 | BH |
| PITG_11119 | Pi conserved hypothetical protein (   | -31.7868 | -36.4585 | 0.109507 | 0.918645 | BH |
| PITG_19237 | Pi conserved hypothetical protein (   | -31.7782 | -36.4758 | 0.109507 | 0.918645 | BH |
| PITG_03684 | Pi conserved hypothetical protein (   | -13.2432 | -2.60228 | 0.109613 | 0.918645 | BH |
| PITG_05672 | Pi conserved hypothetical protein (   | -31.4339 | -37.1643 | 0.109616 | 0.918645 | BH |
| PITG_13122 | Pi ATP-binding Cassette (ABC) Sup     | -31.5275 | -36.9771 | 0.109916 | 0.918645 | BH |
| PITG_07380 | Pi glutamate synthase, putative (1    | -31.5177 | -36.9967 | 0.110384 | 0.918645 | BH |
| PITG_19767 | Pi ATP-dependent Clp protease pro     | -13.2301 | -2.63581 | 0.110419 | 0.918645 | BH |
| PITG_00844 | Pi copine-like protein, putative (11  | -31.6896 | -36.6529 | 0.110477 | 0.918645 | BH |
| PITG_06970 | Pi conserved hypothetical protein (   | -31.6896 | -36.6529 | 0.110477 | 0.918645 | BH |
| PITG_03224 | Pi conserved hypothetical protein (   | -31.7563 | -36.5195 | 0.110517 | 0.918645 | BH |
| PITG_07049 | Pi conserved hypothetical protein (   | -31.5605 | 36.91118 | 0.111503 | 0.918645 | BH |
| PITG_14720 | Pi aldose 1-epimerase, putative (9    | -31.5605 | 36.91118 | 0.111503 | 0.918645 | BH |
| PITG_04501 | Pi hypothetical protein (338 nt)      | -31.3211 | -37.3899 | 0.111509 | 0.918645 | BH |
| PITG_12989 | Pi glutathione S-transferase theta,   | -31.491  | -37.05   | 0.111516 | 0.918645 | BH |
| PITG_05686 | Pi conserved hypothetical protein (   | -31.8082 | -36.4156 | 0.111534 | 0.918645 | BH |
| PITG_14991 | Pi peroxisomal targeting signal 2 re  | -31.8091 | -36.414  | 0.111534 | 0.918645 | BH |
| PITG_15830 | Pi conserved hypothetical protein (   | -31.8082 | -36.4156 | 0.111534 | 0.918645 | BH |
| PITG_12808 | Pi Amino Acid/Auxin Permease (AA      | -12.6322 | 3.130073 | 0.111663 | 0.918645 | BH |
| PITG_17778 | Pi calcium/calmodulin-dependent       | -31.4015 | -37.229  | 0.112003 | 0.918645 | BH |
| PITG_20675 | Pi conserved hypothetical protein (   | -31.7931 | -36.4458 | 0.112558 | 0.918645 | BH |
| PITG_00688 | Pi cytochrome oxidase assembly pi     | -31.4656 | -37.101  | 0.112587 | 0.918645 | BH |
| PITG_02336 | Pi conserved hypothetical protein (   | -31.4458 | -37.1404 | 0.112587 | 0.918645 | BH |
| PITG_22343 | Pi conserved hypothetical protein (   | -14.4399 | 3.420309 | 0.112631 | 0.918645 | BH |
| PITG_08913 | Pi conserved hypothetical protein (   | -31.5188 | -36.9945 | 0.112656 | 0.918645 | BH |
| PITG_10028 | Pi serine palmitoyltransferase, put   | -13.2615 | -2.56206 | 0.113312 | 0.918645 | BH |
| PITG_02418 | Pi conserved hypothetical protein (   | -31.8092 | -36.4137 | 0.113588 | 0.918645 | BH |
| PITG_03473 | Pi callose synthase, putative (6163   | -31.8018 | -36.4285 | 0.113588 | 0.918645 | BH |
| PITG_08135 | Pi D-aspartate oxidase, putative (1   | -31.8092 | -36.4137 | 0.113588 | 0.918645 | BH |
| PITG_07342 | Pi conserved hypothetical protein (   | -31.3589 | -37.3143 | 0.114209 | 0.918645 | BH |
| PITG_21224 | Pi conserved hypothetical protein (   | -31.428  | -37.1762 | 0.114425 | 0.918645 | BH |
| PITG_14297 | Pi hypothetical protein (337 nt)      | -31.622  | -36.7881 | 0.114535 | 0.918645 | BH |
| PITG_07808 | Pi fidgetin-like protein (3137 nt)    | -31.7945 | -36.4431 | 0.114625 | 0.918645 | BH |
| PITG_10980 | Pi phosphatidylinositol-4-phosphat    | -31.7945 | -36.4431 | 0.114625 | 0.918645 | BH |
| PITG_13483 | Pi conserved hypothetical protein (   | -31.7873 | -36.4576 | 0.114625 | 0.918645 | BH |
| PITG_15603 | Pi conserved hypothetical protein (   | -31.7922 | -36.4478 | 0.114625 | 0.918645 | BH |
| PITG_13497 | Pi elicitor-like transglutaminase, pu | -31.697  | -36.6381 | 0.114815 | 0.918645 | BH |
| PITG_02927 | Pi hypothetical protein (700 nt)      | -31.4752 | -37.0817 | 0.114953 | 0.918645 | BH |
| PITG_00978 | Pi conserved hypothetical protein (   | -31.5049 | -37.0223 | 0.114958 | 0.918645 | BH |
| PITG_03166 | Pi vesicle-associated membrane pr     | -31.4896 | -37.0529 | 0.114958 | 0.918645 | BH |
| PITG_08044 | Pi conserved hypothetical protein (   | -11.9358 | -2.33133 | 0.115002 | 0.918645 | BH |
| PITG_00058 | Pi protease inhibitor EpiC4 (519 nt)  | -11.6492 | -2.13673 | 0.115572 | 0.918645 | BH |
| PITG_20354 | Pi hypothetical protein (649 nt)      | -31.4065 | -37.2191 | 0.115648 | 0.918645 | BH |
| PITG_07384 | Pi isoamyl acetate-hydrolyzing este   | -31.7995 | -36.433  | 0.115668 | 0.918645 | BH |
| PITG_20562 | Pi RAC family serine/threonine-pro    | -31.759  | -36.514  | 0.115668 | 0.918645 | BH |

|            |                                        |          |          |          |          |    |
|------------|----------------------------------------|----------|----------|----------|----------|----|
| PITG_13111 | Pi conserved hypothetical protein (    | -14.3494 | 3.231936 | 0.115919 | 0.918645 | BH |
| PITG_01325 | Pi myosin-like protein (1102 nt)       | -31.565  | -36.902  | 0.116061 | 0.918645 | BH |
| PITG_12254 | Pi conserved hypothetical protein (    | -31.5625 | -36.9072 | 0.116061 | 0.918645 | BH |
| PITG_12648 | Pi conserved hypothetical protein (    | -31.5413 | -36.9495 | 0.116061 | 0.918645 | BH |
| PITG_12811 | Pi conserved hypothetical protein (    | -31.5433 | -36.9455 | 0.116061 | 0.918645 | BH |
| PITG_18046 | Pi conserved hypothetical protein (    | -31.5618 | -36.9086 | 0.116061 | 0.918645 | BH |
| PITG_21596 | Pi actin-related protein 2/3 comple    | -31.542  | -36.9482 | 0.116061 | 0.918645 | BH |
| PITG_22939 | Pi Crinkler (CRN) family protein, ps   | -31.5436 | -36.945  | 0.116078 | 0.918645 | BH |
| PITG_11900 | Pi protein kinase, putative (1337 nt)  | -31.4844 | -37.0634 | 0.116148 | 0.918645 | BH |
| PITG_13677 | Pi phosphatidylinositol-4-phosphat     | -31.4568 | -37.1184 | 0.116148 | 0.918645 | BH |
| PITG_22522 | Pi conserved hypothetical protein (    | -13.2362 | -2.62251 | 0.116408 | 0.918645 | BH |
| PITG_05451 | Pi hypothetical protein (1565 nt)      | -31.1682 | -37.6958 | 0.116809 | 0.918645 | BH |
| PITG_02285 | Pi conserved hypothetical protein (    | -31.5737 | -36.8847 | 0.117194 | 0.918645 | BH |
| PITG_06483 | Pi conserved hypothetical protein (    | -31.58   | -36.8722 | 0.117194 | 0.918645 | BH |
| PITG_06719 | Pi glycerol-3-phosphate dehydroge      | -31.5533 | -36.9256 | 0.117194 | 0.918645 | BH |
| PITG_06805 | Pi carbohydrate-binding protein, pi    | -31.5676 | -36.8969 | 0.117194 | 0.918645 | BH |
| PITG_08489 | Pi conserved hypothetical protein (    | -31.5631 | -36.9058 | 0.117194 | 0.918645 | BH |
| PITG_11029 | Pi conserved hypothetical protein (    | -31.5631 | -36.9058 | 0.117194 | 0.918645 | BH |
| PITG_14722 | Pi 12-oxophytodienoate reductase       | -31.5683 | -36.8955 | 0.117194 | 0.918645 | BH |
| PITG_00857 | Pi conserved hypothetical protein (    | -31.4937 | -37.0447 | 0.117288 | 0.918645 | BH |
| PITG_05250 | Pi tRNA (adenine-N(1)-)-methyltra      | -31.5198 | -36.9926 | 0.117288 | 0.918645 | BH |
| PITG_04874 | Pi carbohydrate esterase, putative     | -31.7911 | -36.4499 | 0.117776 | 0.918645 | BH |
| PITG_06146 | Pi conserved hypothetical protein (    | -31.7911 | -36.4499 | 0.117776 | 0.918645 | BH |
| PITG_01072 | Pi 5-methyltetrahydropteroyltrigu      | -11.0058 | 2.971691 | 0.117869 | 0.918645 | BH |
| PITG_07423 | Pi conserved hypothetical protein (    | -31.7372 | -36.5578 | 0.118149 | 0.918645 | BH |
| PITG_01145 | Pi hypothetical protein (807 nt)       | -31.5392 | -36.9536 | 0.118334 | 0.918645 | BH |
| PITG_06691 | Pi cell division control protein 42 (  | -31.5814 | -36.8694 | 0.118334 | 0.918645 | BH |
| PITG_12593 | Pi conserved hypothetical protein (    | -31.5556 | -36.9209 | 0.118334 | 0.918645 | BH |
| PITG_12839 | Pi conserved hypothetical protein (    | -31.5832 | -36.8657 | 0.118334 | 0.918645 | BH |
| PITG_07107 | Pi conserved hypothetical protein (    | -12.4764 | -2.29957 | 0.118382 | 0.918645 | BH |
| PITG_00333 | Pi dihydroflavonol-4-reductase, pu     | -31.4863 | -37.0594 | 0.118464 | 0.918645 | BH |
| PITG_19060 | Pi conserved hypothetical protein (    | -31.526  | -36.98   | 0.118464 | 0.918645 | BH |
| PITG_10674 | Pi CorA Metal Ion Transporter (MI      | -31.6817 | -36.6687 | 0.118608 | 0.918645 | BH |
| PITG_00787 | Pi CRM1 C terminal Exportin 1-like     | -31.8221 | -36.388  | 0.118707 | 0.918645 | BH |
| PITG_01897 | Pi histone deacetylase, putative (1    | -31.8438 | -36.3446 | 0.118707 | 0.918645 | BH |
| PITG_02598 | Pi conserved hypothetical protein (    | -31.8454 | -36.3413 | 0.118707 | 0.918645 | BH |
| PITG_03593 | Pi alanine aminotransferase 2 (173     | -31.8221 | -36.388  | 0.118707 | 0.918645 | BH |
| PITG_06570 | Pi long-chain-fatty-acid-CoA ligase,   | -31.8359 | -36.3603 | 0.118707 | 0.918645 | BH |
| PITG_07530 | Pi conserved hypothetical protein (    | -31.8375 | -36.357  | 0.118707 | 0.918645 | BH |
| PITG_08709 | Pi conserved hypothetical protein (    | -31.8221 | -36.388  | 0.118707 | 0.918645 | BH |
| PITG_08876 | Pi conserved hypothetical protein (    | -31.8367 | -36.3587 | 0.118707 | 0.918645 | BH |
| PITG_09783 | Pi conserved hypothetical protein (    | -31.8695 | -36.293  | 0.118707 | 0.918645 | BH |
| PITG_10383 | Pi conserved hypothetical protein (    | -31.8534 | -36.3254 | 0.118707 | 0.918645 | BH |
| PITG_11226 | Pi conserved hypothetical protein (    | -31.8375 | -36.357  | 0.118707 | 0.918645 | BH |
| PITG_12155 | Pi flagellar peptidyl-prolyl cis-trans | -31.8778 | -36.2765 | 0.118707 | 0.918645 | BH |
| PITG_12453 | Pi conserved hypothetical protein (    | -31.8375 | -36.357  | 0.118707 | 0.918645 | BH |
| PITG_12984 | Pi conserved hypothetical protein (    | -31.8517 | -36.3287 | 0.118707 | 0.918645 | BH |



|            |                                       |          |          |          |          |    |
|------------|---------------------------------------|----------|----------|----------|----------|----|
| PITG_14637 | Pi conserved hypothetical protein (   | -31.8196 | -36.3929 | 0.118707 | 0.918645 | BH |
| PITG_15518 | Pi conserved hypothetical protein (   | -31.8438 | -36.3446 | 0.118707 | 0.918645 | BH |
| PITG_15784 | Pi polyadenylate-binding protein 2    | -31.8606 | -36.3109 | 0.118707 | 0.918645 | BH |
| PITG_16887 | Pi conserved hypothetical protein (   | -31.8446 | -36.3429 | 0.118707 | 0.918645 | BH |
| PITG_18463 | Pi hypothetical protein (1921 nt)     | -31.8204 | -36.3912 | 0.118707 | 0.918645 | BH |
| PITG_18633 | Pi tRNA pseudouridine synthase B,     | -31.8861 | -36.2599 | 0.118707 | 0.918645 | BH |
| PITG_19537 | Pi calnexin, putative (1746 nt)       | -31.877  | -36.2782 | 0.118707 | 0.918645 | BH |
| PITG_20792 | Pi soluble calcium-activated nuclec   | -31.8598 | -36.3126 | 0.118707 | 0.918645 | BH |
| PITG_09997 | Pi phosphatidate cytidyltransfera     | -31.76   | -36.512  | 0.118839 | 0.918645 | BH |
| PITG_12015 | Pi hypothetical protein (3961 nt)     | -31.76   | -36.512  | 0.118839 | 0.918645 | BH |
| PITG_13491 | Pi calcineurin-like phosphoesterase   | -31.7531 | -36.5258 | 0.118839 | 0.918645 | BH |
| PITG_00855 | Pi conserved hypothetical protein (   | -31.543  | -36.946  | 0.11948  | 0.918645 | BH |
| PITG_17884 | Pi conserved hypothetical protein (   | -31.534  | -36.9641 | 0.11948  | 0.918645 | BH |
| PITG_01138 | Pi beta-galactosidase, putative (24   | -31.8704 | -36.2913 | 0.11971  | 0.918645 | BH |
| PITG_01595 | Pi hypothetical protein (328 nt)      | -31.8878 | -36.2565 | 0.11971  | 0.918645 | BH |
| PITG_02075 | Pi 1-acyl-sn-glycerol-3-phosphate a   | -31.8384 | -36.3554 | 0.11971  | 0.918645 | BH |
| PITG_02820 | Pi phosphatidylinositol-3,4,5-trisph  | -31.8257 | -36.3808 | 0.11971  | 0.918645 | BH |
| PITG_03238 | Pi conserved hypothetical protein (   | -31.855  | -36.3221 | 0.11971  | 0.918645 | BH |
| PITG_04539 | Pi conserved hypothetical protein (   | -31.8679 | -36.2963 | 0.11971  | 0.918645 | BH |
| PITG_06767 | Pi transmembrane protein Gpr7-like    | -31.8314 | -36.3693 | 0.11971  | 0.918645 | BH |
| PITG_06845 | Pi riboflavin kinase (601 nt)         | -31.8589 | -36.3143 | 0.11971  | 0.918645 | BH |
| PITG_07305 | Pi conserved hypothetical protein (   | -31.8384 | -36.3554 | 0.11971  | 0.918645 | BH |
| PITG_07905 | Pi xylose isomerase 1 (1410 nt)       | -31.8761 | -36.2799 | 0.11971  | 0.918645 | BH |
| PITG_07955 | Pi xaa-Pro dipeptidase, metallopro    | -31.8462 | -36.3396 | 0.11971  | 0.918645 | BH |
| PITG_07973 | Pi Voltage-gated Ion Channel (VIC)    | -31.8704 | -36.2913 | 0.11971  | 0.918645 | BH |
| PITG_08330 | Pi conserved hypothetical protein (   | -31.8671 | -36.298  | 0.11971  | 0.918645 | BH |
| PITG_08585 | Pi conserved hypothetical protein (   | -31.855  | -36.3221 | 0.11971  | 0.918645 | BH |
| PITG_09449 | Pi SCO1 family protein (916 nt)       | -31.85   | -36.332  | 0.11971  | 0.918645 | BH |
| PITG_09604 | Pi conserved hypothetical protein (   | -31.8471 | -36.338  | 0.11971  | 0.918645 | BH |
| PITG_10268 | Pi hypothetical protein (2199 nt)     | -31.8631 | -36.306  | 0.11971  | 0.918645 | BH |
| PITG_11125 | Pi conserved hypothetical protein (   | -31.8413 | -36.3496 | 0.11971  | 0.918645 | BH |
| PITG_12173 | Pi conserved hypothetical protein (   | -31.8704 | -36.2913 | 0.11971  | 0.918645 | BH |
| PITG_12289 | Pi H - or Na -translocating F-type, v | -31.8392 | -36.3537 | 0.11971  | 0.918645 | BH |
| PITG_13717 | Pi transmembrane protein, putativ     | -31.8886 | -36.2548 | 0.11971  | 0.918645 | BH |
| PITG_14380 | Pi Ion protease, putative (2559 nt)   | -31.8836 | -36.2649 | 0.11971  | 0.918645 | BH |
| PITG_14623 | Pi mediator of RNA polymerase II t    | -31.8509 | -36.3304 | 0.11971  | 0.918645 | BH |
| PITG_14888 | Pi conserved hypothetical protein (   | -31.8795 | -36.2732 | 0.11971  | 0.918645 | BH |
| PITG_15640 | Pi peroxisomal 2,4-dienoyl-CoA rec    | -31.8878 | -36.2565 | 0.11971  | 0.918645 | BH |
| PITG_16329 | Pi conserved hypothetical protein (   | -31.8704 | -36.2913 | 0.11971  | 0.918645 | BH |
| PITG_16798 | Pi phospholipase D; Pi-TM-PLD (27     | -31.8462 | -36.3396 | 0.11971  | 0.918645 | BH |
| PITG_16854 | Pi conserved hypothetical protein (   | -31.8471 | -36.338  | 0.11971  | 0.918645 | BH |
| PITG_19146 | Pi conserved hypothetical protein (   | -31.8462 | -36.3396 | 0.11971  | 0.918645 | BH |
| PITG_21879 | Pi transmembrane protein Gpr7 (171    | -31.8878 | -36.2565 | 0.11971  | 0.918645 | BH |
| PITG_22764 | Pi cysteine synthase, putative (162   | -31.8384 | -36.3554 | 0.11971  | 0.918645 | BH |
| PITG_01496 | Pi glycoside hydrolase, putative (25  | -31.7966 | -36.439  | 0.11991  | 0.918645 | BH |
| PITG_02281 | Pi conserved hypothetical protein (   | -31.8113 | -36.4095 | 0.11991  | 0.918645 | BH |
| PITG_04048 | Pi conserved hypothetical protein (   | -31.6981 | -36.6359 | 0.12041  | 0.918645 | BH |

|            |                                      |          |          |          |          |    |
|------------|--------------------------------------|----------|----------|----------|----------|----|
| PITG_01449 | Pi conserved hypothetical protein (  | -31.5561 | -36.92   | 0.120633 | 0.918645 | BH |
| PITG_00986 | Pi peroxiredoxin-4 (979 nt)          | -31.8744 | -36.2833 | 0.120718 | 0.918645 | BH |
| PITG_01577 | Pi conserved hypothetical protein (  | -31.8169 | -36.3983 | 0.120718 | 0.918645 | BH |
| PITG_02237 | Pi conserved hypothetical protein (  | -31.8492 | -36.3337 | 0.120718 | 0.918645 | BH |
| PITG_05139 | Pi hypothetical protein (470 nt)     | -31.824  | -36.3841 | 0.120718 | 0.918645 | BH |
| PITG_07848 | Pi conserved hypothetical protein (  | -31.8828 | -36.2666 | 0.120718 | 0.918645 | BH |
| PITG_08120 | Pi conserved hypothetical protein (  | -31.8479 | -36.3363 | 0.120718 | 0.918645 | BH |
| PITG_08142 | Pi 5-methylthioadenosine/S-adeno     | -31.8729 | -36.2863 | 0.120718 | 0.918645 | BH |
| PITG_11817 | Pi hypothetical protein (1959 nt)    | -31.824  | -36.3841 | 0.120718 | 0.918645 | BH |
| PITG_13588 | Pi conserved hypothetical protein (  | -31.8811 | -36.2698 | 0.120718 | 0.918645 | BH |
| PITG_14549 | Pi phosphatidic acid phosphatase (   | -31.8248 | -36.3825 | 0.120718 | 0.918645 | BH |
| PITG_16666 | Pi conserved hypothetical protein (  | -31.8169 | -36.3983 | 0.120718 | 0.918645 | BH |
| PITG_17816 | Pi Crinkler (CRN) family protein, ps | -31.8484 | -36.3354 | 0.120718 | 0.918645 | BH |
| PITG_18452 | Pi thioredoxin reductase 1 (3219 n   | -31.8648 | -36.3026 | 0.120718 | 0.918645 | BH |
| PITG_18707 | Pi glycerol-3-phosphate O-acyltran   | -31.8245 | -36.383  | 0.120718 | 0.918645 | BH |
| PITG_19177 | Pi conserved hypothetical protein (  | -31.8492 | -36.3337 | 0.120718 | 0.918645 | BH |
| PITG_02493 | Pi eukaryotic translation initiation | -11.3273 | -2.25311 | 0.120784 | 0.918645 | BH |
| PITG_04471 | Pi Argonaute2 (AGO2) (2784 nt)       | -31.7822 | -36.4678 | 0.120988 | 0.918645 | BH |
| PITG_14580 | Pi conserved hypothetical protein (  | -31.7893 | -36.4534 | 0.120988 | 0.918645 | BH |
| PITG_13729 | Pi conserved hypothetical protein (  | -12.4719 | -2.27832 | 0.121168 | 0.918645 | BH |
| PITG_02626 | Pi conserved hypothetical protein (  | -31.8656 | -36.3009 | 0.121733 | 0.918645 | BH |
| PITG_04846 | Pi conserved hypothetical protein (  | -31.8488 | -36.3346 | 0.121733 | 0.918645 | BH |
| PITG_04910 | Pi serine/threonine protein kinase   | -31.8488 | -36.3346 | 0.121733 | 0.918645 | BH |
| PITG_05990 | Pi myb-like DNA-binding protein, p   | -31.882  | -36.2681 | 0.121733 | 0.918645 | BH |
| PITG_07531 | Pi conserved hypothetical protein (  | -31.8409 | -36.3504 | 0.121733 | 0.918645 | BH |
| PITG_10940 | Pi aldehyde dehydrogenase, mitoc     | -31.8409 | -36.3504 | 0.121733 | 0.918645 | BH |
| PITG_13842 | Pi conserved hypothetical protein (  | -31.8231 | -36.3858 | 0.121733 | 0.918645 | BH |
| PITG_14269 | Pi transmembrane protein, putativ    | -31.8475 | -36.3371 | 0.121733 | 0.918645 | BH |
| PITG_15661 | Pi GMP reductase 2 (2054 nt)         | -31.8819 | -36.2683 | 0.121733 | 0.918645 | BH |
| PITG_15920 | Pi conserved hypothetical protein (  | -31.8564 | -36.3194 | 0.121733 | 0.918645 | BH |
| PITG_17164 | Pi conserved hypothetical protein (  | -31.8488 | -36.3346 | 0.121733 | 0.918645 | BH |
| PITG_17710 | Pi charged multivesicular body pro   | -31.8331 | -36.3659 | 0.121733 | 0.918645 | BH |
| PITG_19204 | Pi conserved hypothetical protein (  | -31.8645 | -36.3031 | 0.121733 | 0.918645 | BH |
| PITG_20296 | Pi ATP-dependent Clp protease ATI    | -31.8331 | -36.3659 | 0.121733 | 0.918645 | BH |
| PITG_03148 | Pi Rab7 family GTPase, putative (98  | -13.2927 | -2.49957 | 0.121733 | 0.918645 | BH |
| PITG_03243 | Pi conserved hypothetical protein (  | -31.5405 | -36.9511 | 0.121792 | 0.918645 | BH |
| PITG_03670 | Pi conserved hypothetical protein (  | -31.5727 | -36.8867 | 0.121792 | 0.918645 | BH |
| PITG_17559 | Pi myb-like DNA-binding protein, p   | -31.5727 | -36.8867 | 0.121792 | 0.918645 | BH |
| PITG_19488 | Pi protein-S-isoprenylcysteine O-m   | -31.5581 | -36.916  | 0.121792 | 0.918645 | BH |
| PITG_00925 | Pi conserved hypothetical protein (  | -31.5119 | -37.0082 | 0.122035 | 0.918645 | BH |
| PITG_02401 | Pi phosphatidylinositol-3,4,5-trisph | -31.5071 | -37.018  | 0.122035 | 0.918645 | BH |
| PITG_16439 | Pi conserved hypothetical protein (  | -31.5169 | -36.9983 | 0.122035 | 0.918645 | BH |
| PITG_18376 | Pi conserved hypothetical protein (  | -31.497  | -37.038  | 0.122035 | 0.918645 | BH |
| PITG_14751 | Pi conserved hypothetical protein (  | -31.768  | -36.496  | 0.122072 | 0.918645 | BH |
| PITG_16376 | Pi conserved hypothetical protein (  | -31.768  | -36.496  | 0.122072 | 0.918645 | BH |
| PITG_01398 | Pi beta-glucosidase, putative (1749  | -31.4629 | -37.1062 | 0.12224  | 0.918645 | BH |
| PITG_14486 | Pi MtN3-like protein (1577 nt)       | -31.4493 | -37.1335 | 0.12224  | 0.918645 | BH |

|            |                                      |          |          |          |          |    |
|------------|--------------------------------------|----------|----------|----------|----------|----|
| PITG_20362 | Pi conserved hypothetical protein (  | -31.1817 | -37.6687 | 0.122357 | 0.918645 | BH |
| PITG_00138 | Pi conserved hypothetical protein (  | -31.8576 | -36.3169 | 0.122754 | 0.918645 | BH |
| PITG_02642 | Pi pyruvate dehydrogenase [lipoan    | -31.8223 | -36.3876 | 0.122754 | 0.918645 | BH |
| PITG_14724 | Pi hypothetical protein (279 nt)     | -31.8718 | -36.2885 | 0.122754 | 0.918645 | BH |
| PITG_15671 | Pi conserved hypothetical protein (  | -31.8387 | -36.3547 | 0.122754 | 0.918645 | BH |
| PITG_19313 | Pi conserved hypothetical protein (  | -31.8894 | -36.2533 | 0.122754 | 0.918645 | BH |
| PITG_19950 | Pi conserved hypothetical protein (  | -31.8186 | -36.3949 | 0.122754 | 0.918645 | BH |
| PITG_02533 | Pi conserved hypothetical protein (  | -31.5361 | -36.9599 | 0.122958 | 0.918645 | BH |
| PITG_16348 | Pi crinkler (CRN) family protein, ps | -31.5628 | -36.9066 | 0.122958 | 0.918645 | BH |
| PITG_17230 | Pi conserved hypothetical protein (  | -31.5681 | -36.8959 | 0.122958 | 0.918645 | BH |
| PITG_14497 | Pi isoprenylcysteine carboxyl meth   | -31.5125 | -37.0071 | 0.12324  | 0.918645 | BH |
| PITG_16925 | Pi hypothetical protein (582 nt)     | -10.6698 | -2.39815 | 0.123618 | 0.918645 | BH |
| PITG_05012 | Pi conserved hypothetical protein (  | -31.8505 | -36.3311 | 0.12378  | 0.918645 | BH |
| PITG_09230 | Pi conserved hypothetical protein (  | -31.8505 | -36.3311 | 0.12378  | 0.918645 | BH |
| PITG_09437 | Pi conserved hypothetical protein (  | -31.8271 | -36.3779 | 0.12378  | 0.918645 | BH |
| PITG_11299 | Pi conserved hypothetical protein (  | -31.8665 | -36.2991 | 0.12378  | 0.918645 | BH |
| PITG_16446 | Pi ribosomal protein S6 kinase, put  | -31.8585 | -36.3152 | 0.12378  | 0.918645 | BH |
| PITG_07573 | Pi conserved hypothetical protein (  | -14.5228 | 3.56135  | 0.123861 | 0.918645 | BH |
| PITG_10806 | Pi conserved hypothetical protein (  | -31.5471 | -36.9379 | 0.124131 | 0.918645 | BH |
| PITG_18385 | Pi conserved hypothetical protein (  | -31.5566 | -36.9189 | 0.124131 | 0.918645 | BH |
| PITG_10303 | Pi conserved hypothetical protein (  | -31.805  | -36.4221 | 0.124262 | 0.918645 | BH |
| PITG_11773 | Pi protein phosphatase 2C, putativ   | -31.805  | -36.4221 | 0.124262 | 0.918645 | BH |
| PITG_06241 | Pi conserved hypothetical protein (  | -13.2581 | -2.57863 | 0.124409 | 0.918645 | BH |
| PITG_13815 | Pi conserved hypothetical protein (  | -31.5174 | -36.9972 | 0.124453 | 0.918645 | BH |
| PITG_14127 | Pi conserved hypothetical protein (  | -31.5177 | -36.9968 | 0.124453 | 0.918645 | BH |
| PITG_21313 | Pi glucokinase, putative (933 nt)    | -11.8833 | -2.47333 | 0.124739 | 0.918645 | BH |
| PITG_01428 | Pi conserved hypothetical protein (  | -31.8838 | -36.2645 | 0.124813 | 0.918645 | BH |
| PITG_05100 | Pi conserved hypothetical protein (  | -31.8457 | -36.3407 | 0.124813 | 0.918645 | BH |
| PITG_06637 | Pi Drug/Metabolite Transporter (D    | -31.8593 | -36.3134 | 0.124813 | 0.918645 | BH |
| PITG_09996 | Pi conserved hypothetical protein (  | -31.8514 | -36.3294 | 0.124813 | 0.918645 | BH |
| PITG_12517 | Pi CAAX prenyl protease 1 (1458 nt   | -31.8709 | -36.2903 | 0.124813 | 0.918645 | BH |
| PITG_20311 | Pi conserved hypothetical protein (  | -31.8792 | -36.2737 | 0.124813 | 0.918645 | BH |
| PITG_20767 | Pi protein kinase, putative (1986 nt | -31.8514 | -36.3294 | 0.124813 | 0.918645 | BH |
| PITG_04321 | Pi conserved hypothetical protein (  | -31.7185 | -36.595  | 0.125028 | 0.918645 | BH |
| PITG_06476 | Pi carbohydrate-binding protein, pi  | -31.7317 | -36.5687 | 0.125028 | 0.918645 | BH |
| PITG_20805 | Pi hypothetical protein (273 nt)     | -31.7317 | -36.5687 | 0.125028 | 0.918645 | BH |
| PITG_00681 | Pi Rab1 family GTPase, putative (1:  | -31.5695 | -36.893  | 0.125311 | 0.918645 | BH |
| PITG_08403 | Pi conserved hypothetical protein (  | -31.5749 | -36.8823 | 0.125311 | 0.918645 | BH |
| PITG_14619 | Pi conserved hypothetical protein (  | -31.5447 | -36.9428 | 0.125311 | 0.918645 | BH |
| PITG_20355 | Pi conserved hypothetical protein (  | -31.553  | -36.9261 | 0.125311 | 0.918645 | BH |
| PITG_04934 | Pi enoyl-CoA hydratase/isomerase     | -31.7621 | -36.5079 | 0.125368 | 0.918645 | BH |
| PITG_11139 | Pi P-type ATPase (P-ATPase) Super    | -31.7691 | -36.4939 | 0.125368 | 0.918645 | BH |
| PITG_02206 | Pi conserved hypothetical protein (  | -31.828  | -36.3761 | 0.125852 | 0.918645 | BH |
| PITG_05286 | Pi conserved hypothetical protein (  | -31.8618 | -36.3085 | 0.125852 | 0.918645 | BH |
| PITG_09537 | Pi conserved hypothetical protein (  | -31.8357 | -36.3606 | 0.125852 | 0.918645 | BH |
| PITG_00431 | Pi calcineurin-like phosphoesterase  | -13.2859 | -2.51698 | 0.12596  | 0.918645 | BH |
| PITG_08085 | Pi conserved hypothetical protein (  | -31.6929 | -36.6462 | 0.126202 | 0.918645 | BH |

|            |                                     |          |          |          |          |    |
|------------|-------------------------------------|----------|----------|----------|----------|----|
| PITG_11259 | Pi conserved hypothetical protein ( | -31.5388 | -36.9546 | 0.126497 | 0.918645 | BH |
| PITG_15731 | Pi ATP-binding Cassette (ABC) Sup   | -31.5331 | -36.9658 | 0.126497 | 0.918645 | BH |
| PITG_01090 | Pi 2Fe-2S ferredoxin, putative (120 | -31.836  | -36.3601 | 0.126897 | 0.918645 | BH |
| PITG_02712 | Pi conserved hypothetical protein ( | -31.8523 | -36.3275 | 0.126897 | 0.918645 | BH |
| PITG_11183 | Pi conserved hypothetical protein ( | -31.8683 | -36.2954 | 0.126897 | 0.918645 | BH |
| PITG_14548 | Pi conserved hypothetical protein ( | -31.8609 | -36.3104 | 0.126897 | 0.918645 | BH |
| PITG_19150 | Pi hypothetical protein (1125 nt)   | -31.8528 | -36.3266 | 0.126897 | 0.918645 | BH |
| PITG_20274 | Pi conserved hypothetical protein ( | -31.8366 | -36.3589 | 0.126897 | 0.918645 | BH |
| PITG_00198 | Pi conserved hypothetical protein ( | -31.5234 | -36.9853 | 0.1269   | 0.918645 | BH |
| PITG_21640 | Pi conserved hypothetical protein ( | -31.5167 | -36.9988 | 0.1269   | 0.918645 | BH |
| PITG_10969 | Pi pre-mRNA-processing-splicing fa  | -13.4447 | 3.626173 | 0.127556 | 0.918645 | BH |
| PITG_01697 | Pi importin alpha-2 subunit (2191 r | -31.8037 | -36.4248 | 0.1276   | 0.918645 | BH |
| PITG_13558 | Pi ATP-binding Cassette (ABC) Sup   | -31.8135 | -36.405  | 0.1276   | 0.918645 | BH |
| PITG_05496 | Pi augments liver regeneration      | -31.5604 | -36.9113 | 0.12769  | 0.918645 | BH |
| PITG_12296 | Pi conserved hypothetical protein ( | -31.5491 | -36.9338 | 0.12769  | 0.918645 | BH |
| PITG_13762 | Pi flavodoxin-like protein (800 nt) | -13.2275 | 3.032535 | 0.127887 | 0.918645 | BH |
| PITG_02793 | Pi conserved hypothetical protein ( | -31.8273 | -36.3776 | 0.127948 | 0.918645 | BH |
| PITG_03422 | Pi conserved hypothetical protein ( | -31.869  | -36.2941 | 0.127948 | 0.918645 | BH |
| PITG_06013 | Pi conserved hypothetical protein ( | -31.8774 | -36.2773 | 0.127948 | 0.918645 | BH |
| PITG_06996 | Pi conserved hypothetical protein ( | -31.8273 | -36.3776 | 0.127948 | 0.918645 | BH |
| PITG_20796 | Pi conserved hypothetical protein ( | -31.5004 | -37.0314 | 0.128135 | 0.918645 | BH |
| PITG_15863 | Pi conserved hypothetical protein ( | -12.4753 | -2.28087 | 0.128703 | 0.918645 | BH |
| PITG_12256 | Pi anoctamin-like protein (2882 nt) | -31.8062 | -36.4198 | 0.128727 | 0.918645 | BH |
| PITG_08199 | Pi HSF-type DNA-binding, putative   | -31.5441 | -36.9439 | 0.12889  | 0.918645 | BH |
| PITG_13554 | Pi ATP-binding Cassette (ABC) Sup   | -31.5764 | -36.8793 | 0.12889  | 0.918645 | BH |
| PITG_13529 | Pi secreted RxLR effector peptide,  | -31.8773 | -36.2776 | 0.129005 | 0.918645 | BH |
| PITG_06227 | Pi carbohydrate-binding protein, pi | -31.5242 | -36.9837 | 0.129377 | 0.918645 | BH |
| PITG_08548 | Pi conserved hypothetical protein ( | -31.5052 | -37.0217 | 0.129377 | 0.918645 | BH |
| PITG_09528 | Pi conserved hypothetical protein ( | -31.5292 | -36.9737 | 0.129377 | 0.918645 | BH |
| PITG_01938 | Pi glyceraldehyde-3-phosphate def   | -10.7629 | 2.862169 | 0.129471 | 0.918645 | BH |
| PITG_05292 | Pi hypothetical protein (861 nt)    | -13.308  | -2.46775 | 0.129551 | 0.918645 | BH |
| PITG_20977 | Pi conserved hypothetical protein ( | -31.6586 | -36.7148 | 0.129595 | 0.918645 | BH |
| PITG_20192 | Pi ORM1-like protein (783 nt)       | -12.5141 | -2.22612 | 0.130051 | 0.918645 | BH |
| PITG_04590 | Pi conserved hypothetical protein ( | -31.8299 | -36.3723 | 0.130068 | 0.918645 | BH |
| PITG_14416 | Pi conserved hypothetical protein ( | -31.8702 | -36.2917 | 0.130068 | 0.918645 | BH |
| PITG_15881 | Pi peptide methionine sulfoxide re  | -31.8702 | -36.2917 | 0.130068 | 0.918645 | BH |
| PITG_17335 | Pi charged multivesicular body pro  | -31.8223 | -36.3876 | 0.130068 | 0.918645 | BH |
| PITG_11466 | Pi tubby-like protein (1823 nt)     | -31.5704 | -36.8914 | 0.130096 | 0.918645 | BH |
| PITG_18298 | Pi coproporphyrinogen III oxidase ( | -31.565  | -36.9022 | 0.130096 | 0.918645 | BH |
| PITG_19415 | Pi hypothetical protein (525 nt)    | -12.4706 | -2.33279 | 0.130136 | 0.918645 | BH |
| PITG_11215 | Pi DnaJ subfamily C protein (1936 r | -12.5436 | -2.15378 | 0.130607 | 0.918645 | BH |
| PITG_06889 | Pi peptidase, putative (2249 nt)    | -31.4997 | -37.0328 | 0.130626 | 0.918645 | BH |
| PITG_09849 | Pi conserved hypothetical protein ( | -31.4947 | -37.0427 | 0.130626 | 0.918645 | BH |
| PITG_13282 | Pi ATP-binding Cassette (ABC) Sup   | -31.6409 | -36.7503 | 0.130861 | 0.918645 | BH |
| PITG_19590 | Pi conserved hypothetical protein ( | -13.3238 | -2.43737 | 0.130987 | 0.918645 | BH |
| PITG_09910 | Pi arabinogalactan endo-1,4-beta-g  | -31.7564 | -36.5194 | 0.131001 | 0.918645 | BH |
| PITG_19544 | Pi carbohydrate-binding protein, pi | -31.7794 | -36.4732 | 0.131001 | 0.918645 | BH |

|            |                                       |          |          |          |          |    |
|------------|---------------------------------------|----------|----------|----------|----------|----|
| PITG_01499 | Pi charged multivesicular body pro    | -31.5665 | -36.8991 | 0.13131  | 0.918645 | BH |
| PITG_03562 | Pi conserved hypothetical protein (   | -31.5151 | -37.002  | 0.131883 | 0.918645 | BH |
| PITG_01785 | Pi conserved hypothetical protein (   | -31.8419 | -36.3483 | 0.132213 | 0.918645 | BH |
| PITG_04842 | Pi conserved hypothetical protein (   | -31.8876 | -36.2568 | 0.132213 | 0.918645 | BH |
| PITG_18164 | Pi conserved hypothetical protein (   | -31.8386 | -36.355  | 0.132213 | 0.918645 | BH |
| PITG_18728 | Pi conserved hypothetical protein (   | -31.867  | -36.2981 | 0.132213 | 0.918645 | BH |
| PITG_15162 | Pi secreted RxLR effector peptide,    | -31.4154 | -37.2014 | 0.132326 | 0.918645 | BH |
| PITG_20830 | Pi conserved hypothetical protein (   | -31.5354 | -36.9614 | 0.13253  | 0.918645 | BH |
| PITG_19263 | Pi sulfite reductase [NADPH] flavop   | -31.3533 | -37.3255 | 0.132569 | 0.918645 | BH |
| PITG_03582 | Pi serine protease family S01B, put   | -31.8794 | -36.2732 | 0.133295 | 0.918645 | BH |
| PITG_06376 | Pi guanine nucleotide-binding prot    | -31.8713 | -36.2896 | 0.133295 | 0.918645 | BH |
| PITG_14833 | Pi conserved hypothetical protein (   | -31.8552 | -36.3217 | 0.133295 | 0.918645 | BH |
| PITG_15776 | Pi protein kinase, putative (867 nt)  | -31.8794 | -36.2732 | 0.133295 | 0.918645 | BH |
| PITG_17351 | Pi conserved hypothetical protein (   | -31.8794 | -36.2732 | 0.133295 | 0.918645 | BH |
| PITG_18118 | Pi conserved hypothetical protein (   | -31.7198 | -36.5925 | 0.133417 | 0.918645 | BH |
| PITG_01830 | Pi conserved hypothetical protein (   | -31.5515 | -36.929  | 0.133757 | 0.918645 | BH |
| PITG_18984 | Pi conserved hypothetical protein (   | -15.4959 | 3.741231 | 0.133798 | 0.918645 | BH |
| PITG_15190 | Pi conserved hypothetical protein (   | -31.2833 | -37.4655 | 0.13399  | 0.918645 | BH |
| PITG_13265 | Pi adenosine kinase (1038 nt)         | -13.5116 | 2.957976 | 0.134076 | 0.918645 | BH |
| PITG_10735 | Pi conserved hypothetical protein (   | -31.8409 | -36.3503 | 0.134383 | 0.918645 | BH |
| PITG_14968 | Pi cAMP-dependent protein kinase      | -31.5005 | -37.0311 | 0.13442  | 0.918645 | BH |
| PITG_00867 | Pi conserved hypothetical protein (   | -31.5999 | -36.8322 | 0.134891 | 0.918645 | BH |
| PITG_01244 | Pi conserved hypothetical protein (   | -31.6056 | -36.821  | 0.134891 | 0.918645 | BH |
| PITG_02498 | Pi iron sulfur cluster assembly prot  | -31.584  | -36.8641 | 0.134891 | 0.918645 | BH |
| PITG_09298 | Pi conserved hypothetical protein (   | -31.6155 | -36.801  | 0.134891 | 0.918645 | BH |
| PITG_14465 | Pi conserved hypothetical protein (   | -31.6049 | -36.8224 | 0.134891 | 0.918645 | BH |
| PITG_16834 | Pi exodeoxyribonuclease (1177 nt)     | -31.5916 | -36.849  | 0.134891 | 0.918645 | BH |
| PITG_17349 | Pi conserved hypothetical protein (   | -31.5978 | -36.8364 | 0.134891 | 0.918645 | BH |
| PITG_18432 | Pi pre-mRNA cleavage complex II p     | -31.6234 | -36.7852 | 0.134891 | 0.918645 | BH |
| PITG_14626 | Pi dual specificity tyrosine-phospho  | -31.6344 | -36.7633 | 0.134891 | 0.918645 | BH |
| PITG_15116 | Pi Multidrug/Oligosaccharidyl-lipid   | -31.6285 | -36.775  | 0.134891 | 0.918645 | BH |
| PITG_16433 | Pi conserved hypothetical protein (   | -31.6213 | -36.7895 | 0.134891 | 0.918645 | BH |
| PITG_09744 | Pi CUG-BP- and ETR-3-like factor, p   | -11.3746 | -2.15586 | 0.13498  | 0.918645 | BH |
| PITG_05587 | Pi protein kinase, putative (2287 nt) | -31.5361 | -36.9598 | 0.134991 | 0.918645 | BH |
| PITG_14054 | Pi secreted RxLR effector peptide,    | -31.4012 | -37.2297 | 0.135023 | 0.918645 | BH |
| PITG_02252 | Pi conserved hypothetical protein (   | -31.8805 | -36.2712 | 0.135477 | 0.918645 | BH |
| PITG_14950 | Pi conserved hypothetical protein (   | -31.8488 | -36.3345 | 0.135477 | 0.918645 | BH |
| PITG_18360 | Pi cAMP-dependent protein kinase      | -31.8167 | -36.3987 | 0.135477 | 0.918645 | BH |
| PITG_04685 | Pi hypothetical protein (1441 nt)     | -31.7714 | -36.4893 | 0.135638 | 0.918645 | BH |
| PITG_11171 | Pi conserved hypothetical protein (   | -31.7575 | -36.5171 | 0.135638 | 0.918645 | BH |
| PITG_00054 | Pi Mitochondrial Protein Transloca    | -31.6307 | -36.7707 | 0.136087 | 0.918645 | BH |
| PITG_03971 | Pi acetyltransferase (GNAT) family,   | -31.633  | -36.7662 | 0.136087 | 0.918645 | BH |
| PITG_04663 | Pi conserved hypothetical protein (   | -31.6249 | -36.7823 | 0.136087 | 0.918645 | BH |
| PITG_09722 | Pi thioredoxin H-type (1210 nt)       | -31.5901 | -36.8518 | 0.136087 | 0.918645 | BH |
| PITG_12488 | Pi conserved hypothetical protein (   | -31.6084 | -36.8153 | 0.136087 | 0.918645 | BH |
| PITG_13366 | Pi conserved hypothetical protein (   | -31.5902 | -36.8516 | 0.136087 | 0.918645 | BH |
| PITG_19314 | Pi replication factor C subunit 3 (12 | -31.6257 | -36.7808 | 0.136087 | 0.918645 | BH |

|            |                                       |          |          |          |          |    |
|------------|---------------------------------------|----------|----------|----------|----------|----|
| PITG_19591 | Pi conserved hypothetical protein (   | -31.6256 | -36.7809 | 0.136087 | 0.918645 | BH |
| PITG_14576 | Pi conserved hypothetical protein (   | -31.5628 | -36.9065 | 0.136231 | 0.918645 | BH |
| PITG_01390 | Pi conserved hypothetical protein (   | -31.8484 | -36.3354 | 0.136578 | 0.918645 | BH |
| PITG_06324 | Pi hypothetical protein (1633 nt)     | -31.8484 | -36.3354 | 0.136578 | 0.918645 | BH |
| PITG_09897 | Pi conserved hypothetical protein (   | -31.8742 | -36.2838 | 0.136578 | 0.918645 | BH |
| PITG_04401 | Pi conserved hypothetical protein (   | -31.8643 | -36.3036 | 0.136578 | 0.918645 | BH |
| PITG_18727 | Pi DNA-directed RNA polymerase II     | -31.8723 | -36.2874 | 0.136578 | 0.918645 | BH |
| PITG_23090 | Pi protein kinase, putative (2448 nt) | -31.8563 | -36.3196 | 0.136578 | 0.918645 | BH |
| PITG_02292 | Pi protein phosphatase, putative (3   | -31.595  | -36.8421 | 0.137289 | 0.918645 | BH |
| PITG_09493 | Pi Mitochondrial Protein Translocase  | -31.6006 | -36.8309 | 0.137289 | 0.918645 | BH |
| PITG_15442 | Pi transmembrane protein, putative    | -31.6148 | -36.8024 | 0.137289 | 0.918645 | BH |
| PITG_16203 | Pi purine nucleoside phosphorylase    | -31.5979 | -36.8363 | 0.137289 | 0.918645 | BH |
| PITG_19691 | Pi conserved hypothetical protein (   | -31.5868 | -36.8584 | 0.137289 | 0.918645 | BH |
| PITG_21829 | Pi conserved hypothetical protein (   | -31.6242 | -36.7837 | 0.137289 | 0.918645 | BH |
| PITG_07366 | Pi conserved hypothetical protein (   | -31.6652 | -36.7016 | 0.137328 | 0.918645 | BH |
| PITG_20970 | Pi triosephosphate isomerase/glyceral | -11.4756 | 2.808586 | 0.137408 | 0.918645 | BH |
| PITG_04041 | Pi conserved hypothetical protein (   | -13.2805 | -2.53766 | 0.137562 | 0.918645 | BH |
| PITG_00974 | Pi YIPF6-like protein (969 nt)        | -31.8406 | -36.3509 | 0.137685 | 0.918645 | BH |
| PITG_10410 | Pi SCP-like extracellular protein (10 | -14.5767 | 3.679115 | 0.138001 | 0.918645 | BH |
| PITG_01034 | Pi Mitochondrial Carrier (MC) Family  | -31.5991 | -36.8338 | 0.138497 | 0.918645 | BH |
| PITG_01627 | Pi alcohol dehydrogenase, putative    | -31.6293 | -36.7736 | 0.138497 | 0.918645 | BH |
| PITG_07953 | Pi 3-ketoacyl-CoA thiolase A (1340    | -31.6106 | -36.8109 | 0.138497 | 0.918645 | BH |
| PITG_17239 | Pi calcineurin-like phosphoesterase   | -31.6163 | -36.7995 | 0.138497 | 0.918645 | BH |
| PITG_18183 | Pi maltose O-acetyltransferase (10    | -31.5938 | -36.8445 | 0.138497 | 0.918645 | BH |
| PITG_06003 | Pi conserved hypothetical protein (   | -31.8815 | -36.269  | 0.138798 | 0.918645 | BH |
| PITG_00861 | Pi conserved hypothetical protein (   | -31.5835 | -36.8651 | 0.139711 | 0.918645 | BH |
| PITG_07238 | Pi conserved hypothetical protein (   | -31.6048 | -36.8226 | 0.139711 | 0.918645 | BH |
| PITG_09873 | Pi pre-mRNA-splicing factor SPF27,    | -31.5835 | -36.8651 | 0.139711 | 0.918645 | BH |
| PITG_10501 | Pi conserved hypothetical protein (   | -31.6344 | -36.7633 | 0.139711 | 0.918645 | BH |
| PITG_17725 | Pi conserved hypothetical protein (   | -13.3278 | -2.43668 | 0.139755 | 0.918645 | BH |
| PITG_09065 | Pi conserved hypothetical protein (   | -31.8734 | -36.2852 | 0.139918 | 0.918645 | BH |
| PITG_19349 | Pi conserved hypothetical protein (   | -31.8574 | -36.3174 | 0.139918 | 0.918645 | BH |
| PITG_00550 | Pi conserved hypothetical protein (   | -31.5445 | -36.9431 | 0.139995 | 0.918645 | BH |
| PITG_02706 | Pi NUK6 (2239 nt)                     | -31.548  | -36.9362 | 0.139995 | 0.918645 | BH |
| PITG_06203 | Pi conserved hypothetical protein (   | -10.8036 | -2.0897  | 0.140772 | 0.918645 | BH |
| PITG_01294 | Pi hypothetical protein (1032 nt)     | -31.7151 | -36.6019 | 0.140931 | 0.918645 | BH |
| PITG_07109 | Pi conserved hypothetical protein (   | -31.5858 | -36.8605 | 0.140932 | 0.918645 | BH |
| PITG_08692 | Pi conserved hypothetical protein (   | -31.6301 | -36.772  | 0.140932 | 0.918645 | BH |
| PITG_13074 | Pi cysteine protease family C01A, p   | -31.5843 | -36.8636 | 0.140932 | 0.918645 | BH |
| PITG_13014 | Pi proliferation-associated protein,  | -12.0246 | 2.898543 | 0.14097  | 0.918645 | BH |
| PITG_05690 | Pi ubiquitin activating enzyme, E1 f  | -31.834  | -36.3642 | 0.141044 | 0.918645 | BH |
| PITG_09388 | Pi GPN-loop GTPase 2, putative (11    | -31.8222 | -36.3878 | 0.141044 | 0.918645 | BH |
| PITG_11461 | Pi HECT E3 ubiquitin ligase, putative | -31.8387 | -36.3547 | 0.141044 | 0.918645 | BH |
| PITG_03376 | Pi endomembrane protein 70-like       | -13.3536 | -2.37777 | 0.141177 | 0.918645 | BH |
| PITG_09600 | Pi conserved hypothetical protein (   | -13.2876 | -2.52717 | 0.142035 | 0.918645 | BH |
| PITG_01287 | Pi conserved hypothetical protein (   | -31.627  | -36.7781 | 0.142159 | 0.918645 | BH |
| PITG_09711 | Pi hypothetical protein (274 nt)      | -31.6089 | -36.8142 | 0.142159 | 0.918645 | BH |

|            |                                      |          |          |          |          |    |
|------------|--------------------------------------|----------|----------|----------|----------|----|
| PITG_18928 | Pi conserved hypothetical protein (  | -31.6329 | -36.7664 | 0.142159 | 0.918645 | BH |
| PITG_07778 | Pi conserved hypothetical protein (  | -31.8188 | -36.3945 | 0.142177 | 0.918645 | BH |
| PITG_21256 | Pi conserved hypothetical protein (  | -31.7277 | -36.5767 | 0.142213 | 0.918645 | BH |
| PITG_04375 | Pi conserved hypothetical protein (  | -31.5334 | -36.9653 | 0.142539 | 0.918645 | BH |
| PITG_23029 | Pi Crinkler (CRN) family protein, ps | -31.5549 | -36.9223 | 0.142539 | 0.918645 | BH |
| PITG_13528 | Pi conserved hypothetical protein (  | -13.174  | -2.79073 | 0.142699 | 0.918645 | BH |
| PITG_10258 | Pi conserved hypothetical protein (  | -31.8161 | -36.4    | 0.142815 | 0.918645 | BH |
| PITG_08322 | Pi conserved hypothetical protein (  | -12.106  | -3.22141 | 0.143113 | 0.918645 | BH |
| PITG_11913 | Pi heat shock cognate 70 kDa prote   | -11.1489 | 2.884465 | 0.143156 | 0.918645 | BH |
| PITG_02480 | Pi conserved hypothetical protein (  | -31.8298 | -36.3725 | 0.143316 | 0.918645 | BH |
| PITG_13590 | Pi ATP-binding Cassette (ABC) supe   | -31.8827 | -36.2666 | 0.143316 | 0.918645 | BH |
| PITG_14420 | Pi conserved hypothetical protein (  | -31.8665 | -36.2992 | 0.143316 | 0.918645 | BH |
| PITG_19474 | Pi cobalamin adenosyltransferase,    | -31.8546 | -36.323  | 0.143316 | 0.918645 | BH |
| PITG_00964 | Pi conserved hypothetical protein (  | -31.6082 | -36.8158 | 0.143392 | 0.918645 | BH |
| PITG_04505 | Pi transmembrane protein, putativ    | -31.6136 | -36.8049 | 0.143392 | 0.918645 | BH |
| PITG_06762 | Pi conserved hypothetical protein (  | -31.6204 | -36.7913 | 0.143392 | 0.918645 | BH |
| PITG_14557 | Pi conserved hypothetical protein (  | -31.585  | -36.862  | 0.143392 | 0.918645 | BH |
| PITG_12042 | Pi hypothetical protein (677 nt)     | -13.2096 | -2.71397 | 0.143725 | 0.918645 | BH |
| PITG_17244 | Pi zinc finger CDGSH domain-conta    | -12.606  | -2.01371 | 0.144352 | 0.918645 | BH |
| PITG_16808 | Pi ATP-binding Cassette (ABC) Supe   | -31.8506 | -36.3309 | 0.144461 | 0.918645 | BH |
| PITG_04184 | Pi conserved hypothetical protein (  | -31.4785 | -37.0751 | 0.144464 | 0.918645 | BH |
| PITG_05151 | Pi Amino Acid/Auxin Permease (AA     | -31.5858 | -36.8606 | 0.144631 | 0.918645 | BH |
| PITG_05565 | Pi conserved hypothetical protein (  | -31.6196 | -36.7928 | 0.144631 | 0.918645 | BH |
| PITG_13679 | Pi conserved hypothetical protein (  | -31.5912 | -36.8496 | 0.144631 | 0.918645 | BH |
| PITG_10815 | Pi conserved hypothetical protein (  | -31.5496 | -36.933  | 0.14511  | 0.918645 | BH |
| PITG_20491 | Pi fumarylacetoacetase (1806 nt)     | -31.5496 | -36.933  | 0.14511  | 0.918645 | BH |
| PITG_00263 | Pi conserved hypothetical protein (  | -31.8199 | -36.3924 | 0.145613 | 0.918645 | BH |
| PITG_18458 | Pi conserved hypothetical protein (  | -31.8199 | -36.3924 | 0.145613 | 0.918645 | BH |
| PITG_21111 | Pi conserved hypothetical protein (  | -31.8199 | -36.3924 | 0.145613 | 0.918645 | BH |
| PITG_07663 | Pi major Facilitator Superfamily (M  | -31.4444 | -37.1433 | 0.145846 | 0.918645 | BH |
| PITG_01411 | Pi elongation of very long chain fat | -31.6031 | -36.8259 | 0.145876 | 0.918645 | BH |
| PITG_02762 | Pi protein kinase, putative (2433 nt | -31.6208 | -36.7905 | 0.145876 | 0.918645 | BH |
| PITG_03449 | Pi conserved hypothetical protein (  | -31.6324 | -36.7673 | 0.145876 | 0.918645 | BH |
| PITG_03597 | Pi alanyl-tRNA synthetase domain-    | -31.6131 | -36.8059 | 0.145876 | 0.918645 | BH |
| PITG_18650 | Pi proteasomal ubiquitin receptor,   | -31.6031 | -36.8259 | 0.145876 | 0.918645 | BH |
| PITG_19128 | Pi conserved hypothetical protein (  | -31.6324 | -36.7673 | 0.145876 | 0.918645 | BH |
| PITG_21018 | Pi expressed protein (1433 nt)       | -31.5954 | -36.8414 | 0.145876 | 0.918645 | BH |
| PITG_17786 | Pi argininosuccinate lyase (1386 nt  | -13.0349 | 2.913721 | 0.145951 | 0.918645 | BH |
| PITG_03888 | Pi conserved hypothetical protein (  | -31.9285 | -36.175  | 0.146764 | 0.918645 | BH |
| PITG_04227 | Pi conserved hypothetical protein (  | -31.9311 | -36.1699 | 0.146764 | 0.918645 | BH |
| PITG_04591 | Pi protein kinase (1318 nt)          | -31.9285 | -36.175  | 0.146764 | 0.918645 | BH |
| PITG_00020 | Pi conserved hypothetical protein (  | -31.9222 | -36.1877 | 0.146764 | 0.918645 | BH |
| PITG_00888 | Pi conserved hypothetical protein (  | -31.9669 | -36.0983 | 0.146764 | 0.918645 | BH |
| PITG_00994 | Pi conserved hypothetical protein (  | -31.9031 | -36.2259 | 0.146764 | 0.918645 | BH |
| PITG_00999 | Pi protein kinase, putative (1151 nt | -31.9392 | -36.1537 | 0.146764 | 0.918645 | BH |
| PITG_01087 | Pi cell division protease ftsH (2050 | -31.9319 | -36.1683 | 0.146764 | 0.918645 | BH |
| PITG_01761 | Pi proline oxidase, putative (1716 r | -31.9409 | -36.1503 | 0.146764 | 0.918645 | BH |

|            |                                        |          |          |          |          |    |
|------------|----------------------------------------|----------|----------|----------|----------|----|
| PITG_02178 | Pi conserved hypothetical protein (    | -31.9294 | -36.1733 | 0.146764 | 0.918645 | BH |
| PITG_02192 | Pi glutathione peroxidase 2 (1037 r    | -31.8946 | -36.243  | 0.146764 | 0.918645 | BH |
| PITG_02239 | Pi ATP-dependent hsl protease ATF      | -31.9492 | -36.1338 | 0.146764 | 0.918645 | BH |
| PITG_02732 | Pi conserved hypothetical protein (    | -31.8954 | -36.2413 | 0.146764 | 0.918645 | BH |
| PITG_03160 | Pi ubiquitin family protein, putative  | -31.9048 | -36.2225 | 0.146764 | 0.918645 | BH |
| PITG_03933 | Pi CTD small phosphatase-like prot     | -31.9384 | -36.1554 | 0.146764 | 0.918645 | BH |
| PITG_04243 | Pi conserved hypothetical protein (    | -31.9109 | -36.2103 | 0.146764 | 0.918645 | BH |
| PITG_06173 | Pi conserved hypothetical protein (    | -31.9576 | -36.117  | 0.146764 | 0.918645 | BH |
| PITG_06274 | Pi ubiquitin-specific protease, puta   | -31.923  | -36.186  | 0.146764 | 0.918645 | BH |
| PITG_06388 | Pi conserved hypothetical protein (    | -31.9409 | -36.1503 | 0.146764 | 0.918645 | BH |
| PITG_06410 | Pi conserved hypothetical protein (    | -31.9134 | -36.2052 | 0.146764 | 0.918645 | BH |
| PITG_06658 | Pi conserved hypothetical protein (    | -31.9214 | -36.1894 | 0.146764 | 0.918645 | BH |
| PITG_06780 | Pi conserved hypothetical protein (    | -31.9134 | -36.2052 | 0.146764 | 0.918645 | BH |
| PITG_07543 | Pi hypothetical protein (728 nt)       | -31.9567 | -36.1187 | 0.146764 | 0.918645 | BH |
| PITG_08241 | Pi hypothetical protein (824 nt)       | -31.9392 | -36.1537 | 0.146764 | 0.918645 | BH |
| PITG_08722 | Pi conserved hypothetical protein (    | -31.8946 | -36.243  | 0.146764 | 0.918645 | BH |
| PITG_08874 | Pi conserved hypothetical protein (    | -31.9375 | -36.1571 | 0.146764 | 0.918645 | BH |
| PITG_09567 | Pi conserved hypothetical protein (    | -31.9475 | -36.1372 | 0.146764 | 0.918645 | BH |
| PITG_09637 | Pi riboflavin biosynthesis protein ri  | -31.9567 | -36.1187 | 0.146764 | 0.918645 | BH |
| PITG_09990 | Pi dolichyldiphosphatase, putative     | -31.9031 | -36.2259 | 0.146764 | 0.918645 | BH |
| PITG_10081 | Pi conserved hypothetical protein (    | -31.9601 | -36.1119 | 0.146764 | 0.918645 | BH |
| PITG_10899 | Pi protein kinase, putative (1146 nt)  | -31.923  | -36.186  | 0.146764 | 0.918645 | BH |
| PITG_11206 | Pi conserved hypothetical protein (    | -31.8946 | -36.243  | 0.146764 | 0.918645 | BH |
| PITG_11597 | Pi conserved hypothetical protein (    | -31.9109 | -36.2103 | 0.146764 | 0.918645 | BH |
| PITG_11791 | Pi conserved hypothetical protein (    | -31.9031 | -36.2259 | 0.146764 | 0.918645 | BH |
| PITG_12053 | Pi acetylornithine aminotransferas     | -31.9118 | -36.2086 | 0.146764 | 0.918645 | BH |
| PITG_12106 | Pi CDP-alcohol phosphatidyltransfe     | -31.9384 | -36.1554 | 0.146764 | 0.918645 | BH |
| PITG_12235 | Pi makorin-like protein (1010 nt)      | -31.892  | -36.248  | 0.146764 | 0.918645 | BH |
| PITG_13651 | Pi conserved hypothetical protein (    | -31.9669 | -36.0983 | 0.146764 | 0.918645 | BH |
| PITG_14835 | Pi conserved hypothetical protein (    | -31.9401 | -36.152  | 0.146764 | 0.918645 | BH |
| PITG_16228 | Pi conserved hypothetical protein (    | -31.9392 | -36.1537 | 0.146764 | 0.918645 | BH |
| PITG_17245 | Pi conserved hypothetical protein (    | -31.9592 | -36.1136 | 0.146764 | 0.918645 | BH |
| PITG_20687 | Pi ribulose-phosphate 3-epimerase      | -31.9401 | -36.152  | 0.146764 | 0.918645 | BH |
| PITG_22409 | Pi hypothetical protein (978 nt)       | -31.9584 | -36.1153 | 0.146764 | 0.918645 | BH |
| PITG_03053 | Pi Drug/Metabolite Transporter (D      | -31.8287 | -36.3747 | 0.146772 | 0.918645 | BH |
| PITG_00973 | Pi conserved hypothetical protein (    | -31.5983 | -36.8356 | 0.147128 | 0.918645 | BH |
| PITG_04478 | Pi protein kinase (1275 nt)            | -31.5983 | -36.8356 | 0.147128 | 0.918645 | BH |
| PITG_14910 | Pi conserved hypothetical protein (    | -13.329  | -2.44058 | 0.147256 | 0.918645 | BH |
| PITG_00234 | Pi conserved hypothetical protein (    | -11.6746 | -2.12523 | 0.14744  | 0.918645 | BH |
| PITG_10927 | Pi conserved hypothetical protein (    | -31.4274 | -37.1773 | 0.147602 | 0.918645 | BH |
| PITG_01107 | Pi conserved hypothetical protein (    | -31.7913 | -36.4495 | 0.14775  | 0.918645 | BH |
| PITG_00676 | Pi transcription factor (2527 nt)      | -31.9248 | -36.1826 | 0.147838 | 0.918645 | BH |
| PITG_02821 | Pi vacuolar-processing enzyme, pu      | -31.9336 | -36.1648 | 0.147838 | 0.918645 | BH |
| PITG_02849 | Pi conserved hypothetical protein (    | -31.9336 | -36.1648 | 0.147838 | 0.918645 | BH |
| PITG_06760 | Pi conserved hypothetical protein (    | -31.9239 | -36.1843 | 0.147838 | 0.918645 | BH |
| PITG_06822 | Pi sulfatase-like protein (3142 nt)    | -31.9248 | -36.1826 | 0.147838 | 0.918645 | BH |
| PITG_07637 | Pi transcription initiation factor TFI | -31.8979 | -36.2362 | 0.147838 | 0.918645 | BH |



|            |                                       |          |          |          |          |    |
|------------|---------------------------------------|----------|----------|----------|----------|----|
| PITG_08305 | Pi conserved hypothetical protein (   | -31.8997 | -36.2327 | 0.147838 | 0.918645 | BH |
| PITG_11070 | Pi conserved hypothetical protein (   | -31.9239 | -36.1843 | 0.147838 | 0.918645 | BH |
| PITG_14816 | Pi conserved hypothetical protein (   | -31.9277 | -36.1768 | 0.147838 | 0.918645 | BH |
| PITG_15927 | Pi conserved hypothetical protein (   | -31.9418 | -36.1486 | 0.147838 | 0.918645 | BH |
| PITG_17727 | Pi conserved hypothetical protein (   | -31.8997 | -36.2327 | 0.147838 | 0.918645 | BH |
| PITG_00472 | Pi pre-mRNA-splicing factor syf2 (1   | -31.9426 | -36.1469 | 0.147838 | 0.918645 | BH |
| PITG_01594 | Pi hypothetical protein (697 nt)      | -31.9328 | -36.1665 | 0.147838 | 0.918645 | BH |
| PITG_02807 | Pi conserved hypothetical protein (   | -31.9466 | -36.1389 | 0.147838 | 0.918645 | BH |
| PITG_06152 | Pi conserved hypothetical protein (   | -31.9092 | -36.2137 | 0.147838 | 0.918645 | BH |
| PITG_09594 | Pi conserved hypothetical protein (   | -31.955  | -36.1222 | 0.147838 | 0.918645 | BH |
| PITG_12084 | Pi Crinkler (CRN) family protein, ps  | -31.9328 | -36.1665 | 0.147838 | 0.918645 | BH |
| PITG_13139 | Pi threonine synthase (1587 nt)       | -31.9092 | -36.2137 | 0.147838 | 0.918645 | BH |
| PITG_16071 | Pi prenyltransferase-like protein, p  | -31.9092 | -36.2137 | 0.147838 | 0.918645 | BH |
| PITG_23143 | Pi protein kinase, putative (2392 nt) | -31.8839 | -36.2642 | 0.147937 | 0.918645 | BH |
| PITG_01103 | Pi phosphatidylinositol synthase (P   | -31.618  | -36.796  | 0.148386 | 0.918645 | BH |
| PITG_11856 | Pi C2 domain-containing protein, p    | -31.6102 | -36.8116 | 0.148386 | 0.918645 | BH |
| PITG_12892 | Pi thioredoxin-like protein, putative | -31.5938 | -36.8445 | 0.148386 | 0.918645 | BH |
| PITG_18173 | Pi conserved hypothetical protein (   | -31.5883 | -36.8556 | 0.148386 | 0.918645 | BH |
| PITG_05660 | Pi putative GPI-anchored serine ric   | -12.6344 | -1.95321 | 0.148696 | 0.918645 | BH |
| PITG_02670 | Pi conserved hypothetical protein (   | -31.9435 | -36.1451 | 0.148918 | 0.918645 | BH |
| PITG_03418 | Pi conserved hypothetical protein (   | -31.9345 | -36.1631 | 0.148918 | 0.918645 | BH |
| PITG_03438 | Pi lipin-like protein (1587 nt)       | -31.9358 | -36.1606 | 0.148918 | 0.918645 | BH |
| PITG_04000 | Pi angio-associated migratory cell p  | -31.8988 | -36.2345 | 0.148918 | 0.918645 | BH |
| PITG_06113 | Pi hypothetical protein (419 nt)      | -31.9083 | -36.2155 | 0.148918 | 0.918645 | BH |
| PITG_06457 | Pi conserved hypothetical protein (   | -31.9256 | -36.1808 | 0.148918 | 0.918645 | BH |
| PITG_10152 | Pi calcium-binding atopy-related at   | -31.9256 | -36.1808 | 0.148918 | 0.918645 | BH |
| PITG_11161 | Pi 2-oxoisovalerate dehydrogenase     | -31.9526 | -36.1269 | 0.148918 | 0.918645 | BH |
| PITG_11710 | Pi conserved hypothetical protein (   | -31.916  | -36.2001 | 0.148918 | 0.918645 | BH |
| PITG_15609 | Pi conserved hypothetical protein (   | -31.9526 | -36.1269 | 0.148918 | 0.918645 | BH |
| PITG_16337 | Pi ribosomal RNA methyltransferase    | -31.9643 | -36.1035 | 0.148918 | 0.918645 | BH |
| PITG_22439 | Pi conserved hypothetical protein (   | -31.9526 | -36.1269 | 0.148918 | 0.918645 | BH |
| PITG_08769 | Pi demethylmenaquinone methyltr       | -31.5532 | -36.9257 | 0.14902  | 0.918645 | BH |
| PITG_09819 | Pi conserved hypothetical protein (   | -31.8789 | -36.2743 | 0.149109 | 0.918645 | BH |
| PITG_13290 | Pi conserved hypothetical protein (   | -31.8789 | -36.2743 | 0.149109 | 0.918645 | BH |
| PITG_11450 | Pi conserved hypothetical protein (   | -10.7789 | -2.16722 | 0.149355 | 0.918645 | BH |
| PITG_01551 | Pi conserved hypothetical protein (   | -13.3689 | -2.34477 | 0.149387 | 0.918645 | BH |
| PITG_00525 | Pi protein kinase, putative (2482 nt) | -31.8997 | -36.2327 | 0.150003 | 0.918645 | BH |
| PITG_00820 | Pi conserved hypothetical protein (   | -31.9354 | -36.1613 | 0.150003 | 0.918645 | BH |
| PITG_02280 | Pi conserved hypothetical protein (   | -31.9082 | -36.2156 | 0.150003 | 0.918645 | BH |
| PITG_05282 | Pi phosphatidylinositol-4-phosphat    | -31.9169 | -36.1983 | 0.150003 | 0.918645 | BH |
| PITG_07053 | Pi conserved hypothetical protein (   | -31.9535 | -36.1251 | 0.150003 | 0.918645 | BH |
| PITG_08294 | Pi hypothetical protein (513 nt)      | -31.8979 | -36.2362 | 0.150003 | 0.918645 | BH |
| PITG_11179 | Pi conserved hypothetical protein (   | -31.9634 | -36.1053 | 0.150003 | 0.918645 | BH |
| PITG_11470 | Pi calcium-dependent protein kina     | -31.944  | -36.1442 | 0.150003 | 0.918645 | BH |
| PITG_16810 | Pi conserved hypothetical protein (   | -31.9627 | -36.1066 | 0.150003 | 0.918645 | BH |
| PITG_16814 | Pi conserved hypothetical protein (   | -31.8912 | -36.2496 | 0.150003 | 0.918645 | BH |
| PITG_17663 | Pi conserved hypothetical protein (   | -31.9169 | -36.1983 | 0.150003 | 0.918645 | BH |

|            |                                      |          |          |          |          |    |
|------------|--------------------------------------|----------|----------|----------|----------|----|
| PITG_18623 | Pi polycomb protein, putative (144   | -31.9354 | -36.1613 | 0.150003 | 0.918645 | BH |
| PITG_19004 | Pi conserved hypothetical protein (  | -31.944  | -36.1442 | 0.150003 | 0.918645 | BH |
| PITG_06027 | Pi hypothetical protein (1266 nt)    | -31.7356 | -36.5609 | 0.150088 | 0.918645 | BH |
| PITG_04047 | Pi hypothetical protein (740 nt)     | -31.8286 | -36.3749 | 0.150288 | 0.918645 | BH |
| PITG_14861 | Pi conserved hypothetical protein (  | -31.821  | -36.39   | 0.150288 | 0.918645 | BH |
| PITG_15076 | Pi methylmalonate semialdehyde c     | -31.8363 | -36.3595 | 0.150288 | 0.918645 | BH |
| PITG_00756 | Pi carboxypeptidase, putative (144   | -31.53   | -36.972  | 0.150337 | 0.918645 | BH |
| PITG_18187 | Pi sulfite reductase [NADPH] subur   | -31.4199 | -37.1922 | 0.150498 | 0.918645 | BH |
| PITG_03923 | Pi conserved hypothetical protein (  | -31.3519 | -37.3282 | 0.150528 | 0.918645 | BH |
| PITG_19855 | Pi hypothetical protein (432 nt)     | -10.5425 | -2.04883 | 0.150689 | 0.918645 | BH |
| PITG_00146 | Pi glucose-6-phosphate 1-dehydrog    | -13.3602 | -2.3635  | 0.150901 | 0.918645 | BH |
| PITG_05617 | Pi UDP-glucose 4-epimerase, putat    | -13.3764 | -2.33105 | 0.150901 | 0.918645 | BH |
| PITG_15605 | Pi conserved hypothetical protein (  | -31.6282 | -36.7757 | 0.150921 | 0.918645 | BH |
| PITG_01691 | Pi phosphatidylinositol-3,4,5-trisph | -31.9636 | -36.1048 | 0.151094 | 0.918645 | BH |
| PITG_02729 | Pi chromodomain protein, putative    | -31.9531 | -36.1258 | 0.151094 | 0.918645 | BH |
| PITG_03795 | Pi conserved hypothetical protein (  | -31.9531 | -36.1258 | 0.151094 | 0.918645 | BH |
| PITG_05009 | Pi conserved hypothetical protein (  | -31.934  | -36.1642 | 0.151094 | 0.918645 | BH |
| PITG_06849 | Pi conserved hypothetical protein (  | -31.9544 | -36.1233 | 0.151094 | 0.918645 | BH |
| PITG_08392 | Pi FACT complex subunit SPT16, pu    | -31.9091 | -36.2138 | 0.151094 | 0.918645 | BH |
| PITG_09277 | Pi conserved hypothetical protein (  | -31.9065 | -36.219  | 0.151094 | 0.918645 | BH |
| PITG_09698 | Pi histidine biosynthesis trifunctor | -31.9431 | -36.146  | 0.151094 | 0.918645 | BH |
| PITG_09779 | Pi conserved hypothetical protein (  | -31.9531 | -36.1258 | 0.151094 | 0.918645 | BH |
| PITG_14567 | Pi conserved hypothetical protein (  | -31.9266 | -36.179  | 0.151094 | 0.918645 | BH |
| PITG_18991 | Pi conserved hypothetical protein (  | -31.9153 | -36.2016 | 0.151094 | 0.918645 | BH |
| PITG_21171 | Pi conserved hypothetical protein (  | -31.9625 | -36.1072 | 0.151094 | 0.918645 | BH |
| PITG_21816 | Pi conserved hypothetical protein (  | -31.9178 | -36.1965 | 0.151094 | 0.918645 | BH |
| PITG_11483 | Pi hypothetical protein (2832 nt)    | -31.3709 | -37.2902 | 0.151278 | 0.918645 | BH |
| PITG_10597 | Pi hypothetical protein (1250 nt)    | -12.01   | -2.19895 | 0.15139  | 0.918645 | BH |
| PITG_04525 | Pi conserved hypothetical protein (  | -31.4772 | -37.0777 | 0.151458 | 0.918645 | BH |
| PITG_19761 | Pi conserved hypothetical protein (  | -12.6249 | -1.97611 | 0.151903 | 0.918645 | BH |
| PITG_08471 | Pi protein kinase (1178 nt)          | -31.9275 | -36.1772 | 0.152191 | 0.918645 | BH |
| PITG_11600 | Pi carbohydrate-binding protein, pi  | -31.9453 | -36.1414 | 0.152191 | 0.918645 | BH |
| PITG_11926 | Pi glu/Leu/Phe/Val dehydrogenase     | -31.9187 | -36.1947 | 0.152191 | 0.918645 | BH |
| PITG_12356 | Pi conserved hypothetical protein (  | -31.9056 | -36.2209 | 0.152191 | 0.918645 | BH |
| PITG_12744 | Pi caltractin-like protein (891 nt)  | -31.897  | -36.2381 | 0.152191 | 0.918645 | BH |
| PITG_12996 | Pi conserved hypothetical protein (  | -31.91   | -36.212  | 0.152191 | 0.918645 | BH |
| PITG_13066 | Pi hypothetical protein (816 nt)     | -31.9187 | -36.1947 | 0.152191 | 0.918645 | BH |
| PITG_20215 | Pi conserved hypothetical protein (  | -31.9522 | -36.1277 | 0.152191 | 0.918645 | BH |
| PITG_09836 | Pi secreted RxLR effector peptide,   | -31.6347 | -36.7627 | 0.152198 | 0.918645 | BH |
| PITG_12292 | Pi rRNA-processing protein, putativ  | -31.5986 | -36.8349 | 0.152198 | 0.918645 | BH |
| PITG_15270 | Pi conserved hypothetical protein (  | -31.5943 | -36.8434 | 0.152198 | 0.918645 | BH |
| PITG_16680 | Pi conserved hypothetical protein (  | -31.6042 | -36.8237 | 0.152198 | 0.918645 | BH |
| PITG_06597 | Pi protein phosphatase 2A regulatc   | -13.3709 | -2.34322 | 0.15242  | 0.918645 | BH |
| PITG_00840 | Pi hypothetical protein (492 nt)     | -31.4543 | -37.1236 | 0.152882 | 0.918645 | BH |
| PITG_12916 | Pi cysteine protease family C01A, p  | -31.5461 | -36.9399 | 0.152993 | 0.918645 | BH |
| PITG_01937 | Pi myosin-like protein (1685 nt)     | -31.9646 | -36.1029 | 0.153293 | 0.918645 | BH |
| PITG_04568 | Pi protein kinase (2281 nt)          | -31.8931 | -36.246  | 0.153293 | 0.918645 | BH |

|            |                                       |          |          |          |          |    |
|------------|---------------------------------------|----------|----------|----------|----------|----|
| PITG_09570 | Pi hypothetical protein (1014 nt)     | -31.9231 | -36.1858 | 0.153293 | 0.918645 | BH |
| PITG_16073 | Pi alcohol dehydrogenase, putative    | -31.9554 | -36.1214 | 0.153293 | 0.918645 | BH |
| PITG_17332 | Pi conserved hypothetical protein (   | -31.8961 | -36.24   | 0.153293 | 0.918645 | BH |
| PITG_19709 | Pi hypothetical protein (279 nt)      | -31.9231 | -36.1858 | 0.153293 | 0.918645 | BH |
| PITG_20117 | Pi 3-ketodihydrosphingosine reduc     | -31.9421 | -36.148  | 0.153293 | 0.918645 | BH |
| PITG_00129 | Pi copine-like protein, putative (15  | -31.6233 | -36.7855 | 0.153482 | 0.918645 | BH |
| PITG_15134 | Pi conserved hypothetical protein (   | -31.6062 | -36.8196 | 0.153482 | 0.918645 | BH |
| PITG_06950 | Pi histone H3.3 (880 nt)              | -9.6508  | 2.257817 | 0.153625 | 0.918645 | BH |
| PITG_16749 | Pi hypothetical protein (1503 nt)     | -13.3582 | -2.36991 | 0.153946 | 0.918645 | BH |
| PITG_00252 | Pi conserved hypothetical protein (   | -31.9606 | -36.111  | 0.154401 | 0.918645 | BH |
| PITG_15818 | Pi conserved hypothetical protein (   | -31.9046 | -36.2228 | 0.154401 | 0.918645 | BH |
| PITG_20717 | Pi conserved hypothetical protein (   | -31.911  | -36.2101 | 0.154401 | 0.918645 | BH |
| PITG_10210 | Pi phosphoenolpyruvate carboxyki      | -11.7482 | -1.95101 | 0.154473 | 0.918645 | BH |
| PITG_02449 | Pi conserved hypothetical protein (   | -31.6156 | -36.801  | 0.154772 | 0.918645 | BH |
| PITG_07200 | Pi conserved hypothetical protein (   | -31.5978 | -36.8366 | 0.154772 | 0.918645 | BH |
| PITG_10659 | Pi conserved hypothetical protein (   | -31.5978 | -36.8366 | 0.154772 | 0.918645 | BH |
| PITG_11676 | Pi conserved hypothetical protein (   | -31.8298 | -36.3725 | 0.15507  | 0.918645 | BH |
| PITG_19939 | Pi glucosylceramidase, putative (21   | -31.8298 | -36.3725 | 0.15507  | 0.918645 | BH |
| PITG_04134 | Pi conserved hypothetical protein (   | -31.9564 | -36.1194 | 0.155514 | 0.918645 | BH |
| PITG_07865 | Pi autophagy-related protein, puta    | -31.9382 | -36.1556 | 0.155514 | 0.918645 | BH |
| PITG_09896 | Pi conserved hypothetical protein (   | -31.9133 | -36.2055 | 0.155514 | 0.918645 | BH |
| PITG_10221 | Pi hypothetical protein (529 nt)      | -31.9411 | -36.1499 | 0.155514 | 0.918645 | BH |
| PITG_14389 | Pi conserved hypothetical protein (   | -31.9564 | -36.1194 | 0.155514 | 0.918645 | BH |
| PITG_15154 | Pi conserved hypothetical protein (   | -31.894  | -36.244  | 0.155514 | 0.918645 | BH |
| PITG_22865 | Pi propionyl coenzyme A carboxyla     | -31.9472 | -36.1376 | 0.155514 | 0.918645 | BH |
| PITG_02985 | Pi conserved hypothetical protein (   | -31.9037 | -36.2248 | 0.156633 | 0.918645 | BH |
| PITG_06199 | Pi Cullin family protein, putative (3 | -31.9311 | -36.17   | 0.156633 | 0.918645 | BH |
| PITG_20046 | Pi conserved hypothetical protein (   | -31.9034 | -36.2253 | 0.156633 | 0.918645 | BH |
| PITG_04824 | Pi conserved hypothetical protein (   | -12.6438 | -1.93442 | 0.156719 | 0.918645 | BH |
| PITG_22670 | Pi PcF and SCR74-like cys-rich secre  | -7.27033 | 2.518627 | 0.156865 | 0.918645 | BH |
| PITG_13262 | Pi cystathionine beta-synthase (15)   | -13.3784 | -2.33191 | 0.157017 | 0.918645 | BH |
| PITG_00563 | Pi hypothetical protein (1348 nt)     | -31.9401 | -36.152  | 0.157758 | 0.918645 | BH |
| PITG_05468 | Pi conserved hypothetical protein (   | -31.9401 | -36.152  | 0.157758 | 0.918645 | BH |
| PITG_14108 | Pi conserved hypothetical protein (   | -31.9211 | -36.1898 | 0.157758 | 0.918645 | BH |
| PITG_19371 | Pi GTP-binding protein, putative (1   | -31.9123 | -36.2075 | 0.157758 | 0.918645 | BH |
| PITG_20498 | Pi conserved hypothetical protein (   | -31.895  | -36.2421 | 0.157758 | 0.918645 | BH |
| PITG_21006 | Pi O-phosphoseryl-tRNA(Sec) selen     | -31.9482 | -36.1356 | 0.157758 | 0.918645 | BH |
| PITG_00380 | Pi sphingosine-1-phosphate lyase,     | -31.6606 | -36.711  | 0.15788  | 0.918645 | BH |
| PITG_01525 | Pi conserved hypothetical protein (   | -31.6721 | -36.6878 | 0.15788  | 0.918645 | BH |
| PITG_02769 | Pi conserved hypothetical protein (   | -31.6721 | -36.6878 | 0.15788  | 0.918645 | BH |
| PITG_06112 | Pi hypothetical protein (481 nt)      | -31.6776 | -36.6769 | 0.15788  | 0.918645 | BH |
| PITG_09004 | Pi conserved hypothetical protein (   | -31.666  | -36.7002 | 0.15788  | 0.918645 | BH |
| PITG_11750 | Pi serine/threonine protein phosph    | -31.6847 | -36.6628 | 0.15788  | 0.918645 | BH |
| PITG_12760 | Pi DNA binding protein, putative (1   | -31.6652 | -36.7017 | 0.15788  | 0.918645 | BH |
| PITG_18677 | Pi conserved hypothetical protein (   | -31.6652 | -36.7017 | 0.15788  | 0.918645 | BH |
| PITG_16117 | Pi conserved hypothetical protein (   | -10.5134 | -2.13434 | 0.158211 | 0.918645 | BH |
| PITG_13614 | Pi malate dehydrogenase, mitocho      | -11.621  | 2.561547 | 0.158354 | 0.918645 | BH |

|            |                                       |          |          |          |          |    |
|------------|---------------------------------------|----------|----------|----------|----------|----|
| PITG_13405 | Pi conserved hypothetical protein (   | -31.6307 | -36.7706 | 0.158679 | 0.918645 | BH |
| PITG_09642 | Pi conserved hypothetical protein (   | -31.9492 | -36.1337 | 0.158888 | 0.918645 | BH |
| PITG_10316 | Pi RNA exonuclease 4 (1140 nt)        | -31.9492 | -36.1337 | 0.158888 | 0.918645 | BH |
| PITG_01031 | Pi conserved hypothetical protein (   | -31.9304 | -36.1713 | 0.158888 | 0.918645 | BH |
| PITG_05174 | Pi conserved hypothetical protein (   | -31.93   | -36.1721 | 0.158888 | 0.918645 | BH |
| PITG_15216 | Pi S-phase kinase-associated prote    | -31.9216 | -36.1888 | 0.158888 | 0.918645 | BH |
| PITG_20033 | Pi conserved hypothetical protein (   | -31.9216 | -36.1888 | 0.158888 | 0.918645 | BH |
| PITG_01070 | Pi conserved hypothetical protein (   | -31.6689 | -36.6942 | 0.159135 | 0.918645 | BH |
| PITG_05855 | Pi protein kinase, putative (2558 nt) | -31.6706 | -36.6908 | 0.159135 | 0.918645 | BH |
| PITG_06918 | Pi conserved hypothetical protein (   | -31.6389 | -36.7544 | 0.159135 | 0.918645 | BH |
| PITG_07242 | Pi conserved hypothetical protein (   | -31.6682 | -36.6957 | 0.159135 | 0.918645 | BH |
| PITG_08812 | Pi conserved hypothetical protein (   | -31.6628 | -36.7065 | 0.159135 | 0.918645 | BH |
| PITG_09430 | Pi trafficking protein particle comp  | -31.6448 | -36.7425 | 0.159135 | 0.918645 | BH |
| PITG_10998 | Pi Glycogen Synthase Kinase 3 beta    | -31.6516 | -36.729  | 0.159135 | 0.918645 | BH |
| PITG_13658 | Pi methionine aminopeptidase, pu      | -31.6877 | -36.6568 | 0.159135 | 0.918645 | BH |
| PITG_14589 | Pi choline-phosphate cytidyltrans     | -31.6366 | -36.7589 | 0.159135 | 0.918645 | BH |
| PITG_16472 | Pi kazal serine protease inhibitor P  | -31.6736 | -36.6848 | 0.159135 | 0.918645 | BH |
| PITG_19690 | Pi conserved hypothetical protein (   | -31.6824 | -36.6673 | 0.159135 | 0.918645 | BH |
| PITG_21000 | Pi conserved hypothetical protein (   | -31.6492 | -36.7337 | 0.159135 | 0.918645 | BH |
| PITG_22105 | Pi conserved hypothetical protein (   | -31.6736 | -36.6848 | 0.159135 | 0.918645 | BH |
| PITG_23273 | Pi Crinkler (CRN) family protein (25  | -31.6621 | -36.708  | 0.159135 | 0.918645 | BH |
| PITG_23187 | Pi conserved hypothetical protein (   | -31.7825 | -36.4672 | 0.159311 | 0.918645 | BH |
| PITG_15504 | Pi thioredoxin peroxidase, putative   | -12.175  | 2.560465 | 0.159868 | 0.918645 | BH |
| PITG_09355 | Pi aquaporin, putative (873 nt)       | -31.8763 | -36.2795 | 0.15996  | 0.918645 | BH |
| PITG_12108 | Pi conserved hypothetical protein (   | -31.8866 | -36.259  | 0.15996  | 0.918645 | BH |
| PITG_04895 | Pi conserved hypothetical protein (   | -31.5968 | -36.8385 | 0.159995 | 0.918645 | BH |
| PITG_08084 | Pi conserved hypothetical protein (   | -31.5913 | -36.8495 | 0.159995 | 0.918645 | BH |
| PITG_15151 | Pi conserved hypothetical protein (   | -31.5961 | -36.8399 | 0.159995 | 0.918645 | BH |
| PITG_00792 | Pi conserved hypothetical protein (   | -31.9679 | -36.0964 | 0.160024 | 0.918645 | BH |
| PITG_00845 | Pi 3'5'-cyclic nucleotide phosphodi   | -31.896  | -36.2401 | 0.160024 | 0.918645 | BH |
| PITG_08083 | Pi conserved hypothetical protein (   | -31.9045 | -36.2232 | 0.160024 | 0.918645 | BH |
| PITG_12266 | Pi inositol-3,4-bisphosphate 4-pho    | -31.9045 | -36.2232 | 0.160024 | 0.918645 | BH |
| PITG_15627 | Pi conserved hypothetical protein (   | -31.9676 | -36.0969 | 0.160024 | 0.918645 | BH |
| PITG_15833 | Pi conserved hypothetical protein (   | -31.9676 | -36.0969 | 0.160024 | 0.918645 | BH |
| PITG_12088 | Pi hypothetical protein (632 nt)      | -31.481  | -37.0702 | 0.160048 | 0.918645 | BH |
| PITG_12565 | Pi conserved hypothetical protein (   | -31.6454 | -36.7412 | 0.160396 | 0.918645 | BH |
| PITG_20727 | Pi conserved hypothetical protein (   | -31.6759 | -36.6803 | 0.160396 | 0.918645 | BH |
| PITG_00486 | Pi hypothetical protein (1155 nt)     | -31.6507 | -36.7307 | 0.160396 | 0.918645 | BH |
| PITG_02562 | Pi conserved hypothetical protein (   | -31.6395 | -36.7531 | 0.160396 | 0.918645 | BH |
| PITG_02798 | Pi conserved hypothetical protein (   | -31.6636 | -36.705  | 0.160396 | 0.918645 | BH |
| PITG_02973 | Pi delta-1-pyrroline-5-carboxylate    | -31.6816 | -36.6688 | 0.160396 | 0.918645 | BH |
| PITG_08209 | Pi conserved hypothetical protein (   | -31.688  | -36.6562 | 0.160396 | 0.918645 | BH |
| PITG_14106 | Pi conserved hypothetical protein (   | -31.6486 | -36.7349 | 0.160396 | 0.918645 | BH |
| PITG_22552 | Pi hypothetical protein (1511 nt)     | -31.6872 | -36.6577 | 0.160396 | 0.918645 | BH |
| PITG_09211 | Pi conserved hypothetical protein (   | -31.7615 | -36.5092 | 0.160635 | 0.918645 | BH |
| PITG_12264 | Pi protoheme IX farnesyltransferas    | -31.5619 | -36.9083 | 0.161133 | 0.918645 | BH |
| PITG_04599 | Pi sestrin-like protein (1761 nt)     | -31.9493 | -36.1334 | 0.161166 | 0.918645 | BH |

|            |                                      |          |          |          |          |    |
|------------|--------------------------------------|----------|----------|----------|----------|----|
| PITG_05729 | Pi conserved hypothetical protein (  | -31.9493 | -36.1334 | 0.161166 | 0.918645 | BH |
| PITG_13970 | Pi conserved hypothetical protein (  | -31.9585 | -36.1152 | 0.161166 | 0.918645 | BH |
| PITG_14743 | Pi conserved hypothetical protein (  | -31.8623 | -36.3075 | 0.1612   | 0.918645 | BH |
| PITG_20186 | Pi conserved hypothetical protein (  | -31.8623 | -36.3075 | 0.1612   | 0.918645 | BH |
| PITG_09704 | Pi dynein light chain Tctex-type, pu | -31.6196 | -36.7929 | 0.161316 | 0.918645 | BH |
| PITG_10750 | Pi beta-glucan synthesis-associat    | -31.6258 | -36.7805 | 0.161316 | 0.918645 | BH |
| PITG_02274 | Pi peroxisomal trans-2-enoyl-CoA r   | -31.5256 | -36.981  | 0.161475 | 0.918645 | BH |
| PITG_15877 | Pi conserved hypothetical protein (  | -31.4467 | -37.1388 | 0.16161  | 0.918645 | BH |
| PITG_00391 | Pi conserved hypothetical protein (  | -31.6837 | -36.6648 | 0.161663 | 0.918645 | BH |
| PITG_04229 | Pi conserved hypothetical protein (  | -31.6643 | -36.7035 | 0.161663 | 0.918645 | BH |
| PITG_04566 | Pi hypothetical protein (132 nt)     | -31.6522 | -36.7277 | 0.161663 | 0.918645 | BH |
| PITG_09891 | Pi conserved hypothetical protein (  | -31.6403 | -36.7516 | 0.161663 | 0.918645 | BH |
| PITG_21209 | Pi conserved hypothetical protein (  | -31.6738 | -36.6844 | 0.161663 | 0.918645 | BH |
| PITG_05601 | Pi conserved hypothetical protein (  | -13.4003 | -2.282   | 0.161739 | 0.918645 | BH |
| PITG_02255 | Pi histone H1, putative (731 nt)     | -10.5772 | -1.97951 | 0.16222  | 0.918645 | BH |
| PITG_20406 | Pi hypothetical protein (2190 nt)    | -31.816  | -36.4    | 0.162447 | 0.918645 | BH |
| PITG_21983 | Pi hypothetical protein (2294 nt)    | -31.8249 | -36.3822 | 0.162447 | 0.918645 | BH |
| PITG_03427 | Pi tyrosine aminotransferase, puta   | -31.5479 | -36.9363 | 0.162515 | 0.918645 | BH |
| PITG_00400 | Pi conserved hypothetical protein (  | -31.6032 | -36.8257 | 0.162645 | 0.918645 | BH |
| PITG_00125 | Pi conserved hypothetical protein (  | -31.6351 | -36.7618 | 0.162935 | 0.918645 | BH |
| PITG_00747 | Pi hydroxymethylglutaryl-CoA lyase   | -31.653  | -36.7262 | 0.162935 | 0.918645 | BH |
| PITG_02950 | Pi conserved hypothetical protein (  | -31.6793 | -36.6735 | 0.162935 | 0.918645 | BH |
| PITG_03168 | Pi hypothetical protein (287 nt)     | -31.6661 | -36.6999 | 0.162935 | 0.918645 | BH |
| PITG_05389 | Pi ATP-binding Cassette (ABC) Supe   | -31.641  | -36.7501 | 0.162935 | 0.918645 | BH |
| PITG_06702 | Pi conserved hypothetical protein (  | -31.653  | -36.7262 | 0.162935 | 0.918645 | BH |
| PITG_08745 | Pi conserved hypothetical protein (  | -31.647  | -36.7382 | 0.162935 | 0.918645 | BH |
| PITG_12327 | Pi conserved hypothetical protein (  | -31.641  | -36.7501 | 0.162935 | 0.918645 | BH |
| PITG_16806 | Pi conserved hypothetical protein (  | -31.647  | -36.7382 | 0.162935 | 0.918645 | BH |
| PITG_22065 | Pi conserved hypothetical protein (  | -10.875  | -1.9418  | 0.163302 | 0.918645 | BH |
| PITG_15994 | Pi conserved hypothetical protein (  | -31.9667 | -36.0987 | 0.163467 | 0.918645 | BH |
| PITG_10384 | Pi hypothetical protein (1443 nt)    | -31.5867 | -36.8587 | 0.163979 | 0.918645 | BH |
| PITG_14401 | Pi myb-like DNA-binding protein, p   | -31.5813 | -36.8696 | 0.163979 | 0.918645 | BH |
| PITG_00782 | Pi conserved hypothetical protein (  | -31.6359 | -36.7603 | 0.164213 | 0.918645 | BH |
| PITG_10936 | Pi hypothetical protein (739 nt)     | -31.6477 | -36.7366 | 0.164213 | 0.918645 | BH |
| PITG_00235 | Pi hypothetical protein (307 nt)     | -31.9415 | -36.1492 | 0.164626 | 0.918645 | BH |
| PITG_00264 | Pi Delta(3,5)-Delta(2,4)-dienoyl-Co  | -31.9415 | -36.1492 | 0.164626 | 0.918645 | BH |
| PITG_02734 | Pi conserved hypothetical protein (  | -31.9505 | -36.1312 | 0.164626 | 0.918645 | BH |
| PITG_03142 | Pi hsp90-like protein (1411 nt)      | -31.947  | -36.1381 | 0.164626 | 0.918645 | BH |
| PITG_03372 | Pi conserved hypothetical protein (  | -31.9596 | -36.113  | 0.164626 | 0.918645 | BH |
| PITG_06851 | Pi conserved hypothetical protein (  | -31.9596 | -36.113  | 0.164626 | 0.918645 | BH |
| PITG_06919 | Pi conserved hypothetical protein (  | -31.9505 | -36.1312 | 0.164626 | 0.918645 | BH |
| PITG_07286 | Pi phosphatidylinositol kinase (430  | -31.9505 | -36.1312 | 0.164626 | 0.918645 | BH |
| PITG_03741 | Pi conserved hypothetical protein (  | -31.621  | -36.7901 | 0.16532  | 0.918645 | BH |
| PITG_13422 | Pi conserved hypothetical protein (  | -31.6153 | -36.8015 | 0.16532  | 0.918645 | BH |
| PITG_19851 | Pi myb-like DNA-binding protein, p   | -31.621  | -36.7901 | 0.16532  | 0.918645 | BH |
| PITG_00423 | Pi conserved hypothetical protein (  | -31.6584 | -36.7153 | 0.165497 | 0.918645 | BH |
| PITG_01438 | Pi conserved hypothetical protein (  | -31.684  | -36.664  | 0.165497 | 0.918645 | BH |

|            |                                       |          |          |          |          |    |
|------------|---------------------------------------|----------|----------|----------|----------|----|
| PITG_03425 | Pi glycoside hydrolase, putative (20  | -31.6367 | -36.7588 | 0.165497 | 0.918645 | BH |
| PITG_15383 | Pi thioredoxin-like protein (456 nt)  | -31.686  | -36.6601 | 0.165497 | 0.918645 | BH |
| PITG_15781 | Pi WD domain-containing protein,      | -31.6777 | -36.6766 | 0.165497 | 0.918645 | BH |
| PITG_20130 | Pi aldehyde dehydrogenase, putati     | -31.6645 | -36.7031 | 0.165497 | 0.918645 | BH |
| PITG_21011 | Pi 14 kDa zinc-binding protein (608   | -31.684  | -36.664  | 0.165497 | 0.918645 | BH |
| PITG_03822 | Pi conserved hypothetical protein (   | -31.9326 | -36.1669 | 0.165792 | 0.918645 | BH |
| PITG_13347 | Pi IMP-specific 5'-nucleotidase, put  | -31.9152 | -36.2018 | 0.165792 | 0.918645 | BH |
| PITG_16670 | Pi conserved hypothetical protein (   | -12.6463 | -1.94075 | 0.166596 | 0.918645 | BH |
| PITG_03223 | Pi conserved hypothetical protein (   | -31.8982 | -36.2357 | 0.166963 | 0.918645 | BH |
| PITG_10992 | Pi conserved hypothetical protein (   | -31.9178 | -36.1964 | 0.166963 | 0.918645 | BH |
| PITG_15537 | Pi conserved hypothetical protein (   | -31.7957 | -36.4407 | 0.16738  | 0.918645 | BH |
| PITG_00712 | Pi isoamyl acetate-hydrolyzing este   | -31.6744 | -36.6834 | 0.168081 | 0.918645 | BH |
| PITG_02796 | Pi myosin-like protein (4929 nt)      | -31.6375 | -36.7572 | 0.168081 | 0.918645 | BH |
| PITG_17552 | Pi myb-like DNA-binding protein, p    | -31.6439 | -36.7442 | 0.168081 | 0.918645 | BH |
| PITG_19147 | Pi conserved hypothetical protein (   | -31.6439 | -36.7442 | 0.168081 | 0.918645 | BH |
| PITG_06223 | Pi protein kinase, putative (1536 nt) | -31.9516 | -36.1289 | 0.168139 | 0.918645 | BH |
| PITG_15983 | Pi conserved hypothetical protein (   | -31.8994 | -36.2334 | 0.168139 | 0.918645 | BH |
| PITG_17423 | Pi conserved hypothetical protein (   | -31.9607 | -36.1107 | 0.168139 | 0.918645 | BH |
| PITG_17576 | Pi protein kinase, putative (1986 nt) | -31.8558 | -36.3206 | 0.168787 | 0.918645 | BH |
| PITG_01619 | Pi metalloprotease family M01, pu     | -31.9427 | -36.1468 | 0.169322 | 0.918645 | BH |
| PITG_07455 | Pi P-type ATPase (P-ATPase) Super     | -31.9427 | -36.1468 | 0.169322 | 0.918645 | BH |
| PITG_09554 | Pi conserved hypothetical protein (   | -31.925  | -36.1822 | 0.169322 | 0.918645 | BH |
| PITG_14123 | Pi calcineurin-like phosphoesterase   | -31.925  | -36.1822 | 0.169322 | 0.918645 | BH |
| PITG_15958 | Pi serine protease family S33, puta   | -31.9338 | -36.1646 | 0.169322 | 0.918645 | BH |
| PITG_21643 | Pi vacuolar protein sorting-associat  | -31.925  | -36.1822 | 0.169322 | 0.918645 | BH |
| PITG_10828 | Pi conserved hypothetical protein (   | -31.6752 | -36.6817 | 0.169382 | 0.918645 | BH |
| PITG_17760 | Pi Amino Acid/Auxin Permease (AA      | -31.6372 | -36.7577 | 0.169382 | 0.918645 | BH |
| PITG_04719 | Pi trafficking protein particle comp  | -31.6236 | -36.785  | 0.169383 | 0.918645 | BH |
| PITG_12350 | Pi conserved hypothetical protein (   | -31.6162 | -36.7997 | 0.169383 | 0.918645 | BH |
| PITG_11722 | Pi conserved hypothetical protein (   | -31.8402 | -36.3517 | 0.170076 | 0.918645 | BH |
| PITG_11760 | Pi HSF-type DNA-binding protein, p    | -31.8402 | -36.3517 | 0.170076 | 0.918645 | BH |
| PITG_01322 | Pi myosin-like protein (3704 nt)      | -31.9078 | -36.2165 | 0.170511 | 0.918645 | BH |
| PITG_04394 | Pi conserved hypothetical protein (   | -31.8909 | -36.2502 | 0.170511 | 0.918645 | BH |
| PITG_00588 | Pi cathepsin, cysteine protease fan   | -31.6509 | -36.7303 | 0.170688 | 0.918645 | BH |
| PITG_13423 | Pi conserved hypothetical protein (   | -31.6885 | -36.6551 | 0.170688 | 0.918645 | BH |
| PITG_18252 | Pi conserved hypothetical protein (   | -31.6885 | -36.6551 | 0.170688 | 0.918645 | BH |
| PITG_09629 | Pi Rab32/38 family GTPase, putativ    | -31.8982 | -36.2357 | 0.171706 | 0.918645 | BH |
| PITG_10240 | Pi pirin, putative (1213 nt)          | -31.6637 | -36.7046 | 0.172    | 0.918645 | BH |
| PITG_20105 | Pi putative methyltransferase, puta   | -31.676  | -36.6801 | 0.172    | 0.918645 | BH |
| PITG_00627 | Pi conserved hypothetical protein (   | -31.6352 | -36.7617 | 0.172124 | 0.918645 | BH |
| PITG_18296 | Pi coproporphyrinogen III oxidase,    | -31.6352 | -36.7617 | 0.172124 | 0.918645 | BH |
| PITG_01824 | Pi protein kinase (1515 nt)           | -31.436  | -37.1601 | 0.172193 | 0.918645 | BH |
| PITG_00793 | Pi hypothetical protein (3031 nt)     | -31.962  | -36.1082 | 0.172906 | 0.918645 | BH |
| PITG_01164 | Pi glucan 1,3-beta-glucosidase, put   | -31.962  | -36.1082 | 0.172906 | 0.918645 | BH |
| PITG_08528 | Pi conserved hypothetical protein (   | -31.962  | -36.1082 | 0.172906 | 0.918645 | BH |
| PITG_13070 | Pi conserved hypothetical protein (   | -31.962  | -36.1082 | 0.172906 | 0.918645 | BH |
| PITG_02634 | Pi conserved hypothetical protein (   | -31.6399 | -36.7524 | 0.173318 | 0.918645 | BH |

|            |                                       |          |          |          |          |    |
|------------|---------------------------------------|----------|----------|----------|----------|----|
| PITG_03657 | Pi kinesin-like protein (1304 nt)     | -31.687  | -36.658  | 0.173318 | 0.918645 | BH |
| PITG_06479 | Pi inositol oxygenase, putative (176  | -31.6517 | -36.7287 | 0.173318 | 0.918645 | BH |
| PITG_18359 | Pi ubiquitin-specific protease, puta  | -31.9262 | -36.1797 | 0.174113 | 0.918645 | BH |
| PITG_20383 | Pi conserved hypothetical protein (   | -12.6864 | -1.84931 | 0.174557 | 0.918645 | BH |
| PITG_09786 | Pi conserved hypothetical protein (   | -10.0582 | -2.20264 | 0.174633 | 0.918645 | BH |
| PITG_13753 | Pi choline/Carnitine O-acyltransfer   | -31.6172 | -36.7978 | 0.174891 | 0.918645 | BH |
| PITG_01478 | Pi conserved hypothetical protein (   | -31.909  | -36.2141 | 0.175326 | 0.918645 | BH |
| PITG_17891 | Pi conserved hypothetical protein (   | -31.909  | -36.2141 | 0.175326 | 0.918645 | BH |
| PITG_03472 | Pi callose synthase, putative (6122   | -31.6466 | -36.7389 | 0.175971 | 0.918645 | BH |
| PITG_03757 | Pi ATPase (2240 nt)                   | -31.6535 | -36.7252 | 0.175971 | 0.918645 | BH |
| PITG_07923 | Pi PLAC8 family protein (1717 nt)     | -31.6348 | -36.7625 | 0.175971 | 0.918645 | BH |
| PITG_15155 | Pi conserved hypothetical protein (   | -31.6407 | -36.7507 | 0.175971 | 0.918645 | BH |
| PITG_07088 | Pi Major Facilitator Superfamily (M   | -31.5839 | -36.8643 | 0.176285 | 0.918645 | BH |
| PITG_14237 | Pi glycoside hydrolase, putative (18  | -14.583  | 2.972133 | 0.176545 | 0.918645 | BH |
| PITG_02664 | Pi ATP-dependent RNA helicase DB      | -13.4357 | -2.21235 | 0.177034 | 0.918645 | BH |
| PITG_09584 | Pi hypothetical protein (885 nt)      | -31.6727 | -36.6867 | 0.177306 | 0.918645 | BH |
| PITG_15906 | Pi DNA repair protein RAD51 (1595     | -31.6716 | -36.689  | 0.177306 | 0.918645 | BH |
| PITG_16120 | Pi conserved hypothetical protein (   | -31.6655 | -36.7012 | 0.177306 | 0.918645 | BH |
| PITG_09280 | Pi bZIP transcription factor, putativ | -31.6415 | -36.749  | 0.178647 | 0.918645 | BH |
| PITG_03435 | Pi conserved hypothetical protein (   | -31.9723 | -36.0875 | 0.179001 | 0.918645 | BH |
| PITG_09962 | Pi conserved hypothetical protein (   | -31.9452 | -36.1417 | 0.179001 | 0.918645 | BH |
| PITG_10449 | Pi ATP-binding Cassette (ABC) Supe    | -31.9363 | -36.1596 | 0.179001 | 0.918645 | BH |
| PITG_17677 | Pi conserved hypothetical protein (   | -31.9723 | -36.0875 | 0.179001 | 0.918645 | BH |
| PITG_06863 | Pi ATP-binding Cassette (ABC) Supe    | -31.6181 | -36.7959 | 0.179092 | 0.918645 | BH |
| PITG_09296 | Pi sterol 3-beta-glucosyltransferase  | -31.6238 | -36.7845 | 0.179092 | 0.918645 | BH |
| PITG_04020 | Pi hypothetical protein (575 nt)      | -31.8221 | -36.388  | 0.179306 | 0.918645 | BH |
| PITG_23305 | Pi hypothetical protein (1044 nt)     | -31.8573 | -36.3174 | 0.179306 | 0.918645 | BH |
| PITG_00155 | Pi conserved hypothetical protein (   | -31.5958 | -36.8406 | 0.180505 | 0.918645 | BH |
| PITG_18316 | Pi phospholipid hydroperoxide glut    | -12.0431 | -2.15363 | 0.180666 | 0.918645 | BH |
| PITG_15195 | Pi conserved hypothetical protein (   | -31.6543 | -36.7235 | 0.181346 | 0.918645 | BH |
| PITG_00849 | Pi hypothetical protein (310 nt)      | -31.9764 | -36.0793 | 0.18238  | 0.918645 | BH |
| PITG_02003 | Pi conserved hypothetical protein (   | -32.0165 | -35.9991 | 0.18238  | 0.918645 | BH |
| PITG_02260 | Pi C2 domain-containing protein, p    | -32.0073 | -36.0175 | 0.18238  | 0.918645 | BH |
| PITG_03545 | Pi conserved hypothetical protein (   | -31.9686 | -36.0949 | 0.18238  | 0.918645 | BH |
| PITG_03621 | Pi conserved hypothetical protein (   | -32.0492 | -35.9337 | 0.18238  | 0.918645 | BH |
| PITG_03946 | Pi conserved hypothetical protein (   | -32.0379 | -35.9564 | 0.18238  | 0.918645 | BH |
| PITG_04225 | Pi geranylgeranyl transferase type-   | -31.9885 | -36.055  | 0.18238  | 0.918645 | BH |
| PITG_04715 | Pi pantothenate kinase, putative (1   | -31.9885 | -36.055  | 0.18238  | 0.918645 | BH |
| PITG_05934 | Pi conserved hypothetical protein (   | -31.9983 | -36.0355 | 0.18238  | 0.918645 | BH |
| PITG_06997 | Pi conserved hypothetical protein (   | -31.986  | -36.0601 | 0.18238  | 0.918645 | BH |
| PITG_08036 | Pi conserved hypothetical protein (   | -32.0379 | -35.9564 | 0.18238  | 0.918645 | BH |
| PITG_09770 | Pi conserved hypothetical protein (   | -31.9974 | -36.0372 | 0.18238  | 0.918645 | BH |
| PITG_09875 | Pi AP-4 complex subunit mu-1, put     | -31.9789 | -36.0742 | 0.18238  | 0.918645 | BH |
| PITG_10007 | Pi diaminopimelate decarboxylase,     | -31.9966 | -36.0389 | 0.18238  | 0.918645 | BH |
| PITG_11250 | Pi conserved hypothetical protein (   | -32.0387 | -35.9547 | 0.18238  | 0.918645 | BH |
| PITG_12302 | Pi conserved hypothetical protein (   | -31.986  | -36.0601 | 0.18238  | 0.918645 | BH |
| PITG_14792 | Pi conserved hypothetical protein (   | -31.9781 | -36.0759 | 0.18238  | 0.918645 | BH |

|            |                                       |          |          |          |          |    |
|------------|---------------------------------------|----------|----------|----------|----------|----|
| PITG_14806 | Pi trafficking protein particle comp  | -31.9781 | -36.0759 | 0.18238  | 0.918645 | BH |
| PITG_15466 | Pi serine protease family S33, puta   | -32.0165 | -35.9991 | 0.18238  | 0.918645 | BH |
| PITG_15550 | Pi conserved hypothetical protein (   | -32.0182 | -35.9957 | 0.18238  | 0.918645 | BH |
| PITG_18242 | Pi conserved hypothetical protein (   | -31.9789 | -36.0742 | 0.18238  | 0.918645 | BH |
| PITG_18473 | Pi 3-phosphoinositide-dependent p     | -31.9781 | -36.0759 | 0.18238  | 0.918645 | BH |
| PITG_18475 | Pi conserved hypothetical protein (   | -31.9764 | -36.0793 | 0.18238  | 0.918645 | BH |
| PITG_19022 | Pi conserved hypothetical protein (   | -32.0082 | -36.0158 | 0.18238  | 0.918645 | BH |
| PITG_20306 | Pi transmembrane protein, putativ     | -31.9686 | -36.0949 | 0.18238  | 0.918645 | BH |
| PITG_01395 | Pi glycoside hydrolase, putative (1   | -31.6795 | -36.6731 | 0.182705 | 0.918645 | BH |
| PITG_02948 | Pi conserved hypothetical protein (   | -31.6733 | -36.6854 | 0.182705 | 0.918645 | BH |
| PITG_03788 | Pi conserved hypothetical protein (   | -31.6857 | -36.6606 | 0.182705 | 0.918645 | BH |
| PITG_00401 | Pi ribosome maturation protein SB     | -31.9903 | -36.0516 | 0.183509 | 0.918645 | BH |
| PITG_00594 | Pi chaperone protein dnaJ, putativ    | -32.0056 | -36.0209 | 0.183509 | 0.918645 | BH |
| PITG_00854 | Pi conserved hypothetical protein (   | -31.9949 | -36.0424 | 0.183509 | 0.918645 | BH |
| PITG_01293 | Pi conserved hypothetical protein (   | -32.0475 | -35.9371 | 0.183509 | 0.918645 | BH |
| PITG_01336 | Pi conserved hypothetical protein (   | -31.9903 | -36.0516 | 0.183509 | 0.918645 | BH |
| PITG_01809 | Pi conserved hypothetical protein (   | -31.9894 | -36.0533 | 0.183509 | 0.918645 | BH |
| PITG_02912 | Pi conserved hypothetical protein (   | -32.05   | -35.932  | 0.183509 | 0.918645 | BH |
| PITG_02958 | Pi conserved hypothetical protein (   | -32.009  | -36.014  | 0.183509 | 0.918645 | BH |
| PITG_03234 | Pi DEAD/DEAH box RNA helicase, p      | -32.0099 | -36.0123 | 0.183509 | 0.918645 | BH |
| PITG_04181 | Pi conserved hypothetical protein (   | -31.9703 | -36.0915 | 0.183509 | 0.918645 | BH |
| PITG_05302 | Pi replication factor C subunit 5 (1  | -31.9703 | -36.0915 | 0.183509 | 0.918645 | BH |
| PITG_05410 | Pi transmembrane protein, putativ     | -32.009  | -36.014  | 0.183509 | 0.918645 | BH |
| PITG_06006 | Pi conserved hypothetical protein (   | -31.9903 | -36.0516 | 0.183509 | 0.918645 | BH |
| PITG_06127 | Pi conserved hypothetical protein (   | -32.0056 | -36.0209 | 0.183509 | 0.918645 | BH |
| PITG_10141 | Pi conserved hypothetical protein (   | -32.0301 | -35.9719 | 0.183509 | 0.918645 | BH |
| PITG_11524 | Pi serine protease family S10, puta   | -31.9851 | -36.0619 | 0.183509 | 0.918645 | BH |
| PITG_13403 | Pi sphingolipid delta(4)-desaturase   | -32      | -36.0321 | 0.183509 | 0.918645 | BH |
| PITG_13804 | Pi conserved hypothetical protein (   | -32.0301 | -35.9719 | 0.183509 | 0.918645 | BH |
| PITG_14381 | Pi conserved hypothetical protein (   | -31.9747 | -36.0828 | 0.183509 | 0.918645 | BH |
| PITG_14768 | Pi conserved hypothetical protein (   | -31.9894 | -36.0533 | 0.183509 | 0.918645 | BH |
| PITG_16009 | Pi importin subunit alpha, putative   | -32.0191 | -35.994  | 0.183509 | 0.918645 | BH |
| PITG_16114 | Pi myb-like DNA-binding protein, p    | -32.0509 | -35.9303 | 0.183509 | 0.918645 | BH |
| PITG_16257 | Pi conserved hypothetical protein (   | -31.9798 | -36.0725 | 0.183509 | 0.918645 | BH |
| PITG_16940 | Pi tRNA guanosine-2'-O-methyltrar     | -32.0292 | -35.9736 | 0.183509 | 0.918645 | BH |
| PITG_17617 | Pi TFIIH basal transcription factor c | -31.9894 | -36.0533 | 0.183509 | 0.918645 | BH |
| PITG_17726 | Pi conserved hypothetical protein (   | -32.0156 | -36.0008 | 0.183509 | 0.918645 | BH |
| PITG_17928 | Pi UDP-N-acetylglucosamine-peptid     | -32.0301 | -35.9719 | 0.183509 | 0.918645 | BH |
| PITG_18786 | Pi conserved hypothetical protein (   | -32.037  | -35.9581 | 0.183509 | 0.918645 | BH |
| PITG_18912 | Pi nonsense transcript regulator (2   | -32      | -36.0321 | 0.183509 | 0.918645 | BH |
| PITG_19800 | Pi secreted RxLR effector peptide,    | -31.9992 | -36.0338 | 0.183509 | 0.918645 | BH |
| PITG_20087 | Pi conserved hypothetical protein (   | -32.0475 | -35.9371 | 0.183509 | 0.918645 | BH |
| PITG_20208 | Pi conserved hypothetical protein (   | -32.0475 | -35.9371 | 0.183509 | 0.918645 | BH |
| PITG_20317 | Pi GTP-dependent nucleic acid-bind    | -31.9747 | -36.0828 | 0.183509 | 0.918645 | BH |
| PITG_20350 | Pi D-amino acid dehydrogenase sr      | -32.0099 | -36.0123 | 0.183509 | 0.918645 | BH |
| PITG_20400 | Pi conserved hypothetical protein (   | -32.0483 | -35.9354 | 0.183509 | 0.918645 | BH |
| PITG_21055 | Pi LAG1 longevity assurance (1284     | -32.0509 | -35.9303 | 0.183509 | 0.918645 | BH |



|            |                                      |          |          |          |          |    |
|------------|--------------------------------------|----------|----------|----------|----------|----|
| PITG_21176 | Pi transportin-like protein (3101 nt | -32.0509 | -35.9303 | 0.183509 | 0.918645 | BH |
| PITG_14088 | Pi conserved hypothetical protein (  | -13.3193 | 2.576036 | 0.183906 | 0.918645 | BH |
| PITG_14002 | Pi conserved hypothetical protein (  | -31.6673 | -36.6976 | 0.184069 | 0.918645 | BH |
| PITG_02034 | Pi zinc transporter, putative (1230  | -32.031  | -35.9702 | 0.184644 | 0.918645 | BH |
| PITG_04618 | Pi trimethyllysine dioxygenase, put  | -31.9911 | -36.0498 | 0.184644 | 0.918645 | BH |
| PITG_05113 | Pi hypothetical protein (1175 nt)    | -32.0009 | -36.0303 | 0.184644 | 0.918645 | BH |
| PITG_05864 | Pi conserved hypothetical protein (  | -32.0249 | -35.9822 | 0.184644 | 0.918645 | BH |
| PITG_07256 | Pi conserved hypothetical protein (  | -31.9834 | -36.0654 | 0.184644 | 0.918645 | BH |
| PITG_08452 | Pi conserved hypothetical protein (  | -31.9911 | -36.0498 | 0.184644 | 0.918645 | BH |
| PITG_09278 | Pi conserved hypothetical protein (  | -31.9842 | -36.0636 | 0.184644 | 0.918645 | BH |
| PITG_09310 | Pi 6-phosphofructo-2-kinase/fructo   | -31.9911 | -36.0498 | 0.184644 | 0.918645 | BH |
| PITG_10118 | Pi conserved hypothetical protein (  | -32.0413 | -35.9495 | 0.184644 | 0.918645 | BH |
| PITG_10417 | Pi conserved hypothetical protein (  | -31.9911 | -36.0498 | 0.184644 | 0.918645 | BH |
| PITG_10601 | Pi molybdenum cofactor biosynthe     | -32.0039 | -36.0244 | 0.184644 | 0.918645 | BH |
| PITG_12318 | Pi ATP-binding Cassette (ABC) Supe   | -32.0466 | -35.9389 | 0.184644 | 0.918645 | BH |
| PITG_14109 | Pi conserved hypothetical protein (  | -32.0148 | -36.0026 | 0.184644 | 0.918645 | BH |
| PITG_18421 | Pi large subunit GTPase 1 (2385 nt)  | -32.0108 | -36.0106 | 0.184644 | 0.918645 | BH |
| PITG_19184 | Pi ER lumen protein retaining recep  | -32.0466 | -35.9389 | 0.184644 | 0.918645 | BH |
| PITG_01280 | Pi conserved hypothetical protein (  | -31.9647 | -36.1026 | 0.185249 | 0.918645 | BH |
| PITG_02320 | Pi conserved hypothetical protein (  | -31.9556 | -36.1209 | 0.185249 | 0.918645 | BH |
| PITG_07758 | Pi conserved hypothetical protein (  | -31.9647 | -36.1026 | 0.185249 | 0.918645 | BH |
| PITG_13345 | Pi conserved hypothetical protein (  | -31.9466 | -36.139  | 0.185249 | 0.918645 | BH |
| PITG_21806 | Pi fumarylacetoacetase (1812 nt)     | -13.3959 | -2.30934 | 0.185655 | 0.918645 | BH |
| PITG_00182 | Pi conserved hypothetical protein (  | -31.9721 | -36.0879 | 0.185783 | 0.918645 | BH |
| PITG_01822 | Pi SNARE associated Golgi protein,   | -31.9729 | -36.0864 | 0.185783 | 0.918645 | BH |
| PITG_02458 | Pi conserved hypothetical protein (  | -32.0422 | -35.9478 | 0.185783 | 0.918645 | BH |
| PITG_19180 | Pi conserved hypothetical protein (  | -32.0457 | -35.9407 | 0.185783 | 0.918645 | BH |
| PITG_20251 | Pi Sulfate Permease (SulP) Family (  | -32.003  | -36.0262 | 0.185783 | 0.918645 | BH |
| PITG_21186 | Pi conserved hypothetical protein (  | -31.9721 | -36.0879 | 0.185783 | 0.918645 | BH |
| PITG_01246 | Pi conserved hypothetical protein (  | -31.9816 | -36.069  | 0.185783 | 0.918645 | BH |
| PITG_03241 | Pi conserved hypothetical protein (  | -32.024  | -35.9841 | 0.185783 | 0.918645 | BH |
| PITG_03801 | Pi conserved hypothetical protein (  | -32.0217 | -35.9887 | 0.185783 | 0.918645 | BH |
| PITG_07349 | Pi gamma-glutamyl hydrolase, puta    | -32.0217 | -35.9887 | 0.185783 | 0.918645 | BH |
| PITG_09285 | Pi conserved hypothetical protein (  | -32.024  | -35.9841 | 0.185783 | 0.918645 | BH |
| PITG_10903 | Pi probable adenosine deaminase,     | -31.9931 | -36.046  | 0.185783 | 0.918645 | BH |
| PITG_12500 | Pi conserved hypothetical protein (  | -31.9931 | -36.046  | 0.185783 | 0.918645 | BH |
| PITG_13397 | Pi protein kinase, putative (2544 nt | -32.024  | -35.9841 | 0.185783 | 0.918645 | BH |
| PITG_14553 | Pi hypothetical protein (1295 nt)    | -32.0117 | -36.0088 | 0.185783 | 0.918645 | BH |
| PITG_17690 | Pi conserved hypothetical protein (  | -31.9816 | -36.069  | 0.185783 | 0.918645 | BH |
| PITG_19166 | Pi conserved hypothetical protein (  | -32.024  | -35.9841 | 0.185783 | 0.918645 | BH |
| PITG_21185 | Pi RPS6 protein kinase (2016 nt)     | -32.0018 | -36.0285 | 0.185783 | 0.918645 | BH |
| PITG_04521 | Pi conserved hypothetical protein (  | -31.8994 | -36.2332 | 0.186121 | 0.918645 | BH |
| PITG_10326 | Pi hypothetical protein (2982 nt)    | -31.8911 | -36.2499 | 0.186121 | 0.918645 | BH |
| PITG_10493 | Pi hypothetical protein (927 nt)     | -31.8994 | -36.2332 | 0.186121 | 0.918645 | BH |
| PITG_08138 | Pi conserved hypothetical protein (  | -31.6918 | -36.6486 | 0.186206 | 0.918645 | BH |
| PITG_07046 | Pi major vault protein (2627 nt)     | -31.9377 | -36.1567 | 0.186517 | 0.918645 | BH |
| PITG_11562 | Pi myb-like DNA-binding protein, p   | -31.9202 | -36.1917 | 0.186517 | 0.918645 | BH |

|            |                                        |          |          |          |          |    |
|------------|----------------------------------------|----------|----------|----------|----------|----|
| PITG_13462 | Pi carbohydrate-binding protein, p     | -31.9202 | -36.1917 | 0.186517 | 0.918645 | BH |
| PITG_14489 | Pi conserved hypothetical protein (    | -31.9289 | -36.1743 | 0.186517 | 0.918645 | BH |
| PITG_18564 | Pi conserved hypothetical protein (    | -31.9315 | -36.169  | 0.186517 | 0.918645 | BH |
| PITG_06599 | Pi conserved hypothetical protein (    | -31.6681 | -36.6958 | 0.186815 | 0.918645 | BH |
| PITG_00556 | Pi conserved hypothetical protein (    | -32.0328 | -35.9666 | 0.186927 | 0.918645 | BH |
| PITG_02050 | Pi putative chitin synthase (Chitin-l  | -32.0328 | -35.9666 | 0.186927 | 0.918645 | BH |
| PITG_03275 | Pi spastin and Fidgetin-like protein   | -32.0328 | -35.9666 | 0.186927 | 0.918645 | BH |
| PITG_07279 | Pi transmembrane protein, putativ      | -32.0328 | -35.9666 | 0.186927 | 0.918645 | BH |
| PITG_09820 | Pi regulator of chromosome conde       | -32.0328 | -35.9666 | 0.186927 | 0.918645 | BH |
| PITG_10570 | Pi hypothetical protein (974 nt)       | -31.9825 | -36.0672 | 0.186927 | 0.918645 | BH |
| PITG_11605 | Pi aldehyde dehydrogenase, putati      | -32.0328 | -35.9666 | 0.186927 | 0.918645 | BH |
| PITG_02494 | Pi conserved hypothetical protein (    | -32.0231 | -35.9859 | 0.186927 | 0.918645 | BH |
| PITG_03804 | Pi myosin-like protein (4796 nt)       | -31.9921 | -36.0479 | 0.186927 | 0.918645 | BH |
| PITG_04702 | Pi conserved hypothetical protein (    | -32.0129 | -36.0062 | 0.186927 | 0.918645 | BH |
| PITG_04974 | Pi conserved hypothetical protein (    | -32.0448 | -35.9425 | 0.186927 | 0.918645 | BH |
| PITG_13317 | Pi conserved hypothetical protein (    | -32.0129 | -36.0062 | 0.186927 | 0.918645 | BH |
| PITG_13468 | Pi hypothetical protein (2031 nt)      | -32.0231 | -35.9859 | 0.186927 | 0.918645 | BH |
| PITG_00167 | Pi cAMP-specific 3',5'-cyclic phosph   | -31.7471 | -36.5379 | 0.187513 | 0.918645 | BH |
| PITG_02695 | Pi striatin-3 family protein (2493 nt) | -31.7517 | -36.5288 | 0.187513 | 0.918645 | BH |
| PITG_02710 | Pi serine protease family S01A, put    | -31.7185 | -36.5951 | 0.187513 | 0.918645 | BH |
| PITG_04002 | Pi conserved hypothetical protein (    | -31.7208 | -36.5905 | 0.187513 | 0.918645 | BH |
| PITG_05614 | Pi conserved hypothetical protein (    | -31.7471 | -36.5379 | 0.187513 | 0.918645 | BH |
| PITG_05627 | Pi conserved hypothetical protein (    | -31.7296 | -36.573  | 0.187513 | 0.918645 | BH |
| PITG_06219 | Pi conserved hypothetical protein (    | -31.7259 | -36.5802 | 0.187513 | 0.918645 | BH |
| PITG_07232 | Pi conserved hypothetical protein (    | -31.6966 | -36.6388 | 0.187513 | 0.918645 | BH |
| PITG_08327 | Pi ubiquitin-conjugating enzyme E2     | -31.7267 | -36.5787 | 0.187513 | 0.918645 | BH |
| PITG_09579 | Pi riboflavin biosynthesis protein ri  | -31.7319 | -36.5683 | 0.187513 | 0.918645 | BH |
| PITG_15063 | Pi conserved hypothetical protein (    | -31.7054 | -36.6213 | 0.187513 | 0.918645 | BH |
| PITG_15573 | Pi cytochrome b ascorbate-depend       | -31.7193 | -36.5935 | 0.187513 | 0.918645 | BH |
| PITG_17091 | Pi histone chaperone ASF1-like pro     | -31.7275 | -36.5771 | 0.187513 | 0.918645 | BH |
| PITG_18037 | Pi ubiquitin family protein, putativ   | -31.7229 | -36.5864 | 0.187513 | 0.918645 | BH |
| PITG_21012 | Pi conserved hypothetical protein (    | -31.7012 | -36.6297 | 0.187513 | 0.918645 | BH |
| PITG_03819 | Pi 26S proteasome non-ATPase reg       | -31.9032 | -36.2257 | 0.187792 | 0.918645 | BH |
| PITG_04270 | Pi sulfatase-like protein (2505 nt)    | -31.8948 | -36.2425 | 0.187792 | 0.918645 | BH |
| PITG_07968 | Pi protein kinase, putative (1581 nt)  | -31.8948 | -36.2425 | 0.187792 | 0.918645 | BH |
| PITG_02735 | Pi 2,3-bisphosphoglycerate-depend      | -32.0126 | -36.0069 | 0.188077 | 0.918645 | BH |
| PITG_03005 | Pi conserved hypothetical protein (    | -31.9719 | -36.0883 | 0.188077 | 0.918645 | BH |
| PITG_03130 | Pi M96 mating-specific protein far     | -31.993  | -36.0461 | 0.188077 | 0.918645 | BH |
| PITG_04603 | Pi conserved hypothetical protein (    | -32.0226 | -35.9868 | 0.188077 | 0.918645 | BH |
| PITG_06972 | Pi conserved hypothetical protein (    | -32.0439 | -35.9444 | 0.188077 | 0.918645 | BH |
| PITG_07325 | Pi conserved hypothetical protein (    | -31.9834 | -36.0653 | 0.188077 | 0.918645 | BH |
| PITG_09862 | Pi conserved hypothetical protein (    | -32.0126 | -36.0069 | 0.188077 | 0.918645 | BH |
| PITG_20693 | Pi crinkler (CRN) family protein, ps   | -31.9834 | -36.0653 | 0.188077 | 0.918645 | BH |
| PITG_20774 | Pi conserved hypothetical protein (    | -32.002  | -36.0281 | 0.188077 | 0.918645 | BH |
| PITG_23048 | Pi secreted RxLR effector peptide,     | -31.6499 | -36.7323 | 0.188196 | 0.918645 | BH |
| PITG_01366 | Pi conserved hypothetical protein (    | -31.7432 | -36.5458 | 0.188826 | 0.918645 | BH |
| PITG_02627 | Pi conserved hypothetical protein (    | -31.735  | -36.5621 | 0.188826 | 0.918645 | BH |

|            |                                      |          |          |          |          |    |
|------------|--------------------------------------|----------|----------|----------|----------|----|
| PITG_04427 | Pi conserved hypothetical protein (  | -31.7085 | -36.6152 | 0.188826 | 0.918645 | BH |
| PITG_05154 | Pi conserved hypothetical protein (  | -31.7432 | -36.5458 | 0.188826 | 0.918645 | BH |
| PITG_07163 | Pi ubiquitin-fold modifier 1 precurs | -31.7081 | -36.6159 | 0.188826 | 0.918645 | BH |
| PITG_09131 | Pi conserved hypothetical protein (  | -31.7221 | -36.588  | 0.188826 | 0.918645 | BH |
| PITG_12912 | Pi phosphatidylinositol transfer pro | -31.7291 | -36.574  | 0.188826 | 0.918645 | BH |
| PITG_13258 | Pi Mitochondrial Carrier (MC) Fami   | -31.7288 | -36.5746 | 0.188826 | 0.918645 | BH |
| PITG_15642 | Pi conserved hypothetical protein (  | -31.7355 | -36.561  | 0.188826 | 0.918645 | BH |
| PITG_20794 | Pi conserved hypothetical protein (  | -31.7224 | -36.5873 | 0.188826 | 0.918645 | BH |
| PITG_12008 | Pi hypothetical protein (276 nt)     | -31.8623 | -36.3076 | 0.188901 | 0.918645 | BH |
| PITG_08881 | Pi succinyl-CoA ligase beta-chain, n | -12.1316 | 2.465201 | 0.189042 | 0.918645 | BH |
| PITG_01511 | Pi conserved hypothetical protein (  | -32.0545 | -35.9231 | 0.189231 | 0.918645 | BH |
| PITG_02582 | Pi C2 domain-containing protein, p   | -32.0324 | -35.9672 | 0.189231 | 0.918645 | BH |
| PITG_03864 | Pi myotubularin-like protein (4123   | -32.0441 | -35.944  | 0.189231 | 0.918645 | BH |
| PITG_05975 | Pi conserved hypothetical protein (  | -32.0545 | -35.9231 | 0.189231 | 0.918645 | BH |
| PITG_07038 | Pi serine/threonine-protein phosph   | -32.0337 | -35.9646 | 0.189231 | 0.918645 | BH |
| PITG_07170 | Pi conserved hypothetical protein (  | -32.0441 | -35.944  | 0.189231 | 0.918645 | BH |
| PITG_12238 | Pi hypothetical protein (1348 nt)    | -32.0545 | -35.9231 | 0.189231 | 0.918645 | BH |
| PITG_13393 | Pi RNA-binding protein, putative (1  | -32.0136 | -36.005  | 0.189231 | 0.918645 | BH |
| PITG_19846 | Pi conserved hypothetical protein (  | -32.0441 | -35.944  | 0.189231 | 0.918645 | BH |
| PITG_21642 | Pi conserved hypothetical protein (  | -32.0545 | -35.9232 | 0.189231 | 0.918645 | BH |
| PITG_22577 | Pi conserved hypothetical protein (  | -32.0221 | -35.9879 | 0.189231 | 0.918645 | BH |
| PITG_15476 | Pi malate dehydrogenase (1245 nt)    | -11.5398 | -1.81019 | 0.189278 | 0.918645 | BH |
| PITG_17838 | Pi PexRD8 family secreted RxLR eff   | -12.1767 | -1.81573 | 0.18994  | 0.918645 | BH |
| PITG_01664 | Pi conserved hypothetical protein (  | -31.7139 | -36.6044 | 0.190143 | 0.918645 | BH |
| PITG_03369 | Pi conserved hypothetical protein (  | -31.7347 | -36.5626 | 0.190143 | 0.918645 | BH |
| PITG_09907 | Pi arabinogalactan endo-1,4-beta-g   | -31.7299 | -36.5724 | 0.190143 | 0.918645 | BH |
| PITG_10905 | Pi conserved hypothetical protein (  | -31.7158 | -36.6005 | 0.190143 | 0.918645 | BH |
| PITG_21049 | Pi conserved hypothetical protein (  | -31.6936 | -36.645  | 0.190143 | 0.918645 | BH |
| PITG_20681 | Pi ATP-binding Cassette (ABC) supe   | -31.8279 | -36.3763 | 0.190302 | 0.918645 | BH |
| PITG_03814 | Pi D-cysteine desulfhydrase, putati  | -32.0555 | -35.9212 | 0.190391 | 0.918645 | BH |
| PITG_06659 | Pi conserved hypothetical protein (  | -31.9749 | -36.0823 | 0.190391 | 0.918645 | BH |
| PITG_06828 | Pi trehalose-phosphatase, putative   | -32.0555 | -35.9212 | 0.190391 | 0.918645 | BH |
| PITG_10502 | Pi conserved hypothetical protein (  | -32.0429 | -35.9464 | 0.190391 | 0.918645 | BH |
| PITG_11536 | Pi conserved hypothetical protein (  | -31.994  | -36.0441 | 0.190391 | 0.918645 | BH |
| PITG_12439 | Pi conserved hypothetical protein (  | -31.9805 | -36.0711 | 0.190391 | 0.918645 | BH |
| PITG_17769 | Pi conserved hypothetical protein (  | -32.0037 | -36.0247 | 0.190391 | 0.918645 | BH |
| PITG_18288 | Pi endoribonuclease L-PSP, putativ   | -31.994  | -36.0441 | 0.190391 | 0.918645 | BH |
| PITG_00593 | Pi monooxygenase, putative (665 r    | -13.4496 | -2.18349 | 0.190674 | 0.918645 | BH |
| PITG_04908 | Pi conserved hypothetical protein (  | -13.4645 | -2.15365 | 0.190674 | 0.918645 | BH |
| PITG_06690 | Pi conserved hypothetical protein (  | -13.4469 | -2.18881 | 0.190674 | 0.918645 | BH |
| PITG_22657 | Pi elongation factor 1-alpha, putati | -9.12905 | 2.545324 | 0.190805 | 0.918645 | BH |
| PITG_08601 | Pi conserved hypothetical protein (  | -12.7025 | -1.82453 | 0.191379 | 0.918645 | BH |
| PITG_00406 | Pi conserved hypothetical protein (  | -31.7057 | -36.6207 | 0.191466 | 0.918645 | BH |
| PITG_04534 | Pi vacuolar protein sorting-associa  | -31.6992 | -36.6337 | 0.191466 | 0.918645 | BH |
| PITG_04570 | Pi conserved hypothetical protein (  | -31.7108 | -36.6105 | 0.191466 | 0.918645 | BH |
| PITG_08736 | Pi conserved hypothetical protein (  | -31.724  | -36.5841 | 0.191466 | 0.918645 | BH |
| PITG_10995 | Pi conserved hypothetical protein (  | -31.7476 | -36.5368 | 0.191466 | 0.918645 | BH |

|            |                                      |          |          |          |          |    |
|------------|--------------------------------------|----------|----------|----------|----------|----|
| PITG_12574 | Pi Rab2 family GTPase, putative (69  | -31.7057 | -36.6207 | 0.191466 | 0.918645 | BH |
| PITG_01810 | Pi Drug/Metabolite Transporter (D    | -32.0246 | -35.983  | 0.191555 | 0.918645 | BH |
| PITG_02156 | Pi conserved hypothetical protein (  | -32.0451 | -35.942  | 0.191555 | 0.918645 | BH |
| PITG_04011 | Pi tetraacyldisaccharide 4'-kinase,  | -32.0246 | -35.983  | 0.191555 | 0.918645 | BH |
| PITG_05861 | Pi conserved hypothetical protein (  | -32.0246 | -35.983  | 0.191555 | 0.918645 | BH |
| PITG_09378 | Pi conserved hypothetical protein (  | -32.0451 | -35.942  | 0.191555 | 0.918645 | BH |
| PITG_15738 | Pi conserved hypothetical protein (  | -32.0246 | -35.983  | 0.191555 | 0.918645 | BH |
| PITG_19966 | Pi carbohydrate-binding protein, pi  | -32.0451 | -35.942  | 0.191555 | 0.918645 | BH |
| PITG_21706 | Pi conserved hypothetical protein (  | -32.0451 | -35.942  | 0.191555 | 0.918645 | BH |
| PITG_17717 | Pi nuclear migration protein nudC,   | -13.454  | -2.17587 | 0.192304 | 0.918645 | BH |
| PITG_04396 | Pi conserved hypothetical protein (  | -31.657  | -36.7181 | 0.192377 | 0.918645 | BH |
| PITG_00218 | Pi ATP-binding Cassette (ABC) Sup    | -31.6392 | -36.7537 | 0.192377 | 0.918645 | BH |
| PITG_10942 | Pi conserved hypothetical protein (  | -11.8119 | -1.83824 | 0.192591 | 0.918645 | BH |
| PITG_04067 | Pi conserved hypothetical protein (  | -31.9854 | -36.0614 | 0.192725 | 0.918645 | BH |
| PITG_05669 | Pi conserved hypothetical protein (  | -31.9854 | -36.0614 | 0.192725 | 0.918645 | BH |
| PITG_11090 | Pi conserved hypothetical protein (  | -32.0047 | -36.0226 | 0.192725 | 0.918645 | BH |
| PITG_12938 | Pi conserved hypothetical protein (  | -31.9854 | -36.0614 | 0.192725 | 0.918645 | BH |
| PITG_18174 | Pi cleavage induced hypothetical p   | -31.995  | -36.0421 | 0.192725 | 0.918645 | BH |
| PITG_19142 | Pi alkylated DNA repair protein alk  | -31.9892 | -36.0537 | 0.192725 | 0.918645 | BH |
| PITG_01155 | Pi conserved hypothetical protein (  | -31.7468 | -36.5385 | 0.192793 | 0.918645 | BH |
| PITG_04034 | Pi SUMO protease, putative (3312     | -31.7399 | -36.5523 | 0.192793 | 0.918645 | BH |
| PITG_12191 | Pi conserved hypothetical protein (  | -31.7044 | -36.6234 | 0.192793 | 0.918645 | BH |
| PITG_12604 | Pi hypothetical protein (2702 nt)    | -31.7116 | -36.6089 | 0.192793 | 0.918645 | BH |
| PITG_00939 | Pi conserved hypothetical protein (  | -31.9494 | -36.1333 | 0.192955 | 0.918645 | BH |
| PITG_17382 | Pi hypothetical protein (1380 nt)    | -31.976  | -36.0802 | 0.193899 | 0.918645 | BH |
| PITG_08780 | Pi Sulfate Permease (SulP) Family (  | -32.0461 | -35.94   | 0.193899 | 0.918645 | BH |
| PITG_13097 | Pi conserved hypothetical protein (  | -31.999  | -36.0341 | 0.193899 | 0.918645 | BH |
| PITG_15973 | Pi conserved hypothetical protein (  | -32.0201 | -35.992  | 0.193899 | 0.918645 | BH |
| PITG_16085 | Pi conserved hypothetical protein (  | -31.999  | -36.0341 | 0.193899 | 0.918645 | BH |
| PITG_05615 | Pi pyrophosphate-energized vacuo     | -10.0006 | 2.443269 | 0.194042 | 0.918645 | BH |
| PITG_03862 | Pi conserved hypothetical protein (  | -31.7107 | -36.6108 | 0.194126 | 0.918645 | BH |
| PITG_06890 | Pi peptidase, putative (1581 nt)     | -31.7458 | -36.5404 | 0.194126 | 0.918645 | BH |
| PITG_11133 | Pi conserved hypothetical protein (  | -31.7323 | -36.5675 | 0.194126 | 0.918645 | BH |
| PITG_12915 | Pi sorting nexin, putative (1759 nt) | -31.739  | -36.554  | 0.194126 | 0.918645 | BH |
| PITG_19198 | Pi conserved hypothetical protein (  | -31.6987 | -36.6347 | 0.194126 | 0.918645 | BH |
| PITG_07400 | Pi 2,3-bisphosphoglycerate-depend    | -11.7781 | -1.92792 | 0.194458 | 0.918645 | BH |
| PITG_00381 | Pi serine protease family S54, puta  | -31.9784 | -36.0752 | 0.195079 | 0.918645 | BH |
| PITG_01233 | Pi transmembrane protein, putativ    | -32.0058 | -36.0206 | 0.195079 | 0.918645 | BH |
| PITG_01728 | Pi conserved hypothetical protein (  | -32.0257 | -35.9808 | 0.195079 | 0.918645 | BH |
| PITG_04665 | Pi ribose-5-phosphate isomerase (}   | -32.0303 | -35.9715 | 0.195079 | 0.918645 | BH |
| PITG_09795 | Pi conserved hypothetical protein (  | -32.0089 | -36.0143 | 0.195079 | 0.918645 | BH |
| PITG_11425 | Pi transcriptional repressor TUP1-li | -32.0257 | -35.9808 | 0.195079 | 0.918645 | BH |
| PITG_14198 | Pi pre-mRNA-splicing factor 38B, pi  | -32.0257 | -35.9808 | 0.195079 | 0.918645 | BH |
| PITG_18738 | Pi hypothetical protein (906 nt)     | -32.0257 | -35.9808 | 0.195079 | 0.918645 | BH |
| PITG_21504 | Pi cyclin-dependent kinase, putativ  | -32.0408 | -35.9506 | 0.195079 | 0.918645 | BH |
| PITG_03642 | Pi conserved hypothetical protein (  | -31.7125 | -36.6072 | 0.195463 | 0.918645 | BH |
| PITG_15831 | Pi 5-formyltetrahydrofolate cyclo-l  | -31.719  | -36.5941 | 0.195463 | 0.918645 | BH |

|            |                                      |          |          |          |          |    |
|------------|--------------------------------------|----------|----------|----------|----------|----|
| PITG_17952 | Pi Major Facilitator Superfamily (M  | -31.7467 | -36.5388 | 0.195463 | 0.918645 | BH |
| PITG_06358 | Pi callose synthase, putative (7335  | -31.9218 | -36.1886 | 0.195575 | 0.918645 | BH |
| PITG_02124 | Pi protein kinase, putative (2883 nt | -31.977  | -36.0781 | 0.196264 | 0.918645 | BH |
| PITG_05502 | Pi calcineurin-like phosphoesterase  | -31.9961 | -36.0399 | 0.196264 | 0.918645 | BH |
| PITG_06895 | Pi conserved hypothetical protein (  | -31.977  | -36.0781 | 0.196264 | 0.918645 | BH |
| PITG_09621 | Pi protein kinase (721 nt)           | -31.9961 | -36.0399 | 0.196264 | 0.918645 | BH |
| PITG_14276 | Pi conserved hypothetical protein (  | -31.9961 | -36.0399 | 0.196264 | 0.918645 | BH |
| PITG_16081 | Pi hypothetical protein (3123 nt)    | -31.9881 | -36.056  | 0.196264 | 0.918645 | BH |
| PITG_02428 | Pi 15-hydroxyprostaglandin dehydr    | -31.7265 | -36.5792 | 0.196806 | 0.918645 | BH |
| PITG_21377 | Pi conserved hypothetical protein (  | -31.7133 | -36.6055 | 0.196806 | 0.918645 | BH |
| PITG_01139 | Pi conserved hypothetical protein (  | -32.0369 | -35.9583 | 0.197454 | 0.918645 | BH |
| PITG_10083 | Pi chromodomain protein, putative    | -32.0267 | -35.9787 | 0.197454 | 0.918645 | BH |
| PITG_10124 | Pi Drug/Metabolite Transporter (D    | -32.0292 | -35.9737 | 0.197454 | 0.918645 | BH |
| PITG_10683 | Pi conserved hypothetical protein (  | -32.0472 | -35.9377 | 0.197454 | 0.918645 | BH |
| PITG_19046 | Pi hypothetical protein (2029 nt)    | -32.0267 | -35.9787 | 0.197454 | 0.918645 | BH |
| PITG_22541 | Pi 60S ribosomal export protein NM   | -31.9774 | -36.0774 | 0.197454 | 0.918645 | BH |
| PITG_22827 | Pi Crinkler (CRN) family protein, ps | -31.9774 | -36.0774 | 0.197454 | 0.918645 | BH |
| PITG_17539 | Pi crinkler (CRN) family protein, pu | -11.293  | -1.8719  | 0.197897 | 0.918645 | BH |
| PITG_02470 | Pi conserved hypothetical protein (  | -31.734  | -36.5641 | 0.198153 | 0.918645 | BH |
| PITG_05748 | Pi conserved hypothetical protein (  | -31.7207 | -36.5908 | 0.198153 | 0.918645 | BH |
| PITG_09452 | Pi MMP37-like protein (895 nt)       | -31.7273 | -36.5775 | 0.198153 | 0.918645 | BH |
| PITG_13159 | Pi conserved hypothetical protein (  | -31.7273 | -36.5775 | 0.198153 | 0.918645 | BH |
| PITG_03738 | Pi 2-isopropylmalate synthase (202   | -12.7084 | -1.82024 | 0.198358 | 0.918645 | BH |
| PITG_09828 | Pi U6 snRNA-associated Sm-like pro   | -12.1254 | -1.97042 | 0.198631 | 0.918645 | BH |
| PITG_10442 | Pi conserved hypothetical protein (  | -32.0168 | -35.9986 | 0.198649 | 0.918645 | BH |
| PITG_11702 | Pi conserved hypothetical protein (  | -32.0168 | -35.9986 | 0.198649 | 0.918645 | BH |
| PITG_13544 | Pi conserved hypothetical protein (  | -32.0619 | -35.9082 | 0.198649 | 0.918645 | BH |
| PITG_14641 | Pi glutathione peroxidase, putative  | -32.0619 | -35.9082 | 0.198649 | 0.918645 | BH |
| PITG_15649 | Pi Mitochondrial Carrier (MC) Fami   | -32.0396 | -35.9529 | 0.198649 | 0.918645 | BH |
| PITG_19247 | Pi atlastin-like protein (2044 nt)   | -32.0069 | -36.0183 | 0.198649 | 0.918645 | BH |
| PITG_03988 | Pi conserved hypothetical protein (  | -31.7016 | -36.6289 | 0.199506 | 0.918645 | BH |
| PITG_04435 | Pi Crinkler (CRN) family protein (25 | -31.7222 | -36.5877 | 0.199506 | 0.918645 | BH |
| PITG_04682 | Pi protein kinase, putative (2628 nt | -31.7141 | -36.6038 | 0.199506 | 0.918645 | BH |
| PITG_20193 | Pi Rab5 family GTPase, putative (8   | -12.6754 | -1.90944 | 0.199644 | 0.918645 | BH |
| PITG_09588 | Pi conserved hypothetical protein (  | -32.0178 | -35.9965 | 0.199849 | 0.918645 | BH |
| PITG_02977 | Pi conserved hypothetical protein (  | -31.6943 | -36.6435 | 0.200864 | 0.918645 | BH |
| PITG_07298 | Pi protein kinase (2197 nt)          | -32.028  | -35.976  | 0.201055 | 0.918645 | BH |
| PITG_19054 | Pi peroxisomal multifunctional enz   | -31.6957 | -36.6408 | 0.202227 | 0.918645 | BH |
| PITG_15985 | Pi hypothetical protein (1063 nt)    | -31.9477 | -36.1366 | 0.202239 | 0.918645 | BH |
| PITG_02363 | Pi conserved hypothetical protein (  | -32.028  | -35.9762 | 0.202266 | 0.918645 | BH |
| PITG_08729 | Pi conserved hypothetical protein (  | -32.028  | -35.9762 | 0.202266 | 0.918645 | BH |
| PITG_16478 | Pi acyl-CoA dehydrogenase, putativ   | -32.028  | -35.9762 | 0.202266 | 0.918645 | BH |
| PITG_19863 | Pi conserved hypothetical protein (  | -32.0066 | -36.0189 | 0.202266 | 0.918645 | BH |
| PITG_01495 | Pi ribonuclease, putative (726 nt)   | -31.9793 | -36.0736 | 0.203482 | 0.918645 | BH |
| PITG_08898 | Pi protein kinase, putative (2098 nt | -31.9793 | -36.0736 | 0.203482 | 0.918645 | BH |
| PITG_10687 | Pi conserved hypothetical protein (  | -31.9984 | -36.0354 | 0.203482 | 0.918645 | BH |
| PITG_10796 | Pi conserved hypothetical protein (  | -32.0166 | -35.9989 | 0.203482 | 0.918645 | BH |

|            |                                        |          |          |          |          |    |
|------------|----------------------------------------|----------|----------|----------|----------|----|
| PITG_12819 | Pi carbohydrate esterase, putative     | -31.9857 | -36.0606 | 0.203482 | 0.918645 | BH |
| PITG_18409 | Pi conserved hypothetical protein (    | -31.9888 | -36.0546 | 0.203482 | 0.918645 | BH |
| PITG_01539 | Pi hypothetical protein (1499 nt)      | -31.7159 | -36.6004 | 0.203595 | 0.918645 | BH |
| PITG_03658 | Pi phosphoglycerate mutase, putat      | -31.6934 | -36.6453 | 0.203595 | 0.918645 | BH |
| PITG_13672 | Pi conserved hypothetical protein (    | -31.7138 | -36.6045 | 0.203595 | 0.918645 | BH |
| PITG_16429 | Pi conserved hypothetical protein (    | -13.4494 | -2.19361 | 0.203842 | 0.918645 | BH |
| PITG_22064 | Pi conserved hypothetical protein (    | -9.57669 | -1.9627  | 0.204477 | 0.918645 | BH |
| PITG_07115 | Pi ATP-binding Cassette (ABC) Sup      | -31.97   | -36.0922 | 0.204703 | 0.918645 | BH |
| PITG_07727 | Pi conserved hypothetical protein (    | -31.97   | -36.0922 | 0.204703 | 0.918645 | BH |
| PITG_01186 | Pi lipase, putative (1775 nt)          | -31.9409 | -36.1503 | 0.204952 | 0.918645 | BH |
| PITG_00979 | Pi conserved hypothetical protein (    | -31.6966 | -36.639  | 0.204968 | 0.918645 | BH |
| PITG_01410 | Pi conserved hypothetical protein (    | -31.6902 | -36.6517 | 0.204968 | 0.918645 | BH |
| PITG_19422 | Pi hypothetical protein (2352 nt)      | -31.6902 | -36.6517 | 0.204968 | 0.918645 | BH |
| PITG_15321 | Pi aminomethyltransferase (1298 r      | -14.1462 | 2.828001 | 0.205241 | 0.918645 | BH |
| PITG_07243 | Pi conserved hypothetical protein (    | -32.0393 | -35.9535 | 0.20593  | 0.918645 | BH |
| PITG_08425 | Pi endothelin-converting enzyme 1      | -32.0292 | -35.9738 | 0.20593  | 0.918645 | BH |
| PITG_08453 | Pi conserved hypothetical protein (    | -32.0496 | -35.9328 | 0.20593  | 0.918645 | BH |
| PITG_13758 | Pi conserved hypothetical protein (    | -32.0496 | -35.9328 | 0.20593  | 0.918645 | BH |
| PITG_16207 | Pi pre-mRNA-splicing helicase BRR      | -32.0496 | -35.9328 | 0.20593  | 0.918645 | BH |
| PITG_19402 | Pi conserved hypothetical protein (    | -32.0292 | -35.9738 | 0.20593  | 0.918645 | BH |
| PITG_07792 | Pi ATP synthase subunit delta', put    | -10.6249 | 2.325484 | 0.207003 | 0.918645 | BH |
| PITG_07055 | Pi ribosomal protein S6 kinase, put    | -32.0192 | -35.9937 | 0.207162 | 0.918645 | BH |
| PITG_15502 | Pi conserved hypothetical protein (    | -32.0192 | -35.9937 | 0.207162 | 0.918645 | BH |
| PITG_12578 | Pi acyl-CoA desaturase 1 (1264 nt)     | -13.4911 | -2.10035 | 0.207653 | 0.918645 | BH |
| PITG_01222 | Pi Drug/Metabolite Transporter (D      | -31.9064 | -36.2194 | 0.207691 | 0.918645 | BH |
| PITG_16852 | Pi hypothetical protein (297 nt)       | -31.8896 | -36.2529 | 0.207691 | 0.918645 | BH |
| PITG_17599 | Pi poly [ADP-ribose] polymerase, p     | -31.9064 | -36.2194 | 0.207691 | 0.918645 | BH |
| PITG_02241 | Pi conserved hypothetical protein (    | -31.7103 | -36.6115 | 0.207729 | 0.918645 | BH |
| PITG_02971 | Pi conserved hypothetical protein (    | -31.7103 | -36.6115 | 0.207729 | 0.918645 | BH |
| PITG_03924 | Pi alcohol dehydrogenase, putative     | -31.7103 | -36.6115 | 0.207729 | 0.918645 | BH |
| PITG_08595 | Pi conserved hypothetical protein (    | -31.6989 | -36.6343 | 0.207729 | 0.918645 | BH |
| PITG_13277 | Pi conserved hypothetical protein (    | -31.6974 | -36.6372 | 0.207729 | 0.918645 | BH |
| PITG_16322 | Pi conserved hypothetical protein (    | -31.6974 | -36.6372 | 0.207729 | 0.918645 | BH |
| PITG_09144 | Pi conserved hypothetical protein (    | -31.9805 | -36.0711 | 0.208399 | 0.918645 | BH |
| PITG_20589 | Pi cathepsin, cysteine protease fan    | -13.484  | -2.11585 | 0.209316 | 0.918645 | BH |
| PITG_01846 | Pi actin-related protein 2/3 comple    | -13.6231 | -1.83635 | 0.209896 | 0.918645 | BH |
| PITG_09428 | Pi conserved hypothetical protein (    | -12.7418 | -1.7423  | 0.210209 | 0.918645 | BH |
| PITG_03616 | Pi conserved hypothetical protein (    | -31.6983 | -36.6354 | 0.210511 | 0.918645 | BH |
| PITG_01770 | Pi leukocyte receptor cluster meml     | -32.051  | -35.9302 | 0.21089  | 0.918645 | BH |
| PITG_13005 | Pi solute carrier family 2, facilitate | -32.0581 | -35.9159 | 0.21089  | 0.918645 | BH |
| PITG_22431 | Pi conserved hypothetical protein (    | -32.051  | -35.9302 | 0.21089  | 0.918645 | BH |
| PITG_20388 | Pi conserved hypothetical protein (    | -13.4901 | -2.10489 | 0.210982 | 0.918645 | BH |
| PITG_03802 | Pi eukaryotic translation initiation   | -13.5731 | -1.95231 | 0.211278 | 0.918645 | BH |
| PITG_19361 | Pi myb-like DNA-binding protein, p     | -13.4098 | -2.29055 | 0.211687 | 0.918645 | BH |
| PITG_04868 | Pi ADP/ATP translocase, putative (     | -9.9114  | 2.364817 | 0.211752 | 0.918645 | BH |
| PITG_00879 | Pi 60S ribosomal protein L30, putat    | -31.996  | -36.0401 | 0.211851 | 0.918645 | BH |
| PITG_16684 | Pi transmembrane protein, putativ      | -31.9862 | -36.0597 | 0.211851 | 0.918645 | BH |

|            |                                       |          |          |          |          |    |
|------------|---------------------------------------|----------|----------|----------|----------|----|
| PITG_17508 | Pi glucosylceramidase, putative (15   | -31.9789 | -36.0744 | 0.211851 | 0.918645 | BH |
| PITG_21037 | Pi conserved hypothetical protein (   | -31.9789 | -36.0744 | 0.211851 | 0.918645 | BH |
| PITG_01064 | Pi conserved hypothetical protein (   | -11.8024 | -1.88935 | 0.21186  | 0.918645 | BH |
| PITG_01814 | Pi conserved hypothetical protein (   | -32.0205 | -35.9911 | 0.212144 | 0.918645 | BH |
| PITG_01923 | Pi conserved hypothetical protein (   | -32.0205 | -35.9911 | 0.212144 | 0.918645 | BH |
| PITG_10149 | Pi mannosyl-oligosaccharide 1,2-al    | -32.0357 | -35.9607 | 0.212144 | 0.918645 | BH |
| PITG_11666 | Pi transmembrane protein, putativ     | -32.0407 | -35.9507 | 0.212144 | 0.918645 | BH |
| PITG_05240 | Pi casein kinase, putative (1301 nt)  | -11.8909 | -1.65341 | 0.2129   | 0.918645 | BH |
| PITG_02607 | Pi peroxisomal multifunctional enz    | -13.6124 | -1.86022 | 0.21313  | 0.918645 | BH |
| PITG_00029 | Pi aminoacylase-1, putative (1617     | -32.0107 | -36.0107 | 0.213403 | 0.918645 | BH |
| PITG_01015 | Pi protein kinase, putative, pseudo   | -31.9913 | -36.0495 | 0.213403 | 0.918645 | BH |
| PITG_06471 | Pi conserved hypothetical protein (   | -32.0107 | -36.0107 | 0.213403 | 0.918645 | BH |
| PITG_16969 | Pi conserved oligomeric Golgi com     | -32.0107 | -36.0107 | 0.213403 | 0.918645 | BH |
| PITG_12824 | Pi glutamate carboxypeptidase, pu     | -31.9266 | -36.1789 | 0.214659 | 0.918645 | BH |
| PITG_01654 | Pi Delta(5) fatty acid desaturase, p  | -14.8214 | 3.446642 | 0.214667 | 0.918645 | BH |
| PITG_04725 | Pi conserved hypothetical protein (   | -31.9819 | -36.0683 | 0.214667 | 0.918645 | BH |
| PITG_20465 | Pi fructokinase, putative (1073 nt)   | -11.4348 | 2.187352 | 0.215423 | 0.918645 | BH |
| PITG_00219 | Pi glucan 1,3-beta-glucosidase, put   | -12.2652 | -1.66335 | 0.21563  | 0.918645 | BH |
| PITG_19993 | Pi GMP synthase [glutamine-hydro      | -14.7106 | 3.222772 | 0.215937 | 0.918645 | BH |
| PITG_04884 | Pi conserved hypothetical protein (   | -32.0524 | -35.9273 | 0.217213 | 0.918645 | BH |
| PITG_11243 | Pi hypothetical protein (1247 nt)     | -32.0026 | -36.027  | 0.217213 | 0.918645 | BH |
| PITG_16958 | Pi transglutaminase elicitor-like pro | -13.1432 | 2.23152  | 0.21761  | 0.918645 | BH |
| PITG_03012 | Pi conserved hypothetical protein (   | -11.1654 | -1.69831 | 0.217743 | 0.918645 | BH |
| PITG_20746 | Pi protein enhancer of rudimentary    | -11.8965 | -1.63962 | 0.217758 | 0.918645 | BH |
| PITG_18718 | Pi GTP-binding nuclear protein spi1   | -11.2183 | 1.715852 | 0.218148 | 0.918645 | BH |
| PITG_16135 | Pi conserved hypothetical protein (   | -14.9421 | 3.681368 | 0.218494 | 0.918645 | BH |
| PITG_18541 | Pi conserved hypothetical protein (   | -32.032  | -35.9681 | 0.218494 | 0.918645 | BH |
| PITG_22718 | Pi conserved hypothetical protein (   | -32.0422 | -35.9478 | 0.218494 | 0.918645 | BH |
| PITG_13750 | Pi conserved hypothetical protein (   | -13.6249 | -1.84017 | 0.219648 | 0.918645 | BH |
| PITG_11753 | Pi conserved hypothetical protein (   | -32.0121 | -36.0078 | 0.21978  | 0.918645 | BH |
| PITG_18378 | Pi conserved hypothetical protein (   | -32.022  | -35.988  | 0.21978  | 0.918645 | BH |
| PITG_20216 | Pi hypothetical protein (533 nt)      | -32.022  | -35.988  | 0.21978  | 0.918645 | BH |
| PITG_22816 | Pi secreted RxLR effector peptide,    | -14.7581 | 3.311014 | 0.21978  | 0.918645 | BH |
| PITG_08660 | Pi conserved hypothetical protein (   | -13.4622 | -2.18056 | 0.220715 | 0.918645 | BH |
| PITG_02563 | Pi conserved hypothetical protein (   | -31.9833 | -36.0655 | 0.221072 | 0.918645 | BH |
| PITG_16268 | Pi conserved hypothetical protein (   | -32.0672 | -35.8977 | 0.221072 | 0.918645 | BH |
| PITG_18165 | Pi conserved hypothetical protein (   | -9.19797 | -2.00166 | 0.221324 | 0.918645 | BH |
| PITG_20775 | Pi adenylate kinase, putative (1847   | -13.2209 | 2.402319 | 0.222276 | 0.918645 | BH |
| PITG_04384 | Pi ribosome biogenesis regulatory     | -31.7524 | -36.5272 | 0.222799 | 0.918645 | BH |
| PITG_07866 | Pi thiamin pyrophosphokinase, put     | -31.7618 | -36.5085 | 0.222799 | 0.918645 | BH |
| PITG_10723 | Pi conserved hypothetical protein (   | -31.7681 | -36.496  | 0.222799 | 0.918645 | BH |
| PITG_10895 | Pi conserved hypothetical protein (   | -31.7578 | -36.5164 | 0.222799 | 0.918645 | BH |
| PITG_13980 | Pi ARP2/3 complex 20 kDa subunit      | -31.7689 | -36.4944 | 0.222799 | 0.918645 | BH |
| PITG_15820 | Pi conserved hypothetical protein (   | -31.7626 | -36.5069 | 0.222799 | 0.918645 | BH |
| PITG_17136 | Pi Rab8 family GTPase, putative (10   | -31.7673 | -36.4976 | 0.222799 | 0.918645 | BH |
| PITG_17359 | Pi calcium/calmodulin-dependent       | -31.7673 | -36.4976 | 0.222799 | 0.918645 | BH |
| PITG_21880 | Pi conserved hypothetical protein (   | -31.754  | -36.5241 | 0.222799 | 0.918645 | BH |

|            |                                       |          |          |          |          |    |
|------------|---------------------------------------|----------|----------|----------|----------|----|
| PITG_03784 | Pi conserved hypothetical protein (   | -13.5858 | -1.93592 | 0.222866 | 0.918645 | BH |
| PITG_03574 | Pi serine/threonine-protein phosph    | -13.6274 | -1.83748 | 0.222931 | 0.918645 | BH |
| PITG_00067 | Pi conserved hypothetical protein (   | -31.7649 | -36.5023 | 0.224149 | 0.918645 | BH |
| PITG_06948 | Pi ubiquitin-conjugating enzyme E2    | -31.7564 | -36.5193 | 0.224149 | 0.918645 | BH |
| PITG_09653 | Pi U6 snRNA-associated Sm-like pro    | -31.7641 | -36.5039 | 0.224149 | 0.918645 | BH |
| PITG_03711 | Pi serine/threonine-protein phosph    | -13.6164 | -1.86071 | 0.224579 | 0.918645 | BH |
| PITG_00074 | Pi conserved hypothetical protein (   | -11.3966 | 2.210241 | 0.224902 | 0.918645 | BH |
| PITG_09593 | Pi conserved hypothetical protein (   | -31.7562 | -36.5196 | 0.225504 | 0.918645 | BH |
| PITG_19636 | Pi polygalacturonase, putative (474   | -32.0541 | -35.9239 | 0.226297 | 0.918645 | BH |
| PITG_13116 | Pi triosephosphate isomerase (857     | -13.5248 | -2.03312 | 0.226624 | 0.918645 | BH |
| PITG_01516 | Pi conserved hypothetical protein (   | -31.7511 | -36.53   | 0.226863 | 0.918645 | BH |
| PITG_07949 | Pi alpha-tubulin, putative (1407 nt)  | -32.0236 | -35.9849 | 0.227618 | 0.918645 | BH |
| PITG_14716 | Pi conserved hypothetical protein (   | -32.0236 | -35.9849 | 0.227618 | 0.918645 | BH |
| PITG_21042 | Pi conserved hypothetical protein (   | -32.0337 | -35.9648 | 0.227618 | 0.918645 | BH |
| PITG_07924 | Pi Drug/Metabolite Transporter (D     | -31.7519 | -36.5283 | 0.228226 | 0.918645 | BH |
| PITG_01043 | Pi 3-phosphoinositide-dependent p     | -13.5014 | -2.08112 | 0.228314 | 0.918645 | BH |
| PITG_06242 | Pi conserved hypothetical protein (   | -13.5056 | -2.07272 | 0.228314 | 0.918645 | BH |
| PITG_04584 | Pi conserved hypothetical protein (   | -32.0655 | -35.9011 | 0.228944 | 0.918645 | BH |
| PITG_05263 | Pi guanine deaminase, putative (14    | -31.9897 | -36.0526 | 0.228944 | 0.918645 | BH |
| PITG_05463 | Pi HECT E3 ubiquitin ligase, putativ  | -32.0655 | -35.9011 | 0.228944 | 0.918645 | BH |
| PITG_09436 | Pi conserved hypothetical protein (   | -12.3185 | -1.541   | 0.229333 | 0.918645 | BH |
| PITG_12670 | Pi conserved hypothetical protein (   | -12.3079 | -1.56224 | 0.229333 | 0.918645 | BH |
| PITG_13177 | Pi elongation of very long chain fat  | -13.4913 | -2.11605 | 0.22958  | 0.918645 | BH |
| PITG_03462 | Pi cysteine protease family C26, pu   | -32.1531 | -35.7259 | 0.231292 | 0.918645 | BH |
| PITG_00166 | Pi phosphoserine phosphatase (11)     | -32.0607 | -35.9107 | 0.231292 | 0.918645 | BH |
| PITG_00174 | Pi hypothetical protein (348 nt)      | -32.0816 | -35.8688 | 0.231292 | 0.918645 | BH |
| PITG_00396 | Pi aspartyl protease family A01B, p   | -32.1274 | -35.7773 | 0.231292 | 0.918645 | BH |
| PITG_00954 | Pi conserved hypothetical protein (   | -32.1157 | -35.8007 | 0.231292 | 0.918645 | BH |
| PITG_01073 | Pi conserved hypothetical protein (   | -32.1066 | -35.8188 | 0.231292 | 0.918645 | BH |
| PITG_01171 | Pi signal recognition particle, putat | -32.0842 | -35.8638 | 0.231292 | 0.918645 | BH |
| PITG_01272 | Pi lysosomal acid lipase/cholestery   | -32.1066 | -35.8188 | 0.231292 | 0.918645 | BH |
| PITG_01549 | Pi succinate semialdehyde dehydr      | -32.0825 | -35.8672 | 0.231292 | 0.918645 | BH |
| PITG_01581 | Pi mitotic spindle checkpoint comp    | -32.059  | -35.9141 | 0.231292 | 0.918645 | BH |
| PITG_01798 | Pi conserved hypothetical protein (   | -32.0598 | -35.9124 | 0.231292 | 0.918645 | BH |
| PITG_01871 | Pi protein kinase, putative (2817 nt) | -32.0698 | -35.8925 | 0.231292 | 0.918645 | BH |
| PITG_02071 | Pi protein kinase, putative (1360 nt) | -32.1066 | -35.8188 | 0.231292 | 0.918645 | BH |
| PITG_02105 | Pi uracil phosphoribosyltransferase   | -32.1165 | -35.7991 | 0.231292 | 0.918645 | BH |
| PITG_02143 | Pi myb-like DNA-binding protein, p    | -32.0953 | -35.8415 | 0.231292 | 0.918645 | BH |
| PITG_02337 | Pi exonuclease, putative (1389 nt)    | -32.1299 | -35.7723 | 0.231292 | 0.918645 | BH |
| PITG_02338 | Pi conserved hypothetical protein (   | -32.0953 | -35.8415 | 0.231292 | 0.918645 | BH |
| PITG_02415 | Pi conserved hypothetical protein (   | -32.0715 | -35.8891 | 0.231292 | 0.918645 | BH |
| PITG_02497 | Pi HECT E3 ubiquitin ligase, putativ  | -32.0945 | -35.8432 | 0.231292 | 0.918645 | BH |
| PITG_02580 | Pi conserved hypothetical protein (   | -32.1058 | -35.8205 | 0.231292 | 0.918645 | BH |
| PITG_02591 | Pi conserved hypothetical protein (   | -32.0816 | -35.8688 | 0.231292 | 0.918645 | BH |
| PITG_02672 | Pi ATP-dependent protease hslV (8     | -32.1058 | -35.8205 | 0.231292 | 0.918645 | BH |
| PITG_03445 | Pi Holliday junction ATP-dependen     | -32.1539 | -35.7242 | 0.231292 | 0.918645 | BH |
| PITG_03832 | Pi mitochondrial Rho GTPase, puta     | -32.1402 | -35.7518 | 0.231292 | 0.918645 | BH |



|            |                                     |          |          |          |          |    |
|------------|-------------------------------------|----------|----------|----------|----------|----|
| PITG_03865 | Pi conserved hypothetical protein ( | -32.1157 | -35.8007 | 0.231292 | 0.918645 | BH |
| PITG_03939 | Pi conserved hypothetical protein ( | -32.1157 | -35.8007 | 0.231292 | 0.918645 | BH |
| PITG_03958 | Pi hypothetical protein (337 nt)    | -32.0581 | -35.9158 | 0.231292 | 0.918645 | BH |
| PITG_04395 | Pi pre-mRNA-processing protein, p   | -32.0833 | -35.8655 | 0.231292 | 0.918645 | BH |
| PITG_05007 | Pi glutaminyl-tRNA synthetase, put  | -32.1157 | -35.8007 | 0.231292 | 0.918645 | BH |
| PITG_05170 | Pi serine protease family S09X, put | -32.092  | -35.8482 | 0.231292 | 0.918645 | BH |
| PITG_05326 | Pi Poly(A) polymerase, putative (34 | -32.1402 | -35.7518 | 0.231292 | 0.918645 | BH |
| PITG_05508 | Pi polycomb protein, putative (267  | -32.0825 | -35.8672 | 0.231292 | 0.918645 | BH |
| PITG_05818 | Pi conserved hypothetical protein ( | -32.105  | -35.8222 | 0.231292 | 0.918645 | BH |
| PITG_06921 | Pi conserved hypothetical protein ( | -32.0615 | -35.909  | 0.231292 | 0.918645 | BH |
| PITG_06966 | Pi conserved hypothetical protein ( | -32.1539 | -35.7242 | 0.231292 | 0.918645 | BH |
| PITG_06980 | Pi conserved hypothetical protein ( | -32.1418 | -35.7485 | 0.231292 | 0.918645 | BH |
| PITG_07102 | Pi conserved hypothetical protein ( | -32.1041 | -35.8238 | 0.231292 | 0.918645 | BH |
| PITG_07111 | Pi conserved hypothetical protein ( | -32.1182 | -35.7958 | 0.231292 | 0.918645 | BH |
| PITG_07826 | Pi hypothetical protein (464 nt)    | -32.1299 | -35.7723 | 0.231292 | 0.918645 | BH |
| PITG_08366 | Pi parafibromin-like protein (1596  | -32.1173 | -35.7974 | 0.231292 | 0.918645 | BH |
| PITG_08609 | Pi endomembrane protein 70-like     | -32.1282 | -35.7756 | 0.231292 | 0.918645 | BH |
| PITG_09827 | Pi mitotic checkpoint protein, puta | -32.0825 | -35.8672 | 0.231292 | 0.918645 | BH |
| PITG_09940 | Pi conserved hypothetical protein ( | -32.1157 | -35.8007 | 0.231292 | 0.918645 | BH |
| PITG_11387 | Pi conserved hypothetical protein ( | -32.1291 | -35.774  | 0.231292 | 0.918645 | BH |
| PITG_11430 | Pi conserved hypothetical protein ( | -32.1182 | -35.7958 | 0.231292 | 0.918645 | BH |
| PITG_11708 | Pi conserved hypothetical protein ( | -32.0698 | -35.8925 | 0.231292 | 0.918645 | BH |
| PITG_13620 | Pi conserved hypothetical protein ( | -32.1539 | -35.7242 | 0.231292 | 0.918645 | BH |
| PITG_13622 | Pi conserved hypothetical protein ( | -32.059  | -35.9141 | 0.231292 | 0.918645 | BH |
| PITG_14728 | Pi conserved hypothetical protein ( | -32.1066 | -35.8188 | 0.231292 | 0.918645 | BH |
| PITG_15774 | Pi protein kinase (901 nt)          | -32.0816 | -35.8688 | 0.231292 | 0.918645 | BH |
| PITG_16208 | Pi conserved hypothetical protein ( | -32.092  | -35.8482 | 0.231292 | 0.918645 | BH |
| PITG_16335 | Pi conserved hypothetical protein ( | -32.0816 | -35.8688 | 0.231292 | 0.918645 | BH |
| PITG_17049 | Pi ATP-binding Cassette (ABC) Supe  | -32.141  | -35.7501 | 0.231292 | 0.918645 | BH |
| PITG_17334 | Pi conserved hypothetical protein ( | -32.1523 | -35.7275 | 0.231292 | 0.918645 | BH |
| PITG_17679 | Pi M96 mating-specific protein far  | -32.1157 | -35.8007 | 0.231292 | 0.918645 | BH |
| PITG_17706 | Pi conserved hypothetical protein ( | -32.0598 | -35.9124 | 0.231292 | 0.918645 | BH |
| PITG_17958 | Pi heme/steroid binding domain-cc   | -32.0715 | -35.8891 | 0.231292 | 0.918645 | BH |
| PITG_18038 | Pi conserved hypothetical protein ( | -32.1418 | -35.7485 | 0.231292 | 0.918645 | BH |
| PITG_18274 | Pi serine protease, putative (3261  | -32.1418 | -35.7485 | 0.231292 | 0.918645 | BH |
| PITG_18384 | Pi conserved hypothetical protein ( | -32.1539 | -35.7242 | 0.231292 | 0.918645 | BH |
| PITG_18943 | Pi conserved hypothetical protein ( | -32.1182 | -35.7958 | 0.231292 | 0.918645 | BH |
| PITG_20999 | Pi conserved hypothetical protein ( | -32.1523 | -35.7275 | 0.231292 | 0.918645 | BH |
| PITG_04996 | Pi conserved hypothetical protein ( | -13.5014 | -2.08337 | 0.231705 | 0.918645 | BH |
| PITG_08594 | Pi conserved hypothetical protein ( | -13.5014 | -2.08337 | 0.231705 | 0.918645 | BH |
| PITG_00292 | Pi hypothetical protein (493 nt)    | -32.1393 | -35.7534 | 0.232458 | 0.918645 | BH |
| PITG_00683 | Pi conserved hypothetical protein ( | -32.1075 | -35.8171 | 0.232458 | 0.918645 | BH |
| PITG_00965 | Pi conserved hypothetical protein ( | -32.0911 | -35.8499 | 0.232458 | 0.918645 | BH |
| PITG_01282 | Pi conserved hypothetical protein ( | -32.0741 | -35.884  | 0.232458 | 0.918645 | BH |
| PITG_01437 | Pi mediator of RNA polymerase II t  | -32.0799 | -35.8723 | 0.232458 | 0.918645 | BH |
| PITG_01744 | Pi conserved hypothetical protein ( | -32.1307 | -35.7707 | 0.232458 | 0.918645 | BH |
| PITG_02203 | Pi conserved hypothetical protein ( | -32.1515 | -35.7291 | 0.232458 | 0.918645 | BH |

|            |                                       |          |          |          |          |    |
|------------|---------------------------------------|----------|----------|----------|----------|----|
| PITG_02319 | Pi hypothetical protein (3391 nt)     | -32.1393 | -35.7534 | 0.232458 | 0.918645 | BH |
| PITG_03199 | Pi ubiquitin-conjugating enzyme E2    | -32.0911 | -35.8499 | 0.232458 | 0.918645 | BH |
| PITG_03246 | Pi conserved hypothetical protein (   | -32.1426 | -35.7468 | 0.232458 | 0.918645 | BH |
| PITG_03355 | Pi conserved hypothetical protein (   | -32.1385 | -35.7551 | 0.232458 | 0.918645 | BH |
| PITG_03703 | Pi conserved hypothetical protein (   | -32.0732 | -35.8857 | 0.232458 | 0.918645 | BH |
| PITG_04596 | Pi hypothetical protein (3211 nt)     | -32.0681 | -35.896  | 0.232458 | 0.918645 | BH |
| PITG_05287 | Pi conserved hypothetical protein (   | -32.1426 | -35.7468 | 0.232458 | 0.918645 | BH |
| PITG_06602 | Pi conserved hypothetical protein (   | -32.119  | -35.7941 | 0.232458 | 0.918645 | BH |
| PITG_07110 | Pi cleavage and polyadenylation sp    | -32.0962 | -35.8398 | 0.232458 | 0.918645 | BH |
| PITG_08454 | Pi conserved hypothetical protein (   | -32.0962 | -35.8398 | 0.232458 | 0.918645 | BH |
| PITG_09898 | Pi ras-like protein (1232 nt)         | -32.085  | -35.8621 | 0.232458 | 0.918645 | BH |
| PITG_10821 | Pi ubiquitin-specific protease, puta  | -32.0911 | -35.8499 | 0.232458 | 0.918645 | BH |
| PITG_10932 | Pi dipeptidyl peptidase, putative (2  | -32.1148 | -35.8025 | 0.232458 | 0.918645 | BH |
| PITG_11233 | Pi conserved hypothetical protein (   | -32.1033 | -35.8255 | 0.232458 | 0.918645 | BH |
| PITG_11405 | Pi conserved hypothetical protein (   | -32.1307 | -35.7707 | 0.232458 | 0.918645 | BH |
| PITG_11923 | Pi mitochondrial 39-S ribosomal pr    | -32.1033 | -35.8255 | 0.232458 | 0.918645 | BH |
| PITG_12308 | Pi conserved hypothetical protein (   | -32.1515 | -35.7291 | 0.232458 | 0.918645 | BH |
| PITG_13783 | Pi conserved hypothetical protein (   | -32.1426 | -35.7468 | 0.232458 | 0.918645 | BH |
| PITG_14853 | Pi exosome complex exonuclease I      | -32.1148 | -35.8025 | 0.232458 | 0.918645 | BH |
| PITG_14874 | Pi 6 snRNA-associated Sm-like prot    | -32.0741 | -35.884  | 0.232458 | 0.918645 | BH |
| PITG_15281 | Pi cell differentiation protein rcd1  | -32.0962 | -35.8398 | 0.232458 | 0.918645 | BH |
| PITG_15852 | Pi transmembrane protein, putativ     | -32.119  | -35.7941 | 0.232458 | 0.918645 | BH |
| PITG_15885 | Pi conserved hypothetical protein (   | -32.1075 | -35.8171 | 0.232458 | 0.918645 | BH |
| PITG_18835 | Pi crinkler (CRN) family protein, 5'  | -32.0911 | -35.8499 | 0.232458 | 0.918645 | BH |
| PITG_19654 | Pi conserved hypothetical protein (   | -32.0741 | -35.884  | 0.232458 | 0.918645 | BH |
| PITG_21581 | Pi conserved hypothetical protein (   | -32.085  | -35.8621 | 0.232458 | 0.918645 | BH |
| PITG_00505 | Pi ubiquitin-conjugating enzyme E2    | -10.0814 | -1.78335 | 0.233055 | 0.918645 | BH |
| PITG_00006 | Pi hypothetical protein (830 nt)      | -32.1084 | -35.8154 | 0.233629 | 0.918645 | BH |
| PITG_00115 | Pi protein kinase, putative (1413 nt) | -32.0859 | -35.8603 | 0.233629 | 0.918645 | BH |
| PITG_00494 | Pi Drug/Metabolite Transporter (D     | -32.1199 | -35.7924 | 0.233629 | 0.918645 | BH |
| PITG_00561 | Pi ubiquinone biosynthesis protein    | -32.1015 | -35.829  | 0.233629 | 0.918645 | BH |
| PITG_00626 | Pi conserved hypothetical protein (   | -32.0902 | -35.8517 | 0.233629 | 0.918645 | BH |
| PITG_02447 | Pi conserved hypothetical protein (   | -32.1506 | -35.7308 | 0.233629 | 0.918645 | BH |
| PITG_02499 | Pi conserved hypothetical protein (   | -32.1435 | -35.7451 | 0.233629 | 0.918645 | BH |
| PITG_02827 | Pi ras-like GTP-binding protein (189  | -32.1435 | -35.7451 | 0.233629 | 0.918645 | BH |
| PITG_02943 | Pi palmitoyltransferase, putative (1  | -32.097  | -35.838  | 0.233629 | 0.918645 | BH |
| PITG_03408 | Pi conserved hypothetical protein (   | -32.1376 | -35.7568 | 0.233629 | 0.918645 | BH |
| PITG_03623 | Pi conserved hypothetical protein (   | -32.0672 | -35.8978 | 0.233629 | 0.918645 | BH |
| PITG_04658 | Pi methylcrotonoyl-CoA carboxylas     | -32.0633 | -35.9055 | 0.233629 | 0.918645 | BH |
| PITG_05412 | Pi Ca2 :Cation Antiporter (CaCA) Fa   | -32.1084 | -35.8154 | 0.233629 | 0.918645 | BH |
| PITG_06056 | Pi hypothetical protein (2034 nt)     | -32.1257 | -35.7807 | 0.233629 | 0.918645 | BH |
| PITG_06343 | Pi N-terminal acetyltransferase cor   | -32.1435 | -35.7451 | 0.233629 | 0.918645 | BH |
| PITG_09241 | Pi conserved hypothetical protein (   | -32.1084 | -35.8154 | 0.233629 | 0.918645 | BH |
| PITG_09507 | Pi ADP-ribosylation factor-related    | -32.1435 | -35.7451 | 0.233629 | 0.918645 | BH |
| PITG_09702 | Pi conserved hypothetical protein (   | -32.1084 | -35.8154 | 0.233629 | 0.918645 | BH |
| PITG_11410 | Pi hypothetical protein (1851 nt)     | -32.1316 | -35.7689 | 0.233629 | 0.918645 | BH |
| PITG_11999 | Pi conserved hypothetical protein (   | -32.0672 | -35.8978 | 0.233629 | 0.918645 | BH |

|            |                                      |          |          |          |          |    |
|------------|--------------------------------------|----------|----------|----------|----------|----|
| PITG_14363 | Pi conserved hypothetical protein (  | -32.1257 | -35.7807 | 0.233629 | 0.918645 | BH |
| PITG_15146 | Pi conserved hypothetical protein (  | -32.1506 | -35.7308 | 0.233629 | 0.918645 | BH |
| PITG_15875 | Pi conserved hypothetical protein (  | -32.1199 | -35.7924 | 0.233629 | 0.918645 | BH |
| PITG_15961 | Pi conserved hypothetical protein (  | -32.0902 | -35.8517 | 0.233629 | 0.918645 | BH |
| PITG_20762 | Pi conserved hypothetical protein (  | -32.1084 | -35.8154 | 0.233629 | 0.918645 | BH |
| PITG_21400 | Pi protein kinase (1076 nt)          | -32.1257 | -35.7807 | 0.233629 | 0.918645 | BH |
| PITG_14913 | Pi 40S ribosomal protein S16 (1118   | -9.10948 | 1.372224 | 0.233702 | 0.918645 | BH |
| PITG_00118 | Pi conserved hypothetical protein (  | -13.6635 | -1.75681 | 0.233718 | 0.918645 | BH |
| PITG_02283 | Pi conserved hypothetical protein (  | -13.6726 | -1.73872 | 0.233718 | 0.918645 | BH |
| PITG_21174 | Pi D-cysteine desulfhydrase, putati  | -13.6497 | -1.7845  | 0.233718 | 0.918645 | BH |
| PITG_01537 | Pi conserved hypothetical protein (  | -32.0642 | -35.9037 | 0.234805 | 0.918645 | BH |
| PITG_01559 | Pi conserved hypothetical protein (  | -32.1444 | -35.7434 | 0.234805 | 0.918645 | BH |
| PITG_02327 | Pi conserved hypothetical protein (  | -32.1325 | -35.7672 | 0.234805 | 0.918645 | BH |
| PITG_03952 | Pi conserved hypothetical protein (  | -32.1498 | -35.7326 | 0.234805 | 0.918645 | BH |
| PITG_06766 | Pi conserved hypothetical protein (  | -32.0642 | -35.9037 | 0.234805 | 0.918645 | BH |
| PITG_08571 | Pi Drug/Metabolite Transporter (D    | -32.0642 | -35.9037 | 0.234805 | 0.918645 | BH |
| PITG_08723 | Pi conserved hypothetical protein (  | -32.1498 | -35.7326 | 0.234805 | 0.918645 | BH |
| PITG_08980 | Pi conserved hypothetical protein (  | -32.075  | -35.8821 | 0.234805 | 0.918645 | BH |
| PITG_10014 | Pi conserved hypothetical protein (  | -32.1208 | -35.7906 | 0.234805 | 0.918645 | BH |
| PITG_10022 | Pi vacuolar protein sorting-associa  | -32.1208 | -35.7906 | 0.234805 | 0.918645 | BH |
| PITG_10239 | Pi myosin heavy chain kinase, puta   | -32.1248 | -35.7825 | 0.234805 | 0.918645 | BH |
| PITG_11131 | Pi conserved hypothetical protein (  | -32.1444 | -35.7434 | 0.234805 | 0.918645 | BH |
| PITG_11451 | Pi conserved hypothetical protein (  | -32.1093 | -35.8136 | 0.234805 | 0.918645 | BH |
| PITG_11561 | Pi nuclear prelamin A recognition f  | -32.0893 | -35.8535 | 0.234805 | 0.918645 | BH |
| PITG_11592 | Pi serine protease family S15, puta  | -32.1444 | -35.7434 | 0.234805 | 0.918645 | BH |
| PITG_13747 | Pi Drug/Metabolite Transporter (D    | -32.1248 | -35.7825 | 0.234805 | 0.918645 | BH |
| PITG_14731 | Pi conserved hypothetical protein (  | -32.1131 | -35.806  | 0.234805 | 0.918645 | BH |
| PITG_16183 | Pi adhesin-like protein (5735 nt)    | -32.1208 | -35.7906 | 0.234805 | 0.918645 | BH |
| PITG_16332 | Pi conserved hypothetical protein (  | -32.1498 | -35.7326 | 0.234805 | 0.918645 | BH |
| PITG_18071 | Pi conserved hypothetical protein (  | -32.1325 | -35.7672 | 0.234805 | 0.918645 | BH |
| PITG_18127 | Pi conserved hypothetical protein (  | -32.1498 | -35.7326 | 0.234805 | 0.918645 | BH |
| PITG_20307 | Pi conserved hypothetical protein (  | -32.1325 | -35.7672 | 0.234805 | 0.918645 | BH |
| PITG_20906 | Pi conserved hypothetical protein (  | -32.0893 | -35.8535 | 0.234805 | 0.918645 | BH |
| PITG_21394 | Pi cobalamin synthesis protein, put  | -32.0642 | -35.9037 | 0.234805 | 0.918645 | BH |
| PITG_21397 | Pi ribose-phosphate pyrophosphok     | -32.1093 | -35.8136 | 0.234805 | 0.918645 | BH |
| PITG_21960 | Pi conserved hypothetical protein (  | -32.1444 | -35.7434 | 0.234805 | 0.918645 | BH |
| PITG_22568 | Pi nuclease, putative (1077 nt)      | -32.1208 | -35.7906 | 0.234805 | 0.918645 | BH |
| PITG_11789 | Pi conserved hypothetical protein (  | -13.6493 | -1.78635 | 0.235365 | 0.918645 | BH |
| PITG_01271 | Pi protein kinase, putative (937 nt) | -32.1121 | -35.8078 | 0.235985 | 0.918645 | BH |
| PITG_02162 | Pi ATP-dependent Clp protease AT     | -32.0869 | -35.8584 | 0.235985 | 0.918645 | BH |
| PITG_05546 | Pi conserved hypothetical protein (  | -32.1367 | -35.7587 | 0.235985 | 0.918645 | BH |
| PITG_07894 | Pi sulfatase-like protein (612 nt)   | -32.1121 | -35.8078 | 0.235985 | 0.918645 | BH |
| PITG_01715 | Pi conserved hypothetical protein (  | -32.0651 | -35.9019 | 0.235985 | 0.918645 | BH |
| PITG_03360 | Pi AP-4 complex subunit epsilon, p   | -32.0651 | -35.9019 | 0.235985 | 0.918645 | BH |
| PITG_06171 | Pi splicing factor 3B subunit 1 (377 | -32.1452 | -35.7416 | 0.235985 | 0.918645 | BH |
| PITG_07976 | Pi conserved hypothetical protein (  | -32.1452 | -35.7416 | 0.235985 | 0.918645 | BH |
| PITG_11321 | Pi conserved hypothetical protein (  | -32.0759 | -35.8803 | 0.235985 | 0.918645 | BH |

|            |                                       |          |          |          |          |    |
|------------|---------------------------------------|----------|----------|----------|----------|----|
| PITG_14586 | Pi 5'-AMP-activated protein kinase    | -32.1452 | -35.7416 | 0.235985 | 0.918645 | BH |
| PITG_16973 | Pi dynein light chain (449 nt)        | -32.1006 | -35.8309 | 0.235985 | 0.918645 | BH |
| PITG_22117 | Pi transglutaminase elicitor-like pro | -32.0456 | -35.9409 | 0.237023 | 0.918645 | BH |
| PITG_00658 | Pi conserved hypothetical protein (   | -32.1488 | -35.7345 | 0.237169 | 0.918645 | BH |
| PITG_01746 | Pi HECT E3 ubiquitin ligase, putativ  | -32.1102 | -35.8117 | 0.237169 | 0.918645 | BH |
| PITG_01792 | Pi conserved hypothetical protein (   | -32.1612 | -35.7098 | 0.237169 | 0.918645 | BH |
| PITG_04552 | Pi conserved hypothetical protein (   | -32.1334 | -35.7653 | 0.237169 | 0.918645 | BH |
| PITG_07852 | Pi conserved hypothetical protein (   | -32.1488 | -35.7345 | 0.237169 | 0.918645 | BH |
| PITG_08984 | Pi protein kinase, putative (2467 nt) | -32.1334 | -35.7653 | 0.237169 | 0.918645 | BH |
| PITG_14692 | Pi conserved hypothetical protein (   | -32.1102 | -35.8117 | 0.237169 | 0.918645 | BH |
| PITG_17003 | Pi choline/ethanolamine kinase, pu    | -32.0989 | -35.8343 | 0.237169 | 0.918645 | BH |
| PITG_17416 | Pi conserved hypothetical protein (   | -32.1102 | -35.8117 | 0.237169 | 0.918645 | BH |
| PITG_19235 | Pi serine/threonine protein kinase    | -32.1217 | -35.7887 | 0.237169 | 0.918645 | BH |
| PITG_21380 | Pi conserved hypothetical protein (   | -32.1334 | -35.7653 | 0.237169 | 0.918645 | BH |
| PITG_22810 | Pi conserved hypothetical protein (   | -32.1488 | -35.7345 | 0.237169 | 0.918645 | BH |
| PITG_00559 | Pi protein phosphatase 2C, putativ    | -32.1462 | -35.7397 | 0.238357 | 0.918645 | BH |
| PITG_01066 | Pi conserved hypothetical protein (   | -32.1462 | -35.7397 | 0.238357 | 0.918645 | BH |
| PITG_01358 | Pi conserved hypothetical protein (   | -32.1462 | -35.7397 | 0.238357 | 0.918645 | BH |
| PITG_02104 | Pi conserved hypothetical protein (   | -32.1479 | -35.7364 | 0.238357 | 0.918645 | BH |
| PITG_06202 | Pi conserved hypothetical protein (   | -32.1479 | -35.7364 | 0.238357 | 0.918645 | BH |
| PITG_06781 | Pi conserved hypothetical protein (   | -32.1462 | -35.7397 | 0.238357 | 0.918645 | BH |
| PITG_07199 | Pi conserved hypothetical protein (   | -32.0762 | -35.8797 | 0.238357 | 0.918645 | BH |
| PITG_12110 | Pi peroxisomal targeting signal 1 re  | -32.1357 | -35.7607 | 0.238357 | 0.918645 | BH |
| PITG_16264 | Pi conserved hypothetical protein (   | -32.0762 | -35.8797 | 0.238357 | 0.918645 | BH |
| PITG_17946 | Pi hypothetical protein (692 nt)      | -32.1479 | -35.7364 | 0.238357 | 0.918645 | BH |
| PITG_19672 | Pi hypothetical protein (1077 nt)     | -32.0762 | -35.8797 | 0.238357 | 0.918645 | BH |
| PITG_06424 | Pi formin-homology 2 domain-cont      | -32.0661 | -35.8999 | 0.238357 | 0.918645 | BH |
| PITG_08749 | Pi conserved hypothetical protein (   | -32.0661 | -35.8999 | 0.238357 | 0.918645 | BH |
| PITG_10911 | Pi conserved hypothetical protein (   | -32.0878 | -35.8564 | 0.238357 | 0.918645 | BH |
| PITG_12541 | Pi conserved hypothetical protein (   | -32.0769 | -35.8784 | 0.238357 | 0.918645 | BH |
| PITG_14239 | Pi Poly(A) polymerase, putative (30   | -32.0769 | -35.8784 | 0.238357 | 0.918645 | BH |
| PITG_17698 | Pi conserved hypothetical protein (   | -32.0769 | -35.8784 | 0.238357 | 0.918645 | BH |
| PITG_12939 | Pi conserved hypothetical protein (   | -32.0155 | -36.0012 | 0.23839  | 0.918645 | BH |
| PITG_00469 | Pi conserved hypothetical protein (   | -32.1112 | -35.8097 | 0.23955  | 0.918645 | BH |
| PITG_01504 | Pi protein phosphatase PP2A regul     | -32.1227 | -35.7867 | 0.23955  | 0.918645 | BH |
| PITG_03342 | Pi sorting and assembly machinery     | -32.1227 | -35.7867 | 0.23955  | 0.918645 | BH |
| PITG_04342 | Pi conserved hypothetical protein (   | -32.1112 | -35.8097 | 0.23955  | 0.918645 | BH |
| PITG_05592 | Pi conserved hypothetical protein (   | -32.1344 | -35.7633 | 0.23955  | 0.918645 | BH |
| PITG_05989 | Pi myb-like DNA-binding protein, p    | -32.1227 | -35.7867 | 0.23955  | 0.918645 | BH |
| PITG_06967 | Pi conserved hypothetical protein (   | -32.0642 | -35.9036 | 0.23955  | 0.918645 | BH |
| PITG_12662 | Pi conserved hypothetical protein (   | -32.0873 | -35.8575 | 0.23955  | 0.918645 | BH |
| PITG_17163 | Pi conserved hypothetical protein (   | -32.1227 | -35.7867 | 0.23955  | 0.918645 | BH |
| PITG_06228 | Pi hypothetical protein (641 nt)      | -31.9961 | -36.0399 | 0.239763 | 0.918645 | BH |
| PITG_00178 | Pi dual specificity tyrosine-phospho  | -32.0671 | -35.8979 | 0.240747 | 0.918645 | BH |
| PITG_00945 | Pi conserved hypothetical protein (   | -32.1347 | -35.7628 | 0.240747 | 0.918645 | BH |
| PITG_02684 | Pi peptidyl-tRNA hydrolase, putativ   | -32.0888 | -35.8544 | 0.240747 | 0.918645 | BH |
| PITG_09531 | Pi conserved hypothetical protein (   | -32.1347 | -35.7628 | 0.240747 | 0.918645 | BH |

|            |                                              |          |          |          |          |    |
|------------|----------------------------------------------|----------|----------|----------|----------|----|
| PITG_15137 | Pi hypothetical protein (530 nt)             | -32.1347 | -35.7628 | 0.240747 | 0.918645 | BH |
| PITG_15925 | Pi conserved hypothetical protein (          | -32.0752 | -35.8818 | 0.240747 | 0.918645 | BH |
| PITG_16826 | Pi conserved hypothetical protein (          | -32.1    | -35.8322 | 0.240747 | 0.918645 | BH |
| PITG_17611 | Pi hypothetical protein (540 nt)             | -32.0888 | -35.8544 | 0.240747 | 0.918645 | BH |
| PITG_10484 | Pi axin interactor, putative (1221 n         | -32.0409 | -35.9504 | 0.241142 | 0.918645 | BH |
| PITG_00719 | Pi acetyl-coenzyme A synthetase (2           | -32.1354 | -35.7613 | 0.241948 | 0.918645 | BH |
| PITG_00722 | Pi conserved hypothetical protein (          | -32.0862 | -35.8596 | 0.241948 | 0.918645 | BH |
| PITG_02659 | Pi serine hydrolase (FSH1)-like prot         | -32.1218 | -35.7886 | 0.241948 | 0.918645 | BH |
| PITG_05293 | Pi conserved hypothetical protein (          | -32.1354 | -35.7613 | 0.241948 | 0.918645 | BH |
| PITG_05540 | Pi conserved hypothetical protein (          | -32.1473 | -35.7375 | 0.241948 | 0.918645 | BH |
| PITG_10488 | Pi protein kinase, putative (1257 nt         | -32.0862 | -35.8596 | 0.241948 | 0.918645 | BH |
| PITG_14564 | Pi conserved hypothetical protein (          | -32.0565 | -35.919  | 0.241948 | 0.918645 | BH |
| PITG_15519 | Pi conserved hypothetical protein (          | -32.1473 | -35.7375 | 0.241948 | 0.918645 | BH |
| PITG_17920 | Pi plasma membrane H <sup>+</sup> -ATPase (8 | -10.4095 | 2.199449 | 0.243046 | 0.918645 | BH |
| PITG_09092 | Pi nucleoside diphosphate kinase,            | -13.7745 | 2.774211 | 0.243145 | 0.918645 | BH |
| PITG_03586 | Pi trafficking protein particle comp         | -32.0975 | -35.8371 | 0.243154 | 0.918645 | BH |
| PITG_08851 | Pi FKBP-type peptidyl-prolyl cis-tra         | -32.101  | -35.8301 | 0.243154 | 0.918645 | BH |
| PITG_09690 | Pi hypothetical protein (1701 nt)            | -32.101  | -35.8301 | 0.243154 | 0.918645 | BH |
| PITG_15959 | Pi conserved hypothetical protein (          | -32.1238 | -35.7845 | 0.243154 | 0.918645 | BH |
| PITG_00338 | Pi conserved hypothetical protein (          | -32.0576 | -35.9169 | 0.244365 | 0.918645 | BH |
| PITG_03061 | Pi conserved hypothetical protein (          | -32.079  | -35.8741 | 0.244365 | 0.918645 | BH |
| PITG_05762 | Pi Cullin family protein, putative (2        | -32.09   | -35.8522 | 0.244365 | 0.918645 | BH |
| PITG_10961 | Pi conserved hypothetical protein (          | -32.1457 | -35.7408 | 0.244365 | 0.918645 | BH |
| PITG_11296 | Pi DNA mismatch repair protein M             | -32.1089 | -35.8142 | 0.244365 | 0.918645 | BH |
| PITG_15542 | Pi conserved hypothetical protein (          | -32.0682 | -35.8957 | 0.244365 | 0.918645 | BH |
| PITG_16386 | Pi BOLA-like protein (541 nt)                | -32.074  | -35.8841 | 0.244365 | 0.918645 | BH |
| PITG_20590 | Pi cleavage induced conserved hyp            | -32.09   | -35.8522 | 0.244365 | 0.918645 | BH |
| PITG_20671 | Pi conserved hypothetical protein (          | -32.09   | -35.8522 | 0.244365 | 0.918645 | BH |
| PITG_15727 | Pi hypothetical protein (908 nt)             | -10.5121 | -2.58642 | 0.244972 | 0.918645 | BH |
| PITG_20556 | Pi hypothetical protein (1091 nt)            | -32.0853 | -35.8616 | 0.245315 | 0.918645 | BH |
| PITG_12694 | Pi protein transport protein SEC13           | -13.6766 | -1.73913 | 0.245319 | 0.918645 | BH |
| PITG_05670 | Pi cleavage induced conserved hyp            | -32.1206 | -35.7909 | 0.245579 | 0.918645 | BH |
| PITG_06884 | Pi conserved hypothetical protein (          | -32.1484 | -35.7353 | 0.245579 | 0.918645 | BH |
| PITG_14440 | Pi conserved hypothetical protein (          | -32.1484 | -35.7353 | 0.245579 | 0.918645 | BH |
| PITG_14727 | Pi callose synthase, putative (6687          | -13.5874 | -1.95133 | 0.246717 | 0.918645 | BH |
| PITG_21544 | Pi conserved hypothetical protein (          | -32.0271 | -35.978  | 0.246718 | 0.918645 | BH |
| PITG_01851 | Pi homogentisate 1,2-dioxygenase             | -32.125  | -35.7822 | 0.246799 | 0.918645 | BH |
| PITG_02814 | Pi conserved hypothetical protein (          | -32.125  | -35.7822 | 0.246799 | 0.918645 | BH |
| PITG_06753 | Pi paired amphipathic helix proteir          | -32.1022 | -35.8278 | 0.246799 | 0.918645 | BH |
| PITG_08470 | Pi diacylglycerol acyltransferase, pi        | -32.1135 | -35.8052 | 0.246799 | 0.918645 | BH |
| PITG_12279 | Pi phosphoglycerate mutase family            | -32.1324 | -35.7673 | 0.246799 | 0.918645 | BH |
| PITG_13201 | Pi conserved hypothetical protein (          | -32.1324 | -35.7673 | 0.246799 | 0.918645 | BH |
| PITG_15924 | Pi conserved hypothetical protein (          | -32.1324 | -35.7673 | 0.246799 | 0.918645 | BH |
| PITG_09721 | Pi conserved hypothetical protein (          | -12.8271 | -1.56779 | 0.24699  | 0.918645 | BH |
| PITG_09401 | Pi pre-mRNA-splicing factor ini1 (3:         | -13.5554 | -1.97181 | 0.247873 | 0.918645 | BH |
| PITG_01250 | Pi regulator of chromosome conde             | -32.0802 | -35.8718 | 0.248023 | 0.918645 | BH |
| PITG_04839 | Pi cleavage induced conserved hyp            | -32.0802 | -35.8718 | 0.248023 | 0.918645 | BH |

|            |                                      |          |          |          |          |    |
|------------|--------------------------------------|----------|----------|----------|----------|----|
| PITG_08132 | Pi conserved hypothetical protein (  | -32.0802 | -35.8718 | 0.248023 | 0.918645 | BH |
| PITG_08935 | Pi acyl-CoA synthetase short-chain   | -32.0694 | -35.8934 | 0.248023 | 0.918645 | BH |
| PITG_15384 | Pi conserved hypothetical protein (  | -32.0694 | -35.8934 | 0.248023 | 0.918645 | BH |
| PITG_16956 | Pi transglutaminase elicitor, putati | -32.0911 | -35.8499 | 0.248023 | 0.918645 | BH |
| PITG_17457 | Pi conserved hypothetical protein (  | -32.0911 | -35.8499 | 0.248023 | 0.918645 | BH |
| PITG_21349 | Pi aspartyl-tRNA synthetase, putati  | -32.0911 | -35.8499 | 0.248023 | 0.918645 | BH |
| PITG_22450 | Pi conserved hypothetical protein (  | -32.0911 | -35.8499 | 0.248023 | 0.918645 | BH |
| PITG_01701 | Pi hypothetical protein (487 nt)     | -12.8195 | -1.58494 | 0.248818 | 0.918645 | BH |
| PITG_05193 | Pi conserved hypothetical protein (  | -32.0839 | -35.8644 | 0.249251 | 0.918645 | BH |
| PITG_10345 | Pi conserved hypothetical protein (  | -32.0588 | -35.9145 | 0.249251 | 0.918645 | BH |
| PITG_16809 | Pi conserved hypothetical protein (  | -32.0588 | -35.9145 | 0.249251 | 0.918645 | BH |
| PITG_17026 | Pi palmitoyltransferase, putative (2 | -32.1496 | -35.7329 | 0.249251 | 0.918645 | BH |
| PITG_18107 | Pi Der1-like family, putative (1230  | -13.5417 | -2.00045 | 0.249586 | 0.918645 | BH |
| PITG_00320 | Pi conserved hypothetical protein (  | -32.1261 | -35.7798 | 0.250484 | 0.918645 | BH |
| PITG_03466 | Pi aldehyde dehydrogenase, putati    | -32.1378 | -35.7565 | 0.250484 | 0.918645 | BH |
| PITG_03815 | Pi FAD-dependent oxidoreductase      | -32.0951 | -35.8419 | 0.250484 | 0.918645 | BH |
| PITG_11627 | Pi conserved hypothetical protein (  | -32.1261 | -35.7798 | 0.250484 | 0.918645 | BH |
| PITG_17399 | Pi conserved hypothetical protein (  | -32.0951 | -35.8419 | 0.250484 | 0.918645 | BH |
| PITG_03008 | Pi conserved hypothetical protein (  | -32.1147 | -35.8026 | 0.251721 | 0.918645 | BH |
| PITG_03464 | Pi aldehyde dehydrogenase, putati    | -32.1147 | -35.8026 | 0.251721 | 0.918645 | BH |
| PITG_08599 | Pi thimet oligopeptidase (2500 nt)   | -32.0923 | -35.8475 | 0.251721 | 0.918645 | BH |
| PITG_11012 | Pi conserved hypothetical protein (  | -32.1147 | -35.8026 | 0.251721 | 0.918645 | BH |
| PITG_16058 | Pi conserved hypothetical protein (  | -32.1034 | -35.8252 | 0.251721 | 0.918645 | BH |
| PITG_17370 | Pi conserved hypothetical protein (  | -32.1147 | -35.8026 | 0.251721 | 0.918645 | BH |
| PITG_18358 | Pi conserved hypothetical protein (  | -32.0923 | -35.8475 | 0.251721 | 0.918645 | BH |
| PITG_02305 | Pi conserved hypothetical protein (  | -12.2593 | 2.040833 | 0.251851 | 0.918645 | BH |
| PITG_04158 | Pi glycoside hydrolase, putative (89 | -32.0814 | -35.8692 | 0.252963 | 0.918645 | BH |
| PITG_10722 | Pi conserved hypothetical protein (  | -32.1431 | -35.7459 | 0.252963 | 0.918645 | BH |
| PITG_10729 | Pi conserved hypothetical protein (  | -32.0814 | -35.8692 | 0.252963 | 0.918645 | BH |
| PITG_15494 | Pi cytosine deaminase (438 nt)       | -32.1064 | -35.8193 | 0.252963 | 0.918645 | BH |
| PITG_18540 | Pi conserved hypothetical protein (  | -32.0814 | -35.8692 | 0.252963 | 0.918645 | BH |
| PITG_13509 | Pi secreted RxLR effector peptide,   | -11.7607 | 2.35154  | 0.253365 | 0.918645 | BH |
| PITG_02161 | Pi conserved hypothetical protein (  | -32.8445 | -34.3432 | 0.253443 | 0.918645 | BH |
| PITG_05779 | Pi neutral ceramidase, putative (69  | -32.8445 | -34.3432 | 0.253443 | 0.918645 | BH |
| PITG_06710 | Pi conserved hypothetical protein (  | -32.8445 | -34.3432 | 0.253443 | 0.918645 | BH |
| PITG_07263 | Pi conserved hypothetical protein (  | -32.8445 | -34.3432 | 0.253443 | 0.918645 | BH |
| PITG_07295 | Pi conserved hypothetical protein (  | -32.8445 | -34.3432 | 0.253443 | 0.918645 | BH |
| PITG_10173 | Pi NADPH-cytochrome P450 reduct      | -32.8445 | -34.3432 | 0.253443 | 0.918645 | BH |
| PITG_11567 | Pi conserved hypothetical protein (  | -32.8445 | -34.3432 | 0.253443 | 0.918645 | BH |
| PITG_12997 | Pi Major Facilitator Superfamily (M  | -32.8445 | -34.3432 | 0.253443 | 0.918645 | BH |
| PITG_13860 | Pi protein kinase, putative (1146 nt | -32.8445 | -34.3432 | 0.253443 | 0.918645 | BH |
| PITG_14023 | Pi conserved hypothetical protein (  | -32.8445 | -34.3432 | 0.253443 | 0.918645 | BH |
| PITG_15658 | Pi hypothetical protein (2142 nt)    | -32.8445 | -34.3432 | 0.253443 | 0.918645 | BH |
| PITG_16031 | Pi conserved hypothetical protein (  | -32.8445 | -34.3432 | 0.253443 | 0.918645 | BH |
| PITG_16742 | Pi conserved hypothetical protein (  | -32.8445 | -34.3432 | 0.253443 | 0.918645 | BH |
| PITG_17145 | Pi conserved hypothetical protein (  | -32.8445 | -34.3432 | 0.253443 | 0.918645 | BH |
| PITG_17824 | Pi conserved hypothetical protein (  | -32.8445 | -34.3432 | 0.253443 | 0.918645 | BH |

|            |                                       |          |          |          |          |    |
|------------|---------------------------------------|----------|----------|----------|----------|----|
| PITG_18602 | Pi conserved hypothetical protein (   | -32.8445 | -34.3432 | 0.253443 | 0.918645 | BH |
| PITG_18606 | Pi conserved hypothetical protein (   | -32.8445 | -34.3432 | 0.253443 | 0.918645 | BH |
| PITG_18743 | Pi amino acid/auxin permease-like     | -32.8445 | -34.3432 | 0.253443 | 0.918645 | BH |
| PITG_19887 | Pi conserved hypothetical protein (   | -32.8445 | -34.3432 | 0.253443 | 0.918645 | BH |
| PITG_22626 | Pi conserved hypothetical protein (   | -32.8445 | -34.3432 | 0.253443 | 0.918645 | BH |
| PITG_22823 | Pi expressed protein (507 nt)         | -32.8445 | -34.3432 | 0.253443 | 0.918645 | BH |
| PITG_22918 | Pi conserved hypothetical protein (   | -32.8445 | -34.3432 | 0.253443 | 0.918645 | BH |
| PITG_23197 | Pi Crinkler (CRN) family protein, ps  | -32.8445 | -34.3432 | 0.253443 | 0.918645 | BH |
| PITG_14595 | Pi conserved hypothetical protein (   | -32.0825 | -35.867  | 0.254209 | 0.918645 | BH |
| PITG_08896 | Pi conserved hypothetical protein (   | -13.5588 | -2.02989 | 0.25477  | 0.918645 | BH |
| PITG_16890 | Pi conserved hypothetical protein (   | -32.8617 | -34.3087 | 0.255281 | 0.918645 | BH |
| PITG_02314 | Pi conserved hypothetical protein (   | -31.8226 | 36.38694 | 0.255281 | 0.918645 | BH |
| PITG_04447 | Pi conserved hypothetical protein (   | -31.8226 | 36.38694 | 0.255281 | 0.918645 | BH |
| PITG_07689 | Pi secreted RxLR effector peptide,    | -31.8226 | 36.38694 | 0.255281 | 0.918645 | BH |
| PITG_08441 | Pi conserved hypothetical protein (   | -32.8273 | -34.3775 | 0.255281 | 0.918645 | BH |
| PITG_10835 | Pi secreted RxLR effector peptide,    | -31.8226 | 36.38694 | 0.255281 | 0.918645 | BH |
| PITG_22922 | Pi secreted RxLR effector peptide,    | -32.8273 | -34.3775 | 0.255281 | 0.918645 | BH |
| PITG_01553 | Pi HECT ubiquitin ligase, putative (2 | -32.151  | -35.7301 | 0.255461 | 0.918645 | BH |
| PITG_19254 | Pi conserved hypothetical protein (   | -32.151  | -35.7301 | 0.255461 | 0.918645 | BH |
| PITG_13641 | Pi glucanase inhibitor protein, puta  | -12.2874 | 2.092285 | 0.255752 | 0.918645 | BH |
| PITG_12550 | Pi conserved hypothetical protein (   | -13.5013 | -2.10105 | 0.255821 | 0.918645 | BH |
| PITG_01173 | Pi palmitoyltransferase, putative (1  | -32.1048 | -35.8226 | 0.256716 | 0.918645 | BH |
| PITG_04538 | Pi splicing factor 3 subunit, putativ | -32.1048 | -35.8226 | 0.256716 | 0.918645 | BH |
| PITG_06120 | Pi conserved hypothetical protein (   | -32.1276 | -35.777  | 0.256716 | 0.918645 | BH |
| PITG_06392 | Pi hypothetical protein (1540 nt)     | -32.1276 | -35.777  | 0.256716 | 0.918645 | BH |
| PITG_18054 | Pi 50S ribosomal protein L7/L12, pi   | -12.1859 | 2.084112 | 0.257033 | 0.918645 | BH |
| PITG_09381 | Pi conserved hypothetical protein (   | -32.0937 | -35.8446 | 0.257977 | 0.918645 | BH |
| PITG_17166 | Pi conserved hypothetical protein (   | -32.0937 | -35.8446 | 0.257977 | 0.918645 | BH |
| PITG_21278 | Pi isochorismatase, putative (728 r   | -13.5628 | -1.96438 | 0.258187 | 0.918645 | BH |
| PITG_08832 | Pi conserved hypothetical protein (   | -13.7039 | -1.67612 | 0.259011 | 0.918645 | BH |
| PITG_18366 | Pi choline/Carnitine O-acyltransfer   | -32.0614 | -35.9092 | 0.259242 | 0.918645 | BH |
| PITG_19125 | Pi conserved hypothetical protein (   | -32.1416 | -35.7489 | 0.259242 | 0.918645 | BH |
| PITG_12041 | Pi cysteine protease family C01A, p   | -13.6639 | -1.77585 | 0.260477 | 0.918645 | BH |
| PITG_01382 | Pi ubiquitin family protein, putative | -13.6992 | -1.68661 | 0.260677 | 0.918645 | BH |
| PITG_06579 | Pi conserved hypothetical protein (   | -13.6971 | -1.69084 | 0.260677 | 0.918645 | BH |
| PITG_10129 | Pi conserved hypothetical protein (   | -13.7118 | -1.66149 | 0.260677 | 0.918645 | BH |
| PITG_04862 | Pi RNA binding protein, putative (1   | -13.5481 | -1.99613 | 0.261647 | 0.918645 | BH |
| PITG_01302 | Pi conserved hypothetical protein (   | -32.1406 | -35.7509 | 0.261786 | 0.918645 | BH |
| PITG_16484 | Pi conserved hypothetical protein (   | -32.1537 | -35.7247 | 0.261786 | 0.918645 | BH |
| PITG_14229 | Pi mannose-1-phosphate guanyltra      | -13.7031 | -1.68005 | 0.262346 | 0.918645 | BH |
| PITG_06108 | Pi dihydrolipoyllysine-residue acety  | -13.8149 | 2.177654 | 0.262385 | 0.918645 | BH |
| PITG_10878 | Pi conserved hypothetical protein (   | -12.3518 | -1.49012 | 0.26305  | 0.918645 | BH |
| PITG_08804 | Pi metalloprotease family M01, pu     | -32.1062 | -35.8196 | 0.263065 | 0.918645 | BH |
| PITG_12037 | Pi ferredoxin-dependent glutamate     | -32.129  | -35.774  | 0.263065 | 0.918645 | BH |
| PITG_09838 | Pi secreted RxLR effector peptide,    | -32.0952 | -35.8417 | 0.264349 | 0.918645 | BH |
| PITG_11853 | Pi C2 domain-containing protein, p    | -32.0842 | -35.8636 | 0.264349 | 0.918645 | BH |
| PITG_14131 | Pi conserved hypothetical protein (   | -32.0952 | -35.8417 | 0.264349 | 0.918645 | BH |

|            |                                                  |          |          |          |          |    |
|------------|--------------------------------------------------|----------|----------|----------|----------|----|
| PITG_05290 | Pi myosin-like protein (3290 nt)                 | -13.2324 | 2.343422 | 0.264901 | 0.918645 | BH |
| PITG_08131 | Pi oxidoreductase htip2-like prot                | -32.0629 | -35.9063 | 0.265638 | 0.918645 | BH |
| PITG_14515 | Pi conserved hypothetical protein (              | -32.14   | -35.7521 | 0.265638 | 0.918645 | BH |
| PITG_18537 | Pi trans-1,2-dihydrobenzene-1,2-di               | -32.0735 | -35.885  | 0.265638 | 0.918645 | BH |
| PITG_19008 | Pi nascent polypeptide-associated                | -11.0799 | 2.030427 | 0.2665   | 0.918645 | BH |
| PITG_10133 | Pi hypothetical protein (402 nt)                 | -32.1149 | -35.8023 | 0.266931 | 0.918645 | BH |
| PITG_01515 | Pi ras-related GTP-binding protein,              | -13.6939 | -1.70218 | 0.267368 | 0.918645 | BH |
| PITG_07028 | Pi peptidyl-prolyl cis-trans isomera             | -13.6906 | -1.70983 | 0.269048 | 0.918645 | BH |
| PITG_09309 | Pi conserved hypothetical protein (              | -32.1542 | -35.7238 | 0.269532 | 0.918645 | BH |
| PITG_18072 | Pi conserved hypothetical protein (              | -9.32372 | -1.74221 | 0.269599 | 0.918645 | BH |
| PITG_17921 | Pi P-type ATPase (P-ATPase) Super                | -10.2149 | 2.134267 | 0.270113 | 0.918645 | BH |
| PITG_02532 | Pi Ca <sup>2+</sup> :Cation Antiporter (CaCA) Fa | -13.0332 | 2.011442 | 0.270313 | 0.918645 | BH |
| PITG_01308 | Pi conserved hypothetical protein (              | -32.1424 | -35.7474 | 0.27084  | 0.918645 | BH |
| PITG_01400 | Pi Argonaute3 (AGO3) (3810 nt)                   | -32.1192 | -35.7937 | 0.27084  | 0.918645 | BH |
| PITG_07702 | Pi UDP-N-acetylglucosamine-peptid                | -32.1424 | -35.7474 | 0.27084  | 0.918645 | BH |
| PITG_17381 | Pi conserved hypothetical protein (              | -32.1192 | -35.7937 | 0.27084  | 0.918645 | BH |
| PITG_19245 | Pi conserved hypothetical protein (              | -13.8317 | 2.196403 | 0.272028 | 0.918645 | BH |
| PITG_06335 | Pi conserved hypothetical protein (              | -32.1642 | -35.7036 | 0.272153 | 0.918645 | BH |
| PITG_20047 | Pi 2-isopropylmalate synthase, put               | -32.1642 | -35.7036 | 0.272153 | 0.918645 | BH |
| PITG_20384 | Pi conserved hypothetical protein (              | -13.688  | -1.71768 | 0.272415 | 0.918645 | BH |
| PITG_21540 | Pi Resistance-Nodulation-Cell Divis              | -13.5613 | -2.03977 | 0.272952 | 0.918645 | BH |
| PITG_03028 | Pi pre-mRNA-splicing factor SF2 (9               | -13.5711 | -1.9417  | 0.273464 | 0.918645 | BH |
| PITG_18117 | Pi conserved hypothetical protein (              | -32.086  | -35.8602 | 0.273471 | 0.918645 | BH |
| PITG_20005 | Pi ATP-binding Cassette (ABC) Supe               | -12.2999 | 2.096751 | 0.27355  | 0.918645 | BH |
| PITG_17785 | Pi hypothetical protein (336 nt)                 | -13.6991 | -1.69661 | 0.274102 | 0.918645 | BH |
| PITG_00625 | Pi monooxygenase, putative (672 r                | -12.8245 | -1.6015  | 0.274679 | 0.918645 | BH |
| PITG_12004 | Pi conserved hypothetical protein (              | -32.1132 | -35.8057 | 0.274794 | 0.918645 | BH |
| PITG_02423 | Pi cysteine protease family C01A, p              | -13.7165 | -1.66309 | 0.275792 | 0.918645 | BH |
| PITG_10195 | Pi acyl-CoA desaturase (1123 nt)                 | -13.0989 | 2.158353 | 0.277224 | 0.918645 | BH |
| PITG_22462 | Pi conserved hypothetical protein (              | -12.7074 | 1.999955 | 0.27741  | 0.918645 | BH |
| PITG_01694 | Pi peptidyl-prolyl cis-trans isomera             | -12.2313 | 1.989472 | 0.277437 | 0.918645 | BH |
| PITG_10686 | Pi conserved hypothetical protein (              | -32.1765 | -35.6791 | 0.277454 | 0.918645 | BH |
| PITG_05313 | Pi undecaprenyl pyrophosphate sy                 | -13.2729 | 2.111137 | 0.277641 | 0.918645 | BH |
| PITG_17393 | Pi conserved hypothetical protein (              | -32.1501 | -35.732  | 0.278791 | 0.918645 | BH |
| PITG_10941 | Pi elongation factor 2 (2909 nt)                 | -9.99777 | 1.999009 | 0.279887 | 0.918645 | BH |
| PITG_14124 | Pi glycoside hydrolase, putative (9              | -32.1326 | -35.7669 | 0.281481 | 0.918645 | BH |
| PITG_14862 | Pi conserved hypothetical protein (              | -32.1211 | -35.7899 | 0.281481 | 0.918645 | BH |
| PITG_17664 | Pi conserved hypothetical protein (              | -32.1326 | -35.7669 | 0.281481 | 0.918645 | BH |
| PITG_08897 | Pi hypothetical protein (439 nt)                 | -32.1622 | -35.7078 | 0.282834 | 0.918645 | BH |
| PITG_22124 | Pi P-type ATPase (P-ATPase) Super                | -32.0987 | -35.8347 | 0.282834 | 0.918645 | BH |
| PITG_15954 | Pi SNARE associated Golgi protein,               | -13.5757 | -1.93963 | 0.283861 | 0.918645 | BH |
| PITG_07283 | Pi threonine dehydratase catabolic               | -32.0878 | -35.8565 | 0.284192 | 0.918645 | BH |
| PITG_07896 | Pi sulfatase-like protein (2403 nt)              | -32.0878 | -35.8565 | 0.284192 | 0.918645 | BH |
| PITG_20488 | Pi conserved hypothetical protein (              | -32.077  | -35.8781 | 0.284192 | 0.918645 | BH |
| PITG_03700 | Pi enolase (1365 nt)                             | -10.2688 | 1.974765 | 0.286446 | 0.918645 | BH |
| PITG_00910 | Pi EF-1 guanine nucleotide exchang               | -10.3538 | 1.944865 | 0.286784 | 0.918645 | BH |
| PITG_02098 | Pi ATP-binding Cassette (ABC) Supe               | -32.1699 | -35.6923 | 0.286922 | 0.918645 | BH |



|            |                                       |          |          |          |          |    |
|------------|---------------------------------------|----------|----------|----------|----------|----|
| PITG_11267 | Pi conserved hypothetical protein (   | -32.087  | -35.8582 | 0.286922 | 0.918645 | BH |
| PITG_14355 | Pi trans-1,2-dihydrobenzene-1,2-di    | -32.1822 | -35.6677 | 0.286922 | 0.918645 | BH |
| PITG_20073 | Pi pyruvate-flavodoxin oxidoreduct    | -32.1699 | -35.6923 | 0.286922 | 0.918645 | BH |
| PITG_19961 | Pi glyceraldehyde-3-phosphate def     | -9.86646 | 1.964851 | 0.287142 | 0.918645 | BH |
| PITG_01604 | Pi serine palmitoyltransferase, put   | -13.7585 | -1.56682 | 0.287918 | 0.918645 | BH |
| PITG_06813 | Pi conserved hypothetical protein (   | -13.7576 | -1.56871 | 0.287918 | 0.918645 | BH |
| PITG_09284 | Pi actin, putative (1342 nt)          | -13.7306 | -1.62254 | 0.287918 | 0.918645 | BH |
| PITG_21508 | Pi conserved hypothetical protein (   | -13.7521 | -1.57963 | 0.287918 | 0.918645 | BH |
| PITG_04255 | Pi glucosylceramidase, putative (16   | -32.146  | -35.7401 | 0.288296 | 0.918645 | BH |
| PITG_05245 | Pi imidazole glycerol phosphate sy    | -13.752  | -1.58098 | 0.289591 | 0.918645 | BH |
| PITG_01493 | Pi conserved hypothetical protein (   | -32.1229 | -35.7864 | 0.289674 | 0.918645 | BH |
| PITG_16026 | Pi conserved hypothetical protein (   | -32.1229 | -35.7864 | 0.289674 | 0.918645 | BH |
| PITG_11249 | Pi heat shock 70 kDa protein (2183    | -9.3276  | 1.62786  | 0.289937 | 0.918645 | BH |
| PITG_17708 | Pi conserved hypothetical protein (   | -10.2693 | 1.973748 | 0.290797 | 0.918645 | BH |
| PITG_08320 | Pi conserved hypothetical protein (   | -32.1005 | -35.8312 | 0.291057 | 0.918645 | BH |
| PITG_14288 | Pi polysaccharide lyase, putative (1  | -32.1005 | -35.8312 | 0.291057 | 0.918645 | BH |
| PITG_20241 | Pi transmembrane protein, putativ     | -32.1116 | -35.8089 | 0.291057 | 0.918645 | BH |
| PITG_20484 | Pi conserved hypothetical protein (   | -32.1005 | -35.8312 | 0.291057 | 0.918645 | BH |
| PITG_05688 | Pi splicing factor U2AF 35 kDa sub    | -13.7558 | -1.57458 | 0.291267 | 0.918645 | BH |
| PITG_12141 | Pi H - or Na -translocating F-type, V | -13.7296 | -1.62947 | 0.294624 | 0.918645 | BH |
| PITG_08462 | Pi actin-related protein 2/3 comple   | -13.7541 | -1.58175 | 0.296305 | 0.918645 | BH |
| PITG_12863 | Pi cyclin-dependent kinase regulato   | -13.7245 | -1.64096 | 0.296305 | 0.918645 | BH |
| PITG_02043 | Pi SWI/SNF-related matrix-associat    | -32.1663 | -35.6996 | 0.296616 | 0.918645 | BH |
| PITG_03476 | Pi conserved hypothetical protein (   | -32.1655 | -35.7011 | 0.296616 | 0.918645 | BH |
| PITG_04992 | Pi arginyl-tRNA synthetase, putativ   | -32.2047 | -35.6227 | 0.296616 | 0.918645 | BH |
| PITG_05886 | Pi peptidyl-prolyl cis-trans isomera  | -32.2047 | -35.6227 | 0.296616 | 0.918645 | BH |
| PITG_06075 | Pi conserved hypothetical protein (   | -32.1789 | -35.6744 | 0.296616 | 0.918645 | BH |
| PITG_07033 | Pi conserved hypothetical protein (   | -32.1663 | -35.6996 | 0.296616 | 0.918645 | BH |
| PITG_08301 | Pi conserved hypothetical protein (   | -32.1789 | -35.6744 | 0.296616 | 0.918645 | BH |
| PITG_15486 | Pi general transcription factor IIH s | -32.1655 | -35.7011 | 0.296616 | 0.918645 | BH |
| PITG_15695 | Pi conserved hypothetical protein (   | -32.1655 | -35.7011 | 0.296616 | 0.918645 | BH |
| PITG_17709 | Pi conserved hypothetical protein (   | -32.1917 | -35.6488 | 0.296616 | 0.918645 | BH |
| PITG_17990 | Pi cell division protein kinase, puta | -32.1917 | -35.6488 | 0.296616 | 0.918645 | BH |
| PITG_18959 | Pi conserved hypothetical protein (   | -32.2047 | -35.6227 | 0.296616 | 0.918645 | BH |
| PITG_20077 | Pi conserved hypothetical protein (   | -32.1655 | -35.7011 | 0.296616 | 0.918645 | BH |
| PITG_21908 | Pi HECT E3 ubiquitin ligase, putativ  | -32.1655 | -35.7011 | 0.296616 | 0.918645 | BH |
| PITG_09832 | Pi adhesin protein, putative (2265    | -13.6035 | 2.317205 | 0.296784 | 0.918645 | BH |
| PITG_00134 | Pi COP9 signalosome complex sub       | -32.261  | -35.5102 | 0.297774 | 0.918645 | BH |
| PITG_00225 | Pi sialin-like protein (1725 nt)      | -32.2454 | -35.5413 | 0.297774 | 0.918645 | BH |
| PITG_00370 | Pi conserved hypothetical protein (   | -32.2447 | -35.5427 | 0.297774 | 0.918645 | BH |
| PITG_00482 | Pi conserved hypothetical protein (   | -32.1548 | -35.7226 | 0.297774 | 0.918645 | BH |
| PITG_00689 | Pi Mitochondrial Carrier (MC) Fami    | -32.1773 | -35.6776 | 0.297774 | 0.918645 | BH |
| PITG_00718 | Pi mono-ADP-ribosyltransferase sir    | -32.2195 | -35.593  | 0.297774 | 0.918645 | BH |
| PITG_01748 | Pi mitochondrial inner membrane       | -32.261  | -35.5102 | 0.297774 | 0.918645 | BH |
| PITG_01778 | Pi soluble pyridine nucleotide trans  | -32.2331 | -35.566  | 0.297774 | 0.918645 | BH |
| PITG_01946 | Pi ras family GTPase, putative (641   | -32.261  | -35.5102 | 0.297774 | 0.918645 | BH |
| PITG_02023 | Pi conserved hypothetical protein (   | -32.2454 | -35.5413 | 0.297774 | 0.918645 | BH |

|            |                                       |          |          |          |          |    |
|------------|---------------------------------------|----------|----------|----------|----------|----|
| PITG_02195 | Pi conserved hypothetical protein (   | -32.2173 | -35.5976 | 0.297774 | 0.918645 | BH |
| PITG_02227 | Pi cleavage induced hypothetical p    | -32.2173 | -35.5976 | 0.297774 | 0.918645 | BH |
| PITG_02453 | Pi conserved hypothetical protein (   | -32.1639 | -35.7044 | 0.297774 | 0.918645 | BH |
| PITG_02764 | Pi conserved hypothetical protein (   | -32.2454 | -35.5413 | 0.297774 | 0.918645 | BH |
| PITG_02787 | Pi conserved hypothetical protein (   | -32.1679 | -35.6963 | 0.297774 | 0.918645 | BH |
| PITG_02802 | Pi stomatin-like protein (1226 nt)    | -32.2469 | -35.5383 | 0.297774 | 0.918645 | BH |
| PITG_03006 | Pi protein kinase (1901 nt)           | -32.261  | -35.5102 | 0.297774 | 0.918645 | BH |
| PITG_03341 | Pi conserved hypothetical protein (   | -32.2447 | -35.5427 | 0.297774 | 0.918645 | BH |
| PITG_03370 | Pi conserved hypothetical protein (   | -32.1932 | -35.6456 | 0.297774 | 0.918645 | BH |
| PITG_03675 | Pi DEAD/DEAH box RNA helicase, p      | -32.2603 | -35.5116 | 0.297774 | 0.918645 | BH |
| PITG_03753 | Pi ubiquitin carboxyl-terminal hydr   | -32.2447 | -35.5427 | 0.297774 | 0.918645 | BH |
| PITG_03754 | Pi protein kinase, putative (2697 nt) | -32.2603 | -35.5116 | 0.297774 | 0.918645 | BH |
| PITG_03781 | Pi conserved hypothetical protein (   | -32.1647 | -35.7028 | 0.297774 | 0.918645 | BH |
| PITG_04403 | Pi hypothetical protein (796 nt)      | -32.2055 | -35.6211 | 0.297774 | 0.918645 | BH |
| PITG_04424 | Pi SNARE associated Golgi protein,    | -32.218  | -35.5961 | 0.297774 | 0.918645 | BH |
| PITG_05368 | Pi conserved hypothetical protein (   | -32.2188 | -35.5946 | 0.297774 | 0.918645 | BH |
| PITG_05597 | Pi conserved hypothetical protein (   | -32.2055 | -35.6211 | 0.297774 | 0.918645 | BH |
| PITG_05598 | Pi conserved hypothetical protein (   | -32.1773 | -35.6776 | 0.297774 | 0.918645 | BH |
| PITG_05658 | Pi conserved hypothetical protein (   | -32.1932 | -35.6456 | 0.297774 | 0.918645 | BH |
| PITG_05858 | Pi conserved hypothetical protein (   | -32.2316 | -35.5689 | 0.297774 | 0.918645 | BH |
| PITG_05907 | Pi conserved hypothetical protein (   | -32.2469 | -35.5383 | 0.297774 | 0.918645 | BH |
| PITG_06218 | Pi conserved hypothetical protein (   | -32.261  | -35.5102 | 0.297774 | 0.918645 | BH |
| PITG_06480 | Pi protein kinase, putative (6057 nt) | -32.2469 | -35.5383 | 0.297774 | 0.918645 | BH |
| PITG_06636 | Pi conserved hypothetical protein (   | -32.1932 | -35.6456 | 0.297774 | 0.918645 | BH |
| PITG_06852 | Pi ATP-binding Cassette (ABC) Super   | -32.2055 | -35.6211 | 0.297774 | 0.918645 | BH |
| PITG_06979 | Pi aspartate carbamoyltransferase     | -32.2032 | -35.6258 | 0.297774 | 0.918645 | BH |
| PITG_07043 | Pi conserved hypothetical protein (   | -32.2316 | -35.5689 | 0.297774 | 0.918645 | BH |
| PITG_07710 | Pi sugar transporter, putative (153   | -32.1647 | -35.7028 | 0.297774 | 0.918645 | BH |
| PITG_07995 | Pi cyclin-dependent kinase, putativ   | -32.1909 | -35.6504 | 0.297774 | 0.918645 | BH |
| PITG_08310 | Pi conserved hypothetical protein (   | -32.2603 | -35.5116 | 0.297774 | 0.918645 | BH |
| PITG_08626 | Pi conserved hypothetical protein (   | -32.2447 | -35.5427 | 0.297774 | 0.918645 | BH |
| PITG_09446 | Pi conserved hypothetical protein (   | -32.1671 | -35.6979 | 0.297774 | 0.918645 | BH |
| PITG_09450 | Pi conserved hypothetical protein (   | -32.2173 | -35.5976 | 0.297774 | 0.918645 | BH |
| PITG_09863 | Pi septum site-determining proteir    | -32.2462 | -35.5398 | 0.297774 | 0.918645 | BH |
| PITG_10069 | Pi conserved hypothetical protein (   | -32.2195 | -35.593  | 0.297774 | 0.918645 | BH |
| PITG_10460 | Pi conserved hypothetical protein (   | -32.1773 | -35.6776 | 0.297774 | 0.918645 | BH |
| PITG_10857 | Pi ubiquitin fusion degradation pro   | -32.2331 | -35.566  | 0.297774 | 0.918645 | BH |
| PITG_11594 | Pi ubiquitin family protein, putativ  | -32.1901 | -35.6519 | 0.297774 | 0.918645 | BH |
| PITG_11795 | Pi ATP-dependent RNA helicase SU      | -32.2055 | -35.6211 | 0.297774 | 0.918645 | BH |
| PITG_11922 | Pi epoxide hydrolase, putative (99    | -32.2195 | -35.593  | 0.297774 | 0.918645 | BH |
| PITG_13102 | Pi fimbrin-like protein (2322 nt)     | -32.1797 | -35.6728 | 0.297774 | 0.918645 | BH |
| PITG_13270 | Pi palmitoyltransferase, putative (1  | -32.1932 | -35.6456 | 0.297774 | 0.918645 | BH |
| PITG_13686 | Pi Sulfate Permease (SulP) Family (   | -32.218  | -35.5961 | 0.297774 | 0.918645 | BH |
| PITG_13767 | Pi conserved hypothetical protein (   | -32.2331 | -35.566  | 0.297774 | 0.918645 | BH |
| PITG_13835 | Pi conserved hypothetical protein (   | -32.2032 | -35.6258 | 0.297774 | 0.918645 | BH |
| PITG_13843 | Pi conserved hypothetical protein (   | -32.1671 | -35.6979 | 0.297774 | 0.918645 | BH |
| PITG_13848 | Pi conserved hypothetical protein (   | -32.2469 | -35.5383 | 0.297774 | 0.918645 | BH |

|            |                                         |          |          |          |          |    |
|------------|-----------------------------------------|----------|----------|----------|----------|----|
| PITG_13855 | Pi phosphatidic acid phosphatase (      | -32.218  | -35.5961 | 0.297774 | 0.918645 | BH |
| PITG_13915 | Pi conserved hypothetical protein (     | -32.2331 | -35.566  | 0.297774 | 0.918645 | BH |
| PITG_14462 | Pi AP-1 complex subunit mu, putat       | -32.261  | -35.5102 | 0.297774 | 0.918645 | BH |
| PITG_14596 | Pi transcription initiation factor IIB, | -32.2596 | -35.513  | 0.297774 | 0.918645 | BH |
| PITG_14766 | Pi conserved hypothetical protein (     | -32.1639 | -35.7044 | 0.297774 | 0.918645 | BH |
| PITG_14914 | Pi conserved hypothetical protein (     | -32.2316 | -35.5689 | 0.297774 | 0.918645 | BH |
| PITG_15251 | Pi conserved hypothetical protein (     | -32.1932 | -35.6456 | 0.297774 | 0.918645 | BH |
| PITG_15641 | Pi conserved hypothetical protein (     | -32.2039 | -35.6242 | 0.297774 | 0.918645 | BH |
| PITG_15652 | Pi H/ACA ribonucleoprotein compl        | -32.2323 | -35.5675 | 0.297774 | 0.918645 | BH |
| PITG_16049 | Pi conserved hypothetical protein (     | -32.1679 | -35.6963 | 0.297774 | 0.918645 | BH |
| PITG_16474 | Pi conserved hypothetical protein (     | -32.1932 | -35.6456 | 0.297774 | 0.918645 | BH |
| PITG_16898 | Pi hypothetical protein (426 nt)        | -32.1773 | -35.6776 | 0.297774 | 0.918645 | BH |
| PITG_17021 | Pi conserved hypothetical protein (     | -32.1639 | -35.7044 | 0.297774 | 0.918645 | BH |
| PITG_17142 | Pi Major Facilitator Superfamily (M     | -32.2173 | -35.5976 | 0.297774 | 0.918645 | BH |
| PITG_17632 | Pi conserved hypothetical protein (     | -32.1639 | -35.7044 | 0.297774 | 0.918645 | BH |
| PITG_18355 | Pi conserved hypothetical protein (     | -32.2323 | -35.5675 | 0.297774 | 0.918645 | BH |
| PITG_18657 | Pi conserved hypothetical protein (     | -32.2447 | -35.5427 | 0.297774 | 0.918645 | BH |
| PITG_19038 | Pi conserved hypothetical protein (     | -32.218  | -35.5961 | 0.297774 | 0.918645 | BH |
| PITG_19124 | Pi endoplasmic reticulum-Golgi int      | -32.1901 | -35.6519 | 0.297774 | 0.918645 | BH |
| PITG_22069 | Pi arginase, putative (598 nt)          | -32.1548 | -35.7226 | 0.297774 | 0.918645 | BH |
| PITG_22687 | Pi HECT E3 ubiquitin ligase, putativ    | -32.1647 | -35.7028 | 0.297774 | 0.918645 | BH |
| PITG_02467 | Pi translocation protein SEC63 (198     | -13.6112 | -1.8602  | 0.298612 | 0.918645 | BH |
| PITG_00128 | Pi conserved hypothetical protein (     | -32.1893 | -35.6536 | 0.298936 | 0.918645 | BH |
| PITG_00200 | Pi conserved hypothetical protein (     | -32.2476 | -35.5368 | 0.298936 | 0.918645 | BH |
| PITG_00456 | Pi conserved hypothetical protein (     | -32.2071 | -35.618  | 0.298936 | 0.918645 | BH |
| PITG_00754 | Pi gamma-glutamyltranspeptidase,        | -32.1556 | -35.7209 | 0.298936 | 0.918645 | BH |
| PITG_00808 | Pi conserved hypothetical protein (     | -32.2203 | -35.5915 | 0.298936 | 0.918645 | BH |
| PITG_01747 | Pi conserved hypothetical protein (     | -32.2617 | -35.5087 | 0.298936 | 0.918645 | BH |
| PITG_01919 | Pi Mitochondrial Carrier (MC) Fami      | -32.2165 | -35.5992 | 0.298936 | 0.918645 | BH |
| PITG_02228 | Pi conserved hypothetical protein (     | -32.2476 | -35.5368 | 0.298936 | 0.918645 | BH |
| PITG_02286 | Pi chromatin-remodeling complex         | -32.1556 | -35.7209 | 0.298936 | 0.918645 | BH |
| PITG_02446 | Pi cyclin-dependent kinase, putativ     | -32.2203 | -35.5915 | 0.298936 | 0.918645 | BH |
| PITG_02628 | Pi conserved hypothetical protein (     | -32.2203 | -35.5915 | 0.298936 | 0.918645 | BH |
| PITG_03058 | Pi cytochrome P450, putative (158       | -32.2588 | -35.5145 | 0.298936 | 0.918645 | BH |
| PITG_03159 | Pi conserved hypothetical protein (     | -32.2588 | -35.5145 | 0.298936 | 0.918645 | BH |
| PITG_03557 | Pi conserved hypothetical protein (     | -32.2476 | -35.5368 | 0.298936 | 0.918645 | BH |
| PITG_03792 | Pi 2,3-bisphosphoglycerate-indepe       | -32.1556 | -35.7209 | 0.298936 | 0.918645 | BH |
| PITG_04023 | Pi conserved hypothetical protein (     | -32.2203 | -35.5915 | 0.298936 | 0.918645 | BH |
| PITG_04211 | Pi conserved hypothetical protein (     | -32.2071 | -35.618  | 0.298936 | 0.918645 | BH |
| PITG_04746 | Pi conserved hypothetical protein (     | -32.2165 | -35.5992 | 0.298936 | 0.918645 | BH |
| PITG_05318 | Pi N-(5'-phosphoribosyl)anthranilat     | -32.1813 | -35.6696 | 0.298936 | 0.918645 | BH |
| PITG_06674 | Pi acetyl-CoA acetyltransferase IB (    | -32.1556 | -35.7209 | 0.298936 | 0.918645 | BH |
| PITG_06708 | Pi cyclin-dependent kinase, putativ     | -32.2338 | -35.5644 | 0.298936 | 0.918645 | BH |
| PITG_06765 | Pi conserved hypothetical protein (     | -32.194  | -35.644  | 0.298936 | 0.918645 | BH |
| PITG_07701 | Pi ubiquinone/menaquinone biosy         | -32.1556 | -35.7209 | 0.298936 | 0.918645 | BH |
| PITG_08136 | Pi conserved hypothetical protein (     | -32.2617 | -35.5087 | 0.298936 | 0.918645 | BH |
| PITG_08473 | Pi conserved hypothetical protein (     | -32.2476 | -35.5368 | 0.298936 | 0.918645 | BH |

|            |                                      |          |          |          |          |    |
|------------|--------------------------------------|----------|----------|----------|----------|----|
| PITG_09001 | Pi conserved hypothetical protein (  | -32.2301 | -35.572  | 0.298936 | 0.918645 | BH |
| PITG_09098 | Pi conserved hypothetical protein (  | -32.1893 | -35.6536 | 0.298936 | 0.918645 | BH |
| PITG_09459 | Pi nitroreductase family, putative ( | -32.2165 | -35.5992 | 0.298936 | 0.918645 | BH |
| PITG_09508 | Pi ubiquitin carboxyl-terminal hydr  | -32.2617 | -35.5087 | 0.298936 | 0.918645 | BH |
| PITG_10987 | Pi Drug/Metabolite Transporter (D    | -32.2071 | -35.618  | 0.298936 | 0.918645 | BH |
| PITG_11024 | Pi conserved hypothetical protein (  | -32.194  | -35.644  | 0.298936 | 0.918645 | BH |
| PITG_11086 | Pi HIT domain-containing protein,    | -32.2203 | -35.5915 | 0.298936 | 0.918645 | BH |
| PITG_11097 | Pi mannose-1-phosphate guanyltra     | -32.2476 | -35.5368 | 0.298936 | 0.918645 | BH |
| PITG_12753 | Pi importin subunit alpha, putative  | -32.2023 | -35.6274 | 0.298936 | 0.918645 | BH |
| PITG_12946 | Pi hydroxyacylglutathione hydrolas   | -32.163  | -35.7061 | 0.298936 | 0.918645 | BH |
| PITG_13493 | Pi conserved hypothetical protein (  | -32.2338 | -35.5644 | 0.298936 | 0.918645 | BH |
| PITG_14169 | Pi conserved hypothetical protein (  | -32.163  | -35.7061 | 0.298936 | 0.918645 | BH |
| PITG_14249 | Pi conserved hypothetical protein (  | -32.1556 | -35.7209 | 0.298936 | 0.918645 | BH |
| PITG_14259 | Pi conserved hypothetical protein (  | -32.2301 | -35.572  | 0.298936 | 0.918645 | BH |
| PITG_14812 | Pi conserved hypothetical protein (  | -32.2023 | -35.6274 | 0.298936 | 0.918645 | BH |
| PITG_15394 | Pi serine protease family S33, puta  | -32.2617 | -35.5087 | 0.298936 | 0.918645 | BH |
| PITG_15737 | Pi conserved hypothetical protein (  | -32.1556 | -35.7209 | 0.298936 | 0.918645 | BH |
| PITG_16038 | Pi conserved hypothetical protein (  | -32.2476 | -35.5368 | 0.298936 | 0.918645 | BH |
| PITG_16812 | Pi anaphase-promoting complex su     | -32.2476 | -35.5368 | 0.298936 | 0.918645 | BH |
| PITG_17600 | Pi conserved hypothetical protein (  | -32.2023 | -35.6274 | 0.298936 | 0.918645 | BH |
| PITG_17733 | Pi conserved hypothetical protein (  | -32.2301 | -35.572  | 0.298936 | 0.918645 | BH |
| PITG_17863 | Pi MtN3-like protein (810 nt)        | -32.2338 | -35.5644 | 0.298936 | 0.918645 | BH |
| PITG_17876 | Pi transmembrane protein, putativ    | -32.2023 | -35.6274 | 0.298936 | 0.918645 | BH |
| PITG_18521 | Pi conserved hypothetical protein (  | -32.163  | -35.7061 | 0.298936 | 0.918645 | BH |
| PITG_18860 | Pi conserved hypothetical protein (  | -32.2071 | -35.618  | 0.298936 | 0.918645 | BH |
| PITG_19466 | Pi conserved hypothetical protein (  | -32.2338 | -35.5644 | 0.298936 | 0.918645 | BH |
| PITG_19615 | Pi hypothetical protein (5192 nt)    | -32.1893 | -35.6536 | 0.298936 | 0.918645 | BH |
| PITG_19817 | Pi conserved hypothetical protein (  | -32.2617 | -35.5087 | 0.298936 | 0.918645 | BH |
| PITG_20800 | Pi conserved hypothetical protein (  | -32.1893 | -35.6536 | 0.298936 | 0.918645 | BH |
| PITG_22340 | Pi conserved hypothetical protein (  | -32.2588 | -35.5145 | 0.298936 | 0.918645 | BH |
| PITG_01652 | Pi conserved hypothetical protein (  | -32.2484 | -35.5353 | 0.300101 | 0.918645 | BH |
| PITG_02205 | Pi conserved hypothetical protein (  | -32.1688 | -35.6946 | 0.300101 | 0.918645 | BH |
| PITG_02233 | Pi conserved hypothetical protein (  | -32.1884 | -35.6553 | 0.300101 | 0.918645 | BH |
| PITG_02487 | Pi conserved hypothetical protein (  | -32.2484 | -35.5353 | 0.300101 | 0.918645 | BH |
| PITG_02716 | Pi conserved hypothetical protein (  | -32.2625 | -35.5072 | 0.300101 | 0.918645 | BH |
| PITG_02722 | Pi conserved hypothetical protein (  | -32.2625 | -35.5072 | 0.300101 | 0.918645 | BH |
| PITG_02917 | Pi puromycin-sensitive aminopepti    | -32.2211 | -35.5898 | 0.300101 | 0.918645 | BH |
| PITG_02979 | Pi conserved hypothetical protein (  | -32.2156 | -35.6008 | 0.300101 | 0.918645 | BH |
| PITG_03778 | Pi Poly(A) polymerase, putative (22  | -32.1688 | -35.6946 | 0.300101 | 0.918645 | BH |
| PITG_05201 | Pi voltage-gated potassium channe    | -32.2625 | -35.5072 | 0.300101 | 0.918645 | BH |
| PITG_05234 | Pi conserved hypothetical protein (  | -32.1688 | -35.6946 | 0.300101 | 0.918645 | BH |
| PITG_05413 | Pi patatin-like phospholipase, puta  | -32.2346 | -35.5628 | 0.300101 | 0.918645 | BH |
| PITG_05629 | Pi Poly(A) polymerase, putative (19  | -32.258  | -35.516  | 0.300101 | 0.918645 | BH |
| PITG_07326 | Pi conserved hypothetical protein (  | -32.2211 | -35.5898 | 0.300101 | 0.918645 | BH |
| PITG_07589 | Pi conserved hypothetical protein (  | -32.2484 | -35.5353 | 0.300101 | 0.918645 | BH |
| PITG_10184 | Pi conserved hypothetical protein (  | -32.2725 | -35.4871 | 0.300101 | 0.918645 | BH |
| PITG_11993 | Pi glycoside hydrolase, putative (16 | -32.2346 | -35.5628 | 0.300101 | 0.918645 | BH |

|            |                                       |          |          |          |          |    |
|------------|---------------------------------------|----------|----------|----------|----------|----|
| PITG_12556 | Pi elicitin-like INF6 (745 nt)        | -32.2156 | -35.6008 | 0.300101 | 0.918645 | BH |
| PITG_12691 | Pi conserved hypothetical protein (   | -32.2346 | -35.5628 | 0.300101 | 0.918645 | BH |
| PITG_12820 | Pi Mitochondrial Protein Transloca    | -32.258  | -35.516  | 0.300101 | 0.918645 | BH |
| PITG_13364 | Pi conserved hypothetical protein (   | -32.2156 | -35.6008 | 0.300101 | 0.918645 | BH |
| PITG_13546 | Pi sphingosine kinase, putative (17   | -32.2484 | -35.5353 | 0.300101 | 0.918645 | BH |
| PITG_13659 | Pi conserved hypothetical protein (   | -32.2211 | -35.5898 | 0.300101 | 0.918645 | BH |
| PITG_13840 | Pi conserved hypothetical protein (   | -32.2211 | -35.5898 | 0.300101 | 0.918645 | BH |
| PITG_13971 | Pi conserved hypothetical protein (   | -32.2211 | -35.5898 | 0.300101 | 0.918645 | BH |
| PITG_14707 | Pi SNF1-related protein kinase cata   | -32.2079 | -35.6163 | 0.300101 | 0.918645 | BH |
| PITG_15672 | Pi conserved hypothetical protein (   | -32.2725 | -35.4871 | 0.300101 | 0.918645 | BH |
| PITG_15783 | Pi conserved hypothetical protein (   | -32.2725 | -35.4871 | 0.300101 | 0.918645 | BH |
| PITG_17161 | Pi conserved hypothetical protein (   | -32.2211 | -35.5898 | 0.300101 | 0.918645 | BH |
| PITG_17609 | Pi conserved hypothetical protein (   | -32.1565 | -35.7192 | 0.300101 | 0.918645 | BH |
| PITG_19164 | Pi Mitochondrial Protein Transloca    | -32.2346 | -35.5628 | 0.300101 | 0.918645 | BH |
| PITG_19410 | Pi conserved hypothetical protein (   | -32.1565 | -35.7192 | 0.300101 | 0.918645 | BH |
| PITG_21219 | Pi conserved hypothetical protein (   | -32.2211 | -35.5898 | 0.300101 | 0.918645 | BH |
| PITG_21389 | Pi conserved hypothetical protein (   | -32.1884 | -35.6553 | 0.300101 | 0.918645 | BH |
| PITG_21618 | Pi Voltage-gated Ion Channel (VIC)    | -32.2725 | -35.4871 | 0.300101 | 0.918645 | BH |
| PITG_22253 | Pi hypothetical protein (633 nt)      | -32.1565 | -35.7192 | 0.300101 | 0.918645 | BH |
| PITG_22644 | Pi conserved hypothetical protein (   | -32.258  | -35.516  | 0.300101 | 0.918645 | BH |
| PITG_00392 | Pi serine protease family S33, puta   | -32.1573 | -35.7174 | 0.30127  | 0.918645 | BH |
| PITG_00654 | Pi DNA damage-inducible protein 1     | -32.1573 | -35.7174 | 0.30127  | 0.918645 | BH |
| PITG_01128 | Pi putative fatty-acid-CoA ligase, pi | -32.2632 | -35.5056 | 0.30127  | 0.918645 | BH |
| PITG_01614 | Pi carbon catabolite repressor prot   | -32.1949 | -35.6422 | 0.30127  | 0.918645 | BH |
| PITG_01679 | Pi conserved hypothetical protein (   | -32.1949 | -35.6422 | 0.30127  | 0.918645 | BH |
| PITG_01970 | Pi enoyl-[acyl-carrier-protein] redu  | -32.2632 | -35.5056 | 0.30127  | 0.918645 | BH |
| PITG_02044 | Pi conserved hypothetical protein (   | -32.1747 | -35.6827 | 0.30127  | 0.918645 | BH |
| PITG_02457 | Pi protein kinase (2695 nt)           | -32.2431 | -35.546  | 0.30127  | 0.918645 | BH |
| PITG_03940 | Pi conserved hypothetical protein (   | -32.2572 | -35.5176 | 0.30127  | 0.918645 | BH |
| PITG_04133 | Pi conserved hypothetical protein (   | -32.1573 | -35.7174 | 0.30127  | 0.918645 | BH |
| PITG_05467 | Pi conserved hypothetical protein (   | -32.2014 | -35.6292 | 0.30127  | 0.918645 | BH |
| PITG_06302 | Pi M96 mating-specific protein farr   | -32.1822 | -35.6678 | 0.30127  | 0.918645 | BH |
| PITG_06827 | Pi DEAD/DEAH box RNA helicase, p      | -32.2148 | -35.6025 | 0.30127  | 0.918645 | BH |
| PITG_07971 | Pi conserved hypothetical protein (   | -32.1949 | -35.6422 | 0.30127  | 0.918645 | BH |
| PITG_09543 | Pi hypothetical protein (602 nt)      | -32.2632 | -35.5056 | 0.30127  | 0.918645 | BH |
| PITG_10971 | Pi protein kinase, putative (2405 nt) | -32.1573 | -35.7174 | 0.30127  | 0.918645 | BH |
| PITG_12739 | Pi hypothetical protein (1072 nt)     | -32.1949 | -35.6422 | 0.30127  | 0.918645 | BH |
| PITG_14111 | Pi vacuolar protein sorting-associat  | -32.1573 | -35.7174 | 0.30127  | 0.918645 | BH |
| PITG_19055 | Pi conserved hypothetical protein (   | -32.1822 | -35.6678 | 0.30127  | 0.918645 | BH |
| PITG_22311 | Pi conserved hypothetical protein (   | -32.2572 | -35.5176 | 0.30127  | 0.918645 | BH |
| PITG_02636 | Pi conserved hypothetical protein (   | -32.2492 | -35.5337 | 0.30127  | 0.918645 | BH |
| PITG_05010 | Pi conserved hypothetical protein (   | -32.1696 | -35.6928 | 0.30127  | 0.918645 | BH |
| PITG_05687 | Pi conserved hypothetical protein (   | -32.2492 | -35.5337 | 0.30127  | 0.918645 | BH |
| PITG_10012 | Pi Drug/Metabolite Transporter (D     | -32.1696 | -35.6928 | 0.30127  | 0.918645 | BH |
| PITG_15089 | Pi ribosomal protein S6 kinase, put   | -32.2492 | -35.5337 | 0.30127  | 0.918645 | BH |
| PITG_17137 | Pi conserved hypothetical protein (   | -32.2492 | -35.5337 | 0.30127  | 0.918645 | BH |
| PITG_18009 | Pi conserved hypothetical protein (   | -32.2492 | -35.5337 | 0.30127  | 0.918645 | BH |

|            |                                      |          |          |          |          |    |
|------------|--------------------------------------|----------|----------|----------|----------|----|
| PITG_20197 | Pi histone acetyltransferase, putati | -32.2492 | -35.5337 | 0.30127  | 0.918645 | BH |
| PITG_21282 | Pi conserved hypothetical protein (  | -32.1696 | -35.6928 | 0.30127  | 0.918645 | BH |
| PITG_11304 | Pi conserved hypothetical protein (  | -13.5996 | -1.88588 | 0.302071 | 0.918645 | BH |
| PITG_22200 | Pi conserved hypothetical protein (  | -12.4169 | -1.34877 | 0.302194 | 0.918645 | BH |
| PITG_20139 | Pi Resistance-Nodulation-Cell Divis  | -12.8517 | -1.62212 | 0.302435 | 0.918645 | BH |
| PITG_00269 | Pi conserved hypothetical protein (  | -32.1958 | -35.6405 | 0.302443 | 0.918645 | BH |
| PITG_00402 | Pi conserved hypothetical protein (  | -32.2088 | -35.6145 | 0.302443 | 0.918645 | BH |
| PITG_00703 | Pi 2,4-dienoyl-CoA reductase (2346   | -32.2088 | -35.6145 | 0.302443 | 0.918645 | BH |
| PITG_01591 | Pi conserved hypothetical protein (  | -32.2355 | -35.5611 | 0.302443 | 0.918645 | BH |
| PITG_03483 | Pi splicing factor U2af large subuni | -32.222  | -35.5881 | 0.302443 | 0.918645 | BH |
| PITG_04283 | Pi conserved hypothetical protein (  | -32.1958 | -35.6405 | 0.302443 | 0.918645 | BH |
| PITG_04973 | Pi conserved hypothetical protein (  | -32.2716 | -35.4888 | 0.302443 | 0.918645 | BH |
| PITG_05239 | Pi conserved hypothetical protein (  | -32.1958 | -35.6405 | 0.302443 | 0.918645 | BH |
| PITG_05277 | Pi conserved hypothetical protein (  | -32.2088 | -35.6145 | 0.302443 | 0.918645 | BH |
| PITG_05480 | Pi conserved hypothetical protein (  | -32.2088 | -35.6145 | 0.302443 | 0.918645 | BH |
| PITG_09435 | Pi conserved hypothetical protein (  | -32.222  | -35.5881 | 0.302443 | 0.918645 | BH |
| PITG_09483 | Pi conserved hypothetical protein (  | -32.2355 | -35.5611 | 0.302443 | 0.918645 | BH |
| PITG_09789 | Pi conserved hypothetical protein (  | -32.2088 | -35.6145 | 0.302443 | 0.918645 | BH |
| PITG_10871 | Pi U1 small nuclear ribonucleoprot   | -32.2355 | -35.5611 | 0.302443 | 0.918645 | BH |
| PITG_11122 | Pi Amino Acid-Polyamine-Organoca     | -32.2422 | -35.5477 | 0.302443 | 0.918645 | BH |
| PITG_12124 | Pi protein phosphatase 2C, putativ   | -32.222  | -35.5881 | 0.302443 | 0.918645 | BH |
| PITG_14113 | Pi conserved hypothetical protein (  | -32.222  | -35.5881 | 0.302443 | 0.918645 | BH |
| PITG_14485 | Pi conserved hypothetical protein (  | -32.2088 | -35.6145 | 0.302443 | 0.918645 | BH |
| PITG_14988 | Pi prefoldin subunit, putative (546  | -32.2283 | -35.5754 | 0.302443 | 0.918645 | BH |
| PITG_15057 | Pi cysteine desulfurase 1, mitochor  | -32.2355 | -35.5611 | 0.302443 | 0.918645 | BH |
| PITG_15593 | Pi conserved hypothetical protein (  | -32.2088 | -35.6145 | 0.302443 | 0.918645 | BH |
| PITG_17140 | Pi transmembrane protein, putativ    | -32.2355 | -35.5611 | 0.302443 | 0.918645 | BH |
| PITG_18119 | Pi conserved hypothetical protein (  | -32.2088 | -35.6145 | 0.302443 | 0.918645 | BH |
| PITG_18301 | Pi conserved hypothetical protein (  | -32.2283 | -35.5754 | 0.302443 | 0.918645 | BH |
| PITG_18361 | Pi inositol oxygenase (918 nt)       | -32.2088 | -35.6145 | 0.302443 | 0.918645 | BH |
| PITG_20206 | Pi ADP-ribosylation factor family (1 | -32.1958 | -35.6405 | 0.302443 | 0.918645 | BH |
| PITG_21146 | Pi conserved hypothetical protein (  | -32.1958 | -35.6405 | 0.302443 | 0.918645 | BH |
| PITG_21557 | Pi conserved hypothetical protein (  | -32.2283 | -35.5754 | 0.302443 | 0.918645 | BH |
| PITG_03546 | Pi hsp70-like protein (1825 nt)      | -13.9416 | 2.421199 | 0.30257  | 0.918645 | BH |
| PITG_00450 | Pi conserved hypothetical protein (  | -32.2563 | -35.5194 | 0.303619 | 0.918645 | BH |
| PITG_01470 | Pi syntaxin-like protein (1174 nt)   | -32.1583 | -35.7155 | 0.303619 | 0.918645 | BH |
| PITG_03103 | Pi conserved hypothetical protein (  | -32.1831 | -35.6659 | 0.303619 | 0.918645 | BH |
| PITG_03990 | Pi conserved hypothetical protein (  | -32.1706 | -35.6909 | 0.303619 | 0.918645 | BH |
| PITG_05599 | Pi conserved hypothetical protein (  | -32.1831 | -35.6659 | 0.303619 | 0.918645 | BH |
| PITG_05926 | Pi conserved hypothetical protein (  | -32.1706 | -35.6909 | 0.303619 | 0.918645 | BH |
| PITG_08469 | Pi conserved hypothetical protein (  | -32.1583 | -35.7155 | 0.303619 | 0.918645 | BH |
| PITG_11783 | Pi conserved hypothetical protein (  | -32.2641 | -35.5039 | 0.303619 | 0.918645 | BH |
| PITG_12584 | Pi DNA binding protein, putative (1  | -32.2641 | -35.5039 | 0.303619 | 0.918645 | BH |
| PITG_13368 | Pi cyclin-like protein (1846 nt)     | -32.2641 | -35.5039 | 0.303619 | 0.918645 | BH |
| PITG_17421 | Pi hypothetical protein (1635 nt)    | -32.1706 | -35.6909 | 0.303619 | 0.918645 | BH |
| PITG_18779 | Pi conserved hypothetical protein (  | -32.1583 | -35.7155 | 0.303619 | 0.918645 | BH |
| PITG_22765 | Pi conserved hypothetical protein (  | -32.2641 | -35.5039 | 0.303619 | 0.918645 | BH |

|            |                                       |          |          |          |          |    |
|------------|---------------------------------------|----------|----------|----------|----------|----|
| PITG_19063 | Pi hypothetical protein (1057 nt)     | -12.0346 | -1.37561 | 0.303719 | 0.918645 | BH |
| PITG_17983 | Pi adenylosuccinate lyase (1779 nt)   | -14.2439 | 2.296349 | 0.303817 | 0.918645 | BH |
| PITG_17919 | Pi P-type ATPase (P-ATPase) Super     | -12.464  | 1.986635 | 0.303895 | 0.918645 | BH |
| PITG_16206 | Pi conserved hypothetical protein (   | -13.9155 | 2.366515 | 0.304182 | 0.918645 | BH |
| PITG_13748 | Pi ubiquitin-conjugating enzyme E2    | -12.4471 | -1.27495 | 0.304759 | 0.918645 | BH |
| PITG_00211 | Pi adenine phosphoribosyltransfer     | -32.223  | -35.5862 | 0.304798 | 0.918645 | BH |
| PITG_00254 | Pi mitogen-activated protein kinase   | -32.2364 | -35.5592 | 0.304798 | 0.918645 | BH |
| PITG_00789 | Pi conserved hypothetical protein (   | -32.1865 | -35.6591 | 0.304798 | 0.918645 | BH |
| PITG_01647 | Pi conserved hypothetical protein (   | -32.2274 | -35.5773 | 0.304798 | 0.918645 | BH |
| PITG_01740 | Pi conserved hypothetical protein (   | -32.223  | -35.5862 | 0.304798 | 0.918645 | BH |
| PITG_03468 | Pi endoplasmic oxidoreductin, puta    | -32.2274 | -35.5773 | 0.304798 | 0.918645 | BH |
| PITG_03636 | Pi hypothetical protein (383 nt)      | -32.2274 | -35.5773 | 0.304798 | 0.918645 | BH |
| PITG_04405 | Pi conserved hypothetical protein (   | -32.2364 | -35.5592 | 0.304798 | 0.918645 | BH |
| PITG_04468 | Pi Mitochondrial Carrier (MC) Fami    | -32.2707 | -35.4906 | 0.304798 | 0.918645 | BH |
| PITG_05323 | Pi conserved hypothetical protein (   | -32.2707 | -35.4906 | 0.304798 | 0.918645 | BH |
| PITG_05653 | Pi protein kinase, putative (3478 nt) | -32.2502 | -35.5318 | 0.304798 | 0.918645 | BH |
| PITG_06369 | Pi myosin-like protein (840 nt)       | -32.223  | -35.5862 | 0.304798 | 0.918645 | BH |
| PITG_08547 | Pi conserved hypothetical protein (   | -32.2097 | -35.6126 | 0.304798 | 0.918645 | BH |
| PITG_08679 | Pi oxidoreductase family, putative    | -32.223  | -35.5862 | 0.304798 | 0.918645 | BH |
| PITG_12160 | Pi protein kinase, putative (1510 nt) | -32.1865 | -35.6591 | 0.304798 | 0.918645 | BH |
| PITG_14558 | Pi conserved hypothetical protein (   | -32.2097 | -35.6126 | 0.304798 | 0.918645 | BH |
| PITG_14975 | Pi acetoacetyl-coenzyme A synthet     | -32.2502 | -35.5318 | 0.304798 | 0.918645 | BH |
| PITG_15619 | Pi protein kinase (957 nt)            | -32.223  | -35.5862 | 0.304798 | 0.918645 | BH |
| PITG_16904 | Pi protein kinase, putative (2597 nt) | -32.2364 | -35.5592 | 0.304798 | 0.918645 | BH |
| PITG_17781 | Pi conserved hypothetical protein (   | -32.2502 | -35.5318 | 0.304798 | 0.918645 | BH |
| PITG_18050 | Pi conserved hypothetical protein (   | -32.2097 | -35.6126 | 0.304798 | 0.918645 | BH |
| PITG_18189 | Pi conserved hypothetical protein (   | -32.2364 | -35.5592 | 0.304798 | 0.918645 | BH |
| PITG_18369 | Pi conserved hypothetical protein (   | -32.2097 | -35.6126 | 0.304798 | 0.918645 | BH |
| PITG_18424 | Pi snurportin-like protein (1563 nt)  | -32.1865 | -35.6591 | 0.304798 | 0.918645 | BH |
| PITG_19964 | Pi conserved hypothetical protein (   | -32.223  | -35.5862 | 0.304798 | 0.918645 | BH |
| PITG_20468 | Pi conserved hypothetical protein (   | -32.1996 | -35.633  | 0.304798 | 0.918645 | BH |
| PITG_13972 | Pi U6 snRNA-associated Sm-like pro    | -12.8962 | -1.43715 | 0.30564  | 0.918645 | BH |
| PITG_01342 | Pi conserved hypothetical protein (   | -32.1841 | -35.6639 | 0.305982 | 0.918645 | BH |
| PITG_01848 | Pi dual specificity phosphatase, put  | -32.1968 | -35.6384 | 0.305982 | 0.918645 | BH |
| PITG_03237 | Pi conserved hypothetical protein (   | -32.1716 | -35.6889 | 0.305982 | 0.918645 | BH |
| PITG_08740 | Pi conserved hypothetical protein (   | -32.1716 | -35.6889 | 0.305982 | 0.918645 | BH |
| PITG_09143 | Pi hypothetical protein (607 nt)      | -32.1968 | -35.6384 | 0.305982 | 0.918645 | BH |
| PITG_10462 | Pi conserved hypothetical protein (   | -32.1716 | -35.6889 | 0.305982 | 0.918645 | BH |
| PITG_13775 | Pi phosphatidylinositol kinase (PIK-  | -32.1841 | -35.6639 | 0.305982 | 0.918645 | BH |
| PITG_14362 | Pi vacuolar proton translocating A1   | -32.1716 | -35.6889 | 0.305982 | 0.918645 | BH |
| PITG_15354 | Pi hypothetical protein (362 nt)      | -32.1716 | -35.6889 | 0.305982 | 0.918645 | BH |
| PITG_17076 | Pi conserved hypothetical protein (   | -32.1716 | -35.6889 | 0.305982 | 0.918645 | BH |
| PITG_19411 | Pi conserved hypothetical protein (   | -32.1968 | -35.6384 | 0.305982 | 0.918645 | BH |
| PITG_21211 | Pi conserved hypothetical protein (   | -32.1968 | -35.6384 | 0.305982 | 0.918645 | BH |
| PITG_22468 | Pi conserved hypothetical protein (   | -32.1716 | -35.6889 | 0.305982 | 0.918645 | BH |
| PITG_20777 | Pi hypothetical protein (584 nt)      | -11.7472 | -1.4108  | 0.306076 | 0.918645 | BH |
| PITG_00188 | Pi kinesin-like protein (3667 nt)     | -32.2651 | -35.5018 | 0.307168 | 0.918645 | BH |

|            |                                      |          |          |          |          |    |
|------------|--------------------------------------|----------|----------|----------|----------|----|
| PITG_00608 | Pi conserved hypothetical protein (  | -32.2651 | -35.5018 | 0.307168 | 0.918645 | BH |
| PITG_02145 | Pi conserved hypothetical protein (  | -32.2651 | -35.5018 | 0.307168 | 0.918645 | BH |
| PITG_03039 | Pi conserved hypothetical protein (  | -32.2511 | -35.5298 | 0.307168 | 0.918645 | BH |
| PITG_04612 | Pi conserved hypothetical protein (  | -32.2651 | -35.5018 | 0.307168 | 0.918645 | BH |
| PITG_06129 | Pi conserved hypothetical protein (  | -32.1594 | -35.7134 | 0.307168 | 0.918645 | BH |
| PITG_06272 | Pi conserved hypothetical protein (  | -32.2651 | -35.5018 | 0.307168 | 0.918645 | BH |
| PITG_06328 | Pi Rab8 family GTPase, putative (20  | -32.2651 | -35.5018 | 0.307168 | 0.918645 | BH |
| PITG_06453 | Pi conserved hypothetical protein (  | -32.1594 | -35.7134 | 0.307168 | 0.918645 | BH |
| PITG_06677 | Pi conserved hypothetical protein (  | -32.1855 | -35.6612 | 0.307168 | 0.918645 | BH |
| PITG_09835 | Pi COP9 signalosome complex subu     | -32.2511 | -35.5298 | 0.307168 | 0.918645 | BH |
| PITG_10085 | Pi conserved hypothetical protein (  | -32.2651 | -35.5018 | 0.307168 | 0.918645 | BH |
| PITG_11256 | Pi conserved hypothetical protein (  | -32.2651 | -35.5018 | 0.307168 | 0.918645 | BH |
| PITG_13488 | Pi serine protease family S08A, put  | -32.2264 | -35.5793 | 0.307168 | 0.918645 | BH |
| PITG_13727 | Pi conserved hypothetical protein (  | -32.1594 | -35.7134 | 0.307168 | 0.918645 | BH |
| PITG_14587 | Pi conserved hypothetical protein (  | -32.2651 | -35.5018 | 0.307168 | 0.918645 | BH |
| PITG_16930 | Pi carbohydrate esterase, putative   | -32.2511 | -35.5298 | 0.307168 | 0.918645 | BH |
| PITG_18101 | Pi conserved hypothetical protein (  | -32.2264 | -35.5793 | 0.307168 | 0.918645 | BH |
| PITG_00078 | Pi kinesin-like protein (2754 nt)    | -32.2375 | -35.5571 | 0.308359 | 0.918645 | BH |
| PITG_00685 | Pi conserved hypothetical protein (  | -32.224  | -35.5841 | 0.308359 | 0.918645 | BH |
| PITG_01349 | Pi Type II (General) Secretory Path  | -32.2375 | -35.5571 | 0.308359 | 0.918645 | BH |
| PITG_01386 | Pi phospholipase, putative (3507 n   | -32.224  | -35.5841 | 0.308359 | 0.918645 | BH |
| PITG_02992 | Pi tyrosyl-tRNA synthetase, putativ  | -32.224  | -35.5841 | 0.308359 | 0.918645 | BH |
| PITG_04680 | Pi phosphoinositol transporter (20   | -32.2375 | -35.5571 | 0.308359 | 0.918645 | BH |
| PITG_07964 | Pi conserved hypothetical protein (  | -32.224  | -35.5841 | 0.308359 | 0.918645 | BH |
| PITG_08451 | Pi conserved hypothetical protein (  | -32.2697 | -35.4927 | 0.308359 | 0.918645 | BH |
| PITG_15497 | Pi conserved hypothetical protein (  | -32.2697 | -35.4927 | 0.308359 | 0.918645 | BH |
| PITG_15848 | Pi conserved hypothetical protein (  | -32.224  | -35.5841 | 0.308359 | 0.918645 | BH |
| PITG_17075 | Pi conserved hypothetical protein (  | -32.2375 | -35.5571 | 0.308359 | 0.918645 | BH |
| PITG_00280 | Pi conserved hypothetical protein (  | -13.6814 | -1.75791 | 0.308409 | 0.918645 | BH |
| PITG_02755 | Pi structural maintenance of chrom   | -32.1727 | -35.6867 | 0.309553 | 0.918645 | BH |
| PITG_03391 | Pi conserved hypothetical protein (  | -32.2117 | -35.6087 | 0.309553 | 0.918645 | BH |
| PITG_04567 | Pi conserved hypothetical protein (  | -32.1727 | -35.6867 | 0.309553 | 0.918645 | BH |
| PITG_04609 | Pi hypothetical protein (-4T49) (52  | -32.1852 | -35.6617 | 0.309553 | 0.918645 | BH |
| PITG_06887 | Pi myosin-like protein (1178 nt)     | -32.1852 | -35.6617 | 0.309553 | 0.918645 | BH |
| PITG_07570 | Pi conserved hypothetical protein (  | -32.1979 | -35.6362 | 0.309553 | 0.918645 | BH |
| PITG_07809 | Pi casein kinase I, putative (1634 n | -32.1979 | -35.6362 | 0.309553 | 0.918645 | BH |
| PITG_07815 | Pi conserved hypothetical protein (  | -32.1727 | -35.6867 | 0.309553 | 0.918645 | BH |
| PITG_08526 | Pi conserved hypothetical protein (  | -32.1979 | -35.6362 | 0.309553 | 0.918645 | BH |
| PITG_12728 | Pi conserved hypothetical protein (  | -32.1979 | -35.6362 | 0.309553 | 0.918645 | BH |
| PITG_13314 | Pi conserved hypothetical protein (  | -32.1979 | -35.6362 | 0.309553 | 0.918645 | BH |
| PITG_20035 | Pi conserved hypothetical protein (  | -32.1979 | -35.6362 | 0.309553 | 0.918645 | BH |
| PITG_13977 | Pi serine/threonine-protein phosph   | -13.7286 | -1.64273 | 0.309826 | 0.918645 | BH |
| PITG_07308 | Pi rRNA 2'-O-methyltransferase fib   | -12.6479 | 1.893579 | 0.310579 | 0.918645 | BH |
| PITG_01146 | Pi selenide, water dikinase, putativ | -32.1605 | -35.7111 | 0.310751 | 0.918645 | BH |
| PITG_03267 | Pi conserved hypothetical protein (  | -32.2662 | -35.4997 | 0.310751 | 0.918645 | BH |
| PITG_03660 | Pi 60S ribosomal protein L6, putati  | -32.2522 | -35.5277 | 0.310751 | 0.918645 | BH |
| PITG_04905 | Pi conserved hypothetical protein (  | -32.2522 | -35.5277 | 0.310751 | 0.918645 | BH |



|            |                                       |          |          |          |          |    |
|------------|---------------------------------------|----------|----------|----------|----------|----|
| PITG_06748 | Pi myb-like DNA-binding protein, p    | -32.2662 | -35.4997 | 0.310751 | 0.918645 | BH |
| PITG_07745 | Pi conserved hypothetical protein (   | -32.2662 | -35.4997 | 0.310751 | 0.918645 | BH |
| PITG_08019 | Pi conserved hypothetical protein (   | -32.2522 | -35.5277 | 0.310751 | 0.918645 | BH |
| PITG_08573 | Pi conserved hypothetical protein (   | -32.2662 | -35.4997 | 0.310751 | 0.918645 | BH |
| PITG_10323 | Pi hypothetical protein (382 nt)      | -32.2662 | -35.4997 | 0.310751 | 0.918645 | BH |
| PITG_11176 | Pi conserved hypothetical protein (   | -32.1843 | -35.6635 | 0.310751 | 0.918645 | BH |
| PITG_12980 | Pi conserved hypothetical protein (   | -32.2522 | -35.5277 | 0.310751 | 0.918645 | BH |
| PITG_15280 | Pi conserved hypothetical protein (   | -32.2522 | -35.5277 | 0.310751 | 0.918645 | BH |
| PITG_10543 | Pi conserved hypothetical protein (   | -10.0598 | -1.72084 | 0.31076  | 0.918645 | BH |
| PITG_00383 | Pi conserved hypothetical protein (   | -32.2685 | -35.495  | 0.311952 | 0.918645 | BH |
| PITG_05315 | Pi undecaprenyl pyrophosphate sy      | -32.2386 | -35.5549 | 0.311952 | 0.918645 | BH |
| PITG_06114 | Pi conserved hypothetical protein (   | -32.2386 | -35.5549 | 0.311952 | 0.918645 | BH |
| PITG_06403 | Pi conserved hypothetical protein (   | -32.2252 | -35.5818 | 0.311952 | 0.918645 | BH |
| PITG_11193 | Pi conserved hypothetical protein (   | -32.2386 | -35.5549 | 0.311952 | 0.918645 | BH |
| PITG_13569 | Pi endo-1,3(4)-beta-glucanase, put    | -32.1973 | -35.6375 | 0.311952 | 0.918645 | BH |
| PITG_19746 | Pi conserved hypothetical protein (   | -32.2386 | -35.5549 | 0.311952 | 0.918645 | BH |
| PITG_21203 | Pi conserved hypothetical protein (   | -32.2252 | -35.5818 | 0.311952 | 0.918645 | BH |
| PITG_07562 | Pi folate-Biopterin Transporter (FB   | -14.3018 | 2.398467 | 0.312631 | 0.918645 | BH |
| PITG_15071 | Pi conserved hypothetical protein (   | -32.1991 | -35.6339 | 0.313157 | 0.918645 | BH |
| PITG_19485 | Pi CREG-like protein (834 nt)         | -32.212  | -35.608  | 0.313157 | 0.918645 | BH |
| PITG_20081 | Pi conserved hypothetical protein (   | -32.1864 | -35.6594 | 0.313157 | 0.918645 | BH |
| PITG_11852 | Pi C2 domain-containing protein, p    | -10.961  | -1.52546 | 0.313544 | 0.918645 | BH |
| PITG_00516 | Pi conserved hypothetical protein (   | -32.1831 | -35.6659 | 0.314366 | 0.918645 | BH |
| PITG_11608 | Pi conserved hypothetical protein (   | -32.1617 | -35.7088 | 0.314366 | 0.918645 | BH |
| PITG_12104 | Pi ATP-dependent DNA helicase 2 s     | -32.1617 | -35.7088 | 0.314366 | 0.918645 | BH |
| PITG_12105 | Pi N-terminal kinase-like protein (2  | -32.1617 | -35.7088 | 0.314366 | 0.918645 | BH |
| PITG_13571 | Pi endo-1,3(4)-beta-glucanase, put    | -32.253  | -35.5261 | 0.314366 | 0.918645 | BH |
| PITG_17716 | Pi voltage-dependent anion-selecti    | -11.5942 | 1.822163 | 0.315469 | 0.918645 | BH |
| PITG_13575 | Pi ATP-binding Cassette (ABC) Supe    | -13.927  | 2.372284 | 0.315573 | 0.918645 | BH |
| PITG_00244 | Pi hypothetical protein (2329 nt)     | -32.2675 | -35.4972 | 0.315579 | 0.918645 | BH |
| PITG_01997 | Pi dynein 1 light intermediate chain  | -32.2535 | -35.5251 | 0.315579 | 0.918645 | BH |
| PITG_03075 | Pi Cullin family protein, putative (3 | -32.2675 | -35.4972 | 0.315579 | 0.918645 | BH |
| PITG_04647 | Pi conserved hypothetical protein (   | -32.2675 | -35.4972 | 0.315579 | 0.918645 | BH |
| PITG_10049 | Pi protein kinase (2110 nt)           | -32.2675 | -35.4972 | 0.315579 | 0.918645 | BH |
| PITG_13007 | Pi conserved hypothetical protein (   | -32.2675 | -35.4972 | 0.315579 | 0.918645 | BH |
| PITG_14394 | Pi conserved hypothetical protein (   | -32.2675 | -35.4972 | 0.315579 | 0.918645 | BH |
| PITG_15807 | Pi conserved hypothetical protein (   | -32.2535 | -35.5251 | 0.315579 | 0.918645 | BH |
| PITG_04379 | Pi putative GPI-anchored serine-ric   | -32.2399 | -35.5524 | 0.316795 | 0.918645 | BH |
| PITG_06735 | Pi conserved hypothetical protein (   | -32.2264 | -35.5792 | 0.316795 | 0.918645 | BH |
| PITG_15957 | Pi serine protease family S33, puta   | -32.2264 | -35.5792 | 0.316795 | 0.918645 | BH |
| PITG_22087 | Pi ATP-binding Cassette (ABC) Supe    | -32.2264 | -35.5792 | 0.316795 | 0.918645 | BH |
| PITG_22634 | Pi conserved hypothetical protein (   | -32.2672 | -35.4976 | 0.316795 | 0.918645 | BH |
| PITG_04376 | Pi conserved hypothetical protein (   | -13.6888 | -1.74985 | 0.31715  | 0.918645 | BH |
| PITG_02866 | Pi conserved hypothetical protein (   | -32.2819 | -35.4683 | 0.318015 | 0.918645 | BH |
| PITG_05505 | Pi conserved hypothetical protein (   | -32.2004 | -35.6313 | 0.318015 | 0.918645 | BH |
| PITG_09675 | Pi phosphatidate cytidylyltransfera   | -32.2819 | -35.4683 | 0.318015 | 0.918645 | BH |
| PITG_12099 | Pi serine protease family S09A, put   | -32.2133 | -35.6054 | 0.318015 | 0.918645 | BH |

|            |                                       |          |          |          |          |    |
|------------|---------------------------------------|----------|----------|----------|----------|----|
| PITG_12258 | Pi conserved hypothetical protein (   | -32.2004 | -35.6313 | 0.318015 | 0.918645 | BH |
| PITG_09665 | Pi protein kinase, putative (2399 nt) | -32.163  | -35.7061 | 0.319239 | 0.918645 | BH |
| PITG_14194 | Pi carbohydrate esterase, putative    | -32.1753 | -35.6816 | 0.319239 | 0.918645 | BH |
| PITG_00931 | Pi conserved hypothetical protein (   | -13.796  | -1.49191 | 0.321072 | 0.918645 | BH |
| PITG_04662 | Pi conserved hypothetical protein (   | -13.8049 | -1.47405 | 0.321072 | 0.918645 | BH |
| PITG_05847 | Pi hypothetical protein (2153 nt)     | -32.2549 | -35.5222 | 0.321699 | 0.918645 | BH |
| PITG_08002 | Pi glucosylceramidase, putative (18   | -32.2689 | -35.4943 | 0.321699 | 0.918645 | BH |
| PITG_08693 | Pi hook domain-containing protein     | -32.2689 | -35.4943 | 0.321699 | 0.918645 | BH |
| PITG_09039 | Pi calcium/calmodulin-dependent       | -32.2689 | -35.4943 | 0.321699 | 0.918645 | BH |
| PITG_09664 | Pi protein kinase, putative (2462 nt) | -32.2549 | -35.5222 | 0.321699 | 0.918645 | BH |
| PITG_10292 | Pi alcohol dehydrogenase, putative    | -32.2658 | -35.5005 | 0.321699 | 0.918645 | BH |
| PITG_11571 | Pi Crinkler (CRN) family protein, ps  | -32.2549 | -35.5222 | 0.321699 | 0.918645 | BH |
| PITG_12537 | Pi autophagy-related protein 7 (22    | -32.2689 | -35.4943 | 0.321699 | 0.918645 | BH |
| PITG_13991 | Pi nicotinate phosphoribosyltransf    | -32.2689 | -35.4943 | 0.321699 | 0.918645 | BH |
| PITG_21077 | Pi DNA-directed RNA polymerase II     | -32.2549 | -35.5222 | 0.321699 | 0.918645 | BH |
| PITG_21114 | Pi conserved hypothetical protein (   | -32.2689 | -35.4943 | 0.321699 | 0.918645 | BH |
| PITG_00170 | Pi vacuolar-sorting receptor, putati  | -12.4602 | -1.25093 | 0.321714 | 0.918645 | BH |
| PITG_01940 | Pi triosephosphate isomerase/glyc     | -9.2687  | 1.92458  | 0.322806 | 0.918645 | BH |
| PITG_06149 | Pi conserved hypothetical protein (   | -32.2413 | -35.5494 | 0.322934 | 0.918645 | BH |
| PITG_09279 | Pi bZIP transcription factor, putativ | -32.2279 | -35.5763 | 0.322934 | 0.918645 | BH |
| PITG_19878 | Pi protein kinase, putative (2849 nt) | -32.2019 | -35.6284 | 0.324173 | 0.918645 | BH |
| PITG_20503 | Pi conserved hypothetical protein (   | -32.2076 | -35.6169 | 0.324173 | 0.918645 | BH |
| PITG_01361 | Pi conserved hypothetical protein (   | -32.1645 | -35.7032 | 0.325417 | 0.918645 | BH |
| PITG_01453 | Pi ubiquitin-specific protease, puta  | -32.1893 | -35.6536 | 0.325417 | 0.918645 | BH |
| PITG_08480 | Pi ubiquitin, putative (2784 nt)      | -32.25   | -35.532  | 0.325417 | 0.918645 | BH |
| PITG_10335 | Pi carnitine O-palmitoyltransferase   | -32.1768 | -35.6786 | 0.325417 | 0.918645 | BH |
| PITG_10885 | Pi conserved hypothetical protein (   | -32.1768 | -35.6786 | 0.325417 | 0.918645 | BH |
| PITG_20273 | Pi conserved hypothetical protein (   | -32.1768 | -35.6786 | 0.325417 | 0.918645 | BH |
| PITG_13469 | Pi hypothetical protein (765 nt)      | -14.0412 | 2.585874 | 0.325479 | 0.918645 | BH |
| PITG_08704 | Pi fatty acid desaturase, putative (: | -14.7928 | 2.327407 | 0.326664 | 0.918645 | BH |
| PITG_14578 | Pi phosducin-like protein (715 nt)    | -13.7831 | -1.52255 | 0.327743 | 0.918645 | BH |
| PITG_08110 | Pi conserved hypothetical protein (   | -32.193  | -35.6462 | 0.327915 | 0.918645 | BH |
| PITG_06247 | Pi conserved hypothetical protein (   | -32.2706 | -35.491  | 0.329169 | 0.918645 | BH |
| PITG_06303 | Pi conserved hypothetical protein (   | -32.2706 | -35.491  | 0.329169 | 0.918645 | BH |
| PITG_13168 | Pi conserved hypothetical protein (   | -32.2566 | -35.5189 | 0.329169 | 0.918645 | BH |
| PITG_13826 | Pi hybrid signal transduction histidi | -32.2706 | -35.491  | 0.329169 | 0.918645 | BH |
| PITG_20868 | Pi beta-glucan synthesis-associat     | -32.2566 | -35.5189 | 0.329169 | 0.918645 | BH |
| PITG_09443 | Pi prefoldin subunit 2, putative (58  | -13.7638 | -1.56235 | 0.329414 | 0.918645 | BH |
| PITG_04124 | Pi glycoside hydrolase, putative (86  | -32.2296 | -35.573  | 0.330428 | 0.918645 | BH |
| PITG_04851 | Pi arginase (1366 nt)                 | -32.243  | -35.5461 | 0.330428 | 0.918645 | BH |
| PITG_22991 | Pi conserved hypothetical protein (   | -32.243  | -35.5461 | 0.330428 | 0.918645 | BH |
| PITG_01450 | Pi HECT E3 ubiquitin ligase, putativ  | -32.2165 | -35.5991 | 0.331691 | 0.918645 | BH |
| PITG_03431 | Pi conserved hypothetical protein (   | -32.2035 | -35.625  | 0.331691 | 0.918645 | BH |
| PITG_05631 | Pi myosin-like protein (6372 nt)      | -32.2165 | -35.5991 | 0.331691 | 0.918645 | BH |
| PITG_13540 | Pi hypothetical protein (3066 nt)     | -32.2165 | -35.5991 | 0.331691 | 0.918645 | BH |
| PITG_09427 | Pi conserved hypothetical protein (   | -13.7603 | -1.59617 | 0.332064 | 0.918645 | BH |
| PITG_05830 | Pi conserved hypothetical protein (   | -32.2784 | -35.4753 | 0.332958 | 0.918645 | BH |

|            |                                         |          |          |          |          |    |
|------------|-----------------------------------------|----------|----------|----------|----------|----|
| PITG_10514 | Pi kinesin-like protein (1702 nt)       | -32.1784 | -35.6753 | 0.332958 | 0.918645 | BH |
| PITG_19607 | Pi histone arginine demethylase, p      | -32.1784 | -35.6753 | 0.332958 | 0.918645 | BH |
| PITG_13689 | Pi crinkler (CRN) family protein, Gy    | -13.7027 | -1.73489 | 0.333052 | 0.918645 | BH |
| PITG_18720 | Pi ATP-citrate synthase (3410 nt)       | -12.7923 | 1.851849 | 0.334977 | 0.918645 | BH |
| PITG_02222 | Pi conserved hypothetical protein (     | -32.293  | -35.4461 | 0.336782 | 0.918645 | BH |
| PITG_22676 | Pi secreted RxLR effector peptide,      | -32.1911 | -35.65   | 0.336782 | 0.918645 | BH |
| PITG_06566 | Pi long-chain-fatty-acid-CoA ligase,    | -13.7901 | -1.51704 | 0.339466 | 0.918645 | BH |
| PITG_00279 | Pi ubiquitin carboxyl-terminal hydr     | -12.9614 | -1.29929 | 0.34025  | 0.918645 | BH |
| PITG_17854 | Pi conserved hypothetical protein (     | -32.2039 | -35.6243 | 0.340643 | 0.918645 | BH |
| PITG_18332 | Pi glycoside hydrolase, putative (11    | -32.2039 | -35.6243 | 0.340643 | 0.918645 | BH |
| PITG_01419 | Pi Major Facilitator Superfamily (M     | -32.2316 | -35.569  | 0.340643 | 0.918645 | BH |
| PITG_05070 | Pi conserved hypothetical protein (     | -32.2316 | -35.569  | 0.340643 | 0.918645 | BH |
| PITG_06937 | Pi metalloprotease family M48X, p       | -32.308  | -35.4162 | 0.340643 | 0.918645 | BH |
| PITG_12466 | Pi Proton-dependent Oligopeptide        | -32.245  | -35.5421 | 0.340643 | 0.918645 | BH |
| PITG_10552 | Pi hypothetical protein (1882 nt)       | -13.4294 | 1.976476 | 0.340706 | 0.918645 | BH |
| PITG_19668 | Pi conserved hypothetical protein (     | -13.7659 | -1.5668  | 0.341145 | 0.918645 | BH |
| PITG_22076 | Pi conserved hypothetical protein (     | -32.2764 | -35.4794 | 0.341938 | 0.918645 | BH |
| PITG_05434 | Pi importin subunit beta, putative (    | -13.7669 | -1.56602 | 0.342826 | 0.918645 | BH |
| PITG_11290 | Pi solute carrier family, facilitated t | -13.7669 | -1.56602 | 0.342826 | 0.918645 | BH |
| PITG_06608 | Pi ubiquitin-conjugating enzyme E2      | -11.8323 | -1.20743 | 0.342988 | 0.918645 | BH |
| PITG_01616 | Pi metalloprotease family M01, pu       | -32.1929 | -35.6463 | 0.343237 | 0.918645 | BH |
| PITG_06427 | Pi serine hydroxymethyltransferase      | -11.5186 | 1.882868 | 0.343837 | 0.918645 | BH |
| PITG_11662 | Pi ankyrin-like protein (2233 nt)       | -32.2886 | -35.455  | 0.345849 | 0.918645 | BH |
| PITG_03712 | Pi elongation factor 3, putative (33    | -11.5937 | -1.23952 | 0.346628 | 0.918645 | BH |
| PITG_16968 | Pi glucan 1,3-beta-glucosidase, put     | -32.2744 | -35.4832 | 0.34716  | 0.918645 | BH |
| PITG_03456 | Pi GPI ethanolamine phosphate tra       | -32.3061 | -35.42   | 0.34716  | 0.918645 | BH |
| PITG_04522 | Pi peptidyl-prolyl cis-trans isomera    | -8.97276 | 1.766927 | 0.347533 | 0.918645 | BH |
| PITG_14829 | Pi conserved hypothetical protein (     | -32.2334 | -35.5653 | 0.348476 | 0.918645 | BH |
| PITG_21255 | Pi conserved hypothetical protein (     | -32.2469 | -35.5384 | 0.348476 | 0.918645 | BH |
| PITG_22680 | Pi conserved hypothetical protein (     | -32.2334 | -35.5653 | 0.348476 | 0.918645 | BH |
| PITG_01791 | Pi protein disulfide-isomerase, put     | -12.4628 | -1.27732 | 0.348648 | 0.918645 | BH |
| PITG_00005 | Pi protein kinase, putative (1646 nt)   | -32.2073 | -35.6174 | 0.349797 | 0.918645 | BH |
| PITG_03410 | Pi acetolactate synthase small subu     | -12.9208 | -1.41474 | 0.351716 | 0.918645 | BH |
| PITG_09289 | Pi eukaryotic translation initiation    | -13.6304 | 1.813476 | 0.352319 | 0.918645 | BH |
| PITG_19606 | Pi conserved hypothetical protein (     | -13.659  | 1.870607 | 0.352319 | 0.918645 | BH |
| PITG_05374 | Pi argininosuccinate synthase (151      | -11.5827 | 1.668087 | 0.352462 | 0.918645 | BH |
| PITG_09402 | Pi phosphoglycerate kinase (981 nt)     | -10.814  | -1.27251 | 0.35371  | 0.918645 | BH |
| PITG_08761 | Pi nucleoside diphosphate kinase B      | -13.6785 | 1.904689 | 0.355617 | 0.918645 | BH |
| PITG_00173 | Pi vesicle-associated membrane pr       | -32.8891 | -34.254  | 0.357526 | 0.918645 | BH |
| PITG_00336 | Pi conserved hypothetical protein (     | -32.8831 | -34.266  | 0.357526 | 0.918645 | BH |
| PITG_01458 | Pi pyruvate dehydrogenase (1731 nt)     | -32.9185 | -34.195  | 0.357526 | 0.918645 | BH |
| PITG_01646 | Pi hypothetical protein (2339 nt)       | -32.9185 | -34.195  | 0.357526 | 0.918645 | BH |
| PITG_02048 | Pi conserved hypothetical protein (     | -32.9185 | -34.195  | 0.357526 | 0.918645 | BH |
| PITG_02290 | Pi conserved hypothetical protein (     | -32.9185 | -34.195  | 0.357526 | 0.918645 | BH |
| PITG_02473 | Pi HECT E3 ubiquitin ligase, putativ    | -32.8891 | -34.254  | 0.357526 | 0.918645 | BH |
| PITG_02516 | Pi conserved hypothetical protein (     | -32.8831 | -34.266  | 0.357526 | 0.918645 | BH |
| PITG_02625 | Pi conserved hypothetical protein (     | -32.8831 | -34.266  | 0.357526 | 0.918645 | BH |

|            |                                                               |          |         |          |          |    |
|------------|---------------------------------------------------------------|----------|---------|----------|----------|----|
| PITG_02688 | Pi conserved hypothetical protein (                           | -32.8891 | -34.254 | 0.357526 | 0.918645 | BH |
| PITG_03259 | Pi conserved hypothetical protein (                           | -32.8831 | -34.266 | 0.357526 | 0.918645 | BH |
| PITG_03295 | Pi copper-transporting ATPase, put                            | -32.8831 | -34.266 | 0.357526 | 0.918645 | BH |
| PITG_03525 | Pi cleavage induced serine proteas                            | -32.9185 | -34.195 | 0.357526 | 0.918645 | BH |
| PITG_04443 | Pi Metal Ion (Mn <sup>2+</sup> -iron) Transport               | -32.9185 | -34.195 | 0.357526 | 0.918645 | BH |
| PITG_04453 | Pi conserved hypothetical protein (                           | -32.9185 | -34.195 | 0.357526 | 0.918645 | BH |
| PITG_04619 | Pi protein kinase (3108 nt)                                   | -32.8831 | -34.266 | 0.357526 | 0.918645 | BH |
| PITG_04683 | Pi bifunctional fold protein (897 nt                          | -32.9185 | -34.195 | 0.357526 | 0.918645 | BH |
| PITG_05260 | Pi pre-mRNA-splicing factor ATP-de                            | -32.9185 | -34.195 | 0.357526 | 0.918645 | BH |
| PITG_05867 | Pi sister chromatid cohesion protei                           | -32.8831 | -34.266 | 0.357526 | 0.918645 | BH |
| PITG_06151 | Pi conserved hypothetical protein (                           | -32.8891 | -34.254 | 0.357526 | 0.918645 | BH |
| PITG_06638 | Pi lysocardiolipin acyltransferase, p                         | -32.9185 | -34.195 | 0.357526 | 0.918645 | BH |
| PITG_06897 | Pi conserved hypothetical protein (                           | -32.9185 | -34.195 | 0.357526 | 0.918645 | BH |
| PITG_07767 | Pi conserved hypothetical protein (                           | -32.9185 | -34.195 | 0.357526 | 0.918645 | BH |
| PITG_08197 | Pi mitochondrial intermediate pep                             | -32.8831 | -34.266 | 0.357526 | 0.918645 | BH |
| PITG_08293 | Pi conserved hypothetical protein (                           | -32.8831 | -34.266 | 0.357526 | 0.918645 | BH |
| PITG_08550 | Pi conserved hypothetical protein (                           | -32.9185 | -34.195 | 0.357526 | 0.918645 | BH |
| PITG_09086 | Pi conserved hypothetical protein (                           | -32.9185 | -34.195 | 0.357526 | 0.918645 | BH |
| PITG_09534 | Pi conserved hypothetical protein (                           | -32.9185 | -34.195 | 0.357526 | 0.918645 | BH |
| PITG_10473 | Pi conserved hypothetical protein (                           | -32.8831 | -34.266 | 0.357526 | 0.918645 | BH |
| PITG_10664 | Pi Intraflagellar Transport Protein 1                         | -32.9185 | -34.195 | 0.357526 | 0.918645 | BH |
| PITG_10813 | Pi endoplasmic reticulum metallo                              | -32.9185 | -34.195 | 0.357526 | 0.918645 | BH |
| PITG_10868 | Pi conserved hypothetical protein (                           | -32.8891 | -34.254 | 0.357526 | 0.918645 | BH |
| PITG_11117 | Pi conserved hypothetical protein (                           | -32.8831 | -34.266 | 0.357526 | 0.918645 | BH |
| PITG_11162 | Pi hypothetical protein (567 nt)                              | -32.9185 | -34.195 | 0.357526 | 0.918645 | BH |
| PITG_11236 | Pi protein kinase, putative (2277 nt                          | -32.8891 | -34.254 | 0.357526 | 0.918645 | BH |
| PITG_11271 | Pi conserved hypothetical protein (                           | -32.9185 | -34.195 | 0.357526 | 0.918645 | BH |
| PITG_12219 | Pi Zinc (Zn <sup>2+</sup> )-Iron (Fe <sup>2+</sup> ) Permease | -32.8891 | -34.254 | 0.357526 | 0.918645 | BH |
| PITG_12274 | Pi conserved hypothetical protein (                           | -32.8831 | -34.266 | 0.357526 | 0.918645 | BH |
| PITG_13661 | Pi conserved hypothetical protein (                           | -32.8891 | -34.254 | 0.357526 | 0.918645 | BH |
| PITG_14223 | Pi conserved hypothetical protein (                           | -32.8891 | -34.254 | 0.357526 | 0.918645 | BH |
| PITG_14365 | Pi conserved hypothetical protein (                           | -32.9185 | -34.195 | 0.357526 | 0.918645 | BH |
| PITG_15091 | Pi conserved hypothetical protein (                           | -32.8831 | -34.266 | 0.357526 | 0.918645 | BH |
| PITG_15500 | Pi conserved hypothetical protein (                           | -32.8891 | -34.254 | 0.357526 | 0.918645 | BH |
| PITG_16010 | Pi conserved hypothetical protein (                           | -32.8831 | -34.266 | 0.357526 | 0.918645 | BH |
| PITG_16022 | Pi conserved hypothetical protein (                           | -32.8831 | -34.266 | 0.357526 | 0.918645 | BH |
| PITG_16163 | Pi conserved hypothetical protein (                           | -32.8831 | -34.266 | 0.357526 | 0.918645 | BH |
| PITG_16455 | Pi conserved hypothetical protein (                           | -32.9185 | -34.195 | 0.357526 | 0.918645 | BH |
| PITG_16962 | Pi hypothetical protein (615 nt)                              | -32.8831 | -34.266 | 0.357526 | 0.918645 | BH |
| PITG_17383 | Pi hsp70-like protein (1525 nt)                               | -32.8831 | -34.266 | 0.357526 | 0.918645 | BH |
| PITG_17460 | Pi DEAD/DEAH box RNA helicase, p                              | -32.8831 | -34.266 | 0.357526 | 0.918645 | BH |
| PITG_17895 | Pi conserved hypothetical protein (                           | -32.9185 | -34.195 | 0.357526 | 0.918645 | BH |
| PITG_18185 | Pi phospholipase D, Pi-sPLD-like-1                            | -32.8891 | -34.254 | 0.357526 | 0.918645 | BH |
| PITG_18254 | Pi conserved hypothetical protein (                           | -32.9185 | -34.195 | 0.357526 | 0.918645 | BH |
| PITG_19096 | Pi phospho-2-dehydro-3-deoxyhep                               | -32.8891 | -34.254 | 0.357526 | 0.918645 | BH |
| PITG_19143 | Pi conserved hypothetical protein (                           | -32.8831 | -34.266 | 0.357526 | 0.918645 | BH |
| PITG_19469 | Pi conserved hypothetical protein (                           | -32.8831 | -34.266 | 0.357526 | 0.918645 | BH |

|            |                                       |          |          |          |          |    |
|------------|---------------------------------------|----------|----------|----------|----------|----|
| PITG_19860 | Pi conserved hypothetical protein (   | -32.8831 | -34.266  | 0.357526 | 0.918645 | BH |
| PITG_20027 | Pi Major Facilitator Superfamily (M   | -32.8831 | -34.266  | 0.357526 | 0.918645 | BH |
| PITG_21419 | Pi conserved hypothetical protein (   | -32.9185 | -34.195  | 0.357526 | 0.918645 | BH |
| PITG_21595 | Pi conserved hypothetical protein (   | -32.9185 | -34.195  | 0.357526 | 0.918645 | BH |
| PITG_21597 | Pi conserved hypothetical protein (   | -32.8891 | -34.254  | 0.357526 | 0.918645 | BH |
| PITG_00223 | Pi DNA repair and recombination p     | -32.956  | -34.12   | 0.357526 | 0.918645 | BH |
| PITG_00343 | Pi conserved hypothetical protein (   | -32.956  | -34.12   | 0.357526 | 0.918645 | BH |
| PITG_00377 | Pi hypothetical protein (1021 nt)     | -32.9221 | -34.188  | 0.357526 | 0.918645 | BH |
| PITG_00419 | Pi conserved hypothetical protein (   | -32.9221 | -34.188  | 0.357526 | 0.918645 | BH |
| PITG_00504 | Pi conserved hypothetical protein (   | -32.9221 | -34.188  | 0.357526 | 0.918645 | BH |
| PITG_00509 | Pi conserved hypothetical protein (   | -32.956  | -34.12   | 0.357526 | 0.918645 | BH |
| PITG_00646 | Pi protein kinase, putative (2411 nt) | -32.956  | -34.12   | 0.357526 | 0.918645 | BH |
| PITG_00713 | Pi synaptic vesicle glycoprotein 2A,  | -32.956  | -34.12   | 0.357526 | 0.918645 | BH |
| PITG_00778 | Pi conserved hypothetical protein (   | -32.9602 | -34.1117 | 0.357526 | 0.918645 | BH |
| PITG_00996 | Pi conserved hypothetical protein (   | -32.956  | -34.12   | 0.357526 | 0.918645 | BH |
| PITG_01051 | Pi Amino Acid-Polyamine-Organoc       | -32.9221 | -34.188  | 0.357526 | 0.918645 | BH |
| PITG_01424 | Pi conserved hypothetical protein (   | -32.9602 | -34.1117 | 0.357526 | 0.918645 | BH |
| PITG_01463 | Pi hypothetical protein (1847 nt)     | -32.956  | -34.12   | 0.357526 | 0.918645 | BH |
| PITG_01751 | Pi conserved hypothetical protein (   | -32.9221 | -34.188  | 0.357526 | 0.918645 | BH |
| PITG_02032 | Pi tRNA (guanine-N(1)-)-methyltra     | -32.956  | -34.12   | 0.357526 | 0.918645 | BH |
| PITG_02229 | Pi conserved hypothetical protein (   | -32.886  | -34.2601 | 0.357526 | 0.918645 | BH |
| PITG_02399 | Pi conserved hypothetical protein (   | -32.886  | -34.2601 | 0.357526 | 0.918645 | BH |
| PITG_02477 | Pi conserved hypothetical protein (   | -32.956  | -34.12   | 0.357526 | 0.918645 | BH |
| PITG_02978 | Pi Chloride Channel (ClC) Family (1   | -32.956  | -34.12   | 0.357526 | 0.918645 | BH |
| PITG_03094 | Pi conserved hypothetical protein (   | -32.956  | -34.12   | 0.357526 | 0.918645 | BH |
| PITG_03268 | Pi conserved hypothetical protein (   | -32.956  | -34.12   | 0.357526 | 0.918645 | BH |
| PITG_03338 | Pi hypothetical protein (846 nt)      | -32.9221 | -34.188  | 0.357526 | 0.918645 | BH |
| PITG_03359 | Pi conserved hypothetical protein (   | -32.886  | -34.2601 | 0.357526 | 0.918645 | BH |
| PITG_03523 | Pi general transcription factor IIH s | -32.9221 | -34.188  | 0.357526 | 0.918645 | BH |
| PITG_03606 | Pi conserved oligomeric Golgi com     | -32.9221 | -34.188  | 0.357526 | 0.918645 | BH |
| PITG_03736 | Pi conserved hypothetical protein (   | -32.886  | -34.2601 | 0.357526 | 0.918645 | BH |
| PITG_03966 | Pi NhaC Na :H Antiporter (NhaC) F     | -32.956  | -34.12   | 0.357526 | 0.918645 | BH |
| PITG_04345 | Pi hypothetical protein (735 nt)      | -32.956  | -34.12   | 0.357526 | 0.918645 | BH |
| PITG_04512 | Pi conserved hypothetical protein (   | -32.886  | -34.2601 | 0.357526 | 0.918645 | BH |
| PITG_04561 | Pi conserved hypothetical protein (   | -32.956  | -34.12   | 0.357526 | 0.918645 | BH |
| PITG_04691 | Pi pyridine nucleotide-disulphide o   | -32.956  | -34.12   | 0.357526 | 0.918645 | BH |
| PITG_04903 | Pi conserved hypothetical protein (   | -32.9602 | -34.1117 | 0.357526 | 0.918645 | BH |
| PITG_04989 | Pi sorbitol dehydrogenase, putativ    | -32.9602 | -34.1117 | 0.357526 | 0.918645 | BH |
| PITG_05168 | Pi conserved hypothetical protein (   | -32.886  | -34.2601 | 0.357526 | 0.918645 | BH |
| PITG_05281 | Pi hypothetical protein (841 nt)      | -32.9221 | -34.188  | 0.357526 | 0.918645 | BH |
| PITG_05300 | Pi methyltransferase (2289 nt)        | -32.886  | -34.2601 | 0.357526 | 0.918645 | BH |
| PITG_05321 | Pi conserved hypothetical protein (   | -32.9602 | -34.1117 | 0.357526 | 0.918645 | BH |
| PITG_05381 | Pi protein phosphatase 2C, putativ    | -32.956  | -34.12   | 0.357526 | 0.918645 | BH |
| PITG_05879 | Pi hypothetical protein (704 nt)      | -32.956  | -34.12   | 0.357526 | 0.918645 | BH |
| PITG_05882 | Pi conserved hypothetical protein (   | -32.886  | -34.2601 | 0.357526 | 0.918645 | BH |
| PITG_06402 | Pi formin-homology 2 domain-cont      | -32.9221 | -34.188  | 0.357526 | 0.918645 | BH |
| PITG_06963 | Pi cyclin-Y-like protein (2863 nt)    | -32.886  | -34.2601 | 0.357526 | 0.918645 | BH |

|            |                                       |          |          |          |          |    |
|------------|---------------------------------------|----------|----------|----------|----------|----|
| PITG_07104 | Pi ADP-ribosylation factor GTPase-    | -32.9221 | -34.188  | 0.357526 | 0.918645 | BH |
| PITG_07841 | Pi glycyl-tRNA synthetase (1528 nt)   | -32.9221 | -34.188  | 0.357526 | 0.918645 | BH |
| PITG_07888 | Pi conserved hypothetical protein (   | -32.956  | -34.12   | 0.357526 | 0.918645 | BH |
| PITG_07988 | Pi sulfatase-like protein (2735 nt)   | -32.9221 | -34.188  | 0.357526 | 0.918645 | BH |
| PITG_08409 | Pi conserved hypothetical protein (   | -32.956  | -34.12   | 0.357526 | 0.918645 | BH |
| PITG_08503 | Pi conserved hypothetical protein (   | -32.956  | -34.12   | 0.357526 | 0.918645 | BH |
| PITG_09474 | Pi conserved hypothetical protein (   | -32.9221 | -34.188  | 0.357526 | 0.918645 | BH |
| PITG_09625 | Pi conserved hypothetical protein (   | -32.956  | -34.12   | 0.357526 | 0.918645 | BH |
| PITG_09753 | Pi conserved hypothetical protein (   | -32.956  | -34.12   | 0.357526 | 0.918645 | BH |
| PITG_09953 | Pi guanylate-binding protein, putat   | -32.956  | -34.12   | 0.357526 | 0.918645 | BH |
| PITG_10784 | Pi conserved hypothetical protein (   | -32.9602 | -34.1117 | 0.357526 | 0.918645 | BH |
| PITG_11816 | Pi conserved hypothetical protein (   | -32.956  | -34.12   | 0.357526 | 0.918645 | BH |
| PITG_12239 | Pi conserved hypothetical protein (   | -32.956  | -34.12   | 0.357526 | 0.918645 | BH |
| PITG_12340 | Pi sulfite oxidase, putative (779 nt) | -32.956  | -34.12   | 0.357526 | 0.918645 | BH |
| PITG_12884 | Pi conserved hypothetical protein (   | -32.9221 | -34.188  | 0.357526 | 0.918645 | BH |
| PITG_13031 | Pi vaiable flagellar number 3 (2096   | -32.956  | -34.12   | 0.357526 | 0.918645 | BH |
| PITG_13574 | Pi hypothetical protein (773 nt)      | -32.886  | -34.2601 | 0.357526 | 0.918645 | BH |
| PITG_13650 | Pi conserved hypothetical protein (   | -32.9221 | -34.188  | 0.357526 | 0.918645 | BH |
| PITG_13833 | Pi conserved hypothetical protein (   | -32.9221 | -34.188  | 0.357526 | 0.918645 | BH |
| PITG_13893 | Pi conserved hypothetical protein (   | -32.9602 | -34.1117 | 0.357526 | 0.918645 | BH |
| PITG_14189 | Pi conserved hypothetical protein (   | -32.9602 | -34.1117 | 0.357526 | 0.918645 | BH |
| PITG_15240 | Pi conserved hypothetical protein (   | -32.9221 | -34.188  | 0.357526 | 0.918645 | BH |
| PITG_15566 | Pi RNA polymerase I-specific transc   | -32.886  | -34.2601 | 0.357526 | 0.918645 | BH |
| PITG_15621 | Pi conserved hypothetical protein (   | -32.886  | -34.2601 | 0.357526 | 0.918645 | BH |
| PITG_15883 | Pi myotubularin-like protein (3379    | -32.9602 | -34.1117 | 0.357526 | 0.918645 | BH |
| PITG_16062 | Pi conserved hypothetical protein (   | -32.886  | -34.2601 | 0.357526 | 0.918645 | BH |
| PITG_16103 | Pi Major Facilitator Superfamily (M   | -32.9602 | -34.1117 | 0.357526 | 0.918645 | BH |
| PITG_16273 | Pi M96 mating-specific protein far    | -32.956  | -34.12   | 0.357526 | 0.918645 | BH |
| PITG_16316 | Pi conserved hypothetical protein (   | -32.956  | -34.12   | 0.357526 | 0.918645 | BH |
| PITG_16382 | Pi HAM34-like putative membrane       | -32.9602 | -34.1117 | 0.357526 | 0.918645 | BH |
| PITG_16487 | Pi cell 5A endo-1,4-betaglucanase,    | -32.9221 | -34.188  | 0.357526 | 0.918645 | BH |
| PITG_16795 | Pi conserved hypothetical protein (   | -32.956  | -34.12   | 0.357526 | 0.918645 | BH |
| PITG_16813 | Pi Rio kinase (1437 nt)               | -32.956  | -34.12   | 0.357526 | 0.918645 | BH |
| PITG_17241 | Pi leucine carboxyl methyltransfer    | -32.9602 | -34.1117 | 0.357526 | 0.918645 | BH |
| PITG_17270 | Pi conserved hypothetical protein (   | -32.9221 | -34.188  | 0.357526 | 0.918645 | BH |
| PITG_17403 | Pi conserved hypothetical protein (   | -32.9602 | -34.1117 | 0.357526 | 0.918645 | BH |
| PITG_17651 | Pi conserved hypothetical protein (   | -32.956  | -34.12   | 0.357526 | 0.918645 | BH |
| PITG_18004 | Pi conserved hypothetical protein (   | -32.9221 | -34.188  | 0.357526 | 0.918645 | BH |
| PITG_18227 | Pi conserved hypothetical protein (   | -32.956  | -34.12   | 0.357526 | 0.918645 | BH |
| PITG_18411 | Pi conserved hypothetical protein (   | -32.9221 | -34.188  | 0.357526 | 0.918645 | BH |
| PITG_19364 | Pi pantothenate kinase, putative (1   | -32.9221 | -34.188  | 0.357526 | 0.918645 | BH |
| PITG_19458 | Pi protein kinase (1187 nt)           | -32.956  | -34.12   | 0.357526 | 0.918645 | BH |
| PITG_19931 | Pi conserved hypothetical protein (   | -32.956  | -34.12   | 0.357526 | 0.918645 | BH |
| PITG_20044 | Pi hypothetical protein (1462 nt)     | -32.886  | -34.2601 | 0.357526 | 0.918645 | BH |
| PITG_20790 | Pi DEAD/DEAH box RNA helicase, p      | -32.9221 | -34.188  | 0.357526 | 0.918645 | BH |
| PITG_21150 | Pi Folate-Biopterin Transporter (FB   | -32.9221 | -34.188  | 0.357526 | 0.918645 | BH |
| PITG_21416 | Pi conserved hypothetical protein (   | -32.9602 | -34.1117 | 0.357526 | 0.918645 | BH |

|            |                                       |          |          |          |          |    |
|------------|---------------------------------------|----------|----------|----------|----------|----|
| PITG_21495 | Pi hypothetical protein (743 nt)      | -32.956  | -34.12   | 0.357526 | 0.918645 | BH |
| PITG_22369 | Pi conserved hypothetical protein (   | -32.886  | -34.2601 | 0.357526 | 0.918645 | BH |
| PITG_23240 | Pi conserved hypothetical protein (   | -32.956  | -34.12   | 0.357526 | 0.918645 | BH |
| PITG_00051 | Pi DNA-directed RNA polymerase II     | -33.0007 | -34.0307 | 0.358295 | 0.918645 | BH |
| PITG_00294 | Pi carbohydrate esterase, putative    | -32.8569 | -34.3182 | 0.358295 | 0.918645 | BH |
| PITG_00398 | Pi conserved hypothetical protein (   | -32.9958 | -34.0405 | 0.358295 | 0.918645 | BH |
| PITG_00514 | Pi myb-like DNA-binding protein, p    | -33.0007 | -34.0307 | 0.358295 | 0.918645 | BH |
| PITG_01200 | Pi conserved hypothetical protein (   | -33.0382 | -33.9558 | 0.358295 | 0.918645 | BH |
| PITG_01230 | Pi hypothetical protein (1386 nt)     | -32.8569 | -34.3182 | 0.358295 | 0.918645 | BH |
| PITG_01864 | Pi conserved hypothetical protein (   | -32.9256 | -34.1809 | 0.358295 | 0.918645 | BH |
| PITG_02507 | Pi conserved hypothetical protein (   | -32.8569 | -34.3182 | 0.358295 | 0.918645 | BH |
| PITG_02666 | Pi protein kinase, putative (3176 nt) | -32.9958 | -34.0405 | 0.358295 | 0.918645 | BH |
| PITG_03109 | Pi conserved hypothetical protein (   | -32.9256 | -34.1809 | 0.358295 | 0.918645 | BH |
| PITG_03302 | Pi conserved hypothetical protein (   | -33.0007 | -34.0307 | 0.358295 | 0.918645 | BH |
| PITG_03324 | Pi ATP-dependent RNA helicase, pu     | -32.9958 | -34.0405 | 0.358295 | 0.918645 | BH |
| PITG_03362 | Pi HECT E3 ubiquitin ligase, putativ  | -33.0007 | -34.0307 | 0.358295 | 0.918645 | BH |
| PITG_03493 | Pi amidophosphoribosyltransferase     | -32.9958 | -34.0405 | 0.358295 | 0.918645 | BH |
| PITG_03570 | Pi conserved hypothetical protein (   | -32.8569 | -34.3182 | 0.358295 | 0.918645 | BH |
| PITG_03751 | Pi nipped-B-like protein (7782 nt)    | -33.0382 | -33.9558 | 0.358295 | 0.918645 | BH |
| PITG_04475 | Pi hypothetical protein (1193 nt)     | -33.0007 | -34.0307 | 0.358295 | 0.918645 | BH |
| PITG_04646 | Pi ATP-binding Cassette (ABC) Super   | -32.9958 | -34.0405 | 0.358295 | 0.918645 | BH |
| PITG_04664 | Pi conserved hypothetical protein (   | -32.9958 | -34.0405 | 0.358295 | 0.918645 | BH |
| PITG_05610 | Pi conserved hypothetical protein (   | -32.9958 | -34.0405 | 0.358295 | 0.918645 | BH |
| PITG_05681 | Pi conserved hypothetical protein (   | -33.0007 | -34.0307 | 0.358295 | 0.918645 | BH |
| PITG_06329 | Pi conserved hypothetical protein (   | -32.8569 | -34.3182 | 0.358295 | 0.918645 | BH |
| PITG_06864 | Pi cytosolic endo-beta-N-acetylgluc   | -33.0382 | -33.9558 | 0.358295 | 0.918645 | BH |
| PITG_07099 | Pi conserved hypothetical protein (   | -33.0382 | -33.9558 | 0.358295 | 0.918645 | BH |
| PITG_07599 | Pi tubulin-specific chaperone E, pu   | -32.9256 | -34.1809 | 0.358295 | 0.918645 | BH |
| PITG_08009 | Pi conserved hypothetical protein (   | -32.8569 | -34.3182 | 0.358295 | 0.918645 | BH |
| PITG_08900 | Pi protein kinase (1363 nt)           | -32.9958 | -34.0405 | 0.358295 | 0.918645 | BH |
| PITG_09320 | Pi ATP-binding Cassette (ABC) Super   | -33.0007 | -34.0307 | 0.358295 | 0.918645 | BH |
| PITG_10136 | Pi conserved hypothetical protein (   | -33.0382 | -33.9558 | 0.358295 | 0.918645 | BH |
| PITG_10564 | Pi conserved hypothetical protein (   | -32.9256 | -34.1809 | 0.358295 | 0.918645 | BH |
| PITG_10783 | Pi CorA Metal Ion Transporter (MII    | -33.0382 | -33.9558 | 0.358295 | 0.918645 | BH |
| PITG_11039 | Pi conserved hypothetical protein (   | -33.0382 | -33.9558 | 0.358295 | 0.918645 | BH |
| PITG_11473 | Pi hypothetical protein (240 nt)      | -32.9256 | -34.1809 | 0.358295 | 0.918645 | BH |
| PITG_11813 | Pi conserved hypothetical protein (   | -32.9256 | -34.1809 | 0.358295 | 0.918645 | BH |
| PITG_12887 | Pi conserved hypothetical protein (   | -32.9958 | -34.0405 | 0.358295 | 0.918645 | BH |
| PITG_13309 | Pi conserved hypothetical protein (   | -32.8569 | -34.3182 | 0.358295 | 0.918645 | BH |
| PITG_13432 | Pi conserved hypothetical protein (   | -32.9958 | -34.0405 | 0.358295 | 0.918645 | BH |
| PITG_13621 | Pi conserved hypothetical protein (   | -32.9958 | -34.0405 | 0.358295 | 0.918645 | BH |
| PITG_14643 | Pi conserved hypothetical protein (   | -32.9958 | -34.0405 | 0.358295 | 0.918645 | BH |
| PITG_16104 | Pi cryptochrome, putative (2154 nt)   | -33.0382 | -33.9558 | 0.358295 | 0.918645 | BH |
| PITG_16340 | Pi conserved hypothetical protein (   | -33.0382 | -33.9558 | 0.358295 | 0.918645 | BH |
| PITG_16453 | Pi conserved hypothetical protein (   | -33.0382 | -33.9558 | 0.358295 | 0.918645 | BH |
| PITG_17001 | Pi conserved hypothetical protein (   | -32.9958 | -34.0405 | 0.358295 | 0.918645 | BH |
| PITG_17015 | Pi conserved hypothetical protein (   | -32.8569 | -34.3182 | 0.358295 | 0.918645 | BH |

|            |                                       |          |          |          |          |    |
|------------|---------------------------------------|----------|----------|----------|----------|----|
| PITG_17347 | Pi conserved hypothetical protein (   | -32.9256 | -34.1809 | 0.358295 | 0.918645 | BH |
| PITG_17675 | Pi bzip regulated hypothetical prot   | -32.9958 | -34.0405 | 0.358295 | 0.918645 | BH |
| PITG_17734 | Pi conserved hypothetical protein (   | -33.0382 | -33.9558 | 0.358295 | 0.918645 | BH |
| PITG_17927 | Pi hypothetical protein (2235 nt)     | -32.8569 | -34.3182 | 0.358295 | 0.918645 | BH |
| PITG_18103 | Pi Poly(A) RNA polymerase, putativ    | -33.0382 | -33.9558 | 0.358295 | 0.918645 | BH |
| PITG_18314 | Pi mitochondrial 2-oxoglutarate/m     | -33.0382 | -33.9558 | 0.358295 | 0.918645 | BH |
| PITG_18726 | Pi conserved hypothetical protein (   | -33.0007 | -34.0307 | 0.358295 | 0.918645 | BH |
| PITG_19351 | Pi kinesin-like protein (1519 nt)     | -32.9958 | -34.0405 | 0.358295 | 0.918645 | BH |
| PITG_19550 | Pi phosphatidylserine decarboxylas    | -32.9958 | -34.0405 | 0.358295 | 0.918645 | BH |
| PITG_19589 | Pi Crinkler (CRN) family protein (18  | -32.9958 | -34.0405 | 0.358295 | 0.918645 | BH |
| PITG_19962 | Pi conserved hypothetical protein (   | -33.0382 | -33.9558 | 0.358295 | 0.918645 | BH |
| PITG_20287 | Pi kinesin-like protein (1714 nt)     | -33.0007 | -34.0307 | 0.358295 | 0.918645 | BH |
| PITG_21528 | Pi GAF domain-containing protein (    | -32.8569 | -34.3182 | 0.358295 | 0.918645 | BH |
| PITG_21598 | Pi conserved hypothetical protein (   | -32.8569 | -34.3182 | 0.358295 | 0.918645 | BH |
| PITG_12749 | Pi conserved hypothetical protein (   | -12.9555 | -1.32994 | 0.358648 | 0.918645 | BH |
| PITG_00026 | Pi ankyrin-like protein (1390 nt)     | -32.9154 | -34.2014 | 0.359066 | 0.918645 | BH |
| PITG_00064 | Pi conserved hypothetical protein (   | -32.9154 | -34.2014 | 0.359066 | 0.918645 | BH |
| PITG_00117 | Pi splicing factor 3A (1905 nt)       | -32.8804 | -34.2713 | 0.359066 | 0.918645 | BH |
| PITG_00190 | Pi conserved hypothetical protein (   | -33.0326 | -33.9668 | 0.359066 | 0.918645 | BH |
| PITG_00231 | Pi eyes absent family protein (2157   | -33.0439 | -33.9443 | 0.359066 | 0.918645 | BH |
| PITG_00274 | Pi Ryanodine-Inositol 1,4,5-triphos   | -32.8804 | -34.2713 | 0.359066 | 0.918645 | BH |
| PITG_00298 | Pi conserved hypothetical protein (   | -33.0326 | -33.9668 | 0.359066 | 0.918645 | BH |
| PITG_00369 | Pi conserved hypothetical protein (   | -32.9912 | -34.0497 | 0.359066 | 0.918645 | BH |
| PITG_00408 | Pi transmembrane protein, putativ     | -33.0326 | -33.9668 | 0.359066 | 0.918645 | BH |
| PITG_00553 | Pi 2-oxoglutarate dehydrogenase E     | -32.9912 | -34.0497 | 0.359066 | 0.918645 | BH |
| PITG_00634 | Pi gamma-tubulin complex compo        | -32.9522 | -34.1277 | 0.359066 | 0.918645 | BH |
| PITG_00796 | Pi conserved hypothetical protein (   | -33.0439 | -33.9443 | 0.359066 | 0.918645 | BH |
| PITG_00819 | Pi conserved hypothetical protein (   | -32.9522 | -34.1277 | 0.359066 | 0.918645 | BH |
| PITG_01033 | Pi Cation Diffusion Facilitator (CDF) | -32.8804 | -34.2713 | 0.359066 | 0.918645 | BH |
| PITG_01050 | Pi Amino Acid-Polyamine-Organoc       | -32.9643 | -34.1035 | 0.359066 | 0.918645 | BH |
| PITG_01056 | Pi myb-like DNA-binding protein, p    | -33.0439 | -33.9443 | 0.359066 | 0.918645 | BH |
| PITG_01156 | Pi conserved hypothetical protein (   | -32.9154 | -34.2014 | 0.359066 | 0.918645 | BH |
| PITG_01235 | Pi conserved hypothetical protein (   | -33.0326 | -33.9668 | 0.359066 | 0.918645 | BH |
| PITG_01236 | Pi conserved hypothetical protein (   | -33.0326 | -33.9668 | 0.359066 | 0.918645 | BH |
| PITG_01341 | Pi conserved hypothetical protein (   | -32.9154 | -34.2014 | 0.359066 | 0.918645 | BH |
| PITG_01414 | Pi conserved hypothetical protein (   | -32.9154 | -34.2014 | 0.359066 | 0.918645 | BH |
| PITG_01416 | Pi sporangia induced TRP protein (:   | -33.0326 | -33.9668 | 0.359066 | 0.918645 | BH |
| PITG_01427 | Pi DEAD/DEAH box RNA helicase, p      | -33.0439 | -33.9443 | 0.359066 | 0.918645 | BH |
| PITG_01469 | Pi conserved hypothetical protein (   | -33.0326 | -33.9668 | 0.359066 | 0.918645 | BH |
| PITG_01520 | Pi hypothetical protein (4181 nt)     | -32.9912 | -34.0497 | 0.359066 | 0.918645 | BH |
| PITG_01527 | Pi conserved hypothetical protein (   | -32.9522 | -34.1277 | 0.359066 | 0.918645 | BH |
| PITG_01682 | Pi conserved hypothetical protein (   | -32.9522 | -34.1277 | 0.359066 | 0.918645 | BH |
| PITG_01721 | Pi Drug/Metabolite Transporter (D     | -32.9522 | -34.1277 | 0.359066 | 0.918645 | BH |
| PITG_01802 | Pi conserved hypothetical protein (   | -33.0326 | -33.9668 | 0.359066 | 0.918645 | BH |
| PITG_01878 | Pi conserved hypothetical protein (   | -32.9154 | -34.2014 | 0.359066 | 0.918645 | BH |
| PITG_01962 | Pi conserved hypothetical protein (   | -33.0326 | -33.9668 | 0.359066 | 0.918645 | BH |
| PITG_02017 | Pi conserved hypothetical protein (   | -32.9912 | -34.0497 | 0.359066 | 0.918645 | BH |



|            |                                       |          |          |          |          |    |
|------------|---------------------------------------|----------|----------|----------|----------|----|
| PITG_02052 | Pi conserved hypothetical protein (   | -33.0439 | -33.9443 | 0.359066 | 0.918645 | BH |
| PITG_02054 | Pi DNA primase small subunit, puta    | -33.0326 | -33.9668 | 0.359066 | 0.918645 | BH |
| PITG_02126 | Pi conserved hypothetical protein (   | -32.9522 | -34.1277 | 0.359066 | 0.918645 | BH |
| PITG_02269 | Pi conserved hypothetical protein (   | -32.9154 | -34.2014 | 0.359066 | 0.918645 | BH |
| PITG_02346 | Pi CCR4-NOT transcription comple      | -32.8804 | -34.2713 | 0.359066 | 0.918645 | BH |
| PITG_02454 | Pi conserved hypothetical protein (   | -32.9912 | -34.0497 | 0.359066 | 0.918645 | BH |
| PITG_02471 | Pi cytochrome b5 reductase with F     | -32.9154 | -34.2014 | 0.359066 | 0.918645 | BH |
| PITG_02506 | Pi conserved hypothetical protein (   | -32.9912 | -34.0497 | 0.359066 | 0.918645 | BH |
| PITG_02530 | Pi conserved hypothetical protein (   | -33.0326 | -33.9668 | 0.359066 | 0.918645 | BH |
| PITG_02766 | Pi patatin-like phospholipase, puta   | -32.8919 | -34.2482 | 0.359066 | 0.918645 | BH |
| PITG_02942 | Pi conserved hypothetical protein (   | -33.0326 | -33.9668 | 0.359066 | 0.918645 | BH |
| PITG_03040 | Pi conserved hypothetical protein (   | -33.0326 | -33.9668 | 0.359066 | 0.918645 | BH |
| PITG_03041 | Pi Major Facilitator Superfamily (M   | -32.9522 | -34.1277 | 0.359066 | 0.918645 | BH |
| PITG_03114 | Pi conserved hypothetical protein (   | -32.9154 | -34.2014 | 0.359066 | 0.918645 | BH |
| PITG_03154 | Pi ubiquitin family protein, putative | -33.0326 | -33.9668 | 0.359066 | 0.918645 | BH |
| PITG_03244 | Pi conserved hypothetical protein (   | -32.9522 | -34.1277 | 0.359066 | 0.918645 | BH |
| PITG_03411 | Pi lysosomal beta glucosidase, puta   | -32.8919 | -34.2482 | 0.359066 | 0.918645 | BH |
| PITG_03414 | Pi cysteine protease family C01A, p   | -33.0326 | -33.9668 | 0.359066 | 0.918645 | BH |
| PITG_03455 | Pi conserved hypothetical protein (   | -32.9154 | -34.2014 | 0.359066 | 0.918645 | BH |
| PITG_03458 | Pi conserved hypothetical protein (   | -32.8804 | -34.2713 | 0.359066 | 0.918645 | BH |
| PITG_03478 | Pi conserved hypothetical protein (   | -32.9154 | -34.2014 | 0.359066 | 0.918645 | BH |
| PITG_03514 | Pi DNA ligase, putative (2916 nt)     | -32.9522 | -34.1277 | 0.359066 | 0.918645 | BH |
| PITG_03558 | Pi conserved hypothetical protein (   | -33.0439 | -33.9443 | 0.359066 | 0.918645 | BH |
| PITG_03564 | Pi hypothetical protein (975 nt)      | -32.8804 | -34.2713 | 0.359066 | 0.918645 | BH |
| PITG_03590 | Pi inositol hexakisphosphate and d    | -32.9522 | -34.1277 | 0.359066 | 0.918645 | BH |
| PITG_03772 | Pi ADP-ribosylation factor-like prot  | -32.9154 | -34.2014 | 0.359066 | 0.918645 | BH |
| PITG_03818 | Pi U3 small nucleolar RNA-associat    | -32.8919 | -34.2482 | 0.359066 | 0.918645 | BH |
| PITG_03871 | Pi conserved hypothetical protein (   | -32.9154 | -34.2014 | 0.359066 | 0.918645 | BH |
| PITG_03951 | Pi conserved hypothetical protein (   | -33.0326 | -33.9668 | 0.359066 | 0.918645 | BH |
| PITG_03999 | Pi eukaryotic initiation factor 4E, p | -33.0326 | -33.9668 | 0.359066 | 0.918645 | BH |
| PITG_04028 | Pi conserved hypothetical protein (   | -33.0326 | -33.9668 | 0.359066 | 0.918645 | BH |
| PITG_04334 | Pi conserved hypothetical protein (   | -33.0439 | -33.9443 | 0.359066 | 0.918645 | BH |
| PITG_04426 | Pi DNA polymerase alpha-associat      | -32.9154 | -34.2014 | 0.359066 | 0.918645 | BH |
| PITG_04466 | Pi cystathionine gamma-synthase,      | -32.9522 | -34.1277 | 0.359066 | 0.918645 | BH |
| PITG_04593 | Pi conserved hypothetical protein (   | -33.0326 | -33.9668 | 0.359066 | 0.918645 | BH |
| PITG_04638 | Pi conserved hypothetical protein (   | -32.9154 | -34.2014 | 0.359066 | 0.918645 | BH |
| PITG_04670 | Pi conserved hypothetical protein (   | -32.9912 | -34.0497 | 0.359066 | 0.918645 | BH |
| PITG_04695 | Pi conserved hypothetical protein (   | -32.9154 | -34.2014 | 0.359066 | 0.918645 | BH |
| PITG_04892 | Pi conserved hypothetical protein (   | -32.9522 | -34.1277 | 0.359066 | 0.918645 | BH |
| PITG_04954 | Pi protein kinase (1494 nt)           | -32.9912 | -34.0497 | 0.359066 | 0.918645 | BH |
| PITG_04990 | Pi conserved hypothetical protein (   | -32.9912 | -34.0497 | 0.359066 | 0.918645 | BH |
| PITG_05005 | Pi conserved hypothetical protein (   | -32.9154 | -34.2014 | 0.359066 | 0.918645 | BH |
| PITG_05173 | Pi conserved hypothetical protein (   | -32.9522 | -34.1277 | 0.359066 | 0.918645 | BH |
| PITG_05354 | Pi asparaginyl-tRNA synthetase (17    | -32.9154 | -34.2014 | 0.359066 | 0.918645 | BH |
| PITG_05519 | Pi phosphatidylinositol 4-phosphat    | -33.0326 | -33.9668 | 0.359066 | 0.918645 | BH |
| PITG_05634 | Pi hypothetical protein (1687 nt)     | -32.9522 | -34.1277 | 0.359066 | 0.918645 | BH |
| PITG_05760 | Pi conserved hypothetical protein (   | -32.9154 | -34.2014 | 0.359066 | 0.918645 | BH |

|            |                                       |          |          |          |          |    |
|------------|---------------------------------------|----------|----------|----------|----------|----|
| PITG_05843 | Pi conserved hypothetical protein (   | -32.8804 | -34.2713 | 0.359066 | 0.918645 | BH |
| PITG_05869 | Pi conserved hypothetical protein (   | -33.0326 | -33.9668 | 0.359066 | 0.918645 | BH |
| PITG_06133 | Pi sugar fermentation stimulation     | -32.9912 | -34.0497 | 0.359066 | 0.918645 | BH |
| PITG_06501 | Pi conserved hypothetical protein (   | -33.0326 | -33.9668 | 0.359066 | 0.918645 | BH |
| PITG_06716 | Pi tafazzin-like protein (1282 nt)    | -32.9522 | -34.1277 | 0.359066 | 0.918645 | BH |
| PITG_06755 | Pi acyl-CoA dehydrogenase/oxidase     | -33.0326 | -33.9668 | 0.359066 | 0.918645 | BH |
| PITG_06847 | Pi conserved hypothetical protein (   | -32.9912 | -34.0497 | 0.359066 | 0.918645 | BH |
| PITG_07063 | Pi conserved hypothetical protein (   | -32.9912 | -34.0497 | 0.359066 | 0.918645 | BH |
| PITG_07139 | Pi conserved hypothetical protein (   | -32.9154 | -34.2014 | 0.359066 | 0.918645 | BH |
| PITG_07284 | Pi SEC14 cytosolic factor, putative   | -32.8804 | -34.2713 | 0.359066 | 0.918645 | BH |
| PITG_07287 | Pi conserved hypothetical protein (   | -32.9154 | -34.2014 | 0.359066 | 0.918645 | BH |
| PITG_07385 | Pi Major Facilitator Superfamily (M   | -33.0326 | -33.9668 | 0.359066 | 0.918645 | BH |
| PITG_07730 | Pi conserved hypothetical protein (   | -32.9154 | -34.2014 | 0.359066 | 0.918645 | BH |
| PITG_07889 | Pi conserved hypothetical protein (   | -33.0326 | -33.9668 | 0.359066 | 0.918645 | BH |
| PITG_07965 | Pi conserved hypothetical protein (   | -32.9912 | -34.0497 | 0.359066 | 0.918645 | BH |
| PITG_08173 | Pi DNA-directed RNA polymerase II     | -32.9522 | -34.1277 | 0.359066 | 0.918645 | BH |
| PITG_08229 | Pi conserved hypothetical protein (   | -32.9912 | -34.0497 | 0.359066 | 0.918645 | BH |
| PITG_08348 | Pi conserved hypothetical protein (   | -32.8804 | -34.2713 | 0.359066 | 0.918645 | BH |
| PITG_08351 | Pi conserved hypothetical protein (   | -33.0326 | -33.9668 | 0.359066 | 0.918645 | BH |
| PITG_08388 | Pi conserved hypothetical protein (   | -33.0326 | -33.9668 | 0.359066 | 0.918645 | BH |
| PITG_08417 | Pi conserved hypothetical protein (   | -33.0326 | -33.9668 | 0.359066 | 0.918645 | BH |
| PITG_08431 | Pi diacylglycerol acyltransferase, pi | -32.9522 | -34.1277 | 0.359066 | 0.918645 | BH |
| PITG_08447 | Pi exonuclease, putative (2805 nt)    | -32.8804 | -34.2713 | 0.359066 | 0.918645 | BH |
| PITG_08558 | Pi pectin lyase, putative (2571 nt)   | -33.0439 | -33.9443 | 0.359066 | 0.918645 | BH |
| PITG_08586 | Pi conserved hypothetical protein (   | -32.9912 | -34.0497 | 0.359066 | 0.918645 | BH |
| PITG_08827 | Pi VAC14 family protein (2543 nt)     | -32.9522 | -34.1277 | 0.359066 | 0.918645 | BH |
| PITG_08901 | Pi protein kinase, putative (1572 nt) | -32.9912 | -34.0497 | 0.359066 | 0.918645 | BH |
| PITG_09006 | Pi conserved hypothetical protein (   | -32.8804 | -34.2713 | 0.359066 | 0.918645 | BH |
| PITG_09242 | Pi conserved hypothetical protein (   | -32.8804 | -34.2713 | 0.359066 | 0.918645 | BH |
| PITG_09535 | Pi conserved hypothetical protein (   | -32.9912 | -34.0497 | 0.359066 | 0.918645 | BH |
| PITG_09536 | Pi phosphoribosylaminoimidazole-      | -32.8804 | -34.2713 | 0.359066 | 0.918645 | BH |
| PITG_09826 | Pi conserved hypothetical protein (   | -33.0326 | -33.9668 | 0.359066 | 0.918645 | BH |
| PITG_09829 | Pi conserved hypothetical protein (   | -33.0326 | -33.9668 | 0.359066 | 0.918645 | BH |
| PITG_09987 | Pi tRNA pseudouridine synthase, pi    | -32.9154 | -34.2014 | 0.359066 | 0.918645 | BH |
| PITG_10048 | Pi conserved hypothetical protein (   | -32.9522 | -34.1277 | 0.359066 | 0.918645 | BH |
| PITG_10062 | Pi protein kinase, putative (2188 nt) | -33.0326 | -33.9668 | 0.359066 | 0.918645 | BH |
| PITG_10547 | Pi hypothetical protein (524 nt)      | -33.0326 | -33.9668 | 0.359066 | 0.918645 | BH |
| PITG_10610 | Pi conserved hypothetical protein (   | -32.9912 | -34.0497 | 0.359066 | 0.918645 | BH |
| PITG_10762 | Pi transmembrane protein, putativ     | -32.9522 | -34.1277 | 0.359066 | 0.918645 | BH |
| PITG_10900 | Pi conserved hypothetical protein (   | -32.9912 | -34.0497 | 0.359066 | 0.918645 | BH |
| PITG_11177 | Pi hypothetical protein (865 nt)      | -32.9522 | -34.1277 | 0.359066 | 0.918645 | BH |
| PITG_11298 | Pi conserved hypothetical protein (   | -32.9522 | -34.1277 | 0.359066 | 0.918645 | BH |
| PITG_11366 | Pi F-actin-capping protein subunit I  | -32.9522 | -34.1277 | 0.359066 | 0.918645 | BH |
| PITG_11463 | Pi carbohydrate-binding protein, pi   | -32.8919 | -34.2482 | 0.359066 | 0.918645 | BH |
| PITG_11467 | Pi conserved hypothetical protein (   | -32.8804 | -34.2713 | 0.359066 | 0.918645 | BH |
| PITG_11468 | Pi peptide deformylase, putative (8   | -32.9154 | -34.2014 | 0.359066 | 0.918645 | BH |
| PITG_11748 | Pi Major Facilitator Superfamily (M   | -33.0439 | -33.9443 | 0.359066 | 0.918645 | BH |

|            |                                       |          |          |          |          |    |
|------------|---------------------------------------|----------|----------|----------|----------|----|
| PITG_11752 | Pi protein phosphatase 1L-like prot   | -33.0326 | -33.9668 | 0.359066 | 0.918645 | BH |
| PITG_12050 | Pi queuine tRNA-ribosyltransferase    | -32.9154 | -34.2014 | 0.359066 | 0.918645 | BH |
| PITG_12290 | Pi conserved hypothetical protein (   | -33.0439 | -33.9443 | 0.359066 | 0.918645 | BH |
| PITG_12315 | Pi conserved hypothetical protein (   | -32.9522 | -34.1277 | 0.359066 | 0.918645 | BH |
| PITG_12489 | Pi protein arginine N-methyltransfe   | -32.9912 | -34.0497 | 0.359066 | 0.918645 | BH |
| PITG_12627 | Pi crinkler (CRN) family protein, Gy  | -32.8804 | -34.2713 | 0.359066 | 0.918645 | BH |
| PITG_12793 | Pi short chain dehydrogenase, puta    | -32.9522 | -34.1277 | 0.359066 | 0.918645 | BH |
| PITG_13096 | Pi conserved hypothetical protein (   | -33.0326 | -33.9668 | 0.359066 | 0.918645 | BH |
| PITG_13249 | Pi conserved hypothetical protein (   | -32.9522 | -34.1277 | 0.359066 | 0.918645 | BH |
| PITG_13291 | Pi dolichyl pyrophosphate Glc1Mar     | -32.9154 | -34.2014 | 0.359066 | 0.918645 | BH |
| PITG_13882 | Pi conserved hypothetical protein (   | -32.9154 | -34.2014 | 0.359066 | 0.918645 | BH |
| PITG_14003 | Pi conserved hypothetical protein (   | -32.9643 | -34.1035 | 0.359066 | 0.918645 | BH |
| PITG_14048 | Pi conserved hypothetical protein (   | -32.9643 | -34.1035 | 0.359066 | 0.918645 | BH |
| PITG_14132 | Pi conserved hypothetical protein (   | -33.0326 | -33.9668 | 0.359066 | 0.918645 | BH |
| PITG_14413 | Pi protein kinase, putative (2688 nt) | -32.9912 | -34.0497 | 0.359066 | 0.918645 | BH |
| PITG_14484 | Pi conserved hypothetical protein (   | -32.9912 | -34.0497 | 0.359066 | 0.918645 | BH |
| PITG_14593 | Pi conserved hypothetical protein (   | -33.0326 | -33.9668 | 0.359066 | 0.918645 | BH |
| PITG_14602 | Pi conserved hypothetical protein (   | -32.9522 | -34.1277 | 0.359066 | 0.918645 | BH |
| PITG_14652 | Pi conserved hypothetical protein (   | -32.8919 | -34.2482 | 0.359066 | 0.918645 | BH |
| PITG_14695 | Pi conserved hypothetical protein (   | -33.0326 | -33.9668 | 0.359066 | 0.918645 | BH |
| PITG_14698 | Pi conserved hypothetical protein (   | -32.8804 | -34.2713 | 0.359066 | 0.918645 | BH |
| PITG_14702 | Pi conserved hypothetical protein (   | -33.0439 | -33.9443 | 0.359066 | 0.918645 | BH |
| PITG_14972 | Pi protein kinase, putative (2515 nt) | -32.9643 | -34.1035 | 0.359066 | 0.918645 | BH |
| PITG_14973 | Pi conserved hypothetical protein (   | -33.0326 | -33.9668 | 0.359066 | 0.918645 | BH |
| PITG_15119 | Pi Multidrug/Oligosaccharidyl-lipid   | -32.9522 | -34.1277 | 0.359066 | 0.918645 | BH |
| PITG_15785 | Pi conserved hypothetical protein (   | -33.0326 | -33.9668 | 0.359066 | 0.918645 | BH |
| PITG_15876 | Pi conserved hypothetical protein (   | -32.9522 | -34.1277 | 0.359066 | 0.918645 | BH |
| PITG_15929 | Pi paladin-like protein (3014 nt)     | -32.9912 | -34.0497 | 0.359066 | 0.918645 | BH |
| PITG_15980 | Pi glycoside hydrolase, putative (13  | -32.9912 | -34.0497 | 0.359066 | 0.918645 | BH |
| PITG_15982 | Pi histone-arginine methyltransfera   | -32.9522 | -34.1277 | 0.359066 | 0.918645 | BH |
| PITG_16066 | Pi conserved hypothetical protein (   | -32.9154 | -34.2014 | 0.359066 | 0.918645 | BH |
| PITG_16331 | Pi conserved hypothetical protein (   | -32.9154 | -34.2014 | 0.359066 | 0.918645 | BH |
| PITG_16452 | Pi hypothetical protein (351 nt)      | -32.9643 | -34.1035 | 0.359066 | 0.918645 | BH |
| PITG_16649 | Pi chromosome transmission fidelit    | -32.8804 | -34.2713 | 0.359066 | 0.918645 | BH |
| PITG_16740 | Pi conserved hypothetical protein (   | -33.0326 | -33.9668 | 0.359066 | 0.918645 | BH |
| PITG_16792 | Pi nucleolar GTP-binding protein 2    | -33.0439 | -33.9443 | 0.359066 | 0.918645 | BH |
| PITG_17107 | Pi aldehyde dehydrogenase, putati     | -32.9154 | -34.2014 | 0.359066 | 0.918645 | BH |
| PITG_17112 | Pi conserved hypothetical protein (   | -32.8804 | -34.2713 | 0.359066 | 0.918645 | BH |
| PITG_17114 | Pi conserved hypothetical protein (   | -32.9643 | -34.1035 | 0.359066 | 0.918645 | BH |
| PITG_17265 | Pi conserved hypothetical protein (   | -33.0326 | -33.9668 | 0.359066 | 0.918645 | BH |
| PITG_17567 | Pi myb-like DNA-binding protein, p    | -32.9912 | -34.0497 | 0.359066 | 0.918645 | BH |
| PITG_17839 | Pi protein kinase (653 nt)            | -33.0326 | -33.9668 | 0.359066 | 0.918645 | BH |
| PITG_17998 | Pi 3-hydroxyisobutyrate dehydroge     | -32.9154 | -34.2014 | 0.359066 | 0.918645 | BH |
| PITG_18207 | Pi conserved hypothetical protein (   | -32.9154 | -34.2014 | 0.359066 | 0.918645 | BH |
| PITG_18634 | Pi DNA topoisomerase, putative (3     | -33.0326 | -33.9668 | 0.359066 | 0.918645 | BH |
| PITG_18695 | Pi UDP-galactose transporter (1132    | -33.0326 | -33.9668 | 0.359066 | 0.918645 | BH |
| PITG_18696 | Pi replication factor C subunit, puta | -32.8804 | -34.2713 | 0.359066 | 0.918645 | BH |

|            |                                      |          |          |          |          |    |
|------------|--------------------------------------|----------|----------|----------|----------|----|
| PITG_18814 | Pi conserved hypothetical protein (  | -32.9154 | -34.2014 | 0.359066 | 0.918645 | BH |
| PITG_18868 | Pi tRNA-dihydrouridine synthase, p   | -32.8804 | -34.2713 | 0.359066 | 0.918645 | BH |
| PITG_18999 | Pi serine protease family S08A, put  | -32.8804 | -34.2713 | 0.359066 | 0.918645 | BH |
| PITG_19085 | Pi conserved hypothetical protein (  | -32.9912 | -34.0497 | 0.359066 | 0.918645 | BH |
| PITG_19167 | Pi conserved hypothetical protein (  | -32.9522 | -34.1277 | 0.359066 | 0.918645 | BH |
| PITG_19212 | Pi tubulin/FtsZ family protein, puta | -32.8804 | -34.2713 | 0.359066 | 0.918645 | BH |
| PITG_20017 | Pi diacylglycerol O-acyltransferase, | -32.9643 | -34.1035 | 0.359066 | 0.918645 | BH |
| PITG_20043 | Pi conserved hypothetical protein (  | -32.9154 | -34.2014 | 0.359066 | 0.918645 | BH |
| PITG_20709 | Pi conserved hypothetical protein (  | -32.9912 | -34.0497 | 0.359066 | 0.918645 | BH |
| PITG_20824 | Pi aspartyl-tRNA synthetase, putati  | -32.9912 | -34.0497 | 0.359066 | 0.918645 | BH |
| PITG_20861 | Pi ATP-binding Cassette (ABC) Supr   | -33.0326 | -33.9668 | 0.359066 | 0.918645 | BH |
| PITG_20945 | Pi conserved hypothetical protein (  | -32.9912 | -34.0497 | 0.359066 | 0.918645 | BH |
| PITG_21046 | Pi glycoside hydrolase, putative (10 | -32.8804 | -34.2713 | 0.359066 | 0.918645 | BH |
| PITG_21317 | Pi transmembrane protein, putativ    | -32.9154 | -34.2014 | 0.359066 | 0.918645 | BH |
| PITG_21720 | Pi conserved hypothetical protein (  | -33.0326 | -33.9668 | 0.359066 | 0.918645 | BH |
| PITG_21828 | Pi conserved hypothetical protein (  | -33.0326 | -33.9668 | 0.359066 | 0.918645 | BH |
| PITG_22191 | Pi conserved hypothetical protein (  | -33.0326 | -33.9668 | 0.359066 | 0.918645 | BH |
| PITG_22419 | Pi hypothetical protein (461 nt)     | -32.9912 | -34.0497 | 0.359066 | 0.918645 | BH |
| PITG_22763 | Pi conserved oligomeric Golgi com    | -32.9912 | -34.0497 | 0.359066 | 0.918645 | BH |
| PITG_23113 | Pi GPN-loop GTPase 1 (1108 nt)       | -32.9912 | -34.0497 | 0.359066 | 0.918645 | BH |
| PITG_05360 | Pi conserved hypothetical protein (  | -13.8408 | -1.40221 | 0.359234 | 0.918645 | BH |
| PITG_10883 | Pi 26S proteasome non-ATPase reg     | -13.8076 | -1.46864 | 0.359234 | 0.918645 | BH |
| PITG_21173 | Pi nucleotide-binding protein 1 (11  | -13.8401 | -1.4036  | 0.359234 | 0.918645 | BH |
| PITG_22743 | Pi dihydrolipoyllysine-residue succi | -13.8121 | -1.45959 | 0.359234 | 0.918645 | BH |
| PITG_00144 | Pi conserved hypothetical protein (  | -32.9289 | -34.1742 | 0.359842 | 0.918645 | BH |
| PITG_00859 | Pi hypothetical protein (759 nt)     | -33.0055 | -34.0212 | 0.359842 | 0.918645 | BH |
| PITG_01192 | Pi Voltage-gated Ion Channel (VIC)   | -32.9289 | -34.1742 | 0.359842 | 0.918645 | BH |
| PITG_01979 | Pi conserved hypothetical protein (  | -33.0055 | -34.0212 | 0.359842 | 0.918645 | BH |
| PITG_02258 | Pi conserved hypothetical protein (  | -32.9289 | -34.1742 | 0.359842 | 0.918645 | BH |
| PITG_04631 | Pi conserved hypothetical protein (  | -33.0055 | -34.0212 | 0.359842 | 0.918645 | BH |
| PITG_06733 | Pi transmembrane protein, putativ    | -32.9289 | -34.1742 | 0.359842 | 0.918645 | BH |
| PITG_08302 | Pi hypothetical protein (477 nt)     | -32.9289 | -34.1742 | 0.359842 | 0.918645 | BH |
| PITG_10122 | Pi Drug/Metabolite Transporter (D    | -33.0055 | -34.0212 | 0.359842 | 0.918645 | BH |
| PITG_10150 | Pi conserved hypothetical protein (  | -32.9289 | -34.1742 | 0.359842 | 0.918645 | BH |
| PITG_10629 | Pi conserved hypothetical protein (  | -33.0055 | -34.0212 | 0.359842 | 0.918645 | BH |
| PITG_11146 | Pi conserved hypothetical protein (  | -33.0055 | -34.0212 | 0.359842 | 0.918645 | BH |
| PITG_16315 | Pi conserved hypothetical protein (  | -33.0055 | -34.0212 | 0.359842 | 0.918645 | BH |
| PITG_16977 | Pi aurora-like protein kinase (1161  | -32.9289 | -34.1742 | 0.359842 | 0.918645 | BH |
| PITG_18877 | Pi conserved hypothetical protein (  | -32.9289 | -34.1742 | 0.359842 | 0.918645 | BH |
| PITG_22598 | Pi amino acid/auxin permease-like    | -32.9289 | -34.1742 | 0.359842 | 0.918645 | BH |
| PITG_05796 | Pi ribosomal RNA-processing prote    | -32.8591 | -34.314  | 0.36062  | 0.918645 | BH |
| PITG_18243 | Pi conserved hypothetical protein (  | -32.8591 | -34.314  | 0.36062  | 0.918645 | BH |
| PITG_00110 | Pi cytochrome c1 heme lyase, puta    | -32.9872 | -34.0576 | 0.361402 | 0.918645 | BH |
| PITG_00147 | Pi conserved hypothetical protein (  | -32.968  | -34.0961 | 0.361402 | 0.918645 | BH |
| PITG_00313 | Pi hypothetical protein (1989 nt)    | -33.0278 | -33.9765 | 0.361402 | 0.918645 | BH |
| PITG_00572 | Pi conserved hypothetical protein (  | -32.968  | -34.0961 | 0.361402 | 0.918645 | BH |
| PITG_00717 | Pi myosin-like protein (6654 nt)     | -32.9489 | -34.1343 | 0.361402 | 0.918645 | BH |

|            |                                      |          |          |          |          |    |
|------------|--------------------------------------|----------|----------|----------|----------|----|
| PITG_00763 | Pi conserved hypothetical protein (  | -32.9489 | -34.1343 | 0.361402 | 0.918645 | BH |
| PITG_00818 | Pi conserved hypothetical protein (  | -32.9872 | -34.0576 | 0.361402 | 0.918645 | BH |
| PITG_00936 | Pi conserved hypothetical protein (  | -32.9872 | -34.0576 | 0.361402 | 0.918645 | BH |
| PITG_01030 | Pi SWI4 1, Peter Pan-like protein su | -32.9489 | -34.1343 | 0.361402 | 0.918645 | BH |
| PITG_01228 | Pi conserved hypothetical protein (  | -32.9489 | -34.1343 | 0.361402 | 0.918645 | BH |
| PITG_01245 | Pi chorismate mutase, putative (19   | -32.9872 | -34.0576 | 0.361402 | 0.918645 | BH |
| PITG_01258 | Pi ras family GTPase, putative (807  | -32.9872 | -34.0576 | 0.361402 | 0.918645 | BH |
| PITG_01412 | Pi Mitochondrial Tricarboxylate Ca   | -32.9872 | -34.0576 | 0.361402 | 0.918645 | BH |
| PITG_01769 | Pi chorismate synthase (1434 nt)     | -32.9872 | -34.0576 | 0.361402 | 0.918645 | BH |
| PITG_01855 | Pi mannosyl-oligosaccharide alpha    | -32.9489 | -34.1343 | 0.361402 | 0.918645 | BH |
| PITG_01931 | Pi conserved hypothetical protein (  | -32.9872 | -34.0576 | 0.361402 | 0.918645 | BH |
| PITG_01957 | Pi serine/threonine-protein phosph   | -32.9872 | -34.0576 | 0.361402 | 0.918645 | BH |
| PITG_02426 | Pi conserved hypothetical protein (  | -32.9872 | -34.0576 | 0.361402 | 0.918645 | BH |
| PITG_02439 | Pi conserved hypothetical protein (  | -32.9489 | -34.1343 | 0.361402 | 0.918645 | BH |
| PITG_02496 | Pi conserved hypothetical protein (  | -33.0278 | -33.9765 | 0.361402 | 0.918645 | BH |
| PITG_02540 | Pi integrator complex subunit, puta  | -32.9872 | -34.0576 | 0.361402 | 0.918645 | BH |
| PITG_02559 | Pi conserved hypothetical protein (  | -32.9872 | -34.0576 | 0.361402 | 0.918645 | BH |
| PITG_02572 | Pi conserved hypothetical protein (  | -32.9872 | -34.0576 | 0.361402 | 0.918645 | BH |
| PITG_02711 | Pi oligopeptidase A, putative (2519  | -33.0278 | -33.9765 | 0.361402 | 0.918645 | BH |
| PITG_02754 | Pi conserved hypothetical protein (  | -32.9489 | -34.1343 | 0.361402 | 0.918645 | BH |
| PITG_02812 | Pi type I inositol-3,4-bisphosphate  | -33.0278 | -33.9765 | 0.361402 | 0.918645 | BH |
| PITG_02990 | Pi conserved hypothetical protein (  | -33.0278 | -33.9765 | 0.361402 | 0.918645 | BH |
| PITG_03016 | Pi conserved hypothetical protein (  | -32.9489 | -34.1343 | 0.361402 | 0.918645 | BH |
| PITG_03063 | Pi conserved hypothetical protein (  | -32.968  | -34.0961 | 0.361402 | 0.918645 | BH |
| PITG_03112 | Pi importin-like protein (3460 nt)   | -32.9489 | -34.1343 | 0.361402 | 0.918645 | BH |
| PITG_03323 | Pi integrator complex subunit, puta  | -33.0278 | -33.9765 | 0.361402 | 0.918645 | BH |
| PITG_03773 | Pi protein kinase (2755 nt)          | -32.9872 | -34.0576 | 0.361402 | 0.918645 | BH |
| PITG_03774 | Pi conserved hypothetical protein (  | -33.0278 | -33.9765 | 0.361402 | 0.918645 | BH |
| PITG_03803 | Pi conserved hypothetical protein (  | -32.9489 | -34.1343 | 0.361402 | 0.918645 | BH |
| PITG_03837 | Pi metalloprotease family M01, pu    | -32.9489 | -34.1343 | 0.361402 | 0.918645 | BH |
| PITG_03996 | Pi conserved hypothetical protein (  | -32.968  | -34.0961 | 0.361402 | 0.918645 | BH |
| PITG_04821 | Pi conserved hypothetical protein (  | -32.968  | -34.0961 | 0.361402 | 0.918645 | BH |
| PITG_05192 | Pi conserved hypothetical protein (  | -32.9872 | -34.0576 | 0.361402 | 0.918645 | BH |
| PITG_05469 | Pi conserved hypothetical protein (  | -32.9489 | -34.1343 | 0.361402 | 0.918645 | BH |
| PITG_05507 | Pi conserved hypothetical protein (  | -32.9489 | -34.1343 | 0.361402 | 0.918645 | BH |
| PITG_05635 | Pi conserved hypothetical protein (  | -32.9489 | -34.1343 | 0.361402 | 0.918645 | BH |
| PITG_05856 | Pi conserved hypothetical protein (  | -32.9872 | -34.0576 | 0.361402 | 0.918645 | BH |
| PITG_06034 | Pi conserved hypothetical protein (  | -33.0278 | -33.9765 | 0.361402 | 0.918645 | BH |
| PITG_06233 | Pi conserved hypothetical protein (  | -32.9489 | -34.1343 | 0.361402 | 0.918645 | BH |
| PITG_06283 | Pi beta-catenin-like protein (1851 r | -32.9872 | -34.0576 | 0.361402 | 0.918645 | BH |
| PITG_06319 | Pi myotubularin-like protein (4485   | -32.9489 | -34.1343 | 0.361402 | 0.918645 | BH |
| PITG_06333 | Pi hypothetical protein (919 nt)     | -33.0278 | -33.9765 | 0.361402 | 0.918645 | BH |
| PITG_06648 | Pi conserved hypothetical protein (  | -33.0278 | -33.9765 | 0.361402 | 0.918645 | BH |
| PITG_07035 | Pi CDK5 regulatory subunit-associa   | -32.9872 | -34.0576 | 0.361402 | 0.918645 | BH |
| PITG_07072 | Pi short chain dehydrogenase, puta   | -32.9489 | -34.1343 | 0.361402 | 0.918645 | BH |
| PITG_07520 | Pi conserved hypothetical protein (  | -32.9872 | -34.0576 | 0.361402 | 0.918645 | BH |
| PITG_08094 | Pi inorganic pyrophosphatase (889    | -32.9489 | -34.1343 | 0.361402 | 0.918645 | BH |

|            |                                       |          |          |          |          |    |
|------------|---------------------------------------|----------|----------|----------|----------|----|
| PITG_08290 | Pi conserved hypothetical protein (   | -32.9872 | -34.0576 | 0.361402 | 0.918645 | BH |
| PITG_08307 | Pi conserved hypothetical protein (   | -32.9489 | -34.1343 | 0.361402 | 0.918645 | BH |
| PITG_08329 | Pi conserved hypothetical protein (   | -33.0278 | -33.9765 | 0.361402 | 0.918645 | BH |
| PITG_08369 | Pi valyl-tRNA synthetase (3808 nt)    | -33.0278 | -33.9765 | 0.361402 | 0.918645 | BH |
| PITG_08738 | Pi conserved hypothetical protein (   | -33.0278 | -33.9765 | 0.361402 | 0.918645 | BH |
| PITG_08766 | Pi demethylmenaquinone methyltr       | -33.0278 | -33.9765 | 0.361402 | 0.918645 | BH |
| PITG_09201 | Pi bzip transcription factor (1089 n  | -32.9489 | -34.1343 | 0.361402 | 0.918645 | BH |
| PITG_09413 | Pi sterol 3-beta-glucosyltransferase  | -32.9489 | -34.1343 | 0.361402 | 0.918645 | BH |
| PITG_09866 | Pi tRNA (adenine-N(1)-)-methyltra     | -33.0278 | -33.9765 | 0.361402 | 0.918645 | BH |
| PITG_09899 | Pi cleavage induced hypothetical p    | -32.9872 | -34.0576 | 0.361402 | 0.918645 | BH |
| PITG_09961 | Pi conserved hypothetical protein (   | -32.9872 | -34.0576 | 0.361402 | 0.918645 | BH |
| PITG_09981 | Pi conserved hypothetical protein (   | -32.968  | -34.0961 | 0.361402 | 0.918645 | BH |
| PITG_10016 | Pi conserved hypothetical protein (   | -32.9489 | -34.1343 | 0.361402 | 0.918645 | BH |
| PITG_10029 | Pi hypothetical protein (400 nt)      | -32.9872 | -34.0576 | 0.361402 | 0.918645 | BH |
| PITG_10105 | Pi exportin-T, putative (3093 nt)     | -33.0278 | -33.9765 | 0.361402 | 0.918645 | BH |
| PITG_10516 | Pi tryptophanyl-tRNA synthetase (1    | -32.9872 | -34.0576 | 0.361402 | 0.918645 | BH |
| PITG_10602 | Pi DNA repair protein, putative (19   | -33.0278 | -33.9765 | 0.361402 | 0.918645 | BH |
| PITG_10690 | Pi conserved hypothetical protein (   | -32.9489 | -34.1343 | 0.361402 | 0.918645 | BH |
| PITG_11017 | Pi conserved hypothetical protein (   | -32.9489 | -34.1343 | 0.361402 | 0.918645 | BH |
| PITG_11138 | Pi fumarate reductase flavoprotein    | -33.0278 | -33.9765 | 0.361402 | 0.918645 | BH |
| PITG_11157 | Pi myotubularin-like protein (2970    | -32.9872 | -34.0576 | 0.361402 | 0.918645 | BH |
| PITG_11198 | Pi nucleolar GTP-binding protein 1    | -32.9872 | -34.0576 | 0.361402 | 0.918645 | BH |
| PITG_11426 | Pi conserved hypothetical protein (   | -32.9489 | -34.1343 | 0.361402 | 0.918645 | BH |
| PITG_11464 | Pi pairing protein 2 family protein ( | -32.9872 | -34.0576 | 0.361402 | 0.918645 | BH |
| PITG_11506 | Pi hypothetical protein (475 nt)      | -32.9872 | -34.0576 | 0.361402 | 0.918645 | BH |
| PITG_11555 | Pi conserved hypothetical protein (   | -32.9872 | -34.0576 | 0.361402 | 0.918645 | BH |
| PITG_11701 | Pi CLPTM1-like membrane protein,      | -32.9489 | -34.1343 | 0.361402 | 0.918645 | BH |
| PITG_12163 | Pi conserved hypothetical protein (   | -33.0278 | -33.9765 | 0.361402 | 0.918645 | BH |
| PITG_12174 | Pi conserved hypothetical protein (   | -32.9489 | -34.1343 | 0.361402 | 0.918645 | BH |
| PITG_12220 | Pi methionine aminopeptidase, pu      | -32.9489 | -34.1343 | 0.361402 | 0.918645 | BH |
| PITG_12377 | Pi conserved hypothetical protein (   | -32.9872 | -34.0576 | 0.361402 | 0.918645 | BH |
| PITG_12441 | Pi conserved hypothetical protein (   | -32.9489 | -34.1343 | 0.361402 | 0.918645 | BH |
| PITG_12470 | Pi glycerol-3-phosphate acyltransfe   | -32.9489 | -34.1343 | 0.361402 | 0.918645 | BH |
| PITG_12503 | Pi conserved hypothetical protein (   | -33.0278 | -33.9765 | 0.361402 | 0.918645 | BH |
| PITG_12518 | Pi conserved hypothetical protein (   | -32.9489 | -34.1343 | 0.361402 | 0.918645 | BH |
| PITG_12674 | Pi sedoheptulokinase-like protein (   | -33.0278 | -33.9765 | 0.361402 | 0.918645 | BH |
| PITG_12836 | Pi UDP-N-acetylglucosamine transf     | -33.0278 | -33.9765 | 0.361402 | 0.918645 | BH |
| PITG_13024 | Pi conserved hypothetical protein (   | -33.0278 | -33.9765 | 0.361402 | 0.918645 | BH |
| PITG_13164 | Pi metalloprotease family M48X, p     | -32.9489 | -34.1343 | 0.361402 | 0.918645 | BH |
| PITG_13255 | Pi conserved hypothetical protein (   | -33.0278 | -33.9765 | 0.361402 | 0.918645 | BH |
| PITG_13297 | Pi conserved hypothetical protein (   | -33.0278 | -33.9765 | 0.361402 | 0.918645 | BH |
| PITG_13298 | Pi conserved hypothetical protein (   | -32.9872 | -34.0576 | 0.361402 | 0.918645 | BH |
| PITG_14028 | Pi conserved hypothetical protein (   | -33.0278 | -33.9765 | 0.361402 | 0.918645 | BH |
| PITG_14178 | Pi conserved hypothetical protein (   | -33.0278 | -33.9765 | 0.361402 | 0.918645 | BH |
| PITG_14709 | Pi conserved hypothetical protein (   | -33.0278 | -33.9765 | 0.361402 | 0.918645 | BH |
| PITG_14977 | Pi conserved hypothetical protein (   | -32.9489 | -34.1343 | 0.361402 | 0.918645 | BH |
| PITG_15152 | Pi secreted RxLR effector peptide,    | -33.0278 | -33.9765 | 0.361402 | 0.918645 | BH |

|            |                                        |          |          |          |          |    |
|------------|----------------------------------------|----------|----------|----------|----------|----|
| PITG_15217 | Pi ribonuclease, putative (1123 nt)    | -33.0278 | -33.9765 | 0.361402 | 0.918645 | BH |
| PITG_15739 | Pi protein MYG1 (1098 nt)              | -33.0278 | -33.9765 | 0.361402 | 0.918645 | BH |
| PITG_16023 | Pi transcription initiation factor TFI | -33.0278 | -33.9765 | 0.361402 | 0.918645 | BH |
| PITG_16365 | Pi conserved hypothetical protein (    | -32.9489 | -34.1343 | 0.361402 | 0.918645 | BH |
| PITG_16476 | Pi receptor kinase, putative (2197     | -33.0278 | -33.9765 | 0.361402 | 0.918645 | BH |
| PITG_16818 | Pi conserved hypothetical protein (    | -32.9489 | -34.1343 | 0.361402 | 0.918645 | BH |
| PITG_16899 | Pi conserved hypothetical protein (    | -33.0278 | -33.9765 | 0.361402 | 0.918645 | BH |
| PITG_16920 | Pi conserved hypothetical protein (    | -33.0278 | -33.9765 | 0.361402 | 0.918645 | BH |
| PITG_17072 | Pi U4/U6 small nuclear ribonucleo      | -33.0278 | -33.9765 | 0.361402 | 0.918645 | BH |
| PITG_17080 | Pi Ca2 :Cation Antiporter (CaCA) Fa    | -32.9872 | -34.0576 | 0.361402 | 0.918645 | BH |
| PITG_17155 | Pi RNA 3'-terminal phosphate cycl      | -32.9872 | -34.0576 | 0.361402 | 0.918645 | BH |
| PITG_17259 | Pi conserved hypothetical protein (    | -33.0278 | -33.9765 | 0.361402 | 0.918645 | BH |
| PITG_17344 | Pi cleavage induced hypothetical p     | -32.968  | -34.0961 | 0.361402 | 0.918645 | BH |
| PITG_18057 | Pi conserved hypothetical protein (    | -32.9489 | -34.1343 | 0.361402 | 0.918645 | BH |
| PITG_18085 | Pi hypothetical protein (710 nt)       | -32.9489 | -34.1343 | 0.361402 | 0.918645 | BH |
| PITG_18232 | Pi avirulence-associated protein 3.    | -32.968  | -34.0961 | 0.361402 | 0.918645 | BH |
| PITG_18538 | Pi 3-isopropylmalate dehydratase I     | -32.9489 | -34.1343 | 0.361402 | 0.918645 | BH |
| PITG_18750 | Pi conserved hypothetical protein (    | -32.968  | -34.0961 | 0.361402 | 0.918645 | BH |
| PITG_18754 | Pi conserved hypothetical protein (    | -33.0278 | -33.9765 | 0.361402 | 0.918645 | BH |
| PITG_18975 | Pi conserved hypothetical protein (    | -32.9489 | -34.1343 | 0.361402 | 0.918645 | BH |
| PITG_19418 | Pi conserved hypothetical protein (    | -32.9872 | -34.0576 | 0.361402 | 0.918645 | BH |
| PITG_19506 | Pi conserved hypothetical protein (    | -32.9872 | -34.0576 | 0.361402 | 0.918645 | BH |
| PITG_19771 | Pi mitochondrial inner membrane        | -33.0278 | -33.9765 | 0.361402 | 0.918645 | BH |
| PITG_19813 | Pi conserved hypothetical protein (    | -33.0278 | -33.9765 | 0.361402 | 0.918645 | BH |
| PITG_20330 | Pi trafficking protein particle comp   | -33.0278 | -33.9765 | 0.361402 | 0.918645 | BH |
| PITG_20683 | Pi conserved hypothetical protein (    | -33.0278 | -33.9765 | 0.361402 | 0.918645 | BH |
| PITG_20711 | Pi Folate-Biopterin Transporter (FB    | -32.968  | -34.0961 | 0.361402 | 0.918645 | BH |
| PITG_20944 | Pi conserved hypothetical protein (    | -32.9489 | -34.1343 | 0.361402 | 0.918645 | BH |
| PITG_21140 | Pi conserved hypothetical protein (    | -33.0278 | -33.9765 | 0.361402 | 0.918645 | BH |
| PITG_21156 | Pi Drug/Metabolite Transporter (D      | -33.0278 | -33.9765 | 0.361402 | 0.918645 | BH |
| PITG_21482 | Pi conserved hypothetical protein (    | -32.9872 | -34.0576 | 0.361402 | 0.918645 | BH |
| PITG_21571 | Pi conserved hypothetical protein (    | -32.9872 | -34.0576 | 0.361402 | 0.918645 | BH |
| PITG_21660 | Pi trehalase, putative (2103 nt)       | -33.0278 | -33.9765 | 0.361402 | 0.918645 | BH |
| PITG_22529 | Pi conserved hypothetical protein (    | -33.0278 | -33.9765 | 0.361402 | 0.918645 | BH |
| PITG_22924 | Pi conserved hypothetical protein (    | -32.9872 | -34.0576 | 0.361402 | 0.918645 | BH |
| PITG_00389 | Pi conserved hypothetical protein (    | -32.8784 | -34.2753 | 0.362188 | 0.918645 | BH |
| PITG_00426 | Pi conserved hypothetical protein (    | -32.8784 | -34.2753 | 0.362188 | 0.918645 | BH |
| PITG_01242 | Pi condensin complex subunit 2, pu     | -32.8784 | -34.2753 | 0.362188 | 0.918645 | BH |
| PITG_01288 | Pi conserved hypothetical protein (    | -32.8784 | -34.2753 | 0.362188 | 0.918645 | BH |
| PITG_01528 | Pi cell division cycle 5-related prote | -32.8784 | -34.2753 | 0.362188 | 0.918645 | BH |
| PITG_01756 | Pi negative elongation factor, puta    | -32.9128 | -34.2064 | 0.362188 | 0.918645 | BH |
| PITG_01782 | Pi conserved hypothetical protein (    | -32.8942 | -34.2436 | 0.362188 | 0.918645 | BH |
| PITG_01817 | Pi conserved hypothetical protein (    | -32.9128 | -34.2064 | 0.362188 | 0.918645 | BH |
| PITG_01999 | Pi Voltage-gated Ion Channel (VIC)     | -32.8942 | -34.2436 | 0.362188 | 0.918645 | BH |
| PITG_02002 | Pi enhancer of mRNA-decapping pr       | -32.8784 | -34.2753 | 0.362188 | 0.918645 | BH |
| PITG_02448 | Pi conserved hypothetical protein (    | -32.8942 | -34.2436 | 0.362188 | 0.918645 | BH |
| PITG_02596 | Pi DC12 family protein (1726 nt)       | -32.9128 | -34.2064 | 0.362188 | 0.918645 | BH |

|            |                                        |          |          |          |          |    |
|------------|----------------------------------------|----------|----------|----------|----------|----|
| PITG_02935 | Pi berberine-like protein (1524 nt)    | -32.9128 | -34.2064 | 0.362188 | 0.918645 | BH |
| PITG_03085 | Pi conserved hypothetical protein (    | -32.8784 | -34.2753 | 0.362188 | 0.918645 | BH |
| PITG_03489 | Pi conserved hypothetical protein (    | -32.9128 | -34.2064 | 0.362188 | 0.918645 | BH |
| PITG_03496 | Pi conserved hypothetical protein (    | -32.9128 | -34.2064 | 0.362188 | 0.918645 | BH |
| PITG_03892 | Pi conserved hypothetical protein (    | -32.9128 | -34.2064 | 0.362188 | 0.918645 | BH |
| PITG_04111 | Pi conserved hypothetical protein (    | -32.8784 | -34.2753 | 0.362188 | 0.918645 | BH |
| PITG_04180 | Pi conserved hypothetical protein (    | -32.9128 | -34.2064 | 0.362188 | 0.918645 | BH |
| PITG_04486 | Pi conserved hypothetical protein (    | -32.9128 | -34.2064 | 0.362188 | 0.918645 | BH |
| PITG_04554 | Pi conserved hypothetical protein (    | -32.8784 | -34.2753 | 0.362188 | 0.918645 | BH |
| PITG_04629 | Pi conserved hypothetical protein (    | -32.8784 | -34.2753 | 0.362188 | 0.918645 | BH |
| PITG_05405 | Pi arginyl-tRNA synthetase, putativ    | -32.8784 | -34.2753 | 0.362188 | 0.918645 | BH |
| PITG_05423 | Pi DNA-dependent protein kinase c      | -32.8784 | -34.2753 | 0.362188 | 0.918645 | BH |
| PITG_05564 | Pi conserved hypothetical protein (    | -32.9128 | -34.2064 | 0.362188 | 0.918645 | BH |
| PITG_05649 | Pi glutamyl-tRNA synthetase, putat     | -32.8784 | -34.2753 | 0.362188 | 0.918645 | BH |
| PITG_05759 | Pi conserved hypothetical protein (    | -32.9128 | -34.2064 | 0.362188 | 0.918645 | BH |
| PITG_05813 | Pi conserved hypothetical protein (    | -32.9128 | -34.2064 | 0.362188 | 0.918645 | BH |
| PITG_06618 | Pi conserved hypothetical protein (    | -32.8784 | -34.2753 | 0.362188 | 0.918645 | BH |
| PITG_06632 | Pi conserved hypothetical protein (    | -32.9128 | -34.2064 | 0.362188 | 0.918645 | BH |
| PITG_06642 | Pi conserved hypothetical protein (    | -32.9128 | -34.2064 | 0.362188 | 0.918645 | BH |
| PITG_06652 | Pi conserved hypothetical protein (    | -32.9128 | -34.2064 | 0.362188 | 0.918645 | BH |
| PITG_07103 | Pi nuclear pore complex protein Nt     | -32.8784 | -34.2753 | 0.362188 | 0.918645 | BH |
| PITG_07240 | Pi 3-deoxy-manno-octulosonate cy       | -32.9128 | -34.2064 | 0.362188 | 0.918645 | BH |
| PITG_07282 | Pi WD domain-containing protein (      | -32.9128 | -34.2064 | 0.362188 | 0.918645 | BH |
| PITG_07793 | Pi Outer Dynein Arm Light Chain 2      | -32.9128 | -34.2064 | 0.362188 | 0.918645 | BH |
| PITG_07890 | Pi conserved hypothetical protein (    | -32.8784 | -34.2753 | 0.362188 | 0.918645 | BH |
| PITG_08442 | Pi conserved hypothetical protein (    | -32.8784 | -34.2753 | 0.362188 | 0.918645 | BH |
| PITG_08655 | Pi conserved hypothetical protein (    | -32.8784 | -34.2753 | 0.362188 | 0.918645 | BH |
| PITG_09478 | Pi conserved hypothetical protein (    | -32.9128 | -34.2064 | 0.362188 | 0.918645 | BH |
| PITG_09587 | Pi mannose-P-dolichol utilization d    | -32.8784 | -34.2753 | 0.362188 | 0.918645 | BH |
| PITG_09672 | Pi cytidyltransferase (1352 nt)        | -32.8942 | -34.2436 | 0.362188 | 0.918645 | BH |
| PITG_10884 | Pi protein kinase, putative (2730 nt)  | -32.8784 | -34.2753 | 0.362188 | 0.918645 | BH |
| PITG_10990 | Pi farnesyl pyrophosphate synthet      | -32.9128 | -34.2064 | 0.362188 | 0.918645 | BH |
| PITG_11126 | Pi conserved hypothetical protein (    | -32.8784 | -34.2753 | 0.362188 | 0.918645 | BH |
| PITG_11194 | Pi conserved hypothetical protein (    | -32.8784 | -34.2753 | 0.362188 | 0.918645 | BH |
| PITG_11273 | Pi ubiquitin-specific protease, puta   | -32.8784 | -34.2753 | 0.362188 | 0.918645 | BH |
| PITG_11492 | Pi conserved hypothetical protein (    | -32.9128 | -34.2064 | 0.362188 | 0.918645 | BH |
| PITG_11764 | Pi conserved hypothetical protein (    | -32.9128 | -34.2064 | 0.362188 | 0.918645 | BH |
| PITG_11829 | Pi hypothetical protein (859 nt)       | -32.9128 | -34.2064 | 0.362188 | 0.918645 | BH |
| PITG_11832 | Pi conserved hypothetical protein (    | -32.8784 | -34.2753 | 0.362188 | 0.918645 | BH |
| PITG_12039 | Pi conserved hypothetical protein (    | -32.8942 | -34.2436 | 0.362188 | 0.918645 | BH |
| PITG_12342 | Pi sulfite oxidase, putative (1779 nt) | -32.8784 | -34.2753 | 0.362188 | 0.918645 | BH |
| PITG_12515 | Pi conserved hypothetical protein (    | -32.8784 | -34.2753 | 0.362188 | 0.918645 | BH |
| PITG_12624 | Pi Crinkler (CRN) family protein, ps   | -32.9128 | -34.2064 | 0.362188 | 0.918645 | BH |
| PITG_12742 | Pi conserved hypothetical protein (    | -32.9128 | -34.2064 | 0.362188 | 0.918645 | BH |
| PITG_13146 | Pi RNA pseudouridylate synthase-li     | -32.8784 | -34.2753 | 0.362188 | 0.918645 | BH |
| PITG_13719 | Pi DNA excision repair protein ERC     | -32.9128 | -34.2064 | 0.362188 | 0.918645 | BH |
| PITG_13769 | Pi sporangia induced conserved hy      | -33.0098 | -34.0124 | 0.362188 | 0.918645 | BH |



|            |                                       |          |          |          |          |    |
|------------|---------------------------------------|----------|----------|----------|----------|----|
| PITG_13773 | Pi conserved hypothetical protein (   | -32.9128 | -34.2064 | 0.362188 | 0.918645 | BH |
| PITG_13808 | Pi conserved hypothetical protein (   | -32.8784 | -34.2753 | 0.362188 | 0.918645 | BH |
| PITG_13836 | Pi cleavage induced predicted prot    | -32.9128 | -34.2064 | 0.362188 | 0.918645 | BH |
| PITG_13999 | Pi protein phosphatase 1 regulator    | -32.8784 | -34.2753 | 0.362188 | 0.918645 | BH |
| PITG_14390 | Pi conserved hypothetical protein (   | -32.9128 | -34.2064 | 0.362188 | 0.918645 | BH |
| PITG_14399 | Pi pre-mRNA-processing factor, pu     | -32.8784 | -34.2753 | 0.362188 | 0.918645 | BH |
| PITG_14606 | Pi conserved hypothetical protein (   | -32.8784 | -34.2753 | 0.362188 | 0.918645 | BH |
| PITG_14675 | Pi conserved hypothetical protein (   | -32.9128 | -34.2064 | 0.362188 | 0.918645 | BH |
| PITG_15393 | Pi eukaryotic translation initiation  | -32.9128 | -34.2064 | 0.362188 | 0.918645 | BH |
| PITG_15411 | Pi conserved hypothetical protein (   | -32.8784 | -34.2753 | 0.362188 | 0.918645 | BH |
| PITG_15444 | Pi conserved hypothetical protein (   | -32.9128 | -34.2064 | 0.362188 | 0.918645 | BH |
| PITG_15493 | Pi threonine aspartase, putative (1   | -32.8784 | -34.2753 | 0.362188 | 0.918645 | BH |
| PITG_15693 | Pi hypothetical protein (725 nt)      | -32.9128 | -34.2064 | 0.362188 | 0.918645 | BH |
| PITG_15762 | Pi conserved hypothetical protein (   | -32.9128 | -34.2064 | 0.362188 | 0.918645 | BH |
| PITG_15779 | Pi conserved hypothetical protein (   | -32.8784 | -34.2753 | 0.362188 | 0.918645 | BH |
| PITG_16459 | Pi thyroid receptor-interacting pro   | -32.8784 | -34.2753 | 0.362188 | 0.918645 | BH |
| PITG_17130 | Pi glyceraldehyde-3-phosphate def     | -32.9128 | -34.2064 | 0.362188 | 0.918645 | BH |
| PITG_17641 | Pi conserved hypothetical protein (   | -33.0098 | -34.0124 | 0.362188 | 0.918645 | BH |
| PITG_17951 | Pi dicarboxylate/Amino Acid:Catio     | -32.8784 | -34.2753 | 0.362188 | 0.918645 | BH |
| PITG_18018 | Pi ribosome-recycling factor, putat   | -32.8784 | -34.2753 | 0.362188 | 0.918645 | BH |
| PITG_18064 | Pi conserved hypothetical protein (   | -32.8784 | -34.2753 | 0.362188 | 0.918645 | BH |
| PITG_18861 | Pi conserved hypothetical protein (   | -32.8942 | -34.2436 | 0.362188 | 0.918645 | BH |
| PITG_18966 | Pi conserved hypothetical protein (   | -32.9128 | -34.2064 | 0.362188 | 0.918645 | BH |
| PITG_19168 | Pi conserved hypothetical protein (   | -32.8784 | -34.2753 | 0.362188 | 0.918645 | BH |
| PITG_20205 | Pi integrator complex subunit 3, pu   | -32.9128 | -34.2064 | 0.362188 | 0.918645 | BH |
| PITG_20235 | Pi conserved hypothetical protein (   | -32.8784 | -34.2753 | 0.362188 | 0.918645 | BH |
| PITG_20249 | Pi conserved hypothetical protein (   | -32.8784 | -34.2753 | 0.362188 | 0.918645 | BH |
| PITG_20521 | Pi hypothetical protein (351 nt)      | -32.9128 | -34.2064 | 0.362188 | 0.918645 | BH |
| PITG_20731 | Pi conserved hypothetical protein (   | -32.9128 | -34.2064 | 0.362188 | 0.918645 | BH |
| PITG_20783 | Pi hypothetical protein (1593 nt)     | -32.9128 | -34.2064 | 0.362188 | 0.918645 | BH |
| PITG_20909 | Pi conserved hypothetical protein (   | -32.9128 | -34.2064 | 0.362188 | 0.918645 | BH |
| PITG_21014 | Pi conserved hypothetical protein (   | -32.8784 | -34.2753 | 0.362188 | 0.918645 | BH |
| PITG_21617 | Pi cell division protein kinase, puta | -32.8942 | -34.2436 | 0.362188 | 0.918645 | BH |
| PITG_22122 | Pi conserved hypothetical protein (   | -32.8784 | -34.2753 | 0.362188 | 0.918645 | BH |
| PITG_22204 | Pi conserved hypothetical protein (   | -32.8784 | -34.2753 | 0.362188 | 0.918645 | BH |
| PITG_22719 | Pi phosphatidylinositol kinase (PIK-  | -32.8784 | -34.2753 | 0.362188 | 0.918645 | BH |
| PITG_12319 | Pi conserved hypothetical protein (   | -32.9316 | -34.1688 | 0.362976 | 0.918645 | BH |
| PITG_12325 | Pi hypothetical protein (645 nt)      | -32.9316 | -34.1688 | 0.362976 | 0.918645 | BH |
| PITG_13038 | Pi conserved hypothetical protein (   | -32.9316 | -34.1688 | 0.362976 | 0.918645 | BH |
| PITG_17685 | Pi conserved hypothetical protein (   | -32.9316 | -34.1688 | 0.362976 | 0.918645 | BH |
| PITG_19016 | Pi conserved hypothetical protein (   | -32.9316 | -34.1688 | 0.362976 | 0.918645 | BH |
| PITG_22323 | Pi ribosome biogenesis protein RLF    | -32.9316 | -34.1688 | 0.362976 | 0.918645 | BH |
| PITG_19535 | Pi proteasome subunit beta, putati    | -12.1797 | -1.07574 | 0.363224 | 0.918645 | BH |
| PITG_03118 | Pi mRNA decapping enzyme (1290        | -32.8607 | -34.3108 | 0.363769 | 0.918645 | BH |
| PITG_09676 | Pi conserved hypothetical protein (   | -32.8607 | -34.3108 | 0.363769 | 0.918645 | BH |
| PITG_01181 | Pi conserved hypothetical protein (   | -12.9692 | -1.28378 | 0.364148 | 0.918645 | BH |
| PITG_07827 | Pi conserved hypothetical protein (   | -12.9777 | -1.26662 | 0.364148 | 0.918645 | BH |

|            |                                      |          |          |          |          |    |
|------------|--------------------------------------|----------|----------|----------|----------|----|
| PITG_05141 | Pi actin-like protein (1487 nt)      | -13.8291 | -1.42927 | 0.364154 | 0.918645 | BH |
| PITG_20288 | Pi conserved hypothetical protein (  | -13.8463 | -1.39486 | 0.364154 | 0.918645 | BH |
| PITG_22666 | Pi conserved hypothetical protein (  | -13.846  | -1.39556 | 0.364154 | 0.918645 | BH |
| PITG_00311 | Pi conserved hypothetical protein (  | -33.0239 | -33.9844 | 0.364564 | 0.918645 | BH |
| PITG_00546 | Pi myosin-like protein (4229 nt)     | -33.0239 | -33.9844 | 0.364564 | 0.918645 | BH |
| PITG_01133 | Pi conserved hypothetical protein (  | -33.0239 | -33.9844 | 0.364564 | 0.918645 | BH |
| PITG_01174 | Pi conserved hypothetical protein (  | -33.0239 | -33.9844 | 0.364564 | 0.918645 | BH |
| PITG_01368 | Pi transmembrane protein, putativ    | -33.0239 | -33.9844 | 0.364564 | 0.918645 | BH |
| PITG_01456 | Pi histone acetyltransferase ESA1 (  | -33.0239 | -33.9844 | 0.364564 | 0.918645 | BH |
| PITG_02475 | Pi conserved hypothetical protein (  | -32.9711 | -34.0898 | 0.364564 | 0.918645 | BH |
| PITG_03099 | Pi hypothetical protein (966 nt)     | -33.0239 | -33.9844 | 0.364564 | 0.918645 | BH |
| PITG_04105 | Pi conserved hypothetical protein (  | -33.0239 | -33.9844 | 0.364564 | 0.918645 | BH |
| PITG_04489 | Pi peroxisome assembly factor, put   | -33.0239 | -33.9844 | 0.364564 | 0.918645 | BH |
| PITG_05188 | Pi conserved hypothetical protein (  | -33.0239 | -33.9844 | 0.364564 | 0.918645 | BH |
| PITG_05446 | Pi pyridoxal-dependent decarboxyl    | -33.0239 | -33.9844 | 0.364564 | 0.918645 | BH |
| PITG_05586 | Pi DNA-(apurinic or apyrimidinic sit | -33.0239 | -33.9844 | 0.364564 | 0.918645 | BH |
| PITG_06924 | Pi conserved hypothetical protein (  | -33.0239 | -33.9844 | 0.364564 | 0.918645 | BH |
| PITG_07044 | Pi conserved hypothetical protein (  | -33.0239 | -33.9844 | 0.364564 | 0.918645 | BH |
| PITG_07229 | Pi conserved hypothetical protein (  | -33.0239 | -33.9844 | 0.364564 | 0.918645 | BH |
| PITG_07259 | Pi serine protease family S09X, put  | -33.0239 | -33.9844 | 0.364564 | 0.918645 | BH |
| PITG_07575 | Pi haloacid dehalogenase-like hydr   | -33.0239 | -33.9844 | 0.364564 | 0.918645 | BH |
| PITG_07925 | Pi exportin-5-like protein (3724 nt) | -33.0239 | -33.9844 | 0.364564 | 0.918645 | BH |
| PITG_08205 | Pi methionyl-tRNA formyltransfera    | -33.0239 | -33.9844 | 0.364564 | 0.918645 | BH |
| PITG_08801 | Pi conserved hypothetical protein (  | -33.0239 | -33.9844 | 0.364564 | 0.918645 | BH |
| PITG_09680 | Pi conserved hypothetical protein (  | -33.0239 | -33.9844 | 0.364564 | 0.918645 | BH |
| PITG_10271 | Pi conserved hypothetical protein (  | -33.0239 | -33.9844 | 0.364564 | 0.918645 | BH |
| PITG_10321 | Pi conserved hypothetical protein (  | -32.9711 | -34.0898 | 0.364564 | 0.918645 | BH |
| PITG_10420 | Pi conserved hypothetical protein (  | -33.0239 | -33.9844 | 0.364564 | 0.918645 | BH |
| PITG_10864 | Pi conserved hypothetical protein (  | -33.0239 | -33.9844 | 0.364564 | 0.918645 | BH |
| PITG_13134 | Pi conserved hypothetical protein (  | -33.0239 | -33.9844 | 0.364564 | 0.918645 | BH |
| PITG_13305 | Pi aldose 1-epimerase, putative (90  | -33.0239 | -33.9844 | 0.364564 | 0.918645 | BH |
| PITG_13344 | Pi Cytochrome Oxidase Biogenesis     | -33.0239 | -33.9844 | 0.364564 | 0.918645 | BH |
| PITG_14137 | Pi histone-lysine N-methyltransfera  | -33.0239 | -33.9844 | 0.364564 | 0.918645 | BH |
| PITG_14163 | Pi Voltage-gated Ion Channel (VIC)   | -33.0239 | -33.9844 | 0.364564 | 0.918645 | BH |
| PITG_15637 | Pi abnormal spindle-like microceph   | -33.0239 | -33.9844 | 0.364564 | 0.918645 | BH |
| PITG_16132 | Pi phosphatidylinositide phosphata   | -33.0239 | -33.9844 | 0.364564 | 0.918645 | BH |
| PITG_16938 | Pi conserved hypothetical protein (  | -33.0239 | -33.9844 | 0.364564 | 0.918645 | BH |
| PITG_16942 | Pi conserved hypothetical protein (  | -32.9711 | -34.0898 | 0.364564 | 0.918645 | BH |
| PITG_17158 | Pi conserved hypothetical protein (  | -33.0239 | -33.9844 | 0.364564 | 0.918645 | BH |
| PITG_17487 | Pi conserved hypothetical protein (  | -33.0239 | -33.9844 | 0.364564 | 0.918645 | BH |
| PITG_18374 | Pi lysophosphatidylcholine acyltrar  | -33.0239 | -33.9844 | 0.364564 | 0.918645 | BH |
| PITG_18644 | Pi conserved hypothetical protein (  | -33.0239 | -33.9844 | 0.364564 | 0.918645 | BH |
| PITG_18759 | Pi conserved hypothetical protein (  | -33.0239 | -33.9844 | 0.364564 | 0.918645 | BH |
| PITG_18795 | Pi conserved hypothetical protein (  | -32.9711 | -34.0898 | 0.364564 | 0.918645 | BH |
| PITG_19126 | Pi conserved hypothetical protein (  | -33.0239 | -33.9844 | 0.364564 | 0.918645 | BH |
| PITG_19857 | Pi conserved hypothetical protein (  | -33.0239 | -33.9844 | 0.364564 | 0.918645 | BH |
| PITG_20504 | Pi conserved hypothetical protein (  | -33.0239 | -33.9844 | 0.364564 | 0.918645 | BH |

|            |                                        |          |          |          |          |    |
|------------|----------------------------------------|----------|----------|----------|----------|----|
| PITG_20908 | Pi conserved hypothetical protein (    | -33.0239 | -33.9844 | 0.364564 | 0.918645 | BH |
| PITG_21639 | Pi M96 mating-specific protein far     | -33.0239 | -33.9844 | 0.364564 | 0.918645 | BH |
| PITG_22414 | Pi conserved hypothetical protein (    | -33.0239 | -33.9844 | 0.364564 | 0.918645 | BH |
| PITG_22585 | Pi conserved hypothetical protein (    | -32.9711 | -34.0898 | 0.364564 | 0.918645 | BH |
| PITG_23284 | Pi crinkler (CRN) domain, pseudoge     | -33.0239 | -33.9844 | 0.364564 | 0.918645 | BH |
| PITG_00039 | Pi telomere length regulation prot     | -32.9843 | -34.0636 | 0.365364 | 0.918645 | BH |
| PITG_00082 | Pi monovalent Cation:Proton Antip      | -32.9843 | -34.0636 | 0.365364 | 0.918645 | BH |
| PITG_00226 | Pi kinesin-like protein (3531 nt)      | -32.9843 | -34.0636 | 0.365364 | 0.918645 | BH |
| PITG_00275 | Pi Iron(III)-zinc(II) purple acid phos | -32.9843 | -34.0636 | 0.365364 | 0.918645 | BH |
| PITG_01232 | Pi conserved hypothetical protein (    | -32.9843 | -34.0636 | 0.365364 | 0.918645 | BH |
| PITG_01960 | Pi conserved hypothetical protein (    | -32.9843 | -34.0636 | 0.365364 | 0.918645 | BH |
| PITG_02184 | Pi conserved hypothetical protein (    | -32.9843 | -34.0636 | 0.365364 | 0.918645 | BH |
| PITG_03002 | Pi patatin-like phospholipase, puta    | -32.9843 | -34.0636 | 0.365364 | 0.918645 | BH |
| PITG_03405 | Pi conserved hypothetical protein (    | -32.9843 | -34.0636 | 0.365364 | 0.918645 | BH |
| PITG_03457 | Pi conserved hypothetical protein (    | -32.9843 | -34.0636 | 0.365364 | 0.918645 | BH |
| PITG_03565 | Pi hypothetical protein (851 nt)       | -32.9843 | -34.0636 | 0.365364 | 0.918645 | BH |
| PITG_03748 | Pi conserved hypothetical protein (    | -32.9843 | -34.0636 | 0.365364 | 0.918645 | BH |
| PITG_06220 | Pi conserved hypothetical protein (    | -32.9843 | -34.0636 | 0.365364 | 0.918645 | BH |
| PITG_06393 | Pi hypothetical protein (2765 nt)      | -32.9843 | -34.0636 | 0.365364 | 0.918645 | BH |
| PITG_06407 | Pi conserved hypothetical protein (    | -32.9843 | -34.0636 | 0.365364 | 0.918645 | BH |
| PITG_06910 | Pi Mitochondrial Carrier (MC) Fami     | -32.9843 | -34.0636 | 0.365364 | 0.918645 | BH |
| PITG_06946 | Pi conserved hypothetical protein (    | -32.9843 | -34.0636 | 0.365364 | 0.918645 | BH |
| PITG_07661 | Pi Major Facilitator Superfamily (M    | -32.9843 | -34.0636 | 0.365364 | 0.918645 | BH |
| PITG_08143 | Pi elicitin-like protein (459 nt)      | -32.9843 | -34.0636 | 0.365364 | 0.918645 | BH |
| PITG_08368 | Pi peptidyl-prolyl cis-trans isomera   | -32.9843 | -34.0636 | 0.365364 | 0.918645 | BH |
| PITG_08383 | Pi DNA-directed RNA polymerase II      | -32.9843 | -34.0636 | 0.365364 | 0.918645 | BH |
| PITG_08566 | Pi conserved hypothetical protein (    | -32.9843 | -34.0636 | 0.365364 | 0.918645 | BH |
| PITG_08668 | Pi hypothetical protein (510 nt)       | -32.9843 | -34.0636 | 0.365364 | 0.918645 | BH |
| PITG_09250 | Pi transmembrane protein, putativ      | -32.9843 | -34.0636 | 0.365364 | 0.918645 | BH |
| PITG_10045 | Pi ser/thr kinase (4007 nt)            | -32.9843 | -34.0636 | 0.365364 | 0.918645 | BH |
| PITG_10423 | Pi conserved hypothetical protein (    | -32.9843 | -34.0636 | 0.365364 | 0.918645 | BH |
| PITG_10721 | Pi transmembrane protein, putativ      | -32.9843 | -34.0636 | 0.365364 | 0.918645 | BH |
| PITG_10968 | Pi CCR4-NOT transcription comple       | -32.9843 | -34.0636 | 0.365364 | 0.918645 | BH |
| PITG_11035 | Pi transmembrane protein, putativ      | -32.9843 | -34.0636 | 0.365364 | 0.918645 | BH |
| PITG_11921 | Pi epoxide hydrolase, putative (890    | -32.9843 | -34.0636 | 0.365364 | 0.918645 | BH |
| PITG_13435 | Pi conserved hypothetical protein (    | -32.9843 | -34.0636 | 0.365364 | 0.918645 | BH |
| PITG_13792 | Pi ribonuclease H2 subunit A, puta     | -32.9843 | -34.0636 | 0.365364 | 0.918645 | BH |
| PITG_14483 | Pi conserved hypothetical protein (    | -32.9843 | -34.0636 | 0.365364 | 0.918645 | BH |
| PITG_15889 | Pi serine protease family S54, puta    | -32.9843 | -34.0636 | 0.365364 | 0.918645 | BH |
| PITG_16209 | Pi conserved hypothetical protein (    | -32.9843 | -34.0636 | 0.365364 | 0.918645 | BH |
| PITG_16400 | Pi conserved hypothetical protein (    | -32.9843 | -34.0636 | 0.365364 | 0.918645 | BH |
| PITG_16430 | Pi conserved hypothetical protein (    | -32.9843 | -34.0636 | 0.365364 | 0.918645 | BH |
| PITG_16820 | Pi conserved hypothetical protein (    | -32.9843 | -34.0636 | 0.365364 | 0.918645 | BH |
| PITG_17669 | Pi M96 mating-specific protein far     | -32.9843 | -34.0636 | 0.365364 | 0.918645 | BH |
| PITG_18813 | Pi conserved hypothetical protein (    | -32.9843 | -34.0636 | 0.365364 | 0.918645 | BH |
| PITG_19659 | Pi ATP-binding Cassette (ABC) Supe     | -32.9843 | -34.0636 | 0.365364 | 0.918645 | BH |
| PITG_20657 | Pi conserved hypothetical protein (    | -32.9843 | -34.0636 | 0.365364 | 0.918645 | BH |

|            |                                       |          |          |          |          |    |
|------------|---------------------------------------|----------|----------|----------|----------|----|
| PITG_20779 | Pi hypothetical protein (693 nt)      | -32.9843 | -34.0636 | 0.365364 | 0.918645 | BH |
| PITG_00031 | Pi conserved hypothetical protein (   | -32.9111 | -34.21   | 0.366166 | 0.918645 | BH |
| PITG_00748 | Pi conserved hypothetical protein (   | -32.9468 | -34.1385 | 0.366166 | 0.918645 | BH |
| PITG_01283 | Pi glycoside hydrolase, putative (85  | -32.9468 | -34.1385 | 0.366166 | 0.918645 | BH |
| PITG_01441 | Pi conserved hypothetical protein (   | -32.9468 | -34.1385 | 0.366166 | 0.918645 | BH |
| PITG_01564 | Pi amino-acid acetyltransferase, pu   | -32.9468 | -34.1385 | 0.366166 | 0.918645 | BH |
| PITG_01954 | Pi conserved hypothetical protein (   | -32.9111 | -34.21   | 0.366166 | 0.918645 | BH |
| PITG_01993 | Pi transmembrane protein, putativ     | -32.9111 | -34.21   | 0.366166 | 0.918645 | BH |
| PITG_02193 | Pi conserved hypothetical protein (   | -32.9468 | -34.1385 | 0.366166 | 0.918645 | BH |
| PITG_02238 | Pi conserved hypothetical protein (   | -32.9468 | -34.1385 | 0.366166 | 0.918645 | BH |
| PITG_02677 | Pi DEAD/DEAH box RNA helicase, p      | -32.9111 | -34.21   | 0.366166 | 0.918645 | BH |
| PITG_02885 | Pi conserved hypothetical protein (   | -32.9468 | -34.1385 | 0.366166 | 0.918645 | BH |
| PITG_03584 | Pi hypothetical protein (2286 nt)     | -32.9468 | -34.1385 | 0.366166 | 0.918645 | BH |
| PITG_03749 | Pi hypothetical protein (975 nt)      | -32.9468 | -34.1385 | 0.366166 | 0.918645 | BH |
| PITG_03789 | Pi conserved hypothetical protein (   | -32.9468 | -34.1385 | 0.366166 | 0.918645 | BH |
| PITG_03877 | Pi conserved hypothetical protein (   | -32.9111 | -34.21   | 0.366166 | 0.918645 | BH |
| PITG_03891 | Pi conserved hypothetical protein (   | -32.9111 | -34.21   | 0.366166 | 0.918645 | BH |
| PITG_04053 | Pi conserved hypothetical protein (   | -32.9468 | -34.1385 | 0.366166 | 0.918645 | BH |
| PITG_04575 | Pi conserved hypothetical protein (   | -32.9111 | -34.21   | 0.366166 | 0.918645 | BH |
| PITG_04644 | Pi mRNA cap guanine-N7 methyltra      | -32.9111 | -34.21   | 0.366166 | 0.918645 | BH |
| PITG_04877 | Pi oxidase, putative (1849 nt)        | -32.9468 | -34.1385 | 0.366166 | 0.918645 | BH |
| PITG_05517 | Pi regulatory-associated protein of   | -32.9468 | -34.1385 | 0.366166 | 0.918645 | BH |
| PITG_06033 | Pi conserved hypothetical protein (   | -32.9111 | -34.21   | 0.366166 | 0.918645 | BH |
| PITG_06067 | Pi conserved hypothetical protein (   | -32.9111 | -34.21   | 0.366166 | 0.918645 | BH |
| PITG_06944 | Pi conserved hypothetical protein (   | -32.9111 | -34.21   | 0.366166 | 0.918645 | BH |
| PITG_07061 | Pi ubiquitin-conjugating enzyme E2    | -32.9468 | -34.1385 | 0.366166 | 0.918645 | BH |
| PITG_07134 | Pi ATP-binding Cassette (ABC) Sup     | -32.9111 | -34.21   | 0.366166 | 0.918645 | BH |
| PITG_07941 | Pi conserved hypothetical protein (   | -32.9111 | -34.21   | 0.366166 | 0.918645 | BH |
| PITG_08056 | Pi carbohydrate esterase, putative    | -32.9111 | -34.21   | 0.366166 | 0.918645 | BH |
| PITG_08386 | Pi hypothetical protein (516 nt)      | -32.9468 | -34.1385 | 0.366166 | 0.918645 | BH |
| PITG_08506 | Pi conserved hypothetical protein (   | -32.9111 | -34.21   | 0.366166 | 0.918645 | BH |
| PITG_08993 | Pi conserved hypothetical protein (   | -32.9468 | -34.1385 | 0.366166 | 0.918645 | BH |
| PITG_09270 | Pi structural maintenance of chron    | -32.9111 | -34.21   | 0.366166 | 0.918645 | BH |
| PITG_09876 | Pi conserved hypothetical protein (   | -32.9468 | -34.1385 | 0.366166 | 0.918645 | BH |
| PITG_10675 | Pi protein kinase, putative (1566 nt) | -32.9468 | -34.1385 | 0.366166 | 0.918645 | BH |
| PITG_10794 | Pi conserved oligomeric Golgi com     | -32.9111 | -34.21   | 0.366166 | 0.918645 | BH |
| PITG_10817 | Pi nonsense transcript regulator (1   | -32.9111 | -34.21   | 0.366166 | 0.918645 | BH |
| PITG_10898 | Pi conserved hypothetical protein (   | -32.9468 | -34.1385 | 0.366166 | 0.918645 | BH |
| PITG_10912 | Pi conserved hypothetical protein (   | -32.9111 | -34.21   | 0.366166 | 0.918645 | BH |
| PITG_11497 | Pi transcriptional regulator ATRX (3  | -32.9111 | -34.21   | 0.366166 | 0.918645 | BH |
| PITG_11557 | Pi conserved hypothetical protein (   | -32.9111 | -34.21   | 0.366166 | 0.918645 | BH |
| PITG_12331 | Pi cleavage and polyadenylation sp    | -32.9468 | -34.1385 | 0.366166 | 0.918645 | BH |
| PITG_12993 | Pi serine/threonine protein kinase    | -32.9468 | -34.1385 | 0.366166 | 0.918645 | BH |
| PITG_13224 | Pi beclin-1-like protein (2184 nt)    | -32.9111 | -34.21   | 0.366166 | 0.918645 | BH |
| PITG_13383 | Pi glycoprotein elicitor-like protein | -32.9468 | -34.1385 | 0.366166 | 0.918645 | BH |
| PITG_13421 | Pi tripeptidyl-peptidase, putative (  | -32.9468 | -34.1385 | 0.366166 | 0.918645 | BH |
| PITG_13426 | Pi conserved hypothetical protein (   | -32.9468 | -34.1385 | 0.366166 | 0.918645 | BH |

|            |                                      |          |          |          |          |    |
|------------|--------------------------------------|----------|----------|----------|----------|----|
| PITG_15075 | Pi Major Facilitator Superfamily (M  | -32.9468 | -34.1385 | 0.366166 | 0.918645 | BH |
| PITG_15141 | Pi conserved hypothetical protein (  | -32.9468 | -34.1385 | 0.366166 | 0.918645 | BH |
| PITG_15644 | Pi glycoside hydrolase, putative (20 | -32.9111 | -34.21   | 0.366166 | 0.918645 | BH |
| PITG_15749 | Pi conserved hypothetical protein (  | -32.8959 | -34.2404 | 0.366166 | 0.918645 | BH |
| PITG_16312 | Pi vacuolar protein sorting-associat | -32.9468 | -34.1385 | 0.366166 | 0.918645 | BH |
| PITG_16461 | Pi protein kinase, putative (2618 nt | -32.9111 | -34.21   | 0.366166 | 0.918645 | BH |
| PITG_17282 | Pi conserved hypothetical protein (  | -32.9468 | -34.1385 | 0.366166 | 0.918645 | BH |
| PITG_17391 | Pi conserved hypothetical protein (  | -32.9468 | -34.1385 | 0.366166 | 0.918645 | BH |
| PITG_18044 | Pi conserved hypothetical protein (  | -32.9468 | -34.1385 | 0.366166 | 0.918645 | BH |
| PITG_18250 | Pi conserved hypothetical protein (  | -32.9111 | -34.21   | 0.366166 | 0.918645 | BH |
| PITG_18320 | Pi conserved hypothetical protein (  | -32.9468 | -34.1385 | 0.366166 | 0.918645 | BH |
| PITG_18328 | Pi conserved hypothetical protein (  | -32.9468 | -34.1385 | 0.366166 | 0.918645 | BH |
| PITG_18372 | Pi myotubularin-like protein (4389   | -32.9468 | -34.1385 | 0.366166 | 0.918645 | BH |
| PITG_18649 | Pi SUMO protease, putative (666 nt   | -32.9111 | -34.21   | 0.366166 | 0.918645 | BH |
| PITG_19110 | Pi conserved hypothetical protein (  | -32.9111 | -34.21   | 0.366166 | 0.918645 | BH |
| PITG_19208 | Pi conserved hypothetical protein (  | -32.9111 | -34.21   | 0.366166 | 0.918645 | BH |
| PITG_19657 | Pi conserved hypothetical protein (  | -32.8959 | -34.2404 | 0.366166 | 0.918645 | BH |
| PITG_20120 | Pi hypothetical protein (234 nt)     | -32.9468 | -34.1385 | 0.366166 | 0.918645 | BH |
| PITG_20525 | Pi conserved hypothetical protein (  | -32.9468 | -34.1385 | 0.366166 | 0.918645 | BH |
| PITG_21507 | Pi sterol 3-beta-glucosyltransferase | -32.9468 | -34.1385 | 0.366166 | 0.918645 | BH |
| PITG_21573 | Pi conserved hypothetical protein (  | -32.9468 | -34.1385 | 0.366166 | 0.918645 | BH |
| PITG_21601 | Pi conserved hypothetical protein (  | -32.9468 | -34.1385 | 0.366166 | 0.918645 | BH |
| PITG_00185 | Pi Voltage-gated Ion Channel (VIC)   | -32.8773 | -34.2775 | 0.366972 | 0.918645 | BH |
| PITG_00197 | Pi conserved hypothetical protein (  | -32.8773 | -34.2775 | 0.366972 | 0.918645 | BH |
| PITG_01005 | Pi conserved hypothetical protein (  | -32.8773 | -34.2775 | 0.366972 | 0.918645 | BH |
| PITG_01252 | Pi conserved hypothetical protein (  | -32.8773 | -34.2775 | 0.366972 | 0.918645 | BH |
| PITG_01902 | Pi conserved hypothetical protein (  | -32.8449 | -34.3423 | 0.366972 | 0.918645 | BH |
| PITG_01921 | Pi conserved hypothetical protein (  | -32.8449 | -34.3423 | 0.366972 | 0.918645 | BH |
| PITG_01989 | Pi hypothetical protein (249 nt)     | -32.8773 | -34.2775 | 0.366972 | 0.918645 | BH |
| PITG_02525 | Pi elicitin-like mating protein M25  | -32.8773 | -34.2775 | 0.366972 | 0.918645 | BH |
| PITG_03032 | Pi conserved hypothetical protein (  | -32.8449 | -34.3423 | 0.366972 | 0.918645 | BH |
| PITG_03083 | Pi nuclease precursor (725 nt)       | -32.8449 | -34.3423 | 0.366972 | 0.918645 | BH |
| PITG_03413 | Pi conserved hypothetical protein (  | -32.8449 | -34.3423 | 0.366972 | 0.918645 | BH |
| PITG_03571 | Pi phosphatidylinositol kinase (PIK- | -32.8449 | -34.3423 | 0.366972 | 0.918645 | BH |
| PITG_03959 | Pi conserved hypothetical protein (  | -32.8773 | -34.2775 | 0.366972 | 0.918645 | BH |
| PITG_04044 | Pi conserved hypothetical protein (  | -32.8773 | -34.2775 | 0.366972 | 0.918645 | BH |
| PITG_04079 | Pi hypothetical protein (673 nt)     | -33.013  | -34.0062 | 0.366972 | 0.918645 | BH |
| PITG_05195 | Pi conserved hypothetical protein (  | -32.8773 | -34.2775 | 0.366972 | 0.918645 | BH |
| PITG_05218 | Pi ATP-binding Cassette (ABC) Super  | -32.8773 | -34.2775 | 0.366972 | 0.918645 | BH |
| PITG_05338 | Pi protein kinase (2601 nt)          | -32.8449 | -34.3423 | 0.366972 | 0.918645 | BH |
| PITG_05644 | Pi phosphatidylinositol-3-phosphat   | -32.8449 | -34.3423 | 0.366972 | 0.918645 | BH |
| PITG_05889 | Pi conserved hypothetical protein (  | -32.8773 | -34.2775 | 0.366972 | 0.918645 | BH |
| PITG_06213 | Pi Resistance-Nodulation-Cell Divis  | -32.8449 | -34.3423 | 0.366972 | 0.918645 | BH |
| PITG_06260 | Pi dihydroxyacetone kinase, putati   | -32.8773 | -34.2775 | 0.366972 | 0.918645 | BH |
| PITG_07233 | Pi GPI inositol-deacylase, putative  | -32.8773 | -34.2775 | 0.366972 | 0.918645 | BH |
| PITG_07347 | Pi conserved hypothetical protein (  | -32.8449 | -34.3423 | 0.366972 | 0.918645 | BH |
| PITG_07395 | Pi hypothetical protein (563 nt)     | -32.8773 | -34.2775 | 0.366972 | 0.918645 | BH |

|            |                                               |          |          |          |          |    |
|------------|-----------------------------------------------|----------|----------|----------|----------|----|
| PITG_07731 | Pi protein kinase, putative (2749 nt)         | -32.8773 | -34.2775 | 0.366972 | 0.918645 | BH |
| PITG_07870 | Pi conserved hypothetical protein (175 nt)    | -32.8449 | -34.3423 | 0.366972 | 0.918645 | BH |
| PITG_08032 | Pi P-type ATPase (P-ATPase) Superfamily       | -32.8449 | -34.3423 | 0.366972 | 0.918645 | BH |
| PITG_08040 | Pi conserved hypothetical protein (175 nt)    | -32.8773 | -34.2775 | 0.366972 | 0.918645 | BH |
| PITG_08045 | Pi dimethyladenosine transferase (175 nt)     | -32.8449 | -34.3423 | 0.366972 | 0.918645 | BH |
| PITG_08207 | Pi conserved hypothetical protein (175 nt)    | -32.8773 | -34.2775 | 0.366972 | 0.918645 | BH |
| PITG_08995 | Pi conserved hypothetical protein (175 nt)    | -32.8773 | -34.2775 | 0.366972 | 0.918645 | BH |
| PITG_09365 | Pi conserved hypothetical protein (175 nt)    | -32.8449 | -34.3423 | 0.366972 | 0.918645 | BH |
| PITG_09581 | Pi conserved hypothetical protein (175 nt)    | -32.8773 | -34.2775 | 0.366972 | 0.918645 | BH |
| PITG_10419 | Pi ubiquitin-conjugating enzyme E2 (175 nt)   | -32.8773 | -34.2775 | 0.366972 | 0.918645 | BH |
| PITG_10472 | Pi conserved hypothetical protein (175 nt)    | -32.8773 | -34.2775 | 0.366972 | 0.918645 | BH |
| PITG_10594 | Pi conserved hypothetical protein (175 nt)    | -32.8773 | -34.2775 | 0.366972 | 0.918645 | BH |
| PITG_11305 | Pi hypothetical protein (755 nt)              | -32.8773 | -34.2775 | 0.366972 | 0.918645 | BH |
| PITG_13055 | Pi conserved hypothetical protein (175 nt)    | -32.8449 | -34.3423 | 0.366972 | 0.918645 | BH |
| PITG_13259 | Pi conserved hypothetical protein (175 nt)    | -32.8773 | -34.2775 | 0.366972 | 0.918645 | BH |
| PITG_13992 | Pi conserved hypothetical protein (175 nt)    | -32.8449 | -34.3423 | 0.366972 | 0.918645 | BH |
| PITG_14992 | Pi protein kinase, putative (3270 nt)         | -32.8449 | -34.3423 | 0.366972 | 0.918645 | BH |
| PITG_15309 | Pi DNA mismatch repair protein (175 nt)       | -32.8773 | -34.2775 | 0.366972 | 0.918645 | BH |
| PITG_15607 | Pi conserved hypothetical protein (175 nt)    | -32.8773 | -34.2775 | 0.366972 | 0.918645 | BH |
| PITG_15736 | Pi conserved hypothetical protein (175 nt)    | -32.8449 | -34.3423 | 0.366972 | 0.918645 | BH |
| PITG_16918 | Pi conserved hypothetical protein (175 nt)    | -32.8773 | -34.2775 | 0.366972 | 0.918645 | BH |
| PITG_17068 | Pi conserved hypothetical protein (175 nt)    | -32.8773 | -34.2775 | 0.366972 | 0.918645 | BH |
| PITG_17984 | Pi conserved hypothetical protein (175 nt)    | -32.8449 | -34.3423 | 0.366972 | 0.918645 | BH |
| PITG_18015 | Pi glycosyl transferase, putative (175 nt)    | -32.8773 | -34.2775 | 0.366972 | 0.918645 | BH |
| PITG_18658 | Pi conserved hypothetical protein (175 nt)    | -32.8449 | -34.3423 | 0.366972 | 0.918645 | BH |
| PITG_18753 | Pi conserved hypothetical protein (175 nt)    | -32.8773 | -34.2775 | 0.366972 | 0.918645 | BH |
| PITG_18961 | Pi conserved hypothetical protein (175 nt)    | -32.8449 | -34.3423 | 0.366972 | 0.918645 | BH |
| PITG_19048 | Pi hypothetical protein (407 nt)              | -32.8773 | -34.2775 | 0.366972 | 0.918645 | BH |
| PITG_19436 | Pi sister chromatid cohesion protein (175 nt) | -32.8773 | -34.2775 | 0.366972 | 0.918645 | BH |
| PITG_20236 | Pi conserved hypothetical protein (175 nt)    | -32.8773 | -34.2775 | 0.366972 | 0.918645 | BH |
| PITG_20823 | Pi conserved hypothetical protein (175 nt)    | -32.8773 | -34.2775 | 0.366972 | 0.918645 | BH |
| PITG_21144 | Pi conserved hypothetical protein (175 nt)    | -32.8773 | -34.2775 | 0.366972 | 0.918645 | BH |
| PITG_21179 | Pi conserved hypothetical protein (175 nt)    | -32.8773 | -34.2775 | 0.366972 | 0.918645 | BH |
| PITG_21216 | Pi hypothetical protein (306 nt)              | -32.8449 | -34.3423 | 0.366972 | 0.918645 | BH |
| PITG_21942 | Pi conserved hypothetical protein (175 nt)    | -32.8449 | -34.3423 | 0.366972 | 0.918645 | BH |
| PITG_22035 | Pi conserved hypothetical protein (175 nt)    | -32.8773 | -34.2775 | 0.366972 | 0.918645 | BH |
| PITG_02221 | Pi thymidylate kinase (651 nt)                | -32.9333 | -34.1655 | 0.367782 | 0.918645 | BH |
| PITG_05511 | Pi Mitochondrial Carrier (MC) Family          | -32.9333 | -34.1655 | 0.367782 | 0.918645 | BH |
| PITG_13801 | Pi conserved hypothetical protein (175 nt)    | -32.9333 | -34.1655 | 0.367782 | 0.918645 | BH |
| PITG_14613 | Pi conserved hypothetical protein (175 nt)    | -32.9333 | -34.1655 | 0.367782 | 0.918645 | BH |
| PITG_14868 | Pi hypothetical protein (1766 nt)             | -32.9333 | -34.1655 | 0.367782 | 0.918645 | BH |
| PITG_22689 | Pi hypothetical protein (1677 nt)             | -32.9333 | -34.1655 | 0.367782 | 0.918645 | BH |
| PITG_00884 | Pi conserved hypothetical protein (175 nt)    | -12.9844 | -1.257   | 0.367791 | 0.918645 | BH |
| PITG_12833 | Pi conserved hypothetical protein (175 nt)    | -12.0842 | 1.692962 | 0.368603 | 0.918645 | BH |
| PITG_00466 | Pi conserved hypothetical protein (175 nt)    | -32.982  | -34.0681 | 0.369413 | 0.918645 | BH |
| PITG_01404 | Pi conserved hypothetical protein (175 nt)    | -32.982  | -34.0681 | 0.369413 | 0.918645 | BH |
| PITG_01622 | Pi myosin-like protein (4212 nt)              | -32.9449 | -34.1423 | 0.369413 | 0.918645 | BH |

|            |                                       |          |          |          |          |    |
|------------|---------------------------------------|----------|----------|----------|----------|----|
| PITG_02199 | Pi conserved hypothetical protein (   | -32.982  | -34.0681 | 0.369413 | 0.918645 | BH |
| PITG_05443 | Pi hypothetical protein (746 nt)      | -32.982  | -34.0681 | 0.369413 | 0.918645 | BH |
| PITG_05455 | Pi hypothetical protein (1667 nt)     | -32.9449 | -34.1423 | 0.369413 | 0.918645 | BH |
| PITG_05478 | Pi conserved hypothetical protein (   | -32.9449 | -34.1423 | 0.369413 | 0.918645 | BH |
| PITG_05563 | Pi hypothetical protein (347 nt)      | -32.982  | -34.0681 | 0.369413 | 0.918645 | BH |
| PITG_05639 | Pi conserved hypothetical protein (   | -32.982  | -34.0681 | 0.369413 | 0.918645 | BH |
| PITG_06671 | Pi canalicular multispecific organic  | -32.982  | -34.0681 | 0.369413 | 0.918645 | BH |
| PITG_06901 | Pi conserved hypothetical protein (   | -32.982  | -34.0681 | 0.369413 | 0.918645 | BH |
| PITG_08230 | Pi vacuolar protein sorting-associat  | -32.9449 | -34.1423 | 0.369413 | 0.918645 | BH |
| PITG_08333 | Pi conserved hypothetical protein (   | -32.982  | -34.0681 | 0.369413 | 0.918645 | BH |
| PITG_08502 | Pi conserved hypothetical protein (   | -32.982  | -34.0681 | 0.369413 | 0.918645 | BH |
| PITG_08686 | Pi conserved hypothetical protein (   | -32.982  | -34.0681 | 0.369413 | 0.918645 | BH |
| PITG_08690 | Pi conserved hypothetical protein (   | -32.982  | -34.0681 | 0.369413 | 0.918645 | BH |
| PITG_10175 | Pi conserved hypothetical protein (   | -32.982  | -34.0681 | 0.369413 | 0.918645 | BH |
| PITG_10314 | Pi conserved hypothetical protein (   | -32.982  | -34.0681 | 0.369413 | 0.918645 | BH |
| PITG_10521 | Pi hypothetical protein (2059 nt)     | -32.982  | -34.0681 | 0.369413 | 0.918645 | BH |
| PITG_10544 | Pi putative GPI-anchored acidic pro   | -32.9449 | -34.1423 | 0.369413 | 0.918645 | BH |
| PITG_11723 | Pi vacuolar protein sorting-associat  | -32.9449 | -34.1423 | 0.369413 | 0.918645 | BH |
| PITG_12150 | Pi conserved hypothetical protein (   | -32.982  | -34.0681 | 0.369413 | 0.918645 | BH |
| PITG_12429 | Pi conserved hypothetical protein (   | -32.9449 | -34.1423 | 0.369413 | 0.918645 | BH |
| PITG_12588 | Pi phosphatidylinositol N-acetylglu   | -32.982  | -34.0681 | 0.369413 | 0.918645 | BH |
| PITG_12930 | Pi porphobilinogen deaminase (13:     | -32.982  | -34.0681 | 0.369413 | 0.918645 | BH |
| PITG_13273 | Pi conserved hypothetical protein (   | -32.9449 | -34.1423 | 0.369413 | 0.918645 | BH |
| PITG_13337 | Pi conserved hypothetical protein (   | -32.982  | -34.0681 | 0.369413 | 0.918645 | BH |
| PITG_13447 | Pi conserved hypothetical protein (   | -32.9449 | -34.1423 | 0.369413 | 0.918645 | BH |
| PITG_13609 | Pi conserved hypothetical protein (   | -32.982  | -34.0681 | 0.369413 | 0.918645 | BH |
| PITG_13764 | Pi conserved hypothetical protein (   | -32.9449 | -34.1423 | 0.369413 | 0.918645 | BH |
| PITG_14156 | Pi protein kinase, putative (2271 nt) | -32.9449 | -34.1423 | 0.369413 | 0.918645 | BH |
| PITG_14270 | Pi GPI-anchored leucine-rich lipopr   | -32.9449 | -34.1423 | 0.369413 | 0.918645 | BH |
| PITG_16528 | Pi hsp70-like protein (1904 nt)       | -32.982  | -34.0681 | 0.369413 | 0.918645 | BH |
| PITG_16842 | Pi conserved hypothetical protein (   | -32.982  | -34.0681 | 0.369413 | 0.918645 | BH |
| PITG_17388 | Pi conserved hypothetical protein (   | -32.982  | -34.0681 | 0.369413 | 0.918645 | BH |
| PITG_17692 | Pi conserved hypothetical protein (   | -32.982  | -34.0681 | 0.369413 | 0.918645 | BH |
| PITG_17845 | Pi carbonic anhydrase, putative (5:   | -32.982  | -34.0681 | 0.369413 | 0.918645 | BH |
| PITG_17985 | Pi conserved hypothetical protein (   | -32.982  | -34.0681 | 0.369413 | 0.918645 | BH |
| PITG_18323 | Pi conserved hypothetical protein (   | -32.982  | -34.0681 | 0.369413 | 0.918645 | BH |
| PITG_19489 | Pi conserved hypothetical protein (   | -32.982  | -34.0681 | 0.369413 | 0.918645 | BH |
| PITG_19646 | Pi pre-mRNA-processing factor 19,     | -32.9449 | -34.1423 | 0.369413 | 0.918645 | BH |
| PITG_20218 | Pi hypothetical protein (629 nt)      | -32.9449 | -34.1423 | 0.369413 | 0.918645 | BH |
| PITG_22141 | Pi conserved hypothetical protein (   | -32.982  | -34.0681 | 0.369413 | 0.918645 | BH |
| PITG_22548 | Pi hypothetical protein similar to p  | -32.982  | -34.0681 | 0.369413 | 0.918645 | BH |
| PITG_22600 | Pi conserved hypothetical protein (   | -32.982  | -34.0681 | 0.369413 | 0.918645 | BH |
| PITG_15133 | Pi conserved hypothetical protein (   | -32.8611 | -34.31   | 0.369413 | 0.918645 | BH |
| PITG_00930 | Pi conserved hypothetical protein (   | -12.5211 | -1.14705 | 0.37005  | 0.918645 | BH |
| PITG_08681 | Pi elongation factor G, mitochondr    | -15.3454 | 3.143605 | 0.370124 | 0.918645 | BH |
| PITG_04156 | Pi conserved hypothetical protein (   | -32.9099 | -34.2123 | 0.370233 | 0.918645 | BH |
| PITG_04204 | Pi geranylgeranyl transferase type-   | -32.9099 | -34.2123 | 0.370233 | 0.918645 | BH |

|            |                                      |          |          |          |          |    |
|------------|--------------------------------------|----------|----------|----------|----------|----|
| PITG_04399 | Pi Amino Acid/Auxin Permease (AA     | -32.9099 | -34.2123 | 0.370233 | 0.918645 | BH |
| PITG_06304 | Pi conserved hypothetical protein (  | -32.9099 | -34.2123 | 0.370233 | 0.918645 | BH |
| PITG_07801 | Pi conserved hypothetical protein (  | -32.9099 | -34.2123 | 0.370233 | 0.918645 | BH |
| PITG_07944 | Pi conserved hypothetical protein (  | -32.9099 | -34.2123 | 0.370233 | 0.918645 | BH |
| PITG_08998 | Pi endoglucanase, putative (1107 r   | -32.9099 | -34.2123 | 0.370233 | 0.918645 | BH |
| PITG_10485 | Pi conserved hypothetical protein (  | -32.9099 | -34.2123 | 0.370233 | 0.918645 | BH |
| PITG_10518 | Pi bloom syndrome protein (3969 i    | -32.9099 | -34.2123 | 0.370233 | 0.918645 | BH |
| PITG_10973 | Pi conserved hypothetical protein (  | -32.9099 | -34.2123 | 0.370233 | 0.918645 | BH |
| PITG_11476 | Pi conserved hypothetical protein (  | -32.9099 | -34.2123 | 0.370233 | 0.918645 | BH |
| PITG_12498 | Pi conserved hypothetical protein (  | -32.9099 | -34.2123 | 0.370233 | 0.918645 | BH |
| PITG_12919 | Pi conserved hypothetical protein (  | -32.9099 | -34.2123 | 0.370233 | 0.918645 | BH |
| PITG_15810 | Pi eukaryotic translation initiation | -32.9099 | -34.2123 | 0.370233 | 0.918645 | BH |
| PITG_16131 | Pi conserved hypothetical protein (  | -32.9099 | -34.2123 | 0.370233 | 0.918645 | BH |
| PITG_17378 | Pi 5'-nucleotidase domain-containi   | -32.9099 | -34.2123 | 0.370233 | 0.918645 | BH |
| PITG_19420 | Pi hypothetical protein (252 nt)     | -32.9099 | -34.2123 | 0.370233 | 0.918645 | BH |
| PITG_20706 | Pi conserved hypothetical protein (  | -32.9099 | -34.2123 | 0.370233 | 0.918645 | BH |
| PITG_16683 | Pi transmembrane protein, putativ    | -32.9728 | -34.0865 | 0.370233 | 0.918645 | BH |
| PITG_20386 | Pi eukaryotic translation initiation | -13.9665 | 1.659918 | 0.370373 | 0.918645 | BH |
| PITG_00260 | Pi conserved hypothetical protein (  | -32.8966 | -34.2389 | 0.371058 | 0.918645 | BH |
| PITG_01063 | Pi conserved hypothetical protein (  | -32.8966 | -34.2389 | 0.371058 | 0.918645 | BH |
| PITG_01298 | Pi conserved hypothetical protein (  | -32.8766 | -34.279  | 0.371058 | 0.918645 | BH |
| PITG_01676 | Pi conserved hypothetical protein (  | -32.8766 | -34.279  | 0.371058 | 0.918645 | BH |
| PITG_01869 | Pi alpha,alpha-trehalose-phosphat    | -32.8766 | -34.279  | 0.371058 | 0.918645 | BH |
| PITG_03402 | Pi conserved hypothetical protein (  | -32.8766 | -34.279  | 0.371058 | 0.918645 | BH |
| PITG_06296 | Pi ATP-binding Cassette (ABC) Sup    | -32.8766 | -34.279  | 0.371058 | 0.918645 | BH |
| PITG_06437 | Pi enoyl-CoA hydratase/isomerase     | -32.8766 | -34.279  | 0.371058 | 0.918645 | BH |
| PITG_07633 | Pi conserved hypothetical protein (  | -32.935  | -34.1622 | 0.371058 | 0.918645 | BH |
| PITG_07772 | Pi conserved hypothetical protein (  | -32.8766 | -34.279  | 0.371058 | 0.918645 | BH |
| PITG_08808 | Pi calcyphosin-like protein (1653 n  | -32.8766 | -34.279  | 0.371058 | 0.918645 | BH |
| PITG_09209 | Pi conserved hypothetical protein (  | -32.8766 | -34.279  | 0.371058 | 0.918645 | BH |
| PITG_09663 | Pi hypothetical protein (538 nt)     | -32.8766 | -34.279  | 0.371058 | 0.918645 | BH |
| PITG_10853 | Pi conserved hypothetical protein (  | -32.8766 | -34.279  | 0.371058 | 0.918645 | BH |
| PITG_11617 | Pi alkylated DNA repair protein alk  | -32.8766 | -34.279  | 0.371058 | 0.918645 | BH |
| PITG_12620 | Pi conserved hypothetical protein (  | -32.8766 | -34.279  | 0.371058 | 0.918645 | BH |
| PITG_13050 | Pi hypothetical protein (455 nt)     | -32.8766 | -34.279  | 0.371058 | 0.918645 | BH |
| PITG_13774 | Pi conserved hypothetical protein (  | -32.8766 | -34.279  | 0.371058 | 0.918645 | BH |
| PITG_14300 | Pi conserved hypothetical protein (  | -32.8766 | -34.279  | 0.371058 | 0.918645 | BH |
| PITG_15967 | Pi dynein heavy chain, outer arm (:  | -32.8766 | -34.279  | 0.371058 | 0.918645 | BH |
| PITG_16539 | Pi conserved hypothetical protein (  | -32.935  | -34.1622 | 0.371058 | 0.918645 | BH |
| PITG_18106 | Pi vacuolar protein sorting-associat | -32.8766 | -34.279  | 0.371058 | 0.918645 | BH |
| PITG_19216 | Pi conserved hypothetical protein (  | -32.8766 | -34.279  | 0.371058 | 0.918645 | BH |
| PITG_19644 | Pi carbohydrate-binding protein, p   | -32.8766 | -34.279  | 0.371058 | 0.918645 | BH |
| PITG_21773 | Pi hypothetical protein (1354 nt)    | -32.8766 | -34.279  | 0.371058 | 0.918645 | BH |
| PITG_21784 | Pi conserved hypothetical protein (  | -32.8766 | -34.279  | 0.371058 | 0.918645 | BH |
| PITG_22616 | Pi conserved hypothetical protein (  | -32.8766 | -34.279  | 0.371058 | 0.918645 | BH |
| PITG_14180 | Pi glutamine synthetase (1184 nt)    | -11.2102 | 1.633458 | 0.371984 | 0.918645 | BH |
| PITG_20345 | Pi conserved hypothetical protein (  | -13.8403 | -1.41297 | 0.372363 | 0.918645 | BH |



|            |                                      |          |          |          |          |    |
|------------|--------------------------------------|----------|----------|----------|----------|----|
| PITG_03098 | Pi carbamoyl-phosphate synthase      | -13.0395 | 1.985565 | 0.372457 | 0.918645 | BH |
| PITG_01580 | Pi conserved hypothetical protein    | -13.8522 | -1.3904  | 0.374007 | 0.918645 | BH |
| PITG_03698 | Pi enolase (1502 nt)                 | -10.4917 | 1.588148 | 0.377653 | 0.918645 | BH |
| PITG_01417 | Pi serine/threonine-protein phosph   | -12.1916 | -1.05198 | 0.377998 | 0.918645 | BH |
| PITG_08445 | Pi cystathionine gamma-lyase (122    | -13.8167 | -1.46524 | 0.378941 | 0.918645 | BH |
| PITG_04977 | Pi conserved hypothetical protein    | -11.6111 | 1.697044 | 0.381313 | 0.918645 | BH |
| PITG_13020 | Pi inorganic phosphate transporter   | -13.4815 | 2.068116 | 0.38184  | 0.918645 | BH |
| PITG_13132 | Pi caltractin (659 nt)               | -13.0633 | -1.12    | 0.382147 | 0.918645 | BH |
| PITG_17525 | Pi crinkler (CRN) family protein, ps | -10.1769 | -1.28372 | 0.383154 | 0.918645 | BH |
| PITG_17007 | Pi cellulose synthase catalytic subu | -10.2539 | -1.29218 | 0.385376 | 0.918645 | BH |
| PITG_12158 | Pi Annexin (Annexin) Family (1140    | -11.229  | 1.657279 | 0.388696 | 0.918645 | BH |
| PITG_00116 | Pi SUMO ligase, putative (2368 nt)   | -32.3204 | -35.3912 | 0.389048 | 0.918645 | BH |
| PITG_00308 | Pi conserved hypothetical protein    | -32.3051 | -35.4219 | 0.389048 | 0.918645 | BH |
| PITG_00479 | Pi conserved hypothetical protein    | -32.2901 | -35.452  | 0.389048 | 0.918645 | BH |
| PITG_00515 | Pi hypothetical protein (1168 nt)    | -32.3051 | -35.4219 | 0.389048 | 0.918645 | BH |
| PITG_01206 | Pi xaa-Pro aminopeptidase, putativ   | -32.3044 | -35.4232 | 0.389048 | 0.918645 | BH |
| PITG_01680 | Pi RNA-binding protein PNO1-like p   | -32.2901 | -35.452  | 0.389048 | 0.918645 | BH |
| PITG_03938 | Pi conserved hypothetical protein    | -32.3204 | -35.3912 | 0.389048 | 0.918645 | BH |
| PITG_04708 | Pi bifunctional fold protein (927 nt | -32.2901 | -35.452  | 0.389048 | 0.918645 | BH |
| PITG_05429 | Pi conserved hypothetical protein    | -32.2754 | -35.4814 | 0.389048 | 0.918645 | BH |
| PITG_05560 | Pi conserved hypothetical protein    | -32.3044 | -35.4232 | 0.389048 | 0.918645 | BH |
| PITG_06695 | Pi conserved hypothetical protein    | -32.2901 | -35.452  | 0.389048 | 0.918645 | BH |
| PITG_06772 | Pi ATP-binding cassette sub-family   | -32.274  | -35.4841 | 0.389048 | 0.918645 | BH |
| PITG_07420 | Pi hypothetical protein (1269 nt)    | -32.2754 | -35.4814 | 0.389048 | 0.918645 | BH |
| PITG_10183 | Pi conserved hypothetical protein    | -32.3044 | -35.4232 | 0.389048 | 0.918645 | BH |
| PITG_10830 | Pi cyclin-dependent kinase with F-k  | -32.3044 | -35.4232 | 0.389048 | 0.918645 | BH |
| PITG_10888 | Pi Resistance-Nodulation-Cell Divis  | -32.2747 | -35.4828 | 0.389048 | 0.918645 | BH |
| PITG_12454 | Pi GTP-binding protein, putative (2  | -32.3051 | -35.4219 | 0.389048 | 0.918645 | BH |
| PITG_14717 | Pi conserved hypothetical protein    | -32.3051 | -35.4219 | 0.389048 | 0.918645 | BH |
| PITG_16020 | Pi conserved hypothetical protein    | -32.3362 | -35.3598 | 0.389048 | 0.918645 | BH |
| PITG_16346 | Pi conserved hypothetical protein    | -32.3051 | -35.4219 | 0.389048 | 0.918645 | BH |
| PITG_18033 | Pi conserved hypothetical protein    | -32.3044 | -35.4232 | 0.389048 | 0.918645 | BH |
| PITG_21602 | Pi pro-apoptotic serine protease ni  | -32.3204 | -35.3912 | 0.389048 | 0.918645 | BH |
| PITG_21395 | Pi CBL-interacting serine/threonine  | -12.1977 | -1.05446 | 0.389546 | 0.918645 | BH |
| PITG_00706 | Pi isoamyl acetate-hydrolyzing este  | -32.3861 | -35.2599 | 0.39013  | 0.918645 | BH |
| PITG_04600 | Pi conserved hypothetical protein    | -32.3861 | -35.2599 | 0.39013  | 0.918645 | BH |
| PITG_04718 | Pi protein pelota (1472 nt)          | -32.4029 | -35.2262 | 0.39013  | 0.918645 | BH |
| PITG_06088 | Pi conserved hypothetical protein    | -32.3861 | -35.2599 | 0.39013  | 0.918645 | BH |
| PITG_08653 | Pi mitochondrial import inner men    | -32.4029 | -35.2262 | 0.39013  | 0.918645 | BH |
| PITG_10026 | Pi phosphatidate cytidyltransfera    | -32.3861 | -35.2599 | 0.39013  | 0.918645 | BH |
| PITG_10989 | Pi down syndrome critical region p   | -32.3861 | -35.2599 | 0.39013  | 0.918645 | BH |
| PITG_15242 | Pi phosphate acetyltransferase (24   | -32.3861 | -35.2599 | 0.39013  | 0.918645 | BH |
| PITG_15571 | Pi Mitochondrial Carrier (MC) Fami   | -32.4029 | -35.2262 | 0.39013  | 0.918645 | BH |
| PITG_19991 | Pi hypothetical protein (720 nt)     | -32.3861 | -35.2599 | 0.39013  | 0.918645 | BH |
| PITG_00071 | Pi DNA replication complex GINS p    | -32.3866 | -35.259  | 0.39013  | 0.918645 | BH |
| PITG_00236 | Pi cyclin-H, putative (1197 nt)      | -32.3687 | -35.2947 | 0.39013  | 0.918645 | BH |
| PITG_00295 | Pi conserved hypothetical protein    | -32.3528 | -35.3265 | 0.39013  | 0.918645 | BH |

|            |                                      |          |          |         |          |    |
|------------|--------------------------------------|----------|----------|---------|----------|----|
| PITG_00302 | Pi phenylalanyl-tRNA synthetase b    | -32.3356 | -35.361  | 0.39013 | 0.918645 | BH |
| PITG_00500 | Pi conserved hypothetical protein (  | -32.3692 | -35.2936 | 0.39013 | 0.918645 | BH |
| PITG_00656 | Pi conserved hypothetical protein (  | -32.3866 | -35.259  | 0.39013 | 0.918645 | BH |
| PITG_00665 | Pi conserved hypothetical protein (  | -32.3057 | -35.4206 | 0.39013 | 0.918645 | BH |
| PITG_00699 | Pi dynactin subunit 5, putative (90  | -32.3368 | -35.3586 | 0.39013 | 0.918645 | BH |
| PITG_01121 | Pi ras family GTPase, putative (183  | -32.3192 | -35.3937 | 0.39013 | 0.918645 | BH |
| PITG_01397 | Pi glycoside hydrolase, putative (17 | -32.3198 | -35.3925 | 0.39013 | 0.918645 | BH |
| PITG_01405 | Pi conserved hypothetical protein (  | -32.3211 | -35.39   | 0.39013 | 0.918645 | BH |
| PITG_01510 | Pi conserved hypothetical protein (  | -32.4034 | -35.2254 | 0.39013 | 0.918645 | BH |
| PITG_01583 | Pi hypothetical protein (1278 nt)    | -32.3534 | -35.3254 | 0.39013 | 0.918645 | BH |
| PITG_01681 | Pi conserved hypothetical protein (  | -32.3698 | -35.2926 | 0.39013 | 0.918645 | BH |
| PITG_01755 | Pi conserved hypothetical protein (  | -32.2907 | -35.4506 | 0.39013 | 0.918645 | BH |
| PITG_01776 | Pi hypothetical protein (678 nt)     | -32.3038 | -35.4246 | 0.39013 | 0.918645 | BH |
| PITG_01789 | Pi conserved hypothetical protein (  | -32.3528 | -35.3265 | 0.39013 | 0.918645 | BH |
| PITG_02069 | Pi vacuolar sorting protein SNF8 (9  | -32.3534 | -35.3254 | 0.39013 | 0.918645 | BH |
| PITG_02097 | Pi hypothetical protein (2647 nt)    | -32.2907 | -35.4506 | 0.39013 | 0.918645 | BH |
| PITG_02347 | Pi conserved hypothetical protein (  | -32.3528 | -35.3265 | 0.39013 | 0.918645 | BH |
| PITG_02564 | Pi exosome complex exonuclease f     | -32.3517 | -35.3288 | 0.39013 | 0.918645 | BH |
| PITG_02679 | Pi conserved hypothetical protein (  | -32.3528 | -35.3265 | 0.39013 | 0.918645 | BH |
| PITG_03017 | Pi integrator complex subunit, put   | -32.3211 | -35.39   | 0.39013 | 0.918645 | BH |
| PITG_03219 | Pi geranylgeranyl transferase type-  | -32.3368 | -35.3586 | 0.39013 | 0.918645 | BH |
| PITG_03532 | Pi conserved hypothetical protein (  | -32.4034 | -35.2254 | 0.39013 | 0.918645 | BH |
| PITG_03610 | Pi conserved hypothetical protein (  | -32.3522 | -35.3276 | 0.39013 | 0.918645 | BH |
| PITG_03646 | Pi vacuolar protein-sorting-associa  | -32.2907 | -35.4506 | 0.39013 | 0.918645 | BH |
| PITG_03659 | Pi conserved hypothetical protein (  | -32.2733 | -35.4856 | 0.39013 | 0.918645 | BH |
| PITG_03761 | Pi conserved hypothetical protein (  | -32.288  | -35.4561 | 0.39013 | 0.918645 | BH |
| PITG_03821 | Pi conserved hypothetical protein (  | -32.3064 | -35.4193 | 0.39013 | 0.918645 | BH |
| PITG_04421 | Pi protein kinase (1613 nt)          | -32.3534 | -35.3254 | 0.39013 | 0.918645 | BH |
| PITG_04555 | Pi hypothetical protein (948 nt)     | -32.3057 | -35.4206 | 0.39013 | 0.918645 | BH |
| PITG_04645 | Pi conserved hypothetical protein (  | -32.2887 | -35.4547 | 0.39013 | 0.918645 | BH |
| PITG_05149 | Pi conserved hypothetical protein (  | -32.3682 | -35.2957 | 0.39013 | 0.918645 | BH |
| PITG_05176 | Pi histone deacetylase, putative (2  | -32.2761 | -35.48   | 0.39013 | 0.918645 | BH |
| PITG_05238 | Pi conserved hypothetical protein (  | -32.3528 | -35.3265 | 0.39013 | 0.918645 | BH |
| PITG_05375 | Pi conserved hypothetical protein (  | -32.3373 | -35.3574 | 0.39013 | 0.918645 | BH |
| PITG_05500 | Pi conserved hypothetical protein (  | -32.288  | -35.4561 | 0.39013 | 0.918645 | BH |
| PITG_05683 | Pi conserved hypothetical protein (  | -32.2914 | -35.4493 | 0.39013 | 0.918645 | BH |
| PITG_05804 | Pi conserved hypothetical protein (  | -32.3217 | -35.3887 | 0.39013 | 0.918645 | BH |
| PITG_06121 | Pi conserved hypothetical protein (  | -32.3698 | -35.2926 | 0.39013 | 0.918645 | BH |
| PITG_06396 | Pi N-acetyltransferase, putative (54 | -32.2907 | -35.4506 | 0.39013 | 0.918645 | BH |
| PITG_06692 | Pi serine protease family S09X, put  | -32.3528 | -35.3265 | 0.39013 | 0.918645 | BH |
| PITG_06886 | Pi conserved hypothetical protein (  | -32.3534 | -35.3254 | 0.39013 | 0.918645 | BH |
| PITG_06900 | Pi beta-secretase, putative (2660 n  | -32.3356 | -35.361  | 0.39013 | 0.918645 | BH |
| PITG_06943 | Pi conserved hypothetical protein (  | -32.3057 | -35.4206 | 0.39013 | 0.918645 | BH |
| PITG_06988 | Pi transmembrane protein, putativ    | -32.3368 | -35.3586 | 0.39013 | 0.918645 | BH |
| PITG_07175 | Pi conserved hypothetical protein (  | -32.3528 | -35.3265 | 0.39013 | 0.918645 | BH |
| PITG_07211 | Pi conserved hypothetical protein (  | -32.3522 | -35.3276 | 0.39013 | 0.918645 | BH |
| PITG_07338 | Pi conserved hypothetical protein (  | -32.3866 | -35.259  | 0.39013 | 0.918645 | BH |

|            |                                       |          |          |         |          |    |
|------------|---------------------------------------|----------|----------|---------|----------|----|
| PITG_08530 | Pi conserved hypothetical protein (   | -32.3356 | -35.361  | 0.39013 | 0.918645 | BH |
| PITG_09426 | Pi conserved hypothetical protein (   | -32.2761 | -35.48   | 0.39013 | 0.918645 | BH |
| PITG_09725 | Pi conserved hypothetical protein (   | -32.2761 | -35.48   | 0.39013 | 0.918645 | BH |
| PITG_09951 | Pi dicer-like, putative (2154 nt)     | -32.3356 | -35.361  | 0.39013 | 0.918645 | BH |
| PITG_09978 | Pi conserved hypothetical protein (   | -32.3198 | -35.3925 | 0.39013 | 0.918645 | BH |
| PITG_10293 | Pi alcohol dehydrogenase, putative    | -32.3687 | -35.2947 | 0.39013 | 0.918645 | BH |
| PITG_10298 | Pi conserved hypothetical protein (   | -32.3217 | -35.3887 | 0.39013 | 0.918645 | BH |
| PITG_10325 | Pi conserved hypothetical protein (   | -32.3687 | -35.2947 | 0.39013 | 0.918645 | BH |
| PITG_10539 | Pi conserved hypothetical protein (   | -32.2733 | -35.4856 | 0.39013 | 0.918645 | BH |
| PITG_10624 | Pi conserved hypothetical protein (   | -32.3692 | -35.2936 | 0.39013 | 0.918645 | BH |
| PITG_10886 | Pi conserved hypothetical protein (   | -32.2907 | -35.4506 | 0.39013 | 0.918645 | BH |
| PITG_11080 | Pi conserved hypothetical protein (   | -32.3698 | -35.2926 | 0.39013 | 0.918645 | BH |
| PITG_11656 | Pi long-chain-fatty-acid-CoA ligase,  | -32.3211 | -35.39   | 0.39013 | 0.918645 | BH |
| PITG_12001 | Pi conserved hypothetical protein (   | -32.3856 | -35.2609 | 0.39013 | 0.918645 | BH |
| PITG_12145 | Pi serine protease family S33, puta   | -32.4034 | -35.2254 | 0.39013 | 0.918645 | BH |
| PITG_12192 | Pi conserved hypothetical protein (   | -32.3692 | -35.2936 | 0.39013 | 0.918645 | BH |
| PITG_12224 | Pi conserved hypothetical protein (   | -32.3698 | -35.2926 | 0.39013 | 0.918645 | BH |
| PITG_12252 | Pi conserved hypothetical protein (   | -32.3373 | -35.3574 | 0.39013 | 0.918645 | BH |
| PITG_12465 | Pi adenylate kinase, putative (806    | -32.3687 | -35.2947 | 0.39013 | 0.918645 | BH |
| PITG_12516 | Pi poly [ADP-ribose] polymerase 2,    | -32.3368 | -35.3586 | 0.39013 | 0.918645 | BH |
| PITG_12661 | Pi conserved hypothetical protein (   | -32.3064 | -35.4193 | 0.39013 | 0.918645 | BH |
| PITG_13165 | Pi D-3-phosphoglycerate dehydrog      | -32.3856 | -35.2609 | 0.39013 | 0.918645 | BH |
| PITG_13284 | Pi conserved hypothetical protein (   | -32.3698 | -35.2926 | 0.39013 | 0.918645 | BH |
| PITG_13803 | Pi Hect domain-containing protein,    | -32.3534 | -35.3254 | 0.39013 | 0.918645 | BH |
| PITG_13827 | Pi conserved hypothetical protein (   | -32.4034 | -35.2254 | 0.39013 | 0.918645 | BH |
| PITG_13903 | Pi conserved hypothetical protein (   | -32.3692 | -35.2936 | 0.39013 | 0.918645 | BH |
| PITG_14863 | Pi NADH-ubiquinone oxidoreducta:      | -32.3866 | -35.259  | 0.39013 | 0.918645 | BH |
| PITG_15596 | Pi protein kinase (1075 nt)           | -32.3368 | -35.3586 | 0.39013 | 0.918645 | BH |
| PITG_15839 | Pi conserved hypothetical protein (   | -32.2887 | -35.4547 | 0.39013 | 0.918645 | BH |
| PITG_16137 | Pi conserved hypothetical protein (   | -32.3856 | -35.2609 | 0.39013 | 0.918645 | BH |
| PITG_16358 | Pi RING Finger Ubiquitin ligase, put  | -32.3373 | -35.3574 | 0.39013 | 0.918645 | BH |
| PITG_16526 | Pi DNA-directed RNA polymerases       | -32.3356 | -35.361  | 0.39013 | 0.918645 | BH |
| PITG_16563 | Pi conserved hypothetical protein (   | -32.3038 | -35.4246 | 0.39013 | 0.918645 | BH |
| PITG_16628 | Pi hypothetical protein (1281 nt)     | -32.3517 | -35.3288 | 0.39013 | 0.918645 | BH |
| PITG_17131 | Pi conserved hypothetical protein (   | -32.3856 | -35.2609 | 0.39013 | 0.918645 | BH |
| PITG_17292 | Pi protein kinase (2211 nt)           | -32.3368 | -35.3586 | 0.39013 | 0.918645 | BH |
| PITG_17897 | Pi protein kinase, putative (2910 nt) | -32.2733 | -35.4856 | 0.39013 | 0.918645 | BH |
| PITG_17942 | Pi ubiquitin activating enzyme, E1 f  | -32.3866 | -35.259  | 0.39013 | 0.918645 | BH |
| PITG_17944 | Pi conserved hypothetical protein (   | -32.3038 | -35.4246 | 0.39013 | 0.918645 | BH |
| PITG_17992 | Pi P-3 complex subunit mu, putativ    | -32.2914 | -35.4493 | 0.39013 | 0.918645 | BH |
| PITG_18235 | Pi transmembrane protein, putativ     | -32.3866 | -35.259  | 0.39013 | 0.918645 | BH |
| PITG_18380 | Pi conserved hypothetical protein (   | -32.3368 | -35.3586 | 0.39013 | 0.918645 | BH |
| PITG_18651 | Pi conserved hypothetical protein (   | -32.3217 | -35.3887 | 0.39013 | 0.918645 | BH |
| PITG_18899 | Pi vacuolar protein sorting-associat  | -32.3692 | -35.2936 | 0.39013 | 0.918645 | BH |
| PITG_19152 | Pi conserved hypothetical protein (   | -32.3522 | -35.3276 | 0.39013 | 0.918645 | BH |
| PITG_19175 | Pi conserved hypothetical protein (   | -32.3687 | -35.2947 | 0.39013 | 0.918645 | BH |
| PITG_19536 | Pi conserved hypothetical protein (   | -32.3522 | -35.3276 | 0.39013 | 0.918645 | BH |

|            |                                                               |          |          |          |          |    |
|------------|---------------------------------------------------------------|----------|----------|----------|----------|----|
| PITG_20055 | Pi ATP-binding Cassette (ABC) Superfamily                     | -32.3368 | -35.3586 | 0.39013  | 0.918645 | BH |
| PITG_20202 | Pi conserved hypothetical protein (PITG_20202)                | -32.3198 | -35.3925 | 0.39013  | 0.918645 | BH |
| PITG_20714 | Pi putative E3 ubiquitin-protein ligase                       | -32.3866 | -35.259  | 0.39013  | 0.918645 | BH |
| PITG_21005 | Pi conserved hypothetical protein (PITG_21005)                | -32.3856 | -35.2609 | 0.39013  | 0.918645 | BH |
| PITG_21048 | Pi conserved hypothetical protein (PITG_21048)                | -32.3866 | -35.259  | 0.39013  | 0.918645 | BH |
| PITG_21075 | Pi conserved hypothetical protein (PITG_21075)                | -32.3856 | -35.2609 | 0.39013  | 0.918645 | BH |
| PITG_21329 | Pi Zinc (Zn <sup>2+</sup> )-Iron (Fe <sup>2+</sup> ) Permease | -32.2761 | -35.48   | 0.39013  | 0.918645 | BH |
| PITG_21626 | Pi ATP-binding cassette protein, putative                     | -32.4034 | -35.2254 | 0.39013  | 0.918645 | BH |
| PITG_21993 | Pi conserved hypothetical protein (PITG_21993)                | -32.3192 | -35.3937 | 0.39013  | 0.918645 | BH |
| PITG_22856 | Pi Crinkler (CRN) family protein (24 kDa)                     | -32.3198 | -35.3925 | 0.39013  | 0.918645 | BH |
| PITG_22958 | Pi conserved hypothetical protein (PITG_22958)                | -32.3211 | -35.39   | 0.39013  | 0.918645 | BH |
| PITG_10707 | Pi PpiC-type peptidyl-prolyl cis-transesterase                | -13.0128 | -1.19646 | 0.390253 | 0.918645 | BH |
| PITG_07914 | Pi synaptobrevin-like protein (108 kDa)                       | -13.0086 | -1.20498 | 0.390253 | 0.918645 | BH |
| PITG_00314 | Pi conserved hypothetical protein (PITG_00314)                | -13.1144 | -0.99708 | 0.390677 | 0.918645 | BH |
| PITG_00194 | Pi casein kinase II subunit, putative                         | -12.5601 | -1.04877 | 0.39074  | 0.918645 | BH |
| PITG_14615 | Pi conserved hypothetical protein (PITG_14615)                | -12.5642 | -1.04062 | 0.39074  | 0.918645 | BH |
| PITG_05156 | Pi secretory protein OPEL (1892 nt)                           | -9.23459 | 1.75043  | 0.390951 | 0.918645 | BH |
| PITG_00158 | Pi conserved hypothetical protein (PITG_00158)                | -32.338  | -35.3561 | 0.391215 | 0.918645 | BH |
| PITG_00568 | Pi Drug/Metabolite Transporter (DITG_00568)                   | -32.3224 | -35.3874 | 0.391215 | 0.918645 | BH |
| PITG_01048 | Pi conserved hypothetical protein (PITG_01048)                | -32.3185 | -35.3951 | 0.391215 | 0.918645 | BH |
| PITG_01737 | Pi DNA damage-binding protein, putative                       | -32.2768 | -35.4785 | 0.391215 | 0.918645 | BH |
| PITG_02197 | Pi DNA topoisomerase, putative (200 kDa)                      | -32.354  | -35.3242 | 0.391215 | 0.918645 | BH |
| PITG_02765 | Pi conserved hypothetical protein (PITG_02765)                | -32.3851 | -35.2619 | 0.391215 | 0.918645 | BH |
| PITG_02867 | Pi ubiquitin conjugation factor E4, putative                  | -32.3871 | -35.2579 | 0.391215 | 0.918645 | BH |
| PITG_02901 | Pi glycoside hydrolase, putative (90 kDa)                     | -32.3703 | -35.2915 | 0.391215 | 0.918645 | BH |
| PITG_03561 | Pi COP9 signalosome complex subunit                           | -32.3511 | -35.33   | 0.391215 | 0.918645 | BH |
| PITG_03744 | Pi conserved hypothetical protein (PITG_03744)                | -32.3031 | -35.426  | 0.391215 | 0.918645 | BH |
| PITG_03874 | Pi actin-like protein (1385 nt)                               | -32.3851 | -35.2619 | 0.391215 | 0.918645 | BH |
| PITG_03947 | Pi conserved hypothetical protein (PITG_03947)                | -32.3511 | -35.33   | 0.391215 | 0.918645 | BH |
| PITG_05183 | Pi hypothetical protein (625 nt)                              | -32.3703 | -35.2915 | 0.391215 | 0.918645 | BH |
| PITG_05521 | Pi protein kinase, putative (2191 nt)                         | -32.3224 | -35.3874 | 0.391215 | 0.918645 | BH |
| PITG_06185 | Pi ADP-ribosylation factor 2 (1004 nt)                        | -32.3703 | -35.2915 | 0.391215 | 0.918645 | BH |
| PITG_07166 | Pi 2-amino-3-carboxymuconate-6-aminotransferase               | -32.3224 | -35.3874 | 0.391215 | 0.918645 | BH |
| PITG_08514 | Pi conserved hypothetical protein (PITG_08514)                | -32.3703 | -35.2915 | 0.391215 | 0.918645 | BH |
| PITG_08734 | Pi Chloride Channel (ClC) Family (200 kDa)                    | -32.3871 | -35.2579 | 0.391215 | 0.918645 | BH |
| PITG_08822 | Pi conserved hypothetical protein (PITG_08822)                | -32.3851 | -35.2619 | 0.391215 | 0.918645 | BH |
| PITG_09423 | Pi conserved hypothetical protein (PITG_09423)                | -32.3224 | -35.3874 | 0.391215 | 0.918645 | BH |
| PITG_09635 | Pi orotidine 5'-phosphate decarboxylase                       | -32.3224 | -35.3874 | 0.391215 | 0.918645 | BH |
| PITG_10147 | Pi cell division protease ftsH (2771 nt)                      | -32.3703 | -35.2915 | 0.391215 | 0.918645 | BH |
| PITG_11020 | Pi conserved hypothetical protein (PITG_11020)                | -32.3871 | -35.2579 | 0.391215 | 0.918645 | BH |
| PITG_11023 | Pi conserved hypothetical protein (PITG_11023)                | -32.3871 | -35.2579 | 0.391215 | 0.918645 | BH |
| PITG_12120 | Pi NPL4-like protein (1332 nt)                                | -32.354  | -35.3242 | 0.391215 | 0.918645 | BH |
| PITG_12609 | Pi Crinkler (CRN) family protein (15 kDa)                     | -32.3871 | -35.2579 | 0.391215 | 0.918645 | BH |
| PITG_13715 | Pi transmembrane protein, putative                            | -32.354  | -35.3242 | 0.391215 | 0.918645 | BH |
| PITG_13966 | Pi conserved hypothetical protein (PITG_13966)                | -32.3511 | -35.33   | 0.391215 | 0.918645 | BH |
| PITG_14847 | Pi conserved hypothetical protein (PITG_14847)                | -32.3511 | -35.33   | 0.391215 | 0.918645 | BH |
| PITG_15329 | Pi conserved hypothetical protein (PITG_15329)                | -32.3871 | -35.2579 | 0.391215 | 0.918645 | BH |

|            |                                       |          |          |          |          |    |
|------------|---------------------------------------|----------|----------|----------|----------|----|
| PITG_16042 | Pi conserved hypothetical protein (   | -32.3871 | -35.2579 | 0.391215 | 0.918645 | BH |
| PITG_16277 | Pi conserved hypothetical protein (   | -32.3031 | -35.426  | 0.391215 | 0.918645 | BH |
| PITG_16468 | Pi conserved hypothetical protein (   | -32.354  | -35.3242 | 0.391215 | 0.918645 | BH |
| PITG_16791 | Pi conserved hypothetical protein (   | -32.3871 | -35.2579 | 0.391215 | 0.918645 | BH |
| PITG_17345 | Pi conserved hypothetical protein (   | -32.3703 | -35.2915 | 0.391215 | 0.918645 | BH |
| PITG_17700 | Pi conserved hypothetical protein (   | -32.3224 | -35.3874 | 0.391215 | 0.918645 | BH |
| PITG_17834 | Pi phospholipid hydroperoxide glut    | -32.3031 | -35.426  | 0.391215 | 0.918645 | BH |
| PITG_18028 | Pi conserved hypothetical protein (   | -32.354  | -35.3242 | 0.391215 | 0.918645 | BH |
| PITG_18459 | Pi conserved hypothetical protein (   | -32.3703 | -35.2915 | 0.391215 | 0.918645 | BH |
| PITG_18891 | Pi uracil-DNA glycosylase (939 nt)    | -32.3703 | -35.2915 | 0.391215 | 0.918645 | BH |
| PITG_20313 | Pi Cation Diffusion Facilitator (CDF) | -32.2768 | -35.4785 | 0.391215 | 0.918645 | BH |
| PITG_20629 | Pi DNA-directed RNA polymerase II     | -32.4024 | -35.2272 | 0.391215 | 0.918645 | BH |
| PITG_21334 | Pi conserved hypothetical protein (   | -32.3031 | -35.426  | 0.391215 | 0.918645 | BH |
| PITG_21502 | Pi conserved hypothetical protein (   | -32.3511 | -35.33   | 0.391215 | 0.918645 | BH |
| PITG_21994 | Pi conserved hypothetical protein (   | -32.3511 | -35.33   | 0.391215 | 0.918645 | BH |
| PITG_00411 | Pi adaptin-like protein (762 nt)      | -32.3876 | -35.2568 | 0.392303 | 0.918645 | BH |
| PITG_00458 | Pi dihydrolipoyllysine-residue acety  | -32.3023 | -35.4275 | 0.392303 | 0.918645 | BH |
| PITG_01229 | Pi conserved hypothetical protein (   | -32.3023 | -35.4275 | 0.392303 | 0.918645 | BH |
| PITG_01781 | Pi heterogeneous nuclear ribonucle    | -32.2922 | -35.4477 | 0.392303 | 0.918645 | BH |
| PITG_01847 | Pi conserved hypothetical protein (   | -32.2922 | -35.4477 | 0.392303 | 0.918645 | BH |
| PITG_02024 | Pi conserved hypothetical protein (   | -32.3023 | -35.4275 | 0.392303 | 0.918645 | BH |
| PITG_02244 | Pi conserved hypothetical protein (   | -32.3342 | -35.3636 | 0.392303 | 0.918645 | BH |
| PITG_02273 | Pi conserved hypothetical protein (   | -32.2872 | -35.4577 | 0.392303 | 0.918645 | BH |
| PITG_03314 | Pi conserved hypothetical protein (   | -32.3023 | -35.4275 | 0.392303 | 0.918645 | BH |
| PITG_03345 | Pi peptidyl-prolyl cis-trans isomera  | -32.2922 | -35.4477 | 0.392303 | 0.918645 | BH |
| PITG_03852 | Pi Mitochondrial Protein Transloca    | -32.2776 | -35.477  | 0.392303 | 0.918645 | BH |
| PITG_03887 | Pi conserved hypothetical protein (   | -32.3676 | -35.297  | 0.392303 | 0.918645 | BH |
| PITG_04941 | Pi RNA polymerase II subunit A C-ter  | -32.3845 | -35.2631 | 0.392303 | 0.918645 | BH |
| PITG_05376 | Pi mitogen-activated protein kinase   | -32.3071 | -35.4178 | 0.392303 | 0.918645 | BH |
| PITG_05411 | Pi conserved hypothetical protein (   | -32.2922 | -35.4477 | 0.392303 | 0.918645 | BH |
| PITG_06609 | Pi conserved hypothetical protein (   | -32.3676 | -35.297  | 0.392303 | 0.918645 | BH |
| PITG_07470 | Pi conserved hypothetical protein (   | -32.3071 | -35.4178 | 0.392303 | 0.918645 | BH |
| PITG_09504 | Pi methionine aminopeptidase, put     | -32.3876 | -35.2568 | 0.392303 | 0.918645 | BH |
| PITG_11108 | Pi conserved hypothetical protein (   | -32.2872 | -35.4577 | 0.392303 | 0.918645 | BH |
| PITG_11563 | Pi conserved hypothetical protein (   | -32.2922 | -35.4477 | 0.392303 | 0.918645 | BH |
| PITG_12563 | Pi Mitochondrial Carrier (MC) Fami    | -32.2922 | -35.4477 | 0.392303 | 0.918645 | BH |
| PITG_13015 | Pi conserved hypothetical protein (   | -32.2922 | -35.4477 | 0.392303 | 0.918645 | BH |
| PITG_13196 | Pi conserved hypothetical protein (   | -32.3342 | -35.3636 | 0.392303 | 0.918645 | BH |
| PITG_14573 | Pi AP-3 complex subunit delta, put    | -32.2776 | -35.477  | 0.392303 | 0.918645 | BH |
| PITG_15360 | Pi conserved hypothetical protein (   | -32.2922 | -35.4477 | 0.392303 | 0.918645 | BH |
| PITG_15998 | Pi phospholipase A-2-activating pro   | -32.2776 | -35.477  | 0.392303 | 0.918645 | BH |
| PITG_17597 | Pi conserved hypothetical protein (   | -32.2922 | -35.4477 | 0.392303 | 0.918645 | BH |
| PITG_17795 | Pi hypothetical protein (1553 nt)     | -32.3342 | -35.3636 | 0.392303 | 0.918645 | BH |
| PITG_19299 | Pi conserved hypothetical protein (   | -32.3071 | -35.4178 | 0.392303 | 0.918645 | BH |
| PITG_19449 | Pi conserved hypothetical protein (   | -32.2872 | -35.4577 | 0.392303 | 0.918645 | BH |
| PITG_20088 | Pi Sulfate Permease (SulP) Family (   | -32.2922 | -35.4477 | 0.392303 | 0.918645 | BH |
| PITG_14478 | Pi NmrA-like family protein, putativ  | -13.1257 | -0.97637 | 0.392442 | 0.918645 | BH |

|            |                                                         |          |          |          |          |    |
|------------|---------------------------------------------------------|----------|----------|----------|----------|----|
| PITG_02594 | Pi glutamate decarboxylase (1660 nt)                    | -11.6774 | -1.05913 | 0.393243 | 0.918645 | BH |
| PITG_00119 | Pi hypothetical protein (1089 nt)                       | -32.371  | -35.2901 | 0.393393 | 0.918645 | BH |
| PITG_00232 | Pi conserved hypothetical protein (1089 nt)             | -32.3387 | -35.3547 | 0.393393 | 0.918645 | BH |
| PITG_00899 | Pi prefoldin subunit 3, putative (78 nt)                | -32.3231 | -35.3859 | 0.393393 | 0.918645 | BH |
| PITG_01592 | Pi conserved hypothetical protein (1089 nt)             | -32.3079 | -35.4163 | 0.393393 | 0.918645 | BH |
| PITG_02588 | Pi conserved hypothetical protein (1089 nt)             | -32.3504 | -35.3314 | 0.393393 | 0.918645 | BH |
| PITG_02813 | Pi conserved hypothetical protein (1089 nt)             | -32.371  | -35.2901 | 0.393393 | 0.918645 | BH |
| PITG_03044 | Pi autophagy-related protein, putative (1089 nt)        | -32.3547 | -35.3228 | 0.393393 | 0.918645 | BH |
| PITG_03601 | Pi inosine triphosphate pyrophosphatase (1089 nt)       | -32.3669 | -35.2983 | 0.393393 | 0.918645 | BH |
| PITG_03608 | Pi serine/threonine-protein phosphatase (1089 nt)       | -32.371  | -35.2901 | 0.393393 | 0.918645 | BH |
| PITG_04822 | Pi inositol polyphosphate multikinase (1089 nt)         | -32.371  | -35.2901 | 0.393393 | 0.918645 | BH |
| PITG_05504 | Pi conserved hypothetical protein (1089 nt)             | -32.3079 | -35.4163 | 0.393393 | 0.918645 | BH |
| PITG_05652 | Pi conserved hypothetical protein (1089 nt)             | -32.371  | -35.2901 | 0.393393 | 0.918645 | BH |
| PITG_05954 | Pi conserved hypothetical protein (1089 nt)             | -32.3547 | -35.3228 | 0.393393 | 0.918645 | BH |
| PITG_07011 | Pi conserved hypothetical protein (1089 nt)             | -32.3387 | -35.3547 | 0.393393 | 0.918645 | BH |
| PITG_08183 | Pi conserved hypothetical protein (1089 nt)             | -32.3547 | -35.3228 | 0.393393 | 0.918645 | BH |
| PITG_09221 | Pi glutaredoxin, putative (722 nt)                      | -32.3547 | -35.3228 | 0.393393 | 0.918645 | BH |
| PITG_09475 | Pi conserved hypothetical protein (1089 nt)             | -32.4018 | -35.2284 | 0.393393 | 0.918645 | BH |
| PITG_09781 | Pi conserved hypothetical protein (1089 nt)             | -32.3231 | -35.3859 | 0.393393 | 0.918645 | BH |
| PITG_10487 | Pi conserved hypothetical protein (1089 nt)             | -32.3504 | -35.3314 | 0.393393 | 0.918645 | BH |
| PITG_10566 | Pi hypothetical protein (296 nt)                        | -32.3387 | -35.3547 | 0.393393 | 0.918645 | BH |
| PITG_10837 | Pi conserved hypothetical protein (1089 nt)             | -32.4018 | -35.2284 | 0.393393 | 0.918645 | BH |
| PITG_11295 | Pi alcohol dehydrogenase, putative (1089 nt)            | -32.3669 | -35.2983 | 0.393393 | 0.918645 | BH |
| PITG_11782 | Pi calcium-binding protein, putative (1089 nt)          | -32.3079 | -35.4163 | 0.393393 | 0.918645 | BH |
| PITG_11805 | Pi splicing factor, arginine/serine-rich 1 (1089 nt)    | -32.4018 | -35.2284 | 0.393393 | 0.918645 | BH |
| PITG_12687 | Pi conserved hypothetical protein (1089 nt)             | -32.3079 | -35.4163 | 0.393393 | 0.918645 | BH |
| PITG_12913 | Pi conserved hypothetical protein (1089 nt)             | -32.3547 | -35.3228 | 0.393393 | 0.918645 | BH |
| PITG_13365 | Pi Poly(U)-binding-splicing factor P1 (1089 nt)         | -32.3547 | -35.3228 | 0.393393 | 0.918645 | BH |
| PITG_13504 | Pi hypothetical protein (396 nt)                        | -32.3547 | -35.3228 | 0.393393 | 0.918645 | BH |
| PITG_14001 | Pi mitogen-activated protein kinase (1089 nt)           | -32.3547 | -35.3228 | 0.393393 | 0.918645 | BH |
| PITG_14181 | Pi long-chain fatty acid transporter (1089 nt)          | -32.3387 | -35.3547 | 0.393393 | 0.918645 | BH |
| PITG_14919 | Pi transmembrane protein, putative (1089 nt)            | -32.371  | -35.2901 | 0.393393 | 0.918645 | BH |
| PITG_14987 | Pi conserved hypothetical protein (1089 nt)             | -32.3547 | -35.3228 | 0.393393 | 0.918645 | BH |
| PITG_15249 | Pi conserved hypothetical protein (1089 nt)             | -32.3504 | -35.3314 | 0.393393 | 0.918645 | BH |
| PITG_15780 | Pi radial spoke protein 11 (405 nt)                     | -32.3177 | -35.3967 | 0.393393 | 0.918645 | BH |
| PITG_15821 | Pi conserved hypothetical protein (1089 nt)             | -32.371  | -35.2901 | 0.393393 | 0.918645 | BH |
| PITG_16360 | Pi lysosomal Pro-X carboxypeptidase (1089 nt)           | -32.3387 | -35.3547 | 0.393393 | 0.918645 | BH |
| PITG_16733 | Pi conserved hypothetical protein (1089 nt)             | -32.3231 | -35.3859 | 0.393393 | 0.918645 | BH |
| PITG_17074 | Pi 3-demethylubiquinone-9 3-methyltransferase (1089 nt) | -32.3547 | -35.3228 | 0.393393 | 0.918645 | BH |
| PITG_17557 | Pi hypothetical protein (787 nt)                        | -32.3079 | -35.4163 | 0.393393 | 0.918645 | BH |
| PITG_18063 | Pi bifunctional polynucleotide phosphorylase (1089 nt)  | -32.371  | -35.2901 | 0.393393 | 0.918645 | BH |
| PITG_18393 | Pi conserved hypothetical protein (1089 nt)             | -32.3079 | -35.4163 | 0.393393 | 0.918645 | BH |
| PITG_18744 | Pi amino acid/auxin permease-like transporter (1089 nt) | -32.3387 | -35.3547 | 0.393393 | 0.918645 | BH |
| PITG_19311 | Pi conserved hypothetical protein (1089 nt)             | -32.3547 | -35.3228 | 0.393393 | 0.918645 | BH |
| PITG_20086 | Pi conserved hypothetical protein (1089 nt)             | -32.3079 | -35.4163 | 0.393393 | 0.918645 | BH |
| PITG_22418 | Pi conserved hypothetical protein (1089 nt)             | -32.371  | -35.2901 | 0.393393 | 0.918645 | BH |
| PITG_11855 | Pi C2 domain-containing protein, putative (1089 nt)     | -11.2481 | -1.26681 | 0.393838 | 0.918645 | BH |

|            |                                       |          |          |          |          |    |
|------------|---------------------------------------|----------|----------|----------|----------|----|
| PITG_00542 | Pi mediator of RNA polymerase II t    | -32.3335 | -35.3652 | 0.394486 | 0.918645 | BH |
| PITG_00947 | Pi conserved hypothetical protein (   | -32.293  | -35.446  | 0.394486 | 0.918645 | BH |
| PITG_02264 | Pi protein kinase, putative (4828 nt) | -32.3883 | -35.2555 | 0.394486 | 0.918645 | BH |
| PITG_02433 | Pi conserved hypothetical protein (   | -32.2864 | -35.4594 | 0.394486 | 0.918645 | BH |
| PITG_03620 | Pi histidinol-phosphate aminotrans    | -32.3335 | -35.3652 | 0.394486 | 0.918645 | BH |
| PITG_04601 | Pi phosphoadenosine phosphosulf       | -32.3883 | -35.2555 | 0.394486 | 0.918645 | BH |
| PITG_04712 | Pi conserved hypothetical protein (   | -32.2784 | -35.4753 | 0.394486 | 0.918645 | BH |
| PITG_07145 | Pi malonyl-CoA decarboxylase (MC      | -32.3883 | -35.2555 | 0.394486 | 0.918645 | BH |
| PITG_09036 | Pi conserved hypothetical protein (   | -32.293  | -35.446  | 0.394486 | 0.918645 | BH |
| PITG_11556 | Pi conserved hypothetical protein (   | -32.3838 | -35.2644 | 0.394486 | 0.918645 | BH |
| PITG_12527 | Pi conserved hypothetical protein (   | -32.3883 | -35.2555 | 0.394486 | 0.918645 | BH |
| PITG_12914 | Pi inositol polyphosphate 5-phosph    | -32.3883 | -35.2555 | 0.394486 | 0.918645 | BH |
| PITG_14257 | Pi conserved hypothetical protein (   | -32.2784 | -35.4753 | 0.394486 | 0.918645 | BH |
| PITG_17262 | Pi ethanolamine-phosphate cytidyl     | -32.3883 | -35.2555 | 0.394486 | 0.918645 | BH |
| PITG_18519 | Pi conserved hypothetical protein (   | -32.3883 | -35.2555 | 0.394486 | 0.918645 | BH |
| PITG_19487 | Pi conserved hypothetical protein (   | -32.3838 | -35.2644 | 0.394486 | 0.918645 | BH |
| PITG_22625 | Pi conserved hypothetical protein (   | -32.3883 | -35.2555 | 0.394486 | 0.918645 | BH |
| PITG_00140 | Pi chromodomain-helicase-DNA-bi       | -32.3554 | -35.3213 | 0.395582 | 0.918645 | BH |
| PITG_01036 | Pi phenylalanyl-tRNA synthetase al    | -32.3395 | -35.3531 | 0.395582 | 0.918645 | BH |
| PITG_01718 | Pi cryptochrome, putative (1734 nt)   | -32.3554 | -35.3213 | 0.395582 | 0.918645 | BH |
| PITG_03467 | Pi conserved hypothetical protein (   | -32.3717 | -35.2887 | 0.395582 | 0.918645 | BH |
| PITG_03934 | Pi protein kinase, putative (2694 nt) | -32.3554 | -35.3213 | 0.395582 | 0.918645 | BH |
| PITG_04104 | Pi conserved hypothetical protein (   | -32.3717 | -35.2887 | 0.395582 | 0.918645 | BH |
| PITG_04535 | Pi nuclear LIM factor interactor-int  | -32.3717 | -35.2887 | 0.395582 | 0.918645 | BH |
| PITG_08172 | Pi conserved hypothetical protein (   | -32.3395 | -35.3531 | 0.395582 | 0.918645 | BH |
| PITG_08175 | Pi hypothetical protein (415 nt)      | -32.3496 | -35.333  | 0.395582 | 0.918645 | BH |
| PITG_10838 | Pi dolichyl-P-Man:Man(7)GlcNAc(2      | -32.3395 | -35.3531 | 0.395582 | 0.918645 | BH |
| PITG_12343 | Pi conserved hypothetical protein (   | -32.4012 | -35.2298 | 0.395582 | 0.918645 | BH |
| PITG_13376 | Pi conserved hypothetical protein (   | -32.3717 | -35.2887 | 0.395582 | 0.918645 | BH |
| PITG_13434 | Pi sel-1 family protein (1821 nt)     | -32.3717 | -35.2887 | 0.395582 | 0.918645 | BH |
| PITG_13927 | Pi conserved hypothetical protein (   | -32.3395 | -35.3531 | 0.395582 | 0.918645 | BH |
| PITG_14588 | Pi sporangia induced hypothetical     | -32.3554 | -35.3213 | 0.395582 | 0.918645 | BH |
| PITG_15540 | Pi conserved hypothetical protein (   | -32.3717 | -35.2887 | 0.395582 | 0.918645 | BH |
| PITG_16720 | Pi conserved hypothetical protein (   | -32.3554 | -35.3213 | 0.395582 | 0.918645 | BH |
| PITG_19041 | Pi protein kinase, putative (2401 nt) | -32.3717 | -35.2887 | 0.395582 | 0.918645 | BH |
| PITG_19109 | Pi conserved hypothetical protein (   | -32.3395 | -35.3531 | 0.395582 | 0.918645 | BH |
| PITG_20819 | Pi conserved hypothetical protein (   | -32.3395 | -35.3531 | 0.395582 | 0.918645 | BH |
| PITG_21023 | Pi conserved hypothetical protein (   | -32.3554 | -35.3213 | 0.395582 | 0.918645 | BH |
| PITG_01120 | Pi conserved hypothetical protein (   | -12.5437 | -1.11091 | 0.39568  | 0.918645 | BH |
| PITG_02785 | Pi fructose-bisphosphate aldolase (   | -12.559  | -1.05772 | 0.396336 | 0.918645 | BH |
| PITG_00337 | Pi small mechanosensitive channel     | -32.2939 | -35.4443 | 0.396681 | 0.918645 | BH |
| PITG_00577 | Pi conserved hypothetical protein (   | -32.2939 | -35.4443 | 0.396681 | 0.918645 | BH |
| PITG_00622 | Pi vacuolar protein sorting-associat  | -32.324  | -35.3841 | 0.396681 | 0.918645 | BH |
| PITG_02654 | Pi serine hydrolase (FSH1)-like prot  | -32.2854 | -35.4612 | 0.396681 | 0.918645 | BH |
| PITG_03364 | Pi RNA polymerase II-associated fa    | -32.3088 | -35.4145 | 0.396681 | 0.918645 | BH |
| PITG_03911 | Pi thioredoxin-like protein (1317 nt) | -32.2939 | -35.4443 | 0.396681 | 0.918645 | BH |
| PITG_05366 | Pi branchpoint-bridging protein, pu   | -32.324  | -35.3841 | 0.396681 | 0.918645 | BH |

|            |                                       |          |          |          |          |    |
|------------|---------------------------------------|----------|----------|----------|----------|----|
| PITG_05395 | Pi conserved hypothetical protein (   | -32.3831 | -35.266  | 0.396681 | 0.918645 | BH |
| PITG_05450 | Pi conserved hypothetical protein (   | -32.3326 | -35.3669 | 0.396681 | 0.918645 | BH |
| PITG_06663 | Pi hypothetical protein (1215 nt)     | -32.324  | -35.3841 | 0.396681 | 0.918645 | BH |
| PITG_07507 | Pi Crinkler (CRN) family protein (56  | -32.3326 | -35.3669 | 0.396681 | 0.918645 | BH |
| PITG_08189 | Pi pre-mRNA-splicing factor, Crook    | -32.2939 | -35.4443 | 0.396681 | 0.918645 | BH |
| PITG_09956 | Pi pre-mRNA-processing factor, pu     | -32.2939 | -35.4443 | 0.396681 | 0.918645 | BH |
| PITG_10138 | Pi alkaline phytoceramidase (aPHC     | -32.3088 | -35.4145 | 0.396681 | 0.918645 | BH |
| PITG_10952 | Pi conserved hypothetical protein (   | -32.2939 | -35.4443 | 0.396681 | 0.918645 | BH |
| PITG_11406 | Pi conserved hypothetical protein (   | -32.3088 | -35.4145 | 0.396681 | 0.918645 | BH |
| PITG_12348 | Pi conserved hypothetical protein (   | -32.324  | -35.3841 | 0.396681 | 0.918645 | BH |
| PITG_13654 | Pi conserved hypothetical protein (   | -32.2854 | -35.4612 | 0.396681 | 0.918645 | BH |
| PITG_13726 | Pi Ca2 :Cation Antiporter (CaCA) Fa   | -32.2939 | -35.4443 | 0.396681 | 0.918645 | BH |
| PITG_15996 | Pi hypothetical protein (656 nt)      | -32.3088 | -35.4145 | 0.396681 | 0.918645 | BH |
| PITG_19045 | Pi conserved hypothetical protein (   | -32.3088 | -35.4145 | 0.396681 | 0.918645 | BH |
| PITG_22477 | Pi conserved hypothetical protein (   | -32.3326 | -35.3669 | 0.396681 | 0.918645 | BH |
| PITG_00863 | Pi DEAD/DEAH box RNA helicase, p      | -32.3891 | -35.2538 | 0.397783 | 0.918645 | BH |
| PITG_01480 | Pi CBL-interacting serine/threonine   | -32.3891 | -35.2538 | 0.397783 | 0.918645 | BH |
| PITG_03824 | Pi conserved hypothetical protein (   | -32.3891 | -35.2538 | 0.397783 | 0.918645 | BH |
| PITG_04564 | Pi conserved hypothetical protein (   | -32.2794 | -35.4733 | 0.397783 | 0.918645 | BH |
| PITG_05331 | Pi conserved hypothetical protein (   | -32.3891 | -35.2538 | 0.397783 | 0.918645 | BH |
| PITG_05874 | Pi conserved hypothetical protein (   | -32.2794 | -35.4733 | 0.397783 | 0.918645 | BH |
| PITG_09920 | Pi conserved hypothetical protein (   | -32.3891 | -35.2538 | 0.397783 | 0.918645 | BH |
| PITG_18464 | Pi hypothetical protein (1786 nt)     | -32.3891 | -35.2538 | 0.397783 | 0.918645 | BH |
| PITG_20319 | Pi glycoside hydrolase, putative (98  | -32.2794 | -35.4733 | 0.397783 | 0.918645 | BH |
| PITG_21873 | Pi conserved hypothetical protein (   | -32.2794 | -35.4733 | 0.397783 | 0.918645 | BH |
| PITG_22353 | Pi geranylgeranyl transferase type-   | -32.2794 | -35.4733 | 0.397783 | 0.918645 | BH |
| PITG_03653 | Pi protein phosphatase 2 (2358 nt)    | -32.3725 | -35.2871 | 0.397783 | 0.918645 | BH |
| PITG_04175 | Pi conserved hypothetical protein (   | -32.3725 | -35.2871 | 0.397783 | 0.918645 | BH |
| PITG_17753 | Pi NADP-dependent malic enzyme        | -32.3725 | -35.2871 | 0.397783 | 0.918645 | BH |
| PITG_20260 | Pi ADP-ribosylation factor family (4  | -32.3725 | -35.2871 | 0.397783 | 0.918645 | BH |
| PITG_01839 | Pi 4-coumarate-CoA ligase, putativ    | -32.3404 | -35.3512 | 0.398887 | 0.918645 | BH |
| PITG_02553 | Pi conserved hypothetical protein (   | -32.3159 | -35.4004 | 0.398887 | 0.918645 | BH |
| PITG_04707 | Pi conserved hypothetical protein (   | -32.4003 | -35.2315 | 0.398887 | 0.918645 | BH |
| PITG_04959 | Pi conserved hypothetical protein (   | -32.3563 | -35.3194 | 0.398887 | 0.918645 | BH |
| PITG_06662 | Pi conserved hypothetical protein (   | -32.3563 | -35.3194 | 0.398887 | 0.918645 | BH |
| PITG_12260 | Pi protein transporter Sec24 (3758    | -32.3404 | -35.3512 | 0.398887 | 0.918645 | BH |
| PITG_13819 | Pi conserved hypothetical protein (   | -32.3563 | -35.3194 | 0.398887 | 0.918645 | BH |
| PITG_15247 | Pi conserved hypothetical protein (   | -32.3563 | -35.3194 | 0.398887 | 0.918645 | BH |
| PITG_15666 | Pi conserved hypothetical protein (   | -32.4003 | -35.2315 | 0.398887 | 0.918645 | BH |
| PITG_15955 | Pi epoxide hydrolase, putative (137   | -32.3563 | -35.3194 | 0.398887 | 0.918645 | BH |
| PITG_17673 | Pi M96 mating-specific protein far    | -32.3563 | -35.3194 | 0.398887 | 0.918645 | BH |
| PITG_17540 | Pi crinkler (CRN) family protein, pu  | -9.9924  | -1.25443 | 0.399606 | 0.918645 | BH |
| PITG_07056 | Pi isocitrate dehydrogenase, mitoc    | -11.4874 | 1.602774 | 0.399716 | 0.918645 | BH |
| PITG_01006 | Pi protein kinase, putative (1464 nt) | -32.2949 | -35.4422 | 0.399994 | 0.918645 | BH |
| PITG_03225 | Pi conserved hypothetical protein (   | -32.3098 | -35.4125 | 0.399994 | 0.918645 | BH |
| PITG_03737 | Pi conserved hypothetical protein (   | -32.325  | -35.3821 | 0.399994 | 0.918645 | BH |
| PITG_03846 | Pi conserved hypothetical protein (   | -32.3098 | -35.4125 | 0.399994 | 0.918645 | BH |



|            |                                      |          |          |          |          |    |
|------------|--------------------------------------|----------|----------|----------|----------|----|
| PITG_05685 | Pi transcription elongation factor S | -32.325  | -35.3821 | 0.399994 | 0.918645 | BH |
| PITG_08412 | Pi hypothetical protein (476 nt)     | -32.325  | -35.3821 | 0.399994 | 0.918645 | BH |
| PITG_08516 | Pi alcohol dehydrogenase, putative   | -32.2844 | -35.4633 | 0.399994 | 0.918645 | BH |
| PITG_12514 | Pi bifunctional aspartokinase/homoc  | -32.4181 | -35.1959 | 0.399994 | 0.918645 | BH |
| PITG_13979 | Pi conserved hypothetical protein (  | -32.2949 | -35.4422 | 0.399994 | 0.918645 | BH |
| PITG_14000 | Pi conserved hypothetical protein (  | -32.325  | -35.3821 | 0.399994 | 0.918645 | BH |
| PITG_14493 | Pi conserved hypothetical protein (  | -32.3098 | -35.4125 | 0.399994 | 0.918645 | BH |
| PITG_16211 | Pi conserved hypothetical protein (  | -32.325  | -35.3821 | 0.399994 | 0.918645 | BH |
| PITG_17348 | Pi myosin-like protein (4233 nt)     | -32.2949 | -35.4422 | 0.399994 | 0.918645 | BH |
| PITG_17728 | Pi conserved hypothetical protein (  | -32.4181 | -35.1959 | 0.399994 | 0.918645 | BH |
| PITG_18973 | Pi conserved hypothetical protein (  | -32.3098 | -35.4125 | 0.399994 | 0.918645 | BH |
| PITG_00203 | Pi mitochondrial-processing peptid   | -12.0236 | 1.569414 | 0.400159 | 0.918645 | BH |
| PITG_11069 | Pi villin-like protein (3045 nt)     | -13.046  | -1.20213 | 0.400476 | 0.918645 | BH |
| PITG_00150 | Pi conserved hypothetical protein (  | -32.4071 | -35.218  | 0.401105 | 0.918645 | BH |
| PITG_00851 | Pi conserved hypothetical protein (  | -32.4071 | -35.218  | 0.401105 | 0.918645 | BH |
| PITG_01224 | Pi conserved hypothetical protein (  | -32.3477 | -35.3367 | 0.401105 | 0.918645 | BH |
| PITG_03609 | Pi conserved hypothetical protein (  | -32.4071 | -35.218  | 0.401105 | 0.918645 | BH |
| PITG_04560 | Pi conserved hypothetical protein (  | -32.2805 | -35.4712 | 0.401105 | 0.918645 | BH |
| PITG_05259 | Pi DNA excision repair protein ERC   | -32.4071 | -35.218  | 0.401105 | 0.918645 | BH |
| PITG_07828 | Pi serine carboxypeptidase-like fan  | -32.2805 | -35.4712 | 0.401105 | 0.918645 | BH |
| PITG_10061 | Pi regulator of chromosome conde     | -32.4071 | -35.218  | 0.401105 | 0.918645 | BH |
| PITG_10160 | Pi NADPH-cytochrome P450 reduct      | -32.4071 | -35.218  | 0.401105 | 0.918645 | BH |
| PITG_10635 | Pi conserved hypothetical protein (  | -32.4071 | -35.218  | 0.401105 | 0.918645 | BH |
| PITG_12156 | Pi Annexin (Annexin) Family (1037    | -32.2805 | -35.4712 | 0.401105 | 0.918645 | BH |
| PITG_13586 | Pi pterin-4-alpha-carbinolamine de   | -32.2805 | -35.4712 | 0.401105 | 0.918645 | BH |
| PITG_15951 | Pi hypothetical protein (1263 nt)    | -32.2805 | -35.4712 | 0.401105 | 0.918645 | BH |
| PITG_19044 | Pi conserved hypothetical protein (  | -32.4071 | -35.218  | 0.401105 | 0.918645 | BH |
| PITG_20037 | Pi hypothetical protein (1299 nt)    | -32.3477 | -35.3367 | 0.401105 | 0.918645 | BH |
| PITG_21396 | Pi conserved hypothetical protein (  | -32.4071 | -35.218  | 0.401105 | 0.918645 | BH |
| PITG_00682 | Pi carbonic anhydrase, putative (11  | -32.3736 | -35.285  | 0.402218 | 0.918645 | BH |
| PITG_00709 | Pi conserved hypothetical protein (  | -32.3736 | -35.285  | 0.402218 | 0.918645 | BH |
| PITG_01182 | Pi conserved hypothetical protein (  | -32.3902 | -35.2518 | 0.402218 | 0.918645 | BH |
| PITG_01617 | Pi conserved hypothetical protein (  | -32.3736 | -35.285  | 0.402218 | 0.918645 | BH |
| PITG_01947 | Pi COPII coat assembly protein SEC   | -32.3902 | -35.2518 | 0.402218 | 0.918645 | BH |
| PITG_02924 | Pi conserved hypothetical protein (  | -32.3736 | -35.285  | 0.402218 | 0.918645 | BH |
| PITG_06647 | Pi conserved hypothetical protein (  | -32.3902 | -35.2518 | 0.402218 | 0.918645 | BH |
| PITG_06869 | Pi conserved hypothetical protein (  | -32.3902 | -35.2518 | 0.402218 | 0.918645 | BH |
| PITG_07030 | Pi conserved hypothetical protein (  | -32.3902 | -35.2518 | 0.402218 | 0.918645 | BH |
| PITG_10461 | Pi conserved hypothetical protein (  | -32.3902 | -35.2518 | 0.402218 | 0.918645 | BH |
| PITG_12840 | Pi conserved hypothetical protein (  | -32.3902 | -35.2518 | 0.402218 | 0.918645 | BH |
| PITG_13666 | Pi conserved hypothetical protein (  | -32.3902 | -35.2518 | 0.402218 | 0.918645 | BH |
| PITG_13939 | Pi conserved hypothetical protein (  | -32.3736 | -35.285  | 0.402218 | 0.918645 | BH |
| PITG_17484 | Pi Drug/Metabolite Transporter (D    | -32.3902 | -35.2518 | 0.402218 | 0.918645 | BH |
| PITG_19735 | Pi conserved hypothetical protein (  | -32.3902 | -35.2518 | 0.402218 | 0.918645 | BH |
| PITG_21727 | Pi conserved hypothetical protein (  | -32.3902 | -35.2518 | 0.402218 | 0.918645 | BH |
| PITG_22108 | Pi conserved hypothetical protein (  | -32.3902 | -35.2518 | 0.402218 | 0.918645 | BH |
| PITG_03177 | Pi conserved hypothetical protein (  | -13.8573 | -1.36924 | 0.403319 | 0.918645 | BH |

|            |                                        |          |          |          |          |    |
|------------|----------------------------------------|----------|----------|----------|----------|----|
| PITG_01578 | Pi conserved hypothetical protein (    | -32.3261 | -35.38   | 0.403333 | 0.918645 | BH |
| PITG_01991 | Pi conserved hypothetical protein (    | -32.3416 | -35.3489 | 0.403333 | 0.918645 | BH |
| PITG_02114 | Pi aspartyl aminopeptidase, putativ    | -32.3416 | -35.3489 | 0.403333 | 0.918645 | BH |
| PITG_03348 | Pi RNA polymerase-associated prof      | -32.3416 | -35.3489 | 0.403333 | 0.918645 | BH |
| PITG_03740 | Pi P-type ATPase (P-ATPase) Super      | -32.3416 | -35.3489 | 0.403333 | 0.918645 | BH |
| PITG_04506 | Pi protein kinase (1653 nt)            | -32.3574 | -35.3172 | 0.403333 | 0.918645 | BH |
| PITG_05227 | Pi conserved hypothetical protein (    | -32.3574 | -35.3172 | 0.403333 | 0.918645 | BH |
| PITG_07991 | Pi glutamate-cysteine ligase cataly    | -32.3261 | -35.38   | 0.403333 | 0.918645 | BH |
| PITG_10416 | Pi nuclear pore glycoprotein, putat    | -32.3574 | -35.3172 | 0.403333 | 0.918645 | BH |
| PITG_10447 | Pi mitogen-activated protein kinas     | -32.3574 | -35.3172 | 0.403333 | 0.918645 | BH |
| PITG_11980 | Pi conserved hypothetical protein (    | -32.3574 | -35.3172 | 0.403333 | 0.918645 | BH |
| PITG_13257 | Pi peroxisomal hydratase-dehydro       | -32.3261 | -35.38   | 0.403333 | 0.918645 | BH |
| PITG_13644 | Pi conserved hypothetical protein (    | -32.3574 | -35.3172 | 0.403333 | 0.918645 | BH |
| PITG_14697 | Pi cystathionine beta-synthase (18     | -32.3261 | -35.38   | 0.403333 | 0.918645 | BH |
| PITG_15228 | Pi transmembrane protein, putativ      | -32.3574 | -35.3172 | 0.403333 | 0.918645 | BH |
| PITG_16210 | Pi ubulin-tyrosine ligase-like protei  | -32.3574 | -35.3172 | 0.403333 | 0.918645 | BH |
| PITG_16864 | Pi conserved hypothetical protein (    | -32.3261 | -35.38   | 0.403333 | 0.918645 | BH |
| PITG_18302 | Pi conserved hypothetical protein (    | -32.3574 | -35.3172 | 0.403333 | 0.918645 | BH |
| PITG_18364 | Pi inositol oxygenase (885 nt)         | -32.3261 | -35.38   | 0.403333 | 0.918645 | BH |
| PITG_18882 | Pi transcription initiation factor TFI | -32.3574 | -35.3172 | 0.403333 | 0.918645 | BH |
| PITG_19064 | Pi pre-mRNA-splicing factor ISY1 (8    | -32.3416 | -35.3489 | 0.403333 | 0.918645 | BH |
| PITG_01555 | Pi conserved hypothetical protein (    | -32.2962 | -35.4398 | 0.404452 | 0.919186 | BH |
| PITG_02750 | Pi NAD kinase, putative (1884 nt)      | -32.2962 | -35.4398 | 0.404452 | 0.919186 | BH |
| PITG_04671 | Pi conserved hypothetical protein (    | -32.417  | -35.1981 | 0.404452 | 0.919186 | BH |
| PITG_05988 | Pi hypothetical protein (452 nt)       | -32.417  | -35.1981 | 0.404452 | 0.919186 | BH |
| PITG_07041 | Pi conserved hypothetical protein (    | -32.417  | -35.1981 | 0.404452 | 0.919186 | BH |
| PITG_12761 | Pi secreted RxLR effector peptide,     | -32.3304 | -35.3714 | 0.404452 | 0.919186 | BH |
| PITG_13997 | Pi serine/threonine protein kinase     | -32.311  | -35.4101 | 0.404452 | 0.919186 | BH |
| PITG_16922 | Pi conserved hypothetical protein (    | -32.2962 | -35.4398 | 0.404452 | 0.919186 | BH |
| PITG_20041 | Pi conserved hypothetical protein (    | -32.2962 | -35.4398 | 0.404452 | 0.919186 | BH |
| PITG_21848 | Pi conserved hypothetical protein (    | -32.417  | -35.1981 | 0.404452 | 0.919186 | BH |
| PITG_07974 | Pi conserved hypothetical protein (    | -13.8752 | -1.33464 | 0.404907 | 0.919819 | BH |
| PITG_10827 | Pi nuclease, putative (2879 nt)        | -13.8831 | -1.3189  | 0.404907 | 0.919819 | BH |
| PITG_02340 | Pi conserved hypothetical protein (    | -32.3808 | -35.2705 | 0.405574 | 0.91988  | BH |
| PITG_07545 | Pi Mitochondrial Carrier (MC) Fami     | -32.2981 | -35.4359 | 0.405574 | 0.91988  | BH |
| PITG_07646 | Pi conserved hypothetical protein (    | -32.2817 | -35.4687 | 0.405574 | 0.91988  | BH |
| PITG_11724 | Pi conserved hypothetical protein (    | -32.2817 | -35.4687 | 0.405574 | 0.91988  | BH |
| PITG_13492 | Pi conserved hypothetical protein (    | -32.2817 | -35.4687 | 0.405574 | 0.91988  | BH |
| PITG_14456 | Pi glutamyl-tRNA synthetase, putat     | -13.8819 | -1.32243 | 0.406495 | 0.91988  | BH |
| PITG_03424 | Pi GTPase, putative (1554 nt)          | -11.6668 | -1.11139 | 0.40665  | 0.91988  | BH |
| PITG_03097 | Pi conserved hypothetical protein (    | -32.3981 | -35.2358 | 0.406699 | 0.91988  | BH |
| PITG_04547 | Pi conserved hypothetical protein (    | -32.3913 | -35.2495 | 0.406699 | 0.91988  | BH |
| PITG_08545 | Pi Crinkler (CRN) family protein, ps   | -32.3135 | -35.4052 | 0.406699 | 0.91988  | BH |
| PITG_11650 | Pi conserved hypothetical protein (    | -32.4083 | -35.2155 | 0.406699 | 0.91988  | BH |
| PITG_13745 | Pi vacuolar protein sorting-associat   | -32.4083 | -35.2155 | 0.406699 | 0.91988  | BH |
| PITG_14657 | Pi tubulin-specific chaperone E, pu    | -32.3913 | -35.2495 | 0.406699 | 0.91988  | BH |
| PITG_15916 | Pi hypothetical protein (1789 nt)      | -32.3135 | -35.4052 | 0.406699 | 0.91988  | BH |

|            |                                       |          |          |          |          |    |
|------------|---------------------------------------|----------|----------|----------|----------|----|
| PITG_17948 | Pi conserved hypothetical protein (   | -32.3913 | -35.2495 | 0.406699 | 0.91988  | BH |
| PITG_19056 | Pi Cation Diffusion Facilitator (CDF) | -32.3913 | -35.2495 | 0.406699 | 0.91988  | BH |
| PITG_19844 | Pi conserved hypothetical protein (   | -32.3913 | -35.2495 | 0.406699 | 0.91988  | BH |
| PITG_20745 | Pi Intraflagellar Transport Protein 5 | -32.3135 | -35.4052 | 0.406699 | 0.91988  | BH |
| PITG_21187 | Pi myoferlin-like protein (6294 nt)   | -32.4083 | -35.2155 | 0.406699 | 0.91988  | BH |
| PITG_21190 | Pi secreted RxLR effector peptide,    | -32.4083 | -35.2155 | 0.406699 | 0.91988  | BH |
| PITG_01188 | Pi aspartate aminotransferase, put    | -32.3587 | -35.3148 | 0.407826 | 0.920633 | BH |
| PITG_02637 | Pi hypothetical protein (2078 nt)     | -32.3587 | -35.3148 | 0.407826 | 0.920633 | BH |
| PITG_03386 | Pi conserved hypothetical protein (   | -32.3628 | -35.3066 | 0.407826 | 0.920633 | BH |
| PITG_03603 | Pi conserved hypothetical protein (   | -32.3749 | -35.2824 | 0.407826 | 0.920633 | BH |
| PITG_10301 | Pi homoserine O-acetyltransferase     | -32.3749 | -35.2824 | 0.407826 | 0.920633 | BH |
| PITG_14284 | Pi conserved hypothetical protein (   | -32.3749 | -35.2824 | 0.407826 | 0.920633 | BH |
| PITG_20174 | Pi carbohydrate-binding protein, pi   | -32.3749 | -35.2824 | 0.407826 | 0.920633 | BH |
| PITG_21699 | Pi conserved hypothetical protein (   | -32.3749 | -35.2824 | 0.407826 | 0.920633 | BH |
| PITG_21918 | Pi amino acid/auxin permease-like     | -32.3749 | -35.2824 | 0.407826 | 0.920633 | BH |
| PITG_12228 | Pi NADH-cytochrome b5 reductase       | -13.9057 | -1.27615 | 0.408083 | 0.920815 | BH |
| PITG_12684 | Pi CSH (456 nt)                       | -13.8997 | -1.28803 | 0.408083 | 0.920815 | BH |
| PITG_17517 | Pi crinkler (CRN) family protein, pu  | -9.87411 | -1.25181 | 0.408252 | 0.920996 | BH |
| PITG_01640 | Pi conserved hypothetical protein (   | -32.3275 | -35.3772 | 0.408957 | 0.921554 | BH |
| PITG_08031 | Pi conserved hypothetical protein (   | -32.3429 | -35.3462 | 0.408957 | 0.921554 | BH |
| PITG_15629 | Pi conserved hypothetical protein (   | -32.3429 | -35.3462 | 0.408957 | 0.921554 | BH |
| PITG_16745 | Pi conserved hypothetical protein (   | -32.3429 | -35.3462 | 0.408957 | 0.921554 | BH |
| PITG_22163 | Pi L-aminoadipate-semialdehyde d      | -32.3275 | -35.3772 | 0.408957 | 0.921554 | BH |
| PITG_11755 | Pi putative GPI-anchored serine-th    | -10.8862 | -1.13294 | 0.409264 | 0.921554 | BH |
| PITG_20719 | Pi conserved hypothetical protein (   | -13.8869 | -1.3148  | 0.409671 | 0.921554 | BH |
| PITG_01605 | Pi serine palmitoyltransferase, put   | -32.2976 | -35.437  | 0.41009  | 0.921554 | BH |
| PITG_01927 | Pi conserved hypothetical protein (   | -32.3124 | -35.4073 | 0.41009  | 0.921554 | BH |
| PITG_02761 | Pi oxidoreductase, putative (1697 r   | -32.2976 | -35.437  | 0.41009  | 0.921554 | BH |
| PITG_09261 | Pi Equilibrative Nucleoside Transpc   | -32.2976 | -35.437  | 0.41009  | 0.921554 | BH |
| PITG_12157 | Pi conserved hypothetical protein (   | -32.283  | -35.466  | 0.41009  | 0.921554 | BH |
| PITG_12162 | Pi RNA-binding protein, putative (2   | -32.3795 | -35.2731 | 0.41009  | 0.921554 | BH |
| PITG_13634 | Pi conserved hypothetical protein (   | -32.2976 | -35.437  | 0.41009  | 0.921554 | BH |
| PITG_14923 | Pi conserved hypothetical protein (   | -32.2976 | -35.437  | 0.41009  | 0.921554 | BH |
| PITG_16923 | Pi hypothetical protein (415 nt)      | -32.3795 | -35.2731 | 0.41009  | 0.921554 | BH |
| PITG_17109 | Pi CCAAT-binding transcription fact   | -32.2976 | -35.437  | 0.41009  | 0.921554 | BH |
| PITG_17554 | Pi myb-like DNA-binding protein, p    | -32.3124 | -35.4073 | 0.41009  | 0.921554 | BH |
| PITG_09605 | Pi conserved hypothetical protein (   | -32.3449 | -35.3422 | 0.411227 | 0.923384 | BH |
| PITG_18047 | Pi hypothetical protein (543 nt)      | -32.3449 | -35.3422 | 0.411227 | 0.923384 | BH |
| PITG_19105 | Pi conserved hypothetical protein (   | -32.3449 | -35.3422 | 0.411227 | 0.923384 | BH |
| PITG_05902 | Pi Major Facilitator Superfamily (M   | -13.8981 | -1.29379 | 0.411259 | 0.923384 | BH |
| PITG_10311 | Pi myb-like DNA-binding domain, p     | -13.0079 | -1.22883 | 0.4117   | 0.924176 | BH |
| PITG_00175 | Pi conserved hypothetical protein (   | -32.3119 | -35.4083 | 0.412366 | 0.924851 | BH |
| PITG_15857 | Pi conserved hypothetical protein (   | -32.3119 | -35.4083 | 0.412366 | 0.924851 | BH |
| PITG_15926 | Pi conserved hypothetical protein (   | -32.3119 | -35.4083 | 0.412366 | 0.924851 | BH |
| PITG_19656 | Pi GMP synthase [glutamine-hydro      | -15.2029 | 3.153467 | 0.412366 | 0.924851 | BH |
| PITG_00764 | Pi V-type proton ATPase subunit H,    | -13.872  | -1.34722 | 0.412847 | 0.924851 | BH |
| PITG_15873 | Pi NADH-cytochrome b5 reductase       | -13.8833 | -1.3245  | 0.412847 | 0.924851 | BH |

|            |                                      |          |          |          |          |    |
|------------|--------------------------------------|----------|----------|----------|----------|----|
| PITG_06415 | Pi heat shock protein 90 (2300 nt)   | -8.7812  | 1.197144 | 0.413262 | 0.924851 | BH |
| PITG_03415 | Pi cysteine protease family C01A, p  | -32.4098 | -35.2125 | 0.413509 | 0.924851 | BH |
| PITG_15962 | Pi conserved hypothetical protein (  | -32.4098 | -35.2125 | 0.413509 | 0.924851 | BH |
| PITG_19065 | Pi pyridine nucleotide-disulphide o  | -32.4098 | -35.2125 | 0.413509 | 0.924851 | BH |
| PITG_19658 | Pi ATP-binding Cassette (ABC) Supe   | -32.4098 | -35.2125 | 0.413509 | 0.924851 | BH |
| PITG_20818 | Pi conserved hypothetical protein (  | -32.3965 | -35.2391 | 0.413509 | 0.924851 | BH |
| PITG_01963 | Pi conserved hypothetical protein (  | -32.3929 | -35.2464 | 0.413509 | 0.924851 | BH |
| PITG_06486 | Pi hypothetical protein (821 nt)     | -32.3929 | -35.2464 | 0.413509 | 0.924851 | BH |
| PITG_07168 | Pi Major Facilitator Superfamily (M  | -32.3929 | -35.2464 | 0.413509 | 0.924851 | BH |
| PITG_10556 | Pi conserved hypothetical protein (  | -32.3929 | -35.2464 | 0.413509 | 0.924851 | BH |
| PITG_20217 | Pi hypothetical protein (878 nt)     | -32.3929 | -35.2464 | 0.413509 | 0.924851 | BH |
| PITG_01964 | Pi conserved hypothetical protein (  | -13.8674 | -1.35755 | 0.414434 | 0.925627 | BH |
| PITG_06739 | Pi conserved hypothetical protein (  | -13.8612 | -1.36999 | 0.414434 | 0.925627 | BH |
| PITG_03575 | Pi anoctamin-like protein (2582 nt)  | -32.3602 | -35.3116 | 0.414654 | 0.925627 | BH |
| PITG_06379 | Pi serine/threonine protein kinase   | -32.3602 | -35.3116 | 0.414654 | 0.925627 | BH |
| PITG_10343 | Pi conserved hypothetical protein (  | -32.3764 | -35.2793 | 0.414654 | 0.925627 | BH |
| PITG_13391 | Pi trans-acting enoyl reductase, pu  | -32.3764 | -35.2793 | 0.414654 | 0.925627 | BH |
| PITG_14230 | Pi calcium-transporting ATPase sar   | -32.3764 | -35.2793 | 0.414654 | 0.925627 | BH |
| PITG_14415 | Pi conserved hypothetical protein (  | -32.3602 | -35.3116 | 0.414654 | 0.925627 | BH |
| PITG_22313 | Pi delta-1-pyrroline-5-carboxylate : | -32.3611 | -35.3099 | 0.414654 | 0.925627 | BH |
| PITG_00852 | Pi conserved hypothetical protein (  | -32.3445 | -35.343  | 0.415803 | 0.926406 | BH |
| PITG_01977 | Pi conserved hypothetical protein (  | -32.4141 | -35.2039 | 0.415803 | 0.926406 | BH |
| PITG_03942 | Pi plectin-like protein (4600 nt)    | -32.4141 | -35.2039 | 0.415803 | 0.926406 | BH |
| PITG_05068 | Pi secreted RxLR effector peptide,   | -15.2613 | 3.264372 | 0.415803 | 0.926406 | BH |
| PITG_20773 | Pi conserved hypothetical protein (  | -32.3445 | -35.343  | 0.415803 | 0.926406 | BH |
| PITG_21127 | Pi adenine phosphoribosyltransfer    | -32.3445 | -35.343  | 0.415803 | 0.926406 | BH |
| PITG_21314 | Pi conserved hypothetical protein (  | -32.3273 | -35.3775 | 0.415803 | 0.926406 | BH |
| PITG_22381 | Pi methylenetetrahydrofolate redu    | -32.3445 | -35.343  | 0.415803 | 0.926406 | BH |
| PITG_22413 | Pi hypothetical protein (1130 nt)    | -32.4141 | -35.2039 | 0.415803 | 0.926406 | BH |
| PITG_00205 | Pi conserved hypothetical protein (  | -13.8855 | -1.32268 | 0.416022 | 0.926496 | BH |
| PITG_11046 | Pi creatine kinase B-type (2280 nt)  | -13.8741 | -1.34542 | 0.416022 | 0.926496 | BH |
| PITG_04470 | Pi Argonaute1 (AGO1) (2784 nt)       | -12.5312 | -1.1611  | 0.416285 | 0.926884 | BH |
| PITG_01418 | Pi choline/Carnitine O-acyltransfer  | -32.2992 | -35.4337 | 0.416955 | 0.927256 | BH |
| PITG_15921 | Pi hypothetical protein (663 nt)     | -32.314  | -35.404  | 0.416955 | 0.927256 | BH |
| PITG_17867 | Pi conserved hypothetical protein (  | -32.3778 | -35.2765 | 0.416955 | 0.927256 | BH |
| PITG_19623 | Pi polygalacturonase, putative (118  | -32.314  | -35.404  | 0.416955 | 0.927256 | BH |
| PITG_19842 | Pi conserved hypothetical protein (  | -32.314  | -35.404  | 0.416955 | 0.927256 | BH |
| PITG_04681 | Pi serine/threonine-protein phosph   | -11.7005 | -1.01563 | 0.416985 | 0.927256 | BH |
| PITG_13084 | Pi conserved hypothetical protein (  | -32.2848 | -35.4625 | 0.418109 | 0.92936  | BH |
| PITG_13402 | Pi cystathionine beta-lyase (2009 n  | -32.2848 | -35.4625 | 0.418109 | 0.92936  | BH |
| PITG_11929 | Pi dihydrolipoyllysine-residue acety | -13.3112 | 1.737532 | 0.419225 | 0.931536 | BH |
| PITG_21056 | Pi conserved hypothetical protein (  | -32.3101 | -35.4118 | 0.419267 | 0.931536 | BH |
| PITG_17929 | Pi signal peptidase complex catalyt  | -13.056  | -1.11186 | 0.420562 | 0.934215 | BH |
| PITG_22933 | Pi secreted RxLR effector peptide,   | -13.9026 | -1.29208 | 0.420784 | 0.934507 | BH |
| PITG_05980 | Pi secreted RxLR effector peptide,   | -12.5052 | 1.786625 | 0.421115 | 0.935045 | BH |
| PITG_06454 | Pi adenosylmethionine-8-amino-7-     | -32.4116 | -35.2089 | 0.421592 | 0.935506 | BH |
| PITG_07167 | Pi conserved hypothetical protein (  | -32.4116 | -35.2089 | 0.421592 | 0.935506 | BH |

|            |                                       |          |          |          |          |      |
|------------|---------------------------------------|----------|----------|----------|----------|------|
| PITG_21523 | Pi cytochrome P450, putative (196     | -32.4116 | -35.2089 | 0.421592 | 0.935506 | BH   |
| PITG_13370 | Pi conserved hypothetical protein (   | -11.0304 | -1.07561 | 0.422311 | 0.936501 | BH   |
| PITG_03252 | Pi alpha-soluble NSF attachment pi    | -13.0535 | -1.11889 | 0.422314 | 0.936501 | BH   |
| PITG_08444 | Pi conserved hypothetical protein (   | -13.0529 | -1.11994 | 0.422314 | 0.936501 | BH   |
| PITG_02526 | Pi dynein heavy chain (14109 nt)      | -32.3783 | -35.2756 | 0.422759 | 0.936501 | BH   |
| PITG_08028 | Pi cohesin subunit, putative (4711    | -32.3783 | -35.2756 | 0.422759 | 0.936501 | BH   |
| PITG_10751 | Pi conserved hypothetical protein (   | -32.3783 | -35.2756 | 0.422759 | 0.936501 | BH   |
| PITG_13171 | Pi conserved hypothetical protein (   | -32.3948 | -35.2425 | 0.422759 | 0.936501 | BH   |
| PITG_17931 | Pi conserved hypothetical protein (   | -32.3948 | -35.2425 | 0.422759 | 0.936501 | BH   |
| PITG_17034 | Pi Annexin (Annexin) Family (987 n    | -9.93382 | -1.2724  | 0.422854 | 0.936512 | BH   |
| PITG_06873 | Pi aspartyl-tRNA synthetase, putati   | -32.3159 | -35.4003 | 0.425103 | 0.941094 | BH   |
| PITG_16464 | Pi Sulfate Permease (SulP) Family (   | -32.3159 | -35.4003 | 0.425103 | 0.941094 | BH   |
| PITG_13271 | Pi conserved hypothetical protein (   | -10.3858 | -1.19158 | 0.425539 | 0.941672 | BH   |
| PITG_01447 | Pi serine protease family S10, puta   | -13.8905 | -1.32005 | 0.425545 | 0.941672 | BH   |
| PITG_01004 | Pi hypothetical protein (405 nt)      | -10.7707 | -1.1697  | 0.425868 | 0.942188 | BH   |
| PITG_07703 | Pi conserved hypothetical protein (   | -32.3012 | -35.4297 | 0.42628  | 0.942298 | BH   |
| PITG_08140 | Pi hypothetical protein (1142 nt)     | -32.2867 | -35.4587 | 0.42628  | 0.942298 | BH   |
| PITG_08531 | Pi conserved hypothetical protein (   | -32.3012 | -35.4297 | 0.42628  | 0.942298 | BH   |
| PITG_10217 | Pi glucan 1,3-beta-glucosidase, put   | -32.3756 | -35.2809 | 0.42628  | 0.942298 | BH   |
| PITG_01082 | Pi ran-specific GTPase-activating pi  | -11.5821 | 1.516485 | 0.426743 | 0.943121 | BH   |
| PITG_04698 | Pi arginine biosynthesis bifunctiona  | -13.0408 | -1.14985 | 0.42756  | 0.944728 | BH   |
| PITG_11471 | Pi Amino Acid-Polyamine-Organoc       | -32.4135 | -35.2052 | 0.428643 | 0.946888 | BH   |
| PITG_06615 | Pi H - or Na -translocating F-type, v | -13.8863 | -1.3311  | 0.42872  | 0.946888 | BH   |
| PITG_05526 | Pi alpha-amylase, putative (2124 n    | -32.364  | -35.3042 | 0.429829 | 0.948736 | BH   |
| PITG_11899 | Pi hypothetical protein (331 nt)      | -32.4102 | -35.2117 | 0.429829 | 0.948736 | BH   |
| PITG_21312 | Pi conserved hypothetical protein (   | -32.364  | -35.3042 | 0.429829 | 0.948736 | BH   |
| PITG_07529 | Pi conserved hypothetical protein (   | -13.1463 | -0.94254 | 0.430445 | 0.949893 | BH   |
| PITG_06325 | Pi conserved hypothetical protein (   | -10.1871 | -1.12316 | 0.430971 | 0.950557 | BH   |
| PITG_07698 | Pi conserved hypothetical protein (   | -32.3483 | -35.3355 | 0.431019 | 0.950557 | BH   |
| PITG_10121 | Pi conserved hypothetical protein (   | -32.3328 | -35.3665 | 0.431019 | 0.950557 | BH   |
| PITG_16915 | Pi elongation factor Tu (560 nt)      | -12.6601 | 1.585004 | 0.431643 | 0.951732 | BH   |
| PITG_17406 | Pi enoyl-CoA hydratase, mitochonc     | -9.97956 | -1.15697 | 0.432047 | 0.952382 | BH   |
| PITG_01074 | Pi conserved hypothetical protein (   | -32.3178 | -35.3965 | 0.432212 | 0.952382 | BH   |
| PITG_07422 | Pi conserved hypothetical protein (   | -32.3178 | -35.3965 | 0.432212 | 0.952382 | BH   |
| PITG_12881 | Pi dolichyl-diphosphooligosacchari    | -11.9421 | -0.99551 | 0.432592 | 0.953019 | BH   |
| PITG_22995 | Pi protease inhibitor Epi5 (267 nt)   | -13.8712 | -1.3651  | 0.433481 | 0.954776 | BH   |
| PITG_02092 | Pi electron transfer flavoprotein-uf  | -13.8731 | -1.36529 | 0.438244 | 0.965061 | BH   |
| PITG_09538 | Pi mitochondrial carnitine/acylcarr   | -13.0423 | -1.16201 | 0.441484 | 0.971993 | BH   |
| PITG_10218 | Pi glucan 1,3-beta-glucosidase, put   | -11.5894 | 1.514785 | 0.442595 | 0.974233 | BH   |
| PITG_17013 | Pi conserved hypothetical protein (   | -11.9993 | -0.88114 | 0.44575  | 0.980971 | BH   |
| PITG_05171 | Pi 60S ribosomal protein L44 (673 i   | -9.07155 | -1.26076 | 0.446028 | 0.981374 | BH   |
| PITG_10219 | Pi V-type proton ATPase subunit E,    | -12.2865 | -0.86697 | 0.449445 | 0.988685 | BH   |
| PITG_14195 | Pi enolase (1485 nt)                  | -12.2154 | 1.535119 | 0.454868 |          | 1 BH |
| PITG_09488 | Pi small nuclear ribonucleoprotein    | -13.9424 | -1.20033 | 0.455932 |          | 1 BH |
| PITG_09576 | Pi orotidine 5'-phosphate decarbo     | -13.9057 | -1.27355 | 0.455932 |          | 1 BH |
| PITG_17384 | Pi conserved hypothetical protein (   | -13.9223 | -1.24039 | 0.455932 |          | 1 BH |
| PITG_19963 | Pi conserved hypothetical protein (   | -13.9277 | -1.22964 | 0.455932 |          | 1 BH |

|            |                                       |          |          |          |      |
|------------|---------------------------------------|----------|----------|----------|------|
| PITG_11474 | Pi conserved hypothetical protein (   | -13.9246 | -1.23593 | 0.455932 | 1 BH |
| PITG_19880 | Pi hypothetical protein (285 nt)      | -12.6335 | -0.90215 | 0.458047 | 1 BH |
| PITG_02256 | Pi aspartate aminotransferase, mit    | -11.0688 | -1.0086  | 0.45824  | 1 BH |
| PITG_13178 | Pi elongation of very long chain fat  | -13.533  | 1.599063 | 0.458891 | 1 BH |
| PITG_01982 | Pi conserved hypothetical protein (   | -13.9171 | -1.25444 | 0.460448 | 1 BH |
| PITG_06995 | Pi 60S ribosomal protein L4 (1327 r   | -10.1992 | 1.362948 | 0.461224 | 1 BH |
| PITG_09596 | Pi nucleoside diphosphate kinase B    | -10.7855 | 1.359172 | 0.461402 | 1 BH |
| PITG_06015 | Pi glucokinase, putative (1401 nt)    | -13.8883 | -1.35506 | 0.462071 | 1 BH |
| PITG_01300 | Pi DNA topoisomerase 2 DNA gyrase     | -13.9253 | -1.24048 | 0.463456 | 1 BH |
| PITG_06619 | Pi ADP-ribosylation factor family (1  | -12.0137 | -0.85738 | 0.46487  | 1 BH |
| PITG_02115 | Pi propionyl-CoA carboxylase beta     | -13.9275 | -1.23855 | 0.466461 | 1 BH |
| PITG_10822 | Pi Mitochondrial Protein Transloca    | -13.9093 | -1.27504 | 0.466461 | 1 BH |
| PITG_02527 | Pi histone H2A variant 1 (654 nt)     | -13.1922 | -0.85848 | 0.471193 | 1 BH |
| PITG_17527 | Pi crinkler (CRN) family protein, pu  | -9.85501 | -1.06997 | 0.473898 | 1 BH |
| PITG_03392 | Pi Rab1 family GTPase (PiYpt1) (92    | -10.4414 | -1.07616 | 0.476193 | 1 BH |
| PITG_03347 | Pi ribonucleoside-diphosphate redi    | -13.1037 | 1.432704 | 0.477246 | 1 BH |
| PITG_00592 | Pi hypothetical protein (698 nt)      | -11.4116 | -0.87114 | 0.477714 | 1 BH |
| PITG_00921 | Pi phospholipase D, Pi-PLD-like-1 (:  | -11.5293 | -1.05007 | 0.478113 | 1 BH |
| PITG_20116 | Pi 50S ribosomal protein L15 (847 r   | -13.9531 | -1.19745 | 0.478459 | 1 BH |
| PITG_01922 | Pi 40S ribosomal protein SA (852 n    | -10.2731 | 1.276908 | 0.478851 | 1 BH |
| PITG_12562 | Pi elicitin-like protein (809 nt)     | -8.74198 | 1.346004 | 0.478887 | 1 BH |
| PITG_16871 | Pi conserved hypothetical protein (   | -13.0109 | 1.574259 | 0.479744 | 1 BH |
| PITG_21059 | Pi conserved hypothetical protein (   | -13.5607 | 1.617292 | 0.482766 | 1 BH |
| PITG_14936 | Pi ATP synthase subunit gamma, pi     | -11.0047 | 1.330567 | 0.484227 | 1 BH |
| PITG_19802 | Pi dihydrolipoyl dehydrogenase, pu    | -11.8283 | 1.359896 | 0.48459  | 1 BH |
| PITG_16005 | Pi methylmalonate-semialdehyde c      | -10.4064 | -0.97036 | 0.485032 | 1 BH |
| PITG_11966 | Pi chaperonin CPN60-1, mitochonc      | -10.7511 | 1.290363 | 0.485538 | 1 BH |
| PITG_15045 | Pi trans-2-enoyl-CoA reductase, pu    | -12.4126 | 1.415427 | 0.486201 | 1 BH |
| PITG_23111 | Pi crinkler (CRN) family protein, pu  | -9.66185 | -1.06755 | 0.490224 | 1 BH |
| PITG_10185 | Pi conserved hypothetical protein (   | -11.7905 | -0.83292 | 0.491183 | 1 BH |
| PITG_10369 | Pi Mitochondrial Protein Transloca    | -13.592  | 1.664928 | 0.49234  | 1 BH |
| PITG_15526 | Pi ATP synthase subunit O, putative   | -11.082  | 1.27345  | 0.494118 | 1 BH |
| PITG_12520 | Pi conserved hypothetical protein (   | -13.2197 | -0.78834 | 0.496015 | 1 BH |
| PITG_15850 | Pi glycine dehydrogenase, mitocho     | -13.0846 | 1.695951 | 0.496583 | 1 BH |
| PITG_03900 | Pi conserved hypothetical protein (   | -13.2177 | -0.79418 | 0.497596 | 1 BH |
| PITG_07328 | Pi manganese superoxide dismutase     | -9.69989 | 1.275562 | 0.498533 | 1 BH |
| PITG_06771 | Pi 40S ribosomal protein S24, puta    | -9.10276 | 1.259419 | 0.500353 | 1 BH |
| PITG_09526 | Pi transcription factor BTF3-like pro | -8.95529 | -1.20213 | 0.50324  | 1 BH |
| PITG_03599 | Pi alanine aminotransferase 2 (150    | -13.2031 | -0.83279 | 0.505474 | 1 BH |
| PITG_15407 | Pi ribosomal protein L34 (647 nt)     | -8.94523 | -1.09051 | 0.506682 | 1 BH |
| PITG_15235 | Pi secreted RxLR effector peptide,    | -13.8999 | -1.3752  | 0.508341 | 1 BH |
| PITG_14179 | Pi glutamine synthetase (841 nt)      | -10.7603 | 1.290731 | 0.508521 | 1 BH |
| PITG_03477 | Pi 60S ribosomal protein L7a-2 (130   | -9.33189 | 1.207154 | 0.509543 | 1 BH |
| PITG_14639 | Pi aminotransferase, putative (194    | -14.6214 | 2.003718 | 0.509713 | 1 BH |
| PITG_13600 | Pi eukaryotic translation initiation  | -12.6674 | -0.87037 | 0.510797 | 1 BH |
| PITG_09553 | Pi conserved hypothetical protein (   | -11.4568 | 1.263846 | 0.511388 | 1 BH |
| PITG_00708 | Pi thioredoxin, putative (984 nt)     | -11.1202 | -0.92567 | 0.511695 | 1 BH |

|            |                                      |          |          |          |      |
|------------|--------------------------------------|----------|----------|----------|------|
| PITG_15611 | Pi protein kinase (900 nt)           | -14.6586 | 2.074431 | 0.512018 | 1 BH |
| PITG_11775 | Pi hypothetical protein (1765 nt)    | -12.6718 | -0.86381 | 0.512463 | 1 BH |
| PITG_01094 | Pi 26S proteasome non-ATPase reg     | -12.6733 | -0.82477 | 0.513117 | 1 BH |
| PITG_17537 | Pi crinkler (CRN) family protein, ps | -9.01378 | -1.06344 | 0.513356 | 1 BH |
| PITG_15723 | Pi 60S ribosomal protein L14, putat  | -8.82474 | -1.12336 | 0.51354  | 1 BH |
| PITG_08082 | Pi cytochrome b5 (444 nt)            | -12.7875 | 1.515009 | 0.513729 | 1 BH |
| PITG_20904 | Pi small nuclear ribonucleoprotein   | -13.9833 | -1.11844 | 0.515255 | 1 BH |
| PITG_05501 | Pi Non-selective Cation Channel-2    | -13.9724 | -1.1415  | 0.516642 | 1 BH |
| PITG_05638 | Pi GTPase, putative (1931 nt)        | -13.9778 | -1.13068 | 0.516642 | 1 BH |
| PITG_20799 | Pi conserved hypothetical protein    | -13.9844 | -1.11748 | 0.516642 | 1 BH |
| PITG_01187 | Pi dolichol kinase, putative (1034 n | -14.7552 | 2.259899 | 0.516646 | 1 BH |
| PITG_08941 | Pi hypothetical protein (1080 nt)    | -11.7773 | -0.85944 | 0.518447 | 1 BH |
| PITG_00536 | Pi pre-mRNA-splicing factor CWC2!    | -32.4775 | -35.0772 | 0.52068  | 1 BH |
| PITG_00797 | Pi WD domain-containing protein      | -32.4583 | -35.1155 | 0.52068  | 1 BH |
| PITG_00830 | Pi conserved hypothetical protein    | -32.4393 | -35.1535 | 0.52068  | 1 BH |
| PITG_00858 | Pi serine/threonine protein kinase   | -32.4396 | -35.1528 | 0.52068  | 1 BH |
| PITG_00989 | Pi histone demethylase, putative (3  | -32.4038 | -35.2245 | 0.52068  | 1 BH |
| PITG_01189 | Pi hypothetical protein (2548 nt)    | -32.4038 | -35.2245 | 0.52068  | 1 BH |
| PITG_02027 | Pi conserved hypothetical protein    | -32.4038 | -35.2245 | 0.52068  | 1 BH |
| PITG_02079 | Pi conserved hypothetical protein    | -32.4775 | -35.0772 | 0.52068  | 1 BH |
| PITG_02152 | Pi hypothetical protein (2048 nt)    | -32.4393 | -35.1535 | 0.52068  | 1 BH |
| PITG_02371 | Pi conserved hypothetical protein    | -32.4215 | -35.1891 | 0.52068  | 1 BH |
| PITG_02491 | Pi conserved hypothetical protein    | -32.4775 | -35.0772 | 0.52068  | 1 BH |
| PITG_03169 | Pi GPN-loop GTPase, putative (391    | -32.4393 | -35.1535 | 0.52068  | 1 BH |
| PITG_03318 | Pi conserved hypothetical protein    | -32.4396 | -35.1528 | 0.52068  | 1 BH |
| PITG_03396 | Pi conserved hypothetical protein    | -32.4396 | -35.1528 | 0.52068  | 1 BH |
| PITG_04666 | Pi conserved hypothetical protein    | -32.4211 | -35.1899 | 0.52068  | 1 BH |
| PITG_04861 | Pi conserved hypothetical protein    | -32.4775 | -35.0772 | 0.52068  | 1 BH |
| PITG_05622 | Pi conserved hypothetical protein    | -32.4038 | -35.2245 | 0.52068  | 1 BH |
| PITG_05659 | Pi conserved hypothetical protein    | -32.4038 | -35.2245 | 0.52068  | 1 BH |
| PITG_05717 | Pi ATP-binding Cassette (ABC) Supe   | -32.4396 | -35.1528 | 0.52068  | 1 BH |
| PITG_05866 | Pi conserved hypothetical protein    | -32.4583 | -35.1155 | 0.52068  | 1 BH |
| PITG_05961 | Pi conserved hypothetical protein    | -32.4211 | -35.1899 | 0.52068  | 1 BH |
| PITG_06001 | Pi ATP-binding Cassette (ABC) supe   | -32.4775 | -35.0772 | 0.52068  | 1 BH |
| PITG_07795 | Pi myosin-like protein (2346 nt)     | -32.4583 | -35.1155 | 0.52068  | 1 BH |
| PITG_08420 | Pi metalloprotease family M76, pu    | -32.4775 | -35.0772 | 0.52068  | 1 BH |
| PITG_08712 | Pi conserved hypothetical protein    | -32.4775 | -35.0772 | 0.52068  | 1 BH |
| PITG_09954 | Pi patatin-like phospholipase, puta  | -32.4396 | -35.1528 | 0.52068  | 1 BH |
| PITG_10065 | Pi conserved hypothetical protein    | -32.4396 | -35.1528 | 0.52068  | 1 BH |
| PITG_12128 | Pi F-box protein, putative (1121 nt) | -32.4775 | -35.0772 | 0.52068  | 1 BH |
| PITG_12183 | Pi double stranded RNA binding, pu   | -32.4396 | -35.1528 | 0.52068  | 1 BH |
| PITG_14114 | Pi conserved hypothetical protein    | -32.4775 | -35.0772 | 0.52068  | 1 BH |
| PITG_14808 | Pi ferrochelatase, mitochondrial pr  | -32.4583 | -35.1155 | 0.52068  | 1 BH |
| PITG_14925 | Pi conserved hypothetical protein    | -32.4038 | -35.2245 | 0.52068  | 1 BH |
| PITG_14944 | Pi conserved hypothetical protein    | -32.4211 | -35.1899 | 0.52068  | 1 BH |
| PITG_16318 | Pi transmembrane protein, putativ    | -32.4038 | -35.2245 | 0.52068  | 1 BH |
| PITG_16492 | Pi conserved hypothetical protein    | -32.4775 | -35.0772 | 0.52068  | 1 BH |

|            |                                      |          |          |          |      |
|------------|--------------------------------------|----------|----------|----------|------|
| PITG_17030 | Pi conserved hypothetical protein (  | -32.4396 | -35.1528 | 0.52068  | 1 BH |
| PITG_17035 | Pi conserved hypothetical protein (  | -32.4396 | -35.1528 | 0.52068  | 1 BH |
| PITG_17047 | Pi ATP-binding Cassette (ABC) Supe   | -32.4775 | -35.0772 | 0.52068  | 1 BH |
| PITG_17159 | Pi conserved hypothetical protein (  | -32.4211 | -35.1899 | 0.52068  | 1 BH |
| PITG_17437 | Pi conserved hypothetical protein (  | -32.4396 | -35.1528 | 0.52068  | 1 BH |
| PITG_17602 | Pi conserved hypothetical protein (  | -32.4038 | -35.2245 | 0.52068  | 1 BH |
| PITG_17701 | Pi conserved hypothetical protein (  | -32.4038 | -35.2245 | 0.52068  | 1 BH |
| PITG_18884 | Pi conserved hypothetical protein (  | -32.4396 | -35.1528 | 0.52068  | 1 BH |
| PITG_19158 | Pi conserved hypothetical protein (  | -32.4396 | -35.1528 | 0.52068  | 1 BH |
| PITG_20903 | Pi exosome complex exonuclease f     | -32.4211 | -35.1899 | 0.52068  | 1 BH |
| PITG_21213 | Pi conserved hypothetical protein (  | -32.4775 | -35.0772 | 0.52068  | 1 BH |
| PITG_21627 | Pi conserved hypothetical protein (  | -32.4396 | -35.1528 | 0.52068  | 1 BH |
| PITG_04337 | Pi conserved hypothetical protein (  | -14.0043 | -1.0812  | 0.520797 | 1 BH |
| PITG_05666 | Pi small nuclear ribonucleoprotein   | -13.9753 | -1.13926 | 0.520797 | 1 BH |
| PITG_16614 | Pi Crinkler (CRN) family protein (12 | -14.0027 | -1.08453 | 0.520797 | 1 BH |
| PITG_09706 | Pi proteasome subunit beta, putati   | -11.6292 | -0.77056 | 0.5214   | 1 BH |
| PITG_07340 | Pi conserved hypothetical protein (  | -9.45055 | -0.98596 | 0.521454 | 1 BH |
| PITG_00193 | Pi conserved hypothetical protein (  | -32.4389 | -35.1542 | 0.521572 | 1 BH |
| PITG_00350 | Pi COP9 signalosome complex subu     | -32.5176 | -34.9969 | 0.521572 | 1 BH |
| PITG_01046 | Pi beta-lactamase-like protein (109  | -32.4577 | -35.1167 | 0.521572 | 1 BH |
| PITG_01457 | Pi conserved hypothetical protein (  | -32.5176 | -34.9969 | 0.521572 | 1 BH |
| PITG_01648 | Pi conserved hypothetical protein (  | -32.4389 | -35.1542 | 0.521572 | 1 BH |
| PITG_02268 | Pi conserved hypothetical protein (  | -32.4975 | -35.0371 | 0.521572 | 1 BH |
| PITG_02613 | Pi conserved hypothetical protein (  | -32.5176 | -34.9969 | 0.521572 | 1 BH |
| PITG_03932 | Pi conserved hypothetical protein (  | -32.4389 | -35.1542 | 0.521572 | 1 BH |
| PITG_04676 | Pi conserved hypothetical protein (  | -32.4773 | -35.0776 | 0.521572 | 1 BH |
| PITG_04876 | Pi hypothetical protein (381 nt)     | -32.5176 | -34.9969 | 0.521572 | 1 BH |
| PITG_05731 | Pi origin recognition complex subu   | -32.4773 | -35.0776 | 0.521572 | 1 BH |
| PITG_05772 | Pi conserved hypothetical protein (  | -32.4975 | -35.0371 | 0.521572 | 1 BH |
| PITG_06984 | Pi stromal cell-derived factor 2 pre | -32.5176 | -34.9969 | 0.521572 | 1 BH |
| PITG_07239 | Pi tartrate-resistant acid phosphat  | -32.4389 | -35.1542 | 0.521572 | 1 BH |
| PITG_09566 | Pi inositol monophosphatase, puta    | -32.5176 | -34.9969 | 0.521572 | 1 BH |
| PITG_09603 | Pi conserved hypothetical protein (  | -32.5176 | -34.9969 | 0.521572 | 1 BH |
| PITG_10196 | Pi conserved hypothetical protein (  | -32.4975 | -35.0371 | 0.521572 | 1 BH |
| PITG_11733 | Pi pantothenate kinase, putative (1  | -32.5176 | -34.9969 | 0.521572 | 1 BH |
| PITG_12121 | Pi uridine kinase (984 nt)           | -32.4773 | -35.0776 | 0.521572 | 1 BH |
| PITG_12446 | Pi conserved hypothetical protein (  | -32.5176 | -34.9969 | 0.521572 | 1 BH |
| PITG_12576 | Pi conserved hypothetical protein (  | -32.4975 | -35.0371 | 0.521572 | 1 BH |
| PITG_12855 | Pi conserved hypothetical protein (  | -32.4773 | -35.0776 | 0.521572 | 1 BH |
| PITG_13567 | Pi endo-1,3(4)-beta-glucanase, put   | -32.4773 | -35.0776 | 0.521572 | 1 BH |
| PITG_15065 | Pi conserved hypothetical protein (  | -32.5176 | -34.9969 | 0.521572 | 1 BH |
| PITG_15541 | Pi conserved hypothetical protein (  | -32.4975 | -35.0371 | 0.521572 | 1 BH |
| PITG_16681 | Pi conserved hypothetical protein (  | -32.4577 | -35.1167 | 0.521572 | 1 BH |
| PITG_17959 | Pi conserved hypothetical protein (  | -32.5176 | -34.9969 | 0.521572 | 1 BH |
| PITG_18024 | Pi conserved hypothetical protein (  | -32.4773 | -35.0776 | 0.521572 | 1 BH |
| PITG_18251 | Pi peptide chain release factor 1 (1 | -32.4389 | -35.1542 | 0.521572 | 1 BH |
| PITG_18874 | Pi conserved hypothetical protein (  | -32.5176 | -34.9969 | 0.521572 | 1 BH |



|            |                                                     |          |          |          |      |
|------------|-----------------------------------------------------|----------|----------|----------|------|
| PITG_19036 | Pi serine/threonine-protein phosphatase             | -32.5176 | -34.9969 | 0.521572 | 1 BH |
| PITG_19774 | Pi mannose-6-phosphate isomerase                    | -32.4577 | -35.1167 | 0.521572 | 1 BH |
| PITG_20533 | Pi conserved hypothetical protein (1211 nt)         | -32.4389 | -35.1542 | 0.521572 | 1 BH |
| PITG_20568 | Pi hypothetical protein (1211 nt)                   | -32.4773 | -35.0776 | 0.521572 | 1 BH |
| PITG_21328 | Pi hypothetical protein (1028 nt)                   | -32.4971 | -35.038  | 0.521572 | 1 BH |
| PITG_22646 | Pi conserved hypothetical protein (1211 nt)         | -32.5176 | -34.9969 | 0.521572 | 1 BH |
| PITG_00049 | Pi conserved hypothetical protein (1211 nt)         | -32.44   | -35.1521 | 0.521572 | 1 BH |
| PITG_00215 | Pi calmodulin-binding transcription factor          | -32.4043 | -35.2236 | 0.521572 | 1 BH |
| PITG_00283 | Pi conserved hypothetical protein (1211 nt)         | -32.5176 | -34.997  | 0.521572 | 1 BH |
| PITG_00523 | Pi conserved hypothetical protein (1211 nt)         | -32.4219 | -35.1883 | 0.521572 | 1 BH |
| PITG_00573 | Pi tyrosine-protein phosphatase, putative           | -32.44   | -35.1521 | 0.521572 | 1 BH |
| PITG_01065 | Pi folylpolyglutamate synthase, putative            | -32.458  | -35.1161 | 0.521572 | 1 BH |
| PITG_01313 | Pi conserved hypothetical protein (1211 nt)         | -32.4974 | -35.0374 | 0.521572 | 1 BH |
| PITG_01683 | Pi conserved hypothetical protein (1211 nt)         | -32.4777 | -35.0767 | 0.521572 | 1 BH |
| PITG_01743 | Pi conserved hypothetical protein (1211 nt)         | -32.5176 | -34.997  | 0.521572 | 1 BH |
| PITG_01772 | Pi conserved hypothetical protein (1211 nt)         | -32.4974 | -35.0374 | 0.521572 | 1 BH |
| PITG_01920 | Pi ubiquitin-specific protease, putative            | -32.4972 | -35.0377 | 0.521572 | 1 BH |
| PITG_02348 | Pi conserved hypothetical protein (1211 nt)         | -32.44   | -35.1521 | 0.521572 | 1 BH |
| PITG_02372 | Pi conserved hypothetical protein (1211 nt)         | -32.4219 | -35.1883 | 0.521572 | 1 BH |
| PITG_02398 | Pi conserved hypothetical protein (1211 nt)         | -32.5176 | -34.997  | 0.521572 | 1 BH |
| PITG_02770 | Pi calcineurin-like phosphoesterase                 | -32.4972 | -35.0377 | 0.521572 | 1 BH |
| PITG_03119 | Pi conserved hypothetical protein (1211 nt)         | -32.4586 | -35.1149 | 0.521572 | 1 BH |
| PITG_03354 | Pi hypothetical protein (367 nt)                    | -32.44   | -35.1521 | 0.521572 | 1 BH |
| PITG_03429 | Pi conserved hypothetical protein (1211 nt)         | -32.4974 | -35.0374 | 0.521572 | 1 BH |
| PITG_03531 | Pi conserved hypothetical protein (1211 nt)         | -32.4974 | -35.0374 | 0.521572 | 1 BH |
| PITG_03585 | Pi hypothetical protein (459 nt)                    | -32.5177 | -34.9968 | 0.521572 | 1 BH |
| PITG_03790 | Pi conserved hypothetical protein (1211 nt)         | -32.4974 | -35.0374 | 0.521572 | 1 BH |
| PITG_03872 | Pi kinesin-like protein (2811 nt)                   | -32.44   | -35.1521 | 0.521572 | 1 BH |
| PITG_04114 | Pi small cellulose binding protein, putative        | -32.4777 | -35.0767 | 0.521572 | 1 BH |
| PITG_04174 | Pi hypothetical protein (696 nt)                    | -32.4972 | -35.0377 | 0.521572 | 1 BH |
| PITG_04497 | Pi conserved hypothetical protein (1211 nt)         | -32.4043 | -35.2236 | 0.521572 | 1 BH |
| PITG_04723 | Pi hypothetical protein (610 nt)                    | -32.4974 | -35.0374 | 0.521572 | 1 BH |
| PITG_04909 | Pi conserved hypothetical protein (1211 nt)         | -32.458  | -35.1161 | 0.521572 | 1 BH |
| PITG_05116 | Pi conserved hypothetical protein (1211 nt)         | -32.5177 | -34.9968 | 0.521572 | 1 BH |
| PITG_05623 | Pi conserved hypothetical protein (1211 nt)         | -32.5177 | -34.9968 | 0.521572 | 1 BH |
| PITG_05679 | Pi replication protein A 70 kDa DNA-binding subunit | -32.4219 | -35.1883 | 0.521572 | 1 BH |
| PITG_05732 | Pi hypothetical protein (619 nt)                    | -32.4586 | -35.1149 | 0.521572 | 1 BH |
| PITG_05817 | Pi aspartyl/Asparaginyl beta-hydroxylase            | -32.4219 | -35.1883 | 0.521572 | 1 BH |
| PITG_05955 | Pi serine protease family S09X, putative            | -32.4219 | -35.1883 | 0.521572 | 1 BH |
| PITG_06012 | Pi conserved hypothetical protein (1211 nt)         | -32.4586 | -35.1149 | 0.521572 | 1 BH |
| PITG_06101 | Pi conserved hypothetical protein (1211 nt)         | -32.5177 | -34.9968 | 0.521572 | 1 BH |
| PITG_06754 | Pi conserved hypothetical protein (1211 nt)         | -32.4777 | -35.0767 | 0.521572 | 1 BH |
| PITG_06802 | Pi conserved hypothetical protein (1211 nt)         | -32.44   | -35.1521 | 0.521572 | 1 BH |
| PITG_06844 | Pi hypothetical protein (1403 nt)                   | -32.44   | -35.1521 | 0.521572 | 1 BH |
| PITG_06917 | Pi Phosphatidylinositol-3-phosphatase               | -32.4974 | -35.0374 | 0.521572 | 1 BH |
| PITG_07210 | Pi protein kinase (2083 nt)                         | -32.4972 | -35.0377 | 0.521572 | 1 BH |
| PITG_07310 | Pi Putative beta-1,4-galactosyltransferase          | -32.4972 | -35.0377 | 0.521572 | 1 BH |

|            |                                        |          |          |          |      |
|------------|----------------------------------------|----------|----------|----------|------|
| PITG_07426 | Pi conserved hypothetical protein (    | -32.4972 | -35.0377 | 0.521572 | 1 BH |
| PITG_07473 | Pi EF hand containing protein, puta    | -32.4219 | -35.1883 | 0.521572 | 1 BH |
| PITG_08324 | Pi conserved hypothetical protein (    | -32.458  | -35.1161 | 0.521572 | 1 BH |
| PITG_08540 | Pi conserved hypothetical protein (    | -32.4972 | -35.0377 | 0.521572 | 1 BH |
| PITG_08675 | Pi conserved hypothetical protein (    | -32.4043 | -35.2236 | 0.521572 | 1 BH |
| PITG_09287 | Pi sporangia induced hypothetical      | -32.4219 | -35.1883 | 0.521572 | 1 BH |
| PITG_09444 | Pi conserved hypothetical protein (    | -32.4972 | -35.0377 | 0.521572 | 1 BH |
| PITG_09723 | Pi conserved hypothetical protein (    | -32.44   | -35.1521 | 0.521572 | 1 BH |
| PITG_09800 | Pi conserved hypothetical protein (    | -32.4586 | -35.1149 | 0.521572 | 1 BH |
| PITG_10134 | Pi signal peptide peptidase-like, as   | -32.4207 | -35.1907 | 0.521572 | 1 BH |
| PITG_10214 | Pi conserved hypothetical protein (    | -32.4207 | -35.1907 | 0.521572 | 1 BH |
| PITG_10533 | Pi conserved hypothetical protein (    | -32.4777 | -35.0767 | 0.521572 | 1 BH |
| PITG_10645 | Pi conserved hypothetical protein (    | -32.4043 | -35.2236 | 0.521572 | 1 BH |
| PITG_10648 | Pi conserved hypothetical protein (    | -32.4586 | -35.1149 | 0.521572 | 1 BH |
| PITG_11424 | Pi conserved hypothetical protein (    | -32.44   | -35.1521 | 0.521572 | 1 BH |
| PITG_11604 | Pi hypothetical protein (679 nt)       | -32.458  | -35.1161 | 0.521572 | 1 BH |
| PITG_11804 | Pi conserved hypothetical protein (    | -32.5176 | -34.997  | 0.521572 | 1 BH |
| PITG_11888 | Pi conserved hypothetical protein (    | -32.4972 | -35.0377 | 0.521572 | 1 BH |
| PITG_12196 | Pi conserved hypothetical protein (    | -32.4777 | -35.0767 | 0.521572 | 1 BH |
| PITG_12463 | Pi cleavage induced conserved hyp      | -32.4777 | -35.0767 | 0.521572 | 1 BH |
| PITG_12494 | Pi transmembrane protein, putativ      | -32.44   | -35.1521 | 0.521572 | 1 BH |
| PITG_12677 | Pi conserved hypothetical protein (    | -32.5177 | -34.9968 | 0.521572 | 1 BH |
| PITG_12821 | Pi conserved hypothetical protein (    | -32.4974 | -35.0374 | 0.521572 | 1 BH |
| PITG_13114 | Pi elicitin-like protein (1288 nt)     | -32.4219 | -35.1883 | 0.521572 | 1 BH |
| PITG_13185 | Pi conserved hypothetical protein (    | -32.44   | -35.1521 | 0.521572 | 1 BH |
| PITG_13607 | Pi translation initiation factor eIF-2 | -32.4043 | -35.2236 | 0.521572 | 1 BH |
| PITG_14770 | Pi conserved hypothetical protein (    | -32.4219 | -35.1883 | 0.521572 | 1 BH |
| PITG_15067 | Pi conserved hypothetical protein (    | -32.4586 | -35.1149 | 0.521572 | 1 BH |
| PITG_15191 | Pi conserved hypothetical protein (    | -32.4586 | -35.1149 | 0.521572 | 1 BH |
| PITG_15696 | Pi TFIIF basal transcription factor c  | -32.5177 | -34.9968 | 0.521572 | 1 BH |
| PITG_16669 | Pi transcription factor IIIB, putative | -32.5176 | -34.997  | 0.521572 | 1 BH |
| PITG_17000 | Pi hypothetical protein (288 nt)       | -32.4043 | -35.2236 | 0.521572 | 1 BH |
| PITG_17004 | Pi conserved hypothetical protein (    | -32.44   | -35.1521 | 0.521572 | 1 BH |
| PITG_17168 | Pi conserved hypothetical protein (    | -32.4043 | -35.2236 | 0.521572 | 1 BH |
| PITG_17201 | Pi GTP-binding protein, putative (1    | -32.4777 | -35.0767 | 0.521572 | 1 BH |
| PITG_17209 | Pi conserved hypothetical protein (    | -32.458  | -35.1161 | 0.521572 | 1 BH |
| PITG_17312 | Pi SUMO-activating enzyme (SAE),       | -32.4207 | -35.1907 | 0.521572 | 1 BH |
| PITG_17572 | Pi protein kinase (614 nt)             | -32.4586 | -35.1149 | 0.521572 | 1 BH |
| PITG_17736 | Pi conserved hypothetical protein (    | -32.5177 | -34.9968 | 0.521572 | 1 BH |
| PITG_17790 | Pi 5-aminolevulinic synthase, put      | -32.4586 | -35.1149 | 0.521572 | 1 BH |
| PITG_17966 | Pi conserved hypothetical protein (    | -32.4972 | -35.0377 | 0.521572 | 1 BH |
| PITG_18534 | Pi trans-1,2-dihydrobenzene-1,2-di     | -32.5176 | -34.997  | 0.521572 | 1 BH |
| PITG_18656 | Pi conserved hypothetical protein (    | -32.5177 | -34.9968 | 0.521572 | 1 BH |
| PITG_19005 | Pi conserved hypothetical protein (    | -32.4972 | -35.0377 | 0.521572 | 1 BH |
| PITG_19113 | Pi conserved hypothetical protein (    | -32.4207 | -35.1907 | 0.521572 | 1 BH |
| PITG_19450 | Pi cell division protein kinase 2 (10  | -32.4777 | -35.0767 | 0.521572 | 1 BH |
| PITG_19456 | Pi protein kinase, putative (2099 nt)  | -32.4043 | -35.2236 | 0.521572 | 1 BH |

|            |                                        |          |          |          |      |
|------------|----------------------------------------|----------|----------|----------|------|
| PITG_20045 | Pi hypothetical protein (793 nt)       | -32.4974 | -35.0374 | 0.521572 | 1 BH |
| PITG_20434 | Pi hypothetical protein (587 nt)       | -32.4043 | -35.2236 | 0.521572 | 1 BH |
| PITG_20608 | Pi conserved hypothetical protein (    | -32.4586 | -35.1149 | 0.521572 | 1 BH |
| PITG_21277 | Pi conserved hypothetical protein (    | -32.4219 | -35.1883 | 0.521572 | 1 BH |
| PITG_21316 | Pi protein phosphatase methyleste      | -32.44   | -35.1521 | 0.521572 | 1 BH |
| PITG_22383 | Pi glycoside hydrolase, putative (14   | -32.4043 | -35.2236 | 0.521572 | 1 BH |
| PITG_22527 | Pi conserved hypothetical protein (    | -32.4972 | -35.0377 | 0.521572 | 1 BH |
| PITG_01253 | Pi aldehyde dehydrogenase, mitoc       | -11.6635 | 1.328552 | 0.522119 | 1 BH |
| PITG_00492 | Pi cytochrome c peroxidase, mitoc      | -12.0602 | -0.79998 | 0.522231 | 1 BH |
| PITG_01076 | Pi ATPase AFG2 protein (2272 nt)       | -32.4202 | -35.1917 | 0.522465 | 1 BH |
| PITG_05202 | Pi voltage-gated potassium channe      | -32.4202 | -35.1917 | 0.522465 | 1 BH |
| PITG_08352 | Pi conserved hypothetical protein (    | -32.4202 | -35.1917 | 0.522465 | 1 BH |
| PITG_08421 | Pi peroxisomal multifunctional enz     | -32.4202 | -35.1917 | 0.522465 | 1 BH |
| PITG_13342 | Pi conserved hypothetical protein (    | -32.4202 | -35.1917 | 0.522465 | 1 BH |
| PITG_18008 | Pi conserved hypothetical protein (    | -32.4202 | -35.1917 | 0.522465 | 1 BH |
| PITG_00012 | Pi conserved hypothetical protein (    | -32.477  | -35.0782 | 0.522465 | 1 BH |
| PITG_01360 | Pi conserved hypothetical protein (    | -32.4048 | -35.2225 | 0.522465 | 1 BH |
| PITG_01719 | Pi conserved hypothetical protein (    | -32.4224 | -35.1874 | 0.522465 | 1 BH |
| PITG_02196 | Pi conserved hypothetical protein (    | -32.4404 | -35.1513 | 0.522465 | 1 BH |
| PITG_02323 | Pi hypothetical protein (603 nt)       | -32.4969 | -35.0384 | 0.522465 | 1 BH |
| PITG_02432 | Pi dolichyl-P-Man:Man(5)GlcNAc(2       | -32.478  | -35.0762 | 0.522465 | 1 BH |
| PITG_02791 | Pi conserved hypothetical protein (    | -32.478  | -35.0762 | 0.522465 | 1 BH |
| PITG_02810 | Pi cell division cycle protein 16 (25' | -32.4224 | -35.1874 | 0.522465 | 1 BH |
| PITG_03404 | Pi conserved hypothetical protein (    | -32.478  | -35.0762 | 0.522465 | 1 BH |
| PITG_03563 | Pi conserved hypothetical protein (    | -32.4589 | -35.1143 | 0.522465 | 1 BH |
| PITG_03696 | Pi conserved hypothetical protein (    | -32.4404 | -35.1513 | 0.522465 | 1 BH |
| PITG_03766 | Pi conserved hypothetical protein (    | -32.477  | -35.0782 | 0.522465 | 1 BH |
| PITG_03782 | Pi conserved hypothetical protein (    | -32.4404 | -35.1513 | 0.522465 | 1 BH |
| PITG_03898 | Pi serine protease family S01B, put    | -32.4385 | -35.1551 | 0.522465 | 1 BH |
| PITG_05559 | Pi conserved hypothetical protein (    | -32.5175 | -34.9972 | 0.522465 | 1 BH |
| PITG_06038 | Pi conserved hypothetical protein (    | -32.5175 | -34.9972 | 0.522465 | 1 BH |
| PITG_06484 | Pi conserved hypothetical protein (    | -32.477  | -35.0782 | 0.522465 | 1 BH |
| PITG_06538 | Pi ATP-binding Cassette (ABC) Sup      | -32.4404 | -35.1513 | 0.522465 | 1 BH |
| PITG_06896 | Pi proline iminopeptidase (1192 nt     | -32.4224 | -35.1874 | 0.522465 | 1 BH |
| PITG_07201 | Pi UDP-glucose:glycoprotein glucos     | -32.4224 | -35.1874 | 0.522465 | 1 BH |
| PITG_07417 | Pi conserved hypothetical protein (    | -32.5175 | -34.9972 | 0.522465 | 1 BH |
| PITG_07447 | Pi conserved hypothetical protein (    | -32.4224 | -35.1874 | 0.522465 | 1 BH |
| PITG_07697 | Pi conserved hypothetical protein (    | -32.4224 | -35.1874 | 0.522465 | 1 BH |
| PITG_07829 | Pi exosome complex exonuclease f       | -32.4589 | -35.1143 | 0.522465 | 1 BH |
| PITG_07851 | Pi protein kinase (1421 nt)            | -32.4589 | -35.1143 | 0.522465 | 1 BH |
| PITG_07898 | Pi sulfatase-like protein (2445 nt)    | -32.4589 | -35.1143 | 0.522465 | 1 BH |
| PITG_08104 | Pi conserved hypothetical protein (    | -32.4589 | -35.1143 | 0.522465 | 1 BH |
| PITG_08184 | Pi phosphatidylinositide phosphata     | -32.4224 | -35.1874 | 0.522465 | 1 BH |
| PITG_09815 | Pi anthranilate synthase componer      | -32.4589 | -35.1143 | 0.522465 | 1 BH |
| PITG_10532 | Pi conserved hypothetical protein (    | -32.4385 | -35.1551 | 0.522465 | 1 BH |
| PITG_11022 | Pi hypothetical protein (769 nt)       | -32.4224 | -35.1874 | 0.522465 | 1 BH |
| PITG_11790 | Pi conserved hypothetical protein (    | -32.477  | -35.0782 | 0.522465 | 1 BH |

|            |                                       |          |          |          |      |
|------------|---------------------------------------|----------|----------|----------|------|
| PITG_11822 | Pi conserved hypothetical protein (   | -32.4404 | -35.1513 | 0.522465 | 1 BH |
| PITG_11914 | Pi acetyltransferase (GNAT) family    | -32.4589 | -35.1143 | 0.522465 | 1 BH |
| PITG_12159 | Pi Annexin (Annexin) Family (1310     | -32.4224 | -35.1874 | 0.522465 | 1 BH |
| PITG_12234 | Pi phosphatidic acid phosphatase (    | -32.4224 | -35.1874 | 0.522465 | 1 BH |
| PITG_12521 | Pi vacuolar protein sorting-associat  | -32.4589 | -35.1143 | 0.522465 | 1 BH |
| PITG_12663 | Pi conserved hypothetical protein (   | -32.4048 | -35.2225 | 0.522465 | 1 BH |
| PITG_12834 | Pi conserved hypothetical protein (   | -32.477  | -35.0782 | 0.522465 | 1 BH |
| PITG_12835 | Pi conserved hypothetical protein (   | -32.478  | -35.0762 | 0.522465 | 1 BH |
| PITG_13103 | Pi fimbrin-like protein (2695 nt)     | -32.5175 | -34.9972 | 0.522465 | 1 BH |
| PITG_14078 | Pi conserved hypothetical protein (   | -32.4224 | -35.1874 | 0.522465 | 1 BH |
| PITG_14174 | Pi conserved hypothetical protein (   | -32.4404 | -35.1513 | 0.522465 | 1 BH |
| PITG_14898 | Pi conserved hypothetical protein (   | -32.478  | -35.0762 | 0.522465 | 1 BH |
| PITG_16024 | Pi riboflavin synthase subunit alpha  | -32.4048 | -35.2225 | 0.522465 | 1 BH |
| PITG_16841 | Pi conserved hypothetical protein (   | -32.4224 | -35.1874 | 0.522465 | 1 BH |
| PITG_17568 | Pi conserved hypothetical protein (   | -32.4404 | -35.1513 | 0.522465 | 1 BH |
| PITG_19037 | Pi chromatin structure-remodeling     | -32.4224 | -35.1874 | 0.522465 | 1 BH |
| PITG_19229 | Pi conserved hypothetical protein (   | -32.5175 | -34.9972 | 0.522465 | 1 BH |
| PITG_20502 | Pi histone-lysine N-methyltransfera   | -32.478  | -35.0762 | 0.522465 | 1 BH |
| PITG_20742 | Pi conserved hypothetical protein (   | -32.4224 | -35.1874 | 0.522465 | 1 BH |
| PITG_01127 | Pi conserved hypothetical protein (   | -32.4783 | -35.0756 | 0.523361 | 1 BH |
| PITG_01251 | Pi conserved hypothetical protein (   | -32.4593 | -35.1135 | 0.523361 | 1 BH |
| PITG_01840 | Pi conserved hypothetical protein (   | -32.4573 | -35.1175 | 0.523361 | 1 BH |
| PITG_02127 | Pi conserved hypothetical protein (   | -32.4978 | -35.0366 | 0.523361 | 1 BH |
| PITG_02259 | Pi hsp70-like protein (2266 nt)       | -32.5179 | -34.9964 | 0.523361 | 1 BH |
| PITG_02624 | Pi aspartyl protease family A01B, p   | -32.4593 | -35.1135 | 0.523361 | 1 BH |
| PITG_02731 | Pi conserved hypothetical protein (   | -32.4593 | -35.1135 | 0.523361 | 1 BH |
| PITG_03155 | Pi secreted RxLR effector peptide,    | -32.4978 | -35.0366 | 0.523361 | 1 BH |
| PITG_03261 | Pi conserved hypothetical protein (   | -32.5179 | -34.9964 | 0.523361 | 1 BH |
| PITG_03505 | Pi conserved hypothetical protein (   | -32.4783 | -35.0756 | 0.523361 | 1 BH |
| PITG_03672 | Pi RIO kinase (1579 nt)               | -32.4978 | -35.0366 | 0.523361 | 1 BH |
| PITG_03768 | Pi 50S ribosomal protein L4 (923 nt)  | -32.4197 | -35.1927 | 0.523361 | 1 BH |
| PITG_05461 | Pi mitotic spindle assembly checkp    | -32.4978 | -35.0366 | 0.523361 | 1 BH |
| PITG_05506 | Pi conserved hypothetical protein (   | -32.5179 | -34.9964 | 0.523361 | 1 BH |
| PITG_05557 | Pi Drug/Metabolite Transporter (D     | -32.4573 | -35.1175 | 0.523361 | 1 BH |
| PITG_06231 | Pi anaphase-promoting complex su      | -32.4593 | -35.1135 | 0.523361 | 1 BH |
| PITG_06545 | Pi exonuclease 1, putative (9349 nt)  | -32.5173 | -34.9975 | 0.523361 | 1 BH |
| PITG_06610 | Pi tRNA nucleotidyltransferase, put   | -32.4197 | -35.1927 | 0.523361 | 1 BH |
| PITG_06867 | Pi conserved hypothetical protein (   | -32.4573 | -35.1175 | 0.523361 | 1 BH |
| PITG_07775 | Pi splicing factor 3B subunit, putati | -32.4978 | -35.0366 | 0.523361 | 1 BH |
| PITG_07810 | Pi hypothetical protein (798 nt)      | -32.4978 | -35.0366 | 0.523361 | 1 BH |
| PITG_08751 | Pi protein phosphatase 2C, putativ    | -32.5179 | -34.9964 | 0.523361 | 1 BH |
| PITG_08883 | Pi conserved hypothetical protein (   | -32.4573 | -35.1175 | 0.523361 | 1 BH |
| PITG_09243 | Pi rRNA methyltransferase, putativ    | -32.4783 | -35.0756 | 0.523361 | 1 BH |
| PITG_09599 | Pi 2OG-Fe(II) oxygenase superfamil    | -32.5173 | -34.9975 | 0.523361 | 1 BH |
| PITG_09712 | Pi DNA-directed RNA polymerase I,     | -32.4573 | -35.1175 | 0.523361 | 1 BH |
| PITG_10430 | Pi peroxisomal acyl-coenzyme A ox     | -32.4978 | -35.0366 | 0.523361 | 1 BH |
| PITG_10650 | Pi hypothetical protein (548 nt)      | -32.5179 | -34.9964 | 0.523361 | 1 BH |

|            |                                      |          |          |          |      |
|------------|--------------------------------------|----------|----------|----------|------|
| PITG_10983 | Pi conserved hypothetical protein (  | -32.5179 | -34.9964 | 0.523361 | 1 BH |
| PITG_11799 | Pi conserved hypothetical protein (  | -32.4978 | -35.0366 | 0.523361 | 1 BH |
| PITG_11806 | Pi vacuolar protein sorting-associat | -32.4978 | -35.0366 | 0.523361 | 1 BH |
| PITG_11887 | Pi conserved hypothetical protein (  | -32.4197 | -35.1927 | 0.523361 | 1 BH |
| PITG_13302 | Pi calcineurin-like phosphoesterase  | -32.5179 | -34.9964 | 0.523361 | 1 BH |
| PITG_13431 | Pi WD domain-containing protein,     | -32.4783 | -35.0756 | 0.523361 | 1 BH |
| PITG_13461 | Pi sporangia induced deflagellation  | -32.4978 | -35.0366 | 0.523361 | 1 BH |
| PITG_14561 | Pi Chloride Channel (ClC) Family (2) | -32.4978 | -35.0366 | 0.523361 | 1 BH |
| PITG_14916 | Pi conserved hypothetical protein (  | -32.4197 | -35.1927 | 0.523361 | 1 BH |
| PITG_16067 | Pi conserved hypothetical protein (  | -32.4783 | -35.0756 | 0.523361 | 1 BH |
| PITG_16555 | Pi GTP-binding protein, putative (1  | -32.4593 | -35.1135 | 0.523361 | 1 BH |
| PITG_16893 | Pi hypothetical protein (1418 nt)    | -32.5179 | -34.9964 | 0.523361 | 1 BH |
| PITG_17006 | Pi hypothetical protein (617 nt)     | -32.4978 | -35.0366 | 0.523361 | 1 BH |
| PITG_17301 | Pi conserved hypothetical protein (  | -32.4783 | -35.0756 | 0.523361 | 1 BH |
| PITG_17325 | Pi lipase, putative (1586 nt)        | -32.5173 | -34.9975 | 0.523361 | 1 BH |
| PITG_17560 | Pi conserved hypothetical protein (  | -32.4593 | -35.1135 | 0.523361 | 1 BH |
| PITG_17779 | Pi conserved hypothetical protein (  | -32.4783 | -35.0756 | 0.523361 | 1 BH |
| PITG_19532 | Pi cleavage and polyadenylation sp   | -32.4783 | -35.0756 | 0.523361 | 1 BH |
| PITG_20240 | Pi aspartyl-tRNA synthetase, putati  | -32.4978 | -35.0366 | 0.523361 | 1 BH |
| PITG_21170 | Pi conserved hypothetical protein (  | -32.4197 | -35.1927 | 0.523361 | 1 BH |
| PITG_22040 | Pi transmembrane protein, putativ    | -32.4978 | -35.0366 | 0.523361 | 1 BH |
| PITG_22404 | Pi conserved hypothetical protein (  | -32.4783 | -35.0756 | 0.523361 | 1 BH |
| PITG_22557 | Pi amino acid/auxin permease-like    | -32.4783 | -35.0756 | 0.523361 | 1 BH |
| PITG_15903 | Pi phosphoethanolamine N-methyl      | -14.6867 | 2.111307 | 0.523631 | 1 BH |
| PITG_00442 | Pi cytochrome c/c1 heme lyase, pu    | -32.4409 | -35.1503 | 0.524259 | 1 BH |
| PITG_00655 | Pi conserved hypothetical protein (  | -32.4766 | -35.079  | 0.524259 | 1 BH |
| PITG_00723 | Pi conserved hypothetical protein (  | -32.438  | -35.1561 | 0.524259 | 1 BH |
| PITG_01379 | Pi conserved hypothetical protein (  | -32.4054 | -35.2213 | 0.524259 | 1 BH |
| PITG_01953 | Pi serine/threonine-protein phosph   | -32.4054 | -35.2213 | 0.524259 | 1 BH |
| PITG_02288 | Pi conserved hypothetical protein (  | -32.4229 | -35.1863 | 0.524259 | 1 BH |
| PITG_02349 | Pi conserved hypothetical protein (  | -32.4409 | -35.1503 | 0.524259 | 1 BH |
| PITG_02478 | Pi DEAD/DEAH box RNA helicase, p     | -32.5384 | -34.9554 | 0.524259 | 1 BH |
| PITG_02486 | Pi conserved hypothetical protein (  | -32.4409 | -35.1503 | 0.524259 | 1 BH |
| PITG_02623 | Pi aspartyl protease family A01B, p  | -32.4409 | -35.1503 | 0.524259 | 1 BH |
| PITG_02723 | Pi conserved hypothetical protein (  | -32.5384 | -34.9554 | 0.524259 | 1 BH |
| PITG_02756 | Pi conserved hypothetical protein (  | -32.4965 | -35.0391 | 0.524259 | 1 BH |
| PITG_02757 | Pi pyruvate kinase (2280 nt)         | -32.5384 | -34.9554 | 0.524259 | 1 BH |
| PITG_02909 | Pi carbohydrate-binding protein, pi  | -32.4409 | -35.1503 | 0.524259 | 1 BH |
| PITG_03163 | Pi conserved hypothetical protein (  | -32.4054 | -35.2213 | 0.524259 | 1 BH |
| PITG_03287 | Pi conserved hypothetical protein (  | -32.4766 | -35.079  | 0.524259 | 1 BH |
| PITG_03409 | Pi serine protease family S10, puta  | -32.4229 | -35.1863 | 0.524259 | 1 BH |
| PITG_03752 | Pi conserved hypothetical protein (  | -32.4766 | -35.079  | 0.524259 | 1 BH |
| PITG_03839 | Pi conserved hypothetical protein (  | -32.4766 | -35.079  | 0.524259 | 1 BH |
| PITG_03925 | Pi hypothetical protein (699 nt)     | -32.4766 | -35.079  | 0.524259 | 1 BH |
| PITG_04577 | Pi conserved hypothetical protein (  | -32.4965 | -35.0391 | 0.524259 | 1 BH |
| PITG_06267 | Pi cysteine synthase, putative (121  | -32.4054 | -35.2213 | 0.524259 | 1 BH |
| PITG_06589 | Pi conserved hypothetical protein (  | -32.4229 | -35.1863 | 0.524259 | 1 BH |

|            |                                                                  |          |          |          |      |
|------------|------------------------------------------------------------------|----------|----------|----------|------|
| PITG_06651 | Pi adiponectin receptor protein, pu                              | -32.4054 | -35.2213 | 0.524259 | 1 BH |
| PITG_08570 | Pi serine protease family S28, puta                              | -32.4409 | -35.1503 | 0.524259 | 1 BH |
| PITG_08597 | Pi conserved hypothetical protein (                              | -32.5384 | -34.9554 | 0.524259 | 1 BH |
| PITG_09377 | Pi ER degradation-enhancing alpha                                | -32.4229 | -35.1863 | 0.524259 | 1 BH |
| PITG_09439 | Pi conserved hypothetical protein (                              | -32.438  | -35.1561 | 0.524259 | 1 BH |
| PITG_10443 | Pi peroxisomal acyl-coenzyme A ox                                | -32.4409 | -35.1503 | 0.524259 | 1 BH |
| PITG_10590 | Pi kynurenine-oxoglutarate transar                               | -32.4229 | -35.1863 | 0.524259 | 1 BH |
| PITG_11265 | Pi conserved hypothetical protein (                              | -32.4409 | -35.1503 | 0.524259 | 1 BH |
| PITG_12223 | Pi SWI/SNF-related matrix-associat                               | -32.4409 | -35.1503 | 0.524259 | 1 BH |
| PITG_13167 | Pi conserved hypothetical protein (                              | -32.4229 | -35.1863 | 0.524259 | 1 BH |
| PITG_14067 | Pi zinc (Zn <sup>2+</sup> )-Iron (Fe <sup>2+</sup> ) Permease (i | -32.4054 | -35.2213 | 0.524259 | 1 BH |
| PITG_14854 | Pi signal recognition particle, putat                            | -32.4229 | -35.1863 | 0.524259 | 1 BH |
| PITG_15445 | Pi conserved hypothetical protein (                              | -32.4965 | -35.0391 | 0.524259 | 1 BH |
| PITG_15496 | Pi acyl-CoA synthetase, putative (1                              | -32.4054 | -35.2213 | 0.524259 | 1 BH |
| PITG_15912 | Pi Glycoside-Pentoside-Hexuronide                                | -32.438  | -35.1561 | 0.524259 | 1 BH |
| PITG_16044 | Pi CRN domain-containing protein-                                | -32.4766 | -35.079  | 0.524259 | 1 BH |
| PITG_16788 | Pi conserved hypothetical protein (                              | -32.4766 | -35.079  | 0.524259 | 1 BH |
| PITG_19530 | Pi conserved hypothetical protein (                              | -32.4229 | -35.1863 | 0.524259 | 1 BH |
| PITG_20494 | Pi conserved hypothetical protein (                              | -32.4229 | -35.1863 | 0.524259 | 1 BH |
| PITG_20803 | Pi conserved hypothetical protein (                              | -32.5384 | -34.9554 | 0.524259 | 1 BH |
| PITG_20808 | Pi serine/threonine protein kinase                               | -32.4409 | -35.1503 | 0.524259 | 1 BH |
| PITG_21909 | Pi conserved hypothetical protein (                              | -32.4409 | -35.1503 | 0.524259 | 1 BH |
| PITG_01526 | Pi dual specificity mitogen-activate                             | -32.4787 | -35.0747 | 0.525158 | 1 BH |
| PITG_01584 | Pi conserved hypothetical protein (                              | -32.5181 | -34.9958 | 0.525158 | 1 BH |
| PITG_02122 | Pi glucosamine-fructose-6-phosphat                               | -32.5181 | -34.9958 | 0.525158 | 1 BH |
| PITG_02671 | Pi cAMP-dependent protein kinase                                 | -32.4981 | -35.0358 | 0.525158 | 1 BH |
| PITG_02724 | Pi Cullin family protein, putative (2                            | -32.4981 | -35.0358 | 0.525158 | 1 BH |
| PITG_02994 | Pi hypothetical protein (1187 nt)                                | -32.4981 | -35.0358 | 0.525158 | 1 BH |
| PITG_03303 | Pi conserved hypothetical protein (                              | -32.4787 | -35.0747 | 0.525158 | 1 BH |
| PITG_03306 | Pi HSF-type DNA-binding protein, p                               | -32.4787 | -35.0747 | 0.525158 | 1 BH |
| PITG_04242 | Pi phosphatase PTC7 family proteir                               | -32.5181 | -34.9958 | 0.525158 | 1 BH |
| PITG_06992 | Pi glucosidase 2 subunit beta, puta                              | -32.5181 | -34.9958 | 0.525158 | 1 BH |
| PITG_07165 | Pi serine protease family S10, puta                              | -32.5181 | -34.9958 | 0.525158 | 1 BH |
| PITG_07331 | Pi conserved hypothetical protein (                              | -32.517  | -34.9981 | 0.525158 | 1 BH |
| PITG_08235 | Pi conserved hypothetical protein (                              | -32.5181 | -34.9958 | 0.525158 | 1 BH |
| PITG_08446 | Pi conserved hypothetical protein (                              | -32.5181 | -34.9958 | 0.525158 | 1 BH |
| PITG_09318 | Pi hypothetical protein (538 nt)                                 | -32.5181 | -34.9958 | 0.525158 | 1 BH |
| PITG_09364 | Pi conserved hypothetical protein (                              | -32.4787 | -35.0747 | 0.525158 | 1 BH |
| PITG_09950 | Pi conserved hypothetical protein (                              | -32.5181 | -34.9958 | 0.525158 | 1 BH |
| PITG_10164 | Pi NAD-dependent histone deacety                                 | -32.4787 | -35.0747 | 0.525158 | 1 BH |
| PITG_10440 | Pi conserved hypothetical protein (                              | -32.4981 | -35.0358 | 0.525158 | 1 BH |
| PITG_10764 | Pi transmembrane protein, putativ                                | -32.4981 | -35.0358 | 0.525158 | 1 BH |
| PITG_11486 | Pi protein-L-isoaspartate O-methyl                               | -32.4981 | -35.0358 | 0.525158 | 1 BH |
| PITG_12051 | Pi conserved hypothetical protein (                              | -32.4981 | -35.0358 | 0.525158 | 1 BH |
| PITG_12307 | Pi conserved hypothetical protein (                              | -32.5181 | -34.9958 | 0.525158 | 1 BH |
| PITG_15060 | Pi conserved hypothetical protein (                              | -32.5181 | -34.9958 | 0.525158 | 1 BH |
| PITG_17330 | Pi pyridoxal kinase, putative (1406                              | -32.4787 | -35.0747 | 0.525158 | 1 BH |

|            |                                        |          |          |          |      |
|------------|----------------------------------------|----------|----------|----------|------|
| PITG_17441 | Pi conserved hypothetical protein (    | -32.4981 | -35.0358 | 0.525158 | 1 BH |
| PITG_17936 | Pi structural maintenance of chrom     | -32.4981 | -35.0358 | 0.525158 | 1 BH |
| PITG_17986 | Pi conserved hypothetical protein (    | -32.4787 | -35.0747 | 0.525158 | 1 BH |
| PITG_18702 | Pi conserved hypothetical protein (    | -32.5181 | -34.9958 | 0.525158 | 1 BH |
| PITG_19612 | Pi conserved hypothetical protein (    | -32.5181 | -34.9958 | 0.525158 | 1 BH |
| PITG_21887 | Pi Major Facilitator Superfamily (M    | -32.5181 | -34.9958 | 0.525158 | 1 BH |
| PITG_23158 | Pi isocitrate dehydrogenase, putati    | -32.4787 | -35.0747 | 0.525158 | 1 BH |
| PITG_13785 | Pi conserved hypothetical protein (    | -14.832  | 2.39795  | 0.525971 | 1 BH |
| PITG_00038 | Pi myb-like DNA-binding protein, p     | -32.4599 | -35.1123 | 0.52606  | 1 BH |
| PITG_01832 | Pi protein kinase (2896 nt)            | -32.4599 | -35.1123 | 0.52606  | 1 BH |
| PITG_02263 | Pi metal transporter, putative (166    | -32.4415 | -35.1491 | 0.52606  | 1 BH |
| PITG_02683 | Pi calcineurin-like phosphoesterase    | -32.4599 | -35.1123 | 0.52606  | 1 BH |
| PITG_03829 | Pi conserved hypothetical protein (    | -32.4236 | -35.185  | 0.52606  | 1 BH |
| PITG_05311 | Pi kinetochore protein NUF2-like p     | -32.4415 | -35.1491 | 0.52606  | 1 BH |
| PITG_05520 | Pi glutamine-dependent NAD(+) sy       | -32.4236 | -35.185  | 0.52606  | 1 BH |
| PITG_06611 | Pi vacuolar amino acid transporter,    | -32.4415 | -35.1491 | 0.52606  | 1 BH |
| PITG_06903 | Pi conserved hypothetical protein (    | -32.4599 | -35.1123 | 0.52606  | 1 BH |
| PITG_08411 | Pi conserved hypothetical protein (    | -32.4599 | -35.1123 | 0.52606  | 1 BH |
| PITG_08817 | Pi conserved hypothetical protein (    | -32.4236 | -35.185  | 0.52606  | 1 BH |
| PITG_08926 | Pi adherence factor, putative (6279    | -32.4415 | -35.1491 | 0.52606  | 1 BH |
| PITG_09246 | Pi conserved hypothetical protein (    | -32.419  | -35.1942 | 0.52606  | 1 BH |
| PITG_09906 | Pi arabinogalactan endo-1,4-beta-g     | -32.4236 | -35.185  | 0.52606  | 1 BH |
| PITG_09995 | Pi conserved hypothetical protein (    | -32.4761 | -35.08   | 0.52606  | 1 BH |
| PITG_11134 | Pi conserved hypothetical protein (    | -32.4599 | -35.1123 | 0.52606  | 1 BH |
| PITG_11142 | Pi protein farnesyltransferase/gera    | -32.4599 | -35.1123 | 0.52606  | 1 BH |
| PITG_11369 | Pi conserved hypothetical protein (    | -32.4415 | -35.1491 | 0.52606  | 1 BH |
| PITG_11728 | Pi eukaryotic translation initiation   | -32.4236 | -35.185  | 0.52606  | 1 BH |
| PITG_12259 | Pi lysosomal Pro-X carboxypeptida      | -32.4236 | -35.185  | 0.52606  | 1 BH |
| PITG_12326 | Pi phosphatidylinositol kinase (PIK    | -32.4415 | -35.1491 | 0.52606  | 1 BH |
| PITG_12933 | Pi conserved hypothetical protein (    | -32.4236 | -35.185  | 0.52606  | 1 BH |
| PITG_13078 | Pi conserved hypothetical protein (    | -32.4415 | -35.1491 | 0.52606  | 1 BH |
| PITG_13631 | Pi cytochrome P450, putative (143      | -32.4761 | -35.08   | 0.52606  | 1 BH |
| PITG_14353 | Pi F-actin-capping protein subunit     | -32.4415 | -35.1491 | 0.52606  | 1 BH |
| PITG_14642 | Pi GDP-L-fucose synthetase (963 nt)    | -32.5381 | -34.9559 | 0.52606  | 1 BH |
| PITG_15981 | Pi conserved hypothetical protein (    | -32.4599 | -35.1123 | 0.52606  | 1 BH |
| PITG_17674 | Pi 5'-3' exoribonuclease 1, putative   | -32.4415 | -35.1491 | 0.52606  | 1 BH |
| PITG_18067 | Pi RAC family serine/threonine-pro     | -32.4236 | -35.185  | 0.52606  | 1 BH |
| PITG_18518 | Pi translation initiation factor eIF-2 | -32.4599 | -35.1123 | 0.52606  | 1 BH |
| PITG_18977 | Pi HECT E3 ubiquitin ligase, putativ   | -32.4236 | -35.185  | 0.52606  | 1 BH |
| PITG_19516 | Pi conserved hypothetical protein (    | -32.4599 | -35.1123 | 0.52606  | 1 BH |
| PITG_19989 | Pi conserved hypothetical protein (    | -32.4599 | -35.1123 | 0.52606  | 1 BH |
| PITG_21514 | Pi conserved hypothetical protein (    | -32.4761 | -35.08   | 0.52606  | 1 BH |
| PITG_03117 | Pi U4/U6 small nuclear ribonucleop     | -32.4062 | -35.2198 | 0.526963 | 1 BH |
| PITG_04232 | Pi conserved hypothetical protein (    | -32.4062 | -35.2198 | 0.526963 | 1 BH |
| PITG_05854 | Pi conserved hypothetical protein (    | -32.496  | -35.0402 | 0.526963 | 1 BH |
| PITG_09684 | Pi hypothetical protein (636 nt)       | -32.4062 | -35.2198 | 0.526963 | 1 BH |
| PITG_13427 | Pi glutathione reductase (1624 nt)     | -32.4062 | -35.2198 | 0.526963 | 1 BH |

|            |                                      |          |          |          |      |
|------------|--------------------------------------|----------|----------|----------|------|
| PITG_14505 | Pi conserved hypothetical protein (  | -32.4372 | -35.1576 | 0.526963 | 1 BH |
| PITG_17967 | Pi conserved hypothetical protein (  | -32.4372 | -35.1576 | 0.526963 | 1 BH |
| PITG_18741 | Pi Amino Acid/Auxin Permease (AA     | -32.4062 | -35.2198 | 0.526963 | 1 BH |
| PITG_18867 | Pi tRNA-dihydrouridine synthase, p   | -32.4062 | -35.2198 | 0.526963 | 1 BH |
| PITG_19032 | Pi conserved hypothetical protein (  | -32.496  | -35.0402 | 0.526963 | 1 BH |
| PITG_01674 | Pi conserved hypothetical protein (  | -32.4987 | -35.0347 | 0.527869 | 1 BH |
| PITG_02616 | Pi caltractin (763 nt)               | -32.5165 | -34.9992 | 0.527869 | 1 BH |
| PITG_02981 | Pi conserved hypothetical protein (  | -32.456  | -35.12   | 0.527869 | 1 BH |
| PITG_04001 | Pi peptidase family U48, putative (  | -32.5165 | -34.9992 | 0.527869 | 1 BH |
| PITG_05609 | Pi conserved hypothetical protein (  | -32.5186 | -34.9949 | 0.527869 | 1 BH |
| PITG_05691 | Pi conserved hypothetical protein (  | -32.4987 | -35.0347 | 0.527869 | 1 BH |
| PITG_06281 | Pi conserved hypothetical protein (  | -32.5186 | -34.9949 | 0.527869 | 1 BH |
| PITG_06817 | Pi inactive ubiquitin carboxyl-termi | -32.5186 | -34.9949 | 0.527869 | 1 BH |
| PITG_07946 | Pi conserved hypothetical protein (  | -32.5186 | -34.9949 | 0.527869 | 1 BH |
| PITG_08532 | Pi Drug/Metabolite Transporter (D    | -32.456  | -35.12   | 0.527869 | 1 BH |
| PITG_10400 | Pi conserved hypothetical protein (  | -32.4987 | -35.0347 | 0.527869 | 1 BH |
| PITG_11231 | Pi conserved hypothetical protein (  | -32.4987 | -35.0347 | 0.527869 | 1 BH |
| PITG_12211 | Pi methionine aminopeptidase, pu     | -32.4987 | -35.0347 | 0.527869 | 1 BH |
| PITG_16116 | Pi conserved hypothetical protein (  | -32.5186 | -34.9949 | 0.527869 | 1 BH |
| PITG_17672 | Pi conserved hypothetical protein (  | -32.456  | -35.12   | 0.527869 | 1 BH |
| PITG_18412 | Pi pre-mRNA cleavage complex II p    | -32.5186 | -34.9949 | 0.527869 | 1 BH |
| PITG_18713 | Pi Rab6 family GTPase, putative (9:  | -32.5186 | -34.9949 | 0.527869 | 1 BH |
| PITG_19369 | Pi conserved hypothetical protein (  | -32.5186 | -34.9949 | 0.527869 | 1 BH |
| PITG_20293 | Pi hypothetical protein (228 nt)     | -32.5165 | -34.9992 | 0.527869 | 1 BH |
| PITG_21133 | Pi hypothetical protein (905 nt)     | -32.4987 | -35.0347 | 0.527869 | 1 BH |
| PITG_04325 | Pi pectinesterase, putative (1053 n  | -14.8222 | 2.374394 | 0.528317 | 1 BH |
| PITG_22742 | Pi conserved hypothetical protein (  | -14.8222 | 2.374394 | 0.528317 | 1 BH |
| PITG_00180 | Pi conserved hypothetical protein (  | -32.4754 | -35.0814 | 0.528777 | 1 BH |
| PITG_00349 | Pi conserved hypothetical protein (  | -32.4795 | -35.0732 | 0.528777 | 1 BH |
| PITG_03365 | Pi glucokinase, putative (1763 nt)   | -32.4606 | -35.1109 | 0.528777 | 1 BH |
| PITG_03614 | Pi signal recognition particle recep | -32.4795 | -35.0732 | 0.528777 | 1 BH |
| PITG_03652 | Pi conserved hypothetical protein (  | -32.4606 | -35.1109 | 0.528777 | 1 BH |
| PITG_04651 | Pi exportin-like protein (4306 nt)   | -32.4795 | -35.0732 | 0.528777 | 1 BH |
| PITG_05056 | Pi GTP-binding protein, putative (1  | -32.4606 | -35.1109 | 0.528777 | 1 BH |
| PITG_05128 | Pi conserved hypothetical protein (  | -32.4423 | -35.1476 | 0.528777 | 1 BH |
| PITG_05317 | Pi transcriptional adapter 2-alpha,  | -32.4423 | -35.1476 | 0.528777 | 1 BH |
| PITG_06232 | Pi hypothetical protein (638 nt)     | -32.4795 | -35.0732 | 0.528777 | 1 BH |
| PITG_06259 | Pi calcium/calmodulin-dependent      | -32.4606 | -35.1109 | 0.528777 | 1 BH |
| PITG_06643 | Pi conserved hypothetical protein (  | -32.4606 | -35.1109 | 0.528777 | 1 BH |
| PITG_08546 | Pi conserved hypothetical protein (  | -32.4795 | -35.0732 | 0.528777 | 1 BH |
| PITG_10167 | Pi eukaryotic translation initiation | -32.4423 | -35.1476 | 0.528777 | 1 BH |
| PITG_13083 | Pi conserved hypothetical protein (  | -32.4795 | -35.0732 | 0.528777 | 1 BH |
| PITG_15124 | Pi Multidrug/Oligosaccharidyl-lipid  | -32.4606 | -35.1109 | 0.528777 | 1 BH |
| PITG_15528 | Pi hypothetical protein (242 nt)     | -32.4795 | -35.0732 | 0.528777 | 1 BH |
| PITG_16364 | Pi conserved hypothetical protein (  | -32.4606 | -35.1109 | 0.528777 | 1 BH |
| PITG_16546 | Pi conserved hypothetical protein (  | -32.4423 | -35.1476 | 0.528777 | 1 BH |
| PITG_17039 | Pi conserved hypothetical protein (  | -32.4795 | -35.0732 | 0.528777 | 1 BH |



|            |                                                          |          |          |          |   |    |
|------------|----------------------------------------------------------|----------|----------|----------|---|----|
| PITG_17387 | Pi ras-specific guanine nucleotide-r                     | -32.4795 | -35.0732 | 0.528777 | 1 | BH |
| PITG_17499 | Pi Chromate Ion Transporter (CHR)                        | -32.4606 | -35.1109 | 0.528777 | 1 | BH |
| PITG_19459 | Pi protein kinase (1234 nt)                              | -32.4423 | -35.1476 | 0.528777 | 1 | BH |
| PITG_20928 | Pi condensin complex subunit, putative                   | -32.4795 | -35.0732 | 0.528777 | 1 | BH |
| PITG_21279 | Pi conserved hypothetical protein (1134 nt)              | -32.4606 | -35.1109 | 0.528777 | 1 | BH |
| PITG_22671 | Pi protein kinase, putative, pseudo                      | -32.4795 | -35.0732 | 0.528777 | 1 | BH |
| PITG_21026 | Pi conserved hypothetical protein (1134 nt)              | -13.9945 | -1.10828 | 0.529079 | 1 | BH |
| PITG_01659 | Pi conserved hypothetical protein (1134 nt)              | -14.6567 | 2.041351 | 0.529492 | 1 | BH |
| PITG_00882 | Pi ATP-binding Cassette (ABC) Superfamily                | -32.4245 | -35.1831 | 0.529687 | 1 | BH |
| PITG_01508 | Pi conserved hypothetical protein (1134 nt)              | -32.4245 | -35.1831 | 0.529687 | 1 | BH |
| PITG_01738 | Pi conserved hypothetical protein (1134 nt)              | -32.4245 | -35.1831 | 0.529687 | 1 | BH |
| PITG_02082 | Pi protein kinase, putative (1134 nt)                    | -32.4245 | -35.1831 | 0.529687 | 1 | BH |
| PITG_02368 | Pi polysaccharide lyase, putative (1134 nt)              | -32.5375 | -34.9572 | 0.529687 | 1 | BH |
| PITG_04860 | Pi conserved hypothetical protein (1134 nt)              | -32.4245 | -35.1831 | 0.529687 | 1 | BH |
| PITG_04907 | Pi conserved hypothetical protein (1134 nt)              | -32.4245 | -35.1831 | 0.529687 | 1 | BH |
| PITG_05588 | Pi conserved hypothetical protein (1134 nt)              | -32.5375 | -34.9572 | 0.529687 | 1 | BH |
| PITG_06356 | Pi conserved hypothetical protein (1134 nt)              | -32.4245 | -35.1831 | 0.529687 | 1 | BH |
| PITG_07327 | Pi H/ACA ribonucleoprotein complex                       | -32.5375 | -34.9572 | 0.529687 | 1 | BH |
| PITG_11143 | Pi AP-1 complex subunit gamma-1                          | -32.4245 | -35.1831 | 0.529687 | 1 | BH |
| PITG_14221 | Pi conserved hypothetical protein (1134 nt)              | -32.4364 | -35.1593 | 0.529687 | 1 | BH |
| PITG_14911 | Pi mitochondrial folate transporter                      | -32.4364 | -35.1593 | 0.529687 | 1 | BH |
| PITG_16127 | Pi conserved hypothetical protein (1134 nt)              | -32.4245 | -35.1831 | 0.529687 | 1 | BH |
| PITG_21398 | Pi DEAD/DEAH box RNA helicase, putative                  | -32.4245 | -35.1831 | 0.529687 | 1 | BH |
| PITG_03356 | Pi conserved hypothetical protein (1134 nt)              | -32.5593 | -34.9135 | 0.530599 | 1 | BH |
| PITG_05805 | Pi tryptophan synthase (1338 nt)                         | -32.5593 | -34.9135 | 0.530599 | 1 | BH |
| PITG_15534 | Pi conserved hypothetical protein (1134 nt)              | -32.4951 | -35.0418 | 0.530599 | 1 | BH |
| PITG_18171 | Pi mitochondrial 2-oxoglutarate/methylcrotonyl-CoA lyase | -32.4951 | -35.0418 | 0.530599 | 1 | BH |
| PITG_15638 | Pi conserved hypothetical protein (1134 nt)              | -8.89896 | -1.07915 | 0.530652 | 1 | BH |
| PITG_00495 | Pi fat-free family protein (2988 nt)                     | -32.5194 | -34.9933 | 0.531513 | 1 | BH |
| PITG_00574 | Pi endonuclease III-like, HhH-GPD superfamily            | -32.5194 | -34.9933 | 0.531513 | 1 | BH |
| PITG_00680 | Pi conserved hypothetical protein (1134 nt)              | -32.5194 | -34.9933 | 0.531513 | 1 | BH |
| PITG_00705 | Pi conserved hypothetical protein (1134 nt)              | -32.5194 | -34.9933 | 0.531513 | 1 | BH |
| PITG_01049 | Pi conserved hypothetical protein (1134 nt)              | -32.5194 | -34.9933 | 0.531513 | 1 | BH |
| PITG_02172 | Pi hypothetical protein (1277 nt)                        | -32.4995 | -35.033  | 0.531513 | 1 | BH |
| PITG_03547 | Pi conserved hypothetical protein (1134 nt)              | -32.4995 | -35.033  | 0.531513 | 1 | BH |
| PITG_04700 | Pi Transient Receptor Potential Calcium channel          | -32.5194 | -34.9933 | 0.531513 | 1 | BH |
| PITG_05004 | Pi aspartyl protease family A01A, putative               | -32.5156 | -35.0009 | 0.531513 | 1 | BH |
| PITG_06155 | Pi conserved hypothetical protein (1134 nt)              | -32.4551 | -35.122  | 0.531513 | 1 | BH |
| PITG_06986 | Pi 5'-3' exoribonuclease, putative (1134 nt)             | -32.4995 | -35.033  | 0.531513 | 1 | BH |
| PITG_09349 | Pi translation elongation factor 1-alpha                 | -32.4995 | -35.033  | 0.531513 | 1 | BH |
| PITG_10388 | Pi myosin-like protein (2458 nt)                         | -32.4995 | -35.033  | 0.531513 | 1 | BH |
| PITG_11981 | Pi conserved hypothetical protein (1134 nt)              | -32.4995 | -35.033  | 0.531513 | 1 | BH |
| PITG_12295 | Pi copine, putative (2872 nt)                            | -32.4995 | -35.033  | 0.531513 | 1 | BH |
| PITG_12988 | Pi conserved hypothetical protein (1134 nt)              | -32.4995 | -35.033  | 0.531513 | 1 | BH |
| PITG_13406 | Pi conserved hypothetical protein (1134 nt)              | -32.5194 | -34.9933 | 0.531513 | 1 | BH |
| PITG_15039 | Pi secreted RxLR effector peptide, putative              | -32.5194 | -34.9933 | 0.531513 | 1 | BH |
| PITG_17833 | Pi hypothetical protein (632 nt)                         | -32.4995 | -35.033  | 0.531513 | 1 | BH |

|            |                                      |          |          |          |   |    |
|------------|--------------------------------------|----------|----------|----------|---|----|
| PITG_17999 | Pi 3-hydroxyisobutyrate dehydroge    | -32.4995 | -35.033  | 0.531513 | 1 | BH |
| PITG_18655 | Pi conserved hypothetical protein (  | -32.4995 | -35.033  | 0.531513 | 1 | BH |
| PITG_00152 | Pi kinesin-like protein (4503 nt)    | -32.4616 | -35.109  | 0.532429 | 1 | BH |
| PITG_00324 | Pi neutral ceramidase, putative (21  | -32.4804 | -35.0714 | 0.532429 | 1 | BH |
| PITG_00413 | Pi Proton-dependent Oligopeptide     | -32.4616 | -35.109  | 0.532429 | 1 | BH |
| PITG_00770 | Pi conserved hypothetical protein (  | -32.4804 | -35.0714 | 0.532429 | 1 | BH |
| PITG_01563 | Pi conserved hypothetical protein (  | -32.4616 | -35.109  | 0.532429 | 1 | BH |
| PITG_01995 | Pi hypothetical protein (138 nt)     | -32.4804 | -35.0714 | 0.532429 | 1 | BH |
| PITG_02575 | Pi alpha,alpha-trehalose-phosphat    | -32.4616 | -35.109  | 0.532429 | 1 | BH |
| PITG_03492 | Pi exportin-2-like protein (3093 nt) | -32.4804 | -35.0714 | 0.532429 | 1 | BH |
| PITG_04261 | Pi ATP-binding Cassette (ABC) Sup    | -32.4804 | -35.0714 | 0.532429 | 1 | BH |
| PITG_06841 | Pi conserved hypothetical protein (  | -32.4804 | -35.0714 | 0.532429 | 1 | BH |
| PITG_08416 | Pi conserved hypothetical protein (  | -32.4804 | -35.0714 | 0.532429 | 1 | BH |
| PITG_08456 | Pi ankyrin-like protein (1932 nt)    | -32.4616 | -35.109  | 0.532429 | 1 | BH |
| PITG_10312 | Pi Patatin like protein (874 nt)     | -32.4804 | -35.0714 | 0.532429 | 1 | BH |
| PITG_10553 | Pi Poly(ADP-ribose) glycohydrolase   | -32.4804 | -35.0714 | 0.532429 | 1 | BH |
| PITG_13985 | Pi conserved hypothetical protein (  | -32.4804 | -35.0714 | 0.532429 | 1 | BH |
| PITG_16878 | Pi conserved hypothetical protein (  | -32.4616 | -35.109  | 0.532429 | 1 | BH |
| PITG_17930 | Pi RNA pseudouridine synthase, pu    | -32.4616 | -35.109  | 0.532429 | 1 | BH |
| PITG_19213 | Pi mitogen-activated protein kinas   | -32.4616 | -35.109  | 0.532429 | 1 | BH |
| PITG_19508 | Pi conserved hypothetical protein (  | -32.4616 | -35.109  | 0.532429 | 1 | BH |
| PITG_20201 | Pi Divalent Anion:Na Symporter (C    | -32.4804 | -35.0714 | 0.532429 | 1 | BH |
| PITG_00632 | Pi dolichyl-diphosphooligosacchari   | -12.9859 | 1.539688 | 0.53246  | 1 | BH |
| PITG_09798 | Pi glucan 1,3-beta-glucosidase, put  | -10.1472 | 1.144417 | 0.532961 | 1 | BH |
| PITG_01401 | Pi conserved hypothetical protein (  | -13.9638 | -1.17342 | 0.533206 | 1 | BH |
| PITG_00289 | Pi glutamate carboxypeptidase, pu    | -32.5366 | -34.9589 | 0.533347 | 1 | BH |
| PITG_01367 | Pi palmitoyltransferase, putative (1 | -32.4434 | -35.1453 | 0.533347 | 1 | BH |
| PITG_02424 | Pi aldo/keto reductase family (935   | -32.4256 | -35.181  | 0.533347 | 1 | BH |
| PITG_02720 | Pi conserved hypothetical protein (  | -32.4256 | -35.181  | 0.533347 | 1 | BH |
| PITG_03471 | Pi conserved hypothetical protein (  | -32.4256 | -35.181  | 0.533347 | 1 | BH |
| PITG_03678 | Pi kynurenine-oxoglutarate transar   | -32.4434 | -35.1453 | 0.533347 | 1 | BH |
| PITG_04179 | Pi condensin-2 complex subunit H2    | -32.4434 | -35.1453 | 0.533347 | 1 | BH |
| PITG_04442 | Pi conserved hypothetical protein (  | -32.4353 | -35.1615 | 0.533347 | 1 | BH |
| PITG_04572 | Pi conserved hypothetical protein (  | -32.4434 | -35.1453 | 0.533347 | 1 | BH |
| PITG_05346 | Pi cation-transporting ATPase, puta  | -32.4434 | -35.1453 | 0.533347 | 1 | BH |
| PITG_05822 | Pi conserved hypothetical protein (  | -32.4256 | -35.181  | 0.533347 | 1 | BH |
| PITG_11081 | Pi conserved hypothetical protein (  | -32.4434 | -35.1453 | 0.533347 | 1 | BH |
| PITG_11890 | Pi putative GPI-anchored serine-th   | -32.4434 | -35.1453 | 0.533347 | 1 | BH |
| PITG_12291 | Pi pre-mRNA-processing factor 39,    | -32.4434 | -35.1453 | 0.533347 | 1 | BH |
| PITG_14279 | Pi conserved hypothetical protein (  | -32.4256 | -35.181  | 0.533347 | 1 | BH |
| PITG_15543 | Pi conserved hypothetical protein (  | -32.4434 | -35.1453 | 0.533347 | 1 | BH |
| PITG_16562 | Pi conserved hypothetical protein (  | -32.4256 | -35.181  | 0.533347 | 1 | BH |
| PITG_17028 | Pi conserved hypothetical protein (  | -32.4434 | -35.1453 | 0.533347 | 1 | BH |
| PITG_17601 | Pi conserved hypothetical protein (  | -32.4256 | -35.181  | 0.533347 | 1 | BH |
| PITG_18331 | Pi conserved hypothetical protein (  | -32.5366 | -34.9589 | 0.533347 | 1 | BH |
| PITG_20743 | Pi nuclear transport factor, putativ | -12.3581 | -0.72373 | 0.533914 | 1 | BH |
| PITG_05657 | Pi conserved hypothetical protein (  | -32.4941 | -35.0439 | 0.534267 | 1 | BH |

|            |                                       |          |          |          |      |
|------------|---------------------------------------|----------|----------|----------|------|
| PITG_17885 | Pi conserved hypothetical protein (   | -13.9718 | -1.16012 | 0.535954 | 1 BH |
| PITG_01193 | Pi aspartate aminotransferase, put    | -32.5408 | -34.9505 | 0.536114 | 1 BH |
| PITG_02242 | Pi conserved hypothetical protein (   | -32.5408 | -34.9505 | 0.536114 | 1 BH |
| PITG_02608 | Pi autophagy-related protein, puta    | -32.5205 | -34.9912 | 0.536114 | 1 BH |
| PITG_02976 | Pi conserved hypothetical protein (   | -32.5408 | -34.9505 | 0.536114 | 1 BH |
| PITG_03518 | Pi hypothetical protein (249 nt)      | -32.5145 | -35.0032 | 0.536114 | 1 BH |
| PITG_03560 | Pi conserved hypothetical protein (   | -32.5408 | -34.9505 | 0.536114 | 1 BH |
| PITG_04850 | Pi conserved hypothetical protein (   | -32.5408 | -34.9505 | 0.536114 | 1 BH |
| PITG_05079 | Pi glycosyltransferase (6744 nt)      | -32.5408 | -34.9505 | 0.536114 | 1 BH |
| PITG_06450 | Pi myosin-like protein (3489 nt)      | -32.5408 | -34.9505 | 0.536114 | 1 BH |
| PITG_07655 | Pi conserved hypothetical protein (   | -32.5205 | -34.9912 | 0.536114 | 1 BH |
| PITG_08157 | Pi queuine tRNA-ribosyltransferase    | -32.5408 | -34.9505 | 0.536114 | 1 BH |
| PITG_08460 | Pi lipin-like protein (2193 nt)       | -32.5145 | -35.0032 | 0.536114 | 1 BH |
| PITG_09272 | Pi hypothetical protein (472 nt)      | -32.5408 | -34.9505 | 0.536114 | 1 BH |
| PITG_11276 | Pi conserved hypothetical protein (   | -32.5408 | -34.9505 | 0.536114 | 1 BH |
| PITG_12161 | Pi delta-1-pyrroline-5-carboxylate :  | -32.5205 | -34.9912 | 0.536114 | 1 BH |
| PITG_12540 | Pi gephyrin-like protein (2015 nt)    | -32.5205 | -34.9912 | 0.536114 | 1 BH |
| PITG_12981 | Pi conserved hypothetical protein (   | -32.5408 | -34.9505 | 0.536114 | 1 BH |
| PITG_13853 | Pi conserved hypothetical protein (   | -32.5408 | -34.9505 | 0.536114 | 1 BH |
| PITG_15062 | Pi conserved hypothetical protein (   | -32.5408 | -34.9505 | 0.536114 | 1 BH |
| PITG_16327 | Pi conserved hypothetical protein (   | -32.5205 | -34.9912 | 0.536114 | 1 BH |
| PITG_16477 | Pi short-chain specific acyl-CoA def  | -32.5408 | -34.9505 | 0.536114 | 1 BH |
| PITG_17273 | Pi conserved hypothetical protein (   | -32.5205 | -34.9912 | 0.536114 | 1 BH |
| PITG_17501 | Pi glucosylceramidase, putative (16   | -32.5408 | -34.9505 | 0.536114 | 1 BH |
| PITG_17768 | Pi retinol dehydrogenase, putative    | -32.5408 | -34.9505 | 0.536114 | 1 BH |
| PITG_18694 | Pi conserved hypothetical protein (   | -32.5408 | -34.9505 | 0.536114 | 1 BH |
| PITG_18735 | Pi vacuolar protein sorting-associat  | -32.5205 | -34.9912 | 0.536114 | 1 BH |
| PITG_20866 | Pi beta-glucan synthesis-associatec   | -32.5205 | -34.9912 | 0.536114 | 1 BH |
| PITG_21289 | Pi polysaccharide lyase, putative (6  | -32.5145 | -35.0032 | 0.536114 | 1 BH |
| PITG_02046 | Pi V-type proton ATPase 16 kDa pr     | -11.7944 | -0.83031 | 0.536783 | 1 BH |
| PITG_17033 | Pi Annexin (Annexin) Family (987 n    | -9.50755 | -1.05247 | 0.536843 | 1 BH |
| PITG_05664 | Pi choline/Carnitine O-acyltransfer   | -32.4816 | -35.069  | 0.537041 | 1 BH |
| PITG_10901 | Pi resistance-Nodulation-Cell Divisi  | -32.4816 | -35.069  | 0.537041 | 1 BH |
| PITG_11153 | Pi conserved hypothetical protein (   | -32.4816 | -35.069  | 0.537041 | 1 BH |
| PITG_12153 | Pi myosin-like protein (4548 nt)      | -32.4816 | -35.069  | 0.537041 | 1 BH |
| PITG_13539 | Pi hypothetical protein (927 nt)      | -32.4816 | -35.069  | 0.537041 | 1 BH |
| PITG_16015 | Pi ribonuclease, putative (1049 nt)   | -32.4816 | -35.069  | 0.537041 | 1 BH |
| PITG_21553 | Pi thioredoxin-like protein (1306 nt) | -32.4816 | -35.069  | 0.537041 | 1 BH |
| PITG_01818 | Pi homeodomain transcription fact     | -32.5008 | -35.0305 | 0.537041 | 1 BH |
| PITG_02914 | Pi hypothetical protein (2357 nt)     | -32.4731 | -35.086  | 0.537041 | 1 BH |
| PITG_03860 | Pi HECT E3 ubiquitin ligase, putativ  | -32.5008 | -35.0305 | 0.537041 | 1 BH |
| PITG_05248 | Pi conserved hypothetical protein (   | -32.5008 | -35.0305 | 0.537041 | 1 BH |
| PITG_11743 | Pi nuclear pore complex protein, p    | -32.5008 | -35.0305 | 0.537041 | 1 BH |
| PITG_13245 | Pi glycerophosphodiesterase, puta     | -32.5008 | -35.0305 | 0.537041 | 1 BH |
| PITG_13896 | Pi conserved hypothetical protein (   | -32.5008 | -35.0305 | 0.537041 | 1 BH |
| PITG_15999 | Pi conserved hypothetical protein (   | -32.5008 | -35.0305 | 0.537041 | 1 BH |
| PITG_19350 | Pi formin-homology 2 domain-cont      | -32.5008 | -35.0305 | 0.537041 | 1 BH |

|            |                                      |          |          |          |      |
|------------|--------------------------------------|----------|----------|----------|------|
| PITG_21941 | Pi alpha-1,2 glucosyltransferase alg | -32.5008 | -35.0305 | 0.537041 | 1 BH |
| PITG_08043 | Pi conserved hypothetical protein (  | -13.9991 | -1.10665 | 0.537326 | 1 BH |
| PITG_00206 | Pi conserved hypothetical protein (  | -32.4447 | -35.1427 | 0.53797  | 1 BH |
| PITG_00732 | Pi phosphatidylinositol kinase (PIK- | -32.4447 | -35.1427 | 0.53797  | 1 BH |
| PITG_03588 | Pi conserved hypothetical protein (  | -32.463  | -35.1062 | 0.53797  | 1 BH |
| PITG_05211 | Pi ATP-binding Cassette (ABC) Sup    | -32.463  | -35.1062 | 0.53797  | 1 BH |
| PITG_07874 | Pi DNA topoisomerase 2 (5187 nt)     | -32.463  | -35.1062 | 0.53797  | 1 BH |
| PITG_08181 | Pi conserved hypothetical protein (  | -32.4447 | -35.1427 | 0.53797  | 1 BH |
| PITG_08974 | Pi conserved hypothetical protein (  | -32.4447 | -35.1427 | 0.53797  | 1 BH |
| PITG_09930 | Pi type II inositol-3,4-bisphosphate | -32.4447 | -35.1427 | 0.53797  | 1 BH |
| PITG_10058 | Pi conserved hypothetical protein (  | -32.463  | -35.1062 | 0.53797  | 1 BH |
| PITG_16797 | Pi tubulin-specific chaperone D, pu  | -32.463  | -35.1062 | 0.53797  | 1 BH |
| PITG_19220 | Pi conserved hypothetical protein (  | -32.463  | -35.1062 | 0.53797  | 1 BH |
| PITG_04679 | Pi conserved hypothetical protein (  | -32.4337 | -35.1647 | 0.538901 | 1 BH |
| PITG_05262 | Pi conserved hypothetical protein (  | -32.5352 | -34.9616 | 0.538901 | 1 BH |
| PITG_07653 | Pi conserved hypothetical protein (  | -32.427  | -35.178  | 0.538901 | 1 BH |
| PITG_07708 | Pi hypothetical protein (659 nt)     | -32.4337 | -35.1647 | 0.538901 | 1 BH |
| PITG_20223 | Pi carbohydrate esterase, putative   | -32.427  | -35.178  | 0.538901 | 1 BH |
| PITG_16184 | Pi protein kinase (1242 nt)          | -32.4926 | -35.0469 | 0.539834 | 1 BH |
| PITG_11364 | Pi conserved hypothetical protein (  | -14.1727 | -0.74445 | 0.540948 | 1 BH |
| PITG_16008 | Pi 40S ribosomal protein S27-like p  | -9.35375 | -0.96047 | 0.541713 | 1 BH |
| PITG_01926 | Pi conserved hypothetical protein (  | -32.5424 | -34.9474 | 0.542647 | 1 BH |
| PITG_05531 | Pi conserved hypothetical protein (  | -32.5221 | -34.988  | 0.542647 | 1 BH |
| PITG_06429 | Pi HECT E3 ubiquitin ligase, putativ | -32.5424 | -34.9474 | 0.542647 | 1 BH |
| PITG_07983 | Pi urease accessory protein, putati  | -32.5127 | -35.0067 | 0.542647 | 1 BH |
| PITG_03333 | Pi conserved hypothetical protein (  | -11.6711 | 1.231906 | 0.542711 | 1 BH |
| PITG_11452 | Pi conserved hypothetical protein (  | -12.72   | -0.73123 | 0.542781 | 1 BH |
| PITG_10921 | Pi conserved hypothetical protein (  | -32.5025 | -35.0272 | 0.543589 | 1 BH |
| PITG_02039 | Pi EF-1 guanine nucleotide exchang   | -11.2784 | 1.190528 | 0.543885 | 1 BH |
| PITG_15492 | Pi peroxiredoxin-2 (777 nt)          | -11.419  | 1.196322 | 0.544447 | 1 BH |
| PITG_06170 | Pi conserved hypothetical protein (  | -32.4834 | -35.0653 | 0.544533 | 1 BH |
| PITG_08481 | Pi regulator of chromosome conde     | -32.4647 | -35.1027 | 0.544533 | 1 BH |
| PITG_08664 | Pi hypothetical protein (483 nt)     | -32.4834 | -35.0653 | 0.544533 | 1 BH |
| PITG_19728 | Pi cohesin subunit, putative (4725   | -32.4834 | -35.0653 | 0.544533 | 1 BH |
| PITG_19856 | Pi conserved hypothetical protein (  | -32.4834 | -35.0653 | 0.544533 | 1 BH |
| PITG_00348 | Pi myosin-like protein (4175 nt)     | -32.4466 | -35.1389 | 0.54548  | 1 BH |
| PITG_20272 | Pi methylenetetrahydrofolate redu    | -32.4466 | -35.1389 | 0.54548  | 1 BH |
| PITG_02570 | Pi conserved hypothetical protein (  | -32.6079 | -34.8163 | 0.54548  | 1 BH |
| PITG_02760 | Pi oxidoreductase, putative (881 nt) | -32.4288 | -35.1744 | 0.54548  | 1 BH |
| PITG_04615 | Pi glucan 1,3-beta-glucosidase, put  | -32.4288 | -35.1744 | 0.54548  | 1 BH |
| PITG_06574 | Pi long-chain-fatty-acid-CoA ligase, | -32.6079 | -34.8163 | 0.54548  | 1 BH |
| PITG_08902 | Pi pleiotropic drug resistance prote | -32.6079 | -34.8163 | 0.54548  | 1 BH |
| PITG_11807 | Pi serine protease, putative (1325   | -32.5334 | -34.9653 | 0.54548  | 1 BH |
| PITG_13576 | Pi ATP-binding Cassette (ABC) Sup    | -32.6079 | -34.8163 | 0.54548  | 1 BH |
| PITG_13579 | Pi ATP-binding Cassette (ABC) Sup    | -32.6079 | -34.8163 | 0.54548  | 1 BH |
| PITG_13901 | Pi conserved hypothetical protein (  | -32.6079 | -34.8163 | 0.54548  | 1 BH |
| PITG_01328 | Pi conserved hypothetical protein (  | -32.586  | -34.8602 | 0.546429 | 1 BH |

|            |                                      |          |          |          |      |
|------------|--------------------------------------|----------|----------|----------|------|
| PITG_10119 | Pi ubiquitin-specific protease, puta | -32.586  | -34.8602 | 0.546429 | 1 BH |
| PITG_03078 | Pi triosephosphate isomerase (819    | -32.6017 | -34.8288 | 0.54738  | 1 BH |
| PITG_04524 | Pi conserved hypothetical protein (  | -32.5647 | -34.9028 | 0.54738  | 1 BH |
| PITG_16280 | Pi glutamate synthase, putative (37  | -32.5647 | -34.9028 | 0.54738  | 1 BH |
| PITG_19013 | Pi hypothetical protein (2144 nt)    | -32.626  | -34.7801 | 0.54738  | 1 BH |
| PITG_22802 | Pi secreted RxLR effector peptide,   | -32.626  | -34.7801 | 0.54738  | 1 BH |
| PITG_00578 | Pi metalloprotease family M38, pu    | -12.7096 | -0.7588  | 0.547472 | 1 BH |
| PITG_05016 | Pi conserved hypothetical protein (  | -32.5237 | -34.9847 | 0.548333 | 1 BH |
| PITG_15956 | Pi epoxide hydrolase, putative (113  | -32.5774 | -34.8772 | 0.548333 | 1 BH |
| PITG_18172 | Pi conserved hypothetical protein (  | -32.5774 | -34.8772 | 0.548333 | 1 BH |
| PITG_08565 | Pi conserved hypothetical protein (  | -12.5087 | 1.312747 | 0.548598 | 1 BH |
| PITG_02926 | Pi conserved hypothetical protein (  | -32.485  | -35.0621 | 0.549289 | 1 BH |
| PITG_05388 | Pi conserved hypothetical protein (  | -32.485  | -35.0621 | 0.549289 | 1 BH |
| PITG_05452 | Pi hypothetical cleavage-induced p   | -32.5319 | -34.9682 | 0.549289 | 1 BH |
| PITG_07117 | Pi ATP-binding Cassette (ABC) Supe   | -32.485  | -35.0621 | 0.549289 | 1 BH |
| PITG_16939 | Pi conserved hypothetical protein (  | -32.485  | -35.0621 | 0.549289 | 1 BH |
| PITG_17853 | Pi conserved hypothetical protein (  | -32.5107 | -35.0107 | 0.549289 | 1 BH |
| PITG_01195 | Pi aspartate aminotransferase, put   | -32.4665 | -35.0992 | 0.550247 | 1 BH |
| PITG_05853 | Pi pterin-4-alpha-carbinolamine de   | -32.4665 | -35.0992 | 0.550247 | 1 BH |
| PITG_09438 | Pi conserved hypothetical protein (  | -11.0579 | -0.79452 | 0.552879 | 1 BH |
| PITG_15626 | Pi superoxide dismutase 2 (637 nt)   | -10.6144 | 1.09362  | 0.554741 | 1 BH |
| PITG_14609 | Pi eukaryotic translation initiation | -12.7049 | -0.77948 | 0.55523  | 1 BH |
| PITG_13676 | Pi conserved hypothetical protein (  | -8.09614 | 0.779989 | 0.555982 | 1 BH |
| PITG_12299 | Pi hypothetical protein (473 nt)     | -8.88031 | 1.124669 | 0.556722 | 1 BH |
| PITG_05464 | Pi conserved hypothetical protein (  | -12.0568 | 1.188931 | 0.559266 | 1 BH |
| PITG_15904 | Pi phosphoethanolamine N-methyl      | -12.7274 | -0.7412  | 0.55985  | 1 BH |
| PITG_17526 | Pi crinkler (CRN) family protein, pu | -9.25421 | -0.96498 | 0.560069 | 1 BH |
| PITG_21488 | Pi Annexin (Annexin) Family (1207    | -9.68155 | -0.96421 | 0.561538 | 1 BH |
| PITG_17133 | Pi 6,7-dimethyl-8-ribityllumazine sy | -12.7923 | -0.60231 | 0.562627 | 1 BH |
| PITG_22103 | Pi triosephosphate isomerase/glyc    | -12.3491 | 1.295972 | 0.562873 | 1 BH |
| PITG_14563 | Pi ubiquinone biosynthesis monoo     | -14.0363 | 1.887932 | 0.563709 | 1 BH |
| PITG_02277 | Pi cyclopropane-fatty-acyl-phosph    | -14.0181 | 1.849104 | 0.56497  | 1 BH |
| PITG_05840 | Pi cytochrome b-c1 complex subur     | -11.4753 | -0.75925 | 0.565735 | 1 BH |
| PITG_07790 | Pi peroxisomal (S)-2-hydroxy-acid c  | -13.9459 | 1.702467 | 0.566231 | 1 BH |
| PITG_15118 | Pi actin-like protein (578 nt)       | -8.41105 | 0.897529 | 0.566814 | 1 BH |
| PITG_19121 | Pi 60S ribosomal protein L10 (848    | -8.63925 | -0.97068 | 0.569774 | 1 BH |
| PITG_00080 | Pi protein kinase (1285 nt)          | -33.0834 | -33.8652 | 0.572196 | 1 BH |
| PITG_00887 | Pi conserved hypothetical protein (  | -33.0834 | -33.8652 | 0.572196 | 1 BH |
| PITG_01644 | Pi sodium/hydrogen exchanger, pu     | -33.0834 | -33.8652 | 0.572196 | 1 BH |
| PITG_05272 | Pi conserved hypothetical protein (  | -33.0834 | -33.8652 | 0.572196 | 1 BH |
| PITG_07245 | Pi conserved hypothetical protein (  | -33.0834 | -33.8652 | 0.572196 | 1 BH |
| PITG_07311 | Pi DEAD/DEAH box RNA helicase, p     | -33.0834 | -33.8652 | 0.572196 | 1 BH |
| PITG_07796 | Pi myosin-like protein (2910 nt)     | -33.0834 | -33.8652 | 0.572196 | 1 BH |
| PITG_09752 | Pi conserved hypothetical protein (  | -33.0834 | -33.8652 | 0.572196 | 1 BH |
| PITG_10877 | Pi peptidyl-prolyl cis-trans isomera | -33.0834 | -33.8652 | 0.572196 | 1 BH |
| PITG_12573 | Pi conserved hypothetical protein (  | -33.0834 | -33.8652 | 0.572196 | 1 BH |
| PITG_17392 | Pi conserved hypothetical protein (  | -33.0834 | -33.8652 | 0.572196 | 1 BH |

|            |                                       |          |          |          |      |
|------------|---------------------------------------|----------|----------|----------|------|
| PITG_18883 | Pi conserved hypothetical protein (   | -33.0834 | -33.8652 | 0.572196 | 1 BH |
| PITG_19876 | Pi conserved hypothetical protein (   | -33.0834 | -33.8652 | 0.572196 | 1 BH |
| PITG_21619 | Pi homoserine O-acetyltransferase     | -33.0834 | -33.8652 | 0.572196 | 1 BH |
| PITG_03598 | Pi 6-phosphofructokinase, putative    | -13.5366 | 1.566572 | 0.572591 | 1 BH |
| PITG_00227 | Pi DEAD/DEAH box RNA helicase, p      | -33.0768 | -33.8784 | 0.572711 | 1 BH |
| PITG_00675 | Pi conserved hypothetical protein (   | -33.0768 | -33.8784 | 0.572711 | 1 BH |
| PITG_00913 | Pi 3-hydroxyisobutyrate dehydroge     | -33.0768 | -33.8784 | 0.572711 | 1 BH |
| PITG_01084 | Pi conserved hypothetical protein (   | -33.0768 | -33.8784 | 0.572711 | 1 BH |
| PITG_01356 | Pi ATP-binding Cassette (ABC) Sup     | -33.0768 | -33.8784 | 0.572711 | 1 BH |
| PITG_01976 | Pi DNA repair protein, putative (16   | -33.0768 | -33.8784 | 0.572711 | 1 BH |
| PITG_02234 | Pi F-box protein, putative (2205 nt,  | -33.0768 | -33.8784 | 0.572711 | 1 BH |
| PITG_03127 | Pi M96 mating-specific protein far    | -33.0903 | -33.8515 | 0.572711 | 1 BH |
| PITG_03269 | Pi conserved hypothetical protein (   | -33.0768 | -33.8784 | 0.572711 | 1 BH |
| PITG_03400 | Pi crinkler (CRN) family protein, pu  | -33.0768 | -33.8784 | 0.572711 | 1 BH |
| PITG_03498 | Pi octanoyltransferase, putative (9   | -33.0903 | -33.8515 | 0.572711 | 1 BH |
| PITG_03831 | Pi conserved hypothetical protein (   | -33.0768 | -33.8784 | 0.572711 | 1 BH |
| PITG_04428 | Pi conserved hypothetical protein (   | -33.0768 | -33.8784 | 0.572711 | 1 BH |
| PITG_04924 | Pi conserved hypothetical protein (   | -33.0903 | -33.8515 | 0.572711 | 1 BH |
| PITG_05198 | Pi conserved hypothetical protein (   | -33.0768 | -33.8784 | 0.572711 | 1 BH |
| PITG_05408 | Pi transmembrane protein, putativ     | -33.0768 | -33.8784 | 0.572711 | 1 BH |
| PITG_05503 | Pi cyclin-C, putative (1179 nt)       | -33.0768 | -33.8784 | 0.572711 | 1 BH |
| PITG_06148 | Pi conserved hypothetical protein (   | -33.0768 | -33.8784 | 0.572711 | 1 BH |
| PITG_06551 | Pi conserved hypothetical protein (   | -33.0768 | -33.8784 | 0.572711 | 1 BH |
| PITG_06981 | Pi DEAD/DEAH box RNA helicase, p      | -33.0768 | -33.8784 | 0.572711 | 1 BH |
| PITG_07060 | Pi hypothetical protein (943 nt)      | -33.0768 | -33.8784 | 0.572711 | 1 BH |
| PITG_07206 | Pi hypothetical protein (1386 nt)     | -33.0768 | -33.8784 | 0.572711 | 1 BH |
| PITG_07277 | Pi exopolysaccharide phosphotran:     | -33.0768 | -33.8784 | 0.572711 | 1 BH |
| PITG_08222 | Pi conserved hypothetical protein (   | -33.0768 | -33.8784 | 0.572711 | 1 BH |
| PITG_09522 | Pi conserved hypothetical protein (   | -33.0903 | -33.8515 | 0.572711 | 1 BH |
| PITG_09985 | Pi pro-apoptotic serine protease n    | -33.0903 | -33.8515 | 0.572711 | 1 BH |
| PITG_11057 | Pi conserved hypothetical protein (   | -33.0768 | -33.8784 | 0.572711 | 1 BH |
| PITG_11221 | Pi conserved hypothetical protein (   | -33.0903 | -33.8515 | 0.572711 | 1 BH |
| PITG_11458 | Pi prostaglandin E synthase, putati   | -33.0768 | -33.8784 | 0.572711 | 1 BH |
| PITG_12600 | Pi flagellar radial spoke protein, pu | -33.0768 | -33.8784 | 0.572711 | 1 BH |
| PITG_12673 | Pi conserved hypothetical protein (   | -33.0768 | -33.8784 | 0.572711 | 1 BH |
| PITG_12683 | Pi conserved hypothetical protein (   | -33.0768 | -33.8784 | 0.572711 | 1 BH |
| PITG_13486 | Pi dTDP-D-glucose 4,6-dehydratase     | -33.0768 | -33.8784 | 0.572711 | 1 BH |
| PITG_14104 | Pi conserved hypothetical protein (   | -33.0768 | -33.8784 | 0.572711 | 1 BH |
| PITG_14152 | Pi conserved hypothetical protein (   | -33.0903 | -33.8515 | 0.572711 | 1 BH |
| PITG_14283 | Pi malonyl CoA-acyl carrier protein   | -33.0903 | -33.8515 | 0.572711 | 1 BH |
| PITG_14730 | Pi nucleolar protein, putative (264   | -33.0768 | -33.8784 | 0.572711 | 1 BH |
| PITG_14822 | Pi conserved hypothetical protein (   | -33.0903 | -33.8515 | 0.572711 | 1 BH |
| PITG_14951 | Pi conserved hypothetical protein (   | -33.0903 | -33.8515 | 0.572711 | 1 BH |
| PITG_15391 | Pi conserved hypothetical protein (   | -33.0768 | -33.8784 | 0.572711 | 1 BH |
| PITG_15479 | Pi conserved hypothetical protein (   | -33.0903 | -33.8515 | 0.572711 | 1 BH |
| PITG_16036 | Pi echinoderm microtubule-associa     | -33.0768 | -33.8784 | 0.572711 | 1 BH |
| PITG_16333 | Pi ATP-dependent hsl protease ATF     | -33.0768 | -33.8784 | 0.572711 | 1 BH |

|            |                                               |          |          |          |      |
|------------|-----------------------------------------------|----------|----------|----------|------|
| PITG_17402 | Pi conserved hypothetical protein (           | -33.0768 | -33.8784 | 0.572711 | 1 BH |
| PITG_18578 | Pi dual specificity protein phosphatase       | -33.0768 | -33.8784 | 0.572711 | 1 BH |
| PITG_19159 | Pi conserved hypothetical protein (           | -33.0768 | -33.8784 | 0.572711 | 1 BH |
| PITG_20637 | Pi conserved hypothetical protein (           | -33.0768 | -33.8784 | 0.572711 | 1 BH |
| PITG_21180 | Pi conserved hypothetical protein (           | -33.0768 | -33.8784 | 0.572711 | 1 BH |
| PITG_21644 | Pi UDP-N-acetylglucosamine transferase        | -33.0768 | -33.8784 | 0.572711 | 1 BH |
| PITG_22021 | Pi HECT E3 ubiquitin ligase, putative         | -33.0768 | -33.8784 | 0.572711 | 1 BH |
| PITG_22159 | Pi conserved hypothetical protein (           | -33.0768 | -33.8784 | 0.572711 | 1 BH |
| PITG_06290 | Pi secreted RxLR effector peptide, (          | -9.32221 | 0.853387 | 0.572939 | 1 BH |
| PITG_05264 | Pi 10 kDa chaperonin (619 nt)                 | -10.1827 | 1.033138 | 0.573117 | 1 BH |
| PITG_00437 | Pi conserved hypothetical protein (           | -33.0708 | -33.8904 | 0.573747 | 1 BH |
| PITG_00991 | Pi Amino Acid-Polyamine-Organocatalase        | -33.0708 | -33.8904 | 0.573747 | 1 BH |
| PITG_01180 | Pi cell division protein ftsZ (1445 nt)       | -33.0708 | -33.8904 | 0.573747 | 1 BH |
| PITG_01784 | Pi conserved hypothetical protein (           | -33.0708 | -33.8904 | 0.573747 | 1 BH |
| PITG_01813 | Pi tRNA (guanine-N(7)-)-methyltransferase     | -33.0708 | -33.8904 | 0.573747 | 1 BH |
| PITG_02185 | Pi conserved hypothetical protein (           | -33.0708 | -33.8904 | 0.573747 | 1 BH |
| PITG_02805 | Pi DNA mismatch repair protein Msh1           | -33.0708 | -33.8904 | 0.573747 | 1 BH |
| PITG_02887 | Pi ribosome biogenesis protein Bm1            | -33.0708 | -33.8904 | 0.573747 | 1 BH |
| PITG_02980 | Pi conserved hypothetical protein (           | -33.0708 | -33.8904 | 0.573747 | 1 BH |
| PITG_03135 | Pi lysosomal beta glucosidase, putative       | -33.0708 | -33.8904 | 0.573747 | 1 BH |
| PITG_03844 | Pi conserved hypothetical protein (           | -33.0708 | -33.8904 | 0.573747 | 1 BH |
| PITG_03855 | Pi DNA-directed RNA polymerase I              | -33.0708 | -33.8904 | 0.573747 | 1 BH |
| PITG_04916 | Pi conserved hypothetical protein (           | -33.0708 | -33.8904 | 0.573747 | 1 BH |
| PITG_04985 | Pi sorbitol dehydrogenase, putative           | -33.0708 | -33.8904 | 0.573747 | 1 BH |
| PITG_05197 | Pi conserved hypothetical protein (           | -33.0708 | -33.8904 | 0.573747 | 1 BH |
| PITG_05433 | Pi STIP-like protein (2466 nt)                | -33.0708 | -33.8904 | 0.573747 | 1 BH |
| PITG_05536 | Pi RNA pseudouridylylase synthase, putative   | -33.0708 | -33.8904 | 0.573747 | 1 BH |
| PITG_06578 | Pi protein kinase (1389 nt)                   | -33.0708 | -33.8904 | 0.573747 | 1 BH |
| PITG_07042 | Pi conserved hypothetical protein (           | -33.0708 | -33.8904 | 0.573747 | 1 BH |
| PITG_07062 | Pi aspartyl/glutamyl-tRNA(Asn/Gln) synthetase | -33.0708 | -33.8904 | 0.573747 | 1 BH |
| PITG_07642 | Pi hypothetical protein (222 nt)              | -33.0708 | -33.8904 | 0.573747 | 1 BH |
| PITG_08373 | Pi serine hydrolase (FSH1)-like protein       | -33.0708 | -33.8904 | 0.573747 | 1 BH |
| PITG_08640 | Pi phosphatidylinositol kinase (PIK)          | -33.0708 | -33.8904 | 0.573747 | 1 BH |
| PITG_09041 | Pi conserved hypothetical protein (           | -33.0708 | -33.8904 | 0.573747 | 1 BH |
| PITG_09666 | Pi conserved hypothetical protein (           | -33.0708 | -33.8904 | 0.573747 | 1 BH |
| PITG_10891 | Pi inositol transporter, putative (15         | -33.0708 | -33.8904 | 0.573747 | 1 BH |
| PITG_10977 | Pi flavin-binding monooxygenase-like          | -33.0708 | -33.8904 | 0.573747 | 1 BH |
| PITG_12305 | Pi rRNA-processing protein FCF1 (9            | -33.0708 | -33.8904 | 0.573747 | 1 BH |
| PITG_14172 | Pi conserved hypothetical protein (           | -33.0708 | -33.8904 | 0.573747 | 1 BH |
| PITG_14176 | Pi conserved hypothetical protein (           | -33.0708 | -33.8904 | 0.573747 | 1 BH |
| PITG_14591 | Pi choline-phosphate cytidylyltransferase     | -33.0708 | -33.8904 | 0.573747 | 1 BH |
| PITG_15322 | Pi conserved hypothetical protein (           | -33.0708 | -33.8904 | 0.573747 | 1 BH |
| PITG_15438 | Pi conserved hypothetical protein (           | -33.0708 | -33.8904 | 0.573747 | 1 BH |
| PITG_15509 | Pi SNF2 family helicase/ATPase and            | -33.0708 | -33.8904 | 0.573747 | 1 BH |
| PITG_15860 | Pi hypothetical protein (985 nt)              | -33.0708 | -33.8904 | 0.573747 | 1 BH |
| PITG_16223 | Pi conserved hypothetical protein (           | -33.0708 | -33.8904 | 0.573747 | 1 BH |
| PITG_17249 | Pi Chloride Channel (ClC) Family (2           | -33.0708 | -33.8904 | 0.573747 | 1 BH |

|            |                                      |          |          |          |      |
|------------|--------------------------------------|----------|----------|----------|------|
| PITG_17628 | Pi conserved hypothetical protein (  | -33.0708 | -33.8904 | 0.573747 | 1 BH |
| PITG_17660 | Pi Amino Acid-Polyamine-Organoc      | -33.0708 | -33.8904 | 0.573747 | 1 BH |
| PITG_18080 | Pi phosphoglycerate mutase (789 r    | -33.0708 | -33.8904 | 0.573747 | 1 BH |
| PITG_18105 | Pi putative GPI mannosyltransferas   | -33.0708 | -33.8904 | 0.573747 | 1 BH |
| PITG_18210 | Pi conserved hypothetical protein (  | -33.0708 | -33.8904 | 0.573747 | 1 BH |
| PITG_18246 | Pi conserved hypothetical protein (  | -33.0708 | -33.8904 | 0.573747 | 1 BH |
| PITG_18826 | Pi Crinkler (CRN) family protein (15 | -33.0708 | -33.8904 | 0.573747 | 1 BH |
| PITG_19257 | Pi calcineurin-like phosphoesterase  | -33.0708 | -33.8904 | 0.573747 | 1 BH |
| PITG_19867 | Pi conserved hypothetical protein (  | -33.0708 | -33.8904 | 0.573747 | 1 BH |
| PITG_20128 | Pi transmembrane protein, putati     | -33.0708 | -33.8904 | 0.573747 | 1 BH |
| PITG_20195 | Pi transcription factor Dp-1 (1620 r | -33.0708 | -33.8904 | 0.573747 | 1 BH |
| PITG_22858 | Pi conserved hypothetical protein (  | -33.0708 | -33.8904 | 0.573747 | 1 BH |
| PITG_01705 | Pi hypothetical protein (362 nt)     | -12.3494 | -0.73874 | 0.573994 | 1 BH |
| PITG_00035 | Pi 60S ribosomal export protein NM   | -33.1109 | -33.8102 | 0.575846 | 1 BH |
| PITG_01339 | Pi conserved hypothetical protein (  | -33.1109 | -33.8102 | 0.575846 | 1 BH |
| PITG_01489 | Pi hypothetical protein (765 nt)     | -33.1109 | -33.8102 | 0.575846 | 1 BH |
| PITG_01741 | Pi conserved hypothetical protein (  | -33.1109 | -33.8102 | 0.575846 | 1 BH |
| PITG_02555 | Pi conserved hypothetical protein (  | -33.1109 | -33.8102 | 0.575846 | 1 BH |
| PITG_02781 | Pi conserved hypothetical protein (  | -33.1109 | -33.8102 | 0.575846 | 1 BH |
| PITG_03049 | Pi cAMP-dependent protein kinase     | -33.1109 | -33.8102 | 0.575846 | 1 BH |
| PITG_03283 | Pi conserved hypothetical protein (  | -33.1109 | -33.8102 | 0.575846 | 1 BH |
| PITG_03317 | Pi conserved hypothetical protein (  | -33.1109 | -33.8102 | 0.575846 | 1 BH |
| PITG_03375 | Pi conserved hypothetical protein (  | -33.1109 | -33.8102 | 0.575846 | 1 BH |
| PITG_03779 | Pi anaphase-promoting complex su     | -33.1109 | -33.8102 | 0.575846 | 1 BH |
| PITG_03957 | Pi conserved hypothetical protein (  | -33.1109 | -33.8102 | 0.575846 | 1 BH |
| PITG_03970 | Pi conserved hypothetical protein (  | -33.1109 | -33.8102 | 0.575846 | 1 BH |
| PITG_03973 | Pi conserved hypothetical protein (  | -33.1109 | -33.8102 | 0.575846 | 1 BH |
| PITG_04057 | Pi conserved hypothetical protein (  | -33.1109 | -33.8102 | 0.575846 | 1 BH |
| PITG_04523 | Pi conserved hypothetical protein (  | -33.1109 | -33.8102 | 0.575846 | 1 BH |
| PITG_04641 | Pi conserved hypothetical protein (  | -33.1109 | -33.8102 | 0.575846 | 1 BH |
| PITG_04917 | Pi anaphase-promoting complex su     | -33.1109 | -33.8102 | 0.575846 | 1 BH |
| PITG_05682 | Pi conserved hypothetical protein (  | -33.1109 | -33.8102 | 0.575846 | 1 BH |
| PITG_05798 | Pi protein kinase, putative (2322 nt | -33.1109 | -33.8102 | 0.575846 | 1 BH |
| PITG_05814 | Pi conserved hypothetical protein (  | -33.1109 | -33.8102 | 0.575846 | 1 BH |
| PITG_07045 | Pi conserved hypothetical protein (  | -33.1109 | -33.8102 | 0.575846 | 1 BH |
| PITG_07074 | Pi conserved hypothetical protein (  | -33.1109 | -33.8102 | 0.575846 | 1 BH |
| PITG_07902 | Pi chromodomain protein, putative    | -33.1109 | -33.8102 | 0.575846 | 1 BH |
| PITG_07952 | Pi conserved hypothetical protein (  | -33.1109 | -33.8102 | 0.575846 | 1 BH |
| PITG_08186 | Pi conserved hypothetical protein (  | -33.1109 | -33.8102 | 0.575846 | 1 BH |
| PITG_08306 | Pi myosin-like protein (2379 nt)     | -33.1109 | -33.8102 | 0.575846 | 1 BH |
| PITG_08436 | Pi conserved hypothetical protein (  | -33.1109 | -33.8102 | 0.575846 | 1 BH |
| PITG_08552 | Pi conserved hypothetical protein (  | -33.1109 | -33.8102 | 0.575846 | 1 BH |
| PITG_08672 | Pi conserved hypothetical protein (  | -33.1109 | -33.8102 | 0.575846 | 1 BH |
| PITG_11038 | Pi ATP-dependent helicase, putativ   | -33.1109 | -33.8102 | 0.575846 | 1 BH |
| PITG_11625 | Pi conserved hypothetical protein (  | -33.1109 | -33.8102 | 0.575846 | 1 BH |
| PITG_11912 | Pi DNA replication licensing factor  | -33.1109 | -33.8102 | 0.575846 | 1 BH |
| PITG_11971 | Pi conserved hypothetical protein (  | -33.1109 | -33.8102 | 0.575846 | 1 BH |



|            |                                       |          |          |          |   |    |
|------------|---------------------------------------|----------|----------|----------|---|----|
| PITG_12346 | Pi DNA replication licensing factor   | -33.1109 | -33.8102 | 0.575846 | 1 | BH |
| PITG_13056 | Pi Mitochondrial Carrier (MC) Fami    | -33.1109 | -33.8102 | 0.575846 | 1 | BH |
| PITG_14765 | Pi GPI ethanolamine phosphate tra     | -33.1109 | -33.8102 | 0.575846 | 1 | BH |
| PITG_14978 | Pi dolichyl-phosphate beta-glucosy    | -33.1109 | -33.8102 | 0.575846 | 1 | BH |
| PITG_15446 | Pi conserved hypothetical protein (   | -33.1109 | -33.8102 | 0.575846 | 1 | BH |
| PITG_15529 | Pi exosome complex exonuclease f      | -33.1109 | -33.8102 | 0.575846 | 1 | BH |
| PITG_15746 | Pi SCP-like extracellular protein, pu | -33.1109 | -33.8102 | 0.575846 | 1 | BH |
| PITG_16225 | Pi HECT E3 ubiquitin ligase, putativ  | -33.1109 | -33.8102 | 0.575846 | 1 | BH |
| PITG_16511 | Pi conserved hypothetical protein (   | -33.1109 | -33.8102 | 0.575846 | 1 | BH |
| PITG_17138 | Pi conserved hypothetical protein (   | -33.1109 | -33.8102 | 0.575846 | 1 | BH |
| PITG_17631 | Pi conserved hypothetical protein (   | -33.1109 | -33.8102 | 0.575846 | 1 | BH |
| PITG_17829 | Pi Hypothetical protein (1383 nt)     | -33.1109 | -33.8102 | 0.575846 | 1 | BH |
| PITG_18800 | Pi conserved hypothetical protein (   | -33.1109 | -33.8102 | 0.575846 | 1 | BH |
| PITG_18851 | Pi conserved hypothetical protein (   | -33.1109 | -33.8102 | 0.575846 | 1 | BH |
| PITG_19441 | Pi ATP-binding Cassette (ABC) Supe    | -33.1109 | -33.8102 | 0.575846 | 1 | BH |
| PITG_19773 | Pi serine/threonine protein kinase    | -33.1109 | -33.8102 | 0.575846 | 1 | BH |
| PITG_20610 | Pi conserved hypothetical protein (   | -33.1109 | -33.8102 | 0.575846 | 1 | BH |
| PITG_20765 | Pi conserved hypothetical protein (   | -33.1109 | -33.8102 | 0.575846 | 1 | BH |
| PITG_22505 | Pi conserved hypothetical protein (   | -33.1109 | -33.8102 | 0.575846 | 1 | BH |
| PITG_02691 | Pi hypothetical protein (4334 nt)     | -33.2032 | -33.6258 | 0.576376 | 1 | BH |
| PITG_10212 | Pi ADP-ribosylation factor family (€  | -33.2032 | -33.6258 | 0.576376 | 1 | BH |
| PITG_10896 | Pi conserved hypothetical protein (   | -33.2032 | -33.6258 | 0.576376 | 1 | BH |
| PITG_00582 | Pi secreted RxLR effector peptide,    | -32.2846 | 35.46294 | 0.576909 | 1 | BH |
| PITG_04049 | Pi secreted RxLR effector peptide,    | -32.2846 | 35.46294 | 0.576909 | 1 | BH |
| PITG_21040 | Pi conserved hypothetical protein (   | -32.2846 | 35.46294 | 0.576909 | 1 | BH |
| PITG_22675 | Pi secreted RxLR effector peptide,    | -32.2846 | 35.46294 | 0.576909 | 1 | BH |
| PITG_02209 | Pi hypothetical protein (836 nt)      | -33.2641 | -33.5038 | 0.577444 | 1 | BH |
| PITG_05495 | Pi conserved hypothetical protein (   | -33.2641 | -33.5038 | 0.577444 | 1 | BH |
| PITG_07095 | Pi hypothetical protein (339 nt)      | -33.333  | -33.366  | 0.577444 | 1 | BH |
| PITG_08639 | Pi conserved hypothetical protein (   | -33.333  | -33.366  | 0.577444 | 1 | BH |
| PITG_10854 | Pi hypothetical protein (921 nt)      | -33.333  | -33.366  | 0.577444 | 1 | BH |
| PITG_14683 | Pi conserved hypothetical protein (   | -33.333  | -33.366  | 0.577444 | 1 | BH |
| PITG_15262 | Pi conserved hypothetical protein (   | -33.333  | -33.366  | 0.577444 | 1 | BH |
| PITG_23045 | Pi isoamyl acetate-hydrolyzing este   | -33.333  | -33.366  | 0.577444 | 1 | BH |
| PITG_23270 | Pi crinkler (CRN) family protein, ps  | -33.333  | -33.366  | 0.577444 | 1 | BH |
| PITG_00083 | Pi conserved hypothetical protein (   | -33.2029 | -33.6263 | 0.577444 | 1 | BH |
| PITG_00176 | Pi presenilin-like protein (1741 nt)  | -33.2029 | -33.6263 | 0.577444 | 1 | BH |
| PITG_00328 | Pi conserved hypothetical protein (   | -33.2029 | -33.6263 | 0.577444 | 1 | BH |
| PITG_00476 | Pi conserved hypothetical protein (   | -33.2029 | -33.6263 | 0.577444 | 1 | BH |
| PITG_00635 | Pi Ryanodine-Inositol 1,4,5-triphos   | -33.2029 | -33.6263 | 0.577444 | 1 | BH |
| PITG_01204 | Pi DNA mismatch repair protein, pi    | -33.2029 | -33.6263 | 0.577444 | 1 | BH |
| PITG_01337 | Pi conserved hypothetical protein (   | -33.2029 | -33.6263 | 0.577444 | 1 | BH |
| PITG_01451 | Pi GPI ethanolamine phosphate tra     | -33.2029 | -33.6263 | 0.577444 | 1 | BH |
| PITG_01509 | Pi conserved hypothetical protein (   | -33.2029 | -33.6263 | 0.577444 | 1 | BH |
| PITG_02134 | Pi conserved hypothetical protein (   | -33.2029 | -33.6263 | 0.577444 | 1 | BH |
| PITG_03351 | Pi DNA mismatch repair protein M:     | -33.2029 | -33.6263 | 0.577444 | 1 | BH |
| PITG_03587 | Pi Mitochondrial Protein Transloca    | -33.2029 | -33.6263 | 0.577444 | 1 | BH |

|            |                                       |          |          |          |      |
|------------|---------------------------------------|----------|----------|----------|------|
| PITG_03662 | Pi calcineurin-like phosphoesterase   | -33.2029 | -33.6263 | 0.577444 | 1 BH |
| PITG_04012 | Pi elongator complex protein, puta    | -33.2029 | -33.6263 | 0.577444 | 1 BH |
| PITG_04800 | Pi conserved hypothetical protein (   | -33.2029 | -33.6263 | 0.577444 | 1 BH |
| PITG_04970 | Pi conserved hypothetical protein (   | -33.2029 | -33.6263 | 0.577444 | 1 BH |
| PITG_05217 | Pi ATP-binding Cassette (ABC) Supe    | -33.2029 | -33.6263 | 0.577444 | 1 BH |
| PITG_05332 | Pi Voltage-gated Ion Channel (VIC)    | -33.2029 | -33.6263 | 0.577444 | 1 BH |
| PITG_05365 | Pi serine/threonine protein kinase    | -33.2029 | -33.6263 | 0.577444 | 1 BH |
| PITG_05549 | Pi conserved hypothetical protein (   | -33.2029 | -33.6263 | 0.577444 | 1 BH |
| PITG_05604 | Pi conserved hypothetical protein (   | -33.2029 | -33.6263 | 0.577444 | 1 BH |
| PITG_05696 | Pi NAD-dependent glycerol-3-phos      | -33.2029 | -33.6263 | 0.577444 | 1 BH |
| PITG_06576 | Pi conserved hypothetical protein (   | -33.2029 | -33.6263 | 0.577444 | 1 BH |
| PITG_06703 | Pi conserved hypothetical protein (   | -33.2029 | -33.6263 | 0.577444 | 1 BH |
| PITG_06880 | Pi mitogen-activated protein kinas    | -33.2029 | -33.6263 | 0.577444 | 1 BH |
| PITG_07010 | Pi conserved hypothetical protein (   | -33.2029 | -33.6263 | 0.577444 | 1 BH |
| PITG_07171 | Pi calcineurin-like phosphoesterase   | -33.2029 | -33.6263 | 0.577444 | 1 BH |
| PITG_07656 | Pi ubiquitin-specific protease, puta  | -33.2029 | -33.6263 | 0.577444 | 1 BH |
| PITG_07818 | Pi conserved hypothetical protein (   | -33.2029 | -33.6263 | 0.577444 | 1 BH |
| PITG_07900 | Pi Amino Acid/Auxin Permease (AA      | -33.2029 | -33.6263 | 0.577444 | 1 BH |
| PITG_07913 | Pi conserved hypothetical protein (   | -33.2029 | -33.6263 | 0.577444 | 1 BH |
| PITG_08017 | Pi cell division cycle protein 123 (1 | -33.2029 | -33.6263 | 0.577444 | 1 BH |
| PITG_08187 | Pi ankyrin-like protein (1227 nt)     | -33.2029 | -33.6263 | 0.577444 | 1 BH |
| PITG_08309 | Pi myosin-like protein (2585 nt)      | -33.2029 | -33.6263 | 0.577444 | 1 BH |
| PITG_08410 | Pi conserved hypothetical protein (   | -33.2029 | -33.6263 | 0.577444 | 1 BH |
| PITG_08505 | Pi conserved hypothetical protein (   | -33.2029 | -33.6263 | 0.577444 | 1 BH |
| PITG_08716 | Pi hypothetical protein (568 nt)      | -33.2029 | -33.6263 | 0.577444 | 1 BH |
| PITG_09851 | Pi metalloprotease family M12A, p     | -33.2029 | -33.6263 | 0.577444 | 1 BH |
| PITG_09980 | Pi conserved hypothetical protein (   | -33.2029 | -33.6263 | 0.577444 | 1 BH |
| PITG_10302 | Pi Sulfate Permease (SulP) Family (   | -33.2029 | -33.6263 | 0.577444 | 1 BH |
| PITG_10408 | Pi SCP-like extracellular protein (61 | -33.2029 | -33.6263 | 0.577444 | 1 BH |
| PITG_10451 | Pi conserved hypothetical protein (   | -33.2029 | -33.6263 | 0.577444 | 1 BH |
| PITG_10676 | Pi transmembrane protein, putativ     | -33.2029 | -33.6263 | 0.577444 | 1 BH |
| PITG_10860 | Pi conserved hypothetical protein (   | -33.2029 | -33.6263 | 0.577444 | 1 BH |
| PITG_11028 | Pi mevalonate kinase, putative (13    | -33.2029 | -33.6263 | 0.577444 | 1 BH |
| PITG_12131 | Pi protease inhibitor Epi4 (957 nt)   | -33.2029 | -33.6263 | 0.577444 | 1 BH |
| PITG_12237 | Pi hypothetical protein (2161 nt)     | -33.2029 | -33.6263 | 0.577444 | 1 BH |
| PITG_12969 | Pi conserved hypothetical protein (   | -33.2029 | -33.6263 | 0.577444 | 1 BH |
| PITG_13285 | Pi hypothetical protein (1188 nt)     | -33.2029 | -33.6263 | 0.577444 | 1 BH |
| PITG_13437 | Pi metalloprotease family M16C, p     | -33.2029 | -33.6263 | 0.577444 | 1 BH |
| PITG_13619 | Pi conserved hypothetical protein (   | -33.2029 | -33.6263 | 0.577444 | 1 BH |
| PITG_14051 | Pi beta-glucan synthesis-associatec   | -33.2029 | -33.6263 | 0.577444 | 1 BH |
| PITG_14286 | Pi conserved hypothetical protein (   | -33.2029 | -33.6263 | 0.577444 | 1 BH |
| PITG_15026 | Pi importin-like protein (3656 nt)    | -33.2029 | -33.6263 | 0.577444 | 1 BH |
| PITG_15258 | Pi conserved hypothetical protein (   | -33.2029 | -33.6263 | 0.577444 | 1 BH |
| PITG_15505 | Pi DNA polymerase epsilon catalyti    | -33.2029 | -33.6263 | 0.577444 | 1 BH |
| PITG_15648 | Pi conserved hypothetical protein (   | -33.2029 | -33.6263 | 0.577444 | 1 BH |
| PITG_15837 | Pi chromodomain protein, putative     | -33.2029 | -33.6263 | 0.577444 | 1 BH |
| PITG_16090 | Pi conserved hypothetical protein (   | -33.2029 | -33.6263 | 0.577444 | 1 BH |

|            |                                      |          |          |          |   |    |
|------------|--------------------------------------|----------|----------|----------|---|----|
| PITG_16097 | Pi Monovalent Cation:Proton Antip    | -33.2029 | -33.6263 | 0.577444 | 1 | BH |
| PITG_17286 | Pi ATP-binding Cassette (ABC) Supe   | -33.2029 | -33.6263 | 0.577444 | 1 | BH |
| PITG_18014 | Pi conserved hypothetical protein (  | -33.2029 | -33.6263 | 0.577444 | 1 | BH |
| PITG_18035 | Pi conserved hypothetical protein (  | -33.2029 | -33.6263 | 0.577444 | 1 | BH |
| PITG_18036 | Pi conserved hypothetical protein (  | -33.2029 | -33.6263 | 0.577444 | 1 | BH |
| PITG_18859 | Pi cGMP-dependent 3',5'-cGMP ph      | -33.2029 | -33.6263 | 0.577444 | 1 | BH |
| PITG_20836 | Pi conserved hypothetical protein (  | -33.2029 | -33.6263 | 0.577444 | 1 | BH |
| PITG_20927 | Pi trehalose-phosphatase, putative   | -33.2029 | -33.6263 | 0.577444 | 1 | BH |
| PITG_21149 | Pi conserved hypothetical protein (  | -33.2029 | -33.6263 | 0.577444 | 1 | BH |
| PITG_21181 | Pi conserved hypothetical protein (  | -33.2029 | -33.6263 | 0.577444 | 1 | BH |
| PITG_21552 | Pi sulfhydryl oxidase, putative (148 | -33.2029 | -33.6263 | 0.577444 | 1 | BH |
| PITG_22378 | Pi conserved hypothetical protein (  | -33.2029 | -33.6263 | 0.577444 | 1 | BH |
| PITG_22851 | Pi conserved hypothetical protein (  | -33.2029 | -33.6263 | 0.577444 | 1 | BH |
| PITG_22857 | Pi DNA repair protein RAD5, SWI/S    | -33.2029 | -33.6263 | 0.577444 | 1 | BH |
| PITG_23007 | Pi histidine kinase (6042 nt)        | -33.2029 | -33.6263 | 0.577444 | 1 | BH |
| PITG_23139 | Pi conserved hypothetical protein (  | -33.2029 | -33.6263 | 0.577444 | 1 | BH |
| PITG_09431 | Pi 40S ribosomal protein S19-3 (94   | -9.54094 | 1.046121 | 0.580092 | 1 | BH |
| PITG_12905 | Pi transmembrane protein, putativ    | -12.414  | -0.60722 | 0.581051 | 1 | BH |
| PITG_04704 | Pi conserved hypothetical protein (  | -13.29   | -0.64395 | 0.582273 | 1 | BH |
| PITG_08671 | Pi conserved hypothetical protein (  | -14.0611 | -0.96285 | 0.584436 | 1 | BH |
| PITG_08673 | Pi conserved hypothetical protein (  | -14.044  | -0.99696 | 0.584436 | 1 | BH |
| PITG_12310 | Pi conserved hypothetical protein (  | -14.0537 | -0.97757 | 0.584436 | 1 | BH |
| PITG_01649 | Pi AP-2 complex subunit sigma (76    | -14.0332 | -1.01984 | 0.585659 | 1 | BH |
| PITG_12877 | Pi DNA-directed RNA polymerase I,    | -14.0476 | -0.99113 | 0.585659 | 1 | BH |
| PITG_19049 | Pi conserved hypothetical protein (  | -14.0403 | -1.00556 | 0.585659 | 1 | BH |
| PITG_00527 | Pi luminal-binding protein 3 precur  | -10.0509 | 1.065158 | 0.58657  | 1 | BH |
| PITG_02339 | Pi 26S proteasome non-ATPase reg     | -14.0503 | -0.98686 | 0.586881 | 1 | BH |
| PITG_06111 | Pi conserved hypothetical protein (  | -14.0503 | -0.98686 | 0.586881 | 1 | BH |
| PITG_20173 | Pi NADH ubiquinone oxidoreductas     | -12.1531 | -0.56594 | 0.58794  | 1 | BH |
| PITG_09578 | Pi vesicle transporter GOT1B-like p  | -14.0337 | -1.02134 | 0.588101 | 1 | BH |
| PITG_20855 | Pi conserved hypothetical protein (  | -14.0634 | -0.96432 | 0.590539 | 1 | BH |
| PITG_03226 | Pi glutathione S-transferase, putati | -13.2814 | -0.7374  | 0.59174  | 1 | BH |
| PITG_02786 | Pi fructose-bisphosphate aldolase (  | -10.9728 | 1.046292 | 0.592143 | 1 | BH |
| PITG_09224 | Pi secreted RxLR effector peptide,   | -13.6021 | 1.756797 | 0.592353 | 1 | BH |
| PITG_14612 | Pi NADH dehydrogenase iron-sulfu     | -11.6894 | -0.67341 | 0.592575 | 1 | BH |
| PITG_05289 | Pi conserved hypothetical protein (  | -14.0467 | -1.00016 | 0.592971 | 1 | BH |
| PITG_19932 | Pi nicotinate-nucleotide pyrophosp   | -14.0409 | -1.01187 | 0.592971 | 1 | BH |
| PITG_15653 | Pi small nuclear ribonucleoprotein   | -12.7416 | -0.71969 | 0.595139 | 1 | BH |
| PITG_13490 | Pi urocanase, putative (2405 nt)     | -14.0213 | -1.05344 | 0.595398 | 1 | BH |
| PITG_16833 | Pi conserved hypothetical protein (  | -14.0353 | -1.02549 | 0.595398 | 1 | BH |
| PITG_08809 | Pi 60S ribosomal protein L12, puta   | -10.6    | 0.986496 | 0.596539 | 1 | BH |
| PITG_12727 | Pi cysteine synthase (1160 nt)       | -12.6945 | -0.78455 | 0.5967   | 1 | BH |
| PITG_14008 | Pi conserved hypothetical protein (  | -12.8733 | 1.306709 | 0.597796 | 1 | BH |
| PITG_01227 | Pi conserved hypothetical protein (  | -14.0244 | -1.0523  | 0.60024  | 1 | BH |
| PITG_11767 | Pi phosphoacetylglucosamine mut      | -12.7542 | -0.70372 | 0.600879 | 1 | BH |
| PITG_12309 | Pi conserved hypothetical protein (  | -12.6965 | -0.78721 | 0.600988 | 1 | BH |
| PITG_04487 | Pi conserved hypothetical protein (  | -12.444  | -0.54715 | 0.608597 | 1 | BH |

|            |                                      |          |          |          |      |
|------------|--------------------------------------|----------|----------|----------|------|
| PITG_09769 | Pi hypothetical protein (616 nt)     | -11.1305 | -0.63467 | 0.60873  | 1 BH |
| PITG_03856 | Pi peptidyl-prolyl cis-trans isomera | -11.3438 | 1.037749 | 0.609362 | 1 BH |
| PITG_13761 | Pi protoplast secreted protein 2 pr  | -12.6425 | 1.186569 | 0.610659 | 1 BH |
| PITG_12483 | Pi eukaryotic translation initiation | -13.7617 | 1.336335 | 0.612268 | 1 BH |
| PITG_03589 | Pi conserved hypothetical protein (  | -12.4315 | -0.57942 | 0.612855 | 1 BH |
| PITG_02026 | Pi succinyl-CoA ligase subunit alph  | -11.8794 | 1.080687 | 0.614629 | 1 BH |
| PITG_03763 | Pi pre-mRNA-splicing factor SF2-lik  | -12.4432 | -0.56097 | 0.615676 | 1 BH |
| PITG_08702 | Pi conserved hypothetical protein (  | -13.7131 | 1.232467 | 0.615858 | 1 BH |
| PITG_02925 | Pi ketol-acid reductoisomerase (17   | -11.1566 | 0.947075 | 0.621549 | 1 BH |
| PITG_02293 | Pi conserved hypothetical protein (  | -14.2321 | -0.62197 | 0.623126 | 1 BH |
| PITG_18330 | Pi conserved hypothetical protein (  | -14.2304 | -0.62539 | 0.623126 | 1 BH |
| PITG_01535 | Pi myosin-like protein (3890 nt)     | -12.7709 | -0.6633  | 0.629431 | 1 BH |
| PITG_08025 | Pi HECT E3 ubiquitin ligase, putativ | -14.0768 | -0.98083 | 0.630138 | 1 BH |
| PITG_14243 | Pi glycoside hydrolase, putative (15 | -14.7982 | 2.355573 | 0.630562 | 1 BH |
| PITG_08591 | Pi actin-depolymerizing factor, put  | -10.0686 | 0.928183 | 0.630762 | 1 BH |
| PITG_02479 | Pi T-complex protein 1 subunit the   | -13.3826 | 1.305676 | 0.633088 | 1 BH |
| PITG_16041 | Pi conserved hypothetical protein (  | -12.0877 | 1.026611 | 0.633855 | 1 BH |
| PITG_04726 | Pi mitochondrial-processing peptid   | -12.416  | 1.129829 | 0.635065 | 1 BH |
| PITG_18025 | Pi fatty acid synthase subunit alph  | -13.7947 | 1.356505 | 0.636056 | 1 BH |
| PITG_06554 | Pi cytochrome P450, putative (412    | -14.9669 | 2.67941  | 0.636848 | 1 BH |
| PITG_17543 | Pi crinkler (CRN) family protein, ps | -9.61445 | -0.74092 | 0.636966 | 1 BH |
| PITG_00733 | Pi aspartyl protease family A22B, p  | -13.338  | -0.55169 | 0.63704  | 1 BH |
| PITG_03033 | Pi conserved hypothetical protein (  | -11.7137 | -0.60431 | 0.638257 | 1 BH |
| PITG_03694 | Pi disulfide-isomerase, putative (14 | -13.3502 | -0.53107 | 0.639463 | 1 BH |
| PITG_16735 | Pi conserved hypothetical protein (  | -13.3479 | -0.5357  | 0.639463 | 1 BH |
| PITG_07258 | Pi conserved hypothetical protein (  | -14.9633 | 2.664406 | 0.64046  | 1 BH |
| PITG_18931 | Pi hypothetical protein (699 nt)     | -8.7712  | 0.859143 | 0.640976 | 1 BH |
| PITG_05225 | Pi 4-aminobutyrate aminotransfer     | -13.2442 | -0.78159 | 0.64136  | 1 BH |
| PITG_11110 | Pi eukaryotic translation initiation | -13.3414 | -0.55232 | 0.641877 | 1 BH |
| PITG_06215 | Pi conserved hypothetical protein (  | -13.3383 | -0.56047 | 0.64308  | 1 BH |
| PITG_13919 | Pi conserved hypothetical protein (  | -9.43331 | -0.73069 | 0.643792 | 1 BH |
| PITG_23005 | Pi conserved hypothetical protein (  | -8.85112 | -0.7653  | 0.644506 | 1 BH |
| PITG_07671 | Pi NADP-specific glutamate dehydr    | -13.3544 | 1.224518 | 0.645329 | 1 BH |
| PITG_06359 | Pi conserved hypothetical protein (  | -14.2417 | -0.63063 | 0.646347 | 1 BH |
| PITG_14604 | Pi hypothetical protein (571 nt)     | -11.943  | -0.53058 | 0.646451 | 1 BH |
| PITG_03178 | Pi 60S ribosomal protein L9 (754 nt) | -9.91236 | 0.847034 | 0.646857 | 1 BH |
| PITG_02211 | Pi UV excision repair protein RAD2   | -12.8085 | -0.5566  | 0.647288 | 1 BH |
| PITG_01310 | Pi peptidyl-prolyl isomerase FKBP1   | -12.7808 | -0.67591 | 0.647912 | 1 BH |
| PITG_06305 | Pi secreted RxLR effector peptide,   | -9.23642 | 0.910773 | 0.64797  | 1 BH |
| PITG_02049 | Pi citrate synthase, mitochondrial p | -12.2435 | 1.072082 | 0.648103 | 1 BH |
| PITG_09445 | Pi conserved hypothetical protein (  | -10.8273 | 0.872857 | 0.6488   | 1 BH |
| PITG_19768 | Pi conserved hypothetical protein (  | -11.9477 | -0.53673 | 0.65453  | 1 BH |
| PITG_05871 | Pi hypothetical protein (336 nt)     | -12.858  | 1.276155 | 0.656281 | 1 BH |
| PITG_15359 | Pi dihydrolipoyl dehydrogenase 1,    | -12.8328 | 1.223199 | 0.657535 | 1 BH |
| PITG_19176 | Pi conserved hypothetical protein (  | -13.2723 | -0.67935 | 0.660703 | 1 BH |
| PITG_23144 | Pi Crinkler (CRN) family protein, ps | -11.8128 | 1.113482 | 0.661587 | 1 BH |
| PITG_02010 | Pi conserved hypothetical protein (  | -14.0914 | -0.90234 | 0.665306 | 1 BH |

|            |                                      |          |          |          |      |
|------------|--------------------------------------|----------|----------|----------|------|
| PITG_16855 | Pi conserved hypothetical protein (  | -14.1266 | -0.83301 | 0.666313 | 1 BH |
| PITG_16671 | Pi 26S proteasome non-ATPase reg     | -14.1152 | -0.85578 | 0.666313 | 1 BH |
| PITG_10032 | Pi 6-phosphogluconate dehydroge      | -10.5334 | -0.58495 | 0.666931 | 1 BH |
| PITG_00804 | Pi T-complex protein 1 subunit del   | -12.7366 | 1.051528 | 0.667173 | 1 BH |
| PITG_12151 | Pi aspartyl-tRNA synthetase, putati  | -14.1219 | -0.84368 | 0.667318 | 1 BH |
| PITG_07791 | Pi conserved hypothetical protein (  | -13.2777 | -0.67973 | 0.667643 | 1 BH |
| PITG_19495 | Pi glyceraldehyde-3-phosphate del    | -10.9307 | -0.67087 | 0.667671 | 1 BH |
| PITG_01524 | Pi RING-box protein 1 (724 nt)       | -12.8966 | -0.3803  | 0.668002 | 1 BH |
| PITG_20798 | Pi ribosomal protein S17, putative   | -14.1286 | -0.83146 | 0.668322 | 1 BH |
| PITG_01144 | Pi conserved hypothetical protein (  | -14.1031 | -0.88367 | 0.669325 | 1 BH |
| PITG_01788 | Pi ubiquitin activating enzyme, E1 f | -14.1454 | -0.79907 | 0.669325 | 1 BH |
| PITG_20281 | Pi GTP-dependent nucleic acid-bind   | -14.0984 | -0.89305 | 0.669325 | 1 BH |
| PITG_12746 | Pi conserved hypothetical protein (  | -14.1107 | -0.8709  | 0.671327 | 1 BH |
| PITG_01945 | Pi conserved hypothetical protein (  | -12.5498 | 1.065336 | 0.671696 | 1 BH |
| PITG_20490 | Pi conserved hypothetical protein (  | -14.278  | -0.59741 | 0.675594 | 1 BH |
| PITG_10913 | Pi conserved hypothetical protein (  | -11.6178 | -0.46141 | 0.67696  | 1 BH |
| PITG_09521 | Pi conserved hypothetical protein (  | -14.1171 | -0.86697 | 0.678297 | 1 BH |
| PITG_08834 | Pi ribosomal protein L37e, putative  | -8.95014 | -0.66554 | 0.679389 | 1 BH |
| PITG_09699 | Pi conserved hypothetical protein (  | -10.9924 | -0.48846 | 0.681841 | 1 BH |
| PITG_01477 | Pi myosin-like protein (5007 nt)     | -14.1091 | -0.88794 | 0.682255 | 1 BH |
| PITG_07269 | Pi 60S ribosomal protein L7 (1385 r  | -9.61128 | 0.755021 | 0.683254 | 1 BH |
| PITG_19023 | Pi NADH-cytochrome b5 reductase      | -12.4513 | -0.53251 | 0.683559 | 1 BH |
| PITG_01248 | Pi polyadenylate-binding protein 1   | -11.1437 | 0.787947 | 0.68509  | 1 BH |
| PITG_13832 | Pi delta-aminolevulinic acid dehydr  | -13.9106 | 1.634293 | 0.688162 | 1 BH |
| PITG_14278 | Pi eukaryotic translation initiation | -14.129  | -0.85604 | 0.688162 | 1 BH |
| PITG_03294 | Pi 60S ribosomal protein L6, putati  | -10.2576 | 0.773443 | 0.688195 | 1 BH |
| PITG_00631 | Pi conserved hypothetical protein (  | -9.06758 | -0.6873  | 0.689506 | 1 BH |
| PITG_20989 | Pi conserved hypothetical protein (  | -13.8555 | 1.519391 | 0.690123 | 1 BH |
| PITG_00443 | Pi 40S ribosomal protein S6 (1247 r  | -8.84208 | 0.738048 | 0.691625 | 1 BH |
| PITG_09874 | Pi conserved hypothetical protein (  | -14.4544 | 1.669865 | 0.693266 | 1 BH |
| PITG_01862 | Pi glucose-6-phosphate isomerase     | -12.1265 | 0.845688 | 0.693628 | 1 BH |
| PITG_09939 | Pi conserved hypothetical protein (  | -13.4033 | -0.41925 | 0.693908 | 1 BH |
| PITG_15449 | Pi branched-chain-amino-acid amir    | -12.0088 | 0.878827 | 0.69422  | 1 BH |
| PITG_05254 | Pi conserved hypothetical protein (  | -14.5061 | 1.769471 | 0.69494  | 1 BH |
| PITG_22951 | Pi similar to sea slug pheromone (2  | -14.5372 | 1.829698 | 0.695777 | 1 BH |
| PITG_06482 | Pi eukaryotic translation initiation | -14.5074 | 1.766291 | 0.697451 | 1 BH |
| PITG_09627 | Pi ribosomal protein L23, putative   | -13.3804 | -0.47258 | 0.698044 | 1 BH |
| PITG_12300 | Pi phosphoribosylglycinamide synt    | -14.563  | 1.871711 | 0.699963 | 1 BH |
| PITG_01062 | Pi S-adenosylmethionine decarbox     | -14.5096 | 1.762849 | 0.7008   | 1 BH |
| PITG_09451 | Pi conserved hypothetical protein (  | -12.532  | -0.37364 | 0.703086 | 1 BH |
| PITG_04906 | Pi glutaredoxin (479 nt)             | -10.0703 | -0.55177 | 0.70315  | 1 BH |
| PITG_01237 | Pi conserved hypothetical protein (  | -14.0187 | -1.05506 | 0.705412 | 1 BH |
| PITG_01255 | Pi eukaryotic translation initiation | -14.0118 | -1.06881 | 0.705412 | 1 BH |
| PITG_00293 | Pi conserved hypothetical protein (  | -13.3933 | -0.46198 | 0.706216 | 1 BH |
| PITG_01752 | Pi transketolase (2256 nt)           | -11.7373 | 0.969236 | 0.707583 | 1 BH |
| PITG_18414 | Pi phosphoglucomutase (3392 nt)      | -11.5417 | 0.927704 | 0.707837 | 1 BH |
| PITG_00503 | Pi Rab32 family GTPase, putative (}  | -14.0076 | -1.08085 | 0.708228 | 1 BH |

|            |                                      |          |          |          |      |
|------------|--------------------------------------|----------|----------|----------|------|
| PITG_03486 | Pi conserved hypothetical protein (  | -9.62949 | -0.65263 | 0.708257 | 1 BH |
| PITG_08346 | Pi carbohydrate-binding protein, pi  | -13.271  | 1.099617 | 0.709247 | 1 BH |
| PITG_04385 | Pi putative GPI-anchored acidic ser  | -14.5168 | 1.755635 | 0.710021 | 1 BH |
| PITG_11462 | Pi conserved hypothetical protein (  | -13.2906 | 1.13142  | 0.712262 | 1 BH |
| PITG_03897 | Pi conserved hypothetical protein (  | -12.9342 | -0.30517 | 0.712722 | 1 BH |
| PITG_01951 | Pi conserved hypothetical protein (  | -32.5821 | -34.868  | 0.712943 | 1 BH |
| PITG_06764 | Pi phosphatidylinositol transfer pro | -32.5821 | -34.868  | 0.712943 | 1 BH |
| PITG_08654 | Pi conserved hypothetical protein (  | -32.5821 | -34.868  | 0.712943 | 1 BH |
| PITG_10163 | Pi conserved hypothetical protein (  | -32.5821 | -34.868  | 0.712943 | 1 BH |
| PITG_10993 | Pi CASP-like protein (2332 nt)       | -32.5821 | -34.868  | 0.712943 | 1 BH |
| PITG_12152 | Pi ribonuclease HII (837 nt)         | -32.5821 | -34.868  | 0.712943 | 1 BH |
| PITG_14979 | Pi palmitoyltransferase, putative (1 | -32.5821 | -34.868  | 0.712943 | 1 BH |
| PITG_15016 | Pi conserved hypothetical protein (  | -32.5821 | -34.868  | 0.712943 | 1 BH |
| PITG_15164 | Pi conserved hypothetical protein (  | -32.5823 | -34.8675 | 0.712943 | 1 BH |
| PITG_19419 | Pi conserved hypothetical protein (  | -32.5823 | -34.8675 | 0.712943 | 1 BH |
| PITG_20385 | Pi 3-oxo-5-alpha-steroid 4-dehydra   | -32.5823 | -34.8675 | 0.712943 | 1 BH |
| PITG_18712 | Pi conserved hypothetical protein (  | -14.2088 | 0.791283 | 0.713396 | 1 BH |
| PITG_00048 | Pi conserved hypothetical protein (  | -32.7043 | -34.6235 | 0.713479 | 1 BH |
| PITG_00734 | Pi conserved hypothetical protein (  | -32.7317 | -34.5686 | 0.713479 | 1 BH |
| PITG_00743 | Pi N-acetylglucosamine-1-phospho     | -32.7317 | -34.5686 | 0.713479 | 1 BH |
| PITG_01020 | Pi conserved hypothetical protein (  | -32.6526 | -34.7269 | 0.713479 | 1 BH |
| PITG_01123 | Pi conserved hypothetical protein (  | -32.6526 | -34.7269 | 0.713479 | 1 BH |
| PITG_01201 | Pi ATP-dependent DNA helicase, pi    | -32.7317 | -34.5686 | 0.713479 | 1 BH |
| PITG_01514 | Pi protoporphyrinogen oxidase, pu    | -32.7317 | -34.5686 | 0.713479 | 1 BH |
| PITG_01935 | Pi hypothetical protein (553 nt)     | -32.7317 | -34.5686 | 0.713479 | 1 BH |
| PITG_02198 | Pi homoserine kinase, putative (12   | -32.6057 | -34.8207 | 0.713479 | 1 BH |
| PITG_02245 | Pi D-2-hydroxyglutarate dehydroge    | -32.7317 | -34.5686 | 0.713479 | 1 BH |
| PITG_02655 | Pi conserved hypothetical protein (  | -32.7043 | -34.6235 | 0.713479 | 1 BH |
| PITG_02744 | Pi conserved hypothetical protein (  | -32.7043 | -34.6235 | 0.713479 | 1 BH |
| PITG_03143 | Pi indigoidine synthase A family pro | -32.6292 | -34.7737 | 0.713479 | 1 BH |
| PITG_03149 | Pi conserved hypothetical protein (  | -32.7317 | -34.5686 | 0.713479 | 1 BH |
| PITG_03242 | Pi conserved hypothetical protein (  | -32.6526 | -34.7269 | 0.713479 | 1 BH |
| PITG_03300 | Pi U4/U6 small nuclear ribonucleop   | -32.7043 | -34.6235 | 0.713479 | 1 BH |
| PITG_03399 | Pi histidyl-tRNA synthetase, putativ | -32.6526 | -34.7269 | 0.713479 | 1 BH |
| PITG_03499 | Pi phosphopantothenoylecysteine d    | -32.7043 | -34.6235 | 0.713479 | 1 BH |
| PITG_03767 | Pi conserved hypothetical protein (  | -32.7043 | -34.6235 | 0.713479 | 1 BH |
| PITG_03826 | Pi conserved hypothetical protein (  | -32.6526 | -34.7269 | 0.713479 | 1 BH |
| PITG_03927 | Pi conserved hypothetical protein (  | -32.7317 | -34.5686 | 0.713479 | 1 BH |
| PITG_03965 | Pi transmembrane protein, putativ    | -32.6292 | -34.7737 | 0.713479 | 1 BH |
| PITG_03972 | Pi acetyltransferase (GNAT) family,  | -32.7317 | -34.5686 | 0.713479 | 1 BH |
| PITG_04310 | Pi hypothetical protein (484 nt)     | -32.7054 | -34.6213 | 0.713479 | 1 BH |
| PITG_04336 | Pi conserved hypothetical protein (  | -32.7317 | -34.5686 | 0.713479 | 1 BH |
| PITG_04479 | Pi conserved hypothetical protein (  | -32.7054 | -34.6213 | 0.713479 | 1 BH |
| PITG_04643 | Pi conserved hypothetical protein (  | -32.7054 | -34.6213 | 0.713479 | 1 BH |
| PITG_04717 | Pi conserved hypothetical protein (  | -32.6526 | -34.7269 | 0.713479 | 1 BH |
| PITG_05221 | Pi Mitochondrial Carrier (MC) Fami   | -32.7043 | -34.6235 | 0.713479 | 1 BH |
| PITG_05512 | Pi conserved hypothetical protein (  | -32.7317 | -34.5686 | 0.713479 | 1 BH |

|            |                                       |          |          |          |      |
|------------|---------------------------------------|----------|----------|----------|------|
| PITG_07083 | Pi ubiquitin thioesterase OTU1-like   | -32.6057 | -34.8207 | 0.713479 | 1 BH |
| PITG_07312 | Pi TATA-box-binding protein (1101     | -32.6526 | -34.7269 | 0.713479 | 1 BH |
| PITG_08037 | Pi conserved hypothetical protein (   | -32.6526 | -34.7269 | 0.713479 | 1 BH |
| PITG_08303 | Pi conserved hypothetical protein (   | -32.6292 | -34.7737 | 0.713479 | 1 BH |
| PITG_08364 | Pi conserved hypothetical protein (   | -32.6526 | -34.7269 | 0.713479 | 1 BH |
| PITG_09726 | Pi phosphoribosylaminoimidazole (     | -32.7054 | -34.6213 | 0.713479 | 1 BH |
| PITG_10040 | Pi conserved hypothetical protein (   | -32.6526 | -34.7269 | 0.713479 | 1 BH |
| PITG_10145 | Pi conserved hypothetical protein (   | -32.7317 | -34.5686 | 0.713479 | 1 BH |
| PITG_10595 | Pi delta-1-pyrroline-5-carboxylate (  | -32.6526 | -34.7269 | 0.713479 | 1 BH |
| PITG_11491 | Pi hypothetical protein (800 nt)      | -32.6526 | -34.7269 | 0.713479 | 1 BH |
| PITG_11530 | Pi conserved hypothetical protein (   | -32.7054 | -34.6213 | 0.713479 | 1 BH |
| PITG_11585 | Pi conserved hypothetical protein (   | -32.7317 | -34.5686 | 0.713479 | 1 BH |
| PITG_11700 | Pi conserved hypothetical protein (   | -32.7317 | -34.5686 | 0.713479 | 1 BH |
| PITG_12048 | Pi M96 mating-specific protein far    | -32.6526 | -34.7269 | 0.713479 | 1 BH |
| PITG_12230 | Pi phosphatidic acid phosphatase (    | -32.7054 | -34.6213 | 0.713479 | 1 BH |
| PITG_12297 | Pi conserved hypothetical protein (   | -32.6526 | -34.7269 | 0.713479 | 1 BH |
| PITG_12675 | Pi sedoheptulokinase, putative (54    | -32.6057 | -34.8207 | 0.713479 | 1 BH |
| PITG_12876 | Pi RNA-binding protein, putative (9   | -32.7317 | -34.5686 | 0.713479 | 1 BH |
| PITG_12883 | Pi conserved hypothetical protein (   | -32.6292 | -34.7737 | 0.713479 | 1 BH |
| PITG_13416 | Pi ubiquinone biosynthesis protein    | -32.7043 | -34.6235 | 0.713479 | 1 BH |
| PITG_13625 | Pi conserved hypothetical protein (   | -32.6526 | -34.7269 | 0.713479 | 1 BH |
| PITG_13771 | Pi conserved hypothetical protein (   | -32.7054 | -34.6213 | 0.713479 | 1 BH |
| PITG_14099 | Pi conserved hypothetical protein (   | -32.6526 | -34.7269 | 0.713479 | 1 BH |
| PITG_14129 | Pi hypothetical protein (710 nt)      | -32.6526 | -34.7269 | 0.713479 | 1 BH |
| PITG_14441 | Pi cytoskeleton-associated protein,   | -32.6526 | -34.7269 | 0.713479 | 1 BH |
| PITG_14566 | Pi lariat debranching enzyme B (15    | -32.7054 | -34.6213 | 0.713479 | 1 BH |
| PITG_17652 | Pi conserved hypothetical protein (   | -32.6292 | -34.7737 | 0.713479 | 1 BH |
| PITG_18236 | Pi conserved hypothetical protein (   | -32.7054 | -34.6213 | 0.713479 | 1 BH |
| PITG_18693 | Pi hypothetical protein (1064 nt)     | -32.6292 | -34.7737 | 0.713479 | 1 BH |
| PITG_19182 | Pi DNA cross-link repair protein, pu  | -32.7317 | -34.5686 | 0.713479 | 1 BH |
| PITG_19242 | Pi conserved hypothetical protein (   | -32.6526 | -34.7269 | 0.713479 | 1 BH |
| PITG_19605 | Pi conserved hypothetical protein (   | -32.7317 | -34.5686 | 0.713479 | 1 BH |
| PITG_19916 | Pi conserved hypothetical protein (   | -32.6526 | -34.7269 | 0.713479 | 1 BH |
| PITG_20040 | Pi conserved hypothetical protein (   | -32.7043 | -34.6235 | 0.713479 | 1 BH |
| PITG_20893 | Pi conserved hypothetical protein (   | -32.7317 | -34.5686 | 0.713479 | 1 BH |
| PITG_21509 | Pi conserved hypothetical protein (   | -32.7043 | -34.6235 | 0.713479 | 1 BH |
| PITG_00220 | Pi general transcription factor IIH s | -32.6788 | -34.6745 | 0.713479 | 1 BH |
| PITG_00409 | Pi rho GDP-dissociation inhibitor (8  | -32.6282 | -34.7757 | 0.713479 | 1 BH |
| PITG_00416 | Pi calcium-dependent protein kina     | -32.605  | -34.8221 | 0.713479 | 1 BH |
| PITG_00441 | Pi conserved hypothetical protein (   | -32.5819 | -34.8684 | 0.713479 | 1 BH |
| PITG_00554 | Pi conserved hypothetical protein (   | -32.654  | -34.7242 | 0.713479 | 1 BH |
| PITG_00571 | Pi bifunctional purine biosynthesis   | -32.678  | -34.6762 | 0.713479 | 1 BH |
| PITG_00590 | Pi conserved hypothetical protein (   | -32.6282 | -34.7757 | 0.713479 | 1 BH |
| PITG_00883 | Pi hypothetical protein (455 nt)      | -32.6054 | -34.8214 | 0.713479 | 1 BH |
| PITG_00990 | Pi conserved hypothetical protein (   | -32.605  | -34.8221 | 0.713479 | 1 BH |
| PITG_01257 | Pi nucleoporin NUP85-like protein     | -32.654  | -34.7242 | 0.713479 | 1 BH |
| PITG_01317 | Pi conserved hypothetical protein (   | -32.678  | -34.6762 | 0.713479 | 1 BH |

|            |                                     |          |          |          |      |
|------------|-------------------------------------|----------|----------|----------|------|
| PITG_01439 | Pi conserved hypothetical protein ( | -32.6046 | -34.8228 | 0.713479 | 1 BH |
| PITG_01711 | Pi anthranilate synthase componer   | -32.6788 | -34.6745 | 0.713479 | 1 BH |
| PITG_01961 | Pi DCN1-like protein (1100 nt)      | -32.6533 | -34.7255 | 0.713479 | 1 BH |
| PITG_02135 | Pi conserved hypothetical protein ( | -32.6287 | -34.7747 | 0.713479 | 1 BH |
| PITG_02380 | Pi C2 domain-containing protein, p  | -32.5819 | -34.8684 | 0.713479 | 1 BH |
| PITG_02397 | Pi conserved hypothetical protein ( | -32.6046 | -34.8228 | 0.713479 | 1 BH |
| PITG_02482 | Pi ATP-dependent RNA helicase Df    | -32.654  | -34.7242 | 0.713479 | 1 BH |
| PITG_02571 | Pi conserved hypothetical protein ( | -32.5819 | -34.8684 | 0.713479 | 1 BH |
| PITG_02940 | Pi phosphoglycerate mutase family   | -32.654  | -34.7242 | 0.713479 | 1 BH |
| PITG_02945 | Pi conserved hypothetical protein ( | -32.6282 | -34.7757 | 0.713479 | 1 BH |
| PITG_03025 | Pi hypothetical protein (891 nt)    | -32.5819 | -34.8684 | 0.713479 | 1 BH |
| PITG_03027 | Pi UDP-N-acetylhexosamine pyropl    | -32.6788 | -34.6745 | 0.713479 | 1 BH |
| PITG_03276 | Pi U4/U6.U5 tri-snRNP-associated    | -32.6054 | -34.8214 | 0.713479 | 1 BH |
| PITG_03329 | Pi conserved hypothetical protein ( | -32.6046 | -34.8228 | 0.713479 | 1 BH |
| PITG_03397 | Pi conserved hypothetical protein ( | -32.6282 | -34.7757 | 0.713479 | 1 BH |
| PITG_03469 | Pi conserved hypothetical protein ( | -32.6287 | -34.7747 | 0.713479 | 1 BH |
| PITG_03604 | Pi conserved hypothetical protein ( | -32.6046 | -34.8228 | 0.713479 | 1 BH |
| PITG_03702 | Pi conserved hypothetical protein ( | -32.6287 | -34.7747 | 0.713479 | 1 BH |
| PITG_04022 | Pi conserved hypothetical protein ( | -32.605  | -34.8221 | 0.713479 | 1 BH |
| PITG_04576 | Pi conserved hypothetical protein ( | -32.6533 | -34.7255 | 0.713479 | 1 BH |
| PITG_04956 | Pi conserved hypothetical protein ( | -32.6287 | -34.7747 | 0.713479 | 1 BH |
| PITG_05008 | Pi conserved hypothetical protein ( | -32.6788 | -34.6745 | 0.713479 | 1 BH |
| PITG_05114 | Pi aspartyl protease family A01A, p | -32.678  | -34.6762 | 0.713479 | 1 BH |
| PITG_05244 | Pi conserved hypothetical protein ( | -32.6046 | -34.8228 | 0.713479 | 1 BH |
| PITG_05566 | Pi conserved hypothetical protein ( | -32.6287 | -34.7747 | 0.713479 | 1 BH |
| PITG_05600 | Pi metalloprotease family M67C, p   | -32.6533 | -34.7255 | 0.713479 | 1 BH |
| PITG_05742 | Pi RWP-RK domain-containing prot    | -32.6046 | -34.8228 | 0.713479 | 1 BH |
| PITG_05825 | Pi conserved hypothetical protein ( | -32.678  | -34.6762 | 0.713479 | 1 BH |
| PITG_06238 | Pi conserved hypothetical protein ( | -32.5825 | -34.867  | 0.713479 | 1 BH |
| PITG_06351 | Pi U2 snRNP component IST3 (813     | -32.678  | -34.6762 | 0.713479 | 1 BH |
| PITG_06426 | Pi conserved hypothetical protein ( | -32.5819 | -34.8684 | 0.713479 | 1 BH |
| PITG_06593 | Pi conserved hypothetical protein ( | -32.6282 | -34.7757 | 0.713479 | 1 BH |
| PITG_06898 | Pi conserved hypothetical protein ( | -32.5825 | -34.867  | 0.713479 | 1 BH |
| PITG_06942 | Pi conserved hypothetical protein ( | -32.6282 | -34.7757 | 0.713479 | 1 BH |
| PITG_06982 | Pi short chain dehydrogenase, puta  | -32.678  | -34.6762 | 0.713479 | 1 BH |
| PITG_07699 | Pi cytochrome P450, putative (159   | -32.6788 | -34.6745 | 0.713479 | 1 BH |
| PITG_08048 | Pi conserved hypothetical protein ( | -32.6282 | -34.7757 | 0.713479 | 1 BH |
| PITG_08396 | Pi conserved hypothetical protein ( | -32.6046 | -34.8228 | 0.713479 | 1 BH |
| PITG_08553 | Pi calcium/calmodulin dependent     | -32.6788 | -34.6745 | 0.713479 | 1 BH |
| PITG_08581 | Pi serine racemase, putative (1456  | -32.5819 | -34.8684 | 0.713479 | 1 BH |
| PITG_08589 | Pi hypothetical protein (1624 nt)   | -32.654  | -34.7242 | 0.713479 | 1 BH |
| PITG_09040 | Pi conserved hypothetical protein ( | -32.6788 | -34.6745 | 0.713479 | 1 BH |
| PITG_09244 | Pi conserved hypothetical protein ( | -32.6282 | -34.7757 | 0.713479 | 1 BH |
| PITG_09297 | Pi conserved hypothetical protein ( | -32.6287 | -34.7747 | 0.713479 | 1 BH |
| PITG_09386 | Pi aquaporin, putative (825 nt)     | -32.6533 | -34.7255 | 0.713479 | 1 BH |
| PITG_09644 | Pi conserved hypothetical protein ( | -32.6533 | -34.7255 | 0.713479 | 1 BH |
| PITG_09679 | Pi conserved hypothetical protein ( | -32.6533 | -34.7255 | 0.713479 | 1 BH |



|            |                                       |          |          |          |   |    |
|------------|---------------------------------------|----------|----------|----------|---|----|
| PITG_09707 | Pi mitochondrial import inner men     | -32.6054 | -34.8214 | 0.713479 | 1 | BH |
| PITG_10011 | Pi polyketide hydroxylase, putative   | -32.6054 | -34.8214 | 0.713479 | 1 | BH |
| PITG_10429 | Pi SCP-like extracellular protein (69 | -32.605  | -34.8221 | 0.713479 | 1 | BH |
| PITG_10481 | Pi conserved hypothetical protein (   | -32.678  | -34.6762 | 0.713479 | 1 | BH |
| PITG_10534 | Pi conserved hypothetical protein (   | -32.5819 | -34.8684 | 0.713479 | 1 | BH |
| PITG_10931 | Pi conserved hypothetical protein (   | -32.605  | -34.8221 | 0.713479 | 1 | BH |
| PITG_10950 | Pi conserved hypothetical protein (   | -32.6533 | -34.7255 | 0.713479 | 1 | BH |
| PITG_11291 | Pi conserved hypothetical protein (   | -32.6788 | -34.6745 | 0.713479 | 1 | BH |
| PITG_11437 | Pi axonemal dynein heavy chain (1     | -32.678  | -34.6762 | 0.713479 | 1 | BH |
| PITG_11445 | Pi sepiapterin reductase, putative (  | -32.6282 | -34.7757 | 0.713479 | 1 | BH |
| PITG_11485 | Pi conserved hypothetical protein (   | -32.6788 | -34.6745 | 0.713479 | 1 | BH |
| PITG_11540 | Pi conserved hypothetical protein (   | -32.654  | -34.7242 | 0.713479 | 1 | BH |
| PITG_11587 | Pi inositol-3,4-bisphosphate 4-pho    | -32.6046 | -34.8228 | 0.713479 | 1 | BH |
| PITG_12149 | Pi conserved hypothetical protein (   | -32.6788 | -34.6745 | 0.713479 | 1 | BH |
| PITG_12478 | Pi conserved hypothetical protein (   | -32.678  | -34.6762 | 0.713479 | 1 | BH |
| PITG_12530 | Pi conserved hypothetical protein (   | -32.6046 | -34.8228 | 0.713479 | 1 | BH |
| PITG_12678 | Pi ribosome production factor 1, pi   | -32.6788 | -34.6745 | 0.713479 | 1 | BH |
| PITG_13202 | Pi zinc transporter, putative (1965   | -32.6282 | -34.7757 | 0.713479 | 1 | BH |
| PITG_13283 | Pi ATP-binding Cassette (ABC) supe    | -32.678  | -34.6762 | 0.713479 | 1 | BH |
| PITG_13399 | Pi asparagine synthetase (1788 nt)    | -32.5825 | -34.867  | 0.713479 | 1 | BH |
| PITG_13523 | Pi conserved hypothetical protein (   | -32.605  | -34.8221 | 0.713479 | 1 | BH |
| PITG_13806 | Pi conserved hypothetical protein (   | -32.6287 | -34.7747 | 0.713479 | 1 | BH |
| PITG_14066 | Pi CUG-BP- and ETR-3-like factor, p   | -32.678  | -34.6762 | 0.713479 | 1 | BH |
| PITG_14197 | Pi conserved hypothetical protein (   | -32.5819 | -34.8684 | 0.713479 | 1 | BH |
| PITG_14379 | Pi conserved hypothetical protein (   | -32.654  | -34.7242 | 0.713479 | 1 | BH |
| PITG_14562 | Pi conserved hypothetical protein (   | -32.6788 | -34.6745 | 0.713479 | 1 | BH |
| PITG_14568 | Pi conserved hypothetical protein (   | -32.5819 | -34.8684 | 0.713479 | 1 | BH |
| PITG_14603 | Pi carbohydrate-binding protein, pi   | -32.5825 | -34.867  | 0.713479 | 1 | BH |
| PITG_16227 | Pi conserved hypothetical protein (   | -32.5825 | -34.867  | 0.713479 | 1 | BH |
| PITG_16298 | Pi conserved hypothetical protein (   | -32.6282 | -34.7757 | 0.713479 | 1 | BH |
| PITG_16770 | Pi conserved hypothetical protein (   | -32.654  | -34.7242 | 0.713479 | 1 | BH |
| PITG_16936 | Pi conserved hypothetical protein (   | -32.678  | -34.6762 | 0.713479 | 1 | BH |
| PITG_16976 | Pi conserved hypothetical protein (   | -32.5825 | -34.867  | 0.713479 | 1 | BH |
| PITG_17023 | Pi phosphoglycerate/bisphosphogl      | -32.605  | -34.8221 | 0.713479 | 1 | BH |
| PITG_17077 | Pi conserved hypothetical protein (   | -32.6282 | -34.7757 | 0.713479 | 1 | BH |
| PITG_17081 | Pi Voltage-gated Ion Channel (VIC)    | -32.678  | -34.6762 | 0.713479 | 1 | BH |
| PITG_17165 | Pi peptidyl-prolyl cis-trans isomera  | -32.678  | -34.6762 | 0.713479 | 1 | BH |
| PITG_17361 | Pi mitogen-activated protein kinas    | -32.654  | -34.7242 | 0.713479 | 1 | BH |
| PITG_17461 | Pi Rab11 family GTPase, putative (:   | -32.6788 | -34.6745 | 0.713479 | 1 | BH |
| PITG_17784 | Pi conserved hypothetical protein (   | -32.6054 | -34.8214 | 0.713479 | 1 | BH |
| PITG_17883 | Pi condensin complex subunit 3, pt    | -32.605  | -34.8221 | 0.713479 | 1 | BH |
| PITG_17997 | Pi conserved hypothetical protein (   | -32.6533 | -34.7255 | 0.713479 | 1 | BH |
| PITG_18151 | Pi conserved hypothetical protein (   | -32.6533 | -34.7255 | 0.713479 | 1 | BH |
| PITG_18245 | Pi conserved hypothetical protein (   | -32.678  | -34.6762 | 0.713479 | 1 | BH |
| PITG_18248 | Pi acetate kinase (1405 nt)           | -32.6282 | -34.7757 | 0.713479 | 1 | BH |
| PITG_18671 | Pi ATP-binding Cassette (ABC) Supe    | -32.6054 | -34.8214 | 0.713479 | 1 | BH |
| PITG_18980 | Pi hypothetical protein (3407 nt)     | -32.5819 | -34.8684 | 0.713479 | 1 | BH |

|            |                                      |          |          |          |      |
|------------|--------------------------------------|----------|----------|----------|------|
| PITG_19283 | Pi conserved hypothetical protein (  | -32.6282 | -34.7757 | 0.713479 | 1 BH |
| PITG_19286 | Pi Major Facilitator Superfamily (M  | -32.654  | -34.7242 | 0.713479 | 1 BH |
| PITG_19310 | Pi conserved hypothetical protein (  | -32.6788 | -34.6745 | 0.713479 | 1 BH |
| PITG_19470 | Pi conserved hypothetical protein (  | -32.678  | -34.6762 | 0.713479 | 1 BH |
| PITG_19791 | Pi conserved hypothetical protein (  | -32.654  | -34.7242 | 0.713479 | 1 BH |
| PITG_19965 | Pi conserved hypothetical protein (  | -32.6287 | -34.7747 | 0.713479 | 1 BH |
| PITG_21579 | Pi adenylate kinase, putative (768   | -32.5825 | -34.867  | 0.713479 | 1 BH |
| PITG_22618 | Pi conserved hypothetical protein (  | -32.654  | -34.7242 | 0.713479 | 1 BH |
| PITG_22688 | Pi trans-aconitate 2-methyltransfer  | -32.5825 | -34.867  | 0.713479 | 1 BH |
| PITG_22828 | Pi secreted RxLR effector peptide,   | -32.5819 | -34.8684 | 0.713479 | 1 BH |
| PITG_00496 | Pi 3'5'-cyclic nucleotide phosphodi  | -32.7619 | -34.5083 | 0.714017 | 1 BH |
| PITG_00589 | Pi conserved hypothetical protein (  | -32.733  | -34.5661 | 0.714017 | 1 BH |
| PITG_00670 | Pi conserved hypothetical protein (  | -32.733  | -34.5661 | 0.714017 | 1 BH |
| PITG_00961 | Pi conserved hypothetical protein (  | -32.6772 | -34.6777 | 0.714017 | 1 BH |
| PITG_01044 | Pi DNA repair protein RAD50, puta    | -32.6772 | -34.6777 | 0.714017 | 1 BH |
| PITG_01483 | Pi conserved hypothetical protein (  | -32.6772 | -34.6777 | 0.714017 | 1 BH |
| PITG_01774 | Pi conserved hypothetical protein (  | -32.7305 | -34.5711 | 0.714017 | 1 BH |
| PITG_02585 | Pi conserved hypothetical protein (  | -32.6297 | -34.7728 | 0.714017 | 1 BH |
| PITG_03446 | Pi conserved hypothetical protein (  | -32.6772 | -34.6777 | 0.714017 | 1 BH |
| PITG_03522 | Pi GPI-anchor transamidase, putati   | -32.7305 | -34.5711 | 0.714017 | 1 BH |
| PITG_05187 | Pi sulfatase-like protein (3390 nt)  | -32.7305 | -34.5711 | 0.714017 | 1 BH |
| PITG_05261 | Pi conserved hypothetical protein (  | -32.7619 | -34.5083 | 0.714017 | 1 BH |
| PITG_05377 | Pi methylenetetrahydrofolate redu    | -32.733  | -34.5661 | 0.714017 | 1 BH |
| PITG_05396 | Pi hypothetical protein (768 nt)     | -32.6772 | -34.6777 | 0.714017 | 1 BH |
| PITG_05692 | Pi histone-lysine N-methyltransfera  | -32.7305 | -34.5711 | 0.714017 | 1 BH |
| PITG_05991 | Pi FKBP-type peptidyl-prolyl cis-tra | -32.6297 | -34.7728 | 0.714017 | 1 BH |
| PITG_06894 | Pi O-sialoglycoprotein endopeptida   | -32.6772 | -34.6777 | 0.714017 | 1 BH |
| PITG_07080 | Pi conserved hypothetical protein (  | -32.6772 | -34.6777 | 0.714017 | 1 BH |
| PITG_07891 | Pi conserved hypothetical protein (  | -32.7305 | -34.5711 | 0.714017 | 1 BH |
| PITG_08393 | Pi conserved hypothetical protein (  | -32.733  | -34.5661 | 0.714017 | 1 BH |
| PITG_08430 | Pi conserved hypothetical protein (  | -32.6772 | -34.6777 | 0.714017 | 1 BH |
| PITG_08663 | Pi plectin-like protein (3035 nt)    | -32.7305 | -34.5711 | 0.714017 | 1 BH |
| PITG_09366 | Pi conserved hypothetical protein (  | -32.7305 | -34.5711 | 0.714017 | 1 BH |
| PITG_10832 | Pi protein recA (1647 nt)            | -32.7305 | -34.5711 | 0.714017 | 1 BH |
| PITG_11170 | Pi histone-binding protein RBBP4 (   | -32.7305 | -34.5711 | 0.714017 | 1 BH |
| PITG_11254 | Pi exocyst complex component, pu     | -32.7305 | -34.5711 | 0.714017 | 1 BH |
| PITG_11417 | Pi U4/U6.U5 small nuclear ribonuc    | -32.733  | -34.5661 | 0.714017 | 1 BH |
| PITG_12257 | Pi conserved hypothetical protein (  | -32.7305 | -34.5711 | 0.714017 | 1 BH |
| PITG_12529 | Pi conserved hypothetical protein (  | -32.6772 | -34.6777 | 0.714017 | 1 BH |
| PITG_12958 | Pi conserved hypothetical protein (  | -32.733  | -34.5661 | 0.714017 | 1 BH |
| PITG_13016 | Pi pescadillo-like protein (1896 nt) | -32.6772 | -34.6777 | 0.714017 | 1 BH |
| PITG_13188 | Pi conserved hypothetical protein (  | -32.6297 | -34.7728 | 0.714017 | 1 BH |
| PITG_14533 | Pi conserved hypothetical protein (  | -32.7305 | -34.5711 | 0.714017 | 1 BH |
| PITG_14616 | Pi conserved hypothetical protein (  | -32.6772 | -34.6777 | 0.714017 | 1 BH |
| PITG_16072 | Pi conserved hypothetical protein (  | -32.733  | -34.5661 | 0.714017 | 1 BH |
| PITG_16937 | Pi foflylpolyglutamate synthase, pu  | -32.7305 | -34.5711 | 0.714017 | 1 BH |
| PITG_17430 | Pi conserved hypothetical protein (  | -32.733  | -34.5661 | 0.714017 | 1 BH |

|            |                                         |          |          |          |      |
|------------|-----------------------------------------|----------|----------|----------|------|
| PITG_17684 | Pi conserved hypothetical protein (     | -32.7305 | -34.5711 | 0.714017 | 1 BH |
| PITG_17788 | Pi coiled-coil domain-containing pr     | -32.733  | -34.5661 | 0.714017 | 1 BH |
| PITG_18007 | Pi CDP-alcohol phosphatidyltransfe      | -32.7305 | -34.5711 | 0.714017 | 1 BH |
| PITG_18027 | Pi histone acetyltransferase, putati    | -32.6772 | -34.6777 | 0.714017 | 1 BH |
| PITG_18237 | Pi replication factor C subunit 2 (99   | -32.7305 | -34.5711 | 0.714017 | 1 BH |
| PITG_18416 | Pi conserved hypothetical protein (     | -32.6772 | -34.6777 | 0.714017 | 1 BH |
| PITG_18574 | Pi conserved hypothetical protein (     | -32.7305 | -34.5711 | 0.714017 | 1 BH |
| PITG_19145 | Pi conserved hypothetical protein (     | -32.7619 | -34.5083 | 0.714017 | 1 BH |
| PITG_19445 | Pi serine protease family S08A, put     | -32.7305 | -34.5711 | 0.714017 | 1 BH |
| PITG_20528 | Pi conserved hypothetical protein (     | -32.6772 | -34.6777 | 0.714017 | 1 BH |
| PITG_22486 | Pi conserved hypothetical protein (     | -32.7305 | -34.5711 | 0.714017 | 1 BH |
| PITG_23128 | Pi katanin p80 subunit (2680 nt)        | -32.6772 | -34.6777 | 0.714017 | 1 BH |
| PITG_00452 | Pi xylulose kinase, putative (1677 r    | -32.7064 | -34.6193 | 0.714017 | 1 BH |
| PITG_00687 | Pi serine protease family S09X, put     | -32.7033 | -34.6255 | 0.714017 | 1 BH |
| PITG_01075 | Pi conserved hypothetical protein (     | -32.5827 | -34.8667 | 0.714017 | 1 BH |
| PITG_02220 | Pi hypothetical protein (1581 nt)       | -32.7033 | -34.6255 | 0.714017 | 1 BH |
| PITG_03034 | Pi cleavage induced conserved hyp       | -32.7064 | -34.6193 | 0.714017 | 1 BH |
| PITG_03330 | Pi conserved hypothetical protein (     | -32.7033 | -34.6255 | 0.714017 | 1 BH |
| PITG_03827 | Pi conserved hypothetical protein (     | -32.7033 | -34.6255 | 0.714017 | 1 BH |
| PITG_03937 | Pi conserved hypothetical protein (     | -32.6796 | -34.6728 | 0.714017 | 1 BH |
| PITG_04569 | Pi conserved hypothetical protein (     | -32.7064 | -34.6193 | 0.714017 | 1 BH |
| PITG_04856 | Pi Crinkler (CRN) family protein (25    | -32.5827 | -34.8667 | 0.714017 | 1 BH |
| PITG_06740 | Pi conserved hypothetical protein (     | -32.7064 | -34.6193 | 0.714017 | 1 BH |
| PITG_08406 | Pi conserved hypothetical protein (     | -32.6796 | -34.6728 | 0.714017 | 1 BH |
| PITG_08584 | Pi conserved hypothetical protein (     | -32.7033 | -34.6255 | 0.714017 | 1 BH |
| PITG_10082 | Pi conserved hypothetical protein (     | -32.7064 | -34.6193 | 0.714017 | 1 BH |
| PITG_11272 | Pi histone demethylase, putative (t     | -32.7033 | -34.6255 | 0.714017 | 1 BH |
| PITG_11444 | Pi conserved hypothetical protein (     | -32.6796 | -34.6728 | 0.714017 | 1 BH |
| PITG_12275 | Pi conserved hypothetical protein (     | -32.7064 | -34.6193 | 0.714017 | 1 BH |
| PITG_13746 | Pi hypothetical protein (936 nt)        | -32.7064 | -34.6193 | 0.714017 | 1 BH |
| PITG_14852 | Pi lipoic acid synthetase, mitochon     | -32.7033 | -34.6255 | 0.714017 | 1 BH |
| PITG_15022 | Pi conserved hypothetical protein (     | -32.7033 | -34.6255 | 0.714017 | 1 BH |
| PITG_15385 | Pi hypothetical protein (354 nt)        | -32.7064 | -34.6193 | 0.714017 | 1 BH |
| PITG_15417 | Pi asparagine synthetase domain-c       | -32.7064 | -34.6193 | 0.714017 | 1 BH |
| PITG_15569 | Pi calpain-like protease (2958 nt)      | -32.6796 | -34.6728 | 0.714017 | 1 BH |
| PITG_16053 | Pi conserved hypothetical protein (     | -32.7033 | -34.6255 | 0.714017 | 1 BH |
| PITG_16271 | Pi M96 mating-specific protein farr     | -32.7033 | -34.6255 | 0.714017 | 1 BH |
| PITG_16479 | Pi putative alpha mannosyltransfer      | -32.5827 | -34.8667 | 0.714017 | 1 BH |
| PITG_16975 | Pi hypothetical protein (491 nt)        | -32.7033 | -34.6255 | 0.714017 | 1 BH |
| PITG_17040 | Pi cellulose binding elicitor lectin, p | -32.7064 | -34.6193 | 0.714017 | 1 BH |
| PITG_17767 | Pi conserved hypothetical protein (     | -32.6796 | -34.6728 | 0.714017 | 1 BH |
| PITG_18542 | Pi conserved hypothetical protein (     | -32.7033 | -34.6255 | 0.714017 | 1 BH |
| PITG_19603 | Pi conserved hypothetical protein (     | -32.7033 | -34.6255 | 0.714017 | 1 BH |
| PITG_20966 | Pi hypothetical protein (1577 nt)       | -32.6796 | -34.6728 | 0.714017 | 1 BH |
| PITG_22241 | Pi conserved hypothetical protein (     | -32.6796 | -34.6728 | 0.714017 | 1 BH |
| PITG_22358 | Pi conserved hypothetical protein (     | -32.7064 | -34.6193 | 0.714017 | 1 BH |
| PITG_23304 | Pi hypothetical protein (2835 nt)       | -32.7033 | -34.6255 | 0.714017 | 1 BH |

|            |                                        |          |          |          |      |
|------------|----------------------------------------|----------|----------|----------|------|
| PITG_00291 | Pi scavenger mRNA-decapping enz'       | -32.6521 | -34.7279 | 0.714555 | 1 BH |
| PITG_00501 | Pi conserved hypothetical protein (    | -32.6804 | -34.6713 | 0.714555 | 1 BH |
| PITG_00980 | Pi nuclear cap-binding protein subu    | -32.5818 | -34.8685 | 0.714555 | 1 BH |
| PITG_01003 | Pi conserved hypothetical protein (    | -32.6044 | -34.8232 | 0.714555 | 1 BH |
| PITG_01108 | Pi conserved hypothetical protein (    | -32.6279 | -34.7764 | 0.714555 | 1 BH |
| PITG_01314 | Pi ubiquitin-specific protease, puta   | -32.6279 | -34.7764 | 0.714555 | 1 BH |
| PITG_01340 | Pi conserved hypothetical protein (    | -32.6044 | -34.8232 | 0.714555 | 1 BH |
| PITG_01639 | Pi Small Conductance Mechanosen        | -32.6044 | -34.8232 | 0.714555 | 1 BH |
| PITG_01754 | Pi conserved hypothetical protein (    | -32.5818 | -34.8685 | 0.714555 | 1 BH |
| PITG_01858 | Pi Der1-like family, putative (1184    | -32.7342 | -34.5637 | 0.714555 | 1 BH |
| PITG_01949 | Pi glycosyl hydrolase, putative (220   | -32.6521 | -34.7279 | 0.714555 | 1 BH |
| PITG_01992 | Pi conserved hypothetical protein (    | -32.6279 | -34.7764 | 0.714555 | 1 BH |
| PITG_02040 | Pi deoxyribonuclease TATDN1-like       | -32.6044 | -34.8232 | 0.714555 | 1 BH |
| PITG_02850 | Pi conserved hypothetical protein (    | -32.6279 | -34.7764 | 0.714555 | 1 BH |
| PITG_03710 | Pi strumpellin, putative (3760 nt)     | -32.6044 | -34.8232 | 0.714555 | 1 BH |
| PITG_03769 | Pi hypothetical protein (713 nt)       | -32.7342 | -34.5637 | 0.714555 | 1 BH |
| PITG_03902 | Pi conserved hypothetical protein (    | -32.6521 | -34.7279 | 0.714555 | 1 BH |
| PITG_03909 | Pi thioredoxin-like protein (2815 nt)  | -32.6044 | -34.8232 | 0.714555 | 1 BH |
| PITG_03993 | Pi eukaryotic translation initiation   | -32.6279 | -34.7764 | 0.714555 | 1 BH |
| PITG_04038 | Pi conserved hypothetical protein (    | -32.6521 | -34.7279 | 0.714555 | 1 BH |
| PITG_04705 | Pi conserved hypothetical protein (    | -32.6044 | -34.8232 | 0.714555 | 1 BH |
| PITG_05194 | Pi conserved hypothetical protein (    | -32.6545 | -34.7231 | 0.714555 | 1 BH |
| PITG_05291 | Pi Animal Inward Rectifier K Chanr     | -32.6279 | -34.7764 | 0.714555 | 1 BH |
| PITG_05298 | Pi conserved hypothetical protein (    | -32.5818 | -34.8685 | 0.714555 | 1 BH |
| PITG_05487 | Pi cyclin-dependent kinase, putativ    | -32.6804 | -34.6713 | 0.714555 | 1 BH |
| PITG_05509 | Pi conserved hypothetical protein (    | -32.6279 | -34.7764 | 0.714555 | 1 BH |
| PITG_05550 | Pi conserved hypothetical protein (    | -32.6545 | -34.7231 | 0.714555 | 1 BH |
| PITG_07234 | Pi ligatin, putative (1807 nt)         | -32.6279 | -34.7764 | 0.714555 | 1 BH |
| PITG_08052 | Pi conserved hypothetical protein (    | -32.6044 | -34.8232 | 0.714555 | 1 BH |
| PITG_08917 | Pi conserved hypothetical protein (    | -32.6044 | -34.8232 | 0.714555 | 1 BH |
| PITG_09028 | Pi conserved hypothetical protein (    | -32.6521 | -34.7279 | 0.714555 | 1 BH |
| PITG_09166 | Pi conserved hypothetical protein (    | -32.6059 | -34.8203 | 0.714555 | 1 BH |
| PITG_09487 | Pi conserved hypothetical protein (    | -32.6521 | -34.7279 | 0.714555 | 1 BH |
| PITG_09564 | Pi vacuolar protein sorting-associat   | -32.6044 | -34.8232 | 0.714555 | 1 BH |
| PITG_09817 | Pi ribose-phosphate pyrophosphok       | -32.7342 | -34.5637 | 0.714555 | 1 BH |
| PITG_09932 | Pi translation initiation factor eIF-2 | -32.6044 | -34.8232 | 0.714555 | 1 BH |
| PITG_09986 | Pi conserved hypothetical protein (    | -32.5818 | -34.8685 | 0.714555 | 1 BH |
| PITG_10039 | Pi conserved hypothetical protein (    | -32.6059 | -34.8203 | 0.714555 | 1 BH |
| PITG_10264 | Pi D-3-phosphoglycerate dehydrog       | -32.6279 | -34.7764 | 0.714555 | 1 BH |
| PITG_10743 | Pi conserved hypothetical protein (    | -32.6521 | -34.7279 | 0.714555 | 1 BH |
| PITG_11064 | Pi conserved hypothetical protein (    | -32.6044 | -34.8232 | 0.714555 | 1 BH |
| PITG_11264 | Pi conserved hypothetical protein (    | -32.6044 | -34.8232 | 0.714555 | 1 BH |
| PITG_11287 | Pi conserved hypothetical protein (    | -32.5818 | -34.8685 | 0.714555 | 1 BH |
| PITG_12178 | Pi conserved hypothetical protein (    | -32.6521 | -34.7279 | 0.714555 | 1 BH |
| PITG_12194 | Pi biotin-protein ligase, putative (1  | -32.5818 | -34.8685 | 0.714555 | 1 BH |
| PITG_12353 | Pi conserved hypothetical protein (    | -32.6545 | -34.7231 | 0.714555 | 1 BH |
| PITG_12837 | Pi N-carbamoylputrescine amidase       | -32.6059 | -34.8203 | 0.714555 | 1 BH |

|            |                                        |          |          |          |      |
|------------|----------------------------------------|----------|----------|----------|------|
| PITG_13417 | Pi conserved hypothetical protein (    | -32.6279 | -34.7764 | 0.714555 | 1 BH |
| PITG_13458 | Pi protein kinase, putative (1992 nt)  | -32.6044 | -34.8232 | 0.714555 | 1 BH |
| PITG_13618 | Pi WD repeat protein pop3 (1134 r      | -32.6044 | -34.8232 | 0.714555 | 1 BH |
| PITG_14460 | Pi chromodomain protein, putative      | -32.6521 | -34.7279 | 0.714555 | 1 BH |
| PITG_14473 | Pi conserved hypothetical protein (    | -32.6521 | -34.7279 | 0.714555 | 1 BH |
| PITG_14640 | Pi conserved hypothetical protein (    | -32.6279 | -34.7764 | 0.714555 | 1 BH |
| PITG_14712 | Pi cell division protease ftsH (1401   | -32.6279 | -34.7764 | 0.714555 | 1 BH |
| PITG_14714 | Pi hypothetical protein (670 nt)       | -32.5818 | -34.8685 | 0.714555 | 1 BH |
| PITG_16344 | Pi conserved hypothetical protein (    | -32.6279 | -34.7764 | 0.714555 | 1 BH |
| PITG_16375 | Pi conserved hypothetical protein (    | -32.6279 | -34.7764 | 0.714555 | 1 BH |
| PITG_17022 | Pi UDP-N-acetylglucosamine-dolich      | -32.6521 | -34.7279 | 0.714555 | 1 BH |
| PITG_17592 | Pi mannosyl-oligosaccharide gluco      | -32.5818 | -34.8685 | 0.714555 | 1 BH |
| PITG_17693 | Pi conserved hypothetical protein (    | -32.6044 | -34.8232 | 0.714555 | 1 BH |
| PITG_17978 | Pi conserved hypothetical protein (    | -32.6521 | -34.7279 | 0.714555 | 1 BH |
| PITG_18113 | Pi DNA-directed RNA polymerase II      | -32.6521 | -34.7279 | 0.714555 | 1 BH |
| PITG_18322 | Pi hypothetical protein (4169 nt)      | -32.6279 | -34.7764 | 0.714555 | 1 BH |
| PITG_19174 | Pi phosphoglucomutase, putative (      | -32.6521 | -34.7279 | 0.714555 | 1 BH |
| PITG_19766 | Pi conserved hypothetical protein (    | -32.5818 | -34.8685 | 0.714555 | 1 BH |
| PITG_20156 | Pi cAMP-dependent protein kinase       | -32.6521 | -34.7279 | 0.714555 | 1 BH |
| PITG_21010 | Pi eukaryotic translation initiation   | -32.6044 | -34.8232 | 0.714555 | 1 BH |
| PITG_21054 | Pi conserved hypothetical protein (    | -32.6279 | -34.7764 | 0.714555 | 1 BH |
| PITG_21184 | Pi conserved hypothetical protein (    | -32.6545 | -34.7231 | 0.714555 | 1 BH |
| PITG_22549 | Pi deoxyribose-phosphate aldolase      | -32.6804 | -34.6713 | 0.714555 | 1 BH |
| PITG_22587 | Pi oxidoreductase, putative (487 nt)   | -32.6279 | -34.7764 | 0.714555 | 1 BH |
| PITG_22716 | Pi M96 mating-specific protein farr    | -32.6044 | -34.8232 | 0.714555 | 1 BH |
| PITG_22717 | Pi elicitin-like protein (420 nt)      | -32.6804 | -34.6713 | 0.714555 | 1 BH |
| PITG_00163 | Pi threonine dehydratase, mitoch       | -32.7072 | -34.6176 | 0.715095 | 1 BH |
| PITG_00250 | Pi conserved hypothetical protein (    | -32.6299 | -34.7722 | 0.715095 | 1 BH |
| PITG_00352 | Pi pyruvate dehydrogenase kinase-      | -32.7025 | -34.6271 | 0.715095 | 1 BH |
| PITG_01101 | Pi aquaporin, putative (894 nt)        | -32.7295 | -34.5732 | 0.715095 | 1 BH |
| PITG_01111 | Pi 12-oxophytodienoate reductase       | -32.7072 | -34.6176 | 0.715095 | 1 BH |
| PITG_01602 | Pi conserved hypothetical protein (    | -32.7633 | -34.5056 | 0.715095 | 1 BH |
| PITG_02382 | Pi conserved hypothetical protein (    | -32.7633 | -34.5056 | 0.715095 | 1 BH |
| PITG_02673 | Pi conserved hypothetical protein (    | -32.7025 | -34.6271 | 0.715095 | 1 BH |
| PITG_02905 | Pi conserved hypothetical protein (    | -32.7025 | -34.6271 | 0.715095 | 1 BH |
| PITG_03379 | Pi conserved hypothetical protein (    | -32.7295 | -34.5732 | 0.715095 | 1 BH |
| PITG_03529 | Pi conserved hypothetical protein (    | -32.7072 | -34.6176 | 0.715095 | 1 BH |
| PITG_03978 | Pi transcription initiation factor TFI | -32.7072 | -34.6176 | 0.715095 | 1 BH |
| PITG_03989 | Pi conserved hypothetical protein (    | -32.7295 | -34.5732 | 0.715095 | 1 BH |
| PITG_04381 | Pi conserved hypothetical protein (    | -32.7025 | -34.6271 | 0.715095 | 1 BH |
| PITG_04594 | Pi aspartyl-tRNA synthetase, putati    | -32.7072 | -34.6176 | 0.715095 | 1 BH |
| PITG_05297 | Pi conserved hypothetical protein (    | -32.7025 | -34.6271 | 0.715095 | 1 BH |
| PITG_06706 | Pi conserved hypothetical protein (    | -32.6299 | -34.7722 | 0.715095 | 1 BH |
| PITG_07281 | Pi conserved hypothetical protein (    | -32.7025 | -34.6271 | 0.715095 | 1 BH |
| PITG_07411 | Pi conserved hypothetical protein (    | -32.7295 | -34.5732 | 0.715095 | 1 BH |
| PITG_09222 | Pi conserved hypothetical protein (    | -32.7295 | -34.5732 | 0.715095 | 1 BH |
| PITG_09360 | Pi conserved hypothetical protein (    | -32.7025 | -34.6271 | 0.715095 | 1 BH |

|            |                                      |          |          |          |      |
|------------|--------------------------------------|----------|----------|----------|------|
| PITG_09818 | Pi conserved hypothetical protein (  | -32.7295 | -34.5732 | 0.715095 | 1 BH |
| PITG_10006 | Pi conserved hypothetical protein (  | -32.7295 | -34.5732 | 0.715095 | 1 BH |
| PITG_10894 | Pi hypothetical protein (1440 nt)    | -32.7025 | -34.6271 | 0.715095 | 1 BH |
| PITG_10923 | Pi apolipoprotein A-I-binding prote  | -32.7295 | -34.5732 | 0.715095 | 1 BH |
| PITG_11525 | Pi serine protease family S10, puta  | -32.7025 | -34.6271 | 0.715095 | 1 BH |
| PITG_11551 | Pi Major Facilitator Superfamily (M  | -32.7633 | -34.5056 | 0.715095 | 1 BH |
| PITG_13415 | Pi protein kinase, putative (2746 ni | -32.7025 | -34.6271 | 0.715095 | 1 BH |
| PITG_13739 | Pi conserved hypothetical protein (  | -32.7633 | -34.5056 | 0.715095 | 1 BH |
| PITG_14572 | Pi conserved hypothetical protein (  | -32.7072 | -34.6176 | 0.715095 | 1 BH |
| PITG_16263 | Pi conserved hypothetical protein (  | -32.7633 | -34.5056 | 0.715095 | 1 BH |
| PITG_16538 | Pi conserved hypothetical protein (  | -32.7295 | -34.5732 | 0.715095 | 1 BH |
| PITG_17814 | Pi conserved hypothetical protein (  | -32.7025 | -34.6271 | 0.715095 | 1 BH |
| PITG_18129 | Pi cyclin-Y-like protein (1254 nt)   | -32.7295 | -34.5732 | 0.715095 | 1 BH |
| PITG_18413 | Pi conserved hypothetical protein (  | -32.7295 | -34.5732 | 0.715095 | 1 BH |
| PITG_19006 | Pi conserved hypothetical protein (  | -32.7295 | -34.5732 | 0.715095 | 1 BH |
| PITG_19457 | Pi conserved hypothetical protein (  | -32.6299 | -34.7722 | 0.715095 | 1 BH |
| PITG_19877 | Pi guanylate-binding protein, putat  | -32.7295 | -34.5732 | 0.715095 | 1 BH |
| PITG_19928 | Pi conserved hypothetical protein (  | -32.7025 | -34.6271 | 0.715095 | 1 BH |
| PITG_20787 | Pi conserved hypothetical protein (  | -32.7295 | -34.5732 | 0.715095 | 1 BH |
| PITG_21308 | Pi choline dehydrogenase, putative   | -32.7633 | -34.5056 | 0.715095 | 1 BH |
| PITG_22038 | Pi conserved hypothetical protein (  | -32.7295 | -34.5732 | 0.715095 | 1 BH |
| PITG_22127 | Pi conserved hypothetical protein (  | -32.7295 | -34.5732 | 0.715095 | 1 BH |
| PITG_23191 | Pi conserved hypothetical protein (  | -32.7295 | -34.5732 | 0.715095 | 1 BH |
| PITG_08959 | Pi 40S ribosomal protein S3-3 (841   | -9.28656 | 0.69192  | 0.715142 | 1 BH |
| PITG_00444 | Pi conserved hypothetical protein (  | -32.6044 | -34.8234 | 0.715636 | 1 BH |
| PITG_00725 | Pi N-acetylglucosamine-1-phospho     | -32.6517 | -34.7286 | 0.715636 | 1 BH |
| PITG_01124 | Pi conserved hypothetical protein (  | -32.6517 | -34.7286 | 0.715636 | 1 BH |
| PITG_01569 | Pi nardilysin, putative (3690 nt)    | -32.6044 | -34.8234 | 0.715636 | 1 BH |
| PITG_01703 | Pi ADP-ribosylation factor GTPase-   | -32.6044 | -34.8234 | 0.715636 | 1 BH |
| PITG_02037 | Pi conserved hypothetical protein (  | -32.6767 | -34.6787 | 0.715636 | 1 BH |
| PITG_02144 | Pi conserved hypothetical protein (  | -32.6044 | -34.8234 | 0.715636 | 1 BH |
| PITG_02357 | Pi P-type ATPase (P-ATPase) Super    | -32.6276 | -34.7768 | 0.715636 | 1 BH |
| PITG_02597 | Pi DnaJ subfamily B protein (1362 r  | -32.6276 | -34.7768 | 0.715636 | 1 BH |
| PITG_02736 | Pi U2 small nuclear ribonucleoprot   | -32.6044 | -34.8234 | 0.715636 | 1 BH |
| PITG_02975 | Pi conserved hypothetical protein (  | -32.6517 | -34.7286 | 0.715636 | 1 BH |
| PITG_03311 | Pi regulator of chromosome conde     | -32.6517 | -34.7286 | 0.715636 | 1 BH |
| PITG_03336 | Pi GTP-binding protein TypA/BipA,    | -32.6276 | -34.7768 | 0.715636 | 1 BH |
| PITG_03569 | Pi conserved hypothetical protein (  | -32.6276 | -34.7768 | 0.715636 | 1 BH |
| PITG_03709 | Pi conserved hypothetical protein (  | -32.6276 | -34.7768 | 0.715636 | 1 BH |
| PITG_03901 | Pi serine/threonine protein kinase   | -32.6517 | -34.7286 | 0.715636 | 1 BH |
| PITG_04226 | Pi geranylgeranyl transferase type-  | -32.6044 | -34.8234 | 0.715636 | 1 BH |
| PITG_04509 | Pi conserved hypothetical protein (  | -32.6549 | -34.7223 | 0.715636 | 1 BH |
| PITG_04532 | Pi conserved hypothetical protein (  | -32.6276 | -34.7768 | 0.715636 | 1 BH |
| PITG_04701 | Pi cleavage induced conserved hyp    | -32.6276 | -34.7768 | 0.715636 | 1 BH |
| PITG_05180 | Pi hypothetical protein (1391 nt)    | -32.6044 | -34.8234 | 0.715636 | 1 BH |
| PITG_05404 | Pi conserved hypothetical protein (  | -32.6276 | -34.7768 | 0.715636 | 1 BH |
| PITG_05494 | Pi conserved hypothetical protein (  | -32.6767 | -34.6787 | 0.715636 | 1 BH |

|            |                                       |          |          |          |      |
|------------|---------------------------------------|----------|----------|----------|------|
| PITG_06026 | Pi conserved hypothetical protein (   | -32.6767 | -34.6787 | 0.715636 | 1 BH |
| PITG_06240 | Pi conserved hypothetical protein (   | -32.6767 | -34.6787 | 0.715636 | 1 BH |
| PITG_06288 | Pi protein kinase (2737 nt)           | -32.6517 | -34.7286 | 0.715636 | 1 BH |
| PITG_06345 | Pi conserved hypothetical protein (   | -32.6517 | -34.7286 | 0.715636 | 1 BH |
| PITG_06367 | Pi conserved hypothetical protein (   | -32.6517 | -34.7286 | 0.715636 | 1 BH |
| PITG_06425 | Pi conserved hypothetical protein (   | -32.7352 | -34.5616 | 0.715636 | 1 BH |
| PITG_06440 | Pi eukaryotic translation initiation  | -32.6767 | -34.6787 | 0.715636 | 1 BH |
| PITG_06705 | Pi conserved hypothetical protein (   | -32.6276 | -34.7768 | 0.715636 | 1 BH |
| PITG_06769 | Pi conserved hypothetical protein (   | -32.6767 | -34.6787 | 0.715636 | 1 BH |
| PITG_06776 | Pi RAC family serine/threonine-pro    | -32.6767 | -34.6787 | 0.715636 | 1 BH |
| PITG_06783 | Pi quinolinate synthetase A proteir   | -32.6276 | -34.7768 | 0.715636 | 1 BH |
| PITG_06819 | Pi transcription elongation factor, p | -32.6517 | -34.7286 | 0.715636 | 1 BH |
| PITG_06846 | Pi Drug/Metabolite Transporter (D     | -32.7352 | -34.5616 | 0.715636 | 1 BH |
| PITG_06871 | Pi ankyrin-like protein (3315 nt)     | -32.6044 | -34.8234 | 0.715636 | 1 BH |
| PITG_06907 | Pi regulator of chromosome conde      | -32.6767 | -34.6787 | 0.715636 | 1 BH |
| PITG_06922 | Pi conserved hypothetical protein (   | -32.7352 | -34.5616 | 0.715636 | 1 BH |
| PITG_07121 | Pi acyl-[acyl-carrier-protein]-UDP-M  | -32.6276 | -34.7768 | 0.715636 | 1 BH |
| PITG_07194 | Pi conserved hypothetical protein (   | -32.6276 | -34.7768 | 0.715636 | 1 BH |
| PITG_07435 | Pi secreted RxLR effector peptide, p  | -32.6276 | -34.7768 | 0.715636 | 1 BH |
| PITG_07915 | Pi conserved hypothetical protein (   | -32.6517 | -34.7286 | 0.715636 | 1 BH |
| PITG_07945 | Pi snRNA-activating protein comple    | -32.6044 | -34.8234 | 0.715636 | 1 BH |
| PITG_08003 | Pi conserved hypothetical protein (   | -32.6767 | -34.6787 | 0.715636 | 1 BH |
| PITG_08964 | Pi Mitochondrial Carrier (MC) Fami    | -32.6276 | -34.7768 | 0.715636 | 1 BH |
| PITG_09305 | Pi DNA repair protein RAD51 (1465     | -32.6767 | -34.6787 | 0.715636 | 1 BH |
| PITG_09415 | Pi ethanolamine kinase, putative (1   | -32.6276 | -34.7768 | 0.715636 | 1 BH |
| PITG_10023 | Pi chromodomain protein, putative     | -32.5826 | -34.8669 | 0.715636 | 1 BH |
| PITG_11869 | Pi SUMO-activating enzyme (SAE),      | -32.6276 | -34.7768 | 0.715636 | 1 BH |
| PITG_11907 | Pi diphthine synthase (933 nt)        | -32.6044 | -34.8234 | 0.715636 | 1 BH |
| PITG_12213 | Pi exonuclease 1, putative (1771 nt)  | -32.6767 | -34.6787 | 0.715636 | 1 BH |
| PITG_12277 | Pi conserved hypothetical protein (   | -32.6767 | -34.6787 | 0.715636 | 1 BH |
| PITG_12806 | Pi phospholipase D, Pi-sPLD-like-12   | -32.6044 | -34.8234 | 0.715636 | 1 BH |
| PITG_13372 | Pi conserved hypothetical protein (   | -32.6044 | -34.8234 | 0.715636 | 1 BH |
| PITG_13828 | Pi histone H3 (698 nt)                | -32.6517 | -34.7286 | 0.715636 | 1 BH |
| PITG_14107 | Pi conserved hypothetical protein (   | -32.5826 | -34.8669 | 0.715636 | 1 BH |
| PITG_14565 | Pi conserved hypothetical protein (   | -32.6044 | -34.8234 | 0.715636 | 1 BH |
| PITG_15817 | Pi calpain-like protein (3729 nt)     | -32.6276 | -34.7768 | 0.715636 | 1 BH |
| PITG_15819 | Pi glutamyl-tRNA(Gln) amidotransf     | -32.6044 | -34.8234 | 0.715636 | 1 BH |
| PITG_15874 | Pi conserved hypothetical protein (   | -32.7352 | -34.5616 | 0.715636 | 1 BH |
| PITG_16775 | Pi conserved hypothetical protein (   | -32.6767 | -34.6787 | 0.715636 | 1 BH |
| PITG_17036 | Pi conserved hypothetical protein (   | -32.6517 | -34.7286 | 0.715636 | 1 BH |
| PITG_17053 | Pi ATP-binding Cassette (ABC) Supe    | -32.6276 | -34.7768 | 0.715636 | 1 BH |
| PITG_17167 | Pi conserved hypothetical protein (   | -32.6276 | -34.7768 | 0.715636 | 1 BH |
| PITG_17329 | Pi COP9 signalosome complex subu      | -32.6276 | -34.7768 | 0.715636 | 1 BH |
| PITG_18382 | Pi conserved hypothetical protein (   | -32.6549 | -34.7223 | 0.715636 | 1 BH |
| PITG_18688 | Pi Poly(A) polymerase, putative (20   | -32.6044 | -34.8234 | 0.715636 | 1 BH |
| PITG_18898 | Pi vacuolar protein sorting-associat  | -32.6517 | -34.7286 | 0.715636 | 1 BH |
| PITG_20034 | Pi methyltransferase domain-conta     | -32.6767 | -34.6787 | 0.715636 | 1 BH |

|            |                                        |          |          |          |      |
|------------|----------------------------------------|----------|----------|----------|------|
| PITG_21196 | Pi hypothetical protein (397 nt)       | -32.7352 | -34.5616 | 0.715636 | 1 BH |
| PITG_22198 | Pi conserved hypothetical protein (    | -32.6044 | -34.8234 | 0.715636 | 1 BH |
| PITG_14282 | Pi conserved hypothetical protein (    | -13.301  | -0.62188 | 0.716015 | 1 BH |
| PITG_00090 | Pi vacuolar sorting protein SNF8 (9    | -32.582  | -34.8682 | 0.716178 | 1 BH |
| PITG_00300 | Pi 3-oxoacyl-[acyl-carrier-protein] s  | -32.582  | -34.8682 | 0.716178 | 1 BH |
| PITG_01387 | Pi conserved hypothetical protein (    | -32.582  | -34.8682 | 0.716178 | 1 BH |
| PITG_01641 | Pi serine protease family S54, puta    | -32.582  | -34.8682 | 0.716178 | 1 BH |
| PITG_02916 | Pi conserved hypothetical protein (    | -32.582  | -34.8682 | 0.716178 | 1 BH |
| PITG_04978 | Pi conserved hypothetical protein (    | -32.6059 | -34.8204 | 0.716178 | 1 BH |
| PITG_05637 | Pi S-adenosylmethionine mitochon       | -32.6808 | -34.6705 | 0.716178 | 1 BH |
| PITG_06829 | Pi conserved hypothetical protein (    | -32.582  | -34.8682 | 0.716178 | 1 BH |
| PITG_07154 | Pi serine carboxypeptidase, putativ    | -32.6059 | -34.8204 | 0.716178 | 1 BH |
| PITG_08367 | Pi conserved hypothetical protein (    | -32.582  | -34.8682 | 0.716178 | 1 BH |
| PITG_10882 | Pi conserved hypothetical protein (    | -32.6059 | -34.8204 | 0.716178 | 1 BH |
| PITG_11044 | Pi protein phosphatase, putative (1    | -32.6808 | -34.6705 | 0.716178 | 1 BH |
| PITG_11052 | Pi endo-1,3(4)-beta-glucanase, put     | -32.582  | -34.8682 | 0.716178 | 1 BH |
| PITG_11202 | Pi conserved hypothetical protein (    | -32.582  | -34.8682 | 0.716178 | 1 BH |
| PITG_11223 | Pi conserved hypothetical protein (    | -32.6059 | -34.8204 | 0.716178 | 1 BH |
| PITG_11780 | Pi conserved hypothetical protein (    | -32.582  | -34.8682 | 0.716178 | 1 BH |
| PITG_13068 | Pi conserved hypothetical protein (    | -32.582  | -34.8682 | 0.716178 | 1 BH |
| PITG_13713 | Pi MICAL-like protein (3165 nt)        | -32.6808 | -34.6705 | 0.716178 | 1 BH |
| PITG_15755 | Pi AP-3 complex subunit beta, puta     | -32.582  | -34.8682 | 0.716178 | 1 BH |
| PITG_16113 | Pi conserved hypothetical protein (    | -32.582  | -34.8682 | 0.716178 | 1 BH |
| PITG_16214 | Pi inactive ubiquitin carboxyl-termi   | -32.582  | -34.8682 | 0.716178 | 1 BH |
| PITG_16226 | Pi conserved hypothetical protein (    | -32.6808 | -34.6705 | 0.716178 | 1 BH |
| PITG_17503 | Pi conserved hypothetical protein (    | -32.582  | -34.8682 | 0.716178 | 1 BH |
| PITG_18095 | Pi transmembrane protein, putativ      | -32.6059 | -34.8204 | 0.716178 | 1 BH |
| PITG_19527 | Pi conserved hypothetical protein (    | -32.582  | -34.8682 | 0.716178 | 1 BH |
| PITG_21842 | Pi conserved hypothetical protein (    | -32.6059 | -34.8204 | 0.716178 | 1 BH |
| PITG_22415 | Pi conserved hypothetical protein (    | -32.6059 | -34.8204 | 0.716178 | 1 BH |
| PITG_00123 | Pi sporangia induced hypothetical      | -32.7565 | -34.519  | 0.716721 | 1 BH |
| PITG_02503 | Pi FAD synthetase, putative (876 nt)   | -32.7643 | -34.5034 | 0.716721 | 1 BH |
| PITG_03076 | Pi ATP-dependent helicase, RECQ f      | -32.7565 | -34.519  | 0.716721 | 1 BH |
| PITG_03179 | Pi conserved hypothetical protein (    | -32.7565 | -34.519  | 0.716721 | 1 BH |
| PITG_04731 | Pi hypothetical protein (1162 nt)      | -32.7565 | -34.519  | 0.716721 | 1 BH |
| PITG_04902 | Pi conserved hypothetical protein (    | -32.7565 | -34.519  | 0.716721 | 1 BH |
| PITG_06698 | Pi ATP-binding Cassette (ABC) Sup      | -32.7565 | -34.519  | 0.716721 | 1 BH |
| PITG_06794 | Pi putative methyltransferase MET      | -32.7565 | -34.519  | 0.716721 | 1 BH |
| PITG_07193 | Pi conserved hypothetical protein (    | -32.7565 | -34.519  | 0.716721 | 1 BH |
| PITG_07839 | Pi translation initiation factor eIF-2 | -32.7565 | -34.519  | 0.716721 | 1 BH |
| PITG_08619 | Pi hypothetical protein (1839 nt)      | -32.7565 | -34.519  | 0.716721 | 1 BH |
| PITG_08776 | Pi conserved hypothetical protein (    | -32.7565 | -34.519  | 0.716721 | 1 BH |
| PITG_09248 | Pi Proton-dependent Oligopeptide       | -32.7565 | -34.519  | 0.716721 | 1 BH |
| PITG_09751 | Pi GPI mannosyltransferase 4, puta     | -32.7565 | -34.519  | 0.716721 | 1 BH |
| PITG_11018 | Pi conserved hypothetical protein (    | -32.7565 | -34.519  | 0.716721 | 1 BH |
| PITG_12497 | Pi conserved hypothetical protein (    | -32.7643 | -34.5034 | 0.716721 | 1 BH |
| PITG_12667 | Pi conserved hypothetical protein (    | -32.7565 | -34.519  | 0.716721 | 1 BH |



|            |                                        |          |          |          |      |
|------------|----------------------------------------|----------|----------|----------|------|
| PITG_13367 | Pi XRP2-like protein (1462 nt)         | -32.7078 | -34.6165 | 0.716721 | 1 BH |
| PITG_13776 | Pi conserved hypothetical protein (    | -32.7565 | -34.519  | 0.716721 | 1 BH |
| PITG_13829 | Pi conserved hypothetical protein (    | -32.7565 | -34.519  | 0.716721 | 1 BH |
| PITG_13969 | Pi conserved hypothetical protein (    | -32.7643 | -34.5034 | 0.716721 | 1 BH |
| PITG_15072 | Pi serine protease family S33, puta    | -32.7565 | -34.519  | 0.716721 | 1 BH |
| PITG_15884 | Pi guanylate-binding protein, putat    | -32.7565 | -34.519  | 0.716721 | 1 BH |
| PITG_16200 | Pi conserved hypothetical protein (    | -32.7078 | -34.6165 | 0.716721 | 1 BH |
| PITG_18062 | Pi conserved hypothetical protein (    | -32.63   | -34.7722 | 0.716721 | 1 BH |
| PITG_18297 | Pi ATP-binding Cassette (ABC) Super    | -32.7565 | -34.519  | 0.716721 | 1 BH |
| PITG_18326 | Pi conserved hypothetical protein (    | -32.7078 | -34.6165 | 0.716721 | 1 BH |
| PITG_18433 | Pi conserved hypothetical protein (    | -32.7078 | -34.6165 | 0.716721 | 1 BH |
| PITG_19769 | Pi conserved hypothetical protein (    | -32.7565 | -34.519  | 0.716721 | 1 BH |
| PITG_20266 | Pi proteasome assembly chaperon        | -32.7565 | -34.519  | 0.716721 | 1 BH |
| PITG_21480 | Pi conserved hypothetical protein (    | -32.7565 | -34.519  | 0.716721 | 1 BH |
| PITG_21599 | Pi conserved hypothetical protein (    | -32.7565 | -34.519  | 0.716721 | 1 BH |
| PITG_22611 | Pi protein recA (641 nt)               | -32.7565 | -34.519  | 0.716721 | 1 BH |
| PITG_00143 | Pi nuclear migration protein nudC-     | -32.702  | -34.6281 | 0.716721 | 1 BH |
| PITG_00296 | Pi protein kinase, putative (1296 nt)  | -32.7287 | -34.5746 | 0.716721 | 1 BH |
| PITG_00668 | Pi conserved hypothetical protein (    | -32.702  | -34.6281 | 0.716721 | 1 BH |
| PITG_00938 | Pi conserved hypothetical protein (    | -32.7287 | -34.5746 | 0.716721 | 1 BH |
| PITG_01083 | Pi conserved hypothetical protein (    | -32.7287 | -34.5746 | 0.716721 | 1 BH |
| PITG_02730 | Pi conserved hypothetical protein (    | -32.702  | -34.6281 | 0.716721 | 1 BH |
| PITG_03459 | Pi COP9 signalosome complex subu       | -32.702  | -34.6281 | 0.716721 | 1 BH |
| PITG_03733 | Pi conserved hypothetical protein (    | -32.7287 | -34.5746 | 0.716721 | 1 BH |
| PITG_04553 | Pi conserved hypothetical protein (    | -32.702  | -34.6281 | 0.716721 | 1 BH |
| PITG_04608 | Pi conserved hypothetical protein (    | -32.7287 | -34.5746 | 0.716721 | 1 BH |
| PITG_05458 | Pi conserved hypothetical protein (    | -32.702  | -34.6281 | 0.716721 | 1 BH |
| PITG_05476 | Pi flavin-binding monooxygenase-li     | -32.702  | -34.6281 | 0.716721 | 1 BH |
| PITG_05935 | Pi DEAD/DEAH box RNA helicase, p       | -32.702  | -34.6281 | 0.716721 | 1 BH |
| PITG_06793 | Pi conserved hypothetical protein (    | -32.702  | -34.6281 | 0.716721 | 1 BH |
| PITG_07071 | Pi conserved hypothetical protein (    | -32.7287 | -34.5746 | 0.716721 | 1 BH |
| PITG_07765 | Pi conserved hypothetical protein (    | -32.7287 | -34.5746 | 0.716721 | 1 BH |
| PITG_08742 | Pi conserved hypothetical protein (    | -32.7287 | -34.5746 | 0.716721 | 1 BH |
| PITG_09190 | Pi bzip transcription factor (1121 nt) | -32.7287 | -34.5746 | 0.716721 | 1 BH |
| PITG_11225 | Pi P-type ATPase (P-ATPase) Super      | -32.7287 | -34.5746 | 0.716721 | 1 BH |
| PITG_13548 | Pi conserved hypothetical protein (    | -32.7287 | -34.5746 | 0.716721 | 1 BH |
| PITG_13669 | Pi serine/threonine protein kinase     | -32.702  | -34.6281 | 0.716721 | 1 BH |
| PITG_16179 | Pi Rab3 GTPase-activating protein (    | -32.702  | -34.6281 | 0.716721 | 1 BH |
| PITG_16900 | Pi cleft lip and palate transmembra    | -32.7287 | -34.5746 | 0.716721 | 1 BH |
| PITG_17840 | Pi protein kinase, putative (1829 nt)  | -32.702  | -34.6281 | 0.716721 | 1 BH |
| PITG_19024 | Pi conserved hypothetical protein (    | -32.7287 | -34.5746 | 0.716721 | 1 BH |
| PITG_19429 | Pi prephenate dehydratase, putativ     | -32.7287 | -34.5746 | 0.716721 | 1 BH |
| PITG_20370 | Pi Amino Acid/Auxin Permease (AA       | -32.7287 | -34.5746 | 0.716721 | 1 BH |
| PITG_20652 | Pi conserved hypothetical protein (    | -32.7287 | -34.5746 | 0.716721 | 1 BH |
| PITG_22301 | Pi conserved hypothetical protein (    | -32.702  | -34.6281 | 0.716721 | 1 BH |
| PITG_22459 | Pi HSF-type DNA-binding protein, p     | -32.702  | -34.6281 | 0.716721 | 1 BH |
| PITG_23176 | Pi 26S proteasome non-ATPase reg       | -32.7287 | -34.5746 | 0.716721 | 1 BH |

|            |                                        |          |          |          |      |
|------------|----------------------------------------|----------|----------|----------|------|
| PITG_00309 | Pi conserved hypothetical protein (    | -32.6764 | -34.6792 | 0.717266 | 1 BH |
| PITG_00829 | Pi conserved hypothetical protein (    | -32.6764 | -34.6792 | 0.717266 | 1 BH |
| PITG_01185 | Pi conserved hypothetical protein (    | -32.6764 | -34.6792 | 0.717266 | 1 BH |
| PITG_01484 | Pi beta-glucosidase, putative (1712    | -32.6516 | -34.7288 | 0.717266 | 1 BH |
| PITG_02400 | Pi protein kinase (3158 nt)            | -32.6764 | -34.6792 | 0.717266 | 1 BH |
| PITG_02759 | Pi hypothetical protein (278 nt)       | -32.655  | -34.7221 | 0.717266 | 1 BH |
| PITG_02951 | Pi phosphoglycerate mutase family      | -32.6516 | -34.7288 | 0.717266 | 1 BH |
| PITG_03265 | Pi Monovalent Cation:Proton Antip      | -32.6764 | -34.6792 | 0.717266 | 1 BH |
| PITG_03305 | Pi peptidase, putative (2045 nt)       | -32.6516 | -34.7288 | 0.717266 | 1 BH |
| PITG_04499 | Pi histone deacetylase, putative (1    | -32.6764 | -34.6792 | 0.717266 | 1 BH |
| PITG_05177 | Pi conserved hypothetical protein (    | -32.6516 | -34.7288 | 0.717266 | 1 BH |
| PITG_05992 | Pi tetrapyrrole (Corrin/Porphyrin) I   | -32.6516 | -34.7288 | 0.717266 | 1 BH |
| PITG_06660 | Pi peroxisome biogenesis factor, pi    | -32.6764 | -34.6792 | 0.717266 | 1 BH |
| PITG_06941 | Pi conserved hypothetical protein (    | -32.6516 | -34.7288 | 0.717266 | 1 BH |
| PITG_07237 | Pi cell division cycle protein 20 (16  | -32.6764 | -34.6792 | 0.717266 | 1 BH |
| PITG_07247 | Pi conserved hypothetical protein (    | -32.6764 | -34.6792 | 0.717266 | 1 BH |
| PITG_08258 | Pi cleavage induced hypothetical p     | -32.6764 | -34.6792 | 0.717266 | 1 BH |
| PITG_09468 | Pi conserved hypothetical protein (    | -32.655  | -34.7221 | 0.717266 | 1 BH |
| PITG_09523 | Pi Rab32/38 family GTPase, putativ     | -32.655  | -34.7221 | 0.717266 | 1 BH |
| PITG_09923 | Pi 6-phosphofructo-2-kinase/fructo     | -32.6764 | -34.6792 | 0.717266 | 1 BH |
| PITG_11459 | Pi conserved hypothetical protein (    | -32.6516 | -34.7288 | 0.717266 | 1 BH |
| PITG_12428 | Pi conserved hypothetical protein (    | -32.6516 | -34.7288 | 0.717266 | 1 BH |
| PITG_12699 | Pi serine/threonine protein kinase     | -32.6516 | -34.7288 | 0.717266 | 1 BH |
| PITG_13228 | Pi conserved hypothetical protein (    | -32.6516 | -34.7288 | 0.717266 | 1 BH |
| PITG_15294 | Pi histidinol dehydrogenase, putati    | -32.6516 | -34.7288 | 0.717266 | 1 BH |
| PITG_16105 | Pi conserved hypothetical protein (    | -32.6516 | -34.7288 | 0.717266 | 1 BH |
| PITG_16467 | Pi hypothetical protein (456 nt)       | -32.6764 | -34.6792 | 0.717266 | 1 BH |
| PITG_17889 | Pi Crinkler (CRN) family protein (24   | -32.6764 | -34.6792 | 0.717266 | 1 BH |
| PITG_17907 | Pi choline/Carnitine O-acyltransfer    | -32.6516 | -34.7288 | 0.717266 | 1 BH |
| PITG_17965 | Pi conserved hypothetical protein (    | -32.6764 | -34.6792 | 0.717266 | 1 BH |
| PITG_18030 | Pi conserved hypothetical protein (    | -32.6516 | -34.7288 | 0.717266 | 1 BH |
| PITG_20571 | Pi alkyldihydroxyacetonephosphat       | -15.4337 | 1.767499 | 0.717266 | 1 BH |
| PITG_12403 | Pi conserved hypothetical protein (    | -15.852  | 2.604131 | 0.717266 | 1 BH |
| PITG_17608 | Pi spermine synthase, putative (10     | -15.852  | 2.604131 | 0.717266 | 1 BH |
| PITG_00942 | Pi conserved hypothetical protein (    | -32.6278 | -34.7764 | 0.717812 | 1 BH |
| PITG_02113 | Pi hypothetical protein (3721 nt)      | -32.6047 | -34.8227 | 0.717812 | 1 BH |
| PITG_02352 | Pi P-type ATPase (P-ATPase) Super      | -32.6047 | -34.8227 | 0.717812 | 1 BH |
| PITG_02531 | Pi conserved hypothetical protein (    | -32.6278 | -34.7764 | 0.717812 | 1 BH |
| PITG_04215 | Pi conserved hypothetical protein (    | -32.7358 | -34.5606 | 0.717812 | 1 BH |
| PITG_04857 | Pi impact-like protein (1370 nt)       | -32.6278 | -34.7764 | 0.717812 | 1 BH |
| PITG_05127 | Pi fatty acid desaturase, putative (   | -32.6278 | -34.7764 | 0.717812 | 1 BH |
| PITG_06048 | Pi eukaryotic initiation factor 4A-III | -32.6278 | -34.7764 | 0.717812 | 1 BH |
| PITG_06694 | Pi conserved hypothetical protein (    | -32.6047 | -34.8227 | 0.717812 | 1 BH |
| PITG_07705 | Pi conserved hypothetical protein (    | -32.6278 | -34.7764 | 0.717812 | 1 BH |
| PITG_07774 | Pi conserved hypothetical protein (    | -32.6278 | -34.7764 | 0.717812 | 1 BH |
| PITG_08572 | Pi dual specificity tyrosine-phosph    | -32.6278 | -34.7764 | 0.717812 | 1 BH |
| PITG_09228 | Pi conserved hypothetical protein (    | -32.7358 | -34.5606 | 0.717812 | 1 BH |

|            |                                       |          |          |          |      |
|------------|---------------------------------------|----------|----------|----------|------|
| PITG_09273 | Pi AMP deaminase 2 (1375 nt)          | -32.6278 | -34.7764 | 0.717812 | 1 BH |
| PITG_10087 | Pi conserved hypothetical protein (   | -32.6278 | -34.7764 | 0.717812 | 1 BH |
| PITG_10617 | Pi conserved hypothetical protein (   | -32.6047 | -34.8227 | 0.717812 | 1 BH |
| PITG_11965 | Pi conserved hypothetical protein (   | -32.6278 | -34.7764 | 0.717812 | 1 BH |
| PITG_12212 | Pi conserved hypothetical protein (   | -32.7358 | -34.5606 | 0.717812 | 1 BH |
| PITG_12956 | Pi conserved hypothetical protein (   | -32.6047 | -34.8227 | 0.717812 | 1 BH |
| PITG_13151 | Pi protein transporter Sec24 (4393    | -32.6278 | -34.7764 | 0.717812 | 1 BH |
| PITG_13272 | Pi conserved hypothetical protein (   | -32.6047 | -34.8227 | 0.717812 | 1 BH |
| PITG_13841 | Pi conserved hypothetical protein (   | -32.6278 | -34.7764 | 0.717812 | 1 BH |
| PITG_13910 | Pi conserved hypothetical protein (   | -32.6047 | -34.8227 | 0.717812 | 1 BH |
| PITG_16121 | Pi conserved hypothetical protein (   | -32.6278 | -34.7764 | 0.717812 | 1 BH |
| PITG_16645 | Pi conserved hypothetical protein (   | -32.6278 | -34.7764 | 0.717812 | 1 BH |
| PITG_16801 | Pi conserved hypothetical protein (   | -32.6278 | -34.7764 | 0.717812 | 1 BH |
| PITG_17063 | Pi secreted RxLR effector peptide,    | -15.7864 | 2.471743 | 0.717812 | 1 BH |
| PITG_17110 | Pi conserved hypothetical protein (   | -32.6278 | -34.7764 | 0.717812 | 1 BH |
| PITG_17495 | Pi protein kinase, putative (1590 nt) | -32.6278 | -34.7764 | 0.717812 | 1 BH |
| PITG_17879 | Pi conserved hypothetical protein (   | -32.6047 | -34.8227 | 0.717812 | 1 BH |
| PITG_22277 | Pi conserved hypothetical protein (   | -32.6278 | -34.7764 | 0.717812 | 1 BH |
| PITG_23159 | Pi HECT E3 ubiquitin ligase, putativ  | -32.6278 | -34.7764 | 0.717812 | 1 BH |
| PITG_20759 | Pi dihydroxy-acid dehydratase (189    | -13.3071 | -0.61357 | 0.717986 | 1 BH |
| PITG_03647 | Pi hypothetical protein (351 nt)      | -32.6808 | -34.6704 | 0.718359 | 1 BH |
| PITG_01068 | Pi conserved hypothetical protein (   | -32.5824 | -34.8673 | 0.718359 | 1 BH |
| PITG_01183 | Pi conserved hypothetical protein (   | -32.5824 | -34.8673 | 0.718359 | 1 BH |
| PITG_03048 | Pi ubiquitin-conjugating enzyme E2    | -32.5824 | -34.8673 | 0.718359 | 1 BH |
| PITG_03288 | Pi myosin-like protein (4434 nt)      | -32.5824 | -34.8673 | 0.718359 | 1 BH |
| PITG_03651 | Pi phospholipase D, Pi-PXPH-PLD (3    | -32.5824 | -34.8673 | 0.718359 | 1 BH |
| PITG_04545 | Pi conserved hypothetical protein (   | -32.5824 | -34.8673 | 0.718359 | 1 BH |
| PITG_04627 | Pi myosin-like protein (1315 nt)      | -32.5824 | -34.8673 | 0.718359 | 1 BH |
| PITG_05740 | Pi conserved hypothetical protein (   | -32.5824 | -34.8673 | 0.718359 | 1 BH |
| PITG_06816 | Pi conserved hypothetical protein (   | -32.5824 | -34.8673 | 0.718359 | 1 BH |
| PITG_09139 | Pi conserved hypothetical protein (   | -32.5824 | -34.8673 | 0.718359 | 1 BH |
| PITG_10450 | Pi protein kinase, putative (1742 nt) | -32.5824 | -34.8673 | 0.718359 | 1 BH |
| PITG_11178 | Pi molybdenum cofactor synthesis      | -32.5824 | -34.8673 | 0.718359 | 1 BH |
| PITG_14818 | Pi guanylate-binding protein, putat   | -32.5824 | -34.8673 | 0.718359 | 1 BH |
| PITG_15382 | Pi alpha kinase (1681 nt)             | -32.5824 | -34.8673 | 0.718359 | 1 BH |
| PITG_16456 | Pi conserved hypothetical protein (   | -32.5824 | -34.8673 | 0.718359 | 1 BH |
| PITG_19823 | Pi conserved hypothetical protein (   | -32.5824 | -34.8673 | 0.718359 | 1 BH |
| PITG_22126 | Pi conserved hypothetical protein (   | -32.5824 | -34.8673 | 0.718359 | 1 BH |
| PITG_00237 | Pi 2OG-Fe(II) oxygenase superfamil    | -32.756  | -34.5201 | 0.718908 | 1 BH |
| PITG_01097 | Pi conserved hypothetical protein (   | -32.756  | -34.5201 | 0.718908 | 1 BH |
| PITG_01241 | Pi conserved hypothetical protein (   | -32.6296 | -34.7728 | 0.718908 | 1 BH |
| PITG_01429 | Pi serine protease family S33, puta   | -32.756  | -34.5201 | 0.718908 | 1 BH |
| PITG_01502 | Pi Cullin-associated NEDD8-dissoci    | -32.756  | -34.5201 | 0.718908 | 1 BH |
| PITG_02103 | Pi glycoside hydrolase, putative (24  | -32.756  | -34.5201 | 0.718908 | 1 BH |
| PITG_02661 | Pi conserved hypothetical protein (   | -32.756  | -34.5201 | 0.718908 | 1 BH |
| PITG_02947 | Pi conserved hypothetical protein (   | -32.756  | -34.5201 | 0.718908 | 1 BH |
| PITG_03406 | Pi conserved hypothetical protein (   | -32.765  | -34.5022 | 0.718908 | 1 BH |

|            |                                       |          |          |          |      |
|------------|---------------------------------------|----------|----------|----------|------|
| PITG_03743 | Pi conserved hypothetical protein (   | -32.765  | -34.5022 | 0.718908 | 1 BH |
| PITG_03878 | Pi dynein intermediate chain 2 (23:   | -32.756  | -34.5201 | 0.718908 | 1 BH |
| PITG_05797 | Pi conserved hypothetical protein (   | -32.756  | -34.5201 | 0.718908 | 1 BH |
| PITG_06557 | Pi cytochrome P450, putative (389     | -32.756  | -34.5201 | 0.718908 | 1 BH |
| PITG_07274 | Pi mitogen-activated protein kinase   | -32.756  | -34.5201 | 0.718908 | 1 BH |
| PITG_07892 | Pi conserved hypothetical protein (   | -32.756  | -34.5201 | 0.718908 | 1 BH |
| PITG_08588 | Pi conserved hypothetical protein (   | -32.756  | -34.5201 | 0.718908 | 1 BH |
| PITG_09681 | Pi transmembrane protein, putativ     | -15.5351 | 1.966615 | 0.718908 | 1 BH |
| PITG_09682 | Pi conserved hypothetical protein (   | -32.756  | -34.5201 | 0.718908 | 1 BH |
| PITG_09780 | Pi conserved hypothetical protein (   | -32.756  | -34.5201 | 0.718908 | 1 BH |
| PITG_10395 | Pi conserved hypothetical protein (   | -32.756  | -34.5201 | 0.718908 | 1 BH |
| PITG_11998 | Pi chromatin modification-related     | -32.756  | -34.5201 | 0.718908 | 1 BH |
| PITG_12338 | Pi sugar fermentation stimulation     | -32.756  | -34.5201 | 0.718908 | 1 BH |
| PITG_12347 | Pi conserved hypothetical protein (   | -15.4789 | 1.854235 | 0.718908 | 1 BH |
| PITG_12482 | Pi serine protease family S28, puta   | -32.756  | -34.5201 | 0.718908 | 1 BH |
| PITG_12809 | Pi phospholipase D, Pi-sPLD-like-11   | -32.756  | -34.5201 | 0.718908 | 1 BH |
| PITG_14056 | Pi conserved hypothetical protein (   | -32.756  | -34.5201 | 0.718908 | 1 BH |
| PITG_14272 | Pi hypothetical protein (1775 nt)     | -32.756  | -34.5201 | 0.718908 | 1 BH |
| PITG_14750 | Pi conserved hypothetical protein (   | -32.756  | -34.5201 | 0.718908 | 1 BH |
| PITG_16299 | Pi conserved hypothetical protein (   | -32.756  | -34.5201 | 0.718908 | 1 BH |
| PITG_17607 | Pi elongation factor Ts, putative (1  | -32.765  | -34.5022 | 0.718908 | 1 BH |
| PITG_19749 | Pi conserved hypothetical protein (   | -32.756  | -34.5201 | 0.718908 | 1 BH |
| PITG_20152 | Pi conserved hypothetical protein (   | -32.756  | -34.5201 | 0.718908 | 1 BH |
| PITG_07885 | Pi eukaryotic translation initiation  | -12.2692 | -0.34375 | 0.719212 | 1 BH |
| PITG_00016 | Pi DNA-binding protein, putative (7   | -32.7286 | -34.5749 | 0.719457 | 1 BH |
| PITG_01203 | Pi mitogen-activated protein kinase   | -32.7286 | -34.5749 | 0.719457 | 1 BH |
| PITG_01677 | Pi conserved hypothetical protein (   | -32.7021 | -34.6279 | 0.719457 | 1 BH |
| PITG_02035 | Pi conserved hypothetical protein (   | -32.7286 | -34.5749 | 0.719457 | 1 BH |
| PITG_02146 | Pi conserved hypothetical protein (   | -32.7021 | -34.6279 | 0.719457 | 1 BH |
| PITG_03011 | Pi F-box protein, putative (4337 nt)  | -32.7021 | -34.6279 | 0.719457 | 1 BH |
| PITG_03043 | Pi hypothetical protein (2357 nt)     | -32.7021 | -34.6279 | 0.719457 | 1 BH |
| PITG_03123 | Pi M96 mating-specific protein farr   | -32.7021 | -34.6279 | 0.719457 | 1 BH |
| PITG_03750 | Pi endo-1,3(4)-beta-glucanase, put    | -32.7021 | -34.6279 | 0.719457 | 1 BH |
| PITG_03903 | Pi conserved hypothetical protein (   | -32.7286 | -34.5749 | 0.719457 | 1 BH |
| PITG_04030 | Pi hypothetical protein (411 nt)      | -32.7021 | -34.6279 | 0.719457 | 1 BH |
| PITG_04115 | Pi conserved hypothetical protein (   | -32.7286 | -34.5749 | 0.719457 | 1 BH |
| PITG_04589 | Pi protein kinase (1190 nt)           | -32.7021 | -34.6279 | 0.719457 | 1 BH |
| PITG_04703 | Pi conserved hypothetical protein (   | -32.7077 | -34.6166 | 0.719457 | 1 BH |
| PITG_04938 | Pi calcium/calmodulin-dependent       | -32.7286 | -34.5749 | 0.719457 | 1 BH |
| PITG_05189 | Pi conserved hypothetical protein (   | -32.7021 | -34.6279 | 0.719457 | 1 BH |
| PITG_05538 | Pi conserved hypothetical protein (   | -32.7286 | -34.5749 | 0.719457 | 1 BH |
| PITG_05674 | Pi peroxisome assembly protein, pi    | -32.7286 | -34.5749 | 0.719457 | 1 BH |
| PITG_06002 | Pi mismatch repair endonuclease p     | -32.7021 | -34.6279 | 0.719457 | 1 BH |
| PITG_06205 | Pi ATP-binding Cassette (ABC) Supe    | -32.7021 | -34.6279 | 0.719457 | 1 BH |
| PITG_06487 | Pi conserved hypothetical protein (   | -32.7077 | -34.6166 | 0.719457 | 1 BH |
| PITG_07191 | Pi protein kinase, putative (1786 nt) | -32.7021 | -34.6279 | 0.719457 | 1 BH |
| PITG_07354 | Pi acylamino-acid-releasing enzym     | -32.7286 | -34.5749 | 0.719457 | 1 BH |

|            |                                      |          |          |          |   |    |
|------------|--------------------------------------|----------|----------|----------|---|----|
| PITG_07707 | Pi conserved hypothetical protein (  | -32.7286 | -34.5749 | 0.719457 | 1 | BH |
| PITG_07723 | Pi Major Facilitator Superfamily (M  | -32.7286 | -34.5749 | 0.719457 | 1 | BH |
| PITG_07868 | Pi conserved hypothetical protein (  | -32.7021 | -34.6279 | 0.719457 | 1 | BH |
| PITG_07978 | Pi protein kinase, putative (1474 nt | -32.7286 | -34.5749 | 0.719457 | 1 | BH |
| PITG_09220 | Pi conserved hypothetical protein (  | -32.7021 | -34.6279 | 0.719457 | 1 | BH |
| PITG_10275 | Pi conserved hypothetical protein (  | -32.7021 | -34.6279 | 0.719457 | 1 | BH |
| PITG_10881 | Pi kinesin-like protein (2499 nt)    | -32.7286 | -34.5749 | 0.719457 | 1 | BH |
| PITG_11010 | Pi conserved hypothetical protein (  | -32.7286 | -34.5749 | 0.719457 | 1 | BH |
| PITG_11050 | Pi endo-1,3(4)-beta-glucanase, put   | -32.7021 | -34.6279 | 0.719457 | 1 | BH |
| PITG_11607 | Pi metalloprotease family M48X, p    | -32.7021 | -34.6279 | 0.719457 | 1 | BH |
| PITG_12175 | Pi conserved hypothetical protein (  | -32.7021 | -34.6279 | 0.719457 | 1 | BH |
| PITG_12499 | Pi conserved hypothetical protein (  | -32.7021 | -34.6279 | 0.719457 | 1 | BH |
| PITG_13039 | Pi conserved hypothetical protein (  | -32.7021 | -34.6279 | 0.719457 | 1 | BH |
| PITG_13320 | Pi conserved hypothetical protein (  | -32.7286 | -34.5749 | 0.719457 | 1 | BH |
| PITG_13718 | Pi conserved hypothetical protein (  | -32.7286 | -34.5749 | 0.719457 | 1 | BH |
| PITG_13838 | Pi polycomb protein EZH2, putative   | -32.7021 | -34.6279 | 0.719457 | 1 | BH |
| PITG_14094 | Pi conserved hypothetical protein (  | -32.7286 | -34.5749 | 0.719457 | 1 | BH |
| PITG_14448 | Pi hypothetical protein (1081 nt)    | -32.7077 | -34.6166 | 0.719457 | 1 | BH |
| PITG_15669 | Pi conserved hypothetical protein (  | -32.7286 | -34.5749 | 0.719457 | 1 | BH |
| PITG_15806 | Pi conserved hypothetical protein (  | -32.7021 | -34.6279 | 0.719457 | 1 | BH |
| PITG_17831 | Pi protein kinase, putative (1930 nt | -32.7021 | -34.6279 | 0.719457 | 1 | BH |
| PITG_18114 | Pi conserved hypothetical protein (  | -32.7286 | -34.5749 | 0.719457 | 1 | BH |
| PITG_18377 | Pi adenylate kinase, putative (2776  | -32.7286 | -34.5749 | 0.719457 | 1 | BH |
| PITG_18747 | Pi GlcNac transferase (1678 nt)      | -32.7021 | -34.6279 | 0.719457 | 1 | BH |
| PITG_18962 | Pi DNA repair protein, putative (26  | -32.7021 | -34.6279 | 0.719457 | 1 | BH |
| PITG_19149 | Pi conserved hypothetical protein (  | -32.7077 | -34.6166 | 0.719457 | 1 | BH |
| PITG_20954 | Pi conserved hypothetical protein (  | -32.7286 | -34.5749 | 0.719457 | 1 | BH |
| PITG_21215 | Pi transmembrane protein, putativ    | -32.7286 | -34.5749 | 0.719457 | 1 | BH |
| PITG_22919 | Pi conserved hypothetical protein (  | -32.7021 | -34.6279 | 0.719457 | 1 | BH |
| PITG_01436 | Pi conserved hypothetical protein (  | -15.6488 | 2.191331 | 0.720008 | 1 | BH |
| PITG_03500 | Pi chromodomain-helicase-DNA-bi      | -32.7955 | -34.441  | 0.720008 | 1 | BH |
| PITG_11976 | Pi UDP-3-O-[3-hydroxymyristoyl] N    | -32.7955 | -34.441  | 0.720008 | 1 | BH |
| PITG_20486 | Pi conserved hypothetical protein (  | -32.7955 | -34.441  | 0.720008 | 1 | BH |
| PITG_00088 | Pi pre-mRNA-splicing factor cwc2,    | -32.6521 | -34.728  | 0.720008 | 1 | BH |
| PITG_00651 | Pi centromere/kinetochore proteir    | -32.6767 | -34.6787 | 0.720008 | 1 | BH |
| PITG_00659 | Pi conserved hypothetical protein (  | -32.6521 | -34.728  | 0.720008 | 1 | BH |
| PITG_00746 | Pi conserved hypothetical protein (  | -32.6521 | -34.728  | 0.720008 | 1 | BH |
| PITG_01409 | Pi conserved hypothetical protein (  | -32.6521 | -34.728  | 0.720008 | 1 | BH |
| PITG_01727 | Pi conserved hypothetical protein (  | -32.6521 | -34.728  | 0.720008 | 1 | BH |
| PITG_01860 | Pi transmembrane protein, putativ    | -32.6521 | -34.728  | 0.720008 | 1 | BH |
| PITG_01867 | Pi splicing factor U2af large subuni | -32.6521 | -34.728  | 0.720008 | 1 | BH |
| PITG_02561 | Pi ubiquitin-specific protease, puta | -32.6767 | -34.6787 | 0.720008 | 1 | BH |
| PITG_03332 | Pi phosphatidylinositol-4-phosphat   | -32.6521 | -34.728  | 0.720008 | 1 | BH |
| PITG_03836 | Pi conserved hypothetical protein (  | -32.6521 | -34.728  | 0.720008 | 1 | BH |
| PITG_04458 | Pi protein kinase (1568 nt)          | -32.6521 | -34.728  | 0.720008 | 1 | BH |
| PITG_04533 | Pi conserved hypothetical protein (  | -32.6767 | -34.6787 | 0.720008 | 1 | BH |
| PITG_04614 | Pi DNA ligase, putative (1649 nt)    | -32.6767 | -34.6787 | 0.720008 | 1 | BH |

|            |                                                               |          |          |          |      |
|------------|---------------------------------------------------------------|----------|----------|----------|------|
| PITG_05894 | Pi conserved hypothetical protein (                           | -32.6521 | -34.728  | 0.720008 | 1 BH |
| PITG_06673 | Pi Major Facilitator Superfamily (M                           | -32.6767 | -34.6787 | 0.720008 | 1 BH |
| PITG_06929 | Pi myotubularin-like protein (3693                            | -32.6521 | -34.728  | 0.720008 | 1 BH |
| PITG_08211 | Pi U2-associated splicing factor, pu                          | -32.6767 | -34.6787 | 0.720008 | 1 BH |
| PITG_08461 | Pi conserved hypothetical protein (                           | -32.6521 | -34.728  | 0.720008 | 1 BH |
| PITG_11431 | Pi ubiquitin-specific protease, puta                          | -32.6767 | -34.6787 | 0.720008 | 1 BH |
| PITG_12459 | Pi protein kinase (931 nt)                                    | -32.6767 | -34.6787 | 0.720008 | 1 BH |
| PITG_12525 | Pi conserved hypothetical protein (                           | -32.6767 | -34.6787 | 0.720008 | 1 BH |
| PITG_13235 | Pi putative P-type ATPase (2964 nt                            | -32.6767 | -34.6787 | 0.720008 | 1 BH |
| PITG_13340 | Pi Folate-Biopterin Transporter (FB                           | -32.6521 | -34.728  | 0.720008 | 1 BH |
| PITG_13721 | Pi alpha,alpha-trehalose-phosphat                             | -32.6767 | -34.6787 | 0.720008 | 1 BH |
| PITG_13752 | Pi conserved hypothetical protein (                           | -32.6521 | -34.728  | 0.720008 | 1 BH |
| PITG_15173 | Pi conserved hypothetical protein (                           | -32.6521 | -34.728  | 0.720008 | 1 BH |
| PITG_15408 | Pi phosphatidylinositol kinase (PIK-                          | -32.6521 | -34.728  | 0.720008 | 1 BH |
| PITG_15836 | Pi hypothetical protein (1718 nt)                             | -32.6521 | -34.728  | 0.720008 | 1 BH |
| PITG_16732 | Pi conserved hypothetical protein (                           | -32.6521 | -34.728  | 0.720008 | 1 BH |
| PITG_16799 | Pi inositol-3,4-bisphosphate 4-pho:                           | -32.6521 | -34.728  | 0.720008 | 1 BH |
| PITG_17170 | Pi peptidyl-tRNA hydrolase, putativ                           | -32.6767 | -34.6787 | 0.720008 | 1 BH |
| PITG_17590 | Pi conserved hypothetical protein (                           | -32.6545 | -34.723  | 0.720008 | 1 BH |
| PITG_17745 | Pi inositol hexakisphosphate and d                            | -32.6767 | -34.6787 | 0.720008 | 1 BH |
| PITG_18070 | Pi phospholipase, putative (3302 n                            | -32.6521 | -34.728  | 0.720008 | 1 BH |
| PITG_19693 | Pi conserved hypothetical protein (                           | -32.6767 | -34.6787 | 0.720008 | 1 BH |
| PITG_20463 | Pi vacuolar protein sorting-associat                          | -32.6767 | -34.6787 | 0.720008 | 1 BH |
| PITG_21807 | Pi conserved hypothetical protein (                           | -32.6521 | -34.728  | 0.720008 | 1 BH |
| PITG_21962 | Pi alpha,alpha-trehalose-phosphat                             | -32.6767 | -34.6787 | 0.720008 | 1 BH |
| PITG_23160 | Pi histone deacetylase, putative (4:                          | -32.6521 | -34.728  | 0.720008 | 1 BH |
| PITG_00460 | Pi phosphatidylinositol-4-phosphat                            | -32.6284 | -34.7753 | 0.72056  | 1 BH |
| PITG_01100 | Pi aquaporin, putative (2207 nt)                              | -32.6284 | -34.7753 | 0.72056  | 1 BH |
| PITG_01523 | Pi Zinc (Zn <sup>2+</sup> )-Iron (Fe <sup>2+</sup> ) Permease | -32.6284 | -34.7753 | 0.72056  | 1 BH |
| PITG_03030 | Pi conserved hypothetical protein (                           | -32.6284 | -34.7753 | 0.72056  | 1 BH |
| PITG_03825 | Pi myosin-like protein (2036 nt)                              | -32.6284 | -34.7753 | 0.72056  | 1 BH |
| PITG_04648 | Pi conserved hypothetical protein (                           | -32.6054 | -34.8213 | 0.72056  | 1 BH |
| PITG_05385 | Pi Zinc (Zn <sup>2+</sup> )-Iron (Fe <sup>2+</sup> ) Permease | -15.7457 | 2.383962 | 0.72056  | 1 BH |
| PITG_07034 | Pi myosin-like protein (4211 nt)                              | -32.6054 | -34.8213 | 0.72056  | 1 BH |
| PITG_08669 | Pi 3-methyl-2-oxobutanoate hydro                              | -32.6284 | -34.7753 | 0.72056  | 1 BH |
| PITG_09064 | Pi conserved hypothetical protein (                           | -32.6284 | -34.7753 | 0.72056  | 1 BH |
| PITG_10285 | Pi conserved hypothetical protein (                           | -32.6284 | -34.7753 | 0.72056  | 1 BH |
| PITG_10452 | Pi CAD protein (4584 nt)                                      | -15.5851 | 2.062588 | 0.72056  | 1 BH |
| PITG_10663 | Pi Multidrug/Oligosaccharidyl-lipid                           | -32.6284 | -34.7753 | 0.72056  | 1 BH |
| PITG_10831 | Pi cyclin-dependent kinase with F-t                           | -32.6054 | -34.8213 | 0.72056  | 1 BH |
| PITG_10844 | Pi conserved hypothetical protein (                           | -32.6054 | -34.8213 | 0.72056  | 1 BH |
| PITG_10845 | Pi conserved hypothetical protein (                           | -32.6284 | -34.7753 | 0.72056  | 1 BH |
| PITG_10935 | Pi phosphatidylinositol kinase (PIK-                          | -32.6284 | -34.7753 | 0.72056  | 1 BH |
| PITG_11761 | Pi conserved hypothetical protein (                           | -32.6054 | -34.8213 | 0.72056  | 1 BH |
| PITG_12813 | Pi phytanoyl-CoA dioxygenase dorr                             | -32.6054 | -34.8213 | 0.72056  | 1 BH |
| PITG_15843 | Pi acyltransferase family (1479 nt)                           | -15.5851 | 2.062588 | 0.72056  | 1 BH |
| PITG_16153 | Pi conserved hypothetical protein (                           | -32.6054 | -34.8213 | 0.72056  | 1 BH |

|            |                                       |          |          |          |      |
|------------|---------------------------------------|----------|----------|----------|------|
| PITG_16267 | Pi Major Facilitator Superfamily (M   | -32.6284 | -34.7753 | 0.72056  | 1 BH |
| PITG_17480 | Pi sodium-coupled neutral amino a     | -32.6054 | -34.8213 | 0.72056  | 1 BH |
| PITG_18902 | Pi conserved hypothetical protein (   | -32.6054 | -34.8213 | 0.72056  | 1 BH |
| PITG_19107 | Pi conserved hypothetical protein (   | -32.6284 | -34.7753 | 0.72056  | 1 BH |
| PITG_19405 | Pi conserved hypothetical protein (   | -32.6054 | -34.8213 | 0.72056  | 1 BH |
| PITG_19472 | Pi ubiquitin-specific protease, puta  | -32.6054 | -34.8213 | 0.72056  | 1 BH |
| PITG_20320 | Pi retinol dehydrogenase, putative    | -32.6284 | -34.7753 | 0.72056  | 1 BH |
| PITG_20559 | Pi conserved hypothetical protein (   | -32.6284 | -34.7753 | 0.72056  | 1 BH |
| PITG_20858 | Pi hypothetical protein (1227 nt)     | -32.6054 | -34.8213 | 0.72056  | 1 BH |
| PITG_11906 | Pi Proton-dependent Oligopeptide      | -32.6049 | -34.8224 | 0.72056  | 1 BH |
| PITG_00284 | Pi phospholipase D, Pi-PXTM-PLD (     | -32.5832 | -34.8656 | 0.721114 | 1 BH |
| PITG_04132 | Pi conserved hypothetical protein (   | -32.5832 | -34.8656 | 0.721114 | 1 BH |
| PITG_04562 | Pi mucin, putative (11178 nt)         | -32.5832 | -34.8656 | 0.721114 | 1 BH |
| PITG_06342 | Pi conserved hypothetical protein (   | -32.5832 | -34.8656 | 0.721114 | 1 BH |
| PITG_08091 | Pi hypothetical protein (243 nt)      | -32.5832 | -34.8656 | 0.721114 | 1 BH |
| PITG_12757 | Pi alpha-ketoglutarate-dependent :    | -32.5832 | -34.8656 | 0.721114 | 1 BH |
| PITG_15058 | Pi transmembrane protein, putativ     | -32.5832 | -34.8656 | 0.721114 | 1 BH |
| PITG_17089 | Pi conserved hypothetical protein (   | -32.5832 | -34.8656 | 0.721114 | 1 BH |
| PITG_17953 | Pi COP9 signalosome complex subu      | -32.5832 | -34.8656 | 0.721114 | 1 BH |
| PITG_19875 | Pi phosphoinositide 3-kinase regul    | -32.5832 | -34.8656 | 0.721114 | 1 BH |
| PITG_22339 | Pi conserved hypothetical protein (   | -32.5832 | -34.8656 | 0.721114 | 1 BH |
| PITG_07100 | Pi conserved hypothetical protein (   | -32.6289 | -34.7744 | 0.721668 | 1 BH |
| PITG_00744 | Pi conserved hypothetical protein (   | -32.7847 | -34.4628 | 0.722225 | 1 BH |
| PITG_00894 | Pi carbohydrate-binding protein, pi   | -32.7562 | -34.5197 | 0.722225 | 1 BH |
| PITG_01452 | Pi conserved hypothetical protein (   | -32.7562 | -34.5197 | 0.722225 | 1 BH |
| PITG_01651 | Pi conserved hypothetical protein (   | -32.7562 | -34.5197 | 0.722225 | 1 BH |
| PITG_02329 | Pi peptide-N(4)-(N-acetyl-beta-gluc   | -32.7847 | -34.4628 | 0.722225 | 1 BH |
| PITG_03401 | Pi chromodomain-helicase-DNA-bi       | -32.7562 | -34.5197 | 0.722225 | 1 BH |
| PITG_05196 | Pi 2-nitropropane dioxygenase, pu     | -32.7847 | -34.4628 | 0.722225 | 1 BH |
| PITG_05274 | Pi conserved hypothetical protein (   | -32.7847 | -34.4628 | 0.722225 | 1 BH |
| PITG_06821 | Pi eukaryotic initiation factor 4E, p | -32.7562 | -34.5197 | 0.722225 | 1 BH |
| PITG_07567 | Pi brefeldin A-inhibited guanine nu   | -32.7562 | -34.5197 | 0.722225 | 1 BH |
| PITG_08802 | Pi NAD-specific glutamate dehydro     | -32.7847 | -34.4628 | 0.722225 | 1 BH |
| PITG_08919 | Pi conserved hypothetical protein (   | -32.7847 | -34.4628 | 0.722225 | 1 BH |
| PITG_09737 | Pi hypothetical protein (1053 nt)     | -32.7847 | -34.4628 | 0.722225 | 1 BH |
| PITG_11232 | Pi conserved hypothetical protein (   | -32.7847 | -34.4628 | 0.722225 | 1 BH |
| PITG_11433 | Pi conserved hypothetical protein (   | -32.7562 | -34.5197 | 0.722225 | 1 BH |
| PITG_11895 | Pi conserved hypothetical protein (   | -32.7847 | -34.4628 | 0.722225 | 1 BH |
| PITG_12349 | Pi conserved hypothetical protein (   | -32.7562 | -34.5197 | 0.722225 | 1 BH |
| PITG_13029 | Pi conserved hypothetical protein (   | -32.7562 | -34.5197 | 0.722225 | 1 BH |
| PITG_13319 | Pi myosin-like protein (3989 nt)      | -32.7847 | -34.4628 | 0.722225 | 1 BH |
| PITG_13386 | Pi conserved hypothetical protein (   | -32.7847 | -34.4628 | 0.722225 | 1 BH |
| PITG_13911 | Pi conserved hypothetical protein (   | -32.7847 | -34.4628 | 0.722225 | 1 BH |
| PITG_13913 | Pi SUMO protease, putative (2081      | -32.7847 | -34.4628 | 0.722225 | 1 BH |
| PITG_14089 | Pi conserved hypothetical protein (   | -32.7562 | -34.5197 | 0.722225 | 1 BH |
| PITG_14699 | Pi phosphatidylserine synthase, pu    | -32.7847 | -34.4628 | 0.722225 | 1 BH |
| PITG_15120 | Pi Multidrug/Oligosaccharidyl-lipid   | -32.7847 | -34.4628 | 0.722225 | 1 BH |

|            |                                        |          |          |          |      |
|------------|----------------------------------------|----------|----------|----------|------|
| PITG_15856 | Pi conserved hypothetical protein (    | -32.7562 | -34.5197 | 0.722225 | 1 BH |
| PITG_16800 | Pi conserved hypothetical protein (    | -32.7562 | -34.5197 | 0.722225 | 1 BH |
| PITG_18094 | Pi conserved hypothetical protein (    | -32.7847 | -34.4628 | 0.722225 | 1 BH |
| PITG_18257 | Pi conserved hypothetical protein (    | -32.7847 | -34.4628 | 0.722225 | 1 BH |
| PITG_18474 | Pi CCR4-NOT transcription comple       | -32.7562 | -34.5197 | 0.722225 | 1 BH |
| PITG_18641 | Pi conserved hypothetical protein (    | -32.7562 | -34.5197 | 0.722225 | 1 BH |
| PITG_19526 | Pi secreted RxLR effector peptide,     | -32.7847 | -34.4628 | 0.722225 | 1 BH |
| PITG_21877 | Pi conserved hypothetical protein (    | -32.7562 | -34.5197 | 0.722225 | 1 BH |
| PITG_22428 | Pi conserved hypothetical protein (    | -32.7562 | -34.5197 | 0.722225 | 1 BH |
| PITG_22555 | Pi conserved hypothetical protein (    | -32.7847 | -34.4628 | 0.722225 | 1 BH |
| PITG_22839 | Pi nuclear mitotic apparatus protei    | -32.7847 | -34.4628 | 0.722225 | 1 BH |
| PITG_00757 | Pi gamma-glutamyltranspeptidase,       | -32.729  | -34.5741 | 0.722782 | 1 BH |
| PITG_00971 | Pi hypothetical protein (249 nt)       | -32.7027 | -34.6268 | 0.722782 | 1 BH |
| PITG_01653 | Pi GPI-anchored wall transfer prote    | -32.729  | -34.5741 | 0.722782 | 1 BH |
| PITG_01932 | Pi conserved hypothetical protein (    | -32.729  | -34.5741 | 0.722782 | 1 BH |
| PITG_03018 | Pi sporangia induced dynein heavy      | -32.729  | -34.5741 | 0.722782 | 1 BH |
| PITG_04289 | Pi ATP-binding Cassette (ABC) Supe     | -32.7027 | -34.6268 | 0.722782 | 1 BH |
| PITG_04439 | Pi hypothetical protein (2797 nt)      | -32.729  | -34.5741 | 0.722782 | 1 BH |
| PITG_04582 | Pi conserved hypothetical protein (    | -32.7027 | -34.6268 | 0.722782 | 1 BH |
| PITG_05456 | Pi DNA mismatch repair protein mi      | -32.7027 | -34.6268 | 0.722782 | 1 BH |
| PITG_06282 | Pi ubiquitin-specific protease, puta   | -32.729  | -34.5741 | 0.722782 | 1 BH |
| PITG_06380 | Pi conserved hypothetical protein (    | -32.729  | -34.5741 | 0.722782 | 1 BH |
| PITG_06684 | Pi conserved hypothetical protein (    | -32.7027 | -34.6268 | 0.722782 | 1 BH |
| PITG_06902 | Pi conserved hypothetical protein (    | -32.729  | -34.5741 | 0.722782 | 1 BH |
| PITG_07192 | Pi conserved hypothetical protein (    | -32.7027 | -34.6268 | 0.722782 | 1 BH |
| PITG_07445 | Pi mucin-like protein (4439 nt)        | -32.729  | -34.5741 | 0.722782 | 1 BH |
| PITG_07657 | Pi conserved hypothetical protein (    | -32.7027 | -34.6268 | 0.722782 | 1 BH |
| PITG_07823 | Pi DNA topoisomerase 2 (2669 nt)       | -32.7027 | -34.6268 | 0.722782 | 1 BH |
| PITG_07948 | Pi choline dehydrogenase, putative     | -32.7027 | -34.6268 | 0.722782 | 1 BH |
| PITG_08741 | Pi conserved hypothetical protein (    | -32.7027 | -34.6268 | 0.722782 | 1 BH |
| PITG_09281 | Pi conserved hypothetical protein (    | -32.7027 | -34.6268 | 0.722782 | 1 BH |
| PITG_09295 | Pi Dicarboxylate/Amino Acid:Catio      | -32.729  | -34.5741 | 0.722782 | 1 BH |
| PITG_09944 | Pi hypothetical protein (1224 nt)      | -32.729  | -34.5741 | 0.722782 | 1 BH |
| PITG_10561 | Pi conserved hypothetical protein (    | -32.7027 | -34.6268 | 0.722782 | 1 BH |
| PITG_11197 | Pi myosin-like protein (3912 nt)       | -32.729  | -34.5741 | 0.722782 | 1 BH |
| PITG_11489 | Pi fatty-acid-CoA ligase, putative (3  | -32.729  | -34.5741 | 0.722782 | 1 BH |
| PITG_11725 | Pi conserved hypothetical protein (    | -32.729  | -34.5741 | 0.722782 | 1 BH |
| PITG_12355 | Pi conserved hypothetical protein (    | -32.729  | -34.5741 | 0.722782 | 1 BH |
| PITG_12983 | Pi synaptic vesicle glycoprotein, pu   | -32.7027 | -34.6268 | 0.722782 | 1 BH |
| PITG_14014 | Pi ATP-binding Cassette (ABC) Supe     | -32.729  | -34.5741 | 0.722782 | 1 BH |
| PITG_14044 | Pi transcription initiation factor TFI | -32.7027 | -34.6268 | 0.722782 | 1 BH |
| PITG_14633 | Pi conserved hypothetical protein (    | -32.7071 | -34.6179 | 0.722782 | 1 BH |
| PITG_14704 | Pi conserved hypothetical protein (    | -32.729  | -34.5741 | 0.722782 | 1 BH |
| PITG_15101 | Pi conserved hypothetical protein (    | -32.729  | -34.5741 | 0.722782 | 1 BH |
| PITG_15167 | Pi hypothetical protein (1374 nt)      | -32.729  | -34.5741 | 0.722782 | 1 BH |
| PITG_18204 | Pi conserved hypothetical protein (    | -32.729  | -34.5741 | 0.722782 | 1 BH |
| PITG_18652 | Pi Cation Diffusion Facilitator (CDF)  | -32.7027 | -34.6268 | 0.722782 | 1 BH |



|            |                                       |          |          |          |      |
|------------|---------------------------------------|----------|----------|----------|------|
| PITG_19905 | Pi calcium/calmodulin dependent p     | -32.729  | -34.5741 | 0.722782 | 1 BH |
| PITG_22389 | Pi conserved hypothetical protein (   | -32.7027 | -34.6268 | 0.722782 | 1 BH |
| PITG_00953 | Pi trafficking protein particle comp  | -32.6775 | -34.6772 | 0.72334  | 1 BH |
| PITG_06556 | Pi transmembrane protein, putativ     | -32.6775 | -34.6772 | 0.72334  | 1 BH |
| PITG_10315 | Pi UDP-sugar pyrophospharylase, p     | -32.6775 | -34.6772 | 0.72334  | 1 BH |
| PITG_18055 | Pi mitochondrial inner membrane       | -32.6775 | -34.6772 | 0.72334  | 1 BH |
| PITG_18300 | Pi conserved hypothetical protein (   | -32.7954 | -34.4412 | 0.72334  | 1 BH |
| PITG_18815 | Pi conserved hypothetical protein (   | -32.6775 | -34.6772 | 0.72334  | 1 BH |
| PITG_21457 | Pi choline transporter-like protein   | -32.6775 | -34.6772 | 0.72334  | 1 BH |
| PITG_22840 | Pi peroxisomal (S)-2-hydroxy-acid c   | -32.6775 | -34.6772 | 0.72334  | 1 BH |
| PITG_02852 | Pi aminoacylase, metalloprotease f    | -32.6294 | -34.7732 | 0.7239   | 1 BH |
| PITG_02928 | Pi berberine-like protein (1530 nt)   | -32.6531 | -34.7258 | 0.7239   | 1 BH |
| PITG_03515 | Pi conserved hypothetical protein (   | -32.6531 | -34.7258 | 0.7239   | 1 BH |
| PITG_05815 | Pi ATP-binding Cassette (ABC) Supε    | -32.6294 | -34.7732 | 0.7239   | 1 BH |
| PITG_06285 | Pi conserved hypothetical protein (   | -32.6294 | -34.7732 | 0.7239   | 1 BH |
| PITG_09035 | Pi conserved hypothetical protein (   | -32.6294 | -34.7732 | 0.7239   | 1 BH |
| PITG_09495 | Pi conserved hypothetical protein (   | -32.6294 | -34.7732 | 0.7239   | 1 BH |
| PITG_10060 | Pi conserved hypothetical protein (   | -32.6531 | -34.7258 | 0.7239   | 1 BH |
| PITG_12177 | Pi hypothetical protein (501 nt)      | -32.6531 | -34.7258 | 0.7239   | 1 BH |
| PITG_15129 | Pi conserved hypothetical protein (   | -32.7351 | -34.5618 | 0.7239   | 1 BH |
| PITG_17792 | Pi F-box protein, putative (2409 nt)  | -32.7351 | -34.5618 | 0.7239   | 1 BH |
| PITG_18230 | Pi glycoside hydrolase, putative (14  | -32.6531 | -34.7258 | 0.7239   | 1 BH |
| PITG_18575 | Pi conserved hypothetical protein (   | -32.6294 | -34.7732 | 0.7239   | 1 BH |
| PITG_20780 | Pi ATPase (3841 nt)                   | -32.6531 | -34.7258 | 0.7239   | 1 BH |
| PITG_21458 | Pi conserved hypothetical protein (   | -32.6531 | -34.7258 | 0.7239   | 1 BH |
| PITG_00330 | Pi phosphatidylinositol-4-phosphat    | -32.6067 | -34.8187 | 0.724462 | 1 BH |
| PITG_02998 | Pi S-adenosyl-L-methionine-depend     | -32.6067 | -34.8187 | 0.724462 | 1 BH |
| PITG_03316 | Pi hypothetical protein (459 nt)      | -32.814  | -34.4041 | 0.724462 | 1 BH |
| PITG_04318 | Pi conserved hypothetical protein (   | -32.814  | -34.4041 | 0.724462 | 1 BH |
| PITG_04677 | Pi protein kinase (1359 nt)           | -32.814  | -34.4041 | 0.724462 | 1 BH |
| PITG_06217 | Pi hypothetical protein (365 nt)      | -32.814  | -34.4041 | 0.724462 | 1 BH |
| PITG_06428 | Pi callose synthase, putative (6861   | -32.6067 | -34.8187 | 0.724462 | 1 BH |
| PITG_06700 | Pi cell division cycle protein 48 (20 | -32.6067 | -34.8187 | 0.724462 | 1 BH |
| PITG_06818 | Pi conserved hypothetical protein (   | -32.814  | -34.4041 | 0.724462 | 1 BH |
| PITG_08089 | Pi conserved hypothetical protein (   | -32.814  | -34.4041 | 0.724462 | 1 BH |
| PITG_08953 | Pi double-strand-break repair prot    | -32.6067 | -34.8187 | 0.724462 | 1 BH |
| PITG_12226 | Pi Phosphatidylinositol kinase (PIK-  | -32.814  | -34.4041 | 0.724462 | 1 BH |
| PITG_12472 | Pi palmitoyltransferase, putative (2  | -32.814  | -34.4041 | 0.724462 | 1 BH |
| PITG_13336 | Pi DNA2-like helicase (4864 nt)       | -32.814  | -34.4041 | 0.724462 | 1 BH |
| PITG_14215 | Pi carbohydrate esterase, putative    | -32.814  | -34.4041 | 0.724462 | 1 BH |
| PITG_18209 | Pi glycoside hydrolase, putative (14  | -32.814  | -34.4041 | 0.724462 | 1 BH |
| PITG_13763 | Pi flavodoxin-like protein (725 nt)   | -12.4299 | 1.114398 | 0.724496 | 1 BH |
| PITG_04930 | Pi conserved hypothetical protein (   | -32.7848 | -34.4624 | 0.725024 | 1 BH |
| PITG_05104 | Pi conserved hypothetical protein (   | -32.6792 | -34.6737 | 0.725024 | 1 BH |
| PITG_05276 | Pi hypothetical protein (732 nt)      | -32.7848 | -34.4624 | 0.725024 | 1 BH |
| PITG_06405 | Pi conserved hypothetical protein (   | -32.7848 | -34.4624 | 0.725024 | 1 BH |
| PITG_07116 | Pi ATP-binding Cassette (ABC) Supε    | -32.7848 | -34.4624 | 0.725024 | 1 BH |

|            |                                                               |          |          |          |      |
|------------|---------------------------------------------------------------|----------|----------|----------|------|
| PITG_09195 | Pi conserved hypothetical protein (                           | -32.7848 | -34.4624 | 0.725024 | 1 BH |
| PITG_09467 | Pi pectin lyase, putative (696 nt)                            | -32.7848 | -34.4624 | 0.725024 | 1 BH |
| PITG_09870 | Pi metalloprotease family M13, pu                             | -32.7848 | -34.4624 | 0.725024 | 1 BH |
| PITG_13582 | Pi glycosyl hydrolase, putative (312                          | -32.7848 | -34.4624 | 0.725024 | 1 BH |
| PITG_15140 | Pi conserved hypothetical protein (                           | -32.7848 | -34.4624 | 0.725024 | 1 BH |
| PITG_16847 | Pi conserved hypothetical protein (                           | -32.7848 | -34.4624 | 0.725024 | 1 BH |
| PITG_16928 | Pi conserved hypothetical protein (                           | -32.7848 | -34.4624 | 0.725024 | 1 BH |
| PITG_17741 | Pi serine protease family S33, puta                           | -32.7848 | -34.4624 | 0.725024 | 1 BH |
| PITG_19080 | Pi conserved hypothetical protein (                           | -32.7848 | -34.4624 | 0.725024 | 1 BH |
| PITG_19679 | Pi elongation factor G, putative (9C                          | -32.7848 | -34.4624 | 0.725024 | 1 BH |
| PITG_20496 | Pi conserved hypothetical protein (                           | -32.7848 | -34.4624 | 0.725024 | 1 BH |
| PITG_22238 | Pi conserved hypothetical protein (                           | -32.7848 | -34.4624 | 0.725024 | 1 BH |
| PITG_23215 | Pi secreted RxLR effector peptide,                            | -32.6792 | -34.6737 | 0.725024 | 1 BH |
| PITG_01966 | Pi conserved hypothetical protein (                           | -32.7566 | -34.519  | 0.725024 | 1 BH |
| PITG_05283 | Pi hypothetical protein (1701 nt)                             | -32.7566 | -34.519  | 0.725024 | 1 BH |
| PITG_06363 | Pi conserved hypothetical protein (                           | -32.7566 | -34.519  | 0.725024 | 1 BH |
| PITG_07895 | Pi sulfatase-like protein (2741 nt)                           | -32.7566 | -34.519  | 0.725024 | 1 BH |
| PITG_07940 | Pi conserved hypothetical protein (                           | -32.7566 | -34.519  | 0.725024 | 1 BH |
| PITG_08768 | Pi hypothetical protein (1452 nt)                             | -32.7566 | -34.519  | 0.725024 | 1 BH |
| PITG_09010 | Pi calcium/calmodulin-dependent                               | -32.7566 | -34.519  | 0.725024 | 1 BH |
| PITG_10557 | Pi conserved hypothetical protein (                           | -32.7566 | -34.519  | 0.725024 | 1 BH |
| PITG_11889 | Pi putative GPI-anchored serine-th                            | -32.7566 | -34.519  | 0.725024 | 1 BH |
| PITG_13077 | Pi geranylgeranyl pyrophosphate s                             | -32.7566 | -34.519  | 0.725024 | 1 BH |
| PITG_13738 | Pi conserved hypothetical protein (                           | -32.7566 | -34.519  | 0.725024 | 1 BH |
| PITG_14155 | Pi nitrate reductase, putative (176!                          | -32.7566 | -34.519  | 0.725024 | 1 BH |
| PITG_16972 | Pi conserved hypothetical protein (                           | -32.7566 | -34.519  | 0.725024 | 1 BH |
| PITG_17304 | Pi conserved hypothetical protein (                           | -32.7566 | -34.519  | 0.725024 | 1 BH |
| PITG_20485 | Pi conserved hypothetical protein (                           | -32.7566 | -34.519  | 0.725024 | 1 BH |
| PITG_20579 | Pi conserved hypothetical protein (                           | -32.7566 | -34.519  | 0.725024 | 1 BH |
| PITG_01787 | Pi conserved hypothetical protein (                           | -32.7954 | -34.4413 | 0.725588 | 1 BH |
| PITG_15878 | Pi conserved hypothetical protein (                           | -32.7954 | -34.4413 | 0.725588 | 1 BH |
| PITG_02552 | Pi conserved hypothetical protein (                           | -32.7296 | -34.5729 | 0.725588 | 1 BH |
| PITG_03398 | Pi histidyl-tRNA synthetase, putativ                          | -32.7296 | -34.5729 | 0.725588 | 1 BH |
| PITG_06502 | Pi conserved hypothetical protein (                           | -32.7296 | -34.5729 | 0.725588 | 1 BH |
| PITG_08023 | Pi HECT E3 ubiquitin ligase, putativ                          | -32.7296 | -34.5729 | 0.725588 | 1 BH |
| PITG_08811 | Pi Zinc (Zn <sup>2+</sup> )-Iron (Fe <sup>2+</sup> ) Permease | -32.7296 | -34.5729 | 0.725588 | 1 BH |
| PITG_12555 | Pi elicitin-like protein, putative (36                        | -32.7296 | -34.5729 | 0.725588 | 1 BH |
| PITG_13155 | Pi conserved hypothetical protein (                           | -32.7296 | -34.5729 | 0.725588 | 1 BH |
| PITG_17116 | Pi conserved hypothetical protein (                           | -32.7296 | -34.5729 | 0.725588 | 1 BH |
| PITG_20200 | Pi vacuolar protein sorting-associat                          | -32.7296 | -34.5729 | 0.725588 | 1 BH |
| PITG_20534 | Pi conserved hypothetical protein (                           | -32.7296 | -34.5729 | 0.725588 | 1 BH |
| PITG_01468 | Pi conserved hypothetical protein (                           | -32.6784 | -34.6754 | 0.726153 | 1 BH |
| PITG_01815 | Pi conserved hypothetical protein (                           | -32.6784 | -34.6754 | 0.726153 | 1 BH |
| PITG_06031 | Pi conserved hypothetical protein (                           | -32.7036 | -34.6248 | 0.726153 | 1 BH |
| PITG_07297 | Pi conserved hypothetical protein (                           | -32.6784 | -34.6754 | 0.726153 | 1 BH |
| PITG_08051 | Pi conserved hypothetical protein (                           | -32.7036 | -34.6248 | 0.726153 | 1 BH |
| PITG_08888 | Pi protein kinase, putative (2280 nt)                         | -32.6784 | -34.6754 | 0.726153 | 1 BH |

|            |                                                               |          |          |          |      |
|------------|---------------------------------------------------------------|----------|----------|----------|------|
| PITG_09670 | Pi protein kinase (621 nt)                                    | -32.7036 | -34.6248 | 0.726153 | 1 BH |
| PITG_10558 | Pi conserved hypothetical protein (                           | -32.6784 | -34.6754 | 0.726153 | 1 BH |
| PITG_14100 | Pi conserved hypothetical protein (                           | -32.6784 | -34.6754 | 0.726153 | 1 BH |
| PITG_15608 | Pi conserved hypothetical protein (                           | -32.7036 | -34.6248 | 0.726153 | 1 BH |
| PITG_16256 | Pi conserved hypothetical protein (                           | -32.7036 | -34.6248 | 0.726153 | 1 BH |
| PITG_17317 | Pi hypothetical protein (752 nt)                              | -32.6784 | -34.6754 | 0.726153 | 1 BH |
| PITG_17520 | Pi conserved hypothetical protein (                           | -32.7036 | -34.6248 | 0.726153 | 1 BH |
| PITG_18498 | Pi conserved hypothetical protein (                           | -32.6784 | -34.6754 | 0.726153 | 1 BH |
| PITG_20529 | Pi conserved hypothetical protein (                           | -32.7036 | -34.6248 | 0.726153 | 1 BH |
| PITG_21723 | Pi ATP-binding Cassette (ABC) Supe                            | -32.7036 | -34.6248 | 0.726153 | 1 BH |
| PITG_22394 | Pi conserved hypothetical protein (                           | -32.6784 | -34.6754 | 0.726153 | 1 BH |
| PITG_00342 | Pi conserved hypothetical protein (                           | -32.7344 | -34.5634 | 0.72672  | 1 BH |
| PITG_02084 | Pi golgi reassembly-stacking protei                           | -32.6542 | -34.7238 | 0.72672  | 1 BH |
| PITG_02577 | Pi conserved hypothetical protein (                           | -32.6542 | -34.7238 | 0.72672  | 1 BH |
| PITG_07636 | Pi serine protease family S15, puta                           | -32.6542 | -34.7238 | 0.72672  | 1 BH |
| PITG_11258 | Pi conserved hypothetical protein (                           | -32.7344 | -34.5634 | 0.72672  | 1 BH |
| PITG_12330 | Pi cleavage and polyadenylation sp                            | -32.6542 | -34.7238 | 0.72672  | 1 BH |
| PITG_12592 | Pi conserved hypothetical protein (                           | -32.6542 | -34.7238 | 0.72672  | 1 BH |
| PITG_17422 | Pi hypothetical protein (1292 nt)                             | -32.7344 | -34.5634 | 0.72672  | 1 BH |
| PITG_19797 | Pi amino acid/auxin permease-like                             | -32.7344 | -34.5634 | 0.72672  | 1 BH |
| PITG_19977 | Pi haloacid dehalogenase-like hydr                            | -32.6542 | -34.7238 | 0.72672  | 1 BH |
| PITG_20212 | Pi intraflagellar transport protein 1                         | -32.6542 | -34.7238 | 0.72672  | 1 BH |
| PITG_21531 | Pi carbohydrate-binding protein, pi                           | -32.6542 | -34.7238 | 0.72672  | 1 BH |
| PITG_22632 | Pi polysaccharide lyase, putative (3                          | -32.6542 | -34.7238 | 0.72672  | 1 BH |
| PITG_15358 | Pi calreticulin precursor (1415 nt)                           | -9.90455 | -0.48946 | 0.726949 | 1 BH |
| PITG_14110 | Pi endoplasmic reticulum-Golgi int                            | -12.8675 | 0.850291 | 0.727016 | 1 BH |
| PITG_20685 | Pi conserved hypothetical protein (                           | -14.3345 | -0.4185  | 0.727252 | 1 BH |
| PITG_15639 | Pi hypothetical protein (570 nt)                              | -9.87644 | 0.663027 | 0.727318 | 1 BH |
| PITG_11521 | Pi Zinc (Zn <sup>2+</sup> )-Iron (Fe <sup>2+</sup> ) Permease | -14.3266 | -0.43554 | 0.728035 | 1 BH |
| PITG_08210 | Pi proteasome subunit beta type-3                             | -12.2296 | -0.41802 | 0.728177 | 1 BH |
| PITG_04382 | Pi 50S ribosomal protein L27 (478 i                           | -14.3171 | -0.45563 | 0.728817 | 1 BH |
| PITG_00716 | Pi thioredoxin, putative (734 nt)                             | -12.8705 | -0.43024 | 0.728876 | 1 BH |
| PITG_07846 | Pi glycylopeptide N-tetradecanoyltri                          | -13.3104 | -0.6296  | 0.729622 | 1 BH |
| PITG_21333 | Pi hypothetical protein (1330 nt)                             | -11.9443 | 0.959146 | 0.730729 | 1 BH |
| PITG_06604 | Pi fumarate hydratase, mitochondr                             | -13.6749 | 1.13312  | 0.733015 | 1 BH |
| PITG_06603 | Pi hypothetical protein (468 nt)                              | -14.3232 | -0.45213 | 0.734274 | 1 BH |
| PITG_08206 | Pi signal peptidase complex subuni                            | -14.3232 | -0.45213 | 0.734274 | 1 BH |
| PITG_03783 | Pi Mitochondrial Protein Transloca                            | -12.5589 | -0.31985 | 0.73809  | 1 BH |
| PITG_00967 | Pi conserved hypothetical protein (                           | -14.1102 | 0.981466 | 0.738156 | 1 BH |
| PITG_03843 | Pi conserved hypothetical protein (                           | -12.567  | -0.30839 | 0.740072 | 1 BH |
| PITG_04125 | Pi glycosyl transferase, putative (1!                         | -10.9428 | -0.4422  | 0.741003 | 1 BH |
| PITG_17804 | Pi Amino Acid/Auxin Permease (AA                              | -13.3308 | 1.135094 | 0.74254  | 1 BH |
| PITG_12049 | Pi conserved hypothetical protein (                           | -11.2295 | -0.43674 | 0.742798 | 1 BH |
| PITG_01599 | Pi coronin-like protein, putative (1!                         | -13.3277 | -0.62261 | 0.742822 | 1 BH |
| PITG_08744 | Pi long-chain-fatty-acid-CoA ligase                           | -11.2809 | -0.3582  | 0.742843 | 1 BH |
| PITG_20901 | Pi voltage-dependent anion-selecti                            | -10.9328 | 0.749444 | 0.742871 | 1 BH |
| PITG_05498 | Pi heat shock protein 90, putative (                          | -12.8951 | -0.41494 | 0.743511 | 1 BH |

|            |                                       |          |          |          |      |
|------------|---------------------------------------|----------|----------|----------|------|
| PITG_00164 | Pi conserved hypothetical protein (   | -14.3429 | -0.42961 | 0.744341 | 1 BH |
| PITG_10455 | Pi conserved hypothetical protein (   | -14.3429 | -0.42961 | 0.744341 | 1 BH |
| PITG_16198 | Pi 60S ribosomal protein L18a (175    | -9.64065 | 0.669483 | 0.745845 | 1 BH |
| PITG_09626 | Pi transcription factor BTF3-like pro | -9.3597  | -0.4989  | 0.74893  | 1 BH |
| PITG_01223 | Pi conserved hypothetical protein (   | -14.3497 | -0.43092 | 0.7528   | 1 BH |
| PITG_03277 | Pi pyruvate dehydrogenase E1 cor      | -11.1472 | 0.652872 | 0.752801 | 1 BH |
| PITG_18089 | Pi protein transporter Sec61 subun    | -11.4902 | 0.692841 | 0.753801 | 1 BH |
| PITG_02694 | Pi 60S ribosomal protein L23a (830    | -9.14413 | 0.592709 | 0.754121 | 1 BH |
| PITG_18053 | Pi dolichyl-diphosphooligosacchari    | -13.43   | -0.36588 | 0.758599 | 1 BH |
| PITG_22685 | Pi dihydroxy-acid dehydratase, put    | -13.427  | -0.37189 | 0.758599 | 1 BH |
| PITG_03463 | Pi carbohydrate esterase, putative    | -13.4541 | -0.31946 | 0.759427 | 1 BH |
| PITG_09441 | Pi Mitochondrial Protein Transloca    | -11.8082 | -0.44098 | 0.759948 | 1 BH |
| PITG_19448 | Pi 50S ribosomal protein L17, puta    | -14.211  | -0.66425 | 0.760703 | 1 BH |
| PITG_00189 | Pi conserved hypothetical protein (   | -14.1618 | -0.76386 | 0.761433 | 1 BH |
| PITG_12154 | Pi conserved hypothetical protein (   | -14.1987 | -0.69131 | 0.762162 | 1 BH |
| PITG_04372 | Pi conserved hypothetical protein (   | -14.1642 | -0.76156 | 0.76289  | 1 BH |
| PITG_05497 | Pi conserved hypothetical protein (   | -12.9788 | -0.22033 | 0.762972 | 1 BH |
| PITG_00183 | Pi dynamin-2 (2133 nt)                | -14.1838 | -0.72475 | 0.764343 | 1 BH |
| PITG_05542 | Pi 3-hydroxyacyl-CoA dehydrogena      | -14.2027 | -0.68822 | 0.765068 | 1 BH |
| PITG_18104 | Pi conserved hypothetical protein (   | -14.2208 | -0.65201 | 0.765068 | 1 BH |
| PITG_04065 | Pi glycerol-3-phosphate dehydroge     | -12.9781 | -0.22863 | 0.765564 | 1 BH |
| PITG_19157 | Pi conserved hypothetical protein (   | -13.4511 | -0.34253 | 0.766795 | 1 BH |
| PITG_02902 | Pi carbohydrate esterase, putative    | -14.1698 | -0.75778 | 0.767238 | 1 BH |
| PITG_13918 | Pi N-terminal acetyltransferase A c   | -14.1958 | -0.70578 | 0.767238 | 1 BH |
| PITG_14598 | Pi prolyl endopeptidase, putative (   | -14.224  | -0.65051 | 0.76796  | 1 BH |
| PITG_12561 | Pi elicitin INF2A-like protein (567 n | -10.4609 | 0.609307 | 0.768905 | 1 BH |
| PITG_03081 | Pi 26S proteasome non-ATPase reg      | -12.9786 | -0.23664 | 0.768988 | 1 BH |
| PITG_09563 | Pi 40S ribosomal protein S9-1 (813    | -8.84796 | -0.46343 | 0.770979 | 1 BH |
| PITG_11071 | Pi conserved hypothetical protein (   | -12.9074 | -0.35647 | 0.775245 | 1 BH |
| PITG_00488 | Pi conserved hypothetical protein (   | -10.7913 | 0.582549 | 0.776112 | 1 BH |
| PITG_13237 | Pi alpha-actinin-1, putative (3164 r  | -14.2325 | -0.64913 | 0.77655  | 1 BH |
| PITG_12528 | Pi conserved hypothetical protein (   | -10.3514 | 0.576526 | 0.776574 | 1 BH |
| PITG_08765 | Pi RNA binding protein, putative (5   | -13.3717 | -0.48249 | 0.777806 | 1 BH |
| PITG_20188 | Pi 60S ribosomal protein L5 (1120 i   | -8.66026 | 0.585377 | 0.777926 | 1 BH |
| PITG_16984 | Pi cellulose synthase 4 (3531 nt)     | -14.1887 | -0.73922 | 0.77797  | 1 BH |
| PITG_13682 | Pi hypothetical protein (564 nt)      | -11.2562 | 0.727087 | 0.778198 | 1 BH |
| PITG_15697 | Pi 60S ribosomal protein L11, puta    | -9.44662 | 0.605613 | 0.778726 | 1 BH |
| PITG_10974 | Pi elongation factor 1-gamma, puta    | -10.4801 | 0.572059 | 0.780283 | 1 BH |
| PITG_03685 | Pi 2-amino-3-ketobutyrate coenzym     | -13.454  | -0.37404 | 0.781914 | 1 BH |
| PITG_06408 | Pi conserved hypothetical protein (   | -11.9186 | -0.20736 | 0.783688 | 1 BH |
| PITG_22572 | Pi C-1-tetrahydrofolate synthase, p   | -13.3669 | -0.51663 | 0.787807 | 1 BH |
| PITG_09540 | Pi 60S ribosomal protein L19-1 (77    | -8.70375 | -0.4373  | 0.787987 | 1 BH |
| PITG_11047 | Pi T-complex protein 1 subunit eta    | -13.1938 | 0.930465 | 0.793815 | 1 BH |
| PITG_21988 | Pi conserved hypothetical protein (   | -32.4503 | -35.1314 | 0.796621 | 1 BH |
| PITG_10471 | Pi conserved hypothetical protein (   | -32.4483 | -35.1356 | 0.798181 | 1 BH |
| PITG_20682 | Pi ATP-binding Cassette (ABC) Sup     | -32.4483 | -35.1356 | 0.798181 | 1 BH |
| PITG_21767 | Pi similar to sea slug pheromone (7   | -32.4483 | -35.1356 | 0.798181 | 1 BH |

|            |                                       |          |          |          |   |    |
|------------|---------------------------------------|----------|----------|----------|---|----|
| PITG_23049 | Pi cyst germination specific acidic r | -32.4483 | -35.1356 | 0.798181 | 1 | BH |
| PITG_11846 | Pi conserved hypothetical protein (   | -32.4889 | -35.0543 | 0.798703 | 1 | BH |
| PITG_02692 | Pi conserved hypothetical protein (   | -32.4307 | -35.1708 | 0.798703 | 1 | BH |
| PITG_08463 | Pi coatomer subunit epsilon, putat    | -32.4307 | -35.1708 | 0.798703 | 1 | BH |
| PITG_16204 | Pi protein kinase (4683 nt)           | -32.4307 | -35.1708 | 0.798703 | 1 | BH |
| PITG_17933 | Pi croquemort-like mating protein     | -32.4307 | -35.1708 | 0.798703 | 1 | BH |
| PITG_20302 | Pi conserved hypothetical protein (   | -32.4307 | -35.1708 | 0.798703 | 1 | BH |
| PITG_22017 | Pi Crinkler (CRN) family protein (53  | -32.4307 | -35.1708 | 0.798703 | 1 | BH |
| PITG_22524 | Pi conserved hypothetical protein (   | -32.4307 | -35.1708 | 0.798703 | 1 | BH |
| PITG_19669 | Pi ubiquitin-like protein/ribosomal   | -8.90372 | 0.479667 | 0.802913 | 1 | BH |
| PITG_00471 | Pi pyridoxal biosynthesis lyase pdx'  | -9.06071 | 0.347782 | 0.804363 | 1 | BH |
| PITG_16757 | Pi 40S ribosomal protein S15a (853    | -10.2386 | -0.30799 | 0.805558 | 1 | BH |
| PITG_06016 | Pi glucokinase, putative (1245 nt)    | -12.2431 | -0.42663 | 0.806077 | 1 | BH |
| PITG_10202 | Pi hypothetical protein (698 nt)      | -8.54137 | -0.40976 | 0.806666 | 1 | BH |
| PITG_05373 | Pi alcohol dehydrogenase class-3, p   | -12.6734 | -0.10305 | 0.808309 | 1 | BH |
| PITG_14575 | Pi U6 snRNA-associated Sm-like pro    | -12.6763 | -0.09711 | 0.808309 | 1 | BH |
| PITG_22406 | Pi conserved hypothetical protein (   | -11.3446 | 0.583383 | 0.809073 | 1 | BH |
| PITG_08711 | Pi hsp90-like protein (1250 nt)       | -12.3587 | -0.16473 | 0.811118 | 1 | BH |
| PITG_17730 | Pi conserved hypothetical protein (   | -13.028  | -0.11979 | 0.814553 | 1 | BH |
| PITG_18774 | Pi Mitochondrial Carrier (MC) Fami    | -11.0904 | 0.543252 | 0.815766 | 1 | BH |
| PITG_00518 | Pi nucleoredoxin, putative (587 nt)   | -11.0256 | -0.22955 | 0.817816 | 1 | BH |
| PITG_01762 | Pi glycyl-tRNA synthetase (2046 nt)   | -13.5343 | 0.89294  | 0.819182 | 1 | BH |
| PITG_13849 | Pi GDP-mannose transporter, puta      | -13.5695 | 0.958656 | 0.820409 | 1 | BH |
| PITG_10858 | Pi glycine cleavage system H protei   | -10.9416 | 0.518938 | 0.821734 | 1 | BH |
| PITG_03220 | Pi proteasome subunit beta type-7     | -11.7905 | -0.1159  | 0.823546 | 1 | BH |
| PITG_11766 | Pi 40S ribosomal protein S3a (1393    | -8.90761 | 0.486791 | 0.827144 | 1 | BH |
| PITG_15890 | Pi threonine protease family T01A,    | -12.0077 | 0.605581 | 0.828349 | 1 | BH |
| PITG_10513 | Pi proteasome subunit alpha type-     | -11.5304 | 0.564556 | 0.829464 | 1 | BH |
| PITG_13683 | Pi NADH dehydrogenase flavoprote      | -12.1944 | 0.691754 | 0.832081 | 1 | BH |
| PITG_02137 | Pi serine/threonine-protein phosph    | -13.5166 | -0.19815 | 0.832409 | 1 | BH |
| PITG_12122 | Pi proteasome subunit alpha type-     | -11.7278 | -0.23877 | 0.833102 | 1 | BH |
| PITG_05938 | Pi conserved hypothetical protein (   | -13.0229 | 1.117771 | 0.834276 | 1 | BH |
| PITG_09432 | Pi nucleolar protein NOP5 (1865 nt)   | -13.5104 | -0.22573 | 0.837016 | 1 | BH |
| PITG_12961 | Pi alanyl-tRNA synthetase, mitoch     | -13.5093 | -0.23379 | 0.838723 | 1 | BH |
| PITG_10300 | Pi electron transfer flavoprotein su  | -12.3919 | -0.09333 | 0.843913 | 1 | BH |
| PITG_22135 | Pi 60S ribosomal protein L10a-1 (8'   | -8.88715 | 0.382159 | 0.84426  | 1 | BH |
| PITG_09512 | Pi prohibitin-2 (1326 nt)             | -11.478  | 0.672861 | 0.848191 | 1 | BH |
| PITG_15377 | Pi conserved hypothetical protein (   | -13.5108 | -0.26432 | 0.848207 | 1 | BH |
| PITG_02022 | Pi clathrin heavy chain (5547 nt)     | -12.7897 | 0.679281 | 0.848492 | 1 | BH |
| PITG_03235 | Pi 60S ribosomal protein L35a-4 (7'   | -8.96331 | -0.36458 | 0.84851  | 1 | BH |
| PITG_03762 | Pi 60S ribosomal protein L38, putat   | -8.44203 | -0.24805 | 0.849986 | 1 | BH |
| PITG_14935 | Pi Mitochondrial Carrier (MC) Fami    | -14.4293 | -0.22883 | 0.851228 | 1 | BH |
| PITG_21283 | Pi conserved hypothetical protein (   | -14.4189 | -0.25085 | 0.851655 | 1 | BH |
| PITG_14608 | Pi 39S ribosomal protein L24, mito    | -14.4528 | -0.18802 | 0.85336  | 1 | BH |
| PITG_17093 | Pi 60S ribosomal protein L24, putat   | -9.30686 | 0.45523  | 0.855014 | 1 | BH |
| PITG_11302 | Pi hypothetical protein (455 nt)      | -14.4261 | -0.24646 | 0.855059 | 1 | BH |
| PITG_10616 | Pi endoplasmic reticulum-Golgi int    | -14.4161 | -0.27025 | 0.85633  | 1 | BH |

|            |                                       |          |          |          |      |
|------------|---------------------------------------|----------|----------|----------|------|
| PITG_19608 | Pi ribosomal protein L7Ae/L30e/S1     | -14.2586 | 1.281939 | 0.85633  | 1 BH |
| PITG_03916 | Pi ribosomal protein L28, putative    | -9.20031 | -0.26196 | 0.857034 | 1 BH |
| PITG_17261 | Pi 60S acidic ribosomal protein P0    | -9.44654 | 0.368863 | 0.860728 | 1 BH |
| PITG_10929 | Pi proteasome subunit alpha, puta     | -11.9766 | 0.535711 | 0.861008 | 1 BH |
| PITG_08703 | Pi conserved hypothetical protein (   | -8.45959 | 0.334354 | 0.864692 | 1 BH |
| PITG_19282 | Pi conserved hypothetical protein (   | -12.594  | -0.25694 | 0.86597  | 1 BH |
| PITG_08024 | Pi conserved hypothetical protein (   | -14.4723 | -0.19838 | 0.868923 | 1 BH |
| PITG_03632 | Pi H - or Na -translocating F-type, v | -10.4195 | -0.279   | 0.869984 | 1 BH |
| PITG_07278 | Pi protein kinase, putative (1325 nt  | -13.0815 | -0.01052 | 0.870978 | 1 BH |
| PITG_11036 | Pi NADH dehydrogenase [ubiquino       | -13.0567 | -0.06004 | 0.870978 | 1 BH |
| PITG_10967 | Pi ras GTPase-activating protein-bi   | -14.2416 | -0.60301 | 0.871148 | 1 BH |
| PITG_02210 | Pi phenylalanine-4-hydroxylase, he    | -14.272  | -0.54341 | 0.871541 | 1 BH |
| PITG_08578 | Pi Mitochondrial Carrier (MC) Fami    | -14.2729 | -0.54168 | 0.871541 | 1 BH |
| PITG_13275 | Pi conserved hypothetical protein (   | -14.2803 | -0.52681 | 0.871541 | 1 BH |
| PITG_14831 | Pi conserved hypothetical protein (   | -14.2587 | -0.57009 | 0.871541 | 1 BH |
| PITG_15657 | Pi conserved hypothetical protein (   | -14.2838 | -0.51991 | 0.871541 | 1 BH |
| PITG_09655 | Pi putative tyrosine-protein phosph   | -13.081  | -0.01591 | 0.871928 | 1 BH |
| PITG_11886 | Pi ubiquitin family protein, putativ  | -14.2581 | -0.57614 | 0.873108 | 1 BH |
| PITG_20209 | Pi conserved hypothetical protein (   | -14.2664 | -0.56086 | 0.873498 | 1 BH |
| PITG_07887 | Pi 26S proteasome non-ATPase reg      | -14.2406 | -0.61359 | 0.873888 | 1 BH |
| PITG_02267 | Pi coatomer subunit beta, putative    | -14.2423 | -0.61281 | 0.874667 | 1 BH |
| PITG_08193 | Pi elicitin-like protein (357 nt)     | -14.0187 | 0.805942 | 0.875443 | 1 BH |
| PITG_00663 | Pi rRNA methyltransferase, putativ    | -14.0766 | 0.919915 | 0.875831 | 1 BH |
| PITG_00850 | Pi thioredoxin-dependent peroxide     | -13.0185 | 0.582247 | 0.876601 | 1 BH |
| PITG_03873 | Pi rab GDP dissociation inhibitor al  | -13.0246 | 0.594451 | 0.876601 | 1 BH |
| PITG_05694 | Pi transcription elongation factor S  | -14.065  | 0.892949 | 0.876604 | 1 BH |
| PITG_13371 | Pi 60S ribosomal protein L31, puta    | -9.27987 | 0.315798 | 0.877978 | 1 BH |
| PITG_11703 | Pi lectin, putative (1278 nt)         | -14.0978 | 0.950945 | 0.878146 | 1 BH |
| PITG_22249 | Pi hypothetical protein (616 nt)      | -14.0555 | 0.864428 | 0.87853  | 1 BH |
| PITG_04931 | Pi conserved hypothetical protein (   | -14.0859 | 0.921233 | 0.879298 | 1 BH |
| PITG_10979 | Pi elongation factor 1-gamma, puta    | -14.1004 | 0.95036  | 0.879298 | 1 BH |
| PITG_16366 | Pi conserved hypothetical protein (   | -12.4239 | -0.02681 | 0.879487 | 1 BH |
| PITG_07173 | Pi 40S ribosomal protein S15 (870     | -9.27635 | 0.308764 | 0.881867 | 1 BH |
| PITG_09345 | Pi 40S ribosomal protein S5-2 (106    | -8.67464 | 0.289477 | 0.885082 | 1 BH |
| PITG_01041 | Pi 60S acidic ribosomal protein P2,   | -10.2186 | -0.14576 | 0.888983 | 1 BH |
| PITG_13157 | Pi suppressor of necrosis 1, putativ  | -14.0918 | 0.879109 | 0.88951  | 1 BH |
| PITG_11099 | Pi 60S ribosomal protein L18-2 (13    | -8.91337 | 0.36943  | 0.892312 | 1 BH |
| PITG_18048 | Pi aconitate hydratase, mitochondi    | -11.3576 | 0.411747 | 0.897799 | 1 BH |
| PITG_16736 | Pi adenylosuccinate synthetase (16    | -12.7363 | 0.595485 | 0.898331 | 1 BH |
| PITG_17593 | Pi conserved hypothetical protein (   | -12.7421 | 0.607051 | 0.898331 | 1 BH |
| PITG_11615 | Pi homoserine dehydrogenase, put      | -12.729  | 0.573318 | 0.899502 | 1 BH |
| PITG_02483 | Pi 3-ketodihydrosphingosine reduc     | -12.2254 | 0.010916 | 0.899761 | 1 BH |
| PITG_06430 | Pi conserved hypothetical protein (   | -12.7472 | 0.584162 | 0.903338 | 1 BH |
| PITG_20412 | Pi putative GPI-anchored serine ric   | -12.6264 | -0.18472 | 0.907022 | 1 BH |
| PITG_20718 | Pi conserved hypothetical protein (   | -13.5822 | -0.06337 | 0.911181 | 1 BH |
| PITG_15467 | Pi conserved hypothetical protein (   | -13.5801 | -0.07117 | 0.911794 | 1 BH |
| PITG_18752 | Pi small nuclear ribonucleoprotein-   | -13.5602 | -0.11285 | 0.9121   | 1 BH |

|            |                                        |          |          |          |   |    |
|------------|----------------------------------------|----------|----------|----------|---|----|
| PITG_14173 | Pi endo-1,3(4)-beta-glucanase, put     | -13.5789 | -0.08308 | 0.913315 | 1 | BH |
| PITG_11127 | Pi coatomer subunit delta, putative    | -13.5398 | -0.16708 | 0.914219 | 1 | BH |
| PITG_20118 | Pi 50S ribosomal protein L15 (753 nt)  | -13.4613 | 0.731023 | 0.915714 | 1 | BH |
| PITG_07903 | Pi 26S proteasome non-ATPase reg       | -13.4663 | 0.729774 | 0.917193 | 1 | BH |
| PITG_19871 | Pi cell division control protein 48 (2 | -11.9067 | -0.21822 | 0.918014 | 1 | BH |
| PITG_07300 | Pi 60S ribosomal protein L35 (797 nt)  | -9.23618 | 0.227537 | 0.920081 | 1 | BH |
| PITG_21378 | Pi protein disulfide-isomerase, put    | -9.9668  | 0.260339 | 0.922671 | 1 | BH |
| PITG_18934 | Pi calreticulin precursor (1415 nt)    | -9.82819 | -0.2335  | 0.923119 | 1 | BH |
| PITG_09793 | Pi small cysteine rich protein SCR10   | -9.40257 | -0.22809 | 0.923902 | 1 | BH |
| PITG_09442 | Pi 40S ribosomal protein S21 (659 nt)  | -8.82197 | -0.12935 | 0.927606 | 1 | BH |
| PITG_03221 | Pi 40S ribosomal protein S18 (948 nt)  | -8.17286 | -0.14489 | 0.927719 | 1 | BH |
| PITG_00062 | Pi Mitochondrial Protein Transloca     | -12.2388 | 0.445986 | 0.930298 | 1 | BH |
| PITG_19161 | Pi pyruvate dehydrogenase E1 cor       | -12.2511 | 0.805161 | 0.93114  | 1 | BH |
| PITG_09015 | Pi NADH ubiquinone oxidoreductas       | -13.112  | 0.052739 | 0.93266  | 1 | BH |
| PITG_00693 | Pi plasma membrane H+-ATPase, p        | -12.2408 | 0.018635 | 0.934163 | 1 | BH |
| PITG_15553 | Pi inorganic pyrophosphatase, put      | -13.1193 | 0.017264 | 0.937968 | 1 | BH |
| PITG_14175 | Pi conserved hypothetical protein (    | -13.1559 | 0.067208 | 0.940288 | 1 | BH |
| PITG_13699 | Pi crinkler (CRN) family protein, ps   | -8.2225  | -0.15634 | 0.94036  | 1 | BH |
| PITG_10031 | Pi lysosomal alpha-mannosidase, p      | -13.1455 | 0.044044 | 0.940518 | 1 | BH |
| PITG_01797 | Pi 26S protease regulatory subunit     | -12.9864 | 0.510828 | 0.941033 | 1 | BH |
| PITG_07947 | Pi secreted RxLR effector peptide,     | -10.826  | 0.283859 | 0.941147 | 1 | BH |
| PITG_03906 | Pi Type II (General) Secretory Path    | -12.95   | -0.27134 | 0.941462 | 1 | BH |
| PITG_00613 | Pi 26S protease regulatory subunit     | -12.9537 | -0.26835 | 0.941904 | 1 | BH |
| PITG_14850 | Pi 40S ribosomal protein S7 (909 nt)   | -9.90017 | 0.200439 | 0.942677 | 1 | BH |
| PITG_00179 | Pi 40S ribosomal protein S12, puta     | -8.84494 | 0.163829 | 0.946491 | 1 | BH |
| PITG_20686 | Pi hypothetical protein (273 nt)       | -12.6849 | 0.492637 | 0.950576 | 1 | BH |
| PITG_02058 | Pi conserved hypothetical protein (    | -12.7006 | 0.49614  | 0.952658 | 1 | BH |
| PITG_20264 | Pi 40S ribosomal protein S13 (784 nt)  | -9.41192 | -0.04488 | 0.955809 | 1 | BH |
| PITG_06404 | Pi conserved hypothetical protein (    | -9.97863 | -0.0168  | 0.957786 | 1 | BH |
| PITG_10887 | Pi 40S ribosomal protein S11 (1081     | -9.38251 | 0.149281 | 0.957794 | 1 | BH |
| PITG_11630 | Pi eukaryotic translation initiation   | -11.6039 | 0.051555 | 0.957931 | 1 | BH |
| PITG_10263 | Pi 60S ribosomal protein L37a, put     | -8.54204 | -0.06251 | 0.958489 | 1 | BH |
| PITG_20489 | Pi mucin-like protein (2163 nt)        | -12.7426 | 0.477415 | 0.959758 | 1 | BH |
| PITG_01700 | Pi inositol-3-phosphate synthase, p    | -12.1995 | 0.367293 | 0.965849 | 1 | BH |
| PITG_20487 | Pi conserved hypothetical protein (    | -12.3445 | 0.141116 | 0.969379 | 1 | BH |
| PITG_12990 | Pi glutathione transferase, theta cl   | -10.6512 | -0.20711 | 0.969497 | 1 | BH |
| PITG_14739 | Pi PexRD8 family secreted RxLR eff     | -11.6275 | 0.118642 | 0.977936 | 1 | BH |
| PITG_10972 | Pi thioredoxin-like protein (1089 nt)  | -11.6145 | 0.085248 | 0.978213 | 1 | BH |
| PITG_18776 | Pi cytochrome c1, mitochondrial pi     | -11.5053 | 0.117427 | 0.979715 | 1 | BH |
| PITG_06449 | Pi pyruvate carboxylase, putative (    | -11.5235 | 0.079856 | 0.982251 | 1 | BH |
| PITG_09552 | Pi conserved hypothetical protein (    | -9.02317 | 0.001705 | 0.985756 | 1 | BH |
| PITG_20795 | Pi ribosomal protein (659 nt)          | -9.04522 | 0.009103 | 0.988152 | 1 | BH |
| PITG_13500 | Pi 40S ribosomal protein S4 (1129 nt)  | -9.13556 | 0.026296 | 0.993498 | 1 | BH |
| PITG_02578 | Pi 60S ribosomal protein L15-1 (62     | -9.34149 | 0.070178 | 0.996217 | 1 | BH |
| PITG_03239 | Pi 60S ribosomal protein L27 (1037     | -8.88115 | 0.03073  | 0.997305 | 1 | BH |
| PITG_10863 | Pi 60S ribosomal protein L32-1 (72     | -8.71839 | 0.043307 | 0.997651 | 1 | BH |
| PITG_18375 | Pi UDP-glucose 6-dehydrogenase (       | -14.8487 | 0.598792 | 1        | 1 | BH |

|            |                                                               |          |          |   |      |
|------------|---------------------------------------------------------------|----------|----------|---|------|
| PITG_03101 | Pi conserved hypothetical protein (                           | -15.0244 | 0.9438   | 1 | 1 BH |
| PITG_01582 | Pi hypothetical protein (601 nt)                              | -32.5602 | -34.9118 | 1 | 1 BH |
| PITG_01825 | Pi conserved hypothetical protein (                           | -32.5602 | -34.9118 | 1 | 1 BH |
| PITG_02797 | Pi ribosomal RNA large subunit me                             | -32.5602 | -34.9118 | 1 | 1 BH |
| PITG_03111 | Pi conserved hypothetical protein (                           | -32.5602 | -34.9118 | 1 | 1 BH |
| PITG_03146 | Pi conserved hypothetical protein (                           | -32.5602 | -34.9118 | 1 | 1 BH |
| PITG_03555 | Pi importin-like protein (3240 nt)                            | -15.1465 | 1.184138 | 1 | 1 BH |
| PITG_05884 | Pi AP-2 complex subunit beta, puta                            | -14.5904 | 0.083487 | 1 | 1 BH |
| PITG_07302 | Pi histone acetyltransferase, putati                          | -32.5602 | -34.9118 | 1 | 1 BH |
| PITG_08688 | Pi conserved hypothetical protein (                           | -32.5602 | -34.9118 | 1 | 1 BH |
| PITG_09640 | Pi ATP phosphoribosyltransferase (                            | -14.5517 | 0.006018 | 1 | 1 BH |
| PITG_10053 | Pi conserved hypothetical protein (                           | -32.5602 | -34.9118 | 1 | 1 BH |
| PITG_10351 | Pi conserved hypothetical protein (                           | -32.5602 | -34.9118 | 1 | 1 BH |
| PITG_10892 | Pi hypothetical protein (1141 nt)                             | -32.5602 | -34.9118 | 1 | 1 BH |
| PITG_11653 | Pi conserved hypothetical protein (                           | -14.7904 | 0.469444 | 1 | 1 BH |
| PITG_12000 | Pi conserved hypothetical protein (                           | -32.5602 | -34.9118 | 1 | 1 BH |
| PITG_13439 | Pi conserved hypothetical protein (                           | -32.5602 | -34.9118 | 1 | 1 BH |
| PITG_13845 | Pi conserved hypothetical protein (                           | -32.5602 | -34.9118 | 1 | 1 BH |
| PITG_15077 | Pi serine protease family S33, puta                           | -32.5602 | -34.9118 | 1 | 1 BH |
| PITG_16328 | Pi tyrosyl-tRNA synthetase, putativ                           | -14.5603 | 0.023269 | 1 | 1 BH |
| PITG_16491 | Pi conserved hypothetical protein (                           | -32.5602 | -34.9118 | 1 | 1 BH |
| PITG_20797 | Pi tubulin-specific chaperone B, pu                           | -32.5602 | -34.9118 | 1 | 1 BH |
| PITG_00023 | Pi mitoferrin-like protein (1812 nt)                          | -32.7854 | -34.4613 | 1 | 1 BH |
| PITG_00216 | Pi conserved hypothetical protein (                           | -13.7573 | 0.286926 | 1 | 1 BH |
| PITG_00233 | Pi Major Facilitator Superfamily (M                           | -32.8156 | -34.4008 | 1 | 1 BH |
| PITG_00281 | Pi Major Facilitator Superfamily (M                           | -32.7854 | -34.4613 | 1 | 1 BH |
| PITG_00422 | Pi Zinc (Zn <sup>2+</sup> )-Iron (Fe <sup>2+</sup> ) Permease | -32.8156 | -34.4008 | 1 | 1 BH |
| PITG_00468 | Pi conserved hypothetical protein (                           | -32.8473 | -34.3375 | 1 | 1 BH |
| PITG_00483 | Pi pumilio-like mating protein M90                            | -32.8473 | -34.3375 | 1 | 1 BH |
| PITG_00524 | Pi conserved hypothetical protein (                           | -32.8473 | -34.3375 | 1 | 1 BH |
| PITG_00664 | Pi conserved hypothetical protein (                           | -32.8156 | -34.4008 | 1 | 1 BH |
| PITG_00697 | Pi conserved hypothetical protein (                           | -14.6887 | 0.282513 | 1 | 1 BH |
| PITG_00762 | Pi conserved hypothetical protein (                           | -32.8156 | -34.4008 | 1 | 1 BH |
| PITG_01112 | Pi UDP-3-O-[3-hydroxymyristoyl] g                             | -32.8156 | -34.4008 | 1 | 1 BH |
| PITG_01343 | Pi serine protease family S10, puta                           | -32.8473 | -34.3375 | 1 | 1 BH |
| PITG_01579 | Pi transcription factor, putative (15                         | -32.5598 | -34.9124 | 1 | 1 BH |
| PITG_01689 | Pi hydroxyacylglutathione hydrolas                            | -32.8156 | -34.4008 | 1 | 1 BH |
| PITG_01745 | Pi NEDD4-like ubiquitin ligase, puta                          | -32.8473 | -34.3375 | 1 | 1 BH |
| PITG_01850 | Pi kinesin-like protein (7582 nt)                             | -32.7854 | -34.4613 | 1 | 1 BH |
| PITG_01898 | Pi conserved hypothetical protein (                           | -32.8156 | -34.4008 | 1 | 1 BH |
| PITG_02011 | Pi calcineurin subunit B, putative (1                         | -32.8473 | -34.3375 | 1 | 1 BH |
| PITG_02157 | Pi conserved hypothetical protein (                           | -32.8473 | -34.3375 | 1 | 1 BH |
| PITG_02194 | Pi conserved hypothetical protein (                           | -32.5602 | -34.9118 | 1 | 1 BH |
| PITG_02208 | Pi conserved hypothetical protein (                           | -32.8156 | -34.4008 | 1 | 1 BH |
| PITG_02391 | Pi conserved hypothetical protein (                           | -32.8156 | -34.4008 | 1 | 1 BH |
| PITG_02452 | Pi conserved hypothetical protein (                           | -32.7854 | -34.4613 | 1 | 1 BH |
| PITG_02456 | Pi conserved hypothetical protein (                           | -32.8473 | -34.3375 | 1 | 1 BH |



|            |                                      |          |          |   |      |
|------------|--------------------------------------|----------|----------|---|------|
| PITG_02490 | Pi conserved hypothetical protein (  | -32.7854 | -34.4613 | 1 | 1 BH |
| PITG_02629 | Pi nucleolin, putative (1642 nt)     | -15.3432 | 1.589124 | 1 | 1 BH |
| PITG_02824 | Pi Sulfate Permease (SulP) Family (  | -32.7854 | -34.4613 | 1 | 1 BH |
| PITG_02895 | Pi selenoprotein O, putative (1914   | -32.7854 | -34.4613 | 1 | 1 BH |
| PITG_03263 | Pi conserved hypothetical protein (  | -32.7854 | -34.4613 | 1 | 1 BH |
| PITG_03371 | Pi acyltransferase, putative (1770 r | -32.8156 | -34.4008 | 1 | 1 BH |
| PITG_03650 | Pi conserved hypothetical protein (  | -32.8473 | -34.3375 | 1 | 1 BH |
| PITG_03863 | Pi conserved hypothetical protein (  | -32.8156 | -34.4008 | 1 | 1 BH |
| PITG_04113 | Pi conserved hypothetical protein (  | -32.5385 | -34.9551 | 1 | 1 BH |
| PITG_04709 | Pi DNA ligase, putative (12166 nt)   | -32.8156 | -34.4008 | 1 | 1 BH |
| PITG_05633 | Pi conserved hypothetical protein (  | -32.8473 | -34.3375 | 1 | 1 BH |
| PITG_05701 | Pi NAD-dependent glycerol-3-phos     | -32.5602 | -34.9118 | 1 | 1 BH |
| PITG_05780 | Pi conserved hypothetical protein (  | -32.5598 | -34.9124 | 1 | 1 BH |
| PITG_06165 | Pi conserved hypothetical protein (  | -32.8473 | -34.3375 | 1 | 1 BH |
| PITG_06507 | Pi conserved hypothetical protein (  | -32.5602 | -34.9118 | 1 | 1 BH |
| PITG_06598 | Pi conserved hypothetical protein (  | -32.8156 | -34.4008 | 1 | 1 BH |
| PITG_06668 | Pi ATP-binding Cassette (ABC) Supe   | -32.8473 | -34.3375 | 1 | 1 BH |
| PITG_06749 | Pi bifunctional dihydrofolate reduc  | -32.8156 | -34.4008 | 1 | 1 BH |
| PITG_07039 | Pi N(4)-(Beta-N-acetylglucosaminy    | -32.8473 | -34.3375 | 1 | 1 BH |
| PITG_07169 | Pi Major Facilitator Superfamily (M  | -32.8156 | -34.4008 | 1 | 1 BH |
| PITG_07230 | Pi HECT E3 ubiquitin ligase, putativ | -32.7854 | -34.4613 | 1 | 1 BH |
| PITG_07551 | Pi N(6)-adenine-specific DNA meth    | -32.8473 | -34.3375 | 1 | 1 BH |
| PITG_07880 | Pi betaine aldehyde dehydrogenas     | -32.8156 | -34.4008 | 1 | 1 BH |
| PITG_07938 | Pi conserved hypothetical protein (  | -32.8473 | -34.3375 | 1 | 1 BH |
| PITG_08093 | Pi conserved hypothetical protein (  | -32.7854 | -34.4613 | 1 | 1 BH |
| PITG_08232 | Pi conserved hypothetical protein (  | -32.8473 | -34.3375 | 1 | 1 BH |
| PITG_08752 | Pi conserved hypothetical protein (  | -32.8156 | -34.4008 | 1 | 1 BH |
| PITG_09247 | Pi neurobeachin-like protein (8721   | -32.8156 | -34.4008 | 1 | 1 BH |
| PITG_09728 | Pi exosome complex exonuclease f     | -32.5385 | -34.9551 | 1 | 1 BH |
| PITG_09949 | Pi conserved hypothetical protein (  | -14.5155 | -0.09109 | 1 | 1 BH |
| PITG_10080 | Pi uroporphyrinogen-III synthase, p  | -32.8255 | -34.381  | 1 | 1 BH |
| PITG_10201 | Pi conserved hypothetical protein (  | -32.8156 | -34.4008 | 1 | 1 BH |
| PITG_10289 | Pi DNA-dependent RNA polymeras       | -32.7854 | -34.4613 | 1 | 1 BH |
| PITG_10334 | Pi serine/threonine protein kinase   | -32.5598 | -34.9124 | 1 | 1 BH |
| PITG_10445 | Pi DNA-directed RNA polymerase I,    | -32.8473 | -34.3375 | 1 | 1 BH |
| PITG_10795 | Pi conserved hypothetical protein (  | -32.8156 | -34.4008 | 1 | 1 BH |
| PITG_10866 | Pi spermidine synthase, putative (1  | -15.1818 | 1.266211 | 1 | 1 BH |
| PITG_10994 | Pi mitochondrial inner membrane      | -32.5598 | -34.9124 | 1 | 1 BH |
| PITG_11065 | Pi NAD-dependent malic enzyme, p     | -14.924  | 0.73253  | 1 | 1 BH |
| PITG_11158 | Pi pre-mRNA-splicing factor SYF1-li  | -32.8473 | -34.3375 | 1 | 1 BH |
| PITG_11765 | Pi conserved hypothetical protein (  | -32.8156 | -34.4008 | 1 | 1 BH |
| PITG_12107 | Pi conserved hypothetical protein (  | -32.8473 | -34.3375 | 1 | 1 BH |
| PITG_12111 | Pi conserved hypothetical protein (  | -32.7854 | -34.4613 | 1 | 1 BH |
| PITG_12119 | Pi ATPase family AAA domain-cont     | -15.1818 | 1.266211 | 1 | 1 BH |
| PITG_12233 | Pi phosphatidic acid phosphatase (   | -32.8156 | -34.4008 | 1 | 1 BH |
| PITG_13173 | Pi conserved hypothetical protein (  | -32.8156 | -34.4008 | 1 | 1 BH |
| PITG_13176 | Pi diamminopimelate decarboxylase,   | -15.5261 | 1.944701 | 1 | 1 BH |

|            |                                      |          |          |   |   |    |
|------------|--------------------------------------|----------|----------|---|---|----|
| PITG_13223 | Pi cysteine desulfurase, putative (1 | -32.8473 | -34.3375 | 1 | 1 | BH |
| PITG_13412 | Pi conserved hypothetical protein (  | -32.8473 | -34.3375 | 1 | 1 | BH |
| PITG_13460 | Pi conserved hypothetical protein (  | -32.7854 | -34.4613 | 1 | 1 | BH |
| PITG_13512 | Pi peptidyl-prolyl cis-trans isomera | -32.7854 | -34.4613 | 1 | 1 | BH |
| PITG_13663 | Pi conserved hypothetical protein (  | -32.7854 | -34.4613 | 1 | 1 | BH |
| PITG_14398 | Pi vacuolar amino acid transporter,  | -32.7854 | -34.4613 | 1 | 1 | BH |
| PITG_14452 | Pi conserved hypothetical protein (  | -32.8473 | -34.3375 | 1 | 1 | BH |
| PITG_14585 | Pi conserved hypothetical protein (  | -32.5598 | -34.9124 | 1 | 1 | BH |
| PITG_14614 | Pi tubulin-specific chaperone C, pu  | -32.7854 | -34.4613 | 1 | 1 | BH |
| PITG_14948 | Pi conserved hypothetical protein (  | -32.8473 | -34.3375 | 1 | 1 | BH |
| PITG_15053 | Pi DNA replication licensing factor  | -32.8473 | -34.3375 | 1 | 1 | BH |
| PITG_15243 | Pi phosphate acetyltransferase (23   | -32.5598 | -34.9124 | 1 | 1 | BH |
| PITG_15447 | Pi conserved hypothetical protein (  | -32.8473 | -34.3375 | 1 | 1 | BH |
| PITG_15463 | Pi lamin-like protein (1884 nt)      | -32.8473 | -34.3375 | 1 | 1 | BH |
| PITG_15960 | Pi conserved hypothetical protein (  | -32.5598 | -34.9124 | 1 | 1 | BH |
| PITG_16006 | Pi conserved hypothetical protein (  | -32.8473 | -34.3375 | 1 | 1 | BH |
| PITG_16224 | Pi conserved hypothetical protein (  | -32.8156 | -34.4008 | 1 | 1 | BH |
| PITG_16326 | Pi calcineurin-like phosphoesterase  | -32.8473 | -34.3375 | 1 | 1 | BH |
| PITG_16495 | Pi conserved hypothetical protein (  | -32.8473 | -34.3375 | 1 | 1 | BH |
| PITG_16530 | Pi aspartyl-tRNA synthetase, putati  | -32.7854 | -34.4613 | 1 | 1 | BH |
| PITG_17037 | Pi calcineurin-like phosphoesterase  | -32.7854 | -34.4613 | 1 | 1 | BH |
| PITG_17360 | Pi 12-oxophytodienoate reductase     | -32.5385 | -34.9551 | 1 | 1 | BH |
| PITG_17479 | Pi conserved hypothetical protein (  | -32.8156 | -34.4008 | 1 | 1 | BH |
| PITG_17627 | Pi conserved hypothetical protein (  | -32.8156 | -34.4008 | 1 | 1 | BH |
| PITG_17705 | Pi protein kinase (1554 nt)          | -32.8473 | -34.3375 | 1 | 1 | BH |
| PITG_17787 | Pi Arsenite-Antimonite (ArsAB) Effl  | -13.7399 | 0.252132 | 1 | 1 | BH |
| PITG_18461 | Pi conserved hypothetical protein (  | -32.8156 | -34.4008 | 1 | 1 | BH |
| PITG_19127 | Pi conserved hypothetical protein (  | -32.7854 | -34.4613 | 1 | 1 | BH |
| PITG_19153 | Pi conserved hypothetical protein (  | -32.8156 | -34.4008 | 1 | 1 | BH |
| PITG_19551 | Pi conserved hypothetical protein (  | -14.6541 | 0.213293 | 1 | 1 | BH |
| PITG_19639 | Pi conserved hypothetical protein (  | -32.8473 | -34.3375 | 1 | 1 | BH |
| PITG_19836 | Pi hypothetical protein (1303 nt)    | -32.7854 | -34.4613 | 1 | 1 | BH |
| PITG_19886 | Pi sphingosine kinase, putative (53  | -32.5598 | -34.9124 | 1 | 1 | BH |
| PITG_20102 | Pi conserved hypothetical protein (  | -15.1818 | 1.266211 | 1 | 1 | BH |
| PITG_20378 | Pi conserved hypothetical protein (  | -32.8156 | -34.4008 | 1 | 1 | BH |
| PITG_21028 | Pi mannosyl-oligosaccharide gluco    | -32.7854 | -34.4613 | 1 | 1 | BH |
| PITG_21212 | Pi conserved hypothetical protein (  | -32.5602 | -34.9118 | 1 | 1 | BH |
| PITG_21335 | Pi conserved hypothetical protein (  | -15.3756 | 1.641178 | 1 | 1 | BH |
| PITG_21351 | Pi conserved hypothetical protein (  | -32.8473 | -34.3375 | 1 | 1 | BH |
| PITG_21492 | Pi conserved hypothetical protein (  | -32.5602 | -34.9118 | 1 | 1 | BH |
| PITG_21853 | Pi transmembrane protein, putativ    | -32.8473 | -34.3375 | 1 | 1 | BH |
| PITG_21944 | Pi conserved hypothetical protein (  | -32.5602 | -34.9118 | 1 | 1 | BH |
| PITG_22053 | Pi NPP1-like protein (798 nt)        | -15.3565 | 1.615626 | 1 | 1 | BH |
| PITG_22334 | Pi Amino Acid-Polyamine-Organoc      | -32.8156 | -34.4008 | 1 | 1 | BH |
| PITG_22427 | Pi ubiquitin-specific protease, puta | -32.8473 | -34.3375 | 1 | 1 | BH |
| PITG_22430 | Pi conserved hypothetical protein (  | -32.5598 | -34.9124 | 1 | 1 | BH |
| PITG_22566 | Pi conserved hypothetical protein (  | -32.8156 | -34.4008 | 1 | 1 | BH |

|            |                                       |          |          |   |      |
|------------|---------------------------------------|----------|----------|---|------|
| PITG_22575 | Pi Drug/Metabolite Transporter (D     | -32.8156 | -34.4008 | 1 | 1 BH |
| PITG_22638 | Pi conserved hypothetical protein (   | -32.8156 | -34.4008 | 1 | 1 BH |
| PITG_22961 | Pi conserved hypothetical protein (   | -15.3565 | 1.615626 | 1 | 1 BH |
| PITG_23178 | Pi kazal-type serine protease inhibi  | -32.8473 | -34.3375 | 1 | 1 BH |
| PITG_00186 | Pi histone acetyltransferase, putati  | -32.8216 | -34.389  | 1 | 1 BH |
| PITG_00229 | Pi 26S protease regulatory subunit    | -13.7851 | 0.333048 | 1 | 1 BH |
| PITG_00299 | Pi alpha-1,3-mannosyltransferase,     | -33.0621 | -33.908  | 1 | 1 BH |
| PITG_00382 | Pi hypothetical protein (756 nt)      | -32.7884 | -34.4553 | 1 | 1 BH |
| PITG_00395 | Pi cathepsin B, cysteine protease fa  | -33.1402 | -33.7516 | 1 | 1 BH |
| PITG_00397 | Pi eukaryotic translation initiation  | -14.3648 | 1.483038 | 1 | 1 BH |
| PITG_00440 | Pi myotubularin-like protein (4762    | -32.7902 | -34.4516 | 1 | 1 BH |
| PITG_00475 | Pi conserved hypothetical protein (   | -32.7902 | -34.4516 | 1 | 1 BH |
| PITG_00502 | Pi conserved hypothetical protein (   | -33.2423 | -33.5475 | 1 | 1 BH |
| PITG_00584 | Pi oxidoreductase, putative (1591     | -32.8519 | -34.3284 | 1 | 1 BH |
| PITG_00641 | Pi conserved hypothetical protein (   | -32.8194 | -34.3934 | 1 | 1 BH |
| PITG_00874 | Pi carbohydrate-binding protein, pi   | -33.0621 | -33.908  | 1 | 1 BH |
| PITG_00982 | Pi conserved hypothetical protein (   | -32.5398 | -34.9525 | 1 | 1 BH |
| PITG_01045 | Pi tRNA pseudouridine synthase D      | -32.8216 | -34.389  | 1 | 1 BH |
| PITG_01058 | Pi conserved hypothetical protein (   | -32.7902 | -34.4516 | 1 | 1 BH |
| PITG_01102 | Pi conserved hypothetical protein (   | -32.8194 | -34.3934 | 1 | 1 BH |
| PITG_01154 | Pi gamma-tubulin complex compo        | -32.5398 | -34.9525 | 1 | 1 BH |
| PITG_01231 | Pi conserved hypothetical protein (   | -33.0621 | -33.908  | 1 | 1 BH |
| PITG_01259 | Pi nuclear pore complex protein, p    | -33.1061 | -33.8198 | 1 | 1 BH |
| PITG_01267 | Pi glycoside hydrolase, putative (14  | -32.5398 | -34.9525 | 1 | 1 BH |
| PITG_01353 | Pi UDP-N-acetylglucosamine transf     | -32.8216 | -34.389  | 1 | 1 BH |
| PITG_01376 | Pi conserved hypothetical protein (   | -33.0621 | -33.908  | 1 | 1 BH |
| PITG_01426 | Pi conserved hypothetical protein (   | -32.7884 | -34.4553 | 1 | 1 BH |
| PITG_01444 | Pi Argonaute5 (AGO5) (2496 nt)        | -33.0621 | -33.908  | 1 | 1 BH |
| PITG_01678 | Pi conserved hypothetical protein (   | -32.7884 | -34.4553 | 1 | 1 BH |
| PITG_01750 | Pi RNA polymerase II-associated pr    | -33.0621 | -33.908  | 1 | 1 BH |
| PITG_01768 | Pi DAHP synthase (1203 nt)            | -33.3587 | -33.3146 | 1 | 1 BH |
| PITG_01790 | Pi conserved hypothetical protein (   | -33.0621 | -33.908  | 1 | 1 BH |
| PITG_01823 | Pi conserved hypothetical protein (   | -33.2916 | -33.449  | 1 | 1 BH |
| PITG_01899 | Pi conserved hypothetical protein (   | -33.2423 | -33.5475 | 1 | 1 BH |
| PITG_01974 | Pi conserved hypothetical protein (   | -33.0621 | -33.908  | 1 | 1 BH |
| PITG_02042 | Pi serine/threonine-protein phosph    | -32.7884 | -34.4553 | 1 | 1 BH |
| PITG_02213 | Pi serine protease family S10, puta   | -32.5823 | -34.8675 | 1 | 1 BH |
| PITG_02303 | Pi ornithine decarboxylase 1 (1502    | -33.2423 | -33.5475 | 1 | 1 BH |
| PITG_02362 | Pi P-type ATPase (P-ATPase) Super     | -33.0621 | -33.908  | 1 | 1 BH |
| PITG_02586 | Pi conserved hypothetical protein (   | -14.47   | -0.17014 | 1 | 1 BH |
| PITG_02667 | Pi conserved hypothetical protein (   | -33.2916 | -33.449  | 1 | 1 BH |
| PITG_02775 | Pi conserved hypothetical protein (   | -33.0621 | -33.908  | 1 | 1 BH |
| PITG_02782 | Pi conserved hypothetical protein (   | -33.1061 | -33.8198 | 1 | 1 BH |
| PITG_02789 | Pi E3 ubiquitin ligase , putative (11 | -33.1061 | -33.8198 | 1 | 1 BH |
| PITG_02799 | Pi conserved hypothetical protein (   | -33.1061 | -33.8198 | 1 | 1 BH |
| PITG_02921 | Pi valyl-tRNA synthetase (3210 nt)    | -14.2877 | -0.51686 | 1 | 1 BH |
| PITG_02957 | Pi conserved hypothetical protein (   | -33.1061 | -33.8198 | 1 | 1 BH |

|            |                                       |          |          |   |      |
|------------|---------------------------------------|----------|----------|---|------|
| PITG_02970 | Pi hypothetical protein (586 nt)      | -33.1061 | -33.8198 | 1 | 1 BH |
| PITG_02989 | Pi conserved hypothetical protein (   | -33.1061 | -33.8198 | 1 | 1 BH |
| PITG_03015 | Pi aspartyl/Asparaginyl beta-hydro    | -32.8519 | -34.3284 | 1 | 1 BH |
| PITG_03074 | Pi diacylglycerol acyltransferase, pi | -32.8216 | -34.389  | 1 | 1 BH |
| PITG_03102 | Pi septum-promoting GTP-binding       | -32.8519 | -34.3284 | 1 | 1 BH |
| PITG_03164 | Pi conserved hypothetical protein (   | -33.3587 | -33.3146 | 1 | 1 BH |
| PITG_03322 | Pi prolyl-tRNA synthetase, putative   | -32.7902 | -34.4516 | 1 | 1 BH |
| PITG_03521 | Pi conserved hypothetical protein (   | -33.2916 | -33.449  | 1 | 1 BH |
| PITG_03594 | Pi protein transporter Sec31A, put:   | -14.5648 | 0.023342 | 1 | 1 BH |
| PITG_03915 | Pi glutamyl-tRNA(Gln) amidotransf     | -32.8216 | -34.389  | 1 | 1 BH |
| PITG_04185 | Pi histone-lysine N-methyltransfera   | -33.1061 | -33.8198 | 1 | 1 BH |
| PITG_04288 | Pi conserved hypothetical protein (   | -33.1061 | -33.8198 | 1 | 1 BH |
| PITG_04333 | Pi 3-oxo-5-alpha-steroid 4-dehydra    | -14.9439 | 0.795392 | 1 | 1 BH |
| PITG_04549 | Pi Ferroportin (FP) Family (1725 nt   | -33.0621 | -33.908  | 1 | 1 BH |
| PITG_04919 | Pi conserved hypothetical protein (   | -33.1061 | -33.8198 | 1 | 1 BH |
| PITG_04927 | Pi conserved hypothetical protein (   | -33.2916 | -33.449  | 1 | 1 BH |
| PITG_04998 | Pi MtN3-like protein (693 nt)         | -33.1061 | -33.8198 | 1 | 1 BH |
| PITG_05072 | Pi secreted RxLR effector peptide,    | -33.0621 | -33.908  | 1 | 1 BH |
| PITG_05155 | Pi conserved hypothetical protein (   | -32.7884 | -34.4553 | 1 | 1 BH |
| PITG_05409 | Pi conserved hypothetical protein (   | -32.8519 | -34.3284 | 1 | 1 BH |
| PITG_05488 | Pi hypothetical protein (2284 nt)     | -32.7884 | -34.4553 | 1 | 1 BH |
| PITG_05490 | Pi conserved hypothetical protein (   | -33.1061 | -33.8198 | 1 | 1 BH |
| PITG_05518 | Pi hypothetical protein (783 nt)      | -32.7884 | -34.4553 | 1 | 1 BH |
| PITG_05567 | Pi kinetochore protein NDC80 (917     | -33.0621 | -33.908  | 1 | 1 BH |
| PITG_05571 | Pi conserved hypothetical protein (   | -33.1061 | -33.8198 | 1 | 1 BH |
| PITG_05673 | Pi hypothetical protein (795 nt)      | -32.8519 | -34.3284 | 1 | 1 BH |
| PITG_05737 | Pi Transient Receptor Potential Ca:   | -32.5398 | -34.9525 | 1 | 1 BH |
| PITG_05763 | Pi conserved hypothetical protein (   | -33.1061 | -33.8198 | 1 | 1 BH |
| PITG_05940 | Pi spindle assembly protein, putati   | -33.0621 | -33.908  | 1 | 1 BH |
| PITG_05960 | Pi hypothetical protein (1290 nt)     | -33.2423 | -33.5475 | 1 | 1 BH |
| PITG_06040 | Pi conserved hypothetical protein (   | -32.8216 | -34.389  | 1 | 1 BH |
| PITG_06353 | Pi conserved hypothetical protein (   | -32.8194 | -34.3934 | 1 | 1 BH |
| PITG_06355 | Pi conserved hypothetical protein (   | -33.1061 | -33.8198 | 1 | 1 BH |
| PITG_06394 | Pi conserved hypothetical protein (   | -33.1061 | -33.8198 | 1 | 1 BH |
| PITG_06406 | Pi HECT E3 ubiquitin ligase, putativ  | -32.5398 | -34.9525 | 1 | 1 BH |
| PITG_06438 | Pi conserved hypothetical protein (   | -33.0621 | -33.908  | 1 | 1 BH |
| PITG_06775 | Pi conserved hypothetical protein (   | -32.8519 | -34.3284 | 1 | 1 BH |
| PITG_06820 | Pi trehalase, putative (2103 nt)      | -32.7902 | -34.4516 | 1 | 1 BH |
| PITG_06856 | Pi kinesin-like protein (1143 nt)     | -33.1061 | -33.8198 | 1 | 1 BH |
| PITG_06899 | Pi conserved hypothetical protein (   | -32.8519 | -34.3284 | 1 | 1 BH |
| PITG_06935 | Pi HSF-type DNA-binding, putative     | -33.0621 | -33.908  | 1 | 1 BH |
| PITG_06987 | Pi conserved hypothetical protein (   | -33.1061 | -33.8198 | 1 | 1 BH |
| PITG_06991 | Pi FHA domain-interacting nucleola    | -32.7884 | -34.4553 | 1 | 1 BH |
| PITG_07073 | Pi conserved hypothetical protein (   | -33.1061 | -33.8198 | 1 | 1 BH |
| PITG_07118 | Pi conserved hypothetical protein (   | -33.1061 | -33.8198 | 1 | 1 BH |
| PITG_07275 | Pi conserved hypothetical protein (   | -33.1061 | -33.8198 | 1 | 1 BH |
| PITG_07381 | Pi conserved hypothetical protein (   | -33.0621 | -33.908  | 1 | 1 BH |

|            |                                       |          |          |   |      |
|------------|---------------------------------------|----------|----------|---|------|
| PITG_07744 | Pi DEAD/DEAH box RNA helicase, p      | -33.0621 | -33.908  | 1 | 1 BH |
| PITG_07884 | Pi XTP3-transactivated gene A prot    | -32.7884 | -34.4553 | 1 | 1 BH |
| PITG_07916 | Pi protein kinase, putative (1779 nt) | -32.7884 | -34.4553 | 1 | 1 BH |
| PITG_07977 | Pi hypothetical protein (1123 nt)     | -33.2916 | -33.449  | 1 | 1 BH |
| PITG_07986 | Pi crinkler (CRN) family protein, ps  | -33.1061 | -33.8198 | 1 | 1 BH |
| PITG_08050 | Pi conserved hypothetical protein (   | -33.0621 | -33.908  | 1 | 1 BH |
| PITG_08137 | Pi palmitoyltransferase, putative (7  | -32.8194 | -34.3934 | 1 | 1 BH |
| PITG_08216 | Pi WD domain-containing protein,      | -33.1061 | -33.8198 | 1 | 1 BH |
| PITG_08233 | Pi conserved hypothetical protein (   | -32.8519 | -34.3284 | 1 | 1 BH |
| PITG_08234 | Pi DnaJ subfamily C member 2 prot     | -13.7992 | 1.418109 | 1 | 1 BH |
| PITG_08328 | Pi ubiquitin-conjugating enzyme E2    | -32.7884 | -34.4553 | 1 | 1 BH |
| PITG_08331 | Pi conserved hypothetical protein (   | -33.2115 | -33.609  | 1 | 1 BH |
| PITG_08395 | Pi conserved hypothetical protein (   | -33.1539 | -33.7243 | 1 | 1 BH |
| PITG_08541 | Pi conserved hypothetical protein (   | -33.1061 | -33.8198 | 1 | 1 BH |
| PITG_08587 | Pi histone acetyltransferase, putati  | -32.8519 | -34.3284 | 1 | 1 BH |
| PITG_08600 | Pi vesicle-fusing ATPase, putative (  | -14.6253 | 0.146995 | 1 | 1 BH |
| PITG_08643 | Pi conserved hypothetical protein (   | -32.8216 | -34.389  | 1 | 1 BH |
| PITG_08732 | Pi conserved hypothetical protein (   | -33.1061 | -33.8198 | 1 | 1 BH |
| PITG_08759 | Pi conserved hypothetical protein (   | -33.0621 | -33.908  | 1 | 1 BH |
| PITG_08805 | Pi hypothetical protein (1049 nt)     | -33.0621 | -33.908  | 1 | 1 BH |
| PITG_08844 | Pi mannitol dehydrogenase, putati     | -33.1539 | -33.7243 | 1 | 1 BH |
| PITG_09008 | Pi conserved hypothetical protein (   | -33.1402 | -33.7516 | 1 | 1 BH |
| PITG_09301 | Pi conserved hypothetical protein (   | -32.8194 | -34.3934 | 1 | 1 BH |
| PITG_09306 | Pi conserved hypothetical protein (   | -33.2916 | -33.449  | 1 | 1 BH |
| PITG_09367 | Pi sterol 3-beta-glucosyltransferase  | -33.2423 | -33.5475 | 1 | 1 BH |
| PITG_09440 | Pi conserved hypothetical protein (   | -15.3379 | 1.576043 | 1 | 1 BH |
| PITG_09701 | Pi conserved hypothetical protein (   | -32.8519 | -34.3284 | 1 | 1 BH |
| PITG_09881 | Pi ATP-binding Cassette (ABC) supe    | -32.8216 | -34.389  | 1 | 1 BH |
| PITG_10038 | Pi SCP-like extracellular protein (10 | -33.2115 | -33.609  | 1 | 1 BH |
| PITG_10050 | Pi alpha-N-acetylglucosaminidase (    | -33.0621 | -33.908  | 1 | 1 BH |
| PITG_10186 | Pi cell division control protein 45 ( | -33.1061 | -33.8198 | 1 | 1 BH |
| PITG_10310 | Pi myb-like DNA-binding protein, p    | -33.1061 | -33.8198 | 1 | 1 BH |
| PITG_10389 | Pi conserved hypothetical protein (   | -33.1402 | -33.7516 | 1 | 1 BH |
| PITG_10482 | Pi pre-mRNA-splicing factor 18, put   | -33.1061 | -33.8198 | 1 | 1 BH |
| PITG_10490 | Pi hypothetical protein (1293 nt)     | -33.2916 | -33.449  | 1 | 1 BH |
| PITG_10569 | Pi hypothetical protein (341 nt)      | -32.5398 | -34.9525 | 1 | 1 BH |
| PITG_10922 | Pi fatty acid synthase subunit alpha  | -33.0621 | -33.908  | 1 | 1 BH |
| PITG_10926 | Pi fatty acid synthase subunit alpha  | -33.1061 | -33.8198 | 1 | 1 BH |
| PITG_10934 | Pi conserved hypothetical protein (   | -33.3587 | -33.3146 | 1 | 1 BH |
| PITG_10943 | Pi conserved hypothetical protein (   | -32.7902 | -34.4516 | 1 | 1 BH |
| PITG_11083 | Pi conserved hypothetical protein (   | -32.8194 | -34.3934 | 1 | 1 BH |
| PITG_11129 | Pi conserved hypothetical protein (   | -32.7902 | -34.4516 | 1 | 1 BH |
| PITG_11155 | Pi conserved hypothetical protein (   | -33.1061 | -33.8198 | 1 | 1 BH |
| PITG_11159 | Pi phospholipid-transporting ATPase   | -33.2115 | -33.609  | 1 | 1 BH |
| PITG_11234 | Pi conserved hypothetical protein (   | -33.1061 | -33.8198 | 1 | 1 BH |
| PITG_11285 | Pi conserved hypothetical protein (   | -32.7884 | -34.4553 | 1 | 1 BH |
| PITG_11308 | Pi conserved hypothetical protein (   | -33.1061 | -33.8198 | 1 | 1 BH |

|            |                                       |          |          |   |      |
|------------|---------------------------------------|----------|----------|---|------|
| PITG_11498 | Pi conserved hypothetical protein (   | -33.1061 | -33.8198 | 1 | 1 BH |
| PITG_11527 | Pi conserved hypothetical protein (   | -32.8519 | -34.3284 | 1 | 1 BH |
| PITG_11558 | Pi beta-glucan synthesis-associated   | -33.1061 | -33.8198 | 1 | 1 BH |
| PITG_11674 | Pi conserved hypothetical protein (   | -33.1061 | -33.8198 | 1 | 1 BH |
| PITG_11675 | Pi conserved hypothetical protein (   | -32.5398 | -34.9525 | 1 | 1 BH |
| PITG_11741 | Pi conserved hypothetical protein (   | -33.1061 | -33.8198 | 1 | 1 BH |
| PITG_12077 | Pi conserved hypothetical protein (   | -32.8216 | -34.389  | 1 | 1 BH |
| PITG_12227 | Pi conserved hypothetical protein (   | -33.0621 | -33.908  | 1 | 1 BH |
| PITG_12426 | Pi conserved hypothetical protein (   | -33.1061 | -33.8198 | 1 | 1 BH |
| PITG_12587 | Pi conserved hypothetical protein (   | -32.8519 | -34.3284 | 1 | 1 BH |
| PITG_12625 | Pi conserved hypothetical protein (   | -32.5823 | -34.8675 | 1 | 1 BH |
| PITG_12714 | Pi hypothetical protein (300 nt)      | -33.0621 | -33.908  | 1 | 1 BH |
| PITG_12838 | Pi conserved hypothetical protein (   | -33.3587 | -33.3146 | 1 | 1 BH |
| PITG_12889 | Pi conserved hypothetical protein (   | -32.7902 | -34.4516 | 1 | 1 BH |
| PITG_12987 | Pi kinesin-like protein (2238 nt)     | -33.1539 | -33.7243 | 1 | 1 BH |
| PITG_13079 | Pi peptidylprolyl isomerase domair    | -33.1061 | -33.8198 | 1 | 1 BH |
| PITG_13353 | Pi hypothetical protein (375 nt)      | -32.8519 | -34.3284 | 1 | 1 BH |
| PITG_13398 | Pi tubulin-tyrosine ligase family, pu | -33.0621 | -33.908  | 1 | 1 BH |
| PITG_13473 | Pi Major Facilitator Superfamily (M   | -33.2115 | -33.609  | 1 | 1 BH |
| PITG_13724 | Pi cysteine protease family C48, pu   | -33.2423 | -33.5475 | 1 | 1 BH |
| PITG_13756 | Pi conserved hypothetical protein (   | -33.2115 | -33.609  | 1 | 1 BH |
| PITG_13796 | Pi conserved hypothetical protein (   | -33.1061 | -33.8198 | 1 | 1 BH |
| PITG_13888 | Pi 4-coumarate-CoA ligase, putativ    | -33.0621 | -33.908  | 1 | 1 BH |
| PITG_13990 | Pi conserved hypothetical protein (   | -32.7884 | -34.4553 | 1 | 1 BH |
| PITG_14285 | Pi vesicle-associated membrane pr     | -32.7884 | -34.4553 | 1 | 1 BH |
| PITG_14322 | Pi methylenetetrahydrofolate dehy     | -15.3841 | 1.668348 | 1 | 1 BH |
| PITG_14352 | Pi methylenetetrahydrofolate dehy     | -33.1061 | -33.8198 | 1 | 1 BH |
| PITG_14635 | Pi sporangia induced hypothetical     | -33.3587 | -33.3146 | 1 | 1 BH |
| PITG_14836 | Pi conserved hypothetical protein (   | -33.1061 | -33.8198 | 1 | 1 BH |
| PITG_14905 | Pi conserved hypothetical protein (   | -33.2115 | -33.609  | 1 | 1 BH |
| PITG_14937 | Pi conserved hypothetical protein (   | -33.2916 | -33.449  | 1 | 1 BH |
| PITG_14976 | Pi pyridoxal phosphate phosphatas     | -33.1061 | -33.8198 | 1 | 1 BH |
| PITG_14994 | Pi conserved hypothetical protein (   | -32.8519 | -34.3284 | 1 | 1 BH |
| PITG_15046 | Pi conserved hypothetical protein (   | -32.8194 | -34.3934 | 1 | 1 BH |
| PITG_15387 | Pi conserved hypothetical protein (   | -32.8194 | -34.3934 | 1 | 1 BH |
| PITG_15410 | Pi conserved hypothetical protein (   | -33.1061 | -33.8198 | 1 | 1 BH |
| PITG_15538 | Pi conserved hypothetical protein (   | -33.0621 | -33.908  | 1 | 1 BH |
| PITG_15868 | Pi DNA primase, putative (1617 nt)    | -32.8519 | -34.3284 | 1 | 1 BH |
| PITG_16054 | Pi 60S ribosomal export protein nn    | -32.8216 | -34.389  | 1 | 1 BH |
| PITG_16269 | Pi M96 mating-specific protein far    | -32.8194 | -34.3934 | 1 | 1 BH |
| PITG_16347 | Pi conserved hypothetical protein (   | -32.8519 | -34.3284 | 1 | 1 BH |
| PITG_16448 | Pi hypothetical protein (1170 nt)     | -33.0621 | -33.908  | 1 | 1 BH |
| PITG_16475 | Pi conserved hypothetical protein (   | -33.1402 | -33.7516 | 1 | 1 BH |
| PITG_16506 | Pi conserved hypothetical protein (   | -33.1061 | -33.8198 | 1 | 1 BH |
| PITG_16556 | Pi elongation factor Tu GTP-binding   | -33.1061 | -33.8198 | 1 | 1 BH |
| PITG_16686 | Pi conserved hypothetical protein (   | -32.8194 | -34.3934 | 1 | 1 BH |
| PITG_16691 | Pi DNA polymerase alpha/epsilon s     | -33.1061 | -33.8198 | 1 | 1 BH |

|            |                                                               |          |          |   |      |
|------------|---------------------------------------------------------------|----------|----------|---|------|
| PITG_16721 | Pi conserved hypothetical protein (                           | -33.0621 | -33.908  | 1 | 1 BH |
| PITG_16741 | Pi isoleucyl-tRNA synthetase (3159                            | -33.0621 | -33.908  | 1 | 1 BH |
| PITG_16764 | Pi hypothetical protein (684 nt)                              | -33.1061 | -33.8198 | 1 | 1 BH |
| PITG_16856 | Pi hypoxanthine-guanine phosphor                              | -33.0621 | -33.908  | 1 | 1 BH |
| PITG_17032 | Pi anthranilate phosphoribosyltran                            | -32.8216 | -34.389  | 1 | 1 BH |
| PITG_17117 | Pi salicylate hydroxylase, putative (                         | -32.8519 | -34.3284 | 1 | 1 BH |
| PITG_17154 | Pi conserved hypothetical protein (                           | -33.2916 | -33.449  | 1 | 1 BH |
| PITG_17171 | Pi hypothetical protein (506 nt)                              | -33.0621 | -33.908  | 1 | 1 BH |
| PITG_17404 | Pi guanine nucleotide-binding prot                            | -32.7884 | -34.4553 | 1 | 1 BH |
| PITG_17723 | Pi conserved hypothetical protein (                           | -32.8194 | -34.3934 | 1 | 1 BH |
| PITG_17750 | Pi conserved hypothetical protein (                           | -33.1061 | -33.8198 | 1 | 1 BH |
| PITG_17904 | Pi conserved hypothetical protein (                           | -33.1061 | -33.8198 | 1 | 1 BH |
| PITG_17922 | Pi hypothetical protein (395 nt)                              | -33.1061 | -33.8198 | 1 | 1 BH |
| PITG_17935 | Pi conserved hypothetical protein (                           | -32.8519 | -34.3284 | 1 | 1 BH |
| PITG_17943 | Pi conserved hypothetical protein (                           | -33.3587 | -33.3146 | 1 | 1 BH |
| PITG_17981 | Pi conserved hypothetical protein (                           | -33.1061 | -33.8198 | 1 | 1 BH |
| PITG_17982 | Pi conserved hypothetical protein (                           | -33.1061 | -33.8198 | 1 | 1 BH |
| PITG_18034 | Pi conserved hypothetical protein (                           | -33.0621 | -33.908  | 1 | 1 BH |
| PITG_18056 | Pi conserved hypothetical protein (                           | -33.1061 | -33.8198 | 1 | 1 BH |
| PITG_18091 | Pi structural maintenance of chron                            | -32.8194 | -34.3934 | 1 | 1 BH |
| PITG_18387 | Pi conserved hypothetical protein (                           | -33.1061 | -33.8198 | 1 | 1 BH |
| PITG_18508 | Pi Zinc (Zn <sup>2+</sup> )-Iron (Fe <sup>2+</sup> ) Permease | -33.1061 | -33.8198 | 1 | 1 BH |
| PITG_18624 | Pi kinesin-like protein (3391 nt)                             | -32.7884 | -34.4553 | 1 | 1 BH |
| PITG_18873 | Pi conserved hypothetical protein (                           | -32.8519 | -34.3284 | 1 | 1 BH |
| PITG_19108 | Pi conserved hypothetical protein (                           | -33.0621 | -33.908  | 1 | 1 BH |
| PITG_19122 | Pi conserved hypothetical protein (                           | -33.1061 | -33.8198 | 1 | 1 BH |
| PITG_19781 | Pi conserved hypothetical protein (                           | -33.0621 | -33.908  | 1 | 1 BH |
| PITG_19822 | Pi conserved hypothetical protein (                           | -33.1061 | -33.8198 | 1 | 1 BH |
| PITG_19841 | Pi conserved hypothetical protein (                           | -33.1061 | -33.8198 | 1 | 1 BH |
| PITG_19915 | Pi conserved hypothetical protein (                           | -32.5398 | -34.9525 | 1 | 1 BH |
| PITG_19956 | Pi conserved hypothetical protein (                           | -32.7902 | -34.4516 | 1 | 1 BH |
| PITG_20222 | Pi conserved hypothetical protein (                           | -33.1061 | -33.8198 | 1 | 1 BH |
| PITG_20253 | Pi Large Conductance Mechanosen                               | -32.7902 | -34.4516 | 1 | 1 BH |
| PITG_20284 | Pi hypothetical protein (998 nt)                              | -33.1061 | -33.8198 | 1 | 1 BH |
| PITG_20316 | Pi exportin-like protein (2743 nt)                            | -33.1061 | -33.8198 | 1 | 1 BH |
| PITG_20537 | Pi conserved hypothetical protein (                           | -33.1402 | -33.7516 | 1 | 1 BH |
| PITG_20760 | Pi peptidyl-prolyl cis-trans isomera                          | -32.5823 | -34.8675 | 1 | 1 BH |
| PITG_20766 | Pi protein kinase, putative (2115 nt)                         | -32.7884 | -34.4553 | 1 | 1 BH |
| PITG_20838 | Pi conserved hypothetical protein (                           | -32.8519 | -34.3284 | 1 | 1 BH |
| PITG_20931 | Pi conserved hypothetical protein (                           | -33.1061 | -33.8198 | 1 | 1 BH |
| PITG_21110 | Pi Mitochondrial Carrier (MC) Fami                            | -33.2423 | -33.5475 | 1 | 1 BH |
| PITG_21336 | Pi patatin like protein (3426 nt)                             | -33.0621 | -33.908  | 1 | 1 BH |
| PITG_21372 | Pi protein kinase (774 nt)                                    | -33.1061 | -33.8198 | 1 | 1 BH |
| PITG_21418 | Pi conserved hypothetical protein (                           | -32.8519 | -34.3284 | 1 | 1 BH |
| PITG_21600 | Pi conserved hypothetical protein (                           | -32.8194 | -34.3934 | 1 | 1 BH |
| PITG_21668 | Pi F-box protein, putative (1142 nt)                          | -33.0621 | -33.908  | 1 | 1 BH |
| PITG_21687 | Pi conserved hypothetical protein (                           | -33.0621 | -33.908  | 1 | 1 BH |

|            |                                      |          |          |   |      |
|------------|--------------------------------------|----------|----------|---|------|
| PITG_21716 | Pi conserved hypothetical protein (  | -33.1061 | -33.8198 | 1 | 1 BH |
| PITG_21718 | Pi conserved hypothetical protein (  | -33.1061 | -33.8198 | 1 | 1 BH |
| PITG_21886 | Pi histidyl-tRNA synthetase (2747 r  | -15.3379 | 1.576043 | 1 | 1 BH |
| PITG_21981 | Pi carbonic anhydrase, putative (85  | -33.1061 | -33.8198 | 1 | 1 BH |
| PITG_22000 | Pi conserved hypothetical protein (  | -33.2916 | -33.449  | 1 | 1 BH |
| PITG_22001 | Pi Major Facilitator Superfamily (M  | -32.8519 | -34.3284 | 1 | 1 BH |
| PITG_22125 | Pi conserved hypothetical protein (  | -33.0621 | -33.908  | 1 | 1 BH |
| PITG_22164 | Pi conserved hypothetical protein (  | -32.7884 | -34.4553 | 1 | 1 BH |
| PITG_22350 | Pi hypothetical protein (288 nt)     | -33.1402 | -33.7516 | 1 | 1 BH |
| PITG_22569 | Pi geranylgeranyl transferase type-  | -32.8194 | -34.3934 | 1 | 1 BH |
| PITG_22662 | Pi cyclin-dependent kinase, putativ  | -32.8194 | -34.3934 | 1 | 1 BH |
| PITG_23141 | Pi cyclin-dependent kinase, putativ  | -33.3587 | -33.3146 | 1 | 1 BH |
| PITG_23205 | Pi 4-nitrophenylphosphatase, puta    | -32.8216 | -34.389  | 1 | 1 BH |
| PITG_23272 | Pi crinkler (CRN) family protein, gy | -33.2916 | -33.449  | 1 | 1 BH |
| PITG_00065 | Pi conserved hypothetical protein (  | -33.117  | -33.7981 | 1 | 1 BH |
| PITG_00066 | Pi conserved hypothetical protein (  | -33.0209 | -33.9903 | 1 | 1 BH |
| PITG_00109 | Pi DEAD/DEAH box RNA helicase, p     | -33.4136 | -33.2049 | 1 | 1 BH |
| PITG_00148 | Pi programmed cell death 6-interac   | -32.5385 | -34.9552 | 1 | 1 BH |
| PITG_00165 | Pi conserved hypothetical protein (  | -33.3425 | -33.347  | 1 | 1 BH |
| PITG_00169 | Pi conserved hypothetical protein (  | -33.2202 | -33.5918 | 1 | 1 BH |
| PITG_00171 | Pi conserved hypothetical protein (  | -33.2202 | -33.5918 | 1 | 1 BH |
| PITG_00192 | Pi conserved hypothetical protein (  | -33.117  | -33.7981 | 1 | 1 BH |
| PITG_00207 | Pi conserved hypothetical protein (  | -33.1666 | -33.6989 | 1 | 1 BH |
| PITG_00262 | Pi nuclear pore complex protein Nu   | -32.5599 | -34.9123 | 1 | 1 BH |
| PITG_00312 | Pi conserved hypothetical protein (  | -33.1666 | -33.6989 | 1 | 1 BH |
| PITG_00315 | Pi transmembrane protein, putativ    | -33.4136 | -33.2049 | 1 | 1 BH |
| PITG_00388 | Pi conserved hypothetical protein (  | -33.1666 | -33.6989 | 1 | 1 BH |
| PITG_00439 | Pi conserved hypothetical protein (  | -33.2785 | -33.4751 | 1 | 1 BH |
| PITG_00449 | Pi conserved hypothetical protein (  | -33.117  | -33.7981 | 1 | 1 BH |
| PITG_00453 | Pi lipoamide acyltransferase compo   | -14.5121 | -0.06568 | 1 | 1 BH |
| PITG_00454 | Pi RCC1 and BTB domain-containin     | -32.5599 | -34.9123 | 1 | 1 BH |
| PITG_00473 | Pi tetratricopeptide repeat protein  | -33.1666 | -33.6989 | 1 | 1 BH |
| PITG_00499 | Pi ATP-dependent RNA helicase db     | -33.117  | -33.7981 | 1 | 1 BH |
| PITG_00535 | Pi hypothetical protein (891 nt)     | -33.2202 | -33.5918 | 1 | 1 BH |
| PITG_00555 | Pi conserved hypothetical protein (  | -33.2573 | -33.5176 | 1 | 1 BH |
| PITG_00560 | Pi conserved hypothetical protein (  | -33.4936 | -33.045  | 1 | 1 BH |
| PITG_00562 | Pi Mitochondrial Tricarboxylate Ca   | -33.4136 | -33.2049 | 1 | 1 BH |
| PITG_00585 | Pi peroxiredoxin-like protein (1365  | -13.0995 | 0.018701 | 1 | 1 BH |
| PITG_00624 | Pi hypothetical protein (627 nt)     | -33.0581 | -33.916  | 1 | 1 BH |
| PITG_00648 | Pi periodic tryptophan protein, put  | -33.1666 | -33.6989 | 1 | 1 BH |
| PITG_00649 | Pi conserved hypothetical protein (  | -32.8141 | -34.4039 | 1 | 1 BH |
| PITG_00662 | Pi conserved hypothetical protein (  | -33.2202 | -33.5918 | 1 | 1 BH |
| PITG_00698 | Pi conserved hypothetical protein (  | -33.4136 | -33.2049 | 1 | 1 BH |
| PITG_00766 | Pi conserved hypothetical protein (  | -33.2202 | -33.5918 | 1 | 1 BH |
| PITG_00943 | Pi proline synthetase co-transcribe  | -14.3043 | -0.47892 | 1 | 1 BH |
| PITG_00952 | Pi conserved hypothetical protein (  | -33.1666 | -33.6989 | 1 | 1 BH |
| PITG_00960 | Pi conserved hypothetical protein (  | -33.2573 | -33.5176 | 1 | 1 BH |



|            |                                     |          |          |   |      |
|------------|-------------------------------------|----------|----------|---|------|
| PITG_00983 | Pi UDP-N-acetylglucosamine-peptid   | -33.117  | -33.7981 | 1 | 1 BH |
| PITG_00998 | Pi dynein heavy chain (12571 nt)    | -33.2573 | -33.5176 | 1 | 1 BH |
| PITG_01001 | Pi conserved hypothetical protein ( | -33.117  | -33.7981 | 1 | 1 BH |
| PITG_01019 | Pi U3 small nucleolar RNA-associat  | -33.117  | -33.7981 | 1 | 1 BH |
| PITG_01053 | Pi Amino Acid-Polyamine-Organoca    | -33.1666 | -33.6989 | 1 | 1 BH |
| PITG_01096 | Pi ATP-binding Cassette (ABC) Super | -33.4136 | -33.2049 | 1 | 1 BH |
| PITG_01113 | Pi conserved hypothetical protein ( | -33.2202 | -33.5918 | 1 | 1 BH |
| PITG_01247 | Pi conserved hypothetical protein ( | -33.2573 | -33.5176 | 1 | 1 BH |
| PITG_01297 | Pi conserved hypothetical protein ( | -33.2202 | -33.5918 | 1 | 1 BH |
| PITG_01301 | Pi conserved hypothetical protein ( | -33.117  | -33.7981 | 1 | 1 BH |
| PITG_01335 | Pi conserved hypothetical protein ( | -32.5385 | -34.9552 | 1 | 1 BH |
| PITG_01350 | Pi conserved hypothetical protein ( | -33.2573 | -33.5176 | 1 | 1 BH |
| PITG_01375 | Pi conserved hypothetical protein ( | -33.2573 | -33.5176 | 1 | 1 BH |
| PITG_01408 | Pi D-isomer specific 2-hydroxyacid  | -13.4139 | -0.39995 | 1 | 1 BH |
| PITG_01425 | Pi coronin-like protein (3119 nt)   | -33.2573 | -33.5176 | 1 | 1 BH |
| PITG_01459 | Pi conserved hypothetical protein ( | -33.0209 | -33.9903 | 1 | 1 BH |
| PITG_01471 | Pi beta-mannosidase, putative (29:  | -33.2573 | -33.5176 | 1 | 1 BH |
| PITG_01543 | Pi NADPH-dependent diflavin oxidc   | -33.2202 | -33.5918 | 1 | 1 BH |
| PITG_01556 | Pi conserved hypothetical protein ( | -33.4936 | -33.045  | 1 | 1 BH |
| PITG_01626 | Pi Drug/Metabolite Transporter (D   | -32.5601 | -34.912  | 1 | 1 BH |
| PITG_01663 | Pi conserved hypothetical protein ( | -33.0209 | -33.9903 | 1 | 1 BH |
| PITG_01671 | Pi conserved hypothetical protein ( | -33.2785 | -33.4751 | 1 | 1 BH |
| PITG_01690 | Pi conserved hypothetical protein ( | -33.2202 | -33.5918 | 1 | 1 BH |
| PITG_01753 | Pi conserved hypothetical protein ( | -33.0209 | -33.9903 | 1 | 1 BH |
| PITG_01759 | Pi conserved hypothetical protein ( | -33.1666 | -33.6989 | 1 | 1 BH |
| PITG_01793 | Pi conserved hypothetical protein ( | -33.4936 | -33.045  | 1 | 1 BH |
| PITG_01873 | Pi conserved hypothetical protein ( | -32.5601 | -34.912  | 1 | 1 BH |
| PITG_01930 | Pi conserved hypothetical protein ( | -33.0209 | -33.9903 | 1 | 1 BH |
| PITG_02016 | Pi integrator complex subunit, puta | -33.2573 | -33.5176 | 1 | 1 BH |
| PITG_02067 | Pi pre-mRNA-splicing factor cwc2,   | -32.5599 | -34.9123 | 1 | 1 BH |
| PITG_02249 | Pi hypothetical protein (415 nt)    | -33.2785 | -33.4751 | 1 | 1 BH |
| PITG_02261 | Pi C2 domain-containing protein, p  | -14.3729 | -0.34419 | 1 | 1 BH |
| PITG_02291 | Pi conserved hypothetical protein ( | -33.3425 | -33.347  | 1 | 1 BH |
| PITG_02294 | Pi conserved hypothetical protein ( | -33.1666 | -33.6989 | 1 | 1 BH |
| PITG_02304 | Pi anaphase-promoting complex su    | -33.2202 | -33.5918 | 1 | 1 BH |
| PITG_02308 | Pi conserved hypothetical protein ( | -32.8141 | -34.4039 | 1 | 1 BH |
| PITG_02330 | Pi conserved hypothetical protein ( | -33.117  | -33.7981 | 1 | 1 BH |
| PITG_02364 | Pi P-type ATPase (P-ATPase) Super   | -33.0209 | -33.9903 | 1 | 1 BH |
| PITG_02420 | Pi DNA-directed RNA polymerase I    | -33.2573 | -33.5176 | 1 | 1 BH |
| PITG_02442 | Pi cysteine protease family C02, pu | -33.0209 | -33.9903 | 1 | 1 BH |
| PITG_02520 | Pi conserved hypothetical protein ( | -32.8141 | -34.4039 | 1 | 1 BH |
| PITG_02541 | Pi conserved hypothetical protein ( | -33.2202 | -33.5918 | 1 | 1 BH |
| PITG_02621 | Pi CTP synthase, putative (1809 nt) | -33.2202 | -33.5918 | 1 | 1 BH |
| PITG_02698 | Pi conserved hypothetical protein ( | -33.0209 | -33.9903 | 1 | 1 BH |
| PITG_02776 | Pi multiple inositol polyphosphate  | -33.117  | -33.7981 | 1 | 1 BH |
| PITG_02783 | Pi multiple inositol polyphosphate  | -33.2202 | -33.5918 | 1 | 1 BH |
| PITG_02863 | Pi conserved hypothetical protein ( | -33.2573 | -33.5176 | 1 | 1 BH |

|            |                                        |          |          |   |      |
|------------|----------------------------------------|----------|----------|---|------|
| PITG_02953 | Pi conserved hypothetical protein (    | -33.3425 | -33.347  | 1 | 1 BH |
| PITG_03019 | Pi conserved hypothetical protein (    | -33.2573 | -33.5176 | 1 | 1 BH |
| PITG_03082 | Pi Outer Dynein Arm Light Chain 1      | -33.4936 | -33.045  | 1 | 1 BH |
| PITG_03110 | Pi conserved hypothetical protein (    | -33.2573 | -33.5176 | 1 | 1 BH |
| PITG_03152 | Pi conserved hypothetical protein (    | -32.8141 | -34.4039 | 1 | 1 BH |
| PITG_03174 | Pi conserved hypothetical protein (    | -33.2573 | -33.5176 | 1 | 1 BH |
| PITG_03192 | Pi secreted RxLR effector peptide,     | -16.1564 | 3.207811 | 1 | 1 BH |
| PITG_03233 | Pi conserved hypothetical protein (    | -33.2785 | -33.4751 | 1 | 1 BH |
| PITG_03337 | Pi conserved hypothetical protein (    | -33.2202 | -33.5918 | 1 | 1 BH |
| PITG_03361 | Pi conserved hypothetical protein (    | -33.4936 | -33.045  | 1 | 1 BH |
| PITG_03389 | Pi replication factor C subunit 4 (11  | -33.1666 | -33.6989 | 1 | 1 BH |
| PITG_03453 | Pi phosphatidylinositol kinase (PIK    | -32.8141 | -34.4039 | 1 | 1 BH |
| PITG_03480 | Pi conserved hypothetical protein (    | -33.2202 | -33.5918 | 1 | 1 BH |
| PITG_03482 | Pi conserved hypothetical protein (    | -33.117  | -33.7981 | 1 | 1 BH |
| PITG_03504 | Pi conserved hypothetical protein (    | -33.1666 | -33.6989 | 1 | 1 BH |
| PITG_03548 | Pi nucleolar protein, putative (1579   | -33.1666 | -33.6989 | 1 | 1 BH |
| PITG_03556 | Pi conserved hypothetical protein (    | -33.2573 | -33.5176 | 1 | 1 BH |
| PITG_03576 | Pi RNA (guanine-9-)-methyltransfer     | -32.5385 | -34.9552 | 1 | 1 BH |
| PITG_03605 | Pi 5-methylthioadenosine/S-adeno       | -33.1666 | -33.6989 | 1 | 1 BH |
| PITG_03656 | Pi inosine-5'-monophosphate dehy       | -32.5601 | -34.912  | 1 | 1 BH |
| PITG_03665 | Pi Amino Acid-Polyamine-Organoc        | -32.8141 | -34.4039 | 1 | 1 BH |
| PITG_03673 | Pi conserved hypothetical protein (    | -33.117  | -33.7981 | 1 | 1 BH |
| PITG_03701 | Pi kinesin-like protein (2486 nt)      | -33.117  | -33.7981 | 1 | 1 BH |
| PITG_03707 | Pi voltage-gated potassium channe      | -33.2573 | -33.5176 | 1 | 1 BH |
| PITG_03756 | Pi kinesin-like protein (2314 nt)      | -32.5385 | -34.9552 | 1 | 1 BH |
| PITG_03776 | Pi conserved hypothetical protein (    | -33.1666 | -33.6989 | 1 | 1 BH |
| PITG_03791 | Pi splicing factor, arginine/serine-ri | -33.2785 | -33.4751 | 1 | 1 BH |
| PITG_03800 | Pi conserved hypothetical protein (    | -32.8141 | -34.4039 | 1 | 1 BH |
| PITG_03820 | Pi conserved hypothetical protein (    | -33.2202 | -33.5918 | 1 | 1 BH |
| PITG_03854 | Pi conserved hypothetical protein (    | -33.2202 | -33.5918 | 1 | 1 BH |
| PITG_03875 | Pi sporangia induced hypothetical      | -33.4339 | -33.1643 | 1 | 1 BH |
| PITG_03886 | Pi equilibrative Nucleoside Transp     | -33.117  | -33.7981 | 1 | 1 BH |
| PITG_03954 | Pi conserved hypothetical protein (    | -33.117  | -33.7981 | 1 | 1 BH |
| PITG_03975 | Pi conserved hypothetical protein (    | -33.4136 | -33.2049 | 1 | 1 BH |
| PITG_03980 | Pi conserved hypothetical protein (    | -33.2202 | -33.5918 | 1 | 1 BH |
| PITG_03991 | Pi hypothetical protein (303 nt)       | -33.1666 | -33.6989 | 1 | 1 BH |
| PITG_03992 | Pi ribulose-phosphate 3-epimerase      | -33.2573 | -33.5176 | 1 | 1 BH |
| PITG_04003 | Pi conserved hypothetical protein (    | -33.0209 | -33.9903 | 1 | 1 BH |
| PITG_04059 | Pi conserved hypothetical protein (    | -33.117  | -33.7981 | 1 | 1 BH |
| PITG_04102 | Pi conserved hypothetical protein (    | -33.2202 | -33.5918 | 1 | 1 BH |
| PITG_04344 | Pi protein kinase (3400 nt)            | -33.117  | -33.7981 | 1 | 1 BH |
| PITG_04390 | Pi hypothetical protein (455 nt)       | -33.2573 | -33.5176 | 1 | 1 BH |
| PITG_04546 | Pi conserved hypothetical protein (    | -33.2202 | -33.5918 | 1 | 1 BH |
| PITG_04571 | Pi conserved hypothetical protein (    | -33.4936 | -33.045  | 1 | 1 BH |
| PITG_04628 | Pi conserved hypothetical protein (    | -33.3425 | -33.347  | 1 | 1 BH |
| PITG_04650 | Pi conserved hypothetical protein (    | -33.4936 | -33.045  | 1 | 1 BH |
| PITG_04710 | Pi conserved hypothetical protein (    | -33.0209 | -33.9903 | 1 | 1 BH |

|            |                                                               |          |          |   |      |
|------------|---------------------------------------------------------------|----------|----------|---|------|
| PITG_04724 | Pi serine protease family S10, puta                           | -33.1666 | -33.6989 | 1 | 1 BH |
| PITG_04844 | Pi folate-Biopterin Transporter (FB'                          | -33.2573 | -33.5176 | 1 | 1 BH |
| PITG_04845 | Pi conserved hypothetical protein (                           | -33.2202 | -33.5918 | 1 | 1 BH |
| PITG_04864 | Pi conserved hypothetical protein (                           | -33.2573 | -33.5176 | 1 | 1 BH |
| PITG_04865 | Pi conserved hypothetical protein (                           | -33.4339 | -33.1643 | 1 | 1 BH |
| PITG_04999 | Pi MtN3-like protein (1252 nt)                                | -33.4136 | -33.2049 | 1 | 1 BH |
| PITG_05071 | Pi deoxyribose-phosphate aldolase                             | -33.117  | -33.7981 | 1 | 1 BH |
| PITG_05186 | Pi Ufm1-specific protease, putative                           | -33.2202 | -33.5918 | 1 | 1 BH |
| PITG_05199 | Pi conserved hypothetical protein (                           | -33.4936 | -33.045  | 1 | 1 BH |
| PITG_05226 | Pi conserved hypothetical protein (                           | -32.5599 | -34.9123 | 1 | 1 BH |
| PITG_05267 | Pi transmembrane protein, putativ                             | -33.2573 | -33.5176 | 1 | 1 BH |
| PITG_05320 | Pi conserved hypothetical protein (                           | -33.1666 | -33.6989 | 1 | 1 BH |
| PITG_05340 | Pi protein kinase, putative (2767 nt)                         | -33.117  | -33.7981 | 1 | 1 BH |
| PITG_05447 | Pi sporangia induced sperm flagella                           | -33.4936 | -33.045  | 1 | 1 BH |
| PITG_05465 | Pi L-gulonolactone oxidase, putativ                           | -33.1666 | -33.6989 | 1 | 1 BH |
| PITG_05475 | Pi conserved hypothetical protein (                           | -33.2573 | -33.5176 | 1 | 1 BH |
| PITG_05486 | Pi acyl-CoA dehydrogenase/oxidase                             | -33.0209 | -33.9903 | 1 | 1 BH |
| PITG_05532 | Pi conserved hypothetical protein (                           | -33.117  | -33.7981 | 1 | 1 BH |
| PITG_05552 | Pi heat shock protein 75 kDa, mito                            | -14.5531 | 0.01636  | 1 | 1 BH |
| PITG_05556 | Pi D-lactate dehydrogenase, putati                            | -33.1666 | -33.6989 | 1 | 1 BH |
| PITG_05562 | Pi conserved hypothetical protein (                           | -33.1666 | -33.6989 | 1 | 1 BH |
| PITG_05590 | Pi conserved hypothetical protein (                           | -33.117  | -33.7981 | 1 | 1 BH |
| PITG_05591 | Pi conserved hypothetical protein (                           | -32.8141 | -34.4039 | 1 | 1 BH |
| PITG_05595 | Pi conserved hypothetical protein (                           | -33.1666 | -33.6989 | 1 | 1 BH |
| PITG_05621 | Pi conserved hypothetical protein (                           | -33.4136 | -33.2049 | 1 | 1 BH |
| PITG_05667 | Pi vacuolar protein sorting-associat                          | -33.117  | -33.7981 | 1 | 1 BH |
| PITG_05705 | Pi ATP-binding Cassette (ABC) Sup                             | -14.8591 | 0.593481 | 1 | 1 BH |
| PITG_05787 | Pi hypothetical protein (616 nt)                              | -32.5601 | -34.912  | 1 | 1 BH |
| PITG_05941 | Pi conserved hypothetical protein (                           | -33.4339 | -33.1643 | 1 | 1 BH |
| PITG_05993 | Pi conserved hypothetical protein (                           | -33.2202 | -33.5918 | 1 | 1 BH |
| PITG_06007 | Pi Zinc (Zn <sup>2+</sup> )-Iron (Fe <sup>2+</sup> ) Permease | -33.117  | -33.7981 | 1 | 1 BH |
| PITG_06039 | Pi conserved hypothetical protein (                           | -33.2573 | -33.5176 | 1 | 1 BH |
| PITG_06178 | Pi conserved hypothetical protein (                           | -32.8141 | -34.4039 | 1 | 1 BH |
| PITG_06258 | Pi conserved hypothetical protein (                           | -33.2573 | -33.5176 | 1 | 1 BH |
| PITG_06354 | Pi conserved hypothetical protein (                           | -33.2573 | -33.5176 | 1 | 1 BH |
| PITG_06373 | Pi putative GPI-anchored serine-ric                           | -33.0209 | -33.9903 | 1 | 1 BH |
| PITG_06506 | Pi conserved hypothetical protein (                           | -33.0581 | -33.916  | 1 | 1 BH |
| PITG_06518 | Pi phospho-2-dehydro-3-deoxyhep                               | -33.3055 | -33.4211 | 1 | 1 BH |
| PITG_06559 | Pi conserved hypothetical protein (                           | -33.2573 | -33.5176 | 1 | 1 BH |
| PITG_06614 | Pi conserved hypothetical protein (                           | -33.2202 | -33.5918 | 1 | 1 BH |
| PITG_06701 | Pi dual specificity protein kinase, p                         | -33.2573 | -33.5176 | 1 | 1 BH |
| PITG_06782 | Pi serine protease family S33, puta                           | -33.117  | -33.7981 | 1 | 1 BH |
| PITG_06803 | Pi conserved hypothetical protein (                           | -33.2573 | -33.5176 | 1 | 1 BH |
| PITG_06810 | Pi conserved hypothetical protein (                           | -33.4936 | -33.045  | 1 | 1 BH |
| PITG_06832 | Pi ubiquitin-specific protease, puta                          | -32.8141 | -34.4039 | 1 | 1 BH |
| PITG_06853 | Pi conserved hypothetical protein (                           | -33.2202 | -33.5918 | 1 | 1 BH |
| PITG_06855 | Pi inorganic phosphate transporter                            | -33.2785 | -33.4751 | 1 | 1 BH |

|            |                                                 |          |          |   |      |
|------------|-------------------------------------------------|----------|----------|---|------|
| PITG_06861 | Pi conserved hypothetical protein (             | -33.2202 | -33.5918 | 1 | 1 BH |
| PITG_06885 | Pi membrane-bound transcription                 | -33.2573 | -33.5176 | 1 | 1 BH |
| PITG_06911 | Pi translation initiation factor IF-2,          | -33.2202 | -33.5918 | 1 | 1 BH |
| PITG_06913 | Pi conserved hypothetical protein (             | -33.2202 | -33.5918 | 1 | 1 BH |
| PITG_06938 | Pi conserved hypothetical protein (             | -33.1666 | -33.6989 | 1 | 1 BH |
| PITG_07077 | Pi lysophospholipid acyltransferase             | -14.2884 | -0.51302 | 1 | 1 BH |
| PITG_07093 | Pi conserved hypothetical protein (             | -33.117  | -33.7981 | 1 | 1 BH |
| PITG_07164 | Pi serine protease family S10, puta             | -14.6476 | 0.178439 | 1 | 1 BH |
| PITG_07228 | Pi conserved hypothetical protein (             | -33.4136 | -33.2049 | 1 | 1 BH |
| PITG_07246 | Pi conserved hypothetical protein (             | -33.2202 | -33.5918 | 1 | 1 BH |
| PITG_07335 | Pi conserved hypothetical protein (             | -33.0209 | -33.9903 | 1 | 1 BH |
| PITG_07456 | Pi conserved hypothetical protein (             | -33.117  | -33.7981 | 1 | 1 BH |
| PITG_07565 | Pi folate-Biopterin Transporter (FB             | -33.2573 | -33.5176 | 1 | 1 BH |
| PITG_07586 | Pi conserved hypothetical protein (             | -16.1564 | 3.207811 | 1 | 1 BH |
| PITG_07660 | Pi transmembrane protein, putativ               | -32.5601 | -34.912  | 1 | 1 BH |
| PITG_07776 | Pi conserved hypothetical protein (             | -33.0209 | -33.9903 | 1 | 1 BH |
| PITG_07830 | Pi protein kinase (2166 nt)                     | -33.2202 | -33.5918 | 1 | 1 BH |
| PITG_07858 | Pi conserved hypothetical protein (             | -33.2202 | -33.5918 | 1 | 1 BH |
| PITG_07933 | Pi F-box protein, putative (1205 nt)            | -33.2202 | -33.5918 | 1 | 1 BH |
| PITG_08013 | Pi conserved hypothetical protein (             | -33.1666 | -33.6989 | 1 | 1 BH |
| PITG_08035 | Pi DNA repair protein radA (1626 n              | -33.0209 | -33.9903 | 1 | 1 BH |
| PITG_08060 | Pi conserved hypothetical protein (             | -33.2202 | -33.5918 | 1 | 1 BH |
| PITG_08159 | Pi conserved hypothetical protein (             | -33.0209 | -33.9903 | 1 | 1 BH |
| PITG_08176 | Pi conserved hypothetical protein (             | -33.2573 | -33.5176 | 1 | 1 BH |
| PITG_08316 | Pi ATP-dependent RNA helicase, pu               | -33.1666 | -33.6989 | 1 | 1 BH |
| PITG_08394 | Pi conserved hypothetical protein (             | -32.5385 | -34.9552 | 1 | 1 BH |
| PITG_08405 | Pi conserved hypothetical protein (             | -33.2785 | -33.4751 | 1 | 1 BH |
| PITG_08439 | Pi conserved hypothetical protein (             | -33.1666 | -33.6989 | 1 | 1 BH |
| PITG_08504 | Pi conserved hypothetical protein (             | -32.8141 | -34.4039 | 1 | 1 BH |
| PITG_08534 | Pi conserved hypothetical protein (             | -33.4136 | -33.2049 | 1 | 1 BH |
| PITG_08551 | Pi conserved hypothetical protein (             | -33.4136 | -33.2049 | 1 | 1 BH |
| PITG_08598 | Pi 6-phosphogluconolactonase, pu                | -14.3043 | -0.47892 | 1 | 1 BH |
| PITG_08713 | Pi ADP-sugar pyrophosphatase, pu                | -33.117  | -33.7981 | 1 | 1 BH |
| PITG_08747 | Pi Mitochondrial Carrier (MC) Fami              | -33.1666 | -33.6989 | 1 | 1 BH |
| PITG_08800 | Pi conserved hypothetical protein (             | -32.5599 | -34.9123 | 1 | 1 BH |
| PITG_08826 | Pi conserved hypothetical protein (             | -32.5599 | -34.9123 | 1 | 1 BH |
| PITG_08956 | Pi DNA repair protein REV1 (2935 r              | -33.2573 | -33.5176 | 1 | 1 BH |
| PITG_09024 | Pi Metal Ion (Mn <sup>2+</sup> -iron) Transport | -33.4136 | -33.2049 | 1 | 1 BH |
| PITG_09082 | Pi conserved hypothetical protein (             | -32.5385 | -34.9552 | 1 | 1 BH |
| PITG_09374 | Pi conserved hypothetical protein (             | -33.1666 | -33.6989 | 1 | 1 BH |
| PITG_09422 | Pi conserved hypothetical protein (             | -33.2573 | -33.5176 | 1 | 1 BH |
| PITG_09424 | Pi conserved hypothetical protein (             | -33.2202 | -33.5918 | 1 | 1 BH |
| PITG_09674 | Pi cytidyltransferase (676 nt)                  | -33.0209 | -33.9903 | 1 | 1 BH |
| PITG_09710 | Pi conserved hypothetical protein (             | -33.1075 | -33.817  | 1 | 1 BH |
| PITG_09729 | Pi conserved hypothetical protein (             | -33.2573 | -33.5176 | 1 | 1 BH |
| PITG_09782 | Pi palmitoyltransferase, putative (2            | -32.5385 | -34.9552 | 1 | 1 BH |
| PITG_09790 | Pi conserved hypothetical protein (             | -32.5601 | -34.912  | 1 | 1 BH |

|            |                                        |          |          |   |      |
|------------|----------------------------------------|----------|----------|---|------|
| PITG_09821 | Pi polysaccharide lyase, putative (4   | -33.4136 | -33.2049 | 1 | 1 BH |
| PITG_09840 | Pi conserved hypothetical protein (    | -33.4339 | -33.1643 | 1 | 1 BH |
| PITG_09922 | Pi conserved hypothetical protein (    | -33.3425 | -33.347  | 1 | 1 BH |
| PITG_09941 | Pi myosin-like protein (2352 nt)       | -13.4074 | -0.41279 | 1 | 1 BH |
| PITG_10004 | Pi selenoprotein W-related family,     | -33.2785 | -33.4751 | 1 | 1 BH |
| PITG_10030 | Pi conserved hypothetical protein (    | -33.4936 | -33.045  | 1 | 1 BH |
| PITG_10063 | Pi omega-3 fatty acid desaturase, ε    | -16.6088 | 4.112602 | 1 | 1 BH |
| PITG_10079 | Pi conserved hypothetical protein (    | -33.4339 | -33.1643 | 1 | 1 BH |
| PITG_10097 | Pi conserved hypothetical protein (    | -32.5599 | -34.9123 | 1 | 1 BH |
| PITG_10098 | Pi conserved hypothetical protein (    | -32.5601 | -34.912  | 1 | 1 BH |
| PITG_10117 | Pi ATP-binding Cassette (ABC) supe     | -33.117  | -33.7981 | 1 | 1 BH |
| PITG_10132 | Pi conserved hypothetical protein (    | -33.3055 | -33.4211 | 1 | 1 BH |
| PITG_10140 | Pi Mitochondrial Carrier (MC) Fami     | -32.8141 | -34.4039 | 1 | 1 BH |
| PITG_10142 | Pi conserved hypothetical protein (    | -13.2614 | 0.342646 | 1 | 1 BH |
| PITG_10158 | Pi conserved hypothetical protein (    | -33.1666 | -33.6989 | 1 | 1 BH |
| PITG_10190 | Pi conserved hypothetical protein (    | -32.5601 | -34.912  | 1 | 1 BH |
| PITG_10265 | Pi conserved hypothetical protein (    | -33.0209 | -33.9903 | 1 | 1 BH |
| PITG_10272 | Pi conserved hypothetical protein (    | -33.0209 | -33.9903 | 1 | 1 BH |
| PITG_10274 | Pi acetyltransferase (GNAT) family,    | -32.5385 | -34.9552 | 1 | 1 BH |
| PITG_10382 | Pi conserved hypothetical protein (    | -33.117  | -33.7981 | 1 | 1 BH |
| PITG_10393 | Pi conserved hypothetical protein (    | -33.2573 | -33.5176 | 1 | 1 BH |
| PITG_10454 | Pi carbamoyl-phosphate synthase        | -15.0265 | 0.940337 | 1 | 1 BH |
| PITG_10480 | Pi translation initiation factor eIF-2 | -32.8141 | -34.4039 | 1 | 1 BH |
| PITG_10555 | Pi conserved hypothetical protein (    | -33.0209 | -33.9903 | 1 | 1 BH |
| PITG_10593 | Pi conserved hypothetical protein (    | -33.1666 | -33.6989 | 1 | 1 BH |
| PITG_10625 | Pi conserved hypothetical protein (    | -33.117  | -33.7981 | 1 | 1 BH |
| PITG_10725 | Pi ribosomal RNA processing prote      | -33.2573 | -33.5176 | 1 | 1 BH |
| PITG_10758 | Pi beta-glucan synthesis-associatec    | -33.117  | -33.7981 | 1 | 1 BH |
| PITG_10801 | Pi sister chromatid cohesion protei    | -33.0209 | -33.9903 | 1 | 1 BH |
| PITG_10836 | Pi HECT E3 ubiquitin ligase, putativ   | -33.1666 | -33.6989 | 1 | 1 BH |
| PITG_10856 | Pi conserved hypothetical protein (    | -32.8141 | -34.4039 | 1 | 1 BH |
| PITG_11007 | Pi conserved hypothetical protein (    | -33.4936 | -33.045  | 1 | 1 BH |
| PITG_11013 | Pi guanylate kinase (880 nt)           | -32.5385 | -34.9552 | 1 | 1 BH |
| PITG_11016 | Pi conserved hypothetical protein (    | -32.5385 | -34.9552 | 1 | 1 BH |
| PITG_11049 | Pi conserved hypothetical protein (    | -33.2202 | -33.5918 | 1 | 1 BH |
| PITG_11186 | Pi conserved hypothetical protein (    | -33.2785 | -33.4751 | 1 | 1 BH |
| PITG_11214 | Pi conserved hypothetical protein (    | -33.2202 | -33.5918 | 1 | 1 BH |
| PITG_11294 | Pi alcohol dehydrogenase, putative     | -33.117  | -33.7981 | 1 | 1 BH |
| PITG_11494 | Pi Multidrug/Oligosaccharidyl-lipid    | -33.1666 | -33.6989 | 1 | 1 BH |
| PITG_11569 | Pi metalloprotease family M17, pu      | -13.7869 | 0.313617 | 1 | 1 BH |
| PITG_11618 | Pi conserved hypothetical protein (    | -33.2202 | -33.5918 | 1 | 1 BH |
| PITG_11680 | Pi conserved hypothetical protein (    | -33.2573 | -33.5176 | 1 | 1 BH |
| PITG_11705 | Pi conserved hypothetical protein (    | -33.1666 | -33.6989 | 1 | 1 BH |
| PITG_11803 | Pi conserved hypothetical protein (    | -33.3055 | -33.4211 | 1 | 1 BH |
| PITG_11903 | Pi conserved hypothetical protein (    | -33.4136 | -33.2049 | 1 | 1 BH |
| PITG_11964 | Pi conserved hypothetical protein (    | -33.2573 | -33.5176 | 1 | 1 BH |
| PITG_12100 | Pi conserved hypothetical protein (    | -32.5601 | -34.912  | 1 | 1 BH |

|            |                                     |          |          |   |      |
|------------|-------------------------------------|----------|----------|---|------|
| PITG_12187 | Pi diphthamide biosynthesis protei  | -33.117  | -33.7981 | 1 | 1 BH |
| PITG_12229 | Pi DNA repair endonuclease XPF, p   | -33.1666 | -33.6989 | 1 | 1 BH |
| PITG_12440 | Pi conserved hypothetical protein ( | -33.0209 | -33.9903 | 1 | 1 BH |
| PITG_12469 | Pi conserved hypothetical protein ( | -33.2202 | -33.5918 | 1 | 1 BH |
| PITG_12511 | Pi conserved hypothetical protein ( | -33.4936 | -33.045  | 1 | 1 BH |
| PITG_12794 | Pi conserved hypothetical protein ( | -33.2573 | -33.5176 | 1 | 1 BH |
| PITG_12826 | Pi conserved hypothetical protein ( | -33.2785 | -33.4751 | 1 | 1 BH |
| PITG_12871 | Pi conserved hypothetical protein ( | -33.3425 | -33.347  | 1 | 1 BH |
| PITG_12872 | Pi MtN3-like protein (974 nt)       | -14.439  | -0.26806 | 1 | 1 BH |
| PITG_12873 | Pi conserved hypothetical protein ( | -33.4136 | -33.2049 | 1 | 1 BH |
| PITG_12880 | Pi conserved hypothetical protein ( | -33.2202 | -33.5918 | 1 | 1 BH |
| PITG_12931 | Pi conserved hypothetical protein ( | -33.3425 | -33.347  | 1 | 1 BH |
| PITG_12963 | Pi conserved hypothetical protein ( | -33.0209 | -33.9903 | 1 | 1 BH |
| PITG_12994 | Pi conserved hypothetical protein ( | -33.3055 | -33.4211 | 1 | 1 BH |
| PITG_13017 | Pi ATP-dependent RNA helicase, pu   | -33.1666 | -33.6989 | 1 | 1 BH |
| PITG_13022 | Pi inorganic phosphate transporter  | -33.2573 | -33.5176 | 1 | 1 BH |
| PITG_13048 | Pi secreted RxLR effector peptide,  | -14.5552 | 0.020533 | 1 | 1 BH |
| PITG_13120 | Pi transmembrane protein, putativ   | -33.2573 | -33.5176 | 1 | 1 BH |
| PITG_13138 | Pi conserved hypothetical protein ( | -33.2785 | -33.4751 | 1 | 1 BH |
| PITG_13182 | Pi conserved hypothetical protein ( | -32.8141 | -34.4039 | 1 | 1 BH |
| PITG_13256 | Pi conserved hypothetical protein ( | -14.3904 | -0.31773 | 1 | 1 BH |
| PITG_13268 | Pi p21-activated protein kinase-int | -33.3425 | -33.347  | 1 | 1 BH |
| PITG_13300 | Pi RNA-binding protein NOB1 (160:   | -33.3425 | -33.347  | 1 | 1 BH |
| PITG_13362 | Pi microtubule-associated protein,  | -33.2573 | -33.5176 | 1 | 1 BH |
| PITG_13395 | Pi P-type ATPase (P-ATPase) Super   | -32.8141 | -34.4039 | 1 | 1 BH |
| PITG_13419 | Pi conserved hypothetical protein ( | -33.1666 | -33.6989 | 1 | 1 BH |
| PITG_13433 | Pi conserved hypothetical protein ( | -33.2202 | -33.5918 | 1 | 1 BH |
| PITG_13436 | Pi conserved hypothetical protein ( | -33.2573 | -33.5176 | 1 | 1 BH |
| PITG_13459 | Pi conserved hypothetical protein ( | -14.5682 | 0.046487 | 1 | 1 BH |
| PITG_13484 | Pi crinkler (CRN) domain-containin  | -33.2573 | -33.5176 | 1 | 1 BH |
| PITG_13499 | Pi MtN3-like protein (779 nt)       | -33.2785 | -33.4751 | 1 | 1 BH |
| PITG_13503 | Pi secreted RxLR effector peptide,  | -33.4936 | -33.045  | 1 | 1 BH |
| PITG_13605 | Pi zinc phosphodiesterase ELAC pro  | -33.1666 | -33.6989 | 1 | 1 BH |
| PITG_13623 | Pi conserved hypothetical protein ( | -33.3425 | -33.347  | 1 | 1 BH |
| PITG_13722 | Pi conserved hypothetical protein ( | -33.1666 | -33.6989 | 1 | 1 BH |
| PITG_13736 | Pi diacylglycerol kinase (2249 nt)  | -33.1666 | -33.6989 | 1 | 1 BH |
| PITG_13791 | Pi conserved hypothetical protein ( | -32.8141 | -34.4039 | 1 | 1 BH |
| PITG_13900 | Pi conserved hypothetical protein ( | -33.117  | -33.7981 | 1 | 1 BH |
| PITG_13976 | Pi DEAD/DEAH box RNA helicase, p    | -33.2202 | -33.5918 | 1 | 1 BH |
| PITG_13988 | Pi conserved hypothetical protein ( | -33.2573 | -33.5176 | 1 | 1 BH |
| PITG_14013 | Pi cytochrome P450, putative (156   | -33.2573 | -33.5176 | 1 | 1 BH |
| PITG_14218 | Pi conserved hypothetical protein ( | -33.1666 | -33.6989 | 1 | 1 BH |
| PITG_14224 | Pi conserved hypothetical protein ( | -32.8141 | -34.4039 | 1 | 1 BH |
| PITG_14251 | Pi conserved hypothetical protein ( | -33.117  | -33.7981 | 1 | 1 BH |
| PITG_14299 | Pi conserved hypothetical protein ( | -32.5601 | -34.912  | 1 | 1 BH |
| PITG_14392 | Pi conserved hypothetical protein ( | -33.0209 | -33.9903 | 1 | 1 BH |
| PITG_14429 | Pi conserved hypothetical protein ( | -33.2573 | -33.5176 | 1 | 1 BH |

|            |                                           |          |          |   |      |
|------------|-------------------------------------------|----------|----------|---|------|
| PITG_14435 | Pi conserved hypothetical protein (       | -33.0209 | -33.9903 | 1 | 1 BH |
| PITG_14463 | Pi protein kinase, putative (2115 nt)     | -33.2573 | -33.5176 | 1 | 1 BH |
| PITG_14466 | Pi conserved hypothetical protein (       | -33.4936 | -33.045  | 1 | 1 BH |
| PITG_14550 | Pi conserved hypothetical protein (       | -33.4136 | -33.2049 | 1 | 1 BH |
| PITG_14577 | Pi conserved hypothetical protein (       | -32.5601 | -34.912  | 1 | 1 BH |
| PITG_14597 | Pi conserved hypothetical protein (       | -14.5384 | -0.01311 | 1 | 1 BH |
| PITG_14599 | Pi conserved hypothetical protein (       | -33.117  | -33.7981 | 1 | 1 BH |
| PITG_14621 | Pi conserved hypothetical protein (       | -33.117  | -33.7981 | 1 | 1 BH |
| PITG_14625 | Pi methylosome protein 50, putative       | -33.1666 | -33.6989 | 1 | 1 BH |
| PITG_14654 | Pi conserved hypothetical protein (       | -33.0209 | -33.9903 | 1 | 1 BH |
| PITG_14703 | Pi calcium-dependent protein kinase       | -33.0209 | -33.9903 | 1 | 1 BH |
| PITG_14845 | Pi conserved hypothetical protein (       | -33.0209 | -33.9903 | 1 | 1 BH |
| PITG_14887 | Pi conserved hypothetical protein (       | -33.2573 | -33.5176 | 1 | 1 BH |
| PITG_14922 | Pi conserved hypothetical protein (       | -33.2573 | -33.5176 | 1 | 1 BH |
| PITG_15006 | Pi ATP-binding Cassette (ABC) Superfamily | -13.7029 | 0.178073 | 1 | 1 BH |
| PITG_15017 | Pi protein phosphatase 2C, putative       | -33.1666 | -33.6989 | 1 | 1 BH |
| PITG_15050 | Pi conserved hypothetical protein (       | -33.4936 | -33.045  | 1 | 1 BH |
| PITG_15052 | Pi conserved hypothetical protein (       | -16.6088 | 4.112602 | 1 | 1 BH |
| PITG_15090 | Pi 50S ribosomal protein L11 (435 nt)     | -14.4983 | -0.09326 | 1 | 1 BH |
| PITG_15373 | Pi conserved hypothetical protein (       | -33.2573 | -33.5176 | 1 | 1 BH |
| PITG_15440 | Pi conserved hypothetical protein (       | -32.5385 | -34.9552 | 1 | 1 BH |
| PITG_15544 | Pi conserved hypothetical protein (       | -33.2202 | -33.5918 | 1 | 1 BH |
| PITG_15565 | Pi conserved hypothetical protein (       | -33.4136 | -33.2049 | 1 | 1 BH |
| PITG_15570 | Pi hypothetical protein (1060 nt)         | -33.1666 | -33.6989 | 1 | 1 BH |
| PITG_15623 | Pi nucleophosmin (2183 nt)                | -32.5601 | -34.912  | 1 | 1 BH |
| PITG_15688 | Pi conserved hypothetical protein (       | -14.1936 | 1.140662 | 1 | 1 BH |
| PITG_15705 | Pi dihydrolipoamide succinyltransferase   | -14.5121 | -0.06568 | 1 | 1 BH |
| PITG_15844 | Pi conserved hypothetical protein (       | -32.8141 | -34.4039 | 1 | 1 BH |
| PITG_15847 | Pi conserved hypothetical protein (       | -33.2202 | -33.5918 | 1 | 1 BH |
| PITG_15891 | Pi palmitoyltransferase, putative (1      | -32.5385 | -34.9552 | 1 | 1 BH |
| PITG_15969 | Pi conserved hypothetical protein (       | -33.4136 | -33.2049 | 1 | 1 BH |
| PITG_16115 | Pi conserved hypothetical protein (       | -33.1666 | -33.6989 | 1 | 1 BH |
| PITG_16129 | Pi conserved hypothetical protein (       | -32.8141 | -34.4039 | 1 | 1 BH |
| PITG_16134 | Pi conserved hypothetical protein (       | -33.2573 | -33.5176 | 1 | 1 BH |
| PITG_16138 | Pi exosome complex exonuclease family     | -33.2785 | -33.4751 | 1 | 1 BH |
| PITG_16152 | Pi conserved hypothetical protein (       | -33.117  | -33.7981 | 1 | 1 BH |
| PITG_16178 | Pi conserved hypothetical protein (       | -33.2573 | -33.5176 | 1 | 1 BH |
| PITG_16339 | Pi protein kinase, putative (1542 nt)     | -33.3425 | -33.347  | 1 | 1 BH |
| PITG_16378 | Pi conserved hypothetical protein (       | -32.5385 | -34.9552 | 1 | 1 BH |
| PITG_16440 | Pi protein kinase (1479 nt)               | -33.0209 | -33.9903 | 1 | 1 BH |
| PITG_16527 | Pi bloom syndrome protein, DEAD, D        | -33.117  | -33.7981 | 1 | 1 BH |
| PITG_16651 | Pi conserved hypothetical protein (       | -33.0209 | -33.9903 | 1 | 1 BH |
| PITG_16709 | Pi conserved hypothetical protein (       | -33.2573 | -33.5176 | 1 | 1 BH |
| PITG_16729 | Pi acyltransferase family (1434 nt)       | -33.3425 | -33.347  | 1 | 1 BH |
| PITG_16807 | Pi 3-hydroxy-3-methylglutaryl-coenzyme    | -33.117  | -33.7981 | 1 | 1 BH |
| PITG_16910 | Pi ATP-binding Cassette (ABC) Superfamily | -33.2573 | -33.5176 | 1 | 1 BH |
| PITG_16924 | Pi conserved hypothetical protein (       | -32.5599 | -34.9123 | 1 | 1 BH |

|            |                                      |          |          |   |      |
|------------|--------------------------------------|----------|----------|---|------|
| PITG_16978 | Pi crossover junction endonuclease   | -32.5385 | -34.9552 | 1 | 1 BH |
| PITG_16983 | Pi conserved hypothetical protein (  | -33.2573 | -33.5176 | 1 | 1 BH |
| PITG_17058 | Pi ATP-binding Cassette (ABC) Supe   | -33.0209 | -33.9903 | 1 | 1 BH |
| PITG_17071 | Pi malonyl-CoA decarboxylase (MC     | -33.1666 | -33.6989 | 1 | 1 BH |
| PITG_17111 | Pi conserved hypothetical protein (  | -33.2573 | -33.5176 | 1 | 1 BH |
| PITG_17128 | Pi conserved hypothetical protein (  | -33.1666 | -33.6989 | 1 | 1 BH |
| PITG_17205 | Pi elongation factor G, putative (37 | -33.2573 | -33.5176 | 1 | 1 BH |
| PITG_17240 | Pi eukaryotic translation initiation | -13.6506 | 0.073423 | 1 | 1 BH |
| PITG_17285 | Pi conserved hypothetical protein (  | -16.6088 | 4.112602 | 1 | 1 BH |
| PITG_17302 | Pi multicopper oxidase, putative (1  | -33.0209 | -33.9903 | 1 | 1 BH |
| PITG_17394 | Pi developmentally-regulated GTP-    | -33.2785 | -33.4751 | 1 | 1 BH |
| PITG_17395 | Pi 5'-AMP-activated protein kinase   | -32.5599 | -34.9123 | 1 | 1 BH |
| PITG_17405 | Pi conserved hypothetical protein (  | -32.8141 | -34.4039 | 1 | 1 BH |
| PITG_17433 | Pi hypothetical protein (845 nt)     | -33.1666 | -33.6989 | 1 | 1 BH |
| PITG_17493 | Pi conserved hypothetical protein (  | -33.2202 | -33.5918 | 1 | 1 BH |
| PITG_17606 | Pi cation-transporting ATPase, puta  | -33.1666 | -33.6989 | 1 | 1 BH |
| PITG_17827 | Pi conserved hypothetical protein (  | -33.0209 | -33.9903 | 1 | 1 BH |
| PITG_17996 | Pi conserved hypothetical protein (  | -33.2202 | -33.5918 | 1 | 1 BH |
| PITG_18031 | Pi conserved hypothetical protein (  | -33.1666 | -33.6989 | 1 | 1 BH |
| PITG_18203 | Pi avirulence-associated protein 3.  | -33.3425 | -33.347  | 1 | 1 BH |
| PITG_18304 | Pi conserved hypothetical protein (  | -33.4136 | -33.2049 | 1 | 1 BH |
| PITG_18321 | Pi conserved hypothetical protein (  | -33.1666 | -33.6989 | 1 | 1 BH |
| PITG_18329 | Pi conserved hypothetical protein (  | -32.8141 | -34.4039 | 1 | 1 BH |
| PITG_18371 | Pi hypothetical protein (560 nt)     | -33.4136 | -33.2049 | 1 | 1 BH |
| PITG_18642 | Pi conserved hypothetical protein (  | -32.8141 | -34.4039 | 1 | 1 BH |
| PITG_18906 | Pi ATP-binding Cassette (ABC) Supe   | -32.8141 | -34.4039 | 1 | 1 BH |
| PITG_18987 | Pi hypothetical protein (354 nt)     | -32.5599 | -34.9123 | 1 | 1 BH |
| PITG_19025 | Pi conserved hypothetical protein (  | -32.5385 | -34.9552 | 1 | 1 BH |
| PITG_19099 | Pi elongator complex protein, puta   | -33.117  | -33.7981 | 1 | 1 BH |
| PITG_19181 | Pi conserved hypothetical protein (  | -33.4936 | -33.045  | 1 | 1 BH |
| PITG_19191 | Pi 2-oxoglutarate dehydrogenase,     | -33.117  | -33.7981 | 1 | 1 BH |
| PITG_19224 | Pi conserved hypothetical protein (  | -33.1666 | -33.6989 | 1 | 1 BH |
| PITG_19251 | Pi palmitoyltransferase, putative (1 | -33.2573 | -33.5176 | 1 | 1 BH |
| PITG_19281 | Pi ATP-binding cassette sub-family   | -14.5842 | 0.078596 | 1 | 1 BH |
| PITG_19287 | Pi conserved hypothetical protein (  | -33.4136 | -33.2049 | 1 | 1 BH |
| PITG_19383 | Pi conserved hypothetical protein (  | -33.2573 | -33.5176 | 1 | 1 BH |
| PITG_19557 | Pi putative dolichyl-diphosphooligc  | -13.4113 | 0.642325 | 1 | 1 BH |
| PITG_19592 | Pi Mitochondrial Protein Transloca   | -13.2219 | 0.263532 | 1 | 1 BH |
| PITG_19611 | Pi conserved hypothetical protein (  | -33.117  | -33.7981 | 1 | 1 BH |
| PITG_19634 | Pi polygalacturonase, putative (651  | -33.2202 | -33.5918 | 1 | 1 BH |
| PITG_19645 | Pi conserved hypothetical protein (  | -33.2573 | -33.5176 | 1 | 1 BH |
| PITG_19674 | Pi conserved hypothetical protein (  | -33.2573 | -33.5176 | 1 | 1 BH |
| PITG_20078 | Pi conserved hypothetical protein (  | -33.0209 | -33.9903 | 1 | 1 BH |
| PITG_20115 | Pi adenylate kinase, putative (1616  | -33.4936 | -33.045  | 1 | 1 BH |
| PITG_20234 | Pi conserved hypothetical protein (  | -33.2202 | -33.5918 | 1 | 1 BH |
| PITG_20247 | Pi hypothetical protein (2075 nt)    | -33.2573 | -33.5176 | 1 | 1 BH |
| PITG_20263 | Pi conserved hypothetical protein (  | -33.0209 | -33.9903 | 1 | 1 BH |



|            |                                       |          |          |   |      |
|------------|---------------------------------------|----------|----------|---|------|
| PITG_20331 | Pi conserved hypothetical protein (   | -33.2202 | -33.5918 | 1 | 1 BH |
| PITG_20522 | Pi conserved hypothetical protein (   | -33.2785 | -33.4751 | 1 | 1 BH |
| PITG_20539 | Pi conserved hypothetical protein (   | -33.2785 | -33.4751 | 1 | 1 BH |
| PITG_20633 | Pi Major Facilitator Superfamily (M   | -33.2573 | -33.5176 | 1 | 1 BH |
| PITG_20638 | Pi hypothetical protein (1499 nt)     | -33.4136 | -33.2049 | 1 | 1 BH |
| PITG_20715 | Pi deoxyribodipyrimidine photolya:    | -33.4136 | -33.2049 | 1 | 1 BH |
| PITG_20801 | Pi conserved hypothetical protein (   | -33.2573 | -33.5176 | 1 | 1 BH |
| PITG_20825 | Pi conserved hypothetical protein (   | -32.5601 | -34.912  | 1 | 1 BH |
| PITG_21074 | Pi conserved hypothetical protein (   | -33.3055 | -33.4211 | 1 | 1 BH |
| PITG_21175 | Pi conserved hypothetical protein (   | -33.1666 | -33.6989 | 1 | 1 BH |
| PITG_21178 | Pi conserved hypothetical protein (   | -33.117  | -33.7981 | 1 | 1 BH |
| PITG_21210 | Pi conserved hypothetical protein (   | -32.5385 | -34.9552 | 1 | 1 BH |
| PITG_21222 | Pi conserved hypothetical protein (   | -33.2202 | -33.5918 | 1 | 1 BH |
| PITG_21286 | Pi conserved hypothetical protein (   | -33.0209 | -33.9903 | 1 | 1 BH |
| PITG_21310 | Pi conserved hypothetical protein (   | -33.0209 | -33.9903 | 1 | 1 BH |
| PITG_21363 | Pi putative GPI-anchored serine-th    | -16.5803 | 5.9044   | 1 | 1 BH |
| PITG_21379 | Pi conserved hypothetical protein (   | -33.4936 | -33.045  | 1 | 1 BH |
| PITG_21511 | Pi myosin-like protein (2489 nt)      | -33.0209 | -33.9903 | 1 | 1 BH |
| PITG_21688 | Pi conserved hypothetical protein (   | -33.2202 | -33.5918 | 1 | 1 BH |
| PITG_21759 | Pi cytochrome P450, putative (267     | -15.0265 | 0.940337 | 1 | 1 BH |
| PITG_21914 | Pi conserved hypothetical protein (   | -33.4136 | -33.2049 | 1 | 1 BH |
| PITG_22075 | Pi conserved hypothetical protein (   | -33.0209 | -33.9903 | 1 | 1 BH |
| PITG_22149 | Pi conserved hypothetical protein (   | -33.2202 | -33.5918 | 1 | 1 BH |
| PITG_22267 | Pi conserved hypothetical protein (   | -33.2573 | -33.5176 | 1 | 1 BH |
| PITG_22590 | Pi conserved hypothetical protein (   | -32.8141 | -34.4039 | 1 | 1 BH |
| PITG_22683 | Pi secreted RxLR effector peptide,    | -33.2573 | -33.5176 | 1 | 1 BH |
| PITG_22684 | Pi peptidyl-prolyl cis-trans isomera  | -33.1666 | -33.6989 | 1 | 1 BH |
| PITG_22734 | Pi NPP1-like protein, 3' partial (567 | -33.4936 | -33.045  | 1 | 1 BH |
| PITG_22874 | Pi Crinkler (CRN) family protein, ps  | -33.0209 | -33.9903 | 1 | 1 BH |
| PITG_22989 | Pi mitogen-activated protein kinas    | -33.2202 | -33.5918 | 1 | 1 BH |
| PITG_23093 | Pi NPP1-like protein, pseudogene (    | -16.5803 | 5.9044   | 1 | 1 BH |
| PITG_23134 | Pi conserved hypothetical protein (   | -14.9734 | 0.832647 | 1 | 1 BH |
| PITG_23142 | Pi peptidylprolyl isomerase (2241 r   | -33.117  | -33.7981 | 1 | 1 BH |
| PITG_23277 | Pi crinkler (CRN) domain, pseudoge    | -33.0209 | -33.9903 | 1 | 1 BH |
| PITG_23286 | Pi crinkler (CRN) domain, pseudoge    | -33.1666 | -33.6989 | 1 | 1 BH |
| PITG_00015 | Pi DNA-binding protein, putative (8   | -33.3158 | -33.4004 | 1 | 1 BH |
| PITG_00037 | Pi conserved hypothetical protein (   | -32.8544 | -34.3233 | 1 | 1 BH |
| PITG_00042 | Pi conserved hypothetical protein (   | -32.5385 | -34.9551 | 1 | 1 BH |
| PITG_00069 | Pi conserved hypothetical protein (   | -32.8173 | -34.3975 | 1 | 1 BH |
| PITG_00108 | Pi phospholipase D, putative (1037    | -32.8494 | -34.3334 | 1 | 1 BH |
| PITG_00177 | Pi allantoicase (1194 nt)             | -33.5554 | -32.9214 | 1 | 1 BH |
| PITG_00187 | Pi protein kinase, putative (1771 nt  | -33.0661 | -33.8998 | 1 | 1 BH |
| PITG_00259 | Pi conserved hypothetical protein (   | -33.3925 | -33.247  | 1 | 1 BH |
| PITG_00332 | Pi Monovalent Cation:Proton Antip     | -34.931  | -30.1702 | 1 | 1 BH |
| PITG_00361 | Pi conserved hypothetical protein (   | -33.0661 | -33.8998 | 1 | 1 BH |
| PITG_00385 | Pi conserved hypothetical protein (   | -33.3158 | -33.4004 | 1 | 1 BH |
| PITG_00417 | Pi Patatin like protein (3525 nt)     | -32.5385 | -34.9551 | 1 | 1 BH |

|            |                                                               |          |          |   |      |
|------------|---------------------------------------------------------------|----------|----------|---|------|
| PITG_00421 | Pi conserved hypothetical protein (                           | -33.0661 | -33.8998 | 1 | 1 BH |
| PITG_00448 | Pi tRNA (cytosine-5-)-methyltransf                            | -33.7674 | -32.4973 | 1 | 1 BH |
| PITG_00467 | Pi conserved hypothetical protein (                           | -33.7674 | -32.4973 | 1 | 1 BH |
| PITG_00489 | Pi conserved hypothetical protein (                           | -34.931  | -30.1702 | 1 | 1 BH |
| PITG_00603 | Pi conserved hypothetical protein (                           | -33.3158 | -33.4004 | 1 | 1 BH |
| PITG_00630 | Pi conserved hypothetical protein (                           | -33.3158 | -33.4004 | 1 | 1 BH |
| PITG_00669 | Pi conserved hypothetical protein (                           | -33.3158 | -33.4004 | 1 | 1 BH |
| PITG_00750 | Pi Zinc (Zn <sup>2+</sup> )-Iron (Fe <sup>2+</sup> ) Permease | -33.4775 | -33.0772 | 1 | 1 BH |
| PITG_00771 | Pi conserved hypothetical protein (                           | -33.3158 | -33.4004 | 1 | 1 BH |
| PITG_00798 | Pi conserved hypothetical protein (                           | -33.3158 | -33.4004 | 1 | 1 BH |
| PITG_00846 | Pi conserved hypothetical protein (                           | -33.7674 | -32.4973 | 1 | 1 BH |
| PITG_00886 | Pi conserved hypothetical protein (                           | -32.8494 | -34.3334 | 1 | 1 BH |
| PITG_00891 | Pi conserved hypothetical protein (                           | -34.931  | -30.1702 | 1 | 1 BH |
| PITG_00929 | Pi conserved hypothetical protein (                           | -34.931  | -30.1702 | 1 | 1 BH |
| PITG_00940 | Pi pre-mRNA polyadenylation factc                             | -33.0661 | -33.8998 | 1 | 1 BH |
| PITG_00962 | Pi conserved hypothetical protein (                           | -33.5554 | -32.9214 | 1 | 1 BH |
| PITG_01040 | Pi ras family GTPase, putative (985                           | -34.931  | -30.1702 | 1 | 1 BH |
| PITG_01047 | Pi conserved hypothetical protein (                           | -33.0661 | -33.8998 | 1 | 1 BH |
| PITG_01088 | Pi sporangia induced dynein heavy                             | -33.7674 | -32.4973 | 1 | 1 BH |
| PITG_01104 | Pi ubiquitin thioesterase otubain (7                          | -32.7575 | -34.5171 | 1 | 1 BH |
| PITG_01109 | Pi palmitoyltransferase, putative (1                          | -32.8494 | -34.3334 | 1 | 1 BH |
| PITG_01125 | Pi Drug/Metabolite Transporter (D                             | -32.8237 | -34.3847 | 1 | 1 BH |
| PITG_01142 | Pi protein kinase, putative (1185 nt                          | -33.3158 | -33.4004 | 1 | 1 BH |
| PITG_01152 | Pi conserved hypothetical protein (                           | -33.3158 | -33.4004 | 1 | 1 BH |
| PITG_01211 | Pi transmembrane protein, putativ                             | -34.931  | -30.1702 | 1 | 1 BH |
| PITG_01219 | Pi conserved hypothetical protein (                           | -34.931  | -30.1702 | 1 | 1 BH |
| PITG_01266 | Pi glycoside hydrolase, putative (16                          | -34.931  | -30.1702 | 1 | 1 BH |
| PITG_01275 | Pi lipase, putative (1281 nt)                                 | -33.3158 | -33.4004 | 1 | 1 BH |
| PITG_01276 | Pi conserved hypothetical protein (                           | -34.931  | -30.1702 | 1 | 1 BH |
| PITG_01430 | Pi glycoside hydrolase, putative (17                          | -33.0661 | -33.8998 | 1 | 1 BH |
| PITG_01492 | Pi conserved hypothetical protein (                           | -15.2157 | 1.317251 | 1 | 1 BH |
| PITG_01507 | Pi conserved hypothetical protein (                           | -33.7674 | -32.4973 | 1 | 1 BH |
| PITG_01519 | Pi hypothetical protein (2051 nt)                             | -33.5554 | -32.9214 | 1 | 1 BH |
| PITG_01568 | Pi cGMP 3',5'-cyclic phosphodieste                            | -33.3925 | -33.247  | 1 | 1 BH |
| PITG_01650 | Pi conserved hypothetical protein (                           | -32.8494 | -34.3334 | 1 | 1 BH |
| PITG_01708 | Pi hypothetical protein (874 nt)                              | -34.931  | -30.1702 | 1 | 1 BH |
| PITG_01816 | Pi conserved hypothetical protein (                           | -34.931  | -30.1702 | 1 | 1 BH |
| PITG_01941 | Pi conserved hypothetical protein (                           | -32.8173 | -34.3975 | 1 | 1 BH |
| PITG_01980 | Pi conserved hypothetical protein (                           | -33.5554 | -32.9214 | 1 | 1 BH |
| PITG_02018 | Pi hypothetical protein (644 nt)                              | -32.8544 | -34.3233 | 1 | 1 BH |
| PITG_02030 | Pi cleavage induced hypothetical p                            | -34.931  | -30.1702 | 1 | 1 BH |
| PITG_02073 | Pi conserved hypothetical protein (                           | -33.7674 | -32.4973 | 1 | 1 BH |
| PITG_02077 | Pi protein kinase, putative (2392 nt                          | -32.8544 | -34.3233 | 1 | 1 BH |
| PITG_02081 | Pi conserved hypothetical protein (                           | -34.931  | -30.1702 | 1 | 1 BH |
| PITG_02111 | Pi conserved hypothetical protein (                           | -33.3158 | -33.4004 | 1 | 1 BH |
| PITG_02138 | Pi conserved hypothetical protein (                           | -33.3158 | -33.4004 | 1 | 1 BH |
| PITG_02160 | Pi hypothetical protein (466 nt)                              | -33.3158 | -33.4004 | 1 | 1 BH |

|            |                                              |          |          |   |      |
|------------|----------------------------------------------|----------|----------|---|------|
| PITG_02306 | Pi hypothetical protein (1337 nt)            | -34.931  | -30.1702 | 1 | 1 BH |
| PITG_02322 | Pi conserved hypothetical protein (          | -32.792  | -34.448  | 1 | 1 BH |
| PITG_02356 | Pi calcium-transporting ATPase 1, $\epsilon$ | -33.3158 | -33.4004 | 1 | 1 BH |
| PITG_02361 | Pi P-type ATPase (P-ATPase) Super            | -33.3158 | -33.4004 | 1 | 1 BH |
| PITG_02440 | Pi conserved hypothetical protein (          | -32.8237 | -34.3847 | 1 | 1 BH |
| PITG_02472 | Pi conserved hypothetical protein (          | -33.7674 | -32.4973 | 1 | 1 BH |
| PITG_02495 | Pi phosphatidylinositol kinase (PIK-         | -33.0661 | -33.8998 | 1 | 1 BH |
| PITG_02617 | Pi conserved hypothetical protein (          | -33.5554 | -32.9214 | 1 | 1 BH |
| PITG_02717 | Pi conserved hypothetical protein (          | -32.7575 | -34.5171 | 1 | 1 BH |
| PITG_02728 | Pi inositol-3,4-bisphosphate 4-pho:          | -33.0661 | -33.8998 | 1 | 1 BH |
| PITG_02819 | Pi conserved hypothetical protein (          | -34.931  | -30.1702 | 1 | 1 BH |
| PITG_02922 | Pi Polycystin Cation Channel (PCC)           | -34.931  | -30.1702 | 1 | 1 BH |
| PITG_02968 | Pi choline dehydrogenase, putative           | -32.8494 | -34.3334 | 1 | 1 BH |
| PITG_03031 | Pi conserved hypothetical protein (          | -33.0661 | -33.8998 | 1 | 1 BH |
| PITG_03064 | Pi kinesin-like protein (3993 nt)            | -34.931  | -30.1702 | 1 | 1 BH |
| PITG_03077 | Pi tubulin polyglutamylase, putativ          | -33.7674 | -32.4973 | 1 | 1 BH |
| PITG_03144 | Pi conserved hypothetical protein (          | -32.8494 | -34.3334 | 1 | 1 BH |
| PITG_03165 | Pi conserved hypothetical protein (          | -32.7575 | -34.5171 | 1 | 1 BH |
| PITG_03180 | Pi dynein heavy chain (13683 nt)             | -33.3802 | -33.2716 | 1 | 1 BH |
| PITG_03200 | Pi conserved hypothetical protein (          | -32.7575 | -34.5171 | 1 | 1 BH |
| PITG_03202 | Pi hypothetical protein (671 nt)             | -34.931  | -30.1702 | 1 | 1 BH |
| PITG_03203 | Pi exocyst complex component 4, $\mu$        | -34.931  | -30.1702 | 1 | 1 BH |
| PITG_03212 | Pi hypothetical protein (405 nt)             | -34.931  | -30.1702 | 1 | 1 BH |
| PITG_03253 | Pi conserved hypothetical protein (          | -32.7575 | -34.5171 | 1 | 1 BH |
| PITG_03260 | Pi conserved hypothetical protein (          | -32.8173 | -34.3975 | 1 | 1 BH |
| PITG_03266 | Pi conserved hypothetical protein (          | -32.7575 | -34.5171 | 1 | 1 BH |
| PITG_03272 | Pi conserved hypothetical protein (          | -33.7674 | -32.4973 | 1 | 1 BH |
| PITG_03282 | Pi conserved hypothetical protein (          | -33.5554 | -32.9214 | 1 | 1 BH |
| PITG_03286 | Pi hypothetical protein (367 nt)             | -33.3158 | -33.4004 | 1 | 1 BH |
| PITG_03381 | Pi ferric reductase, putative (2685          | -33.0661 | -33.8998 | 1 | 1 BH |
| PITG_03390 | Pi WD domain-containing protein,             | -33.0661 | -33.8998 | 1 | 1 BH |
| PITG_03434 | Pi conserved hypothetical protein (          | -33.1023 | -33.8275 | 1 | 1 BH |
| PITG_03444 | Pi dynein heavy chain (13863 nt)             | -34.931  | -30.1702 | 1 | 1 BH |
| PITG_03461 | Pi conserved hypothetical protein (          | -33.0661 | -33.8998 | 1 | 1 BH |
| PITG_03490 | Pi conserved hypothetical protein (          | -32.8494 | -34.3334 | 1 | 1 BH |
| PITG_03497 | Pi separin, putative (3167 nt)               | -33.3158 | -33.4004 | 1 | 1 BH |
| PITG_03559 | Pi conserved hypothetical protein (          | -33.7674 | -32.4973 | 1 | 1 BH |
| PITG_03627 | Pi conserved hypothetical protein (          | -34.931  | -30.1702 | 1 | 1 BH |
| PITG_03629 | Pi conserved hypothetical protein (          | -33.0661 | -33.8998 | 1 | 1 BH |
| PITG_03641 | Pi conserved hypothetical protein (          | -32.8544 | -34.3233 | 1 | 1 BH |
| PITG_03679 | Pi conserved hypothetical protein (          | -34.931  | -30.1702 | 1 | 1 BH |
| PITG_03704 | Pi conserved hypothetical protein (          | -34.931  | -30.1702 | 1 | 1 BH |
| PITG_03735 | Pi conserved hypothetical protein (          | -33.7674 | -32.4973 | 1 | 1 BH |
| PITG_03755 | Pi aspartate aminotransferase, put           | -32.8173 | -34.3975 | 1 | 1 BH |
| PITG_03806 | Pi aspartyl-tRNA synthetase, putati          | -32.5385 | -34.9551 | 1 | 1 BH |
| PITG_03845 | Pi conserved hypothetical protein (          | -33.3158 | -33.4004 | 1 | 1 BH |
| PITG_03859 | Pi conserved hypothetical protein (          | -34.931  | -30.1702 | 1 | 1 BH |

|            |                                      |          |          |   |      |
|------------|--------------------------------------|----------|----------|---|------|
| PITG_03869 | Pi hypothetical protein (708 nt)     | -34.931  | -30.1702 | 1 | 1 BH |
| PITG_03879 | Pi conserved hypothetical protein (  | -33.3158 | -33.4004 | 1 | 1 BH |
| PITG_03919 | Pi ribokinase, putative (1104 nt)    | -32.8173 | -34.3975 | 1 | 1 BH |
| PITG_03926 | Pi conserved hypothetical protein (  | -34.931  | -30.1702 | 1 | 1 BH |
| PITG_03941 | Pi conserved hypothetical protein (  | -34.931  | -30.1702 | 1 | 1 BH |
| PITG_03967 | Pi conserved hypothetical protein (  | -32.7575 | -34.5171 | 1 | 1 BH |
| PITG_04112 | Pi transmembrane protein, putativ    | -34.931  | -30.1702 | 1 | 1 BH |
| PITG_04335 | Pi AP-2 complex subunit alpha, put   | -34.931  | -30.1702 | 1 | 1 BH |
| PITG_04456 | Pi hypothetical protein (1641 nt)    | -34.931  | -30.1702 | 1 | 1 BH |
| PITG_04474 | Pi conserved hypothetical protein (  | -33.0661 | -33.8998 | 1 | 1 BH |
| PITG_04626 | Pi Amino Acid/Auxin Permease (AA     | -32.8173 | -34.3975 | 1 | 1 BH |
| PITG_04699 | Pi conserved hypothetical protein (  | -32.8173 | -34.3975 | 1 | 1 BH |
| PITG_04706 | Pi potential pseudogene (372 nt)     | -34.931  | -30.1702 | 1 | 1 BH |
| PITG_04721 | Pi dynein light chain/pantothenate   | -34.931  | -30.1702 | 1 | 1 BH |
| PITG_04774 | Pi conserved hypothetical protein (  | -33.3158 | -33.4004 | 1 | 1 BH |
| PITG_04849 | Pi conserved hypothetical protein (  | -34.931  | -30.1702 | 1 | 1 BH |
| PITG_04912 | Pi conserved hypothetical protein (  | -34.931  | -30.1702 | 1 | 1 BH |
| PITG_04918 | Pi alanyl-tRNA synthetase, putative  | -33.3158 | -33.4004 | 1 | 1 BH |
| PITG_04939 | Pi Dicarboxylate/Amino Acid:Catio    | -33.5554 | -32.9214 | 1 | 1 BH |
| PITG_04948 | Pi conserved hypothetical protein (  | -34.931  | -30.1702 | 1 | 1 BH |
| PITG_04971 | Pi conserved hypothetical protein (  | -33.3158 | -33.4004 | 1 | 1 BH |
| PITG_04991 | Pi conserved hypothetical protein (  | -33.0661 | -33.8998 | 1 | 1 BH |
| PITG_05143 | Pi conserved hypothetical protein (  | -34.931  | -30.1702 | 1 | 1 BH |
| PITG_05203 | Pi ATP-binding Cassette (ABC) supe   | -34.931  | -30.1702 | 1 | 1 BH |
| PITG_05204 | Pi ATP-binding Cassette (ABC) supe   | -34.931  | -30.1702 | 1 | 1 BH |
| PITG_05205 | Pi ATP-binding Cassette (ABC) supe   | -33.7674 | -32.4973 | 1 | 1 BH |
| PITG_05329 | Pi conserved hypothetical protein (  | -32.8494 | -34.3334 | 1 | 1 BH |
| PITG_05334 | Pi conserved hypothetical protein (  | -34.931  | -30.1702 | 1 | 1 BH |
| PITG_05355 | Pi conserved hypothetical protein (  | -32.8494 | -34.3334 | 1 | 1 BH |
| PITG_05358 | Pi conserved hypothetical protein (  | -33.3158 | -33.4004 | 1 | 1 BH |
| PITG_05363 | Pi dihydrodipicolinate synthase, pu  | -13.8076 | 0.38567  | 1 | 1 BH |
| PITG_05364 | Pi conserved hypothetical protein (  | -33.0661 | -33.8998 | 1 | 1 BH |
| PITG_05367 | Pi translational activator GCN1, pu  | -33.0661 | -33.8998 | 1 | 1 BH |
| PITG_05371 | Pi conserved hypothetical protein (  | -34.931  | -30.1702 | 1 | 1 BH |
| PITG_05394 | Pi conserved hypothetical protein (  | -34.931  | -30.1702 | 1 | 1 BH |
| PITG_05397 | Pi conserved hypothetical protein (  | -34.931  | -30.1702 | 1 | 1 BH |
| PITG_05427 | Pi conserved hypothetical protein (  | -34.931  | -30.1702 | 1 | 1 BH |
| PITG_05444 | Pi conserved hypothetical protein (  | -33.5554 | -32.9214 | 1 | 1 BH |
| PITG_05457 | Pi regulator of chromosome conde     | -34.931  | -30.1702 | 1 | 1 BH |
| PITG_05479 | Pi ubiquitin-activating enzyme (E1)  | -32.8173 | -34.3975 | 1 | 1 BH |
| PITG_05481 | Pi conserved hypothetical protein (  | -34.931  | -30.1702 | 1 | 1 BH |
| PITG_05656 | Pi WD domain-containing protein,     | -34.931  | -30.1702 | 1 | 1 BH |
| PITG_05668 | Pi conserved hypothetical protein (  | -33.0661 | -33.8998 | 1 | 1 BH |
| PITG_05733 | Pi glutathione gamma-glutamylcys     | -33.7674 | -32.4973 | 1 | 1 BH |
| PITG_05832 | Pi delta-1-pyrroline-5-carboxylate : | -32.5385 | -34.955  | 1 | 1 BH |
| PITG_05939 | Pi carbonyl reductase, putative (74  | -32.7575 | -34.5171 | 1 | 1 BH |
| PITG_06160 | Pi HECT E3 ubiquitin ligase, putativ | -34.931  | -30.1702 | 1 | 1 BH |

|            |                                         |          |          |   |      |
|------------|-----------------------------------------|----------|----------|---|------|
| PITG_06256 | Pi conserved hypothetical protein (     | -33.3158 | -33.4004 | 1 | 1 BH |
| PITG_06262 | Pi U3 small nucleolar ribonucleopr      | -32.792  | -34.448  | 1 | 1 BH |
| PITG_06387 | Pi conserved hypothetical protein (     | -32.8173 | -34.3975 | 1 | 1 BH |
| PITG_06416 | Pi conserved hypothetical protein (     | -32.792  | -34.448  | 1 | 1 BH |
| PITG_06417 | Pi conserved hypothetical protein (     | -33.3158 | -33.4004 | 1 | 1 BH |
| PITG_06508 | Pi conserved hypothetical protein (     | -33.3802 | -33.2716 | 1 | 1 BH |
| PITG_06516 | Pi conserved hypothetical protein (     | -32.7575 | -34.5171 | 1 | 1 BH |
| PITG_06517 | Pi conserved hypothetical protein (     | -33.3158 | -33.4004 | 1 | 1 BH |
| PITG_06558 | Pi conserved hypothetical protein (     | -14.6577 | 0.213077 | 1 | 1 BH |
| PITG_06580 | Pi conserved hypothetical protein (     | -34.931  | -30.1702 | 1 | 1 BH |
| PITG_06682 | Pi conserved hypothetical protein (     | -33.3802 | -33.2716 | 1 | 1 BH |
| PITG_06686 | Pi conserved hypothetical protein (     | -32.8173 | -34.3975 | 1 | 1 BH |
| PITG_06714 | Pi conserved hypothetical protein (     | -33.3158 | -33.4004 | 1 | 1 BH |
| PITG_06804 | Pi conserved hypothetical protein (     | -34.931  | -30.1702 | 1 | 1 BH |
| PITG_06908 | Pi elicitin-like protein (522 nt)       | -34.931  | -30.1702 | 1 | 1 BH |
| PITG_06916 | Pi conserved hypothetical protein (     | -34.931  | -30.1702 | 1 | 1 BH |
| PITG_06923 | Pi conserved hypothetical protein (     | -33.5554 | -32.9214 | 1 | 1 BH |
| PITG_06945 | Pi conserved hypothetical protein (     | -33.0661 | -33.8998 | 1 | 1 BH |
| PITG_06962 | Pi endoglucanase, putative (1715 r      | -15.0893 | 1.083812 | 1 | 1 BH |
| PITG_06965 | Pi cleavage induced conserved hyp       | -34.931  | -30.1702 | 1 | 1 BH |
| PITG_07052 | Pi conserved hypothetical protein (     | -32.8494 | -34.3334 | 1 | 1 BH |
| PITG_07054 | Pi conserved hypothetical protein (     | -33.0661 | -33.8998 | 1 | 1 BH |
| PITG_07059 | Pi MADS-box transcription factor, p     | -34.931  | -30.1702 | 1 | 1 BH |
| PITG_07087 | Pi Major Facilitator Superfamily (M     | -33.3925 | -33.247  | 1 | 1 BH |
| PITG_07108 | Pi conserved hypothetical protein (     | -32.792  | -34.448  | 1 | 1 BH |
| PITG_07129 | Pi conserved hypothetical protein (     | -34.931  | -30.1702 | 1 | 1 BH |
| PITG_07146 | Pi conserved hypothetical protein (     | -34.931  | -30.1702 | 1 | 1 BH |
| PITG_07174 | Pi ribonuclease P protein subunit p     | -33.0661 | -33.8998 | 1 | 1 BH |
| PITG_07176 | Pi conserved hypothetical protein (     | -33.3158 | -33.4004 | 1 | 1 BH |
| PITG_07227 | Pi hypothetical protein (555 nt)        | -33.0661 | -33.8998 | 1 | 1 BH |
| PITG_07250 | Pi conserved hypothetical protein (     | -33.0661 | -33.8998 | 1 | 1 BH |
| PITG_07253 | Pi conserved hypothetical protein (     | -34.931  | -30.1702 | 1 | 1 BH |
| PITG_07273 | Pi conserved hypothetical protein (     | -34.931  | -30.1702 | 1 | 1 BH |
| PITG_07321 | Pi conserved hypothetical protein (     | -33.5554 | -32.9214 | 1 | 1 BH |
| PITG_07458 | Pi Ammonium Transporter (Amt) F         | -34.931  | -30.1702 | 1 | 1 BH |
| PITG_07516 | Pi EF hand containing protein, puta     | -32.7575 | -34.5171 | 1 | 1 BH |
| PITG_07537 | Pi conserved hypothetical protein (     | -34.931  | -30.1702 | 1 | 1 BH |
| PITG_07644 | Pi replication factor C subunit 1 (28   | -33.3158 | -33.4004 | 1 | 1 BH |
| PITG_07687 | Pi conserved hypothetical protein (     | -34.931  | -30.1702 | 1 | 1 BH |
| PITG_07820 | Pi guanine deaminase, putative (13      | -33.3802 | -33.2716 | 1 | 1 BH |
| PITG_07853 | Pi conserved hypothetical protein (     | -33.7674 | -32.4973 | 1 | 1 BH |
| PITG_07856 | Pi conserved hypothetical protein (     | -33.0661 | -33.8998 | 1 | 1 BH |
| PITG_07857 | Pi conserved hypothetical protein (     | -33.3158 | -33.4004 | 1 | 1 BH |
| PITG_07879 | Pi conserved hypothetical protein (     | -33.0661 | -33.8998 | 1 | 1 BH |
| PITG_07911 | Pi cytosolic 5'-nucleotidase III-like p | -34.931  | -30.1702 | 1 | 1 BH |
| PITG_07921 | Pi PLAC8 family protein (459 nt)        | -34.931  | -30.1702 | 1 | 1 BH |
| PITG_07943 | Pi phospholipid-transporting ATPase     | -34.931  | -30.1702 | 1 | 1 BH |

|            |                                      |          |          |   |      |
|------------|--------------------------------------|----------|----------|---|------|
| PITG_07958 | Pi conserved hypothetical protein (  | -34.931  | -30.1702 | 1 | 1 BH |
| PITG_07993 | Pi methyltransferase WBSR22 (11      | -32.7575 | -34.5171 | 1 | 1 BH |
| PITG_08008 | Pi protein kinase, putative (2631 nt | -34.931  | -30.1702 | 1 | 1 BH |
| PITG_08087 | Pi RNA polymerase II-associated pr   | -33.0661 | -33.8998 | 1 | 1 BH |
| PITG_08168 | Pi fibronectin type III domain-conta | -33.3158 | -33.4004 | 1 | 1 BH |
| PITG_08198 | Pi conserved hypothetical protein (  | -32.7575 | -34.5171 | 1 | 1 BH |
| PITG_08221 | Pi conserved hypothetical protein (  | -33.7674 | -32.4973 | 1 | 1 BH |
| PITG_08237 | Pi histone deacetylase, putative (2) | -32.8173 | -34.3975 | 1 | 1 BH |
| PITG_08299 | Pi conserved hypothetical protein (  | -33.3158 | -33.4004 | 1 | 1 BH |
| PITG_08357 | Pi conserved hypothetical protein (  | -33.3158 | -33.4004 | 1 | 1 BH |
| PITG_08382 | Pi ATP-binding Cassette (ABC) supe   | -34.931  | -30.1702 | 1 | 1 BH |
| PITG_08413 | Pi hypothetical protein (159 nt)     | -32.8494 | -34.3334 | 1 | 1 BH |
| PITG_08423 | Pi kinesin-like protein (3419 nt)    | -34.931  | -30.1702 | 1 | 1 BH |
| PITG_08455 | Pi conserved hypothetical protein (  | -33.0661 | -33.8998 | 1 | 1 BH |
| PITG_08549 | Pi mitogen-activated protein kinas   | -34.931  | -30.1702 | 1 | 1 BH |
| PITG_08580 | Pi conserved hypothetical protein (  | -32.8173 | -34.3975 | 1 | 1 BH |
| PITG_08602 | Pi conserved hypothetical protein (  | -32.8173 | -34.3975 | 1 | 1 BH |
| PITG_08605 | Pi conserved hypothetical protein (  | -32.5385 | -34.955  | 1 | 1 BH |
| PITG_08612 | Pi cell 5A endo-1,4-beta-glucanase,  | -34.931  | -30.1702 | 1 | 1 BH |
| PITG_08628 | Pi conserved hypothetical protein (  | -34.931  | -30.1702 | 1 | 1 BH |
| PITG_08630 | Pi hypothetical protein (864 nt)     | -34.931  | -30.1702 | 1 | 1 BH |
| PITG_08683 | Pi conserved hypothetical protein (  | -32.8494 | -34.3334 | 1 | 1 BH |
| PITG_08708 | Pi conserved hypothetical protein (  | -33.0661 | -33.8998 | 1 | 1 BH |
| PITG_08724 | Pi conserved hypothetical protein (  | -33.0661 | -33.8998 | 1 | 1 BH |
| PITG_08739 | Pi conserved hypothetical protein (  | -32.792  | -34.448  | 1 | 1 BH |
| PITG_08750 | Pi conserved hypothetical protein (  | -34.931  | -30.1702 | 1 | 1 BH |
| PITG_08754 | Pi conserved hypothetical protein (  | -33.0661 | -33.8998 | 1 | 1 BH |
| PITG_08807 | Pi conserved hypothetical protein (  | -34.931  | -30.1702 | 1 | 1 BH |
| PITG_08831 | Pi ribonuclease 3, putative (1010 n  | -33.3158 | -33.4004 | 1 | 1 BH |
| PITG_08839 | Pi conserved hypothetical protein (  | -34.931  | -30.1702 | 1 | 1 BH |
| PITG_08850 | Pi mannitol dehydrogenase, putati    | -33.5554 | -32.9214 | 1 | 1 BH |
| PITG_08871 | Pi conserved hypothetical protein (  | -34.931  | -30.1702 | 1 | 1 BH |
| PITG_08927 | Pi conserved hypothetical protein (  | -33.3158 | -33.4004 | 1 | 1 BH |
| PITG_08958 | Pi protein kinase (537 nt)           | -34.931  | -30.1702 | 1 | 1 BH |
| PITG_08967 | Pi protein kinase, putative (1830 nt | -33.3158 | -33.4004 | 1 | 1 BH |
| PITG_08970 | Pi conserved hypothetical protein (  | -33.3158 | -33.4004 | 1 | 1 BH |
| PITG_08994 | Pi conserved hypothetical protein (  | -32.8494 | -34.3334 | 1 | 1 BH |
| PITG_09030 | Pi dynein light chain, putative (333 | -34.931  | -30.1702 | 1 | 1 BH |
| PITG_09042 | Pi DEAD/DEAH box RNA helicase, p     | -33.3158 | -33.4004 | 1 | 1 BH |
| PITG_09081 | Pi phosphatidylinositol-4-phosphat   | -33.7674 | -32.4973 | 1 | 1 BH |
| PITG_09097 | Pi conserved hypothetical protein (  | -32.8173 | -34.3975 | 1 | 1 BH |
| PITG_09181 | Pi conserved hypothetical protein (  | -32.8494 | -34.3334 | 1 | 1 BH |
| PITG_09252 | Pi conserved hypothetical protein (  | -34.931  | -30.1702 | 1 | 1 BH |
| PITG_09286 | Pi conserved hypothetical protein (  | -32.792  | -34.448  | 1 | 1 BH |
| PITG_09383 | Pi aquaporin, putative (825 nt)      | -34.931  | -30.1702 | 1 | 1 BH |
| PITG_09447 | Pi conserved hypothetical protein (  | -32.8544 | -34.3233 | 1 | 1 BH |
| PITG_09671 | Pi receptor-type tyrosine-protein p  | -32.8173 | -34.3975 | 1 | 1 BH |

|            |                                       |          |          |   |      |
|------------|---------------------------------------|----------|----------|---|------|
| PITG_09703 | Pi unc-45 family protein (3219 nt)    | -33.0661 | -33.8998 | 1 | 1 BH |
| PITG_09714 | Pi conserved hypothetical protein (   | -33.3158 | -33.4004 | 1 | 1 BH |
| PITG_09791 | Pi seryl-tRNA synthetase (1476 nt)    | -32.8544 | -34.3233 | 1 | 1 BH |
| PITG_09834 | Pi conserved hypothetical protein (   | -34.931  | -30.1702 | 1 | 1 BH |
| PITG_09861 | Pi secreted RxLR effector peptide,    | -33.3158 | -33.4004 | 1 | 1 BH |
| PITG_09952 | Pi radial spoke protein (872 nt)      | -34.931  | -30.1702 | 1 | 1 BH |
| PITG_09977 | Pi conserved hypothetical protein (   | -32.792  | -34.448  | 1 | 1 BH |
| PITG_09979 | Pi conserved hypothetical protein (   | -34.931  | -30.1702 | 1 | 1 BH |
| PITG_09991 | Pi dolichyldiphosphatase 1, putativ   | -32.8173 | -34.3975 | 1 | 1 BH |
| PITG_10008 | Pi protein kinase (2733 nt)           | -32.7575 | -34.5171 | 1 | 1 BH |
| PITG_10027 | Pi alpha-N-acetylglucosaminidase (    | -32.7575 | -34.5171 | 1 | 1 BH |
| PITG_10328 | Pi conserved hypothetical protein (   | -33.3158 | -33.4004 | 1 | 1 BH |
| PITG_10381 | Pi SCP-like extracellular protein (2C | -33.7674 | -32.4973 | 1 | 1 BH |
| PITG_10394 | Pi nitric oxide synthase-interacting  | -32.8173 | -34.3975 | 1 | 1 BH |
| PITG_10441 | Pi conserved hypothetical protein (   | -33.0661 | -33.8998 | 1 | 1 BH |
| PITG_10474 | Pi hypothetical protein (1124 nt)     | -34.931  | -30.1702 | 1 | 1 BH |
| PITG_10483 | Pi conserved hypothetical protein (   | -33.3802 | -33.2716 | 1 | 1 BH |
| PITG_10591 | Pi conserved hypothetical protein (   | -33.0661 | -33.8998 | 1 | 1 BH |
| PITG_10615 | Pi conserved hypothetical protein (   | -32.8494 | -34.3334 | 1 | 1 BH |
| PITG_10667 | Pi conserved hypothetical protein (   | -32.8544 | -34.3233 | 1 | 1 BH |
| PITG_10701 | Pi carbohydrate-binding protein, pi   | -33.5554 | -32.9214 | 1 | 1 BH |
| PITG_10724 | Pi conserved hypothetical protein (   | -33.3158 | -33.4004 | 1 | 1 BH |
| PITG_10799 | Pi conserved hypothetical protein (   | -34.931  | -30.1702 | 1 | 1 BH |
| PITG_10865 | Pi dymeclin, putative (2772 nt)       | -33.0661 | -33.8998 | 1 | 1 BH |
| PITG_10870 | Pi conserved hypothetical protein (   | -34.931  | -30.1702 | 1 | 1 BH |
| PITG_11000 | Pi ATP-dependent RNA helicase, pu     | -33.3158 | -33.4004 | 1 | 1 BH |
| PITG_11043 | Pi conserved hypothetical protein (   | -33.7674 | -32.4973 | 1 | 1 BH |
| PITG_11106 | Pi gamma-tubulin complex compo        | -32.7575 | -34.5171 | 1 | 1 BH |
| PITG_11140 | Pi sodium-dependent phosphate tr      | -34.931  | -30.1702 | 1 | 1 BH |
| PITG_11180 | Pi conserved hypothetical protein (   | -32.5385 | -34.9551 | 1 | 1 BH |
| PITG_11195 | Pi conserved hypothetical protein (   | -33.3158 | -33.4004 | 1 | 1 BH |
| PITG_11218 | Pi conserved hypothetical protein (   | -33.5554 | -32.9214 | 1 | 1 BH |
| PITG_11219 | Pi conserved hypothetical protein (   | -33.3158 | -33.4004 | 1 | 1 BH |
| PITG_11235 | Pi conserved hypothetical protein (   | -34.931  | -30.1702 | 1 | 1 BH |
| PITG_11242 | Pi conserved hypothetical protein (   | -32.7575 | -34.5171 | 1 | 1 BH |
| PITG_11300 | Pi conserved hypothetical protein (   | -33.5554 | -32.9214 | 1 | 1 BH |
| PITG_11373 | Pi ATP-binding Cassette (ABC) supe    | -33.0661 | -33.8998 | 1 | 1 BH |
| PITG_11411 | Pi hypothetical protein (147 nt)      | -33.3158 | -33.4004 | 1 | 1 BH |
| PITG_11460 | Pi conserved hypothetical protein (   | -14.5132 | -0.06471 | 1 | 1 BH |
| PITG_11573 | Pi serine protease family S33, puta   | -33.7674 | -32.4973 | 1 | 1 BH |
| PITG_11621 | Pi conserved hypothetical protein (   | -34.931  | -30.1702 | 1 | 1 BH |
| PITG_11647 | Pi conserved hypothetical protein (   | -34.931  | -30.1702 | 1 | 1 BH |
| PITG_11651 | Pi conserved hypothetical protein (   | -32.7575 | -34.5171 | 1 | 1 BH |
| PITG_11677 | Pi diacylglycerol acyltransferase, pi | -33.3802 | -33.2716 | 1 | 1 BH |
| PITG_11825 | Pi hypothetical protein (581 nt)      | -32.5385 | -34.9551 | 1 | 1 BH |
| PITG_11827 | Pi conserved hypothetical protein (   | -33.3158 | -33.4004 | 1 | 1 BH |
| PITG_11877 | Pi conserved hypothetical protein (   | -32.8494 | -34.3334 | 1 | 1 BH |

|            |                                      |          |          |   |      |
|------------|--------------------------------------|----------|----------|---|------|
| PITG_11938 | Pi conserved hypothetical protein (  | -34.931  | -30.1702 | 1 | 1 BH |
| PITG_11972 | Pi pre-mRNA-splicing factor 38A, p   | -32.792  | -34.448  | 1 | 1 BH |
| PITG_11978 | Pi conserved hypothetical protein (  | -33.0661 | -33.8998 | 1 | 1 BH |
| PITG_11987 | Pi glycoside hydrolase, putative (24 | -34.931  | -30.1702 | 1 | 1 BH |
| PITG_12103 | Pi conserved hypothetical protein (  | -34.931  | -30.1702 | 1 | 1 BH |
| PITG_12123 | Pi sporangia induced myosin-like p   | -33.7674 | -32.4973 | 1 | 1 BH |
| PITG_12146 | Pi hypothetical protein (588 nt)     | -33.3158 | -33.4004 | 1 | 1 BH |
| PITG_12166 | Pi twinkle protein, putative (2264 r | -33.3158 | -33.4004 | 1 | 1 BH |
| PITG_12169 | Pi polycomb-like protein (4401 nt)   | -33.3158 | -33.4004 | 1 | 1 BH |
| PITG_12267 | Pi conserved hypothetical protein (  | -34.931  | -30.1702 | 1 | 1 BH |
| PITG_12285 | Pi polypyrimidine tract-binding pro  | -33.3802 | -33.2716 | 1 | 1 BH |
| PITG_12301 | Pi conserved hypothetical protein (  | -34.931  | -30.1702 | 1 | 1 BH |
| PITG_12306 | Pi conserved hypothetical protein (  | -33.3158 | -33.4004 | 1 | 1 BH |
| PITG_12394 | Pi conserved hypothetical protein (  | -32.8173 | -34.3975 | 1 | 1 BH |
| PITG_12519 | Pi conserved hypothetical protein (  | -33.3158 | -33.4004 | 1 | 1 BH |
| PITG_12523 | Pi conserved hypothetical protein (  | -32.7575 | -34.5171 | 1 | 1 BH |
| PITG_12567 | Pi sporangia induced conserved hy    | -33.7674 | -32.4973 | 1 | 1 BH |
| PITG_12660 | Pi conserved hypothetical protein (  | -34.931  | -30.1702 | 1 | 1 BH |
| PITG_12842 | Pi conserved hypothetical protein (  | -33.5554 | -32.9214 | 1 | 1 BH |
| PITG_12890 | Pi conserved hypothetical protein (  | -34.931  | -30.1702 | 1 | 1 BH |
| PITG_13128 | Pi 7-dehydrocholesterol reductase    | -33.0661 | -33.8998 | 1 | 1 BH |
| PITG_13183 | Pi sporangia induced conserved hy    | -34.931  | -30.1702 | 1 | 1 BH |
| PITG_13239 | Pi Mitochondrial Carrier (MC) Fami   | -32.7575 | -34.5171 | 1 | 1 BH |
| PITG_13250 | Pi Mitochondrial Protein Transloca   | -14.9211 | 0.734619 | 1 | 1 BH |
| PITG_13260 | Pi tenascin-like protein (3393 nt)   | -34.931  | -30.1702 | 1 | 1 BH |
| PITG_13267 | Pi conserved hypothetical protein (  | -34.931  | -30.1702 | 1 | 1 BH |
| PITG_13269 | Pi conserved hypothetical protein (  | -34.931  | -30.1702 | 1 | 1 BH |
| PITG_13274 | Pi hypothetical protein (558 nt)     | -34.931  | -30.1702 | 1 | 1 BH |
| PITG_13409 | Pi serine protease family S33, puta  | -33.7674 | -32.4973 | 1 | 1 BH |
| PITG_13430 | Pi conserved hypothetical protein (  | -33.3158 | -33.4004 | 1 | 1 BH |
| PITG_13464 | Pi conserved hypothetical protein (  | -33.3158 | -33.4004 | 1 | 1 BH |
| PITG_13551 | Pi creatine kinase, mitochondrial p  | -33.7674 | -32.4973 | 1 | 1 BH |
| PITG_13687 | Pi pre-mRNA-splicing factor ATP-de   | -33.0661 | -33.8998 | 1 | 1 BH |
| PITG_13766 | Pi WD repeat protein 35 (6588 nt)    | -34.931  | -30.1702 | 1 | 1 BH |
| PITG_13802 | Pi conserved hypothetical protein (  | -33.3802 | -33.2716 | 1 | 1 BH |
| PITG_13805 | Pi conserved hypothetical protein (  | -33.4775 | -33.0772 | 1 | 1 BH |
| PITG_13895 | Pi sporangia induced conserved hy    | -34.931  | -30.1702 | 1 | 1 BH |
| PITG_13909 | Pi conserved hypothetical protein (  | -33.3158 | -33.4004 | 1 | 1 BH |
| PITG_13920 | Pi phosphatidylinositol kinase (PIK- | -32.8494 | -34.3334 | 1 | 1 BH |
| PITG_13922 | Pi proline-rich protein 6 (411 nt)   | -32.8494 | -34.3334 | 1 | 1 BH |
| PITG_14087 | Pi conserved hypothetical protein (  | -34.931  | -30.1702 | 1 | 1 BH |
| PITG_14119 | Pi conserved hypothetical protein (  | -34.931  | -30.1702 | 1 | 1 BH |
| PITG_14171 | Pi Amino Acid-Polyamine-Organoc      | -33.0661 | -33.8998 | 1 | 1 BH |
| PITG_14210 | Pi Amino Acid/Auxin Permease (AA     | -33.7674 | -32.4973 | 1 | 1 BH |
| PITG_14222 | Pi sporangia induced conserved hy    | -34.931  | -30.1702 | 1 | 1 BH |
| PITG_14253 | Pi conserved hypothetical protein (  | -34.931  | -30.1702 | 1 | 1 BH |
| PITG_14277 | Pi trichohyalin-like protein (1827 n | -33.3158 | -33.4004 | 1 | 1 BH |



|            |                                      |          |          |   |      |
|------------|--------------------------------------|----------|----------|---|------|
| PITG_14280 | Pi conserved hypothetical protein (  | -33.3158 | -33.4004 | 1 | 1 BH |
| PITG_14431 | Pi conserved hypothetical protein (  | -33.5554 | -32.9214 | 1 | 1 BH |
| PITG_14574 | Pi conserved hypothetical protein (  | -33.0661 | -33.8998 | 1 | 1 BH |
| PITG_14611 | Pi conserved hypothetical protein (  | -32.8173 | -34.3975 | 1 | 1 BH |
| PITG_14620 | Pi FKBP-type peptidyl-prolyl cis-tra | -33.4775 | -33.0772 | 1 | 1 BH |
| PITG_14656 | Pi conserved hypothetical protein (  | -33.3158 | -33.4004 | 1 | 1 BH |
| PITG_14663 | Pi conserved hypothetical protein (  | -33.3925 | -33.247  | 1 | 1 BH |
| PITG_14807 | Pi tubulin gamma chain (1401 nt)     | -32.8237 | -34.3847 | 1 | 1 BH |
| PITG_14832 | Pi hypothetical protein (809 nt)     | -34.931  | -30.1702 | 1 | 1 BH |
| PITG_15042 | Pi sporangia-induced kinesin-like p  | -34.931  | -30.1702 | 1 | 1 BH |
| PITG_15139 | Pi phospholipid-transporting ATPase  | -33.3158 | -33.4004 | 1 | 1 BH |
| PITG_15207 | Pi conserved hypothetical protein (  | -33.3158 | -33.4004 | 1 | 1 BH |
| PITG_15292 | Pi catalase (1541 nt)                | -32.8494 | -34.3334 | 1 | 1 BH |
| PITG_15319 | Pi Voltage-gated Ion Channel (VIC)   | -34.931  | -30.1702 | 1 | 1 BH |
| PITG_15320 | Pi Voltage-gated Ion Channel (VIC)   | -34.931  | -30.1702 | 1 | 1 BH |
| PITG_15334 | Pi hypothetical protein (436 nt)     | -34.931  | -30.1702 | 1 | 1 BH |
| PITG_15367 | Pi Voltage-gated Ion Channel (VIC)   | -33.0661 | -33.8998 | 1 | 1 BH |
| PITG_15376 | Pi conserved hypothetical protein (  | -34.931  | -30.1702 | 1 | 1 BH |
| PITG_15379 | Pi conserved hypothetical protein (  | -33.3158 | -33.4004 | 1 | 1 BH |
| PITG_15389 | Pi hypothetical protein (238 nt)     | -33.3158 | -33.4004 | 1 | 1 BH |
| PITG_15398 | Pi conserved hypothetical protein (  | -33.3802 | -33.2716 | 1 | 1 BH |
| PITG_15443 | Pi conserved hypothetical protein (  | -32.7575 | -34.5171 | 1 | 1 BH |
| PITG_15448 | Pi conserved hypothetical protein (  | -34.931  | -30.1702 | 1 | 1 BH |
| PITG_15462 | Pi GAF domain-containing protein (   | -33.3158 | -33.4004 | 1 | 1 BH |
| PITG_15677 | Pi conserved hypothetical protein (  | -33.3158 | -33.4004 | 1 | 1 BH |
| PITG_15748 | Pi conserved hypothetical protein (  | -32.792  | -34.448  | 1 | 1 BH |
| PITG_15855 | Pi conserved hypothetical protein (  | -33.7674 | -32.4973 | 1 | 1 BH |
| PITG_15861 | Pi conserved hypothetical protein (  | -34.931  | -30.1702 | 1 | 1 BH |
| PITG_15869 | Pi conserved hypothetical protein (  | -33.0661 | -33.8998 | 1 | 1 BH |
| PITG_15870 | Pi conserved hypothetical protein (  | -33.3802 | -33.2716 | 1 | 1 BH |
| PITG_15908 | Pi conserved hypothetical protein (  | -34.931  | -30.1702 | 1 | 1 BH |
| PITG_15968 | Pi mucin-like protein (3491 nt)      | -34.931  | -30.1702 | 1 | 1 BH |
| PITG_16017 | Pi deoxyribose-phosphate aldolase    | -33.3158 | -33.4004 | 1 | 1 BH |
| PITG_16057 | Pi enolase-like protein, putative (1 | -34.931  | -30.1702 | 1 | 1 BH |
| PITG_16088 | Pi conserved hypothetical protein (  | -33.0661 | -33.8998 | 1 | 1 BH |
| PITG_16099 | Pi conserved hypothetical protein (  | -34.931  | -30.1702 | 1 | 1 BH |
| PITG_16199 | Pi conserved hypothetical protein (  | -34.931  | -30.1702 | 1 | 1 BH |
| PITG_16319 | Pi conserved hypothetical protein (  | -33.3158 | -33.4004 | 1 | 1 BH |
| PITG_16334 | Pi conserved hypothetical protein (  | -33.0661 | -33.8998 | 1 | 1 BH |
| PITG_16345 | Pi conserved hypothetical protein (  | -33.0661 | -33.8998 | 1 | 1 BH |
| PITG_16353 | Pi conserved hypothetical protein (  | -14.5996 | 0.108144 | 1 | 1 BH |
| PITG_16385 | Pi conserved hypothetical protein (  | -33.3158 | -33.4004 | 1 | 1 BH |
| PITG_16499 | Pi cytochrome P450, putative (157    | -34.931  | -30.1702 | 1 | 1 BH |
| PITG_16722 | Pi metalloprotease family M67A, p    | -33.3158 | -33.4004 | 1 | 1 BH |
| PITG_16804 | Pi conserved hypothetical protein (  | -33.3158 | -33.4004 | 1 | 1 BH |
| PITG_16903 | Pi hypothetical protein (2596 nt)    | -33.3802 | -33.2716 | 1 | 1 BH |
| PITG_16917 | Pi conserved hypothetical protein (  | -33.5554 | -32.9214 | 1 | 1 BH |

|            |                                     |          |          |   |      |
|------------|-------------------------------------|----------|----------|---|------|
| PITG_17043 | Pi conserved hypothetical protein ( | -33.3158 | -33.4004 | 1 | 1 BH |
| PITG_17070 | Pi CCAAT-binding transcription fact | -33.3158 | -33.4004 | 1 | 1 BH |
| PITG_17092 | Pi protein arginine N-methyltransfe | -33.3158 | -33.4004 | 1 | 1 BH |
| PITG_17106 | Pi conserved hypothetical protein ( | -32.8173 | -34.3975 | 1 | 1 BH |
| PITG_17108 | Pi protein phosphatase 1 regulator  | -34.931  | -30.1702 | 1 | 1 BH |
| PITG_17123 | Pi T-complex protein 1 subunit gan  | -13.0555 | 0.646472 | 1 | 1 BH |
| PITG_17129 | Pi copper-transporting ATPase, put  | -33.0661 | -33.8998 | 1 | 1 BH |
| PITG_17162 | Pi conserved hypothetical protein ( | -34.931  | -30.1702 | 1 | 1 BH |
| PITG_17172 | Pi 2-dehydro-3-deoxyphosphoocto     | -33.3158 | -33.4004 | 1 | 1 BH |
| PITG_17280 | Pi conserved hypothetical protein ( | -33.3158 | -33.4004 | 1 | 1 BH |
| PITG_17287 | Pi AP-1 complex subunit beta, puta  | -14.6577 | 0.213077 | 1 | 1 BH |
| PITG_17342 | Pi Sporangia Induced Dynein Regul   | -34.931  | -30.1702 | 1 | 1 BH |
| PITG_17346 | Pi conserved hypothetical protein ( | -33.3158 | -33.4004 | 1 | 1 BH |
| PITG_17390 | Pi protein kinase (2076 nt)         | -34.931  | -30.1702 | 1 | 1 BH |
| PITG_17419 | Pi conserved hypothetical protein ( | -34.931  | -30.1702 | 1 | 1 BH |
| PITG_17486 | Pi conserved hypothetical protein ( | -34.931  | -30.1702 | 1 | 1 BH |
| PITG_17494 | Pi protein kinase (491 nt)          | -33.3158 | -33.4004 | 1 | 1 BH |
| PITG_17496 | Pi glycoside hydrolase, putative (9 | -33.3158 | -33.4004 | 1 | 1 BH |
| PITG_17513 | Pi conserved hypothetical protein ( | -33.7674 | -32.4973 | 1 | 1 BH |
| PITG_17587 | Pi conserved hypothetical protein ( | -32.8173 | -34.3975 | 1 | 1 BH |
| PITG_17696 | Pi hypothetical protein (551 nt)    | -34.931  | -30.1702 | 1 | 1 BH |
| PITG_17735 | Pi conserved hypothetical protein ( | -34.931  | -30.1702 | 1 | 1 BH |
| PITG_17748 | Pi leucyl-tRNA synthetase, putative | -33.3158 | -33.4004 | 1 | 1 BH |
| PITG_17868 | Pi conserved hypothetical protein ( | -32.7575 | -34.5171 | 1 | 1 BH |
| PITG_17882 | Pi regulator of chromosome conde    | -32.5385 | -34.955  | 1 | 1 BH |
| PITG_18010 | Pi conserved hypothetical protein ( | -32.7575 | -34.5171 | 1 | 1 BH |
| PITG_18049 | Pi chromosome segregation protei    | -33.0661 | -33.8998 | 1 | 1 BH |
| PITG_18155 | Pi conserved hypothetical protein ( | -33.3158 | -33.4004 | 1 | 1 BH |
| PITG_18161 | Pi conserved hypothetical protein ( | -14.8313 | 0.552462 | 1 | 1 BH |
| PITG_18168 | Pi conserved hypothetical protein ( | -33.3158 | -33.4004 | 1 | 1 BH |
| PITG_18272 | Pi conserved hypothetical protein ( | -32.5385 | -34.9551 | 1 | 1 BH |
| PITG_18383 | Pi conserved hypothetical protein ( | -34.931  | -30.1702 | 1 | 1 BH |
| PITG_18443 | Pi conserved hypothetical protein ( | -34.931  | -30.1702 | 1 | 1 BH |
| PITG_18509 | Pi exosome complex exonuclease F    | -33.0661 | -33.8998 | 1 | 1 BH |
| PITG_18659 | Pi conserved hypothetical protein ( | -33.3802 | -33.2716 | 1 | 1 BH |
| PITG_18690 | Pi conserved hypothetical protein ( | -33.3158 | -33.4004 | 1 | 1 BH |
| PITG_18736 | Pi conserved hypothetical protein ( | -33.5554 | -32.9214 | 1 | 1 BH |
| PITG_18862 | Pi conserved hypothetical protein ( | -33.0661 | -33.8998 | 1 | 1 BH |
| PITG_18863 | Pi conserved hypothetical protein ( | -32.8544 | -34.3233 | 1 | 1 BH |
| PITG_18960 | Pi conserved hypothetical protein ( | -33.3158 | -33.4004 | 1 | 1 BH |
| PITG_18976 | Pi RNA binding protein, putative (8 | -32.8173 | -34.3975 | 1 | 1 BH |
| PITG_19093 | Pi conserved hypothetical protein ( | -34.931  | -30.1702 | 1 | 1 BH |
| PITG_19094 | Pi conserved hypothetical protein ( | -34.931  | -30.1702 | 1 | 1 BH |
| PITG_19100 | Pi Voltage-gated Ion Channel (VIC)  | -34.931  | -30.1702 | 1 | 1 BH |
| PITG_19101 | Pi Voltage-gated Ion Channel (VIC)  | -34.931  | -30.1702 | 1 | 1 BH |
| PITG_19123 | Pi conserved hypothetical protein ( | -33.5554 | -32.9214 | 1 | 1 BH |
| PITG_19148 | Pi conserved hypothetical protein ( | -33.0661 | -33.8998 | 1 | 1 BH |

|            |                                      |          |          |   |      |
|------------|--------------------------------------|----------|----------|---|------|
| PITG_19183 | Pi conserved hypothetical protein (  | -32.8494 | -34.3334 | 1 | 1 BH |
| PITG_19269 | Pi conserved hypothetical protein (  | -33.0661 | -33.8998 | 1 | 1 BH |
| PITG_19462 | Pi metallophosphoesterase, putati    | -33.3158 | -33.4004 | 1 | 1 BH |
| PITG_19465 | Pi hypothetical protein (492 nt)     | -34.931  | -30.1702 | 1 | 1 BH |
| PITG_19618 | Pi hypothetical protein (654 nt)     | -33.3158 | -33.4004 | 1 | 1 BH |
| PITG_19642 | Pi conserved hypothetical protein (  | -34.931  | -30.1702 | 1 | 1 BH |
| PITG_19647 | Pi meiosis-specific nuclear structur | -34.931  | -30.1702 | 1 | 1 BH |
| PITG_19649 | Pi endopolygalacturonase, putativ    | -34.931  | -30.1702 | 1 | 1 BH |
| PITG_19730 | Pi 2-acylglycerol O-acyltransferase, | -33.3158 | -33.4004 | 1 | 1 BH |
| PITG_19750 | Pi conserved hypothetical protein (  | -33.0661 | -33.8998 | 1 | 1 BH |
| PITG_19849 | Pi protein kinase (2164 nt)          | -32.8173 | -34.3975 | 1 | 1 BH |
| PITG_19901 | Pi conserved hypothetical protein (  | -32.7575 | -34.5171 | 1 | 1 BH |
| PITG_20024 | Pi hypothetical protein (816 nt)     | -34.931  | -30.1702 | 1 | 1 BH |
| PITG_20032 | Pi conserved hypothetical protein (  | -32.8494 | -34.3334 | 1 | 1 BH |
| PITG_20080 | Pi carbohydrate-binding protein, p   | -34.931  | -30.1702 | 1 | 1 BH |
| PITG_20109 | Pi Voltage-gated Ion Channel (VIC)   | -33.0661 | -33.8998 | 1 | 1 BH |
| PITG_20248 | Pi conserved hypothetical protein (  | -33.3158 | -33.4004 | 1 | 1 BH |
| PITG_20285 | Pi adenylate kinase, putative (2334  | -34.931  | -30.1702 | 1 | 1 BH |
| PITG_20291 | Pi Ammonium Transporter (Amt) F      | -34.931  | -30.1702 | 1 | 1 BH |
| PITG_20397 | Pi conserved hypothetical protein (  | -33.7674 | -32.4973 | 1 | 1 BH |
| PITG_20413 | Pi putative GP-anchored serine-ricl  | -34.931  | -30.1702 | 1 | 1 BH |
| PITG_20435 | Pi EF hand containing protein, puta  | -34.931  | -30.1702 | 1 | 1 BH |
| PITG_20492 | Pi conserved hypothetical protein (  | -33.3158 | -33.4004 | 1 | 1 BH |
| PITG_20591 | Pi conserved hypothetical protein (  | -34.931  | -30.1702 | 1 | 1 BH |
| PITG_20609 | Pi conserved hypothetical protein (  | -33.3802 | -33.2716 | 1 | 1 BH |
| PITG_20676 | Pi beta-glucosidase, putative (243C  | -33.0661 | -33.8998 | 1 | 1 BH |
| PITG_20692 | Pi EF hand containing protein, puta  | -34.931  | -30.1702 | 1 | 1 BH |
| PITG_20844 | Pi conserved hypothetical protein (  | -34.931  | -30.1702 | 1 | 1 BH |
| PITG_21003 | Pi conserved hypothetical protein (  | -33.3158 | -33.4004 | 1 | 1 BH |
| PITG_21199 | Pi hypothetical protein (721 nt)     | -33.3158 | -33.4004 | 1 | 1 BH |
| PITG_21364 | Pi conserved hypothetical protein (  | -33.3802 | -33.2716 | 1 | 1 BH |
| PITG_21371 | Pi conserved hypothetical protein (  | -34.931  | -30.1702 | 1 | 1 BH |
| PITG_21384 | Pi hypothetical protein (1601 nt)    | -34.931  | -30.1702 | 1 | 1 BH |
| PITG_21437 | Pi conserved hypothetical protein (  | -33.3158 | -33.4004 | 1 | 1 BH |
| PITG_21501 | Pi calcium/calmodulin dependent p    | -33.0661 | -33.8998 | 1 | 1 BH |
| PITG_21621 | Pi cysteine protease family (429 nt  | -34.931  | -30.1702 | 1 | 1 BH |
| PITG_21634 | Pi hypothetical protein (804 nt)     | -33.3158 | -33.4004 | 1 | 1 BH |
| PITG_21802 | Pi conserved hypothetical protein (  | -33.5554 | -32.9214 | 1 | 1 BH |
| PITG_21854 | Pi cAMP protein kinase (1375 nt)     | -34.931  | -30.1702 | 1 | 1 BH |
| PITG_21875 | Pi conserved hypothetical protein (  | -33.3158 | -33.4004 | 1 | 1 BH |
| PITG_21940 | Pi cytochrome P450, putative (157    | -33.3158 | -33.4004 | 1 | 1 BH |
| PITG_22047 | Pi E3 ubiquitin-protein ligase HERC  | -34.931  | -30.1702 | 1 | 1 BH |
| PITG_22094 | Pi conserved hypothetical protein (  | -33.3158 | -33.4004 | 1 | 1 BH |
| PITG_22453 | Pi conserved hypothetical protein (  | -33.3158 | -33.4004 | 1 | 1 BH |
| PITG_22479 | Pi conserved hypothetical protein (  | -34.931  | -30.1702 | 1 | 1 BH |
| PITG_22508 | Pi conserved hypothetical protein (  | -33.0661 | -33.8998 | 1 | 1 BH |
| PITG_22510 | Pi conserved hypothetical protein (  | -33.3158 | -33.4004 | 1 | 1 BH |

|            |                                       |          |          |   |      |
|------------|---------------------------------------|----------|----------|---|------|
| PITG_22523 | Pi eukaryotic translation initiation  | -33.3158 | -33.4004 | 1 | 1 BH |
| PITG_22562 | Pi croquemort-like mating protein,    | -16.1133 | 3.121634 | 1 | 1 BH |
| PITG_22859 | Pi conserved hypothetical protein (   | -33.0661 | -33.8998 | 1 | 1 BH |
| PITG_22927 | Pi hypothetical protein (834 nt)      | -34.931  | -30.1702 | 1 | 1 BH |
| PITG_22931 | Pi conserved hypothetical protein (   | -33.4775 | -33.0772 | 1 | 1 BH |
| PITG_00014 | Pi 26S proteasome non-ATPase reg      | -13.0498 | -0.07169 | 1 | 1 BH |
| PITG_00022 | Pi Multidrug/Oligosaccharidyl-lipid   | -33.9938 | -32.0444 | 1 | 1 BH |
| PITG_00024 | Pi conserved hypothetical protein (   | -33.9938 | -32.0444 | 1 | 1 BH |
| PITG_00025 | Pi conserved hypothetical protein (   | -33.267  | -33.4981 | 1 | 1 BH |
| PITG_00028 | Pi aminoacylase-1, putative (1660     | -33.2108 | -33.6105 | 1 | 1 BH |
| PITG_00033 | Pi hypothetical protein (889 nt)      | -50.0161 | 0        | 1 | 1 BH |
| PITG_00034 | Pi aldehyde dehydrogenase, putati     | -13.1425 | 0.837742 | 1 | 1 BH |
| PITG_00043 | Pi conserved hypothetical protein (   | -33.2108 | -33.6105 | 1 | 1 BH |
| PITG_00046 | Pi sporangia induced conserved hy     | -34.7809 | -30.4703 | 1 | 1 BH |
| PITG_00047 | Pi conserved hypothetical protein (   | -34.1864 | -31.6594 | 1 | 1 BH |
| PITG_00055 | Pi conserved hypothetical protein (   | -50.0161 | 0        | 1 | 1 BH |
| PITG_00060 | Pi hypothetical protein (647 nt)      | -50.0161 | 0        | 1 | 1 BH |
| PITG_00063 | Pi mitogen activated protein kinase   | -33.8446 | -32.3428 | 1 | 1 BH |
| PITG_00070 | Pi conserved hypothetical protein (   | -33.2108 | -33.6105 | 1 | 1 BH |
| PITG_00075 | Pi conserved hypothetical protein (   | -33.6923 | -32.6476 | 1 | 1 BH |
| PITG_00076 | Pi hypothetical protein (680 nt)      | -50.0161 | 0        | 1 | 1 BH |
| PITG_00077 | Pi ubiquitin-specific protease, puta  | -32.8145 | -34.4032 | 1 | 1 BH |
| PITG_00081 | Pi protein kinase, putative (2507 nt) | -34.459  | -31.1142 | 1 | 1 BH |
| PITG_00094 | Pi conserved hypothetical protein (   | -34.459  | -31.1142 | 1 | 1 BH |
| PITG_00101 | Pi HECT E3 ubiquitin ligase, putativ  | -34.459  | -31.1142 | 1 | 1 BH |
| PITG_00107 | Pi conserved hypothetical protein (   | -34.2191 | -31.5939 | 1 | 1 BH |
| PITG_00121 | Pi sporangia induced predicted pro    | -50.0161 | 0        | 1 | 1 BH |
| PITG_00124 | Pi ser/thr kinase (1093 nt)           | -33.8446 | -32.3428 | 1 | 1 BH |
| PITG_00127 | Pi estradiol 17-beta-dehydrogenase    | -12.9118 | 0.386014 | 1 | 1 BH |
| PITG_00132 | Pi phosphoglycerate kinase (1321 r    | -32.5598 | -34.9125 | 1 | 1 BH |
| PITG_00133 | Pi phosphoserine aminotransferase     | -14.6351 | 0.179122 | 1 | 1 BH |
| PITG_00142 | Pi ribosome biogenesis protein NEI    | -33.6527 | -32.7266 | 1 | 1 BH |
| PITG_00149 | Pi conserved hypothetical protein (   | -50.0161 | 0        | 1 | 1 BH |
| PITG_00160 | Pi conserved hypothetical protein (   | -33.2308 | -33.5705 | 1 | 1 BH |
| PITG_00172 | Pi proteasome subunit alpha, puta     | -12.6398 | 0.377084 | 1 | 1 BH |
| PITG_00191 | Pi conserved hypothetical protein (   | -33.3757 | -33.2808 | 1 | 1 BH |
| PITG_00204 | Pi kinesin heavy chain, putative (32  | -33.2108 | -33.6105 | 1 | 1 BH |
| PITG_00221 | Pi tryptophan synthase, putative (1   | -33.4706 | -33.0909 | 1 | 1 BH |
| PITG_00224 | Pi conserved hypothetical protein (   | -33.1242 | -33.7836 | 1 | 1 BH |
| PITG_00230 | Pi peptidyl-prolyl cis-trans isomera  | -34.7809 | -30.4703 | 1 | 1 BH |
| PITG_00255 | Pi conserved hypothetical protein (   | -32.8458 | -34.3406 | 1 | 1 BH |
| PITG_00256 | Pi conserved hypothetical protein (   | -33.6194 | -32.7933 | 1 | 1 BH |
| PITG_00266 | Pi 40S ribosomal protein S10 (596     | -9.65393 | -0.0292  | 1 | 1 BH |
| PITG_00271 | Pi conserved hypothetical protein (   | -33.4552 | -33.1217 | 1 | 1 BH |
| PITG_00273 | Pi N-acetylated-alpha-linked acidic   | -34.2191 | -31.5939 | 1 | 1 BH |
| PITG_00282 | Pi conserved hypothetical protein (   | -32.8269 | -34.3783 | 1 | 1 BH |
| PITG_00287 | Pi formyl-coenzyme A transferase,     | -33.1592 | -33.7138 | 1 | 1 BH |

|            |                                       |          |          |   |      |
|------------|---------------------------------------|----------|----------|---|------|
| PITG_00290 | Pi conserved hypothetical protein (   | -33.7378 | -32.5565 | 1 | 1 BH |
| PITG_00301 | Pi conserved hypothetical protein (   | -34.459  | -31.1142 | 1 | 1 BH |
| PITG_00321 | Pi conserved hypothetical protein (   | -50.0161 | 0        | 1 | 1 BH |
| PITG_00323 | Pi conserved hypothetical protein (   | -32.8458 | -34.3406 | 1 | 1 BH |
| PITG_00351 | Pi conserved hypothetical protein (   | -50.0161 | 0        | 1 | 1 BH |
| PITG_00362 | Pi conserved hypothetical protein (   | -34.7809 | -30.4703 | 1 | 1 BH |
| PITG_00393 | Pi conserved hypothetical protein (   | -34.1864 | -31.6594 | 1 | 1 BH |
| PITG_00399 | Pi nuclear ribonuclease Z, putative   | -32.5631 | -34.9059 | 1 | 1 BH |
| PITG_00404 | Pi hypothetical protein (1637 nt)     | -33.1242 | -33.7836 | 1 | 1 BH |
| PITG_00410 | Pi bystin (1269 nt)                   | -33.1592 | -33.7138 | 1 | 1 BH |
| PITG_00420 | Pi F-box protein, putative (489 nt)   | -33.9073 | -32.2176 | 1 | 1 BH |
| PITG_00424 | Pi conserved hypothetical protein (   | -32.7937 | -34.4448 | 1 | 1 BH |
| PITG_00430 | Pi conserved hypothetical protein (   | -33.1528 | -33.7264 | 1 | 1 BH |
| PITG_00447 | Pi sporangia induced hypothetical     | -34.459  | -31.1142 | 1 | 1 BH |
| PITG_00457 | Pi conserved hypothetical protein (   | -13.89   | 0.541073 | 1 | 1 BH |
| PITG_00459 | Pi coatomer subunit zeta-1, putativ   | -13.2045 | 0.235496 | 1 | 1 BH |
| PITG_00461 | Pi Mitochondrial Carrier (MC) Fami    | -13.0955 | 0.748647 | 1 | 1 BH |
| PITG_00478 | Pi conserved hypothetical protein (   | -34.7809 | -30.4703 | 1 | 1 BH |
| PITG_00490 | Pi protein phosphatase 2C, putativ    | -14.4803 | -0.13043 | 1 | 1 BH |
| PITG_00510 | Pi hypothetical protein (2755 nt)     | -33.4706 | -33.0909 | 1 | 1 BH |
| PITG_00543 | Pi formate-tetrahydrofolate ligase    | -13.8508 | 0.431517 | 1 | 1 BH |
| PITG_00566 | Pi uroporphyrinogen decarboxylas      | -14.5886 | 0.083528 | 1 | 1 BH |
| PITG_00567 | Pi conserved hypothetical protein (   | -33.4706 | -33.0909 | 1 | 1 BH |
| PITG_00569 | Pi phosphatidylinositol kinase (PIK   | -50.0161 | 0        | 1 | 1 BH |
| PITG_00570 | Pi phosphatidylserine synthase, pu    | -33.1753 | -33.6814 | 1 | 1 BH |
| PITG_00595 | Pi conserved hypothetical protein (   | -34.459  | -31.1142 | 1 | 1 BH |
| PITG_00614 | Pi protein kinase (570 nt)            | -50.0161 | 0        | 1 | 1 BH |
| PITG_00633 | Pi proteasome subunit alpha type-     | -11.9923 | 0.28515  | 1 | 1 BH |
| PITG_00643 | Pi protein kinase, putative (2750 nt) | -50.0161 | 0        | 1 | 1 BH |
| PITG_00647 | Pi conserved hypothetical protein (   | -32.7868 | -34.4585 | 1 | 1 BH |
| PITG_00660 | Pi conserved hypothetical protein (   | -34.3408 | -31.3505 | 1 | 1 BH |
| PITG_00666 | Pi kinesin-like protein (3039 nt)     | -34.459  | -31.1142 | 1 | 1 BH |
| PITG_00672 | Pi conserved hypothetical protein (   | -50.0161 | 0        | 1 | 1 BH |
| PITG_00674 | Pi carbonic anhydrase, putative (10   | -33.6527 | -32.7266 | 1 | 1 BH |
| PITG_00694 | Pi Sulfate Permease (SulP) Family (   | -33.1943 | -33.6435 | 1 | 1 BH |
| PITG_00702 | Pi conserved hypothetical protein (   | -11.6613 | 0.183736 | 1 | 1 BH |
| PITG_00710 | Pi isoamyl acetate-hydrolyzing este   | -33.5194 | -32.9934 | 1 | 1 BH |
| PITG_00720 | Pi acetyl-coenzyme A synthetase (1    | -14.9181 | 0.738953 | 1 | 1 BH |
| PITG_00755 | Pi conserved hypothetical protein (   | -33.1528 | -33.7264 | 1 | 1 BH |
| PITG_00765 | Pi flagellar adenylate kinase (844 n  | -13.156  | 0.10909  | 1 | 1 BH |
| PITG_00772 | Pi Major Facilitator Superfamily (M   | -50.0161 | 0        | 1 | 1 BH |
| PITG_00790 | Pi conserved hypothetical protein (   | -33.9938 | -32.0444 | 1 | 1 BH |
| PITG_00807 | Pi conserved hypothetical protein (   | -14.8043 | 0.511264 | 1 | 1 BH |
| PITG_00816 | Pi conserved hypothetical protein (   | -33.9073 | -32.2176 | 1 | 1 BH |
| PITG_00827 | Pi prohibitin (1137 nt)               | -11.4469 | -0.00671 | 1 | 1 BH |
| PITG_00828 | Pi phosphatidylinositol kinase (PIK-  | -33.1592 | -33.7138 | 1 | 1 BH |
| PITG_00853 | Pi conserved hypothetical protein (   | -33.267  | -33.4981 | 1 | 1 BH |

|            |                                      |          |          |   |      |
|------------|--------------------------------------|----------|----------|---|------|
| PITG_00864 | Pi conserved hypothetical protein (  | -33.4509 | -33.1303 | 1 | 1 BH |
| PITG_00868 | Pi naringenin,2-oxoglutarate 3-dio   | -34.459  | -31.1142 | 1 | 1 BH |
| PITG_00877 | Pi putative GPI anchor protein (168  | -34.459  | -31.1142 | 1 | 1 BH |
| PITG_00878 | Pi 2OG-Fe(II) oxygenase superfamil   | -32.7847 | -34.4627 | 1 | 1 BH |
| PITG_00880 | Pi conserved hypothetical protein (  | -9.98527 | 0.297281 | 1 | 1 BH |
| PITG_00896 | Pi phosphatidylinositol-4-phosphat   | -33.4509 | -33.1303 | 1 | 1 BH |
| PITG_00897 | Pi conserved hypothetical protein (  | -50.0161 | 0        | 1 | 1 BH |
| PITG_00911 | Pi conserved hypothetical protein (  | -32.8269 | -34.3783 | 1 | 1 BH |
| PITG_00919 | Pi Glycoside-Pentoside-Hexuronide    | -33.8889 | -32.2543 | 1 | 1 BH |
| PITG_00934 | Pi hypothetical protein (1213 nt)    | -33.7227 | -32.5868 | 1 | 1 BH |
| PITG_00937 | Pi sporangia induced hypothetical    | -50.0161 | 0        | 1 | 1 BH |
| PITG_00941 | Pi 60S ribosomal protein L21-1 (10   | -9.93051 | 0.042042 | 1 | 1 BH |
| PITG_00970 | Pi conserved hypothetical protein (  | -32.5607 | -34.9107 | 1 | 1 BH |
| PITG_00981 | Pi conserved hypothetical protein (  | -33.3191 | -33.3938 | 1 | 1 BH |
| PITG_00988 | Pi myb-like DNA-binding protein, p   | -33.9938 | -32.0444 | 1 | 1 BH |
| PITG_00997 | Pi conserved hypothetical protein (  | -11.9306 | 0.166897 | 1 | 1 BH |
| PITG_01027 | Pi SF-assemblin, putative (1047 nt)  | -50.0161 | 0        | 1 | 1 BH |
| PITG_01042 | Pi 60S ribosomal protein L22, puta   | -9.68888 | -0.02245 | 1 | 1 BH |
| PITG_01054 | Pi conserved hypothetical protein (  | -33.2108 | -33.6105 | 1 | 1 BH |
| PITG_01055 | Pi conserved hypothetical protein (  | -50.0161 | 0        | 1 | 1 BH |
| PITG_01067 | Pi conserved hypothetical protein (  | -33.267  | -33.4981 | 1 | 1 BH |
| PITG_01081 | Pi Drug/Metabolite Transporter (D    | -33.3955 | -33.241  | 1 | 1 BH |
| PITG_01085 | Pi conserved hypothetical protein (  | -32.7949 | -34.4422 | 1 | 1 BH |
| PITG_01098 | Pi ATP-binding Cassette (ABC) supe   | -34.1864 | -31.6594 | 1 | 1 BH |
| PITG_01118 | Pi conserved hypothetical protein (  | -33.2108 | -33.6105 | 1 | 1 BH |
| PITG_01130 | Pi conserved hypothetical protein (  | -34.1864 | -31.6594 | 1 | 1 BH |
| PITG_01134 | Pi conserved hypothetical protein (  | -33.1592 | -33.7138 | 1 | 1 BH |
| PITG_01136 | Pi conserved hypothetical protein (  | -50.0161 | 0        | 1 | 1 BH |
| PITG_01143 | Pi conserved hypothetical protein (  | -50.0161 | 0        | 1 | 1 BH |
| PITG_01153 | Pi conserved hypothetical protein (  | -33.1592 | -33.7138 | 1 | 1 BH |
| PITG_01159 | Pi conserved hypothetical protein (  | -32.7847 | -34.4627 | 1 | 1 BH |
| PITG_01170 | Pi potassium/sodium hyperpolariza    | -34.459  | -31.1142 | 1 | 1 BH |
| PITG_01184 | Pi eukaryotic translation initiation | -13.0066 | 0.568374 | 1 | 1 BH |
| PITG_01196 | Pi hypothetical protein (981 nt)     | -34.2191 | -31.5939 | 1 | 1 BH |
| PITG_01199 | Pi conserved hypothetical protein (  | -33.9938 | -32.0444 | 1 | 1 BH |
| PITG_01216 | Pi hypothetical protein (1398 nt)    | -33.3283 | -33.3755 | 1 | 1 BH |
| PITG_01217 | Pi transmembrane protein, putativ    | -14.7247 | 0.355868 | 1 | 1 BH |
| PITG_01218 | Pi conserved hypothetical protein (  | -50.0161 | 0        | 1 | 1 BH |
| PITG_01249 | Pi conserved hypothetical protein (  | -33.8221 | -32.388  | 1 | 1 BH |
| PITG_01260 | Pi S-phase kinase-associated prote   | -12.1028 | -0.24205 | 1 | 1 BH |
| PITG_01265 | Pi conserved hypothetical protein (  | -32.7847 | -34.4627 | 1 | 1 BH |
| PITG_01273 | Pi PLAC8 family protein (315 nt)     | -50.0161 | 0        | 1 | 1 BH |
| PITG_01277 | Pi hypothetical protein (834 nt)     | -50.0161 | 0        | 1 | 1 BH |
| PITG_01281 | Pi conserved hypothetical protein (  | -50.0161 | 0        | 1 | 1 BH |
| PITG_01284 | Pi conserved hypothetical protein (  | -33.8446 | -32.3428 | 1 | 1 BH |
| PITG_01292 | Pi conserved hypothetical protein (  | -12.3371 | -0.19792 | 1 | 1 BH |
| PITG_01296 | Pi D-Tyr-tRNA(Tyr) deacylase (698    | -33.6188 | -32.7945 | 1 | 1 BH |

|            |                                       |          |          |   |      |
|------------|---------------------------------------|----------|----------|---|------|
| PITG_01312 | Pi conserved hypothetical protein (   | -34.3408 | -31.3505 | 1 | 1 BH |
| PITG_01315 | Pi conserved hypothetical protein (   | -32.8458 | -34.3406 | 1 | 1 BH |
| PITG_01318 | Pi peptidyl-prolyl cis-trans isomera  | -13.7723 | 0.296004 | 1 | 1 BH |
| PITG_01324 | Pi conserved hypothetical protein (   | -33.267  | -33.4981 | 1 | 1 BH |
| PITG_01329 | Pi septum formation protein Maf (     | -33.267  | -33.4981 | 1 | 1 BH |
| PITG_01330 | Pi lysophospholipid acyltransferase   | -14.1429 | 1.043054 | 1 | 1 BH |
| PITG_01332 | Pi lysophospholipid acyltransferase   | -33.1753 | -33.6814 | 1 | 1 BH |
| PITG_01333 | Pi complement control module prc      | -32.5385 | -34.955  | 1 | 1 BH |
| PITG_01363 | Pi conserved hypothetical protein (   | -50.0161 | 0        | 1 | 1 BH |
| PITG_01370 | Pi ATP-binding Cassette (ABC) Supe    | -33.1528 | -33.7264 | 1 | 1 BH |
| PITG_01372 | Pi conserved hypothetical protein (   | -33.9938 | -32.0444 | 1 | 1 BH |
| PITG_01389 | Pi proteasome subunit beta type-5     | -12.326  | 0.602173 | 1 | 1 BH |
| PITG_01413 | Pi conserved hypothetical protein (   | -34.0871 | -31.858  | 1 | 1 BH |
| PITG_01415 | Pi conserved hypothetical protein (   | -50.0161 | 0        | 1 | 1 BH |
| PITG_01434 | Pi conserved hypothetical protein (   | -34.1864 | -31.6594 | 1 | 1 BH |
| PITG_01440 | Pi conserved hypothetical protein (   | -33.267  | -33.4981 | 1 | 1 BH |
| PITG_01442 | Pi conserved hypothetical protein (   | -33.5302 | -32.9718 | 1 | 1 BH |
| PITG_01445 | Pi protein kinase, putative (2103 nt) | -34.459  | -31.1142 | 1 | 1 BH |
| PITG_01479 | Pi pre-mRNA-splicing factor prp46,    | -32.5391 | -34.9538 | 1 | 1 BH |
| PITG_01490 | Pi conserved hypothetical protein (   | -33.6194 | -32.7933 | 1 | 1 BH |
| PITG_01491 | Pi conserved hypothetical protein (   | -33.5302 | -32.9718 | 1 | 1 BH |
| PITG_01498 | Pi ATP-binding cassette sub-family    | -14.3756 | -0.3423  | 1 | 1 BH |
| PITG_01512 | Pi conserved hypothetical protein (   | -50.0161 | 0        | 1 | 1 BH |
| PITG_01513 | Pi dynein light chain intermediate    | -33.8221 | -32.388  | 1 | 1 BH |
| PITG_01576 | Pi protein kinase, putative (1593 nt) | -32.5385 | -34.955  | 1 | 1 BH |
| PITG_01588 | Pi conserved hypothetical protein (   | -32.8458 | -34.3406 | 1 | 1 BH |
| PITG_01589 | Pi conserved hypothetical protein (   | -32.5599 | -34.9123 | 1 | 1 BH |
| PITG_01590 | Pi conserved hypothetical protein (   | -33.9872 | -32.0576 | 1 | 1 BH |
| PITG_01598 | Pi conserved hypothetical protein (   | -34.1864 | -31.6594 | 1 | 1 BH |
| PITG_01603 | Pi conserved hypothetical protein (   | -33.4706 | -33.0909 | 1 | 1 BH |
| PITG_01606 | Pi conserved hypothetical protein (   | -33.2108 | -33.6105 | 1 | 1 BH |
| PITG_01608 | Pi Major Facilitator Superfamily (M   | -13.8901 | 0.546983 | 1 | 1 BH |
| PITG_01643 | Pi conserved hypothetical protein (   | -32.8458 | -34.3406 | 1 | 1 BH |
| PITG_01645 | Pi conserved hypothetical protein (   | -33.1592 | -33.7138 | 1 | 1 BH |
| PITG_01655 | Pi conserved hypothetical protein (   | -50.0161 | 0        | 1 | 1 BH |
| PITG_01661 | Pi conserved hypothetical protein (   | -34.1864 | -31.6594 | 1 | 1 BH |
| PITG_01662 | Pi conserved hypothetical protein (   | -33.1321 | -33.7679 | 1 | 1 BH |
| PITG_01702 | Pi conserved hypothetical protein (   | -13.0082 | 0.57638  | 1 | 1 BH |
| PITG_01706 | Pi conserved hypothetical protein (   | -50.0161 | 0        | 1 | 1 BH |
| PITG_01709 | Pi hypothetical protein (1063 nt)     | -50.0161 | 0        | 1 | 1 BH |
| PITG_01710 | Pi conserved hypothetical protein (   | -33.1753 | -33.6814 | 1 | 1 BH |
| PITG_01713 | Pi conserved hypothetical protein (   | -34.459  | -31.1142 | 1 | 1 BH |
| PITG_01716 | Pi hypothetical protein (844 nt)      | -34.459  | -31.1142 | 1 | 1 BH |
| PITG_01717 | Pi dynein heavy chain (14029 nt)      | -33.6194 | -32.7933 | 1 | 1 BH |
| PITG_01742 | Pi thymidine kinase (746 nt)          | -34.459  | -31.1142 | 1 | 1 BH |
| PITG_01749 | Pi conserved hypothetical protein (   | -32.7868 | -34.4585 | 1 | 1 BH |
| PITG_01771 | Pi monothiol glutaredoxin-5, mitoc    | -13.1093 | 0.776109 | 1 | 1 BH |

|            |                                       |          |          |   |   |    |
|------------|---------------------------------------|----------|----------|---|---|----|
| PITG_01783 | Pi acetyl-CoA acetyltransferase (21   | -13.1756 | 0.177743 | 1 | 1 | BH |
| PITG_01796 | Pi potassium/sodium hyperpolariza     | -33.1943 | -33.6435 | 1 | 1 | BH |
| PITG_01821 | Pi conserved hypothetical protein (   | -33.8446 | -32.3428 | 1 | 1 | BH |
| PITG_01833 | Pi 60S ribosomal protein L13, puta    | -10.3352 | 0.371937 | 1 | 1 | BH |
| PITG_01836 | Pi conserved hypothetical protein (   | -33.1242 | -33.7836 | 1 | 1 | BH |
| PITG_01852 | Pi dynein heavy chain (12653 nt)      | -33.267  | -33.4981 | 1 | 1 | BH |
| PITG_01857 | Pi conserved hypothetical protein (   | -33.267  | -33.4981 | 1 | 1 | BH |
| PITG_01859 | Pi conserved hypothetical protein (   | -50.0161 | 0        | 1 | 1 | BH |
| PITG_01865 | Pi regulator of chromosome conde      | -50.0161 | 0        | 1 | 1 | BH |
| PITG_01868 | Pi conserved hypothetical protein (   | -50.0161 | 0        | 1 | 1 | BH |
| PITG_01870 | Pi conserved hypothetical protein (   | -32.7868 | -34.4585 | 1 | 1 | BH |
| PITG_01880 | Pi hypothetical protein (1956 nt)     | -33.6194 | -32.7933 | 1 | 1 | BH |
| PITG_01896 | Pi conserved hypothetical protein (   | -33.2108 | -33.6105 | 1 | 1 | BH |
| PITG_01924 | Pi twinfilin-like protein (1088 nt)   | -32.5387 | -34.9546 | 1 | 1 | BH |
| PITG_01929 | Pi conserved hypothetical protein (   | -33.267  | -33.4981 | 1 | 1 | BH |
| PITG_01942 | Pi conserved hypothetical protein (   | -33.9872 | -32.0576 | 1 | 1 | BH |
| PITG_01952 | Pi conserved hypothetical protein (   | -32.8145 | -34.4032 | 1 | 1 | BH |
| PITG_01955 | Pi P-type ATPase (P-ATPase) Super     | -50.0161 | 0        | 1 | 1 | BH |
| PITG_01956 | Pi conserved hypothetical protein (   | -50.0161 | 0        | 1 | 1 | BH |
| PITG_01994 | Pi conserved hypothetical protein (   | -32.8458 | -34.3406 | 1 | 1 | BH |
| PITG_01998 | Pi Voltage-gated Ion Channel (VIC)    | -32.8458 | -34.3406 | 1 | 1 | BH |
| PITG_02001 | Pi conserved hypothetical protein (   | -32.7847 | -34.4627 | 1 | 1 | BH |
| PITG_02008 | Pi cleavage induced hypothetical p    | -50.0161 | 0        | 1 | 1 | BH |
| PITG_02021 | Pi dysferlin-like protein (5806 nt)   | -33.1753 | -33.6814 | 1 | 1 | BH |
| PITG_02028 | Pi conserved hypothetical protein (   | -50.0161 | 0        | 1 | 1 | BH |
| PITG_02029 | Pi cleavage induced hypothetical p    | -50.0161 | 0        | 1 | 1 | BH |
| PITG_02031 | Pi conserved hypothetical protein (   | -33.1592 | -33.7138 | 1 | 1 | BH |
| PITG_02036 | Pi Equilibrative Nucleoside Transpc   | -32.5385 | -34.955  | 1 | 1 | BH |
| PITG_02051 | Pi conserved hypothetical protein (   | -33.2308 | -33.5705 | 1 | 1 | BH |
| PITG_02055 | Pi conserved hypothetical protein (   | -32.8458 | -34.3406 | 1 | 1 | BH |
| PITG_02059 | Pi conserved hypothetical protein (   | -33.5465 | -32.9391 | 1 | 1 | BH |
| PITG_02074 | Pi conserved hypothetical protein (   | -33.6194 | -32.7933 | 1 | 1 | BH |
| PITG_02076 | Pi conserved hypothetical protein (   | -50.0161 | 0        | 1 | 1 | BH |
| PITG_02085 | Pi ATP-binding Cassette (ABC) Supe    | -33.9938 | -32.0444 | 1 | 1 | BH |
| PITG_02088 | Pi conserved hypothetical protein (   | -33.1528 | -33.7264 | 1 | 1 | BH |
| PITG_02093 | Pi pre-rRNA-processing protein ESF    | -33.3955 | -33.241  | 1 | 1 | BH |
| PITG_02094 | Pi dnaJ heat shock protein (994 nt)   | -33.8221 | -32.388  | 1 | 1 | BH |
| PITG_02096 | Pi polycomb-like protein (1962 nt)    | -32.8458 | -34.3406 | 1 | 1 | BH |
| PITG_02107 | Pi conserved hypothetical protein (   | -34.3408 | -31.3505 | 1 | 1 | BH |
| PITG_02108 | Pi dynein light chain-like protein (4 | -34.2191 | -31.5939 | 1 | 1 | BH |
| PITG_02112 | Pi 3-hydroxyisobutyryl-CoA hydrok     | -13.8973 | 0.54033  | 1 | 1 | BH |
| PITG_02116 | Pi protein kinase (449 nt)            | -50.0161 | 0        | 1 | 1 | BH |
| PITG_02123 | Pi hypothetical protein (1595 nt)     | -33.7227 | -32.5868 | 1 | 1 | BH |
| PITG_02128 | Pi conserved hypothetical protein (   | -33.7227 | -32.5868 | 1 | 1 | BH |
| PITG_02147 | Pi Voltage-gated Ion Channel (VIC)    | -34.459  | -31.1142 | 1 | 1 | BH |
| PITG_02148 | Pi conserved hypothetical protein (   | -50.0161 | 0        | 1 | 1 | BH |
| PITG_02167 | Pi conserved hypothetical protein (   | -50.0161 | 0        | 1 | 1 | BH |



|            |                                        |          |          |   |   |    |
|------------|----------------------------------------|----------|----------|---|---|----|
| PITG_02182 | Pi homoserine dehydrogenase, put       | -13.1024 | 0.752641 | 1 | 1 | BH |
| PITG_02186 | Pi FKBP-type peptidyl-prolyl cis-tra   | -15.0257 | 0.957847 | 1 | 1 | BH |
| PITG_02190 | Pi conserved hypothetical protein (    | -33.4509 | -33.1303 | 1 | 1 | BH |
| PITG_02191 | Pi proteasome subunit beta type-6      | -12.6803 | -0.08909 | 1 | 1 | BH |
| PITG_02202 | Pi conserved hypothetical protein (    | -32.7604 | -34.5114 | 1 | 1 | BH |
| PITG_02212 | Pi mitogen-activated protein kinas     | -50.0161 | 0        | 1 | 1 | BH |
| PITG_02230 | Pi conserved hypothetical protein (    | -32.5391 | -34.9538 | 1 | 1 | BH |
| PITG_02250 | Pi conserved hypothetical protein (    | -33.7227 | -32.5868 | 1 | 1 | BH |
| PITG_02251 | Pi conserved hypothetical protein (    | -33.3955 | -33.241  | 1 | 1 | BH |
| PITG_02254 | Pi conserved hypothetical protein (    | -32.7949 | -34.4422 | 1 | 1 | BH |
| PITG_02257 | Pi conserved hypothetical protein (    | -50.0161 | 0        | 1 | 1 | BH |
| PITG_02275 | Pi peroxisomal trans-2-enoyl-CoA r     | -50.0161 | 0        | 1 | 1 | BH |
| PITG_02284 | Pi xanthine dehydrogenase, putativ     | -33.9938 | -32.0444 | 1 | 1 | BH |
| PITG_02289 | Pi acetyl-coenzyme A transporter,      | -33.267  | -33.4981 | 1 | 1 | BH |
| PITG_02307 | Pi alpha,alpha-trehalose-phosphat      | -33.267  | -33.4981 | 1 | 1 | BH |
| PITG_02324 | Pi hypothetical protein (598 nt)       | -33.1753 | -33.6814 | 1 | 1 | BH |
| PITG_02341 | Pi conserved hypothetical protein (    | -50.0161 | 0        | 1 | 1 | BH |
| PITG_02342 | Pi conserved hypothetical protein (    | -34.7809 | -30.4703 | 1 | 1 | BH |
| PITG_02343 | Pi kinesin-like protein (5133 nt)      | -32.8458 | -34.3406 | 1 | 1 | BH |
| PITG_02344 | Pi 5-oxoprolinase (3842 nt)            | -32.5616 | -34.9088 | 1 | 1 | BH |
| PITG_02384 | Pi conserved hypothetical protein (    | -32.5391 | -34.9538 | 1 | 1 | BH |
| PITG_02393 | Pi conserved hypothetical protein (    | -50.0161 | 0        | 1 | 1 | BH |
| PITG_02427 | Pi conserved hypothetical protein (    | -32.8458 | -34.3406 | 1 | 1 | BH |
| PITG_02429 | Pi cAMP-dependent protein kinase       | -34.459  | -31.1142 | 1 | 1 | BH |
| PITG_02430 | Pi conserved hypothetical protein (    | -32.7868 | -34.4585 | 1 | 1 | BH |
| PITG_02441 | Pi hypothetical protein (2940 nt)      | -33.9938 | -32.0444 | 1 | 1 | BH |
| PITG_02460 | Pi sporulation induced hypothetica     | -33.5851 | -32.862  | 1 | 1 | BH |
| PITG_02462 | Pi actin-like protein (1227 nt)        | -50.0161 | 0        | 1 | 1 | BH |
| PITG_02464 | Pi conserved hypothetical protein (    | -33.7227 | -32.5868 | 1 | 1 | BH |
| PITG_02489 | Pi conserved hypothetical protein (    | -33.2108 | -33.6105 | 1 | 1 | BH |
| PITG_02492 | Pi microtubule-associated protein,     | -33.5851 | -32.862  | 1 | 1 | BH |
| PITG_02502 | Pi T-complex protein 1 subunit zeta    | -13.3581 | 0.540506 | 1 | 1 | BH |
| PITG_02509 | Pi conserved hypothetical protein (    | -34.1864 | -31.6594 | 1 | 1 | BH |
| PITG_02515 | Pi LETM1 and EF-hand domain-con        | -14.4574 | -0.17388 | 1 | 1 | BH |
| PITG_02521 | Pi conserved hypothetical protein (    | -33.9938 | -32.0444 | 1 | 1 | BH |
| PITG_02528 | Pi elongator complex protein, puta     | -33.3955 | -33.241  | 1 | 1 | BH |
| PITG_02529 | Pi protein kinase, putative (4011 nt)  | -32.7847 | -34.4627 | 1 | 1 | BH |
| PITG_02546 | Pi ubiquitin carboxyl-terminal hydr    | -32.7588 | -34.5144 | 1 | 1 | BH |
| PITG_02547 | Pi transcription initiation factor TFI | -32.7847 | -34.4627 | 1 | 1 | BH |
| PITG_02549 | Pi conserved hypothetical protein (    | -34.3408 | -31.3505 | 1 | 1 | BH |
| PITG_02551 | Pi calmodulin-like protein (595 nt)    | -50.0161 | 0        | 1 | 1 | BH |
| PITG_02556 | Pi Major Facilitator Superfamily (M    | -33.1753 | -33.6814 | 1 | 1 | BH |
| PITG_02568 | Pi conserved hypothetical protein (    | -34.7809 | -30.4703 | 1 | 1 | BH |
| PITG_02569 | Pi Rab11 family GTPase, putative (:    | -34.3408 | -31.3505 | 1 | 1 | BH |
| PITG_02576 | Pi protein phosphatase 2C, putativ     | -33.1753 | -33.6814 | 1 | 1 | BH |
| PITG_02592 | Pi conserved hypothetical protein (    | -33.9073 | -32.2176 | 1 | 1 | BH |
| PITG_02595 | Pi conserved hypothetical protein (    | -34.459  | -31.1142 | 1 | 1 | BH |

|            |                                      |          |          |   |      |
|------------|--------------------------------------|----------|----------|---|------|
| PITG_02619 | Pi hypothetical protein (309 nt)     | -33.1242 | -33.7836 | 1 | 1 BH |
| PITG_02620 | Pi conserved hypothetical protein (  | -33.2308 | -33.5705 | 1 | 1 BH |
| PITG_02622 | Pi conserved hypothetical protein (  | -50.0161 | 0        | 1 | 1 BH |
| PITG_02635 | Pi conserved hypothetical protein (  | -33.2108 | -33.6105 | 1 | 1 BH |
| PITG_02638 | Pi hypothetical protein (1487 nt)    | -34.7809 | -30.4703 | 1 | 1 BH |
| PITG_02646 | Pi conserved hypothetical protein (  | -50.0161 | 0        | 1 | 1 BH |
| PITG_02650 | Pi hypothetical protein (228 nt)     | -33.5851 | -32.862  | 1 | 1 BH |
| PITG_02663 | Pi conserved hypothetical protein (  | -14.5772 | 0.053205 | 1 | 1 BH |
| PITG_02678 | Pi conserved hypothetical protein (  | -33.9073 | -32.2176 | 1 | 1 BH |
| PITG_02680 | Pi conserved hypothetical protein (  | -33.9938 | -32.0444 | 1 | 1 BH |
| PITG_02687 | Pi conserved hypothetical protein (  | -50.0161 | 0        | 1 | 1 BH |
| PITG_02696 | Pi vacuolar protein sorting-associat | -32.7847 | -34.4627 | 1 | 1 BH |
| PITG_02697 | Pi ATP-binding Cassette (ABC) Sup    | -33.4552 | -33.1217 | 1 | 1 BH |
| PITG_02713 | Pi brefeldin A-inhibited guanine nu  | -50.0161 | 0        | 1 | 1 BH |
| PITG_02718 | Pi conserved hypothetical protein (  | -33.2108 | -33.6105 | 1 | 1 BH |
| PITG_02719 | Pi conserved hypothetical protein (  | -32.8145 | -34.4032 | 1 | 1 BH |
| PITG_02721 | Pi tubulin polyglutamylase, putativ  | -34.7809 | -30.4703 | 1 | 1 BH |
| PITG_02725 | Pi conserved hypothetical protein (  | -32.7604 | -34.5114 | 1 | 1 BH |
| PITG_02733 | Pi conserved hypothetical protein (  | -32.5391 | -34.9538 | 1 | 1 BH |
| PITG_02738 | Pi hypothetical protein (729 nt)     | -33.1528 | -33.7264 | 1 | 1 BH |
| PITG_02739 | Pi conserved hypothetical protein (  | -32.5385 | -34.955  | 1 | 1 BH |
| PITG_02740 | Pi acetolactate synthase, mitochor   | -14.3688 | -0.34984 | 1 | 1 BH |
| PITG_02741 | Pi glutaredoxin (527 nt)             | -13.1567 | 0.137672 | 1 | 1 BH |
| PITG_02751 | Pi conserved hypothetical protein (  | -33.9073 | -32.2176 | 1 | 1 BH |
| PITG_02752 | Pi ribosomal RNA methyltransferas    | -33.1753 | -33.6814 | 1 | 1 BH |
| PITG_02753 | Pi DNA polymerase zeta catalytic s   | -33.1528 | -33.7264 | 1 | 1 BH |
| PITG_02758 | Pi conserved hypothetical protein (  | -33.4706 | -33.0909 | 1 | 1 BH |
| PITG_02774 | Pi multiple inositol polyphosphate   | -34.1864 | -31.6594 | 1 | 1 BH |
| PITG_02778 | Pi conserved hypothetical protein (  | -33.1592 | -33.7138 | 1 | 1 BH |
| PITG_02780 | Pi conserved hypothetical protein (  | -33.267  | -33.4981 | 1 | 1 BH |
| PITG_02784 | Pi conserved hypothetical protein (  | -33.6188 | -32.7945 | 1 | 1 BH |
| PITG_02788 | Pi dynein 18 kDa light chain (447 n  | -50.0161 | 0        | 1 | 1 BH |
| PITG_02794 | Pi conserved hypothetical protein (  | -33.267  | -33.4981 | 1 | 1 BH |
| PITG_02800 | Pi conserved hypothetical protein (  | -33.2108 | -33.6105 | 1 | 1 BH |
| PITG_02809 | Pi conserved hypothetical protein (  | -32.5598 | -34.9125 | 1 | 1 BH |
| PITG_02815 | Pi conserved hypothetical protein (  | -34.7809 | -30.4703 | 1 | 1 BH |
| PITG_02818 | Pi conserved hypothetical protein (  | -33.8221 | -32.388  | 1 | 1 BH |
| PITG_02822 | Pi conserved hypothetical protein (  | -32.7868 | -34.4585 | 1 | 1 BH |
| PITG_02826 | Pi DEAD/DEAH box RNA helicase, p     | -32.5607 | -34.9107 | 1 | 1 BH |
| PITG_02840 | Pi WD repeat-containing protein sr   | -34.459  | -31.1142 | 1 | 1 BH |
| PITG_02846 | Pi para-hydroxybenzoate-polypren     | -33.5302 | -32.9718 | 1 | 1 BH |
| PITG_02848 | Pi conserved hypothetical protein (  | -33.2108 | -33.6105 | 1 | 1 BH |
| PITG_02854 | Pi aspartate-semialdehyde dehydr     | -15.0848 | 1.075956 | 1 | 1 BH |
| PITG_02855 | Pi conserved hypothetical protein (  | -50.0161 | 0        | 1 | 1 BH |
| PITG_02856 | Pi DEAD/DEAH box RNA helicase, p     | -13.9356 | 0.632284 | 1 | 1 BH |
| PITG_02857 | Pi L-allo-threonine aldolase (1202 r | -32.7937 | -34.4448 | 1 | 1 BH |
| PITG_02858 | Pi L-allo-threonine aldolase (1256 r | -33.4552 | -33.1217 | 1 | 1 BH |

|            |                                       |          |          |   |      |
|------------|---------------------------------------|----------|----------|---|------|
| PITG_02864 | Pi conserved hypothetical protein (   | -33.1528 | -33.7264 | 1 | 1 BH |
| PITG_02893 | Pi conserved hypothetical protein (   | -33.4706 | -33.0909 | 1 | 1 BH |
| PITG_02911 | Pi conserved hypothetical protein (   | -33.2108 | -33.6105 | 1 | 1 BH |
| PITG_02920 | Pi conserved hypothetical protein (   | -32.5599 | -34.9123 | 1 | 1 BH |
| PITG_02952 | Pi sporangia induced Bardet-Biedl s   | -33.9872 | -32.0576 | 1 | 1 BH |
| PITG_02961 | Pi choline dehydrogenase, putative    | -33.267  | -33.4981 | 1 | 1 BH |
| PITG_02964 | Pi carbohydrate-binding protein, pi   | -14.6283 | 0.14644  | 1 | 1 BH |
| PITG_02997 | Pi conserved hypothetical protein (   | -33.9073 | -32.2176 | 1 | 1 BH |
| PITG_03014 | Pi F-box protein, putative (3548 nt)  | -33.2108 | -33.6105 | 1 | 1 BH |
| PITG_03024 | Pi hypothetical protein (588 nt)      | -32.8458 | -34.3406 | 1 | 1 BH |
| PITG_03042 | Pi Major Facilitator Superfamily (M   | -32.7604 | -34.5114 | 1 | 1 BH |
| PITG_03050 | Pi conserved hypothetical protein (   | -50.0161 | 0        | 1 | 1 BH |
| PITG_03051 | Pi Drug/Metabolite Transporter (D     | -50.0161 | 0        | 1 | 1 BH |
| PITG_03052 | Pi Drug/Metabolite Transporter (D     | -34.7809 | -30.4703 | 1 | 1 BH |
| PITG_03056 | Pi DNA polymerase I, putative (406    | -33.267  | -33.4981 | 1 | 1 BH |
| PITG_03057 | Pi ubiquitin-conjugating enzyme E2    | -32.7868 | -34.4585 | 1 | 1 BH |
| PITG_03060 | Pi alpha-1,2-glucosyltransferase, pi  | -32.5607 | -34.9107 | 1 | 1 BH |
| PITG_03062 | Pi conserved hypothetical protein (   | -50.0161 | 0        | 1 | 1 BH |
| PITG_03072 | Pi conserved hypothetical protein (   | -32.5616 | -34.9088 | 1 | 1 BH |
| PITG_03079 | Pi hypothetical protein (1987 nt)     | -33.3283 | -33.3755 | 1 | 1 BH |
| PITG_03106 | Pi conserved hypothetical protein (   | -50.0161 | 0        | 1 | 1 BH |
| PITG_03131 | Pi M96 mating-specific protein farr   | -33.0544 | -33.9233 | 1 | 1 BH |
| PITG_03147 | Pi conserved hypothetical protein (   | -33.0544 | -33.9233 | 1 | 1 BH |
| PITG_03150 | Pi proteasome subunit alpha type-     | -12.3055 | 0.563875 | 1 | 1 BH |
| PITG_03156 | Pi pre-rRNA-processing protein TSF    | -33.3283 | -33.3755 | 1 | 1 BH |
| PITG_03158 | Pi tRNA isopentenyltransferase, pu    | -32.8269 | -34.3783 | 1 | 1 BH |
| PITG_03161 | Pi conserved hypothetical protein (   | -50.0161 | 0        | 1 | 1 BH |
| PITG_03162 | Pi cleavage induced hypothetical p    | -34.459  | -31.1142 | 1 | 1 BH |
| PITG_03170 | Pi SCP-like extracellular protein (55 | -50.0161 | 0        | 1 | 1 BH |
| PITG_03172 | Pi conserved hypothetical protein (   | -50.0161 | 0        | 1 | 1 BH |
| PITG_03181 | Pi conserved hypothetical protein (   | -50.0161 | 0        | 1 | 1 BH |
| PITG_03211 | Pi conserved hypothetical protein (   | -50.0161 | 0        | 1 | 1 BH |
| PITG_03236 | Pi conserved hypothetical protein (   | -32.8458 | -34.3406 | 1 | 1 BH |
| PITG_03240 | Pi conserved hypothetical protein (   | -34.459  | -31.1142 | 1 | 1 BH |
| PITG_03273 | Pi conserved hypothetical protein (   | -33.5194 | -32.9934 | 1 | 1 BH |
| PITG_03274 | Pi elongation factor P, putative (94  | -14.8704 | 0.648429 | 1 | 1 BH |
| PITG_03278 | Pi sporangia induced hypothetical     | -33.6194 | -32.7933 | 1 | 1 BH |
| PITG_03281 | Pi hypothetical protein (1206 nt)     | -33.4706 | -33.0909 | 1 | 1 BH |
| PITG_03285 | Pi hypothetical protein (501 nt)      | -33.1528 | -33.7264 | 1 | 1 BH |
| PITG_03292 | Pi GTPase (1643 nt)                   | -33.267  | -33.4981 | 1 | 1 BH |
| PITG_03296 | Pi conserved hypothetical protein (   | -34.0871 | -31.858  | 1 | 1 BH |
| PITG_03297 | Pi conserved hypothetical protein (   | -34.459  | -31.1142 | 1 | 1 BH |
| PITG_03301 | Pi DEAD/DEAH box RNA helicase, p      | -33.4706 | -33.0909 | 1 | 1 BH |
| PITG_03307 | Pi conserved hypothetical protein (   | -34.459  | -31.1142 | 1 | 1 BH |
| PITG_03309 | Pi Intraflagellar Transport Protein 1 | -50.0161 | 0        | 1 | 1 BH |
| PITG_03313 | Pi conserved hypothetical protein (   | -33.267  | -33.4981 | 1 | 1 BH |
| PITG_03325 | Pi hypothetical protein (3096 nt)     | -33.9938 | -32.0444 | 1 | 1 BH |

|            |                                         |          |          |   |      |
|------------|-----------------------------------------|----------|----------|---|------|
| PITG_03331 | Pi conserved hypothetical protein (     | -32.7604 | -34.5114 | 1 | 1 BH |
| PITG_03335 | Pi callose synthase, putative (7947     | -13.7874 | 0.290889 | 1 | 1 BH |
| PITG_03346 | Pi cleavage induced hypothetical p      | -33.6527 | -32.7266 | 1 | 1 BH |
| PITG_03353 | Pi 60S ribosomal protein L17-2 (75      | -8.86941 | -0.06775 | 1 | 1 BH |
| PITG_03373 | Pi cell division protein ftsZ (2511 nt) | -32.5391 | -34.9538 | 1 | 1 BH |
| PITG_03380 | Pi conserved hypothetical protein (     | -14.3595 | -0.3697  | 1 | 1 BH |
| PITG_03388 | Pi lectin, putative (1612 nt)           | -14.6215 | 0.146896 | 1 | 1 BH |
| PITG_03419 | Pi flagellar protein, putative (4935    | -33.9938 | -32.0444 | 1 | 1 BH |
| PITG_03420 | Pi 50S ribosomal protein L13 (423 nt)   | -13.0889 | 0.737783 | 1 | 1 BH |
| PITG_03423 | Pi dynein heavy chain (12423 nt)        | -33.8889 | -32.2543 | 1 | 1 BH |
| PITG_03432 | Pi conserved hypothetical protein (     | -33.7227 | -32.5868 | 1 | 1 BH |
| PITG_03433 | Pi regulator of chromosome conde        | -33.8446 | -32.3428 | 1 | 1 BH |
| PITG_03436 | Pi conserved hypothetical protein (     | -32.7847 | -34.4627 | 1 | 1 BH |
| PITG_03437 | Pi conserved hypothetical protein (     | -50.0161 | 0        | 1 | 1 BH |
| PITG_03450 | Pi conserved hypothetical protein (     | -33.6194 | -32.7933 | 1 | 1 BH |
| PITG_03484 | Pi conserved hypothetical protein (     | -34.459  | -31.1142 | 1 | 1 BH |
| PITG_03485 | Pi hypothetical protein (1088 nt)       | -34.7809 | -30.4703 | 1 | 1 BH |
| PITG_03488 | Pi dynein heavy chain (13140 nt)        | -34.7809 | -30.4703 | 1 | 1 BH |
| PITG_03491 | Pi myosin-like protein (2468 nt)        | -32.7868 | -34.4585 | 1 | 1 BH |
| PITG_03494 | Pi conserved hypothetical protein (     | -34.7809 | -30.4703 | 1 | 1 BH |
| PITG_03502 | Pi alcohol dehydrogenase, putative      | -33.8446 | -32.3428 | 1 | 1 BH |
| PITG_03506 | Pi conserved hypothetical protein (     | -33.2108 | -33.6105 | 1 | 1 BH |
| PITG_03533 | Pi endo-1,3(4)-beta-glucanase, put      | -33.3283 | -33.3755 | 1 | 1 BH |
| PITG_03549 | Pi coatomer subunit gamma, putat        | -14.4758 | -0.14446 | 1 | 1 BH |
| PITG_03554 | Pi endo-1,3(4)-beta-glucanase, put      | -34.1864 | -31.6594 | 1 | 1 BH |
| PITG_03566 | Pi conserved hypothetical protein (     | -32.8458 | -34.3406 | 1 | 1 BH |
| PITG_03568 | Pi DEAD/DEAH box RNA helicase, p        | -12.2646 | 0.809112 | 1 | 1 BH |
| PITG_03580 | Pi hypothetical protein (1000 nt)       | -50.0161 | 0        | 1 | 1 BH |
| PITG_03592 | Pi conserved hypothetical protein (     | -34.7809 | -30.4703 | 1 | 1 BH |
| PITG_03600 | Pi bardet-Biedl syndrome 2 proteir      | -34.459  | -31.1142 | 1 | 1 BH |
| PITG_03612 | Pi G-protein alpha subunit 1 (1608      | -33.267  | -33.4981 | 1 | 1 BH |
| PITG_03617 | Pi protein kinase (2278 nt)             | -33.267  | -33.4981 | 1 | 1 BH |
| PITG_03618 | Pi conserved hypothetical protein (     | -33.7227 | -32.5868 | 1 | 1 BH |
| PITG_03625 | Pi hypothetical protein (814 nt)        | -34.459  | -31.1142 | 1 | 1 BH |
| PITG_03630 | Pi conserved hypothetical protein (     | -33.267  | -33.4981 | 1 | 1 BH |
| PITG_03631 | Pi conserved hypothetical protein (     | -33.1528 | -33.7264 | 1 | 1 BH |
| PITG_03634 | Pi nucleoside diphosphate kinase, p     | -50.0161 | 0        | 1 | 1 BH |
| PITG_03635 | Pi conserved hypothetical protein (     | -33.267  | -33.4981 | 1 | 1 BH |
| PITG_03643 | Pi 3-phosphoinositide-dependent p       | -32.7868 | -34.4585 | 1 | 1 BH |
| PITG_03648 | Pi hypothetical protein (919 nt)        | -32.5602 | -34.9117 | 1 | 1 BH |
| PITG_03649 | Pi conserved hypothetical protein (     | -33.2108 | -33.6105 | 1 | 1 BH |
| PITG_03661 | Pi cysteinyl-tRNA synthetase, putat     | -14.5178 | -0.06293 | 1 | 1 BH |
| PITG_03669 | Pi conserved hypothetical protein (     | -34.2191 | -31.5939 | 1 | 1 BH |
| PITG_03682 | Pi conserved hypothetical protein (     | -32.8458 | -34.3406 | 1 | 1 BH |
| PITG_03690 | Pi hypothetical protein (483 nt)        | -50.0161 | 0        | 1 | 1 BH |
| PITG_03691 | Pi conserved hypothetical protein (     | -50.0161 | 0        | 1 | 1 BH |
| PITG_03692 | Pi Voltage-gated Ion Channel (VIC)      | -50.0161 | 0        | 1 | 1 BH |

|            |                                       |          |          |   |      |
|------------|---------------------------------------|----------|----------|---|------|
| PITG_03734 | Pi conserved hypothetical protein (   | -33.1242 | -33.7836 | 1 | 1 BH |
| PITG_03739 | Pi conserved hypothetical protein (   | -50.0161 | 0        | 1 | 1 BH |
| PITG_03759 | Pi conserved hypothetical protein (   | -32.7847 | -34.4627 | 1 | 1 BH |
| PITG_03764 | Pi polyribonucleotide nucleotidyltr   | -33.5302 | -32.9718 | 1 | 1 BH |
| PITG_03775 | Pi protein kinase, putative (2426 nt) | -33.3283 | -33.3755 | 1 | 1 BH |
| PITG_03777 | Pi conserved hypothetical protein (   | -32.5385 | -34.955  | 1 | 1 BH |
| PITG_03796 | Pi conserved hypothetical protein (   | -14.3697 | -0.34815 | 1 | 1 BH |
| PITG_03797 | Pi conserved hypothetical protein (   | -33.9938 | -32.0444 | 1 | 1 BH |
| PITG_03799 | Pi eukaryotic initiation factor 4E, p | -14.3812 | -0.3251  | 1 | 1 BH |
| PITG_03813 | Pi tripeptidyl-peptidase, putative (  | -33.2108 | -33.6105 | 1 | 1 BH |
| PITG_03823 | Pi conserved hypothetical protein (   | -33.4706 | -33.0909 | 1 | 1 BH |
| PITG_03833 | Pi diacylglycerol O-acyltransferase,  | -33.5851 | -32.862  | 1 | 1 BH |
| PITG_03840 | Pi endomembrane protein 70-like       | -33.267  | -33.4981 | 1 | 1 BH |
| PITG_03841 | Pi endomembrane protein 70-like       | -32.8458 | -34.3406 | 1 | 1 BH |
| PITG_03842 | Pi conserved hypothetical protein (   | -32.5846 | -34.8628 | 1 | 1 BH |
| PITG_03851 | Pi conserved hypothetical protein (   | -34.3408 | -31.3505 | 1 | 1 BH |
| PITG_03866 | Pi hypothetical protein (1045 nt)     | -34.2191 | -31.5939 | 1 | 1 BH |
| PITG_03876 | Pi U3 small nucleolar RNA-interacti   | -33.1943 | -33.6435 | 1 | 1 BH |
| PITG_03885 | Pi conserved hypothetical protein (   | -33.267  | -33.4981 | 1 | 1 BH |
| PITG_03890 | Pi conserved hypothetical protein (   | -33.7227 | -32.5868 | 1 | 1 BH |
| PITG_03899 | Pi conserved hypothetical protein (   | -33.1592 | -33.7138 | 1 | 1 BH |
| PITG_03929 | Pi conserved hypothetical protein (   | -32.5599 | -34.9123 | 1 | 1 BH |
| PITG_03930 | Pi zinc phosphodiesterase, putative   | -34.1864 | -31.6594 | 1 | 1 BH |
| PITG_03931 | Pi conserved hypothetical protein (   | -33.6527 | -32.7266 | 1 | 1 BH |
| PITG_03943 | Pi conserved hypothetical protein (   | -33.0968 | -33.8385 | 1 | 1 BH |
| PITG_03944 | Pi conserved hypothetical protein (   | -32.5846 | -34.8628 | 1 | 1 BH |
| PITG_03948 | Pi tubby-like protein (2140 nt)       | -33.9073 | -32.2176 | 1 | 1 BH |
| PITG_03955 | Pi U3 small nucleolar RNA-associat    | -33.5851 | -32.862  | 1 | 1 BH |
| PITG_03956 | Pi conserved hypothetical protein (   | -14.2979 | 1.360576 | 1 | 1 BH |
| PITG_03960 | Pi conserved hypothetical protein (   | -33.6527 | -32.7266 | 1 | 1 BH |
| PITG_03961 | Pi conserved hypothetical protein (   | -34.1864 | -31.6594 | 1 | 1 BH |
| PITG_03974 | Pi conserved hypothetical protein (   | -50.0161 | 0        | 1 | 1 BH |
| PITG_03979 | Pi conserved hypothetical protein (   | -34.3408 | -31.3505 | 1 | 1 BH |
| PITG_03986 | Pi bardet-Biedl syndrome 1 family     | -34.459  | -31.1142 | 1 | 1 BH |
| PITG_03987 | Pi DEAD/DEAH box RNA helicase, p      | -32.7868 | -34.4585 | 1 | 1 BH |
| PITG_03997 | Pi conserved hypothetical protein (   | -32.7937 | -34.4448 | 1 | 1 BH |
| PITG_03998 | Pi conserved hypothetical protein (   | -33.9938 | -32.0444 | 1 | 1 BH |
| PITG_04006 | Pi conserved hypothetical protein (   | -14.5944 | 0.083835 | 1 | 1 BH |
| PITG_04032 | Pi conserved hypothetical protein (   | -33.8446 | -32.3428 | 1 | 1 BH |
| PITG_04071 | Pi putative extracellular dioxygena   | -50.0161 | 0        | 1 | 1 BH |
| PITG_04074 | Pi secreted RxLR effector peptide,    | -32.7949 | -34.4422 | 1 | 1 BH |
| PITG_04075 | Pi sporangia induced hypothetical     | -50.0161 | 0        | 1 | 1 BH |
| PITG_04077 | Pi carbohydrate esterase, putative    | -33.6561 | -32.7199 | 1 | 1 BH |
| PITG_04129 | Pi cobalamin synthesis protein, put   | -50.0161 | 0        | 1 | 1 BH |
| PITG_04130 | Pi cobalamin synthesis protein, put   | -50.0161 | 0        | 1 | 1 BH |
| PITG_04136 | Pi conserved hypothetical protein (   | -33.1528 | -33.7264 | 1 | 1 BH |
| PITG_04230 | Pi conserved hypothetical protein (   | -32.7847 | -34.4627 | 1 | 1 BH |

|            |                                                               |          |          |   |      |
|------------|---------------------------------------------------------------|----------|----------|---|------|
| PITG_04231 | Pi conserved hypothetical protein (                           | -34.3408 | -31.3505 | 1 | 1 BH |
| PITG_04262 | Pi cysteine protease family C59, pu                           | -32.5599 | -34.9123 | 1 | 1 BH |
| PITG_04281 | Pi Cleavage induced conserved pro                             | -34.7809 | -30.4703 | 1 | 1 BH |
| PITG_04295 | Pi ATP-binding Cassette (ABC) Supe                            | -33.9872 | -32.0576 | 1 | 1 BH |
| PITG_04296 | Pi ATP-binding Cassette (ABC) Supe                            | -33.9073 | -32.2176 | 1 | 1 BH |
| PITG_04317 | Pi Major Facilitator Superfamily (M                           | -34.7809 | -30.4703 | 1 | 1 BH |
| PITG_04320 | Pi Major Facilitator Superfamily (M                           | -50.0161 | 0        | 1 | 1 BH |
| PITG_04324 | Pi conserved hypothetical protein (                           | -34.459  | -31.1142 | 1 | 1 BH |
| PITG_04339 | Pi secreted RxLR effector peptide,                            | -33.267  | -33.4981 | 1 | 1 BH |
| PITG_04341 | Pi transmembrane protein, putativ                             | -50.0161 | 0        | 1 | 1 BH |
| PITG_04348 | Pi conserved hypothetical protein (                           | -33.2108 | -33.6105 | 1 | 1 BH |
| PITG_04352 | Pi conserved hypothetical protein (                           | -33.267  | -33.4981 | 1 | 1 BH |
| PITG_04359 | Pi conserved hypothetical protein (                           | -33.1242 | -33.7836 | 1 | 1 BH |
| PITG_04377 | Pi conserved hypothetical protein (                           | -33.1528 | -33.7264 | 1 | 1 BH |
| PITG_04391 | Pi conserved hypothetical protein (                           | -14.3937 | -0.3     | 1 | 1 BH |
| PITG_04392 | Pi conserved hypothetical protein (                           | -33.1849 | -33.6624 | 1 | 1 BH |
| PITG_04393 | Pi tubulin polyglutamylase, putativ                           | -33.5194 | -32.9934 | 1 | 1 BH |
| PITG_04398 | Pi Amino Acid/Auxin Permease (AA                              | -13.9112 | 0.562177 | 1 | 1 BH |
| PITG_04441 | Pi 3-isopropylmalate dehydrogena:                             | -15.2218 | 1.348687 | 1 | 1 BH |
| PITG_04445 | Pi conserved hypothetical protein (                           | -34.7809 | -30.4703 | 1 | 1 BH |
| PITG_04450 | Pi Zinc (Zn <sup>2+</sup> )-Iron (Fe <sup>2+</sup> ) Permease | -50.0161 | 0        | 1 | 1 BH |
| PITG_04454 | Pi sporangia induced hypothetical                             | -50.0161 | 0        | 1 | 1 BH |
| PITG_04457 | Pi tripeptidyl-peptidase, putative (                          | -32.5846 | -34.8628 | 1 | 1 BH |
| PITG_04464 | Pi conserved hypothetical protein (                           | -50.0161 | 0        | 1 | 1 BH |
| PITG_04467 | Pi conserved hypothetical protein (                           | -33.6188 | -32.7945 | 1 | 1 BH |
| PITG_04480 | Pi conserved hypothetical protein (                           | -34.0871 | -31.858  | 1 | 1 BH |
| PITG_04481 | Pi conserved hypothetical protein (                           | -14.2862 | -0.52875 | 1 | 1 BH |
| PITG_04482 | Pi Drug/Metabolite Transporter (D                             | -32.7868 | -34.4585 | 1 | 1 BH |
| PITG_04485 | Pi conserved hypothetical protein (                           | -32.5846 | -34.8628 | 1 | 1 BH |
| PITG_04490 | Pi conserved hypothetical protein (                           | -34.459  | -31.1142 | 1 | 1 BH |
| PITG_04500 | Pi nucleosome assembly protein 1                              | -13.2856 | 0.372954 | 1 | 1 BH |
| PITG_04508 | Pi conserved hypothetical protein (                           | -32.5391 | -34.9538 | 1 | 1 BH |
| PITG_04511 | Pi conserved hypothetical protein (                           | -33.267  | -33.4981 | 1 | 1 BH |
| PITG_04513 | Pi RIB72 protein (1656 nt)                                    | -34.459  | -31.1142 | 1 | 1 BH |
| PITG_04527 | Pi DNA replication licensing factor                           | -33.2108 | -33.6105 | 1 | 1 BH |
| PITG_04529 | Pi formin-homology 2 domain-cont                              | -33.1528 | -33.7264 | 1 | 1 BH |
| PITG_04536 | Pi conserved hypothetical protein (                           | -34.0871 | -31.858  | 1 | 1 BH |
| PITG_04558 | Pi hypothetical protein (2958 nt)                             | -34.7809 | -30.4703 | 1 | 1 BH |
| PITG_04579 | Pi conserved hypothetical protein (                           | -32.7588 | -34.5144 | 1 | 1 BH |
| PITG_04588 | Pi Amino Acid/Auxin Permease (AA                              | -32.8458 | -34.3406 | 1 | 1 BH |
| PITG_04610 | Pi dolichyl-diphosphooligosacchari                            | -33.2108 | -33.6105 | 1 | 1 BH |
| PITG_04634 | Pi conserved hypothetical protein (                           | -33.8221 | -32.388  | 1 | 1 BH |
| PITG_04639 | Pi conserved hypothetical protein (                           | -34.459  | -31.1142 | 1 | 1 BH |
| PITG_04661 | Pi L-amino adipate-semialdehyde d                             | -32.5391 | -34.9538 | 1 | 1 BH |
| PITG_04674 | Pi conserved hypothetical protein (                           | -33.1242 | -33.7836 | 1 | 1 BH |
| PITG_04697 | Pi conserved hypothetical protein (                           | -50.0161 | 0        | 1 | 1 BH |
| PITG_04711 | Pi conserved hypothetical protein (                           | -33.6188 | -32.7945 | 1 | 1 BH |

|            |                                      |          |          |   |      |
|------------|--------------------------------------|----------|----------|---|------|
| PITG_04831 | Pi regulator of chromosome conde     | -13.7504 | 0.258029 | 1 | 1 BH |
| PITG_04833 | Pi conserved hypothetical protein (  | -50.0161 | 0        | 1 | 1 BH |
| PITG_04834 | Pi conserved hypothetical protein (  | -33.4706 | -33.0909 | 1 | 1 BH |
| PITG_04843 | Pi 60S ribosomal protein L13, puta   | -9.32871 | -0.05582 | 1 | 1 BH |
| PITG_04847 | Pi conserved hypothetical protein (  | -33.4706 | -33.0909 | 1 | 1 BH |
| PITG_04848 | Pi conserved hypothetical protein (  | -50.0161 | 0        | 1 | 1 BH |
| PITG_04859 | Pi Polycystin Cation Channel (PCC)   | -34.1864 | -31.6594 | 1 | 1 BH |
| PITG_04863 | Pi conserved hypothetical protein (  | -33.5851 | -32.862  | 1 | 1 BH |
| PITG_04866 | Pi conserved hypothetical protein (  | -50.0161 | 0        | 1 | 1 BH |
| PITG_04867 | Pi conserved hypothetical protein (  | -34.459  | -31.1142 | 1 | 1 BH |
| PITG_04871 | Pi conserved hypothetical protein (  | -50.0161 | 0        | 1 | 1 BH |
| PITG_04873 | Pi conserved hypothetical protein (  | -32.7937 | -34.4448 | 1 | 1 BH |
| PITG_04880 | Pi Equilibrative Nucleoside Transpc  | -33.1592 | -33.7138 | 1 | 1 BH |
| PITG_04882 | Pi 4-coumarate-CoA ligase, putativ   | -32.7847 | -34.4627 | 1 | 1 BH |
| PITG_04888 | Pi kinesin-like protein (2334 nt)    | -33.3191 | -33.3938 | 1 | 1 BH |
| PITG_04889 | Pi conserved hypothetical protein (  | -33.2108 | -33.6105 | 1 | 1 BH |
| PITG_04891 | Pi conserved hypothetical protein (  | -34.1864 | -31.6594 | 1 | 1 BH |
| PITG_04922 | Pi protein kinase (1188 nt)          | -34.2191 | -31.5939 | 1 | 1 BH |
| PITG_04935 | Pi calcineurin-like phosphoesterase  | -33.1242 | -33.7836 | 1 | 1 BH |
| PITG_04957 | Pi AP-2 complex subunit sigma-1 (4   | -34.3408 | -31.3505 | 1 | 1 BH |
| PITG_04958 | Pi coatomer subunit beta' (3231 nt   | -14.2965 | -0.51326 | 1 | 1 BH |
| PITG_04967 | Pi conserved hypothetical protein (  | -34.1864 | -31.6594 | 1 | 1 BH |
| PITG_04976 | Pi conserved hypothetical protein (  | -34.459  | -31.1142 | 1 | 1 BH |
| PITG_04980 | Pi conserved hypothetical protein (  | -33.7227 | -32.5868 | 1 | 1 BH |
| PITG_05000 | Pi MtN3-like protein (849 nt)        | -50.0161 | 0        | 1 | 1 BH |
| PITG_05075 | Pi conserved hypothetical protein (  | -33.267  | -33.4981 | 1 | 1 BH |
| PITG_05099 | Pi conserved hypothetical protein (  | -32.7588 | -34.5144 | 1 | 1 BH |
| PITG_05111 | Pi conserved hypothetical protein (  | -33.9872 | -32.0576 | 1 | 1 BH |
| PITG_05135 | Pi hypothetical protein (463 nt)     | -33.9938 | -32.0444 | 1 | 1 BH |
| PITG_05150 | Pi conserved hypothetical protein (  | -33.8221 | -32.388  | 1 | 1 BH |
| PITG_05182 | Pi hypothetical protein (287 nt)     | -33.3283 | -33.3755 | 1 | 1 BH |
| PITG_05190 | Pi conserved hypothetical protein (  | -32.5601 | -34.9119 | 1 | 1 BH |
| PITG_05223 | Pi phosphatidylinositol-3,4,5-trisph | -50.0161 | 0        | 1 | 1 BH |
| PITG_05233 | Pi CLIP-associating protein, putativ | -32.7847 | -34.4627 | 1 | 1 BH |
| PITG_05235 | Pi conserved hypothetical protein (  | -50.0161 | 0        | 1 | 1 BH |
| PITG_05278 | Pi conserved hypothetical protein (  | -33.1592 | -33.7138 | 1 | 1 BH |
| PITG_05288 | Pi conserved hypothetical protein (  | -50.0161 | 0        | 1 | 1 BH |
| PITG_05294 | Pi conserved hypothetical protein (  | -33.9872 | -32.0576 | 1 | 1 BH |
| PITG_05295 | Pi conserved hypothetical protein (  | -50.0161 | 0        | 1 | 1 BH |
| PITG_05296 | Pi cleavage induced hypothetical p   | -33.6527 | -32.7266 | 1 | 1 BH |
| PITG_05301 | Pi translation elongation factor 1-a | -13.7636 | 0.276683 | 1 | 1 BH |
| PITG_05304 | Pi Voltage-gated Ion Channel (VIC)   | -33.3283 | -33.3755 | 1 | 1 BH |
| PITG_05305 | Pi conserved hypothetical protein (  | -33.6923 | -32.6476 | 1 | 1 BH |
| PITG_05319 | Pi hypothetical protein (3149 nt)    | -33.1321 | -33.7679 | 1 | 1 BH |
| PITG_05347 | Pi 1-aminocyclopropane-1-carboxy     | -12.727  | 0.016463 | 1 | 1 BH |
| PITG_05353 | Pi HSF-type DNA-binding protein, p   | -32.8458 | -34.3406 | 1 | 1 BH |
| PITG_05356 | Pi maleylacetoacetate isomerase (f   | -13.0485 | -0.11511 | 1 | 1 BH |

|            |                                       |          |          |   |      |
|------------|---------------------------------------|----------|----------|---|------|
| PITG_05361 | Pi conserved hypothetical protein (   | -33.8446 | -32.3428 | 1 | 1 BH |
| PITG_05362 | Pi conserved hypothetical protein (   | -33.1592 | -33.7138 | 1 | 1 BH |
| PITG_05379 | Pi conserved hypothetical protein (   | -33.5302 | -32.9718 | 1 | 1 BH |
| PITG_05392 | Pi conserved hypothetical protein (   | -32.8276 | -34.3769 | 1 | 1 BH |
| PITG_05398 | Pi conserved hypothetical protein (   | -34.1864 | -31.6594 | 1 | 1 BH |
| PITG_05420 | Pi conserved hypothetical protein (   | -33.1528 | -33.7264 | 1 | 1 BH |
| PITG_05477 | Pi hypothetical protein (2208 nt)     | -34.3408 | -31.3505 | 1 | 1 BH |
| PITG_05483 | Pi protein kinase, putative (1117 nt) | -33.1753 | -33.6814 | 1 | 1 BH |
| PITG_05485 | Pi peroxisomal acyl-coenzyme A ox     | -32.7847 | -34.4627 | 1 | 1 BH |
| PITG_05491 | Pi conserved hypothetical protein (   | -33.1528 | -33.7264 | 1 | 1 BH |
| PITG_05499 | Pi conserved hypothetical protein (   | -33.6194 | -32.7933 | 1 | 1 BH |
| PITG_05510 | Pi hypothetical protein (1251 nt)     | -32.5385 | -34.955  | 1 | 1 BH |
| PITG_05523 | Pi ubiquitin-specific protease, puta  | -33.267  | -33.4981 | 1 | 1 BH |
| PITG_05539 | Pi carbon-nitrogen hydrolase, puta    | -13.7003 | 0.167291 | 1 | 1 BH |
| PITG_05541 | Pi dolichyl pyrophosphate Man9Gl      | -33.1242 | -33.7836 | 1 | 1 BH |
| PITG_05551 | Pi ribose-phosphate pyrophosphok      | -14.9958 | 0.891764 | 1 | 1 BH |
| PITG_05561 | Pi conserved hypothetical protein (   | -11.8018 | -0.09084 | 1 | 1 BH |
| PITG_05594 | Pi O-sialoglycoprotein endopeptida    | -33.1592 | -33.7138 | 1 | 1 BH |
| PITG_05605 | Pi radial spoke head protein, putat   | -50.0161 | 0        | 1 | 1 BH |
| PITG_05607 | Pi formin-homology 2 domain-cont      | -50.0161 | 0        | 1 | 1 BH |
| PITG_05608 | Pi transmembrane protein, putativ     | -50.0161 | 0        | 1 | 1 BH |
| PITG_05618 | Pi phosphatidylinositol 4-phosphat    | -33.8446 | -32.3428 | 1 | 1 BH |
| PITG_05619 | Pi conserved hypothetical protein (   | -50.0161 | 0        | 1 | 1 BH |
| PITG_05636 | Pi transaldolase (1192 nt)            | -11.1501 | 0.332837 | 1 | 1 BH |
| PITG_05642 | Pi WD domain-containing protein,      | -33.6923 | -32.6476 | 1 | 1 BH |
| PITG_05643 | Pi hypothetical protein (3228 nt)     | -32.5599 | -34.9123 | 1 | 1 BH |
| PITG_05654 | Pi conserved hypothetical protein (   | -32.7868 | -34.4585 | 1 | 1 BH |
| PITG_05655 | Pi conserved hypothetical protein (   | -33.9073 | -32.2176 | 1 | 1 BH |
| PITG_05680 | Pi conserved hypothetical protein (   | -33.1242 | -33.7836 | 1 | 1 BH |
| PITG_05708 | Pi conserved hypothetical protein (   | -50.0161 | 0        | 1 | 1 BH |
| PITG_05709 | Pi adenylate kinase, putative (1064   | -32.5616 | -34.9088 | 1 | 1 BH |
| PITG_05712 | Pi conserved hypothetical protein (   | -50.0161 | 0        | 1 | 1 BH |
| PITG_05746 | Pi conserved hypothetical protein (   | -34.1864 | -31.6594 | 1 | 1 BH |
| PITG_05747 | Pi conserved hypothetical protein (   | -33.6527 | -32.7266 | 1 | 1 BH |
| PITG_05749 | Pi conserved hypothetical protein (   | -50.0161 | 0        | 1 | 1 BH |
| PITG_05752 | Pi conserved hypothetical protein (   | -33.1753 | -33.6814 | 1 | 1 BH |
| PITG_05757 | Pi structural maintenance of chron    | -32.8145 | -34.4032 | 1 | 1 BH |
| PITG_05761 | Pi transmembrane protein, putativ     | -32.5846 | -34.8628 | 1 | 1 BH |
| PITG_05778 | Pi conserved hypothetical protein (   | -12.6818 | -0.13808 | 1 | 1 BH |
| PITG_05782 | Pi conserved hypothetical protein (   | -33.1592 | -33.7138 | 1 | 1 BH |
| PITG_05799 | Pi conserved hypothetical protein (   | -33.267  | -33.4981 | 1 | 1 BH |
| PITG_05806 | Pi AP-2 complex subunit mu (2148      | -50.0161 | 0        | 1 | 1 BH |
| PITG_05816 | Pi conserved hypothetical protein (   | -32.7868 | -34.4585 | 1 | 1 BH |
| PITG_05819 | Pi conserved hypothetical protein (   | -33.2108 | -33.6105 | 1 | 1 BH |
| PITG_05831 | Pi conserved hypothetical protein (   | -50.0161 | 0        | 1 | 1 BH |
| PITG_05835 | Pi sporangia induced conserved hy     | -50.0161 | 0        | 1 | 1 BH |
| PITG_05836 | Pi conserved hypothetical protein (   | -50.0161 | 0        | 1 | 1 BH |



|            |                                                |          |          |   |      |
|------------|------------------------------------------------|----------|----------|---|------|
| PITG_05862 | Pi mitogen-activated protein kinase            | -33.9938 | -32.0444 | 1 | 1 BH |
| PITG_05863 | Pi conserved hypothetical protein (            | -34.459  | -31.1142 | 1 | 1 BH |
| PITG_05865 | Pi serine/threonine protein kinase             | -50.0161 | 0        | 1 | 1 BH |
| PITG_05880 | Pi conserved hypothetical protein (            | -33.6527 | -32.7266 | 1 | 1 BH |
| PITG_05883 | Pi bardet-Biedl syndrome 5 protei              | -33.6194 | -32.7933 | 1 | 1 BH |
| PITG_05909 | Pi conserved hypothetical protein (            | -33.2108 | -33.6105 | 1 | 1 BH |
| PITG_05922 | Pi dynein heavy chain (13827 nt)               | -33.5302 | -32.9718 | 1 | 1 BH |
| PITG_05949 | Pi conserved hypothetical protein (            | -50.0161 | 0        | 1 | 1 BH |
| PITG_05956 | Pi conserved hypothetical protein (            | -50.0161 | 0        | 1 | 1 BH |
| PITG_05998 | Pi ribonucleoside-diphosphate redi             | -13.7222 | 0.186278 | 1 | 1 BH |
| PITG_06011 | Pi 3'(2'),5'-bisphosphate nucleotid            | -33.8221 | -32.388  | 1 | 1 BH |
| PITG_06014 | Pi conserved hypothetical protein (            | -50.0161 | 0        | 1 | 1 BH |
| PITG_06023 | Pi conserved hypothetical protein (            | -50.0161 | 0        | 1 | 1 BH |
| PITG_06035 | Pi conserved hypothetical protein (            | -32.5602 | -34.9117 | 1 | 1 BH |
| PITG_06046 | Pi conserved hypothetical protein (            | -32.7588 | -34.5144 | 1 | 1 BH |
| PITG_06047 | Pi conserved hypothetical protein (            | -33.2308 | -33.5705 | 1 | 1 BH |
| PITG_06078 | Pi hypothetical protein (1057 nt)              | -33.3955 | -33.241  | 1 | 1 BH |
| PITG_06106 | Pi Intraflagellar Transport Protein $\epsilon$ | -33.8446 | -32.3428 | 1 | 1 BH |
| PITG_06107 | Pi protein kinase, putative (1699 nt)          | -33.5851 | -32.862  | 1 | 1 BH |
| PITG_06119 | Pi conserved hypothetical protein (            | -14.6378 | 0.179466 | 1 | 1 BH |
| PITG_06131 | Pi conserved hypothetical protein (            | -13.0005 | -0.19046 | 1 | 1 BH |
| PITG_06132 | Pi katanin p60 ATPase-containing s             | -33.267  | -33.4981 | 1 | 1 BH |
| PITG_06139 | Pi conserved hypothetical protein (            | -50.0161 | 0        | 1 | 1 BH |
| PITG_06143 | Pi Voltage-gated Ion Channel (VIC)             | -50.0161 | 0        | 1 | 1 BH |
| PITG_06144 | Pi conserved hypothetical protein (            | -33.8221 | -32.388  | 1 | 1 BH |
| PITG_06158 | Pi conserved hypothetical protein (            | -33.1528 | -33.7264 | 1 | 1 BH |
| PITG_06166 | Pi conserved hypothetical protein (            | -50.0161 | 0        | 1 | 1 BH |
| PITG_06167 | Pi conserved hypothetical protein (            | -50.0161 | 0        | 1 | 1 BH |
| PITG_06176 | Pi conserved hypothetical protein (            | -33.1528 | -33.7264 | 1 | 1 BH |
| PITG_06201 | Pi TATA-box-binding protein (1101              | -32.7937 | -34.4448 | 1 | 1 BH |
| PITG_06225 | Pi flagellar radial spoke protein, pu          | -34.0871 | -31.858  | 1 | 1 BH |
| PITG_06236 | Pi cleavage induced protein kinase             | -33.8446 | -32.3428 | 1 | 1 BH |
| PITG_06248 | Pi ATP-binding Cassette (ABC) Sup              | -34.459  | -31.1142 | 1 | 1 BH |
| PITG_06257 | Pi conserved hypothetical protein (            | -33.1528 | -33.7264 | 1 | 1 BH |
| PITG_06261 | Pi conserved hypothetical protein (            | -50.0161 | 0        | 1 | 1 BH |
| PITG_06273 | Pi conserved hypothetical protein (            | -50.0161 | 0        | 1 | 1 BH |
| PITG_06309 | Pi Voltage-gated Ion Channel (VIC)             | -50.0161 | 0        | 1 | 1 BH |
| PITG_06318 | Pi conserved hypothetical protein (            | -34.1864 | -31.6594 | 1 | 1 BH |
| PITG_06320 | Pi T-complex protein 1 subunit eps             | -12.3666 | 0.680911 | 1 | 1 BH |
| PITG_06322 | Pi myosin-like protein (9897 nt)               | -14.6848 | 0.244792 | 1 | 1 BH |
| PITG_06327 | Pi chromodomain protein, putative              | -50.0161 | 0        | 1 | 1 BH |
| PITG_06332 | Pi sugar transporter, putative (154            | -32.7604 | -34.5114 | 1 | 1 BH |
| PITG_06336 | Pi Glycoside-Pentoside-Hexuronide              | -34.7809 | -30.4703 | 1 | 1 BH |
| PITG_06346 | Pi conserved hypothetical protein (            | -33.1753 | -33.6814 | 1 | 1 BH |
| PITG_06360 | Pi conserved hypothetical protein (            | -33.7227 | -32.5868 | 1 | 1 BH |
| PITG_06382 | Pi conserved hypothetical protein (            | -34.1864 | -31.6594 | 1 | 1 BH |
| PITG_06384 | Pi conserved hypothetical protein (            | -33.2108 | -33.6105 | 1 | 1 BH |

|            |                                                 |          |          |   |      |
|------------|-------------------------------------------------|----------|----------|---|------|
| PITG_06385 | Pi conserved hypothetical protein (             | -12.0651 | 0.433181 | 1 | 1 BH |
| PITG_06398 | Pi conserved hypothetical protein (             | -33.7227 | -32.5868 | 1 | 1 BH |
| PITG_06448 | Pi pyruvate carboxylase, mitochon               | -14.1854 | -0.77808 | 1 | 1 BH |
| PITG_06452 | Pi formin-homology 2 domain-cont                | -32.5391 | -34.9538 | 1 | 1 BH |
| PITG_06456 | Pi maintenance of ploidy protein r              | -34.3408 | -31.3505 | 1 | 1 BH |
| PITG_06475 | Pi conserved hypothetical protein (             | -14.8933 | 0.694255 | 1 | 1 BH |
| PITG_06494 | Pi conserved hypothetical protein (             | -34.459  | -31.1142 | 1 | 1 BH |
| PITG_06495 | Pi M96 mating-specific protein farr             | -33.267  | -33.4981 | 1 | 1 BH |
| PITG_06513 | Pi hypothetical protein (577 nt)                | -33.2108 | -33.6105 | 1 | 1 BH |
| PITG_06519 | Pi conserved hypothetical protein (             | -34.7809 | -30.4703 | 1 | 1 BH |
| PITG_06521 | Pi conserved hypothetical protein (             | -33.5302 | -32.9718 | 1 | 1 BH |
| PITG_06529 | Pi conserved hypothetical protein (             | -50.0161 | 0        | 1 | 1 BH |
| PITG_06536 | Pi conserved hypothetical protein (             | -33.267  | -33.4981 | 1 | 1 BH |
| PITG_06539 | Pi conserved hypothetical protein (             | -32.5631 | -34.9059 | 1 | 1 BH |
| PITG_06575 | Pi transmembrane protein, putativ               | -33.1592 | -33.7138 | 1 | 1 BH |
| PITG_06594 | Pi serine/threonine protein phosph              | -14.5733 | 0.05304  | 1 | 1 BH |
| PITG_06596 | Pi conserved hypothetical protein (             | -14.7119 | 0.317628 | 1 | 1 BH |
| PITG_06605 | Pi conserved hypothetical protein (             | -34.459  | -31.1142 | 1 | 1 BH |
| PITG_06606 | Pi UDP-N-acetylglucosamine-pepti                | -33.9938 | -32.0444 | 1 | 1 BH |
| PITG_06607 | Pi protein kinase, putative (2332 nt)           | -34.459  | -31.1142 | 1 | 1 BH |
| PITG_06613 | Pi hypothetical protein (645 nt)                | -33.1528 | -33.7264 | 1 | 1 BH |
| PITG_06629 | Pi conserved hypothetical protein (             | -33.9938 | -32.0444 | 1 | 1 BH |
| PITG_06630 | Pi conserved hypothetical protein (             | -33.7227 | -32.5868 | 1 | 1 BH |
| PITG_06640 | Pi conserved hypothetical protein (             | -33.1849 | -33.6624 | 1 | 1 BH |
| PITG_06646 | Pi conserved hypothetical protein (             | -33.9938 | -32.0444 | 1 | 1 BH |
| PITG_06649 | Pi adenyl cyclase-associated prot               | -12.7184 | 0.544472 | 1 | 1 BH |
| PITG_06655 | Pi hypothetical protein (327 nt)                | -50.0161 | 0        | 1 | 1 BH |
| PITG_06657 | Pi thioredoxin-like protein (1092 nt)           | -13.7337 | 0.236004 | 1 | 1 BH |
| PITG_06661 | Pi Chloride Channel (ClC) Family (2             | -33.9938 | -32.0444 | 1 | 1 BH |
| PITG_06664 | Pi conserved hypothetical protein (             | -32.7868 | -34.4585 | 1 | 1 BH |
| PITG_06666 | Pi kinesin-like protein (2770 nt)               | -34.7809 | -30.4703 | 1 | 1 BH |
| PITG_06672 | Pi P-type ATPase (P-ATPase) Super               | -34.7809 | -30.4703 | 1 | 1 BH |
| PITG_06680 | Pi conserved hypothetical protein (             | -33.267  | -33.4981 | 1 | 1 BH |
| PITG_06689 | Pi sporangia induced conserved hy               | -33.3283 | -33.3755 | 1 | 1 BH |
| PITG_06718 | Pi tenascin-like protein (2301 nt)              | -34.459  | -31.1142 | 1 | 1 BH |
| PITG_06720 | Pi conserved hypothetical protein (             | -33.7227 | -32.5868 | 1 | 1 BH |
| PITG_06721 | Pi conserved hypothetical protein (             | -34.459  | -31.1142 | 1 | 1 BH |
| PITG_06725 | Pi conserved hypothetical protein (             | -50.0161 | 0        | 1 | 1 BH |
| PITG_06726 | Pi Voltage-gated Ion Channel (VIC)              | -34.459  | -31.1142 | 1 | 1 BH |
| PITG_06727 | Pi Voltage-gated Ion Channel (VIC)              | -34.1864 | -31.6594 | 1 | 1 BH |
| PITG_06731 | Pi H <sup>-</sup> -translocating Pyrophosphatas | -12.1602 | 0.623354 | 1 | 1 BH |
| PITG_06734 | Pi conserved hypothetical protein (             | -50.0161 | 0        | 1 | 1 BH |
| PITG_06741 | Pi conserved hypothetical protein (             | -33.267  | -33.4981 | 1 | 1 BH |
| PITG_06758 | Pi conserved hypothetical protein (             | -14.277  | -0.55358 | 1 | 1 BH |
| PITG_06770 | Pi hypothetical protein (444 nt)                | -33.267  | -33.4981 | 1 | 1 BH |
| PITG_06773 | Pi regulator of chromosome conde                | -34.0871 | -31.858  | 1 | 1 BH |
| PITG_06774 | Pi conserved hypothetical protein (             | -33.1528 | -33.7264 | 1 | 1 BH |

|            |                                       |          |          |   |      |
|------------|---------------------------------------|----------|----------|---|------|
| PITG_06778 | Pi clusterin-associated protein 1 (1  | -33.8446 | -32.3428 | 1 | 1 BH |
| PITG_06788 | Pi exoglucanase 1 precursor (1575     | -34.459  | -31.1142 | 1 | 1 BH |
| PITG_06791 | Pi conserved hypothetical protein (   | -33.2308 | -33.5705 | 1 | 1 BH |
| PITG_06792 | Pi conserved hypothetical protein (   | -33.2108 | -33.6105 | 1 | 1 BH |
| PITG_06796 | Pi conserved hypothetical protein (   | -32.7588 | -34.5144 | 1 | 1 BH |
| PITG_06808 | Pi trehalase, putative (1971 nt)      | -33.267  | -33.4981 | 1 | 1 BH |
| PITG_06814 | Pi tyrosine phosphatase, putative (   | -12.6475 | 0.410195 | 1 | 1 BH |
| PITG_06815 | Pi NADH dehydrogenase flavoprote      | -12.0693 | 0.436448 | 1 | 1 BH |
| PITG_06830 | Pi ubiquitin-conjugating enzyme E2    | -33.7227 | -32.5868 | 1 | 1 BH |
| PITG_06836 | Pi conserved hypothetical protein (   | -33.1242 | -33.7836 | 1 | 1 BH |
| PITG_06850 | Pi conserved hypothetical protein (   | -32.7937 | -34.4448 | 1 | 1 BH |
| PITG_06854 | Pi conserved hypothetical protein (   | -50.0161 | 0        | 1 | 1 BH |
| PITG_06877 | Pi conserved hypothetical protein (   | -32.5385 | -34.955  | 1 | 1 BH |
| PITG_06891 | Pi S-formylglutathione hydrolase, p   | -14.5364 | -0.03471 | 1 | 1 BH |
| PITG_06893 | Pi conserved hypothetical protein (   | -32.7868 | -34.4585 | 1 | 1 BH |
| PITG_06904 | Pi conserved hypothetical protein (   | -50.0161 | 0        | 1 | 1 BH |
| PITG_06912 | Pi Amino Acid/Auxin Permease (AA      | -32.5387 | -34.9546 | 1 | 1 BH |
| PITG_06915 | Pi flagella associated protein (1619  | -34.2191 | -31.5939 | 1 | 1 BH |
| PITG_06920 | Pi SEC1 family transporter SLY1 (18   | -32.5616 | -34.9088 | 1 | 1 BH |
| PITG_06926 | Pi cysteine protease family C01A, p   | -50.0161 | 0        | 1 | 1 BH |
| PITG_06934 | Pi conserved hypothetical protein (   | -32.8458 | -34.3406 | 1 | 1 BH |
| PITG_06939 | Pi conserved hypothetical protein (   | -33.3955 | -33.241  | 1 | 1 BH |
| PITG_06949 | Pi Intraflagellar Transport Protein 2 | -33.4706 | -33.0909 | 1 | 1 BH |
| PITG_06964 | Pi protein kinase, putative (2352 nt) | -50.0161 | 0        | 1 | 1 BH |
| PITG_06968 | Pi conserved hypothetical protein (   | -14.4558 | -0.17707 | 1 | 1 BH |
| PITG_06969 | Pi oxidoreductase, putative (1123 r   | -13.7161 | 0.200755 | 1 | 1 BH |
| PITG_06978 | Pi metalloprotease family M20D, p     | -33.1753 | -33.6814 | 1 | 1 BH |
| PITG_07007 | Pi hypothetical protein (1026 nt)     | -33.9073 | -32.2176 | 1 | 1 BH |
| PITG_07012 | Pi transmembrane protein, putativ     | -33.7227 | -32.5868 | 1 | 1 BH |
| PITG_07016 | Pi Voltage-gated Ion Channel (VIC)    | -50.0161 | 0        | 1 | 1 BH |
| PITG_07020 | Pi conserved hypothetical protein (   | -33.8221 | -32.388  | 1 | 1 BH |
| PITG_07024 | Pi inosine-5'-monophosphate dehy      | -15.1461 | 1.189893 | 1 | 1 BH |
| PITG_07026 | Pi conserved hypothetical protein (   | -33.1242 | -33.7836 | 1 | 1 BH |
| PITG_07031 | Pi conserved hypothetical protein (   | -33.4706 | -33.0909 | 1 | 1 BH |
| PITG_07036 | Pi ubiquitin activating enzyme, E1 f  | -14.3533 | -0.40753 | 1 | 1 BH |
| PITG_07047 | Pi THO complex subunit, putative (    | -32.5391 | -34.9538 | 1 | 1 BH |
| PITG_07048 | Pi superoxide dismutase, mitochor     | -11.6081 | 0.530912 | 1 | 1 BH |
| PITG_07065 | Pi conserved hypothetical protein (   | -50.0161 | 0        | 1 | 1 BH |
| PITG_07076 | Pi Voltage-gated Ion Channel (VIC)    | -50.0161 | 0        | 1 | 1 BH |
| PITG_07078 | Pi conserved hypothetical protein (   | -50.0161 | 0        | 1 | 1 BH |
| PITG_07086 | Pi Major Facilitator Superfamily (M   | -33.3757 | -33.2808 | 1 | 1 BH |
| PITG_07120 | Pi conserved hypothetical protein (   | -33.9938 | -32.0444 | 1 | 1 BH |
| PITG_07124 | Pi conserved hypothetical protein (   | -33.1849 | -33.6624 | 1 | 1 BH |
| PITG_07128 | Pi conserved hypothetical protein (   | -33.7227 | -32.5868 | 1 | 1 BH |
| PITG_07135 | Pi conserved hypothetical protein (   | -33.1592 | -33.7138 | 1 | 1 BH |
| PITG_07136 | Pi serine protease family S33, puta   | -50.0161 | 0        | 1 | 1 BH |
| PITG_07141 | Pi methionyl-tRNA synthetase, put     | -33.1528 | -33.7264 | 1 | 1 BH |

|            |                                       |          |          |   |      |
|------------|---------------------------------------|----------|----------|---|------|
| PITG_07151 | Pi conserved hypothetical protein (   | -34.7809 | -30.4703 | 1 | 1 BH |
| PITG_07153 | Pi serine protease family S10, puta   | -14.2826 | -0.53457 | 1 | 1 BH |
| PITG_07155 | Pi conserved hypothetical protein (   | -10.9546 | -0.2315  | 1 | 1 BH |
| PITG_07161 | Pi serine protease family S10, puta   | -33.5851 | -32.862  | 1 | 1 BH |
| PITG_07162 | Pi sideroflexin-1-like protein (978 r | -14.5103 | -0.06808 | 1 | 1 BH |
| PITG_07184 | Pi conserved hypothetical protein (   | -50.0161 | 0        | 1 | 1 BH |
| PITG_07195 | Pi AP-4 complex subunit sigma, put    | -13.6937 | -0.28587 | 1 | 1 BH |
| PITG_07212 | Pi conserved hypothetical protein (   | -32.7847 | -34.4627 | 1 | 1 BH |
| PITG_07216 | Pi ATPase WRNIP1 (1628 nt)            | -33.267  | -33.4981 | 1 | 1 BH |
| PITG_07226 | Pi conserved hypothetical protein (   | -33.2108 | -33.6105 | 1 | 1 BH |
| PITG_07248 | Pi protein kinase (2918 nt)           | -33.9938 | -32.0444 | 1 | 1 BH |
| PITG_07249 | Pi conserved hypothetical protein (   | -15.9205 | 2.738598 | 1 | 1 BH |
| PITG_07251 | Pi protein kinase (2493 nt)           | -50.0161 | 0        | 1 | 1 BH |
| PITG_07270 | Pi conserved hypothetical protein (   | -34.459  | -31.1142 | 1 | 1 BH |
| PITG_07271 | Pi conserved hypothetical protein (   | -34.459  | -31.1142 | 1 | 1 BH |
| PITG_07276 | Pi exopolysaccharide phosphotran:     | -33.1592 | -33.7138 | 1 | 1 BH |
| PITG_07289 | Pi phosphatidylinositol kinase (416   | -32.5616 | -34.9088 | 1 | 1 BH |
| PITG_07292 | Pi hcp beta-lactamase-like protein    | -32.5387 | -34.9546 | 1 | 1 BH |
| PITG_07293 | Pi conserved hypothetical protein (   | -33.1528 | -33.7264 | 1 | 1 BH |
| PITG_07301 | Pi conserved hypothetical protein (   | -32.7588 | -34.5144 | 1 | 1 BH |
| PITG_07317 | Pi protein kinase (2850 nt)           | -50.0161 | 0        | 1 | 1 BH |
| PITG_07319 | Pi calcium-activated potassium cha    | -34.1864 | -31.6594 | 1 | 1 BH |
| PITG_07334 | Pi carbohydrate esterase, putative    | -32.7588 | -34.5144 | 1 | 1 BH |
| PITG_07336 | Pi hypothetical protein (2464 nt)     | -34.1864 | -31.6594 | 1 | 1 BH |
| PITG_07343 | Pi conserved hypothetical protein (   | -34.0871 | -31.858  | 1 | 1 BH |
| PITG_07344 | Pi conserved hypothetical protein (   | -50.0161 | 0        | 1 | 1 BH |
| PITG_07345 | Pi transmembrane protein, putativ     | -50.0161 | 0        | 1 | 1 BH |
| PITG_07348 | Pi conserved hypothetical protein (   | -33.8446 | -32.3428 | 1 | 1 BH |
| PITG_07355 | Pi cleavage induced hypothetical p    | -33.5194 | -32.9934 | 1 | 1 BH |
| PITG_07389 | Pi conserved hypothetical protein (   | -50.0161 | 0        | 1 | 1 BH |
| PITG_07406 | Pi conserved hypothetical protein (   | -50.0161 | 0        | 1 | 1 BH |
| PITG_07410 | Pi conserved hypothetical protein (   | -50.0161 | 0        | 1 | 1 BH |
| PITG_07433 | Pi conserved hypothetical protein (   | -33.1242 | -33.7836 | 1 | 1 BH |
| PITG_07487 | Pi EF hand containing protein, puta   | -34.1864 | -31.6594 | 1 | 1 BH |
| PITG_07496 | Pi conserved hypothetical protein (   | -32.7868 | -34.4585 | 1 | 1 BH |
| PITG_07510 | Pi hypothetical protein (1039 nt)     | -32.5601 | -34.9119 | 1 | 1 BH |
| PITG_07536 | Pi conserved hypothetical protein (   | -50.0161 | 0        | 1 | 1 BH |
| PITG_07546 | Pi replication protein A 32 kDa sub   | -14.6056 | 0.115071 | 1 | 1 BH |
| PITG_07628 | Pi tubulin-specific chaperone E, pu   | -32.5607 | -34.9107 | 1 | 1 BH |
| PITG_07635 | Pi conserved hypothetical protein (   | -50.0161 | 0        | 1 | 1 BH |
| PITG_07652 | Pi mitogen-activated protein kinas    | -33.1849 | -33.6624 | 1 | 1 BH |
| PITG_07682 | Pi conserved hypothetical protein (   | -34.459  | -31.1142 | 1 | 1 BH |
| PITG_07686 | Pi conserved hypothetical protein (   | -50.0161 | 0        | 1 | 1 BH |
| PITG_07700 | Pi conserved hypothetical protein (   | -32.5607 | -34.9107 | 1 | 1 BH |
| PITG_07714 | Pi ATP-binding Cassette (ABC) supe    | -34.1864 | -31.6594 | 1 | 1 BH |
| PITG_07715 | Pi ATP-binding Cassette (ABC) Supe    | -33.6194 | -32.7933 | 1 | 1 BH |
| PITG_07717 | Pi ATP-binding Cassette (ABC) Supe    | -33.3955 | -33.241  | 1 | 1 BH |

|            |                                      |          |          |   |      |
|------------|--------------------------------------|----------|----------|---|------|
| PITG_07728 | Pi conserved hypothetical protein (  | -33.4509 | -33.1303 | 1 | 1 BH |
| PITG_07741 | Pi secreted RxLR effector peptide,   | -50.0161 | 0        | 1 | 1 BH |
| PITG_07752 | Pi conserved hypothetical protein (  | -50.0161 | 0        | 1 | 1 BH |
| PITG_07797 | Pi methionyl-tRNA synthetase, put    | -32.8145 | -34.4032 | 1 | 1 BH |
| PITG_07804 | Pi conserved hypothetical protein (  | -33.267  | -33.4981 | 1 | 1 BH |
| PITG_07817 | Pi conserved hypothetical protein (  | -33.1528 | -33.7264 | 1 | 1 BH |
| PITG_07821 | Pi ATP-dependent RNA helicase, pu    | -33.4509 | -33.1303 | 1 | 1 BH |
| PITG_07831 | Pi conserved hypothetical protein (  | -34.459  | -31.1142 | 1 | 1 BH |
| PITG_07832 | Pi conserved hypothetical protein (  | -50.0161 | 0        | 1 | 1 BH |
| PITG_07837 | Pi conserved hypothetical protein (  | -33.9938 | -32.0444 | 1 | 1 BH |
| PITG_07838 | Pi conserved hypothetical protein (  | -34.1864 | -31.6594 | 1 | 1 BH |
| PITG_07843 | Pi protein disulfide-isomerase, put  | -13.4785 | -0.31111 | 1 | 1 BH |
| PITG_07847 | Pi conserved hypothetical protein (  | -50.0161 | 0        | 1 | 1 BH |
| PITG_07855 | Pi Drug/Metabolite Transporter (D    | -32.8145 | -34.4032 | 1 | 1 BH |
| PITG_07861 | Pi carbohydrate-binding protein, p   | -14.6415 | 0.17944  | 1 | 1 BH |
| PITG_07878 | Pi conserved hypothetical protein (  | -50.0161 | 0        | 1 | 1 BH |
| PITG_07882 | Pi conserved hypothetical protein (  | -33.9938 | -32.0444 | 1 | 1 BH |
| PITG_07886 | Pi EF-hand domain-containing prot    | -50.0161 | 0        | 1 | 1 BH |
| PITG_07910 | Pi 5'-AMP-activated protein kinase   | -34.459  | -31.1142 | 1 | 1 BH |
| PITG_07912 | Pi Polycystin Cation Channel (PCC)   | -33.9938 | -32.0444 | 1 | 1 BH |
| PITG_07922 | Pi hypothetical protein (478 nt)     | -33.6188 | -32.7945 | 1 | 1 BH |
| PITG_07926 | Pi glycoprotein-N-acetylgalactosar   | -33.2108 | -33.6105 | 1 | 1 BH |
| PITG_07937 | Pi conserved hypothetical protein (  | -33.2108 | -33.6105 | 1 | 1 BH |
| PITG_07950 | Pi Voltage-gated Ion Channel (VIC)   | -34.1864 | -31.6594 | 1 | 1 BH |
| PITG_07951 | Pi conserved hypothetical protein (  | -33.7378 | -32.5565 | 1 | 1 BH |
| PITG_07959 | Pi conserved hypothetical protein (  | -34.459  | -31.1142 | 1 | 1 BH |
| PITG_07972 | Pi conserved hypothetical protein (  | -11.9494 | 0.199267 | 1 | 1 BH |
| PITG_07992 | Pi conserved hypothetical protein (  | -50.0161 | 0        | 1 | 1 BH |
| PITG_07994 | Pi Dicarboxylate/Amino Acid:Catio    | -33.267  | -33.4981 | 1 | 1 BH |
| PITG_08000 | Pi glucosylceramidase (2040 nt)      | -34.459  | -31.1142 | 1 | 1 BH |
| PITG_08001 | Pi glucosylceramidase, putative (20  | -14.5224 | -0.06265 | 1 | 1 BH |
| PITG_08004 | Pi glucosylceramidase, putative (20  | -33.1242 | -33.7836 | 1 | 1 BH |
| PITG_08011 | Pi pre-mRNA-splicing factor RSE1 (:  | -32.5599 | -34.9123 | 1 | 1 BH |
| PITG_08014 | Pi proteasome subunit beta type-2    | -12.2612 | 0.470067 | 1 | 1 BH |
| PITG_08015 | Pi Dynein 1b Light Intermediate Ch   | -34.2191 | -31.5939 | 1 | 1 BH |
| PITG_08016 | Pi vesicle-trafficking protein SEC22 | -32.5616 | -34.9088 | 1 | 1 BH |
| PITG_08022 | Pi threonine dehydratase, putative   | -32.7588 | -34.5144 | 1 | 1 BH |
| PITG_08026 | Pi DEAD/DEAH box RNA helicase, p     | -33.8221 | -32.388  | 1 | 1 BH |
| PITG_08038 | Pi sporangia induced hypothetical    | -32.7937 | -34.4448 | 1 | 1 BH |
| PITG_08046 | Pi kinesin-like protein (3040 nt)    | -33.8446 | -32.3428 | 1 | 1 BH |
| PITG_08049 | Pi Equilibrative Nucleoside Transpc  | -33.2108 | -33.6105 | 1 | 1 BH |
| PITG_08059 | Pi conserved hypothetical protein (  | -33.9938 | -32.0444 | 1 | 1 BH |
| PITG_08072 | Pi conserved hypothetical protein (  | -33.1753 | -33.6814 | 1 | 1 BH |
| PITG_08095 | Pi conserved hypothetical protein (  | -32.7847 | -34.4627 | 1 | 1 BH |
| PITG_08099 | Pi PLAC8 family protein (711 nt)     | -50.0161 | 0        | 1 | 1 BH |
| PITG_08107 | Pi hypothetical protein (888 nt)     | -50.0161 | 0        | 1 | 1 BH |
| PITG_08128 | Pi conserved hypothetical protein (  | -50.0161 | 0        | 1 | 1 BH |

|            |                                       |          |          |   |      |
|------------|---------------------------------------|----------|----------|---|------|
| PITG_08129 | Pi folic acid synthesis protein fol1, | -33.267  | -33.4981 | 1 | 1 BH |
| PITG_08130 | Pi conserved hypothetical protein (   | -34.7809 | -30.4703 | 1 | 1 BH |
| PITG_08139 | Pi conserved hypothetical protein (   | -14.8561 | 0.594222 | 1 | 1 BH |
| PITG_08155 | Pi peptidyl-prolyl cis-trans isomera  | -33.2108 | -33.6105 | 1 | 1 BH |
| PITG_08156 | Pi conserved hypothetical protein (   | -33.3757 | -33.2808 | 1 | 1 BH |
| PITG_08178 | Pi conserved hypothetical protein (   | -50.0161 | 0        | 1 | 1 BH |
| PITG_08179 | Pi ATP-binding Cassette (ABC) Supε    | -33.2108 | -33.6105 | 1 | 1 BH |
| PITG_08188 | Pi conserved hypothetical protein (   | -14.6351 | 0.179122 | 1 | 1 BH |
| PITG_08202 | Pi conserved hypothetical protein (   | -17.1998 | 5.293305 | 1 | 1 BH |
| PITG_08285 | Pi conserved hypothetical protein (   | -50.0161 | 0        | 1 | 1 BH |
| PITG_08295 | Pi dynein heavy chain (12098 nt)      | -33.3955 | -33.241  | 1 | 1 BH |
| PITG_08314 | Pi ATP-binding Cassette (ABC) Supε    | -33.1528 | -33.7264 | 1 | 1 BH |
| PITG_08315 | Pi conserved hypothetical protein (   | -33.7227 | -32.5868 | 1 | 1 BH |
| PITG_08326 | Pi DNA polymerase alpha catalytic     | -32.8458 | -34.3406 | 1 | 1 BH |
| PITG_08334 | Pi conserved hypothetical protein (   | -50.0161 | 0        | 1 | 1 BH |
| PITG_08363 | Pi conserved hypothetical protein (   | -33.9938 | -32.0444 | 1 | 1 BH |
| PITG_08365 | Pi Voltage-gated Ion Channel (VIC)    | -33.6527 | -32.7266 | 1 | 1 BH |
| PITG_08374 | Pi conserved hypothetical protein (   | -32.8145 | -34.4032 | 1 | 1 BH |
| PITG_08387 | Pi phosphatidylinositol kinase (PIK-  | -50.0161 | 0        | 1 | 1 BH |
| PITG_08400 | Pi conserved hypothetical protein (   | -33.267  | -33.4981 | 1 | 1 BH |
| PITG_08404 | Pi cleavage induced hypothetical p    | -34.1864 | -31.6594 | 1 | 1 BH |
| PITG_08408 | Pi conserved hypothetical protein (   | -32.7949 | -34.4422 | 1 | 1 BH |
| PITG_08419 | Pi sporangia induced hypothetical     | -33.9073 | -32.2176 | 1 | 1 BH |
| PITG_08427 | Pi conserved hypothetical protein (   | -33.7378 | -32.5565 | 1 | 1 BH |
| PITG_08437 | Pi conserved hypothetical protein (   | -50.0161 | 0        | 1 | 1 BH |
| PITG_08458 | Pi kinesin-like protein (2444 nt)     | -50.0161 | 0        | 1 | 1 BH |
| PITG_08475 | Pi conserved hypothetical protein (   | -33.9938 | -32.0444 | 1 | 1 BH |
| PITG_08492 | Pi cytochrome b5-like protein (914    | -50.0161 | 0        | 1 | 1 BH |
| PITG_08493 | Pi hypothetical protein (588 nt)      | -34.1864 | -31.6594 | 1 | 1 BH |
| PITG_08494 | Pi conserved hypothetical protein (   | -33.9938 | -32.0444 | 1 | 1 BH |
| PITG_08495 | Pi hypothetical protein (1083 nt)     | -13.6075 | -0.02401 | 1 | 1 BH |
| PITG_08539 | Pi conserved hypothetical protein (   | -33.267  | -33.4981 | 1 | 1 BH |
| PITG_08543 | Pi conserved hypothetical protein (   | -33.5302 | -32.9718 | 1 | 1 BH |
| PITG_08544 | Pi Solute:Sodium Symporter (SSS) f    | -33.7227 | -32.5868 | 1 | 1 BH |
| PITG_08559 | Pi conserved hypothetical protein (   | -33.4509 | -33.1303 | 1 | 1 BH |
| PITG_08567 | Pi conserved hypothetical protein (   | -33.267  | -33.4981 | 1 | 1 BH |
| PITG_08569 | Pi conserved hypothetical protein (   | -34.7809 | -30.4703 | 1 | 1 BH |
| PITG_08579 | Pi isoleucyl-tRNA synthetase (3531    | -14.2101 | 1.175534 | 1 | 1 BH |
| PITG_08590 | Pi carbohydrate esterase, putative    | -32.7949 | -34.4422 | 1 | 1 BH |
| PITG_08592 | Pi conserved hypothetical protein (   | -34.3408 | -31.3505 | 1 | 1 BH |
| PITG_08604 | Pi Arsenical Resistance-3 (ACR3) Fa   | -33.267  | -33.4981 | 1 | 1 BH |
| PITG_08606 | Pi conserved hypothetical protein (   | -33.6194 | -32.7933 | 1 | 1 BH |
| PITG_08607 | Pi conserved hypothetical protein (   | -32.7847 | -34.4627 | 1 | 1 BH |
| PITG_08627 | Pi conserved hypothetical protein (   | -34.0871 | -31.858  | 1 | 1 BH |
| PITG_08646 | Pi polysaccharide lyase, putative (5  | -32.7868 | -34.4585 | 1 | 1 BH |
| PITG_08659 | Pi conserved hypothetical protein (   | -11.6636 | 0.563768 | 1 | 1 BH |
| PITG_08661 | Pi CDK5 regulatory subunit-associa    | -33.2108 | -33.6105 | 1 | 1 BH |

|            |                                       |          |          |   |      |
|------------|---------------------------------------|----------|----------|---|------|
| PITG_08676 | Pi 26S proteasome non-ATPase reg      | -13.0916 | -0.00156 | 1 | 1 BH |
| PITG_08684 | Pi conserved hypothetical protein (   | -33.2108 | -33.6105 | 1 | 1 BH |
| PITG_08685 | Pi conserved hypothetical protein (   | -33.9073 | -32.2176 | 1 | 1 BH |
| PITG_08687 | Pi Mitochondrial Carrier (MC) Fami    | -33.1528 | -33.7264 | 1 | 1 BH |
| PITG_08691 | Pi conserved hypothetical protein (   | -33.4509 | -33.1303 | 1 | 1 BH |
| PITG_08695 | Pi extended synaptotagmin, putati     | -33.8446 | -32.3428 | 1 | 1 BH |
| PITG_08696 | Pi iron-sulfur cluster scaffold prote | -14.2826 | -0.53457 | 1 | 1 BH |
| PITG_08699 | Pi conserved hypothetical protein (   | -32.5607 | -34.9107 | 1 | 1 BH |
| PITG_08714 | Pi lysyl-tRNA synthetase (1990 nt)    | -15.2907 | 1.470021 | 1 | 1 BH |
| PITG_08715 | Pi conserved hypothetical protein (   | -14.6364 | 0.179232 | 1 | 1 BH |
| PITG_08717 | Pi conserved hypothetical protein (   | -33.9073 | -32.2176 | 1 | 1 BH |
| PITG_08720 | Pi conserved hypothetical protein (   | -50.0161 | 0        | 1 | 1 BH |
| PITG_08746 | Pi conserved hypothetical protein (   | -32.8145 | -34.4032 | 1 | 1 BH |
| PITG_08753 | Pi tubulin-tyrosine ligase family, pu | -34.1864 | -31.6594 | 1 | 1 BH |
| PITG_08755 | Pi myb-like DNA-binding protein, p    | -34.1864 | -31.6594 | 1 | 1 BH |
| PITG_08757 | Pi Voltage-gated Ion Channel (VIC)    | -50.0161 | 0        | 1 | 1 BH |
| PITG_08758 | Pi Chloride Channel (ClC) Family (2)  | -33.5302 | -32.9718 | 1 | 1 BH |
| PITG_08762 | Pi conserved hypothetical protein (   | -13.7911 | 0.333686 | 1 | 1 BH |
| PITG_08770 | Pi conserved hypothetical protein (   | -33.2108 | -33.6105 | 1 | 1 BH |
| PITG_08775 | Pi hypothetical protein (1536 nt)     | -33.5302 | -32.9718 | 1 | 1 BH |
| PITG_08785 | Pi conserved hypothetical protein (   | -33.9073 | -32.2176 | 1 | 1 BH |
| PITG_08793 | Pi conserved hypothetical protein (   | -50.0161 | 0        | 1 | 1 BH |
| PITG_08795 | Pi conserved hypothetical protein (   | -50.0161 | 0        | 1 | 1 BH |
| PITG_08803 | Pi mannitol dehydrogenase, putati     | -34.459  | -31.1142 | 1 | 1 BH |
| PITG_08810 | Pi conserved hypothetical protein (   | -12.6079 | 0.336057 | 1 | 1 BH |
| PITG_08840 | Pi conserved hypothetical protein (   | -50.0161 | 0        | 1 | 1 BH |
| PITG_08841 | Pi conserved hypothetical protein (   | -50.0161 | 0        | 1 | 1 BH |
| PITG_08843 | Pi mannitol dehydrogenase, putati     | -50.0161 | 0        | 1 | 1 BH |
| PITG_08845 | Pi mannitol dehydrogenase, putati     | -33.7378 | -32.5565 | 1 | 1 BH |
| PITG_08864 | Pi conserved hypothetical protein (   | -33.4706 | -33.0909 | 1 | 1 BH |
| PITG_08875 | Pi conserved hypothetical protein (   | -34.7809 | -30.4703 | 1 | 1 BH |
| PITG_08880 | Pi ADP-ribosylation factor family (2  | -33.8221 | -32.388  | 1 | 1 BH |
| PITG_08882 | Pi choline transporter-like protein ( | -50.0161 | 0        | 1 | 1 BH |
| PITG_08893 | Pi conserved hypothetical protein (   | -33.9073 | -32.2176 | 1 | 1 BH |
| PITG_08916 | Pi kinesin-like protein (2333 nt)     | -33.9872 | -32.0576 | 1 | 1 BH |
| PITG_08922 | Pi Rab11 family GTPase, putative (:   | -50.0161 | 0        | 1 | 1 BH |
| PITG_08928 | Pi conserved hypothetical protein (   | -33.6923 | -32.6476 | 1 | 1 BH |
| PITG_08933 | Pi calcium/calmodulin-dependent :     | -33.8221 | -32.388  | 1 | 1 BH |
| PITG_08934 | Pi hypothetical protein (558 nt)      | -33.2308 | -33.5705 | 1 | 1 BH |
| PITG_08936 | Pi hypothetical protein (2118 nt)     | -33.1528 | -33.7264 | 1 | 1 BH |
| PITG_08938 | Pi hypothetical protein (605 nt)      | -50.0161 | 0        | 1 | 1 BH |
| PITG_08954 | Pi conserved hypothetical protein (   | -34.7809 | -30.4703 | 1 | 1 BH |
| PITG_08955 | Pi GTP cyclohydrolase I (972 nt)      | -33.1592 | -33.7138 | 1 | 1 BH |
| PITG_08960 | Pi myb-like DNA-binding protein, p    | -33.1528 | -33.7264 | 1 | 1 BH |
| PITG_08977 | Pi hypothetical protein (419 nt)      | -33.1321 | -33.7679 | 1 | 1 BH |
| PITG_08979 | Pi vacuolar protein sorting-associat  | -50.0161 | 0        | 1 | 1 BH |
| PITG_08991 | Pi insulin-degrading-like enzyme, n   | -33.1528 | -33.7264 | 1 | 1 BH |

|            |                                      |          |          |   |      |
|------------|--------------------------------------|----------|----------|---|------|
| PITG_08997 | Pi ATP-dependent RNA helicase DB     | -32.5846 | -34.8628 | 1 | 1 BH |
| PITG_09005 | Pi conserved hypothetical protein (  | -33.267  | -33.4981 | 1 | 1 BH |
| PITG_09009 | Pi conserved hypothetical protein (  | -34.459  | -31.1142 | 1 | 1 BH |
| PITG_09034 | Pi conserved hypothetical protein (  | -33.2108 | -33.6105 | 1 | 1 BH |
| PITG_09061 | Pi conserved hypothetical protein (  | -50.0161 | 0        | 1 | 1 BH |
| PITG_09073 | Pi hypothetical protein (1517 nt)    | -33.2308 | -33.5705 | 1 | 1 BH |
| PITG_09089 | Pi exportin-6-like protein (3714 nt) | -32.8458 | -34.3406 | 1 | 1 BH |
| PITG_09121 | Pi conserved hypothetical protein (  | -34.7809 | -30.4703 | 1 | 1 BH |
| PITG_09137 | Pi conserved hypothetical protein (  | -50.0161 | 0        | 1 | 1 BH |
| PITG_09138 | Pi conserved hypothetical protein (  | -33.1592 | -33.7138 | 1 | 1 BH |
| PITG_09192 | Pi mannan endo-1,4-beta-mannosi      | -34.3408 | -31.3505 | 1 | 1 BH |
| PITG_09208 | Pi aquaporin, putative (745 nt)      | -50.0161 | 0        | 1 | 1 BH |
| PITG_09210 | Pi hypothetical protein (524 nt)     | -32.8145 | -34.4032 | 1 | 1 BH |
| PITG_09249 | Pi sporangia induced hypothetical    | -34.0871 | -31.858  | 1 | 1 BH |
| PITG_09260 | Pi conserved hypothetical protein (  | -33.2108 | -33.6105 | 1 | 1 BH |
| PITG_09282 | Pi calcium-transporting ATPase 1, ε  | -12.6009 | -0.30234 | 1 | 1 BH |
| PITG_09292 | Pi Dicer-like 1 (DCL1) (4995 nt)     | -33.2108 | -33.6105 | 1 | 1 BH |
| PITG_09293 | Pi GAF domain-containing protein (   | -33.267  | -33.4981 | 1 | 1 BH |
| PITG_09303 | Pi conserved hypothetical protein (  | -33.1528 | -33.7264 | 1 | 1 BH |
| PITG_09304 | Pi conserved hypothetical protein (  | -13.7648 | 0.294394 | 1 | 1 BH |
| PITG_09312 | Pi conserved hypothetical protein (  | -50.0161 | 0        | 1 | 1 BH |
| PITG_09321 | Pi conserved hypothetical protein (  | -33.8221 | -32.388  | 1 | 1 BH |
| PITG_09341 | Pi conserved hypothetical protein (  | -33.7227 | -32.5868 | 1 | 1 BH |
| PITG_09344 | Pi kinesin-like protein (2518 nt)    | -34.7809 | -30.4703 | 1 | 1 BH |
| PITG_09348 | Pi glutaredoxin, putative (1448 nt)  | -14.6215 | 0.146896 | 1 | 1 BH |
| PITG_09362 | Pi conserved hypothetical protein (  | -33.2108 | -33.6105 | 1 | 1 BH |
| PITG_09375 | Pi cGMP-dependent protein kinase     | -33.9073 | -32.2176 | 1 | 1 BH |
| PITG_09376 | Pi conserved hypothetical protein (  | -32.7847 | -34.4627 | 1 | 1 BH |
| PITG_09384 | Pi aquaporin, putative (825 nt)      | -33.5465 | -32.9391 | 1 | 1 BH |
| PITG_09393 | Pi pyruvate kinase (1566 nt)         | -14.6234 | 0.146868 | 1 | 1 BH |
| PITG_09400 | Pi pyruvate kinase (1889 nt)         | -12.0925 | -0.2522  | 1 | 1 BH |
| PITG_09404 | Pi myosin-like protein (4883 nt)     | -13.8651 | 0.450158 | 1 | 1 BH |
| PITG_09414 | Pi conserved hypothetical protein (  | -33.1592 | -33.7138 | 1 | 1 BH |
| PITG_09419 | Pi gamma-soluble NSF attachment      | -32.8145 | -34.4032 | 1 | 1 BH |
| PITG_09448 | Pi conserved hypothetical protein (  | -33.1592 | -33.7138 | 1 | 1 BH |
| PITG_09456 | Pi nitroreductase family, putative ( | -32.7868 | -34.4585 | 1 | 1 BH |
| PITG_09462 | Pi conserved hypothetical protein (  | -33.2108 | -33.6105 | 1 | 1 BH |
| PITG_09470 | Pi arabinan endo-1,5-alpha-L-arabi   | -50.0161 | 0        | 1 | 1 BH |
| PITG_09471 | Pi F-box protein, putative (879 nt)  | -34.459  | -31.1142 | 1 | 1 BH |
| PITG_09472 | Pi conserved hypothetical protein (  | -11.3971 | -0.09909 | 1 | 1 BH |
| PITG_09473 | Pi conserved hypothetical protein (  | -33.9073 | -32.2176 | 1 | 1 BH |
| PITG_09477 | Pi ATP-binding Cassette (ABC) Supe   | -33.1528 | -33.7264 | 1 | 1 BH |
| PITG_09505 | Pi centrosome-associated protein,    | -32.8458 | -34.3406 | 1 | 1 BH |
| PITG_09506 | Pi 30S ribosomal protein S5, putati  | -14.2596 | 1.283983 | 1 | 1 BH |
| PITG_09547 | Pi conserved hypothetical protein (  | -10.7105 | 0.177961 | 1 | 1 BH |
| PITG_09572 | Pi conserved hypothetical protein (  | -33.1592 | -33.7138 | 1 | 1 BH |
| PITG_09582 | Pi ATP phosphoribosyltransferase (   | -14.6329 | 0.174635 | 1 | 1 BH |



|            |                                           |          |          |   |      |
|------------|-------------------------------------------|----------|----------|---|------|
| PITG_09585 | Pi secreted RxLR effector peptide,        | -32.7604 | -34.5114 | 1 | 1 BH |
| PITG_09595 | Pi conserved hypothetical protein (       | -33.9872 | -32.0576 | 1 | 1 BH |
| PITG_09620 | Pi protein kinase (354 nt)                | -32.6274 | -34.7773 | 1 | 1 BH |
| PITG_09631 | Pi conserved hypothetical protein (       | -15.2163 | 1.331587 | 1 | 1 BH |
| PITG_09638 | Pi conserved hypothetical protein (       | -33.1242 | -33.7836 | 1 | 1 BH |
| PITG_09648 | Pi conserved hypothetical protein (       | -33.1592 | -33.7138 | 1 | 1 BH |
| PITG_09650 | Pi conserved hypothetical protein (       | -50.0161 | 0        | 1 | 1 BH |
| PITG_09667 | Pi sporangia induced bZIP regulate        | -50.0161 | 0        | 1 | 1 BH |
| PITG_09700 | Pi conserved hypothetical protein (       | -32.5387 | -34.9546 | 1 | 1 BH |
| PITG_09708 | Pi conserved hypothetical protein (       | -34.459  | -31.1142 | 1 | 1 BH |
| PITG_09715 | Pi conserved hypothetical protein (       | -50.0161 | 0        | 1 | 1 BH |
| PITG_09747 | Pi conserved hypothetical protein (       | -32.7847 | -34.4627 | 1 | 1 BH |
| PITG_09760 | Pi mucin-like protein (4777 nt)           | -12.3944 | 0.349073 | 1 | 1 BH |
| PITG_09765 | Pi hypothetical protein (1420 nt)         | -33.8446 | -32.3428 | 1 | 1 BH |
| PITG_09785 | Pi lipase maturation factor 2 (2229       | -33.1592 | -33.7138 | 1 | 1 BH |
| PITG_09792 | Pi DEAD/DEAH box RNA helicase, p          | -33.3955 | -33.241  | 1 | 1 BH |
| PITG_09816 | Pi conserved hypothetical protein (       | -32.7588 | -34.5144 | 1 | 1 BH |
| PITG_09839 | Pi conserved hypothetical protein (       | -34.0871 | -31.858  | 1 | 1 BH |
| PITG_09846 | Pi prolyl-tRNA synthetase, putative       | -13.8421 | 0.433676 | 1 | 1 BH |
| PITG_09852 | Pi conserved hypothetical protein (       | -32.5631 | -34.9059 | 1 | 1 BH |
| PITG_09867 | Pi calcineurin-like phosphoesterase       | -33.1242 | -33.7836 | 1 | 1 BH |
| PITG_09868 | Pi hypothetical protein (977 nt)          | -34.7809 | -30.4703 | 1 | 1 BH |
| PITG_09880 | Pi conserved hypothetical protein (       | -32.7868 | -34.4585 | 1 | 1 BH |
| PITG_09885 | Pi ATP-binding Cassette (ABC) Supe        | -50.0161 | 0        | 1 | 1 BH |
| PITG_09887 | Pi alternative oxidase, putative (91      | -50.0161 | 0        | 1 | 1 BH |
| PITG_09900 | Pi 2Fe-2S ferredoxin, putative (545       | -33.0495 | -33.9331 | 1 | 1 BH |
| PITG_09904 | Pi hypothetical protein (3114 nt)         | -50.0161 | 0        | 1 | 1 BH |
| PITG_09921 | Pi conserved hypothetical protein (       | -33.1592 | -33.7138 | 1 | 1 BH |
| PITG_09937 | Pi dolichol-phosphate mannosyltra         | -14.5147 | -0.0642  | 1 | 1 BH |
| PITG_09965 | Pi protein transport Sec23/Sec24-li       | -14.7263 | 0.355237 | 1 | 1 BH |
| PITG_09967 | Pi conserved hypothetical protein (       | -33.3955 | -33.241  | 1 | 1 BH |
| PITG_09968 | Pi conserved hypothetical protein (       | -33.267  | -33.4981 | 1 | 1 BH |
| PITG_09983 | Pi protocadherin Fat-like protein (1      | -33.9938 | -32.0444 | 1 | 1 BH |
| PITG_10002 | Pi conserved hypothetical protein (       | -32.5601 | -34.9119 | 1 | 1 BH |
| PITG_10034 | Pi fatty acyl-CoA reductase, putativ      | -33.267  | -33.4981 | 1 | 1 BH |
| PITG_10042 | Pi conserved hypothetical protein (       | -33.0495 | -33.9331 | 1 | 1 BH |
| PITG_10052 | Pi choline/Carnitine O-acyltransfer       | -32.7868 | -34.4585 | 1 | 1 BH |
| PITG_10059 | Pi conserved hypothetical protein (       | -33.1528 | -33.7264 | 1 | 1 BH |
| PITG_10068 | Pi polycomb-like protein (3343 nt)        | -32.8145 | -34.4032 | 1 | 1 BH |
| PITG_10076 | Pi conserved hypothetical protein (       | -50.0161 | 0        | 1 | 1 BH |
| PITG_10094 | Pi Intraflagellar Transport Protein $\xi$ | -50.0161 | 0        | 1 | 1 BH |
| PITG_10096 | Pi conserved hypothetical protein (       | -34.459  | -31.1142 | 1 | 1 BH |
| PITG_10107 | Pi Multidrug/Oligosaccharidyl-lipid       | -34.0871 | -31.858  | 1 | 1 BH |
| PITG_10120 | Pi conserved hypothetical protein (       | -33.267  | -33.4981 | 1 | 1 BH |
| PITG_10123 | Pi Drug/Metabolite Transporter (D         | -33.1592 | -33.7138 | 1 | 1 BH |
| PITG_10127 | Pi ras family GTPase, putative (115       | -33.9872 | -32.0576 | 1 | 1 BH |
| PITG_10131 | Pi conserved hypothetical protein (       | -50.0161 | 0        | 1 | 1 BH |

|            |                                         |          |          |   |      |
|------------|-----------------------------------------|----------|----------|---|------|
| PITG_10165 | Pi conserved hypothetical protein (     | -33.9938 | -32.0444 | 1 | 1 BH |
| PITG_10169 | Pi 26S protease regulatory subunit      | -12.6475 | -0.14263 | 1 | 1 BH |
| PITG_10191 | Pi conserved hypothetical protein (     | -32.5385 | -34.955  | 1 | 1 BH |
| PITG_10199 | Pi conserved hypothetical protein (     | -33.7378 | -32.5565 | 1 | 1 BH |
| PITG_10203 | Pi conserved hypothetical protein (     | -12.006  | 0.317636 | 1 | 1 BH |
| PITG_10207 | Pi Mitochondrial Carrier (MC) Fami      | -14.3055 | -0.47776 | 1 | 1 BH |
| PITG_10208 | Pi conserved hypothetical protein (     | -14.8033 | 0.515401 | 1 | 1 BH |
| PITG_10211 | Pi conserved hypothetical protein (     | -34.459  | -31.1142 | 1 | 1 BH |
| PITG_10226 | Pi Ammonium Transporter (Amt) F         | -50.0161 | 0        | 1 | 1 BH |
| PITG_10250 | Pi conserved hypothetical protein (     | -32.7868 | -34.4585 | 1 | 1 BH |
| PITG_10256 | Pi conserved hypothetical protein (     | -34.459  | -31.1142 | 1 | 1 BH |
| PITG_10284 | Pi cellulose binding elicitor lectin (C | -50.0161 | 0        | 1 | 1 BH |
| PITG_10287 | Pi adenylate cyclase, putative (472     | -34.459  | -31.1142 | 1 | 1 BH |
| PITG_10291 | Pi conserved hypothetical protein (     | -33.2108 | -33.6105 | 1 | 1 BH |
| PITG_10294 | Pi conserved hypothetical protein (     | -50.0161 | 0        | 1 | 1 BH |
| PITG_10299 | Pi conserved hypothetical protein (     | -50.0161 | 0        | 1 | 1 BH |
| PITG_10355 | Pi conserved hypothetical protein (     | -33.1528 | -33.7264 | 1 | 1 BH |
| PITG_10380 | Pi conserved hypothetical protein (     | -50.0161 | 0        | 1 | 1 BH |
| PITG_10399 | Pi glycoside hydrolase, putative (14    | -33.1592 | -33.7138 | 1 | 1 BH |
| PITG_10412 | Pi SCP-like extracellular protein (91   | -34.459  | -31.1142 | 1 | 1 BH |
| PITG_10413 | Pi SCP-like extracellular protein (54   | -50.0161 | 0        | 1 | 1 BH |
| PITG_10421 | Pi conserved hypothetical protein (     | -34.1864 | -31.6594 | 1 | 1 BH |
| PITG_10422 | Pi conserved hypothetical protein (     | -33.267  | -33.4981 | 1 | 1 BH |
| PITG_10437 | Pi acyl-CoA dehydrogenase/oxidase       | -32.8458 | -34.3406 | 1 | 1 BH |
| PITG_10457 | Pi RNA-dependent RNA Polymerase         | -33.1528 | -33.7264 | 1 | 1 BH |
| PITG_10475 | Pi kinesin-like protein (2201 nt)       | -50.0161 | 0        | 1 | 1 BH |
| PITG_10492 | Pi lactation elevated protein 1 (134    | -33.2108 | -33.6105 | 1 | 1 BH |
| PITG_10507 | Pi cleavage induced hypothetical p      | -33.7227 | -32.5868 | 1 | 1 BH |
| PITG_10508 | Pi programmed cell death protein :      | -33.1528 | -33.7264 | 1 | 1 BH |
| PITG_10509 | Pi L-2-hydroxyglutarate dehydroge       | -32.7604 | -34.5114 | 1 | 1 BH |
| PITG_10517 | Pi tenascin-like protein (2406 nt)      | -33.1528 | -33.7264 | 1 | 1 BH |
| PITG_10519 | Pi pantoate beta-alanine ligase, pu     | -33.1753 | -33.6814 | 1 | 1 BH |
| PITG_10524 | Pi gastricsin, aspartyl protease fam    | -14.6392 | 0.179819 | 1 | 1 BH |
| PITG_10526 | Pi conserved hypothetical protein (     | -50.0161 | 0        | 1 | 1 BH |
| PITG_10571 | Pi hypothetical protein (357 nt)        | -50.0161 | 0        | 1 | 1 BH |
| PITG_10574 | Pi RNA pseudouridylate synthase, p      | -33.267  | -33.4981 | 1 | 1 BH |
| PITG_10576 | Pi conserved hypothetical protein (     | -32.7868 | -34.4585 | 1 | 1 BH |
| PITG_10592 | Pi DEAD/DEAH box RNA helicase, p        | -33.267  | -33.4981 | 1 | 1 BH |
| PITG_10600 | Pi conserved hypothetical protein (     | -14.491  | -0.11777 | 1 | 1 BH |
| PITG_10611 | Pi conserved hypothetical protein (     | -50.0161 | 0        | 1 | 1 BH |
| PITG_10622 | Pi lipase, putative (689 nt)            | -33.267  | -33.4981 | 1 | 1 BH |
| PITG_10651 | Pi conserved hypothetical protein (     | -34.0871 | -31.858  | 1 | 1 BH |
| PITG_10702 | Pi conserved hypothetical protein (     | -33.1592 | -33.7138 | 1 | 1 BH |
| PITG_10745 | Pi conserved hypothetical protein (     | -50.0161 | 0        | 1 | 1 BH |
| PITG_10747 | Pi conserved hypothetical protein (     | -13.4659 | -0.29961 | 1 | 1 BH |
| PITG_10768 | Pi conserved hypothetical protein (     | -15.9205 | 2.738598 | 1 | 1 BH |
| PITG_10769 | Pi conserved hypothetical protein (     | -50.0161 | 0        | 1 | 1 BH |

|            |                                      |          |          |   |      |
|------------|--------------------------------------|----------|----------|---|------|
| PITG_10772 | Pi putative GPI-anchored elicitin IN | -15.0545 | 0.997534 | 1 | 1 BH |
| PITG_10792 | Pi conserved hypothetical protein (  | -32.7937 | -34.4448 | 1 | 1 BH |
| PITG_10816 | Pi conserved hypothetical protein (  | -33.1753 | -33.6814 | 1 | 1 BH |
| PITG_10819 | Pi midasin-like protein (18373 nt)   | -33.3955 | -33.241  | 1 | 1 BH |
| PITG_10834 | Pi calcium-activated potassium cha   | -33.5302 | -32.9718 | 1 | 1 BH |
| PITG_10846 | Pi lysosomal alpha-glucosidase, pu   | -33.9938 | -32.0444 | 1 | 1 BH |
| PITG_10849 | Pi conserved hypothetical protein (  | -33.9938 | -32.0444 | 1 | 1 BH |
| PITG_10889 | Pi conserved hypothetical protein (  | -33.2108 | -33.6105 | 1 | 1 BH |
| PITG_10897 | Pi Chloride Channel (ClC) Family (2  | -50.0161 | 0        | 1 | 1 BH |
| PITG_10915 | Pi conserved hypothetical protein (  | -50.0161 | 0        | 1 | 1 BH |
| PITG_10916 | Pi eukaryotic translation initiation | -13.2636 | 0.351422 | 1 | 1 BH |
| PITG_10949 | Pi conserved hypothetical protein (  | -33.1849 | -33.6624 | 1 | 1 BH |
| PITG_10954 | Pi conserved hypothetical protein (  | -33.267  | -33.4981 | 1 | 1 BH |
| PITG_10955 | Pi conserved hypothetical protein (  | -33.1592 | -33.7138 | 1 | 1 BH |
| PITG_10965 | Pi conserved hypothetical protein (  | -50.0161 | 0        | 1 | 1 BH |
| PITG_10966 | Pi conserved hypothetical protein (  | -50.0161 | 0        | 1 | 1 BH |
| PITG_10981 | Pi conserved hypothetical protein (  | -33.9938 | -32.0444 | 1 | 1 BH |
| PITG_10984 | Pi choline transporter-like protein  | -50.0161 | 0        | 1 | 1 BH |
| PITG_10991 | Pi conserved hypothetical protein (  | -50.0161 | 0        | 1 | 1 BH |
| PITG_10997 | Pi hypothetical protein (2542 nt)    | -50.0161 | 0        | 1 | 1 BH |
| PITG_10999 | Pi endo-1,3(4)-beta-glucanase, put   | -50.0161 | 0        | 1 | 1 BH |
| PITG_11008 | Pi conserved hypothetical protein (  | -33.5194 | -32.9934 | 1 | 1 BH |
| PITG_11009 | Pi conserved hypothetical protein (  | -13.5307 | -0.16997 | 1 | 1 BH |
| PITG_11021 | Pi conserved hypothetical protein (  | -33.9073 | -32.2176 | 1 | 1 BH |
| PITG_11025 | Pi hypothetical protein (1299 nt)    | -50.0161 | 0        | 1 | 1 BH |
| PITG_11027 | Pi conserved hypothetical protein (  | -50.0161 | 0        | 1 | 1 BH |
| PITG_11040 | Pi hypothetical protein (540 nt)     | -13.0152 | -0.17474 | 1 | 1 BH |
| PITG_11063 | Pi 26S proteasome non-ATPase reg     | -13.0016 | -0.17487 | 1 | 1 BH |
| PITG_11068 | Pi hypothetical protein (521 nt)     | -50.0161 | 0        | 1 | 1 BH |
| PITG_11075 | Pi conserved hypothetical protein (  | -33.4706 | -33.0909 | 1 | 1 BH |
| PITG_11084 | Pi transmembrane protein, putativ    | -33.2108 | -33.6105 | 1 | 1 BH |
| PITG_11085 | Pi phospholipid-transporting ATPas   | -34.1864 | -31.6594 | 1 | 1 BH |
| PITG_11087 | Pi conserved hypothetical protein (  | -32.7847 | -34.4627 | 1 | 1 BH |
| PITG_11088 | Pi conserved hypothetical protein (  | -32.7604 | -34.5114 | 1 | 1 BH |
| PITG_11096 | Pi hypothetical protein (1086 nt)    | -50.0161 | 0        | 1 | 1 BH |
| PITG_11098 | Pi conserved hypothetical protein (  | -32.7868 | -34.4585 | 1 | 1 BH |
| PITG_11102 | Pi cGMP-dependent protein kinase     | -50.0161 | 0        | 1 | 1 BH |
| PITG_11111 | Pi leucyl-tRNA synthetase, cytoplas  | -32.5391 | -34.9538 | 1 | 1 BH |
| PITG_11114 | Pi conserved hypothetical protein (  | -32.8145 | -34.4032 | 1 | 1 BH |
| PITG_11121 | Pi ATP-binding Cassette (ABC) Supe   | -33.1592 | -33.7138 | 1 | 1 BH |
| PITG_11130 | Pi conserved hypothetical protein (  | -33.8221 | -32.388  | 1 | 1 BH |
| PITG_11152 | Pi conserved hypothetical protein (  | -14.5733 | 0.05304  | 1 | 1 BH |
| PITG_11169 | Pi histone-binding protein RBBP7 (:  | -33.267  | -33.4981 | 1 | 1 BH |
| PITG_11181 | Pi conserved hypothetical protein (  | -34.3408 | -31.3505 | 1 | 1 BH |
| PITG_11184 | Pi conserved hypothetical protein (  | -33.2108 | -33.6105 | 1 | 1 BH |
| PITG_11185 | Pi hypothetical protein (579 nt)     | -50.0161 | 0        | 1 | 1 BH |
| PITG_11188 | Pi conserved hypothetical protein (  | -33.2108 | -33.6105 | 1 | 1 BH |

|            |                                       |          |          |   |      |
|------------|---------------------------------------|----------|----------|---|------|
| PITG_11196 | Pi conserved hypothetical protein (   | -34.459  | -31.1142 | 1 | 1 BH |
| PITG_11203 | Pi anoctamin-like protein (2730 nt)   | -33.6527 | -32.7266 | 1 | 1 BH |
| PITG_11229 | Pi aldehyde dehydrogenase, putati     | -32.5631 | -34.9059 | 1 | 1 BH |
| PITG_11238 | Pi nuclear LIM factor interactor-int  | -34.0871 | -31.858  | 1 | 1 BH |
| PITG_11239 | Pi nuclear LIM factor interactor-int  | -50.0161 | 0        | 1 | 1 BH |
| PITG_11241 | Pi nuclear LIM factor interactor-int  | -32.5616 | -34.9088 | 1 | 1 BH |
| PITG_11246 | Pi conserved hypothetical protein (   | -33.267  | -33.4981 | 1 | 1 BH |
| PITG_11253 | Pi serine/threonine protein kinase    | -34.2191 | -31.5939 | 1 | 1 BH |
| PITG_11262 | Pi conserved hypothetical protein (   | -15.0672 | 1.015046 | 1 | 1 BH |
| PITG_11275 | Pi conserved hypothetical protein (   | -33.9938 | -32.0444 | 1 | 1 BH |
| PITG_11292 | Pi conserved hypothetical protein (   | -32.8145 | -34.4032 | 1 | 1 BH |
| PITG_11293 | Pi alcohol dehydrogenase, putative    | -13.3437 | 0.486826 | 1 | 1 BH |
| PITG_11327 | Pi Annexin (Annexin) Family (2498     | -11.2161 | 0.413722 | 1 | 1 BH |
| PITG_11329 | Pi Annexin (Annexin) Family (3825     | -12.6409 | -0.19251 | 1 | 1 BH |
| PITG_11375 | Pi conserved hypothetical protein (   | -34.2191 | -31.5939 | 1 | 1 BH |
| PITG_11396 | Pi conserved hypothetical protein (   | -50.0161 | 0        | 1 | 1 BH |
| PITG_11400 | Pi cleavage induced hypothetical p    | -50.0161 | 0        | 1 | 1 BH |
| PITG_11403 | Pi WD domain-containing protein (     | -33.2108 | -33.6105 | 1 | 1 BH |
| PITG_11434 | Pi conserved hypothetical protein (   | -33.3955 | -33.241  | 1 | 1 BH |
| PITG_11457 | Pi phosphoribosylformylglycinamic     | -33.8446 | -32.3428 | 1 | 1 BH |
| PITG_11472 | Pi Intraflagellar Transport Protein 7 | -33.4706 | -33.0909 | 1 | 1 BH |
| PITG_11477 | Pi conserved hypothetical protein (   | -50.0161 | 0        | 1 | 1 BH |
| PITG_11490 | Pi conserved hypothetical protein (   | -50.0161 | 0        | 1 | 1 BH |
| PITG_11495 | Pi Multidrug/Oligosaccharidyl-lipid   | -34.7809 | -30.4703 | 1 | 1 BH |
| PITG_11496 | Pi conserved hypothetical protein (   | -32.7604 | -34.5114 | 1 | 1 BH |
| PITG_11504 | Pi cleavage induced hypothetical p    | -34.0871 | -31.858  | 1 | 1 BH |
| PITG_11522 | Pi aspartyl protease family A01B, p   | -34.1864 | -31.6594 | 1 | 1 BH |
| PITG_11526 | Pi conserved hypothetical protein (   | -50.0161 | 0        | 1 | 1 BH |
| PITG_11538 | Pi conserved hypothetical protein (   | -33.8889 | -32.2543 | 1 | 1 BH |
| PITG_11548 | Pi conserved hypothetical protein (   | -33.1528 | -33.7264 | 1 | 1 BH |
| PITG_11568 | Pi hypothetical protein (996 nt)      | -15.0014 | 0.883462 | 1 | 1 BH |
| PITG_11586 | Pi conserved hypothetical protein (   | -14.7035 | 0.314694 | 1 | 1 BH |
| PITG_11588 | Pi hypothetical cleavage-induced p    | -12.9951 | -0.18562 | 1 | 1 BH |
| PITG_11603 | Pi peptidyl-prolyl cis-trans isomera  | -11.1513 | 0.360891 | 1 | 1 BH |
| PITG_11616 | Pi conserved hypothetical protein (   | -34.1864 | -31.6594 | 1 | 1 BH |
| PITG_11626 | Pi proteasome subunit beta type-6     | -12.4165 | 0.393214 | 1 | 1 BH |
| PITG_11629 | Pi conserved hypothetical protein (   | -33.9938 | -32.0444 | 1 | 1 BH |
| PITG_11638 | Pi voltage-gated potassium channe     | -14.148  | 1.041763 | 1 | 1 BH |
| PITG_11652 | Pi conserved hypothetical protein (   | -33.9938 | -32.0444 | 1 | 1 BH |
| PITG_11699 | Pi hypothetical protein (1409 nt)     | -33.2108 | -33.6105 | 1 | 1 BH |
| PITG_11704 | Pi lectin, putative (1295 nt)         | -14.3148 | -0.47271 | 1 | 1 BH |
| PITG_11712 | Pi neutral alpha-glucosidase, putat   | -13.7796 | 0.314479 | 1 | 1 BH |
| PITG_11729 | Pi conserved hypothetical protein (   | -13.838  | 0.433105 | 1 | 1 BH |
| PITG_11734 | Pi 50S ribosomal protein L3-2 (111    | -14.344  | -0.4006  | 1 | 1 BH |
| PITG_11735 | Pi conserved hypothetical protein (   | -32.8145 | -34.4032 | 1 | 1 BH |
| PITG_11749 | Pi conserved hypothetical protein (   | -34.0871 | -31.858  | 1 | 1 BH |
| PITG_11756 | Pi Voltage-gated Ion Channel (VIC)    | -34.0871 | -31.858  | 1 | 1 BH |

|            |                                                               |          |          |   |      |
|------------|---------------------------------------------------------------|----------|----------|---|------|
| PITG_11794 | Pi conserved hypothetical protein (                           | -34.3408 | -31.3505 | 1 | 1 BH |
| PITG_11802 | Pi conserved hypothetical protein (                           | -32.8458 | -34.3406 | 1 | 1 BH |
| PITG_11812 | Pi DNA replication licensing factor                           | -33.2108 | -33.6105 | 1 | 1 BH |
| PITG_11818 | Pi conserved hypothetical protein (                           | -50.0161 | 0        | 1 | 1 BH |
| PITG_11823 | Pi hypothetical protein (954 nt)                              | -34.7809 | -30.4703 | 1 | 1 BH |
| PITG_11838 | Pi Major facilitator Superfamily (13                          | -50.0161 | 0        | 1 | 1 BH |
| PITG_11845 | Pi conserved hypothetical protein (                           | -50.0161 | 0        | 1 | 1 BH |
| PITG_11848 | Pi conserved hypothetical protein (                           | -50.0161 | 0        | 1 | 1 BH |
| PITG_11859 | Pi hypothetical protein (989 nt)                              | -33.1753 | -33.6814 | 1 | 1 BH |
| PITG_11862 | Pi conserved hypothetical protein (                           | -32.7604 | -34.5114 | 1 | 1 BH |
| PITG_11863 | Pi transmembrane protein, putativ                             | -33.9938 | -32.0444 | 1 | 1 BH |
| PITG_11875 | Pi peptidase, putative (1983 nt)                              | -33.9073 | -32.2176 | 1 | 1 BH |
| PITG_11878 | Pi conserved hypothetical protein (                           | -34.3408 | -31.3505 | 1 | 1 BH |
| PITG_11879 | Pi hypothetical protein (1593 nt)                             | -50.0161 | 0        | 1 | 1 BH |
| PITG_11885 | Pi cleavage induced hypothetical p                            | -33.9938 | -32.0444 | 1 | 1 BH |
| PITG_11910 | Pi serine protease family S08A, put                           | -50.0161 | 0        | 1 | 1 BH |
| PITG_11927 | Pi conserved hypothetical protein (                           | -14.9427 | 0.789311 | 1 | 1 BH |
| PITG_11937 | Pi conserved hypothetical protein (                           | -34.1864 | -31.6594 | 1 | 1 BH |
| PITG_11940 | Pi chitin-binding protein, putative (                         | -33.6561 | -32.7199 | 1 | 1 BH |
| PITG_11959 | Pi conserved hypothetical protein (                           | -14.3067 | -0.49293 | 1 | 1 BH |
| PITG_11960 | Pi Amino Acid-Polyamine-Organoc                               | -33.1592 | -33.7138 | 1 | 1 BH |
| PITG_11963 | Pi ATP-binding Cassette (ABC) Supe                            | -34.1864 | -31.6594 | 1 | 1 BH |
| PITG_11969 | Pi ATP-binding Cassette (ABC) Supe                            | -33.3955 | -33.241  | 1 | 1 BH |
| PITG_11979 | Pi conserved hypothetical protein (                           | -32.5599 | -34.9123 | 1 | 1 BH |
| PITG_11983 | Pi conserved hypothetical protein (                           | -33.267  | -33.4981 | 1 | 1 BH |
| PITG_11988 | Pi Mitochondrial Carrier (MC) Fami                            | -50.0161 | 0        | 1 | 1 BH |
| PITG_11989 | Pi alcohol dehydrogenase, putative                            | -50.0161 | 0        | 1 | 1 BH |
| PITG_12003 | Pi conserved hypothetical protein (                           | -33.1528 | -33.7264 | 1 | 1 BH |
| PITG_12058 | Pi ATP-binding Cassette (ABC) Supe                            | -33.9938 | -32.0444 | 1 | 1 BH |
| PITG_12112 | Pi conserved hypothetical protein (                           | -33.267  | -33.4981 | 1 | 1 BH |
| PITG_12113 | Pi conserved hypothetical protein (                           | -33.2308 | -33.5705 | 1 | 1 BH |
| PITG_12115 | Pi calmodulin-like protein (2661 nt                           | -33.7227 | -32.5868 | 1 | 1 BH |
| PITG_12142 | Pi conserved hypothetical protein (                           | -32.8458 | -34.3406 | 1 | 1 BH |
| PITG_12176 | Pi conserved hypothetical protein (                           | -33.4509 | -33.1303 | 1 | 1 BH |
| PITG_12186 | Pi sporangia induced mitogen-activ                            | -50.0161 | 0        | 1 | 1 BH |
| PITG_12193 | Pi 50S ribosomal protein L1 (1144 r                           | -13.8953 | 0.559249 | 1 | 1 BH |
| PITG_12195 | Pi katanin p60 ATPase-containing s                            | -33.9073 | -32.2176 | 1 | 1 BH |
| PITG_12214 | Pi conserved hypothetical protein (                           | -33.267  | -33.4981 | 1 | 1 BH |
| PITG_12215 | Pi Zinc (Zn <sup>2+</sup> )-Iron (Fe <sup>2+</sup> ) Permease | -34.0871 | -31.858  | 1 | 1 BH |
| PITG_12221 | Pi conserved hypothetical protein (                           | -34.3408 | -31.3505 | 1 | 1 BH |
| PITG_12222 | Pi sporangia induced conserved hy                             | -50.0161 | 0        | 1 | 1 BH |
| PITG_12232 | Pi phosphatidic acid phosphatase,                             | -32.8145 | -34.4032 | 1 | 1 BH |
| PITG_12265 | Pi nuclear prelamin A recognition f                           | -33.1242 | -33.7836 | 1 | 1 BH |
| PITG_12273 | Pi conserved hypothetical protein (                           | -32.5387 | -34.9546 | 1 | 1 BH |
| PITG_12278 | Pi sterol O-acyltransferase, putativ                          | -50.0161 | 0        | 1 | 1 BH |
| PITG_12283 | Pi conserved hypothetical protein (                           | -33.2108 | -33.6105 | 1 | 1 BH |
| PITG_12284 | Pi hypothetical protein (1024 nt)                             | -33.1528 | -33.7264 | 1 | 1 BH |

|            |                                      |          |          |   |      |
|------------|--------------------------------------|----------|----------|---|------|
| PITG_12304 | Pi TATA-box-binding protein, putat   | -33.1592 | -33.7138 | 1 | 1 BH |
| PITG_12313 | Pi hypothetical protein (691 nt)     | -50.0161 | 0        | 1 | 1 BH |
| PITG_12316 | Pi conserved hypothetical protein (  | -33.2108 | -33.6105 | 1 | 1 BH |
| PITG_12317 | Pi conserved hypothetical protein (  | -33.8446 | -32.3428 | 1 | 1 BH |
| PITG_12357 | Pi gastricsin, putative (1410 nt)    | -32.5631 | -34.9059 | 1 | 1 BH |
| PITG_12427 | Pi conserved hypothetical protein (  | -11.3524 | -0.18835 | 1 | 1 BH |
| PITG_12450 | Pi hypothetical protein (887 nt)     | -34.3408 | -31.3505 | 1 | 1 BH |
| PITG_12452 | Pi conserved hypothetical protein (  | -34.459  | -31.1142 | 1 | 1 BH |
| PITG_12462 | Pi aconitate hydratase, putative (2  | -13.8761 | 0.517063 | 1 | 1 BH |
| PITG_12484 | Pi conserved hypothetical protein (  | -33.5302 | -32.9718 | 1 | 1 BH |
| PITG_12490 | Pi conserved hypothetical protein (  | -33.1321 | -33.7679 | 1 | 1 BH |
| PITG_12502 | Pi conserved hypothetical protein (  | -50.0161 | 0        | 1 | 1 BH |
| PITG_12522 | Pi conserved hypothetical protein (  | -50.0161 | 0        | 1 | 1 BH |
| PITG_12524 | Pi elongation factor 3, putative (34 | -34.0871 | -31.858  | 1 | 1 BH |
| PITG_12532 | Pi conserved hypothetical protein (  | -33.1528 | -33.7264 | 1 | 1 BH |
| PITG_12535 | Pi eukaryotic peptide chain release  | -33.4706 | -33.0909 | 1 | 1 BH |
| PITG_12548 | Pi type I inositol-3,4-bisphosphate  | -32.7847 | -34.4627 | 1 | 1 BH |
| PITG_12549 | Pi conserved hypothetical protein (  | -33.267  | -33.4981 | 1 | 1 BH |
| PITG_12552 | Pi conserved hypothetical protein (  | -34.459  | -31.1142 | 1 | 1 BH |
| PITG_12568 | Pi sporangia induced parkin coregu   | -50.0161 | 0        | 1 | 1 BH |
| PITG_12571 | Pi conserved hypothetical protein (  | -33.9872 | -32.0576 | 1 | 1 BH |
| PITG_12572 | Pi conserved hypothetical protein (  | -50.0161 | 0        | 1 | 1 BH |
| PITG_12577 | Pi sporangia induced dynein heavy    | -33.267  | -33.4981 | 1 | 1 BH |
| PITG_12579 | Pi kinesin-like protein (2611 nt)    | -33.8446 | -32.3428 | 1 | 1 BH |
| PITG_12594 | Pi TRAF3-interacting protein, putat  | -33.1753 | -33.6814 | 1 | 1 BH |
| PITG_12599 | Pi elicitin-like protein (1765 nt)   | -12.6499 | -0.15492 | 1 | 1 BH |
| PITG_12668 | Pi conserved hypothetical protein (  | -33.1321 | -33.7679 | 1 | 1 BH |
| PITG_12682 | Pi cytochrome c (606 nt)             | -11.6926 | 0.482301 | 1 | 1 BH |
| PITG_12692 | Pi conserved hypothetical protein (  | -33.1849 | -33.6624 | 1 | 1 BH |
| PITG_12697 | Pi 30S ribosomal protein S9 (987 nt) | -14.4542 | -0.18027 | 1 | 1 BH |
| PITG_12763 | Pi IQ and ubiquitin-like domain-cor  | -34.7809 | -30.4703 | 1 | 1 BH |
| PITG_12788 | Pi 12-oxophytodienoate reductase     | -14.4704 | -0.14784 | 1 | 1 BH |
| PITG_12797 | Pi regulator of nonsense transcript  | -32.5385 | -34.955  | 1 | 1 BH |
| PITG_12812 | Pi sporangia induced conserved hy    | -33.8446 | -32.3428 | 1 | 1 BH |
| PITG_12818 | Pi glutamate carboxypeptidase, pu    | -14.3793 | -0.3412  | 1 | 1 BH |
| PITG_12827 | Pi sporulation induced hypothetica   | -33.3757 | -33.2808 | 1 | 1 BH |
| PITG_12841 | Pi conserved hypothetical protein (  | -34.7809 | -30.4703 | 1 | 1 BH |
| PITG_12844 | Pi conserved hypothetical protein (  | -50.0161 | 0        | 1 | 1 BH |
| PITG_12845 | Pi conserved hypothetical protein (  | -33.8446 | -32.3428 | 1 | 1 BH |
| PITG_12853 | Pi conserved hypothetical protein (  | -32.8145 | -34.4032 | 1 | 1 BH |
| PITG_12864 | Pi asparaginyl-tRNA synthetase (15   | -13.1172 | 0.791921 | 1 | 1 BH |
| PITG_12870 | Pi conserved hypothetical protein (  | -33.9872 | -32.0576 | 1 | 1 BH |
| PITG_12878 | Pi hypothetical protein similar to s | -33.9872 | -32.0576 | 1 | 1 BH |
| PITG_12891 | Pi conserved hypothetical protein (  | -33.4706 | -33.0909 | 1 | 1 BH |
| PITG_12901 | Pi conserved hypothetical protein (  | -33.267  | -33.4981 | 1 | 1 BH |
| PITG_12902 | Pi conserved hypothetical protein (  | -33.1242 | -33.7836 | 1 | 1 BH |
| PITG_12903 | Pi protein kinase (2275 nt)          | -33.7227 | -32.5868 | 1 | 1 BH |

|            |                                        |          |          |   |      |
|------------|----------------------------------------|----------|----------|---|------|
| PITG_12904 | Pi conserved hypothetical protein (    | -12.3356 | 0.246831 | 1 | 1 BH |
| PITG_12911 | Pi conserved hypothetical protein (    | -50.0161 | 0        | 1 | 1 BH |
| PITG_12949 | Pi conserved hypothetical protein (    | -32.8458 | -34.3406 | 1 | 1 BH |
| PITG_12950 | Pi cAMP-specific 3',5'-cyclic phosph   | -50.0161 | 0        | 1 | 1 BH |
| PITG_12959 | Pi conserved hypothetical protein (    | -34.459  | -31.1142 | 1 | 1 BH |
| PITG_12960 | Pi conserved hypothetical protein (    | -33.267  | -33.4981 | 1 | 1 BH |
| PITG_12962 | Pi histone deacetylase, putative (1    | -33.4706 | -33.0909 | 1 | 1 BH |
| PITG_12982 | Pi conserved hypothetical protein (    | -50.0161 | 0        | 1 | 1 BH |
| PITG_13019 | Pi conserved hypothetical protein (    | -33.1528 | -33.7264 | 1 | 1 BH |
| PITG_13030 | Pi P-type ATPase (P-ATPase) Super      | -33.8446 | -32.3428 | 1 | 1 BH |
| PITG_13040 | Pi conserved hypothetical protein (    | -33.2108 | -33.6105 | 1 | 1 BH |
| PITG_13042 | Pi conserved hypothetical protein (    | -32.5846 | -34.8628 | 1 | 1 BH |
| PITG_13043 | Pi conserved hypothetical protein (    | -33.3283 | -33.3755 | 1 | 1 BH |
| PITG_13044 | Pi secreted RxLR effector peptide,     | -14.6498 | 0.208469 | 1 | 1 BH |
| PITG_13064 | Pi conserved hypothetical protein (    | -32.7588 | -34.5144 | 1 | 1 BH |
| PITG_13065 | Pi myosin-like protein (5690 nt)       | -33.267  | -33.4981 | 1 | 1 BH |
| PITG_13115 | Pi conserved hypothetical protein (    | -50.0161 | 0        | 1 | 1 BH |
| PITG_13135 | Pi copper-transporting ATPase, put     | -32.5616 | -34.9088 | 1 | 1 BH |
| PITG_13150 | Pi phosphatidylinositol kinase (768    | -33.1528 | -33.7264 | 1 | 1 BH |
| PITG_13160 | Pi conserved hypothetical protein (    | -34.7809 | -30.4703 | 1 | 1 BH |
| PITG_13172 | Pi GPI mannosyltransferase, putati     | -33.1592 | -33.7138 | 1 | 1 BH |
| PITG_13174 | Pi translation initiation factor IF-2, | -33.2108 | -33.6105 | 1 | 1 BH |
| PITG_13175 | Pi ATP-binding Cassette (ABC) Super    | -50.0161 | 0        | 1 | 1 BH |
| PITG_13198 | Pi conserved hypothetical protein (    | -50.0161 | 0        | 1 | 1 BH |
| PITG_13231 | Pi cobalamin synthesis protein, put    | -50.0161 | 0        | 1 | 1 BH |
| PITG_13234 | Pi conserved hypothetical protein (    | -33.1528 | -33.7264 | 1 | 1 BH |
| PITG_13240 | Pi conserved hypothetical protein (    | -33.2108 | -33.6105 | 1 | 1 BH |
| PITG_13252 | Pi conserved hypothetical protein (    | -14.5919 | 0.084042 | 1 | 1 BH |
| PITG_13253 | Pi hypothetical protein (1914 nt)      | -33.5851 | -32.862  | 1 | 1 BH |
| PITG_13264 | Pi conserved hypothetical protein (    | -50.0161 | 0        | 1 | 1 BH |
| PITG_13276 | Pi conserved hypothetical protein (    | -33.1753 | -33.6814 | 1 | 1 BH |
| PITG_13289 | Pi thioredoxin-like protein (1353 nt)  | -32.5607 | -34.9107 | 1 | 1 BH |
| PITG_13296 | Pi aldose 1-epimerase, putative (94    | -14.1213 | 0.978466 | 1 | 1 BH |
| PITG_13299 | Pi conserved hypothetical protein (    | -33.8446 | -32.3428 | 1 | 1 BH |
| PITG_13303 | Pi conserved hypothetical protein (    | -33.1242 | -33.7836 | 1 | 1 BH |
| PITG_13304 | Pi conserved hypothetical protein (    | -34.7809 | -30.4703 | 1 | 1 BH |
| PITG_13312 | Pi 40S ribosomal protein S25, puta     | -8.8365  | 0.149026 | 1 | 1 BH |
| PITG_13316 | Pi conserved hypothetical protein (    | -50.0161 | 0        | 1 | 1 BH |
| PITG_13321 | Pi conserved hypothetical protein (    | -34.0871 | -31.858  | 1 | 1 BH |
| PITG_13323 | Pi spore induced hypothetical prot     | -33.9938 | -32.0444 | 1 | 1 BH |
| PITG_13327 | Pi conserved hypothetical protein (    | -34.7809 | -30.4703 | 1 | 1 BH |
| PITG_13346 | Pi conserved hypothetical protein (    | -33.9938 | -32.0444 | 1 | 1 BH |
| PITG_13354 | Pi conserved hypothetical protein (    | -33.1321 | -33.7679 | 1 | 1 BH |
| PITG_13378 | Pi conserved hypothetical protein (    | -34.1864 | -31.6594 | 1 | 1 BH |
| PITG_13389 | Pi conserved hypothetical protein (    | -33.6194 | -32.7933 | 1 | 1 BH |
| PITG_13390 | Pi conserved hypothetical protein (    | -33.8446 | -32.3428 | 1 | 1 BH |
| PITG_13404 | Pi DNA-directed RNA polymerase II      | -14.7706 | 0.42986  | 1 | 1 BH |

|            |                                       |          |          |   |      |
|------------|---------------------------------------|----------|----------|---|------|
| PITG_13413 | Pi conserved hypothetical protein (   | -33.1753 | -33.6814 | 1 | 1 BH |
| PITG_13414 | Pi conserved hypothetical protein (   | -34.3408 | -31.3505 | 1 | 1 BH |
| PITG_13440 | Pi conserved hypothetical protein (   | -32.7868 | -34.4585 | 1 | 1 BH |
| PITG_13456 | Pi conserved hypothetical protein (   | -33.8889 | -32.2543 | 1 | 1 BH |
| PITG_13494 | Pi elicitor-like transglutaminase, pu | -50.0161 | 0        | 1 | 1 BH |
| PITG_13496 | Pi elicitor-like transglutaminase, pu | -33.9938 | -32.0444 | 1 | 1 BH |
| PITG_13511 | Pi phosphatidylinositol-4-phosphat    | -34.2191 | -31.5939 | 1 | 1 BH |
| PITG_13527 | Pi conserved hypothetical protein (   | -32.7868 | -34.4585 | 1 | 1 BH |
| PITG_13562 | Pi conserved hypothetical protein (   | -50.0161 | 0        | 1 | 1 BH |
| PITG_13581 | Pi ATP-binding Cassette (ABC) Supe    | -50.0161 | 0        | 1 | 1 BH |
| PITG_13583 | Pi ATP-binding Cassette (ABC) Supe    | -50.0161 | 0        | 1 | 1 BH |
| PITG_13595 | Pi conserved hypothetical protein (   | -33.5194 | -32.9934 | 1 | 1 BH |
| PITG_13596 | Pi biotin synthase (1332 nt)          | -12.4228 | 0.416093 | 1 | 1 BH |
| PITG_13601 | Pi cleavage induced hypothetical p    | -50.0161 | 0        | 1 | 1 BH |
| PITG_13603 | Pi conserved hypothetical protein (   | -50.0161 | 0        | 1 | 1 BH |
| PITG_13604 | Pi P-type ATPase (P-ATPase) Super     | -50.0161 | 0        | 1 | 1 BH |
| PITG_13613 | Pi P-type ATPase (P-ATPase) Super     | -32.7949 | -34.4422 | 1 | 1 BH |
| PITG_13657 | Pi conserved hypothetical protein (   | -14.2672 | -0.57308 | 1 | 1 BH |
| PITG_13674 | Pi conserved hypothetical protein (   | -50.0161 | 0        | 1 | 1 BH |
| PITG_13675 | Pi conserved hypothetical protein (   | -33.4706 | -33.0909 | 1 | 1 BH |
| PITG_13678 | Pi conserved hypothetical protein (   | -32.7588 | -34.5144 | 1 | 1 BH |
| PITG_13681 | Pi 40S ribosomal protein S26, puta    | -8.32502 | -0.0196  | 1 | 1 BH |
| PITG_13716 | Pi conserved hypothetical protein (   | -33.2108 | -33.6105 | 1 | 1 BH |
| PITG_13728 | Pi NADH dehydrogenase [ubiquino       | -13.0458 | -0.08641 | 1 | 1 BH |
| PITG_13730 | Pi Mitochondrial Carrier (MC) Fami    | -33.8446 | -32.3428 | 1 | 1 BH |
| PITG_13732 | Pi dual specificity phosphatase, put  | -33.4706 | -33.0909 | 1 | 1 BH |
| PITG_13751 | Pi conserved hypothetical protein (   | -14.7055 | 0.318648 | 1 | 1 BH |
| PITG_13755 | Pi phosphatidylinositol kinase (PIK-  | -50.0161 | 0        | 1 | 1 BH |
| PITG_13757 | Pi conserved hypothetical protein (   | -33.2108 | -33.6105 | 1 | 1 BH |
| PITG_13772 | Pi conserved hypothetical protein (   | -32.8458 | -34.3406 | 1 | 1 BH |
| PITG_13794 | Pi conserved hypothetical protein (   | -50.0161 | 0        | 1 | 1 BH |
| PITG_13795 | Pi conserved hypothetical protein (   | -50.0161 | 0        | 1 | 1 BH |
| PITG_13814 | Pi serine/threonine protein kinase    | -50.0161 | 0        | 1 | 1 BH |
| PITG_13825 | Pi ras family GTPase, putative (618   | -50.0161 | 0        | 1 | 1 BH |
| PITG_13831 | Pi tryptophanyl-tRNA synthetase (1    | -15.0825 | 1.061406 | 1 | 1 BH |
| PITG_13834 | Pi vacuolar protein, putative (1115   | -34.459  | -31.1142 | 1 | 1 BH |
| PITG_13844 | Pi conserved hypothetical protein (   | -33.6194 | -32.7933 | 1 | 1 BH |
| PITG_13846 | Pi WD repeat protein 39 (1095 nt)     | -32.7588 | -34.5144 | 1 | 1 BH |
| PITG_13850 | Pi hypothetical protein (2825 nt)     | -34.0871 | -31.858  | 1 | 1 BH |
| PITG_13873 | Pi alpha-glucosidase, putative (258   | -33.1528 | -33.7264 | 1 | 1 BH |
| PITG_13881 | Pi conserved hypothetical protein (   | -50.0161 | 0        | 1 | 1 BH |
| PITG_13887 | Pi AMP-binding enzyme, putative (     | -33.6527 | -32.7266 | 1 | 1 BH |
| PITG_13889 | Pi 4-coumarate-CoA ligase, putativ    | -33.3283 | -33.3755 | 1 | 1 BH |
| PITG_13890 | Pi hypothetical protein (319 nt)      | -50.0161 | 0        | 1 | 1 BH |
| PITG_13899 | Pi conserved hypothetical protein (   | -33.2108 | -33.6105 | 1 | 1 BH |
| PITG_13906 | Pi hypothetical protein (1325 nt)     | -33.6527 | -32.7266 | 1 | 1 BH |
| PITG_13907 | Pi conserved hypothetical protein (   | -50.0161 | 0        | 1 | 1 BH |



|            |                                       |          |          |   |      |
|------------|---------------------------------------|----------|----------|---|------|
| PITG_13908 | Pi conserved hypothetical protein (   | -50.0161 | 0        | 1 | 1 BH |
| PITG_13934 | Pi calcium-dependent protein kina     | -50.0161 | 0        | 1 | 1 BH |
| PITG_13937 | Pi hypothetical protein (666 nt)      | -33.7227 | -32.5868 | 1 | 1 BH |
| PITG_13968 | Pi dynein heavy chain (13181 nt)      | -33.8446 | -32.3428 | 1 | 1 BH |
| PITG_13975 | Pi hypothetical protein (371 nt)      | -32.7949 | -34.4422 | 1 | 1 BH |
| PITG_14009 | Pi pre-mRNA-splicing factor ATP-de    | -33.1592 | -33.7138 | 1 | 1 BH |
| PITG_14010 | Pi conserved hypothetical protein (   | -50.0161 | 0        | 1 | 1 BH |
| PITG_14021 | Pi hypothetical protein (906 nt)      | -33.8446 | -32.3428 | 1 | 1 BH |
| PITG_14050 | Pi conserved hypothetical protein (   | -33.1528 | -33.7264 | 1 | 1 BH |
| PITG_14083 | Pi glutathione reductase (1482 nt)    | -11.3255 | 0.127609 | 1 | 1 BH |
| PITG_14084 | Pi catechol O-methyltransferase, p    | -34.3408 | -31.3505 | 1 | 1 BH |
| PITG_14112 | Pi conserved hypothetical protein (   | -33.4706 | -33.0909 | 1 | 1 BH |
| PITG_14130 | Pi conserved hypothetical protein (   | -14.2234 | -0.70947 | 1 | 1 BH |
| PITG_14133 | Pi programmed cell death protein,     | -12.5791 | 0.278508 | 1 | 1 BH |
| PITG_14134 | Pi conserved hypothetical protein (   | -32.8458 | -34.3406 | 1 | 1 BH |
| PITG_14135 | Pi conserved hypothetical protein (   | -33.1528 | -33.7264 | 1 | 1 BH |
| PITG_14136 | Pi tRNA-dihydrouridine synthase, p    | -33.1528 | -33.7264 | 1 | 1 BH |
| PITG_14138 | Pi glycoside hydrolase, putative (12  | -50.0161 | 0        | 1 | 1 BH |
| PITG_14141 | Pi 1,3-beta-glucanosyltransferase,    | -14.6975 | 0.28099  | 1 | 1 BH |
| PITG_14148 | Pi hypothetical protein (1080 nt)     | -33.8889 | -32.2543 | 1 | 1 BH |
| PITG_14151 | Pi conserved hypothetical protein (   | -33.2108 | -33.6105 | 1 | 1 BH |
| PITG_14177 | Pi conserved hypothetical protein (   | -50.0161 | 0        | 1 | 1 BH |
| PITG_14182 | Pi conserved hypothetical protein (   | -50.0161 | 0        | 1 | 1 BH |
| PITG_14188 | Pi kinesin-like protein KIF6 (2729 n  | -34.3408 | -31.3505 | 1 | 1 BH |
| PITG_14207 | Pi conserved hypothetical protein (   | -33.2108 | -33.6105 | 1 | 1 BH |
| PITG_14216 | Pi methylthioribose-1-phosphate is    | -14.7857 | 0.471493 | 1 | 1 BH |
| PITG_14217 | Pi conserved hypothetical protein (   | -32.7937 | -34.4448 | 1 | 1 BH |
| PITG_14226 | Pi conserved hypothetical protein (   | -33.9073 | -32.2176 | 1 | 1 BH |
| PITG_14247 | Pi conserved hypothetical protein (   | -33.1753 | -33.6814 | 1 | 1 BH |
| PITG_14248 | Pi rRNA-processing protein EBP2, p    | -15.1461 | 1.189893 | 1 | 1 BH |
| PITG_14252 | Pi conserved hypothetical protein (   | -34.7809 | -30.4703 | 1 | 1 BH |
| PITG_14281 | Pi sporangia induced conserved hy     | -34.0871 | -31.858  | 1 | 1 BH |
| PITG_14357 | Pi dimeric dihydrodiol dehydrogen     | -16.3549 | 3.606167 | 1 | 1 BH |
| PITG_14358 | Pi trans-1,2-dihydrobenzene-1,2-di    | -33.3955 | -33.241  | 1 | 1 BH |
| PITG_14375 | Pi conserved hypothetical protein (   | -32.5391 | -34.9538 | 1 | 1 BH |
| PITG_14384 | Pi sodium/potassium-transporting      | -50.0161 | 0        | 1 | 1 BH |
| PITG_14385 | Pi conserved hypothetical protein (   | -32.8458 | -34.3406 | 1 | 1 BH |
| PITG_14388 | Pi cytochrome P450, putative (158     | -33.016  | -34.0001 | 1 | 1 BH |
| PITG_14393 | Pi calcium/calmodulin-dependent       | -33.1528 | -33.7264 | 1 | 1 BH |
| PITG_14397 | Pi proliferating cell nuclear antigen | -13.4362 | 0.678623 | 1 | 1 BH |
| PITG_14402 | Pi conserved hypothetical protein (   | -50.0161 | 0        | 1 | 1 BH |
| PITG_14412 | Pi carbonic anhydrase, putative (11   | -50.0161 | 0        | 1 | 1 BH |
| PITG_14439 | Pi conserved hypothetical protein (   | -12.5002 | 0.56321  | 1 | 1 BH |
| PITG_14442 | Pi hypothetical protein (156 nt)      | -32.5385 | -34.955  | 1 | 1 BH |
| PITG_14459 | Pi conserved hypothetical protein (   | -50.0161 | 0        | 1 | 1 BH |
| PITG_14461 | Pi actin-like protein (1370 nt)       | -33.1592 | -33.7138 | 1 | 1 BH |
| PITG_14467 | Pi conserved hypothetical protein (   | -34.7809 | -30.4703 | 1 | 1 BH |

|            |                                       |          |          |   |      |
|------------|---------------------------------------|----------|----------|---|------|
| PITG_14471 | Pi conserved hypothetical protein (   | -33.1753 | -33.6814 | 1 | 1 BH |
| PITG_14474 | Pi conserved hypothetical protein (   | -50.0161 | 0        | 1 | 1 BH |
| PITG_14514 | Pi HSF-type DNA-binding protein, p    | -32.8458 | -34.3406 | 1 | 1 BH |
| PITG_14520 | Pi conserved hypothetical protein (   | -33.7378 | -32.5565 | 1 | 1 BH |
| PITG_14530 | Pi conserved hypothetical protein (   | -34.2191 | -31.5939 | 1 | 1 BH |
| PITG_14532 | Pi conserved hypothetical protein (   | -33.6194 | -32.7933 | 1 | 1 BH |
| PITG_14551 | Pi hypothetical protein (629 nt)      | -33.8221 | -32.388  | 1 | 1 BH |
| PITG_14570 | Pi conserved hypothetical protein (   | -33.6188 | -32.7945 | 1 | 1 BH |
| PITG_14579 | Pi conserved hypothetical protein (   | -33.1592 | -33.7138 | 1 | 1 BH |
| PITG_14582 | Pi sporangia induced hypothetical     | -33.4552 | -33.1217 | 1 | 1 BH |
| PITG_14584 | Pi microtubule-associated protein     | -14.4574 | -0.17388 | 1 | 1 BH |
| PITG_14607 | Pi conserved hypothetical protein (   | -50.0161 | 0        | 1 | 1 BH |
| PITG_14617 | Pi conserved hypothetical protein (   | -32.7588 | -34.5144 | 1 | 1 BH |
| PITG_14624 | Pi conserved hypothetical protein (   | -33.5465 | -32.9391 | 1 | 1 BH |
| PITG_14726 | Pi hypothetical protein (1975 nt)     | -50.0161 | 0        | 1 | 1 BH |
| PITG_14729 | Pi 30S ribosomal protein S16, puta    | -13.952  | 0.672604 | 1 | 1 BH |
| PITG_14740 | Pi conserved hypothetical protein (   | -50.0161 | 0        | 1 | 1 BH |
| PITG_14744 | Pi conserved hypothetical protein (   | -33.2108 | -33.6105 | 1 | 1 BH |
| PITG_14746 | Pi conserved hypothetical protein (   | -33.267  | -33.4981 | 1 | 1 BH |
| PITG_14757 | Pi conserved hypothetical protein (   | -33.2108 | -33.6105 | 1 | 1 BH |
| PITG_14840 | Pi conserved hypothetical protein (   | -50.0161 | 0        | 1 | 1 BH |
| PITG_14851 | Pi hypothetical protein (400 nt)      | -32.7588 | -34.5144 | 1 | 1 BH |
| PITG_14885 | Pi DNA-directed RNA polymerase II     | -13.2011 | 0.215186 | 1 | 1 BH |
| PITG_14886 | Pi conserved hypothetical protein (   | -33.1242 | -33.7836 | 1 | 1 BH |
| PITG_14908 | Pi bzip controlled hypothetical pro   | -34.7809 | -30.4703 | 1 | 1 BH |
| PITG_14918 | Pi riboflavin biosynthesis protein ri | -33.1592 | -33.7138 | 1 | 1 BH |
| PITG_14921 | Pi conserved hypothetical protein (   | -32.5601 | -34.9119 | 1 | 1 BH |
| PITG_14934 | Pi conserved hypothetical protein (   | -33.2108 | -33.6105 | 1 | 1 BH |
| PITG_14938 | Pi conserved hypothetical protein (   | -34.7809 | -30.4703 | 1 | 1 BH |
| PITG_14939 | Pi glucosidase, putative (1728 nt)    | -13.6034 | -0.02657 | 1 | 1 BH |
| PITG_14941 | Pi conserved hypothetical protein (   | -13.7808 | 0.330071 | 1 | 1 BH |
| PITG_14945 | Pi conserved hypothetical protein (   | -33.6527 | -32.7266 | 1 | 1 BH |
| PITG_14946 | Pi conserved hypothetical protein (   | -33.5194 | -32.9934 | 1 | 1 BH |
| PITG_14947 | Pi conserved hypothetical protein (   | -33.4706 | -33.0909 | 1 | 1 BH |
| PITG_14980 | Pi conserved hypothetical protein (   | -33.3955 | -33.241  | 1 | 1 BH |
| PITG_14999 | Pi hypothetical protein (1256 nt)     | -50.0161 | 0        | 1 | 1 BH |
| PITG_15011 | Pi hypothetical protein (1329 nt)     | -33.4706 | -33.0909 | 1 | 1 BH |
| PITG_15021 | Pi conserved hypothetical protein (   | -50.0161 | 0        | 1 | 1 BH |
| PITG_15033 | Pi choline dehydrogenase, putative    | -33.5194 | -32.9934 | 1 | 1 BH |
| PITG_15041 | Pi conserved hypothetical protein (   | -50.0161 | 0        | 1 | 1 BH |
| PITG_15047 | Pi conserved hypothetical protein (   | -50.0161 | 0        | 1 | 1 BH |
| PITG_15079 | Pi conserved hypothetical protein (   | -32.5599 | -34.9123 | 1 | 1 BH |
| PITG_15085 | Pi conserved hypothetical protein (   | -33.2108 | -33.6105 | 1 | 1 BH |
| PITG_15097 | Pi conserved hypothetical protein (   | -32.7588 | -34.5144 | 1 | 1 BH |
| PITG_15175 | Pi conserved hypothetical protein (   | -33.4706 | -33.0909 | 1 | 1 BH |
| PITG_15196 | Pi conserved hypothetical protein (   | -33.1242 | -33.7836 | 1 | 1 BH |
| PITG_15214 | Pi conserved hypothetical protein (   | -50.0161 | 0        | 1 | 1 BH |

|            |                                      |          |          |   |      |
|------------|--------------------------------------|----------|----------|---|------|
| PITG_15223 | Pi conserved hypothetical protein (  | -33.3283 | -33.3755 | 1 | 1 BH |
| PITG_15241 | Pi conserved hypothetical protein (  | -33.6561 | -32.7199 | 1 | 1 BH |
| PITG_15244 | Pi ATP-binding Cassette (ABC) Supe   | -50.0161 | 0        | 1 | 1 BH |
| PITG_15250 | Pi conserved hypothetical protein (  | -13.8997 | 0.562265 | 1 | 1 BH |
| PITG_15252 | Pi conserved hypothetical protein (  | -33.1528 | -33.7264 | 1 | 1 BH |
| PITG_15253 | Pi ATP-binding Cassette (ABC) Supe   | -50.0161 | 0        | 1 | 1 BH |
| PITG_15254 | Pi conserved hypothetical protein (  | -33.8446 | -32.3428 | 1 | 1 BH |
| PITG_15257 | Pi conserved hypothetical protein (  | -33.1528 | -33.7264 | 1 | 1 BH |
| PITG_15264 | Pi transmembrane protein, putativ    | -50.0161 | 0        | 1 | 1 BH |
| PITG_15267 | Pi phospholipid-transporting ATPase  | -32.7847 | -34.4627 | 1 | 1 BH |
| PITG_15290 | Pi IQ and AAA domain-containing p    | -33.6188 | -32.7945 | 1 | 1 BH |
| PITG_15293 | Pi conserved hypothetical protein (  | -33.2108 | -33.6105 | 1 | 1 BH |
| PITG_15310 | Pi actin-like protein (1413 nt)      | -32.8145 | -34.4032 | 1 | 1 BH |
| PITG_15335 | Pi thioredoxin/dynein outer arm pr   | -34.3408 | -31.3505 | 1 | 1 BH |
| PITG_15336 | Pi conserved hypothetical protein (  | -34.459  | -31.1142 | 1 | 1 BH |
| PITG_15337 | Pi secreted RxLR effector peptide,   | -50.0161 | 0        | 1 | 1 BH |
| PITG_15375 | Pi conserved hypothetical protein (  | -33.6561 | -32.7199 | 1 | 1 BH |
| PITG_15392 | Pi leukotriene A-4 hydrolase-like pi | -14.3862 | -0.34027 | 1 | 1 BH |
| PITG_15395 | Pi conserved hypothetical protein (  | -34.7809 | -30.4703 | 1 | 1 BH |
| PITG_15414 | Pi sporangia induced 28 kDa inner    | -50.0161 | 0        | 1 | 1 BH |
| PITG_15459 | Pi GAF domain-containing protein (   | -50.0161 | 0        | 1 | 1 BH |
| PITG_15471 | Pi conserved hypothetical protein (  | -50.0161 | 0        | 1 | 1 BH |
| PITG_15473 | Pi conserved hypothetical protein (  | -50.0161 | 0        | 1 | 1 BH |
| PITG_15491 | Pi glutaredoxin (599 nt)             | -50.0161 | 0        | 1 | 1 BH |
| PITG_15547 | Pi Amino Acid-Polyamine-Organoca     | -50.0161 | 0        | 1 | 1 BH |
| PITG_15549 | Pi Mitochondrial Carrier (MC) Fami   | -33.6527 | -32.7266 | 1 | 1 BH |
| PITG_15552 | Pi phosphatidylinositol-4-phosphat   | -33.6194 | -32.7933 | 1 | 1 BH |
| PITG_15564 | Pi conserved hypothetical protein (  | -32.7847 | -34.4627 | 1 | 1 BH |
| PITG_15568 | Pi conserved hypothetical protein (  | -12.5009 | 0.127115 | 1 | 1 BH |
| PITG_15572 | Pi conserved hypothetical protein (  | -50.0161 | 0        | 1 | 1 BH |
| PITG_15576 | Pi glycoside hydrolase, putative (91 | -50.0161 | 0        | 1 | 1 BH |
| PITG_15577 | Pi hypothetical protein (1345 nt)    | -34.7809 | -30.4703 | 1 | 1 BH |
| PITG_15582 | Pi conserved hypothetical protein (  | -33.8446 | -32.3428 | 1 | 1 BH |
| PITG_15616 | Pi protein kinase (861 nt)           | -33.9872 | -32.0576 | 1 | 1 BH |
| PITG_15620 | Pi Voltage-gated Ion Channel (VIC)   | -34.1864 | -31.6594 | 1 | 1 BH |
| PITG_15625 | Pi dynein heavy chain (15033 nt)     | -33.1528 | -33.7264 | 1 | 1 BH |
| PITG_15628 | Pi conserved hypothetical protein (  | -33.3757 | -33.2808 | 1 | 1 BH |
| PITG_15655 | Pi conserved hypothetical protein (  | -34.7809 | -30.4703 | 1 | 1 BH |
| PITG_15659 | Pi ribonucleoside-diphosphate redi   | -50.0161 | 0        | 1 | 1 BH |
| PITG_15662 | Pi conserved hypothetical protein (  | -33.4706 | -33.0909 | 1 | 1 BH |
| PITG_15686 | Pi conserved hypothetical protein (  | -16.1748 | 3.247302 | 1 | 1 BH |
| PITG_15711 | Pi conserved hypothetical protein (  | -32.7847 | -34.4627 | 1 | 1 BH |
| PITG_15744 | Pi conserved hypothetical protein (  | -50.0161 | 0        | 1 | 1 BH |
| PITG_15745 | Pi adhesin-like protein (2106 nt)    | -34.7809 | -30.4703 | 1 | 1 BH |
| PITG_15758 | Pi conserved hypothetical protein (  | -50.0161 | 0        | 1 | 1 BH |
| PITG_15759 | Pi conserved hypothetical protein (  | -50.0161 | 0        | 1 | 1 BH |
| PITG_15771 | Pi hsp70-like protein (2743 nt)      | -12.5115 | 0.102548 | 1 | 1 BH |

|            |                                       |          |          |   |      |
|------------|---------------------------------------|----------|----------|---|------|
| PITG_15777 | Pi protein kinase (924 nt)            | -33.2308 | -33.5705 | 1 | 1 BH |
| PITG_15778 | Pi diphosphomevalonate decarbox       | -33.267  | -33.4981 | 1 | 1 BH |
| PITG_15786 | Pi heat shock 70 kDa protein, mito    | -11.9892 | -0.05058 | 1 | 1 BH |
| PITG_15791 | Pi glycoside hydrolase, putative (14  | -32.5607 | -34.9107 | 1 | 1 BH |
| PITG_15832 | Pi conserved hypothetical protein (   | -32.5598 | -34.9125 | 1 | 1 BH |
| PITG_15838 | Pi conserved hypothetical protein (   | -33.1528 | -33.7264 | 1 | 1 BH |
| PITG_15849 | Pi hypothetical protein (264 nt)      | -50.0161 | 0        | 1 | 1 BH |
| PITG_15851 | Pi conserved hypothetical protein (   | -34.1864 | -31.6594 | 1 | 1 BH |
| PITG_15858 | Pi conserved hypothetical protein (   | -34.1864 | -31.6594 | 1 | 1 BH |
| PITG_15862 | Pi conserved hypothetical protein (   | -33.6194 | -32.7933 | 1 | 1 BH |
| PITG_15866 | Pi conserved hypothetical protein (   | -14.8253 | 0.557026 | 1 | 1 BH |
| PITG_15867 | Pi syntaxin-binding protein, putativ  | -33.8446 | -32.3428 | 1 | 1 BH |
| PITG_15882 | Pi alpha,alpha-trehalose-phosphat     | -33.1592 | -33.7138 | 1 | 1 BH |
| PITG_15900 | Pi ATP-binding Cassette (ABC) Sup     | -34.0871 | -31.858  | 1 | 1 BH |
| PITG_15923 | Pi conserved hypothetical protein (   | -15.1877 | 1.280624 | 1 | 1 BH |
| PITG_15946 | Pi hypothetical protein (2795 nt)     | -33.2108 | -33.6105 | 1 | 1 BH |
| PITG_15947 | Pi hypothetical protein (912 nt)      | -33.2108 | -33.6105 | 1 | 1 BH |
| PITG_15948 | Pi serine protease family S33, puta   | -34.459  | -31.1142 | 1 | 1 BH |
| PITG_15963 | Pi conserved hypothetical protein (   | -33.8889 | -32.2543 | 1 | 1 BH |
| PITG_15964 | Pi conserved hypothetical protein (   | -34.2191 | -31.5939 | 1 | 1 BH |
| PITG_16001 | Pi regulator of chromosome conde      | -33.8446 | -32.3428 | 1 | 1 BH |
| PITG_16014 | Pi conserved hypothetical protein (   | -33.2108 | -33.6105 | 1 | 1 BH |
| PITG_16016 | Pi cytochrome oxidase assembly pi     | -32.8458 | -34.3406 | 1 | 1 BH |
| PITG_16037 | Pi conserved hypothetical protein (   | -33.267  | -33.4981 | 1 | 1 BH |
| PITG_16040 | Pi conserved hypothetical protein (   | -34.1864 | -31.6594 | 1 | 1 BH |
| PITG_16048 | Pi triosephosphate isomerase (843     | -13.1968 | 0.215693 | 1 | 1 BH |
| PITG_16055 | Pi lysosomal Pro-X carboxypeptida     | -32.5602 | -34.9117 | 1 | 1 BH |
| PITG_16056 | Pi cyclin-dependent kinase-like, pu   | -33.6561 | -32.7199 | 1 | 1 BH |
| PITG_16061 | Pi sodium/potassium-transporting      | -34.459  | -31.1142 | 1 | 1 BH |
| PITG_16076 | Pi glyoxylate/hydroxypyruvate red     | -32.7847 | -34.4627 | 1 | 1 BH |
| PITG_16078 | Pi conserved hypothetical protein (   | -32.7847 | -34.4627 | 1 | 1 BH |
| PITG_16079 | Pi conserved hypothetical protein (   | -32.8458 | -34.3406 | 1 | 1 BH |
| PITG_16083 | Pi glyoxylate/hydroxypyruvate red     | -15.092  | 1.085461 | 1 | 1 BH |
| PITG_16089 | Pi conserved hypothetical protein (   | -33.5194 | -32.9934 | 1 | 1 BH |
| PITG_16092 | Pi Multidrug/Oligosaccharidyl-lipid   | -34.459  | -31.1142 | 1 | 1 BH |
| PITG_16094 | Pi hypothetical protein (479 nt)      | -50.0161 | 0        | 1 | 1 BH |
| PITG_16098 | Pi D-isomer specific 2-hydroxyacid    | -32.5385 | -34.955  | 1 | 1 BH |
| PITG_16107 | Pi rRNA biogenesis protein rrp5 (58   | -33.1592 | -33.7138 | 1 | 1 BH |
| PITG_16112 | Pi Intraflagellar Transport Protein 5 | -34.7809 | -30.4703 | 1 | 1 BH |
| PITG_16126 | Pi Dicarboxylate/Amino Acid:Catio     | -14.6041 | 0.1147   | 1 | 1 BH |
| PITG_16190 | Pi hypothetical protein (2274 nt)     | -50.0161 | 0        | 1 | 1 BH |
| PITG_16213 | Pi protein kinase, putative (1315 nt  | -33.8446 | -32.3428 | 1 | 1 BH |
| PITG_16258 | Pi hypothetical protein (522 nt)      | -33.6194 | -32.7933 | 1 | 1 BH |
| PITG_16278 | Pi conserved hypothetical protein (   | -34.1864 | -31.6594 | 1 | 1 BH |
| PITG_16309 | Pi conserved hypothetical protein (   | -32.7847 | -34.4627 | 1 | 1 BH |
| PITG_16310 | Pi conserved hypothetical protein (   | -33.0968 | -33.8385 | 1 | 1 BH |
| PITG_16317 | Pi regulator of microtubule dynam     | -32.7588 | -34.5144 | 1 | 1 BH |

|            |                                      |          |          |   |      |
|------------|--------------------------------------|----------|----------|---|------|
| PITG_16320 | Pi conserved hypothetical protein (  | -33.9073 | -32.2176 | 1 | 1 BH |
| PITG_16321 | Pi conserved hypothetical protein (  | -50.0161 | 0        | 1 | 1 BH |
| PITG_16324 | Pi conserved hypothetical protein (  | -34.3408 | -31.3505 | 1 | 1 BH |
| PITG_16354 | Pi conserved hypothetical protein (  | -33.1753 | -33.6814 | 1 | 1 BH |
| PITG_16359 | Pi UTP-glucose-1-phosphate uridylyl  | -32.5599 | -34.9123 | 1 | 1 BH |
| PITG_16383 | Pi Major Facilitator Superfamily (M  | -33.8889 | -32.2543 | 1 | 1 BH |
| PITG_16392 | Pi conserved hypothetical protein (  | -34.459  | -31.1142 | 1 | 1 BH |
| PITG_16395 | Pi conserved hypothetical protein (  | -33.9073 | -32.2176 | 1 | 1 BH |
| PITG_16406 | Pi conserved hypothetical protein (  | -34.1864 | -31.6594 | 1 | 1 BH |
| PITG_16432 | Pi conserved hypothetical protein (  | -33.8446 | -32.3428 | 1 | 1 BH |
| PITG_16434 | Pi conserved hypothetical protein (  | -50.0161 | 0        | 1 | 1 BH |
| PITG_16462 | Pi conserved hypothetical protein (  | -33.2108 | -33.6105 | 1 | 1 BH |
| PITG_16465 | Pi conserved hypothetical protein (  | -34.7809 | -30.4703 | 1 | 1 BH |
| PITG_16466 | Pi sporulation induced hypothetical  | -50.0161 | 0        | 1 | 1 BH |
| PITG_16473 | Pi serine protease family S08A, put  | -50.0161 | 0        | 1 | 1 BH |
| PITG_16483 | Pi conserved hypothetical protein (  | -34.1864 | -31.6594 | 1 | 1 BH |
| PITG_16494 | Pi hypothetical protein (410 nt)     | -33.9938 | -32.0444 | 1 | 1 BH |
| PITG_16512 | Pi conserved hypothetical protein (  | -33.1753 | -33.6814 | 1 | 1 BH |
| PITG_16553 | Pi conserved hypothetical protein (  | -33.6194 | -32.7933 | 1 | 1 BH |
| PITG_16557 | Pi conserved hypothetical protein (  | -32.5387 | -34.9546 | 1 | 1 BH |
| PITG_16559 | Pi glycoside hydrolase, putative (25 | -50.0161 | 0        | 1 | 1 BH |
| PITG_16664 | Pi conserved hypothetical protein (  | -34.2191 | -31.5939 | 1 | 1 BH |
| PITG_16668 | Pi cyclin-like protein (1014 nt)     | -33.1753 | -33.6814 | 1 | 1 BH |
| PITG_16674 | Pi conserved hypothetical protein (  | -33.7378 | -32.5565 | 1 | 1 BH |
| PITG_16682 | Pi conserved hypothetical protein (  | -32.7868 | -34.4585 | 1 | 1 BH |
| PITG_16695 | Pi N-acetyltransferase 5 (813 nt)    | -32.7588 | -34.5144 | 1 | 1 BH |
| PITG_16710 | Pi conserved hypothetical protein (  | -50.0161 | 0        | 1 | 1 BH |
| PITG_16719 | Pi conserved hypothetical protein (  | -32.7868 | -34.4585 | 1 | 1 BH |
| PITG_16724 | Pi conserved hypothetical protein (  | -33.5302 | -32.9718 | 1 | 1 BH |
| PITG_16727 | Pi conserved hypothetical protein (  | -50.0161 | 0        | 1 | 1 BH |
| PITG_16734 | Pi protein kinase (1372 nt)          | -33.2108 | -33.6105 | 1 | 1 BH |
| PITG_16781 | Pi hypothetical protein (706 nt)     | -33.1321 | -33.7679 | 1 | 1 BH |
| PITG_16783 | Pi conserved hypothetical protein (  | -33.7227 | -32.5868 | 1 | 1 BH |
| PITG_16840 | Pi conserved hypothetical protein (  | -33.9938 | -32.0444 | 1 | 1 BH |
| PITG_16853 | Pi conserved hypothetical protein (  | -33.7378 | -32.5565 | 1 | 1 BH |
| PITG_16863 | Pi conserved hypothetical protein (  | -32.7868 | -34.4585 | 1 | 1 BH |
| PITG_16865 | Pi aldose 1-epimerase, putative (14  | -33.0968 | -33.8385 | 1 | 1 BH |
| PITG_16884 | Pi conserved hypothetical protein (  | -33.8889 | -32.2543 | 1 | 1 BH |
| PITG_16966 | Pi 2-oxoglutarate dehydrogenase E    | -13.3234 | 0.457569 | 1 | 1 BH |
| PITG_16967 | Pi cleavage induced hypothetical p   | -50.0161 | 0        | 1 | 1 BH |
| PITG_16974 | Pi conserved hypothetical protein (  | -32.7868 | -34.4585 | 1 | 1 BH |
| PITG_16981 | Pi thrombospondin-like protein (72   | -34.459  | -31.1142 | 1 | 1 BH |
| PITG_17002 | Pi conserved hypothetical protein (  | -34.0871 | -31.858  | 1 | 1 BH |
| PITG_17017 | Pi hypothetical protein (969 nt)     | -50.0161 | 0        | 1 | 1 BH |
| PITG_17027 | Pi conserved hypothetical protein (  | -50.0161 | 0        | 1 | 1 BH |
| PITG_17031 | Pi conserved hypothetical protein (  | -33.6561 | -32.7199 | 1 | 1 BH |
| PITG_17041 | Pi cardiolipin synthetase, putative  | -33.267  | -33.4981 | 1 | 1 BH |

|            |                                      |          |          |   |      |
|------------|--------------------------------------|----------|----------|---|------|
| PITG_17045 | Pi mannitol dehydrogenase, putati    | -13.8851 | 0.53885  | 1 | 1 BH |
| PITG_17055 | Pi endo-1,4-beta-xylanase, putativ   | -50.0161 | 0        | 1 | 1 BH |
| PITG_17073 | Pi conserved hypothetical protein (  | -34.7809 | -30.4703 | 1 | 1 BH |
| PITG_17079 | Pi conserved hypothetical protein (  | -33.4706 | -33.0909 | 1 | 1 BH |
| PITG_17088 | Pi conserved hypothetical protein (  | -33.9938 | -32.0444 | 1 | 1 BH |
| PITG_17090 | Pi conserved hypothetical protein (  | -32.8458 | -34.3406 | 1 | 1 BH |
| PITG_17103 | Pi hypothetical protein (652 nt)     | -33.3283 | -33.3755 | 1 | 1 BH |
| PITG_17105 | Pi conserved hypothetical protein (  | -33.1528 | -33.7264 | 1 | 1 BH |
| PITG_17122 | Pi Amino Acid/Auxin Permease (AA     | -34.3408 | -31.3505 | 1 | 1 BH |
| PITG_17125 | Pi conserved hypothetical protein (  | -33.8446 | -32.3428 | 1 | 1 BH |
| PITG_17127 | Pi copper-transporting ATPase, put   | -33.1592 | -33.7138 | 1 | 1 BH |
| PITG_17132 | Pi flagella associated protein (3083 | -34.1864 | -31.6594 | 1 | 1 BH |
| PITG_17135 | Pi arginine n-methyltransferase, pu  | -33.1592 | -33.7138 | 1 | 1 BH |
| PITG_17141 | Pi Major Facilitator Superfamily (M  | -33.2108 | -33.6105 | 1 | 1 BH |
| PITG_17160 | Pi conserved hypothetical protein (  | -33.5194 | -32.9934 | 1 | 1 BH |
| PITG_17174 | Pi conserved hypothetical protein (  | -13.7249 | 0.185671 | 1 | 1 BH |
| PITG_17195 | Pi tetrahydrofolate dehydrogenase    | -33.1321 | -33.7679 | 1 | 1 BH |
| PITG_17242 | Pi conserved hypothetical protein (  | -33.2108 | -33.6105 | 1 | 1 BH |
| PITG_17247 | Pi sporangia induced conserved hy    | -34.1864 | -31.6594 | 1 | 1 BH |
| PITG_17248 | Pi conserved hypothetical protein (  | -34.1864 | -31.6594 | 1 | 1 BH |
| PITG_17258 | Pi conserved hypothetical protein (  | -33.5851 | -32.862  | 1 | 1 BH |
| PITG_17272 | Pi conserved hypothetical protein (  | -33.5851 | -32.862  | 1 | 1 BH |
| PITG_17289 | Pi deoxyuridine 5'-triphosphate nu   | -33.2308 | -33.5705 | 1 | 1 BH |
| PITG_17297 | Pi conserved hypothetical protein (  | -50.0161 | 0        | 1 | 1 BH |
| PITG_17298 | Pi tRNA (cytosine-5-)-methyltransf   | -33.1753 | -33.6814 | 1 | 1 BH |
| PITG_17313 | Pi conserved hypothetical protein (  | -33.1592 | -33.7138 | 1 | 1 BH |
| PITG_17314 | Pi cysteine protease family C01A, p  | -50.0161 | 0        | 1 | 1 BH |
| PITG_17315 | Pi sporangia induced conserved hy    | -50.0161 | 0        | 1 | 1 BH |
| PITG_17328 | Pi transmembrane protein, putativ    | -33.2108 | -33.6105 | 1 | 1 BH |
| PITG_17362 | Pi conserved hypothetical protein (  | -50.0161 | 0        | 1 | 1 BH |
| PITG_17396 | Pi syntaxin, putative (1273 nt)      | -50.0161 | 0        | 1 | 1 BH |
| PITG_17407 | Pi Poly(A) polymerase beta (2210 r   | -32.8458 | -34.3406 | 1 | 1 BH |
| PITG_17410 | Pi protein kinase, putative (1201 nt | -50.0161 | 0        | 1 | 1 BH |
| PITG_17426 | Pi conserved hypothetical protein (  | -32.7937 | -34.4448 | 1 | 1 BH |
| PITG_17439 | Pi Ca2 :Cation Antiporter (CaCA) Fa  | -32.7868 | -34.4585 | 1 | 1 BH |
| PITG_17477 | Pi conserved hypothetical protein (  | -34.7809 | -30.4703 | 1 | 1 BH |
| PITG_17478 | Pi conserved hypothetical protein (  | -50.0161 | 0        | 1 | 1 BH |
| PITG_17481 | Pi conserved hypothetical protein (  | -33.2108 | -33.6105 | 1 | 1 BH |
| PITG_17485 | Pi conserved hypothetical protein (  | -32.7588 | -34.5144 | 1 | 1 BH |
| PITG_17488 | Pi conserved hypothetical protein (  | -33.2108 | -33.6105 | 1 | 1 BH |
| PITG_17490 | Pi Mitochondrial Carrier (MC) Fami   | -33.267  | -33.4981 | 1 | 1 BH |
| PITG_17492 | Pi hypothetical protein (2466 nt)    | -32.8145 | -34.4032 | 1 | 1 BH |
| PITG_17510 | Pi hypothetical protein (626 nt)     | -34.1864 | -31.6594 | 1 | 1 BH |
| PITG_17512 | Pi calcium/calmodulin-dependent p    | -32.7847 | -34.4627 | 1 | 1 BH |
| PITG_17546 | Pi glycoside hydrolase, putative (21 | -14.6528 | 0.213169 | 1 | 1 BH |
| PITG_17549 | Pi myosin-like protein (4388 nt)     | -32.5607 | -34.9107 | 1 | 1 BH |
| PITG_17550 | Pi serine protease family S09A, put  | -33.1592 | -33.7138 | 1 | 1 BH |

|            |                                       |          |          |   |      |
|------------|---------------------------------------|----------|----------|---|------|
| PITG_17556 | Pi conserved hypothetical protein (   | -32.7847 | -34.4627 | 1 | 1 BH |
| PITG_17577 | Pi protein kinase, putative (2172 nt) | -32.5607 | -34.9107 | 1 | 1 BH |
| PITG_17580 | Pi protein kinase (333 nt)            | -50.0161 | 0        | 1 | 1 BH |
| PITG_17581 | Pi conserved hypothetical protein (   | -33.8446 | -32.3428 | 1 | 1 BH |
| PITG_17583 | Pi protein kinase (1911 nt)           | -33.1528 | -33.7264 | 1 | 1 BH |
| PITG_17589 | Pi histidine acid phosphatase, puta   | -33.2108 | -33.6105 | 1 | 1 BH |
| PITG_17595 | Pi conserved hypothetical protein (   | -33.2308 | -33.5705 | 1 | 1 BH |
| PITG_17629 | Pi conserved hypothetical protein (   | -34.459  | -31.1142 | 1 | 1 BH |
| PITG_17639 | Pi phosphatidylinositol kinase (191   | -33.8446 | -32.3428 | 1 | 1 BH |
| PITG_17646 | Pi conserved hypothetical protein (   | -34.2191 | -31.5939 | 1 | 1 BH |
| PITG_17650 | Pi conserved hypothetical protein (   | -33.4509 | -33.1303 | 1 | 1 BH |
| PITG_17681 | Pi conserved hypothetical protein (   | -33.5465 | -32.9391 | 1 | 1 BH |
| PITG_17703 | Pi conserved hypothetical protein (   | -33.1753 | -33.6814 | 1 | 1 BH |
| PITG_17704 | Pi conserved hypothetical protein (   | -50.0161 | 0        | 1 | 1 BH |
| PITG_17718 | Pi conserved hypothetical protein (   | -50.0161 | 0        | 1 | 1 BH |
| PITG_17721 | Pi conserved hypothetical protein (   | -33.7227 | -32.5868 | 1 | 1 BH |
| PITG_17722 | Pi conserved hypothetical protein (   | -34.0871 | -31.858  | 1 | 1 BH |
| PITG_17744 | Pi conserved hypothetical protein (   | -34.7809 | -30.4703 | 1 | 1 BH |
| PITG_17746 | Pi conserved hypothetical protein (   | -33.1753 | -33.6814 | 1 | 1 BH |
| PITG_17771 | Pi conserved hypothetical protein (   | -33.6561 | -32.7199 | 1 | 1 BH |
| PITG_17791 | Pi ubiquitin-specific protease, puta  | -50.0161 | 0        | 1 | 1 BH |
| PITG_17805 | Pi Amino Acid/Auxin Permease (AA      | -14.6322 | 0.154188 | 1 | 1 BH |
| PITG_17806 | Pi Amino Acid/Auxin Permease (AA      | -50.0161 | 0        | 1 | 1 BH |
| PITG_17811 | Pi patatin-like phospholipase, puta   | -33.1592 | -33.7138 | 1 | 1 BH |
| PITG_17825 | Pi conserved hypothetical protein (   | -50.0161 | 0        | 1 | 1 BH |
| PITG_17826 | Pi conserved hypothetical protein (   | -34.7809 | -30.4703 | 1 | 1 BH |
| PITG_17828 | Pi putative GPI-anchored serine-th    | -33.8221 | -32.388  | 1 | 1 BH |
| PITG_17841 | Pi conserved hypothetical protein (   | -33.9938 | -32.0444 | 1 | 1 BH |
| PITG_17849 | Pi hypothetical protein (388 nt)      | -32.5599 | -34.9123 | 1 | 1 BH |
| PITG_17855 | Pi conserved hypothetical protein (   | -34.1864 | -31.6594 | 1 | 1 BH |
| PITG_17877 | Pi hypothetical protein (516 nt)      | -50.0161 | 0        | 1 | 1 BH |
| PITG_17881 | Pi conserved hypothetical protein (   | -34.7809 | -30.4703 | 1 | 1 BH |
| PITG_17893 | Pi conserved hypothetical protein (   | -32.7868 | -34.4585 | 1 | 1 BH |
| PITG_17910 | Pi conserved hypothetical protein (   | -32.5616 | -34.9088 | 1 | 1 BH |
| PITG_17925 | Pi pentafunctional AROM polypept      | -33.3283 | -33.3755 | 1 | 1 BH |
| PITG_17954 | Pi conserved hypothetical protein (   | -50.0161 | 0        | 1 | 1 BH |
| PITG_17956 | Pi croquemort mating protein M82      | -33.9073 | -32.2176 | 1 | 1 BH |
| PITG_17960 | Pi Dicarboxylate/Amino Acid:Catio     | -34.1864 | -31.6594 | 1 | 1 BH |
| PITG_17961 | Pi Dicarboxylate/Amino Acid:Catio     | -34.3408 | -31.3505 | 1 | 1 BH |
| PITG_17975 | Pi dual 3',5'-cyclic-AMP and-GMP p    | -50.0161 | 0        | 1 | 1 BH |
| PITG_17976 | Pi transmembrane protein, putativ     | -33.4552 | -33.1217 | 1 | 1 BH |
| PITG_17991 | Pi CorA Metal Ion Transporter (MII    | -33.5851 | -32.862  | 1 | 1 BH |
| PITG_17994 | Pi Cyclin B (1718 nt)                 | -32.7588 | -34.5144 | 1 | 1 BH |
| PITG_18016 | Pi flagellar protein, putative (2007  | -32.7868 | -34.4585 | 1 | 1 BH |
| PITG_18017 | Pi conserved hypothetical protein (   | -33.4509 | -33.1303 | 1 | 1 BH |
| PITG_18039 | Pi conserved hypothetical protein (   | -34.1864 | -31.6594 | 1 | 1 BH |
| PITG_18065 | Pi conserved hypothetical protein (   | -50.0161 | 0        | 1 | 1 BH |

|            |                                       |          |          |   |      |
|------------|---------------------------------------|----------|----------|---|------|
| PITG_18066 | Pi conserved hypothetical protein (   | -33.9073 | -32.2176 | 1 | 1 BH |
| PITG_18073 | Pi cell division protein kinase, puta | -32.7868 | -34.4585 | 1 | 1 BH |
| PITG_18076 | Pi phosphoglycerate mutase family     | -33.267  | -33.4981 | 1 | 1 BH |
| PITG_18092 | Pi conserved hypothetical protein (   | -33.5851 | -32.862  | 1 | 1 BH |
| PITG_18099 | Pi cysteine protease family C15, pu   | -14.7437 | 0.393807 | 1 | 1 BH |
| PITG_18100 | Pi conserved hypothetical protein (   | -14.1912 | 1.141564 | 1 | 1 BH |
| PITG_18169 | Pi conserved hypothetical protein (   | -50.0161 | 0        | 1 | 1 BH |
| PITG_18175 | Pi conserved hypothetical protein (   | -32.5385 | -34.955  | 1 | 1 BH |
| PITG_18195 | Pi conserved hypothetical protein (   | -50.0161 | 0        | 1 | 1 BH |
| PITG_18201 | Pi avirulence-associated protein 3.   | -33.7227 | -32.5868 | 1 | 1 BH |
| PITG_18206 | Pi conserved hypothetical protein (   | -33.3283 | -33.3755 | 1 | 1 BH |
| PITG_18276 | Pi conserved hypothetical protein (   | -32.8145 | -34.4032 | 1 | 1 BH |
| PITG_18289 | Pi ATP-binding Cassette (ABC) Sup     | -33.9073 | -32.2176 | 1 | 1 BH |
| PITG_18334 | Pi alcohol dehydrogenase, putative    | -50.0161 | 0        | 1 | 1 BH |
| PITG_18335 | Pi glycoside hydrolase, putative (1   | -50.0161 | 0        | 1 | 1 BH |
| PITG_18336 | Pi glycoside hydrolase, putative (1   | -34.459  | -31.1142 | 1 | 1 BH |
| PITG_18356 | Pi beta-glucan synthesis-associated   | -33.9938 | -32.0444 | 1 | 1 BH |
| PITG_18379 | Pi conserved hypothetical protein (   | -34.3408 | -31.3505 | 1 | 1 BH |
| PITG_18381 | Pi conserved hypothetical protein (   | -33.8889 | -32.2543 | 1 | 1 BH |
| PITG_18392 | Pi T-complex protein 1 subunit bet    | -13.1583 | 0.854523 | 1 | 1 BH |
| PITG_18396 | Pi conserved hypothetical protein (   | -14.289  | -0.5156  | 1 | 1 BH |
| PITG_18397 | Pi conserved hypothetical protein (   | -32.5631 | -34.9059 | 1 | 1 BH |
| PITG_18418 | Pi conserved hypothetical protein (   | -34.459  | -31.1142 | 1 | 1 BH |
| PITG_18420 | Pi protein kinase, putative (1415 nt) | -13.4176 | -0.40562 | 1 | 1 BH |
| PITG_18423 | Pi conserved hypothetical protein (   | -33.267  | -33.4981 | 1 | 1 BH |
| PITG_18445 | Pi hypothetical protein (1604 nt)     | -50.0161 | 0        | 1 | 1 BH |
| PITG_18449 | Pi conserved hypothetical protein (   | -34.7809 | -30.4703 | 1 | 1 BH |
| PITG_18482 | Pi polysaccharide lyase, putative (1  | -33.267  | -33.4981 | 1 | 1 BH |
| PITG_18489 | Pi conserved hypothetical protein (   | -33.7227 | -32.5868 | 1 | 1 BH |
| PITG_18505 | Pi conserved hypothetical protein (   | -50.0161 | 0        | 1 | 1 BH |
| PITG_18545 | Pi tetrahydrofolate dehydrogenase     | -33.4706 | -33.0909 | 1 | 1 BH |
| PITG_18583 | Pi nonribosomal peptide synthetas     | -33.9938 | -32.0444 | 1 | 1 BH |
| PITG_18603 | Pi conserved hypothetical protein (   | -33.6188 | -32.7945 | 1 | 1 BH |
| PITG_18614 | Pi conserved hypothetical protein (   | -33.1242 | -33.7836 | 1 | 1 BH |
| PITG_18632 | Pi ATPase (1497 nt)                   | -32.5391 | -34.9538 | 1 | 1 BH |
| PITG_18678 | Pi transmembrane protein, putativ     | -50.0161 | 0        | 1 | 1 BH |
| PITG_18680 | Pi cleavage induced conserved hyp     | -50.0161 | 0        | 1 | 1 BH |
| PITG_18706 | Pi acetyl-CoA carboxylase, putative   | -13.9451 | 0.63194  | 1 | 1 BH |
| PITG_18709 | Pi conserved hypothetical protein (   | -50.0161 | 0        | 1 | 1 BH |
| PITG_18714 | Pi intraflagellar Transport protein   | -33.7227 | -32.5868 | 1 | 1 BH |
| PITG_18717 | Pi H/ACA ribonucleoprotein compl      | -14.3107 | -0.46723 | 1 | 1 BH |
| PITG_18719 | Pi transmembrane protein, putativ     | -33.2108 | -33.6105 | 1 | 1 BH |
| PITG_18721 | Pi conserved hypothetical protein (   | -33.5302 | -32.9718 | 1 | 1 BH |
| PITG_18731 | Pi 26S proteasome non-ATPase reg      | -13.2471 | 0.277503 | 1 | 1 BH |
| PITG_18748 | Pi conserved hypothetical protein (   | -33.9938 | -32.0444 | 1 | 1 BH |
| PITG_18749 | Pi conserved hypothetical protein (   | -32.8458 | -34.3406 | 1 | 1 BH |
| PITG_18756 | Pi conserved hypothetical protein (   | -32.5616 | -34.9088 | 1 | 1 BH |



|            |                                      |          |          |   |      |
|------------|--------------------------------------|----------|----------|---|------|
| PITG_18775 | Pi conserved hypothetical protein (  | -10.1663 | -0.06333 | 1 | 1 BH |
| PITG_18801 | Pi conserved hypothetical protein (  | -50.0161 | 0        | 1 | 1 BH |
| PITG_18894 | Pi vacuolar protein sorting-associat | -32.5385 | -34.955  | 1 | 1 BH |
| PITG_18895 | Pi conserved hypothetical protein (  | -32.7847 | -34.4627 | 1 | 1 BH |
| PITG_18913 | Pi hypothetical protein (716 nt)     | -34.0871 | -31.858  | 1 | 1 BH |
| PITG_18920 | Pi conserved hypothetical protein (  | -34.7809 | -30.4703 | 1 | 1 BH |
| PITG_18935 | Pi dihydrolipoyl dehydrogenase 1,    | -33.2108 | -33.6105 | 1 | 1 BH |
| PITG_18947 | Pi hypothetical protein (746 nt)     | -13.5979 | 1.002017 | 1 | 1 BH |
| PITG_18963 | Pi conserved hypothetical protein (  | -32.7868 | -34.4585 | 1 | 1 BH |
| PITG_18992 | Pi acyltransferase family (1344 nt)  | -50.0161 | 0        | 1 | 1 BH |
| PITG_19007 | Pi conserved hypothetical protein (  | -13.81   | 0.38848  | 1 | 1 BH |
| PITG_19040 | Pi conserved hypothetical protein (  | -50.0161 | 0        | 1 | 1 BH |
| PITG_19047 | Pi hypothetical protein (1680 nt)    | -32.8458 | -34.3406 | 1 | 1 BH |
| PITG_19078 | Pi conserved hypothetical protein (  | -32.7604 | -34.5114 | 1 | 1 BH |
| PITG_19087 | Pi hypothetical protein (419 nt)     | -33.9872 | -32.0576 | 1 | 1 BH |
| PITG_19095 | Pi conserved hypothetical protein (  | -32.7588 | -34.5144 | 1 | 1 BH |
| PITG_19103 | Pi conserved hypothetical protein (  | -34.459  | -31.1142 | 1 | 1 BH |
| PITG_19117 | Pi conserved hypothetical protein (  | -50.0161 | 0        | 1 | 1 BH |
| PITG_19144 | Pi conserved hypothetical protein (  | -33.9938 | -32.0444 | 1 | 1 BH |
| PITG_19154 | Pi conserved hypothetical protein (  | -34.459  | -31.1142 | 1 | 1 BH |
| PITG_19163 | Pi ATP-dependent RNA helicase, pu    | -33.2108 | -33.6105 | 1 | 1 BH |
| PITG_19179 | Pi mitochondrial import receptor s   | -14.2576 | -0.59231 | 1 | 1 BH |
| PITG_19199 | Pi arginine N-methyltransferase, pu  | -14.4042 | -0.29399 | 1 | 1 BH |
| PITG_19205 | Pi conserved hypothetical protein (  | -33.6527 | -32.7266 | 1 | 1 BH |
| PITG_19219 | Pi conserved hypothetical protein (  | -33.6527 | -32.7266 | 1 | 1 BH |
| PITG_19223 | Pi conserved hypothetical protein (  | -33.1592 | -33.7138 | 1 | 1 BH |
| PITG_19249 | Pi conserved hypothetical protein (  | -33.9073 | -32.2176 | 1 | 1 BH |
| PITG_19293 | Pi hypothetical protein (339 nt)     | -33.6188 | -32.7945 | 1 | 1 BH |
| PITG_19294 | Pi protein kinase (900 nt)           | -50.0161 | 0        | 1 | 1 BH |
| PITG_19302 | Pi secreted RxLR effector peptide,   | -50.0161 | 0        | 1 | 1 BH |
| PITG_19363 | Pi conserved hypothetical protein (  | -33.9938 | -32.0444 | 1 | 1 BH |
| PITG_19366 | Pi polysaccharide lyase, putative (1 | -32.7604 | -34.5114 | 1 | 1 BH |
| PITG_19421 | Pi hypothetical protein (264 nt)     | -32.5616 | -34.9088 | 1 | 1 BH |
| PITG_19432 | Pi Amino Acid/Auxin Permease (AA     | -33.1528 | -33.7264 | 1 | 1 BH |
| PITG_19451 | Pi cleavage induced conserved hyp    | -50.0161 | 0        | 1 | 1 BH |
| PITG_19461 | Pi conserved hypothetical protein (  | -32.7588 | -34.5144 | 1 | 1 BH |
| PITG_19473 | Pi conserved hypothetical protein (  | -33.6527 | -32.7266 | 1 | 1 BH |
| PITG_19514 | Pi conserved hypothetical protein (  | -32.5616 | -34.9088 | 1 | 1 BH |
| PITG_19531 | Pi 50S ribosomal protein L25, puta   | -13.9067 | 0.58188  | 1 | 1 BH |
| PITG_19533 | Pi cleavage and polyadenylation sp   | -33.267  | -33.4981 | 1 | 1 BH |
| PITG_19547 | Pi phosphatidylserine decarboxylas   | -33.9073 | -32.2176 | 1 | 1 BH |
| PITG_19602 | Pi putative GPI-anchored serine-th   | -34.3408 | -31.3505 | 1 | 1 BH |
| PITG_19604 | Pi elicitin-like protein (2043 nt)   | -33.9073 | -32.2176 | 1 | 1 BH |
| PITG_19609 | Pi dynein-like protein (1863 nt)     | -33.4509 | -33.1303 | 1 | 1 BH |
| PITG_19622 | Pi conserved hypothetical protein (  | -32.5631 | -34.9059 | 1 | 1 BH |
| PITG_19640 | Pi transmembrane protein, putativ    | -33.1592 | -33.7138 | 1 | 1 BH |
| PITG_19641 | Pi conserved hypothetical protein (  | -33.9938 | -32.0444 | 1 | 1 BH |

|            |                                      |          |          |   |      |
|------------|--------------------------------------|----------|----------|---|------|
| PITG_19643 | Pi conserved hypothetical protein (  | -33.1528 | -33.7264 | 1 | 1 BH |
| PITG_19648 | Pi conserved hypothetical protein (  | -34.7809 | -30.4703 | 1 | 1 BH |
| PITG_19676 | Pi conserved hypothetical protein (  | -33.1528 | -33.7264 | 1 | 1 BH |
| PITG_19692 | Pi conserved hypothetical protein (  | -33.1753 | -33.6814 | 1 | 1 BH |
| PITG_19710 | Pi conserved hypothetical protein (  | -33.3955 | -33.241  | 1 | 1 BH |
| PITG_19736 | Pi alcohol dehydrogenase, putative   | -33.2308 | -33.5705 | 1 | 1 BH |
| PITG_19741 | Pi conserved hypothetical protein (  | -12.9301 | 0.420255 | 1 | 1 BH |
| PITG_19745 | Pi conserved hypothetical protein (  | -32.7847 | -34.4627 | 1 | 1 BH |
| PITG_19763 | Pi conserved hypothetical protein (  | -50.0161 | 0        | 1 | 1 BH |
| PITG_19764 | Pi conserved hypothetical protein (  | -34.3408 | -31.3505 | 1 | 1 BH |
| PITG_19780 | Pi eukaryotic translation initiation | -14.2059 | -0.74462 | 1 | 1 BH |
| PITG_19790 | Pi patatin-like phospholipase, puta  | -32.8458 | -34.3406 | 1 | 1 BH |
| PITG_19809 | Pi conserved hypothetical protein (  | -32.8458 | -34.3406 | 1 | 1 BH |
| PITG_19814 | Pi conserved hypothetical protein (  | -11.7397 | 0.345475 | 1 | 1 BH |
| PITG_19815 | Pi conserved hypothetical protein (  | -50.0161 | 0        | 1 | 1 BH |
| PITG_19862 | Pi conserved hypothetical protein (  | -33.8221 | -32.388  | 1 | 1 BH |
| PITG_19868 | Pi tRNA-dihydrouridine synthase, p   | -33.4509 | -33.1303 | 1 | 1 BH |
| PITG_19869 | Pi serine/threonine protein kinase   | -34.1864 | -31.6594 | 1 | 1 BH |
| PITG_19879 | Pi conserved hypothetical protein (  | -33.5194 | -32.9934 | 1 | 1 BH |
| PITG_19930 | Pi conserved hypothetical protein (  | -33.9073 | -32.2176 | 1 | 1 BH |
| PITG_19967 | Pi conserved hypothetical protein (  | -50.0161 | 0        | 1 | 1 BH |
| PITG_19972 | Pi conserved hypothetical protein (  | -33.9938 | -32.0444 | 1 | 1 BH |
| PITG_19984 | Pi conserved hypothetical protein (  | -50.0161 | 0        | 1 | 1 BH |
| PITG_19995 | Pi conserved hypothetical protein (  | -33.1528 | -33.7264 | 1 | 1 BH |
| PITG_19997 | Pi transmembrane protein, putativ    | -33.7227 | -32.5868 | 1 | 1 BH |
| PITG_19999 | Pi 40S ribosomal protein S14 (80S    | -8.60656 | -0.11465 | 1 | 1 BH |
| PITG_20009 | Pi conserved hypothetical protein (  | -32.5601 | -34.9119 | 1 | 1 BH |
| PITG_20026 | Pi conserved hypothetical protein (  | -33.8446 | -32.3428 | 1 | 1 BH |
| PITG_20053 | Pi conserved hypothetical protein (  | -33.8446 | -32.3428 | 1 | 1 BH |
| PITG_20061 | Pi conserved hypothetical protein (  | -33.1592 | -33.7138 | 1 | 1 BH |
| PITG_20066 | Pi maltose O-acetyltransferase, pu   | -50.0161 | 0        | 1 | 1 BH |
| PITG_20094 | Pi hypothetical protein (2087 nt)    | -50.0161 | 0        | 1 | 1 BH |
| PITG_20103 | Pi mitogen-activated protein kinase  | -33.2108 | -33.6105 | 1 | 1 BH |
| PITG_20110 | Pi conserved hypothetical protein (  | -33.2108 | -33.6105 | 1 | 1 BH |
| PITG_20146 | Pi Drug/Metabolite Transporter (D    | -14.7833 | 0.472983 | 1 | 1 BH |
| PITG_20148 | Pi conserved hypothetical protein (  | -33.8446 | -32.3428 | 1 | 1 BH |
| PITG_20153 | Pi Voltage-gated Ion Channel (VIC)   | -33.6194 | -32.7933 | 1 | 1 BH |
| PITG_20157 | Pi Axonemal Inner Arm I1 Interme     | -34.1864 | -31.6594 | 1 | 1 BH |
| PITG_20159 | Pi Voltage-gated Ion Channel (VIC)   | -33.1528 | -33.7264 | 1 | 1 BH |
| PITG_20160 | Pi conserved hypothetical protein (  | -33.1528 | -33.7264 | 1 | 1 BH |
| PITG_20189 | Pi 60S ribosomal protein L14, puta   | -9.19097 | -0.18195 | 1 | 1 BH |
| PITG_20199 | Pi Crinkler (CRN) family protein, ps | -34.7809 | -30.4703 | 1 | 1 BH |
| PITG_20203 | Pi Hect-domain containing peotein    | -32.5616 | -34.9088 | 1 | 1 BH |
| PITG_20204 | Pi conserved hypothetical protein (  | -33.1528 | -33.7264 | 1 | 1 BH |
| PITG_20211 | Pi phosphatidylinositol N-acetylglu  | -33.267  | -33.4981 | 1 | 1 BH |
| PITG_20221 | Pi sporangia induced phosphatidyl    | -33.6194 | -32.7933 | 1 | 1 BH |
| PITG_20230 | Pi Amino Acid/Auxin Permease (AA     | -50.0161 | 0        | 1 | 1 BH |

|            |                                                              |          |          |   |   |    |
|------------|--------------------------------------------------------------|----------|----------|---|---|----|
| PITG_20239 | Pi ATP-binding Cassette (ABC) Superfamily                    | -33.1528 | -33.7264 | 1 | 1 | BH |
| PITG_20265 | Pi conserved hypothetical protein (100 aa)                   | -33.2108 | -33.6105 | 1 | 1 | BH |
| PITG_20286 | Pi conserved hypothetical protein (100 aa)                   | -33.8446 | -32.3428 | 1 | 1 | BH |
| PITG_20289 | Pi carbohydrate-binding protein, putative                    | -32.5391 | -34.9538 | 1 | 1 | BH |
| PITG_20295 | Pi conserved hypothetical protein (100 aa)                   | -33.9938 | -32.0444 | 1 | 1 | BH |
| PITG_20332 | Pi conserved hypothetical protein (100 aa)                   | -34.459  | -31.1142 | 1 | 1 | BH |
| PITG_20333 | Pi conserved hypothetical protein (100 aa)                   | -33.1528 | -33.7264 | 1 | 1 | BH |
| PITG_20344 | Pi conserved hypothetical protein (100 aa)                   | -15.2163 | 1.331587 | 1 | 1 | BH |
| PITG_20347 | Pi Drug/Metabolite Transporter (DUF1237)                     | -14.9686 | 0.841141 | 1 | 1 | BH |
| PITG_20377 | Pi tRNA pseudouridine synthase (100 aa)                      | -33.4706 | -33.0909 | 1 | 1 | BH |
| PITG_20379 | Pi conserved hypothetical protein (100 aa)                   | -33.5851 | -32.862  | 1 | 1 | BH |
| PITG_20458 | Pi conserved hypothetical protein (100 aa)                   | -34.7809 | -30.4703 | 1 | 1 | BH |
| PITG_20464 | Pi conserved hypothetical protein (100 aa)                   | -50.0161 | 0        | 1 | 1 | BH |
| PITG_20506 | Pi conserved hypothetical protein (100 aa)                   | -33.267  | -33.4981 | 1 | 1 | BH |
| PITG_20518 | Pi sporangia induced hypothetical protein (100 aa)           | -50.0161 | 0        | 1 | 1 | BH |
| PITG_20526 | Pi conserved hypothetical protein (100 aa)                   | -33.8446 | -32.3428 | 1 | 1 | BH |
| PITG_20527 | Pi DNA polymerase delta catalytic subunit (100 aa)           | -33.1592 | -33.7138 | 1 | 1 | BH |
| PITG_20548 | Pi conserved hypothetical protein (100 aa)                   | -32.5607 | -34.9107 | 1 | 1 | BH |
| PITG_20563 | Pi conserved hypothetical protein (100 aa)                   | -33.2308 | -33.5705 | 1 | 1 | BH |
| PITG_20585 | Pi AhpC/TSA family Redoxin, putative                         | -13.6986 | 0.152513 | 1 | 1 | BH |
| PITG_20593 | Pi conserved hypothetical protein (100 aa)                   | -33.0495 | -33.9331 | 1 | 1 | BH |
| PITG_20600 | Pi protein kinase (441 nt)                                   | -34.459  | -31.1142 | 1 | 1 | BH |
| PITG_20604 | Pi conserved hypothetical protein (100 aa)                   | -33.5851 | -32.862  | 1 | 1 | BH |
| PITG_20617 | Pi conserved hypothetical protein (100 aa)                   | -33.5302 | -32.9718 | 1 | 1 | BH |
| PITG_20623 | Pi conserved hypothetical protein (100 aa)                   | -33.2308 | -33.5705 | 1 | 1 | BH |
| PITG_20628 | Pi conserved hypothetical protein (100 aa)                   | -34.459  | -31.1142 | 1 | 1 | BH |
| PITG_20630 | Pi Cation Diffusion Facilitator (CDF) family                 | -32.7868 | -34.4585 | 1 | 1 | BH |
| PITG_20631 | Pi conserved hypothetical protein (100 aa)                   | -34.459  | -31.1142 | 1 | 1 | BH |
| PITG_20632 | Pi hypothetical protein (912 nt)                             | -33.2308 | -33.5705 | 1 | 1 | BH |
| PITG_20672 | Pi methyltransferase domain-containing protein (100 aa)      | -32.7588 | -34.5144 | 1 | 1 | BH |
| PITG_20689 | Pi eukaryotic translation initiation factor 4E (eIF4E)       | -13.5121 | 0.848519 | 1 | 1 | BH |
| PITG_20716 | Pi conserved hypothetical protein (100 aa)                   | -50.0161 | 0        | 1 | 1 | BH |
| PITG_20739 | Pi hypothetical protein (558 nt)                             | -50.0161 | 0        | 1 | 1 | BH |
| PITG_20741 | Pi hypothetical protein (623 nt)                             | -50.0161 | 0        | 1 | 1 | BH |
| PITG_20744 | Pi conserved hypothetical protein (100 aa)                   | -33.8889 | -32.2543 | 1 | 1 | BH |
| PITG_20749 | Pi sporangia induced conserved hypothetical protein (100 aa) | -34.7809 | -30.4703 | 1 | 1 | BH |
| PITG_20770 | Pi protein kinase (747 nt)                                   | -33.1528 | -33.7264 | 1 | 1 | BH |
| PITG_20791 | Pi ADP-ribosylation factor family (ARF)                      | -33.5194 | -32.9934 | 1 | 1 | BH |
| PITG_20809 | Pi conserved hypothetical protein (100 aa)                   | -33.267  | -33.4981 | 1 | 1 | BH |
| PITG_20820 | Pi conserved hypothetical protein (100 aa)                   | -32.7847 | -34.4627 | 1 | 1 | BH |
| PITG_20831 | Pi conserved hypothetical protein (100 aa)                   | -32.8145 | -34.4032 | 1 | 1 | BH |
| PITG_20842 | Pi conserved hypothetical protein (100 aa)                   | -33.9938 | -32.0444 | 1 | 1 | BH |
| PITG_20849 | Pi alcohol dehydrogenase, putative                           | -33.3955 | -33.241  | 1 | 1 | BH |
| PITG_20854 | Pi conserved hypothetical protein (100 aa)                   | -33.4509 | -33.1303 | 1 | 1 | BH |
| PITG_20895 | Pi beta-glucan synthesis-associated protein (100 aa)         | -33.267  | -33.4981 | 1 | 1 | BH |
| PITG_20902 | Pi outer dynein arm-docking complex (100 aa)                 | -50.0161 | 0        | 1 | 1 | BH |
| PITG_20907 | Pi cobalamin synthesis protein, putative                     | -32.5616 | -34.9088 | 1 | 1 | BH |

|            |                                       |          |          |   |      |
|------------|---------------------------------------|----------|----------|---|------|
| PITG_20917 | Pi sulfatase-like protein (939 nt)    | -50.0161 | 0        | 1 | 1 BH |
| PITG_20947 | Pi conserved hypothetical protein (   | -33.6561 | -32.7199 | 1 | 1 BH |
| PITG_20985 | Pi fibronectin type III domain-conta  | -33.8446 | -32.3428 | 1 | 1 BH |
| PITG_20987 | Pi conserved hypothetical protein (   | -34.0871 | -31.858  | 1 | 1 BH |
| PITG_21013 | Pi kinesin-associated protein, puta   | -33.7227 | -32.5868 | 1 | 1 BH |
| PITG_21017 | Pi hydrocephalus-inducing protein,    | -33.8446 | -32.3428 | 1 | 1 BH |
| PITG_21022 | Pi P-type ATPase (P-ATPase) Super     | -33.4509 | -33.1303 | 1 | 1 BH |
| PITG_21027 | Pi conserved hypothetical protein (   | -12.2808 | 0.134652 | 1 | 1 BH |
| PITG_21033 | Pi conserved hypothetical protein (   | -50.0161 | 0        | 1 | 1 BH |
| PITG_21041 | Pi conserved hypothetical protein (   | -33.8446 | -32.3428 | 1 | 1 BH |
| PITG_21065 | Pi conserved hypothetical protein (   | -50.0161 | 0        | 1 | 1 BH |
| PITG_21067 | Pi conserved hypothetical protein (   | -32.8458 | -34.3406 | 1 | 1 BH |
| PITG_21071 | Pi threonyl-tRNA synthetase (2235     | -13.3416 | 0.487104 | 1 | 1 BH |
| PITG_21141 | Pi ATP-binding Cassette (ABC) supe    | -34.1864 | -31.6594 | 1 | 1 BH |
| PITG_21154 | Pi conserved hypothetical protein (   | -33.1528 | -33.7264 | 1 | 1 BH |
| PITG_21163 | Pi GAF domain-containing protein (    | -33.8446 | -32.3428 | 1 | 1 BH |
| PITG_21166 | Pi conserved hypothetical protein (   | -33.5302 | -32.9718 | 1 | 1 BH |
| PITG_21202 | Pi conserved hypothetical protein (   | -33.9872 | -32.0576 | 1 | 1 BH |
| PITG_21208 | Pi conserved hypothetical protein (   | -50.0161 | 0        | 1 | 1 BH |
| PITG_21220 | Pi Rab28 family GTPase, putative (:   | -33.5194 | -32.9934 | 1 | 1 BH |
| PITG_21238 | Pi secreted RxLR effector peptide,    | -17.1998 | 5.293305 | 1 | 1 BH |
| PITG_21258 | Pi conserved hypothetical protein (   | -50.0161 | 0        | 1 | 1 BH |
| PITG_21280 | Pi conserved hypothetical protein (   | -15.1133 | 1.124308 | 1 | 1 BH |
| PITG_21284 | Pi leukotriene A-4 hydrolase, putat   | -33.1528 | -33.7264 | 1 | 1 BH |
| PITG_21285 | Pi hypothetical protein (794 nt)      | -34.7809 | -30.4703 | 1 | 1 BH |
| PITG_21295 | Pi 12-oxophytodienoate reductase      | -33.1592 | -33.7138 | 1 | 1 BH |
| PITG_21302 | Pi conserved hypothetical protein (   | -34.3408 | -31.3505 | 1 | 1 BH |
| PITG_21309 | Pi histone deacetylase, putative (1   | -33.1321 | -33.7679 | 1 | 1 BH |
| PITG_21352 | Pi conserved hypothetical protein (   | -34.3408 | -31.3505 | 1 | 1 BH |
| PITG_21393 | Pi eukaryotic translation initiation  | -13.8134 | 1.416998 | 1 | 1 BH |
| PITG_21409 | Pi hypothetical protein (1891 nt)     | -33.267  | -33.4981 | 1 | 1 BH |
| PITG_21442 | Pi EF hand containing protein, puta   | -33.9938 | -32.0444 | 1 | 1 BH |
| PITG_21451 | Pi conserved hypothetical protein (   | -33.9938 | -32.0444 | 1 | 1 BH |
| PITG_21466 | Pi conserved hypothetical protein (   | -33.1592 | -33.7138 | 1 | 1 BH |
| PITG_21518 | Pi conserved hypothetical protein (   | -32.7937 | -34.4448 | 1 | 1 BH |
| PITG_21535 | Pi conserved hypothetical protein (   | -34.459  | -31.1142 | 1 | 1 BH |
| PITG_21536 | Pi HECT ubiquitin ligase, putative (: | -33.6188 | -32.7945 | 1 | 1 BH |
| PITG_21582 | Pi tetrahydrofolate dehydrogenase     | -14.6266 | 1.979314 | 1 | 1 BH |
| PITG_21584 | Pi hypothetical protein (2912 nt)     | -50.0161 | 0        | 1 | 1 BH |
| PITG_21590 | Pi conserved hypothetical protein (   | -34.3408 | -31.3505 | 1 | 1 BH |
| PITG_21591 | Pi conserved hypothetical protein (   | -33.6194 | -32.7933 | 1 | 1 BH |
| PITG_21593 | Pi conserved hypothetical protein (   | -32.8458 | -34.3406 | 1 | 1 BH |
| PITG_21620 | Pi fumarylacetoacetate (FAA) hydr     | -14.5832 | 0.075286 | 1 | 1 BH |
| PITG_21661 | Pi eukaryotic initiation factor 4E, p | -14.2906 | -0.51483 | 1 | 1 BH |
| PITG_21665 | Pi conserved hypothetical protein (   | -33.267  | -33.4981 | 1 | 1 BH |
| PITG_21667 | Pi conserved hypothetical protein (   | -34.7809 | -30.4703 | 1 | 1 BH |
| PITG_21724 | Pi conserved hypothetical protein (   | -33.1528 | -33.7264 | 1 | 1 BH |

|            |                                                               |          |          |   |      |
|------------|---------------------------------------------------------------|----------|----------|---|------|
| PITG_21762 | Pi conserved hypothetical protein (                           | -34.459  | -31.1142 | 1 | 1 BH |
| PITG_21763 | Pi conserved hypothetical protein (                           | -33.6527 | -32.7266 | 1 | 1 BH |
| PITG_21764 | Pi caltractin (690 nt)                                        | -33.1321 | -33.7679 | 1 | 1 BH |
| PITG_21781 | Pi conserved hypothetical protein (                           | -34.459  | -31.1142 | 1 | 1 BH |
| PITG_21794 | Pi conserved hypothetical protein (                           | -33.9872 | -32.0576 | 1 | 1 BH |
| PITG_21811 | Pi conserved hypothetical protein (                           | -50.0161 | 0        | 1 | 1 BH |
| PITG_21841 | Pi transmembrane protein, putativ                             | -32.5601 | -34.9119 | 1 | 1 BH |
| PITG_21852 | Pi diphthamide biosynthesis protei                            | -33.2108 | -33.6105 | 1 | 1 BH |
| PITG_21876 | Pi conserved hypothetical protein (                           | -50.0161 | 0        | 1 | 1 BH |
| PITG_21888 | Pi hypothetical protein (942 nt)                              | -33.9872 | -32.0576 | 1 | 1 BH |
| PITG_21889 | Pi conserved hypothetical protein (                           | -33.2108 | -33.6105 | 1 | 1 BH |
| PITG_21923 | Pi conserved hypothetical protein (                           | -50.0161 | 0        | 1 | 1 BH |
| PITG_21937 | Pi conserved hypothetical protein (                           | -50.0161 | 0        | 1 | 1 BH |
| PITG_21939 | Pi conserved hypothetical protein (                           | -32.7604 | -34.5114 | 1 | 1 BH |
| PITG_21945 | Pi NmrA-like family protein, putati                           | -50.0161 | 0        | 1 | 1 BH |
| PITG_21961 | Pi conserved hypothetical protein (                           | -33.8221 | -32.388  | 1 | 1 BH |
| PITG_22020 | Pi eukaryotic initiation factor 4E, p                         | -13.4425 | 0.6957   | 1 | 1 BH |
| PITG_22022 | Pi cysteine protease family C01A, p                           | -50.0161 | 0        | 1 | 1 BH |
| PITG_22037 | Pi hypothetical protein (988 nt)                              | -33.5465 | -32.9391 | 1 | 1 BH |
| PITG_22056 | Pi conserved hypothetical protein (                           | -32.8145 | -34.4032 | 1 | 1 BH |
| PITG_22057 | Pi conserved hypothetical protein (                           | -32.8458 | -34.3406 | 1 | 1 BH |
| PITG_22091 | Pi potential noncoding RNA (521 nt)                           | -50.0161 | 0        | 1 | 1 BH |
| PITG_22095 | Pi beta-glucosidase, putative (190C                           | -33.7227 | -32.5868 | 1 | 1 BH |
| PITG_22112 | Pi conserved hypothetical protein (                           | -33.7378 | -32.5565 | 1 | 1 BH |
| PITG_22113 | Pi conserved hypothetical protein (                           | -33.1943 | -33.6435 | 1 | 1 BH |
| PITG_22129 | Pi conserved hypothetical protein (                           | -50.0161 | 0        | 1 | 1 BH |
| PITG_22134 | Pi ATP-binding Cassette (ABC) Sup                             | -33.267  | -33.4981 | 1 | 1 BH |
| PITG_22150 | Pi conserved hypothetical protein (                           | -50.0161 | 0        | 1 | 1 BH |
| PITG_22203 | Pi conserved hypothetical protein (                           | -33.1753 | -33.6814 | 1 | 1 BH |
| PITG_22247 | Pi conserved hypothetical protein (                           | -50.0161 | 0        | 1 | 1 BH |
| PITG_22333 | Pi CTD small phosphatase-like prot                            | -33.7378 | -32.5565 | 1 | 1 BH |
| PITG_22432 | Pi Zinc (Zn <sup>2+</sup> )-Iron (Fe <sup>2+</sup> ) Permease | -34.459  | -31.1142 | 1 | 1 BH |
| PITG_22458 | Pi conserved hypothetical protein (                           | -33.4509 | -33.1303 | 1 | 1 BH |
| PITG_22491 | Pi conserved hypothetical protein (                           | -32.5607 | -34.9107 | 1 | 1 BH |
| PITG_22517 | Pi dynein heavy chain (1942 nt)                               | -34.7809 | -30.4703 | 1 | 1 BH |
| PITG_22544 | Pi conserved hypothetical protein (                           | -34.459  | -31.1142 | 1 | 1 BH |
| PITG_22629 | Pi conserved hypothetical protein (                           | -34.1864 | -31.6594 | 1 | 1 BH |
| PITG_22639 | Pi conserved hypothetical protein (                           | -33.9938 | -32.0444 | 1 | 1 BH |
| PITG_22658 | Pi Annexin (Annexin) Family (594 n                            | -10.5004 | 0.479628 | 1 | 1 BH |
| PITG_22667 | Pi conserved hypothetical protein (                           | -50.0161 | 0        | 1 | 1 BH |
| PITG_22668 | Pi NPP1-like protein (1560 nt)                                | -33.3955 | -33.241  | 1 | 1 BH |
| PITG_22672 | Pi conserved hypothetical protein (                           | -33.1242 | -33.7836 | 1 | 1 BH |
| PITG_22686 | Pi protein kinase (8109 nt)                                   | -50.0161 | 0        | 1 | 1 BH |
| PITG_22715 | Pi serine/threonine protein kinase                            | -33.1592 | -33.7138 | 1 | 1 BH |
| PITG_22795 | Pi conserved hypothetical protein (                           | -50.0161 | 0        | 1 | 1 BH |
| PITG_22817 | Pi conserved hypothetical protein (                           | -50.0161 | 0        | 1 | 1 BH |
| PITG_22831 | Pi Crinkler (CRN) family protein (14                          | -33.1242 | -33.7836 | 1 | 1 BH |

|            |                                       |          |          |   |      |
|------------|---------------------------------------|----------|----------|---|------|
| PITG_22846 | Pi elicitin-like protein (375 nt)     | -50.0161 | 0        | 1 | 1 BH |
| PITG_22861 | Pi conserved hypothetical protein (   | -50.0161 | 0        | 1 | 1 BH |
| PITG_22862 | Pi conserved hypothetical protein (   | -50.0161 | 0        | 1 | 1 BH |
| PITG_22878 | Pi zonadhesin-like protein (1343 nt   | -33.9073 | -32.2176 | 1 | 1 BH |
| PITG_22944 | Pi secreted peptide, putative, 3' pa  | -50.0161 | 0        | 1 | 1 BH |
| PITG_22946 | Pi acyl-protein thioesterase, putati  | -13.4101 | -0.40926 | 1 | 1 BH |
| PITG_22947 | Pi acyl-protein thioesterase, putati  | -34.7809 | -30.4703 | 1 | 1 BH |
| PITG_22957 | Pi conserved hypothetical protein (   | -50.0161 | 0        | 1 | 1 BH |
| PITG_22982 | Pi conserved hypothetical protein (   | -33.2108 | -33.6105 | 1 | 1 BH |
| PITG_22997 | Pi conserved hypothetical protein (   | -33.267  | -33.4981 | 1 | 1 BH |
| PITG_23034 | Pi Regulator of G protein signaling   | -50.0161 | 0        | 1 | 1 BH |
| PITG_23058 | Pi conserved hypothetical protein (   | -50.0161 | 0        | 1 | 1 BH |
| PITG_23065 | Pi general transcription factor IIH s | -32.7868 | -34.4585 | 1 | 1 BH |
| PITG_23066 | Pi phosphatidylinositol 4-phosphat    | -33.2308 | -33.5705 | 1 | 1 BH |
| PITG_23109 | Pi protein kinase, putative (1847 ni  | -32.8276 | -34.3769 | 1 | 1 BH |
| PITG_23149 | Pi conserved hypothetical protein (   | -33.3283 | -33.3755 | 1 | 1 BH |
| PITG_23170 | Pi conserved hypothetical protein (   | -33.3757 | -33.2808 | 1 | 1 BH |
| PITG_23198 | Pi Crinkler (CRN) family protein, ps  | -50.0161 | 0        | 1 | 1 BH |
| PITG_23307 | Pi hypothetical cleavage-induced tr   | -34.2191 | -31.5939 | 1 | 1 BH |
| PITG_23316 | Pi cleavage induced predicted prot    | -50.0161 | 0        | 1 | 1 BH |
| PITG_23320 | Pi hypothetical cleavage induced p    | -32.7868 | -34.4585 | 1 | 1 BH |
| PITG_00513 | Pi myb-like DNA-binding protein, p    | -32.6783 | -34.6755 | 1 | 1 BH |
| PITG_00695 | Pi importin, putative (3310 nt)       | -14.2066 | 1.176026 | 1 | 1 BH |
| PITG_01352 | Pi conserved hypothetical protein (   | -32.6308 | -34.7706 | 1 | 1 BH |
| PITG_01913 | Pi dihydroorotate dehydrogenase,      | -14.8256 | 0.556466 | 1 | 1 BH |
| PITG_02047 | Pi conserved hypothetical protein (   | -14.8702 | 0.645561 | 1 | 1 BH |
| PITG_02328 | Pi conserved hypothetical protein (   | -14.5991 | 0.103301 | 1 | 1 BH |
| PITG_04248 | Pi NPP1-like protein (760 nt)         | -32.6783 | -34.6755 | 1 | 1 BH |
| PITG_05006 | Pi U1 small nuclear ribonucleoprot    | -14.3443 | -0.40881 | 1 | 1 BH |
| PITG_05534 | Pi nucleolar protein Nop56 (1854 r    | -14.8936 | 0.692386 | 1 | 1 BH |
| PITG_06989 | Pi acyltransferase family (1139 nt)   | -32.6308 | -34.7706 | 1 | 1 BH |
| PITG_08794 | Pi hypothetical protein (739 nt)      | -32.6308 | -34.7706 | 1 | 1 BH |
| PITG_13749 | Pi 2,3-bisphosphoglycerate-depend     | -14.8942 | 0.696135 | 1 | 1 BH |
| PITG_14436 | Pi conserved hypothetical protein (   | -32.6308 | -34.7706 | 1 | 1 BH |
| PITG_16111 | Pi conserved hypothetical protein (   | -32.6308 | -34.7706 | 1 | 1 BH |
| PITG_17156 | Pi conserved hypothetical protein (   | -14.5442 | -0.00648 | 1 | 1 BH |
| PITG_20254 | Pi large conductance mechanosens      | -32.6308 | -34.7706 | 1 | 1 BH |
| PITG_21047 | Pi conserved hypothetical protein (   | -32.6308 | -34.7706 | 1 | 1 BH |
| PITG_21522 | Pi conserved hypothetical protein (   | -32.6308 | -34.7706 | 1 | 1 BH |
| PITG_21648 | Pi RXLR effector family, putative (1  | -32.6783 | -34.6755 | 1 | 1 BH |
| PITG_21894 | Pi conserved hypothetical protein (   | -32.6308 | -34.7706 | 1 | 1 BH |
| PITG_23201 | Pi conserved hypothetical protein (   | -32.6308 | -34.7706 | 1 | 1 BH |

he list of PITG genes with logFC (fold-change), p-value, false discovery rate (FDR), and normalized cou

| P18 - Rep1 | P18 - Rep2 | T3 - Rep1 | T3 - Rep2 | P18 - mean |        |
|------------|------------|-----------|-----------|------------|--------|
|            | 2          | 5         | 122       | 240        | 3.5    |
|            | 3          | 8         | 110       | 189        | 5.5    |
|            | 0          | 0         | 45        | 101        | 0      |
|            | 17         | 34        | 107       | 194        | 25.5   |
|            | 14         | 24        | 53        | 115        | 19     |
|            | 8          | 17        | 34        | 50         | 12.5   |
|            | 12         | 48        | 50        | 96         | 30     |
|            | 15         | 38        | 41        | 61         | 26.5   |
|            | 56         | 98        | 77        | 168        | 77     |
|            | 1          | 0         | 8         | 16         | 0.5    |
|            | 16         | 19        | 166       | 5          | 17.5   |
|            | 25         | 150       | 69        | 128        | 87.5   |
| 3212       | 695        | 0         | 0         | 0          | 1953.5 |
|            | 13         | 7         | 19        | 22         | 10     |
|            | 113        | 534       | 254       | 138        | 323.5  |
|            | 6          | 3         | 7         | 26         | 4.5    |
|            | 11         | 87        | 35        | 45         | 49     |
| 1269       | 755        | 0         | 0         | 0          | 1012   |
|            | 178        | 176       | 126       | 186        | 177    |
| 2413       | 486        | 0         | 0         | 0          | 1449.5 |
| 1785       | 535        | 0         | 0         | 0          | 1160   |
| 2645       | 465        | 0         | 0         | 0          | 1555   |
|            | 347        | 1519      | 0         | 0          | 933    |
|            | 12         | 15        | 8         | 22         | 13.5   |
| 1231       | 479        | 0         | 0         | 0          | 855    |
| 1105       | 572        | 0         | 0         | 0          | 838.5  |
|            | 184        | 3098      | 0         | 0          | 1641   |
|            | 1          | 27        | 8         | 21         | 14     |
| 2748       | 286        | 0         | 0         | 0          | 1517   |
| 1219       | 1768       | 2         | 0         | 0          | 1493.5 |
|            | 157        | 2669      | 0         | 0          | 1413   |
|            | 177        | 241       | 89        | 131        | 209    |
|            | 6          | 63        | 14        | 37         | 34.5   |
|            | 569        | 584       | 0         | 0          | 576.5  |
| 6190       | 85         | 0         | 0         | 0          | 3137.5 |
|            | 600        | 1199      | 1         | 0          | 899.5  |
|            | 5          | 38        | 8         | 20         | 21.5   |
|            | 659        | 488       | 0         | 0          | 573.5  |
|            | 85         | 627       | 147       | 128        | 356    |
|            | 41         | 111       | 33        | 26         | 76     |
| 1069       | 288        | 0         | 0         | 0          | 678.5  |
|            | 149        | 1758      | 0         | 0          | 953.5  |
|            | 173        | 1296      | 0         | 0          | 734.5  |
|            | 6          | 44        | 8         | 24         | 25     |
|            | 197        | 129       | 75        | 130        | 163    |

|      |      |     |     |       |
|------|------|-----|-----|-------|
| 51   | 358  | 82  | 67  | 204.5 |
| 74   | 528  | 103 | 122 | 301   |
| 644  | 427  | 0   | 0   | 535.5 |
| 6    | 13   | 4   | 11  | 9.5   |
| 214  | 1118 | 0   | 0   | 666   |
| 221  | 1032 | 0   | 0   | 626.5 |
| 382  | 405  | 0   | 0   | 393.5 |
| 490  | 455  | 0   | 0   | 472.5 |
| 41   | 477  | 88  | 129 | 259   |
| 990  | 210  | 0   | 0   | 600   |
| 274  | 467  | 0   | 0   | 370.5 |
| 2    | 0    | 48  | 0   | 1     |
| 1075 | 195  | 0   | 0   | 635   |
| 0    | 0    | 50  | 0   | 0     |
| 2    | 0    | 45  | 0   | 1     |
| 1208 | 170  | 0   | 0   | 689   |
| 1    | 15   | 4   | 6   | 8     |
| 358  | 351  | 0   | 0   | 354.5 |
| 1053 | 115  | 0   | 0   | 584   |
| 2    | 0    | 38  | 0   | 1     |
| 591  | 240  | 0   | 0   | 415.5 |
| 653  | 223  | 0   | 0   | 438   |
| 81   | 1889 | 0   | 0   | 985   |
| 4    | 9    | 75  | 0   | 6.5   |
| 490  | 248  | 0   | 0   | 369   |
| 238  | 189  | 95  | 61  | 213.5 |
| 1845 | 52   | 0   | 0   | 948.5 |
| 268  | 353  | 0   | 0   | 310.5 |
| 263  | 370  | 0   | 0   | 316.5 |
| 307  | 323  | 0   | 0   | 315   |
| 212  | 435  | 0   | 0   | 323.5 |
| 136  | 725  | 0   | 0   | 430.5 |
| 195  | 465  | 0   | 0   | 330   |
| 459  | 829  | 309 | 65  | 644   |
| 70   | 1757 | 0   | 0   | 913.5 |
| 82   | 1447 | 0   | 0   | 764.5 |
| 242  | 357  | 0   | 0   | 299.5 |
| 7    | 3    | 72  | 0   | 5     |
| 2    | 0    | 26  | 0   | 1     |
| 165  | 509  | 0   | 0   | 337   |
| 0    | 0    | 27  | 0   | 0     |
| 210  | 371  | 0   | 0   | 290.5 |
| 567  | 178  | 0   | 0   | 372.5 |
| 0    | 0    | 25  | 0   | 0     |
| 199  | 384  | 0   | 0   | 291.5 |
| 0    | 5    | 23  | 0   | 2.5   |
| 656  | 101  | 0   | 0   | 378.5 |



|     |      |     |    |       |
|-----|------|-----|----|-------|
| 769 | 1375 | 3   | 0  | 1072  |
| 8   | 0    | 139 | 0  | 4     |
| 410 | 526  | 1   | 0  | 468   |
| 78  | 1039 | 0   | 0  | 558.5 |
| 0   | 0    | 20  | 0  | 0     |
| 305 | 236  | 0   | 0  | 270.5 |
| 1   | 13   | 46  | 0  | 7     |
| 47  | 96   | 12  | 27 | 71.5  |
| 399 | 1020 | 2   | 0  | 709.5 |
| 482 | 108  | 0   | 0  | 295   |
| 583 | 135  | 0   | 0  | 359   |
| 619 | 85   | 0   | 0  | 352   |
| 225 | 148  | 67  | 52 | 186.5 |
| 638 | 82   | 0   | 0  | 360   |
| 10  | 8    | 101 | 0  | 9     |
| 218 | 850  | 1   | 0  | 534   |
| 196 | 288  | 63  | 47 | 242   |
| 0   | 2    | 17  | 0  | 1     |
| 42  | 1126 | 0   | 0  | 584   |
| 246 | 468  | 85  | 60 | 357   |
| 59  | 746  | 0   | 0  | 402.5 |
| 70  | 951  | 0   | 0  | 510.5 |
| 382 | 114  | 0   | 0  | 248   |
| 919 | 171  | 1   | 0  | 545   |
| 422 | 156  | 0   | 0  | 289   |
| 290 | 554  | 1   | 0  | 422   |
| 12  | 29   | 2   | 14 | 20.5  |
| 49  | 851  | 0   | 0  | 450   |
| 180 | 300  | 0   | 0  | 240   |
| 432 | 97   | 0   | 0  | 264.5 |
| 565 | 1144 | 3   | 0  | 854.5 |
| 370 | 111  | 0   | 0  | 240.5 |
| 6   | 3    | 35  | 0  | 4.5   |
| 53  | 727  | 0   | 0  | 390   |
| 92  | 595  | 0   | 0  | 343.5 |
| 7   | 4    | 54  | 0  | 5.5   |
| 137 | 368  | 0   | 0  | 252.5 |
| 10  | 102  | 9   | 16 | 56    |
| 7   | 3    | 31  | 0  | 5     |
| 76  | 702  | 0   | 0  | 389   |
| 121 | 405  | 0   | 0  | 263   |
| 1   | 0    | 13  | 0  | 0.5   |
| 168 | 195  | 0   | 0  | 181.5 |
| 60  | 574  | 0   | 0  | 317   |
| 136 | 344  | 0   | 0  | 240   |
| 72  | 455  | 0   | 0  | 263.5 |
| 144 | 215  | 0   | 0  | 179.5 |

|     |      |    |    |       |
|-----|------|----|----|-------|
| 75  | 422  | 0  | 0  | 248.5 |
| 61  | 529  | 0  | 0  | 295   |
| 46  | 693  | 0  | 0  | 369.5 |
| 102 | 441  | 0  | 0  | 271.5 |
| 121 | 373  | 0  | 0  | 247   |
| 102 | 671  | 74 | 59 | 386.5 |
| 110 | 267  | 0  | 0  | 188.5 |
| 120 | 241  | 0  | 0  | 180.5 |
| 120 | 242  | 0  | 0  | 181   |
| 122 | 359  | 0  | 0  | 240.5 |
| 312 | 153  | 0  | 0  | 232.5 |
| 79  | 602  | 0  | 0  | 340.5 |
| 40  | 19   | 4  | 21 | 29.5  |
| 63  | 485  | 0  | 0  | 274   |
| 14  | 1631 | 0  | 0  | 822.5 |
| 69  | 428  | 0  | 0  | 248.5 |
| 173 | 246  | 0  | 0  | 209.5 |
| 80  | 367  | 0  | 0  | 223.5 |
| 449 | 236  | 1  | 0  | 342.5 |
| 0   | 0    | 12 | 0  | 0     |
| 190 | 223  | 0  | 0  | 206.5 |
| 281 | 104  | 0  | 0  | 192.5 |
| 72  | 603  | 0  | 0  | 337.5 |
| 105 | 256  | 0  | 0  | 180.5 |
| 30  | 136  | 17 | 13 | 83    |
| 318 | 87   | 0  | 0  | 202.5 |
| 0   | 0    | 11 | 0  | 0     |
| 254 | 1796 | 3  | 0  | 1025  |
| 50  | 529  | 0  | 0  | 289.5 |
| 54  | 489  | 0  | 0  | 271.5 |
| 138 | 188  | 0  | 0  | 163   |
| 98  | 409  | 0  | 0  | 253.5 |
| 196 | 135  | 0  | 0  | 165.5 |
| 140 | 184  | 0  | 0  | 162   |
| 88  | 284  | 0  | 0  | 186   |
| 152 | 171  | 0  | 0  | 161.5 |
| 80  | 487  | 51 | 39 | 283.5 |
| 104 | 241  | 0  | 0  | 172.5 |
| 107 | 237  | 0  | 0  | 172   |
| 161 | 162  | 0  | 0  | 161.5 |
| 21  | 1034 | 0  | 0  | 527.5 |
| 516 | 40   | 0  | 0  | 278   |
| 51  | 498  | 0  | 0  | 274.5 |
| 59  | 432  | 0  | 0  | 245.5 |
| 160 | 224  | 0  | 0  | 192   |
| 288 | 84   | 0  | 0  | 186   |
| 0   | 0    | 10 | 0  | 0     |

|      |      |     |     |       |
|------|------|-----|-----|-------|
| 0    | 0    | 10  | 0   | 0     |
| 142  | 172  | 0   | 0   | 157   |
| 117  | 4    | 449 | 2   | 60.5  |
| 144  | 189  | 14  | 57  | 166.5 |
| 60   | 396  | 0   | 0   | 228   |
| 239  | 100  | 0   | 0   | 169.5 |
| 26   | 826  | 0   | 0   | 426   |
| 140  | 255  | 0   | 0   | 197.5 |
| 242  | 882  | 2   | 0   | 562   |
| 99   | 354  | 0   | 0   | 226.5 |
| 308  | 687  | 2   | 0   | 497.5 |
| 260  | 307  | 1   | 0   | 283.5 |
| 5    | 0    | 21  | 0   | 2.5   |
| 58   | 408  | 0   | 0   | 233   |
| 338  | 297  | 1   | 0   | 317.5 |
| 0    | 3    | 9   | 0   | 1.5   |
| 2    | 0    | 9   | 0   | 1     |
| 103  | 324  | 0   | 0   | 213.5 |
| 1    | 0    | 9   | 0   | 0.5   |
| 1    | 0    | 9   | 0   | 0.5   |
| 76   | 297  | 0   | 0   | 186.5 |
| 75   | 291  | 0   | 0   | 183   |
| 1067 | 1107 | 167 | 228 | 1087  |
| 88   | 250  | 0   | 0   | 169   |
| 104  | 207  | 0   | 0   | 155.5 |
| 63   | 353  | 0   | 0   | 208   |
| 216  | 103  | 0   | 0   | 159.5 |
| 0    | 0    | 9   | 0   | 0     |
| 138  | 161  | 0   | 0   | 149.5 |
| 128  | 168  | 0   | 0   | 148   |
| 19   | 912  | 0   | 0   | 465.5 |
| 150  | 141  | 0   | 0   | 145.5 |
| 41   | 488  | 0   | 0   | 264.5 |
| 83   | 252  | 0   | 0   | 167.5 |
| 141  | 492  | 1   | 0   | 316.5 |
| 56   | 359  | 0   | 0   | 207.5 |
| 57   | 342  | 0   | 0   | 199.5 |
| 61   | 329  | 0   | 0   | 195   |
| 867  | 370  | 3   | 0   | 618.5 |
| 336  | 516  | 2   | 0   | 426   |
| 263  | 654  | 2   | 0   | 458.5 |
| 50   | 380  | 0   | 0   | 215   |
| 18   | 813  | 0   | 0   | 415.5 |
| 105  | 629  | 1   | 0   | 367   |
| 46   | 403  | 0   | 0   | 224.5 |
| 157  | 122  | 0   | 0   | 139.5 |
| 112  | 169  | 0   | 0   | 140.5 |

|      |      |     |   |        |
|------|------|-----|---|--------|
| 73   | 250  | 0   | 0 | 161.5  |
| 37   | 467  | 0   | 0 | 252    |
| 79   | 222  | 0   | 0 | 150.5  |
| 12   | 0    | 31  | 0 | 6      |
| 4    | 47   | 4   | 6 | 25.5   |
| 187  | 96   | 0   | 0 | 141.5  |
| 2207 | 1830 | 11  | 0 | 2018.5 |
| 53   | 327  | 0   | 0 | 190    |
| 184  | 310  | 1   | 0 | 247    |
| 41   | 394  | 0   | 0 | 217.5  |
| 2    | 2    | 7   | 0 | 2      |
| 163  | 99   | 0   | 0 | 131    |
| 78   | 205  | 0   | 0 | 141.5  |
| 99   | 168  | 0   | 0 | 133.5  |
| 85   | 190  | 0   | 0 | 137.5  |
| 79   | 204  | 0   | 0 | 141.5  |
| 86   | 190  | 0   | 0 | 138    |
| 0    | 4    | 7   | 0 | 2      |
| 29   | 24   | 4   | 8 | 26.5   |
| 176  | 89   | 0   | 0 | 132.5  |
| 72   | 221  | 0   | 0 | 146.5  |
| 0    | 1    | 7   | 0 | 0.5    |
| 156  | 99   | 0   | 0 | 127.5  |
| 26   | 523  | 0   | 0 | 274.5  |
| 195  | 282  | 1   | 0 | 238.5  |
| 81   | 189  | 0   | 0 | 135    |
| 128  | 120  | 0   | 0 | 124    |
| 34   | 0    | 136 | 0 | 17     |
| 100  | 153  | 0   | 0 | 126.5  |
| 73   | 207  | 0   | 0 | 140    |
| 124  | 124  | 0   | 0 | 124    |
| 162  | 833  | 2   | 0 | 497.5  |
| 163  | 318  | 1   | 0 | 240.5  |
| 33   | 4    | 98  | 0 | 18.5   |
| 79   | 184  | 0   | 0 | 131.5  |
| 87   | 173  | 0   | 0 | 130    |
| 96   | 154  | 0   | 0 | 125    |
| 71   | 200  | 0   | 0 | 135.5  |
| 44   | 319  | 0   | 0 | 181.5  |
| 21   | 528  | 0   | 0 | 274.5  |
| 263  | 17   | 0   | 0 | 140    |
| 161  | 84   | 0   | 0 | 122.5  |
| 180  | 71   | 0   | 0 | 125.5  |
| 62   | 224  | 0   | 0 | 143    |
| 81   | 169  | 0   | 0 | 125    |
| 53   | 1528 | 2   | 0 | 790.5  |
| 227  | 22   | 0   | 0 | 124.5  |

|     |     |     |     |       |
|-----|-----|-----|-----|-------|
| 131 | 101 | 0   | 0   | 116   |
| 66  | 202 | 0   | 0   | 134   |
| 92  | 154 | 0   | 0   | 123   |
| 69  | 203 | 0   | 0   | 136   |
| 0   | 3   | 6   | 0   | 1.5   |
| 4   | 0   | 12  | 0   | 2     |
| 32  | 386 | 0   | 0   | 209   |
| 79  | 574 | 1   | 0   | 326.5 |
| 97  | 141 | 0   | 0   | 119   |
| 64  | 207 | 0   | 0   | 135.5 |
| 29  | 394 | 0   | 0   | 211.5 |
| 251 | 39  | 0   | 0   | 145   |
| 25  | 450 | 0   | 0   | 237.5 |
| 11  | 694 | 0   | 0   | 352.5 |
| 55  | 235 | 0   | 0   | 145   |
| 111 | 118 | 0   | 0   | 114.5 |
| 14  | 2   | 30  | 0   | 8     |
| 150 | 81  | 0   | 0   | 115.5 |
| 129 | 101 | 0   | 0   | 115   |
| 9   | 0   | 20  | 0   | 4.5   |
| 76  | 175 | 0   | 0   | 125.5 |
| 39  | 312 | 0   | 0   | 175.5 |
| 133 | 49  | 0   | 0   | 91    |
| 58  | 228 | 0   | 0   | 143   |
| 43  | 282 | 0   | 0   | 162.5 |
| 87  | 146 | 0   | 0   | 116.5 |
| 172 | 67  | 0   | 0   | 119.5 |
| 889 | 812 | 139 | 105 | 850.5 |
| 160 | 36  | 0   | 0   | 98    |
| 61  | 207 | 0   | 0   | 134   |
| 39  | 306 | 0   | 0   | 172.5 |
| 18  | 503 | 0   | 0   | 260.5 |
| 107 | 115 | 0   | 0   | 111   |
| 117 | 57  | 0   | 0   | 87    |
| 131 | 693 | 2   | 0   | 412   |
| 28  | 381 | 0   | 0   | 204.5 |
| 78  | 160 | 0   | 0   | 119   |
| 10  | 661 | 0   | 0   | 335.5 |
| 39  | 295 | 0   | 0   | 167   |
| 40  | 297 | 0   | 0   | 168.5 |
| 25  | 262 | 0   | 0   | 143.5 |
| 25  | 259 | 0   | 0   | 142   |
| 57  | 126 | 0   | 0   | 91.5  |
| 42  | 170 | 0   | 0   | 106   |
| 0   | 0   | 0   | 3   | 0     |
| 65  | 189 | 0   | 0   | 127   |
| 84  | 143 | 0   | 0   | 113.5 |

|     |     |    |    |       |
|-----|-----|----|----|-------|
| 121 | 54  | 0  | 0  | 87.5  |
| 163 | 65  | 0  | 0  | 114   |
| 32  | 216 | 0  | 0  | 124   |
| 62  | 194 | 0  | 0  | 128   |
| 67  | 105 | 0  | 0  | 86    |
| 100 | 67  | 0  | 0  | 83.5  |
| 108 | 61  | 0  | 0  | 84.5  |
| 25  | 251 | 0  | 0  | 138   |
| 127 | 46  | 0  | 0  | 86.5  |
| 8   | 464 | 0  | 0  | 236   |
| 83  | 83  | 0  | 0  | 83    |
| 130 | 85  | 0  | 0  | 107.5 |
| 19  | 453 | 0  | 0  | 236   |
| 220 | 39  | 0  | 0  | 129.5 |
| 72  | 164 | 0  | 0  | 118   |
| 66  | 178 | 0  | 0  | 122   |
| 80  | 148 | 0  | 0  | 114   |
| 65  | 175 | 0  | 0  | 120   |
| 70  | 164 | 0  | 0  | 117   |
| 20  | 277 | 0  | 0  | 148.5 |
| 55  | 213 | 0  | 0  | 134   |
| 111 | 357 | 1  | 0  | 234   |
| 72  | 91  | 0  | 0  | 81.5  |
| 13  | 359 | 0  | 0  | 186   |
| 15  | 335 | 0  | 0  | 175   |
| 150 | 33  | 0  | 0  | 91.5  |
| 10  | 614 | 0  | 0  | 312   |
| 35  | 182 | 0  | 0  | 108.5 |
| 238 | 12  | 0  | 0  | 125   |
| 102 | 62  | 0  | 0  | 82    |
| 63  | 116 | 3  | 22 | 89.5  |
| 83  | 142 | 0  | 0  | 112.5 |
| 34  | 185 | 0  | 0  | 109.5 |
| 54  | 120 | 0  | 0  | 87    |
| 123 | 114 | 10 | 24 | 118.5 |
| 112 | 345 | 23 | 25 | 228.5 |
| 26  | 369 | 0  | 0  | 197.5 |
| 118 | 91  | 0  | 0  | 104.5 |
| 57  | 192 | 0  | 0  | 124.5 |
| 87  | 132 | 0  | 0  | 109.5 |
| 169 | 25  | 0  | 0  | 97    |
| 100 | 112 | 0  | 0  | 106   |
| 39  | 165 | 0  | 0  | 102   |
| 77  | 85  | 0  | 0  | 81    |
| 51  | 136 | 0  | 0  | 93.5  |
| 48  | 136 | 0  | 0  | 92    |
| 378 | 82  | 1  | 0  | 230   |

|     |      |     |    |       |
|-----|------|-----|----|-------|
| 2   | 25   | 15  | 0  | 13.5  |
| 35  | 295  | 0   | 0  | 165   |
| 26  | 225  | 0   | 0  | 125.5 |
| 17  | 296  | 0   | 0  | 156.5 |
| 15  | 0    | 26  | 0  | 7.5   |
| 63  | 101  | 0   | 0  | 82    |
| 65  | 102  | 0   | 0  | 83.5  |
| 46  | 142  | 0   | 0  | 94    |
| 43  | 243  | 0   | 0  | 143   |
| 93  | 398  | 1   | 0  | 245.5 |
| 96  | 391  | 1   | 0  | 243.5 |
| 34  | 300  | 0   | 0  | 167   |
| 8   | 23   | 18  | 0  | 15.5  |
| 28  | 207  | 0   | 0  | 117.5 |
| 0   | 5    | 5   | 0  | 2.5   |
| 54  | 200  | 0   | 0  | 127   |
| 38  | 265  | 0   | 0  | 151.5 |
| 79  | 77   | 0   | 0  | 78    |
| 78  | 143  | 0   | 0  | 110.5 |
| 76  | 146  | 0   | 0  | 111   |
| 14  | 322  | 0   | 0  | 168   |
| 123 | 41   | 0   | 0  | 82    |
| 163 | 55   | 0   | 0  | 109   |
| 145 | 254  | 1   | 0  | 199.5 |
| 35  | 286  | 0   | 0  | 160.5 |
| 79  | 140  | 0   | 0  | 109.5 |
| 89  | 65   | 0   | 0  | 77    |
| 5   | 485  | 0   | 0  | 245   |
| 30  | 317  | 0   | 0  | 173.5 |
| 43  | 1270 | 2   | 0  | 656.5 |
| 192 | 16   | 0   | 0  | 104   |
| 197 | 183  | 1   | 0  | 190   |
| 127 | 1185 | 3   | 0  | 656   |
| 188 | 42   | 0   | 0  | 115   |
| 91  | 63   | 0   | 0  | 77    |
| 29  | 201  | 0   | 0  | 115   |
| 23  | 233  | 0   | 0  | 128   |
| 55  | 117  | 0   | 0  | 86    |
| 98  | 375  | 1   | 0  | 236.5 |
| 340 | 422  | 104 | 19 | 381   |
| 136 | 271  | 1   | 0  | 203.5 |
| 186 | 43   | 0   | 0  | 114.5 |
| 106 | 49   | 0   | 0  | 77.5  |
| 10  | 545  | 0   | 0  | 277.5 |
| 52  | 116  | 0   | 0  | 84    |
| 47  | 129  | 0   | 0  | 88    |
| 59  | 107  | 0   | 0  | 83    |

|     |     |    |    |       |
|-----|-----|----|----|-------|
| 57  | 109 | 0  | 0  | 83    |
| 119 | 40  | 0  | 0  | 79.5  |
| 14  | 301 | 0  | 0  | 157.5 |
| 102 | 102 | 0  | 0  | 102   |
| 76  | 81  | 0  | 0  | 78.5  |
| 74  | 78  | 0  | 0  | 76    |
| 53  | 198 | 0  | 0  | 125.5 |
| 113 | 90  | 0  | 0  | 101.5 |
| 135 | 555 | 2  | 0  | 345   |
| 17  | 281 | 0  | 0  | 149   |
| 73  | 141 | 0  | 0  | 107   |
| 72  | 147 | 0  | 0  | 109.5 |
| 60  | 99  | 0  | 0  | 79.5  |
| 148 | 60  | 0  | 0  | 104   |
| 10  | 355 | 0  | 0  | 182.5 |
| 388 | 304 | 43 | 49 | 346   |
| 41  | 6   | 76 | 0  | 23.5  |
| 186 | 40  | 0  | 0  | 113   |
| 42  | 140 | 0  | 0  | 91    |
| 23  | 221 | 0  | 0  | 122   |
| 35  | 767 | 1  | 0  | 401   |
| 105 | 95  | 0  | 0  | 100   |
| 47  | 206 | 0  | 0  | 126.5 |
| 6   | 422 | 0  | 0  | 214   |
| 128 | 33  | 0  | 0  | 80.5  |
| 81  | 121 | 0  | 0  | 101   |
| 81  | 124 | 0  | 0  | 102.5 |
| 67  | 87  | 0  | 0  | 77    |
| 39  | 149 | 0  | 0  | 94    |
| 0   | 783 | 0  | 0  | 391.5 |
| 35  | 267 | 0  | 0  | 151   |
| 41  | 229 | 0  | 0  | 135   |
| 107 | 89  | 0  | 0  | 98    |
| 105 | 89  | 0  | 0  | 97    |
| 18  | 63  | 11 | 2  | 40.5  |
| 15  | 285 | 0  | 0  | 150   |
| 20  | 241 | 0  | 0  | 130.5 |
| 70  | 84  | 0  | 0  | 77    |
| 67  | 83  | 0  | 0  | 75    |
| 193 | 35  | 0  | 0  | 114   |
| 16  | 273 | 0  | 0  | 144.5 |
| 112 | 304 | 1  | 0  | 208   |
| 159 | 51  | 0  | 0  | 105   |
| 0   | 0   | 5  | 0  | 0     |
| 0   | 8   | 9  | 0  | 4     |
| 2   | 568 | 0  | 0  | 285   |
| 66  | 145 | 0  | 0  | 105.5 |



|     |      |    |   |       |
|-----|------|----|---|-------|
| 132 | 65   | 0  | 0 | 98.5  |
| 49  | 117  | 0  | 0 | 83    |
| 71  | 75   | 0  | 0 | 73    |
| 29  | 178  | 0  | 0 | 103.5 |
| 60  | 92   | 0  | 0 | 76    |
| 113 | 39   | 0  | 0 | 76    |
| 47  | 200  | 0  | 0 | 123.5 |
| 166 | 43   | 0  | 0 | 104.5 |
| 24  | 196  | 0  | 0 | 110   |
| 444 | 1072 | 6  | 0 | 758   |
| 7   | 373  | 0  | 0 | 190   |
| 52  | 174  | 0  | 0 | 113   |
| 61  | 89   | 0  | 0 | 75    |
| 62  | 87   | 0  | 0 | 74.5  |
| 135 | 60   | 0  | 0 | 97.5  |
| 174 | 39   | 0  | 0 | 106.5 |
| 81  | 111  | 0  | 0 | 96    |
| 39  | 139  | 0  | 0 | 89    |
| 35  | 249  | 0  | 0 | 142   |
| 97  | 95   | 0  | 0 | 96    |
| 130 | 27   | 0  | 0 | 78.5  |
| 108 | 41   | 0  | 0 | 74.5  |
| 23  | 206  | 0  | 0 | 114.5 |
| 0   | 34   | 21 | 0 | 17    |
| 42  | 211  | 0  | 0 | 126.5 |
| 18  | 129  | 9  | 7 | 73.5  |
| 181 | 33   | 0  | 0 | 107   |
| 59  | 150  | 0  | 0 | 104.5 |
| 67  | 74   | 0  | 0 | 70.5  |
| 48  | 190  | 0  | 0 | 119   |
| 32  | 249  | 0  | 0 | 140.5 |
| 121 | 64   | 0  | 0 | 92.5  |
| 99  | 89   | 0  | 0 | 94    |
| 74  | 123  | 0  | 0 | 98.5  |
| 81  | 62   | 0  | 0 | 71.5  |
| 35  | 240  | 0  | 0 | 137.5 |
| 49  | 105  | 0  | 0 | 77    |
| 44  | 113  | 0  | 0 | 78.5  |
| 53  | 101  | 0  | 0 | 77    |
| 53  | 100  | 0  | 0 | 76.5  |
| 39  | 217  | 0  | 0 | 128   |
| 100 | 84   | 0  | 0 | 92    |
| 24  | 195  | 0  | 0 | 109.5 |
| 88  | 52   | 0  | 0 | 70    |
| 89  | 53   | 0  | 0 | 71    |
| 4   | 416  | 0  | 0 | 210   |
| 89  | 94   | 0  | 0 | 91.5  |

|     |     |   |    |       |
|-----|-----|---|----|-------|
| 1   | 9   | 8 | 0  | 5     |
| 21  | 313 | 0 | 0  | 167   |
| 95  | 43  | 0 | 0  | 69    |
| 96  | 44  | 0 | 0  | 70    |
| 122 | 28  | 0 | 0  | 75    |
| 81  | 58  | 0 | 0  | 69.5  |
| 951 | 196 | 5 | 0  | 573.5 |
| 38  | 131 | 0 | 0  | 84.5  |
| 60  | 86  | 0 | 0  | 73    |
| 22  | 195 | 0 | 0  | 108.5 |
| 101 | 78  | 0 | 0  | 89.5  |
| 72  | 64  | 0 | 0  | 68    |
| 40  | 208 | 0 | 0  | 124   |
| 13  | 254 | 0 | 0  | 133.5 |
| 21  | 195 | 0 | 0  | 108   |
| 9   | 309 | 0 | 0  | 159   |
| 25  | 275 | 0 | 0  | 150   |
| 35  | 227 | 0 | 0  | 131   |
| 67  | 126 | 0 | 0  | 96.5  |
| 67  | 126 | 0 | 0  | 96.5  |
| 9   | 292 | 0 | 0  | 150.5 |
| 76  | 61  | 0 | 0  | 68.5  |
| 28  | 167 | 0 | 0  | 97.5  |
| 53  | 158 | 0 | 0  | 105.5 |
| 6   | 343 | 0 | 0  | 174.5 |
| 6   | 342 | 0 | 0  | 174   |
| 114 | 505 | 2 | 0  | 309.5 |
| 26  | 262 | 0 | 0  | 144   |
| 26  | 163 | 0 | 0  | 94.5  |
| 86  | 51  | 0 | 0  | 68.5  |
| 67  | 71  | 0 | 0  | 69    |
| 142 | 17  | 0 | 0  | 79.5  |
| 7   | 320 | 0 | 0  | 163.5 |
| 22  | 184 | 0 | 0  | 103   |
| 85  | 48  | 0 | 0  | 66.5  |
| 87  | 48  | 0 | 0  | 67.5  |
| 137 | 19  | 0 | 0  | 78    |
| 43  | 115 | 0 | 0  | 79    |
| 41  | 112 | 0 | 0  | 76.5  |
| 28  | 254 | 0 | 0  | 141   |
| 122 | 239 | 9 | 25 | 180.5 |
| 99  | 36  | 0 | 0  | 67.5  |
| 79  | 56  | 0 | 0  | 67.5  |
| 109 | 32  | 0 | 0  | 70.5  |
| 53  | 87  | 0 | 0  | 70    |
| 53  | 85  | 0 | 0  | 69    |
| 53  | 86  | 0 | 0  | 69.5  |

|     |     |   |   |       |
|-----|-----|---|---|-------|
| 29  | 148 | 0 | 0 | 88.5  |
| 3   | 11  | 7 | 0 | 7     |
| 2   | 444 | 0 | 0 | 223   |
| 118 | 24  | 0 | 0 | 71    |
| 24  | 173 | 0 | 0 | 98.5  |
| 24  | 172 | 0 | 0 | 98    |
| 20  | 187 | 0 | 0 | 103.5 |
| 21  | 192 | 0 | 0 | 106.5 |
| 57  | 83  | 0 | 0 | 70    |
| 109 | 30  | 0 | 0 | 69.5  |
| 69  | 61  | 0 | 0 | 65    |
| 91  | 80  | 0 | 0 | 85.5  |
| 211 | 83  | 1 | 0 | 147   |
| 103 | 72  | 0 | 0 | 87.5  |
| 15  | 223 | 0 | 0 | 119   |
| 88  | 43  | 0 | 0 | 65.5  |
| 35  | 127 | 0 | 0 | 81    |
| 59  | 79  | 0 | 0 | 69    |
| 42  | 181 | 0 | 0 | 111.5 |
| 2   | 439 | 0 | 0 | 220.5 |
| 52  | 153 | 0 | 0 | 102.5 |
| 68  | 116 | 0 | 0 | 92    |
| 7   | 302 | 0 | 0 | 154.5 |
| 49  | 366 | 1 | 0 | 207.5 |
| 14  | 224 | 0 | 0 | 119   |
| 50  | 157 | 0 | 0 | 103.5 |
| 72  | 108 | 0 | 0 | 90    |
| 220 | 70  | 1 | 0 | 145   |
| 62  | 68  | 0 | 0 | 65    |
| 31  | 140 | 0 | 0 | 85.5  |
| 30  | 136 | 0 | 0 | 83    |
| 120 | 213 | 1 | 0 | 166.5 |
| 3   | 10  | 0 | 3 | 6.5   |
| 7   | 22  | 3 | 2 | 14.5  |
| 11  | 236 | 0 | 0 | 123.5 |
| 0   | 3   | 4 | 0 | 1.5   |
| 43  | 102 | 0 | 0 | 72.5  |
| 40  | 109 | 0 | 0 | 74.5  |
| 46  | 94  | 0 | 0 | 70    |
| 47  | 93  | 0 | 0 | 70    |
| 44  | 98  | 0 | 0 | 71    |
| 46  | 99  | 0 | 0 | 72.5  |
| 90  | 277 | 1 | 0 | 183.5 |
| 79  | 94  | 0 | 0 | 86.5  |
| 490 | 313 | 4 | 0 | 401.5 |
| 17  | 200 | 0 | 0 | 108.5 |
| 50  | 84  | 0 | 0 | 67    |

|     |      |   |   |       |
|-----|------|---|---|-------|
| 39  | 107  | 0 | 0 | 73    |
| 50  | 84   | 0 | 0 | 67    |
| 184 | 126  | 1 | 0 | 155   |
| 14  | 210  | 0 | 0 | 112   |
| 84  | 41   | 0 | 0 | 62.5  |
| 65  | 59   | 0 | 0 | 62    |
| 106 | 27   | 0 | 0 | 66.5  |
| 2   | 409  | 0 | 0 | 205.5 |
| 41  | 177  | 0 | 0 | 109   |
| 41  | 176  | 0 | 0 | 108.5 |
| 0   | 0    | 4 | 0 | 0     |
| 0   | 0    | 4 | 0 | 0     |
| 76  | 49   | 0 | 0 | 62.5  |
| 22  | 164  | 0 | 0 | 93    |
| 35  | 119  | 0 | 0 | 77    |
| 52  | 78   | 0 | 0 | 65    |
| 52  | 79   | 0 | 0 | 65.5  |
| 109 | 227  | 1 | 0 | 168   |
| 68  | 58   | 0 | 0 | 63    |
| 54  | 73   | 0 | 0 | 63.5  |
| 33  | 122  | 0 | 0 | 77.5  |
| 25  | 152  | 0 | 0 | 88.5  |
| 33  | 126  | 0 | 0 | 79.5  |
| 57  | 68   | 0 | 0 | 62.5  |
| 59  | 71   | 0 | 0 | 65    |
| 9   | 243  | 0 | 0 | 126   |
| 30  | 132  | 0 | 0 | 81    |
| 30  | 133  | 0 | 0 | 81.5  |
| 131 | 13   | 0 | 0 | 72    |
| 13  | 203  | 0 | 0 | 108   |
| 29  | 136  | 0 | 0 | 82.5  |
| 412 | 1772 | 9 | 0 | 1092  |
| 177 | 86   | 1 | 0 | 131.5 |
| 93  | 795  | 3 | 0 | 444   |
| 22  | 161  | 0 | 0 | 91.5  |
| 41  | 92   | 0 | 0 | 66.5  |
| 46  | 89   | 0 | 0 | 67.5  |
| 44  | 92   | 0 | 0 | 68    |
| 45  | 84   | 0 | 0 | 64.5  |
| 43  | 91   | 0 | 0 | 67    |
| 43  | 88   | 0 | 0 | 65.5  |
| 71  | 46   | 0 | 0 | 58.5  |
| 81  | 38   | 0 | 0 | 59.5  |
| 17  | 174  | 0 | 0 | 95.5  |
| 26  | 137  | 0 | 0 | 81.5  |
| 12  | 204  | 0 | 0 | 108   |
| 48  | 84   | 0 | 0 | 66    |

|     |      |    |   |       |
|-----|------|----|---|-------|
| 47  | 84   | 0  | 0 | 65.5  |
| 38  | 103  | 0  | 0 | 70.5  |
| 37  | 100  | 0  | 0 | 68.5  |
| 47  | 80   | 0  | 0 | 63.5  |
| 118 | 15   | 0  | 0 | 66.5  |
| 3   | 10   | 6  | 0 | 6.5   |
| 52  | 75   | 0  | 0 | 63.5  |
| 51  | 73   | 0  | 0 | 62    |
| 51  | 77   | 0  | 0 | 64    |
| 33  | 111  | 0  | 0 | 72    |
| 34  | 114  | 0  | 0 | 74    |
| 33  | 109  | 0  | 0 | 71    |
| 16  | 176  | 0  | 0 | 96    |
| 24  | 139  | 0  | 0 | 81.5  |
| 24  | 145  | 0  | 0 | 84.5  |
| 53  | 73   | 0  | 0 | 63    |
| 31  | 113  | 0  | 0 | 72    |
| 16  | 182  | 0  | 0 | 99    |
| 139 | 157  | 1  | 0 | 148   |
| 54  | 65   | 0  | 0 | 59.5  |
| 30  | 115  | 0  | 0 | 72.5  |
| 83  | 265  | 1  | 0 | 174   |
| 686 | 1270 | 10 | 0 | 978   |
| 6   | 266  | 0  | 0 | 136   |
| 13  | 199  | 0  | 0 | 106   |
| 15  | 179  | 0  | 0 | 97    |
| 29  | 120  | 0  | 0 | 74.5  |
| 56  | 65   | 0  | 0 | 60.5  |
| 3   | 306  | 0  | 0 | 154.5 |
| 27  | 123  | 0  | 0 | 75    |
| 153 | 137  | 1  | 0 | 145   |
| 161 | 123  | 1  | 0 | 142   |
| 77  | 38   | 0  | 0 | 57.5  |
| 14  | 183  | 0  | 0 | 98.5  |
| 57  | 57   | 0  | 0 | 57    |
| 10  | 212  | 0  | 0 | 111   |
| 20  | 150  | 0  | 0 | 85    |
| 19  | 151  | 0  | 0 | 85    |
| 91  | 24   | 0  | 0 | 57.5  |
| 13  | 183  | 0  | 0 | 98    |
| 43  | 84   | 0  | 0 | 63.5  |
| 39  | 92   | 0  | 0 | 65.5  |
| 37  | 95   | 0  | 0 | 66    |
| 19  | 158  | 0  | 0 | 88.5  |
| 24  | 132  | 0  | 0 | 78    |
| 46  | 77   | 0  | 0 | 61.5  |
| 35  | 100  | 0  | 0 | 67.5  |

|     |     |   |    |       |
|-----|-----|---|----|-------|
| 35  | 101 | 0 | 0  | 68    |
| 47  | 76  | 0 | 0  | 61.5  |
| 34  | 102 | 0 | 0  | 68    |
| 37  | 99  | 0 | 0  | 68    |
| 13  | 189 | 0 | 0  | 101   |
| 100 | 20  | 0 | 0  | 60    |
| 15  | 174 | 0 | 0  | 94.5  |
| 31  | 105 | 0 | 0  | 68    |
| 46  | 72  | 0 | 0  | 59    |
| 23  | 136 | 0 | 0  | 79.5  |
| 62  | 49  | 0 | 0  | 55.5  |
| 61  | 50  | 0 | 0  | 55.5  |
| 12  | 186 | 0 | 0  | 99    |
| 108 | 16  | 0 | 0  | 62    |
| 17  | 155 | 0 | 0  | 86    |
| 50  | 70  | 0 | 0  | 60    |
| 30  | 111 | 0 | 0  | 70.5  |
| 51  | 67  | 0 | 0  | 59    |
| 22  | 134 | 0 | 0  | 78    |
| 89  | 27  | 0 | 0  | 58    |
| 119 | 70  | 5 | 16 | 94.5  |
| 67  | 285 | 1 | 0  | 176   |
| 14  | 179 | 0 | 0  | 96.5  |
| 55  | 603 | 2 | 0  | 329   |
| 2   | 314 | 0 | 0  | 158   |
| 29  | 108 | 0 | 0  | 68.5  |
| 52  | 65  | 0 | 0  | 58.5  |
| 17  | 158 | 0 | 0  | 87.5  |
| 53  | 63  | 0 | 0  | 58    |
| 28  | 114 | 0 | 0  | 71    |
| 16  | 160 | 0 | 0  | 88    |
| 56  | 254 | 1 | 0  | 155   |
| 180 | 215 | 2 | 0  | 197.5 |
| 13  | 178 | 0 | 0  | 95.5  |
| 54  | 60  | 0 | 0  | 57    |
| 27  | 121 | 0 | 0  | 74    |
| 66  | 44  | 0 | 0  | 55    |
| 16  | 163 | 0 | 0  | 89.5  |
| 82  | 235 | 1 | 0  | 158.5 |
| 84  | 176 | 1 | 0  | 130   |
| 7   | 216 | 0 | 0  | 111.5 |
| 65  | 41  | 0 | 0  | 53    |
| 8   | 204 | 0 | 0  | 106   |
| 12  | 178 | 0 | 0  | 95    |
| 89  | 21  | 0 | 0  | 55    |
| 8   | 212 | 0 | 0  | 110   |
| 18  | 65  | 5 | 3  | 41.5  |

|     |      |     |   |       |
|-----|------|-----|---|-------|
| 36  | 89   | 0   | 0 | 62.5  |
| 38  | 79   | 0   | 0 | 58.5  |
| 37  | 84   | 0   | 0 | 60.5  |
| 39  | 77   | 0   | 0 | 58    |
| 38  | 79   | 0   | 0 | 58.5  |
| 115 | 120  | 1   | 0 | 117.5 |
| 137 | 1105 | 5   | 0 | 621   |
| 174 | 674  | 4   | 0 | 424   |
| 9   | 199  | 0   | 0 | 104   |
| 32  | 93   | 0   | 0 | 62.5  |
| 34  | 95   | 0   | 0 | 64.5  |
| 34  | 91   | 0   | 0 | 62.5  |
| 22  | 128  | 0   | 0 | 75    |
| 68  | 36   | 0   | 0 | 52    |
| 32  | 97   | 0   | 0 | 64.5  |
| 43  | 68   | 0   | 0 | 55.5  |
| 31  | 96   | 0   | 0 | 63.5  |
| 46  | 66   | 0   | 0 | 56    |
| 21  | 134  | 0   | 0 | 77.5  |
| 60  | 47   | 0   | 0 | 53.5  |
| 59  | 46   | 0   | 0 | 52.5  |
| 21  | 128  | 0   | 0 | 74.5  |
| 128 | 96   | 1   | 0 | 112   |
| 47  | 63   | 0   | 0 | 55    |
| 29  | 100  | 0   | 0 | 64.5  |
| 29  | 99   | 0   | 0 | 64    |
| 48  | 61   | 0   | 0 | 54.5  |
| 20  | 135  | 0   | 0 | 77.5  |
| 709 | 0    | 2   | 0 | 354.5 |
| 64  | 202  | 1   | 0 | 133   |
| 15  | 157  | 0   | 0 | 86    |
| 27  | 110  | 0   | 0 | 68.5  |
| 19  | 138  | 0   | 0 | 78.5  |
| 66  | 266  | 1   | 0 | 166   |
| 1   | 306  | 0   | 0 | 153.5 |
| 18  | 138  | 0   | 0 | 78    |
| 126 | 276  | 2   | 0 | 201   |
| 24  | 115  | 0   | 0 | 69.5  |
| 18  | 61   | 25  | 0 | 39.5  |
| 55  | 49   | 0   | 0 | 52    |
| 16  | 139  | 0   | 0 | 77.5  |
| 21  | 117  | 0   | 0 | 69    |
| 51  | 232  | 1   | 0 | 141.5 |
| 72  | 26   | 0   | 0 | 49    |
| 35  | 297  | 1   | 0 | 166   |
| 69  | 336  | 165 | 0 | 202.5 |
| 66  | 34   | 0   | 0 | 50    |

|     |      |    |   |       |
|-----|------|----|---|-------|
| 15  | 140  | 0  | 0 | 77.5  |
| 104 | 8    | 0  | 0 | 56    |
| 7   | 190  | 0  | 0 | 98.5  |
| 56  | 44   | 0  | 0 | 50    |
| 55  | 43   | 0  | 0 | 49    |
| 20  | 122  | 0  | 0 | 71    |
| 58  | 44   | 0  | 0 | 51    |
| 57  | 44   | 0  | 0 | 50.5  |
| 34  | 80   | 0  | 0 | 57    |
| 35  | 77   | 0  | 0 | 56    |
| 33  | 85   | 0  | 0 | 59    |
| 34  | 84   | 0  | 0 | 59    |
| 40  | 71   | 0  | 0 | 55.5  |
| 34  | 81   | 0  | 0 | 57.5  |
| 39  | 73   | 0  | 0 | 56    |
| 33  | 81   | 0  | 0 | 57    |
| 35  | 78   | 0  | 0 | 56.5  |
| 33  | 85   | 0  | 0 | 59    |
| 1   | 0    | 3  | 0 | 0.5   |
| 19  | 125  | 0  | 0 | 72    |
| 29  | 92   | 0  | 0 | 60.5  |
| 41  | 66   | 0  | 0 | 53.5  |
| 30  | 90   | 0  | 0 | 60    |
| 977 | 2159 | 18 | 0 | 1568  |
| 112 | 6    | 0  | 0 | 59    |
| 69  | 181  | 1  | 0 | 125   |
| 14  | 148  | 0  | 0 | 81    |
| 13  | 143  | 0  | 0 | 78    |
| 55  | 486  | 2  | 0 | 270.5 |
| 13  | 79   | 0  | 0 | 46    |
| 13  | 79   | 0  | 0 | 46    |
| 47  | 57   | 0  | 0 | 52    |
| 45  | 56   | 0  | 0 | 50.5  |
| 18  | 131  | 0  | 0 | 74.5  |
| 60  | 197  | 1  | 0 | 128.5 |
| 13  | 147  | 0  | 0 | 80    |
| 308 | 0    | 1  | 0 | 154   |
| 12  | 80   | 0  | 0 | 46    |
| 10  | 164  | 0  | 0 | 87    |
| 10  | 162  | 0  | 0 | 86    |
| 10  | 167  | 0  | 0 | 88.5  |
| 25  | 104  | 0  | 0 | 64.5  |
| 48  | 56   | 0  | 0 | 52    |
| 25  | 106  | 0  | 0 | 65.5  |
| 25  | 99   | 0  | 0 | 62    |
| 5   | 209  | 0  | 0 | 107   |
| 6   | 194  | 0  | 0 | 100   |



|     |     |    |   |       |
|-----|-----|----|---|-------|
| 2   | 8   | 5  | 0 | 5     |
| 12  | 82  | 0  | 0 | 47    |
| 12  | 82  | 0  | 0 | 47    |
| 7   | 100 | 0  | 0 | 53.5  |
| 49  | 52  | 0  | 0 | 50.5  |
| 16  | 128 | 0  | 0 | 72    |
| 17  | 133 | 0  | 0 | 75    |
| 16  | 127 | 0  | 0 | 71.5  |
| 167 | 48  | 1  | 0 | 107.5 |
| 12  | 148 | 0  | 0 | 80    |
| 12  | 146 | 0  | 0 | 79    |
| 22  | 94  | 34 | 0 | 58    |
| 7   | 103 | 0  | 0 | 55    |
| 7   | 104 | 0  | 0 | 55.5  |
| 22  | 105 | 0  | 0 | 63.5  |
| 0   | 168 | 0  | 0 | 84    |
| 11  | 86  | 0  | 0 | 48.5  |
| 22  | 108 | 0  | 0 | 65    |
| 22  | 113 | 0  | 0 | 67.5  |
| 51  | 49  | 0  | 0 | 50    |
| 62  | 6   | 0  | 0 | 34    |
| 39  | 266 | 1  | 0 | 152.5 |
| 6   | 102 | 0  | 0 | 54    |
| 4   | 122 | 0  | 0 | 63    |
| 178 | 303 | 3  | 0 | 240.5 |
| 53  | 46  | 0  | 0 | 49.5  |
| 85  | 339 | 2  | 0 | 212   |
| 49  | 13  | 0  | 0 | 31    |
| 24  | 47  | 0  | 0 | 35.5  |
| 21  | 56  | 0  | 0 | 38.5  |
| 21  | 54  | 0  | 0 | 37.5  |
| 26  | 45  | 0  | 0 | 35.5  |
| 24  | 46  | 0  | 0 | 35    |
| 23  | 49  | 0  | 0 | 36    |
| 22  | 54  | 0  | 0 | 38    |
| 24  | 50  | 0  | 0 | 37    |
| 21  | 52  | 0  | 0 | 36.5  |
| 21  | 54  | 0  | 0 | 37.5  |
| 21  | 57  | 0  | 0 | 39    |
| 21  | 56  | 0  | 0 | 38.5  |
| 24  | 46  | 0  | 0 | 35    |
| 25  | 45  | 0  | 0 | 35    |
| 24  | 49  | 0  | 0 | 36.5  |
| 25  | 46  | 0  | 0 | 35.5  |
| 23  | 50  | 0  | 0 | 36.5  |
| 22  | 52  | 0  | 0 | 37    |
| 23  | 52  | 0  | 0 | 37.5  |

|     |     |    |    |       |
|-----|-----|----|----|-------|
| 19  | 115 | 0  | 0  | 67    |
| 192 | 141 | 2  | 0  | 166.5 |
| 25  | 44  | 0  | 0  | 34.5  |
| 25  | 42  | 0  | 0  | 33.5  |
| 28  | 42  | 0  | 0  | 35    |
| 19  | 59  | 0  | 0  | 39    |
| 28  | 42  | 0  | 0  | 35    |
| 26  | 40  | 0  | 0  | 33    |
| 19  | 61  | 0  | 0  | 40    |
| 20  | 59  | 0  | 0  | 39.5  |
| 19  | 59  | 0  | 0  | 39    |
| 20  | 55  | 0  | 0  | 37.5  |
| 27  | 43  | 0  | 0  | 35    |
| 25  | 42  | 0  | 0  | 33.5  |
| 19  | 56  | 0  | 0  | 37.5  |
| 26  | 44  | 0  | 0  | 35    |
| 20  | 58  | 0  | 0  | 39    |
| 27  | 44  | 0  | 0  | 35.5  |
| 27  | 44  | 0  | 0  | 35.5  |
| 19  | 55  | 0  | 0  | 37    |
| 5   | 33  | 11 | 0  | 19    |
| 9   | 88  | 0  | 0  | 48.5  |
| 9   | 90  | 0  | 0  | 49.5  |
| 344 | 197 | 4  | 0  | 270.5 |
| 18  | 60  | 0  | 0  | 39    |
| 18  | 57  | 0  | 0  | 37.5  |
| 27  | 38  | 0  | 0  | 32.5  |
| 28  | 40  | 0  | 0  | 34    |
| 18  | 61  | 0  | 0  | 39.5  |
| 71  | 0   | 0  | 0  | 35.5  |
| 9   | 94  | 0  | 0  | 51.5  |
| 41  | 19  | 0  | 0  | 30    |
| 30  | 86  | 0  | 0  | 58    |
| 29  | 82  | 0  | 0  | 55.5  |
| 34  | 69  | 0  | 0  | 51.5  |
| 30  | 85  | 0  | 0  | 57.5  |
| 36  | 67  | 0  | 0  | 51.5  |
| 29  | 81  | 0  | 0  | 55    |
| 31  | 79  | 0  | 0  | 55    |
| 29  | 81  | 0  | 0  | 55    |
| 29  | 82  | 0  | 0  | 55.5  |
| 403 | 704 | 81 | 19 | 553.5 |
| 30  | 39  | 0  | 0  | 34.5  |
| 28  | 36  | 0  | 0  | 32    |
| 30  | 37  | 0  | 0  | 33.5  |
| 48  | 11  | 0  | 0  | 29.5  |
| 5   | 104 | 0  | 0  | 54.5  |

|     |     |   |   |       |
|-----|-----|---|---|-------|
| 51  | 12  | 0 | 0 | 31.5  |
| 9   | 152 | 0 | 0 | 80.5  |
| 9   | 152 | 0 | 0 | 80.5  |
| 8   | 88  | 0 | 0 | 48    |
| 8   | 88  | 0 | 0 | 48    |
| 54  | 38  | 0 | 0 | 46    |
| 65  | 28  | 0 | 0 | 46.5  |
| 38  | 63  | 0 | 0 | 50.5  |
| 41  | 60  | 0 | 0 | 50.5  |
| 30  | 34  | 0 | 0 | 32    |
| 16  | 67  | 0 | 0 | 41.5  |
| 29  | 35  | 0 | 0 | 32    |
| 16  | 64  | 0 | 0 | 40    |
| 16  | 65  | 0 | 0 | 40.5  |
| 32  | 36  | 0 | 0 | 34    |
| 5   | 110 | 0 | 0 | 57.5  |
| 31  | 33  | 0 | 0 | 32    |
| 15  | 65  | 0 | 0 | 40    |
| 15  | 66  | 0 | 0 | 40.5  |
| 31  | 34  | 0 | 0 | 32.5  |
| 15  | 69  | 0 | 0 | 42    |
| 15  | 65  | 0 | 0 | 40    |
| 12  | 144 | 0 | 0 | 78    |
| 25  | 88  | 0 | 0 | 56.5  |
| 41  | 56  | 0 | 0 | 48.5  |
| 41  | 58  | 0 | 0 | 49.5  |
| 27  | 90  | 0 | 0 | 58.5  |
| 26  | 86  | 0 | 0 | 56    |
| 26  | 86  | 0 | 0 | 56    |
| 42  | 60  | 0 | 0 | 51    |
| 547 | 0   | 2 | 0 | 273.5 |
| 3   | 127 | 0 | 0 | 65    |
| 77  | 136 | 1 | 0 | 106.5 |
| 35  | 553 | 2 | 0 | 294   |
| 16  | 119 | 0 | 0 | 67.5  |
| 32  | 32  | 0 | 0 | 32    |
| 15  | 71  | 0 | 0 | 43    |
| 14  | 67  | 0 | 0 | 40.5  |
| 32  | 33  | 0 | 0 | 32.5  |
| 25  | 95  | 0 | 0 | 60    |
| 42  | 55  | 0 | 0 | 48.5  |
| 42  | 52  | 0 | 0 | 47    |
| 9   | 0   | 7 | 0 | 4.5   |
| 2   | 224 | 0 | 0 | 113   |
| 16  | 126 | 0 | 0 | 71    |
| 56  | 34  | 0 | 0 | 45    |
| 31  | 30  | 0 | 0 | 30.5  |

|     |     |    |   |      |
|-----|-----|----|---|------|
| 31  | 30  | 0  | 0 | 30.5 |
| 13  | 68  | 0  | 0 | 40.5 |
| 33  | 30  | 0  | 0 | 31.5 |
| 14  | 71  | 0  | 0 | 42.5 |
| 14  | 70  | 0  | 0 | 42   |
| 43  | 51  | 0  | 0 | 47   |
| 24  | 97  | 0  | 0 | 60.5 |
| 23  | 94  | 0  | 0 | 58.5 |
| 11  | 140 | 0  | 0 | 75.5 |
| 52  | 10  | 0  | 0 | 31   |
| 7   | 93  | 0  | 0 | 50   |
| 7   | 93  | 0  | 0 | 50   |
| 81  | 14  | 0  | 0 | 47.5 |
| 13  | 69  | 0  | 0 | 41   |
| 13  | 72  | 0  | 0 | 42.5 |
| 13  | 70  | 0  | 0 | 41.5 |
| 13  | 71  | 0  | 0 | 42   |
| 13  | 69  | 0  | 0 | 41   |
| 8   | 160 | 0  | 0 | 84   |
| 73  | 18  | 0  | 0 | 45.5 |
| 22  | 98  | 0  | 0 | 60   |
| 88  | 10  | 0  | 0 | 49   |
| 7   | 95  | 0  | 0 | 51   |
| 56  | 5   | 0  | 0 | 30.5 |
| 33  | 28  | 0  | 0 | 30.5 |
| 13  | 74  | 0  | 0 | 43.5 |
| 10  | 142 | 0  | 0 | 76   |
| 34  | 27  | 0  | 0 | 30.5 |
| 12  | 75  | 0  | 0 | 43.5 |
| 12  | 72  | 0  | 0 | 42   |
| 33  | 26  | 0  | 0 | 29.5 |
| 3   | 197 | 0  | 0 | 100  |
| 14  | 130 | 0  | 0 | 72   |
| 439 | 191 | 5  | 0 | 315  |
| 20  | 99  | 0  | 0 | 59.5 |
| 6   | 92  | 0  | 0 | 49   |
| 10  | 148 | 0  | 0 | 79   |
| 36  | 27  | 0  | 0 | 31.5 |
| 33  | 25  | 0  | 0 | 29   |
| 36  | 27  | 0  | 0 | 31.5 |
| 11  | 73  | 0  | 0 | 42   |
| 4   | 189 | 0  | 0 | 96.5 |
| 63  | 91  | 10 | 4 | 77   |
| 13  | 125 | 0  | 0 | 69   |
| 49  | 44  | 0  | 0 | 46.5 |
| 49  | 45  | 0  | 0 | 47   |
| 68  | 146 | 1  | 0 | 107  |

|     |     |    |   |       |
|-----|-----|----|---|-------|
| 45  | 14  | 0  | 0 | 29.5  |
| 6   | 95  | 0  | 0 | 50.5  |
| 11  | 75  | 0  | 0 | 43    |
| 35  | 25  | 0  | 0 | 30    |
| 11  | 77  | 0  | 0 | 44    |
| 48  | 203 | 1  | 0 | 125.5 |
| 66  | 21  | 0  | 0 | 43.5  |
| 1   | 141 | 0  | 0 | 71    |
| 48  | 42  | 0  | 0 | 45    |
| 106 | 84  | 1  | 0 | 95    |
| 6   | 101 | 0  | 0 | 53.5  |
| 6   | 101 | 0  | 0 | 53.5  |
| 37  | 25  | 0  | 0 | 31    |
| 0   | 0   | 3  | 0 | 0     |
| 0   | 0   | 3  | 0 | 0     |
| 5   | 180 | 0  | 0 | 92.5  |
| 51  | 41  | 0  | 0 | 46    |
| 10  | 75  | 0  | 0 | 42.5  |
| 35  | 22  | 0  | 0 | 28.5  |
| 10  | 75  | 0  | 0 | 42.5  |
| 5   | 53  | 15 | 0 | 29    |
| 9   | 151 | 0  | 0 | 80    |
| 36  | 22  | 0  | 0 | 29    |
| 60  | 27  | 0  | 0 | 43.5  |
| 62  | 27  | 0  | 0 | 44.5  |
| 4   | 8   | 4  | 0 | 6     |
| 17  | 108 | 0  | 0 | 62.5  |
| 85  | 115 | 1  | 0 | 100   |
| 9   | 77  | 0  | 0 | 43    |
| 9   | 78  | 0  | 0 | 43.5  |
| 9   | 77  | 0  | 0 | 43    |
| 6   | 168 | 0  | 0 | 87    |
| 68  | 18  | 0  | 0 | 43    |
| 57  | 3   | 0  | 0 | 30    |
| 9   | 79  | 0  | 0 | 44    |
| 9   | 79  | 0  | 0 | 44    |
| 9   | 80  | 0  | 0 | 44.5  |
| 37  | 20  | 0  | 0 | 28.5  |
| 5   | 102 | 0  | 0 | 53.5  |
| 11  | 130 | 0  | 0 | 70.5  |
| 52  | 36  | 0  | 0 | 44    |
| 53  | 37  | 0  | 0 | 45    |
| 66  | 550 | 3  | 0 | 308   |
| 197 | 362 | 4  | 0 | 279.5 |
| 8   | 152 | 0  | 0 | 80    |
| 37  | 19  | 0  | 0 | 28    |
| 9   | 84  | 0  | 0 | 46.5  |

|     |     |    |   |       |
|-----|-----|----|---|-------|
| 2   | 14  | 4  | 0 | 8     |
| 32  | 67  | 0  | 0 | 49.5  |
| 28  | 76  | 0  | 0 | 52    |
| 36  | 63  | 0  | 0 | 49.5  |
| 33  | 69  | 0  | 0 | 51    |
| 29  | 74  | 0  | 0 | 51.5  |
| 35  | 65  | 0  | 0 | 50    |
| 65  | 0   | 0  | 0 | 32.5  |
| 60  | 23  | 0  | 0 | 41.5  |
| 11  | 134 | 0  | 0 | 72.5  |
| 40  | 224 | 1  | 0 | 132   |
| 109 | 0   | 0  | 0 | 54.5  |
| 35  | 59  | 0  | 0 | 47    |
| 26  | 77  | 0  | 0 | 51.5  |
| 26  | 82  | 0  | 0 | 54    |
| 36  | 58  | 0  | 0 | 47    |
| 27  | 78  | 0  | 0 | 52.5  |
| 27  | 78  | 0  | 0 | 52.5  |
| 35  | 60  | 0  | 0 | 47.5  |
| 54  | 34  | 0  | 0 | 44    |
| 52  | 33  | 0  | 0 | 42.5  |
| 38  | 18  | 0  | 0 | 28    |
| 38  | 18  | 0  | 0 | 28    |
| 23  | 160 | 48 | 0 | 91.5  |
| 4   | 98  | 0  | 0 | 51    |
| 39  | 57  | 0  | 0 | 48    |
| 24  | 81  | 0  | 0 | 52.5  |
| 38  | 56  | 0  | 0 | 47    |
| 37  | 53  | 0  | 0 | 45    |
| 169 | 104 | 2  | 0 | 136.5 |
| 15  | 119 | 0  | 0 | 67    |
| 14  | 113 | 0  | 0 | 63.5  |
| 2   | 111 | 0  | 0 | 56.5  |
| 20  | 52  | 0  | 0 | 36    |
| 22  | 45  | 0  | 0 | 33.5  |
| 20  | 49  | 0  | 0 | 34.5  |
| 20  | 52  | 0  | 0 | 36    |
| 22  | 46  | 0  | 0 | 34    |
| 20  | 50  | 0  | 0 | 35    |
| 20  | 52  | 0  | 0 | 36    |
| 21  | 48  | 0  | 0 | 34.5  |
| 20  | 46  | 0  | 0 | 33    |
| 20  | 48  | 0  | 0 | 34    |
| 20  | 50  | 0  | 0 | 35    |
| 20  | 45  | 0  | 0 | 32.5  |
| 20  | 50  | 0  | 0 | 35    |
| 22  | 44  | 0  | 0 | 33    |

|    |     |   |   |      |
|----|-----|---|---|------|
| 23 | 46  | 0 | 0 | 34.5 |
| 22 | 45  | 0 | 0 | 33.5 |
| 21 | 45  | 0 | 0 | 33   |
| 21 | 47  | 0 | 0 | 34   |
| 22 | 48  | 0 | 0 | 35   |
| 20 | 44  | 0 | 0 | 32   |
| 21 | 43  | 0 | 0 | 32   |
| 22 | 43  | 0 | 0 | 32.5 |
| 8  | 86  | 0 | 0 | 47   |
| 8  | 86  | 0 | 0 | 47   |
| 8  | 87  | 0 | 0 | 47.5 |
| 41 | 52  | 0 | 0 | 46.5 |
| 24 | 90  | 0 | 0 | 57   |
| 19 | 48  | 0 | 0 | 33.5 |
| 18 | 48  | 0 | 0 | 33   |
| 19 | 52  | 0 | 0 | 35.5 |
| 25 | 41  | 0 | 0 | 33   |
| 18 | 52  | 0 | 0 | 35   |
| 22 | 42  | 0 | 0 | 32   |
| 18 | 55  | 0 | 0 | 36.5 |
| 23 | 41  | 0 | 0 | 32   |
| 19 | 52  | 0 | 0 | 35.5 |
| 22 | 41  | 0 | 0 | 31.5 |
| 19 | 51  | 0 | 0 | 35   |
| 19 | 48  | 0 | 0 | 33.5 |
| 23 | 40  | 0 | 0 | 31.5 |
| 18 | 52  | 0 | 0 | 35   |
| 24 | 40  | 0 | 0 | 32   |
| 18 | 53  | 0 | 0 | 35.5 |
| 18 | 51  | 0 | 0 | 34.5 |
| 25 | 39  | 0 | 0 | 32   |
| 19 | 48  | 0 | 0 | 33.5 |
| 18 | 54  | 0 | 0 | 36   |
| 17 | 50  | 0 | 0 | 33.5 |
| 23 | 38  | 0 | 0 | 30.5 |
| 23 | 42  | 0 | 0 | 32.5 |
| 18 | 49  | 0 | 0 | 33.5 |
| 18 | 48  | 0 | 0 | 33   |
| 19 | 48  | 0 | 0 | 33.5 |
| 19 | 51  | 0 | 0 | 35   |
| 18 | 53  | 0 | 0 | 35.5 |
| 19 | 51  | 0 | 0 | 35   |
| 18 | 48  | 0 | 0 | 33   |
| 19 | 52  | 0 | 0 | 35.5 |
| 7  | 83  | 0 | 0 | 45   |
| 7  | 81  | 0 | 0 | 44   |
| 4  | 104 | 0 | 0 | 54   |

|     |     |   |   |       |
|-----|-----|---|---|-------|
| 22  | 90  | 0 | 0 | 56    |
| 24  | 37  | 0 | 0 | 30.5  |
| 17  | 59  | 0 | 0 | 38    |
| 25  | 38  | 0 | 0 | 31.5  |
| 27  | 37  | 0 | 0 | 32    |
| 24  | 36  | 0 | 0 | 30    |
| 17  | 55  | 0 | 0 | 36    |
| 16  | 54  | 0 | 0 | 35    |
| 27  | 37  | 0 | 0 | 32    |
| 16  | 53  | 0 | 0 | 34.5  |
| 26  | 39  | 0 | 0 | 32.5  |
| 17  | 59  | 0 | 0 | 38    |
| 26  | 36  | 0 | 0 | 31    |
| 16  | 55  | 0 | 0 | 35.5  |
| 17  | 58  | 0 | 0 | 37.5  |
| 25  | 38  | 0 | 0 | 31.5  |
| 377 | 208 | 5 | 0 | 292.5 |
| 7   | 85  | 0 | 0 | 46    |
| 7   | 84  | 0 | 0 | 45.5  |
| 117 | 215 | 2 | 0 | 166   |
| 15  | 57  | 0 | 0 | 36    |
| 16  | 57  | 0 | 0 | 36.5  |
| 16  | 57  | 0 | 0 | 36.5  |
| 15  | 55  | 0 | 0 | 35    |
| 16  | 58  | 0 | 0 | 37    |
| 16  | 58  | 0 | 0 | 37    |
| 28  | 35  | 0 | 0 | 31.5  |
| 27  | 34  | 0 | 0 | 30.5  |
| 25  | 34  | 0 | 0 | 29.5  |
| 26  | 35  | 0 | 0 | 30.5  |
| 16  | 57  | 0 | 0 | 36.5  |
| 16  | 59  | 0 | 0 | 37.5  |
| 26  | 34  | 0 | 0 | 30    |
| 16  | 59  | 0 | 0 | 37.5  |
| 81  | 111 | 1 | 0 | 96    |
| 22  | 93  | 0 | 0 | 57.5  |
| 21  | 89  | 0 | 0 | 55    |
| 21  | 89  | 0 | 0 | 55    |
| 42  | 47  | 0 | 0 | 44.5  |
| 13  | 118 | 0 | 0 | 65.5  |
| 13  | 119 | 0 | 0 | 66    |
| 13  | 117 | 0 | 0 | 65    |
| 56  | 29  | 0 | 0 | 42.5  |
| 7   | 87  | 0 | 0 | 47    |
| 7   | 87  | 0 | 0 | 47    |
| 9   | 137 | 0 | 0 | 73    |
| 9   | 140 | 0 | 0 | 74.5  |



|     |      |   |   |       |
|-----|------|---|---|-------|
| 0   | 232  | 0 | 0 | 116   |
| 15  | 58   | 0 | 0 | 36.5  |
| 29  | 33   | 0 | 0 | 31    |
| 27  | 31   | 0 | 0 | 29    |
| 28  | 33   | 0 | 0 | 30.5  |
| 26  | 31   | 0 | 0 | 28.5  |
| 15  | 63   | 0 | 0 | 39    |
| 21  | 96   | 0 | 0 | 58.5  |
| 20  | 93   | 0 | 0 | 56.5  |
| 20  | 92   | 0 | 0 | 56    |
| 55  | 28   | 0 | 0 | 41.5  |
| 124 | 1439 | 8 | 0 | 781.5 |
| 14  | 61   | 0 | 0 | 37.5  |
| 14  | 61   | 0 | 0 | 37.5  |
| 14  | 64   | 0 | 0 | 39    |
| 14  | 59   | 0 | 0 | 36.5  |
| 14  | 60   | 0 | 0 | 37    |
| 0   | 14   | 4 | 0 | 7     |
| 20  | 96   | 0 | 0 | 58    |
| 44  | 43   | 0 | 0 | 43.5  |
| 6   | 84   | 0 | 0 | 45    |
| 6   | 84   | 0 | 0 | 45    |
| 38  | 219  | 1 | 0 | 128.5 |
| 55  | 27   | 0 | 0 | 41    |
| 12  | 119  | 0 | 0 | 65.5  |
| 307 | 87   | 3 | 0 | 197   |
| 13  | 59   | 0 | 0 | 36    |
| 29  | 30   | 0 | 0 | 29.5  |
| 13  | 62   | 0 | 0 | 37.5  |
| 13  | 63   | 0 | 0 | 38    |
| 28  | 29   | 0 | 0 | 28.5  |
| 28  | 28   | 0 | 0 | 28    |
| 13  | 63   | 0 | 0 | 38    |
| 3   | 103  | 0 | 0 | 53    |
| 3   | 101  | 0 | 0 | 52    |
| 3   | 101  | 0 | 0 | 52    |
| 18  | 96   | 0 | 0 | 57    |
| 18  | 95   | 0 | 0 | 56.5  |
| 46  | 41   | 0 | 0 | 43.5  |
| 19  | 97   | 0 | 0 | 58    |
| 6   | 90   | 0 | 0 | 48    |
| 6   | 89   | 0 | 0 | 47.5  |
| 13  | 66   | 0 | 0 | 39.5  |
| 29  | 28   | 0 | 0 | 28.5  |
| 13  | 65   | 0 | 0 | 39    |
| 44  | 194  | 1 | 0 | 119   |
| 3   | 107  | 0 | 0 | 55    |

|     |     |    |   |       |
|-----|-----|----|---|-------|
| 47  | 40  | 0  | 0 | 43.5  |
| 18  | 103 | 0  | 0 | 60.5  |
| 31  | 27  | 0  | 0 | 29    |
| 12  | 65  | 0  | 0 | 38.5  |
| 12  | 63  | 0  | 0 | 37.5  |
| 30  | 26  | 0  | 0 | 28    |
| 30  | 27  | 0  | 0 | 28.5  |
| 12  | 67  | 0  | 0 | 39.5  |
| 11  | 120 | 0  | 0 | 65.5  |
| 56  | 25  | 0  | 0 | 40.5  |
| 2   | 26  | 0  | 3 | 14    |
| 40  | 12  | 0  | 0 | 26    |
| 5   | 85  | 0  | 0 | 45    |
| 46  | 38  | 0  | 0 | 42    |
| 47  | 38  | 0  | 0 | 42.5  |
| 15  | 12  | 9  | 0 | 13.5  |
| 32  | 26  | 0  | 0 | 29    |
| 30  | 25  | 0  | 0 | 27.5  |
| 11  | 64  | 0  | 0 | 37.5  |
| 32  | 26  | 0  | 0 | 29    |
| 58  | 24  | 0  | 0 | 41    |
| 72  | 312 | 2  | 0 | 192   |
| 5   | 86  | 0  | 0 | 45.5  |
| 17  | 103 | 0  | 0 | 60    |
| 16  | 99  | 0  | 0 | 57.5  |
| 30  | 24  | 0  | 0 | 27    |
| 10  | 122 | 0  | 0 | 66    |
| 58  | 23  | 0  | 0 | 40.5  |
| 10  | 121 | 0  | 0 | 65.5  |
| 36  | 180 | 55 | 0 | 108   |
| 55  | 161 | 1  | 0 | 108   |
| 1   | 117 | 0  | 0 | 59    |
| 43  | 354 | 2  | 0 | 198.5 |
| 11  | 70  | 0  | 0 | 40.5  |
| 10  | 67  | 0  | 0 | 38.5  |
| 10  | 67  | 0  | 0 | 38.5  |
| 11  | 71  | 0  | 0 | 41    |
| 47  | 34  | 0  | 0 | 40.5  |
| 47  | 35  | 0  | 0 | 41    |
| 188 | 70  | 2  | 0 | 129   |
| 143 | 117 | 2  | 0 | 130   |
| 10  | 127 | 0  | 0 | 68.5  |
| 59  | 23  | 0  | 0 | 41    |
| 1   | 120 | 0  | 0 | 60.5  |
| 49  | 168 | 1  | 0 | 108.5 |
| 5   | 93  | 0  | 0 | 49    |
| 42  | 11  | 0  | 0 | 26.5  |

|     |     |   |   |       |
|-----|-----|---|---|-------|
| 15  | 103 | 0 | 0 | 59    |
| 58  | 21  | 0 | 0 | 39.5  |
| 33  | 22  | 0 | 0 | 27.5  |
| 9   | 67  | 0 | 0 | 38    |
| 10  | 71  | 0 | 0 | 40.5  |
| 32  | 21  | 0 | 0 | 26.5  |
| 73  | 10  | 0 | 0 | 41.5  |
| 15  | 109 | 0 | 0 | 62    |
| 3   | 176 | 0 | 0 | 89.5  |
| 9   | 68  | 0 | 0 | 38.5  |
| 9   | 69  | 0 | 0 | 39    |
| 9   | 71  | 0 | 0 | 40    |
| 9   | 68  | 0 | 0 | 38.5  |
| 9   | 68  | 0 | 0 | 38.5  |
| 2   | 105 | 0 | 0 | 53.5  |
| 14  | 108 | 0 | 0 | 61    |
| 2   | 3   | 2 | 0 | 2.5   |
| 93  | 0   | 0 | 0 | 46.5  |
| 3   | 30  | 7 | 0 | 16.5  |
| 34  | 20  | 0 | 0 | 27    |
| 9   | 129 | 0 | 0 | 69    |
| 29  | 67  | 0 | 0 | 48    |
| 29  | 66  | 0 | 0 | 47.5  |
| 28  | 72  | 0 | 0 | 50    |
| 31  | 60  | 0 | 0 | 45.5  |
| 30  | 64  | 0 | 0 | 47    |
| 33  | 60  | 0 | 0 | 46.5  |
| 32  | 61  | 0 | 0 | 46.5  |
| 28  | 65  | 0 | 0 | 46.5  |
| 29  | 61  | 0 | 0 | 45    |
| 29  | 62  | 0 | 0 | 45.5  |
| 31  | 59  | 0 | 0 | 45    |
| 348 | 205 | 5 | 0 | 276.5 |
| 14  | 111 | 0 | 0 | 62.5  |
| 4   | 162 | 0 | 0 | 83    |
| 8   | 70  | 0 | 0 | 39    |
| 34  | 19  | 0 | 0 | 26.5  |
| 9   | 76  | 0 | 0 | 42.5  |
| 4   | 93  | 0 | 0 | 48.5  |
| 4   | 95  | 0 | 0 | 49.5  |
| 26  | 68  | 0 | 0 | 47    |
| 31  | 57  | 0 | 0 | 44    |
| 26  | 69  | 0 | 0 | 47.5  |
| 35  | 56  | 0 | 0 | 45.5  |
| 25  | 74  | 0 | 0 | 49.5  |
| 27  | 73  | 0 | 0 | 50    |
| 33  | 54  | 0 | 0 | 43.5  |

|     |     |    |   |      |
|-----|-----|----|---|------|
| 25  | 71  | 0  | 0 | 48   |
| 13  | 108 | 0  | 0 | 60.5 |
| 8   | 74  | 0  | 0 | 41   |
| 8   | 74  | 0  | 0 | 41   |
| 33  | 18  | 0  | 0 | 25.5 |
| 8   | 72  | 0  | 0 | 40   |
| 8   | 71  | 0  | 0 | 39.5 |
| 8   | 73  | 0  | 0 | 40.5 |
| 36  | 53  | 0  | 0 | 44.5 |
| 36  | 52  | 0  | 0 | 44   |
| 24  | 75  | 0  | 0 | 49.5 |
| 24  | 78  | 0  | 0 | 51   |
| 24  | 80  | 0  | 0 | 52   |
| 35  | 50  | 0  | 0 | 42.5 |
| 55  | 0   | 0  | 0 | 27.5 |
| 13  | 132 | 32 | 0 | 72.5 |
| 101 | 74  | 1  | 0 | 87.5 |
| 8   | 75  | 0  | 0 | 41.5 |
| 1   | 11  | 4  | 0 | 6    |
| 38  | 48  | 0  | 0 | 43   |
| 36  | 47  | 0  | 0 | 41.5 |
| 22  | 80  | 0  | 0 | 51   |
| 22  | 79  | 0  | 0 | 50.5 |
| 22  | 83  | 0  | 0 | 52.5 |
| 7   | 72  | 0  | 0 | 39.5 |
| 21  | 87  | 0  | 0 | 54   |
| 38  | 47  | 0  | 0 | 42.5 |
| 21  | 87  | 0  | 0 | 54   |
| 37  | 44  | 0  | 0 | 40.5 |
| 88  | 83  | 1  | 0 | 85.5 |
| 7   | 73  | 0  | 0 | 40   |
| 7   | 75  | 0  | 0 | 41   |
| 53  | 26  | 0  | 0 | 39.5 |
| 12  | 113 | 0  | 0 | 62.5 |
| 389 | 551 | 8  | 0 | 470  |
| 50  | 3   | 0  | 0 | 26.5 |
| 41  | 44  | 0  | 0 | 42.5 |
| 19  | 83  | 0  | 0 | 51   |
| 20  | 89  | 0  | 0 | 54.5 |
| 5   | 95  | 22 | 0 | 50   |
| 7   | 78  | 0  | 0 | 42.5 |
| 37  | 16  | 0  | 0 | 26.5 |
| 36  | 16  | 0  | 0 | 26   |
| 74  | 103 | 1  | 0 | 88.5 |
| 104 | 65  | 1  | 0 | 84.5 |
| 39  | 41  | 0  | 0 | 40   |
| 40  | 42  | 0  | 0 | 41   |

|     |     |    |   |       |
|-----|-----|----|---|-------|
| 39  | 40  | 0  | 0 | 39.5  |
| 7   | 80  | 0  | 0 | 43.5  |
| 1   | 106 | 0  | 0 | 53.5  |
| 11  | 118 | 0  | 0 | 64.5  |
| 53  | 24  | 0  | 0 | 38.5  |
| 13  | 316 | 1  | 0 | 164.5 |
| 42  | 6   | 0  | 0 | 24    |
| 385 | 0   | 2  | 0 | 192.5 |
| 11  | 172 | 42 | 0 | 91.5  |
| 37  | 15  | 0  | 0 | 26    |
| 6   | 74  | 0  | 0 | 40    |
| 6   | 76  | 0  | 0 | 41    |
| 36  | 14  | 0  | 0 | 25    |
| 41  | 40  | 0  | 0 | 40.5  |
| 18  | 88  | 0  | 0 | 53    |
| 40  | 40  | 0  | 0 | 40    |
| 42  | 42  | 0  | 0 | 42    |
| 136 | 32  | 1  | 0 | 84    |
| 111 | 149 | 2  | 0 | 130   |
| 6   | 78  | 0  | 0 | 42    |
| 67  | 9   | 0  | 0 | 38    |
| 18  | 93  | 0  | 0 | 55.5  |
| 41  | 38  | 0  | 0 | 39.5  |
| 18  | 92  | 0  | 0 | 55    |
| 10  | 117 | 0  | 0 | 63.5  |
| 10  | 117 | 0  | 0 | 63.5  |
| 6   | 82  | 0  | 0 | 44    |
| 6   | 82  | 0  | 0 | 44    |
| 6   | 82  | 0  | 0 | 44    |
| 4   | 152 | 0  | 0 | 78    |
| 17  | 92  | 0  | 0 | 54.5  |
| 16  | 91  | 0  | 0 | 53.5  |
| 16  | 89  | 0  | 0 | 52.5  |
| 42  | 37  | 0  | 0 | 39.5  |
| 17  | 92  | 0  | 0 | 54.5  |
| 16  | 89  | 0  | 0 | 52.5  |
| 43  | 38  | 0  | 0 | 40.5  |
| 6   | 39  | 10 | 0 | 22.5  |
| 21  | 37  | 0  | 0 | 29    |
| 18  | 43  | 0  | 0 | 30.5  |
| 21  | 37  | 0  | 0 | 29    |
| 18  | 44  | 0  | 0 | 31    |
| 19  | 37  | 0  | 0 | 28    |
| 20  | 42  | 0  | 0 | 31    |
| 19  | 40  | 0  | 0 | 29.5  |
| 17  | 45  | 0  | 0 | 31    |
| 17  | 44  | 0  | 0 | 30.5  |

|    |     |   |   |       |
|----|-----|---|---|-------|
| 20 | 39  | 0 | 0 | 29.5  |
| 20 | 43  | 0 | 0 | 31.5  |
| 18 | 41  | 0 | 0 | 29.5  |
| 19 | 45  | 0 | 0 | 32    |
| 18 | 46  | 0 | 0 | 32    |
| 20 | 38  | 0 | 0 | 29    |
| 21 | 39  | 0 | 0 | 30    |
| 19 | 38  | 0 | 0 | 28.5  |
| 17 | 46  | 0 | 0 | 31.5  |
| 17 | 44  | 0 | 0 | 30.5  |
| 18 | 45  | 0 | 0 | 31.5  |
| 19 | 42  | 0 | 0 | 30.5  |
| 18 | 45  | 0 | 0 | 31.5  |
| 20 | 36  | 0 | 0 | 28    |
| 19 | 40  | 0 | 0 | 29.5  |
| 20 | 43  | 0 | 0 | 31.5  |
| 21 | 36  | 0 | 0 | 28.5  |
| 20 | 37  | 0 | 0 | 28.5  |
| 20 | 36  | 0 | 0 | 28    |
| 20 | 42  | 0 | 0 | 31    |
| 16 | 44  | 0 | 0 | 30    |
| 17 | 46  | 0 | 0 | 31.5  |
| 20 | 43  | 0 | 0 | 31.5  |
| 21 | 39  | 0 | 0 | 30    |
| 20 | 42  | 0 | 0 | 31    |
| 20 | 41  | 0 | 0 | 30.5  |
| 20 | 38  | 0 | 0 | 29    |
| 23 | 37  | 0 | 0 | 30    |
| 19 | 37  | 0 | 0 | 28    |
| 18 | 42  | 0 | 0 | 30    |
| 19 | 40  | 0 | 0 | 29.5  |
| 17 | 42  | 0 | 0 | 29.5  |
| 18 | 42  | 0 | 0 | 30    |
| 18 | 40  | 0 | 0 | 29    |
| 38 | 13  | 0 | 0 | 25.5  |
| 16 | 95  | 0 | 0 | 55.5  |
| 16 | 95  | 0 | 0 | 55.5  |
| 95 | 68  | 1 | 0 | 81.5  |
| 69 | 624 | 4 | 0 | 346.5 |
| 74 | 5   | 0 | 0 | 39.5  |
| 44 | 5   | 0 | 0 | 24.5  |
| 15 | 50  | 0 | 0 | 32.5  |
| 15 | 49  | 0 | 0 | 32    |
| 15 | 49  | 0 | 0 | 32    |
| 16 | 48  | 0 | 0 | 32    |
| 15 | 50  | 0 | 0 | 32.5  |
| 16 | 51  | 0 | 0 | 33.5  |

|     |      |   |   |       |
|-----|------|---|---|-------|
| 24  | 34   | 0 | 0 | 29    |
| 16  | 48   | 0 | 0 | 32    |
| 22  | 35   | 0 | 0 | 28.5  |
| 16  | 46   | 0 | 0 | 31    |
| 24  | 34   | 0 | 0 | 29    |
| 15  | 48   | 0 | 0 | 31.5  |
| 16  | 47   | 0 | 0 | 31.5  |
| 21  | 35   | 0 | 0 | 28    |
| 23  | 35   | 0 | 0 | 29    |
| 22  | 32   | 0 | 0 | 27    |
| 16  | 47   | 0 | 0 | 31.5  |
| 23  | 35   | 0 | 0 | 29    |
| 23  | 35   | 0 | 0 | 29    |
| 5   | 76   | 0 | 0 | 40.5  |
| 43  | 34   | 0 | 0 | 38.5  |
| 15  | 95   | 0 | 0 | 55    |
| 45  | 34   | 0 | 0 | 39.5  |
| 45  | 35   | 0 | 0 | 40    |
| 78  | 205  | 2 | 0 | 141.5 |
| 14  | 50   | 0 | 0 | 32    |
| 14  | 51   | 0 | 0 | 32.5  |
| 23  | 32   | 0 | 0 | 27.5  |
| 15  | 53   | 0 | 0 | 34    |
| 24  | 33   | 0 | 0 | 28.5  |
| 14  | 52   | 0 | 0 | 33    |
| 14  | 52   | 0 | 0 | 33    |
| 14  | 49   | 0 | 0 | 31.5  |
| 15  | 51   | 0 | 0 | 33    |
| 14  | 49   | 0 | 0 | 31.5  |
| 22  | 31   | 0 | 0 | 26.5  |
| 14  | 49   | 0 | 0 | 31.5  |
| 55  | 20   | 0 | 0 | 37.5  |
| 36  | 11   | 0 | 0 | 23.5  |
| 36  | 11   | 0 | 0 | 23.5  |
| 137 | 1164 | 8 | 0 | 650.5 |
| 63  | 121  | 1 | 0 | 92    |
| 14  | 55   | 0 | 0 | 34.5  |
| 13  | 53   | 0 | 0 | 33    |
| 14  | 54   | 0 | 0 | 34    |
| 14  | 53   | 0 | 0 | 33.5  |
| 13  | 51   | 0 | 0 | 32    |
| 26  | 30   | 0 | 0 | 28    |
| 23  | 29   | 0 | 0 | 26    |
| 24  | 29   | 0 | 0 | 26.5  |
| 13  | 50   | 0 | 0 | 31.5  |
| 14  | 56   | 0 | 0 | 35    |
| 14  | 53   | 0 | 0 | 33.5  |

|     |     |    |   |       |
|-----|-----|----|---|-------|
| 13  | 53  | 0  | 0 | 33    |
| 24  | 29  | 0  | 0 | 26.5  |
| 0   | 107 | 0  | 0 | 53.5  |
| 5   | 83  | 0  | 0 | 44    |
| 5   | 84  | 0  | 0 | 44.5  |
| 5   | 82  | 0  | 0 | 43.5  |
| 9   | 123 | 0  | 0 | 66    |
| 2   | 162 | 0  | 0 | 82    |
| 0   | 183 | 0  | 0 | 91.5  |
| 308 | 982 | 10 | 0 | 645   |
| 71  | 107 | 1  | 0 | 89    |
| 66  | 112 | 1  | 0 | 89    |
| 14  | 94  | 0  | 0 | 54    |
| 12  | 52  | 0  | 0 | 32    |
| 24  | 28  | 0  | 0 | 26    |
| 24  | 28  | 0  | 0 | 26    |
| 25  | 28  | 0  | 0 | 26.5  |
| 12  | 53  | 0  | 0 | 32.5  |
| 13  | 56  | 0  | 0 | 34.5  |
| 26  | 29  | 0  | 0 | 27.5  |
| 25  | 27  | 0  | 0 | 26    |
| 24  | 28  | 0  | 0 | 26    |
| 13  | 54  | 0  | 0 | 33.5  |
| 26  | 28  | 0  | 0 | 27    |
| 24  | 27  | 0  | 0 | 25.5  |
| 13  | 55  | 0  | 0 | 34    |
| 1   | 176 | 0  | 0 | 88.5  |
| 47  | 527 | 3  | 0 | 287   |
| 3   | 147 | 0  | 0 | 75    |
| 69  | 230 | 2  | 0 | 149.5 |
| 12  | 56  | 0  | 0 | 34    |
| 12  | 54  | 0  | 0 | 33    |
| 12  | 57  | 0  | 0 | 34.5  |
| 27  | 27  | 0  | 0 | 27    |
| 27  | 28  | 0  | 0 | 27.5  |
| 12  | 58  | 0  | 0 | 35    |
| 12  | 57  | 0  | 0 | 34.5  |
| 25  | 26  | 0  | 0 | 25.5  |
| 44  | 29  | 0  | 0 | 36.5  |
| 46  | 31  | 0  | 0 | 38.5  |
| 14  | 100 | 0  | 0 | 57    |
| 46  | 30  | 0  | 0 | 38    |
| 47  | 155 | 1  | 0 | 101   |
| 3   | 152 | 0  | 0 | 77.5  |
| 8   | 122 | 0  | 0 | 65    |
| 11  | 54  | 0  | 0 | 32.5  |
| 12  | 60  | 0  | 0 | 36    |



|      |     |     |    |       |
|------|-----|-----|----|-------|
| 27   | 25  | 0   | 0  | 26    |
| 11   | 55  | 0   | 0  | 33    |
| 28   | 26  | 0   | 0  | 27    |
| 27   | 25  | 0   | 0  | 26    |
| 26   | 25  | 0   | 0  | 25.5  |
| 13   | 97  | 0   | 0  | 55    |
| 13   | 100 | 0   | 0  | 56.5  |
| 192  | 271 | 4   | 21 | 231.5 |
| 45   | 164 | 1   | 0  | 104.5 |
| 26   | 23  | 0   | 0  | 24.5  |
| 28   | 25  | 0   | 0  | 26.5  |
| 11   | 60  | 0   | 0  | 35.5  |
| 217  | 220 | 4   | 0  | 218.5 |
| 46   | 28  | 0   | 0  | 37    |
| 47   | 29  | 0   | 0  | 38    |
| 47   | 29  | 0   | 0  | 38    |
| 4    | 85  | 0   | 0  | 44.5  |
| 4    | 85  | 0   | 0  | 44.5  |
| 10   | 57  | 0   | 0  | 33.5  |
| 10   | 59  | 0   | 0  | 34.5  |
| 28   | 24  | 0   | 0  | 26    |
| 27   | 23  | 0   | 0  | 25    |
| 10   | 57  | 0   | 0  | 33.5  |
| 11   | 62  | 0   | 0  | 36.5  |
| 10   | 58  | 0   | 0  | 34    |
| 29   | 23  | 0   | 0  | 26    |
| 28   | 22  | 0   | 0  | 25    |
| 10   | 63  | 0   | 0  | 36.5  |
| 91   | 172 | 2   | 0  | 131.5 |
| 1344 | 347 | 560 | 3  | 845.5 |
| 77   | 88  | 1   | 0  | 82.5  |
| 28   | 21  | 0   | 0  | 24.5  |
| 28   | 21  | 0   | 0  | 24.5  |
| 29   | 21  | 0   | 0  | 25    |
| 29   | 22  | 0   | 0  | 25.5  |
| 10   | 64  | 0   | 0  | 37    |
| 9    | 60  | 0   | 0  | 34.5  |
| 26   | 63  | 0   | 0  | 44.5  |
| 27   | 59  | 0   | 0  | 43    |
| 27   | 59  | 0   | 0  | 43    |
| 28   | 56  | 0   | 0  | 42    |
| 27   | 60  | 0   | 0  | 43.5  |
| 27   | 57  | 0   | 0  | 42    |
| 28   | 58  | 0   | 0  | 43    |
| 28   | 58  | 0   | 0  | 43    |
| 627  | 370 | 10  | 0  | 498.5 |
| 29   | 95  | 26  | 0  | 62    |

|    |     |    |   |      |
|----|-----|----|---|------|
| 11 | 100 | 0  | 0 | 55.5 |
| 28 | 20  | 0  | 0 | 24   |
| 28 | 20  | 0  | 0 | 24   |
| 9  | 62  | 0  | 0 | 35.5 |
| 29 | 20  | 0  | 0 | 24.5 |
| 9  | 63  | 0  | 0 | 36   |
| 9  | 63  | 0  | 0 | 36   |
| 23 | 68  | 0  | 0 | 45.5 |
| 29 | 55  | 0  | 0 | 42   |
| 31 | 56  | 0  | 0 | 43.5 |
| 24 | 66  | 0  | 0 | 45   |
| 23 | 69  | 0  | 0 | 46   |
| 31 | 55  | 0  | 0 | 43   |
| 30 | 56  | 0  | 0 | 43   |
| 23 | 65  | 0  | 0 | 44   |
| 26 | 67  | 0  | 0 | 46.5 |
| 25 | 63  | 0  | 0 | 44   |
| 30 | 51  | 0  | 0 | 40.5 |
| 25 | 67  | 0  | 0 | 46   |
| 25 | 63  | 0  | 0 | 44   |
| 24 | 67  | 0  | 0 | 45.5 |
| 1  | 98  | 0  | 0 | 49.5 |
| 21 | 62  | 17 | 0 | 41.5 |
| 38 | 7   | 0  | 0 | 22.5 |
| 3  | 80  | 0  | 0 | 41.5 |
| 11 | 106 | 0  | 0 | 58.5 |
| 11 | 107 | 0  | 0 | 59   |
| 49 | 25  | 0  | 0 | 37   |
| 28 | 18  | 0  | 0 | 23   |
| 9  | 66  | 0  | 0 | 37.5 |
| 9  | 65  | 0  | 0 | 37   |
| 9  | 65  | 0  | 0 | 37   |
| 8  | 60  | 0  | 0 | 34   |
| 8  | 60  | 0  | 0 | 34   |
| 4  | 144 | 0  | 0 | 74   |
| 22 | 74  | 0  | 0 | 48   |
| 22 | 69  | 0  | 0 | 45.5 |
| 23 | 71  | 0  | 0 | 47   |
| 22 | 75  | 0  | 0 | 48.5 |
| 22 | 71  | 0  | 0 | 46.5 |
| 31 | 49  | 0  | 0 | 40   |
| 31 | 48  | 0  | 0 | 39.5 |
| 34 | 48  | 0  | 0 | 41   |
| 32 | 46  | 0  | 0 | 39   |
| 1  | 101 | 0  | 0 | 51   |
| 57 | 14  | 0  | 0 | 35.5 |
| 8  | 62  | 0  | 0 | 35   |

|     |     |    |   |       |
|-----|-----|----|---|-------|
| 8   | 62  | 0  | 0 | 35    |
| 8   | 61  | 0  | 0 | 34.5  |
| 3   | 83  | 0  | 0 | 43    |
| 3   | 83  | 0  | 0 | 43    |
| 48  | 23  | 0  | 0 | 35.5  |
| 10  | 103 | 0  | 0 | 56.5  |
| 63  | 8   | 0  | 0 | 35.5  |
| 72  | 5   | 0  | 0 | 38.5  |
| 20  | 72  | 0  | 0 | 46    |
| 21  | 73  | 0  | 0 | 47    |
| 21  | 75  | 0  | 0 | 48    |
| 21  | 77  | 0  | 0 | 49    |
| 33  | 46  | 0  | 0 | 39.5  |
| 57  | 123 | 1  | 0 | 90    |
| 321 | 876 | 10 | 0 | 598.5 |
| 3   | 89  | 0  | 0 | 46    |
| 41  | 7   | 0  | 0 | 24    |
| 6   | 126 | 0  | 0 | 66    |
| 10  | 107 | 0  | 0 | 58.5  |
| 20  | 80  | 0  | 0 | 50    |
| 20  | 77  | 0  | 0 | 48.5  |
| 34  | 43  | 0  | 0 | 38.5  |
| 35  | 43  | 0  | 0 | 39    |
| 20  | 79  | 0  | 0 | 49.5  |
| 20  | 77  | 0  | 0 | 48.5  |
| 20  | 78  | 0  | 0 | 49    |
| 20  | 79  | 0  | 0 | 49.5  |
| 20  | 78  | 0  | 0 | 49    |
| 262 | 694 | 8  | 0 | 478   |
| 29  | 16  | 0  | 0 | 22.5  |
| 10  | 110 | 0  | 0 | 60    |
| 10  | 111 | 0  | 0 | 60.5  |
| 19  | 82  | 0  | 0 | 50.5  |
| 19  | 80  | 0  | 0 | 49.5  |
| 7   | 65  | 0  | 0 | 36    |
| 7   | 65  | 0  | 0 | 36    |
| 7   | 64  | 0  | 0 | 35.5  |
| 30  | 16  | 0  | 0 | 23    |
| 7   | 63  | 0  | 0 | 35    |
| 7   | 63  | 0  | 0 | 35    |
| 7   | 64  | 0  | 0 | 35.5  |
| 7   | 64  | 0  | 0 | 35.5  |
| 9   | 106 | 0  | 0 | 57.5  |
| 9   | 107 | 0  | 0 | 58    |
| 9   | 106 | 0  | 0 | 57.5  |
| 37  | 40  | 0  | 0 | 38.5  |
| 36  | 38  | 0  | 0 | 37    |

|     |     |   |   |      |
|-----|-----|---|---|------|
| 18  | 84  | 0 | 0 | 51   |
| 17  | 78  | 0 | 0 | 47.5 |
| 36  | 39  | 0 | 0 | 37.5 |
| 37  | 39  | 0 | 0 | 38   |
| 36  | 38  | 0 | 0 | 37   |
| 7   | 66  | 0 | 0 | 36.5 |
| 7   | 68  | 0 | 0 | 37.5 |
| 116 | 118 | 2 | 0 | 117  |
| 7   | 70  | 0 | 0 | 38.5 |
| 32  | 15  | 0 | 0 | 23.5 |
| 46  | 0   | 0 | 0 | 23   |
| 16  | 82  | 0 | 0 | 49   |
| 17  | 86  | 0 | 0 | 51.5 |
| 40  | 36  | 0 | 0 | 38   |
| 40  | 36  | 0 | 0 | 38   |
| 6   | 66  | 0 | 0 | 36   |
| 33  | 15  | 0 | 0 | 24   |
| 6   | 65  | 0 | 0 | 35.5 |
| 2   | 86  | 0 | 0 | 44   |
| 6   | 67  | 0 | 0 | 36.5 |
| 6   | 67  | 0 | 0 | 36.5 |
| 6   | 69  | 0 | 0 | 37.5 |
| 6   | 69  | 0 | 0 | 37.5 |
| 6   | 68  | 0 | 0 | 37   |
| 6   | 69  | 0 | 0 | 37.5 |
| 15  | 84  | 0 | 0 | 49.5 |
| 41  | 35  | 0 | 0 | 38   |
| 50  | 18  | 0 | 0 | 34   |
| 8   | 109 | 0 | 0 | 58.5 |
| 2   | 88  | 0 | 0 | 45   |
| 2   | 88  | 0 | 0 | 45   |
| 6   | 71  | 0 | 0 | 38.5 |
| 6   | 73  | 0 | 0 | 39.5 |
| 15  | 88  | 0 | 0 | 51.5 |
| 14  | 84  | 0 | 0 | 49   |
| 14  | 84  | 0 | 0 | 49   |
| 34  | 13  | 0 | 0 | 23.5 |
| 14  | 88  | 0 | 0 | 51   |
| 14  | 86  | 0 | 0 | 50   |
| 50  | 16  | 0 | 0 | 33   |
| 50  | 16  | 0 | 0 | 33   |
| 74  | 3   | 0 | 0 | 38.5 |
| 5   | 67  | 0 | 0 | 36   |
| 5   | 67  | 0 | 0 | 36   |
| 5   | 67  | 0 | 0 | 36   |
| 5   | 67  | 0 | 0 | 36   |
| 14  | 92  | 0 | 0 | 53   |

|     |     |    |   |       |
|-----|-----|----|---|-------|
| 40  | 29  | 0  | 0 | 34.5  |
| 14  | 90  | 0  | 0 | 52    |
| 5   | 71  | 0  | 0 | 38    |
| 72  | 192 | 2  | 0 | 132   |
| 953 | 360 | 14 | 0 | 656.5 |
| 7   | 111 | 0  | 0 | 59    |
| 5   | 73  | 0  | 0 | 39    |
| 5   | 73  | 0  | 0 | 39    |
| 13  | 93  | 0  | 0 | 53    |
| 43  | 28  | 0  | 0 | 35.5  |
| 13  | 95  | 0  | 0 | 54    |
| 13  | 94  | 0  | 0 | 53.5  |
| 7   | 117 | 0  | 0 | 62    |
| 5   | 7   | 3  | 0 | 6     |
| 46  | 135 | 1  | 0 | 90.5  |
| 42  | 27  | 0  | 0 | 34.5  |
| 12  | 91  | 0  | 0 | 51.5  |
| 12  | 92  | 0  | 0 | 52    |
| 12  | 96  | 0  | 0 | 54    |
| 32  | 9   | 0  | 0 | 20.5  |
| 4   | 71  | 0  | 0 | 37.5  |
| 4   | 72  | 0  | 0 | 38    |
| 32  | 9   | 0  | 0 | 20.5  |
| 6   | 113 | 0  | 0 | 59.5  |
| 6   | 112 | 0  | 0 | 59    |
| 43  | 3   | 0  | 0 | 23    |
| 1   | 88  | 0  | 0 | 44.5  |
| 6   | 117 | 0  | 0 | 61.5  |
| 31  | 538 | 3  | 0 | 284.5 |
| 11  | 96  | 0  | 0 | 53.5  |
| 19  | 36  | 0  | 0 | 27.5  |
| 18  | 34  | 0  | 0 | 26    |
| 17  | 37  | 0  | 0 | 27    |
| 17  | 41  | 0  | 0 | 29    |
| 16  | 35  | 0  | 0 | 25.5  |
| 17  | 34  | 0  | 0 | 25.5  |
| 16  | 41  | 0  | 0 | 28.5  |
| 16  | 41  | 0  | 0 | 28.5  |
| 16  | 40  | 0  | 0 | 28    |
| 19  | 35  | 0  | 0 | 27    |
| 17  | 34  | 0  | 0 | 25.5  |
| 17  | 38  | 0  | 0 | 27.5  |
| 16  | 42  | 0  | 0 | 29    |
| 18  | 36  | 0  | 0 | 27    |
| 16  | 36  | 0  | 0 | 26    |
| 19  | 35  | 0  | 0 | 27    |
| 17  | 40  | 0  | 0 | 28.5  |

|    |    |   |   |      |
|----|----|---|---|------|
| 17 | 40 | 0 | 0 | 28.5 |
| 18 | 34 | 0 | 0 | 26   |
| 16 | 38 | 0 | 0 | 27   |
| 16 | 42 | 0 | 0 | 29   |
| 17 | 40 | 0 | 0 | 28.5 |
| 19 | 36 | 0 | 0 | 27.5 |
| 16 | 39 | 0 | 0 | 27.5 |
| 17 | 41 | 0 | 0 | 29   |
| 10 | 94 | 0 | 0 | 52   |
| 10 | 95 | 0 | 0 | 52.5 |
| 10 | 93 | 0 | 0 | 51.5 |
| 14 | 45 | 0 | 0 | 29.5 |
| 19 | 33 | 0 | 0 | 26   |
| 20 | 32 | 0 | 0 | 26   |
| 18 | 31 | 0 | 0 | 24.5 |
| 14 | 45 | 0 | 0 | 29.5 |
| 15 | 43 | 0 | 0 | 29   |
| 15 | 37 | 0 | 0 | 26   |
| 15 | 41 | 0 | 0 | 28   |
| 14 | 43 | 0 | 0 | 28.5 |
| 15 | 45 | 0 | 0 | 30   |
| 15 | 45 | 0 | 0 | 30   |
| 15 | 41 | 0 | 0 | 28   |
| 14 | 45 | 0 | 0 | 29.5 |
| 19 | 33 | 0 | 0 | 26   |
| 14 | 41 | 0 | 0 | 27.5 |
| 20 | 33 | 0 | 0 | 26.5 |
| 14 | 44 | 0 | 0 | 29   |
| 14 | 41 | 0 | 0 | 27.5 |
| 21 | 32 | 0 | 0 | 26.5 |
| 15 | 43 | 0 | 0 | 29   |
| 15 | 40 | 0 | 0 | 27.5 |
| 14 | 39 | 0 | 0 | 26.5 |
| 15 | 44 | 0 | 0 | 29.5 |
| 15 | 39 | 0 | 0 | 27   |
| 15 | 43 | 0 | 0 | 29   |
| 19 | 32 | 0 | 0 | 25.5 |
| 14 | 41 | 0 | 0 | 27.5 |
| 18 | 32 | 0 | 0 | 25   |
| 14 | 44 | 0 | 0 | 29   |
| 15 | 42 | 0 | 0 | 28.5 |
| 18 | 31 | 0 | 0 | 24.5 |
| 18 | 31 | 0 | 0 | 24.5 |
| 21 | 32 | 0 | 0 | 26.5 |
| 14 | 43 | 0 | 0 | 28.5 |
| 17 | 33 | 0 | 0 | 25   |
| 14 | 39 | 0 | 0 | 26.5 |

|    |     |   |   |       |
|----|-----|---|---|-------|
| 14 | 39  | 0 | 0 | 26.5  |
| 18 | 10  | 7 | 0 | 14    |
| 10 | 96  | 0 | 0 | 53    |
| 13 | 43  | 0 | 0 | 28    |
| 13 | 47  | 0 | 0 | 30    |
| 13 | 46  | 0 | 0 | 29.5  |
| 20 | 29  | 0 | 0 | 24.5  |
| 22 | 29  | 0 | 0 | 25.5  |
| 13 | 47  | 0 | 0 | 30    |
| 21 | 31  | 0 | 0 | 26    |
| 13 | 47  | 0 | 0 | 30    |
| 13 | 42  | 0 | 0 | 27.5  |
| 13 | 47  | 0 | 0 | 30    |
| 21 | 29  | 0 | 0 | 25    |
| 19 | 29  | 0 | 0 | 24    |
| 20 | 30  | 0 | 0 | 25    |
| 13 | 45  | 0 | 0 | 29    |
| 19 | 29  | 0 | 0 | 24    |
| 3  | 71  | 0 | 0 | 37    |
| 3  | 72  | 0 | 0 | 37.5  |
| 3  | 71  | 0 | 0 | 37    |
| 3  | 73  | 0 | 0 | 38    |
| 26 | 193 | 1 | 0 | 109.5 |
| 13 | 49  | 0 | 0 | 31    |
| 23 | 28  | 0 | 0 | 25.5  |
| 12 | 44  | 0 | 0 | 28    |
| 20 | 27  | 0 | 0 | 23.5  |
| 22 | 27  | 0 | 0 | 24.5  |
| 13 | 49  | 0 | 0 | 31    |
| 13 | 48  | 0 | 0 | 30.5  |
| 21 | 27  | 0 | 0 | 24    |
| 12 | 46  | 0 | 0 | 29    |
| 12 | 46  | 0 | 0 | 29    |
| 21 | 27  | 0 | 0 | 24    |
| 22 | 28  | 0 | 0 | 25    |
| 22 | 28  | 0 | 0 | 25    |
| 21 | 27  | 0 | 0 | 24    |
| 12 | 47  | 0 | 0 | 29.5  |
| 13 | 48  | 0 | 0 | 30.5  |
| 21 | 27  | 0 | 0 | 24    |
| 12 | 48  | 0 | 0 | 30    |
| 0  | 85  | 0 | 0 | 42.5  |
| 0  | 86  | 0 | 0 | 43    |
| 0  | 85  | 0 | 0 | 42.5  |
| 26 | 58  | 0 | 0 | 42    |
| 3  | 74  | 0 | 0 | 38.5  |
| 3  | 76  | 0 | 0 | 39.5  |

|    |    |   |   |      |
|----|----|---|---|------|
| 3  | 76 | 0 | 0 | 39.5 |
| 3  | 75 | 0 | 0 | 39   |
| 35 | 7  | 0 | 0 | 21   |
| 9  | 98 | 0 | 0 | 53.5 |
| 11 | 47 | 0 | 0 | 29   |
| 11 | 47 | 0 | 0 | 29   |
| 11 | 47 | 0 | 0 | 29   |
| 11 | 47 | 0 | 0 | 29   |
| 11 | 47 | 0 | 0 | 29   |
| 12 | 50 | 0 | 0 | 31   |
| 11 | 47 | 0 | 0 | 29   |
| 22 | 25 | 0 | 0 | 23.5 |
| 12 | 49 | 0 | 0 | 30.5 |
| 22 | 26 | 0 | 0 | 24   |
| 21 | 25 | 0 | 0 | 23   |
| 22 | 26 | 0 | 0 | 24   |
| 22 | 25 | 0 | 0 | 23.5 |
| 23 | 56 | 0 | 0 | 39.5 |
| 26 | 49 | 0 | 0 | 37.5 |
| 25 | 56 | 0 | 0 | 40.5 |
| 22 | 62 | 0 | 0 | 42   |
| 23 | 56 | 0 | 0 | 39.5 |
| 28 | 48 | 0 | 0 | 38   |
| 24 | 57 | 0 | 0 | 40.5 |
| 28 | 53 | 0 | 0 | 40.5 |
| 23 | 59 | 0 | 0 | 41   |
| 25 | 54 | 0 | 0 | 39.5 |
| 25 | 58 | 0 | 0 | 41.5 |
| 24 | 58 | 0 | 0 | 41   |
| 22 | 61 | 0 | 0 | 41.5 |
| 28 | 49 | 0 | 0 | 38.5 |
| 22 | 65 | 0 | 0 | 43.5 |
| 3  | 78 | 0 | 0 | 40.5 |
| 3  | 79 | 0 | 0 | 41   |
| 3  | 79 | 0 | 0 | 41   |
| 11 | 49 | 0 | 0 | 30   |
| 24 | 26 | 0 | 0 | 25   |
| 11 | 51 | 0 | 0 | 31   |
| 11 | 48 | 0 | 0 | 29.5 |
| 22 | 23 | 0 | 0 | 22.5 |
| 11 | 52 | 0 | 0 | 31.5 |
| 11 | 49 | 0 | 0 | 30   |
| 11 | 52 | 0 | 0 | 31.5 |
| 23 | 25 | 0 | 0 | 24   |
| 47 | 20 | 0 | 0 | 33.5 |
| 28 | 46 | 0 | 0 | 37   |
| 21 | 62 | 0 | 0 | 41.5 |



|     |     |     |   |       |
|-----|-----|-----|---|-------|
| 21  | 66  | 0   | 0 | 43.5  |
| 28  | 46  | 0   | 0 | 37    |
| 30  | 47  | 0   | 0 | 38.5  |
| 29  | 47  | 0   | 0 | 38    |
| 20  | 65  | 0   | 0 | 42.5  |
| 29  | 46  | 0   | 0 | 37.5  |
| 29  | 45  | 0   | 0 | 37    |
| 20  | 66  | 0   | 0 | 43    |
| 42  | 0   | 0   | 0 | 21    |
| 14  | 84  | 17  | 0 | 49    |
| 10  | 47  | 0   | 0 | 28.5  |
| 23  | 22  | 0   | 0 | 22.5  |
| 10  | 48  | 0   | 0 | 29    |
| 10  | 47  | 0   | 0 | 28.5  |
| 10  | 49  | 0   | 0 | 29.5  |
| 10  | 48  | 0   | 0 | 29    |
| 10  | 47  | 0   | 0 | 28.5  |
| 10  | 51  | 0   | 0 | 30.5  |
| 10  | 48  | 0   | 0 | 29    |
| 22  | 22  | 0   | 0 | 22    |
| 23  | 23  | 0   | 0 | 23    |
| 96  | 553 | 5   | 0 | 324.5 |
| 130 | 208 | 3   | 0 | 169   |
| 31  | 44  | 0   | 0 | 37.5  |
| 30  | 43  | 0   | 0 | 36.5  |
| 19  | 67  | 0   | 0 | 43    |
| 20  | 67  | 0   | 0 | 43.5  |
| 32  | 45  | 0   | 0 | 38.5  |
| 0   | 94  | 0   | 0 | 47    |
| 9   | 49  | 0   | 0 | 29    |
| 10  | 55  | 0   | 0 | 32.5  |
| 9   | 49  | 0   | 0 | 29    |
| 23  | 21  | 0   | 0 | 22    |
| 10  | 53  | 0   | 0 | 31.5  |
| 25  | 23  | 0   | 0 | 24    |
| 10  | 52  | 0   | 0 | 31    |
| 10  | 53  | 0   | 0 | 31.5  |
| 49  | 124 | 1   | 0 | 86.5  |
| 51  | 115 | 1   | 0 | 83    |
| 48  | 127 | 1   | 0 | 87.5  |
| 151 | 567 | 158 | 0 | 359   |
| 55  | 222 | 2   | 0 | 138.5 |
| 33  | 41  | 0   | 0 | 37    |
| 33  | 42  | 0   | 0 | 37.5  |
| 18  | 72  | 0   | 0 | 45    |
| 18  | 70  | 0   | 0 | 44    |
| 31  | 39  | 0   | 0 | 35    |

|     |     |    |   |       |
|-----|-----|----|---|-------|
| 33  | 41  | 0  | 0 | 37    |
| 9   | 52  | 0  | 0 | 30.5  |
| 9   | 50  | 0  | 0 | 29.5  |
| 9   | 52  | 0  | 0 | 30.5  |
| 9   | 52  | 0  | 0 | 30.5  |
| 9   | 50  | 0  | 0 | 29.5  |
| 9   | 52  | 0  | 0 | 30.5  |
| 9   | 50  | 0  | 0 | 29.5  |
| 9   | 50  | 0  | 0 | 29.5  |
| 47  | 127 | 1  | 0 | 87    |
| 8   | 102 | 0  | 0 | 55    |
| 8   | 105 | 0  | 0 | 56.5  |
| 221 | 156 | 4  | 0 | 188.5 |
| 9   | 56  | 0  | 0 | 32.5  |
| 9   | 56  | 0  | 0 | 32.5  |
| 9   | 54  | 0  | 0 | 31.5  |
| 9   | 56  | 0  | 0 | 32.5  |
| 9   | 55  | 0  | 0 | 32    |
| 26  | 20  | 0  | 0 | 23    |
| 32  | 37  | 0  | 0 | 34.5  |
| 32  | 38  | 0  | 0 | 35    |
| 18  | 73  | 0  | 0 | 45.5  |
| 17  | 74  | 0  | 0 | 45.5  |
| 35  | 5   | 0  | 0 | 20    |
| 9   | 57  | 0  | 0 | 33    |
| 8   | 52  | 0  | 0 | 30    |
| 26  | 19  | 0  | 0 | 22.5  |
| 25  | 19  | 0  | 0 | 22    |
| 26  | 19  | 0  | 0 | 22.5  |
| 74  | 346 | 82 | 0 | 210   |
| 35  | 36  | 0  | 0 | 35.5  |
| 16  | 71  | 0  | 0 | 43.5  |
| 16  | 73  | 0  | 0 | 44.5  |
| 16  | 72  | 0  | 0 | 44    |
| 17  | 76  | 0  | 0 | 46.5  |
| 258 | 111 | 4  | 0 | 184.5 |
| 27  | 19  | 0  | 0 | 23    |
| 8   | 56  | 0  | 0 | 32    |
| 8   | 54  | 0  | 0 | 31    |
| 25  | 18  | 0  | 0 | 21.5  |
| 26  | 18  | 0  | 0 | 22    |
| 8   | 54  | 0  | 0 | 31    |
| 8   | 54  | 0  | 0 | 31    |
| 8   | 54  | 0  | 0 | 31    |
| 25  | 17  | 0  | 0 | 21    |
| 16  | 76  | 0  | 0 | 46    |
| 16  | 75  | 0  | 0 | 45.5  |

|     |     |   |   |       |
|-----|-----|---|---|-------|
| 15  | 73  | 0 | 0 | 44    |
| 2   | 78  | 0 | 0 | 40    |
| 8   | 59  | 0 | 0 | 33.5  |
| 8   | 57  | 0 | 0 | 32.5  |
| 8   | 59  | 0 | 0 | 33.5  |
| 8   | 57  | 0 | 0 | 32.5  |
| 8   | 57  | 0 | 0 | 32.5  |
| 27  | 18  | 0 | 0 | 22.5  |
| 15  | 76  | 0 | 0 | 45.5  |
| 15  | 78  | 0 | 0 | 46.5  |
| 7   | 55  | 0 | 0 | 31    |
| 7   | 56  | 0 | 0 | 31.5  |
| 26  | 16  | 0 | 0 | 21    |
| 7   | 54  | 0 | 0 | 30.5  |
| 7   | 56  | 0 | 0 | 31.5  |
| 28  | 17  | 0 | 0 | 22.5  |
| 28  | 17  | 0 | 0 | 22.5  |
| 74  | 763 | 6 | 0 | 418.5 |
| 14  | 77  | 0 | 0 | 45.5  |
| 14  | 79  | 0 | 0 | 46.5  |
| 14  | 78  | 0 | 0 | 46    |
| 14  | 78  | 0 | 0 | 46    |
| 110 | 101 | 2 | 0 | 105.5 |
| 208 | 84  | 3 | 0 | 146   |
| 7   | 57  | 0 | 0 | 32    |
| 7   | 57  | 0 | 0 | 32    |
| 25  | 15  | 0 | 0 | 20    |
| 25  | 15  | 0 | 0 | 20    |
| 26  | 15  | 0 | 0 | 20.5  |
| 7   | 58  | 0 | 0 | 32.5  |
| 38  | 31  | 0 | 0 | 34.5  |
| 37  | 30  | 0 | 0 | 33.5  |
| 14  | 80  | 0 | 0 | 47    |
| 31  | 291 | 2 | 0 | 161   |
| 27  | 15  | 0 | 0 | 21    |
| 39  | 30  | 0 | 0 | 34.5  |
| 27  | 14  | 0 | 0 | 20.5  |
| 13  | 85  | 0 | 0 | 49    |
| 36  | 3   | 0 | 0 | 19.5  |
| 6   | 58  | 0 | 0 | 32    |
| 6   | 58  | 0 | 0 | 32    |
| 6   | 58  | 0 | 0 | 32    |
| 28  | 14  | 0 | 0 | 21    |
| 6   | 63  | 0 | 0 | 34.5  |
| 6   | 63  | 0 | 0 | 34.5  |
| 6   | 61  | 0 | 0 | 33.5  |
| 28  | 13  | 0 | 0 | 20.5  |

|     |      |    |   |        |
|-----|------|----|---|--------|
| 29  | 14   | 0  | 0 | 21.5   |
| 6   | 62   | 0  | 0 | 34     |
| 12  | 84   | 0  | 0 | 48     |
| 40  | 28   | 0  | 0 | 34     |
| 39  | 27   | 0  | 0 | 33     |
| 74  | 71   | 1  | 0 | 72.5   |
| 598 | 1831 | 22 | 0 | 1214.5 |
| 6   | 64   | 0  | 0 | 35     |
| 6   | 64   | 0  | 0 | 35     |
| 1   | 78   | 0  | 0 | 39.5   |
| 12  | 87   | 0  | 0 | 49.5   |
| 12  | 88   | 0  | 0 | 50     |
| 12  | 88   | 0  | 0 | 50     |
| 3   | 18   | 4  | 0 | 10.5   |
| 5   | 59   | 0  | 0 | 32     |
| 5   | 60   | 0  | 0 | 32.5   |
| 5   | 58   | 0  | 0 | 31.5   |
| 5   | 58   | 0  | 0 | 31.5   |
| 5   | 58   | 0  | 0 | 31.5   |
| 5   | 60   | 0  | 0 | 32.5   |
| 54  | 225  | 50 | 0 | 139.5  |
| 5   | 61   | 0  | 0 | 33     |
| 5   | 61   | 0  | 0 | 33     |
| 50  | 109  | 1  | 0 | 79.5   |
| 1   | 82   | 0  | 0 | 41.5   |
| 1   | 84   | 0  | 0 | 42.5   |
| 1   | 82   | 0  | 0 | 41.5   |
| 11  | 87   | 0  | 0 | 49     |
| 11  | 87   | 0  | 0 | 49     |
| 11  | 87   | 0  | 0 | 49     |
| 41  | 25   | 0  | 0 | 33     |
| 11  | 89   | 0  | 0 | 50     |
| 11  | 89   | 0  | 0 | 50     |
| 5   | 65   | 0  | 0 | 35     |
| 45  | 122  | 1  | 0 | 83.5   |
| 42  | 90   | 1  | 0 | 66     |
| 58  | 197  | 2  | 0 | 127.5  |
| 10  | 91   | 0  | 0 | 50.5   |
| 4   | 60   | 0  | 0 | 32     |
| 28  | 9    | 0  | 0 | 18.5   |
| 4   | 60   | 0  | 0 | 32     |
| 60  | 88   | 1  | 0 | 74     |
| 22  | 147  | 1  | 0 | 84.5   |
| 20  | 202  | 1  | 0 | 111    |
| 81  | 378  | 85 | 0 | 229.5  |
| 35  | 0    | 0  | 0 | 17.5   |
| 35  | 1    | 0  | 0 | 18     |

|      |      |    |   |        |
|------|------|----|---|--------|
| 0    | 76   | 0  | 0 | 38     |
| 0    | 76   | 0  | 0 | 38     |
| 258  | 91   | 4  | 0 | 174.5  |
| 4    | 63   | 0  | 0 | 33.5   |
| 4    | 63   | 0  | 0 | 33.5   |
| 29   | 9    | 0  | 0 | 19     |
| 4    | 61   | 0  | 0 | 32.5   |
| 117  | 311  | 4  | 0 | 214    |
| 34   | 110  | 1  | 0 | 72     |
| 4    | 64   | 0  | 0 | 34     |
| 4    | 66   | 0  | 0 | 35     |
| 4    | 64   | 0  | 0 | 34     |
| 4    | 64   | 0  | 0 | 34     |
| 38   | 1    | 0  | 0 | 19.5   |
| 2    | 8    | 3  | 0 | 5      |
| 4    | 67   | 0  | 0 | 35.5   |
| 33   | 133  | 26 | 0 | 83     |
| 49   | 331  | 3  | 0 | 190    |
| 2    | 10   | 3  | 0 | 6      |
| 3    | 62   | 0  | 0 | 32.5   |
| 31   | 8    | 0  | 0 | 19.5   |
| 7    | 46   | 7  | 0 | 26.5   |
| 182  | 554  | 7  | 0 | 368    |
| 129  | 280  | 4  | 0 | 204.5  |
| 40   | 193  | 21 | 1 | 116.5  |
| 1    | 8    | 3  | 0 | 4.5    |
| 3    | 64   | 0  | 0 | 33.5   |
| 3    | 63   | 0  | 0 | 33     |
| 56   | 60   | 1  | 0 | 58     |
| 3    | 66   | 0  | 0 | 34.5   |
| 3    | 65   | 0  | 0 | 34     |
| 3    | 65   | 0  | 0 | 34     |
| 1    | 11   | 3  | 0 | 6      |
| 22   | 180  | 1  | 0 | 101    |
| 3    | 69   | 0  | 0 | 36     |
| 29   | 6    | 0  | 0 | 17.5   |
| 1404 | 1067 | 29 | 0 | 1235.5 |
| 12   | 29   | 7  | 0 | 20.5   |
| 25   | 51   | 0  | 0 | 38     |
| 22   | 56   | 0  | 0 | 39     |
| 23   | 53   | 0  | 0 | 38     |
| 27   | 46   | 0  | 0 | 36.5   |
| 22   | 55   | 0  | 0 | 38.5   |
| 21   | 58   | 0  | 0 | 39.5   |
| 24   | 51   | 0  | 0 | 37.5   |
| 24   | 51   | 0  | 0 | 37.5   |
| 23   | 55   | 0  | 0 | 39     |

|     |     |    |   |       |
|-----|-----|----|---|-------|
| 17  | 155 | 1  | 0 | 86    |
| 25  | 126 | 1  | 0 | 75.5  |
| 27  | 45  | 0  | 0 | 36    |
| 20  | 61  | 0  | 0 | 40.5  |
| 28  | 43  | 0  | 0 | 35.5  |
| 24  | 131 | 1  | 0 | 77.5  |
| 32  | 139 | 27 | 0 | 85.5  |
| 29  | 42  | 0  | 0 | 35.5  |
| 2   | 64  | 0  | 0 | 33    |
| 51  | 97  | 1  | 0 | 74    |
| 18  | 66  | 0  | 0 | 42    |
| 2   | 67  | 0  | 0 | 34.5  |
| 2   | 67  | 0  | 0 | 34.5  |
| 2   | 66  | 0  | 0 | 34    |
| 17  | 68  | 0  | 0 | 42.5  |
| 57  | 91  | 1  | 0 | 74    |
| 42  | 122 | 1  | 0 | 82    |
| 30  | 4   | 0  | 0 | 17    |
| 33  | 5   | 0  | 0 | 19    |
| 30  | 4   | 0  | 0 | 17    |
| 123 | 137 | 3  | 0 | 130   |
| 64  | 271 | 3  | 0 | 167.5 |
| 25  | 164 | 1  | 0 | 94.5  |
| 14  | 30  | 0  | 0 | 22    |
| 15  | 36  | 0  | 0 | 25.5  |
| 16  | 32  | 0  | 0 | 24    |
| 16  | 28  | 0  | 0 | 22    |
| 16  | 29  | 0  | 0 | 22.5  |
| 13  | 36  | 0  | 0 | 24.5  |
| 13  | 38  | 0  | 0 | 25.5  |
| 13  | 36  | 0  | 0 | 24.5  |
| 15  | 34  | 0  | 0 | 24.5  |
| 17  | 32  | 0  | 0 | 24.5  |
| 16  | 34  | 0  | 0 | 25    |
| 17  | 31  | 0  | 0 | 24    |
| 13  | 36  | 0  | 0 | 24.5  |
| 15  | 31  | 0  | 0 | 23    |
| 13  | 37  | 0  | 0 | 25    |
| 13  | 34  | 0  | 0 | 23.5  |
| 13  | 37  | 0  | 0 | 25    |
| 15  | 35  | 0  | 0 | 25    |
| 14  | 35  | 0  | 0 | 24.5  |
| 14  | 34  | 0  | 0 | 24    |
| 16  | 32  | 0  | 0 | 24    |
| 14  | 34  | 0  | 0 | 24    |
| 13  | 32  | 0  | 0 | 22.5  |
| 15  | 29  | 0  | 0 | 22    |

|    |     |   |   |      |
|----|-----|---|---|------|
| 16 | 29  | 0 | 0 | 22.5 |
| 16 | 29  | 0 | 0 | 22.5 |
| 18 | 30  | 0 | 0 | 24   |
| 14 | 36  | 0 | 0 | 25   |
| 16 | 29  | 0 | 0 | 22.5 |
| 17 | 29  | 0 | 0 | 23   |
| 15 | 29  | 0 | 0 | 22   |
| 15 | 34  | 0 | 0 | 24.5 |
| 15 | 32  | 0 | 0 | 23.5 |
| 14 | 38  | 0 | 0 | 26   |
| 13 | 32  | 0 | 0 | 22.5 |
| 13 | 33  | 0 | 0 | 23   |
| 16 | 30  | 0 | 0 | 23   |
| 13 | 35  | 0 | 0 | 24   |
| 13 | 34  | 0 | 0 | 23.5 |
| 14 | 33  | 0 | 0 | 23.5 |
| 15 | 30  | 0 | 0 | 22.5 |
| 15 | 34  | 0 | 0 | 24.5 |
| 16 | 29  | 0 | 0 | 22.5 |
| 14 | 32  | 0 | 0 | 23   |
| 13 | 35  | 0 | 0 | 24   |
| 17 | 31  | 0 | 0 | 24   |
| 13 | 32  | 0 | 0 | 22.5 |
| 17 | 32  | 0 | 0 | 24.5 |
| 13 | 36  | 0 | 0 | 24.5 |
| 16 | 32  | 0 | 0 | 24   |
| 17 | 29  | 0 | 0 | 23   |
| 16 | 32  | 0 | 0 | 24   |
| 14 | 31  | 0 | 0 | 22.5 |
| 15 | 28  | 0 | 0 | 21.5 |
| 16 | 29  | 0 | 0 | 22.5 |
| 16 | 34  | 0 | 0 | 25   |
| 15 | 35  | 0 | 0 | 25   |
| 13 | 33  | 0 | 0 | 23   |
| 13 | 33  | 0 | 0 | 23   |
| 13 | 32  | 0 | 0 | 22.5 |
| 13 | 35  | 0 | 0 | 24   |
| 15 | 28  | 0 | 0 | 21.5 |
| 38 | 132 | 1 | 0 | 85   |
| 38 | 132 | 1 | 0 | 85   |
| 16 | 27  | 0 | 0 | 21.5 |
| 12 | 38  | 0 | 0 | 25   |
| 18 | 27  | 0 | 0 | 22.5 |
| 12 | 41  | 0 | 0 | 26.5 |
| 18 | 28  | 0 | 0 | 23   |
| 12 | 36  | 0 | 0 | 24   |
| 16 | 26  | 0 | 0 | 21   |

|     |     |    |   |      |
|-----|-----|----|---|------|
| 16  | 27  | 0  | 0 | 21.5 |
| 18  | 27  | 0  | 0 | 22.5 |
| 12  | 35  | 0  | 0 | 23.5 |
| 17  | 25  | 0  | 0 | 21   |
| 13  | 39  | 0  | 0 | 26   |
| 19  | 27  | 0  | 0 | 23   |
| 12  | 35  | 0  | 0 | 23.5 |
| 12  | 37  | 0  | 0 | 24.5 |
| 12  | 39  | 0  | 0 | 25.5 |
| 12  | 39  | 0  | 0 | 25.5 |
| 12  | 40  | 0  | 0 | 26   |
| 18  | 27  | 0  | 0 | 22.5 |
| 17  | 27  | 0  | 0 | 22   |
| 17  | 28  | 0  | 0 | 22.5 |
| 12  | 36  | 0  | 0 | 24   |
| 17  | 28  | 0  | 0 | 22.5 |
| 16  | 26  | 0  | 0 | 21   |
| 12  | 35  | 0  | 0 | 23.5 |
| 17  | 27  | 0  | 0 | 22   |
| 12  | 41  | 0  | 0 | 26.5 |
| 12  | 39  | 0  | 0 | 25.5 |
| 12  | 37  | 0  | 0 | 24.5 |
| 12  | 38  | 0  | 0 | 25   |
| 18  | 27  | 0  | 0 | 22.5 |
| 12  | 41  | 0  | 0 | 26.5 |
| 12  | 40  | 0  | 0 | 26   |
| 645 | 669 | 16 | 0 | 657  |
| 11  | 40  | 0  | 0 | 25.5 |
| 11  | 42  | 0  | 0 | 26.5 |
| 11  | 39  | 0  | 0 | 25   |
| 19  | 24  | 0  | 0 | 21.5 |
| 19  | 25  | 0  | 0 | 22   |
| 17  | 24  | 0  | 0 | 20.5 |
| 11  | 37  | 0  | 0 | 24   |
| 11  | 37  | 0  | 0 | 24   |
| 11  | 41  | 0  | 0 | 26   |
| 18  | 23  | 0  | 0 | 20.5 |
| 20  | 25  | 0  | 0 | 22.5 |
| 12  | 42  | 0  | 0 | 27   |
| 11  | 40  | 0  | 0 | 25.5 |
| 18  | 24  | 0  | 0 | 21   |
| 11  | 37  | 0  | 0 | 24   |
| 11  | 40  | 0  | 0 | 25.5 |
| 11  | 37  | 0  | 0 | 24   |
| 11  | 40  | 0  | 0 | 25.5 |
| 11  | 38  | 0  | 0 | 24.5 |
| 20  | 25  | 0  | 0 | 22.5 |



|     |     |    |   |      |
|-----|-----|----|---|------|
| 18  | 24  | 0  | 0 | 21   |
| 17  | 24  | 0  | 0 | 20.5 |
| 11  | 39  | 0  | 0 | 25   |
| 19  | 25  | 0  | 0 | 22   |
| 11  | 40  | 0  | 0 | 25.5 |
| 18  | 24  | 0  | 0 | 21   |
| 422 | 444 | 64 | 9 | 433  |
| 44  | 76  | 1  | 0 | 60   |
| 36  | 91  | 1  | 0 | 63.5 |
| 39  | 90  | 1  | 0 | 64.5 |
| 11  | 44  | 0  | 0 | 27.5 |
| 10  | 39  | 0  | 0 | 24.5 |
| 10  | 40  | 0  | 0 | 25   |
| 18  | 22  | 0  | 0 | 20   |
| 11  | 44  | 0  | 0 | 27.5 |
| 11  | 44  | 0  | 0 | 27.5 |
| 18  | 22  | 0  | 0 | 20   |
| 11  | 43  | 0  | 0 | 27   |
| 10  | 41  | 0  | 0 | 25.5 |
| 10  | 41  | 0  | 0 | 25.5 |
| 19  | 22  | 0  | 0 | 20.5 |
| 10  | 39  | 0  | 0 | 24.5 |
| 10  | 42  | 0  | 0 | 26   |
| 20  | 23  | 0  | 0 | 21.5 |
| 10  | 39  | 0  | 0 | 24.5 |
| 19  | 22  | 0  | 0 | 20.5 |
| 19  | 23  | 0  | 0 | 21   |
| 10  | 41  | 0  | 0 | 25.5 |
| 18  | 22  | 0  | 0 | 20   |
| 10  | 40  | 0  | 0 | 25   |
| 18  | 22  | 0  | 0 | 20   |
| 10  | 40  | 0  | 0 | 25   |
| 20  | 23  | 0  | 0 | 21.5 |
| 11  | 44  | 0  | 0 | 27.5 |
| 10  | 42  | 0  | 0 | 26   |
| 10  | 39  | 0  | 0 | 24.5 |
| 10  | 41  | 0  | 0 | 25.5 |
| 33  | 103 | 1  | 0 | 68   |
| 20  | 21  | 0  | 0 | 20.5 |
| 10  | 44  | 0  | 0 | 27   |
| 19  | 21  | 0  | 0 | 20   |
| 20  | 21  | 0  | 0 | 20.5 |
| 10  | 46  | 0  | 0 | 28   |
| 10  | 46  | 0  | 0 | 28   |
| 9   | 41  | 0  | 0 | 25   |
| 9   | 41  | 0  | 0 | 25   |
| 10  | 45  | 0  | 0 | 27.5 |

|    |    |   |   |      |
|----|----|---|---|------|
| 9  | 41 | 0 | 0 | 25   |
| 20 | 22 | 0 | 0 | 21   |
| 1  | 67 | 0 | 0 | 34   |
| 19 | 20 | 0 | 0 | 19.5 |
| 9  | 44 | 0 | 0 | 26.5 |
| 19 | 19 | 0 | 0 | 19   |
| 9  | 42 | 0 | 0 | 25.5 |
| 19 | 20 | 0 | 0 | 19.5 |
| 9  | 42 | 0 | 0 | 25.5 |
| 9  | 44 | 0 | 0 | 26.5 |
| 9  | 45 | 0 | 0 | 27   |
| 9  | 44 | 0 | 0 | 26.5 |
| 9  | 43 | 0 | 0 | 26   |
| 9  | 42 | 0 | 0 | 25.5 |
| 19 | 20 | 0 | 0 | 19.5 |
| 8  | 43 | 0 | 0 | 25.5 |
| 8  | 43 | 0 | 0 | 25.5 |
| 8  | 43 | 0 | 0 | 25.5 |
| 20 | 18 | 0 | 0 | 19   |
| 20 | 18 | 0 | 0 | 19   |
| 8  | 43 | 0 | 0 | 25.5 |
| 22 | 20 | 0 | 0 | 21   |
| 20 | 19 | 0 | 0 | 19.5 |
| 22 | 20 | 0 | 0 | 21   |
| 20 | 18 | 0 | 0 | 19   |
| 22 | 20 | 0 | 0 | 21   |
| 9  | 48 | 0 | 0 | 28.5 |
| 9  | 48 | 0 | 0 | 28.5 |
| 9  | 46 | 0 | 0 | 27.5 |
| 9  | 47 | 0 | 0 | 28   |
| 9  | 47 | 0 | 0 | 28   |
| 9  | 47 | 0 | 0 | 28   |
| 1  | 70 | 0 | 0 | 35.5 |
| 8  | 46 | 0 | 0 | 27   |
| 8  | 45 | 0 | 0 | 26.5 |
| 8  | 45 | 0 | 0 | 26.5 |
| 8  | 46 | 0 | 0 | 27   |
| 8  | 44 | 0 | 0 | 26   |
| 8  | 45 | 0 | 0 | 26.5 |
| 23 | 19 | 0 | 0 | 21   |
| 22 | 19 | 0 | 0 | 20.5 |
| 8  | 45 | 0 | 0 | 26.5 |
| 1  | 72 | 0 | 0 | 36.5 |
| 8  | 50 | 0 | 0 | 29   |
| 21 | 17 | 0 | 0 | 19   |
| 8  | 48 | 0 | 0 | 28   |
| 21 | 17 | 0 | 0 | 19   |

|     |     |    |   |       |
|-----|-----|----|---|-------|
| 21  | 17  | 0  | 0 | 19    |
| 23  | 18  | 0  | 0 | 20.5  |
| 8   | 47  | 0  | 0 | 27.5  |
| 8   | 48  | 0  | 0 | 28    |
| 32  | 2   | 0  | 0 | 17    |
| 7   | 46  | 0  | 0 | 26.5  |
| 23  | 17  | 0  | 0 | 20    |
| 22  | 16  | 0  | 0 | 19    |
| 7   | 46  | 0  | 0 | 26.5  |
| 7   | 45  | 0  | 0 | 26    |
| 23  | 17  | 0  | 0 | 20    |
| 8   | 51  | 0  | 0 | 29.5  |
| 7   | 45  | 0  | 0 | 26    |
| 37  | 335 | 56 | 0 | 186   |
| 3   | 26  | 0  | 2 | 14.5  |
| 23  | 16  | 0  | 0 | 19.5  |
| 7   | 49  | 0  | 0 | 28    |
| 7   | 49  | 0  | 0 | 28    |
| 7   | 47  | 0  | 0 | 27    |
| 7   | 53  | 0  | 0 | 30    |
| 7   | 51  | 0  | 0 | 29    |
| 7   | 50  | 0  | 0 | 28.5  |
| 22  | 14  | 0  | 0 | 18    |
| 23  | 15  | 0  | 0 | 19    |
| 7   | 52  | 0  | 0 | 29.5  |
| 24  | 16  | 0  | 0 | 20    |
| 7   | 50  | 0  | 0 | 28.5  |
| 7   | 50  | 0  | 0 | 28.5  |
| 932 | 0   | 9  | 0 | 466   |
| 31  | 0   | 0  | 0 | 15.5  |
| 54  | 52  | 1  | 0 | 53    |
| 23  | 14  | 0  | 0 | 18.5  |
| 6   | 47  | 0  | 0 | 26.5  |
| 6   | 47  | 0  | 0 | 26.5  |
| 10  | 171 | 1  | 0 | 90.5  |
| 0   | 71  | 0  | 0 | 35.5  |
| 6   | 49  | 0  | 0 | 27.5  |
| 6   | 49  | 0  | 0 | 27.5  |
| 6   | 51  | 0  | 0 | 28.5  |
| 6   | 50  | 0  | 0 | 28    |
| 23  | 13  | 0  | 0 | 18    |
| 23  | 13  | 0  | 0 | 18    |
| 23  | 13  | 0  | 0 | 18    |
| 68  | 139 | 2  | 0 | 103.5 |
| 47  | 97  | 1  | 0 | 72    |
| 6   | 53  | 0  | 0 | 29.5  |
| 6   | 53  | 0  | 0 | 29.5  |



|     |     |    |   |       |
|-----|-----|----|---|-------|
| 0   | 22  | 0  | 0 | 11    |
| 0   | 22  | 0  | 0 | 11    |
| 0   | 22  | 0  | 0 | 11    |
| 0   | 22  | 0  | 0 | 11    |
| 0   | 22  | 0  | 0 | 11    |
| 0   | 22  | 0  | 0 | 11    |
| 0   | 22  | 0  | 0 | 11    |
| 0   | 22  | 0  | 0 | 11    |
| 26  | 11  | 0  | 0 | 18.5  |
| 88  | 12  | 1  | 0 | 50    |
| 11  | 0   | 0  | 0 | 5.5   |
| 0   | 0   | 2  | 0 | 0     |
| 0   | 0   | 2  | 0 | 0     |
| 0   | 0   | 2  | 0 | 0     |
| 11  | 1   | 0  | 0 | 6     |
| 0   | 0   | 2  | 0 | 0     |
| 11  | 1   | 0  | 0 | 6     |
| 4   | 51  | 0  | 0 | 27.5  |
| 4   | 51  | 0  | 0 | 27.5  |
| 17  | 80  | 13 | 0 | 48.5  |
| 21  | 170 | 1  | 0 | 95.5  |
| 4   | 55  | 0  | 0 | 29.5  |
| 4   | 55  | 0  | 0 | 29.5  |
| 4   | 53  | 0  | 0 | 28.5  |
| 4   | 53  | 0  | 0 | 28.5  |
| 23  | 76  | 14 | 0 | 49.5  |
| 4   | 56  | 0  | 0 | 30    |
| 4   | 56  | 0  | 0 | 30    |
| 30  | 132 | 1  | 0 | 81    |
| 35  | 86  | 1  | 0 | 60.5  |
| 4   | 59  | 0  | 0 | 31.5  |
| 25  | 8   | 0  | 0 | 16.5  |
| 17  | 135 | 1  | 0 | 76    |
| 43  | 70  | 1  | 0 | 56.5  |
| 32  | 94  | 1  | 0 | 63    |
| 30  | 95  | 1  | 0 | 62.5  |
| 65  | 61  | 1  | 0 | 63    |
| 3   | 54  | 0  | 0 | 28.5  |
| 25  | 7   | 0  | 0 | 16    |
| 30  | 97  | 1  | 0 | 63.5  |
| 7   | 24  | 4  | 0 | 15.5  |
| 134 | 97  | 3  | 0 | 115.5 |
| 3   | 57  | 0  | 0 | 30    |
| 3   | 55  | 0  | 0 | 29    |
| 3   | 58  | 0  | 0 | 30.5  |
| 3   | 59  | 0  | 0 | 31    |
| 3   | 58  | 0  | 0 | 30.5  |

|     |      |    |   |        |
|-----|------|----|---|--------|
| 0   | 55   | 7  | 0 | 27.5   |
| 3   | 61   | 0  | 0 | 32     |
| 26  | 6    | 0  | 0 | 16     |
| 3   | 60   | 0  | 0 | 31.5   |
| 79  | 105  | 32 | 0 | 92     |
| 27  | 6    | 0  | 0 | 16.5   |
| 25  | 110  | 1  | 0 | 67.5   |
| 52  | 53   | 1  | 0 | 52.5   |
| 2   | 55   | 0  | 0 | 28.5   |
| 632 | 2083 | 29 | 0 | 1357.5 |
| 37  | 406  | 63 | 0 | 221.5  |
| 8   | 54   | 7  | 0 | 31     |
| 2   | 56   | 0  | 0 | 29     |
| 2   | 58   | 0  | 0 | 30     |
| 2   | 56   | 0  | 0 | 29     |
| 2   | 58   | 0  | 0 | 30     |
| 14  | 9    | 4  | 0 | 11.5   |
| 26  | 4    | 0  | 0 | 15     |
| 26  | 4    | 0  | 0 | 15     |
| 22  | 118  | 1  | 0 | 70     |
| 3   | 196  | 1  | 0 | 99.5   |
| 39  | 110  | 1  | 0 | 74.5   |
| 2   | 61   | 0  | 0 | 31.5   |
| 9   | 96   | 13 | 0 | 52.5   |
| 54  | 47   | 1  | 0 | 50.5   |
| 104 | 65   | 2  | 0 | 84.5   |
| 28  | 4    | 0  | 0 | 16     |
| 20  | 116  | 1  | 0 | 68     |
| 12  | 39   | 7  | 0 | 25.5   |
| 12  | 64   | 9  | 0 | 38     |
| 31  | 59   | 13 | 0 | 45     |
| 26  | 3    | 0  | 0 | 14.5   |
| 8   | 41   | 6  | 0 | 24.5   |
| 27  | 3    | 0  | 0 | 15     |
| 111 | 351  | 70 | 0 | 231    |
| 1   | 59   | 0  | 0 | 30     |
| 1   | 60   | 0  | 0 | 30.5   |
| 1   | 59   | 0  | 0 | 30     |
| 27  | 2    | 0  | 0 | 14.5   |
| 1   | 62   | 0  | 0 | 31.5   |
| 61  | 62   | 1  | 0 | 61.5   |
| 1   | 63   | 0  | 0 | 32     |
| 1   | 63   | 0  | 0 | 32     |
| 1   | 64   | 0  | 0 | 32.5   |
| 103 | 271  | 57 | 0 | 187    |
| 106 | 241  | 53 | 0 | 173.5  |
| 0   | 58   | 0  | 0 | 29     |

|     |     |    |    |       |
|-----|-----|----|----|-------|
| 30  | 2   | 0  | 0  | 16    |
| 0   | 57  | 0  | 0  | 28.5  |
| 0   | 58  | 0  | 0  | 29    |
| 118 | 400 | 76 | 0  | 259   |
| 37  | 70  | 1  | 0  | 53.5  |
| 31  | 83  | 1  | 0  | 57    |
| 36  | 78  | 1  | 0  | 57    |
| 32  | 82  | 1  | 0  | 57    |
| 0   | 60  | 0  | 0  | 30    |
| 40  | 65  | 1  | 0  | 52.5  |
| 0   | 62  | 0  | 0  | 31    |
| 0   | 62  | 0  | 0  | 31    |
| 427 | 142 | 9  | 20 | 284.5 |
| 75  | 332 | 57 | 0  | 203.5 |
| 0   | 64  | 0  | 0  | 32    |
| 0   | 64  | 0  | 0  | 32    |
| 0   | 63  | 0  | 0  | 31.5  |
| 0   | 64  | 0  | 0  | 32    |
| 42  | 60  | 1  | 0  | 51    |
| 25  | 102 | 1  | 0  | 63.5  |
| 46  | 52  | 1  | 0  | 49    |
| 48  | 54  | 1  | 0  | 51    |
| 13  | 31  | 0  | 0  | 22    |
| 14  | 29  | 0  | 0  | 21.5  |
| 13  | 28  | 0  | 0  | 20.5  |
| 13  | 28  | 0  | 0  | 20.5  |
| 13  | 30  | 0  | 0  | 21.5  |
| 13  | 31  | 0  | 0  | 22    |
| 13  | 30  | 0  | 0  | 21.5  |
| 14  | 29  | 0  | 0  | 21.5  |
| 14  | 29  | 0  | 0  | 21.5  |
| 13  | 29  | 0  | 0  | 21    |
| 13  | 29  | 0  | 0  | 21    |
| 13  | 28  | 0  | 0  | 20.5  |
| 14  | 29  | 0  | 0  | 21.5  |
| 14  | 29  | 0  | 0  | 21.5  |
| 7   | 28  | 5  | 0  | 17.5  |
| 11  | 28  | 0  | 0  | 19.5  |
| 13  | 25  | 0  | 0  | 19    |
| 14  | 23  | 0  | 0  | 18.5  |
| 12  | 34  | 0  | 0  | 23    |
| 15  | 26  | 0  | 0  | 20.5  |
| 11  | 31  | 0  | 0  | 21    |
| 11  | 28  | 0  | 0  | 19.5  |
| 11  | 30  | 0  | 0  | 20.5  |
| 11  | 28  | 0  | 0  | 19.5  |
| 13  | 25  | 0  | 0  | 19    |

|    |    |   |   |      |
|----|----|---|---|------|
| 14 | 25 | 0 | 0 | 19.5 |
| 14 | 25 | 0 | 0 | 19.5 |
| 16 | 25 | 0 | 0 | 20.5 |
| 13 | 25 | 0 | 0 | 19   |
| 11 | 35 | 0 | 0 | 23   |
| 11 | 29 | 0 | 0 | 20   |
| 11 | 28 | 0 | 0 | 19.5 |
| 14 | 23 | 0 | 0 | 18.5 |
| 11 | 33 | 0 | 0 | 22   |
| 12 | 26 | 0 | 0 | 19   |
| 14 | 23 | 0 | 0 | 18.5 |
| 12 | 26 | 0 | 0 | 19   |
| 15 | 27 | 0 | 0 | 21   |
| 12 | 30 | 0 | 0 | 21   |
| 13 | 27 | 0 | 0 | 20   |
| 12 | 29 | 0 | 0 | 20.5 |
| 12 | 30 | 0 | 0 | 21   |
| 15 | 26 | 0 | 0 | 20.5 |
| 11 | 33 | 0 | 0 | 22   |
| 13 | 26 | 0 | 0 | 19.5 |
| 11 | 29 | 0 | 0 | 20   |
| 11 | 28 | 0 | 0 | 19.5 |
| 11 | 29 | 0 | 0 | 20   |
| 11 | 33 | 0 | 0 | 22   |
| 12 | 30 | 0 | 0 | 21   |
| 15 | 24 | 0 | 0 | 19.5 |
| 13 | 26 | 0 | 0 | 19.5 |
| 15 | 27 | 0 | 0 | 21   |
| 14 | 27 | 0 | 0 | 20.5 |
| 12 | 26 | 0 | 0 | 19   |
| 14 | 23 | 0 | 0 | 18.5 |
| 12 | 33 | 0 | 0 | 22.5 |
| 14 | 25 | 0 | 0 | 19.5 |
| 12 | 27 | 0 | 0 | 19.5 |
| 11 | 31 | 0 | 0 | 21   |
| 15 | 26 | 0 | 0 | 20.5 |
| 11 | 30 | 0 | 0 | 20.5 |
| 15 | 25 | 0 | 0 | 20   |
| 12 | 30 | 0 | 0 | 21   |
| 11 | 31 | 0 | 0 | 21   |
| 12 | 32 | 0 | 0 | 22   |
| 11 | 33 | 0 | 0 | 22   |
| 13 | 27 | 0 | 0 | 20   |
| 11 | 30 | 0 | 0 | 20.5 |
| 15 | 24 | 0 | 0 | 19.5 |
| 12 | 33 | 0 | 0 | 22.5 |
| 11 | 29 | 0 | 0 | 20   |



|    |    |   |   |      |
|----|----|---|---|------|
| 13 | 27 | 0 | 0 | 20   |
| 11 | 30 | 0 | 0 | 20.5 |
| 11 | 28 | 0 | 0 | 19.5 |
| 13 | 24 | 0 | 0 | 18.5 |
| 16 | 25 | 0 | 0 | 20.5 |
| 13 | 26 | 0 | 0 | 19.5 |
| 11 | 33 | 0 | 0 | 22   |
| 14 | 26 | 0 | 0 | 20   |
| 12 | 28 | 0 | 0 | 20   |
| 11 | 35 | 0 | 0 | 23   |
| 11 | 33 | 0 | 0 | 22   |
| 15 | 26 | 0 | 0 | 20.5 |
| 16 | 25 | 0 | 0 | 20.5 |
| 14 | 25 | 0 | 0 | 19.5 |
| 16 | 25 | 0 | 0 | 20.5 |
| 12 | 28 | 0 | 0 | 20   |
| 14 | 23 | 0 | 0 | 18.5 |
| 13 | 27 | 0 | 0 | 20   |
| 15 | 25 | 0 | 0 | 20   |
| 12 | 34 | 0 | 0 | 23   |
| 15 | 27 | 0 | 0 | 21   |
| 42 | 93 | 1 | 0 | 67.5 |
| 16 | 23 | 0 | 0 | 19.5 |
| 10 | 31 | 0 | 0 | 20.5 |
| 10 | 34 | 0 | 0 | 22   |
| 11 | 36 | 0 | 0 | 23.5 |
| 10 | 33 | 0 | 0 | 21.5 |
| 10 | 30 | 0 | 0 | 20   |
| 15 | 23 | 0 | 0 | 19   |
| 10 | 31 | 0 | 0 | 20.5 |
| 11 | 36 | 0 | 0 | 23.5 |
| 10 | 33 | 0 | 0 | 21.5 |
| 10 | 33 | 0 | 0 | 21.5 |
| 14 | 22 | 0 | 0 | 18   |
| 14 | 22 | 0 | 0 | 18   |
| 10 | 31 | 0 | 0 | 20.5 |
| 11 | 36 | 0 | 0 | 23.5 |
| 10 | 33 | 0 | 0 | 21.5 |
| 10 | 34 | 0 | 0 | 22   |
| 15 | 23 | 0 | 0 | 19   |
| 10 | 36 | 0 | 0 | 23   |
| 11 | 36 | 0 | 0 | 23.5 |
| 10 | 32 | 0 | 0 | 21   |
| 10 | 35 | 0 | 0 | 22.5 |
| 11 | 36 | 0 | 0 | 23.5 |
| 10 | 30 | 0 | 0 | 20   |
| 10 | 31 | 0 | 0 | 20.5 |

|    |    |   |   |      |
|----|----|---|---|------|
| 15 | 22 | 0 | 0 | 18.5 |
| 16 | 23 | 0 | 0 | 19.5 |
| 15 | 23 | 0 | 0 | 19   |
| 10 | 30 | 0 | 0 | 20   |
| 10 | 34 | 0 | 0 | 22   |
| 10 | 35 | 0 | 0 | 22.5 |
| 10 | 33 | 0 | 0 | 21.5 |
| 10 | 31 | 0 | 0 | 20.5 |
| 16 | 22 | 0 | 0 | 19   |
| 17 | 23 | 0 | 0 | 20   |
| 10 | 32 | 0 | 0 | 21   |
| 17 | 23 | 0 | 0 | 20   |
| 11 | 36 | 0 | 0 | 23.5 |
| 15 | 22 | 0 | 0 | 18.5 |
| 16 | 22 | 0 | 0 | 19   |
| 10 | 30 | 0 | 0 | 20   |
| 11 | 36 | 0 | 0 | 23.5 |
| 10 | 31 | 0 | 0 | 20.5 |
| 10 | 31 | 0 | 0 | 20.5 |
| 16 | 22 | 0 | 0 | 19   |
| 15 | 22 | 0 | 0 | 18.5 |
| 10 | 32 | 0 | 0 | 21   |
| 16 | 22 | 0 | 0 | 19   |
| 17 | 23 | 0 | 0 | 20   |
| 10 | 34 | 0 | 0 | 22   |
| 10 | 32 | 0 | 0 | 21   |
| 16 | 23 | 0 | 0 | 19.5 |
| 10 | 30 | 0 | 0 | 20   |
| 16 | 23 | 0 | 0 | 19.5 |
| 14 | 22 | 0 | 0 | 18   |
| 9  | 33 | 0 | 0 | 21   |
| 10 | 37 | 0 | 0 | 23.5 |
| 17 | 21 | 0 | 0 | 19   |
| 9  | 33 | 0 | 0 | 21   |
| 9  | 32 | 0 | 0 | 20.5 |
| 9  | 32 | 0 | 0 | 20.5 |
| 9  | 35 | 0 | 0 | 22   |
| 16 | 21 | 0 | 0 | 18.5 |
| 10 | 37 | 0 | 0 | 23.5 |
| 9  | 32 | 0 | 0 | 20.5 |
| 10 | 37 | 0 | 0 | 23.5 |
| 9  | 34 | 0 | 0 | 21.5 |
| 15 | 20 | 0 | 0 | 17.5 |
| 9  | 35 | 0 | 0 | 22   |
| 9  | 33 | 0 | 0 | 21   |
| 15 | 19 | 0 | 0 | 17   |
| 9  | 34 | 0 | 0 | 21.5 |

|    |    |   |   |      |
|----|----|---|---|------|
| 16 | 21 | 0 | 0 | 18.5 |
| 9  | 34 | 0 | 0 | 21.5 |
| 15 | 20 | 0 | 0 | 17.5 |
| 16 | 21 | 0 | 0 | 18.5 |
| 9  | 33 | 0 | 0 | 21   |
| 9  | 35 | 0 | 0 | 22   |
| 9  | 35 | 0 | 0 | 22   |
| 9  | 35 | 0 | 0 | 22   |
| 9  | 36 | 0 | 0 | 22.5 |
| 15 | 19 | 0 | 0 | 17   |
| 15 | 19 | 0 | 0 | 17   |
| 9  | 35 | 0 | 0 | 22   |
| 10 | 38 | 0 | 0 | 24   |
| 9  | 34 | 0 | 0 | 21.5 |
| 10 | 38 | 0 | 0 | 24   |
| 9  | 35 | 0 | 0 | 22   |
| 17 | 21 | 0 | 0 | 19   |
| 15 | 19 | 0 | 0 | 17   |
| 10 | 38 | 0 | 0 | 24   |
| 15 | 20 | 0 | 0 | 17.5 |
| 9  | 40 | 0 | 0 | 24.5 |
| 9  | 40 | 0 | 0 | 24.5 |
| 8  | 34 | 0 | 0 | 21   |
| 9  | 37 | 0 | 0 | 23   |
| 9  | 37 | 0 | 0 | 23   |
| 8  | 34 | 0 | 0 | 21   |
| 18 | 20 | 0 | 0 | 19   |
| 16 | 19 | 0 | 0 | 17.5 |
| 16 | 18 | 0 | 0 | 17   |
| 9  | 40 | 0 | 0 | 24.5 |
| 17 | 20 | 0 | 0 | 18.5 |
| 9  | 38 | 0 | 0 | 23.5 |
| 17 | 19 | 0 | 0 | 18   |
| 9  | 37 | 0 | 0 | 23   |
| 8  | 34 | 0 | 0 | 21   |
| 9  | 40 | 0 | 0 | 24.5 |
| 9  | 37 | 0 | 0 | 23   |
| 9  | 40 | 0 | 0 | 24.5 |
| 9  | 38 | 0 | 0 | 23.5 |
| 16 | 18 | 0 | 0 | 17   |
| 8  | 35 | 0 | 0 | 21.5 |
| 9  | 39 | 0 | 0 | 24   |
| 8  | 35 | 0 | 0 | 21.5 |
| 9  | 39 | 0 | 0 | 24   |
| 8  | 35 | 0 | 0 | 21.5 |
| 8  | 35 | 0 | 0 | 21.5 |
| 8  | 35 | 0 | 0 | 21.5 |

|     |     |   |   |      |
|-----|-----|---|---|------|
| 8   | 35  | 0 | 0 | 21.5 |
| 9   | 39  | 0 | 0 | 24   |
| 36  | 109 | 1 | 0 | 72.5 |
| 112 | 110 | 3 | 0 | 111  |
| 6   | 274 | 2 | 0 | 140  |
| 8   | 39  | 0 | 0 | 23.5 |
| 8   | 38  | 0 | 0 | 23   |
| 8   | 38  | 0 | 0 | 23   |
| 8   | 36  | 0 | 0 | 22   |
| 8   | 37  | 0 | 0 | 22.5 |
| 8   | 39  | 0 | 0 | 23.5 |
| 16  | 17  | 0 | 0 | 16.5 |
| 8   | 39  | 0 | 0 | 23.5 |
| 8   | 38  | 0 | 0 | 23   |
| 8   | 38  | 0 | 0 | 23   |
| 8   | 37  | 0 | 0 | 22.5 |
| 8   | 36  | 0 | 0 | 22   |
| 8   | 38  | 0 | 0 | 23   |
| 8   | 36  | 0 | 0 | 22   |
| 17  | 17  | 0 | 0 | 17   |
| 8   | 37  | 0 | 0 | 22.5 |
| 8   | 37  | 0 | 0 | 22.5 |
| 8   | 38  | 0 | 0 | 23   |
| 17  | 18  | 0 | 0 | 17.5 |
| 8   | 36  | 0 | 0 | 22   |
| 8   | 38  | 0 | 0 | 23   |
| 8   | 36  | 0 | 0 | 22   |
| 8   | 38  | 0 | 0 | 23   |
| 17  | 18  | 0 | 0 | 17.5 |
| 8   | 38  | 0 | 0 | 23   |
| 8   | 39  | 0 | 0 | 23.5 |
| 8   | 39  | 0 | 0 | 23.5 |
| 17  | 18  | 0 | 0 | 17.5 |
| 4   | 24  | 4 | 0 | 14   |
| 17  | 16  | 0 | 0 | 16.5 |
| 8   | 42  | 0 | 0 | 25   |
| 8   | 40  | 0 | 0 | 24   |
| 8   | 41  | 0 | 0 | 24.5 |
| 8   | 40  | 0 | 0 | 24   |
| 8   | 41  | 0 | 0 | 24.5 |
| 8   | 42  | 0 | 0 | 25   |
| 7   | 36  | 0 | 0 | 21.5 |
| 7   | 36  | 0 | 0 | 21.5 |
| 7   | 36  | 0 | 0 | 21.5 |
| 8   | 41  | 0 | 0 | 24.5 |
| 8   | 42  | 0 | 0 | 25   |
| 7   | 36  | 0 | 0 | 21.5 |

|     |     |    |   |       |
|-----|-----|----|---|-------|
| 73  | 306 | 4  | 0 | 189.5 |
| 4   | 19  | 3  | 0 | 11.5  |
| 6   | 94  | 11 | 0 | 50    |
| 12  | 9   | 4  | 0 | 10.5  |
| 82  | 159 | 3  | 0 | 120.5 |
| 7   | 39  | 0  | 0 | 23    |
| 7   | 38  | 0  | 0 | 22.5  |
| 19  | 17  | 0  | 0 | 18    |
| 18  | 16  | 0  | 0 | 17    |
| 7   | 39  | 0  | 0 | 23    |
| 18  | 16  | 0  | 0 | 17    |
| 18  | 16  | 0  | 0 | 17    |
| 7   | 38  | 0  | 0 | 22.5  |
| 17  | 15  | 0  | 0 | 16    |
| 17  | 15  | 0  | 0 | 16    |
| 7   | 37  | 0  | 0 | 22    |
| 7   | 39  | 0  | 0 | 23    |
| 7   | 40  | 0  | 0 | 23.5  |
| 7   | 39  | 0  | 0 | 23    |
| 19  | 17  | 0  | 0 | 18    |
| 7   | 40  | 0  | 0 | 23.5  |
| 7   | 37  | 0  | 0 | 22    |
| 7   | 39  | 0  | 0 | 23    |
| 7   | 38  | 0  | 0 | 22.5  |
| 7   | 37  | 0  | 0 | 22    |
| 7   | 40  | 0  | 0 | 23.5  |
| 7   | 38  | 0  | 0 | 22.5  |
| 7   | 40  | 0  | 0 | 23.5  |
| 19  | 17  | 0  | 0 | 18    |
| 7   | 39  | 0  | 0 | 23    |
| 19  | 16  | 0  | 0 | 17.5  |
| 78  | 92  | 2  | 0 | 85    |
| 7   | 42  | 0  | 0 | 24.5  |
| 7   | 41  | 0  | 0 | 24    |
| 7   | 43  | 0  | 0 | 25    |
| 7   | 43  | 0  | 0 | 25    |
| 7   | 41  | 0  | 0 | 24    |
| 7   | 43  | 0  | 0 | 25    |
| 7   | 42  | 0  | 0 | 24.5  |
| 7   | 43  | 0  | 0 | 25    |
| 7   | 43  | 0  | 0 | 25    |
| 7   | 43  | 0  | 0 | 25    |
| 7   | 41  | 0  | 0 | 24    |
| 7   | 41  | 0  | 0 | 24    |
| 7   | 43  | 0  | 0 | 25    |
| 207 | 124 | 5  | 0 | 165.5 |
| 6   | 38  | 0  | 0 | 22    |

|    |     |   |   |      |
|----|-----|---|---|------|
| 6  | 38  | 0 | 0 | 22   |
| 6  | 38  | 0 | 0 | 22   |
| 6  | 39  | 0 | 0 | 22.5 |
| 6  | 38  | 0 | 0 | 22   |
| 7  | 44  | 0 | 0 | 25.5 |
| 6  | 38  | 0 | 0 | 22   |
| 6  | 38  | 0 | 0 | 22   |
| 7  | 44  | 0 | 0 | 25.5 |
| 20 | 15  | 0 | 0 | 17.5 |
| 6  | 39  | 0 | 0 | 22.5 |
| 6  | 38  | 0 | 0 | 22   |
| 6  | 38  | 0 | 0 | 22   |
| 19 | 14  | 0 | 0 | 16.5 |
| 7  | 44  | 0 | 0 | 25.5 |
| 6  | 38  | 0 | 0 | 22   |
| 6  | 39  | 0 | 0 | 22.5 |
| 19 | 14  | 0 | 0 | 16.5 |
| 6  | 40  | 0 | 0 | 23   |
| 6  | 41  | 0 | 0 | 23.5 |
| 6  | 40  | 0 | 0 | 23   |
| 6  | 41  | 0 | 0 | 23.5 |
| 6  | 41  | 0 | 0 | 23.5 |
| 6  | 40  | 0 | 0 | 23   |
| 6  | 41  | 0 | 0 | 23.5 |
| 18 | 13  | 0 | 0 | 15.5 |
| 18 | 13  | 0 | 0 | 15.5 |
| 6  | 41  | 0 | 0 | 23.5 |
| 6  | 40  | 0 | 0 | 23   |
| 10 | 147 | 1 | 0 | 78.5 |
| 6  | 45  | 0 | 0 | 25.5 |
| 20 | 13  | 0 | 0 | 16.5 |
| 6  | 45  | 0 | 0 | 25.5 |
| 6  | 44  | 0 | 0 | 25   |
| 6  | 44  | 0 | 0 | 25   |
| 6  | 43  | 0 | 0 | 24.5 |
| 6  | 43  | 0 | 0 | 24.5 |
| 6  | 45  | 0 | 0 | 25.5 |
| 6  | 43  | 0 | 0 | 24.5 |
| 6  | 43  | 0 | 0 | 24.5 |
| 6  | 43  | 0 | 0 | 24.5 |
| 6  | 43  | 0 | 0 | 24.5 |
| 6  | 43  | 0 | 0 | 24.5 |
| 17 | 120 | 1 | 0 | 68.5 |
| 22 | 50  | 9 | 0 | 36   |
| 6  | 46  | 0 | 0 | 26   |
| 5  | 40  | 0 | 0 | 22.5 |
| 5  | 41  | 0 | 0 | 23   |
| 5  | 41  | 0 | 0 | 23   |

|    |      |    |   |       |
|----|------|----|---|-------|
| 5  | 40   | 0  | 0 | 22.5  |
| 5  | 40   | 0  | 0 | 22.5  |
| 5  | 41   | 0  | 0 | 23    |
| 5  | 40   | 0  | 0 | 22.5  |
| 5  | 40   | 0  | 0 | 22.5  |
| 21 | 13   | 0  | 0 | 17    |
| 5  | 41   | 0  | 0 | 23    |
| 5  | 41   | 0  | 0 | 23    |
| 65 | 1922 | 17 | 0 | 993.5 |
| 19 | 11   | 0  | 0 | 15    |
| 5  | 42   | 0  | 0 | 23.5  |
| 5  | 42   | 0  | 0 | 23.5  |
| 5  | 43   | 0  | 0 | 24    |
| 5  | 42   | 0  | 0 | 23.5  |
| 21 | 12   | 0  | 0 | 16.5  |
| 5  | 42   | 0  | 0 | 23.5  |
| 5  | 43   | 0  | 0 | 24    |
| 2  | 21   | 3  | 0 | 11.5  |
| 5  | 45   | 0  | 0 | 25    |
| 5  | 44   | 0  | 0 | 24.5  |
| 5  | 46   | 0  | 0 | 25.5  |
| 67 | 886  | 9  | 0 | 476.5 |
| 22 | 11   | 0  | 0 | 16.5  |
| 5  | 48   | 0  | 0 | 26.5  |
| 5  | 48   | 0  | 0 | 26.5  |
| 5  | 48   | 0  | 0 | 26.5  |
| 20 | 10   | 0  | 0 | 15    |
| 41 | 119  | 20 | 0 | 80    |
| 2  | 29   | 4  | 0 | 15.5  |
| 4  | 42   | 0  | 0 | 23    |
| 4  | 43   | 0  | 0 | 23.5  |
| 4  | 42   | 0  | 0 | 23    |
| 4  | 42   | 0  | 0 | 23    |
| 4  | 42   | 0  | 0 | 23    |
| 4  | 42   | 0  | 0 | 23    |
| 4  | 42   | 0  | 0 | 23    |
| 4  | 42   | 0  | 0 | 23    |
| 4  | 43   | 0  | 0 | 23.5  |
| 4  | 44   | 0  | 0 | 24    |
| 4  | 45   | 0  | 0 | 24.5  |
| 4  | 45   | 0  | 0 | 24.5  |
| 4  | 45   | 0  | 0 | 24.5  |
| 20 | 9    | 0  | 0 | 14.5  |
| 8  | 150  | 1  | 0 | 79    |
| 20 | 8    | 0  | 0 | 14    |
| 4  | 47   | 0  | 0 | 25.5  |
| 20 | 8    | 0  | 0 | 14    |
| 4  | 46   | 0  | 0 | 25    |

|    |     |     |   |       |
|----|-----|-----|---|-------|
| 4  | 47  | 0   | 0 | 25.5  |
| 4  | 50  | 0   | 0 | 27    |
| 4  | 49  | 0   | 0 | 26.5  |
| 33 | 71  | 1   | 0 | 52    |
| 35 | 65  | 1   | 0 | 50    |
| 3  | 45  | 0   | 0 | 24    |
| 3  | 44  | 0   | 0 | 23.5  |
| 3  | 44  | 0   | 0 | 23.5  |
| 3  | 44  | 0   | 0 | 23.5  |
| 3  | 45  | 0   | 0 | 24    |
| 21 | 7   | 0   | 0 | 14    |
| 3  | 45  | 0   | 0 | 24    |
| 3  | 44  | 0   | 0 | 23.5  |
| 3  | 44  | 0   | 0 | 23.5  |
| 3  | 45  | 0   | 0 | 24    |
| 3  | 44  | 0   | 0 | 23.5  |
| 65 | 190 | 3   | 0 | 127.5 |
| 89 | 815 | 115 | 0 | 452   |
| 3  | 46  | 0   | 0 | 24.5  |
| 3  | 47  | 0   | 0 | 25    |
| 3  | 49  | 0   | 0 | 26    |
| 23 | 7   | 0   | 0 | 15    |
| 3  | 52  | 0   | 0 | 27.5  |
| 3  | 50  | 0   | 0 | 26.5  |
| 22 | 6   | 0   | 0 | 14    |
| 3  | 51  | 0   | 0 | 27    |
| 3  | 51  | 0   | 0 | 27    |
| 3  | 51  | 0   | 0 | 27    |
| 13 | 2   | 4   | 0 | 7.5   |
| 1  | 16  | 2   | 0 | 8.5   |
| 24 | 93  | 1   | 0 | 58.5  |
| 24 | 6   | 0   | 0 | 15    |
| 2  | 46  | 0   | 0 | 24    |
| 2  | 46  | 0   | 0 | 24    |
| 2  | 47  | 0   | 0 | 24.5  |
| 2  | 46  | 0   | 0 | 24    |
| 2  | 47  | 0   | 0 | 24.5  |
| 46 | 50  | 1   | 0 | 48    |
| 2  | 49  | 0   | 0 | 25.5  |
| 2  | 48  | 0   | 0 | 25    |
| 2  | 48  | 0   | 0 | 25    |
| 2  | 50  | 0   | 0 | 26    |
| 2  | 51  | 0   | 0 | 26.5  |
| 2  | 50  | 0   | 0 | 26    |
| 2  | 50  | 0   | 0 | 26    |
| 60 | 22  | 1   | 0 | 41    |
| 22 | 4   | 0   | 0 | 13    |



|     |     |     |   |       |
|-----|-----|-----|---|-------|
| 2   | 53  | 0   | 0 | 27.5  |
| 2   | 53  | 0   | 0 | 27.5  |
| 71  | 12  | 1   | 0 | 41.5  |
| 7   | 74  | 8   | 0 | 40.5  |
| 22  | 3   | 0   | 0 | 12.5  |
| 25  | 4   | 0   | 0 | 14.5  |
| 17  | 107 | 1   | 0 | 62    |
| 52  | 125 | 2   | 0 | 88.5  |
| 25  | 3   | 0   | 0 | 14    |
| 25  | 3   | 0   | 0 | 14    |
| 1   | 51  | 0   | 0 | 26    |
| 1   | 51  | 0   | 0 | 26    |
| 22  | 2   | 0   | 0 | 12    |
| 1   | 50  | 0   | 0 | 25.5  |
| 14  | 25  | 5   | 0 | 19.5  |
| 17  | 112 | 1   | 0 | 64.5  |
| 23  | 2   | 0   | 0 | 12.5  |
| 16  | 114 | 1   | 0 | 65    |
| 16  | 114 | 1   | 0 | 65    |
| 106 | 274 | 5   | 0 | 190   |
| 1   | 54  | 0   | 0 | 27.5  |
| 9   | 195 | 22  | 0 | 102   |
| 0   | 49  | 0   | 0 | 24.5  |
| 86  | 415 | 6   | 0 | 250.5 |
| 0   | 50  | 0   | 0 | 25    |
| 23  | 0   | 0   | 0 | 11.5  |
| 239 | 787 | 134 | 0 | 513   |
| 0   | 53  | 0   | 0 | 26.5  |
| 0   | 52  | 0   | 0 | 26    |
| 0   | 53  | 0   | 0 | 26.5  |
| 32  | 264 | 3   | 0 | 148   |
| 0   | 55  | 0   | 0 | 27.5  |
| 94  | 51  | 2   | 0 | 72.5  |
| 10  | 29  | 4   | 0 | 19.5  |
| 11  | 25  | 4   | 0 | 18    |
| 48  | 117 | 19  | 0 | 82.5  |
| 319 | 351 | 11  | 0 | 335   |
| 8   | 30  | 4   | 0 | 19    |
| 6   | 9   | 0   | 0 | 7.5   |
| 4   | 13  | 0   | 0 | 8.5   |
| 4   | 12  | 0   | 0 | 8     |
| 4   | 12  | 0   | 0 | 8     |
| 4   | 12  | 0   | 0 | 8     |
| 4   | 12  | 0   | 0 | 8     |
| 6   | 9   | 0   | 0 | 7.5   |
| 4   | 13  | 0   | 0 | 8.5   |
| 4   | 13  | 0   | 0 | 8.5   |

|   |    |   |   |     |
|---|----|---|---|-----|
| 6 | 9  | 0 | 0 | 7.5 |
| 4 | 13 | 0 | 0 | 8.5 |
| 4 | 13 | 0 | 0 | 8.5 |
| 4 | 12 | 0 | 0 | 8   |
| 4 | 12 | 0 | 0 | 8   |
| 4 | 12 | 0 | 0 | 8   |
| 4 | 13 | 0 | 0 | 8.5 |
| 4 | 12 | 0 | 0 | 8   |
| 4 | 12 | 0 | 0 | 8   |
| 4 | 13 | 0 | 0 | 8.5 |
| 6 | 9  | 0 | 0 | 7.5 |
| 4 | 12 | 0 | 0 | 8   |
| 4 | 12 | 0 | 0 | 8   |
| 4 | 12 | 0 | 0 | 8   |
| 4 | 13 | 0 | 0 | 8.5 |
| 4 | 13 | 0 | 0 | 8.5 |
| 4 | 12 | 0 | 0 | 8   |
| 4 | 12 | 0 | 0 | 8   |
| 4 | 12 | 0 | 0 | 8   |
| 4 | 13 | 0 | 0 | 8.5 |
| 4 | 12 | 0 | 0 | 8   |
| 4 | 12 | 0 | 0 | 8   |
| 6 | 9  | 0 | 0 | 7.5 |
| 4 | 13 | 0 | 0 | 8.5 |
| 4 | 12 | 0 | 0 | 8   |
| 6 | 9  | 0 | 0 | 7.5 |
| 4 | 12 | 0 | 0 | 8   |
| 6 | 9  | 0 | 0 | 7.5 |
| 4 | 13 | 0 | 0 | 8.5 |
| 6 | 9  | 0 | 0 | 7.5 |
| 6 | 9  | 0 | 0 | 7.5 |
| 4 | 12 | 0 | 0 | 8   |
| 4 | 13 | 0 | 0 | 8.5 |
| 6 | 9  | 0 | 0 | 7.5 |
| 4 | 13 | 0 | 0 | 8.5 |
| 4 | 13 | 0 | 0 | 8.5 |
| 4 | 13 | 0 | 0 | 8.5 |
| 4 | 12 | 0 | 0 | 8   |
| 4 | 13 | 0 | 0 | 8.5 |
| 4 | 13 | 0 | 0 | 8.5 |
| 4 | 13 | 0 | 0 | 8.5 |
| 4 | 12 | 0 | 0 | 8   |
| 6 | 9  | 0 | 0 | 7.5 |
| 4 | 12 | 0 | 0 | 8   |
| 6 | 9  | 0 | 0 | 7.5 |
| 4 | 13 | 0 | 0 | 8.5 |
| 4 | 13 | 0 | 0 | 8.5 |

|   |    |   |   |     |
|---|----|---|---|-----|
| 4 | 13 | 0 | 0 | 8.5 |
| 4 | 13 | 0 | 0 | 8.5 |
| 4 | 12 | 0 | 0 | 8   |
| 4 | 12 | 0 | 0 | 8   |
| 6 | 9  | 0 | 0 | 7.5 |
| 4 | 11 | 0 | 0 | 7.5 |
| 4 | 11 | 0 | 0 | 7.5 |
| 5 | 10 | 0 | 0 | 7.5 |
| 5 | 10 | 0 | 0 | 7.5 |
| 5 | 10 | 0 | 0 | 7.5 |
| 4 | 11 | 0 | 0 | 7.5 |
| 4 | 11 | 0 | 0 | 7.5 |
| 4 | 11 | 0 | 0 | 7.5 |
| 5 | 9  | 0 | 0 | 7   |
| 4 | 11 | 0 | 0 | 7.5 |
| 5 | 10 | 0 | 0 | 7.5 |
| 5 | 9  | 0 | 0 | 7   |
| 4 | 11 | 0 | 0 | 7.5 |
| 5 | 10 | 0 | 0 | 7.5 |
| 4 | 11 | 0 | 0 | 7.5 |
| 5 | 11 | 0 | 0 | 8   |
| 5 | 11 | 0 | 0 | 8   |
| 4 | 11 | 0 | 0 | 7.5 |
| 4 | 11 | 0 | 0 | 7.5 |
| 4 | 11 | 0 | 0 | 7.5 |
| 4 | 11 | 0 | 0 | 7.5 |
| 5 | 10 | 0 | 0 | 7.5 |
| 5 | 11 | 0 | 0 | 8   |
| 5 | 10 | 0 | 0 | 7.5 |
| 5 | 10 | 0 | 0 | 7.5 |
| 5 | 11 | 0 | 0 | 8   |
| 4 | 11 | 0 | 0 | 7.5 |
| 4 | 11 | 0 | 0 | 7.5 |
| 5 | 11 | 0 | 0 | 8   |
| 4 | 11 | 0 | 0 | 7.5 |
| 4 | 11 | 0 | 0 | 7.5 |
| 5 | 9  | 0 | 0 | 7   |
| 5 | 9  | 0 | 0 | 7   |
| 5 | 11 | 0 | 0 | 8   |
| 5 | 10 | 0 | 0 | 7.5 |
| 5 | 11 | 0 | 0 | 8   |
| 5 | 9  | 0 | 0 | 7   |
| 4 | 11 | 0 | 0 | 7.5 |
| 4 | 11 | 0 | 0 | 7.5 |
| 5 | 11 | 0 | 0 | 8   |
| 5 | 10 | 0 | 0 | 7.5 |
| 5 | 11 | 0 | 0 | 8   |

|   |    |   |   |     |
|---|----|---|---|-----|
| 5 | 10 | 0 | 0 | 7.5 |
| 5 | 10 | 0 | 0 | 7.5 |
| 4 | 11 | 0 | 0 | 7.5 |
| 5 | 10 | 0 | 0 | 7.5 |
| 4 | 11 | 0 | 0 | 7.5 |
| 4 | 11 | 0 | 0 | 7.5 |
| 5 | 10 | 0 | 0 | 7.5 |
| 4 | 11 | 0 | 0 | 7.5 |
| 4 | 11 | 0 | 0 | 7.5 |
| 4 | 11 | 0 | 0 | 7.5 |
| 5 | 9  | 0 | 0 | 7   |
| 4 | 11 | 0 | 0 | 7.5 |
| 4 | 11 | 0 | 0 | 7.5 |
| 4 | 11 | 0 | 0 | 7.5 |
| 5 | 10 | 0 | 0 | 7.5 |
| 4 | 11 | 0 | 0 | 7.5 |
| 5 | 11 | 0 | 0 | 8   |
| 5 | 10 | 0 | 0 | 7.5 |
| 5 | 10 | 0 | 0 | 7.5 |
| 5 | 9  | 0 | 0 | 7   |
| 5 | 9  | 0 | 0 | 7   |
| 5 | 10 | 0 | 0 | 7.5 |
| 5 | 11 | 0 | 0 | 8   |
| 5 | 11 | 0 | 0 | 8   |
| 5 | 9  | 0 | 0 | 7   |
| 5 | 11 | 0 | 0 | 8   |
| 5 | 9  | 0 | 0 | 7   |
| 4 | 11 | 0 | 0 | 7.5 |
| 4 | 11 | 0 | 0 | 7.5 |
| 5 | 9  | 0 | 0 | 7   |
| 5 | 10 | 0 | 0 | 7.5 |
| 4 | 11 | 0 | 0 | 7.5 |
| 4 | 11 | 0 | 0 | 7.5 |
| 5 | 9  | 0 | 0 | 7   |
| 5 | 10 | 0 | 0 | 7.5 |
| 5 | 9  | 0 | 0 | 7   |
| 4 | 11 | 0 | 0 | 7.5 |
| 5 | 10 | 0 | 0 | 7.5 |
| 4 | 11 | 0 | 0 | 7.5 |
| 5 | 10 | 0 | 0 | 7.5 |
| 5 | 10 | 0 | 0 | 7.5 |
| 4 | 11 | 0 | 0 | 7.5 |
| 4 | 11 | 0 | 0 | 7.5 |
| 5 | 11 | 0 | 0 | 8   |
| 5 | 10 | 0 | 0 | 7.5 |
| 5 | 10 | 0 | 0 | 7.5 |
| 5 | 9  | 0 | 0 | 7   |

|   |    |   |   |     |
|---|----|---|---|-----|
| 4 | 11 | 0 | 0 | 7.5 |
| 5 | 11 | 0 | 0 | 8   |
| 4 | 11 | 0 | 0 | 7.5 |
| 5 | 8  | 0 | 0 | 6.5 |
| 7 | 8  | 0 | 0 | 7.5 |
| 4 | 10 | 0 | 0 | 7   |
| 5 | 8  | 0 | 0 | 6.5 |
| 4 | 9  | 0 | 0 | 6.5 |
| 7 | 8  | 0 | 0 | 7.5 |
| 6 | 8  | 0 | 0 | 7   |
| 7 | 8  | 0 | 0 | 7.5 |
| 4 | 10 | 0 | 0 | 7   |
| 6 | 8  | 0 | 0 | 7   |
| 5 | 8  | 0 | 0 | 6.5 |
| 4 | 10 | 0 | 0 | 7   |
| 5 | 8  | 0 | 0 | 6.5 |
| 4 | 10 | 0 | 0 | 7   |
| 7 | 8  | 0 | 0 | 7.5 |
| 4 | 9  | 0 | 0 | 6.5 |
| 5 | 8  | 0 | 0 | 6.5 |
| 4 | 10 | 0 | 0 | 7   |
| 4 | 10 | 0 | 0 | 7   |
| 4 | 10 | 0 | 0 | 7   |
| 5 | 8  | 0 | 0 | 6.5 |
| 7 | 8  | 0 | 0 | 7.5 |
| 4 | 9  | 0 | 0 | 6.5 |
| 4 | 9  | 0 | 0 | 6.5 |
| 6 | 8  | 0 | 0 | 7   |
| 7 | 8  | 0 | 0 | 7.5 |
| 4 | 10 | 0 | 0 | 7   |
| 5 | 8  | 0 | 0 | 6.5 |
| 4 | 9  | 0 | 0 | 6.5 |
| 6 | 8  | 0 | 0 | 7   |
| 4 | 9  | 0 | 0 | 6.5 |
| 4 | 9  | 0 | 0 | 6.5 |
| 6 | 8  | 0 | 0 | 7   |
| 6 | 8  | 0 | 0 | 7   |
| 4 | 10 | 0 | 0 | 7   |
| 7 | 8  | 0 | 0 | 7.5 |
| 4 | 10 | 0 | 0 | 7   |
| 4 | 10 | 0 | 0 | 7   |
| 4 | 10 | 0 | 0 | 7   |
| 4 | 9  | 0 | 0 | 6.5 |
| 4 | 9  | 0 | 0 | 6.5 |
| 4 | 9  | 0 | 0 | 6.5 |
| 4 | 10 | 0 | 0 | 7   |
| 7 | 8  | 0 | 0 | 7.5 |

|    |     |   |   |     |
|----|-----|---|---|-----|
| 6  | 8   | 0 | 0 | 7   |
| 4  | 10  | 0 | 0 | 7   |
| 4  | 9   | 0 | 0 | 6.5 |
| 7  | 8   | 0 | 0 | 7.5 |
| 4  | 9   | 0 | 0 | 6.5 |
| 4  | 9   | 0 | 0 | 6.5 |
| 5  | 8   | 0 | 0 | 6.5 |
| 4  | 10  | 0 | 0 | 7   |
| 4  | 10  | 0 | 0 | 7   |
| 4  | 10  | 0 | 0 | 7   |
| 4  | 9   | 0 | 0 | 6.5 |
| 5  | 8   | 0 | 0 | 6.5 |
| 7  | 8   | 0 | 0 | 7.5 |
| 7  | 8   | 0 | 0 | 7.5 |
| 30 | 176 | 2 | 0 | 103 |
| 3  | 14  | 0 | 0 | 8.5 |
| 3  | 14  | 0 | 0 | 8.5 |
| 3  | 15  | 0 | 0 | 9   |
| 3  | 11  | 0 | 0 | 7   |
| 5  | 7   | 0 | 0 | 6   |
| 3  | 15  | 0 | 0 | 9   |
| 3  | 11  | 0 | 0 | 7   |
| 3  | 12  | 0 | 0 | 7.5 |
| 3  | 11  | 0 | 0 | 7   |
| 3  | 12  | 0 | 0 | 7.5 |
| 3  | 13  | 0 | 0 | 8   |
| 5  | 7   | 0 | 0 | 6   |
| 3  | 13  | 0 | 0 | 8   |
| 3  | 15  | 0 | 0 | 9   |
| 6  | 7   | 0 | 0 | 6.5 |
| 5  | 7   | 0 | 0 | 6   |
| 3  | 14  | 0 | 0 | 8.5 |
| 3  | 11  | 0 | 0 | 7   |
| 3  | 11  | 0 | 0 | 7   |
| 3  | 14  | 0 | 0 | 8.5 |
| 3  | 14  | 0 | 0 | 8.5 |
| 3  | 11  | 0 | 0 | 7   |
| 5  | 7   | 0 | 0 | 6   |
| 3  | 11  | 0 | 0 | 7   |
| 3  | 12  | 0 | 0 | 7.5 |
| 3  | 13  | 0 | 0 | 8   |
| 3  | 13  | 0 | 0 | 8   |
| 3  | 13  | 0 | 0 | 8   |
| 3  | 11  | 0 | 0 | 7   |
| 3  | 14  | 0 | 0 | 8.5 |
| 3  | 11  | 0 | 0 | 7   |
| 3  | 12  | 0 | 0 | 7.5 |

|   |    |   |   |     |
|---|----|---|---|-----|
| 5 | 7  | 0 | 0 | 6   |
| 3 | 11 | 0 | 0 | 7   |
| 3 | 13 | 0 | 0 | 8   |
| 3 | 14 | 0 | 0 | 8.5 |
| 3 | 15 | 0 | 0 | 9   |
| 3 | 12 | 0 | 0 | 7.5 |
| 3 | 14 | 0 | 0 | 8.5 |
| 3 | 12 | 0 | 0 | 7.5 |
| 3 | 11 | 0 | 0 | 7   |
| 7 | 7  | 0 | 0 | 7   |
| 3 | 11 | 0 | 0 | 7   |
| 3 | 11 | 0 | 0 | 7   |
| 3 | 13 | 0 | 0 | 8   |
| 3 | 14 | 0 | 0 | 8.5 |
| 3 | 11 | 0 | 0 | 7   |
| 3 | 13 | 0 | 0 | 8   |
| 7 | 7  | 0 | 0 | 7   |
| 3 | 11 | 0 | 0 | 7   |
| 3 | 14 | 0 | 0 | 8.5 |
| 3 | 15 | 0 | 0 | 9   |
| 3 | 14 | 0 | 0 | 8.5 |
| 3 | 13 | 0 | 0 | 8   |
| 5 | 7  | 0 | 0 | 6   |
| 3 | 15 | 0 | 0 | 9   |
| 3 | 13 | 0 | 0 | 8   |
| 3 | 14 | 0 | 0 | 8.5 |
| 7 | 7  | 0 | 0 | 7   |
| 3 | 14 | 0 | 0 | 8.5 |
| 3 | 11 | 0 | 0 | 7   |
| 3 | 11 | 0 | 0 | 7   |
| 3 | 11 | 0 | 0 | 7   |
| 5 | 7  | 0 | 0 | 6   |
| 3 | 14 | 0 | 0 | 8.5 |
| 3 | 13 | 0 | 0 | 8   |
| 3 | 11 | 0 | 0 | 7   |
| 3 | 14 | 0 | 0 | 8.5 |
| 3 | 12 | 0 | 0 | 7.5 |
| 3 | 14 | 0 | 0 | 8.5 |
| 3 | 13 | 0 | 0 | 8   |
| 3 | 12 | 0 | 0 | 7.5 |
| 3 | 12 | 0 | 0 | 7.5 |
| 3 | 14 | 0 | 0 | 8.5 |
| 3 | 13 | 0 | 0 | 8   |
| 3 | 14 | 0 | 0 | 8.5 |
| 3 | 11 | 0 | 0 | 7   |
| 3 | 13 | 0 | 0 | 8   |
| 3 | 14 | 0 | 0 | 8.5 |

|   |    |   |   |     |
|---|----|---|---|-----|
| 3 | 15 | 0 | 0 | 9   |
| 3 | 11 | 0 | 0 | 7   |
| 3 | 12 | 0 | 0 | 7.5 |
| 3 | 11 | 0 | 0 | 7   |
| 3 | 13 | 0 | 0 | 8   |
| 3 | 11 | 0 | 0 | 7   |
| 3 | 12 | 0 | 0 | 7.5 |
| 3 | 12 | 0 | 0 | 7.5 |
| 3 | 14 | 0 | 0 | 8.5 |
| 3 | 15 | 0 | 0 | 9   |
| 3 | 14 | 0 | 0 | 8.5 |
| 3 | 11 | 0 | 0 | 7   |
| 3 | 14 | 0 | 0 | 8.5 |
| 3 | 11 | 0 | 0 | 7   |
| 3 | 12 | 0 | 0 | 7.5 |
| 3 | 13 | 0 | 0 | 8   |
| 3 | 12 | 0 | 0 | 7.5 |
| 3 | 15 | 0 | 0 | 9   |
| 3 | 11 | 0 | 0 | 7   |
| 3 | 11 | 0 | 0 | 7   |
| 3 | 11 | 0 | 0 | 7   |
| 3 | 13 | 0 | 0 | 8   |
| 3 | 15 | 0 | 0 | 9   |
| 5 | 7  | 0 | 0 | 6   |
| 3 | 12 | 0 | 0 | 7.5 |
| 3 | 13 | 0 | 0 | 8   |
| 3 | 12 | 0 | 0 | 7.5 |
| 3 | 15 | 0 | 0 | 9   |
| 3 | 15 | 0 | 0 | 9   |
| 3 | 12 | 0 | 0 | 7.5 |
| 3 | 15 | 0 | 0 | 9   |
| 3 | 11 | 0 | 0 | 7   |
| 3 | 11 | 0 | 0 | 7   |
| 3 | 14 | 0 | 0 | 8.5 |
| 3 | 13 | 0 | 0 | 8   |
| 3 | 11 | 0 | 0 | 7   |
| 3 | 11 | 0 | 0 | 7   |
| 3 | 12 | 0 | 0 | 7.5 |
| 3 | 13 | 0 | 0 | 8   |
| 3 | 12 | 0 | 0 | 7.5 |
| 3 | 13 | 0 | 0 | 8   |
| 3 | 13 | 0 | 0 | 8   |
| 3 | 13 | 0 | 0 | 8   |
| 7 | 7  | 0 | 0 | 7   |
| 3 | 15 | 0 | 0 | 9   |
| 3 | 14 | 0 | 0 | 8.5 |
| 5 | 7  | 0 | 0 | 6   |



|   |    |   |   |     |
|---|----|---|---|-----|
| 3 | 11 | 0 | 0 | 7   |
| 3 | 14 | 0 | 0 | 8.5 |
| 5 | 7  | 0 | 0 | 6   |
| 3 | 13 | 0 | 0 | 8   |
| 3 | 12 | 0 | 0 | 7.5 |
| 3 | 15 | 0 | 0 | 9   |
| 3 | 13 | 0 | 0 | 8   |
| 3 | 11 | 0 | 0 | 7   |
| 3 | 13 | 0 | 0 | 8   |
| 3 | 14 | 0 | 0 | 8.5 |
| 3 | 14 | 0 | 0 | 8.5 |
| 6 | 7  | 0 | 0 | 6.5 |
| 6 | 7  | 0 | 0 | 6.5 |
| 3 | 11 | 0 | 0 | 7   |
| 3 | 12 | 0 | 0 | 7.5 |
| 3 | 12 | 0 | 0 | 7.5 |
| 3 | 11 | 0 | 0 | 7   |
| 3 | 13 | 0 | 0 | 8   |
| 7 | 7  | 0 | 0 | 7   |
| 3 | 11 | 0 | 0 | 7   |
| 3 | 15 | 0 | 0 | 9   |
| 5 | 7  | 0 | 0 | 6   |
| 6 | 7  | 0 | 0 | 6.5 |
| 3 | 11 | 0 | 0 | 7   |
| 3 | 13 | 0 | 0 | 8   |
| 3 | 11 | 0 | 0 | 7   |
| 3 | 13 | 0 | 0 | 8   |
| 3 | 12 | 0 | 0 | 7.5 |
| 3 | 12 | 0 | 0 | 7.5 |
| 3 | 13 | 0 | 0 | 8   |
| 3 | 14 | 0 | 0 | 8.5 |
| 3 | 14 | 0 | 0 | 8.5 |
| 6 | 7  | 0 | 0 | 6.5 |
| 3 | 15 | 0 | 0 | 9   |
| 3 | 11 | 0 | 0 | 7   |
| 5 | 7  | 0 | 0 | 6   |
| 3 | 14 | 0 | 0 | 8.5 |
| 3 | 15 | 0 | 0 | 9   |
| 6 | 7  | 0 | 0 | 6.5 |
| 3 | 11 | 0 | 0 | 7   |
| 3 | 12 | 0 | 0 | 7.5 |
| 3 | 11 | 0 | 0 | 7   |
| 3 | 14 | 0 | 0 | 8.5 |
| 3 | 14 | 0 | 0 | 8.5 |
| 3 | 11 | 0 | 0 | 7   |
| 3 | 11 | 0 | 0 | 7   |
| 3 | 15 | 0 | 0 | 9   |

|    |    |   |   |      |
|----|----|---|---|------|
| 3  | 14 | 0 | 0 | 8.5  |
| 3  | 15 | 0 | 0 | 9    |
| 3  | 15 | 0 | 0 | 9    |
| 3  | 12 | 0 | 0 | 7.5  |
| 3  | 13 | 0 | 0 | 8    |
| 3  | 15 | 0 | 0 | 9    |
| 6  | 7  | 0 | 0 | 6.5  |
| 3  | 14 | 0 | 0 | 8.5  |
| 3  | 12 | 0 | 0 | 7.5  |
| 3  | 12 | 0 | 0 | 7.5  |
| 3  | 11 | 0 | 0 | 7    |
| 3  | 12 | 0 | 0 | 7.5  |
| 3  | 15 | 0 | 0 | 9    |
| 3  | 14 | 0 | 0 | 8.5  |
| 3  | 11 | 0 | 0 | 7    |
| 3  | 11 | 0 | 0 | 7    |
| 3  | 11 | 0 | 0 | 7    |
| 3  | 12 | 0 | 0 | 7.5  |
| 3  | 12 | 0 | 0 | 7.5  |
| 3  | 12 | 0 | 0 | 7.5  |
| 29 | 71 | 1 | 0 | 50   |
| 31 | 73 | 1 | 0 | 52   |
| 30 | 69 | 1 | 0 | 49.5 |
| 32 | 70 | 1 | 0 | 51   |
| 7  | 6  | 0 | 0 | 6.5  |
| 6  | 6  | 0 | 0 | 6    |
| 7  | 6  | 0 | 0 | 6.5  |
| 6  | 6  | 0 | 0 | 6    |
| 7  | 6  | 0 | 0 | 6.5  |
| 6  | 6  | 0 | 0 | 6    |
| 7  | 6  | 0 | 0 | 6.5  |
| 7  | 6  | 0 | 0 | 6.5  |
| 6  | 6  | 0 | 0 | 6    |
| 7  | 6  | 0 | 0 | 6.5  |
| 6  | 6  | 0 | 0 | 6    |
| 6  | 6  | 0 | 0 | 6    |
| 6  | 6  | 0 | 0 | 6    |
| 7  | 6  | 0 | 0 | 6.5  |
| 7  | 6  | 0 | 0 | 6.5  |
| 7  | 6  | 0 | 0 | 6.5  |
| 8  | 6  | 0 | 0 | 7    |
| 8  | 6  | 0 | 0 | 7    |
| 2  | 14 | 0 | 0 | 8    |
| 7  | 5  | 0 | 0 | 6    |
| 2  | 13 | 0 | 0 | 7.5  |
| 7  | 5  | 0 | 0 | 6    |
| 2  | 15 | 0 | 0 | 8.5  |

|   |    |   |   |     |
|---|----|---|---|-----|
| 2 | 15 | 0 | 0 | 8.5 |
| 2 | 14 | 0 | 0 | 8   |
| 2 | 14 | 0 | 0 | 8   |
| 2 | 15 | 0 | 0 | 8.5 |
| 2 | 15 | 0 | 0 | 8.5 |
| 2 | 14 | 0 | 0 | 8   |
| 2 | 14 | 0 | 0 | 8   |
| 2 | 14 | 0 | 0 | 8   |
| 2 | 14 | 0 | 0 | 8   |
| 2 | 15 | 0 | 0 | 8.5 |
| 2 | 14 | 0 | 0 | 8   |
| 2 | 14 | 0 | 0 | 8   |
| 2 | 14 | 0 | 0 | 8   |
| 2 | 15 | 0 | 0 | 8.5 |
| 2 | 13 | 0 | 0 | 7.5 |
| 2 | 14 | 0 | 0 | 8   |
| 2 | 14 | 0 | 0 | 8   |
| 2 | 14 | 0 | 0 | 8   |
| 2 | 13 | 0 | 0 | 7.5 |
| 2 | 15 | 0 | 0 | 8.5 |
| 2 | 13 | 0 | 0 | 7.5 |
| 2 | 13 | 0 | 0 | 7.5 |
| 2 | 15 | 0 | 0 | 8.5 |
| 7 | 5  | 0 | 0 | 6   |
| 2 | 15 | 0 | 0 | 8.5 |
| 2 | 13 | 0 | 0 | 7.5 |
| 2 | 14 | 0 | 0 | 8   |
| 2 | 13 | 0 | 0 | 7.5 |
| 2 | 15 | 0 | 0 | 8.5 |
| 2 | 15 | 0 | 0 | 8.5 |
| 7 | 5  | 0 | 0 | 6   |
| 7 | 5  | 0 | 0 | 6   |
| 2 | 14 | 0 | 0 | 8   |
| 2 | 15 | 0 | 0 | 8.5 |
| 2 | 15 | 0 | 0 | 8.5 |
| 2 | 15 | 0 | 0 | 8.5 |
| 2 | 14 | 0 | 0 | 8   |
| 2 | 13 | 0 | 0 | 7.5 |
| 2 | 15 | 0 | 0 | 8.5 |
| 2 | 14 | 0 | 0 | 8   |
| 2 | 15 | 0 | 0 | 8.5 |
| 2 | 13 | 0 | 0 | 7.5 |
| 2 | 13 | 0 | 0 | 7.5 |
| 2 | 14 | 0 | 0 | 8   |
| 2 | 15 | 0 | 0 | 8.5 |
| 2 | 14 | 0 | 0 | 8   |
| 2 | 15 | 0 | 0 | 8.5 |

|   |    |   |   |     |
|---|----|---|---|-----|
| 2 | 14 | 0 | 0 | 8   |
| 2 | 15 | 0 | 0 | 8.5 |
| 2 | 13 | 0 | 0 | 7.5 |
| 2 | 13 | 0 | 0 | 7.5 |
| 2 | 13 | 0 | 0 | 7.5 |
| 2 | 13 | 0 | 0 | 7.5 |
| 2 | 15 | 0 | 0 | 8.5 |
| 2 | 15 | 0 | 0 | 8.5 |
| 2 | 13 | 0 | 0 | 7.5 |
| 2 | 14 | 0 | 0 | 8   |
| 2 | 14 | 0 | 0 | 8   |
| 7 | 5  | 0 | 0 | 6   |
| 2 | 15 | 0 | 0 | 8.5 |
| 2 | 14 | 0 | 0 | 8   |
| 2 | 13 | 0 | 0 | 7.5 |
| 2 | 14 | 0 | 0 | 8   |
| 2 | 13 | 0 | 0 | 7.5 |
| 2 | 15 | 0 | 0 | 8.5 |
| 2 | 15 | 0 | 0 | 8.5 |
| 2 | 13 | 0 | 0 | 7.5 |
| 2 | 14 | 0 | 0 | 8   |
| 2 | 14 | 0 | 0 | 8   |
| 2 | 15 | 0 | 0 | 8.5 |
| 2 | 14 | 0 | 0 | 8   |
| 2 | 14 | 0 | 0 | 8   |
| 2 | 14 | 0 | 0 | 8   |
| 2 | 15 | 0 | 0 | 8.5 |
| 2 | 13 | 0 | 0 | 7.5 |
| 2 | 15 | 0 | 0 | 8.5 |
| 2 | 15 | 0 | 0 | 8.5 |
| 2 | 14 | 0 | 0 | 8   |
| 2 | 15 | 0 | 0 | 8.5 |
| 2 | 15 | 0 | 0 | 8.5 |
| 2 | 13 | 0 | 0 | 7.5 |
| 2 | 15 | 0 | 0 | 8.5 |
| 2 | 13 | 0 | 0 | 7.5 |
| 2 | 13 | 0 | 0 | 7.5 |
| 2 | 13 | 0 | 0 | 7.5 |
| 2 | 15 | 0 | 0 | 8.5 |
| 2 | 13 | 0 | 0 | 7.5 |
| 2 | 13 | 0 | 0 | 7.5 |
| 2 | 13 | 0 | 0 | 7.5 |
| 2 | 14 | 0 | 0 | 8   |
| 2 | 13 | 0 | 0 | 7.5 |
| 2 | 13 | 0 | 0 | 7.5 |
| 2 | 13 | 0 | 0 | 7.5 |
| 2 | 15 | 0 | 0 | 8.5 |
| 2 | 13 | 0 | 0 | 7.5 |

|   |    |   |   |     |
|---|----|---|---|-----|
| 2 | 13 | 0 | 0 | 7.5 |
| 2 | 13 | 0 | 0 | 7.5 |
| 2 | 13 | 0 | 0 | 7.5 |
| 2 | 15 | 0 | 0 | 8.5 |
| 2 | 13 | 0 | 0 | 7.5 |
| 2 | 15 | 0 | 0 | 8.5 |
| 2 | 13 | 0 | 0 | 7.5 |
| 2 | 13 | 0 | 0 | 7.5 |
| 2 | 13 | 0 | 0 | 7.5 |
| 2 | 14 | 0 | 0 | 8   |
| 2 | 14 | 0 | 0 | 8   |
| 2 | 13 | 0 | 0 | 7.5 |
| 7 | 5  | 0 | 0 | 6   |
| 2 | 15 | 0 | 0 | 8.5 |
| 2 | 15 | 0 | 0 | 8.5 |
| 7 | 5  | 0 | 0 | 6   |
| 2 | 15 | 0 | 0 | 8.5 |
| 7 | 5  | 0 | 0 | 6   |
| 2 | 13 | 0 | 0 | 7.5 |
| 2 | 15 | 0 | 0 | 8.5 |
| 2 | 14 | 0 | 0 | 8   |
| 2 | 14 | 0 | 0 | 8   |
| 2 | 13 | 0 | 0 | 7.5 |
| 2 | 13 | 0 | 0 | 7.5 |
| 2 | 13 | 0 | 0 | 7.5 |
| 2 | 13 | 0 | 0 | 7.5 |
| 7 | 5  | 0 | 0 | 6   |
| 2 | 15 | 0 | 0 | 8.5 |
| 2 | 13 | 0 | 0 | 7.5 |
| 2 | 13 | 0 | 0 | 7.5 |
| 2 | 14 | 0 | 0 | 8   |
| 2 | 14 | 0 | 0 | 8   |
| 2 | 13 | 0 | 0 | 7.5 |
| 2 | 13 | 0 | 0 | 7.5 |
| 2 | 14 | 0 | 0 | 8   |
| 2 | 17 | 0 | 0 | 9.5 |
| 2 | 17 | 0 | 0 | 9.5 |
| 2 | 17 | 0 | 0 | 9.5 |
| 2 | 17 | 0 | 0 | 9.5 |
| 2 | 17 | 0 | 0 | 9.5 |
| 2 | 16 | 0 | 0 | 9   |
| 8 | 5  | 0 | 0 | 6.5 |
| 2 | 16 | 0 | 0 | 9   |
| 8 | 5  | 0 | 0 | 6.5 |
| 2 | 17 | 0 | 0 | 9.5 |
| 8 | 5  | 0 | 0 | 6.5 |
| 2 | 16 | 0 | 0 | 9   |

|   |    |   |   |     |
|---|----|---|---|-----|
| 2 | 16 | 0 | 0 | 9   |
| 2 | 17 | 0 | 0 | 9.5 |
| 2 | 16 | 0 | 0 | 9   |
| 2 | 16 | 0 | 0 | 9   |
| 2 | 16 | 0 | 0 | 9   |
| 2 | 17 | 0 | 0 | 9.5 |
| 2 | 16 | 0 | 0 | 9   |
| 2 | 16 | 0 | 0 | 9   |
| 2 | 17 | 0 | 0 | 9.5 |
| 2 | 17 | 0 | 0 | 9.5 |
| 2 | 17 | 0 | 0 | 9.5 |
| 2 | 17 | 0 | 0 | 9.5 |
| 2 | 16 | 0 | 0 | 9   |
| 2 | 17 | 0 | 0 | 9.5 |
| 2 | 16 | 0 | 0 | 9   |
| 2 | 16 | 0 | 0 | 9   |
| 2 | 17 | 0 | 0 | 9.5 |
| 2 | 16 | 0 | 0 | 9   |
| 2 | 16 | 0 | 0 | 9   |
| 2 | 16 | 0 | 0 | 9   |
| 2 | 17 | 0 | 0 | 9.5 |
| 2 | 17 | 0 | 0 | 9.5 |
| 2 | 17 | 0 | 0 | 9.5 |
| 2 | 16 | 0 | 0 | 9   |
| 2 | 17 | 0 | 0 | 9.5 |
| 8 | 5  | 0 | 0 | 6.5 |
| 2 | 17 | 0 | 0 | 9.5 |
| 2 | 16 | 0 | 0 | 9   |
| 2 | 17 | 0 | 0 | 9.5 |
| 2 | 17 | 0 | 0 | 9.5 |
| 2 | 17 | 0 | 0 | 9.5 |
| 2 | 16 | 0 | 0 | 9   |
| 2 | 16 | 0 | 0 | 9   |
| 2 | 16 | 0 | 0 | 9   |
| 2 | 17 | 0 | 0 | 9.5 |
| 8 | 5  | 0 | 0 | 6.5 |
| 2 | 17 | 0 | 0 | 9.5 |
| 2 | 17 | 0 | 0 | 9.5 |
| 2 | 16 | 0 | 0 | 9   |
| 2 | 16 | 0 | 0 | 9   |
| 2 | 17 | 0 | 0 | 9.5 |
| 2 | 16 | 0 | 0 | 9   |
| 7 | 4  | 0 | 0 | 5.5 |

|    |     |   |   |      |
|----|-----|---|---|------|
| 2  | 16  | 0 | 0 | 9    |
| 2  | 17  | 0 | 0 | 9.5  |
| 2  | 16  | 0 | 0 | 9    |
| 2  | 17  | 0 | 0 | 9.5  |
| 2  | 16  | 0 | 0 | 9    |
| 2  | 17  | 0 | 0 | 9.5  |
| 2  | 17  | 0 | 0 | 9.5  |
| 2  | 16  | 0 | 0 | 9    |
| 2  | 16  | 0 | 0 | 9    |
| 2  | 17  | 0 | 0 | 9.5  |
| 2  | 16  | 0 | 0 | 9    |
| 2  | 17  | 0 | 0 | 9.5  |
| 2  | 17  | 0 | 0 | 9.5  |
| 2  | 16  | 0 | 0 | 9    |
| 7  | 4   | 0 | 0 | 5.5  |
| 2  | 17  | 0 | 0 | 9.5  |
| 2  | 17  | 0 | 0 | 9.5  |
| 2  | 17  | 0 | 0 | 9.5  |
| 8  | 5   | 0 | 0 | 6.5  |
| 2  | 16  | 0 | 0 | 9    |
| 2  | 17  | 0 | 0 | 9.5  |
| 2  | 16  | 0 | 0 | 9    |
| 2  | 17  | 0 | 0 | 9.5  |
| 2  | 17  | 0 | 0 | 9.5  |
| 2  | 16  | 0 | 0 | 9    |
| 2  | 16  | 0 | 0 | 9    |
| 2  | 16  | 0 | 0 | 9    |
| 2  | 16  | 0 | 0 | 9    |
| 2  | 17  | 0 | 0 | 9.5  |
| 8  | 5   | 0 | 0 | 6.5  |
| 2  | 17  | 0 | 0 | 9.5  |
| 2  | 17  | 0 | 0 | 9.5  |
| 2  | 17  | 0 | 0 | 9.5  |
| 8  | 4   | 0 | 0 | 6    |
| 8  | 4   | 0 | 0 | 6    |
| 8  | 4   | 0 | 0 | 6    |
| 8  | 4   | 0 | 0 | 6    |
| 8  | 4   | 0 | 0 | 6    |
| 8  | 4   | 0 | 0 | 6    |
| 91 | 181 | 4 | 0 | 136  |
| 9  | 4   | 0 | 0 | 6.5  |
| 9  | 4   | 0 | 0 | 6.5  |
| 55 | 116 | 2 | 0 | 85.5 |
| 50 | 124 | 2 | 0 | 87   |

|    |    |   |   |      |
|----|----|---|---|------|
| 24 | 84 | 1 | 0 | 54   |
| 38 | 51 | 1 | 0 | 44.5 |
| 23 | 83 | 1 | 0 | 53   |
| 1  | 15 | 0 | 0 | 8    |
| 1  | 15 | 0 | 0 | 8    |
| 1  | 15 | 0 | 0 | 8    |
| 1  | 15 | 0 | 0 | 8    |
| 1  | 15 | 0 | 0 | 8    |
| 1  | 15 | 0 | 0 | 8    |
| 8  | 3  | 0 | 0 | 5.5  |
| 1  | 15 | 0 | 0 | 8    |
| 1  | 15 | 0 | 0 | 8    |
| 1  | 15 | 0 | 0 | 8    |
| 1  | 15 | 0 | 0 | 8    |
| 1  | 15 | 0 | 0 | 8    |
| 1  | 15 | 0 | 0 | 8    |
| 1  | 15 | 0 | 0 | 8    |
| 1  | 15 | 0 | 0 | 8    |
| 1  | 15 | 0 | 0 | 8    |
| 1  | 15 | 0 | 0 | 8    |
| 1  | 15 | 0 | 0 | 8    |
| 1  | 15 | 0 | 0 | 8    |
| 1  | 15 | 0 | 0 | 8    |
| 1  | 15 | 0 | 0 | 8    |
| 1  | 15 | 0 | 0 | 8    |
| 1  | 15 | 0 | 0 | 8    |
| 1  | 15 | 0 | 0 | 8    |
| 8  | 3  | 0 | 0 | 5.5  |
| 1  | 15 | 0 | 0 | 8    |
| 1  | 15 | 0 | 0 | 8    |
| 1  | 15 | 0 | 0 | 8    |
| 1  | 15 | 0 | 0 | 8    |
| 1  | 15 | 0 | 0 | 8    |
| 1  | 15 | 0 | 0 | 8    |
| 1  | 15 | 0 | 0 | 8    |
| 1  | 15 | 0 | 0 | 8    |
| 1  | 15 | 0 | 0 | 8    |
| 1  | 15 | 0 | 0 | 8    |
| 1  | 15 | 0 | 0 | 8    |
| 1  | 15 | 0 | 0 | 8    |
| 1  | 15 | 0 | 0 | 8    |
| 1  | 15 | 0 | 0 | 8    |
| 8  | 3  | 0 | 0 | 5.5  |
| 1  | 15 | 0 | 0 | 8    |
| 1  | 15 | 0 | 0 | 8    |
| 1  | 15 | 0 | 0 | 8    |
| 1  | 15 | 0 | 0 | 8    |
| 1  | 15 | 0 | 0 | 8    |
| 8  | 3  | 0 | 0 | 5.5  |
| 1  | 15 | 0 | 0 | 8    |
| 1  | 15 | 0 | 0 | 8    |
| 1  | 15 | 0 | 0 | 8    |





|   |    |   |   |     |
|---|----|---|---|-----|
| 1 | 16 | 0 | 0 | 8.5 |
| 1 | 18 | 0 | 0 | 9.5 |
| 1 | 17 | 0 | 0 | 9   |
| 1 | 17 | 0 | 0 | 9   |
| 1 | 17 | 0 | 0 | 9   |
| 1 | 17 | 0 | 0 | 9   |
| 1 | 18 | 0 | 0 | 9.5 |
| 1 | 18 | 0 | 0 | 9.5 |
| 1 | 17 | 0 | 0 | 9   |
| 1 | 17 | 0 | 0 | 9   |
| 1 | 18 | 0 | 0 | 9.5 |
| 1 | 17 | 0 | 0 | 9   |
| 1 | 17 | 0 | 0 | 9   |
| 1 | 17 | 0 | 0 | 9   |
| 1 | 18 | 0 | 0 | 9.5 |
| 1 | 18 | 0 | 0 | 9.5 |
| 1 | 17 | 0 | 0 | 9   |
| 1 | 18 | 0 | 0 | 9.5 |
| 1 | 18 | 0 | 0 | 9.5 |
| 1 | 17 | 0 | 0 | 9   |
| 1 | 18 | 0 | 0 | 9.5 |
| 1 | 18 | 0 | 0 | 9.5 |
| 1 | 18 | 0 | 0 | 9.5 |
| 1 | 17 | 0 | 0 | 9   |
| 1 | 18 | 0 | 0 | 9.5 |
| 1 | 18 | 0 | 0 | 9.5 |
| 1 | 18 | 0 | 0 | 9.5 |
| 1 | 17 | 0 | 0 | 9   |
| 1 | 18 | 0 | 0 | 9.5 |
| 1 | 18 | 0 | 0 | 9.5 |
| 1 | 17 | 0 | 0 | 9   |
| 1 | 18 | 0 | 0 | 9.5 |
| 1 | 18 | 0 | 0 | 9.5 |
| 1 | 18 | 0 | 0 | 9.5 |
| 1 | 17 | 0 | 0 | 9   |
| 1 | 17 | 0 | 0 | 9   |
| 1 | 18 | 0 | 0 | 9.5 |
| 1 | 17 | 0 | 0 | 9   |
| 1 | 17 | 0 | 0 | 9   |

|   |    |   |   |      |
|---|----|---|---|------|
| 1 | 17 | 0 | 0 | 9    |
| 1 | 17 | 0 | 0 | 9    |
| 1 | 18 | 0 | 0 | 9.5  |
| 9 | 3  | 0 | 0 | 6    |
| 1 | 17 | 0 | 0 | 9    |
| 1 | 18 | 0 | 0 | 9.5  |
| 1 | 17 | 0 | 0 | 9    |
| 1 | 17 | 0 | 0 | 9    |
| 1 | 17 | 0 | 0 | 9    |
| 1 | 18 | 0 | 0 | 9.5  |
| 1 | 17 | 0 | 0 | 9    |
| 1 | 17 | 0 | 0 | 9    |
| 1 | 17 | 0 | 0 | 9    |
| 1 | 18 | 0 | 0 | 9.5  |
| 1 | 18 | 0 | 0 | 9.5  |
| 1 | 18 | 0 | 0 | 9.5  |
| 9 | 3  | 0 | 0 | 6    |
| 1 | 17 | 0 | 0 | 9    |
| 1 | 17 | 0 | 0 | 9    |
| 1 | 17 | 0 | 0 | 9    |
| 1 | 17 | 0 | 0 | 9    |
| 1 | 17 | 0 | 0 | 9    |
| 1 | 19 | 0 | 0 | 10   |
| 1 | 19 | 0 | 0 | 10   |
| 1 | 19 | 0 | 0 | 10   |
| 1 | 19 | 0 | 0 | 10   |
| 1 | 20 | 0 | 0 | 10.5 |
| 1 | 20 | 0 | 0 | 10.5 |
| 1 | 19 | 0 | 0 | 10   |
| 1 | 19 | 0 | 0 | 10   |
| 1 | 20 | 0 | 0 | 10.5 |
| 1 | 20 | 0 | 0 | 10.5 |
| 1 | 20 | 0 | 0 | 10.5 |
| 1 | 20 | 0 | 0 | 10.5 |
| 1 | 19 | 0 | 0 | 10   |
| 1 | 19 | 0 | 0 | 10   |
| 8 | 2  | 0 | 0 | 5    |
| 1 | 19 | 0 | 0 | 10   |
| 1 | 19 | 0 | 0 | 10   |
| 1 | 20 | 0 | 0 | 10.5 |
| 1 | 20 | 0 | 0 | 10.5 |
| 1 | 19 | 0 | 0 | 10   |
| 1 | 20 | 0 | 0 | 10.5 |
| 1 | 19 | 0 | 0 | 10   |
| 1 | 19 | 0 | 0 | 10   |
| 1 | 20 | 0 | 0 | 10.5 |
| 1 | 19 | 0 | 0 | 10   |

|    |    |    |   |      |
|----|----|----|---|------|
| 1  | 19 | 0  | 0 | 10   |
| 1  | 20 | 0  | 0 | 10.5 |
| 1  | 20 | 0  | 0 | 10.5 |
| 1  | 19 | 0  | 0 | 10   |
| 1  | 20 | 0  | 0 | 10.5 |
| 1  | 19 | 0  | 0 | 10   |
| 1  | 19 | 0  | 0 | 10   |
| 1  | 20 | 0  | 0 | 10.5 |
| 1  | 19 | 0  | 0 | 10   |
| 1  | 19 | 0  | 0 | 10   |
| 1  | 19 | 0  | 0 | 10   |
| 1  | 19 | 0  | 0 | 10   |
| 1  | 19 | 0  | 0 | 10   |
| 1  | 20 | 0  | 0 | 10.5 |
| 1  | 19 | 0  | 0 | 10   |
| 1  | 20 | 0  | 0 | 10.5 |
| 1  | 20 | 0  | 0 | 10.5 |
| 1  | 19 | 0  | 0 | 10   |
| 1  | 19 | 0  | 0 | 10   |
| 1  | 20 | 0  | 0 | 10.5 |
| 1  | 19 | 0  | 0 | 10   |
| 1  | 19 | 0  | 0 | 10   |
| 1  | 19 | 0  | 0 | 10   |
| 1  | 19 | 0  | 0 | 10   |
| 1  | 20 | 0  | 0 | 10.5 |
| 1  | 20 | 0  | 0 | 10.5 |
| 1  | 19 | 0  | 0 | 10   |
| 1  | 19 | 0  | 0 | 10   |
| 1  | 19 | 0  | 0 | 10   |
| 1  | 19 | 0  | 0 | 10   |
| 1  | 19 | 0  | 0 | 10   |
| 1  | 20 | 0  | 0 | 10.5 |
| 1  | 20 | 0  | 0 | 10.5 |
| 1  | 19 | 0  | 0 | 10   |
| 9  | 2  | 0  | 0 | 5.5  |
| 9  | 2  | 0  | 0 | 5.5  |
| 9  | 2  | 0  | 0 | 5.5  |
| 9  | 2  | 0  | 0 | 5.5  |
| 9  | 2  | 0  | 0 | 5.5  |
| 9  | 2  | 0  | 0 | 5.5  |
| 64 | 92 | 2  | 0 | 78   |
| 28 | 94 | 13 | 0 | 61   |
| 0  | 18 | 0  | 0 | 9    |
| 0  | 18 | 0  | 0 | 9    |
| 0  | 19 | 0  | 0 | 9.5  |

|     |    |   |   |      |
|-----|----|---|---|------|
| 0   | 18 | 0 | 0 | 9    |
| 0   | 18 | 0 | 0 | 9    |
| 0   | 19 | 0 | 0 | 9.5  |
| 0   | 19 | 0 | 0 | 9.5  |
| 0   | 18 | 0 | 0 | 9    |
| 0   | 18 | 0 | 0 | 9    |
| 0   | 18 | 0 | 0 | 9    |
| 0   | 18 | 0 | 0 | 9    |
| 0   | 19 | 0 | 0 | 9.5  |
| 0   | 18 | 0 | 0 | 9    |
| 0   | 18 | 0 | 0 | 9    |
| 0   | 18 | 0 | 0 | 9    |
| 0   | 18 | 0 | 0 | 9    |
| 0   | 18 | 0 | 0 | 9    |
| 0   | 19 | 0 | 0 | 9.5  |
| 0   | 19 | 0 | 0 | 9.5  |
| 0   | 18 | 0 | 0 | 9    |
| 0   | 19 | 0 | 0 | 9.5  |
| 0   | 18 | 0 | 0 | 9    |
| 0   | 18 | 0 | 0 | 9    |
| 0   | 19 | 0 | 0 | 9.5  |
| 0   | 18 | 0 | 0 | 9    |
| 0   | 19 | 0 | 0 | 9.5  |
| 0   | 19 | 0 | 0 | 9.5  |
| 0   | 18 | 0 | 0 | 9    |
| 0   | 18 | 0 | 0 | 9    |
| 0   | 18 | 0 | 0 | 9    |
| 0   | 18 | 0 | 0 | 9    |
| 0   | 18 | 0 | 0 | 9    |
| 0   | 18 | 0 | 0 | 9    |
| 0   | 18 | 0 | 0 | 9    |
| 0   | 18 | 0 | 0 | 9    |
| 0   | 18 | 0 | 0 | 9    |
| 0   | 18 | 0 | 0 | 9    |
| 0   | 19 | 0 | 0 | 9.5  |
| 0   | 19 | 0 | 0 | 9.5  |
| 0   | 18 | 0 | 0 | 9    |
| 0   | 18 | 0 | 0 | 9    |
| 0   | 18 | 0 | 0 | 9    |
| 10  | 2  | 0 | 0 | 6    |
| 102 | 85 | 3 | 0 | 93.5 |
| 0   | 9  | 0 | 1 | 4.5  |
| 0   | 20 | 0 | 0 | 10   |
| 0   | 20 | 0 | 0 | 10   |

|    |     |    |   |       |
|----|-----|----|---|-------|
| 0  | 20  | 0  | 0 | 10    |
| 0  | 20  | 0  | 0 | 10    |
| 0  | 20  | 0  | 0 | 10    |
| 0  | 20  | 0  | 0 | 10    |
| 0  | 20  | 0  | 0 | 10    |
| 0  | 20  | 0  | 0 | 10    |
| 0  | 20  | 0  | 0 | 10    |
| 0  | 20  | 0  | 0 | 10    |
| 0  | 20  | 0  | 0 | 10    |
| 0  | 20  | 0  | 0 | 10    |
| 0  | 20  | 0  | 0 | 10    |
| 0  | 20  | 0  | 0 | 10    |
| 0  | 20  | 0  | 0 | 10    |
| 0  | 20  | 0  | 0 | 10    |
| 0  | 20  | 0  | 0 | 10    |
| 0  | 20  | 0  | 0 | 10    |
| 0  | 20  | 0  | 0 | 10    |
| 9  | 1   | 0  | 0 | 5     |
| 5  | 31  | 1  | 1 | 18    |
| 10 | 1   | 0  | 0 | 5.5   |
| 10 | 1   | 0  | 0 | 5.5   |
| 0  | 21  | 0  | 0 | 10.5  |
| 0  | 21  | 0  | 0 | 10.5  |
| 0  | 21  | 0  | 0 | 10.5  |
| 0  | 21  | 0  | 0 | 10.5  |
| 0  | 21  | 0  | 0 | 10.5  |
| 0  | 21  | 0  | 0 | 10.5  |
| 10 | 0   | 0  | 0 | 5     |
| 0  | 21  | 0  | 0 | 10.5  |
| 0  | 21  | 0  | 0 | 10.5  |
| 0  | 21  | 0  | 0 | 10.5  |
| 0  | 21  | 0  | 0 | 10.5  |
| 0  | 21  | 0  | 0 | 10.5  |
| 0  | 21  | 0  | 0 | 10.5  |
| 0  | 21  | 0  | 0 | 10.5  |
| 0  | 21  | 0  | 0 | 10.5  |
| 0  | 21  | 0  | 0 | 10.5  |
| 0  | 21  | 0  | 0 | 10.5  |
| 0  | 21  | 0  | 0 | 10.5  |
| 0  | 21  | 0  | 0 | 10.5  |
| 0  | 21  | 0  | 0 | 10.5  |
| 10 | 0   | 0  | 0 | 5     |
| 0  | 21  | 0  | 0 | 10.5  |
| 0  | 21  | 0  | 0 | 10.5  |
| 0  | 21  | 0  | 0 | 10.5  |
| 0  | 21  | 0  | 0 | 10.5  |
| 0  | 21  | 0  | 0 | 10.5  |
| 0  | 21  | 0  | 0 | 10.5  |
| 0  | 21  | 0  | 0 | 10.5  |
| 0  | 21  | 0  | 0 | 10.5  |
| 0  | 21  | 0  | 0 | 10.5  |
| 0  | 21  | 0  | 0 | 10.5  |
| 40 | 203 | 25 | 0 | 121.5 |
| 18 | 95  | 1  | 0 | 56.5  |

|     |      |    |   |       |
|-----|------|----|---|-------|
| 3   | 65   | 7  | 0 | 34    |
| 17  | 95   | 1  | 0 | 56    |
| 114 | 237  | 42 | 0 | 175.5 |
| 84  | 190  | 4  | 0 | 137   |
| 16  | 104  | 1  | 0 | 60    |
| 15  | 182  | 19 | 0 | 98.5  |
| 7   | 36   | 5  | 0 | 21.5  |
| 23  | 158  | 2  | 0 | 90.5  |
| 301 | 978  | 18 | 0 | 639.5 |
| 173 | 1177 | 17 | 0 | 675   |
| 22  | 236  | 25 | 0 | 129   |
| 11  | 24   | 0  | 0 | 17.5  |
| 11  | 25   | 0  | 0 | 18    |
| 11  | 26   | 0  | 0 | 18.5  |
| 11  | 25   | 0  | 0 | 18    |
| 12  | 23   | 0  | 0 | 17.5  |
| 11  | 26   | 0  | 0 | 18.5  |
| 11  | 24   | 0  | 0 | 17.5  |
| 11  | 26   | 0  | 0 | 18.5  |
| 11  | 27   | 0  | 0 | 19    |
| 12  | 23   | 0  | 0 | 17.5  |
| 11  | 26   | 0  | 0 | 18.5  |
| 13  | 23   | 0  | 0 | 18    |
| 11  | 27   | 0  | 0 | 19    |
| 12  | 23   | 0  | 0 | 17.5  |
| 12  | 23   | 0  | 0 | 17.5  |
| 12  | 25   | 0  | 0 | 18.5  |
| 11  | 25   | 0  | 0 | 18    |
| 11  | 25   | 0  | 0 | 18    |
| 11  | 23   | 0  | 0 | 17    |
| 11  | 25   | 0  | 0 | 18    |
| 12  | 23   | 0  | 0 | 17.5  |
| 11  | 24   | 0  | 0 | 17.5  |
| 53  | 256  | 4  | 0 | 154.5 |
| 10  | 22   | 0  | 0 | 16    |
| 10  | 22   | 0  | 0 | 16    |
| 11  | 19   | 0  | 0 | 15    |
| 10  | 22   | 0  | 0 | 16    |
| 11  | 19   | 0  | 0 | 15    |
| 10  | 22   | 0  | 0 | 16    |
| 10  | 22   | 0  | 0 | 16    |
| 10  | 22   | 0  | 0 | 16    |
| 11  | 19   | 0  | 0 | 15    |
| 10  | 22   | 0  | 0 | 16    |
| 9   | 24   | 0  | 0 | 16.5  |
| 11  | 21   | 0  | 0 | 16    |
| 10  | 24   | 0  | 0 | 17    |

|    |    |   |   |      |
|----|----|---|---|------|
| 12 | 21 | 0 | 0 | 16.5 |
| 10 | 23 | 0 | 0 | 16.5 |
| 9  | 24 | 0 | 0 | 16.5 |
| 10 | 27 | 0 | 0 | 18.5 |
| 10 | 25 | 0 | 0 | 17.5 |
| 13 | 20 | 0 | 0 | 16.5 |
| 12 | 22 | 0 | 0 | 17   |
| 10 | 26 | 0 | 0 | 18   |
| 10 | 21 | 0 | 0 | 15.5 |
| 9  | 26 | 0 | 0 | 17.5 |
| 9  | 25 | 0 | 0 | 17   |
| 10 | 28 | 0 | 0 | 19   |
| 13 | 21 | 0 | 0 | 17   |
| 10 | 24 | 0 | 0 | 17   |
| 9  | 26 | 0 | 0 | 17.5 |
| 10 | 28 | 0 | 0 | 19   |
| 10 | 24 | 0 | 0 | 17   |
| 12 | 20 | 0 | 0 | 16   |
| 10 | 24 | 0 | 0 | 17   |
| 10 | 26 | 0 | 0 | 18   |
| 10 | 25 | 0 | 0 | 17.5 |
| 10 | 21 | 0 | 0 | 15.5 |
| 11 | 22 | 0 | 0 | 16.5 |
| 10 | 28 | 0 | 0 | 19   |
| 14 | 21 | 0 | 0 | 17.5 |
| 14 | 20 | 0 | 0 | 17   |
| 9  | 29 | 0 | 0 | 19   |
| 9  | 26 | 0 | 0 | 17.5 |
| 10 | 27 | 0 | 0 | 18.5 |
| 13 | 22 | 0 | 0 | 17.5 |
| 12 | 19 | 0 | 0 | 15.5 |
| 10 | 29 | 0 | 0 | 19.5 |
| 10 | 24 | 0 | 0 | 17   |
| 9  | 27 | 0 | 0 | 18   |
| 14 | 20 | 0 | 0 | 17   |
| 9  | 30 | 0 | 0 | 19.5 |
| 9  | 28 | 0 | 0 | 18.5 |
| 9  | 25 | 0 | 0 | 17   |
| 10 | 28 | 0 | 0 | 19   |
| 10 | 24 | 0 | 0 | 17   |
| 9  | 26 | 0 | 0 | 17.5 |
| 12 | 21 | 0 | 0 | 16.5 |
| 10 | 27 | 0 | 0 | 18.5 |
| 10 | 25 | 0 | 0 | 17.5 |
| 10 | 24 | 0 | 0 | 17   |
| 11 | 22 | 0 | 0 | 16.5 |
| 9  | 24 | 0 | 0 | 16.5 |



|    |    |   |   |      |
|----|----|---|---|------|
| 12 | 21 | 0 | 0 | 16.5 |
| 10 | 29 | 0 | 0 | 19.5 |
| 10 | 29 | 0 | 0 | 19.5 |
| 12 | 21 | 0 | 0 | 16.5 |
| 12 | 22 | 0 | 0 | 17   |
| 11 | 21 | 0 | 0 | 16   |
| 9  | 28 | 0 | 0 | 18.5 |
| 11 | 21 | 0 | 0 | 16   |
| 14 | 21 | 0 | 0 | 17.5 |
| 10 | 23 | 0 | 0 | 16.5 |
| 10 | 28 | 0 | 0 | 19   |
| 9  | 25 | 0 | 0 | 17   |
| 10 | 26 | 0 | 0 | 18   |
| 11 | 20 | 0 | 0 | 15.5 |
| 10 | 21 | 0 | 0 | 15.5 |
| 10 | 23 | 0 | 0 | 16.5 |
| 9  | 25 | 0 | 0 | 17   |
| 9  | 27 | 0 | 0 | 18   |
| 11 | 21 | 0 | 0 | 16   |
| 10 | 25 | 0 | 0 | 17.5 |
| 9  | 29 | 0 | 0 | 19   |
| 11 | 20 | 0 | 0 | 15.5 |
| 9  | 25 | 0 | 0 | 17   |
| 9  | 26 | 0 | 0 | 17.5 |
| 10 | 21 | 0 | 0 | 15.5 |
| 10 | 23 | 0 | 0 | 16.5 |
| 9  | 24 | 0 | 0 | 16.5 |
| 10 | 25 | 0 | 0 | 17.5 |
| 13 | 22 | 0 | 0 | 17.5 |
| 11 | 20 | 0 | 0 | 15.5 |
| 9  | 27 | 0 | 0 | 18   |
| 12 | 21 | 0 | 0 | 16.5 |
| 13 | 21 | 0 | 0 | 17   |
| 12 | 20 | 0 | 0 | 16   |
| 11 | 20 | 0 | 0 | 15.5 |
| 10 | 25 | 0 | 0 | 17.5 |
| 14 | 21 | 0 | 0 | 17.5 |
| 9  | 24 | 0 | 0 | 16.5 |
| 13 | 21 | 0 | 0 | 17   |
| 9  | 30 | 0 | 0 | 19.5 |
| 9  | 24 | 0 | 0 | 16.5 |
| 10 | 25 | 0 | 0 | 17.5 |
| 9  | 28 | 0 | 0 | 18.5 |
| 10 | 23 | 0 | 0 | 16.5 |
| 11 | 22 | 0 | 0 | 16.5 |
| 11 | 21 | 0 | 0 | 16   |
| 11 | 22 | 0 | 0 | 16.5 |

|    |      |     |   |       |
|----|------|-----|---|-------|
| 10 | 25   | 0   | 0 | 17.5  |
| 12 | 22   | 0   | 0 | 17    |
| 9  | 24   | 0   | 0 | 16.5  |
| 11 | 20   | 0   | 0 | 15.5  |
| 9  | 24   | 0   | 0 | 16.5  |
| 11 | 20   | 0   | 0 | 15.5  |
| 10 | 29   | 0   | 0 | 19.5  |
| 10 | 21   | 0   | 0 | 15.5  |
| 13 | 20   | 0   | 0 | 16.5  |
| 12 | 22   | 0   | 0 | 17    |
| 10 | 26   | 0   | 0 | 18    |
| 50 | 113  | 2   | 0 | 81.5  |
| 52 | 110  | 2   | 0 | 81    |
| 52 | 80   | 2   | 0 | 66    |
| 71 | 134  | 3   | 0 | 102.5 |
| 61 | 154  | 3   | 0 | 107.5 |
| 32 | 1028 | 111 | 0 | 530   |
| 8  | 29   | 0   | 0 | 18.5  |
| 8  | 30   | 0   | 0 | 19    |
| 14 | 18   | 0   | 0 | 16    |
| 9  | 31   | 0   | 0 | 20    |
| 8  | 28   | 0   | 0 | 18    |
| 12 | 18   | 0   | 0 | 15    |
| 8  | 26   | 0   | 0 | 17    |
| 8  | 27   | 0   | 0 | 17.5  |
| 13 | 18   | 0   | 0 | 15.5  |
| 14 | 19   | 0   | 0 | 16.5  |
| 12 | 18   | 0   | 0 | 15    |
| 13 | 18   | 0   | 0 | 15.5  |
| 8  | 27   | 0   | 0 | 17.5  |
| 8  | 30   | 0   | 0 | 19    |
| 8  | 27   | 0   | 0 | 17.5  |
| 8  | 30   | 0   | 0 | 19    |
| 8  | 27   | 0   | 0 | 17.5  |
| 8  | 26   | 0   | 0 | 17    |
| 12 | 18   | 0   | 0 | 15    |
| 8  | 30   | 0   | 0 | 19    |
| 8  | 30   | 0   | 0 | 19    |
| 8  | 27   | 0   | 0 | 17.5  |
| 8  | 26   | 0   | 0 | 17    |
| 8  | 26   | 0   | 0 | 17    |
| 8  | 28   | 0   | 0 | 18    |
| 8  | 26   | 0   | 0 | 17    |
| 8  | 28   | 0   | 0 | 18    |
| 13 | 18   | 0   | 0 | 15.5  |
| 13 | 18   | 0   | 0 | 15.5  |
| 8  | 26   | 0   | 0 | 17    |

|    |    |   |   |      |
|----|----|---|---|------|
| 8  | 26 | 0 | 0 | 17   |
| 14 | 19 | 0 | 0 | 16.5 |
| 8  | 28 | 0 | 0 | 18   |
| 8  | 26 | 0 | 0 | 17   |
| 8  | 27 | 0 | 0 | 17.5 |
| 8  | 30 | 0 | 0 | 19   |
| 14 | 19 | 0 | 0 | 16.5 |
| 8  | 28 | 0 | 0 | 18   |
| 8  | 27 | 0 | 0 | 17.5 |
| 8  | 27 | 0 | 0 | 17.5 |
| 9  | 31 | 0 | 0 | 20   |
| 12 | 17 | 0 | 0 | 14.5 |
| 14 | 19 | 0 | 0 | 16.5 |
| 13 | 18 | 0 | 0 | 15.5 |
| 13 | 18 | 0 | 0 | 15.5 |
| 7  | 28 | 0 | 0 | 17.5 |
| 15 | 17 | 0 | 0 | 16   |
| 15 | 17 | 0 | 0 | 16   |
| 8  | 32 | 0 | 0 | 20   |
| 8  | 32 | 0 | 0 | 20   |
| 15 | 17 | 0 | 0 | 16   |
| 14 | 17 | 0 | 0 | 15.5 |
| 15 | 18 | 0 | 0 | 16.5 |
| 15 | 17 | 0 | 0 | 16   |
| 8  | 32 | 0 | 0 | 20   |
| 8  | 33 | 0 | 0 | 20.5 |
| 13 | 17 | 0 | 0 | 15   |
| 13 | 16 | 0 | 0 | 14.5 |
| 8  | 31 | 0 | 0 | 19.5 |
| 8  | 32 | 0 | 0 | 20   |
| 13 | 17 | 0 | 0 | 15   |
| 8  | 31 | 0 | 0 | 19.5 |
| 7  | 28 | 0 | 0 | 17.5 |
| 15 | 18 | 0 | 0 | 16.5 |
| 8  | 32 | 0 | 0 | 20   |
| 8  | 32 | 0 | 0 | 20   |
| 8  | 32 | 0 | 0 | 20   |
| 14 | 17 | 0 | 0 | 15.5 |
| 8  | 33 | 0 | 0 | 20.5 |
| 8  | 32 | 0 | 0 | 20   |
| 8  | 33 | 0 | 0 | 20.5 |
| 8  | 32 | 0 | 0 | 20   |
| 14 | 17 | 0 | 0 | 15.5 |
| 8  | 31 | 0 | 0 | 19.5 |
| 15 | 18 | 0 | 0 | 16.5 |
| 8  | 32 | 0 | 0 | 20   |
| 53 | 75 | 2 | 0 | 64   |

|     |     |   |   |       |
|-----|-----|---|---|-------|
| 112 | 290 | 6 | 0 | 201   |
| 7   | 29  | 0 | 0 | 18    |
| 7   | 31  | 0 | 0 | 19    |
| 7   | 32  | 0 | 0 | 19.5  |
| 7   | 33  | 0 | 0 | 20    |
| 14  | 16  | 0 | 0 | 15    |
| 7   | 29  | 0 | 0 | 18    |
| 7   | 30  | 0 | 0 | 18.5  |
| 14  | 15  | 0 | 0 | 14.5  |
| 7   | 29  | 0 | 0 | 18    |
| 7   | 29  | 0 | 0 | 18    |
| 7   | 33  | 0 | 0 | 20    |
| 7   | 29  | 0 | 0 | 18    |
| 7   | 30  | 0 | 0 | 18.5  |
| 7   | 31  | 0 | 0 | 19    |
| 7   | 30  | 0 | 0 | 18.5  |
| 7   | 30  | 0 | 0 | 18.5  |
| 13  | 15  | 0 | 0 | 14    |
| 7   | 32  | 0 | 0 | 19.5  |
| 14  | 16  | 0 | 0 | 15    |
| 7   | 31  | 0 | 0 | 19    |
| 13  | 15  | 0 | 0 | 14    |
| 14  | 15  | 0 | 0 | 14.5  |
| 7   | 33  | 0 | 0 | 20    |
| 13  | 15  | 0 | 0 | 14    |
| 7   | 33  | 0 | 0 | 20    |
| 7   | 30  | 0 | 0 | 18.5  |
| 7   | 30  | 0 | 0 | 18.5  |
| 7   | 30  | 0 | 0 | 18.5  |
| 7   | 30  | 0 | 0 | 18.5  |
| 7   | 31  | 0 | 0 | 19    |
| 7   | 29  | 0 | 0 | 18    |
| 7   | 30  | 0 | 0 | 18.5  |
| 14  | 16  | 0 | 0 | 15    |
| 15  | 16  | 0 | 0 | 15.5  |
| 7   | 29  | 0 | 0 | 18    |
| 7   | 31  | 0 | 0 | 19    |
| 7   | 32  | 0 | 0 | 19.5  |
| 7   | 30  | 0 | 0 | 18.5  |
| 7   | 33  | 0 | 0 | 20    |
| 7   | 29  | 0 | 0 | 18    |
| 7   | 33  | 0 | 0 | 20    |
| 7   | 31  | 0 | 0 | 19    |
| 7   | 30  | 0 | 0 | 18.5  |
| 7   | 33  | 0 | 0 | 20    |
| 7   | 29  | 0 | 0 | 18    |
| 34  | 699 | 8 | 0 | 366.5 |

|     |     |   |   |      |
|-----|-----|---|---|------|
| 15  | 15  | 0 | 0 | 15   |
| 7   | 34  | 0 | 0 | 20.5 |
| 6   | 30  | 0 | 0 | 18   |
| 16  | 16  | 0 | 0 | 16   |
| 15  | 15  | 0 | 0 | 15   |
| 6   | 30  | 0 | 0 | 18   |
| 7   | 35  | 0 | 0 | 21   |
| 6   | 30  | 0 | 0 | 18   |
| 7   | 34  | 0 | 0 | 20.5 |
| 14  | 14  | 0 | 0 | 14   |
| 6   | 30  | 0 | 0 | 18   |
| 6   | 30  | 0 | 0 | 18   |
| 7   | 35  | 0 | 0 | 21   |
| 6   | 30  | 0 | 0 | 18   |
| 6   | 30  | 0 | 0 | 18   |
| 14  | 14  | 0 | 0 | 14   |
| 6   | 30  | 0 | 0 | 18   |
| 6   | 32  | 0 | 0 | 19   |
| 6   | 33  | 0 | 0 | 19.5 |
| 6   | 32  | 0 | 0 | 19   |
| 6   | 31  | 0 | 0 | 18.5 |
| 6   | 32  | 0 | 0 | 19   |
| 6   | 31  | 0 | 0 | 18.5 |
| 6   | 31  | 0 | 0 | 18.5 |
| 6   | 33  | 0 | 0 | 19.5 |
| 15  | 14  | 0 | 0 | 14.5 |
| 6   | 33  | 0 | 0 | 19.5 |
| 14  | 13  | 0 | 0 | 13.5 |
| 6   | 31  | 0 | 0 | 18.5 |
| 6   | 31  | 0 | 0 | 18.5 |
| 6   | 33  | 0 | 0 | 19.5 |
| 6   | 32  | 0 | 0 | 19   |
| 6   | 31  | 0 | 0 | 18.5 |
| 6   | 32  | 0 | 0 | 19   |
| 6   | 31  | 0 | 0 | 18.5 |
| 6   | 33  | 0 | 0 | 19.5 |
| 6   | 33  | 0 | 0 | 19.5 |
| 6   | 32  | 0 | 0 | 19   |
| 105 | 70  | 3 | 0 | 87.5 |
| 84  | 107 | 3 | 0 | 95.5 |
| 6   | 36  | 0 | 0 | 21   |
| 6   | 36  | 0 | 0 | 21   |
| 6   | 34  | 0 | 0 | 20   |
| 17  | 14  | 0 | 0 | 15.5 |
| 6   | 35  | 0 | 0 | 20.5 |
| 6   | 36  | 0 | 0 | 21   |
| 6   | 34  | 0 | 0 | 20   |

|     |      |    |   |       |
|-----|------|----|---|-------|
| 15  | 12   | 0  | 0 | 13.5  |
| 16  | 13   | 0  | 0 | 14.5  |
| 6   | 34   | 0  | 0 | 20    |
| 16  | 13   | 0  | 0 | 14.5  |
| 6   | 36   | 0  | 0 | 21    |
| 6   | 36   | 0  | 0 | 21    |
| 6   | 35   | 0  | 0 | 20.5  |
| 6   | 36   | 0  | 0 | 21    |
| 6   | 35   | 0  | 0 | 20.5  |
| 6   | 34   | 0  | 0 | 20    |
| 17  | 14   | 0  | 0 | 15.5  |
| 6   | 36   | 0  | 0 | 21    |
| 6   | 35   | 0  | 0 | 20.5  |
| 6   | 35   | 0  | 0 | 20.5  |
| 16  | 13   | 0  | 0 | 14.5  |
| 5   | 32   | 0  | 0 | 18.5  |
| 5   | 32   | 0  | 0 | 18.5  |
| 5   | 32   | 0  | 0 | 18.5  |
| 6   | 37   | 0  | 0 | 21.5  |
| 5   | 32   | 0  | 0 | 18.5  |
| 6   | 37   | 0  | 0 | 21.5  |
| 5   | 32   | 0  | 0 | 18.5  |
| 5   | 32   | 0  | 0 | 18.5  |
| 6   | 37   | 0  | 0 | 21.5  |
| 6   | 37   | 0  | 0 | 21.5  |
| 6   | 37   | 0  | 0 | 21.5  |
| 5   | 33   | 0  | 0 | 19    |
| 5   | 33   | 0  | 0 | 19    |
| 5   | 33   | 0  | 0 | 19    |
| 5   | 33   | 0  | 0 | 19    |
| 5   | 35   | 0  | 0 | 20    |
| 17  | 12   | 0  | 0 | 14.5  |
| 15  | 11   | 0  | 0 | 13    |
| 5   | 34   | 0  | 0 | 19.5  |
| 5   | 34   | 0  | 0 | 19.5  |
| 5   | 35   | 0  | 0 | 20    |
| 5   | 34   | 0  | 0 | 19.5  |
| 5   | 34   | 0  | 0 | 19.5  |
| 15  | 11   | 0  | 0 | 13    |
| 5   | 34   | 0  | 0 | 19.5  |
| 5   | 34   | 0  | 0 | 19.5  |
| 330 | 1119 | 21 | 0 | 724.5 |
| 33  | 170  | 20 | 0 | 101.5 |
| 5   | 38   | 0  | 0 | 21.5  |
| 5   | 37   | 0  | 0 | 21    |
| 5   | 36   | 0  | 0 | 20.5  |
| 5   | 37   | 0  | 0 | 21    |

|    |     |    |   |      |
|----|-----|----|---|------|
| 5  | 36  | 0  | 0 | 20.5 |
| 5  | 36  | 0  | 0 | 20.5 |
| 18 | 12  | 0  | 0 | 15   |
| 15 | 10  | 0  | 0 | 12.5 |
| 5  | 38  | 0  | 0 | 21.5 |
| 5  | 36  | 0  | 0 | 20.5 |
| 5  | 37  | 0  | 0 | 21   |
| 5  | 36  | 0  | 0 | 20.5 |
| 5  | 38  | 0  | 0 | 21.5 |
| 15 | 10  | 0  | 0 | 12.5 |
| 5  | 37  | 0  | 0 | 21   |
| 26 | 112 | 13 | 0 | 69   |
| 9  | 197 | 2  | 0 | 103  |
| 4  | 33  | 0  | 0 | 18.5 |
| 4  | 33  | 0  | 0 | 18.5 |
| 17 | 10  | 0  | 0 | 13.5 |
| 4  | 33  | 0  | 0 | 18.5 |
| 5  | 39  | 0  | 0 | 22   |
| 4  | 33  | 0  | 0 | 18.5 |
| 5  | 39  | 0  | 0 | 22   |
| 4  | 33  | 0  | 0 | 18.5 |
| 4  | 33  | 0  | 0 | 18.5 |
| 4  | 33  | 0  | 0 | 18.5 |
| 5  | 39  | 0  | 0 | 22   |
| 5  | 39  | 0  | 0 | 22   |
| 5  | 39  | 0  | 0 | 22   |
| 4  | 33  | 0  | 0 | 18.5 |
| 17 | 10  | 0  | 0 | 13.5 |
| 4  | 33  | 0  | 0 | 18.5 |
| 4  | 35  | 0  | 0 | 19.5 |
| 4  | 35  | 0  | 0 | 19.5 |
| 4  | 34  | 0  | 0 | 19   |
| 4  | 35  | 0  | 0 | 19.5 |
| 4  | 34  | 0  | 0 | 19   |
| 4  | 35  | 0  | 0 | 19.5 |
| 4  | 34  | 0  | 0 | 19   |
| 4  | 34  | 0  | 0 | 19   |
| 4  | 34  | 0  | 0 | 19   |
| 4  | 34  | 0  | 0 | 19   |
| 4  | 34  | 0  | 0 | 19   |
| 4  | 34  | 0  | 0 | 19   |
| 4  | 34  | 0  | 0 | 19   |
| 4  | 34  | 0  | 0 | 19   |
| 4  | 35  | 0  | 0 | 19.5 |
| 4  | 34  | 0  | 0 | 19   |
| 4  | 34  | 0  | 0 | 19   |
| 4  | 34  | 0  | 0 | 19   |
| 4  | 34  | 0  | 0 | 19   |
| 4  | 34  | 0  | 0 | 19   |
| 29 | 68  | 1  | 0 | 48.5 |

|     |     |   |   |       |
|-----|-----|---|---|-------|
| 4   | 38  | 0 | 0 | 21    |
| 4   | 37  | 0 | 0 | 20.5  |
| 4   | 37  | 0 | 0 | 20.5  |
| 4   | 37  | 0 | 0 | 20.5  |
| 4   | 37  | 0 | 0 | 20.5  |
| 4   | 36  | 0 | 0 | 20    |
| 4   | 36  | 0 | 0 | 20    |
| 4   | 38  | 0 | 0 | 21    |
| 4   | 36  | 0 | 0 | 20    |
| 4   | 36  | 0 | 0 | 20    |
| 4   | 36  | 0 | 0 | 20    |
| 4   | 38  | 0 | 0 | 21    |
| 4   | 36  | 0 | 0 | 20    |
| 4   | 38  | 0 | 0 | 21    |
| 4   | 36  | 0 | 0 | 20    |
| 4   | 36  | 0 | 0 | 20    |
| 4   | 38  | 0 | 0 | 21    |
| 4   | 36  | 0 | 0 | 20    |
| 4   | 38  | 0 | 0 | 21    |
| 4   | 36  | 0 | 0 | 20    |
| 4   | 37  | 0 | 0 | 20.5  |
| 4   | 40  | 0 | 0 | 22    |
| 4   | 40  | 0 | 0 | 22    |
| 16  | 8   | 0 | 0 | 12    |
| 16  | 8   | 0 | 0 | 12    |
| 16  | 8   | 0 | 0 | 12    |
| 18  | 9   | 0 | 0 | 13.5  |
| 4   | 39  | 0 | 0 | 21.5  |
| 4   | 40  | 0 | 0 | 22    |
| 4   | 40  | 0 | 0 | 22    |
| 16  | 8   | 0 | 0 | 12    |
| 28  | 67  | 1 | 0 | 47.5  |
| 33  | 55  | 1 | 0 | 44    |
| 17  | 8   | 0 | 0 | 12.5  |
| 19  | 9   | 0 | 0 | 14    |
| 4   | 41  | 0 | 0 | 22.5  |
| 4   | 41  | 0 | 0 | 22.5  |
| 4   | 41  | 0 | 0 | 22.5  |
| 35  | 51  | 1 | 0 | 43    |
| 196 | 121 | 6 | 0 | 158.5 |
| 17  | 7   | 0 | 0 | 12    |
| 3   | 36  | 0 | 0 | 19.5  |
| 19  | 8   | 0 | 0 | 13.5  |
| 3   | 35  | 0 | 0 | 19    |
| 3   | 35  | 0 | 0 | 19    |
| 3   | 36  | 0 | 0 | 19.5  |
| 19  | 8   | 0 | 0 | 13.5  |



|     |      |    |   |       |
|-----|------|----|---|-------|
| 3   | 36   | 0  | 0 | 19.5  |
| 3   | 36   | 0  | 0 | 19.5  |
| 3   | 36   | 0  | 0 | 19.5  |
| 19  | 8    | 0  | 0 | 13.5  |
| 3   | 35   | 0  | 0 | 19    |
| 3   | 35   | 0  | 0 | 19    |
| 3   | 38   | 0  | 0 | 20.5  |
| 3   | 38   | 0  | 0 | 20.5  |
| 18  | 7    | 0  | 0 | 12.5  |
| 3   | 37   | 0  | 0 | 20    |
| 3   | 37   | 0  | 0 | 20    |
| 3   | 37   | 0  | 0 | 20    |
| 3   | 37   | 0  | 0 | 20    |
| 3   | 37   | 0  | 0 | 20    |
| 3   | 37   | 0  | 0 | 20    |
| 35  | 47   | 1  | 0 | 41    |
| 35  | 48   | 1  | 0 | 41.5  |
| 392 | 1139 | 23 | 0 | 765.5 |
| 3   | 40   | 0  | 0 | 21.5  |
| 3   | 39   | 0  | 0 | 21    |
| 3   | 39   | 0  | 0 | 21    |
| 3   | 39   | 0  | 0 | 21    |
| 3   | 40   | 0  | 0 | 21.5  |
| 125 | 676  | 11 | 0 | 400.5 |
| 21  | 80   | 1  | 0 | 50.5  |
| 3   | 42   | 0  | 0 | 22.5  |
| 3   | 41   | 0  | 0 | 22    |
| 3   | 42   | 0  | 0 | 22.5  |
| 3   | 42   | 0  | 0 | 22.5  |
| 3   | 43   | 0  | 0 | 23    |
| 18  | 6    | 0  | 0 | 12    |
| 3   | 42   | 0  | 0 | 22.5  |
| 3   | 42   | 0  | 0 | 22.5  |
| 18  | 6    | 0  | 0 | 12    |
| 3   | 42   | 0  | 0 | 22.5  |
| 3   | 41   | 0  | 0 | 22    |
| 19  | 6    | 0  | 0 | 12.5  |
| 19  | 6    | 0  | 0 | 12.5  |
| 19  | 6    | 0  | 0 | 12.5  |
| 38  | 42   | 1  | 0 | 40    |
| 26  | 168  | 2  | 0 | 97    |
| 20  | 6    | 0  | 0 | 13    |
| 20  | 6    | 0  | 0 | 13    |
| 20  | 6    | 0  | 0 | 13    |
| 1   | 8    | 2  | 0 | 4.5   |
| 19  | 87   | 1  | 0 | 53    |
| 19  | 85   | 1  | 0 | 52    |

|     |      |     |   |      |
|-----|------|-----|---|------|
| 256 | 1262 | 115 | 2 | 759  |
| 2   | 37   | 0   | 0 | 19.5 |
| 2   | 37   | 0   | 0 | 19.5 |
| 2   | 37   | 0   | 0 | 19.5 |
| 2   | 37   | 0   | 0 | 19.5 |
| 18  | 5    | 0   | 0 | 11.5 |
| 2   | 38   | 0   | 0 | 20   |
| 2   | 38   | 0   | 0 | 20   |
| 2   | 38   | 0   | 0 | 20   |
| 2   | 38   | 0   | 0 | 20   |
| 2   | 38   | 0   | 0 | 20   |
| 18  | 90   | 1   | 0 | 54   |
| 42  | 40   | 1   | 0 | 41   |
| 2   | 40   | 0   | 0 | 21   |
| 2   | 40   | 0   | 0 | 21   |
| 2   | 39   | 0   | 0 | 20.5 |
| 2   | 39   | 0   | 0 | 20.5 |
| 2   | 39   | 0   | 0 | 20.5 |
| 2   | 40   | 0   | 0 | 21   |
| 19  | 5    | 0   | 0 | 12   |
| 2   | 41   | 0   | 0 | 21.5 |
| 18  | 4    | 0   | 0 | 11   |
| 18  | 4    | 0   | 0 | 11   |
| 0   | 9    | 2   | 0 | 4.5  |
| 2   | 41   | 0   | 0 | 21.5 |
| 2   | 41   | 0   | 0 | 21.5 |
| 20  | 5    | 0   | 0 | 12.5 |
| 2   | 41   | 0   | 0 | 21.5 |
| 18  | 4    | 0   | 0 | 11   |
| 17  | 89   | 1   | 0 | 53   |
| 17  | 91   | 1   | 0 | 54   |
| 20  | 262  | 3   | 0 | 141  |
| 2   | 44   | 0   | 0 | 23   |
| 2   | 43   | 0   | 0 | 22.5 |
| 19  | 4    | 0   | 0 | 11.5 |
| 2   | 43   | 0   | 0 | 22.5 |
| 2   | 43   | 0   | 0 | 22.5 |
| 93  | 315  | 6   | 0 | 204  |
| 2   | 45   | 0   | 0 | 23.5 |
| 2   | 45   | 0   | 0 | 23.5 |
| 11  | 41   | 5   | 0 | 26   |
| 21  | 4    | 0   | 0 | 12.5 |
| 52  | 96   | 2   | 0 | 74   |
| 42  | 33   | 1   | 0 | 37.5 |
| 50  | 4    | 10  | 0 | 27   |
| 1   | 39   | 0   | 0 | 20   |
| 1   | 39   | 0   | 0 | 20   |

|      |      |    |   |       |
|------|------|----|---|-------|
| 1    | 39   | 0  | 0 | 20    |
| 241  | 316  | 10 | 0 | 278.5 |
| 38   | 127  | 2  | 0 | 82.5  |
| 39   | 125  | 2  | 0 | 82    |
| 1    | 41   | 0  | 0 | 21    |
| 1    | 41   | 0  | 0 | 21    |
| 1    | 41   | 0  | 0 | 21    |
| 1    | 40   | 0  | 0 | 20.5  |
| 1    | 40   | 0  | 0 | 20.5  |
| 136  | 1631 | 22 | 0 | 883.5 |
| 1    | 45   | 0  | 0 | 23    |
| 1    | 45   | 0  | 0 | 23    |
| 121  | 1106 | 16 | 0 | 613.5 |
| 13   | 97   | 1  | 0 | 55    |
| 402  | 164  | 12 | 0 | 283   |
| 1    | 46   | 0  | 0 | 23.5  |
| 1    | 47   | 0  | 0 | 24    |
| 1    | 46   | 0  | 0 | 23.5  |
| 20   | 2    | 0  | 0 | 11    |
| 30   | 168  | 18 | 0 | 99    |
| 65   | 73   | 2  | 0 | 69    |
| 0    | 41   | 0  | 0 | 20.5  |
| 12   | 100  | 1  | 0 | 56    |
| 0    | 44   | 0  | 0 | 22    |
| 20   | 0    | 0  | 0 | 10    |
| 0    | 44   | 0  | 0 | 22    |
| 27   | 126  | 2  | 0 | 76.5  |
| 304  | 872  | 19 | 0 | 588   |
| 0    | 45   | 0  | 0 | 22.5  |
| 0    | 46   | 0  | 0 | 23    |
| 8    | 90   | 8  | 0 | 49    |
| 367  | 993  | 22 | 0 | 680   |
| 0    | 47   | 0  | 0 | 23.5  |
| 0    | 47   | 0  | 0 | 23.5  |
| 129  | 154  | 5  | 0 | 141.5 |
| 11   | 105  | 1  | 0 | 58    |
| 10   | 107  | 1  | 0 | 58.5  |
| 24   | 162  | 2  | 0 | 93    |
| 18   | 193  | 18 | 0 | 105.5 |
| 117  | 147  | 5  | 0 | 132   |
| 1245 | 771  | 42 | 0 | 1008  |
| 58   | 201  | 4  | 0 | 129.5 |
| 38   | 67   | 11 | 0 | 52.5  |
| 26   | 60   | 1  | 0 | 43    |
| 26   | 66   | 1  | 0 | 46    |
| 28   | 59   | 1  | 0 | 43.5  |
| 29   | 56   | 1  | 0 | 42.5  |

|      |      |     |   |        |
|------|------|-----|---|--------|
| 25   | 65   | 1   | 0 | 45     |
| 60   | 130  | 3   | 0 | 95     |
| 258  | 238  | 10  | 0 | 248    |
| 6    | 45   | 4   | 0 | 25.5   |
| 20   | 77   | 1   | 0 | 48.5   |
| 194  | 220  | 48  | 0 | 207    |
| 93   | 226  | 31  | 0 | 159.5  |
| 5    | 116  | 1   | 0 | 60.5   |
| 18   | 80   | 1   | 0 | 49     |
| 57   | 270  | 5   | 0 | 163.5  |
| 16   | 84   | 1   | 0 | 50     |
| 40   | 36   | 1   | 0 | 38     |
| 21   | 128  | 2   | 0 | 74.5   |
| 398  | 1029 | 25  | 0 | 713.5  |
| 129  | 985  | 16  | 0 | 557    |
| 7    | 68   | 0   | 2 | 37.5   |
| 149  | 277  | 8   | 0 | 213    |
| 22   | 542  | 7   | 0 | 282    |
| 42   | 25   | 1   | 0 | 33.5   |
| 146  | 311  | 44  | 0 | 228.5  |
| 225  | 1286 | 136 | 0 | 755.5  |
| 8    | 67   | 6   | 0 | 37.5   |
| 2    | 52   | 4   | 0 | 27     |
| 66   | 228  | 26  | 0 | 147    |
| 26   | 151  | 14  | 0 | 88.5   |
| 257  | 690  | 17  | 0 | 473.5  |
| 121  | 186  | 31  | 0 | 153.5  |
| 21   | 90   | 9   | 0 | 55.5   |
| 361  | 1380 | 29  | 0 | 870.5  |
| 98   | 243  | 6   | 0 | 170.5  |
| 1    | 52   | 4   | 0 | 26.5   |
| 64   | 220  | 24  | 0 | 142    |
| 46   | 67   | 2   | 0 | 56.5   |
| 4    | 68   | 6   | 0 | 36     |
| 29   | 104  | 2   | 0 | 66.5   |
| 78   | 767  | 67  | 0 | 422.5  |
| 360  | 640  | 102 | 0 | 500    |
| 1562 | 295  | 47  | 0 | 928.5  |
| 22   | 123  | 2   | 0 | 72.5   |
| 1208 | 953  | 49  | 0 | 1080.5 |
| 59   | 0    | 1   | 0 | 29.5   |
| 31   | 379  | 31  | 0 | 205    |
| 321  | 538  | 85  | 0 | 429.5  |
| 5    | 13   | 2   | 0 | 9      |
| 92   | 52   | 3   | 0 | 72     |
| 33   | 206  | 18  | 0 | 119.5  |
| 64   | 611  | 10  | 0 | 337.5  |

|      |      |    |   |        |
|------|------|----|---|--------|
| 7    | 8    | 2  | 0 | 7.5    |
| 22   | 202  | 3  | 0 | 112    |
| 49   | 140  | 3  | 0 | 94.5   |
| 616  | 2048 | 47 | 0 | 1332   |
| 1513 | 644  | 53 | 0 | 1078.5 |
| 10   | 79   | 7  | 0 | 44.5   |
| 23   | 60   | 1  | 0 | 41.5   |
| 29   | 49   | 1  | 0 | 39     |
| 22   | 63   | 1  | 0 | 42.5   |
| 22   | 62   | 1  | 0 | 42     |
| 2    | 15   | 2  | 0 | 8.5    |
| 118  | 208  | 6  | 0 | 163    |
| 9    | 19   | 0  | 0 | 14     |
| 9    | 20   | 0  | 0 | 14.5   |
| 10   | 19   | 0  | 0 | 14.5   |
| 9    | 21   | 0  | 0 | 15     |
| 9    | 23   | 0  | 0 | 16     |
| 9    | 23   | 0  | 0 | 16     |
| 9    | 23   | 0  | 0 | 16     |
| 9    | 19   | 0  | 0 | 14     |
| 10   | 19   | 0  | 0 | 14.5   |
| 9    | 22   | 0  | 0 | 15.5   |
| 9    | 19   | 0  | 0 | 14     |
| 10   | 19   | 0  | 0 | 14.5   |
| 9    | 21   | 0  | 0 | 15     |
| 9    | 21   | 0  | 0 | 15     |
| 10   | 20   | 0  | 0 | 15     |
| 9    | 19   | 0  | 0 | 14     |
| 9    | 23   | 0  | 0 | 16     |
| 9    | 23   | 0  | 0 | 16     |
| 9    | 21   | 0  | 0 | 15     |
| 9    | 20   | 0  | 0 | 14.5   |
| 10   | 20   | 0  | 0 | 15     |
| 9    | 19   | 0  | 0 | 14     |
| 9    | 20   | 0  | 0 | 14.5   |
| 9    | 19   | 0  | 0 | 14     |
| 9    | 19   | 0  | 0 | 14     |
| 9    | 21   | 0  | 0 | 15     |
| 9    | 21   | 0  | 0 | 15     |
| 9    | 19   | 0  | 0 | 14     |
| 9    | 21   | 0  | 0 | 15     |
| 9    | 19   | 0  | 0 | 14     |
| 9    | 20   | 0  | 0 | 14.5   |
| 9    | 23   | 0  | 0 | 16     |
| 10   | 20   | 0  | 0 | 15     |
| 9    | 23   | 0  | 0 | 16     |
| 9    | 19   | 0  | 0 | 14     |

|     |      |    |   |      |
|-----|------|----|---|------|
| 9   | 21   | 0  | 0 | 15   |
| 9   | 21   | 0  | 0 | 15   |
| 9   | 19   | 0  | 0 | 14   |
| 10  | 20   | 0  | 0 | 15   |
| 9   | 21   | 0  | 0 | 15   |
| 9   | 23   | 0  | 0 | 16   |
| 9   | 23   | 0  | 0 | 16   |
| 9   | 21   | 0  | 0 | 15   |
| 9   | 21   | 0  | 0 | 15   |
| 10  | 20   | 0  | 0 | 15   |
| 9   | 19   | 0  | 0 | 14   |
| 9   | 21   | 0  | 0 | 15   |
| 32  | 38   | 1  | 0 | 35   |
| 18  | 72   | 1  | 0 | 45   |
| 17  | 70   | 1  | 0 | 43.5 |
| 127 | 223  | 7  | 0 | 175  |
| 524 | 1296 | 35 | 0 | 910  |
| 11  | 17   | 0  | 0 | 14   |
| 8   | 19   | 0  | 0 | 13.5 |
| 11  | 16   | 0  | 0 | 13.5 |
| 8   | 19   | 0  | 0 | 13.5 |
| 11  | 17   | 0  | 0 | 14   |
| 7   | 22   | 0  | 0 | 14.5 |
| 8   | 19   | 0  | 0 | 13.5 |
| 11  | 17   | 0  | 0 | 14   |
| 10  | 17   | 0  | 0 | 13.5 |
| 8   | 19   | 0  | 0 | 13.5 |
| 10  | 17   | 0  | 0 | 13.5 |
| 7   | 22   | 0  | 0 | 14.5 |
| 8   | 19   | 0  | 0 | 13.5 |
| 11  | 17   | 0  | 0 | 14   |
| 8   | 19   | 0  | 0 | 13.5 |
| 8   | 19   | 0  | 0 | 13.5 |
| 7   | 22   | 0  | 0 | 14.5 |
| 8   | 19   | 0  | 0 | 13.5 |
| 10  | 17   | 0  | 0 | 13.5 |
| 8   | 19   | 0  | 0 | 13.5 |
| 7   | 22   | 0  | 0 | 14.5 |
| 10  | 17   | 0  | 0 | 13.5 |
| 10  | 17   | 0  | 0 | 13.5 |
| 8   | 19   | 0  | 0 | 13.5 |
| 7   | 22   | 0  | 0 | 14.5 |
| 11  | 16   | 0  | 0 | 13.5 |
| 8   | 19   | 0  | 0 | 13.5 |
| 10  | 17   | 0  | 0 | 13.5 |
| 11  | 17   | 0  | 0 | 14   |
| 8   | 19   | 0  | 0 | 13.5 |

|    |    |   |   |      |
|----|----|---|---|------|
| 8  | 19 | 0 | 0 | 13.5 |
| 11 | 16 | 0 | 0 | 13.5 |
| 11 | 17 | 0 | 0 | 14   |
| 10 | 17 | 0 | 0 | 13.5 |
| 10 | 16 | 0 | 0 | 13   |
| 8  | 19 | 0 | 0 | 13.5 |
| 8  | 23 | 0 | 0 | 15.5 |
| 8  | 25 | 0 | 0 | 16.5 |
| 9  | 17 | 0 | 0 | 13   |
| 8  | 24 | 0 | 0 | 16   |
| 8  | 23 | 0 | 0 | 15.5 |
| 10 | 18 | 0 | 0 | 14   |
| 8  | 20 | 0 | 0 | 14   |
| 8  | 21 | 0 | 0 | 14.5 |
| 9  | 17 | 0 | 0 | 13   |
| 8  | 20 | 0 | 0 | 14   |
| 9  | 18 | 0 | 0 | 13.5 |
| 8  | 23 | 0 | 0 | 15.5 |
| 8  | 24 | 0 | 0 | 16   |
| 9  | 17 | 0 | 0 | 13   |
| 9  | 18 | 0 | 0 | 13.5 |
| 8  | 22 | 0 | 0 | 15   |
| 8  | 23 | 0 | 0 | 15.5 |
| 8  | 20 | 0 | 0 | 14   |
| 8  | 20 | 0 | 0 | 14   |
| 7  | 21 | 0 | 0 | 14   |
| 8  | 20 | 0 | 0 | 14   |
| 8  | 23 | 0 | 0 | 15.5 |
| 8  | 21 | 0 | 0 | 14.5 |
| 9  | 18 | 0 | 0 | 13.5 |
| 8  | 25 | 0 | 0 | 16.5 |
| 8  | 20 | 0 | 0 | 14   |
| 10 | 18 | 0 | 0 | 14   |
| 7  | 21 | 0 | 0 | 14   |
| 7  | 21 | 0 | 0 | 14   |
| 8  | 24 | 0 | 0 | 16   |
| 8  | 22 | 0 | 0 | 15   |
| 8  | 24 | 0 | 0 | 16   |
| 8  | 24 | 0 | 0 | 16   |
| 8  | 22 | 0 | 0 | 15   |
| 7  | 21 | 0 | 0 | 14   |
| 8  | 21 | 0 | 0 | 14.5 |
| 8  | 23 | 0 | 0 | 15.5 |
| 8  | 23 | 0 | 0 | 15.5 |
| 8  | 20 | 0 | 0 | 14   |
| 9  | 18 | 0 | 0 | 13.5 |
| 9  | 18 | 0 | 0 | 13.5 |

|    |    |   |   |      |
|----|----|---|---|------|
| 9  | 18 | 0 | 0 | 13.5 |
| 8  | 24 | 0 | 0 | 16   |
| 10 | 18 | 0 | 0 | 14   |
| 9  | 18 | 0 | 0 | 13.5 |
| 8  | 25 | 0 | 0 | 16.5 |
| 8  | 24 | 0 | 0 | 16   |
| 9  | 18 | 0 | 0 | 13.5 |
| 8  | 23 | 0 | 0 | 15.5 |
| 8  | 22 | 0 | 0 | 15   |
| 11 | 18 | 0 | 0 | 14.5 |
| 11 | 18 | 0 | 0 | 14.5 |
| 8  | 21 | 0 | 0 | 14.5 |
| 8  | 25 | 0 | 0 | 16.5 |
| 8  | 22 | 0 | 0 | 15   |
| 8  | 23 | 0 | 0 | 15.5 |
| 10 | 18 | 0 | 0 | 14   |
| 9  | 17 | 0 | 0 | 13   |
| 9  | 18 | 0 | 0 | 13.5 |
| 8  | 21 | 0 | 0 | 14.5 |
| 8  | 21 | 0 | 0 | 14.5 |
| 8  | 23 | 0 | 0 | 15.5 |
| 7  | 21 | 0 | 0 | 14   |
| 8  | 20 | 0 | 0 | 14   |
| 8  | 24 | 0 | 0 | 16   |
| 8  | 23 | 0 | 0 | 15.5 |
| 8  | 25 | 0 | 0 | 16.5 |
| 8  | 24 | 0 | 0 | 16   |
| 8  | 22 | 0 | 0 | 15   |
| 8  | 22 | 0 | 0 | 15   |
| 7  | 21 | 0 | 0 | 14   |
| 9  | 17 | 0 | 0 | 13   |
| 8  | 25 | 0 | 0 | 16.5 |
| 8  | 23 | 0 | 0 | 15.5 |
| 8  | 25 | 0 | 0 | 16.5 |
| 8  | 21 | 0 | 0 | 14.5 |
| 10 | 18 | 0 | 0 | 14   |
| 11 | 18 | 0 | 0 | 14.5 |
| 8  | 22 | 0 | 0 | 15   |
| 7  | 21 | 0 | 0 | 14   |
| 8  | 22 | 0 | 0 | 15   |
| 9  | 18 | 0 | 0 | 13.5 |
| 9  | 17 | 0 | 0 | 13   |
| 7  | 21 | 0 | 0 | 14   |
| 9  | 18 | 0 | 0 | 13.5 |
| 11 | 18 | 0 | 0 | 14.5 |
| 8  | 21 | 0 | 0 | 14.5 |
| 8  | 25 | 0 | 0 | 16.5 |



|    |     |    |   |       |
|----|-----|----|---|-------|
| 8  | 20  | 0  | 0 | 14    |
| 8  | 25  | 0  | 0 | 16.5  |
| 8  | 22  | 0  | 0 | 15    |
| 8  | 24  | 0  | 0 | 16    |
| 8  | 23  | 0  | 0 | 15.5  |
| 8  | 25  | 0  | 0 | 16.5  |
| 9  | 18  | 0  | 0 | 13.5  |
| 7  | 220 | 16 | 0 | 113.5 |
| 28 | 313 | 5  | 0 | 170.5 |
| 12 | 16  | 0  | 0 | 14    |
| 12 | 16  | 0  | 0 | 14    |
| 12 | 16  | 0  | 0 | 14    |
| 12 | 16  | 0  | 0 | 14    |
| 12 | 16  | 0  | 0 | 14    |
| 12 | 16  | 0  | 0 | 14    |
| 11 | 15  | 0  | 0 | 13    |
| 7  | 27  | 0  | 0 | 17    |
| 7  | 26  | 0  | 0 | 16.5  |
| 7  | 25  | 0  | 0 | 16    |
| 11 | 14  | 0  | 0 | 12.5  |
| 7  | 23  | 0  | 0 | 15    |
| 7  | 23  | 0  | 0 | 15    |
| 7  | 26  | 0  | 0 | 16.5  |
| 7  | 23  | 0  | 0 | 15    |
| 7  | 24  | 0  | 0 | 15.5  |
| 7  | 25  | 0  | 0 | 16    |
| 11 | 15  | 0  | 0 | 13    |
| 7  | 25  | 0  | 0 | 16    |
| 12 | 15  | 0  | 0 | 13.5  |
| 10 | 15  | 0  | 0 | 12.5  |
| 10 | 15  | 0  | 0 | 12.5  |
| 11 | 15  | 0  | 0 | 13    |
| 7  | 25  | 0  | 0 | 16    |
| 7  | 26  | 0  | 0 | 16.5  |
| 7  | 26  | 0  | 0 | 16.5  |
| 10 | 15  | 0  | 0 | 12.5  |
| 7  | 26  | 0  | 0 | 16.5  |
| 7  | 26  | 0  | 0 | 16.5  |
| 7  | 24  | 0  | 0 | 15.5  |
| 7  | 24  | 0  | 0 | 15.5  |
| 7  | 24  | 0  | 0 | 15.5  |
| 7  | 24  | 0  | 0 | 15.5  |
| 7  | 26  | 0  | 0 | 16.5  |
| 7  | 24  | 0  | 0 | 15.5  |
| 12 | 15  | 0  | 0 | 13.5  |
| 7  | 26  | 0  | 0 | 16.5  |
| 11 | 15  | 0  | 0 | 13    |

|    |    |   |   |      |
|----|----|---|---|------|
| 7  | 25 | 0 | 0 | 16   |
| 7  | 24 | 0 | 0 | 15.5 |
| 7  | 26 | 0 | 0 | 16.5 |
| 7  | 26 | 0 | 0 | 16.5 |
| 7  | 24 | 0 | 0 | 15.5 |
| 7  | 27 | 0 | 0 | 17   |
| 11 | 15 | 0 | 0 | 13   |
| 7  | 23 | 0 | 0 | 15   |
| 10 | 15 | 0 | 0 | 12.5 |
| 7  | 26 | 0 | 0 | 16.5 |
| 7  | 25 | 0 | 0 | 16   |
| 7  | 23 | 0 | 0 | 15   |
| 7  | 27 | 0 | 0 | 17   |
| 7  | 26 | 0 | 0 | 16.5 |
| 7  | 25 | 0 | 0 | 16   |
| 7  | 26 | 0 | 0 | 16.5 |
| 10 | 15 | 0 | 0 | 12.5 |
| 7  | 23 | 0 | 0 | 15   |
| 7  | 26 | 0 | 0 | 16.5 |
| 6  | 25 | 0 | 0 | 15.5 |
| 6  | 26 | 0 | 0 | 16   |
| 12 | 14 | 0 | 0 | 13   |
| 6  | 24 | 0 | 0 | 15   |
| 6  | 23 | 0 | 0 | 14.5 |
| 6  | 26 | 0 | 0 | 16   |
| 6  | 26 | 0 | 0 | 16   |
| 6  | 24 | 0 | 0 | 15   |
| 6  | 23 | 0 | 0 | 14.5 |
| 6  | 25 | 0 | 0 | 15.5 |
| 6  | 24 | 0 | 0 | 15   |
| 13 | 14 | 0 | 0 | 13.5 |
| 6  | 24 | 0 | 0 | 15   |
| 6  | 23 | 0 | 0 | 14.5 |
| 12 | 14 | 0 | 0 | 13   |
| 6  | 26 | 0 | 0 | 16   |
| 11 | 13 | 0 | 0 | 12   |
| 13 | 14 | 0 | 0 | 13.5 |
| 12 | 14 | 0 | 0 | 13   |
| 6  | 24 | 0 | 0 | 15   |
| 6  | 24 | 0 | 0 | 15   |
| 6  | 23 | 0 | 0 | 14.5 |
| 12 | 14 | 0 | 0 | 13   |
| 6  | 25 | 0 | 0 | 15.5 |
| 11 | 13 | 0 | 0 | 12   |
| 12 | 14 | 0 | 0 | 13   |
| 6  | 24 | 0 | 0 | 15   |
| 6  | 23 | 0 | 0 | 14.5 |

|    |    |   |   |      |
|----|----|---|---|------|
| 6  | 23 | 0 | 0 | 14.5 |
| 6  | 24 | 0 | 0 | 15   |
| 6  | 24 | 0 | 0 | 15   |
| 13 | 14 | 0 | 0 | 13.5 |
| 6  | 23 | 0 | 0 | 14.5 |
| 6  | 25 | 0 | 0 | 15.5 |
| 6  | 24 | 0 | 0 | 15   |
| 6  | 24 | 0 | 0 | 15   |
| 13 | 14 | 0 | 0 | 13.5 |
| 6  | 25 | 0 | 0 | 15.5 |
| 6  | 26 | 0 | 0 | 16   |
| 6  | 23 | 0 | 0 | 14.5 |
| 6  | 24 | 0 | 0 | 15   |
| 6  | 25 | 0 | 0 | 15.5 |
| 11 | 13 | 0 | 0 | 12   |
| 6  | 26 | 0 | 0 | 16   |
| 6  | 25 | 0 | 0 | 15.5 |
| 6  | 25 | 0 | 0 | 15.5 |
| 6  | 24 | 0 | 0 | 15   |
| 13 | 14 | 0 | 0 | 13.5 |
| 6  | 24 | 0 | 0 | 15   |
| 6  | 25 | 0 | 0 | 15.5 |
| 6  | 25 | 0 | 0 | 15.5 |
| 1  | 19 | 2 | 0 | 10   |
| 6  | 27 | 0 | 0 | 16.5 |
| 12 | 13 | 0 | 0 | 12.5 |
| 13 | 13 | 0 | 0 | 13   |
| 6  | 29 | 0 | 0 | 17.5 |
| 6  | 29 | 0 | 0 | 17.5 |
| 6  | 28 | 0 | 0 | 17   |
| 6  | 27 | 0 | 0 | 16.5 |
| 11 | 12 | 0 | 0 | 11.5 |
| 6  | 27 | 0 | 0 | 16.5 |
| 6  | 27 | 0 | 0 | 16.5 |
| 11 | 12 | 0 | 0 | 11.5 |
| 12 | 12 | 0 | 0 | 12   |
| 11 | 12 | 0 | 0 | 11.5 |
| 6  | 27 | 0 | 0 | 16.5 |
| 6  | 29 | 0 | 0 | 17.5 |
| 12 | 13 | 0 | 0 | 12.5 |
| 6  | 28 | 0 | 0 | 17   |
| 12 | 13 | 0 | 0 | 12.5 |
| 12 | 13 | 0 | 0 | 12.5 |
| 12 | 13 | 0 | 0 | 12.5 |
| 12 | 12 | 0 | 0 | 12   |
| 6  | 29 | 0 | 0 | 17.5 |
| 6  | 28 | 0 | 0 | 17   |

|    |    |   |   |      |
|----|----|---|---|------|
| 6  | 29 | 0 | 0 | 17.5 |
| 6  | 27 | 0 | 0 | 16.5 |
| 11 | 12 | 0 | 0 | 11.5 |
| 6  | 28 | 0 | 0 | 17   |
| 13 | 13 | 0 | 0 | 13   |
| 6  | 27 | 0 | 0 | 16.5 |
| 6  | 28 | 0 | 0 | 17   |
| 6  | 27 | 0 | 0 | 16.5 |
| 6  | 27 | 0 | 0 | 16.5 |
| 6  | 28 | 0 | 0 | 17   |
| 6  | 29 | 0 | 0 | 17.5 |
| 6  | 28 | 0 | 0 | 17   |
| 12 | 12 | 0 | 0 | 12   |
| 6  | 29 | 0 | 0 | 17.5 |
| 13 | 13 | 0 | 0 | 13   |
| 12 | 13 | 0 | 0 | 12.5 |
| 12 | 13 | 0 | 0 | 12.5 |
| 6  | 28 | 0 | 0 | 17   |
| 6  | 28 | 0 | 0 | 17   |
| 11 | 12 | 0 | 0 | 11.5 |
| 6  | 27 | 0 | 0 | 16.5 |
| 6  | 27 | 0 | 0 | 16.5 |
| 5  | 27 | 0 | 0 | 16   |
| 5  | 25 | 0 | 0 | 15   |
| 5  | 25 | 0 | 0 | 15   |
| 5  | 26 | 0 | 0 | 15.5 |
| 5  | 26 | 0 | 0 | 15.5 |
| 5  | 26 | 0 | 0 | 15.5 |
| 5  | 27 | 0 | 0 | 16   |
| 5  | 27 | 0 | 0 | 16   |
| 5  | 25 | 0 | 0 | 15   |
| 5  | 25 | 0 | 0 | 15   |
| 5  | 25 | 0 | 0 | 15   |
| 12 | 11 | 0 | 0 | 11.5 |
| 5  | 25 | 0 | 0 | 15   |
| 5  | 25 | 0 | 0 | 15   |
| 5  | 25 | 0 | 0 | 15   |
| 5  | 27 | 0 | 0 | 16   |
| 5  | 25 | 0 | 0 | 15   |
| 5  | 27 | 0 | 0 | 16   |
| 5  | 26 | 0 | 0 | 15.5 |
| 5  | 26 | 0 | 0 | 15.5 |
| 5  | 26 | 0 | 0 | 15.5 |
| 5  | 26 | 0 | 0 | 15.5 |
| 5  | 25 | 0 | 0 | 15   |
| 5  | 25 | 0 | 0 | 15   |
| 5  | 27 | 0 | 0 | 16   |

|    |    |   |   |      |
|----|----|---|---|------|
| 5  | 26 | 0 | 0 | 15.5 |
| 5  | 26 | 0 | 0 | 15.5 |
| 5  | 27 | 0 | 0 | 16   |
| 5  | 25 | 0 | 0 | 15   |
| 5  | 25 | 0 | 0 | 15   |
| 5  | 25 | 0 | 0 | 15   |
| 5  | 27 | 0 | 0 | 16   |
| 0  | 17 | 2 | 0 | 8.5  |
| 5  | 28 | 0 | 0 | 16.5 |
| 5  | 28 | 0 | 0 | 16.5 |
| 5  | 29 | 0 | 0 | 17   |
| 5  | 28 | 0 | 0 | 16.5 |
| 5  | 30 | 0 | 0 | 17.5 |
| 5  | 29 | 0 | 0 | 17   |
| 5  | 30 | 0 | 0 | 17.5 |
| 5  | 29 | 0 | 0 | 17   |
| 5  | 28 | 0 | 0 | 16.5 |
| 5  | 28 | 0 | 0 | 16.5 |
| 5  | 30 | 0 | 0 | 17.5 |
| 5  | 29 | 0 | 0 | 17   |
| 14 | 12 | 0 | 0 | 13   |
| 5  | 30 | 0 | 0 | 17.5 |
| 13 | 11 | 0 | 0 | 12   |
| 5  | 28 | 0 | 0 | 16.5 |
| 5  | 28 | 0 | 0 | 16.5 |
| 5  | 29 | 0 | 0 | 17   |
| 5  | 30 | 0 | 0 | 17.5 |
| 5  | 30 | 0 | 0 | 17.5 |
| 5  | 29 | 0 | 0 | 17   |
| 5  | 30 | 0 | 0 | 17.5 |
| 5  | 29 | 0 | 0 | 17   |
| 13 | 11 | 0 | 0 | 12   |
| 5  | 29 | 0 | 0 | 17   |
| 12 | 10 | 0 | 0 | 11   |
| 5  | 28 | 0 | 0 | 16.5 |
| 5  | 29 | 0 | 0 | 17   |
| 5  | 30 | 0 | 0 | 17.5 |
| 5  | 28 | 0 | 0 | 16.5 |
| 5  | 30 | 0 | 0 | 17.5 |
| 5  | 28 | 0 | 0 | 16.5 |
| 5  | 28 | 0 | 0 | 16.5 |
| 13 | 11 | 0 | 0 | 12   |
| 5  | 31 | 0 | 0 | 18   |
| 5  | 31 | 0 | 0 | 18   |
| 13 | 10 | 0 | 0 | 11.5 |
| 5  | 31 | 0 | 0 | 18   |
| 5  | 31 | 0 | 0 | 18   |

|    |    |   |   |      |
|----|----|---|---|------|
| 14 | 11 | 0 | 0 | 12.5 |
| 14 | 11 | 0 | 0 | 12.5 |
| 5  | 31 | 0 | 0 | 18   |
| 5  | 31 | 0 | 0 | 18   |
| 13 | 10 | 0 | 0 | 11.5 |
| 4  | 28 | 0 | 0 | 16   |
| 13 | 9  | 0 | 0 | 11   |
| 14 | 10 | 0 | 0 | 12   |
| 13 | 9  | 0 | 0 | 11   |
| 4  | 27 | 0 | 0 | 15.5 |
| 4  | 28 | 0 | 0 | 16   |
| 4  | 27 | 0 | 0 | 15.5 |
| 4  | 27 | 0 | 0 | 15.5 |
| 4  | 27 | 0 | 0 | 15.5 |
| 14 | 10 | 0 | 0 | 12   |
| 4  | 28 | 0 | 0 | 16   |
| 4  | 28 | 0 | 0 | 16   |
| 4  | 28 | 0 | 0 | 16   |
| 4  | 27 | 0 | 0 | 15.5 |
| 14 | 10 | 0 | 0 | 12   |
| 4  | 27 | 0 | 0 | 15.5 |
| 4  | 27 | 0 | 0 | 15.5 |
| 4  | 27 | 0 | 0 | 15.5 |
| 13 | 9  | 0 | 0 | 11   |
| 4  | 28 | 0 | 0 | 16   |
| 9  | 0  | 2 | 0 | 4.5  |
| 9  | 0  | 2 | 0 | 4.5  |
| 14 | 9  | 0 | 0 | 11.5 |
| 4  | 29 | 0 | 0 | 16.5 |
| 4  | 30 | 0 | 0 | 17   |
| 4  | 29 | 0 | 0 | 16.5 |
| 4  | 30 | 0 | 0 | 17   |
| 4  | 29 | 0 | 0 | 16.5 |
| 4  | 30 | 0 | 0 | 17   |
| 4  | 31 | 0 | 0 | 17.5 |
| 4  | 31 | 0 | 0 | 17.5 |
| 4  | 29 | 0 | 0 | 16.5 |
| 4  | 30 | 0 | 0 | 17   |
| 4  | 30 | 0 | 0 | 17   |
| 4  | 29 | 0 | 0 | 16.5 |
| 4  | 31 | 0 | 0 | 17.5 |
| 4  | 29 | 0 | 0 | 16.5 |
| 4  | 30 | 0 | 0 | 17   |
| 4  | 29 | 0 | 0 | 16.5 |
| 4  | 30 | 0 | 0 | 17   |
| 4  | 31 | 0 | 0 | 17.5 |
| 4  | 29 | 0 | 0 | 16.5 |

|      |     |    |   |      |
|------|-----|----|---|------|
| 4    | 29  | 0  | 0 | 16.5 |
| 4    | 30  | 0  | 0 | 17   |
| 4    | 31  | 0  | 0 | 17.5 |
| 4    | 29  | 0  | 0 | 16.5 |
| 4    | 30  | 0  | 0 | 17   |
| 4    | 29  | 0  | 0 | 16.5 |
| 13   | 80  | 1  | 0 | 46.5 |
| 0    | 22  | 2  | 0 | 11   |
| 4    | 32  | 0  | 0 | 18   |
| 4    | 32  | 0  | 0 | 18   |
| 4    | 32  | 0  | 0 | 18   |
| 4    | 32  | 0  | 0 | 18   |
| 4    | 32  | 0  | 0 | 18   |
| 13   | 8   | 0  | 0 | 10.5 |
| 4    | 32  | 0  | 0 | 18   |
| 4    | 32  | 0  | 0 | 18   |
| 13   | 8   | 0  | 0 | 10.5 |
| 4    | 32  | 0  | 0 | 18   |
| 13   | 8   | 0  | 0 | 10.5 |
| 4    | 32  | 0  | 0 | 18   |
| 15   | 9   | 0  | 0 | 12   |
| 15   | 9   | 0  | 0 | 12   |
| 4    | 32  | 0  | 0 | 18   |
| 4    | 32  | 0  | 0 | 18   |
| 13   | 7   | 0  | 0 | 10   |
| 13   | 7   | 0  | 0 | 10   |
| 14   | 8   | 0  | 0 | 11   |
| 14   | 8   | 0  | 0 | 11   |
| 1383 | 673 | 51 | 0 | 1028 |
| 3    | 29  | 0  | 0 | 16   |
| 3    | 29  | 0  | 0 | 16   |
| 3    | 29  | 0  | 0 | 16   |
| 3    | 29  | 0  | 0 | 16   |
| 3    | 29  | 0  | 0 | 16   |
| 3    | 30  | 0  | 0 | 16.5 |
| 3    | 30  | 0  | 0 | 16.5 |
| 3    | 29  | 0  | 0 | 16   |
| 14   | 7   | 0  | 0 | 10.5 |
| 15   | 8   | 0  | 0 | 11.5 |
| 3    | 30  | 0  | 0 | 16.5 |
| 3    | 30  | 0  | 0 | 16.5 |
| 3    | 30  | 0  | 0 | 16.5 |
| 3    | 30  | 0  | 0 | 16.5 |
| 3    | 30  | 0  | 0 | 16.5 |
| 3    | 30  | 0  | 0 | 16.5 |
| 3    | 29  | 0  | 0 | 16   |
| 3    | 29  | 0  | 0 | 16   |
| 3    | 30  | 0  | 0 | 16.5 |

|     |     |    |   |       |
|-----|-----|----|---|-------|
| 3   | 30  | 0  | 0 | 16.5  |
| 3   | 30  | 0  | 0 | 16.5  |
| 3   | 32  | 0  | 0 | 17.5  |
| 3   | 31  | 0  | 0 | 17    |
| 3   | 32  | 0  | 0 | 17.5  |
| 3   | 31  | 0  | 0 | 17    |
| 3   | 32  | 0  | 0 | 17.5  |
| 3   | 31  | 0  | 0 | 17    |
| 3   | 32  | 0  | 0 | 17.5  |
| 3   | 31  | 0  | 0 | 17    |
| 3   | 31  | 0  | 0 | 17    |
| 3   | 31  | 0  | 0 | 17    |
| 3   | 31  | 0  | 0 | 17    |
| 3   | 32  | 0  | 0 | 17.5  |
| 3   | 31  | 0  | 0 | 17    |
| 3   | 31  | 0  | 0 | 17    |
| 3   | 31  | 0  | 0 | 17    |
| 3   | 32  | 0  | 0 | 17.5  |
| 3   | 32  | 0  | 0 | 17.5  |
| 3   | 32  | 0  | 0 | 17.5  |
| 3   | 32  | 0  | 0 | 17.5  |
| 3   | 31  | 0  | 0 | 17    |
| 12  | 61  | 6  | 0 | 36.5  |
| 122 | 453 | 46 | 0 | 287.5 |
| 12  | 87  | 1  | 0 | 49.5  |
| 14  | 6   | 0  | 0 | 10    |
| 3   | 33  | 0  | 0 | 18    |
| 3   | 34  | 0  | 0 | 18.5  |
| 3   | 34  | 0  | 0 | 18.5  |
| 3   | 34  | 0  | 0 | 18.5  |
| 3   | 33  | 0  | 0 | 18    |
| 3   | 33  | 0  | 0 | 18    |
| 16  | 7   | 0  | 0 | 11.5  |
| 3   | 33  | 0  | 0 | 18    |
| 3   | 33  | 0  | 0 | 18    |
| 3   | 34  | 0  | 0 | 18.5  |
| 3   | 33  | 0  | 0 | 18    |
| 3   | 33  | 0  | 0 | 18    |
| 3   | 33  | 0  | 0 | 18    |
| 3   | 34  | 0  | 0 | 18.5  |
| 3   | 33  | 0  | 0 | 18    |
| 3   | 34  | 0  | 0 | 18.5  |
| 3   | 33  | 0  | 0 | 18    |
| 3   | 34  | 0  | 0 | 18.5  |
| 14  | 6   | 0  | 0 | 10    |
| 83  | 116 | 4  | 0 | 99.5  |
| 15  | 6   | 0  | 0 | 10.5  |





|     |     |    |   |      |
|-----|-----|----|---|------|
| 2   | 32  | 0  | 0 | 17   |
| 10  | 86  | 1  | 0 | 48   |
| 2   | 35  | 0  | 0 | 18.5 |
| 2   | 35  | 0  | 0 | 18.5 |
| 2   | 34  | 0  | 0 | 18   |
| 2   | 34  | 0  | 0 | 18   |
| 2   | 34  | 0  | 0 | 18   |
| 2   | 35  | 0  | 0 | 18.5 |
| 2   | 35  | 0  | 0 | 18.5 |
| 2   | 35  | 0  | 0 | 18.5 |
| 2   | 34  | 0  | 0 | 18   |
| 2   | 34  | 0  | 0 | 18   |
| 2   | 34  | 0  | 0 | 18   |
| 17  | 5   | 0  | 0 | 11   |
| 15  | 4   | 0  | 0 | 9.5  |
| 2   | 36  | 0  | 0 | 19   |
| 17  | 5   | 0  | 0 | 11   |
| 2   | 36  | 0  | 0 | 19   |
| 16  | 4   | 0  | 0 | 10   |
| 14  | 54  | 1  | 0 | 34   |
| 759 | 929 | 38 | 0 | 844  |
| 1   | 32  | 0  | 0 | 16.5 |
| 1   | 33  | 0  | 0 | 17   |
| 1   | 32  | 0  | 0 | 16.5 |
| 16  | 3   | 0  | 0 | 9.5  |
| 71  | 88  | 15 | 0 | 79.5 |
| 59  | 103 | 3  | 0 | 81   |
| 1   | 34  | 0  | 0 | 17.5 |
| 84  | 140 | 20 | 0 | 112  |
| 87  | 103 | 18 | 0 | 95   |
| 1   | 35  | 0  | 0 | 18   |
| 1   | 36  | 0  | 0 | 18.5 |
| 1   | 35  | 0  | 0 | 18   |
| 1   | 35  | 0  | 0 | 18   |
| 1   | 35  | 0  | 0 | 18   |
| 1   | 37  | 0  | 0 | 19   |
| 1   | 37  | 0  | 0 | 19   |
| 0   | 31  | 0  | 0 | 15.5 |
| 1   | 38  | 0  | 0 | 19.5 |
| 1   | 38  | 0  | 0 | 19.5 |
| 0   | 31  | 0  | 0 | 15.5 |
| 0   | 31  | 0  | 0 | 15.5 |
| 16  | 2   | 0  | 0 | 9    |
| 0   | 31  | 0  | 0 | 15.5 |
| 0   | 31  | 0  | 0 | 15.5 |
| 0   | 31  | 0  | 0 | 15.5 |
| 0   | 32  | 0  | 0 | 16   |



|   |    |   |   |     |
|---|----|---|---|-----|
| 4 | 8  | 0 | 0 | 6   |
| 4 | 8  | 0 | 0 | 6   |
| 4 | 8  | 0 | 0 | 6   |
| 2 | 54 | 4 | 0 | 28  |
| 3 | 10 | 0 | 0 | 6.5 |
| 3 | 10 | 0 | 0 | 6.5 |
| 3 | 10 | 0 | 0 | 6.5 |
| 3 | 10 | 0 | 0 | 6.5 |
| 3 | 10 | 0 | 0 | 6.5 |
| 3 | 10 | 0 | 0 | 6.5 |
| 3 | 10 | 0 | 0 | 6.5 |
| 5 | 6  | 0 | 0 | 5.5 |
| 3 | 10 | 0 | 0 | 6.5 |
| 3 | 10 | 0 | 0 | 6.5 |
| 5 | 6  | 0 | 0 | 5.5 |
| 3 | 10 | 0 | 0 | 6.5 |
| 3 | 10 | 0 | 0 | 6.5 |
| 5 | 6  | 0 | 0 | 5.5 |
| 3 | 10 | 0 | 0 | 6.5 |
| 3 | 10 | 0 | 0 | 6.5 |
| 3 | 10 | 0 | 0 | 6.5 |
| 3 | 10 | 0 | 0 | 6.5 |
| 3 | 10 | 0 | 0 | 6.5 |
| 3 | 10 | 0 | 0 | 6.5 |
| 3 | 10 | 0 | 0 | 6.5 |
| 3 | 10 | 0 | 0 | 6.5 |
| 3 | 10 | 0 | 0 | 6.5 |
| 3 | 10 | 0 | 0 | 6.5 |
| 3 | 10 | 0 | 0 | 6.5 |
| 5 | 6  | 0 | 0 | 5.5 |
| 5 | 6  | 0 | 0 | 5.5 |
| 3 | 10 | 0 | 0 | 6.5 |
| 5 | 6  | 0 | 0 | 5.5 |
| 3 | 10 | 0 | 0 | 6.5 |
| 3 | 10 | 0 | 0 | 6.5 |
| 3 | 10 | 0 | 0 | 6.5 |
| 3 | 10 | 0 | 0 | 6.5 |
| 3 | 10 | 0 | 0 | 6.5 |
| 3 | 10 | 0 | 0 | 6.5 |
| 5 | 6  | 0 | 0 | 5.5 |
| 5 | 6  | 0 | 0 | 5.5 |
| 3 | 10 | 0 | 0 | 6.5 |
| 5 | 6  | 0 | 0 | 5.5 |
| 5 | 6  | 0 | 0 | 5.5 |
| 3 | 10 | 0 | 0 | 6.5 |
| 5 | 6  | 0 | 0 | 5.5 |
| 3 | 10 | 0 | 0 | 6.5 |
| 3 | 10 | 0 | 0 | 6.5 |











|     |     |    |   |       |
|-----|-----|----|---|-------|
| 0   | 13  | 0  | 0 | 6.5   |
| 0   | 13  | 0  | 0 | 6.5   |
| 0   | 13  | 0  | 0 | 6.5   |
| 0   | 13  | 0  | 0 | 6.5   |
| 0   | 13  | 0  | 0 | 6.5   |
| 0   | 13  | 0  | 0 | 6.5   |
| 0   | 13  | 0  | 0 | 6.5   |
| 0   | 13  | 0  | 0 | 6.5   |
| 0   | 13  | 0  | 0 | 6.5   |
| 0   | 13  | 0  | 0 | 6.5   |
| 0   | 13  | 0  | 0 | 6.5   |
| 0   | 13  | 0  | 0 | 6.5   |
| 0   | 13  | 0  | 0 | 6.5   |
| 0   | 13  | 0  | 0 | 6.5   |
| 0   | 13  | 0  | 0 | 6.5   |
| 0   | 13  | 0  | 0 | 6.5   |
| 0   | 13  | 0  | 0 | 6.5   |
| 296 | 487 | 69 | 0 | 391.5 |
| 68  | 126 | 4  | 0 | 97    |
| 35  | 75  | 2  | 0 | 55    |
| 22  | 51  | 1  | 0 | 36.5  |
| 25  | 47  | 1  | 0 | 36    |
| 22  | 52  | 1  | 0 | 37    |
| 21  | 57  | 1  | 0 | 39    |
| 21  | 55  | 1  | 0 | 38    |
| 21  | 56  | 1  | 0 | 38.5  |
| 106 | 559 | 48 | 0 | 332.5 |
| 18  | 61  | 1  | 0 | 39.5  |
| 18  | 61  | 1  | 0 | 39.5  |
| 71  | 169 | 5  | 0 | 120   |
| 30  | 38  | 1  | 0 | 34    |
| 30  | 34  | 1  | 0 | 32    |
| 67  | 12  | 2  | 0 | 39.5  |
| 47  | 317 | 24 | 0 | 182   |
| 10  | 31  | 4  | 0 | 20.5  |
| 160 | 115 | 7  | 0 | 137.5 |
| 33  | 30  | 1  | 0 | 31.5  |
| 14  | 71  | 1  | 0 | 42.5  |
| 82  | 49  | 3  | 0 | 65.5  |
| 13  | 76  | 1  | 0 | 44.5  |
| 13  | 74  | 1  | 0 | 43.5  |
| 155 | 217 | 31 | 0 | 186   |
| 43  | 146 | 3  | 0 | 94.5  |
| 12  | 76  | 6  | 0 | 44    |
| 11  | 80  | 1  | 0 | 45.5  |
| 18  | 184 | 3  | 0 | 101   |
| 36  | 161 | 3  | 0 | 98.5  |
| 61  | 130 | 4  | 0 | 95.5  |

|     |      |     |   |        |
|-----|------|-----|---|--------|
| 182 | 277  | 11  | 0 | 229.5  |
| 40  | 238  | 18  | 0 | 139    |
| 5   | 114  | 7   | 0 | 59.5   |
| 8   | 37   | 3   | 0 | 22.5   |
| 44  | 172  | 4   | 0 | 108    |
| 39  | 136  | 12  | 0 | 87.5   |
| 82  | 86   | 4   | 0 | 84     |
| 7   | 43   | 3   | 0 | 25     |
| 74  | 221  | 20  | 0 | 147.5  |
| 17  | 41   | 1   | 0 | 29     |
| 19  | 37   | 1   | 0 | 28     |
| 20  | 174  | 3   | 0 | 97     |
| 3   | 91   | 1   | 0 | 47     |
| 4   | 10   | 2   | 0 | 7      |
| 218 | 343  | 45  | 0 | 280.5  |
| 9   | 52   | 4   | 0 | 30.5   |
| 64  | 56   | 10  | 0 | 60     |
| 26  | 93   | 8   | 0 | 59.5   |
| 2   | 48   | 3   | 0 | 25     |
| 1   | 12   | 2   | 0 | 6.5    |
| 261 | 1431 | 34  | 0 | 846    |
| 39  | 57   | 2   | 0 | 48     |
| 123 | 177  | 7   | 0 | 150    |
| 23  | 89   | 2   | 0 | 56     |
| 41  | 51   | 2   | 0 | 46     |
| 0   | 14   | 2   | 0 | 7      |
| 488 | 996  | 112 | 0 | 742    |
| 11  | 139  | 2   | 0 | 75     |
| 44  | 46   | 2   | 0 | 45     |
| 20  | 98   | 2   | 0 | 59     |
| 368 | 1457 | 39  | 0 | 912.5  |
| 811 | 1654 | 59  | 0 | 1232.5 |
| 5   | 64   | 4   | 0 | 34.5   |
| 5   | 66   | 1   | 0 | 35.5   |
| 101 | 150  | 6   | 0 | 125.5  |
| 271 | 347  | 49  | 0 | 309    |
| 37  | 124  | 3   | 0 | 80.5   |
| 11  | 193  | 3   | 0 | 102    |
| 125 | 1194 | 82  | 0 | 659.5  |
| 22  | 124  | 9   | 0 | 73     |
| 128 | 214  | 25  | 0 | 171    |
| 122 | 104  | 6   | 0 | 113    |
| 36  | 27   | 6   | 0 | 31.5   |
| 12  | 82   | 6   | 0 | 47     |
| 33  | 83   | 2   | 0 | 58     |
| 14  | 198  | 13  | 0 | 106    |
| 22  | 47   | 1   | 0 | 34.5   |

|      |      |     |   |       |
|------|------|-----|---|-------|
| 18   | 51   | 1   | 0 | 34.5  |
| 22   | 44   | 1   | 0 | 33    |
| 347  | 245  | 18  | 0 | 296   |
| 23   | 73   | 6   | 0 | 48    |
| 24   | 39   | 1   | 0 | 31.5  |
| 22   | 106  | 2   | 0 | 64    |
| 330  | 64   | 13  | 0 | 197   |
| 34   | 107  | 3   | 0 | 70.5  |
| 26   | 34   | 1   | 0 | 30    |
| 28   | 33   | 1   | 0 | 30.5  |
| 26   | 32   | 1   | 0 | 29    |
| 15   | 61   | 1   | 0 | 38    |
| 29   | 30   | 1   | 0 | 29.5  |
| 25   | 85   | 7   | 0 | 55    |
| 0    | 74   | 1   | 0 | 37    |
| 86   | 265  | 8   | 0 | 175.5 |
| 33   | 21   | 1   | 0 | 27    |
| 1000 | 905  | 57  | 0 | 952.5 |
| 199  | 271  | 13  | 0 | 235   |
| 8    | 75   | 1   | 0 | 41.5  |
| 294  | 552  | 59  | 0 | 423   |
| 57   | 136  | 4   | 0 | 96.5  |
| 70   | 255  | 19  | 0 | 162.5 |
| 7    | 29   | 3   | 0 | 18    |
| 6    | 77   | 1   | 0 | 41.5  |
| 235  | 245  | 37  | 0 | 240   |
| 1054 | 567  | 52  | 0 | 810.5 |
| 16   | 14   | 3   | 0 | 15    |
| 495  | 966  | 102 | 0 | 730.5 |
| 5    | 19   | 2   | 0 | 12    |
| 33   | 130  | 9   | 0 | 81.5  |
| 30   | 64   | 2   | 0 | 47    |
| 37   | 136  | 10  | 0 | 86.5  |
| 4    | 19   | 2   | 0 | 11.5  |
| 9    | 8    | 2   | 0 | 8.5   |
| 3    | 21   | 2   | 0 | 12    |
| 41   | 45   | 2   | 0 | 43    |
| 2    | 21   | 2   | 0 | 11.5  |
| 2    | 23   | 2   | 0 | 12.5  |
| 62   | 98   | 4   | 0 | 80    |
| 126  | 1091 | 26  | 0 | 608.5 |
| 15   | 72   | 1   | 0 | 43.5  |
| 15   | 73   | 1   | 0 | 44    |
| 14   | 101  | 2   | 0 | 57.5  |
| 18   | 214  | 13  | 0 | 116   |
| 13   | 266  | 15  | 0 | 139.5 |
| 13   | 78   | 1   | 0 | 45.5  |

|     |     |    |   |       |
|-----|-----|----|---|-------|
| 790 | 195 | 35 | 0 | 492.5 |
| 22  | 36  | 4  | 0 | 29    |
| 0   | 27  | 2  | 0 | 13.5  |
| 13  | 53  | 4  | 0 | 33    |
| 33  | 100 | 3  | 0 | 66.5  |
| 7   | 18  | 0  | 0 | 12.5  |
| 7   | 18  | 0  | 0 | 12.5  |
| 7   | 18  | 0  | 0 | 12.5  |
| 7   | 18  | 0  | 0 | 12.5  |
| 7   | 18  | 0  | 0 | 12.5  |
| 7   | 18  | 0  | 0 | 12.5  |
| 7   | 18  | 0  | 0 | 12.5  |
| 7   | 18  | 0  | 0 | 12.5  |
| 8   | 16  | 0  | 0 | 12    |
| 8   | 16  | 0  | 0 | 12    |
| 8   | 16  | 0  | 0 | 12    |
| 7   | 33  | 0  | 1 | 20    |
| 6   | 15  | 0  | 0 | 10.5  |
| 6   | 14  | 0  | 0 | 10    |
| 6   | 14  | 0  | 0 | 10    |
| 6   | 17  | 0  | 0 | 11.5  |
| 6   | 17  | 0  | 0 | 11.5  |
| 6   | 14  | 0  | 0 | 10    |
| 6   | 14  | 0  | 0 | 10    |
| 6   | 14  | 0  | 0 | 10    |
| 9   | 13  | 0  | 0 | 11    |
| 6   | 14  | 0  | 0 | 10    |
| 6   | 15  | 0  | 0 | 10.5  |
| 6   | 15  | 0  | 0 | 10.5  |
| 8   | 14  | 0  | 0 | 11    |
| 6   | 14  | 0  | 0 | 10    |
| 6   | 17  | 0  | 0 | 11.5  |
| 6   | 15  | 0  | 0 | 10.5  |
| 6   | 17  | 0  | 0 | 11.5  |
| 6   | 15  | 0  | 0 | 10.5  |
| 6   | 15  | 0  | 0 | 10.5  |
| 6   | 17  | 0  | 0 | 11.5  |
| 6   | 14  | 0  | 0 | 10    |
| 8   | 14  | 0  | 0 | 11    |
| 6   | 14  | 0  | 0 | 10    |
| 7   | 13  | 0  | 0 | 10    |
| 6   | 14  | 0  | 0 | 10    |
| 7   | 13  | 0  | 0 | 10    |
| 7   | 13  | 0  | 0 | 10    |
| 6   | 17  | 0  | 0 | 11.5  |
| 6   | 15  | 0  | 0 | 10.5  |
| 6   | 14  | 0  | 0 | 10    |

|   |    |   |   |      |
|---|----|---|---|------|
| 9 | 13 | 0 | 0 | 11   |
| 6 | 17 | 0 | 0 | 11.5 |
| 6 | 17 | 0 | 0 | 11.5 |
| 8 | 14 | 0 | 0 | 11   |
| 6 | 17 | 0 | 0 | 11.5 |
| 7 | 13 | 0 | 0 | 10   |
| 6 | 17 | 0 | 0 | 11.5 |
| 6 | 14 | 0 | 0 | 10   |
| 6 | 17 | 0 | 0 | 11.5 |
| 6 | 17 | 0 | 0 | 11.5 |
| 7 | 13 | 0 | 0 | 10   |
| 6 | 14 | 0 | 0 | 10   |
| 6 | 14 | 0 | 0 | 10   |
| 6 | 17 | 0 | 0 | 11.5 |
| 7 | 13 | 0 | 0 | 10   |
| 6 | 17 | 0 | 0 | 11.5 |
| 9 | 13 | 0 | 0 | 11   |
| 6 | 14 | 0 | 0 | 10   |
| 8 | 14 | 0 | 0 | 11   |
| 6 | 15 | 0 | 0 | 10.5 |
| 6 | 17 | 0 | 0 | 11.5 |
| 7 | 13 | 0 | 0 | 10   |
| 6 | 17 | 0 | 0 | 11.5 |
| 6 | 17 | 0 | 0 | 11.5 |
| 6 | 17 | 0 | 0 | 11.5 |
| 7 | 13 | 0 | 0 | 10   |
| 8 | 14 | 0 | 0 | 11   |
| 7 | 13 | 0 | 0 | 10   |
| 8 | 14 | 0 | 0 | 11   |
| 6 | 14 | 0 | 0 | 10   |
| 6 | 17 | 0 | 0 | 11.5 |
| 6 | 14 | 0 | 0 | 10   |
| 6 | 17 | 0 | 0 | 11.5 |
| 6 | 15 | 0 | 0 | 10.5 |
| 6 | 14 | 0 | 0 | 10   |
| 6 | 15 | 0 | 0 | 10.5 |
| 7 | 14 | 0 | 0 | 10.5 |
| 6 | 18 | 0 | 0 | 12   |
| 7 | 17 | 0 | 0 | 12   |
| 6 | 20 | 0 | 0 | 13   |
| 8 | 13 | 0 | 0 | 10.5 |
| 6 | 16 | 0 | 0 | 11   |
| 6 | 18 | 0 | 0 | 12   |
| 8 | 15 | 0 | 0 | 11.5 |
| 7 | 17 | 0 | 0 | 12   |
| 8 | 13 | 0 | 0 | 10.5 |
| 6 | 16 | 0 | 0 | 11   |

|   |    |   |   |      |
|---|----|---|---|------|
| 6 | 19 | 0 | 0 | 12.5 |
| 7 | 14 | 0 | 0 | 10.5 |
| 7 | 15 | 0 | 0 | 11   |
| 7 | 16 | 0 | 0 | 11.5 |
| 6 | 20 | 0 | 0 | 13   |
| 6 | 19 | 0 | 0 | 12.5 |
| 8 | 13 | 0 | 0 | 10.5 |
| 6 | 20 | 0 | 0 | 13   |
| 8 | 13 | 0 | 0 | 10.5 |
| 6 | 18 | 0 | 0 | 12   |
| 6 | 20 | 0 | 0 | 13   |
| 7 | 14 | 0 | 0 | 10.5 |
| 8 | 15 | 0 | 0 | 11.5 |
| 6 | 19 | 0 | 0 | 12.5 |
| 6 | 18 | 0 | 0 | 12   |
| 7 | 16 | 0 | 0 | 11.5 |
| 6 | 19 | 0 | 0 | 12.5 |
| 7 | 16 | 0 | 0 | 11.5 |
| 7 | 17 | 0 | 0 | 12   |
| 7 | 15 | 0 | 0 | 11   |
| 7 | 16 | 0 | 0 | 11.5 |
| 7 | 14 | 0 | 0 | 10.5 |
| 6 | 16 | 0 | 0 | 11   |
| 6 | 19 | 0 | 0 | 12.5 |
| 7 | 16 | 0 | 0 | 11.5 |
| 7 | 15 | 0 | 0 | 11   |
| 6 | 19 | 0 | 0 | 12.5 |
| 6 | 16 | 0 | 0 | 11   |
| 9 | 14 | 0 | 0 | 11.5 |
| 6 | 16 | 0 | 0 | 11   |
| 6 | 20 | 0 | 0 | 13   |
| 6 | 18 | 0 | 0 | 12   |
| 9 | 14 | 0 | 0 | 11.5 |
| 6 | 18 | 0 | 0 | 12   |
| 6 | 16 | 0 | 0 | 11   |
| 7 | 14 | 0 | 0 | 10.5 |
| 6 | 18 | 0 | 0 | 12   |
| 6 | 19 | 0 | 0 | 12.5 |
| 7 | 14 | 0 | 0 | 10.5 |
| 6 | 20 | 0 | 0 | 13   |
| 8 | 13 | 0 | 0 | 10.5 |
| 7 | 14 | 0 | 0 | 10.5 |
| 6 | 18 | 0 | 0 | 12   |
| 7 | 16 | 0 | 0 | 11.5 |
| 7 | 15 | 0 | 0 | 11   |
| 7 | 15 | 0 | 0 | 11   |
| 7 | 15 | 0 | 0 | 11   |

|   |    |   |   |      |
|---|----|---|---|------|
| 8 | 15 | 0 | 0 | 11.5 |
| 8 | 15 | 0 | 0 | 11.5 |
| 7 | 17 | 0 | 0 | 12   |
| 6 | 16 | 0 | 0 | 11   |
| 6 | 20 | 0 | 0 | 13   |
| 7 | 17 | 0 | 0 | 12   |
| 7 | 15 | 0 | 0 | 11   |
| 7 | 14 | 0 | 0 | 10.5 |
| 6 | 16 | 0 | 0 | 11   |
| 6 | 18 | 0 | 0 | 12   |
| 7 | 14 | 0 | 0 | 10.5 |
| 8 | 13 | 0 | 0 | 10.5 |
| 6 | 19 | 0 | 0 | 12.5 |
| 7 | 14 | 0 | 0 | 10.5 |
| 6 | 16 | 0 | 0 | 11   |
| 6 | 19 | 0 | 0 | 12.5 |
| 7 | 14 | 0 | 0 | 10.5 |
| 6 | 18 | 0 | 0 | 12   |
| 6 | 16 | 0 | 0 | 11   |
| 9 | 14 | 0 | 0 | 11.5 |
| 7 | 17 | 0 | 0 | 12   |
| 7 | 16 | 0 | 0 | 11.5 |
| 6 | 16 | 0 | 0 | 11   |
| 6 | 20 | 0 | 0 | 13   |
| 8 | 13 | 0 | 0 | 10.5 |
| 7 | 14 | 0 | 0 | 10.5 |
| 6 | 20 | 0 | 0 | 13   |
| 9 | 14 | 0 | 0 | 11.5 |
| 9 | 14 | 0 | 0 | 11.5 |
| 6 | 18 | 0 | 0 | 12   |
| 8 | 13 | 0 | 0 | 10.5 |
| 6 | 16 | 0 | 0 | 11   |
| 9 | 14 | 0 | 0 | 11.5 |
| 7 | 17 | 0 | 0 | 12   |
| 6 | 18 | 0 | 0 | 12   |
| 6 | 16 | 0 | 0 | 11   |
| 6 | 16 | 0 | 0 | 11   |
| 8 | 13 | 0 | 0 | 10.5 |
| 7 | 14 | 0 | 0 | 10.5 |
| 8 | 15 | 0 | 0 | 11.5 |
| 7 | 17 | 0 | 0 | 12   |
| 7 | 15 | 0 | 0 | 11   |
| 7 | 15 | 0 | 0 | 11   |
| 6 | 16 | 0 | 0 | 11   |
| 6 | 18 | 0 | 0 | 12   |
| 8 | 15 | 0 | 0 | 11.5 |
| 6 | 20 | 0 | 0 | 13   |

|   |    |   |   |      |
|---|----|---|---|------|
| 6 | 18 | 0 | 0 | 12   |
| 8 | 13 | 0 | 0 | 10.5 |
| 7 | 14 | 0 | 0 | 10.5 |
| 6 | 16 | 0 | 0 | 11   |
| 8 | 13 | 0 | 0 | 10.5 |
| 7 | 16 | 0 | 0 | 11.5 |
| 9 | 14 | 0 | 0 | 11.5 |
| 8 | 13 | 0 | 0 | 10.5 |
| 9 | 14 | 0 | 0 | 11.5 |
| 6 | 20 | 0 | 0 | 13   |
| 7 | 11 | 0 | 0 | 9    |
| 7 | 12 | 0 | 0 | 9.5  |
| 7 | 12 | 0 | 0 | 9.5  |
| 5 | 18 | 0 | 0 | 11.5 |
| 5 | 18 | 0 | 0 | 11.5 |
| 5 | 18 | 0 | 0 | 11.5 |
| 5 | 16 | 0 | 0 | 10.5 |
| 9 | 12 | 0 | 0 | 10.5 |
| 5 | 18 | 0 | 0 | 11.5 |
| 5 | 16 | 0 | 0 | 10.5 |
| 5 | 16 | 0 | 0 | 10.5 |
| 7 | 11 | 0 | 0 | 9    |
| 7 | 12 | 0 | 0 | 9.5  |
| 5 | 18 | 0 | 0 | 11.5 |
| 5 | 16 | 0 | 0 | 10.5 |
| 9 | 12 | 0 | 0 | 10.5 |
| 5 | 18 | 0 | 0 | 11.5 |
| 5 | 18 | 0 | 0 | 11.5 |
| 5 | 16 | 0 | 0 | 10.5 |
| 7 | 12 | 0 | 0 | 9.5  |
| 5 | 18 | 0 | 0 | 11.5 |
| 5 | 16 | 0 | 0 | 10.5 |
| 5 | 16 | 0 | 0 | 10.5 |
| 5 | 16 | 0 | 0 | 10.5 |
| 5 | 16 | 0 | 0 | 10.5 |
| 7 | 12 | 0 | 0 | 9.5  |
| 5 | 16 | 0 | 0 | 10.5 |
| 5 | 18 | 0 | 0 | 11.5 |
| 7 | 12 | 0 | 0 | 9.5  |
| 5 | 18 | 0 | 0 | 11.5 |
| 9 | 12 | 0 | 0 | 10.5 |
| 5 | 16 | 0 | 0 | 10.5 |
| 5 | 18 | 0 | 0 | 11.5 |
| 7 | 12 | 0 | 0 | 9.5  |
| 5 | 16 | 0 | 0 | 10.5 |
| 7 | 12 | 0 | 0 | 9.5  |



|    |    |   |   |      |
|----|----|---|---|------|
| 5  | 16 | 0 | 0 | 10.5 |
| 7  | 12 | 0 | 0 | 9.5  |
| 5  | 16 | 0 | 0 | 10.5 |
| 5  | 18 | 0 | 0 | 11.5 |
| 5  | 16 | 0 | 0 | 10.5 |
| 5  | 18 | 0 | 0 | 11.5 |
| 5  | 16 | 0 | 0 | 10.5 |
| 7  | 11 | 0 | 0 | 9    |
| 5  | 16 | 0 | 0 | 10.5 |
| 5  | 18 | 0 | 0 | 11.5 |
| 5  | 16 | 0 | 0 | 10.5 |
| 5  | 18 | 0 | 0 | 11.5 |
| 8  | 11 | 0 | 0 | 9.5  |
| 5  | 17 | 0 | 0 | 11   |
| 10 | 12 | 0 | 0 | 11   |
| 5  | 17 | 0 | 0 | 11   |
| 8  | 11 | 0 | 0 | 9.5  |
| 5  | 17 | 0 | 0 | 11   |
| 5  | 17 | 0 | 0 | 11   |
| 8  | 12 | 0 | 0 | 10   |
| 8  | 11 | 0 | 0 | 9.5  |
| 10 | 12 | 0 | 0 | 11   |
| 8  | 11 | 0 | 0 | 9.5  |
| 8  | 12 | 0 | 0 | 10   |
| 5  | 17 | 0 | 0 | 11   |
| 8  | 11 | 0 | 0 | 9.5  |
| 5  | 17 | 0 | 0 | 11   |
| 8  | 12 | 0 | 0 | 10   |
| 8  | 11 | 0 | 0 | 9.5  |
| 8  | 11 | 0 | 0 | 9.5  |
| 5  | 17 | 0 | 0 | 11   |
| 5  | 17 | 0 | 0 | 11   |
| 8  | 11 | 0 | 0 | 9.5  |
| 8  | 11 | 0 | 0 | 9.5  |
| 8  | 12 | 0 | 0 | 10   |
| 5  | 17 | 0 | 0 | 11   |
| 5  | 17 | 0 | 0 | 11   |
| 10 | 12 | 0 | 0 | 11   |
| 5  | 17 | 0 | 0 | 11   |
| 8  | 11 | 0 | 0 | 9.5  |
| 8  | 12 | 0 | 0 | 10   |
| 5  | 17 | 0 | 0 | 11   |
| 5  | 17 | 0 | 0 | 11   |
| 8  | 12 | 0 | 0 | 10   |
| 8  | 12 | 0 | 0 | 10   |
| 8  | 11 | 0 | 0 | 9.5  |
| 5  | 17 | 0 | 0 | 11   |

|    |    |   |   |      |
|----|----|---|---|------|
| 5  | 19 | 0 | 0 | 12   |
| 9  | 10 | 0 | 0 | 9.5  |
| 5  | 22 | 0 | 0 | 13.5 |
| 5  | 21 | 0 | 0 | 13   |
| 5  | 20 | 0 | 0 | 12.5 |
| 5  | 20 | 0 | 0 | 12.5 |
| 5  | 21 | 0 | 0 | 13   |
| 5  | 21 | 0 | 0 | 13   |
| 5  | 22 | 0 | 0 | 13.5 |
| 8  | 10 | 0 | 0 | 9    |
| 5  | 19 | 0 | 0 | 12   |
| 5  | 20 | 0 | 0 | 12.5 |
| 5  | 21 | 0 | 0 | 13   |
| 5  | 20 | 0 | 0 | 12.5 |
| 5  | 21 | 0 | 0 | 13   |
| 8  | 10 | 0 | 0 | 9    |
| 5  | 19 | 0 | 0 | 12   |
| 5  | 21 | 0 | 0 | 13   |
| 5  | 20 | 0 | 0 | 12.5 |
| 5  | 19 | 0 | 0 | 12   |
| 5  | 21 | 0 | 0 | 13   |
| 9  | 11 | 0 | 0 | 10   |
| 5  | 20 | 0 | 0 | 12.5 |
| 5  | 22 | 0 | 0 | 13.5 |
| 9  | 10 | 0 | 0 | 9.5  |
| 5  | 20 | 0 | 0 | 12.5 |
| 9  | 11 | 0 | 0 | 10   |
| 5  | 20 | 0 | 0 | 12.5 |
| 5  | 21 | 0 | 0 | 13   |
| 5  | 21 | 0 | 0 | 13   |
| 5  | 19 | 0 | 0 | 12   |
| 10 | 11 | 0 | 0 | 10.5 |
| 5  | 19 | 0 | 0 | 12   |
| 5  | 21 | 0 | 0 | 13   |
| 8  | 10 | 0 | 0 | 9    |
| 5  | 21 | 0 | 0 | 13   |
| 5  | 22 | 0 | 0 | 13.5 |
| 10 | 11 | 0 | 0 | 10.5 |
| 5  | 20 | 0 | 0 | 12.5 |
| 5  | 19 | 0 | 0 | 12   |
| 5  | 21 | 0 | 0 | 13   |
| 5  | 21 | 0 | 0 | 13   |
| 5  | 22 | 0 | 0 | 13.5 |
| 5  | 19 | 0 | 0 | 12   |
| 5  | 22 | 0 | 0 | 13.5 |
| 9  | 11 | 0 | 0 | 10   |
| 10 | 11 | 0 | 0 | 10.5 |

|    |    |   |   |      |
|----|----|---|---|------|
| 5  | 20 | 0 | 0 | 12.5 |
| 5  | 21 | 0 | 0 | 13   |
| 5  | 21 | 0 | 0 | 13   |
| 5  | 19 | 0 | 0 | 12   |
| 5  | 19 | 0 | 0 | 12   |
| 5  | 20 | 0 | 0 | 12.5 |
| 5  | 20 | 0 | 0 | 12.5 |
| 5  | 22 | 0 | 0 | 13.5 |
| 5  | 20 | 0 | 0 | 12.5 |
| 5  | 20 | 0 | 0 | 12.5 |
| 5  | 19 | 0 | 0 | 12   |
| 5  | 22 | 0 | 0 | 13.5 |
| 5  | 21 | 0 | 0 | 13   |
| 5  | 19 | 0 | 0 | 12   |
| 5  | 19 | 0 | 0 | 12   |
| 5  | 20 | 0 | 0 | 12.5 |
| 5  | 19 | 0 | 0 | 12   |
| 5  | 22 | 0 | 0 | 13.5 |
| 5  | 19 | 0 | 0 | 12   |
| 5  | 21 | 0 | 0 | 13   |
| 5  | 20 | 0 | 0 | 12.5 |
| 9  | 11 | 0 | 0 | 10   |
| 9  | 10 | 0 | 0 | 9.5  |
| 5  | 20 | 0 | 0 | 12.5 |
| 5  | 21 | 0 | 0 | 13   |
| 9  | 10 | 0 | 0 | 9.5  |
| 9  | 9  | 0 | 0 | 9    |
| 10 | 10 | 0 | 0 | 10   |
| 4  | 19 | 0 | 0 | 11.5 |
| 4  | 18 | 0 | 0 | 11   |
| 9  | 9  | 0 | 0 | 9    |
| 8  | 9  | 0 | 0 | 8.5  |
| 8  | 9  | 0 | 0 | 8.5  |
| 4  | 19 | 0 | 0 | 11.5 |
| 4  | 19 | 0 | 0 | 11.5 |
| 4  | 18 | 0 | 0 | 11   |
| 9  | 9  | 0 | 0 | 9    |
| 9  | 9  | 0 | 0 | 9    |
| 4  | 18 | 0 | 0 | 11   |
| 4  | 19 | 0 | 0 | 11.5 |
| 9  | 9  | 0 | 0 | 9    |
| 4  | 19 | 0 | 0 | 11.5 |
| 10 | 10 | 0 | 0 | 10   |
| 4  | 19 | 0 | 0 | 11.5 |
| 4  | 18 | 0 | 0 | 11   |
| 4  | 18 | 0 | 0 | 11   |
| 4  | 19 | 0 | 0 | 11.5 |

|     |     |    |   |      |
|-----|-----|----|---|------|
| 4   | 18  | 0  | 0 | 11   |
| 4   | 18  | 0  | 0 | 11   |
| 4   | 19  | 0  | 0 | 11.5 |
| 4   | 18  | 0  | 0 | 11   |
| 4   | 19  | 0  | 0 | 11.5 |
| 8   | 9   | 0  | 0 | 8.5  |
| 4   | 19  | 0  | 0 | 11.5 |
| 8   | 9   | 0  | 0 | 8.5  |
| 9   | 9   | 0  | 0 | 9    |
| 8   | 9   | 0  | 0 | 8.5  |
| 4   | 18  | 0  | 0 | 11   |
| 4   | 19  | 0  | 0 | 11.5 |
| 4   | 18  | 0  | 0 | 11   |
| 4   | 18  | 0  | 0 | 11   |
| 4   | 18  | 0  | 0 | 11   |
| 10  | 10  | 0  | 0 | 10   |
| 4   | 18  | 0  | 0 | 11   |
| 4   | 19  | 0  | 0 | 11.5 |
| 4   | 18  | 0  | 0 | 11   |
| 8   | 9   | 0  | 0 | 8.5  |
| 4   | 18  | 0  | 0 | 11   |
| 4   | 18  | 0  | 0 | 11   |
| 4   | 18  | 0  | 0 | 11   |
| 465 | 513 | 73 | 0 | 489  |
| 4   | 23  | 0  | 0 | 13.5 |
| 4   | 21  | 0  | 0 | 12.5 |
| 4   | 21  | 0  | 0 | 12.5 |
| 4   | 23  | 0  | 0 | 13.5 |
| 4   | 23  | 0  | 0 | 13.5 |
| 4   | 20  | 0  | 0 | 12   |
| 4   | 23  | 0  | 0 | 13.5 |
| 4   | 22  | 0  | 0 | 13   |
| 4   | 22  | 0  | 0 | 13   |
| 4   | 23  | 0  | 0 | 13.5 |
| 4   | 21  | 0  | 0 | 12.5 |
| 4   | 21  | 0  | 0 | 12.5 |
| 4   | 22  | 0  | 0 | 13   |
| 4   | 22  | 0  | 0 | 13   |
| 4   | 22  | 0  | 0 | 13   |
| 4   | 21  | 0  | 0 | 12.5 |
| 4   | 23  | 0  | 0 | 13.5 |
| 10  | 9   | 0  | 0 | 9.5  |
| 4   | 22  | 0  | 0 | 13   |
| 4   | 22  | 0  | 0 | 13   |
| 4   | 23  | 0  | 0 | 13.5 |
| 4   | 22  | 0  | 0 | 13   |
| 4   | 20  | 0  | 0 | 12   |

|    |    |   |   |      |
|----|----|---|---|------|
| 4  | 20 | 0 | 0 | 12   |
| 4  | 20 | 0 | 0 | 12   |
| 4  | 21 | 0 | 0 | 12.5 |
| 4  | 21 | 0 | 0 | 12.5 |
| 4  | 21 | 0 | 0 | 12.5 |
| 9  | 8  | 0 | 0 | 8.5  |
| 4  | 20 | 0 | 0 | 12   |
| 4  | 22 | 0 | 0 | 13   |
| 4  | 20 | 0 | 0 | 12   |
| 4  | 20 | 0 | 0 | 12   |
| 4  | 22 | 0 | 0 | 13   |
| 4  | 21 | 0 | 0 | 12.5 |
| 9  | 8  | 0 | 0 | 8.5  |
| 4  | 23 | 0 | 0 | 13.5 |
| 4  | 20 | 0 | 0 | 12   |
| 9  | 8  | 0 | 0 | 8.5  |
| 4  | 22 | 0 | 0 | 13   |
| 4  | 22 | 0 | 0 | 13   |
| 4  | 22 | 0 | 0 | 13   |
| 4  | 21 | 0 | 0 | 12.5 |
| 4  | 23 | 0 | 0 | 13.5 |
| 4  | 20 | 0 | 0 | 12   |
| 4  | 22 | 0 | 0 | 13   |
| 4  | 20 | 0 | 0 | 12   |
| 4  | 22 | 0 | 0 | 13   |
| 11 | 10 | 0 | 0 | 10.5 |
| 4  | 22 | 0 | 0 | 13   |
| 4  | 23 | 0 | 0 | 13.5 |
| 4  | 20 | 0 | 0 | 12   |
| 4  | 20 | 0 | 0 | 12   |
| 4  | 23 | 0 | 0 | 13.5 |
| 4  | 23 | 0 | 0 | 13.5 |
| 4  | 21 | 0 | 0 | 12.5 |
| 11 | 10 | 0 | 0 | 10.5 |
| 4  | 23 | 0 | 0 | 13.5 |
| 4  | 22 | 0 | 0 | 13   |
| 4  | 23 | 0 | 0 | 13.5 |
| 9  | 8  | 0 | 0 | 8.5  |
| 4  | 20 | 0 | 0 | 12   |
| 4  | 21 | 0 | 0 | 12.5 |
| 4  | 22 | 0 | 0 | 13   |
| 4  | 22 | 0 | 0 | 13   |
| 4  | 22 | 0 | 0 | 13   |
| 10 | 9  | 0 | 0 | 9.5  |
| 4  | 23 | 0 | 0 | 13.5 |
| 4  | 21 | 0 | 0 | 12.5 |
| 4  | 20 | 0 | 0 | 12   |

|    |    |   |   |      |
|----|----|---|---|------|
| 9  | 8  | 0 | 0 | 8.5  |
| 4  | 23 | 0 | 0 | 13.5 |
| 33 | 77 | 2 | 0 | 55   |
| 4  | 24 | 0 | 0 | 14   |
| 4  | 24 | 0 | 0 | 14   |
| 4  | 24 | 0 | 0 | 14   |
| 4  | 24 | 0 | 0 | 14   |
| 4  | 24 | 0 | 0 | 14   |
| 11 | 9  | 0 | 0 | 10   |
| 10 | 8  | 0 | 0 | 9    |
| 4  | 24 | 0 | 0 | 14   |
| 11 | 9  | 0 | 0 | 10   |
| 4  | 24 | 0 | 0 | 14   |
| 11 | 9  | 0 | 0 | 10   |
| 10 | 8  | 0 | 0 | 9    |
| 4  | 24 | 0 | 0 | 14   |
| 4  | 24 | 0 | 0 | 14   |
| 11 | 9  | 0 | 0 | 10   |
| 4  | 24 | 0 | 0 | 14   |
| 4  | 24 | 0 | 0 | 14   |
| 10 | 8  | 0 | 0 | 9    |
| 4  | 24 | 0 | 0 | 14   |
| 4  | 24 | 0 | 0 | 14   |
| 4  | 24 | 0 | 0 | 14   |
| 10 | 8  | 0 | 0 | 9    |
| 4  | 24 | 0 | 0 | 14   |
| 11 | 9  | 0 | 0 | 10   |
| 4  | 24 | 0 | 0 | 14   |
| 11 | 9  | 0 | 0 | 10   |
| 11 | 9  | 0 | 0 | 10   |
| 3  | 19 | 0 | 0 | 11   |
| 9  | 7  | 0 | 0 | 8    |
| 3  | 19 | 0 | 0 | 11   |
| 3  | 19 | 0 | 0 | 11   |
| 3  | 19 | 0 | 0 | 11   |
| 3  | 19 | 0 | 0 | 11   |
| 3  | 19 | 0 | 0 | 11   |
| 3  | 19 | 0 | 0 | 11   |
| 3  | 19 | 0 | 0 | 11   |
| 3  | 19 | 0 | 0 | 11   |
| 3  | 19 | 0 | 0 | 11   |
| 3  | 19 | 0 | 0 | 11   |
| 3  | 19 | 0 | 0 | 11   |
| 3  | 19 | 0 | 0 | 11   |
| 3  | 19 | 0 | 0 | 11   |
| 3  | 19 | 0 | 0 | 11   |
| 3  | 19 | 0 | 0 | 11   |
| 9  | 7  | 0 | 0 | 8    |
| 3  | 19 | 0 | 0 | 11   |

|    |    |   |   |      |
|----|----|---|---|------|
| 10 | 7  | 0 | 0 | 8.5  |
| 3  | 19 | 0 | 0 | 11   |
| 3  | 19 | 0 | 0 | 11   |
| 9  | 7  | 0 | 0 | 8    |
| 3  | 19 | 0 | 0 | 11   |
| 3  | 19 | 0 | 0 | 11   |
| 10 | 7  | 0 | 0 | 8.5  |
| 11 | 8  | 0 | 0 | 9.5  |
| 3  | 19 | 0 | 0 | 11   |
| 10 | 7  | 0 | 0 | 8.5  |
| 10 | 7  | 0 | 0 | 8.5  |
| 3  | 19 | 0 | 0 | 11   |
| 3  | 19 | 0 | 0 | 11   |
| 3  | 19 | 0 | 0 | 11   |
| 3  | 19 | 0 | 0 | 11   |
| 3  | 19 | 0 | 0 | 11   |
| 3  | 21 | 0 | 0 | 12   |
| 3  | 20 | 0 | 0 | 11.5 |
| 3  | 21 | 0 | 0 | 12   |
| 3  | 20 | 0 | 0 | 11.5 |
| 3  | 20 | 0 | 0 | 11.5 |
| 3  | 21 | 0 | 0 | 12   |
| 3  | 21 | 0 | 0 | 12   |
| 3  | 20 | 0 | 0 | 11.5 |
| 3  | 21 | 0 | 0 | 12   |
| 3  | 20 | 0 | 0 | 11.5 |
| 3  | 21 | 0 | 0 | 12   |
| 3  | 21 | 0 | 0 | 12   |
| 3  | 21 | 0 | 0 | 12   |
| 3  | 20 | 0 | 0 | 11.5 |
| 3  | 20 | 0 | 0 | 11.5 |
| 3  | 20 | 0 | 0 | 11.5 |
| 3  | 20 | 0 | 0 | 11.5 |
| 3  | 20 | 0 | 0 | 11.5 |
| 3  | 20 | 0 | 0 | 11.5 |
| 3  | 20 | 0 | 0 | 11.5 |
| 3  | 20 | 0 | 0 | 11.5 |
| 3  | 20 | 0 | 0 | 11.5 |
| 3  | 20 | 0 | 0 | 11.5 |
| 3  | 20 | 0 | 0 | 11.5 |
| 3  | 20 | 0 | 0 | 11.5 |
| 3  | 20 | 0 | 0 | 11.5 |
| 3  | 20 | 0 | 0 | 11.5 |
| 3  | 20 | 0 | 0 | 11.5 |
| 3  | 21 | 0 | 0 | 12   |
| 3  | 21 | 0 | 0 | 12   |
| 3  | 20 | 0 | 0 | 11.5 |
| 3  | 21 | 0 | 0 | 12   |
| 3  | 20 | 0 | 0 | 11.5 |
| 3  | 20 | 0 | 0 | 11.5 |
| 3  | 20 | 0 | 0 | 11.5 |
| 3  | 20 | 0 | 0 | 11.5 |
| 3  | 20 | 0 | 0 | 11.5 |
| 3  | 21 | 0 | 0 | 12   |
| 3  | 21 | 0 | 0 | 12   |
| 3  | 20 | 0 | 0 | 11.5 |

|    |    |   |   |      |
|----|----|---|---|------|
| 3  | 22 | 0 | 0 | 12.5 |
| 3  | 22 | 0 | 0 | 12.5 |
| 3  | 22 | 0 | 0 | 12.5 |
| 3  | 23 | 0 | 0 | 13   |
| 3  | 22 | 0 | 0 | 12.5 |
| 11 | 7  | 0 | 0 | 9    |
| 3  | 23 | 0 | 0 | 13   |
| 3  | 22 | 0 | 0 | 12.5 |
| 3  | 23 | 0 | 0 | 13   |
| 3  | 22 | 0 | 0 | 12.5 |
| 3  | 23 | 0 | 0 | 13   |
| 3  | 23 | 0 | 0 | 13   |
| 3  | 22 | 0 | 0 | 12.5 |
| 3  | 23 | 0 | 0 | 13   |
| 3  | 22 | 0 | 0 | 12.5 |
| 3  | 22 | 0 | 0 | 12.5 |
| 11 | 7  | 0 | 0 | 9    |
| 11 | 7  | 0 | 0 | 9    |
| 3  | 22 | 0 | 0 | 12.5 |
| 3  | 23 | 0 | 0 | 13   |
| 3  | 23 | 0 | 0 | 13   |
| 3  | 23 | 0 | 0 | 13   |
| 3  | 23 | 0 | 0 | 13   |
| 3  | 23 | 0 | 0 | 13   |
| 3  | 23 | 0 | 0 | 13   |
| 3  | 22 | 0 | 0 | 12.5 |
| 3  | 22 | 0 | 0 | 12.5 |
| 3  | 23 | 0 | 0 | 13   |
| 3  | 22 | 0 | 0 | 12.5 |
| 3  | 23 | 0 | 0 | 13   |
| 2  | 10 | 1 | 0 | 6    |
| 2  | 4  | 1 | 0 | 3    |
| 2  | 4  | 1 | 0 | 3    |
| 3  | 24 | 0 | 0 | 13.5 |
| 3  | 25 | 0 | 0 | 14   |
| 3  | 25 | 0 | 0 | 14   |
| 3  | 24 | 0 | 0 | 13.5 |
| 10 | 6  | 0 | 0 | 8    |
| 3  | 24 | 0 | 0 | 13.5 |
| 3  | 24 | 0 | 0 | 13.5 |
| 3  | 24 | 0 | 0 | 13.5 |
| 3  | 25 | 0 | 0 | 14   |
| 3  | 24 | 0 | 0 | 13.5 |
| 3  | 24 | 0 | 0 | 13.5 |
| 3  | 24 | 0 | 0 | 13.5 |
| 10 | 6  | 0 | 0 | 8    |



|    |    |   |   |      |
|----|----|---|---|------|
| 3  | 24 | 0 | 0 | 13.5 |
| 3  | 24 | 0 | 0 | 13.5 |
| 3  | 25 | 0 | 0 | 14   |
| 3  | 24 | 0 | 0 | 13.5 |
| 10 | 6  | 0 | 0 | 8    |
| 3  | 25 | 0 | 0 | 14   |
| 3  | 24 | 0 | 0 | 13.5 |
| 3  | 25 | 0 | 0 | 14   |
| 3  | 24 | 0 | 0 | 13.5 |
| 3  | 25 | 0 | 0 | 14   |
| 3  | 24 | 0 | 0 | 13.5 |
| 3  | 24 | 0 | 0 | 13.5 |
| 3  | 24 | 0 | 0 | 13.5 |
| 3  | 3  | 1 | 0 | 3    |
| 3  | 24 | 0 | 0 | 13.5 |
| 3  | 24 | 0 | 0 | 13.5 |
| 3  | 25 | 0 | 0 | 14   |
| 3  | 24 | 0 | 0 | 13.5 |
| 3  | 24 | 0 | 0 | 13.5 |
| 40 | 61 | 2 | 0 | 50.5 |
| 11 | 6  | 0 | 0 | 8.5  |
| 3  | 26 | 0 | 0 | 14.5 |
| 3  | 26 | 0 | 0 | 14.5 |
| 3  | 26 | 0 | 0 | 14.5 |
| 3  | 26 | 0 | 0 | 14.5 |
| 3  | 26 | 0 | 0 | 14.5 |
| 3  | 26 | 0 | 0 | 14.5 |
| 3  | 26 | 0 | 0 | 14.5 |
| 3  | 26 | 0 | 0 | 14.5 |
| 3  | 26 | 0 | 0 | 14.5 |
| 3  | 26 | 0 | 0 | 14.5 |
| 3  | 26 | 0 | 0 | 14.5 |
| 3  | 26 | 0 | 0 | 14.5 |
| 3  | 26 | 0 | 0 | 14.5 |
| 3  | 26 | 0 | 0 | 14.5 |
| 3  | 26 | 0 | 0 | 14.5 |
| 3  | 26 | 0 | 0 | 14.5 |
| 3  | 26 | 0 | 0 | 14.5 |
| 3  | 26 | 0 | 0 | 14.5 |
| 2  | 21 | 0 | 0 | 11.5 |
| 2  | 21 | 0 | 0 | 11.5 |
| 12 | 6  | 0 | 0 | 9    |
| 2  | 21 | 0 | 0 | 11.5 |
| 2  | 21 | 0 | 0 | 11.5 |
| 2  | 21 | 0 | 0 | 11.5 |
| 2  | 21 | 0 | 0 | 11.5 |
| 2  | 21 | 0 | 0 | 11.5 |
| 2  | 21 | 0 | 0 | 11.5 |
| 10 | 5  | 0 | 0 | 7.5  |

|    |    |   |   |      |
|----|----|---|---|------|
| 10 | 5  | 0 | 0 | 7.5  |
| 2  | 21 | 0 | 0 | 11.5 |
| 2  | 21 | 0 | 0 | 11.5 |
| 2  | 21 | 0 | 0 | 11.5 |
| 2  | 21 | 0 | 0 | 11.5 |
| 2  | 21 | 0 | 0 | 11.5 |
| 2  | 21 | 0 | 0 | 11.5 |
| 1  | 10 | 1 | 0 | 5.5  |
| 2  | 21 | 0 | 0 | 11.5 |
| 2  | 21 | 0 | 0 | 11.5 |
| 2  | 21 | 0 | 0 | 11.5 |
| 2  | 21 | 0 | 0 | 11.5 |
| 2  | 21 | 0 | 0 | 11.5 |
| 1  | 11 | 1 | 0 | 6    |
| 2  | 21 | 0 | 0 | 11.5 |
| 2  | 21 | 0 | 0 | 11.5 |
| 2  | 21 | 0 | 0 | 11.5 |
| 2  | 21 | 0 | 0 | 11.5 |
| 2  | 21 | 0 | 0 | 11.5 |
| 2  | 21 | 0 | 0 | 11.5 |
| 2  | 21 | 0 | 0 | 11.5 |
| 10 | 5  | 0 | 0 | 7.5  |
| 2  | 21 | 0 | 0 | 11.5 |
| 2  | 21 | 0 | 0 | 11.5 |
| 83 | 96 | 5 | 0 | 89.5 |
| 2  | 22 | 0 | 0 | 12   |
| 2  | 22 | 0 | 0 | 12   |
| 2  | 23 | 0 | 0 | 12.5 |
| 2  | 22 | 0 | 0 | 12   |
| 2  | 23 | 0 | 0 | 12.5 |
| 2  | 23 | 0 | 0 | 12.5 |
| 2  | 23 | 0 | 0 | 12.5 |
| 2  | 23 | 0 | 0 | 12.5 |
| 2  | 23 | 0 | 0 | 12.5 |
| 2  | 22 | 0 | 0 | 12   |
| 2  | 23 | 0 | 0 | 12.5 |
| 2  | 22 | 0 | 0 | 12   |
| 2  | 23 | 0 | 0 | 12.5 |
| 11 | 5  | 0 | 0 | 8    |
| 2  | 22 | 0 | 0 | 12   |
| 2  | 23 | 0 | 0 | 12.5 |
| 2  | 22 | 0 | 0 | 12   |
| 2  | 22 | 0 | 0 | 12   |
| 2  | 23 | 0 | 0 | 12.5 |
| 2  | 23 | 0 | 0 | 12.5 |
| 11 | 5  | 0 | 0 | 8    |
| 2  | 23 | 0 | 0 | 12.5 |
| 2  | 22 | 0 | 0 | 12   |

|    |    |   |   |      |
|----|----|---|---|------|
| 2  | 22 | 0 | 0 | 12   |
| 2  | 22 | 0 | 0 | 12   |
| 2  | 23 | 0 | 0 | 12.5 |
| 2  | 22 | 0 | 0 | 12   |
| 2  | 23 | 0 | 0 | 12.5 |
| 2  | 23 | 0 | 0 | 12.5 |
| 2  | 22 | 0 | 0 | 12   |
| 2  | 22 | 0 | 0 | 12   |
| 2  | 23 | 0 | 0 | 12.5 |
| 2  | 23 | 0 | 0 | 12.5 |
| 2  | 23 | 0 | 0 | 12.5 |
| 2  | 23 | 0 | 0 | 12.5 |
| 2  | 23 | 0 | 0 | 12.5 |
| 2  | 22 | 0 | 0 | 12   |
| 2  | 22 | 0 | 0 | 12   |
| 2  | 23 | 0 | 0 | 12.5 |
| 2  | 22 | 0 | 0 | 12   |
| 11 | 5  | 0 | 0 | 8    |
| 2  | 22 | 0 | 0 | 12   |
| 2  | 23 | 0 | 0 | 12.5 |
| 2  | 23 | 0 | 0 | 12.5 |
| 2  | 22 | 0 | 0 | 12   |
| 2  | 22 | 0 | 0 | 12   |
| 2  | 23 | 0 | 0 | 12.5 |
| 2  | 23 | 0 | 0 | 12.5 |
| 11 | 5  | 0 | 0 | 8    |
| 2  | 22 | 0 | 0 | 12   |
| 2  | 22 | 0 | 0 | 12   |
| 2  | 23 | 0 | 0 | 12.5 |
| 0  | 10 | 1 | 0 | 5    |
| 10 | 4  | 0 | 0 | 7    |
| 10 | 4  | 0 | 0 | 7    |
| 10 | 4  | 0 | 0 | 7    |
| 2  | 25 | 0 | 0 | 13.5 |
| 2  | 24 | 0 | 0 | 13   |
| 2  | 25 | 0 | 0 | 13.5 |
| 2  | 25 | 0 | 0 | 13.5 |
| 2  | 25 | 0 | 0 | 13.5 |
| 2  | 25 | 0 | 0 | 13.5 |
| 2  | 25 | 0 | 0 | 13.5 |
| 2  | 25 | 0 | 0 | 13.5 |
| 2  | 25 | 0 | 0 | 13.5 |
| 2  | 24 | 0 | 0 | 13   |
| 2  | 25 | 0 | 0 | 13.5 |
| 2  | 25 | 0 | 0 | 13.5 |
| 2  | 25 | 0 | 0 | 13.5 |
| 2  | 24 | 0 | 0 | 13   |
| 2  | 24 | 0 | 0 | 13   |

|    |    |   |   |      |
|----|----|---|---|------|
| 2  | 25 | 0 | 0 | 13.5 |
| 2  | 24 | 0 | 0 | 13   |
| 2  | 25 | 0 | 0 | 13.5 |
| 2  | 24 | 0 | 0 | 13   |
| 2  | 25 | 0 | 0 | 13.5 |
| 2  | 24 | 0 | 0 | 13   |
| 2  | 24 | 0 | 0 | 13   |
| 2  | 24 | 0 | 0 | 13   |
| 2  | 24 | 0 | 0 | 13   |
| 2  | 25 | 0 | 0 | 13.5 |
| 2  | 24 | 0 | 0 | 13   |
| 2  | 25 | 0 | 0 | 13.5 |
| 2  | 25 | 0 | 0 | 13.5 |
| 2  | 25 | 0 | 0 | 13.5 |
| 2  | 25 | 0 | 0 | 13.5 |
| 2  | 25 | 0 | 0 | 13.5 |
| 2  | 25 | 0 | 0 | 13.5 |
| 2  | 24 | 0 | 0 | 13   |
| 12 | 5  | 0 | 0 | 8.5  |
| 2  | 24 | 0 | 0 | 13   |
| 2  | 25 | 0 | 0 | 13.5 |
| 2  | 24 | 0 | 0 | 13   |
| 2  | 24 | 0 | 0 | 13   |
| 2  | 25 | 0 | 0 | 13.5 |
| 2  | 24 | 0 | 0 | 13   |
| 2  | 25 | 0 | 0 | 13.5 |
| 2  | 26 | 0 | 0 | 14   |
| 2  | 26 | 0 | 0 | 14   |
| 2  | 26 | 0 | 0 | 14   |
| 2  | 26 | 0 | 0 | 14   |
| 2  | 26 | 0 | 0 | 14   |
| 2  | 27 | 0 | 0 | 14.5 |
| 5  | 0  | 1 | 0 | 2.5  |
| 2  | 27 | 0 | 0 | 14.5 |
| 2  | 26 | 0 | 0 | 14   |
| 2  | 26 | 0 | 0 | 14   |
| 2  | 26 | 0 | 0 | 14   |
| 0  | 11 | 1 | 0 | 5.5  |
| 2  | 26 | 0 | 0 | 14   |
| 2  | 27 | 0 | 0 | 14.5 |
| 2  | 27 | 0 | 0 | 14.5 |
| 2  | 26 | 0 | 0 | 14   |
| 2  | 26 | 0 | 0 | 14   |
| 2  | 27 | 0 | 0 | 14.5 |
| 2  | 27 | 0 | 0 | 14.5 |
| 0  | 11 | 1 | 0 | 5.5  |
| 2  | 27 | 0 | 0 | 14.5 |

|    |    |   |   |      |
|----|----|---|---|------|
| 2  | 26 | 0 | 0 | 14   |
| 2  | 27 | 0 | 0 | 14.5 |
| 2  | 27 | 0 | 0 | 14.5 |
| 2  | 26 | 0 | 0 | 14   |
| 2  | 27 | 0 | 0 | 14.5 |
| 2  | 27 | 0 | 0 | 14.5 |
| 2  | 26 | 0 | 0 | 14   |
| 2  | 26 | 0 | 0 | 14   |
| 2  | 27 | 0 | 0 | 14.5 |
| 13 | 5  | 0 | 0 | 9    |
| 2  | 28 | 0 | 0 | 15   |
| 2  | 28 | 0 | 0 | 15   |
| 2  | 28 | 0 | 0 | 15   |
| 2  | 28 | 0 | 0 | 15   |
| 2  | 28 | 0 | 0 | 15   |
| 2  | 28 | 0 | 0 | 15   |
| 2  | 28 | 0 | 0 | 15   |
| 2  | 28 | 0 | 0 | 15   |
| 2  | 28 | 0 | 0 | 15   |
| 2  | 28 | 0 | 0 | 15   |
| 2  | 28 | 0 | 0 | 15   |
| 2  | 28 | 0 | 0 | 15   |
| 13 | 4  | 0 | 0 | 8.5  |
| 1  | 22 | 0 | 0 | 11.5 |
| 1  | 23 | 0 | 0 | 12   |
| 1  | 23 | 0 | 0 | 12   |
| 1  | 23 | 0 | 0 | 12   |
| 1  | 22 | 0 | 0 | 11.5 |
| 1  | 23 | 0 | 0 | 12   |
| 1  | 22 | 0 | 0 | 11.5 |
| 1  | 22 | 0 | 0 | 11.5 |
| 1  | 23 | 0 | 0 | 12   |
| 1  | 22 | 0 | 0 | 11.5 |
| 1  | 22 | 0 | 0 | 11.5 |
| 1  | 22 | 0 | 0 | 11.5 |
| 1  | 22 | 0 | 0 | 11.5 |
| 1  | 23 | 0 | 0 | 12   |
| 1  | 22 | 0 | 0 | 11.5 |
| 1  | 23 | 0 | 0 | 12   |
| 1  | 23 | 0 | 0 | 12   |
| 1  | 22 | 0 | 0 | 11.5 |
| 1  | 22 | 0 | 0 | 11.5 |
| 1  | 22 | 0 | 0 | 11.5 |
| 1  | 22 | 0 | 0 | 11.5 |
| 1  | 23 | 0 | 0 | 12   |
| 1  | 22 | 0 | 0 | 11.5 |
| 1  | 22 | 0 | 0 | 11.5 |

|    |    |   |   |      |
|----|----|---|---|------|
| 1  | 23 | 0 | 0 | 12   |
| 1  | 23 | 0 | 0 | 12   |
| 1  | 22 | 0 | 0 | 11.5 |
| 1  | 22 | 0 | 0 | 11.5 |
| 1  | 23 | 0 | 0 | 12   |
| 1  | 23 | 0 | 0 | 12   |
| 1  | 22 | 0 | 0 | 11.5 |
| 1  | 23 | 0 | 0 | 12   |
| 1  | 23 | 0 | 0 | 12   |
| 1  | 22 | 0 | 0 | 11.5 |
| 1  | 22 | 0 | 0 | 11.5 |
| 1  | 24 | 0 | 0 | 12.5 |
| 1  | 25 | 0 | 0 | 13   |
| 1  | 24 | 0 | 0 | 12.5 |
| 1  | 24 | 0 | 0 | 12.5 |
| 1  | 24 | 0 | 0 | 12.5 |
| 1  | 25 | 0 | 0 | 13   |
| 1  | 24 | 0 | 0 | 12.5 |
| 1  | 25 | 0 | 0 | 13   |
| 1  | 25 | 0 | 0 | 13   |
| 1  | 24 | 0 | 0 | 12.5 |
| 1  | 24 | 0 | 0 | 12.5 |
| 1  | 25 | 0 | 0 | 13   |
| 1  | 24 | 0 | 0 | 12.5 |
| 1  | 25 | 0 | 0 | 13   |
| 1  | 25 | 0 | 0 | 13   |
| 1  | 25 | 0 | 0 | 13   |
| 1  | 25 | 0 | 0 | 13   |
| 1  | 25 | 0 | 0 | 13   |
| 1  | 24 | 0 | 0 | 12.5 |
| 1  | 24 | 0 | 0 | 12.5 |
| 1  | 25 | 0 | 0 | 13   |
| 1  | 24 | 0 | 0 | 12.5 |
| 1  | 24 | 0 | 0 | 12.5 |
| 1  | 24 | 0 | 0 | 12.5 |
| 1  | 24 | 0 | 0 | 12.5 |
| 1  | 25 | 0 | 0 | 13   |
| 1  | 24 | 0 | 0 | 12.5 |
| 1  | 25 | 0 | 0 | 13   |
| 12 | 3  | 0 | 0 | 7.5  |
| 1  | 24 | 0 | 0 | 12.5 |
| 1  | 24 | 0 | 0 | 12.5 |
| 1  | 24 | 0 | 0 | 12.5 |
| 1  | 24 | 0 | 0 | 12.5 |
| 1  | 25 | 0 | 0 | 13   |

|    |     |   |   |      |
|----|-----|---|---|------|
| 1  | 24  | 0 | 0 | 12.5 |
| 1  | 25  | 0 | 0 | 13   |
| 1  | 26  | 0 | 0 | 13.5 |
| 1  | 26  | 0 | 0 | 13.5 |
| 1  | 26  | 0 | 0 | 13.5 |
| 1  | 26  | 0 | 0 | 13.5 |
| 11 | 2   | 0 | 0 | 6.5  |
| 1  | 26  | 0 | 0 | 13.5 |
| 1  | 26  | 0 | 0 | 13.5 |
| 1  | 26  | 0 | 0 | 13.5 |
| 1  | 28  | 0 | 0 | 14.5 |
| 1  | 27  | 0 | 0 | 14   |
| 1  | 27  | 0 | 0 | 14   |
| 1  | 28  | 0 | 0 | 14.5 |
| 1  | 28  | 0 | 0 | 14.5 |
| 1  | 28  | 0 | 0 | 14.5 |
| 1  | 28  | 0 | 0 | 14.5 |
| 1  | 27  | 0 | 0 | 14   |
| 1  | 27  | 0 | 0 | 14   |
| 12 | 2   | 0 | 0 | 7    |
| 12 | 2   | 0 | 0 | 7    |
| 1  | 27  | 0 | 0 | 14   |
| 1  | 28  | 0 | 0 | 14.5 |
| 1  | 27  | 0 | 0 | 14   |
| 1  | 27  | 0 | 0 | 14   |
| 1  | 29  | 0 | 0 | 15   |
| 1  | 29  | 0 | 0 | 15   |
| 0  | 23  | 0 | 0 | 11.5 |
| 0  | 23  | 0 | 0 | 11.5 |
| 0  | 23  | 0 | 0 | 11.5 |
| 0  | 23  | 0 | 0 | 11.5 |
| 1  | 29  | 0 | 0 | 15   |
| 1  | 29  | 0 | 0 | 15   |
| 0  | 23  | 0 | 0 | 11.5 |
| 0  | 23  | 0 | 0 | 11.5 |
| 1  | 29  | 0 | 0 | 15   |
| 0  | 23  | 0 | 0 | 11.5 |
| 0  | 23  | 0 | 0 | 11.5 |
| 0  | 23  | 0 | 0 | 11.5 |
| 0  | 23  | 0 | 0 | 11.5 |
| 0  | 23  | 0 | 0 | 11.5 |
| 9  | 129 | 8 | 0 | 69   |
| 0  | 24  | 0 | 0 | 12   |
| 13 | 2   | 0 | 0 | 7.5  |
| 0  | 24  | 0 | 0 | 12   |
| 0  | 24  | 0 | 0 | 12   |
| 0  | 24  | 0 | 0 | 12   |

|    |    |   |   |      |
|----|----|---|---|------|
| 0  | 24 | 0 | 0 | 12   |
| 0  | 24 | 0 | 0 | 12   |
| 0  | 24 | 0 | 0 | 12   |
| 0  | 24 | 0 | 0 | 12   |
| 0  | 24 | 0 | 0 | 12   |
| 0  | 24 | 0 | 0 | 12   |
| 0  | 24 | 0 | 0 | 12   |
| 0  | 24 | 0 | 0 | 12   |
| 0  | 24 | 0 | 0 | 12   |
| 0  | 24 | 0 | 0 | 12   |
| 0  | 24 | 0 | 0 | 12   |
| 0  | 24 | 0 | 0 | 12   |
| 0  | 24 | 0 | 0 | 12   |
| 13 | 2  | 0 | 0 | 7.5  |
| 0  | 25 | 0 | 0 | 12.5 |
| 0  | 25 | 0 | 0 | 12.5 |
| 0  | 25 | 0 | 0 | 12.5 |
| 0  | 25 | 0 | 0 | 12.5 |
| 0  | 25 | 0 | 0 | 12.5 |
| 0  | 25 | 0 | 0 | 12.5 |
| 0  | 25 | 0 | 0 | 12.5 |
| 0  | 25 | 0 | 0 | 12.5 |
| 0  | 25 | 0 | 0 | 12.5 |
| 0  | 25 | 0 | 0 | 12.5 |
| 0  | 25 | 0 | 0 | 12.5 |
| 0  | 25 | 0 | 0 | 12.5 |
| 0  | 25 | 0 | 0 | 12.5 |
| 0  | 25 | 0 | 0 | 12.5 |
| 0  | 25 | 0 | 0 | 12.5 |
| 0  | 25 | 0 | 0 | 12.5 |
| 0  | 25 | 0 | 0 | 12.5 |
| 12 | 0  | 0 | 0 | 6    |
| 12 | 0  | 0 | 0 | 6    |
| 0  | 26 | 0 | 0 | 13   |
| 0  | 26 | 0 | 0 | 13   |
| 0  | 26 | 0 | 0 | 13   |
| 0  | 26 | 0 | 0 | 13   |
| 0  | 26 | 0 | 0 | 13   |
| 0  | 26 | 0 | 0 | 13   |
| 0  | 26 | 0 | 0 | 13   |
| 0  | 26 | 0 | 0 | 13   |
| 0  | 26 | 0 | 0 | 13   |
| 0  | 26 | 0 | 0 | 13   |
| 0  | 26 | 0 | 0 | 13   |
| 0  | 28 | 0 | 0 | 14   |
| 0  | 28 | 0 | 0 | 14   |
| 0  | 27 | 0 | 0 | 13.5 |
| 0  | 28 | 0 | 0 | 14   |
| 0  | 27 | 0 | 0 | 13.5 |
| 0  | 28 | 0 | 0 | 14   |



|     |     |    |   |       |
|-----|-----|----|---|-------|
| 0   | 27  | 0  | 0 | 13.5  |
| 0   | 28  | 0  | 0 | 14    |
| 0   | 28  | 0  | 0 | 14    |
| 0   | 27  | 0  | 0 | 13.5  |
| 0   | 27  | 0  | 0 | 13.5  |
| 0   | 28  | 0  | 0 | 14    |
| 0   | 27  | 0  | 0 | 13.5  |
| 0   | 28  | 0  | 0 | 14    |
| 0   | 27  | 0  | 0 | 13.5  |
| 0   | 27  | 0  | 0 | 13.5  |
| 0   | 28  | 0  | 0 | 14    |
| 13  | 0   | 0  | 0 | 6.5   |
| 0   | 29  | 0  | 0 | 14.5  |
| 0   | 29  | 0  | 0 | 14.5  |
| 0   | 29  | 0  | 0 | 14.5  |
| 13  | 0   | 0  | 0 | 6.5   |
| 0   | 29  | 0  | 0 | 14.5  |
| 0   | 29  | 0  | 0 | 14.5  |
| 13  | 0   | 0  | 0 | 6.5   |
| 13  | 0   | 0  | 0 | 6.5   |
| 0   | 29  | 0  | 0 | 14.5  |
| 0   | 29  | 0  | 0 | 14.5  |
| 0   | 29  | 0  | 0 | 14.5  |
| 0   | 29  | 0  | 0 | 14.5  |
| 320 | 801 | 30 | 0 | 560.5 |
| 19  | 79  | 5  | 0 | 49    |
| 16  | 33  | 1  | 0 | 24.5  |
| 227 | 530 | 47 | 0 | 378.5 |
| 13  | 40  | 1  | 0 | 26.5  |
| 53  | 176 | 5  | 0 | 114.5 |
| 12  | 43  | 1  | 0 | 27.5  |
| 44  | 92  | 3  | 0 | 68    |
| 15  | 115 | 2  | 0 | 65    |
| 17  | 183 | 11 | 0 | 100   |
| 4   | 53  | 3  | 0 | 28.5  |
| 8   | 51  | 1  | 0 | 29.5  |
| 8   | 51  | 1  | 0 | 29.5  |
| 59  | 96  | 4  | 0 | 77.5  |
| 7   | 33  | 2  | 0 | 20    |
| 39  | 137 | 4  | 0 | 88    |
| 38  | 635 | 14 | 0 | 336.5 |
| 35  | 4   | 4  | 0 | 19.5  |
| 107 | 354 | 11 | 0 | 230.5 |
| 8   | 128 | 2  | 0 | 68    |
| 52  | 438 | 11 | 0 | 245   |
| 124 | 208 | 22 | 0 | 166   |
| 17  | 146 | 3  | 0 | 81.5  |

|      |      |     |   |        |
|------|------|-----|---|--------|
| 4    | 58   | 1   | 0 | 31     |
| 4    | 58   | 1   | 0 | 31     |
| 333  | 478  | 56  | 0 | 405.5  |
| 805  | 437  | 45  | 0 | 621    |
| 2    | 62   | 1   | 0 | 32     |
| 67   | 280  | 18  | 0 | 173.5  |
| 51   | 220  | 14  | 0 | 135.5  |
| 452  | 759  | 78  | 0 | 605.5  |
| 25   | 70   | 2   | 0 | 47.5   |
| 29   | 62   | 2   | 0 | 45.5   |
| 33   | 49   | 2   | 0 | 41     |
| 140  | 89   | 7   | 0 | 114.5  |
| 20   | 37   | 1   | 0 | 28.5   |
| 16   | 51   | 1   | 0 | 33.5   |
| 14   | 51   | 1   | 0 | 32.5   |
| 14   | 55   | 1   | 0 | 34.5   |
| 26   | 105  | 3   | 0 | 65.5   |
| 12   | 57   | 1   | 0 | 34.5   |
| 11   | 57   | 1   | 0 | 34     |
| 11   | 55   | 1   | 0 | 33     |
| 23   | 112  | 3   | 0 | 67.5   |
| 42   | 31   | 2   | 0 | 36.5   |
| 10   | 63   | 1   | 0 | 36.5   |
| 10   | 60   | 1   | 0 | 35     |
| 9    | 59   | 1   | 0 | 34     |
| 63   | 559  | 30  | 0 | 311    |
| 19   | 121  | 3   | 0 | 70     |
| 905  | 1115 | 66  | 0 | 1010   |
| 42   | 87   | 3   | 0 | 64.5   |
| 105  | 330  | 23  | 0 | 217.5  |
| 5    | 67   | 1   | 0 | 36     |
| 160  | 411  | 32  | 0 | 285.5  |
| 28   | 74   | 2   | 0 | 51     |
| 761  | 786  | 110 | 0 | 773.5  |
| 5    | 72   | 1   | 0 | 38.5   |
| 90   | 189  | 17  | 0 | 139.5  |
| 400  | 536  | 63  | 0 | 468    |
| 167  | 332  | 29  | 0 | 249.5  |
| 6    | 109  | 2   | 0 | 57.5   |
| 45   | 238  | 7   | 0 | 141.5  |
| 14   | 106  | 2   | 0 | 60     |
| 1117 | 946  | 74  | 0 | 1031.5 |
| 12   | 67   | 4   | 0 | 39.5   |
| 18   | 2    | 0   | 0 | 10     |
| 0    | 39   | 0   | 0 | 19.5   |
| 0    | 39   | 0   | 0 | 19.5   |
| 0    | 39   | 0   | 0 | 19.5   |

|      |      |    |    |        |
|------|------|----|----|--------|
| 0    | 39   | 0  | 0  | 19.5   |
| 18   | 0    | 0  | 0  | 9      |
| 0    | 40   | 0  | 0  | 20     |
| 0    | 40   | 0  | 0  | 20     |
| 0    | 40   | 0  | 0  | 20     |
| 0    | 40   | 0  | 0  | 20     |
| 0    | 40   | 0  | 0  | 20     |
| 0    | 40   | 0  | 0  | 20     |
| 0    | 40   | 0  | 0  | 20     |
| 577  | 885  | 89 | 0  | 731    |
| 843  | 173  | 14 | 14 | 508    |
| 345  | 364  | 25 | 0  | 354.5  |
| 108  | 55   | 5  | 0  | 81.5   |
| 1308 | 896  | 84 | 0  | 1102   |
| 27   | 133  | 4  | 0  | 80     |
| 61   | 59   | 4  | 0  | 60     |
| 82   | 202  | 15 | 0  | 142    |
| 39   | 159  | 5  | 0  | 99     |
| 42   | 60   | 3  | 0  | 51     |
| 120  | 199  | 18 | 0  | 159.5  |
| 131  | 344  | 14 | 0  | 237.5  |
| 16   | 40   | 3  | 0  | 28     |
| 12   | 45   | 3  | 0  | 28.5   |
| 99   | 299  | 20 | 0  | 199    |
| 67   | 210  | 8  | 0  | 138.5  |
| 620  | 780  | 89 | 0  | 700    |
| 35   | 162  | 9  | 0  | 98.5   |
| 31   | 269  | 13 | 0  | 150    |
| 41   | 114  | 8  | 0  | 77.5   |
| 19   | 69   | 2  | 0  | 44     |
| 96   | 179  | 8  | 0  | 137.5  |
| 6    | 85   | 5  | 0  | 45.5   |
| 39   | 28   | 2  | 0  | 33.5   |
| 11   | 88   | 2  | 0  | 49.5   |
| 43   | 139  | 5  | 0  | 91     |
| 671  | 779  | 87 | 0  | 725    |
| 87   | 147  | 14 | 0  | 117    |
| 5    | 102  | 2  | 0  | 53.5   |
| 15   | 102  | 5  | 0  | 58.5   |
| 928  | 731  | 63 | 0  | 829.5  |
| 1198 | 1185 | 90 | 1  | 1191.5 |
| 14   | 29   | 1  | 0  | 21.5   |
| 12   | 34   | 1  | 0  | 23     |
| 18   | 19   | 1  | 0  | 18.5   |
| 435  | 686  | 66 | 0  | 560.5  |
| 7    | 44   | 1  | 0  | 25.5   |
| 6    | 47   | 1  | 0  | 26.5   |

|     |      |     |   |       |
|-----|------|-----|---|-------|
| 10  | 18   | 2   | 0 | 14    |
| 703 | 723  | 55  | 0 | 713   |
| 588 | 246  | 58  | 0 | 417   |
| 30  | 184  | 9   | 0 | 107   |
| 746 | 1440 | 116 | 0 | 1093  |
| 65  | 73   | 4   | 0 | 69    |
| 0   | 56   | 1   | 0 | 28    |
| 277 | 371  | 22  | 0 | 324   |
| 29  | 77   | 3   | 0 | 53    |
| 28  | 84   | 3   | 0 | 56    |
| 17  | 40   | 1   | 0 | 28.5  |
| 16  | 39   | 1   | 0 | 27.5  |
| 15  | 41   | 1   | 0 | 28    |
| 18  | 34   | 1   | 0 | 26    |
| 20  | 32   | 1   | 0 | 26    |
| 14  | 42   | 1   | 0 | 28    |
| 24  | 88   | 3   | 0 | 56    |
| 11  | 51   | 1   | 0 | 31    |
| 24  | 23   | 1   | 0 | 23.5  |
| 10  | 55   | 1   | 0 | 32.5  |
| 9   | 57   | 1   | 0 | 33    |
| 12  | 29   | 2   | 0 | 20.5  |
| 10  | 29   | 2   | 0 | 19.5  |
| 16  | 84   | 4   | 0 | 50    |
| 16  | 83   | 4   | 0 | 49.5  |
| 8   | 34   | 2   | 0 | 21    |
| 421 | 830  | 64  | 0 | 625.5 |
| 6   | 36   | 2   | 0 | 21    |
| 6   | 39   | 2   | 0 | 22.5  |
| 5   | 39   | 2   | 0 | 22    |
| 5   | 38   | 2   | 0 | 21.5  |
| 54  | 105  | 5   | 0 | 79.5  |
| 462 | 749  | 64  | 0 | 605.5 |
| 861 | 805  | 98  | 0 | 833   |
| 338 | 333  | 27  | 0 | 335.5 |
| 24  | 0    | 2   | 0 | 12    |
| 689 | 709  | 85  | 0 | 699   |
| 40  | 313  | 14  | 0 | 176.5 |
| 37  | 64   | 5   | 0 | 50.5  |
| 29  | 80   | 5   | 0 | 54.5  |
| 22  | 98   | 5   | 0 | 60    |
| 87  | 63   | 6   | 0 | 75    |
| 13  | 115  | 5   | 0 | 64    |
| 40  | 117  | 4   | 0 | 78.5  |
| 22  | 53   | 2   | 0 | 37.5  |
| 17  | 64   | 2   | 0 | 40.5  |
| 16  | 69   | 2   | 0 | 42.5  |

|      |      |     |   |        |
|------|------|-----|---|--------|
| 13   | 73   | 2   | 0 | 43     |
| 12   | 81   | 2   | 0 | 46.5   |
| 10   | 61   | 3   | 0 | 35.5   |
| 8    | 65   | 3   | 0 | 36.5   |
| 63   | 203  | 7   | 0 | 133    |
| 561  | 634  | 64  | 0 | 597.5  |
| 123  | 839  | 38  | 0 | 481    |
| 218  | 971  | 35  | 0 | 594.5  |
| 365  | 1143 | 48  | 0 | 754    |
| 1029 | 556  | 76  | 0 | 792.5  |
| 1386 | 1393 | 120 | 0 | 1389.5 |
| 43   | 121  | 7   | 0 | 82     |
| 39   | 103  | 8   | 0 | 71     |
| 30   | 69   | 3   | 0 | 49.5   |
| 18   | 209  | 6   | 0 | 113.5  |
| 9    | 115  | 3   | 0 | 62     |
| 5    | 118  | 3   | 0 | 61.5   |
| 418  | 3376 | 110 | 1 | 1897   |
| 5    | 120  | 3   | 0 | 62.5   |
| 14   | 94   | 4   | 0 | 54     |
| 95   | 398  | 20  | 0 | 246.5  |
| 41   | 79   | 3   | 0 | 60     |
| 30   | 102  | 3   | 0 | 66     |
| 373  | 370  | 39  | 0 | 371.5  |
| 862  | 610  | 83  | 0 | 736    |
| 41   | 66   | 5   | 0 | 53.5   |
| 15   | 120  | 5   | 0 | 67.5   |
| 538  | 634  | 51  | 0 | 586    |
| 127  | 932  | 34  | 0 | 529.5  |
| 582  | 455  | 56  | 0 | 518.5  |
| 40   | 295  | 10  | 0 | 167.5  |
| 1005 | 1131 | 95  | 0 | 1068   |
| 1    | 147  | 5   | 0 | 74     |
| 43   | 133  | 7   | 0 | 88     |
| 2    | 217  | 6   | 0 | 109.5  |
| 94   | 605  | 19  | 0 | 349.5  |
| 99   | 152  | 10  | 0 | 125.5  |
| 56   | 253  | 10  | 0 | 154.5  |
| 85   | 215  | 11  | 0 | 150    |
| 12   | 374  | 11  | 0 | 193    |
| 914  | 334  | 69  | 0 | 624    |
| 821  | 496  | 68  | 0 | 658.5  |
| 606  | 814  | 64  | 0 | 710    |
| 561  | 600  | 56  | 0 | 580.5  |
| 689  | 1041 | 77  | 0 | 865    |
| 925  | 817  | 87  | 0 | 871    |
| 4    | 24   | 1   | 0 | 14     |

|    |    |   |   |      |
|----|----|---|---|------|
| 2  | 21 | 1 | 0 | 11.5 |
| 4  | 25 | 0 | 0 | 14.5 |
| 4  | 25 | 0 | 0 | 14.5 |
| 4  | 25 | 0 | 0 | 14.5 |
| 4  | 25 | 0 | 0 | 14.5 |
| 4  | 25 | 0 | 0 | 14.5 |
| 1  | 19 | 1 | 0 | 10   |
| 6  | 34 | 1 | 0 | 20   |
| 4  | 25 | 0 | 0 | 14.5 |
| 4  | 25 | 0 | 0 | 14.5 |
| 17 | 14 | 1 | 0 | 15.5 |
| 4  | 25 | 0 | 0 | 14.5 |
| 4  | 25 | 0 | 0 | 14.5 |
| 4  | 25 | 0 | 0 | 14.5 |
| 2  | 31 | 1 | 0 | 16.5 |
| 4  | 25 | 0 | 0 | 14.5 |
| 4  | 25 | 0 | 0 | 14.5 |
| 4  | 25 | 0 | 0 | 14.5 |
| 4  | 25 | 0 | 0 | 14.5 |
| 6  | 36 | 1 | 0 | 21   |
| 4  | 25 | 0 | 0 | 14.5 |
| 4  | 25 | 0 | 0 | 14.5 |
| 3  | 18 | 0 | 0 | 10.5 |
| 18 | 40 | 2 | 0 | 29   |
| 3  | 17 | 0 | 0 | 10   |
| 3  | 18 | 0 | 0 | 10.5 |
| 3  | 17 | 0 | 0 | 10   |
| 3  | 16 | 0 | 0 | 9.5  |
| 3  | 16 | 0 | 0 | 9.5  |
| 3  | 16 | 0 | 0 | 9.5  |
| 3  | 17 | 0 | 0 | 10   |
| 6  | 28 | 1 | 0 | 17   |
| 3  | 17 | 0 | 0 | 10   |
| 3  | 17 | 0 | 0 | 10   |
| 3  | 16 | 0 | 0 | 9.5  |
| 6  | 21 | 0 | 0 | 13.5 |
| 3  | 17 | 0 | 0 | 10   |
| 3  | 16 | 0 | 0 | 9.5  |
| 3  | 18 | 0 | 0 | 10.5 |
| 3  | 17 | 0 | 0 | 10   |
| 3  | 16 | 0 | 0 | 9.5  |
| 3  | 16 | 0 | 0 | 9.5  |
| 9  | 15 | 0 | 0 | 12   |
| 3  | 17 | 0 | 0 | 10   |
| 3  | 17 | 0 | 0 | 10   |
| 3  | 18 | 0 | 0 | 10.5 |
| 3  | 16 | 0 | 0 | 9.5  |

|    |    |   |   |      |
|----|----|---|---|------|
| 3  | 18 | 0 | 0 | 10.5 |
| 3  | 10 | 1 | 0 | 6.5  |
| 3  | 18 | 0 | 0 | 10.5 |
| 3  | 18 | 0 | 0 | 10.5 |
| 3  | 18 | 0 | 0 | 10.5 |
| 3  | 17 | 0 | 0 | 10   |
| 3  | 16 | 0 | 0 | 9.5  |
| 3  | 17 | 0 | 0 | 10   |
| 10 | 14 | 0 | 0 | 12   |
| 3  | 17 | 0 | 0 | 10   |
| 3  | 16 | 0 | 0 | 9.5  |
| 9  | 15 | 0 | 0 | 12   |
| 6  | 21 | 0 | 0 | 13.5 |
| 3  | 16 | 0 | 0 | 9.5  |
| 9  | 15 | 0 | 0 | 12   |
| 3  | 17 | 0 | 0 | 10   |
| 3  | 16 | 0 | 0 | 9.5  |
| 3  | 17 | 0 | 0 | 10   |
| 3  | 16 | 0 | 0 | 9.5  |
| 3  | 17 | 0 | 0 | 10   |
| 3  | 18 | 0 | 0 | 10.5 |
| 3  | 16 | 0 | 0 | 9.5  |
| 3  | 17 | 0 | 0 | 10   |
| 3  | 16 | 0 | 0 | 9.5  |
| 3  | 18 | 0 | 0 | 10.5 |
| 3  | 16 | 0 | 0 | 9.5  |
| 3  | 17 | 0 | 0 | 10   |
| 3  | 17 | 0 | 0 | 10   |
| 10 | 14 | 0 | 0 | 12   |
| 2  | 48 | 1 | 0 | 25   |
| 8  | 7  | 0 | 0 | 7.5  |
| 3  | 17 | 0 | 0 | 10   |
| 3  | 18 | 0 | 0 | 10.5 |
| 6  | 21 | 0 | 0 | 13.5 |
| 3  | 16 | 0 | 0 | 9.5  |
| 3  | 17 | 0 | 0 | 10   |
| 3  | 14 | 1 | 0 | 8.5  |
| 6  | 21 | 0 | 0 | 13.5 |
| 1  | 27 | 1 | 0 | 14   |
| 3  | 16 | 0 | 0 | 9.5  |
| 3  | 17 | 0 | 0 | 10   |
| 3  | 16 | 0 | 0 | 9.5  |
| 3  | 18 | 0 | 0 | 10.5 |
| 3  | 14 | 1 | 0 | 8.5  |
| 3  | 17 | 0 | 0 | 10   |
| 3  | 17 | 0 | 0 | 10   |
| 0  | 12 | 1 | 0 | 6    |

|    |    |   |   |      |
|----|----|---|---|------|
| 3  | 16 | 0 | 0 | 9.5  |
| 3  | 16 | 0 | 0 | 9.5  |
| 3  | 18 | 0 | 0 | 10.5 |
| 3  | 18 | 0 | 0 | 10.5 |
| 3  | 18 | 0 | 0 | 10.5 |
| 3  | 18 | 0 | 0 | 10.5 |
| 3  | 16 | 0 | 0 | 9.5  |
| 6  | 21 | 0 | 0 | 13.5 |
| 3  | 18 | 0 | 0 | 10.5 |
| 3  | 16 | 0 | 0 | 9.5  |
| 3  | 16 | 0 | 0 | 9.5  |
| 6  | 21 | 0 | 0 | 13.5 |
| 3  | 16 | 0 | 0 | 9.5  |
| 3  | 16 | 0 | 0 | 9.5  |
| 6  | 21 | 0 | 0 | 13.5 |
| 3  | 16 | 0 | 0 | 9.5  |
| 3  | 17 | 0 | 0 | 10   |
| 3  | 16 | 0 | 0 | 9.5  |
| 3  | 16 | 0 | 0 | 9.5  |
| 3  | 18 | 0 | 0 | 10.5 |
| 3  | 18 | 0 | 0 | 10.5 |
| 10 | 14 | 0 | 0 | 12   |
| 3  | 17 | 0 | 0 | 10   |
| 3  | 17 | 0 | 0 | 10   |
| 3  | 16 | 0 | 0 | 9.5  |
| 17 | 44 | 2 | 0 | 30.5 |
| 3  | 17 | 0 | 0 | 10   |
| 3  | 18 | 0 | 0 | 10.5 |
| 3  | 17 | 0 | 0 | 10   |
| 6  | 30 | 1 | 0 | 18   |
| 3  | 16 | 0 | 0 | 9.5  |
| 3  | 18 | 0 | 0 | 10.5 |
| 6  | 21 | 0 | 0 | 13.5 |
| 3  | 14 | 1 | 0 | 8.5  |
| 3  | 17 | 0 | 0 | 10   |
| 3  | 18 | 0 | 0 | 10.5 |
| 9  | 15 | 0 | 0 | 12   |
| 0  | 15 | 1 | 0 | 7.5  |
| 3  | 16 | 0 | 0 | 9.5  |
| 9  | 15 | 0 | 0 | 12   |
| 3  | 16 | 0 | 0 | 9.5  |
| 9  | 15 | 0 | 0 | 12   |
| 5  | 6  | 1 | 0 | 5.5  |
| 3  | 17 | 0 | 0 | 10   |
| 3  | 16 | 0 | 0 | 9.5  |
| 6  | 21 | 0 | 0 | 13.5 |
| 3  | 17 | 0 | 0 | 10   |



|    |    |   |   |      |
|----|----|---|---|------|
| 3  | 17 | 0 | 0 | 10   |
| 3  | 17 | 0 | 0 | 10   |
| 5  | 6  | 1 | 0 | 5.5  |
| 3  | 16 | 0 | 0 | 9.5  |
| 6  | 11 | 0 | 0 | 8.5  |
| 11 | 52 | 2 | 0 | 31.5 |
| 0  | 16 | 0 | 0 | 8    |
| 5  | 14 | 0 | 0 | 9.5  |
| 5  | 5  | 0 | 0 | 5    |
| 4  | 25 | 2 | 0 | 14.5 |
| 6  | 12 | 0 | 0 | 9    |
| 6  | 12 | 0 | 0 | 9    |
| 4  | 5  | 0 | 0 | 4.5  |
| 5  | 12 | 0 | 0 | 8.5  |
| 5  | 13 | 0 | 0 | 9    |
| 0  | 16 | 0 | 0 | 8    |
| 3  | 28 | 0 | 0 | 15.5 |
| 6  | 11 | 0 | 0 | 8.5  |
| 6  | 12 | 0 | 0 | 9    |
| 5  | 13 | 0 | 0 | 9    |
| 3  | 28 | 0 | 0 | 15.5 |
| 0  | 16 | 0 | 0 | 8    |
| 0  | 15 | 0 | 0 | 7.5  |
| 3  | 28 | 0 | 0 | 15.5 |
| 6  | 11 | 0 | 0 | 8.5  |
| 0  | 16 | 0 | 0 | 8    |
| 5  | 14 | 0 | 0 | 9.5  |
| 0  | 16 | 0 | 0 | 8    |
| 5  | 14 | 0 | 0 | 9.5  |
| 0  | 16 | 0 | 0 | 8    |
| 3  | 5  | 0 | 0 | 4    |
| 0  | 16 | 0 | 0 | 8    |
| 3  | 6  | 0 | 0 | 4.5  |
| 4  | 5  | 0 | 0 | 4.5  |
| 0  | 16 | 0 | 0 | 8    |
| 5  | 14 | 0 | 0 | 9.5  |
| 12 | 8  | 0 | 0 | 10   |
| 4  | 5  | 0 | 0 | 4.5  |
| 0  | 16 | 0 | 0 | 8    |
| 4  | 47 | 1 | 0 | 25.5 |
| 3  | 6  | 0 | 0 | 4.5  |
| 0  | 16 | 0 | 0 | 8    |
| 0  | 15 | 0 | 0 | 7.5  |
| 0  | 15 | 0 | 0 | 7.5  |
| 0  | 15 | 0 | 0 | 7.5  |
| 11 | 48 | 1 | 0 | 29.5 |
| 0  | 15 | 0 | 0 | 7.5  |

|   |    |   |   |      |
|---|----|---|---|------|
| 0 | 15 | 0 | 0 | 7.5  |
| 0 | 15 | 0 | 0 | 7.5  |
| 5 | 12 | 0 | 0 | 8.5  |
| 6 | 11 | 0 | 0 | 8.5  |
| 5 | 12 | 0 | 0 | 8.5  |
| 3 | 5  | 0 | 0 | 4    |
| 6 | 12 | 0 | 0 | 9    |
| 3 | 6  | 0 | 0 | 4.5  |
| 4 | 40 | 1 | 0 | 22   |
| 6 | 11 | 0 | 0 | 8.5  |
| 0 | 15 | 0 | 0 | 7.5  |
| 0 | 15 | 0 | 0 | 7.5  |
| 7 | 14 | 1 | 0 | 10.5 |
| 0 | 16 | 0 | 0 | 8    |
| 0 | 15 | 0 | 0 | 7.5  |
| 3 | 6  | 0 | 0 | 4.5  |
| 0 | 15 | 0 | 0 | 7.5  |
| 0 | 16 | 0 | 0 | 8    |
| 5 | 14 | 0 | 0 | 9.5  |
| 5 | 12 | 0 | 0 | 8.5  |
| 5 | 14 | 0 | 0 | 9.5  |
| 0 | 15 | 0 | 0 | 7.5  |
| 5 | 14 | 0 | 0 | 9.5  |
| 0 | 16 | 0 | 0 | 8    |
| 0 | 15 | 0 | 0 | 7.5  |
| 5 | 12 | 0 | 0 | 8.5  |
| 3 | 28 | 0 | 0 | 15.5 |
| 0 | 15 | 0 | 0 | 7.5  |
| 0 | 16 | 0 | 0 | 8    |
| 4 | 5  | 0 | 0 | 4.5  |
| 6 | 11 | 0 | 0 | 8.5  |
| 5 | 13 | 0 | 0 | 9    |
| 0 | 15 | 0 | 0 | 7.5  |
| 0 | 15 | 0 | 0 | 7.5  |
| 3 | 28 | 0 | 0 | 15.5 |
| 0 | 16 | 0 | 0 | 8    |
| 5 | 12 | 0 | 0 | 8.5  |
| 6 | 12 | 0 | 0 | 9    |
| 0 | 15 | 0 | 0 | 7.5  |
| 5 | 12 | 0 | 0 | 8.5  |
| 0 | 16 | 0 | 0 | 8    |
| 0 | 15 | 0 | 0 | 7.5  |
| 5 | 14 | 0 | 0 | 9.5  |
| 0 | 15 | 0 | 0 | 7.5  |
| 0 | 15 | 0 | 0 | 7.5  |
| 0 | 15 | 0 | 0 | 7.5  |
| 0 | 16 | 0 | 0 | 8    |

|    |    |   |   |      |
|----|----|---|---|------|
| 0  | 16 | 0 | 0 | 8    |
| 5  | 14 | 0 | 0 | 9.5  |
| 5  | 14 | 0 | 0 | 9.5  |
| 3  | 6  | 0 | 0 | 4.5  |
| 0  | 15 | 0 | 0 | 7.5  |
| 0  | 16 | 0 | 0 | 8    |
| 5  | 13 | 0 | 0 | 9    |
| 0  | 15 | 0 | 0 | 7.5  |
| 5  | 12 | 0 | 0 | 8.5  |
| 10 | 30 | 3 | 0 | 20   |
| 5  | 14 | 0 | 0 | 9.5  |
| 7  | 0  | 0 | 0 | 3.5  |
| 7  | 1  | 0 | 0 | 4    |
| 0  | 15 | 0 | 0 | 7.5  |
| 5  | 12 | 0 | 0 | 8.5  |
| 4  | 36 | 1 | 0 | 20   |
| 6  | 11 | 0 | 0 | 8.5  |
| 0  | 15 | 0 | 0 | 7.5  |
| 0  | 16 | 0 | 0 | 8    |
| 0  | 16 | 0 | 0 | 8    |
| 7  | 1  | 0 | 0 | 4    |
| 5  | 5  | 0 | 0 | 5    |
| 5  | 13 | 0 | 0 | 9    |
| 3  | 6  | 0 | 0 | 4.5  |
| 4  | 5  | 0 | 0 | 4.5  |
| 2  | 12 | 1 | 0 | 7    |
| 5  | 12 | 0 | 0 | 8.5  |
| 6  | 11 | 0 | 0 | 8.5  |
| 7  | 0  | 0 | 0 | 3.5  |
| 0  | 16 | 0 | 0 | 8    |
| 0  | 15 | 0 | 0 | 7.5  |
| 0  | 15 | 0 | 0 | 7.5  |
| 5  | 5  | 0 | 0 | 5    |
| 0  | 15 | 0 | 0 | 7.5  |
| 3  | 6  | 0 | 0 | 4.5  |
| 3  | 28 | 0 | 0 | 15.5 |
| 0  | 16 | 0 | 0 | 8    |
| 0  | 15 | 0 | 0 | 7.5  |
| 3  | 5  | 0 | 0 | 4    |
| 6  | 12 | 0 | 0 | 9    |
| 5  | 13 | 0 | 0 | 9    |
| 6  | 12 | 0 | 0 | 9    |
| 0  | 15 | 0 | 0 | 7.5  |
| 7  | 0  | 0 | 0 | 3.5  |
| 0  | 15 | 0 | 0 | 7.5  |
| 5  | 14 | 0 | 0 | 9.5  |
| 0  | 15 | 0 | 0 | 7.5  |

|    |    |   |   |      |
|----|----|---|---|------|
| 0  | 15 | 0 | 0 | 7.5  |
| 5  | 12 | 0 | 0 | 8.5  |
| 0  | 15 | 0 | 0 | 7.5  |
| 0  | 15 | 0 | 0 | 7.5  |
| 3  | 28 | 0 | 0 | 15.5 |
| 0  | 15 | 0 | 0 | 7.5  |
| 6  | 11 | 0 | 0 | 8.5  |
| 0  | 16 | 0 | 0 | 8    |
| 0  | 15 | 0 | 0 | 7.5  |
| 5  | 12 | 0 | 0 | 8.5  |
| 12 | 8  | 0 | 0 | 10   |
| 0  | 16 | 0 | 0 | 8    |
| 3  | 5  | 0 | 0 | 4    |
| 6  | 12 | 0 | 0 | 9    |
| 7  | 1  | 0 | 0 | 4    |
| 0  | 15 | 0 | 0 | 7.5  |
| 5  | 12 | 0 | 0 | 8.5  |
| 0  | 16 | 0 | 0 | 8    |
| 7  | 0  | 0 | 0 | 3.5  |
| 4  | 5  | 0 | 0 | 4.5  |
| 7  | 0  | 0 | 0 | 3.5  |
| 0  | 15 | 0 | 0 | 7.5  |
| 0  | 16 | 0 | 0 | 8    |
| 5  | 14 | 0 | 0 | 9.5  |
| 5  | 14 | 0 | 0 | 9.5  |
| 2  | 11 | 1 | 0 | 6.5  |
| 0  | 15 | 0 | 0 | 7.5  |
| 3  | 5  | 0 | 0 | 4    |
| 0  | 15 | 0 | 0 | 7.5  |
| 7  | 0  | 0 | 0 | 3.5  |
| 3  | 6  | 0 | 0 | 4.5  |
| 0  | 15 | 0 | 0 | 7.5  |
| 5  | 12 | 0 | 0 | 8.5  |
| 5  | 13 | 0 | 0 | 9    |
| 5  | 13 | 0 | 0 | 9    |
| 0  | 15 | 0 | 0 | 7.5  |
| 0  | 16 | 0 | 0 | 8    |
| 5  | 12 | 0 | 0 | 8.5  |
| 6  | 11 | 0 | 0 | 8.5  |
| 5  | 13 | 0 | 0 | 9    |
| 5  | 12 | 0 | 0 | 8.5  |
| 0  | 16 | 0 | 0 | 8    |
| 5  | 5  | 0 | 0 | 5    |
| 0  | 15 | 0 | 0 | 7.5  |
| 0  | 15 | 0 | 0 | 7.5  |
| 5  | 13 | 0 | 0 | 9    |
| 0  | 15 | 0 | 0 | 7.5  |

|    |    |   |   |      |
|----|----|---|---|------|
| 0  | 16 | 0 | 0 | 8    |
| 0  | 16 | 0 | 0 | 8    |
| 0  | 15 | 0 | 0 | 7.5  |
| 0  | 16 | 0 | 0 | 8    |
| 6  | 11 | 0 | 0 | 8.5  |
| 5  | 12 | 0 | 0 | 8.5  |
| 3  | 6  | 0 | 0 | 4.5  |
| 0  | 16 | 0 | 0 | 8    |
| 5  | 14 | 0 | 0 | 9.5  |
| 5  | 13 | 0 | 0 | 9    |
| 0  | 15 | 0 | 0 | 7.5  |
| 0  | 15 | 0 | 0 | 7.5  |
| 0  | 15 | 0 | 0 | 7.5  |
| 5  | 12 | 0 | 0 | 8.5  |
| 3  | 5  | 0 | 0 | 4    |
| 0  | 15 | 0 | 0 | 7.5  |
| 0  | 15 | 0 | 0 | 7.5  |
| 0  | 16 | 0 | 0 | 8    |
| 0  | 15 | 0 | 0 | 7.5  |
| 5  | 13 | 0 | 0 | 9    |
| 0  | 15 | 0 | 0 | 7.5  |
| 0  | 15 | 0 | 0 | 7.5  |
| 5  | 14 | 0 | 0 | 9.5  |
| 5  | 12 | 0 | 0 | 8.5  |
| 0  | 16 | 0 | 0 | 8    |
| 0  | 15 | 0 | 0 | 7.5  |
| 0  | 16 | 0 | 0 | 8    |
| 0  | 15 | 0 | 0 | 7.5  |
| 0  | 15 | 0 | 0 | 7.5  |
| 3  | 28 | 0 | 0 | 15.5 |
| 6  | 12 | 0 | 0 | 9    |
| 0  | 15 | 0 | 0 | 7.5  |
| 6  | 12 | 0 | 0 | 9    |
| 0  | 15 | 0 | 0 | 7.5  |
| 0  | 15 | 0 | 0 | 7.5  |
| 5  | 5  | 0 | 0 | 5    |
| 12 | 8  | 0 | 0 | 10   |
| 5  | 14 | 0 | 0 | 9.5  |
| 5  | 12 | 0 | 0 | 8.5  |
| 0  | 15 | 0 | 0 | 7.5  |
| 4  | 5  | 0 | 0 | 4.5  |
| 0  | 16 | 0 | 0 | 8    |
| 0  | 15 | 0 | 0 | 7.5  |
| 5  | 12 | 0 | 0 | 8.5  |
| 5  | 13 | 0 | 0 | 9    |
| 0  | 16 | 0 | 0 | 8    |
| 0  | 16 | 0 | 0 | 8    |

|    |    |   |   |      |
|----|----|---|---|------|
| 0  | 15 | 0 | 0 | 7.5  |
| 0  | 15 | 0 | 0 | 7.5  |
| 2  | 12 | 1 | 0 | 7    |
| 0  | 15 | 0 | 0 | 7.5  |
| 3  | 6  | 0 | 0 | 4.5  |
| 5  | 12 | 0 | 0 | 8.5  |
| 0  | 16 | 0 | 0 | 8    |
| 5  | 14 | 0 | 0 | 9.5  |
| 5  | 5  | 0 | 0 | 5    |
| 5  | 13 | 0 | 0 | 9    |
| 5  | 13 | 0 | 0 | 9    |
| 3  | 5  | 0 | 0 | 4    |
| 6  | 11 | 0 | 0 | 8.5  |
| 3  | 6  | 0 | 0 | 4.5  |
| 2  | 11 | 0 | 0 | 6.5  |
| 0  | 17 | 0 | 0 | 8.5  |
| 2  | 6  | 0 | 0 | 4    |
| 7  | 20 | 0 | 0 | 13.5 |
| 2  | 7  | 0 | 0 | 4.5  |
| 2  | 9  | 0 | 0 | 5.5  |
| 2  | 9  | 0 | 0 | 5.5  |
| 2  | 11 | 0 | 0 | 6.5  |
| 2  | 10 | 0 | 0 | 6    |
| 7  | 19 | 0 | 0 | 13   |
| 2  | 10 | 0 | 0 | 6    |
| 2  | 6  | 0 | 0 | 4    |
| 2  | 10 | 0 | 0 | 6    |
| 2  | 8  | 0 | 0 | 5    |
| 2  | 11 | 0 | 0 | 6.5  |
| 10 | 31 | 1 | 0 | 20.5 |
| 7  | 19 | 0 | 0 | 13   |
| 2  | 10 | 0 | 0 | 6    |
| 2  | 11 | 0 | 0 | 6.5  |
| 2  | 9  | 0 | 0 | 5.5  |
| 0  | 12 | 0 | 0 | 6    |
| 2  | 5  | 0 | 0 | 3.5  |
| 2  | 6  | 0 | 0 | 4    |
| 21 | 91 | 3 | 0 | 56   |
| 8  | 1  | 0 | 0 | 4.5  |
| 2  | 10 | 0 | 0 | 6    |
| 1  | 21 | 0 | 0 | 11   |
| 2  | 9  | 0 | 0 | 5.5  |
| 2  | 6  | 0 | 0 | 4    |
| 2  | 9  | 0 | 0 | 5.5  |
| 14 | 40 | 1 | 0 | 27   |
| 2  | 10 | 0 | 0 | 6    |
| 0  | 12 | 0 | 0 | 6    |

|    |    |   |   |      |
|----|----|---|---|------|
| 2  | 11 | 0 | 0 | 6.5  |
| 0  | 12 | 0 | 0 | 6    |
| 2  | 11 | 0 | 0 | 6.5  |
| 2  | 11 | 0 | 0 | 6.5  |
| 2  | 10 | 0 | 0 | 6    |
| 2  | 6  | 0 | 0 | 4    |
| 2  | 9  | 0 | 0 | 5.5  |
| 0  | 12 | 0 | 0 | 6    |
| 2  | 9  | 0 | 0 | 5.5  |
| 2  | 11 | 0 | 0 | 6.5  |
| 7  | 20 | 0 | 0 | 13.5 |
| 0  | 12 | 0 | 0 | 6    |
| 0  | 12 | 0 | 0 | 6    |
| 24 | 75 | 2 | 0 | 49.5 |
| 0  | 12 | 0 | 0 | 6    |
| 0  | 17 | 0 | 0 | 8.5  |
| 0  | 12 | 0 | 0 | 6    |
| 2  | 9  | 0 | 0 | 5.5  |
| 2  | 5  | 0 | 0 | 3.5  |
| 8  | 17 | 0 | 0 | 12.5 |
| 0  | 17 | 0 | 0 | 8.5  |
| 2  | 8  | 0 | 0 | 5    |
| 2  | 9  | 0 | 0 | 5.5  |
| 0  | 17 | 0 | 0 | 8.5  |
| 2  | 10 | 0 | 0 | 6    |
| 2  | 5  | 0 | 0 | 3.5  |
| 8  | 17 | 0 | 0 | 12.5 |
| 0  | 17 | 0 | 0 | 8.5  |
| 0  | 12 | 0 | 0 | 6    |
| 7  | 19 | 0 | 0 | 13   |
| 2  | 8  | 0 | 0 | 5    |
| 11 | 40 | 1 | 0 | 25.5 |
| 2  | 7  | 0 | 0 | 4.5  |
| 2  | 10 | 0 | 0 | 6    |
| 2  | 9  | 0 | 0 | 5.5  |
| 1  | 21 | 0 | 0 | 11   |
| 2  | 11 | 0 | 0 | 6.5  |
| 0  | 17 | 0 | 0 | 8.5  |
| 0  | 12 | 0 | 0 | 6    |
| 0  | 17 | 0 | 0 | 8.5  |
| 1  | 21 | 0 | 0 | 11   |
| 2  | 9  | 0 | 0 | 5.5  |
| 2  | 9  | 0 | 0 | 5.5  |
| 0  | 17 | 0 | 0 | 8.5  |
| 2  | 11 | 0 | 0 | 6.5  |
| 2  | 9  | 0 | 0 | 5.5  |
| 0  | 12 | 0 | 0 | 6    |

|   |    |   |   |      |
|---|----|---|---|------|
| 2 | 7  | 0 | 0 | 4.5  |
| 0 | 12 | 0 | 0 | 6    |
| 2 | 5  | 0 | 0 | 3.5  |
| 0 | 12 | 0 | 0 | 6    |
| 1 | 21 | 0 | 0 | 11   |
| 0 | 12 | 0 | 0 | 6    |
| 3 | 0  | 1 | 0 | 1.5  |
| 2 | 8  | 0 | 0 | 5    |
| 2 | 9  | 0 | 0 | 5.5  |
| 2 | 5  | 0 | 0 | 3.5  |
| 2 | 10 | 0 | 0 | 6    |
| 1 | 21 | 0 | 0 | 11   |
| 2 | 9  | 0 | 0 | 5.5  |
| 2 | 11 | 0 | 0 | 6.5  |
| 2 | 10 | 0 | 0 | 6    |
| 2 | 10 | 0 | 0 | 6    |
| 0 | 12 | 0 | 0 | 6    |
| 7 | 20 | 0 | 0 | 13.5 |
| 2 | 10 | 0 | 0 | 6    |
| 8 | 17 | 0 | 0 | 12.5 |
| 1 | 21 | 0 | 0 | 11   |
| 2 | 11 | 0 | 0 | 6.5  |
| 2 | 11 | 0 | 0 | 6.5  |
| 0 | 12 | 0 | 0 | 6    |
| 7 | 20 | 0 | 0 | 13.5 |
| 2 | 10 | 0 | 0 | 6    |
| 2 | 8  | 0 | 0 | 5    |
| 1 | 21 | 0 | 0 | 11   |
| 2 | 9  | 0 | 0 | 5.5  |
| 2 | 9  | 0 | 0 | 5.5  |
| 3 | 4  | 0 | 0 | 3.5  |
| 2 | 11 | 0 | 0 | 6.5  |
| 2 | 11 | 0 | 0 | 6.5  |
| 2 | 6  | 0 | 0 | 4    |
| 2 | 9  | 0 | 0 | 5.5  |
| 2 | 10 | 0 | 0 | 6    |
| 0 | 12 | 0 | 0 | 6    |
| 0 | 17 | 0 | 0 | 8.5  |
| 2 | 11 | 0 | 0 | 6.5  |
| 2 | 9  | 0 | 0 | 5.5  |
| 2 | 11 | 0 | 0 | 6.5  |
| 0 | 12 | 0 | 0 | 6    |
| 2 | 9  | 0 | 0 | 5.5  |
| 2 | 5  | 0 | 0 | 3.5  |
| 2 | 7  | 0 | 0 | 4.5  |
| 2 | 5  | 0 | 0 | 3.5  |
| 0 | 17 | 0 | 0 | 8.5  |



|    |    |   |   |      |
|----|----|---|---|------|
| 2  | 10 | 0 | 0 | 6    |
| 0  | 12 | 0 | 0 | 6    |
| 2  | 9  | 0 | 0 | 5.5  |
| 0  | 12 | 0 | 0 | 6    |
| 3  | 4  | 0 | 0 | 3.5  |
| 2  | 6  | 0 | 0 | 4    |
| 2  | 11 | 0 | 0 | 6.5  |
| 2  | 9  | 0 | 0 | 5.5  |
| 2  | 5  | 0 | 0 | 3.5  |
| 7  | 19 | 0 | 0 | 13   |
| 0  | 12 | 0 | 0 | 6    |
| 2  | 10 | 0 | 0 | 6    |
| 2  | 11 | 0 | 0 | 6.5  |
| 2  | 5  | 0 | 0 | 3.5  |
| 2  | 10 | 0 | 0 | 6    |
| 0  | 12 | 0 | 0 | 6    |
| 0  | 17 | 0 | 0 | 8.5  |
| 2  | 11 | 0 | 0 | 6.5  |
| 13 | 22 | 1 | 0 | 17.5 |
| 2  | 10 | 0 | 0 | 6    |
| 2  | 10 | 0 | 0 | 6    |
| 2  | 11 | 0 | 0 | 6.5  |
| 1  | 21 | 0 | 0 | 11   |
| 2  | 10 | 0 | 0 | 6    |
| 2  | 6  | 0 | 0 | 4    |
| 2  | 11 | 0 | 0 | 6.5  |
| 0  | 32 | 1 | 0 | 16   |
| 8  | 17 | 0 | 0 | 12.5 |
| 3  | 4  | 0 | 0 | 3.5  |
| 2  | 9  | 0 | 0 | 5.5  |
| 2  | 11 | 0 | 0 | 6.5  |
| 0  | 12 | 0 | 0 | 6    |
| 1  | 21 | 0 | 0 | 11   |
| 0  | 12 | 0 | 0 | 6    |
| 0  | 12 | 0 | 0 | 6    |
| 0  | 17 | 0 | 0 | 8.5  |
| 8  | 1  | 0 | 0 | 4.5  |
| 4  | 4  | 0 | 0 | 4    |
| 0  | 12 | 0 | 0 | 6    |
| 2  | 9  | 0 | 0 | 5.5  |
| 0  | 12 | 0 | 0 | 6    |
| 2  | 11 | 0 | 0 | 6.5  |
| 0  | 12 | 0 | 0 | 6    |
| 2  | 5  | 0 | 0 | 3.5  |
| 1  | 21 | 0 | 0 | 11   |
| 2  | 9  | 0 | 0 | 5.5  |
| 2  | 8  | 0 | 0 | 5    |

|    |    |   |   |      |
|----|----|---|---|------|
| 2  | 9  | 0 | 0 | 5.5  |
| 0  | 12 | 0 | 0 | 6    |
| 2  | 9  | 0 | 0 | 5.5  |
| 2  | 9  | 0 | 0 | 5.5  |
| 2  | 10 | 0 | 0 | 6    |
| 21 | 27 | 1 | 0 | 24   |
| 2  | 11 | 0 | 0 | 6.5  |
| 2  | 39 | 1 | 0 | 20.5 |
| 2  | 6  | 0 | 0 | 4    |
| 2  | 9  | 0 | 0 | 5.5  |
| 0  | 17 | 0 | 0 | 8.5  |
| 2  | 11 | 0 | 0 | 6.5  |
| 0  | 12 | 0 | 0 | 6    |
| 3  | 0  | 1 | 0 | 1.5  |
| 8  | 17 | 0 | 0 | 12.5 |
| 0  | 17 | 0 | 0 | 8.5  |
| 2  | 9  | 0 | 0 | 5.5  |
| 2  | 9  | 0 | 0 | 5.5  |
| 2  | 9  | 0 | 0 | 5.5  |
| 2  | 10 | 0 | 0 | 6    |
| 0  | 17 | 0 | 0 | 8.5  |
| 2  | 9  | 0 | 0 | 5.5  |
| 0  | 17 | 0 | 0 | 8.5  |
| 0  | 12 | 0 | 0 | 6    |
| 2  | 10 | 0 | 0 | 6    |
| 7  | 20 | 0 | 0 | 13.5 |
| 2  | 8  | 0 | 0 | 5    |
| 2  | 10 | 0 | 0 | 6    |
| 1  | 21 | 0 | 0 | 11   |
| 2  | 6  | 0 | 0 | 4    |
| 2  | 6  | 0 | 0 | 4    |
| 14 | 40 | 1 | 0 | 27   |
| 2  | 11 | 0 | 0 | 6.5  |
| 2  | 10 | 0 | 0 | 6    |
| 7  | 19 | 0 | 0 | 13   |
| 7  | 19 | 0 | 0 | 13   |
| 0  | 12 | 0 | 0 | 6    |
| 2  | 6  | 0 | 0 | 4    |
| 7  | 20 | 0 | 0 | 13.5 |
| 2  | 10 | 0 | 0 | 6    |
| 0  | 12 | 0 | 0 | 6    |
| 2  | 9  | 0 | 0 | 5.5  |
| 0  | 17 | 0 | 0 | 8.5  |
| 8  | 0  | 0 | 0 | 4    |
| 0  | 12 | 0 | 0 | 6    |
| 7  | 20 | 0 | 0 | 13.5 |
| 8  | 17 | 0 | 0 | 12.5 |

|    |    |   |   |      |
|----|----|---|---|------|
| 2  | 6  | 0 | 0 | 4    |
| 3  | 4  | 0 | 0 | 3.5  |
| 2  | 7  | 0 | 0 | 4.5  |
| 25 | 74 | 2 | 0 | 49.5 |
| 2  | 8  | 0 | 0 | 5    |
| 2  | 5  | 0 | 0 | 3.5  |
| 1  | 1  | 1 | 0 | 1    |
| 3  | 4  | 0 | 0 | 3.5  |
| 7  | 19 | 0 | 0 | 13   |
| 8  | 17 | 0 | 0 | 12.5 |
| 2  | 11 | 0 | 0 | 6.5  |
| 4  | 4  | 0 | 0 | 4    |
| 1  | 21 | 0 | 0 | 11   |
| 18 | 70 | 3 | 0 | 44   |
| 2  | 10 | 0 | 0 | 6    |
| 8  | 17 | 0 | 0 | 12.5 |
| 0  | 17 | 0 | 0 | 8.5  |
| 0  | 17 | 0 | 0 | 8.5  |
| 7  | 20 | 0 | 0 | 13.5 |
| 2  | 11 | 0 | 0 | 6.5  |
| 0  | 12 | 0 | 0 | 6    |
| 1  | 23 | 1 | 0 | 12   |
| 1  | 21 | 0 | 0 | 11   |
| 0  | 17 | 0 | 0 | 8.5  |
| 2  | 10 | 0 | 0 | 6    |
| 2  | 11 | 0 | 0 | 6.5  |
| 0  | 12 | 0 | 0 | 6    |
| 2  | 11 | 0 | 0 | 6.5  |
| 0  | 17 | 0 | 0 | 8.5  |
| 2  | 10 | 0 | 0 | 6    |
| 1  | 21 | 0 | 0 | 11   |
| 2  | 5  | 0 | 0 | 3.5  |
| 7  | 20 | 0 | 0 | 13.5 |
| 7  | 20 | 0 | 0 | 13.5 |
| 2  | 9  | 0 | 0 | 5.5  |
| 2  | 8  | 0 | 0 | 5    |
| 2  | 9  | 0 | 0 | 5.5  |
| 2  | 11 | 0 | 0 | 6.5  |
| 2  | 10 | 0 | 0 | 6    |
| 6  | 63 | 2 | 0 | 34.5 |
| 2  | 9  | 0 | 0 | 5.5  |
| 0  | 12 | 0 | 0 | 6    |
| 2  | 10 | 0 | 0 | 6    |
| 4  | 4  | 0 | 0 | 4    |
| 2  | 6  | 0 | 0 | 4    |
| 0  | 12 | 0 | 0 | 6    |
| 8  | 17 | 0 | 0 | 12.5 |

|    |    |   |   |      |
|----|----|---|---|------|
| 2  | 11 | 0 | 0 | 6.5  |
| 2  | 10 | 0 | 0 | 6    |
| 0  | 17 | 0 | 0 | 8.5  |
| 2  | 9  | 0 | 0 | 5.5  |
| 2  | 5  | 0 | 0 | 3.5  |
| 0  | 12 | 0 | 0 | 6    |
| 2  | 8  | 0 | 0 | 5    |
| 2  | 7  | 0 | 0 | 4.5  |
| 28 | 0  | 1 | 0 | 14   |
| 2  | 6  | 0 | 0 | 4    |
| 2  | 9  | 0 | 0 | 5.5  |
| 2  | 7  | 0 | 0 | 4.5  |
| 0  | 17 | 0 | 0 | 8.5  |
| 4  | 4  | 0 | 0 | 4    |
| 2  | 10 | 0 | 0 | 6    |
| 0  | 12 | 0 | 0 | 6    |
| 10 | 28 | 1 | 0 | 19   |
| 0  | 12 | 0 | 0 | 6    |
| 2  | 8  | 0 | 0 | 5    |
| 1  | 21 | 0 | 0 | 11   |
| 7  | 47 | 1 | 0 | 27   |
| 2  | 7  | 0 | 0 | 4.5  |
| 2  | 7  | 0 | 0 | 4.5  |
| 0  | 12 | 0 | 0 | 6    |
| 1  | 21 | 0 | 0 | 11   |
| 2  | 10 | 0 | 0 | 6    |
| 2  | 9  | 0 | 0 | 5.5  |
| 0  | 12 | 0 | 0 | 6    |
| 13 | 21 | 1 | 0 | 17   |
| 0  | 12 | 0 | 0 | 6    |
| 2  | 8  | 0 | 0 | 5    |
| 2  | 5  | 0 | 0 | 3.5  |
| 2  | 10 | 0 | 0 | 6    |
| 2  | 7  | 0 | 0 | 4.5  |
| 2  | 10 | 0 | 0 | 6    |
| 2  | 10 | 0 | 0 | 6    |
| 1  | 21 | 0 | 0 | 11   |
| 2  | 11 | 0 | 0 | 6.5  |
| 2  | 9  | 0 | 0 | 5.5  |
| 0  | 12 | 0 | 0 | 6    |
| 0  | 12 | 0 | 0 | 6    |
| 2  | 10 | 0 | 0 | 6    |
| 1  | 21 | 0 | 0 | 11   |
| 2  | 11 | 0 | 0 | 6.5  |
| 8  | 17 | 0 | 0 | 12.5 |
| 0  | 17 | 0 | 0 | 8.5  |
| 0  | 12 | 0 | 0 | 6    |

|    |    |   |   |      |
|----|----|---|---|------|
| 0  | 17 | 0 | 0 | 8.5  |
| 0  | 12 | 0 | 0 | 6    |
| 2  | 5  | 0 | 0 | 3.5  |
| 2  | 6  | 0 | 0 | 4    |
| 8  | 17 | 0 | 0 | 12.5 |
| 13 | 23 | 1 | 0 | 18   |
| 2  | 11 | 0 | 0 | 6.5  |
| 2  | 11 | 0 | 0 | 6.5  |
| 2  | 10 | 0 | 0 | 6    |
| 0  | 17 | 0 | 0 | 8.5  |
| 0  | 17 | 0 | 0 | 8.5  |
| 0  | 17 | 0 | 0 | 8.5  |
| 0  | 12 | 0 | 0 | 6    |
| 0  | 12 | 0 | 0 | 6    |
| 19 | 44 | 2 | 0 | 31.5 |
| 2  | 10 | 0 | 0 | 6    |
| 2  | 5  | 0 | 0 | 3.5  |
| 1  | 1  | 1 | 0 | 1    |
| 10 | 32 | 1 | 0 | 21   |
| 0  | 12 | 0 | 0 | 6    |
| 7  | 20 | 0 | 0 | 13.5 |
| 2  | 9  | 0 | 0 | 5.5  |
| 2  | 6  | 0 | 0 | 4    |
| 2  | 10 | 0 | 0 | 6    |
| 8  | 17 | 0 | 0 | 12.5 |
| 5  | 32 | 2 | 0 | 18.5 |
| 10 | 31 | 1 | 0 | 20.5 |
| 1  | 21 | 0 | 0 | 11   |
| 2  | 9  | 0 | 0 | 5.5  |
| 7  | 20 | 0 | 0 | 13.5 |
| 2  | 6  | 0 | 0 | 4    |
| 2  | 10 | 0 | 0 | 6    |
| 1  | 21 | 0 | 0 | 11   |
| 0  | 12 | 0 | 0 | 6    |
| 2  | 8  | 0 | 0 | 5    |
| 2  | 11 | 0 | 0 | 6.5  |
| 0  | 12 | 0 | 0 | 6    |
| 2  | 7  | 0 | 0 | 4.5  |
| 7  | 20 | 0 | 0 | 13.5 |
| 0  | 17 | 0 | 0 | 8.5  |
| 2  | 11 | 0 | 0 | 6.5  |
| 0  | 17 | 0 | 0 | 8.5  |
| 0  | 12 | 0 | 0 | 6    |
| 2  | 7  | 0 | 0 | 4.5  |
| 2  | 11 | 0 | 0 | 6.5  |
| 0  | 12 | 0 | 0 | 6    |
| 7  | 19 | 0 | 0 | 13   |

|    |    |   |   |      |
|----|----|---|---|------|
| 7  | 20 | 0 | 0 | 13.5 |
| 0  | 12 | 0 | 0 | 6    |
| 0  | 17 | 0 | 0 | 8.5  |
| 2  | 10 | 0 | 0 | 6    |
| 0  | 12 | 0 | 0 | 6    |
| 2  | 10 | 0 | 0 | 6    |
| 0  | 12 | 0 | 0 | 6    |
| 22 | 44 | 2 | 0 | 33   |
| 1  | 1  | 1 | 0 | 1    |
| 0  | 17 | 0 | 0 | 8.5  |
| 2  | 8  | 0 | 0 | 5    |
| 7  | 19 | 0 | 0 | 13   |
| 1  | 21 | 0 | 0 | 11   |
| 2  | 10 | 0 | 0 | 6    |
| 2  | 9  | 0 | 0 | 5.5  |
| 2  | 10 | 0 | 0 | 6    |
| 0  | 17 | 0 | 0 | 8.5  |
| 2  | 9  | 0 | 0 | 5.5  |
| 2  | 10 | 0 | 0 | 6    |
| 2  | 7  | 0 | 0 | 4.5  |
| 2  | 6  | 0 | 0 | 4    |
| 2  | 10 | 0 | 0 | 6    |
| 1  | 21 | 0 | 0 | 11   |
| 2  | 6  | 0 | 0 | 4    |
| 1  | 21 | 0 | 0 | 11   |
| 1  | 21 | 0 | 0 | 11   |
| 7  | 19 | 0 | 0 | 13   |
| 7  | 20 | 0 | 0 | 13.5 |
| 2  | 11 | 0 | 0 | 6.5  |
| 2  | 5  | 0 | 0 | 3.5  |
| 2  | 11 | 0 | 0 | 6.5  |
| 2  | 10 | 0 | 0 | 6    |
| 0  | 12 | 0 | 0 | 6    |
| 12 | 22 | 1 | 0 | 17   |
| 2  | 6  | 0 | 0 | 4    |
| 0  | 12 | 0 | 0 | 6    |
| 15 | 56 | 3 | 0 | 35.5 |
| 19 | 74 | 3 | 0 | 46.5 |
| 2  | 11 | 0 | 0 | 6.5  |
| 2  | 9  | 0 | 0 | 5.5  |
| 0  | 12 | 0 | 0 | 6    |
| 0  | 12 | 0 | 0 | 6    |
| 0  | 17 | 0 | 0 | 8.5  |
| 2  | 5  | 0 | 0 | 3.5  |
| 2  | 9  | 0 | 0 | 5.5  |
| 0  | 12 | 0 | 0 | 6    |
| 0  | 17 | 0 | 0 | 8.5  |

|   |    |   |   |      |
|---|----|---|---|------|
| 2 | 9  | 0 | 0 | 5.5  |
| 2 | 8  | 0 | 0 | 5    |
| 2 | 8  | 0 | 0 | 5    |
| 0 | 12 | 0 | 0 | 6    |
| 2 | 6  | 0 | 0 | 4    |
| 2 | 6  | 0 | 0 | 4    |
| 0 | 12 | 0 | 0 | 6    |
| 8 | 17 | 0 | 0 | 12.5 |
| 4 | 4  | 0 | 0 | 4    |
| 2 | 10 | 0 | 0 | 6    |
| 2 | 11 | 0 | 0 | 6.5  |
| 7 | 20 | 0 | 0 | 13.5 |
| 2 | 9  | 0 | 0 | 5.5  |
| 0 | 17 | 0 | 0 | 8.5  |
| 0 | 17 | 0 | 0 | 8.5  |
| 1 | 0  | 2 | 0 | 0.5  |
| 2 | 5  | 0 | 0 | 3.5  |
| 0 | 17 | 0 | 0 | 8.5  |
| 2 | 9  | 0 | 0 | 5.5  |
| 1 | 23 | 1 | 0 | 12   |
| 2 | 6  | 0 | 0 | 4    |
| 0 | 17 | 0 | 0 | 8.5  |
| 2 | 9  | 0 | 0 | 5.5  |
| 0 | 12 | 0 | 0 | 6    |
| 1 | 21 | 0 | 0 | 11   |
| 0 | 12 | 0 | 0 | 6    |
| 2 | 10 | 0 | 0 | 6    |
| 2 | 5  | 0 | 0 | 3.5  |
| 0 | 17 | 0 | 0 | 8.5  |
| 2 | 9  | 0 | 0 | 5.5  |
| 1 | 0  | 2 | 0 | 0.5  |
| 1 | 25 | 1 | 0 | 13   |
| 2 | 11 | 0 | 0 | 6.5  |
| 0 | 17 | 0 | 0 | 8.5  |
| 2 | 10 | 0 | 0 | 6    |
| 0 | 11 | 0 | 0 | 5.5  |
| 6 | 10 | 0 | 0 | 8    |
| 8 | 18 | 0 | 0 | 13   |
| 4 | 15 | 0 | 0 | 9.5  |
| 4 | 14 | 0 | 0 | 9    |
| 1 | 6  | 0 | 0 | 3.5  |
| 1 | 14 | 0 | 0 | 7.5  |
| 5 | 1  | 0 | 0 | 3    |
| 0 | 1  | 0 | 0 | 0.5  |
| 1 | 14 | 0 | 0 | 7.5  |
| 0 | 11 | 0 | 0 | 5.5  |
| 8 | 18 | 0 | 0 | 13   |

|   |    |   |   |      |
|---|----|---|---|------|
| 1 | 14 | 0 | 0 | 7.5  |
| 1 | 4  | 0 | 0 | 2.5  |
| 1 | 4  | 0 | 0 | 2.5  |
| 0 | 1  | 0 | 0 | 0.5  |
| 0 | 11 | 0 | 0 | 5.5  |
| 0 | 11 | 0 | 0 | 5.5  |
| 0 | 11 | 0 | 0 | 5.5  |
| 5 | 0  | 0 | 0 | 2.5  |
| 0 | 11 | 0 | 0 | 5.5  |
| 0 | 11 | 0 | 0 | 5.5  |
| 1 | 4  | 0 | 0 | 2.5  |
| 4 | 14 | 0 | 0 | 9    |
| 0 | 1  | 0 | 0 | 0.5  |
| 0 | 1  | 0 | 0 | 0.5  |
| 1 | 14 | 0 | 0 | 7.5  |
| 1 | 6  | 0 | 0 | 3.5  |
| 0 | 1  | 0 | 0 | 0.5  |
| 1 | 14 | 0 | 0 | 7.5  |
| 1 | 4  | 0 | 0 | 2.5  |
| 4 | 17 | 0 | 0 | 10.5 |
| 4 | 14 | 0 | 0 | 9    |
| 7 | 9  | 0 | 0 | 8    |
| 0 | 11 | 0 | 0 | 5.5  |
| 0 | 11 | 0 | 0 | 5.5  |
| 0 | 1  | 0 | 0 | 0.5  |
| 0 | 1  | 0 | 0 | 0.5  |
| 0 | 1  | 0 | 0 | 0.5  |
| 0 | 11 | 0 | 0 | 5.5  |
| 0 | 1  | 0 | 0 | 0.5  |
| 1 | 14 | 0 | 0 | 7.5  |
| 0 | 19 | 1 | 0 | 9.5  |
| 1 | 4  | 0 | 0 | 2.5  |
| 1 | 6  | 0 | 0 | 3.5  |
| 5 | 1  | 0 | 0 | 3    |
| 4 | 14 | 0 | 0 | 9    |
| 0 | 1  | 0 | 0 | 0.5  |
| 0 | 1  | 0 | 0 | 0.5  |
| 4 | 15 | 0 | 0 | 9.5  |
| 1 | 6  | 0 | 0 | 3.5  |
| 6 | 10 | 0 | 0 | 8    |
| 0 | 1  | 0 | 0 | 0.5  |
| 1 | 4  | 0 | 0 | 2.5  |
| 6 | 10 | 0 | 0 | 8    |
| 0 | 1  | 0 | 0 | 0.5  |
| 0 | 11 | 0 | 0 | 5.5  |
| 0 | 11 | 0 | 0 | 5.5  |
| 0 | 11 | 0 | 0 | 5.5  |



|   |    |   |   |      |
|---|----|---|---|------|
| 0 | 1  | 0 | 0 | 0.5  |
| 7 | 10 | 0 | 0 | 8.5  |
| 0 | 11 | 0 | 0 | 5.5  |
| 0 | 11 | 0 | 0 | 5.5  |
| 7 | 9  | 0 | 0 | 8    |
| 1 | 4  | 0 | 0 | 2.5  |
| 1 | 14 | 0 | 0 | 7.5  |
| 1 | 6  | 0 | 0 | 3.5  |
| 4 | 17 | 0 | 0 | 10.5 |
| 1 | 14 | 0 | 0 | 7.5  |
| 0 | 1  | 0 | 0 | 0.5  |
| 0 | 1  | 0 | 0 | 0.5  |
| 4 | 14 | 0 | 0 | 9    |
| 1 | 14 | 0 | 0 | 7.5  |
| 0 | 1  | 0 | 0 | 0.5  |
| 1 | 4  | 0 | 0 | 2.5  |
| 4 | 14 | 0 | 0 | 9    |
| 4 | 17 | 0 | 0 | 10.5 |
| 0 | 10 | 0 | 0 | 5    |
| 4 | 17 | 0 | 0 | 10.5 |
| 0 | 1  | 0 | 0 | 0.5  |
| 0 | 1  | 0 | 0 | 0.5  |
| 0 | 1  | 0 | 0 | 0.5  |
| 4 | 17 | 0 | 0 | 10.5 |
| 4 | 15 | 0 | 0 | 9.5  |
| 4 | 17 | 0 | 0 | 10.5 |
| 1 | 4  | 0 | 0 | 2.5  |
| 1 | 6  | 0 | 0 | 3.5  |
| 0 | 11 | 0 | 0 | 5.5  |
| 1 | 14 | 0 | 0 | 7.5  |
| 1 | 14 | 0 | 0 | 7.5  |
| 7 | 2  | 0 | 0 | 4.5  |
| 0 | 1  | 0 | 0 | 0.5  |
| 1 | 14 | 0 | 0 | 7.5  |
| 4 | 14 | 0 | 0 | 9    |
| 0 | 11 | 0 | 0 | 5.5  |
| 1 | 4  | 0 | 0 | 2.5  |
| 0 | 1  | 0 | 0 | 0.5  |
| 1 | 14 | 0 | 0 | 7.5  |
| 6 | 10 | 0 | 0 | 8    |
| 0 | 1  | 0 | 0 | 0.5  |
| 0 | 1  | 0 | 0 | 0.5  |
| 1 | 4  | 0 | 0 | 2.5  |
| 4 | 15 | 0 | 0 | 9.5  |
| 8 | 18 | 0 | 0 | 13   |
| 0 | 11 | 0 | 0 | 5.5  |
| 0 | 1  | 0 | 0 | 0.5  |

|    |    |   |   |      |
|----|----|---|---|------|
| 0  | 1  | 0 | 0 | 0.5  |
| 0  | 11 | 0 | 0 | 5.5  |
| 4  | 15 | 0 | 0 | 9.5  |
| 0  | 1  | 0 | 0 | 0.5  |
| 0  | 1  | 0 | 0 | 0.5  |
| 4  | 17 | 0 | 0 | 10.5 |
| 0  | 1  | 0 | 0 | 0.5  |
| 0  | 1  | 0 | 0 | 0.5  |
| 0  | 1  | 0 | 0 | 0.5  |
| 1  | 14 | 0 | 0 | 7.5  |
| 4  | 15 | 0 | 0 | 9.5  |
| 4  | 15 | 0 | 0 | 9.5  |
| 0  | 1  | 0 | 0 | 0.5  |
| 0  | 1  | 0 | 0 | 0.5  |
| 0  | 11 | 0 | 0 | 5.5  |
| 0  | 1  | 0 | 0 | 0.5  |
| 0  | 1  | 0 | 0 | 0.5  |
| 0  | 11 | 0 | 0 | 5.5  |
| 1  | 6  | 0 | 0 | 3.5  |
| 0  | 1  | 0 | 0 | 0.5  |
| 0  | 11 | 0 | 0 | 5.5  |
| 1  | 14 | 0 | 0 | 7.5  |
| 0  | 1  | 0 | 0 | 0.5  |
| 0  | 1  | 0 | 0 | 0.5  |
| 0  | 1  | 0 | 0 | 0.5  |
| 1  | 4  | 0 | 0 | 2.5  |
| 4  | 14 | 0 | 0 | 9    |
| 0  | 1  | 0 | 0 | 0.5  |
| 4  | 14 | 0 | 0 | 9    |
| 0  | 11 | 0 | 0 | 5.5  |
| 16 | 39 | 2 | 0 | 27.5 |
| 1  | 14 | 0 | 0 | 7.5  |
| 1  | 14 | 0 | 0 | 7.5  |
| 0  | 1  | 0 | 0 | 0.5  |
| 0  | 1  | 0 | 0 | 0.5  |
| 0  | 1  | 0 | 0 | 0.5  |
| 0  | 1  | 0 | 0 | 0.5  |
| 1  | 6  | 0 | 0 | 3.5  |
| 0  | 1  | 0 | 0 | 0.5  |
| 4  | 15 | 0 | 0 | 9.5  |
| 0  | 1  | 0 | 0 | 0.5  |
| 0  | 1  | 0 | 0 | 0.5  |
| 1  | 14 | 0 | 0 | 7.5  |
| 1  | 4  | 0 | 0 | 2.5  |
| 9  | 16 | 0 | 0 | 12.5 |
| 4  | 17 | 0 | 0 | 10.5 |
| 0  | 1  | 0 | 0 | 0.5  |

|   |    |   |   |      |
|---|----|---|---|------|
| 0 | 11 | 0 | 0 | 5.5  |
| 7 | 10 | 0 | 0 | 8.5  |
| 4 | 15 | 0 | 0 | 9.5  |
| 7 | 10 | 0 | 0 | 8.5  |
| 0 | 11 | 0 | 0 | 5.5  |
| 0 | 10 | 0 | 0 | 5    |
| 4 | 17 | 0 | 0 | 10.5 |
| 0 | 11 | 0 | 0 | 5.5  |
| 4 | 34 | 1 | 0 | 19   |
| 0 | 1  | 0 | 0 | 0.5  |
| 0 | 10 | 0 | 0 | 5    |
| 4 | 15 | 0 | 0 | 9.5  |
| 0 | 11 | 0 | 0 | 5.5  |
| 0 | 1  | 0 | 0 | 0.5  |
| 0 | 1  | 0 | 0 | 0.5  |
| 0 | 1  | 0 | 0 | 0.5  |
| 1 | 6  | 0 | 0 | 3.5  |
| 1 | 14 | 0 | 0 | 7.5  |
| 7 | 9  | 1 | 0 | 8    |
| 0 | 1  | 0 | 0 | 0.5  |
| 4 | 14 | 0 | 0 | 9    |
| 1 | 14 | 0 | 0 | 7.5  |
| 0 | 1  | 0 | 0 | 0.5  |
| 5 | 1  | 0 | 0 | 3    |
| 7 | 10 | 0 | 0 | 8.5  |
| 0 | 1  | 0 | 0 | 0.5  |
| 0 | 1  | 0 | 0 | 0.5  |
| 1 | 14 | 0 | 0 | 7.5  |
| 0 | 11 | 0 | 0 | 5.5  |
| 1 | 14 | 0 | 0 | 7.5  |
| 1 | 14 | 0 | 0 | 7.5  |
| 0 | 1  | 0 | 0 | 0.5  |
| 0 | 1  | 0 | 0 | 0.5  |
| 1 | 6  | 0 | 0 | 3.5  |
| 0 | 1  | 0 | 0 | 0.5  |
| 4 | 17 | 0 | 0 | 10.5 |
| 0 | 1  | 0 | 0 | 0.5  |
| 0 | 11 | 0 | 0 | 5.5  |
| 0 | 1  | 0 | 0 | 0.5  |
| 0 | 10 | 0 | 0 | 5    |
| 1 | 4  | 0 | 0 | 2.5  |
| 1 | 14 | 0 | 0 | 7.5  |
| 0 | 11 | 0 | 0 | 5.5  |
| 1 | 14 | 0 | 0 | 7.5  |
| 0 | 1  | 0 | 0 | 0.5  |
| 0 | 1  | 0 | 0 | 0.5  |
| 0 | 1  | 0 | 0 | 0.5  |

|   |    |   |   |      |
|---|----|---|---|------|
| 0 | 1  | 0 | 0 | 0.5  |
| 4 | 17 | 0 | 0 | 10.5 |
| 0 | 1  | 0 | 0 | 0.5  |
| 1 | 14 | 0 | 0 | 7.5  |
| 0 | 11 | 0 | 0 | 5.5  |
| 4 | 17 | 0 | 0 | 10.5 |
| 1 | 4  | 0 | 0 | 2.5  |
| 4 | 15 | 0 | 0 | 9.5  |
| 0 | 11 | 0 | 0 | 5.5  |
| 0 | 11 | 0 | 0 | 5.5  |
| 0 | 1  | 0 | 0 | 0.5  |
| 4 | 14 | 0 | 0 | 9    |
| 0 | 1  | 0 | 0 | 0.5  |
| 1 | 14 | 0 | 0 | 7.5  |
| 0 | 1  | 0 | 0 | 0.5  |
| 4 | 15 | 0 | 0 | 9.5  |
| 4 | 15 | 0 | 0 | 9.5  |
| 9 | 16 | 0 | 0 | 12.5 |
| 0 | 1  | 0 | 0 | 0.5  |
| 0 | 1  | 0 | 0 | 0.5  |
| 0 | 1  | 0 | 0 | 0.5  |
| 4 | 14 | 0 | 0 | 9    |
| 1 | 14 | 0 | 0 | 7.5  |
| 1 | 14 | 0 | 0 | 7.5  |
| 7 | 10 | 0 | 0 | 8.5  |
| 0 | 1  | 0 | 0 | 0.5  |
| 1 | 14 | 0 | 0 | 7.5  |
| 0 | 1  | 0 | 0 | 0.5  |
| 0 | 11 | 0 | 0 | 5.5  |
| 0 | 1  | 0 | 0 | 0.5  |
| 1 | 6  | 0 | 0 | 3.5  |
| 0 | 1  | 0 | 0 | 0.5  |
| 0 | 11 | 0 | 0 | 5.5  |
| 0 | 1  | 0 | 0 | 0.5  |
| 0 | 11 | 0 | 0 | 5.5  |
| 0 | 11 | 0 | 0 | 5.5  |
| 4 | 14 | 0 | 0 | 9    |
| 0 | 1  | 0 | 0 | 0.5  |
| 0 | 11 | 0 | 0 | 5.5  |
| 1 | 4  | 0 | 0 | 2.5  |
| 4 | 15 | 0 | 0 | 9.5  |
| 4 | 14 | 0 | 0 | 9    |
| 0 | 1  | 0 | 0 | 0.5  |
| 7 | 10 | 0 | 0 | 8.5  |
| 0 | 1  | 0 | 0 | 0.5  |
| 6 | 10 | 0 | 0 | 8    |
| 4 | 15 | 0 | 0 | 9.5  |

|   |    |   |   |      |
|---|----|---|---|------|
| 1 | 14 | 0 | 0 | 7.5  |
| 0 | 11 | 0 | 0 | 5.5  |
| 6 | 10 | 0 | 0 | 8    |
| 0 | 1  | 0 | 0 | 0.5  |
| 0 | 11 | 0 | 0 | 5.5  |
| 0 | 1  | 0 | 0 | 0.5  |
| 7 | 10 | 0 | 0 | 8.5  |
| 0 | 1  | 0 | 0 | 0.5  |
| 4 | 15 | 0 | 0 | 9.5  |
| 4 | 17 | 0 | 0 | 10.5 |
| 4 | 17 | 0 | 0 | 10.5 |
| 0 | 11 | 0 | 0 | 5.5  |
| 1 | 4  | 0 | 0 | 2.5  |
| 4 | 15 | 0 | 0 | 9.5  |
| 1 | 14 | 0 | 0 | 7.5  |
| 0 | 1  | 0 | 0 | 0.5  |
| 0 | 10 | 0 | 0 | 5    |
| 1 | 14 | 0 | 0 | 7.5  |
| 4 | 14 | 0 | 0 | 9    |
| 6 | 10 | 0 | 0 | 8    |
| 1 | 6  | 0 | 0 | 3.5  |
| 0 | 11 | 0 | 0 | 5.5  |
| 0 | 1  | 0 | 0 | 0.5  |
| 1 | 14 | 0 | 0 | 7.5  |
| 0 | 1  | 0 | 0 | 0.5  |
| 0 | 11 | 0 | 0 | 5.5  |
| 1 | 4  | 0 | 0 | 2.5  |
| 4 | 17 | 0 | 0 | 10.5 |
| 0 | 1  | 0 | 0 | 0.5  |
| 8 | 18 | 0 | 0 | 13   |
| 0 | 11 | 0 | 0 | 5.5  |
| 1 | 6  | 0 | 0 | 3.5  |
| 0 | 11 | 0 | 0 | 5.5  |
| 0 | 1  | 0 | 0 | 0.5  |
| 4 | 17 | 0 | 0 | 10.5 |
| 1 | 6  | 0 | 0 | 3.5  |
| 1 | 14 | 0 | 0 | 7.5  |
| 0 | 11 | 0 | 0 | 5.5  |
| 9 | 33 | 1 | 0 | 21   |
| 1 | 4  | 0 | 0 | 2.5  |
| 0 | 1  | 0 | 0 | 0.5  |
| 0 | 1  | 0 | 0 | 0.5  |
| 4 | 17 | 0 | 0 | 10.5 |
| 0 | 10 | 0 | 0 | 5    |
| 8 | 18 | 0 | 0 | 13   |
| 0 | 11 | 0 | 0 | 5.5  |
| 4 | 14 | 0 | 0 | 9    |

|   |    |   |   |      |
|---|----|---|---|------|
| 0 | 1  | 0 | 0 | 0.5  |
| 7 | 10 | 0 | 0 | 8.5  |
| 1 | 14 | 0 | 0 | 7.5  |
| 0 | 1  | 0 | 0 | 0.5  |
| 0 | 1  | 0 | 0 | 0.5  |
| 1 | 4  | 0 | 0 | 2.5  |
| 0 | 11 | 0 | 0 | 5.5  |
| 0 | 11 | 0 | 0 | 5.5  |
| 0 | 11 | 0 | 0 | 5.5  |
| 0 | 1  | 0 | 0 | 0.5  |
| 0 | 10 | 0 | 0 | 5    |
| 0 | 1  | 0 | 0 | 0.5  |
| 0 | 11 | 0 | 0 | 5.5  |
| 4 | 15 | 0 | 0 | 9.5  |
| 0 | 11 | 0 | 0 | 5.5  |
| 4 | 17 | 0 | 0 | 10.5 |
| 1 | 4  | 0 | 0 | 2.5  |
| 0 | 1  | 0 | 0 | 0.5  |
| 1 | 6  | 0 | 0 | 3.5  |
| 0 | 1  | 0 | 0 | 0.5  |
| 1 | 14 | 0 | 0 | 7.5  |
| 0 | 1  | 0 | 0 | 0.5  |
| 4 | 17 | 0 | 0 | 10.5 |
| 2 | 25 | 1 | 0 | 13.5 |
| 0 | 1  | 0 | 0 | 0.5  |
| 0 | 1  | 0 | 0 | 0.5  |
| 0 | 1  | 0 | 0 | 0.5  |
| 0 | 1  | 0 | 0 | 0.5  |
| 1 | 4  | 0 | 0 | 2.5  |
| 0 | 11 | 0 | 0 | 5.5  |
| 0 | 11 | 0 | 0 | 5.5  |
| 1 | 4  | 0 | 0 | 2.5  |
| 1 | 14 | 0 | 0 | 7.5  |
| 0 | 1  | 0 | 0 | 0.5  |
| 0 | 10 | 0 | 0 | 5    |
| 5 | 0  | 0 | 0 | 2.5  |
| 0 | 1  | 0 | 0 | 0.5  |
| 0 | 11 | 0 | 0 | 5.5  |
| 4 | 14 | 0 | 0 | 9    |
| 4 | 14 | 0 | 0 | 9    |
| 0 | 1  | 0 | 0 | 0.5  |
| 0 | 1  | 0 | 0 | 0.5  |
| 1 | 14 | 0 | 0 | 7.5  |
| 1 | 4  | 0 | 0 | 2.5  |
| 0 | 1  | 0 | 0 | 0.5  |
| 0 | 1  | 0 | 0 | 0.5  |
| 0 | 11 | 0 | 0 | 5.5  |

|    |    |   |   |      |
|----|----|---|---|------|
| 0  | 11 | 0 | 0 | 5.5  |
| 1  | 6  | 0 | 0 | 3.5  |
| 1  | 14 | 0 | 0 | 7.5  |
| 4  | 15 | 0 | 0 | 9.5  |
| 5  | 0  | 0 | 0 | 2.5  |
| 0  | 11 | 0 | 0 | 5.5  |
| 5  | 1  | 0 | 0 | 3    |
| 7  | 9  | 0 | 0 | 8    |
| 0  | 1  | 0 | 0 | 0.5  |
| 0  | 1  | 0 | 0 | 0.5  |
| 0  | 11 | 0 | 0 | 5.5  |
| 0  | 11 | 0 | 0 | 5.5  |
| 4  | 14 | 0 | 0 | 9    |
| 0  | 1  | 0 | 0 | 0.5  |
| 0  | 1  | 0 | 0 | 0.5  |
| 0  | 1  | 0 | 0 | 0.5  |
| 1  | 14 | 0 | 0 | 7.5  |
| 0  | 1  | 0 | 0 | 0.5  |
| 0  | 11 | 0 | 0 | 5.5  |
| 0  | 11 | 0 | 0 | 5.5  |
| 0  | 10 | 0 | 0 | 5    |
| 4  | 17 | 0 | 0 | 10.5 |
| 0  | 1  | 0 | 0 | 0.5  |
| 0  | 11 | 0 | 0 | 5.5  |
| 0  | 11 | 0 | 0 | 5.5  |
| 7  | 10 | 0 | 0 | 8.5  |
| 1  | 4  | 0 | 0 | 2.5  |
| 0  | 1  | 0 | 0 | 0.5  |
| 1  | 14 | 0 | 0 | 7.5  |
| 0  | 10 | 0 | 0 | 5    |
| 0  | 1  | 0 | 0 | 0.5  |
| 0  | 1  | 0 | 0 | 0.5  |
| 0  | 11 | 0 | 0 | 5.5  |
| 0  | 1  | 0 | 0 | 0.5  |
| 1  | 14 | 0 | 0 | 7.5  |
| 0  | 1  | 0 | 0 | 0.5  |
| 0  | 1  | 0 | 0 | 0.5  |
| 0  | 11 | 0 | 0 | 5.5  |
| 1  | 14 | 0 | 0 | 7.5  |
| 1  | 14 | 0 | 0 | 7.5  |
| 13 | 19 | 1 | 0 | 16   |
| 0  | 11 | 0 | 0 | 5.5  |
| 0  | 1  | 0 | 0 | 0.5  |
| 0  | 11 | 0 | 0 | 5.5  |
| 0  | 11 | 0 | 0 | 5.5  |
| 0  | 10 | 0 | 0 | 5    |
| 1  | 6  | 0 | 0 | 3.5  |

|    |    |   |   |      |
|----|----|---|---|------|
| 0  | 11 | 0 | 0 | 5.5  |
| 0  | 11 | 0 | 0 | 5.5  |
| 0  | 11 | 0 | 0 | 5.5  |
| 4  | 15 | 0 | 0 | 9.5  |
| 0  | 1  | 0 | 0 | 0.5  |
| 12 | 87 | 4 | 0 | 49.5 |
| 1  | 14 | 0 | 0 | 7.5  |
| 0  | 1  | 0 | 0 | 0.5  |
| 0  | 11 | 0 | 0 | 5.5  |
| 0  | 11 | 0 | 0 | 5.5  |
| 4  | 34 | 1 | 0 | 19   |
| 0  | 1  | 0 | 0 | 0.5  |
| 0  | 11 | 0 | 0 | 5.5  |
| 0  | 1  | 0 | 0 | 0.5  |
| 0  | 1  | 0 | 0 | 0.5  |
| 0  | 1  | 0 | 0 | 0.5  |
| 0  | 11 | 0 | 0 | 5.5  |
| 0  | 11 | 0 | 0 | 5.5  |
| 1  | 4  | 0 | 0 | 2.5  |
| 4  | 15 | 0 | 0 | 9.5  |
| 0  | 1  | 0 | 0 | 0.5  |
| 0  | 1  | 0 | 0 | 0.5  |
| 0  | 11 | 0 | 0 | 5.5  |
| 4  | 17 | 0 | 0 | 10.5 |
| 9  | 16 | 0 | 0 | 12.5 |
| 4  | 17 | 0 | 0 | 10.5 |
| 1  | 14 | 0 | 0 | 7.5  |
| 0  | 11 | 0 | 0 | 5.5  |
| 2  | 29 | 1 | 0 | 15.5 |
| 0  | 11 | 0 | 0 | 5.5  |
| 8  | 18 | 0 | 0 | 13   |
| 0  | 1  | 0 | 0 | 0.5  |
| 0  | 1  | 0 | 0 | 0.5  |
| 1  | 14 | 0 | 0 | 7.5  |
| 0  | 10 | 0 | 0 | 5    |
| 0  | 11 | 0 | 0 | 5.5  |
| 1  | 6  | 0 | 0 | 3.5  |
| 1  | 14 | 0 | 0 | 7.5  |
| 6  | 10 | 0 | 0 | 8    |
| 0  | 11 | 0 | 0 | 5.5  |
| 4  | 15 | 0 | 0 | 9.5  |
| 0  | 1  | 0 | 0 | 0.5  |
| 0  | 1  | 0 | 0 | 0.5  |
| 0  | 1  | 0 | 0 | 0.5  |
| 0  | 1  | 0 | 0 | 0.5  |
| 1  | 6  | 0 | 0 | 3.5  |
| 1  | 14 | 0 | 0 | 7.5  |



|   |    |   |   |      |
|---|----|---|---|------|
| 4 | 14 | 0 | 0 | 9    |
| 1 | 14 | 0 | 0 | 7.5  |
| 0 | 11 | 0 | 0 | 5.5  |
| 0 | 1  | 0 | 0 | 0.5  |
| 0 | 11 | 0 | 0 | 5.5  |
| 0 | 1  | 0 | 0 | 0.5  |
| 0 | 1  | 0 | 0 | 0.5  |
| 0 | 1  | 0 | 0 | 0.5  |
| 0 | 11 | 0 | 0 | 5.5  |
| 1 | 14 | 0 | 0 | 7.5  |
| 4 | 15 | 0 | 0 | 9.5  |
| 4 | 17 | 0 | 0 | 10.5 |
| 0 | 1  | 0 | 0 | 0.5  |
| 4 | 14 | 0 | 0 | 9    |
| 0 | 1  | 0 | 0 | 0.5  |
| 1 | 14 | 0 | 0 | 7.5  |
| 0 | 11 | 0 | 0 | 5.5  |
| 0 | 1  | 0 | 0 | 0.5  |
| 0 | 1  | 0 | 0 | 0.5  |
| 1 | 4  | 0 | 0 | 2.5  |
| 0 | 1  | 0 | 0 | 0.5  |
| 0 | 1  | 0 | 0 | 0.5  |
| 0 | 11 | 0 | 0 | 5.5  |
| 0 | 1  | 0 | 0 | 0.5  |
| 0 | 10 | 0 | 0 | 5    |
| 1 | 14 | 0 | 0 | 7.5  |
| 0 | 1  | 0 | 0 | 0.5  |
| 0 | 1  | 0 | 0 | 0.5  |
| 0 | 11 | 0 | 0 | 5.5  |
| 0 | 11 | 0 | 0 | 5.5  |
| 0 | 10 | 0 | 0 | 5    |
| 0 | 1  | 0 | 0 | 0.5  |
| 0 | 1  | 0 | 0 | 0.5  |
| 0 | 11 | 0 | 0 | 5.5  |
| 1 | 14 | 0 | 0 | 7.5  |
| 0 | 1  | 0 | 0 | 0.5  |
| 0 | 11 | 0 | 0 | 5.5  |
| 1 | 6  | 0 | 0 | 3.5  |
| 0 | 1  | 0 | 0 | 0.5  |
| 0 | 11 | 0 | 0 | 5.5  |
| 0 | 11 | 0 | 0 | 5.5  |
| 0 | 1  | 0 | 0 | 0.5  |
| 0 | 11 | 0 | 0 | 5.5  |
| 0 | 11 | 0 | 0 | 5.5  |
| 0 | 1  | 0 | 0 | 0.5  |
| 1 | 14 | 0 | 0 | 7.5  |
| 0 | 11 | 0 | 0 | 5.5  |

|     |     |    |   |      |
|-----|-----|----|---|------|
| 0   | 11  | 0  | 0 | 5.5  |
| 0   | 5   | 1  | 0 | 2.5  |
| 1   | 14  | 0  | 0 | 7.5  |
| 0   | 1   | 0  | 0 | 0.5  |
| 5   | 0   | 0  | 0 | 2.5  |
| 30  | 81  | 3  | 0 | 55.5 |
| 0   | 4   | 0  | 0 | 2    |
| 0   | 4   | 0  | 0 | 2    |
| 1   | 10  | 0  | 0 | 5.5  |
| 1   | 11  | 0  | 0 | 6    |
| 0   | 0   | 0  | 0 | 0    |
| 16  | 65  | 4  | 0 | 40.5 |
| 1   | 11  | 0  | 0 | 6    |
| 1   | 0   | 0  | 0 | 0.5  |
| 0   | 3   | 0  | 0 | 1.5  |
| 0   | 0   | 0  | 0 | 0    |
| 0   | 0   | 0  | 0 | 0    |
| 0   | 5   | 0  | 0 | 2.5  |
| 1   | 11  | 0  | 0 | 6    |
| 2   | 3   | 0  | 0 | 2.5  |
| 0   | 0   | 0  | 0 | 0    |
| 2   | 19  | 0  | 0 | 10.5 |
| 0   | 2   | 0  | 0 | 1    |
| 0   | 2   | 0  | 0 | 1    |
| 2   | 0   | 0  | 0 | 1    |
| 0   | 0   | 0  | 0 | 0    |
| 0   | 5   | 0  | 0 | 2.5  |
| 31  | 70  | 4  | 0 | 50.5 |
| 12  | 9   | 0  | 0 | 10.5 |
| 8   | 27  | 1  | 0 | 17.5 |
| 1   | 5   | 0  | 0 | 3    |
| 0   | 0   | 0  | 0 | 0    |
| 3   | 7   | 0  | 0 | 5    |
| 17  | 129 | 5  | 0 | 73   |
| 4   | 3   | 0  | 0 | 3.5  |
| 1   | 11  | 0  | 0 | 6    |
| 1   | 7   | 0  | 0 | 4    |
| 3   | 9   | 0  | 0 | 6    |
| 1   | 0   | 0  | 0 | 0.5  |
| 2   | 18  | 0  | 0 | 10   |
| 0   | 7   | 0  | 0 | 3.5  |
| 513 | 401 | 43 | 0 | 457  |
| 4   | 2   | 0  | 0 | 3    |
| 2   | 0   | 0  | 0 | 1    |
| 9   | 5   | 0  | 0 | 7    |
| 1   | 12  | 0  | 0 | 6.5  |

|     |     |    |   |       |
|-----|-----|----|---|-------|
| 3   | 1   | 0  | 0 | 2     |
| 0   | 2   | 0  | 0 | 1     |
| 0   | 0   | 0  | 0 | 0     |
| 2   | 18  | 0  | 0 | 10    |
| 0   | 0   | 0  | 0 | 0     |
| 1   | 0   | 0  | 0 | 0.5   |
| 0   | 3   | 0  | 0 | 1.5   |
| 1   | 31  | 0  | 0 | 16    |
| 3   | 9   | 0  | 0 | 6     |
| 1   | 12  | 0  | 0 | 6.5   |
| 1   | 3   | 0  | 0 | 2     |
| 8   | 8   | 0  | 0 | 8     |
| 0   | 14  | 0  | 0 | 7     |
| 0   | 2   | 0  | 0 | 1     |
| 9   | 46  | 2  | 0 | 27.5  |
| 23  | 68  | 3  | 0 | 45.5  |
| 20  | 63  | 4  | 0 | 41.5  |
| 1   | 0   | 0  | 0 | 0.5   |
| 16  | 21  | 1  | 0 | 18.5  |
| 1   | 7   | 0  | 0 | 4     |
| 4   | 61  | 2  | 0 | 32.5  |
| 7   | 32  | 1  | 0 | 19.5  |
| 1   | 7   | 0  | 0 | 4     |
| 0   | 0   | 0  | 0 | 0     |
| 3   | 8   | 0  | 0 | 5.5   |
| 0   | 2   | 0  | 0 | 1     |
| 0   | 0   | 0  | 0 | 0     |
| 46  | 169 | 8  | 0 | 107.5 |
| 0   | 0   | 0  | 0 | 0     |
| 4   | 16  | 0  | 0 | 10    |
| 1   | 1   | 0  | 0 | 1     |
| 0   | 2   | 0  | 0 | 1     |
| 0   | 0   | 0  | 0 | 0     |
| 1   | 5   | 0  | 0 | 3     |
| 5   | 4   | 0  | 0 | 4.5   |
| 61  | 218 | 10 | 0 | 139.5 |
| 3   | 3   | 0  | 0 | 3     |
| 4   | 21  | 1  | 0 | 12.5  |
| 0   | 14  | 0  | 0 | 7     |
| 12  | 101 | 3  | 0 | 56.5  |
| 0   | 0   | 0  | 0 | 0     |
| 0   | 4   | 0  | 0 | 2     |
| 12  | 10  | 1  | 0 | 11    |
| 1   | 3   | 0  | 0 | 2     |
| 130 | 152 | 11 | 0 | 141   |
| 1   | 12  | 0  | 0 | 6.5   |
| 1   | 10  | 0  | 0 | 5.5   |

|     |     |    |   |       |
|-----|-----|----|---|-------|
| 0   | 9   | 0  | 0 | 4.5   |
| 0   | 2   | 0  | 0 | 1     |
| 0   | 2   | 0  | 0 | 1     |
| 2   | 20  | 0  | 0 | 11    |
| 375 | 261 | 38 | 0 | 318   |
| 0   | 9   | 0  | 0 | 4.5   |
| 0   | 0   | 0  | 0 | 0     |
| 9   | 5   | 0  | 0 | 7     |
| 3   | 0   | 0  | 0 | 1.5   |
| 0   | 6   | 0  | 0 | 3     |
| 0   | 0   | 0  | 0 | 0     |
| 421 | 306 | 36 | 0 | 363.5 |
| 3   | 27  | 0  | 0 | 15    |
| 5   | 2   | 0  | 0 | 3.5   |
| 0   | 4   | 0  | 0 | 2     |
| 67  | 147 | 8  | 0 | 107   |
| 0   | 0   | 0  | 0 | 0     |
| 492 | 407 | 42 | 0 | 449.5 |
| 1   | 11  | 0  | 0 | 6     |
| 0   | 0   | 0  | 0 | 0     |
| 1   | 10  | 0  | 0 | 5.5   |
| 1   | 8   | 0  | 0 | 4.5   |
| 9   | 6   | 0  | 0 | 7.5   |
| 0   | 3   | 0  | 0 | 1.5   |
| 1   | 11  | 0  | 0 | 6     |
| 0   | 3   | 0  | 0 | 1.5   |
| 1   | 12  | 0  | 0 | 6.5   |
| 0   | 0   | 0  | 0 | 0     |
| 0   | 0   | 0  | 0 | 0     |
| 1   | 12  | 0  | 0 | 6.5   |
| 2   | 20  | 0  | 0 | 11    |
| 0   | 2   | 0  | 0 | 1     |
| 20  | 77  | 4  | 0 | 48.5  |
| 2   | 0   | 0  | 0 | 1     |
| 0   | 4   | 0  | 0 | 2     |
| 1   | 9   | 0  | 0 | 5     |
| 6   | 26  | 1  | 0 | 16    |
| 0   | 0   | 0  | 0 | 0     |
| 2   | 2   | 0  | 0 | 2     |
| 29  | 236 | 6  | 0 | 132.5 |
| 2   | 20  | 0  | 0 | 11    |
| 0   | 0   | 0  | 0 | 0     |
| 0   | 0   | 0  | 0 | 0     |
| 0   | 5   | 0  | 0 | 2.5   |
| 61  | 118 | 5  | 0 | 89.5  |
| 3   | 2   | 0  | 0 | 2.5   |

|    |     |   |   |      |
|----|-----|---|---|------|
| 1  | 1   | 0 | 0 | 1    |
| 2  | 18  | 0 | 0 | 10   |
| 8  | 60  | 2 | 0 | 34   |
| 1  | 10  | 0 | 0 | 5.5  |
| 1  | 10  | 0 | 0 | 5.5  |
| 6  | 33  | 2 | 0 | 19.5 |
| 3  | 8   | 0 | 0 | 5.5  |
| 6  | 22  | 0 | 0 | 14   |
| 0  | 0   | 0 | 0 | 0    |
| 0  | 14  | 0 | 0 | 7    |
| 0  | 4   | 0 | 0 | 2    |
| 23 | 141 | 7 | 0 | 82   |
| 1  | 2   | 0 | 0 | 1.5  |
| 0  | 0   | 0 | 0 | 0    |
| 0  | 3   | 0 | 0 | 1.5  |
| 1  | 10  | 0 | 0 | 5.5  |
| 0  | 8   | 0 | 0 | 4    |
| 0  | 2   | 0 | 0 | 1    |
| 4  | 26  | 0 | 0 | 15   |
| 0  | 7   | 0 | 0 | 3.5  |
| 0  | 8   | 0 | 0 | 4    |
| 9  | 44  | 1 | 0 | 26.5 |
| 0  | 0   | 0 | 0 | 0    |
| 2  | 2   | 0 | 0 | 2    |
| 6  | 22  | 0 | 0 | 14   |
| 2  | 18  | 0 | 0 | 10   |
| 5  | 23  | 0 | 0 | 14   |
| 2  | 1   | 0 | 0 | 1.5  |
| 0  | 3   | 0 | 0 | 1.5  |
| 1  | 7   | 0 | 0 | 4    |
| 1  | 11  | 0 | 0 | 6    |
| 19 | 25  | 2 | 0 | 22   |
| 2  | 18  | 0 | 0 | 10   |
| 1  | 12  | 0 | 0 | 6.5  |
| 0  | 0   | 0 | 0 | 0    |
| 0  | 3   | 0 | 0 | 1.5  |
| 4  | 7   | 0 | 0 | 5.5  |
| 24 | 68  | 4 | 0 | 46   |
| 0  | 0   | 0 | 0 | 0    |
| 0  | 0   | 0 | 0 | 0    |
| 3  | 8   | 0 | 0 | 5.5  |
| 0  | 2   | 0 | 0 | 1    |
| 0  | 2   | 0 | 0 | 1    |
| 0  | 7   | 0 | 0 | 3.5  |
| 0  | 2   | 0 | 0 | 1    |
| 4  | 16  | 0 | 0 | 10   |
| 28 | 44  | 4 | 0 | 36   |

|     |     |    |   |       |
|-----|-----|----|---|-------|
| 29  | 60  | 3  | 0 | 44.5  |
| 5   | 4   | 0  | 0 | 4.5   |
| 0   | 5   | 0  | 0 | 2.5   |
| 210 | 367 | 30 | 0 | 288.5 |
| 3   | 9   | 0  | 0 | 6     |
| 1   | 10  | 0  | 0 | 5.5   |
| 1   | 10  | 0  | 0 | 5.5   |
| 0   | 0   | 0  | 0 | 0     |
| 0   | 0   | 0  | 0 | 0     |
| 0   | 0   | 0  | 0 | 0     |
| 4   | 16  | 0  | 0 | 10    |
| 0   | 7   | 0  | 0 | 3.5   |
| 1   | 11  | 0  | 0 | 6     |
| 5   | 24  | 0  | 0 | 14.5  |
| 1   | 10  | 0  | 0 | 5.5   |
| 2   | 1   | 0  | 0 | 1.5   |
| 2   | 19  | 0  | 0 | 10.5  |
| 0   | 0   | 0  | 0 | 0     |
| 0   | 0   | 0  | 0 | 0     |
| 2   | 18  | 0  | 0 | 10    |
| 2   | 18  | 0  | 0 | 10    |
| 2   | 20  | 0  | 0 | 11    |
| 0   | 0   | 0  | 0 | 0     |
| 3   | 8   | 0  | 0 | 5.5   |
| 0   | 0   | 0  | 0 | 0     |
| 0   | 0   | 0  | 0 | 0     |
| 1   | 12  | 0  | 0 | 6.5   |
| 6   | 22  | 0  | 0 | 14    |
| 3   | 7   | 0  | 0 | 5     |
| 2   | 18  | 0  | 0 | 10    |
| 4   | 1   | 0  | 0 | 2.5   |
| 0   | 7   | 0  | 0 | 3.5   |
| 0   | 0   | 0  | 0 | 0     |
| 0   | 4   | 0  | 0 | 2     |
| 0   | 14  | 0  | 0 | 7     |
| 1   | 8   | 0  | 0 | 4.5   |
| 2   | 2   | 0  | 0 | 2     |
| 2   | 18  | 0  | 0 | 10    |
| 1   | 1   | 0  | 0 | 1     |
| 2   | 0   | 0  | 0 | 1     |
| 6   | 52  | 2  | 0 | 29    |
| 0   | 0   | 0  | 0 | 0     |
| 0   | 6   | 0  | 0 | 3     |
| 0   | 6   | 0  | 0 | 3     |
| 0   | 2   | 0  | 0 | 1     |
| 0   | 0   | 0  | 0 | 0     |
| 0   | 0   | 0  | 0 | 0     |

|    |     |   |   |      |
|----|-----|---|---|------|
| 15 | 73  | 4 | 0 | 44   |
| 6  | 13  | 1 | 0 | 9.5  |
| 0  | 9   | 0 | 0 | 4.5  |
| 28 | 129 | 4 | 0 | 78.5 |
| 6  | 13  | 0 | 0 | 9.5  |
| 0  | 0   | 0 | 0 | 0    |
| 4  | 26  | 0 | 0 | 15   |
| 0  | 6   | 0 | 0 | 3    |
| 1  | 8   | 0 | 0 | 4.5  |
| 9  | 6   | 0 | 0 | 7.5  |
| 0  | 0   | 0 | 0 | 0    |
| 0  | 0   | 0 | 0 | 0    |
| 0  | 4   | 0 | 0 | 2    |
| 1  | 10  | 0 | 0 | 5.5  |
| 1  | 10  | 0 | 0 | 5.5  |
| 3  | 8   | 0 | 0 | 5.5  |
| 0  | 0   | 0 | 0 | 0    |
| 1  | 0   | 0 | 0 | 0.5  |
| 2  | 18  | 0 | 0 | 10   |
| 2  | 29  | 0 | 0 | 15.5 |
| 4  | 26  | 0 | 0 | 15   |
| 0  | 0   | 0 | 0 | 0    |
| 2  | 18  | 0 | 0 | 10   |
| 0  | 2   | 0 | 0 | 1    |
| 4  | 16  | 0 | 0 | 10   |
| 0  | 4   | 0 | 0 | 2    |
| 2  | 4   | 0 | 0 | 3    |
| 0  | 0   | 0 | 0 | 0    |
| 0  | 6   | 0 | 0 | 3    |
| 1  | 11  | 0 | 0 | 6    |
| 2  | 4   | 0 | 0 | 3    |
| 20 | 52  | 3 | 0 | 36   |
| 0  | 3   | 0 | 0 | 1.5  |
| 11 | 33  | 1 | 0 | 22   |
| 0  | 4   | 0 | 0 | 2    |
| 1  | 8   | 0 | 0 | 4.5  |
| 2  | 20  | 0 | 0 | 11   |
| 5  | 15  | 0 | 0 | 10   |
| 2  | 20  | 0 | 0 | 11   |
| 1  | 1   | 0 | 0 | 1    |
| 0  | 0   | 0 | 0 | 0    |
| 3  | 8   | 0 | 0 | 5.5  |
| 1  | 0   | 0 | 0 | 0.5  |
| 1  | 1   | 0 | 0 | 1    |
| 3  | 8   | 0 | 0 | 5.5  |
| 1  | 3   | 0 | 0 | 2    |
| 0  | 2   | 0 | 0 | 1    |

|    |    |   |   |      |
|----|----|---|---|------|
| 3  | 9  | 0 | 0 | 6    |
| 3  | 7  | 0 | 0 | 5    |
| 0  | 0  | 0 | 0 | 0    |
| 1  | 11 | 0 | 0 | 6    |
| 1  | 0  | 0 | 0 | 0.5  |
| 0  | 0  | 0 | 0 | 0    |
| 2  | 4  | 0 | 0 | 3    |
| 5  | 37 | 1 | 0 | 21   |
| 1  | 3  | 0 | 0 | 2    |
| 0  | 4  | 0 | 0 | 2    |
| 0  | 0  | 0 | 0 | 0    |
| 2  | 20 | 0 | 0 | 11   |
| 4  | 2  | 0 | 0 | 3    |
| 0  | 0  | 0 | 0 | 0    |
| 1  | 11 | 0 | 0 | 6    |
| 2  | 19 | 0 | 0 | 10.5 |
| 1  | 0  | 0 | 0 | 0.5  |
| 6  | 13 | 0 | 0 | 9.5  |
| 4  | 26 | 0 | 0 | 15   |
| 0  | 14 | 0 | 0 | 7    |
| 6  | 22 | 0 | 0 | 14   |
| 15 | 32 | 1 | 0 | 23.5 |
| 24 | 74 | 3 | 0 | 49   |
| 1  | 3  | 0 | 0 | 2    |
| 3  | 8  | 0 | 0 | 5.5  |
| 0  | 14 | 0 | 0 | 7    |
| 1  | 7  | 0 | 0 | 4    |
| 0  | 3  | 0 | 0 | 1.5  |
| 1  | 12 | 0 | 0 | 6.5  |
| 1  | 10 | 0 | 0 | 5.5  |
| 3  | 2  | 0 | 0 | 2.5  |
| 0  | 0  | 0 | 0 | 0    |
| 1  | 10 | 0 | 0 | 5.5  |
| 1  | 11 | 0 | 0 | 6    |
| 12 | 9  | 0 | 0 | 10.5 |
| 1  | 0  | 0 | 0 | 0.5  |
| 2  | 2  | 0 | 0 | 2    |
| 4  | 16 | 0 | 0 | 10   |
| 3  | 27 | 0 | 0 | 15   |
| 0  | 2  | 0 | 0 | 1    |
| 0  | 8  | 0 | 0 | 4    |
| 1  | 11 | 0 | 0 | 6    |
| 5  | 13 | 1 | 0 | 9    |
| 0  | 0  | 0 | 0 | 0    |
| 9  | 42 | 2 | 0 | 25.5 |
| 8  | 8  | 0 | 0 | 8    |
| 4  | 2  | 0 | 0 | 3    |



|    |     |   |   |      |
|----|-----|---|---|------|
| 0  | 14  | 0 | 0 | 7    |
| 1  | 7   | 0 | 0 | 4    |
| 1  | 11  | 0 | 0 | 6    |
| 5  | 23  | 0 | 0 | 14   |
| 2  | 1   | 0 | 0 | 1.5  |
| 1  | 10  | 0 | 0 | 5.5  |
| 3  | 38  | 1 | 0 | 20.5 |
| 1  | 3   | 0 | 0 | 2    |
| 1  | 11  | 0 | 0 | 6    |
| 2  | 18  | 0 | 0 | 10   |
| 6  | 13  | 0 | 0 | 9.5  |
| 0  | 0   | 0 | 0 | 0    |
| 0  | 0   | 0 | 0 | 0    |
| 1  | 0   | 0 | 0 | 0.5  |
| 1  | 10  | 0 | 0 | 5.5  |
| 4  | 16  | 0 | 0 | 10   |
| 3  | 27  | 0 | 0 | 15   |
| 0  | 0   | 0 | 0 | 0    |
| 2  | 29  | 0 | 0 | 15.5 |
| 1  | 9   | 0 | 0 | 5    |
| 0  | 0   | 0 | 0 | 0    |
| 7  | 3   | 0 | 0 | 5    |
| 7  | 3   | 0 | 0 | 5    |
| 25 | 142 | 7 | 0 | 83.5 |
| 1  | 9   | 0 | 0 | 5    |
| 9  | 5   | 0 | 0 | 7    |
| 0  | 0   | 0 | 0 | 0    |
| 0  | 2   | 0 | 0 | 1    |
| 0  | 0   | 0 | 0 | 0    |
| 0  | 0   | 0 | 0 | 0    |
| 0  | 0   | 0 | 0 | 0    |
| 0  | 0   | 0 | 0 | 0    |
| 2  | 18  | 0 | 0 | 10   |
| 0  | 2   | 0 | 0 | 1    |
| 3  | 3   | 0 | 0 | 3    |
| 8  | 15  | 1 | 0 | 11.5 |
| 0  | 7   | 0 | 0 | 3.5  |
| 1  | 7   | 0 | 0 | 4    |
| 0  | 14  | 0 | 0 | 7    |
| 1  | 10  | 0 | 0 | 5.5  |
| 1  | 2   | 0 | 0 | 1.5  |
| 0  | 2   | 0 | 0 | 1    |
| 1  | 7   | 0 | 0 | 4    |
| 0  | 2   | 0 | 0 | 1    |
| 0  | 0   | 0 | 0 | 0    |
| 1  | 10  | 0 | 0 | 5.5  |
| 0  | 4   | 0 | 0 | 2    |

|     |     |    |   |       |
|-----|-----|----|---|-------|
| 6   | 13  | 0  | 0 | 9.5   |
| 3   | 70  | 2  | 0 | 36.5  |
| 1   | 5   | 0  | 0 | 3     |
| 840 | 821 | 75 | 0 | 830.5 |
| 4   | 26  | 0  | 0 | 15    |
| 13  | 37  | 1  | 0 | 25    |
| 6   | 32  | 1  | 0 | 19    |
| 0   | 4   | 0  | 0 | 2     |
| 27  | 49  | 4  | 0 | 38    |
| 3   | 0   | 0  | 0 | 1.5   |
| 0   | 6   | 0  | 0 | 3     |
| 0   | 5   | 0  | 0 | 2.5   |
| 2   | 20  | 0  | 0 | 11    |
| 0   | 0   | 0  | 0 | 0     |
| 0   | 7   | 0  | 0 | 3.5   |
| 0   | 2   | 0  | 0 | 1     |
| 1   | 0   | 0  | 0 | 0.5   |
| 1   | 0   | 0  | 0 | 0.5   |
| 4   | 16  | 0  | 0 | 10    |
| 1   | 0   | 0  | 0 | 0.5   |
| 0   | 5   | 0  | 0 | 2.5   |
| 1   | 11  | 0  | 0 | 6     |
| 1   | 9   | 0  | 0 | 5     |
| 7   | 40  | 1  | 0 | 23.5  |
| 0   | 3   | 0  | 0 | 1.5   |
| 2   | 18  | 0  | 0 | 10    |
| 20  | 142 | 8  | 0 | 81    |
| 0   | 0   | 0  | 0 | 0     |
| 1   | 0   | 0  | 0 | 0.5   |
| 0   | 2   | 0  | 0 | 1     |
| 1   | 10  | 0  | 0 | 5.5   |
| 1   | 10  | 0  | 0 | 5.5   |
| 0   | 6   | 0  | 0 | 3     |
| 0   | 2   | 0  | 0 | 1     |
| 1   | 10  | 0  | 0 | 5.5   |
| 0   | 14  | 0  | 0 | 7     |
| 0   | 0   | 0  | 0 | 0     |
| 1   | 10  | 0  | 0 | 5.5   |
| 4   | 16  | 0  | 0 | 10    |
| 10  | 13  | 0  | 0 | 11.5  |
| 1   | 11  | 0  | 0 | 6     |
| 6   | 39  | 1  | 0 | 22.5  |
| 2   | 0   | 0  | 0 | 1     |
| 2   | 18  | 0  | 0 | 10    |
| 0   | 0   | 0  | 0 | 0     |
| 0   | 0   | 0  | 0 | 0     |
| 0   | 0   | 0  | 0 | 0     |

|    |    |   |   |      |
|----|----|---|---|------|
| 3  | 9  | 0 | 0 | 6    |
| 0  | 0  | 0 | 0 | 0    |
| 2  | 20 | 0 | 0 | 11   |
| 0  | 8  | 0 | 0 | 4    |
| 1  | 9  | 0 | 0 | 5    |
| 6  | 22 | 0 | 0 | 14   |
| 14 | 34 | 1 | 0 | 24   |
| 0  | 4  | 0 | 0 | 2    |
| 14 | 33 | 1 | 0 | 23.5 |
| 1  | 11 | 0 | 0 | 6    |
| 1  | 7  | 0 | 0 | 4    |
| 2  | 4  | 0 | 0 | 3    |
| 1  | 10 | 0 | 0 | 5.5  |
| 2  | 18 | 0 | 0 | 10   |
| 1  | 30 | 0 | 0 | 15.5 |
| 1  | 1  | 0 | 0 | 1    |
| 2  | 0  | 0 | 0 | 1    |
| 5  | 4  | 0 | 0 | 4.5  |
| 1  | 10 | 0 | 0 | 5.5  |
| 0  | 6  | 0 | 0 | 3    |
| 1  | 12 | 0 | 0 | 6.5  |
| 5  | 23 | 0 | 0 | 14   |
| 0  | 3  | 0 | 0 | 1.5  |
| 1  | 5  | 0 | 0 | 3    |
| 6  | 4  | 0 | 0 | 5    |
| 1  | 30 | 0 | 0 | 15.5 |
| 1  | 3  | 0 | 0 | 2    |
| 2  | 4  | 0 | 0 | 3    |
| 9  | 18 | 2 | 0 | 13.5 |
| 1  | 5  | 0 | 0 | 3    |
| 0  | 3  | 0 | 0 | 1.5  |
| 0  | 0  | 0 | 0 | 0    |
| 1  | 1  | 0 | 0 | 1    |
| 0  | 2  | 0 | 0 | 1    |
| 4  | 16 | 0 | 0 | 10   |
| 8  | 8  | 0 | 0 | 8    |
| 0  | 4  | 0 | 0 | 2    |
| 4  | 38 | 1 | 0 | 21   |
| 0  | 5  | 0 | 0 | 2.5  |
| 0  | 0  | 0 | 0 | 0    |
| 9  | 6  | 0 | 0 | 7.5  |
| 0  | 0  | 0 | 0 | 0    |
| 4  | 0  | 0 | 0 | 2    |
| 0  | 0  | 0 | 0 | 0    |
| 0  | 0  | 0 | 0 | 0    |
| 0  | 14 | 0 | 0 | 7    |
| 2  | 20 | 0 | 0 | 11   |

|    |    |   |   |      |
|----|----|---|---|------|
| 1  | 1  | 0 | 0 | 1    |
| 5  | 23 | 0 | 0 | 14   |
| 1  | 0  | 0 | 0 | 0.5  |
| 2  | 1  | 0 | 0 | 1.5  |
| 1  | 3  | 0 | 0 | 2    |
| 1  | 0  | 0 | 0 | 0.5  |
| 0  | 0  | 0 | 0 | 0    |
| 0  | 2  | 0 | 0 | 1    |
| 1  | 10 | 0 | 0 | 5.5  |
| 0  | 0  | 0 | 0 | 0    |
| 1  | 11 | 0 | 0 | 6    |
| 1  | 10 | 0 | 0 | 5.5  |
| 3  | 9  | 0 | 0 | 6    |
| 0  | 14 | 0 | 0 | 7    |
| 13 | 34 | 1 | 0 | 23.5 |
| 4  | 6  | 0 | 0 | 5    |
| 3  | 3  | 0 | 0 | 3    |
| 5  | 53 | 2 | 0 | 29   |
| 4  | 11 | 1 | 0 | 7.5  |
| 1  | 0  | 0 | 0 | 0.5  |
| 0  | 0  | 0 | 0 | 0    |
| 0  | 0  | 0 | 0 | 0    |
| 1  | 30 | 0 | 0 | 15.5 |
| 0  | 0  | 0 | 0 | 0    |
| 3  | 2  | 0 | 0 | 2.5  |
| 1  | 2  | 0 | 0 | 1.5  |
| 26 | 17 | 1 | 0 | 21.5 |
| 4  | 16 | 0 | 0 | 10   |
| 1  | 30 | 0 | 0 | 15.5 |
| 0  | 2  | 0 | 0 | 1    |
| 11 | 82 | 3 | 0 | 46.5 |
| 4  | 26 | 0 | 0 | 15   |
| 1  | 10 | 0 | 0 | 5.5  |
| 0  | 2  | 0 | 0 | 1    |
| 1  | 11 | 0 | 0 | 6    |
| 0  | 14 | 0 | 0 | 7    |
| 1  | 2  | 0 | 0 | 1.5  |
| 1  | 0  | 0 | 0 | 0.5  |
| 5  | 15 | 0 | 0 | 10   |
| 2  | 18 | 0 | 0 | 10   |
| 1  | 11 | 0 | 0 | 6    |
| 2  | 2  | 0 | 0 | 2    |
| 0  | 2  | 0 | 0 | 1    |
| 4  | 26 | 0 | 0 | 15   |
| 3  | 9  | 0 | 0 | 6    |
| 0  | 0  | 0 | 0 | 0    |
| 3  | 2  | 0 | 0 | 2.5  |

|     |     |    |   |       |
|-----|-----|----|---|-------|
| 10  | 58  | 2  | 0 | 34    |
| 0   | 0   | 0  | 0 | 0     |
| 1   | 7   | 0  | 0 | 4     |
| 585 | 646 | 54 | 0 | 615.5 |
| 1   | 7   | 0  | 0 | 4     |
| 0   | 0   | 0  | 0 | 0     |
| 0   | 3   | 0  | 0 | 1.5   |
| 2   | 4   | 0  | 0 | 3     |
| 0   | 0   | 0  | 0 | 0     |
| 0   | 2   | 0  | 0 | 1     |
| 0   | 0   | 0  | 0 | 0     |
| 8   | 8   | 0  | 0 | 8     |
| 1   | 12  | 0  | 0 | 6.5   |
| 2   | 20  | 0  | 0 | 11    |
| 5   | 2   | 0  | 0 | 3.5   |
| 1   | 11  | 0  | 0 | 6     |
| 0   | 3   | 0  | 0 | 1.5   |
| 2   | 0   | 0  | 0 | 1     |
| 3   | 9   | 0  | 0 | 6     |
| 1   | 1   | 0  | 0 | 1     |
| 6   | 58  | 1  | 0 | 32    |
| 0   | 3   | 0  | 0 | 1.5   |
| 0   | 2   | 0  | 0 | 1     |
| 0   | 6   | 0  | 0 | 3     |
| 0   | 0   | 0  | 0 | 0     |
| 1   | 10  | 0  | 0 | 5.5   |
| 5   | 15  | 0  | 0 | 10    |
| 2   | 1   | 0  | 0 | 1.5   |
| 0   | 4   | 0  | 0 | 2     |
| 2   | 2   | 0  | 0 | 2     |
| 1   | 9   | 0  | 0 | 5     |
| 11  | 11  | 0  | 0 | 11    |
| 0   | 0   | 0  | 0 | 0     |
| 2   | 20  | 0  | 0 | 11    |
| 0   | 0   | 0  | 0 | 0     |
| 1   | 12  | 0  | 0 | 6.5   |
| 0   | 0   | 0  | 0 | 0     |
| 2   | 1   | 0  | 0 | 1.5   |
| 0   | 0   | 0  | 0 | 0     |
| 1   | 5   | 0  | 0 | 3     |
| 8   | 61  | 2  | 0 | 34.5  |
| 1   | 9   | 0  | 0 | 5     |
| 2   | 3   | 0  | 0 | 2.5   |
| 4   | 7   | 0  | 0 | 5.5   |
| 37  | 97  | 4  | 0 | 67    |
| 2   | 18  | 0  | 0 | 10    |
| 12  | 122 | 3  | 0 | 67    |

|    |     |    |   |       |
|----|-----|----|---|-------|
| 0  | 5   | 0  | 0 | 2.5   |
| 1  | 12  | 0  | 0 | 6.5   |
| 0  | 8   | 0  | 0 | 4     |
| 10 | 3   | 0  | 0 | 6.5   |
| 0  | 3   | 0  | 0 | 1.5   |
| 0  | 14  | 0  | 0 | 7     |
| 1  | 1   | 0  | 0 | 1     |
| 3  | 8   | 0  | 0 | 5.5   |
| 2  | 20  | 0  | 0 | 11    |
| 0  | 14  | 0  | 0 | 7     |
| 0  | 7   | 0  | 0 | 3.5   |
| 6  | 22  | 0  | 0 | 14    |
| 1  | 10  | 0  | 0 | 5.5   |
| 14 | 55  | 2  | 0 | 34.5  |
| 3  | 9   | 0  | 0 | 6     |
| 3  | 20  | 1  | 0 | 11.5  |
| 74 | 189 | 8  | 0 | 131.5 |
| 1  | 12  | 0  | 0 | 6.5   |
| 0  | 0   | 0  | 0 | 0     |
| 0  | 0   | 0  | 0 | 0     |
| 0  | 0   | 0  | 0 | 0     |
| 0  | 5   | 0  | 0 | 2.5   |
| 0  | 0   | 0  | 0 | 0     |
| 39 | 390 | 16 | 0 | 214.5 |
| 2  | 3   | 0  | 0 | 2.5   |
| 5  | 23  | 0  | 0 | 14    |
| 4  | 16  | 0  | 0 | 10    |
| 1  | 3   | 0  | 0 | 2     |
| 3  | 9   | 0  | 0 | 6     |
| 0  | 0   | 0  | 0 | 0     |
| 2  | 29  | 0  | 0 | 15.5  |
| 0  | 0   | 0  | 0 | 0     |
| 0  | 3   | 0  | 0 | 1.5   |
| 1  | 5   | 0  | 0 | 3     |
| 0  | 0   | 0  | 0 | 0     |
| 3  | 8   | 0  | 0 | 5.5   |
| 2  | 19  | 0  | 0 | 10.5  |
| 1  | 30  | 0  | 0 | 15.5  |
| 10 | 171 | 4  | 0 | 90.5  |
| 1  | 12  | 0  | 0 | 6.5   |
| 1  | 10  | 0  | 0 | 5.5   |
| 0  | 0   | 0  | 0 | 0     |
| 4  | 16  | 0  | 0 | 10    |
| 1  | 11  | 0  | 0 | 6     |
| 0  | 0   | 0  | 0 | 0     |
| 0  | 0   | 0  | 0 | 0     |
| 0  | 0   | 0  | 0 | 0     |

|    |     |   |   |      |
|----|-----|---|---|------|
| 0  | 4   | 0 | 0 | 2    |
| 0  | 2   | 0 | 0 | 1    |
| 0  | 0   | 0 | 0 | 0    |
| 1  | 5   | 0 | 0 | 3    |
| 0  | 7   | 0 | 0 | 3.5  |
| 1  | 11  | 0 | 0 | 6    |
| 0  | 8   | 0 | 0 | 4    |
| 0  | 0   | 0 | 0 | 0    |
| 0  | 0   | 0 | 0 | 0    |
| 7  | 68  | 2 | 0 | 37.5 |
| 2  | 2   | 0 | 0 | 2    |
| 0  | 0   | 0 | 0 | 0    |
| 0  | 0   | 0 | 0 | 0    |
| 10 | 13  | 0 | 0 | 11.5 |
| 5  | 15  | 0 | 0 | 10   |
| 3  | 7   | 0 | 0 | 5    |
| 1  | 8   | 0 | 0 | 4.5  |
| 0  | 5   | 0 | 0 | 2.5  |
| 2  | 4   | 0 | 0 | 3    |
| 6  | 31  | 1 | 0 | 18.5 |
| 19 | 116 | 3 | 0 | 67.5 |
| 1  | 10  | 0 | 0 | 5.5  |
| 0  | 0   | 0 | 0 | 0    |
| 0  | 0   | 0 | 0 | 0    |
| 2  | 2   | 0 | 0 | 2    |
| 0  | 14  | 0 | 0 | 7    |
| 0  | 0   | 0 | 0 | 0    |
| 0  | 0   | 0 | 0 | 0    |
| 0  | 14  | 0 | 0 | 7    |
| 8  | 8   | 0 | 0 | 8    |
| 1  | 2   | 0 | 0 | 1.5  |
| 0  | 5   | 0 | 0 | 2.5  |
| 0  | 2   | 0 | 0 | 1    |
| 0  | 14  | 0 | 0 | 7    |
| 0  | 0   | 0 | 0 | 0    |
| 0  | 0   | 0 | 0 | 0    |
| 0  | 0   | 0 | 0 | 0    |
| 0  | 3   | 0 | 0 | 1.5  |
| 21 | 135 | 7 | 0 | 78   |
| 1  | 39  | 1 | 0 | 20   |
| 0  | 0   | 0 | 0 | 0    |
| 6  | 13  | 0 | 0 | 9.5  |
| 1  | 0   | 0 | 0 | 0.5  |
| 3  | 8   | 0 | 0 | 5.5  |
| 0  | 6   | 0 | 0 | 3    |
| 0  | 3   | 0 | 0 | 1.5  |
| 1  | 11  | 0 | 0 | 6    |

|    |     |   |   |      |
|----|-----|---|---|------|
| 46 | 143 | 8 | 0 | 94.5 |
| 0  | 6   | 0 | 0 | 3    |
| 1  | 82  | 1 | 0 | 41.5 |
| 4  | 26  | 0 | 0 | 15   |
| 1  | 1   | 0 | 0 | 1    |
| 6  | 18  | 1 | 0 | 12   |
| 0  | 2   | 0 | 0 | 1    |
| 1  | 10  | 0 | 0 | 5.5  |
| 1  | 11  | 0 | 0 | 6    |
| 1  | 0   | 0 | 0 | 0.5  |
| 0  | 8   | 0 | 0 | 4    |
| 0  | 0   | 0 | 0 | 0    |
| 1  | 10  | 0 | 0 | 5.5  |
| 1  | 31  | 0 | 0 | 16   |
| 1  | 12  | 0 | 0 | 6.5  |
| 7  | 33  | 1 | 0 | 20   |
| 3  | 33  | 1 | 0 | 18   |
| 0  | 2   | 0 | 0 | 1    |
| 0  | 4   | 0 | 0 | 2    |
| 0  | 2   | 0 | 0 | 1    |
| 0  | 14  | 0 | 0 | 7    |
| 0  | 4   | 0 | 0 | 2    |
| 0  | 6   | 0 | 0 | 3    |
| 4  | 6   | 0 | 0 | 5    |
| 0  | 4   | 0 | 0 | 2    |
| 19 | 107 | 5 | 0 | 63   |
| 0  | 0   | 0 | 0 | 0    |
| 15 | 49  | 2 | 0 | 32   |
| 0  | 4   | 0 | 0 | 2    |
| 4  | 16  | 0 | 0 | 10   |
| 1  | 0   | 0 | 0 | 0.5  |
| 1  | 0   | 0 | 0 | 0.5  |
| 1  | 10  | 0 | 0 | 5.5  |
| 1  | 9   | 0 | 0 | 5    |
| 0  | 2   | 0 | 0 | 1    |
| 0  | 6   | 0 | 0 | 3    |
| 0  | 2   | 0 | 0 | 1    |
| 0  | 0   | 0 | 0 | 0    |
| 0  | 2   | 0 | 0 | 1    |
| 0  | 3   | 0 | 0 | 1.5  |
| 40 | 126 | 8 | 0 | 83   |
| 0  | 0   | 0 | 0 | 0    |
| 1  | 10  | 0 | 0 | 5.5  |
| 6  | 60  | 1 | 0 | 33   |
| 1  | 10  | 0 | 0 | 5.5  |
| 1  | 2   | 0 | 0 | 1.5  |
| 0  | 14  | 0 | 0 | 7    |



|    |     |    |   |      |
|----|-----|----|---|------|
| 0  | 5   | 0  | 0 | 2.5  |
| 0  | 2   | 0  | 0 | 1    |
| 3  | 7   | 0  | 0 | 5    |
| 1  | 11  | 0  | 0 | 6    |
| 5  | 15  | 0  | 0 | 10   |
| 1  | 10  | 0  | 0 | 5.5  |
| 25 | 109 | 5  | 0 | 67   |
| 40 | 155 | 8  | 0 | 97.5 |
| 0  | 6   | 0  | 0 | 3    |
| 3  | 9   | 0  | 0 | 6    |
| 8  | 8   | 0  | 0 | 8    |
| 0  | 0   | 0  | 0 | 0    |
| 6  | 22  | 0  | 0 | 14   |
| 4  | 42  | 1  | 0 | 23   |
| 4  | 16  | 0  | 0 | 10   |
| 0  | 0   | 0  | 0 | 0    |
| 5  | 24  | 0  | 0 | 14.5 |
| 2  | 0   | 0  | 0 | 1    |
| 2  | 29  | 0  | 0 | 15.5 |
| 0  | 0   | 0  | 0 | 0    |
| 2  | 18  | 0  | 0 | 10   |
| 1  | 8   | 0  | 0 | 4.5  |
| 1  | 7   | 0  | 0 | 4    |
| 0  | 0   | 0  | 0 | 0    |
| 13 | 29  | 1  | 0 | 21   |
| 15 | 51  | 2  | 0 | 33   |
| 3  | 8   | 0  | 0 | 5.5  |
| 1  | 3   | 0  | 0 | 2    |
| 0  | 6   | 0  | 0 | 3    |
| 0  | 0   | 0  | 0 | 0    |
| 2  | 2   | 0  | 0 | 2    |
| 2  | 17  | 1  | 0 | 9.5  |
| 3  | 9   | 0  | 0 | 6    |
| 1  | 7   | 0  | 0 | 4    |
| 4  | 57  | 1  | 0 | 30.5 |
| 4  | 26  | 0  | 0 | 15   |
| 43 | 229 | 12 | 0 | 136  |
| 0  | 0   | 0  | 0 | 0    |
| 0  | 0   | 0  | 0 | 0    |
| 0  | 0   | 0  | 0 | 0    |
| 4  | 3   | 0  | 0 | 3.5  |
| 0  | 4   | 0  | 0 | 2    |
| 4  | 6   | 0  | 0 | 5    |
| 0  | 6   | 0  | 0 | 3    |
| 1  | 12  | 0  | 0 | 6.5  |
| 0  | 0   | 0  | 0 | 0    |
| 0  | 14  | 0  | 0 | 7    |

|    |     |    |   |       |
|----|-----|----|---|-------|
| 1  | 0   | 0  | 0 | 0.5   |
| 8  | 55  | 1  | 0 | 31.5  |
| 43 | 568 | 15 | 0 | 305.5 |
| 2  | 4   | 0  | 0 | 3     |
| 12 | 27  | 1  | 0 | 19.5  |
| 0  | 0   | 0  | 0 | 0     |
| 22 | 53  | 0  | 1 | 37.5  |
| 2  | 20  | 0  | 0 | 11    |
| 1  | 10  | 0  | 0 | 5.5   |
| 1  | 11  | 0  | 0 | 6     |
| 0  | 4   | 0  | 0 | 2     |
| 1  | 5   | 1  | 0 | 3     |
| 0  | 0   | 0  | 0 | 0     |
| 0  | 2   | 0  | 0 | 1     |
| 0  | 2   | 0  | 0 | 1     |
| 1  | 12  | 0  | 0 | 6.5   |
| 2  | 29  | 0  | 0 | 15.5  |
| 5  | 24  | 0  | 0 | 14.5  |
| 0  | 14  | 0  | 0 | 7     |
| 5  | 15  | 0  | 0 | 10    |
| 0  | 0   | 0  | 0 | 0     |
| 0  | 3   | 0  | 0 | 1.5   |
| 5  | 15  | 0  | 0 | 10    |
| 0  | 3   | 0  | 0 | 1.5   |
| 1  | 2   | 0  | 0 | 1.5   |
| 0  | 0   | 0  | 0 | 0     |
| 0  | 0   | 0  | 0 | 0     |
| 0  | 5   | 0  | 0 | 2.5   |
| 3  | 3   | 0  | 0 | 3     |
| 0  | 0   | 0  | 0 | 0     |
| 0  | 0   | 0  | 0 | 0     |
| 0  | 0   | 0  | 0 | 0     |
| 3  | 9   | 0  | 0 | 6     |
| 0  | 3   | 0  | 0 | 1.5   |
| 4  | 16  | 0  | 0 | 10    |
| 11 | 11  | 0  | 0 | 11    |
| 0  | 0   | 0  | 0 | 0     |
| 6  | 33  | 1  | 0 | 19.5  |
| 3  | 27  | 0  | 0 | 15    |
| 0  | 0   | 0  | 0 | 0     |
| 4  | 6   | 0  | 0 | 5     |
| 0  | 2   | 0  | 0 | 1     |
| 0  | 0   | 0  | 0 | 0     |
| 3  | 27  | 0  | 0 | 15    |
| 0  | 3   | 0  | 0 | 1.5   |
| 0  | 7   | 0  | 0 | 3.5   |
| 1  | 8   | 0  | 0 | 4.5   |

|    |     |   |   |      |
|----|-----|---|---|------|
| 0  | 9   | 0 | 0 | 4.5  |
| 0  | 0   | 0 | 0 | 0    |
| 0  | 0   | 0 | 0 | 0    |
| 2  | 19  | 0 | 0 | 10.5 |
| 1  | 10  | 0 | 0 | 5.5  |
| 0  | 14  | 0 | 0 | 7    |
| 0  | 9   | 0 | 0 | 4.5  |
| 0  | 2   | 0 | 0 | 1    |
| 0  | 0   | 0 | 0 | 0    |
| 0  | 4   | 0 | 0 | 2    |
| 0  | 3   | 0 | 0 | 1.5  |
| 8  | 100 | 2 | 0 | 54   |
| 0  | 0   | 0 | 0 | 0    |
| 2  | 19  | 0 | 0 | 10.5 |
| 4  | 35  | 1 | 0 | 19.5 |
| 0  | 0   | 0 | 0 | 0    |
| 0  | 4   | 0 | 0 | 2    |
| 0  | 0   | 0 | 0 | 0    |
| 0  | 2   | 0 | 0 | 1    |
| 0  | 4   | 0 | 0 | 2    |
| 3  | 2   | 0 | 0 | 2.5  |
| 1  | 11  | 0 | 0 | 6    |
| 1  | 11  | 0 | 0 | 6    |
| 0  | 3   | 0 | 0 | 1.5  |
| 3  | 1   | 0 | 0 | 2    |
| 0  | 2   | 0 | 0 | 1    |
| 49 | 179 | 8 | 0 | 114  |
| 0  | 0   | 0 | 0 | 0    |
| 1  | 10  | 0 | 0 | 5.5  |
| 0  | 2   | 0 | 0 | 1    |
| 4  | 43  | 1 | 0 | 23.5 |
| 3  | 9   | 0 | 0 | 6    |
| 5  | 23  | 0 | 0 | 14   |
| 24 | 157 | 7 | 0 | 90.5 |
| 2  | 0   | 0 | 0 | 1    |
| 2  | 29  | 0 | 0 | 15.5 |
| 5  | 15  | 0 | 0 | 10   |
| 2  | 2   | 0 | 0 | 2    |
| 8  | 8   | 0 | 0 | 8    |
| 0  | 5   | 0 | 0 | 2.5  |
| 1  | 11  | 0 | 0 | 6    |
| 0  | 4   | 0 | 0 | 2    |
| 3  | 8   | 0 | 0 | 5.5  |
| 2  | 20  | 0 | 0 | 11   |
| 0  | 0   | 0 | 0 | 0    |
| 0  | 0   | 0 | 0 | 0    |
| 0  | 0   | 0 | 0 | 0    |

|    |     |    |   |       |
|----|-----|----|---|-------|
| 1  | 10  | 0  | 0 | 5.5   |
| 1  | 0   | 0  | 0 | 0.5   |
| 1  | 30  | 1  | 0 | 15.5  |
| 1  | 11  | 0  | 0 | 6     |
| 4  | 3   | 0  | 0 | 3.5   |
| 0  | 0   | 0  | 0 | 0     |
| 1  | 11  | 0  | 0 | 6     |
| 8  | 27  | 1  | 0 | 17.5  |
| 0  | 1   | 1  | 0 | 0.5   |
| 0  | 0   | 0  | 0 | 0     |
| 1  | 8   | 0  | 0 | 4.5   |
| 0  | 14  | 0  | 0 | 7     |
| 0  | 6   | 0  | 0 | 3     |
| 2  | 18  | 0  | 0 | 10    |
| 0  | 0   | 0  | 0 | 0     |
| 0  | 4   | 0  | 0 | 2     |
| 1  | 5   | 0  | 0 | 3     |
| 2  | 19  | 0  | 0 | 10.5  |
| 0  | 0   | 0  | 0 | 0     |
| 1  | 10  | 0  | 0 | 5.5   |
| 0  | 3   | 0  | 0 | 1.5   |
| 9  | 6   | 0  | 0 | 7.5   |
| 1  | 3   | 0  | 0 | 2     |
| 3  | 1   | 0  | 0 | 2     |
| 0  | 0   | 0  | 0 | 0     |
| 0  | 0   | 0  | 0 | 0     |
| 0  | 4   | 0  | 0 | 2     |
| 0  | 0   | 0  | 0 | 0     |
| 0  | 3   | 0  | 0 | 1.5   |
| 0  | 4   | 0  | 0 | 2     |
| 13 | 69  | 2  | 0 | 41    |
| 1  | 10  | 0  | 0 | 5.5   |
| 0  | 8   | 0  | 0 | 4     |
| 0  | 6   | 0  | 0 | 3     |
| 0  | 9   | 0  | 0 | 4.5   |
| 1  | 10  | 0  | 0 | 5.5   |
| 1  | 0   | 0  | 0 | 0.5   |
| 5  | 31  | 2  | 0 | 18    |
| 9  | 6   | 0  | 0 | 7.5   |
| 1  | 1   | 0  | 0 | 1     |
| 1  | 10  | 0  | 0 | 5.5   |
| 0  | 7   | 0  | 0 | 3.5   |
| 2  | 20  | 0  | 0 | 11    |
| 1  | 2   | 0  | 0 | 1.5   |
| 4  | 16  | 0  | 0 | 10    |
| 5  | 296 | 12 | 0 | 150.5 |
| 1  | 11  | 0  | 0 | 6     |

|    |     |   |   |      |
|----|-----|---|---|------|
| 19 | 97  | 3 | 0 | 58   |
| 1  | 11  | 0 | 0 | 6    |
| 1  | 3   | 0 | 0 | 2    |
| 0  | 14  | 0 | 0 | 7    |
| 0  | 9   | 0 | 0 | 4.5  |
| 0  | 5   | 0 | 0 | 2.5  |
| 8  | 55  | 1 | 0 | 31.5 |
| 3  | 27  | 0 | 0 | 15   |
| 0  | 17  | 1 | 0 | 8.5  |
| 7  | 29  | 1 | 0 | 18   |
| 1  | 3   | 0 | 0 | 2    |
| 0  | 0   | 0 | 0 | 0    |
| 2  | 19  | 0 | 0 | 10.5 |
| 0  | 3   | 0 | 0 | 1.5  |
| 0  | 3   | 0 | 0 | 1.5  |
| 0  | 0   | 0 | 0 | 0    |
| 0  | 8   | 0 | 0 | 4    |
| 8  | 58  | 2 | 0 | 33   |
| 1  | 11  | 0 | 0 | 6    |
| 0  | 8   | 0 | 0 | 4    |
| 1  | 3   | 0 | 0 | 2    |
| 0  | 0   | 0 | 0 | 0    |
| 0  | 0   | 0 | 0 | 0    |
| 0  | 2   | 0 | 0 | 1    |
| 31 | 105 | 5 | 0 | 68   |
| 0  | 0   | 0 | 0 | 0    |
| 0  | 0   | 0 | 0 | 0    |
| 0  | 0   | 0 | 0 | 0    |
| 3  | 1   | 0 | 0 | 2    |
| 1  | 7   | 0 | 0 | 4    |
| 1  | 0   | 0 | 0 | 0.5  |
| 2  | 2   | 0 | 0 | 2    |
| 0  | 0   | 0 | 0 | 0    |
| 1  | 3   | 0 | 0 | 2    |
| 2  | 1   | 0 | 0 | 1.5  |
| 0  | 0   | 0 | 0 | 0    |
| 2  | 3   | 0 | 0 | 2.5  |
| 2  | 2   | 0 | 0 | 2    |
| 3  | 7   | 0 | 0 | 5    |
| 0  | 14  | 0 | 0 | 7    |
| 0  | 0   | 0 | 0 | 0    |
| 1  | 0   | 0 | 0 | 0.5  |
| 1  | 12  | 0 | 0 | 6.5  |
| 0  | 14  | 0 | 0 | 7    |
| 4  | 7   | 0 | 0 | 5.5  |
| 0  | 0   | 0 | 0 | 0    |
| 0  | 14  | 0 | 0 | 7    |

|     |     |    |   |       |
|-----|-----|----|---|-------|
| 1   | 30  | 0  | 0 | 15.5  |
| 1   | 10  | 0  | 0 | 5.5   |
| 0   | 2   | 0  | 0 | 1     |
| 1   | 11  | 0  | 0 | 6     |
| 0   | 0   | 0  | 0 | 0     |
| 3   | 7   | 0  | 0 | 5     |
| 2   | 18  | 0  | 0 | 10    |
| 1   | 0   | 0  | 0 | 0.5   |
| 0   | 0   | 0  | 0 | 0     |
| 1   | 12  | 0  | 0 | 6.5   |
| 1   | 1   | 0  | 0 | 1     |
| 0   | 0   | 0  | 0 | 0     |
| 2   | 19  | 0  | 0 | 10.5  |
| 1   | 2   | 0  | 0 | 1.5   |
| 1   | 11  | 0  | 0 | 6     |
| 11  | 192 | 4  | 0 | 101.5 |
| 1   | 11  | 0  | 0 | 6     |
| 1   | 10  | 0  | 0 | 5.5   |
| 0   | 14  | 0  | 0 | 7     |
| 12  | 52  | 2  | 0 | 32    |
| 0   | 0   | 0  | 0 | 0     |
| 2   | 2   | 0  | 0 | 2     |
| 0   | 6   | 0  | 0 | 3     |
| 1   | 0   | 0  | 0 | 0.5   |
| 6   | 32  | 1  | 0 | 19    |
| 1   | 11  | 0  | 0 | 6     |
| 1   | 3   | 0  | 0 | 2     |
| 2   | 20  | 0  | 0 | 11    |
| 4   | 1   | 0  | 0 | 2.5   |
| 5   | 34  | 1  | 0 | 19.5  |
| 36  | 224 | 6  | 0 | 130   |
| 3   | 62  | 2  | 0 | 32.5  |
| 1   | 12  | 0  | 0 | 6.5   |
| 2   | 19  | 0  | 0 | 10.5  |
| 1   | 12  | 0  | 0 | 6.5   |
| 4   | 16  | 0  | 0 | 10    |
| 1   | 11  | 0  | 0 | 6     |
| 0   | 0   | 0  | 0 | 0     |
| 0   | 2   | 0  | 0 | 1     |
| 118 | 208 | 11 | 0 | 163   |
| 1   | 3   | 0  | 0 | 2     |
| 0   | 14  | 0  | 0 | 7     |
| 2   | 18  | 0  | 0 | 10    |
| 8   | 22  | 2  | 0 | 15    |
| 212 | 218 | 21 | 0 | 215   |
| 1   | 12  | 0  | 0 | 6.5   |
| 12  | 19  | 1  | 0 | 15.5  |

|    |     |   |   |      |
|----|-----|---|---|------|
| 6  | 13  | 0 | 0 | 9.5  |
| 2  | 1   | 0 | 0 | 1.5  |
| 14 | 2   | 0 | 0 | 8    |
| 2  | 15  | 1 | 0 | 8.5  |
| 3  | 9   | 0 | 0 | 6    |
| 1  | 12  | 0 | 0 | 6.5  |
| 0  | 0   | 0 | 0 | 0    |
| 0  | 0   | 0 | 0 | 0    |
| 5  | 24  | 0 | 0 | 14.5 |
| 0  | 2   | 0 | 0 | 1    |
| 0  | 0   | 0 | 0 | 0    |
| 2  | 20  | 0 | 0 | 11   |
| 22 | 151 | 6 | 0 | 86.5 |
| 0  | 5   | 0 | 0 | 2.5  |
| 1  | 12  | 0 | 0 | 6.5  |
| 1  | 8   | 0 | 0 | 4.5  |
| 5  | 15  | 0 | 0 | 10   |
| 1  | 2   | 0 | 0 | 1.5  |
| 7  | 55  | 2 | 0 | 31   |
| 1  | 31  | 0 | 0 | 16   |
| 3  | 9   | 0 | 0 | 6    |
| 1  | 0   | 0 | 0 | 0.5  |
| 4  | 16  | 0 | 0 | 10   |
| 0  | 0   | 0 | 0 | 0    |
| 0  | 0   | 0 | 0 | 0    |
| 6  | 5   | 0 | 0 | 5.5  |
| 0  | 0   | 0 | 0 | 0    |
| 1  | 12  | 0 | 0 | 6.5  |
| 8  | 35  | 1 | 0 | 21.5 |
| 5  | 28  | 1 | 0 | 16.5 |
| 1  | 8   | 0 | 0 | 4.5  |
| 1  | 10  | 0 | 0 | 5.5  |
| 0  | 4   | 0 | 0 | 2    |
| 11 | 11  | 0 | 0 | 11   |
| 1  | 10  | 0 | 0 | 5.5  |
| 6  | 5   | 0 | 0 | 5.5  |
| 4  | 16  | 0 | 0 | 10   |
| 0  | 14  | 0 | 0 | 7    |
| 2  | 19  | 0 | 0 | 10.5 |
| 0  | 0   | 0 | 0 | 0    |
| 0  | 0   | 0 | 0 | 0    |
| 0  | 2   | 0 | 0 | 1    |
| 1  | 2   | 0 | 0 | 1.5  |
| 1  | 10  | 0 | 0 | 5.5  |
| 1  | 12  | 0 | 0 | 6.5  |
| 2  | 1   | 0 | 0 | 1.5  |
| 0  | 0   | 0 | 0 | 0    |

|    |     |   |   |      |
|----|-----|---|---|------|
| 0  | 4   | 0 | 0 | 2    |
| 41 | 109 | 4 | 0 | 75   |
| 6  | 22  | 0 | 0 | 14   |
| 3  | 1   | 0 | 0 | 2    |
| 55 | 144 | 8 | 0 | 99.5 |
| 13 | 42  | 1 | 0 | 27.5 |
| 9  | 16  | 1 | 0 | 12.5 |
| 0  | 2   | 0 | 0 | 1    |
| 0  | 0   | 0 | 0 | 0    |
| 4  | 16  | 0 | 0 | 10   |
| 0  | 2   | 0 | 0 | 1    |
| 0  | 0   | 0 | 0 | 0    |
| 0  | 2   | 0 | 0 | 1    |
| 1  | 11  | 0 | 0 | 6    |
| 0  | 0   | 0 | 0 | 0    |
| 0  | 0   | 0 | 0 | 0    |
| 0  | 14  | 0 | 0 | 7    |
| 0  | 0   | 0 | 0 | 0    |
| 1  | 12  | 0 | 0 | 6.5  |
| 0  | 2   | 0 | 0 | 1    |
| 0  | 0   | 0 | 0 | 0    |
| 0  | 3   | 0 | 0 | 1.5  |
| 1  | 10  | 0 | 0 | 5.5  |
| 2  | 18  | 0 | 0 | 10   |
| 0  | 14  | 0 | 0 | 7    |
| 0  | 0   | 0 | 0 | 0    |
| 1  | 11  | 0 | 0 | 6    |
| 0  | 6   | 0 | 0 | 3    |
| 0  | 14  | 0 | 0 | 7    |
| 6  | 13  | 0 | 0 | 9.5  |
| 0  | 14  | 0 | 0 | 7    |
| 3  | 8   | 0 | 0 | 5.5  |
| 5  | 33  | 1 | 0 | 19   |
| 0  | 0   | 0 | 0 | 0    |
| 0  | 0   | 0 | 0 | 0    |
| 1  | 10  | 0 | 0 | 5.5  |
| 4  | 16  | 0 | 0 | 10   |
| 1  | 10  | 0 | 0 | 5.5  |
| 6  | 41  | 1 | 0 | 23.5 |
| 0  | 0   | 0 | 0 | 0    |
| 1  | 10  | 0 | 0 | 5.5  |
| 1  | 2   | 0 | 0 | 1.5  |
| 1  | 12  | 0 | 0 | 6.5  |
| 0  | 0   | 0 | 0 | 0    |
| 19 | 77  | 2 | 0 | 48   |
| 1  | 5   | 1 | 0 | 3    |
| 0  | 0   | 0 | 0 | 0    |



|    |     |   |   |      |
|----|-----|---|---|------|
| 1  | 22  | 1 | 0 | 11.5 |
| 8  | 8   | 0 | 0 | 8    |
| 3  | 8   | 0 | 0 | 5.5  |
| 1  | 8   | 0 | 0 | 4.5  |
| 0  | 8   | 0 | 0 | 4    |
| 0  | 4   | 0 | 0 | 2    |
| 0  | 4   | 0 | 0 | 2    |
| 1  | 11  | 0 | 0 | 6    |
| 0  | 0   | 0 | 0 | 0    |
| 0  | 0   | 0 | 0 | 0    |
| 30 | 44  | 3 | 0 | 37   |
| 4  | 6   | 0 | 0 | 5    |
| 1  | 10  | 0 | 0 | 5.5  |
| 1  | 12  | 0 | 0 | 6.5  |
| 0  | 0   | 0 | 0 | 0    |
| 0  | 0   | 0 | 0 | 0    |
| 0  | 4   | 0 | 0 | 2    |
| 0  | 0   | 0 | 0 | 0    |
| 0  | 0   | 0 | 0 | 0    |
| 0  | 0   | 0 | 0 | 0    |
| 0  | 0   | 0 | 0 | 0    |
| 3  | 3   | 0 | 0 | 3    |
| 18 | 69  | 2 | 0 | 43.5 |
| 1  | 3   | 0 | 0 | 2    |
| 0  | 0   | 0 | 0 | 0    |
| 0  | 0   | 0 | 0 | 0    |
| 57 | 32  | 3 | 0 | 44.5 |
| 26 | 100 | 3 | 0 | 63   |
| 0  | 0   | 0 | 0 | 0    |
| 1  | 7   | 0 | 0 | 4    |
| 1  | 11  | 0 | 0 | 6    |
| 0  | 3   | 0 | 0 | 1.5  |
| 2  | 20  | 0 | 0 | 11   |
| 6  | 13  | 0 | 0 | 9.5  |
| 0  | 0   | 0 | 0 | 0    |
| 4  | 16  | 0 | 0 | 10   |
| 0  | 0   | 0 | 0 | 0    |
| 4  | 26  | 0 | 0 | 15   |
| 2  | 19  | 0 | 0 | 10.5 |
| 1  | 12  | 0 | 0 | 6.5  |
| 2  | 2   | 0 | 0 | 2    |
| 7  | 33  | 1 | 0 | 20   |
| 1  | 10  | 0 | 0 | 5.5  |
| 1  | 1   | 0 | 0 | 1    |
| 1  | 11  | 0 | 0 | 6    |
| 0  | 0   | 0 | 0 | 0    |
| 1  | 11  | 0 | 0 | 6    |

|    |     |    |   |       |
|----|-----|----|---|-------|
| 0  | 2   | 0  | 0 | 1     |
| 1  | 5   | 0  | 0 | 3     |
| 1  | 31  | 0  | 0 | 16    |
| 1  | 2   | 0  | 0 | 1.5   |
| 0  | 0   | 0  | 0 | 0     |
| 2  | 29  | 0  | 0 | 15.5  |
| 1  | 10  | 0  | 0 | 5.5   |
| 2  | 0   | 0  | 0 | 1     |
| 12 | 0   | 1  | 0 | 6     |
| 0  | 4   | 0  | 0 | 2     |
| 2  | 19  | 0  | 0 | 10.5  |
| 10 | 76  | 3  | 0 | 43    |
| 7  | 426 | 16 | 0 | 216.5 |
| 18 | 163 | 4  | 0 | 90.5  |
| 2  | 0   | 0  | 0 | 1     |
| 0  | 0   | 0  | 0 | 0     |
| 0  | 0   | 0  | 0 | 0     |
| 1  | 11  | 0  | 0 | 6     |
| 1  | 8   | 0  | 0 | 4.5   |
| 0  | 5   | 0  | 0 | 2.5   |
| 1  | 7   | 0  | 0 | 4     |
| 0  | 0   | 0  | 0 | 0     |
| 0  | 0   | 0  | 0 | 0     |
| 1  | 0   | 0  | 0 | 0.5   |
| 6  | 13  | 0  | 0 | 9.5   |
| 1  | 2   | 0  | 0 | 1.5   |
| 0  | 3   | 0  | 0 | 1.5   |
| 0  | 0   | 0  | 0 | 0     |
| 3  | 0   | 0  | 0 | 1.5   |
| 0  | 14  | 0  | 0 | 7     |
| 0  | 26  | 1  | 0 | 13    |
| 12 | 15  | 1  | 0 | 13.5  |
| 28 | 97  | 3  | 0 | 62.5  |
| 90 | 274 | 16 | 0 | 182   |
| 0  | 3   | 0  | 0 | 1.5   |
| 22 | 145 | 6  | 0 | 83.5  |
| 0  | 4   | 0  | 0 | 2     |
| 4  | 37  | 2  | 0 | 20.5  |
| 0  | 4   | 0  | 0 | 2     |
| 1  | 11  | 0  | 0 | 6     |
| 7  | 54  | 1  | 0 | 30.5  |
| 9  | 57  | 2  | 0 | 33    |
| 9  | 51  | 2  | 0 | 30    |
| 18 | 28  | 1  | 0 | 23    |
| 2  | 19  | 0  | 0 | 10.5  |
| 1  | 2   | 0  | 0 | 1.5   |
| 1  | 2   | 0  | 0 | 1.5   |

|    |    |   |   |      |
|----|----|---|---|------|
| 1  | 1  | 0 | 0 | 1    |
| 2  | 18 | 0 | 0 | 10   |
| 1  | 11 | 0 | 0 | 6    |
| 0  | 0  | 0 | 0 | 0    |
| 1  | 0  | 0 | 0 | 0.5  |
| 0  | 0  | 0 | 0 | 0    |
| 0  | 0  | 0 | 0 | 0    |
| 0  | 0  | 0 | 0 | 0    |
| 3  | 8  | 0 | 0 | 5.5  |
| 6  | 13 | 0 | 0 | 9.5  |
| 0  | 4  | 0 | 0 | 2    |
| 1  | 3  | 0 | 0 | 2    |
| 1  | 1  | 0 | 0 | 1    |
| 0  | 0  | 0 | 0 | 0    |
| 0  | 4  | 0 | 0 | 2    |
| 0  | 0  | 0 | 0 | 0    |
| 4  | 20 | 1 | 0 | 12   |
| 0  | 3  | 0 | 0 | 1.5  |
| 4  | 0  | 0 | 0 | 2    |
| 6  | 57 | 1 | 0 | 31.5 |
| 1  | 12 | 0 | 0 | 6.5  |
| 0  | 3  | 0 | 0 | 1.5  |
| 1  | 8  | 0 | 0 | 4.5  |
| 5  | 23 | 0 | 0 | 14   |
| 1  | 10 | 0 | 0 | 5.5  |
| 0  | 0  | 0 | 0 | 0    |
| 0  | 0  | 0 | 0 | 0    |
| 0  | 14 | 0 | 0 | 7    |
| 0  | 4  | 0 | 0 | 2    |
| 1  | 10 | 0 | 0 | 5.5  |
| 3  | 7  | 0 | 0 | 5    |
| 0  | 6  | 0 | 0 | 3    |
| 2  | 18 | 0 | 0 | 10   |
| 0  | 9  | 0 | 0 | 4.5  |
| 0  | 0  | 0 | 0 | 0    |
| 13 | 37 | 2 | 0 | 25   |
| 1  | 3  | 0 | 0 | 2    |
| 1  | 10 | 0 | 0 | 5.5  |
| 1  | 2  | 0 | 0 | 1.5  |
| 1  | 1  | 0 | 0 | 1    |
| 0  | 0  | 0 | 0 | 0    |
| 2  | 19 | 0 | 0 | 10.5 |
| 3  | 9  | 0 | 0 | 6    |
| 5  | 24 | 0 | 0 | 14.5 |
| 0  | 0  | 0 | 0 | 0    |
| 1  | 11 | 0 | 0 | 6    |
| 0  | 14 | 0 | 0 | 7    |

|     |     |    |   |      |
|-----|-----|----|---|------|
| 1   | 12  | 0  | 0 | 6.5  |
| 0   | 0   | 0  | 0 | 0    |
| 1   | 11  | 0  | 0 | 6    |
| 0   | 5   | 0  | 0 | 2.5  |
| 1   | 31  | 0  | 0 | 16   |
| 116 | 242 | 11 | 0 | 179  |
| 1   | 1   | 0  | 0 | 1    |
| 0   | 2   | 0  | 0 | 1    |
| 11  | 43  | 2  | 0 | 27   |
| 0   | 8   | 0  | 0 | 4    |
| 4   | 7   | 0  | 0 | 5.5  |
| 0   | 0   | 0  | 0 | 0    |
| 0   | 0   | 0  | 0 | 0    |
| 1   | 2   | 0  | 0 | 1.5  |
| 0   | 14  | 0  | 0 | 7    |
| 1   | 7   | 0  | 0 | 4    |
| 2   | 20  | 0  | 0 | 11   |
| 1   | 10  | 0  | 0 | 5.5  |
| 0   | 2   | 0  | 0 | 1    |
| 0   | 0   | 0  | 0 | 0    |
| 2   | 1   | 0  | 0 | 1.5  |
| 0   | 0   | 0  | 0 | 0    |
| 1   | 10  | 0  | 0 | 5.5  |
| 0   | 5   | 0  | 0 | 2.5  |
| 3   | 8   | 0  | 0 | 5.5  |
| 25  | 144 | 4  | 0 | 84.5 |
| 4   | 7   | 0  | 0 | 5.5  |
| 95  | 103 | 11 | 0 | 99   |
| 4   | 6   | 0  | 0 | 5    |
| 15  | 25  | 1  | 0 | 20   |
| 1   | 0   | 0  | 0 | 0.5  |
| 11  | 32  | 1  | 0 | 21.5 |
| 6   | 22  | 0  | 0 | 14   |
| 0   | 5   | 0  | 0 | 2.5  |
| 7   | 48  | 1  | 0 | 27.5 |
| 4   | 3   | 0  | 0 | 3.5  |
| 1   | 0   | 0  | 0 | 0.5  |
| 0   | 0   | 0  | 0 | 0    |
| 0   | 5   | 0  | 0 | 2.5  |
| 2   | 19  | 0  | 0 | 10.5 |
| 19  | 62  | 4  | 0 | 40.5 |
| 2   | 1   | 0  | 0 | 1.5  |
| 2   | 1   | 0  | 0 | 1.5  |
| 1   | 7   | 0  | 0 | 4    |
| 1   | 10  | 0  | 0 | 5.5  |
| 3   | 9   | 0  | 0 | 6    |
| 0   | 6   | 0  | 0 | 3    |

|     |     |    |   |       |
|-----|-----|----|---|-------|
| 33  | 143 | 6  | 0 | 88    |
| 0   | 0   | 0  | 0 | 0     |
| 2   | 18  | 0  | 0 | 10    |
| 0   | 0   | 0  | 0 | 0     |
| 0   | 2   | 0  | 0 | 1     |
| 1   | 10  | 0  | 0 | 5.5   |
| 1   | 7   | 0  | 0 | 4     |
| 0   | 0   | 0  | 0 | 0     |
| 0   | 14  | 0  | 0 | 7     |
| 0   | 5   | 0  | 0 | 2.5   |
| 1   | 11  | 0  | 0 | 6     |
| 1   | 30  | 0  | 0 | 15.5  |
| 1   | 9   | 0  | 0 | 5     |
| 12  | 18  | 1  | 0 | 15    |
| 5   | 15  | 0  | 0 | 10    |
| 1   | 10  | 0  | 0 | 5.5   |
| 0   | 0   | 0  | 0 | 0     |
| 2   | 29  | 0  | 0 | 15.5  |
| 0   | 14  | 0  | 0 | 7     |
| 1   | 0   | 0  | 0 | 0.5   |
| 1   | 12  | 0  | 0 | 6.5   |
| 1   | 11  | 0  | 0 | 6     |
| 0   | 0   | 0  | 0 | 0     |
| 0   | 0   | 0  | 0 | 0     |
| 0   | 14  | 0  | 0 | 7     |
| 1   | 11  | 0  | 0 | 6     |
| 5   | 36  | 1  | 0 | 20.5  |
| 2   | 4   | 0  | 0 | 3     |
| 0   | 0   | 0  | 0 | 0     |
| 3   | 8   | 0  | 0 | 5.5   |
| 3   | 27  | 0  | 0 | 15    |
| 3   | 41  | 2  | 0 | 22    |
| 0   | 5   | 0  | 0 | 2.5   |
| 3   | 9   | 0  | 0 | 6     |
| 1   | 0   | 0  | 0 | 0.5   |
| 773 | 832 | 83 | 0 | 802.5 |
| 0   | 0   | 0  | 0 | 0     |
| 1   | 2   | 0  | 0 | 1.5   |
| 0   | 4   | 0  | 0 | 2     |
| 1   | 0   | 0  | 0 | 0.5   |
| 0   | 4   | 0  | 0 | 2     |
| 4   | 7   | 0  | 0 | 5.5   |
| 0   | 3   | 0  | 0 | 1.5   |
| 0   | 7   | 0  | 0 | 3.5   |
| 0   | 5   | 0  | 0 | 2.5   |
| 2   | 32  | 1  | 0 | 17    |

|      |      |     |   |        |
|------|------|-----|---|--------|
| 3    | 8    | 0   | 0 | 5.5    |
| 1    | 1    | 0   | 0 | 1      |
| 4    | 16   | 0   | 0 | 10     |
| 3    | 0    | 0   | 0 | 1.5    |
| 0    | 0    | 0   | 0 | 0      |
| 0    | 4    | 0   | 0 | 2      |
| 2    | 0    | 0   | 0 | 1      |
| 4    | 16   | 0   | 0 | 10     |
| 0    | 0    | 0   | 0 | 0      |
| 0    | 0    | 0   | 0 | 0      |
| 0    | 0    | 0   | 0 | 0      |
| 3    | 3    | 0   | 0 | 3      |
| 26   | 134  | 6   | 0 | 80     |
| 0    | 0    | 0   | 0 | 0      |
| 0    | 0    | 0   | 0 | 0      |
| 0    | 0    | 0   | 0 | 0      |
| 9    | 6    | 0   | 0 | 7.5    |
| 6    | 61   | 1   | 0 | 33.5   |
| 0    | 0    | 0   | 0 | 0      |
| 1    | 7    | 0   | 0 | 4      |
| 5    | 15   | 0   | 0 | 10     |
| 1054 | 1507 | 107 | 1 | 1280.5 |
| 1    | 11   | 0   | 0 | 6      |
| 24   | 95   | 3   | 0 | 59.5   |
| 0    | 5    | 0   | 0 | 2.5    |
| 1    | 7    | 0   | 0 | 4      |
| 7    | 25   | 1   | 0 | 16     |
| 0    | 0    | 0   | 0 | 0      |
| 1    | 11   | 0   | 0 | 6      |
| 2    | 18   | 0   | 0 | 10     |
| 0    | 0    | 0   | 0 | 0      |
| 0    | 0    | 0   | 0 | 0      |
| 0    | 0    | 0   | 0 | 0      |
| 2    | 19   | 1   | 0 | 10.5   |
| 0    | 2    | 0   | 0 | 1      |
| 0    | 7    | 0   | 0 | 3.5    |
| 5    | 15   | 0   | 0 | 10     |
| 1    | 2    | 0   | 0 | 1.5    |
| 0    | 14   | 0   | 0 | 7      |
| 0    | 0    | 0   | 0 | 0      |
| 1    | 5    | 0   | 0 | 3      |
| 1    | 9    | 0   | 0 | 5      |
| 0    | 0    | 0   | 0 | 0      |
| 1    | 11   | 0   | 0 | 6      |
| 1    | 5    | 0   | 0 | 3      |
| 0    | 0    | 0   | 0 | 0      |

|    |     |    |   |      |
|----|-----|----|---|------|
| 0  | 0   | 0  | 0 | 0    |
| 0  | 0   | 0  | 0 | 0    |
| 0  | 6   | 0  | 0 | 3    |
| 0  | 5   | 0  | 0 | 2.5  |
| 9  | 6   | 0  | 0 | 7.5  |
| 1  | 12  | 0  | 0 | 6.5  |
| 0  | 0   | 0  | 0 | 0    |
| 0  | 5   | 0  | 0 | 2.5  |
| 0  | 14  | 0  | 0 | 7    |
| 20 | 408 | 13 | 0 | 214  |
| 1  | 1   | 0  | 0 | 1    |
| 1  | 7   | 0  | 0 | 4    |
| 0  | 80  | 1  | 0 | 40   |
| 31 | 112 | 5  | 0 | 71.5 |
| 2  | 18  | 0  | 0 | 10   |
| 0  | 14  | 0  | 0 | 7    |
| 0  | 14  | 0  | 0 | 7    |
| 0  | 0   | 0  | 0 | 0    |
| 2  | 36  | 1  | 0 | 19   |
| 3  | 0   | 0  | 0 | 1.5  |
| 1  | 11  | 0  | 0 | 6    |
| 0  | 0   | 0  | 0 | 0    |
| 0  | 0   | 0  | 0 | 0    |
| 1  | 1   | 0  | 0 | 1    |
| 1  | 11  | 0  | 0 | 6    |
| 4  | 27  | 1  | 0 | 15.5 |
| 8  | 8   | 0  | 0 | 8    |
| 1  | 3   | 0  | 0 | 2    |
| 3  | 8   | 0  | 0 | 5.5  |
| 2  | 17  | 1  | 0 | 9.5  |
| 1  | 0   | 0  | 0 | 0.5  |
| 1  | 2   | 0  | 0 | 1.5  |
| 1  | 2   | 1  | 0 | 1.5  |
| 1  | 8   | 0  | 0 | 4.5  |
| 4  | 26  | 0  | 0 | 15   |
| 0  | 0   | 0  | 0 | 0    |
| 2  | 18  | 0  | 0 | 10   |
| 9  | 0   | 0  | 0 | 4.5  |
| 0  | 14  | 0  | 0 | 7    |
| 10 | 64  | 3  | 0 | 37   |
| 0  | 0   | 0  | 0 | 0    |
| 0  | 0   | 0  | 0 | 0    |
| 20 | 128 | 6  | 0 | 74   |
| 6  | 22  | 0  | 0 | 14   |
| 0  | 0   | 0  | 0 | 0    |
| 1  | 12  | 0  | 0 | 6.5  |
| 1  | 0   | 0  | 0 | 0.5  |

|    |    |   |   |      |
|----|----|---|---|------|
| 3  | 8  | 0 | 0 | 5.5  |
| 0  | 0  | 0 | 0 | 0    |
| 2  | 18 | 0 | 0 | 10   |
| 3  | 1  | 0 | 0 | 2    |
| 2  | 0  | 0 | 0 | 1    |
| 0  | 7  | 0 | 0 | 3.5  |
| 2  | 2  | 0 | 0 | 2    |
| 3  | 2  | 0 | 0 | 2.5  |
| 1  | 12 | 0 | 0 | 6.5  |
| 4  | 2  | 0 | 0 | 3    |
| 11 | 33 | 1 | 0 | 22   |
| 0  | 0  | 0 | 0 | 0    |
| 5  | 15 | 0 | 0 | 10   |
| 4  | 1  | 0 | 0 | 2.5  |
| 0  | 0  | 0 | 0 | 0    |
| 15 | 28 | 2 | 0 | 21.5 |
| 0  | 0  | 0 | 0 | 0    |
| 1  | 11 | 0 | 0 | 6    |
| 1  | 10 | 0 | 0 | 5.5  |
| 1  | 11 | 0 | 0 | 6    |
| 0  | 0  | 0 | 0 | 0    |
| 5  | 15 | 0 | 0 | 10   |
| 39 | 35 | 3 | 0 | 37   |
| 3  | 9  | 0 | 0 | 6    |
| 1  | 0  | 0 | 0 | 0.5  |
| 1  | 12 | 0 | 0 | 6.5  |
| 11 | 11 | 0 | 0 | 11   |
| 1  | 11 | 0 | 0 | 6    |
| 1  | 0  | 0 | 0 | 0.5  |
| 16 | 63 | 2 | 0 | 39.5 |
| 14 | 46 | 2 | 0 | 30   |
| 1  | 5  | 0 | 0 | 3    |
| 3  | 3  | 0 | 0 | 3    |
| 1  | 7  | 0 | 0 | 4    |
| 1  | 8  | 0 | 0 | 4.5  |
| 0  | 0  | 0 | 0 | 0    |
| 1  | 7  | 0 | 0 | 4    |
| 0  | 0  | 0 | 0 | 0    |
| 3  | 3  | 0 | 0 | 3    |
| 0  | 0  | 0 | 0 | 0    |
| 0  | 0  | 0 | 0 | 0    |
| 5  | 23 | 0 | 0 | 14   |
| 1  | 11 | 0 | 0 | 6    |
| 5  | 15 | 0 | 0 | 10   |
| 1  | 7  | 0 | 0 | 4    |
| 3  | 9  | 0 | 0 | 6    |
| 0  | 0  | 0 | 0 | 0    |



|    |     |   |   |      |
|----|-----|---|---|------|
| 1  | 9   | 0 | 0 | 5    |
| 4  | 0   | 0 | 0 | 2    |
| 0  | 0   | 0 | 0 | 0    |
| 10 | 43  | 2 | 0 | 26.5 |
| 0  | 14  | 0 | 0 | 7    |
| 0  | 0   | 0 | 0 | 0    |
| 0  | 5   | 0 | 0 | 2.5  |
| 0  | 14  | 0 | 0 | 7    |
| 0  | 0   | 0 | 0 | 0    |
| 2  | 20  | 0 | 0 | 11   |
| 3  | 2   | 0 | 0 | 2.5  |
| 1  | 11  | 0 | 0 | 6    |
| 2  | 19  | 0 | 0 | 10.5 |
| 1  | 1   | 0 | 0 | 1    |
| 0  | 2   | 0 | 0 | 1    |
| 0  | 0   | 0 | 0 | 0    |
| 4  | 0   | 0 | 0 | 2    |
| 4  | 54  | 1 | 0 | 29   |
| 1  | 0   | 0 | 0 | 0.5  |
| 0  | 0   | 0 | 0 | 0    |
| 0  | 0   | 0 | 0 | 0    |
| 0  | 0   | 0 | 0 | 0    |
| 0  | 0   | 0 | 0 | 0    |
| 0  | 0   | 0 | 0 | 0    |
| 1  | 5   | 0 | 0 | 3    |
| 0  | 7   | 0 | 0 | 3.5  |
| 2  | 20  | 0 | 0 | 11   |
| 45 | 102 | 5 | 0 | 73.5 |
| 0  | 0   | 0 | 0 | 0    |
| 0  | 0   | 0 | 0 | 0    |
| 1  | 0   | 0 | 0 | 0.5  |
| 0  | 5   | 0 | 0 | 2.5  |
| 2  | 1   | 0 | 0 | 1.5  |
| 0  | 3   | 0 | 0 | 1.5  |
| 0  | 14  | 0 | 0 | 7    |
| 4  | 3   | 0 | 0 | 3.5  |
| 1  | 0   | 0 | 0 | 0.5  |
| 0  | 0   | 0 | 0 | 0    |
| 1  | 7   | 0 | 0 | 4    |
| 1  | 3   | 1 | 0 | 2    |
| 2  | 20  | 0 | 0 | 11   |
| 0  | 0   | 0 | 0 | 0    |
| 1  | 0   | 0 | 0 | 0.5  |
| 0  | 0   | 0 | 0 | 0    |
| 0  | 0   | 0 | 0 | 0    |
| 15 | 167 | 5 | 0 | 91   |

|    |     |   |   |       |
|----|-----|---|---|-------|
| 3  | 7   | 0 | 0 | 5     |
| 1  | 10  | 0 | 0 | 5.5   |
| 75 | 140 | 7 | 0 | 107.5 |
| 3  | 27  | 0 | 0 | 15    |
| 12 | 9   | 0 | 0 | 10.5  |
| 0  | 14  | 0 | 0 | 7     |
| 0  | 0   | 0 | 0 | 0     |
| 0  | 3   | 0 | 0 | 1.5   |
| 0  | 3   | 0 | 0 | 1.5   |
| 0  | 7   | 0 | 0 | 3.5   |
| 6  | 21  | 1 | 0 | 13.5  |
| 0  | 5   | 0 | 0 | 2.5   |
| 1  | 12  | 0 | 0 | 6.5   |
| 1  | 2   | 0 | 0 | 1.5   |
| 5  | 10  | 1 | 0 | 7.5   |
| 1  | 11  | 0 | 0 | 6     |
| 1  | 11  | 0 | 0 | 6     |
| 0  | 2   | 0 | 0 | 1     |
| 3  | 0   | 0 | 0 | 1.5   |
| 2  | 0   | 0 | 0 | 1     |
| 0  | 5   | 0 | 0 | 2.5   |
| 1  | 11  | 0 | 0 | 6     |
| 2  | 18  | 0 | 0 | 10    |
| 1  | 10  | 0 | 0 | 5.5   |
| 0  | 3   | 0 | 0 | 1.5   |
| 34 | 46  | 3 | 0 | 40    |
| 10 | 13  | 0 | 0 | 11.5  |
| 4  | 0   | 0 | 0 | 2     |
| 0  | 2   | 0 | 0 | 1     |
| 2  | 20  | 0 | 0 | 11    |
| 2  | 20  | 0 | 0 | 11    |
| 2  | 18  | 0 | 0 | 10    |
| 8  | 7   | 1 | 0 | 7.5   |
| 3  | 3   | 0 | 0 | 3     |
| 0  | 2   | 0 | 0 | 1     |
| 0  | 0   | 0 | 0 | 0     |
| 6  | 22  | 0 | 0 | 14    |
| 1  | 12  | 0 | 0 | 6.5   |
| 1  | 0   | 0 | 0 | 0.5   |
| 7  | 31  | 1 | 0 | 19    |
| 0  | 0   | 0 | 0 | 0     |
| 0  | 5   | 0 | 0 | 2.5   |
| 0  | 7   | 0 | 0 | 3.5   |
| 0  | 3   | 0 | 0 | 1.5   |
| 2  | 20  | 0 | 0 | 11    |
| 6  | 4   | 0 | 0 | 5     |
| 5  | 15  | 0 | 0 | 10    |

|    |    |   |   |      |
|----|----|---|---|------|
| 1  | 3  | 0 | 0 | 2    |
| 0  | 0  | 0 | 0 | 0    |
| 1  | 1  | 0 | 0 | 1    |
| 3  | 8  | 0 | 0 | 5.5  |
| 5  | 23 | 0 | 0 | 14   |
| 3  | 0  | 0 | 0 | 1.5  |
| 0  | 2  | 0 | 0 | 1    |
| 1  | 3  | 0 | 0 | 2    |
| 0  | 3  | 0 | 0 | 1.5  |
| 0  | 5  | 0 | 0 | 2.5  |
| 0  | 0  | 0 | 0 | 0    |
| 1  | 11 | 0 | 0 | 6    |
| 1  | 0  | 0 | 0 | 0.5  |
| 0  | 0  | 0 | 0 | 0    |
| 0  | 0  | 0 | 0 | 0    |
| 0  | 3  | 0 | 0 | 1.5  |
| 0  | 4  | 0 | 0 | 2    |
| 3  | 8  | 0 | 0 | 5.5  |
| 0  | 7  | 0 | 0 | 3.5  |
| 5  | 24 | 0 | 0 | 14.5 |
| 0  | 0  | 0 | 0 | 0    |
| 2  | 0  | 0 | 0 | 1    |
| 3  | 8  | 0 | 0 | 5.5  |
| 3  | 1  | 0 | 0 | 2    |
| 4  | 16 | 0 | 0 | 10   |
| 5  | 15 | 0 | 0 | 10   |
| 0  | 0  | 0 | 0 | 0    |
| 4  | 16 | 0 | 0 | 10   |
| 0  | 8  | 0 | 0 | 4    |
| 0  | 0  | 0 | 0 | 0    |
| 1  | 11 | 0 | 0 | 6    |
| 4  | 7  | 0 | 0 | 5.5  |
| 0  | 6  | 0 | 0 | 3    |
| 0  | 4  | 0 | 0 | 2    |
| 3  | 1  | 0 | 0 | 2    |
| 4  | 16 | 0 | 0 | 10   |
| 6  | 4  | 0 | 0 | 5    |
| 3  | 0  | 0 | 0 | 1.5  |
| 13 | 72 | 3 | 0 | 42.5 |
| 0  | 0  | 0 | 0 | 0    |
| 4  | 16 | 0 | 0 | 10   |
| 0  | 2  | 0 | 0 | 1    |
| 1  | 2  | 0 | 0 | 1.5  |
| 0  | 0  | 0 | 0 | 0    |
| 0  | 0  | 0 | 0 | 0    |
| 4  | 0  | 0 | 0 | 2    |
| 1  | 10 | 0 | 0 | 5.5  |

|    |    |   |   |      |
|----|----|---|---|------|
| 12 | 40 | 2 | 0 | 26   |
| 0  | 0  | 0 | 0 | 0    |
| 1  | 0  | 0 | 0 | 0.5  |
| 1  | 7  | 0 | 0 | 4    |
| 0  | 4  | 0 | 0 | 2    |
| 2  | 18 | 0 | 0 | 10   |
| 1  | 9  | 0 | 0 | 5    |
| 0  | 14 | 0 | 0 | 7    |
| 1  | 1  | 0 | 0 | 1    |
| 0  | 5  | 0 | 0 | 2.5  |
| 1  | 12 | 0 | 0 | 6.5  |
| 0  | 3  | 0 | 0 | 1.5  |
| 1  | 12 | 0 | 0 | 6.5  |
| 1  | 11 | 0 | 0 | 6    |
| 3  | 3  | 0 | 0 | 3    |
| 6  | 70 | 2 | 0 | 38   |
| 4  | 7  | 0 | 0 | 5.5  |
| 1  | 11 | 0 | 0 | 6    |
| 0  | 3  | 0 | 0 | 1.5  |
| 0  | 3  | 0 | 0 | 1.5  |
| 2  | 4  | 0 | 0 | 3    |
| 2  | 4  | 0 | 0 | 3    |
| 3  | 7  | 0 | 0 | 5    |
| 0  | 0  | 0 | 0 | 0    |
| 3  | 8  | 0 | 0 | 5.5  |
| 1  | 12 | 0 | 0 | 6.5  |
| 0  | 0  | 0 | 0 | 0    |
| 0  | 0  | 0 | 0 | 0    |
| 1  | 11 | 0 | 0 | 6    |
| 0  | 0  | 0 | 0 | 0    |
| 0  | 0  | 0 | 0 | 0    |
| 2  | 18 | 0 | 0 | 10   |
| 0  | 0  | 0 | 0 | 0    |
| 8  | 8  | 0 | 0 | 8    |
| 4  | 16 | 0 | 0 | 10   |
| 1  | 0  | 0 | 0 | 0.5  |
| 0  | 0  | 0 | 0 | 0    |
| 1  | 11 | 0 | 0 | 6    |
| 5  | 15 | 0 | 0 | 10   |
| 1  | 11 | 0 | 0 | 6    |
| 1  | 10 | 0 | 0 | 5.5  |
| 2  | 19 | 0 | 0 | 10.5 |
| 0  | 3  | 0 | 0 | 1.5  |
| 2  | 20 | 0 | 0 | 11   |
| 7  | 28 | 1 | 0 | 17.5 |
| 3  | 27 | 0 | 0 | 15   |
| 1  | 12 | 0 | 0 | 6.5  |

|    |    |   |   |      |
|----|----|---|---|------|
| 2  | 20 | 0 | 0 | 11   |
| 3  | 27 | 0 | 0 | 15   |
| 0  | 0  | 0 | 0 | 0    |
| 0  | 5  | 0 | 0 | 2.5  |
| 0  | 14 | 0 | 0 | 7    |
| 1  | 11 | 0 | 0 | 6    |
| 3  | 7  | 0 | 0 | 5    |
| 0  | 2  | 0 | 0 | 1    |
| 0  | 5  | 0 | 0 | 2.5  |
| 2  | 0  | 0 | 0 | 1    |
| 0  | 9  | 0 | 0 | 4.5  |
| 4  | 1  | 0 | 0 | 2.5  |
| 3  | 8  | 0 | 0 | 5.5  |
| 0  | 0  | 0 | 0 | 0    |
| 0  | 0  | 0 | 0 | 0    |
| 0  | 6  | 0 | 0 | 3    |
| 1  | 2  | 0 | 0 | 1.5  |
| 1  | 0  | 0 | 0 | 0.5  |
| 3  | 8  | 0 | 0 | 5.5  |
| 4  | 0  | 0 | 0 | 2    |
| 0  | 0  | 0 | 0 | 0    |
| 18 | 7  | 1 | 0 | 12.5 |
| 0  | 0  | 0 | 0 | 0    |
| 1  | 12 | 0 | 0 | 6.5  |
| 0  | 0  | 0 | 0 | 0    |
| 1  | 0  | 0 | 0 | 0.5  |
| 2  | 2  | 0 | 0 | 2    |
| 0  | 4  | 0 | 0 | 2    |
| 5  | 23 | 0 | 0 | 14   |
| 0  | 3  | 0 | 0 | 1.5  |
| 0  | 0  | 0 | 0 | 0    |
| 1  | 0  | 0 | 0 | 0.5  |
| 4  | 16 | 0 | 0 | 10   |
| 2  | 29 | 0 | 0 | 15.5 |
| 1  | 9  | 0 | 0 | 5    |
| 0  | 0  | 0 | 0 | 0    |
| 1  | 3  | 0 | 0 | 2    |
| 0  | 3  | 0 | 0 | 1.5  |
| 1  | 1  | 0 | 0 | 1    |
| 0  | 0  | 0 | 0 | 0    |
| 4  | 2  | 0 | 0 | 3    |
| 2  | 4  | 0 | 0 | 3    |
| 5  | 15 | 0 | 0 | 10   |
| 4  | 16 | 0 | 0 | 10   |
| 0  | 9  | 0 | 0 | 4.5  |
| 0  | 3  | 0 | 0 | 1.5  |
| 0  | 0  | 0 | 0 | 0    |

|    |    |   |   |      |
|----|----|---|---|------|
| 1  | 3  | 0 | 0 | 2    |
| 4  | 16 | 0 | 0 | 10   |
| 1  | 10 | 0 | 0 | 5.5  |
| 2  | 4  | 0 | 0 | 3    |
| 6  | 25 | 1 | 0 | 15.5 |
| 6  | 30 | 2 | 0 | 18   |
| 0  | 0  | 0 | 0 | 0    |
| 6  | 22 | 0 | 0 | 14   |
| 0  | 0  | 0 | 0 | 0    |
| 0  | 6  | 0 | 0 | 3    |
| 1  | 9  | 0 | 0 | 5    |
| 2  | 19 | 0 | 0 | 10.5 |
| 1  | 3  | 0 | 0 | 2    |
| 0  | 0  | 0 | 0 | 0    |
| 0  | 0  | 0 | 0 | 0    |
| 0  | 2  | 0 | 0 | 1    |
| 0  | 4  | 0 | 0 | 2    |
| 1  | 1  | 0 | 0 | 1    |
| 3  | 0  | 0 | 0 | 1.5  |
| 11 | 74 | 4 | 0 | 42.5 |
| 10 | 50 | 1 | 0 | 30   |
| 1  | 31 | 0 | 0 | 16   |
| 0  | 2  | 0 | 0 | 1    |
| 16 | 92 | 2 | 0 | 54   |
| 1  | 10 | 0 | 0 | 5.5  |
| 0  | 0  | 0 | 0 | 0    |
| 1  | 0  | 0 | 0 | 0.5  |
| 1  | 10 | 0 | 0 | 5.5  |
| 0  | 6  | 0 | 0 | 3    |
| 0  | 0  | 0 | 0 | 0    |
| 1  | 7  | 0 | 0 | 4    |
| 0  | 4  | 0 | 0 | 2    |
| 3  | 2  | 0 | 0 | 2.5  |
| 3  | 9  | 0 | 0 | 6    |
| 4  | 26 | 0 | 0 | 15   |
| 0  | 0  | 0 | 0 | 0    |
| 0  | 0  | 0 | 0 | 0    |
| 5  | 50 | 2 | 0 | 27.5 |
| 0  | 0  | 0 | 0 | 0    |
| 0  | 6  | 0 | 0 | 3    |
| 19 | 29 | 1 | 0 | 24   |
| 1  | 11 | 0 | 0 | 6    |
| 0  | 8  | 0 | 0 | 4    |
| 8  | 95 | 3 | 0 | 51.5 |
| 0  | 4  | 0 | 0 | 2    |
| 2  | 18 | 0 | 0 | 10   |
| 2  | 29 | 0 | 0 | 15.5 |

|     |     |    |   |      |
|-----|-----|----|---|------|
| 361 | 291 | 29 | 0 | 326  |
| 0   | 0   | 0  | 0 | 0    |
| 6   | 22  | 0  | 0 | 14   |
| 2   | 20  | 0  | 0 | 11   |
| 1   | 2   | 0  | 0 | 1.5  |
| 1   | 0   | 0  | 0 | 0.5  |
| 1   | 11  | 0  | 0 | 6    |
| 8   | 51  | 3  | 0 | 29.5 |
| 4   | 16  | 0  | 0 | 10   |
| 0   | 0   | 0  | 0 | 0    |
| 14  | 43  | 2  | 0 | 28.5 |
| 0   | 0   | 0  | 0 | 0    |
| 2   | 18  | 0  | 0 | 10   |
| 6   | 13  | 0  | 0 | 9.5  |
| 2   | 1   | 0  | 0 | 1.5  |
| 5   | 15  | 0  | 0 | 10   |
| 0   | 2   | 0  | 0 | 1    |
| 0   | 0   | 0  | 0 | 0    |
| 0   | 4   | 0  | 0 | 2    |
| 0   | 2   | 0  | 0 | 1    |
| 1   | 11  | 0  | 0 | 6    |
| 6   | 62  | 1  | 0 | 34   |
| 6   | 48  | 1  | 0 | 27   |
| 1   | 5   | 0  | 0 | 3    |
| 1   | 5   | 0  | 0 | 3    |
| 1   | 12  | 0  | 0 | 6.5  |
| 1   | 3   | 0  | 0 | 2    |
| 3   | 2   | 0  | 0 | 2.5  |
| 0   | 0   | 0  | 0 | 0    |
| 0   | 0   | 0  | 0 | 0    |
| 0   | 4   | 0  | 0 | 2    |
| 6   | 13  | 0  | 0 | 9.5  |
| 2   | 29  | 0  | 0 | 15.5 |
| 0   | 14  | 0  | 0 | 7    |
| 0   | 0   | 0  | 0 | 0    |
| 5   | 15  | 0  | 0 | 10   |
| 1   | 5   | 0  | 0 | 3    |
| 2   | 29  | 0  | 0 | 15.5 |
| 13  | 36  | 2  | 0 | 24.5 |
| 1   | 10  | 0  | 0 | 5.5  |
| 1   | 3   | 0  | 0 | 2    |
| 1   | 1   | 0  | 0 | 1    |
| 1   | 3   | 0  | 0 | 2    |
| 0   | 9   | 0  | 0 | 4.5  |
| 1   | 31  | 0  | 0 | 16   |
| 1   | 12  | 0  | 0 | 6.5  |
| 0   | 4   | 0  | 0 | 2    |

|     |      |    |   |       |
|-----|------|----|---|-------|
| 0   | 14   | 0  | 0 | 7     |
| 1   | 0    | 0  | 0 | 0.5   |
| 0   | 14   | 0  | 0 | 7     |
| 3   | 8    | 0  | 0 | 5.5   |
| 1   | 8    | 0  | 0 | 4.5   |
| 3   | 7    | 0  | 0 | 5     |
| 36  | 56   | 4  | 0 | 46    |
| 2   | 20   | 0  | 0 | 11    |
| 0   | 0    | 0  | 0 | 0     |
| 1   | 1    | 0  | 0 | 1     |
| 0   | 82   | 1  | 0 | 41    |
| 2   | 18   | 0  | 0 | 10    |
| 2   | 18   | 0  | 0 | 10    |
| 75  | 151  | 10 | 0 | 113   |
| 0   | 0    | 0  | 0 | 0     |
| 2   | 2    | 0  | 0 | 2     |
| 0   | 9    | 0  | 0 | 4.5   |
| 0   | 3    | 0  | 0 | 1.5   |
| 3   | 3    | 0  | 0 | 3     |
| 1   | 3    | 0  | 0 | 2     |
| 0   | 0    | 0  | 0 | 0     |
| 0   | 4    | 0  | 0 | 2     |
| 0   | 0    | 0  | 0 | 0     |
| 0   | 14   | 0  | 0 | 7     |
| 0   | 6    | 0  | 0 | 3     |
| 862 | 1356 | 89 | 0 | 1109  |
| 11  | 11   | 0  | 0 | 11    |
| 0   | 5    | 0  | 0 | 2.5   |
| 0   | 5    | 0  | 0 | 2.5   |
| 1   | 12   | 0  | 0 | 6.5   |
| 0   | 0    | 0  | 0 | 0     |
| 0   | 0    | 0  | 0 | 0     |
| 1   | 11   | 0  | 0 | 6     |
| 1   | 11   | 0  | 0 | 6     |
| 6   | 23   | 1  | 0 | 14.5  |
| 0   | 5    | 0  | 0 | 2.5   |
| 0   | 7    | 0  | 0 | 3.5   |
| 0   | 3    | 0  | 0 | 1.5   |
| 0   | 14   | 0  | 0 | 7     |
| 0   | 14   | 0  | 0 | 7     |
| 657 | 776  | 57 | 0 | 716.5 |
| 1   | 0    | 0  | 0 | 0.5   |
| 2   | 29   | 0  | 0 | 15.5  |
| 0   | 14   | 0  | 0 | 7     |
| 1   | 10   | 0  | 0 | 5.5   |
| 0   | 7    | 0  | 0 | 3.5   |
| 0   | 0    | 0  | 0 | 0     |



|    |    |   |   |      |
|----|----|---|---|------|
| 0  | 14 | 0 | 0 | 7    |
| 1  | 11 | 0 | 0 | 6    |
| 0  | 5  | 0 | 0 | 2.5  |
| 4  | 26 | 0 | 0 | 15   |
| 0  | 4  | 0 | 0 | 2    |
| 0  | 2  | 0 | 0 | 1    |
| 0  | 14 | 0 | 0 | 7    |
| 2  | 15 | 1 | 0 | 8.5  |
| 4  | 19 | 1 | 0 | 11.5 |
| 1  | 7  | 0 | 0 | 4    |
| 2  | 4  | 0 | 0 | 3    |
| 1  | 0  | 0 | 0 | 0.5  |
| 0  | 0  | 0 | 0 | 0    |
| 1  | 10 | 0 | 0 | 5.5  |
| 0  | 0  | 0 | 0 | 0    |
| 0  | 5  | 0 | 0 | 2.5  |
| 1  | 12 | 0 | 0 | 6.5  |
| 3  | 27 | 0 | 0 | 15   |
| 3  | 7  | 0 | 0 | 5    |
| 10 | 64 | 2 | 0 | 37   |
| 6  | 5  | 0 | 0 | 5.5  |
| 0  | 2  | 0 | 0 | 1    |
| 2  | 4  | 0 | 0 | 3    |
| 0  | 8  | 0 | 0 | 4    |
| 3  | 7  | 0 | 0 | 5    |
| 0  | 2  | 0 | 0 | 1    |
| 4  | 16 | 0 | 0 | 10   |
| 0  | 2  | 0 | 0 | 1    |
| 3  | 7  | 0 | 0 | 5    |
| 5  | 15 | 0 | 0 | 10   |
| 19 | 36 | 3 | 0 | 27.5 |
| 0  | 0  | 0 | 0 | 0    |
| 0  | 0  | 0 | 0 | 0    |
| 0  | 0  | 0 | 0 | 0    |
| 3  | 0  | 0 | 0 | 1.5  |
| 1  | 0  | 0 | 0 | 0.5  |
| 0  | 14 | 0 | 0 | 7    |
| 3  | 3  | 0 | 0 | 3    |
| 1  | 10 | 0 | 0 | 5.5  |
| 2  | 20 | 0 | 0 | 11   |
| 2  | 19 | 0 | 0 | 10.5 |
| 0  | 4  | 0 | 0 | 2    |
| 1  | 8  | 0 | 0 | 4.5  |
| 0  | 9  | 0 | 0 | 4.5  |
| 1  | 10 | 0 | 0 | 5.5  |
| 0  | 0  | 0 | 0 | 0    |
| 2  | 29 | 0 | 0 | 15.5 |

|    |     |   |   |      |
|----|-----|---|---|------|
| 0  | 0   | 0 | 0 | 0    |
| 4  | 0   | 0 | 0 | 2    |
| 0  | 5   | 0 | 0 | 2.5  |
| 1  | 2   | 0 | 0 | 1.5  |
| 0  | 6   | 0 | 0 | 3    |
| 0  | 5   | 0 | 0 | 2.5  |
| 0  | 9   | 0 | 0 | 4.5  |
| 34 | 158 | 6 | 0 | 96   |
| 0  | 0   | 0 | 0 | 0    |
| 0  | 5   | 0 | 0 | 2.5  |
| 0  | 0   | 0 | 0 | 0    |
| 2  | 18  | 0 | 0 | 10   |
| 11 | 74  | 3 | 0 | 42.5 |
| 0  | 3   | 0 | 0 | 1.5  |
| 0  | 14  | 0 | 0 | 7    |
| 0  | 5   | 0 | 0 | 2.5  |
| 0  | 8   | 0 | 0 | 4    |
| 2  | 1   | 0 | 0 | 1.5  |
| 0  | 0   | 0 | 0 | 0    |
| 3  | 3   | 0 | 0 | 3    |
| 0  | 1   | 1 | 0 | 0.5  |
| 0  | 0   | 0 | 0 | 0    |
| 2  | 18  | 1 | 0 | 10   |
| 0  | 14  | 0 | 0 | 7    |
| 1  | 0   | 0 | 0 | 0.5  |
| 1  | 12  | 0 | 0 | 6.5  |
| 1  | 1   | 0 | 0 | 1    |
| 4  | 7   | 0 | 0 | 5.5  |
| 1  | 1   | 0 | 0 | 1    |
| 4  | 42  | 3 | 0 | 23   |
| 1  | 10  | 0 | 0 | 5.5  |
| 0  | 4   | 0 | 0 | 2    |
| 0  | 4   | 0 | 0 | 2    |
| 1  | 12  | 0 | 0 | 6.5  |
| 8  | 8   | 0 | 0 | 8    |
| 0  | 2   | 0 | 0 | 1    |
| 3  | 2   | 0 | 0 | 2.5  |
| 0  | 23  | 2 | 0 | 11.5 |
| 0  | 0   | 0 | 0 | 0    |
| 1  | 1   | 0 | 0 | 1    |
| 0  | 7   | 0 | 0 | 3.5  |
| 2  | 18  | 0 | 0 | 10   |
| 14 | 18  | 1 | 0 | 16   |
| 9  | 52  | 1 | 0 | 30.5 |
| 1  | 10  | 0 | 0 | 5.5  |
| 1  | 0   | 0 | 0 | 0.5  |
| 0  | 14  | 0 | 0 | 7    |

|    |     |    |   |      |
|----|-----|----|---|------|
| 0  | 2   | 0  | 0 | 1    |
| 1  | 5   | 0  | 0 | 3    |
| 4  | 7   | 0  | 0 | 5.5  |
| 0  | 2   | 0  | 0 | 1    |
| 2  | 1   | 0  | 0 | 1.5  |
| 0  | 0   | 0  | 0 | 0    |
| 11 | 11  | 0  | 0 | 11   |
| 1  | 11  | 0  | 0 | 6    |
| 0  | 0   | 0  | 0 | 0    |
| 2  | 1   | 0  | 0 | 1.5  |
| 1  | 11  | 0  | 0 | 6    |
| 0  | 0   | 0  | 0 | 0    |
| 0  | 0   | 0  | 0 | 0    |
| 6  | 13  | 0  | 0 | 9.5  |
| 0  | 0   | 0  | 0 | 0    |
| 2  | 2   | 0  | 0 | 2    |
| 11 | 61  | 3  | 0 | 36   |
| 0  | 0   | 0  | 0 | 0    |
| 4  | 1   | 0  | 0 | 2.5  |
| 2  | 19  | 0  | 0 | 10.5 |
| 2  | 18  | 0  | 0 | 10   |
| 0  | 0   | 0  | 0 | 0    |
| 0  | 6   | 0  | 0 | 3    |
| 3  | 1   | 0  | 0 | 2    |
| 5  | 4   | 0  | 0 | 4.5  |
| 0  | 0   | 0  | 0 | 0    |
| 1  | 10  | 0  | 0 | 5.5  |
| 0  | 0   | 0  | 0 | 0    |
| 3  | 8   | 0  | 0 | 5.5  |
| 0  | 0   | 0  | 0 | 0    |
| 3  | 1   | 0  | 0 | 2    |
| 0  | 2   | 0  | 0 | 1    |
| 0  | 9   | 0  | 0 | 4.5  |
| 3  | 27  | 0  | 0 | 15   |
| 1  | 0   | 0  | 0 | 0.5  |
| 0  | 2   | 0  | 0 | 1    |
| 0  | 3   | 0  | 0 | 1.5  |
| 0  | 4   | 0  | 0 | 2    |
| 21 | 663 | 28 | 0 | 342  |
| 0  | 0   | 0  | 0 | 0    |
| 1  | 8   | 0  | 0 | 4.5  |
| 3  | 9   | 0  | 0 | 6    |
| 0  | 0   | 0  | 0 | 0    |
| 1  | 12  | 0  | 0 | 6.5  |
| 0  | 0   | 0  | 0 | 0    |
| 0  | 0   | 0  | 0 | 0    |
| 3  | 9   | 0  | 0 | 6    |

|    |    |   |   |      |
|----|----|---|---|------|
| 0  | 0  | 0 | 0 | 0    |
| 0  | 0  | 0 | 0 | 0    |
| 0  | 0  | 0 | 0 | 0    |
| 1  | 3  | 0 | 0 | 2    |
| 0  | 0  | 0 | 0 | 0    |
| 22 | 80 | 2 | 0 | 51   |
| 1  | 0  | 0 | 0 | 0.5  |
| 0  | 0  | 0 | 0 | 0    |
| 1  | 11 | 0 | 0 | 6    |
| 1  | 10 | 0 | 0 | 5.5  |
| 0  | 0  | 0 | 0 | 0    |
| 0  | 0  | 0 | 0 | 0    |
| 4  | 16 | 0 | 0 | 10   |
| 3  | 7  | 0 | 0 | 5    |
| 10 | 3  | 0 | 0 | 6.5  |
| 1  | 9  | 0 | 0 | 5    |
| 4  | 3  | 0 | 0 | 3.5  |
| 0  | 0  | 0 | 0 | 0    |
| 2  | 0  | 0 | 0 | 1    |
| 0  | 0  | 0 | 0 | 0    |
| 4  | 16 | 0 | 0 | 10   |
| 14 | 0  | 0 | 0 | 7    |
| 7  | 27 | 2 | 0 | 17   |
| 0  | 30 | 0 | 0 | 15   |
| 5  | 23 | 1 | 0 | 14   |
| 5  | 21 | 1 | 0 | 13   |
| 15 | 15 | 1 | 0 | 15   |
| 14 | 0  | 0 | 0 | 7    |
| 8  | 49 | 1 | 0 | 28.5 |
| 5  | 20 | 1 | 0 | 12.5 |
| 0  | 30 | 0 | 0 | 15   |
| 0  | 30 | 0 | 0 | 15   |
| 8  | 14 | 1 | 0 | 11   |
| 0  | 30 | 0 | 0 | 15   |
| 0  | 30 | 0 | 0 | 15   |
| 7  | 35 | 1 | 0 | 21   |
| 0  | 30 | 0 | 0 | 15   |
| 0  | 30 | 0 | 0 | 15   |
| 0  | 30 | 0 | 0 | 15   |
| 14 | 0  | 0 | 0 | 7    |
| 0  | 30 | 0 | 0 | 15   |
| 0  | 30 | 0 | 0 | 15   |

means of replicates for the samples (T3 and P18). The average of the counts for replicates were considered

| T3 - mean | T3 > P18 |
|-----------|----------|
| 181       | TRUE     |
| 149.5     | TRUE     |
| 73        | TRUE     |
| 150.5     | TRUE     |
| 84        | TRUE     |
| 42        | TRUE     |
| 73        | TRUE     |
| 51        | TRUE     |
| 122.5     | TRUE     |
| 12        | TRUE     |
| 85.5      | TRUE     |
| 98.5      | TRUE     |
| 0         | FALSE    |
| 20.5      | TRUE     |
| 196       | FALSE    |
| 16.5      | TRUE     |
| 40        | FALSE    |
| 0         | FALSE    |
| 156       | FALSE    |
| 0         | FALSE    |
| 15        | TRUE     |
| 0         | FALSE    |
| 0         | FALSE    |
| 0         | FALSE    |
| 14.5      | TRUE     |
| 0         | FALSE    |
| 1         | FALSE    |
| 0         | FALSE    |
| 110       | FALSE    |
| 25.5      | FALSE    |
| 0         | FALSE    |
| 0         | FALSE    |
| 0.5       | FALSE    |
| 14        | FALSE    |
| 0         | FALSE    |
| 137.5     | FALSE    |
| 29.5      | FALSE    |
| 0         | FALSE    |
| 0         | FALSE    |
| 0         | FALSE    |
| 16        | FALSE    |
| 102.5     | FALSE    |

|       |       |
|-------|-------|
| 74.5  | FALSE |
| 112.5 | FALSE |
| 0     | FALSE |
| 7.5   | FALSE |
| 0     | FALSE |
| 108.5 | FALSE |
| 0     | FALSE |
| 0     | FALSE |
| 24    | TRUE  |
| 0     | FALSE |
| 25    | TRUE  |
| 22.5  | TRUE  |
| 0     | FALSE |
| 5     | FALSE |
| 0     | FALSE |
| 0     | FALSE |
| 19    | TRUE  |
| 0     | FALSE |
| 0     | FALSE |
| 0     | FALSE |
| 37.5  | TRUE  |
| 0     | FALSE |
| 78    | FALSE |
| 0     | FALSE |
| 187   | FALSE |
| 0     | FALSE |
| 0     | FALSE |
| 0     | FALSE |
| 36    | TRUE  |
| 13    | TRUE  |
| 0     | FALSE |
| 13.5  | TRUE  |
| 0     | FALSE |
| 0     | FALSE |
| 12.5  | TRUE  |
| 0     | FALSE |
| 11.5  | TRUE  |
| 0     | FALSE |







|       |       |
|-------|-------|
| 5     | TRUE  |
| 0     | FALSE |
| 225.5 | TRUE  |
| 35.5  | FALSE |
| 0     | FALSE |
| 1     | FALSE |
| 0     | FALSE |
| 1     | FALSE |
| 0.5   | FALSE |
| 10.5  | TRUE  |
| 0     | FALSE |
| 0.5   | FALSE |
| 4.5   | TRUE  |
| 4.5   | TRUE  |
| 0     | FALSE |
| 4.5   | TRUE  |
| 4.5   | TRUE  |
| 0     | FALSE |
| 0     | FALSE |
| 197.5 | FALSE |
| 0     | FALSE |
| 4.5   | TRUE  |
| 0     | FALSE |
| 0.5   | FALSE |
| 0     | FALSE |
| 0     | FALSE |
| 0     | FALSE |
| 1.5   | FALSE |
| 1     | FALSE |
| 1     | FALSE |
| 0     | FALSE |
| 0     | FALSE |
| 0.5   | FALSE |
| 0     | FALSE |
| 0     | FALSE |
| 0     | FALSE |







7.5 FALSE  
0 FALSE  
0 FALSE  
0 FALSE  
13 TRUE  
0 FALSE  
0 FALSE  
0 FALSE  
0 FALSE  
0.5 FALSE  
0.5 FALSE  
0 FALSE  
9 FALSE  
0 FALSE  
2.5 FALSE  
0 FALSE  
0.5 FALSE  
0 FALSE  
0 FALSE  
0 FALSE  
0 FALSE  
0 FALSE  
0 FALSE  
0.5 FALSE  
0 FALSE  
0 FALSE  
0 FALSE  
0 FALSE  
1 FALSE  
0 FALSE  
0.5 FALSE  
1.5 FALSE  
0 FALSE  
0 FALSE  
0 FALSE  
0 FALSE  
0 FALSE  
0.5 FALSE  
61.5 FALSE  
0.5 FALSE  
0 FALSE  
0 FALSE  
0 FALSE  
0 FALSE  
0 FALSE  
0 FALSE

0 FALSE  
0 FALSE  
0 FALSE  
0 FALSE  
0 FALSE  
0 FALSE  
0 FALSE  
0 FALSE  
0 FALSE  
1 FALSE  
0 FALSE  
0 FALSE  
0 FALSE  
0 FALSE  
0 FALSE  
0 FALSE  
46 FALSE  
38 TRUE  
0 FALSE  
0 FALSE  
0 FALSE  
0.5 FALSE  
0 FALSE  
0.5 FALSE  
0 FALSE  
0 FALSE  
0 FALSE  
0 FALSE  
0 FALSE  
0 FALSE  
0.5 FALSE  
0 FALSE  
2.5 TRUE  
4.5 TRUE  
0 FALSE  
0 FALSE







0 FALSE  
3.5 FALSE  
0 FALSE  
0.5 FALSE  
0 FALSE  
0.5 FALSE  
0 FALSE  
0 FALSE  
0 FALSE  
0.5 FALSE  
0 FALSE  
0 FALSE  
0.5 FALSE  
1.5 FALSE  
2.5 FALSE  
0 FALSE  
2 TRUE  
0 FALSE  
0 FALSE  
0 FALSE  
0 FALSE  
0 FALSE  
0 FALSE  
0.5 FALSE  
0 FALSE  
2 FALSE  
0 FALSE  
0 FALSE





0 FALSE  
0 FALSE  
0 FALSE  
0 FALSE  
0 FALSE  
0 FALSE  
0 FALSE  
0 FALSE  
0 FALSE  
0 FALSE  
0 FALSE  
0 FALSE  
0 FALSE  
0 FALSE  
0 FALSE  
0 FALSE  
0 FALSE  
0 FALSE  
0 FALSE  
0 FALSE  
0 FALSE  
10.5 FALSE  
0.5 FALSE  
0 FALSE  
1 FALSE  
0 FALSE  
0.5 FALSE  
1 FALSE  
0 FALSE  
0 FALSE  
0 FALSE  
0 FALSE  
0 FALSE  
0.5 FALSE  
0.5 FALSE  
0 FALSE  
4 FALSE

0 FALSE  
0 FALSE  
0 FALSE  
0 FALSE  
0 FALSE  
0.5 FALSE  
2.5 FALSE  
2 FALSE  
0 FALSE  
0.5 FALSE  
0 FALSE  
0 FALSE  
0 FALSE  
0 FALSE  
0 FALSE  
1 FALSE  
0.5 FALSE  
0 FALSE  
0 FALSE  
0 FALSE  
0.5 FALSE  
0 FALSE  
0 FALSE  
1 FALSE  
0 FALSE  
12.5 FALSE  
0 FALSE  
0 FALSE  
0 FALSE  
0.5 FALSE  
0 FALSE  
0.5 FALSE  
82.5 FALSE  
0 FALSE





0 FALSE  
1 FALSE  
0 FALSE  
5.5 FALSE  
0 FALSE  
0 FALSE  
2 FALSE  
0 FALSE  
50 FALSE  
0 FALSE  
0 FALSE  
0 FALSE  
0 FALSE  
0 FALSE



0 FALSE  
0 FALSE  
0 FALSE  
0 FALSE  
0 FALSE  
0 FALSE  
0 FALSE  
0 FALSE  
0 FALSE  
0 FALSE  
0 FALSE  
0 FALSE  
0 FALSE  
0 FALSE  
0 FALSE  
0 FALSE  
0 FALSE  
0 FALSE  
0 FALSE  
0 FALSE  
0 FALSE  
0 FALSE  
0 FALSE  
0 FALSE  
0 FALSE  
0 FALSE  
0 FALSE  
0 FALSE  
0 FALSE  
0 FALSE  
0 FALSE  
0 FALSE  
0 FALSE  
0 FALSE  
0.5 FALSE  
1 FALSE  
0 FALSE  
3.5 FALSE  
0 FALSE  
0 FALSE  
0 FALSE  
0 FALSE

0 FALSE  
0 FALSE  
0 FALSE  
0 FALSE  
0 FALSE  
0 FALSE  
0 FALSE  
0 FALSE  
0 FALSE  
0 FALSE  
0 FALSE  
0 FALSE  
0 FALSE  
0 FALSE  
0 FALSE  
0 FALSE  
0 FALSE  
0 FALSE  
0 FALSE  
0 FALSE  
0 FALSE  
0 FALSE  
0 FALSE  
0 FALSE  
0 FALSE  
0 FALSE  
0 FALSE  
0 FALSE  
0 FALSE  
0 FALSE  
0 FALSE  
0 FALSE  
0 FALSE  
0 FALSE  
2.5 FALSE  
0 FALSE  
7 FALSE  
0 FALSE  
0 FALSE  
0 FALSE  
0.5 FALSE

0 FALSE  
0 FALSE  
0 FALSE  
0 FALSE  
0 FALSE  
0.5 FALSE  
0 FALSE  
0 FALSE  
0 FALSE  
0.5 FALSE  
0 FALSE  
0 FALSE  
0 FALSE  
1.5 TRUE  
1.5 TRUE  
0 FALSE  
0 FALSE  
0 FALSE  
0 FALSE  
0 FALSE  
7.5 FALSE  
0 FALSE  
0 FALSE  
0 FALSE  
0 FALSE  
2 FALSE  
0 FALSE  
0.5 FALSE  
0 FALSE  
1.5 FALSE  
2 FALSE  
0 FALSE  
0 FALSE  
0 FALSE









0 FALSE  
0 FALSE  
0 FALSE  
0 FALSE  
0 FALSE  
0 FALSE  
0 FALSE  
0 FALSE  
0 FALSE  
0 FALSE  
1.5 FALSE  
0 FALSE  
0 FALSE  
0 FALSE  
0 FALSE  
4.5 FALSE  
0 FALSE  
0 FALSE  
0 FALSE  
0 FALSE  
0 FALSE  
1 FALSE  
0 FALSE  
27.5 FALSE  
0.5 FALSE  
0 FALSE  
1 FALSE  
0 FALSE  
0 FALSE  
0 FALSE  
0 FALSE  
0 FALSE  
0 FALSE  
1 FALSE  
1 FALSE  
0 FALSE  
0 FALSE  
0 FALSE  
0.5 FALSE  
0 FALSE  
0 FALSE





0 FALSE  
0 FALSE  
0 FALSE  
0 FALSE  
0 FALSE  
0 FALSE  
0 FALSE  
0 FALSE  
0 FALSE  
0 FALSE  
0 FALSE  
0 FALSE  
0 FALSE  
0 FALSE  
0 FALSE  
0 FALSE  
16 FALSE  
0.5 FALSE  
0 FALSE  
2 FALSE  
0 FALSE  
0.5 FALSE  
0 FALSE  
0 FALSE  
0 FALSE  
0 FALSE  
4 FALSE  
0 FALSE  
0 FALSE  
0 FALSE  
0 FALSE  
11 FALSE  
0 FALSE  
0 FALSE  
0 FALSE  
0.5 FALSE  
0.5 FALSE  
0 FALSE  
0 FALSE







0 FALSE  
0 FALSE  
0 FALSE  
0 FALSE  
0 FALSE  
0 FALSE  
0 FALSE  
0 FALSE  
0 FALSE  
0 FALSE  
5 FALSE  
0.5 FALSE  
0.5 FALSE  
0 FALSE  
0.5 FALSE  
0 FALSE  
0 FALSE  
0 FALSE  
0 FALSE  
0 FALSE

|       |       |
|-------|-------|
| 0     | FALSE |
| 12.5  | FALSE |
| 0.5   | FALSE |
| 0     | FALSE |
| 0     | FALSE |
| 0     | FALSE |
| 2     | FALSE |
| 0     | FALSE |
| 1     | FALSE |
| 281.5 | FALSE |
| 0.5   | FALSE |
| 0     | FALSE |
| 5     | FALSE |
| 13    | FALSE |

















0 FALSE  
8.5 FALSE  
0 FALSE  
2.5 FALSE  
1.5 FALSE  
0 FALSE  
0.5 FALSE  
0.5 FALSE  
0.5 FALSE  
79 FALSE  
1 FALSE  
0 FALSE  
0 FALSE  
0 FALSE  
0 FALSE  
0 FALSE







0 FALSE  
0 FALSE  
0 FALSE  
0 FALSE  
0 FALSE  
0.5 FALSE  
11 FALSE  
0 FALSE  
0 FALSE  
0 FALSE  
0 FALSE  
0 FALSE  
0 FALSE  
2 FALSE  
0 FALSE  
0 FALSE  
0 FALSE  
0 FALSE  
0 FALSE  
0 FALSE  
25 FALSE  
0 FALSE  
0 FALSE  
0.5 FALSE  
0 FALSE  
0.5 FALSE  
0.5 FALSE  
1 FALSE  
0 FALSE  
0 FALSE  
0 FALSE  
0 FALSE  
0.5 FALSE  
0.5 FALSE  
0.5 FALSE  
42.5 FALSE  
0 FALSE  
0 FALSE





0 FALSE  
0 FALSE  
0 FALSE  
0 FALSE  
0 FALSE  
0 FALSE  
0 FALSE  
0 FALSE  
0 FALSE  
0 FALSE  
0 FALSE  
0 FALSE  
0 FALSE  
0 FALSE  
0 FALSE  
0 FALSE  
0 FALSE  
0 FALSE  
0 FALSE  
0 FALSE  
0 FALSE  
0 FALSE  
0 FALSE  
0 FALSE  
0 FALSE  
0 FALSE  
0 FALSE  
0 FALSE  
0 FALSE  
0 FALSE  
0 FALSE  
0 FALSE  
0 FALSE  
0.5 FALSE  
0.5 FALSE  
0 FALSE









0 FALSE  
0 FALSE  
0 FALSE  
0 FALSE  
0 FALSE  
0 FALSE  
0 FALSE  
0 FALSE  
0 FALSE  
0 FALSE  
0 FALSE  
0 FALSE  
0 FALSE  
0 FALSE  
28 FALSE  
1 FALSE  
0 FALSE  
4.5 FALSE  
0 FALSE  
0.5 FALSE  
0 FALSE  
0 FALSE  
0 FALSE  
0.5 FALSE  
0 FALSE  
1 FALSE  
0.5 FALSE  
0 FALSE  
0 FALSE



0 FALSE  
0 FALSE  
0 FALSE  
0 FALSE  
0 FALSE  
0 FALSE  
0 FALSE  
0 FALSE  
0 FALSE  
0.5 FALSE  
0 FALSE  
1 TRUE  
1 TRUE  
1 TRUE  
0 FALSE  
1 TRUE  
0 FALSE  
0 FALSE  
0 FALSE  
6.5 FALSE  
0.5 FALSE  
0 FALSE  
0 FALSE  
0 FALSE  
0 FALSE  
7 FALSE  
0 FALSE  
0 FALSE  
0.5 FALSE  
0.5 FALSE  
0 FALSE  
0 FALSE  
0.5 FALSE  
0.5 FALSE  
0.5 FALSE  
0.5 FALSE  
0.5 FALSE  
0.5 FALSE  
0 FALSE  
0 FALSE  
0.5 FALSE  
2 FALSE  
1.5 FALSE  
0 FALSE  
0 FALSE  
0 FALSE  
0 FALSE  
0 FALSE

3.5 FALSE  
0 FALSE  
0 FALSE  
0 FALSE  
16 FALSE  
0 FALSE  
0.5 FALSE  
0.5 FALSE  
0 FALSE  
14.5 FALSE  
31.5 FALSE  
3.5 FALSE  
0 FALSE  
0 FALSE  
0 FALSE  
0 FALSE  
2 FALSE  
0 FALSE  
0 FALSE  
0.5 FALSE  
0.5 FALSE  
0.5 FALSE  
0 FALSE  
6.5 FALSE  
0.5 FALSE  
1 FALSE  
0 FALSE  
0.5 FALSE  
3.5 FALSE  
4.5 FALSE  
6.5 FALSE  
0 FALSE  
3 FALSE  
0 FALSE  
35 FALSE  
0 FALSE  
0 FALSE  
0 FALSE  
0 FALSE  
0.5 FALSE  
0 FALSE  
0 FALSE  
0 FALSE  
28.5 FALSE  
26.5 FALSE  
0 FALSE

















0 FALSE  
0 FALSE  
0 FALSE  
0 FALSE  
0 FALSE  
0 FALSE  
0 FALSE  
0 FALSE  
0 FALSE  
0 FALSE  
0 FALSE  
0 FALSE  
0 FALSE  
0 FALSE  
0 FALSE  
0 FALSE  
0 FALSE  
0 FALSE  
0 FALSE  
0 FALSE  
0 FALSE  
0 FALSE  
0 FALSE  
0.5 FALSE  
0 FALSE  
0.5 FALSE  
4.5 FALSE  
0 FALSE  
0 FALSE  
0 FALSE  
0 FALSE

0 FALSE  
0 FALSE  
0 FALSE  
0 FALSE  
0 FALSE  
0 FALSE  
0 FALSE  
0 FALSE  
8.5 FALSE  
0 FALSE  
1.5 FALSE  
0 FALSE  
0 FALSE  
0 FALSE  
4.5 FALSE  
0 FALSE  
0 FALSE  
0 FALSE  
0 FALSE  
0 FALSE  
10 FALSE  
2 FALSE  
0 FALSE  
0.5 FALSE  
0 FALSE  
0 FALSE  
0 FALSE  
0 FALSE

|      |       |
|------|-------|
| 0    | FALSE |
| 0    | FALSE |
| 0    | FALSE |
| 0.5  | FALSE |
| 0.5  | FALSE |
| 0    | FALSE |
| 1.5  | FALSE |
| 57.5 | FALSE |
| 0    | FALSE |
| 2    | FALSE |
| 1    | FALSE |
| 0.5  | FALSE |
| 0    | FALSE |
| 0.5  | FALSE |
| 0    | FALSE |
| 0.5  | FALSE |
| 0    | FALSE |

































0 FALSE  
2 FALSE  
0 FALSE  
0 FALSE  
1 FALSE  
1 FALSE











0 FALSE  
0 FALSE  
0 FALSE  
0 FALSE  
0 FALSE  
0 FALSE  
0 FALSE  
0 FALSE  
0 FALSE  
0 FALSE  
0 FALSE  
0 FALSE  
0 FALSE  
0 FALSE  
0 FALSE  
0 FALSE  
0 FALSE  
0 FALSE  
0 FALSE  
0 FALSE  
0 FALSE  
0 FALSE  
0 FALSE  
0 FALSE  
0 FALSE  
0 FALSE  
0 FALSE  
0 FALSE  
0 FALSE  
0 FALSE  
0 FALSE  
0 FALSE  
0 FALSE  
0 FALSE  
0 FALSE  
0 FALSE  
0 FALSE  
0 FALSE  
0 FALSE  
0 FALSE  
0 FALSE  
0 FALSE  
0 FALSE  
0 FALSE  
0 FALSE  
0 FALSE  
0 FALSE  
0 FALSE  
0 FALSE  
0 FALSE  
0 FALSE  
0 FALSE  
0 FALSE  
0 FALSE  
1 FALSE  
6.5 FALSE  
0 FALSE  
0 FALSE  
0 FALSE





















0 FALSE  
0 FALSE  
0 FALSE  
0 FALSE  
0 FALSE  
0 FALSE  
0 FALSE  
0 FALSE  
0 FALSE  
0 FALSE  
0 FALSE  
0 FALSE  
0 FALSE  
0 FALSE  
0 FALSE  
0 FALSE  
0 FALSE  
0 FALSE  
0 FALSE  
0 FALSE  
0 FALSE  
0 FALSE  
0 FALSE  
0 FALSE  
0 FALSE  
0 FALSE  
0 FALSE  
0 FALSE  
0 FALSE  
0 FALSE  
0 FALSE  
0 FALSE  
0 FALSE  
0 FALSE  
0 FALSE  
0 FALSE  
0 FALSE  
0 FALSE  
0 FALSE  
0 FALSE  
0 FALSE  
10.5 FALSE  
10 FALSE  
0 FALSE  
0 FALSE  
0 FALSE  
0 FALSE



0 FALSE  
0 FALSE  
0 FALSE  
0 FALSE  
0 FALSE  
0 FALSE  
0 FALSE  
0 FALSE  
0 FALSE  
0 FALSE  
0 FALSE  
0 FALSE  
0 FALSE  
0 FALSE  
0 FALSE  
0 FALSE  
0 FALSE  
0 FALSE  
0 FALSE  
0 FALSE  
0 FALSE  
0 FALSE  
0 FALSE  
0 FALSE  
0 FALSE  
0 FALSE  
0 FALSE  
0 FALSE  
0 FALSE  
0 FALSE  
0 FALSE  
0.5 FALSE  
0.5 FALSE  
0 FALSE  
0 FALSE  
0 FALSE  
0 FALSE  
0 FALSE  
0.5 FALSE  
3 FALSE  
0 FALSE

0 FALSE  
0 FALSE  
0 FALSE  
0 FALSE  
0 FALSE  
0 FALSE  
0 FALSE  
0 FALSE  
0 FALSE  
0 FALSE  
0 FALSE  
0 FALSE  
0.5 FALSE  
0.5 FALSE  
11.5 FALSE  
0 FALSE  
0 FALSE  
0 FALSE  
0 FALSE  
0 FALSE  
5.5 FALSE  
0.5 FALSE  
0 FALSE  
0.5 FALSE  
1 FALSE  
0 FALSE  
0 FALSE  
0 FALSE  
1 FALSE  
0.5 FALSE  
0.5 FALSE

58.5 FALSE  
0 FALSE  
0.5 FALSE  
0.5 FALSE  
0 FALSE  
1 FALSE  
0 FALSE  
0 FALSE  
0 FALSE  
0 FALSE  
0 FALSE  
0.5 FALSE  
0.5 FALSE  
1.5 FALSE  
0 FALSE  
0 FALSE  
0 FALSE  
0 FALSE  
0 FALSE  
3 FALSE  
0 FALSE  
0 FALSE  
2.5 FALSE  
0 FALSE  
1 FALSE  
0.5 FALSE  
5 FALSE  
0 FALSE  
0 FALSE



0 FALSE  
5 FALSE  
1 FALSE  
1 FALSE  
0 FALSE  
0 FALSE  
0 FALSE  
0 FALSE  
0 FALSE  
11 FALSE  
0 FALSE  
0 FALSE  
8 FALSE  
0.5 FALSE  
6 FALSE  
0 FALSE  
0 FALSE  
0 FALSE  
0 FALSE  
9 FALSE  
1 FALSE  
0 FALSE  
0.5 FALSE  
0 FALSE  
0 FALSE  
0 FALSE  
1 FALSE  
9.5 FALSE  
0 FALSE  
0 FALSE  
4 FALSE  
11 FALSE  
0 FALSE  
0 FALSE  
2.5 FALSE  
0.5 FALSE  
0.5 FALSE  
1 FALSE  
9 FALSE  
2.5 FALSE  
21 FALSE  
2 FALSE  
5.5 FALSE  
0.5 FALSE  
0.5 FALSE  
0.5 FALSE  
0.5 FALSE

|      |       |
|------|-------|
| 0.5  | FALSE |
| 1.5  | FALSE |
| 5    | FALSE |
| 2    | FALSE |
| 0.5  | FALSE |
| 24   | FALSE |
| 15.5 | FALSE |
| 0.5  | FALSE |
| 0.5  | FALSE |
| 2.5  | FALSE |
| 0.5  | FALSE |
| 0.5  | FALSE |
| 1    | FALSE |
| 12.5 | FALSE |
| 8    | FALSE |
| 1    | FALSE |
| 4    | FALSE |
| 3.5  | FALSE |
| 0.5  | FALSE |
| 22   | FALSE |
| 68   | FALSE |
| 3    | FALSE |
| 2    | FALSE |
| 13   | FALSE |
| 7    | FALSE |
| 8.5  | FALSE |
| 15.5 | FALSE |
| 4.5  | FALSE |
| 14.5 | FALSE |
| 3    | FALSE |
| 2    | FALSE |
| 12   | FALSE |
| 1    | FALSE |
| 3    | FALSE |
| 1    | FALSE |
| 33.5 | FALSE |
| 51   | FALSE |
| 23.5 | FALSE |
| 1    | FALSE |
| 24.5 | FALSE |
| 0.5  | FALSE |
| 15.5 | FALSE |
| 42.5 | FALSE |
| 1    | FALSE |
| 1.5  | FALSE |
| 9    | FALSE |
| 5    | FALSE |

























|     |       |
|-----|-------|
| 0   | FALSE |
| 3   | FALSE |
| 23  | FALSE |
| 0.5 | FALSE |
| 0   | FALSE |
| 2   | FALSE |
| 0   | FALSE |



















|      |       |
|------|-------|
| 0    | FALSE |
| 34.5 | FALSE |
| 2    | FALSE |
| 1    | FALSE |
| 0.5  | FALSE |
| 24   | FALSE |
| 0.5  | FALSE |
| 0.5  | FALSE |
| 2.5  | FALSE |
| 0.5  | FALSE |
| 0.5  | FALSE |
| 1    | FALSE |
| 12   | FALSE |
| 2    | FALSE |
| 3.5  | FALSE |
| 0.5  | FALSE |
| 0.5  | FALSE |
| 1.5  | FALSE |
| 0.5  | FALSE |
| 0.5  | FALSE |
| 15.5 | FALSE |
| 1.5  | FALSE |
| 3    | FALSE |
| 0.5  | FALSE |
| 1.5  | FALSE |
| 1.5  | FALSE |
| 2    | FALSE |

5.5 FALSE  
9 FALSE  
3.5 FALSE  
1.5 FALSE  
2 FALSE  
6 FALSE  
2 FALSE  
1.5 FALSE  
10 FALSE  
0.5 FALSE  
0.5 FALSE  
1.5 FALSE  
0.5 FALSE  
1 FALSE  
22.5 FALSE  
2 FALSE  
5 FALSE  
4 FALSE  
1.5 FALSE  
1 FALSE  
17 FALSE  
1 FALSE  
3.5 FALSE  
1 FALSE  
1 FALSE  
1 FALSE  
56 FALSE  
1 FALSE  
1 FALSE  
1 FALSE  
19.5 FALSE  
29.5 FALSE  
2 FALSE  
0.5 FALSE  
3 FALSE  
24.5 FALSE  
1.5 FALSE  
1.5 FALSE  
41 FALSE  
4.5 FALSE  
12.5 FALSE  
3 FALSE  
3 FALSE  
3 FALSE  
1 FALSE  
6.5 FALSE  
0.5 FALSE



0.5 FALSE  
0.5 FALSE  
9 FALSE  
3 FALSE  
0.5 FALSE  
1 FALSE  
6.5 FALSE  
1.5 FALSE  
0.5 FALSE  
0.5 FALSE  
0.5 FALSE  
0.5 FALSE  
0.5 FALSE  
3.5 FALSE  
0.5 FALSE  
4 FALSE  
0.5 FALSE  
28.5 FALSE  
6.5 FALSE  
0.5 FALSE  
29.5 FALSE  
2 FALSE  
9.5 FALSE  
1.5 FALSE  
0.5 FALSE  
18.5 FALSE  
26 FALSE  
1.5 FALSE  
51 FALSE  
1 FALSE  
4.5 FALSE  
1 FALSE  
5 FALSE  
1 FALSE  
13 FALSE  
0.5 FALSE  
0.5 FALSE  
1 FALSE  
6.5 FALSE  
7.5 FALSE  
0.5 FALSE











































0 FALSE  
0 FALSE  
0 FALSE  
0 FALSE  
0 FALSE  
0 FALSE  
0 FALSE  
0 FALSE  
0 FALSE  
0 FALSE  
0 FALSE  
0 FALSE  
0 FALSE  
0 FALSE  
0 FALSE  
0 FALSE  
0 FALSE  
0 FALSE  
0 FALSE  
0 FALSE  
0 FALSE  
0 FALSE  
0 FALSE  
0 FALSE  
0 FALSE  
0 FALSE  
0 FALSE  
0 FALSE  
0 FALSE  
0 FALSE  
0 FALSE  
0 FALSE  
0 FALSE  
0 FALSE  
0 FALSE  
0 FALSE  
0 FALSE  
0 FALSE  
0 FALSE  
0 FALSE  
0 FALSE  
0 FALSE  
0 FALSE  
4 FALSE  
0 FALSE  
0 FALSE  
0 FALSE  
0 FALSE  
0 FALSE



|      |       |
|------|-------|
| 0    | FALSE |
| 15   | FALSE |
| 2.5  | FALSE |
| 0.5  | FALSE |
| 23.5 | FALSE |
| 0.5  | FALSE |
| 2.5  | FALSE |
| 0.5  | FALSE |
| 1.5  | FALSE |
| 1    | FALSE |
| 5.5  | FALSE |
| 1.5  | FALSE |
| 0.5  | FALSE |
| 0.5  | FALSE |
| 2    | FALSE |
| 1    | FALSE |
| 2    | FALSE |
| 7    | FALSE |
| 2    | FALSE |
| 5.5  | FALSE |
| 1    | FALSE |
| 5.5  | FALSE |
| 11   | FALSE |
| 1.5  | FALSE |

0.5 FALSE  
0.5 FALSE  
28 FALSE  
22.5 FALSE  
0.5 FALSE  
9 FALSE  
7 FALSE  
39 FALSE  
1 FALSE  
1 FALSE  
1 FALSE  
3.5 FALSE  
0.5 FALSE  
0.5 FALSE  
0.5 FALSE  
0.5 FALSE  
1.5 FALSE  
0.5 FALSE  
0.5 FALSE  
0.5 FALSE  
1.5 FALSE  
1 FALSE  
0.5 FALSE  
0.5 FALSE  
0.5 FALSE  
15 FALSE  
1.5 FALSE  
33 FALSE  
1.5 FALSE  
11.5 FALSE  
0.5 FALSE  
16 FALSE  
1 FALSE  
55 FALSE  
0.5 FALSE  
8.5 FALSE  
31.5 FALSE  
14.5 FALSE  
1 FALSE  
3.5 FALSE  
1 FALSE  
37 FALSE  
2 FALSE  
0 FALSE  
0 FALSE  
0 FALSE  
0 FALSE



0 FALSE  
0 FALSE  
0 FALSE  
0 FALSE  
0 FALSE  
0 FALSE  
0 FALSE  
0 FALSE  
0 FALSE  
44.5 FALSE  
14 FALSE  
12.5 FALSE  
2.5 FALSE  
42 FALSE  
2 FALSE  
2 FALSE  
7.5 FALSE  
2.5 FALSE  
1.5 FALSE  
9 FALSE  
7 FALSE  
1.5 FALSE  
1.5 FALSE  
10 FALSE  
4 FALSE  
44.5 FALSE  
4.5 FALSE  
6.5 FALSE  
4 FALSE  
1 FALSE  
4 FALSE  
2.5 FALSE  
1 FALSE  
1 FALSE  
2.5 FALSE  
43.5 FALSE  
7 FALSE  
1 FALSE  
2.5 FALSE  
31.5 FALSE  
45.5 FALSE  
0.5 FALSE  
0.5 FALSE  
0.5 FALSE  
33 FALSE  
0.5 FALSE  
0.5 FALSE

1 FALSE  
27.5 FALSE  
29 FALSE  
4.5 FALSE  
58 FALSE  
2 FALSE  
0.5 FALSE  
11 FALSE  
1.5 FALSE  
1.5 FALSE  
0.5 FALSE  
0.5 FALSE  
0.5 FALSE  
0.5 FALSE  
0.5 FALSE  
1.5 FALSE  
0.5 FALSE  
0.5 FALSE  
0.5 FALSE  
1 FALSE  
1 FALSE  
2 FALSE  
2 FALSE  
1 FALSE  
32 FALSE  
1 FALSE  
1 FALSE  
1 FALSE  
1 FALSE  
2.5 FALSE  
32 FALSE  
49 FALSE  
13.5 FALSE  
1 FALSE  
42.5 FALSE  
7 FALSE  
2.5 FALSE  
2.5 FALSE  
2.5 FALSE  
3 FALSE  
2.5 FALSE  
2 FALSE  
1 FALSE  
1 FALSE  
1 FALSE

1 FALSE  
1 FALSE  
1.5 FALSE  
1.5 FALSE  
3.5 FALSE  
32 FALSE  
19 FALSE  
17.5 FALSE  
24 FALSE  
38 FALSE  
60 FALSE  
3.5 FALSE  
4 FALSE  
1.5 FALSE  
3 FALSE  
1.5 FALSE  
1.5 FALSE  
55.5 FALSE  
1.5 FALSE  
2 FALSE  
10 FALSE  
1.5 FALSE  
1.5 FALSE  
19.5 FALSE  
41.5 FALSE  
2.5 FALSE  
2.5 FALSE  
25.5 FALSE  
17 FALSE  
28 FALSE  
5 FALSE  
47.5 FALSE  
2.5 FALSE  
3.5 FALSE  
3 FALSE  
9.5 FALSE  
5 FALSE  
5 FALSE  
5.5 FALSE  
5.5 FALSE  
34.5 FALSE  
34 FALSE  
32 FALSE  
28 FALSE  
38.5 FALSE  
43.5 FALSE  
0.5 FALSE



0 FALSE  
0.5 FALSE  
0 FALSE  
0.5 FALSE  
0 FALSE  
0 FALSE  
0 FALSE  
0 FALSE  
0 FALSE  
0 FALSE  
0.5 FALSE  
0 FALSE  
0.5 FALSE  
0 FALSE  
0 FALSE  
0 FALSE  
0 FALSE  
0.5 FALSE  
0 FALSE  
0 FALSE  
0.5 FALSE



0 FALSE  
0 FALSE  
0.5 FALSE  
0 FALSE  
0 FALSE  
1 FALSE  
0 FALSE  
0 FALSE  
0 FALSE  
1 FALSE  
0 FALSE  
0.5 FALSE  
0 FALSE  
0 FALSE  
0 FALSE  
0 FALSE  
0 FALSE  
0.5 FALSE  
0 FALSE

















































0 FALSE  
0 FALSE  
0 FALSE  
0 FALSE  
0 FALSE  
0 FALSE  
0 FALSE  
0 FALSE  
0 FALSE  
0 FALSE  
0 FALSE  
0 FALSE  
0 FALSE  
0 FALSE  
0 FALSE  
0 FALSE  
0 FALSE  
0 FALSE  
0 FALSE  
0 FALSE  
0 FALSE  
0 FALSE  
0 FALSE  
0 FALSE  
0 FALSE  
0 FALSE  
0 FALSE  
0 FALSE  
0 FALSE  
0 FALSE  
0 FALSE  
0 FALSE  
0 FALSE  
0 FALSE  
0 FALSE  
0.5 FALSE  
0 FALSE  
0 FALSE  
0 FALSE  
0 FALSE  
0 FALSE  
0 FALSE





0 FALSE  
0.5 FALSE  
0 FALSE  
0 FALSE  
0 FALSE  
1.5 FALSE  
0 FALSE  
0 FALSE  
0 FALSE  
0 FALSE  
0 FALSE  
2 FALSE  
0 FALSE  
2 FALSE  
0 FALSE  
0.5 FALSE  
0 FALSE  
0 FALSE  
0 FALSE  
2.5 FALSE  
0 FALSE  
21.5 FALSE  
0 FALSE  
0 FALSE  
0 FALSE  
0 FALSE



0 FALSE  
0 FALSE  
0 FALSE  
0 FALSE  
0 FALSE  
0 FALSE  
0 FALSE  
0 FALSE  
0 FALSE  
0 FALSE  
0 FALSE  
0 FALSE  
0 FALSE  
0 FALSE  
0 FALSE  
0 FALSE  
1 FALSE  
1.5 FALSE  
2 FALSE  
0 FALSE  
0.5 FALSE  
0 FALSE  
1 FALSE  
0.5 FALSE  
0 FALSE  
0.5 FALSE  
0 FALSE  
1.5 FALSE  
0 FALSE  
0 FALSE  
0.5 FALSE  
0 FALSE  
5.5 FALSE  
0 FALSE  
0 FALSE





1.5 FALSE  
0 FALSE  
0 FALSE  
15 FALSE  
0 FALSE  
1 FALSE  
0 FALSE



0 FALSE  
0 FALSE  
0 FALSE  
0 FALSE  
0 FALSE  
0 FALSE  
0 FALSE  
0.5 FALSE  
0 FALSE  
0.5 FALSE  
1.5 FALSE  
0 FALSE  
0.5 FALSE  
0 FALSE  
1 FALSE  
0 FALSE  
0 FALSE



0 FALSE  
1 FALSE  
0 FALSE  
37.5 FALSE  
0 FALSE  
0.5 FALSE  
0.5 FALSE  
0 FALSE  
2 FALSE  
0 FALSE  
0.5 FALSE  
0 FALSE  
0 FALSE  
4 FALSE  
0 FALSE  
0.5 FALSE  
0 FALSE  
0 FALSE  
0 FALSE  
0 FALSE  
0 FALSE







|     |       |
|-----|-------|
| 1   | FALSE |
| 0   | FALSE |
| 0   | FALSE |
| 27  | FALSE |
| 0   | FALSE |
| 0.5 | FALSE |
| 0   | FALSE |
| 1   | FALSE |
| 0   | FALSE |
| 0   | FALSE |
| 0   | FALSE |
| 2   | FALSE |
| 0   | FALSE |
| 1.5 | FALSE |





4 FALSE  
0 FALSE  
0.5 FALSE  
0 FALSE  
0 FALSE  
0.5 FALSE  
0 FALSE  
0.5 FALSE  
0.5 FALSE  
0 FALSE  
0.5 FALSE  
0.5 FALSE  
0 FALSE  
0.5 FALSE  
0 FALSE  
0 FALSE  
0 FALSE













0 FALSE  
0 FALSE  
0 FALSE  
0 FALSE  
0 FALSE  
0 FALSE  
0 FALSE  
0 FALSE  
0 FALSE  
0 FALSE  
0 FALSE  
0 FALSE  
0 FALSE  
0 FALSE  
0 FALSE  
2 FALSE  
0 FALSE  
0 FALSE  
0 FALSE  
1 FALSE  
0 FALSE  
0 FALSE  
0 FALSE  
0 FALSE  
0.5 FALSE  
0 FALSE  
0 FALSE  
0 FALSE  
0 FALSE  
0.5 FALSE  
3 FALSE  
1 FALSE  
0 FALSE  
5.5 FALSE  
0 FALSE  
0 FALSE  
0 FALSE  
1 FALSE  
10.5 FALSE  
0 FALSE  
0.5 FALSE



0 FALSE  
2 FALSE  
0 FALSE  
0 FALSE  
4 FALSE  
0.5 FALSE  
0.5 FALSE  
0 FALSE  
0.5 FALSE  
0 FALSE  
0 FALSE  
0 FALSE  
0 FALSE  
0 FALSE  
0.5 FALSE  
0 FALSE  
0 FALSE  
0 FALSE  
0 FALSE  
0 FALSE  
1 FALSE  
0.5 FALSE  
0 FALSE

0.5 FALSE  
0 FALSE  
1.5 FALSE  
0 FALSE  
1 FALSE  
0 FALSE  
0 FALSE  
0 FALSE  
1.5 FALSE  
1.5 FALSE  
0 FALSE  
0.5 FALSE  
0 FALSE  
0 FALSE  
0 FALSE  
0 FALSE  
0 FALSE  
0 FALSE

0 FALSE  
0 FALSE  
0 FALSE  
0 FALSE  
0 FALSE  
0 FALSE  
0 FALSE  
0 FALSE  
0.5 FALSE  
0 FALSE  
0 FALSE  
1.5 FALSE  
8 FALSE  
2 FALSE  
0 FALSE  
0.5 FALSE  
0.5 FALSE  
1.5 FALSE  
8 FALSE  
0 FALSE  
3 FALSE  
0 FALSE  
1 FALSE  
0 FALSE  
0 FALSE  
0.5 FALSE  
1 FALSE  
1 FALSE  
0.5 FALSE  
0 FALSE  
0 FALSE  
0 FALSE





0 FALSE  
0 FALSE  
0 FALSE  
0 FALSE  
0 FALSE  
5.5 FALSE  
0 FALSE  
0 FALSE  
1 FALSE  
0 FALSE  
2 FALSE  
0 FALSE  
5.5 FALSE  
0 FALSE  
0.5 FALSE  
0 FALSE  
0.5 FALSE  
0 FALSE  
0 FALSE  
0.5 FALSE  
0 FALSE  
0 FALSE  
0 FALSE  
0 FALSE  
0 FALSE  
0 FALSE  
2 FALSE  
0 FALSE  
0 FALSE  
0 FALSE  
0 FALSE  
0 FALSE  
0 FALSE





0 FALSE  
0 FALSE  
0 FALSE  
0 FALSE  
0 FALSE  
0 FALSE  
0 FALSE  
0 FALSE  
0 FALSE  
6.5 FALSE  
0 FALSE  
0 FALSE  
0.5 FALSE  
2.5 FALSE  
0 FALSE  
0 FALSE  
0 FALSE  
0 FALSE  
0.5 FALSE  
0 FALSE  
0 FALSE  
0 FALSE  
0 FALSE  
0 FALSE  
0.5 FALSE  
0 FALSE  
0 FALSE  
0 FALSE  
0 FALSE  
0.5 FALSE  
0 FALSE  
0 FALSE  
1.5 FALSE  
0 FALSE  
0 FALSE  
3 FALSE  
0 FALSE  
0 FALSE  
0 FALSE  
0 FALSE



0 FALSE  
0 FALSE  
0 FALSE  
1 FALSE  
0 FALSE  
0.5 FALSE  
0 FALSE  
0.5 FALSE  
0 FALSE  
0.5 FALSE  
0 FALSE  
0 FALSE  
0 FALSE  
0 FALSE  
0 FALSE  
2.5 FALSE











0 FALSE  
0 FALSE  
0 FALSE  
0 FALSE  
0.5 FALSE  
1 FALSE  
0 FALSE  
2 FALSE  
0.5 FALSE  
0 FALSE  
0 FALSE  
1 FALSE  
0 FALSE  
0.5 FALSE  
0 FALSE  
0 FALSE  
1.5 FALSE  
0 FALSE  
0 FALSE  
0 FALSE



0 FALSE  
0 FALSE  
0 FALSE  
0 FALSE  
0 FALSE  
0 FALSE  
2 FALSE  
0 FALSE  
0 FALSE  
0 FALSE  
0.5 FALSE  
0 FALSE  
0 FALSE  
5 FALSE  
0 FALSE  
44.5 FALSE  
0 FALSE  
0.5 FALSE  
0 FALSE  
0 FALSE  
0 FALSE  
0 FALSE  
0 FALSE  
28.5 FALSE  
0 FALSE  
0 FALSE  
0 FALSE  
0 FALSE  
0 FALSE  
0 FALSE



0 FALSE  
0 FALSE  
0 FALSE  
0 FALSE  
0 FALSE  
0 FALSE  
0 FALSE  
0 FALSE  
3 FALSE  
0 FALSE  
0 FALSE  
0 FALSE  
0 FALSE  
1.5 FALSE  
0 FALSE  
0.5 FALSE  
0 FALSE  
0.5 FALSE  
0 FALSE  
1.5 FALSE  
0 FALSE  
1 FALSE  
0 FALSE  
0 FALSE  
0 FALSE  
0 FALSE  
0.5 FALSE  
0.5 FALSE  
0 FALSE  
0 FALSE  
0 FALSE





0 FALSE  
0 FALSE  
0 FALSE  
0 FALSE  
0 FALSE  
1 FALSE  
0 FALSE  
1 FALSE  
0 FALSE  
0.5 FALSE  
0.5 FALSE  
0.5 FALSE  
0 FALSE  
0.5 FALSE  
0.5 FALSE  
0 FALSE  
0 FALSE  
0.5 FALSE  
0 FALSE  
0 FALSE  
0.5 FALSE  
0 FALSE

ed to identify if the genes were up-regulated in one or the other sample. The Benjamini and Hochber



















































































































































































































































































































































































































































































































g's (BH) method was used to adjust p-values for multiple testing and for controlling the false discover

















































































































































































































































































































































































































































































































**y rate (FDR)**
