# Supplementary material
Source: PubMed Central journal article supplement (PMC6638658)
Supplement: MPP-13-454-s008.pdf [file MPP-13-454-s008.pdf]

**Table S4. Table showing the results of differential gene analysis using edgeR for the pair T6 - P18. It has the**

| Gene ID (PITG #)                                                                           | logConc  | logFC    | p.value  |
|--------------------------------------------------------------------------------------------|----------|----------|----------|
| PITG_08841   Pi conserved hypothetical protein (129 nt)                                    | -28.7946 | 42.44285 | 1.03E-11 |
| PITG_08845   Pi mannitol dehydrogenase, putative (1065 nt)                                 | -12.9399 | 9.148329 | 1.29E-09 |
| PITG_18920   Pi conserved hypothetical protein (1307 nt)                                   | -14.3386 | 10.5281  | 1.78E-09 |
| PITG_17826   Pi conserved hypothetical protein (2000 nt)                                   | -14.6435 | 9.936781 | 3.05E-09 |
| PITG_00251   Pi conserved hypothetical protein (1831 nt)                                   | -30.1356 | -39.7609 | 5.09E-09 |
| PITG_00121   Pi sporangia induced predicted protein (1146 nt)                              | -30.4166 | 39.19887 | 1.87E-08 |
| PITG_04074   Pi secreted RxLR effector peptide, putative (528 nt)                          | -11.8658 | 7.458751 | 2.36E-08 |
| PITG_08795   Pi conserved hypothetical protein (2861 nt)                                   | -30.391  | 39.25016 | 3.00E-08 |
| PITG_15969   Pi conserved hypothetical protein (2656 nt)                                   | -13.1505 | 7.302491 | 3.66E-08 |
| PITG_02501   Pi conserved hypothetical protein (986 nt)                                    | -12.7925 | -8.73206 | 3.68E-08 |
| PITG_15375   Pi conserved hypothetical protein (2035 nt)                                   | -13.1535 | 8.422314 | 3.77E-08 |
| PITG_07355   Pi cleavage induced hypothetical protein (1265 nt)                            | -13.3278 | 7.440945 | 3.88E-08 |
| PITG_14412   Pi carbonic anhydrase, putative (1128 nt)                                     | -30.5379 | 38.95622 | 3.88E-08 |
| PITG_08844   Pi mannitol dehydrogenase, putative (1696 nt)                                 | -12.2247 | 8.214878 | 4.35E-08 |
| PITG_14312   Pi methylenetetrahydrofolate dehydrogenase [NAD+], putative (1065 nt)         | -29.8839 | -40.2643 | 4.38E-08 |
| PITG_08880   Pi ADP-ribosylation factor family (2009 nt)                                   | -13.9244 | 7.461892 | 6.95E-08 |
| PITG_18845   Pi hypothetical protein (799 nt)                                              | -29.8223 | -40.3876 | 8.38E-08 |
| PITG_13671   Pi glucanase inhibitor protein 3 (839 nt)                                     | -30.1922 | -39.6478 | 9.69E-08 |
| PITG_17002   Pi conserved hypothetical protein (1054 nt)                                   | -14.396  | 7.530123 | 9.73E-08 |
| PITG_11863   Pi transmembrane protein, putative (700 nt)                                   | -14.1585 | 7.531594 | 9.95E-08 |
| PITG_04999   Pi MtN3-like protein (1252 nt)                                                | -13.3094 | 6.984689 | 1.03E-07 |
| PITG_09297   Pi conserved hypothetical protein (697 nt)                                    | -12.0001 | 6.481005 | 1.15E-07 |
| PITG_14726   Pi hypothetical protein (1975 nt)                                             | -30.7582 | 38.51566 | 1.18E-07 |
| PITG_07921   Pi PLAC8 family protein (459 nt)                                              | -15.5907 | 8.454336 | 1.22E-07 |
| PITG_13327   Pi conserved hypothetical protein (852 nt)                                    | -15.253  | 8.717838 | 1.26E-07 |
| PITG_16727   Pi conserved hypothetical protein (1484 nt)                                   | -30.776  | 38.48019 | 1.32E-07 |
| PITG_19602   Pi putative GPI-anchored serine-threonine rich hypothetical protein (1540 nt) | -14.6339 | 8.111968 | 1.37E-07 |
| PITG_12920   Pi hypothetical protein (1569 nt)                                             | -30.768  | -38.4962 | 1.39E-07 |
| PITG_18578   Pi dual specificity protein phosphatase, putative (1540 nt)                   | -12.8215 | 6.61211  | 1.55E-07 |
| PITG_12336   Pi Crinkler (CRN) family protein, pseudogene (491 nt)                         | -30.5314 | -38.9692 | 2.05E-07 |
| PITG_06021   Pi glucokinase, putative (1041 nt)                                            | -30.3094 | -39.4134 | 2.13E-07 |
| PITG_04121   Pi sorbitol dehydrogenase, putative (1080 nt)                                 | -9.438   | 6.280735 | 2.24E-07 |
| PITG_08843   Pi mannitol dehydrogenase, putative (1065 nt)                                 | -30.4197 | 39.1927  | 2.42E-07 |
| PITG_19103   Pi conserved hypothetical protein (684 nt)                                    | -15.0188 | 7.684184 | 2.66E-07 |
| PITG_11621   Pi conserved hypothetical protein (881 nt)                                    | -15.7742 | 8.084523 | 2.69E-07 |
| PITG_12878   Pi hypothetical protein similar to sexually induced protein 3 (1316 nt)       | -14.2906 | 7.435291 | 2.94E-07 |
| PITG_15628   Pi conserved hypothetical protein (1316 nt)                                   | -13.3406 | 6.850096 | 3.02E-07 |
| PITG_17828   Pi putative GPI-anchored serine-threonine rich hypothetical protein (1623 nt) | -14.1031 | 7.101265 | 3.09E-07 |
| PITG_01363   Pi conserved hypothetical protein (1623 nt)                                   | -30.961  | 38.11006 | 4.07E-07 |
| PITG_09383   Pi aquaporin, putative (825 nt)                                               | -15.8824 | 7.867173 | 4.62E-07 |
| PITG_19399   Pi methylenetetrahydrofolate dehydrogenase [NAD+], putative (1065 nt)         | -14.0064 | -10.0668 | 4.64E-07 |
| PITG_00761   Pi protein kinase, putative (1140 nt)                                         | -14.9427 | -8.21662 | 4.69E-07 |
| PITG_02507   Pi conserved hypothetical protein (972 nt)                                    | -12.5157 | 6.390227 | 4.73E-07 |
| PITG_07059   Pi MADS-box transcription factor, putative (1697 nt)                          | -15.8907 | 7.850452 | 4.86E-07 |
| PITG_05394   Pi conserved hypothetical protein (2421 nt)                                   | -15.9094 | 7.813151 | 5.40E-07 |

|            |                                                                  |          |          |          |
|------------|------------------------------------------------------------------|----------|----------|----------|
| PITG_06085 | Pi hypothetical protein (1199 nt)                                | -30.8179 | -38.3963 | 5.77E-07 |
| PITG_14530 | Pi conserved hypothetical protein (383 nt)                       | -14.4877 | 8.015498 | 7.02E-07 |
| PITG_05949 | Pi conserved hypothetical protein (3151 nt)                      | -30.9898 | 38.05247 | 7.17E-07 |
| PITG_17477 | Pi conserved hypothetical protein (1125 nt)                      | -15.5053 | 8.208552 | 7.20E-07 |
| PITG_06741 | Pi conserved hypothetical protein (8256 nt)                      | -13.1109 | 6.763309 | 7.27E-07 |
| PITG_14663 | Pi conserved hypothetical protein (533 nt)                       | -13.2501 | 7.134613 | 8.00E-07 |
| PITG_02030 | Pi cleavage induced hypothetical protein (1042 nt)               | -15.9814 | 7.669184 | 8.45E-07 |
| PITG_17825 | Pi conserved hypothetical protein (707 nt)                       | -30.9721 | 38.08799 | 8.64E-07 |
| PITG_13496 | Pi elicitor-like transglutaminase, putative (2063 nt)            | -14.5267 | 6.795024 | 9.01E-07 |
| PITG_00149 | Pi conserved hypothetical protein (5349 nt)                      | -30.7392 | 38.55373 | 9.06E-07 |
| PITG_04281 | Pi Cleavage induced conserved protein (432 nt)                   | -15.6054 | 8.015148 | 9.41E-07 |
| PITG_08103 | Pi hypothetical protein (333 nt)                                 | -30.2447 | -39.5428 | 9.50E-07 |
| PITG_19930 | Pi conserved hypothetical protein (1199 nt)                      | -14.4273 | 6.721978 | 9.70E-07 |
| PITG_15968 | Pi mucin-like protein (3491 nt)                                  | -16.0127 | 7.606571 | 1.01E-06 |
| PITG_18443 | Pi conserved hypothetical protein (563 nt)                       | -15.9354 | 7.766054 | 1.02E-06 |
| PITG_10381 | Pi SCP-like extracellular protein (2091 nt)                      | -14.2994 | 6.403146 | 1.18E-06 |
| PITG_11238 | Pi nuclear LIM factor interactor-interacting protein cleavage-   | -14.7993 | 6.723436 | 1.24E-06 |
| PITG_13183 | Pi sporangia induced conserved hypothetical protein (674 nt)     | -16.0538 | 7.524302 | 1.30E-06 |
| PITG_22878 | Pi zonadhesin-like protein (1343 nt)                             | -14.4861 | 6.604482 | 1.41E-06 |
| PITG_04335 | Pi AP-2 complex subunit alpha, putative (3043 nt)                | -16.0515 | 7.529893 | 1.42E-06 |
| PITG_16389 | Pi crinkler (CRN) family protein, pseudogene (1467 nt)           | -31.1802 | -37.6718 | 1.48E-06 |
| PITG_14624 | Pi conserved hypothetical protein (801 nt)                       | -13.6282 | 6.985622 | 1.64E-06 |
| PITG_16382 | Pi HAM34-like putative membrane protein, putative (3491 n        | -12.9909 | 5.836011 | 1.72E-06 |
| PITG_13581 | Pi ATP-binding Cassette (ABC) Superfamily (4050 nt)              | -31.1781 | 37.676   | 1.82E-06 |
| PITG_05956 | Pi conserved hypothetical protein (2443 nt)                      | -31.2149 | 37.60222 | 1.88E-06 |
| PITG_11239 | Pi nuclear LIM factor interactor-interacting protein cleavage-   | -31.1874 | 37.65734 | 1.95E-06 |
| PITG_09306 | Pi conserved hypothetical protein (1203 nt)                      | -13.5767 | 5.985883 | 2.00E-06 |
| PITG_10571 | Pi hypothetical protein (357 nt)                                 | -31.1613 | 37.70944 | 2.15E-06 |
| PITG_11987 | Pi glycoside hydrolase, putative (2422 nt)                       | -16.1537 | 7.324496 | 2.42E-06 |
| PITG_11858 | Pi conserved hypothetical protein (1256 nt)                      | -14.6486 | -6.96557 | 2.45E-06 |
| PITG_18680 | Pi cleavage induced conserved hypothetical protein (1279 nt)     | -31.2332 | 37.56577 | 2.57E-06 |
| PITG_01266 | Pi glycoside hydrolase, putative (1680 nt)                       | -16.1183 | 7.399258 | 2.73E-06 |
| PITG_06381 | Pi hypothetical protein (468 nt)                                 | -12.0831 | 5.554617 | 2.79E-06 |
| PITG_13551 | Pi creatine kinase, mitochondrial precursor (2465 nt)            | -14.4319 | 6.138714 | 2.97E-06 |
| PITG_16465 | Pi conserved hypothetical protein (722 nt)                       | -15.7834 | 7.656995 | 3.03E-06 |
| PITG_11241 | Pi nuclear LIM factor interactor-interacting protein spore-spore | -12.0937 | 5.990141 | 3.15E-06 |
| PITG_15858 | Pi conserved hypothetical protein (1103 nt)                      | -14.9477 | 6.726566 | 3.20E-06 |
| PITG_05941 | Pi conserved hypothetical protein (1926 nt)                      | -13.8467 | 6.040168 | 3.55E-06 |
| PITG_02429 | Pi cAMP-dependent protein kinase catalytic subunit, putative     | -15.4485 | 6.824942 | 3.59E-06 |
| PITG_05387 | Pi ATP-binding Cassette (ABC) Superfamily (1371 nt)              | -31.2612 | -37.5097 | 3.66E-06 |
| PITG_07146 | Pi conserved hypothetical protein (458 nt)                       | -16.0078 | 7.63221  | 3.90E-06 |
| PITG_13267 | Pi conserved hypothetical protein (1109 nt)                      | -16.1184 | 7.403861 | 3.98E-06 |
| PITG_11903 | Pi conserved hypothetical protein (1712 nt)                      | -13.8745 | 5.854872 | 4.24E-06 |
| PITG_01333 | Pi complement control module protein, putative (753 nt)          | -12.3574 | 5.391977 | 4.26E-06 |
| PITG_06261 | Pi conserved hypothetical protein (759 nt)                       | -31.3475 | 37.33712 | 4.53E-06 |
| PITG_05806 | Pi AP-2 complex subunit mu (2148 nt)                             | -31.3462 | 37.33971 | 4.90E-06 |
| PITG_01415 | Pi conserved hypothetical protein (1455 nt)                      | -31.3603 | 37.31148 | 4.93E-06 |

|            |                                                                 |          |          |          |
|------------|-----------------------------------------------------------------|----------|----------|----------|
| PITG_04957 | Pi AP-2 complex subunit sigma-1 (439 nt)                        | -15.27   | 6.842364 | 4.94E-06 |
| PITG_09767 | Pi conserved hypothetical protein (1714 nt)                     | -30.9235 | -38.1852 | 5.16E-06 |
| PITG_09249 | Pi sporangia induced hypothetical protein (706 nt)              | -14.9331 | 6.455199 | 5.40E-06 |
| PITG_09194 | Pi aquaporin, putative (713 nt)                                 | -30.9727 | -38.0867 | 5.54E-06 |
| PITG_09667 | Pi sporangia induced bZIP regulated hypothetical protein (54    | -31.285  | 37.46218 | 5.54E-06 |
| PITG_16893 | Pi hypothetical protein (1418 nt)                               | -12.219  | 5.588243 | 5.77E-06 |
| PITG_02029 | Pi cleavage induced hypothetical protein (1963 nt)              | -31.405  | 37.22206 | 5.92E-06 |
| PITG_21568 | Pi histone H1, putative (779 nt)                                | -30.5108 | -39.0105 | 6.02E-06 |
| PITG_17362 | Pi conserved hypothetical protein (1039 nt)                     | -31.3342 | 37.36369 | 6.17E-06 |
| PITG_02008 | Pi cleavage induced hypothetical protein (1557 nt)              | -31.3639 | 37.30422 | 6.21E-06 |
| PITG_08000 | Pi glucosylceramidase (2040 nt)                                 | -15.5613 | 6.597891 | 6.43E-06 |
| PITG_17486 | Pi conserved hypothetical protein (1200 nt)                     | -16.3325 | 6.966942 | 6.79E-06 |
| PITG_22022 | Pi cysteine protease family C01A, putative (1504 nt)            | -30.9298 | 38.17253 | 6.88E-06 |
| PITG_15861 | Pi conserved hypothetical protein (879 nt)                      | -16.3351 | 6.961765 | 7.11E-06 |
| PITG_16494 | Pi hypothetical protein (410 nt)                                | -14.8765 | 6.095485 | 7.16E-06 |
| PITG_14567 | Pi conserved hypothetical protein (387 nt)                      | -11.0285 | 5.610748 | 7.22E-06 |
| PITG_17675 | Pi bzip regulated hypothetical protein (861 nt)                 | -13.3035 | 5.337752 | 7.27E-06 |
| PITG_12545 | Pi croquemort-like mating protein M82, putative (2332 nt)       | -30.8316 | -38.3689 | 7.45E-06 |
| PITG_10378 | Pi conserved hypothetical protein (999 nt)                      | -11.0378 | -6.89207 | 7.57E-06 |
| PITG_19088 | Pi conserved hypothetical protein (676 nt)                      | -30.9765 | -38.0791 | 7.67E-06 |
| PITG_16221 | Pi Crinkler (CRN) family protein (1982 nt)                      | -15.671  | -6.87997 | 7.91E-06 |
| PITG_00332 | Pi Monovalent Cation:Proton Antiporter-1 (CPA1) Family (20      | -16.3471 | 6.938739 | 8.03E-06 |
| PITG_13269 | Pi conserved hypothetical protein (1039 nt)                     | -16.3471 | 6.938739 | 8.03E-06 |
| PITG_04721 | Pi dynein light chain/pantothenate kinase (377 nt)              | -16.3003 | 7.03612  | 8.25E-06 |
| PITG_05392 | Pi conserved hypothetical protein (1245 nt)                     | -12.6987 | 5.937752 | 8.43E-06 |
| PITG_10153 | Pi conserved hypothetical protein (868 nt)                      | -13.4202 | -6.7783  | 8.52E-06 |
| PITG_17410 | Pi protein kinase, putative (1201 nt)                           | -31.4767 | 37.07878 | 9.04E-06 |
| PITG_16967 | Pi cleavage induced hypothetical protein (2571 nt)              | -31.4708 | 37.09044 | 9.96E-06 |
| PITG_20413 | Pi putative GP-anchored serine-rich elicitor INL13-like protein | -16.3213 | 6.995196 | 1.01E-05 |
| PITG_10999 | Pi endo-1,3(4)-beta-glucanase, putative (2238 nt)               | -31.4866 | 37.05896 | 1.02E-05 |
| PITG_15166 | Pi secreted RxLR effector peptide, putative (519 nt)            | -30.5876 | -38.857  | 1.09E-05 |
| PITG_03627 | Pi conserved hypothetical protein (1434 nt)                     | -16.2949 | 7.051915 | 1.14E-05 |
| PITG_08897 | Pi hypothetical protein (439 nt)                                | -11.0287 | 6.584375 | 1.15E-05 |
| PITG_14177 | Pi conserved hypothetical protein (401 nt)                      | -31.5243 | 36.98346 | 1.17E-05 |
| PITG_08569 | Pi conserved hypothetical protein (1127 nt)                     | -16.023  | 7.177782 | 1.24E-05 |
| PITG_11848 | Pi conserved hypothetical protein (1239 nt)                     | -31.4891 | 37.05396 | 1.26E-05 |
| PITG_00937 | Pi sporangia induced hypothetical protein (2469 nt)             | -31.5412 | 36.94964 | 1.30E-05 |
| PITG_06474 | Pi conserved hypothetical protein (1321 nt)                     | -31.1852 | -37.6616 | 1.30E-05 |
| PITG_09354 | Pi aquaporin, putative (866 nt)                                 | -14.4888 | -6.1439  | 1.30E-05 |
| PITG_22150 | Pi conserved hypothetical protein (976 nt)                      | -31.5296 | 36.97286 | 1.32E-05 |
| PITG_19078 | Pi conserved hypothetical protein (1213 nt)                     | -12.7674 | 5.474684 | 1.34E-05 |
| PITG_02658 | Pi conserved hypothetical protein (1370 nt)                     | -14.9182 | -6.42822 | 1.34E-05 |
| PITG_10870 | Pi conserved hypothetical protein (1393 nt)                     | -16.3629 | 6.913873 | 1.45E-05 |
| PITG_12798 | Pi short chain dehydrogenase, putative (766 nt)                 | -30.9396 | -38.1529 | 1.46E-05 |
| PITG_21937 | Pi conserved hypothetical protein (1908 nt)                     | -31.5459 | 36.94026 | 1.46E-05 |
| PITG_13601 | Pi cleavage induced hypothetical protein (1338 nt)              | -31.4586 | 37.11501 | 1.55E-05 |
| PITG_06142 | Pi copine-like protein (2275 nt)                                | -14.3123 | -6.40595 | 1.61E-05 |

|            |                                                         |          |          |          |
|------------|---------------------------------------------------------|----------|----------|----------|
| PITG_00877 | Pi putative GPI anchor protein (1686 nt)                | -15.7227 | 6.275041 | 1.64E-05 |
| PITG_10365 | Pi conserved hypothetical protein (819 nt)              | -10.7082 | -5.97773 | 1.66E-05 |
| PITG_10934 | Pi conserved hypothetical protein (1731 nt)             | -14.064  | 5.291476 | 1.68E-05 |
| PITG_06019 | Pi glucokinase, putative (919 nt)                       | -14.8835 | -6.39083 | 1.68E-05 |
| PITG_02657 | Pi conserved hypothetical protein (1664 nt)             | -15.0486 | -6.16401 | 1.70E-05 |
| PITG_08875 | Pi conserved hypothetical protein (1037 nt)             | -16.0957 | 7.034665 | 1.70E-05 |
| PITG_09979 | Pi conserved hypothetical protein (1417 nt)             | -16.4885 | 6.654896 | 1.71E-05 |
| PITG_16981 | Pi thrombospondin-like protein (7212 nt)                | -15.5046 | 6.73609  | 1.71E-05 |
| PITG_12911 | Pi conserved hypothetical protein (511 nt)              | -31.4563 | 37.11944 | 1.78E-05 |
| PITG_08382 | Pi ATP-binding Cassette (ABC) superfamily (665 nt)      | -16.5019 | 6.6281   | 1.81E-05 |
| PITG_16199 | Pi conserved hypothetical protein (1818 nt)             | -16.4985 | 6.634879 | 1.81E-05 |
| PITG_22667 | Pi conserved hypothetical protein (1285 nt)             | -31.5002 | 37.0318  | 1.83E-05 |
| PITG_10364 | Pi conserved hypothetical protein (810 nt)              | -10.9339 | -5.67551 | 1.85E-05 |
| PITG_07999 | Pi alpha-tubulin, putative (1757 nt)                    | -12.647  | 4.915093 | 1.86E-05 |
| PITG_05295 | Pi conserved hypothetical protein (847 nt)              | -31.5977 | 36.83666 | 1.93E-05 |
| PITG_16278 | Pi conserved hypothetical protein (571 nt)              | -15.4578 | 5.70629  | 1.98E-05 |
| PITG_00321 | Pi conserved hypothetical protein (1365 nt)             | -31.6182 | 36.79573 | 2.03E-05 |
| PITG_15376 | Pi conserved hypothetical protein (1641 nt)             | -16.5172 | 6.597461 | 2.03E-05 |
| PITG_12686 | Pi conserved hypothetical protein (930 nt)              | -13.3596 | -5.06337 | 2.03E-05 |
| PITG_13934 | Pi calcium-dependent protein kinase, putative (2099 nt) | -31.5469 | 36.93834 | 2.05E-05 |
| PITG_08913 | Pi conserved hypothetical protein (435 nt)              | -31.5172 | -36.9977 | 2.05E-05 |
| PITG_08750 | Pi conserved hypothetical protein (543 nt)              | -16.5259 | 6.580081 | 2.15E-05 |
| PITG_08612 | Pi cell 5A endo-1,4-beta-glucanase, putative (1789 nt)  | -16.5285 | 6.57486  | 2.15E-05 |
| PITG_11102 | Pi cGMP-dependent protein kinase, putative (2475 nt)    | -31.6105 | 36.81117 | 2.17E-05 |
| PITG_04317 | Pi Major Facilitator Superfamily (MFS) (1527 nt)        | -15.8993 | 7.387903 | 2.19E-05 |
| PITG_11572 | Pi conserved hypothetical protein (1158 nt)             | -11.9218 | -6.04662 | 2.24E-05 |
| PITG_13414 | Pi conserved hypothetical protein (1014 nt)             | -15.5143 | 6.352905 | 2.32E-05 |
| PITG_19294 | Pi protein kinase (900 nt)                              | -31.5969 | 36.83827 | 2.35E-05 |
| PITG_10799 | Pi conserved hypothetical protein (955 nt)              | -16.4363 | 6.769134 | 2.41E-05 |
| PITG_00891 | Pi conserved hypothetical protein (837 nt)              | -16.5527 | 6.52656  | 2.43E-05 |
| PITG_14607 | Pi conserved hypothetical protein (1089 nt)             | -31.65   | 36.73205 | 2.59E-05 |
| PITG_03309 | Pi Intraflagellar Transport Protein 140 (4726 nt)       | -31.6365 | 36.75914 | 2.60E-05 |
| PITG_07406 | Pi conserved hypothetical protein (1008 nt)             | -31.6278 | 36.77652 | 2.61E-05 |
| PITG_09137 | Pi conserved hypothetical protein (551 nt)              | -31.6481 | 36.73594 | 2.76E-05 |
| PITG_05389 | Pi ATP-binding Cassette (ABC) Superfamily (836 nt)      | -31.6398 | -36.7524 | 2.77E-05 |
| PITG_07633 | Pi conserved hypothetical protein (533 nt)              | -12.4754 | 6.782122 | 2.82E-05 |
| PITG_10413 | Pi SCP-like extracellular protein (549 nt)              | -31.5937 | 36.84481 | 2.85E-05 |
| PITG_01096 | Pi ATP-binding Cassette (ABC) Superfamily (2979 nt)     | -14.1963 | 5.210972 | 2.87E-05 |
| PITG_00489 | Pi conserved hypothetical protein (1605 nt)             | -16.5721 | 6.488792 | 2.93E-05 |
| PITG_22247 | Pi conserved hypothetical protein (2879 nt)             | -31.6719 | 36.68839 | 2.93E-05 |
| PITG_00962 | Pi conserved hypothetical protein (774 nt)              | -14.4893 | 5.157931 | 2.98E-05 |
| PITG_00123 | Pi sporangia induced hypothetical protein (453 nt)      | -13.0146 | 4.930936 | 2.99E-05 |
| PITG_04075 | Pi sporangia induced hypothetical protein (496 nt)      | -31.5854 | 36.86125 | 3.06E-05 |
| PITG_18173 | Pi conserved hypothetical protein (792 nt)              | -31.5901 | -36.852  | 3.06E-05 |
| PITG_21584 | Pi hypothetical protein (2912 nt)                       | -31.0016 | 38.02893 | 3.08E-05 |
| PITG_08209 | Pi conserved hypothetical protein (505 nt)              | -31.6887 | -36.6546 | 3.12E-05 |
| PITG_18169 | Pi conserved hypothetical protein (547 nt)              | -31.6795 | 36.67307 | 3.12E-05 |

|            |                                                              |          |          |          |
|------------|--------------------------------------------------------------|----------|----------|----------|
| PITG_18678 | Pi transmembrane protein, putative (3121 nt)                 | -31.5589 | 36.9143  | 3.17E-05 |
| PITG_04378 | Pi elicitin-like protein (723 nt)                            | -13.06   | -5.29758 | 3.30E-05 |
| PITG_21854 | Pi cAMP protein kinase (1375 nt)                             | -16.5892 | 6.454436 | 3.33E-05 |
| PITG_06591 | Pi berberine-like protein (1700 nt)                          | -31.6947 | 36.64267 | 3.33E-05 |
| PITG_17396 | Pi syntaxin, putative (1273 nt)                              | -31.6383 | 36.75557 | 3.34E-05 |
| PITG_13001 | Pi glucose transporter, putative (1485 nt)                   | -31.1325 | 37.76707 | 3.36E-05 |
| PITG_10199 | Pi conserved hypothetical protein (417 nt)                   | -14.6598 | 5.708614 | 3.51E-05 |
| PITG_17760 | Pi Amino Acid/Auxin Permease (AAP) Family (1518 nt)          | -31.639  | -36.7541 | 3.56E-05 |
| PITG_12533 | Pi hypothetical protein (204 nt)                             | -14.6102 | -5.90446 | 3.59E-05 |
| PITG_06669 | Pi conserved hypothetical protein (1191 nt)                  | -15.2849 | -7.67168 | 3.76E-05 |
| PITG_14474 | Pi conserved hypothetical protein (696 nt)                   | -31.4447 | 37.14274 | 3.79E-05 |
| PITG_03052 | Pi Drug/Metabolite Transporter (DMT) Superfamily (548 nt)    | -16.2163 | 6.791059 | 3.83E-05 |
| PITG_07190 | Pi conserved hypothetical protein (1667 nt)                  | -30.7655 | -38.5011 | 3.85E-05 |
| PITG_10375 | Pi conserved hypothetical protein (813 nt)                   | -11.8233 | -5.64903 | 3.97E-05 |
| PITG_11997 | Pi conserved hypothetical protein (798 nt)                   | -10.6056 | 4.576535 | 4.01E-05 |
| PITG_10211 | Pi conserved hypothetical protein (697 nt)                   | -15.829  | 6.068157 | 4.01E-05 |
| PITG_00674 | Pi carbonic anhydrase, putative (1051 nt)                    | -14.6525 | 5.226947 | 4.06E-05 |
| PITG_00129 | Pi copine-like protein, putative (1517 nt)                   | -31.6212 | -36.7898 | 4.06E-05 |
| PITG_06227 | Pi carbohydrate-binding protein, putative (1080 nt)          | -31.522  | -36.9882 | 4.12E-05 |
| PITG_03979 | Pi conserved hypothetical protein (1152 nt)                  | -15.4843 | 6.404148 | 4.13E-05 |
| PITG_17315 | Pi sporangia induced conserved hypothetical protein (2444 r  | -31.7321 | 36.56799 | 4.34E-05 |
| PITG_03875 | Pi sporangia induced hypothetical protein (527 nt)           | -14.2837 | 5.167478 | 4.36E-05 |
| PITG_07958 | Pi conserved hypothetical protein (1102 nt)                  | -16.6514 | 6.329151 | 4.38E-05 |
| PITG_07853 | Pi conserved hypothetical protein (2058 nt)                  | -14.8969 | 5.208047 | 4.40E-05 |
| PITG_14683 | Pi conserved hypothetical protein (1460 nt)                  | -13.8067 | 5.782827 | 4.51E-05 |
| PITG_15414 | Pi sporangia induced 28 kDa inner dynein arm light chain (86 | -31.6464 | 36.73938 | 4.51E-05 |
| PITG_02819 | Pi conserved hypothetical protein (471 nt)                   | -16.6023 | 6.432151 | 4.52E-05 |
| PITG_22795 | Pi conserved hypothetical protein (1113 nt)                  | -31.4899 | 37.05225 | 4.54E-05 |
| PITG_01055 | Pi conserved hypothetical protein (1823 nt)                  | -31.7208 | 36.5905  | 4.56E-05 |
| PITG_20196 | Pi hypothetical protein (555 nt)                             | -11.2909 | -5.24796 | 4.57E-05 |
| PITG_07424 | Pi cytochrome P450, putative (1695 nt)                       | -13.4727 | -6.10029 | 4.60E-05 |
| PITG_07996 | Pi alpha-tubulin (1698 nt)                                   | -14.3581 | 5.218768 | 4.61E-05 |
| PITG_10915 | Pi conserved hypothetical protein (1692 nt)                  | -31.7453 | 36.54141 | 4.64E-05 |
| PITG_14384 | Pi sodium/potassium-transporting ATPase subunit alpha, put   | -31.7484 | 36.53533 | 4.64E-05 |
| PITG_11875 | Pi peptidase, putative (1983 nt)                             | -15.0434 | 5.490119 | 4.69E-05 |
| PITG_03704 | Pi conserved hypothetical protein (672 nt)                   | -16.665  | 6.301848 | 4.70E-05 |
| PITG_17017 | Pi hypothetical protein (969 nt)                             | -31.6581 | 36.71592 | 4.77E-05 |
| PITG_21811 | Pi conserved hypothetical protein (378 nt)                   | -31.6375 | 36.75706 | 4.81E-05 |
| PITG_07410 | Pi conserved hypothetical protein (1287 nt)                  | -31.7154 | 36.6013  | 4.81E-05 |
| PITG_07992 | Pi conserved hypothetical protein (612 nt)                   | -31.7238 | 36.58457 | 4.84E-05 |
| PITG_15151 | Pi conserved hypothetical protein (423 nt)                   | -31.5984 | -36.8353 | 4.94E-05 |
| PITG_14401 | Pi myb-like DNA-binding protein, putative (4060 nt)          | -31.5789 | -36.8743 | 5.03E-05 |
| PITG_02399 | Pi conserved hypothetical protein (760 nt)                   | -13.3991 | 4.713523 | 5.08E-05 |
| PITG_12935 | Pi conserved hypothetical protein (399 nt)                   | -15.1096 | -6.04827 | 5.16E-05 |
| PITG_02638 | Pi hypothetical protein (1487 nt)                            | -16.2501 | 6.71904  | 5.23E-05 |
| PITG_06721 | Pi conserved hypothetical protein (649 nt)                   | -15.9196 | 5.881149 | 5.37E-05 |
| PITG_06087 | Pi secreted RxLR effector peptide, putative (384 nt)         | -31.5939 | 36.84429 | 5.55E-05 |

|            |                                                             |          |          |          |
|------------|-------------------------------------------------------------|----------|----------|----------|
| PITG_01249 | Pi conserved hypothetical protein (618 nt)                  | -14.9404 | 5.423625 | 5.65E-05 |
| PITG_06225 | Pi flagellar radial spoke protein, putative (1437 nt)       | -15.4232 | 5.475715 | 5.66E-05 |
| PITG_08879 | Pi hypothetical protein (510 nt)                            | -14.0671 | -5.47904 | 5.82E-05 |
| PITG_15900 | Pi ATP-binding Cassette (ABC) Superfamily (3873 nt)         | -15.4314 | 5.459233 | 5.90E-05 |
| PITG_03961 | Pi conserved hypothetical protein (1104 nt)                 | -15.6018 | 5.42522  | 5.95E-05 |
| PITG_03212 | Pi hypothetical protein (405 nt)                            | -16.6815 | 6.271803 | 5.99E-05 |
| PITG_06022 | Pi glucokinase, putative (1126 nt)                          | -14.355  | -6.32296 | 6.12E-05 |
| PITG_16849 | Pi hypothetical protein (713 nt)                            | -15.8129 | -6.60357 | 6.12E-05 |
| PITG_19978 | Pi conserved hypothetical protein (497 nt)                  | -13.6288 | 4.861663 | 6.39E-05 |
| PITG_00564 | Pi conserved hypothetical protein (1083 nt)                 | -11.64   | -4.68264 | 6.41E-05 |
| PITG_16061 | Pi sodium/potassium-transporting ATPase subunit alpha, put  | -15.9335 | 5.856325 | 6.41E-05 |
| PITG_15448 | Pi conserved hypothetical protein (569 nt)                  | -16.1817 | 7.316049 | 6.52E-05 |
| PITG_01716 | Pi hypothetical protein (844 nt)                            | -15.9633 | 5.793785 | 6.59E-05 |
| PITG_10372 | Pi conserved hypothetical protein (1547 nt)                 | -11.8511 | -7.27179 | 6.75E-05 |
| PITG_03924 | Pi alcohol dehydrogenase, putative (1236 nt)                | -31.7079 | -36.6164 | 6.76E-05 |
| PITG_08720 | Pi conserved hypothetical protein (1254 nt)                 | -31.7809 | 36.47039 | 6.80E-05 |
| PITG_21363 | Pi putative GPI-anchored serine-threonine rich hypothetical | -16.3128 | 6.595892 | 6.83E-05 |
| PITG_19040 | Pi conserved hypothetical protein (240 nt)                  | -31.6785 | 36.67508 | 7.13E-05 |
| PITG_13881 | Pi conserved hypothetical protein (954 nt)                  | -31.8308 | 36.37053 | 7.18E-05 |
| PITG_07530 | Pi conserved hypothetical protein (1857 nt)                 | -31.8372 | -36.3578 | 7.18E-05 |
| PITG_22861 | Pi conserved hypothetical protein (1655 nt)                 | -31.796  | 36.44004 | 7.30E-05 |
| PITG_08099 | Pi PLAC8 family protein (711 nt)                            | -31.7491 | 36.53389 | 7.33E-05 |
| PITG_02509 | Pi conserved hypothetical protein (730 nt)                  | -15.659  | 5.308968 | 7.37E-05 |
| PITG_13286 | Pi conserved hypothetical protein (521 nt)                  | -14.5602 | -5.03243 | 7.51E-05 |
| PITG_11845 | Pi conserved hypothetical protein (563 nt)                  | -31.7895 | 36.45313 | 7.60E-05 |
| PITG_22870 | Pi avr2 secreted RxLR effector peptide, putative (351 nt)   | -16.0912 | 6.994644 | 7.62E-05 |
| PITG_19146 | Pi conserved hypothetical protein (900 nt)                  | -31.8457 | -36.3408 | 7.75E-05 |
| PITG_02381 | Pi conserved hypothetical protein (1985 nt)                 | -15.9907 | -6.24369 | 7.94E-05 |
| PITG_02139 | Pi conserved hypothetical protein (976 nt)                  | -31.8034 | -36.4254 | 8.03E-05 |
| PITG_15017 | Pi protein phosphatase 2C, putative (1689 nt)               | -13.9254 | 4.74585  | 8.03E-05 |
| PITG_15150 | Pi chaperone clpB (1245 nt)                                 | -14.534  | -5.9638  | 8.09E-05 |
| PITG_14054 | Pi secreted RxLR effector peptide, putative (690 nt)        | -31.399  | -37.2341 | 8.12E-05 |
| PITG_13175 | Pi ATP-binding Cassette (ABC) Superfamily (5847 nt)         | -31.853  | 36.32606 | 8.38E-05 |
| PITG_13889 | Pi 4-coumarate-CoA ligase, putative (2240 nt)               | -14.2071 | 4.807276 | 8.40E-05 |
| PITG_15162 | Pi secreted RxLR effector peptide, putative (510 nt)        | -31.4176 | -37.1969 | 8.45E-05 |
| PITG_21794 | Pi conserved hypothetical protein (683 nt)                  | -15.2244 | 5.5658   | 8.61E-05 |
| PITG_20641 | Pi Crinkler (CRN) family protein, pseudogene (2044 nt)      | -14.4485 | -6.13579 | 8.74E-05 |
| PITG_03948 | Pi tubby-like protein (2140 nt)                             | -15.1708 | 5.235068 | 9.10E-05 |
| PITG_09887 | Pi alternative oxidase, putative (913 nt)                   | -31.8429 | 36.34637 | 9.11E-05 |
| PITG_03172 | Pi conserved hypothetical protein (1120 nt)                 | -31.8196 | 36.39298 | 9.23E-05 |
| PITG_06672 | Pi P-type ATPase (P-ATPase) Superfamily (3138 nt)           | -16.3679 | 6.485589 | 9.28E-05 |
| PITG_01706 | Pi conserved hypothetical protein (1809 nt)                 | -31.8741 | 36.28387 | 9.57E-05 |
| PITG_03742 | Pi conserved hypothetical protein (909 nt)                  | -13.889  | -5.20003 | 9.64E-05 |
| PITG_11299 | Pi conserved hypothetical protein (327 nt)                  | -31.8648 | -36.3025 | 9.83E-05 |
| PITG_12088 | Pi hypothetical protein (632 nt)                            | -31.4786 | -37.0749 | 0.000101 |
| PITG_08812 | Pi conserved hypothetical protein (1614 nt)                 | -11.114  | 4.388319 | 0.000102 |
| PITG_02840 | Pi WD repeat-containing protein srw1 (2088 nt)              | -16.0261 | 5.669722 | 0.000102 |

|            |                                                               |          |          |          |
|------------|---------------------------------------------------------------|----------|----------|----------|
| PITG_06166 | Pi conserved hypothetical protein (1116 nt)                   | -31.5087 | 37.01475 | 0.000103 |
| PITG_11857 | Pi C2 domain-containing protein, putative (1331 nt)           | -15.4132 | -5.43352 | 0.000105 |
| PITG_05205 | Pi ATP-binding Cassette (ABC) superfamily (610 nt)            | -14.9648 | 5.077152 | 0.000105 |
| PITG_17342 | Pi Sporangia Induced Dynein Regulatory Complex Protein (16    | -16.7787 | 6.078388 | 0.000106 |
| PITG_14138 | Pi glycoside hydrolase, putative (1240 nt)                    | -31.8922 | 36.24768 | 0.000107 |
| PITG_14626 | Pi dual specificity tyrosine-phosphorylation-regulated kinase | -16.1816 | -5.85726 | 0.000108 |
| PITG_05746 | Pi conserved hypothetical protein (617 nt)                    | -15.3341 | 5.986043 | 0.000108 |
| PITG_12568 | Pi sporangia induced parkin coregulated protein (1424 nt)     | -31.8904 | 36.25132 | 0.000109 |
| PITG_09952 | Pi radial spoke protein (872 nt)                              | -16.8126 | 6.006793 | 0.00011  |
| PITG_16466 | Pi sporulation induced hypothetical protein (863 nt)          | -31.838  | 36.35614 | 0.000112 |
| PITG_12015 | Pi hypothetical protein (3961 nt)                             | -31.7571 | -36.5179 | 0.000113 |
| PITG_17027 | Pi conserved hypothetical protein (679 nt)                    | -31.548  | 36.93602 | 0.000115 |
| PITG_01130 | Pi conserved hypothetical protein (1730 nt)                   | -15.336  | 5.983938 | 0.000115 |
| PITG_12084 | Pi Crinkler (CRN) family protein, pseudogene (2736 nt)        | -31.9319 | -36.1683 | 0.000116 |
| PITG_19451 | Pi cleavage induced conserved hypothetical protein (554 nt)   | -31.9126 | 36.20686 | 0.000116 |
| PITG_17975 | Pi dual 3',5'-cyclic-AMP and-GMP phosphodiesterase, putativ   | -31.7862 | 36.45969 | 0.000117 |
| PITG_13769 | Pi sporangia induced conserved hypothetical protein (960 nt)  | -13.6129 | 4.836785 | 0.000117 |
| PITG_02418 | Pi conserved hypothetical protein (1689 nt)                   | -31.8064 | -36.4194 | 0.000118 |
| PITG_22104 | Pi conserved hypothetical protein (482 nt)                    | -15.4819 | 6.043314 | 0.00012  |
| PITG_14182 | Pi conserved hypothetical protein (1586 nt)                   | -31.8533 | 36.32541 | 0.000121 |
| PITG_00844 | Pi copine-like protein, putative (1103 nt)                    | -31.6867 | -36.6587 | 0.000122 |
| PITG_08409 | Pi conserved hypothetical protein (634 nt)                    | -13.6635 | 4.454674 | 0.000123 |
| PITG_12827 | Pi sporulation induced hypothetical protein (582 nt)          | -14.3788 | 4.776426 | 0.000126 |
| PITG_13494 | Pi elicitor-like transglutaminase, putative (1278 nt)         | -31.9222 | 36.1878  | 0.000127 |
| PITG_13583 | Pi ATP-binding Cassette (ABC) Superfamily (4243 nt)           | -31.926  | 36.1802  | 0.000127 |
| PITG_04866 | Pi conserved hypothetical protein (574 nt)                    | -31.907  | 36.21815 | 0.000129 |
| PITG_22686 | Pi protein kinase (8109 nt)                                   | -31.907  | 36.21815 | 0.000129 |
| PITG_12796 | Pi short chain dehydrogenase, putative (958 nt)               | -14.3577 | -6.31917 | 0.000129 |
| PITG_07959 | Pi conserved hypothetical protein (1146 nt)                   | -16.0233 | 5.680974 | 0.000129 |
| PITG_03695 | Pi hypothetical protein (706 nt)                              | -9.81781 | -5.04048 | 0.00013  |
| PITG_20815 | Pi ATP-binding Cassette (ABC) Superfamily (1008 nt)           | -12.9309 | -5.25217 | 0.000131 |
| PITG_11477 | Pi conserved hypothetical protein (605 nt)                    | -31.5207 | 36.99063 | 0.000133 |
| PITG_04912 | Pi conserved hypothetical protein (1214 nt)                   | -16.7867 | 6.065279 | 0.000134 |
| PITG_10294 | Pi conserved hypothetical protein (899 nt)                    | -31.8851 | 36.26195 | 0.000134 |
| PITG_17740 | Pi conserved hypothetical protein (1389 nt)                   | -13.6935 | -4.48936 | 0.000135 |
| PITG_13520 | Pi conserved hypothetical protein (559 nt)                    | -16.7972 | 6.043296 | 0.000138 |
| PITG_02028 | Pi conserved hypothetical protein (2584 nt)                   | -31.9434 | 36.14521 | 0.000138 |
| PITG_06816 | Pi conserved hypothetical protein (1079 nt)                   | -12.8833 | 4.497997 | 0.00014  |
| PITG_12186 | Pi sporangia induced mitogen-activated protein kinase, puta   | -31.9278 | 36.17657 | 0.00014  |
| PITG_13814 | Pi serine/threonine protein kinase (1146 nt)                  | -31.9278 | 36.17657 | 0.00014  |
| PITG_20140 | Pi conserved hypothetical protein (1737 nt)                   | -14.6449 | -5.84627 | 0.00014  |
| PITG_01793 | Pi conserved hypothetical protein (1992 nt)                   | -14.5814 | 4.771686 | 0.000144 |
| PITG_17668 | Pi conserved hypothetical protein (710 nt)                    | -12.8584 | -4.84582 | 0.000146 |
| PITG_13815 | Pi conserved hypothetical protein (1398 nt)                   | -16.0683 | -6.09025 | 0.000148 |
| PITG_09066 | Pi conserved hypothetical protein (1363 nt)                   | -15.7544 | -6.58438 | 0.000149 |
| PITG_16094 | Pi hypothetical protein (479 nt)                              | -31.7788 | 36.47454 | 0.000149 |
| PITG_06689 | Pi sporangia induced conserved hypothetical protein (1006 r   | -14.2821 | 4.659629 | 0.000149 |

|            |                                                                 |          |          |          |
|------------|-----------------------------------------------------------------|----------|----------|----------|
| PITG_13115 | Pi conserved hypothetical protein (1254 nt)                     | -31.9574 | 36.11728 | 0.000151 |
| PITG_14792 | Pi conserved hypothetical protein (2590 nt)                     | -31.9778 | -36.0764 | 0.000151 |
| PITG_22758 | Pi arabinofuranosidase (1062 nt)                                | -31.6474 | 36.73734 | 0.000152 |
| PITG_11375 | Pi conserved hypothetical protein (640 nt)                      | -15.3252 | 6.304986 | 0.000152 |
| PITG_14950 | Pi conserved hypothetical protein (456 nt)                      | -31.8518 | -36.3284 | 0.000153 |
| PITG_11996 | Pi conserved hypothetical protein (820 nt)                      | -9.27151 | 4.269911 | 0.000153 |
| PITG_04558 | Pi hypothetical protein (2958 nt)                               | -16.3901 | 6.427478 | 0.000154 |
| PITG_15335 | Pi thioredoxin/dynein outer arm protein (670 nt)                | -15.8216 | 5.736569 | 0.000156 |
| PITG_05294 | Pi conserved hypothetical protein (1647 nt)                     | -15.2861 | 5.434919 | 0.000158 |
| PITG_06791 | Pi conserved hypothetical protein (1442 nt)                     | -14.211  | 4.465772 | 0.000159 |
| PITG_04049 | Pi secreted RxLR effector peptide, putative (474 nt)            | -31.727  | 36.57821 | 0.00016  |
| PITG_08334 | Pi conserved hypothetical protein (714 nt)                      | -31.9416 | 36.14889 | 0.00016  |
| PITG_17945 | Pi chitinase, putative (822 nt)                                 | -13.5947 | -5.12233 | 0.000161 |
| PITG_19293 | Pi hypothetical protein (339 nt)                                | -14.5078 | 5.474546 | 0.000162 |
| PITG_09868 | Pi hypothetical protein (977 nt)                                | -16.482  | 6.259801 | 0.000164 |
| PITG_21640 | Pi conserved hypothetical protein (926 nt)                      | -16.0678 | -6.09213 | 0.000165 |
| PITG_17718 | Pi conserved hypothetical protein (758 nt)                      | -31.9798 | 36.07252 | 0.000165 |
| PITG_15491 | Pi glutaredoxin (599 nt)                                        | -31.6932 | 36.64571 | 0.000166 |
| PITG_05835 | Pi sporangia induced conserved hypothetical protein (1028 r     | -31.9632 | 36.10577 | 0.000166 |
| PITG_10765 | Pi beta-glucan synthesis-associated protein, putative (2189 r   | -13.4846 | -4.71526 | 0.000167 |
| PITG_06143 | Pi Voltage-gated Ion Channel (VIC) Superfamily (1038 nt)        | -31.9531 | 36.12584 | 0.000168 |
| PITG_19101 | Pi Voltage-gated Ion Channel (VIC) Superfamily (2045 nt)        | -16.8411 | 5.956614 | 0.00017  |
| PITG_19648 | Pi conserved hypothetical protein (1292 nt)                     | -16.3826 | 6.435429 | 0.000172 |
| PITG_17419 | Pi conserved hypothetical protein (835 nt)                      | -16.882  | 5.869917 | 0.000174 |
| PITG_20291 | Pi Ammonium Transporter (Amt) Family (1011 nt)                  | -16.7413 | 6.167214 | 0.000174 |
| PITG_10303 | Pi conserved hypothetical protein (992 nt)                      | -31.8018 | -36.4285 | 0.000175 |
| PITG_07151 | Pi conserved hypothetical protein (2220 nt)                     | -16.2291 | 6.711498 | 0.000176 |
| PITG_06219 | Pi conserved hypothetical protein (1323 nt)                     | -16.2728 | -5.67474 | 0.000177 |
| PITG_15229 | Pi conserved hypothetical protein (991 nt)                      | -15.0316 | -4.96413 | 0.000179 |
| PITG_14357 | Pi dimeric dihydrodiol dehydrogenase, putative (1155 nt)        | -15.5901 | 5.141582 | 0.000179 |
| PITG_09065 | Pi conserved hypothetical protein (1125 nt)                     | -31.8701 | -36.2919 | 0.00018  |
| PITG_13890 | Pi hypothetical protein (319 nt)                                | -31.7682 | 36.49562 | 0.000181 |
| PITG_02551 | Pi calmodulin-like protein (595 nt)                             | -32.0029 | 36.02635 | 0.000181 |
| PITG_18065 | Pi conserved hypothetical protein (4337 nt)                     | -32.0029 | 36.02635 | 0.000181 |
| PITG_01556 | Pi conserved hypothetical protein (1966 nt)                     | -14.6646 | 4.604635 | 0.000182 |
| PITG_14581 | Pi conserved hypothetical protein (1445 nt)                     | -13.3072 | -4.51795 | 0.000184 |
| PITG_08785 | Pi conserved hypothetical protein (3335 nt)                     | -15.1826 | 5.215026 | 0.000185 |
| PITG_16262 | Pi hypothetical protein (1312 nt)                               | -15.5118 | -5.23704 | 0.000187 |
| PITG_00395 | Pi cathepsin B, cysteine protease family C01A, putative (121.   | -14.0107 | 4.548325 | 0.000189 |
| PITG_14253 | Pi conserved hypothetical protein (1734 nt)                     | -16.9267 | 5.77861  | 0.00019  |
| PITG_19647 | Pi meiosis-specific nuclear structural protein 1, putative (145 | -16.8907 | 5.854416 | 0.000191 |
| PITG_08458 | Pi kinesin-like protein (2444 nt)                               | -31.9394 | 36.15322 | 0.000194 |
| PITG_23029 | Pi Crinkler (CRN) family protein, pseudogene (1794 nt)          | -16.106  | -6.01554 | 0.000197 |
| PITG_20755 | Pi conserved hypothetical protein (477 nt)                      | -14.6937 | -4.76512 | 0.000199 |
| PITG_22860 | Pi Crinkler (CRN) family protein, pseudogene (237 nt)           | -14.314  | -4.77636 | 0.0002   |
| PITG_04454 | Pi sporangia induced hypothetical protein (1319 nt)             | -31.9712 | 36.08964 | 0.0002   |
| PITG_19098 | Pi conserved hypothetical protein (930 nt)                      | -12.591  | -4.34056 | 0.000201 |



|            |                                                                |          |          |          |
|------------|----------------------------------------------------------------|----------|----------|----------|
| PITG_10374 | Pi conserved hypothetical protein (915 nt)                     | -11.4122 | -5.31425 | 0.000201 |
| PITG_12139 | Pi conserved hypothetical protein (1308 nt)                    | -13.2303 | 5.960256 | 0.000201 |
| PITG_08979 | Pi vacuolar protein sorting-associated protein, putative (440) | -31.9571 | 36.11782 | 0.000201 |
| PITG_15759 | Pi conserved hypothetical protein (701 nt)                     | -31.9571 | 36.11782 | 0.000201 |
| PITG_15336 | Pi conserved hypothetical protein (639 nt)                     | -16.0891 | 5.552453 | 0.000202 |
| PITG_20053 | Pi conserved hypothetical protein (558 nt)                     | -15.1408 | 4.972081 | 0.000204 |
| PITG_03580 | Pi hypothetical protein (1000 nt)                              | -31.0251 | 37.98181 | 0.000205 |
| PITG_18383 | Pi conserved hypothetical protein (471 nt)                     | -16.9245 | 5.784814 | 0.000209 |
| PITG_09030 | Pi dynein light chain, putative (333 nt)                       | -16.931  | 5.769973 | 0.00021  |
| PITG_03211 | Pi conserved hypothetical protein (457 nt)                     | -31.8254 | 36.38129 | 0.000211 |
| PITG_05608 | Pi transmembrane protein, putative (3096 nt)                   | -31.8254 | 36.38129 | 0.000211 |
| PITG_03434 | Pi conserved hypothetical protein (1225 nt)                    | -13.8043 | 4.83476  | 0.000217 |
| PITG_20518 | Pi sporangia induced hypothetical protein (1250 nt)            | -31.8838 | 36.2646  | 0.000218 |
| PITG_14420 | Pi conserved hypothetical protein (2520 nt)                    | -31.8631 | -36.3059 | 0.000219 |
| PITG_02922 | Pi Polycystin Cation Channel (PCC) Family (3330 nt)            | -16.9399 | 5.753039 | 0.00022  |
| PITG_11854 | Pi C2 domain-containing protein, putative (1331 nt)            | -15.9075 | -6.28133 | 0.000224 |
| PITG_13562 | Pi conserved hypothetical protein (1052 nt)                    | -31.9001 | 36.23197 | 0.000224 |
| PITG_21525 | Pi conserved hypothetical protein (3571 nt)                    | -14.0676 | -4.53924 | 0.000224 |
| PITG_06212 | Pi conserved hypothetical protein (813 nt)                     | -16.1454 | 6.851852 | 0.000227 |
| PITG_01507 | Pi conserved hypothetical protein (2668 nt)                    | -15.1903 | 4.620576 | 0.000228 |
| PITG_14861 | Pi conserved hypothetical protein (1617 nt)                    | -31.8177 | -36.3968 | 0.000228 |
| PITG_13675 | Pi conserved hypothetical protein (1029 nt)                    | -14.6425 | 4.509212 | 0.000234 |
| PITG_20397 | Pi conserved hypothetical protein (1646 nt)                    | -15.1696 | 4.663288 | 0.000234 |
| PITG_22669 | Pi NPP1-like protein, pseudogene (732 nt)                      | -15.9206 | 5.917242 | 0.000234 |
| PITG_08085 | Pi conserved hypothetical protein (526 nt)                     | -31.6899 | -36.6523 | 0.000235 |
| PITG_11885 | Pi cleavage induced hypothetical protein (1739 nt)             | -15.4777 | 4.896767 | 0.000238 |
| PITG_18195 | Pi conserved hypothetical protein (766 nt)                     | -32.0241 | 35.98389 | 0.000241 |
| PITG_02076 | Pi conserved hypothetical protein (803 nt)                     | -32.0425 | 35.94714 | 0.000242 |
| PITG_00569 | Pi phosphatidylinositol kinase (PIK-B) (3526 nt)               | -31.9653 | 36.10158 | 0.000243 |
| PITG_04071 | Pi putative extracellular dioxygenase (1131 nt)                | -31.9655 | 36.10111 | 0.000243 |
| PITG_18505 | Pi conserved hypothetical protein (2997 nt)                    | -31.8715 | 36.28909 | 0.000245 |
| PITG_07847 | Pi conserved hypothetical protein (1047 nt)                    | -31.1026 | 37.82686 | 0.00025  |
| PITG_14467 | Pi conserved hypothetical protein (561 nt)                     | -16.4883 | 6.230959 | 0.000253 |
| PITG_02167 | Pi conserved hypothetical protein (1490 nt)                    | -32.0441 | 35.94383 | 0.000254 |
| PITG_07317 | Pi protein kinase (2850 nt)                                    | -32.0441 | 35.94383 | 0.000254 |
| PITG_12277 | Pi conserved hypothetical protein (5146 nt)                    | -13.2068 | 4.2366   | 0.000254 |
| PITG_15268 | Pi conserved hypothetical protein (633 nt)                     | -14.8848 | -5.36157 | 0.000255 |
| PITG_07170 | Pi conserved hypothetical protein (772 nt)                     | -32.0415 | -35.9491 | 0.000263 |
| PITG_16081 | Pi hypothetical protein (3123 nt)                              | -31.9914 | -36.0493 | 0.000264 |
| PITG_06860 | Pi ATP-binding Cassette (ABC) Superfamily (4112 nt)            | -13.7053 | -5.9702  | 0.000265 |
| PITG_11898 | Pi conserved hypothetical protein (1307 nt)                    | -32.0768 | 35.87851 | 0.000268 |
| PITG_12982 | Pi conserved hypothetical protein (1242 nt)                    | -32.0677 | 35.89674 | 0.000268 |
| PITG_08285 | Pi conserved hypothetical protein (1548 nt)                    | -31.904  | 36.22419 | 0.000269 |
| PITG_14946 | Pi conserved hypothetical protein (1047 nt)                    | -14.7496 | 4.5963   | 0.000269 |
| PITG_02815 | Pi conserved hypothetical protein (653 nt)                     | -15.2885 | 8.416075 | 0.000269 |
| PITG_11584 | Pi conserved hypothetical protein (1228 nt)                    | -10.8227 | -4.48241 | 0.000272 |
| PITG_15212 | Pi conserved hypothetical protein (836 nt)                     | -13.9363 | -5.75186 | 0.000275 |

|            |                                                             |          |          |          |
|------------|-------------------------------------------------------------|----------|----------|----------|
| PITG_10094 | Pi Intraflagellar Transport Protein 88 (3210 nt)            | -32.0486 | 35.93492 | 0.000277 |
| PITG_15994 | Pi conserved hypothetical protein (845 nt)                  | -31.9703 | -36.0916 | 0.000278 |
| PITG_02568 | Pi conserved hypothetical protein (1143 nt)                 | -16.1528 | 6.826998 | 0.000288 |
| PITG_15021 | Pi conserved hypothetical protein (899 nt)                  | -32.0531 | 35.92599 | 0.00029  |
| PITG_15948 | Pi serine protease family S33, putative (1622 nt)           | -16.1143 | 5.509291 | 0.000294 |
| PITG_01276 | Pi conserved hypothetical protein (2314 nt)                 | -17.0034 | 5.626155 | 0.000297 |
| PITG_02143 | Pi myb-like DNA-binding protein, putative (1070 nt)         | -32.0943 | -35.8434 | 0.000297 |
| PITG_02257 | Pi conserved hypothetical protein (309 nt)                  | -32.0814 | 35.86933 | 0.000297 |
| PITG_17806 | Pi Amino Acid/Auxin Permease (AAP) Family (1452 nt)         | -32.0218 | 35.98848 | 0.0003   |
| PITG_08685 | Pi conserved hypothetical protein (920 nt)                  | -15.3808 | 4.815009 | 0.000303 |
| PITG_12278 | Pi sterol O-acyltransferase, putative (1380 nt)             | -32.0739 | 35.88434 | 0.000306 |
| PITG_02342 | Pi conserved hypothetical protein (581 nt)                  | -16.5405 | 6.128977 | 0.000306 |
| PITG_08613 | Pi cell 5A endo-1,4-beta-glucanase, putative (1749 nt)      | -14.3777 | -4.85818 | 0.000308 |
| PITG_06248 | Pi ATP-binding Cassette (ABC) Superfamily (3961 nt)         | -16.2081 | 5.308518 | 0.00031  |
| PITG_03202 | Pi hypothetical protein (671 nt)                            | -16.9911 | 5.651679 | 0.000311 |
| PITG_08839 | Pi conserved hypothetical protein (1515 nt)                 | -16.9911 | 5.651679 | 0.000311 |
| PITG_09252 | Pi conserved hypothetical protein (695 nt)                  | -16.9911 | 5.651679 | 0.000311 |
| PITG_13560 | Pi endoglucanase, putative (700 nt)                         | -32.086  | 35.86007 | 0.000311 |
| PITG_14840 | Pi conserved hypothetical protein (2958 nt)                 | -31.5457 | 36.94078 | 0.000312 |
| PITG_13456 | Pi conserved hypothetical protein (391 nt)                  | -15.0411 | 5.557942 | 0.000316 |
| PITG_06678 | Pi conserved hypothetical protein (1004 nt)                 | -14.9585 | -6.11081 | 0.000316 |
| PITG_07115 | Pi ATP-binding Cassette (ABC) Superfamily (4158 nt)         | -31.9663 | -36.0995 | 0.000318 |
| PITG_03433 | Pi regulator of chromosome condensation (RCC1)-like protei  | -15.2158 | 4.823973 | 0.00032  |
| PITG_03593 | Pi alanine aminotransferase 2 (1739 nt)                     | -16.3688 | -5.48322 | 0.000324 |
| PITG_16112 | Pi Intraflagellar Transport Protein 57 (1424 nt)            | -16.621  | 5.984096 | 0.000324 |
| PITG_17237 | Pi succinate dehydrogenase iron-sulfur protein (621 nt)     | -16.6176 | 5.990781 | 0.000324 |
| PITG_10687 | Pi conserved hypothetical protein (468 nt)                  | -31.9946 | -36.0429 | 0.000329 |
| PITG_13198 | Pi conserved hypothetical protein (815 nt)                  | -31.1975 | 37.63704 | 0.00033  |
| PITG_05000 | Pi MtN3-like protein (849 nt)                               | -32.1032 | 35.82575 | 0.00033  |
| PITG_17679 | Pi M96 mating-specific protein family (1339 nt)             | -32.1164 | -35.7993 | 0.00033  |
| PITG_14354 | Pi conserved hypothetical protein (2139 nt)                 | -11.7806 | -4.93977 | 0.000334 |
| PITG_07020 | Pi conserved hypothetical protein (568 nt)                  | -15.2112 | 4.876821 | 0.000335 |
| PITG_01164 | Pi glucan 1,3-beta-glucosidase, putative (1119 nt)          | -31.9581 | -36.116  | 0.000336 |
| PITG_12313 | Pi hypothetical protein (691 nt)                            | -32.0954 | 35.84136 | 0.000338 |
| PITG_15572 | Pi conserved hypothetical protein (2690 nt)                 | -31.8478 | 36.33652 | 0.000339 |
| PITG_20221 | Pi sporangia induced phosphatidyl inositol kinase (1863 nt) | -14.849  | 4.663118 | 0.00034  |
| PITG_19863 | Pi conserved hypothetical protein (2178 nt)                 | -32.0105 | -36.011  | 0.000343 |
| PITG_06289 | Pi conserved hypothetical protein (1754 nt)                 | -16.3397 | -5.54291 | 0.000343 |
| PITG_10683 | Pi conserved hypothetical protein (966 nt)                  | -32.0436 | -35.9449 | 0.000343 |
| PITG_04969 | Pi conserved hypothetical protein (1865 nt)                 | -14.6935 | -5.75651 | 0.000343 |
| PITG_13795 | Pi conserved hypothetical protein (2454 nt)                 | -32.1079 | 35.81625 | 0.000345 |
| PITG_17297 | Pi conserved hypothetical protein (3320 nt)                 | -32.0417 | 35.94874 | 0.000345 |
| PITG_14055 | Pi alcohol dehydrogenase, putative (1170 nt)                | -15.1085 | -4.72563 | 0.000347 |
| PITG_05391 | Pi histone H1, putative (1061 nt)                           | -13.0674 | -4.6637  | 0.000352 |
| PITG_20692 | Pi EF hand containing protein, putative (1367 nt)           | -16.9851 | 5.669508 | 0.000363 |
| PITG_09904 | Pi hypothetical protein (3114 nt)                           | -32.1257 | 35.78079 | 0.000368 |
| PITG_13264 | Pi conserved hypothetical protein (1151 nt)                 | -32.0263 | 35.9796  | 0.000374 |

|            |                                                             |          |          |          |
|------------|-------------------------------------------------------------|----------|----------|----------|
| PITG_04871 | Pi conserved hypothetical protein (2382 nt)                 | -32.1175 | 35.79704 | 0.000375 |
| PITG_14731 | Pi conserved hypothetical protein (2188 nt)                 | -32.1152 | -35.8017 | 0.000375 |
| PITG_00722 | Pi conserved hypothetical protein (1226 nt)                 | -32.0898 | -35.8525 | 0.000379 |
| PITG_03161 | Pi conserved hypothetical protein (3229 nt)                 | -32.1354 | 35.76124 | 0.000384 |
| PITG_02222 | Pi conserved hypothetical protein (975 nt)                  | -12.2247 | 4.722047 | 0.000386 |
| PITG_20741 | Pi hypothetical protein (623 nt)                            | -32.0462 | 35.93965 | 0.000392 |
| PITG_16853 | Pi conserved hypothetical protein (1845 nt)                 | -15.0975 | 4.83323  | 0.000393 |
| PITG_17816 | Pi Crinkler (CRN) family protein, pseudogene (1701 nt)      | -16.3969 | -5.42744 | 0.000394 |
| PITG_15471 | Pi conserved hypothetical protein (2307 nt)                 | -31.9597 | 36.11264 | 0.000395 |
| PITG_08871 | Pi conserved hypothetical protein (701 nt)                  | -17.0488 | 5.534268 | 0.000395 |
| PITG_09384 | Pi aquaporin, putative (825 nt)                             | -14.7563 | 4.746094 | 0.000397 |
| PITG_10063 | Pi omega-3 fatty acid desaturase, endoplasmic reticulum, pu | -15.9678 | 5.442373 | 0.000399 |
| PITG_05611 | Pi conserved hypothetical protein (1091 nt)                 | -13.9029 | -4.50159 | 0.0004   |
| PITG_03437 | Pi conserved hypothetical protein (1021 nt)                 | -32.0832 | 35.86569 | 0.000401 |
| PITG_22333 | Pi CTD small phosphatase-like protein, putative (957 nt)    | -14.9529 | 5.092861 | 0.000402 |
| PITG_10542 | Pi conserved hypothetical protein (1600 nt)                 | -16.6291 | 5.961002 | 0.000403 |
| PITG_22157 | Pi Major Facilitator Superfamily (MFS) (1483 nt)            | -13.4076 | 5.38245  | 0.000405 |
| PITG_12173 | Pi conserved hypothetical protein (1693 nt)                 | -16.4171 | -5.38647 | 0.000405 |
| PITG_02792 | Pi conserved hypothetical protein (1898 nt)                 | -14.6831 | -4.866   | 0.000409 |
| PITG_15190 | Pi conserved hypothetical protein (973 nt)                  | -31.2846 | -37.463  | 0.000409 |
| PITG_02081 | Pi conserved hypothetical protein (1706 nt)                 | -17.0629 | 5.507173 | 0.000411 |
| PITG_20435 | Pi EF hand containing protein, putative (1097 nt)           | -17.0629 | 5.507173 | 0.000411 |
| PITG_01956 | Pi conserved hypothetical protein (2669 nt)                 | -32.0668 | 35.89855 | 0.000412 |
| PITG_22091 | Pi potential noncoding RNA (521 nt)                         | -31.2975 | 37.43716 | 0.000414 |
| PITG_13282 | Pi ATP-binding Cassette (ABC) Superfamily (4764 nt)         | -31.6381 | -36.7558 | 0.000415 |
| PITG_02841 | Pi conserved hypothetical protein (1129 nt)                 | -14.733  | -4.76501 | 0.000418 |
| PITG_04928 | Pi conserved hypothetical protein (1404 nt)                 | -14.4234 | -5.48176 | 0.000423 |
| PITG_20591 | Pi conserved hypothetical protein (1398 nt)                 | -17.0066 | 5.625632 | 0.000425 |
| PITG_07389 | Pi conserved hypothetical protein (1305 nt)                 | -32.0519 | 35.92826 | 0.000426 |
| PITG_14466 | Pi conserved hypothetical protein (1410 nt)                 | -14.7919 | 4.350358 | 0.000431 |
| PITG_13604 | Pi P-type ATPase (P-ATPase) Superfamily (4258 nt)           | -32.1224 | 35.78733 | 0.000435 |
| PITG_08807 | Pi conserved hypothetical protein (618 nt)                  | -16.9903 | 5.661044 | 0.000435 |
| PITG_11562 | Pi myb-like DNA-binding protein, putative (880 nt)          | -31.9163 | -36.1995 | 0.000437 |
| PITG_04714 | Pi conserved hypothetical protein (534 nt)                  | -13.4439 | -4.20466 | 0.00044  |
| PITG_16963 | Pi transglutaminase elicitor M81C (2242 nt)                 | -15.2176 | 4.831863 | 0.000442 |
| PITG_01040 | Pi ras family GTPase, putative (985 nt)                     | -17.0729 | 5.486229 | 0.000443 |
| PITG_12584 | Pi DNA binding protein, putative (1363 nt)                  | -12.5607 | 3.885937 | 0.000449 |
| PITG_00834 | Pi conserved hypothetical protein (740 nt)                  | -12.2735 | -5.52371 | 0.00045  |
| PITG_02116 | Pi protein kinase (449 nt)                                  | -32.088  | 35.85615 | 0.000454 |
| PITG_04490 | Pi conserved hypothetical protein (872 nt)                  | -16.2899 | 5.143568 | 0.000459 |
| PITG_07848 | Pi conserved hypothetical protein (1029 nt)                 | -16.4311 | -5.359   | 0.000459 |
| PITG_10012 | Pi Drug/Metabolite Transporter (DMT) Superfamily (1203 nt)  | -32.167  | -35.698  | 0.000465 |
| PITG_09291 | Pi conserved hypothetical protein (604 nt)                  | -14.1822 | -4.74566 | 0.000466 |
| PITG_12039 | Pi conserved hypothetical protein (572 nt)                  | -13.6514 | 4.284835 | 0.000467 |
| PITG_00055 | Pi conserved hypothetical protein (1335 nt)                 | -31.8516 | 36.32898 | 0.000468 |
| PITG_11722 | Pi conserved hypothetical protein (392 nt)                  | -31.8366 | -36.3589 | 0.000474 |
| PITG_11760 | Pi HSF-type DNA-binding protein, putative (711 nt)          | -31.8366 | -36.3589 | 0.000474 |

|            |                                                                |          |          |          |
|------------|----------------------------------------------------------------|----------|----------|----------|
| PITG_07911 | Pi cytosolic 5'-nucleotidase III-like protein (1156 nt)        | -16.9399 | 5.770907 | 0.00048  |
| PITG_09262 | Pi Equilibrative Nucleoside Transporter (ENT) Family (1356 nt) | -31.4116 | -37.2088 | 0.000482 |
| PITG_10132 | Pi conserved hypothetical protein (3213 nt)                    | -14.3867 | 4.453664 | 0.000494 |
| PITG_17881 | Pi conserved hypothetical protein (1136 nt)                    | -16.6449 | 5.922515 | 0.000498 |
| PITG_11024 | Pi conserved hypothetical protein (534 nt)                     | -32.1922 | -35.6477 | 0.000499 |
| PITG_09218 | Pi secreted RxLR effector peptide, putative (498 nt)           | -15.5791 | 5.800438 | 0.000501 |
| PITG_22363 | Pi major Facilitator Superfamily (MFS)-like protein (448 nt)   | -31.3928 | 37.24643 | 0.000503 |
| PITG_05235 | Pi conserved hypothetical protein (399 nt)                     | -32.0928 | 35.84651 | 0.000512 |
| PITG_10997 | Pi hypothetical protein (2542 nt)                              | -32.0928 | 35.84651 | 0.000512 |
| PITG_15042 | Pi sporangia-induced kinesin-like protein (1308 nt)            | -17.1033 | 5.426357 | 0.000518 |
| PITG_17696 | Pi hypothetical protein (551 nt)                               | -17.0701 | 5.495668 | 0.000519 |
| PITG_22350 | Pi hypothetical protein (288 nt)                               | -13.6304 | 5.272483 | 0.000521 |
| PITG_18335 | Pi glycoside hydrolase, putative (1332 nt)                     | -32.1505 | 35.73118 | 0.000524 |
| PITG_04158 | Pi glycoside hydrolase, putative (897 nt)                      | -32.0772 | -35.8777 | 0.000527 |
| PITG_11252 | Pi heat shock protein 70 (1965 nt)                             | -31.4241 | 37.1839  | 0.000529 |
| PITG_14591 | Pi choline-phosphate cytidylyltransferase B (955 nt)           | -14.0921 | 4.025286 | 0.00053  |
| PITG_00897 | Pi conserved hypothetical protein (1429 nt)                    | -32.1323 | 35.76743 | 0.000531 |
| PITG_08755 | Pi myb-like DNA-binding protein, putative (987 nt)             | -16.0489 | 4.52412  | 0.000537 |
| PITG_04023 | Pi conserved hypothetical protein (1584 nt)                    | -32.2186 | -35.595  | 0.000539 |
| PITG_06273 | Pi conserved hypothetical protein (922 nt)                     | -32.1832 | 35.66561 | 0.000539 |
| PITG_07886 | Pi EF-hand domain-containing protein, putative (1866 nt)       | -32.1832 | 35.66561 | 0.000539 |
| PITG_11526 | Pi conserved hypothetical protein (2882 nt)                    | -32.1832 | 35.66561 | 0.000539 |
| PITG_10769 | Pi conserved hypothetical protein (911 nt)                     | -32.1321 | 35.7679  | 0.000553 |
| PITG_14980 | Pi conserved hypothetical protein (1487 nt)                    | -14.7175 | 4.056991 | 0.00056  |
| PITG_06382 | Pi conserved hypothetical protein (807 nt)                     | -16.0587 | 4.506256 | 0.000562 |
| PITG_00033 | Pi hypothetical protein (889 nt)                               | -32.1744 | 35.6834  | 0.000562 |
| PITG_15320 | Pi Voltage-gated Ion Channel (VIC) Superfamily (2520 nt)       | -17.0758 | 5.486243 | 0.000562 |
| PITG_20285 | Pi adenylate kinase, putative (2334 nt)                        | -17.0758 | 5.486243 | 0.000562 |
| PITG_21208 | Pi conserved hypothetical protein (357 nt)                     | -32.1744 | 35.6834  | 0.000562 |
| PITG_00514 | Pi myb-like DNA-binding protein, putative (627 nt)             | -14.0248 | 3.936503 | 0.000562 |
| PITG_16069 | Pi heat shock protein 101 (2853 nt)                            | -12.2643 | -4.2518  | 0.000563 |
| PITG_02788 | Pi dynein 18 kDa light chain (447 nt)                          | -32.1556 | 35.72095 | 0.000567 |
| PITG_21764 | Pi caltractin (690 nt)                                         | -14.1877 | 4.132381 | 0.000572 |
| PITG_22479 | Pi conserved hypothetical protein (512 nt)                     | -17.0018 | 5.645078 | 0.000577 |
| PITG_15398 | Pi conserved hypothetical protein (2334 nt)                    | -14.5405 | 4.338271 | 0.00058  |
| PITG_01219 | Pi conserved hypothetical protein (1646 nt)                    | -17.1347 | 5.363448 | 0.000584 |
| PITG_00789 | Pi conserved hypothetical protein (393 nt)                     | -32.1899 | -35.6522 | 0.000584 |
| PITG_20324 | Pi conserved hypothetical protein (1335 nt)                    | -14.1061 | -5.33108 | 0.000585 |
| PITG_11627 | Pi conserved hypothetical protein (1284 nt)                    | -32.1218 | -35.7886 | 0.000586 |
| PITG_05656 | Pi WD domain-containing protein, putative (4811 nt)            | -16.9459 | 5.764121 | 0.000587 |
| PITG_16553 | Pi conserved hypothetical protein (802 nt)                     | -14.9574 | 4.446322 | 0.000596 |
| PITG_15549 | Pi Mitochondrial Carrier (MC) Family (1028 nt)                 | -15.0634 | 4.410701 | 0.000602 |
| PITG_04445 | Pi conserved hypothetical protein (1692 nt)                    | -16.7244 | 5.777156 | 0.000604 |
| PITG_18119 | Pi conserved hypothetical protein (1968 nt)                    | -32.2058 | -35.6205 | 0.000605 |
| PITG_00447 | Pi sporangia induced hypothetical protein (1163 nt)            | -16.2317 | 5.28027  | 0.000612 |
| PITG_03995 | Pi ATP-dependent DNA helicase, putative (1613 nt)              | -14.5993 | -5.03787 | 0.000616 |
| PITG_10076 | Pi conserved hypothetical protein (930 nt)                     | -31.9684 | 36.09538 | 0.000622 |

|            |                                                                                      |          |          |          |
|------------|--------------------------------------------------------------------------------------|----------|----------|----------|
| PITG_10353 | Pi conserved hypothetical protein (688 nt)                                           | -15.0185 | -5.09788 | 0.000627 |
| PITG_23034 | Pi Regulator of G protein signaling (2740 nt)                                        | -32.1991 | 35.63388 | 0.000628 |
| PITG_03484 | Pi conserved hypothetical protein (398 nt)                                           | -16.3343 | 5.057696 | 0.000636 |
| PITG_06139 | Pi conserved hypothetical protein (1730 nt)                                          | -32.0977 | 35.83666 | 0.000659 |
| PITG_19094 | Pi conserved hypothetical protein (1027 nt)                                          | -17.1403 | 5.352377 | 0.00066  |
| PITG_05386 | Pi Zinc (Zn <sup>2+</sup> )-Iron (Fe <sup>2+</sup> ) Permease (ZIP) Family (2693 nt) | -15.0882 | -4.67144 | 0.000661 |
| PITG_06184 | Pi conserved hypothetical protein (2648 nt)                                          | -15.3567 | -5.56897 | 0.000663 |
| PITG_08471 | Pi protein kinase (1178 nt)                                                          | -16.4729 | -5.27649 | 0.000664 |
| PITG_22947 | Pi acyl-protein thioesterase, putative (817 nt)                                      | -16.6966 | 5.819186 | 0.00067  |
| PITG_15334 | Pi hypothetical protein (436 nt)                                                     | -17.0465 | 5.554823 | 0.000671 |
| PITG_02995 | Pi conserved hypothetical protein (701 nt)                                           | -14.9141 | -4.40019 | 0.000673 |
| PITG_19382 | Pi conserved hypothetical protein (1280 nt)                                          | -13.0108 | -3.86533 | 0.000677 |
| PITG_01281 | Pi conserved hypothetical protein (544 nt)                                           | -32.2045 | 35.62306 | 0.000678 |
| PITG_09307 | Pi conserved hypothetical protein (388 nt)                                           | -13.7808 | -4.75424 | 0.00068  |
| PITG_13895 | Pi sporangia induced conserved hypothetical protein (2312 nt)                        | -17.0876 | 5.46749  | 0.00068  |
| PITG_14005 | Pi conserved hypothetical protein (1653 nt)                                          | -14.5068 | -5.22558 | 0.000682 |
| PITG_14252 | Pi conserved hypothetical protein (2175 nt)                                          | -16.3796 | 6.378558 | 0.000684 |
| PITG_06120 | Pi conserved hypothetical protein (1155 nt)                                          | -32.1228 | -35.7865 | 0.000684 |
| PITG_15552 | Pi phosphatidylinositol-4-phosphate-5-kinase (PIPK-C) (2006 nt)                      | -14.9952 | 4.368866 | 0.000687 |
| PITG_01811 | Pi F-box protein, putative (1187 nt)                                                 | -14.9668 | -4.29344 | 0.00069  |
| PITG_23305 | Pi hypothetical protein (1044 nt)                                                    | -31.8538 | -36.3246 | 0.000697 |
| PITG_16043 | Pi conserved hypothetical protein (1179 nt)                                          | -14.1105 | -3.97639 | 0.000699 |
| PITG_14908 | Pi bzip controlled hypothetical protein (631 nt)                                     | -16.1146 | 6.851829 | 0.0007   |
| PITG_00530 | Pi conserved hypothetical protein (1328 nt)                                          | -14.5057 | -4.53012 | 0.000704 |
| PITG_05708 | Pi conserved hypothetical protein (1346 nt)                                          | -32.239  | 35.55403 | 0.000711 |
| PITG_06309 | Pi Voltage-gated Ion Channel (VIC) Superfamily (2325 nt)                             | -32.2457 | 35.54074 | 0.000711 |
| PITG_04034 | Pi SUMO protease, putative (3312 nt)                                                 | -16.2589 | -5.58468 | 0.000716 |
| PITG_11011 | Pi conserved hypothetical protein (537 nt)                                           | -12.9476 | -4.11611 | 0.000728 |
| PITG_05288 | Pi conserved hypothetical protein (1815 nt)                                          | -32.0812 | 35.86974 | 0.000728 |
| PITG_23198 | Pi Crinkler (CRN) family protein, pseudogene (1143 nt)                               | -32.0812 | 35.86974 | 0.000728 |
| PITG_15820 | Pi conserved hypothetical protein (2086 nt)                                          | -15.8185 | -4.62079 | 0.000729 |
| PITG_03636 | Pi hypothetical protein (383 nt)                                                     | -32.231  | -35.5701 | 0.000732 |
| PITG_22311 | Pi conserved hypothetical protein (2017 nt)                                          | -32.2602 | -35.5118 | 0.000738 |
| PITG_09482 | Pi conserved hypothetical protein (1825 nt)                                          | -14.0914 | -4.56159 | 0.000739 |
| PITG_07458 | Pi Ammonium Transporter (Amt) Family (1395 nt)                                       | -17.1783 | 5.276217 | 0.000749 |
| PITG_05103 | Pi conserved hypothetical protein (1077 nt)                                          | -15.2476 | -4.62825 | 0.00075  |
| PITG_00060 | Pi hypothetical protein (647 nt)                                                     | -32.185  | 35.66218 | 0.000758 |
| PITG_03050 | Pi conserved hypothetical protein (4071 nt)                                          | -32.2514 | 35.52939 | 0.000765 |
| PITG_08107 | Pi hypothetical protein (888 nt)                                                     | -32.2514 | 35.52939 | 0.000765 |
| PITG_07752 | Pi conserved hypothetical protein (2454 nt)                                          | -32.1502 | 35.73161 | 0.000769 |
| PITG_06904 | Pi conserved hypothetical protein (885 nt)                                           | -32.2674 | 35.49734 | 0.000777 |
| PITG_07833 | Pi similar to sea slug pheromone (795 nt)                                            | -32.2674 | 35.49734 | 0.000777 |
| PITG_02186 | Pi FKBP-type peptidyl-prolyl cis-trans isomerase, putative (544 nt)                  | -13.6314 | 3.746883 | 0.00078  |
| PITG_08404 | Pi cleavage induced hypothetical protein (853 nt)                                    | -16.0979 | 4.431173 | 0.000781 |
| PITG_19800 | Pi secreted RxLR effector peptide, putative (621 nt)                                 | -16.5455 | -5.12977 | 0.000782 |
| PITG_01098 | Pi ATP-binding Cassette (ABC) superfamily (273 nt)                                   | -16.0872 | 4.456024 | 0.000784 |
| PITG_15047 | Pi conserved hypothetical protein (2076 nt)                                          | -32.2221 | 35.58791 | 0.000787 |

|            |                                                               |          |          |          |
|------------|---------------------------------------------------------------|----------|----------|----------|
| PITG_11140 | Pi sodium-dependent phosphate transporter, putative (1551 nt) | -17.1585 | 5.320828 | 0.000794 |
| PITG_17781 | Pi conserved hypothetical protein (1531 nt)                   | -32.2466 | -35.5389 | 0.000794 |
| PITG_14716 | Pi conserved hypothetical protein (841 nt)                    | -32.0191 | -35.9939 | 0.000802 |
| PITG_21042 | Pi conserved hypothetical protein (1237 nt)                   | -32.0291 | -35.9739 | 0.000802 |
| PITG_09193 | Pi aquaporin, putative (942 nt)                               | -14.5897 | -5.1485  | 0.000805 |
| PITG_21618 | Pi Voltage-gated Ion Channel (VIC) Superfamily (821 nt)       | -32.275  | -35.4821 | 0.000805 |
| PITG_14486 | Pi MtN3-like protein (1577 nt)                                | -15.4781 | -5.20056 | 0.000808 |
| PITG_07487 | Pi EF hand containing protein, putative (688 nt)              | -16.1396 | 4.342795 | 0.000816 |
| PITG_06529 | Pi conserved hypothetical protein (2592 nt)                   | -32.2303 | 35.5715  | 0.000823 |
| PITG_17400 | Pi conserved hypothetical protein (1270 nt)                   | -11.6404 | -4.018   | 0.00084  |
| PITG_10412 | Pi SCP-like extracellular protein (915 nt)                    | -16.2408 | 5.271002 | 0.000845 |
| PITG_20619 | Pi pirin (1082 nt)                                            | -12.667  | -4.71071 | 0.000846 |
| PITG_17088 | Pi conserved hypothetical protein (1389 nt)                   | -15.6867 | 4.48621  | 0.000846 |
| PITG_06519 | Pi conserved hypothetical protein (1617 nt)                   | -16.7522 | 5.707906 | 0.000849 |
| PITG_10154 | Pi conserved hypothetical protein (1158 nt)                   | -13.8771 | -4.50273 | 0.000851 |
| PITG_01277 | Pi hypothetical protein (834 nt)                              | -32.284  | 35.46412 | 0.000853 |
| PITG_03859 | Pi conserved hypothetical protein (1775 nt)                   | -17.196  | 5.240948 | 0.000853 |
| PITG_07687 | Pi conserved hypothetical protein (2886 nt)                   | -17.196  | 5.240948 | 0.000853 |
| PITG_04464 | Pi conserved hypothetical protein (949 nt)                    | -32.2958 | 35.44055 | 0.000853 |
| PITG_20094 | Pi hypothetical protein (2087 nt)                             | -32.2958 | 35.44055 | 0.000853 |
| PITG_16268 | Pi conserved hypothetical protein (1369 nt)                   | -32.0721 | -35.8879 | 0.000871 |
| PITG_04320 | Pi Major Facilitator Superfamily (MFS) (1530 nt)              | -32.1904 | 35.65123 | 0.000877 |
| PITG_05607 | Pi formin-homology 2 domain-containing protein (5378 nt)      | -32.1904 | 35.65123 | 0.000877 |
| PITG_06854 | Pi conserved hypothetical protein (620 nt)                    | -32.1904 | 35.65123 | 0.000877 |
| PITG_16099 | Pi conserved hypothetical protein (4496 nt)                   | -17.2022 | 5.229506 | 0.000884 |
| PITG_11484 | Pi secreted RxLR effector peptide, putative (408 nt)          | -12.9085 | 4.876191 | 0.00089  |
| PITG_14740 | Pi conserved hypothetical protein (1719 nt)                   | -32.1479 | 35.7364  | 0.000891 |
| PITG_04447 | Pi conserved hypothetical protein (2249 nt)                   | -32.2606 | 35.51091 | 0.000896 |
| PITG_16959 | Pi transglutaminase elicitor M81D (1759 nt)                   | -32.004  | 36.02404 | 0.000899 |
| PITG_14057 | Pi alcohol dehydrogenase, putative (1005 nt)                  | -14.6499 | -4.38321 | 0.000901 |
| PITG_01186 | Pi lipase, putative (1775 nt)                                 | -31.937  | -36.1581 | 0.000907 |
| PITG_21203 | Pi conserved hypothetical protein (1229 nt)                   | -32.2206 | -35.5908 | 0.00091  |
| PITG_06949 | Pi Intraflagellar Transport Protein 20 (713 nt)               | -14.8722 | 4.050806 | 0.000914 |
| PITG_05427 | Pi conserved hypothetical protein (2562 nt)                   | -17.2084 | 5.217963 | 0.000915 |
| PITG_11938 | Pi conserved hypothetical protein (747 nt)                    | -17.2084 | 5.217963 | 0.000915 |
| PITG_03273 | Pi conserved hypothetical protein (768 nt)                    | -14.9318 | 4.227856 | 0.000927 |
| PITG_07065 | Pi conserved hypothetical protein (1494 nt)                   | -32.2571 | 35.51791 | 0.000928 |
| PITG_03162 | Pi cleavage induced hypothetical protein (683 nt)             | -16.4088 | 4.907139 | 0.000929 |
| PITG_00081 | Pi protein kinase, putative (2507 nt)                         | -16.438  | 4.845903 | 0.000937 |
| PITG_09350 | Pi aquaporin, putative (903 nt)                               | -14.3651 | -4.89081 | 0.000944 |
| PITG_05880 | Pi conserved hypothetical protein (1713 nt)                   | -15.1808 | 4.172237 | 0.000947 |
| PITG_05371 | Pi conserved hypothetical protein (1051 nt)                   | -17.0764 | 5.498919 | 0.000948 |
| PITG_11838 | Pi Major facilitator Superfamily (1301 nt)                    | -32.279  | 35.47412 | 0.000948 |
| PITG_17063 | Pi secreted RxLR effector peptide, putative (483 nt)          | -14.9666 | 4.161297 | 0.000949 |
| PITG_02654 | Pi serine hydrolase (FSH1)-like protein, putative (858 nt)    | -32.2896 | -35.4529 | 0.000961 |
| PITG_03911 | Pi thioredoxin-like protein (1317 nt)                         | -32.2899 | -35.4523 | 0.000961 |
| PITG_13590 | Pi ATP-binding Cassette (ABC) superfamily (4143 nt)           | -16.4282 | -5.37162 | 0.000965 |

|            |                                                                |          |          |          |
|------------|----------------------------------------------------------------|----------|----------|----------|
| PITG_11878 | Pi conserved hypothetical protein (723 nt)                     | -16.1495 | 5.079885 | 0.000976 |
| PITG_19984 | Pi conserved hypothetical protein (1292 nt)                    | -32.2157 | 35.60076 | 0.000977 |
| PITG_16074 | Pi heat shock protein 101 (2766 nt)                            | -11.5234 | -3.99917 | 0.000977 |
| PITG_06027 | Pi hypothetical protein (1266 nt)                              | -31.7333 | -36.5655 | 0.000981 |
| PITG_02950 | Pi conserved hypothetical protein (684 nt)                     | -15.7122 | -4.73402 | 0.000983 |
| PITG_15659 | Pi ribonucleoside-diphosphate reductase small chain (1180 r    | -31.7448 | 36.54246 | 0.000984 |
| PITG_16190 | Pi hypothetical protein (2274 nt)                              | -31.7448 | 36.54246 | 0.000984 |
| PITG_07882 | Pi conserved hypothetical protein (2100 nt)                    | -15.7604 | 4.329511 | 0.000994 |
| PITG_08451 | Pi conserved hypothetical protein (2212 nt)                    | -32.2743 | -35.4836 | 0.000996 |
| PITG_05712 | Pi conserved hypothetical protein (471 nt)                     | -32.2629 | 35.5063  | 0.000996 |
| PITG_12763 | Pi IQ and ubiquitin-like domain-containing protein, putative ( | -16.7215 | 5.755295 | 0.001005 |
| PITG_11495 | Pi Multidrug/Oligosaccharidyl-lipid/Polysaccharide (MOP) Fli   | -16.8051 | 5.606759 | 0.001007 |
| PITG_04697 | Pi conserved hypothetical protein (2515 nt)                    | -32.3071 | 35.41788 | 0.001009 |
| PITG_04849 | Pi conserved hypothetical protein (1595 nt)                    | -17.2378 | 5.15828  | 0.001009 |
| PITG_04379 | Pi putative GPI-anchored serine-rich hypothetical protein (59  | -32.2348 | -35.5625 | 0.001012 |
| PITG_15576 | Pi glycoside hydrolase, putative (911 nt)                      | -32.2849 | 35.46229 | 0.001016 |
| PITG_21762 | Pi conserved hypothetical protein (1042 nt)                    | -16.4278 | 4.869194 | 0.001016 |
| PITG_01211 | Pi transmembrane protein, putative (1710 nt)                   | -17.1449 | 5.354964 | 0.001018 |
| PITG_17390 | Pi protein kinase (2076 nt)                                    | -17.1449 | 5.354964 | 0.001018 |
| PITG_11629 | Pi conserved hypothetical protein (503 nt)                     | -15.7651 | 4.318307 | 0.001019 |
| PITG_04396 | Pi conserved hypothetical protein (552 nt)                     | -15.7136 | -4.84144 | 0.001031 |
| PITG_17735 | Pi conserved hypothetical protein (2304 nt)                    | -17.2385 | 5.157916 | 0.001044 |
| PITG_16392 | Pi conserved hypothetical protein (2654 nt)                    | -16.3013 | 5.148583 | 0.001047 |
| PITG_15473 | Pi conserved hypothetical protein (1992 nt)                    | -32.2889 | 35.4543  | 0.001051 |
| PITG_03669 | Pi conserved hypothetical protein (1037 nt)                    | -15.744  | 5.473755 | 0.001053 |
| PITG_02050 | Pi putative chitin synthase (Chitin-UDP-GlcNac-transferase) (  | -16.5781 | -5.06578 | 0.001058 |
| PITG_04102 | Pi conserved hypothetical protein (1084 nt)                    | -14.5166 | 3.780284 | 0.001063 |
| PITG_20209 | Pi conserved hypothetical protein (1670 nt)                    | -12.176  | 3.632502 | 0.00107  |
| PITG_00125 | Pi conserved hypothetical protein (1671 nt)                    | -15.4055 | -4.30668 | 0.001072 |
| PITG_09312 | Pi conserved hypothetical protein (656 nt)                     | -32.3078 | 35.41653 | 0.00108  |
| PITG_19967 | Pi conserved hypothetical protein (1981 nt)                    | -32.3078 | 35.41653 | 0.00108  |
| PITG_01512 | Pi conserved hypothetical protein (864 nt)                     | -32.1303 | 35.7715  | 0.001083 |
| PITG_10475 | Pi kinesin-like protein (2201 nt)                              | -32.1303 | 35.7715  | 0.001083 |
| PITG_04948 | Pi conserved hypothetical protein (757 nt)                     | -17.1928 | 5.254138 | 0.001088 |
| PITG_00244 | Pi hypothetical protein (2329 nt)                              | -32.2623 | -35.5076 | 0.001091 |
| PITG_23180 | Pi Crinkler (CRN) family protein, pseudogene (594 nt)          | -12.5822 | -3.536   | 0.0011   |
| PITG_16483 | Pi conserved hypothetical protein (1136 nt)                    | -16.1859 | 4.25174  | 0.001114 |
| PITG_09885 | Pi ATP-binding Cassette (ABC) Superfamily (1842 nt)            | -32.35   | 35.33219 | 0.001119 |
| PITG_16057 | Pi enolase-like protein, putative (1713 nt)                    | -17.2502 | 5.132589 | 0.001119 |
| PITG_23316 | Pi cleavage induced predicted protein (1947 nt)                | -32.3563 | 35.3195  | 0.001119 |
| PITG_00011 | Pi conserved hypothetical protein (591 nt)                     | -11.8996 | -4.31233 | 0.001121 |
| PITG_09309 | Pi conserved hypothetical protein (1971 nt)                    | -32.149  | -35.7342 | 0.001122 |
| PITG_03830 | Pi 3'5'-cyclic nucleotide phosphodiesterase, putative (3449 n  | -14.0501 | -3.77642 | 0.001123 |
| PITG_20332 | Pi conserved hypothetical protein (4246 nt)                    | -16.4782 | 4.765412 | 0.001131 |
| PITG_07689 | Pi secreted RxLR effector peptide, putative (315 nt)           | -31.976  | 36.0802  | 0.001135 |
| PITG_18543 | Pi conserved hypothetical protein (1311 nt)                    | -15.0273 | -4.17318 | 0.001138 |
| PITG_08120 | Pi conserved hypothetical protein (821 nt)                     | -15.9035 | -4.45135 | 0.001141 |

|            |                                                                |          |          |          |
|------------|----------------------------------------------------------------|----------|----------|----------|
| PITG_13323 | Pi spore induced hypothetical protein (651 nt)                 | -15.7838 | 4.282771 | 0.001141 |
| PITG_06580 | Pi conserved hypothetical protein (3943 nt)                    | -17.172  | 5.30065  | 0.001142 |
| PITG_08387 | Pi phosphatidylinositol kinase (PIK-H1) (3080 nt)              | -32.2689 | 35.49434 | 0.001142 |
| PITG_13316 | Pi conserved hypothetical protein (1400 nt)                    | -32.2689 | 35.49434 | 0.001142 |
| PITG_16999 | Pi conserved hypothetical protein (734 nt)                     | -10.425  | -3.97537 | 0.001154 |
| PITG_16628 | Pi hypothetical protein (1281 nt)                              | -32.3531 | -35.326  | 0.001157 |
| PITG_01308 | Pi conserved hypothetical protein (318 nt)                     | -32.1373 | -35.7575 | 0.001162 |
| PITG_02650 | Pi hypothetical protein (228 nt)                               | -14.9521 | 4.408198 | 0.001164 |
| PITG_08130 | Pi conserved hypothetical protein (358 nt)                     | -16.3323 | 6.432285 | 0.001165 |
| PITG_03106 | Pi conserved hypothetical protein (2633 nt)                    | -32.3378 | 35.35654 | 0.001196 |
| PITG_08128 | Pi conserved hypothetical protein (1080 nt)                    | -32.3378 | 35.35654 | 0.001196 |
| PITG_13907 | Pi conserved hypothetical protein (483 nt)                     | -32.3378 | 35.35654 | 0.001196 |
| PITG_22117 | Pi transglutaminase elicitor-like protein (1112 nt)            | -32.0412 | -35.9498 | 0.001202 |
| PITG_03974 | Pi conserved hypothetical protein (1086 nt)                    | -32.1772 | 35.67778 | 0.001212 |
| PITG_10897 | Pi Chloride Channel (ClC) Family (2473 nt)                     | -32.1772 | 35.67778 | 0.001212 |
| PITG_22894 | Pi secreted RxLR effector peptide, putative (276 nt)           | -15.5213 | 4.263917 | 0.001213 |
| PITG_13677 | Pi phosphatidylinositol-4-phosphate-5-kinase (PIPK-D7/GPCF     | -15.2041 | -4.62214 | 0.001227 |
| PITG_18382 | Pi conserved hypothetical protein (806 nt)                     | -13.312  | 3.983057 | 0.001231 |
| PITG_03926 | Pi conserved hypothetical protein (816 nt)                     | -17.222  | 5.195748 | 0.001235 |
| PITG_10745 | Pi conserved hypothetical protein (615 nt)                     | -32.3201 | 35.39193 | 0.001235 |
| PITG_05457 | Pi regulator of chromosome condensation (RCC1)-like protei     | -17.245  | 5.145843 | 0.001236 |
| PITG_15821 | Pi conserved hypothetical protein (564 nt)                     | -32.3679 | -35.2963 | 0.001236 |
| PITG_02303 | Pi ornithine decarboxylase 1 (1502 nt)                         | -14.5856 | 3.796998 | 0.001237 |
| PITG_06906 | Pi conserved hypothetical protein (2088 nt)                    | -13.9129 | -4.00357 | 0.001241 |
| PITG_06160 | Pi HECT E3 ubiquitin ligase, putative (4422 nt)                | -17.2    | 5.243793 | 0.001244 |
| PITG_06964 | Pi protein kinase, putative (2352 nt)                          | -32.2971 | 35.43799 | 0.001244 |
| PITG_09834 | Pi conserved hypothetical protein (3282 nt)                    | -17.2    | 5.243793 | 0.001244 |
| PITG_21371 | Pi conserved hypothetical protein (599 nt)                     | -17.2    | 5.243793 | 0.001244 |
| PITG_04834 | Pi conserved hypothetical protein (4770 nt)                    | -14.9432 | 3.907814 | 0.001246 |
| PITG_07635 | Pi conserved hypothetical protein (2342 nt)                    | -32.2477 | 35.53665 | 0.00125  |
| PITG_12844 | Pi conserved hypothetical protein (762 nt)                     | -32.2477 | 35.53665 | 0.00125  |
| PITG_02748 | Pi conserved hypothetical protein (981 nt)                     | -15.1782 | -4.67438 | 0.001254 |
| PITG_21285 | Pi hypothetical protein (794 nt)                               | -16.8454 | 5.528462 | 0.001271 |
| PITG_12004 | Pi conserved hypothetical protein (1823 nt)                    | -32.1183 | -35.7956 | 0.001272 |
| PITG_15214 | Pi conserved hypothetical protein (1016 nt)                    | -32.331  | 35.3701  | 0.001277 |
| PITG_04480 | Pi conserved hypothetical protein (883 nt)                     | -15.8725 | 4.575721 | 0.001283 |
| PITG_21621 | Pi cysteine protease family (429 nt)                           | -17.2888 | 5.05522  | 0.001291 |
| PITG_07200 | Pi conserved hypothetical protein (1056 nt)                    | -15.3725 | -4.37859 | 0.001311 |
| PITG_12812 | Pi sporangia induced conserved hypothetical protein (1529 r    | -15.4545 | 4.352225 | 0.001313 |
| PITG_00273 | Pi N-acetylated-alpha-linked acidic dipeptidase-like protein ( | -15.9393 | 5.131869 | 0.001324 |
| PITG_02107 | Pi conserved hypothetical protein (579 nt)                     | -16.1737 | 5.027884 | 0.001331 |
| PITG_12609 | Pi Crinkler (CRN) family protein (1561 nt)                     | -32.385  | -35.262  | 0.001333 |
| PITG_15244 | Pi ATP-binding Cassette (ABC) Superfamily (4052 nt)            | -32.3627 | 35.30672 | 0.001333 |
| PITG_16614 | Pi Crinkler (CRN) family protein (1281 nt)                     | -15.7682 | -4.62197 | 0.001337 |
| PITG_22517 | Pi dynein heavy chain (1942 nt)                                | -16.8667 | 5.488167 | 0.001345 |
| PITG_15999 | Pi conserved hypothetical protein (784 nt)                     | -13.0695 | 3.797007 | 0.001348 |
| PITG_14010 | Pi conserved hypothetical protein (1545 nt)                    | -32.275  | 35.48208 | 0.001351 |



|            |                                                               |          |          |          |
|------------|---------------------------------------------------------------|----------|----------|----------|
| PITG_15253 | Pi ATP-binding Cassette (ABC) Superfamily (1364 nt)           | -32.2704 | 35.49133 | 0.001351 |
| PITG_03679 | Pi conserved hypothetical protein (1258 nt)                   | -17.2522 | 5.13445  | 0.001363 |
| PITG_19763 | Pi conserved hypothetical protein (638 nt)                    | -32.3505 | 35.33112 | 0.001363 |
| PITG_14691 | Pi hypothetical protein (2751 nt)                             | -15.0664 | -5.01012 | 0.001366 |
| PITG_13248 | Pi conserved hypothetical protein (1178 nt)                   | -14.8246 | -3.95839 | 0.001367 |
| PITG_15175 | Pi conserved hypothetical protein (1117 nt)                   | -14.9618 | 3.870444 | 0.00137  |
| PITG_03051 | Pi Drug/Metabolite Transporter (DMT) Superfamily (1306 nt)    | -32.3691 | 35.29382 | 0.001376 |
| PITG_14400 | Pi myb-like DNA-binding protein, putative (917 nt)            | -14.0032 | -4.24856 | 0.001378 |
| PITG_13540 | Pi hypothetical protein (3066 nt)                             | -32.2109 | -35.6103 | 0.00138  |
| PITG_12403 | Pi conserved hypothetical protein (1453 nt)                   | -15.2121 | 3.889471 | 0.001386 |
| PITG_22124 | Pi P-type ATPase (P-ATPase) Superfamily (3539 nt)             | -32.094  | -35.8442 | 0.001398 |
| PITG_15269 | Pi conserved hypothetical protein (700 nt)                    | -15.7405 | -4.79056 | 0.001405 |
| PITG_21352 | Pi conserved hypothetical protein (3558 nt)                   | -16.2144 | 4.950004 | 0.001406 |
| PITG_20047 | Pi 2-isopropylmalate synthase, putative (630 nt)              | -32.1697 | -35.6927 | 0.001406 |
| PITG_03612 | Pi G-protein alpha subunit 1 (1608 nt)                        | -14.5604 | 3.855549 | 0.001407 |
| PITG_12140 | Pi peroxisomal Lon protease (2784 nt)                         | -14.7701 | -4.00042 | 0.001411 |
| PITG_18923 | Pi putative GPI-anchored serine-rich hypothetical protein (81 | -12.1692 | -3.54863 | 0.001418 |
| PITG_05143 | Pi conserved hypothetical protein (498 nt)                    | -17.2766 | 5.082665 | 0.001421 |
| PITG_11185 | Pi hypothetical protein (579 nt)                              | -32.3757 | 35.2808  | 0.001421 |
| PITG_15041 | Pi conserved hypothetical protein (651 nt)                    | -32.3757 | 35.2808  | 0.001421 |
| PITG_16499 | Pi cytochrome P450, putative (1572 nt)                        | -17.2766 | 5.082665 | 0.001421 |
| PITG_22047 | Pi E3 ubiquitin-protein ligase HERC, putative (1561 nt)       | -17.2766 | 5.082665 | 0.001421 |
| PITG_04777 | Pi conserved hypothetical protein (1102 nt)                   | -13.4239 | -3.59604 | 0.00143  |
| PITG_10326 | Pi hypothetical protein (2982 nt)                             | -31.8883 | -36.2554 | 0.001443 |
| PITG_04521 | Pi conserved hypothetical protein (1795 nt)                   | -31.8966 | -36.2388 | 0.001443 |
| PITG_10493 | Pi hypothetical protein (927 nt)                              | -31.8966 | -36.2388 | 0.001443 |
| PITG_00124 | Pi ser/thr kinase (1093 nt)                                   | -15.5081 | 4.239358 | 0.001443 |
| PITG_14124 | Pi glycoside hydrolase, putative (927 nt)                     | -32.1277 | -35.7768 | 0.00146  |
| PITG_14862 | Pi conserved hypothetical protein (1476 nt)                   | -32.1162 | -35.7997 | 0.00146  |
| PITG_03933 | Pi CTD small phosphatase-like protein, putative (1269 nt)     | -12.1315 | 3.460188 | 0.001467 |
| PITG_20148 | Pi conserved hypothetical protein (3544 nt)                   | -15.4899 | 4.279555 | 0.001484 |
| PITG_07943 | Pi phospholipid-transporting ATPase, putative (7899 nt)       | -17.3228 | 4.987391 | 0.001495 |
| PITG_11616 | Pi conserved hypothetical protein (1011 nt)                   | -16.1931 | 4.251173 | 0.001513 |
| PITG_08549 | Pi mitogen-activated protein kinase kinase kinase, putative ( | -17.2837 | 5.070414 | 0.001514 |
| PITG_12660 | Pi conserved hypothetical protein (1298 nt)                   | -17.2837 | 5.070414 | 0.001514 |
| PITG_05150 | Pi conserved hypothetical protein (2939 nt)                   | -15.4491 | 4.393834 | 0.00152  |
| PITG_08480 | Pi ubiquitin, putative (2784 nt)                              | -32.2559 | -35.5203 | 0.001526 |
| PITG_09595 | Pi conserved hypothetical protein (783 nt)                    | -15.7101 | 4.58513  | 0.00153  |
| PITG_08509 | Pi conserved hypothetical protein (828 nt)                    | -12.8056 | -3.68329 | 0.001535 |
| PITG_15100 | Pi histidine ammonia-lyase (1846 nt)                          | -14.3665 | -3.82782 | 0.001536 |
| PITG_22677 | Pi PcF and SCR74-like cys-rich secreted peptide, putative (21 | -16.8921 | 5.434898 | 0.001539 |
| PITG_07184 | Pi conserved hypothetical protein (1653 nt)                   | -32.4019 | 35.22822 | 0.001542 |
| PITG_08922 | Pi Rab11 family GTPase, putative (1075 nt)                    | -32.4019 | 35.22822 | 0.001542 |
| PITG_13766 | Pi WD repeat protein 35 (6588 nt)                             | -17.3161 | 5.001601 | 0.001542 |
| PITG_05223 | Pi phosphatidylinositol-3,4,5-trisphosphate 5-phosphatase, p  | -32.3571 | 35.31795 | 0.001549 |
| PITG_18992 | Pi acyltransferase family (1344 nt)                           | -32.3571 | 35.31795 | 0.001549 |
| PITG_20902 | Pi outer dynein arm-docking complex subunit 3 (803 nt)        | -32.3571 | 35.31795 | 0.001549 |

|            |                                                      |          |          |          |
|------------|------------------------------------------------------|----------|----------|----------|
| PITG_12761 | Pi secreted RxLR effector peptide, putative (849 nt) | -32.3361 | -35.3599 | 0.00155  |
| PITG_03164 | Pi conserved hypothetical protein (632 nt)           | -14.7969 | 3.824233 | 0.001554 |
| PITG_06318 | Pi conserved hypothetical protein (2615 nt)          | -16.2281 | 4.174164 | 0.001562 |
| PITG_17554 | Pi myb-like DNA-binding protein, putative (640 nt)   | -32.3066 | -35.4189 | 0.001564 |
| PITG_05682 | Pi conserved hypothetical protein (405 nt)           | -14.1891 | 3.994738 | 0.001569 |
| PITG_17855 | Pi conserved hypothetical protein (2509 nt)          | -16.2683 | 4.085387 | 0.00158  |
| PITG_07143 | Pi catalase-peroxidase, putative (2105 nt)           | -32.4089 | 35.21441 | 0.001591 |
| PITG_07697 | Pi conserved hypothetical protein (840 nt)           | -32.4196 | -35.1929 | 0.001591 |
| PITG_21961 | Pi conserved hypothetical protein (1683 nt)          | -15.4609 | 4.371364 | 0.00161  |
| PITG_04232 | Pi conserved hypothetical protein (1917 nt)          | -32.4015 | -35.2292 | 0.001612 |
| PITG_08729 | Pi conserved hypothetical protein (780 nt)           | -16.5727 | -5.08101 | 0.001613 |
| PITG_09216 | Pi secreted RxLR effector peptide, putative (528 nt) | -14.4931 | 4.925865 | 0.00164  |
| PITG_16089 | Pi conserved hypothetical protein (1434 nt)          | -15.0469 | 3.99755  | 0.001646 |
| PITG_18302 | Pi conserved hypothetical protein (558 nt)           | -32.352  | -35.3281 | 0.00165  |
| PITG_01395 | Pi glycoside hydrolase, putative (1716 nt)           | -15.7082 | -4.74118 | 0.001661 |
| PITG_02357 | Pi P-type ATPase (P-ATPase) Superfamily (3566 nt)    | -13.3281 | 3.804878 | 0.001663 |
| PITG_13052 | Pi glycoside hydrolase, putative (1197 nt)           | -14.1939 | -3.81031 | 0.001684 |
| PITG_10965 | Pi conserved hypothetical protein (2415 nt)          | -32.402  | 35.22814 | 0.001692 |
| PITG_18497 | Pi Crinkler (CRN) family protein (1358 nt)           | -11.6501 | -3.42828 | 0.001703 |
| PITG_05866 | Pi conserved hypothetical protein (715 nt)           | -32.4582 | -35.1157 | 0.00174  |
| PITG_08628 | Pi conserved hypothetical protein (1098 nt)          | -17.3366 | 4.959775 | 0.00174  |
| PITG_03869 | Pi hypothetical protein (708 nt)                     | -17.317  | 5.003773 | 0.001744 |
| PITG_20024 | Pi hypothetical protein (816 nt)                     | -17.317  | 5.003773 | 0.001744 |
| PITG_13084 | Pi conserved hypothetical protein (795 nt)           | -32.2788 | -35.4745 | 0.00175  |
| PITG_11522 | Pi aspartyl protease family A01B, putative (1473 nt) | -16.2864 | 4.049149 | 0.001752 |
| PITG_05397 | Pi conserved hypothetical protein (3759 nt)          | -17.2156 | 5.223713 | 0.001776 |
| PITG_14148 | Pi hypothetical protein (1080 nt)                    | -15.3187 | 4.97616  | 0.001777 |
| PITG_16936 | Pi conserved hypothetical protein (498 nt)           | -13.6116 | 3.449887 | 0.001793 |
| PITG_20533 | Pi conserved hypothetical protein (989 nt)           | -32.4409 | -35.1503 | 0.001793 |
| PITG_05203 | Pi ATP-binding Cassette (ABC) superfamily (3362 nt)  | -17.3515 | 4.930881 | 0.001793 |
| PITG_15067 | Pi conserved hypothetical protein (1969 nt)          | -32.4573 | -35.1175 | 0.001793 |
| PITG_14489 | Pi conserved hypothetical protein (1783 nt)          | -16.475  | -5.28269 | 0.001804 |
| PITG_07046 | Pi major vault protein (2627 nt)                     | -16.4838 | -5.26515 | 0.001804 |
| PITG_10686 | Pi conserved hypothetical protein (796 nt)           | -32.1819 | -35.6684 | 0.00181  |
| PITG_06926 | Pi cysteine protease family C01A, putative (1245 nt) | -32.3329 | 35.36623 | 0.00181  |
| PITG_08437 | Pi conserved hypothetical protein (1400 nt)          | -31.9965 | 36.03918 | 0.001842 |
| PITG_01273 | Pi PLAC8 family protein (315 nt)                     | -32.4434 | 35.14532 | 0.001848 |
| PITG_03438 | Pi lipin-like protein (1587 nt)                      | -16.4548 | -5.19335 | 0.001848 |
| PITG_10362 | Pi conserved hypothetical protein (867 nt)           | -9.66792 | -6.37989 | 0.001864 |
| PITG_04032 | Pi conserved hypothetical protein (789 nt)           | -15.4333 | 4.417299 | 0.001869 |
| PITG_22544 | Pi conserved hypothetical protein (723 nt)           | -16.5663 | 4.589175 | 0.001879 |
| PITG_11882 | Pi conserved hypothetical protein (901 nt)           | -13.3346 | -3.3715  | 0.001884 |
| PITG_01816 | Pi conserved hypothetical protein (1913 nt)          | -17.3248 | 4.991237 | 0.00191  |
| PITG_06916 | Pi conserved hypothetical protein (3997 nt)          | -17.3248 | 4.991237 | 0.00191  |
| PITG_08008 | Pi protein kinase, putative (2631 nt)                | -17.3248 | 4.991237 | 0.00191  |
| PITG_08423 | Pi kinesin-like protein (3419 nt)                    | -17.3248 | 4.991237 | 0.00191  |
| PITG_17854 | Pi conserved hypothetical protein (2622 nt)          | -32.2095 | -35.6131 | 0.001914 |

|            |                                                                 |          |          |          |
|------------|-----------------------------------------------------------------|----------|----------|----------|
| PITG_18332 | Pi glycoside hydrolase, putative (1104 nt)                      | -32.2095 | -35.6131 | 0.001914 |
| PITG_04130 | Pi cobalamin synthesis protein, putative (1715 nt)              | -31.971  | 36.09006 | 0.001922 |
| PITG_06107 | Pi protein kinase, putative (1699 nt)                           | -15.2936 | 3.726712 | 0.001925 |
| PITG_16956 | Pi transglutaminase elicitor, putative (2508 nt)                | -16.6355 | -4.95457 | 0.001941 |
| PITG_19623 | Pi polygalacturonase, putative (1188 nt)                        | -32.308  | -35.416  | 0.00195  |
| PITG_11296 | Pi DNA mismatch repair protein Msh3, putative (3033 nt)         | -16.661  | -4.90268 | 0.001981 |
| PITG_13674 | Pi conserved hypothetical protein (717 nt)                      | -32.3099 | 35.41233 | 0.00199  |
| PITG_13651 | Pi conserved hypothetical protein (915 nt)                      | -16.0236 | -4.21041 | 0.002003 |
| PITG_18521 | Pi conserved hypothetical protein (897 nt)                      | -16.7123 | -4.79702 | 0.002015 |
| PITG_12466 | Pi Proton-dependent Oligopeptide Transporter (POT) Family       | -32.2394 | -35.5533 | 0.002031 |
| PITG_19100 | Pi Voltage-gated Ion Channel (VIC) Superfamily (1416 nt)        | -17.1688 | 5.32875  | 0.002033 |
| PITG_07344 | Pi conserved hypothetical protein (2091 nt)                     | -32.4654 | 35.10135 | 0.002037 |
| PITG_09650 | Pi conserved hypothetical protein (639 nt)                      | -32.4654 | 35.10135 | 0.002037 |
| PITG_23307 | Pi hypothetical cleavage-induced transcript lacking long ORF    | -16.0218 | 4.966894 | 0.002044 |
| PITG_05537 | Pi copper-transporting ATPase, putative (4125 nt)               | -14.6883 | -4.02474 | 0.002056 |
| PITG_21190 | Pi secreted RxLR effector peptide, putative (1020 nt)           | -32.4021 | -35.228  | 0.002057 |
| PITG_08417 | Pi conserved hypothetical protein (668 nt)                      | -14.2506 | 3.574543 | 0.002065 |
| PITG_21313 | Pi glucokinase, putative (933 nt)                               | -12.6041 | -3.91238 | 0.002067 |
| PITG_10884 | Pi protein kinase, putative (2730 nt)                           | -13.9235 | 3.593336 | 0.00208  |
| PITG_11823 | Pi hypothetical protein (954 nt)                                | -16.9224 | 5.367562 | 0.002089 |
| PITG_10460 | Pi conserved hypothetical protein (5694 nt)                     | -16.7254 | -4.76996 | 0.002095 |
| PITG_06788 | Pi exoglucanase 1 precursor (1575 nt)                           | -16.5953 | 4.531179 | 0.002095 |
| PITG_10284 | Pi cellulose binding elicitor lectin (CBEL), putative (1639 nt) | -32.4582 | 35.11571 | 0.002097 |
| PITG_11396 | Pi conserved hypothetical protein (3393 nt)                     | -32.4726 | 35.0869  | 0.002097 |
| PITG_12196 | Pi conserved hypothetical protein (699 nt)                      | -32.4766 | -35.0788 | 0.002097 |
| PITG_16473 | Pi serine protease family S08A, putative (1422 nt)              | -32.4726 | 35.0869  | 0.002097 |
| PITG_17478 | Pi conserved hypothetical protein (432 nt)                      | -32.4726 | 35.0869  | 0.002097 |
| PITG_22475 | Pi conserved hypothetical protein (956 nt)                      | -14.3853 | 3.583634 | 0.002124 |
| PITG_04690 | Pi pyridine nucleotide-disulphide oxidoreductase, putative (1   | -11.8344 | -3.74295 | 0.002129 |
| PITG_14505 | Pi conserved hypothetical protein (389 nt)                      | -32.4425 | -35.1471 | 0.002141 |
| PITG_13231 | Pi cobalamin synthesis protein, putative (1371 nt)              | -32.451  | 35.13005 | 0.002158 |
| PITG_10507 | Pi cleavage induced hypothetical protein (1441 nt)              | -15.4647 | 3.840124 | 0.002159 |
| PITG_02721 | Pi tubulin polyglutamylase, putative (1992 nt)                  | -16.6943 | 5.756689 | 0.002161 |
| PITG_21141 | Pi ATP-binding Cassette (ABC) superfamily (1744 nt)             | -16.3255 | 3.970896 | 0.002168 |
| PITG_05605 | Pi radial spoke head protein, putative (2076 nt)                | -32.3397 | 35.35279 | 0.002172 |
| PITG_07078 | Pi conserved hypothetical protein (2564 nt)                     | -32.3397 | 35.35279 | 0.002172 |
| PITG_09605 | Pi conserved hypothetical protein (608 nt)                      | -32.3514 | -35.3293 | 0.002172 |
| PITG_12916 | Pi cysteine protease family C01A, putative (1440 nt)            | -15.2931 | -4.44464 | 0.002179 |
| PITG_06182 | Pi conserved hypothetical protein (1473 nt)                     | -13.9544 | -4.02276 | 0.002189 |
| PITG_04373 | Pi secreted RxLR effector peptide, putative (426 nt)            | -13.0889 | -3.53585 | 0.00219  |
| PITG_00772 | Pi Major Facilitator Superfamily (MFS) (1662 nt)                | -32.4226 | 35.18692 | 0.002204 |
| PITG_07531 | Pi conserved hypothetical protein (2090 nt)                     | -15.871  | -4.41644 | 0.002206 |
| PITG_13396 | Pi conserved hypothetical protein (587 nt)                      | -11.9468 | -3.50173 | 0.002212 |
| PITG_01284 | Pi conserved hypothetical protein (426 nt)                      | -15.5913 | 4.073006 | 0.002212 |
| PITG_10991 | Pi conserved hypothetical protein (1197 nt)                     | -32.076  | 35.88018 | 0.002219 |
| PITG_10430 | Pi peroxisomal acyl-coenzyme A oxidase, putative (1976 nt)      | -32.4944 | -35.0432 | 0.00222  |
| PITG_10474 | Pi hypothetical protein (1124 nt)                               | -17.3882 | 4.859424 | 0.00222  |

|            |                                                               |          |          |          |
|------------|---------------------------------------------------------------|----------|----------|----------|
| PITG_07574 | Pi conserved hypothetical protein (1383 nt)                   | -13.3684 | -3.46775 | 0.002239 |
| PITG_12058 | Pi ATP-binding Cassette (ABC) Superfamily (2430 nt)           | -15.901  | 4.052094 | 0.002241 |
| PITG_22431 | Pi conserved hypothetical protein (835 nt)                    | -16.5959 | -5.03745 | 0.002247 |
| PITG_09897 | Pi conserved hypothetical protein (781 nt)                    | -15.9355 | -4.39421 | 0.002259 |
| PITG_07423 | Pi conserved hypothetical protein (1173 nt)                   | -15.7948 | -4.68537 | 0.002269 |
| PITG_06510 | Pi conserved hypothetical protein (925 nt)                    | -14.0552 | -3.47861 | 0.002279 |
| PITG_03925 | Pi hypothetical protein (699 nt)                              | -32.4805 | -35.071  | 0.002285 |
| PITG_06759 | Pi conserved hypothetical protein (3396 nt)                   | -13.9067 | -3.47399 | 0.002298 |
| PITG_17142 | Pi Major Facilitator Superfamily (MFS) (1380 nt)              | -16.7653 | -4.69014 | 0.002341 |
| PITG_10764 | Pi transmembrane protein, putative (1509 nt)                  | -32.4936 | -35.0449 | 0.00235  |
| PITG_15445 | Pi conserved hypothetical protein (1188 nt)                   | -32.5009 | -35.0304 | 0.00235  |
| PITG_17399 | Pi conserved hypothetical protein (454 nt)                    | -16.6482 | -4.9305  | 0.002355 |
| PITG_10750 | Pi beta-glucan synthesis-associated protein, putative (2402 r | -15.3726 | -4.28465 | 0.002356 |
| PITG_22830 | Pi Crinkler (CRN) family protein, pseudogene (498 nt)         | -13.7635 | -3.40824 | 0.002361 |
| PITG_03053 | Pi Drug/Metabolite Transporter (DMT) Superfamily (674 nt)     | -15.8914 | -4.48691 | 0.002364 |
| PITG_05296 | Pi cleavage induced hypothetical protein (1213 nt)            | -15.3573 | 3.818423 | 0.002369 |
| PITG_20241 | Pi transmembrane protein, putative (1626 nt)                  | -32.108  | -35.816  | 0.002373 |
| PITG_13060 | Pi conserved hypothetical protein (964 nt)                    | -13.5521 | -3.56603 | 0.00239  |
| PITG_01568 | Pi cGMP 3',5'-cyclic phosphodiesterase subunit delta, putativ | -14.6705 | 4.275186 | 0.002391 |
| PITG_02613 | Pi conserved hypothetical protein (799 nt)                    | -32.5171 | -34.9979 | 0.002397 |
| PITG_04876 | Pi hypothetical protein (381 nt)                              | -32.5171 | -34.9979 | 0.002397 |
| PITG_06908 | Pi elicitor-like protein (522 nt)                             | -17.411  | 4.810913 | 0.002397 |
| PITG_12890 | Pi conserved hypothetical protein (1289 nt)                   | -17.411  | 4.810913 | 0.002397 |
| PITG_15065 | Pi conserved hypothetical protein (1365 nt)                   | -32.5171 | -34.9979 | 0.002397 |
| PITG_01441 | Pi conserved hypothetical protein (360 nt)                    | -14.0608 | 3.583998 | 0.002401 |
| PITG_07342 | Pi conserved hypothetical protein (761 nt)                    | -15.0552 | -4.71378 | 0.002408 |
| PITG_01919 | Pi Mitochondrial Carrier (MC) Family (1106 nt)                | -16.7653 | -4.69063 | 0.002421 |
| PITG_15655 | Pi conserved hypothetical protein (2621 nt)                   | -16.9904 | 5.242986 | 0.002421 |
| PITG_06456 | Pi maintenance of ploidy protein mob1 (780 nt)                | -16.3444 | 4.692657 | 0.00243  |
| PITG_14582 | Pi sporangia induced hypothetical protein (657 nt)            | -14.8767 | 4.099418 | 0.002438 |
| PITG_14288 | Pi polysaccharide lyase, putative (1681 nt)                   | -32.097  | -35.838  | 0.00245  |
| PITG_19474 | Pi cobalamin adenosyltransferase, putative (704 nt)           | -16.3736 | -5.34706 | 0.002452 |
| PITG_10495 | Pi hypothetical protein (1115 nt)                             | -13.7803 | -6.3677  | 0.002452 |
| PITG_10380 | Pi conserved hypothetical protein (1392 nt)                   | -32.3708 | 35.29052 | 0.002454 |
| PITG_08758 | Pi Chloride Channel (ClC) Family (2575 nt)                    | -15.1511 | 3.701778 | 0.002458 |
| PITG_03170 | Pi SCP-like extracellular protein (558 nt)                    | -32.4958 | 35.04057 | 0.002465 |
| PITG_06038 | Pi conserved hypothetical protein (977 nt)                    | -32.5198 | -34.9925 | 0.002465 |
| PITG_07417 | Pi conserved hypothetical protein (858 nt)                    | -32.5198 | -34.9925 | 0.002465 |
| PITG_10274 | Pi acetyltransferase (GNAT) family, putative (871 nt)         | -32.5368 | -34.9584 | 0.002465 |
| PITG_11879 | Pi hypothetical protein (1593 nt)                             | -32.0973 | 35.83757 | 0.002465 |
| PITG_19649 | Pi endopolygalacturonase, putative (967 nt)                   | -17.3329 | 4.978861 | 0.002471 |
| PITG_06607 | Pi protein kinase, putative (2332 nt)                         | -16.5986 | 4.531903 | 0.002481 |
| PITG_01868 | Pi conserved hypothetical protein (1683 nt)                   | -32.4578 | 35.11654 | 0.002486 |
| PITG_14127 | Pi conserved hypothetical protein (1123 nt)                   | -15.025  | -4.02024 | 0.002502 |
| PITG_09471 | Pi F-box protein, putative (879 nt)                           | -16.6051 | 4.514531 | 0.002503 |
| PITG_17161 | Pi conserved hypothetical protein (2064 nt)                   | -16.7661 | -4.68931 | 0.002503 |
| PITG_07270 | Pi conserved hypothetical protein (4688 nt)                   | -16.6116 | 4.501461 | 0.002503 |

|            |                                                                  |          |          |          |
|------------|------------------------------------------------------------------|----------|----------|----------|
| PITG_01056 | Pi myb-like DNA-binding protein, putative (1658 nt)              | -14.2651 | 3.632288 | 0.002504 |
| PITG_13491 | Pi calcineurin-like phosphoesterase, putative (1645 nt)          | -15.7813 | -4.59476 | 0.002512 |
| PITG_13002 | Pi Major Facilitator Superfamily (MFS) (1476 nt)                 | -14.1629 | 4.259879 | 0.002515 |
| PITG_20693 | Pi crinkler (CRN) family protein, pseudogene (2824 nt)           | -16.0382 | -4.18355 | 0.002517 |
| PITG_06365 | Pi conserved hypothetical protein (1917 nt)                      | -15.7552 | -4.64669 | 0.002518 |
| PITG_04833 | Pi conserved hypothetical protein (1761 nt)                      | -32.4298 | 35.17242 | 0.002542 |
| PITG_07076 | Pi Voltage-gated Ion Channel (VIC) Superfamily (4657 nt)         | -32.4298 | 35.17242 | 0.002542 |
| PITG_22944 | Pi secreted peptide, putative, 3' partial (1327 nt)              | -32.4298 | 35.17242 | 0.002542 |
| PITG_14570 | Pi conserved hypothetical protein (1274 nt)                      | -15.243  | 4.031297 | 0.002599 |
| PITG_13030 | Pi P-type ATPase (P-ATPase) Superfamily (3897 nt)                | -15.6127 | 4.032209 | 0.002617 |
| PITG_03485 | Pi hypothetical protein (1088 nt)                                | -17.022  | 5.181972 | 0.002625 |
| PITG_06480 | Pi protein kinase, putative (6057 nt)                            | -16.7932 | -4.63435 | 0.002625 |
| PITG_13083 | Pi conserved hypothetical protein (786 nt)                       | -32.4739 | -35.0844 | 0.002629 |
| PITG_02774 | Pi multiple inositol polyphosphate phosphatase, putative (44     | -16.3425 | 3.942003 | 0.002673 |
| PITG_07319 | Pi calcium-activated potassium channel subunit alpha-1, putative | -16.3425 | 3.942003 | 0.002673 |
| PITG_12124 | Pi protein phosphatase 2C, putative (1356 nt)                    | -16.7666 | -4.6891  | 0.002673 |
| PITG_11096 | Pi hypothetical protein (1086 nt)                                | -32.4873 | 35.05748 | 0.002676 |
| PITG_12273 | Pi conserved hypothetical protein (1558 nt)                      | -32.5343 | -34.9635 | 0.002676 |
| PITG_18445 | Pi hypothetical protein (1604 nt)                                | -32.3168 | 35.39852 | 0.002681 |
| PITG_18913 | Pi hypothetical protein (716 nt)                                 | -16.0234 | 4.273761 | 0.002689 |
| PITG_04590 | Pi conserved hypothetical protein (1771 nt)                      | -15.8587 | -4.44057 | 0.002693 |
| PITG_11463 | Pi carbohydrate-binding protein, putative (753 nt)               | -13.9935 | 3.575239 | 0.002712 |
| PITG_07242 | Pi conserved hypothetical protein (639 nt)                       | -15.2164 | -3.79436 | 0.002713 |
| PITG_09890 | Pi alternative oxidase, mitochondrial precursor (1034 nt)        | -12.2045 | -4.14431 | 0.002723 |
| PITG_11937 | Pi conserved hypothetical protein (1005 nt)                      | -15.9969 | 4.663888 | 0.002734 |
| PITG_07165 | Pi serine protease family S10, putative (1536 nt)                | -32.5137 | -35.0047 | 0.00275  |
| PITG_07331 | Pi conserved hypothetical protein (1314 nt)                      | -32.522  | -34.9881 | 0.00275  |
| PITG_15060 | Pi conserved hypothetical protein (3840 nt)                      | -32.5137 | -35.0047 | 0.00275  |
| PITG_14226 | Pi conserved hypothetical protein (1554 nt)                      | -15.7605 | 4.056412 | 0.002754 |
| PITG_09121 | Pi conserved hypothetical protein (667 nt)                       | -16.9947 | 5.225125 | 0.002761 |
| PITG_05729 | Pi conserved hypothetical protein (1581 nt)                      | -16.0044 | -4.25531 | 0.002777 |
| PITG_22675 | Pi secreted RxLR effector peptide, putative (363 nt)             | -32.2854 | 35.4613  | 0.002796 |
| PITG_14267 | Pi Crinkler (CRN) family protein, pseudogene (1902 nt)           | -12.2214 | -3.29879 | 0.002813 |
| PITG_15270 | Pi conserved hypothetical protein (788 nt)                       | -15.1417 | -3.94673 | 0.002814 |
| PITG_07793 | Pi Outer Dynein Arm Light Chain 2 (550 nt)                       | -14.0815 | 3.414524 | 0.002825 |
| PITG_16434 | Pi conserved hypothetical protein (2661 nt)                      | -32.4653 | 35.1015  | 0.002855 |
| PITG_21303 | Pi secreted RxLR effector peptide, putative, 3' partial (634 nt) | -13.75   | -5.86326 | 0.002858 |
| PITG_16472 | Pi kazal serine protease inhibitor PbraEPI2 (981 nt)             | -15.2221 | -3.78308 | 0.002871 |
| PITG_05697 | Pi Crinkler (CRN) family protein, pseudogene (862 nt)            | -12.9251 | -3.18666 | 0.002884 |
| PITG_08178 | Pi conserved hypothetical protein (2157 nt)                      | -32.1653 | 35.70152 | 0.002892 |
| PITG_02230 | Pi conserved hypothetical protein (2093 nt)                      | -32.5334 | -34.9652 | 0.002903 |
| PITG_15744 | Pi conserved hypothetical protein (1112 nt)                      | -32.4949 | 35.04235 | 0.002903 |
| PITG_07832 | Pi conserved hypothetical protein (1376 nt)                      | -32.3468 | 35.33851 | 0.002907 |
| PITG_13638 | Pi glucanase inhibitor protein 1 (777 nt)                        | -32.3468 | 35.33851 | 0.002907 |
| PITG_02306 | Pi hypothetical protein (1337 nt)                                | -17.4596 | 4.714679 | 0.002915 |
| PITG_06804 | Pi conserved hypothetical protein (16341 nt)                     | -17.4596 | 4.714679 | 0.002915 |
| PITG_07345 | Pi transmembrane protein, putative (2031 nt)                     | -32.5433 | 34.94544 | 0.002915 |

|            |                                                                                      |          |          |          |
|------------|--------------------------------------------------------------------------------------|----------|----------|----------|
| PITG_12103 | Pi conserved hypothetical protein (1092 nt)                                          | -17.4596 | 4.714679 | 0.002915 |
| PITG_12950 | Pi cAMP-specific 3',5'-cyclic phosphodiesterase, putative (26                        | -32.5433 | 34.94544 | 0.002915 |
| PITG_17791 | Pi ubiquitin-specific protease, putative (8249 nt)                                   | -32.5512 | 34.92967 | 0.002915 |
| PITG_18987 | Pi hypothetical protein (354 nt)                                                     | -32.5586 | -34.915  | 0.002915 |
| PITG_05481 | Pi conserved hypothetical protein (1622 nt)                                          | -17.3419 | 4.96696  | 0.002923 |
| PITG_15908 | Pi conserved hypothetical protein (5365 nt)                                          | -17.3419 | 4.96696  | 0.002923 |
| PITG_18412 | Pi pre-mRNA cleavage complex II protein Clp1, putative (131                          | -32.5131 | -35.006  | 0.002982 |
| PITG_01445 | Pi protein kinase, putative (2103 nt)                                                | -16.6486 | 4.430407 | 0.002986 |
| PITG_01086 | Pi conserved hypothetical protein (1296 nt)                                          | -11.0014 | -3.75866 | 0.003015 |
| PITG_14937 | Pi conserved hypothetical protein (2201 nt)                                          | -14.8065 | 3.526423 | 0.003037 |
| PITG_01713 | Pi conserved hypothetical protein (1559 nt)                                          | -16.605  | 4.523495 | 0.003041 |
| PITG_16898 | Pi hypothetical protein (426 nt)                                                     | -12.7724 | 3.136923 | 0.003058 |
| PITG_10966 | Pi conserved hypothetical protein (672 nt)                                           | -32.5261 | 34.9799  | 0.003073 |
| PITG_15264 | Pi transmembrane protein, putative (1623 nt)                                         | -32.5261 | 34.9799  | 0.003073 |
| PITG_19117 | Pi conserved hypothetical protein (1705 nt)                                          | -32.5261 | 34.9799  | 0.003073 |
| PITG_12215 | Pi Zinc (Zn <sup>2+</sup> )-Iron (Fe <sup>2+</sup> ) Permease (ZIP) Family (1005 nt) | -16.1493 | 4.023461 | 0.003103 |
| PITG_14580 | Pi conserved hypothetical protein (1702 nt)                                          | -15.8172 | -4.52289 | 0.003109 |
| PITG_00792 | Pi conserved hypothetical protein (478 nt)                                           | -16.0288 | -4.20575 | 0.003113 |
| PITG_01553 | Pi HECT ubiquitin ligase, putative (2046 nt)                                         | -16.6953 | -4.83754 | 0.003115 |
| PITG_15116 | Pi Multidrug/Oligosaccharidyl-lipid/Polysaccharide (MOP) Fli                         | -15.0056 | -3.52889 | 0.003124 |
| PITG_03519 | Pi conserved hypothetical protein (1339 nt)                                          | -14.1034 | -3.3824  | 0.003125 |
| PITG_05629 | Pi Poly(A) polymerase, putative (1901 nt)                                            | -16.8076 | -4.6063  | 0.003143 |
| PITG_01655 | Pi conserved hypothetical protein (910 nt)                                           | -32.5116 | 35.00886 | 0.003145 |
| PITG_03690 | Pi hypothetical protein (483 nt)                                                     | -32.5276 | 34.97697 | 0.003155 |
| PITG_06023 | Pi conserved hypothetical protein (1107 nt)                                          | -32.5276 | 34.97697 | 0.003155 |
| PITG_11021 | Pi conserved hypothetical protein (721 nt)                                           | -15.7169 | 4.147141 | 0.003216 |
| PITG_15616 | Pi protein kinase (861 nt)                                                           | -15.6999 | 4.570801 | 0.003217 |
| PITG_00005 | Pi protein kinase, putative (1646 nt)                                                | -32.2035 | -35.6251 | 0.003222 |
| PITG_02393 | Pi conserved hypothetical protein (1545 nt)                                          | -32.5026 | 35.02683 | 0.00323  |
| PITG_03062 | Pi conserved hypothetical protein (1880 nt)                                          | -32.5026 | 35.02683 | 0.00323  |
| PITG_05836 | Pi conserved hypothetical protein (1684 nt)                                          | -32.5026 | 35.02683 | 0.00323  |
| PITG_08487 | Pi conserved hypothetical protein (1651 nt)                                          | -15.4891 | -4.05043 | 0.003233 |
| PITG_19636 | Pi polygalacturonase, putative (474 nt)                                              | -16.5999 | -5.0342  | 0.003246 |
| PITG_07253 | Pi conserved hypothetical protein (300 nt)                                           | -17.3774 | 4.894958 | 0.003268 |
| PITG_03240 | Pi conserved hypothetical protein (5329 nt)                                          | -16.6295 | 4.473019 | 0.003282 |
| PITG_07586 | Pi conserved hypothetical protein (547 nt)                                           | -15.4916 | 4.640305 | 0.003286 |
| PITG_15963 | Pi conserved hypothetical protein (1521 nt)                                          | -15.6363 | 4.404946 | 0.003288 |
| PITG_03443 | Pi lipin-like protein (1587 nt)                                                      | -15.509  | -4.01059 | 0.003306 |
| PITG_00705 | Pi conserved hypothetical protein (759 nt)                                           | -32.5128 | -35.0065 | 0.003316 |
| PITG_19915 | Pi conserved hypothetical protein (808 nt)                                           | -32.5332 | -34.9657 | 0.003316 |
| PITG_12695 | Pi conserved hypothetical protein (1068 nt)                                          | -12.9855 | -3.25151 | 0.00332  |
| PITG_02341 | Pi conserved hypothetical protein (678 nt)                                           | -32.534  | 34.96415 | 0.003323 |
| PITG_05865 | Pi serine/threonine protein kinase (1321 nt)                                         | -32.534  | 34.96415 | 0.003323 |
| PITG_20917 | Pi sulfatase-like protein (939 nt)                                                   | -32.534  | 34.96415 | 0.003323 |
| PITG_03646 | Pi vacuolar protein-sorting-associated protein, putative (147                        | -16.8367 | -4.5473  | 0.003328 |
| PITG_18721 | Pi conserved hypothetical protein (939 nt)                                           | -15.2125 | 3.580932 | 0.003348 |
| PITG_08757 | Pi Voltage-gated Ion Channel (VIC) Superfamily (1309 nt)                             | -32.4731 | 35.08598 | 0.003356 |

|            |                                                                |          |          |          |
|------------|----------------------------------------------------------------|----------|----------|----------|
| PITG_09787 | Pi cytochrome P450, putative (1697 nt)                         | -14.386  | -3.91225 | 0.003383 |
| PITG_03064 | Pi kinesin-like protein (3993 nt)                              | -17.5026 | 4.627635 | 0.003384 |
| PITG_03203 | Pi exocyst complex component 4, putative (2990 nt)             | -17.4943 | 4.644238 | 0.003384 |
| PITG_10347 | Pi secreted RxLR effector peptide, putative (1329 nt)          | -32.5196 | 34.99289 | 0.00341  |
| PITG_15077 | Pi serine protease family S33, putative (1402 nt)              | -32.5546 | -34.9228 | 0.00341  |
| PITG_04634 | Pi conserved hypothetical protein (3590 nt)                    | -15.6772 | 3.94488  | 0.003439 |
| PITG_11274 | Pi long-chain-fatty-acid-CoA ligase, putative (2647 nt)        | -14.025  | -3.49561 | 0.003444 |
| PITG_19609 | Pi dynein-like protein (1863 nt)                               | -15.0051 | 3.684274 | 0.003445 |
| PITG_01661 | Pi conserved hypothetical protein (1396 nt)                    | -16.4006 | 3.827646 | 0.00345  |
| PITG_19150 | Pi hypothetical protein (1125 nt)                              | -15.6266 | -3.86639 | 0.003456 |
| PITG_00416 | Pi calcium-dependent protein kinase, putative (2172 nt)        | -32.6043 | -34.8235 | 0.00347  |
| PITG_08840 | Pi conserved hypothetical protein (499 nt)                     | -32.5592 | 34.91379 | 0.00347  |
| PITG_10429 | Pi SCP-like extracellular protein (694 nt)                     | -32.6043 | -34.8235 | 0.00347  |
| PITG_02500 | Pi conserved hypothetical protein (790 nt)                     | -14.5611 | -4.05968 | 0.00348  |
| PITG_01143 | Pi conserved hypothetical protein (838 nt)                     | -32.2404 | 35.55125 | 0.00348  |
| PITG_03278 | Pi sporangia induced hypothetical protein (2039 nt)            | -15.2764 | 3.817993 | 0.003484 |
| PITG_13274 | Pi hypothetical protein (558 nt)                               | -17.463  | 4.714689 | 0.003499 |
| PITG_21642 | Pi conserved hypothetical protein (463 nt)                     | -16.1139 | -4.03212 | 0.00351  |
| PITG_17744 | Pi conserved hypothetical protein (1778 nt)                    | -17.0705 | 5.080458 | 0.003538 |
| PITG_21553 | Pi thioredoxin-like protein (1306 nt)                          | -32.4747 | -35.0827 | 0.003538 |
| PITG_01027 | Pi SF-assemblin, putative (1047 nt)                            | -32.5672 | 34.89775 | 0.003559 |
| PITG_04341 | Pi transmembrane protein, putative (1410 nt)                   | -32.5672 | 34.89775 | 0.003559 |
| PITG_04615 | Pi glucan 1,3-beta-glucosidase, putative (1681 nt)             | -32.422  | -35.188  | 0.003566 |
| PITG_21255 | Pi conserved hypothetical protein (2166 nt)                    | -32.2427 | -35.5468 | 0.003581 |
| PITG_01142 | Pi protein kinase, putative (1185 nt)                          | -14.7519 | 3.66143  | 0.003583 |
| PITG_10611 | Pi conserved hypothetical protein (973 nt)                     | -32.5035 | 35.02518 | 0.003586 |
| PITG_11989 | Pi alcohol dehydrogenase, putative (982 nt)                    | -32.2116 | 35.60886 | 0.003592 |
| PITG_21516 | Pi memo-like protein (1521 nt)                                 | -13.7732 | -3.42654 | 0.003596 |
| PITG_14620 | Pi FKBP-type peptidyl-prolyl cis-trans isomerase, putative (52 | -14.8173 | 4.309485 | 0.00361  |
| PITG_19818 | Pi conserved hypothetical protein (533 nt)                     | -15.9469 | 3.973115 | 0.003636 |
| PITG_04324 | Pi conserved hypothetical protein (1751 nt)                    | -16.69   | 4.346248 | 0.003647 |
| PITG_08052 | Pi conserved hypothetical protein (438 nt)                     | -32.6004 | -34.8313 | 0.00365  |
| PITG_11910 | Pi serine protease family S08A, putative (1458 nt)             | -32.5776 | 34.87698 | 0.00365  |
| PITG_21258 | Pi conserved hypothetical protein (1986 nt)                    | -32.5776 | 34.87698 | 0.00365  |
| PITG_06862 | Pi ATP-binding Cassette (ABC) Superfamily (4122 nt)            | -14.1836 | -4.53517 | 0.003662 |
| PITG_07167 | Pi conserved hypothetical protein (551 nt)                     | -32.405  | -35.2221 | 0.003663 |
| PITG_21523 | Pi cytochrome P450, putative (1965 nt)                         | -32.405  | -35.2221 | 0.003663 |
| PITG_11235 | Pi conserved hypothetical protein (741 nt)                     | -17.4148 | 4.819168 | 0.00368  |
| PITG_14087 | Pi conserved hypothetical protein (2506 nt)                    | -17.4148 | 4.819168 | 0.00368  |
| PITG_15459 | Pi GAF domain-containing protein (3303 nt)                     | -32.5421 | 34.948   | 0.003682 |
| PITG_15867 | Pi syntaxin-binding protein, putative (2129 nt)                | -15.705  | 3.843718 | 0.003688 |
| PITG_21923 | Pi conserved hypothetical protein (1163 nt)                    | -32.2673 | 35.4975  | 0.003691 |
| PITG_10392 | Pi conserved hypothetical protein (632 nt)                     | -14.333  | -4.02123 | 0.003723 |
| PITG_14594 | Pi ubiquitin-conjugating enzyme E2, putative (604 nt)          | -10.6262 | -3.54466 | 0.003735 |
| PITG_07273 | Pi conserved hypothetical protein (726 nt)                     | -17.4765 | 4.683792 | 0.003742 |
| PITG_09166 | Pi conserved hypothetical protein (760 nt)                     | -32.6103 | -34.8114 | 0.003742 |
| PITG_11647 | Pi conserved hypothetical protein (1107 nt)                    | -17.4765 | 4.683792 | 0.003742 |

|            |                                                                                     |          |          |          |
|------------|-------------------------------------------------------------------------------------|----------|----------|----------|
| PITG_13545 | Pi conserved hypothetical protein (1320 nt)                                         | -12.053  | -4.05958 | 0.003752 |
| PITG_07714 | Pi ATP-binding Cassette (ABC) superfamily (4094 nt)                                 | -16.4278 | 3.771527 | 0.003759 |
| PITG_22432 | Pi Zinc (Zn <sup>2+</sup> )-Iron (Fe <sup>2+</sup> ) Permease (ZIP) Family (981 nt) | -16.6752 | 4.37716  | 0.003759 |
| PITG_00515 | Pi hypothetical protein (1168 nt)                                                   | -16.8521 | -4.51664 | 0.003765 |
| PITG_01955 | Pi P-type ATPase (P-ATPase) Superfamily (4198 nt)                                   | -32.5107 | 35.01069 | 0.003776 |
| PITG_11400 | Pi cleavage induced hypothetical protein (1011 nt)                                  | -32.2441 | 35.54394 | 0.00379  |
| PITG_03673 | Pi conserved hypothetical protein (940 nt)                                          | -14.567  | 3.261982 | 0.003818 |
| PITG_22846 | Pi elicitor-like protein (375 nt)                                                   | -32.4452 | 35.14172 | 0.003825 |
| PITG_20849 | Pi alcohol dehydrogenase, putative (1090 nt)                                        | -15.0773 | 3.338638 | 0.003829 |
| PITG_02855 | Pi conserved hypothetical protein (1233 nt)                                         | -32.5754 | 34.88134 | 0.003836 |
| PITG_05619 | Pi conserved hypothetical protein (1496 nt)                                         | -32.5754 | 34.88134 | 0.003836 |
| PITG_10226 | Pi Ammonium Transporter (Amt) Family (1557 nt)                                      | -32.5754 | 34.88134 | 0.003836 |
| PITG_14720 | Pi aldose 1-epimerase, putative (963 nt)                                            | -32.5754 | 34.88134 | 0.003836 |
| PITG_01845 | Pi conserved hypothetical protein (766 nt)                                          | -13.1797 | -3.21602 | 0.003846 |
| PITG_20037 | Pi hypothetical protein (1299 nt)                                                   | -13.046  | 3.294032 | 0.003853 |
| PITG_12511 | Pi conserved hypothetical protein (1963 nt)                                         | -15.197  | 3.540313 | 0.003854 |
| PITG_00782 | Pi conserved hypothetical protein (1044 nt)                                         | -15.0114 | -3.5175  | 0.003854 |
| PITG_11276 | Pi conserved hypothetical protein (507 nt)                                          | -32.5335 | -34.9652 | 0.003874 |
| PITG_21410 | Pi elicitor-like protein INF4 (459 nt)                                              | -13.2273 | 4.047891 | 0.003887 |
| PITG_13306 | Pi secreted RxLR effector peptide, putative (300 nt)                                | -14.3622 | -4.47161 | 0.003913 |
| PITG_10269 | Pi conserved hypothetical protein (749 nt)                                          | -11.323  | -3.56111 | 0.003945 |
| PITG_09473 | Pi conserved hypothetical protein (747 nt)                                          | -15.8437 | 3.889671 | 0.003949 |
| PITG_15687 | Pi conserved hypothetical protein (743 nt)                                          | -13.2424 | -3.40344 | 0.003966 |
| PITG_09849 | Pi conserved hypothetical protein (987 nt)                                          | -15.0688 | -4.1839  | 0.003968 |
| PITG_03657 | Pi kinesin-like protein (1304 nt)                                                   | -15.2195 | -3.71309 | 0.00397  |
| PITG_08046 | Pi kinesin-like protein (3040 nt)                                                   | -15.7143 | 3.82512  | 0.003971 |
| PITG_17333 | Pi serine/threonine protein kinase (1905 nt)                                        | -13.9806 | -3.32665 | 0.003971 |
| PITG_17834 | Pi phospholipid hydroperoxide glutathione peroxidase, putative (1000 nt)            | -16.8527 | -4.51618 | 0.003996 |
| PITG_01316 | Pi conserved hypothetical protein (708 nt)                                          | -13.8463 | -3.31979 | 0.004    |
| PITG_10882 | Pi conserved hypothetical protein (1014 nt)                                         | -32.6119 | -34.8083 | 0.004031 |
| PITG_07422 | Pi conserved hypothetical protein (1236 nt)                                         | -32.3133 | -35.4055 | 0.004039 |
| PITG_17580 | Pi protein kinase (333 nt)                                                          | -32.2953 | 35.44153 | 0.004039 |
| PITG_11248 | Pi hypothetical protein (786 nt)                                                    | -11.7063 | -3.96755 | 0.004122 |
| PITG_06965 | Pi cleavage induced conserved hypothetical protein (4599 nt)                        | -17.3879 | 4.88322  | 0.004135 |
| PITG_02796 | Pi myosin-like protein (4929 nt)                                                    | -15.0127 | -3.51506 | 0.004157 |
| PITG_10040 | Pi conserved hypothetical protein (701 nt)                                          | -32.6508 | -34.7304 | 0.004161 |
| PITG_12883 | Pi conserved hypothetical protein (576 nt)                                          | -32.6308 | -34.7706 | 0.004161 |
| PITG_16298 | Pi conserved hypothetical protein (2074 nt)                                         | -32.6261 | -34.78   | 0.004161 |
| PITG_02646 | Pi conserved hypothetical protein (1623 nt)                                         | -32.5941 | 34.84385 | 0.004161 |
| PITG_13794 | Pi conserved hypothetical protein (1424 nt)                                         | -32.6024 | 34.82721 | 0.004161 |
| PITG_20716 | Pi conserved hypothetical protein (1027 nt)                                         | -32.6024 | 34.82721 | 0.004161 |
| PITG_04135 | Pi glycoside hydrolase, putative (864 nt)                                           | -16.0012 | 4.678906 | 0.004171 |
| PITG_05334 | Pi conserved hypothetical protein (1455 nt)                                         | -17.4543 | 4.739162 | 0.004175 |
| PITG_23282 | Pi Crinkler (CRN) family protein, pseudogene (4320 nt)                              | -13.4004 | -3.11484 | 0.004188 |
| PITG_02671 | Pi cAMP-dependent protein kinase regulatory subunit (1775 nt)                       | -13.4204 | 3.0974   | 0.0042   |
| PITG_04687 | Pi hypothetical protein (1162 nt)                                                   | -15.7245 | 5.401525 | 0.004206 |
| PITG_00552 | Pi memo-like protein (1522 nt)                                                      | -11.4732 | -3.25184 | 0.004216 |



|            |                                                                                      |          |          |          |
|------------|--------------------------------------------------------------------------------------|----------|----------|----------|
| PITG_17332 | Pi conserved hypothetical protein (1138 nt)                                          | -15.6699 | -3.77977 | 0.004226 |
| PITG_13529 | Pi secreted RxLR effector peptide, putative (489 nt)                                 | -15.6517 | -3.81754 | 0.004227 |
| PITG_11977 | Pi conserved hypothetical protein (2109 nt)                                          | -14.2996 | -3.65424 | 0.00423  |
| PITG_12625 | Pi conserved hypothetical protein (2471 nt)                                          | -32.5891 | -34.8538 | 0.004234 |
| PITG_04450 | Pi Zinc (Zn <sup>2+</sup> )-Iron (Fe <sup>2+</sup> ) Permease (ZIP) Family (1794 nt) | -32.6311 | 34.76982 | 0.004262 |
| PITG_19465 | Pi hypothetical protein (492 nt)                                                     | -17.5318 | 4.571194 | 0.004262 |
| PITG_03307 | Pi conserved hypothetical protein (1277 nt)                                          | -16.7478 | 4.2262   | 0.004275 |
| PITG_07271 | Pi conserved hypothetical protein (4240 nt)                                          | -16.7478 | 4.2262   | 0.004275 |
| PITG_10287 | Pi adenylate cyclase, putative (4726 nt)                                             | -16.7478 | 4.2262   | 0.004275 |
| PITG_20791 | Pi ADP-ribosylation factor family (689 nt)                                           | -15.2183 | 3.652748 | 0.004276 |
| PITG_21033 | Pi conserved hypothetical protein (321 nt)                                           | -32.4951 | 35.04195 | 0.004287 |
| PITG_22862 | Pi conserved hypothetical protein (762 nt)                                           | -32.4951 | 35.04195 | 0.004287 |
| PITG_09831 | Pi conserved hypothetical protein (677 nt)                                           | -15.1131 | 4.430694 | 0.004288 |
| PITG_15547 | Pi Amino Acid-Polyamine-Organocation (APC) Family (960 nt)                           | -32.3243 | 35.38343 | 0.004315 |
| PITG_20066 | Pi maltose O-acetyltransferase, putative (543 nt)                                    | -32.3243 | 35.38343 | 0.004315 |
| PITG_07698 | Pi conserved hypothetical protein (867 nt)                                           | -32.3436 | -35.3449 | 0.004315 |
| PITG_03080 | Pi hypothetical protein (999 nt)                                                     | -13.23   | -3.78103 | 0.004317 |
| PITG_10911 | Pi conserved hypothetical protein (1182 nt)                                          | -16.1423 | -3.97598 | 0.004323 |
| PITG_09403 | Pi hypothetical protein (583 nt)                                                     | -13.2533 | -3.04208 | 0.004325 |
| PITG_15660 | Pi mitochondrial carnitine/acylcarnitine carrier protein, puta                       | -12.048  | -3.44955 | 0.004358 |
| PITG_00688 | Pi cytochrome oxidase assembly protein, putative (1797 nt)                           | -14.7205 | -3.60135 | 0.004358 |
| PITG_03592 | Pi conserved hypothetical protein (3269 nt)                                          | -17.0563 | 5.092817 | 0.004359 |
| PITG_07910 | Pi 5'-AMP-activated protein kinase catalytic subunit, putative                       | -16.6887 | 4.357618 | 0.004359 |
| PITG_14938 | Pi conserved hypothetical protein (474 nt)                                           | -17.0563 | 5.092817 | 0.004359 |
| PITG_20600 | Pi protein kinase (441 nt)                                                           | -16.6887 | 4.357618 | 0.004359 |
| PITG_19302 | Pi secreted RxLR effector peptide, putative (1524 nt)                                | -32.2781 | 35.47596 | 0.004383 |
| PITG_12480 | Pi conserved hypothetical protein (1597 nt)                                          | -14.0024 | -3.2003  | 0.004384 |
| PITG_13135 | Pi copper-transporting ATPase, putative (3057 nt)                                    | -32.5541 | -34.9238 | 0.004387 |
| PITG_03488 | Pi dynein heavy chain (13140 nt)                                                     | -17.1233 | 4.977137 | 0.0044   |
| PITG_12252 | Pi conserved hypothetical protein (4475 nt)                                          | -16.8831 | -4.45501 | 0.0044   |
| PITG_20199 | Pi Crinkler (CRN) family protein, pseudogene (770 nt)                                | -17.1111 | 5.00158  | 0.0044   |
| PITG_10121 | Pi conserved hypothetical protein (738 nt)                                           | -32.3284 | -35.3753 | 0.004432 |
| PITG_14084 | Pi catechol O-methyltransferase, putative (1111 nt)                                  | -16.4232 | 4.529013 | 0.004443 |
| PITG_22126 | Pi conserved hypothetical protein (2049 nt)                                          | -32.5757 | -34.8807 | 0.004444 |
| PITG_11891 | Pi conserved hypothetical protein (1104 nt)                                          | -13.2539 | 4.641732 | 0.004466 |
| PITG_04134 | Pi conserved hypothetical protein (1923 nt)                                          | -15.9849 | -4.18817 | 0.004469 |
| PITG_02212 | Pi mitogen-activated protein kinase, putative (1318 nt)                              | -32.6194 | 34.79332 | 0.00447  |
| PITG_04112 | Pi transmembrane protein, putative (4285 nt)                                         | -17.5206 | 4.595673 | 0.00447  |
| PITG_20080 | Pi carbohydrate-binding protein, putative (1664 nt)                                  | -17.5236 | 4.589688 | 0.00447  |
| PITG_02011 | Pi calcineurin subunit B, putative (1489 nt)                                         | -14.1005 | 3.124162 | 0.004476 |
| PITG_11755 | Pi putative GPI-anchored serine-threonine rich hypothetical                          | -11.8461 | -3.05458 | 0.004496 |
| PITG_10049 | Pi protein kinase (2110 nt)                                                          | -16.8108 | -4.60473 | 0.004515 |
| PITG_09346 | Pi conserved hypothetical protein (1107 nt)                                          | -13.3248 | -3.21241 | 0.004518 |
| PITG_02108 | Pi dynein light chain-like protein (485 nt)                                          | -16.0962 | 4.782246 | 0.004523 |
| PITG_14551 | Pi hypothetical protein (629 nt)                                                     | -15.7897 | 3.726965 | 0.004524 |
| PITG_02401 | Pi phosphatidylinositol-3,4,5-trisphosphate 3-phosphatase, p                         | -14.7572 | -3.5274  | 0.004566 |
| PITG_06288 | Pi protein kinase (2737 nt)                                                          | -32.6464 | -34.7394 | 0.004578 |

|            |                                                                   |          |          |          |
|------------|-------------------------------------------------------------------|----------|----------|----------|
| PITG_18898 | Pi vacuolar protein sorting-associated protein, putative (611 nt) | -32.6464 | -34.7394 | 0.004578 |
| PITG_04047 | Pi hypothetical protein (740 nt)                                  | -15.856  | -4.44479 | 0.004584 |
| PITG_07951 | Pi conserved hypothetical protein (631 nt)                        | -15.3999 | 4.179343 | 0.004613 |
| PITG_07136 | Pi serine protease family S33, putative (984 nt)                  | -32.3546 | 35.32289 | 0.004629 |
| PITG_14999 | Pi hypothetical protein (1256 nt)                                 | -32.3546 | 35.32289 | 0.004629 |
| PITG_08110 | Pi conserved hypothetical protein (1126 nt)                       | -16.7483 | -4.73433 | 0.004633 |
| PITG_04536 | Pi conserved hypothetical protein (1351 nt)                       | -16.2164 | 3.889212 | 0.004645 |
| PITG_09009 | Pi conserved hypothetical protein (1516 nt)                       | -16.7313 | 4.263575 | 0.004659 |
| PITG_02737 | Pi conserved hypothetical protein (1280 nt)                       | -13.9121 | -3.42145 | 0.004689 |
| PITG_00840 | Pi hypothetical protein (492 nt)                                  | -15.1487 | -4.5202  | 0.004733 |
| PITG_00478 | Pi conserved hypothetical protein (3441 nt)                       | -17.0604 | 5.077453 | 0.004753 |
| PITG_11196 | Pi conserved hypothetical protein (777 nt)                        | -16.7163 | 4.300903 | 0.004755 |
| PITG_12824 | Pi glutamate carboxypeptidase, putative (2310 nt)                 | -16.4833 | -5.27883 | 0.004775 |
| PITG_20374 | Pi conserved hypothetical protein (2933 nt)                       | -14.1793 | -3.32501 | 0.004791 |
| PITG_04706 | Pi potential pseudogene (372 nt)                                  | -17.53   | 4.579679 | 0.004798 |
| PITG_11969 | Pi ATP-binding Cassette (ABC) Superfamily (4122 nt)               | -15.1198 | 3.253618 | 0.004853 |
| PITG_03562 | Pi conserved hypothetical protein (3350 nt)                       | -14.9133 | -3.78869 | 0.004853 |
| PITG_17122 | Pi Amino Acid/Auxin Permease (AAP) Family (1471 nt)               | -16.423  | 4.526624 | 0.004881 |
| PITG_13511 | Pi phosphatidylinositol-4-phosphate-5-kinase (PIPK-D6/GPCF)       | -16.1589 | 4.676401 | 0.004892 |
| PITG_10862 | Pi cytochrome c oxidase assembly protein COX11, mitochondri       | -13.1206 | -3.39114 | 0.004907 |
| PITG_08492 | Pi cytochrome b5-like protein (914 nt)                            | -32.6282 | 34.77572 | 0.004912 |
| PITG_11490 | Pi conserved hypothetical protein (1911 nt)                       | -32.6282 | 34.77572 | 0.004912 |
| PITG_07810 | Pi hypothetical protein (798 nt)                                  | -13.416  | 3.113161 | 0.004949 |
| PITG_10127 | Pi ras family GTPase, putative (1150 nt)                          | -15.9469 | 4.11336  | 0.004995 |
| PITG_00839 | Pi conserved hypothetical protein (797 nt)                        | -10.9243 | -3.45387 | 0.005007 |
| PITG_20858 | Pi hypothetical protein (1227 nt)                                 | -32.5977 | -34.8367 | 0.005009 |
| PITG_17559 | Pi myb-like DNA-binding protein, putative (627 nt)                | -14.9851 | -3.71486 | 0.005021 |
| PITG_07007 | Pi hypothetical protein (1026 nt)                                 | -15.8041 | 3.973825 | 0.005022 |
| PITG_05204 | Pi ATP-binding Cassette (ABC) superfamily (1497 nt)               | -17.5579 | 4.51817  | 0.005028 |
| PITG_06734 | Pi conserved hypothetical protein (2133 nt)                       | -32.6486 | 34.73488 | 0.005028 |
| PITG_20040 | Pi conserved hypothetical protein (1107 nt)                       | -32.7033 | -34.6254 | 0.005028 |
| PITG_02462 | Pi actin-like protein (1227 nt)                                   | -32.6399 | 34.75237 | 0.005028 |
| PITG_15706 | Pi conserved hypothetical protein (558 nt)                        | -14.1873 | -4.39005 | 0.005043 |
| PITG_07248 | Pi protein kinase (2918 nt)                                       | -16.0851 | 3.680108 | 0.005052 |
| PITG_08352 | Pi conserved hypothetical protein (370 nt)                        | -13.3139 | 3.034132 | 0.005053 |
| PITG_13345 | Pi conserved hypothetical protein (1800 nt)                       | -16.4567 | -5.1755  | 0.005071 |
| PITG_12757 | Pi alpha-ketoglutarate-dependent sulfonate dioxygenase, pu        | -32.5757 | -34.8807 | 0.005129 |
| PITG_15058 | Pi transmembrane protein, putative (4373 nt)                      | -32.5757 | -34.8807 | 0.005129 |
| PITG_01899 | Pi conserved hypothetical protein (803 nt)                        | -14.797  | 3.368981 | 0.005142 |
| PITG_12098 | Pi Crinkler (CRN) family protein, pseudogene (1258 nt)            | -11.5123 | -3.0305  | 0.005191 |
| PITG_10636 | Pi conserved hypothetical protein (1056 nt)                       | -13.9724 | 4.07274  | 0.005193 |
| PITG_11275 | Pi conserved hypothetical protein (573 nt)                        | -16.084  | 3.684126 | 0.005209 |
| PITG_02409 | Pi Folate-Biopterin Transporter (FBT) Family (1707 nt)            | -14.6172 | 3.836196 | 0.005216 |
| PITG_11859 | Pi hypothetical protein (989 nt)                                  | -14.5214 | 3.621324 | 0.005224 |
| PITG_10390 | Pi conserved hypothetical protein (527 nt)                        | -14.599  | -4.51498 | 0.005232 |
| PITG_09548 | Pi syntaxin-like protein (1222 nt)                                | -13.4802 | -3.24471 | 0.005235 |
| PITG_00614 | Pi protein kinase (570 nt)                                        | -32.6664 | 34.69939 | 0.005261 |

|            |                                                                 |          |          |          |
|------------|-----------------------------------------------------------------|----------|----------|----------|
| PITG_17108 | Pi protein phosphatase 1 regulatory subunit 7, putative (253    | -17.5673 | 4.501254 | 0.005261 |
| PITG_21065 | Pi conserved hypothetical protein (2122 nt)                     | -32.6664 | 34.69939 | 0.005261 |
| PITG_21238 | Pi secreted RxLR effector peptide, putative (384 nt)            | -17.5805 | 4.474782 | 0.005261 |
| PITG_01775 | Pi protein phosphatase 2C, putative (1181 nt)                   | -14.4586 | -3.22944 | 0.005288 |
| PITG_12296 | Pi conserved hypothetical protein (1833 nt)                     | -14.9642 | -3.75928 | 0.00531  |
| PITG_17163 | Pi conserved hypothetical protein (1082 nt)                     | -16.177  | -3.9072  | 0.005349 |
| PITG_14123 | Pi calcineurin-like phosphoesterase, putative (1560 nt)         | -15.9523 | -4.2527  | 0.005358 |
| PITG_02616 | Pi caltractin (763 nt)                                          | -13.3681 | 3.321759 | 0.005364 |
| PITG_22717 | Pi elicitin-like protein (420 nt)                               | -32.6851 | -34.6619 | 0.005381 |
| PITG_16321 | Pi conserved hypothetical protein (660 nt)                      | -32.6045 | 34.8231  | 0.005388 |
| PITG_06976 | Pi conserved hypothetical protein (1373 nt)                     | -13.436  | -3.43784 | 0.005402 |
| PITG_05655 | Pi conserved hypothetical protein (5861 nt)                     | -15.8662 | 3.847186 | 0.005407 |
| PITG_10107 | Pi Multidrug/Oligosaccharidyl-lipid/Polysaccharide (MOP) Fli    | -16.0398 | 4.238923 | 0.005419 |
| PITG_18336 | Pi glycoside hydrolase, putative (1398 nt)                      | -16.768  | 4.191679 | 0.005441 |
| PITG_18644 | Pi conserved hypothetical protein (3472 nt)                     | -14.4024 | 3.204855 | 0.005442 |
| PITG_03639 | Pi cellulose binding elicitor lectin (CBEL), putative (1030 nt) | -11.015  | -3.27835 | 0.005446 |
| PITG_13603 | Pi conserved hypothetical protein (683 nt)                      | -32.5192 | 34.99365 | 0.005454 |
| PITG_09675 | Pi phosphatidate cytidyltransferase, putative (1488 nt)         | -16.8366 | -4.55442 | 0.005473 |
| PITG_00795 | Pi conserved hypothetical protein (983 nt)                      | -13.8263 | -3.52742 | 0.005518 |
| PITG_03431 | Pi conserved hypothetical protein (1826 nt)                     | -16.7482 | -4.73581 | 0.005533 |
| PITG_16204 | Pi protein kinase (4683 nt)                                     | -32.4256 | -35.1809 | 0.005542 |
| PITG_20302 | Pi conserved hypothetical protein (1115 nt)                     | -32.4256 | -35.1809 | 0.005542 |
| PITG_13807 | Pi hypothetical protein (645 nt)                                | -9.77255 | 3.047743 | 0.005566 |
| PITG_19991 | Pi hypothetical protein (720 nt)                                | -16.9332 | -4.35432 | 0.005572 |
| PITG_16049 | Pi conserved hypothetical protein (882 nt)                      | -16.223  | -3.81218 | 0.00558  |
| PITG_10373 | Pi conserved hypothetical protein (930 nt)                      | -9.50453 | -3.80435 | 0.005593 |
| PITG_07728 | Pi conserved hypothetical protein (3552 nt)                     | -15.1121 | 3.470171 | 0.005661 |
| PITG_03811 | Pi protein kinase (892 nt)                                      | -13.4711 | -3.26304 | 0.005661 |
| PITG_11471 | Pi Amino Acid-Polyamine-Organocation (APC) Family (1456 r       | -32.4086 | -35.215  | 0.005682 |
| PITG_11020 | Pi conserved hypothetical protein (1377 nt)                     | -16.9323 | -4.35655 | 0.005724 |
| PITG_20434 | Pi hypothetical protein (587 nt)                                | -16.9496 | -4.32186 | 0.005724 |
| PITG_00094 | Pi conserved hypothetical protein (4402 nt)                     | -16.7751 | 4.180347 | 0.005744 |
| PITG_02148 | Pi conserved hypothetical protein (938 nt)                      | -32.6702 | 34.69174 | 0.005754 |
| PITG_13825 | Pi ras family GTPase, putative (618 nt)                         | -32.6756 | 34.68097 | 0.005754 |
| PITG_11249 | Pi heat shock 70 kDa protein (2183 nt)                          | -11.7676 | -3.25006 | 0.005798 |
| PITG_00362 | Pi conserved hypothetical protein (1377 nt)                     | -17.1186 | 4.963464 | 0.005817 |
| PITG_06202 | Pi conserved hypothetical protein (818 nt)                      | -16.2081 | -3.84485 | 0.005874 |
| PITG_20749 | Pi sporangia induced conserved hypothetical protein (981 nt     | -17.145  | 4.91996  | 0.005901 |
| PITG_21888 | Pi hypothetical protein (942 nt)                                | -15.9718 | 4.057974 | 0.005946 |
| PITG_17508 | Pi glucosylceramidase, putative (1500 nt)                       | -16.5294 | -5.18762 | 0.005954 |
| PITG_21037 | Pi conserved hypothetical protein (401 nt)                      | -16.5294 | -5.18762 | 0.005954 |
| PITG_06578 | Pi protein kinase (1389 nt)                                     | -14.5158 | 3.181496 | 0.005956 |
| PITG_08689 | Pi hypothetical protein (982 nt)                                | -14.623  | -3.3734  | 0.005957 |
| PITG_10131 | Pi conserved hypothetical protein (563 nt)                      | -32.3908 | 35.25049 | 0.005971 |
| PITG_03149 | Pi conserved hypothetical protein (910 nt)                      | -13.9129 | 3.066843 | 0.005978 |
| PITG_13422 | Pi conserved hypothetical protein (2145 nt)                     | -14.9898 | -3.56183 | 0.006001 |
| PITG_15849 | Pi hypothetical protein (264 nt)                                | -32.4193 | 35.19355 | 0.006031 |

|            |                                                                 |          |          |          |
|------------|-----------------------------------------------------------------|----------|----------|----------|
| PITG_16093 | Pi conserved hypothetical protein (801 nt)                      | -13.8854 | -3.10103 | 0.006036 |
| PITG_20350 | Pi D-amino acid dehydrogenase small subunit, putative (199:     | -15.78   | -3.55642 | 0.006048 |
| PITG_00945 | Pi conserved hypothetical protein (1286 nt)                     | -16.1954 | -3.87089 | 0.00605  |
| PITG_17230 | Pi conserved hypothetical protein (1256 nt)                     | -11.5928 | 3.049875 | 0.006064 |
| PITG_18418 | Pi conserved hypothetical protein (1581 nt)                     | -16.7037 | 4.339361 | 0.006102 |
| PITG_03958 | Pi hypothetical protein (337 nt)                                | -12.6034 | 2.997436 | 0.006109 |
| PITG_00556 | Pi conserved hypothetical protein (1274 nt)                     | -16.062  | -4.03433 | 0.006124 |
| PITG_06655 | Pi hypothetical protein (327 nt)                                | -32.7073 | 34.61742 | 0.006126 |
| PITG_07016 | Pi Voltage-gated Ion Channel (VIC) Superfamily (2668 nt)        | -32.7073 | 34.61742 | 0.006126 |
| PITG_07537 | Pi conserved hypothetical protein (1333 nt)                     | -17.6078 | 4.41831  | 0.006126 |
| PITG_12267 | Pi conserved hypothetical protein (2446 nt)                     | -17.6078 | 4.41831  | 0.006126 |
| PITG_12572 | Pi conserved hypothetical protein (2855 nt)                     | -32.7073 | 34.61742 | 0.006126 |
| PITG_15758 | Pi conserved hypothetical protein (3908 nt)                     | -32.7073 | 34.61742 | 0.006126 |
| PITG_19182 | Pi DNA cross-link repair protein, putative (2025 nt)            | -32.7312 | -34.5696 | 0.006126 |
| PITG_04310 | Pi hypothetical protein (484 nt)                                | -32.7066 | -34.6189 | 0.006126 |
| PITG_14566 | Pi lariat debranching enzyme B (1542 nt)                        | -32.7066 | -34.6189 | 0.006126 |
| PITG_09468 | Pi conserved hypothetical protein (1978 nt)                     | -32.6624 | -34.7073 | 0.006148 |
| PITG_03862 | Pi conserved hypothetical protein (360 nt)                      | -15.2818 | -3.74816 | 0.006172 |
| PITG_02998 | Pi S-adenosyl-L-methionine-dependent methyltransferase, p       | -32.5986 | -34.835  | 0.006174 |
| PITG_21767 | Pi similar to sea slug pheromone (795 nt)                       | -32.4433 | -35.1455 | 0.00618  |
| PITG_23049 | Pi cyst germination specific acidic repeat protein precursor, p | -32.4433 | -35.1455 | 0.00618  |
| PITG_03941 | Pi conserved hypothetical protein (2328 nt)                     | -17.6174 | 4.400049 | 0.006259 |
| PITG_17162 | Pi conserved hypothetical protein (3300 nt)                     | -17.6174 | 4.400049 | 0.006259 |
| PITG_20362 | Pi conserved hypothetical protein (1466 nt)                     | -14.7091 | -4.72879 | 0.006283 |
| PITG_07129 | Pi conserved hypothetical protein (2982 nt)                     | -17.4015 | 4.874104 | 0.006294 |
| PITG_05747 | Pi conserved hypothetical protein (779 nt)                      | -15.5474 | 3.43819  | 0.006304 |
| PITG_19993 | Pi GMP synthase [glutamine-hydrolyzing], putative (1587 nt)     | -14.7141 | 3.168437 | 0.006323 |
| PITG_10526 | Pi conserved hypothetical protein (3273 nt)                     | -32.4327 | 35.16662 | 0.006331 |
| PITG_09910 | Pi arabinogalactan endo-1,4-beta-galactosidase (1077 nt)        | -15.4786 | -3.97764 | 0.006375 |
| PITG_11988 | Pi Mitochondrial Carrier (MC) Family (857 nt)                   | -32.7168 | 34.5986  | 0.006394 |
| PITG_12942 | Pi conserved hypothetical protein (1295 nt)                     | -32.7168 | 34.5986  | 0.006394 |
| PITG_13908 | Pi conserved hypothetical protein (775 nt)                      | -32.7168 | 34.5986  | 0.006394 |
| PITG_17370 | Pi conserved hypothetical protein (1896 nt)                     | -16.1692 | -3.9279  | 0.006399 |
| PITG_17437 | Pi conserved hypothetical protein (1821 nt)                     | -16.9864 | -4.2479  | 0.0064   |
| PITG_04456 | Pi hypothetical protein (1641 nt)                               | -17.5882 | 4.468245 | 0.006423 |
| PITG_21384 | Pi hypothetical protein (1601 nt)                               | -17.5882 | 4.468245 | 0.006423 |
| PITG_14601 | Pi hypothetical protein (369 nt)                                | -9.10553 | 3.240441 | 0.006469 |
| PITG_14568 | Pi conserved hypothetical protein (1108 nt)                     | -13.6572 | 2.969087 | 0.00647  |
| PITG_02678 | Pi conserved hypothetical protein (1105 nt)                     | -15.9349 | 3.707927 | 0.006488 |
| PITG_04974 | Pi conserved hypothetical protein (1077 nt)                     | -16.0787 | -4.00101 | 0.006488 |
| PITG_07411 | Pi conserved hypothetical protein (1236 nt)                     | -32.7246 | -34.583  | 0.006531 |
| PITG_09061 | Pi conserved hypothetical protein (771 nt)                      | -32.6795 | 34.67302 | 0.006531 |
| PITG_01170 | Pi potassium/sodium hyperpolarization-activated cyclic nucle    | -16.8069 | 4.116709 | 0.006533 |
| PITG_06302 | Pi M96 mating-specific protein family (849 nt)                  | -16.2366 | -3.78621 | 0.006545 |
| PITG_10984 | Pi choline transporter-like protein (2525 nt)                   | -32.6373 | 34.75756 | 0.006564 |
| PITG_12522 | Pi conserved hypothetical protein (566 nt)                      | -32.6373 | 34.75756 | 0.006564 |
| PITG_16710 | Pi conserved hypothetical protein (2562 nt)                     | -32.6373 | 34.75756 | 0.006564 |

|            |                                                               |          |          |          |
|------------|---------------------------------------------------------------|----------|----------|----------|
| PITG_19815 | Pi conserved hypothetical protein (3665 nt)                   | -32.6373 | 34.75756 | 0.006564 |
| PITG_07239 | Pi tartrate-resistant acid phosphatase type 5, putative (1204 | -16.9882 | -4.24483 | 0.006568 |
| PITG_16092 | Pi Multidrug/Oligosaccharidyl-lipid/Polysaccharide (MOP) Fli  | -16.8181 | 4.08715  | 0.006568 |
| PITG_03008 | Pi conserved hypothetical protein (1887 nt)                   | -16.6265 | -4.84341 | 0.006581 |
| PITG_13260 | Pi tenascin-like protein (3393 nt)                            | -17.5523 | 4.549226 | 0.006598 |
| PITG_00351 | Pi conserved hypothetical protein (2181 nt)                   | -32.4539 | 35.12424 | 0.0066   |
| PITG_06167 | Pi conserved hypothetical protein (2883 nt)                   | -32.4539 | 35.12424 | 0.0066   |
| PITG_14402 | Pi conserved hypothetical protein (819 nt)                    | -32.4539 | 35.12424 | 0.0066   |
| PITG_15337 | Pi secreted RxLR effector peptide, putative (501 nt)          | -32.4539 | 35.12424 | 0.0066   |
| PITG_07682 | Pi conserved hypothetical protein (3584 nt)                   | -16.6851 | 4.386885 | 0.006622 |
| PITG_03923 | Pi conserved hypothetical protein (491 nt)                    | -15.1019 | -4.8349  | 0.006648 |
| PITG_19645 | Pi conserved hypothetical protein (1338 nt)                   | -14.6805 | 3.58548  | 0.006657 |
| PITG_01677 | Pi conserved hypothetical protein (1394 nt)                   | -32.694  | -34.6441 | 0.006707 |
| PITG_08494 | Pi conserved hypothetical protein (1132 nt)                   | -16.1252 | 3.605521 | 0.006735 |
| PITG_20295 | Pi conserved hypothetical protein (1230 nt)                   | -16.1252 | 3.605521 | 0.006735 |
| PITG_01076 | Pi ATPase AFG2 protein (2272 nt)                              | -16.9703 | -4.28098 | 0.006739 |
| PITG_05388 | Pi conserved hypothetical protein (1065 nt)                   | -32.4798 | -35.0725 | 0.006758 |
| PITG_01407 | Pi D-isomer specific 2-hydroxyacid dehydrogenase, putative    | -14.092  | -3.69796 | 0.006768 |
| PITG_18379 | Pi conserved hypothetical protein (387 nt)                    | -16.5455 | 4.289568 | 0.006819 |
| PITG_11552 | Pi conserved hypothetical protein (532 nt)                    | -13.7831 | -3.32652 | 0.00682  |
| PITG_17498 | Pi conserved hypothetical protein (721 nt)                    | -15.4259 | -3.98066 | 0.006863 |
| PITG_15745 | Pi adhesin-like protein (2106 nt)                             | -16.7987 | 5.488987 | 0.006883 |
| PITG_11461 | Pi HECT E3 ubiquitin ligase, putative (3357 nt)               | -15.5919 | -3.84626 | 0.006909 |
| PITG_04129 | Pi cobalamin synthesis protein, putative (1680 nt)            | -32.4772 | 35.07777 | 0.006918 |
| PITG_22933 | Pi secreted RxLR effector peptide, putative (483 nt)          | -14.8907 | -3.25938 | 0.006925 |
| PITG_16322 | Pi conserved hypothetical protein (2059 nt)                   | -15.0719 | -3.39718 | 0.007033 |
| PITG_03515 | Pi conserved hypothetical protein (706 nt)                    | -32.6447 | -34.7428 | 0.007048 |
| PITG_02979 | Pi conserved hypothetical protein (438 nt)                    | -16.2744 | -3.71009 | 0.00705  |
| PITG_10443 | Pi peroxisomal acyl-coenzyme A oxidase, putative (2002 nt)    | -16.9848 | -4.25278 | 0.007092 |
| PITG_13968 | Pi dynein heavy chain (13181 nt)                              | -15.8239 | 3.607728 | 0.007131 |
| PITG_13003 | Pi glucose transporter, putative (1559 nt)                    | -13.3486 | 3.803582 | 0.007164 |
| PITG_07493 | Pi Crinkler (CRN) family protein (561 nt)                     | -13.7837 | -3.44564 | 0.007164 |
| PITG_04435 | Pi Crinkler (CRN) family protein (2520 nt)                    | -15.2942 | -3.72537 | 0.007173 |
| PITG_09495 | Pi conserved hypothetical protein (594 nt)                    | -32.6214 | -34.7894 | 0.007204 |
| PITG_01492 | Pi conserved hypothetical protein (429 nt)                    | -14.1696 | 3.364807 | 0.007213 |
| PITG_14945 | Pi conserved hypothetical protein (806 nt)                    | -15.5708 | 3.39304  | 0.007258 |
| PITG_00076 | Pi hypothetical protein (680 nt)                              | -32.4904 | 35.05141 | 0.007266 |
| PITG_17954 | Pi conserved hypothetical protein (2384 nt)                   | -32.4904 | 35.05141 | 0.007266 |
| PITG_11133 | Pi conserved hypothetical protein (1295 nt)                   | -15.1249 | -3.3594  | 0.007271 |
| PITG_02619 | Pi hypothetical protein (309 nt)                              | -14.7123 | 3.025484 | 0.007328 |
| PITG_01819 | Pi conserved hypothetical protein (1123 nt)                   | -13.9847 | -3.12315 | 0.007344 |
| PITG_20675 | Pi conserved hypothetical protein (1808 nt)                   | -15.3262 | -3.49943 | 0.007355 |
| PITG_02147 | Pi Voltage-gated Ion Channel (VIC) Superfamily (2985 nt)      | -16.8519 | 4.01809  | 0.007383 |
| PITG_07831 | Pi conserved hypothetical protein (766 nt)                    | -16.845  | 4.031857 | 0.007383 |
| PITG_12301 | Pi conserved hypothetical protein (795 nt)                    | -17.6389 | 4.364835 | 0.007406 |
| PITG_05858 | Pi conserved hypothetical protein (1331 nt)                   | -16.2884 | -3.68099 | 0.007416 |
| PITG_00841 | Pi conserved hypothetical protein (675 nt)                    | -13.6091 | -4.38936 | 0.007435 |

|            |                                                              |          |          |          |
|------------|--------------------------------------------------------------|----------|----------|----------|
| PITG_22462 | Pi conserved hypothetical protein (337 nt)                   | -12.284  | 2.829801 | 0.007438 |
| PITG_01196 | Pi hypothetical protein (981 nt)                             | -15.978  | 4.929141 | 0.007442 |
| PITG_21918 | Pi amino acid/auxin permease-like protein (561 nt)           | -16.9176 | -4.39211 | 0.007468 |
| PITG_08202 | Pi conserved hypothetical protein (896 nt)                   | -17.6518 | 4.330338 | 0.007533 |
| PITG_08882 | Pi choline transporter-like protein (2436 nt)                | -32.7611 | 34.50983 | 0.007533 |
| PITG_11818 | Pi conserved hypothetical protein (1541 nt)                  | -32.7513 | 34.52945 | 0.007533 |
| PITG_02680 | Pi conserved hypothetical protein (3812 nt)                  | -16.1375 | 3.588201 | 0.007537 |
| PITG_08954 | Pi conserved hypothetical protein (2823 nt)                  | -17.2343 | 4.755158 | 0.007569 |
| PITG_22827 | Pi Crinkler (CRN) family protein, pseudogene (304 nt)        | -15.9844 | -4.07913 | 0.007581 |
| PITG_06392 | Pi hypothetical protein (1540 nt)                            | -16.182  | -3.90397 | 0.007586 |
| PITG_17863 | Pi MtN3-like protein (810 nt)                                | -16.2888 | -3.6806  | 0.007624 |
| PITG_08817 | Pi conserved hypothetical protein (1735 nt)                  | -16.9668 | -4.2899  | 0.007649 |
| PITG_03199 | Pi ubiquitin-conjugating enzyme E2, putative (492 nt)        | -12.7363 | 2.866044 | 0.007654 |
| PITG_17877 | Pi hypothetical protein (516 nt)                             | -32.771  | 34.49002 | 0.007686 |
| PITG_20739 | Pi hypothetical protein (558 nt)                             | -32.771  | 34.49002 | 0.007686 |
| PITG_05099 | Pi conserved hypothetical protein (900 nt)                   | -32.7565 | -34.5192 | 0.007686 |
| PITG_08958 | Pi protein kinase (537 nt)                                   | -17.6422 | 4.350404 | 0.007686 |
| PITG_13497 | Pi elicitor-like transglutaminase, putative (2006 nt)        | -15.2231 | -3.70434 | 0.007703 |
| PITG_13655 | Pi glucanase inhibitor protein, putative (774 nt)            | -16.1895 | 4.582831 | 0.007706 |
| PITG_03739 | Pi conserved hypothetical protein (5650 nt)                  | -32.6851 | 34.66194 | 0.007718 |
| PITG_09470 | Pi arabinan endo-1,5-alpha-L-arabinosidase A precursor (110  | -32.6851 | 34.66194 | 0.007718 |
| PITG_13660 | Pi conserved hypothetical protein (2658 nt)                  | -11.6206 | -3.32298 | 0.00772  |
| PITG_06425 | Pi conserved hypothetical protein (547 nt)                   | -13.96   | 3.019595 | 0.007738 |
| PITG_04108 | Pi conserved hypothetical protein (1432 nt)                  | -14.1605 | -3.00795 | 0.007741 |
| PITG_05733 | Pi glutathione gamma-glutamylcysteinyltransferase, putative  | -15.8093 | 3.386669 | 0.007761 |
| PITG_16320 | Pi conserved hypothetical protein (759 nt)                   | -15.9441 | 3.690562 | 0.007761 |
| PITG_10124 | Pi Drug/Metabolite Transporter (DMT) Superfamily (1202 nt)   | -16.0646 | -4.02847 | 0.007792 |
| PITG_01434 | Pi conserved hypothetical protein (2721 nt)                  | -16.1856 | 4.30341  | 0.007793 |
| PITG_04650 | Pi conserved hypothetical protein (856 nt)                   | -15.2986 | 3.338009 | 0.007809 |
| PITG_15620 | Pi Voltage-gated Ion Channel (VIC) Superfamily (3285 nt)     | -16.2746 | 4.101721 | 0.00782  |
| PITG_04910 | Pi serine/threonine protein kinase (2511 nt)                 | -15.3585 | -3.35924 | 0.00783  |
| PITG_00790 | Pi conserved hypothetical protein (2195 nt)                  | -16.1689 | 3.514439 | 0.007836 |
| PITG_05862 | Pi mitogen-activated protein kinase, putative (3958 nt)      | -16.1689 | 3.514439 | 0.007836 |
| PITG_00156 | Pi beta-tubulin (1747 nt)                                    | -12.6675 | 2.785777 | 0.00784  |
| PITG_16682 | Pi conserved hypothetical protein (798 nt)                   | -32.7823 | -34.4675 | 0.007841 |
| PITG_18449 | Pi conserved hypothetical protein (1009 nt)                  | -17.2165 | 4.774696 | 0.007842 |
| PITG_15669 | Pi conserved hypothetical protein (1362 nt)                  | -32.7202 | -34.5916 | 0.007878 |
| PITG_18312 | Pi conserved hypothetical protein (1141 nt)                  | -12.7063 | -3.55982 | 0.007895 |
| PITG_18296 | Pi coproporphyrinogen III oxidase, mitochondrial precursor ( | -15.2103 | -3.90293 | 0.007901 |
| PITG_05456 | Pi DNA mismatch repair protein mutS, putative (1891 nt)      | -32.6938 | -34.6445 | 0.007951 |
| PITG_13304 | Pi conserved hypothetical protein (810 nt)                   | -17.2402 | 4.738795 | 0.007952 |
| PITG_19654 | Pi conserved hypothetical protein (451 nt)                   | -15.844  | -3.42917 | 0.007991 |
| PITG_18066 | Pi conserved hypothetical protein (1681 nt)                  | -15.9603 | 3.657501 | 0.00802  |
| PITG_00024 | Pi conserved hypothetical protein (1959 nt)                  | -16.1748 | 3.504458 | 0.008053 |
| PITG_02441 | Pi hypothetical protein (2940 nt)                            | -16.1748 | 3.504458 | 0.008053 |
| PITG_06629 | Pi conserved hypothetical protein (1112 nt)                  | -16.1748 | 3.504458 | 0.008053 |
| PITG_12534 | Pi 4-coumarate-CoA ligase, putative (2139 nt)                | -13.4253 | -2.86233 | 0.008056 |

|            |                                                              |          |          |          |
|------------|--------------------------------------------------------------|----------|----------|----------|
| PITG_11749 | Pi conserved hypothetical protein (1044 nt)                  | -16.3398 | 3.642379 | 0.008116 |
| PITG_09296 | Pi sterol 3-beta-glucosyltransferase, putative (6765 nt)     | -14.9981 | -3.54565 | 0.008154 |
| PITG_15319 | Pi Voltage-gated Ion Channel (VIC) Superfamily (4882 nt)     | -17.6152 | 4.4174   | 0.008206 |
| PITG_07336 | Pi hypothetical protein (2464 nt)                            | -16.2596 | 4.140106 | 0.008243 |
| PITG_09891 | Pi conserved hypothetical protein (1419 nt)                  | -14.8758 | -3.22756 | 0.008256 |
| PITG_09483 | Pi conserved hypothetical protein (1458 nt)                  | -16.2897 | -3.6805  | 0.008274 |
| PITG_02713 | Pi brefeldin A-inhibited guanine nucleotide-exchange proteir | -32.7264 | 34.57934 | 0.008322 |
| PITG_17037 | Pi calcineurin-like phosphoesterase (1581 nt)                | -32.7787 | -34.4748 | 0.008322 |
| PITG_21171 | Pi conserved hypothetical protein (596 nt)                   | -15.692  | -3.55766 | 0.008338 |
| PITG_08322 | Pi conserved hypothetical protein (552 nt)                   | -13.1245 | -5.25769 | 0.008354 |
| PITG_10927 | Pi conserved hypothetical protein (727 nt)                   | -15.0062 | -4.32772 | 0.008448 |
| PITG_18534 | Pi trans-1,2-dihydrobenzene-1,2-diol dehydrogenase, putati   | -13.5964 | 2.849582 | 0.008454 |
| PITG_03076 | Pi ATP-dependent helicase, RECQ family protein (2383 nt)     | -32.7498 | -34.5326 | 0.008488 |
| PITG_15884 | Pi guanylate-binding protein, putative (2455 nt)             | -32.7498 | -34.5326 | 0.008488 |
| PITG_03804 | Pi myosin-like protein (4796 nt)                             | -15.7388 | -3.55006 | 0.008501 |
| PITG_03159 | Pi conserved hypothetical protein (555 nt)                   | -16.3168 | -3.62472 | 0.008504 |
| PITG_12821 | Pi conserved hypothetical protein (2837 nt)                  | -17.0437 | -4.13335 | 0.008556 |
| PITG_07426 | Pi conserved hypothetical protein (1196 nt)                  | -17.0449 | -4.13091 | 0.008556 |
| PITG_22527 | Pi conserved hypothetical protein (446 nt)                   | -17.0449 | -4.13091 | 0.008556 |
| PITG_16439 | Pi conserved hypothetical protein (1453 nt)                  | -14.6769 | -3.32618 | 0.008558 |
| PITG_15956 | Pi epoxide hydrolase, putative (1137 nt)                     | -32.584  | -34.8642 | 0.008601 |
| PITG_14358 | Pi trans-1,2-dihydrobenzene-1,2-diol dehydrogenase, putati   | -15.1286 | 3.236015 | 0.008627 |
| PITG_07741 | Pi secreted RxLR effector peptide, putative (348 nt)         | -32.6408 | 34.75053 | 0.00864  |
| PITG_15662 | Pi conserved hypothetical protein (1467 nt)                  | -15.3117 | 3.173066 | 0.008692 |
| PITG_16021 | Pi conserved hypothetical protein (1775 nt)                  | -12.0968 | -2.86515 | 0.008698 |
| PITG_00984 | Pi serine hydrolase (FSH1), putative (889 nt)                | -13.0717 | -3.35736 | 0.008743 |
| PITG_10533 | Pi conserved hypothetical protein (1218 nt)                  | -17.0239 | -4.17336 | 0.008763 |
| PITG_05731 | Pi origin recognition complex subunit, putative (1392 nt)    | -17.026  | -4.16917 | 0.008763 |
| PITG_12450 | Pi hypothetical protein (887 nt)                             | -16.5246 | 4.319989 | 0.008778 |
| PITG_14188 | Pi kinesin-like protein KIF6 (2729 nt)                       | -16.5825 | 4.214672 | 0.008793 |
| PITG_16120 | Pi conserved hypothetical protein (756 nt)                   | -14.9152 | -3.21089 | 0.00887  |
| PITG_14415 | Pi conserved hypothetical protein (3134 nt)                  | -16.9034 | -4.42326 | 0.008896 |
| PITG_15642 | Pi conserved hypothetical protein (1448 nt)                  | -14.9883 | -3.06295 | 0.008924 |
| PITG_07031 | Pi conserved hypothetical protein (2213 nt)                  | -15.3155 | 3.166485 | 0.008961 |
| PITG_14947 | Pi conserved hypothetical protein (835 nt)                   | -15.3083 | 3.180871 | 0.008961 |
| PITG_02323 | Pi hypothetical protein (603 nt)                             | -17.0474 | -4.12669 | 0.008973 |
| PITG_07251 | Pi protein kinase (2493 nt)                                  | -32.5693 | 34.89361 | 0.008983 |
| PITG_08938 | Pi hypothetical protein (605 nt)                             | -32.5693 | 34.89361 | 0.008983 |
| PITG_09715 | Pi conserved hypothetical protein (562 nt)                   | -32.5693 | 34.89361 | 0.008983 |
| PITG_02570 | Pi conserved hypothetical protein (578 nt)                   | -32.6019 | -34.8283 | 0.008983 |
| PITG_13390 | Pi conserved hypothetical protein (1345 nt)                  | -15.818  | 3.640352 | 0.009056 |
| PITG_10308 | Pi conserved hypothetical protein (2740 nt)                  | -15.0855 | -3.44243 | 0.009072 |
| PITG_13381 | Pi conserved hypothetical protein (1234 nt)                  | -12.2201 | -2.94755 | 0.009116 |
| PITG_14281 | Pi sporangia induced conserved hypothetical protein (1368 r  | -16.3682 | 3.585542 | 0.009152 |
| PITG_12524 | Pi elongation factor 3, putative (3478 nt)                   | -16.3565 | 3.609006 | 0.009152 |
| PITG_15865 | Pi conserved hypothetical protein (1048 nt)                  | -13.6067 | -3.23475 | 0.00916  |
| PITG_02499 | Pi conserved hypothetical protein (1724 nt)                  | -16.1732 | -3.81194 | 0.009167 |

|            |                                                               |          |          |          |
|------------|---------------------------------------------------------------|----------|----------|----------|
| PITG_01328 | Pi conserved hypothetical protein (1343 nt)                   | -32.5801 | -34.8719 | 0.009177 |
| PITG_17301 | Pi conserved hypothetical protein (380 nt)                    | -17.0222 | -4.17746 | 0.009187 |
| PITG_06778 | Pi clusterin-associated protein 1 (1386 nt)                   | -15.8605 | 3.540373 | 0.00921  |
| PITG_19402 | Pi conserved hypothetical protein (1551 nt)                   | -16.056  | -4.04525 | 0.009248 |
| PITG_00706 | Pi isoamyl acetate-hydrolyzing esterase 1, putative (824 nt)  | -13.3716 | 2.768854 | 0.00928  |
| PITG_14056 | Pi conserved hypothetical protein (1861 nt)                   | -32.7475 | -34.537  | 0.009357 |
| PITG_02314 | Pi conserved hypothetical protein (1137 nt)                   | -32.8195 | 34.39318 | 0.009357 |
| PITG_02622 | Pi conserved hypothetical protein (2367 nt)                   | -32.8195 | 34.39318 | 0.009357 |
| PITG_03691 | Pi conserved hypothetical protein (1602 nt)                   | -32.8195 | 34.39318 | 0.009357 |
| PITG_19642 | Pi conserved hypothetical protein (1156 nt)                   | -17.7304 | 4.173109 | 0.009357 |
| PITG_21876 | Pi conserved hypothetical protein (991 nt)                    | -32.8195 | 34.39318 | 0.009357 |
| PITG_23058 | Pi conserved hypothetical protein (2172 nt)                   | -32.8195 | 34.39318 | 0.009357 |
| PITG_03444 | Pi dynein heavy chain (13863 nt)                              | -17.7199 | 4.194063 | 0.009357 |
| PITG_07049 | Pi conserved hypothetical protein (1561 nt)                   | -32.5752 | 34.88167 | 0.009374 |
| PITG_10835 | Pi secreted RxLR effector peptide, putative (726 nt)          | -32.5752 | 34.88167 | 0.009374 |
| PITG_16044 | Pi CRN domain-containing protein-containing protein (1076 nt) | -17.0281 | -4.16615 | 0.009405 |
| PITG_09708 | Pi conserved hypothetical protein (886 nt)                    | -16.8744 | 3.978851 | 0.009405 |
| PITG_06570 | Pi long-chain-fatty-acid-CoA ligase, putative (2636 nt)       | -15.4051 | -3.49829 | 0.00941  |
| PITG_10815 | Pi conserved hypothetical protein (1393 nt)                   | -14.7834 | -3.41105 | 0.009424 |
| PITG_12594 | Pi TRAF3-interacting protein, putative (2339 nt)              | -14.813  | 3.033598 | 0.00947  |
| PITG_09690 | Pi hypothetical protein (1701 nt)                             | -16.1286 | -3.90073 | 0.009503 |
| PITG_08015 | Pi Dynein 1b Light Intermediate Chain (1212 nt)               | -16.2612 | 4.449047 | 0.009509 |
| PITG_10667 | Pi conserved hypothetical protein (2577 nt)                   | -32.8568 | -34.3186 | 0.009534 |
| PITG_14459 | Pi conserved hypothetical protein (849 nt)                    | -32.809  | 34.41407 | 0.009534 |
| PITG_18659 | Pi conserved hypothetical protein (408 nt)                    | -15.1598 | 3.094208 | 0.009659 |
| PITG_02094 | Pi dnaJ heat shock protein (994 nt)                           | -15.9592 | 3.389123 | 0.009688 |
| PITG_19093 | Pi conserved hypothetical protein (1419 nt)                   | -17.7415 | 4.152784 | 0.009713 |
| PITG_22927 | Pi hypothetical protein (834 nt)                              | -17.7415 | 4.152784 | 0.009713 |
| PITG_01963 | Pi conserved hypothetical protein (2094 nt)                   | -16.9357 | -4.35824 | 0.009734 |
| PITG_10556 | Pi conserved hypothetical protein (1362 nt)                   | -16.9357 | -4.35824 | 0.009734 |
| PITG_15672 | Pi conserved hypothetical protein (1341 nt)                   | -16.3315 | -3.59579 | 0.009759 |
| PITG_06923 | Pi conserved hypothetical protein (1964 nt)                   | -15.5325 | 3.075706 | 0.009768 |
| PITG_05922 | Pi dynein heavy chain (13827 nt)                              | -15.4468 | 3.112322 | 0.009779 |
| PITG_18984 | Pi conserved hypothetical protein (5340 nt)                   | -15.6205 | 3.515055 | 0.009779 |
| PITG_19142 | Pi alkylated DNA repair protein alkB-like protein (1118 nt)   | -15.7417 | -3.54519 | 0.009837 |
| PITG_12939 | Pi conserved hypothetical protein (3961 nt)                   | -16.5235 | -5.03415 | 0.009846 |
| PITG_14119 | Pi conserved hypothetical protein (647 nt)                    | -17.5226 | 4.62876  | 0.009895 |
| PITG_01708 | Pi hypothetical protein (874 nt)                              | -17.6997 | 4.237396 | 0.009895 |
| PITG_08793 | Pi conserved hypothetical protein (3312 nt)                   | -32.7985 | 34.43505 | 0.009895 |
| PITG_13755 | Pi phosphatidylinositol kinase (PIK-E3) (1488 nt)             | -32.7985 | 34.43505 | 0.009895 |
| PITG_10701 | Pi carbohydrate-binding protein, putative (1605 nt)           | -15.4638 | 3.224338 | 0.00993  |
| PITG_13307 | Pi conserved hypothetical protein (737 nt)                    | -12.9464 | -2.99733 | 0.009937 |
| PITG_04867 | Pi conserved hypothetical protein (4644 nt)                   | -16.751  | 4.266916 | 0.009948 |
| PITG_12446 | Pi conserved hypothetical protein (1687 nt)                   | -17.0643 | -4.09224 | 0.009965 |
| PITG_03282 | Pi conserved hypothetical protein (3024 nt)                   | -15.5507 | 3.037278 | 0.010013 |
| PITG_09208 | Pi aquaporin, putative (745 nt)                               | -32.7004 | 34.63138 | 0.010019 |
| PITG_00375 | Pi haustorium-specific membrane protein, putative (3072 nt)   | -16.2155 | 4.250435 | 0.01002  |



|            |                                                                   |          |          |          |
|------------|-------------------------------------------------------------------|----------|----------|----------|
| PITG_02456 | Pi conserved hypothetical protein (3667 nt)                       | -32.8408 | -34.3506 | 0.01008  |
| PITG_04848 | Pi conserved hypothetical protein (649 nt)                        | -32.7812 | 34.46975 | 0.01008  |
| PITG_14948 | Pi conserved hypothetical protein (535 nt)                        | -32.8408 | -34.3506 | 0.01008  |
| PITG_22957 | Pi conserved hypothetical protein (1545 nt)                       | -32.7812 | 34.46975 | 0.01008  |
| PITG_17606 | Pi cation-transporting ATPase, putative (3417 nt)                 | -14.795  | 3.008338 | 0.010089 |
| PITG_22896 | Pi secreted RxLR effector peptide, putative (585 nt)              | -14.1412 | 3.780375 | 0.010093 |
| PITG_03584 | Pi hypothetical protein (2286 nt)                                 | -14.2526 | 3.209867 | 0.010093 |
| PITG_06014 | Pi conserved hypothetical protein (1740 nt)                       | -32.6122 | 34.80768 | 0.0101   |
| PITG_06989 | Pi acyltransferase family (1139 nt)                               | -32.6244 | -34.7834 | 0.0101   |
| PITG_07636 | Pi serine protease family S15, putative (2178 nt)                 | -32.6478 | -34.7365 | 0.0101   |
| PITG_16111 | Pi conserved hypothetical protein (1490 nt)                       | -32.6244 | -34.7834 | 0.0101   |
| PITG_20254 | Pi large conductance mechanosensitive channel, putative (1511 nt) | -32.6244 | -34.7834 | 0.0101   |
| PITG_21522 | Pi conserved hypothetical protein (1510 nt)                       | -32.6244 | -34.7834 | 0.0101   |
| PITG_22632 | Pi polysaccharide lyase, putative (385 nt)                        | -32.6478 | -34.7365 | 0.0101   |
| PITG_08536 | Pi conserved hypothetical protein (1168 nt)                       | -14.9862 | -3.64731 | 0.010103 |
| PITG_18943 | Pi conserved hypothetical protein (882 nt)                        | -15.8886 | -3.3393  | 0.010113 |
| PITG_12452 | Pi conserved hypothetical protein (567 nt)                        | -16.9186 | 3.886164 | 0.010195 |
| PITG_16324 | Pi conserved hypothetical protein (1098 nt)                       | -16.5984 | 4.177683 | 0.01027  |
| PITG_05689 | Pi conserved hypothetical protein (1700 nt)                       | -13.4236 | -3.04127 | 0.01036  |
| PITG_14993 | Pi protein-L-isoaspartate O-methyltransferase, putative (720 nt)  | -14.3166 | -4.13607 | 0.010373 |
| PITG_17125 | Pi conserved hypothetical protein (753 nt)                        | -15.8971 | 3.463286 | 0.010391 |
| PITG_11368 | Pi conserved hypothetical protein (1143 nt)                       | -15.211  | -3.18641 | 0.010394 |
| PITG_21013 | Pi kinesin-associated protein, putative (2124 nt)                 | -15.7029 | 3.392225 | 0.010397 |
| PITG_15129 | Pi conserved hypothetical protein (1772 nt)                       | -32.7453 | -34.5415 | 0.010418 |
| PITG_12841 | Pi conserved hypothetical protein (2114 nt)                       | -17.3158 | 4.589954 | 0.010428 |
| PITG_11983 | Pi conserved hypothetical protein (920 nt)                        | -14.9418 | 3.095293 | 0.01049  |
| PITG_17677 | Pi conserved hypothetical protein (1271 nt)                       | -15.751  | -3.62984 | 0.010514 |
| PITG_22817 | Pi conserved hypothetical protein (234 nt)                        | -32.6297 | 34.77279 | 0.010521 |
| PITG_13544 | Pi conserved hypothetical protein (2742 nt)                       | -15.8382 | -3.44711 | 0.010567 |
| PITG_04594 | Pi aspartyl-tRNA synthetase, putative (1215 nt)                   | -13.7602 | 3.287153 | 0.010592 |
| PITG_05193 | Pi conserved hypothetical protein (1056 nt)                       | -16.1199 | -3.9177  | 0.010597 |
| PITG_03882 | Pi histone H2A type 1 (529 nt)                                    | -12.7702 | -2.83405 | 0.010609 |
| PITG_18851 | Pi conserved hypothetical protein (900 nt)                        | -14.704  | 2.950181 | 0.010623 |
| PITG_02687 | Pi conserved hypothetical protein (601 nt)                        | -32.7878 | 34.45642 | 0.010651 |
| PITG_00595 | Pi conserved hypothetical protein (2676 nt)                       | -16.9118 | 3.902655 | 0.010666 |
| PITG_00022 | Pi Multidrug/Oligosaccharidyl-lipid/Polysaccharide (MOP) FliC     | -16.2504 | 3.349603 | 0.010667 |
| PITG_06646 | Pi conserved hypothetical protein (4498 nt)                       | -16.2504 | 3.349603 | 0.010667 |
| PITG_05328 | Pi conserved hypothetical protein (2246 nt)                       | -13.9599 | -3.17615 | 0.010668 |
| PITG_00392 | Pi serine protease family S33, putative (907 nt)                  | -16.186  | -3.78629 | 0.01068  |
| PITG_04296 | Pi ATP-binding Cassette (ABC) Superfamily (1896 nt)               | -16.0318 | 3.514559 | 0.01068  |
| PITG_00672 | Pi conserved hypothetical protein (2295 nt)                       | -32.747  | 34.5382  | 0.010693 |
| PITG_03181 | Pi conserved hypothetical protein (2415 nt)                       | -32.747  | 34.5382  | 0.010693 |
| PITG_11027 | Pi conserved hypothetical protein (2652 nt)                       | -32.747  | 34.5382  | 0.010693 |
| PITG_18709 | Pi conserved hypothetical protein (1109 nt)                       | -32.747  | 34.5382  | 0.010693 |
| PITG_12619 | Pi Crinkler (CRN) family protein (1740 nt)                        | -11.4005 | -2.6696  | 0.010734 |
| PITG_19013 | Pi hypothetical protein (2144 nt)                                 | -32.6332 | -34.7656 | 0.010737 |
| PITG_22802 | Pi secreted RxLR effector peptide, putative (225 nt)              | -32.6332 | -34.7656 | 0.010737 |

|            |                                                               |          |          |          |
|------------|---------------------------------------------------------------|----------|----------|----------|
| PITG_03374 | Pi conserved hypothetical protein (2227 nt)                   | -15.2899 | -3.74372 | 0.010752 |
| PITG_12123 | Pi sporangia induced myosin-like protein (1021 nt)            | -15.8214 | 3.370445 | 0.01085  |
| PITG_18257 | Pi conserved hypothetical protein (1514 nt)                   | -32.775  | -34.4821 | 0.010896 |
| PITG_20077 | Pi conserved hypothetical protein (1269 nt)                   | -16.1973 | -3.76386 | 0.010906 |
| PITG_09983 | Pi protocadherin Fat-like protein (10467 nt)                  | -16.2568 | 3.338544 | 0.010937 |
| PITG_10751 | Pi conserved hypothetical protein (797 nt)                    | -16.9223 | -4.38926 | 0.011034 |
| PITG_03634 | Pi nucleoside diphosphate kinase, putative (1229 nt)          | -32.7917 | 34.44871 | 0.011046 |
| PITG_05831 | Pi conserved hypothetical protein (1057 nt)                   | -32.7917 | 34.44871 | 0.011046 |
| PITG_13772 | Pi conserved hypothetical protein (2493 nt)                   | -32.837  | -34.3581 | 0.011046 |
| PITG_16559 | Pi glycoside hydrolase, putative (2511 nt)                    | -32.7917 | 34.44871 | 0.011046 |
| PITG_20464 | Pi conserved hypothetical protein (991 nt)                    | -32.7917 | 34.44871 | 0.011046 |
| PITG_03585 | Pi hypothetical protein (459 nt)                              | -13.5944 | 2.842726 | 0.011137 |
| PITG_19111 | Pi conserved hypothetical protein (2034 nt)                   | -14.4811 | -2.91435 | 0.011151 |
| PITG_05863 | Pi conserved hypothetical protein (654 nt)                    | -16.905  | 3.919163 | 0.011153 |
| PITG_13802 | Pi conserved hypothetical protein (1184 nt)                   | -15.1464 | 3.137241 | 0.011202 |
| PITG_23281 | Pi Crinkler (CRN) family protein, pseudogene (1825 nt)        | -13.0373 | -2.78318 | 0.011226 |
| PITG_00643 | Pi protein kinase, putative (2750 nt)                         | -32.6578 | 34.71645 | 0.011226 |
| PITG_17314 | Pi cysteine protease family C01A, putative (1077 nt)          | -32.6578 | 34.71645 | 0.011226 |
| PITG_00710 | Pi isoamyl acetate-hydrolyzing esterase, putative (823 nt)    | -15.4393 | 3.214984 | 0.011233 |
| PITG_11292 | Pi conserved hypothetical protein (802 nt)                    | -32.8059 | -34.4203 | 0.011248 |
| PITG_22056 | Pi conserved hypothetical protein (714 nt)                    | -32.8059 | -34.4203 | 0.011248 |
| PITG_00868 | Pi naringenin,2-oxoglutarate 3-dioxygenase, putative (987 nt) | -16.8921 | 3.955107 | 0.011294 |
| PITG_15406 | Pi Amino Acid/Auxin Permease (AAP) Family (1470 nt)           | -14.2568 | -2.77316 | 0.011331 |
| PITG_03096 | Pi hypothetical protein (1264 nt)                             | -11.8001 | -2.92572 | 0.011347 |
| PITG_03554 | Pi endo-1,3(4)-beta-glucanase, putative (2036 nt)             | -16.2897 | 4.090098 | 0.011385 |
| PITG_10558 | Pi conserved hypothetical protein (2168 nt)                   | -32.6718 | -34.6885 | 0.011449 |
| PITG_14100 | Pi conserved hypothetical protein (1340 nt)                   | -32.6718 | -34.6885 | 0.011449 |
| PITG_16135 | Pi conserved hypothetical protein (1432 nt)                   | -15.1958 | 3.100439 | 0.011482 |
| PITG_02275 | Pi peroxisomal trans-2-enoyl-CoA reductase, putative (486 n   | -32.7653 | 34.50143 | 0.011524 |
| PITG_15951 | Pi hypothetical protein (1263 nt)                             | -16.7925 | -4.51348 | 0.011636 |
| PITG_00046 | Pi sporangia induced conserved hypothetical protein (2619 r   | -17.2893 | 4.631285 | 0.011658 |
| PITG_20628 | Pi conserved hypothetical protein (4791 nt)                   | -16.9199 | 3.892306 | 0.011658 |
| PITG_18127 | Pi conserved hypothetical protein (5592 nt)                   | -15.9231 | -3.27147 | 0.011684 |
| PITG_02893 | Pi conserved hypothetical protein (1012 nt)                   | -15.3918 | 3.010591 | 0.011768 |
| PITG_18822 | Pi Crinkler (CRN) family protein, pseudogene (1859 nt)        | -13.7365 | -3.00977 | 0.011815 |
| PITG_19656 | Pi GMP synthase [glutamine-hydrolyzing], putative (1416 nt)   | -15.2045 | 3.084222 | 0.01182  |
| PITG_13843 | Pi conserved hypothetical protein (456 nt)                    | -16.1722 | -3.71144 | 0.011866 |
| PITG_07514 | Pi crinkler (CRN) family protein, pseudogene (695 nt)         | -14.0581 | -3.24245 | 0.011871 |
| PITG_00582 | Pi secreted RxLR effector peptide, putative (648 nt)          | -32.7768 | 34.47842 | 0.011872 |
| PITG_11068 | Pi hypothetical protein (521 nt)                              | -32.7768 | 34.47842 | 0.011872 |
| PITG_16731 | Pi conserved hypothetical protein (609 nt)                    | -13.5101 | -2.72018 | 0.011947 |
| PITG_01865 | Pi regulator of chromosome condensation (RCC1)-like protei    | -32.83   | 34.37217 | 0.011957 |
| PITG_02473 | Pi HECT E3 ubiquitin ligase, putative (1995 nt)               | -32.8924 | -34.2472 | 0.011957 |
| PITG_19143 | Pi conserved hypothetical protein (907 nt)                    | -32.8797 | -34.2726 | 0.011957 |
| PITG_20027 | Pi Major Facilitator Superfamily (MFS) (1638 nt)              | -32.8797 | -34.2726 | 0.011957 |
| PITG_18300 | Pi conserved hypothetical protein (573 nt)                    | -32.8065 | -34.4191 | 0.011959 |
| PITG_21110 | Pi Mitochondrial Carrier (MC) Family (1080 nt)                | -14.87   | 3.213715 | 0.01197  |

|            |                                                                        |          |          |          |
|------------|------------------------------------------------------------------------|----------|----------|----------|
| PITG_09635 | Pi orotidine 5'-phosphate decarboxylase, putative (1621 nt)            | -16.8376 | -4.42743 | 0.012001 |
| PITG_18356 | Pi beta-glucan synthesis-associated protein KRE6 (2462 nt)             | -16.2677 | 3.31493  | 0.012001 |
| PITG_19060 | Pi conserved hypothetical protein (321 nt)                             | -14.5522 | -3.04139 | 0.012017 |
| PITG_20715 | Pi deoxyribodipyrimidine photolyase, putative (1763 nt)                | -15.2053 | 3.196971 | 0.012033 |
| PITG_07109 | Pi conserved hypothetical protein (2827 nt)                            | -14.6553 | -2.99474 | 0.012054 |
| PITG_07968 | Pi protein kinase, putative (1581 nt)                                  | -15.6404 | -3.75114 | 0.012098 |
| PITG_03370 | Pi conserved hypothetical protein (850 nt)                             | -16.2234 | -3.71173 | 0.012103 |
| PITG_09930 | Pi type II inositol-3,4-bisphosphate 4-phosphatase, putative (1158 nt) | -16.9873 | -4.25462 | 0.012109 |
| PITG_04989 | Pi sorbitol dehydrogenase, putative (1158 nt)                          | -14.4814 | 2.85463  | 0.012183 |
| PITG_03648 | Pi hypothetical protein (919 nt)                                       | -17.1109 | -3.9997  | 0.012183 |
| PITG_16327 | Pi conserved hypothetical protein (707 nt)                             | -13.5429 | 2.929759 | 0.01222  |
| PITG_12989 | Pi glutathione S-transferase theta, putative (785 nt)                  | -14.4792 | -3.02112 | 0.012319 |
| PITG_01218 | Pi conserved hypothetical protein (1353 nt)                            | -32.8406 | 34.35081 | 0.012376 |
| PITG_02269 | Pi conserved hypothetical protein (729 nt)                             | -32.9093 | -34.2135 | 0.012376 |
| PITG_17055 | Pi endo-1,4-beta-xylanase, putative (1422 nt)                          | -32.8406 | 34.35081 | 0.012376 |
| PITG_21598 | Pi conserved hypothetical protein (1836 nt)                            | -32.8624 | -34.3074 | 0.012376 |
| PITG_21945 | Pi NmrA-like family protein, putative (1022 nt)                        | -32.8406 | 34.35081 | 0.012376 |
| PITG_09962 | Pi conserved hypothetical protein (2799 nt)                            | -15.6905 | -3.65008 | 0.012389 |
| PITG_19665 | Pi conserved hypothetical protein (2043 nt)                            | -13.8547 | -2.92438 | 0.012395 |
| PITG_06360 | Pi conserved hypothetical protein (1029 nt)                            | -15.7774 | 3.233944 | 0.012407 |
| PITG_02119 | Pi protein kinase, putative (1583 nt)                                  | -13.3691 | -2.73165 | 0.012421 |
| PITG_17552 | Pi myb-like DNA-binding protein, putative (773 nt)                     | -14.931  | -3.31419 | 0.012512 |
| PITG_23048 | Pi secreted RxLR effector peptide, putative (483 nt)                   | -14.9932 | -3.40886 | 0.012512 |
| PITG_09283 | Pi conserved hypothetical protein (591 nt)                             | -13.5842 | -2.6894  | 0.012523 |
| PITG_08630 | Pi hypothetical protein (864 nt)                                       | -17.7072 | 4.235454 | 0.012524 |
| PITG_14832 | Pi hypothetical protein (809 nt)                                       | -17.7072 | 4.235454 | 0.012524 |
| PITG_20844 | Pi conserved hypothetical protein (1697 nt)                            | -17.7072 | 4.235454 | 0.012524 |
| PITG_02766 | Pi patatin-like phospholipase, putative (2211 nt)                      | -32.8986 | -34.235  | 0.012589 |
| PITG_14698 | Pi conserved hypothetical protein (1683 nt)                            | -32.8742 | -34.2837 | 0.012589 |
| PITG_11794 | Pi conserved hypothetical protein (2011 nt)                            | -16.6746 | 4.030482 | 0.012622 |
| PITG_17946 | Pi hypothetical protein (692 nt)                                       | -15.9226 | -3.27449 | 0.012625 |
| PITG_07120 | Pi conserved hypothetical protein (2986 nt)                            | -16.2488 | 3.365585 | 0.01266  |
| PITG_12948 | Pi conserved hypothetical protein (1899 nt)                            | -14.2747 | -2.73758 | 0.012666 |
| PITG_07786 | Pi hypothetical protein (438 nt)                                       | -14.065  | -3.27432 | 0.012689 |
| PITG_03986 | Pi bardet-Biedl syndrome 1 family protein (2368 nt)                    | -16.9515 | 3.82474  | 0.012716 |
| PITG_16338 | Pi conserved hypothetical protein (1409 nt)                            | -13.9157 | -2.80083 | 0.012722 |
| PITG_01859 | Pi conserved hypothetical protein (1535 nt)                            | -32.8028 | 34.42642 | 0.012747 |
| PITG_07088 | Pi Major Facilitator Superfamily (MFS) (1479 nt)                       | -14.8173 | -3.34283 | 0.012761 |
| PITG_12903 | Pi protein kinase (2275 nt)                                            | -15.7973 | 3.190275 | 0.012814 |
| PITG_08553 | Pi calcium/calmodulin dependent protein kinase, putative (1158 nt)     | -13.9307 | 2.824189 | 0.012817 |
| PITG_11676 | Pi conserved hypothetical protein (1299 nt)                            | -15.3554 | -3.43988 | 0.012836 |
| PITG_02552 | Pi conserved hypothetical protein (1095 nt)                            | -32.7224 | -34.5872 | 0.012852 |
| PITG_06725 | Pi conserved hypothetical protein (2837 nt)                            | -32.7067 | 34.6188  | 0.012852 |
| PITG_10299 | Pi conserved hypothetical protein (479 nt)                             | -32.7067 | 34.6188  | 0.012852 |
| PITG_11025 | Pi hypothetical protein (1299 nt)                                      | -32.7067 | 34.6188  | 0.012852 |
| PITG_13155 | Pi conserved hypothetical protein (921 nt)                             | -32.7224 | -34.5872 | 0.012852 |
| PITG_11218 | Pi conserved hypothetical protein (935 nt)                             | -15.5804 | 2.980929 | 0.01286  |

|            |                                                             |          |          |          |
|------------|-------------------------------------------------------------|----------|----------|----------|
| PITG_01282 | Pi conserved hypothetical protein (1990 nt)                 | -15.8    | -3.34246 | 0.012946 |
| PITG_17405 | Pi conserved hypothetical protein (2008 nt)                 | -32.8043 | -34.4236 | 0.012974 |
| PITG_11253 | Pi serine/threonine protein kinase (3351 nt)                | -16.2856 | 4.380823 | 0.013021 |
| PITG_16810 | Pi conserved hypothetical protein (1884 nt)                 | -15.5098 | -3.20822 | 0.013057 |
| PITG_00846 | Pi conserved hypothetical protein (1337 nt)                 | -15.9231 | 3.160427 | 0.01307  |
| PITG_08051 | Pi conserved hypothetical protein (574 nt)                  | -32.6967 | -34.6388 | 0.013095 |
| PITG_16256 | Pi conserved hypothetical protein (1489 nt)                 | -32.6967 | -34.6388 | 0.013095 |
| PITG_17520 | Pi conserved hypothetical protein (430 nt)                  | -32.6967 | -34.6388 | 0.013095 |
| PITG_20529 | Pi conserved hypothetical protein (4934 nt)                 | -32.6967 | -34.6388 | 0.013095 |
| PITG_14455 | Pi Cation Diffusion Facilitator (CDF) Family (1155 nt)      | -13.3761 | -2.66615 | 0.013102 |
| PITG_09341 | Pi conserved hypothetical protein (1148 nt)                 | -15.7987 | 3.189374 | 0.013143 |
| PITG_20337 | Pi conserved hypothetical protein (1056 nt)                 | -12.0808 | 3.153206 | 0.013154 |
| PITG_17167 | Pi conserved hypothetical protein (802 nt)                  | -13.8616 | 2.730181 | 0.013177 |
| PITG_12222 | Pi sporangia induced conserved hypothetical protein (1771 r | -32.8517 | 34.32876 | 0.013248 |
| PITG_18801 | Pi conserved hypothetical protein (2091 nt)                 | -32.8517 | 34.32876 | 0.013248 |
| PITG_22129 | Pi conserved hypothetical protein (576 nt)                  | -32.8517 | 34.32876 | 0.013248 |
| PITG_12350 | Pi conserved hypothetical protein (1215 nt)                 | -14.7604 | -3.09978 | 0.013262 |
| PITG_06757 | Pi conserved hypothetical protein (916 nt)                  | -13.6296 | -2.87605 | 0.013262 |
| PITG_15395 | Pi conserved hypothetical protein (751 nt)                  | -17.329  | 4.554242 | 0.013266 |
| PITG_05468 | Pi conserved hypothetical protein (836 nt)                  | -15.4926 | -3.24432 | 0.013276 |
| PITG_18402 | Pi conserved hypothetical protein (1056 nt)                 | -12.3647 | 3.254065 | 0.013319 |
| PITG_04868 | Pi ADP/ATP translocase, putative (933 nt)                   | -9.82324 | 2.537745 | 0.013389 |
| PITG_15444 | Pi conserved hypothetical protein (2945 nt)                 | -32.9041 | -34.224  | 0.013474 |
| PITG_15442 | Pi transmembrane protein, putative (1282 nt)                | -14.6553 | -2.8868  | 0.013496 |
| PITG_01493 | Pi conserved hypothetical protein (557 nt)                  | -12.5545 | 3.331337 | 0.013531 |
| PITG_14632 | Pi conserved hypothetical protein (1024 nt)                 | -10.565  | -2.4797  | 0.013531 |
| PITG_11085 | Pi phospholipid-transporting ATPase, putative (4464 nt)     | -16.4861 | 3.653104 | 0.013544 |
| PITG_11466 | Pi tubby-like protein (1823 nt)                             | -14.601  | -2.94402 | 0.013569 |
| PITG_22065 | Pi conserved hypothetical protein (1121 nt)                 | -11.3645 | -2.9209  | 0.013586 |
| PITG_19797 | Pi amino acid/auxin permease-like protein (1191 nt)         | -32.7427 | -34.5466 | 0.013591 |
| PITG_11504 | Pi cleavage induced hypothetical protein (1043 nt)          | -16.448  | 3.42585  | 0.01369  |
| PITG_11832 | Pi conserved hypothetical protein (1280 nt)                 | -32.8698 | -34.2925 | 0.013702 |
| PITG_13146 | Pi RNA pseudouridylate synthase-like protein (1798 nt)      | -32.8698 | -34.2925 | 0.013702 |
| PITG_17264 | Pi WD domain-containing protein, putative (2009 nt)         | -13.7673 | -2.66958 | 0.013727 |
| PITG_01074 | Pi conserved hypothetical protein (1684 nt)                 | -16.8658 | -4.51034 | 0.01378  |
| PITG_02363 | Pi conserved hypothetical protein (495 nt)                  | -15.7504 | -3.43774 | 0.013875 |
| PITG_13937 | Pi hypothetical protein (666 nt)                            | -15.8207 | 3.143419 | 0.013962 |
| PITG_06605 | Pi conserved hypothetical protein (1433 nt)                 | -16.982  | 3.759386 | 0.014024 |
| PITG_20115 | Pi adenylate kinase, putative (1616 nt)                     | -15.4467 | 3.041142 | 0.014104 |
| PITG_08315 | Pi conserved hypothetical protein (719 nt)                  | -15.8051 | 3.182256 | 0.014167 |
| PITG_19939 | Pi glucosylceramidase, putative (2151 nt)                   | -15.3767 | -3.48168 | 0.014307 |
| PITG_14968 | Pi cAMP-dependent protein kinase catalytic subunit alpha, p | -14.5261 | -3.0929  | 0.014372 |
| PITG_08175 | Pi hypothetical protein (415 nt)                            | -16.8708 | -4.35946 | 0.014515 |
| PITG_01709 | Pi hypothetical protein (1063 nt)                           | -32.759  | 34.51421 | 0.014597 |
| PITG_03692 | Pi Voltage-gated Ion Channel (VIC) Superfamily (1818 nt)    | -32.759  | 34.51421 | 0.014597 |
| PITG_07536 | Pi conserved hypothetical protein (811 nt)                  | -32.759  | 34.51421 | 0.014597 |
| PITG_12502 | Pi conserved hypothetical protein (900 nt)                  | -32.759  | 34.51421 | 0.014597 |

|            |                                                                 |          |          |          |
|------------|-----------------------------------------------------------------|----------|----------|----------|
| PITG_18334 | Pi alcohol dehydrogenase, putative (1017 nt)                    | -32.759  | 34.51421 | 0.014597 |
| PITG_03600 | Pi bardet-Biedl syndrome 2 protein (2234 nt)                    | -16.9907 | 3.744727 | 0.014608 |
| PITG_01075 | Pi conserved hypothetical protein (559 nt)                      | -17.134  | -3.95394 | 0.014608 |
| PITG_21667 | Pi conserved hypothetical protein (1008 nt)                     | -17.364  | 4.491221 | 0.014608 |
| PITG_03118 | Pi mRNA decapping enzyme (1290 nt)                              | -32.8712 | -34.2897 | 0.014649 |
| PITG_03788 | Pi conserved hypothetical protein (1241 nt)                     | -14.8298 | -2.9598  | 0.014684 |
| PITG_01272 | Pi lysosomal acid lipase/cholesteryl ester hydrolase, putative  | -15.8545 | -3.31841 | 0.014726 |
| PITG_20866 | Pi beta-glucan synthesis-associated protein (2232 nt)           | -17.0622 | -4.10371 | 0.014747 |
| PITG_05597 | Pi conserved hypothetical protein (897 nt)                      | -15.9761 | -3.16429 | 0.014783 |
| PITG_06599 | Pi conserved hypothetical protein (984 nt)                      | -14.8121 | -2.99549 | 0.014809 |
| PITG_02352 | Pi P-type ATPase (P-ATPase) Superfamily (3239 nt)               | -13.8527 | 2.648118 | 0.014858 |
| PITG_07116 | Pi ATP-binding Cassette (ABC) Superfamily (1497 nt)             | -32.7773 | -34.4776 | 0.014859 |
| PITG_09195 | Pi conserved hypothetical protein (907 nt)                      | -32.7773 | -34.4776 | 0.014859 |
| PITG_09467 | Pi pectin lyase, putative (696 nt)                              | -32.7773 | -34.4776 | 0.014859 |
| PITG_13582 | Pi glycosyl hydrolase, putative (3124 nt)                       | -32.7773 | -34.4776 | 0.014859 |
| PITG_15140 | Pi conserved hypothetical protein (3796 nt)                     | -32.7773 | -34.4776 | 0.014859 |
| PITG_16847 | Pi conserved hypothetical protein (2167 nt)                     | -32.7773 | -34.4776 | 0.014859 |
| PITG_16928 | Pi conserved hypothetical protein (824 nt)                      | -32.7773 | -34.4776 | 0.014859 |
| PITG_15011 | Pi hypothetical protein (1329 nt)                               | -15.427  | 2.943584 | 0.014873 |
| PITG_15593 | Pi conserved hypothetical protein (887 nt)                      | -13.0955 | 2.597441 | 0.014932 |
| PITG_17270 | Pi conserved hypothetical protein (784 nt)                      | -32.9229 | -34.1863 | 0.014944 |
| PITG_13960 | Pi endoribonuclease L-PSP, putative (700 nt)                    | -13.8353 | 2.875647 | 0.014981 |
| PITG_03356 | Pi conserved hypothetical protein (1164 nt)                     | -17.1149 | -3.99571 | 0.015023 |
| PITG_08419 | Pi sporangia induced hypothetical protein (689 nt)              | -16.0128 | 3.558729 | 0.015029 |
| PITG_19249 | Pi conserved hypothetical protein (1432 nt)                     | -16.0049 | 3.574535 | 0.015029 |
| PITG_02492 | Pi microtubule-associated protein, putative (7118 nt)           | -15.6878 | 2.938065 | 0.015105 |
| PITG_15735 | Pi protein kinase, putative (3069 nt)                           | -12.9329 | -2.67768 | 0.015106 |
| PITG_05283 | Pi hypothetical protein (1701 nt)                               | -32.7495 | -34.5332 | 0.015124 |
| PITG_07895 | Pi sulfatase-like protein (2741 nt)                             | -32.7495 | -34.5332 | 0.015124 |
| PITG_11889 | Pi putative GPI-anchored serine-threonine rich hypothetical     | -32.7495 | -34.5332 | 0.015124 |
| PITG_17304 | Pi conserved hypothetical protein (980 nt)                      | -32.7495 | -34.5332 | 0.015124 |
| PITG_20579 | Pi conserved hypothetical protein (669 nt)                      | -32.7495 | -34.5332 | 0.015124 |
| PITG_17704 | Pi conserved hypothetical protein (1413 nt)                     | -32.8634 | 34.30526 | 0.015142 |
| PITG_06398 | Pi conserved hypothetical protein (1713 nt)                     | -15.8875 | 2.994638 | 0.015145 |
| PITG_05672 | Pi conserved hypothetical protein (1898 nt)                     | -14.3984 | -3.08328 | 0.015178 |
| PITG_00343 | Pi conserved hypothetical protein (2037 nt)                     | -32.954  | -34.1242 | 0.015182 |
| PITG_04345 | Pi hypothetical protein (735 nt)                                | -32.954  | -34.1242 | 0.015182 |
| PITG_16316 | Pi conserved hypothetical protein (2640 nt)                     | -32.954  | -34.1242 | 0.015182 |
| PITG_00230 | Pi peptidyl-prolyl cis-trans isomerase, mitochondrial precursor | -17.371  | 4.472582 | 0.01521  |
| PITG_14107 | Pi conserved hypothetical protein (573 nt)                      | -17.1358 | -3.9512  | 0.01521  |
| PITG_08802 | Pi NAD-specific glutamate dehydrogenase, putative (3177 nt)     | -14.1303 | 2.799661 | 0.015214 |
| PITG_03468 | Pi endoplasmic oxidoreductin, putative (1549 nt)                | -16.263  | -3.63219 | 0.015217 |
| PITG_03038 | Pi Major Facilitator Superfamily (MFS) (1617 nt)                | -13.5573 | -2.7439  | 0.015224 |
| PITG_10645 | Pi conserved hypothetical protein (3802 nt)                     | -16.459  | -3.34021 | 0.015338 |
| PITG_06327 | Pi chromodomain protein, putative (1504 nt)                     | -32.7528 | 34.52653 | 0.015394 |
| PITG_20230 | Pi Amino Acid/Auxin Permease (AAP) Family (1497 nt)             | -32.7528 | 34.52653 | 0.015394 |
| PITG_21040 | Pi conserved hypothetical protein (1900 nt)                     | -32.7528 | 34.52653 | 0.015394 |

|            |                                                               |          |          |          |
|------------|---------------------------------------------------------------|----------|----------|----------|
| PITG_03891 | Pi conserved hypothetical protein (1556 nt)                   | -32.9006 | -34.2308 | 0.015394 |
| PITG_06067 | Pi conserved hypothetical protein (1275 nt)                   | -32.9006 | -34.2308 | 0.015394 |
| PITG_11853 | Pi C2 domain-containing protein, putative (1193 nt)           | -16.0816 | -3.8754  | 0.015493 |
| PITG_13840 | Pi conserved hypothetical protein (1269 nt)                   | -15.9905 | -3.13673 | 0.015514 |
| PITG_22468 | Pi conserved hypothetical protein (438 nt)                    | -16.1731 | -3.70461 | 0.015525 |
| PITG_21544 | Pi conserved hypothetical protein (1151 nt)                   | -16.089  | -4.1137  | 0.015526 |
| PITG_16840 | Pi conserved hypothetical protein (405 nt)                    | -16.2654 | 3.348707 | 0.015608 |
| PITG_14322 | Pi methylenetetrahydrofolate dehydrogenase [NAD+], putative   | -14.8637 | 2.668641 | 0.015608 |
| PITG_11870 | Pi conserved hypothetical protein (1853 nt)                   | -12.9103 | -2.82522 | 0.015636 |
| PITG_07717 | Pi ATP-binding Cassette (ABC) Superfamily (4092 nt)           | -15.2492 | 2.998298 | 0.015649 |
| PITG_10472 | Pi conserved hypothetical protein (1187 nt)                   | -32.8671 | -34.298  | 0.015649 |
| PITG_15878 | Pi conserved hypothetical protein (701 nt)                    | -32.8041 | -34.4238 | 0.015667 |
| PITG_08431 | Pi diacylglycerol acyltransferase, putative (1263 nt)         | -32.9465 | -34.1391 | 0.015668 |
| PITG_11298 | Pi conserved hypothetical protein (696 nt)                    | -32.9465 | -34.1391 | 0.015668 |
| PITG_17961 | Pi Dicarboxylate/Amino Acid:Cation (Na or H ) Symporter (D    | -16.6864 | 4.00338  | 0.015684 |
| PITG_13546 | Pi sphingosine kinase, putative (1761 nt)                     | -16.2776 | -3.60322 | 0.015749 |
| PITG_20830 | Pi conserved hypothetical protein (3586 nt)                   | -14.5208 | -2.93878 | 0.015783 |
| PITG_13819 | Pi conserved hypothetical protein (2376 nt)                   | -16.4094 | -3.44353 | 0.015885 |
| PITG_08695 | Pi extended synaptotagmin, putative (1264 nt)                 | -15.9649 | 3.33901  | 0.015901 |
| PITG_09067 | Pi M96 mating-specific protein family (2232 nt)               | -14.1637 | -3.00635 | 0.01601  |
| PITG_00628 | Pi hypothetical protein (338 nt)                              | -13.0267 | -3.10782 | 0.016012 |
| PITG_07160 | Pi serine protease family S10, putative (1817 nt)             | -13.7268 | -2.81658 | 0.016101 |
| PITG_02241 | Pi conserved hypothetical protein (1095 nt)                   | -14.9284 | -3.05829 | 0.016104 |
| PITG_07939 | Pi conserved hypothetical protein (2746 nt)                   | -14.293  | -3.00723 | 0.016124 |
| PITG_12317 | Pi conserved hypothetical protein (793 nt)                    | -15.9823 | 3.298676 | 0.01627  |
| PITG_18233 | Pi conserved hypothetical protein (756 nt)                    | -12.7637 | -2.49641 | 0.016283 |
| PITG_07967 | Pi protein kinase, putative (1453 nt)                         | -13.7487 | -2.91564 | 0.016296 |
| PITG_19466 | Pi conserved hypothetical protein (1491 nt)                   | -16.2381 | -3.57882 | 0.016342 |
| PITG_04976 | Pi conserved hypothetical protein (2466 nt)                   | -17.0252 | 3.672802 | 0.016594 |
| PITG_13834 | Pi vacuolar protein, putative (11155 nt)                      | -17.0252 | 3.672802 | 0.016594 |
| PITG_17652 | Pi conserved hypothetical protein (878 nt)                    | -17.178  | -3.8651  | 0.016594 |
| PITG_19791 | Pi conserved hypothetical protein (1354 nt)                   | -17.2034 | -3.81445 | 0.016594 |
| PITG_01187 | Pi dolichol kinase, putative (1034 nt)                        | -32.9402 | -34.1518 | 0.016678 |
| PITG_01855 | Pi mannosyl-oligosaccharide alpha-1,2-mannosidase, putative   | -32.9402 | -34.1518 | 0.016678 |
| PITG_12174 | Pi conserved hypothetical protein (2057 nt)                   | -32.9402 | -34.1518 | 0.016678 |
| PITG_12518 | Pi conserved hypothetical protein (2695 nt)                   | -32.9402 | -34.1518 | 0.016678 |
| PITG_07501 | Pi Crinkler (CRN) family protein (748 nt)                     | -12.1544 | -2.63571 | 0.016678 |
| PITG_12808 | Pi Amino Acid/Auxin Permease (AAP) Family (1485 nt)           | -12.7439 | 2.88121  | 0.01671  |
| PITG_10212 | Pi ADP-ribosylation factor family (634 nt)                    | -14.8832 | 3.080788 | 0.016719 |
| PITG_22959 | Pi protein kinase, putative (1777 nt)                         | -11.8634 | -2.74834 | 0.016787 |
| PITG_21220 | Pi Rab28 family GTPase, putative (708 nt)                     | -15.4182 | 3.237554 | 0.016793 |
| PITG_00929 | Pi conserved hypothetical protein (862 nt)                    | -17.7242 | 4.218994 | 0.016794 |
| PITG_14222 | Pi sporangia induced conserved hypothetical protein (1313 nt) | -17.7242 | 4.218994 | 0.016794 |
| PITG_14743 | Pi conserved hypothetical protein (4802 nt)                   | -15.3875 | -3.37528 | 0.016822 |
| PITG_08769 | Pi demethylmenaquinone methyltransferase, putative (672 nt)   | -14.6255 | -3.06116 | 0.016824 |
| PITG_17073 | Pi conserved hypothetical protein (2050 nt)                   | -17.4082 | 4.405086 | 0.016917 |
| PITG_23093 | Pi NPP1-like protein, pseudogene (701 nt)                     | -17.2666 | 4.619442 | 0.016939 |

|            |                                                               |          |          |          |
|------------|---------------------------------------------------------------|----------|----------|----------|
| PITG_19144 | Pi conserved hypothetical protein (840 nt)                    | -16.3081 | 3.252563 | 0.016973 |
| PITG_06773 | Pi regulator of chromosome condensation (RCC1), putative (    | -16.4878 | 3.345871 | 0.01706  |
| PITG_17132 | Pi flagella associated protein (3083 nt)                      | -16.5432 | 3.537298 | 0.01706  |
| PITG_17722 | Pi conserved hypothetical protein (1082 nt)                   | -16.4878 | 3.345871 | 0.01706  |
| PITG_05749 | Pi conserved hypothetical protein (888 nt)                    | -32.8155 | 34.40109 | 0.017078 |
| PITG_07686 | Pi conserved hypothetical protein (1952 nt)                   | -32.8155 | 34.40109 | 0.017078 |
| PITG_13860 | Pi protein kinase, putative (1146 nt)                         | -32.8364 | -34.3593 | 0.017078 |
| PITG_15658 | Pi hypothetical protein (2142 nt)                             | -32.8364 | -34.3593 | 0.017078 |
| PITG_16031 | Pi conserved hypothetical protein (1179 nt)                   | -32.8364 | -34.3593 | 0.017078 |
| PITG_16742 | Pi conserved hypothetical protein (513 nt)                    | -32.8364 | -34.3593 | 0.017078 |
| PITG_19887 | Pi conserved hypothetical protein (4715 nt)                   | -32.8364 | -34.3593 | 0.017078 |
| PITG_22823 | Pi expressed protein (507 nt)                                 | -32.8364 | -34.3593 | 0.017078 |
| PITG_08677 | Pi inositol 2-dehydrogenase, putative (1170 nt)               | -12.9029 | 3.135921 | 0.017246 |
| PITG_01594 | Pi hypothetical protein (697 nt)                              | -15.3258 | -2.95633 | 0.017333 |
| PITG_03316 | Pi hypothetical protein (459 nt)                              | -32.8062 | -34.4197 | 0.017366 |
| PITG_08984 | Pi protein kinase, putative (2467 nt)                         | -15.8793 | -3.26925 | 0.017408 |
| PITG_04382 | Pi 50S ribosomal protein L27 (478 nt)                         | -12.8634 | 2.443132 | 0.017422 |
| PITG_15603 | Pi conserved hypothetical protein (1020 nt)                   | -15.2092 | -3.27328 | 0.017496 |
| PITG_15050 | Pi conserved hypothetical protein (1959 nt)                   | -15.5268 | 2.880357 | 0.017631 |
| PITG_15290 | Pi IQ and AAA domain-containing protein, putative (2839 nt)   | -15.3198 | 3.811066 | 0.017707 |
| PITG_14949 | Pi conserved hypothetical protein (1160 nt)                   | -14.0041 | -2.58842 | 0.017722 |
| PITG_17344 | Pi cleavage induced hypothetical protein (1552 nt)            | -14.5195 | 2.842716 | 0.017795 |
| PITG_02203 | Pi conserved hypothetical protein (2022 nt)                   | -15.9016 | -3.22414 | 0.017799 |
| PITG_08059 | Pi conserved hypothetical protein (1164 nt)                   | -16.357  | 3.138131 | 0.017809 |
| PITG_16274 | Pi M96 mating-specific protein family (1200 nt)               | -13.8776 | -2.80731 | 0.017817 |
| PITG_18677 | Pi conserved hypothetical protein (2072 nt)                   | -14.7195 | -2.80974 | 0.017859 |
| PITG_06345 | Pi conserved hypothetical protein (2853 nt)                   | -17.194  | -3.8347  | 0.017916 |
| PITG_12648 | Pi conserved hypothetical protein (1371 nt)                   | -11.826  | 2.482689 | 0.017941 |
| PITG_08595 | Pi conserved hypothetical protein (766 nt)                    | -14.9874 | -3.20472 | 0.01795  |
| PITG_18603 | Pi conserved hypothetical protein (1088 nt)                   | -15.1782 | 4.071059 | 0.018077 |
| PITG_14431 | Pi conserved hypothetical protein (1571 nt)                   | -15.6942 | 2.749287 | 0.01823  |
| PITG_00213 | Pi hypothetical protein (1007 nt)                             | -12.3475 | -2.66691 | 0.018243 |
| PITG_04895 | Pi conserved hypothetical protein (1584 nt)                   | -14.6358 | -2.92718 | 0.018302 |
| PITG_16804 | Pi conserved hypothetical protein (1269 nt)                   | -15.144  | 2.873666 | 0.01835  |
| PITG_10052 | Pi choline/Carnitine O-acyltransferase, putative (1929 nt)    | -14.225  | 2.644626 | 0.018442 |
| PITG_12747 | Pi conserved hypothetical protein (1334 nt)                   | -13.2697 | -2.68091 | 0.018479 |
| PITG_01188 | Pi aspartate aminotransferase, putative (2034 nt)             | -16.8686 | -4.35811 | 0.018505 |
| PITG_18795 | Pi conserved hypothetical protein (966 nt)                    | -32.9836 | -34.0649 | 0.018572 |
| PITG_09377 | Pi ER degradation-enhancing alpha-mannosidase-like proteir    | -16.4763 | -3.30733 | 0.01858  |
| PITG_00754 | Pi gamma-glutamyltranspeptidase, putative (1671 nt)           | -15.8815 | -3.17942 | 0.018669 |
| PITG_09090 | Pi conserved hypothetical protein (1818 nt)                   | -13.5015 | -2.51947 | 0.018788 |
| PITG_02692 | Pi conserved hypothetical protein (1703 nt)                   | -16.9777 | -4.28506 | 0.0188   |
| PITG_01513 | Pi dynein light chain intermediate polypeptide, putative (884 | -16.1031 | 3.099168 | 0.018816 |
| PITG_03423 | Pi dynein heavy chain (12423 nt)                              | -16.0225 | 3.63265  | 0.01882  |
| PITG_02156 | Pi conserved hypothetical protein (541 nt)                    | -15.5718 | -3.00875 | 0.018822 |
| PITG_10675 | Pi protein kinase, putative (1566 nt)                         | -32.9359 | -34.1602 | 0.018856 |
| PITG_12993 | Pi serine/threonine protein kinase (1089 nt)                  | -32.9359 | -34.1602 | 0.018856 |

|            |                                                            |          |          |          |
|------------|------------------------------------------------------------|----------|----------|----------|
| PITG_20525 | Pi conserved hypothetical protein (737 nt)                 | -32.9359 | -34.1602 | 0.018856 |
| PITG_00101 | Pi HECT E3 ubiquitin ligase, putative (6796 nt)            | -17.0388 | 3.655839 | 0.018958 |
| PITG_17576 | Pi protein kinase, putative (1986 nt)                      | -15.381  | -3.38782 | 0.018966 |
| PITG_21202 | Pi conserved hypothetical protein (1899 nt)                | -16.158  | 3.661787 | 0.019141 |
| PITG_01722 | Pi conserved hypothetical protein (1347 nt)                | -15.0808 | -3.01075 | 0.019182 |
| PITG_04077 | Pi carbohydrate esterase, putative (699 nt)                | -15.6244 | 3.467364 | 0.019214 |
| PITG_05100 | Pi conserved hypothetical protein (693 nt)                 | -15.1155 | -2.87256 | 0.019218 |
| PITG_18922 | Pi conserved hypothetical protein (1842 nt)                | -15.0544 | -2.87037 | 0.019332 |
| PITG_18951 | Pi carbohydrate-binding protein, putative (2346 nt)        | -13.8697 | -2.78714 | 0.019368 |
| PITG_10165 | Pi conserved hypothetical protein (2226 nt)                | -16.3726 | 3.114393 | 0.019375 |
| PITG_04478 | Pi protein kinase (1275 nt)                                | -14.5577 | -2.76234 | 0.019498 |
| PITG_15301 | Pi protein kinase (929 nt)                                 | -14.9502 | -2.7736  | 0.019526 |
| PITG_03362 | Pi HECT E3 ubiquitin ligase, putative (2057 nt)            | -33.0038 | -34.0245 | 0.019541 |
| PITG_09320 | Pi ATP-binding Cassette (ABC) Superfamily (2251 nt)        | -33.0038 | -34.0245 | 0.019541 |
| PITG_16340 | Pi conserved hypothetical protein (1657 nt)                | -33.0379 | -33.9564 | 0.019541 |
| PITG_19643 | Pi conserved hypothetical protein (945 nt)                 | -14.7385 | 3.059547 | 0.019608 |
| PITG_08304 | Pi cGMP-dependent protein kinase, putative (4180 nt)       | -13.9367 | -2.53682 | 0.019614 |
| PITG_04584 | Pi conserved hypothetical protein (1664 nt)                | -15.8465 | -3.44632 | 0.019622 |
| PITG_13673 | Pi conserved hypothetical protein (2148 nt)                | -13.1589 | -2.57087 | 0.019631 |
| PITG_06661 | Pi Chloride Channel (ClC) Family (2119 nt)                 | -16.2747 | 3.34107  | 0.019719 |
| PITG_10096 | Pi conserved hypothetical protein (4107 nt)                | -17.0627 | 3.597965 | 0.019762 |
| PITG_21509 | Pi conserved hypothetical protein (1726 nt)                | -17.2506 | -3.71997 | 0.019762 |
| PITG_12357 | Pi gastricsin, putative (1410 nt)                          | -17.1051 | -4.02115 | 0.019804 |
| PITG_01962 | Pi conserved hypothetical protein (1068 nt)                | -33.0278 | -33.9764 | 0.019823 |
| PITG_03040 | Pi conserved hypothetical protein (2196 nt)                | -33.0278 | -33.9764 | 0.019823 |
| PITG_17839 | Pi protein kinase (653 nt)                                 | -33.0278 | -33.9764 | 0.019823 |
| PITG_04399 | Pi Amino Acid/Auxin Permease (AAP) Family (1010 nt)        | -32.901  | -34.2301 | 0.019906 |
| PITG_12498 | Pi conserved hypothetical protein (1583 nt)                | -32.901  | -34.2301 | 0.019906 |
| PITG_20947 | Pi conserved hypothetical protein (454 nt)                 | -15.516  | 3.624798 | 0.019983 |
| PITG_02104 | Pi conserved hypothetical protein (1808 nt)                | -15.9005 | -3.22722 | 0.020026 |
| PITG_22241 | Pi conserved hypothetical protein (549 nt)                 | -17.2297 | -3.76207 | 0.020124 |
| PITG_15846 | Pi conserved hypothetical protein (2814 nt)                | -12.9518 | -2.56703 | 0.020157 |
| PITG_14833 | Pi conserved hypothetical protein (1892 nt)                | -15.1042 | -2.83282 | 0.020214 |
| PITG_01654 | Pi Delta(5) fatty acid desaturase, putative (1711 nt)      | -15.0867 | 2.88398  | 0.020214 |
| PITG_01869 | Pi alpha,alpha-trehalose-phosphate synthase [UDP-forming], | -32.868  | -34.2962 | 0.020221 |
| PITG_07772 | Pi conserved hypothetical protein (2037 nt)                | -32.868  | -34.2962 | 0.020221 |
| PITG_09663 | Pi hypothetical protein (538 nt)                           | -32.868  | -34.2962 | 0.020221 |
| PITG_13050 | Pi hypothetical protein (455 nt)                           | -32.868  | -34.2962 | 0.020221 |
| PITG_21773 | Pi hypothetical protein (1354 nt)                          | -32.868  | -34.2962 | 0.020221 |
| PITG_21784 | Pi conserved hypothetical protein (1308 nt)                | -32.868  | -34.2962 | 0.020221 |
| PITG_13372 | Pi conserved hypothetical protein (845 nt)                 | -13.9447 | 2.469216 | 0.02044  |
| PITG_08469 | Pi conserved hypothetical protein (1791 nt)                | -15.8822 | -3.17663 | 0.020493 |
| PITG_09765 | Pi hypothetical protein (1420 nt)                          | -16.0521 | 3.153248 | 0.02056  |
| PITG_12453 | Pi conserved hypothetical protein (1539 nt)                | -14.9831 | -2.64983 | 0.020578 |
| PITG_22343 | Pi conserved hypothetical protein (921 nt)                 | -14.7631 | 2.778629 | 0.020583 |
| PITG_19764 | Pi conserved hypothetical protein (3585 nt)                | -16.8027 | 3.776053 | 0.020621 |
| PITG_02221 | Pi thymidylate kinase (651 nt)                             | -32.9458 | -34.1405 | 0.020638 |



|            |                                                               |          |          |          |
|------------|---------------------------------------------------------------|----------|----------|----------|
| PITG_01981 | Pi conserved hypothetical protein (1011 nt)                   | -14.9614 | -2.69455 | 0.020702 |
| PITG_22007 | Pi conserved hypothetical protein (436 nt)                    | -13.0853 | -2.44833 | 0.020706 |
| PITG_20842 | Pi conserved hypothetical protein (522 nt)                    | -16.399  | 3.056103 | 0.020713 |
| PITG_08551 | Pi conserved hypothetical protein (123 nt)                    | -15.2389 | 3.134589 | 0.020762 |
| PITG_05151 | Pi Amino Acid/Auxin Permease (AAP) Family (1545 nt)           | -14.4622 | -2.62077 | 0.02089  |
| PITG_07961 | Pi cleavage induced tubulin alpha chain (1549 nt)             | -14.7889 | 3.088308 | 0.020908 |
| PITG_02559 | Pi conserved hypothetical protein (1807 nt)                   | -32.9784 | -34.0753 | 0.020982 |
| PITG_07520 | Pi conserved hypothetical protein (970 nt)                    | -32.9784 | -34.0753 | 0.020982 |
| PITG_14709 | Pi conserved hypothetical protein (572 nt)                    | -33.0192 | -33.9938 | 0.020982 |
| PITG_21482 | Pi conserved hypothetical protein (1096 nt)                   | -32.9784 | -34.0753 | 0.020982 |
| PITG_22529 | Pi conserved hypothetical protein (1086 nt)                   | -33.0192 | -33.9938 | 0.020982 |
| PITG_13387 | Pi conserved hypothetical protein (898 nt)                    | -12.5112 | -2.37879 | 0.021078 |
| PITG_16478 | Pi acyl-CoA dehydrogenase, putative (2462 nt)                 | -15.5535 | -3.04476 | 0.021108 |
| PITG_20484 | Pi conserved hypothetical protein (782 nt)                    | -12.6381 | 3.074644 | 0.021137 |
| PITG_17948 | Pi conserved hypothetical protein (1056 nt)                   | -16.4443 | -3.3782  | 0.021138 |
| PITG_05421 | Pi conserved hypothetical protein (1945 nt)                   | -14.0719 | -2.86914 | 0.021329 |
| PITG_01199 | Pi conserved hypothetical protein (711 nt)                    | -16.304  | 3.280625 | 0.021423 |
| PITG_14696 | Pi serine hydroxymethyltransferase 1, mitochondrial precurs   | -12.823  | 2.478115 | 0.021469 |
| PITG_18001 | Pi ubiquitin, putative (625 nt)                               | -12.4464 | 3.082705 | 0.021474 |
| PITG_08543 | Pi conserved hypothetical protein (984 nt)                    | -15.6192 | 2.767607 | 0.021487 |
| PITG_16208 | Pi conserved hypothetical protein (1179 nt)                   | -15.6232 | -2.90644 | 0.021502 |
| PITG_17421 | Pi hypothetical protein (1635 nt)                             | -15.9161 | -3.19582 | 0.021511 |
| PITG_00659 | Pi conserved hypothetical protein (2015 nt)                   | -17.1928 | -3.84114 | 0.021564 |
| PITG_10935 | Pi phosphatidylinositol kinase (PIK-I) (3717 nt)              | -17.1691 | -3.88861 | 0.021564 |
| PITG_16267 | Pi Major Facilitator Superfamily (MFS) (1363 nt)              | -17.1691 | -3.88861 | 0.021564 |
| PITG_19107 | Pi conserved hypothetical protein (1288 nt)                   | -17.1691 | -3.88861 | 0.021564 |
| PITG_12195 | Pi katanin p60 ATPase-containing subunit, putative (2120 nt)  | -16.188  | 3.201372 | 0.021606 |
| PITG_03454 | Pi conserved hypothetical protein (1378 nt)                   | -13.3625 | -2.59466 | 0.021837 |
| PITG_21024 | Pi conserved hypothetical protein (2342 nt)                   | -13.6078 | -2.79611 | 0.021844 |
| PITG_21213 | Pi conserved hypothetical protein (394 nt)                    | -16.9955 | -4.11247 | 0.021895 |
| PITG_18503 | Pi Crinkler (CRN) family protein (1363 nt)                    | -10.9158 | -2.35591 | 0.021906 |
| PITG_03559 | Pi conserved hypothetical protein (1530 nt)                   | -16.0344 | 2.937884 | 0.021928 |
| PITG_06830 | Pi ubiquitin-conjugating enzyme E2, putative (834 nt)         | -15.965  | 2.845376 | 0.021939 |
| PITG_21151 | Pi Annexin (Annexin) Family (1009 nt)                         | -13.1393 | -3.0705  | 0.021968 |
| PITG_08881 | Pi succinyl-CoA ligase beta-chain, mitochondrial precursor (2 | -12.1586 | 2.395135 | 0.022025 |
| PITG_13258 | Pi Mitochondrial Carrier (MC) Family (894 nt)                 | -14.7584 | -2.63011 | 0.022093 |
| PITG_15385 | Pi hypothetical protein (354 nt)                              | -14.097  | 2.614093 | 0.022179 |
| PITG_06651 | Pi adiponectin receptor protein, putative (1700 nt)           | -13.566  | 2.439906 | 0.022283 |
| PITG_16939 | Pi conserved hypothetical protein (2557 nt)                   | -17.0315 | -4.17666 | 0.022311 |
| PITG_04861 | Pi conserved hypothetical protein (1383 nt)                   | -16.5341 | -3.18956 | 0.022332 |
| PITG_07898 | Pi sulfatase-like protein (2445 nt)                           | -16.9742 | -4.15467 | 0.022332 |
| PITG_08712 | Pi conserved hypothetical protein (801 nt)                    | -16.5341 | -3.18956 | 0.022332 |
| PITG_15851 | Pi conserved hypothetical protein (1463 nt)                   | -16.5843 | 3.455062 | 0.022332 |
| PITG_22951 | Pi similar to sea slug pheromone (261 nt)                     | -14.0114 | 2.898644 | 0.0224   |
| PITG_10763 | Pi lysocardiolipin acyltransferase, putative (1851 nt)        | -13.3787 | -2.66587 | 0.022724 |
| PITG_08018 | Pi conserved hypothetical protein (1362 nt)                   | -13.8023 | -2.49749 | 0.022728 |
| PITG_15541 | Pi conserved hypothetical protein (778 nt)                    | -16.5521 | -3.15416 | 0.022775 |

|            |                                                                           |          |          |          |
|------------|---------------------------------------------------------------------------|----------|----------|----------|
| PITG_18024 | Pi conserved hypothetical protein (2420 nt)                               | -16.5352 | -3.18789 | 0.022775 |
| PITG_05346 | Pi cation-transporting ATPase, putative (4774 nt)                         | -16.4958 | -3.27413 | 0.022796 |
| PITG_15543 | Pi conserved hypothetical protein (1270 nt)                               | -16.4958 | -3.27413 | 0.022796 |
| PITG_21993 | Pi conserved hypothetical protein (967 nt)                                | -16.0919 | -2.93328 | 0.022878 |
| PITG_16940 | Pi tRNA guanosine-2'-O-methyltransferase, putative (1490 nt)              | -15.4056 | -2.72903 | 0.02293  |
| PITG_02952 | Pi sporangia induced Bardet-Biedl syndrome 4 protein (1381 nt)            | -16.2969 | 3.41895  | 0.023025 |
| PITG_01015 | Pi protein kinase, putative, pseudogene (1641 nt)                         | -15.5372 | -3.15934 | 0.023118 |
| PITG_00546 | Pi myosin-like protein (4229 nt)                                          | -33.0126 | -34.0069 | 0.023142 |
| PITG_03099 | Pi hypothetical protein (966 nt)                                          | -33.0126 | -34.0069 | 0.023142 |
| PITG_14163 | Pi Voltage-gated Ion Channel (VIC) Superfamily (1572 nt)                  | -33.0126 | -34.0069 | 0.023142 |
| PITG_19857 | Pi conserved hypothetical protein (2813 nt)                               | -33.0126 | -34.0069 | 0.023142 |
| PITG_21639 | Pi M96 mating-specific protein family (1088 nt)                           | -33.0126 | -34.0069 | 0.023142 |
| PITG_01258 | Pi ras family GTPase, putative (807 nt)                                   | -14.6594 | 2.55612  | 0.023153 |
| PITG_03372 | Pi conserved hypothetical protein (1359 nt)                               | -15.3328 | -2.87532 | 0.023197 |
| PITG_10321 | Pi conserved hypothetical protein (1432 nt)                               | -14.5783 | 2.757362 | 0.023209 |
| PITG_12221 | Pi conserved hypothetical protein (3529 nt)                               | -16.7362 | 3.892326 | 0.023252 |
| PITG_09579 | Pi riboflavin biosynthesis protein ribBA, putative (1873 nt)              | -14.7479 | -2.60018 | 0.023254 |
| PITG_00964 | Pi conserved hypothetical protein (1301 nt)                               | -14.4883 | -2.56859 | 0.023276 |
| PITG_02949 | Pi conserved hypothetical protein (919 nt)                                | -13.7353 | -2.73246 | 0.023323 |
| PITG_03748 | Pi conserved hypothetical protein (3027 nt)                               | -32.9732 | -34.0857 | 0.023465 |
| PITG_11921 | Pi epoxide hydrolase, putative (890 nt)                                   | -32.9732 | -34.0857 | 0.023465 |
| PITG_14483 | Pi conserved hypothetical protein (1593 nt)                               | -32.9732 | -34.0857 | 0.023465 |
| PITG_17669 | Pi M96 mating-specific protein family (1476 nt)                           | -32.9732 | -34.0857 | 0.023465 |
| PITG_23063 | Pi Crinkler (CRN) family protein (585 nt)                                 | -13.1018 | -2.39962 | 0.023469 |
| PITG_02911 | Pi conserved hypothetical protein (971 nt)                                | -15.0759 | 2.60042  | 0.023592 |
| PITG_03597 | Pi alanyl-tRNA synthetase domain-containing protein 1, putative (1647 nt) | -14.6171 | -2.80716 | 0.023641 |
| PITG_02562 | Pi conserved hypothetical protein (1647 nt)                               | -14.5167 | -2.51162 | 0.023647 |
| PITG_01255 | Pi eukaryotic translation initiation factor 5, putative (1329 nt)         | -12.2997 | 2.346312 | 0.023669 |
| PITG_19605 | Pi conserved hypothetical protein (899 nt)                                | -17.2785 | -3.66413 | 0.023701 |
| PITG_22076 | Pi conserved hypothetical protein (546 nt)                                | -16.344  | -3.59326 | 0.023763 |
| PITG_13321 | Pi conserved hypothetical protein (1411 nt)                               | -16.5908 | 3.140337 | 0.023836 |
| PITG_19658 | Pi ATP-binding Cassette (ABC) Superfamily (474 nt)                        | -16.4631 | -3.34406 | 0.023844 |
| PITG_05455 | Pi hypothetical protein (1667 nt)                                         | -32.9357 | -34.1607 | 0.023913 |
| PITG_20218 | Pi hypothetical protein (629 nt)                                          | -32.9357 | -34.1607 | 0.023913 |
| PITG_17026 | Pi palmitoyltransferase, putative (2162 nt)                               | -15.8941 | -3.24131 | 0.023968 |
| PITG_13366 | Pi conserved hypothetical protein (3990 nt)                               | -14.4034 | -2.48004 | 0.023969 |
| PITG_11773 | Pi protein phosphatase 2C, putative (2350 nt)                             | -15.0712 | -2.9677  | 0.024    |
| PITG_12256 | Pi anoctamin-like protein (2882 nt)                                       | -15.1614 | -3.14534 | 0.024    |
| PITG_06666 | Pi kinesin-like protein (2770 nt)                                         | -17.4766 | 4.245048 | 0.024018 |
| PITG_05582 | Pi glutathione S-transferase, putative (705 nt)                           | -9.92365 | -2.29576 | 0.024048 |
| PITG_10256 | Pi conserved hypothetical protein (2930 nt)                               | -17.112  | 3.500783 | 0.024106 |
| PITG_10082 | Pi conserved hypothetical protein (1668 nt)                               | -17.2572 | -3.70712 | 0.024106 |
| PITG_08867 | Pi mannitol dehydrogenase, putative (2842 nt)                             | -13.8043 | -2.46282 | 0.024113 |
| PITG_08376 | Pi conserved hypothetical protein (974 nt)                                | -13.177  | -2.42616 | 0.024184 |
| PITG_06228 | Pi hypothetical protein (641 nt)                                          | -15.7159 | -3.49777 | 0.024249 |
| PITG_01136 | Pi conserved hypothetical protein (3534 nt)                               | -32.8768 | 34.27848 | 0.024263 |
| PITG_07878 | Pi conserved hypothetical protein (1659 nt)                               | -32.8768 | 34.27848 | 0.024263 |

|            |                                                           |          |          |          |
|------------|-----------------------------------------------------------|----------|----------|----------|
| PITG_04048 | Pi conserved hypothetical protein (1554 nt)               | -14.9307 | -3.11537 | 0.024287 |
| PITG_15686 | Pi conserved hypothetical protein (1242 nt)               | -16.2238 | 3.129854 | 0.024337 |
| PITG_10323 | Pi hypothetical protein (382 nt)                          | -16.2661 | -3.51632 | 0.024375 |
| PITG_03092 | Pi conserved hypothetical protein (441 nt)                | -13.8564 | -2.73493 | 0.024384 |
| PITG_17349 | Pi conserved hypothetical protein (1247 nt)               | -14.4654 | -2.57034 | 0.02445  |
| PITG_09453 | Pi conserved hypothetical protein (1145 nt)               | -13.6376 | -2.86549 | 0.024459 |
| PITG_17639 | Pi phosphatidylinositol kinase (1910 nt)                  | -16.1247 | 3.004375 | 0.024505 |
| PITG_22856 | Pi Crinkler (CRN) family protein (2421 nt)                | -16.3265 | -3.40275 | 0.024505 |
| PITG_09344 | Pi kinesin-like protein (2518 nt)                         | -17.5135 | 4.192133 | 0.024517 |
| PITG_00451 | Pi 2-oxoisovalerate dehydrogenase subunit beta, mitochond | -12.6316 | -2.54999 | 0.024559 |
| PITG_05883 | Pi bardet-Biedl syndrome 5 protein (1047 nt)              | -15.7495 | 2.860233 | 0.02456  |
| PITG_17441 | Pi conserved hypothetical protein (522 nt)                | -16.551  | -3.1586  | 0.024607 |
| PITG_04859 | Pi Polycystin Cation Channel (PCC) Family (1653 nt)       | -16.5866 | 3.458925 | 0.024607 |
| PITG_18874 | Pi conserved hypothetical protein (1275 nt)               | -13.8345 | 2.366775 | 0.024738 |
| PITG_12459 | Pi protein kinase (931 nt)                                | -17.2171 | -3.79222 | 0.024859 |
| PITG_03123 | Pi M96 mating-specific protein family (2036 nt)           | -17.2426 | -3.74125 | 0.024859 |
| PITG_06002 | Pi mismatch repair endonuclease pms1, putative (3223 nt)  | -17.2426 | -3.74125 | 0.024859 |
| PITG_11050 | Pi endo-1,3(4)-beta-glucanase, putative (2340 nt)         | -17.2426 | -3.74125 | 0.024859 |
| PITG_13373 | Pi conserved hypothetical protein (1037 nt)               | -13.1716 | -2.69534 | 0.02494  |
| PITG_03610 | Pi conserved hypothetical protein (1190 nt)               | -16.1237 | -2.86899 | 0.025012 |
| PITG_06106 | Pi Intraflagellar Transport Protein 81 (2181 nt)          | -16.1017 | 3.052182 | 0.025012 |
| PITG_06900 | Pi beta-secretase, putative (2660 nt)                     | -16.1076 | -2.90119 | 0.025012 |
| PITG_15864 | Pi conserved hypothetical protein (506 nt)                | -13.4748 | -2.74024 | 0.025028 |
| PITG_03192 | Pi secreted RxLR effector peptide, putative (435 nt)      | -16.0492 | 3.562117 | 0.025028 |
| PITG_15382 | Pi alpha kinase (1681 nt)                                 | -13.831  | 2.61094  | 0.025033 |
| PITG_08736 | Pi conserved hypothetical protein (2528 nt)               | -14.777  | -2.69569 | 0.025065 |
| PITG_16258 | Pi hypothetical protein (522 nt)                          | -15.7187 | 2.939022 | 0.025073 |
| PITG_04884 | Pi conserved hypothetical protein (872 nt)                | -15.7483 | -3.33358 | 0.025076 |
| PITG_10651 | Pi conserved hypothetical protein (1140 nt)               | -16.5372 | 3.246383 | 0.02508  |
| PITG_21022 | Pi P-type ATPase (P-ATPase) Superfamily (4173 nt)         | -15.462  | 2.768604 | 0.025115 |
| PITG_00439 | Pi conserved hypothetical protein (1452 nt)               | -15.2021 | 2.646834 | 0.02517  |
| PITG_10454 | Pi carbamoyl-phosphate synthase [ammonia], putative (5076 | -14.1645 | 2.619029 | 0.025332 |
| PITG_09597 | Pi conserved hypothetical protein (1395 nt)               | -14.0815 | -2.67286 | 0.025411 |
| PITG_19644 | Pi carbohydrate-binding protein, putative (2295 nt)       | -14.2683 | 2.900718 | 0.025413 |
| PITG_12318 | Pi ATP-binding Cassette (ABC) Superfamily (2112 nt)       | -15.4251 | -2.69003 | 0.025436 |
| PITG_06335 | Pi conserved hypothetical protein (3335 nt)               | -16.1691 | -3.694   | 0.025513 |
| PITG_05272 | Pi conserved hypothetical protein (2186 nt)               | -33.0844 | -33.8634 | 0.025541 |
| PITG_07433 | Pi conserved hypothetical protein (1193 nt)               | -33.1209 | -33.7902 | 0.025541 |
| PITG_08004 | Pi glucosylceramidase, putative (2009 nt)                 | -33.1209 | -33.7902 | 0.025541 |
| PITG_12902 | Pi conserved hypothetical protein (1108 nt)               | -33.1209 | -33.7902 | 0.025541 |
| PITG_13303 | Pi conserved hypothetical protein (1686 nt)               | -33.1209 | -33.7902 | 0.025541 |
| PITG_18614 | Pi conserved hypothetical protein (949 nt)                | -33.1209 | -33.7902 | 0.025541 |
| PITG_03340 | Pi conserved hypothetical protein (646 nt)                | -13.3839 | -2.4528  | 0.025544 |
| PITG_10722 | Pi conserved hypothetical protein (1447 nt)               | -15.898  | -3.23393 | 0.02557  |
| PITG_09998 | Pi conserved hypothetical protein (862 nt)                | -11.8986 | -2.64484 | 0.025615 |
| PITG_19363 | Pi conserved hypothetical protein (1697 nt)               | -16.3151 | 3.274498 | 0.025642 |
| PITG_21049 | Pi conserved hypothetical protein (466 nt)                | -14.6559 | -2.56501 | 0.025679 |

|            |                                                              |          |          |          |
|------------|--------------------------------------------------------------|----------|----------|----------|
| PITG_01931 | Pi conserved hypothetical protein (1755 nt)                  | -14.6856 | 2.503691 | 0.025687 |
| PITG_01457 | Pi conserved hypothetical protein (3662 nt)                  | -16.5735 | -3.11065 | 0.02571  |
| PITG_00292 | Pi hypothetical protein (493 nt)                             | -15.6707 | -2.81142 | 0.02574  |
| PITG_05140 | Pi L-threonine 3-dehydrogenase, putative (1071 nt)           | -12.9677 | -2.35227 | 0.025779 |
| PITG_05577 | Pi glutathione S-transferase, putative (2532 nt)             | -8.66047 | -2.29858 | 0.025785 |
| PITG_14104 | Pi conserved hypothetical protein (978 nt)                   | -33.0728 | -33.8866 | 0.02587  |
| PITG_16213 | Pi protein kinase, putative (1315 nt)                        | -16.1003 | 3.068231 | 0.025897 |
| PITG_10926 | Pi fatty acid synthase subunit alpha, putative (12098 nt)    | -14.8271 | 2.679983 | 0.025905 |
| PITG_10995 | Pi conserved hypothetical protein (1065 nt)                  | -14.7906 | -2.61647 | 0.02595  |
| PITG_00833 | Pi conserved hypothetical protein (1007 nt)                  | -9.95826 | -2.60876 | 0.025966 |
| PITG_21932 | Pi hypothetical protein (919 nt)                             | -13.2821 | -2.64252 | 0.026024 |
| PITG_16311 | Pi ubiquitin family protein, putative (918 nt)               | -11.1584 | 2.540493 | 0.026067 |
| PITG_19025 | Pi conserved hypothetical protein (840 nt)                   | -16.5935 | -3.07134 | 0.026194 |
| PITG_04924 | Pi conserved hypothetical protein (1134 nt)                  | -33.0964 | -33.8392 | 0.026202 |
| PITG_06718 | Pi tenascin-like protein (2301 nt)                           | -17.1005 | 3.530923 | 0.02621  |
| PITG_13548 | Pi conserved hypothetical protein (495 nt)                   | -17.2697 | -3.6841  | 0.02621  |
| PITG_13317 | Pi conserved hypothetical protein (1118 nt)                  | -15.4092 | -2.79029 | 0.026342 |
| PITG_08526 | Pi conserved hypothetical protein (499 nt)                   | -15.9205 | -3.09921 | 0.02638  |
| PITG_18800 | Pi conserved hypothetical protein (1069 nt)                  | -14.8339 | 2.706489 | 0.026514 |
| PITG_11294 | Pi alcohol dehydrogenase, putative (1221 nt)                 | -33.1087 | -33.8147 | 0.026537 |
| PITG_02588 | Pi conserved hypothetical protein (915 nt)                   | -16.1247 | -2.86896 | 0.026575 |
| PITG_11457 | Pi phosphoribosylformylglycinamide synthase (4128 nt)        | -16.1021 | 3.05705  | 0.026575 |
| PITG_08722 | Pi conserved hypothetical protein (1333 nt)                  | -15.0406 | -2.53485 | 0.026633 |
| PITG_17360 | Pi 12-oxophytodienoate reductase, putative (1119 nt)         | -16.5978 | -3.06322 | 0.026685 |
| PITG_04405 | Pi conserved hypothetical protein (1606 nt)                  | -15.9816 | -3.0651  | 0.026711 |
| PITG_18118 | Pi conserved hypothetical protein (848 nt)                   | -15.1998 | -3.56201 | 0.026801 |
| PITG_10014 | Pi conserved hypothetical protein (828 nt)                   | -15.6294 | -2.81697 | 0.026866 |
| PITG_20128 | Pi transemembrane protein, putative (1342 nt)                | -33.0624 | -33.9073 | 0.026877 |
| PITG_10681 | Pi conserved hypothetical protein (1103 nt)                  | -13.8368 | -2.53158 | 0.02694  |
| PITG_04174 | Pi hypothetical protein (696 nt)                             | -13.7579 | 2.443188 | 0.026951 |
| PITG_00107 | Pi conserved hypothetical protein (1243 nt)                  | -16.195  | 4.435716 | 0.026967 |
| PITG_07241 | Pi Monovalent Cation:Proton Antiporter-1 (CPA1) Family (22   | -13.8515 | -2.56708 | 0.027003 |
| PITG_11604 | Pi hypothetical protein (679 nt)                             | -13.7112 | 2.382682 | 0.027007 |
| PITG_17401 | Pi conserved hypothetical protein (891 nt)                   | -12.1774 | -2.43074 | 0.027012 |
| PITG_22286 | Pi Crinkler (CRN) family protein, pseudogene (924 nt)        | -14.1731 | -2.45067 | 0.027013 |
| PITG_17629 | Pi conserved hypothetical protein (593 nt)                   | -16.967  | 3.851338 | 0.027052 |
| PITG_11267 | Pi conserved hypothetical protein (714 nt)                   | -16.0887 | -3.84545 | 0.027138 |
| PITG_08305 | Pi conserved hypothetical protein (8670 nt)                  | -15.0472 | -2.52197 | 0.027265 |
| PITG_10452 | Pi CAD protein (4584 nt)                                     | -15.1938 | 2.786265 | 0.027452 |
| PITG_00469 | Pi conserved hypothetical protein (1536 nt)                  | -15.657  | -2.9151  | 0.027455 |
| PITG_18171 | Pi mitochondrial 2-oxoglutarate/malate carrier protein, puta | -16.5595 | -3.14505 | 0.027543 |
| PITG_03476 | Pi conserved hypothetical protein (1247 nt)                  | -15.6959 | -2.76101 | 0.027635 |
| PITG_11881 | Pi conserved hypothetical protein (902 nt)                   | -16.6303 | 3.369934 | 0.027684 |
| PITG_02449 | Pi conserved hypothetical protein (1012 nt)                  | -14.4966 | -2.55239 | 0.027719 |
| PITG_22108 | Pi conserved hypothetical protein (857 nt)                   | -13.5059 | 2.493619 | 0.027793 |
| PITG_11246 | Pi conserved hypothetical protein (1571 nt)                  | -15.0932 | 2.809774 | 0.027813 |
| PITG_12113 | Pi conserved hypothetical protein (1158 nt)                  | -15.2019 | 2.48394  | 0.02786  |

|            |                                                                 |          |          |          |
|------------|-----------------------------------------------------------------|----------|----------|----------|
| PITG_19508 | Pi conserved hypothetical protein (2224 nt)                     | -16.9715 | -4.15388 | 0.028055 |
| PITG_16664 | Pi conserved hypothetical protein (682 nt)                      | -16.5292 | 3.926107 | 0.028204 |
| PITG_02075 | Pi 1-acyl-sn-glycerol-3-phosphate acyltransferase, putative (:  | -14.9698 | -2.62109 | 0.02833  |
| PITG_20197 | Pi histone acetyltransferase, putative (2061 nt)                | -15.995  | -3.03783 | 0.028346 |
| PITG_01429 | Pi serine protease family S33, putative (1941 nt)               | -17.2959 | -3.63377 | 0.028445 |
| PITG_09682 | Pi conserved hypothetical protein (1069 nt)                     | -17.2959 | -3.63377 | 0.028445 |
| PITG_01809 | Pi conserved hypothetical protein (1961 nt)                     | -15.2402 | -2.55902 | 0.028498 |
| PITG_08544 | Pi Solute:Sodium Symporter (SSS) Family (1159 nt)               | -16.0407 | 2.688195 | 0.02856  |
| PITG_20253 | Pi Large Conductance Mechanosensitive Ion Channel (MscL)        | -17.3382 | -3.54468 | 0.02864  |
| PITG_00861 | Pi conserved hypothetical protein (1384 nt)                     | -14.4176 | -2.53776 | 0.028745 |
| PITG_10555 | Pi conserved hypothetical protein (1371 nt)                     | -33.0108 | -34.0105 | 0.028771 |
| PITG_10801 | Pi sister chromatid cohesion protein PDS5 (4001 nt)             | -33.0108 | -34.0105 | 0.028771 |
| PITG_14435 | Pi conserved hypothetical protein (1786 nt)                     | -33.0108 | -34.0105 | 0.028771 |
| PITG_17302 | Pi multicopper oxidase, putative (1814 nt)                      | -33.0108 | -34.0105 | 0.028771 |
| PITG_16264 | Pi conserved hypothetical protein (1408 nt)                     | -15.6486 | -3.01524 | 0.028931 |
| PITG_08236 | Pi conserved hypothetical protein (1544 nt)                     | -12.4469 | -2.26659 | 0.028945 |
| PITG_05135 | Pi hypothetical protein (463 nt)                                | -16.2444 | 3.450955 | 0.028957 |
| PITG_03375 | Pi conserved hypothetical protein (2260 nt)                     | -33.0992 | -33.8338 | 0.028986 |
| PITG_04641 | Pi conserved hypothetical protein (1368 nt)                     | -33.0992 | -33.8338 | 0.028986 |
| PITG_12496 | Pi conserved hypothetical protein (1593 nt)                     | -14.8287 | -2.59135 | 0.029032 |
| PITG_21183 | Pi conserved hypothetical protein (2061 nt)                     | -14.8293 | -2.59021 | 0.029032 |
| PITG_16339 | Pi protein kinase, putative (1542 nt)                           | -15.3617 | 2.592421 | 0.029082 |
| PITG_05261 | Pi conserved hypothetical protein (682 nt)                      | -17.3118 | -3.59786 | 0.029095 |
| PITG_06416 | Pi conserved hypothetical protein (2157 nt)                     | -17.3429 | -3.53575 | 0.029095 |
| PITG_02621 | Pi CTP synthase, putative (1809 nt)                             | -15.1752 | 2.463124 | 0.029146 |
| PITG_05443 | Pi hypothetical protein (746 nt)                                | -32.9723 | -34.0876 | 0.029157 |
| PITG_06671 | Pi canalicular multispecific organic anion transporter, putativ | -32.9723 | -34.0876 | 0.029157 |
| PITG_10175 | Pi conserved hypothetical protein (1981 nt)                     | -32.9723 | -34.0876 | 0.029157 |
| PITG_16842 | Pi conserved hypothetical protein (696 nt)                      | -32.9723 | -34.0876 | 0.029157 |
| PITG_17845 | Pi carbonic anhydrase, putative (535 nt)                        | -32.9723 | -34.0876 | 0.029157 |
| PITG_19489 | Pi conserved hypothetical protein (1287 nt)                     | -32.9723 | -34.0876 | 0.029157 |
| PITG_22141 | Pi conserved hypothetical protein (1282 nt)                     | -32.9723 | -34.0876 | 0.029157 |
| PITG_03419 | Pi flagellar protein, putative (4935 nt)                        | -16.4523 | 2.956777 | 0.029231 |
| PITG_10849 | Pi conserved hypothetical protein (2061 nt)                     | -16.4523 | 2.956777 | 0.029231 |
| PITG_13490 | Pi urocanase, putative (2405 nt)                                | -14.7814 | -2.58353 | 0.029244 |
| PITG_10217 | Pi glucan 1,3-beta-glucosidase, putative (3102 nt)              | -16.4436 | -3.39239 | 0.029312 |
| PITG_11978 | Pi conserved hypothetical protein (579 nt)                      | -33.0545 | -33.9231 | 0.029351 |
| PITG_15367 | Pi Voltage-gated Ion Channel (VIC) Superfamily (1774 nt)        | -33.0545 | -33.9231 | 0.029351 |
| PITG_04513 | Pi RIB72 protein (1656 nt)                                      | -17.165  | 3.396157 | 0.029555 |
| PITG_04639 | Pi conserved hypothetical protein (1213 nt)                     | -17.165  | 3.396157 | 0.029555 |
| PITG_15443 | Pi conserved hypothetical protein (876 nt)                      | -17.3002 | -3.62159 | 0.029555 |
| PITG_10637 | Pi conserved hypothetical protein (1272 nt)                     | -14.5157 | 3.162746 | 0.029598 |
| PITG_09768 | Pi dentin sialophosphoprotein-like protein (1715 nt)            | -12.2154 | -2.21329 | 0.02966  |
| PITG_20985 | Pi fibronectin type III domain-containing protein (4156 nt)     | -16.1516 | 2.958218 | 0.029686 |
| PITG_04891 | Pi conserved hypothetical protein (1528 nt)                     | -16.6587 | 3.30624  | 0.029733 |
| PITG_09729 | Pi conserved hypothetical protein (864 nt)                      | -15.1003 | 2.728816 | 0.02985  |
| PITG_06263 | Pi H/ACA ribonucleoprotein complex subunit 4 (2103 nt)          | -13.7989 | 2.350227 | 0.029999 |

|            |                                                                         |          |          |          |
|------------|-------------------------------------------------------------------------|----------|----------|----------|
| PITG_18884 | Pi conserved hypothetical protein (1702 nt)                             | -13.7383 | 2.248028 | 0.03003  |
| PITG_13901 | Pi conserved hypothetical protein (3281 nt)                             | -17.1534 | -3.93143 | 0.030057 |
| PITG_03960 | Pi conserved hypothetical protein (1106 nt)                             | -15.8544 | 2.829465 | 0.030127 |
| PITG_07024 | Pi inosine-5'-monophosphate dehydrogenase 2 (1726 nt)                   | -14.4914 | 2.457698 | 0.030166 |
| PITG_10190 | Pi conserved hypothetical protein (796 nt)                              | -16.6168 | -3.02474 | 0.030263 |
| PITG_15164 | Pi conserved hypothetical protein (2019 nt)                             | -16.6394 | -2.97944 | 0.030263 |
| PITG_17325 | Pi lipase, putative (1586 nt)                                           | -17.0386 | -4.02538 | 0.030263 |
| PITG_15577 | Pi hypothetical protein (1345 nt)                                       | -17.5768 | 4.060994 | 0.03049  |
| PITG_20458 | Pi conserved hypothetical protein (1046 nt)                             | -17.5768 | 4.060994 | 0.03049  |
| PITG_15321 | Pi aminomethyltransferase (1298 nt)                                     | -14.3238 | 2.429767 | 0.030603 |
| PITG_14550 | Pi conserved hypothetical protein (609 nt)                              | -15.4623 | 2.680014 | 0.030631 |
| PITG_02109 | Pi conserved hypothetical protein (2412 nt)                             | -13.746  | -2.55093 | 0.030633 |
| PITG_22064 | Pi conserved hypothetical protein (349 nt)                              | -9.80843 | -2.42636 | 0.030674 |
| PITG_17512 | Pi calcium/calmodulin-dependent protein kinase, putative (1             | -14.3526 | 2.359897 | 0.030694 |
| PITG_06035 | Pi conserved hypothetical protein (1038 nt)                             | -16.6201 | -3.01871 | 0.030799 |
| PITG_02368 | Pi polysaccharide lyase, putative (1621 nt)                             | -16.6017 | -3.05998 | 0.030836 |
| PITG_17721 | Pi conserved hypothetical protein (5449 nt)                             | -16.0306 | 2.716054 | 0.030842 |
| PITG_00063 | Pi mitogen activated protein kinase 7 (1520 nt)                         | -16.1617 | 2.930266 | 0.030867 |
| PITG_01694 | Pi peptidyl-prolyl cis-trans isomerase 1 (686 nt)                       | -12.1445 | 2.165438 | 0.030882 |
| PITG_13663 | Pi conserved hypothetical protein (1842 nt)                             | -17.3264 | -3.5703  | 0.030966 |
| PITG_00797 | Pi WD domain-containing protein (2367 nt)                               | -13.7608 | 2.279064 | 0.030979 |
| PITG_11594 | Pi ubiquitin family protein, putative (2388 nt)                         | -15.7215 | -2.70967 | 0.031028 |
| PITG_14970 | Pi protein kinase, putative (2617 nt)                                   | -13.0102 | -2.21835 | 0.031039 |
| PITG_06506 | Pi conserved hypothetical protein (861 nt)                              | -14.7108 | 2.84213  | 0.031057 |
| PITG_04663 | Pi conserved hypothetical protein (2069 nt)                             | -14.4696 | -2.47343 | 0.031059 |
| PITG_05616 | Pi UDP-glucose 4-epimerase, putative (1607 nt)                          | -12.238  | -2.32406 | 0.031061 |
| PITG_07341 | Pi conserved hypothetical protein (819 nt)                              | -12.2195 | -2.61974 | 0.031148 |
| PITG_14210 | Pi Amino Acid/Auxin Permease (AAAP) Family (1597 nt)                    | -16.1445 | 2.713588 | 0.031165 |
| PITG_04394 | Pi conserved hypothetical protein (732 nt)                              | -15.1566 | -2.79572 | 0.031176 |
| PITG_10213 | Pi conserved hypothetical protein (1236 nt)                             | -13.4981 | -2.63747 | 0.031275 |
| PITG_19641 | Pi conserved hypothetical protein (4528 nt)                             | -16.4909 | 2.872323 | 0.031341 |
| PITG_18545 | Pi tetrahydrofolate dehydrogenase (1038 nt)                             | -15.5817 | 2.634112 | 0.03136  |
| PITG_13378 | Pi conserved hypothetical protein (309 nt)                              | -16.6179 | 3.406503 | 0.031385 |
| PITG_07826 | Pi hypothetical protein (464 nt)                                        | -13.0739 | 2.337275 | 0.031422 |
| PITG_02760 | Pi oxidoreductase, putative (881 nt)                                    | -16.4835 | -3.30856 | 0.031451 |
| PITG_13225 | Pi conserved hypothetical protein (840 nt)                              | -12.8445 | -2.21454 | 0.031507 |
| PITG_08704 | Pi fatty acid desaturase, putative (1374 nt)                            | -14.6428 | 2.577426 | 0.031533 |
| PITG_18306 | Pi conserved hypothetical protein (1823 nt)                             | -9.22464 | -2.16373 | 0.031536 |
| PITG_17908 | Pi urease accessory protein ureG, putative (1996 nt)                    | -13.9209 | -2.57788 | 0.031682 |
| PITG_15877 | Pi conserved hypothetical protein (396 nt)                              | -14.5378 | -3.31496 | 0.031692 |
| PITG_11013 | Pi guanylate kinase (880 nt)                                            | -13.924  | 2.266287 | 0.031729 |
| PITG_00448 | Pi tRNA (cytosine-5-)-methyltransferase NSUN2, putative (20             | -16.1517 | 2.6998   | 0.031753 |
| PITG_18252 | Pi conserved hypothetical protein (736 nt)                              | -14.6602 | -2.60681 | 0.031814 |
| PITG_13850 | Pi hypothetical protein (2825 nt)                                       | -16.614  | 3.092991 | 0.03189  |
| PITG_04700 | Pi Transient Receptor Potential Ca <sup>2+</sup> Channel (TRP-CC) Famil | -16.5713 | -3.12204 | 0.031939 |
| PITG_02308 | Pi conserved hypothetical protein (812 nt)                              | -14.3397 | 2.496382 | 0.032027 |
| PITG_20485 | Pi conserved hypothetical protein (2224 nt)                             | -14.1342 | 2.686934 | 0.032039 |

|            |                                                             |          |          |          |
|------------|-------------------------------------------------------------|----------|----------|----------|
| PITG_17596 | Pi conserved hypothetical protein (2142 nt)                 | -12.3047 | -2.55434 | 0.032041 |
| PITG_04321 | Pi conserved hypothetical protein (1065 nt)                 | -15.0065 | -3.18014 | 0.032076 |
| PITG_11386 | Pi hypothetical protein (2357 nt)                           | -13.3247 | -2.30064 | 0.03214  |
| PITG_02579 | Pi enoyl-CoA hydratase/isomerase family, putative (1085 nt) | -13.4201 | -2.33437 | 0.032168 |
| PITG_03551 | Pi histone H3 (411 nt)                                      | -13.076  | 2.739743 | 0.032184 |
| PITG_04078 | Pi Rab5 family GTPase, putative (745 nt)                    | -12.309  | -2.15157 | 0.032236 |
| PITG_03054 | Pi conserved hypothetical protein (713 nt)                  | -14.0114 | -2.61281 | 0.032302 |
| PITG_04295 | Pi ATP-binding Cassette (ABC) Superfamily (1872 nt)         | -16.3843 | 3.246089 | 0.032349 |
| PITG_21170 | Pi conserved hypothetical protein (446 nt)                  | -16.4554 | -3.24752 | 0.032349 |
| PITG_15649 | Pi Mitochondrial Carrier (MC) Family (840 nt)               | -15.4212 | -2.69853 | 0.032357 |
| PITG_00608 | Pi conserved hypothetical protein (1108 nt)                 | -13.3264 | 2.359581 | 0.032364 |
| PITG_11153 | Pi conserved hypothetical protein (1295 nt)                 | -16.5344 | -3.20047 | 0.032391 |
| PITG_01145 | Pi hypothetical protein (807 nt)                            | -14.3992 | -2.67264 | 0.032457 |
| PITG_00062 | Pi Mitochondrial Protein Translocase (MPT) Family (312 nt)  | -11.372  | 2.177401 | 0.032522 |
| PITG_15746 | Pi SCP-like extracellular protein, putative (1590 nt)       | -14.925  | 2.515737 | 0.032572 |
| PITG_07896 | Pi sulfatase-like protein (2403 nt)                         | -15.8329 | -3.36783 | 0.032607 |
| PITG_18381 | Pi conserved hypothetical protein (1352 nt)                 | -16.1516 | 3.374506 | 0.032611 |
| PITG_14621 | Pi conserved hypothetical protein (414 nt)                  | -14.9814 | 2.440081 | 0.032648 |
| PITG_12579 | Pi kinesin-like protein (2611 nt)                           | -16.1826 | 2.894177 | 0.032649 |
| PITG_16432 | Pi conserved hypothetical protein (1620 nt)                 | -16.1826 | 2.894177 | 0.032649 |
| PITG_15194 | Pi Solute:Sodium Symporter (SSS) Family (1223 nt)           | -13.2367 | -2.24377 | 0.032712 |
| PITG_21781 | Pi conserved hypothetical protein (965 nt)                  | -17.1254 | 3.501837 | 0.032813 |
| PITG_13554 | Pi ATP-binding Cassette (ABC) Superfamily (1521 nt)         | -14.3294 | -2.39332 | 0.032847 |
| PITG_14722 | Pi 12-oxophytodienoate reductase, putative (1155 nt)        | -14.3437 | -2.44453 | 0.032847 |
| PITG_08592 | Pi conserved hypothetical protein (833 nt)                  | -16.8884 | 3.603938 | 0.032849 |
| PITG_09321 | Pi conserved hypothetical protein (656 nt)                  | -16.1535 | 2.981089 | 0.032868 |
| PITG_02914 | Pi hypothetical protein (2357 nt)                           | -16.5394 | -3.19092 | 0.032964 |
| PITG_08475 | Pi conserved hypothetical protein (1101 nt)                 | -16.4909 | 2.877666 | 0.033007 |
| PITG_21536 | Pi HECT ubiquitin ligase, putative (1180 nt)                | -15.6526 | 3.17763  | 0.033072 |
| PITG_21256 | Pi conserved hypothetical protein (478 nt)                  | -15.2064 | -3.54336 | 0.033077 |
| PITG_12592 | Pi conserved hypothetical protein (1758 nt)                 | -17.1989 | -3.83963 | 0.033079 |
| PITG_08702 | Pi conserved hypothetical protein (4001 nt)                 | -13.1974 | 2.241585 | 0.033111 |
| PITG_06146 | Pi conserved hypothetical protein (1188 nt)                 | -12.3853 | 2.376485 | 0.03318  |
| PITG_14855 | Pi conserved hypothetical protein (426 nt)                  | -12.9728 | -2.44311 | 0.0333   |
| PITG_06084 | Pi conserved hypothetical protein (1456 nt)                 | -12.7001 | -2.89493 | 0.033305 |
| PITG_12355 | Pi conserved hypothetical protein (1214 nt)                 | -17.2694 | -3.6909  | 0.033326 |
| PITG_00666 | Pi kinesin-like protein (3039 nt)                           | -17.1628 | 3.412236 | 0.033425 |
| PITG_12552 | Pi conserved hypothetical protein (2793 nt)                 | -17.1628 | 3.412236 | 0.033425 |
| PITG_01742 | Pi thymidine kinase (746 nt)                                | -17.0498 | 3.682826 | 0.033619 |
| PITG_03625 | Pi hypothetical protein (814 nt)                            | -17.0498 | 3.682826 | 0.033619 |
| PITG_02563 | Pi conserved hypothetical protein (2174 nt)                 | -15.3558 | -2.83031 | 0.033657 |
| PITG_07212 | Pi conserved hypothetical protein (1568 nt)                 | -17.3246 | -3.57643 | 0.033933 |
| PITG_08977 | Pi hypothetical protein (419 nt)                            | -33.1346 | -33.7629 | 0.033967 |
| PITG_14471 | Pi conserved hypothetical protein (1146 nt)                 | -33.1732 | -33.6858 | 0.033967 |
| PITG_17195 | Pi tetrahydrofolate dehydrogenase (2491 nt)                 | -33.1346 | -33.7629 | 0.033967 |
| PITG_02497 | Pi HECT E3 ubiquitin ligase, putative (2229 nt)             | -15.4878 | -2.63197 | 0.034    |
| PITG_13419 | Pi conserved hypothetical protein (1043 nt)                 | -15.0732 | 2.451079 | 0.034071 |

|            |                                                                 |          |          |          |
|------------|-----------------------------------------------------------------|----------|----------|----------|
| PITG_00718 | Pi mono-ADP-ribosyltransferase sirtuin-6-like protein (1146 nt) | -15.7485 | -2.65583 | 0.034159 |
| PITG_13128 | Pi 7-dehydrocholesterol reductase (1375 nt)                     | -14.8651 | 2.445414 | 0.034209 |
| PITG_22639 | Pi conserved hypothetical protein (566 nt)                      | -16.4646 | 2.948477 | 0.034226 |
| PITG_02784 | Pi conserved hypothetical protein (1649 nt)                     | -15.7849 | 2.945881 | 0.034341 |
| PITG_13262 | Pi cystathionine beta-synthase (1582 nt)                        | -13.3381 | -2.2483  | 0.034373 |
| PITG_05879 | Pi hypothetical protein (704 nt)                                | -14.6981 | 2.385963 | 0.034509 |
| PITG_07343 | Pi conserved hypothetical protein (2065 nt)                     | -16.6476 | 3.026314 | 0.03455  |
| PITG_18537 | Pi trans-1,2-dihydrobenzene-1,2-diol dehydrogenase, putative    | -15.619  | -2.99642 | 0.034781 |
| PITG_16269 | Pi M96 mating-specific protein family (1527 nt)                 | -17.3652 | -3.49073 | 0.034893 |
| PITG_13775 | Pi phosphatidylinositol kinase (PIK-J) (3151 nt)                | -15.71   | -2.73217 | 0.035029 |
| PITG_09008 | Pi conserved hypothetical protein (438 nt)                      | -14.895  | 2.762718 | 0.035036 |
| PITG_04022 | Pi conserved hypothetical protein (1818 nt)                     | -16.6609 | -2.93654 | 0.035129 |
| PITG_00473 | Pi tetratricopeptide repeat protein, putative (3075 nt)         | -33.1588 | -33.7145 | 0.03513  |
| PITG_03605 | Pi 5-methylthioadenosine/S-adenosylhomocysteine deaminase       | -33.1588 | -33.7145 | 0.03513  |
| PITG_05320 | Pi conserved hypothetical protein (586 nt)                      | -33.1588 | -33.7145 | 0.03513  |
| PITG_18417 | Pi conserved hypothetical protein (1435 nt)                     | -13.9866 | -2.23068 | 0.035135 |
| PITG_20105 | Pi putative methyltransferase, putative (851 nt)                | -12.232  | 2.197932 | 0.035243 |
| PITG_04288 | Pi conserved hypothetical protein (835 nt)                      | -33.095  | -33.842  | 0.035288 |
| PITG_04998 | Pi MtN3-like protein (693 nt)                                   | -33.095  | -33.842  | 0.035288 |
| PITG_07118 | Pi conserved hypothetical protein (3736 nt)                     | -33.095  | -33.842  | 0.035288 |
| PITG_07986 | Pi crinkler (CRN) family protein, pseudogene (1115 nt)          | -33.095  | -33.842  | 0.035288 |
| PITG_15410 | Pi conserved hypothetical protein (1616 nt)                     | -33.095  | -33.842  | 0.035288 |
| PITG_16556 | Pi elongation factor Tu GTP-binding domain-containing protein   | -33.095  | -33.842  | 0.035288 |
| PITG_17922 | Pi hypothetical protein (395 nt)                                | -33.095  | -33.842  | 0.035288 |
| PITG_17981 | Pi conserved hypothetical protein (771 nt)                      | -33.095  | -33.842  | 0.035288 |
| PITG_17982 | Pi conserved hypothetical protein (2353 nt)                     | -33.095  | -33.842  | 0.035288 |
| PITG_20222 | Pi conserved hypothetical protein (1839 nt)                     | -33.095  | -33.842  | 0.035288 |
| PITG_20931 | Pi conserved hypothetical protein (433 nt)                      | -33.095  | -33.842  | 0.035288 |
| PITG_21718 | Pi conserved hypothetical protein (599 nt)                      | -33.095  | -33.842  | 0.035288 |
| PITG_21981 | Pi carbonic anhydrase, putative (857 nt)                        | -33.095  | -33.842  | 0.035288 |
| PITG_04381 | Pi conserved hypothetical protein (631 nt)                      | -14.2128 | 2.331884 | 0.035306 |
| PITG_11259 | Pi conserved hypothetical protein (755 nt)                      | -14.2506 | -2.37163 | 0.035306 |
| PITG_08493 | Pi hypothetical protein (588 nt)                                | -16.6548 | 3.330984 | 0.03532  |
| PITG_18039 | Pi conserved hypothetical protein (1487 nt)                     | -16.6548 | 3.330984 | 0.03532  |
| PITG_12439 | Pi conserved hypothetical protein (1266 nt)                     | -15.2511 | -2.60178 | 0.03538  |
| PITG_08413 | Pi hypothetical protein (159 nt)                                | -17.3929 | -3.43568 | 0.035403 |
| PITG_08994 | Pi conserved hypothetical protein (1203 nt)                     | -17.3929 | -3.43568 | 0.035403 |
| PITG_04732 | Pi conserved hypothetical protein (2596 nt)                     | -13.4943 | -3.11538 | 0.035419 |
| PITG_17159 | Pi conserved hypothetical protein (903 nt)                      | -16.1926 | -2.73122 | 0.035435 |
| PITG_06457 | Pi conserved hypothetical protein (1426 nt)                     | -15.0849 | -2.50512 | 0.035481 |
| PITG_09098 | Pi conserved hypothetical protein (1329 nt)                     | -15.74   | -2.74745 | 0.03554  |
| PITG_09463 | Pi conserved hypothetical protein (1839 nt)                     | -14.7758 | -3.66185 | 0.035603 |
| PITG_01231 | Pi conserved hypothetical protein (1274 nt)                     | -33.0516 | -33.9288 | 0.035717 |
| PITG_07381 | Pi conserved hypothetical protein (1845 nt)                     | -33.0516 | -33.9288 | 0.035717 |
| PITG_08050 | Pi conserved hypothetical protein (1734 nt)                     | -33.0516 | -33.9288 | 0.035717 |
| PITG_08805 | Pi hypothetical protein (1049 nt)                               | -33.0516 | -33.9288 | 0.035717 |
| PITG_17171 | Pi hypothetical protein (506 nt)                                | -33.0516 | -33.9288 | 0.035717 |



|            |                                                            |          |          |          |
|------------|------------------------------------------------------------|----------|----------|----------|
| PITG_19108 | Pi conserved hypothetical protein (1839 nt)                | -33.0516 | -33.9288 | 0.035717 |
| PITG_18424 | Pi snurportin-like protein (1563 nt)                       | -15.7395 | -2.75006 | 0.035725 |
| PITG_05331 | Pi conserved hypothetical protein (1294 nt)                | -16.1572 | -2.80648 | 0.035767 |
| PITG_09684 | Pi hypothetical protein (636 nt)                           | -16.1743 | -2.77233 | 0.035767 |
| PITG_08761 | Pi nucleoside diphosphate kinase B (837 nt)                | -13.5342 | 2.176567 | 0.035805 |
| PITG_03655 | Pi conserved hypothetical protein (1287 nt)                | -13.9201 | -2.42986 | 0.03597  |
| PITG_03104 | Pi conserved hypothetical protein (1542 nt)                | -13.0325 | -2.28421 | 0.036097 |
| PITG_00471 | Pi pyridoxal biosynthesis lyase pdxS (1094 nt)             | -10.5727 | -2.67554 | 0.036218 |
| PITG_03833 | Pi diacylglycerol O-acyltransferase, putative (2409 nt)    | -15.8897 | 2.534424 | 0.036219 |
| PITG_17164 | Pi conserved hypothetical protein (889 nt)                 | -14.9157 | -2.47304 | 0.036226 |
| PITG_07837 | Pi conserved hypothetical protein (658 nt)                 | -16.5228 | 2.808512 | 0.036309 |
| PITG_04939 | Pi Dicarboxylate/Amino Acid:Cation (Na or H ) Symporter (D | -15.8412 | 2.459361 | 0.036322 |
| PITG_11182 | Pi conserved hypothetical protein (2220 nt)                | -14.0256 | -2.39419 | 0.036405 |
| PITG_01230 | Pi hypothetical protein (1386 nt)                          | -17.4099 | -3.40252 | 0.036439 |
| PITG_19850 | Pi conserved hypothetical protein (1578 nt)                | -14.7374 | -2.4019  | 0.036478 |
| PITG_04215 | Pi conserved hypothetical protein (2212 nt)                | -14.0828 | 2.758032 | 0.036562 |
| PITG_08496 | Pi conserved hypothetical protein (696 nt)                 | -12.5605 | -2.25254 | 0.036659 |
| PITG_20686 | Pi hypothetical protein (273 nt)                           | -11.8804 | 2.10517  | 0.036697 |
| PITG_03881 | Pi histone H2A (420 nt)                                    | -12.4649 | -2.33179 | 0.03671  |
| PITG_04980 | Pi conserved hypothetical protein (31653 nt)               | -16.0869 | 2.597656 | 0.03672  |
| PITG_20604 | Pi conserved hypothetical protein (480 nt)                 | -15.6346 | 3.041454 | 0.036887 |
| PITG_00301 | Pi conserved hypothetical protein (2787 nt)                | -17.2054 | 3.31825  | 0.036965 |
| PITG_15447 | Pi conserved hypothetical protein (2972 nt)                | -17.3884 | -3.44591 | 0.036965 |
| PITG_09896 | Pi conserved hypothetical protein (324 nt)                 | -15.077  | -2.52306 | 0.036998 |
| PITG_10886 | Pi conserved hypothetical protein (470 nt)                 | -13.4421 | 2.241632 | 0.037102 |
| PITG_01118 | Pi conserved hypothetical protein (1302 nt)                | -33.1986 | -33.6348 | 0.03714  |
| PITG_09034 | Pi conserved hypothetical protein (3808 nt)                | -33.1986 | -33.6348 | 0.03714  |
| PITG_10291 | Pi conserved hypothetical protein (1955 nt)                | -33.1986 | -33.6348 | 0.03714  |
| PITG_05884 | Pi AP-2 complex subunit beta, putative (2760 nt)           | -13.5093 | 2.226221 | 0.037223 |
| PITG_06726 | Pi Voltage-gated Ion Channel (VIC) Superfamily (866 nt)    | -17.0946 | 3.590099 | 0.037294 |
| PITG_00383 | Pi conserved hypothetical protein (1121 nt)                | -16.0008 | -2.93759 | 0.037365 |
| PITG_07705 | Pi conserved hypothetical protein (698 nt)                 | -14.0749 | 2.297118 | 0.037371 |
| PITG_14729 | Pi 30S ribosomal protein S16, putative (494 nt)            | -13.1942 | 2.191837 | 0.03744  |
| PITG_10409 | Pi SCP-like extracellular protein (603 nt)                 | -15.6742 | 2.692532 | 0.03745  |
| PITG_06189 | Pi conserved hypothetical protein (1399 nt)                | -12.1403 | -2.36792 | 0.037461 |
| PITG_20966 | Pi hypothetical protein (1577 nt)                          | -14.1707 | 2.35538  | 0.037486 |
| PITG_13173 | Pi conserved hypothetical protein (1493 nt)                | -17.3568 | -3.50948 | 0.037497 |
| PITG_11052 | Pi endo-1,3(4)-beta-glucanase, putative (2085 nt)          | -17.0936 | -3.91331 | 0.037514 |
| PITG_06575 | Pi transmembrane protein, putative (3054 nt)               | -33.147  | -33.738  | 0.037553 |
| PITG_09572 | Pi conserved hypothetical protein (1890 nt)                | -33.147  | -33.738  | 0.037553 |
| PITG_10702 | Pi conserved hypothetical protein (790 nt)                 | -33.147  | -33.738  | 0.037553 |
| PITG_22562 | Pi croquemort-like mating protein, putative (1555 nt)      | -16.1104 | 3.084994 | 0.037884 |
| PITG_02288 | Pi conserved hypothetical protein (1412 nt)                | -16.1914 | -2.73623 | 0.038035 |
| PITG_12571 | Pi conserved hypothetical protein (1395 nt)                | -16.3805 | 3.236833 | 0.038035 |
| PITG_05180 | Pi hypothetical protein (1391 nt)                          | -16.6565 | -2.94816 | 0.038126 |
| PITG_18748 | Pi conserved hypothetical protein (5857 nt)                | -16.5324 | 2.794761 | 0.038126 |
| PITG_03494 | Pi conserved hypothetical protein (1327 nt)                | -17.5339 | 4.111625 | 0.038202 |

|            |                                                            |          |          |          |
|------------|------------------------------------------------------------|----------|----------|----------|
| PITG_18094 | Pi conserved hypothetical protein (8494 nt)                | -17.3242 | -3.58047 | 0.038202 |
| PITG_11119 | Pi conserved hypothetical protein (3006 nt)                | -14.8444 | -2.56281 | 0.038327 |
| PITG_09402 | Pi phosphoglycerate kinase (981 nt)                        | -11.2676 | -2.1785  | 0.038605 |
| PITG_03450 | Pi conserved hypothetical protein (1090 nt)                | -15.8224 | 2.731658 | 0.038666 |
| PITG_09664 | Pi protein kinase, putative (2462 nt)                      | -15.9985 | -3.03346 | 0.038666 |
| PITG_21041 | Pi conserved hypothetical protein (2342 nt)                | -16.1907 | 2.883621 | 0.038704 |
| PITG_15856 | Pi conserved hypothetical protein (1310 nt)                | -17.2963 | -3.63679 | 0.038762 |
| PITG_02659 | Pi serine hydrolase (FSH1)-like protein, putative (831 nt) | -15.6953 | -2.92392 | 0.038773 |
| PITG_03658 | Pi phosphoglycerate mutase, putative (1801 nt)             | -14.5857 | -2.41946 | 0.038842 |
| PITG_00726 | Pi conserved hypothetical protein (1015 nt)                | -12.808  | -2.11673 | 0.038852 |
| PITG_20615 | Pi conserved hypothetical protein (1342 nt)                | -12.9311 | -2.32678 | 0.038907 |
| PITG_00169 | Pi conserved hypothetical protein (2737 nt)                | -15.2242 | 2.367199 | 0.038934 |
| PITG_11473 | Pi hypothetical protein (240 nt)                           | -14.6085 | 2.471831 | 0.039025 |
| PITG_00712 | Pi isoamyl acetate-hydrolyzing esterase, putative (987 nt) | -14.5395 | -2.4217  | 0.039059 |
| PITG_01312 | Pi conserved hypothetical protein (1483 nt)                | -16.9477 | 3.484354 | 0.039101 |
| PITG_03611 | Pi histone H2B (594 nt)                                    | -12.3557 | -2.15879 | 0.039151 |
| PITG_22552 | Pi hypothetical protein (1511 nt)                          | -14.5124 | -2.30405 | 0.039215 |
| PITG_13459 | Pi conserved hypothetical protein (676 nt)                 | -13.5284 | 2.13367  | 0.03927  |
| PITG_09723 | Pi conserved hypothetical protein (554 nt)                 | -16.4445 | -3.16674 | 0.039369 |
| PITG_07977 | Pi hypothetical protein (1123 nt)                          | -15.2641 | 2.609806 | 0.039495 |
| PITG_17513 | Pi conserved hypothetical protein (957 nt)                 | -16.215  | 2.571901 | 0.039768 |
| PITG_13979 | Pi conserved hypothetical protein (829 nt)                 | -16.0168 | -2.90611 | 0.039821 |
| PITG_06336 | Pi Glycoside-Pentoside-Hexuronide (GPH):Cation Symporter   | -17.5504 | 4.071442 | 0.039899 |
| PITG_15485 | Pi conserved hypothetical protein (1711 nt)                | -12.5329 | 2.063147 | 0.039976 |
| PITG_06050 | Pi Crinkler (CRN) family protein (1890 nt)                 | -13.0278 | -2.49146 | 0.039992 |
| PITG_00536 | Pi pre-mRNA-splicing factor CWC25-like protein (1726 nt)   | -16.2487 | -2.61896 | 0.04005  |
| PITG_09210 | Pi hypothetical protein (524 nt)                           | -17.3542 | -3.51683 | 0.040237 |
| PITG_12232 | Pi phosphatidic acid phosphatase, putative (726 nt)        | -17.3542 | -3.51683 | 0.040237 |
| PITG_09278 | Pi conserved hypothetical protein (1445 nt)                | -15.2225 | -2.53423 | 0.040303 |
| PITG_01131 | Pi conserved hypothetical protein (1300 nt)                | -14.8062 | 2.468243 | 0.040428 |
| PITG_01046 | Pi beta-lactamase-like protein (1095 nt)                   | -16.4918 | -3.17474 | 0.040449 |
| PITG_08104 | Pi conserved hypothetical protein (611 nt)                 | -16.4877 | -3.18293 | 0.040449 |
| PITG_05727 | Pi conserved hypothetical protein (1947 nt)                | -14.1862 | -2.33384 | 0.04063  |
| PITG_22040 | Pi transmembrane protein, putative (556 nt)                | -13.9047 | 2.133412 | 0.040689 |
| PITG_23273 | Pi Crinkler (CRN) family protein (2559 nt)                 | -14.4547 | -2.29568 | 0.040769 |
| PITG_12693 | Pi conserved hypothetical protein (715 nt)                 | -11.3855 | -2.39263 | 0.040812 |
| PITG_05282 | Pi phosphatidylinositol-4-phosphate-5-kinase (PIPK-D1/GPCF | -15.0472 | -2.46633 | 0.040857 |
| PITG_01372 | Pi conserved hypothetical protein (914 nt)                 | -16.557  | 2.736284 | 0.040986 |
| PITG_17841 | Pi conserved hypothetical protein (1180 nt)                | -16.557  | 2.736284 | 0.040986 |
| PITG_07852 | Pi conserved hypothetical protein (2288 nt)                | -15.5291 | -2.48223 | 0.041099 |
| PITG_11666 | Pi transmembrane protein, putative (3344 nt)               | -15.4319 | -2.75152 | 0.041116 |
| PITG_03346 | Pi cleavage induced hypothetical protein (1250 nt)         | -15.9514 | 2.635571 | 0.04116  |
| PITG_02549 | Pi conserved hypothetical protein (401 nt)                 | -16.8843 | 3.59977  | 0.041289 |
| PITG_13065 | Pi myosin-like protein (5690 nt)                           | -15.2562 | 2.465222 | 0.041321 |
| PITG_19152 | Pi conserved hypothetical protein (792 nt)                 | -16.1016 | -2.82426 | 0.041345 |
| PITG_03757 | Pi ATPase (2240 nt)                                        | -14.4807 | -2.36956 | 0.041455 |
| PITG_16512 | Pi conserved hypothetical protein (2003 nt)                | -15.1447 | 2.369539 | 0.041645 |

|            |                                                                                      |          |          |          |
|------------|--------------------------------------------------------------------------------------|----------|----------|----------|
| PITG_22112 | Pi conserved hypothetical protein (1037 nt)                                          | -16.0113 | 2.978432 | 0.041669 |
| PITG_20073 | Pi pyruvate-flavodoxin oxidoreductase, putative (1733 nt)                            | -16.1629 | -3.69077 | 0.041779 |
| PITG_06374 | Pi Lysosomal Cystine Transporter (LCT) Family (906 nt)                               | -13.6299 | -2.23633 | 0.041994 |
| PITG_13715 | Pi transmembrane protein, putative (3401 nt)                                         | -16.1003 | -2.82697 | 0.042084 |
| PITG_03552 | Pi histone H4 (523 nt)                                                               | -13.3755 | -2.30068 | 0.042109 |
| PITG_10743 | Pi conserved hypothetical protein (7120 nt)                                          | -16.7055 | -2.84842 | 0.042275 |
| PITG_06502 | Pi conserved hypothetical protein (2315 nt)                                          | -17.2735 | -3.68945 | 0.042372 |
| PITG_08811 | Pi Zinc (Zn <sup>2+</sup> )-Iron (Fe <sup>2+</sup> ) Permease (ZIP) Family (1342 nt) | -17.2735 | -3.68945 | 0.042372 |
| PITG_17116 | Pi conserved hypothetical protein (443 nt)                                           | -17.2735 | -3.68945 | 0.042372 |
| PITG_05587 | Pi protein kinase, putative (2287 nt)                                                | -14.2252 | -2.34715 | 0.042802 |
| PITG_03947 | Pi conserved hypothetical protein (1666 nt)                                          | -16.0811 | -2.78015 | 0.04283  |
| PITG_06094 | Pi secreted RxLR effector peptide, putative (489 nt)                                 | -14.6729 | 2.753113 | 0.042837 |
| PITG_11438 | Pi hypothetical protein (689 nt)                                                     | -14.0184 | -2.23092 | 0.042848 |
| PITG_15619 | Pi protein kinase (957 nt)                                                           | -15.7684 | -2.69231 | 0.042956 |
| PITG_20487 | Pi conserved hypothetical protein (1031 nt)                                          | -11.0776 | 2.665557 | 0.042987 |
| PITG_06031 | Pi conserved hypothetical protein (2188 nt)                                          | -17.2479 | -3.74119 | 0.042991 |
| PITG_15149 | Pi conserved hypothetical protein (2030 nt)                                          | -13.9256 | -2.22062 | 0.043004 |
| PITG_11321 | Pi conserved hypothetical protein (1853 nt)                                          | -15.4876 | -2.71057 | 0.043061 |
| PITG_13020 | Pi inorganic phosphate transporter, putative (1428 nt)                               | -13.3409 | 2.333593 | 0.043179 |
| PITG_08473 | Pi conserved hypothetical protein (2967 nt)                                          | -15.7948 | -2.63789 | 0.043199 |
| PITG_06715 | Pi serine/threonine-protein phosphatase PP2A catalytic subunit (1037 nt)             | -14.8651 | 2.28063  | 0.043245 |
| PITG_12650 | Pi Crinkler (CRN) family protein, pseudogene (2507 nt)                               | -10.8496 | -2.02546 | 0.043335 |
| PITG_01662 | Pi conserved hypothetical protein (621 nt)                                           | -14.9699 | 2.564223 | 0.043359 |
| PITG_00336 | Pi conserved hypothetical protein (3015 nt)                                          | -17.4271 | -3.36735 | 0.043463 |
| PITG_03297 | Pi conserved hypothetical protein (2244 nt)                                          | -17.2531 | 3.21849  | 0.043463 |
| PITG_09086 | Pi conserved hypothetical protein (1263 nt)                                          | -17.4632 | -3.29525 | 0.043463 |
| PITG_10473 | Pi conserved hypothetical protein (1473 nt)                                          | -17.4271 | -3.36735 | 0.043463 |
| PITG_16962 | Pi hypothetical protein (615 nt)                                                     | -17.4271 | -3.36735 | 0.043463 |
| PITG_02251 | Pi conserved hypothetical protein (420 nt)                                           | -15.49   | 2.51552  | 0.043503 |
| PITG_07915 | Pi conserved hypothetical protein (2095 nt)                                          | -16.7038 | -2.85303 | 0.043591 |
| PITG_05988 | Pi hypothetical protein (452 nt)                                                     | -16.4264 | -3.19362 | 0.043597 |
| PITG_13672 | Pi conserved hypothetical protein (1059 nt)                                          | -14.6061 | -2.37876 | 0.043606 |
| PITG_06748 | Pi myb-like DNA-binding protein, putative (2053 nt)                                  | -13.4277 | 2.15412  | 0.043662 |
| PITG_12854 | Pi Mitochondrial Carrier (MC) Family (1014 nt)                                       | -12.3157 | -2.05687 | 0.043772 |
| PITG_16272 | Pi M96 mating-specific protein family (1792 nt)                                      | -14.6367 | -2.27176 | 0.043827 |
| PITG_21442 | Pi EF hand containing protein, putative (631 nt)                                     | -16.5537 | 2.768568 | 0.043941 |
| PITG_09995 | Pi conserved hypothetical protein (1983 nt)                                          | -16.5132 | -3.13174 | 0.043964 |
| PITG_12843 | Pi rab proteins geranylgeranyltransferase component A, putative (1037 nt)            | -14.66   | -2.22481 | 0.043977 |
| PITG_16795 | Pi conserved hypothetical protein (2033 nt)                                          | -14.747  | 2.288438 | 0.044146 |
| PITG_02864 | Pi conserved hypothetical protein (2682 nt)                                          | -33.141  | -33.7501 | 0.044228 |
| PITG_04136 | Pi conserved hypothetical protein (1644 nt)                                          | -33.141  | -33.7501 | 0.044228 |
| PITG_04377 | Pi conserved hypothetical protein (2048 nt)                                          | -33.141  | -33.7501 | 0.044228 |
| PITG_06158 | Pi conserved hypothetical protein (1241 nt)                                          | -33.141  | -33.7501 | 0.044228 |
| PITG_06176 | Pi conserved hypothetical protein (2960 nt)                                          | -33.141  | -33.7501 | 0.044228 |
| PITG_07817 | Pi conserved hypothetical protein (6441 nt)                                          | -33.141  | -33.7501 | 0.044228 |
| PITG_08936 | Pi hypothetical protein (2118 nt)                                                    | -33.141  | -33.7501 | 0.044228 |
| PITG_09303 | Pi conserved hypothetical protein (583 nt)                                           | -33.141  | -33.7501 | 0.044228 |

|            |                                                            |          |          |          |
|------------|------------------------------------------------------------|----------|----------|----------|
| PITG_10059 | Pi conserved hypothetical protein (1483 nt)                | -33.141  | -33.7501 | 0.044228 |
| PITG_11548 | Pi conserved hypothetical protein (1535 nt)                | -33.141  | -33.7501 | 0.044228 |
| PITG_12532 | Pi conserved hypothetical protein (588 nt)                 | -33.141  | -33.7501 | 0.044228 |
| PITG_14050 | Pi conserved hypothetical protein (807 nt)                 | -33.141  | -33.7501 | 0.044228 |
| PITG_20770 | Pi protein kinase (747 nt)                                 | -33.141  | -33.7501 | 0.044228 |
| PITG_21154 | Pi conserved hypothetical protein (1440 nt)                | -33.141  | -33.7501 | 0.044228 |
| PITG_23274 | Pi crinkler (CRN) family protein, 5' partial (1476 nt)     | -13.5976 | -2.24791 | 0.044364 |
| PITG_04043 | Pi conserved hypothetical protein (1359 nt)                | -14.0024 | -2.26394 | 0.044561 |
| PITG_21535 | Pi conserved hypothetical protein (3847 nt)                | -17.2645 | 3.198586 | 0.044623 |
| PITG_15470 | Pi conserved hypothetical protein (1371 nt)                | -14.6236 | -2.68667 | 0.044624 |
| PITG_16605 | Pi Crinkler (CRN) family protein, pseudogene (2513 nt)     | -10.0123 | -2.0347  | 0.044627 |
| PITG_15582 | Pi conserved hypothetical protein (9886 nt)                | -16.2708 | 2.712138 | 0.044689 |
| PITG_07087 | Pi Major Facilitator Superfamily (MFS) (1425 nt)           | -15.4807 | 2.65934  | 0.044693 |
| PITG_09679 | Pi conserved hypothetical protein (620 nt)                 | -14.1967 | 2.188312 | 0.044727 |
| PITG_05447 | Pi sporangia induced sperm flagellar protein (967 nt)      | -15.6475 | 2.642025 | 0.04474  |
| PITG_07973 | Pi Voltage-gated Ion Channel (VIC) Superfamily (1558 nt)   | -14.9242 | -2.40069 | 0.044824 |
| PITG_06178 | Pi conserved hypothetical protein (1210 nt)                | -17.3533 | -3.52177 | 0.044914 |
| PITG_22017 | Pi Crinkler (CRN) family protein (536 nt)                  | -16.9374 | -4.20362 | 0.044945 |
| PITG_06325 | Pi conserved hypothetical protein (1299 nt)                | -10.6336 | -2.01648 | 0.044981 |
| PITG_00449 | Pi conserved hypothetical protein (1134 nt)                | -15.0874 | 2.222039 | 0.045063 |
| PITG_09997 | Pi phosphatidate cytidyltransferase, putative (1128 nt)    | -14.844  | -2.68648 | 0.045088 |
| PITG_01290 | Pi peptidyl-prolyl cis-trans isomerase C (762 nt)          | -13.9355 | -2.5792  | 0.045133 |
| PITG_02842 | Pi CDP-alcohol phosphatidyltransferase, putative (1754 nt) | -14.6532 | -2.283   | 0.045248 |
| PITG_16063 | Pi conserved hypothetical protein (1501 nt)                | -14.6507 | -2.24356 | 0.045248 |
| PITG_21528 | Pi GAF domain-containing protein (2073 nt)                 | -14.5068 | 2.402638 | 0.045266 |
| PITG_05182 | Pi hypothetical protein (287 nt)                           | -15.3119 | 2.63374  | 0.045295 |
| PITG_11906 | Pi Proton-dependent Oligopeptide Transporter (POT) Family  | -16.6716 | -2.92422 | 0.045309 |
| PITG_06640 | Pi conserved hypothetical protein (1302 nt)                | -15.1524 | 2.419855 | 0.045377 |
| PITG_04658 | Pi methylcrotonoyl-CoA carboxylase subunit alpha, putative | -15.4045 | -2.5943  | 0.045393 |
| PITG_09839 | Pi conserved hypothetical protein (3126 nt)                | -16.7091 | 2.9023   | 0.045614 |
| PITG_08753 | Pi tubulin-tyrosine ligase family, putative (1485 nt)      | -16.7352 | 3.166944 | 0.045614 |
| PITG_09192 | Pi mannan endo-1,4-beta-mannosidase, putative (1387 nt)    | -16.9394 | 3.4922   | 0.045614 |
| PITG_00320 | Pi conserved hypothetical protein (1593 nt)                | -15.4984 | -2.54436 | 0.045661 |
| PITG_08042 | Pi protein kinase (1669 nt)                                | -12.7002 | -2.04955 | 0.045762 |
| PITG_00973 | Pi conserved hypothetical protein (1326 nt)                | -14.458  | -2.55767 | 0.045935 |
| PITG_02128 | Pi conserved hypothetical protein (8356 nt)                | -16.157  | 2.455492 | 0.046161 |
| PITG_15925 | Pi conserved hypothetical protein (1834 nt)                | -15.4916 | -2.70524 | 0.046361 |
| PITG_03652 | Pi conserved hypothetical protein (2266 nt)                | -16.2283 | -2.66561 | 0.046507 |
| PITG_12231 | Pi phosphatidic acid phosphatase (1334 nt)                 | -13.1963 | -2.09715 | 0.046551 |
| PITG_05183 | Pi hypothetical protein (625 nt)                           | -13.6574 | 2.124381 | 0.046648 |
| PITG_22165 | Pi conserved hypothetical protein (1306 nt)                | -13.3737 | -2.09324 | 0.046662 |
| PITG_15518 | Pi conserved hypothetical protein (1535 nt)                | -14.7933 | -2.2428  | 0.046703 |
| PITG_10680 | Pi conserved hypothetical protein (486 nt)                 | -13.0007 | -2.22611 | 0.046725 |
| PITG_00766 | Pi conserved hypothetical protein (2056 nt)                | -33.2128 | -33.6064 | 0.046973 |
| PITG_11049 | Pi conserved hypothetical protein (1237 nt)                | -33.2128 | -33.6064 | 0.046973 |
| PITG_20234 | Pi conserved hypothetical protein (1138 nt)                | -33.2128 | -33.6064 | 0.046973 |
| PITG_21688 | Pi conserved hypothetical protein (2520 nt)                | -33.2128 | -33.6064 | 0.046973 |

|            |                                                           |          |          |          |
|------------|-----------------------------------------------------------|----------|----------|----------|
| PITG_04645 | Pi conserved hypothetical protein (922 nt)                | -13.4934 | 2.140951 | 0.047298 |
| PITG_14639 | Pi aminotransferase, putative (1949 nt)                   | -14.5144 | 2.210589 | 0.047306 |
| PITG_09710 | Pi conserved hypothetical protein (465 nt)                | -14.7185 | 2.987738 | 0.047337 |
| PITG_06727 | Pi Voltage-gated Ion Channel (VIC) Superfamily (1441 nt)  | -16.7965 | 3.030635 | 0.047383 |
| PITG_17510 | Pi hypothetical protein (626 nt)                          | -16.7965 | 3.030635 | 0.047383 |
| PITG_02569 | Pi Rab11 family GTPase, putative (1821 nt)                | -16.8911 | 3.578077 | 0.047413 |
| PITG_09016 | Pi NADH ubiquinone oxidoreductase, putative (1031 nt)     | -14.0642 | -2.62646 | 0.047503 |
| PITG_11183 | Pi conserved hypothetical protein (2028 nt)               | -14.9072 | -2.38352 | 0.047567 |
| PITG_20489 | Pi mucin-like protein (2163 nt)                           | -11.6566 | 2.636592 | 0.047582 |
| PITG_22848 | Pi Crinkler (CRN) family protein (1146 nt)                | -10.2096 | -1.98942 | 0.047584 |
| PITG_19128 | Pi conserved hypothetical protein (1400 nt)               | -14.3754 | -2.26167 | 0.047603 |
| PITG_04554 | Pi conserved hypothetical protein (862 nt)                | -17.4176 | -3.38911 | 0.04762  |
| PITG_06632 | Pi conserved hypothetical protein (790 nt)                | -17.4521 | -3.32013 | 0.04762  |
| PITG_15411 | Pi conserved hypothetical protein (1101 nt)               | -17.4176 | -3.38911 | 0.04762  |
| PITG_13324 | Pi conserved hypothetical protein (1113 nt)               | -11.3926 | 2.174326 | 0.047773 |
| PITG_02209 | Pi hypothetical protein (836 nt)                          | -15.2006 | 2.705747 | 0.047914 |
| PITG_01296 | Pi D-Tyr-tRNA(Tyr) deacylase (698 nt)                     | -15.7856 | 2.917336 | 0.048021 |
| PITG_17328 | Pi transmembrane protein, putative (738 nt)               | -15.2569 | 2.23858  | 0.048073 |
| PITG_05825 | Pi conserved hypothetical protein (1258 nt)               | -16.7332 | -2.79193 | 0.048078 |
| PITG_09040 | Pi conserved hypothetical protein (317 nt)                | -16.736  | -2.78631 | 0.048078 |
| PITG_17001 | Pi conserved hypothetical protein (913 nt)                | -14.7135 | 2.521977 | 0.048177 |
| PITG_09742 | Pi hypothetical protein (2594 nt)                         | -10.0604 | 1.986509 | 0.048208 |
| PITG_19997 | Pi transmembrane protein, putative (2844 nt)              | -16.1733 | 2.428703 | 0.048425 |
| PITG_04930 | Pi conserved hypothetical protein (526 nt)                | -17.3283 | -3.57959 | 0.048546 |
| PITG_09870 | Pi metalloprotease family M13, putative (2034 nt)         | -17.3283 | -3.57959 | 0.048546 |
| PITG_00138 | Pi conserved hypothetical protein (525 nt)                | -14.8426 | -2.29214 | 0.048561 |
| PITG_14112 | Pi conserved hypothetical protein (965 nt)                | -15.7024 | 2.390388 | 0.04861  |
| PITG_01044 | Pi DNA repair protein RAD50, putative (3843 nt)           | -16.7307 | -2.79753 | 0.04878  |
| PITG_12529 | Pi conserved hypothetical protein (432 nt)                | -16.7307 | -2.79753 | 0.04878  |
| PITG_08974 | Pi conserved hypothetical protein (4363 nt)               | -16.4685 | -3.22005 | 0.048796 |
| PITG_12845 | Pi conserved hypothetical protein (680 nt)                | -16.2416 | 2.79498  | 0.048796 |
| PITG_20490 | Pi conserved hypothetical protein (928 nt)                | -12.6522 | 2.638285 | 0.049161 |
| PITG_23322 | Pi hypothetical protein (1055 nt)                         | -14.7868 | -2.46188 | 0.049192 |
| PITG_01664 | Pi conserved hypothetical protein (1463 nt)               | -14.5499 | -2.27247 | 0.049242 |
| PITG_11524 | Pi serine protease family S10, putative (1662 nt)         | -12.9616 | 1.989785 | 0.049244 |
| PITG_01440 | Pi conserved hypothetical protein (1204 nt)               | -33.2546 | -33.5228 | 0.049284 |
| PITG_01929 | Pi conserved hypothetical protein (2803 nt)               | -33.2546 | -33.5228 | 0.049284 |
| PITG_05523 | Pi ubiquitin-specific protease, putative (2915 nt)        | -33.2546 | -33.5228 | 0.049284 |
| PITG_08567 | Pi conserved hypothetical protein (2527 nt)               | -33.2546 | -33.5228 | 0.049284 |
| PITG_09005 | Pi conserved hypothetical protein (1933 nt)               | -33.2546 | -33.5228 | 0.049284 |
| PITG_09293 | Pi GAF domain-containing protein (2362 nt)                | -33.2546 | -33.5228 | 0.049284 |
| PITG_04337 | Pi conserved hypothetical protein (480 nt)                | -12.422  | 2.089604 | 0.049402 |
| PITG_20117 | Pi 3-ketodihydrosphingosine reductase, putative (1075 nt) | -15.077  | -2.40667 | 0.04948  |
| PITG_15818 | Pi conserved hypothetical protein (1282 nt)               | -14.9754 | -2.35544 | 0.049546 |
| PITG_15860 | Pi hypothetical protein (985 nt)                          | -14.9046 | 2.418366 | 0.049598 |
| PITG_11556 | Pi conserved hypothetical protein (966 nt)                | -16.1371 | -2.75378 | 0.04966  |
| PITG_15241 | Pi conserved hypothetical protein (2148 nt)               | -15.8266 | 3.040397 | 0.049714 |

|            |                                                                      |          |          |          |
|------------|----------------------------------------------------------------------|----------|----------|----------|
| PITG_19488 | Pi protein-S-isoprenylcysteine O-methyltransferase (823 nt)          | -14.2095 | -2.21352 | 0.049741 |
| PITG_09064 | Pi conserved hypothetical protein (1353 nt)                          | -17.1366 | -3.82269 | 0.049844 |
| PITG_19154 | Pi conserved hypothetical protein (672 nt)                           | -17.1896 | 3.400178 | 0.049883 |
| PITG_12224 | Pi conserved hypothetical protein (928 nt)                           | -16.0731 | -2.70315 | 0.049907 |
| PITG_20156 | Pi cAMP-dependent protein kinase catalytic subunit, putative         | -14.254  | 2.050487 | 0.049907 |
| PITG_03712 | Pi elongation factor 3, putative (3342 nt)                           | -9.98881 | 1.967848 | 0.049969 |
| PITG_14728 | Pi conserved hypothetical protein (1368 nt)                          | -15.3732 | -2.35551 | 0.050112 |
| PITG_02521 | Pi conserved hypothetical protein (1199 nt)                          | -16.6354 | 2.585091 | 0.050202 |
| PITG_11652 | Pi conserved hypothetical protein (2815 nt)                          | -16.6224 | 2.611013 | 0.050202 |
| PITG_17036 | Pi conserved hypothetical protein (1052 nt)                          | -17.1637 | -3.77354 | 0.050202 |
| PITG_19972 | Pi conserved hypothetical protein (1973 nt)                          | -16.6224 | 2.611013 | 0.050202 |
| PITG_16056 | Pi cyclin-dependent kinase-like, putative (1947 nt)                  | -15.675  | 3.261153 | 0.050501 |
| PITG_16973 | Pi dynein light chain (449 nt)                                       | -13.1696 | 2.043222 | 0.050559 |
| PITG_13160 | Pi conserved hypothetical protein (930 nt)                           | -17.5272 | 4.075796 | 0.050562 |
| PITG_07034 | Pi myosin-like protein (4211 nt)                                     | -17.1137 | -3.8679  | 0.050573 |
| PITG_15542 | Pi conserved hypothetical protein (805 nt)                           | -15.333  | -2.43975 | 0.050695 |
| PITG_15921 | Pi hypothetical protein (663 nt)                                     | -16.0332 | -2.86905 | 0.050699 |
| PITG_00709 | Pi conserved hypothetical protein (2184 nt)                          | -16.0945 | -2.75011 | 0.050734 |
| PITG_01848 | Pi dual specificity phosphatase, putative (2488 nt)                  | -15.5698 | -2.40101 | 0.050738 |
| PITG_12235 | Pi makorin-like protein (1010 nt)                                    | -14.9473 | -2.35454 | 0.050739 |
| PITG_11883 | Pi conserved hypothetical protein (1266 nt)                          | -15.3636 | 2.526116 | 0.050862 |
| PITG_19369 | Pi conserved hypothetical protein (780 nt)                           | -16.5439 | -3.0702  | 0.050912 |
| PITG_00330 | Pi phosphatidylinositol-4-phosphate-5-kinase (PI-PIPK-B) (37         | -16.659  | -2.95403 | 0.051063 |
| PITG_00257 | Pi conserved hypothetical protein (2512 nt)                          | -14.7131 | -2.25826 | 0.051223 |
| PITG_01980 | Pi conserved hypothetical protein (418 nt)                           | -15.9098 | 2.323103 | 0.051312 |
| PITG_02362 | Pi P-type ATPase (P-ATPase) Superfamily (2973 nt)                    | -14.8902 | 2.380531 | 0.051468 |
| PITG_13226 | Pi conserved hypothetical protein (1765 nt)                          | -13.5806 | -2.44459 | 0.051471 |
| PITG_22765 | Pi conserved hypothetical protein (937 nt)                           | -13.4947 | 2.017876 | 0.051485 |
| PITG_14533 | Pi conserved hypothetical protein (677 nt)                           | -14.3267 | 2.226415 | 0.051486 |
| PITG_21211 | Pi conserved hypothetical protein (1583 nt)                          | -15.5528 | -2.36662 | 0.051635 |
| PITG_16257 | Pi conserved hypothetical protein (1794 nt)                          | -15.1108 | -2.33903 | 0.051635 |
| PITG_05781 | Pi eukaryotic translation initiation factor 2-alpha kinase, putative | -13.9092 | -2.1326  | 0.05184  |
| PITG_17285 | Pi conserved hypothetical protein (1388 nt)                          | -16.8046 | 3.731615 | 0.051878 |
| PITG_17628 | Pi conserved hypothetical protein (1129 nt)                          | -15.014  | 2.182512 | 0.051921 |
| PITG_07582 | Pi conserved hypothetical protein (1205 nt)                          | -16.683  | 3.490788 | 0.051986 |
| PITG_08803 | Pi mannitol dehydrogenase, putative (4248 nt)                        | -17.2917 | 3.161799 | 0.052051 |
| PITG_20631 | Pi conserved hypothetical protein (813 nt)                           | -17.2917 | 3.161799 | 0.052051 |
| PITG_07905 | Pi xylose isomerase 1 (1410 nt)                                      | -14.9598 | -2.44624 | 0.05231  |
| PITG_19604 | Pi elicitin-like protein (2043 nt)                                   | -16.3605 | 2.862143 | 0.052348 |
| PITG_06606 | Pi UDP-N-acetylglucosamine-peptide N-acetylglucosaminyltr            | -16.633  | 2.595352 | 0.052386 |
| PITG_08363 | Pi conserved hypothetical protein (5034 nt)                          | -16.633  | 2.595352 | 0.052386 |
| PITG_08775 | Pi hypothetical protein (1536 nt)                                    | -15.8638 | 2.282204 | 0.052411 |
| PITG_08465 | Pi conserved hypothetical protein (1183 nt)                          | -11.6756 | 2.396807 | 0.052455 |
| PITG_08605 | Pi conserved hypothetical protein (1206 nt)                          | -16.3109 | -2.49529 | 0.052496 |
| PITG_08916 | Pi kinesin-like protein (2333 nt)                                    | -16.4877 | 3.028118 | 0.052496 |
| PITG_17006 | Pi hypothetical protein (617 nt)                                     | -16.5003 | -3.05382 | 0.052496 |
| PITG_04570 | Pi conserved hypothetical protein (1599 nt)                          | -14.5024 | -2.19977 | 0.052504 |

|            |                                                                                     |          |          |          |
|------------|-------------------------------------------------------------------------------------|----------|----------|----------|
| PITG_01250 | Pi regulator of chromosome condensation (RCC1)-like protei                          | -15.328  | -2.38555 | 0.052619 |
| PITG_18250 | Pi conserved hypothetical protein (933 nt)                                          | -17.4495 | -3.32861 | 0.052706 |
| PITG_05303 | Pi conserved hypothetical protein (1083 nt)                                         | -11.4559 | -1.95529 | 0.052886 |
| PITG_00697 | Pi conserved hypothetical protein (643 nt)                                          | -13.7902 | 2.060488 | 0.05289  |
| PITG_04612 | Pi conserved hypothetical protein (2820 nt)                                         | -15.8099 | -2.60945 | 0.052931 |
| PITG_03761 | Pi conserved hypothetical protein (1349 nt)                                         | -15.8391 | -2.54942 | 0.052938 |
| PITG_03296 | Pi conserved hypothetical protein (6272 nt)                                         | -16.7797 | 2.762404 | 0.052988 |
| PITG_00750 | Pi Zinc (Zn <sup>2+</sup> )-Iron (Fe <sup>2+</sup> ) Permease (ZIP) Family (984 nt) | -15.6299 | 2.736657 | 0.053001 |
| PITG_05642 | Pi WD domain-containing protein, putative (1283 nt)                                 | -15.9895 | 2.772733 | 0.053072 |
| PITG_13558 | Pi ATP-binding Cassette (ABC) Superfamily (4053 nt)                                 | -14.8243 | -2.44158 | 0.053092 |
| PITG_07638 | Pi phospholipase A2, putative (933 nt)                                              | -12.7161 | -2.16438 | 0.053114 |
| PITG_16200 | Pi conserved hypothetical protein (1905 nt)                                         | -16.7725 | -2.71734 | 0.053127 |
| PITG_06272 | Pi conserved hypothetical protein (1471 nt)                                         | -13.4839 | 2.041049 | 0.053174 |
| PITG_19364 | Pi pantothenate kinase, putative (1351 nt)                                          | -17.4702 | -3.28085 | 0.053235 |
| PITG_00290 | Pi conserved hypothetical protein (504 nt)                                          | -16.1011 | 2.805491 | 0.053261 |
| PITG_00148 | Pi programmed cell death 6-interacting protein, putative (26                        | -16.5683 | -3.02188 | 0.053288 |
| PITG_09375 | Pi cGMP-dependent protein kinase, putative (4972 nt)                                | -16.4046 | 2.768089 | 0.053288 |
| PITG_15891 | Pi palmitoyltransferase, putative (1557 nt)                                         | -16.5683 | -3.02188 | 0.053288 |
| PITG_06144 | Pi conserved hypothetical protein (421 nt)                                          | -16.3627 | 2.584085 | 0.053288 |
| PITG_07128 | Pi conserved hypothetical protein (1116 nt)                                         | -16.1805 | 2.410515 | 0.0533   |
| PITG_05218 | Pi ATP-binding Cassette (ABC) Superfamily (1692 nt)                                 | -17.4161 | -3.39593 | 0.053368 |
| PITG_07395 | Pi hypothetical protein (563 nt)                                                    | -17.4161 | -3.39593 | 0.053368 |
| PITG_16918 | Pi conserved hypothetical protein (2688 nt)                                         | -17.4161 | -3.39593 | 0.053368 |
| PITG_07117 | Pi ATP-binding Cassette (ABC) Superfamily (1960 nt)                                 | -16.9917 | -4.0962  | 0.053449 |
| PITG_06887 | Pi myosin-like protein (1178 nt)                                                    | -15.5576 | -2.42547 | 0.053455 |
| PITG_17790 | Pi 5-aminolevulinat synthase, putative (1828 nt)                                    | -13.8749 | 2.045972 | 0.05348  |
| PITG_09637 | Pi riboflavin biosynthesis protein ribBA (634 nt)                                   | -15.1445 | -2.49316 | 0.053706 |
| PITG_17949 | Pi PNS1-like protein (1539 nt)                                                      | -12.5744 | -2.20561 | 0.053741 |
| PITG_12156 | Pi Annexin (Annexin) Family (1037 nt)                                               | -15.8051 | -2.54189 | 0.05382  |
| PITG_10490 | Pi hypothetical protein (1293 nt)                                                   | -15.3643 | 2.40977  | 0.053823 |
| PITG_17003 | Pi choline/ethanolamine kinase, putative (1129 nt)                                  | -15.364  | -2.37567 | 0.053823 |
| PITG_01592 | Pi conserved hypothetical protein (554 nt)                                          | -15.8342 | -2.48417 | 0.053828 |
| PITG_20503 | Pi conserved hypothetical protein (1925 nt)                                         | -15.7222 | -2.62293 | 0.053858 |
| PITG_01413 | Pi conserved hypothetical protein (1566 nt)                                         | -16.5997 | 3.118131 | 0.053861 |
| PITG_15870 | Pi conserved hypothetical protein (903 nt)                                          | -15.5724 | 2.276377 | 0.053864 |
| PITG_06660 | Pi peroxisome biogenesis factor, putative (4144 nt)                                 | -16.7277 | -2.80739 | 0.053875 |
| PITG_18354 | Pi succinate dehydrogenase flavoprotein subunit, mitochond                          | -13.2879 | 2.114999 | 0.053949 |
| PITG_04076 | Pi conserved hypothetical protein (714 nt)                                          | -14.6104 | -2.47381 | 0.053965 |
| PITG_20488 | Pi conserved hypothetical protein (403 nt)                                          | -12.9359 | 2.381474 | 0.053999 |
| PITG_03832 | Pi mitochondrial Rho GTPase, putative (2358 nt)                                     | -15.3926 | -2.25432 | 0.054012 |
| PITG_00177 | Pi allantoicase (1194 nt)                                                           | -15.9285 | 2.281576 | 0.054032 |
| PITG_05444 | Pi conserved hypothetical protein (12213 nt)                                        | -15.9285 | 2.281576 | 0.054032 |
| PITG_09081 | Pi phosphatidylinositol-4-phosphate 5-kinase, putative (727                         | -16.3099 | 2.383546 | 0.054093 |
| PITG_03988 | Pi conserved hypothetical protein (2026 nt)                                         | -14.4589 | -2.13405 | 0.054146 |
| PITG_08320 | Pi conserved hypothetical protein (481 nt)                                          | -15.7918 | -3.22414 | 0.054208 |
| PITG_21872 | Pi myosin-like protein (1703 nt)                                                    | -13.463  | -2.09233 | 0.054235 |
| PITG_07228 | Pi conserved hypothetical protein (869 nt)                                          | -15.5676 | 2.470627 | 0.054511 |

|            |                                                              |          |          |          |
|------------|--------------------------------------------------------------|----------|----------|----------|
| PITG_17876 | Pi transmembrane protein, putative (1588 nt)                 | -15.5984 | -2.41147 | 0.054511 |
| PITG_17257 | Pi carbohydrate esterase, putative (2028 nt)                 | -11.7829 | -2.14615 | 0.054513 |
| PITG_01050 | Pi Amino Acid-Polyamine-Organocation (APC) Family (1668 r    | -17.5178 | -3.18642 | 0.054523 |
| PITG_08140 | Pi hypothetical protein (1142 nt)                            | -16.0053 | -2.92167 | 0.05461  |
| PITG_03931 | Pi conserved hypothetical protein (480 nt)                   | -15.9843 | 2.573136 | 0.054712 |
| PITG_12988 | Pi conserved hypothetical protein (2649 nt)                  | -16.5238 | -3.11004 | 0.054928 |
| PITG_17833 | Pi hypothetical protein (632 nt)                             | -16.5238 | -3.11004 | 0.054928 |
| PITG_01964 | Pi conserved hypothetical protein (676 nt)                   | -14.3165 | -2.26227 | 0.054997 |
| PITG_15985 | Pi hypothetical protein (1063 nt)                            | -12.6604 | 2.457347 | 0.055017 |
| PITG_05112 | Pi protein kinase, putative (2275 nt)                        | -13.6691 | -2.13146 | 0.05512  |
| PITG_03514 | Pi DNA ligase, putative (2916 nt)                            | -17.4941 | -3.2342  | 0.055174 |
| PITG_05173 | Pi conserved hypothetical protein (1588 nt)                  | -17.4941 | -3.2342  | 0.055174 |
| PITG_13763 | Pi flavodoxin-like protein (725 nt)                          | -11.9165 | 2.126133 | 0.055244 |
| PITG_17599 | Pi poly [ADP-ribose] polymerase, putative (6232 nt)          | -15.1741 | -2.77084 | 0.055345 |
| PITG_07792 | Pi ATP synthase subunit delta', putative (510 nt)            | -10.8319 | 1.906793 | 0.055359 |
| PITG_02595 | Pi conserved hypothetical protein (4154 nt)                  | -17.2508 | 3.271735 | 0.055418 |
| PITG_06494 | Pi conserved hypothetical protein (1341 nt)                  | -17.2508 | 3.271735 | 0.055418 |
| PITG_10173 | Pi NADPH-cytochrome P450 reductase, putative (2371 nt)       | -17.3872 | -3.46086 | 0.055418 |
| PITG_12959 | Pi conserved hypothetical protein (1061 nt)                  | -17.2508 | 3.271735 | 0.055418 |
| PITG_13386 | Pi conserved hypothetical protein (1314 nt)                  | -14.4572 | 2.144675 | 0.055545 |
| PITG_12531 | Pi conserved hypothetical protein (231 nt)                   | -13.4213 | -2.15434 | 0.055562 |
| PITG_12840 | Pi conserved hypothetical protein (1923 nt)                  | -16.111  | -2.71739 | 0.055582 |
| PITG_15862 | Pi conserved hypothetical protein (927 nt)                   | -15.9451 | 2.471067 | 0.055582 |
| PITG_21886 | Pi histidyl-tRNA synthetase (2747 nt)                        | -15.0203 | 2.169774 | 0.055583 |
| PITG_16041 | Pi conserved hypothetical protein (1535 nt)                  | -13.7165 | -2.22396 | 0.055735 |
| PITG_04640 | Pi translation elongation factor 1-alpha, putative (1448 nt) | -9.57919 | 2.04225  | 0.055759 |
| PITG_18375 | Pi UDP-glucose 6-dehydrogenase (1490 nt)                     | -14.0975 | 2.075109 | 0.055799 |
| PITG_00698 | Pi conserved hypothetical protein (997 nt)                   | -15.6068 | 2.390817 | 0.055859 |
| PITG_03408 | Pi conserved hypothetical protein (4564 nt)                  | -15.3919 | -2.25593 | 0.055937 |
| PITG_20987 | Pi conserved hypothetical protein (455 nt)                   | -16.8042 | 2.713115 | 0.055963 |
| PITG_01239 | Pi conserved hypothetical protein (650 nt)                   | -13.872  | -2.02478 | 0.05608  |
| PITG_00939 | Pi conserved hypothetical protein (2435 nt)                  | -15.2925 | -2.80244 | 0.056147 |
| PITG_10459 | Pi conserved hypothetical protein (661 nt)                   | -10.4408 | 1.96035  | 0.056166 |
| PITG_13473 | Pi Major Facilitator Superfamily (MFS) (1559 nt)             | -15.1026 | 2.697783 | 0.0562   |
| PITG_12577 | Pi sporangia induced dynein heavy chain (13723 nt)           | -15.3428 | 2.292096 | 0.056211 |
| PITG_05277 | Pi conserved hypothetical protein (1301 nt)                  | -15.5999 | -2.40939 | 0.056389 |
| PITG_00334 | Pi conserved hypothetical protein (3697 nt)                  | -13.242  | -2.00589 | 0.056474 |
| PITG_08657 | Pi conserved hypothetical protein (1925 nt)                  | -13.8201 | 2.478007 | 0.056476 |
| PITG_05176 | Pi histone deacetylase, putative (2432 nt)                   | -15.8443 | -2.62053 | 0.056539 |
| PITG_08717 | Pi conserved hypothetical protein (357 nt)                   | -16.4204 | 2.737951 | 0.05655  |
| PITG_03245 | Pi conserved hypothetical protein (1426 nt)                  | -13.4837 | -2.00214 | 0.056555 |
| PITG_17646 | Pi conserved hypothetical protein (1773 nt)                  | -16.4801 | 3.880898 | 0.056561 |
| PITG_02085 | Pi ATP-binding Cassette (ABC) Superfamily (4124 nt)          | -16.6526 | 2.545118 | 0.056723 |
| PITG_00670 | Pi conserved hypothetical protein (998 nt)                   | -16.7914 | -2.67555 | 0.056723 |
| PITG_03174 | Pi conserved hypothetical protein (1364 nt)                  | -33.2442 | -33.5437 | 0.056804 |
| PITG_13436 | Pi conserved hypothetical protein (463 nt)                   | -33.2442 | -33.5437 | 0.056804 |
| PITG_13484 | Pi crinkler (CRN) domain-containing protein (1987 nt)        | -33.2442 | -33.5437 | 0.056804 |



|            |                                                                |          |          |          |
|------------|----------------------------------------------------------------|----------|----------|----------|
| PITG_19674 | Pi conserved hypothetical protein (2583 nt)                    | -33.2442 | -33.5437 | 0.056804 |
| PITG_20609 | Pi conserved hypothetical protein (1579 nt)                    | -15.5923 | 2.232883 | 0.056869 |
| PITG_08934 | Pi hypothetical protein (558 nt)                               | -15.3592 | 2.169608 | 0.056912 |
| PITG_06702 | Pi conserved hypothetical protein (1540 nt)                    | -14.3427 | -2.11138 | 0.056963 |
| PITG_09211 | Pi conserved hypothetical protein (11748 nt)                   | -14.8153 | -2.63079 | 0.057232 |
| PITG_21257 | Pi conserved hypothetical protein (721 nt)                     | -13.4643 | -2.26607 | 0.057289 |
| PITG_06919 | Pi conserved hypothetical protein (1279 nt)                    | -15.0786 | -2.40371 | 0.057295 |
| PITG_03952 | Pi conserved hypothetical protein (906 nt)                     | -15.5646 | -2.5559  | 0.057318 |
| PITG_00328 | Pi conserved hypothetical protein (1449 nt)                    | -33.1907 | -33.6508 | 0.057339 |
| PITG_05217 | Pi ATP-binding Cassette (ABC) Superfamily (1851 nt)            | -33.1907 | -33.6508 | 0.057339 |
| PITG_05696 | Pi NAD-dependent glycerol-3-phosphate dehydrogenase (12        | -33.1907 | -33.6508 | 0.057339 |
| PITG_12237 | Pi hypothetical protein (2161 nt)                              | -33.1907 | -33.6508 | 0.057339 |
| PITG_13285 | Pi hypothetical protein (1188 nt)                              | -33.1907 | -33.6508 | 0.057339 |
| PITG_13619 | Pi conserved hypothetical protein (650 nt)                     | -33.1907 | -33.6508 | 0.057339 |
| PITG_21552 | Pi sulfhydryl oxidase, putative (1480 nt)                      | -33.1907 | -33.6508 | 0.057339 |
| PITG_22378 | Pi conserved hypothetical protein (1441 nt)                    | -33.1907 | -33.6508 | 0.057339 |
| PITG_19862 | Pi conserved hypothetical protein (2445 nt)                    | -16.3519 | 2.600595 | 0.057384 |
| PITG_03890 | Pi conserved hypothetical protein (3515 nt)                    | -16.1824 | 2.416315 | 0.057426 |
| PITG_03866 | Pi hypothetical protein (1045 nt)                              | -16.9512 | 3.104868 | 0.05749  |
| PITG_06915 | Pi flagella associated protein (1619 nt)                       | -16.9512 | 3.104868 | 0.05749  |
| PITG_17684 | Pi conserved hypothetical protein (921 nt)                     | -16.7846 | -2.68971 | 0.05749  |
| PITG_11940 | Pi chitin-binding protein, putative (816 nt)                   | -15.8767 | 2.943483 | 0.057512 |
| PITG_03888 | Pi conserved hypothetical protein (886 nt)                     | -14.9835 | -2.28207 | 0.057618 |
| PITG_06274 | Pi ubiquitin-specific protease, putative (2090 nt)             | -14.9766 | -2.29586 | 0.057618 |
| PITG_08787 | Pi crinkler (CRN) family protein, pseudogene (849 nt)          | -10.8879 | -1.88038 | 0.057814 |
| PITG_01644 | Pi sodium/hydrogen exchanger, putative (3211 nt)               | -15.0194 | 2.266046 | 0.058315 |
| PITG_03456 | Pi GPI ethanolamine phosphate transferase, putative (3069 r    | -16.0893 | -2.97111 | 0.058346 |
| PITG_08832 | Pi conserved hypothetical protein (856 nt)                     | -11.9286 | 1.873336 | 0.058474 |
| PITG_08395 | Pi conserved hypothetical protein (1842 nt)                    | -14.9879 | 2.658573 | 0.058527 |
| PITG_15069 | Pi conserved hypothetical protein (1006 nt)                    | -10.2651 | 2.032111 | 0.058531 |
| PITG_19125 | Pi conserved hypothetical protein (1393 nt)                    | -15.5429 | -2.52941 | 0.058637 |
| PITG_16433 | Pi conserved hypothetical protein (1541 nt)                    | -14.2715 | -2.08873 | 0.058746 |
| PITG_21908 | Pi HECT E3 ubiquitin ligase, putative (1985 nt)                | -15.4176 | -2.20432 | 0.058858 |
| PITG_12110 | Pi peroxisomal targeting signal 1 receptor, putative (2251 nt) | -15.3913 | -2.25771 | 0.058891 |
| PITG_03369 | Pi conserved hypothetical protein (1287 nt)                    | -14.5005 | -2.08986 | 0.05895  |
| PITG_06844 | Pi hypothetical protein (1403 nt)                              | -16.1871 | -2.65314 | 0.059133 |
| PITG_08639 | Pi conserved hypothetical protein (585 nt)                     | -15.0258 | 3.20718  | 0.059213 |
| PITG_00925 | Pi conserved hypothetical protein (1055 nt)                    | -14.1134 | -2.21989 | 0.059545 |
| PITG_07093 | Pi conserved hypothetical protein (1104 nt)                    | -15.1678 | 2.060467 | 0.059588 |
| PITG_14584 | Pi microtubule -associated protein EB1 (1049 nt)               | -13.385  | 1.964342 | 0.059624 |
| PITG_17275 | Pi conserved hypothetical protein (2126 nt)                    | -12.1234 | -1.92034 | 0.059664 |
| PITG_05068 | Pi secreted RxLR effector peptide, putative (378 nt)           | -15.6491 | 2.407335 | 0.059675 |
| PITG_08067 | Pi Crinkler (CRN) family protein, pseudogene (1176 nt)         | -12.8082 | -1.92696 | 0.059856 |
| PITG_13539 | Pi hypothetical protein (927 nt)                               | -16.4778 | -3.08658 | 0.059892 |
| PITG_14097 | Pi conserved hypothetical protein (1762 nt)                    | -14.5978 | -2.13432 | 0.059921 |
| PITG_14197 | Pi conserved hypothetical protein (1160 nt)                    | -16.3508 | -2.41552 | 0.059929 |
| PITG_03577 | Pi vacuolar protein sorting-associated protein VTA1 (1524 nt)  | -13.296  | -2.08823 | 0.05994  |

|            |                                                                |          |          |          |
|------------|----------------------------------------------------------------|----------|----------|----------|
| PITG_00830 | Pi conserved hypothetical protein (798 nt)                     | -16.1678 | -2.6071  | 0.060038 |
| PITG_15191 | Pi conserved hypothetical protein (990 nt)                     | -16.1848 | -2.57306 | 0.060038 |
| PITG_00142 | Pi ribosome biogenesis protein NEP1, putative (870 nt)         | -16.0412 | 2.451461 | 0.060038 |
| PITG_01871 | Pi protein kinase, putative (2817 nt)                          | -15.231  | -2.2124  | 0.060245 |
| PITG_16760 | Pi elongation of very long chain fatty acids protein, putative | -13.5746 | 2.301028 | 0.060303 |
| PITG_08154 | Pi conserved hypothetical protein (1186 nt)                    | -12.5155 | -2.44118 | 0.060469 |
| PITG_00981 | Pi conserved hypothetical protein (1637 nt)                    | -15.3339 | 2.618535 | 0.060598 |
| PITG_03886 | Pi equilibrative Nucleoside Transporter (ENT) family (1518 nt) | -15.1726 | 2.051735 | 0.060621 |
| PITG_15961 | Pi conserved hypothetical protein (3683 nt)                    | -15.2384 | -2.1398  | 0.060621 |
| PITG_10981 | Pi conserved hypothetical protein (3176 nt)                    | -16.6834 | 2.492819 | 0.060621 |
| PITG_15550 | Pi conserved hypothetical protein (987 nt)                     | -15.1363 | -2.23314 | 0.06066  |
| PITG_16015 | Pi ribonuclease, putative (1049 nt)                            | -16.2496 | -2.62942 | 0.060769 |
| PITG_15731 | Pi ATP-binding Cassette (ABC) Superfamily (4094 nt)            | -14.1094 | -2.1257  | 0.060814 |
| PITG_21289 | Pi polysaccharide lyase, putative (694 nt)                     | -16.5543 | -3.04857 | 0.060863 |
| PITG_02480 | Pi conserved hypothetical protein (981 nt)                     | -14.9176 | -2.54039 | 0.060877 |
| PITG_02059 | Pi conserved hypothetical protein (370 nt)                     | -15.6734 | 2.834368 | 0.060923 |
| PITG_12514 | Pi bifunctional aspartokinase/homoserine dehydrogenase, p      | -16.1511 | -2.63764 | 0.061144 |
| PITG_10885 | Pi conserved hypothetical protein (1708 nt)                    | -15.5483 | -2.44507 | 0.061206 |
| PITG_11700 | Pi conserved hypothetical protein (1427 nt)                    | -14.3879 | 2.117289 | 0.061221 |
| PITG_21172 | Pi protein phosphatase 1E, putative (2060 nt)                  | -13.9879 | -2.03509 | 0.061327 |
| PITG_02364 | Pi P-type ATPase (P-ATPase) Superfamily (2332 nt)              | -14.9004 | 2.197233 | 0.061409 |
| PITG_01083 | Pi conserved hypothetical protein (2466 nt)                    | -16.7796 | -2.70245 | 0.061421 |
| PITG_21480 | Pi conserved hypothetical protein (605 nt)                     | -16.8075 | -2.64668 | 0.061421 |
| PITG_18980 | Pi hypothetical protein (3407 nt)                              | -16.6105 | -2.93736 | 0.061536 |
| PITG_18707 | Pi glycerol-3-phosphate O-acyltransferase, putative (2302 nt)  | -14.7489 | -2.23669 | 0.061598 |
| PITG_01154 | Pi gamma-tubulin complex component, putative (3261 nt)         | -16.5639 | -3.03    | 0.061661 |
| PITG_13616 | Pi conserved hypothetical protein (983 nt)                     | -13.9277 | -2.0915  | 0.061706 |
| PITG_00756 | Pi carboxypeptidase, putative (1449 nt)                        | -14.1783 | -2.27906 | 0.061871 |
| PITG_03715 | Pi conserved hypothetical protein (1000 nt)                    | -14.6087 | -2.11214 | 0.061891 |
| PITG_06476 | Pi carbohydrate-binding protein, putative (1213 nt)            | -14.7038 | -2.52707 | 0.061986 |
| PITG_22816 | Pi secreted RxLR effector peptide, putative (246 nt)           | -15.2962 | 2.167612 | 0.062197 |
| PITG_18787 | Pi conserved hypothetical protein (1713 nt)                    | -13.3764 | -2.04906 | 0.062517 |
| PITG_04922 | Pi protein kinase (1188 nt)                                    | -16.7738 | 3.443254 | 0.062539 |
| PITG_04568 | Pi protein kinase (2281 nt)                                    | -14.828  | -2.12595 | 0.062548 |
| PITG_01352 | Pi conserved hypothetical protein (987 nt)                     | -14.0535 | 2.349212 | 0.06271  |
| PITG_18174 | Pi cleavage induced hypothetical protein (2413 nt)             | -15.1237 | -2.31338 | 0.062741 |
| PITG_06873 | Pi aspartyl-tRNA synthetase, putative (754 nt)                 | -16.0592 | -2.9141  | 0.062987 |
| PITG_19907 | Pi Rab21/Rab5 family GTPase, putative (908 nt)                 | -12.6451 | -1.87606 | 0.063086 |
| PITG_02923 | Pi conserved hypothetical protein (2058 nt)                    | -13.3345 | -1.93399 | 0.063111 |
| PITG_16068 | Pi conserved hypothetical protein (744 nt)                     | -14.4861 | -2.4085  | 0.063167 |
| PITG_13299 | Pi conserved hypothetical protein (1580 nt)                    | -16.3424 | 2.580235 | 0.063424 |
| PITG_04877 | Pi oxidase, putative (1849 nt)                                 | -17.4847 | -3.25779 | 0.063424 |
| PITG_18320 | Pi conserved hypothetical protein (925 nt)                     | -17.4847 | -3.25779 | 0.063424 |
| PITG_17771 | Pi conserved hypothetical protein (798 nt)                     | -15.8317 | 2.98459  | 0.063545 |
| PITG_16904 | Pi protein kinase, putative (2597 nt)                          | -15.6272 | -2.3555  | 0.063695 |
| PITG_11963 | Pi ATP-binding Cassette (ABC) Superfamily (4113 nt)            | -16.8128 | 3.015167 | 0.063858 |
| PITG_10518 | Pi bloom syndrome protein (3969 nt)                            | -17.4516 | -3.33119 | 0.064015 |

|            |                                                                |          |          |          |
|------------|----------------------------------------------------------------|----------|----------|----------|
| PITG_08627 | Pi conserved hypothetical protein (691 nt)                     | -16.8141 | 2.693605 | 0.064055 |
| PITG_21114 | Pi conserved hypothetical protein (1530 nt)                    | -15.813  | -2.6068  | 0.064159 |
| PITG_05411 | Pi conserved hypothetical protein (1120 nt)                    | -15.8596 | -2.59115 | 0.064164 |
| PITG_08301 | Pi conserved hypothetical protein (1306 nt)                    | -15.4304 | -2.1786  | 0.064233 |
| PITG_01789 | Pi conserved hypothetical protein (1283 nt)                    | -15.9011 | -2.42511 | 0.064454 |
| PITG_03302 | Pi conserved hypothetical protein (810 nt)                     | -14.9513 | 2.082463 | 0.064527 |
| PITG_10421 | Pi conserved hypothetical protein (2203 nt)                    | -16.8377 | 2.96691  | 0.064684 |
| PITG_19869 | Pi serine/threonine protein kinase (1548 nt)                   | -16.8377 | 2.96691  | 0.064684 |
| PITG_11617 | Pi alkylated DNA repair protein alkB (928 nt)                  | -17.4186 | -3.39752 | 0.064775 |
| PITG_13774 | Pi conserved hypothetical protein (3318 nt)                    | -17.4186 | -3.39752 | 0.064775 |
| PITG_21926 | Pi conserved hypothetical protein (718 nt)                     | -14.3408 | -2.41751 | 0.06481  |
| PITG_00523 | Pi conserved hypothetical protein (723 nt)                     | -13.8595 | 1.928104 | 0.064834 |
| PITG_10079 | Pi conserved hypothetical protein (1312 nt)                    | -15.4139 | 2.875148 | 0.064874 |
| PITG_13346 | Pi conserved hypothetical protein (1176 nt)                    | -16.6118 | 2.666745 | 0.065064 |
| PITG_18815 | Pi conserved hypothetical protein (951 nt)                     | -16.729  | -2.8129  | 0.065064 |
| PITG_04909 | Pi conserved hypothetical protein (596 nt)                     | -13.9137 | 1.977591 | 0.065067 |
| PITG_00886 | Pi conserved hypothetical protein (802 nt)                     | -14.624  | 2.100248 | 0.065096 |
| PITG_03111 | Pi conserved hypothetical protein (1474 nt)                    | -16.3276 | -2.46576 | 0.065215 |
| PITG_10772 | Pi putative GPI-anchored elicitor INL11b-like protein (570 nt) | -14.4596 | 2.149852 | 0.065274 |
| PITG_12872 | Pi MtN3-like protein (974 nt)                                  | -15.8569 | -3.09328 | 0.065441 |
| PITG_12809 | Pi phospholipase D, Pi-sPLD-like-11 (1798 nt)                  | -16.8061 | -2.65236 | 0.065516 |
| PITG_14272 | Pi hypothetical protein (1775 nt)                              | -16.8061 | -2.65236 | 0.065516 |
| PITG_05212 | Pi Crinkler (CRN) family protein, missing secretion signal pep | -9.98511 | -1.9478  | 0.065531 |
| PITG_13171 | Pi conserved hypothetical protein (1722 nt)                    | -13.6892 | 2.135695 | 0.065614 |
| PITG_17778 | Pi calcium/calmodulin-dependent protein kinase II (1431 nt)    | -13.894  | -2.22371 | 0.065615 |
| PITG_21302 | Pi conserved hypothetical protein (513 nt)                     | -17.0783 | 3.222337 | 0.065683 |
| PITG_14829 | Pi conserved hypothetical protein (649 nt)                     | -15.9795 | -3.07644 | 0.065738 |
| PITG_13728 | Pi NADH dehydrogenase [ubiquinone] iron-sulfur protein 4, r    | -12.0582 | 1.882755 | 0.065744 |
| PITG_22680 | Pi conserved hypothetical protein (318 nt)                     | -13.2028 | 2.480595 | 0.065778 |
| PITG_20311 | Pi conserved hypothetical protein (501 nt)                     | -14.855  | -2.21628 | 0.065907 |
| PITG_01067 | Pi conserved hypothetical protein (2401 nt)                    | -15.3753 | 2.227023 | 0.06608  |
| PITG_10989 | Pi down syndrome critical region protein 3 (1808 nt)           | -13.7923 | 1.927596 | 0.066296 |
| PITG_08671 | Pi conserved hypothetical protein (340 nt)                     | -12.6347 | 1.889295 | 0.066319 |
| PITG_12356 | Pi conserved hypothetical protein (843 nt)                     | -14.8694 | -2.13838 | 0.066393 |
| PITG_14355 | Pi trans-1,2-dihydrobenzene-1,2-diol dehydrogenase, putativ    | -15.7572 | -2.82878 | 0.066401 |
| PITG_11226 | Pi conserved hypothetical protein (1839 nt)                    | -12.7339 | 1.848377 | 0.066714 |
| PITG_16026 | Pi conserved hypothetical protein (1171 nt)                    | -15.6714 | -2.89972 | 0.066925 |
| PITG_21006 | Pi O-phosphoserine-tRNA(Sec) selenium transferase, putative    | -14.9733 | -2.19956 | 0.067007 |
| PITG_07327 | Pi H/ACA ribonucleoprotein complex non-core subunit NAF1       | -16.5476 | -2.95332 | 0.067036 |
| PITG_09261 | Pi Equilibrative Nucleoside Transporter (ENT) Family (1356 n   | -15.8208 | -2.50971 | 0.067158 |
| PITG_07277 | Pi exopolysaccharide phosphotransferase, putative (1639 nt)    | -15.0737 | 2.110598 | 0.06719  |
| PITG_14478 | Pi NmrA-like family protein, putative (802 nt)                 | -13.6188 | -1.95932 | 0.067219 |
| PITG_11862 | Pi conserved hypothetical protein (1503 nt)                    | -16.817  | -2.62435 | 0.067337 |
| PITG_02249 | Pi hypothetical protein (415 nt)                               | -15.419  | 2.214317 | 0.067423 |
| PITG_10768 | Pi conserved hypothetical protein (972 nt)                     | -16.0568 | 2.427345 | 0.067552 |
| PITG_19459 | Pi protein kinase (1234 nt)                                    | -16.1854 | -2.6581  | 0.067552 |
| PITG_05687 | Pi conserved hypothetical protein (726 nt)                     | -15.6405 | -2.3281  | 0.067595 |

|            |                                                               |          |          |          |
|------------|---------------------------------------------------------------|----------|----------|----------|
| PITG_18203 | Pi avirulence-associated protein 3.4, putative (3419 nt)      | -15.5818 | 2.149119 | 0.06775  |
| PITG_19320 | Pi Crinkler (CRN) family protein (846 nt)                     | -12.5691 | -2.08149 | 0.067856 |
| PITG_02123 | Pi hypothetical protein (1595 nt)                             | -16.2311 | 2.324684 | 0.067958 |
| PITG_09642 | Pi conserved hypothetical protein (506 nt)                    | -14.9813 | -2.18349 | 0.068141 |
| PITG_00988 | Pi myb-like DNA-binding protein, putative (1056 nt)           | -16.7063 | 2.439597 | 0.068173 |
| PITG_04231 | Pi conserved hypothetical protein (1248 nt)                   | -17.0623 | 3.251661 | 0.068173 |
| PITG_09286 | Pi conserved hypothetical protein (1312 nt)                   | -16.852  | -2.55477 | 0.068173 |
| PITG_15052 | Pi conserved hypothetical protein (1236 nt)                   | -17.0623 | 3.251661 | 0.068173 |
| PITG_01802 | Pi conserved hypothetical protein (2790 nt)                   | -17.5753 | -3.07134 | 0.068216 |
| PITG_04593 | Pi conserved hypothetical protein (1849 nt)                   | -17.5753 | -3.07134 | 0.068216 |
| PITG_08558 | Pi pectin lyase, putative (2571 nt)                           | -17.5959 | -3.03018 | 0.068216 |
| PITG_13617 | Pi caltractin (633 nt)                                        | -11.5496 | 1.804357 | 0.068312 |
| PITG_13805 | Pi conserved hypothetical protein (1584 nt)                   | -15.6989 | 2.595625 | 0.068386 |
| PITG_01318 | Pi peptidyl-prolyl cis-trans isomerase, putative (1359 nt)    | -12.9435 | 1.935943 | 0.068443 |
| PITG_07727 | Pi conserved hypothetical protein (693 nt)                    | -15.069  | -2.30581 | 0.068598 |
| PITG_14362 | Pi vacuolar proton translocating ATPase A subunit, putative ( | -13.3691 | 1.898288 | 0.068664 |
| PITG_02818 | Pi conserved hypothetical protein (3640 nt)                   | -16.4009 | 2.499468 | 0.068688 |
| PITG_09277 | Pi conserved hypothetical protein (1076 nt)                   | -14.882  | -2.16187 | 0.068697 |
| PITG_10649 | Pi conserved hypothetical protein (1782 nt)                   | -11.9643 | -1.80677 | 0.068992 |
| PITG_07912 | Pi Polycystin Cation Channel (PCC) Family (2838 nt)           | -16.7266 | 2.400789 | 0.069016 |
| PITG_16863 | Pi conserved hypothetical protein (1302 nt)                   | -16.8393 | -2.58073 | 0.069016 |
| PITG_21451 | Pi conserved hypothetical protein (4362 nt)                   | -16.7266 | 2.400789 | 0.069016 |
| PITG_09381 | Pi conserved hypothetical protein (921 nt)                    | -15.3585 | -2.3927  | 0.069027 |
| PITG_01605 | Pi serine palmitoyltransferase, putative (1455 nt)            | -15.8414 | -2.54963 | 0.069195 |
| PITG_08864 | Pi conserved hypothetical protein (2365 nt)                   | -15.6381 | 2.559236 | 0.069323 |
| PITG_07715 | Pi ATP-binding Cassette (ABC) Superfamily (3840 nt)           | -16.0188 | 2.323628 | 0.069508 |
| PITG_18714 | Pi intraflagellar Transport protein 80 (2304 nt)              | -16.2706 | 2.230361 | 0.069614 |
| PITG_09015 | Pi NADH ubiquinone oxidoreductase, putative (846 nt)          | -12.2322 | 1.811705 | 0.069785 |
| PITG_09922 | Pi conserved hypothetical protein (938 nt)                    | -15.5992 | 2.115252 | 0.069869 |
| PITG_18835 | Pi crinkler (CRN) family protein, 5' partial (981 nt)         | -15.253  | -2.16838 | 0.069878 |
| PITG_02767 | Pi cysteine dioxygenase, putative (736 nt)                    | -14.4729 | -2.29963 | 0.070038 |
| PITG_05139 | Pi hypothetical protein (470 nt)                              | -14.6927 | -2.11569 | 0.070068 |
| PITG_17786 | Pi argininosuccinate lyase (1386 nt)                          | -13.4562 | 2.046199 | 0.070103 |
| PITG_05819 | Pi conserved hypothetical protein (348 nt)                    | -15.3287 | 2.100128 | 0.070399 |
| PITG_00563 | Pi hypothetical protein (1348 nt)                             | -14.9981 | -2.25515 | 0.070438 |
| PITG_13409 | Pi serine protease family S33, putative (1986 nt)             | -16.391  | 2.219812 | 0.07044  |
| PITG_01003 | Pi conserved hypothetical protein (2352 nt)                   | -16.3725 | -2.37337 | 0.070547 |
| PITG_11496 | Pi conserved hypothetical protein (2009 nt)                   | -14.5329 | 1.943897 | 0.070635 |
| PITG_20682 | Pi ATP-binding Cassette (ABC) Superfamily (1965 nt)           | -16.4731 | -3.20909 | 0.070636 |
| PITG_19303 | Pi conserved hypothetical protein (1424 nt)                   | -12.3424 | -2.59117 | 0.070638 |
| PITG_12160 | Pi protein kinase, putative (1510 nt)                         | -15.4426 | -2.15537 | 0.070691 |
| PITG_15551 | Pi hypothetical protein (517 nt)                              | -13.8688 | -2.09125 | 0.070691 |
| PITG_00393 | Pi conserved hypothetical protein (880 nt)                    | -16.8765 | 2.879246 | 0.070721 |
| PITG_19361 | Pi myb-like DNA-binding protein, putative (1223 nt)           | -13.2888 | -2.05394 | 0.070963 |
| PITG_11019 | Pi conserved hypothetical protein (1664 nt)                   | -13.996  | -1.92381 | 0.070979 |
| PITG_02812 | Pi type I inositol-3,4-bisphosphate 4-phosphatase, putative ( | -17.567  | -3.08948 | 0.071153 |
| PITG_06333 | Pi hypothetical protein (919 nt)                              | -17.567  | -3.08948 | 0.071153 |

|            |                                                             |          |          |          |
|------------|-------------------------------------------------------------|----------|----------|----------|
| PITG_12377 | Pi conserved hypothetical protein (465 nt)                  | -17.5262 | -3.17106 | 0.071153 |
| PITG_06047 | Pi conserved hypothetical protein (905 nt)                  | -15.4276 | 2.032549 | 0.07131  |
| PITG_02470 | Pi conserved hypothetical protein (899 nt)                  | -14.4767 | -2.05899 | 0.071498 |
| PITG_16530 | Pi aspartyl-tRNA synthetase, putative (2382 nt)             | -16.8363 | -2.58858 | 0.071583 |
| PITG_17663 | Pi conserved hypothetical protein (1866 nt)                 | -14.8886 | -2.14839 | 0.071712 |
| PITG_03241 | Pi conserved hypothetical protein (1528 nt)                 | -15.0937 | -2.11693 | 0.071725 |
| PITG_21501 | Pi calcium/calmodulin dependent protein kinase, putative (1 | -15.054  | 2.067777 | 0.071725 |
| PITG_16184 | Pi protein kinase (1242 nt)                                 | -16.5011 | -3.03633 | 0.071903 |
| PITG_13631 | Pi cytochrome P450, putative (1435 nt)                      | -16.2309 | -2.56652 | 0.071932 |
| PITG_06903 | Pi conserved hypothetical protein (2970 nt)                 | -16.2038 | -2.62069 | 0.071932 |
| PITG_06088 | Pi conserved hypothetical protein (1754 nt)                 | -15.9348 | -2.35756 | 0.071973 |
| PITG_13903 | Pi conserved hypothetical protein (971 nt)                  | -15.9177 | -2.39176 | 0.071973 |
| PITG_10819 | Pi midasin-like protein (18373 nt)                          | -15.61   | 2.273259 | 0.07202  |
| PITG_00212 | Pi conserved hypothetical protein (1458 nt)                 | -12.1274 | -1.83794 | 0.072078 |
| PITG_05762 | Pi Cullin family protein, putative (2268 nt)                | -15.3224 | -2.33377 | 0.072132 |
| PITG_18326 | Pi conserved hypothetical protein (1353 nt)                 | -14.343  | 2.143379 | 0.072147 |
| PITG_16591 | Pi Crinkler (CRN) family protein (2658 nt)                  | -10.7512 | -2.1111  | 0.072301 |
| PITG_04967 | Pi conserved hypothetical protein (2153 nt)                 | -16.8517 | 2.954193 | 0.07242  |
| PITG_22676 | Pi secreted RxLR effector peptide, putative (486 nt)        | -15.77   | -2.78985 | 0.072477 |
| PITG_04572 | Pi conserved hypothetical protein (1193 nt)                 | -16.1631 | -2.6123  | 0.072499 |
| PITG_16878 | Pi conserved hypothetical protein (562 nt)                  | -16.1814 | -2.57579 | 0.072499 |
| PITG_03951 | Pi conserved hypothetical protein (921 nt)                  | -14.9728 | 2.133659 | 0.072552 |
| PITG_10488 | Pi protein kinase, putative (1257 nt)                       | -15.251  | -2.17541 | 0.072582 |
| PITG_13785 | Pi conserved hypothetical protein (984 nt)                  | -14.9232 | 2.161773 | 0.072614 |
| PITG_15962 | Pi conserved hypothetical protein (1744 nt)                 | -16.1286 | -2.67876 | 0.072757 |
| PITG_17330 | Pi pyridoxal kinase, putative (1406 nt)                     | -16.2011 | -2.53891 | 0.072936 |
| PITG_01314 | Pi ubiquitin-specific protease, putative (1568 nt)          | -16.6552 | -2.84782 | 0.073252 |
| PITG_07657 | Pi conserved hypothetical protein (1342 nt)                 | -17.2091 | -3.67399 | 0.073313 |
| PITG_18583 | Pi nonribosomal peptide synthetase, putative (4723 nt)      | -16.6591 | 2.568564 | 0.073313 |
| PITG_11120 | Pi conserved hypothetical protein (957 nt)                  | -13.3737 | -1.89162 | 0.073331 |
| PITG_03272 | Pi conserved hypothetical protein (696 nt)                  | -16.3371 | 2.337217 | 0.07339  |
| PITG_03306 | Pi HSF-type DNA-binding protein, putative (755 nt)          | -13.9822 | 1.896271 | 0.073559 |
| PITG_16783 | Pi conserved hypothetical protein (1201 nt)                 | -16.2423 | 2.313382 | 0.073644 |
| PITG_18018 | Pi ribosome-recycling factor, putative (995 nt)             | -14.7069 | 2.02652  | 0.073647 |
| PITG_00074 | Pi conserved hypothetical protein (1263 nt)                 | -11.5866 | 1.8231   | 0.073662 |
| PITG_19868 | Pi tRNA-dihydrouridine synthase, putative (1772 nt)         | -15.7246 | 2.248978 | 0.073801 |
| PITG_09779 | Pi conserved hypothetical protein (557 nt)                  | -12.9637 | 1.861759 | 0.073864 |
| PITG_04994 | Pi conserved hypothetical protein (2863 nt)                 | -12.845  | -1.86189 | 0.073914 |
| PITG_07321 | Pi conserved hypothetical protein (2618 nt)                 | -16.0226 | 2.098533 | 0.073948 |
| PITG_15780 | Pi radial spoke protein 11 (405 nt)                         | -13.653  | 1.947772 | 0.073999 |
| PITG_03103 | Pi conserved hypothetical protein (1894 nt)                 | -15.4478 | -2.20793 | 0.074036 |
| PITG_15920 | Pi conserved hypothetical protein (942 nt)                  | -14.6717 | -1.94363 | 0.074076 |
| PITG_11472 | Pi Intraflagellar Transport Protein 72/74 (1977 nt)         | -15.8294 | 2.136395 | 0.074082 |
| PITG_21983 | Pi hypothetical protein (2294 nt)                           | -14.8177 | -2.35441 | 0.07419  |
| PITG_05111 | Pi conserved hypothetical protein (675 nt)                  | -16.5893 | 2.834179 | 0.074203 |
| PITG_15855 | Pi conserved hypothetical protein (4697 nt)                 | -16.3624 | 2.279882 | 0.074203 |
| PITG_20319 | Pi glycoside hydrolase, putative (984 nt)                   | -15.6518 | -2.23697 | 0.074203 |

|            |                                                              |          |          |          |
|------------|--------------------------------------------------------------|----------|----------|----------|
| PITG_18301 | Pi conserved hypothetical protein (690 nt)                   | -15.644  | -2.39786 | 0.074255 |
| PITG_04678 | Pi phosphatidylinositol-3,4,5-trisphosphate 3-phosphatase, p | -14.2618 | -2.35754 | 0.074297 |
| PITG_11134 | Pi conserved hypothetical protein (804 nt)                   | -16.1595 | -2.52649 | 0.074532 |
| PITG_06324 | Pi hypothetical protein (1633 nt)                            | -14.7231 | -2.09934 | 0.074553 |
| PITG_12504 | Pi Mitochondrial Carrier (MC) Family (987 nt)                | -14.5146 | -1.98303 | 0.074681 |
| PITG_15228 | Pi transmembrane protein, putative (2191 nt)                 | -15.8812 | -2.38948 | 0.074729 |
| PITG_20629 | Pi DNA-directed RNA polymerase III subunit RPC8, putative (  | -13.793  | 1.999972 | 0.074738 |
| PITG_13152 | Pi conserved hypothetical protein (1680 nt)                  | -13.802  | -2.02631 | 0.074738 |
| PITG_03406 | Pi conserved hypothetical protein (606 nt)                   | -14.4553 | 2.160879 | 0.074827 |
| PITG_22764 | Pi cysteine synthase, putative (1625 nt)                     | -12.7591 | 1.800149 | 0.074909 |
| PITG_16364 | Pi conserved hypothetical protein (2133 nt)                  | -16.2035 | -2.62163 | 0.074967 |
| PITG_01275 | Pi lipase, putative (1281 nt)                                | -33.3019 | -33.4282 | 0.075019 |
| PITG_06417 | Pi conserved hypothetical protein (1845 nt)                  | -33.3019 | -33.4282 | 0.075019 |
| PITG_08168 | Pi fibronectin type III domain-containing protein (6283 nt)  | -33.3019 | -33.4282 | 0.075019 |
| PITG_08357 | Pi conserved hypothetical protein (1458 nt)                  | -33.3019 | -33.4282 | 0.075019 |
| PITG_11411 | Pi hypothetical protein (147 nt)                             | -33.3019 | -33.4282 | 0.075019 |
| PITG_11827 | Pi conserved hypothetical protein (3059 nt)                  | -33.3019 | -33.4282 | 0.075019 |
| PITG_13430 | Pi conserved hypothetical protein (960 nt)                   | -33.3019 | -33.4282 | 0.075019 |
| PITG_13909 | Pi conserved hypothetical protein (1343 nt)                  | -33.3019 | -33.4282 | 0.075019 |
| PITG_14656 | Pi conserved hypothetical protein (2994 nt)                  | -33.3019 | -33.4282 | 0.075019 |
| PITG_15207 | Pi conserved hypothetical protein (3197 nt)                  | -33.3019 | -33.4282 | 0.075019 |
| PITG_15379 | Pi conserved hypothetical protein (1531 nt)                  | -33.3019 | -33.4282 | 0.075019 |
| PITG_15389 | Pi hypothetical protein (238 nt)                             | -33.3019 | -33.4282 | 0.075019 |
| PITG_19618 | Pi hypothetical protein (654 nt)                             | -33.3019 | -33.4282 | 0.075019 |
| PITG_21003 | Pi conserved hypothetical protein (804 nt)                   | -33.3019 | -33.4282 | 0.075019 |
| PITG_21199 | Pi hypothetical protein (721 nt)                             | -33.3019 | -33.4282 | 0.075019 |
| PITG_21634 | Pi hypothetical protein (804 nt)                             | -33.3019 | -33.4282 | 0.075019 |
| PITG_22510 | Pi conserved hypothetical protein (632 nt)                   | -33.3019 | -33.4282 | 0.075019 |
| PITG_17247 | Pi sporangia induced conserved hypothetical protein (1586 r  | -16.8886 | 2.86348  | 0.075095 |
| PITG_15807 | Pi conserved hypothetical protein (2721 nt)                  | -15.6248 | -2.29144 | 0.07513  |
| PITG_07435 | Pi secreted RxLR effector peptide, putative (501 nt)         | -16.6532 | -2.85172 | 0.075161 |
| PITG_16887 | Pi conserved hypothetical protein (2079 nt)                  | -14.6687 | -1.99138 | 0.075328 |
| PITG_02356 | Pi calcium-transporting ATPase 1, endoplasmic reticulum-tyr  | -15.4952 | 2.173039 | 0.075358 |
| PITG_06901 | Pi conserved hypothetical protein (825 nt)                   | -17.4864 | -3.1145  | 0.07572  |
| PITG_22413 | Pi hypothetical protein (1130 nt)                            | -16.172  | -2.68739 | 0.075839 |
| PITG_17590 | Pi conserved hypothetical protein (1071 nt)                  | -14.1397 | 2.323754 | 0.075868 |
| PITG_00896 | Pi phosphatidylinositol-4-phosphate-5-kinase (Pi-PIPK-D9/GF  | -15.7317 | 2.238424 | 0.07594  |
| PITG_10723 | Pi conserved hypothetical protein (702 nt)                   | -14.4937 | -1.94792 | 0.075965 |
| PITG_11538 | Pi conserved hypothetical protein (1390 nt)                  | -16.1115 | 3.291705 | 0.076072 |
| PITG_07210 | Pi protein kinase (2083 nt)                                  | -16.2466 | -2.53414 | 0.07621  |
| PITG_09603 | Pi conserved hypothetical protein (519 nt)                   | -16.2659 | -2.49564 | 0.07621  |
| PITG_06783 | Pi quinolinate synthetase A protein, putative (1730 nt)      | -14.2588 | 1.935882 | 0.076224 |
| PITG_18759 | Pi conserved hypothetical protein (1105 nt)                  | -17.5612 | -3.10405 | 0.076502 |
| PITG_14636 | Pi COP9 signalosome complex subunit, putative (978 nt)       | -13.6321 | -1.93516 | 0.076548 |
| PITG_00483 | Pi pumilio-like mating protein M90 (3326 nt)                 | -14.7055 | 1.917756 | 0.076559 |
| PITG_08427 | Pi conserved hypothetical protein (1161 nt)                  | -16.1722 | 2.656577 | 0.076596 |
| PITG_18458 | Pi conserved hypothetical protein (2357 nt)                  | -14.7063 | -2.18024 | 0.076733 |

|            |                                                              |          |          |          |
|------------|--------------------------------------------------------------|----------|----------|----------|
| PITG_05485 | Pi peroxisomal acyl-coenzyme A oxidase, putative (2265 nt)   | -16.8348 | -2.59501 | 0.07689  |
| PITG_09747 | Pi conserved hypothetical protein (1880 nt)                  | -16.8348 | -2.59501 | 0.07689  |
| PITG_17489 | Pi conserved hypothetical protein (750 nt)                   | -14.5572 | -1.93717 | 0.076894 |
| PITG_13335 | Pi conserved hypothetical protein (1147 nt)                  | -11.8694 | 1.939798 | 0.076919 |
| PITG_00211 | Pi adenine phosphoribosyltransferase, putative (945 nt)      | -15.471  | -2.09847 | 0.076968 |
| PITG_08928 | Pi conserved hypothetical protein (1172 nt)                  | -16.1462 | 2.464635 | 0.077028 |
| PITG_04124 | Pi glycoside hydrolase, putative (860 nt)                    | -15.7986 | -2.72886 | 0.077038 |
| PITG_00308 | Pi conserved hypothetical protein (2420 nt)                  | -15.6988 | -2.21008 | 0.077054 |
| PITG_05559 | Pi conserved hypothetical protein (2055 nt)                  | -16.2689 | -2.48982 | 0.077242 |
| PITG_04104 | Pi conserved hypothetical protein (3886 nt)                  | -15.9166 | -2.3956  | 0.077303 |
| PITG_10693 | Pi conserved hypothetical protein (1256 nt)                  | -11.1778 | -1.93114 | 0.077325 |
| PITG_09649 | Pi conserved hypothetical protein (472 nt)                   | -12.1368 | -1.8013  | 0.077409 |
| PITG_12238 | Pi hypothetical protein (1348 nt)                            | -13.1795 | 1.814788 | 0.077444 |
| PITG_04725 | Pi conserved hypothetical protein (10266 nt)                 | -15.0946 | -2.31251 | 0.07756  |
| PITG_16958 | Pi transglutaminase elicitor-like protein (1734 nt)          | -15.2779 | -2.06223 | 0.077736 |
| PITG_05477 | Pi hypothetical protein (2208 nt)                            | -17.1079 | 3.163987 | 0.07777  |
| PITG_14109 | Pi conserved hypothetical protein (1654 nt)                  | -15.0449 | -2.05689 | 0.077869 |
| PITG_05853 | Pi pterin-4-alpha-carbinolamine dehydratase (369 nt)         | -16.4912 | -3.17288 | 0.077911 |
| PITG_07861 | Pi carbohydrate-binding protein, putative (1564 nt)          | -15.8779 | -2.31626 | 0.077967 |
| PITG_05185 | Pi conserved hypothetical protein (2003 nt)                  | -12.102  | -1.75689 | 0.078042 |
| PITG_07249 | Pi conserved hypothetical protein (1252 nt)                  | -16.0927 | 2.357313 | 0.078069 |
| PITG_21017 | Pi hydrocephalus-inducing protein, putative (13327 nt)       | -16.4084 | 2.43886  | 0.078077 |
| PITG_11029 | Pi conserved hypothetical protein (1609 nt)                  | -14.0498 | -1.88163 | 0.078147 |
| PITG_17043 | Pi conserved hypothetical protein (769 nt)                   | -15.439  | 2.316024 | 0.078176 |
| PITG_19366 | Pi polysaccharide lyase, putative (1685 nt)                  | -14.4373 | 2.134861 | 0.078269 |
| PITG_12842 | Pi conserved hypothetical protein (681 nt)                   | -16.045  | 2.048686 | 0.078281 |
| PITG_04401 | Pi conserved hypothetical protein (615 nt)                   | -14.739  | -2.0676  | 0.078586 |
| PITG_04270 | Pi sulfatase-like protein (2505 nt)                          | -14.9047 | -2.2796  | 0.078808 |
| PITG_00324 | Pi neutral ceramidase, putative (2144 nt)                    | -16.2225 | -2.58443 | 0.079119 |
| PITG_01442 | Pi conserved hypothetical protein (1890 nt)                  | -15.9588 | 2.08826  | 0.079119 |
| PITG_05467 | Pi conserved hypothetical protein (987 nt)                   | -15.4718 | -2.15962 | 0.079289 |
| PITG_15391 | Pi conserved hypothetical protein (2923 nt)                  | -15.1299 | 1.996969 | 0.079313 |
| PITG_22625 | Pi conserved hypothetical protein (982 nt)                   | -15.895  | -2.28468 | 0.079489 |
| PITG_20157 | Pi Axonemal Inner Arm I1 Intermediate Chain Dynein (3423 r   | -16.909  | 2.805577 | 0.079561 |
| PITG_03797 | Pi conserved hypothetical protein (420 nt)                   | -16.7375 | 2.400933 | 0.079632 |
| PITG_03851 | Pi conserved hypothetical protein (1389 nt)                  | -17.0799 | 3.204943 | 0.079632 |
| PITG_00252 | Pi conserved hypothetical protein (1134 nt)                  | -14.9131 | -2.00329 | 0.079758 |
| PITG_03558 | Pi conserved hypothetical protein (1056 nt)                  | -15.0156 | 2.129509 | 0.079767 |
| PITG_17154 | Pi conserved hypothetical protein (1293 nt)                  | -15.4422 | 2.253365 | 0.079779 |
| PITG_08181 | Pi conserved hypothetical protein (2074 nt)                  | -13.8674 | 1.979004 | 0.079878 |
| PITG_00668 | Pi conserved hypothetical protein (1176 nt)                  | -14.4273 | 1.888127 | 0.079939 |
| PITG_12833 | Pi conserved hypothetical protein (477 nt)                   | -12.0339 | 1.788271 | 0.079954 |
| PITG_11981 | Pi conserved hypothetical protein (2355 nt)                  | -16.2193 | -2.50028 | 0.080175 |
| PITG_12176 | Pi conserved hypothetical protein (2728 nt)                  | -15.7371 | 2.235005 | 0.080316 |
| PITG_03791 | Pi splicing factor, arginine/serine-rich, putative (1259 nt) | -15.4742 | 2.10394  | 0.080352 |
| PITG_05410 | Pi transmembrane protein, putative (1622 nt)                 | -15.0625 | -2.12414 | 0.080355 |
| PITG_11181 | Pi conserved hypothetical protein (1836 nt)                  | -17.1173 | 3.142498 | 0.080465 |

|            |                                                               |          |          |          |
|------------|---------------------------------------------------------------|----------|----------|----------|
| PITG_01468 | Pi conserved hypothetical protein (663 nt)                    | -16.7345 | -2.81175 | 0.080528 |
| PITG_18833 | Pi Crinkler (CRN) family protein (2362 nt)                    | -11.1762 | -1.80466 | 0.08059  |
| PITG_22687 | Pi HECT E3 ubiquitin ligase, putative (2500 nt)               | -15.3116 | -1.99295 | 0.08066  |
| PITG_14497 | Pi isoprenylcysteine carboxyl methyltransferase, putative (93 | -14.1    | -2.17676 | 0.081253 |
| PITG_10203 | Pi conserved hypothetical protein (1104 nt)                   | -11.313  | 1.702159 | 0.081313 |
| PITG_18206 | Pi conserved hypothetical protein (5849 nt)                   | -15.605  | 2.013824 | 0.081609 |
| PITG_11856 | Pi C2 domain-containing protein, putative (1173 nt)           | -14.2438 | -2.08441 | 0.081665 |
| PITG_11189 | Pi phosphoenolpyruvate carboxykinase (1804 nt)                | -12.5597 | -1.73601 | 0.081701 |
| PITG_01217 | Pi transmembrane protein, putative (780 nt)                   | -13.9624 | 1.862496 | 0.081815 |
| PITG_02284 | Pi xanthine dehydrogenase, putative (4353 nt)                 | -16.7644 | 2.325217 | 0.082292 |
| PITG_04873 | Pi conserved hypothetical protein (558 nt)                    | -17.3171 | -3.46731 | 0.082292 |
| PITG_17587 | Pi conserved hypothetical protein (841 nt)                    | -16.8703 | -2.5189  | 0.082292 |
| PITG_02464 | Pi conserved hypothetical protein (5435 nt)                   | -16.284  | 2.228207 | 0.082306 |
| PITG_07507 | Pi Crinkler (CRN) family protein (564 nt)                     | -15.9064 | -2.50028 | 0.082394 |
| PITG_03501 | Pi alcohol dehydrogenase, putative (3353 nt)                  | -14.5979 | -1.96781 | 0.082512 |
| PITG_09271 | Pi ornithine aminotransferase, mitochondrial precursor (157   | -12.5733 | -1.79055 | 0.082591 |
| PITG_13915 | Pi conserved hypothetical protein (3859 nt)                   | -15.4995 | -2.10282 | 0.082728 |
| PITG_04847 | Pi conserved hypothetical protein (1560 nt)                   | -15.836  | 2.123178 | 0.082797 |
| PITG_12962 | Pi histone deacetylase, putative (1113 nt)                    | -15.836  | 2.123178 | 0.082797 |
| PITG_18008 | Pi conserved hypothetical protein (1255 nt)                   | -15.9721 | -2.28365 | 0.082797 |
| PITG_15596 | Pi protein kinase (1075 nt)                                   | -15.6964 | -2.08087 | 0.082798 |
| PITG_09143 | Pi hypothetical protein (607 nt)                              | -15.4613 | -2.18189 | 0.082832 |
| PITG_20273 | Pi conserved hypothetical protein (1789 nt)                   | -15.4236 | -2.1958  | 0.082983 |
| PITG_07938 | Pi conserved hypothetical protein (1065 nt)                   | -14.7345 | 1.858435 | 0.08307  |
| PITG_15611 | Pi protein kinase (900 nt)                                    | -16.919  | -2.42192 | 0.083215 |
| PITG_07708 | Pi hypothetical protein (659 nt)                              | -16.1398 | -2.55353 | 0.083309 |
| PITG_14724 | Pi hypothetical protein (279 nt)                              | -14.72   | -1.97947 | 0.083671 |
| PITG_09555 | Pi ubiquitin-ribosomal fusion protein, putative (461 nt)      | -10.1563 | 1.829451 | 0.083788 |
| PITG_08723 | Pi conserved hypothetical protein (681 nt)                    | -15.3127 | -2.04986 | 0.083877 |
| PITG_03082 | Pi Outer Dynein Arm Light Chain 1 (1826 nt)                   | -15.891  | 2.152705 | 0.083924 |
| PITG_06078 | Pi hypothetical protein (1057 nt)                             | -15.6513 | 2.195297 | 0.083934 |
| PITG_02157 | Pi conserved hypothetical protein (465 nt)                    | -16.8982 | -2.46414 | 0.084143 |
| PITG_06668 | Pi ATP-binding Cassette (ABC) Superfamily (8369 nt)           | -16.8982 | -2.46414 | 0.084143 |
| PITG_09487 | Pi conserved hypothetical protein (1230 nt)                   | -16.6796 | -2.79908 | 0.084165 |
| PITG_03675 | Pi DEAD/DEAH box RNA helicase, putative (1986 nt)             | -15.5122 | -2.01516 | 0.084258 |
| PITG_00757 | Pi gamma-glutamyltranspeptidase, putative (1670 nt)           | -17.2351 | -3.62238 | 0.084333 |
| PITG_07445 | Pi mucin-like protein (4439 nt)                               | -17.2351 | -3.62238 | 0.084333 |
| PITG_10846 | Pi lysosomal alpha-glucosidase, putative (3666 nt)            | -16.7105 | 2.464043 | 0.084333 |
| PITG_12148 | Pi conserved hypothetical protein (1929 nt)                   | -14.3824 | -2.07298 | 0.084382 |
| PITG_15090 | Pi 50S ribosomal protein L11 (435 nt)                         | -13.5556 | 1.783902 | 0.084522 |
| PITG_06595 | Pi ATP synthase subunit beta, putative (1595 nt)              | -10.4318 | 1.800954 | 0.084562 |
| PITG_15602 | Pi conserved hypothetical protein (1893 nt)                   | -12.8695 | -1.81989 | 0.08463  |
| PITG_23289 | Pi crinkler (CRN) domain, pseudogene (555 nt)                 | -11.7325 | -1.69334 | 0.084791 |
| PITG_13342 | Pi conserved hypothetical protein (930 nt)                    | -15.934  | -2.20812 | 0.085058 |
| PITG_03095 | Pi carbohydrate-binding protein, putative (3021 nt)           | -13.701  | -1.96556 | 0.085067 |
| PITG_09310 | Pi 6-phosphofructo-2-kinase/fructose-2,6-biphosphatase, pu    | -14.9386 | -1.95225 | 0.085168 |
| PITG_03077 | Pi tubulin polyglutamylase, putative (2157 nt)                | -16.4092 | 2.185589 | 0.08518  |



|            |                                                              |          |          |          |
|------------|--------------------------------------------------------------|----------|----------|----------|
| PITG_05347 | Pi 1-aminocyclopropane-1-carboxylate deaminase (1029 nt)     | -13.6545 | -1.84013 | 0.085228 |
| PITG_08538 | Pi conserved hypothetical protein (651 nt)                   | -13.3749 | -1.93058 | 0.085356 |
| PITG_00913 | Pi 3-hydroxyisobutyrate dehydrogenase, putative (1079 nt)    | -17.62   | -2.98153 | 0.085541 |
| PITG_03269 | Pi conserved hypothetical protein (852 nt)                   | -17.62   | -2.98153 | 0.085541 |
| PITG_05198 | Pi conserved hypothetical protein (1917 nt)                  | -17.62   | -2.98153 | 0.085541 |
| PITG_08222 | Pi conserved hypothetical protein (1346 nt)                  | -17.62   | -2.98153 | 0.085541 |
| PITG_09638 | Pi conserved hypothetical protein (812 nt)                   | -17.6683 | -2.88495 | 0.085541 |
| PITG_22672 | Pi conserved hypothetical protein (3078 nt)                  | -17.6683 | -2.88495 | 0.085541 |
| PITG_06815 | Pi NADH dehydrogenase flavoprotein 1, mitochondrial precu    | -11.4312 | 1.708096 | 0.085954 |
| PITG_05398 | Pi conserved hypothetical protein (4052 nt)                  | -16.9386 | 2.758312 | 0.086019 |
| PITG_03946 | Pi conserved hypothetical protein (1718 nt)                  | -15.0924 | -2.06418 | 0.086114 |
| PITG_07279 | Pi transmembrane protein, putative (4092 nt)                 | -15.0716 | -2.05445 | 0.086114 |
| PITG_08199 | Pi HSF-type DNA-binding, putative (928 nt)                   | -12.1626 | 1.811805 | 0.086131 |
| PITG_19710 | Pi conserved hypothetical protein (775 nt)                   | -15.534  | 2.464195 | 0.086143 |
| PITG_13595 | Pi conserved hypothetical protein (714 nt)                   | -15.93   | 2.23037  | 0.0862   |
| PITG_00150 | Pi conserved hypothetical protein (1395 nt)                  | -15.9115 | -2.24907 | 0.086232 |
| PITG_04611 | Pi protein kinase (1116 nt)                                  | -13.7751 | -1.84287 | 0.086244 |
| PITG_06385 | Pi conserved hypothetical protein (899 nt)                   | -11.4269 | 1.706738 | 0.086252 |
| PITG_02244 | Pi conserved hypothetical protein (1359 nt)                  | -15.6976 | -2.07767 | 0.086328 |
| PITG_03620 | Pi histidinol-phosphate aminotransferase, putative (1859 nt) | -15.7148 | -2.11073 | 0.086328 |
| PITG_10566 | Pi hypothetical protein (296 nt)                             | -15.6953 | -2.08238 | 0.086328 |
| PITG_06217 | Pi hypothetical protein (365 nt)                             | -14.491  | 2.210646 | 0.086355 |
| PITG_17632 | Pi conserved hypothetical protein (1513 nt)                  | -15.4023 | -2.17478 | 0.086403 |
| PITG_07663 | Pi major Facilitator Superfamily (MFS) (1692 nt)             | -14.0873 | -2.43325 | 0.086413 |
| PITG_17983 | Pi adenylosuccinate lyase (1779 nt)                          | -14.4533 | 1.849839 | 0.086563 |
| PITG_13761 | Pi protoplast secreted protein 2 precursor (703 nt)          | -12.24   | 1.974057 | 0.086582 |
| PITG_04243 | Pi conserved hypothetical protein (932 nt)                   | -14.8121 | -2.01059 | 0.086712 |
| PITG_15197 | Pi hypothetical protein (1477 nt)                            | -12.0962 | -2.16026 | 0.0869   |
| PITG_03939 | Pi conserved hypothetical protein (1931 nt)                  | -15.2487 | -2.0633  | 0.086901 |
| PITG_10097 | Pi conserved hypothetical protein (1596 nt)                  | -16.3072 | -2.41294 | 0.086948 |
| PITG_17882 | Pi regulator of chromosome condensation (RCC1)-like protei   | -16.2888 | -2.4498  | 0.086948 |
| PITG_12517 | Pi CAAX prenyl protease 1 (1458 nt)                          | -14.7405 | -2.01992 | 0.086953 |
| PITG_20767 | Pi protein kinase, putative (1986 nt)                        | -14.6848 | -2.00399 | 0.086998 |
| PITG_02759 | Pi hypothetical protein (278 nt)                             | -16.4341 | -2.25405 | 0.087196 |
| PITG_01942 | Pi conserved hypothetical protein (2181 nt)                  | -16.5816 | 2.8254   | 0.087196 |
| PITG_08295 | Pi dynein heavy chain (12098 nt)                             | -15.661  | 2.171075 | 0.08752  |
| PITG_17709 | Pi conserved hypothetical protein (2187 nt)                  | -15.3376 | -1.94096 | 0.087662 |
| PITG_00047 | Pi conserved hypothetical protein (2806 nt)                  | -16.9435 | 2.751983 | 0.08792  |
| PITG_01717 | Pi dynein heavy chain (14029 nt)                             | -16.0931 | 2.174921 | 0.087957 |
| PITG_02617 | Pi conserved hypothetical protein (1476 nt)                  | -16.0314 | 2.085114 | 0.087957 |
| PITG_19473 | Pi conserved hypothetical protein (5766 nt)                  | -16.1301 | 2.282512 | 0.087957 |
| PITG_13621 | Pi conserved hypothetical protein (511 nt)                   | -15.0001 | 1.945991 | 0.088019 |
| PITG_08365 | Pi Voltage-gated Ion Channel (VIC) Superfamily (2646 nt)     | -16.1438 | 2.246326 | 0.088047 |
| PITG_13265 | Pi adenosine kinase (1038 nt)                                | -13.9744 | 1.997831 | 0.088137 |
| PITG_06518 | Pi phospho-2-dehydro-3-deoxyheptonate aldolase (1512 nt)     | -15.4676 | 2.282004 | 0.088169 |
| PITG_04184 | Pi conserved hypothetical protein (1851 nt)                  | -14.0334 | -2.17363 | 0.08817  |
| PITG_01436 | Pi conserved hypothetical protein (716 nt)                   | -15.6933 | 2.052172 | 0.088285 |

|            |                                                                            |          |          |          |
|------------|----------------------------------------------------------------------------|----------|----------|----------|
| PITG_11125 | Pi conserved hypothetical protein (1595 nt)                                | -14.607  | -1.877   | 0.088353 |
| PITG_05565 | Pi conserved hypothetical protein (1806 nt)                                | -14.1806 | -1.90761 | 0.088442 |
| PITG_10983 | Pi conserved hypothetical protein (558 nt)                                 | -14.116  | 1.791262 | 0.088546 |
| PITG_19989 | Pi conserved hypothetical protein (1060 nt)                                | -13.9464 | 1.895177 | 0.088557 |
| PITG_02330 | Pi conserved hypothetical protein (1368 nt)                                | -17.6262 | -2.8487  | 0.088773 |
| PITG_03135 | Pi lysosomal beta glucosidase, putative (2368 nt)                          | -17.6102 | -3.00281 | 0.088773 |
| PITG_05433 | Pi STIP-like protein (2466 nt)                                             | -17.6102 | -3.00281 | 0.088773 |
| PITG_18210 | Pi conserved hypothetical protein (1489 nt)                                | -17.6102 | -3.00281 | 0.088773 |
| PITG_18826 | Pi Crinkler (CRN) family protein (1559 nt)                                 | -17.6102 | -3.00281 | 0.088773 |
| PITG_08188 | Pi conserved hypothetical protein (1701 nt)                                | -13.7866 | 1.867489 | 0.088876 |
| PITG_08216 | Pi WD domain-containing protein, putative (4192 nt)                        | -15.1736 | 1.985319 | 0.088884 |
| PITG_19362 | Pi myb-like DNA-binding protein, putative (1042 nt)                        | -12.8065 | -1.83756 | 0.088885 |
| PITG_01974 | Pi conserved hypothetical protein (1305 nt)                                | -17.5658 | -2.95722 | 0.088892 |
| PITG_09388 | Pi GPN-loop GTPase 2, putative (1156 nt)                                   | -14.6509 | -2.03061 | 0.088953 |
| PITG_22016 | Pi conserved hypothetical protein (624 nt)                                 | -11.0913 | -1.9812  | 0.088954 |
| PITG_17137 | Pi conserved hypothetical protein (4551 nt)                                | -15.498  | -2.04413 | 0.089163 |
| PITG_00203 | Pi mitochondrial-processing peptidase subunit beta (1470 nt)               | -11.941  | 1.726896 | 0.089264 |
| PITG_04710 | Pi conserved hypothetical protein (998 nt)                                 | -17.5611 | -3.11098 | 0.089764 |
| PITG_08159 | Pi conserved hypothetical protein (2251 nt)                                | -17.5611 | -3.11098 | 0.089764 |
| PITG_09674 | Pi cytidyltransferase (676 nt)                                             | -17.5611 | -3.11098 | 0.089764 |
| PITG_10272 | Pi conserved hypothetical protein (557 nt)                                 | -17.5611 | -3.11098 | 0.089764 |
| PITG_16440 | Pi protein kinase (1479 nt)                                                | -17.5611 | -3.11098 | 0.089764 |
| PITG_17976 | Pi transmembrane protein, putative (3328 nt)                               | -15.5144 | 2.757096 | 0.089866 |
| PITG_09401 | Pi pre-mRNA-splicing factor ini1 (333 nt)                                  | -13.4561 | -1.77278 | 0.089883 |
| PITG_16729 | Pi acyltransferase family (1434 nt)                                        | -15.6408 | 2.034265 | 0.089926 |
| PITG_09378 | Pi conserved hypothetical protein (1118 nt)                                | -15.0702 | -2.00592 | 0.090041 |
| PITG_10834 | Pi calcium-activated potassium channel subunit alpha-1, putative (1470 nt) | -16.0125 | 1.982777 | 0.090186 |
| PITG_02036 | Pi Equilibrative Nucleoside Transporter (ENT) Family (2000 nt)             | -16.2628 | -2.41652 | 0.090267 |
| PITG_03929 | Pi conserved hypothetical protein (1643 nt)                                | -16.3041 | -2.41967 | 0.090267 |
| PITG_02854 | Pi aspartate-semialdehyde dehydrogenase, putative (1273 nt)                | -14.7031 | 1.832282 | 0.090315 |
| PITG_01020 | Pi conserved hypothetical protein (693 nt)                                 | -16.6568 | -2.74155 | 0.090357 |
| PITG_17889 | Pi Crinkler (CRN) family protein (2472 nt)                                 | -16.7004 | -2.75716 | 0.090357 |
| PITG_04682 | Pi protein kinase, putative (2628 nt)                                      | -14.3356 | -1.85619 | 0.090576 |
| PITG_11080 | Pi conserved hypothetical protein (1850 nt)                                | -15.7453 | -2.04944 | 0.090587 |
| PITG_13284 | Pi conserved hypothetical protein (1246 nt)                                | -15.7453 | -2.04944 | 0.090587 |
| PITG_13337 | Pi conserved hypothetical protein (1459 nt)                                | -17.5226 | -3.18831 | 0.090643 |
| PITG_18323 | Pi conserved hypothetical protein (1158 nt)                                | -17.5226 | -3.18831 | 0.090643 |
| PITG_07335 | Pi conserved hypothetical protein (1194 nt)                                | -17.5251 | -3.03764 | 0.090643 |
| PITG_21511 | Pi myosin-like protein (2489 nt)                                           | -17.5251 | -3.03764 | 0.090643 |
| PITG_18753 | Pi conserved hypothetical protein (702 nt)                                 | -14.6607 | 2.123568 | 0.090788 |
| PITG_11451 | Pi conserved hypothetical protein (2309 nt)                                | -15.2387 | -2.0833  | 0.090794 |
| PITG_02977 | Pi conserved hypothetical protein (1039 nt)                                | -14.347  | -1.93935 | 0.090898 |
| PITG_17546 | Pi glycoside hydrolase, putative (2172 nt)                                 | -13.8705 | 1.762514 | 0.090982 |
| PITG_02751 | Pi conserved hypothetical protein (2612 nt)                                | -16.4181 | 2.755315 | 0.091229 |
| PITG_15079 | Pi conserved hypothetical protein (818 nt)                                 | -16.2827 | -2.37634 | 0.091387 |
| PITG_18489 | Pi conserved hypothetical protein (630 nt)                                 | -16.333  | 2.103569 | 0.091412 |
| PITG_20026 | Pi conserved hypothetical protein (387 nt)                                 | -16.4639 | 2.329741 | 0.091412 |

|            |                                                             |          |          |          |
|------------|-------------------------------------------------------------|----------|----------|----------|
| PITG_18251 | Pi peptide chain release factor 1 (1172 nt)                 | -15.9899 | -2.24768 | 0.091592 |
| PITG_23149 | Pi conserved hypothetical protein (1170 nt)                 | -15.5775 | 2.087003 | 0.09161  |
| PITG_18891 | Pi uracil-DNA glycosylase (939 nt)                          | -15.7448 | -2.05053 | 0.091808 |
| PITG_22850 | Pi Crinkler (CRN) family protein, pseudogene (2401 nt)      | -11.1685 | -1.68106 | 0.091864 |
| PITG_10601 | Pi molybdenum cofactor biosynthesis protein 1 A (1542 nt)   | -14.9668 | -1.94319 | 0.092358 |
| PITG_20251 | Pi Sulfate Permease (SulP) Family (2784 nt)                 | -14.9545 | -1.92038 | 0.092358 |
| PITG_16557 | Pi conserved hypothetical protein (1549 nt)                 | -16.2388 | -2.36871 | 0.092444 |
| PITG_07509 | Pi Crinkler (CRN) family protein, pseudogene (829 nt)       | -12.5967 | -1.7825  | 0.092519 |
| PITG_14243 | Pi glycoside hydrolase, putative (1587 nt)                  | -14.9461 | 2.055898 | 0.09254  |
| PITG_08547 | Pi conserved hypothetical protein (363 nt)                  | -15.5486 | -2.30367 | 0.092551 |
| PITG_00510 | Pi hypothetical protein (2755 nt)                           | -15.8771 | 2.04099  | 0.092774 |
| PITG_12300 | Pi phosphoribosylglycinamide synthetase, putative (3432 nt) | -14.5174 | 1.922404 | 0.092847 |
| PITG_03802 | Pi eukaryotic translation initiation factor 6 (934 nt)      | -13.5015 | -1.81529 | 0.092885 |
| PITG_19042 | Pi conserved hypothetical protein (1798 nt)                 | -13.534  | -1.73328 | 0.092897 |
| PITG_21590 | Pi conserved hypothetical protein (2627 nt)                 | -17.1566 | 3.067429 | 0.092943 |
| PITG_14273 | Pi conserved hypothetical protein (546 nt)                  | -12.5794 | -2.36315 | 0.092986 |
| PITG_05627 | Pi conserved hypothetical protein (2431 nt)                 | -14.3802 | -1.87166 | 0.093111 |
| PITG_12172 | Pi hypothetical protein (402 nt)                            | -13.931  | -1.76684 | 0.093119 |
| PITG_19889 | Pi Crinkler (CRN) family protein, pseudogene (2522 nt)      | -12.1552 | -1.77207 | 0.093139 |
| PITG_17031 | Pi conserved hypothetical protein (828 nt)                  | -16.0521 | 2.605379 | 0.09325  |
| PITG_17577 | Pi protein kinase, putative (2172 nt)                       | -14.1607 | 1.856483 | 0.093395 |
| PITG_19087 | Pi hypothetical protein (419 nt)                            | -16.6201 | 2.759526 | 0.093542 |
| PITG_11043 | Pi conserved hypothetical protein (570 nt)                  | -16.4291 | 2.151225 | 0.093542 |
| PITG_13887 | Pi AMP-binding enzyme, putative (1596 nt)                   | -16.1391 | 2.268746 | 0.093584 |
| PITG_02797 | Pi ribosomal RNA large subunit methyltransferase N, putativ | -16.3031 | -2.42223 | 0.093647 |
| PITG_04881 | Pi conserved hypothetical protein (1570 nt)                 | -13.5978 | -1.82292 | 0.093775 |
| PITG_16225 | Pi HECT E3 ubiquitin ligase, putative (2427 nt)             | -17.6475 | -2.93054 | 0.093777 |
| PITG_17138 | Pi conserved hypothetical protein (840 nt)                  | -17.6475 | -2.93054 | 0.093777 |
| PITG_03659 | Pi conserved hypothetical protein (836 nt)                  | -15.5272 | -1.98534 | 0.093803 |
| PITG_06013 | Pi conserved hypothetical protein (744 nt)                  | -14.6993 | -1.93172 | 0.093806 |
| PITG_01607 | Pi actin-like protein (1324 nt)                             | -14.5258 | -1.92164 | 0.093831 |
| PITG_00660 | Pi conserved hypothetical protein (5732 nt)                 | -17.1668 | 3.046101 | 0.093907 |
| PITG_07099 | Pi conserved hypothetical protein (1224 nt)                 | -15.0434 | 2.032593 | 0.094041 |
| PITG_17423 | Pi conserved hypothetical protein (1189 nt)                 | -14.9181 | -2.04263 | 0.094149 |
| PITG_04874 | Pi carbohydrate esterase, putative (1146 nt)                | -14.56   | -1.97414 | 0.094233 |
| PITG_14465 | Pi conserved hypothetical protein (1814 nt)                 | -14.0758 | -1.76401 | 0.094259 |
| PITG_13253 | Pi hypothetical protein (1914 nt)                           | -15.9658 | 2.380771 | 0.094398 |
| PITG_07161 | Pi serine protease family S10, putative (1987 nt)           | -15.9515 | 2.409357 | 0.094398 |
| PITG_06203 | Pi conserved hypothetical protein (764 nt)                  | -10.5956 | -1.67302 | 0.094466 |
| PITG_00006 | Pi hypothetical protein (830 nt)                            | -15.1748 | -1.95482 | 0.094508 |
| PITG_00361 | Pi conserved hypothetical protein (1984 nt)                 | -17.603  | -3.02009 | 0.094629 |
| PITG_01339 | Pi conserved hypothetical protein (1558 nt)                 | -17.6158 | -2.86582 | 0.094629 |
| PITG_01430 | Pi glycoside hydrolase, putative (1770 nt)                  | -17.603  | -3.02009 | 0.094629 |
| PITG_04057 | Pi conserved hypothetical protein (1083 nt)                 | -17.6158 | -2.86582 | 0.094629 |
| PITG_13687 | Pi pre-mRNA-splicing factor ATP-dependent RNA helicase, pu  | -17.603  | -3.02009 | 0.094629 |
| PITG_15483 | Pi putative GPI-anchored serine-threonine rich hypothetical | -11.9094 | -1.65916 | 0.094821 |
| PITG_11736 | Pi conserved hypothetical protein (526 nt)                  | -13.2448 | -1.84152 | 0.094893 |

|            |                                                                 |          |          |          |
|------------|-----------------------------------------------------------------|----------|----------|----------|
| PITG_03243 | Pi conserved hypothetical protein (1556 nt)                     | -13.9808 | -1.83632 | 0.094991 |
| PITG_00174 | Pi hypothetical protein (348 nt)                                | -15.1107 | -1.92541 | 0.095048 |
| PITG_09073 | Pi hypothetical protein (1517 nt)                               | -15.4927 | 1.902394 | 0.095081 |
| PITG_01495 | Pi ribonuclease, putative (726 nt)                              | -15.0626 | -2.24862 | 0.095095 |
| PITG_21540 | Pi Resistance-Nodulation-Cell Division (RND) Superfamily (23    | -13.6422 | -2.21004 | 0.095117 |
| PITG_21737 | Pi hypothetical protein (462 nt)                                | -10.7902 | 2.811492 | 0.095263 |
| PITG_10293 | Pi alcohol dehydrogenase, putative (1967 nt)                    | -15.7634 | -2.08113 | 0.095515 |
| PITG_19175 | Pi conserved hypothetical protein (2919 nt)                     | -15.7634 | -2.08113 | 0.095515 |
| PITG_01768 | Pi DAHP synthase (1203 nt)                                      | -15.6903 | 2.037109 | 0.095515 |
| PITG_15120 | Pi Multidrug/Oligosaccharidyl-lipid/Polysaccharide (MOP) Fli    | -14.5712 | 1.926712 | 0.095571 |
| PITG_02720 | Pi conserved hypothetical protein (1338 nt)                     | -15.9484 | -2.25478 | 0.095598 |
| PITG_13391 | Pi trans-acting enoyl reductase, putative (1404 nt)             | -15.8988 | -2.3533  | 0.09565  |
| PITG_17248 | Pi conserved hypothetical protein (2217 nt)                     | -16.9673 | 2.688945 | 0.095852 |
| PITG_22629 | Pi conserved hypothetical protein (591 nt)                      | -16.9673 | 2.688945 | 0.095852 |
| PITG_12513 | Pi conserved hypothetical protein (1590 nt)                     | -14.3386 | -2.20422 | 0.095894 |
| PITG_12264 | Pi protoheme IX farnesyltransferase, putative (1439 nt)         | -14.1345 | -2.04069 | 0.095914 |
| PITG_05534 | Pi nucleolar protein Nop56 (1854 nt)                            | -14.3434 | 1.773648 | 0.096046 |
| PITG_10290 | Pi alcohol dehydrogenase, putative (1233 nt)                    | -12.8185 | -2.17995 | 0.096066 |
| PITG_17445 | Pi glycerol kinase 1 (1685 nt)                                  | -12.63   | -1.76109 | 0.096087 |
| PITG_09596 | Pi nucleoside diphosphate kinase B (661 nt)                     | -10.66   | 1.609672 | 0.096151 |
| PITG_17525 | Pi crinkler (CRN) family protein, pseudogene (1289 nt)          | -10.4059 | -1.74216 | 0.096255 |
| PITG_11573 | Pi serine protease family S33, putative (1166 nt)               | -16.4405 | 2.120829 | 0.096279 |
| PITG_10936 | Pi hypothetical protein (739 nt)                                | -14.2054 | -1.85762 | 0.096521 |
| PITG_21517 | Pi 2-oxoglutarate dehydrogenase E1 component, putative (2       | -13.3588 | -1.73365 | 0.096728 |
| PITG_16732 | Pi conserved hypothetical protein (803 nt)                      | -16.6746 | -2.80827 | 0.096786 |
| PITG_09669 | Pi protein kinase (525 nt)                                      | -13.5084 | -1.72503 | 0.096827 |
| PITG_01598 | Pi conserved hypothetical protein (2612 nt)                     | -16.9783 | 2.668736 | 0.096833 |
| PITG_16040 | Pi conserved hypothetical protein (701 nt)                      | -16.9783 | 2.668736 | 0.096833 |
| PITG_01051 | Pi Amino Acid-Polyamine-Organocation (APC) Family (1935 r       | -16.9794 | -2.29949 | 0.096833 |
| PITG_03523 | Pi general transcription factor IIH subunit, putative (1647 nt) | -16.9794 | -2.29949 | 0.096833 |
| PITG_16406 | Pi conserved hypothetical protein (928 nt)                      | -16.9573 | 2.710743 | 0.096833 |
| PITG_20178 | Pi conserved hypothetical protein (243 nt)                      | -12.7492 | -1.69388 | 0.09715  |
| PITG_07794 | Pi conserved hypothetical protein (1375 nt)                     | -12.5948 | -1.7087  | 0.097389 |
| PITG_09819 | Pi conserved hypothetical protein (475 nt)                      | -14.7736 | -2.04614 | 0.097588 |
| PITG_15661 | Pi GMP reductase 2 (2054 nt)                                    | -14.7183 | -1.93593 | 0.097592 |
| PITG_03325 | Pi hypothetical protein (3096 nt)                               | -16.7659 | 2.351346 | 0.0978   |
| PITG_15500 | Pi conserved hypothetical protein (730 nt)                      | -16.9489 | -2.36097 | 0.09782  |
| PITG_13713 | Pi MICAL-like protein (3165 nt)                                 | -16.4588 | -2.20343 | 0.09788  |
| PITG_06479 | Pi inositol oxygenase, putative (1762 nt)                       | -14.1924 | -1.81971 | 0.098003 |
| PITG_13747 | Pi Drug/Metabolite Transporter (DMT) Superfamily (1261 nt)      | -15.2597 | -2.04122 | 0.098062 |
| PITG_02910 | Pi conserved hypothetical protein (1409 nt)                     | -13.6851 | -2.01751 | 0.098235 |
| PITG_03735 | Pi conserved hypothetical protein (2507 nt)                     | -16.4845 | 2.034364 | 0.098438 |
| PITG_19603 | Pi conserved hypothetical protein (1995 nt)                     | -16.7315 | -2.69532 | 0.098438 |
| PITG_17531 | Pi crinkler (CRN) family protein, putative (2106 nt)            | -11.2817 | -1.67129 | 0.098574 |
| PITG_14991 | Pi peroxisomal targeting signal 2 receptor, putative (2257 nt)  | -14.5875 | -1.96027 | 0.098684 |
| PITG_09285 | Pi conserved hypothetical protein (2445 nt)                     | -14.9755 | -1.87848 | 0.098714 |
| PITG_15388 | Pi phenol acid carboxylase, putative (771 nt)                   | -14.4763 | -1.84418 | 0.098782 |

|            |                                                              |          |          |          |
|------------|--------------------------------------------------------------|----------|----------|----------|
| PITG_16916 | Pi protein kinase, putative (1603 nt)                        | -12.894  | -1.91474 | 0.098789 |
| PITG_15693 | Pi hypothetical protein (725 nt)                             | -14.745  | 2.116058 | 0.098968 |
| PITG_07100 | Pi conserved hypothetical protein (1405 nt)                  | -16.4108 | -2.30773 | 0.099106 |
| PITG_06475 | Pi conserved hypothetical protein (988 nt)                   | -14.3641 | 1.742405 | 0.099171 |
| PITG_08375 | Pi conserved hypothetical protein (635 nt)                   | -14.5033 | -1.90573 | 0.0993   |
| PITG_13654 | Pi conserved hypothetical protein (627 nt)                   | -15.7024 | -2.28302 | 0.099802 |
| PITG_11852 | Pi C2 domain-containing protein, putative (1283 nt)          | -11.1952 | -1.99543 | 0.099823 |
| PITG_16203 | Pi purine nucleoside phosphorylase 1 (1238 nt)               | -14.0913 | -1.82547 | 0.099828 |
| PITG_16546 | Pi conserved hypothetical protein (1347 nt)                  | -15.966  | -2.22    | 0.100015 |
| PITG_14106 | Pi conserved hypothetical protein (1064 nt)                  | -14.1849 | -1.80302 | 0.100122 |
| PITG_03588 | Pi conserved hypothetical protein (481 nt)                   | -13.969  | 1.850088 | 0.100126 |
| PITG_08377 | Pi conserved hypothetical protein (858 nt)                   | -12.0294 | -1.76891 | 0.10024  |
| PITG_11638 | Pi voltage-gated potassium channel subunit beta, putative (1 | -13.787  | 1.733678 | 0.100488 |
| PITG_01920 | Pi ubiquitin-specific protease, putative (5316 nt)           | -16.028  | -2.09679 | 0.100507 |
| PITG_04934 | Pi enoyl-CoA hydratase/isomerase family, putative (1816 nt)  | -14.4934 | -1.98545 | 0.100586 |
| PITG_01490 | Pi conserved hypothetical protein (8280 nt)                  | -16.118  | 2.127086 | 0.100593 |
| PITG_14532 | Pi conserved hypothetical protein (1551 nt)                  | -16.1013 | 2.160458 | 0.100593 |
| PITG_15567 | Pi conserved hypothetical protein (1461 nt)                  | -11.7412 | -1.62912 | 0.100595 |
| PITG_22835 | Pi Crinkler (CRN) family protein, pseudogene (2322 nt)       | -12.0374 | -1.72782 | 0.100684 |
| PITG_01824 | Pi protein kinase (1515 nt)                                  | -14.0722 | -2.42549 | 0.10071  |
| PITG_08581 | Pi serine racemase, putative (1456 nt)                       | -16.3278 | -2.37193 | 0.100714 |
| PITG_10993 | Pi CASP-like protein (2332 nt)                               | -16.3086 | -2.32553 | 0.100714 |
| PITG_16917 | Pi conserved hypothetical protein (1539 nt)                  | -16.1205 | 1.896561 | 0.100714 |
| PITG_02472 | Pi conserved hypothetical protein (873 nt)                   | -16.3177 | 2.392405 | 0.100759 |
| PITG_09786 | Pi conserved hypothetical protein (953 nt)                   | -9.8491  | -1.78345 | 0.100825 |
| PITG_03644 | Pi Rab8 family GTPase, putative (688 nt)                     | -12.0108 | 1.626343 | 0.101244 |
| PITG_16475 | Pi conserved hypothetical protein (524 nt)                   | -15.1857 | 2.182096 | 0.101289 |
| PITG_02274 | Pi peroxisomal trans-2-enoyl-CoA reductase, putative (1059   | -14.0722 | -2.06214 | 0.101303 |
| PITG_06604 | Pi fumarate hydratase, mitochondrial precursor (2089 nt)     | -13.34   | 1.774625 | 0.101338 |
| PITG_03183 | Pi hypothetical protein (700 nt)                             | -14.5251 | -1.82249 | 0.101459 |
| PITG_12555 | Pi elicitor-like protein, putative (360 nt)                  | -17.2355 | -3.61235 | 0.101577 |
| PITG_15656 | Pi conserved hypothetical protein (598 nt)                   | -12.1164 | -1.76102 | 0.101646 |
| PITG_01491 | Pi conserved hypothetical protein (1349 nt)                  | -16.0533 | 1.901339 | 0.101775 |
| PITG_10239 | Pi myosin heavy chain kinase, putative (2173 nt)             | -15.3036 | -2.13462 | 0.10187  |
| PITG_10119 | Pi ubiquitin-specific protease, putative (5318 nt)           | -16.6098 | -2.93598 | 0.101911 |
| PITG_11999 | Pi conserved hypothetical protein (642 nt)                   | -15.1237 | -2.00221 | 0.101973 |
| PITG_14380 | Pi lon protease, putative (2559 nt)                          | -14.6674 | -1.82889 | 0.10225  |
| PITG_12286 | Pi ADP-ribosylation factor family (932 nt)                   | -11.6443 | 1.764478 | 0.102301 |
| PITG_12663 | Pi conserved hypothetical protein (3610 nt)                  | -13.9485 | 1.675998 | 0.1024   |
| PITG_14595 | Pi conserved hypothetical protein (702 nt)                   | -15.2201 | -2.12074 | 0.102604 |
| PITG_14634 | Pi 1-(5-phosphoribosyl)-5-[(5-phosphoribosylamino)methyl     | -13.2553 | -1.7463  | 0.102604 |
| PITG_08768 | Pi hypothetical protein (1452 nt)                            | -16.8119 | -2.65583 | 0.102653 |
| PITG_10557 | Pi conserved hypothetical protein (1088 nt)                  | -16.8119 | -2.65583 | 0.102653 |
| PITG_06011 | Pi 3'(2'),5'-bisphosphate nucleotidase, putative (2500 nt)   | -16.5443 | 2.21584  | 0.102832 |
| PITG_15866 | Pi conserved hypothetical protein (1363 nt)                  | -14.2178 | 1.758305 | 0.102892 |
| PITG_14297 | Pi hypothetical protein (337 nt)                             | -14.3491 | -2.22974 | 0.102913 |
| PITG_01776 | Pi hypothetical protein (678 nt)                             | -15.5573 | -1.92498 | 0.103119 |

|            |                                                              |          |          |          |
|------------|--------------------------------------------------------------|----------|----------|----------|
| PITG_04555 | Pi hypothetical protein (948 nt)                             | -15.5565 | -1.92669 | 0.103119 |
| PITG_16024 | Pi riboflavin synthase subunit alpha, putative (732 nt)      | -15.7785 | -1.98327 | 0.103299 |
| PITG_06722 | Pi translation elongation factor 1-alpha, putative (1528 nt) | -8.58381 | 1.57604  | 0.103345 |
| PITG_13835 | Pi conserved hypothetical protein (934 nt)                   | -15.365  | -1.94438 | 0.10343  |
| PITG_11690 | Pi conserved hypothetical protein (1864 nt)                  | -11.9034 | -1.59873 | 0.103487 |
| PITG_00166 | Pi phosphoserine phosphatase (1163 nt)                       | -13.2758 | 1.657499 | 0.103573 |
| PITG_14605 | Pi conserved hypothetical protein (1100 nt)                  | -13.4294 | -1.72447 | 0.10368  |
| PITG_17004 | Pi conserved hypothetical protein (3860 nt)                  | -16.008  | -2.29307 | 0.10373  |
| PITG_17947 | Pi chitinase, putative (705 nt)                              | -11.4942 | -1.71279 | 0.103737 |
| PITG_17960 | Pi Dicarboxylate/Amino Acid:Cation (Na or H ) Symporter (D   | -17.0031 | 2.631021 | 0.103865 |
| PITG_06662 | Pi conserved hypothetical protein (2303 nt)                  | -13.8182 | 1.733384 | 0.10387  |
| PITG_00297 | Pi conserved hypothetical protein (1760 nt)                  | -12.1091 | -1.75609 | 0.103918 |
| PITG_15964 | Pi conserved hypothetical protein (1639 nt)                  | -16.9013 | 3.204684 | 0.103945 |
| PITG_09478 | Pi conserved hypothetical protein (1284 nt)                  | -14.8583 | 1.87111  | 0.103959 |
| PITG_12819 | Pi carbohydrate esterase, putative (1076 nt)                 | -14.952  | -1.97476 | 0.104324 |
| PITG_02985 | Pi conserved hypothetical protein (1470 nt)                  | -14.7312 | -1.86779 | 0.10458  |
| PITG_04589 | Pi protein kinase (1190 nt)                                  | -16.4681 | -2.18868 | 0.104586 |
| PITG_04949 | Pi conserved hypothetical protein (1014 nt)                  | -16.4497 | 2.380759 | 0.104586 |
| PITG_10032 | Pi 6-phosphogluconate dehydrogenase (1661 nt)                | -11.1213 | -1.7588  | 0.10465  |
| PITG_11262 | Pi conserved hypothetical protein (719 nt)                   | -16.8656 | -2.54956 | 0.104827 |
| PITG_02596 | Pi DC12 family protein (1726 nt)                             | -16.9622 | -2.33845 | 0.104893 |
| PITG_14675 | Pi conserved hypothetical protein (1113 nt)                  | -16.9622 | -2.33845 | 0.104893 |
| PITG_22057 | Pi conserved hypothetical protein (1659 nt)                  | -17.3538 | -3.39085 | 0.104893 |
| PITG_17028 | Pi conserved hypothetical protein (7224 nt)                  | -15.966  | -2.21961 | 0.104982 |
| PITG_05361 | Pi conserved hypothetical protein (1754 nt)                  | -16.5133 | 2.229032 | 0.105065 |
| PITG_11046 | Pi creatine kinase B-type (2280 nt)                          | -12.364  | 1.667156 | 0.105154 |
| PITG_02022 | Pi clathrin heavy chain (5547 nt)                            | -12.272  | 1.702658 | 0.105273 |
| PITG_08537 | Pi conserved hypothetical protein (1025 nt)                  | -12.4254 | -1.67337 | 0.105473 |
| PITG_00221 | Pi tryptophan synthase, putative (1147 nt)                   | -15.9209 | 1.954564 | 0.105479 |
| PITG_15195 | Pi conserved hypothetical protein (2239 nt)                  | -14.2211 | -1.86861 | 0.105535 |
| PITG_01810 | Pi Drug/Metabolite Transporter (DMT) Superfamily (1278 nt)   | -14.9586 | -1.86439 | 0.105848 |
| PITG_20734 | Pi conserved hypothetical protein (785 nt)                   | -11.3385 | 1.65281  | 0.105857 |
| PITG_04996 | Pi conserved hypothetical protein (1200 nt)                  | -13.2889 | -1.66108 | 0.106047 |
| PITG_15526 | Pi ATP synthase subunit O, putative (696 nt)                 | -10.9208 | 1.592816 | 0.1061   |
| PITG_05676 | Pi histone H4 (468 nt)                                       | -12.1779 | -1.88397 | 0.106212 |
| PITG_03513 | Pi protein kinase, putative (1587 nt)                        | -13.5751 | -1.66901 | 0.106385 |
| PITG_08367 | Pi conserved hypothetical protein (1429 nt)                  | -16.3249 | -2.37848 | 0.106655 |
| PITG_14917 | Pi thioredoxin-like protein (2028 nt)                        | -13.6796 | -1.72438 | 0.10667  |
| PITG_14479 | Pi conserved hypothetical protein (1394 nt)                  | -12.7797 | -1.65229 | 0.106986 |
| PITG_22568 | Pi nuclease, putative (1077 nt)                              | -15.208  | -1.97246 | 0.107065 |
| PITG_02789 | Pi E3 ubiquitin ligase , putative (1129 nt)                  | -17.6446 | -2.94263 | 0.107124 |
| PITG_05490 | Pi conserved hypothetical protein (1609 nt)                  | -17.6446 | -2.94263 | 0.107124 |
| PITG_06987 | Pi conserved hypothetical protein (924 nt)                   | -17.6446 | -2.94263 | 0.107124 |
| PITG_07073 | Pi conserved hypothetical protein (1425 nt)                  | -17.6446 | -2.94263 | 0.107124 |
| PITG_08541 | Pi conserved hypothetical protein (1195 nt)                  | -17.6446 | -2.94263 | 0.107124 |
| PITG_16733 | Pi conserved hypothetical protein (1673 nt)                  | -15.5714 | -1.89735 | 0.107145 |
| PITG_11756 | Pi Voltage-gated Ion Channel (VIC) Superfamily (3301 nt)     | -16.8865 | 2.545481 | 0.107234 |

|            |                                                               |          |          |          |
|------------|---------------------------------------------------------------|----------|----------|----------|
| PITG_02764 | Pi conserved hypothetical protein (967 nt)                    | -15.5309 | -2.11065 | 0.107289 |
| PITG_00716 | Pi thioredoxin, putative (734 nt)                             | -11.8661 | 1.579009 | 0.107303 |
| PITG_00467 | Pi conserved hypothetical protein (720 nt)                    | -16.4802 | 2.048315 | 0.107324 |
| PITG_02250 | Pi conserved hypothetical protein (780 nt)                    | -16.3923 | 1.986916 | 0.107324 |
| PITG_12600 | Pi flagellar radial spoke protein, putative (1137 nt)         | -15.2014 | 1.854039 | 0.107447 |
| PITG_17480 | Pi sodium-coupled neutral amino acid transporter, putative (  | -14.2951 | 1.762251 | 0.108016 |
| PITG_04185 | Pi histone-lysine N-methyltransferase, putative (7129 nt)     | -17.6094 | -2.87069 | 0.108058 |
| PITG_04919 | Pi conserved hypothetical protein (1984 nt)                   | -17.6094 | -2.87069 | 0.108058 |
| PITG_11558 | Pi beta-glucan synthesis-associated protein, putative (2101 r | -17.6094 | -2.87069 | 0.108058 |
| PITG_21335 | Pi conserved hypothetical protein (737 nt)                    | -17.6094 | -2.87069 | 0.108058 |
| PITG_03432 | Pi conserved hypothetical protein (7002 nt)                   | -16.4266 | 1.920171 | 0.108462 |
| PITG_11250 | Pi conserved hypothetical protein (600 nt)                    | -15.0118 | -1.90133 | 0.108517 |
| PITG_17706 | Pi conserved hypothetical protein (2463 nt)                   | -15.0093 | -1.81083 | 0.108596 |
| PITG_04821 | Pi conserved hypothetical protein (546 nt)                    | -14.9484 | 1.977613 | 0.10863  |
| PITG_00200 | Pi conserved hypothetical protein (592 nt)                    | -15.5319 | -2.1093  | 0.108639 |
| PITG_01790 | Pi conserved hypothetical protein (2401 nt)                   | -17.6018 | -3.0291  | 0.108998 |
| PITG_12227 | Pi conserved hypothetical protein (1112 nt)                   | -17.6018 | -3.0291  | 0.108998 |
| PITG_12714 | Pi hypothetical protein (300 nt)                              | -17.6018 | -3.0291  | 0.108998 |
| PITG_19880 | Pi hypothetical protein (285 nt)                              | -11.3649 | 1.634909 | 0.109028 |
| PITG_18788 | Pi tubulin/FtsZ family (3005 nt)                              | -12.8042 | -1.82847 | 0.109058 |
| PITG_16674 | Pi conserved hypothetical protein (1474 nt)                   | -16.3151 | 2.393261 | 0.109076 |
| PITG_03142 | Pi hsp90-like protein (1411 nt)                               | -14.8296 | -1.88641 | 0.109254 |
| PITG_00545 | Pi nucleoredoxin, putative (600 nt)                           | -13.397  | -1.91369 | 0.109487 |
| PITG_22657 | Pi elongation factor 1-alpha, putative (278 nt)               | -9.60573 | 1.590357 | 0.109638 |
| PITG_02324 | Pi hypothetical protein (598 nt)                              | -17.7205 | -2.78048 | 0.109803 |
| PITG_22203 | Pi conserved hypothetical protein (771 nt)                    | -17.7205 | -2.78048 | 0.109803 |
| PITG_08585 | Pi conserved hypothetical protein (807 nt)                    | -14.564  | -1.74332 | 0.109805 |
| PITG_17925 | Pi pentafunctional AROM polypeptide, putative (4738 nt)       | -15.6734 | 1.87707  | 0.109847 |
| PITG_00724 | Pi conserved hypothetical protein (460 nt)                    | -13.7011 | -1.77355 | 0.109963 |
| PITG_08155 | Pi peptidyl-prolyl cis-trans isomerase, putative (1049 nt)    | -15.426  | 1.916588 | 0.109997 |
| PITG_01367 | Pi palmitoyltransferase, putative (1059 nt)                   | -15.9465 | -2.1777  | 0.11006  |
| PITG_06732 | Pi acyl-CoA dehydrogenase, putative (1461 nt)                 | -13.4221 | -1.64547 | 0.11008  |
| PITG_00256 | Pi conserved hypothetical protein (1551 nt)                   | -16.1291 | 2.120183 | 0.110235 |
| PITG_01072 | Pi 5-methyltetrahydropteroyltriglutamate-homocysteine me      | -11.6085 | 1.756972 | 0.110276 |
| PITG_05562 | Pi conserved hypothetical protein (3050 nt)                   | -15.3279 | 1.948727 | 0.110323 |
| PITG_00627 | Pi conserved hypothetical protein (859 nt)                    | -14.2066 | -1.89346 | 0.110408 |
| PITG_22671 | Pi protein kinase, putative, pseudogene (819 nt)              | -16.0031 | -2.14594 | 0.110557 |
| PITG_01390 | Pi conserved hypothetical protein (2214 nt)                   | -14.6105 | -1.87286 | 0.110649 |
| PITG_22919 | Pi conserved hypothetical protein (674 nt)                    | -16.7245 | -2.70865 | 0.110757 |
| PITG_12254 | Pi conserved hypothetical protein (1917 nt)                   | -13.9618 | -1.70779 | 0.110804 |
| PITG_13320 | Pi conserved hypothetical protein (279 nt)                    | -14.5056 | 1.831178 | 0.111064 |
| PITG_12682 | Pi cytochrome c (606 nt)                                      | -11.1427 | 1.586896 | 0.111121 |
| PITG_13376 | Pi conserved hypothetical protein (1462 nt)                   | -15.7619 | -2.08575 | 0.111177 |
| PITG_12563 | Pi Mitochondrial Carrier (MC) Family (1174 nt)                | -15.5571 | -1.9885  | 0.111233 |
| PITG_02210 | Pi phenylalanine-4-hydroxylase, henna-like protein (1920 nt)  | -14.897  | -1.79506 | 0.111408 |
| PITG_06129 | Pi conserved hypothetical protein (1938 nt)                   | -15.2872 | -1.98635 | 0.111726 |
| PITG_00180 | Pi conserved hypothetical protein (1967 nt)                   | -16.0123 | -2.1274  | 0.111843 |

|            |                                                              |          |          |          |
|------------|--------------------------------------------------------------|----------|----------|----------|
| PITG_18289 | Pi ATP-binding Cassette (ABC) Superfamily (777 nt)           | -16.5014 | 2.588052 | 0.111864 |
| PITG_19547 | Pi phosphatidylserine decarboxylase, putative (1121 nt)      | -16.5014 | 2.588052 | 0.111864 |
| PITG_16001 | Pi regulator of chromosome condensation (RCC1), putative (   | -16.4845 | 2.297904 | 0.111914 |
| PITG_22095 | Pi beta-glucosidase, putative (1900 nt)                      | -16.418  | 1.943105 | 0.111914 |
| PITG_08801 | Pi conserved hypothetical protein (4261 nt)                  | -15.0617 | 1.884913 | 0.111983 |
| PITG_20727 | Pi conserved hypothetical protein (3130 nt)                  | -14.1848 | -1.70165 | 0.112038 |
| PITG_00390 | Pi conserved hypothetical protein (1591 nt)                  | -12.6088 | -1.62437 | 0.11205  |
| PITG_06723 | Pi conserved hypothetical protein (973 nt)                   | -12.716  | -1.66654 | 0.112202 |
| PITG_05961 | Pi conserved hypothetical protein (1560 nt)                  | -15.7987 | -1.94278 | 0.112246 |
| PITG_08013 | Pi conserved hypothetical protein (879 nt)                   | -17.6761 | -2.74922 | 0.112459 |
| PITG_13722 | Pi conserved hypothetical protein (1657 nt)                  | -17.7065 | -2.80984 | 0.112459 |
| PITG_16115 | Pi conserved hypothetical protein (1116 nt)                  | -17.7065 | -2.80984 | 0.112459 |
| PITG_22684 | Pi peptidyl-prolyl cis-trans isomerase, putative (1394 nt)   | -17.7065 | -2.80984 | 0.112459 |
| PITG_03598 | Pi 6-phosphofructokinase, putative (1636 nt)                 | -13.3875 | 1.83382  | 0.112503 |
| PITG_20211 | Pi phosphatidylinositol N-acetylglucosaminyltransferase subf | -15.5099 | 1.959133 | 0.112609 |
| PITG_13576 | Pi ATP-binding Cassette (ABC) Superfamily (4047 nt)          | -16.3808 | -2.38143 | 0.112613 |
| PITG_13389 | Pi conserved hypothetical protein (962 nt)                   | -16.1416 | 2.078082 | 0.112755 |
| PITG_22459 | Pi HSF-type DNA-binding protein, putative (909 nt)           | -14.5307 | 1.681415 | 0.112893 |
| PITG_21894 | Pi conserved hypothetical protein (630 nt)                   | -16.6542 | -2.84713 | 0.113066 |
| PITG_23201 | Pi conserved hypothetical protein (849 nt)                   | -16.6542 | -2.84713 | 0.113066 |
| PITG_02677 | Pi DEAD/DEAH box RNA helicase, putative (1859 nt)            | -16.96   | -2.34736 | 0.113326 |
| PITG_03998 | Pi conserved hypothetical protein (7252 nt)                  | -16.8256 | 2.228359 | 0.113326 |
| PITG_06213 | Pi Resistance-Nodulation-Cell Division (RND) Superfamily (43 | -17.3506 | -3.393   | 0.113326 |
| PITG_21942 | Pi conserved hypothetical protein (532 nt)                   | -17.3506 | -3.393   | 0.113326 |
| PITG_18064 | Pi conserved hypothetical protein (1916 nt)                  | -14.8355 | 1.767517 | 0.113416 |
| PITG_10449 | Pi ATP-binding Cassette (ABC) Superfamily (5896 nt)          | -14.7985 | -1.90248 | 0.113492 |
| PITG_05621 | Pi conserved hypothetical protein (1835 nt)                  | -15.7949 | 2.014552 | 0.11359  |
| PITG_13488 | Pi serine protease family S08A, putative (1548 nt)           | -15.4679 | -2.0429  | 0.113724 |
| PITG_03609 | Pi conserved hypothetical protein (3948 nt)                  | -15.7779 | -1.98501 | 0.113857 |
| PITG_18671 | Pi ATP-binding Cassette (ABC) Superfamily (2077 nt)          | -16.3553 | -2.31673 | 0.114385 |
| PITG_01989 | Pi hypothetical protein (249 nt)                             | -16.9266 | -2.41479 | 0.114407 |
| PITG_21379 | Pi conserved hypothetical protein (589 nt)                   | -15.9409 | 2.054045 | 0.114435 |
| PITG_05012 | Pi conserved hypothetical protein (1562 nt)                  | -14.5644 | -1.76657 | 0.114448 |
| PITG_22354 | Pi hypothetical protein (586 nt)                             | -13.4043 | -1.66734 | 0.114531 |
| PITG_13103 | Pi fimbrin-like protein (2695 nt)                            | -16.0502 | -2.05225 | 0.114797 |
| PITG_17272 | Pi conserved hypothetical protein (1911 nt)                  | -16.0502 | 2.213401 | 0.114797 |
| PITG_19229 | Pi conserved hypothetical protein (531 nt)                   | -16.0502 | -2.05225 | 0.114797 |
| PITG_06405 | Pi conserved hypothetical protein (2593 nt)                  | -17.2904 | -3.50381 | 0.114935 |
| PITG_07263 | Pi conserved hypothetical protein (478 nt)                   | -16.8984 | -2.48095 | 0.114935 |
| PITG_17741 | Pi serine protease family S33, putative (4095 nt)            | -17.2904 | -3.50381 | 0.114935 |
| PITG_19679 | Pi elongation factor G, putative (901 nt)                    | -17.2904 | -3.50381 | 0.114935 |
| PITG_19485 | Pi CREG-like protein (834 nt)                                | -15.496  | -2.18802 | 0.115064 |
| PITG_05304 | Pi Voltage-gated Ion Channel (VIC) Superfamily (4117 nt)     | -15.6815 | 1.86586  | 0.115207 |
| PITG_21727 | Pi conserved hypothetical protein (4364 nt)                  | -15.7611 | -2.01872 | 0.115207 |
| PITG_14152 | Pi conserved hypothetical protein (667 nt)                   | -15.1423 | 2.0567   | 0.11529  |
| PITG_18037 | Pi ubiquitin family protein, putative (1724 nt)              | -14.2853 | -1.70889 | 0.115483 |
| PITG_10195 | Pi acyl-CoA desaturase (1123 nt)                             | -13.2758 | 1.79794  | 0.115613 |



|            |                                                              |          |          |          |
|------------|--------------------------------------------------------------|----------|----------|----------|
| PITG_03143 | Pi indigoidine synthase A family protein, putative (2864 nt) | -16.3585 | -2.22561 | 0.115623 |
| PITG_06593 | Pi conserved hypothetical protein (1815 nt)                  | -16.3748 | -2.27804 | 0.115623 |
| PITG_12675 | Pi sedoheptulokinase, putative (5416 nt)                     | -16.3576 | -2.31227 | 0.115623 |
| PITG_00816 | Pi conserved hypothetical protein (2086 nt)                  | -16.603  | 2.371735 | 0.115718 |
| PITG_01088 | Pi sporangia induced dynein heavy chain (12490 nt)           | -16.5137 | 1.975809 | 0.115718 |
| PITG_06113 | Pi hypothetical protein (419 nt)                             | -14.6745 | -1.74185 | 0.115768 |
| PITG_18432 | Pi pre-mRNA cleavage complex II protein Clp1, putative (131  | -14.0869 | -1.71268 | 0.115786 |
| PITG_21504 | Pi cyclin-dependent kinase, putative (1162 nt)               | -14.9943 | -1.84084 | 0.115942 |
| PITG_12526 | Pi conserved hypothetical protein (1578 nt)                  | -13.742  | -1.78213 | 0.115994 |
| PITG_03930 | Pi zinc phosphodiesterase, putative (2918 nt)                | -16.9223 | 2.840078 | 0.116061 |
| PITG_07838 | Pi conserved hypothetical protein (1191 nt)                  | -16.9223 | 2.840078 | 0.116061 |
| PITG_08089 | Pi conserved hypothetical protein (1210 nt)                  | -16.8684 | -2.54167 | 0.116061 |
| PITG_01271 | Pi protein kinase, putative (937 nt)                         | -15.1567 | -1.88442 | 0.116166 |
| PITG_14237 | Pi glycoside hydrolase, putative (1854 nt)                   | -15.074  | 2.00873  | 0.116305 |
| PITG_06635 | Pi signal recognition particle, putative (2795 nt)           | -13.644  | -1.68144 | 0.116311 |
| PITG_02516 | Pi conserved hypothetical protein (1328 nt)                  | -17.3975 | -3.30809 | 0.116357 |
| PITG_21419 | Pi conserved hypothetical protein (1162 nt)                  | -17.4335 | -3.23599 | 0.116357 |
| PITG_06056 | Pi hypothetical protein (2034 nt)                            | -13.3873 | 1.703081 | 0.116394 |
| PITG_09936 | Pi conserved hypothetical protein (1312 nt)                  | -13.8604 | -1.67215 | 0.11642  |
| PITG_09798 | Pi glucan 1,3-beta-glucosidase, putative (2238 nt)           | -9.9436  | 1.5498   | 0.116429 |
| PITG_21328 | Pi hypothetical protein (1028 nt)                            | -14.1275 | 1.709707 | 0.1165   |
| PITG_14967 | Pi conserved hypothetical protein (844 nt)                   | -13.826  | -1.69158 | 0.116563 |
| PITG_03647 | Pi hypothetical protein (351 nt)                             | -14.4611 | 1.804807 | 0.116591 |
| PITG_00856 | Pi conserved hypothetical protein (733 nt)                   | -12.5326 | -1.90991 | 0.116591 |
| PITG_19219 | Pi conserved hypothetical protein (993 nt)                   | -16.2364 | 2.061902 | 0.116868 |
| PITG_16263 | Pi conserved hypothetical protein (929 nt)                   | -16.8005 | -2.5573  | 0.116881 |
| PITG_01896 | Pi conserved hypothetical protein (2265 nt)                  | -17.7468 | -2.73114 | 0.116982 |
| PITG_05909 | Pi conserved hypothetical protein (1665 nt)                  | -17.7468 | -2.73114 | 0.116982 |
| PITG_13716 | Pi conserved hypothetical protein (1034 nt)                  | -17.7468 | -2.73114 | 0.116982 |
| PITG_15947 | Pi hypothetical protein (912 nt)                             | -17.7468 | -2.73114 | 0.116982 |
| PITG_20266 | Pi proteasome assembly chaperone, putative (1413 nt)         | -14.6337 | 1.693577 | 0.117332 |
| PITG_18092 | Pi conserved hypothetical protein (4408 nt)                  | -16.0575 | 2.198606 | 0.117413 |
| PITG_13341 | Pi 2,4-dienoyl-CoA reductase, mitochondrial precursor (2285  | -13.1973 | -1.7706  | 0.117632 |
| PITG_02849 | Pi conserved hypothetical protein (2260 nt)                  | -14.687  | -1.67713 | 0.117641 |
| PITG_19418 | Pi conserved hypothetical protein (2222 nt)                  | -15.0813 | 1.711391 | 0.11766  |
| PITG_11122 | Pi Amino Acid-Polyamine-Organocation (APC) Family (1686 r    | -15.4828 | -2.01344 | 0.117761 |
| PITG_14021 | Pi hypothetical protein (906 nt)                             | -16.4965 | 2.283425 | 0.117791 |
| PITG_00828 | Pi phosphatidylinositol kinase (PIK-5) (10555 nt)            | -17.6953 | -2.83457 | 0.117901 |
| PITG_01054 | Pi conserved hypothetical protein (2179 nt)                  | -17.7155 | -2.66735 | 0.117901 |
| PITG_02635 | Pi conserved hypothetical protein (2136 nt)                  | -17.7155 | -2.66735 | 0.117901 |
| PITG_09785 | Pi lipase maturation factor 2 (2229 nt)                      | -17.6953 | -2.83457 | 0.117901 |
| PITG_17811 | Pi patatin-like phospholipase, putative (1557 nt)            | -17.6953 | -2.83457 | 0.117901 |
| PITG_05959 | Pi conserved hypothetical protein (588 nt)                   | -12.5405 | -2.12963 | 0.117991 |
| PITG_01590 | Pi conserved hypothetical protein (1187 nt)                  | -16.7563 | 2.500162 | 0.11805  |
| PITG_21312 | Pi conserved hypothetical protein (510 nt)                   | -15.8875 | -2.37403 | 0.11823  |
| PITG_04903 | Pi conserved hypothetical protein (1386 nt)                  | -17.0186 | -2.22159 | 0.11848  |
| PITG_03166 | Pi vesicle-associated membrane protein, putative (1044 nt)   | -13.8577 | -1.78185 | 0.118599 |

|            |                                                              |          |          |          |
|------------|--------------------------------------------------------------|----------|----------|----------|
| PITG_01200 | Pi conserved hypothetical protein (645 nt)                   | -15.0272 | 2.065551 | 0.118612 |
| PITG_02292 | Pi protein phosphatase, putative (3132 nt)                   | -14.023  | -1.69455 | 0.118667 |
| PITG_09287 | Pi sporangia induced hypothetical protein (576 nt)           | -13.9956 | 1.656171 | 0.118667 |
| PITG_05832 | Pi delta-1-pyrroline-5-carboxylate synthetase, putative (951 | -16.051  | -1.97462 | 0.11873  |
| PITG_15833 | Pi conserved hypothetical protein (1646 nt)                  | -14.8658 | -1.90633 | 0.118731 |
| PITG_13301 | Pi H - or Na -translocating F-type, V-type and A-type ATPase | -13.0732 | 1.723696 | 0.118752 |
| PITG_06150 | Pi conserved hypothetical protein (1446 nt)                  | -14.4366 | -1.68894 | 0.118755 |
| PITG_06918 | Pi conserved hypothetical protein (453 nt)                   | -14.0887 | -1.65204 | 0.118787 |
| PITG_01645 | Pi conserved hypothetical protein (1678 nt)                  | -17.6638 | -2.77031 | 0.118825 |
| PITG_14461 | Pi actin-like protein (1370 nt)                              | -17.6638 | -2.77031 | 0.118825 |
| PITG_20215 | Pi conserved hypothetical protein (930 nt)                   | -14.7791 | -1.77147 | 0.118973 |
| PITG_22931 | Pi conserved hypothetical protein (1266 nt)                  | -15.8326 | 2.31909  | 0.119101 |
| PITG_03244 | Pi conserved hypothetical protein (1787 nt)                  | -14.9751 | 1.801302 | 0.119105 |
| PITG_20824 | Pi aspartyl-tRNA synthetase, putative (659 nt)               | -15.0887 | 1.732126 | 0.11916  |
| PITG_08026 | Pi DEAD/DEAH box RNA helicase, putative (2571 nt)            | -16.5993 | 2.106749 | 0.119224 |
| PITG_09024 | Pi Metal Ion (Mn2 -iron) Transporter (Nramp) Family (2044 r  | -15.7577 | 2.093688 | 0.119295 |
| PITG_11203 | Pi anoctamin-like protein (2730 nt)                          | -16.2453 | 2.045825 | 0.119375 |
| PITG_02343 | Pi kinesin-like protein (5133 nt)                            | -14.8018 | 1.707532 | 0.119509 |
| PITG_05669 | Pi conserved hypothetical protein (2501 nt)                  | -14.9075 | -1.91792 | 0.119509 |
| PITG_00026 | Pi ankyrin-like protein (1390 nt)                            | -17.4268 | -3.24792 | 0.119549 |
| PITG_06454 | Pi adenosylmethionine-8-amino-7-oxononanoate aminotran       | -15.9126 | -2.23882 | 0.119778 |
| PITG_05302 | Pi replication factor C subunit 5 (1129 nt)                  | -14.8255 | -1.80629 | 0.119793 |
| PITG_22416 | Pi conserved hypothetical protein (990 nt)                   | -10.9693 | -2.71065 | 0.119929 |
| PITG_18376 | Pi conserved hypothetical protein (635 nt)                   | -13.8724 | -1.78077 | 0.120375 |
| PITG_03533 | Pi endo-1,3(4)-beta-glucanase, putative (1717 nt)            | -15.6929 | 1.836833 | 0.120406 |
| PITG_18977 | Pi HECT E3 ubiquitin ligase, putative (2660 nt)              | -15.7953 | -1.95002 | 0.120406 |
| PITG_09253 | Pi conserved hypothetical protein (559 nt)                   | -12.7507 | 1.558203 | 0.120409 |
| PITG_20313 | Pi Cation Diffusion Facilitator (CDF) Family (988 nt)        | -13.7316 | 1.602251 | 0.12059  |
| PITG_10762 | Pi transmembrane protein, putative (1989 nt)                 | -17.0038 | -2.25243 | 0.120624 |
| PITG_04532 | Pi conserved hypothetical protein (1101 nt)                  | -16.3707 | -2.28676 | 0.120638 |
| PITG_15250 | Pi conserved hypothetical protein (672 nt)                   | -13.38   | 1.588073 | 0.120822 |
| PITG_18446 | Pi 26S protease regulatory subunit 6B (1345 nt)              | -13.7109 | 1.707468 | 0.120924 |
| PITG_06806 | Pi hypothetical protein (324 nt)                             | -12.6579 | -1.66029 | 0.121029 |
| PITG_09131 | Pi conserved hypothetical protein (757 nt)                   | -12.6567 | 1.546317 | 0.121067 |
| PITG_18165 | Pi conserved hypothetical protein (611 nt)                   | -8.98612 | -1.57743 | 0.121084 |
| PITG_18117 | Pi conserved hypothetical protein (1272 nt)                  | -15.1825 | -2.07384 | 0.121103 |
| PITG_00560 | Pi conserved hypothetical protein (1537 nt)                  | -15.9703 | 1.994378 | 0.121383 |
| PITG_06684 | Pi conserved hypothetical protein (1592 nt)                  | -16.7242 | -2.70844 | 0.121391 |
| PITG_07642 | Pi hypothetical protein (222 nt)                             | -15.1516 | 1.924999 | 0.121443 |
| PITG_20321 | Pi retinol dehydrogenase, putative (1053 nt)                 | -13.6805 | -1.71945 | 0.121496 |
| PITG_07953 | Pi 3-ketoacyl-CoA thiolase A (1340 nt)                       | -14.0159 | -1.62646 | 0.121501 |
| PITG_07071 | Pi conserved hypothetical protein (996 nt)                   | -16.7528 | -2.65244 | 0.12159  |
| PITG_09598 | Pi U4/U6.U5 tri-snRNP-associated protein, putative (2208 nt  | -14.4471 | -1.73769 | 0.122029 |
| PITG_21005 | Pi conserved hypothetical protein (1281 nt)                  | -15.7992 | -2.08532 | 0.122054 |
| PITG_20623 | Pi conserved hypothetical protein (405 nt)                   | -15.4952 | 1.898877 | 0.122155 |
| PITG_03058 | Pi cytochrome P450, putative (1587 nt)                       | -15.4974 | -1.98451 | 0.122528 |
| PITG_21128 | Pi succinyl CoA transferase, putative (1914 nt)              | -12.5776 | -1.63035 | 0.122617 |

|            |                                                              |          |          |          |
|------------|--------------------------------------------------------------|----------|----------|----------|
| PITG_05609 | Pi conserved hypothetical protein (1362 nt)                  | -16.0423 | -2.06762 | 0.122718 |
| PITG_06996 | Pi conserved hypothetical protein (807 nt)                   | -14.5497 | -1.81374 | 0.122828 |
| PITG_22575 | Pi Drug/Metabolite Transporter (DMT) Superfamily (1056 nt)   | -14.753  | 1.692453 | 0.122953 |
| PITG_04442 | Pi conserved hypothetical protein (417 nt)                   | -16.0123 | -2.29433 | 0.123231 |
| PITG_19823 | Pi conserved hypothetical protein (362 nt)                   | -14.2944 | 1.675862 | 0.123525 |
| PITG_15957 | Pi serine protease family S33, putative (1008 nt)            | -15.4571 | -2.06379 | 0.123815 |
| PITG_02712 | Pi conserved hypothetical protein (1495 nt)                  | -14.6371 | -1.90372 | 0.123971 |
| PITG_19032 | Pi conserved hypothetical protein (2686 nt)                  | -16.0514 | -2.12645 | 0.12406  |
| PITG_13597 | Pi conserved hypothetical protein (861 nt)                   | -10.2946 | -1.58761 | 0.124379 |
| PITG_14816 | Pi conserved hypothetical protein (1632 nt)                  | -14.722  | -1.76088 | 0.124622 |
| PITG_10168 | Pi conserved hypothetical protein (357 nt)                   | -13.2203 | -1.65851 | 0.12472  |
| PITG_16211 | Pi conserved hypothetical protein (2250 nt)                  | -15.5718 | -1.89738 | 0.124874 |
| PITG_02592 | Pi conserved hypothetical protein (565 nt)                   | -16.547  | 2.496504 | 0.124878 |
| PITG_15354 | Pi hypothetical protein (362 nt)                             | -15.2369 | -1.83273 | 0.124934 |
| PITG_01228 | Pi conserved hypothetical protein (801 nt)                   | -16.9982 | -2.26593 | 0.124976 |
| PITG_09981 | Pi conserved hypothetical protein (1287 nt)                  | -17.0347 | -2.1929  | 0.124976 |
| PITG_06236 | Pi cleavage induced protein kinase (1250 nt)                 | -16.5482 | 2.163084 | 0.125182 |
| PITG_08933 | Pi calcium/calmodulin-dependent 3',5'-cyclic nucleotide pho  | -16.6085 | 2.083273 | 0.125182 |
| PITG_12115 | Pi calmodulin-like protein (2661 nt)                         | -16.446  | 1.879432 | 0.125182 |
| PITG_02322 | Pi conserved hypothetical protein (1615 nt)                  | -14.6716 | 1.806129 | 0.125254 |
| PITG_01065 | Pi folylpolyglutamate synthase, putative (1754 nt)           | -15.8363 | -1.86748 | 0.125358 |
| PITG_03169 | Pi GPN-loop GTPase, putative (3919 nt)                       | -15.8172 | -1.90567 | 0.125358 |
| PITG_17030 | Pi conserved hypothetical protein (1248 nt)                  | -15.8162 | -1.90769 | 0.125358 |
| PITG_12211 | Pi methionine aminopeptidase, putative (1152 nt)             | -16.042  | -2.1456  | 0.125407 |
| PITG_11434 | Pi conserved hypothetical protein (1099 nt)                  | -15.749  | 2.0011   | 0.12597  |
| PITG_18867 | Pi tRNA-dihydrouridine synthase, putative (732 nt)           | -15.7957 | -2.0188  | 0.12597  |
| PITG_05855 | Pi protein kinase, putative (2558 nt)                        | -14.1419 | -1.63196 | 0.126267 |
| PITG_09724 | Pi conserved hypothetical protein (1302 nt)                  | -12.6496 | -1.55646 | 0.126361 |
| PITG_02382 | Pi conserved hypothetical protein (506 nt)                   | -16.5394 | -2.03958 | 0.12639  |
| PITG_06893 | Pi conserved hypothetical protein (2139 nt)                  | -16.5544 | -2.00952 | 0.12639  |
| PITG_09880 | Pi conserved hypothetical protein (504 nt)                   | -16.5544 | -2.00952 | 0.12639  |
| PITG_08019 | Pi conserved hypothetical protein (1655 nt)                  | -15.4834 | -2.0116  | 0.126535 |
| PITG_06937 | Pi metalloprotease family M48X, putative (903 nt)            | -15.7118 | -2.19776 | 0.1267   |
| PITG_03223 | Pi conserved hypothetical protein (1665 nt)                  | -14.6495 | -1.75396 | 0.126726 |
| PITG_06376 | Pi guanine nucleotide-binding protein G(I)/G(S)/G(T) subunit | -12.9167 | 1.6057   | 0.12676  |
| PITG_02105 | Pi uracil phosphoribosyltransferase, putative (815 nt)       | -15.1028 | -1.77086 | 0.12676  |
| PITG_12575 | Pi autophagocytosis associated protein, putative (2043 nt)   | -12.9009 | -1.55724 | 0.126774 |
| PITG_18786 | Pi conserved hypothetical protein (1083 nt)                  | -14.9271 | -1.73489 | 0.126942 |
| PITG_16826 | Pi conserved hypothetical protein (5579 nt)                  | -15.0839 | -1.81132 | 0.127383 |
| PITG_07723 | Pi Major Facilitator Superfamily (MFS) (1533 nt)             | -16.7507 | -2.65623 | 0.127604 |
| PITG_14094 | Pi conserved hypothetical protein (1700 nt)                  | -16.7507 | -2.65623 | 0.127604 |
| PITG_07857 | Pi conserved hypothetical protein (1530 nt)                  | -15.6523 | 1.858871 | 0.127648 |
| PITG_08874 | Pi conserved hypothetical protein (1050 nt)                  | -14.7212 | -1.7212  | 0.127872 |
| PITG_22358 | Pi conserved hypothetical protein (1483 nt)                  | -14.5166 | 1.774121 | 0.128012 |
| PITG_00450 | Pi conserved hypothetical protein (6882 nt)                  | -15.4208 | -1.83451 | 0.12802  |
| PITG_14563 | Pi ubiquinone biosynthesis monooxygenase, putative (1482 nt) | -14.1529 | 1.641937 | 0.128061 |
| PITG_00119 | Pi hypothetical protein (1089 nt)                            | -15.6194 | -1.80116 | 0.128177 |

|            |                                                               |          |          |          |
|------------|---------------------------------------------------------------|----------|----------|----------|
| PITG_14553 | Pi hypothetical protein (1295 nt)                             | -14.9106 | -1.81425 | 0.128309 |
| PITG_05787 | Pi hypothetical protein (616 nt)                              | -16.0904 | -1.97191 | 0.128534 |
| PITG_21648 | Pi RXLR effector family, putative (1819 nt)                   | -16.7182 | -2.71908 | 0.128658 |
| PITG_00380 | Pi sphingosine-1-phosphate lyase, putative (1905 nt)          | -14.1096 | -1.61016 | 0.12878  |
| PITG_20766 | Pi protein kinase, putative (2115 nt)                         | -14.7173 | 1.677348 | 0.128793 |
| PITG_05618 | Pi phosphatidylinositol 4-phosphate 5-kinase (PIPK-D3/GPCR    | -16.5349 | 2.195351 | 0.128824 |
| PITG_20526 | Pi conserved hypothetical protein (3370 nt)                   | -16.5349 | 2.195351 | 0.128824 |
| PITG_16879 | Pi conserved hypothetical protein (393 nt)                    | -13.5176 | -1.59883 | 0.12901  |
| PITG_05761 | Pi transmembrane protein, putative (4754 nt)                  | -16.3253 | -2.3806  | 0.129356 |
| PITG_14924 | Pi conserved hypothetical protein (524 nt)                    | -13.0103 | -1.73688 | 0.129371 |
| PITG_17685 | Pi conserved hypothetical protein (1189 nt)                   | -17.0001 | -2.26431 | 0.129415 |
| PITG_05004 | Pi aspartyl protease family A01A, putative (1946 nt)          | -16.0538 | -2.04424 | 0.129485 |
| PITG_06155 | Pi conserved hypothetical protein (1230 nt)                   | -14.068  | 1.685031 | 0.129637 |
| PITG_00554 | Pi conserved hypothetical protein (1203 nt)                   | -16.3598 | -2.12906 | 0.129639 |
| PITG_13461 | Pi sporangia induced deflagellation-inducible protein (463 nt | -14.1494 | 1.643683 | 0.129783 |
| PITG_11855 | Pi C2 domain-containing protein, putative (1198 nt)           | -11.6001 | -1.97264 | 0.129899 |
| PITG_00894 | Pi carbohydrate-binding protein, putative (1712 nt)           | -16.5227 | -2.08447 | 0.130006 |
| PITG_14704 | Pi conserved hypothetical protein (804 nt)                    | -16.723  | -2.59401 | 0.130006 |
| PITG_03618 | Pi conserved hypothetical protein (2139 nt)                   | -16.4683 | 1.842599 | 0.130049 |
| PITG_04125 | Pi glycosyl transferase, putative (1548 nt)                   | -11.6195 | -1.79869 | 0.130503 |
| PITG_02553 | Pi conserved hypothetical protein (1261 nt)                   | -15.5891 | -1.92711 | 0.130683 |
| PITG_10942 | Pi conserved hypothetical protein (1319 nt)                   | -11.6769 | -1.56556 | 0.130836 |
| PITG_20798 | Pi ribosomal protein S17, putative (423 nt)                   | -12.9455 | 1.54172  | 0.1309   |
| PITG_05305 | Pi conserved hypothetical protein (1732 nt)                   | -16.273  | 2.209517 | 0.130948 |
| PITG_16348 | Pi crinkler (CRN) family protein, pseudogene (1519 nt)        | -13.9343 | -1.65469 | 0.13095  |
| PITG_00381 | Pi serine protease family S54, putative (1348 nt)             | -14.7962 | -1.69553 | 0.130965 |
| PITG_07029 | Pi palmitoyl-protein thioesterase 1, putative (1415 nt)       | -13.3452 | -1.59111 | 0.131081 |
| PITG_03467 | Pi conserved hypothetical protein (1085 nt)                   | -15.6192 | -1.80186 | 0.131105 |
| PITG_10624 | Pi conserved hypothetical protein (1868 nt)                   | -15.6364 | -1.82906 | 0.131105 |
| PITG_21023 | Pi conserved hypothetical protein (1979 nt)                   | -15.6029 | -1.83456 | 0.131105 |
| PITG_07758 | Pi conserved hypothetical protein (1114 nt)                   | -14.9666 | -2.11568 | 0.131137 |
| PITG_02194 | Pi conserved hypothetical protein (1662 nt)                   | -16.1109 | -2.00565 | 0.131267 |
| PITG_03806 | Pi aspartyl-tRNA synthetase, putative (1582 nt)               | -16.0872 | -2.05321 | 0.131267 |
| PITG_05701 | Pi NAD-dependent glycerol-3-phosphate dehydrogenase (10       | -16.1109 | -2.00565 | 0.131267 |
| PITG_05365 | Pi serine/threonine protein kinase (718 nt)                   | -17.7404 | -2.75024 | 0.131292 |
| PITG_17286 | Pi ATP-binding Cassette (ABC) Superfamily (5919 nt)           | -17.7404 | -2.75024 | 0.131292 |
| PITG_05584 | Pi hypothetical protein (1111 nt)                             | -13.374  | -1.73063 | 0.131415 |
| PITG_02193 | Pi conserved hypothetical protein (1009 nt)                   | -14.9643 | 1.773277 | 0.131513 |
| PITG_01062 | Pi S-adenosylmethionine decarboxylase proenzyme, putative     | -14.5021 | 1.744034 | 0.131515 |
| PITG_04671 | Pi conserved hypothetical protein (981 nt)                    | -15.7839 | -1.90272 | 0.131632 |
| PITG_05259 | Pi DNA excision repair protein ERCC-6 (3159 nt)               | -15.7963 | -2.01918 | 0.131632 |
| PITG_01777 | Pi presenilin-like protein (2926 nt)                          | -13.7132 | -1.54564 | 0.131736 |
| PITG_22689 | Pi hypothetical protein (1677 nt)                             | -14.8172 | 2.099274 | 0.132035 |
| PITG_00399 | Pi nuclear ribonuclease Z, putative (989 nt)                  | -16.2564 | -2.31665 | 0.132149 |
| PITG_18397 | Pi conserved hypothetical protein (1272 nt)                   | -16.1305 | -2.06497 | 0.132149 |
| PITG_20744 | Pi conserved hypothetical protein (641 nt)                    | -16.53   | 2.603912 | 0.132263 |
| PITG_10940 | Pi aldehyde dehydrogenase, mitochondrial precursor (1677 nt)  | -12.8725 | 1.580896 | 0.132275 |

|            |                                                                |          |          |          |
|------------|----------------------------------------------------------------|----------|----------|----------|
| PITG_23045 | Pi isoamyl acetate-hydrolyzing esterase, putative (735 nt)     | -15.6006 | 2.178827 | 0.132282 |
| PITG_06613 | Pi hypothetical protein (645 nt)                               | -17.6908 | -2.84979 | 0.132287 |
| PITG_08309 | Pi myosin-like protein (2585 nt)                               | -17.7057 | -2.67921 | 0.132287 |
| PITG_09477 | Pi ATP-binding Cassette (ABC) Superfamily (5537 nt)            | -17.6908 | -2.84979 | 0.132287 |
| PITG_12969 | Pi conserved hypothetical protein (1500 nt)                    | -17.7057 | -2.67921 | 0.132287 |
| PITG_18036 | Pi conserved hypothetical protein (863 nt)                     | -17.7057 | -2.67921 | 0.132287 |
| PITG_20204 | Pi conserved hypothetical protein (6207 nt)                    | -17.6908 | -2.84979 | 0.132287 |
| PITG_20333 | Pi conserved hypothetical protein (1223 nt)                    | -17.6908 | -2.84979 | 0.132287 |
| PITG_16005 | Pi methylmalonate-semialdehyde dehydrogenase, mitochondon      | -10.6841 | -1.52613 | 0.132468 |
| PITG_06296 | Pi ATP-binding Cassette (ABC) Superfamily (5895 nt)            | -16.9299 | -2.4175  | 0.132518 |
| PITG_17145 | Pi conserved hypothetical protein (2440 nt)                    | -17.35   | -3.38517 | 0.132518 |
| PITG_02920 | Pi conserved hypothetical protein (466 nt)                     | -16.0851 | -1.98222 | 0.132642 |
| PITG_04262 | Pi cysteine protease family C59, putative (1473 nt)            | -16.0851 | -1.98222 | 0.132642 |
| PITG_08506 | Pi conserved hypothetical protein (649 nt)                     | -17.4164 | -3.26244 | 0.1328   |
| PITG_19208 | Pi conserved hypothetical protein (1612 nt)                    | -17.4164 | -3.26244 | 0.1328   |
| PITG_00188 | Pi kinesin-like protein (3667 nt)                              | -15.497  | -1.98464 | 0.132976 |
| PITG_04522 | Pi peptidyl-prolyl cis-trans isomerase (683 nt)                | -9.12449 | 1.462587 | 0.133038 |
| PITG_13178 | Pi elongation of very long chain fatty acids protein, putative | -13.5312 | 1.576816 | 0.133046 |
| PITG_19817 | Pi conserved hypothetical protein (951 nt)                     | -13.7008 | 1.606992 | 0.133058 |
| PITG_08156 | Pi conserved hypothetical protein (483 nt)                     | -15.628  | 2.219466 | 0.133155 |
| PITG_13150 | Pi phosphatidylinositol kinase (7680 nt)                       | -17.6558 | -2.77831 | 0.133286 |
| PITG_13873 | Pi alpha-glucosidase, putative (2582 nt)                       | -17.6558 | -2.77831 | 0.133286 |
| PITG_15838 | Pi conserved hypothetical protein (1857 nt)                    | -17.6558 | -2.77831 | 0.133286 |
| PITG_21284 | Pi leukotriene A-4 hydrolase, putative (2778 nt)               | -17.6558 | -2.77831 | 0.133286 |
| PITG_21724 | Pi conserved hypothetical protein (2546 nt)                    | -17.6558 | -2.77831 | 0.133286 |
| PITG_18902 | Pi conserved hypothetical protein (1976 nt)                    | -16.3462 | -2.33734 | 0.133584 |
| PITG_07711 | Pi Major Facilitator Superfamily (MFS) (1383 nt)               | -11.9622 | 1.563242 | 0.133678 |
| PITG_12852 | Pi conserved hypothetical protein (1682 nt)                    | -14.4488 | -1.73554 | 0.133687 |
| PITG_01524 | Pi RING-box protein 1 (724 nt)                                 | -11.9637 | 1.482084 | 0.133744 |
| PITG_19298 | Pi sugar phosphate exchanger, putative (1633 nt)               | -14.2754 | -1.72686 | 0.133747 |
| PITG_05311 | Pi kinetochore protein NUF2-like protein (1412 nt)             | -15.8132 | -1.91406 | 0.13388  |
| PITG_03113 | Pi conserved hypothetical protein (741 nt)                     | -12.6576 | -1.55233 | 0.133909 |
| PITG_07950 | Pi Voltage-gated Ion Channel (VIC) Superfamily (2783 nt)       | -17.0183 | 2.614216 | 0.13394  |
| PITG_13614 | Pi malate dehydrogenase, mitochondrial precursor (1175 nt)     | -12.1169 | 1.564835 | 0.133967 |
| PITG_16852 | Pi hypothetical protein (297 nt)                               | -14.764  | -2.01935 | 0.134039 |
| PITG_18797 | Pi conserved hypothetical protein (1978 nt)                    | -13.8793 | -1.66253 | 0.134233 |
| PITG_15569 | Pi calpain-like protease (2958 nt)                             | -16.4102 | -2.12203 | 0.134557 |
| PITG_19205 | Pi conserved hypothetical protein (3550 nt)                    | -16.283  | 1.968695 | 0.134557 |
| PITG_02046 | Pi V-type proton ATPase 16 kDa proteolipid subunit, putative   | -10.6506 | 1.459476 | 0.134974 |
| PITG_06204 | Pi conserved hypothetical protein (2248 nt)                    | -11.8661 | -1.57981 | 0.135101 |
| PITG_12676 | Pi cyclin-like protein (1923 nt)                               | -13.0173 | -1.51673 | 0.13527  |
| PITG_11979 | Pi conserved hypothetical protein (585 nt)                     | -16.1044 | -2.01969 | 0.135409 |
| PITG_05488 | Pi hypothetical protein (2284 nt)                              | -16.8179 | -2.52269 | 0.135527 |
| PITG_16054 | Pi 60S ribosomal export protein nmd3, putative (1500 nt)       | -16.8548 | -2.44891 | 0.135527 |
| PITG_22164 | Pi conserved hypothetical protein (502 nt)                     | -16.8179 | -2.52269 | 0.135527 |
| PITG_13757 | Pi conserved hypothetical protein (1170 nt)                    | -15.524  | 1.70564  | 0.135542 |
| PITG_12996 | Pi conserved hypothetical protein (1007 nt)                    | -14.6428 | -1.68776 | 0.135659 |

|            |                                                                  |          |          |          |
|------------|------------------------------------------------------------------|----------|----------|----------|
| PITG_14194 | Pi carbohydrate esterase, putative (1356 nt)                     | -15.3018 | -1.95741 | 0.135849 |
| PITG_00291 | Pi scavenger mRNA-decapping enzyme DcpS, putative (1522          | -16.3757 | -2.19073 | 0.135875 |
| PITG_17867 | Pi conserved hypothetical protein (1769 nt)                      | -15.7634 | -2.01501 | 0.136229 |
| PITG_13428 | Pi conserved hypothetical protein (792 nt)                       | -13.8176 | -1.6115  | 0.136303 |
| PITG_03414 | Pi cysteine protease family C01A, putative (1431 nt)             | -15.1565 | 1.764217 | 0.136311 |
| PITG_13347 | Pi IMP-specific 5'-nucleotidase, putative (1463 nt)              | -14.677  | -1.74003 | 0.136616 |
| PITG_13397 | Pi protein kinase, putative (2544 nt)                            | -14.9267 | -1.78203 | 0.136629 |
| PITG_09977 | Pi conserved hypothetical protein (1929 nt)                      | -16.8274 | -2.50358 | 0.136757 |
| PITG_11130 | Pi conserved hypothetical protein (4116 nt)                      | -16.649  | 2.010532 | 0.136757 |
| PITG_08565 | Pi conserved hypothetical protein (624 nt)                       | -12.4154 | 1.489475 | 0.136762 |
| PITG_09289 | Pi eukaryotic translation initiation factor 3 subunit F, putativ | -13.7648 | 1.536563 | 0.136918 |
| PITG_13828 | Pi histone H3 (698 nt)                                           | -16.3948 | -2.23854 | 0.137199 |
| PITG_22549 | Pi deoxyribose-phosphate aldolase 1 (860 nt)                     | -16.4129 | -2.11592 | 0.137199 |
| PITG_01248 | Pi polyadenylate-binding protein 1-B (2432 nt)                   | -10.8107 | 1.451067 | 0.137225 |
| PITG_02691 | Pi hypothetical protein (4334 nt)                                | -15.4171 | 2.002493 | 0.137258 |
| PITG_04820 | Pi conserved hypothetical protein (1802 nt)                      | -13.6078 | -1.54336 | 0.137266 |
| PITG_07436 | Pi hypothetical protein (1894 nt)                                | -12.1447 | -1.77627 | 0.137783 |
| PITG_03865 | Pi conserved hypothetical protein (1392 nt)                      | -15.0541 | -1.67426 | 0.137867 |
| PITG_06452 | Pi formin-homology 2 domain-containing protein (2602 nt)         | -16.0628 | -2.02651 | 0.138198 |
| PITG_07086 | Pi Major Facilitator Superfamily (MFS) (1455 nt)                 | -15.8102 | 1.905567 | 0.138217 |
| PITG_17335 | Pi charged multivesicular body protein 2a (858 nt)               | -14.4518 | -1.65867 | 0.138354 |
| PITG_21075 | Pi conserved hypothetical protein (684 nt)                       | -15.6386 | -1.76244 | 0.138446 |
| PITG_02785 | Pi fructose-bisphosphate aldolase (1314 nt)                      | -12.8197 | -1.57667 | 0.138704 |
| PITG_03131 | Pi M96 mating-specific protein family (2995 nt)                  | -14.9446 | 2.288974 | 0.138712 |
| PITG_11877 | Pi conserved hypothetical protein (1913 nt)                      | -14.7994 | 1.751713 | 0.138767 |
| PITG_12233 | Pi phosphatidic acid phosphatase (1195 nt)                       | -14.7677 | 1.666602 | 0.138767 |
| PITG_23141 | Pi cyclin-dependent kinase, putative (1847 nt)                   | -15.748  | 1.916841 | 0.138844 |
| PITG_04483 | Pi conserved hypothetical protein (2088 nt)                      | -13.6308 | -1.71367 | 0.138854 |
| PITG_02608 | Pi autophagy-related protein, putative (1744 nt)                 | -16.0627 | -2.10718 | 0.139207 |
| PITG_10463 | Pi conserved hypothetical protein (953 nt)                       | -12.7578 | 1.54317  | 0.139342 |
| PITG_15885 | Pi conserved hypothetical protein (1447 nt)                      | -15.0671 | -1.74258 | 0.139499 |
| PITG_21056 | Pi conserved hypothetical protein (309 nt)                       | -15.7321 | -2.23746 | 0.139699 |
| PITG_00075 | Pi conserved hypothetical protein (4353 nt)                      | -16.357  | 2.044927 | 0.139863 |
| PITG_03168 | Pi hypothetical protein (287 nt)                                 | -12.5511 | 1.535218 | 0.139873 |
| PITG_09931 | Pi conserved hypothetical protein (759 nt)                       | -14.4961 | -1.7534  | 0.140102 |
| PITG_16834 | Pi exodeoxyribonuclease (1177 nt)                                | -13.9646 | -1.5933  | 0.140184 |
| PITG_08481 | Pi regulator of chromosome condensation (RCC1)-like protei       | -16.0079 | -2.21982 | 0.140325 |
| PITG_03863 | Pi conserved hypothetical protein (2538 nt)                      | -16.8399 | -2.4784  | 0.140479 |
| PITG_16224 | Pi conserved hypothetical protein (1772 nt)                      | -16.8399 | -2.4784  | 0.140479 |
| PITG_08460 | Pi lipin-like protein (2193 nt)                                  | -16.0732 | -2.0864  | 0.140619 |
| PITG_10141 | Pi conserved hypothetical protein (2682 nt)                      | -14.8426 | -1.60171 | 0.140738 |
| PITG_19581 | Pi crinkler (CRN) family protein, pseudogene (2543 nt)           | -11.0342 | -1.5767  | 0.140741 |
| PITG_20783 | Pi hypothetical protein (1593 nt)                                | -14.9256 | 1.74195  | 0.140827 |
| PITG_19736 | Pi alcohol dehydrogenase, putative (1016 nt)                     | -15.5535 | 1.782163 | 0.141081 |
| PITG_01107 | Pi conserved hypothetical protein (1743 nt)                      | -14.4972 | -1.84511 | 0.141106 |
| PITG_23066 | Pi phosphatidylinositol 4-phosphate 5-kinase (PIPK-D11/GPC       | -15.5894 | 1.709092 | 0.141464 |
| PITG_05227 | Pi conserved hypothetical protein (2034 nt)                      | -15.6036 | -1.8343  | 0.141536 |

|            |                                                                |          |          |          |
|------------|----------------------------------------------------------------|----------|----------|----------|
| PITG_04711 | Pi conserved hypothetical protein (569 nt)                     | -16.0564 | 2.36448  | 0.14175  |
| PITG_10382 | Pi conserved hypothetical protein (1263 nt)                    | -15.3993 | 1.599942 | 0.141893 |
| PITG_06119 | Pi conserved hypothetical protein (1070 nt)                    | -13.9621 | 1.511397 | 0.142183 |
| PITG_14001 | Pi mitogen-activated protein kinase, putative (1218 nt)        | -13.9192 | 1.532844 | 0.142359 |
| PITG_23240 | Pi conserved hypothetical protein (266 nt)                     | -17.4717 | -3.15964 | 0.142396 |
| PITG_13439 | Pi conserved hypothetical protein (775 nt)                     | -16.0649 | -1.94404 | 0.142422 |
| PITG_14723 | Pi conserved hypothetical protein (1040 nt)                    | -12.4977 | -1.52513 | 0.142496 |
| PITG_13726 | Pi Ca <sup>2+</sup> :Cation Antiporter (CaCA) Family (1305 nt) | -13.798  | 1.528075 | 0.142537 |
| PITG_00829 | Pi conserved hypothetical protein (456 nt)                     | -16.4181 | -2.19255 | 0.142547 |
| PITG_05113 | Pi hypothetical protein (1175 nt)                              | -13.2239 | 1.517281 | 0.142548 |
| PITG_07111 | Pi conserved hypothetical protein (1333 nt)                    | -15.0905 | -1.74389 | 0.142777 |
| PITG_03520 | Pi conserved hypothetical protein (1531 nt)                    | -14.3507 | -1.61064 | 0.142777 |
| PITG_13132 | Pi caltractin (659 nt)                                         | -11.7313 | 1.537548 | 0.143121 |
| PITG_00259 | Pi conserved hypothetical protein (849 nt)                     | -15.8197 | 1.979113 | 0.143241 |
| PITG_17034 | Pi Annexin (Annexin) Family (987 nt)                           | -10.1178 | -1.64153 | 0.143247 |
| PITG_05593 | Pi conserved hypothetical protein (459 nt)                     | -11.9167 | 1.488149 | 0.143362 |
| PITG_03583 | Pi putative secreted protein (462 nt)                          | -10.7572 | 1.699815 | 0.143415 |
| PITG_11955 | Pi conserved hypothetical protein (1249 nt)                    | -11.2474 | -2.51775 | 0.143425 |
| PITG_09956 | Pi pre-mRNA-processing factor, putative (2947 nt)              | -15.5259 | -1.92708 | 0.143449 |
| PITG_05595 | Pi conserved hypothetical protein (5505 nt)                    | -15.4122 | 1.781693 | 0.143709 |
| PITG_05805 | Pi tryptophan synthase (1338 nt)                               | -16.0976 | -1.9567  | 0.14384  |
| PITG_04010 | Pi APS kinase/ATP sulfurlyase/pyrophosphatase fusion prote     | -13.3942 | -1.60467 | 0.144063 |
| PITG_01821 | Pi conserved hypothetical protein (1265 nt)                    | -16.567  | 2.121512 | 0.144245 |
| PITG_13613 | Pi P-type ATPase (P-ATPase) Superfamily (2145 nt)              | -16.8358 | -2.48627 | 0.144245 |
| PITG_15254 | Pi conserved hypothetical protein (426 nt)                     | -16.567  | 2.121512 | 0.144245 |
| PITG_21163 | Pi GAF domain-containing protein (2247 nt)                     | -16.567  | 2.121512 | 0.144245 |
| PITG_14751 | Pi conserved hypothetical protein (1574 nt)                    | -14.3424 | -1.65932 | 0.144253 |
| PITG_01241 | Pi conserved hypothetical protein (453 nt)                     | -16.3381 | -2.16373 | 0.144357 |
| PITG_01647 | Pi conserved hypothetical protein (1958 nt)                    | -15.286  | -1.67871 | 0.144481 |
| PITG_02902 | Pi carbohydrate esterase, putative (1228 nt)                   | -13.0293 | 1.509885 | 0.144487 |
| PITG_08900 | Pi protein kinase (1363 nt)                                    | -17.0513 | -2.15626 | 0.144666 |
| PITG_18726 | Pi conserved hypothetical protein (1282 nt)                    | -17.0603 | -2.1382  | 0.144666 |
| PITG_00997 | Pi conserved hypothetical protein (645 nt)                     | -11.2915 | 1.445226 | 0.144841 |
| PITG_01690 | Pi conserved hypothetical protein (1475 nt)                    | -17.7604 | -2.70154 | 0.144849 |
| PITG_03341 | Pi conserved hypothetical protein (1303 nt)                    | -15.3645 | -1.77651 | 0.14511  |
| PITG_16337 | Pi ribosomal RNA methyltransferase, putative (971 nt)          | -14.7305 | -1.62988 | 0.145225 |
| PITG_10905 | Pi conserved hypothetical protein (1815 nt)                    | -14.2093 | -1.59225 | 0.145236 |
| PITG_16383 | Pi Major Facilitator Superfamily (MFS) (1536 nt)               | -16.5512 | 2.575317 | 0.145252 |
| PITG_20377 | Pi tRNA pseudouridine synthase (1476 nt)                       | -15.9852 | 1.8349   | 0.145264 |
| PITG_05451 | Pi hypothetical protein (1565 nt)                              | -13.5755 | -2.50882 | 0.145378 |
| PITG_02997 | Pi conserved hypothetical protein (7869 nt)                    | -16.6784 | 2.223486 | 0.145511 |
| PITG_16395 | Pi conserved hypothetical protein (2016 nt)                    | -16.6784 | 2.223486 | 0.145511 |
| PITG_16686 | Pi conserved hypothetical protein (549 nt)                     | -16.5894 | -1.93832 | 0.145511 |
| PITG_02073 | Pi conserved hypothetical protein (14444 nt)                   | -16.5353 | 1.937332 | 0.145511 |
| PITG_12567 | Pi sporangia induced conserved hypothetical protein (1539 r    | -16.5353 | 1.937332 | 0.145511 |
| PITG_16358 | Pi RING Finger Ubiquitin ligase, putative (1245 nt)            | -13.894  | 1.521695 | 0.145521 |
| PITG_00045 | Pi myosin-like protein (4243 nt)                               | -13.0277 | -1.56316 | 0.1458   |

|            |                                                               |          |          |          |
|------------|---------------------------------------------------------------|----------|----------|----------|
| PITG_10547 | Pi hypothetical protein (524 nt)                              | -17.0849 | -2.08959 | 0.145808 |
| PITG_14413 | Pi protein kinase, putative (2688 nt)                         | -17.0429 | -2.17355 | 0.145808 |
| PITG_16740 | Pi conserved hypothetical protein (1653 nt)                   | -17.0849 | -2.08959 | 0.145808 |
| PITG_15531 | Pi glutathione S-transferase, putative (1086 nt)              | -12.4413 | -1.5614  | 0.145968 |
| PITG_06808 | Pi trehalase, putative (1971 nt)                              | -15.5924 | 1.791616 | 0.146029 |
| PITG_01771 | Pi monothiol glutaredoxin-5, mitochondrial precursor (762 n   | -12.7729 | 1.454228 | 0.146218 |
| PITG_14561 | Pi Chloride Channel (ClC) Family (2991 nt)                    | -15.8543 | -1.76441 | 0.146219 |
| PITG_04571 | Pi conserved hypothetical protein (802 nt)                    | -15.9951 | 1.947558 | 0.146326 |
| PITG_11323 | Pi conserved hypothetical protein (2178 nt)                   | -12.2478 | -1.43353 | 0.146467 |
| PITG_05748 | Pi conserved hypothetical protein (1156 nt)                   | -14.2364 | -1.63053 | 0.146571 |
| PITG_00506 | Pi syntaxin 7-like protein (1139 nt)                          | -13.7028 | -1.47827 | 0.146685 |
| PITG_03755 | Pi aspartate aminotransferase, putative (2506 nt)             | -16.5851 | -1.94762 | 0.146782 |
| PITG_06630 | Pi conserved hypothetical protein (6368 nt)                   | -16.5149 | 1.74162  | 0.146782 |
| PITG_06720 | Pi conserved hypothetical protein (5418 nt)                   | -16.5149 | 1.74162  | 0.146782 |
| PITG_07012 | Pi transmembrane protein, putative (3789 nt)                  | -16.5043 | 1.762913 | 0.146782 |
| PITG_13014 | Pi proliferation-associated protein, metalloprotease family N | -12.6062 | 1.714723 | 0.146869 |
| PITG_05263 | Pi guanine deaminase, putative (1486 nt)                      | -14.9972 | -2.05747 | 0.146933 |
| PITG_14549 | Pi phosphatidic acid phosphatase (1026 nt)                    | -14.4463 | -1.62204 | 0.146988 |
| PITG_09554 | Pi conserved hypothetical protein (1804 nt)                   | -14.6866 | -1.72125 | 0.147085 |
| PITG_00669 | Pi conserved hypothetical protein (696 nt)                    | -15.6125 | 1.986661 | 0.147157 |
| PITG_00067 | Pi conserved hypothetical protein (2386 nt)                   | -14.2679 | -1.50507 | 0.147283 |
| PITG_02397 | Pi conserved hypothetical protein (848 nt)                    | -16.1321 | -1.88851 | 0.147417 |
| PITG_03025 | Pi hypothetical protein (891 nt)                              | -16.109  | -1.93464 | 0.147417 |
| PITG_04831 | Pi regulator of chromosome condensation (RCC1)-like protei    | -13.1305 | 1.48292  | 0.147627 |
| PITG_00078 | Pi kinesin-like protein (2754 nt)                             | -15.2878 | -1.67571 | 0.147675 |
| PITG_10440 | Pi conserved hypothetical protein (503 nt)                    | -15.8701 | -1.80035 | 0.147706 |
| PITG_16309 | Pi conserved hypothetical protein (931 nt)                    | -16.8067 | -2.54436 | 0.148057 |
| PITG_18201 | Pi avirulence-associated protein 3.4, putative (3419 nt)      | -16.4942 | 1.785092 | 0.148057 |
| PITG_00588 | Pi cathepsin, cysteine protease family C01A, putative (2248 r | -14.1062 | -1.6485  | 0.148176 |
| PITG_06980 | Pi conserved hypothetical protein (894 nt)                    | -15.1022 | -1.6721  | 0.148219 |
| PITG_05251 | Pi protein tyrosine phosphatase type IVA protein 1 (583 nt)   | -12.3641 | -1.4139  | 0.148251 |
| PITG_03354 | Pi hypothetical protein (367 nt)                              | -15.8518 | -1.98016 | 0.148529 |
| PITG_12183 | Pi double stranded RNA binding, putative (1215 nt)            | -15.8523 | -1.97918 | 0.148529 |
| PITG_17927 | Pi hypothetical protein (2235 nt)                             | -14.7624 | 1.880322 | 0.148589 |
| PITG_08530 | Pi conserved hypothetical protein (1872 nt)                   | -15.4828 | -1.65043 | 0.148781 |
| PITG_06898 | Pi conserved hypothetical protein (3454 nt)                   | -16.1339 | -1.9598  | 0.148849 |
| PITG_07866 | Pi thiamin pyrophosphokinase, putative (662 nt)               | -14.2711 | -1.52883 | 0.149095 |
| PITG_22253 | Pi hypothetical protein (633 nt)                              | -15.1409 | -1.69545 | 0.149205 |
| PITG_02026 | Pi succinyl-CoA ligase subunit alpha, mitochondrial precursor | -11.7028 | 1.429481 | 0.14924  |
| PITG_02762 | Pi protein kinase, putative (2433 nt)                         | -13.9913 | -1.53988 | 0.149251 |
| PITG_11300 | Pi conserved hypothetical protein (923 nt)                    | -16.2144 | 1.721152 | 0.149349 |
| PITG_20617 | Pi conserved hypothetical protein (594 nt)                    | -16.1516 | 1.704716 | 0.149349 |
| PITG_09631 | Pi conserved hypothetical protein (465 nt)                    | -15.0243 | 1.674279 | 0.149396 |
| PITG_17279 | Pi conserved hypothetical protein (1737 nt)                   | -13.1671 | -1.71525 | 0.149457 |
| PITG_17681 | Pi conserved hypothetical protein (1737 nt)                   | -16.0885 | 2.072078 | 0.149568 |
| PITG_12580 | Pi conserved hypothetical protein (401 nt)                    | -11.9049 | 1.454853 | 0.149603 |
| PITG_20425 | Pi Crinkler (CRN) family protein, pseudogene (2573 nt)        | -11.7168 | -1.46966 | 0.149662 |



|            |                                                                    |          |          |          |
|------------|--------------------------------------------------------------------|----------|----------|----------|
| PITG_17540 | Pi crinkler (CRN) family protein, putative (1962 nt)               | -10.0982 | -1.46662 | 0.149693 |
| PITG_06132 | Pi katanin p60 ATPase-containing subunit, putative (3154 nt)       | -17.8027 | -2.61896 | 0.149711 |
| PITG_06495 | Pi M96 mating-specific protein family (531 nt)                     | -17.8027 | -2.61896 | 0.149711 |
| PITG_06680 | Pi conserved hypothetical protein (1031 nt)                        | -17.8027 | -2.61896 | 0.149711 |
| PITG_08604 | Pi Arsenical Resistance-3 (ACR3) Family (1188 nt)                  | -17.8027 | -2.61896 | 0.149711 |
| PITG_10422 | Pi conserved hypothetical protein (1180 nt)                        | -17.8027 | -2.61896 | 0.149711 |
| PITG_21409 | Pi hypothetical protein (1891 nt)                                  | -17.8027 | -2.61896 | 0.149711 |
| PITG_22997 | Pi conserved hypothetical protein (957 nt)                         | -17.8027 | -2.61896 | 0.149711 |
| PITG_07080 | Pi conserved hypothetical protein (1446 nt)                        | -14.5528 | 1.554369 | 0.149786 |
| PITG_13682 | Pi hypothetical protein (564 nt)                                   | -10.9215 | 1.39667  | 0.149794 |
| PITG_15783 | Pi conserved hypothetical protein (1379 nt)                        | -15.3296 | -1.59044 | 0.149944 |
| PITG_09967 | Pi conserved hypothetical protein (807 nt)                         | -15.7986 | 1.910151 | 0.150023 |
| PITG_03237 | Pi conserved hypothetical protein (433 nt)                         | -15.2089 | -1.78037 | 0.15023  |
| PITG_03493 | Pi amidophosphoribosyltransferase (1803 nt)                        | -15.1866 | 1.571866 | 0.150244 |
| PITG_03710 | Pi strumpellin, putative (3760 nt)                                 | -16.13   | -1.89242 | 0.150286 |
| PITG_05298 | Pi conserved hypothetical protein (930 nt)                         | -16.1072 | -1.93807 | 0.150286 |
| PITG_03803 | Pi conserved hypothetical protein (2148 nt)                        | -17.4572 | -3.18497 | 0.150425 |
| PITG_09961 | Pi conserved hypothetical protein (853 nt)                         | -17.0362 | -2.18923 | 0.150425 |
| PITG_13024 | Pi conserved hypothetical protein (1443 nt)                        | -17.077  | -2.10768 | 0.150425 |
| PITG_13164 | Pi metalloprotease family M48X, putative (1196 nt)                 | -17.4572 | -3.18497 | 0.150425 |
| PITG_02264 | Pi protein kinase, putative (4828 nt)                              | -15.6523 | -1.7991  | 0.150641 |
| PITG_01329 | Pi septum formation protein Maf (860 nt)                           | -17.7717 | -2.55564 | 0.150696 |
| PITG_02289 | Pi acetyl-coenzyme A transporter, putative (1608 nt)               | -17.7717 | -2.55564 | 0.150696 |
| PITG_04339 | Pi secreted RxLR effector peptide, putative (723 nt)               | -17.7717 | -2.55564 | 0.150696 |
| PITG_12214 | Pi conserved hypothetical protein (1677 nt)                        | -17.7717 | -2.55564 | 0.150696 |
| PITG_17539 | Pi crinkler (CRN) family protein, putative (733 nt)                | -11.2401 | -1.76735 | 0.150738 |
| PITG_11571 | Pi Crinkler (CRN) family protein, pseudogene (4364 nt)             | -15.4123 | -1.85795 | 0.151007 |
| PITG_02973 | Pi delta-1-pyrroline-5-carboxylate synthetase, putative (1032 nt)  | -14.0891 | -1.48018 | 0.151397 |
| PITG_00623 | Pi 4-aminobutyrate aminotransferase, putative (1276 nt)            | -13.032  | -1.42162 | 0.15141  |
| PITG_23087 | Pi Crinkler (CRN) family protein (1296 nt)                         | -11.2597 | -1.62496 | 0.151499 |
| PITG_04985 | Pi sorbitol dehydrogenase, putative (1175 nt)                      | -15.2841 | 1.643993 | 0.151565 |
| PITG_22433 | Pi conserved hypothetical protein (1203 nt)                        | -13.3317 | -1.93162 | 0.151712 |
| PITG_10011 | Pi polyketide hydroxylase, putative (1876 nt)                      | -16.1175 | -1.8415  | 0.151728 |
| PITG_19608 | Pi ribosomal protein L7Ae/L30e/S12e/Gadd4, putative (679 nt)       | -14.1467 | 1.512259 | 0.151883 |
| PITG_07917 | Pi PLAC8 family protein (722 nt)                                   | -14.2862 | -1.63284 | 0.15217  |
| PITG_05960 | Pi hypothetical protein (1290 nt)                                  | -15.6214 | 1.719506 | 0.152188 |
| PITG_18392 | Pi T-complex protein 1 subunit beta (1686 nt)                      | -12.8429 | 1.46949  | 0.152333 |
| PITG_14282 | Pi conserved hypothetical protein (701 nt)                         | -12.2747 | 1.430099 | 0.152439 |
| PITG_23088 | Pi Crinkler (CRN) family protein (1302 nt)                         | -11.5213 | -1.39667 | 0.152453 |
| PITG_01648 | Pi conserved hypothetical protein (674 nt)                         | -14.0594 | 1.612239 | 0.15253  |
| PITG_19878 | Pi protein kinase, putative (2849 nt)                              | -15.3279 | -1.90522 | 0.152541 |
| PITG_02533 | Pi conserved hypothetical protein (845 nt)                         | -13.8142 | -1.5224  | 0.152773 |
| PITG_10955 | Pi conserved hypothetical protein (1538 nt)                        | -15.4087 | 1.743583 | 0.153125 |
| PITG_19766 | Pi conserved hypothetical protein (1787 nt)                        | -16.1264 | -1.97556 | 0.153175 |
| PITG_04973 | Pi conserved hypothetical protein (1469 nt)                        | -15.3296 | -1.5909  | 0.15319  |
| PITG_03318 | Pi conserved hypothetical protein (4708 nt)                        | -15.6911 | -1.65742 | 0.153292 |
| PITG_15892 | Pi calcium/calmodulin dependent protein kinase, putative (1368 nt) | -13.6685 | -1.48553 | 0.153422 |

|            |                                                                  |          |          |          |
|------------|------------------------------------------------------------------|----------|----------|----------|
| PITG_06430 | Pi conserved hypothetical protein (1141 nt)                      | -12.2779 | 1.509626 | 0.153469 |
| PITG_18393 | Pi conserved hypothetical protein (1546 nt)                      | -15.5408 | -1.8974  | 0.153553 |
| PITG_03079 | Pi hypothetical protein (1987 nt)                                | -15.7859 | 1.654628 | 0.153702 |
| PITG_10133 | Pi hypothetical protein (402 nt)                                 | -15.1491 | -1.8465  | 0.153743 |
| PITG_20139 | Pi Resistance-Nodulation-Cell Division (RND) Superfamily (20     | -12.921  | -1.76743 | 0.153805 |
| PITG_13776 | Pi conserved hypothetical protein (829 nt)                       | -14.6925 | 1.578915 | 0.153851 |
| PITG_16809 | Pi conserved hypothetical protein (2435 nt)                      | -14.9325 | -1.68061 | 0.154024 |
| PITG_02220 | Pi hypothetical protein (1581 nt)                                | -16.4487 | -2.1301  | 0.154155 |
| PITG_15022 | Pi conserved hypothetical protein (1507 nt)                      | -16.4487 | -2.1301  | 0.154155 |
| PITG_21763 | Pi conserved hypothetical protein (1462 nt)                      | -16.3235 | 1.886807 | 0.154155 |
| PITG_10980 | Pi phosphatidylinositol-4-phosphate-5-kinase (Pi-PIPK-D2) (3     | -14.3862 | -1.63953 | 0.154262 |
| PITG_10007 | Pi diaminopimelate decarboxylase, putative (1584 nt)             | -14.8004 | -1.64509 | 0.154375 |
| PITG_00732 | Pi phosphatidylinositol kinase (PIK-K) (4015 nt)                 | -15.8142 | -1.91306 | 0.154539 |
| PITG_04393 | Pi tubulin polyglutamylase, putative (1809 nt)                   | -16.0898 | 1.910813 | 0.154626 |
| PITG_02798 | Pi conserved hypothetical protein (513 nt)                       | -14.0619 | -1.50518 | 0.154722 |
| PITG_09539 | Pi hypothetical protein (665 nt)                                 | -12.1375 | -1.50545 | 0.154747 |
| PITG_00938 | Pi conserved hypothetical protein (5558 nt)                      | -14.6381 | 1.573847 | 0.154792 |
| PITG_19119 | Pi conserved hypothetical protein (717 nt)                       | -10.3555 | -1.4383  | 0.154908 |
| PITG_20194 | Pi protein mago nashi (912 nt)                                   | -14.4166 | 1.718147 | 0.155107 |
| PITG_04372 | Pi conserved hypothetical protein (610 nt)                       | -14.5983 | -1.63742 | 0.15513  |
| PITG_02964 | Pi carbohydrate-binding protein, putative (1075 nt)              | -15.6217 | -1.86505 | 0.155343 |
| PITG_04427 | Pi conserved hypothetical protein (1462 nt)                      | -14.2038 | -1.6088  | 0.155445 |
| PITG_19445 | Pi serine protease family S08A, putative (1096 nt)               | -16.4551 | -2.03223 | 0.155533 |
| PITG_10417 | Pi conserved hypothetical protein (904 nt)                       | -14.7542 | -1.58272 | 0.15568  |
| PITG_04524 | Pi conserved hypothetical protein (473 nt)                       | -16.2567 | -2.30352 | 0.155976 |
| PITG_02958 | Pi conserved hypothetical protein (864 nt)                       | -14.7629 | -1.52523 | 0.156143 |
| PITG_18834 | Pi crinkler (CRN) family protein (2548 nt)                       | -10.7084 | -1.42366 | 0.156322 |
| PITG_04468 | Pi Mitochondrial Carrier (MC) Family (882 nt)                    | -15.3296 | -1.59154 | 0.156456 |
| PITG_04839 | Pi cleavage induced conserved hypothetical protein (1974 nt      | -14.9909 | -1.70659 | 0.156558 |
| PITG_08673 | Pi conserved hypothetical protein (1365 nt)                      | -12.8422 | 1.408688 | 0.156688 |
| PITG_10735 | Pi conserved hypothetical protein (984 nt)                       | -14.5129 | -1.68349 | 0.156705 |
| PITG_11290 | Pi solute carrier family, facilitated glucose transporter, putat | -12.2379 | 1.483691 | 0.156767 |
| PITG_02328 | Pi conserved hypothetical protein (968 nt)                       | -15.6216 | -1.93174 | 0.156904 |
| PITG_09789 | Pi conserved hypothetical protein (2931 nt)                      | -15.2467 | -1.70446 | 0.156909 |
| PITG_17600 | Pi conserved hypothetical protein (1505 nt)                      | -15.2203 | -1.65478 | 0.156909 |
| PITG_01519 | Pi hypothetical protein (2051 nt)                                | -16.2435 | 1.652632 | 0.156916 |
| PITG_09711 | Pi hypothetical protein (274 nt)                                 | -12.4286 | 1.550955 | 0.156928 |
| PITG_08701 | Pi conserved hypothetical protein (1445 nt)                      | -12.6883 | -1.4159  | 0.157312 |
| PITG_18272 | Pi conserved hypothetical protein (1840 nt)                      | -15.9153 | -1.70954 | 0.157442 |
| PITG_00406 | Pi conserved hypothetical protein (1597 nt)                      | -14.1637 | -1.53053 | 0.157473 |
| PITG_07056 | Pi isocitrate dehydrogenase, mitochondrial precursor (1472       | -11.5758 | 1.418727 | 0.157529 |
| PITG_19178 | Pi 13 kDa ribonucleoprotein-associated protein (613 nt)          | -12.8167 | 1.417033 | 0.157548 |
| PITG_06390 | Pi conserved hypothetical protein (3043 nt)                      | -14.282  | -1.50712 | 0.157683 |
| PITG_00820 | Pi conserved hypothetical protein (1224 nt)                      | -13.1394 | 1.421848 | 0.157964 |
| PITG_03550 | Pi histone H2B (493 nt)                                          | -12.6071 | -1.51363 | 0.158201 |
| PITG_20041 | Pi conserved hypothetical protein (2287 nt)                      | -13.8033 | 1.520406 | 0.158257 |
| PITG_19505 | Pi conserved hypothetical protein (641 nt)                       | -10.7718 | 1.474404 | 0.158295 |

|            |                                                               |          |          |          |
|------------|---------------------------------------------------------------|----------|----------|----------|
| PITG_07243 | Pi conserved hypothetical protein (3002 nt)                   | -14.9594 | -1.81149 | 0.158301 |
| PITG_18380 | Pi conserved hypothetical protein (903 nt)                    | -15.4967 | -1.68102 | 0.158368 |
| PITG_16915 | Pi elongation factor Tu (560 nt)                              | -12.6666 | 1.553824 | 0.158396 |
| PITG_07940 | Pi conserved hypothetical protein (1261 nt)                   | -16.779  | -2.59793 | 0.158427 |
| PITG_01952 | Pi conserved hypothetical protein (1052 nt)                   | -16.5799 | -1.96372 | 0.158443 |
| PITG_18276 | Pi conserved hypothetical protein (1704 nt)                   | -16.5799 | -1.96372 | 0.158443 |
| PITG_16474 | Pi conserved hypothetical protein (1283 nt)                   | -15.1783 | -1.62023 | 0.158516 |
| PITG_07400 | Pi 2,3-bisphosphoglycerate-dependent phosphoglycerate m       | -11.5764 | -1.52133 | 0.158635 |
| PITG_06740 | Pi conserved hypothetical protein (765 nt)                    | -14.5572 | 1.690781 | 0.158936 |
| PITG_05116 | Pi conserved hypothetical protein (814 nt)                    | -15.8925 | -1.75511 | 0.158967 |
| PITG_05623 | Pi conserved hypothetical protein (2699 nt)                   | -15.8925 | -1.75511 | 0.158967 |
| PITG_17879 | Pi conserved hypothetical protein (970 nt)                    | -16.127  | -1.89809 | 0.159009 |
| PITG_09665 | Pi protein kinase, putative (2399 nt)                         | -15.1726 | -1.74672 | 0.159095 |
| PITG_16458 | Pi conserved hypothetical protein (1230 nt)                   | -13.4556 | -1.5075  | 0.15951  |
| PITG_01595 | Pi hypothetical protein (328 nt)                              | -14.5557 | -1.59419 | 0.159577 |
| PITG_06396 | Pi N-acetyltransferase, putative (546 nt)                     | -15.3437 | -1.56165 | 0.159625 |
| PITG_14572 | Pi conserved hypothetical protein (794 nt)                    | -16.4405 | -2.06032 | 0.159696 |
| PITG_05588 | Pi conserved hypothetical protein (882 nt)                    | -16.1137 | -2.08834 | 0.159792 |
| PITG_03749 | Pi hypothetical protein (975 nt)                              | -17.452  | -3.19124 | 0.159887 |
| PITG_10721 | Pi transmembrane protein, putative (1707 nt)                  | -17.0323 | -2.20165 | 0.159887 |
| PITG_13383 | Pi glycoprotein elicitor-like protein (967 nt)                | -17.452  | -3.19124 | 0.159887 |
| PITG_20120 | Pi hypothetical protein (234 nt)                              | -17.452  | -3.19124 | 0.159887 |
| PITG_05293 | Pi conserved hypothetical protein (2351 nt)                   | -15.0805 | -1.66839 | 0.160046 |
| PITG_11387 | Pi conserved hypothetical protein (2136 nt)                   | -15.1297 | -1.77555 | 0.160268 |
| PITG_10240 | Pi pirin, putative (1213 nt)                                  | -14.0679 | -1.52235 | 0.160302 |
| PITG_18175 | Pi conserved hypothetical protein (1426 nt)                   | -15.9121 | -1.71616 | 0.160495 |
| PITG_14616 | Pi conserved hypothetical protein (654 nt)                    | -14.5589 | 1.544537 | 0.160513 |
| PITG_20868 | Pi beta-glucan synthesis-associated protein, putative (2390 r | -15.4143 | -1.85641 | 0.160563 |
| PITG_20977 | Pi conserved hypothetical protein (1610 nt)                   | -14.2691 | -1.94907 | 0.160835 |
| PITG_17168 | Pi conserved hypothetical protein (1145 nt)                   | -15.6699 | -1.76245 | 0.161142 |
| PITG_08233 | Pi conserved hypothetical protein (408 nt)                    | -16.8826 | -2.39326 | 0.161231 |
| PITG_08893 | Pi conserved hypothetical protein (2893 nt)                   | -16.7058 | 2.165783 | 0.161231 |
| PITG_05262 | Pi conserved hypothetical protein (621 nt)                    | -16.0948 | -2.04412 | 0.161274 |
| PITG_10569 | Pi hypothetical protein (341 nt)                              | -16.1055 | -2.10538 | 0.161274 |
| PITG_04131 | Pi glycoside hydrolase, putative (2221 nt)                    | -12.7296 | -1.77184 | 0.161292 |
| PITG_17999 | Pi 3-hydroxyisobutyrate dehydrogenase, putative (1296 nt)     | -15.852  | -1.76652 | 0.161307 |
| PITG_12980 | Pi conserved hypothetical protein (2345 nt)                   | -15.3649 | -1.77394 | 0.161389 |
| PITG_18824 | Pi crinkler (CRN) family protein, pseudogene (2748 nt)        | -11.796  | -1.37178 | 0.16142  |
| PITG_11692 | Pi conserved hypothetical protein (645 nt)                    | -13.3993 | -1.78703 | 0.161464 |
| PITG_10315 | Pi UDP-sugar pyrophospharylase, putative (1913 nt)            | -16.4175 | -2.19593 | 0.161918 |
| PITG_11075 | Pi conserved hypothetical protein (1791 nt)                   | -16.0267 | 1.750844 | 0.161955 |
| PITG_10191 | Pi conserved hypothetical protein (2294 nt)                   | -15.8954 | -1.68242 | 0.162029 |
| PITG_07232 | Pi conserved hypothetical protein (1400 nt)                   | -14.1036 | -1.45112 | 0.16212  |
| PITG_02582 | Pi C2 domain-containing protein, putative (826 nt)            | -14.8598 | -1.61013 | 0.162228 |
| PITG_08252 | Pi hypothetical protein (1222 nt)                             | -12.9514 | -1.74726 | 0.162487 |
| PITG_00978 | Pi conserved hypothetical protein (2853 nt)                   | -13.7584 | -1.52067 | 0.162519 |
| PITG_14078 | Pi conserved hypothetical protein (1769 nt)                   | -15.6873 | -1.72827 | 0.162725 |

|            |                                                                                 |          |          |          |
|------------|---------------------------------------------------------------------------------|----------|----------|----------|
| PITG_11753 | Pi conserved hypothetical protein (951 nt)                                      | -14.8976 | -1.79879 | 0.162995 |
| PITG_00912 | Pi 3-hydroxyisobutyrate dehydrogenase, putative (1590 nt)                       | -11.8864 | -1.51833 | 0.163083 |
| PITG_13005 | Pi solute carrier family 2, facilitated glucose transporter, putative (1590 nt) | -15.0635 | -1.90833 | 0.163282 |
| PITG_02928 | Pi berberine-like protein (1530 nt)                                             | -16.3934 | -2.24422 | 0.16334  |
| PITG_06884 | Pi conserved hypothetical protein (1061 nt)                                     | -15.0929 | -1.64352 | 0.163466 |
| PITG_14852 | Pi lipoic acid synthetase, mitochondrial precursor (1241 nt)                    | -14.6593 | 1.44764  | 0.163607 |
| PITG_00314 | Pi conserved hypothetical protein (853 nt)                                      | -11.9331 | 1.368214 | 0.163632 |
| PITG_00420 | Pi F-box protein, putative (489 nt)                                             | -16.7269 | 2.124253 | 0.163831 |
| PITG_17956 | Pi croquemort mating protein M82 (2302 nt)                                      | -16.7269 | 2.124253 | 0.163831 |
| PITG_00603 | Pi conserved hypothetical protein (543 nt)                                      | -17.8174 | -2.45737 | 0.163914 |
| PITG_08831 | Pi ribonuclease 3, putative (1010 nt)                                           | -17.8174 | -2.45737 | 0.163914 |
| PITG_11219 | Pi conserved hypothetical protein (2744 nt)                                     | -17.8174 | -2.45737 | 0.163914 |
| PITG_20248 | Pi conserved hypothetical protein (562 nt)                                      | -17.8174 | -2.45737 | 0.163914 |
| PITG_20492 | Pi conserved hypothetical protein (2911 nt)                                     | -17.8174 | -2.45737 | 0.163914 |
| PITG_05170 | Pi serine protease family S09X, putative (1823 nt)                              | -14.9936 | -1.64782 | 0.163997 |
| PITG_19270 | Pi conserved hypothetical protein (1212 nt)                                     | -12.8293 | -1.54307 | 0.164489 |
| PITG_01744 | Pi conserved hypothetical protein (1476 nt)                                     | -14.9965 | -1.5081  | 0.164634 |
| PITG_21000 | Pi conserved hypothetical protein (2349 nt)                                     | -13.9952 | -1.42777 | 0.164663 |
| PITG_11247 | Pi heat shock 70 kDa protein (2090 nt)                                          | -10.7807 | -1.47666 | 0.16478  |
| PITG_03110 | Pi conserved hypothetical protein (2819 nt)                                     | -17.7591 | -2.57341 | 0.164962 |
| PITG_05475 | Pi conserved hypothetical protein (1305 nt)                                     | -17.7938 | -2.64289 | 0.164962 |
| PITG_14429 | Pi conserved hypothetical protein (751 nt)                                      | -17.7938 | -2.64289 | 0.164962 |
| PITG_14922 | Pi conserved hypothetical protein (1532 nt)                                     | -17.7591 | -2.57341 | 0.164962 |
| PITG_04421 | Pi protein kinase (1613 nt)                                                     | -15.4979 | -1.62057 | 0.164982 |
| PITG_18031 | Pi conserved hypothetical protein (1265 nt)                                     | -15.4974 | 1.60182  | 0.164982 |
| PITG_11719 | Pi 4-hydroxyphenylpyruvate dioxygenase (1344 nt)                                | -13.1343 | -1.47199 | 0.16513  |
| PITG_00274 | Pi Ryanodine-Inositol 1,4,5-triphosphate Receptor Ca2 Channel (1344 nt)         | -16.9051 | -2.34807 | 0.165137 |
| PITG_08416 | Pi conserved hypothetical protein (2411 nt)                                     | -14.1666 | 1.524321 | 0.165411 |
| PITG_17537 | Pi crinkler (CRN) family protein, pseudogene (1419 nt)                          | -9.19584 | -1.42782 | 0.165687 |
| PITG_02460 | Pi sporulation induced hypothetical protein (637 nt)                            | -16.1728 | 1.968207 | 0.166319 |
| PITG_19242 | Pi conserved hypothetical protein (2733 nt)                                     | -16.1807 | -1.79128 | 0.166319 |
| PITG_17869 | Pi conserved hypothetical protein (2888 nt)                                     | -12.767  | -1.36195 | 0.166362 |
| PITG_09139 | Pi conserved hypothetical protein (1619 nt)                                     | -16.0855 | -1.90102 | 0.166408 |
| PITG_01745 | Pi NEDD4-like ubiquitin ligase, putative (1968 nt)                              | -16.8717 | -2.41465 | 0.166448 |
| PITG_12870 | Pi conserved hypothetical protein (1856 nt)                                     | -16.8247 | 2.361564 | 0.166448 |
| PITG_02098 | Pi ATP-binding Cassette (ABC) Superfamily (5086 nt)                             | -15.3833 | -2.13658 | 0.166471 |
| PITG_12228 | Pi NADH-cytochrome b5 reductase, putative (900 nt)                              | -14.0092 | -1.47812 | 0.166596 |
| PITG_19287 | Pi conserved hypothetical protein (947 nt)                                      | -15.8058 | 2.002157 | 0.166809 |
| PITG_11689 | Pi putative GPI-anchored serine-rich hypothetical protein (1429 nt)             | -12.3574 | -1.412   | 0.167581 |
| PITG_13659 | Pi conserved hypothetical protein (699 nt)                                      | -15.2598 | -1.67809 | 0.167896 |
| PITG_11008 | Pi conserved hypothetical protein (663 nt)                                      | -16.1046 | 1.872298 | 0.167901 |
| PITG_12162 | Pi RNA-binding protein, putative (2493 nt)                                      | -15.6399 | -1.76303 | 0.167929 |
| PITG_19844 | Pi conserved hypothetical protein (2022 nt)                                     | -15.6541 | -1.79982 | 0.167929 |
| PITG_16865 | Pi aldose 1-epimerase, putative (1429 nt)                                       | -15.367  | 1.673516 | 0.167958 |
| PITG_09621 | Pi protein kinase (721 nt)                                                      | -14.7577 | -1.57742 | 0.168065 |
| PITG_09655 | Pi putative tyrosine-protein phosphatase OCA1, putative (330 nt)                | -12.3814 | 1.377608 | 0.168568 |
| PITG_15540 | Pi conserved hypothetical protein (522 nt)                                      | -14.0182 | 1.39887  | 0.168868 |

|            |                                                              |          |          |          |
|------------|--------------------------------------------------------------|----------|----------|----------|
| PITG_03446 | Pi conserved hypothetical protein (756 nt)                   | -14.5945 | 1.471438 | 0.168888 |
| PITG_16277 | Pi conserved hypothetical protein (2222 nt)                  | -15.4817 | -1.77784 | 0.169022 |
| PITG_05360 | Pi conserved hypothetical protein (926 nt)                   | -12.4695 | 1.339243 | 0.169023 |
| PITG_23205 | Pi 4-nitrophenylphosphatase, putative (1508 nt)              | -14.8796 | 1.502292 | 0.169077 |
| PITG_14221 | Pi conserved hypothetical protein (1071 nt)                  | -15.6956 | -1.65008 | 0.169102 |
| PITG_00744 | Pi conserved hypothetical protein (1400 nt)                  | -16.7784 | -2.48462 | 0.169148 |
| PITG_03665 | Pi Amino Acid-Polyamine-Organocation (APC) Family (4903 r    | -16.5797 | -1.96913 | 0.169148 |
| PITG_23109 | Pi protein kinase, putative (1847 nt)                        | -16.6112 | -1.90611 | 0.169148 |
| PITG_03864 | Pi myotubularin-like protein (4123 nt)                       | -14.877  | -1.61965 | 0.169289 |
| PITG_09284 | Pi actin, putative (1342 nt)                                 | -13.6195 | -1.40019 | 0.169397 |
| PITG_21325 | Pi crinkler (CRN) domain, pseudogene (1454 nt)               | -10.9102 | -1.48419 | 0.1694   |
| PITG_12958 | Pi conserved hypothetical protein (858 nt)                   | -16.3039 | -1.70188 | 0.169568 |
| PITG_21505 | Pi conserved hypothetical protein (651 nt)                   | -12.8931 | -1.66941 | 0.169653 |
| PITG_08173 | Pi DNA-directed RNA polymerase III subunit 127.6 kDa polyp   | -15.0725 | 1.607178 | 0.169872 |
| PITG_03160 | Pi ubiquitin family protein, putative (1188 nt)              | -14.5368 | -1.48868 | 0.170047 |
| PITG_22590 | Pi conserved hypothetical protein (436 nt)                   | -14.793  | 1.589795 | 0.170089 |
| PITG_11229 | Pi aldehyde dehydrogenase, putative (1548 nt)                | -16.0634 | -1.93871 | 0.170268 |
| PITG_17517 | Pi crinkler (CRN) family protein, putative (1445 nt)         | -9.91613 | -1.33619 | 0.170329 |
| PITG_07348 | Pi conserved hypothetical protein (706 nt)                   | -16.6253 | 2.004948 | 0.170406 |
| PITG_08221 | Pi conserved hypothetical protein (1098 nt)                  | -16.5952 | 1.816873 | 0.170406 |
| PITG_15539 | Pi conserved hypothetical protein (1063 nt)                  | -13.4774 | -1.47093 | 0.170496 |
| PITG_09705 | Pi SUMO-conjugating enzyme (SCE), putative (483 nt)          | -13.5953 | -1.44837 | 0.170763 |
| PITG_14381 | Pi conserved hypothetical protein (793 nt)                   | -14.6857 | -1.50014 | 0.170886 |
| PITG_03043 | Pi hypothetical protein (2357 nt)                            | -16.4424 | -2.14463 | 0.170996 |
| PITG_05499 | Pi conserved hypothetical protein (2720 nt)                  | -16.3003 | 1.76451  | 0.170996 |
| PITG_07978 | Pi protein kinase, putative (1474 nt)                        | -16.4462 | -2.04638 | 0.170996 |
| PITG_12484 | Pi conserved hypothetical protein (1401 nt)                  | -16.2451 | 1.517607 | 0.170996 |
| PITG_16724 | Pi conserved hypothetical protein (887 nt)                   | -16.2451 | 1.517607 | 0.170996 |
| PITG_14013 | Pi cytochrome P450, putative (1567 nt)                       | -15.5937 | 1.745584 | 0.171133 |
| PITG_06719 | Pi glycerol-3-phosphate dehydrogenase, mitochondrial prec    | -13.7924 | -1.40708 | 0.171219 |
| PITG_08412 | Pi hypothetical protein (476 nt)                             | -15.4819 | -1.71421 | 0.171404 |
| PITG_01616 | Pi metalloprotease family M01, putative (2942 nt)            | -15.3716 | -2.01618 | 0.17142  |
| PITG_14623 | Pi mediator of RNA polymerase II transcription subunit, puta | -14.4544 | -1.5351  | 0.171617 |
| PITG_00389 | Pi conserved hypothetical protein (1735 nt)                  | -16.9003 | -2.35727 | 0.171734 |
| PITG_15493 | Pi threonine aspartase, putative (1266 nt)                   | -16.9003 | -2.35727 | 0.171734 |
| PITG_20286 | Pi conserved hypothetical protein (891 nt)                   | -16.6364 | 1.984672 | 0.171734 |
| PITG_11071 | Pi conserved hypothetical protein (534 nt)                   | -12.0568 | 1.345199 | 0.171813 |
| PITG_01302 | Pi conserved hypothetical protein (2376 nt)                  | -15.1247 | -1.73658 | 0.172022 |
| PITG_04384 | Pi ribosome biogenesis regulatory protein (970 nt)           | -12.8216 | 1.335261 | 0.172251 |
| PITG_05154 | Pi conserved hypothetical protein (792 nt)                   | -12.7552 | 1.432474 | 0.172254 |
| PITG_14441 | Pi cytoskeleton-associated protein, putative (5859 nt)       | -16.1619 | -1.75279 | 0.172291 |
| PITG_22734 | Pi NPP1-like protein, 3' partial (567 nt)                    | -16.0983 | 1.738224 | 0.172291 |
| PITG_01229 | Pi conserved hypothetical protein (1882 nt)                  | -15.4817 | -1.77915 | 0.172305 |
| PITG_21308 | Pi choline dehydrogenase, putative (1732 nt)                 | -16.3372 | -1.63675 | 0.172429 |
| PITG_19263 | Pi sulfite reductase [NADPH] flavoprotein component, putati  | -13.604  | -1.83429 | 0.172669 |
| PITG_10821 | Pi ubiquitin-specific protease, putative (1423 nt)           | -14.9065 | -1.47409 | 0.172686 |
| PITG_01588 | Pi conserved hypothetical protein (3042 nt)                  | -16.8677 | -2.4224  | 0.173067 |

|            |                                                                |          |          |          |
|------------|----------------------------------------------------------------|----------|----------|----------|
| PITG_11236 | Pi protein kinase, putative (2277 nt)                          | -16.6634 | -1.79093 | 0.173067 |
| PITG_19790 | Pi patatin-like phospholipase, putative (2204 nt)              | -16.8677 | -2.4224  | 0.173067 |
| PITG_18054 | Pi 50S ribosomal protein L7/L12, putative (614 nt)             | -12.5501 | 1.348832 | 0.173256 |
| PITG_17289 | Pi deoxyuridine 5'-triphosphate nucleotidohydrolase (743 nt)   | -15.658  | 1.571869 | 0.173281 |
| PITG_11846 | Pi conserved hypothetical protein (3964 nt)                    | -13.7713 | 2.363819 | 0.173467 |
| PITG_10659 | Pi conserved hypothetical protein (752 nt)                     | -13.9159 | -1.46264 | 0.173595 |
| PITG_06016 | Pi glucokinase, putative (1245 nt)                             | -12.839  | -1.61387 | 0.173596 |
| PITG_00250 | Pi conserved hypothetical protein (1791 nt)                    | -16.1847 | -1.859   | 0.173794 |
| PITG_03281 | Pi hypothetical protein (1206 nt)                              | -16.0725 | 1.652473 | 0.173794 |
| PITG_03017 | Pi integrator complex subunit, putative (2706 nt)              | -15.3744 | -1.5003  | 0.173895 |
| PITG_09978 | Pi conserved hypothetical protein (1349 nt)                    | -15.375  | -1.49902 | 0.173895 |
| PITG_14717 | Pi conserved hypothetical protein (3989 nt)                    | -15.3591 | -1.53081 | 0.173895 |
| PITG_14214 | Pi conserved hypothetical protein (544 nt)                     | -13.1987 | -1.45569 | 0.173902 |
| PITG_15906 | Pi DNA repair protein RAD51 (1595 nt)                          | -14.0964 | -1.54906 | 0.173989 |
| PITG_09006 | Pi conserved hypothetical protein (3074 nt)                    | -16.8799 | -2.29311 | 0.174403 |
| PITG_13730 | Pi Mitochondrial Carrier (MC) Family (1213 nt)                 | -16.6482 | 1.964992 | 0.174403 |
| PITG_17581 | Pi conserved hypothetical protein (640 nt)                     | -16.6482 | 1.964992 | 0.174403 |
| PITG_00863 | Pi DEAD/DEAH box RNA helicase, putative (1236 nt)              | -14.0272 | 1.447083 | 0.174651 |
| PITG_19449 | Pi conserved hypothetical protein (831 nt)                     | -15.3579 | -1.58899 | 0.174699 |
| PITG_12915 | Pi sorting nexin, putative (1759 nt)                           | -14.1793 | -1.44228 | 0.174843 |
| PITG_17560 | Pi conserved hypothetical protein (1623 nt)                    | -15.7073 | -1.62557 | 0.174901 |
| PITG_09072 | Pi conserved hypothetical protein (858 nt)                     | -13.4535 | -1.42308 | 0.175111 |
| PITG_04342 | Pi conserved hypothetical protein (1914 nt)                    | -14.9857 | -1.57379 | 0.175268 |
| PITG_15033 | Pi choline dehydrogenase, putative (1825 nt)                   | -16.1066 | 1.863441 | 0.175437 |
| PITG_05631 | Pi myosin-like protein (6372 nt)                               | -15.3274 | -1.84629 | 0.175634 |
| PITG_14129 | Pi hypothetical protein (710 nt)                               | -14.4756 | 1.622498 | 0.17565  |
| PITG_20728 | Pi conserved hypothetical protein (840 nt)                     | -13.3918 | -1.372   | 0.175961 |
| PITG_04680 | Pi phosphoinositol transporter (2048 nt)                       | -15.2611 | -1.62389 | 0.176516 |
| PITG_09838 | Pi secreted RxLR effector peptide, putative (369 nt)           | -15.091  | -1.8526  | 0.176536 |
| PITG_03006 | Pi protein kinase (1901 nt)                                    | -15.2888 | -1.56915 | 0.176537 |
| PITG_20505 | Pi conserved hypothetical protein (637 nt)                     | -12.874  | 1.372249 | 0.176563 |
| PITG_09609 | Pi conserved hypothetical protein (769 nt)                     | -11.4759 | 1.360917 | 0.176584 |
| PITG_21166 | Pi conserved hypothetical protein (1556 nt)                    | -16.2269 | 1.56156  | 0.176753 |
| PITG_12535 | Pi eukaryotic peptide chain release factor subunit 1 (1320 nt) | -16.0644 | 1.671086 | 0.176812 |
| PITG_12891 | Pi conserved hypothetical protein (1209 nt)                    | -16.0613 | 1.677274 | 0.176812 |
| PITG_21047 | Pi conserved hypothetical protein (1099 nt)                    | -14.3738 | 1.710638 | 0.176925 |
| PITG_03154 | Pi ubiquitin family protein, putative (977 nt)                 | -17.5455 | -3.01163 | 0.176971 |
| PITG_07385 | Pi Major Facilitator Superfamily (MFS) (1549 nt)               | -17.5455 | -3.01163 | 0.176971 |
| PITG_11792 | Pi conserved hypothetical protein (1580 nt)                    | -13.4033 | -1.39061 | 0.177126 |
| PITG_02814 | Pi conserved hypothetical protein (672 nt)                     | -15.125  | -1.79052 | 0.177133 |
| PITG_07095 | Pi hypothetical protein (339 nt)                               | -15.6978 | 1.968858 | 0.177657 |
| PITG_11286 | Pi hypothetical protein (2926 nt)                              | -13.2779 | -1.41353 | 0.177801 |
| PITG_10148 | Pi conserved hypothetical protein (880 nt)                     | -12.3635 | -1.40288 | 0.177925 |
| PITG_04392 | Pi conserved hypothetical protein (2196 nt)                    | -15.5626 | 1.602602 | 0.177939 |
| PITG_10325 | Pi conserved hypothetical protein (2351 nt)                    | -15.6063 | -1.76662 | 0.177939 |
| PITG_17392 | Pi conserved hypothetical protein (504 nt)                     | -17.141  | -1.97683 | 0.178172 |
| PITG_22831 | Pi Crinkler (CRN) family protein (1416 nt)                     | -17.1778 | -1.90327 | 0.178172 |

|            |                                                               |          |          |          |
|------------|---------------------------------------------------------------|----------|----------|----------|
| PITG_00296 | Pi protein kinase, putative (1296 nt)                         | -16.4262 | -1.99141 | 0.178204 |
| PITG_09190 | Pi bzip transcription factor (1121 nt)                        | -16.2937 | -1.72635 | 0.178204 |
| PITG_20370 | Pi Amino Acid/Auxin Permease (AAP) Family (1560 nt)           | -16.2937 | -1.72635 | 0.178204 |
| PITG_05954 | Pi conserved hypothetical protein (1623 nt)                   | -15.5126 | -1.65062 | 0.178211 |
| PITG_11295 | Pi alcohol dehydrogenase, putative (1226 nt)                  | -15.5312 | -1.61327 | 0.178211 |
| PITG_11161 | Pi 2-oxoisovalerate dehydrogenase alpha subunit, mitochondr   | -14.6421 | -1.51264 | 0.178417 |
| PITG_01293 | Pi conserved hypothetical protein (1036 nt)                   | -14.8032 | -1.44466 | 0.178439 |
| PITG_02660 | Pi conserved hypothetical protein (873 nt)                    | -12.6865 | -1.42283 | 0.178625 |
| PITG_21212 | Pi conserved hypothetical protein (1560 nt)                   | -15.9392 | -1.66179 | 0.178652 |
| PITG_12520 | Pi conserved hypothetical protein (948 nt)                    | -12.1446 | 1.36505  | 0.178676 |
| PITG_09652 | Pi conserved hypothetical protein (536 nt)                    | -10.3983 | 1.369868 | 0.17871  |
| PITG_09474 | Pi conserved hypothetical protein (945 nt)                    | -15.081  | 1.497615 | 0.178862 |
| PITG_20855 | Pi conserved hypothetical protein (1206 nt)                   | -14.3339 | -1.49998 | 0.179041 |
| PITG_01774 | Pi conserved hypothetical protein (2628 nt)                   | -16.4763 | -2.07498 | 0.179078 |
| PITG_21939 | Pi conserved hypothetical protein (1147 nt)                   | -16.4881 | -1.96655 | 0.179078 |
| PITG_22840 | Pi peroxisomal (S)-2-hydroxy-acid oxidase, putative (1246 nt) | -16.2438 | -1.83664 | 0.179311 |
| PITG_01356 | Pi ATP-binding Cassette (ABC) Superfamily (3687 nt)           | -17.1298 | -1.99985 | 0.179377 |
| PITG_18779 | Pi conserved hypothetical protein (566 nt)                    | -15.1582 | -1.7213  | 0.179395 |
| PITG_07653 | Pi conserved hypothetical protein (786 nt)                    | -15.8383 | -2.02015 | 0.179401 |
| PITG_03424 | Pi GTPase, putative (1554 nt)                                 | -11.8132 | -1.40069 | 0.179589 |
| PITG_17131 | Pi conserved hypothetical protein (852 nt)                    | -15.5327 | -1.55066 | 0.179618 |
| PITG_13116 | Pi triosephosphate isomerase (857 nt)                         | -13.1881 | -1.35895 | 0.179669 |
| PITG_05639 | Pi conserved hypothetical protein (810 nt)                    | -17.0338 | -2.20794 | 0.179743 |
| PITG_07710 | Pi sugar transporter, putative (1536 nt)                      | -13.6248 | 1.380993 | 0.179755 |
| PITG_20563 | Pi conserved hypothetical protein (2207 nt)                   | -15.6715 | 1.545175 | 0.179784 |
| PITG_05201 | Pi voltage-gated potassium channel subunit beta, putative (6  | -15.2886 | -1.56945 | 0.180037 |
| PITG_06545 | Pi exonuclease 1, putative (9349 nt)                          | -14.2314 | 1.582893 | 0.180097 |
| PITG_18030 | Pi conserved hypothetical protein (531 nt)                    | -14.5466 | 1.451933 | 0.180122 |
| PITG_18071 | Pi conserved hypothetical protein (1140 nt)                   | -15.008  | -1.52894 | 0.180218 |
| PITG_08640 | Pi phosphatidylinositol kinase (PIK-G3) (3186 nt)             | -17.5796 | -2.94173 | 0.180586 |
| PITG_20088 | Pi Sulfate Permease (SulP) Family (2784 nt)                   | -15.3935 | -1.66158 | 0.180729 |
| PITG_04618 | Pi trimethyllysine dioxygenase, putative (1540 nt)            | -14.7054 | -1.48514 | 0.180733 |
| PITG_17039 | Pi conserved hypothetical protein (492 nt)                    | -14.2003 | 1.460868 | 0.180864 |
| PITG_03502 | Pi alcohol dehydrogenase, putative (873 nt)                   | -16.6617 | 1.947286 | 0.181151 |
| PITG_12515 | Pi conserved hypothetical protein (884 nt)                    | -16.8748 | -2.29975 | 0.181151 |
| PITG_01759 | Pi conserved hypothetical protein (2105 nt)                   | -15.5232 | 1.5502   | 0.181301 |
| PITG_18750 | Pi conserved hypothetical protein (667 nt)                    | -15.0044 | 1.842042 | 0.181373 |
| PITG_11569 | Pi metalloprotease family M17, putative (1605 nt)             | -13.2093 | 1.450116 | 0.181422 |
| PITG_14619 | Pi conserved hypothetical protein (859 nt)                    | -13.7816 | -1.4097  | 0.181455 |
| PITG_08713 | Pi ADP-sugar pyrophosphatase, putative (831 nt)               | -17.1662 | -1.92807 | 0.181799 |
| PITG_13297 | Pi conserved hypothetical protein (1521 nt)                   | -17.5363 | -3.02795 | 0.181799 |
| PITG_14251 | Pi conserved hypothetical protein (1827 nt)                   | -17.1662 | -1.92807 | 0.181799 |
| PITG_17259 | Pi conserved hypothetical protein (1384 nt)                   | -17.5363 | -3.02795 | 0.181799 |
| PITG_20274 | Pi conserved hypothetical protein (1244 nt)                   | -14.377  | -1.45041 | 0.181806 |
| PITG_21827 | Pi Rab11 family GTPase, putative (730 nt)                     | -14.1336 | 1.469827 | 0.181849 |
| PITG_03200 | Pi conserved hypothetical protein (1599 nt)                   | -16.5013 | -2.02533 | 0.181956 |
| PITG_03989 | Pi conserved hypothetical protein (1648 nt)                   | -16.473  | -2.08196 | 0.181956 |

|            |                                                            |          |          |          |
|------------|------------------------------------------------------------|----------|----------|----------|
| PITG_15138 | Pi conserved hypothetical protein (1231 nt)                | -13.2971 | -1.37485 | 0.182068 |
| PITG_03621 | Pi conserved hypothetical protein (1467 nt)                | -14.8138 | -1.463   | 0.182136 |
| PITG_06652 | Pi conserved hypothetical protein (874 nt)                 | -15.059  | 1.458494 | 0.182412 |
| PITG_17130 | Pi glyceraldehyde-3-phosphate dehydrogenase, putative (16  | -15.0693 | 1.437797 | 0.182412 |
| PITG_14133 | Pi programmed cell death protein, putative (1547 nt)       | -12.0523 | 1.327144 | 0.182433 |
| PITG_03229 | Pi glutathione S-transferase, putative (1267 nt)           | -12.6192 | -1.31489 | 0.182437 |
| PITG_00934 | Pi hypothetical protein (1213 nt)                          | -16.5404 | 1.704194 | 0.182513 |
| PITG_01005 | Pi conserved hypothetical protein (2452 nt)                | -16.8972 | -2.36286 | 0.182513 |
| PITG_22001 | Pi Major Facilitator Superfamily (MFS) (624 nt)            | -14.9194 | 1.532727 | 0.182565 |
| PITG_05379 | Pi conserved hypothetical protein (1508 nt)                | -16.2186 | 1.585711 | 0.182581 |
| PITG_07823 | Pi DNA topoisomerase 2 (2669 nt)                           | -16.4424 | -2.1459  | 0.182581 |
| PITG_16223 | Pi conserved hypothetical protein (1095 nt)                | -17.1201 | -2.02094 | 0.183016 |
| PITG_20195 | Pi transcription factor Dp-1 (1620 nt)                     | -17.1201 | -2.02094 | 0.183016 |
| PITG_20522 | Pi conserved hypothetical protein (513 nt)                 | -15.6784 | 1.699355 | 0.183058 |
| PITG_17326 | Pi conserved hypothetical protein (852 nt)                 | -12.1773 | -1.51942 | 0.183065 |
| PITG_02228 | Pi conserved hypothetical protein (2007 nt)                | -15.3003 | -1.64879 | 0.183549 |
| PITG_09584 | Pi hypothetical protein (885 nt)                           | -14.0817 | -1.49531 | 0.183551 |
| PITG_01902 | Pi conserved hypothetical protein (781 nt)                 | -16.8652 | -2.42675 | 0.18388  |
| PITG_16400 | Pi conserved hypothetical protein (489 nt)                 | -15.1253 | 1.61705  | 0.184054 |
| PITG_18298 | Pi coproporphyrinogen III oxidase (1314 nt)                | -13.847  | -1.45716 | 0.184087 |
| PITG_20381 | Pi hypothetical protein (791 nt)                           | -14.3215 | -1.45898 | 0.184118 |
| PITG_17782 | Pi iron-sulfur cluster assembly protein, putative (525 nt) | -13.2991 | -1.35431 | 0.184344 |
| PITG_15625 | Pi dynein heavy chain (15033 nt)                           | -15.441  | 1.637082 | 0.184713 |
| PITG_11625 | Pi conserved hypothetical protein (3543 nt)                | -15.4443 | 1.47212  | 0.184918 |
| PITG_15045 | Pi trans-2-enoyl-CoA reductase, putative (1309 nt)         | -12.4482 | 1.335287 | 0.18493  |
| PITG_14231 | Pi importin subunit alpha, putative (2162 nt)              | -13.5887 | -1.36622 | 0.18507  |
| PITG_23165 | Pi Crinkler (CRN) family protein (1293 nt)                 | -11.0428 | -1.28558 | 0.185406 |
| PITG_07892 | Pi conserved hypothetical protein (926 nt)                 | -16.3206 | -1.67595 | 0.185521 |
| PITG_01121 | Pi ras family GTPase, putative (1832 nt)                   | -15.4534 | -1.65397 | 0.18621  |
| PITG_11018 | Pi conserved hypothetical protein (1026 nt)                | -16.4981 | -2.03222 | 0.186302 |
| PITG_07305 | Pi conserved hypothetical protein (1652 nt)                | -14.3966 | -1.47451 | 0.186514 |
| PITG_10470 | Pi conserved hypothetical protein (605 nt)                 | -11.1562 | -1.38524 | 0.18654  |
| PITG_15565 | Pi conserved hypothetical protein (645 nt)                 | -15.9272 | 1.751732 | 0.186595 |
| PITG_01815 | Pi conserved hypothetical protein (8368 nt)                | -16.3955 | -2.13988 | 0.186769 |
| PITG_02457 | Pi protein kinase (2695 nt)                                | -15.2318 | -1.51425 | 0.186977 |
| PITG_08441 | Pi conserved hypothetical protein (1173 nt)                | -16.6125 | -1.91184 | 0.187221 |
| PITG_22922 | Pi secreted RxLR effector peptide, putative (1467 nt)      | -16.6125 | -1.91184 | 0.187221 |
| PITG_06929 | Pi myotubularin-like protein (3693 nt)                     | -16.1729 | -1.80578 | 0.187499 |
| PITG_10827 | Pi nuclease, putative (2879 nt)                            | -13.9538 | -1.45835 | 0.187609 |
| PITG_12667 | Pi conserved hypothetical protein (1401 nt)                | -16.4764 | -1.98804 | 0.187758 |
| PITG_12490 | Pi conserved hypothetical protein (1365 nt)                | -15.4205 | 1.666632 | 0.18795  |
| PITG_02415 | Pi conserved hypothetical protein (2036 nt)                | -14.8259 | -1.39909 | 0.187988 |
| PITG_10570 | Pi hypothetical protein (974 nt)                           | -13.2528 | 1.384618 | 0.18805  |
| PITG_20345 | Pi conserved hypothetical protein (1221 nt)                | -13.842  | -1.42311 | 0.188064 |
| PITG_10351 | Pi conserved hypothetical protein (3514 nt)                | -15.931  | -1.67867 | 0.188195 |
| PITG_22668 | Pi NPP1-like protein (1560 nt)                             | -15.8919 | 1.711711 | 0.188195 |
| PITG_20168 | Pi Crinkler (CRN) family protein, pseudogene (2557 nt)     | -10.3915 | -1.28716 | 0.188627 |



|            |                                                            |          |          |          |
|------------|------------------------------------------------------------|----------|----------|----------|
| PITG_22742 | Pi conserved hypothetical protein (459 nt)                 | -15.0054 | 2.030515 | 0.188656 |
| PITG_01925 | Pi transmembrane protein, putative (886 nt)                | -13.0266 | -1.36893 | 0.188656 |
| PITG_10198 | Pi adenosylhomocysteinase (1443 nt)                        | -12.647  | 1.508177 | 0.188856 |
| PITG_15006 | Pi ATP-binding Cassette (ABC) Superfamily (2610 nt)        | -14.5491 | -1.51514 | 0.188915 |
| PITG_02770 | Pi calcineurin-like phosphoesterase, putative (2185 nt)    | -15.7497 | -1.54022 | 0.189011 |
| PITG_13739 | Pi conserved hypothetical protein (318 nt)                 | -14.7387 | 1.567362 | 0.18937  |
| PITG_19022 | Pi conserved hypothetical protein (1632 nt)                | -14.7176 | -1.43615 | 0.18937  |
| PITG_01124 | Pi conserved hypothetical protein (816 nt)                 | -14.5738 | 1.406416 | 0.189395 |
| PITG_16020 | Pi conserved hypothetical protein (1670 nt)                | -15.3906 | -1.46776 | 0.189692 |
| PITG_11179 | Pi conserved hypothetical protein (2068 nt)                | -14.6243 | -1.42003 | 0.189741 |
| PITG_16137 | Pi conserved hypothetical protein (1581 nt)                | -15.5471 | -1.58016 | 0.189763 |
| PITG_10913 | Pi conserved hypothetical protein (841 nt)                 | -10.7518 | 1.269013 | 0.189883 |
| PITG_17991 | Pi CorA Metal Ion Transporter (MIT) Family (1434 nt)       | -16.2104 | 1.893089 | 0.19007  |
| PITG_19824 | Pi conserved hypothetical protein (1095 nt)                | -9.74692 | 1.482253 | 0.19025  |
| PITG_07913 | Pi conserved hypothetical protein (668 nt)                 | -15.5814 | 1.557931 | 0.190287 |
| PITG_17103 | Pi hypothetical protein (652 nt)                           | -15.8128 | 1.61519  | 0.190337 |
| PITG_03629 | Pi conserved hypothetical protein (1655 nt)                | -17.571  | -2.95491 | 0.190406 |
| PITG_04474 | Pi conserved hypothetical protein (1138 nt)                | -17.571  | -2.95491 | 0.190406 |
| PITG_11373 | Pi ATP-binding Cassette (ABC) superfamily (5163 nt)        | -17.571  | -2.95491 | 0.190406 |
| PITG_16345 | Pi conserved hypothetical protein (853 nt)                 | -17.571  | -2.95491 | 0.190406 |
| PITG_18049 | Pi chromosome segregation protein, putative (3762 nt)      | -17.571  | -2.95491 | 0.190406 |
| PITG_00012 | Pi conserved hypothetical protein (636 nt)                 | -15.732  | -1.57572 | 0.190671 |
| PITG_11790 | Pi conserved hypothetical protein (306 nt)                 | -15.732  | -1.57572 | 0.190671 |
| PITG_06663 | Pi hypothetical protein (1215 nt)                          | -13.8921 | 1.467052 | 0.191025 |
| PITG_16009 | Pi importin subunit alpha, putative (2553 nt)              | -14.7633 | -1.48566 | 0.191037 |
| PITG_13806 | Pi conserved hypothetical protein (3134 nt)                | -14.5535 | 1.374217 | 0.191136 |
| PITG_19046 | Pi hypothetical protein (2029 nt)                          | -14.7882 | -1.51689 | 0.191622 |
| PITG_05668 | Pi conserved hypothetical protein (1771 nt)                | -17.1134 | -2.03845 | 0.191651 |
| PITG_14845 | Pi conserved hypothetical protein (2881 nt)                | -15.2584 | 1.485594 | 0.191809 |
| PITG_03155 | Pi secreted RxLR effector peptide, putative (750 nt)       | -15.7459 | -1.54814 | 0.192334 |
| PITG_11799 | Pi conserved hypothetical protein (2308 nt)                | -15.7459 | -1.54814 | 0.192334 |
| PITG_20491 | Pi fumarylacetoacetase (1806 nt)                           | -13.8267 | -1.49815 | 0.192367 |
| PITG_21699 | Pi conserved hypothetical protein (482 nt)                 | -15.6916 | -1.93135 | 0.192403 |
| PITG_05591 | Pi conserved hypothetical protein (1147 nt)                | -14.8305 | 1.515887 | 0.192439 |
| PITG_22658 | Pi Annexin (Annexin) Family (594 nt)                       | -9.958   | 1.560895 | 0.192464 |
| PITG_10149 | Pi mannosyl-oligosaccharide 1,2-alpha-mannosidase, putativ | -14.8661 | -1.60112 | 0.192653 |
| PITG_12353 | Pi conserved hypothetical protein (798 nt)                 | -14.561  | 1.48153  | 0.192711 |
| PITG_16487 | Pi cell 5A endo-1,4-beta-glucanase, putative (1995 nt)     | -16.9545 | -2.24935 | 0.192936 |
| PITG_22238 | Pi conserved hypothetical protein (2150 nt)                | -16.7777 | -2.47393 | 0.19295  |
| PITG_17769 | Pi conserved hypothetical protein (903 nt)                 | -14.7013 | -1.43181 | 0.193148 |
| PITG_03242 | Pi conserved hypothetical protein (1499 nt)                | -16.1995 | -1.82846 | 0.193152 |
| PITG_06218 | Pi conserved hypothetical protein (677 nt)                 | -13.7928 | 1.423705 | 0.193171 |
| PITG_15644 | Pi glycoside hydrolase, putative (2049 nt)                 | -16.6759 | -1.7756  | 0.193566 |
| PITG_00842 | Pi copine-like protein, putative (974 nt)                  | -13.1744 | -1.34485 | 0.193573 |
| PITG_02074 | Pi conserved hypothetical protein (975 nt)                 | -16.3335 | 1.694218 | 0.193619 |
| PITG_13906 | Pi hypothetical protein (1325 nt)                          | -16.3638 | 1.81514  | 0.193619 |
| PITG_01727 | Pi conserved hypothetical protein (1018 nt)                | -16.1535 | -1.76334 | 0.193691 |

|            |                                                                |          |          |          |
|------------|----------------------------------------------------------------|----------|----------|----------|
| PITG_03427 | Pi tyrosine aminotransferase, putative (1933 nt)               | -13.831  | -1.51448 | 0.193807 |
| PITG_10471 | Pi conserved hypothetical protein (996 nt)                     | -15.8196 | -1.90378 | 0.193938 |
| PITG_15467 | Pi conserved hypothetical protein (1091 nt)                    | -14.2572 | -1.43166 | 0.193973 |
| PITG_08213 | Pi carbohydrate-binding protein, putative (1134 nt)            | -13.258  | -1.39483 | 0.194177 |
| PITG_05260 | Pi pre-mRNA-splicing factor ATP-dependent RNA helicase PR      | -16.9471 | -2.26408 | 0.194291 |
| PITG_19860 | Pi conserved hypothetical protein (1929 nt)                    | -16.911  | -2.33628 | 0.194291 |
| PITG_08699 | Pi conserved hypothetical protein (755 nt)                     | -15.9303 | -1.68031 | 0.194625 |
| PITG_01698 | Pi small cysteine rich protein SCR76 (617 nt)                  | -10.6814 | 1.304164 | 0.194691 |
| PITG_08306 | Pi myosin-like protein (2379 nt)                               | -15.4762 | 1.403232 | 0.194878 |
| PITG_12292 | Pi rRNA-processing protein, putative (710 nt)                  | -13.8927 | -1.41387 | 0.19492  |
| PITG_00185 | Pi Voltage-gated Ion Channel (VIC) Superfamily (3986 nt)       | -16.6424 | -1.84309 | 0.194966 |
| PITG_04044 | Pi conserved hypothetical protein (594 nt)                     | -16.6424 | -1.84309 | 0.194966 |
| PITG_07947 | Pi secreted RxLR effector peptide, putative (462 nt)           | -11.609  | -1.28461 | 0.195064 |
| PITG_06557 | Pi cytochrome P450, putative (3892 nt)                         | -16.4736 | -1.99196 | 0.195094 |
| PITG_18624 | Pi kinesin-like protein (3391 nt)                              | -16.3563 | -1.59724 | 0.195094 |
| PITG_04133 | Pi conserved hypothetical protein (2291 nt)                    | -15.0324 | -1.48016 | 0.195142 |
| PITG_07923 | Pi PLAC8 family protein (1717 nt)                              | -12.5512 | 1.396273 | 0.195337 |
| PITG_14806 | Pi trafficking protein particle complex subunit, putative (701 | -14.6689 | -1.4588  | 0.195555 |
| PITG_22928 | Pi glutaryl-CoA dehydrogenase, putative (1897 nt)              | -13.4146 | -1.35565 | 0.19616  |
| PITG_03060 | Pi alpha-1,2-glucosyltransferase, putative (1863 nt)           | -15.913  | -1.64501 | 0.196241 |
| PITG_05194 | Pi conserved hypothetical protein (2265 nt)                    | -16.2079 | -1.81229 | 0.196248 |
| PITG_03546 | Pi hsp70-like protein (1825 nt)                                | -14.4256 | 1.423871 | 0.196302 |
| PITG_22062 | Pi conserved hypothetical protein (874 nt)                     | -11.6853 | -1.50586 | 0.196515 |
| PITG_07061 | Pi ubiquitin-conjugating enzyme E2, putative (1255 nt)         | -15.0768 | 1.549507 | 0.196736 |
| PITG_07454 | Pi conserved hypothetical protein (400 nt)                     | -11.882  | -1.51693 | 0.196858 |
| PITG_03455 | Pi conserved hypothetical protein (2339 nt)                    | -16.9403 | -2.27753 | 0.19701  |
| PITG_09279 | Pi bZIP transcription factor, putative (2459 nt)               | -15.2499 | -1.64557 | 0.197558 |
| PITG_20719 | Pi conserved hypothetical protein (972 nt)                     | -13.9305 | -1.40667 | 0.1978   |
| PITG_09954 | Pi patatin-like phospholipase, putative (2300 nt)              | -15.5852 | -1.44564 | 0.197829 |
| PITG_21627 | Pi conserved hypothetical protein (752 nt)                     | -15.5852 | -1.44564 | 0.197829 |
| PITG_09506 | Pi 30S ribosomal protein S5, putative (1158 nt)                | -14.2027 | 1.391091 | 0.197905 |
| PITG_16310 | Pi conserved hypothetical protein (3710 nt)                    | -15.3882 | 1.620244 | 0.198046 |
| PITG_21182 | Pi apoptosis-inducing factor 1, putative (1743 nt)             | -14.2332 | -1.3915  | 0.19829  |
| PITG_03425 | Pi glycoside hydrolase, putative (2021 nt)                     | -13.9321 | -1.35666 | 0.198486 |
| PITG_03738 | Pi 2-isopropylmalate synthase (2027 nt)                        | -12.4739 | -1.34782 | 0.198736 |
| PITG_23170 | Pi conserved hypothetical protein (660 nt)                     | -15.8159 | 1.848825 | 0.198869 |
| PITG_11734 | Pi 50S ribosomal protein L3-2 (1111 nt)                        | -13.5    | 1.29387  | 0.199232 |
| PITG_10937 | Pi UDP-glucuronic acid decarboxylase 1 (1286 nt)               | -14.3162 | -1.50373 | 0.199266 |
| PITG_15262 | Pi conserved hypothetical protein (2010 nt)                    | -15.5812 | 2.121365 | 0.199506 |
| PITG_06850 | Pi conserved hypothetical protein (1271 nt)                    | -16.3685 | -1.5747  | 0.199539 |
| PITG_10214 | Pi conserved hypothetical protein (767 nt)                     | -15.707  | -1.75912 | 0.199635 |
| PITG_14669 | Pi phospholipase A2, putative (938 nt)                         | -12.4829 | -1.32677 | 0.199707 |
| PITG_18877 | Pi conserved hypothetical protein (1024 nt)                    | -16.9691 | -2.21977 | 0.199744 |
| PITG_12760 | Pi DNA binding protein, putative (1159 nt)                     | -14.0056 | -1.38182 | 0.199877 |
| PITG_09459 | Pi nitroreductase family, putative (1208 nt)                   | -15.1676 | -1.49419 | 0.199903 |
| PITG_02227 | Pi cleavage induced hypothetical protein (1578 nt)             | -15.1794 | -1.51779 | 0.199903 |
| PITG_02826 | Pi DEAD/DEAH box RNA helicase, putative (2948 nt)              | -14.3727 | 1.43334  | 0.200126 |

|            |                                                                |          |          |          |
|------------|----------------------------------------------------------------|----------|----------|----------|
| PITG_09781 | Pi conserved hypothetical protein (448 nt)                     | -15.4237 | -1.60043 | 0.200201 |
| PITG_05516 | Pi glutathione S-transferase omega-like protein (1319 nt)      | -13.3127 | -1.3974  | 0.20032  |
| PITG_09556 | Pi guanine nucleotide-binding protein subunit beta-2-like prc  | -10.0852 | 1.316086 | 0.200569 |
| PITG_11329 | Pi Annexin (Annexin) Family (3825 nt)                          | -11.8654 | 1.349809 | 0.200586 |
| PITG_15360 | Pi conserved hypothetical protein (542 nt)                     | -15.305  | -1.48518 | 0.200651 |
| PITG_13177 | Pi elongation of very long chain fatty acids protein, putative | -13.12   | -1.37834 | 0.200666 |
| PITG_18100 | Pi conserved hypothetical protein (2674 nt)                    | -14.0734 | 1.356421 | 0.200676 |
| PITG_18304 | Pi conserved hypothetical protein (1410 nt)                    | -15.9521 | 1.700091 | 0.201266 |
| PITG_10895 | Pi conserved hypothetical protein (2655 nt)                    | -14.1719 | -1.34163 | 0.201392 |
| PITG_07168 | Pi Major Facilitator Superfamily (MFS) (1945 nt)               | -14.0206 | 1.466057 | 0.201966 |
| PITG_05686 | Pi conserved hypothetical protein (2021 nt)                    | -14.3402 | -1.49245 | 0.202351 |
| PITG_02935 | Pi berberine-like protein (1524 nt)                            | -16.9346 | -2.28878 | 0.202492 |
| PITG_12624 | Pi Crinkler (CRN) family protein, pseudogene (1751 nt)         | -16.9346 | -2.28878 | 0.202492 |
| PITG_18411 | Pi conserved hypothetical protein (2239 nt)                    | -16.9286 | -2.19798 | 0.202492 |
| PITG_18966 | Pi conserved hypothetical protein (1660 nt)                    | -16.9346 | -2.28878 | 0.202492 |
| PITG_21400 | Pi protein kinase (1076 nt)                                    | -14.9521 | -1.42504 | 0.202711 |
| PITG_07865 | Pi autophagy-related protein, putative (8968 nt)               | -14.5676 | -1.42706 | 0.202782 |
| PITG_19531 | Pi 50S ribosomal protein L25, putative (785 nt)                | -13.5417 | 1.30667  | 0.202863 |
| PITG_00990 | Pi conserved hypothetical protein (891 nt)                     | -15.9645 | -1.54433 | 0.202894 |
| PITG_00682 | Pi carbonic anhydrase, putative (1115 nt)                      | -14.0496 | 1.336644 | 0.203217 |
| PITG_13569 | Pi endo-1,3(4)-beta-glucanase, putative (2985 nt)              | -15.1523 | -1.52487 | 0.203338 |
| PITG_12315 | Pi conserved hypothetical protein (1244 nt)                    | -15.1431 | 1.463461 | 0.203575 |
| PITG_00940 | Pi pre-mRNA polyadenylation factor, putative (1593 nt)         | -15.3613 | 1.453053 | 0.203726 |
| PITG_06814 | Pi tyrosine phosphatase, putative (2277 nt)                    | -12.2132 | 1.271551 | 0.203784 |
| PITG_15883 | Pi myotubularin-like protein (3379 nt)                         | -16.7331 | -1.65089 | 0.203871 |
| PITG_02400 | Pi protein kinase (3158 nt)                                    | -16.2183 | -1.793   | 0.204041 |
| PITG_16735 | Pi conserved hypothetical protein (561 nt)                     | -12.4387 | 1.288342 | 0.204109 |
| PITG_13657 | Pi conserved hypothetical protein (936 nt)                     | -13.2867 | 1.371285 | 0.20427  |
| PITG_13618 | Pi WD repeat protein pop3 (1134 nt)                            | -15.9769 | -1.58657 | 0.204525 |
| PITG_00931 | Pi conserved hypothetical protein (1452 nt)                    | -13.7245 | -1.3488  | 0.204824 |
| PITG_17884 | Pi conserved hypothetical protein (2967 nt)                    | -13.7093 | -1.31944 | 0.204824 |
| PITG_21278 | Pi isochorismatase, putative (728 nt)                          | -13.2285 | -1.30032 | 0.204945 |
| PITG_15727 | Pi hypothetical protein (908 nt)                               | -10.3141 | -2.18984 | 0.20516  |
| PITG_00089 | Pi GTP-binding protein SAR1 (955 nt)                           | -10.4302 | -1.30493 | 0.205437 |
| PITG_06822 | Pi sulfatase-like protein (3142 nt)                            | -14.5014 | -1.34182 | 0.205542 |
| PITG_04927 | Pi conserved hypothetical protein (1731 nt)                    | -15.7414 | 1.655313 | 0.20574  |
| PITG_10483 | Pi conserved hypothetical protein (2773 nt)                    | -15.8646 | 1.68658  | 0.206006 |
| PITG_11036 | Pi NADH dehydrogenase [ubiquinone] 1 alpha subcomplex su       | -12.3962 | 1.257518 | 0.206068 |
| PITG_05117 | Pi glycine amidinotransferase, mitochondrial precursor (123:   | -13.3148 | -1.32641 | 0.206152 |
| PITG_11264 | Pi conserved hypothetical protein (697 nt)                     | -15.9601 | -1.55262 | 0.206158 |
| PITG_03441 | Pi malate synthase (1822 nt)                                   | -11.3939 | -1.23948 | 0.206278 |
| PITG_13683 | Pi NADH dehydrogenase flavoprotein 2, mitochondrial precu      | -11.9232 | 1.231567 | 0.20643  |
| PITG_11662 | Pi ankyrin-like protein (2233 nt)                              | -15.5786 | -2.0449  | 0.206452 |
| PITG_02126 | Pi conserved hypothetical protein (508 nt)                     | -16.7187 | -1.68105 | 0.20664  |
| PITG_03873 | Pi rab GDP dissociation inhibitor alpha (1530 nt)              | -12.6879 | 1.256414 | 0.206732 |
| PITG_13314 | Pi conserved hypothetical protein (1006 nt)                    | -15.1675 | -1.59278 | 0.206988 |
| PITG_00689 | Pi Mitochondrial Carrier (MC) Family (1053 nt)                 | -13.7036 | 1.274506 | 0.206999 |

|            |                                                                                     |          |          |          |
|------------|-------------------------------------------------------------------------------------|----------|----------|----------|
| PITG_01155 | Pi conserved hypothetical protein (1395 nt)                                         | -14.1477 | -1.33387 | 0.207312 |
| PITG_02757 | Pi pyruvate kinase (2280 nt)                                                        | -15.9548 | -1.77608 | 0.207644 |
| PITG_00864 | Pi conserved hypothetical protein (2433 nt)                                         | -16.0247 | 1.66692  | 0.207842 |
| PITG_10451 | Pi conserved hypothetical protein (6511 nt)                                         | -15.6154 | 1.489759 | 0.20805  |
| PITG_07297 | Pi conserved hypothetical protein (1382 nt)                                         | -16.4208 | -2.19173 | 0.208119 |
| PITG_08888 | Pi protein kinase, putative (2280 nt)                                               | -16.4208 | -2.19173 | 0.208119 |
| PITG_23111 | Pi crinkler (CRN) family protein, putative (1296 nt)                                | -9.76816 | -1.28072 | 0.208314 |
| PITG_10085 | Pi conserved hypothetical protein (2970 nt)                                         | -15.2484 | -1.48273 | 0.208455 |
| PITG_20153 | Pi Voltage-gated Ion Channel (VIC) Superfamily (8061 nt)                            | -16.324  | 1.732256 | 0.208529 |
| PITG_21591 | Pi conserved hypothetical protein (1045 nt)                                         | -16.324  | 1.732256 | 0.208529 |
| PITG_20671 | Pi conserved hypothetical protein (649 nt)                                          | -14.9307 | -1.54859 | 0.208578 |
| PITG_06790 | Pi Ufm1-conjugating enzyme 1 (568 nt)                                               | -13.5599 | -1.29336 | 0.208648 |
| PITG_11069 | Pi villin-like protein (3045 nt)                                                    | -13.2193 | -1.55606 | 0.208653 |
| PITG_10938 | Pi protein phosphatase 2C, putative (1237 nt)                                       | -12.403  | -1.25308 | 0.208775 |
| PITG_11285 | Pi conserved hypothetical protein (1260 nt)                                         | -16.5352 | -1.95726 | 0.208911 |
| PITG_09815 | Pi anthranilate synthase component 2, putative (1155 nt)                            | -14.222  | 1.347467 | 0.209139 |
| PITG_02044 | Pi conserved hypothetical protein (501 nt)                                          | -15.0561 | -1.4328  | 0.209379 |
| PITG_22598 | Pi amino acid/auxin permease-like protein (282 nt)                                  | -16.941  | -2.16952 | 0.209422 |
| PITG_02916 | Pi conserved hypothetical protein (1431 nt)                                         | -15.9527 | -1.6352  | 0.209433 |
| PITG_19318 | Pi Crinkler (CRN) family protein (2611 nt)                                          | -11.0607 | -1.2441  | 0.209803 |
| PITG_19879 | Pi conserved hypothetical protein (1407 nt)                                         | -16.0751 | 1.906753 | 0.209896 |
| PITG_03845 | Pi conserved hypothetical protein (5129 nt)                                         | -17.8513 | -2.52702 | 0.209912 |
| PITG_10328 | Pi conserved hypothetical protein (2733 nt)                                         | -17.8513 | -2.52702 | 0.209912 |
| PITG_17172 | Pi 2-dehydro-3-deoxyphosphooctonate aldolase (1295 nt)                              | -17.8513 | -2.52702 | 0.209912 |
| PITG_18690 | Pi conserved hypothetical protein (1140 nt)                                         | -17.8513 | -2.52702 | 0.209912 |
| PITG_06521 | Pi conserved hypothetical protein (5626 nt)                                         | -16.2906 | 1.443557 | 0.21004  |
| PITG_19849 | Pi protein kinase (2164 nt)                                                         | -16.5617 | -1.90438 | 0.210396 |
| PITG_00283 | Pi conserved hypothetical protein (1065 nt)                                         | -15.7705 | -1.49871 | 0.210498 |
| PITG_02001 | Pi conserved hypothetical protein (1016 nt)                                         | -14.8074 | 1.452267 | 0.21066  |
| PITG_09604 | Pi conserved hypothetical protein (2560 nt)                                         | -14.3637 | -1.37467 | 0.210711 |
| PITG_05408 | Pi transmembrane protein, putative (2470 nt)                                        | -15.4002 | 1.456855 | 0.210767 |
| PITG_01192 | Pi Voltage-gated Ion Channel (VIC) Superfamily (3328 nt)                            | -16.708  | -1.70435 | 0.210819 |
| PITG_06856 | Pi kinesin-like protein (1143 nt)                                                   | -17.1562 | -1.96136 | 0.210836 |
| PITG_17904 | Pi conserved hypothetical protein (483 nt)                                          | -17.1562 | -1.96136 | 0.210836 |
| PITG_18508 | Pi Zinc (Zn <sup>2+</sup> )-Iron (Fe <sup>2+</sup> ) Permease (ZIP) Family (843 nt) | -17.1562 | -1.96136 | 0.210836 |
| PITG_09644 | Pi conserved hypothetical protein (474 nt)                                          | -14.5926 | 1.396665 | 0.210913 |
| PITG_06319 | Pi myotubularin-like protein (4485 nt)                                              | -15.1363 | 1.449446 | 0.210942 |
| PITG_02926 | Pi conserved hypothetical protein (657 nt)                                          | -15.8365 | -1.79097 | 0.210982 |
| PITG_14066 | Pi CUG-BP- and ETR-3-like factor, putative (1618 nt)                                | -14.6647 | 1.343703 | 0.211014 |
| PITG_01449 | Pi conserved hypothetical protein (350 nt)                                          | -12.4599 | 1.26709  | 0.211304 |
| PITG_05657 | Pi conserved hypothetical protein (789 nt)                                          | -14.258  | 1.460334 | 0.211491 |
| PITG_19007 | Pi conserved hypothetical protein (669 nt)                                          | -13.3648 | 1.272156 | 0.211611 |
| PITG_05202 | Pi voltage-gated potassium channel subunit beta, putative (7                        | -15.5836 | -1.50815 | 0.211696 |
| PITG_13658 | Pi methionine aminopeptidase, putative (834 nt)                                     | -14.0085 | -1.3011  | 0.211742 |
| PITG_11159 | Pi phospholipid-transporting ATPase, putative (3816 nt)                             | -15.4067 | 2.034255 | 0.21196  |
| PITG_18574 | Pi conserved hypothetical protein (922 nt)                                          | -14.744  | 1.389621 | 0.212609 |
| PITG_01398 | Pi beta-glucosidase, putative (1749 nt)                                             | -13.6067 | -1.40433 | 0.212712 |

|            |                                                               |          |          |          |
|------------|---------------------------------------------------------------|----------|----------|----------|
| PITG_23155 | Pi Crinkler (CRN) family protein, pseudogene (1862 nt)        | -12.9777 | -1.37465 | 0.213099 |
| PITG_08210 | Pi proteasome subunit beta type-3, putative (794 nt)          | -11.4127 | 1.212897 | 0.213262 |
| PITG_05553 | Pi D-lactate dehydrogenase, putative (1573 nt)                | -13.5853 | -1.33892 | 0.213598 |
| PITG_08307 | Pi conserved hypothetical protein (839 nt)                    | -16.7137 | -1.69423 | 0.213623 |
| PITG_09201 | Pi bzip transcription factor (1089 nt)                        | -16.7137 | -1.69423 | 0.213623 |
| PITG_19110 | Pi conserved hypothetical protein (1772 nt)                   | -16.9308 | -2.29582 | 0.213623 |
| PITG_02285 | Pi conserved hypothetical protein (2074 nt)                   | -13.7719 | -1.27863 | 0.213723 |
| PITG_08405 | Pi conserved hypothetical protein (5259 nt)                   | -15.7348 | 1.582595 | 0.213901 |
| PITG_17033 | Pi Annexin (Annexin) Family (987 nt)                          | -9.69383 | -1.42608 | 0.213972 |
| PITG_23187 | Pi conserved hypothetical protein (1458 nt)                   | -12.7585 | 1.565561 | 0.214176 |
| PITG_15534 | Pi conserved hypothetical protein (905 nt)                    | -15.7705 | -1.56554 | 0.214209 |
| PITG_12806 | Pi phospholipase D, Pi-sPLD-like-12 (1818 nt)                 | -15.9931 | -1.62372 | 0.214364 |
| PITG_03274 | Pi elongation factor P, putative (944 nt)                     | -14.5241 | 1.346164 | 0.214437 |
| PITG_09434 | Pi conserved hypothetical protein (739 nt)                    | -12.3947 | 1.263292 | 0.214489 |
| PITG_01850 | Pi kinesin-like protein (7582 nt)                             | -16.527  | -1.9743  | 0.214869 |
| PITG_05926 | Pi conserved hypothetical protein (1496 nt)                   | -15.0565 | -1.477   | 0.215015 |
| PITG_19657 | Pi conserved hypothetical protein (2720 nt)                   | -15.0201 | 1.561672 | 0.215028 |
| PITG_13509 | Pi secreted RxLR effector peptide, putative (660 nt)          | -12.1388 | 1.609022 | 0.215082 |
| PITG_13732 | Pi dual specificity phosphatase, putative (1324 nt)           | -16.0816 | 1.646541 | 0.215083 |
| PITG_08218 | Pi conserved hypothetical protein (725 nt)                    | -13.1134 | -1.26644 | 0.215432 |
| PITG_02765 | Pi conserved hypothetical protein (901 nt)                    | -15.5635 | -1.61416 | 0.2156   |
| PITG_09700 | Pi conserved hypothetical protein (1255 nt)                   | -15.7857 | -1.4688  | 0.215606 |
| PITG_03500 | Pi chromodomain-helicase-DNA-binding protein 1 (2790 nt)      | -16.3754 | -1.56813 | 0.216119 |
| PITG_14995 | Pi conserved hypothetical protein (687 nt)                    | -14.2552 | -1.34746 | 0.216363 |
| PITG_10201 | Pi conserved hypothetical protein (942 nt)                    | -16.5358 | -1.86952 | 0.216366 |
| PITG_22566 | Pi conserved hypothetical protein (1366 nt)                   | -16.5358 | -1.86952 | 0.216366 |
| PITG_10519 | Pi pantoate beta-alanine ligase, putative (949 nt)            | -15.593  | 1.47304  | 0.216479 |
| PITG_11424 | Pi conserved hypothetical protein (2382 nt)                   | -15.675  | -1.62927 | 0.216479 |
| PITG_11803 | Pi conserved hypothetical protein (1940 nt)                   | -15.7395 | 1.731568 | 0.216544 |
| PITG_04614 | Pi DNA ligase, putative (1649 nt)                             | -16.178  | -1.71485 | 0.216672 |
| PITG_01743 | Pi conserved hypothetical protein (582 nt)                    | -15.7859 | -1.53006 | 0.217313 |
| PITG_06199 | Pi Cullin family protein, putative (3859 nt)                  | -14.5126 | -1.31928 | 0.21748  |
| PITG_01671 | Pi conserved hypothetical protein (709 nt)                    | -15.73   | 1.60147  | 0.217616 |
| PITG_05738 | Pi cleavage induced conserved hypothetical protein (561 nt)   | -13.541  | -1.28561 | 0.217749 |
| PITG_02655 | Pi conserved hypothetical protein (804 nt)                    | -16.2334 | -1.68605 | 0.217905 |
| PITG_02744 | Pi conserved hypothetical protein (2910 nt)                   | -16.2334 | -1.68605 | 0.217905 |
| PITG_03300 | Pi U4/U6 small nuclear ribonucleoprotein Prp31 (1625 nt)      | -16.2334 | -1.68605 | 0.217905 |
| PITG_01659 | Pi conserved hypothetical protein (736 nt)                    | -16.8373 | -2.3562  | 0.217954 |
| PITG_05779 | Pi neutral ceramidase, putative (696 nt)                      | -16.8373 | -2.3562  | 0.217954 |
| PITG_18606 | Pi conserved hypothetical protein (1720 nt)                   | -16.8373 | -2.3562  | 0.217954 |
| PITG_01382 | Pi ubiquitin family protein, putative (1724 nt)               | -13.4928 | -1.2713  | 0.217973 |
| PITG_04283 | Pi conserved hypothetical protein (3545 nt)                   | -15.1819 | -1.62193 | 0.217992 |
| PITG_18187 | Pi sulfite reductase [NADPH] subunit beta, putative (4512 nt) | -13.6548 | -1.67109 | 0.218287 |
| PITG_11177 | Pi hypothetical protein (865 nt)                              | -15.1404 | 1.473745 | 0.218337 |
| PITG_16687 | Pi conserved hypothetical protein (614 nt)                    | -13.1629 | -1.26984 | 0.218908 |
| PITG_18959 | Pi conserved hypothetical protein (999 nt)                    | -15.083  | -1.37891 | 0.219138 |
| PITG_12855 | Pi conserved hypothetical protein (1188 nt)                   | -15.7635 | -1.64614 | 0.219323 |

|            |                                                                             |          |          |          |
|------------|-----------------------------------------------------------------------------|----------|----------|----------|
| PITG_12154 | Pi conserved hypothetical protein (3494 nt)                                 | -13.2409 | 1.216589 | 0.219717 |
| PITG_00486 | Pi hypothetical protein (1155 nt)                                           | -13.9307 | -1.29321 | 0.219957 |
| PITG_21963 | Pi Crinkler (CRN) family protein, pseudogene (1286 nt)                      | -10.3936 | -1.18433 | 0.220081 |
| PITG_09576 | Pi orotidine 5'-phosphate decarboxylase, putative (1685 nt)                 | -13.9214 | -1.30628 | 0.220762 |
| PITG_01370 | Pi ATP-binding Cassette (ABC) Superfamily (4527 nt)                         | -15.4909 | 1.540415 | 0.220843 |
| PITG_12904 | Pi conserved hypothetical protein (618 nt)                                  | -11.8549 | 1.202389 | 0.220967 |
| PITG_14812 | Pi conserved hypothetical protein (809 nt)                                  | -15.0829 | -1.37916 | 0.22104  |
| PITG_11107 | Pi conserved hypothetical protein (939 nt)                                  | -14.2109 | -1.35118 | 0.221125 |
| PITG_07991 | Pi glutamate-cysteine ligase catalytic subunit, putative (2397 nt)          | -15.3903 | -1.52817 | 0.221493 |
| PITG_15869 | Pi conserved hypothetical protein (1387 nt)                                 | -15.3657 | 1.456824 | 0.221493 |
| PITG_11887 | Pi conserved hypothetical protein (2098 nt)                                 | -15.6608 | -1.65745 | 0.221762 |
| PITG_13750 | Pi conserved hypothetical protein (906 nt)                                  | -13.3485 | -1.28248 | 0.221867 |
| PITG_16684 | Pi transmembrane protein, putative (2148 nt)                                | -14.8445 | -1.7589  | 0.221889 |
| PITG_19607 | Pi histone arginine demethylase, putative (3486 nt)                         | -15.1345 | -1.61175 | 0.222224 |
| PITG_14564 | Pi conserved hypothetical protein (1257 nt)                                 | -14.7536 | -1.3278  | 0.222337 |
| PITG_07804 | Pi conserved hypothetical protein (982 nt)                                  | -15.7166 | 1.545648 | 0.222446 |
| PITG_04715 | Pi pantothenate kinase, putative (1800 nt)                                  | -14.6204 | -1.32132 | 0.222845 |
| PITG_14388 | Pi cytochrome P450, putative (1581 nt)                                      | -15.0924 | 1.867768 | 0.222994 |
| PITG_15525 | Pi Rab21/Rab5 family GTPase, putative (747 nt)                              | -12.969  | -1.24137 | 0.223111 |
| PITG_00626 | Pi conserved hypothetical protein (2004 nt)                                 | -14.857  | -1.37721 | 0.223147 |
| PITG_11561 | Pi nuclear prelamin A recognition factor-like protein (1512 nt)             | -14.8746 | -1.41393 | 0.223147 |
| PITG_07879 | Pi conserved hypothetical protein (1400 nt)                                 | -15.3798 | 1.417445 | 0.223308 |
| PITG_03956 | Pi conserved hypothetical protein (963 nt)                                  | -14.3245 | 1.310313 | 0.223505 |
| PITG_07340 | Pi conserved hypothetical protein (569 nt)                                  | -9.54157 | -1.16813 | 0.223541 |
| PITG_18044 | Pi conserved hypothetical protein (1623 nt)                                 | -16.9402 | -2.164   | 0.223545 |
| PITG_10929 | Pi proteasome subunit alpha, putative (964 nt)                              | -11.6221 | 1.23742  | 0.223679 |
| PITG_05757 | Pi structural maintenance of chromosomes protein, putative (1000 nt)        | -16.532  | -1.87539 | 0.223893 |
| PITG_12853 | Pi conserved hypothetical protein (1224 nt)                                 | -16.532  | -1.87539 | 0.223893 |
| PITG_07894 | Pi sulfatase-like protein (612 nt)                                          | -13.5125 | 1.398617 | 0.223937 |
| PITG_17242 | Pi conserved hypothetical protein (2469 nt)                                 | -15.6992 | 1.356565 | 0.224161 |
| PITG_01082 | Pi ran-specific GTPase-activating protein, putative (936 nt)                | -11.7073 | 1.258869 | 0.224232 |
| PITG_05462 | Pi aldehyde dehydrogenase family 7 member A1 (2327 nt)                      | -12.722  | -1.25761 | 0.224327 |
| PITG_01703 | Pi ADP-ribosylation factor GTPase-activating protein, putative (1000 nt)    | -14.5152 | 1.328186 | 0.224495 |
| PITG_18717 | Pi H/ACA ribonucleoprotein complex subunit 3 (442 nt)                       | -13.4477 | 1.264493 | 0.224671 |
| PITG_05141 | Pi actin-like protein (1487 nt)                                             | -13.7407 | -1.25676 | 0.224771 |
| PITG_05990 | Pi myb-like DNA-binding protein, putative (2043 nt)                         | -14.3825 | -1.27588 | 0.224804 |
| PITG_14863 | Pi NADH-ubiquinone oxidoreductase, putative (1508 nt)                       | -15.5037 | -1.49802 | 0.224821 |
| PITG_03225 | Pi conserved hypothetical protein (1653 nt)                                 | -15.3327 | -1.48062 | 0.224847 |
| PITG_03877 | Pi conserved hypothetical protein (1680 nt)                                 | -16.9047 | -2.23429 | 0.224976 |
| PITG_06033 | Pi conserved hypothetical protein (941 nt)                                  | -16.9047 | -2.23429 | 0.224976 |
| PITG_03740 | Pi P-type ATPase (P-ATPase) Superfamily (3451 nt)                           | -15.4533 | -1.597   | 0.225107 |
| PITG_00312 | Pi conserved hypothetical protein (411 nt)                                  | -17.2163 | -1.82798 | 0.22522  |
| PITG_20571 | Pi alkyldihydroxyacetonephosphate synthase, peroxisomal, putative (1000 nt) | -17.2163 | -1.82798 | 0.22522  |
| PITG_20689 | Pi eukaryotic translation initiation factor 3 subunit H, putative (1000 nt) | -13.3203 | 1.23508  | 0.225261 |
| PITG_20534 | Pi conserved hypothetical protein (859 nt)                                  | -16.4217 | -1.97723 | 0.225294 |
| PITG_13844 | Pi conserved hypothetical protein (2067 nt)                                 | -16.354  | 1.655062 | 0.225407 |
| PITG_01700 | Pi inositol-3-phosphate synthase, putative (4011 nt)                        | -11.7897 | 1.183783 | 0.22548  |

|            |                                                              |          |          |          |
|------------|--------------------------------------------------------------|----------|----------|----------|
| PITG_11527 | Pi conserved hypothetical protein (864 nt)                   | -14.9702 | 1.431226 | 0.225572 |
| PITG_09355 | Pi aquaporin, putative (873 nt)                              | -14.5321 | -1.57316 | 0.225607 |
| PITG_21488 | Pi Annexin (Annexin) Family (1207 nt)                        | -9.93961 | -1.48135 | 0.225686 |
| PITG_02820 | Pi phosphatidylinositol-3,4,5-trisphosphate 3-phosphatase, p | -14.3048 | -1.33595 | 0.225769 |
| PITG_12257 | Pi conserved hypothetical protein (588 nt)                   | -16.2387 | -1.5988  | 0.22584  |
| PITG_03056 | Pi DNA polymerase I, putative (4067 nt)                      | -15.7247 | 1.53207  | 0.225878 |
| PITG_02994 | Pi hypothetical protein (1187 nt)                            | -15.7616 | -1.58083 | 0.225878 |
| PITG_04132 | Pi conserved hypothetical protein (1047 nt)                  | -15.9517 | -1.6379  | 0.225958 |
| PITG_11761 | Pi conserved hypothetical protein (1008 nt)                  | -15.9739 | -1.59348 | 0.225958 |
| PITG_09431 | Pi 40S ribosomal protein S19-3 (946 nt)                      | -9.48394 | 1.1608   | 0.22602  |
| PITG_06514 | Pi calmodulin (649 nt)                                       | -10.1579 | 1.241147 | 0.226072 |
| PITG_10017 | Pi conserved hypothetical protein (1414 nt)                  | -12.9487 | -1.23711 | 0.226176 |
| PITG_01946 | Pi ras family GTPase, putative (641 nt)                      | -13.8691 | 1.270328 | 0.226352 |
| PITG_06609 | Pi conserved hypothetical protein (1221 nt)                  | -15.4889 | -1.5275  | 0.226633 |
| PITG_00146 | Pi glucose-6-phosphate 1-dehydrogenase (1735 nt)             | -12.8031 | -1.24757 | 0.226699 |
| PITG_13752 | Pi conserved hypothetical protein (2768 nt)                  | -14.6128 | 1.313468 | 0.226706 |
| PITG_02846 | Pi para-hydroxybenzoate-polyprenyltransferase, putative (23  | -16.3134 | 1.381098 | 0.226923 |
| PITG_16128 | Pi conserved hypothetical protein (1035 nt)                  | -14.2622 | -1.33295 | 0.227112 |
| PITG_01961 | Pi DCN1-like protein (1100 nt)                               | -16.0305 | -1.47925 | 0.227307 |
| PITG_12048 | Pi M96 mating-specific protein family (1390 nt)              | -16.0276 | -1.485   | 0.227307 |
| PITG_11243 | Pi hypothetical protein (1247 nt)                            | -13.2935 | 1.412656 | 0.227412 |
| PITG_20805 | Pi hypothetical protein (273 nt)                             | -14.3283 | -1.76718 | 0.227743 |
| PITG_08193 | Pi elicitin-like protein (357 nt)                            | -13.7859 | 1.269168 | 0.227999 |
| PITG_00919 | Pi Glycoside-Pentoside-Hexuronide (GPH):Cation Symporter     | -16.6895 | 2.284922 | 0.228443 |
| PITG_03764 | Pi polyribonucleotide nucleotidyltransferase, putative (2724 | -16.3032 | 1.40342  | 0.228443 |
| PITG_08009 | Pi conserved hypothetical protein (717 nt)                   | -16.4311 | -1.4489  | 0.228443 |
| PITG_16884 | Pi conserved hypothetical protein (1124 nt)                  | -16.7061 | 2.251689 | 0.228443 |
| PITG_05590 | Pi conserved hypothetical protein (1202 nt)                  | -15.4538 | 1.489176 | 0.228447 |
| PITG_10335 | Pi carnitine O-palmitoyltransferase 2, putative (823 nt)     | -15.0375 | -1.4247  | 0.228662 |
| PITG_20608 | Pi conserved hypothetical protein (1443 nt)                  | -14.2459 | 1.305012 | 0.228735 |
| PITG_17209 | Pi conserved hypothetical protein (1477 nt)                  | -15.6197 | -1.43506 | 0.228829 |
| PITG_00562 | Pi Mitochondrial Tricarboxylate Carrier (MTC) Family (1636 r | -15.9791 | 1.64649  | 0.228972 |
| PITG_13188 | Pi conserved hypothetical protein (2010 nt)                  | -16.0106 | -1.51906 | 0.228972 |
| PITG_08742 | Pi conserved hypothetical protein (972 nt)                   | -16.2511 | -1.64992 | 0.22903  |
| PITG_01483 | Pi conserved hypothetical protein (1109 nt)                  | -14.6661 | 1.329393 | 0.229359 |
| PITG_17021 | Pi conserved hypothetical protein (1563 nt)                  | -14.9896 | -1.34976 | 0.229443 |
| PITG_19147 | Pi conserved hypothetical protein (450 nt)                   | -13.9496 | -1.34862 | 0.229481 |
| PITG_04800 | Pi conserved hypothetical protein (1200 nt)                  | -15.6605 | 1.401352 | 0.229618 |
| PITG_17595 | Pi conserved hypothetical protein (3198 nt)                  | -15.695  | 1.499473 | 0.229618 |
| PITG_12984 | Pi conserved hypothetical protein (1215 nt)                  | -14.3229 | -1.26997 | 0.229702 |
| PITG_00342 | Pi conserved hypothetical protein (1537 nt)                  | -16.316  | -1.70345 | 0.230066 |
| PITG_04261 | Pi ATP-binding Cassette (ABC) Superfamily (2690 nt)          | -14.2709 | 1.316476 | 0.230347 |
| PITG_17708 | Pi conserved hypothetical protein (668 nt)                   | -10.6367 | 1.235943 | 0.230383 |
| PITG_00568 | Pi Drug/Metabolite Transporter (DMT) Superfamily (1861 nt)   | -15.3481 | -1.45052 | 0.230486 |
| PITG_01603 | Pi conserved hypothetical protein (8629 nt)                  | -16.1685 | 1.464007 | 0.230628 |
| PITG_17079 | Pi conserved hypothetical protein (6370 nt)                  | -16.1685 | 1.464007 | 0.230628 |
| PITG_15568 | Pi conserved hypothetical protein (824 nt)                   | -11.9757 | 1.177125 | 0.230842 |

|            |                                                                                      |          |          |          |
|------------|--------------------------------------------------------------------------------------|----------|----------|----------|
| PITG_11287 | Pi conserved hypothetical protein (616 nt)                                           | -15.9922 | -1.70135 | 0.230964 |
| PITG_17496 | Pi glycoside hydrolase, putative (935 nt)                                            | -15.885  | 1.391685 | 0.230964 |
| PITG_05551 | Pi ribose-phosphate pyrophosphokinase, putative (1542 nt)                            | -14.7588 | 1.333163 | 0.231379 |
| PITG_00422 | Pi Zinc (Zn <sup>2+</sup> )-Iron (Fe <sup>2+</sup> ) Permease (ZIP) Family (1176 nt) | -16.5136 | -1.81824 | 0.231491 |
| PITG_00468 | Pi conserved hypothetical protein (862 nt)                                           | -16.5454 | -1.7546  | 0.231491 |
| PITG_02208 | Pi conserved hypothetical protein (1974 nt)                                          | -16.3804 | -1.55174 | 0.231491 |
| PITG_14452 | Pi conserved hypothetical protein (406 nt)                                           | -16.5454 | -1.7546  | 0.231491 |
| PITG_17705 | Pi protein kinase (1554 nt)                                                          | -16.4122 | -1.4881  | 0.231491 |
| PITG_10889 | Pi conserved hypothetical protein (3143 nt)                                          | -17.2571 | -1.74924 | 0.231544 |
| PITG_14934 | Pi conserved hypothetical protein (1359 nt)                                          | -17.2571 | -1.74924 | 0.231544 |
| PITG_07703 | Pi conserved hypothetical protein (5210 nt)                                          | -15.3509 | -1.5558  | 0.231758 |
| PITG_14172 | Pi conserved hypothetical protein (1397 nt)                                          | -15.4141 | 1.383995 | 0.232078 |
| PITG_04561 | Pi conserved hypothetical protein (1419 nt)                                          | -16.9853 | -2.18777 | 0.232283 |
| PITG_13031 | Pi variable flagellar number 3 (2096 nt)                                             | -16.9853 | -2.18777 | 0.232283 |
| PITG_16273 | Pi M96 mating-specific protein family (1530 nt)                                      | -16.9853 | -2.18777 | 0.232283 |
| PITG_13417 | Pi conserved hypothetical protein (1464 nt)                                          | -15.9838 | -1.50536 | 0.232308 |
| PITG_17023 | Pi phosphoglycerate/bisphosphoglycerate mutase (1177 nt)                             | -15.9982 | -1.61155 | 0.232308 |
| PITG_19965 | Pi conserved hypothetical protein (1744 nt)                                          | -16.0224 | -1.56328 | 0.232308 |
| PITG_16745 | Pi conserved hypothetical protein (786 nt)                                           | -15.4682 | -1.62459 | 0.232318 |
| PITG_15639 | Pi hypothetical protein (570 nt)                                                     | -9.63853 | 1.138689 | 0.232343 |
| PITG_19864 | Pi conserved hypothetical protein (923 nt)                                           | -10.7426 | -1.17792 | 0.232468 |
| PITG_10674 | Pi CorA Metal Ion Transporter (MIT) Family (2073 nt)                                 | -14.1219 | -1.56186 | 0.232596 |
| PITG_23215 | Pi secreted RxLR effector peptide, putative (486 nt)                                 | -16.2202 | -1.7102  | 0.232729 |
| PITG_11536 | Pi conserved hypothetical protein (522 nt)                                           | -14.6233 | -1.3156  | 0.232907 |
| PITG_09010 | Pi calcium/calmodulin-dependent protein kinase, putative (2                          | -16.4731 | -1.9851  | 0.233127 |
| PITG_10888 | Pi Resistance-Nodulation-Cell Division (RND) Superfamily (31                         | -15.2125 | -1.35741 | 0.233519 |
| PITG_01104 | Pi ubiquitin thioesterase otubain (727 nt)                                           | -14.8485 | 1.278659 | 0.233562 |
| PITG_13801 | Pi conserved hypothetical protein (2132 nt)                                          | -16.7185 | -1.69341 | 0.233637 |
| PITG_20287 | Pi kinesin-like protein (1714 nt)                                                    | -17.0356 | -2.08715 | 0.233676 |
| PITG_09209 | Pi conserved hypothetical protein (2025 nt)                                          | -14.9698 | 1.488519 | 0.233678 |
| PITG_04425 | Pi ubiquitin-conjugating enzyme E2, putative (785 nt)                                | -12.8784 | -1.22209 | 0.233757 |
| PITG_00385 | Pi conserved hypothetical protein (3214 nt)                                          | -15.8509 | 1.463374 | 0.234313 |
| PITG_14248 | Pi rRNA-processing protein EBP2, putative (1109 nt)                                  | -15.0549 | 1.329598 | 0.234379 |
| PITG_03152 | Pi conserved hypothetical protein (6883 nt)                                          | -16.5527 | -1.92493 | 0.23455  |
| PITG_03800 | Pi conserved hypothetical protein (644 nt)                                           | -16.5527 | -1.92493 | 0.23455  |
| PITG_18713 | Pi Rab6 family GTPase, putative (937 nt)                                             | -14.3463 | 1.325537 | 0.234767 |
| PITG_18317 | Pi phospholipid hydroperoxide glutathione peroxidase, putative                       | -11.831  | -1.18524 | 0.234951 |
| PITG_11610 | Pi conserved hypothetical protein (3524 nt)                                          | -10.2506 | -1.21108 | 0.235039 |
| PITG_15929 | Pi paladin-like protein (3014 nt)                                                    | -17.017  | -2.12435 | 0.235072 |
| PITG_16452 | Pi hypothetical protein (351 nt)                                                     | -17.0023 | -2.15364 | 0.235072 |
| PITG_01705 | Pi hypothetical protein (362 nt)                                                     | -11.3911 | 1.179639 | 0.235243 |
| PITG_00658 | Pi conserved hypothetical protein (1260 nt)                                          | -14.9763 | -1.37699 | 0.235252 |
| PITG_08131 | Pi oxidoreductase htip2-like protein (817 nt)                                        | -14.813  | -1.42828 | 0.235498 |
| PITG_11869 | Pi SUMO-activating enzyme (SAE), putative (1584 nt)                                  | -15.9816 | -1.50918 | 0.23565  |
| PITG_02637 | Pi hypothetical protein (2078 nt)                                                    | -15.4074 | -1.43853 | 0.235933 |
| PITG_05196 | Pi 2-nitropropane dioxygenase, putative (745 nt)                                     | -16.5235 | -1.98346 | 0.236083 |
| PITG_15844 | Pi conserved hypothetical protein (2118 nt)                                          | -16.5296 | -1.87769 | 0.236083 |



|            |                                                                    |          |          |          |
|------------|--------------------------------------------------------------------|----------|----------|----------|
| PITG_06849 | Pi conserved hypothetical protein (1628 nt)                        | -14.5467 | -1.31735 | 0.23616  |
| PITG_11146 | Pi conserved hypothetical protein (2655 nt)                        | -17.0452 | -2.06776 | 0.236471 |
| PITG_10485 | Pi conserved hypothetical protein (1836 nt)                        | -16.9307 | -2.29472 | 0.236551 |
| PITG_12919 | Pi conserved hypothetical protein (3422 nt)                        | -16.9307 | -2.29472 | 0.236551 |
| PITG_19420 | Pi hypothetical protein (252 nt)                                   | -16.9307 | -2.29472 | 0.236551 |
| PITG_10334 | Pi serine/threonine protein kinase (1221 nt)                       | -15.8085 | -1.42279 | 0.236628 |
| PITG_12746 | Pi conserved hypothetical protein (760 nt)                         | -13.0467 | 1.265738 | 0.237041 |
| PITG_07699 | Pi cytochrome P450, putative (1599 nt)                             | -16.2486 | -1.8119  | 0.237044 |
| PITG_18377 | Pi adenylate kinase, putative (2776 nt)                            | -16.249  | -1.65377 | 0.237044 |
| PITG_19854 | Pi conserved hypothetical protein (1732 nt)                        | -12.043  | -1.17561 | 0.237384 |
| PITG_22339 | Pi conserved hypothetical protein (937 nt)                         | -14.4688 | 1.326927 | 0.237425 |
| PITG_18883 | Pi conserved hypothetical protein (585 nt)                         | -15.457  | 1.391236 | 0.237532 |
| PITG_19080 | Pi conserved hypothetical protein (872 nt)                         | -14.8337 | 1.401288 | 0.237618 |
| PITG_14277 | Pi trichohyalin-like protein (1827 nt)                             | -15.8602 | 1.448384 | 0.237671 |
| PITG_16922 | Pi conserved hypothetical protein (961 nt)                         | -13.9215 | 1.285997 | 0.237791 |
| PITG_11813 | Pi conserved hypothetical protein (2037 nt)                        | -15.1234 | 1.44548  | 0.23781  |
| PITG_19096 | Pi phospho-2-dehydro-3-deoxyheptonate aldolase (1513 nt)           | -15.0952 | 1.349796 | 0.23781  |
| PITG_12811 | Pi conserved hypothetical protein (658 nt)                         | -13.6762 | -1.21088 | 0.237914 |
| PITG_13138 | Pi conserved hypothetical protein (2544 nt)                        | -15.7675 | 1.525904 | 0.237951 |
| PITG_12620 | Pi conserved hypothetical protein (1680 nt)                        | -16.8977 | -2.36072 | 0.238014 |
| PITG_15057 | Pi cysteine desulfurase 1, mitochondrial precursor (1582 nt)       | -13.8253 | 1.244454 | 0.238185 |
| PITG_03653 | Pi protein phosphatase 2 (2358 nt)                                 | -14.1079 | 1.219571 | 0.238283 |
| PITG_19157 | Pi conserved hypothetical protein (449 nt)                         | -12.6565 | 1.257254 | 0.238523 |
| PITG_09553 | Pi conserved hypothetical protein (1008 nt)                        | -11.4875 | 1.195519 | 0.238591 |
| PITG_10275 | Pi conserved hypothetical protein (2856 nt)                        | -16.2228 | -1.70618 | 0.238654 |
| PITG_17787 | Pi Arsenite-Antimonite (ArsAB) Efflux Family (1135 nt)             | -13.2735 | 1.181872 | 0.238668 |
| PITG_05225 | Pi 4-aminobutyrate aminotransferase, mitochondrial precursor       | -13.5301 | -1.3632  | 0.238755 |
| PITG_17943 | Pi conserved hypothetical protein (1303 nt)                        | -15.9739 | 1.468549 | 0.238999 |
| PITG_15737 | Pi conserved hypothetical protein (528 nt)                         | -14.9892 | -1.39423 | 0.239127 |
| PITG_06967 | Pi conserved hypothetical protein (1460 nt)                        | -13.501  | 1.238411 | 0.239215 |
| PITG_02752 | Pi ribosomal RNA methyltransferase nop2-like protein (2126 nt)     | -15.6293 | 1.400543 | 0.239359 |
| PITG_19008 | Pi nascent polypeptide-associated complex subunit alpha-like       | -11.4958 | 1.202415 | 0.239435 |
| PITG_00584 | Pi oxidoreductase, putative (1591 nt)                              | -14.9937 | 1.384191 | 0.239648 |
| PITG_12646 | Pi Crinkler (CRN) family protein (2186 nt)                         | -12.4649 | -1.17535 | 0.239735 |
| PITG_04746 | Pi conserved hypothetical protein (2806 nt)                        | -15.1075 | -1.3742  | 0.239738 |
| PITG_01785 | Pi conserved hypothetical protein (423 nt)                         | -14.3164 | -1.28476 | 0.240088 |
| PITG_17394 | Pi developmentally-regulated GTP-binding protein 1 (1149 nt)       | -15.783  | 1.48691  | 0.240097 |
| PITG_03259 | Pi conserved hypothetical protein (1300 nt)                        | -15.0487 | 1.390566 | 0.240104 |
| PITG_01184 | Pi eukaryotic translation initiation factor 3 subunit G, putative  | -12.7028 | 1.16836  | 0.240173 |
| PITG_00264 | Pi Delta(3,5)-Delta(2,4)-dienoyl-CoA isomerase, putative (1016 nt) | -14.5154 | -1.31358 | 0.240594 |
| PITG_04773 | Pi conserved hypothetical protein (454 nt)                         | -14.2306 | -1.27918 | 0.24063  |
| PITG_11651 | Pi conserved hypothetical protein (773 nt)                         | -14.8299 | 1.321561 | 0.240644 |
| PITG_13841 | Pi conserved hypothetical protein (3438 nt)                        | -15.9971 | -1.54655 | 0.240676 |
| PITG_04701 | Pi cleavage induced conserved hypothetical protein (2201 nt)       | -16.0164 | -1.57697 | 0.240676 |
| PITG_03996 | Pi conserved hypothetical protein (662 nt)                         | -17.0102 | -2.1376  | 0.240682 |
| PITG_17155 | Pi RNA 3'-terminal phosphate cyclase, putative (2034 nt)           | -17.0092 | -2.13966 | 0.240682 |
| PITG_06799 | Pi ribosomal protein L27 (785 nt)                                  | -10.3309 | 1.174324 | 0.240735 |

|            |                                                              |          |          |          |
|------------|--------------------------------------------------------------|----------|----------|----------|
| PITG_22037 | Pi hypothetical protein (988 nt)                             | -16.1921 | 1.826196 | 0.240866 |
| PITG_14257 | Pi conserved hypothetical protein (2697 nt)                  | -15.2357 | -1.40583 | 0.241098 |
| PITG_14279 | Pi conserved hypothetical protein (1597 nt)                  | -15.6549 | -1.66842 | 0.241254 |
| PITG_03472 | Pi callose synthase, putative (6122 nt)                      | -13.9237 | -1.30361 | 0.241257 |
| PITG_07030 | Pi conserved hypothetical protein (1334 nt)                  | -14.108  | 1.288171 | 0.241745 |
| PITG_09790 | Pi conserved hypothetical protein (856 nt)                   | -15.8277 | -1.44653 | 0.241834 |
| PITG_12100 | Pi conserved hypothetical protein (1683 nt)                  | -15.8277 | -1.44653 | 0.241834 |
| PITG_11081 | Pi conserved hypothetical protein (519 nt)                   | -14.2129 | 1.287399 | 0.241836 |
| PITG_04703 | Pi conserved hypothetical protein (603 nt)                   | -16.2675 | -1.69641 | 0.241879 |
| PITG_20235 | Pi conserved hypothetical protein (1161 nt)                  | -15.0519 | 1.339414 | 0.242014 |
| PITG_10087 | Pi conserved hypothetical protein (2755 nt)                  | -15.98   | -1.51154 | 0.242355 |
| PITG_22000 | Pi conserved hypothetical protein (366 nt)                   | -15.6945 | 1.746134 | 0.242479 |
| PITG_15873 | Pi NADH-cytochrome b5 reductase (1043 nt)                    | -13.8456 | -1.25571 | 0.242495 |
| PITG_03842 | Pi conserved hypothetical protein (4143 nt)                  | -15.9345 | -1.59895 | 0.242725 |
| PITG_16363 | Pi hypothetical protein (1392 nt)                            | -11.1565 | 1.172204 | 0.242818 |
| PITG_07124 | Pi conserved hypothetical protein (542 nt)                   | -15.6621 | 1.402536 | 0.242937 |
| PITG_13990 | Pi conserved hypothetical protein (512 nt)                   | -14.8861 | 1.340066 | 0.243003 |
| PITG_10922 | Pi fatty acid synthase subunit alpha, putative (12163 nt)    | -15.3523 | 1.466908 | 0.243103 |
| PITG_12212 | Pi conserved hypothetical protein (753 nt)                   | -14.7102 | 1.505581 | 0.243358 |
| PITG_08664 | Pi hypothetical protein (483 nt)                             | -15.7463 | -1.62056 | 0.243481 |
| PITG_06026 | Pi conserved hypothetical protein (1015 nt)                  | -16.2424 | -1.82708 | 0.243495 |
| PITG_07821 | Pi ATP-dependent RNA helicase, putative (5639 nt)            | -16.1236 | 1.449139 | 0.243495 |
| PITG_06890 | Pi peptidase, putative (1581 nt)                             | -14.097  | -1.25018 | 0.243547 |
| PITG_21944 | Pi conserved hypothetical protein (937 nt)                   | -15.8295 | -1.44336 | 0.243572 |
| PITG_00191 | Pi conserved hypothetical protein (1047 nt)                  | -15.9864 | 1.550551 | 0.244035 |
| PITG_02697 | Pi ATP-binding Cassette (ABC) Superfamily (2563 nt)          | -16.0773 | 1.708696 | 0.244035 |
| PITG_19775 | Pi conserved hypothetical protein (554 nt)                   | -12.9805 | -1.27773 | 0.244286 |
| PITG_02027 | Pi conserved hypothetical protein (6430 nt)                  | -15.535  | -1.49072 | 0.244552 |
| PITG_02731 | Pi conserved hypothetical protein (3612 nt)                  | -15.6919 | -1.59523 | 0.244728 |
| PITG_03261 | Pi conserved hypothetical protein (766 nt)                   | -15.8013 | -1.5717  | 0.244891 |
| PITG_01792 | Pi conserved hypothetical protein (639 nt)                   | -14.9995 | -1.37463 | 0.24494  |
| PITG_14585 | Pi conserved hypothetical protein (948 nt)                   | -15.8247 | -1.45345 | 0.245311 |
| PITG_04380 | Pi hypothetical protein (740 nt)                             | -13.3353 | -1.18131 | 0.245353 |
| PITG_01244 | Pi conserved hypothetical protein (1255 nt)                  | -13.8084 | -1.22705 | 0.245568 |
| PITG_07121 | Pi acyl-[acyl-carrier-protein]-UDP-N-acetylglucosamine O-acy | -14.5971 | 1.25798  | 0.245725 |
| PITG_02253 | Pi isovaleryl-CoA dehydrogenase, putative (1538 nt)          | -12.4243 | -1.15663 | 0.24573  |
| PITG_17460 | Pi DEAD/DEAH box RNA helicase, putative (2653 nt)            | -15.0543 | 1.380284 | 0.245835 |
| PITG_05526 | Pi alpha-amylase, putative (2124 nt)                         | -15.6536 | -1.89377 | 0.245944 |
| PITG_15292 | Pi catalase (1541 nt)                                        | -16.5942 | -1.83937 | 0.246287 |
| PITG_14695 | Pi conserved hypothetical protein (1320 nt)                  | -16.8    | -1.51836 | 0.246335 |
| PITG_15980 | Pi glycoside hydrolase, putative (1332 nt)                   | -16.7581 | -1.60223 | 0.246335 |
| PITG_07325 | Pi conserved hypothetical protein (1203 nt)                  | -14.5587 | -1.22707 | 0.24649  |
| PITG_10593 | Pi conserved hypothetical protein (1185 nt)                  | -15.6214 | 1.355576 | 0.246519 |
| PITG_03016 | Pi conserved hypothetical protein (640 nt)                   | -15.195  | 1.332962 | 0.246786 |
| PITG_11304 | Pi conserved hypothetical protein (448 nt)                   | -12.0895 | 1.131995 | 0.246916 |
| PITG_18183 | Pi maltose O-acetyltransferase (1036 nt)                     | -13.769  | -1.20009 | 0.247003 |
| PITG_03616 | Pi conserved hypothetical protein (789 nt)                   | -14.011  | -1.27262 | 0.247079 |

|            |                                                                |          |          |          |
|------------|----------------------------------------------------------------|----------|----------|----------|
| PITG_13277 | Pi conserved hypothetical protein (1592 nt)                    | -14.0229 | -1.29896 | 0.247079 |
| PITG_00172 | Pi proteasome subunit alpha, putative (933 nt)                 | -12.2291 | 1.187709 | 0.247271 |
| PITG_06691 | Pi cell division control protein 42 (1236 nt)                  | -12.5671 | 1.15526  | 0.247393 |
| PITG_19023 | Pi NADH-cytochrome b5 reductase, putative (1093 nt)            | -11.6206 | 1.128229 | 0.247495 |
| PITG_20774 | Pi conserved hypothetical protein (2992 nt)                    | -14.6547 | -1.32326 | 0.247755 |
| PITG_02756 | Pi conserved hypothetical protein (1271 nt)                    | -15.6478 | -1.32153 | 0.248311 |
| PITG_15872 | Pi conserved hypothetical protein (898 nt)                     | -12.7085 | -1.19345 | 0.24842  |
| PITG_12299 | Pi hypothetical protein (473 nt)                               | -8.85886 | 1.168978 | 0.248608 |
| PITG_07027 | Pi isocitrate lyase (1764 nt)                                  | -12.1427 | 1.261754 | 0.248785 |
| PITG_02337 | Pi exonuclease, putative (1389 nt)                             | -14.8938 | -1.30313 | 0.248955 |
| PITG_15694 | Pi dihydroorotase (1271 nt)                                    | -14.2322 | -1.22114 | 0.248998 |
| PITG_16799 | Pi inositol-3,4-bisphosphate 4-phosphatase, putative (3238 r   | -16.0201 | -1.50098 | 0.249086 |
| PITG_02003 | Pi conserved hypothetical protein (865 nt)                     | -14.6496 | -1.26294 | 0.24913  |
| PITG_04631 | Pi conserved hypothetical protein (1040 nt)                    | -16.7838 | -1.55199 | 0.249177 |
| PITG_03878 | Pi dynein intermediate chain 2 (2326 nt)                       | -14.8378 | 1.275799 | 0.24927  |
| PITG_09242 | Pi conserved hypothetical protein (2321 nt)                    | -16.6225 | -1.78299 | 0.249326 |
| PITG_15463 | Pi lamin-like protein (1884 nt)                                | -16.589  | -1.84996 | 0.249326 |
| PITG_14108 | Pi conserved hypothetical protein (5027 nt)                    | -14.4757 | -1.28533 | 0.249389 |
| PITG_12258 | Pi conserved hypothetical protein (796 nt)                     | -15.073  | -1.3998  | 0.249657 |
| PITG_17258 | Pi conserved hypothetical protein (1386 nt)                    | -16.2646 | 1.782373 | 0.249981 |
| PITG_14770 | Pi conserved hypothetical protein (1513 nt)                    | -15.4743 | -1.30063 | 0.250065 |
| PITG_01526 | Pi dual specificity mitogen-activated protein kinase kinase, p | -15.6199 | -1.37752 | 0.250103 |
| PITG_10487 | Pi conserved hypothetical protein (1587 nt)                    | -15.4359 | -1.49569 | 0.250455 |
| PITG_09260 | Pi conserved hypothetical protein (4938 nt)                    | -15.7483 | 1.259572 | 0.250534 |
| PITG_16820 | Pi conserved hypothetical protein (1218 nt)                    | -17.0033 | -2.15087 | 0.250602 |
| PITG_05199 | Pi conserved hypothetical protein (1101 nt)                    | -16.2366 | 1.460897 | 0.250626 |
| PITG_05286 | Pi conserved hypothetical protein (555 nt)                     | -14.3353 | -1.24602 | 0.250711 |
| PITG_21994 | Pi conserved hypothetical protein (901 nt)                     | -15.3824 | -1.38186 | 0.250846 |
| PITG_02346 | Pi CCR4-NOT transcription complex subunit 7 (650 nt)           | -16.601  | -1.73933 | 0.250849 |
| PITG_12627 | Pi crinkler (CRN) family protein, Gypsy-disrupted, pseudogen   | -16.601  | -1.73933 | 0.250849 |
| PITG_01509 | Pi conserved hypothetical protein (1670 nt)                    | -17.2514 | -1.76918 | 0.251015 |
| PITG_09980 | Pi conserved hypothetical protein (784 nt)                     | -17.2514 | -1.76918 | 0.251015 |
| PITG_12131 | Pi protease inhibitor Epi4 (957 nt)                            | -17.2514 | -1.76918 | 0.251015 |
| PITG_14286 | Pi conserved hypothetical protein (1870 nt)                    | -17.2514 | -1.76918 | 0.251015 |
| PITG_13250 | Pi Mitochondrial Protein Translocase (MPT) Family (1047 nt)    | -14.6559 | 1.227282 | 0.251257 |
| PITG_01386 | Pi phospholipase, putative (3507 nt)                           | -15.0975 | -1.35043 | 0.251305 |
| PITG_20796 | Pi conserved hypothetical protein (688 nt)                     | -13.641  | -1.30195 | 0.251498 |
| PITG_09836 | Pi secreted RxLR effector peptide, putative (483 nt)           | -13.8725 | -1.2286  | 0.251884 |
| PITG_10949 | Pi conserved hypothetical protein (829 nt)                     | -15.6306 | 1.46337  | 0.251896 |
| PITG_01189 | Pi hypothetical protein (2548 nt)                              | -15.5073 | -1.43488 | 0.251903 |
| PITG_02887 | Pi ribosome biogenesis protein BMS1 (3663 nt)                  | -15.4605 | 1.290257 | 0.251903 |
| PITG_03773 | Pi protein kinase (2755 nt)                                    | -16.7517 | -1.61752 | 0.252029 |
| PITG_14178 | Pi conserved hypothetical protein (453 nt)                     | -16.7925 | -1.536   | 0.252029 |
| PITG_21507 | Pi sterol 3-beta-glucosyltransferase, putative (3531 nt)       | -16.9661 | -2.22529 | 0.252029 |
| PITG_06483 | Pi conserved hypothetical protein (1048 nt)                    | -13.7426 | -1.19982 | 0.252338 |
| PITG_23178 | Pi kazal-type serine protease inhibitor, putative (1594 nt)    | -16.5677 | -1.80577 | 0.252374 |
| PITG_17452 | Pi importin alpha-2 subunit (2296 nt)                          | -11.9097 | -1.12053 | 0.25245  |

|            |                                                                          |          |          |          |
|------------|--------------------------------------------------------------------------|----------|----------|----------|
| PITG_13523 | Pi conserved hypothetical protein (1599 nt)                              | -16.0174 | -1.64899 | 0.252461 |
| PITG_06766 | Pi conserved hypothetical protein (1797 nt)                              | -14.7347 | -1.25452 | 0.252782 |
| PITG_18099 | Pi cysteine protease family C15, putative (1610 nt)                      | -14.3118 | 1.242968 | 0.252786 |
| PITG_02532 | Pi Ca2 :Cation Antiporter (CaCA) Family (3392 nt)                        | -13.3974 | 1.264037 | 0.253059 |
| PITG_20079 | Pi conserved hypothetical protein (1225 nt)                              | -13.203  | -1.35331 | 0.253088 |
| PITG_06596 | Pi conserved hypothetical protein (1272 nt)                              | -14.2387 | 1.232897 | 0.253112 |
| PITG_14224 | Pi conserved hypothetical protein (1097 nt)                              | -16.3788 | -1.56404 | 0.253136 |
| PITG_07572 | Pi conserved hypothetical protein (780 nt)                               | -12.4482 | 1.203613 | 0.25316  |
| PITG_06997 | Pi conserved hypothetical protein (507 nt)                               | -14.5812 | -1.24789 | 0.253418 |
| PITG_00755 | Pi conserved hypothetical protein (2618 nt)                              | -17.2024 | -1.86837 | 0.253668 |
| PITG_07258 | Pi conserved hypothetical protein (1535 nt)                              | -17.2024 | -1.86837 | 0.253668 |
| PITG_13527 | Pi conserved hypothetical protein (1548 nt)                              | -16.3118 | -1.52901 | 0.253849 |
| PITG_17160 | Pi conserved hypothetical protein (1836 nt)                              | -16.267  | 1.560566 | 0.253849 |
| PITG_17994 | Pi Cyclin B (1718 nt)                                                    | -16.3051 | -1.61743 | 0.253849 |
| PITG_19461 | Pi conserved hypothetical protein (1566 nt)                              | -16.3051 | -1.61743 | 0.253849 |
| PITG_03359 | Pi conserved hypothetical protein (1441 nt)                              | -15.1099 | 1.292006 | 0.254125 |
| PITG_11563 | Pi conserved hypothetical protein (928 nt)                               | -13.9809 | 1.162338 | 0.254427 |
| PITG_15251 | Pi conserved hypothetical protein (1309 nt)                              | -13.7649 | 1.2047   | 0.25497  |
| PITG_18409 | Pi conserved hypothetical protein (2100 nt)                              | -14.6259 | -1.34649 | 0.255022 |
| PITG_11180 | Pi conserved hypothetical protein (1669 nt)                              | -14.4385 | 1.243936 | 0.255241 |
| PITG_21149 | Pi conserved hypothetical protein (1645 nt)                              | -15.669  | 1.387572 | 0.255352 |
| PITG_10027 | Pi alpha-N-acetylglucosaminidase (NAGLU), putative (2125 nt)             | -16.2823 | -1.5879  | 0.255462 |
| PITG_14916 | Pi conserved hypothetical protein (705 nt)                               | -15.4782 | -1.29369 | 0.25558  |
| PITG_00513 | Pi myb-like DNA-binding protein, putative (725 nt)                       | -16.217  | -1.7154  | 0.255687 |
| PITG_11699 | Pi hypothetical protein (1409 nt)                                        | -15.7161 | 1.327875 | 0.255768 |
| PITG_01253 | Pi aldehyde dehydrogenase, mitochondrial precursor (1557 nt)             | -13.0211 | -1.39642 | 0.255905 |
| PITG_12185 | Pi 26S protease regulatory subunit 4 (1560 nt)                           | -12.2249 | 1.159503 | 0.255985 |
| PITG_16038 | Pi conserved hypothetical protein (2034 nt)                              | -15.124  | -1.29687 | 0.256073 |
| PITG_08016 | Pi vesicle-trafficking protein SEC22b, putative (1146 nt)                | -14.4313 | 1.317651 | 0.256254 |
| PITG_19905 | Pi calcium/calmodulin dependent protein kinase, putative (925 nt)        | -16.2284 | -1.61096 | 0.256501 |
| PITG_10480 | Pi translation initiation factor eIF-2B subunit beta, putative (1048 nt) | -14.9298 | 1.316238 | 0.256569 |
| PITG_17597 | Pi conserved hypothetical protein (3204 nt)                              | -15.2503 | -1.37637 | 0.256597 |
| PITG_04111 | Pi conserved hypothetical protein (763 nt)                               | -16.618  | -1.79278 | 0.256961 |
| PITG_16079 | Pi conserved hypothetical protein (926 nt)                               | -16.5852 | -1.85842 | 0.256961 |
| PITG_17090 | Pi conserved hypothetical protein (1149 nt)                              | -16.5852 | -1.85842 | 0.256961 |
| PITG_10561 | Pi conserved hypothetical protein (844 nt)                               | -14.7225 | 1.289714 | 0.256979 |
| PITG_02255 | Pi histone H1, putative (731 nt)                                         | -10.1309 | -1.0874  | 0.257054 |
| PITG_08534 | Pi conserved hypothetical protein (969 nt)                               | -16.0416 | 1.521037 | 0.257364 |
| PITG_15139 | Pi phospholipid-transporting ATPase, putative (4176 nt)                  | -15.9221 | 1.317527 | 0.257536 |
| PITG_17049 | Pi ATP-binding Cassette (ABC) Superfamily (5337 nt)                      | -14.9444 | -1.35713 | 0.257537 |
| PITG_09594 | Pi conserved hypothetical protein (955 nt)                               | -14.5264 | -1.25908 | 0.257548 |
| PITG_15958 | Pi serine protease family S33, putative (1068 nt)                        | -14.5627 | -1.43256 | 0.257724 |
| PITG_04375 | Pi conserved hypothetical protein (805 nt)                               | -13.6843 | -1.27689 | 0.258246 |
| PITG_20005 | Pi ATP-binding Cassette (ABC) Superfamily (3483 nt)                      | -12.738  | 1.201361 | 0.258287 |
| PITG_01528 | Pi cell division cycle 5-related protein, putative (2390 nt)             | -16.596  | -1.74777 | 0.258493 |
| PITG_03024 | Pi hypothetical protein (588 nt)                                         | -16.5632 | -1.81341 | 0.258493 |
| PITG_22122 | Pi conserved hypothetical protein (1748 nt)                              | -16.596  | -1.74777 | 0.258493 |

|            |                                                                  |          |          |          |
|------------|------------------------------------------------------------------|----------|----------|----------|
| PITG_07230 | Pi HECT E3 ubiquitin ligase, putative (8169 nt)                  | -16.3078 | -1.53673 | 0.258693 |
| PITG_11291 | Pi conserved hypothetical protein (2010 nt)                      | -16.0399 | -1.39365 | 0.259053 |
| PITG_03049 | Pi cAMP-dependent protein kinase catalytic subunit, putative     | -15.5612 | 1.234487 | 0.259076 |
| PITG_03530 | Pi alpha-aminoadipic semialdehyde synthase, putative (3248       | -14.1359 | -1.332   | 0.259109 |
| PITG_06267 | Pi cysteine synthase, putative (1215 nt)                         | -15.5054 | -1.43712 | 0.259259 |
| PITG_00798 | Pi conserved hypothetical protein (4828 nt)                      | -15.7912 | 1.648892 | 0.259319 |
| PITG_10098 | Pi conserved hypothetical protein (686 nt)                       | -14.4699 | 1.26892  | 0.259368 |
| PITG_01992 | Pi conserved hypothetical protein (531 nt)                       | -14.6161 | 1.229503 | 0.259372 |
| PITG_03097 | Pi conserved hypothetical protein (965 nt)                       | -15.5815 | -1.58663 | 0.2595   |
| PITG_05115 | Pi HECT E3 ubiquitin ligase, putative (2055 nt)                  | -11.9087 | -1.11055 | 0.259503 |
| PITG_09543 | Pi hypothetical protein (602 nt)                                 | -15.1271 | -1.24663 | 0.259966 |
| PITG_07193 | Pi conserved hypothetical protein (1507 nt)                      | -16.2789 | -1.59453 | 0.26031  |
| PITG_12497 | Pi conserved hypothetical protein (1557 nt)                      | -16.303  | -1.5463  | 0.26031  |
| PITG_01185 | Pi conserved hypothetical protein (709 nt)                       | -14.6521 | 1.350202 | 0.260334 |
| PITG_05504 | Pi conserved hypothetical protein (1304 nt)                      | -15.2415 | -1.29884 | 0.260426 |
| PITG_02305 | Pi conserved hypothetical protein (864 nt)                       | -12.7094 | 1.131126 | 0.260483 |
| PITG_15055 | Pi conserved hypothetical protein (945 nt)                       | -11.4778 | -1.10444 | 0.260493 |
| PITG_10129 | Pi conserved hypothetical protein (891 nt)                       | -13.4601 | -1.16081 | 0.260736 |
| PITG_03034 | Pi cleavage induced conserved hypothetical protein (2094 nt)     | -16.0705 | -1.33214 | 0.260743 |
| PITG_09526 | Pi transcription factor BTF3-like protein (935 nt)               | -9.00395 | -1.29869 | 0.260748 |
| PITG_20527 | Pi DNA polymerase delta catalytic subunit (5630 nt)              | -15.5804 | 1.390263 | 0.260872 |
| PITG_06962 | Pi endoglucanase, putative (1715 nt)                             | -14.9965 | 1.286261 | 0.261165 |
| PITG_08725 | Pi protein kinase (2339 nt)                                      | -13.3655 | -1.16266 | 0.261226 |
| PITG_00504 | Pi conserved hypothetical protein (1469 nt)                      | -16.4921 | -1.32549 | 0.261565 |
| PITG_13574 | Pi hypothetical protein (773 nt)                                 | -16.4554 | -1.39898 | 0.261565 |
| PITG_05586 | Pi DNA-(apurinic or apyrimidinic site) lyase, putative (1909 nt) | -16.7874 | -1.55057 | 0.262096 |
| PITG_07575 | Pi haloacid dehalogenase-like hydrolase, putative (855 nt)       | -16.7874 | -1.55057 | 0.262096 |
| PITG_17158 | Pi conserved hypothetical protein (1415 nt)                      | -16.7874 | -1.55057 | 0.262096 |
| PITG_06847 | Pi conserved hypothetical protein (2232 nt)                      | -15.3199 | 1.270798 | 0.262118 |
| PITG_17254 | Pi conserved hypothetical protein (674 nt)                       | -13.4757 | -1.23257 | 0.262161 |
| PITG_06907 | Pi regulator of chromosome condensation (RCC1)-like protein      | -16.0477 | -1.44506 | 0.262434 |
| PITG_09386 | Pi aquaporin, putative (825 nt)                                  | -16.0474 | -1.51315 | 0.262434 |
| PITG_07455 | Pi P-type ATPase (P-ATPase) Superfamily (4047 nt)                | -14.5532 | -1.3848  | 0.262519 |
| PITG_00587 | Pi hypothetical protein (631 nt)                                 | -12.5093 | -1.20974 | 0.262529 |
| PITG_05276 | Pi hypothetical protein (732 nt)                                 | -16.501  | -1.92972 | 0.262576 |
| PITG_10931 | Pi conserved hypothetical protein (2048 nt)                      | -15.8561 | -1.3275  | 0.262648 |
| PITG_09712 | Pi DNA-directed RNA polymerase I, II, and III subunit rpabc3,    | -14.3021 | 1.210284 | 0.262794 |
| PITG_06471 | Pi conserved hypothetical protein (1972 nt)                      | -14.6971 | -1.40396 | 0.263191 |
| PITG_03002 | Pi patatin-like phospholipase, putative (2204 nt)                | -16.7481 | -1.62977 | 0.263544 |
| PITG_00424 | Pi conserved hypothetical protein (1020 nt)                      | -16.3106 | -1.45361 | 0.263549 |
| PITG_03940 | Pi conserved hypothetical protein (773 nt)                       | -15.1499 | -1.28994 | 0.263856 |
| PITG_11783 | Pi conserved hypothetical protein (1426 nt)                      | -15.1383 | -1.26852 | 0.263856 |
| PITG_08804 | Pi metalloprotease family M01, putative (2849 nt)                | -14.8825 | -1.3935  | 0.26402  |
| PITG_00163 | Pi threonine dehydratase, mitochondrial precursor (1555 nt)      | -16.0737 | -1.32531 | 0.264126 |
| PITG_02940 | Pi phosphoglycerate mutase family (840 nt)                       | -16.0502 | -1.50793 | 0.264126 |
| PITG_09821 | Pi polysaccharide lyase, putative (409 nt)                       | -15.9963 | 1.619529 | 0.264324 |
| PITG_02571 | Pi conserved hypothetical protein (1114 nt)                      | -15.8308 | -1.37821 | 0.264402 |

|            |                                                               |          |          |          |
|------------|---------------------------------------------------------------|----------|----------|----------|
| PITG_22828 | Pi secreted RxLR effector peptide, putative (408 nt)          | -15.8308 | -1.37821 | 0.264402 |
| PITG_01823 | Pi conserved hypothetical protein (847 nt)                    | -15.8545 | 1.429958 | 0.264402 |
| PITG_02051 | Pi conserved hypothetical protein (476 nt)                    | -15.7917 | 1.304369 | 0.264402 |
| PITG_05079 | Pi glycosyltransferase (6744 nt)                              | -15.785  | -1.47245 | 0.264512 |
| PITG_12981 | Pi conserved hypothetical protein (2214 nt)                   | -15.785  | -1.47245 | 0.264512 |
| PITG_15408 | Pi phosphatidylinositol kinase (PIK-L1) (9717 nt)             | -14.6755 | 1.188156 | 0.264718 |
| PITG_06679 | Pi casein kinase II subunit beta (1229 nt)                    | -12.434  | -1.10484 | 0.264788 |
| PITG_00974 | Pi YIPF6-like protein (969 nt)                                | -14.279  | -1.24232 | 0.265635 |
| PITG_12938 | Pi conserved hypothetical protein (489 nt)                    | -14.5599 | -1.22462 | 0.265799 |
| PITG_03480 | Pi conserved hypothetical protein (748 nt)                    | -15.8064 | 1.202057 | 0.266156 |
| PITG_17651 | Pi conserved hypothetical protein (993 nt)                    | -15.2286 | 1.326638 | 0.266165 |
| PITG_09304 | Pi conserved hypothetical protein (1304 nt)                   | -13.3417 | 1.130322 | 0.266183 |
| PITG_01414 | Pi conserved hypothetical protein (785 nt)                    | -16.4804 | -1.35091 | 0.266187 |
| PITG_03871 | Pi conserved hypothetical protein (1305 nt)                   | -16.4804 | -1.35091 | 0.266187 |
| PITG_02640 | Pi conserved hypothetical protein (986 nt)                    | -13.1209 | -1.14525 | 0.266207 |
| PITG_10553 | Pi Poly(ADP-ribose) glycohydrolase, putative (1659 nt)        | -15.6939 | -1.52661 | 0.266265 |
| PITG_02190 | Pi conserved hypothetical protein (1627 nt)                   | -16.1326 | 1.456411 | 0.266343 |
| PITG_13842 | Pi conserved hypothetical protein (2210 nt)                   | -14.26   | -1.25268 | 0.266421 |
| PITG_19691 | Pi conserved hypothetical protein (1303 nt)                   | -13.752  | -1.19246 | 0.266439 |
| PITG_05717 | Pi ATP-binding Cassette (ABC) Superfamily (718 nt)            | -15.5713 | -1.41797 | 0.266688 |
| PITG_16808 | Pi ATP-binding Cassette (ABC) Superfamily (3039 nt)           | -14.3186 | -1.28232 | 0.266758 |
| PITG_04882 | Pi 4-coumarate-CoA ligase, putative (1782 nt)                 | -14.8763 | 1.314372 | 0.266775 |
| PITG_18045 | Pi protein kinase, putative (1574 nt)                         | -13.2566 | -1.10502 | 0.267282 |
| PITG_09451 | Pi conserved hypothetical protein (733 nt)                    | -11.7908 | 1.11093  | 0.267395 |
| PITG_13043 | Pi conserved hypothetical protein (2146 nt)                   | -15.9554 | 1.313137 | 0.267511 |
| PITG_01922 | Pi 40S ribosomal protein SA (852 nt)                          | -10.3731 | 1.077168 | 0.267621 |
| PITG_03373 | Pi cell division protein ftsZ (2511 nt)                       | -14.4715 | 1.154237 | 0.267939 |
| PITG_00910 | Pi EF-1 guanine nucleotide exchange domain-containing prot    | -10.7883 | 1.0756   | 0.268187 |
| PITG_10395 | Pi conserved hypothetical protein (847 nt)                    | -16.2763 | -1.59925 | 0.268418 |
| PITG_12338 | Pi sugar fermentation stimulation protein (1111 nt)           | -16.2763 | -1.59925 | 0.268418 |
| PITG_12548 | Pi type I inositol-3,4-bisphosphate 4-phosphatase, putative ( | -16.305  | -1.54191 | 0.268418 |
| PITG_16076 | Pi glyoxylate/hydroxypyruvate reductase A, putative (1210 n   | -16.305  | -1.54191 | 0.268418 |
| PITG_16050 | Pi hypothetical protein (2981 nt)                             | -15.4529 | 1.355177 | 0.268458 |
| PITG_16333 | Pi ATP-dependent hsl protease ATP-binding subunit hslU, pu    | -15.5141 | 1.227247 | 0.268542 |
| PITG_11016 | Pi conserved hypothetical protein (613 nt)                    | -15.6827 | -1.25092 | 0.268708 |
| PITG_14520 | Pi conserved hypothetical protein (692 nt)                    | -16.5463 | 1.861711 | 0.268923 |
| PITG_08258 | Pi cleavage induced hypothetical protein (788 nt)             | -16.0457 | -1.44931 | 0.269205 |
| PITG_20638 | Pi hypothetical protein (1499 nt)                             | -16.0216 | 1.563797 | 0.269205 |
| PITG_01252 | Pi conserved hypothetical protein (2557 nt)                   | -16.6154 | -1.79929 | 0.269278 |
| PITG_07233 | Pi GPI inositol-deacylase, putative (2673 nt)                 | -16.6154 | -1.79929 | 0.269278 |
| PITG_08040 | Pi conserved hypothetical protein (1004 nt)                   | -16.6154 | -1.79929 | 0.269278 |
| PITG_10419 | Pi ubiquitin-conjugating enzyme E2, putative (1070 nt)        | -16.6154 | -1.79929 | 0.269278 |
| PITG_14992 | Pi protein kinase, putative (3270 nt)                         | -16.5832 | -1.8638  | 0.269278 |
| PITG_19436 | Pi sister chromatid cohesion protein PDS5 (4000 nt)           | -16.6154 | -1.79929 | 0.269278 |
| PITG_11597 | Pi conserved hypothetical protein (654 nt)                    | -14.3914 | -1.16887 | 0.269363 |
| PITG_02598 | Pi conserved hypothetical protein (2378 nt)                   | -14.2584 | -1.16876 | 0.269435 |
| PITG_06796 | Pi conserved hypothetical protein (1294 nt)                   | -14.8904 | 1.212132 | 0.269534 |

|            |                                                                |          |          |          |
|------------|----------------------------------------------------------------|----------|----------|----------|
| PITG_00396 | Pi aspartyl protease family A01B, putative (2059 nt)           | -13.6718 | 1.138374 | 0.269574 |
| PITG_19669 | Pi ubiquitin-like protein/ribosomal protein (737 nt)           | -8.61637 | 1.054825 | 0.269741 |
| PITG_09387 | Pi aspartyl protease family A01A, putative (2760 nt)           | -13.2187 | -1.09916 | 0.270072 |
| PITG_02821 | Pi vacuolar-processing enzyme, putative (1425 nt)              | -14.4673 | -1.23803 | 0.27022  |
| PITG_02082 | Pi protein kinase, putative (1134 nt)                          | -15.5222 | -1.4013  | 0.270299 |
| PITG_14174 | Pi conserved hypothetical protein (605 nt)                     | -15.5695 | -1.42178 | 0.270397 |
| PITG_19037 | Pi chromatin structure-remodeling complex subunit snf21-lik    | -15.5512 | -1.4582  | 0.270397 |
| PITG_03777 | Pi conserved hypothetical protein (2315 nt)                    | -15.6812 | -1.25412 | 0.270516 |
| PITG_05510 | Pi hypothetical protein (1251 nt)                              | -15.6812 | -1.25412 | 0.270516 |
| PITG_08207 | Pi conserved hypothetical protein (2934 nt)                    | -16.5925 | -1.75227 | 0.270826 |
| PITG_05935 | Pi DEAD/DEAH box RNA helicase, putative (2533 nt)              | -16.0544 | -1.3629  | 0.2709   |
| PITG_01932 | Pi conserved hypothetical protein (19892 nt)                   | -14.7577 | 1.324002 | 0.271019 |
| PITG_09035 | Pi conserved hypothetical protein (2904 nt)                    | -16.0167 | -1.58295 | 0.271136 |
| PITG_08396 | Pi conserved hypothetical protein (1226 nt)                    | -15.8698 | -1.3628  | 0.27142  |
| PITG_11327 | Pi Annexin (Annexin) Family (2498 nt)                          | -10.7041 | 1.433219 | 0.271453 |
| PITG_08588 | Pi conserved hypothetical protein (1211 nt)                    | -16.2965 | -1.63777 | 0.27167  |
| PITG_01746 | Pi HECT E3 ubiquitin ligase, putative (1985 nt)                | -14.8326 | -1.26928 | 0.271909 |
| PITG_14023 | Pi conserved hypothetical protein (3526 nt)                    | -14.994  | 1.319409 | 0.271914 |
| PITG_00845 | Pi 3'5'-cyclic nucleotide phosphodiesterase, putative (4473 n  | -14.4109 | -1.28231 | 0.272148 |
| PITG_01880 | Pi hypothetical protein (1956 nt)                              | -16.4384 | 1.499643 | 0.272376 |
| PITG_08606 | Pi conserved hypothetical protein (1804 nt)                    | -16.4384 | 1.499643 | 0.272376 |
| PITG_18727 | Pi DNA-directed RNA polymerase II subunit J (786 nt)           | -14.3634 | -1.28447 | 0.272381 |
| PITG_17455 | Pi vacuolar protein sorting-associating protein, putative (308 | -13.6094 | -1.13025 | 0.272651 |
| PITG_09835 | Pi COP9 signalosome complex subunit, putative (1571 nt)        | -13.9019 | 1.148516 | 0.272962 |
| PITG_10900 | Pi conserved hypothetical protein (1587 nt)                    | -15.3509 | 1.205481 | 0.273321 |
| PITG_21127 | Pi adenine phosphoribosyltransferase, putative (624 nt)        | -15.3521 | -1.38637 | 0.273331 |
| PITG_10058 | Pi conserved hypothetical protein (5932 nt)                    | -15.6912 | -1.59527 | 0.273463 |
| PITG_16797 | Pi tubulin-specific chaperone D, putative (4440 nt)            | -15.6912 | -1.59527 | 0.273463 |
| PITG_06594 | Pi serine/threonine protein phosphatase 2A (1888 nt)           | -14.0156 | 1.152059 | 0.273647 |
| PITG_08333 | Pi conserved hypothetical protein (1690 nt)                    | -17.0019 | -2.15251 | 0.273758 |
| PITG_17388 | Pi conserved hypothetical protein (735 nt)                     | -17.0019 | -2.15251 | 0.273758 |
| PITG_19313 | Pi conserved hypothetical protein (1116 nt)                    | -14.3697 | -1.2067  | 0.27381  |
| PITG_00116 | Pi SUMO ligase, putative (2368 nt)                             | -15.2816 | -1.31344 | 0.273873 |
| PITG_01288 | Pi conserved hypothetical protein (2401 nt)                    | -16.4421 | -1.43084 | 0.273928 |
| PITG_04629 | Pi conserved hypothetical protein (1137 nt)                    | -16.4421 | -1.43084 | 0.273928 |
| PITG_11829 | Pi hypothetical protein (859 nt)                               | -16.4766 | -1.36189 | 0.273928 |
| PITG_03632 | Pi H - or Na -translocating F-type, V-type and A-type ATPase   | -9.74838 | 1.06438  | 0.274819 |
| PITG_12482 | Pi serine protease family S28, putative (1581 nt)              | -16.2572 | -1.55727 | 0.274928 |
| PITG_17608 | Pi spermine synthase, putative (1049 nt)                       | -16.2817 | 1.748832 | 0.274928 |
| PITG_10145 | Pi conserved hypothetical protein (567 nt)                     | -14.7753 | 1.343026 | 0.274978 |
| PITG_06118 | Pi V-type proton ATPase subunit B, putative (2559 nt)          | -12.6373 | 1.210402 | 0.275066 |
| PITG_10974 | Pi elongation factor 1-gamma, putative (1420 nt)               | -10.2366 | 1.059248 | 0.275149 |
| PITG_10136 | Pi conserved hypothetical protein (627 nt)                     | -15.3972 | 1.324812 | 0.275214 |
| PITG_00411 | Pi adaptin-like protein (762 nt)                               | -15.4256 | -1.34652 | 0.275214 |
| PITG_11913 | Pi heat shock cognate 70 kDa protein (2483 nt)                 | -11.9292 | 1.313208 | 0.275271 |
| PITG_20589 | Pi cathepsin, cysteine protease family C01A, putative (1458 r  | -12.9834 | -1.11591 | 0.275605 |
| PITG_16538 | Pi conserved hypothetical protein (991 nt)                     | -14.8081 | 1.248301 | 0.27594  |

|            |                                                                                      |          |          |          |
|------------|--------------------------------------------------------------------------------------|----------|----------|----------|
| PITG_06941 | Pi conserved hypothetical protein (3400 nt)                                          | -16.0392 | -1.53258 | 0.275989 |
| PITG_17907 | Pi choline/Carnitine O-acyltransferase, putative (2182 nt)                           | -16.0392 | -1.53258 | 0.275989 |
| PITG_03361 | Pi conserved hypothetical protein (1394 nt)                                          | -16.1829 | 1.573817 | 0.276259 |
| PITG_05385 | Pi Zinc (Zn <sup>2+</sup> )-Iron (Fe <sup>2+</sup> ) Permease (ZIP) Family (2746 nt) | -16.0857 | 1.789479 | 0.27626  |
| PITG_03301 | Pi DEAD/DEAH box RNA helicase, putative (1773 nt)                                    | -16.2215 | 1.366833 | 0.276559 |
| PITG_06855 | Pi inorganic phosphate transporter, putative (1540 nt)                               | -15.8395 | 1.377152 | 0.276686 |
| PITG_18947 | Pi hypothetical protein (746 nt)                                                     | -13.5238 | 1.130915 | 0.276824 |
| PITG_09832 | Pi adhesin protein, putative (2265 nt)                                               | -14.1904 | 1.123063 | 0.276893 |
| PITG_06108 | Pi dihydrolipoyllysine-residue acetyltransferase component c                         | -14.3106 | 1.170783 | 0.276923 |
| PITG_14208 | Pi conserved hypothetical protein (544 nt)                                           | -12.5378 | -1.31751 | 0.276923 |
| PITG_21766 | Pi conserved hypothetical protein (605 nt)                                           | -12.5861 | -1.29647 | 0.276996 |
| PITG_15492 | Pi peroxiredoxin-2 (777 nt)                                                          | -11.4871 | 1.06476  | 0.277124 |
| PITG_22105 | Pi conserved hypothetical protein (1578 nt)                                          | -13.8971 | -1.13337 | 0.277272 |
| PITG_17650 | Pi conserved hypothetical protein (1603 nt)                                          | -16.0914 | 1.579272 | 0.277485 |
| PITG_11063 | Pi 26S proteasome non-ATPase regulatory subunit 7 (1064 n                            | -12.374  | 1.074682 | 0.277658 |
| PITG_02398 | Pi conserved hypothetical protein (378 nt)                                           | -15.679  | -1.3164  | 0.277746 |
| PITG_01840 | Pi conserved hypothetical protein (1414 nt)                                          | -15.5156 | -1.21878 | 0.277809 |
| PITG_22858 | Pi conserved hypothetical protein (1335 nt)                                          | -15.4884 | 1.235516 | 0.277809 |
| PITG_03799 | Pi eukaryotic initiation factor 4E, putative (1543 nt)                               | -13.6674 | 1.100965 | 0.277818 |
| PITG_15671 | Pi conserved hypothetical protein (306 nt)                                           | -14.2609 | -1.19128 | 0.278025 |
| PITG_08691 | Pi conserved hypothetical protein (677 nt)                                           | -16.1879 | 1.322322 | 0.278191 |
| PITG_03796 | Pi conserved hypothetical protein (766 nt)                                           | -13.6391 | 1.110946 | 0.278285 |
| PITG_02541 | Pi conserved hypothetical protein (2286 nt)                                          | -15.7805 | 1.258974 | 0.278443 |
| PITG_21396 | Pi conserved hypothetical protein (993 nt)                                           | -14.2012 | 1.169584 | 0.278587 |
| PITG_10455 | Pi conserved hypothetical protein (2354 nt)                                          | -13.5299 | 1.17422  | 0.278785 |
| PITG_16681 | Pi conserved hypothetical protein (414 nt)                                           | -15.6363 | -1.46851 | 0.278867 |
| PITG_22200 | Pi conserved hypothetical protein (955 nt)                                           | -12.2982 | -1.1082  | 0.278905 |
| PITG_08369 | Pi valyl-tRNA synthetase (3808 nt)                                                   | -15.3834 | 1.270545 | 0.278998 |
| PITG_16476 | Pi receptor kinase, putative (2197 nt)                                               | -15.364  | 1.309366 | 0.278998 |
| PITG_05374 | Pi argininosuccinate synthase (1515 nt)                                              | -11.8775 | 1.077553 | 0.279612 |
| PITG_01405 | Pi conserved hypothetical protein (1870 nt)                                          | -15.2934 | -1.33821 | 0.279657 |
| PITG_03839 | Pi conserved hypothetical protein (777 nt)                                           | -15.5354 | -1.17938 | 0.27966  |
| PITG_09872 | Pi cell 5A endo-1,4-beta-glucanase (1920 nt)                                         | -14.0294 | -1.16181 | 0.280136 |
| PITG_18688 | Pi Poly(A) polymerase, putative (2034 nt)                                            | -15.867  | -1.37041 | 0.280199 |
| PITG_10854 | Pi hypothetical protein (921 nt)                                                     | -15.8731 | 1.639186 | 0.280314 |
| PITG_12161 | Pi delta-1-pyrroline-5-carboxylate synthetase (2324 nt)                              | -14.3953 | 1.224114 | 0.280395 |
| PITG_12880 | Pi conserved hypothetical protein (1857 nt)                                          | -17.2702 | -1.71965 | 0.280487 |
| PITG_19855 | Pi hypothetical protein (432 nt)                                                     | -10.0374 | -1.03917 | 0.28069  |
| PITG_03462 | Pi cysteine protease family C26, putative (1074 nt)                                  | -14.8536 | -1.12641 | 0.280812 |
| PITG_13783 | Pi conserved hypothetical protein (1158 nt)                                          | -14.8417 | -1.15021 | 0.280812 |
| PITG_05681 | Pi conserved hypothetical protein (1802 nt)                                          | -15.3699 | 1.243864 | 0.280889 |
| PITG_02205 | Pi conserved hypothetical protein (1055 nt)                                          | -14.9595 | -1.28573 | 0.28141  |
| PITG_07993 | Pi methyltransferase WBSCR22 (1157 nt)                                               | -14.9138 | 1.147565 | 0.28141  |
| PITG_02329 | Pi peptide-N(4)-(N-acetyl-beta-glucosaminyl)asparagine amic                          | -16.3034 | -1.54438 | 0.28146  |
| PITG_04441 | Pi 3-isopropylmalate dehydrogenase (1392 nt)                                         | -15.2627 | 1.257608 | 0.281582 |
| PITG_15927 | Pi conserved hypothetical protein (2096 nt)                                          | -14.4759 | -1.22092 | 0.281723 |
| PITG_06127 | Pi conserved hypothetical protein (1166 nt)                                          | -14.5736 | -1.15378 | 0.281839 |



|            |                                                                                     |          |          |          |
|------------|-------------------------------------------------------------------------------------|----------|----------|----------|
| PITG_09400 | Pi pyruvate kinase (1889 nt)                                                        | -11.4194 | 1.088395 | 0.281954 |
| PITG_20110 | Pi conserved hypothetical protein (1747 nt)                                         | -15.7571 | 1.244439 | 0.281956 |
| PITG_05670 | Pi cleavage induced conserved hypothetical protein (1291 nt)                        | -14.8608 | -1.25136 | 0.281973 |
| PITG_11703 | Pi lectin, putative (1278 nt)                                                       | -14.0106 | 1.103363 | 0.282293 |
| PITG_00457 | Pi conserved hypothetical protein (1101 nt)                                         | -13.602  | 1.10266  | 0.282444 |
| PITG_03752 | Pi conserved hypothetical protein (379 nt)                                          | -15.6566 | -1.42934 | 0.282472 |
| PITG_13665 | Pi conserved hypothetical protein (543 nt)                                          | -12.523  | -1.08733 | 0.282734 |
| PITG_14028 | Pi conserved hypothetical protein (2018 nt)                                         | -15.3372 | 1.375337 | 0.282766 |
| PITG_05600 | Pi metalloprotease family M67C, putative (2008 nt)                                  | -16.0663 | -1.55114 | 0.282786 |
| PITG_19737 | Pi 3-mercaptopyruvate sulfurtransferase, putative (1506 nt)                         | -11.0758 | -1.13554 | 0.2828   |
| PITG_11748 | Pi Major Facilitator Superfamily (MFS) (1560 nt)                                    | -17.0805 | -1.99743 | 0.282813 |
| PITG_22021 | Pi HECT E3 ubiquitin ligase, putative (1995 nt)                                     | -17.1039 | -1.95056 | 0.282813 |
| PITG_02206 | Pi conserved hypothetical protein (456 nt)                                          | -14.2047 | -1.13939 | 0.283342 |
| PITG_15503 | Pi conserved hypothetical protein (1359 nt)                                         | -12.9894 | -1.07422 | 0.283761 |
| PITG_10069 | Pi conserved hypothetical protein (869 nt)                                          | -13.873  | 1.095102 | 0.283889 |
| PITG_06428 | Pi callose synthase, putative (6861 nt)                                             | -14.5834 | 1.187617 | 0.28412  |
| PITG_15774 | Pi protein kinase (901 nt)                                                          | -14.7503 | -1.20495 | 0.284197 |
| PITG_01469 | Pi conserved hypothetical protein (3400 nt)                                         | -17.059  | -2.04024 | 0.284219 |
| PITG_17265 | Pi conserved hypothetical protein (2028 nt)                                         | -17.059  | -2.04024 | 0.284219 |
| PITG_12745 | Pi 40S ribosomal protein S17, putative (840 nt)                                     | -10.5367 | 1.099012 | 0.284302 |
| PITG_04175 | Pi conserved hypothetical protein (1903 nt)                                         | -15.4085 | -1.3811  | 0.284667 |
| PITG_12349 | Pi conserved hypothetical protein (1049 nt)                                         | -16.2961 | -1.64082 | 0.284733 |
| PITG_01270 | Pi conserved hypothetical protein (1169 nt)                                         | -10.7814 | 1.075494 | 0.284992 |
| PITG_06894 | Pi O-sialoglycoprotein endopeptidase, putative (1740 nt)                            | -14.7138 | 1.238945 | 0.285075 |
| PITG_10065 | Pi conserved hypothetical protein (1224 nt)                                         | -15.5073 | -1.28938 | 0.285212 |
| PITG_14923 | Pi conserved hypothetical protein (2970 nt)                                         | -15.2402 | -1.34908 | 0.285257 |
| PITG_10298 | Pi conserved hypothetical protein (577 nt)                                          | -14.0794 | 1.087557 | 0.285357 |
| PITG_20760 | Pi peptidyl-prolyl cis-trans isomerase B precursor (715 nt)                         | -15.8575 | -1.39062 | 0.28547  |
| PITG_01404 | Pi conserved hypothetical protein (3856 nt)                                         | -16.974  | -2.08562 | 0.285588 |
| PITG_06373 | Pi putative GPI-anchored serine-rich elicitor INL3b-like protei                     | -16.7884 | -1.55869 | 0.285588 |
| PITG_16651 | Pi conserved hypothetical protein (291 nt)                                          | -16.7884 | -1.55869 | 0.285588 |
| PITG_10517 | Pi tenascin-like protein (2406 nt)                                                  | -15.5741 | 1.375578 | 0.286079 |
| PITG_16894 | Pi hypothetical protein (1312 nt)                                                   | -10.415  | -1.23834 | 0.286177 |
| PITG_03275 | Pi spastin and Fidgetin-like protein (1835 nt)                                      | -14.6083 | -1.128   | 0.286293 |
| PITG_13458 | Pi protein kinase, putative (1992 nt)                                               | -14.599  | 1.168202 | 0.286293 |
| PITG_06902 | Pi conserved hypothetical protein (6729 nt)                                         | -16.2693 | -1.69483 | 0.286372 |
| PITG_06260 | Pi dihydroxyacetone kinase, putative (1799 nt)                                      | -16.57   | -1.69611 | 0.286415 |
| PITG_10592 | Pi DEAD/DEAH box RNA helicase, putative (2818 nt)                                   | -17.3129 | -1.63698 | 0.286826 |
| PITG_14156 | Pi protein kinase, putative (2271 nt)                                               | -16.9372 | -2.1584  | 0.287078 |
| PITG_11521 | Pi Zinc (Zn <sup>2+</sup> )-Iron (Fe <sup>2+</sup> ) Permease (ZIP) Family (997 nt) | -13.5616 | 1.08814  | 0.287093 |
| PITG_17527 | Pi crinkler (CRN) family protein, putative (1959 nt)                                | -9.84499 | -1.05012 | 0.287107 |
| PITG_04545 | Pi conserved hypothetical protein (1505 nt)                                         | -15.844  | -1.41802 | 0.287228 |
| PITG_08234 | Pi DnaJ subfamily C member 2 protein (1263 nt)                                      | -13.9286 | 1.151311 | 0.287585 |
| PITG_00272 | Pi phosphatidylinositol kinase (1338 nt)                                            | -11.7183 | -1.09717 | 0.287666 |
| PITG_00377 | Pi hypothetical protein (1021 nt)                                                   | -16.6718 | -1.68392 | 0.288051 |
| PITG_02290 | Pi conserved hypothetical protein (1941 nt)                                         | -16.6644 | -1.69884 | 0.288051 |
| PITG_07841 | Pi glycyl-tRNA synthetase (1528 nt)                                                 | -16.6718 | -1.68392 | 0.288051 |

|            |                                                                 |          |          |          |
|------------|-----------------------------------------------------------------|----------|----------|----------|
| PITG_21597 | Pi conserved hypothetical protein (1385 nt)                     | -16.6417 | -1.74425 | 0.288051 |
| PITG_09698 | Pi histidine biosynthesis trifunctional protein, putative (1613 | -14.4808 | -1.21121 | 0.288074 |
| PITG_10042 | Pi conserved hypothetical protein (384 nt)                      | -17.091  | -1.976   | 0.288446 |
| PITG_11138 | Pi fumarate reductase flavoprotein subunit, putative (1746 n    | -17.0498 | -2.05854 | 0.288446 |
| PITG_12836 | Pi UDP-N-acetylglucosamine transferase subunit ALG14 (106       | -17.0498 | -2.05854 | 0.288446 |
| PITG_15152 | Pi secreted RxLR effector peptide, putative (2283 nt)           | -17.0498 | -2.05854 | 0.288446 |
| PITG_17072 | Pi U4/U6 small nuclear ribonucleoprotein Prp4, putative (16:    | -17.0498 | -2.05854 | 0.288446 |
| PITG_04802 | Pi conserved hypothetical protein (1097 nt)                     | -9.75836 | -1.14627 | 0.288589 |
| PITG_09504 | Pi methionine aminopeptidase, putative (1432 nt)                | -14.1988 | 1.10638  | 0.288661 |
| PITG_21816 | Pi conserved hypothetical protein (1525 nt)                     | -14.3954 | -1.16067 | 0.28885  |
| PITG_09939 | Pi conserved hypothetical protein (1099 nt)                     | -12.6678 | 1.052075 | 0.288938 |
| PITG_18719 | Pi transmembrane protein, putative (1945 nt)                    | -15.7668 | 1.230035 | 0.288985 |
| PITG_03955 | Pi U3 small nucleolar RNA-associated protein, putative (1545    | -16.3315 | 1.650793 | 0.289203 |
| PITG_18473 | Pi 3-phosphoinositide-dependent protein kinase, putative (2     | -14.5367 | -1.19427 | 0.289323 |
| PITG_12239 | Pi conserved hypothetical protein (1768 nt)                     | -16.6814 | -1.57964 | 0.289575 |
| PITG_12884 | Pi conserved hypothetical protein (570 nt)                      | -16.6505 | -1.64137 | 0.289575 |
| PITG_22353 | Pi geranylgeranyl transferase type-1 subunit beta, putative (:  | -15.1643 | -1.26187 | 0.28966  |
| PITG_14936 | Pi ATP synthase subunit gamma, putative (1115 nt)               | -11.1442 | 1.048734 | 0.289912 |
| PITG_04505 | Pi transmembrane protein, putative (1852 nt)                    | -13.7546 | -1.09419 | 0.29014  |
| PITG_11044 | Pi protein phosphatase, putative (1218 nt)                      | -14.7761 | 1.171683 | 0.290261 |
| PITG_05550 | Pi conserved hypothetical protein (1173 nt)                     | -14.6682 | 1.264484 | 0.290286 |
| PITG_13666 | Pi conserved hypothetical protein (2062 nt)                     | -15.4253 | -1.34785 | 0.290328 |
| PITG_08600 | Pi vesicle-fusing ATPase, putative (2422 nt)                    | -14.1167 | 1.138813 | 0.290509 |
| PITG_05822 | Pi conserved hypothetical protein (1647 nt)                     | -15.5079 | -1.36684 | 0.290549 |
| PITG_10030 | Pi conserved hypothetical protein (796 nt)                      | -16.3054 | 1.323494 | 0.290822 |
| PITG_19181 | Pi conserved hypothetical protein (678 nt)                      | -16.3054 | 1.323494 | 0.290822 |
| PITG_13571 | Pi endo-1,3(4)-beta-glucanase, putative (3132 nt)               | -15.1602 | -1.31889 | 0.29099  |
| PITG_12191 | Pi conserved hypothetical protein (1947 nt)                     | -13.9539 | -1.1292  | 0.291059 |
| PITG_05005 | Pi conserved hypothetical protein (1910 nt)                     | -16.6576 | -1.7127  | 0.291101 |
| PITG_23143 | Pi protein kinase, putative (2392 nt)                           | -14.4071 | -1.32499 | 0.291152 |
| PITG_17403 | Pi conserved hypothetical protein (728 nt)                      | -15.272  | 1.271769 | 0.29119  |
| PITG_20465 | Pi fructokinase, putative (1073 nt)                             | -11.999  | 1.052404 | 0.291261 |
| PITG_01740 | Pi conserved hypothetical protein (3507 nt)                     | -15.0435 | -1.24303 | 0.291668 |
| PITG_17075 | Pi conserved hypothetical protein (3325 nt)                     | -15.0465 | -1.19468 | 0.291668 |
| PITG_04643 | Pi conserved hypothetical protein (1093 nt)                     | -16.0838 | -1.37261 | 0.292132 |
| PITG_11585 | Pi conserved hypothetical protein (886 nt)                      | -16.1082 | -1.3238  | 0.292132 |
| PITG_00440 | Pi myotubularin-like protein (4762 nt)                          | -16.3399 | -1.54775 | 0.292441 |
| PITG_14611 | Pi conserved hypothetical protein (366 nt)                      | -16.3428 | -1.46704 | 0.292441 |
| PITG_00634 | Pi gamma-tubulin complex component 4, putative (2670 nt)        | -16.6735 | -1.59479 | 0.292628 |
| PITG_02471 | Pi cytochrome b5 reductase with F-box domain, putative (99      | -16.6362 | -1.6693  | 0.292628 |
| PITG_20125 | Pi conserved hypothetical protein (494 nt)                      | -13.4729 | -1.06712 | 0.293094 |
| PITG_02256 | Pi aspartate aminotransferase, mitochondrial precursor (153     | -11.0942 | -1.05727 | 0.293121 |
| PITG_10384 | Pi hypothetical protein (1443 nt)                               | -12.5991 | 1.104924 | 0.293339 |
| PITG_11750 | Pi serine/threonine protein phosphatase 2A 59 kDa regulato      | -13.8931 | -1.07941 | 0.293655 |
| PITG_14131 | Pi conserved hypothetical protein (1121 nt)                     | -14.8348 | -1.34343 | 0.293933 |
| PITG_01084 | Pi conserved hypothetical protein (1377 nt)                     | -16.8446 | -1.42859 | 0.294107 |
| PITG_02234 | Pi F-box protein, putative (2205 nt)                            | -16.8446 | -1.42859 | 0.294107 |

|            |                                                              |          |          |          |
|------------|--------------------------------------------------------------|----------|----------|----------|
| PITG_04359 | Pi conserved hypothetical protein (1065 nt)                  | -16.8927 | -1.33223 | 0.294107 |
| PITG_12668 | Pi conserved hypothetical protein (614 nt)                   | -16.9057 | -1.30636 | 0.294107 |
| PITG_19876 | Pi conserved hypothetical protein (861 nt)                   | -16.8557 | -1.40641 | 0.294107 |
| PITG_21309 | Pi histone deacetylase, putative (1432 nt)                   | -16.9057 | -1.30636 | 0.294107 |
| PITG_14379 | Pi conserved hypothetical protein (1828 nt)                  | -15.9083 | -1.22309 | 0.294271 |
| PITG_16770 | Pi conserved hypothetical protein (2520 nt)                  | -15.9083 | -1.22309 | 0.294271 |
| PITG_16088 | Pi conserved hypothetical protein (1690 nt)                  | -15.4879 | 1.20501  | 0.294452 |
| PITG_22859 | Pi conserved hypothetical protein (468 nt)                   | -15.4879 | 1.20501  | 0.294452 |
| PITG_19578 | Pi Crinkler (CRN) family protein, pseudogene (1347 nt)       | -10.4247 | -1.0027  | 0.294691 |
| PITG_12983 | Pi synaptic vesicle glycoprotein, putative (1994 nt)         | -16.0519 | -1.36482 | 0.294708 |
| PITG_18774 | Pi Mitochondrial Carrier (MC) Family (1038 nt)               | -10.8558 | 1.013799 | 0.294807 |
| PITG_08138 | Pi conserved hypothetical protein (1737 nt)                  | -13.9261 | -1.1174  | 0.294945 |
| PITG_09772 | Pi conserved hypothetical protein (635 nt)                   | -11.2447 | -1.01809 | 0.295074 |
| PITG_00500 | Pi conserved hypothetical protein (537 nt)                   | -15.3183 | -1.1929  | 0.295099 |
| PITG_07102 | Pi conserved hypothetical protein (3206 nt)                  | -14.796  | -1.20468 | 0.295279 |
| PITG_12463 | Pi cleavage induced conserved hypothetical protein (1317 nt) | -15.6086 | -1.34349 | 0.295289 |
| PITG_13586 | Pi pterin-4-alpha-carbinolamine dehydratase (416 nt)         | -15.1648 | -1.26137 | 0.295501 |
| PITG_12931 | Pi conserved hypothetical protein (3057 nt)                  | -16.0621 | 1.189507 | 0.295524 |
| PITG_14635 | Pi sporangia induced hypothetical protein (1302 nt)          | -16.0882 | 1.241685 | 0.295524 |
| PITG_01941 | Pi conserved hypothetical protein (1713 nt)                  | -16.3619 | -1.50436 | 0.295681 |
| PITG_02758 | Pi conserved hypothetical protein (1692 nt)                  | -16.271  | 1.254426 | 0.295681 |
| PITG_04863 | Pi conserved hypothetical protein (2468 nt)                  | -16.3691 | 1.575231 | 0.295681 |
| PITG_18736 | Pi conserved hypothetical protein (1934 nt)                  | -16.2979 | 1.543952 | 0.295681 |
| PITG_13832 | Pi delta-aminolevulinic acid dehydratase, putative (1084 nt) | -14.1475 | 1.14261  | 0.295703 |
| PITG_12454 | Pi GTP-binding protein, putative (2157 nt)                   | -15.1831 | -1.17876 | 0.295712 |
| PITG_02974 | Pi conserved hypothetical protein (318 nt)                   | -12.4392 | -1.03061 | 0.295885 |
| PITG_08668 | Pi hypothetical protein (510 nt)                             | -15.3228 | 1.221022 | 0.295888 |
| PITG_06507 | Pi conserved hypothetical protein (1096 nt)                  | -14.5492 | 1.118871 | 0.295959 |
| PITG_10695 | Pi conserved hypothetical protein (802 nt)                   | -14.116  | -1.16391 | 0.296867 |
| PITG_16205 | Pi conserved hypothetical protein (489 nt)                   | -13.4364 | -1.09652 | 0.297013 |
| PITG_19814 | Pi conserved hypothetical protein (785 nt)                   | -11.4087 | 1.007998 | 0.297053 |
| PITG_06484 | Pi conserved hypothetical protein (480 nt)                   | -15.6124 | -1.33599 | 0.297149 |
| PITG_00352 | Pi pyruvate dehydrogenase kinase-like protein (1277 nt)      | -16.0738 | -1.39284 | 0.29722  |
| PITG_01201 | Pi ATP-dependent DNA helicase, putative (1947 nt)            | -16.1252 | -1.3576  | 0.29722  |
| PITG_04336 | Pi conserved hypothetical protein (999 nt)                   | -16.1252 | -1.3576  | 0.29722  |
| PITG_11525 | Pi serine protease family S10, putative (1638 nt)            | -16.0738 | -1.39284 | 0.29722  |
| PITG_12230 | Pi phosphatidic acid phosphatase (999 nt)                    | -16.1006 | -1.4067  | 0.29722  |
| PITG_21914 | Pi conserved hypothetical protein (958 nt)                   | -16.0595 | 1.486431 | 0.29722  |
| PITG_08752 | Pi conserved hypothetical protein (696 nt)                   | -16.3382 | -1.47587 | 0.297301 |
| PITG_17885 | Pi conserved hypothetical protein (595 nt)                   | -13.9681 | -1.1623  | 0.29738  |
| PITG_05871 | Pi hypothetical protein (336 nt)                             | -12.9346 | 1.136148 | 0.297417 |
| PITG_14868 | Pi hypothetical protein (1766 nt)                            | -15.1445 | 1.456063 | 0.297485 |
| PITG_05315 | Pi undecaprenyl pyrophosphate synthetase, putative (1304 r   | -15.0471 | -1.1938  | 0.297584 |
| PITG_12696 | Pi conserved hypothetical protein (881 nt)                   | -13.4782 | -1.0903  | 0.297658 |
| PITG_08091 | Pi hypothetical protein (243 nt)                             | -15.8446 | -1.41937 | 0.297777 |
| PITG_07259 | Pi serine protease family S09X, putative (1149 nt)           | -15.3709 | 1.270386 | 0.297862 |
| PITG_23287 | Pi crinkler (CRN) domain, pseudogene (1182 nt)               | -9.33451 | -1.01572 | 0.297983 |

|            |                                                                  |          |          |          |
|------------|------------------------------------------------------------------|----------|----------|----------|
| PITG_06231 | Pi anaphase-promoting complex subunit, putative (3017 nt)        | -14.3003 | 1.191346 | 0.298075 |
| PITG_01719 | Pi conserved hypothetical protein (3108 nt)                      | -15.4477 | -1.25118 | 0.298153 |
| PITG_02942 | Pi conserved hypothetical protein (919 nt)                       | -15.4127 | 1.250274 | 0.298153 |
| PITG_04334 | Pi conserved hypothetical protein (1221 nt)                      | -15.435  | 1.294863 | 0.298153 |
| PITG_06896 | Pi proline iminopeptidase (1192 nt)                              | -15.4477 | -1.25118 | 0.298153 |
| PITG_08421 | Pi peroxisomal multifunctional enzyme type 2, putative (222      | -15.4648 | -1.26804 | 0.298153 |
| PITG_21393 | Pi eukaryotic translation initiation factor 3 subunit A, putativ | -13.9236 | 1.173662 | 0.298177 |
| PITG_05364 | Pi conserved hypothetical protein (3070 nt)                      | -17.0849 | -1.98774 | 0.298371 |
| PITG_10441 | Pi conserved hypothetical protein (2635 nt)                      | -17.0849 | -1.98774 | 0.298371 |
| PITG_15438 | Pi conserved hypothetical protein (469 nt)                       | -17.0681 | -1.91527 | 0.298371 |
| PITG_16527 | Pi bloom syndrome protein, DEAD/DEAH box helicase (1650          | -16.8816 | -1.3564  | 0.298371 |
| PITG_17416 | Pi conserved hypothetical protein (1337 nt)                      | -14.7666 | -1.1359  | 0.298412 |
| PITG_16048 | Pi triosephosphate isomerase (843 nt)                            | -13.8888 | -1.16348 | 0.298417 |
| PITG_04180 | Pi conserved hypothetical protein (1175 nt)                      | -16.6523 | -1.72418 | 0.298747 |
| PITG_10690 | Pi conserved hypothetical protein (1609 nt)                      | -16.6666 | -1.60732 | 0.298747 |
| PITG_05187 | Pi sulfatase-like protein (3390 nt)                              | -16.1216 | -1.36506 | 0.298916 |
| PITG_08393 | Pi conserved hypothetical protein (1106 nt)                      | -16.129  | -1.35028 | 0.298916 |
| PITG_10006 | Pi conserved hypothetical protein (1480 nt)                      | -16.0842 | -1.30435 | 0.298916 |
| PITG_18129 | Pi cyclin-Y-like protein (1254 nt)                               | -16.0842 | -1.30435 | 0.298916 |
| PITG_21802 | Pi conserved hypothetical protein (3033 nt)                      | -16.3261 | 1.489644 | 0.298922 |
| PITG_17334 | Pi conserved hypothetical protein (720 nt)                       | -14.8788 | -1.17756 | 0.299063 |
| PITG_17136 | Pi Rab8 family GTPase, putative (1009 nt)                        | -14.0588 | -1.0803  | 0.299148 |
| PITG_23139 | Pi conserved hypothetical protein (309 nt)                       | -15.7568 | 1.20369  | 0.299536 |
| PITG_11677 | Pi diacylglycerol acyltransferase, putative (1479 nt)            | -15.9333 | 1.617612 | 0.299594 |
| PITG_23284 | Pi crinkler (CRN) domain, pseudogene (3069 nt)                   | -17.043  | -2.07144 | 0.299796 |
| PITG_08781 | Pi conserved hypothetical protein (2114 nt)                      | -12.8821 | -1.0584  | 0.299816 |
| PITG_06556 | Pi transmembrane protein, putative (1556 nt)                     | -16.0643 | -1.48744 | 0.299828 |
| PITG_10513 | Pi proteasome subunit alpha type-6, putative (930 nt)            | -11.2685 | 1.081966 | 0.300029 |
| PITG_00594 | Pi chaperone protein dnaJ, putative (1617 nt)                    | -14.5684 | -1.14277 | 0.300178 |
| PITG_05934 | Pi conserved hypothetical protein (971 nt)                       | -14.5487 | -1.13828 | 0.300178 |
| PITG_09365 | Pi conserved hypothetical protein (654 nt)                       | -14.9713 | 1.405732 | 0.300266 |
| PITG_03489 | Pi conserved hypothetical protein (1514 nt)                      | -16.6304 | -1.67941 | 0.30028  |
| PITG_14571 | Pi conserved hypothetical protein (495 nt)                       | -11.4119 | -1.03435 | 0.300383 |
| PITG_08014 | Pi proteasome subunit beta type-2, putative (770 nt)             | -11.9706 | 1.04273  | 0.300511 |
| PITG_03263 | Pi conserved hypothetical protein (1480 nt)                      | -16.3273 | -1.57433 | 0.300544 |
| PITG_22303 | Pi hypothetical protein (1440 nt)                                | -12.4741 | 1.033995 | 0.300596 |
| PITG_00165 | Pi conserved hypothetical protein (1289 nt)                      | -16.0469 | 1.22157  | 0.300612 |
| PITG_15223 | Pi conserved hypothetical protein (3428 nt)                      | -16.005  | 1.2127   | 0.300612 |
| PITG_18063 | Pi bifunctional polynucleotide phosphatase/kinase, putative      | -15.3049 | -1.17244 | 0.300901 |
| PITG_11131 | Pi conserved hypothetical protein (1635 nt)                      | -14.8868 | -1.23865 | 0.301099 |
| PITG_11215 | Pi DnaJ subfamily C protein (1936 nt)                            | -11.9952 | -1.05376 | 0.301199 |
| PITG_20009 | Pi conserved hypothetical protein (531 nt)                       | -15.8491 | -1.47742 | 0.301295 |
| PITG_00694 | Pi Sulfate Permease (SulP) Family (3015 nt)                      | -15.7346 | 1.327792 | 0.301326 |
| PITG_06995 | Pi 60S ribosomal protein L4 (1327 nt)                            | -10.3708 | 1.022105 | 0.301668 |
| PITG_01358 | Pi conserved hypothetical protein (2202 nt)                      | -13.7158 | 1.106221 | 0.301684 |
| PITG_16900 | Pi cleft lip and palate transmembrane family protein (2050 n     | -16.098  | -1.34452 | 0.302308 |
| PITG_18371 | Pi hypothetical protein (560 nt)                                 | -16.0688 | 1.468846 | 0.302308 |

|            |                                                               |          |          |          |
|------------|---------------------------------------------------------------|----------|----------|----------|
| PITG_11708 | Pi conserved hypothetical protein (1914 nt)                   | -14.7486 | -1.24844 | 0.302356 |
| PITG_06303 | Pi conserved hypothetical protein (2000 nt)                   | -15.1304 | -1.23851 | 0.302561 |
| PITG_04403 | Pi hypothetical protein (796 nt)                              | -14.9695 | -1.15167 | 0.3027   |
| PITG_17868 | Pi conserved hypothetical protein (4540 nt)                   | -14.9486 | 1.07839  | 0.3027   |
| PITG_06988 | Pi transmembrane protein, putative (1171 nt)                  | -15.3093 | -1.30647 | 0.302831 |
| PITG_03569 | Pi conserved hypothetical protein (1653 nt)                   | -15.8736 | -1.2932  | 0.303065 |
| PITG_19283 | Pi conserved hypothetical protein (695 nt)                    | -15.8936 | -1.31508 | 0.303065 |
| PITG_07510 | Pi hypothetical protein (1039 nt)                             | -15.7118 | -1.19346 | 0.303137 |
| PITG_13403 | Pi sphingolipid delta(4)-desaturase DES1-like protein (1087 n | -13.4727 | 1.016458 | 0.303259 |
| PITG_17730 | Pi conserved hypothetical protein (489 nt)                    | -12.462  | 1.016844 | 0.303857 |
| PITG_03775 | Pi protein kinase, putative (2426 nt)                         | -16.015  | 1.195122 | 0.304003 |
| PITG_03529 | Pi conserved hypothetical protein (756 nt)                    | -16.1074 | -1.39468 | 0.304003 |
| PITG_16179 | Pi Rab3 GTPase-activating protein catalytic subunit, putative | -16.0715 | -1.39776 | 0.304003 |
| PITG_06237 | Pi 60S ribosomal protein L8, putative (1172 nt)               | -9.73554 | 1.003564 | 0.304089 |
| PITG_16477 | Pi short-chain specific acyl-CoA dehydrogenase, mitochondri   | -14.4834 | 1.129062 | 0.304118 |
| PITG_03897 | Pi conserved hypothetical protein (740 nt)                    | -12.276  | 1.008073 | 0.304183 |
| PITG_02037 | Pi conserved hypothetical protein (534 nt)                    | -14.7434 | 1.167607 | 0.304499 |
| PITG_02127 | Pi conserved hypothetical protein (873 nt)                    | -15.5486 | -1.15271 | 0.304576 |
| PITG_03150 | Pi proteasome subunit alpha type-3, putative (1000 nt)        | -12.0622 | 1.042643 | 0.304647 |
| PITG_17926 | Pi conserved hypothetical protein (831 nt)                    | -12.7355 | -1.07479 | 0.304883 |
| PITG_19016 | Pi conserved hypothetical protein (714 nt)                    | -16.6703 | -1.5985  | 0.304884 |
| PITG_02478 | Pi DEAD/DEAH box RNA helicase, putative (2331 nt)             | -15.7642 | -1.38887 | 0.304946 |
| PITG_19802 | Pi dihydrolipoyl dehydrogenase, putative (690 nt)             | -11.9828 | 1.042517 | 0.305012 |
| PITG_05010 | Pi conserved hypothetical protein (985 nt)                    | -14.8672 | -1.09978 | 0.305163 |
| PITG_03768 | Pi 50S ribosomal protein L4 (923 nt)                          | -14.2787 | 1.107254 | 0.305171 |
| PITG_19586 | Pi crinkler (CRN) family protein, pseudogene (2457 nt)        | -12.3985 | -1.00725 | 0.305891 |
| PITG_13503 | Pi secreted RxLR effector peptide, putative (1678 nt)         | -16.2351 | 1.469151 | 0.306134 |
| PITG_09820 | Pi regulator of chromosome condensation (RCC1)-like protei    | -14.6455 | -1.20198 | 0.306208 |
| PITG_01350 | Pi conserved hypothetical protein (2687 nt)                   | -17.3049 | -1.6617  | 0.306221 |
| PITG_03556 | Pi conserved hypothetical protein (1002 nt)                   | -17.3049 | -1.6617  | 0.306221 |
| PITG_06354 | Pi conserved hypothetical protein (1754 nt)                   | -17.3049 | -1.6617  | 0.306221 |
| PITG_16134 | Pi conserved hypothetical protein (1265 nt)                   | -17.3049 | -1.6617  | 0.306221 |
| PITG_16178 | Pi conserved hypothetical protein (3149 nt)                   | -17.3049 | -1.6617  | 0.306221 |
| PITG_21457 | Pi choline transporter-like protein (2414 nt)                 | -14.7137 | 1.207515 | 0.30637  |
| PITG_16346 | Pi conserved hypothetical protein (1339 nt)                   | -14.0646 | 1.058044 | 0.30638  |
| PITG_12347 | Pi conserved hypothetical protein (1221 nt)                   | -15.8202 | 1.113172 | 0.306578 |
| PITG_05495 | Pi conserved hypothetical protein (1451 nt)                   | -15.7625 | 1.575314 | 0.306633 |
| PITG_13434 | Pi sel-1 family protein (1821 nt)                             | -15.3046 | -1.17255 | 0.306686 |
| PITG_18718 | Pi GTP-binding nuclear protein spi1 (1387 nt)                 | -11.5557 | 1.037946 | 0.306891 |
| PITG_06781 | Pi conserved hypothetical protein (859 nt)                    | -14.8778 | -1.21776 | 0.307191 |
| PITG_16539 | Pi conserved hypothetical protein (501 nt)                    | -15.0129 | 1.664803 | 0.307405 |
| PITG_12882 | Pi electron transfer flavoprotein subunit alpha, mitochondria | -10.8511 | -1.05618 | 0.30757  |
| PITG_18067 | Pi RAC family serine/threonine-protein kinase (3279 nt)       | -15.4467 | -1.25287 | 0.307626 |
| PITG_02761 | Pi oxidoreductase, putative (1697 nt)                         | -15.2075 | -1.27603 | 0.308082 |
| PITG_06215 | Pi conserved hypothetical protein (1249 nt)                   | -12.5355 | 1.03779  | 0.308091 |
| PITG_00453 | Pi lipoamide acyltransferase component of branched-chain a    | -15.0911 | -1.23014 | 0.308148 |
| PITG_01976 | Pi DNA repair protein, putative (1680 nt)                     | -15.5141 | 1.230303 | 0.308282 |

|            |                                                                 |          |          |          |
|------------|-----------------------------------------------------------------|----------|----------|----------|
| PITG_17829 | Pi Hypothetical protein (1383 nt)                               | -16.8737 | -1.37677 | 0.308383 |
| PITG_20765 | Pi conserved hypothetical protein (728 nt)                      | -16.8737 | -1.37677 | 0.308383 |
| PITG_20193 | Pi Rab5 family GTPase, putative (872 nt)                        | -12.2611 | -1.08558 | 0.308548 |
| PITG_04230 | Pi conserved hypothetical protein (970 nt)                      | -16.3249 | -1.58075 | 0.308659 |
| PITG_07855 | Pi Drug/Metabolite Transporter (DMT) Superfamily (1443 nt)      | -16.3548 | -1.52089 | 0.308659 |
| PITG_11205 | Pi Rab2 family GTPase, putative (904 nt)                        | -12.153  | -0.99994 | 0.308932 |
| PITG_07298 | Pi protein kinase (2197 nt)                                     | -14.6193 | -1.13946 | 0.309043 |
| PITG_02093 | Pi pre-rRNA-processing protein ESF2 (732 nt)                    | -16.0426 | 1.415213 | 0.30909  |
| PITG_09792 | Pi DEAD/DEAH box RNA helicase, putative (2065 nt)               | -16.0373 | 1.425723 | 0.30909  |
| PITG_05545 | Pi conserved hypothetical protein (1936 nt)                     | -13.2698 | -1.05623 | 0.309252 |
| PITG_08044 | Pi conserved hypothetical protein (1360 nt)                     | -11.3129 | -1.08794 | 0.309317 |
| PITG_01172 | Pi methionine-R-sulfoxide reductase (799 nt)                    | -13.3547 | -1.02356 | 0.309558 |
| PITG_11900 | Pi protein kinase, putative (1337 nt)                           | -12.3541 | 1.20337  | 0.309778 |
| PITG_07044 | Pi conserved hypothetical protein (816 nt)                      | -17.0172 | -2.01132 | 0.30982  |
| PITG_10941 | Pi elongation factor 2 (2909 nt)                                | -10.4914 | 1.010181 | 0.309934 |
| PITG_02531 | Pi conserved hypothetical protein (4082 nt)                     | -15.8724 | -1.29636 | 0.31009  |
| PITG_11169 | Pi histone-binding protein RBBP7 (2601 nt)                      | -15.8568 | 1.267898 | 0.31009  |
| PITG_19448 | Pi 50S ribosomal protein L17, putative (1302 nt)                | -13.356  | 1.048392 | 0.310107 |
| PITG_19966 | Pi carbohydrate-binding protein, putative (1062 nt)             | -14.6364 | -1.13828 | 0.310361 |
| PITG_01153 | Pi conserved hypothetical protein (11340 nt)                    | -15.68   | 1.187163 | 0.310369 |
| PITG_01576 | Pi protein kinase, putative (1593 nt)                           | -15.6964 | -1.28246 | 0.310369 |
| PITG_10028 | Pi serine palmitoyltransferase, putative (1672 nt)              | -12.4891 | -1.0152  | 0.310442 |
| PITG_03463 | Pi carbohydrate esterase, putative (894 nt)                     | -13.8368 | -1.08079 | 0.310598 |
| PITG_15249 | Pi conserved hypothetical protein (788 nt)                      | -14.0877 | 1.202607 | 0.310872 |
| PITG_02281 | Pi conserved hypothetical protein (1434 nt)                     | -14.2071 | -1.21586 | 0.310946 |
| PITG_10794 | Pi conserved oligomeric Golgi complex subunit 6, putative (2    | -16.6489 | -1.73214 | 0.311038 |
| PITG_08206 | Pi signal peptidase complex subunit 3, putative (1742 nt)       | -13.5653 | 1.047082 | 0.311046 |
| PITG_13808 | Pi conserved hypothetical protein (673 nt)                      | -15.1476 | 1.144161 | 0.311382 |
| PITG_02213 | Pi serine protease family S10, putative (1950 nt)               | -15.7364 | -1.1453  | 0.312174 |
| PITG_02723 | Pi conserved hypothetical protein (1428 nt)                     | -15.7033 | -1.26905 | 0.312174 |
| PITG_18633 | Pi tRNA pseudouridine synthase B, putative (1304 nt)            | -14.3132 | -1.11406 | 0.312177 |
| PITG_04030 | Pi hypothetical protein (411 nt)                                | -16.0699 | -1.40132 | 0.312481 |
| PITG_11557 | Pi conserved hypothetical protein (807 nt)                      | -16.6261 | -1.68534 | 0.312579 |
| PITG_04508 | Pi conserved hypothetical protein (3456 nt)                     | -14.526  | 1.04581  | 0.312746 |
| PITG_21620 | Pi fumarylacetoacetate (FAA) hydrolase, putative (1135 nt)      | -14.0828 | 1.088642 | 0.312973 |
| PITG_00443 | Pi 40S ribosomal protein S6 (1247 nt)                           | -8.7304  | 0.961571 | 0.31303  |
| PITG_13749 | Pi 2,3-bisphosphoglycerate-dependent phosphoglycerate m         | -14.7089 | 1.074645 | 0.313147 |
| PITG_01643 | Pi conserved hypothetical protein (703 nt)                      | -15.121  | 1.067034 | 0.31333  |
| PITG_17053 | Pi ATP-binding Cassette (ABC) Superfamily (3639 nt)             | -15.9648 | -1.47181 | 0.313599 |
| PITG_03238 | Pi conserved hypothetical protein (1371 nt)                     | -14.2465 | -1.10862 | 0.313957 |
| PITG_03906 | Pi Type II (General) Secretory Pathway (IIISP) Family (1601 nt) | -12.3259 | 0.977967 | 0.314345 |
| PITG_03344 | Pi H - or Na -translocating F-type, V-type and A-type ATPase    | -12.1533 | 1.004742 | 0.314661 |
| PITG_21132 | Pi conserved hypothetical protein (568 nt)                      | -14.0236 | -1.05672 | 0.31488  |
| PITG_07295 | Pi conserved hypothetical protein (426 nt)                      | -16.5364 | -1.74987 | 0.314954 |
| PITG_02191 | Pi proteasome subunit beta type-6, putative (2247 nt)           | -12.1297 | 1.005835 | 0.315041 |
| PITG_09699 | Pi conserved hypothetical protein (656 nt)                      | -10.2591 | 0.979543 | 0.315252 |
| PITG_11017 | Pi conserved hypothetical protein (837 nt)                      | -16.5126 | -1.28934 | 0.315664 |

|            |                                                                  |          |          |          |
|------------|------------------------------------------------------------------|----------|----------|----------|
| PITG_05319 | Pi hypothetical protein (3149 nt)                                | -15.5832 | 1.338884 | 0.315676 |
| PITG_22404 | Pi conserved hypothetical protein (1419 nt)                      | -15.5432 | -1.21831 | 0.315676 |
| PITG_18245 | Pi conserved hypothetical protein (1596 nt)                      | -14.7907 | 1.091646 | 0.315904 |
| PITG_04467 | Pi conserved hypothetical protein (870 nt)                       | -16.3147 | 1.835697 | 0.316081 |
| PITG_08883 | Pi conserved hypothetical protein (659 nt)                       | -15.543  | -1.28152 | 0.316565 |
| PITG_01826 | Pi conserved hypothetical protein (1431 nt)                      | -13.023  | -1.20746 | 0.316599 |
| PITG_13204 | Pi conserved hypothetical protein (802 nt)                       | -11.2581 | -0.96223 | 0.316863 |
| PITG_17461 | Pi Rab11 family GTPase, putative (1359 nt)                       | -16.0922 | -1.49933 | 0.317567 |
| PITG_18602 | Pi conserved hypothetical protein (1387 nt)                      | -15.0621 | 1.179357 | 0.317931 |
| PITG_17695 | Pi hypothetical protein (852 nt)                                 | -12.3148 | -1.14502 | 0.318087 |
| PITG_08504 | Pi conserved hypothetical protein (3268 nt)                      | -16.3326 | -1.48599 | 0.318413 |
| PITG_04065 | Pi glycerol-3-phosphate dehydrogenase (1038 nt)                  | -13.3857 | -1.05105 | 0.318742 |
| PITG_00034 | Pi aldehyde dehydrogenase, putative (1971 nt)                    | -13.0615 | 0.990329 | 0.319248 |
| PITG_05571 | Pi conserved hypothetical protein (985 nt)                       | -15.5965 | 1.150474 | 0.319251 |
| PITG_09951 | Pi dicer-like, putative (2154 nt)                                | -15.2042 | -1.09282 | 0.319399 |
| PITG_17292 | Pi protein kinase (2211 nt)                                      | -15.2032 | -1.09471 | 0.319399 |
| PITG_10903 | Pi probable adenosine deaminase, putative (1356 nt)              | -14.5049 | -1.06155 | 0.319868 |
| PITG_06935 | Pi HSF-type DNA-binding, putative (1623 nt)                      | -17.0813 | -1.99398 | 0.319931 |
| PITG_13888 | Pi 4-coumarate-CoA ligase, putative (1788 nt)                    | -17.0813 | -1.99398 | 0.319931 |
| PITG_21336 | Pi patatin like protein (3426 nt)                                | -17.0813 | -1.99398 | 0.319931 |
| PITG_08681 | Pi elongation factor G, mitochondrial precursor (2410 nt)        | -16.2154 | 1.271116 | 0.32004  |
| PITG_10664 | Pi Intraflagellar Transport Protein 122 (4279 nt)                | -15.2943 | 1.039992 | 0.320539 |
| PITG_02172 | Pi hypothetical protein (1277 nt)                                | -15.5475 | -1.1574  | 0.321208 |
| PITG_04726 | Pi mitochondrial-processing peptidase subunit alpha, putativ     | -12.4885 | 0.978419 | 0.321251 |
| PITG_19422 | Pi hypothetical protein (2352 nt)                                | -13.9172 | -1.11634 | 0.321305 |
| PITG_02124 | Pi protein kinase, putative (2883 nt)                            | -14.4835 | -1.1057  | 0.321382 |
| PITG_03823 | Pi conserved hypothetical protein (922 nt)                       | -16.2481 | 1.317795 | 0.321667 |
| PITG_01349 | Pi Type II (General) Secretory Pathway (IISP) Family (1407 nt)   | -15.0778 | -1.25469 | 0.321943 |
| PITG_15359 | Pi dihydrolipoyl dehydrogenase 1, mitochondrial precursor (      | -12.93   | 1.012823 | 0.321951 |
| PITG_10221 | Pi hypothetical protein (529 nt)                                 | -13.3149 | 1.110214 | 0.321963 |
| PITG_14597 | Pi conserved hypothetical protein (279 nt)                       | -14.0335 | 1.001525 | 0.322219 |
| PITG_18107 | Pi Der1-like family, putative (1230 nt)                          | -12.0509 | 0.982845 | 0.322222 |
| PITG_05429 | Pi conserved hypothetical protein (2915 nt)                      | -15.0989 | -1.13088 | 0.322361 |
| PITG_01602 | Pi conserved hypothetical protein (2006 nt)                      | -14.9122 | 1.221028 | 0.32275  |
| PITG_01945 | Pi conserved hypothetical protein (1058 nt)                      | -12.5931 | 0.97308  | 0.322901 |
| PITG_12661 | Pi conserved hypothetical protein (1996 nt)                      | -14.0828 | 1.019007 | 0.322931 |
| PITG_08902 | Pi pleiotropic drug resistance protein, putative (6261 nt)       | -16.0235 | -1.66242 | 0.32294  |
| PITG_01569 | Pi nardilysin, putative (3690 nt)                                | -14.6241 | 1.110367 | 0.322951 |
| PITG_01233 | Pi transmembrane protein, putative (2335 nt)                     | -14.5554 | -1.13385 | 0.323119 |
| PITG_17406 | Pi enoyl-CoA hydratase, mitochondrial precursor (913 nt)         | -9.8761  | -0.95035 | 0.323177 |
| PITG_02195 | Pi conserved hypothetical protein (528 nt)                       | -14.9829 | -1.12493 | 0.323506 |
| PITG_09436 | Pi conserved hypothetical protein (709 nt)                       | -11.0587 | 0.981202 | 0.323585 |
| PITG_02282 | Pi acyl-CoA dehydrogenase, putative (2342 nt)                    | -12.4272 | -1.05964 | 0.323812 |
| PITG_00624 | Pi hypothetical protein (627 nt)                                 | -15.3653 | 1.491812 | 0.323839 |
| PITG_00994 | Pi conserved hypothetical protein (1176 nt)                      | -14.3234 | -1.06596 | 0.324175 |
| PITG_00109 | Pi DEAD/DEAH box RNA helicase, putative (1557 nt)                | -16.0894 | 1.432311 | 0.324347 |
| PITG_03978 | Pi transcription initiation factor TFIID subunit 6, putative (15 | -16.1249 | -1.43671 | 0.324347 |

|            |                                                                                |          |          |          |
|------------|--------------------------------------------------------------------------------|----------|----------|----------|
| PITG_07820 | Pi guanine deaminase, putative (1335 nt)                                       | -16.0137 | 1.391974 | 0.324347 |
| PITG_18242 | Pi conserved hypothetical protein (326 nt)                                     | -13.4189 | 1.043285 | 0.324355 |
| PITG_17785 | Pi hypothetical protein (336 nt)                                               | -12.3473 | 1.013363 | 0.324398 |
| PITG_16042 | Pi conserved hypothetical protein (1670 nt)                                    | -15.3459 | -1.18494 | 0.3244   |
| PITG_00999 | Pi protein kinase, putative (1151 nt)                                          | -13.3628 | 0.999656 | 0.324595 |
| PITG_17993 | Pi conserved hypothetical protein (1987 nt)                                    | -12.5454 | -1.01071 | 0.324608 |
| PITG_19053 | Pi hypothetical protein (291 nt)                                               | -12.4382 | 1.232983 | 0.324613 |
| PITG_02103 | Pi glycoside hydrolase, putative (2430 nt)                                     | -14.9322 | 1.089924 | 0.324652 |
| PITG_03453 | Pi phosphatidyl inositol kinase (PIK-G1) (3466 nt)                             | -16.3131 | -1.44239 | 0.324924 |
| PITG_08454 | Pi conserved hypothetical protein (2319 nt)                                    | -13.6819 | 0.981562 | 0.325127 |
| PITG_19932 | Pi nicotinate-nucleotide pyrophosphorylase, putative (988 nt)                  | -13.0404 | 0.979444 | 0.325185 |
| PITG_20355 | Pi conserved hypothetical protein (555 nt)                                     | -13.5999 | -1.02695 | 0.326019 |
| PITG_13405 | Pi conserved hypothetical protein (2746 nt)                                    | -13.7847 | -1.09004 | 0.326025 |
| PITG_05287 | Pi conserved hypothetical protein (1000 nt)                                    | -14.8004 | -1.06716 | 0.326153 |
| PITG_09624 | Pi conserved hypothetical protein (602 nt)                                     | -12.4751 | 1.013916 | 0.326177 |
| PITG_06320 | Pi T-complex protein 1 subunit epsilon (1838 nt)                               | -12.1979 | 1.009347 | 0.326349 |
| PITG_14608 | Pi 39S ribosomal protein L24, mitochondrial, putative (959 nt)                 | -13.8468 | 1.038366 | 0.326443 |
| PITG_06407 | Pi conserved hypothetical protein (600 nt)                                     | -16.5472 | -1.22452 | 0.326497 |
| PITG_16942 | Pi conserved hypothetical protein (919 nt)                                     | -16.5526 | -1.21391 | 0.326497 |
| PITG_20061 | Pi conserved hypothetical protein (681 nt)                                     | -15.6739 | 1.210805 | 0.326583 |
| PITG_22577 | Pi conserved hypothetical protein (357 nt)                                     | -14.5866 | -1.10537 | 0.326619 |
| PITG_19624 | Pi polygalacturonase, putative (1119 nt)                                       | -15.5302 | 1.202115 | 0.326728 |
| PITG_01626 | Pi Drug/Metabolite Transporter (DMT) Superfamily (2883 nt)                     | -15.7971 | -1.38517 | 0.326755 |
| PITG_01873 | Pi conserved hypothetical protein (2991 nt)                                    | -15.7971 | -1.38517 | 0.326755 |
| PITG_11152 | Pi conserved hypothetical protein (1788 nt)                                    | -14.0745 | 1.03395  | 0.327306 |
| PITG_14935 | Pi Mitochondrial Carrier (MC) Family (1582 nt)                                 | -13.8089 | 1.013048 | 0.327416 |
| PITG_00193 | Pi conserved hypothetical protein (2741 nt)                                    | -15.457  | -1.18164 | 0.327505 |
| PITG_02348 | Pi conserved hypothetical protein (1142 nt)                                    | -15.4542 | -1.18728 | 0.327505 |
| PITG_16792 | Pi nucleolar GTP-binding protein 2 (1589 nt)                                   | -15.4763 | 1.211813 | 0.327505 |
| PITG_19964 | Pi conserved hypothetical protein (831 nt)                                     | -15.0221 | -1.20155 | 0.327513 |
| PITG_08049 | Pi Equilibrative Nucleoside Transporter (ENT) Family (4923 nt)                 | -15.8216 | 1.12549  | 0.327615 |
| PITG_11725 | Pi conserved hypothetical protein (1143 nt)                                    | -16.0779 | -1.3131  | 0.327736 |
| PITG_08028 | Pi cohesin subunit, putative (4711 nt)                                         | -15.4126 | -1.37511 | 0.327837 |
| PITG_12331 | Pi cleavage and polyadenylation specificity factor subunit, putative (1143 nt) | -16.6395 | -1.55805 | 0.328049 |
| PITG_07145 | Pi malonyl-CoA decarboxylase (MCD), putative (2361 nt)                         | -15.333  | -1.16337 | 0.328249 |
| PITG_22430 | Pi conserved hypothetical protein (673 nt)                                     | -15.7933 | -1.39265 | 0.32856  |
| PITG_22718 | Pi conserved hypothetical protein (1518 nt)                                    | -14.6507 | -1.18347 | 0.328621 |
| PITG_20116 | Pi 50S ribosomal protein L15 (847 nt)                                          | -12.8061 | 1.10553  | 0.328667 |
| PITG_08241 | Pi hypothetical protein (824 nt)                                               | -13.3602 | 1.004804 | 0.32914  |
| PITG_14485 | Pi conserved hypothetical protein (2715 nt)                                    | -13.8817 | 1.025508 | 0.329181 |
| PITG_05560 | Pi conserved hypothetical protein (3430 nt)                                    | -15.2058 | -1.22322 | 0.329184 |
| PITG_04365 | Pi cysteine protease family C48, putative (613 nt)                             | -12.9146 | -0.99343 | 0.329244 |
| PITG_20272 | Pi methylenetetrahydrofolate reductase, putative (831 nt)                      | -15.5411 | -1.357   | 0.32942  |
| PITG_18104 | Pi conserved hypothetical protein (875 nt)                                     | -13.3892 | 0.999387 | 0.329594 |
| PITG_14170 | Pi galactokinase, putative (1310 nt)                                           | -13.3262 | -1.042   | 0.329748 |
| PITG_03660 | Pi 60S ribosomal protein L6, putative (1049 nt)                                | -15.0835 | -1.20852 | 0.329771 |
| PITG_06121 | Pi conserved hypothetical protein (1154 nt)                                    | -15.3418 | -1.24172 | 0.33017  |



|            |                                                                 |          |          |          |
|------------|-----------------------------------------------------------------|----------|----------|----------|
| PITG_02242 | Pi conserved hypothetical protein (1385 nt)                     | -15.753  | -1.40683 | 0.330176 |
| PITG_04850 | Pi conserved hypothetical protein (1488 nt)                     | -15.753  | -1.40683 | 0.330176 |
| PITG_04395 | Pi pre-mRNA-processing protein, putative (2063 nt)              | -14.6689 | -1.03951 | 0.330348 |
| PITG_03027 | Pi UDP-N-acetylhexosamine pyrophosphorylase, putative (15       | -15.9314 | -1.17674 | 0.33036  |
| PITG_04479 | Pi conserved hypothetical protein (1170 nt)                     | -15.9435 | -1.09211 | 0.33036  |
| PITG_05008 | Pi conserved hypothetical protein (497 nt)                      | -15.9314 | -1.17674 | 0.33036  |
| PITG_07874 | Pi DNA topoisomerase 2 (5187 nt)                                | -15.5871 | -1.38694 | 0.3304   |
| PITG_07775 | Pi splicing factor 3B subunit, putative (719 nt)                | -15.6122 | -1.28072 | 0.330689 |
| PITG_21644 | Pi UDP-N-acetylglucosamine transporter, putative (1747 nt)      | -15.5821 | 1.092641 | 0.330689 |
| PITG_20074 | Pi flavodoxin-like protein (537 nt)                             | -13.0021 | -1.04681 | 0.330975 |
| PITG_17933 | Pi croquemort-like mating protein M82, putative (1869 nt)       | -15.4817 | -1.29698 | 0.331049 |
| PITG_18052 | Pi 60S ribosomal protein L3 (1310 nt)                           | -10.2459 | 0.962998 | 0.33109  |
| PITG_04439 | Pi hypothetical protein (2797 nt)                               | -16.115  | -1.38526 | 0.331125 |
| PITG_06682 | Pi conserved hypothetical protein (4348 nt)                     | -16.0249 | 1.376691 | 0.331125 |
| PITG_20632 | Pi hypothetical protein (912 nt)                                | -15.7832 | 1.324065 | 0.331227 |
| PITG_10289 | Pi DNA-dependent RNA polymerase, putative (3507 nt)             | -14.9689 | 1.140979 | 0.331506 |
| PITG_05567 | Pi kinetochore protein NDC80 (917 nt)                           | -17.0538 | -1.92738 | 0.331594 |
| PITG_21668 | Pi F-box protein, putative (1142 nt)                            | -17.0538 | -1.92738 | 0.331594 |
| PITG_06802 | Pi conserved hypothetical protein (1399 nt)                     | -14.3537 | 1.01364  | 0.331633 |
| PITG_22249 | Pi hypothetical protein (616 nt)                                | -15.0804 | -1.20277 | 0.331722 |
| PITG_23112 | Pi expressed protein (596 nt)                                   | -12.1044 | -1.20063 | 0.331895 |
| PITG_05211 | Pi ATP-binding Cassette (ABC) Superfamily (3861 nt)             | -15.5725 | -1.35705 | 0.332235 |
| PITG_04499 | Pi histone deacetylase, putative (1602 nt)                      | -14.7877 | 1.065781 | 0.332257 |
| PITG_12873 | Pi conserved hypothetical protein (2030 nt)                     | -16.1541 | 1.296028 | 0.332429 |
| PITG_13678 | Pi conserved hypothetical protein (1343 nt)                     | -16.1331 | -1.27403 | 0.332429 |
| PITG_14283 | Pi malonyl CoA-acyl carrier protein transacylase, putative (97  | -15.6072 | 1.142629 | 0.332535 |
| PITG_10951 | Pi succinate dehydrogenase iron-sulfur protein, mitochondri     | -12.1077 | 0.938623 | 0.33254  |
| PITG_20078 | Pi conserved hypothetical protein (1193 nt)                     | -17.0128 | -2.00878 | 0.33306  |
| PITG_22075 | Pi conserved hypothetical protein (1121 nt)                     | -17.0128 | -2.00878 | 0.33306  |
| PITG_02775 | Pi conserved hypothetical protein (2460 nt)                     | -16.8291 | -1.4766  | 0.33306  |
| PITG_13111 | Pi conserved hypothetical protein (3817 nt)                     | -15.4189 | 1.037083 | 0.333163 |
| PITG_17683 | Pi conserved hypothetical protein (1717 nt)                     | -14.11   | -1.02498 | 0.333433 |
| PITG_08265 | Pi conserved hypothetical protein (847 nt)                      | -12.0585 | -0.94656 | 0.33352  |
| PITG_15486 | Pi general transcription factor IIH subunit, putative (1515 nt) | -14.8478 | -1.06471 | 0.333743 |
| PITG_08851 | Pi FKBP-type peptidyl-prolyl cis-trans isomerase, putative (11  | -14.7382 | -1.12133 | 0.333764 |
| PITG_10138 | Pi alkaline phytoceramidase (aPHC), putative (871 nt)           | -14.07   | 1.043373 | 0.333828 |
| PITG_03337 | Pi conserved hypothetical protein (3329 nt)                     | -15.853  | 1.108838 | 0.333853 |
| PITG_03521 | Pi conserved hypothetical protein (987 nt)                      | -15.9428 | 1.253272 | 0.333853 |
| PITG_12469 | Pi conserved hypothetical protein (2089 nt)                     | -15.853  | 1.108838 | 0.333853 |
| PITG_10369 | Pi Mitochondrial Protein Translocase (MPT) Family (396 nt)      | -15.1108 | -1.39667 | 0.333862 |
| PITG_01754 | Pi conserved hypothetical protein (4202 nt)                     | -15.7233 | -1.17021 | 0.333964 |
| PITG_03776 | Pi conserved hypothetical protein (3841 nt)                     | -15.7086 | 1.181074 | 0.333964 |
| PITG_18741 | Pi Amino Acid/Auxin Permease (AAP) Family (1491 nt)             | -15.338  | -1.10556 | 0.334003 |
| PITG_03850 | Pi conserved hypothetical protein (2685 nt)                     | -13.4817 | -1.00574 | 0.334445 |
| PITG_06803 | Pi conserved hypothetical protein (2788 nt)                     | -15.8461 | 1.244072 | 0.334609 |
| PITG_07671 | Pi NADP-specific glutamate dehydrogenase, putative (1752 r      | -13.4226 | 1.064447 | 0.334729 |
| PITG_20379 | Pi conserved hypothetical protein (1779 nt)                     | -16.3899 | 1.534019 | 0.334804 |

|            |                                                               |          |          |          |
|------------|---------------------------------------------------------------|----------|----------|----------|
| PITG_20347 | Pi Drug/Metabolite Transporter (DMT) Superfamily (1059 nt)    | -14.8777 | 1.001636 | 0.334856 |
| PITG_05694 | Pi transcription elongation factor SPT4 (602 nt)              | -13.9965 | 1.014021 | 0.335575 |
| PITG_16131 | Pi conserved hypothetical protein (734 nt)                    | -16.6249 | -1.68309 | 0.335826 |
| PITG_00693 | Pi plasma membrane H <sup>+</sup> -ATPase, putative (2898 nt) | -12.7814 | -1.07042 | 0.335844 |
| PITG_02145 | Pi conserved hypothetical protein (1971 nt)                   | -15.1164 | -1.22295 | 0.336183 |
| PITG_00271 | Pi conserved hypothetical protein (1164 nt)                   | -16.1463 | 1.543411 | 0.336208 |
| PITG_01784 | Pi conserved hypothetical protein (1626 nt)                   | -15.5713 | 1.070573 | 0.336221 |
| PITG_02565 | Pi protein kinase, putative (1170 nt)                         | -13.9711 | -1.06792 | 0.336354 |
| PITG_11223 | Pi conserved hypothetical protein (767 nt)                    | -15.896  | -1.38487 | 0.336356 |
| PITG_10878 | Pi conserved hypothetical protein (687 nt)                    | -11.1057 | 1.005739 | 0.33637  |
| PITG_04619 | Pi protein kinase (3108 nt)                                   | -16.4094 | -1.3338  | 0.336404 |
| PITG_01300 | Pi DNA topoisomerase 2 DNA gyrase B (4764 nt)                 | -12.824  | 0.954966 | 0.33657  |
| PITG_03829 | Pi conserved hypothetical protein (2808 nt)                   | -14.307  | 1.025424 | 0.337044 |
| PITG_07308 | Pi rRNA 2'-O-methyltransferase fibrillar, putative (981 nt)   | -13.1011 | 0.986605 | 0.337156 |
| PITG_12213 | Pi exonuclease 1, putative (1771 nt)                          | -15.9228 | -1.19472 | 0.337342 |
| PITG_08732 | Pi conserved hypothetical protein (1037 nt)                   | -15.6186 | 1.096919 | 0.337349 |
| PITG_15062 | Pi conserved hypothetical protein (3901 nt)                   | -15.6961 | -1.28957 | 0.337349 |
| PITG_02725 | Pi conserved hypothetical protein (1766 nt)                   | -16.1544 | -1.29919 | 0.337469 |
| PITG_03253 | Pi conserved hypothetical protein (425 nt)                    | -16.1124 | -1.2481  | 0.337469 |
| PITG_06305 | Pi secreted RxLR effector peptide, putative (276 nt)          | -10.2793 | -1.17619 | 0.337585 |
| PITG_09472 | Pi conserved hypothetical protein (707 nt)                    | -10.8895 | 0.917111 | 0.337646 |
| PITG_14914 | Pi conserved hypothetical protein (710 nt)                    | -15.0355 | -1.17485 | 0.337955 |
| PITG_06963 | Pi cyclin-Y-like protein (2863 nt)                            | -16.4348 | -1.35789 | 0.338004 |
| PITG_11231 | Pi conserved hypothetical protein (1045 nt)                   | -15.6243 | -1.31218 | 0.338061 |
| PITG_07154 | Pi serine carboxypeptidase, putative (1312 nt)                | -15.9319 | -1.45727 | 0.338103 |
| PITG_20989 | Pi conserved hypothetical protein (2292 nt)                   | -14.1016 | 1.05102  | 0.338148 |
| PITG_12905 | Pi transmembrane protein, putative (780 nt)                   | -11.6423 | 0.937162 | 0.338647 |
| PITG_11406 | Pi conserved hypothetical protein (1068 nt)                   | -15.2297 | -1.27366 | 0.338895 |
| PITG_10950 | Pi conserved hypothetical protein (1773 nt)                   | -15.921  | -1.26036 | 0.339084 |
| PITG_12838 | Pi conserved hypothetical protein (1399 nt)                   | -16.1272 | 1.163003 | 0.339148 |
| PITG_17664 | Pi conserved hypothetical protein (1731 nt)                   | -14.8286 | -1.18209 | 0.339468 |
| PITG_00764 | Pi V-type proton ATPase subunit H, putative (2110 nt)         | -12.7234 | 0.943025 | 0.339579 |
| PITG_08850 | Pi mannitol dehydrogenase, putative (2060 nt)                 | -16.3461 | 1.446435 | 0.339603 |
| PITG_11007 | Pi conserved hypothetical protein (598 nt)                    | -16.316  | 1.302596 | 0.339603 |
| PITG_22450 | Pi conserved hypothetical protein (1316 nt)                   | -14.7279 | -1.14219 | 0.339872 |
| PITG_01559 | Pi conserved hypothetical protein (1885 nt)                   | -14.833  | -1.13096 | 0.339892 |
| PITG_01674 | Pi conserved hypothetical protein (1571 nt)                   | -15.6103 | -1.28355 | 0.339898 |
| PITG_03754 | Pi protein kinase, putative (2697 nt)                         | -15.015  | -1.02089 | 0.339964 |
| PITG_04646 | Pi ATP-binding Cassette (ABC) Superfamily (2265 nt)           | -16.7433 | -1.54101 | 0.340487 |
| PITG_15217 | Pi ribonuclease, putative (1123 nt)                           | -15.418  | 1.20592  | 0.340673 |
| PITG_12178 | Pi conserved hypothetical protein (852 nt)                    | -15.916  | -1.27069 | 0.340824 |
| PITG_06939 | Pi conserved hypothetical protein (1181 nt)                   | -16.1169 | 1.260585 | 0.340825 |
| PITG_03338 | Pi hypothetical protein (846 nt)                              | -15.2035 | 1.25218  | 0.340828 |
| PITG_07166 | Pi 2-amino-3-carboxymuconate-6-semialdehyde decarboxylase     | -15.2333 | -1.21837 | 0.340828 |
| PITG_05633 | Pi conserved hypothetical protein (3358 nt)                   | -16.37   | -1.4125  | 0.341202 |
| PITG_16006 | Pi conserved hypothetical protein (1989 nt)                   | -16.37   | -1.4125  | 0.341202 |
| PITG_18017 | Pi conserved hypothetical protein (1021 nt)                   | -16.2271 | 1.270941 | 0.341236 |

|            |                                                                 |          |          |          |
|------------|-----------------------------------------------------------------|----------|----------|----------|
| PITG_01043 | Pi 3-phosphoinositide-dependent protein kinase, putative (2     | -12.9389 | -0.95429 | 0.341388 |
| PITG_17484 | Pi Drug/Metabolite Transporter (DMT) Superfamily (1322 nt)      | -15.3209 | -1.13909 | 0.341637 |
| PITG_11176 | Pi conserved hypothetical protein (669 nt)                      | -13.8511 | 1.024408 | 0.34178  |
| PITG_05658 | Pi conserved hypothetical protein (2647 nt)                     | -14.9175 | -1.10008 | 0.341815 |
| PITG_00654 | Pi DNA damage-inducible protein 1, putative (1999 nt)           | -14.8362 | -1.08775 | 0.341933 |
| PITG_19085 | Pi conserved hypothetical protein (1692 nt)                     | -16.7342 | -1.55936 | 0.341987 |
| PITG_17499 | Pi Chromate Ion Transporter (CHR) Family (1580 nt)              | -14.3713 | 1.040223 | 0.342238 |
| PITG_02734 | Pi conserved hypothetical protein (387 nt)                      | -14.4185 | -1.08314 | 0.342499 |
| PITG_01216 | Pi hypothetical protein (1398 nt)                               | -16.069  | 1.085926 | 0.342502 |
| PITG_02824 | Pi Sulfate Permease (SulP) Family (3174 nt)                     | -16.138  | -1.19629 | 0.342502 |
| PITG_04731 | Pi hypothetical protein (1162 nt)                               | -16.126  | -1.28871 | 0.342502 |
| PITG_06516 | Pi conserved hypothetical protein (757 nt)                      | -16.1468 | -1.31542 | 0.342502 |
| PITG_10008 | Pi protein kinase (2733 nt)                                     | -16.1468 | -1.31542 | 0.342502 |
| PITG_12523 | Pi conserved hypothetical protein (1376 nt)                     | -16.1468 | -1.31542 | 0.342502 |
| PITG_18366 | Pi choline/Carnitine O-acyltransferase, putative (2555 nt)      | -14.7073 | -1.22095 | 0.342531 |
| PITG_12947 | Pi 40S ribosomal protein S23, putative (952 nt)                 | -9.1264  | 0.909543 | 0.342534 |
| PITG_19064 | Pi pre-mRNA-splicing factor ISY1 (859 nt)                       | -15.2136 | -1.11834 | 0.342758 |
| PITG_07276 | Pi exopolysaccharide phosphotransferase, putative (1434 nt)     | -15.7229 | 1.101393 | 0.342936 |
| PITG_12289 | Pi H - or Na -translocating F-type, V-type and A-type ATPase    | -13.1824 | 0.955657 | 0.34295  |
| PITG_05009 | Pi conserved hypothetical protein (705 nt)                      | -13.3464 | 1.019574 | 0.343121 |
| PITG_01977 | Pi conserved hypothetical protein (1218 nt)                     | -15.4646 | -1.27071 | 0.343237 |
| PITG_20017 | Pi diacylglycerol O-acyltransferase, putative (1296 nt)         | -16.7197 | -1.58844 | 0.343487 |
| PITG_02629 | Pi nucleolin, putative (1642 nt)                                | -15.5689 | 1.121968 | 0.343567 |
| PITG_06003 | Pi conserved hypothetical protein (2705 nt)                     | -14.3052 | -1.13184 | 0.344027 |
| PITG_18088 | Pi conserved hypothetical protein (1991 nt)                     | -13.5176 | -0.96717 | 0.344056 |
| PITG_03564 | Pi hypothetical protein (975 nt)                                | -15.1414 | 1.190718 | 0.344195 |
| PITG_04079 | Pi hypothetical protein (673 nt)                                | -15.3164 | 1.422771 | 0.344383 |
| PITG_05843 | Pi conserved hypothetical protein (1597 nt)                     | -16.4229 | -1.38299 | 0.344399 |
| PITG_17112 | Pi conserved hypothetical protein (1715 nt)                     | -16.4229 | -1.38299 | 0.344399 |
| PITG_05245 | Pi imidazole glycerol phosphate synthase hisHF, putative (24    | -13.4556 | -0.98575 | 0.344441 |
| PITG_04935 | Pi calcineurin-like phosphoesterase, putative (1806 nt)         | -17.1523 | -1.85384 | 0.344469 |
| PITG_12265 | Pi nuclear prelamin A recognition factor-like protein (1311 nt) | -17.1523 | -1.85384 | 0.344469 |
| PITG_03991 | Pi hypothetical protein (303 nt)                                | -15.7263 | 1.150517 | 0.344725 |
| PITG_19129 | Pi ATP-dependent RNA helicase eIF4A, putative (1319 nt)         | -11.9145 | 0.925549 | 0.344794 |
| PITG_06482 | Pi eukaryotic translation initiation factor 3 subunit, putative | -14.8701 | 1.008747 | 0.344846 |
| PITG_17607 | Pi elongation factor Ts, putative (1047 nt)                     | -14.9289 | 1.212682 | 0.344846 |
| PITG_11470 | Pi calcium-dependent protein kinase, putative (1870 nt)         | -14.3955 | -1.03844 | 0.345051 |
| PITG_02372 | Pi conserved hypothetical protein (1359 nt)                     | -15.4219 | -1.19166 | 0.345095 |
| PITG_14171 | Pi Amino Acid-Polyamine-Organocation (APC) Family (1748 r       | -15.5395 | 1.098086 | 0.345399 |
| PITG_01797 | Pi 26S protease regulatory subunit 6A-A (1647 nt)               | -12.7459 | 0.980042 | 0.345467 |
| PITG_09578 | Pi vesicle transporter GOT1B-like protein (615 nt)              | -14.0168 | -0.98082 | 0.345689 |
| PITG_23272 | Pi crinkler (CRN) family protein, gypsy-inserted pseudogene (   | -15.9377 | 1.262768 | 0.346039 |
| PITG_07229 | Pi conserved hypothetical protein (444 nt)                      | -15.41   | 1.18967  | 0.34628  |
| PITG_21828 | Pi conserved hypothetical protein (836 nt)                      | -15.4417 | 1.197769 | 0.34628  |
| PITG_02263 | Pi metal transporter, putative (1660 nt)                        | -14.3558 | 1.001901 | 0.346444 |
| PITG_03288 | Pi myosin-like protein (4434 nt)                                | -15.7214 | -1.1757  | 0.346513 |
| PITG_13910 | Pi conserved hypothetical protein (1120 nt)                     | -15.7438 | -1.13091 | 0.346513 |

|            |                                                                  |          |          |          |
|------------|------------------------------------------------------------------|----------|----------|----------|
| PITG_17549 | Pi myosin-like protein (4388 nt)                                 | -15.7897 | -1.39906 | 0.346513 |
| PITG_18991 | Pi conserved hypothetical protein (647 nt)                       | -13.3147 | 1.008022 | 0.34703  |
| PITG_08696 | Pi iron-sulfur cluster scaffold protein Nfu-like protein (1037 r | -13.5159 | 0.983899 | 0.347202 |
| PITG_16468 | Pi conserved hypothetical protein (2126 nt)                      | -15.2294 | -1.08607 | 0.347219 |
| PITG_17239 | Pi calcineurin-like phosphoesterase, putative (2269 nt)          | -13.7103 | -0.99238 | 0.347418 |
| PITG_02503 | Pi FAD synthetase, putative (876 nt)                             | -16.1668 | -1.27656 | 0.347526 |
| PITG_16386 | Pi Bola-like protein (541 nt)                                    | -14.6455 | -1.0123  | 0.34759  |
| PITG_14652 | Pi conserved hypothetical protein (2239 nt)                      | -16.4094 | -1.25593 | 0.347594 |
| PITG_09445 | Pi conserved hypothetical protein (633 nt)                       | -10.8135 | 0.9019   | 0.34808  |
| PITG_04179 | Pi condensin-2 complex subunit H2, putative (2172 nt)            | -15.4776 | -1.24352 | 0.348144 |
| PITG_12193 | Pi 50S ribosomal protein L1 (1144 nt)                            | -13.6905 | 0.964075 | 0.348367 |
| PITG_17944 | Pi conserved hypothetical protein (3812 nt)                      | -15.1296 | -1.06971 | 0.348371 |
| PITG_22908 | Pi PcF and SCR74-like cys-rich secreted peptide, putative (39    | -13.3786 | 1.29388  | 0.348376 |
| PITG_05449 | Pi palmitoyltransferase, putative (1401 nt)                      | -13.516  | -0.95399 | 0.348554 |
| PITG_04344 | Pi protein kinase (3400 nt)                                      | -17.1396 | -1.87893 | 0.348593 |
| PITG_19672 | Pi hypothetical protein (1077 nt)                                | -14.6827 | -1.07965 | 0.348994 |
| PITG_22198 | Pi conserved hypothetical protein (722 nt)                       | -14.6561 | 1.048928 | 0.348994 |
| PITG_10218 | Pi glucan 1,3-beta-glucosidase, putative (1915 nt)               | -11.8105 | 1.064322 | 0.349176 |
| PITG_03085 | Pi conserved hypothetical protein (1413 nt)                      | -16.3986 | -1.35483 | 0.349191 |
| PITG_11087 | Pi conserved hypothetical protein (2011 nt)                      | -16.152  | -1.23691 | 0.349199 |
| PITG_07072 | Pi short chain dehydrogenase, putative (767 nt)                  | -16.6884 | -1.65184 | 0.34949  |
| PITG_15791 | Pi glycoside hydrolase, putative (1428 nt)                       | -14.5675 | 1.042938 | 0.349733 |
| PITG_19836 | Pi hypothetical protein (1303 nt)                                | -15.0014 | 1.074638 | 0.349948 |
| PITG_06889 | Pi peptidase, putative (2249 nt)                                 | -13.5189 | -1.08169 | 0.350036 |
| PITG_04978 | Pi conserved hypothetical protein (635 nt)                       | -15.773  | -1.13111 | 0.350082 |
| PITG_08036 | Pi conserved hypothetical protein (596 nt)                       | -13.576  | 0.968529 | 0.350161 |
| PITG_05126 | Pi splicing factor 3A subunit, putative (735 nt)                 | -15.5899 | 1.413519 | 0.350505 |
| PITG_17951 | Pi dicarboxylate/Amino Acid:Cation (Na or H) Symporter (DA       | -16.4183 | -1.3933  | 0.350788 |
| PITG_22204 | Pi conserved hypothetical protein (829 nt)                       | -16.4183 | -1.3933  | 0.350788 |
| PITG_16078 | Pi conserved hypothetical protein (3849 nt)                      | -16.1348 | -1.20151 | 0.350871 |
| PITG_15626 | Pi superoxide dismutase 2 (637 nt)                               | -10.6948 | 0.937188 | 0.350945 |
| PITG_09367 | Pi sterol 3-beta-glucosyltransferase, putative (5031 nt)         | -15.9168 | 1.126748 | 0.351241 |
| PITG_11618 | Pi conserved hypothetical protein (1342 nt)                      | -15.8822 | 1.057605 | 0.351241 |
| PITG_00982 | Pi conserved hypothetical protein (4269 nt)                      | -14.5581 | 0.978465 | 0.351791 |
| PITG_11198 | Pi nucleolar GTP-binding protein 1 (2043 nt)                     | -15.4286 | 1.026938 | 0.351866 |
| PITG_00567 | Pi conserved hypothetical protein (1012 nt)                      | -16.2946 | 1.215012 | 0.352385 |
| PITG_06152 | Pi conserved hypothetical protein (901 nt)                       | -14.2831 | -0.95624 | 0.352492 |
| PITG_03156 | Pi pre-rRNA-processing protein TSR1 (2490 nt)                    | -16.0876 | 1.056015 | 0.352542 |
| PITG_07562 | Pi folate-Biopterin Transporter (FBT) family (1821 nt)           | -16.1063 | -1.25827 | 0.352542 |
| PITG_06577 | Pi conserved hypothetical protein (766 nt)                       | -11.4168 | 0.916819 | 0.352658 |
| PITG_13402 | Pi cystathionine beta-lyase (2009 nt)                            | -13.999  | 1.08109  | 0.352842 |
| PITG_02953 | Pi conserved hypothetical protein (492 nt)                       | -16.0305 | 1.269083 | 0.353148 |
| PITG_02053 | Pi 40S ribosomal protein S8-2 (975 nt)                           | -9.56676 | 0.917645 | 0.353365 |
| PITG_09898 | Pi ras-like protein (1232 nt)                                    | -14.6778 | -1.05478 | 0.353498 |
| PITG_08453 | Pi conserved hypothetical protein (807 nt)                       | -14.6488 | -1.14955 | 0.35366  |
| PITG_21841 | Pi transmembrane protein, putative (587 nt)                      | -14.5476 | 1.124161 | 0.353698 |
| PITG_05541 | Pi dolichyl pyrophosphate Man9GlcNAc2 alpha-1,3-glucosylt        | -17.1268 | -1.80071 | 0.354104 |

|            |                                                                |          |          |          |
|------------|----------------------------------------------------------------|----------|----------|----------|
| PITG_13249 | Pi conserved hypothetical protein (1325 nt)                    | -15.3313 | 1.087191 | 0.354241 |
| PITG_09036 | Pi conserved hypothetical protein (789 nt)                     | -15.1136 | -1.10248 | 0.35426  |
| PITG_06290 | Pi secreted RxLR effector peptide, putative (483 nt)           | -10.2564 | -1.01576 | 0.354533 |
| PITG_04977 | Pi conserved hypothetical protein (3445 nt)                    | -12.9662 | -1.02472 | 0.354558 |
| PITG_00986 | Pi peroxiredoxin-4 (979 nt)                                    | -14.2285 | -0.98674 | 0.354734 |
| PITG_05114 | Pi aspartyl protease family A01A, putative (1749 nt)           | -14.8331 | 1.006671 | 0.355085 |
| PITG_14195 | Pi enolase (1485 nt)                                           | -12.5275 | 0.91386  | 0.3554   |
| PITG_03843 | Pi conserved hypothetical protein (1253 nt)                    | -11.9615 | 0.898949 | 0.355411 |
| PITG_05483 | Pi protein kinase, putative (1117 nt)                          | -16.9448 | -1.22805 | 0.355484 |
| PITG_12342 | Pi sulfite oxidase, putative (1779 nt)                         | -16.3797 | -1.3132  | 0.355576 |
| PITG_03404 | Pi conserved hypothetical protein (893 nt)                     | -15.5166 | -1.1643  | 0.356004 |
| PITG_03333 | Pi conserved hypothetical protein (1859 nt)                    | -11.8342 | 0.910827 | 0.356015 |
| PITG_11070 | Pi conserved hypothetical protein (958 nt)                     | -14.3291 | -0.99841 | 0.35612  |
| PITG_05659 | Pi conserved hypothetical protein (1291 nt)                    | -15.3761 | -1.17272 | 0.356146 |
| PITG_00409 | Pi rho GDP-dissociation inhibitor (853 nt)                     | -14.7389 | 0.992995 | 0.356176 |
| PITG_17526 | Pi crinkler (CRN) family protein, putative (1956 nt)           | -9.3353  | -1.12777 | 0.356303 |
| PITG_18331 | Pi conserved hypothetical protein (8852 nt)                    | -15.6003 | -1.05254 | 0.356343 |
| PITG_09544 | Pi conserved hypothetical protein (757 nt)                     | -11.9848 | -1.14363 | 0.356839 |
| PITG_10783 | Pi CorA Metal Ion Transporter (MIT) Family (1620 nt)           | -16.6073 | -1.0951  | 0.356999 |
| PITG_07197 | Pi 3-ketoacyl-CoA thiolase, mitochondrial (1353 nt)            | -12.2217 | -0.89649 | 0.357    |
| PITG_07971 | Pi conserved hypothetical protein (1467 nt)                    | -13.9078 | 0.919609 | 0.357043 |
| PITG_00578 | Pi metalloprotease family M38, putative (1299 nt)              | -12.7913 | -0.91782 | 0.357174 |
| PITG_04181 | Pi conserved hypothetical protein (1755 nt)                    | -14.4184 | -0.99258 | 0.357195 |
| PITG_05709 | Pi adenylate kinase, putative (1064 nt)                        | -15.7895 | -1.39886 | 0.357201 |
| PITG_20189 | Pi 60S ribosomal protein L14, putative (710 nt)                | -8.6552  | 0.890289 | 0.357265 |
| PITG_22319 | Pi UDP-glucose 4-epimerase, putative (1287 nt)                 | -13.2233 | -0.97525 | 0.357589 |
| PITG_02506 | Pi conserved hypothetical protein (1835 nt)                    | -15.4487 | 1.010472 | 0.357874 |
| PITG_03399 | Pi histidyl-tRNA synthetase, putative (1123 nt)                | -14.7519 | 1.066468 | 0.358226 |
| PITG_03973 | Pi conserved hypothetical protein (4616 nt)                    | -17.1296 | -1.89844 | 0.358247 |
| PITG_05798 | Pi protein kinase, putative (2322 nt)                          | -17.1296 | -1.89844 | 0.358247 |
| PITG_15696 | Pi TFIIF basal transcription factor complex helicase subunit ( | -15.6476 | -1.26546 | 0.358479 |
| PITG_02530 | Pi conserved hypothetical protein (1675 nt)                    | -16.5983 | -1.11393 | 0.358501 |
| PITG_15785 | Pi conserved hypothetical protein (1732 nt)                    | -16.5983 | -1.11393 | 0.358501 |
| PITG_06810 | Pi conserved hypothetical protein (962 nt)                     | -16.339  | 1.258523 | 0.358767 |
| PITG_10838 | Pi dolichyl-P-Man:Man(7)GlcNAc(2)-PP-dolichyl-alpha-1,6-m:     | -15.2245 | -1.14121 | 0.358835 |
| PITG_02280 | Pi conserved hypothetical protein (1966 nt)                    | -14.2921 | -0.99099 | 0.35893  |
| PITG_01428 | Pi conserved hypothetical protein (728 nt)                     | -14.2281 | -0.96233 | 0.359029 |
| PITG_17430 | Pi conserved hypothetical protein (1075 nt)                    | -16.1475 | -1.38949 | 0.359219 |
| PITG_00115 | Pi protein kinase, putative (1413 nt)                          | -14.6868 | -1.07072 | 0.359687 |
| PITG_02624 | Pi aspartyl protease family A01B, putative (1499 nt)           | -15.4966 | -1.2046  | 0.359741 |
| PITG_01313 | Pi conserved hypothetical protein (1642 nt)                    | -14.4683 | 1.016829 | 0.359868 |
| PITG_02184 | Pi conserved hypothetical protein (518 nt)                     | -16.7214 | -1.58696 | 0.360004 |
| PITG_03457 | Pi conserved hypothetical protein (5820 nt)                    | -16.7214 | -1.58696 | 0.360004 |
| PITG_06946 | Pi conserved hypothetical protein (2130 nt)                    | -16.7214 | -1.58696 | 0.360004 |
| PITG_20709 | Pi conserved hypothetical protein (580 nt)                     | -16.6906 | -1.46576 | 0.360004 |
| PITG_00633 | Pi proteasome subunit alpha type-7, threonine protease fam     | -11.6789 | 0.908226 | 0.36003  |
| PITG_16871 | Pi conserved hypothetical protein (1239 nt)                    | -13.2818 | 1.015998 | 0.360359 |

|            |                                                            |          |          |          |
|------------|------------------------------------------------------------|----------|----------|----------|
| PITG_02925 | Pi ketol-acid reductoisomerase (1703 nt)                   | -11.179  | 0.900566 | 0.36043  |
| PITG_06767 | Pi transmembrane protein Gpr7-like protein (1815 nt)       | -14.1335 | -0.97794 | 0.360571 |
| PITG_07924 | Pi Drug/Metabolite Transporter (DMT) Superfamily (1795 nt) | -13.0266 | 0.916112 | 0.36067  |
| PITG_02885 | Pi conserved hypothetical protein (1866 nt)                | -16.6842 | -1.66149 | 0.361507 |
| PITG_03410 | Pi acetolactate synthase small subunit, putative (1042 nt) | -12.6939 | -0.95432 | 0.361508 |
| PITG_03826 | Pi conserved hypothetical protein (950 nt)                 | -15.9367 | -1.29971 | 0.36161  |
| PITG_19286 | Pi Major Facilitator Superfamily (MFS) (1368 nt)           | -15.9406 | -1.29183 | 0.36161  |
| PITG_20676 | Pi beta-glucosidase, putative (2430 nt)                    | -15.5503 | 1.087605 | 0.361788 |
| PITG_07347 | Pi conserved hypothetical protein (892 nt)                 | -16.3632 | -1.42499 | 0.361956 |
| PITG_15309 | Pi DNA mismatch repair protein mutS, putative (3242 nt)    | -16.3954 | -1.36049 | 0.361956 |
| PITG_21179 | Pi conserved hypothetical protein (876 nt)                 | -16.3954 | -1.36049 | 0.361956 |
| PITG_01418 | Pi choline/Carnitine O-acyltransferase, putative (2134 nt) | -14.0475 | 1.041073 | 0.362034 |
| PITG_16966 | Pi 2-oxoglutarate dehydrogenase E1 component, putative (3  | -13.0757 | 0.940378 | 0.362418 |
| PITG_02361 | Pi P-type ATPase (P-ATPase) Superfamily (2973 nt)          | -16.0436 | 1.074399 | 0.362552 |
| PITG_19177 | Pi conserved hypothetical protein (1173 nt)                | -14.1907 | -1.01167 | 0.362933 |
| PITG_00198 | Pi conserved hypothetical protein (472 nt)                 | -13.5519 | -1.05038 | 0.362978 |
| PITG_10871 | Pi U1 small nuclear ribonucleoprotein C, putative (871 nt) | -13.96   | 0.975896 | 0.36318  |
| PITG_01181 | Pi conserved hypothetical protein (1587 nt)                | -12.781  | -0.90716 | 0.363183 |
| PITG_08733 | Pi conserved hypothetical protein (1008 nt)                | -13.8477 | -1.08507 | 0.363216 |
| PITG_17516 | Pi S-adenosylmethionine synthetase 2 (1547 nt)             | -10.5663 | 0.989464 | 0.363451 |
| PITG_23158 | Pi isocitrate dehydrogenase, putative (1269 nt)            | -15.5149 | -1.16816 | 0.363465 |
| PITG_00197 | Pi conserved hypothetical protein (2757 nt)                | -16.4159 | -1.40033 | 0.36355  |
| PITG_19048 | Pi hypothetical protein (407 nt)                           | -16.4159 | -1.40033 | 0.36355  |
| PITG_20854 | Pi conserved hypothetical protein (486 nt)                 | -16.2581 | 1.183709 | 0.36355  |
| PITG_06232 | Pi hypothetical protein (638 nt)                           | -14.4431 | 0.973445 | 0.363646 |
| PITG_14979 | Pi palmitoyltransferase, putative (1047 nt)                | -15.6352 | -0.97884 | 0.363956 |
| PITG_21579 | Pi adenylate kinase, putative (768 nt)                     | -15.6393 | -0.9707  | 0.363956 |
| PITG_16326 | Pi calcineurin-like phosphoesterase (2862 nt)              | -15.1155 | 1.099919 | 0.363999 |
| PITG_00655 | Pi conserved hypothetical protein (1033 nt)                | -14.4077 | 1.074618 | 0.363999 |
| PITG_11817 | Pi hypothetical protein (1959 nt)                          | -13.127  | 1.012858 | 0.364059 |
| PITG_01452 | Pi conserved hypothetical protein (2655 nt)                | -16.1227 | -1.29612 | 0.364217 |
| PITG_16903 | Pi hypothetical protein (2596 nt)                          | -16.064  | 1.29129  | 0.364217 |
| PITG_16198 | Pi 60S ribosomal protein L18a (1751 nt)                    | -9.53813 | 0.875444 | 0.364245 |
| PITG_05297 | Pi conserved hypothetical protein (531 nt)                 | -14.9092 | 0.934499 | 0.364505 |
| PITG_03339 | Pi conserved hypothetical protein (1065 nt)                | -12.7419 | -0.91872 | 0.364699 |
| PITG_13423 | Pi conserved hypothetical protein (1721 nt)                | -13.8378 | -0.96334 | 0.364795 |
| PITG_02572 | Pi conserved hypothetical protein (3372 nt)                | -15.4567 | 0.962444 | 0.365322 |
| PITG_17936 | Pi structural maintenance of chromosomes protein 4, putati | -15.5087 | -1.07719 | 0.365322 |
| PITG_08959 | Pi 40S ribosomal protein S3-3 (841 nt)                     | -9.18651 | 0.893113 | 0.365588 |
| PITG_00441 | Pi conserved hypothetical protein (1546 nt)                | -15.6334 | -0.9828  | 0.365776 |
| PITG_08446 | Pi conserved hypothetical protein (3347 nt)                | -15.6451 | -1.27054 | 0.365776 |
| PITG_12305 | Pi rRNA-processing protein FCF1 (928 nt)                   | -15.6039 | 1.003487 | 0.365776 |
| PITG_16800 | Pi conserved hypothetical protein (539 nt)                 | -16.1048 | -1.25936 | 0.365882 |
| PITG_21759 | Pi cytochrome P450, putative (2672 nt)                     | -16.1048 | -1.25936 | 0.365882 |
| PITG_10292 | Pi alcohol dehydrogenase, putative (1239 nt)               | -13.8931 | 1.247372 | 0.365912 |
| PITG_17348 | Pi myosin-like protein (4233 nt)                           | -15.1145 | -1.10194 | 0.365935 |
| PITG_18963 | Pi conserved hypothetical protein (2541 nt)                | -15.0212 | 1.050618 | 0.366267 |

|            |                                                                |          |          |          |
|------------|----------------------------------------------------------------|----------|----------|----------|
| PITG_19415 | Pi hypothetical protein (525 nt)                               | -10.8026 | 1.006568 | 0.366463 |
| PITG_03379 | Pi conserved hypothetical protein (3157 nt)                    | -14.9213 | 1.01976  | 0.366506 |
| PITG_12283 | Pi conserved hypothetical protein (1842 nt)                    | -16.9729 | -1.17713 | 0.366559 |
| PITG_13499 | Pi MtN3-like protein (779 nt)                                  | -15.9044 | 1.255024 | 0.366777 |
| PITG_14439 | Pi conserved hypothetical protein (779 nt)                     | -12.3201 | 0.914001 | 0.366948 |
| PITG_03345 | Pi peptidyl-prolyl cis-trans isomerase E, putative (634 nt)    | -14.1089 | 0.906126 | 0.367068 |
| PITG_05566 | Pi conserved hypothetical protein (479 nt)                     | -15.7744 | -1.06748 | 0.367196 |
| PITG_07312 | Pi TATA-box-binding protein (1101 nt)                          | -15.7967 | -1.02295 | 0.367196 |
| PITG_08072 | Pi conserved hypothetical protein (1437 nt)                    | -15.7882 | 1.083169 | 0.367196 |
| PITG_15072 | Pi serine protease family S33, putative (1449 nt)              | -16.1654 | -1.35692 | 0.367546 |
| PITG_22163 | Pi L-aminoadipate-semialdehyde dehydrogenase, putative (1      | -15.2337 | -1.21198 | 0.36759  |
| PITG_02732 | Pi conserved hypothetical protein (1556 nt)                    | -14.248  | -0.94761 | 0.367633 |
| PITG_08646 | Pi polysaccharide lyase, putative (599 nt)                     | -15.0083 | 1.082722 | 0.367665 |
| PITG_10858 | Pi glycine cleavage system H protein, mitochondrial precursc   | -10.7691 | 0.862385 | 0.367679 |
| PITG_16479 | Pi putative alpha mannosyltransferase (1764 nt)                | -15.7625 | -1.21691 | 0.367828 |
| PITG_20775 | Pi adenylate kinase, putative (1847 nt)                        | -13.9249 | 0.991536 | 0.367945 |
| PITG_01489 | Pi hypothetical protein (765 nt)                               | -17.1041 | -1.83888 | 0.367947 |
| PITG_14978 | Pi dolichyl-phosphate beta-glucosyltransferase, putative (82)  | -17.1041 | -1.83888 | 0.367947 |
| PITG_02716 | Pi conserved hypothetical protein (1906 nt)                    | -15.0531 | -1.09849 | 0.368247 |
| PITG_05195 | Pi conserved hypothetical protein (381 nt)                     | -16.376  | -1.31699 | 0.368331 |
| PITG_20823 | Pi conserved hypothetical protein (943 nt)                     | -16.376  | -1.31699 | 0.368331 |
| PITG_09704 | Pi dynein light chain Tctex-type, putative (467 nt)            | -12.7289 | 0.99958  | 0.368428 |
| PITG_19174 | Pi phosphoglucomutase, putative (1969 nt)                      | -15.7941 | -1.02839 | 0.368967 |
| PITG_22716 | Pi M96 mating-specific protein family (1613 nt)                | -15.8366 | -1.30591 | 0.368967 |
| PITG_08576 | Pi conserved hypothetical protein (925 nt)                     | -13.4789 | -0.9359  | 0.368984 |
| PITG_08546 | Pi conserved hypothetical protein (1458 nt)                    | -15.5014 | -1.14327 | 0.369028 |
| PITG_16899 | Pi conserved hypothetical protein (1404 nt)                    | -15.4527 | 1.135607 | 0.369028 |
| PITG_10118 | Pi conserved hypothetical protein (1278 nt)                    | -14.5495 | -0.97214 | 0.369069 |
| PITG_04971 | Pi conserved hypothetical protein (3105 nt)                    | -16.0661 | 1.036594 | 0.369208 |
| PITG_14562 | Pi conserved hypothetical protein (465 nt)                     | -14.8427 | 1.000385 | 0.369253 |
| PITG_09521 | Pi conserved hypothetical protein (539 nt)                     | -13.1911 | 0.995725 | 0.369288 |
| PITG_14442 | Pi hypothetical protein (156 nt)                               | -15.6395 | -1.16963 | 0.369408 |
| PITG_02498 | Pi iron sulfur cluster assembly protein 1, mitochondrial precu | -12.7092 | 0.883919 | 0.369411 |
| PITG_18378 | Pi conserved hypothetical protein (1120 nt)                    | -14.5777 | -1.12007 | 0.36947  |
| PITG_17849 | Pi hypothetical protein (388 nt)                               | -15.7349 | -1.27267 | 0.369594 |
| PITG_04227 | Pi conserved hypothetical protein (917 nt)                     | -14.3369 | -0.98263 | 0.369596 |
| PITG_14275 | Pi hypothetical protein (213 nt)                               | -12.284  | -1.10355 | 0.369623 |
| PITG_11088 | Pi conserved hypothetical protein (797 nt)                     | -15.9972 | -0.98483 | 0.369887 |
| PITG_13689 | Pi crinkler (CRN) family protein, Gypsy-disrupted, pseudogen   | -13.3949 | -1.11063 | 0.369963 |
| PITG_04509 | Pi conserved hypothetical protein (2121 nt)                    | -15.9448 | -1.28675 | 0.370215 |
| PITG_05939 | Pi carbonyl reductase, putative (744 nt)                       | -15.0089 | 0.957787 | 0.370222 |
| PITG_18235 | Pi transmembrane protein, putative (1125 nt)                   | -14.2974 | 0.91445  | 0.370381 |
| PITG_18011 | Pi conserved hypothetical protein (2051 nt)                    | -12.2292 | -0.89224 | 0.370404 |
| PITG_21877 | Pi conserved hypothetical protein (665 nt)                     | -16.1422 | -1.33085 | 0.370871 |
| PITG_19612 | Pi conserved hypothetical protein (900 nt)                     | -14.532  | 0.954669 | 0.371148 |
| PITG_14274 | Pi conserved hypothetical protein (1579 nt)                    | -12.4882 | -1.19719 | 0.371195 |
| PITG_06817 | Pi inactive ubiquitin carboxyl-terminal hydrolase, putative (2 | -15.6443 | -1.27227 | 0.371219 |

|            |                                                                |          |          |          |
|------------|----------------------------------------------------------------|----------|----------|----------|
| PITG_07946 | Pi conserved hypothetical protein (1648 nt)                    | -15.6443 | -1.27227 | 0.371219 |
| PITG_09852 | Pi conserved hypothetical protein (575 nt)                     | -15.7902 | -1.39688 | 0.371357 |
| PITG_07334 | Pi carbohydrate esterase, putative (969 nt)                    | -15.9928 | -0.99353 | 0.371601 |
| PITG_11530 | Pi conserved hypothetical protein (1474 nt)                    | -15.9587 | -1.12233 | 0.371601 |
| PITG_18007 | Pi CDP-alcohol phosphatidyltransferase, putative (1560 nt)     | -15.964  | -1.05111 | 0.371601 |
| PITG_19404 | Pi conserved hypothetical protein (402 nt)                     | -12.1259 | -0.99953 | 0.371668 |
| PITG_07314 | Pi conserved hypothetical protein (3093 nt)                    | -13.9848 | -0.91436 | 0.371681 |
| PITG_10967 | Pi ras GTPase-activating protein-binding protein, putative (21 | -13.4853 | 0.908395 | 0.3717   |
| PITG_22313 | Pi delta-1-pyrroline-5-carboxylate synthetase, putative (940   | -15.3434 | -1.24501 | 0.371749 |
| PITG_04376 | Pi conserved hypothetical protein (2040 nt)                    | -13.3319 | -1.04607 | 0.371873 |
| PITG_11626 | Pi proteasome subunit beta type-6, putative (727 nt)           | -12.1547 | 0.908179 | 0.372673 |
| PITG_03790 | Pi conserved hypothetical protein (1198 nt)                    | -15.4827 | -1.01095 | 0.372721 |
| PITG_00219 | Pi glucan 1,3-beta-glucosidase, putative (1188 nt)             | -11.8906 | -0.91755 | 0.37285  |
| PITG_11452 | Pi conserved hypothetical protein (1201 nt)                    | -11.9157 | 0.879025 | 0.372907 |
| PITG_13122 | Pi ATP-binding Cassette (ABC) Superfamily (4446 nt)            | -13.6394 | -1.21066 | 0.37293  |
| PITG_10038 | Pi SCP-like extracellular protein (1059 nt)                    | -15.8278 | 1.242235 | 0.37312  |
| PITG_03980 | Pi conserved hypothetical protein (1897 nt)                    | -15.9028 | 1.008599 | 0.373313 |
| PITG_11272 | Pi histone demethylase, putative (6395 nt)                     | -15.9517 | -1.1364  | 0.373313 |
| PITG_02793 | Pi conserved hypothetical protein (3525 nt)                    | -14.1335 | -0.97808 | 0.373503 |
| PITG_07545 | Pi Mitochondrial Carrier (MC) Family (1222 nt)                 | -15.1295 | -1.07273 | 0.373643 |
| PITG_08935 | Pi acyl-CoA synthetase short-chain family member, putative     | -14.6079 | -0.98904 | 0.373725 |
| PITG_07914 | Pi synaptobrevin-like protein (1084 nt)                        | -11.9746 | 0.863177 | 0.373984 |
| PITG_10147 | Pi cell division protease ftsH (2771 nt)                       | -14.235  | 0.969334 | 0.374044 |
| PITG_08683 | Pi conserved hypothetical protein (542 nt)                     | -15.1366 | 1.074925 | 0.374447 |
| PITG_17015 | Pi conserved hypothetical protein (1119 nt)                    | -15.149  | 1.123517 | 0.374447 |
| PITG_10029 | Pi hypothetical protein (400 nt)                               | -15.4569 | 0.966668 | 0.374563 |
| PITG_22995 | Pi protease inhibitor Epi5 (267 nt)                            | -13.665  | -0.9638  | 0.374754 |
| PITG_01387 | Pi conserved hypothetical protein (1858 nt)                    | -15.7567 | -1.23095 | 0.37488  |
| PITG_04041 | Pi conserved hypothetical protein (458 nt)                     | -12.467  | -0.90629 | 0.375771 |
| PITG_03741 | Pi conserved hypothetical protein (699 nt)                     | -13.73   | -1.01865 | 0.375952 |
| PITG_16429 | Pi conserved hypothetical protein (682 nt)                     | -11.9045 | 0.90042  | 0.376182 |
| PITG_17479 | Pi conserved hypothetical protein (1213 nt)                    | -15.1108 | 0.976697 | 0.376389 |
| PITG_04888 | Pi kinesin-like protein (2334 nt)                              | -15.9198 | 1.422008 | 0.376397 |
| PITG_19535 | Pi proteasome subunit beta, putative (696 nt)                  | -11.2152 | 0.853658 | 0.376561 |
| PITG_02642 | Pi pyruvate dehydrogenase [lipoamide] (1222 nt)                | -14.0982 | -0.93103 | 0.376624 |
| PITG_10355 | Pi conserved hypothetical protein (1203 nt)                    | -15.6921 | 1.142925 | 0.376639 |
| PITG_19928 | Pi conserved hypothetical protein (648 nt)                     | -15.9487 | -1.14271 | 0.376731 |
| PITG_08185 | Pi conserved hypothetical protein (511 nt)                     | -11.3656 | -0.88928 | 0.377346 |
| PITG_01681 | Pi conserved hypothetical protein (904 nt)                     | -15.2577 | -1.07392 | 0.37738  |
| PITG_05583 | Pi glutathione S-transferase, putative (2983 nt)               | -13.4299 | -0.91301 | 0.37741  |
| PITG_15615 | Pi short/branched chain specific acyl-CoA dehydrogenase, pu    | -11.3258 | -0.86404 | 0.377619 |
| PITG_02782 | Pi conserved hypothetical protein (978 nt)                     | -17.1243 | -1.90811 | 0.377695 |
| PITG_06355 | Pi conserved hypothetical protein (2869 nt)                    | -17.1243 | -1.90811 | 0.377695 |
| PITG_11674 | Pi conserved hypothetical protein (3607 nt)                    | -17.1243 | -1.90811 | 0.377695 |
| PITG_19822 | Pi conserved hypothetical protein (973 nt)                     | -17.1243 | -1.90811 | 0.377695 |
| PITG_02769 | Pi conserved hypothetical protein (995 nt)                     | -13.7769 | -0.89736 | 0.378085 |
| PITG_10146 | Pi 40S ribosomal protein S2 (1222 nt)                          | -10.4384 | 0.90816  | 0.378232 |



|            |                                                              |          |          |          |
|------------|--------------------------------------------------------------|----------|----------|----------|
| PITG_02160 | Pi hypothetical protein (466 nt)                             | -17.3629 | -1.54506 | 0.378302 |
| PITG_04774 | Pi conserved hypothetical protein (1414 nt)                  | -17.3629 | -1.54506 | 0.378302 |
| PITG_06517 | Pi conserved hypothetical protein (1863 nt)                  | -17.3629 | -1.54506 | 0.378302 |
| PITG_06714 | Pi conserved hypothetical protein (3310 nt)                  | -17.3629 | -1.54506 | 0.378302 |
| PITG_08299 | Pi conserved hypothetical protein (2213 nt)                  | -17.3629 | -1.54506 | 0.378302 |
| PITG_21437 | Pi conserved hypothetical protein (1202 nt)                  | -17.3629 | -1.54506 | 0.378302 |
| PITG_08672 | Pi conserved hypothetical protein (1201 nt)                  | -15.6165 | 1.123816 | 0.378437 |
| PITG_13406 | Pi conserved hypothetical protein (1294 nt)                  | -15.6439 | -1.27318 | 0.378437 |
| PITG_14515 | Pi conserved hypothetical protein (2532 nt)                  | -13.683  | 1.174    | 0.378717 |
| PITG_11650 | Pi conserved hypothetical protein (915 nt)                   | -15.3382 | -1.1038  | 0.37874  |
| PITG_16766 | Pi hypothetical protein (1349 nt)                            | -12.1834 | 0.871435 | 0.378895 |
| PITG_15654 | Pi conserved hypothetical protein (794 nt)                   | -10.5372 | 0.853598 | 0.379188 |
| PITG_13300 | Pi RNA-binding protein NOB1 (1601 nt)                        | -16.1396 | 1.033419 | 0.379215 |
| PITG_17109 | Pi CCAAT-binding transcription factor, putative (781 nt)     | -15.1465 | -1.16101 | 0.379386 |
| PITG_13575 | Pi ATP-binding Cassette (ABC) Superfamily (4077 nt)          | -14.5832 | 1.011101 | 0.379793 |
| PITG_04560 | Pi conserved hypothetical protein (1001 nt)                  | -14.0646 | 0.937889 | 0.379893 |
| PITG_01627 | Pi alcohol dehydrogenase, putative (1640 nt)                 | -13.7004 | -0.91078 | 0.380103 |
| PITG_08619 | Pi hypothetical protein (1839 nt)                            | -15.9853 | -1.00818 | 0.380141 |
| PITG_13382 | Pi conserved hypothetical protein (1221 nt)                  | -11.879  | -0.85811 | 0.380207 |
| PITG_20825 | Pi conserved hypothetical protein (516 nt)                   | -15.6496 | -1.09042 | 0.380235 |
| PITG_15857 | Pi conserved hypothetical protein (654 nt)                   | -14.1099 | 1.02619  | 0.380298 |
| PITG_18440 | Pi conserved hypothetical protein (778 nt)                   | -14.0281 | -0.93567 | 0.380537 |
| PITG_01496 | Pi glycoside hydrolase, putative (2531 nt)                   | -13.094  | 0.950938 | 0.380845 |
| PITG_00069 | Pi conserved hypothetical protein (1759 nt)                  | -16.1896 | -1.16111 | 0.380853 |
| PITG_00315 | Pi transmembrane protein, putative (4152 nt)                 | -16.164  | 1.276667 | 0.380853 |
| PITG_18359 | Pi ubiquitin-specific protease, putative (2486 nt)           | -14.3281 | -1.00163 | 0.381031 |
| PITG_20611 | Pi nucleoporin-like protein (1199 nt)                        | -12.7924 | -0.8831  | 0.381085 |
| PITG_18385 | Pi conserved hypothetical protein (597 nt)                   | -13.5924 | -0.98586 | 0.38119  |
| PITG_07567 | Pi brefeldin A-inhibited guanine nucleotide-exchange proteir | -14.968  | 1.013244 | 0.381227 |
| PITG_12699 | Pi serine/threonine protein kinase (3258 nt)                 | -15.7906 | -1.03696 | 0.381297 |
| PITG_01852 | Pi dynein heavy chain (12653 nt)                             | -15.9437 | 1.090151 | 0.381842 |
| PITG_08545 | Pi Crinkler (CRN) family protein, pseudogene (1885 nt)       | -15.1774 | -1.12332 | 0.381988 |
| PITG_05190 | Pi conserved hypothetical protein (546 nt)                   | -15.6329 | -1.03997 | 0.38203  |
| PITG_02320 | Pi conserved hypothetical protein (1297 nt)                  | -13.3862 | 0.997792 | 0.382079 |
| PITG_10316 | Pi RNA exonuclease 4 (1140 nt)                               | -14.3521 | -0.92621 | 0.382089 |
| PITG_04481 | Pi conserved hypothetical protein (943 nt)                   | -13.5446 | 0.971321 | 0.382485 |
| PITG_02440 | Pi conserved hypothetical protein (1523 nt)                  | -16.2057 | -1.12885 | 0.382489 |
| PITG_20498 | Pi conserved hypothetical protein (1405 nt)                  | -14.2384 | -0.94183 | 0.382497 |
| PITG_02199 | Pi conserved hypothetical protein (2991 nt)                  | -16.7205 | -1.59106 | 0.382582 |
| PITG_04002 | Pi conserved hypothetical protein (3380 nt)                  | -13.8719 | -0.89546 | 0.383315 |
| PITG_18204 | Pi conserved hypothetical protein (3115 nt)                  | -14.8237 | 1.22415  | 0.383418 |
| PITG_18433 | Pi conserved hypothetical protein (1884 nt)                  | -15.9686 | -1.10359 | 0.383542 |
| PITG_19163 | Pi ATP-dependent RNA helicase, putative (1642 nt)            | -15.9317 | 0.890257 | 0.383542 |
| PITG_11767 | Pi phosphoacetylglucosamine mutase, putative (1967 nt)       | -12.8677 | -0.93908 | 0.383716 |
| PITG_00955 | Pi conserved hypothetical protein (2098 nt)                  | -13.1412 | -0.87032 | 0.38377  |
| PITG_12930 | Pi porphobilinogen deaminase (1313 nt)                       | -16.6962 | -1.54111 | 0.38409  |
| PITG_14270 | Pi GPI-anchored leucine-rich lipoprotein (1437 nt)           | -16.6841 | -1.66409 | 0.38409  |

|            |                                                                |          |          |          |
|------------|----------------------------------------------------------------|----------|----------|----------|
| PITG_17985 | Pi conserved hypothetical protein (858 nt)                     | -16.6962 | -1.54111 | 0.38409  |
| PITG_08810 | Pi conserved hypothetical protein (765 nt)                     | -12.3488 | 0.849424 | 0.384207 |
| PITG_11254 | Pi exocyst complex component, putative (3439 nt)               | -14.9455 | 0.985276 | 0.384952 |
| PITG_20717 | Pi conserved hypothetical protein (4711 nt)                    | -14.3009 | -1.0008  | 0.385159 |
| PITG_09818 | Pi conserved hypothetical protein (3367 nt)                    | -15.9924 | -1.11875 | 0.38524  |
| PITG_08388 | Pi conserved hypothetical protein (2881 nt)                    | -15.4854 | 1.112612 | 0.385551 |
| PITG_00762 | Pi conserved hypothetical protein (1108 nt)                    | -16.1851 | -1.17031 | 0.385757 |
| PITG_06040 | Pi conserved hypothetical protein (2080 nt)                    | -16.2172 | -1.17404 | 0.385757 |
| PITG_12871 | Pi conserved hypothetical protein (2577 nt)                    | -16.1194 | 1.075916 | 0.385757 |
| PITG_18461 | Pi conserved hypothetical protein (2208 nt)                    | -16.1851 | -1.17031 | 0.385757 |
| PITG_19153 | Pi conserved hypothetical protein (8551 nt)                    | -16.1851 | -1.17031 | 0.385757 |
| PITG_00967 | Pi conserved hypothetical protein (896 nt)                     | -14.1237 | 0.936295 | 0.385782 |
| PITG_18106 | Pi vacuolar protein sorting-associated protein, putative (144. | -16.3956 | -1.35904 | 0.385838 |
| PITG_18396 | Pi conserved hypothetical protein (2174 nt)                    | -14.516  | -0.97751 | 0.385882 |
| PITG_13762 | Pi flavodoxin-like protein (800 nt)                            | -15.2558 | -0.98899 | 0.386906 |
| PITG_09228 | Pi conserved hypothetical protein (1116 nt)                    | -15.9821 | -1.0143  | 0.386935 |
| PITG_13174 | Pi translation initiation factor IF-2, putative (2742 nt)      | -15.8979 | 0.960464 | 0.386935 |
| PITG_15777 | Pi protein kinase (924 nt)                                     | -15.9499 | 0.988554 | 0.386935 |
| PITG_09817 | Pi ribose-phosphate pyrophosphokinase (1247 nt)                | -14.9793 | 0.96687  | 0.386936 |
| PITG_18564 | Pi conserved hypothetical protein (487 nt)                     | -14.4007 | -1.09668 | 0.387008 |
| PITG_01260 | Pi S-phase kinase-associated protein 1A (999 nt)               | -11.5355 | 0.885932 | 0.387243 |
| PITG_04458 | Pi protein kinase (1568 nt)                                    | -15.9679 | -1.37957 | 0.387335 |
| PITG_02528 | Pi elongator complex protein, putative (2055 nt)               | -16.1366 | 1.221225 | 0.387388 |
| PITG_17893 | Pi conserved hypothetical protein (2310 nt)                    | -16.1762 | -1.25634 | 0.387388 |
| PITG_12997 | Pi Major Facilitator Superfamily (MFS) (1509 nt)               | -16.364  | -1.42201 | 0.387428 |
| PITG_22626 | Pi conserved hypothetical protein (808 nt)                     | -16.364  | -1.42201 | 0.387428 |
| PITG_18655 | Pi conserved hypothetical protein (1374 nt)                    | -14.5269 | 0.880642 | 0.387567 |
| PITG_08516 | Pi alcohol dehydrogenase, putative (1689 nt)                   | -15.0721 | -1.0174  | 0.387794 |
| PITG_00051 | Pi DNA-directed RNA polymerase III subunit RPC6, putative (    | -15.4991 | 0.987233 | 0.387821 |
| PITG_12677 | Pi conserved hypothetical protein (2021 nt)                    | -15.5568 | -1.08387 | 0.387821 |
| PITG_18656 | Pi conserved hypothetical protein (3802 nt)                    | -15.5568 | -1.08387 | 0.387821 |
| PITG_02113 | Pi hypothetical protein (3721 nt)                              | -14.6835 | 0.986399 | 0.38792  |
| PITG_00571 | Pi bifunctional purine biosynthesis protein PURH, putative (1  | -14.8624 | 0.948882 | 0.387999 |
| PITG_18364 | Pi inositol oxygenase (885 nt)                                 | -14.1601 | 0.926169 | 0.388432 |
| PITG_13019 | Pi conserved hypothetical protein (1151 nt)                    | -17.144  | -1.74845 | 0.388897 |
| PITG_09272 | Pi hypothetical protein (472 nt)                               | -15.6644 | -1.23219 | 0.389183 |
| PITG_03492 | Pi exportin-2-like protein (3093 nt)                           | -15.4756 | -1.08707 | 0.389191 |
| PITG_06486 | Pi hypothetical protein (821 nt)                               | -15.3471 | -1.1855  | 0.389861 |
| PITG_05368 | Pi conserved hypothetical protein (1023 nt)                    | -14.8773 | -0.91342 | 0.389987 |
| PITG_18070 | Pi phospholipase, putative (3302 nt)                           | -15.7898 | -1.03964 | 0.390031 |
| PITG_01064 | Pi conserved hypothetical protein (955 nt)                     | -11.3311 | -0.94356 | 0.390039 |
| PITG_01287 | Pi conserved hypothetical protein (726 nt)                     | -12.7983 | 0.885991 | 0.390203 |
| PITG_05975 | Pi conserved hypothetical protein (1753 nt)                    | -14.5866 | -0.99945 | 0.390271 |
| PITG_21187 | Pi myoferlin-like protein (6294 nt)                            | -14.3266 | 0.919474 | 0.390301 |
| PITG_02989 | Pi conserved hypothetical protein (1691 nt)                    | -17.0974 | -1.84084 | 0.390302 |
| PITG_10310 | Pi myb-like DNA-binding protein, putative (699 nt)             | -17.0974 | -1.84084 | 0.390302 |
| PITG_11498 | Pi conserved hypothetical protein (888 nt)                     | -17.0974 | -1.84084 | 0.390302 |

|            |                                                                                      |          |          |          |
|------------|--------------------------------------------------------------------------------------|----------|----------|----------|
| PITG_19432 | Pi Amino Acid/Auxin Permease (AAP) Family (1455 nt)                                  | -16.9187 | -1.29629 | 0.390302 |
| PITG_19841 | Pi conserved hypothetical protein (911 nt)                                           | -17.0974 | -1.84084 | 0.390302 |
| PITG_00237 | Pi 2OG-Fe(II) oxygenase superfamily protein (1345 nt)                                | -15.9829 | -1.01248 | 0.39032  |
| PITG_07707 | Pi conserved hypothetical protein (1962 nt)                                          | -15.9554 | -1.06752 | 0.39032  |
| PITG_06615 | Pi H - or Na -translocating F-type, V-type and A-type ATPase                         | -12.7674 | 0.896276 | 0.390364 |
| PITG_17895 | Pi conserved hypothetical protein (2092 nt)                                          | -16.4456 | -1.26154 | 0.390379 |
| PITG_12159 | Pi Annexin (Annexin) Family (1310 nt)                                                | -15.3928 | -1.14    | 0.390512 |
| PITG_15476 | Pi malate dehydrogenase (1245 nt)                                                    | -11.0746 | -0.88158 | 0.390638 |
| PITG_19595 | Pi hypothetical protein (412 nt)                                                     | -10.5609 | 0.834822 | 0.39067  |
| PITG_16972 | Pi conserved hypothetical protein (2086 nt)                                          | -16.125  | -1.29237 | 0.390757 |
| PITG_03449 | Pi conserved hypothetical protein (372 nt)                                           | -13.6941 | -0.89898 | 0.39104  |
| PITG_01222 | Pi Drug/Metabolite Transporter (DMT) Superfamily (1416 nt)                           | -14.336  | -1.09677 | 0.391217 |
| PITG_01982 | Pi conserved hypothetical protein (2435 nt)                                          | -12.8611 | 0.85165  | 0.391543 |
| PITG_04698 | Pi arginine biosynthesis bifunctional protein argJ, putative (1                      | -12.9228 | -0.90995 | 0.391769 |
| PITG_01389 | Pi proteasome subunit beta type-5, putative (867 nt)                                 | -12.1903 | 0.864633 | 0.39179  |
| PITG_08119 | Pi oxidoreductase htatip2 (1434 nt)                                                  | -12.2385 | -0.83778 | 0.391846 |
| PITG_07988 | Pi sulfatase-like protein (2735 nt)                                                  | -16.4718 | -1.28391 | 0.391924 |
| PITG_03630 | Pi conserved hypothetical protein (1908 nt)                                          | -15.9139 | 1.157387 | 0.39201  |
| PITG_15806 | Pi conserved hypothetical protein (1643 nt)                                          | -15.945  | -1.15163 | 0.39201  |
| PITG_17840 | Pi protein kinase, putative (1829 nt)                                                | -15.9636 | -1.17816 | 0.39201  |
| PITG_19127 | Pi conserved hypothetical protein (1513 nt)                                          | -16.1727 | -1.26438 | 0.392272 |
| PITG_11369 | Pi conserved hypothetical protein (2107 nt)                                          | -15.3975 | -1.08255 | 0.392372 |
| PITG_21723 | Pi ATP-binding Cassette (ABC) Superfamily (3223 nt)                                  | -15.9309 | -1.1147  | 0.392449 |
| PITG_08330 | Pi conserved hypothetical protein (463 nt)                                           | -13.2826 | 0.87392  | 0.392505 |
| PITG_14851 | Pi hypothetical protein (400 nt)                                                     | -15.0472 | 0.8975   | 0.392532 |
| PITG_20382 | Pi conserved hypothetical protein (492 nt)                                           | -13.1753 | -0.96526 | 0.392833 |
| PITG_01970 | Pi enoyl-[acyl-carrier-protein] reductase [NADH], putative (1.                       | -14.9857 | -0.96336 | 0.392855 |
| PITG_00592 | Pi hypothetical protein (698 nt)                                                     | -11.3929 | -0.83309 | 0.392928 |
| PITG_19551 | Pi conserved hypothetical protein (1351 nt)                                          | -14.3032 | 0.895713 | 0.39322  |
| PITG_02039 | Pi EF-1 guanine nucleotide exchange domain-containing prot                           | -11.4617 | 0.825904 | 0.393227 |
| PITG_21595 | Pi conserved hypothetical protein (1718 nt)                                          | -16.4645 | -1.29882 | 0.393468 |
| PITG_07702 | Pi UDP-N-acetylglucosamine-peptide N-acetylglucosaminyltr                            | -14.8279 | -1.14285 | 0.3935   |
| PITG_01523 | Pi Zinc (Zn <sup>2+</sup> )-Iron (Fe <sup>2+</sup> ) Permease (ZIP) Family (1029 nt) | -15.8402 | -1.23345 | 0.393508 |
| PITG_07922 | Pi hypothetical protein (478 nt)                                                     | -16.4245 | 1.62005  | 0.393787 |
| PITG_02055 | Pi conserved hypothetical protein (1756 nt)                                          | -16.213  | -1.11488 | 0.393897 |
| PITG_04628 | Pi conserved hypothetical protein (1167 nt)                                          | -16.1126 | 1.092176 | 0.393897 |
| PITG_04552 | Pi conserved hypothetical protein (991 nt)                                           | -14.6983 | -0.90552 | 0.39393  |
| PITG_00723 | Pi conserved hypothetical protein (465 nt)                                           | -15.416  | -1.09429 | 0.394228 |
| PITG_13167 | Pi conserved hypothetical protein (1874 nt)                                          | -15.3925 | -1.14129 | 0.394228 |
| PITG_15134 | Pi conserved hypothetical protein (865 nt)                                           | -12.7586 | 0.865499 | 0.394287 |
| PITG_16098 | Pi D-isomer specific 2-hydroxyacid dehydrogenase, putative                           | -14.6142 | 0.879617 | 0.394527 |
| PITG_13168 | Pi conserved hypothetical protein (12990 nt)                                         | -15.0318 | -1.09465 | 0.394607 |
| PITG_00921 | Pi phospholipase D, Pi-PLD-like-1 (1823 nt)                                          | -11.5001 | -0.99531 | 0.395167 |
| PITG_19405 | Pi conserved hypothetical protein (712 nt)                                           | -15.8174 | -1.27874 | 0.395243 |
| PITG_07903 | Pi 26S proteasome non-ATPase regulatory subunit, putative                            | -13.3695 | 0.904901 | 0.395381 |
| PITG_09992 | Pi conserved hypothetical protein (1949 nt)                                          | -13.9162 | -0.96971 | 0.395514 |
| PITG_09089 | Pi exportin-6-like protein (3714 nt)                                                 | -16.1958 | -1.07963 | 0.39552  |

|            |                                                               |          |          |          |
|------------|---------------------------------------------------------------|----------|----------|----------|
| PITG_09547 | Pi conserved hypothetical protein (920 nt)                    | -10.3832 | 0.835128 | 0.395553 |
| PITG_22394 | Pi conserved hypothetical protein (1648 nt)                   | -15.9236 | -1.19835 | 0.395852 |
| PITG_16353 | Pi conserved hypothetical protein (954 nt)                    | -14.2172 | 0.883087 | 0.396009 |
| PITG_15358 | Pi calreticulin precursor (1415 nt)                           | -10.0702 | -0.82089 | 0.396088 |
| PITG_14363 | Pi conserved hypothetical protein (389 nt)                    | -13.7566 | 0.963098 | 0.396367 |
| PITG_00793 | Pi hypothetical protein (3031 nt)                             | -14.4066 | -1.01622 | 0.396583 |
| PITG_09721 | Pi conserved hypothetical protein (1031 nt)                   | -12.465  | -0.84319 | 0.396643 |
| PITG_21196 | Pi hypothetical protein (397 nt)                              | -14.9723 | 0.994218 | 0.396774 |
| PITG_03115 | Pi conserved hypothetical protein (1210 nt)                   | -13.8988 | -0.92423 | 0.397009 |
| PITG_07211 | Pi conserved hypothetical protein (1127 nt)                   | -15.1665 | -0.95394 | 0.397011 |
| PITG_03942 | Pi plectin-like protein (4600 nt)                             | -15.3847 | -1.11091 | 0.397213 |
| PITG_01063 | Pi conserved hypothetical protein (4588 nt)                   | -15.2244 | 1.14454  | 0.397518 |
| PITG_06426 | Pi conserved hypothetical protein (1035 nt)                   | -15.7109 | -1.1388  | 0.397533 |
| PITG_14637 | Pi conserved hypothetical protein (2003 nt)                   | -14.0711 | -0.89472 | 0.398211 |
| PITG_10972 | Pi thioredoxin-like protein (1089 nt)                         | -11.2433 | 0.823759 | 0.398285 |
| PITG_14179 | Pi glutamine synthetase (841 nt)                              | -10.9333 | 0.939518 | 0.398521 |
| PITG_05254 | Pi conserved hypothetical protein (765 nt)                    | -14.9417 | 0.872474 | 0.398726 |
| PITG_02564 | Pi exosome complex exonuclease RRP6-like protein (4806 nt)    | -15.167  | -0.95297 | 0.398932 |
| PITG_14000 | Pi conserved hypothetical protein (1313 nt)                   | -14.1776 | 0.890471 | 0.399191 |
| PITG_00980 | Pi nuclear cap-binding protein subunit, putative (2845 nt)    | -14.6949 | 0.885635 | 0.399248 |
| PITG_13991 | Pi nicotinate phosphoribosyltransferase, putative (1834 nt)   | -15.0656 | -1.11452 | 0.399307 |
| PITG_02439 | Pi conserved hypothetical protein (2130 nt)                   | -16.469  | -1.21413 | 0.399634 |
| PITG_18057 | Pi conserved hypothetical protein (1127 nt)                   | -16.469  | -1.21413 | 0.399634 |
| PITG_06388 | Pi conserved hypothetical protein (857 nt)                    | -13.4316 | 0.866135 | 0.400248 |
| PITG_02822 | Pi conserved hypothetical protein (772 nt)                    | -15.0609 | 0.973237 | 0.400296 |
| PITG_17492 | Pi hypothetical protein (2466 nt)                             | -16.2003 | -1.21103 | 0.40038  |
| PITG_13039 | Pi conserved hypothetical protein (1839 nt)                   | -15.9626 | -1.18215 | 0.400428 |
| PITG_16037 | Pi conserved hypothetical protein (393 nt)                    | -15.925  | 1.141382 | 0.400428 |
| PITG_22874 | Pi Crinkler (CRN) family protein, pseudogene (2555 nt)        | -16.5877 | -1.15317 | 0.4007   |
| PITG_00065 | Pi conserved hypothetical protein (2385 nt)                   | -15.6503 | 1.096273 | 0.401093 |
| PITG_21178 | Pi conserved hypothetical protein (2751 nt)                   | -15.6424 | 1.112044 | 0.401093 |
| PITG_18321 | Pi conserved hypothetical protein (873 nt)                    | -15.7172 | 1.191296 | 0.401106 |
| PITG_17690 | Pi conserved hypothetical protein (2438 nt)                   | -14.379  | -0.87102 | 0.401115 |
| PITG_00209 | Pi Major Facilitator Superfamily (MFS) (1943 nt)              | -14.0142 | -0.87421 | 0.401143 |
| PITG_11492 | Pi conserved hypothetical protein (795 nt)                    | -16.4329 | -1.28635 | 0.401172 |
| PITG_20731 | Pi conserved hypothetical protein (4509 nt)                   | -16.4329 | -1.28635 | 0.401172 |
| PITG_06111 | Pi conserved hypothetical protein (409 nt)                    | -13.128  | 0.852312 | 0.401175 |
| PITG_07955 | Pi xaa-Pro dipeptidase, metalloprotease family M24B, putative | -13.2641 | 0.821898 | 0.401252 |
| PITG_12744 | Pi caltractin-like protein (891 nt)                           | -13.3121 | 0.937854 | 0.401451 |
| PITG_03778 | Pi Poly(A) polymerase, putative (2233 nt)                     | -14.7877 | -0.93952 | 0.401586 |
| PITG_09800 | Pi conserved hypothetical protein (1120 nt)                   | -15.4588 | -1.1179  | 0.401838 |
| PITG_16798 | Pi phospholipase D; Pi-TM-PLD (2713 nt)                       | -14.1252 | -0.9003  | 0.401985 |
| PITG_08095 | Pi conserved hypothetical protein (1345 nt)                   | -16.1707 | -1.2706  | 0.401997 |
| PITG_02722 | Pi conserved hypothetical protein (769 nt)                    | -14.0614 | 0.884697 | 0.402489 |
| PITG_22946 | Pi acyl-protein thioesterase, putative (903 nt)               | -12.7908 | 0.823724 | 0.402563 |
| PITG_05377 | Pi methylenetetrahydrofolate reductase, putative (1776 nt)    | -14.968  | 0.971201 | 0.402614 |
| PITG_14994 | Pi conserved hypothetical protein (821 nt)                    | -15.1788 | 1.014306 | 0.402758 |

|            |                                                            |          |          |          |
|------------|------------------------------------------------------------|----------|----------|----------|
| PITG_19234 | Pi choline/Carnitine O-acyltransferase, putative (2593 nt) | -14.0606 | -0.93593 | 0.40286  |
| PITG_10140 | Pi Mitochondrial Carrier (MC) Family (1097 nt)             | -15.0993 | 0.978444 | 0.403121 |
| PITG_01504 | Pi protein phosphatase PP2A regulatory subunit B (2342 nt) | -13.7784 | 0.886174 | 0.403231 |
| PITG_16332 | Pi conserved hypothetical protein (585 nt)                 | -14.7725 | -0.97039 | 0.403548 |
| PITG_02858 | Pi L-allo-threonine aldolase (1256 nt)                     | -16.2474 | 1.359737 | 0.403613 |
| PITG_20800 | Pi conserved hypothetical protein (1264 nt)                | -13.9298 | 0.873906 | 0.403979 |
| PITG_03435 | Pi conserved hypothetical protein (1046 nt)                | -14.4338 | -0.99636 | 0.404056 |
| PITG_01041 | Pi 60S acidic ribosomal protein P2, putative (558 nt)      | -9.73318 | 0.826683 | 0.404163 |
| PITG_07311 | Pi DEAD/DEAH box RNA helicase, putative (2446 nt)          | -16.8333 | -1.3609  | 0.404226 |
| PITG_03892 | Pi conserved hypothetical protein (2067 nt)                | -16.4528 | -1.3243  | 0.404246 |
| PITG_06642 | Pi conserved hypothetical protein (1129 nt)                | -16.4528 | -1.3243  | 0.404246 |
| PITG_09672 | Pi cytidyltransferase (1352 nt)                            | -16.4544 | -1.32111 | 0.404246 |
| PITG_13719 | Pi DNA excision repair protein ERCC-1 (946 nt)             | -16.4528 | -1.3243  | 0.404246 |
| PITG_21531 | Pi carbohydrate-binding protein, putative (1688 nt)        | -15.9186 | -1.28002 | 0.404341 |
| PITG_03601 | Pi inosine triphosphate pyrophosphatase (576 nt)           | -15.1849 | -0.91761 | 0.404663 |
| PITG_04487 | Pi conserved hypothetical protein (596 nt)                 | -11.7707 | 0.79962  | 0.404807 |
| PITG_11305 | Pi hypothetical protein (755 nt)                           | -15.1739 | 1.110763 | 0.404897 |
| PITG_01159 | Pi conserved hypothetical protein (720 nt)                 | -15.0299 | 1.015694 | 0.405006 |
| PITG_00382 | Pi hypothetical protein (756 nt)                           | -16.2001 | -1.28428 | 0.405227 |
| PITG_20521 | Pi hypothetical protein (351 nt)                           | -15.3456 | 0.891968 | 0.405283 |
| PITG_19846 | Pi conserved hypothetical protein (2183 nt)                | -14.5282 | -0.92462 | 0.405563 |
| PITG_00231 | Pi eyes absent family protein (2157 nt)                    | -16.7978 | -1.43212 | 0.405656 |
| PITG_03400 | Pi crinkler (CRN) family protein, putative (1950 nt)       | -16.8212 | -1.38525 | 0.405656 |
| PITG_05869 | Pi conserved hypothetical protein (2379 nt)                | -16.7763 | -1.47522 | 0.405656 |
| PITG_06551 | Pi conserved hypothetical protein (1907 nt)                | -16.8212 | -1.38525 | 0.405656 |
| PITG_06755 | Pi acyl-CoA dehydrogenase/oxidase (2491 nt)                | -16.7763 | -1.47522 | 0.405656 |
| PITG_07889 | Pi conserved hypothetical protein (1200 nt)                | -16.7763 | -1.47522 | 0.405656 |
| PITG_06558 | Pi conserved hypothetical protein (1380 nt)                | -14.2971 | 0.907225 | 0.405659 |
| PITG_01641 | Pi serine protease family S54, putative (858 nt)           | -15.6937 | -1.11722 | 0.406406 |
| PITG_09728 | Pi exosome complex exonuclease RRP4 (1584 nt)              | -14.5905 | 0.954378 | 0.406452 |
| PITG_19950 | Pi conserved hypothetical protein (435 nt)                 | -14.0737 | -0.91265 | 0.406736 |
| PITG_02430 | Pi conserved hypothetical protein (1829 nt)                | -16.1967 | -1.29176 | 0.406839 |
| PITG_03180 | Pi dynein heavy chain (13683 nt)                           | -16.1071 | 1.201437 | 0.406839 |
| PITG_11976 | Pi UDP-3-O-[3-hydroxymyristoyl] N-acetylglucosamine deace  | -16.2019 | -1.20941 | 0.406839 |
| PITG_10050 | Pi alpha-N-acetylglucosaminidase (NAGLU), putative (2349 n | -15.5679 | 1.02821  | 0.406882 |
| PITG_01236 | Pi conserved hypothetical protein (927 nt)                 | -16.755  | -1.43213 | 0.407086 |
| PITG_06501 | Pi conserved hypothetical protein (882 nt)                 | -16.755  | -1.43213 | 0.407086 |
| PITG_14730 | Pi nucleolar protein, putative (2642 nt)                   | -16.7999 | -1.3422  | 0.407086 |
| PITG_00971 | Pi hypothetical protein (249 nt)                           | -15.9452 | -1.15257 | 0.407127 |
| PITG_07192 | Pi conserved hypothetical protein (4665 nt)                | -15.9452 | -1.15257 | 0.407127 |
| PITG_13836 | Pi cleavage induced predicted protein (2174 nt)            | -16.414  | -1.2449  | 0.407316 |
| PITG_17166 | Pi conserved hypothetical protein (1020 nt)                | -14.6772 | -1.0285  | 0.40758  |
| PITG_12593 | Pi conserved hypothetical protein (766 nt)                 | -13.5236 | -0.85419 | 0.40778  |
| PITG_00495 | Pi fat-free family protein (2988 nt)                       | -15.5401 | -1.06566 | 0.407815 |
| PITG_12327 | Pi conserved hypothetical protein (1781 nt)                | -12.845  | 0.836752 | 0.407857 |
| PITG_08709 | Pi conserved hypothetical protein (782 nt)                 | -13.2065 | 0.841119 | 0.408022 |
| PITG_04718 | Pi protein pelota (1472 nt)                                | -15.2937 | -1.00192 | 0.408199 |

|            |                                                               |          |          |          |
|------------|---------------------------------------------------------------|----------|----------|----------|
| PITG_17919 | Pi P-type ATPase (P-ATPase) Superfamily (1797 nt)             | -13.9526 | -1.00757 | 0.408233 |
| PITG_06205 | Pi ATP-binding Cassette (ABC) Superfamily (6175 nt)           | -14.9263 | 0.883798 | 0.408407 |
| PITG_12177 | Pi hypothetical protein (501 nt)                              | -14.8025 | 0.937663 | 0.408443 |
| PITG_06508 | Pi conserved hypothetical protein (4042 nt)                   | -16.1178 | 1.181952 | 0.40845  |
| PITG_21364 | Pi conserved hypothetical protein (1826 nt)                   | -16.1178 | 1.181952 | 0.40845  |
| PITG_10856 | Pi conserved hypothetical protein (1031 nt)                   | -16.1802 | -1.18106 | 0.40845  |
| PITG_06827 | Pi DEAD/DEAH box RNA helicase, putative (2046 nt)             | -14.9002 | -0.95978 | 0.408465 |
| PITG_22961 | Pi conserved hypothetical protein (657 nt)                    | -16.8243 | -1.29306 | 0.408515 |
| PITG_00048 | Pi conserved hypothetical protein (1230 nt)                   | -15.8493 | -0.91777 | 0.40877  |
| PITG_13362 | Pi microtubule-associated protein, putative (7408 nt)         | -15.9046 | 1.125531 | 0.408797 |
| PITG_03477 | Pi 60S ribosomal protein L7a-2 (1307 nt)                      | -9.52575 | 0.81997  | 0.409341 |
| PITG_21596 | Pi actin-related protein 2/3 complex subunit, putative (1816  | -13.4877 | -0.83816 | 0.409558 |
| PITG_02185 | Pi conserved hypothetical protein (1272 nt)                   | -15.621  | 0.972954 | 0.409932 |
| PITG_04916 | Pi conserved hypothetical protein (2175 nt)                   | -16.8106 | -1.40709 | 0.409944 |
| PITG_17249 | Pi Chloride Channel (ClC) Family (2160 nt)                    | -16.8106 | -1.40709 | 0.409944 |
| PITG_17660 | Pi Amino Acid-Polyamine-Organocation (APC) Family (1586 r     | -16.8106 | -1.40709 | 0.409944 |
| PITG_11233 | Pi conserved hypothetical protein (543 nt)                    | -14.6746 | -0.9629  | 0.409957 |
| PITG_12169 | Pi polycomb-like protein (4401 nt)                            | -16.1131 | 0.937203 | 0.41006  |
| PITG_17426 | Pi conserved hypothetical protein (2090 nt)                   | -16.2117 | -1.26294 | 0.41006  |
| PITG_21518 | Pi conserved hypothetical protein (752 nt)                    | -16.2117 | -1.26294 | 0.41006  |
| PITG_10514 | Pi kinesin-like protein (1702 nt)                             | -14.8539 | -1.05193 | 0.410356 |
| PITG_06880 | Pi mitogen-activated protein kinase kinase kinase, putative ( | -15.8895 | 0.941656 | 0.410466 |
| PITG_18859 | Pi cGMP-dependent 3',5'-cGMP phosphodiesterase, putative      | -15.8895 | 0.941656 | 0.410466 |
| PITG_00207 | Pi conserved hypothetical protein (1220 nt)                   | -15.7987 | 1.000136 | 0.410488 |
| PITG_00687 | Pi serine protease family S09X, putative (1631 nt)            | -15.846  | -0.9246  | 0.410488 |
| PITG_02576 | Pi protein phosphatase 2C, putative (1267 nt)                 | -15.823  | 1.013666 | 0.410488 |
| PITG_08439 | Pi conserved hypothetical protein (821 nt)                    | -15.79   | 1.01761  | 0.410488 |
| PITG_10481 | Pi conserved hypothetical protein (2053 nt)                   | -15.898  | -1.12231 | 0.410488 |
| PITG_19224 | Pi conserved hypothetical protein (668 nt)                    | -15.7987 | 1.000136 | 0.410488 |
| PITG_08235 | Pi conserved hypothetical protein (1784 nt)                   | -14.5689 | 0.880894 | 0.410513 |
| PITG_00279 | Pi ubiquitin carboxyl-terminal hydrolase, putative (4051 nt)  | -12.7216 | -0.82018 | 0.410898 |
| PITG_06731 | Pi H -translocating Pyrophosphatase (H -PPase) Family (2404   | -12.8938 | -0.84705 | 0.411056 |
| PITG_01514 | Pi protoporphyrinogen oxidase, putative (3680 nt)             | -14.9824 | 0.92774  | 0.411295 |
| PITG_10891 | Pi inositol transporter, putative (1586 nt)                   | -16.789  | -1.36308 | 0.411372 |
| PITG_03323 | Pi integrator complex subunit, putative (2087 nt)             | -16.7673 | -1.4937  | 0.411372 |
| PITG_08745 | Pi conserved hypothetical protein (558 nt)                    | -13.6897 | -0.82932 | 0.411853 |
| PITG_15141 | Pi conserved hypothetical protein (2175 nt)                   | -16.4643 | -1.22295 | 0.411913 |
| PITG_03409 | Pi serine protease family S10, putative (1713 nt)             | -15.2967 | -0.95162 | 0.411939 |
| PITG_07778 | Pi conserved hypothetical protein (2697 nt)                   | -14.0999 | -0.97123 | 0.412296 |
| PITG_05539 | Pi carbon-nitrogen hydrolase, putative (1105 nt)              | -13.3511 | 0.85702  | 0.412381 |
| PITG_13771 | Pi conserved hypothetical protein (1194 nt)                   | -14.8895 | 1.015694 | 0.412388 |
| PITG_00852 | Pi conserved hypothetical protein (734 nt)                    | -15.1514 | -0.98647 | 0.412469 |
| PITG_05506 | Pi conserved hypothetical protein (747 nt)                    | -14.5719 | 0.88094  | 0.412533 |
| PITG_07543 | Pi hypothetical protein (728 nt)                              | -14.3232 | -0.84916 | 0.412567 |
| PITG_13255 | Pi conserved hypothetical protein (3044 nt)                   | -16.7457 | -1.44944 | 0.4128   |
| PITG_04627 | Pi myosin-like protein (1315 nt)                              | -14.6938 | 0.877806 | 0.413185 |
| PITG_13048 | Pi secreted RxLR effector peptide, putative (756 nt)          | -14.9898 | -0.85406 | 0.413241 |

|            |                                                               |          |          |          |
|------------|---------------------------------------------------------------|----------|----------|----------|
| PITG_12285 | Pi polypyrimidine tract-binding protein, putative (2360 nt)   | -16.1296 | 1.163811 | 0.413275 |
| PITG_20795 | Pi ribosomal protein (659 nt)                                 | -8.63457 | 0.831556 | 0.413331 |
| PITG_00031 | Pi conserved hypothetical protein (882 nt)                    | -16.429  | -1.29346 | 0.413444 |
| PITG_18649 | Pi SUMO protease, putative (666 nt)                           | -16.429  | -1.29346 | 0.413444 |
| PITG_02433 | Pi conserved hypothetical protein (1312 nt)                   | -15.065  | -1.00326 | 0.413687 |
| PITG_05281 | Pi hypothetical protein (841 nt)                              | -15.2889 | 1.081914 | 0.413801 |
| PITG_03311 | Pi regulator of chromosome condensation (RCC1)-like protei    | -15.8823 | -1.21425 | 0.413915 |
| PITG_03876 | Pi U3 small nucleolar RNA-interacting protein, putative (1416 | -15.8483 | 1.099159 | 0.413915 |
| PITG_07281 | Pi conserved hypothetical protein (2508 nt)                   | -15.8431 | -0.93087 | 0.413915 |
| PITG_07829 | Pi exosome complex exonuclease RRP43, putative (1147 nt)      | -14.4511 | 0.889215 | 0.41408  |
| PITG_08326 | Pi DNA polymerase alpha catalytic subunit, putative (4927 nt) | -15.1692 | 0.970726 | 0.414115 |
| PITG_06351 | Pi U2 snRNP component IST3 (813 nt)                           | -14.8904 | 0.892953 | 0.414341 |
| PITG_17747 | Pi H - or Na -translocating F-type, V-type and A-type ATPase  | -12.4742 | 0.80319  | 0.414502 |
| PITG_00014 | Pi 26S proteasome non-ATPase regulatory subunit 13, putati    | -12.614  | 0.797508 | 0.414526 |
| PITG_04596 | Pi hypothetical protein (3211 nt)                             | -14.5873 | -0.92776 | 0.414547 |
| PITG_19526 | Pi secreted RxLR effector peptide, putative (378 nt)          | -16.1702 | -1.27459 | 0.41488  |
| PITG_01683 | Pi conserved hypothetical protein (3889 nt)                   | -15.4376 | -1.00145 | 0.414952 |
| PITG_03033 | Pi conserved hypothetical protein (519 nt)                    | -11.0137 | 0.797502 | 0.415024 |
| PITG_17897 | Pi protein kinase, putative (2910 nt)                         | -14.9757 | -0.88239 | 0.415182 |
| PITG_20548 | Pi conserved hypothetical protein (1859 nt)                   | -15.671  | -1.16171 | 0.415195 |
| PITG_20216 | Pi hypothetical protein (533 nt)                              | -14.5518 | -1.0693  | 0.415447 |
| PITG_00215 | Pi calmodulin-binding transcription activator, putative (3470 | -15.3031 | -1.02892 | 0.415659 |
| PITG_12259 | Pi lysosomal Pro-X carboxypeptidase, putative (1629 nt)       | -15.2852 | -0.93037 | 0.415659 |
| PITG_10383 | Pi conserved hypothetical protein (1023 nt)                   | -14.1268 | -0.87363 | 0.4157   |
| PITG_20160 | Pi conserved hypothetical protein (2291 nt)                   | -15.7538 | 1.022686 | 0.41589  |
| PITG_03801 | Pi conserved hypothetical protein (1398 nt)                   | -14.4617 | -0.8776  | 0.416131 |
| PITG_13751 | Pi conserved hypothetical protein (920 nt)                    | -14.4409 | 0.835025 | 0.416131 |
| PITG_05125 | Pi hypothetical protein (632 nt)                              | -11.295  | -1.00537 | 0.416282 |
| PITG_19123 | Pi conserved hypothetical protein (1327 nt)                   | -16.3936 | 1.366542 | 0.416501 |
| PITG_08711 | Pi hsp90-like protein (1250 nt)                               | -12.6956 | -0.84252 | 0.416649 |
| PITG_17093 | Pi 60S ribosomal protein L24, putative (1177 nt)              | -9.14821 | 0.773079 | 0.41676  |
| PITG_06589 | Pi conserved hypothetical protein (1167 nt)                   | -14.3839 | 0.874021 | 0.417184 |
| PITG_15496 | Pi acyl-CoA synthetase, putative (1889 nt)                    | -14.3752 | 0.820903 | 0.417184 |
| PITG_07173 | Pi 40S ribosomal protein S15 (870 nt)                         | -9.04464 | 0.772659 | 0.417276 |
| PITG_19247 | Pi atlastin-like protein (2044 nt)                            | -14.4376 | -0.8965  | 0.41735  |
| PITG_02750 | Pi NAD kinase, putative (1884 nt)                             | -15.0453 | -0.96227 | 0.417468 |
| PITG_19005 | Pi conserved hypothetical protein (2137 nt)                   | -14.5244 | 0.910646 | 0.417683 |
| PITG_20087 | Pi conserved hypothetical protein (729 nt)                    | -14.5358 | -0.90959 | 0.417683 |
| PITG_03789 | Pi conserved hypothetical protein (7113 nt)                   | -16.4451 | -1.17972 | 0.418029 |
| PITG_21573 | Pi conserved hypothetical protein (441 nt)                    | -16.4451 | -1.17972 | 0.418029 |
| PITG_20174 | Pi carbohydrate-binding protein, putative (1564 nt)           | -15.281  | -1.11772 | 0.418529 |
| PITG_18207 | Pi conserved hypothetical protein (3419 nt)                   | -15.388  | 0.8246   | 0.418613 |
| PITG_12694 | Pi protein transport protein SEC13 (1324 nt)                  | -13.221  | -0.82209 | 0.418748 |
| PITG_00160 | Pi conserved hypothetical protein (8298 nt)                   | -15.9848 | 0.918284 | 0.41878  |
| PITG_03322 | Pi prolyl-tRNA synthetase, putative (1936 nt)                 | -16.043  | -0.95372 | 0.41878  |
| PITG_07916 | Pi protein kinase, putative (1779 nt)                         | -16.023  | -0.9333  | 0.41878  |
| PITG_17404 | Pi guanine nucleotide-binding protein (2549 nt)               | -15.0833 | 0.94562  | 0.41902  |

|            |                                                                                |          |          |          |
|------------|--------------------------------------------------------------------------------|----------|----------|----------|
| PITG_13283 | Pi ATP-binding Cassette (ABC) superfamily (897 nt)                             | -15.8373 | -1.00021 | 0.419033 |
| PITG_11728 | Pi eukaryotic translation initiation factor 2-alpha kinase, putative (1740 nt) | -15.3079 | -0.97467 | 0.41936  |
| PITG_02600 | Pi hypothetical protein (549 nt)                                               | -12.9465 | -0.81783 | 0.419405 |
| PITG_15609 | Pi conserved hypothetical protein (544 nt)                                     | -13.4541 | 0.865322 | 0.419685 |
| PITG_14440 | Pi conserved hypothetical protein (651 nt)                                     | -13.8607 | 0.820477 | 0.419785 |
| PITG_20173 | Pi NADH ubiquinone oxidoreductase subunit, putative (1740 nt)                  | -11.4795 | 0.780601 | 0.419909 |
| PITG_21941 | Pi alpha-1,2 glucosyltransferase alg-10 (995 nt)                               | -15.5342 | -1.13079 | 0.420311 |
| PITG_10004 | Pi selenoprotein W-related family, putative (695 nt)                           | -16.016  | 1.019644 | 0.420429 |
| PITG_13846 | Pi WD repeat protein 39 (1095 nt)                                              | -16.0081 | -1.0237  | 0.420429 |
| PITG_03505 | Pi conserved hypothetical protein (3356 nt)                                    | -15.4355 | -1.00602 | 0.420436 |
| PITG_06001 | Pi ATP-binding Cassette (ABC) superfamily (1444 nt)                            | -15.4509 | -1.02315 | 0.420436 |
| PITG_08599 | Pi thimet oligopeptidase (2500 nt)                                             | -14.6486 | -0.97977 | 0.42045  |
| PITG_17952 | Pi Major Facilitator Superfamily (MFS) (2148 nt)                               | -13.8963 | -0.84656 | 0.420453 |
| PITG_12973 | Pi conserved hypothetical protein (2173 nt)                                    | -13.1609 | 0.820938 | 0.4205   |
| PITG_03098 | Pi carbamoyl-phosphate synthase [ammonia], putative (4536 nt)                  | -13.5475 | 0.942948 | 0.420698 |
| PITG_18776 | Pi cytochrome c1, mitochondrial precursor (1368 nt)                            | -11.1783 | 0.770573 | 0.420787 |
| PITG_10595 | Pi delta-1-pyrroline-5-carboxylate reductase, putative (1564 nt)               | -14.8322 | 0.905269 | 0.421066 |
| PITG_11890 | Pi putative GPI-anchored serine-threonine rich hypothetical protein (1776 nt)  | -14.4142 | 0.882658 | 0.421354 |
| PITG_01368 | Pi transmembrane protein, putative (1776 nt)                                   | -16.7607 | -1.50807 | 0.421358 |
| PITG_08724 | Pi conserved hypothetical protein (792 nt)                                     | -16.7802 | -1.37838 | 0.421358 |
| PITG_10420 | Pi conserved hypothetical protein (6036 nt)                                    | -16.7607 | -1.50807 | 0.421358 |
| PITG_20109 | Pi Voltage-gated Ion Channel (VIC) Superfamily (4534 nt)                       | -16.7802 | -1.37838 | 0.421358 |
| PITG_17779 | Pi conserved hypothetical protein (1524 nt)                                    | -14.5137 | 0.836447 | 0.421749 |
| PITG_03491 | Pi myosin-like protein (2468 nt)                                               | -16.0336 | -0.9727  | 0.422075 |
| PITG_10250 | Pi conserved hypothetical protein (2117 nt)                                    | -16.0336 | -0.9727  | 0.422075 |
| PITG_11186 | Pi conserved hypothetical protein (2283 nt)                                    | -16.0259 | 1.000369 | 0.422075 |
| PITG_13440 | Pi conserved hypothetical protein (1376 nt)                                    | -16.0336 | -0.9727  | 0.422075 |
| PITG_13276 | Pi conserved hypothetical protein (1167 nt)                                    | -17.2046 | -1.7492  | 0.422223 |
| PITG_02791 | Pi conserved hypothetical protein (817 nt)                                     | -15.4488 | -1.02775 | 0.422255 |
| PITG_05732 | Pi hypothetical protein (619 nt)                                               | -15.4305 | -1.06427 | 0.422255 |
| PITG_00501 | Pi conserved hypothetical protein (2340 nt)                                    | -15.8459 | -0.98399 | 0.422429 |
| PITG_02192 | Pi glutathione peroxidase 2 (1037 nt)                                          | -14.1801 | -0.81389 | 0.422611 |
| PITG_05446 | Pi pyridoxal-dependent decarboxylase, putative (3752 nt)                       | -16.7383 | -1.46196 | 0.422783 |
| PITG_08663 | Pi plectin-like protein (3035 nt)                                              | -14.9684 | 0.941472 | 0.422884 |
| PITG_02047 | Pi conserved hypothetical protein (1553 nt)                                    | -14.7122 | 0.947725 | 0.422962 |
| PITG_08048 | Pi conserved hypothetical protein (1083 nt)                                    | -14.8179 | 0.834624 | 0.423038 |
| PITG_19044 | Pi conserved hypothetical protein (1583 nt)                                    | -15.2789 | -0.98766 | 0.423043 |
| PITG_01285 | Pi transmembrane protein, putative (1246 nt)                                   | -12.989  | -0.78682 | 0.423131 |
| PITG_06343 | Pi N-terminal acetyltransferase complex ARD1 subunit (1225 nt)                 | -13.8532 | 0.827314 | 0.423853 |
| PITG_05818 | Pi conserved hypothetical protein (2265 nt)                                    | -14.6072 | -0.82621 | 0.423935 |
| PITG_00505 | Pi ubiquitin-conjugating enzyme E2, putative (444 nt)                          | -9.57849 | -0.7768  | 0.424007 |
| PITG_07237 | Pi cell division cycle protein 20 (1675 nt)                                    | -15.89   | -1.13566 | 0.424123 |
| PITG_15630 | Pi conserved hypothetical protein (558 nt)                                     | -13.4428 | -0.82388 | 0.424211 |
| PITG_02493 | Pi eukaryotic translation initiation factor 1b, putative (881 nt)              | -10.6149 | -0.82636 | 0.424651 |
| PITG_06262 | Pi U3 small nucleolar ribonucleoprotein protein IMP3 (555 nt)                  | -15.0876 | 0.976829 | 0.424737 |
| PITG_02783 | Pi multiple inositol polyphosphate phosphatase 1, putative (1467 nt)           | -17.2438 | -1.67055 | 0.424789 |
| PITG_05993 | Pi conserved hypothetical protein (1467 nt)                                    | -17.2438 | -1.67055 | 0.424789 |



|            |                                                              |          |          |          |
|------------|--------------------------------------------------------------|----------|----------|----------|
| PITG_06614 | Pi conserved hypothetical protein (1416 nt)                  | -17.2438 | -1.67055 | 0.424789 |
| PITG_15570 | Pi hypothetical protein (1060 nt)                            | -17.1895 | -1.77914 | 0.424789 |
| PITG_15847 | Pi conserved hypothetical protein (2463 nt)                  | -17.2438 | -1.67055 | 0.424789 |
| PITG_23286 | Pi crinkler (CRN) domain, pseudogene (2170 nt)               | -17.1895 | -1.77914 | 0.424789 |
| PITG_17753 | Pi NADP-dependent malic enzyme (1617 nt)                     | -14.3108 | 0.815543 | 0.424804 |
| PITG_20679 | Pi conserved hypothetical protein (498 nt)                   | -12.0442 | 0.97191  | 0.425154 |
| PITG_09782 | Pi palmitoyltransferase, putative (2295 nt)                  | -15.5652 | -1.01632 | 0.425161 |
| PITG_14390 | Pi conserved hypothetical protein (799 nt)                   | -15.3276 | 0.937949 | 0.425198 |
| PITG_14014 | Pi ATP-binding Cassette (ABC) Superfamily (4015 nt)          | -14.9465 | 0.947447 | 0.425517 |
| PITG_04059 | Pi conserved hypothetical protein (1231 nt)                  | -16.6804 | -0.9516  | 0.425631 |
| PITG_11907 | Pi diphthine synthase (933 nt)                               | -15.6885 | -1.00985 | 0.425632 |
| PITG_18756 | Pi conserved hypothetical protein (919 nt)                   | -15.6707 | -1.16123 | 0.425632 |
| PITG_17393 | Pi conserved hypothetical protein (564 nt)                   | -14.8262 | -1.06418 | 0.425794 |
| PITG_18928 | Pi conserved hypothetical protein (926 nt)                   | -12.8433 | 0.819657 | 0.426133 |
| PITG_19282 | Pi conserved hypothetical protein (926 nt)                   | -12.0721 | 0.792107 | 0.42622  |
| PITG_11653 | Pi conserved hypothetical protein (4177 nt)                  | -14.5413 | 0.935493 | 0.426236 |
| PITG_03743 | Pi conserved hypothetical protein (1129 nt)                  | -14.9565 | 1.137176 | 0.426279 |
| PITG_10263 | Pi 60S ribosomal protein L37a, putative (825 nt)             | -8.12735 | 0.767393 | 0.426315 |
| PITG_00402 | Pi conserved hypothetical protein (1268 nt)                  | -13.966  | 0.85869  | 0.426496 |
| PITG_10796 | Pi conserved hypothetical protein (1721 nt)                  | -14.5075 | -0.96504 | 0.426596 |
| PITG_04564 | Pi conserved hypothetical protein (4350 nt)                  | -15.0002 | -0.93369 | 0.426701 |
| PITG_01679 | Pi conserved hypothetical protein (1438 nt)                  | -14.8245 | -0.91333 | 0.426961 |
| PITG_21012 | Pi conserved hypothetical protein (931 nt)                   | -13.7875 | -0.80546 | 0.427109 |
| PITG_09224 | Pi secreted RxLR effector peptide, putative (420 nt)         | -14.0674 | 0.817309 | 0.428036 |
| PITG_17012 | Pi conserved hypothetical protein (8696 nt)                  | -13.1221 | 0.799925 | 0.428154 |
| PITG_09423 | Pi conserved hypothetical protein (1862 nt)                  | -15.0844 | -0.92232 | 0.42852  |
| PITG_02202 | Pi conserved hypothetical protein (1111 nt)                  | -16.1034 | -1.19717 | 0.428631 |
| PITG_04902 | Pi conserved hypothetical protein (1710 nt)                  | -16.001  | -1.03873 | 0.428631 |
| PITG_06698 | Pi ATP-binding Cassette (ABC) Superfamily (2863 nt)          | -16.001  | -1.03873 | 0.428631 |
| PITG_13176 | Pi diaminopimelate decarboxylase, putative (1249 nt)         | -15.9405 | 1.073591 | 0.4287   |
| PITG_01614 | Pi carbon catabolite repressor protein, putative (4923 nt)   | -14.8333 | -0.93062 | 0.428913 |
| PITG_09874 | Pi conserved hypothetical protein (1292 nt)                  | -14.8139 | 0.931589 | 0.428913 |
| PITG_03011 | Pi F-box protein, putative (4337 nt)                         | -15.8396 | -0.93989 | 0.429186 |
| PITG_01860 | Pi transmembrane protein, putative (2746 nt)                 | -15.8793 | -1.21951 | 0.429186 |
| PITG_10539 | Pi conserved hypothetical protein (650 nt)                   | -15.0158 | -0.96847 | 0.429278 |
| PITG_00218 | Pi ATP-binding Cassette (ABC) Superfamily (14365 nt)         | -13.7062 | -0.90021 | 0.429558 |
| PITG_21988 | Pi conserved hypothetical protein (1305 nt)                  | -15.4588 | -1.13465 | 0.429761 |
| PITG_15571 | Pi Mitochondrial Carrier (MC) Family (1806 nt)               | -15.2181 | -0.85074 | 0.429775 |
| PITG_00302 | Pi phenylalanyl-tRNA synthetase beta chain (2017 nt)         | -14.2447 | 0.826152 | 0.429878 |
| PITG_05598 | Pi conserved hypothetical protein (884 nt)                   | -14.7454 | -0.81009 | 0.429942 |
| PITG_09599 | Pi 2OG-Fe(II) oxygenase superfamily protein (1014 nt)        | -14.6122 | 0.830456 | 0.429951 |
| PITG_02428 | Pi 15-hydroxyprostaglandin dehydrogenase [NAD+], putative    | -13.862  | -0.85926 | 0.430211 |
| PITG_19045 | Pi conserved hypothetical protein (949 nt)                   | -15.1074 | -1.03096 | 0.430403 |
| PITG_08011 | Pi pre-mRNA-splicing factor RSE1 (3594 nt)                   | -15.5835 | -0.97946 | 0.43049  |
| PITG_09640 | Pi ATP phosphoribosyltransferase (974 nt)                    | -15.0056 | -0.88346 | 0.430496 |
| PITG_03420 | Pi 50S ribosomal protein L13 (423 nt)                        | -13.0646 | 0.789374 | 0.43054  |
| PITG_12877 | Pi DNA-directed RNA polymerase I, II, and III subunit RPABC2 | -13.1578 | 0.785977 | 0.430668 |

|            |                                                                  |          |          |          |
|------------|------------------------------------------------------------------|----------|----------|----------|
| PITG_21146 | Pi conserved hypothetical protein (1271 nt)                      | -14.8335 | -0.93026 | 0.430858 |
| PITG_04931 | Pi conserved hypothetical protein (1322 nt)                      | -14.1    | 0.86942  | 0.431099 |
| PITG_12266 | Pi inositol-3,4-bisphosphate 4-phosphatase, putative (4696 r     | -14.2285 | -0.88524 | 0.43111  |
| PITG_10311 | Pi myb-like DNA-binding domain, putative (2590 nt)               | -11.9802 | 0.821208 | 0.431168 |
| PITG_02620 | Pi conserved hypothetical protein (1545 nt)                      | -16.0053 | 0.877868 | 0.431894 |
| PITG_02943 | Pi palmitoyltransferase, putative (1033 nt)                      | -14.6047 | -0.86199 | 0.431942 |
| PITG_22646 | Pi conserved hypothetical protein (498 nt)                       | -14.6009 | 0.834377 | 0.431942 |
| PITG_17617 | Pi TFIIH basal transcription factor complex helicase XPB subu    | -14.4165 | -0.91149 | 0.432218 |
| PITG_03711 | Pi serine/threonine-protein phosphatase 2A regulatory subu       | -13.0986 | -0.83101 | 0.432259 |
| PITG_08038 | Pi sporangia induced hypothetical protein (973 nt)               | -15.0981 | 0.973366 | 0.43228  |
| PITG_01006 | Pi protein kinase, putative (1464 nt)                            | -14.9904 | -0.85438 | 0.432385 |
| PITG_21389 | Pi conserved hypothetical protein (717 nt)                       | -13.9543 | 0.824737 | 0.432409 |
| PITG_00204 | Pi kinesin heavy chain, putative (3202 nt)                       | -17.2291 | -1.69953 | 0.432494 |
| PITG_02489 | Pi conserved hypothetical protein (1975 nt)                      | -17.2291 | -1.69953 | 0.432494 |
| PITG_02800 | Pi conserved hypothetical protein (3207 nt)                      | -17.2291 | -1.69953 | 0.432494 |
| PITG_04889 | Pi conserved hypothetical protein (4476 nt)                      | -17.2291 | -1.69953 | 0.432494 |
| PITG_07226 | Pi conserved hypothetical protein (4561 nt)                      | -17.2291 | -1.69953 | 0.432494 |
| PITG_08770 | Pi conserved hypothetical protein (1674 nt)                      | -17.2291 | -1.69953 | 0.432494 |
| PITG_11188 | Pi conserved hypothetical protein (1313 nt)                      | -17.2291 | -1.69953 | 0.432494 |
| PITG_14757 | Pi conserved hypothetical protein (3006 nt)                      | -17.2291 | -1.69953 | 0.432494 |
| PITG_20265 | Pi conserved hypothetical protein (3215 nt)                      | -17.2291 | -1.69953 | 0.432494 |
| PITG_07278 | Pi protein kinase, putative (1325 nt)                            | -12.6882 | 0.773834 | 0.432535 |
| PITG_22398 | Pi conserved hypothetical protein (596 nt)                       | -13.9988 | -0.88252 | 0.432543 |
| PITG_08083 | Pi conserved hypothetical protein (1055 nt)                      | -14.2229 | -0.87353 | 0.433134 |
| PITG_09512 | Pi prohibitin-2 (1326 nt)                                        | -11.438  | 0.754581 | 0.433286 |
| PITG_13097 | Pi conserved hypothetical protein (543 nt)                       | -13.5003 | 0.969124 | 0.433415 |
| PITG_03422 | Pi conserved hypothetical protein (587 nt)                       | -14.1582 | -0.86459 | 0.433601 |
| PITG_03975 | Pi conserved hypothetical protein (1161 nt)                      | -16.2125 | 1.179254 | 0.433608 |
| PITG_11111 | Pi leucyl-tRNA synthetase, cytoplasmic, putative (3405 nt)       | -14.6315 | 0.838005 | 0.43374  |
| PITG_03614 | Pi signal recognition particle receptor subunit alpha (2122 nt   | -14.5034 | 0.851389 | 0.433771 |
| PITG_13172 | Pi GPI mannosyltransferase, putative (1365 nt)                   | -17.1775 | -1.80272 | 0.433779 |
| PITG_14579 | Pi conserved hypothetical protein (3101 nt)                      | -17.1775 | -1.80272 | 0.433779 |
| PITG_13259 | Pi conserved hypothetical protein (1083 nt)                      | -15.2642 | 0.898382 | 0.433982 |
| PITG_06780 | Pi conserved hypothetical protein (1753 nt)                      | -14.2407 | -0.86158 | 0.433995 |
| PITG_06912 | Pi Amino Acid/Auxin Permease (AAP) Family (1493 nt)              | -15.5495 | -0.99593 | 0.434021 |
| PITG_13273 | Pi conserved hypothetical protein (3811 nt)                      | -15.3537 | 0.992442 | 0.434109 |
| PITG_15248 | Pi catalase (1694 nt)                                            | -12.3248 | 0.788873 | 0.434138 |
| PITG_19314 | Pi replication factor C subunit 3 (1287 nt)                      | -13.6413 | -0.80921 | 0.434408 |
| PITG_15652 | Pi H/ACA ribonucleoprotein complex subunit, putative (1546       | -14.0383 | 0.819461 | 0.434842 |
| PITG_22406 | Pi conserved hypothetical protein (957 nt)                       | -11.2424 | 0.787176 | 0.434967 |
| PITG_13839 | Pi conserved hypothetical protein (511 nt)                       | -13.3961 | -0.84865 | 0.435145 |
| PITG_07952 | Pi conserved hypothetical protein (1282 nt)                      | -16.6728 | -0.97143 | 0.435589 |
| PITG_12226 | Pi Phosphatidylinositol kinase (PIK-L2) (7980 nt)                | -16.1631 | -1.13957 | 0.435622 |
| PITG_00397 | Pi eukaryotic translation initiation factor 3 subunit C, putativ | -14.648  | 0.890461 | 0.43568  |
| PITG_07302 | Pi histone acetyltransferase, putative (7584 nt)                 | -15.5822 | -0.98181 | 0.435781 |
| PITG_18632 | Pi ATPase (1497 nt)                                              | -15.574  | -1.05012 | 0.435781 |
| PITG_11293 | Pi alcohol dehydrogenase, putative (1080 nt)                     | -13.1856 | 0.787139 | 0.435805 |

|            |                                                               |          |          |          |
|------------|---------------------------------------------------------------|----------|----------|----------|
| PITG_18973 | Pi conserved hypothetical protein (3057 nt)                   | -15.1076 | -1.03043 | 0.436019 |
| PITG_08031 | Pi conserved hypothetical protein (7775 nt)                   | -15.1806 | -1.04662 | 0.436316 |
| PITG_18414 | Pi phosphoglucomutase (3392 nt)                               | -11.5568 | 0.889279 | 0.436385 |
| PITG_15749 | Pi conserved hypothetical protein (1287 nt)                   | -15.2594 | 1.06581  | 0.436619 |
| PITG_18076 | Pi phosphoglycerate mutase family (1280 nt)                   | -15.9644 | 1.055143 | 0.436768 |
| PITG_19749 | Pi conserved hypothetical protein (1337 nt)                   | -15.9987 | -1.04407 | 0.436768 |
| PITG_07054 | Pi conserved hypothetical protein (837 nt)                    | -16.6283 | -1.06114 | 0.43701  |
| PITG_15996 | Pi hypothetical protein (656 nt)                              | -14.1747 | 0.834518 | 0.437059 |
| PITG_05847 | Pi hypothetical protein (2153 nt)                             | -14.0274 | 0.910558 | 0.437542 |
| PITG_04538 | Pi splicing factor 3 subunit, putative (2042 nt)              | -14.6443 | -0.9199  | 0.437826 |
| PITG_21887 | Pi Major Facilitator Superfamily (MFS) (1489 nt)              | -14.5923 | 0.835568 | 0.437872 |
| PITG_17698 | Pi conserved hypothetical protein (1168 nt)                   | -14.6109 | -0.95588 | 0.438205 |
| PITG_12158 | Pi Annexin (Annexin) Family (1140 nt)                         | -11.6218 | 0.864211 | 0.438226 |
| PITG_13829 | Pi conserved hypothetical protein (809 nt)                    | -16.0921 | -1.21659 | 0.438387 |
| PITG_00590 | Pi conserved hypothetical protein (3207 nt)                   | -15.7441 | -1.01726 | 0.439146 |
| PITG_12573 | Pi conserved hypothetical protein (746 nt)                    | -15.6791 | 0.947705 | 0.439146 |
| PITG_04156 | Pi conserved hypothetical protein (1998 nt)                   | -16.4508 | -1.33484 | 0.439317 |
| PITG_13042 | Pi conserved hypothetical protein (5964 nt)                   | -15.6926 | -1.11611 | 0.439373 |
| PITG_19004 | Pi conserved hypothetical protein (1214 nt)                   | -14.3057 | -0.85903 | 0.439583 |
| PITG_01156 | Pi conserved hypothetical protein (1452 nt)                   | -16.2688 | -0.93509 | 0.439833 |
| PITG_09447 | Pi conserved hypothetical protein (4266 nt)                   | -16.251  | -1.10643 | 0.439833 |
| PITG_09840 | Pi conserved hypothetical protein (345 nt)                    | -16.2653 | 1.201018 | 0.439833 |
| PITG_12486 | Pi conserved hypothetical protein (1010 nt)                   | -9.28508 | -0.73541 | 0.44027  |
| PITG_14612 | Pi NADH dehydrogenase iron-sulfur protein 8, mitochondrial    | -10.9606 | 0.788296 | 0.440356 |
| PITG_02486 | Pi conserved hypothetical protein (1050 nt)                   | -14.4645 | 0.784831 | 0.440378 |
| PITG_06636 | Pi conserved hypothetical protein (606 nt)                    | -13.9513 | 0.832697 | 0.44076  |
| PITG_06771 | Pi 40S ribosomal protein S24, putative (944 nt)               | -9.35799 | 0.749349 | 0.441028 |
| PITG_10957 | Pi hypothetical protein (2152 nt)                             | -12.7541 | -0.77412 | 0.441248 |
| PITG_05940 | Pi spindle assembly protein, putative (2132 nt)               | -16.7997 | -1.43235 | 0.441272 |
| PITG_08759 | Pi conserved hypothetical protein (1095 nt)                   | -16.7997 | -1.43235 | 0.441272 |
| PITG_03649 | Pi conserved hypothetical protein (1999 nt)                   | -17.204  | -1.64061 | 0.441495 |
| PITG_10622 | Pi lipase, putative (689 nt)                                  | -17.0287 | -1.06485 | 0.441495 |
| PITG_00167 | Pi cAMP-specific 3',5'-cyclic phosphodiesterase, putative (18 | -13.8759 | -0.79668 | 0.441947 |
| PITG_06304 | Pi conserved hypothetical protein (2001 nt)                   | -16.4081 | -1.24686 | 0.442345 |
| PITG_20706 | Pi conserved hypothetical protein (1552 nt)                   | -16.4081 | -1.24686 | 0.442345 |
| PITG_00942 | Pi conserved hypothetical protein (2332 nt)                   | -14.7977 | 0.852302 | 0.442397 |
| PITG_13102 | Pi fimbrin-like protein (2322 nt)                             | -14.794  | -0.90538 | 0.442524 |
| PITG_09985 | Pi pro-apoptotic serine protease nma111-like protein (2862    | -15.7127 | 0.932292 | 0.442572 |
| PITG_10264 | Pi D-3-phosphoglycerate dehydrogenase (1493 nt)               | -15.7417 | -1.02169 | 0.442572 |
| PITG_00299 | Pi alpha-1,3-mannosyltransferase, putative (4859 nt)          | -16.7757 | -1.38282 | 0.442692 |
| PITG_01444 | Pi Argonaute5 (AGO5) (2496 nt)                                | -16.7757 | -1.38282 | 0.442692 |
| PITG_10265 | Pi conserved hypothetical protein (2322 nt)                   | -16.7589 | -1.51398 | 0.442692 |
| PITG_16721 | Pi conserved hypothetical protein (988 nt)                    | -16.7757 | -1.38282 | 0.442692 |
| PITG_22125 | Pi conserved hypothetical protein (519 nt)                    | -16.7757 | -1.38282 | 0.442692 |
| PITG_14385 | Pi conserved hypothetical protein (4127 nt)                   | -15.1753 | 0.957493 | 0.442722 |
| PITG_05292 | Pi hypothetical protein (861 nt)                              | -12.4601 | -0.77324 | 0.443225 |
| PITG_12182 | Pi conserved hypothetical protein (1267 nt)                   | -12.8971 | -0.80638 | 0.443574 |

|            |                                                                         |          |          |          |
|------------|-------------------------------------------------------------------------|----------|----------|----------|
| PITG_10184 | Pi conserved hypothetical protein (1195 nt)                             | -14.0935 | 0.881506 | 0.443641 |
| PITG_11265 | Pi conserved hypothetical protein (829 nt)                              | -15.3037 | -0.89356 | 0.443686 |
| PITG_16555 | Pi GTP-binding protein, putative (1846 nt)                              | -15.3333 | -0.87845 | 0.443686 |
| PITG_14575 | Pi U6 snRNA-associated Sm-like protein, putative (321 nt)               | -12.2493 | 0.763789 | 0.443912 |
| PITG_10899 | Pi protein kinase, putative (1146 nt)                                   | -14.2625 | -0.86804 | 0.443929 |
| PITG_02698 | Pi conserved hypothetical protein (4793 nt)                             | -16.7348 | -1.46424 | 0.444111 |
| PITG_17827 | Pi conserved hypothetical protein (794 nt)                              | -16.7348 | -1.46424 | 0.444111 |
| PITG_17312 | Pi SUMO-activating enzyme (SAE), putative (1132 nt)                     | -14.4084 | 0.840136 | 0.444234 |
| PITG_00702 | Pi conserved hypothetical protein (700 nt)                              | -11.3799 | 0.74347  | 0.444279 |
| PITG_06981 | Pi DEAD/DEAH box RNA helicase, putative (2637 nt)                       | -15.6789 | 0.899369 | 0.444279 |
| PITG_18080 | Pi phosphoglycerate mutase (789 nt)                                     | -15.6847 | 0.841929 | 0.444279 |
| PITG_15071 | Pi conserved hypothetical protein (1382 nt)                             | -14.8173 | -0.89246 | 0.444298 |
| PITG_01081 | Pi Drug/Metabolite Transporter (DMT) Superfamily (1319 nt)              | -16.2068 | 1.083259 | 0.444478 |
| PITG_19212 | Pi tubulin/FtsZ family protein, putative (1644 nt)                      | -16.2682 | -1.07303 | 0.444478 |
| PITG_07283 | Pi threonine dehydratase catabolic, putative (1560 nt)                  | -14.6173 | -0.93836 | 0.444931 |
| PITG_02670 | Pi conserved hypothetical protein (869 nt)                              | -13.4685 | 0.797926 | 0.445089 |
| PITG_07637 | Pi transcription initiation factor TFIID subunit, putative (468 nt)     | -14.1776 | -0.79937 | 0.445139 |
| PITG_09837 | Pi secreted RxLR effector peptide, putative (369 nt)                    | -13.1371 | -0.89215 | 0.445839 |
| PITG_18056 | Pi conserved hypothetical protein (1078 nt)                             | -15.7735 | 0.787142 | 0.445879 |
| PITG_09628 | Pi conserved hypothetical protein (1141 nt)                             | -13.1577 | 0.776049 | 0.445921 |
| PITG_23005 | Pi conserved hypothetical protein (630 nt)                              | -8.84416 | -0.75133 | 0.44593  |
| PITG_13268 | Pi p21-activated protein kinase-interacting protein, putative (1004 nt) | -16.1725 | 0.971795 | 0.446022 |
| PITG_13623 | Pi conserved hypothetical protein (1004 nt)                             | -16.1725 | 0.971795 | 0.446022 |
| PITG_06910 | Pi Mitochondrial Carrier (MC) Family (1056 nt)                          | -15.5059 | 0.838961 | 0.446249 |
| PITG_03599 | Pi alanine aminotransferase 2 (1500 nt)                                 | -13.1829 | -0.79933 | 0.446302 |
| PITG_21607 | Pi serine protease family S10, putative (1508 nt)                       | -13.1859 | -0.83233 | 0.446341 |
| PITG_10160 | Pi NADPH-cytochrome P450 reductase, putative (2164 nt)                  | -15.204  | -0.83779 | 0.446373 |
| PITG_13831 | Pi tryptophanyl-tRNA synthetase (1691 nt)                               | -15.1702 | 0.844452 | 0.446373 |
| PITG_18330 | Pi conserved hypothetical protein (939 nt)                              | -13.5483 | 0.740773 | 0.446379 |
| PITG_00954 | Pi conserved hypothetical protein (865 nt)                              | -14.644  | -0.85378 | 0.446795 |
| PITG_01292 | Pi conserved hypothetical protein (664 nt)                              | -11.8745 | 0.728244 | 0.447101 |
| PITG_07890 | Pi conserved hypothetical protein (2045 nt)                             | -16.2285 | -1.01458 | 0.447564 |
| PITG_22719 | Pi phosphatidylinositol kinase (PIK-G2) (4244 nt)                       | -16.2285 | -1.01458 | 0.447564 |
| PITG_12742 | Pi conserved hypothetical protein (1926 nt)                             | -16.263  | -0.94558 | 0.447564 |
| PITG_19017 | Pi 14-3-3 protein epsilon (1094 nt)                                     | -10.0199 | 0.770351 | 0.447663 |
| PITG_17329 | Pi COP9 signalosome complex subunit, putative (1757 nt)                 | -15.7397 | -1.02525 | 0.447682 |
| PITG_01133 | Pi conserved hypothetical protein (1122 nt)                             | -15.53   | 0.950897 | 0.447979 |
| PITG_11232 | Pi conserved hypothetical protein (3141 nt)                             | -16.0098 | -0.95823 | 0.448052 |
| PITG_14699 | Pi phosphatidylserine synthase, putative (1546 nt)                      | -16.0098 | -0.95823 | 0.448052 |
| PITG_16072 | Pi conserved hypothetical protein (850 nt)                              | -16.0195 | -1.13399 | 0.448052 |
| PITG_03148 | Pi Rab7 family GTPase, putative (984 nt)                                | -12.4165 | -0.745   | 0.44866  |
| PITG_00879 | Pi 60S ribosomal protein L30, putative (976 nt)                         | -14.5267 | -1.08533 | 0.448693 |
| PITG_05817 | Pi aspartyl/Asparaginyl beta-hydroxylase, putative (942 nt)             | -15.3209 | -0.9933  | 0.449099 |
| PITG_13185 | Pi conserved hypothetical protein (1501 nt)                             | -15.3392 | -0.95671 | 0.449099 |
| PITG_12051 | Pi conserved hypothetical protein (315 nt)                              | -14.5414 | 0.855981 | 0.449109 |
| PITG_10979 | Pi elongation factor 1-gamma, putative (1555 nt)                        | -14.1732 | 0.78055  | 0.449133 |
| PITG_13493 | Pi conserved hypothetical protein (1342 nt)                             | -14.8644 | -0.83346 | 0.44924  |

|            |                                                              |          |          |          |
|------------|--------------------------------------------------------------|----------|----------|----------|
| PITG_07972 | Pi conserved hypothetical protein (1173 nt)                  | -11.6741 | 0.746379 | 0.449332 |
| PITG_06367 | Pi conserved hypothetical protein (1007 nt)                  | -15.7005 | -0.84944 | 0.449377 |
| PITG_05489 | Pi conserved hypothetical protein (408 nt)                   | -11.7067 | -0.76702 | 0.44952  |
| PITG_03549 | Pi coatomer subunit gamma, putative (3611 nt)                | -13.9921 | 0.805875 | 0.449529 |
| PITG_19095 | Pi conserved hypothetical protein (2048 nt)                  | -16.0426 | -1.08841 | 0.449654 |
| PITG_06991 | Pi FHA domain-interacting nucleolar phosphoprotein, putative | -15.12   | 0.872132 | 0.449786 |
| PITG_19999 | Pi 40S ribosomal protein S14 (808 nt)                        | -8.1888  | 0.721146 | 0.4501   |
| PITG_07470 | Pi conserved hypothetical protein (3281 nt)                  | -14.1821 | 0.820472 | 0.450115 |
| PITG_11789 | Pi conserved hypothetical protein (2341 nt)                  | -12.387  | 0.735769 | 0.450327 |
| PITG_03587 | Pi Mitochondrial Protein Translocase (MPT) Family (3720 nt)  | -17.2202 | -1.7164  | 0.45051  |
| PITG_08505 | Pi conserved hypothetical protein (1578 nt)                  | -17.2202 | -1.7164  | 0.45051  |
| PITG_10302 | Pi Sulfate Permease (SulP) Family (2751 nt)                  | -17.2202 | -1.7164  | 0.45051  |
| PITG_18035 | Pi conserved hypothetical protein (941 nt)                   | -17.2202 | -1.7164  | 0.45051  |
| PITG_00577 | Pi conserved hypothetical protein (2944 nt)                  | -15.0341 | -0.94414 | 0.450951 |
| PITG_11170 | Pi histone-binding protein RBBP4 (1632 nt)                   | -15.0007 | 0.876795 | 0.450951 |
| PITG_13971 | Pi conserved hypothetical protein (1801 nt)                  | -14.8508 | -0.86065 | 0.451156 |
| PITG_22428 | Pi conserved hypothetical protein (488 nt)                   | -15.9983 | -1.04629 | 0.451254 |
| PITG_18028 | Pi conserved hypothetical protein (2296 nt)                  | -15.1547 | -0.93652 | 0.451641 |
| PITG_13939 | Pi conserved hypothetical protein (2961 nt)                  | -15.2232 | -1.00868 | 0.451811 |
| PITG_02578 | Pi 60S ribosomal protein L15-1 (621 nt)                      | -9.00858 | 0.736951 | 0.452078 |
| PITG_09444 | Pi conserved hypothetical protein (1052 nt)                  | -15.459  | -0.95867 | 0.452138 |
| PITG_06934 | Pi conserved hypothetical protein (2871 nt)                  | -16.2313 | -1.1487  | 0.452178 |
| PITG_16016 | Pi cytochrome oxidase assembly protein, putative (1429 nt)   | -16.2313 | -1.1487  | 0.452178 |
| PITG_19809 | Pi conserved hypothetical protein (2673 nt)                  | -16.2313 | -1.1487  | 0.452178 |
| PITG_21280 | Pi conserved hypothetical protein (373 nt)                   | -16.2313 | -1.1487  | 0.452178 |
| PITG_03767 | Pi conserved hypothetical protein (4755 nt)                  | -15.94   | -1.09937 | 0.452438 |
| PITG_23090 | Pi protein kinase, putative (2448 nt)                        | -14.122  | -0.86435 | 0.452507 |
| PITG_05953 | Pi conserved hypothetical protein (765 nt)                   | -13.1096 | -0.75975 | 0.452656 |
| PITG_16376 | Pi conserved hypothetical protein (2684 nt)                  | -13.9406 | -0.85611 | 0.452959 |
| PITG_15124 | Pi Multidrug/Oligosaccharidyl-lipid/Polysaccharide (MOP) Fli | -14.3982 | 1.008939 | 0.452967 |
| PITG_07289 | Pi phosphatidylinositol kinase (4167 nt)                     | -15.5812 | -0.98309 | 0.453147 |
| PITG_10864 | Pi conserved hypothetical protein (1542 nt)                  | -15.5299 | 0.954884 | 0.453147 |
| PITG_08374 | Pi conserved hypothetical protein (2459 nt)                  | -15.1716 | 0.845598 | 0.453614 |
| PITG_10969 | Pi pre-mRNA-processing-splicing factor 8 (7384 nt)           | -14.8103 | 0.824607 | 0.453715 |
| PITG_02736 | Pi U2 small nuclear ribonucleoprotein A', putative (1375 nt) | -14.7512 | 0.858152 | 0.454075 |
| PITG_16271 | Pi M96 mating-specific protein family (1679 nt)              | -15.9365 | -1.10627 | 0.454084 |
| PITG_03324 | Pi ATP-dependent RNA helicase, putative (2810 nt)            | -16.5245 | -1.10364 | 0.454402 |
| PITG_00476 | Pi conserved hypothetical protein (3579 nt)                  | -15.9433 | 0.832435 | 0.454447 |
| PITG_06259 | Pi calcium/calmodulin-dependent protein kinase, putative (3  | -15.3212 | -0.85817 | 0.454466 |
| PITG_18934 | Pi calreticulin precursor (1415 nt)                          | -10.0918 | -0.76171 | 0.45448  |
| PITG_17768 | Pi retinol dehydrogenase, putative (852 nt)                  | -15.574  | -1.05123 | 0.454861 |
| PITG_10729 | Pi conserved hypothetical protein (10174 nt)                 | -14.6035 | -0.93374 | 0.455294 |
| PITG_12192 | Pi conserved hypothetical protein (2599 nt)                  | -15.1336 | -0.82347 | 0.455333 |
| PITG_12889 | Pi conserved hypothetical protein (846 nt)                   | -15.1188 | 0.894457 | 0.455333 |
| PITG_21879 | Pi transmembrane protein Gpr7 (1715 nt)                      | -14.1498 | -0.78317 | 0.455657 |
| PITG_17703 | Pi conserved hypothetical protein (2997 nt)                  | -15.8734 | 0.91279  | 0.455725 |
| PITG_07275 | Pi conserved hypothetical protein (1680 nt)                  | -15.7469 | 0.849619 | 0.455764 |

|            |                                                               |          |          |          |
|------------|---------------------------------------------------------------|----------|----------|----------|
| PITG_15697 | Pi 60S ribosomal protein L11, putative (880 nt)               | -9.38984 | 0.720092 | 0.45589  |
| PITG_17005 | Pi conserved hypothetical protein (1571 nt)                   | -11.0139 | -0.72667 | 0.455929 |
| PITG_03482 | Pi conserved hypothetical protein (2693 nt)                   | -15.6765 | 1.050648 | 0.45612  |
| PITG_05177 | Pi conserved hypothetical protein (1793 nt)                   | -15.6991 | -0.85326 | 0.45612  |
| PITG_08572 | Pi dual specificity tyrosine-phosphorylation-regulated kinase | -15.6752 | -0.90118 | 0.45612  |
| PITG_01361 | Pi conserved hypothetical protein (2647 nt)                   | -14.7449 | -0.88849 | 0.456647 |
| PITG_02291 | Pi conserved hypothetical protein (1800 nt)                   | -16.1849 | 0.950456 | 0.456772 |
| PITG_00703 | Pi 2,4-dienoyl-CoA reductase (2346 nt)                        | -14.8465 | -0.90419 | 0.456863 |
| PITG_00398 | Pi conserved hypothetical protein (1621 nt)                   | -16.5434 | -1.14108 | 0.457293 |
| PITG_04664 | Pi conserved hypothetical protein (1586 nt)                   | -16.5434 | -1.14108 | 0.457293 |
| PITG_09953 | Pi guanylate-binding protein, putative (2898 nt)              | -16.5027 | -1.22237 | 0.457293 |
| PITG_12340 | Pi sulfite oxidase, putative (779 nt)                         | -16.5027 | -1.22237 | 0.457293 |
| PITG_19351 | Pi kinesin-like protein (1519 nt)                             | -16.5434 | -1.14108 | 0.457293 |
| PITG_11985 | Pi hypothetical protein (309 nt)                              | -11.3568 | -0.92365 | 0.457336 |
| PITG_09950 | Pi conserved hypothetical protein (3267 nt)                   | -15.4621 | -0.90513 | 0.457423 |
| PITG_12288 | Pi ADP-ribosylation factor family (968 nt)                    | -10.6508 | 0.710111 | 0.457492 |
| PITG_02420 | Pi DNA-directed RNA polymerase I subunit RPA2, putative (3    | -15.9572 | 1.023573 | 0.45763  |
| PITG_04603 | Pi conserved hypothetical protein (7600 nt)                   | -14.4481 | -0.84777 | 0.458269 |
| PITG_02077 | Pi protein kinase, putative (2392 nt)                         | -16.2693 | -1.14592 | 0.4583   |
| PITG_04575 | Pi conserved hypothetical protein (1882 nt)                   | -16.2586 | -0.95271 | 0.4583   |
| PITG_05673 | Pi hypothetical protein (795 nt)                              | -16.2644 | -1.1557  | 0.4583   |
| PITG_09270 | Pi structural maintenance of chromosomes protein 6, putati    | -16.2586 | -0.95271 | 0.4583   |
| PITG_18015 | Pi glycosyl transferase, putative (1574 nt)                   | -16.2426 | -1.05604 | 0.4583   |
| PITG_18316 | Pi phospholipid hydroperoxide glutathione peroxidase, putat   | -11.3749 | -0.82075 | 0.458455 |
| PITG_11929 | Pi dihydrolipoyllysine-residue acetyltransferase component c  | -13.7931 | 0.760754 | 0.458494 |
| PITG_01520 | Pi hypothetical protein (4181 nt)                             | -16.5344 | -1.15928 | 0.458736 |
| PITG_04954 | Pi protein kinase (1494 nt)                                   | -16.5344 | -1.15928 | 0.458736 |
| PITG_06133 | Pi sugar fermentation stimulation protein (1179 nt)           | -16.5344 | -1.15928 | 0.458736 |
| PITG_17567 | Pi myb-like DNA-binding protein, putative (504 nt)            | -16.5344 | -1.15928 | 0.458736 |
| PITG_06075 | Pi conserved hypothetical protein (3266 nt)                   | -13.9751 | 0.73204  | 0.458969 |
| PITG_10158 | Pi conserved hypothetical protein (3450 nt)                   | -15.8581 | 0.88203  | 0.458997 |
| PITG_03388 | Pi lectin, putative (1612 nt)                                 | -15.1438 | -0.91681 | 0.459001 |
| PITG_03887 | Pi conserved hypothetical protein (1367 nt)                   | -15.1352 | -0.82073 | 0.459001 |
| PITG_14847 | Pi conserved hypothetical protein (943 nt)                    | -15.1183 | -0.85453 | 0.459001 |
| PITG_01584 | Pi conserved hypothetical protein (2506 nt)                   | -15.4504 | -0.88109 | 0.459174 |
| PITG_09097 | Pi conserved hypothetical protein (1199 nt)                   | -16.2275 | -1.23006 | 0.459825 |
| PITG_17068 | Pi conserved hypothetical protein (4224 nt)                   | -16.225  | -1.01967 | 0.459825 |
| PITG_01557 | Pi conserved hypothetical protein (1647 nt)                   | -13.3997 | -0.75173 | 0.460122 |
| PITG_00819 | Pi conserved hypothetical protein (3717 nt)                   | -16.4951 | -1.23814 | 0.460177 |
| PITG_00216 | Pi conserved hypothetical protein (685 nt)                    | -13.5152 | 0.770831 | 0.460337 |
| PITG_05412 | Pi Ca2 :Cation Antiporter (CaCA) Family (2261 nt)             | -14.624  | -0.85444 | 0.460425 |
| PITG_14110 | Pi endoplasmic reticulum-Golgi intermediate compartment p     | -12.9165 | 0.743483 | 0.460493 |
| PITG_14588 | Pi sporangia induced hypothetical protein similar to endothe  | -15.1057 | -0.84029 | 0.460827 |
| PITG_20672 | Pi methyltransferase domain-containing protein, putative (1.  | -15.0905 | 0.812256 | 0.460827 |
| PITG_06703 | Pi conserved hypothetical protein (490 nt)                    | -17.1937 | -1.65049 | 0.460834 |
| PITG_02447 | Pi conserved hypothetical protein (1248 nt)                   | -14.7036 | -0.8286  | 0.461043 |
| PITG_07250 | Pi conserved hypothetical protein (1055 nt)                   | -15.6568 | 0.867204 | 0.461138 |

|            |                                                                |          |          |          |
|------------|----------------------------------------------------------------|----------|----------|----------|
| PITG_00858 | Pi serine/threonine protein kinase (3299 nt)                   | -15.2426 | -0.76057 | 0.461488 |
| PITG_17930 | Pi RNA pseudouridine synthase, putative (1218 nt)              | -15.321  | -0.8581  | 0.461551 |
| PITG_15781 | Pi WD domain-containing protein, putative (1246 nt)            | -12.9649 | 0.755872 | 0.46245  |
| PITG_14727 | Pi callose synthase, putative (6687 nt)                        | -13.0371 | -0.85886 | 0.462849 |
| PITG_14586 | Pi 5'-AMP-activated protein kinase subunit beta, putative (99  | -14.712  | -0.88779 | 0.46296  |
| PITG_00110 | Pi cytochrome c1 heme lyase, putative (823 nt)                 | -16.5075 | -1.13722 | 0.463055 |
| PITG_02267 | Pi coatomer subunit beta, putative (2979 nt)                   | -13.5448 | 0.767548 | 0.463184 |
| PITG_06920 | Pi SEC1 family transporter SLY1 (1888 nt)                      | -15.5554 | -0.92633 | 0.463377 |
| PITG_16484 | Pi conserved hypothetical protein (927 nt)                     | -13.8577 | 0.890918 | 0.46374  |
| PITG_11656 | Pi long-chain-fatty-acid-CoA ligase, putative (2143 nt)        | -14.2184 | 0.811628 | 0.464042 |
| PITG_16648 | Pi conserved hypothetical protein (1191 nt)                    | -13.1901 | 0.772698 | 0.464172 |
| PITG_15959 | Pi conserved hypothetical protein (1483 nt)                    | -14.6219 | -0.79785 | 0.464254 |
| PITG_17984 | Pi conserved hypothetical protein (1317 nt)                    | -16.2298 | -1.15469 | 0.464389 |
| PITG_11157 | Pi myotubularin-like protein (2970 nt)                         | -16.527  | -1.17532 | 0.464492 |
| PITG_17080 | Pi Ca2 :Cation Antiporter (CaCA) Family (1904 nt)              | -16.527  | -1.17532 | 0.464492 |
| PITG_15377 | Pi conserved hypothetical protein (1667 nt)                    | -13.8011 | -0.86028 | 0.464532 |
| PITG_10345 | Pi conserved hypothetical protein (2367 nt)                    | -14.5489 | -0.91346 | 0.464583 |
| PITG_15863 | Pi conserved hypothetical protein (1556 nt)                    | -10.9751 | 0.717224 | 0.464611 |
| PITG_19856 | Pi conserved hypothetical protein (991 nt)                     | -15.4116 | -0.95539 | 0.464621 |
| PITG_21349 | Pi aspartyl-tRNA synthetase, putative (1043 nt)                | -13.7816 | 0.749973 | 0.465233 |
| PITG_03522 | Pi GPI-anchor transamidase, putative (1739 nt)                 | -15.8885 | -0.89785 | 0.465499 |
| PITG_21397 | Pi ribose-phosphate pyrophosphokinase, putative (1516 nt)      | -13.8371 | 0.719664 | 0.465684 |
| PITG_00717 | Pi myosin-like protein (6654 nt)                               | -16.4889 | -1.2519  | 0.465927 |
| PITG_05367 | Pi translational activator GCN1, putative (8268 nt)            | -15.6513 | 0.88192  | 0.466123 |
| PITG_07227 | Pi hypothetical protein (555 nt)                               | -15.6666 | 0.851439 | 0.466123 |
| PITG_12119 | Pi ATPase family AAA domain-containing protein 3A (1870 nt)    | -15.4129 | 0.778578 | 0.466131 |
| PITG_19199 | Pi arginine N-methyltransferase, putative (1377 nt)            | -13.8578 | 0.781258 | 0.46638  |
| PITG_12309 | Pi conserved hypothetical protein (234 nt)                     | -11.9428 | 0.715641 | 0.466728 |
| PITG_02525 | Pi elicitin-like mating protein M25 (846 nt)                   | -15.2712 | 0.884462 | 0.466814 |
| PITG_20494 | Pi conserved hypothetical protein (384 nt)                     | -15.2218 | -0.80219 | 0.466892 |
| PITG_02778 | Pi conserved hypothetical protein (5595 nt)                    | -15.8361 | 0.874828 | 0.467115 |
| PITG_10064 | Pi conserved hypothetical protein (1378 nt)                    | -13.2259 | -0.74819 | 0.467355 |
| PITG_11099 | Pi 60S ribosomal protein L18-2 (1333 nt)                       | -8.74436 | 0.7083   | 0.467594 |
| PITG_13699 | Pi crinkler (CRN) family protein, pseudogene (2083 nt)         | -8.5534  | -0.81848 | 0.467779 |
| PITG_11768 | Pi conserved hypothetical protein (521 nt)                     | -13.1114 | -0.75762 | 0.467946 |
| PITG_04824 | Pi conserved hypothetical protein (3821 nt)                    | -12.0466 | -0.73944 | 0.468048 |
| PITG_11193 | Pi conserved hypothetical protein (1244 nt)                    | -14.8568 | -0.81364 | 0.468096 |
| PITG_02380 | Pi C2 domain-containing protein, putative (762 nt)             | -15.6074 | -0.93178 | 0.46826  |
| PITG_02068 | Pi GTP-binding protein SAR1 (964 nt)                           | -11.9966 | -0.72438 | 0.468365 |
| PITG_05628 | Pi hypothetical protein (806 nt)                               | -11.0992 | -0.71016 | 0.468515 |
| PITG_14707 | Pi SNF1-related protein kinase catalytic subunit alpha, putati | -14.783  | -0.77848 | 0.468516 |
| PITG_17076 | Pi conserved hypothetical protein (2557 nt)                    | -14.7103 | -0.78377 | 0.468664 |
| PITG_09991 | Pi dolichyldiphosphatase 1, putative (1104 nt)                 | -15.2052 | 0.808209 | 0.468682 |
| PITG_05458 | Pi conserved hypothetical protein (1649 nt)                    | -15.9157 | -1.08466 | 0.468728 |
| PITG_20787 | Pi conserved hypothetical protein (3251 nt)                    | -15.8856 | -0.90454 | 0.468728 |
| PITG_13804 | Pi conserved hypothetical protein (2535 nt)                    | -14.4491 | -0.8147  | 0.469622 |
| PITG_16984 | Pi cellulose synthase 4 (3531 nt)                              | -14.2405 | -0.86063 | 0.469649 |

|            |                                                                  |          |          |          |
|------------|------------------------------------------------------------------|----------|----------|----------|
| PITG_02490 | Pi conserved hypothetical protein (870 nt)                       | -15.1129 | 0.856076 | 0.469865 |
| PITG_06403 | Pi conserved hypothetical protein (1558 nt)                      | -14.8612 | -0.87561 | 0.469945 |
| PITG_11459 | Pi conserved hypothetical protein (1659 nt)                      | -14.8298 | 0.884703 | 0.469945 |
| PITG_04475 | Pi hypothetical protein (1193 nt)                                | -15.566  | 0.85279  | 0.469958 |
| PITG_08703 | Pi conserved hypothetical protein (937 nt)                       | -8.28543 | 0.682788 | 0.470013 |
| PITG_11923 | Pi mitochondrial 39-S ribosomal protein L47, putative (513 n     | -13.8193 | 0.747648 | 0.470713 |
| PITG_21380 | Pi conserved hypothetical protein (1311 nt)                      | -13.8822 | 0.723717 | 0.471156 |
| PITG_21851 | Pi hypothetical protein (864 nt)                                 | -11.9646 | -0.78394 | 0.471281 |
| PITG_01049 | Pi conserved hypothetical protein (1147 nt)                      | -15.461  | -0.90743 | 0.471298 |
| PITG_18085 | Pi hypothetical protein (710 nt)                                 | -15.3733 | 0.998317 | 0.47146  |
| PITG_20777 | Pi hypothetical protein (584 nt)                                 | -10.6729 | 0.741163 | 0.471526 |
| PITG_10534 | Pi conserved hypothetical protein (1580 nt)                      | -15.5948 | -0.90586 | 0.471652 |
| PITG_06610 | Pi tRNA nucleotidyltransferase, putative (1847 nt)               | -15.2482 | -0.83318 | 0.472244 |
| PITG_18813 | Pi conserved hypothetical protein (1749 nt)                      | -16.5015 | -1.14854 | 0.473078 |
| PITG_00208 | Pi protein kinase, putative (2334 nt)                            | -13.412  | -0.72714 | 0.473352 |
| PITG_01516 | Pi conserved hypothetical protein (903 nt)                       | -13.1308 | 0.705109 | 0.473406 |
| PITG_03347 | Pi ribonucleoside-diphosphate reductase small chain (1466 r      | -14.2447 | -0.87352 | 0.473466 |
| PITG_01778 | Pi soluble pyridine nucleotide transhydrogenase, putative (1     | -14.0793 | 0.736852 | 0.473657 |
| PITG_03117 | Pi U4/U6 small nuclear ribonucleoprotein Prp3, putative (21      | -15.2145 | -0.85861 | 0.474016 |
| PITG_00883 | Pi hypothetical protein (455 nt)                                 | -14.7893 | 0.815254 | 0.47416  |
| PITG_19121 | Pi 60S ribosomal protein L10 (848 nt)                            | -8.51695 | -0.72547 | 0.474204 |
| PITG_05615 | Pi pyrophosphate-energized vacuolar membrane proton pun          | -10.8241 | 0.79375  | 0.474283 |
| PITG_00625 | Pi monooxygenase, putative (672 nt)                              | -12.4101 | -0.7681  | 0.474337 |
| PITG_08237 | Pi histone deacetylase, putative (2589 nt)                       | -16.0493 | -0.88054 | 0.47434  |
| PITG_11214 | Pi conserved hypothetical protein (1440 nt)                      | -16.015  | 0.784183 | 0.47434  |
| PITG_09827 | Pi mitotic checkpoint protein, putative (786 nt)                 | -14.5316 | -0.76614 | 0.47442  |
| PITG_01539 | Pi hypothetical protein (1499 nt)                                | -13.8099 | -0.79909 | 0.474749 |
| PITG_14835 | Pi conserved hypothetical protein (2160 nt)                      | -14.2431 | -0.75894 | 0.474938 |
| PITG_13738 | Pi conserved hypothetical protein (2194 nt)                      | -15.9836 | -1.00938 | 0.474977 |
| PITG_21140 | Pi conserved hypothetical protein (950 nt)                       | -15.5607 | 0.916885 | 0.475025 |
| PITG_19506 | Pi conserved hypothetical protein (2006 nt)                      | -15.5631 | 0.748629 | 0.475025 |
| PITG_20263 | Pi conserved hypothetical protein (549 nt)                       | -15.5194 | 0.963578 | 0.475145 |
| PITG_05674 | Pi peroxisome assembly protein, putative (1244 nt)               | -15.8661 | -0.88697 | 0.475147 |
| PITG_17201 | Pi GTP-binding protein, putative (1843 nt)                       | -15.3546 | -0.83565 | 0.475168 |
| PITG_04704 | Pi conserved hypothetical protein (1168 nt)                      | -12.618  | 0.700304 | 0.475343 |
| PITG_02023 | Pi conserved hypothetical protein (1095 nt)                      | -14.8787 | -0.80489 | 0.475383 |
| PITG_17966 | Pi conserved hypothetical protein (525 nt)                       | -14.5646 | 0.829652 | 0.475433 |
| PITG_17557 | Pi hypothetical protein (787 nt)                                 | -15.0489 | -0.91448 | 0.475699 |
| PITG_13415 | Pi protein kinase, putative (2746 nt)                            | -15.0303 | 0.692872 | 0.475699 |
| PITG_02024 | Pi conserved hypothetical protein (1569 nt)                      | -14.2114 | 0.76697  | 0.475872 |
| PITG_06911 | Pi translation initiation factor IF-2, putative (1972 nt)        | -16.0256 | 0.763782 | 0.475888 |
| PITG_00226 | Pi kinesin-like protein (3531 nt)                                | -16.5222 | -1.18733 | 0.475928 |
| PITG_00275 | Pi Iron(III)-zinc(II) purple acid phosphatase, putative (1549 nt | -16.5222 | -1.18733 | 0.475928 |
| PITG_16209 | Pi conserved hypothetical protein (1750 nt)                      | -16.5222 | -1.18733 | 0.475928 |
| PITG_14260 | Pi FACT complex subunit SSRP1, putative (1614 nt)                | -13.2696 | -0.72536 | 0.475954 |
| PITG_06608 | Pi ubiquitin-conjugating enzyme E2, putative (764 nt)            | -10.8869 | 0.682772 | 0.477085 |
| PITG_11097 | Pi mannose-1-phosphate guanyltransferase alpha, putative (       | -14.8783 | -0.80561 | 0.477246 |



|            |                                                             |          |          |          |
|------------|-------------------------------------------------------------|----------|----------|----------|
| PITG_18355 | Pi conserved hypothetical protein (1811 nt)                 | -14.8732 | -0.85049 | 0.477246 |
| PITG_19589 | Pi Crinkler (CRN) family protein (1818 nt)                  | -16.4844 | -1.0214  | 0.477351 |
| PITG_05778 | Pi conserved hypothetical protein (2026 nt)                 | -13.0179 | -0.82017 | 0.477444 |
| PITG_18863 | Pi conserved hypothetical protein (747 nt)                  | -15.2294 | 0.935964 | 0.477544 |
| PITG_11766 | Pi 40S ribosomal protein S3a (1393 nt)                      | -8.81024 | 0.682233 | 0.477655 |
| PITG_00888 | Pi conserved hypothetical protein (992 nt)                  | -14.3144 | -0.79207 | 0.478098 |
| PITG_01937 | Pi myosin-like protein (1685 nt)                            | -14.3032 | -0.78895 | 0.478098 |
| PITG_18232 | Pi avirulence-associated protein 3.4, putative (5892 nt)    | -15.4637 | 0.949155 | 0.478123 |
| PITG_09488 | Pi small nuclear ribonucleoprotein Sm D3 (503 nt)           | -13.7186 | -0.75351 | 0.478338 |
| PITG_19780 | Pi eukaryotic translation initiation factor 1A (457 nt)     | -13.3343 | 0.989448 | 0.478536 |
| PITG_04676 | Pi conserved hypothetical protein (795 nt)                  | -15.3682 | -0.85278 | 0.478665 |
| PITG_10423 | Pi conserved hypothetical protein (1419 nt)                 | -16.4824 | -1.10546 | 0.478772 |
| PITG_21144 | Pi conserved hypothetical protein (3569 nt)                 | -15.2738 | 0.887416 | 0.478931 |
| PITG_08232 | Pi conserved hypothetical protein (1707 nt)                 | -16.0766 | -0.82573 | 0.478975 |
| PITG_22334 | Pi Amino Acid-Polyamine-Organocation (APC) Family (529 nt)  | -16.0447 | -0.8895  | 0.478975 |
| PITG_13228 | Pi conserved hypothetical protein (2007 nt)                 | -14.839  | 0.870005 | 0.479098 |
| PITG_17891 | Pi conserved hypothetical protein (2335 nt)                 | -14.2401 | -0.89196 | 0.47914  |
| PITG_05505 | Pi conserved hypothetical protein (2274 nt)                 | -13.9796 | 0.789809 | 0.479191 |
| PITG_04961 | Pi crinkler (CRN) family protein, pseudogene (4915 nt)      | -11.7559 | -0.76497 | 0.47921  |
| PITG_10185 | Pi conserved hypothetical protein (504 nt)                  | -11.0329 | 0.681747 | 0.479212 |
| PITG_13596 | Pi biotin synthase (1332 nt)                                | -12.9929 | -0.73123 | 0.479698 |
| PITG_07380 | Pi glutamate synthase, putative (1695 nt)                   | -12.6639 | 0.718296 | 0.480166 |
| PITG_01426 | Pi conserved hypothetical protein (2715 nt)                 | -16.054  | -0.99433 | 0.480514 |
| PITG_06598 | Pi conserved hypothetical protein (1611 nt)                 | -16.0603 | -0.91994 | 0.480514 |
| PITG_16138 | Pi exosome complex exonuclease RRP42-like protein (888 nt)  | -16.0365 | 0.981264 | 0.480514 |
| PITG_15118 | Pi actin-like protein (578 nt)                              | -8.52294 | 0.67354  | 0.48084  |
| PITG_11114 | Pi conserved hypothetical protein (1834 nt)                 | -15.1972 | 0.791443 | 0.48105  |
| PITG_23176 | Pi 26S proteasome non-ATPase regulatory subunit, putative   | -15.0237 | 0.802525 | 0.481124 |
| PITG_19350 | Pi formin-homology 2 domain-containing protein (4822 nt)    | -15.4416 | -0.9463  | 0.481508 |
| PITG_12394 | Pi conserved hypothetical protein (882 nt)                  | -16.0808 | -0.94123 | 0.482049 |
| PITG_03828 | Pi conserved hypothetical protein (1679 nt)                 | -12.9476 | -0.67958 | 0.482311 |
| PITG_14642 | Pi GDP-L-fucose synthetase (963 nt)                         | -14.6593 | 0.828628 | 0.482413 |
| PITG_10830 | Pi cyclin-dependent kinase with F-box domain, putative (342 | -14.2205 | 0.747435 | 0.482826 |
| PITG_16695 | Pi N-acetyltransferase 5 (813 nt)                           | -15.1351 | 0.721451 | 0.483067 |
| PITG_18046 | Pi conserved hypothetical protein (2477 nt)                 | -13.4673 | -0.72082 | 0.483146 |
| PITG_02627 | Pi conserved hypothetical protein (1416 nt)                 | -13.8259 | -0.74734 | 0.483482 |
| PITG_08661 | Pi CDK5 regulatory subunit-associated protein 1 (1877 nt)   | -15.9998 | 0.753928 | 0.483582 |
| PITG_12960 | Pi conserved hypothetical protein (1742 nt)                 | -16.0078 | 0.963357 | 0.483582 |
| PITG_17490 | Pi Mitochondrial Carrier (MC) Family (1161 nt)              | -16.0078 | 0.963357 | 0.483582 |
| PITG_09364 | Pi conserved hypothetical protein (959 nt)                  | -15.3516 | -0.84202 | 0.483867 |
| PITG_02177 | Pi metalloprotease family M48X, putative (1636 nt)          | -13.2845 | -0.71551 | 0.484235 |
| PITG_05614 | Pi conserved hypothetical protein (1206 nt)                 | -13.8578 | -0.76038 | 0.484475 |
| PITG_03814 | Pi D-cysteine desulfhydrase, putative (1482 nt)             | -14.5025 | -0.82552 | 0.484516 |
| PITG_00899 | Pi prefoldin subunit 3, putative (784 nt)                   | -14.2553 | 0.736371 | 0.484563 |
| PITG_17717 | Pi nuclear migration protein nudC, putative (1038 nt)       | -12.7121 | -0.69324 | 0.484722 |
| PITG_02260 | Pi C2 domain-containing protein, putative (783 nt)          | -14.3997 | -0.8022  | 0.484809 |
| PITG_20306 | Pi transmembrane protein, putative (1668 nt)                | -14.2836 | -0.72638 | 0.484906 |

|            |                                                                  |          |          |          |
|------------|------------------------------------------------------------------|----------|----------|----------|
| PITG_03473 | Pi callose synthase, putative (6163 nt)                          | -13.9748 | -0.7881  | 0.484994 |
| PITG_02921 | Pi valyl-tRNA synthetase (3210 nt)                               | -13.6697 | 0.708818 | 0.485135 |
| PITG_13296 | Pi aldose 1-epimerase, putative (947 nt)                         | -14.1821 | 0.828965 | 0.485177 |
| PITG_06677 | Pi conserved hypothetical protein (1181 nt)                      | -14.7932 | -0.85897 | 0.485257 |
| PITG_00983 | Pi UDP-N-acetylglucosamine-peptide N-acetylglucosaminyltr        | -16.8569 | -1.31432 | 0.485797 |
| PITG_01301 | Pi conserved hypothetical protein (3616 nt)                      | -16.8569 | -1.31432 | 0.485797 |
| PITG_16562 | Pi conserved hypothetical protein (1333 nt)                      | -15.2322 | -0.82389 | 0.486268 |
| PITG_20994 | Pi conserved hypothetical protein (3079 nt)                      | -13.2198 | -0.73292 | 0.486396 |
| PITG_08746 | Pi conserved hypothetical protein (3138 nt)                      | -16.0411 | -0.89632 | 0.486638 |
| PITG_09419 | Pi gamma-soluble NSF attachment protein, putative (2957 nt)      | -16.0411 | -0.89632 | 0.486638 |
| PITG_00855 | Pi conserved hypothetical protein (1091 nt)                      | -13.424  | -0.70315 | 0.48681  |
| PITG_15502 | Pi conserved hypothetical protein (894 nt)                       | -14.4146 | -0.80252 | 0.486873 |
| PITG_03736 | Pi conserved hypothetical protein (2031 nt)                      | -15.3274 | 0.857065 | 0.487308 |
| PITG_08023 | Pi HECT E3 ubiquitin ligase, putative (6662 nt)                  | -16.0612 | -1.26365 | 0.487432 |
| PITG_10883 | Pi 26S proteasome non-ATPase regulatory subunit, putative        | -12.7331 | 0.679753 | 0.487759 |
| PITG_10932 | Pi dipeptidyl peptidase, putative (2406 nt)                      | -14.5962 | -0.75923 | 0.48788  |
| PITG_01208 | Pi trifunctional enzyme subunit beta, mitochondrial precursc     | -11.6319 | -0.71878 | 0.487914 |
| PITG_02479 | Pi T-complex protein 1 subunit theta (1856 nt)                   | -13.6548 | 0.745023 | 0.488117 |
| PITG_00281 | Pi Major Facilitator Superfamily (MFS) (1781 nt)                 | -16.0467 | -1.01095 | 0.488162 |
| PITG_06770 | Pi hypothetical protein (444 nt)                                 | -16.0189 | 0.944934 | 0.488162 |
| PITG_14099 | Pi conserved hypothetical protein (728 nt)                       | -14.8648 | 0.841475 | 0.488276 |
| PITG_03954 | Pi conserved hypothetical protein (995 nt)                       | -16.8356 | -1.26999 | 0.488396 |
| PITG_07456 | Pi conserved hypothetical protein (1320 nt)                      | -16.8356 | -1.26999 | 0.488396 |
| PITG_04941 | Pi RNA polymerase II subunit A C-terminal domain phosphat        | -15.1428 | -0.76579 | 0.4884   |
| PITG_13504 | Pi hypothetical protein (396 nt)                                 | -15.1543 | -0.93713 | 0.4884   |
| PITG_14919 | Pi transmembrane protein, putative (1650 nt)                     | -15.1605 | -0.88366 | 0.4884   |
| PITG_13679 | Pi conserved hypothetical protein (2052 nt)                      | -13.5427 | -0.76009 | 0.488415 |
| PITG_09345 | Pi 40S ribosomal protein S5-2 (1061 nt)                          | -8.48053 | 0.678501 | 0.488455 |
| PITG_17240 | Pi eukaryotic translation initiation factor 3 subunit E-interact | -13.3409 | 0.694283 | 0.489113 |
| PITG_07573 | Pi conserved hypothetical protein (2598 nt)                      | -15.8293 | 0.860305 | 0.489399 |
| PITG_08314 | Pi ATP-binding Cassette (ABC) Superfamily (960 nt)               | -15.8293 | 0.860305 | 0.489399 |
| PITG_16053 | Pi conserved hypothetical protein (1032 nt)                      | -15.8789 | -0.98402 | 0.489399 |
| PITG_10352 | Pi sporangia induced hypothetical protein (731 nt)               | -10.9338 | 0.687051 | 0.489434 |
| PITG_01950 | Pi protein kinase, putative (2368 nt)                            | -13.2129 | -0.68323 | 0.489936 |
| PITG_09450 | Pi conserved hypothetical protein (5480 nt)                      | -14.0483 | 0.74422  | 0.490036 |
| PITG_02857 | Pi L-allo-threonine aldolase (1202 nt)                           | -15.1539 | 0.863825 | 0.490166 |
| PITG_07286 | Pi phosphatidylinositol kinase (4304 nt)                         | -14.2802 | -0.80723 | 0.490274 |
| PITG_18463 | Pi hypothetical protein (1921 nt)                                | -13.277  | 0.695639 | 0.49042  |
| PITG_18027 | Pi histone acetyltransferase, putative (2887 nt)                 | -15.7279 | -0.79385 | 0.49053  |
| PITG_05666 | Pi small nuclear ribonucleoprotein E (240 nt)                    | -13.0526 | 0.699619 | 0.491282 |
| PITG_01379 | Pi conserved hypothetical protein (1668 nt)                      | -15.1559 | -0.7399  | 0.491924 |
| PITG_22418 | Pi conserved hypothetical protein (481 nt)                       | -15.1503 | -0.86258 | 0.491924 |
| PITG_19979 | Pi conserved hypothetical protein (780 nt)                       | -13.1852 | 0.711256 | 0.49195  |
| PITG_00269 | Pi conserved hypothetical protein (2585 nt)                      | -14.0239 | 0.688502 | 0.491995 |
| PITG_01549 | Pi succinate semialdehyde dehydrogenase, mitochondrial pr        | -13.794  | 0.70905  | 0.492278 |
| PITG_01913 | Pi dihydroorotate dehydrogenase, mitochondrial precursor (       | -14.7158 | 0.756433 | 0.492325 |
| PITG_20797 | Pi tubulin-specific chaperone B, putative (928 nt)               | -14.7154 | 0.750628 | 0.492325 |

|            |                                                                   |          |          |          |
|------------|-------------------------------------------------------------------|----------|----------|----------|
| PITG_08598 | Pi 6-phosphogluconolactonase, putative (984 nt)                   | -13.7208 | 0.683318 | 0.49249  |
| PITG_04424 | Pi SNARE associated Golgi protein, putative (918 nt)              | -14.8046 | -0.76812 | 0.492527 |
| PITG_13157 | Pi suppressor of necrosis 1, putative (1074 nt)                   | -14.0631 | 0.961991 | 0.492638 |
| PITG_04113 | Pi conserved hypothetical protein (1646 nt)                       | -15.4912 | -0.84706 | 0.493052 |
| PITG_12886 | Pi conserved hypothetical protein (819 nt)                        | -9.39271 | -0.67072 | 0.493439 |
| PITG_19482 | Pi ras protein let-60 (1186 nt)                                   | -12.3715 | -0.67341 | 0.493527 |
| PITG_16864 | Pi conserved hypothetical protein (2664 nt)                       | -15.0452 | -0.84283 | 0.493564 |
| PITG_22618 | Pi conserved hypothetical protein (656 nt)                        | -14.8756 | 0.840595 | 0.493698 |
| PITG_04255 | Pi glucosylceramidase, putative (1623 nt)                         | -14.7669 | -0.99553 | 0.494032 |
| PITG_16528 | Pi hsp70-like protein (1904 nt)                                   | -16.4997 | -1.15096 | 0.494313 |
| PITG_20081 | Pi conserved hypothetical protein (5295 nt)                       | -14.7875 | -0.88143 | 0.494319 |
| PITG_06851 | Pi conserved hypothetical protein (1061 nt)                       | -13.5263 | 0.736918 | 0.494355 |
| PITG_13275 | Pi conserved hypothetical protein (954 nt)                        | -13.6582 | 0.720076 | 0.494516 |
| PITG_02781 | Pi conserved hypothetical protein (1596 nt)                       | -16.8472 | -1.33485 | 0.494876 |
| PITG_04523 | Pi conserved hypothetical protein (2736 nt)                       | -16.8472 | -1.33485 | 0.494876 |
| PITG_07045 | Pi conserved hypothetical protein (3128 nt)                       | -16.8472 | -1.33485 | 0.494876 |
| PITG_08186 | Pi conserved hypothetical protein (1872 nt)                       | -16.8472 | -1.33485 | 0.494876 |
| PITG_17631 | Pi conserved hypothetical protein (534 nt)                        | -16.8472 | -1.33485 | 0.494876 |
| PITG_10715 | Pi hypothetical protein (1221 nt)                                 | -11.6064 | -0.75826 | 0.494895 |
| PITG_04500 | Pi nucleosome assembly protein 1 (1225 nt)                        | -13.1082 | 0.713815 | 0.495377 |
| PITG_05395 | Pi conserved hypothetical protein (1404 nt)                       | -15.1817 | -0.84073 | 0.495424 |
| PITG_20121 | Pi conserved hypothetical protein (772 nt)                        | -12.2875 | 0.663307 | 0.495781 |
| PITG_16855 | Pi conserved hypothetical protein (925 nt)                        | -13.3659 | 0.684745 | 0.496023 |
| PITG_03957 | Pi conserved hypothetical protein (2017 nt)                       | -16.825  | -1.28921 | 0.496169 |
| PITG_08552 | Pi conserved hypothetical protein (2095 nt)                       | -16.825  | -1.28921 | 0.496169 |
| PITG_14765 | Pi GPI ethanolamine phosphate transferase, putative (2985 r       | -16.825  | -1.28921 | 0.496169 |
| PITG_19441 | Pi ATP-binding Cassette (ABC) Superfamily (3824 nt)               | -16.825  | -1.28921 | 0.496169 |
| PITG_11630 | Pi eukaryotic translation initiation factor 1A, putative (786 nt) | -11.2803 | 0.693538 | 0.49628  |
| PITG_06716 | Pi tafazzin-like protein (1282 nt)                                | -15.4728 | 0.804119 | 0.496406 |
| PITG_03178 | Pi 60S ribosomal protein L9 (754 nt)                              | -10.0026 | 0.668014 | 0.496749 |
| PITG_02695 | Pi striatin-3 family protein (2493 nt)                            | -13.8474 | -0.7184  | 0.496827 |
| PITG_17692 | Pi conserved hypothetical protein (1392 nt)                       | -16.5218 | -1.19228 | 0.497121 |
| PITG_22548 | Pi hypothetical protein similar to phosphatidylinositol 3-kina    | -16.5218 | -1.19228 | 0.497121 |
| PITG_16183 | Pi adhesin-like protein (5735 nt)                                 | -14.5893 | -0.73769 | 0.497239 |
| PITG_07476 | Pi conserved hypothetical protein (1568 nt)                       | -10.9618 | -0.70117 | 0.49752  |
| PITG_10543 | Pi conserved hypothetical protein (1087 nt)                       | -9.593   | -0.7884  | 0.497657 |
| PITG_01511 | Pi conserved hypothetical protein (1649 nt)                       | -14.4649 | -0.75587 | 0.497673 |
| PITG_06943 | Pi conserved hypothetical protein (1647 nt)                       | -14.9637 | -0.7407  | 0.498292 |
| PITG_22810 | Pi conserved hypothetical protein (768 nt)                        | -13.9089 | 0.75717  | 0.498322 |
| PITG_03525 | Pi cleavage induced serine protease family S33, putative (15      | -16.2925 | -0.95534 | 0.498328 |
| PITG_13764 | Pi conserved hypothetical protein (780 nt)                        | -16.4854 | -1.26538 | 0.498523 |
| PITG_16105 | Pi conserved hypothetical protein (771 nt)                        | -15.7619 | -0.98028 | 0.498535 |
| PITG_07701 | Pi ubiquinone/menaquinone biosynthesis methyltransferase          | -14.6811 | -0.77954 | 0.498549 |
| PITG_02520 | Pi conserved hypothetical protein (2341 nt)                       | -16.039  | -0.89984 | 0.498746 |
| PITG_18329 | Pi conserved hypothetical protein (975 nt)                        | -16.039  | -0.89984 | 0.498746 |
| PITG_18642 | Pi conserved hypothetical protein (2079 nt)                       | -16.039  | -0.89984 | 0.498746 |
| PITG_03557 | Pi conserved hypothetical protein (1429 nt)                       | -14.8669 | -0.78073 | 0.499059 |

|            |                                                                |          |          |          |
|------------|----------------------------------------------------------------|----------|----------|----------|
| PITG_06643 | Pi conserved hypothetical protein (1753 nt)                    | -15.3563 | -0.92516 | 0.499184 |
| PITG_11022 | Pi hypothetical protein (769 nt)                               | -14.4561 | 0.732765 | 0.499547 |
| PITG_07851 | Pi protein kinase (1421 nt)                                    | -15.2594 | -0.72707 | 0.499726 |
| PITG_12521 | Pi vacuolar protein sorting-associated protein 35, putative (2 | -15.2594 | -0.72707 | 0.499726 |
| PITG_00350 | Pi COP9 signalosome complex subunit 1, putative (1472 nt)      | -15.4904 | -0.94453 | 0.499738 |
| PITG_03109 | Pi conserved hypothetical protein (1054 nt)                    | -16.3078 | -0.9248  | 0.499764 |
| PITG_03277 | Pi pyruvate dehydrogenase E1 component subunit alpha (15       | -11.1394 | 0.665326 | 0.499772 |
| PITG_05601 | Pi conserved hypothetical protein (1098 nt)                    | -11.9342 | 0.65026  | 0.49982  |
| PITG_08061 | Pi hydroxyacyl-coenzyme A dehydrogenase, mitochondrial p       | -13.7351 | -0.78648 | 0.500051 |
| PITG_13918 | Pi N-terminal acetyltransferase A complex subunit nat1-like    | -14.2353 | -0.79626 | 0.500066 |
| PITG_11912 | Pi DNA replication licensing factor MCM7 (2607 nt)             | -15.7295 | 0.896603 | 0.500123 |
| PITG_22505 | Pi conserved hypothetical protein (1198 nt)                    | -15.7295 | 0.896603 | 0.500123 |
| PITG_01397 | Pi glycoside hydrolase, putative (1725 nt)                     | -14.2118 | 0.82563  | 0.50052  |
| PITG_13370 | Pi conserved hypothetical protein (1551 nt)                    | -10.8215 | -0.65664 | 0.500546 |
| PITG_06359 | Pi conserved hypothetical protein (1237 nt)                    | -13.5451 | 0.744137 | 0.500618 |
| PITG_17967 | Pi conserved hypothetical protein (2693 nt)                    | -15.2998 | -0.87404 | 0.500862 |
| PITG_09626 | Pi transcription factor BTF3-like protein (888 nt)             | -9.45942 | -0.69717 | 0.501126 |
| PITG_04426 | Pi DNA polymerase alpha-associated DNA helicase A, putativ     | -16.2856 | -0.96929 | 0.501198 |
| PITG_08715 | Pi conserved hypothetical protein (2483 nt)                    | -14.3376 | 0.762041 | 0.501245 |
| PITG_00970 | Pi conserved hypothetical protein (1122 nt)                    | -14.6956 | 0.787441 | 0.501432 |
| PITG_08739 | Pi conserved hypothetical protein (495 nt)                     | -16.0798 | -1.01412 | 0.501745 |
| PITG_22624 | Pi Major Facilitator Superfamily (MFS) (702 nt)                | -12.5873 | -0.89624 | 0.502069 |
| PITG_03643 | Pi 3-phosphoinositide-dependent protein kinase, putative (2    | -15.1233 | 0.85145  | 0.502351 |
| PITG_07767 | Pi conserved hypothetical protein (2458 nt)                    | -16.3097 | -0.98894 | 0.502629 |
| PITG_18455 | Pi conserved hypothetical protein (575 nt)                     | -13.9561 | -0.73205 | 0.502786 |
| PITG_02069 | Pi vacuolar sorting protein SNF8 (980 nt)                      | -15.0871 | -0.79951 | 0.503114 |
| PITG_05680 | Pi conserved hypothetical protein (676 nt)                     | -15.7421 | 0.969148 | 0.503288 |
| PITG_09181 | Pi conserved hypothetical protein (1067 nt)                    | -15.2386 | 0.878982 | 0.503324 |
| PITG_18005 | Pi conserved hypothetical protein (1379 nt)                    | -12.6225 | -0.65195 | 0.504079 |
| PITG_02339 | Pi 26S proteasome non-ATPase regulatory subunit 12, putati     | -13.2109 | 0.686505 | 0.504295 |
| PITG_08082 | Pi cytochrome b5 (444 nt)                                      | -13.1889 | 0.693903 | 0.504326 |
| PITG_08094 | Pi inorganic pyrophosphatase (889 nt)                          | -15.4582 | 0.8066   | 0.504697 |
| PITG_20289 | Pi carbohydrate-binding protein, putative (1402 nt)            | -15.4941 | -0.88959 | 0.504697 |
| PITG_10725 | Pi ribosomal RNA processing protein 1 (1804 nt)                | -16.0338 | 0.865357 | 0.504733 |
| PITG_07285 | Pi conserved hypothetical protein (1174 nt)                    | -10.0966 | -0.68538 | 0.504827 |
| PITG_03772 | Pi ADP-ribosylation factor-like protein (1588 nt)              | -16.3032 | -1.00266 | 0.505484 |
| PITG_16066 | Pi conserved hypothetical protein (978 nt)                     | -16.3032 | -1.00266 | 0.505484 |
| PITG_17609 | Pi conserved hypothetical protein (1112 nt)                    | -13.9602 | 0.662678 | 0.505844 |
| PITG_18861 | Pi conserved hypothetical protein (1158 nt)                    | -15.3526 | 0.876062 | 0.505857 |
| PITG_22524 | Pi conserved hypothetical protein (1004 nt)                    | -15.361  | -1.03799 | 0.505945 |
| PITG_10285 | Pi conserved hypothetical protein (2697 nt)                    | -15.7513 | -1.05839 | 0.506437 |
| PITG_05420 | Pi conserved hypothetical protein (681 nt)                     | -15.8125 | 0.911473 | 0.506483 |
| PITG_14578 | Pi phosducin-like protein (715 nt)                             | -13.3546 | -0.67073 | 0.5065   |
| PITG_19495 | Pi glyceraldehyde-3-phosphate dehydrogenase, putative (54      | -10.9863 | -0.77909 | 0.506567 |
| PITG_01832 | Pi protein kinase (2896 nt)                                    | -15.2577 | -0.73029 | 0.506567 |
| PITG_18459 | Pi conserved hypothetical protein (1623 nt)                    | -15.0682 | -0.69731 | 0.506623 |
| PITG_01123 | Pi conserved hypothetical protein (654 nt)                     | -14.9017 | 0.76639  | 0.507178 |

|            |                                                                  |          |          |          |
|------------|------------------------------------------------------------------|----------|----------|----------|
| PITG_03398 | Pi histidyl-tRNA synthetase, putative (1038 nt)                  | -14.9845 | 0.881937 | 0.507728 |
| PITG_03332 | Pi phosphatidylinositol-4-phosphate 5-kinase, putative (1412 nt) | -15.7608 | -0.98148 | 0.508005 |
| PITG_15173 | Pi conserved hypothetical protein (2982 nt)                      | -15.7608 | -0.98148 | 0.508005 |
| PITG_18072 | Pi conserved hypothetical protein (1370 nt)                      | -8.76856 | -0.63217 | 0.508138 |
| PITG_10861 | Pi nuclear transcription factor Y subunit B-3 (700 nt)           | -11.3744 | -0.63963 | 0.508566 |
| PITG_01332 | Pi lysophospholipid acyltransferase, putative (1563 nt)          | -15.8986 | 0.862317 | 0.508771 |
| PITG_12749 | Pi conserved hypothetical protein (1335 nt)                      | -11.9592 | 0.657171 | 0.509172 |
| PITG_16910 | Pi ATP-binding Cassette (ABC) Superfamily (1875 nt)              | -16.0085 | 0.921046 | 0.509194 |
| PITG_13256 | Pi conserved hypothetical protein (995 nt)                       | -13.8674 | 0.711569 | 0.509353 |
| PITG_13066 | Pi hypothetical protein (816 nt)                                 | -14.1913 | -0.74834 | 0.509411 |
| PITG_11086 | Pi HIT domain-containing protein, putative (592 nt)              | -14.0943 | 0.651917 | 0.509968 |
| PITG_02245 | Pi D-2-hydroxyglutarate dehydrogenase, mitochondrial precursor   | -15.9527 | -1.01277 | 0.510297 |
| PITG_05267 | Pi transmembrane protein, putative (1028 nt)                     | -15.9909 | 1.009432 | 0.51046  |
| PITG_15831 | Pi 5-formyltetrahydrofolate cyclo-ligase, putative (931 nt)      | -13.7702 | -0.70429 | 0.510611 |
| PITG_04677 | Pi protein kinase (1359 nt)                                      | -16.2279 | -1.2506  | 0.510615 |
| PITG_18728 | Pi conserved hypothetical protein (2363 nt)                      | -14.1048 | -0.75944 | 0.510663 |
| PITG_22323 | Pi ribosome biogenesis protein RLP24 (675 nt)                    | -16.3217 | -0.89743 | 0.511163 |
| PITG_06406 | Pi HECT E3 ubiquitin ligase, putative (648 nt)                   | -15.4936 | -0.89106 | 0.511239 |
| PITG_17045 | Pi mannitol dehydrogenase, putative (2012 nt)                    | -13.8078 | 0.685261 | 0.511424 |
| PITG_11551 | Pi Major Facilitator Superfamily (MFS) (504 nt)                  | -15.9153 | -0.78627 | 0.511818 |
| PITG_03504 | Pi conserved hypothetical protein (955 nt)                       | -15.8832 | 0.831891 | 0.511818 |
| PITG_02254 | Pi conserved hypothetical protein (2198 nt)                      | -16.087  | -1.00411 | 0.512155 |
| PITG_13975 | Pi hypothetical protein (371 nt)                                 | -16.087  | -1.00411 | 0.512155 |
| PITG_23192 | Pi small nuclear ribonucleoprotein F, putative (580 nt)          | -12.0467 | 0.65403  | 0.512305 |
| PITG_01756 | Pi negative elongation factor, putative (2775 nt)                | -16.2983 | -1.01436 | 0.512576 |
| PITG_18038 | Pi conserved hypothetical protein (900 nt)                       | -13.9246 | 0.682942 | 0.513276 |
| PITG_17069 | Pi coatomer protein complex, putative (3808 nt)                  | -14.0095 | 0.731115 | 0.51337  |
| PITG_13438 | Pi conserved hypothetical protein (1355 nt)                      | -12.9876 | -0.67565 | 0.513756 |
| PITG_07083 | Pi ubiquitin thioesterase OTU1-like protein (1069 nt)            | -15.6376 | -0.87149 | 0.51405  |
| PITG_20284 | Pi hypothetical protein (998 nt)                                 | -16.843  | -1.34558 | 0.514186 |
| PITG_03685 | Pi 2-amino-3-ketobutyrate coenzyme A ligase, mitochondria        | -13.6756 | -0.83166 | 0.51483  |
| PITG_22683 | Pi secreted RxLR effector peptide, putative (522 nt)             | -16.021  | 0.902838 | 0.515105 |
| PITG_01119 | Pi conserved hypothetical protein (610 nt)                       | -11.6737 | -0.68685 | 0.515371 |
| PITG_06394 | Pi conserved hypothetical protein (1365 nt)                      | -16.8191 | -1.29626 | 0.515467 |
| PITG_19122 | Pi conserved hypothetical protein (1498 nt)                      | -16.8191 | -1.29626 | 0.515467 |
| PITG_04705 | Pi conserved hypothetical protein (2356 nt)                      | -15.6411 | -0.91547 | 0.515645 |
| PITG_06383 | Pi conserved hypothetical protein (2769 nt)                      | -13.1075 | -0.76344 | 0.515823 |
| PITG_02423 | Pi cysteine protease family C01A, putative (2587 nt)             | -12.5504 | 0.661654 | 0.515847 |
| PITG_00266 | Pi 40S ribosomal protein S10 (596 nt)                            | -9.31665 | 0.64686  | 0.516528 |
| PITG_01697 | Pi importin alpha-2 subunit (2191 nt)                            | -13.1795 | 0.831192 | 0.516645 |
| PITG_06410 | Pi conserved hypothetical protein (6512 nt)                      | -14.1585 | -0.69732 | 0.516944 |
| PITG_00170 | Pi vacuolar-sorting receptor, putative (1963 nt)                 | -12.1484 | -0.62897 | 0.51714  |
| PITG_16781 | Pi hypothetical protein (706 nt)                                 | -15.7641 | 0.974754 | 0.517335 |
| PITG_11982 | Pi conserved hypothetical protein (486 nt)                       | -12.9725 | -0.63389 | 0.517572 |
| PITG_07301 | Pi conserved hypothetical protein (4224 nt)                      | -15.9172 | -0.84043 | 0.517868 |
| PITG_14913 | Pi 40S ribosomal protein S16 (1118 nt)                           | -9.47691 | 0.637776 | 0.51805  |
| PITG_10736 | Pi cysteine protease family C54, putative (1313 nt)              | -13.0675 | -0.66241 | 0.518451 |

|            |                                                                |          |          |          |
|------------|----------------------------------------------------------------|----------|----------|----------|
| PITG_03119 | Pi conserved hypothetical protein (1770 nt)                    | -14.529  | 0.739366 | 0.518549 |
| PITG_16921 | Pi conserved hypothetical protein (867 nt)                     | -8.93993 | -0.61227 | 0.518928 |
| PITG_07328 | Pi manganese superoxide dismutase (877 nt)                     | -9.99484 | 0.682813 | 0.519015 |
| PITG_13661 | Pi conserved hypothetical protein (1053 nt)                    | -16.3047 | -1.07512 | 0.519608 |
| PITG_16062 | Pi conserved hypothetical protein (1547 nt)                    | -16.2991 | -1.08629 | 0.519608 |
| PITG_08571 | Pi Drug/Metabolite Transporter (DMT) Superfamily (1227 nt)     | -13.7705 | 0.6736   | 0.519813 |
| PITG_02717 | Pi conserved hypothetical protein (922 nt)                     | -15.9139 | -0.84797 | 0.52087  |
| PITG_01864 | Pi conserved hypothetical protein (998 nt)                     | -16.3422 | -1.00068 | 0.521007 |
| PITG_20212 | Pi intraflagellar transport protein 172 (5418 nt)              | -14.8364 | 0.879201 | 0.521041 |
| PITG_19411 | Pi conserved hypothetical protein (1390 nt)                    | -14.7356 | -0.73317 | 0.521204 |
| PITG_22666 | Pi conserved hypothetical protein (654 nt)                     | -12.8267 | 0.63826  | 0.521206 |
| PITG_06329 | Pi conserved hypothetical protein (457 nt)                     | -15.2752 | 0.86454  | 0.521619 |
| PITG_00280 | Pi conserved hypothetical protein (1521 nt)                    | -13.171  | -0.74701 | 0.521807 |
| PITG_00058 | Pi protease inhibitor EpiC4 (519 nt)                           | -10.2752 | 0.61174  | 0.522473 |
| PITG_00158 | Pi conserved hypothetical protein (551 nt)                     | -14.2988 | 0.712688 | 0.522503 |
| PITG_15247 | Pi conserved hypothetical protein (567 nt)                     | -15.1394 | -0.90003 | 0.522583 |
| PITG_00479 | Pi conserved hypothetical protein (2066 nt)                    | -14.1994 | 0.72794  | 0.522991 |
| PITG_04907 | Pi conserved hypothetical protein (652 nt)                     | -15.2632 | -0.88327 | 0.523264 |
| PITG_03821 | Pi conserved hypothetical protein (3044 nt)                    | -14.9954 | -0.80595 | 0.523499 |
| PITG_12754 | Pi dynein light chain 2B (588 nt)                              | -12.3908 | 0.62265  | 0.523742 |
| PITG_13291 | Pi dolichyl pyrophosphate Glc1Man9GlcNAc2 alpha-1,3-gluc       | -16.3245 | -1.03735 | 0.523798 |
| PITG_10501 | Pi conserved hypothetical protein (404 nt)                     | -12.9036 | 0.701902 | 0.523986 |
| PITG_11410 | Pi hypothetical protein (1851 nt)                              | -14.6082 | -0.7294  | 0.524052 |
| PITG_17123 | Pi T-complex protein 1 subunit gamma (1738 nt)                 | -13.0309 | 0.68298  | 0.524273 |
| PITG_07199 | Pi conserved hypothetical protein (724 nt)                     | -13.7561 | 0.769848 | 0.524726 |
| PITG_12163 | Pi conserved hypothetical protein (1014 nt)                    | -15.6247 | 0.791674 | 0.525114 |
| PITG_14280 | Pi conserved hypothetical protein (667 nt)                     | -16.1895 | 0.786118 | 0.525191 |
| PITG_17346 | Pi conserved hypothetical protein (1201 nt)                    | -16.1895 | 0.786118 | 0.525191 |
| PITG_13853 | Pi conserved hypothetical protein (1208 nt)                    | -15.5073 | -0.91541 | 0.525677 |
| PITG_14750 | Pi conserved hypothetical protein (1760 nt)                    | -15.9675 | -0.97975 | 0.526831 |
| PITG_22113 | Pi conserved hypothetical protein (1068 nt)                    | -15.9246 | 0.936455 | 0.526831 |
| PITG_13483 | Pi conserved hypothetical protein (1657 nt)                    | -13.9137 | -0.72278 | 0.527065 |
| PITG_03684 | Pi conserved hypothetical protein (962 nt)                     | -12.2743 | -0.6668  | 0.527919 |
| PITG_06025 | Pi conserved hypothetical protein (2390 nt)                    | -13.0719 | -0.6421  | 0.528208 |
| PITG_10711 | Pi PpiC-type peptidyl-prolyl cis-trans isomerase, putative (10 | -13.3126 | -0.65255 | 0.528292 |
| PITG_04511 | Pi conserved hypothetical protein (1507 nt)                    | -17.2851 | -1.58757 | 0.528435 |
| PITG_05075 | Pi conserved hypothetical protein (3271 nt)                    | -17.2851 | -1.58757 | 0.528435 |
| PITG_05799 | Pi conserved hypothetical protein (905 nt)                     | -17.2851 | -1.58757 | 0.528435 |
| PITG_08539 | Pi conserved hypothetical protein (755 nt)                     | -17.2851 | -1.58757 | 0.528435 |
| PITG_14746 | Pi conserved hypothetical protein (867 nt)                     | -17.2851 | -1.58757 | 0.528435 |
| PITG_11806 | Pi vacuolar protein sorting-associated protein 26B-A (703 nt)  | -15.3952 | -0.84524 | 0.528649 |
| PITG_09770 | Pi conserved hypothetical protein (1403 nt)                    | -14.3189 | -0.68039 | 0.529409 |
| PITG_10987 | Pi Drug/Metabolite Transporter (DMT) Superfamily (1416 nt)     | -14.0543 | 0.679587 | 0.529514 |
| PITG_16453 | Pi conserved hypothetical protein (2559 nt)                    | -16.568  | -1.01672 | 0.53041  |
| PITG_16764 | Pi hypothetical protein (684 nt)                               | -16.797  | -1.23401 | 0.530785 |
| PITG_04398 | Pi Amino Acid/Auxin Permease (AAP) Family (1608 nt)            | -13.8302 | 0.701621 | 0.531143 |
| PITG_18695 | Pi UDP-galactose transporter (1132 nt)                         | -16.5573 | -1.0379  | 0.531704 |

|            |                                                                |          |          |          |
|------------|----------------------------------------------------------------|----------|----------|----------|
| PITG_13849 | Pi GDP-mannose transporter, putative (1020 nt)                 | -13.708  | 0.67197  | 0.53237  |
| PITG_18706 | Pi acetyl-CoA carboxylase, putative (8050 nt)                  | -13.9032 | 0.694158 | 0.532524 |
| PITG_02112 | Pi 3-hydroxyisobutyryl-CoA hydrolase, putative (1549 nt)       | -13.8229 | 0.670171 | 0.532964 |
| PITG_06864 | Pi cytosolic endo-beta-N-acetylglucosaminidase, putative (25   | -16.5868 | -1.05427 | 0.532995 |
| PITG_01242 | Pi condensin complex subunit 2, putative (2609 nt)             | -15.3399 | 0.76252  | 0.533467 |
| PITG_12550 | Pi conserved hypothetical protein (496 nt)                     | -12.1189 | 0.657254 | 0.533599 |
| PITG_18662 | Pi conserved hypothetical protein (641 nt)                     | -11.7165 | 0.666291 | 0.534028 |
| PITG_10123 | Pi Drug/Metabolite Transporter (DMT) Superfamily (362 nt)      | -15.8685 | 0.822685 | 0.534202 |
| PITG_02683 | Pi calcineurin-like phosphoesterase, putative (1396 nt)        | -14.5366 | 0.71146  | 0.534273 |
| PITG_14132 | Pi conserved hypothetical protein (715 nt)                     | -16.5765 | -1.07517 | 0.534284 |
| PITG_14702 | Pi conserved hypothetical protein (384 nt)                     | -16.5978 | -1.03256 | 0.534284 |
| PITG_13462 | Pi carbohydrate-binding protein, putative (1542 nt)            | -14.2364 | -0.84235 | 0.534393 |
| PITG_03565 | Pi hypothetical protein (851 nt)                               | -15.5663 | 0.720566 | 0.534415 |
| PITG_02667 | Pi conserved hypothetical protein (592 nt)                     | -16.1066 | 0.926008 | 0.534621 |
| PITG_13364 | Pi conserved hypothetical protein (708 nt)                     | -14.8021 | -0.76853 | 0.53472  |
| PITG_15416 | Pi conserved hypothetical protein (627 nt)                     | -12.6409 | 0.620081 | 0.534819 |
| PITG_06693 | Pi trifunctional enzyme subunit alpha, putative (2244 nt)      | -12.8845 | -0.73329 | 0.535118 |
| PITG_00622 | Pi vacuolar protein sorting-associated protein 18 (4544 nt)    | -14.9831 | -0.7203  | 0.535409 |
| PITG_12826 | Pi conserved hypothetical protein (678 nt)                     | -16.0847 | 0.882176 | 0.536036 |
| PITG_17081 | Pi Voltage-gated Ion Channel (VIC) Superfamily (2685 nt)       | -15.8085 | -0.94376 | 0.536197 |
| PITG_03635 | Pi conserved hypothetical protein (3743 nt)                    | -17.2602 | -1.52901 | 0.53622  |
| PITG_04352 | Pi conserved hypothetical protein (3282 nt)                    | -17.2602 | -1.52901 | 0.53622  |
| PITG_19533 | Pi cleavage and polyadenylation specificity factor subunit, pu | -17.2602 | -1.52901 | 0.53622  |
| PITG_20809 | Pi conserved hypothetical protein (747 nt)                     | -17.2602 | -1.52901 | 0.53622  |
| PITG_08740 | Pi conserved hypothetical protein (2290 nt)                    | -14.6945 | -0.75219 | 0.53623  |
| PITG_20385 | Pi 3-oxo-5-alpha-steroid 4-dehydrogenase, putative (602 nt)    | -15.5324 | -0.76471 | 0.536486 |
| PITG_02724 | Pi Cullin family protein, putative (2338 nt)                   | -15.4069 | -0.87039 | 0.536652 |
| PITG_01120 | Pi conserved hypothetical protein (231 nt)                     | -11.655  | 0.671325 | 0.537403 |
| PITG_13435 | Pi conserved hypothetical protein (3146 nt)                    | -15.5779 | 0.699866 | 0.53748  |
| PITG_15046 | Pi conserved hypothetical protein (775 nt)                     | -15.2741 | 0.690345 | 0.537686 |
| PITG_16036 | Pi echinoderm microtubule-associated protein (7873 nt)         | -15.7632 | 0.72952  | 0.537701 |
| PITG_18931 | Pi hypothetical protein (699 nt)                               | -8.89109 | 0.619454 | 0.537758 |
| PITG_00804 | Pi T-complex protein 1 subunit delta (1892 nt)                 | -12.9301 | 0.65993  | 0.537809 |
| PITG_17543 | Pi crinkler (CRN) family protein, pseudogene (1989 nt)         | -9.55716 | -0.62727 | 0.53782  |
| PITG_08346 | Pi carbohydrate-binding protein, putative (3089 nt)            | -13.4925 | 0.662619 | 0.537935 |
| PITG_15924 | Pi conserved hypothetical protein (1916 nt)                    | -14.6087 | -0.70038 | 0.538049 |
| PITG_02502 | Pi T-complex protein 1 subunit zeta (3765 nt)                  | -13.2978 | 0.658458 | 0.538079 |
| PITG_11417 | Pi U4/U6.U5 small nuclear ribonucleoprotein 27 kDa protein     | -15.9114 | -0.91833 | 0.538585 |
| PITG_06631 | Pi conserved hypothetical protein (1938 nt)                    | -13.0475 | -0.67471 | 0.539166 |
| PITG_00313 | Pi hypothetical protein (1989 nt)                              | -16.5678 | -1.09371 | 0.539421 |
| PITG_06034 | Pi conserved hypothetical protein (1369 nt)                    | -16.5678 | -1.09371 | 0.539421 |
| PITG_11922 | Pi epoxide hydrolase, putative (993 nt)                        | -14.7612 | -0.68158 | 0.539639 |
| PITG_01858 | Pi Der1-like family, putative (1184 nt)                        | -15.9143 | -0.91331 | 0.540039 |
| PITG_10832 | Pi protein recA (1647 nt)                                      | -15.0737 | 0.729177 | 0.540201 |
| PITG_03233 | Pi conserved hypothetical protein (996 nt)                     | -16.0958 | 0.861969 | 0.540259 |
| PITG_07941 | Pi conserved hypothetical protein (114 nt)                     | -16.319  | -1.05627 | 0.540364 |
| PITG_12487 | Pi conserved hypothetical protein (606 nt)                     | -8.39095 | -0.58731 | 0.540896 |

|            |                                                               |          |          |          |
|------------|---------------------------------------------------------------|----------|----------|----------|
| PITG_17920 | Pi plasma membrane H <sup>+</sup> -ATPase (876 nt)            | -11.1838 | 0.644834 | 0.541474 |
| PITG_23144 | Pi Crinkler (CRN) family protein, pseudogene (7122 nt)        | -12.8228 | -0.90936 | 0.541657 |
| PITG_15868 | Pi DNA primase, putative (1617 nt)                            | -16.1186 | -0.8651  | 0.54166  |
| PITG_04865 | Pi conserved hypothetical protein (858 nt)                    | -16.297  | 1.121283 | 0.54173  |
| PITG_03286 | Pi hypothetical protein (367 nt)                              | -17.3314 | -1.49413 | 0.541776 |
| PITG_06256 | Pi conserved hypothetical protein (5536 nt)                   | -17.3314 | -1.49413 | 0.541776 |
| PITG_16722 | Pi metalloprotease family M67A, putative (757 nt)             | -17.3314 | -1.49413 | 0.541776 |
| PITG_17070 | Pi CCAAT-binding transcription factor, putative (752 nt)      | -17.3314 | -1.49413 | 0.541776 |
| PITG_18168 | Pi conserved hypothetical protein (1080 nt)                   | -17.3314 | -1.49413 | 0.541776 |
| PITG_20794 | Pi conserved hypothetical protein (1264 nt)                   | -13.1175 | 0.617841 | 0.542021 |
| PITG_13114 | Pi elicitin-like protein (1288 nt)                            | -14.4944 | 0.658735 | 0.542084 |
| PITG_19963 | Pi conserved hypothetical protein (1042 nt)                   | -12.9913 | 0.644488 | 0.542098 |
| PITG_01001 | Pi conserved hypothetical protein (2731 nt)                   | -15.7987 | 0.800295 | 0.542186 |
| PITG_16152 | Pi conserved hypothetical protein (2635 nt)                   | -15.7803 | 0.837104 | 0.542186 |
| PITG_01702 | Pi conserved hypothetical protein (846 nt)                    | -12.9751 | 0.63893  | 0.542903 |
| PITG_22035 | Pi conserved hypothetical protein (1467 nt)                   | -15.3445 | 0.738916 | 0.542959 |
| PITG_19977 | Pi haloacid dehalogenase-like hydrolase, putative (859 nt)    | -15.7781 | -1.00527 | 0.543071 |
| PITG_18735 | Pi vacuolar protein sorting-associated protein, putative (187 | -14.6116 | 0.791575 | 0.543178 |
| PITG_19316 | Pi Crinkler (CRN) family protein, pseudogene (1872 nt)        | -12.2799 | -0.62949 | 0.54342  |
| PITG_00391 | Pi conserved hypothetical protein (2680 nt)                   | -13.686  | -0.67466 | 0.543444 |
| PITG_09366 | Pi conserved hypothetical protein (703 nt)                    | -15.0867 | 0.703846 | 0.543512 |
| PITG_07974 | Pi conserved hypothetical protein (1801 nt)                   | -12.8842 | 0.64647  | 0.543594 |
| PITG_01265 | Pi conserved hypothetical protein (1336 nt)                   | -15.1419 | 0.786122 | 0.543857 |
| PITG_20118 | Pi 50S ribosomal protein L15 (753 nt)                         | -13.4859 | 0.666358 | 0.543882 |
| PITG_12794 | Pi conserved hypothetical protein (4368 nt)                   | -17.2737 | -1.60939 | 0.543997 |
| PITG_16983 | Pi conserved hypothetical protein (1051 nt)                   | -17.2737 | -1.60939 | 0.543997 |
| PITG_20633 | Pi Major Facilitator Superfamily (MFS) (441 nt)               | -17.2737 | -1.60939 | 0.543997 |
| PITG_05500 | Pi conserved hypothetical protein (1252 nt)                   | -14.9403 | -0.75163 | 0.544236 |
| PITG_10258 | Pi conserved hypothetical protein (381 nt)                    | -13.9967 | -0.74343 | 0.544289 |
| PITG_14850 | Pi 40S ribosomal protein S7 (909 nt)                          | -9.70294 | 0.596473 | 0.544307 |
| PITG_06846 | Pi Drug/Metabolite Transporter (DMT) Superfamily (909 nt)     | -15.917  | -0.90963 | 0.544382 |
| PITG_12549 | Pi conserved hypothetical protein (966 nt)                    | -16.0667 | 0.845522 | 0.544453 |
| PITG_12561 | Pi elicitin INF2A-like protein (567 nt)                       | -11.0859 | -0.64424 | 0.544701 |
| PITG_03365 | Pi glucokinase, putative (1763 nt)                            | -14.5336 | 0.717647 | 0.544742 |
| PITG_15504 | Pi thioredoxin peroxidase, putative (765 nt)                  | -13.1159 | 0.674353 | 0.545141 |
| PITG_04525 | Pi conserved hypothetical protein (982 nt)                    | -13.3248 | -0.78377 | 0.545799 |
| PITG_00720 | Pi acetyl-coenzyme A synthetase (1983 nt)                     | -14.9133 | 0.722609 | 0.545914 |
| PITG_10747 | Pi conserved hypothetical protein (721 nt)                    | -12.9908 | 0.643593 | 0.545949 |
| PITG_05675 | Pi histone, putative (441 nt)                                 | -13.8951 | -0.80518 | 0.545993 |
| PITG_03574 | Pi serine/threonine-protein phosphatase 4 catalytic subunit   | -12.4014 | 0.60876  | 0.546263 |
| PITG_08693 | Pi hook domain-containing protein (2751 nt)                   | -14.9165 | -0.81315 | 0.54648  |
| PITG_01419 | Pi Major Facilitator Superfamily (MFS) (1956 nt)              | -14.8868 | -0.90283 | 0.546504 |
| PITG_03265 | Pi Monovalent Cation:Proton Antiporter-1 (CPA1) Family (17    | -15.8005 | -0.95978 | 0.546632 |
| PITG_03650 | Pi conserved hypothetical protein (2458 nt)                   | -15.2672 | 0.793103 | 0.547344 |
| PITG_03590 | Pi inositol hexakisphosphate and diphosphoinositol-pentakis   | -15.5052 | 0.741783 | 0.547391 |
| PITG_05476 | Pi flavin-binding monooxygenase-like protein (1557 nt)        | -15.8123 | -0.87953 | 0.548105 |
| PITG_04489 | Pi peroxisome assembly factor, putative (2828 nt)             | -16.5615 | -1.10837 | 0.548341 |



|            |                                                               |          |          |          |
|------------|---------------------------------------------------------------|----------|----------|----------|
| PITG_20504 | Pi conserved hypothetical protein (1002 nt)                   | -16.5615 | -1.10837 | 0.548341 |
| PITG_13676 | Pi conserved hypothetical protein (555 nt)                    | -8.80006 | -0.62734 | 0.548657 |
| PITG_05546 | Pi conserved hypothetical protein (1299 nt)                   | -14.6492 | -0.78214 | 0.548893 |
| PITG_13392 | Pi conserved hypothetical protein (677 nt)                    | -12.5546 | 0.616004 | 0.549358 |
| PITG_06700 | Pi cell division cycle protein 48 (2039 nt)                   | -15.639  | -0.9217  | 0.549568 |
| PITG_06503 | Pi hypothetical protein (1469 nt)                             | -11.389  | -0.69347 | 0.550054 |
| PITG_06408 | Pi conserved hypothetical protein (1849 nt)                   | -12.1256 | -0.62567 | 0.55024  |
| PITG_03555 | Pi importin-like protein (3240 nt)                            | -15.2673 | 0.910433 | 0.550434 |
| PITG_21658 | Pi conserved hypothetical protein (4189 nt)                   | -11.6817 | -0.60468 | 0.550507 |
| PITG_09004 | Pi conserved hypothetical protein (925 nt)                    | -13.6338 | -0.63597 | 0.550615 |
| PITG_11743 | Pi nuclear pore complex protein, putative (6165 nt)           | -15.4175 | -0.89484 | 0.550731 |
| PITG_19065 | Pi pyridine nucleotide-disulphide oxidoreductase, putative (1 | -14.4532 | 0.668163 | 0.550809 |
| PITG_03827 | Pi conserved hypothetical protein (1240 nt)                   | -15.7685 | -0.7673  | 0.551039 |
| PITG_05938 | Pi conserved hypothetical protein (1148 nt)                   | -13.2304 | 0.6852   | 0.551649 |
| PITG_14592 | Pi hypothetical protein (608 nt)                              | -13.8969 | -0.67154 | 0.551725 |
| PITG_09861 | Pi secreted RxLR effector peptide, putative (702 nt)          | -17.3059 | -1.42757 | 0.551771 |
| PITG_01787 | Pi conserved hypothetical protein (1738 nt)                   | -15.0713 | 1.016411 | 0.551934 |
| PITG_11178 | Pi molybdenum cofactor synthesis protein 2 large subunit (6   | -15.5237 | -0.78197 | 0.551986 |
| PITG_08090 | Pi conserved hypothetical protein (3085 nt)                   | -12.8122 | -0.62235 | 0.552134 |
| PITG_08708 | Pi conserved hypothetical protein (3084 nt)                   | -15.7343 | 0.708467 | 0.552499 |
| PITG_08754 | Pi conserved hypothetical protein (2329 nt)                   | -15.7343 | 0.708467 | 0.552499 |
| PITG_19773 | Pi serine/threonine protein kinase (2308 nt)                  | -15.7699 | 0.817078 | 0.552499 |
| PITG_00960 | Pi conserved hypothetical protein (2971 nt)                   | -17.2475 | -1.54361 | 0.552881 |
| PITG_06039 | Pi conserved hypothetical protein (843 nt)                    | -17.2475 | -1.54361 | 0.552881 |
| PITG_20247 | Pi hypothetical protein (2075 nt)                             | -17.2475 | -1.54361 | 0.552881 |
| PITG_14818 | Pi guanylate-binding protein, putative (1890 nt)              | -15.5118 | -0.75736 | 0.553508 |
| PITG_16788 | Pi conserved hypothetical protein (1197 nt)                   | -15.3158 | -0.7416  | 0.553664 |
| PITG_02283 | Pi conserved hypothetical protein (719 nt)                    | -13.1135 | -0.6218  | 0.553702 |
| PITG_01459 | Pi conserved hypothetical protein (2081 nt)                   | -15.5859 | 0.827766 | 0.554034 |
| PITG_14180 | Pi glutamine synthetase (1184 nt)                             | -11.7227 | 0.603005 | 0.554134 |
| PITG_01608 | Pi Major Facilitator Superfamily (MFS) (1695 nt)              | -14.5058 | -0.67558 | 0.554246 |
| PITG_00016 | Pi DNA-binding protein, putative (708 nt)                     | -15.9024 | -0.94309 | 0.554406 |
| PITG_02917 | Pi puromycin-sensitive aminopeptidase, putative (2655 nt)     | -14.764  | -0.68478 | 0.554907 |
| PITG_15494 | Pi cytosine deaminase (438 nt)                                | -14.576  | -0.7364  | 0.554938 |
| PITG_01353 | Pi UDP-N-acetylglucosamine transferase subunit, putative (5   | -15.2717 | 0.71615  | 0.555229 |
| PITG_03074 | Pi diacylglycerol acyltransferase, putative (1160 nt)         | -15.2717 | 0.71615  | 0.555229 |
| PITG_21514 | Pi conserved hypothetical protein (845 nt)                    | -15.326  | -0.75872 | 0.555229 |
| PITG_09531 | Pi conserved hypothetical protein (981 nt)                    | -13.9079 | 0.703331 | 0.555254 |
| PITG_00452 | Pi xylulose kinase, putative (1677 nt)                        | -15.7985 | -0.79195 | 0.555408 |
| PITG_05189 | Pi conserved hypothetical protein (642 nt)                    | -15.8104 | -0.88248 | 0.555408 |
| PITG_19693 | Pi conserved hypothetical protein (2062 nt)                   | -15.7994 | -0.96225 | 0.555408 |
| PITG_21643 | Pi vacuolar protein sorting-associated protein 29 (650 nt)    | -13.5019 | 0.647715 | 0.555453 |
| PITG_14509 | Pi hypothetical protein (243 nt)                              | -13.1725 | -0.8229  | 0.555468 |
| PITG_03943 | Pi conserved hypothetical protein (672 nt)                    | -15.6895 | 1.0041   | 0.555514 |
| PITG_12987 | Pi kinesin-like protein (2238 nt)                             | -15.7386 | 1.170594 | 0.555514 |
| PITG_22670 | Pi PcF and SCR74-like cys-rich secreted peptide, putative (25 | -8.18561 | 0.688736 | 0.555547 |
| PITG_07887 | Pi 26S proteasome non-ATPase regulatory subunit 6 (1430 n     | -13.6161 | 0.623739 | 0.556394 |

|            |                                                               |          |          |          |
|------------|---------------------------------------------------------------|----------|----------|----------|
| PITG_02924 | Pi conserved hypothetical protein (1970 nt)                   | -15.1023 | -0.76826 | 0.556494 |
| PITG_12152 | Pi ribonuclease HIII (837 nt)                                 | -15.4941 | -0.69547 | 0.556536 |
| PITG_13911 | Pi conserved hypothetical protein (745 nt)                    | -15.1409 | 0.782787 | 0.556543 |
| PITG_02679 | Pi conserved hypothetical protein (3114 nt)                   | -15.0434 | -0.70995 | 0.556575 |
| PITG_09726 | Pi phosphoribosylaminoimidazole carboxylase (1833 nt)         | -15.0346 | 0.726165 | 0.556575 |
| PITG_07529 | Pi conserved hypothetical protein (536 nt)                    | -12.3782 | 0.587732 | 0.556876 |
| PITG_16073 | Pi alcohol dehydrogenase, putative (1376 nt)                  | -14.2322 | -0.68654 | 0.556923 |
| PITG_10169 | Pi 26S protease regulatory subunit 7 (1450 nt)                | -12.2863 | 0.577963 | 0.557184 |
| PITG_05840 | Pi cytochrome b-c1 complex subunit Rieske, putative (948 nt)  | -10.8047 | 0.585199 | 0.557979 |
| PITG_06238 | Pi conserved hypothetical protein (736 nt)                    | -15.4974 | -0.68931 | 0.558042 |
| PITG_17273 | Pi conserved hypothetical protein (3462 nt)                   | -14.6725 | 0.67146  | 0.558177 |
| PITG_03416 | Pi cysteine protease family C01A, putative (1530 nt)          | -13.8507 | -0.62858 | 0.558182 |
| PITG_16117 | Pi conserved hypothetical protein (875 nt)                    | -9.74675 | -0.59983 | 0.558823 |
| PITG_12049 | Pi conserved hypothetical protein (683 nt)                    | -10.7271 | 0.566459 | 0.559088 |
| PITG_19038 | Pi conserved hypothetical protein (2066 nt)                   | -14.1001 | 0.640916 | 0.559094 |
| PITG_00613 | Pi 26S protease regulatory subunit 8 (1558 nt)                | -12.5179 | 0.599011 | 0.559595 |
| PITG_19842 | Pi conserved hypothetical protein (3047 nt)                   | -14.9886 | -0.78271 | 0.559865 |
| PITG_13641 | Pi glucanase inhibitor protein, putative (771 nt)             | -13.6645 | -0.67387 | 0.559965 |
| PITG_19865 | Pi carboxyvinyl-carboxyphosphonate phosphorylmutase, put      | -13.9733 | -0.72947 | 0.560204 |
| PITG_05497 | Pi conserved hypothetical protein (904 nt)                    | -12.5773 | 0.576779 | 0.560329 |
| PITG_10219 | Pi V-type proton ATPase subunit E, putative (824 nt)          | -11.5661 | 0.571396 | 0.560778 |
| PITG_10971 | Pi protein kinase, putative (2405 nt)                         | -13.9801 | 0.626989 | 0.560929 |
| PITG_06970 | Pi conserved hypothetical protein (3040 nt)                   | -13.7079 | -0.70351 | 0.561145 |
| PITG_06992 | Pi glucosidase 2 subunit beta, putative (3210 nt)             | -14.6852 | 0.648837 | 0.561149 |
| PITG_17568 | Pi conserved hypothetical protein (2884 nt)                   | -15.2305 | -0.74381 | 0.561161 |
| PITG_08394 | Pi conserved hypothetical protein (3215 nt)                   | -15.4148 | -0.71542 | 0.561243 |
| PITG_11010 | Pi conserved hypothetical protein (4156 nt)                   | -15.0789 | 0.686507 | 0.561258 |
| PITG_08995 | Pi conserved hypothetical protein (718 nt)                    | -15.3553 | 0.731227 | 0.561411 |
| PITG_00152 | Pi kinesin-like protein (4503 nt)                             | -15.31   | -0.83459 | 0.561435 |
| PITG_02981 | Pi conserved hypothetical protein (1555 nt)                   | -15.2973 | -0.78032 | 0.561435 |
| PITG_12142 | Pi conserved hypothetical protein (615 nt)                    | -15.2786 | 0.757703 | 0.561435 |
| PITG_18738 | Pi hypothetical protein (906 nt)                              | -14.3884 | -0.72027 | 0.561457 |
| PITG_14831 | Pi conserved hypothetical protein (1281 nt)                   | -14.2994 | -0.6463  | 0.561514 |
| PITG_13068 | Pi conserved hypothetical protein (737 nt)                    | -14.7399 | 0.803688 | 0.561569 |
| PITG_01535 | Pi myosin-like protein (3890 nt)                              | -12.772  | -0.6717  | 0.561716 |
| PITG_08676 | Pi 26S proteasome non-ATPase regulatory subunit 14, putati    | -12.7904 | 0.592424 | 0.561845 |
| PITG_20192 | Pi ORM1-like protein (783 nt)                                 | -11.7055 | -0.61259 | 0.561846 |
| PITG_08403 | Pi conserved hypothetical protein (1685 nt)                   | -13.4528 | -0.64567 | 0.562016 |
| PITG_13078 | Pi conserved hypothetical protein (592 nt)                    | -14.5503 | 0.610689 | 0.562086 |
| PITG_13492 | Pi conserved hypothetical protein (1837 nt)                   | -14.9171 | -0.76399 | 0.562306 |
| PITG_12994 | Pi conserved hypothetical protein (4956 nt)                   | -15.9988 | 1.204852 | 0.562881 |
| PITG_20200 | Pi vacuolar protein sorting-associated protein, putative (218 | -15.9402 | -1.0271  | 0.562881 |
| PITG_08559 | Pi conserved hypothetical protein (622 nt)                    | -16.3082 | 1.135941 | 0.563339 |
| PITG_22458 | Pi conserved hypothetical protein (451 nt)                    | -16.3082 | 1.135941 | 0.563339 |
| PITG_22522 | Pi conserved hypothetical protein (446 nt)                    | -11.6301 | 0.585761 | 0.563466 |
| PITG_00229 | Pi 26S protease regulatory subunit S10B (1485 nt)             | -13.6331 | 0.624528 | 0.563468 |
| PITG_14885 | Pi DNA-directed RNA polymerase II 19 kDa polypeptide (701     | -13.6478 | -0.6672  | 0.563468 |

|            |                                                            |          |          |          |
|------------|------------------------------------------------------------|----------|----------|----------|
| PITG_18095 | Pi transmembrane protein, putative (886 nt)                | -14.8646 | 0.691923 | 0.563667 |
| PITG_11202 | Pi conserved hypothetical protein (1053 nt)                | -14.8265 | 0.615765 | 0.563667 |
| PITG_09965 | Pi protein transport Sec23/Sec24-like protein (2541 nt)    | -14.5675 | 0.650727 | 0.563767 |
| PITG_10031 | Pi lysosomal alpha-mannosidase, putative (3135 nt)         | -12.8186 | 0.683174 | 0.563772 |
| PITG_15537 | Pi conserved hypothetical protein (786 nt)                 | -14.0497 | -0.94763 | 0.564157 |
| PITG_18361 | Pi inositol oxygenase (918 nt)                             | -14.0905 | 0.607153 | 0.564403 |
| PITG_06886 | Pi conserved hypothetical protein (932 nt)                 | -15.1383 | -0.89932 | 0.564404 |
| PITG_19216 | Pi conserved hypothetical protein (644 nt)                 | -15.3521 | 0.723873 | 0.564421 |
| PITG_06776 | Pi RAC family serine/threonine-protein kinase (2717 nt)    | -14.9922 | 0.665801 | 0.564673 |
| PITG_01753 | Pi conserved hypothetical protein (659 nt)                 | -16.5382 | -1.07402 | 0.564681 |
| PITG_21286 | Pi conserved hypothetical protein (466 nt)                 | -16.5382 | -1.07402 | 0.564681 |
| PITG_09895 | Pi conserved hypothetical protein (1317 nt)                | -13.8485 | -0.69057 | 0.564819 |
| PITG_07870 | Pi conserved hypothetical protein (363 nt)                 | -16.1041 | -0.90109 | 0.565002 |
| PITG_09298 | Pi conserved hypothetical protein (885 nt)                 | -13.5198 | -0.60839 | 0.565195 |
| PITG_00164 | Pi conserved hypothetical protein (1426 nt)                | -14.4733 | -0.70704 | 0.565732 |
| PITG_21210 | Pi conserved hypothetical protein (1694 nt)                | -15.4624 | -0.81009 | 0.565827 |
| PITG_09348 | Pi glutaredoxin, putative (1448 nt)                        | -14.3361 | 0.699895 | 0.566034 |
| PITG_15955 | Pi epoxide hydrolase, putative (1375 nt)                   | -14.3443 | 0.682359 | 0.566034 |
| PITG_20945 | Pi conserved hypothetical protein (735 nt)                 | -15.6263 | 0.655374 | 0.566243 |
| PITG_21011 | Pi 14 kDa zinc-binding protein (608 nt)                    | -13.0317 | 0.646144 | 0.5663   |
| PITG_19421 | Pi hypothetical protein (264 nt)                           | -14.7505 | 0.677337 | 0.566378 |
| PITG_07349 | Pi gamma-glutamyl hydrolase, putative (954 nt)             | -13.7312 | 0.583337 | 0.566882 |
| PITG_18652 | Pi Cation Diffusion Facilitator (CDF) Family (1946 nt)     | -15.8245 | -0.91215 | 0.566883 |
| PITG_01034 | Pi Mitochondrial Carrier (MC) Family (787 nt)              | -13.4782 | -0.58717 | 0.567027 |
| PITG_01663 | Pi conserved hypothetical protein (10315 nt)               | -16.5602 | -1.11511 | 0.56717  |
| PITG_07776 | Pi conserved hypothetical protein (829 nt)                 | -16.5602 | -1.11511 | 0.56717  |
| PITG_14392 | Pi conserved hypothetical protein (2690 nt)                | -16.5602 | -1.11511 | 0.56717  |
| PITG_01146 | Pi selenide, water dikinase, putative (1363 nt)            | -13.9603 | 0.670126 | 0.568013 |
| PITG_17594 | Pi conserved hypothetical protein (2173 nt)                | -13.772  | -0.64701 | 0.56821  |
| PITG_00338 | Pi conserved hypothetical protein (978 nt)                 | -14.4737 | -0.76623 | 0.568211 |
| PITG_09281 | Pi conserved hypothetical protein (2811 nt)                | -15.8099 | -0.88195 | 0.5683   |
| PITG_07960 | Pi alpha-tubulin, putative (1576 nt)                       | -12.8688 | -0.63752 | 0.568312 |
| PITG_17990 | Pi cell division protein kinase, putative (1253 nt)        | -14.0621 | 0.609869 | 0.568486 |
| PITG_19537 | Pi calnexin, putative (1746 nt)                            | -14.0793 | -0.68204 | 0.568486 |
| PITG_06423 | Pi conserved hypothetical protein (420 nt)                 | -11.8465 | -0.63971 | 0.568545 |
| PITG_00827 | Pi prohibitin (1137 nt)                                    | -11.166  | 0.558237 | 0.568818 |
| PITG_14456 | Pi glutamyl-tRNA synthetase, putative (3088 nt)            | -13.5143 | -0.58309 | 0.568842 |
| PITG_16978 | Pi crossover junction endonuclease MUS81-like protein (189 | -15.4375 | -0.76002 | 0.568855 |
| PITG_00475 | Pi conserved hypothetical protein (749 nt)                 | -15.1971 | 0.737576 | 0.568991 |
| PITG_00725 | Pi N-acetylglucosamine-1-phosphotransferase subunits alpha | -15.674  | -0.79833 | 0.569157 |
| PITG_06006 | Pi conserved hypothetical protein (986 nt)                 | -13.6483 | 0.62616  | 0.569355 |
| PITG_00128 | Pi conserved hypothetical protein (675 nt)                 | -14.7164 | -0.7013  | 0.569403 |
| PITG_01762 | Pi glycyl-tRNA synthetase (2046 nt)                        | -13.6663 | 0.626554 | 0.569477 |
| PITG_09873 | Pi pre-mRNA-splicing factor SPF27, putative (2223 nt)      | -13.4619 | -0.62754 | 0.569638 |
| PITG_13848 | Pi conserved hypothetical protein (2816 nt)                | -14.1499 | 0.65162  | 0.570188 |
| PITG_11600 | Pi carbohydrate-binding protein, putative (1070 nt)        | -14.2058 | -0.67178 | 0.57067  |
| PITG_09315 | Pi conserved hypothetical protein (1081 nt)                | -13.2603 | 0.585554 | 0.57068  |

|            |                                                                 |          |          |          |
|------------|-----------------------------------------------------------------|----------|----------|----------|
| PITG_18288 | Pi endoribonuclease L-PSP, putative (697 nt)                    | -13.661  | 0.609136 | 0.571254 |
| PITG_15748 | Pi conserved hypothetical protein (1106 nt)                     | -16.0173 | -0.88338 | 0.571434 |
| PITG_15133 | Pi conserved hypothetical protein (1393 nt)                     | -16.1429 | -0.82537 | 0.571707 |
| PITG_00930 | Pi conserved hypothetical protein (883 nt)                      | -12.239  | -0.57831 | 0.571768 |
| PITG_20537 | Pi conserved hypothetical protein (1243 nt)                     | -15.7558 | 1.053567 | 0.572052 |
| PITG_07103 | Pi nuclear pore complex protein Nup155 (4625 nt)                | -15.3875 | 0.665389 | 0.573356 |
| PITG_08794 | Pi hypothetical protein (739 nt)                                | -14.8782 | 0.701975 | 0.573482 |
| PITG_15076 | Pi methylmalonate semialdehyde dehydrogenase [acylating]        | -13.3304 | 0.637309 | 0.573553 |
| PITG_20486 | Pi conserved hypothetical protein (420 nt)                      | -15.1471 | 0.896619 | 0.573703 |
| PITG_10498 | Pi conserved hypothetical protein (658 nt)                      | -10.281  | -0.62365 | 0.573928 |
| PITG_10416 | Pi nuclear pore glycoprotein, putative (1609 nt)                | -14.3404 | 0.692068 | 0.574421 |
| PITG_01525 | Pi conserved hypothetical protein (901 nt)                      | -13.6112 | -0.56597 | 0.57444  |
| PITG_01411 | Pi elongation of very long chain fatty acids protein, putative  | -12.8792 | 0.614509 | 0.574574 |
| PITG_03824 | Pi conserved hypothetical protein (672 nt)                      | -14.4098 | 0.681849 | 0.574873 |
| PITG_18230 | Pi glycoside hydrolase, putative (1426 nt)                      | -14.9045 | 0.729509 | 0.574953 |
| PITG_04609 | Pi hypothetical protein (-4T49) (529 nt)                        | -14.034  | 0.623763 | 0.575117 |
| PITG_14911 | Pi mitochondrial folate transporter/carrier, putative (1137 nt) | -15.2575 | -0.77309 | 0.575144 |
| PITG_10343 | Pi conserved hypothetical protein (4480 nt)                     | -15.0938 | -0.74407 | 0.575233 |
| PITG_13644 | Pi conserved hypothetical protein (1181 nt)                     | -15.1133 | -0.84758 | 0.575233 |
| PITG_00223 | Pi DNA repair and recombination protein RAD54 (3231 nt)         | -16.3479 | -0.91252 | 0.575565 |
| PITG_19931 | Pi conserved hypothetical protein (2001 nt)                     | -16.3479 | -0.91252 | 0.575565 |
| PITG_17748 | Pi leucyl-tRNA synthetase, putative (2767 nt)                   | -16.1352 | 0.91212  | 0.575698 |
| PITG_11643 | Pi voltage-gated potassium channel subunit beta, putative (1    | -15.5525 | -0.87725 | 0.575759 |
| PITG_07153 | Pi serine protease family S10, putative (1491 nt)               | -14.352  | -0.68668 | 0.576074 |
| PITG_14247 | Pi conserved hypothetical protein (4481 nt)                     | -16.9218 | -1.18392 | 0.576627 |
| PITG_03393 | Pi autophagy-related protein, putative (1234 nt)                | -11.2842 | -0.55517 | 0.577109 |
| PITG_07868 | Pi conserved hypothetical protein (3591 nt)                     | -15.008  | 0.721449 | 0.577278 |
| PITG_21377 | Pi conserved hypothetical protein (1445 nt)                     | -13.7063 | -0.60052 | 0.577773 |
| PITG_12604 | Pi hypothetical protein (2702 nt)                               | -13.7178 | -0.62828 | 0.577773 |
| PITG_00683 | Pi conserved hypothetical protein (567 nt)                      | -14.5123 | -0.63211 | 0.57805  |
| PITG_01957 | Pi serine/threonine-protein phosphatase 2B catalytic subunit    | -16.3544 | -0.83191 | 0.578076 |
| PITG_07108 | Pi conserved hypothetical protein (1008 nt)                     | -15.2085 | 0.731291 | 0.578185 |
| PITG_00589 | Pi conserved hypothetical protein (442 nt)                      | -15.121  | 0.666861 | 0.578214 |
| PITG_03532 | Pi conserved hypothetical protein (2049 nt)                     | -15.1294 | -0.67642 | 0.578214 |
| PITG_00535 | Pi hypothetical protein (891 nt)                                | -16.9611 | -1.10575 | 0.578832 |
| PITG_01113 | Pi conserved hypothetical protein (1345 nt)                     | -16.9611 | -1.10575 | 0.578832 |
| PITG_07830 | Pi protein kinase (2166 nt)                                     | -16.9611 | -1.10575 | 0.578832 |
| PITG_13500 | Pi 40S ribosomal protein S4 (1129 nt)                           | -8.88105 | 0.535899 | 0.578854 |
| PITG_04599 | Pi sestrin-like protein (1761 nt)                               | -14.1969 | -0.64379 | 0.579127 |
| PITG_06648 | Pi conserved hypothetical protein (759 nt)                      | -15.631  | 0.781785 | 0.579207 |
| PITG_13986 | Pi trafficking protein particle complex subunit 3 (1025 nt)     | -12.9933 | -0.5842  | 0.579328 |
| PITG_22389 | Pi conserved hypothetical protein (1110 nt)                     | -15.7648 | -0.78342 | 0.579505 |
| PITG_01921 | Pi conserved hypothetical protein (890 nt)                      | -15.2855 | 0.739529 | 0.579546 |
| PITG_16116 | Pi conserved hypothetical protein (1453 nt)                     | -14.6535 | 0.708728 | 0.579811 |
| PITG_11791 | Pi conserved hypothetical protein (309 nt)                      | -14.1023 | -0.62392 | 0.579834 |
| PITG_13980 | Pi ARP2/3 complex 20 kDa subunit (1341 nt)                      | -13.8337 | -0.62572 | 0.579845 |
| PITG_16161 | Pi hypothetical protein (2019 nt)                               | -12.2088 | -0.63446 | 0.579924 |

|            |                                                             |          |          |          |
|------------|-------------------------------------------------------------|----------|----------|----------|
| PITG_10961 | Pi conserved hypothetical protein (1307 nt)                 | -14.6437 | -0.72373 | 0.579933 |
| PITG_17996 | Pi conserved hypothetical protein (1524 nt)                 | -16.9397 | -1.06231 | 0.579933 |
| PITG_13845 | Pi conserved hypothetical protein (2278 nt)                 | -14.7822 | 0.617672 | 0.580298 |
| PITG_07238 | Pi conserved hypothetical protein (677 nt)                  | -13.5006 | -0.60911 | 0.58051  |
| PITG_04114 | Pi small cellulose binding protein, putative (512 nt)       | -14.5957 | 0.68223  | 0.581406 |
| PITG_13620 | Pi conserved hypothetical protein (3219 nt)                 | -14.617  | -0.65261 | 0.581406 |
| PITG_14249 | Pi conserved hypothetical protein (1489 nt)                 | -14.603  | -0.62343 | 0.581406 |
| PITG_11012 | Pi conserved hypothetical protein (1337 nt)                 | -13.9077 | 0.590086 | 0.581598 |
| PITG_13070 | Pi conserved hypothetical protein (633 nt)                  | -14.2311 | -0.66524 | 0.582308 |
| PITG_02152 | Pi hypothetical protein (2048 nt)                           | -15.2258 | -0.7242  | 0.582703 |
| PITG_03163 | Pi conserved hypothetical protein (2087 nt)                 | -15.1362 | -0.70101 | 0.582844 |
| PITG_08135 | Pi D-aspartate oxidase, putative (1354 nt)                  | -13.298  | 0.595707 | 0.582856 |
| PITG_06012 | Pi conserved hypothetical protein (669 nt)                  | -14.5812 | 0.633709 | 0.583044 |
| PITG_13298 | Pi conserved hypothetical protein (2908 nt)                 | -16.3728 | -0.86504 | 0.583069 |
| PITG_19281 | Pi ATP-binding cassette sub-family E member 1 (2034 nt)     | -14.3078 | 0.636004 | 0.583406 |
| PITG_02092 | Pi electron transfer flavoprotein-ubiquinone oxidoreductase | -13.5122 | -0.65491 | 0.583532 |
| PITG_00289 | Pi glutamate carboxypeptidase, putative (2350 nt)           | -15.4355 | -0.72099 | 0.58367  |
| PITG_03094 | Pi conserved hypothetical protein (607 nt)                  | -15.4485 | 0.888475 | 0.58367  |
| PITG_09540 | Pi 60S ribosomal protein L19-1 (774 nt)                     | -8.7559  | -0.54095 | 0.583966 |
| PITG_14747 | Pi conserved hypothetical protein (2999 nt)                 | -13.8549 | -0.62047 | 0.584173 |
| PITG_07797 | Pi methionyl-tRNA synthetase, putative (2231 nt)            | -15.2191 | 0.753236 | 0.584198 |
| PITG_01330 | Pi lysophospholipid acyltransferase, putative (1563 nt)     | -14.3524 | 0.601992 | 0.584362 |
| PITG_18274 | Pi serine protease, putative (3261 nt)                      | -14.6121 | -0.69166 | 0.584673 |
| PITG_14300 | Pi conserved hypothetical protein (1090 nt)                 | -15.3552 | 0.73548  | 0.58502  |
| PITG_01267 | Pi glycoside hydrolase, putative (1419 nt)                  | -15.4346 | -0.76934 | 0.585123 |
| PITG_03560 | Pi conserved hypothetical protein (12004 nt)                | -15.4104 | -0.72502 | 0.585123 |
| PITG_08157 | Pi queuine tRNA-ribosyltransferase domain-containing prote  | -15.3989 | -0.70206 | 0.585123 |
| PITG_03429 | Pi conserved hypothetical protein (959 nt)                  | -15.3207 | -0.68756 | 0.585297 |
| PITG_09282 | Pi calcium-transporting ATPase 1, endoplasmic reticulum-tyr | -12.1377 | 0.614478 | 0.585316 |
| PITG_07926 | Pi glycoprotein-N-acetylgalactosamine 3-beta-galactosyltran | -16.9466 | -1.13571 | 0.58542  |
| PITG_11184 | Pi conserved hypothetical protein (2305 nt)                 | -16.9466 | -1.13571 | 0.58542  |
| PITG_16462 | Pi conserved hypothetical protein (3268 nt)                 | -16.9466 | -1.13571 | 0.58542  |
| PITG_03314 | Pi conserved hypothetical protein (755 nt)                  | -14.2647 | 0.66076  | 0.585617 |
| PITG_03898 | Pi serine protease family S01B, putative (1839 nt)          | -15.2269 | -0.72283 | 0.585687 |
| PITG_02684 | Pi peptidyl-tRNA hydrolase, putative (797 nt)               | -13.8571 | 0.593539 | 0.585877 |
| PITG_13340 | Pi Folate-Biopterin Transporter (FBT) Family (1773 nt)      | -15.6583 | -0.77567 | 0.586248 |
| PITG_03795 | Pi conserved hypothetical protein (707 nt)                  | -13.5939 | 0.602219 | 0.586411 |
| PITG_01606 | Pi conserved hypothetical protein (3729 nt)                 | -16.9246 | -1.09055 | 0.586514 |
| PITG_09362 | Pi conserved hypothetical protein (2118 nt)                 | -16.9246 | -1.09055 | 0.586514 |
| PITG_11084 | Pi transmembrane protein, putative (2352 nt)                | -16.9246 | -1.09055 | 0.586514 |
| PITG_15235 | Pi secreted RxLR effector peptide, putative (552 nt)        | -13.6554 | -0.88106 | 0.586694 |
| PITG_11117 | Pi conserved hypothetical protein (1666 nt)                 | -15.3504 | 0.784655 | 0.586782 |
| PITG_18342 | Pi alcohol dehydrogenase, putative (980 nt)                 | -13.7747 | -0.61361 | 0.587054 |
| PITG_01814 | Pi conserved hypothetical protein (1520 nt)                 | -14.3877 | -0.74229 | 0.587592 |
| PITG_14448 | Pi hypothetical protein (1081 nt)                           | -15.7981 | -0.77718 | 0.587763 |
| PITG_14269 | Pi transmembrane protein, putative (1149 nt)                | -14.0062 | -0.64711 | 0.587885 |
| PITG_02475 | Pi conserved hypothetical protein (501 nt)                  | -16.5153 | -1.12105 | 0.588022 |

|            |                                                                   |          |          |          |
|------------|-------------------------------------------------------------------|----------|----------|----------|
| PITG_21853 | Pi transmembrane protein, putative (1840 nt)                      | -15.3035 | 0.719769 | 0.588262 |
| PITG_07828 | Pi serine carboxypeptidase-like family S10, putative (1835 nt)    | -14.2344 | 0.598217 | 0.588906 |
| PITG_09039 | Pi calcium/calmodulin-dependent protein kinase, putative (1       | -14.8665 | -0.71448 | 0.588945 |
| PITG_07888 | Pi conserved hypothetical protein (899 nt)                        | -15.5482 | 0.685942 | 0.588978 |
| PITG_11608 | Pi conserved hypothetical protein (927 nt)                        | -14.6757 | -0.75783 | 0.589374 |
| PITG_05326 | Pi Poly(A) polymerase, putative (3459 nt)                         | -14.619  | -0.7075  | 0.589512 |
| PITG_12041 | Pi cysteine protease family C01A, putative (1131 nt)              | -12.4933 | 0.557128 | 0.589539 |
| PITG_21173 | Pi nucleotide-binding protein 1 (1186 nt)                         | -13.4228 | -0.56948 | 0.589642 |
| PITG_07646 | Pi conserved hypothetical protein (465 nt)                        | -14.9094 | -0.73839 | 0.590233 |
| PITG_05321 | Pi conserved hypothetical protein (1515 nt)                       | -16.3747 | -0.93511 | 0.590483 |
| PITG_02664 | Pi ATP-dependent RNA helicase DBP2, putative (2496 nt)            | -12.6029 | -0.54834 | 0.590539 |
| PITG_03846 | Pi conserved hypothetical protein (1944 nt)                       | -14.9549 | -0.72385 | 0.590543 |
| PITG_01498 | Pi ATP-binding cassette sub-family F member 2 (1895 nt)           | -13.9    | 0.595252 | 0.590608 |
| PITG_04001 | Pi peptidase family U48, putative (1432 nt)                       | -15.4353 | -0.81664 | 0.590885 |
| PITG_12565 | Pi conserved hypothetical protein (681 nt)                        | -13.5657 | -0.58602 | 0.591115 |
| PITG_11486 | Pi protein-L-isoaspartate O-methyltransferase (795 nt)            | -15.3175 | -0.69475 | 0.591204 |
| PITG_06969 | Pi oxidoreductase, putative (1123 nt)                             | -13.5274 | 0.571759 | 0.591629 |
| PITG_03608 | Pi serine/threonine-protein phosphatase 5 (1716 nt)               | -14.4233 | 0.589845 | 0.591641 |
| PITG_08143 | Pi elicitor-like protein (459 nt)                                 | -16.3678 | -0.87748 | 0.59171  |
| PITG_19659 | Pi ATP-binding Cassette (ABC) Superfamily (3837 nt)               | -16.3678 | -0.87748 | 0.59171  |
| PITG_19961 | Pi glyceraldehyde-3-phosphate dehydrogenase (669 nt)              | -10.5785 | 0.539245 | 0.591773 |
| PITG_19167 | Pi conserved hypothetical protein (942 nt)                        | -15.5403 | 0.669759 | 0.591826 |
| PITG_13976 | Pi DEAD/DEAH box RNA helicase, putative (1502 nt)                 | -16.9178 | -1.01069 | 0.591968 |
| PITG_01737 | Pi DNA damage-binding protein, putative (3453 nt)                 | -14.8897 | -0.71385 | 0.592039 |
| PITG_16925 | Pi hypothetical protein (582 nt)                                  | -9.18742 | 0.565285 | 0.592199 |
| PITG_16814 | Pi conserved hypothetical protein (1704 nt)                       | -14.0913 | -0.65793 | 0.592243 |
| PITG_10866 | Pi spermidine synthase, putative (1070 nt)                        | -15.4389 | 0.734536 | 0.592314 |
| PITG_20344 | Pi conserved hypothetical protein (1577 nt)                       | -15.4365 | 0.862678 | 0.592314 |
| PITG_03763 | Pi pre-mRNA-splicing factor SF2-like protein (1786 nt)            | -12.4376 | -0.54508 | 0.592341 |
| PITG_12465 | Pi adenylate kinase, putative (806 nt)                            | -15.0516 | -0.65704 | 0.592351 |
| PITG_17263 | Pi regulator of microtubule dynamics protein, putative (1023      | -12.5522 | -0.56929 | 0.592464 |
| PITG_10916 | Pi eukaryotic translation initiation factor 3, putative (1533 nt) | -13.1674 | 0.549804 | 0.59274  |
| PITG_04053 | Pi conserved hypothetical protein (670 nt)                        | -16.3307 | -0.95213 | 0.592935 |
| PITG_10048 | Pi conserved hypothetical protein (906 nt)                        | -16.3614 | -0.96305 | 0.592935 |
| PITG_17883 | Pi condensin complex subunit 3, putative (3779 nt)                | -15.5775 | -0.7702  | 0.593242 |
| PITG_02735 | Pi 2,3-bisphosphoglycerate-dependent phosphoglycerate mu          | -14.3016 | -0.59522 | 0.593353 |
| PITG_10635 | Pi conserved hypothetical protein (470 nt)                        | -14.4955 | 0.58359  | 0.594072 |
| PITG_11364 | Pi conserved hypothetical protein (936 nt)                        | -13.4981 | 0.597205 | 0.594337 |
| PITG_18731 | Pi 26S proteasome non-ATPase regulatory subunit, putative         | -13.0671 | 0.622652 | 0.594344 |
| PITG_10002 | Pi conserved hypothetical protein (1327 nt)                       | -14.7898 | 0.645562 | 0.594368 |
| PITG_17089 | Pi conserved hypothetical protein (706 nt)                        | -14.7869 | 0.689798 | 0.594368 |
| PITG_01796 | Pi potassium/sodium hyperpolarization-activated cyclic nucl       | -15.8392 | 1.080416 | 0.594553 |
| PITG_21556 | Pi conserved hypothetical protein (1813 nt)                       | -13.1168 | -0.55428 | 0.594563 |
| PITG_01203 | Pi mitogen-activated protein kinase, putative (2335 nt)           | -15.1046 | 0.6331   | 0.59491  |
| PITG_10837 | Pi conserved hypothetical protein (3679 nt)                       | -15.1248 | -0.66202 | 0.59491  |
| PITG_08669 | Pi 3-methyl-2-oxobutanoate hydroxymethyltransferase (153          | -14.9159 | 0.611507 | 0.595098 |
| PITG_00400 | Pi conserved hypothetical protein (796 nt)                        | -13.5104 | -0.64951 | 0.595223 |

|            |                                                                    |          |          |          |
|------------|--------------------------------------------------------------------|----------|----------|----------|
| PITG_06775 | Pi conserved hypothetical protein (398 nt)                         | -15.3372 | 0.697941 | 0.595573 |
| PITG_16210 | Pi ubulin-tyrosine ligase-like protein (2111 nt)                   | -14.3592 | 0.653799 | 0.595712 |
| PITG_00459 | Pi coatomer subunit zeta-1, putative (1166 nt)                     | -13.0455 | 0.549477 | 0.595724 |
| PITG_04579 | Pi conserved hypothetical protein (2495 nt)                        | -15.8882 | -0.78427 | 0.595837 |
| PITG_22486 | Pi conserved hypothetical protein (482 nt)                         | -15.8594 | -0.84186 | 0.595837 |
| PITG_11718 | Pi hypothetical protein (1646 nt)                                  | -12.0547 | 0.633405 | 0.595847 |
| PITG_14888 | Pi conserved hypothetical protein (707 nt)                         | -14.0355 | -0.58843 | 0.595972 |
| PITG_20383 | Pi conserved hypothetical protein (1221 nt)                        | -12.0256 | -0.52869 | 0.596027 |
| PITG_20725 | Pi histone H3.3 type 1 (656 nt)                                    | -11.4835 | -0.5081  | 0.596344 |
| PITG_15954 | Pi SNARE associated Golgi protein, putative (970 nt)               | -12.883  | -0.54931 | 0.59684  |
| PITG_18237 | Pi replication factor C subunit 2 (998 nt)                         | -15.8457 | -0.81401 | 0.59718  |
| PITG_05480 | Pi conserved hypothetical protein (3958 nt)                        | -14.759  | -0.72763 | 0.597452 |
| PITG_16352 | Pi conserved hypothetical protein (1015 nt)                        | -13.8349 | -0.53874 | 0.59767  |
| PITG_11588 | Pi hypothetical cleavage-induced protein (1378 nt)                 | -12.6367 | 0.526315 | 0.59787  |
| PITG_17710 | Pi charged multivesicular body protein 1b-2 (747 nt)               | -13.9507 | -0.60773 | 0.597874 |
| PITG_00496 | Pi 3'5'-cyclic nucleotide phosphodiesterase, putative (3735 nt)    | -15.8191 | -0.61117 | 0.598519 |
| PITG_09600 | Pi conserved hypothetical protein (561 nt)                         | -12.3029 | -0.55336 | 0.598835 |
| PITG_12961 | Pi alanyl-tRNA synthetase, mitochondrial precursor (3091 nt)       | -13.0981 | 0.576829 | 0.599235 |
| PITG_04547 | Pi conserved hypothetical protein (3742 nt)                        | -15.1192 | -0.73423 | 0.599334 |
| PITG_08132 | Pi conserved hypothetical protein (1057 nt)                        | -14.4683 | -0.66616 | 0.599507 |
| PITG_23128 | Pi katanin p80 subunit (2680 nt)                                   | -15.0328 | 0.59589  | 0.599926 |
| PITG_07949 | Pi alpha-tubulin, putative (1407 nt)                               | -14.3967 | -0.75059 | 0.600012 |
| PITG_05894 | Pi conserved hypothetical protein (1943 nt)                        | -15.733  | -0.91624 | 0.600013 |
| PITG_00442 | Pi cytochrome c/c1 heme lyase, putative (1233 nt)                  | -14.5497 | 0.614877 | 0.600149 |
| PITG_10707 | Pi PpiC-type peptidyl-prolyl cis-trans isomerase, putative (69 nt) | -12.1544 | 0.520221 | 0.600428 |
| PITG_00635 | Pi Ryanodine-Inositol 1,4,5-triphosphate Receptor Ca2 Channel      | -16.9384 | -1.15439 | 0.60064  |
| PITG_01337 | Pi conserved hypothetical protein (4089 nt)                        | -16.9384 | -1.15439 | 0.60064  |
| PITG_07010 | Pi conserved hypothetical protein (1227 nt)                        | -16.9384 | -1.15439 | 0.60064  |
| PITG_14051 | Pi beta-glucan synthesis-associated protein, putative (2177 nt)    | -16.9384 | -1.15439 | 0.60064  |
| PITG_16090 | Pi conserved hypothetical protein (6724 nt)                        | -16.9384 | -1.15439 | 0.60064  |
| PITG_05667 | Pi vacuolar protein sorting-associated protein, putative (361 nt)  | -15.8082 | 0.782071 | 0.601184 |
| PITG_13064 | Pi conserved hypothetical protein (1384 nt)                        | -15.8606 | -0.72789 | 0.601184 |
| PITG_13413 | Pi conserved hypothetical protein (1419 nt)                        | -15.883  | 0.894136 | 0.601184 |
| PITG_05149 | Pi conserved hypothetical protein (2082 nt)                        | -15.0798 | -0.71196 | 0.601421 |
| PITG_17156 | Pi conserved hypothetical protein (623 nt)                         | -14.2502 | 0.564251 | 0.601883 |
| PITG_22135 | Pi 60S ribosomal protein L10a-1 (895 nt)                           | -8.82511 | 0.506979 | 0.601889 |
| PITG_00134 | Pi COP9 signalosome complex subunit 3, putative (1502 nt)          | -14.8464 | -0.68443 | 0.601903 |
| PITG_15983 | Pi conserved hypothetical protein (977 nt)                         | -14.1512 | -0.73546 | 0.60192  |
| PITG_14229 | Pi mannose-1-phosphate guanyltransferase beta, putative (5 nt)     | -12.6078 | 0.507342 | 0.602767 |
| PITG_02088 | Pi conserved hypothetical protein (3152 nt)                        | -16.8892 | -1.25297 | 0.602798 |
| PITG_08410 | Pi conserved hypothetical protein (1389 nt)                        | -16.9152 | -1.10473 | 0.602798 |
| PITG_11028 | Pi mevalonate kinase, putative (1306 nt)                           | -16.9152 | -1.10473 | 0.602798 |
| PITG_12003 | Pi conserved hypothetical protein (1960 nt)                        | -16.8892 | -1.25297 | 0.602798 |
| PITG_14135 | Pi conserved hypothetical protein (593 nt)                         | -16.8892 | -1.25297 | 0.602798 |
| PITG_20159 | Pi Voltage-gated Ion Channel (VIC) Superfamily (7118 nt)           | -16.8892 | -1.25297 | 0.602798 |
| PITG_21181 | Pi conserved hypothetical protein (3348 nt)                        | -16.9152 | -1.10473 | 0.602798 |
| PITG_23007 | Pi histidine kinase (6042 nt)                                      | -16.9152 | -1.10473 | 0.602798 |

|            |                                                                  |          |          |          |
|------------|------------------------------------------------------------------|----------|----------|----------|
| PITG_04608 | Pi conserved hypothetical protein (2467 nt)                      | -15.0608 | 0.728462 | 0.602909 |
| PITG_20630 | Pi Cation Diffusion Facilitator (CDF) Family (984 nt)            | -15.2307 | 0.632079 | 0.602977 |
| PITG_19568 | Pi crinkler (CRN) family protein, pseudogene (1056 nt)           | -10.0179 | -0.66735 | 0.60325  |
| PITG_06597 | Pi protein phosphatase 2A regulatory B subunit, putative (20     | -12.4677 | -0.53903 | 0.603427 |
| PITG_15960 | Pi conserved hypothetical protein (2469 nt)                      | -14.8019 | 0.589426 | 0.603445 |
| PITG_05902 | Pi Major Facilitator Superfamily (MFS) (1749 nt)                 | -12.9888 | 0.53145  | 0.603646 |
| PITG_13736 | Pi diacylglycerol kinase (2249 nt)                               | -15.8683 | 0.864155 | 0.603832 |
| PITG_16448 | Pi hypothetical protein (1170 nt)                                | -15.654  | 0.858976 | 0.604064 |
| PITG_21059 | Pi conserved hypothetical protein (870 nt)                       | -14.0408 | 0.627259 | 0.604207 |
| PITG_03020 | Pi cysteine protease family C01A, putative (1608 nt)             | -10.8175 | -0.50346 | 0.604232 |
| PITG_23197 | Pi Crinkler (CRN) family protein, pseudogene (331 nt)            | -16.1306 | -0.93252 | 0.604286 |
| PITG_13153 | Pi GTP-binding protein, putative (1780 nt)                       | -13.8439 | -0.58141 | 0.604377 |
| PITG_03774 | Pi conserved hypothetical protein (3442 nt)                      | -15.5868 | 0.871002 | 0.60439  |
| PITG_12503 | Pi conserved hypothetical protein (1477 nt)                      | -15.5868 | 0.871002 | 0.60439  |
| PITG_04591 | Pi protein kinase (1318 nt)                                      | -13.5731 | 0.539086 | 0.604398 |
| PITG_01138 | Pi beta-galactosidase, putative (2469 nt)                        | -14.0076 | -0.56787 | 0.604419 |
| PITG_03287 | Pi conserved hypothetical protein (1545 nt)                      | -15.2848 | -0.67625 | 0.604432 |
| PITG_15695 | Pi conserved hypothetical protein (2460 nt)                      | -14.668  | -0.70567 | 0.604752 |
| PITG_15875 | Pi conserved hypothetical protein (2397 nt)                      | -14.5594 | -0.67876 | 0.60485  |
| PITG_12141 | Pi H - or Na -translocating F-type, V-type and A-type ATPase     | -12.6418 | 0.541354 | 0.604903 |
| PITG_16469 | Pi RMD5 family protein (2464 nt)                                 | -13.7524 | -0.62242 | 0.604944 |
| PITG_04204 | Pi geranylgeranyl transferase type-2 subunit alpha, putative     | -15.4012 | 0.758922 | 0.604962 |
| PITG_17359 | Pi calcium/calmodulin-dependent protein kinase kinase, putative  | -13.8146 | -0.59179 | 0.605079 |
| PITG_03545 | Pi conserved hypothetical protein (1213 nt)                      | -14.2304 | -0.62008 | 0.605157 |
| PITG_20559 | Pi conserved hypothetical protein (991 nt)                       | -14.9224 | 0.604838 | 0.605506 |
| PITG_12525 | Pi conserved hypothetical protein (600 nt)                       | -14.995  | 0.662155 | 0.605672 |
| PITG_01437 | Pi mediator of RNA polymerase II transcription subunit, putative | -13.8492 | 0.594817 | 0.606029 |
| PITG_09944 | Pi hypothetical protein (1224 nt)                                | -15.0904 | 0.658479 | 0.606591 |
| PITG_03606 | Pi conserved oligomeric Golgi complex subunit, putative (251     | -16.1749 | -0.69    | 0.606604 |
| PITG_01748 | Pi mitochondrial inner membrane protein OXA1 (1920 nt)           | -14.2255 | 0.557483 | 0.606775 |
| PITG_18658 | Pi conserved hypothetical protein (1286 nt)                      | -15.2972 | 0.705823 | 0.606984 |
| PITG_19105 | Pi conserved hypothetical protein (948 nt)                       | -14.2885 | 0.769066 | 0.607069 |
| PITG_19741 | Pi conserved hypothetical protein (781 nt)                       | -12.858  | 0.567852 | 0.60713  |
| PITG_01870 | Pi conserved hypothetical protein (1468 nt)                      | -15.216  | 0.663007 | 0.607322 |
| PITG_20904 | Pi small nuclear ribonucleoprotein Sm D1 (424 nt)                | -13.1536 | 0.538812 | 0.60734  |
| PITG_19198 | Pi conserved hypothetical protein (612 nt)                       | -13.1153 | 0.524462 | 0.607415 |
| PITG_05289 | Pi conserved hypothetical protein (1216 nt)                      | -13.8446 | -0.5858  | 0.607671 |
| PITG_00743 | Pi N-acetylglucosamine-1-phosphotransferase subunits alpha       | -15.9367 | -0.98035 | 0.607772 |
| PITG_07206 | Pi hypothetical protein (1386 nt)                                | -15.7928 | 0.674193 | 0.607772 |
| PITG_13056 | Pi Mitochondrial Carrier (MC) Family (1210 nt)                   | -15.8321 | 0.691339 | 0.607772 |
| PITG_05104 | Pi conserved hypothetical protein (928 nt)                       | -15.8668 | -1.02994 | 0.607904 |
| PITG_08310 | Pi conserved hypothetical protein (354 nt)                       | -14.8192 | -0.62929 | 0.608024 |
| PITG_12527 | Pi conserved hypothetical protein (1653 nt)                      | -15.116  | -0.72202 | 0.608025 |
| PITG_12099 | Pi serine protease family S09A, putative (2235 nt)               | -14.7425 | -0.68778 | 0.608117 |
| PITG_02527 | Pi histone H2A variant 1 (654 nt)                                | -12.4954 | 0.527298 | 0.608411 |
| PITG_05688 | Pi splicing factor U2AF 35 kDa subunit (1193 nt)                 | -13.2418 | -0.54314 | 0.608487 |
| PITG_00038 | Pi myb-like DNA-binding protein, putative (2903 nt)              | -15.2683 | -0.7509  | 0.608758 |



|            |                                                           |          |          |          |
|------------|-----------------------------------------------------------|----------|----------|----------|
| PITG_17627 | Pi conserved hypothetical protein (3774 nt)               | -15.2353 | 0.729326 | 0.608758 |
| PITG_17040 | Pi cellulose binding elicitor lectin, putative (1143 nt)  | -15.0503 | 0.705873 | 0.608796 |
| PITG_06358 | Pi callose synthase, putative (7335 nt)                   | -14.1831 | -0.72793 | 0.608802 |
| PITG_16299 | Pi conserved hypothetical protein (2944 nt)               | -15.8783 | -0.80427 | 0.609077 |
| PITG_19223 | Pi conserved hypothetical protein (3603 nt)               | -15.8463 | 0.857158 | 0.609077 |
| PITG_20152 | Pi conserved hypothetical protein (6347 nt)               | -15.8783 | -0.80427 | 0.609077 |
| PITG_02487 | Pi conserved hypothetical protein (939 nt)                | -14.849  | -0.7463  | 0.609536 |
| PITG_12837 | Pi N-carbamoylputrescine amidase (1332 nt)                | -14.8406 | 0.731085 | 0.609536 |
| PITG_13074 | Pi cysteine protease family C01A, putative (1277 nt)      | -13.4284 | -0.55819 | 0.610131 |
| PITG_11724 | Pi conserved hypothetical protein (774 nt)                | -14.8905 | -0.71071 | 0.610206 |
| PITG_04115 | Pi conserved hypothetical protein (2899 nt)               | -15.8511 | -0.85884 | 0.610379 |
| PITG_06922 | Pi conserved hypothetical protein (651 nt)                | -15.9026 | -0.87144 | 0.610379 |
| PITG_11242 | Pi conserved hypothetical protein (1236 nt)               | -15.8215 | -0.66224 | 0.610379 |
| PITG_09389 | Pi trehalose-phosphatase, putative (3869 nt)              | -13.0434 | -0.53969 | 0.610825 |
| PITG_00155 | Pi conserved hypothetical protein (1187 nt)               | -13.4749 | -0.61078 | 0.610848 |
| PITG_08445 | Pi cystathionine gamma-lyase (1227 nt)                    | -13.4024 | -0.64153 | 0.611129 |
| PITG_13966 | Pi conserved hypothetical protein (1026 nt)               | -15.0415 | -0.70812 | 0.6114   |
| PITG_06402 | Pi formin-homology 2 domain-containing protein (3315 nt)  | -16.1905 | -0.72144 | 0.6115   |
| PITG_15240 | Pi conserved hypothetical protein (2706 nt)               | -16.1905 | -0.72144 | 0.6115   |
| PITG_18016 | Pi flagellar protein, putative (2007 nt)                  | -15.2236 | 0.649321 | 0.611612 |
| PITG_01227 | Pi conserved hypothetical protein (677 nt)                | -13.2126 | 0.559159 | 0.611666 |
| PITG_12260 | Pi protein transporter Sec24 (3758 nt)                    | -14.3584 | 0.589908 | 0.612004 |
| PITG_01401 | Pi conserved hypothetical protein (1356 nt)               | -13.0936 | 0.555685 | 0.612819 |
| PITG_01139 | Pi conserved hypothetical protein (744 nt)                | -13.7649 | 0.56826  | 0.613046 |
| PITG_13724 | Pi cysteine protease family C48, putative (1388 nt)       | -15.9871 | 0.972716 | 0.613514 |
| PITG_17347 | Pi conserved hypothetical protein (1593 nt)               | -16.1979 | -0.70744 | 0.613928 |
| PITG_16930 | Pi carbohydrate esterase, putative (2711 nt)              | -14.8326 | -0.71241 | 0.614027 |
| PITG_08528 | Pi conserved hypothetical protein (764 nt)                | -14.2134 | -0.62929 | 0.614471 |
| PITG_08187 | Pi ankyrin-like protein (1227 nt)                         | -16.8933 | -1.0435  | 0.614603 |
| PITG_21074 | Pi conserved hypothetical protein (1617 nt)               | -16.0515 | 1.101084 | 0.614777 |
| PITG_00173 | Pi vesicle-associated membrane protein, putative (848 nt) | -15.4517 | 0.635264 | 0.614861 |
| PITG_09941 | Pi myosin-like protein (2352 nt)                          | -13.4623 | -0.52592 | 0.615122 |
| PITG_07139 | Pi conserved hypothetical protein (1738 nt)               | -16.1772 | -0.74928 | 0.615138 |
| PITG_13882 | Pi conserved hypothetical protein (2061 nt)               | -16.1772 | -0.74928 | 0.615138 |
| PITG_21617 | Pi cell division protein kinase, putative (2339 nt)       | -16.2827 | -0.97542 | 0.615138 |
| PITG_13468 | Pi hypothetical protein (2031 nt)                         | -13.7038 | 0.65542  | 0.615359 |
| PITG_04906 | Pi glutaredoxin (479 nt)                                  | -9.53655 | 0.513832 | 0.615869 |
| PITG_00987 | Pi conserved hypothetical protein (243 nt)                | -9.34098 | -0.549   | 0.615952 |
| PITG_01555 | Pi conserved hypothetical protein (1642 nt)               | -14.2617 | 0.60359  | 0.616061 |
| PITG_14299 | Pi conserved hypothetical protein (1286 nt)               | -15.461  | -0.71311 | 0.616233 |
| PITG_16491 | Pi conserved hypothetical protein (924 nt)                | -15.5029 | -0.82371 | 0.616233 |
| PITG_20188 | Pi 60S ribosomal protein L5 (1120 nt)                     | -8.70693 | 0.492804 | 0.616282 |
| PITG_10312 | Pi Patatin like protein (874 nt)                          | -14.6489 | 0.560323 | 0.616566 |
| PITG_12990 | Pi glutathione transferase, theta class (787 nt)          | -10.2978 | 0.496871 | 0.617404 |
| PITG_10844 | Pi conserved hypothetical protein (1937 nt)               | -14.8662 | 0.623626 | 0.617495 |
| PITG_00144 | Pi conserved hypothetical protein (1314 nt)               | -16.2051 | -0.69429 | 0.617548 |
| PITG_01582 | Pi hypothetical protein (601 nt)                          | -15.491  | -0.79946 | 0.617599 |

|            |                                                                      |          |          |          |
|------------|----------------------------------------------------------------------|----------|----------|----------|
| PITG_10990 | Pi farnesyl pyrophosphate synthetase (1420 nt)                       | -15.4373 | 0.701849 | 0.617599 |
| PITG_12319 | Pi conserved hypothetical protein (1132 nt)                          | -16.1966 | -0.64837 | 0.618749 |
| PITG_08953 | Pi double-strand-break repair protein rad21 (2125 nt)                | -15.5462 | -0.73702 | 0.619225 |
| PITG_10921 | Pi conserved hypothetical protein (15721 nt)                         | -15.3604 | -0.77849 | 0.619429 |
| PITG_06982 | Pi short chain dehydrogenase, putative (1314 nt)                     | -15.7177 | -0.76217 | 0.619633 |
| PITG_00118 | Pi conserved hypothetical protein (624 nt)                           | -12.5344 | 0.503279 | 0.619895 |
| PITG_17556 | Pi conserved hypothetical protein (2867 nt)                          | -15.2099 | 0.649176 | 0.620035 |
| PITG_11712 | Pi neutral alpha-glucosidase, putative (3069 nt)                     | -13.6398 | 0.578094 | 0.620388 |
| PITG_00647 | Pi conserved hypothetical protein (2152 nt)                          | -15.1812 | 0.731252 | 0.620519 |
| PITG_06647 | Pi conserved hypothetical protein (1443 nt)                          | -14.4787 | 0.544828 | 0.620866 |
| PITG_12678 | Pi ribosome production factor 1, putative (2107 nt)                  | -15.7979 | -0.90968 | 0.62094  |
| PITG_03531 | Pi conserved hypothetical protein (3480 nt)                          | -14.6358 | 0.682589 | 0.62138  |
| PITG_18744 | Pi amino acid/auxin permease-like protein (657 nt)                   | -14.9898 | -0.67034 | 0.621509 |
| PITG_16492 | Pi conserved hypothetical protein (1126 nt)                          | -14.5914 | 0.69548  | 0.62153  |
| PITG_11126 | Pi conserved hypothetical protein (2584 nt)                          | -15.4196 | 0.602251 | 0.621665 |
| PITG_01836 | Pi conserved hypothetical protein (3595 nt)                          | -16.6507 | -0.85113 | 0.621689 |
| PITG_06836 | Pi conserved hypothetical protein (769 nt)                           | -16.6507 | -0.85113 | 0.621689 |
| PITG_10532 | Pi conserved hypothetical protein (490 nt)                           | -15.1678 | -0.5993  | 0.621936 |
| PITG_19530 | Pi conserved hypothetical protein (656 nt)                           | -15.1634 | -0.68544 | 0.621936 |
| PITG_09793 | Pi small cysteine rich protein SCR108 (1043 nt)                      | -9.52883 | -0.48108 | 0.622048 |
| PITG_13252 | Pi conserved hypothetical protein (1183 nt)                          | -14.3255 | 0.593526 | 0.622184 |
| PITG_07965 | Pi conserved hypothetical protein (952 nt)                           | -15.6762 | 0.555455 | 0.622244 |
| PITG_14155 | Pi nitrate reductase, putative (1765 nt)                             | -16.088  | -1.21038 | 0.622293 |
| PITG_11780 | Pi conserved hypothetical protein (5416 nt)                          | -15.4773 | -0.68203 | 0.62301  |
| PITG_12673 | Pi conserved hypothetical protein (1305 nt)                          | -15.7223 | 0.812205 | 0.623542 |
| PITG_06637 | Pi Drug/Metabolite Transporter (DMT) Superfamily (1179 nt)           | -13.9967 | -0.59609 | 0.623621 |
| PITG_13289 | Pi thioredoxin-like protein (1353 nt)                                | -15.4903 | -0.80028 | 0.624351 |
| PITG_15912 | Pi Glycoside-Pentoside-Hexuronide (GPH):Cation Symporter             | -15.1977 | -0.65626 | 0.624751 |
| PITG_21909 | Pi conserved hypothetical protein (979 nt)                           | -15.1372 | -0.55979 | 0.624751 |
| PITG_07269 | Pi 60S ribosomal protein L7 (1385 nt)                                | -9.74985 | 0.478205 | 0.624813 |
| PITG_05494 | Pi conserved hypothetical protein (1248 nt)                          | -15.712  | -0.7738  | 0.624836 |
| PITG_18542 | Pi conserved hypothetical protein (851 nt)                           | -15.7543 | -0.74095 | 0.624836 |
| PITG_14599 | Pi conserved hypothetical protein (2040 nt)                          | -16.6379 | -0.87646 | 0.624904 |
| PITG_00490 | Pi protein phosphatase 2C, putative (1562 nt)                        | -14.1458 | 0.549788 | 0.625012 |
| PITG_15787 | Pi conserved hypothetical protein (2141 nt)                          | -12.3053 | 0.503124 | 0.62516  |
| PITG_05016 | Pi conserved hypothetical protein (3060 nt)                          | -15.4402 | -0.84366 | 0.625276 |
| PITG_15146 | Pi conserved hypothetical protein (1896 nt)                          | -14.5798 | -0.58109 | 0.62559  |
| PITG_02252 | Pi conserved hypothetical protein (3288 nt)                          | -13.4787 | 0.516807 | 0.625684 |
| PITG_00708 | Pi thioredoxin, putative (984 nt)                                    | -10.9121 | -0.51263 | 0.625729 |
| PITG_07107 | Pi conserved hypothetical protein (583 nt)                           | -11.5937 | -0.53139 | 0.625748 |
| PITG_09441 | Pi Mitochondrial Protein Translocase (MPT) Family (399 nt)           | -11.3348 | 0.511133 | 0.62579  |
| PITG_19099 | Pi elongator complex protein, putative (2965 nt)                     | -16.6572 | -0.91423 | 0.625972 |
| PITG_05991 | Pi FKBP-type peptidyl-prolyl cis-trans isomerase, putative (1000 nt) | -14.931  | 0.641041 | 0.626026 |
| PITG_09360 | Pi conserved hypothetical protein (5277 nt)                          | -15.7126 | -0.66982 | 0.626125 |
| PITG_03642 | Pi conserved hypothetical protein (1061 nt)                          | -13.6808 | -0.55146 | 0.626714 |
| PITG_06323 | Pi endomembrane protein 70-like protein, putative (2184 nt)          | -12.3193 | 0.490895 | 0.626802 |
| PITG_13234 | Pi conserved hypothetical protein (1734 nt)                          | -15.8399 | 0.842382 | 0.626946 |

|            |                                                                 |          |          |          |
|------------|-----------------------------------------------------------------|----------|----------|----------|
| PITG_17910 | Pi conserved hypothetical protein (1003 nt)                     | -14.8041 | 0.570251 | 0.62713  |
| PITG_01991 | Pi conserved hypothetical protein (3136 nt)                     | -15.0079 | -0.70693 | 0.627201 |
| PITG_09440 | Pi conserved hypothetical protein (1025 nt)                     | -15.7249 | 0.763251 | 0.627409 |
| PITG_21010 | Pi eukaryotic translation initiation factor 3 subunit, putative | -14.9028 | 0.560635 | 0.627471 |
| PITG_08611 | Pi cell 5A endo-1,4-beta-glucanase, putative (1749 nt)          | -11.2763 | -0.49032 | 0.627585 |
| PITG_10300 | Pi electron transfer flavoprotein subunit beta (890 nt)         | -12.1004 | 0.48645  | 0.627816 |
| PITG_19160 | Pi conserved hypothetical protein (1462 nt)                     | -14.0747 | -0.58843 | 0.627952 |
| PITG_15640 | Pi peroxisomal 2,4-dienoyl-CoA reductase, putative (894 nt)     | -14.0288 | -0.54118 | 0.628242 |
| PITG_08550 | Pi conserved hypothetical protein (804 nt)                      | -16.2021 | -0.76954 | 0.628247 |
| PITG_11162 | Pi hypothetical protein (567 nt)                                | -16.2021 | -0.76954 | 0.628247 |
| PITG_03224 | Pi conserved hypothetical protein (786 nt)                      | -13.7902 | -0.57498 | 0.628278 |
| PITG_08898 | Pi protein kinase, putative (2098 nt)                           | -14.2204 | -0.57385 | 0.628522 |
| PITG_04553 | Pi conserved hypothetical protein (2658 nt)                     | -15.7226 | -0.7009  | 0.628689 |
| PITG_12105 | Pi N-terminal kinase-like protein (2938 nt)                     | -14.6434 | -0.69393 | 0.628749 |
| PITG_17736 | Pi conserved hypothetical protein (1180 nt)                     | -15.3937 | -0.75759 | 0.628978 |
| PITG_19063 | Pi hypothetical protein (1057 nt)                               | -11.5851 | -0.47899 | 0.629116 |
| PITG_19851 | Pi myb-like DNA-binding protein, putative (2525 nt)             | -13.507  | -0.57447 | 0.629398 |
| PITG_01993 | Pi transmembrane protein, putative (645 nt)                     | -16.1694 | -0.76962 | 0.629422 |
| PITG_05511 | Pi Mitochondrial Carrier (MC) Family (1343 nt)                  | -16.2009 | -0.64116 | 0.629422 |
| PITG_22557 | Pi amino acid/auxin permease-like protein (807 nt)              | -15.3629 | -0.84968 | 0.630171 |
| PITG_18062 | Pi conserved hypothetical protein (2532 nt)                     | -14.8994 | 0.706016 | 0.630237 |
| PITG_02992 | Pi tyrosyl-tRNA synthetase, putative (1698 nt)                  | -14.7808 | -0.71657 | 0.630266 |
| PITG_12797 | Pi regulator of nonsense transcripts 2, putative (3744 nt)      | -15.4021 | -0.69669 | 0.630332 |
| PITG_06658 | Pi conserved hypothetical protein (433 nt)                      | -14.1136 | -0.57399 | 0.630442 |
| PITG_01341 | Pi conserved hypothetical protein (1179 nt)                     | -16.197  | -0.78106 | 0.630594 |
| PITG_21333 | Pi hypothetical protein (1330 nt)                               | -12.6869 | -0.5358  | 0.630895 |
| PITG_15281 | Pi cell differentiation protein rcd1 (2005 nt)                  | -13.9025 | 0.54062  | 0.630993 |
| PITG_03779 | Pi anaphase-promoting complex subunit, putative (6320 nt)       | -16.6275 | -0.89682 | 0.631282 |
| PITG_04917 | Pi anaphase-promoting complex subunit, putative (2135 nt)       | -16.6275 | -0.89682 | 0.631282 |
| PITG_00559 | Pi protein phosphatase 2C, putative (2776 nt)                   | -14.5699 | -0.6015  | 0.631527 |
| PITG_10817 | Pi nonsense transcript regulator (1299 nt)                      | -16.2419 | -0.91212 | 0.631763 |
| PITG_03819 | Pi 26S proteasome non-ATPase regulatory subunit, putative       | -14.1082 | -0.65319 | 0.631845 |
| PITG_05363 | Pi dihydrodipicolinate synthase, putative (1162 nt)             | -13.7233 | 0.552357 | 0.63218  |
| PITG_00850 | Pi thioredoxin-dependent peroxide reductase, putative (163      | -13.0411 | 0.527584 | 0.632199 |
| PITG_15852 | Pi transmembrane protein, putative (1124 nt)                    | -14.5308 | -0.62399 | 0.632238 |
| PITG_07062 | Pi aspartyl/glutamyl-tRNA(Asn/Gln) amidotransferase subun       | -15.7216 | 0.77351  | 0.632503 |
| PITG_15573 | Pi cytochrome b ascorbate-dependent protein, putative (109      | -13.1677 | 0.508521 | 0.632805 |
| PITG_11603 | Pi peptidyl-prolyl cis-trans isomerase CYP19-4 precursor (87    | -11.1029 | 0.456154 | 0.632886 |
| PITG_08172 | Pi conserved hypothetical protein (1247 nt)                     | -14.3863 | 0.533834 | 0.633011 |
| PITG_00117 | Pi splicing factor 3A (1905 nt)                                 | -15.3753 | 0.709414 | 0.633024 |
| PITG_06114 | Pi conserved hypothetical protein (4443 nt)                     | -14.7525 | -0.60447 | 0.63313  |
| PITG_05814 | Pi conserved hypothetical protein (1799 nt)                     | -16.6479 | -0.93502 | 0.633394 |
| PITG_07964 | Pi conserved hypothetical protein (1850 nt)                     | -14.1463 | 0.550902 | 0.634224 |
| PITG_00641 | Pi conserved hypothetical protein (893 nt)                      | -15.3354 | 0.568563 | 0.634361 |
| PITG_01689 | Pi hydroxyacylglutathione hydrolase, putative (1066 nt)         | -15.3351 | 0.528894 | 0.634361 |
| PITG_03822 | Pi conserved hypothetical protein (1792 nt)                     | -13.5947 | 0.49226  | 0.634399 |
| PITG_03972 | Pi acetyltransferase (GNAT) family, putative (453 nt)           | -15.1446 | 0.603889 | 0.634413 |

|            |                                                              |          |          |          |
|------------|--------------------------------------------------------------|----------|----------|----------|
| PITG_01066 | Pi conserved hypothetical protein (957 nt)                   | -14.5771 | -0.61531 | 0.634449 |
| PITG_12150 | Pi conserved hypothetical protein (646 nt)                   | -15.541  | 0.773617 | 0.63482  |
| PITG_18720 | Pi ATP-citrate synthase (3410 nt)                            | -13.4417 | 0.532538 | 0.634873 |
| PITG_09848 | Pi medium-chain specific acyl-CoA dehydrogenase, mitochor    | -12.6207 | -0.54807 | 0.63488  |
| PITG_15637 | Pi abnormal spindle-like microcephaly-associated protein (61 | -15.7018 | 0.605952 | 0.635023 |
| PITG_10026 | Pi phosphatidate cytidyltransferase, putative (1847 nt)      | -15.0864 | -0.66074 | 0.635234 |
| PITG_15242 | Pi phosphate acetyltransferase (2448 nt)                     | -15.0864 | -0.66074 | 0.635234 |
| PITG_03177 | Pi conserved hypothetical protein (895 nt)                   | -12.9123 | 0.520246 | 0.635302 |
| PITG_19615 | Pi hypothetical protein (5192 nt)                            | -14.6927 | -0.65688 | 0.63534  |
| PITG_05980 | Pi secreted RxLR effector peptide, putative (486 nt)         | -13.7463 | -0.67773 | 0.635484 |
| PITG_15409 | Pi conserved hypothetical protein (1103 nt)                  | -11.6592 | 0.479721 | 0.635671 |
| PITG_17456 | Pi conserved hypothetical protein (817 nt)                   | -13.0581 | -0.54331 | 0.635872 |
| PITG_11064 | Pi conserved hypothetical protein (1076 nt)                  | -14.9041 | 0.560875 | 0.635997 |
| PITG_17725 | Pi conserved hypothetical protein (695 nt)                   | -11.8672 | 0.488432 | 0.636158 |
| PITG_18509 | Pi exosome complex exonuclease RRP44, putative (3240 nt)     | -15.7162 | 0.74711  | 0.636277 |
| PITG_00502 | Pi conserved hypothetical protein (4136 nt)                  | -16.0637 | 0.840175 | 0.636293 |
| PITG_22628 | Pi hypothetical protein (589 nt)                             | -13.0439 | -0.51271 | 0.636321 |
| PITG_18475 | Pi conserved hypothetical protein (901 nt)                   | -14.2225 | -0.5693  | 0.636494 |
| PITG_07983 | Pi urease accessory protein, putative (1556 nt)              | -15.3685 | -0.69181 | 0.636743 |
| PITG_15657 | Pi conserved hypothetical protein (616 nt)                   | -13.7583 | 0.525522 | 0.636902 |
| PITG_01335 | Pi conserved hypothetical protein (2333 nt)                  | -15.3719 | -0.6285  | 0.637019 |
| PITG_10208 | Pi conserved hypothetical protein (551 nt)                   | -15.3749 | -0.6225  | 0.637019 |
| PITG_09246 | Pi conserved hypothetical protein (532 nt)                   | -15.199  | -0.73609 | 0.637121 |
| PITG_06694 | Pi conserved hypothetical protein (1201 nt)                  | -14.8937 | 0.56688  | 0.637394 |
| PITG_02556 | Pi Major Facilitator Superfamily (MFS) (1790 nt)             | -15.9972 | 0.665291 | 0.637481 |
| PITG_20539 | Pi conserved hypothetical protein (1868 nt)                  | -16.0642 | 0.923883 | 0.637481 |
| PITG_03072 | Pi conserved hypothetical protein (699 nt)                   | -15.4559 | -0.72825 | 0.637483 |
| PITG_00651 | Pi centromere/kinetochore protein, putative (3303 nt)        | -15.7851 | -0.93288 | 0.637527 |
| PITG_08442 | Pi conserved hypothetical protein (1035 nt)                  | -16.1593 | -0.86011 | 0.637567 |
| PITG_15311 | Pi hypothetical protein (2765 nt)                            | -13.2571 | 0.520497 | 0.637908 |
| PITG_03220 | Pi proteasome subunit beta type-7, putative (1249 nt)        | -11.5029 | 0.457295 | 0.637915 |
| PITG_04333 | Pi 3-oxo-5-alpha-steroid 4-dehydrogenase, putative (974 nt)  | -15.0658 | 0.554535 | 0.638001 |
| PITG_07038 | Pi serine/threonine-protein phosphatase ppe1 (1248 nt)       | -13.781  | 0.528378 | 0.638029 |
| PITG_00516 | Pi conserved hypothetical protein (717 nt)                   | -14.6819 | -0.64807 | 0.638134 |
| PITG_19959 | Pi hypothetical protein (984 nt)                             | -12.4651 | 0.493798 | 0.638385 |
| PITG_16114 | Pi myb-like DNA-binding protein, putative (2249 nt)          | -14.3414 | -0.51526 | 0.638409 |
| PITG_09875 | Pi AP-4 complex subunit mu-1, putative (1344 nt)             | -13.6683 | 0.544074 | 0.638508 |
| PITG_13681 | Pi 40S ribosomal protein S26, putative (675 nt)              | -8.08817 | 0.45433  | 0.638743 |
| PITG_06487 | Pi conserved hypothetical protein (1194 nt)                  | -15.7731 | -0.70651 | 0.638772 |
| PITG_20906 | Pi conserved hypothetical protein (433 nt)                   | -14.4386 | -0.54453 | 0.638901 |
| PITG_09769 | Pi hypothetical protein (616 nt)                             | -10.5879 | 0.451703 | 0.63949  |
| PITG_04661 | Pi L-aminoadipate-semialdehyde dehydrogenase large subur     | -15.3887 | -0.67833 | 0.639655 |
| PITG_09432 | Pi nucleolar protein NOP5 (1865 nt)                          | -13.1408 | 0.526217 | 0.639842 |
| PITG_15053 | Pi DNA replication licensing factor MCM6, putative (2825 nt) | -16.0919 | -0.85645 | 0.639846 |
| PITG_08211 | Pi U2-associated splicing factor, putative (3263 nt)         | -15.723  | -0.80682 | 0.640014 |
| PITG_10081 | Pi conserved hypothetical protein (1329 nt)                  | -13.658  | 0.488793 | 0.640074 |
| PITG_16854 | Pi conserved hypothetical protein (4617 nt)                  | -13.9508 | -0.54956 | 0.640464 |

|            |                                                                                     |          |          |          |
|------------|-------------------------------------------------------------------------------------|----------|----------|----------|
| PITG_14067 | Pi zinc (Zn <sup>2+</sup> )-Iron (Fe <sup>2+</sup> ) Permease (ZIP) family (993 nt) | -15.1015 | -0.63121 | 0.640743 |
| PITG_07366 | Pi conserved hypothetical protein (522 nt)                                          | -13.6862 | -0.74301 | 0.640826 |
| PITG_01998 | Pi Voltage-gated Ion Channel (VIC) Superfamily (1365 nt)                            | -15.338  | 0.634167 | 0.640965 |
| PITG_03078 | Pi triosephosphate isomerase (819 nt)                                               | -15.5866 | -0.76233 | 0.641152 |
| PITG_13579 | Pi ATP-binding Cassette (ABC) Superfamily (4047 nt)                                 | -15.5627 | -0.7568  | 0.641152 |
| PITG_04651 | Pi exportin-like protein (4306 nt)                                                  | -14.6748 | 0.509369 | 0.641272 |
| PITG_12946 | Pi hydroxyacylglutathione hydrolase (839 nt)                                        | -14.0656 | 0.498123 | 0.641688 |
| PITG_03268 | Pi conserved hypothetical protein (744 nt)                                          | -15.5861 | 0.609983 | 0.641911 |
| PITG_17997 | Pi conserved hypothetical protein (2376 nt)                                         | -15.6146 | -0.64743 | 0.641911 |
| PITG_07944 | Pi conserved hypothetical protein (1242 nt)                                         | -16.1522 | -0.74026 | 0.642165 |
| PITG_05796 | Pi ribosomal RNA-processing protein, putative (978 nt)                              | -16.1054 | -0.76794 | 0.642197 |
| PITG_02096 | Pi polycomb-like protein (1962 nt)                                                  | -15.3459 | 0.619217 | 0.64227  |
| PITG_01310 | Pi peptidyl-prolyl isomerase FKBP12 (333 nt)                                        | -12.1765 | 0.524431 | 0.642279 |
| PITG_09549 | Pi hypothetical protein (264 nt)                                                    | -13.3362 | 0.529461 | 0.642348 |
| PITG_15449 | Pi branched-chain-amino-acid aminotransferase (1312 nt)                             | -12.6898 | -0.4872  | 0.642511 |
| PITG_00807 | Pi conserved hypothetical protein (570 nt)                                          | -14.7697 | 0.599521 | 0.642947 |
| PITG_17746 | Pi conserved hypothetical protein (2850 nt)                                         | -16.0084 | 0.643949 | 0.643368 |
| PITG_22301 | Pi conserved hypothetical protein (1371 nt)                                         | -15.0798 | 0.583964 | 0.643459 |
| PITG_12108 | Pi conserved hypothetical protein (8734 nt)                                         | -14.0387 | -0.58206 | 0.643898 |
| PITG_05989 | Pi myb-like DNA-binding protein, putative (1912 nt)                                 | -14.5117 | -0.5792  | 0.643934 |
| PITG_20033 | Pi conserved hypothetical protein (1003 nt)                                         | -14.1051 | -0.57009 | 0.644074 |
| PITG_09318 | Pi hypothetical protein (538 nt)                                                    | -14.7019 | 0.61838  | 0.644086 |
| PITG_00189 | Pi conserved hypothetical protein (1889 nt)                                         | -13.5301 | 0.495214 | 0.644133 |
| PITG_01923 | Pi conserved hypothetical protein (2375 nt)                                         | -14.3365 | -0.6428  | 0.644219 |
| PITG_03813 | Pi tripeptidyl-peptidase, putative (2252 nt)                                        | -16.0107 | 0.733455 | 0.644534 |
| PITG_08809 | Pi 60S ribosomal protein L12, putative (1873 nt)                                    | -10.8675 | 0.453262 | 0.644633 |
| PITG_21026 | Pi conserved hypothetical protein (2173 nt)                                         | -13.6853 | -0.50029 | 0.644683 |
| PITG_01581 | Pi mitotic spindle checkpoint component mad2 (1007 nt)                              | -14.4066 | -0.60761 | 0.644689 |
| PITG_15039 | Pi secreted RxLR effector peptide, putative (1518 nt)                               | -15.4017 | -0.78802 | 0.644864 |
| PITG_10210 | Pi phosphoenolpyruvate carboxykinase (1839 nt)                                      | -11.0093 | -0.47157 | 0.645236 |
| PITG_21071 | Pi threonyl-tRNA synthetase (2235 nt)                                               | -13.3245 | 0.507592 | 0.645404 |
| PITG_11888 | Pi conserved hypothetical protein (3291 nt)                                         | -15.3013 | -0.64326 | 0.64548  |
| PITG_13567 | Pi endo-1,3(4)-beta-glucanase, putative (2700 nt)                                   | -15.2825 | -0.6809  | 0.64548  |
| PITG_05463 | Pi HECT E3 ubiquitin ligase, putative (2473 nt)                                     | -14.4316 | -0.61093 | 0.645527 |
| PITG_05556 | Pi D-lactate dehydrogenase, putative (1794 nt)                                      | -15.9942 | 0.614744 | 0.645698 |
| PITG_10437 | Pi acyl-CoA dehydrogenase/oxidase (2174 nt)                                         | -16.0724 | -0.83371 | 0.645698 |
| PITG_18749 | Pi conserved hypothetical protein (2573 nt)                                         | -16.0724 | -0.83371 | 0.645698 |
| PITG_03916 | Pi ribosomal protein L28, putative (772 nt)                                         | -8.84631 | 0.44686  | 0.646119 |
| PITG_04582 | Pi conserved hypothetical protein (2387 nt)                                         | -15.7205 | -0.70415 | 0.64616  |
| PITG_21334 | Pi conserved hypothetical protein (1330 nt)                                         | -14.3165 | 0.558319 | 0.646354 |
| PITG_20223 | Pi carbohydrate esterase, putative (470 nt)                                         | -15.1746 | -0.70462 | 0.646423 |
| PITG_01676 | Pi conserved hypothetical protein (1226 nt)                                         | -16.2638 | -1.09173 | 0.646722 |
| PITG_03901 | Pi serine/threonine protein kinase (2295 nt)                                        | -15.5948 | -0.63983 | 0.64695  |
| PITG_19916 | Pi conserved hypothetical protein (1065 nt)                                         | -15.624  | -0.67723 | 0.64695  |
| PITG_20747 | Pi transcription elongation factor B polypeptide 1 (564 nt)                         | -12.6803 | 0.513244 | 0.647224 |
| PITG_09588 | Pi conserved hypothetical protein (1034 nt)                                         | -14.3204 | -0.59483 | 0.647229 |
| PITG_01619 | Pi metalloprotease family M01, putative (3027 nt)                                   | -14.1457 | -0.57052 | 0.647478 |

|            |                                                                  |          |          |          |
|------------|------------------------------------------------------------------|----------|----------|----------|
| PITG_00695 | Pi importin, putative (3310 nt)                                  | -15.108  | -0.63993 | 0.647488 |
| PITG_03709 | Pi conserved hypothetical protein (694 nt)                       | -15.65   | -0.84643 | 0.648198 |
| PITG_14044 | Pi transcription initiation factor TFIID subunit 2, putative (38 | -15.7074 | -0.67586 | 0.648591 |
| PITG_13803 | Pi Hect domain-containing protein, putative (5525 nt)            | -15.0429 | -0.71104 | 0.648739 |
| PITG_19761 | Pi conserved hypothetical protein (1520 nt)                      | -11.411  | 0.449842 | 0.648934 |
| PITG_11741 | Pi conserved hypothetical protein (1761 nt)                      | -16.6442 | -0.94655 | 0.649017 |
| PITG_12426 | Pi conserved hypothetical protein (1858 nt)                      | -16.6442 | -0.94655 | 0.649017 |
| PITG_16691 | Pi DNA polymerase alpha/epsilon subunit B, putative (1991 r      | -16.6442 | -0.94655 | 0.649017 |
| PITG_00763 | Pi conserved hypothetical protein (1209 nt)                      | -15.5711 | 0.57982  | 0.649441 |
| PITG_02850 | Pi conserved hypothetical protein (2391 nt)                      | -15.5972 | -0.73142 | 0.649441 |
| PITG_10016 | Pi conserved hypothetical protein (1180 nt)                      | -15.5623 | 0.59731  | 0.649441 |
| PITG_14643 | Pi conserved hypothetical protein (385 nt)                       | -15.6062 | 0.733593 | 0.649441 |
| PITG_08688 | Pi conserved hypothetical protein (432 nt)                       | -14.8168 | 0.549773 | 0.649447 |
| PITG_07975 | Pi methylcrotonoyl-CoA carboxylase beta chain, mitochondri       | -13.8443 | -0.51407 | 0.649614 |
| PITG_06953 | Pi histone H3.3 (528 nt)                                         | -12.2652 | -0.52611 | 0.649702 |
| PITG_02467 | Pi translocation protein SEC63 (1987 nt)                         | -12.912  | -0.46179 | 0.649752 |
| PITG_04289 | Pi ATP-binding Cassette (ABC) Superfamily (3689 nt)              | -15.7487 | -0.75747 | 0.649801 |
| PITG_08941 | Pi hypothetical protein (1080 nt)                                | -11.5768 | -0.45761 | 0.649993 |
| PITG_04385 | Pi putative GPI-anchored acidic serine-threonine rich HAM34      | -15.861  | -0.96749 | 0.650111 |
| PITG_19735 | Pi conserved hypothetical protein (1350 nt)                      | -15.0847 | -0.66598 | 0.650143 |
| PITG_01943 | Pi 60S ribosomal protein L23 (623 nt)                            | -8.56159 | 0.444047 | 0.650155 |
| PITG_18775 | Pi conserved hypothetical protein (563 nt)                       | -9.91074 | 0.449877 | 0.650411 |
| PITG_12037 | Pi ferredoxin-dependent glutamate synthase, putative (4743       | -13.9616 | 0.537455 | 0.650588 |
| PITG_20045 | Pi hypothetical protein (793 nt)                                 | -15.2612 | -0.56851 | 0.650732 |
| PITG_06659 | Pi conserved hypothetical protein (848 nt)                       | -13.6643 | 0.526691 | 0.650765 |
| PITG_20818 | Pi conserved hypothetical protein (792 nt)                       | -14.446  | 0.680647 | 0.650998 |
| PITG_13079 | Pi peptidylprolyl isomerase domain and WD repeat-containir       | -16.6026 | -0.86008 | 0.651073 |
| PITG_13055 | Pi conserved hypothetical protein (1328 nt)                      | -15.3357 | 0.628874 | 0.651259 |
| PITG_08660 | Pi conserved hypothetical protein (589 nt)                       | -12.6145 | -0.49143 | 0.651318 |
| PITG_16335 | Pi conserved hypothetical protein (856 nt)                       | -14.4223 | -0.54845 | 0.65135  |
| PITG_06950 | Pi histone H3.3 (880 nt)                                         | -11.0001 | -0.43941 | 0.651599 |
| PITG_12428 | Pi conserved hypothetical protein (3124 nt)                      | -15.593  | -0.64335 | 0.651912 |
| PITG_16067 | Pi conserved hypothetical protein (1236 nt)                      | -15.2987 | -0.73197 | 0.65203  |
| PITG_06448 | Pi pyruvate carboxylase, mitochondrial precursor (2075 nt)       | -14.1437 | -0.70417 | 0.652063 |
| PITG_10648 | Pi conserved hypothetical protein (1964 nt)                      | -14.5998 | 0.596403 | 0.652846 |
| PITG_22541 | Pi 60S ribosomal export protein NMD3, putative (1203 nt)         | -14.2449 | -0.60386 | 0.652932 |
| PITG_09493 | Pi Mitochondrial Protein Translocase (MPT) Family (688 nt)       | -13.442  | -0.50978 | 0.653232 |
| PITG_07880 | Pi betaine aldehyde dehydrogenase (1476 nt)                      | -15.2718 | 0.656294 | 0.653323 |
| PITG_09676 | Pi conserved hypothetical protein (615 nt)                       | -15.337  | 0.743714 | 0.653361 |
| PITG_04011 | Pi tetraacyldisaccharide 4'-kinase, putative (1161 nt)           | -14.3008 | -0.54946 | 0.653594 |
| PITG_15627 | Pi conserved hypothetical protein (1153 nt)                      | -13.6538 | 0.514941 | 0.653737 |
| PITG_21121 | Pi hypothetical protein (132 nt)                                 | -12.169  | -0.49863 | 0.653777 |
| PITG_06603 | Pi hypothetical protein (468 nt)                                 | -13.8329 | 0.512226 | 0.65406  |
| PITG_04038 | Pi conserved hypothetical protein (1405 nt)                      | -15.001  | 0.557781 | 0.65413  |
| PITG_19746 | Pi conserved hypothetical protein (1407 nt)                      | -14.1904 | 0.519106 | 0.654147 |
| PITG_13809 | Pi Rab18 family GTPase, putative (955 nt)                        | -13.0036 | -0.48923 | 0.654188 |
| PITG_03698 | Pi enolase (1502 nt)                                             | -11.0609 | 0.450063 | 0.654307 |

|            |                                                            |          |          |          |
|------------|------------------------------------------------------------|----------|----------|----------|
| PITG_08532 | Pi Drug/Metabolite Transporter (DMT) Superfamily (1407 nt) | -14.6403 | 0.537659 | 0.654316 |
| PITG_06754 | Pi conserved hypothetical protein (845 nt)                 | -15.3117 | -0.74889 | 0.65461  |
| PITG_20745 | Pi Intraflagellar Transport Protein 52 (1678 nt)           | -14.9321 | -0.6185  | 0.654992 |
| PITG_08692 | Pi conserved hypothetical protein (1251 nt)                | -13.0193 | 0.442768 | 0.655099 |
| PITG_08579 | Pi isoleucyl-tRNA synthetase (3531 nt)                     | -14.5178 | 0.539128 | 0.65515  |
| PITG_17726 | Pi conserved hypothetical protein (726 nt)                 | -13.7765 | 0.481855 | 0.655194 |
| PITG_01924 | Pi twinfilin-like protein (1088 nt)                        | -14.7677 | 0.566122 | 0.655215 |
| PITG_19310 | Pi conserved hypothetical protein (966 nt)                 | -15.0136 | 0.658718 | 0.655462 |
| PITG_12949 | Pi conserved hypothetical protein (911 nt)                 | -16.0421 | -0.76475 | 0.656017 |
| PITG_03451 | Pi conserved hypothetical protein (959 nt)                 | -12.8266 | -0.46144 | 0.656257 |
| PITG_15736 | Pi conserved hypothetical protein (812 nt)                 | -15.3527 | 0.599502 | 0.656288 |
| PITG_14615 | Pi conserved hypothetical protein (468 nt)                 | -11.822  | 0.442977 | 0.656837 |
| PITG_01171 | Pi signal recognition particle, putative (1536 nt)         | -14.4361 | -0.57236 | 0.657062 |
| PITG_14987 | Pi conserved hypothetical protein (510 nt)                 | -14.4193 | 0.532597 | 0.657062 |
| PITG_14989 | Pi conserved hypothetical protein (333 nt)                 | -13.0089 | -0.44998 | 0.657395 |
| PITG_04665 | Pi ribose-5-phosphate isomerase (857 nt)                   | -14.3254 | -0.54541 | 0.657841 |
| PITG_15723 | Pi 60S ribosomal protein L14, putative (718 nt)            | -8.49525 | -0.46364 | 0.658066 |
| PITG_19166 | Pi conserved hypothetical protein (1499 nt)                | -13.7767 | 0.519589 | 0.658174 |
| PITG_14596 | Pi transcription initiation factor IIB, putative (927 nt)  | -14.253  | 0.503538 | 0.658193 |
| PITG_19870 | Pi bax inhibitor-like protein (1129 nt)                    | -12.9322 | -0.46415 | 0.658248 |
| PITG_19544 | Pi carbohydrate-binding protein, putative (594 nt)         | -13.8136 | -0.52808 | 0.658298 |
| PITG_17042 | Pi protein RER1A (736 nt)                                  | -13.3465 | 0.481429 | 0.65834  |
| PITG_09376 | Pi conserved hypothetical protein (5603 nt)                | -15.2615 | 0.542126 | 0.658438 |
| PITG_06972 | Pi conserved hypothetical protein (631 nt)                 | -13.8114 | 0.531816 | 0.659143 |
| PITG_03030 | Pi conserved hypothetical protein (1138 nt)                | -15.6475 | -0.85072 | 0.659218 |
| PITG_03641 | Pi conserved hypothetical protein (1581 nt)                | -16.0332 | -0.67487 | 0.659399 |
| PITG_08716 | Pi hypothetical protein (568 nt)                           | -15.9907 | 0.735871 | 0.659399 |
| PITG_05518 | Pi hypothetical protein (783 nt)                           | -15.9183 | -0.72414 | 0.659576 |
| PITG_06978 | Pi metalloprotease family M20D, putative (2049 nt)         | -15.9178 | 0.823413 | 0.659576 |
| PITG_01979 | Pi conserved hypothetical protein (420 nt)                 | -16.544  | -1.06446 | 0.660197 |
| PITG_00461 | Pi Mitochondrial Carrier (MC) Family (879 nt)              | -13.2483 | 0.437526 | 0.660319 |
| PITG_07171 | Pi calcineurin-like phosphoesterase, putative (987 nt)     | -16.0021 | 0.714838 | 0.66052  |
| PITG_13650 | Pi conserved hypothetical protein (693 nt)                 | -15.5012 | 0.657748 | 0.660543 |
| PITG_17728 | Pi conserved hypothetical protein (1491 nt)                | -14.5219 | 0.616827 | 0.660591 |
| PITG_12692 | Pi conserved hypothetical protein (1687 nt)                | -15.9349 | 0.857491 | 0.66073  |
| PITG_03547 | Pi conserved hypothetical protein (2473 nt)                | -15.2952 | -0.6552  | 0.660962 |
| PITG_12164 | Pi conserved hypothetical protein (708 nt)                 | -12.3946 | 0.453641 | 0.6614   |
| PITG_12892 | Pi thioredoxin-like protein, putative (755 nt)             | -12.9321 | 0.487998 | 0.661565 |
| PITG_01447 | Pi serine protease family S10, putative (1425 nt)          | -12.9923 | 0.466465 | 0.661708 |
| PITG_19768 | Pi conserved hypothetical protein (782 nt)                 | -11.4573 | 0.448319 | 0.661758 |
| PITG_15923 | Pi conserved hypothetical protein (889 nt)                 | -15.5176 | 0.624787 | 0.661775 |
| PITG_16974 | Pi conserved hypothetical protein (738 nt)                 | -15.9137 | -0.73332 | 0.661881 |
| PITG_02239 | Pi ATP-dependent hsl protease ATP-binding subunit hslU (15 | -14.1297 | -0.49527 | 0.661978 |
| PITG_00071 | Pi DNA replication complex GINS protein PSF1 (1030 nt)     | -14.5231 | 0.462965 | 0.661998 |
| PITG_03703 | Pi conserved hypothetical protein (1480 nt)                | -14.3811 | -0.50707 | 0.662252 |
| PITG_10105 | Pi exportin-T, putative (3093 nt)                          | -16.5481 | -1.05609 | 0.662255 |
| PITG_19213 | Pi mitogen-activated protein kinase, putative (3606 nt)    | -14.6323 | 0.52095  | 0.662442 |

|            |                                                                  |          |          |          |
|------------|------------------------------------------------------------------|----------|----------|----------|
| PITG_03586 | Pi trafficking protein particle complex subunit, putative (501   | -14.4678 | -0.56179 | 0.662539 |
| PITG_12157 | Pi conserved hypothetical protein (2196 nt)                      | -14.8459 | -0.61851 | 0.66279  |
| PITG_19804 | Pi hypothetical protein (1288 nt)                                | -12.8366 | -0.46286 | 0.662857 |
| PITG_08591 | Pi actin-depolymerizing factor, putative (744 nt)                | -10.3245 | 0.41746  | 0.663508 |
| PITG_03221 | Pi 40S ribosomal protein S18 (948 nt)                            | -7.88931 | 0.42267  | 0.663556 |
| PITG_12187 | Pi diphthamide biosynthesis protein 1 (2303 nt)                  | -15.9005 | 0.596678 | 0.664169 |
| PITG_17071 | Pi malonyl-CoA decarboxylase (MCD), putative (2217 nt)           | -15.9125 | 0.773336 | 0.664169 |
| PITG_15776 | Pi protein kinase, putative (867 nt)                             | -13.4954 | 0.483445 | 0.664256 |
| PITG_20217 | Pi hypothetical protein (878 nt)                                 | -15.0866 | -0.66378 | 0.664346 |
| PITG_03568 | Pi DEAD/DEAH box RNA helicase, putative (1945 nt)                | -12.4319 | 0.464618 | 0.664422 |
| PITG_15786 | Pi heat shock 70 kDa protein, mitochondrial precursor (1902      | -12.1822 | -0.43551 | 0.664493 |
| PITG_18452 | Pi thioredoxin reductase 1 (3219 nt)                             | -13.4689 | 0.483047 | 0.664577 |
| PITG_04666 | Pi conserved hypothetical protein (1826 nt)                      | -14.5458 | 0.562929 | 0.664759 |
| PITG_06966 | Pi conserved hypothetical protein (1446 nt)                      | -14.5458 | -0.51011 | 0.664759 |
| PITG_14548 | Pi conserved hypothetical protein (485 nt)                       | -13.4447 | 0.529161 | 0.664968 |
| PITG_08045 | Pi dimethyladenosine transferase (1226 nt)                       | -16.0391 | -0.76667 | 0.664975 |
| PITG_15365 | Pi conserved hypothetical protein (1466 nt)                      | -12.7879 | -0.44743 | 0.665085 |
| PITG_13196 | Pi conserved hypothetical protein (1584 nt)                      | -14.9702 | -0.62182 | 0.665141 |
| PITG_01484 | Pi beta-glucosidase, putative (1712 nt)                          | -15.6329 | -0.71475 | 0.665185 |
| PITG_05557 | Pi Drug/Metabolite Transporter (DMT) Superfamily (1113 nt)       | -14.6001 | 0.610889 | 0.665234 |
| PITG_16058 | Pi conserved hypothetical protein (10877 nt)                     | -14.4576 | -0.55387 | 0.665242 |
| PITG_09144 | Pi conserved hypothetical protein (1676 nt)                      | -14.2    | -0.52886 | 0.665284 |
| PITG_10117 | Pi ATP-binding Cassette (ABC) superfamily (5077 nt)              | -15.8626 | 0.673391 | 0.665308 |
| PITG_19006 | Pi conserved hypothetical protein (2670 nt)                      | -15.1801 | 0.502101 | 0.66558  |
| PITG_06131 | Pi conserved hypothetical protein (883 nt)                       | -13.1314 | -0.46128 | 0.66569  |
| PITG_01591 | Pi conserved hypothetical protein (3637 nt)                      | -14.7192 | -0.54279 | 0.665713 |
| PITG_21626 | Pi ATP-binding cassette protein, putative (4435 nt)              | -14.5327 | 0.516944 | 0.666127 |
| PITG_15871 | Pi nucleolar protein, putative (2417 nt)                         | -12.5224 | -0.47181 | 0.66634  |
| PITG_16023 | Pi transcription initiation factor TFIID subunit, putative (2763 | -16.5294 | -1.01509 | 0.666343 |
| PITG_11607 | Pi metalloprotease family M48X, putative (748 nt)                | -15.7005 | -0.64118 | 0.666357 |
| PITG_17831 | Pi protein kinase, putative (1930 nt)                            | -15.7005 | -0.64118 | 0.666357 |
| PITG_12818 | Pi glutamate carboxypeptidase, putative (2339 nt)                | -14.4809 | -0.55855 | 0.666583 |
| PITG_02344 | Pi 5-oxoprolinase (3842 nt)                                      | -14.8262 | 0.530424 | 0.666674 |
| PITG_08327 | Pi ubiquitin-conjugating enzyme E2 (659 nt)                      | -13.2137 | 0.445593 | 0.667513 |
| PITG_03855 | Pi DNA-directed RNA polymerase I subunit RPA1, putative (5       | -15.8441 | 0.525783 | 0.667573 |
| PITG_08093 | Pi conserved hypothetical protein (2712 nt)                      | -15.9243 | -0.76894 | 0.667573 |
| PITG_15819 | Pi glutamyl-tRNA(Gln) amidotransferase subunit A, putative       | -15.5354 | -0.71089 | 0.66786  |
| PITG_04842 | Pi conserved hypothetical protein (5338 nt)                      | -13.9888 | -0.47348 | 0.668422 |
| PITG_10060 | Pi conserved hypothetical protein (2022 nt)                      | -15.5922 | -0.64491 | 0.668715 |
| PITG_04226 | Pi geranylgeranyl transferase type-2 subunit alpha, putative     | -15.4877 | -0.61483 | 0.669062 |
| PITG_16365 | Pi conserved hypothetical protein (5508 nt)                      | -15.5166 | 0.688787 | 0.669062 |
| PITG_02567 | Pi T-complex protein 1 subunit alpha (1841 nt)                   | -13.2573 | 0.480359 | 0.66921  |
| PITG_11225 | Pi P-type ATPase (P-ATPase) Superfamily (4335 nt)                | -15.1771 | 0.49588  | 0.669361 |
| PITG_07925 | Pi exportin-5-like protein (3724 nt)                             | -16.5409 | -1.06978 | 0.669385 |
| PITG_18374 | Pi lysophosphatidylcholine acyltransferase, putative (1677 nt)   | -16.5409 | -1.06978 | 0.669385 |
| PITG_20908 | Pi conserved hypothetical protein (2363 nt)                      | -16.5409 | -1.06978 | 0.669385 |
| PITG_10901 | Pi resistance-Nodulation-Cell Division (RND) superfamily (49     | -15.2767 | -0.6923  | 0.669635 |



|            |                                                                   |          |          |          |
|------------|-------------------------------------------------------------------|----------|----------|----------|
| PITG_11098 | Pi conserved hypothetical protein (2149 nt)                       | -15.9432 | -0.7889  | 0.669823 |
| PITG_18575 | Pi conserved hypothetical protein (798 nt)                        | -15.6479 | -0.84927 | 0.669884 |
| PITG_15890 | Pi threonine protease family T01A, putative (858 nt)              | -12.0887 | 0.437907 | 0.67027  |
| PITG_19622 | Pi conserved hypothetical protein (4284 nt)                       | -14.8213 | 0.539109 | 0.670507 |
| PITG_06424 | Pi formin-homology 2 domain-containing protein (3877 nt)          | -14.3782 | -0.53764 | 0.670555 |
| PITG_17795 | Pi hypothetical protein (1553 nt)                                 | -14.3596 | 0.592494 | 0.670601 |
| PITG_02694 | Pi 60S ribosomal protein L23a (830 nt)                            | -9.23601 | 0.409349 | 0.670785 |
| PITG_20590 | Pi cleavage induced conserved hypothetical protein (1255 nt)      | -13.9073 | 0.498075 | 0.670792 |
| PITG_21176 | Pi transportin-like protein (3101 nt)                             | -14.3237 | -0.48    | 0.671225 |
| PITG_06618 | Pi conserved hypothetical protein (1107 nt)                       | -15.463  | 0.514494 | 0.671451 |
| PITG_06871 | Pi ankyrin-like protein (3315 nt)                                 | -15.5238 | -0.6858  | 0.671451 |
| PITG_15830 | Pi conserved hypothetical protein (651 nt)                        | -13.3517 | 0.485071 | 0.671497 |
| PITG_02453 | Pi conserved hypothetical protein (1095 nt)                       | -14.0526 | 0.524695 | 0.6715   |
| PITG_16071 | Pi prenyltransferase-like protein, putative (2267 nt)             | -14.0572 | -0.50451 | 0.6715   |
| PITG_12578 | Pi acyl-CoA desaturase 1 (1264 nt)                                | -12.2265 | 0.428908 | 0.671511 |
| PITG_01360 | Pi conserved hypothetical protein (735 nt)                        | -14.5359 | 0.502956 | 0.671527 |
| PITG_02161 | Pi conserved hypothetical protein (3408 nt)                       | -16.0704 | -0.83595 | 0.67157  |
| PITG_04600 | Pi conserved hypothetical protein (1983 nt)                       | -14.486  | 0.540015 | 0.671959 |
| PITG_00808 | Pi conserved hypothetical protein (1619 nt)                       | -14.1795 | 0.48166  | 0.672006 |
| PITG_04067 | Pi conserved hypothetical protein (985 nt)                        | -14.2161 | -0.53698 | 0.672214 |
| PITG_06863 | Pi ATP-binding Cassette (ABC) Superfamily (4098 nt)               | -13.5227 | -0.61233 | 0.672433 |
| PITG_02529 | Pi protein kinase, putative (4011 nt)                             | -15.9217 | -0.77531 | 0.67317  |
| PITG_20820 | Pi conserved hypothetical protein (3315 nt)                       | -15.9217 | -0.77531 | 0.67317  |
| PITG_11039 | Pi conserved hypothetical protein (787 nt)                        | -16.5275 | -0.93528 | 0.67341  |
| PITG_18634 | Pi DNA topoisomerase, putative (3053 nt)                          | -16.4423 | -0.80057 | 0.67341  |
| PITG_11110 | Pi eukaryotic translation initiation factor 2 subunit 3 (1847 nt) | -13.2867 | -0.43551 | 0.673553 |
| PITG_01940 | Pi triosephosphate isomerase/glyceraldehyde-3-phosphate c         | -9.98522 | 0.489553 | 0.673811 |
| PITG_00663 | Pi rRNA methyltransferase, putative (3915 nt)                     | -14.3128 | 0.440543 | 0.67397  |
| PITG_02491 | Pi conserved hypothetical protein (739 nt)                        | -14.6753 | 0.528121 | 0.674179 |
| PITG_05128 | Pi conserved hypothetical protein (5333 nt)                       | -15.2288 | -0.74618 | 0.674323 |
| PITG_05512 | Pi conserved hypothetical protein (1614 nt)                       | -15.1813 | 0.53054  | 0.674323 |
| PITG_17716 | Pi voltage-dependent anion-selective channel protein, putati      | -12.2837 | 0.440091 | 0.6749   |
| PITG_18101 | Pi conserved hypothetical protein (2262 nt)                       | -14.7413 | -0.58975 | 0.674935 |
| PITG_18752 | Pi small nuclear ribonucleoprotein-associated protein, putati     | -13.266  | 0.466728 | 0.675008 |
| PITG_10183 | Pi conserved hypothetical protein (872 nt)                        | -14.8997 | -0.6108  | 0.675251 |
| PITG_22958 | Pi conserved hypothetical protein (1679 nt)                       | -14.89   | -0.53194 | 0.675251 |
| PITG_10724 | Pi conserved hypothetical protein (8835 nt)                       | -16.3407 | 0.482014 | 0.675409 |
| PITG_15357 | Pi conserved hypothetical protein (567 nt)                        | -13.7838 | -0.47901 | 0.675448 |
| PITG_09428 | Pi conserved hypothetical protein (966 nt)                        | -12.077  | -0.41489 | 0.675542 |
| PITG_04844 | Pi folate-Biopterin Transporter (FBT) family (1518 nt)            | -16.0357 | 0.886503 | 0.675911 |
| PITG_15216 | Pi S-phase kinase-associated protein 1A (615 nt)                  | -14.0907 | -0.54058 | 0.67656  |
| PITG_19470 | Pi conserved hypothetical protein (756 nt)                        | -15.0965 | 0.480046 | 0.676614 |
| PITG_15881 | Pi peptide methionine sulfoxide reductase (494 nt)                | -13.9686 | -0.50077 | 0.676791 |
| PITG_08230 | Pi vacuolar protein sorting-associated protein, putative (124     | -15.5749 | 0.550101 | 0.676814 |
| PITG_09528 | Pi conserved hypothetical protein (1289 nt)                       | -12.8073 | 0.459185 | 0.677127 |
| PITG_15761 | Pi conserved hypothetical protein (1032 nt)                       | -12.5037 | 0.410331 | 0.677145 |
| PITG_12122 | Pi proteasome subunit alpha type-5, putative (964 nt)             | -11.4049 | 0.407863 | 0.677265 |

|            |                                                              |          |          |          |
|------------|--------------------------------------------------------------|----------|----------|----------|
| PITG_21502 | Pi conserved hypothetical protein (417 nt)                   | -14.4127 | 0.553608 | 0.677392 |
| PITG_08876 | Pi conserved hypothetical protein (655 nt)                   | -13.8896 | -0.4651  | 0.677691 |
| PITG_05804 | Pi conserved hypothetical protein (1129 nt)                  | -14.8707 | -0.49438 | 0.677823 |
| PITG_03783 | Pi Mitochondrial Protein Translocase (MPT) Family (258 nt)   | -12.1919 | 0.416449 | 0.677854 |
| PITG_06538 | Pi ATP-binding Cassette (ABC) Superfamily (501 nt)           | -15.1193 | -0.52173 | 0.677862 |
| PITG_09435 | Pi conserved hypothetical protein (3425 nt)                  | -14.6749 | -0.50822 | 0.678121 |
| PITG_11926 | Pi glu/Leu/Phe/Val dehydrogenase family, putative (3096 nt)  | -13.5919 | 0.448297 | 0.678339 |
| PITG_17117 | Pi salicylate hydroxylase, putative (1304 nt)                | -15.3939 | 0.58378  | 0.678397 |
| PITG_20780 | Pi ATPase (3841 nt)                                          | -14.9964 | 0.546856 | 0.678406 |
| PITG_01283 | Pi glycoside hydrolase, putative (8578 nt)                   | -15.5034 | 0.696274 | 0.678505 |
| PITG_04648 | Pi conserved hypothetical protein (1624 nt)                  | -15.4745 | -0.59665 | 0.678505 |
| PITG_11775 | Pi hypothetical protein (1765 nt)                            | -12.0135 | 0.445885 | 0.678585 |
| PITG_13237 | Pi alpha-actinin-1, putative (3164 nt)                       | -14.169  | -0.53926 | 0.678669 |
| PITG_08531 | Pi conserved hypothetical protein (540 nt)                   | -14.9383 | -0.72702 | 0.679033 |
| PITG_02810 | Pi cell division cycle protein 16 (2592 nt)                  | -15.1103 | -0.5763  | 0.679103 |
| PITG_20759 | Pi dihydroxy-acid dehydratase (1899 nt)                      | -13.2324 | -0.46044 | 0.679109 |
| PITG_21117 | Pi malate synthase, glyoxysomal, putative (1780 nt)          | -11.5651 | -0.4205  | 0.679481 |
| PITG_04501 | Pi hypothetical protein (338 nt)                             | -12.8854 | -0.52804 | 0.679547 |
| PITG_07287 | Pi conserved hypothetical protein (771 nt)                   | -15.4863 | 0.636103 | 0.679665 |
| PITG_00455 | Pi conserved hypothetical protein (1185 nt)                  | -12.5295 | 0.414368 | 0.679745 |
| PITG_05240 | Pi casein kinase, putative (1301 nt)                         | -11.2614 | -0.39518 | 0.680118 |
| PITG_04938 | Pi calcium/calmodulin-dependent protein kinase, putative (1  | -15.154  | 0.537179 | 0.680403 |
| PITG_10822 | Pi Mitochondrial Protein Translocase (MPT) Family (657 nt)   | -13.5059 | -0.4597  | 0.680609 |
| PITG_03144 | Pi conserved hypothetical protein (1997 nt)                  | -15.388  | 0.571798 | 0.680778 |
| PITG_08826 | Pi conserved hypothetical protein (1321 nt)                  | -15.4477 | -0.69394 | 0.680778 |
| PITG_19886 | Pi sphingosine kinase, putative (5332 nt)                    | -15.4237 | -0.65354 | 0.680778 |
| PITG_20838 | Pi conserved hypothetical protein (1921 nt)                  | -15.4019 | 0.567996 | 0.680778 |
| PITG_19875 | Pi phosphoinositide 3-kinase regulatory subunit (6054 nt)    | -15.5114 | -0.75736 | 0.68082  |
| PITG_05250 | Pi tRNA (adenine-N(1)-)-methyltransferase catalytic subunit, | -13.2795 | -0.50865 | 0.680911 |
| PITG_11612 | Pi conserved hypothetical protein (1277 nt)                  | -11.8575 | -0.44442 | 0.680986 |
| PITG_00632 | Pi dolichyl-diphosphooligosaccharide-protein glycosyltransfe | -13.5237 | 0.449914 | 0.68116  |
| PITG_14088 | Pi conserved hypothetical protein (835 nt)                   | -14.3046 | 0.625437 | 0.681262 |
| PITG_17641 | Pi conserved hypothetical protein (1358 nt)                  | -16.4324 | -0.82548 | 0.681357 |
| PITG_09670 | Pi protein kinase (621 nt)                                   | -15.074  | 0.597914 | 0.681524 |
| PITG_05643 | Pi hypothetical protein (3228 nt)                            | -14.8467 | 0.494751 | 0.68163  |
| PITG_08749 | Pi conserved hypothetical protein (1312 nt)                  | -13.8875 | 0.443044 | 0.681842 |
| PITG_14714 | Pi hypothetical protein (670 nt)                             | -15.3907 | -0.50592 | 0.68196  |
| PITG_07945 | Pi snRNA-activating protein complex subunit 3, putative (135 | -15.5133 | -0.65936 | 0.681971 |
| PITG_08780 | Pi Sulfate Permease (SulP) Family (2805 nt)                  | -14.3332 | -0.52987 | 0.682016 |
| PITG_09990 | Pi dolichyldiphosphatase, putative (941 nt)                  | -13.5579 | 0.465033 | 0.682166 |
| PITG_01691 | Pi phosphatidylinositol-3,4,5-trisphosphate 3-phosphatase, p | -14.1482 | -0.48375 | 0.682484 |
| PITG_17814 | Pi conserved hypothetical protein (2097 nt)                  | -15.0892 | 0.576246 | 0.682792 |
| PITG_17700 | Pi conserved hypothetical protein (1292 nt)                  | -14.8732 | -0.49962 | 0.682886 |
| PITG_09829 | Pi conserved hypothetical protein (1602 nt)                  | -15.7623 | 0.551113 | 0.683041 |
| PITG_15097 | Pi conserved hypothetical protein (1695 nt)                  | -15.7974 | -0.60272 | 0.683041 |
| PITG_16649 | Pi chromosome transmission fidelity protein, putative (3420  | -15.4161 | 0.627855 | 0.683137 |
| PITG_22427 | Pi ubiquitin-specific protease, putative (777 nt)            | -15.3747 | 0.576614 | 0.683137 |

|            |                                                              |          |          |          |
|------------|--------------------------------------------------------------|----------|----------|----------|
| PITG_01410 | Pi conserved hypothetical protein (1171 nt)                  | -13.6062 | -0.4913  | 0.683244 |
| PITG_07795 | Pi myosin-like protein (2346 nt)                             | -14.6253 | 0.550098 | 0.683344 |
| PITG_08001 | Pi glucosylceramidase, putative (2022 nt)                    | -14.244  | 0.473763 | 0.683894 |
| PITG_02084 | Pi golgi reassembly-stacking protein, putative (1053 nt)     | -15.0377 | 0.475473 | 0.683904 |
| PITG_00787 | Pi CRM1 C terminal Exportin 1-like protein (3496 nt)         | -13.8598 | -0.46557 | 0.684062 |
| PITG_21111 | Pi conserved hypothetical protein (614 nt)                   | -13.8888 | -0.54615 | 0.684084 |
| PITG_20307 | Pi conserved hypothetical protein (1010 nt)                  | -14.0078 | 0.471969 | 0.684111 |
| PITG_17503 | Pi conserved hypothetical protein (997 nt)                   | -14.8672 | 0.535668 | 0.684136 |
| PITG_05830 | Pi conserved hypothetical protein (724 nt)                   | -14.8539 | -0.60035 | 0.684147 |
| PITG_03063 | Pi conserved hypothetical protein (474 nt)                   | -15.5526 | 0.767298 | 0.684259 |
| PITG_05486 | Pi acyl-CoA dehydrogenase/oxidase (2366 nt)                  | -16.3861 | -0.7698  | 0.684304 |
| PITG_01109 | Pi palmitoyltransferase, putative (1538 nt)                  | -15.4043 | 0.540413 | 0.68431  |
| PITG_06765 | Pi conserved hypothetical protein (760 nt)                   | -14.6051 | -0.47538 | 0.684642 |
| PITG_07995 | Pi cyclin-dependent kinase, putative (918 nt)                | -14.6267 | -0.51948 | 0.684642 |
| PITG_07843 | Pi protein disulfide-isomerase, putative (1657 nt)           | -13.082  | 0.468568 | 0.68484  |
| PITG_01400 | Pi Argonaute3 (AGO3) (3810 nt)                               | -14.5193 | -0.61283 | 0.685097 |
| PITG_07293 | Pi conserved hypothetical protein (1493 nt)                  | -15.883  | 0.753005 | 0.685171 |
| PITG_03766 | Pi conserved hypothetical protein (429 nt)                   | -15.2092 | -0.53485 | 0.685173 |
| PITG_01935 | Pi hypothetical protein (553 nt)                             | -15.7855 | -0.6783  | 0.685255 |
| PITG_08198 | Pi conserved hypothetical protein (1653 nt)                  | -15.7935 | -0.6108  | 0.685255 |
| PITG_12876 | Pi RNA-binding protein, putative (924 nt)                    | -15.7855 | -0.6783  | 0.685255 |
| PITG_03700 | Pi enolase (1365 nt)                                         | -11.0334 | 0.445063 | 0.685342 |
| PITG_02043 | Pi SWI/SNF-related matrix-associated actin-dependent regul.  | -14.091  | 0.449275 | 0.685837 |
| PITG_16228 | Pi conserved hypothetical protein (3169 nt)                  | -14.1116 | -0.49784 | 0.685837 |
| PITG_19458 | Pi protein kinase (1187 nt)                                  | -16.3307 | -0.87889 | 0.686196 |
| PITG_10828 | Pi conserved hypothetical protein (1943 nt)                  | -13.5694 | -0.47944 | 0.686331 |
| PITG_00206 | Pi conserved hypothetical protein (1726 nt)                  | -15.2293 | -0.744   | 0.686353 |
| PITG_03678 | Pi kynurenine-oxoglutarate transaminase, putative (1248 nt)  | -15.2084 | -0.70066 | 0.686353 |
| PITG_03751 | Pi nipped-B-like protein (7782 nt)                           | -15.7477 | 0.623833 | 0.686355 |
| PITG_00132 | Pi phosphoglycerate kinase (1321 nt)                         | -15.4343 | -0.63197 | 0.686639 |
| PITG_02909 | Pi carbohydrate-binding protein, putative (1740 nt)          | -14.6435 | 0.429869 | 0.687076 |
| PITG_05434 | Pi importin subunit beta, putative (3021 nt)                 | -12.7697 | 0.420451 | 0.687125 |
| PITG_13159 | Pi conserved hypothetical protein (1943 nt)                  | -13.6562 | -0.44497 | 0.687253 |
| PITG_16156 | Pi conserved hypothetical protein (1174 nt)                  | -13.0419 | 0.462348 | 0.688479 |
| PITG_01101 | Pi aquaporin, putative (894 nt)                              | -15.7787 | -0.69283 | 0.688544 |
| PITG_07765 | Pi conserved hypothetical protein (2670 nt)                  | -15.7622 | -0.67364 | 0.688544 |
| PITG_05006 | Pi U1 small nuclear ribonucleoprotein A (865 nt)             | -13.8905 | 0.483702 | 0.688591 |
| PITG_09413 | Pi sterol 3-beta-glucosyltransferase, putative (4590 nt)     | -15.5216 | 0.694216 | 0.688786 |
| PITG_00989 | Pi histone demethylase, putative (3052 nt)                   | -15.0353 | -0.49158 | 0.689036 |
| PITG_03048 | Pi ubiquitin-conjugating enzyme E2, putative (1098 nt)       | -14.8664 | 0.533481 | 0.689073 |
| PITG_12588 | Pi phosphatidylinositol N-acetylglucosaminyltransferase subu | -16.4795 | -1.1049  | 0.689177 |
| PITG_22600 | Pi conserved hypothetical protein (804 nt)                   | -16.4795 | -1.1049  | 0.689177 |
| PITG_11483 | Pi hypothetical protein (2832 nt)                            | -13.0128 | -0.58228 | 0.689573 |
| PITG_00941 | Pi 60S ribosomal protein L21-1 (1002 nt)                     | -9.75263 | 0.399688 | 0.689786 |
| PITG_13997 | Pi serine/threonine protein kinase (3857 nt)                 | -14.8911 | -0.59578 | 0.690292 |
| PITG_02856 | Pi DEAD/DEAH box RNA helicase, putative (2098 nt)            | -14.0068 | 0.476851 | 0.690754 |
| PITG_01294 | Pi hypothetical protein (1032 nt)                            | -13.7038 | -0.57008 | 0.691163 |

|            |                                                              |          |          |          |
|------------|--------------------------------------------------------------|----------|----------|----------|
| PITG_16103 | Pi Major Facilitator Superfamily (MFS) (1347 nt)             | -16.2296 | -0.64305 | 0.691165 |
| PITG_17241 | Pi leucine carboxyl methyltransferase, putative (1195 nt)    | -16.2296 | -0.64305 | 0.691165 |
| PITG_02058 | Pi conserved hypothetical protein (1499 nt)                  | -13.1707 | -0.45588 | 0.69129  |
| PITG_02867 | Pi ubiquitin conjugation factor E4, putative (3219 nt)       | -15.0576 | -0.60866 | 0.691467 |
| PITG_04569 | Pi conserved hypothetical protein (3737 nt)                  | -15.0766 | 0.656829 | 0.691467 |
| PITG_13970 | Pi conserved hypothetical protein (2027 nt)                  | -14.1416 | -0.49708 | 0.691733 |
| PITG_18105 | Pi putative GPI mannosyltransferase (2326 nt)                | -15.7722 | 0.67144  | 0.691796 |
| PITG_00936 | Pi conserved hypothetical protein (963 nt)                   | -16.2139 | -0.55095 | 0.692151 |
| PITG_00882 | Pi ATP-binding Cassette (ABC) Superfamily (6129 nt)          | -15.1339 | -0.62608 | 0.692377 |
| PITG_06813 | Pi conserved hypothetical protein (932 nt)                   | -13.1781 | -0.41132 | 0.692785 |
| PITG_03589 | Pi conserved hypothetical protein (421 nt)                   | -12.3424 | -0.40481 | 0.692817 |
| PITG_17261 | Pi 60S acidic ribosomal protein P0 (1350 nt)                 | -9.42197 | 0.419855 | 0.69283  |
| PITG_21283 | Pi conserved hypothetical protein (533 nt)                   | -14.0694 | 0.443096 | 0.692945 |
| PITG_12670 | Pi conserved hypothetical protein (2070 nt)                  | -11.3289 | 0.39312  | 0.692995 |
| PITG_03840 | Pi endomembrane protein 70-like protein, putative (3071 nt)  | -16.2021 | 0.57475  | 0.693134 |
| PITG_05056 | Pi GTP-binding protein, putative (1843 nt)                   | -14.661  | 0.465931 | 0.693276 |
| PITG_17727 | Pi conserved hypothetical protein (521 nt)                   | -14.0218 | -0.47252 | 0.693357 |
| PITG_01830 | Pi conserved hypothetical protein (1556 nt)                  | -13.3109 | -0.45692 | 0.693698 |
| PITG_02663 | Pi conserved hypothetical protein (1298 nt)                  | -14.9024 | -0.61668 | 0.693914 |
| PITG_00190 | Pi conserved hypothetical protein (1683 nt)                  | -15.7481 | 0.58451  | 0.693945 |
| PITG_22685 | Pi dihydroxy-acid dehydratase, putative (1869 nt)            | -13.4619 | -0.44158 | 0.694332 |
| PITG_13393 | Pi RNA-binding protein, putative (1978 nt)                   | -14.2448 | -0.47973 | 0.694387 |
| PITG_06984 | Pi stromal cell-derived factor 2 precursor (957 nt)          | -15.3204 | -0.60496 | 0.694495 |
| PITG_06281 | Pi conserved hypothetical protein (4655 nt)                  | -14.7915 | 0.431979 | 0.69453  |
| PITG_02626 | Pi conserved hypothetical protein (1995 nt)                  | -13.9384 | -0.45334 | 0.694733 |
| PITG_20388 | Pi conserved hypothetical protein (1307 nt)                  | -12.2374 | 0.402931 | 0.69488  |
| PITG_01366 | Pi conserved hypothetical protein (921 nt)                   | -13.7237 | -0.50507 | 0.694886 |
| PITG_16938 | Pi conserved hypothetical protein (504 nt)                   | -15.7456 | 0.518381 | 0.695013 |
| PITG_04466 | Pi cystathionine gamma-synthase, putative (1575 nt)          | -16.2892 | -0.8239  | 0.695091 |
| PITG_14972 | Pi protein kinase, putative (2515 nt)                        | -16.3126 | -0.77724 | 0.695091 |
| PITG_17114 | Pi conserved hypothetical protein (1473 nt)                  | -16.3126 | -0.77724 | 0.695091 |
| PITG_20086 | Pi conserved hypothetical protein (1361 nt)                  | -14.3738 | 0.435821 | 0.695405 |
| PITG_04875 | Pi xaa-Pro aminopeptidase, putative (2111 nt)                | -13.8324 | -0.45555 | 0.695539 |
| PITG_06387 | Pi conserved hypothetical protein (583 nt)                   | -15.307  | 0.603102 | 0.69565  |
| PITG_08184 | Pi phosphatidylinositide phosphatase SAC1-like protein (474  | -14.5657 | 0.512559 | 0.69573  |
| PITG_23270 | Pi crinkler (CRN) family protein, pseudogene (1386 nt)       | -16.138  | 1.039013 | 0.69598  |
| PITG_12494 | Pi transmembrane protein, putative (1423 nt)                 | -14.6071 | 0.507903 | 0.696008 |
| PITG_12441 | Pi conserved hypothetical protein (1074 nt)                  | -16.3343 | -0.94193 | 0.696066 |
| PITG_01232 | Pi conserved hypothetical protein (2368 nt)                  | -15.7062 | 0.439627 | 0.696078 |
| PITG_01477 | Pi myosin-like protein (5007 nt)                             | -13.9007 | -0.48524 | 0.696428 |
| PITG_14905 | Pi conserved hypothetical protein (1760 nt)                  | -16.0048 | 0.869046 | 0.696778 |
| PITG_12556 | Pi elicitor-like INF6 (745 nt)                               | -14.1944 | 0.452595 | 0.696852 |
| PITG_00337 | Pi small mechanosensitive channel family protein, putative ( | -14.7993 | -0.47352 | 0.696958 |
| PITG_11506 | Pi hypothetical protein (475 nt)                             | -16.2466 | -0.61171 | 0.697038 |
| PITG_20711 | Pi Folate-Biopterin Transporter (FBT) Family (981 nt)        | -16.2461 | -0.61263 | 0.697038 |
| PITG_09866 | Pi tRNA (adenine-N(1)-)-methyltransferase non-catalytic sub  | -15.7398 | 0.566817 | 0.697139 |
| PITG_05452 | Pi hypothetical cleavage-induced protein (2059 nt)           | -14.7338 | 0.653599 | 0.697671 |

|            |                                                              |          |          |          |
|------------|--------------------------------------------------------------|----------|----------|----------|
| PITG_00025 | Pi conserved hypothetical protein (1831 nt)                  | -17.0025 | -1.02363 | 0.697767 |
| PITG_02794 | Pi conserved hypothetical protein (1986 nt)                  | -17.0025 | -1.02363 | 0.697767 |
| PITG_03313 | Pi conserved hypothetical protein (1944 nt)                  | -17.0025 | -1.02363 | 0.697767 |
| PITG_20506 | Pi conserved hypothetical protein (5792 nt)                  | -17.0025 | -1.02363 | 0.697767 |
| PITG_08328 | Pi ubiquitin-conjugating enzyme E2, putative (728 nt)        | -15.296  | 0.520734 | 0.697945 |
| PITG_14462 | Pi AP-1 complex subunit mu, putative (2736 nt)               | -14.7623 | -0.51614 | 0.698116 |
| PITG_22409 | Pi hypothetical protein (978 nt)                             | -13.673  | 0.455189 | 0.698117 |
| PITG_11047 | Pi T-complex protein 1 subunit eta (2074 nt)                 | -13.4442 | 0.416452 | 0.698317 |
| PITG_01798 | Pi conserved hypothetical protein (1890 nt)                  | -14.3455 | -0.48322 | 0.698673 |
| PITG_03756 | Pi kinesin-like protein (2314 nt)                            | -15.3014 | -0.48812 | 0.699084 |
| PITG_16378 | Pi conserved hypothetical protein (1377 nt)                  | -15.3014 | -0.48812 | 0.699084 |
| PITG_20907 | Pi cobalamin synthesis protein, putative (1297 nt)           | -15.4086 | -0.63696 | 0.699103 |
| PITG_17838 | Pi PexRD8 family secreted RxLR effector peptide, putative (4 | -11.46   | -0.38138 | 0.699222 |
| PITG_05538 | Pi conserved hypothetical protein (1354 nt)                  | -15.823  | -0.79895 | 0.69925  |
| PITG_11733 | Pi pantothenate kinase, putative (1865 nt)                   | -14.7465 | 0.543054 | 0.699341 |
| PITG_02780 | Pi conserved hypothetical protein (6195 nt)                  | -16.9809 | -0.97792 | 0.699391 |
| PITG_02961 | Pi choline dehydrogenase, putative (1843 nt)                 | -16.9809 | -0.97792 | 0.699391 |
| PITG_06536 | Pi conserved hypothetical protein (2385 nt)                  | -16.9809 | -0.97792 | 0.699391 |
| PITG_08400 | Pi conserved hypothetical protein (1956 nt)                  | -16.9809 | -0.97792 | 0.699391 |
| PITG_09968 | Pi conserved hypothetical protein (1605 nt)                  | -16.9809 | -0.97792 | 0.699391 |
| PITG_10574 | Pi RNA pseudouridylylase, putative (1084 nt)                 | -16.9809 | -0.97792 | 0.699391 |
| PITG_03130 | Pi M96 mating-specific protein family (878 nt)               | -14.2086 | -0.48861 | 0.699427 |
| PITG_01470 | Pi syntaxin-like protein (1174 nt)                           | -14.561  | -0.53614 | 0.699472 |
| PITG_03039 | Pi conserved hypothetical protein (3607 nt)                  | -14.2349 | 0.483501 | 0.699483 |
| PITG_16757 | Pi 40S ribosomal protein S15a (853 nt)                       | -9.89819 | 0.374395 | 0.699886 |
| PITG_18372 | Pi myotubularin-like protein (4389 nt)                       | -16.3114 | -0.91838 | 0.699938 |
| PITG_21601 | Pi conserved hypothetical protein (5258 nt)                  | -16.3114 | -0.91838 | 0.699938 |
| PITG_00965 | Pi conserved hypothetical protein (1942 nt)                  | -13.9453 | 0.447346 | 0.699949 |
| PITG_03057 | Pi ubiquitin-conjugating enzyme E2, putative (641 nt)        | -15.2935 | 0.507999 | 0.700218 |
| PITG_01103 | Pi phosphatidylinositol synthase (PIS) (986 nt)              | -13.4285 | -0.40819 | 0.700223 |
| PITG_12963 | Pi conserved hypothetical protein (2475 nt)                  | -16.4323 | -0.83831 | 0.700687 |
| PITG_21174 | Pi D-cysteine desulfhydrase, putative (1314 nt)              | -12.9642 | -0.41388 | 0.700875 |
| PITG_08406 | Pi conserved hypothetical protein (552 nt)                   | -15.055  | 0.587148 | 0.700952 |
| PITG_20685 | Pi conserved hypothetical protein (393 nt)                   | -13.901  | 0.449493 | 0.700999 |
| PITG_02666 | Pi protein kinase, putative (3176 nt)                        | -15.6673 | 0.610592 | 0.701558 |
| PITG_08503 | Pi conserved hypothetical protein (550 nt)                   | -15.6448 | 0.492687 | 0.701558 |
| PITG_09563 | Pi 40S ribosomal protein S9-1 (813 nt)                       | -8.43199 | 0.369002 | 0.702099 |
| PITG_02384 | Pi conserved hypothetical protein (1429 nt)                  | -15.3255 | -0.55312 | 0.70247  |
| PITG_16669 | Pi transcription factor IIIB, putative (2114 nt)             | -15.3535 | -0.66526 | 0.70247  |
| PITG_00656 | Pi conserved hypothetical protein (699 nt)                   | -14.5083 | 0.49257  | 0.702472 |
| PITG_08430 | Pi conserved hypothetical protein (1350 nt)                  | -15.7019 | -0.74294 | 0.70263  |
| PITG_05653 | Pi protein kinase, putative (3478 nt)                        | -14.7406 | -0.52979 | 0.702975 |
| PITG_22439 | Pi conserved hypothetical protein (330 nt)                   | -14.1312 | -0.48801 | 0.703094 |
| PITG_11702 | Pi conserved hypothetical protein (3018 nt)                  | -14.2411 | -0.46404 | 0.703229 |
| PITG_12788 | Pi 12-oxophytodienoate reductase, putative (1119 nt)         | -14.186  | 0.415971 | 0.703231 |
| PITG_02827 | Pi ras-like GTP-binding protein (1897 nt)                    | -14.5206 | -0.50749 | 0.703713 |
| PITG_03965 | Pi transmembrane protein, putative (1919 nt)                 | -14.9839 | 0.524141 | 0.703989 |

|            |                                                                  |          |          |          |
|------------|------------------------------------------------------------------|----------|----------|----------|
| PITG_16344 | Pi conserved hypothetical protein (2776 nt)                      | -14.9634 | 0.533698 | 0.703989 |
| PITG_06322 | Pi myosin-like protein (9897 nt)                                 | -14.5347 | 0.514487 | 0.704041 |
| PITG_00979 | Pi conserved hypothetical protein (2036 nt)                      | -13.6096 | -0.47593 | 0.704266 |
| PITG_07815 | Pi conserved hypothetical protein (828 nt)                       | -14.547  | -0.45512 | 0.704364 |
| PITG_19049 | Pi conserved hypothetical protein (1310 nt)                      | -13.74   | -0.40734 | 0.704654 |
| PITG_00646 | Pi protein kinase, putative (2411 nt)                            | -16.24   | -0.69363 | 0.704722 |
| PITG_21875 | Pi conserved hypothetical protein (1070 nt)                      | -16.2482 | 0.667014 | 0.704722 |
| PITG_07791 | Pi conserved hypothetical protein (698 nt)                       | -12.7379 | 0.393063 | 0.704944 |
| PITG_09932 | Pi translation initiation factor eIF-2B subunit epsilon, putativ | -14.9462 | 0.473953 | 0.705161 |
| PITG_07790 | Pi peroxisomal (S)-2-hydroxy-acid oxidase, putative (1448 nt     | -14.5517 | 0.470194 | 0.70557  |
| PITG_00179 | Pi 40S ribosomal protein S12, putative (958 nt)                  | -8.73791 | 0.378902 | 0.705777 |
| PITG_01479 | Pi pre-mRNA-splicing factor prp46, putative (2055 nt)            | -15.298  | -0.49628 | 0.705811 |
| PITG_02733 | Pi conserved hypothetical protein (1731 nt)                      | -15.298  | -0.49628 | 0.705811 |
| PITG_02673 | Pi conserved hypothetical protein (1392 nt)                      | -15.6341 | -0.51356 | 0.705822 |
| PITG_11648 | Pi chitobiosyldiphosphodolichol beta-mannosyltransferase, p      | -13.742  | -0.43573 | 0.705961 |
| PITG_03415 | Pi cysteine protease family C01A, putative (1575 nt)             | -15.1138 | -0.64901 | 0.706123 |
| PITG_08741 | Pi conserved hypothetical protein (2554 nt)                      | -15.113  | 0.513958 | 0.706123 |
| PITG_06845 | Pi riboflavin kinase (601 nt)                                    | -13.9053 | -0.40473 | 0.70613  |
| PITG_06559 | Pi conserved hypothetical protein (1132 nt)                      | -16.2032 | 0.526538 | 0.706618 |
| PITG_01580 | Pi conserved hypothetical protein (510 nt)                       | -13.352  | -0.39828 | 0.707975 |
| PITG_11675 | Pi conserved hypothetical protein (2970 nt)                      | -15.2872 | -0.47821 | 0.708014 |
| PITG_16385 | Pi conserved hypothetical protein (1164 nt)                      | -17.0499 | -0.93102 | 0.708255 |
| PITG_18960 | Pi conserved hypothetical protein (897 nt)                       | -17.0499 | -0.93102 | 0.708255 |
| PITG_17092 | Pi protein arginine N-methyltransferase 1 (1032 nt)              | -16.2249 | 0.720717 | 0.708505 |
| PITG_22991 | Pi conserved hypothetical protein (1248 nt)                      | -14.7243 | -0.52851 | 0.708841 |
| PITG_20593 | Pi conserved hypothetical protein (1968 nt)                      | -15.7101 | 0.786962 | 0.708976 |
| PITG_06885 | Pi membrane-bound transcription factor site-1 protease, put      | -16.9918 | -1.04729 | 0.709056 |
| PITG_07644 | Pi replication factor C subunit 1 (2845 nt)                      | -17.0266 | -0.88277 | 0.709056 |
| PITG_08956 | Pi DNA repair protein REV1 (2935 nt)                             | -16.9918 | -1.04729 | 0.709056 |
| PITG_08970 | Pi conserved hypothetical protein (3475 nt)                      | -17.0266 | -0.88277 | 0.709056 |
| PITG_12146 | Pi hypothetical protein (588 nt)                                 | -17.0266 | -0.88277 | 0.709056 |
| PITG_14463 | Pi protein kinase, putative (2115 nt)                            | -16.9918 | -1.04729 | 0.709056 |
| PITG_17205 | Pi elongation factor G, putative (3736 nt)                       | -16.9918 | -1.04729 | 0.709056 |
| PITG_19251 | Pi palmitoyltransferase, putative (1431 nt)                      | -16.9918 | -1.04729 | 0.709056 |
| PITG_22453 | Pi conserved hypothetical protein (691 nt)                       | -17.0266 | -0.88277 | 0.709056 |
| PITG_15711 | Pi conserved hypothetical protein (693 nt)                       | -15.2852 | 0.497556 | 0.709108 |
| PITG_04685 | Pi hypothetical protein (1441 nt)                                | -13.284  | 0.470291 | 0.70953  |
| PITG_02277 | Pi cyclopropane-fatty-acyl-phospholipid synthase (1439 nt)       | -14.6815 | 0.50078  | 0.709597 |
| PITG_05413 | Pi patatin-like phospholipase, putative (1423 nt)                | -14.6883 | -0.48133 | 0.709597 |
| PITG_13767 | Pi conserved hypothetical protein (2007 nt)                      | -14.7044 | -0.51317 | 0.709597 |
| PITG_19164 | Pi Mitochondrial Protein Translocase (MPT) Family (1613 nt)      | -14.6812 | -0.46704 | 0.709597 |
| PITG_01375 | Pi conserved hypothetical protein (11548 nt)                     | -16.9684 | -0.99882 | 0.709856 |
| PITG_14887 | Pi conserved hypothetical protein (7911 nt)                      | -16.9684 | -0.99882 | 0.709856 |
| PITG_00947 | Pi conserved hypothetical protein (1852 nt)                      | -14.3308 | 0.463861 | 0.709858 |
| PITG_06674 | Pi acetyl-CoA acetyltransferase IB (474 nt)                      | -14.1029 | 0.376472 | 0.709903 |
| PITG_08601 | Pi conserved hypothetical protein (1233 nt)                      | -11.9814 | -0.38497 | 0.710186 |
| PITG_01678 | Pi conserved hypothetical protein (1602 nt)                      | -15.2498 | 0.612843 | 0.7102   |

|            |                                                               |          |          |          |
|------------|---------------------------------------------------------------|----------|----------|----------|
| PITG_13312 | Pi 40S ribosomal protein S25, putative (1154 nt)              | -8.73155 | 0.359655 | 0.710249 |
| PITG_02960 | Pi mitogen-activated protein kinase kinase kinase, putative ( | -12.8189 | -0.38268 | 0.710612 |
| PITG_19054 | Pi peroxisomal multifunctional enzyme, putative (1484 nt)     | -13.1796 | 0.380757 | 0.710914 |
| PITG_07155 | Pi conserved hypothetical protein (1334 nt)                   | -11.0416 | -0.40901 | 0.711042 |
| PITG_11430 | Pi conserved hypothetical protein (1414 nt)                   | -14.4574 | -0.47816 | 0.711121 |
| PITG_07055 | Pi ribosomal protein S6 kinase, putative (2853 nt)            | -14.2815 | -0.5343  | 0.711295 |
| PITG_03518 | Pi hypothetical protein (249 nt)                              | -14.7136 | 0.59981  | 0.711417 |
| PITG_13528 | Pi conserved hypothetical protein (1300 nt)                   | -11.9909 | -0.42986 | 0.711778 |
| PITG_17673 | Pi M96 mating-specific protein family (2077 nt)               | -14.9921 | -0.61338 | 0.71207  |
| PITG_07048 | Pi superoxide dismutase, mitochondrial precursor (800 nt)     | -11.6885 | 0.364851 | 0.712076 |
| PITG_01325 | Pi myosin-like protein (1102 nt)                              | -13.3158 | -0.40329 | 0.712248 |
| PITG_00417 | Pi Patatin like protein (3525 nt)                             | -15.3243 | -0.52725 | 0.712363 |
| PITG_16354 | Pi conserved hypothetical protein (722 nt)                    | -16.0622 | 0.535033 | 0.712456 |
| PITG_11464 | Pi pairing protein 2 family protein (1400 nt)                 | -15.6376 | 0.605306 | 0.713123 |
| PITG_11485 | Pi conserved hypothetical protein (937 nt)                    | -15.6656 | -0.64571 | 0.713123 |
| PITG_09082 | Pi conserved hypothetical protein (611 nt)                    | -14.8023 | 0.51327  | 0.71329  |
| PITG_14657 | Pi tubulin-specific chaperone E, putative (1808 nt)           | -15.0449 | -0.58208 | 0.713413 |
| PITG_11116 | Pi NAD-specific glutamate dehydrogenase, putative (3486 nt)   | -13.7089 | -0.46709 | 0.713491 |
| PITG_03075 | Pi Cullin family protein, putative (3486 nt)                  | -14.756  | -0.49929 | 0.713535 |
| PITG_13398 | Pi tubulin-tyrosine ligase family, putative (3275 nt)         | -15.7616 | 0.645335 | 0.713633 |
| PITG_20779 | Pi hypothetical protein (693 nt)                              | -15.7076 | 0.457081 | 0.713633 |
| PITG_18541 | Pi conserved hypothetical protein (234 nt)                    | -14.2826 | -0.49031 | 0.713641 |
| PITG_19728 | Pi cohesin subunit, putative (4725 nt)                        | -15.282  | -0.67352 | 0.714008 |
| PITG_06772 | Pi ATP-binding cassette sub-family F member 1 (2707 nt)       | -14.2959 | 0.47606  | 0.714023 |
| PITG_16645 | Pi conserved hypothetical protein (1371 nt)                   | -14.9728 | 0.502126 | 0.714327 |
| PITG_01297 | Pi conserved hypothetical protein (663 nt)                    | -16.0681 | 0.679521 | 0.714363 |
| PITG_20043 | Pi conserved hypothetical protein (1810 nt)                   | -16.1452 | -0.68856 | 0.714363 |
| PITG_21046 | Pi glycoside hydrolase, putative (1012 nt)                    | -16.1099 | -0.75913 | 0.714363 |
| PITG_06450 | Pi myosin-like protein (3489 nt)                              | -15.2875 | -0.47834 | 0.714509 |
| PITG_18297 | Pi ATP-binding Cassette (ABC) Superfamily (1773 nt)           | -15.2355 | 0.48994  | 0.714621 |
| PITG_21962 | Pi alpha,alpha-trehalose-phosphate synthase [UDP-forming],    | -15.6955 | -0.75463 | 0.715173 |
| PITG_00029 | Pi aminoacylase-1, putative (1617 nt)                         | -14.234  | -0.47764 | 0.715275 |
| PITG_04724 | Pi serine protease family S10, putative (1455 nt)             | -16.0473 | 0.504548 | 0.715313 |
| PITG_08447 | Pi exonuclease, putative (2805 nt)                            | -16.1254 | -0.78946 | 0.715313 |
| PITG_22839 | Pi nuclear mitotic apparatus protein, putative (5941 nt)      | -15.3002 | 0.459795 | 0.715576 |
| PITG_01622 | Pi myosin-like protein (4212 nt)                              | -16.2927 | -0.88134 | 0.71596  |
| PITG_02229 | Pi conserved hypothetical protein (1303 nt)                   | -16.1535 | -0.79528 | 0.716259 |
| PITG_15621 | Pi conserved hypothetical protein (2935 nt)                   | -16.1535 | -0.79528 | 0.716259 |
| PITG_11433 | Pi conserved hypothetical protein (989 nt)                    | -15.2722 | 0.403797 | 0.716638 |
| PITG_02625 | Pi conserved hypothetical protein (625 nt)                    | -16.1474 | -0.80796 | 0.717202 |
| PITG_01960 | Pi conserved hypothetical protein (2080 nt)                   | -15.6349 | 0.584766 | 0.717207 |
| PITG_17170 | Pi peptidyl-tRNA hydrolase, putative (1208 nt)                | -15.6827 | -0.7271  | 0.717207 |
| PITG_17351 | Pi conserved hypothetical protein (1969 nt)                   | -13.5206 | 0.429868 | 0.717254 |
| PITG_00232 | Pi conserved hypothetical protein (691 nt)                    | -14.9212 | -0.53507 | 0.717823 |
| PITG_04992 | Pi arginyl-tRNA synthetase, putative (1618 nt)                | -14.64   | -0.49292 | 0.718023 |
| PITG_18384 | Pi conserved hypothetical protein (688 nt)                    | -14.5007 | -0.4194  | 0.718056 |
| PITG_08129 | Pi folic acid synthesis protein fol1, putative (1745 nt)      | -16.1198 | 0.739217 | 0.718142 |

|            |                                                              |          |          |          |
|------------|--------------------------------------------------------------|----------|----------|----------|
| PITG_21665 | Pi conserved hypothetical protein (1266 nt)                  | -16.1198 | 0.739217 | 0.718142 |
| PITG_03041 | Pi Major Facilitator Superfamily (MFS) (1170 nt)             | -15.6431 | 0.471734 | 0.718218 |
| PITG_12111 | Pi conserved hypothetical protein (2470 nt)                  | -15.2429 | 0.594603 | 0.718959 |
| PITG_05423 | Pi DNA-dependent protein kinase catalytic subunit, putative  | -16.1206 | -0.7998  | 0.719079 |
| PITG_07240 | Pi 3-deoxy-manno-octulosonate cytidylyltransferase, putativ  | -16.0493 | -0.51929 | 0.719079 |
| PITG_11194 | Pi conserved hypothetical protein (3661 nt)                  | -16.1206 | -0.7998  | 0.719079 |
| PITG_14606 | Pi conserved hypothetical protein (705 nt)                   | -16.1206 | -0.7998  | 0.719079 |
| PITG_15779 | Pi conserved hypothetical protein (4641 nt)                  | -16.105  | -0.76858 | 0.719079 |
| PITG_16459 | Pi thyroid receptor-interacting protein 13 (1292 nt)         | -16.1206 | -0.7998  | 0.719079 |
| PITG_21014 | Pi conserved hypothetical protein (2481 nt)                  | -16.105  | -0.76858 | 0.719079 |
| PITG_22982 | Pi conserved hypothetical protein (393 nt)                   | -16.0638 | 0.627236 | 0.719079 |
| PITG_12528 | Pi conserved hypothetical protein (758 nt)                   | -10.4661 | 0.346598 | 0.719279 |
| PITG_02494 | Pi conserved hypothetical protein (1225 nt)                  | -13.8158 | 0.438997 | 0.719606 |
| PITG_05478 | Pi conserved hypothetical protein (2145 nt)                  | -16.2059 | -0.70241 | 0.719635 |
| PITG_08142 | Pi 5-methylthioadenosine/S-adenosylhomocysteine deamina      | -13.9186 | -0.38355 | 0.719719 |
| PITG_10039 | Pi conserved hypothetical protein (693 nt)                   | -14.9751 | 0.456579 | 0.719873 |
| PITG_21054 | Pi conserved hypothetical protein (1243 nt)                  | -15.5726 | -0.68427 | 0.719962 |
| PITG_04229 | Pi conserved hypothetical protein (711 nt)                   | -13.1134 | 0.393859 | 0.719988 |
| PITG_11812 | Pi DNA replication licensing factor Mcm2, putative (3072 nt) | -16.0868 | 0.58259  | 0.720013 |
| PITG_08626 | Pi conserved hypothetical protein (1020 nt)                  | -14.6945 | -0.43782 | 0.720054 |
| PITG_00542 | Pi mediator of RNA polymerase II transcription subunit 31 (4 | -14.9325 | -0.54598 | 0.720072 |
| PITG_12348 | Pi conserved hypothetical protein (1089 nt)                  | -14.9055 | -0.56659 | 0.720072 |
| PITG_17140 | Pi transmembrane protein, putative (1043 nt)                 | -14.2401 | 0.416114 | 0.720266 |
| PITG_12839 | Pi conserved hypothetical protein (1318 nt)                  | -13.3471 | -0.38952 | 0.720274 |
| PITG_21806 | Pi fumarylacetoacetase (1812 nt)                             | -12.4352 | -0.39334 | 0.720337 |
| PITG_02662 | Pi ubiquitin family protein, putative (1157 nt)              | -12.449  | -0.3813  | 0.720633 |
| PITG_21314 | Pi conserved hypothetical protein (1180 nt)                  | -14.4054 | 0.49791  | 0.720634 |
| PITG_17733 | Pi conserved hypothetical protein (522 nt)                   | -14.6804 | -0.46643 | 0.721184 |
| PITG_13404 | Pi DNA-directed RNA polymerase II 135 kDa polypeptide (360   | -14.7427 | 0.453064 | 0.72142  |
| PITG_13969 | Pi conserved hypothetical protein (545 nt)                   | -15.2509 | 0.55454  | 0.72216  |
| PITG_14921 | Pi conserved hypothetical protein (676 nt)                   | -14.8933 | 0.442857 | 0.722298 |
| PITG_05531 | Pi conserved hypothetical protein (2270 nt)                  | -15.3163 | -0.61286 | 0.722921 |
| PITG_12151 | Pi aspartyl-tRNA synthetase, putative (1714 nt)              | -13.89   | -0.37561 | 0.723009 |
| PITG_06733 | Pi transmembrane protein, putative (2112 nt)                 | -15.5624 | 0.597335 | 0.723037 |
| PITG_19457 | Pi conserved hypothetical protein (512 nt)                   | -15.5972 | -0.68279 | 0.723037 |
| PITG_00333 | Pi dihydroflavonol-4-reductase, putative (3720 nt)           | -13.1542 | -0.40412 | 0.723131 |
| PITG_12541 | Pi conserved hypothetical protein (659 nt)                   | -13.9173 | 0.426689 | 0.723374 |
| PITG_15466 | Pi serine protease family S33, putative (1221 nt)            | -14.2201 | -0.40391 | 0.723822 |
| PITG_11468 | Pi peptide deformylase, putative (834 nt)                    | -15.5118 | 0.578912 | 0.724053 |
| PITG_05813 | Pi conserved hypothetical protein (983 nt)                   | -16.0657 | -0.54644 | 0.724641 |
| PITG_12662 | Pi conserved hypothetical protein (681 nt)                   | -13.9561 | 0.418733 | 0.724701 |
| PITG_16813 | Pi Rio kinase (1437 nt)                                      | -15.5656 | 0.652393 | 0.725065 |
| PITG_03576 | Pi RNA (guanine-9-)-methyltransferase domain-containing pr   | -14.8277 | 0.458467 | 0.725138 |
| PITG_11497 | Pi transcriptional regulator ATRX (3819 nt)                  | -16.1353 | -0.70734 | 0.725558 |
| PITG_13224 | Pi beclin-1-like protein (2184 nt)                           | -16.1353 | -0.70734 | 0.725558 |
| PITG_01510 | Pi conserved hypothetical protein (568 nt)                   | -14.5854 | 0.41169  | 0.725895 |
| PITG_16749 | Pi hypothetical protein (1503 nt)                            | -12.3534 | -0.36281 | 0.725958 |



|            |                                                                 |          |          |          |
|------------|-----------------------------------------------------------------|----------|----------|----------|
| PITG_18050 | Pi conserved hypothetical protein (1456 nt)                     | -14.633  | -0.4754  | 0.726041 |
| PITG_06242 | Pi conserved hypothetical protein (797 nt)                      | -12.6509 | -0.36519 | 0.726096 |
| PITG_13778 | Pi cell cycle-related kinase, putative (2870 nt)                | -11.8337 | 0.349457 | 0.726266 |
| PITG_21706 | Pi conserved hypothetical protein (1444 nt)                     | -13.8391 | 0.468819 | 0.726421 |
| PITG_04006 | Pi conserved hypothetical protein (3031 nt)                     | -14.4376 | 0.3717   | 0.726441 |
| PITG_01954 | Pi conserved hypothetical protein (1015 nt)                     | -16.0461 | -0.52763 | 0.726473 |
| PITG_05889 | Pi conserved hypothetical protein (4132 nt)                     | -16.1018 | -0.77436 | 0.726473 |
| PITG_08056 | Pi carbohydrate esterase, putative (1567 nt)                    | -16.0461 | -0.52763 | 0.726473 |
| PITG_20236 | Pi conserved hypothetical protein (1559 nt)                     | -16.1179 | -0.80655 | 0.726473 |
| PITG_15294 | Pi histidinol dehydrogenase, putative (1676 nt)                 | -15.581  | -0.61927 | 0.727076 |
| PITG_15982 | Pi histone-arginine methyltransferase, putative (1126 nt)       | -15.5582 | 0.637023 | 0.727076 |
| PITG_18518 | Pi translation initiation factor eIF-2B subunit alpha, putative | -15.1364 | -0.4875  | 0.72772  |
| PITG_12053 | Pi acetylornithine aminotransferase, mitochondrial precursor    | -14.0168 | -0.41764 | 0.727905 |
| PITG_04862 | Pi RNA binding protein, putative (1307 nt)                      | -12.7461 | -0.38723 | 0.728104 |
| PITG_12179 | Pi conserved hypothetical protein (519 nt)                      | -12.4977 | 0.385645 | 0.728264 |
| PITG_04644 | Pi mRNA cap guanine-N7 methyltransferase, putative (1772        | -16.12   | -0.67316 | 0.728294 |
| PITG_19299 | Pi conserved hypothetical protein (715 nt)                      | -14.8551 | -0.52576 | 0.728464 |
| PITG_11462 | Pi conserved hypothetical protein (1920 nt)                     | -13.6489 | 0.403806 | 0.728669 |
| PITG_00849 | Pi hypothetical protein (310 nt)                                | -13.7447 | 0.38603  | 0.728892 |
| PITG_15544 | Pi conserved hypothetical protein (588 nt)                      | -16.742  | -0.66843 | 0.728988 |
| PITG_19692 | Pi conserved hypothetical protein (1804 nt)                     | -16.7219 | -0.78395 | 0.728988 |
| PITG_09523 | Pi Rab32/38 family GTPase, putative (683 nt)                    | -15.5532 | -0.48459 | 0.72907  |
| PITG_16446 | Pi ribosomal protein S6 kinase, putative (2757 nt)              | -13.5104 | 0.372244 | 0.729294 |
| PITG_01238 | Pi hypothetical protein (1236 nt)                               | -12.5535 | -0.41334 | 0.729745 |
| PITG_06149 | Pi conserved hypothetical protein (2283 nt)                     | -14.6768 | -0.44651 | 0.730024 |
| PITG_15384 | Pi conserved hypothetical protein (351 nt)                      | -13.9025 | 0.428016 | 0.73004  |
| PITG_02951 | Pi phosphoglycerate mutase family (708 nt)                      | -15.5694 | -0.59375 | 0.730061 |
| PITG_04318 | Pi conserved hypothetical protein (1698 nt)                     | -15.2984 | 0.584937 | 0.730064 |
| PITG_06861 | Pi conserved hypothetical protein (1298 nt)                     | -16.7614 | -0.70566 | 0.730551 |
| PITG_13433 | Pi conserved hypothetical protein (1183 nt)                     | -16.7614 | -0.70566 | 0.730551 |
| PITG_07163 | Pi ubiquitin-fold modifier 1 precursor (515 nt)                 | -13.6093 | -0.41458 | 0.730736 |
| PITG_02134 | Pi conserved hypothetical protein (17245 nt)                    | -16.0659 | 0.585564 | 0.731005 |
| PITG_07731 | Pi protein kinase, putative (2749 nt)                           | -16.136  | -0.83693 | 0.731005 |
| PITG_21150 | Pi Folate-Biopterin Transporter (FBT) Family (1554 nt)          | -15.5435 | 0.571995 | 0.731048 |
| PITG_04471 | Pi Argonaute2 (AGO2) (2784 nt)                                  | -13.7745 | -0.4648  | 0.731076 |
| PITG_01053 | Pi Amino Acid-Polyamine-Organocation (APC) Family (1680 r       | -16.7074 | -0.814   | 0.731331 |
| PITG_13605 | Pi zinc phosphodiesterase ELAC protein 2, putative (1054 nt)    | -16.8855 | -1.17035 | 0.731331 |
| PITG_14218 | Pi conserved hypothetical protein (2868 nt)                     | -16.7074 | -0.814   | 0.731331 |
| PITG_10502 | Pi conserved hypothetical protein (676 nt)                      | -14.3038 | -0.45963 | 0.731365 |
| PITG_17959 | Pi conserved hypothetical protein (1255 nt)                     | -14.8208 | 0.394707 | 0.731736 |
| PITG_10484 | Pi axin interactor, putative (1221 nt)                          | -13.8321 | 0.486917 | 0.731844 |
| PITG_00176 | Pi presenilin-like protein (1741 nt)                            | -16.0546 | 0.609758 | 0.731903 |
| PITG_00263 | Pi conserved hypothetical protein (4408 nt)                     | -13.8466 | -0.46208 | 0.731964 |
| PITG_01578 | Pi conserved hypothetical protein (1235 nt)                     | -14.432  | 0.386089 | 0.732011 |
| PITG_13077 | Pi geranylgeranyl pyrophosphate synthetase (1034 nt)            | -15.2738 | 0.407789 | 0.732071 |
| PITG_16347 | Pi conserved hypothetical protein (1156 nt)                     | -15.9831 | -0.59452 | 0.73211  |
| PITG_21418 | Pi conserved hypothetical protein (4089 nt)                     | -15.9831 | -0.59452 | 0.73211  |

|            |                                                                   |          |          |          |
|------------|-------------------------------------------------------------------|----------|----------|----------|
| PITG_05376 | Pi mitogen-activated protein kinase organizer, putative (143      | -14.3982 | 0.39015  | 0.73213  |
| PITG_21018 | Pi expressed protein (1433 nt)                                    | -13.3747 | -0.39348 | 0.732246 |
| PITG_01342 | Pi conserved hypothetical protein (2067 nt)                       | -14.5931 | -0.49952 | 0.732657 |
| PITG_03631 | Pi conserved hypothetical protein (1670 nt)                       | -16.0167 | 0.487172 | 0.732799 |
| PITG_11886 | Pi ubiquitin family protein, putative (1263 nt)                   | -14.1667 | -0.4045  | 0.732942 |
| PITG_11009 | Pi conserved hypothetical protein (2119 nt)                       | -13.2723 | 0.339523 | 0.732952 |
| PITG_19516 | Pi conserved hypothetical protein (2268 nt)                       | -15.1652 | -0.54251 | 0.732955 |
| PITG_15629 | Pi conserved hypothetical protein (1197 nt)                       | -14.8874 | -0.46299 | 0.733095 |
| PITG_20167 | Pi Crinkler (CRN) family protein, pseudogene (2511 nt)            | -11.8531 | -0.52389 | 0.733399 |
| PITG_05300 | Pi methyltransferase (2289 nt)                                    | -15.4723 | 0.567201 | 0.733402 |
| PITG_04348 | Pi conserved hypothetical protein (3299 nt)                       | -16.727  | -0.69792 | 0.733661 |
| PITG_14151 | Pi conserved hypothetical protein (3267 nt)                       | -16.727  | -0.69792 | 0.733661 |
| PITG_15946 | Pi hypothetical protein (2795 nt)                                 | -16.727  | -0.69792 | 0.733661 |
| PITG_20202 | Pi conserved hypothetical protein (1366 nt)                       | -14.8461 | -0.4417  | 0.733888 |
| PITG_03102 | Pi septum-promoting GTP-binding protein 1 (827 nt)                | -15.997  | -0.62225 | 0.73395  |
| PITG_09701 | Pi conserved hypothetical protein (489 nt)                        | -15.997  | -0.62225 | 0.73395  |
| PITG_10394 | Pi nitric oxide synthase-interacting protein, putative (870 nt)   | -15.9447 | -0.67133 | 0.73395  |
| PITG_00460 | Pi phosphatidylinositol-4-phosphate-5-kinase (Pi-PIP5K) (30       | -15.581  | -0.71687 | 0.733985 |
| PITG_13367 | Pi XRP2-like protein (1462 nt)                                    | -15.1505 | 0.530876 | 0.733987 |
| PITG_09430 | Pi trafficking protein particle complex subunit 2, putative (14   | -13.085  | 0.379269 | 0.734182 |
| PITG_07033 | Pi conserved hypothetical protein (555 nt)                        | -14.545  | -0.45868 | 0.734386 |
| PITG_16022 | Pi conserved hypothetical protein (1078 nt)                       | -15.4654 | 0.553476 | 0.734404 |
| PITG_11444 | Pi conserved hypothetical protein (918 nt)                        | -15.0964 | 0.507191 | 0.734484 |
| PITG_19158 | Pi conserved hypothetical protein (2102 nt)                       | -15.0631 | -0.40155 | 0.734484 |
| PITG_06513 | Pi hypothetical protein (577 nt)                                  | -16.1012 | 0.573293 | 0.734583 |
| PITG_09374 | Pi conserved hypothetical protein (2997 nt)                       | -15.9608 | 0.675859 | 0.734866 |
| PITG_07191 | Pi protein kinase, putative (1786 nt)                             | -15.1342 | 0.468032 | 0.735014 |
| PITG_06792 | Pi conserved hypothetical protein (4242 nt)                       | -16.7472 | -0.73574 | 0.735207 |
| PITG_21852 | Pi diphthamide biosynthesis protein, putative (1635 nt)           | -16.7472 | -0.73574 | 0.735207 |
| PITG_12483 | Pi eukaryotic translation initiation factor 3, putative (1428 nt) | -14.2151 | 0.414387 | 0.735334 |
| PITG_14613 | Pi conserved hypothetical protein (1019 nt)                       | -16.1085 | -0.46589 | 0.735472 |
| PITG_11822 | Pi conserved hypothetical protein (1137 nt)                       | -15.0611 | -0.40547 | 0.735535 |
| PITG_07039 | Pi N(4)-(Beta-N-acetylglucosaminy)-L-asparaginase, putative       | -15.9719 | -0.61703 | 0.735777 |
| PITG_10758 | Pi beta-glucan synthesis-associated protein, putative (2337 r     | -15.9213 | 0.555127 | 0.735777 |
| PITG_13309 | Pi conserved hypothetical protein (1365 nt)                       | -16.0093 | -0.59824 | 0.735777 |
| PITG_19639 | Pi conserved hypothetical protein (2459 nt)                       | -15.9719 | -0.61703 | 0.735777 |
| PITG_00746 | Pi conserved hypothetical protein (1512 nt)                       | -15.5682 | -0.59452 | 0.735924 |
| PITG_01100 | Pi aquaporin, putative (2207 nt)                                  | -15.5445 | -0.64198 | 0.735924 |
| PITG_02809 | Pi conserved hypothetical protein (4665 nt)                       | -14.8645 | 0.505556 | 0.736018 |
| PITG_13972 | Pi U6 snRNA-associated Sm-like protein LSm6, putative (456        | -12.0058 | 0.346974 | 0.736091 |
| PITG_04958 | Pi coatomer subunit beta' (3231 nt)                               | -13.8149 | 0.433333 | 0.736096 |
| PITG_01639 | Pi Small Conductance Mechanosensitive Ion Channel (MscS)          | -15.478  | -0.58915 | 0.736393 |
| PITG_05291 | Pi Animal Inward Rectifier K Channel (IRK-C) Family (1553 nt      | -15.0435 | 0.373906 | 0.73658  |
| PITG_07808 | Pi fidgetin-like protein (3137 nt)                                | -13.7799 | -0.42697 | 0.736677 |
| PITG_09247 | Pi neurobeachin-like protein (8721 nt)                            | -15.9402 | -0.68046 | 0.736686 |
| PITG_07310 | Pi Putative beta-1,4-galactosyltransferase (1089 nt)              | -14.7605 | 0.438124 | 0.737269 |
| PITG_13371 | Pi 60S ribosomal protein L31, putative (762 nt)                   | -9.27467 | 0.326345 | 0.737276 |

|            |                                                                         |          |          |          |
|------------|-------------------------------------------------------------------------|----------|----------|----------|
| PITG_17611 | Pi hypothetical protein (540 nt)                                        | -14.3481 | -0.3876  | 0.737455 |
| PITG_10389 | Pi conserved hypothetical protein (363 nt)                              | -15.9738 | 0.617688 | 0.737591 |
| PITG_12107 | Pi conserved hypothetical protein (1621 nt)                             | -15.9864 | -0.64457 | 0.737591 |
| PITG_16495 | Pi conserved hypothetical protein (2508 nt)                             | -15.9864 | -0.64457 | 0.737591 |
| PITG_21765 | Pi conserved hypothetical protein (1047 nt)                             | -13.2382 | 0.352881 | 0.738231 |
| PITG_20773 | Pi conserved hypothetical protein (1446 nt)                             | -14.9149 | -0.51427 | 0.7383   |
| PITG_14573 | Pi AP-3 complex subunit delta, putative (3366 nt)                       | -14.7939 | -0.52254 | 0.738342 |
| PITG_02040 | Pi deoxyribonuclease TATDN1-like protein (1658 nt)                      | -15.4243 | -0.48085 | 0.738364 |
| PITG_19183 | Pi conserved hypothetical protein (1447 nt)                             | -15.4484 | 0.452263 | 0.738364 |
| PITG_10005 | Pi conserved hypothetical protein (1921 nt)                             | -12.435  | 0.338843 | 0.738459 |
| PITG_03371 | Pi acyltransferase, putative (1770 nt)                                  | -15.9547 | -0.70808 | 0.738494 |
| PITG_15392 | Pi leukotriene A-4 hydrolase-like protein (2013 nt)                     | -14.4504 | -0.48807 | 0.738504 |
| PITG_13737 | Pi protoplast secreted protein 2 precursor (697 nt)                     | -9.71845 | -0.38311 | 0.738583 |
| PITG_13469 | Pi hypothetical protein (765 nt)                                        | -15.0281 | 0.669041 | 0.738812 |
| PITG_00194 | Pi casein kinase II subunit, putative (1305 nt)                         | -12.2115 | -0.35054 | 0.739113 |
| PITG_08751 | Pi protein phosphatase 2C, putative (1128 nt)                           | -14.777  | 0.470766 | 0.739409 |
| PITG_12325 | Pi hypothetical protein (645 nt)                                        | -16.1171 | -0.51317 | 0.739877 |
| PITG_07885 | Pi eukaryotic translation initiation factor 2 subunit alpha (1222 nt)   | -12.268  | -0.33718 | 0.739883 |
| PITG_20264 | Pi 40S ribosomal protein S13 (784 nt)                                   | -9.22637 | 0.327044 | 0.739943 |
| PITG_03012 | Pi conserved hypothetical protein (823 nt)                              | -10.1564 | 0.318835 | 0.740101 |
| PITG_18009 | Pi conserved hypothetical protein (495 nt)                              | -14.2991 | 0.353387 | 0.740249 |
| PITG_12304 | Pi TATA-box-binding protein, putative (560 nt)                          | -15.9482 | 0.650704 | 0.740288 |
| PITG_18243 | Pi conserved hypothetical protein (567 nt)                              | -15.4637 | 0.516313 | 0.740318 |
| PITG_02097 | Pi hypothetical protein (2647 nt)                                       | -14.7679 | -0.40979 | 0.740469 |
| PITG_10952 | Pi conserved hypothetical protein (3778 nt)                             | -14.7762 | -0.42868 | 0.740469 |
| PITG_02802 | Pi stomatin-like protein (1226 nt)                                      | -14.2767 | 0.39781  | 0.740517 |
| PITG_09846 | Pi prolyl-tRNA synthetase, putative (2542 nt)                           | -13.8767 | 0.346449 | 0.740541 |
| PITG_12155 | Pi flagellar peptidyl-prolyl cis-trans isomerase (884 nt)               | -13.9475 | -0.41639 | 0.740565 |
| PITG_21458 | Pi conserved hypothetical protein (2035 nt)                             | -15.5214 | -0.5033  | 0.740705 |
| PITG_10590 | Pi kynurenine-oxoglutarate transaminase, putative (1503 nt)             | -15.0689 | -0.495   | 0.740707 |
| PITG_19634 | Pi polygalacturonase, putative (651 nt)                                 | -16.077  | 0.681282 | 0.740751 |
| PITG_13920 | Pi phosphatidylinositol kinase (PIK-D) (3069 nt)                        | -15.9139 | -0.47648 | 0.741181 |
| PITG_15407 | Pi ribosomal protein L34 (647 nt)                                       | -8.56398 | -0.32739 | 0.741228 |
| PITG_00426 | Pi conserved hypothetical protein (2286 nt)                             | -15.4543 | 0.530844 | 0.741288 |
| PITG_01938 | Pi glyceraldehyde-3-phosphate dehydrogenase (1025 nt)                   | -12.0045 | 0.373968 | 0.741561 |
| PITG_01408 | Pi D-isomer specific 2-hydroxyacid dehydrogenase, putative (1025 nt)    | -13.0439 | 0.335918 | 0.741602 |
| PITG_19184 | Pi ER lumen protein retaining receptor (1036 nt)                        | -14.2881 | -0.41561 | 0.741637 |
| PITG_05815 | Pi ATP-binding Cassette (ABC) Superfamily (5469 nt)                     | -15.569  | -0.69147 | 0.74165  |
| PITG_02813 | Pi conserved hypothetical protein (1230 nt)                             | -14.5257 | 0.386911 | 0.742065 |
| PITG_03990 | Pi conserved hypothetical protein (1403 nt)                             | -14.5265 | -0.41701 | 0.742065 |
| PITG_01994 | Pi conserved hypothetical protein (290 nt)                              | -15.9826 | -0.6532  | 0.742071 |
| PITG_04588 | Pi Amino Acid/Auxin Permease (AAAP) Family (1551 nt)                    | -15.9826 | -0.6532  | 0.742071 |
| PITG_01604 | Pi serine palmitoyltransferase, putative (1525 nt)                      | -12.8072 | 0.337    | 0.742179 |
| PITG_00482 | Pi conserved hypothetical protein (2025 nt)                             | -14.4874 | -0.39305 | 0.742374 |
| PITG_03936 | Pi ras protein let-60 (1206 nt)                                         | -11.8248 | -0.33467 | 0.742415 |
| PITG_00178 | Pi dual specificity tyrosine-phosphorylation-regulated kinase (1206 nt) | -14.3088 | -0.39693 | 0.742447 |
| PITG_08808 | Pi calcyphosin-like protein (1653 nt)                                   | -16.0858 | -0.73693 | 0.742492 |

|            |                                                                                |          |          |          |
|------------|--------------------------------------------------------------------------------|----------|----------|----------|
| PITG_01846 | Pi actin-related protein 2/3 complex subunit, putative (2316 nt)               | -12.8726 | -0.3352  | 0.742548 |
| PITG_17767 | Pi conserved hypothetical protein (3923 nt)                                    | -15.0886 | 0.520261 | 0.742739 |
| PITG_03815 | Pi FAD-dependent oxidoreductase domain-containing protein (2316 nt)            | -14.3684 | -0.36678 | 0.742894 |
| PITG_01898 | Pi conserved hypothetical protein (734 nt)                                     | -15.9704 | -0.73586 | 0.742957 |
| PITG_14598 | Pi prolyl endopeptidase, putative (2259 nt)                                    | -13.7166 | 0.351145 | 0.743079 |
| PITG_01068 | Pi conserved hypothetical protein (1195 nt)                                    | -15.4415 | -0.61747 | 0.743216 |
| PITG_05740 | Pi conserved hypothetical protein (1906 nt)                                    | -15.4415 | -0.61747 | 0.743216 |
| PITG_12956 | Pi conserved hypothetical protein (2474 nt)                                    | -15.4639 | -0.57268 | 0.743216 |
| PITG_20354 | Pi hypothetical protein (649 nt)                                               | -12.9839 | -0.38428 | 0.743448 |
| PITG_02319 | Pi hypothetical protein (3391 nt)                                              | -14.4935 | -0.45672 | 0.743465 |
| PITG_19536 | Pi conserved hypothetical protein (567 nt)                                     | -14.472  | 0.434968 | 0.743465 |
| PITG_17141 | Pi Major Facilitator Superfamily (MFS) (1374 nt)                               | -16.772  | -0.77177 | 0.743611 |
| PITG_17110 | Pi conserved hypothetical protein (2299 nt)                                    | -15.0401 | 0.366641 | 0.743748 |
| PITG_09963 | Pi cellulose synthase catalytic subunit, putative (4148 nt)                    | -11.9075 | -0.34066 | 0.743803 |
| PITG_00151 | Pi conserved hypothetical protein (429 nt)                                     | -12.4842 | -0.33928 | 0.744037 |
| PITG_18055 | Pi mitochondrial inner membrane protease ATP23 (990 nt)                        | -15.1161 | 0.402736 | 0.744048 |
| PITG_10462 | Pi conserved hypothetical protein (3594 nt)                                    | -14.5204 | -0.40293 | 0.744202 |
| PITG_13437 | Pi metalloprotease family M16C, putative (3147 nt)                             | -16.7179 | -0.71511 | 0.744367 |
| PITG_20836 | Pi conserved hypothetical protein (1774 nt)                                    | -16.7179 | -0.71511 | 0.744367 |
| PITG_19774 | Pi mannose-6-phosphate isomerase, putative (1208 nt)                           | -14.7118 | 0.386528 | 0.744385 |
| PITG_20320 | Pi retinol dehydrogenase, putative (693 nt)                                    | -15.5361 | -0.61752 | 0.744465 |
| PITG_12310 | Pi conserved hypothetical protein (966 nt)                                     | -13.3889 | 0.351136 | 0.744642 |
| PITG_16923 | Pi hypothetical protein (415 nt)                                               | -14.9704 | -0.43771 | 0.744804 |
| PITG_18053 | Pi dolichyl-diphosphooligosaccharide-protein glycosyltransferase (1080 nt)     | -13.4371 | -0.38277 | 0.745111 |
| PITG_20714 | Pi putative E3 ubiquitin-protein ligase MARCH6 (membrane-associated) (1080 nt) | -15.0265 | -0.5438  | 0.745609 |
| PITG_09305 | Pi DNA repair protein RAD51 (1465 nt)                                          | -15.0778 | 0.498095 | 0.74575  |
| PITG_00083 | Pi conserved hypothetical protein (957 nt)                                     | -16.7395 | -0.75512 | 0.745875 |
| PITG_01204 | Pi DNA mismatch repair protein, putative (2873 nt)                             | -16.7395 | -0.75512 | 0.745875 |
| PITG_09851 | Pi metalloprotease family M12A, putative (1182 nt)                             | -16.7395 | -0.75512 | 0.745875 |
| PITG_16097 | Pi Monovalent Cation:Proton Antiporter-1 (CPA1) Family (1609 nt)               | -16.7395 | -0.75512 | 0.745875 |
| PITG_08653 | Pi mitochondrial import inner membrane translocase subunit (1080 nt)           | -15.0198 | -0.45395 | 0.746628 |
| PITG_16375 | Pi conserved hypothetical protein (624 nt)                                     | -14.9957 | 0.468962 | 0.746628 |
| PITG_20208 | Pi conserved hypothetical protein (3284 nt)                                    | -14.2891 | -0.41675 | 0.74713  |
| PITG_10552 | Pi hypothetical protein (1882 nt)                                              | -14.2333 | 0.374723 | 0.747184 |
| PITG_03028 | Pi pre-mRNA-splicing factor SF2 (928 nt)                                       | -12.7791 | -0.35946 | 0.747217 |
| PITG_17244 | Pi zinc finger CDGSH domain-containing protein 1 (405 nt)                      | -11.7607 | -0.32111 | 0.747321 |
| PITG_00911 | Pi conserved hypothetical protein (1817 nt)                                    | -15.9979 | -0.68288 | 0.747346 |
| PITG_03032 | Pi conserved hypothetical protein (2103 nt)                                    | -15.9653 | -0.63042 | 0.747346 |
| PITG_00430 | Pi conserved hypothetical protein (2326 nt)                                    | -16.8655 | -1.20385 | 0.747379 |
| PITG_07141 | Pi methionyl-tRNA synthetase, putative (1621 nt)                               | -16.8655 | -1.20385 | 0.747379 |
| PITG_15089 | Pi ribosomal protein S6 kinase, putative (2109 nt)                             | -14.7095 | -0.46787 | 0.747535 |
| PITG_08687 | Pi Mitochondrial Carrier (MC) Family (1084 nt)                                 | -16.0423 | 0.462433 | 0.74766  |
| PITG_05070 | Pi conserved hypothetical protein (1421 nt)                                    | -14.6896 | -0.51101 | 0.747705 |
| PITG_03147 | Pi conserved hypothetical protein (849 nt)                                     | -15.7001 | 0.799771 | 0.74788  |
| PITG_06649 | Pi adenyl cyclase-associated protein, putative (1414 nt)                       | -12.8175 | 0.336367 | 0.747897 |
| PITG_15837 | Pi chromodomain protein, putative (3178 nt)                                    | -16.6987 | -0.66857 | 0.748129 |
| PITG_06764 | Pi phosphatidylinositol transfer protein SFH5, putative (1014 nt)              | -15.3356 | -0.3799  | 0.748277 |

|            |                                                                 |          |          |          |
|------------|-----------------------------------------------------------------|----------|----------|----------|
| PITG_19419 | Pi conserved hypothetical protein (1373 nt)                     | -15.3762 | -0.45247 | 0.748277 |
| PITG_09627 | Pi ribosomal protein L23, putative (958 nt)                     | -12.9711 | 0.352608 | 0.748359 |
| PITG_19176 | Pi conserved hypothetical protein (421 nt)                      | -12.7628 | 0.338311 | 0.748483 |
| PITG_13827 | Pi conserved hypothetical protein (2988 nt)                     | -15.0066 | -0.43086 | 0.748649 |
| PITG_16318 | Pi transmembrane protein, putative (627 nt)                     | -15.0059 | -0.43231 | 0.748649 |
| PITG_00284 | Pi phospholipase D, Pi-PXTM-PLD (5424 nt)                       | -15.4411 | -0.61774 | 0.7489   |
| PITG_04562 | Pi mucin, putative (11178 nt)                                   | -15.4526 | -0.64064 | 0.7489   |
| PITG_03294 | Pi 60S ribosomal protein L6, putative (1516 nt)                 | -10.4848 | 0.321397 | 0.749769 |
| PITG_11405 | Pi conserved hypothetical protein (4792 nt)                     | -14.4264 | -0.3681  | 0.749902 |
| PITG_01537 | Pi conserved hypothetical protein (1356 nt)                     | -14.3149 | -0.4124  | 0.749937 |
| PITG_13791 | Pi conserved hypothetical protein (1320 nt)                     | -15.9502 | -0.72    | 0.749944 |
| PITG_05839 | Pi conserved hypothetical protein (542 nt)                      | -10.5683 | -0.36342 | 0.750081 |
| PITG_03971 | Pi acetyltransferase (GNAT) family, putative (541 nt)           | -13.0857 | 0.33002  | 0.750485 |
| PITG_01747 | Pi conserved hypothetical protein (1101 nt)                     | -14.7016 | -0.39426 | 0.750632 |
| PITG_19956 | Pi conserved hypothetical protein (1681 nt)                     | -15.8324 | -0.53261 | 0.750697 |
| PITG_03719 | Pi voltage-gated potassium channel subunit beta, putative (1    | -12.3968 | 0.327857 | 0.750741 |
| PITG_21216 | Pi hypothetical protein (306 nt)                                | -15.4282 | 0.443868 | 0.750763 |
| PITG_01839 | Pi 4-coumarate-CoA ligase, putative (2069 nt)                   | -14.4625 | 0.381612 | 0.750918 |
| PITG_15497 | Pi conserved hypothetical protein (1797 nt)                     | -14.3204 | 0.424225 | 0.750982 |
| PITG_00943 | Pi proline synthetase co-transcribed bacterial protein (849 nt) | -13.8745 | 0.376058 | 0.751112 |
| PITG_01031 | Pi conserved hypothetical protein (2295 nt)                     | -13.6649 | 0.346031 | 0.751142 |
| PITG_14276 | Pi conserved hypothetical protein (866 nt)                      | -13.7824 | 0.371952 | 0.751389 |
| PITG_00887 | Pi conserved hypothetical protein (1650 nt)                     | -15.8393 | 0.627366 | 0.751581 |
| PITG_12145 | Pi serine protease family S33, putative (1748 nt)               | -15.0152 | -0.44811 | 0.751641 |
| PITG_04662 | Pi conserved hypothetical protein (1364 nt)                     | -13.2482 | -0.35912 | 0.751943 |
| PITG_02237 | Pi conserved hypothetical protein (484 nt)                      | -13.8784 | -0.38719 | 0.752218 |
| PITG_15117 | Pi actin-like protein (1384 nt)                                 | -10.3725 | 0.339614 | 0.752234 |
| PITG_06257 | Pi conserved hypothetical protein (6418 nt)                     | -15.9411 | 0.63672  | 0.752517 |
| PITG_06686 | Pi conserved hypothetical protein (2067 nt)                     | -15.9922 | -0.75743 | 0.752517 |
| PITG_16153 | Pi conserved hypothetical protein (965 nt)                      | -15.4413 | -0.5256  | 0.752611 |
| PITG_11023 | Pi conserved hypothetical protein (786 nt)                      | -14.9967 | -0.48535 | 0.752628 |
| PITG_09920 | Pi conserved hypothetical protein (1401 nt)                     | -15.0074 | -0.51263 | 0.752628 |
| PITG_15688 | Pi conserved hypothetical protein (2067 nt)                     | -15.0074 | -0.51263 | 0.752628 |
| PITG_10576 | Pi conserved hypothetical protein (1213 nt)                     | -15.341  | 0.413591 | 0.75304  |
| PITG_10892 | Pi hypothetical protein (1141 nt)                               | -15.3569 | -0.53189 | 0.75304  |
| PITG_03753 | Pi ubiquitin carboxyl-terminal hydrolase and/or F-box protein   | -14.6664 | -0.38005 | 0.753043 |
| PITG_14822 | Pi conserved hypothetical protein (2339 nt)                     | -15.8523 | 0.653051 | 0.753338 |
| PITG_10022 | Pi vacuolar protein sorting-associated protein 8 (5419 nt)      | -14.4395 | -0.4387  | 0.754125 |
| PITG_05171 | Pi 60S ribosomal protein L44 (673 nt)                           | -8.28234 | 0.318379 | 0.754217 |
| PITG_02957 | Pi conserved hypothetical protein (1746 nt)                     | -15.9063 | 0.523102 | 0.754219 |
| PITG_08331 | Pi conserved hypothetical protein (1413 nt)                     | -16.0365 | 0.82744  | 0.754219 |
| PITG_09427 | Pi conserved hypothetical protein (786 nt)                      | -12.7803 | 0.373392 | 0.754561 |
| PITG_17563 | Pi hypothetical protein (1433 nt)                               | -11.5434 | 0.302783 | 0.754651 |
| PITG_07818 | Pi conserved hypothetical protein (551 nt)                      | -16.7671 | -0.79113 | 0.754825 |
| PITG_08659 | Pi conserved hypothetical protein (2330 nt)                     | -12.1568 | -0.4297  | 0.75506  |
| PITG_14176 | Pi conserved hypothetical protein (1998 nt)                     | -15.816  | 0.580232 | 0.755081 |
| PITG_06690 | Pi conserved hypothetical protein (863 nt)                      | -12.1909 | 0.322283 | 0.755374 |

|            |                                                                       |          |          |          |
|------------|-----------------------------------------------------------------------|----------|----------|----------|
| PITG_01182 | Pi conserved hypothetical protein (2003 nt)                           | -15.0073 | -0.51252 | 0.755559 |
| PITG_21492 | Pi conserved hypothetical protein (2918 nt)                           | -15.3369 | -0.45853 | 0.755845 |
| PITG_02426 | Pi conserved hypothetical protein (1473 nt)                           | -15.77   | 0.335877 | 0.755948 |
| PITG_03997 | Pi conserved hypothetical protein (2059 nt)                           | -15.8549 | -0.54028 | 0.755948 |
| PITG_21209 | Pi conserved hypothetical protein (1158 nt)                           | -13.5189 | -0.37105 | 0.756047 |
| PITG_14692 | Pi conserved hypothetical protein (455 nt)                            | -14.4095 | -0.41468 | 0.756279 |
| PITG_05491 | Pi conserved hypothetical protein (974 nt)                            | -16.7181 | -0.89055 | 0.756301 |
| PITG_14136 | Pi tRNA-dihydrouridine synthase, putative (1339 nt)                   | -16.7181 | -0.89055 | 0.756301 |
| PITG_15252 | Pi conserved hypothetical protein (1635 nt)                           | -16.8436 | -1.14154 | 0.756301 |
| PITG_07700 | Pi conserved hypothetical protein (826 nt)                            | -15.3561 | -0.5335  | 0.756771 |
| PITG_02067 | Pi pre-mRNA-splicing factor cwc2, putative (1347 nt)                  | -14.9112 | 0.378733 | 0.756836 |
| PITG_06708 | Pi cyclin-dependent kinase, putative (2415 nt)                        | -14.6662 | -0.43638 | 0.757122 |
| PITG_07796 | Pi myosin-like protein (2910 nt)                                      | -16.6334 | -0.96109 | 0.757415 |
| PITG_09522 | Pi conserved hypothetical protein (2072 nt)                           | -16.6274 | -0.89779 | 0.757415 |
| PITG_13486 | Pi dTDP-D-glucose 4,6-dehydratase, putative (1332 nt)                 | -16.6213 | -0.9853  | 0.757415 |
| PITG_21180 | Pi conserved hypothetical protein (1029 nt)                           | -16.6213 | -0.9853  | 0.757415 |
| PITG_16083 | Pi glyoxylate/hydroxypyruvate reductase A, putative (1239 nt)         | -16.016  | -0.7461  | 0.757591 |
| PITG_12291 | Pi pre-mRNA-processing factor 39, putative (2886 nt)                  | -14.6872 | 0.336604 | 0.757663 |
| PITG_05549 | Pi conserved hypothetical protein (1577 nt)                           | -16.6804 | -0.61144 | 0.757773 |
| PITG_08183 | Pi conserved hypothetical protein (1792 nt)                           | -14.9372 | -0.50314 | 0.757819 |
| PITG_12913 | Pi conserved hypothetical protein (2337 nt)                           | -14.9372 | -0.50314 | 0.757819 |
| PITG_00054 | Pi Mitochondrial Protein Translocase (MPT) Family (911 nt)            | -13.4268 | -0.3646  | 0.758125 |
| PITG_03498 | Pi octanoyltransferase, putative (967 nt)                             | -16.6461 | -0.93593 | 0.75816  |
| PITG_18693 | Pi hypothetical protein (1064 nt)                                     | -15.0101 | 0.469825 | 0.758446 |
| PITG_12290 | Pi conserved hypothetical protein (1221 nt)                           | -15.8234 | 0.514244 | 0.758527 |
| PITG_22053 | Pi NPP1-like protein (798 nt)                                         | -15.8686 | 0.616554 | 0.758527 |
| PITG_16207 | Pi pre-mRNA-splicing helicase BRR2, putative (6882 nt)                | -14.2787 | -0.41134 | 0.758648 |
| PITG_05780 | Pi conserved hypothetical protein (1494 nt)                           | -14.916  | 0.362314 | 0.758797 |
| PITG_00224 | Pi conserved hypothetical protein (3393 nt)                           | -16.515  | -0.5787  | 0.758903 |
| PITG_07042 | Pi conserved hypothetical protein (738 nt)                            | -16.5914 | -0.9696  | 0.758903 |
| PITG_09867 | Pi calcineurin-like phosphoesterase, putative (1895 nt)               | -16.515  | -0.5787  | 0.758903 |
| PITG_06758 | Pi conserved hypothetical protein (654 nt)                            | -14.2359 | -0.47198 | 0.758955 |
| PITG_03466 | Pi aldehyde dehydrogenase, putative (2196 nt)                         | -14.4854 | -0.47189 | 0.759076 |
| PITG_02547 | Pi transcription initiation factor TFIID subunit 1, putative (471 nt) | -15.803  | -0.53992 | 0.759381 |
| PITG_08607 | Pi conserved hypothetical protein (2566 nt)                           | -15.803  | -0.53992 | 0.759381 |
| PITG_15267 | Pi phospholipid-transporting ATPase, putative (5630 nt)               | -15.803  | -0.53992 | 0.759381 |
| PITG_01714 | Pi conserved hypothetical protein (411 nt)                            | -13.2061 | -0.31414 | 0.759554 |
| PITG_03831 | Pi conserved hypothetical protein (2000 nt)                           | -16.5835 | -0.9086  | 0.759644 |
| PITG_17402 | Pi conserved hypothetical protein (402 nt)                            | -16.5835 | -0.9086  | 0.759644 |
| PITG_03083 | Pi nuclease precursor (725 nt)                                        | -15.4236 | 0.464384 | 0.759855 |
| PITG_07496 | Pi conserved hypothetical protein (468 nt)                            | -15.8508 | -0.60319 | 0.760231 |
| PITG_17129 | Pi copper-transporting ATPase, putative (3401 nt)                     | -15.7974 | 0.582192 | 0.760231 |
| PITG_13826 | Pi hybrid signal transduction histidine kinase, putative (1264 nt)    | -14.7907 | -0.55894 | 0.760557 |
| PITG_03353 | Pi 60S ribosomal protein L17-2 (752 nt)                               | -8.68791 | 0.295994 | 0.760707 |
| PITG_03566 | Pi conserved hypothetical protein (1146 nt)                           | -15.9258 | -0.52005 | 0.760923 |
| PITG_22918 | Pi conserved hypothetical protein (1214 nt)                           | -15.9665 | -0.6283  | 0.760923 |
| PITG_07652 | Pi mitogen-activated protein kinase, putative (3285 nt)               | -15.9853 | 0.743912 | 0.760923 |

|            |                                                                |          |          |          |
|------------|----------------------------------------------------------------|----------|----------|----------|
| PITG_11959 | Pi conserved hypothetical protein (2156 nt)                    | -13.8879 | 0.326089 | 0.761049 |
| PITG_10625 | Pi conserved hypothetical protein (978 nt)                     | -16.503  | -0.60395 | 0.761121 |
| PITG_19056 | Pi Cation Diffusion Facilitator (CDF) Family (1173 nt)         | -14.9991 | -0.49322 | 0.761291 |
| PITG_16065 | Pi conserved hypothetical protein (643 nt)                     | -12.8311 | -0.30192 | 0.76132  |
| PITG_12834 | Pi conserved hypothetical protein (572 nt)                     | -14.7338 | 0.416558 | 0.761564 |
| PITG_21398 | Pi DEAD/DEAH box RNA helicase, putative (3288 nt)              | -14.6464 | 0.346388 | 0.762091 |
| PITG_21378 | Pi protein disulfide-isomerase, putative (1781 nt)             | -10.2542 | -0.31636 | 0.762262 |
| PITG_01097 | Pi conserved hypothetical protein (8792 nt)                    | -15.8019 | -0.64856 | 0.762763 |
| PITG_09780 | Pi conserved hypothetical protein (2136 nt)                    | -15.8019 | -0.64856 | 0.762763 |
| PITG_17317 | Pi hypothetical protein (752 nt)                               | -15.1062 | 0.437631 | 0.762911 |
| PITG_00854 | Pi conserved hypothetical protein (3184 nt)                    | -13.8042 | 0.34376  | 0.762978 |
| PITG_02607 | Pi peroxisomal multifunctional enzyme, putative (1083 nt)      | -12.5344 | 0.293047 | 0.763157 |
| PITG_05175 | Pi conserved hypothetical protein (1473 nt)                    | -11.2771 | -0.33492 | 0.763295 |
| PITG_15529 | Pi exosome complex exonuclease RRP45-like protein (1853 r      | -16.4748 | -0.59138 | 0.763323 |
| PITG_05156 | Pi secretory protein OPEL (1892 nt)                            | -10.2884 | -0.35977 | 0.763636 |
| PITG_18435 | Pi uricase, putative (1137 nt)                                 | -11.8744 | -0.308   | 0.764015 |
| PITG_01047 | Pi conserved hypothetical protein (1840 nt)                    | -16.5828 | -0.9861  | 0.764054 |
| PITG_19750 | Pi conserved hypothetical protein (4204 nt)                    | -16.5828 | -0.9861  | 0.764054 |
| PITG_02259 | Pi hsp70-like protein (2266 nt)                                | -15.2971 | -0.56903 | 0.764469 |
| PITG_12881 | Pi dolichyl-diphosphooligosaccharide-protein glycosyltransfe   | -11.5929 | -0.29451 | 0.764627 |
| PITG_18161 | Pi conserved hypothetical protein (1269 nt)                    | -15.3353 | -0.48948 | 0.764925 |
| PITG_00492 | Pi cytochrome c peroxidase, mitochondrial precursor (1247 r    | -11.4993 | 0.31638  | 0.765122 |
| PITG_18048 | Pi aconitate hydratase, mitochondrial precursor (3034 nt)      | -11.4023 | 0.31738  | 0.765354 |
| PITG_21599 | Pi conserved hypothetical protein (1744 nt)                    | -15.2508 | 0.460143 | 0.765379 |
| PITG_00187 | Pi protein kinase, putative (1771 nt)                          | -16.6033 | -1.02449 | 0.76551  |
| PITG_02728 | Pi inositol-3,4-bisphosphate 4-phosphatase, putative (6826 r   | -16.6033 | -1.02449 | 0.76551  |
| PITG_07074 | Pi conserved hypothetical protein (4855 nt)                    | -16.4935 | -0.62503 | 0.76551  |
| PITG_22555 | Pi conserved hypothetical protein (1343 nt)                    | -15.3249 | 0.411543 | 0.765811 |
| PITG_00699 | Pi dynactin subunit 5, putative (906 nt)                       | -14.8868 | -0.46189 | 0.766261 |
| PITG_03927 | Pi conserved hypothetical protein (1626 nt)                    | -15.7598 | -0.62709 | 0.766877 |
| PITG_13913 | Pi SUMO protease, putative (2081 nt)                           | -15.8152 | -0.56901 | 0.766922 |
| PITG_19269 | Pi conserved hypothetical protein (1193 nt)                    | -16.5639 | -0.94332 | 0.766959 |
| PITG_07096 | Pi protease inhibitor Epi11 (1335 nt)                          | -11.9799 | 0.36944  | 0.767177 |
| PITG_10939 | Pi conserved hypothetical protein (681 nt)                     | -12.1548 | -0.32168 | 0.767179 |
| PITG_14375 | Pi conserved hypothetical protein (1976 nt)                    | -15.2333 | -0.36812 | 0.767186 |
| PITG_22069 | Pi arginase, putative (598 nt)                                 | -14.1189 | 0.344214 | 0.767356 |
| PITG_02948 | Pi conserved hypothetical protein (1305 nt)                    | -13.1553 | 0.338634 | 0.767364 |
| PITG_01195 | Pi aspartate aminotransferase, putative (2001 nt)              | -15.122  | -0.43618 | 0.767398 |
| PITG_19550 | Pi phosphatidylserine decarboxylase, putative (1442 nt)        | -15.6948 | 0.555756 | 0.767724 |
| PITG_07839 | Pi translation initiation factor eIF-2B subunit gamma, putativ | -15.2606 | 0.442798 | 0.768083 |
| PITG_15876 | Pi conserved hypothetical protein (953 nt)                     | -15.6808 | 0.388111 | 0.768568 |
| PITG_01966 | Pi conserved hypothetical protein (1154 nt)                    | -15.2717 | 0.452619 | 0.768576 |
| PITG_03158 | Pi tRNA isopentenyltransferase, putative (1380 nt)             | -15.3693 | 0.568216 | 0.76932  |
| PITG_02017 | Pi conserved hypothetical protein (1481 nt)                    | -15.6856 | 0.537179 | 0.769408 |
| PITG_13096 | Pi conserved hypothetical protein (2588 nt)                    | -15.7277 | 0.621347 | 0.769408 |
| PITG_06710 | Pi conserved hypothetical protein (1204 nt)                    | -15.4317 | 0.447678 | 0.769461 |
| PITG_05318 | Pi N-(5'-phosphoribosyl)anthranilate isomerase indole-3-glyc   | -14.545  | -0.40643 | 0.769704 |

|            |                                                                 |          |          |          |
|------------|-----------------------------------------------------------------|----------|----------|----------|
| PITG_06185 | Pi ADP-ribosylation factor 2 (1004 nt)                          | -14.539  | 0.360861 | 0.769704 |
| PITG_09955 | Pi acyl-CoA dehydrogenase family member 9, mitochondrial        | -12.9318 | -0.35668 | 0.769949 |
| PITG_09816 | Pi conserved hypothetical protein (1536 nt)                     | -15.7296 | -0.46617 | 0.770245 |
| PITG_09426 | Pi conserved hypothetical protein (1331 nt)                     | -14.3416 | 0.383622 | 0.770721 |
| PITG_01947 | Pi COPII coat assembly protein SEC16, putative (8683 nt)        | -14.5855 | 0.331042 | 0.770905 |
| PITG_09508 | Pi ubiquitin carboxyl-terminal hydrolase, putative (1014 nt)    | -14.3027 | 0.402467 | 0.77108  |
| PITG_16812 | Pi anaphase-promoting complex subunit 10 (692 nt)               | -14.2944 | 0.362267 | 0.77108  |
| PITG_13416 | Pi ubiquinone biosynthesis protein COQ4 (849 nt)                | -15.1904 | 0.399646 | 0.77121  |
| PITG_18236 | Pi conserved hypothetical protein (1431 nt)                     | -15.1867 | 0.421848 | 0.77121  |
| PITG_20999 | Pi conserved hypothetical protein (2109 nt)                     | -14.112  | 0.355825 | 0.771391 |
| PITG_05498 | Pi heat shock protein 90, putative (2645 nt)                    | -12.5303 | 0.305671 | 0.771748 |
| PITG_12470 | Pi glycerol-3-phosphate acyltransferase, putative (2523 nt)     | -15.6738 | 0.37439  | 0.771909 |
| PITG_05450 | Pi conserved hypothetical protein (1286 nt)                     | -14.8889 | -0.45861 | 0.771909 |
| PITG_05307 | Pi phosphoenolpyruvate carboxykinase, putative (1985 nt)        | -9.22974 | -0.33864 | 0.77249  |
| PITG_03266 | Pi conserved hypothetical protein (1069 nt)                     | -15.8387 | -0.69014 | 0.772623 |
| PITG_05155 | Pi conserved hypothetical protein (972 nt)                      | -15.7883 | -0.45898 | 0.772623 |
| PITG_07516 | Pi EF hand containing protein, putative (1368 nt)               | -15.8387 | -0.69014 | 0.772623 |
| PITG_03061 | Pi conserved hypothetical protein (1746 nt)                     | -14.3484 | -0.43054 | 0.772666 |
| PITG_00859 | Pi hypothetical protein (759 nt)                                | -15.7236 | 0.57474  | 0.772735 |
| PITG_10923 | Pi apolipoprotein A-I-binding protein, putative (966 nt)        | -15.6978 | -0.53058 | 0.772735 |
| PITG_21842 | Pi conserved hypothetical protein (859 nt)                      | -14.9587 | 0.494856 | 0.772864 |
| PITG_01173 | Pi palmitoyltransferase, putative (1089 nt)                     | -14.0113 | 0.342852 | 0.773194 |
| PITG_14836 | Pi conserved hypothetical protein (1128 nt)                     | -16.4698 | -0.60229 | 0.773402 |
| PITG_00066 | Pi conserved hypothetical protein (3837 nt)                     | -15.7639 | 0.473129 | 0.774228 |
| PITG_19161 | Pi pyruvate dehydrogenase E1 component subunit beta (142        | -12.5016 | 0.302148 | 0.77436  |
| PITG_08290 | Pi conserved hypothetical protein (958 nt)                      | -15.6935 | 0.492579 | 0.775195 |
| PITG_17572 | Pi protein kinase (614 nt)                                      | -14.7018 | 0.396658 | 0.775521 |
| PITG_03461 | Pi conserved hypothetical protein (839 nt)                      | -16.4728 | -0.74669 | 0.775521 |
| PITG_06201 | Pi TATA-box-binding protein (1101 nt)                           | -15.7981 | -0.44151 | 0.775821 |
| PITG_20687 | Pi ribulose-phosphate 3-epimerase (753 nt)                      | -14.0351 | -0.34297 | 0.776012 |
| PITG_06438 | Pi conserved hypothetical protein (1345 nt)                     | -16.601  | -1.0334  | 0.776225 |
| PITG_12728 | Pi conserved hypothetical protein (342 nt)                      | -14.5396 | -0.33949 | 0.776385 |
| PITG_06379 | Pi serine/threonine protein kinase (1971 nt)                    | -14.9221 | -0.46577 | 0.77644  |
| PITG_01701 | Pi hypothetical protein (487 nt)                                | -11.8879 | 0.276716 | 0.776612 |
| PITG_10207 | Pi Mitochondrial Carrier (MC) Family (1035 nt)                  | -13.8873 | 0.352541 | 0.777102 |
| PITG_05854 | Pi conserved hypothetical protein (512 nt)                      | -15.1939 | -0.40941 | 0.777425 |
| PITG_03459 | Pi COP9 signalosome complex subunit, putative (1255 nt)         | -15.1736 | 0.396318 | 0.777425 |
| PITG_04843 | Pi 60S ribosomal protein L13, putative (1197 nt)                | -9.16336 | 0.275774 | 0.778048 |
| PITG_00423 | Pi conserved hypothetical protein (781 nt)                      | -13.4567 | -0.30546 | 0.778273 |
| PITG_05691 | Pi conserved hypothetical protein (2217 nt)                     | -15.1835 | -0.43043 | 0.778295 |
| PITG_17387 | Pi ras-specific guanine nucleotide-releasing factor, putative ( | -15.1641 | -0.46921 | 0.778295 |
| PITG_08383 | Pi DNA-directed RNA polymerase III largest subunit (4605 nt)    | -15.6966 | 0.460161 | 0.778428 |
| PITG_16430 | Pi conserved hypothetical protein (2730 nt)                     | -15.6966 | 0.460161 | 0.778428 |
| PITG_21215 | Pi transmembrane protein, putative (1222 nt)                    | -15.7345 | -0.6238  | 0.778428 |
| PITG_09449 | Pi SCO1 family protein (916 nt)                                 | -13.8588 | -0.34601 | 0.77868  |
| PITG_10045 | Pi ser/thr kinase (4007 nt)                                     | -15.6726 | 0.509247 | 0.779229 |
| PITG_18651 | Pi conserved hypothetical protein (2887 nt)                     | -14.7984 | -0.34903 | 0.779571 |



|            |                                                                  |          |          |          |
|------------|------------------------------------------------------------------|----------|----------|----------|
| PITG_06363 | Pi conserved hypothetical protein (1885 nt)                      | -15.7893 | -0.62208 | 0.77976  |
| PITG_20954 | Pi conserved hypothetical protein (948 nt)                       | -15.694  | -0.54095 | 0.780027 |
| PITG_05168 | Pi conserved hypothetical protein (1032 nt)                      | -15.568  | 0.37572  | 0.78027  |
| PITG_16315 | Pi conserved hypothetical protein (783 nt)                       | -16.3912 | -0.75805 | 0.780393 |
| PITG_04530 | Pi conserved hypothetical protein (1065 nt)                      | -11.9782 | -0.28497 | 0.780463 |
| PITG_18694 | Pi conserved hypothetical protein (410 nt)                       | -14.8477 | 0.400506 | 0.780929 |
| PITG_03226 | Pi glutathione S-transferase, putative (1389 nt)                 | -13.1223 | -0.40689 | 0.780945 |
| PITG_13432 | Pi conserved hypothetical protein (1026 nt)                      | -16.3885 | -0.83127 | 0.781101 |
| PITG_04708 | Pi bifunctional fold protein (927 nt)                            | -14.7319 | -0.33739 | 0.781273 |
| PITG_07420 | Pi hypothetical protein (1269 nt)                                | -14.762  | -0.45722 | 0.781273 |
| PITG_11302 | Pi hypothetical protein (455 nt)                                 | -14.4889 | -0.39003 | 0.781486 |
| PITG_02787 | Pi conserved hypothetical protein (1719 nt)                      | -14.5005 | -0.36765 | 0.781486 |
| PITG_12308 | Pi conserved hypothetical protein (1038 nt)                      | -14.4502 | -0.32063 | 0.781618 |
| PITG_18754 | Pi conserved hypothetical protein (817 nt)                       | -16.3949 | -0.7507  | 0.781807 |
| PITG_21660 | Pi trehalase, putative (2103 nt)                                 | -16.3949 | -0.7507  | 0.781807 |
| PITG_08584 | Pi conserved hypothetical protein (1865 nt)                      | -15.5669 | -0.36716 | 0.7819   |
| PITG_12478 | Pi conserved hypothetical protein (1470 nt)                      | -15.6139 | -0.55449 | 0.7819   |
| PITG_16975 | Pi hypothetical protein (491 nt)                                 | -15.5669 | -0.36716 | 0.7819   |
| PITG_18416 | Pi conserved hypothetical protein (2192 nt)                      | -15.6225 | -0.58432 | 0.7819   |
| PITG_14114 | Pi conserved hypothetical protein (1440 nt)                      | -14.7346 | 0.409493 | 0.782185 |
| PITG_03563 | Pi conserved hypothetical protein (1413 nt)                      | -15.0885 | -0.38528 | 0.782422 |
| PITG_08766 | Pi demethylmenaquinone methyltransferase, putative (1035         | -16.3781 | -0.71607 | 0.78251  |
| PITG_06841 | Pi conserved hypothetical protein (2425 nt)                      | -15.1642 | -0.46935 | 0.782582 |
| PITG_13235 | Pi putative P-type ATPase (2964 nt)                              | -15.1465 | 0.342526 | 0.782582 |
| PITG_12275 | Pi conserved hypothetical protein (548 nt)                       | -15.5997 | -0.39009 | 0.78271  |
| PITG_17107 | Pi aldehyde dehydrogenase, putative (1721 nt)                    | -15.5994 | 0.401767 | 0.78271  |
| PITG_18254 | Pi conserved hypothetical protein (3885 nt)                      | -15.5654 | 0.498694 | 0.78271  |
| PITG_03617 | Pi protein kinase (2278 nt)                                      | -16.2943 | 0.390312 | 0.783212 |
| PITG_20861 | Pi ATP-binding Cassette (ABC) Superfamily (474 nt)               | -16.2956 | -0.51196 | 0.783212 |
| PITG_13016 | Pi pescadillo-like protein (1896 nt)                             | -15.1084 | 0.444053 | 0.783289 |
| PITG_03355 | Pi conserved hypothetical protein (1254 nt)                      | -14.4619 | -0.39448 | 0.783485 |
| PITG_15998 | Pi phospholipase A-2-activating protein, putative (2794 nt)      | -14.7541 | -0.44323 | 0.783993 |
| PITG_13927 | Pi conserved hypothetical protein (1113 nt)                      | -14.4907 | 0.327413 | 0.784229 |
| PITG_13718 | Pi conserved hypothetical protein (1401 nt)                      | -15.1838 | 0.47756  | 0.784268 |
| PITG_06769 | Pi conserved hypothetical protein (1080 nt)                      | -15.6319 | -0.61347 | 0.784319 |
| PITG_11197 | Pi myosin-like protein (3912 nt)                                 | -15.7334 | -0.62415 | 0.784748 |
| PITG_17674 | Pi 5'-3' exoribonuclease 1, putative (4517 nt)                   | -15.1179 | -0.52443 | 0.785863 |
| PITG_13669 | Pi serine/threonine protein kinase (2411 nt)                     | -15.5722 | -0.40084 | 0.785913 |
| PITG_13796 | Pi conserved hypothetical protein (967 nt)                       | -16.5165 | -0.66873 | 0.785928 |
| PITG_03348 | Pi RNA polymerase-associated protein CTR9 (3501 nt)              | -14.4868 | 0.334704 | 0.786032 |
| PITG_00431 | Pi calcineurin-like phosphoesterase, putative (1687 nt)          | -12.1706 | -0.28961 | 0.786035 |
| PITG_14941 | Pi conserved hypothetical protein (1344 nt)                      | -13.7938 | 0.296465 | 0.78634  |
| PITG_02970 | Pi hypothetical protein (586 nt)                                 | -16.5839 | -0.8022  | 0.786611 |
| PITG_05072 | Pi secreted RxLR effector peptide, putative, 3' partial (402 nt) | -16.4731 | -0.75609 | 0.786611 |
| PITG_06611 | Pi vacuolar amino acid transporter, putative (1810 nt)           | -14.7156 | 0.28018  | 0.786665 |
| PITG_17986 | Pi conserved hypothetical protein (1234 nt)                      | -14.7304 | 0.400433 | 0.786665 |
| PITG_19813 | Pi conserved hypothetical protein (1907 nt)                      | -16.3616 | -0.67767 | 0.786692 |

|            |                                                               |          |          |          |
|------------|---------------------------------------------------------------|----------|----------|----------|
| PITG_01817 | Pi conserved hypothetical protein (1015 nt)                   | -15.5752 | 0.427139 | 0.786705 |
| PITG_21687 | Pi conserved hypothetical protein (533 nt)                    | -16.5402 | -0.88892 | 0.787293 |
| PITG_14137 | Pi histone-lysine N-methyltransferase, putative (4506 nt)     | -16.3883 | -0.76449 | 0.787382 |
| PITG_19126 | Pi conserved hypothetical protein (875 nt)                    | -16.3883 | -0.76449 | 0.787382 |
| PITG_08366 | Pi parafibromin-like protein (1596 nt)                        | -14.4025 | -0.36917 | 0.787957 |
| PITG_08609 | Pi endomembrane protein 70-like protein, putative (2953 nt)   | -14.4083 | -0.33407 | 0.787957 |
| PITG_22865 | Pi propionyl coenzyme A carboxylase (Pi-PCC1) (2295 nt)       | -14.0428 | -0.33967 | 0.788431 |
| PITG_12727 | Pi cysteine synthase (1160 nt)                                | -12.4476 | -0.29369 | 0.788681 |
| PITG_03486 | Pi conserved hypothetical protein (662 nt)                    | -9.15506 | 0.297717 | 0.788729 |
| PITG_01206 | Pi xaa-Pro aminopeptidase, putative (1660 nt)                 | -14.4017 | 0.385302 | 0.788871 |
| PITG_05007 | Pi glutaminyl-tRNA synthetase, putative (2013 nt)             | -14.4078 | -0.38146 | 0.788871 |
| PITG_00719 | Pi acetyl-coenzyme A synthetase (2013 nt)                     | -14.4404 | -0.38865 | 0.788949 |
| PITG_01453 | Pi ubiquitin-specific protease, putative (8843 nt)            | -14.5356 | -0.37063 | 0.788982 |
| PITG_15528 | Pi hypothetical protein (242 nt)                              | -14.7299 | 0.399176 | 0.789292 |
| PITG_15738 | Pi conserved hypothetical protein (965 nt)                    | -14.1989 | -0.34496 | 0.789303 |
| PITG_22340 | Pi conserved hypothetical protein (641 nt)                    | -14.7029 | -0.3953  | 0.789754 |
| PITG_17672 | Pi conserved hypothetical protein (2875 nt)                   | -15.1128 | -0.40797 | 0.790065 |
| PITG_03750 | Pi endo-1,3(4)-beta-glucanase, putative (1797 nt)             | -15.5594 | -0.38138 | 0.790616 |
| PITG_13838 | Pi polycomb protein EZH2, putative (2824 nt)                  | -15.5594 | -0.38138 | 0.790616 |
| PITG_15154 | Pi conserved hypothetical protein (1444 nt)                   | -13.6233 | 0.285207 | 0.790797 |
| PITG_00553 | Pi 2-oxoglutarate dehydrogenase E1 component, putative (2     | -16.4007 | -0.88437 | 0.790804 |
| PITG_10610 | Pi conserved hypothetical protein (912 nt)                    | -16.4007 | -0.88437 | 0.790804 |
| PITG_14484 | Pi conserved hypothetical protein (1905 nt)                   | -16.4007 | -0.88437 | 0.790804 |
| PITG_16666 | Pi conserved hypothetical protein (631 nt)                    | -13.7585 | -0.28718 | 0.791368 |
| PITG_11431 | Pi ubiquitin-specific protease, putative (3500 nt)            | -15.6043 | -0.57204 | 0.791388 |
| PITG_16736 | Pi adenylosuccinate synthetase (1656 nt)                      | -12.9017 | 0.267573 | 0.791429 |
| PITG_11568 | Pi hypothetical protein (996 nt)                              | -15.2235 | 0.402932 | 0.791645 |
| PITG_05679 | Pi replication protein A 70 kDa DNA-binding subunit, putative | -15.0145 | -0.38148 | 0.791844 |
| PITG_09443 | Pi prefoldin subunit 2, putative (589 nt)                     | -13.1344 | -0.29831 | 0.79195  |
| PITG_09437 | Pi conserved hypothetical protein (976 nt)                    | -13.4697 | 0.327994 | 0.791971 |
| PITG_18962 | Pi DNA repair protein, putative (2633 nt)                     | -15.5828 | -0.4262  | 0.792157 |
| PITG_08311 | Pi conserved hypothetical protein (622 nt)                    | -9.23685 | 0.267711 | 0.792349 |
| PITG_18912 | Pi nonsense transcript regulator (2567 nt)                    | -14.1264 | -0.29075 | 0.792458 |
| PITG_09722 | Pi thioredoxin H-type (1210 nt)                               | -13.3218 | -0.31232 | 0.792556 |
| PITG_00747 | Pi hydroxymethylglutaryl-CoA lyase, mitochondrial precursor   | -13.4399 | -0.30582 | 0.793309 |
| PITG_17035 | Pi conserved hypothetical protein (1584 nt)                   | -15.0459 | -0.36704 | 0.793517 |
| PITG_11540 | Pi conserved hypothetical protein (3669 nt)                   | -15.5237 | -0.45368 | 0.793666 |
| PITG_15387 | Pi conserved hypothetical protein (2150 nt)                   | -15.4589 | 0.320921 | 0.793666 |
| PITG_18873 | Pi conserved hypothetical protein (1696 nt)                   | -15.4921 | 0.387355 | 0.793666 |
| PITG_02071 | Pi protein kinase, putative (1360 nt)                         | -14.3678 | -0.3454  | 0.79394  |
| PITG_01073 | Pi conserved hypothetical protein (2492 nt)                   | -14.3568 | -0.32341 | 0.79394  |
| PITG_15462 | Pi GAF domain-containing protein (1812 nt)                    | -16.2754 | 0.619637 | 0.79418  |
| PITG_03440 | Pi malate synthase (1771 nt)                                  | -11.5262 | -0.31453 | 0.794418 |
| PITG_07052 | Pi conserved hypothetical protein (443 nt)                    | -15.4862 | 0.375355 | 0.794447 |
| PITG_01224 | Pi conserved hypothetical protein (821 nt)                    | -14.8541 | -0.33696 | 0.794464 |
| PITG_01770 | Pi leukocyte receptor cluster member 8 (1942 nt)              | -14.2381 | -0.32589 | 0.794512 |
| PITG_13015 | Pi conserved hypothetical protein (1792 nt)                   | -14.4005 | 0.324525 | 0.795114 |

|            |                                                              |          |          |          |
|------------|--------------------------------------------------------------|----------|----------|----------|
| PITG_04533 | Pi conserved hypothetical protein (1683 nt)                  | -15.5701 | -0.49908 | 0.795202 |
| PITG_02482 | Pi ATP-dependent RNA helicase DHX8 (3493 nt)                 | -15.4805 | -0.36785 | 0.795225 |
| PITG_18635 | Pi conserved hypothetical protein (621 nt)                   | -13.7316 | -0.32537 | 0.795283 |
| PITG_03460 | Pi seryl-tRNA synthetase (1365 nt)                           | -13.4195 | 0.292131 | 0.795522 |
| PITG_06328 | Pi Rab8 family GTPase, putative (2041 nt)                    | -14.6806 | -0.35225 | 0.795818 |
| PITG_10445 | Pi DNA-directed RNA polymerase I, II, and III subunit RPABC1 | -15.4634 | 0.399216 | 0.795999 |
| PITG_01751 | Pi conserved hypothetical protein (682 nt)                   | -15.526  | 0.607733 | 0.795999 |
| PITG_09702 | Pi conserved hypothetical protein (1816 nt)                  | -14.3626 | -0.33246 | 0.796603 |
| PITG_00205 | Pi conserved hypothetical protein (736 nt)                   | -13.0786 | 0.28273  | 0.796749 |
| PITG_03336 | Pi GTP-binding protein TypA/BipA, putative (2327 nt)         | -15.4884 | -0.52396 | 0.79677  |
| PITG_00225 | Pi sialin-like protein (1725 nt)                             | -14.6318 | -0.31134 | 0.796818 |
| PITG_14169 | Pi conserved hypothetical protein (3882 nt)                  | -14.1387 | 0.350993 | 0.796976 |
| PITG_01424 | Pi conserved hypothetical protein (2122 nt)                  | -16.1991 | -0.58099 | 0.797329 |
| PITG_17298 | Pi tRNA (cytosine-5-)-methyltransferase, putative (2567 nt)  | -16.1222 | 0.414937 | 0.797329 |
| PITG_03661 | Pi cysteinyl-tRNA synthetase, putative (2142 nt)             | -14.6743 | -0.39478 | 0.797506 |
| PITG_01649 | Pi AP-2 complex subunit sigma (767 nt)                       | -13.3903 | 0.26318  | 0.79766  |
| PITG_01463 | Pi hypothetical protein (1847 nt)                            | -16.2056 | -0.62858 | 0.798009 |
| PITG_02978 | Pi Chloride Channel (CIC) Family (1830 nt)                   | -16.2056 | -0.62858 | 0.798009 |
| PITG_00088 | Pi pre-mRNA-splicing factor cwc2, putative (1347 nt)         | -15.1007 | 0.342289 | 0.798164 |
| PITG_14633 | Pi conserved hypothetical protein (943 nt)                   | -15.609  | -0.37517 | 0.798199 |
| PITG_03015 | Pi aspartyl/Asparaginyl beta-hydroxylase, putative (1095 nt) | -15.4627 | 0.446698 | 0.7983   |
| PITG_13151 | Pi protein transporter Sec24 (4393 nt)                       | -15.0193 | 0.408166 | 0.798431 |
| PITG_00543 | Pi formate-tetrahydrofolate ligase (2336 nt)                 | -14.2472 | -0.38264 | 0.798787 |
| PITG_21940 | Pi cytochrome P450, putative (1575 nt)                       | -16.292  | 0.598472 | 0.798835 |
| PITG_13165 | Pi D-3-phosphoglycerate dehydrogenase, putative (1923 nt)    | -14.9649 | -0.41474 | 0.798849 |
| PITG_03966 | Pi NhaC Na :H Antiporter (NhaC) Family (2306 nt)             | -16.1753 | -0.56742 | 0.799362 |
| PITG_20331 | Pi conserved hypothetical protein (1878 nt)                  | -16.1494 | 0.5169   | 0.799362 |
| PITG_12684 | Pi CSH (456 nt)                                              | -13.4032 | -0.29012 | 0.799524 |
| PITG_21581 | Pi conserved hypothetical protein (824 nt)                   | -14.3231 | -0.34569 | 0.799598 |
| PITG_03376 | Pi endomembrane protein 70-like protein, putative (2245 nt)  | -12.2941 | -0.25647 | 0.799611 |
| PITG_19456 | Pi protein kinase, putative (2099 nt)                        | -14.945  | -0.31405 | 0.799671 |
| PITG_04857 | Pi impact-like protein (1370 nt)                             | -15.4868 | -0.52681 | 0.799817 |
| PITG_17978 | Pi conserved hypothetical protein (1735 nt)                  | -15.4837 | -0.40555 | 0.799817 |
| PITG_13912 | Pi conserved hypothetical protein (368 nt)                   | -13.1604 | -0.29736 | 0.80007  |
| PITG_01128 | Pi putative fatty-acid-CoA ligase, putative (2690 nt)        | -14.3441 | 0.320447 | 0.800075 |
| PITG_02927 | Pi hypothetical protein (700 nt)                             | -13.1065 | -0.3522  | 0.800265 |
| PITG_02198 | Pi homoserine kinase, putative (1289 nt)                     | -14.9751 | 0.453801 | 0.800488 |
| PITG_21067 | Pi conserved hypothetical protein (1059 nt)                  | -15.477  | 0.356122 | 0.80057  |
| PITG_14394 | Pi conserved hypothetical protein (662 nt)                   | -14.6816 | -0.35057 | 0.800827 |
| PITG_03596 | Pi conserved hypothetical protein (1893 nt)                  | -12.8279 | -0.27936 | 0.801184 |
| PITG_17245 | Pi conserved hypothetical protein (1389 nt)                  | -14.0588 | -0.31456 | 0.801214 |
| PITG_07774 | Pi conserved hypothetical protein (2334 nt)                  | -15.476  | -0.5035  | 0.80132  |
| PITG_23159 | Pi HECT E3 ubiquitin ligase, putative (5214 nt)              | -15.476  | -0.5035  | 0.80132  |
| PITG_05469 | Pi conserved hypothetical protein (1071 nt)                  | -16.1754 | -0.62788 | 0.801374 |
| PITG_16818 | Pi conserved hypothetical protein (3006 nt)                  | -16.1754 | -0.62788 | 0.801374 |
| PITG_20944 | Pi conserved hypothetical protein (1984 nt)                  | -16.1754 | -0.62788 | 0.801374 |
| PITG_17853 | Pi conserved hypothetical protein (3488 nt)                  | -14.6976 | 0.637196 | 0.8016   |

|            |                                                              |          |          |          |
|------------|--------------------------------------------------------------|----------|----------|----------|
| PITG_03342 | Pi sorting and assembly machinery component 50 (1971 nt)     | -14.0825 | 0.277899 | 0.801819 |
| PITG_19149 | Pi conserved hypothetical protein (2916 nt)                  | -15.1783 | 0.462382 | 0.801851 |
| PITG_20386 | Pi eukaryotic translation initiation factor 5B (2919 nt)     | -14.6291 | 0.311613 | 0.80189  |
| PITG_05634 | Pi hypothetical protein (1687 nt)                            | -16.2141 | -0.67492 | 0.802041 |
| PITG_11701 | Pi CLPTM1-like membrane protein, putative (1971 nt)          | -16.1912 | -0.65846 | 0.802041 |
| PITG_06579 | Pi conserved hypothetical protein (819 nt)                   | -12.7127 | 0.275523 | 0.802167 |
| PITG_10616 | Pi endoplasmic reticulum-Golgi intermediate compartment p    | -14.1179 | 0.306601 | 0.80221  |
| PITG_12234 | Pi phosphatidic acid phosphatase (1429 nt)                   | -14.6335 | 0.378835 | 0.802718 |
| PITG_01953 | Pi serine/threonine-protein phosphatase, putative (3061 nt)  | -14.9439 | -0.31645 | 0.802911 |
| PITG_04601 | Pi phosphoadenosine phosphosulfate reductase (1647 nt)       | -14.9536 | -0.40447 | 0.802911 |
| PITG_15903 | Pi phosphoethanolamine N-methyltransferase (1532 nt)         | -15.5631 | 0.316668 | 0.803333 |
| PITG_23134 | Pi conserved hypothetical protein (390 nt)                   | -15.6057 | -0.4662  | 0.803333 |
| PITG_22939 | Pi Crinkler (CRN) family protein, pseudogene (1654 nt)       | -13.2676 | -0.38946 | 0.80334  |
| PITG_11426 | Pi conserved hypothetical protein (1125 nt)                  | -16.1605 | -0.5951  | 0.803367 |
| PITG_04325 | Pi pectinesterase, putative (1053 nt)                        | -15.7577 | 0.551041 | 0.803379 |
| PITG_18860 | Pi conserved hypothetical protein (988 nt)                   | -14.5709 | -0.35461 | 0.803425 |
| PITG_21807 | Pi conserved hypothetical protein (2911 nt)                  | -15.5096 | -0.48097 | 0.80355  |
| PITG_22638 | Pi conserved hypothetical protein (455 nt)                   | -15.4543 | 0.296961 | 0.80355  |
| PITG_16113 | Pi conserved hypothetical protein (1971 nt)                  | -14.9478 | 0.373187 | 0.80371  |
| PITG_09681 | Pi transmembrane protein, putative (2182 nt)                 | -16.1788 | 0.625084 | 0.804027 |
| PITG_05290 | Pi myosin-like protein (3290 nt)                             | -14.6215 | -0.44532 | 0.804398 |
| PITG_17589 | Pi histidine acid phosphatase, putative (1155 nt)            | -16.1227 | 0.513226 | 0.804684 |
| PITG_14239 | Pi Poly(A) polymerase, putative (3061 nt)                    | -14.3031 | -0.34417 | 0.804753 |
| PITG_15967 | Pi dynein heavy chain, outer arm (14271 nt)                  | -15.5473 | 0.334875 | 0.804776 |
| PITG_08002 | Pi glucosylceramidase, putative (1829 nt)                    | -14.6756 | -0.33467 | 0.804878 |
| PITG_17784 | Pi conserved hypothetical protein (1308 nt)                  | -15.4203 | -0.44642 | 0.804879 |
| PITG_03836 | Pi conserved hypothetical protein (1754 nt)                  | -15.4986 | -0.45722 | 0.80502  |
| PITG_16008 | Pi 40S ribosomal protein S27-like protein (935 nt)           | -8.75499 | 0.237604 | 0.805311 |
| PITG_00254 | Pi mitogen-activated protein kinase, putative (2165 nt)      | -14.3069 | 0.283367 | 0.805593 |
| PITG_01125 | Pi Drug/Metabolite Transporter (DMT) Superfamily (1700 nt)   | -15.3989 | 0.485912 | 0.805631 |
| PITG_03571 | Pi phosphatidylinositol kinase (PIK-L3) (13852 nt)           | -15.4565 | 0.386127 | 0.805751 |
| PITG_01340 | Pi conserved hypothetical protein (2082 nt)                  | -15.4135 | -0.46025 | 0.806378 |
| PITG_17693 | Pi conserved hypothetical protein (1816 nt)                  | -15.3928 | -0.41893 | 0.806378 |
| PITG_05301 | Pi translation elongation factor 1-alpha, putative (1898 nt) | -13.7544 | 0.280236 | 0.806535 |
| PITG_11795 | Pi ATP-dependent RNA helicase SUPV3L1, putative (2961 nt)    | -14.5707 | -0.35411 | 0.806737 |
| PITG_13686 | Pi Sulfate Permease (SulP) Family (3498 nt)                  | -14.5841 | -0.32735 | 0.806737 |
| PITG_13426 | Pi conserved hypothetical protein (2646 nt)                  | -16.1869 | -0.66825 | 0.807295 |
| PITG_02971 | Pi conserved hypothetical protein (2669 nt)                  | -13.2676 | 0.262154 | 0.807344 |
| PITG_13753 | Pi choline/Carnitine O-acyltransferase, putative (2114 nt)   | -13.3549 | -0.28579 | 0.807436 |
| PITG_14113 | Pi conserved hypothetical protein (952 nt)                   | -14.27   | 0.301277 | 0.807499 |
| PITG_06233 | Pi conserved hypothetical protein (811 nt)                   | -16.1456 | -0.5589  | 0.807943 |
| PITG_00359 | Pi hypothetical protein (817 nt)                             | -12.73   | -0.27319 | 0.808242 |
| PITG_00851 | Pi conserved hypothetical protein (1468 nt)                  | -14.952  | -0.33312 | 0.808416 |
| PITG_17804 | Pi Amino Acid/Auxin Permease (AAP) Family (1545 nt)          | -14.1307 | -0.44292 | 0.808565 |
| PITG_00023 | Pi mitoferrin-like protein (1812 nt)                         | -15.3723 | 0.333536 | 0.8086   |
| PITG_14565 | Pi conserved hypothetical protein (1448 nt)                  | -15.4119 | -0.46382 | 0.8086   |
| PITG_10845 | Pi conserved hypothetical protein (2676 nt)                  | -15.4566 | -0.46362 | 0.808643 |

|            |                                                                    |          |          |          |
|------------|--------------------------------------------------------------------|----------|----------|----------|
| PITG_14910 | Pi conserved hypothetical protein (2328 nt)                        | -12.2361 | -0.25035 | 0.809165 |
| PITG_18000 | Pi conserved hypothetical protein (872 nt)                         | -12.7504 | -0.25112 | 0.809982 |
| PITG_15641 | Pi conserved hypothetical protein (1283 nt)                        | -14.2313 | 0.32449  | 0.810035 |
| PITG_03276 | Pi U4/U6.U5 tri-snRNP-associated protein, putative (2068 nt)       | -15.3813 | -0.36929 | 0.810064 |
| PITG_07565 | Pi folate-Biopterin Transporter (FBT) family (1775 nt)             | -16.2561 | 0.464311 | 0.810453 |
| PITG_00853 | Pi conserved hypothetical protein (642 nt)                         | -16.1706 | 0.653647 | 0.810513 |
| PITG_10524 | Pi gastricsin, aspartyl protease family A01A, putative (2214 nt)   | -14.5583 | 0.319928 | 0.810768 |
| PITG_04626 | Pi Amino Acid/Auxin Permease (AAP) Family (1323 nt)                | -15.3806 | 0.459639 | 0.81079  |
| PITG_05742 | Pi RWP-RK domain-containing protein, putative (708 nt)             | -15.3774 | -0.37752 | 0.81079  |
| PITG_06427 | Pi serine hydroxymethyltransferase, mitochondrial precursor        | -12.3023 | 0.303325 | 0.810954 |
| PITG_08714 | Pi lysyl-tRNA synthetase (1990 nt)                                 | -16.334  | -0.6364  | 0.811085 |
| PITG_08017 | Pi cell division cycle protein 123 (1114 nt)                       | -16.1367 | 0.443946 | 0.811151 |
| PITG_07300 | Pi 60S ribosomal protein L35 (797 nt)                              | -9.23187 | 0.23705  | 0.811455 |
| PITG_02696 | Pi vacuolar protein sorting-associated protein, putative (1330 nt) | -15.3607 | 0.343645 | 0.811514 |
| PITG_13272 | Pi conserved hypothetical protein (768 nt)                         | -15.4108 | -0.46646 | 0.811514 |
| PITG_00995 | Pi conserved hypothetical protein (537 nt)                         | -13.1643 | -0.26802 | 0.811565 |
| PITG_07660 | Pi transmembrane protein, putative (1026 nt)                       | -14.8943 | 0.42019  | 0.811568 |
| PITG_04970 | Pi conserved hypothetical protein (3710 nt)                        | -16.1497 | 0.419494 | 0.811787 |
| PITG_07900 | Pi Amino Acid/Auxin Permease (AAP) Family (1652 nt)                | -16.1245 | 0.469904 | 0.811787 |
| PITG_03402 | Pi conserved hypothetical protein (2464 nt)                        | -15.5394 | 0.363367 | 0.811834 |
| PITG_13112 | Pi conserved hypothetical protein (1738 nt)                        | -13.4443 | -0.30214 | 0.81192  |
| PITG_00140 | Pi chromodomain-helicase-DNA-binding protein, putative (510 nt)    | -14.9125 | -0.45372 | 0.812337 |
| PITG_14003 | Pi conserved hypothetical protein (1725 nt)                        | -16.1456 | -0.45134 | 0.812421 |
| PITG_04443 | Pi Metal Ion (Mn2 -iron) Transporter (Nramp) Family (1725 nt)      | -16.0475 | -0.4657  | 0.813359 |
| PITG_12274 | Pi conserved hypothetical protein (567 nt)                         | -16.0114 | -0.53799 | 0.813359 |
| PITG_05882 | Pi conserved hypothetical protein (952 nt)                         | -16.032  | -0.55228 | 0.814006 |
| PITG_10813 | Pi endoplasmic reticulum metalloproteinase, putative (2973 nt)     | -16.0337 | -0.43787 | 0.814006 |
| PITG_11271 | Pi conserved hypothetical protein (1236 nt)                        | -16.0337 | -0.43787 | 0.814006 |
| PITG_19469 | Pi conserved hypothetical protein (926 nt)                         | -15.9976 | -0.51012 | 0.814006 |
| PITG_00262 | Pi nuclear pore complex protein Nup93-like protein (2904 nt)       | -15.2937 | -0.38632 | 0.81421  |
| PITG_10509 | Pi L-2-hydroxyglutarate dehydrogenase, putative (1415 nt)          | -15.3034 | 0.402825 | 0.81421  |
| PITG_16924 | Pi conserved hypothetical protein (1645 nt)                        | -15.2937 | -0.38632 | 0.81421  |
| PITG_05797 | Pi conserved hypothetical protein (937 nt)                         | -15.3501 | 0.254035 | 0.814374 |
| PITG_00952 | Pi conserved hypothetical protein (1707 nt)                        | -16.0246 | 0.548336 | 0.814651 |
| PITG_01878 | Pi conserved hypothetical protein (4692 nt)                        | -16.0405 | -0.47978 | 0.814651 |
| PITG_10868 | Pi conserved hypothetical protein (1427 nt)                        | -16.0389 | -0.53875 | 0.814651 |
| PITG_12050 | Pi queuine tRNA-ribosyltransferase (1284 nt)                       | -16.0405 | -0.47978 | 0.814651 |
| PITG_13833 | Pi conserved hypothetical protein (1674 nt)                        | -15.9773 | -0.2948  | 0.814651 |
| PITG_16806 | Pi conserved hypothetical protein (707 nt)                         | -13.1478 | 0.254394 | 0.814677 |
| PITG_22688 | Pi trans-aconitate 2-methyltransferase, putative (928 nt)          | -15.3302 | -0.35176 | 0.814938 |
| PITG_17091 | Pi histone chaperone ASF1-like protein (2210 nt)                   | -13.5586 | -0.24199 | 0.815172 |
| PITG_06638 | Pi lysocardiolipin acyltransferase, putative (1329 nt)             | -15.97   | -0.30971 | 0.815294 |
| PITG_19191 | Pi 2-oxoglutarate dehydrogenase, putative (3475 nt)                | -15.9857 | 0.426267 | 0.815294 |
| PITG_14925 | Pi conserved hypothetical protein (1667 nt)                        | -14.6141 | 0.352945 | 0.815361 |
| PITG_03331 | Pi conserved hypothetical protein (582 nt)                         | -15.3113 | 0.386945 | 0.815661 |
| PITG_03818 | Pi U3 small nucleolar RNA-associated protein, putative (2742 nt)   | -16.0457 | -0.52558 | 0.815934 |
| PITG_11467 | Pi conserved hypothetical protein (1011 nt)                        | -16.0196 | -0.57782 | 0.815934 |

|            |                                                                                     |          |          |          |
|------------|-------------------------------------------------------------------------------------|----------|----------|----------|
| PITG_05521 | Pi protein kinase, putative (2191 nt)                                               | -14.4621 | 0.321028 | 0.81623  |
| PITG_07891 | Pi conserved hypothetical protein (487 nt)                                          | -15.2891 | 0.299085 | 0.816381 |
| PITG_12194 | Pi biotin-protein ligase, putative (1076 nt)                                        | -15.3219 | -0.36845 | 0.816381 |
| PITG_17592 | Pi mannosyl-oligosaccharide glucosidase, putative (2676 nt)                         | -15.3219 | -0.36845 | 0.816381 |
| PITG_21282 | Pi conserved hypothetical protein (393 nt)                                          | -14.4697 | -0.30556 | 0.817018 |
| PITG_01782 | Pi conserved hypothetical protein (2307 nt)                                         | -16.038  | -0.48491 | 0.817841 |
| PITG_05759 | Pi conserved hypothetical protein (1146 nt)                                         | -16.0348 | -0.49121 | 0.817841 |
| PITG_20909 | Pi conserved hypothetical protein (831 nt)                                          | -16.0348 | -0.49121 | 0.817841 |
| PITG_13505 | Pi hypothetical protein (766 nt)                                                    | -12.6869 | 0.235498 | 0.81799  |
| PITG_19646 | Pi pre-mRNA-processing factor 19, putative (1575 nt)                                | -16.1536 | -0.60186 | 0.818047 |
| PITG_11615 | Pi homoserine dehydrogenase, putative (1519 nt)                                     | -12.8648 | 0.295023 | 0.818056 |
| PITG_20819 | Pi conserved hypothetical protein (1799 nt)                                         | -14.8218 | -0.33734 | 0.818072 |
| PITG_16968 | Pi glucan 1,3-beta-glucosidase, putative (1377 nt)                                  | -14.2967 | 0.453542 | 0.818074 |
| PITG_05636 | Pi transaldolase (1192 nt)                                                          | -11.4498 | -0.27117 | 0.818202 |
| PITG_05496 | Pi augmenter of liver regeneration (811 nt)                                         | -12.97   | 0.276449 | 0.818283 |
| PITG_03701 | Pi kinesin-like protein (2486 nt)                                                   | -16.0096 | 0.38278  | 0.818472 |
| PITG_08655 | Pi conserved hypothetical protein (764 nt)                                          | -15.9864 | -0.53133 | 0.818472 |
| PITG_17383 | Pi hsp70-like protein (1525 nt)                                                     | -16.0407 | -0.59387 | 0.818472 |
| PITG_04470 | Pi Argonaute1 (AGO1) (2784 nt)                                                      | -11.8233 | 0.248759 | 0.818856 |
| PITG_20790 | Pi DEAD/DEAH box RNA helicase, putative (1698 nt)                                   | -15.9909 | -0.32261 | 0.819101 |
| PITG_12042 | Pi hypothetical protein (677 nt)                                                    | -11.9905 | -0.27092 | 0.819313 |
| PITG_16107 | Pi rRNA biogenesis protein rrp5 (5835 nt)                                           | -16.0012 | 0.547235 | 0.819727 |
| PITG_17135 | Pi arginine n-methyltransferase, putative (1544 nt)                                 | -16.0012 | 0.547235 | 0.819727 |
| PITG_01755 | Pi conserved hypothetical protein (886 nt)                                          | -14.4123 | 0.300607 | 0.82013  |
| PITG_21329 | Pi Zinc (Zn <sup>2+</sup> )-Iron (Fe <sup>2+</sup> ) Permease (ZIP) Family (657 nt) | -14.4122 | 0.24131  | 0.82013  |
| PITG_03114 | Pi conserved hypothetical protein (1276 nt)                                         | -15.978  | -0.34916 | 0.820352 |
| PITG_16331 | Pi conserved hypothetical protein (1864 nt)                                         | -15.978  | -0.34916 | 0.820352 |
| PITG_12082 | Pi hypothetical protein (540 nt)                                                    | -11.0724 | -0.2451  | 0.820588 |
| PITG_20186 | Pi conserved hypothetical protein (927 nt)                                          | -13.5688 | 0.26164  | 0.820593 |
| PITG_06449 | Pi pyruvate carboxylase, putative (738 nt)                                          | -11.4197 | 0.28155  | 0.82077  |
| PITG_07473 | Pi EF hand containing protein, putative (1622 nt)                                   | -15.0169 | -0.37982 | 0.82095  |
| PITG_16334 | Pi conserved hypothetical protein (1007 nt)                                         | -15.9428 | 0.294006 | 0.820974 |
| PITG_21602 | Pi pro-apoptotic serine protease nma111-like protein (3255 nt)                      | -14.7627 | -0.2757  | 0.821107 |
| PITG_10301 | Pi homoserine O-acetyltransferase, putative (1212 nt)                               | -14.8793 | -0.31827 | 0.821261 |
| PITG_10150 | Pi conserved hypothetical protein (3680 nt)                                         | -16.0049 | -0.29643 | 0.821594 |
| PITG_04719 | Pi trafficking protein particle complex subunit 2-like protein                      | -13.4044 | -0.33567 | 0.821597 |
| PITG_13239 | Pi Mitochondrial Carrier (MC) Family (1073 nt)                                      | -15.2786 | 0.42252  | 0.822012 |
| PITG_12599 | Pi elicitor-like protein (1765 nt)                                                  | -12.4364 | 0.264676 | 0.822045 |
| PITG_11605 | Pi aldehyde dehydrogenase, putative (1740 nt)                                       | -13.9046 | 0.279511 | 0.822166 |
| PITG_07134 | Pi ATP-binding Cassette (ABC) Superfamily (4101 nt)                                 | -16.0308 | -0.49947 | 0.822212 |
| PITG_16461 | Pi protein kinase, putative (2618 nt)                                               | -16.0308 | -0.49947 | 0.822212 |
| PITG_03544 | Pi conserved hypothetical protein (984 nt)                                          | -13.7507 | -0.2474  | 0.822246 |
| PITG_20468 | Pi conserved hypothetical protein (714 nt)                                          | -14.2331 | 0.313666 | 0.822779 |
| PITG_11038 | Pi ATP-dependent helicase, putative (8102 nt)                                       | -16.0005 | 0.362323 | 0.822828 |
| PITG_04567 | Pi conserved hypothetical protein (885 nt)                                          | -14.4597 | -0.27969 | 0.82316  |
| PITG_11914 | Pi acetyltransferase (GNAT) family protein, putative (540 nt)                       | -14.7475 | 0.296899 | 0.823343 |
| PITG_10865 | Pi dymeclin, putative (2772 nt)                                                     | -15.9559 | 0.272827 | 0.823441 |

|            |                                                                |          |          |          |
|------------|----------------------------------------------------------------|----------|----------|----------|
| PITG_08025 | Pi HECT E3 ubiquitin ligase, putative (3597 nt)                | -13.4112 | 0.333793 | 0.823511 |
| PITG_01438 | Pi conserved hypothetical protein (1296 nt)                    | -13.2197 | 0.271965 | 0.824368 |
| PITG_00494 | Pi Drug/Metabolite Transporter (DMT) Superfamily (1551 nt)     | -14.1004 | 0.237851 | 0.824595 |
| PITG_12104 | Pi ATP-dependent DNA helicase 2 subunit, putative (2477 nt)    | -14.4595 | -0.32597 | 0.82465  |
| PITG_09538 | Pi mitochondrial carnitine/acylcarnitine carrier protein, puta | -12.6023 | -0.28868 | 0.82465  |
| PITG_01741 | Pi conserved hypothetical protein (856 nt)                     | -16.0121 | 0.34282  | 0.824662 |
| PITG_11804 | Pi conserved hypothetical protein (1414 nt)                    | -15.219  | -0.39577 | 0.824708 |
| PITG_01833 | Pi 60S ribosomal protein L13, putative (1480 nt)               | -10.4144 | 0.214377 | 0.824825 |
| PITG_09280 | Pi bZIP transcription factor, putative (1708 nt)               | -13.113  | 0.296862 | 0.825884 |
| PITG_02038 | Pi fructose 1,6 bisphosphatase (1099 nt)                       | -12.2793 | -0.25562 | 0.826393 |
| PITG_09881 | Pi ATP-binding Cassette (ABC) superfamily (1089 nt)            | -15.8646 | -0.4682  | 0.826404 |
| PITG_05464 | Pi conserved hypothetical protein (1043 nt)                    | -12.5204 | 0.251814 | 0.826567 |
| PITG_11825 | Pi hypothetical protein (581 nt)                               | -15.1973 | -0.27345 | 0.826778 |
| PITG_00675 | Pi conserved hypothetical protein (3391 nt)                    | -15.8858 | 0.484402 | 0.827024 |
| PITG_09791 | Pi seryl-tRNA synthetase (1476 nt)                             | -15.8985 | -0.40053 | 0.827024 |
| PITG_01416 | Pi sporangia induced TRP protein (1617 nt)                     | -15.8409 | 0.394518 | 0.827641 |
| PITG_14951 | Pi conserved hypothetical protein (3676 nt)                    | -15.901  | 0.556239 | 0.827641 |
| PITG_02182 | Pi homoserine dehydrogenase, putative (1518 nt)                | -13.3574 | 0.232176 | 0.827955 |
| PITG_18025 | Pi fatty acid synthase subunit alpha, putative (12457 nt)      | -14.3386 | 0.245912 | 0.828035 |
| PITG_05664 | Pi choline/Carnitine O-acyltransferase, putative (2092 nt)     | -14.8005 | 0.259222 | 0.828214 |
| PITG_03915 | Pi glutamyl-tRNA(Gln) amidotransferase subunit, putative (21   | -15.8775 | -0.49436 | 0.828256 |
| PITG_12077 | Pi conserved hypothetical protein (1505 nt)                    | -15.8775 | -0.49436 | 0.828256 |
| PITG_13368 | Pi cyclin-like protein (1846 nt)                               | -14.3694 | 0.268407 | 0.828323 |
| PITG_08580 | Pi conserved hypothetical protein (1236 nt)                    | -15.8671 | -0.51532 | 0.828868 |
| PITG_08602 | Pi conserved hypothetical protein (1191 nt)                    | -15.8671 | -0.51532 | 0.828868 |
| PITG_21351 | Pi conserved hypothetical protein (1050 nt)                    | -15.8812 | -0.43559 | 0.828868 |
| PITG_07201 | Pi UDP-glucose:glycoprotein glucosyltransferase, putative (5   | -14.6987 | 0.246592 | 0.828927 |
| PITG_05589 | Pi conserved hypothetical protein (1113 nt)                    | -13.059  | -0.2984  | 0.829071 |
| PITG_02273 | Pi conserved hypothetical protein (1042 nt)                    | -14.7108 | -0.29148 | 0.829647 |
| PITG_15839 | Pi conserved hypothetical protein (1039 nt)                    | -14.7182 | -0.30812 | 0.829647 |
| PITG_21510 | Pi ubiquitin-conjugating enzyme E2, putative (882 nt)          | -12.396  | -0.21963 | 0.830265 |
| PITG_06566 | Pi long-chain-fatty-acid-CoA ligase, putative (2152 nt)        | -13.1852 | -0.31552 | 0.830551 |
| PITG_12008 | Pi hypothetical protein (276 nt)                               | -13.5396 | 0.345528 | 0.830577 |
| PITG_08302 | Pi hypothetical protein (477 nt)                               | -16.0177 | -0.334   | 0.83065  |
| PITG_15653 | Pi small nuclear ribonucleoprotein G (381 nt)                  | -12.2553 | 0.260767 | 0.830955 |
| PITG_01551 | Pi conserved hypothetical protein (550 nt)                     | -12.3039 | -0.21394 | 0.83116  |
| PITG_05519 | Pi phosphatidylinositol 4-phosphate 5-kinase D3 (PIPK-D3/GI    | -15.863  | 0.353181 | 0.831293 |
| PITG_14173 | Pi endo-1,3(4)-beta-glucanase, putative (2623 nt)              | -13.6612 | -0.25886 | 0.831329 |
| PITG_04846 | Pi conserved hypothetical protein (2670 nt)                    | -13.8126 | -0.26847 | 0.83135  |
| PITG_02510 | Pi conserved hypothetical protein (1081 nt)                    | -10.6444 | -0.2214  | 0.831367 |
| PITG_04681 | Pi serine/threonine-protein phosphatase PP1-gamma catalyt      | -11.2973 | -0.21088 | 0.831642 |
| PITG_11975 | Pi conserved hypothetical protein (1393 nt)                    | -9.47538 | 0.207628 | 0.831743 |
| PITG_07801 | Pi conserved hypothetical protein (3748 nt)                    | -16.031  | -0.49932 | 0.831825 |
| PITG_11476 | Pi conserved hypothetical protein (1327 nt)                    | -16.031  | -0.49932 | 0.831825 |
| PITG_17378 | Pi 5'-nucleotidase domain-containing protein, putative (2327   | -16.031  | -0.49932 | 0.831825 |
| PITG_01315 | Pi conserved hypothetical protein (527 nt)                     | -15.8771 | -0.44415 | 0.831893 |
| PITG_08137 | Pi palmitoyltransferase, putative (726 nt)                     | -15.886  | -0.53187 | 0.831893 |

|            |                                                               |          |          |          |
|------------|---------------------------------------------------------------|----------|----------|----------|
| PITG_14514 | Pi HSF-type DNA-binding protein, putative (627 nt)            | -15.864  | -0.41797 | 0.831893 |
| PITG_19047 | Pi hypothetical protein (1680 nt)                             | -15.8771 | -0.44415 | 0.831893 |
| PITG_01246 | Pi conserved hypothetical protein (1249 nt)                   | -13.8183 | 0.249777 | 0.832112 |
| PITG_19772 | Pi hypothetical protein (614 nt)                              | -9.93159 | 0.226279 | 0.832234 |
| PITG_22381 | Pi methylenetetrahydrofolate reductase, putative (1844 nt)    | -14.809  | -0.30097 | 0.832338 |
| PITG_19349 | Pi conserved hypothetical protein (1161 nt)                   | -13.536  | 0.310515 | 0.832442 |
| PITG_19204 | Pi conserved hypothetical protein (1439 nt)                   | -13.8479 | -0.2641  | 0.832475 |
| PITG_20831 | Pi conserved hypothetical protein (4202 nt)                   | -15.8461 | -0.50633 | 0.832491 |
| PITG_03841 | Pi endomembrane protein 70-like protein, putative (1982 nt)   | -15.8514 | -0.39072 | 0.833087 |
| PITG_21395 | Pi CBL-interacting serine/threonine-protein kinase, putative  | -11.5623 | 0.212713 | 0.83328  |
| PITG_17174 | Pi conserved hypothetical protein (1163 nt)                   | -13.9962 | -0.37159 | 0.83337  |
| PITG_17942 | Pi ubiquitin activating enzyme, E1 family, putative (1777 nt) | -14.6365 | 0.236069 | 0.833405 |
| PITG_14976 | Pi pyridoxal phosphate phosphatase, putative (2429 nt)        | -16.0063 | 0.336915 | 0.833574 |
| PITG_16680 | Pi conserved hypothetical protein (1514 nt)                   | -13.3156 | -0.23633 | 0.833667 |
| PITG_07985 | Pi myosin-like protein (4915 nt)                              | -13.5406 | -0.27078 | 0.833919 |
| PITG_19590 | Pi conserved hypothetical protein (986 nt)                    | -12.2106 | -0.21308 | 0.834298 |
| PITG_11143 | Pi AP-1 complex subunit gamma-1 (3986 nt)                     | -14.6857 | 0.267707 | 0.83457  |
| PITG_07169 | Pi Major Facilitator Superfamily (MFS) (1861 nt)              | -15.8781 | -0.54994 | 0.834861 |
| PITG_09680 | Pi conserved hypothetical protein (1291 nt)                   | -15.8363 | 0.340805 | 0.835448 |
| PITG_17602 | Pi conserved hypothetical protein (1236 nt)                   | -14.6379 | 0.303552 | 0.835517 |
| PITG_12297 | Pi conserved hypothetical protein (2181 nt)                   | -15.1292 | 0.312593 | 0.835564 |
| PITG_02211 | Pi UV excision repair protein RAD23 (1465 nt)                 | -12.6382 | -0.21919 | 0.836233 |
| PITG_02010 | Pi conserved hypothetical protein (793 nt)                    | -13.7618 | -0.24287 | 0.836365 |
| PITG_05644 | Pi phosphatidylinositol-3-phosphate 5-kinase (4944 nt)        | -15.8748 | -0.44946 | 0.836615 |
| PITG_17000 | Pi hypothetical protein (288 nt)                              | -14.643  | 0.290949 | 0.837591 |
| PITG_20681 | Pi ATP-binding Cassette (ABC) superfamily (2764 nt)           | -13.794  | -0.3212  | 0.83772  |
| PITG_13134 | Pi conserved hypothetical protein (543 nt)                    | -15.8487 | 0.320895 | 0.837774 |
| PITG_13344 | Pi Cytochrome Oxidase Biogenesis (Oxa1) Family (1380 nt)      | -15.8487 | 0.320895 | 0.837774 |
| PITG_15638 | Pi conserved hypothetical protein (686 nt)                    | -8.46567 | -0.21181 | 0.838551 |
| PITG_00953 | Pi trafficking protein particle complex subunit 6B (691 nt)   | -15.1863 | 0.264458 | 0.838573 |
| PITG_05383 | Pi conserved hypothetical protein (724 nt)                    | -13.7364 | -0.22938 | 0.838718 |
| PITG_17382 | Pi hypothetical protein (1380 nt)                             | -13.8065 | 0.245936 | 0.838741 |
| PITG_04990 | Pi conserved hypothetical protein (813 nt)                    | -15.7299 | 0.447518 | 0.838813 |
| PITG_00537 | Pi ubiquitin-conjugating enzyme E2, putative (882 nt)         | -12.7051 | -0.25923 | 0.838949 |
| PITG_08084 | Pi conserved hypothetical protein (874 nt)                    | -13.2885 | -0.25516 | 0.83898  |
| PITG_02515 | Pi LETM1 and EF-hand domain-containing protein 1, putative    | -14.2388 | 0.256759 | 0.839205 |
| PITG_16719 | Pi conserved hypothetical protein (701 nt)                    | -15.7309 | -0.36767 | 0.839403 |
| PITG_18073 | Pi cell division protein kinase, putative (1103 nt)           | -15.7309 | -0.36767 | 0.839403 |
| PITG_05238 | Pi conserved hypothetical protein (1011 nt)                   | -14.5817 | 0.213535 | 0.839631 |
| PITG_06664 | Pi conserved hypothetical protein (1578 nt)                   | -15.7429 | -0.39125 | 0.839989 |
| PITG_17593 | Pi conserved hypothetical protein (1209 nt)                   | -12.9331 | 0.222238 | 0.840169 |
| PITG_03267 | Pi conserved hypothetical protein (7326 nt)                   | -14.6331 | -0.2562  | 0.840301 |
| PITG_08573 | Pi conserved hypothetical protein (629 nt)                    | -14.6398 | -0.26951 | 0.840301 |
| PITG_05381 | Pi protein phosphatase 2C, putative (1315 nt)                 | -15.7186 | 0.345976 | 0.840574 |
| PITG_10943 | Pi conserved hypothetical protein (1415 nt)                   | -15.7643 | -0.39666 | 0.840574 |
| PITG_01251 | Pi conserved hypothetical protein (756 nt)                    | -15.0497 | -0.31126 | 0.841023 |
| PITG_10863 | Pi 60S ribosomal protein L32-1 (723 nt)                       | -8.64246 | 0.195961 | 0.841359 |



|            |                                                                |          |          |          |
|------------|----------------------------------------------------------------|----------|----------|----------|
| PITG_00133 | Pi phosphoserine aminotransferase, putative (11706 nt)         | -14.5855 | 0.268487 | 0.841674 |
| PITG_04535 | Pi nuclear LIM factor interactor-interacting protein hyphal fo | -14.5798 | 0.2756   | 0.841674 |
| PITG_00809 | Pi M96 mating-specific protein family (4618 nt)                | -12.8333 | -0.28018 | 0.841685 |
| PITG_05654 | Pi conserved hypothetical protein (623 nt)                     | -15.7555 | -0.41493 | 0.841735 |
| PITG_03239 | Pi 60S ribosomal protein L27 (1037 nt)                         | -8.79839 | 0.196635 | 0.841862 |
| PITG_16214 | Pi inactive ubiquitin carboxyl-terminal hydrolase, putative (2 | -15.0318 | 0.205322 | 0.842305 |
| PITG_09828 | Pi U6 snRNA-associated Sm-like protein LSm3, putative (337     | -11.0315 | 0.221126 | 0.842526 |
| PITG_08411 | Pi conserved hypothetical protein (1276 nt)                    | -15.0492 | -0.31265 | 0.84294  |
| PITG_22277 | Pi conserved hypothetical protein (1008 nt)                    | -15.1081 | 0.237489 | 0.843209 |
| PITG_20260 | Pi ADP-ribosylation factor family (456 nt)                     | -14.5797 | 0.275427 | 0.843679 |
| PITG_00878 | Pi 2OG-Fe(II) oxygenase superfamily protein (1082 nt)          | -15.7239 | -0.38166 | 0.844028 |
| PITG_01715 | Pi conserved hypothetical protein (1513 nt)                    | -14.2483 | -0.27907 | 0.844076 |
| PITG_13007 | Pi conserved hypothetical protein (1381 nt)                    | -14.6541 | -0.29426 | 0.84425  |
| PITG_00685 | Pi conserved hypothetical protein (645 nt)                     | -14.585  | -0.32605 | 0.844339 |
| PITG_20412 | Pi putative GPI-anchored serine rich elicitor SOL13E-like prot | -12.6321 | -0.19869 | 0.844785 |
| PITG_02446 | Pi cyclin-dependent kinase, putative (1646 nt)                 | -14.5336 | -0.22644 | 0.844796 |
| PITG_15383 | Pi thioredoxin-like protein (456 nt)                           | -13.5041 | -0.30351 | 0.845026 |
| PITG_00015 | Pi DNA-binding protein, putative (804 nt)                      | -17.0792 | -0.97265 | 0.845213 |
| PITG_22087 | Pi ATP-binding Cassette (ABC) Superfamily (4098 nt)            | -14.3144 | 0.224599 | 0.845526 |
| PITG_01042 | Pi 60S ribosomal protein L22, putative (776 nt)                | -9.58199 | 0.192796 | 0.845572 |
| PITG_18743 | Pi amino acid/auxin permease-like protein (706 nt)             | -15.8623 | -0.41977 | 0.845663 |
| PITG_21316 | Pi protein phosphatase methylesterase, putative (1485 nt)      | -14.9811 | -0.24171 | 0.845948 |
| PITG_21219 | Pi conserved hypothetical protein (1781 nt)                    | -14.5337 | -0.22627 | 0.846125 |
| PITG_09744 | Pi CUG-BP- and ETR-3-like factor, putative (1645 nt)           | -10.399  | -0.2027  | 0.846822 |
| PITG_18420 | Pi protein kinase, putative (1415 nt)                          | -13.3243 | -0.22852 | 0.846951 |
| PITG_07326 | Pi conserved hypothetical protein (1795 nt)                    | -14.5463 | -0.25078 | 0.847438 |
| PITG_08456 | Pi ankyrin-like protein (1932 nt)                              | -15.0492 | -0.31363 | 0.847906 |
| PITG_09438 | Pi conserved hypothetical protein (579 nt)                     | -10.5591 | 0.205768 | 0.847962 |
| PITG_16455 | Pi conserved hypothetical protein (2559 nt)                    | -15.6507 | 0.327687 | 0.848525 |
| PITG_19371 | Pi GTP-binding protein, putative (1525 nt)                     | -13.9824 | -0.33598 | 0.84906  |
| PITG_04391 | Pi conserved hypothetical protein (1107 nt)                    | -14.12   | 0.24388  | 0.85039  |
| PITG_02786 | Pi fructose-bisphosphate aldolase (1256 nt)                    | -11.6006 | -0.21369 | 0.850394 |
| PITG_08548 | Pi conserved hypothetical protein (732 nt)                     | -12.855  | 0.288868 | 0.850673 |
| PITG_03762 | Pi 60S ribosomal protein L38, putative (708 nt)                | -8.2267  | 0.183027 | 0.852    |
| PITG_02233 | Pi conserved hypothetical protein (731 nt)                     | -14.4886 | -0.24537 | 0.852845 |
| PITG_19036 | Pi serine/threonine-protein phosphatase ppe1 (1425 nt)         | -14.9094 | 0.217166 | 0.852869 |
| PITG_02048 | Pi conserved hypothetical protein (1263 nt)                    | -15.6358 | 0.360286 | 0.854072 |
| PITG_09706 | Pi proteasome subunit beta, putative (818 nt)                  | -11.3357 | -0.1825  | 0.854233 |
| PITG_05248 | Pi conserved hypothetical protein (759 nt)                     | -15.1277 | -0.30367 | 0.854462 |
| PITG_19024 | Pi conserved hypothetical protein (3528 nt)                    | -15.6229 | -0.39122 | 0.854614 |
| PITG_20652 | Pi conserved hypothetical protein (615 nt)                     | -15.6229 | -0.39122 | 0.854614 |
| PITG_08896 | Pi conserved hypothetical protein (266 nt)                     | -12.6626 | -0.23026 | 0.854965 |
| PITG_22743 | Pi dihydrolipoyllysine-residue succinyltransferase componen    | -13.1795 | -0.19435 | 0.85508  |
| PITG_03478 | Pi conserved hypothetical protein (4797 nt)                    | -15.6297 | 0.347445 | 0.855153 |
| PITG_07284 | Pi SEC14 cytosolic factor, putative (2586 nt)                  | -15.5945 | 0.277013 | 0.855153 |
| PITG_18814 | Pi conserved hypothetical protein (1219 nt)                    | -15.6297 | 0.347445 | 0.855153 |
| PITG_12343 | Pi conserved hypothetical protein (811 nt)                     | -14.9258 | -0.25849 | 0.855279 |

|            |                                                                  |          |          |          |
|------------|------------------------------------------------------------------|----------|----------|----------|
| PITG_13600 | Pi eukaryotic translation initiation factor 3 subunit, putative  | -12.3349 | -0.19853 | 0.856721 |
| PITG_02307 | Pi alpha,alpha-trehalose-phosphate synthase [UDP-forming],       | -16.8032 | -0.6236  | 0.857003 |
| PITG_04457 | Pi tripeptidyl-peptidase, putative (4697 nt)                     | -15.0325 | 0.207964 | 0.857266 |
| PITG_03603 | Pi conserved hypothetical protein (647 nt)                       | -14.5484 | 0.34485  | 0.857402 |
| PITG_08408 | Pi conserved hypothetical protein (844 nt)                       | -15.7266 | -0.28977 | 0.857582 |
| PITG_08822 | Pi conserved hypothetical protein (1103 nt)                      | -14.9125 | -0.30918 | 0.857635 |
| PITG_22383 | Pi glycoside hydrolase, putative (1436 nt)                       | -14.928  | -0.27816 | 0.857635 |
| PITG_21224 | Pi conserved hypothetical protein (879 nt)                       | -13.0056 | -0.32733 | 0.857859 |
| PITG_06241 | Pi conserved hypothetical protein (1025 nt)                      | -11.8772 | 0.179239 | 0.858091 |
| PITG_14909 | Pi conserved hypothetical protein (761 nt)                       | -11.6318 | -0.19858 | 0.858337 |
| PITG_00806 | Pi conserved hypothetical protein (911 nt)                       | -12.6282 | 0.227453 | 0.858475 |
| PITG_00182 | Pi conserved hypothetical protein (354 nt)                       | -13.7731 | 0.301709 | 0.8588   |
| PITG_19709 | Pi hypothetical protein (279 nt)                                 | -13.7224 | 0.22077  | 0.85888  |
| PITG_00733 | Pi aspartyl protease family A22B, putative (1122 nt)             | -13.1605 | -0.19255 | 0.858978 |
| PITG_00631 | Pi conserved hypothetical protein (479 nt)                       | -8.63179 | 0.185238 | 0.859084 |
| PITG_11592 | Pi serine protease family S15, putative (2220 nt)                | -14.3929 | -0.25119 | 0.85909  |
| PITG_02710 | Pi serine protease family S01A, putative (3352 nt)               | -13.5712 | -0.30065 | 0.859101 |
| PITG_07551 | Pi N(6)-adenine-specific DNA methyltransferase 2, putative (     | -15.5308 | 0.264469 | 0.859208 |
| PITG_11139 | Pi P-type ATPase (P-ATPase) Superfamily (3195 nt)                | -13.6751 | -0.32139 | 0.859245 |
| PITG_20281 | Pi GTP-dependent nucleic acid-binding protein engD (1372 n       | -13.7672 | -0.23849 | 0.859444 |
| PITG_00680 | Pi conserved hypothetical protein (2351 nt)                      | -14.9047 | 0.206006 | 0.85994  |
| PITG_14436 | Pi conserved hypothetical protein (1255 nt)                      | -15.1127 | 0.239883 | 0.860027 |
| PITG_08425 | Pi endothelin-converting enzyme 1, metalloprotease family I      | -14.1557 | -0.24502 | 0.86009  |
| PITG_03784 | Pi conserved hypothetical protein (905 nt)                       | -12.5202 | 0.188857 | 0.860226 |
| PITG_05356 | Pi maleylacetoacetate isomerase (660 nt)                         | -13.0872 | -0.20445 | 0.860314 |
| PITG_00234 | Pi conserved hypothetical protein (2020 nt)                      | -10.7089 | -0.19652 | 0.861013 |
| PITG_06869 | Pi conserved hypothetical protein (1796 nt)                      | -14.9024 | -0.29955 | 0.861075 |
| PITG_05502 | Pi calcineurin-like phosphoesterase, putative (1922 nt)          | -14.0779 | -0.21849 | 0.861559 |
| PITG_14175 | Pi conserved hypothetical protein (8683 nt)                      | -13.0478 | 0.269064 | 0.862028 |
| PITG_00143 | Pi nuclear migration protein nudC-like protein (973 nt)          | -15.5191 | -0.29227 | 0.862377 |
| PITG_16227 | Pi conserved hypothetical protein (456 nt)                       | -14.9779 | 0.346619 | 0.862417 |
| PITG_13768 | Pi acyl-CoA-binding domain-containing protein, putative (160     | -13.5092 | 0.207357 | 0.86248  |
| PITG_14493 | Pi conserved hypothetical protein (946 nt)                       | -14.4803 | 0.230708 | 0.862487 |
| PITG_04390 | Pi hypothetical protein (455 nt)                                 | -16.793  | -0.64793 | 0.862758 |
| PITG_06701 | Pi dual specificity protein kinase, putative (1580 nt)           | -16.793  | -0.64793 | 0.862758 |
| PITG_13022 | Pi inorganic phosphate transporter, putative (1419 nt)           | -16.793  | -0.64793 | 0.862758 |
| PITG_19487 | Pi conserved hypothetical protein (770 nt)                       | -14.8665 | -0.21348 | 0.863278 |
| PITG_02853 | Pi 3,2-trans-enoyl-CoA isomerase, mitochondrial precursor (      | -12.5568 | -0.18338 | 0.863304 |
| PITG_12691 | Pi conserved hypothetical protein (2388 nt)                      | -14.3451 | 0.205471 | 0.863713 |
| PITG_00884 | Pi conserved hypothetical protein (441 nt)                       | -12.2631 | 0.188216 | 0.863766 |
| PITG_01617 | Pi conserved hypothetical protein (1226 nt)                      | -14.8617 | -0.28773 | 0.86384  |
| PITG_09220 | Pi conserved hypothetical protein (3458 nt)                      | -15.4958 | -0.25412 | 0.86393  |
| PITG_05011 | Pi 5A endo-1,4-beta-glucanase, putative (1696 nt)                | -11.0692 | -0.18416 | 0.864035 |
| PITG_18882 | Pi transcription initiation factor TFIID subunit, putative (3840 | -14.8381 | -0.30463 | 0.864399 |
| PITG_14285 | Pi vesicle-associated membrane protein, putative (749 nt)        | -15.4186 | 0.274977 | 0.865104 |
| PITG_08196 | Pi conserved hypothetical protein (836 nt)                       | -13.7177 | -0.29075 | 0.865345 |
| PITG_02458 | Pi conserved hypothetical protein (1512 nt)                      | -13.9736 | 0.180972 | 0.865618 |

|            |                                                                                       |          |          |          |
|------------|---------------------------------------------------------------------------------------|----------|----------|----------|
| PITG_01515 | Pi ras-related GTP-binding protein, putative (1521 nt)                                | -12.9318 | -0.18342 | 0.865946 |
| PITG_00649 | Pi conserved hypothetical protein (1739 nt)                                           | -15.4937 | 0.189491 | 0.866472 |
| PITG_16969 | Pi conserved oligomeric Golgi complex subunit, putative (351 nt)                      | -14.1178 | -0.24337 | 0.867033 |
| PITG_13625 | Pi conserved hypothetical protein (672 nt)                                            | -15.4154 | -0.26014 | 0.867178 |
| PITG_09295 | Pi Dicarboxylate/Amino Acid:Cation (Na <sup>+</sup> or H <sup>+</sup> ) Symporter (D) | -15.6203 | -0.38376 | 0.867465 |
| PITG_02018 | Pi hypothetical protein (644 nt)                                                      | -15.5346 | 0.323029 | 0.867474 |
| PITG_12587 | Pi conserved hypothetical protein (618 nt)                                            | -15.5298 | 0.313551 | 0.867474 |
| PITG_01949 | Pi glycosyl hydrolase, putative (2208 nt)                                             | -15.4308 | -0.30149 | 0.86769  |
| PITG_06819 | Pi transcription elongation factor, putative (1438 nt)                                | -15.4385 | -0.3273  | 0.86769  |
| PITG_14460 | Pi chromodomain protein, putative (1071 nt)                                           | -15.4128 | -0.26548 | 0.86769  |
| PITG_16366 | Pi conserved hypothetical protein (1368 nt)                                           | -12.5139 | -0.20586 | 0.867887 |
| PITG_07077 | Pi lysophospholipid acyltransferase, putative (2152 nt)                               | -13.9438 | 0.185388 | 0.867968 |
| PITG_17929 | Pi signal peptidase complex catalytic subunit SEC11A, putative                        | -12.3979 | 0.205582 | 0.868929 |
| PITG_05255 | Pi hypothetical protein (1122 nt)                                                     | -11.8514 | -0.16174 | 0.869203 |
| PITG_09641 | Pi conserved hypothetical protein (444 nt)                                            | -13.6631 | -0.26912 | 0.869629 |
| PITG_08037 | Pi conserved hypothetical protein (1024 nt)                                           | -15.426  | -0.28035 | 0.869714 |
| PITG_08392 | Pi FACT complex subunit SPT16, putative (3458 nt)                                     | -13.9496 | -0.30359 | 0.869745 |
| PITG_04908 | Pi conserved hypothetical protein (1814 nt)                                           | -12.4708 | -0.16644 | 0.86987  |
| PITG_09028 | Pi conserved hypothetical protein (761 nt)                                            | -15.4237 | -0.28523 | 0.870214 |
| PITG_08444 | Pi conserved hypothetical protein (2342 nt)                                           | -12.5949 | -0.20657 | 0.870316 |
| PITG_13201 | Pi conserved hypothetical protein (2461 nt)                                           | -14.3545 | -0.19194 | 0.870609 |
| PITG_00662 | Pi conserved hypothetical protein (4077 nt)                                           | -16.589  | -0.36238 | 0.870621 |
| PITG_07246 | Pi conserved hypothetical protein (1190 nt)                                           | -16.589  | -0.36238 | 0.870621 |
| PITG_02912 | Pi conserved hypothetical protein (1474 nt)                                           | -13.9237 | 0.318581 | 0.8708   |
| PITG_01094 | Pi 26S proteasome non-ATPase regulatory subunit 11, putative                          | -12.1612 | 0.197411 | 0.870918 |
| PITG_03820 | Pi conserved hypothetical protein (797 nt)                                            | -16.5723 | -0.32814 | 0.871019 |
| PITG_04546 | Pi conserved hypothetical protein (864 nt)                                            | -16.5723 | -0.32814 | 0.871019 |
| PITG_00260 | Pi conserved hypothetical protein (842 nt)                                            | -15.6377 | 0.312082 | 0.871331 |
| PITG_03854 | Pi conserved hypothetical protein (1062 nt)                                           | -16.6067 | -0.39564 | 0.87181  |
| PITG_06913 | Pi conserved hypothetical protein (5405 nt)                                           | -16.6067 | -0.39564 | 0.87181  |
| PITG_08060 | Pi conserved hypothetical protein (1197 nt)                                           | -16.6067 | -0.39564 | 0.87181  |
| PITG_09424 | Pi conserved hypothetical protein (1191 nt)                                           | -16.6067 | -0.39564 | 0.87181  |
| PITG_06223 | Pi protein kinase, putative (1536 nt)                                                 | -14.0063 | -0.25505 | 0.871928 |
| PITG_00585 | Pi peroxiredoxin-like protein (1365 nt)                                               | -13.0246 | 0.160945 | 0.871953 |
| PITG_00734 | Pi conserved hypothetical protein (1974 nt)                                           | -15.3257 | 0.241071 | 0.872801 |
| PITG_19767 | Pi ATP-dependent Clp protease proteolytic subunit, putative                           | -11.999  | -0.1705  | 0.872932 |
| PITG_09292 | Pi Dicer-like 1 (DCL1) (4995 nt)                                                      | -16.5742 | -0.39233 | 0.87299  |
| PITG_15293 | Pi conserved hypothetical protein (1851 nt)                                           | -16.5742 | -0.39233 | 0.87299  |
| PITG_04527 | Pi DNA replication licensing factor mcm4, putative (3124 nt)                          | -16.5572 | -0.35692 | 0.873382 |
| PITG_11403 | Pi WD domain-containing protein (1431 nt)                                             | -16.5572 | -0.35692 | 0.873382 |
| PITG_01867 | Pi splicing factor U2af large subunit, putative (2685 nt)                             | -15.4254 | -0.30975 | 0.873651 |
| PITG_05325 | Pi conserved hypothetical protein (992 nt)                                            | -12.7413 | -0.20673 | 0.87373  |
| PITG_10600 | Pi conserved hypothetical protein (2646 nt)                                           | -14.2661 | 0.311763 | 0.873882 |
| PITG_03014 | Pi F-box protein, putative (3548 nt)                                                  | -16.5928 | -0.42568 | 0.874162 |
| PITG_04610 | Pi dolichyl-diphosphooligosaccharide-protein glycosyltransferase                      | -16.5928 | -0.42568 | 0.874162 |
| PITG_14207 | Pi conserved hypothetical protein (1032 nt)                                           | -16.5928 | -0.42568 | 0.874162 |
| PITG_05274 | Pi conserved hypothetical protein (3045 nt)                                           | -15.3967 | 0.266751 | 0.874613 |

|            |                                                                    |          |          |          |
|------------|--------------------------------------------------------------------|----------|----------|----------|
| PITG_04860 | Pi conserved hypothetical protein (944 nt)                         | -14.7162 | 0.208741 | 0.874897 |
| PITG_09760 | Pi mucin-like protein (4777 nt)                                    | -12.4797 | 0.169408 | 0.874947 |
| PITG_22127 | Pi conserved hypothetical protein (1097 nt)                        | -15.3272 | 0.20965  | 0.875272 |
| PITG_20400 | Pi conserved hypothetical protein (652 nt)                         | -14.1866 | -0.20987 | 0.875495 |
| PITG_02336 | Pi conserved hypothetical protein (1068 nt)                        | -12.9789 | -0.20288 | 0.875719 |
| PITG_22264 | Pi ribosomal protein S6 kinase alpha-5, putative (1950 nt)         | -12.8043 | 0.217917 | 0.875763 |
| PITG_03235 | Pi 60S ribosomal protein L35a-4 (797 nt)                           | -8.85937 | -0.15587 | 0.875982 |
| PITG_19055 | Pi conserved hypothetical protein (1137 nt)                        | -14.2515 | 0.184028 | 0.876058 |
| PITG_06356 | Pi conserved hypothetical protein (959 nt)                         | -14.7229 | 0.197206 | 0.876446 |
| PITG_16671 | Pi 26S proteasome non-ATPase regulatory subunit 3 (1796 nt)        | -13.5591 | 0.257677 | 0.876734 |
| PITG_19591 | Pi conserved hypothetical protein (666 nt)                         | -13.3208 | -0.17393 | 0.876763 |
| PITG_00388 | Pi conserved hypothetical protein (2188 nt)                        | -16.5743 | -0.53791 | 0.876865 |
| PITG_01822 | Pi SNARE associated Golgi protein, putative (909 nt)               | -13.8457 | 0.176747 | 0.877239 |
| PITG_12820 | Pi Mitochondrial Protein Translocase (MPT) Family (441 nt)         | -14.6202 | -0.22989 | 0.878423 |
| PITG_03499 | Pi phosphopantothencycysteine decarboxylase, putative (909 nt)     | -15.2383 | 0.303854 | 0.878764 |
| PITG_07656 | Pi ubiquitin-specific protease, putative (2872 nt)                 | -16.5476 | -0.37293 | 0.878769 |
| PITG_10676 | Pi transmembrane protein, putative (2010 nt)                       | -16.5476 | -0.37293 | 0.878769 |
| PITG_08590 | Pi carbohydrate esterase, putative (888 nt)                        | -15.4314 | 0.307098 | 0.878841 |
| PITG_10617 | Pi conserved hypothetical protein (4837 nt)                        | -15.308  | -0.2579  | 0.8791   |
| PITG_03234 | Pi DEAD/DEAH box RNA helicase, putative (3253 nt)                  | -14.1603 | -0.31862 | 0.879147 |
| PITG_20130 | Pi aldehyde dehydrogenase, putative (1370 nt)                      | -13.4422 | -0.25427 | 0.879243 |
| PITG_10860 | Pi conserved hypothetical protein (1061 nt)                        | -16.5855 | -0.44536 | 0.879525 |
| PITG_01718 | Pi cryptochrome, putative (1734 nt)                                | -14.607  | 0.156701 | 0.879971 |
| PITG_10831 | Pi cyclin-dependent kinase with F-box domain, putative (342 nt)    | -15.3217 | -0.28919 | 0.880499 |
| PITG_19472 | Pi ubiquitin-specific protease, putative (8250 nt)                 | -15.3217 | -0.28919 | 0.880499 |
| PITG_09230 | Pi conserved hypothetical protein (510 nt)                         | -13.8179 | -0.27423 | 0.880804 |
| PITG_20288 | Pi conserved hypothetical protein (1103 nt)                        | -13.0718 | 0.158983 | 0.880909 |
| PITG_00236 | Pi cyclin-H, putative (1197 nt)                                    | -14.6159 | 0.213728 | 0.880987 |
| PITG_06247 | Pi conserved hypothetical protein (537 nt)                         | -14.743  | -0.46359 | 0.881433 |
| PITG_17013 | Pi conserved hypothetical protein (3313 nt)                        | -11.6465 | -0.17289 | 0.881513 |
| PITG_11065 | Pi NAD-dependent malic enzyme, putative (2026 nt)                  | -15.4051 | -0.25978 | 0.881573 |
| PITG_08654 | Pi conserved hypothetical protein (1176 nt)                        | -15.24   | -0.18821 | 0.881622 |
| PITG_10053 | Pi conserved hypothetical protein (673 nt)                         | -15.2355 | -0.28909 | 0.881622 |
| PITG_12000 | Pi conserved hypothetical protein (1834 nt)                        | -15.2355 | -0.28909 | 0.881622 |
| PITG_20746 | Pi protein enhancer of rudimentary (501 nt)                        | -11.1562 | -0.15896 | 0.881805 |
| PITG_17965 | Pi conserved hypothetical protein (3855 nt)                        | -15.2381 | 0.165015 | 0.882555 |
| PITG_20034 | Pi methyltransferase domain-containing protein, putative (1000 nt) | -15.2302 | 0.191625 | 0.882555 |
| PITG_07026 | Pi conserved hypothetical protein (2849 nt)                        | -16.3725 | -0.2949  | 0.882984 |
| PITG_05561 | Pi conserved hypothetical protein (1659 nt)                        | -11.8285 | -0.14515 | 0.883493 |
| PITG_21185 | Pi RPS6 protein kinase (2016 nt)                                   | -14.0961 | -0.22611 | 0.883669 |
| PITG_16976 | Pi conserved hypothetical protein (454 nt)                         | -15.253  | -0.19983 | 0.883937 |
| PITG_05690 | Pi ubiquitin activating enzyme, E1 family, putative (3337 nt)      | -13.5667 | 0.154733 | 0.883982 |
| PITG_05340 | Pi protein kinase, putative (2767 nt)                              | -16.3597 | -0.32088 | 0.884112 |
| PITG_05532 | Pi conserved hypothetical protein (3062 nt)                        | -16.3597 | -0.32088 | 0.884112 |
| PITG_02416 | Pi conserved hypothetical protein (506 nt)                         | -10.8663 | 0.171917 | 0.884169 |
| PITG_21557 | Pi conserved hypothetical protein (685 nt)                         | -14.6445 | -0.39695 | 0.884451 |
| PITG_06576 | Pi conserved hypothetical protein (1092 nt)                        | -16.6119 | -0.47603 | 0.884731 |

|            |                                                                |          |          |          |
|------------|----------------------------------------------------------------|----------|----------|----------|
| PITG_20317 | Pi GTP-dependent nucleic acid-binding protein engD, putativ    | -14.0761 | -0.27991 | 0.884897 |
| PITG_08470 | Pi diacylglycerol acyltransferase, putative (1215 nt)          | -14.128  | 0.1464   | 0.884902 |
| PITG_14853 | Pi exosome complex exonuclease MTR3-like protein (830 nt)      | -14.072  | 0.289073 | 0.885415 |
| PITG_01152 | Pi conserved hypothetical protein (2485 nt)                    | -16.4895 | 0.224724 | 0.885828 |
| PITG_03392 | Pi Rab1 family GTPase (PiYpt1) (925 nt)                        | -9.82449 | 0.155901 | 0.885955 |
| PITG_03418 | Pi conserved hypothetical protein (711 nt)                     | -13.7228 | 0.253172 | 0.886061 |
| PITG_20203 | Pi Hect-domain containing peotein, putative (7079 nt)          | -15.2441 | -0.30972 | 0.886196 |
| PITG_09784 | Pi conserved hypothetical protein (465 nt)                     | -12.0046 | -0.20891 | 0.886267 |
| PITG_22134 | Pi ATP-binding Cassette (ABC) Superfamily (1288 nt)            | -16.3578 | 0.269594 | 0.887072 |
| PITG_11474 | Pi conserved hypothetical protein (1686 nt)                    | -13.4299 | -0.24842 | 0.887391 |
| PITG_10202 | Pi hypothetical protein (698 nt)                               | -8.26442 | 0.144832 | 0.887772 |
| PITG_00127 | Pi estradiol 17-beta-dehydrogenase, putative (1259 nt)         | -13.226  | -0.24272 | 0.887784 |
| PITG_02049 | Pi citrate synthase, mitochondrial precursor (1693 nt)         | -12.6992 | 0.151067 | 0.887894 |
| PITG_14284 | Pi conserved hypothetical protein (5103 nt)                    | -14.5544 | 0.328541 | 0.888286 |
| PITG_18657 | Pi conserved hypothetical protein (645 nt)                     | -14.5621 | -0.17356 | 0.888286 |
| PITG_11971 | Pi conserved hypothetical protein (926 nt)                     | -16.3679 | -0.3712  | 0.888527 |
| PITG_02729 | Pi chromodomain protein, putative (1543 nt)                    | -14.0426 | -0.29523 | 0.888584 |
| PITG_11965 | Pi conserved hypothetical protein (2073 nt)                    | -15.147  | 0.152874 | 0.888698 |
| PITG_19254 | Pi conserved hypothetical protein (1271 nt)                    | -14.1342 | 0.28127  | 0.888842 |
| PITG_05542 | Pi 3-hydroxyacyl-CoA dehydrogenase, putative (984 nt)          | -13.7292 | 0.247904 | 0.889137 |
| PITG_22020 | Pi eukaryotic initiation factor 4E, putative (1651 nt)         | -13.716  | 0.13465  | 0.889137 |
| PITG_02555 | Pi conserved hypothetical protein (1587 nt)                    | -16.4412 | -0.51541 | 0.889249 |
| PITG_13746 | Pi hypothetical protein (936 nt)                               | -15.2511 | 0.299469 | 0.8897   |
| PITG_01788 | Pi ubiquitin activating enzyme, E1 family, putative (1291 nt)  | -13.6714 | 0.157221 | 0.889729 |
| PITG_02268 | Pi conserved hypothetical protein (1552 nt)                    | -15.0813 | -0.21479 | 0.889905 |
| PITG_09221 | Pi glutaredoxin, putative (722 nt)                             | -14.5266 | 0.320959 | 0.890021 |
| PITG_15373 | Pi conserved hypothetical protein (637 nt)                     | -16.3591 | 0.216504 | 0.890681 |
| PITG_19867 | Pi conserved hypothetical protein (1043 nt)                    | -16.3511 | -0.47399 | 0.891037 |
| PITG_08540 | Pi conserved hypothetical protein (5615 nt)                    | -15.1008 | -0.24246 | 0.891242 |
| PITG_08917 | Pi conserved hypothetical protein (1002 nt)                    | -15.0795 | 0.207719 | 0.891242 |
| PITG_07175 | Pi conserved hypothetical protein (712 nt)                     | -14.5264 | 0.324726 | 0.891416 |
| PITG_13270 | Pi palmitoyltransferase, putative (1738 nt)                    | -14.4665 | -0.19731 | 0.892054 |
| PITG_03246 | Pi conserved hypothetical protein (2572 nt)                    | -14.4325 | -0.33197 | 0.892058 |
| PITG_11155 | Pi conserved hypothetical protein (1353 nt)                    | -16.3457 | -0.3525  | 0.892098 |
| PITG_05244 | Pi conserved hypothetical protein (2844 nt)                    | -15.0806 | 0.215319 | 0.892557 |
| PITG_00319 | Pi conserved hypothetical protein (744 nt)                     | -12.0325 | -0.13911 | 0.893114 |
| PITG_01004 | Pi hypothetical protein (405 nt)                               | -10.1085 | 0.157085 | 0.893203 |
| PITG_10447 | Pi mitogen-activated protein kinase, putative (2007 nt)        | -14.5156 | 0.344191 | 0.893238 |
| PITG_05239 | Pi conserved hypothetical protein (1290 nt)                    | -14.4674 | -0.19599 | 0.893436 |
| PITG_13919 | Pi conserved hypothetical protein (904 nt)                     | -9.13275 | -0.13023 | 0.89395  |
| PITG_00171 | Pi conserved hypothetical protein (1383 nt)                    | -16.2404 | 0.334212 | 0.894046 |
| PITG_01543 | Pi NADPH-dependent diflavin oxidoreductase, putative (2349 nt) | -16.2532 | 0.30856  | 0.894046 |
| PITG_22149 | Pi conserved hypothetical protein (1248 nt)                    | -16.2532 | 0.30856  | 0.894046 |
| PITG_20316 | Pi exportin-like protein (2743 nt)                             | -16.4348 | -0.52149 | 0.894197 |
| PITG_01680 | Pi RNA-binding protein PNO1-like protein (892 nt)              | -14.3896 | 0.347104 | 0.894266 |
| PITG_10650 | Pi hypothetical protein (548 nt)                               | -15.1461 | -0.26125 | 0.894291 |
| PITG_06415 | Pi heat shock protein 90 (2300 nt)                             | -9.31192 | 0.135007 | 0.894306 |

|            |                                                                   |          |          |          |
|------------|-------------------------------------------------------------------|----------|----------|----------|
| PITG_10836 | Pi HECT E3 ubiquitin ligase, putative (2000 nt)                   | -16.1991 | 0.200213 | 0.894401 |
| PITG_17433 | Pi hypothetical protein (845 nt)                                  | -16.1991 | 0.200213 | 0.894401 |
| PITG_21175 | Pi conserved hypothetical protein (796 nt)                        | -16.1862 | 0.225954 | 0.894401 |
| PITG_16856 | Pi hypoxanthine-guanine phosphoribosyltransferase, putativ        | -16.3915 | -0.6071  | 0.89489  |
| PITG_14391 | Pi conserved hypothetical protein (854 nt)                        | -11.3415 | 0.131335 | 0.894917 |
| PITG_09349 | Pi translation elongation factor 1-alpha, putative (2423 nt)      | -15.0699 | -0.2045  | 0.895125 |
| PITG_10992 | Pi conserved hypothetical protein (417 nt)                        | -13.7287 | 0.196878 | 0.895392 |
| PITG_08684 | Pi conserved hypothetical protein (549 nt)                        | -16.2383 | 0.278248 | 0.89616  |
| PITG_17921 | Pi P-type ATPase (P-ATPase) Superfamily (4365 nt)                 | -11.1959 | 0.166984 | 0.896331 |
| PITG_11425 | Pi transcriptional repressor TUP1-like protein (2735 nt)          | -13.9491 | 0.15648  | 0.896375 |
| PITG_05362 | Pi conserved hypothetical protein (2212 nt)                       | -16.1867 | 0.174971 | 0.896509 |
| PITG_08955 | Pi GTP cyclohydrolase I (972 nt)                                  | -16.1736 | 0.201236 | 0.896509 |
| PITG_05264 | Pi 10 kDa chaperonin (619 nt)                                     | -10.6367 | 0.125194 | 0.896599 |
| PITG_10410 | Pi SCP-like extracellular protein (1006 nt)                       | -16.2127 | 0.331987 | 0.896856 |
| PITG_01818 | Pi homeodomain transcription factor, putative (2644 nt)           | -15.0702 | -0.20368 | 0.897615 |
| PITG_13245 | Pi glycerophosphodiesterase, putative (3322 nt)                   | -15.0702 | -0.20368 | 0.897615 |
| PITG_13729 | Pi conserved hypothetical protein (1097 nt)                       | -11.2709 | 0.124303 | 0.89835  |
| PITG_01618 | Pi conserved hypothetical protein (773 nt)                        | -14.3266 | 0.187812 | 0.898605 |
| PITG_21372 | Pi protein kinase (774 nt)                                        | -16.3892 | -0.41134 | 0.898644 |
| PITG_03594 | Pi protein transporter Sec31A, putative (4482 nt)                 | -14.4214 | 0.286057 | 0.898837 |
| PITG_17487 | Pi conserved hypothetical protein (680 nt)                        | -16.1749 | -0.33026 | 0.899933 |
| PITG_07292 | Pi hcp beta-lactamase-like protein (963 nt)                       | -14.9468 | 0.207966 | 0.900414 |
| PITG_19962 | Pi conserved hypothetical protein (471 nt)                        | -16.2153 | -0.31071 | 0.900606 |
| PITG_20046 | Pi conserved hypothetical protein (978 nt)                        | -13.9218 | -0.27314 | 0.90087  |
| PITG_17422 | Pi hypothetical protein (1292 nt)                                 | -15.2776 | 0.377046 | 0.901056 |
| PITG_08991 | Pi insulin-degrading-like enzyme, metalloprotease family M1       | -16.1664 | 0.187844 | 0.901274 |
| PITG_12562 | Pi elicitor-like protein (809 nt)                                 | -9.34918 | 0.130301 | 0.901818 |
| PITG_17007 | Pi cellulose synthase catalytic subunit [UDP-forming], putativ    | -9.67425 | -0.13428 | 0.902075 |
| PITG_10268 | Pi hypothetical protein (2199 nt)                                 | -13.8317 | -0.24649 | 0.902234 |
| PITG_19159 | Pi conserved hypothetical protein (1511 nt)                       | -16.0333 | 0.18973  | 0.902575 |
| PITG_20637 | Pi conserved hypothetical protein (2541 nt)                       | -16.0333 | 0.18973  | 0.902575 |
| PITG_07110 | Pi cleavage and polyadenylation specificity factor subunit 3 (    | -14.2805 | -0.21479 | 0.90269  |
| PITG_06805 | Pi carbohydrate-binding protein, putative (1113 nt)               | -13.2086 | -0.17958 | 0.902818 |
| PITG_16226 | Pi conserved hypothetical protein (498 nt)                        | -15.1132 | 0.478353 | 0.90315  |
| PITG_06979 | Pi aspartate carbamoyltransferase (1271 nt)                       | -14.252  | 0.283114 | 0.90317  |
| PITG_16127 | Pi conserved hypothetical protein (893 nt)                        | -14.9373 | -0.23483 | 0.903242 |
| PITG_14047 | Pi conserved hypothetical protein (694 nt)                        | -12.6479 | -0.14138 | 0.903253 |
| PITG_02293 | Pi conserved hypothetical protein (1190 nt)                       | -13.807  | 0.226803 | 0.903306 |
| PITG_05772 | Pi conserved hypothetical protein (1603 nt)                       | -14.8808 | 0.186444 | 0.90364  |
| PITG_11118 | Pi conserved hypothetical protein (1799 nt)                       | -12.4906 | -0.20961 | 0.90373  |
| PITG_15848 | Pi conserved hypothetical protein (2917 nt)                       | -14.2798 | 0.284446 | 0.903963 |
| PITG_13607 | Pi translation initiation factor eIF-2B subunit delta, putative ( | -14.8746 | -0.17277 | 0.904042 |
| PITG_19450 | Pi cell division protein kinase 2 (1000 nt)                       | -14.8689 | 0.136006 | 0.904042 |
| PITG_10282 | Pi pre-mRNA branch site protein p14, putative (673 nt)            | -12.0648 | -0.12599 | 0.904101 |
| PITG_07041 | Pi conserved hypothetical protein (3501 nt)                       | -15.0443 | -0.43004 | 0.904503 |
| PITG_05599 | Pi conserved hypothetical protein (632 nt)                        | -14.2686 | 0.150172 | 0.904798 |
| PITG_12440 | Pi conserved hypothetical protein (1557 nt)                       | -16.1743 | -0.3375  | 0.904883 |

|            |                                                              |          |          |          |
|------------|--------------------------------------------------------------|----------|----------|----------|
| PITG_12813 | Pi phytanoyl-CoA dioxygenase domain-containing protein, pi   | -14.962  | 0.428369 | 0.905198 |
| PITG_12279 | Pi phosphoglycerate mutase family protein (823 nt)           | -14.3255 | -0.13558 | 0.905416 |
| PITG_18464 | Pi hypothetical protein (1786 nt)                            | -14.8706 | -0.23972 | 0.905627 |
| PITG_00370 | Pi conserved hypothetical protein (964 nt)                   | -14.3009 | 0.349257 | 0.906031 |
| PITG_03283 | Pi conserved hypothetical protein (1315 nt)                  | -16.0231 | 0.31452  | 0.906549 |
| PITG_16206 | Pi conserved hypothetical protein (651 nt)                   | -14.9197 | 0.395833 | 0.906792 |
| PITG_05517 | Pi regulatory-associated protein of mTOR (4096 nt)           | -16.0664 | -0.42831 | 0.906873 |
| PITG_17282 | Pi conserved hypothetical protein (5424 nt)                  | -16.0664 | -0.42831 | 0.906873 |
| PITG_12106 | Pi CDP-alcohol phosphatidyltransferase, putative (1620 nt)   | -13.7437 | 0.236133 | 0.907024 |
| PITG_13421 | Pi tripeptidyl-peptidase, putative (2214 nt)                 | -16.0521 | -0.3986  | 0.907195 |
| PITG_11966 | Pi chaperonin CPN60-1, mitochondrial precursor (1943 nt)     | -11.4719 | -0.14942 | 0.907499 |
| PITG_12295 | Pi copine, putative (2872 nt)                                | -14.8778 | 0.179589 | 0.907939 |
| PITG_16359 | Pi UTP-glucose-1-phosphate uridylyltransferase (1851 nt)     | -14.8967 | 0.398066 | 0.907939 |
| PITG_21133 | Pi hypothetical protein (905 nt)                             | -14.8591 | 0.220957 | 0.907939 |
| PITG_10499 | Pi conserved hypothetical protein (2133 nt)                  | -12.6597 | 0.141984 | 0.908063 |
| PITG_01564 | Pi amino-acid acetyltransferase, putative (1704 nt)          | -16.0383 | -0.36731 | 0.908157 |
| PITG_02238 | Pi conserved hypothetical protein (5511 nt)                  | -16.0383 | -0.36731 | 0.908157 |
| PITG_18328 | Pi conserved hypothetical protein (752 nt)                   | -16.0383 | -0.36731 | 0.908157 |
| PITG_04506 | Pi protein kinase (1653 nt)                                  | -14.9126 | -0.45232 | 0.908316 |
| PITG_09537 | Pi conserved hypothetical protein (976 nt)                   | -13.7335 | -0.16627 | 0.90872  |
| PITG_05864 | Pi conserved hypothetical protein (975 nt)                   | -14.1744 | -0.27453 | 0.908903 |
| PITG_14353 | Pi F-actin-capping protein subunit alpha, putative (1198 nt) | -14.8019 | 0.107568 | 0.908923 |
| PITG_08765 | Pi RNA binding protein, putative (538 nt)                    | -13.0712 | 0.116297 | 0.909699 |
| PITG_00298 | Pi conserved hypothetical protein (1380 nt)                  | -15.9052 | 0.265387 | 0.909751 |
| PITG_04453 | Pi conserved hypothetical protein (1413 nt)                  | -15.944  | -0.25868 | 0.909751 |
| PITG_10482 | Pi pre-mRNA-splicing factor 18, putative (1063 nt)           | -16.0413 | 0.253141 | 0.91005  |
| PITG_21716 | Pi conserved hypothetical protein (534 nt)                   | -16.0413 | 0.253141 | 0.91005  |
| PITG_07599 | Pi tubulin-specific chaperone E, putative (2085 nt)          | -15.9595 | -0.22766 | 0.910073 |
| PITG_16104 | Pi cryptochrome, putative (2154 nt)                          | -15.9272 | 0.264895 | 0.910073 |
| PITG_14352 | Pi methylenetetrahydrofolate dehydrogenase [NAD+], putat     | -16.029  | 0.279244 | 0.910363 |
| PITG_05354 | Pi asparaginyl-tRNA synthetase (1709 nt)                     | -15.9497 | -0.29831 | 0.910394 |
| PITG_09987 | Pi tRNA pseudouridine synthase, putative (2048 nt)           | -15.9497 | -0.29831 | 0.910394 |
| PITG_14216 | Pi methylthioribose-1-phosphate isomerase, putative (1089    | -14.8272 | 0.362446 | 0.910431 |
| PITG_12835 | Pi conserved hypothetical protein (530 nt)                   | -14.7784 | 0.311702 | 0.91046  |
| PITG_04549 | Pi Ferroportin (FP) Family (1725 nt)                         | -16.0111 | 0.141723 | 0.910674 |
| PITG_18696 | Pi replication factor C subunit, putative (3196 nt)          | -15.9146 | -0.3686  | 0.910714 |
| PITG_20742 | Pi conserved hypothetical protein (955 nt)                   | -14.753  | 0.138044 | 0.910839 |
| PITG_00064 | Pi conserved hypothetical protein (1572 nt)                  | -15.9244 | -0.24622 | 0.911032 |
| PITG_08738 | Pi conserved hypothetical protein (941 nt)                   | -15.8959 | 0.246492 | 0.911032 |
| PITG_05373 | Pi alcohol dehydrogenase class-3, putative (1242 nt)         | -12.6851 | -0.13279 | 0.911082 |
| PITG_13354 | Pi conserved hypothetical protein (2571 nt)                  | -16.0603 | 0.380699 | 0.911293 |
| PITG_16085 | Pi conserved hypothetical protein (1283 nt)                  | -13.8964 | 0.177476 | 0.911489 |
| PITG_07011 | Pi conserved hypothetical protein (1076 nt)                  | -14.7551 | -0.20289 | 0.911592 |
| PITG_02990 | Pi conserved hypothetical protein (1597 nt)                  | -15.9076 | 0.224827 | 0.911664 |
| PITG_08329 | Pi conserved hypothetical protein (4663 nt)                  | -15.9076 | 0.224827 | 0.911664 |
| PITG_03335 | Pi callose synthase, putative (7947 nt)                      | -13.856  | 0.132425 | 0.911849 |
| PITG_11764 | Pi conserved hypothetical protein (1584 nt)                  | -15.9442 | -0.30993 | 0.911979 |

|            |                                                                   |          |          |          |
|------------|-------------------------------------------------------------------|----------|----------|----------|
| PITG_20205 | Pi integrator complex subunit 3, putative (3387 nt)               | -15.9442 | -0.30993 | 0.911979 |
| PITG_21720 | Pi conserved hypothetical protein (1298 nt)                       | -15.9413 | 0.19763  | 0.912604 |
| PITG_01036 | Pi phenylalanyl-tRNA synthetase alpha chain (1874 nt)             | -14.7629 | -0.21797 | 0.91307  |
| PITG_01646 | Pi hypothetical protein (2339 nt)                                 | -15.9024 | -0.17242 | 0.913225 |
| PITG_12540 | Pi gephyrin-like protein (2015 nt)                                | -14.8211 | 0.372485 | 0.913348 |
| PITG_01640 | Pi conserved hypothetical protein (4219 nt)                       | -14.8231 | -0.39613 | 0.913348 |
| PITG_14939 | Pi glucosidase, putative (1728 nt)                                | -13.6521 | -0.13191 | 0.913706 |
| PITG_13773 | Pi conserved hypothetical protein (3030 nt)                       | -15.9061 | -0.22803 | 0.913841 |
| PITG_15393 | Pi eukaryotic translation initiation factor, putative (2892 nt)   | -15.9061 | -0.22803 | 0.913841 |
| PITG_01508 | Pi conserved hypothetical protein (3416 nt)                       | -14.7398 | 0.160304 | 0.914156 |
| PITG_13271 | Pi conserved hypothetical protein (366 nt)                        | -9.84711 | -0.11581 | 0.914313 |
| PITG_00488 | Pi conserved hypothetical protein (623 nt)                        | -11.0283 | 0.106933 | 0.914342 |
| PITG_02740 | Pi acetolactate synthase, mitochondrial precursor (1947 nt)       | -14.0608 | 0.266608 | 0.914582 |
| PITG_10083 | Pi chromodomain protein, putative (5912 nt)                       | -14.1176 | -0.17733 | 0.914644 |
| PITG_04712 | Pi conserved hypothetical protein (3360 nt)                       | -14.7235 | -0.38235 | 0.91478  |
| PITG_08205 | Pi methionyl-tRNA formyltransferase, putative (1696 nt)           | -15.9141 | 0.188924 | 0.915059 |
| PITG_00770 | Pi conserved hypothetical protein (3380 nt)                       | -14.7637 | 0.331562 | 0.915224 |
| PITG_05409 | Pi conserved hypothetical protein (709 nt)                        | -15.8003 | -0.22889 | 0.915875 |
| PITG_07256 | Pi conserved hypothetical protein (934 nt)                        | -14.0089 | -0.10871 | 0.917303 |
| PITG_01847 | Pi conserved hypothetical protein (1573 nt)                       | -14.6356 | -0.14726 | 0.917392 |
| PITG_05652 | Pi conserved hypothetical protein (519 nt)                        | -14.6469 | 0.14304  | 0.917392 |
| PITG_02636 | Pi conserved hypothetical protein (4157 nt)                       | -14.6591 | -0.36737 | 0.917392 |
| PITG_01343 | Pi serine protease family S10, putative (1311 nt)                 | -15.7773 | -0.22714 | 0.917401 |
| PITG_04003 | Pi conserved hypothetical protein (19526 nt)                      | -15.8865 | 0.226523 | 0.917737 |
| PITG_01781 | Pi heterogeneous nuclear ribonucleoprotein A1, putative (2601 nt) | -14.642  | -0.15989 | 0.917745 |
| PITG_19041 | Pi protein kinase, putative (2401 nt)                             | -14.6406 | 0.153914 | 0.917745 |
| PITG_06173 | Pi conserved hypothetical protein (1052 nt)                       | -13.9772 | -0.1548  | 0.918054 |
| PITG_10806 | Pi conserved hypothetical protein (1542 nt)                       | -13.0133 | 0.124466 | 0.918488 |
| PITG_00518 | Pi nucleoredoxin, putative (587 nt)                               | -10.962  | -0.1029  | 0.918513 |
| PITG_00147 | Pi conserved hypothetical protein (891 nt)                        | -15.8228 | 0.235072 | 0.91919  |
| PITG_05338 | Pi protein kinase (2601 nt)                                       | -15.7952 | -0.28896 | 0.921223 |
| PITG_15926 | Pi conserved hypothetical protein (1808 nt)                       | -14.7124 | -0.17963 | 0.921305 |
| PITG_06820 | Pi trehalase, putative (2103 nt)                                  | -15.6693 | -0.20633 | 0.921458 |
| PITG_14365 | Pi conserved hypothetical protein (2070 nt)                       | -15.6701 | 0.289033 | 0.921751 |
| PITG_10564 | Pi conserved hypothetical protein (597 nt)                        | -15.6857 | 0.319944 | 0.922043 |
| PITG_23320 | Pi hypothetical cleavage induced protein (1848 nt)                | -15.6598 | -0.22549 | 0.922043 |
| PITG_14259 | Pi conserved hypothetical protein (483 nt)                        | -14.5415 | -0.1863  | 0.922089 |
| PITG_11040 | Pi hypothetical protein (540 nt)                                  | -12.9893 | -0.11271 | 0.922203 |
| PITG_17998 | Pi 3-hydroxyisobutyrate dehydrogenase, putative (2334 nt)         | -15.6632 | 0.274832 | 0.922334 |
| PITG_01458 | Pi pyruvate dehydrogenase (1731 nt)                               | -15.6803 | 0.269518 | 0.922623 |
| PITG_02258 | Pi conserved hypothetical protein (1072 nt)                       | -15.6933 | 0.334725 | 0.922912 |
| PITG_13512 | Pi peptidyl-prolyl cis-trans isomerase B precursor (1169 nt)      | -15.6558 | -0.23356 | 0.922912 |
| PITG_15916 | Pi hypothetical protein (1789 nt)                                 | -14.6991 | -0.15581 | 0.922913 |
| PITG_09452 | Pi MMP37-like protein (895 nt)                                    | -13.4942 | -0.12087 | 0.922924 |
| PITG_14198 | Pi pre-mRNA-splicing factor 38B, putative (2124 nt)               | -13.9633 | 0.130068 | 0.923056 |
| PITG_00419 | Pi conserved hypothetical protein (964 nt)                        | -15.6952 | 0.269073 | 0.923484 |
| PITG_13139 | Pi threonine synthase (1587 nt)                                   | -13.8784 | -0.14672 | 0.923588 |



|            |                                                                |          |          |          |
|------------|----------------------------------------------------------------|----------|----------|----------|
| PITG_01791 | Pi protein disulfide-isomerase, putative (633 nt)              | -11.7713 | 0.100351 | 0.923936 |
| PITG_05552 | Pi heat shock protein 75 kDa, mitochondrial precursor (2634    | -14.4924 | 0.144014 | 0.924207 |
| PITG_13922 | Pi proline-rich protein 6 (411 nt)                             | -15.7745 | -0.19078 | 0.92431  |
| PITG_02628 | Pi conserved hypothetical protein (1134 nt)                    | -14.4804 | -0.12007 | 0.924538 |
| PITG_17992 | Pi P-3 complex subunit mu, putative (1447 nt)                  | -14.4912 | 0.141796 | 0.924538 |
| PITG_03458 | Pi conserved hypothetical protein (3101 nt)                    | -15.6497 | 0.166038 | 0.924615 |
| PITG_13038 | Pi conserved hypothetical protein (1433 nt)                    | -15.7374 | 0.271269 | 0.924615 |
| PITG_19311 | Pi conserved hypothetical protein (580 nt)                     | -14.5396 | 0.294146 | 0.924734 |
| PITG_17931 | Pi conserved hypothetical protein (869 nt)                     | -14.686  | 0.145388 | 0.924789 |
| PITG_16977 | Pi aurora-like protein kinase (1161 nt)                        | -15.7122 | 0.290664 | 0.924894 |
| PITG_08594 | Pi conserved hypothetical protein (1188 nt)                    | -12.3818 | 0.1531   | 0.925129 |
| PITG_11171 | Pi conserved hypothetical protein (1371 nt)                    | -13.6368 | -0.29061 | 0.925231 |
| PITG_15155 | Pi conserved hypothetical protein (1255 nt)                    | -13.1544 | 0.212216 | 0.925362 |
| PITG_11567 | Pi conserved hypothetical protein (6184 nt)                    | -15.7707 | -0.23655 | 0.925402 |
| PITG_08489 | Pi conserved hypothetical protein (944 nt)                     | -13.0602 | 0.097349 | 0.925528 |
| PITG_13336 | Pi DNA2-like helicase (4864 nt)                                | -15.7664 | -0.3486  | 0.925673 |
| PITG_04486 | Pi conserved hypothetical protein (537 nt)                     | -15.6799 | 0.225178 | 0.925726 |
| PITG_18369 | Pi conserved hypothetical protein (1040 nt)                    | -14.4793 | -0.16885 | 0.926162 |
| PITG_06112 | Pi hypothetical protein (481 nt)                               | -13.3985 | -0.11775 | 0.926316 |
| PITG_23277 | Pi crinkler (CRN) domain, pseudogene (858 nt)                  | -15.8815 | 0.278655 | 0.926385 |
| PITG_18209 | Pi glycoside hydrolase, putative (1428 nt)                     | -15.9929 | -0.77299 | 0.926652 |
| PITG_13588 | Pi conserved hypothetical protein (317 nt)                     | -13.8149 | -0.14304 | 0.92668  |
| PITG_00108 | Pi phospholipase D, putative (1037 nt)                         | -15.5708 | 0.206643 | 0.926899 |
| PITG_00880 | Pi conserved hypothetical protein (1523 nt)                    | -10.0797 | 0.110487 | 0.926988 |
| PITG_00472 | Pi pre-mRNA-splicing factor syf2 (1007 nt)                     | -13.8082 | 0.116387 | 0.927017 |
| PITG_13223 | Pi cysteine desulfurase, putative (1380 nt)                    | -15.5748 | 0.176289 | 0.927177 |
| PITG_00664 | Pi conserved hypothetical protein (3626 nt)                    | -15.5431 | 0.112896 | 0.927453 |
| PITG_11450 | Pi conserved hypothetical protein (466 nt)                     | -9.74876 | -0.10836 | 0.927672 |
| PITG_10615 | Pi conserved hypothetical protein (1117 nt)                    | -15.5553 | 0.238754 | 0.927728 |
| PITG_09505 | Pi centrosome-associated protein, putative (6330 nt)           | -15.5705 | 0.168014 | 0.928546 |
| PITG_14587 | Pi conserved hypothetical protein (1670 nt)                    | -14.4418 | 0.124742 | 0.92873  |
| PITG_02615 | Pi conserved hypothetical protein (1055 nt)                    | -12.8061 | -0.18731 | 0.928767 |
| PITG_10152 | Pi calcium-binding atopy-related autoantigen-like protein (19  | -13.7747 | 0.113605 | 0.928793 |
| PITG_08718 | Pi conserved hypothetical protein (942 nt)                     | -11.8312 | 0.092947 | 0.928832 |
| PITG_11993 | Pi glycoside hydrolase, putative (1617 nt)                     | -14.3835 | 0.127945 | 0.929002 |
| PITG_05355 | Pi conserved hypothetical protein (2512 nt)                    | -15.5657 | 0.220021 | 0.929085 |
| PITG_15973 | Pi conserved hypothetical protein (1294 nt)                    | -13.9481 | 0.160518 | 0.929241 |
| PITG_10857 | Pi ubiquitin fusion degradation protein, putative (3949 nt)    | -14.3849 | 0.12609  | 0.929625 |
| PITG_05617 | Pi UDP-glucose 4-epimerase, putative (1400 nt)                 | -12.2864 | -0.14964 | 0.929661 |
| PITG_13855 | Pi phosphatidic acid phosphatase (890 nt)                      | -14.3511 | 0.138878 | 0.930427 |
| PITG_23065 | Pi general transcription factor IIH subunit, putative (495 nt) | -15.4635 | 0.166656 | 0.930914 |
| PITG_04937 | Pi conserved hypothetical protein (615 nt)                     | -13.0288 | -0.1929  | 0.931636 |
| PITG_09570 | Pi hypothetical protein (1014 nt)                              | -13.9778 | -0.29291 | 0.932138 |
| PITG_16464 | Pi Sulfate Permease (SulP) Family (2097 nt)                    | -14.5369 | 0.129018 | 0.932251 |
| PITG_10597 | Pi hypothetical protein (1250 nt)                              | -10.9575 | -0.09701 | 0.932334 |
| PITG_06968 | Pi conserved hypothetical protein (2451 nt)                    | -14.3096 | 0.114859 | 0.932668 |
| PITG_18895 | Pi conserved hypothetical protein (1339 nt)                    | -15.6662 | -0.23864 | 0.932787 |

|            |                                                            |          |          |          |
|------------|------------------------------------------------------------|----------|----------|----------|
| PITG_11489 | Pi fatty-acid-CoA ligase, putative (3596 nt)               | -15.5631 | -0.28029 | 0.932981 |
| PITG_07884 | Pi XTP3-transactivated gene A protein (1704 nt)            | -15.4551 | 0.204328 | 0.933271 |
| PITG_19745 | Pi conserved hypothetical protein (872 nt)                 | -15.4659 | 0.134282 | 0.933271 |
| PITG_11972 | Pi pre-mRNA-splicing factor 38A, putative (625 nt)         | -15.4637 | 0.221198 | 0.933526 |
| PITG_10193 | Pi ubiquitin, putative (471 nt)                            | -8.42212 | 0.082717 | 0.933984 |
| PITG_03469 | Pi conserved hypothetical protein (1248 nt)                | -15.3734 | -0.26548 | 0.934215 |
| PITG_11445 | Pi sepiapterin reductase, putative (709 nt)                | -15.3707 | -0.27085 | 0.934215 |
| PITG_01257 | Pi nucleoporin NUP85-like protein (2211 nt)                | -15.4015 | -0.20927 | 0.934473 |
| PITG_10887 | Pi 40S ribosomal protein S11 (1081 nt)                     | -9.40944 | 0.096741 | 0.934671 |
| PITG_18113 | Pi DNA-directed RNA polymerase II 36 kDa polypeptide A (76 | -15.3928 | -0.22667 | 0.934731 |
| PITG_14473 | Pi conserved hypothetical protein (2059 nt)                | -15.3736 | -0.18776 | 0.934986 |
| PITG_02672 | Pi ATP-dependent protease hslV (887 nt)                    | -14.2582 | -0.1271  | 0.935078 |
| PITG_02975 | Pi conserved hypothetical protein (3032 nt)                | -15.3904 | -0.2316  | 0.935241 |
| PITG_12499 | Pi conserved hypothetical protein (1804 nt)                | -15.4652 | -0.18735 | 0.935284 |
| PITG_12175 | Pi conserved hypothetical protein (920 nt)                 | -15.4703 | -0.19576 | 0.935776 |
| PITG_19429 | Pi prephenate dehydratase, putative (2816 nt)              | -15.3621 | 0.12663  | 0.935997 |
| PITG_08467 | Pi diacylglycerol O-acyltransferase, putative (1179 nt)    | -12.9198 | -0.09843 | 0.936526 |
| PITG_08364 | Pi conserved hypothetical protein (1424 nt)                | -15.3707 | -0.1696  | 0.936742 |
| PITG_06171 | Pi splicing factor 3B subunit 1 (3778 nt)                  | -14.2151 | 0.105669 | 0.937077 |
| PITG_08024 | Pi conserved hypothetical protein (1559 nt)                | -14.5945 | -0.4579  | 0.937278 |
| PITG_08461 | Pi conserved hypothetical protein (1221 nt)                | -15.3877 | -0.23724 | 0.937718 |
| PITG_03329 | Pi conserved hypothetical protein (947 nt)                 | -15.293  | -0.21086 | 0.937898 |
| PITG_18164 | Pi conserved hypothetical protein (1270 nt)                | -13.6059 | 0.096884 | 0.938107 |
| PITG_22572 | Pi C-1-tetrahydrofolate synthase, putative (1111 nt)       | -13.2092 | -0.2117  | 0.938238 |
| PITG_01752 | Pi transketolase (2256 nt)                                 | -12.2691 | -0.10281 | 0.938263 |
| PITG_02905 | Pi conserved hypothetical protein (1843 nt)                | -15.2828 | 0.188035 | 0.938391 |
| PITG_03937 | Pi conserved hypothetical protein (812 nt)                 | -15.2857 | 0.127189 | 0.938635 |
| PITG_14217 | Pi conserved hypothetical protein (978 nt)                 | -15.344  | 0.483703 | 0.938635 |
| PITG_03018 | Pi sporangia induced dynein heavy chain (12567 nt)         | -15.3505 | 0.138399 | 0.939149 |
| PITG_20562 | Pi RAC family serine/threonine-protein kinase (4989 nt)    | -13.6155 | -0.24062 | 0.939499 |
| PITG_07628 | Pi tubulin-specific chaperone E, putative (1808 nt)        | -15.308  | -0.43648 | 0.940311 |
| PITG_04485 | Pi conserved hypothetical protein (6206 nt)                | -15.3784 | -0.48871 | 0.940312 |
| PITG_18498 | Pi conserved hypothetical protein (5417 nt)                | -15.4514 | -0.25287 | 0.94048  |
| PITG_13399 | Pi asparagine synthetase (1788 nt)                         | -15.2178 | -0.12661 | 0.940742 |
| PITG_15016 | Pi conserved hypothetical protein (1338 nt)                | -15.2047 | -0.11833 | 0.940742 |
| PITG_15832 | Pi conserved hypothetical protein (3253 nt)                | -15.3413 | -0.45171 | 0.941242 |
| PITG_05638 | Pi GTPase, putative (1931 nt)                              | -13.4608 | -0.09984 | 0.941675 |
| PITG_18702 | Pi conserved hypothetical protein (1770 nt)                | -15.2481 | -0.47713 | 0.941689 |
| PITG_02162 | Pi ATP-dependent Clp protease ATP-binding subunit clpX (22 | -14.1032 | 0.09717  | 0.941706 |
| PITG_09593 | Pi conserved hypothetical protein (812 nt)                 | -13.4575 | 0.082827 | 0.941949 |
| PITG_11374 | Pi hypothetical protein (309 nt)                           | -11.3197 | 0.090583 | 0.942197 |
| PITG_09748 | Pi CUG-BP- and ETR-3-like factor, putative (1607 nt)       | -11.8149 | 0.071128 | 0.942364 |
| PITG_21394 | Pi cobalamin synthesis protein, putative (1194 nt)         | -14.0638 | 0.086972 | 0.942843 |
| PITG_12574 | Pi Rab2 family GTPase, putative (695 nt)                   | -13.4426 | -0.0882  | 0.943133 |
| PITG_06619 | Pi ADP-ribosylation factor family (1012 nt)                | -11.5248 | 0.116934 | 0.943473 |
| PITG_01951 | Pi conserved hypothetical protein (903 nt)                 | -15.2018 | -0.11102 | 0.943524 |
| PITG_15836 | Pi hypothetical protein (1718 nt)                          | -15.2122 | 0.113747 | 0.943971 |

|            |                                                                |          |          |          |
|------------|----------------------------------------------------------------|----------|----------|----------|
| PITG_01127 | Pi conserved hypothetical protein (2528 nt)                    | -15.1561 | -0.44803 | 0.943999 |
| PITG_06917 | Pi Phosphatidylinositol-3-phosphate5- kinase (Fab-like; PIPK-  | -15.1464 | -0.33916 | 0.943999 |
| PITG_19532 | Pi cleavage and polyadenylation specificity factor subunit, pu | -15.1653 | -0.46635 | 0.943999 |
| PITG_08597 | Pi conserved hypothetical protein (969 nt)                     | -15.138  | -0.13488 | 0.944453 |
| PITG_10164 | Pi NAD-dependent histone deacetylase sir2-like protein (198    | -15.1646 | -0.46799 | 0.944678 |
| PITG_20803 | Pi conserved hypothetical protein (1947 nt)                    | -15.1462 | -0.15231 | 0.944901 |
| PITG_15553 | Pi inorganic pyrophosphatase, putative (1909 nt)               | -13.0835 | 0.075948 | 0.945691 |
| PITG_15623 | Pi nucampholin (2183 nt)                                       | -15.0475 | 0.113917 | 0.945863 |
| PITG_04856 | Pi Crinkler (CRN) family protein (2517 nt)                     | -15.0746 | 0.16806  | 0.946528 |
| PITG_20240 | Pi aspartyl-tRNA synthetase, putative (1045 nt)                | -15.0368 | -0.13062 | 0.946528 |
| PITG_04723 | Pi hypothetical protein (610 nt)                               | -15.0555 | -0.15703 | 0.946965 |
| PITG_09415 | Pi ethanolamine kinase, putative (1754 nt)                     | -15.0633 | 0.325683 | 0.946965 |
| PITG_20970 | Pi triosephosphate isomerase/glyceraldehyde-3-phosphate c      | -12.7802 | 0.187015 | 0.947139 |
| PITG_08926 | Pi adherence factor, putative (6279 nt)                        | -15.0684 | -0.42549 | 0.947182 |
| PITG_05226 | Pi conserved hypothetical protein (2029 nt)                    | -15.037  | 0.128076 | 0.947397 |
| PITG_13758 | Pi conserved hypothetical protein (1702 nt)                    | -14.0165 | 0.113087 | 0.947559 |
| PITG_05317 | Pi transcriptional adapter 2-alpha, putative (2023 nt)         | -15.0771 | -0.44351 | 0.948036 |
| PITG_13302 | Pi calcineurin-like phosphoesterase (2485 nt)                  | -14.9633 | 0.097097 | 0.948625 |
| PITG_11258 | Pi conserved hypothetical protein (570 nt)                     | -15.3201 | 0.293379 | 0.948917 |
| PITG_06404 | Pi conserved hypothetical protein (816 nt)                     | -9.92513 | 0.088228 | 0.949043 |
| PITG_06986 | Pi 5'-3' exoribonuclease, putative (2994 nt)                   | -15.0455 | -0.15276 | 0.949489 |
| PITG_06867 | Pi conserved hypothetical protein (1454 nt)                    | -14.9787 | -0.1454  | 0.949883 |
| PITG_03860 | Pi HECT E3 ubiquitin ligase, putative (15735 nt)               | -15.0618 | -0.18677 | 0.949895 |
| PITG_20903 | Pi exosome complex exonuclease RRP40, putative (1522 nt)       | -14.9164 | -0.17808 | 0.950335 |
| PITG_11206 | Pi conserved hypothetical protein (2315 nt)                    | -13.8298 | -0.11319 | 0.950358 |
| PITG_00049 | Pi conserved hypothetical protein (1998 nt)                    | -14.9329 | -0.14515 | 0.950543 |
| PITG_08744 | Pi long-chain-fatty-acid-CoA ligase (2516 nt)                  | -11.0476 | 0.104439 | 0.950824 |
| PITG_19871 | Pi cell division control protein 48 (2866 nt)                  | -11.7655 | 0.062137 | 0.951427 |
| PITG_15850 | Pi glycine dehydrogenase, mitochondrial precursor (3343 nt)    | -13.9879 | -0.13463 | 0.951588 |
| PITG_15440 | Pi conserved hypothetical protein (222 nt)                     | -15.1335 | -0.14666 | 0.951686 |
| PITG_07447 | Pi conserved hypothetical protein (643 nt)                     | -14.898  | -0.15007 | 0.951965 |
| PITG_20293 | Pi hypothetical protein (228 nt)                               | -15.0633 | -0.07835 | 0.952246 |
| PITG_03471 | Pi conserved hypothetical protein (4608 nt)                    | -14.9052 | -0.17048 | 0.95314  |
| PITG_04000 | Pi angio-associated migratory cell protein (1737 nt)           | -13.7341 | 0.088131 | 0.953446 |
| PITG_12223 | Pi SWI/SNF-related matrix-associated actin-dependent regul.    | -14.8292 | 0.056219 | 0.953493 |
| PITG_14416 | Pi conserved hypothetical protein (1437 nt)                    | -13.7673 | -0.09881 | 0.954241 |
| PITG_12153 | Pi myosin-like protein (4548 nt)                               | -14.9011 | 0.060491 | 0.954648 |
| PITG_03396 | Pi conserved hypothetical protein (2455 nt)                    | -14.7986 | 0.127672 | 0.954702 |
| PITG_04822 | Pi inositol polyphosphate multikinase, putative (1122 nt)      | -14.7738 | -0.11067 | 0.954702 |
| PITG_09582 | Pi ATP phosphoribosyltransferase (900 nt)                      | -14.7909 | -0.13412 | 0.955273 |
| PITG_09552 | Pi conserved hypothetical protein (1583 nt)                    | -9.05453 | -0.05974 | 0.955395 |
| PITG_16280 | Pi glutamate synthase, putative (3791 nt)                      | -15.0523 | 0.098182 | 0.955715 |
| PITG_01322 | Pi myosin-like protein (3704 nt)                               | -13.7597 | 0.062014 | 0.95586  |
| PITG_16791 | Pi conserved hypothetical protein (1066 nt)                    | -14.7186 | 0.069235 | 0.955994 |
| PITG_03872 | Pi kinesin-like protein (2811 nt)                              | -14.7792 | 0.163788 | 0.956019 |
| PITG_01897 | Pi histone deacetylase, putative (1804 nt)                     | -13.6308 | 0.082255 | 0.956779 |
| PITG_01480 | Pi CBL-interacting serine/threonine-protein kinase, putative   | -14.7173 | 0.066898 | 0.957104 |

|            |                                                                       |          |          |          |
|------------|-----------------------------------------------------------------------|----------|----------|----------|
| PITG_14576 | Pi conserved hypothetical protein (1042 nt)                           | -13.0761 | 0.056659 | 0.957221 |
| PITG_02340 | Pi conserved hypothetical protein (3042 nt)                           | -14.7876 | -0.05612 | 0.95746  |
| PITG_02901 | Pi glycoside hydrolase, putative (902 nt)                             | -14.6593 | 0.120481 | 0.957917 |
| PITG_12912 | Pi phosphatidylinositol transfer protein beta isoform (1250 nt)       | -13.5563 | -0.23293 | 0.958982 |
| PITG_03561 | Pi COP9 signalosome complex subunit 5, putative (1222 nt)             | -14.6219 | 0.139729 | 0.959005 |
| PITG_02984 | Pi conserved hypothetical protein (358 nt)                            | -12.92   | 0.057619 | 0.959084 |
| PITG_12863 | Pi cyclin-dependent kinase regulatory subunit (1007 nt)               | -12.9378 | -0.06221 | 0.959411 |
| PITG_17719 | Pi iron-sulfur cluster assembly protein, putative (901 nt)            | -13.4962 | 0.084444 | 0.960883 |
| PITG_19109 | Pi conserved hypothetical protein (375 nt)                            | -14.6102 | 0.089291 | 0.960893 |
| PITG_18712 | Pi conserved hypothetical protein (2161 nt)                           | -14.5546 | 0.074971 | 0.96121  |
| PITG_16833 | Pi conserved hypothetical protein (2406 nt)                           | -13.4912 | 0.052421 | 0.961603 |
| PITG_05323 | Pi conserved hypothetical protein (741 nt)                            | -14.5728 | -0.07746 | 0.961707 |
| PITG_07745 | Pi conserved hypothetical protein (1141 nt)                           | -14.5699 | -0.12974 | 0.961871 |
| PITG_06891 | Pi S-formylglutathione hydrolase, putative (911 nt)                   | -14.5703 | -0.12491 | 0.963301 |
| PITG_09907 | Pi arabinogalactan endo-1,4-beta-galactosidase, putative (970 nt)     | -13.4166 | 0.049585 | 0.963411 |
| PITG_09863 | Pi septum site-determining protein minD (1017 nt)                     | -14.4277 | 0.096399 | 0.963617 |
| PITG_11256 | Pi conserved hypothetical protein (522 nt)                            | -14.5492 | -0.08288 | 0.963761 |
| PITG_02594 | Pi glutamate decarboxylase (1660 nt)                                  | -11.1247 | 0.045682 | 0.964655 |
| PITG_22644 | Pi conserved hypothetical protein (662 nt)                            | -14.4592 | 0.089323 | 0.964858 |
| PITG_16670 | Pi conserved hypothetical protein (661 nt)                            | -11.7019 | -0.04895 | 0.965163 |
| PITG_04921 | Pi hypothetical protein (456 nt)                                      | -12.8114 | -0.06908 | 0.96532  |
| PITG_06244 | Pi hypothetical protein (2175 nt)                                     | -11.316  | 0.049901 | 0.96636  |
| PITG_05249 | Pi conserved hypothetical protein (552 nt)                            | -10.4908 | 0.047195 | 0.966362 |
| PITG_06602 | Pi conserved hypothetical protein (1790 nt)                           | -14.2743 | -0.11098 | 0.966773 |
| PITG_02327 | Pi conserved hypothetical protein (1533 nt)                           | -14.2866 | -0.08633 | 0.967068 |
| PITG_04020 | Pi hypothetical protein (575 nt)                                      | -13.6572 | -0.04885 | 0.967219 |
| PITG_05313 | Pi undecaprenyl pyrophosphate synthetase, putative (1220 nt)          | -14.2813 | 0.072684 | 0.967504 |
| PITG_15137 | Pi hypothetical protein (530 nt)                                      | -14.2818 | -0.0399  | 0.967789 |
| PITG_21987 | Pi protein phosphatase 2C, putative (735 nt)                          | -11.7666 | -0.04474 | 0.969083 |
| PITG_17958 | Pi heme/steroid binding domain-containing protein, putative (1000 nt) | -14.1677 | -0.08267 | 0.969448 |
| PITG_03252 | Pi alpha-soluble NSF attachment protein, putative (1268 nt)           | -12.4689 | 0.047222 | 0.970011 |
| PITG_21186 | Pi conserved hypothetical protein (972 nt)                            | -14.059  | -0.26867 | 0.972497 |
| PITG_02034 | Pi zinc transporter, putative (1230 nt)                               | -13.9184 | 0.248103 | 0.97395  |
| PITG_18623 | Pi polycomb protein, putative (1447 nt)                               | -13.901  | -0.10138 | 0.974187 |
| PITG_06512 | Pi conserved hypothetical protein (1622 nt)                           | -11.8823 | -0.04731 | 0.974445 |
| PITG_01223 | Pi conserved hypothetical protein (1177 nt)                           | -14.1102 | 0.029353 | 0.974756 |
| PITG_02706 | Pi NUK6 (2239 nt)                                                     | -13.0514 | 0.051201 | 0.974778 |
| PITG_16329 | Pi conserved hypothetical protein (2573 nt)                           | -13.7533 | -0.05918 | 0.976378 |
| PITG_05998 | Pi ribonucleoside-diphosphate reductase large subunit (2885 nt)       | -13.7746 | 0.064274 | 0.977802 |
| PITG_20585 | Pi AhpC/TSA family Redoxin, putative (2885 nt)                        | -13.7483 | 0.040316 | 0.977943 |
| PITG_13861 | Pi conserved hypothetical protein (1372 nt)                           | -13.6068 | -0.06392 | 0.979067 |
| PITG_15771 | Pi hsp70-like protein (2743 nt)                                       | -12.5854 | -0.0552  | 0.980274 |
| PITG_15063 | Pi conserved hypothetical protein (410 nt)                            | -13.3727 | 0.043506 | 0.981805 |
| PITG_07384 | Pi isoamyl acetate-hydrolyzing esterase 1 (849 nt)                    | -13.4741 | 0.232518 | 0.981853 |
| PITG_19690 | Pi conserved hypothetical protein (860 nt)                            | -13.3177 | 0.064751 | 0.982421 |
| PITG_01070 | Pi conserved hypothetical protein (1289 nt)                           | -13.2984 | 0.043506 | 0.982509 |
| PITG_14609 | Pi eukaryotic translation initiation factor 2 subunit beta (1000 nt)  | -12.3353 | -0.03427 | 0.982515 |

|            |                                                                 |          |          |          |
|------------|-----------------------------------------------------------------|----------|----------|----------|
| PITG_00527 | Pi luminal-binding protein 3 precursor (2088 nt)                | -10.5703 | 0.024179 | 0.9827   |
| PITG_04566 | Pi hypothetical protein (132 nt)                                | -13.2007 | 0.170491 | 0.983916 |
| PITG_07156 | Pi serine protease family S10, putative (1505 nt)               | -12.1369 | 0.033093 | 0.984778 |
| PITG_11244 | Pi heat shock 70 kDa protein (2279 nt)                          | -10.8495 | -0.02231 | 0.984874 |
| PITG_03900 | Pi conserved hypothetical protein (1014 nt)                     | -12.839  | -0.041   | 0.987327 |
| PITG_14083 | Pi glutathione reductase (1482 nt)                              | -11.3782 | 0.017577 | 0.988258 |
| PITG_14604 | Pi hypothetical protein (571 nt)                                | -11.6652 | 0.027128 | 0.988435 |
| PITG_20793 | Pi conserved hypothetical protein (361 nt)                      | -12.7206 | 0.028267 | 0.988485 |
| PITG_13748 | Pi ubiquitin-conjugating enzyme E2, putative (776 nt)           | -11.8019 | 0.016029 | 0.993627 |
| PITG_00233 | Pi Major Facilitator Superfamily (MFS) (1776 nt)                | -15.8366 | -0.47323 | 1        |
| PITG_00404 | Pi hypothetical protein (1637 nt)                               | -16.0942 | 0.262705 | 1        |
| PITG_01112 | Pi UDP-3-O-[3-hydroxymyristoyl] glucosamine N-acyltransferase   | -15.4232 | 0.353564 | 1        |
| PITG_01245 | Pi chorismate mutase, putative (1976 nt)                        | -15.7802 | 0.314566 | 1        |
| PITG_01579 | Pi transcription factor, putative (1553 nt)                     | -15.2668 | -0.33833 | 1        |
| PITG_01650 | Pi conserved hypothetical protein (1251 nt)                     | -15.7709 | -0.19243 | 1        |
| PITG_01813 | Pi tRNA (guanine-N(7)-)-methyltransferase, putative (907 nt)    | -16.1026 | 0.007129 | 1        |
| PITG_01825 | Pi conserved hypothetical protein (1123 nt)                     | -14.9532 | 0.275616 | 1        |
| PITG_02032 | Pi tRNA (guanine-N(1)-)-methyltransferase, putative (1366 nt)   | -15.9272 | -0.07114 | 1        |
| PITG_02294 | Pi conserved hypothetical protein (2285 nt)                     | -16.4099 | -0.2206  | 1        |
| PITG_02895 | Pi selenoprotein O, putative (1914 nt)                          | -15.5914 | -0.10472 | 1        |
| PITG_03490 | Pi conserved hypothetical protein (1776 nt)                     | -15.7709 | -0.19243 | 1        |
| PITG_03570 | Pi conserved hypothetical protein (1365 nt)                     | -15.9174 | -0.41509 | 1        |
| PITG_03656 | Pi inosine-5'-monophosphate dehydrogenase, putative (1754 nt)   | -15.0016 | 0.205719 | 1        |
| PITG_04512 | Pi conserved hypothetical protein (1076 nt)                     | -15.545  | 0.421734 | 1        |
| PITG_05637 | Pi S-adenosylmethionine mitochondrial carrier protein, putative | -15.4241 | -0.12507 | 1        |
| PITG_06749 | Pi bifunctional dihydrofolate reductase-thymidylate synthase    | -15.7693 | -0.33875 | 1        |
| PITG_06794 | Pi putative methyltransferase METT10D (1723 nt)                 | -15.6267 | -0.29179 | 1        |
| PITG_06829 | Pi conserved hypothetical protein (9345 nt)                     | -15.0104 | 0.248637 | 1        |
| PITG_06897 | Pi conserved hypothetical protein (1969 nt)                     | -15.889  | -0.14756 | 1        |
| PITG_07216 | Pi ATPase WRNIP1 (1628 nt)                                      | -16.7831 | -0.58595 | 1        |
| PITG_08316 | Pi ATP-dependent RNA helicase, putative (4308 nt)               | -16.5181 | -0.43626 | 1        |
| PITG_09248 | Pi Proton-dependent Oligopeptide Transporter (POT) Family       | -15.6156 | -0.26952 | 1        |
| PITG_09567 | Pi conserved hypothetical protein (796 nt)                      | -13.935  | -0.10957 | 1        |
| PITG_09666 | Pi conserved hypothetical protein (1146 nt)                     | -15.9282 | 0.355779 | 1        |
| PITG_09751 | Pi GPI mannosyltransferase 4, putative (1822 nt)                | -15.3898 | 0.182109 | 1        |
| PITG_09783 | Pi conserved hypothetical protein (1687 nt)                     | -13.7151 | 0.015141 | 1        |
| PITG_10034 | Pi fatty acyl-CoA reductase, putative (3991 nt)                 | -16.7831 | -0.58595 | 1        |
| PITG_10792 | Pi conserved hypothetical protein (1930 nt)                     | -15.6567 | -0.14306 | 1        |
| PITG_11108 | Pi conserved hypothetical protein (929 nt)                      | -14.6895 | -0.25028 | 1        |
| PITG_11491 | Pi hypothetical protein (800 nt)                                | -15.3098 | -0.04864 | 1        |
| PITG_11816 | Pi conserved hypothetical protein (1444 nt)                     | -15.6638 | 0.455718 | 1        |
| PITG_12121 | Pi uridine kinase (984 nt)                                      | -14.9572 | -0.03142 | 1        |
| PITG_13017 | Pi ATP-dependent RNA helicase, putative (3981 nt)               | -16.4099 | -0.2206  | 1        |
| PITG_13893 | Pi conserved hypothetical protein (463 nt)                      | -15.9355 | -0.05458 | 1        |
| PITG_14854 | Pi signal recognition particle, putative (1843 nt)              | -14.9304 | -0.21806 | 1        |
| PITG_15817 | Pi calpain-like protein (3729 nt)                               | -15.2161 | 0.021207 | 1        |
| PITG_16841 | Pi conserved hypothetical protein (694 nt)                      | -14.7854 | 0.074799 | 1        |

|            |                                                                                       |          |          |   |
|------------|---------------------------------------------------------------------------------------|----------|----------|---|
| PITG_17734 | Pi conserved hypothetical protein (3125 nt)                                           | -16.0112 | 0.096862 | 1 |
| PITG_18185 | Pi phospholipase D, Pi-sPLD-like-1 (1650 nt)                                          | -15.866  | -0.19364 | 1 |
| PITG_18246 | Pi conserved hypothetical protein (2709 nt)                                           | -16.1026 | 0.007129 | 1 |
| PITG_18423 | Pi conserved hypothetical protein (5054 nt)                                           | -16.7831 | -0.58595 | 1 |
| PITG_19611 | Pi conserved hypothetical protein (2220 nt)                                           | -16.3444 | -0.29015 | 1 |
| PITG_19668 | Pi conserved hypothetical protein (1234 nt)                                           | -12.9649 | 0.026765 | 1 |
| PITG_20378 | Pi conserved hypothetical protein (1596 nt)                                           | -15.7454 | -0.29092 | 1 |
| PITG_22611 | Pi protein recA (641 nt)                                                              | -15.6267 | -0.29179 | 1 |
| PITG_00020 | Pi conserved hypothetical protein (2785 nt)                                           | -13.7692 | 0.116669 | 1 |
| PITG_00503 | Pi Rab32 family GTPase, putative (840 nt)                                             | -13.4373 | 0.04944  | 1 |
| PITG_00867 | Pi conserved hypothetical protein (1749 nt)                                           | -13.2484 | -0.12973 | 1 |
| PITG_01087 | Pi cell division protease ftsH (2050 nt)                                              | -13.7751 | 0.14247  | 1 |
| PITG_02537 | Pi conserved hypothetical protein (1443 nt)                                           | -11.8366 | 0.003445 | 1 |
| PITG_03389 | Pi replication factor C subunit 4 (1123 nt)                                           | -16.5527 | -0.50399 | 1 |
| PITG_03899 | Pi conserved hypothetical protein (2889 nt)                                           | -16.5226 | -0.49559 | 1 |
| PITG_04674 | Pi conserved hypothetical protein (1407 nt)                                           | -16.2526 | -0.05551 | 1 |
| PITG_04880 | Pi Equilibrative Nucleoside Transporter (ENT) Family (1065 nt)                        | -16.5413 | -0.52909 | 1 |
| PITG_05508 | Pi polycomb protein, putative (2674 nt)                                               | -14.1385 | 0.020137 | 1 |
| PITG_05874 | Pi conserved hypothetical protein (1037 nt)                                           | -14.3973 | 0.271008 | 1 |
| PITG_06554 | Pi cytochrome P450, putative (4126 nt)                                                | -16.5226 | -0.49559 | 1 |
| PITG_06695 | Pi conserved hypothetical protein (1404 nt)                                           | -14.5295 | 0.06722  | 1 |
| PITG_06739 | Pi conserved hypothetical protein (493 nt)                                            | -13.1341 | 0.091297 | 1 |
| PITG_06921 | Pi conserved hypothetical protein (465 nt)                                            | -14.1168 | -0.02335 | 1 |
| PITG_07047 | Pi THO complex subunit, putative (2342 nt)                                            | -15.0596 | -0.02204 | 1 |
| PITG_07994 | Pi Dicarboxylate/Amino Acid:Cation (Na <sup>+</sup> or H <sup>+</sup> ) Symporter (D) | -16.4897 | 0.000818 | 1 |
| PITG_08578 | Pi Mitochondrial Carrier (MC) Family (1068 nt)                                        | -14.1129 | -0.22544 | 1 |
| PITG_08932 | Pi conserved hypothetical protein (1781 nt)                                           | -11.7176 | 0.006899 | 1 |
| PITG_09648 | Pi conserved hypothetical protein (512 nt)                                            | -16.5413 | -0.52909 | 1 |
| PITG_09940 | Pi conserved hypothetical protein (2091 nt)                                           | -14.3295 | -0.22487 | 1 |
| PITG_10142 | Pi conserved hypothetical protein (4210 nt)                                           | -13.4788 | -0.09929 | 1 |
| PITG_11090 | Pi conserved hypothetical protein (1029 nt)                                           | -13.9208 | 0.131021 | 1 |
| PITG_12472 | Pi palmitoyltransferase, putative (2460 nt)                                           | -15.8321 | -0.48    | 1 |
| PITG_12488 | Pi conserved hypothetical protein (974 nt)                                            | -13.1877 | 0.023201 | 1 |
| PITG_12887 | Pi conserved hypothetical protein (1840 nt)                                           | -16.1265 | -0.30771 | 1 |
| PITG_13365 | Pi Poly(U)-binding-splicing factor PUF60, putative (1707 nt)                          | -14.6198 | 0.132982 | 1 |
| PITG_13727 | Pi conserved hypothetical protein (1417 nt)                                           | -14.2597 | 0.068259 | 1 |
| PITG_14009 | Pi pre-mRNA-splicing factor ATP-dependent RNA helicase, putative                      | -16.5226 | -0.49559 | 1 |
| PITG_14589 | Pi choline-phosphate cytidyltransferase B (1341 nt)                                   | -13.2306 | 0.051257 | 1 |
| PITG_15784 | Pi polyadenylate-binding protein 2 (741 nt)                                           | -13.8285 | -0.24649 | 1 |
| PITG_15882 | Pi alpha,alpha-trehalose-phosphate synthase (3076 nt)                                 | -16.5226 | -0.49559 | 1 |
| PITG_17788 | Pi coiled-coil domain-containing protein 94 (846 nt)                                  | -15.4758 | -0.049   | 1 |
| PITG_20718 | Pi conserved hypothetical protein (1161 nt)                                           | -13.6198 | -0.13986 | 1 |
| PITG_20792 | Pi soluble calcium-activated nucleotidase, putative (1368 nt)                         | -13.655  | 0.098405 | 1 |
| PITG_21619 | Pi homoserine O-acetyltransferase, putative (927 nt)                                  | -16.1259 | 0.054182 | 1 |
| PITG_00028 | Pi aminoacylase-1, putative (1660 nt)                                                 | -16.315  | 0.126147 | 1 |
| PITG_00070 | Pi conserved hypothetical protein (2152 nt)                                           | -16.4493 | -0.14249 | 1 |
| PITG_00082 | Pi monovalent Cation:Proton Antiporter-2 (CPA2) family (216 nt)                       | -16.1036 | -0.35387 | 1 |

|            |                                                               |          |          |   |
|------------|---------------------------------------------------------------|----------|----------|---|
| PITG_00186 | Pi histone acetyltransferase, putative (1618 nt)              | -15.5237 | 0.213588 | 1 |
| PITG_00255 | Pi conserved hypothetical protein (438 nt)                    | -15.6916 | -0.07219 | 1 |
| PITG_00287 | Pi formyl-coenzyme A transferase, putative (1335 nt)          | -16.2773 | -0.00624 | 1 |
| PITG_00311 | Pi conserved hypothetical protein (728 nt)                    | -16.0141 | -0.00998 | 1 |
| PITG_00408 | Pi transmembrane protein, putative (3475 nt)                  | -16.001  | 0.076188 | 1 |
| PITG_00437 | Pi conserved hypothetical protein (1505 nt)                   | -16.1794 | -0.14572 | 1 |
| PITG_00466 | Pi conserved hypothetical protein (2946 nt)                   | -16.2232 | -0.5979  | 1 |
| PITG_00499 | Pi ATP-dependent RNA helicase dbp4, putative (1628 nt)        | -16.468  | -0.53651 | 1 |
| PITG_00630 | Pi conserved hypothetical protein (5242 nt)                   | -16.6427 | -0.10801 | 1 |
| PITG_00648 | Pi periodic tryptophan protein, putative (1706 nt)            | -16.1737 | 0.25262  | 1 |
| PITG_00796 | Pi conserved hypothetical protein (1363 nt)                   | -16.0221 | 0.118314 | 1 |
| PITG_00996 | Pi conserved hypothetical protein (973 nt)                    | -16.0222 | -0.25997 | 1 |
| PITG_01134 | Pi conserved hypothetical protein (9050 nt)                   | -16.3817 | -0.21502 | 1 |
| PITG_01183 | Pi conserved hypothetical protein (3168 nt)                   | -15.1695 | -0.07271 | 1 |
| PITG_01376 | Pi conserved hypothetical protein (2266 nt)                   | -16.0772 | 0.009627 | 1 |
| PITG_01450 | Pi HECT E3 ubiquitin ligase, putative (14519 nt)              | -14.4008 | 0.006864 | 1 |
| PITG_01478 | Pi conserved hypothetical protein (1301 nt)                   | -13.8418 | -0.09747 | 1 |
| PITG_01563 | Pi conserved hypothetical protein (2711 nt)                   | -14.9107 | -0.03732 | 1 |
| PITG_01749 | Pi conserved hypothetical protein (1656 nt)                   | -15.5168 | 0.060014 | 1 |
| PITG_01857 | Pi conserved hypothetical protein (1186 nt)                   | -16.4379 | 0.129618 | 1 |
| PITG_02052 | Pi conserved hypothetical protein (856 nt)                    | -15.9986 | 0.167768 | 1 |
| PITG_02054 | Pi DNA primase small subunit, putative (1497 nt)              | -15.8942 | 0.287392 | 1 |
| PITG_02304 | Pi anaphase-promoting complex subunit 7, putative (2210 nt)   | -16.2003 | 0.422279 | 1 |
| PITG_02496 | Pi conserved hypothetical protein (2508 nt)                   | -15.8678 | 0.31496  | 1 |
| PITG_02718 | Pi conserved hypothetical protein (1648 nt)                   | -16.4493 | -0.14249 | 1 |
| PITG_02753 | Pi DNA polymerase zeta catalytic subunit, putative (5677 nt)  | -16.4106 | -0.29088 | 1 |
| PITG_02805 | Pi DNA mismatch repair protein Msh2, putative (2451 nt)       | -16.4384 | -0.6637  | 1 |
| PITG_02976 | Pi conserved hypothetical protein (3591 nt)                   | -14.9326 | 0.233302 | 1 |
| PITG_03042 | Pi Major Facilitator Superfamily (MFS) (1476 nt)              | -15.6167 | -0.2238  | 1 |
| PITG_03112 | Pi importin-like protein (3460 nt)                            | -15.8647 | -0.00351 | 1 |
| PITG_03260 | Pi conserved hypothetical protein (2299 nt)                   | -15.6262 | -0.03478 | 1 |
| PITG_03295 | Pi copper-transporting ATPase, putative (3771 nt)             | -15.8285 | -0.17235 | 1 |
| PITG_03411 | Pi lysosomal beta glucosidase, putative (2370 nt)             | -15.9538 | -0.34253 | 1 |
| PITG_03506 | Pi conserved hypothetical protein (1452 nt)                   | -16.4493 | -0.14249 | 1 |
| PITG_03548 | Pi nucleolar protein, putative (1579 nt)                      | -16.1612 | 0.280653 | 1 |
| PITG_03856 | Pi peptidyl-prolyl cis-trans isomerase, putative (1789 nt)    | -11.8586 | 0.00271  | 1 |
| PITG_03999 | Pi eukaryotic initiation factor 4E, putative (1175 nt)        | -15.8304 | 0.414975 | 1 |
| PITG_04028 | Pi conserved hypothetical protein (2175 nt)                   | -15.8942 | 0.287392 | 1 |
| PITG_04577 | Pi conserved hypothetical protein (2403 nt)                   | -14.9565 | 0.054068 | 1 |
| PITG_04647 | Pi conserved hypothetical protein (1327 nt)                   | -14.4077 | 0.197265 | 1 |
| PITG_04691 | Pi pyridine nucleotide-disulphide oxidoreductase, putative (1 | -15.9285 | -0.06866 | 1 |
| PITG_04699 | Pi conserved hypothetical protein (489 nt)                    | -15.5575 | 0.102657 | 1 |
| PITG_05186 | Pi Ufm1-specific protease, putative (2070 nt)                 | -16.464  | -0.11225 | 1 |
| PITG_05233 | Pi CLIP-associating protein, putative (4598 nt)               | -15.7496 | -0.4292  | 1 |
| PITG_05324 | Pi conserved hypothetical protein (675 nt)                    | -11.62   | -0.00416 | 1 |
| PITG_05465 | Pi L-gulonolactone oxidase, putative (1707 nt)                | -16.1612 | 0.280653 | 1 |
| PITG_05479 | Pi ubiquitin-activating enzyme (E1), putative (1981 nt)       | -15.5575 | 0.102657 | 1 |

|            |                                                                                      |          |          |   |
|------------|--------------------------------------------------------------------------------------|----------|----------|---|
| PITG_05563 | Pi hypothetical protein (347 nt)                                                     | -16.2232 | -0.5979  | 1 |
| PITG_05610 | Pi conserved hypothetical protein (1132 nt)                                          | -15.9555 | 0.034256 | 1 |
| PITG_06007 | Pi Zinc (Zn <sup>2+</sup> )-Iron (Fe <sup>2+</sup> ) Permease (ZIP) Family (1320 nt) | -16.1235 | 0.152369 | 1 |
| PITG_06046 | Pi conserved hypothetical protein (547 nt)                                           | -15.5492 | -0.1063  | 1 |
| PITG_06148 | Pi conserved hypothetical protein (1498 nt)                                          | -16.4667 | -0.67533 | 1 |
| PITG_06151 | Pi conserved hypothetical protein (600 nt)                                           | -15.8783 | -0.22073 | 1 |
| PITG_06220 | Pi conserved hypothetical protein (3013 nt)                                          | -16.1036 | -0.35387 | 1 |
| PITG_06258 | Pi conserved hypothetical protein (753 nt)                                           | -16.5136 | -0.08406 | 1 |
| PITG_06673 | Pi Major Facilitator Superfamily (MFS) (2166 nt)                                     | -15.4021 | -0.16864 | 1 |
| PITG_06774 | Pi conserved hypothetical protein (454 nt)                                           | -16.4106 | -0.29088 | 1 |
| PITG_06853 | Pi conserved hypothetical protein (1980 nt)                                          | -16.4487 | -0.08165 | 1 |
| PITG_06938 | Pi conserved hypothetical protein (957 nt)                                           | -16.2125 | 0.174874 | 1 |
| PITG_07856 | Pi conserved hypothetical protein (1033 nt)                                          | -16.4129 | -0.64489 | 1 |
| PITG_07933 | Pi F-box protein, putative (1205 nt)                                                 | -16.4336 | -0.05009 | 1 |
| PITG_07937 | Pi conserved hypothetical protein (5262 nt)                                          | -16.4337 | -0.11115 | 1 |
| PITG_08139 | Pi conserved hypothetical protein (5069 nt)                                          | -14.989  | 0.295901 | 1 |
| PITG_08179 | Pi ATP-binding Cassette (ABC) Superfamily (4661 nt)                                  | -16.4493 | -0.14249 | 1 |
| PITG_08351 | Pi conserved hypothetical protein (1707 nt)                                          | -15.772  | 0.531749 | 1 |
| PITG_08373 | Pi serine hydrolase (FSH1)-like protein, putative (687 nt)                           | -15.9113 | 0.401763 | 1 |
| PITG_08586 | Pi conserved hypothetical protein (1322 nt)                                          | -15.9157 | 0.090997 | 1 |
| PITG_08747 | Pi Mitochondrial Carrier (MC) Family (3855 nt)                                       | -16.5347 | -0.47105 | 1 |
| PITG_08960 | Pi myb-like DNA-binding protein, putative (1198 nt)                                  | -16.4106 | -0.29088 | 1 |
| PITG_08997 | Pi ATP-dependent RNA helicase DBP5, putative (1507 nt)                               | -14.989  | 0.295901 | 1 |
| PITG_09041 | Pi conserved hypothetical protein (1113 nt)                                          | -16.3134 | -0.41367 | 1 |
| PITG_09092 | Pi nucleoside diphosphate kinase, putative (7716 nt)                                 | -15.1812 | -0.09451 | 1 |
| PITG_09301 | Pi conserved hypothetical protein (597 nt)                                           | -15.7789 | -0.31891 | 1 |
| PITG_09404 | Pi myosin-like protein (4883 nt)                                                     | -14.15   | -0.14254 | 1 |
| PITG_09703 | Pi unc-45 family protein (3219 nt)                                                   | -16.4129 | -0.64489 | 1 |
| PITG_09900 | Pi 2Fe-2S ferredoxin, putative (545 nt)                                              | -16.3121 | -0.41621 | 1 |
| PITG_09949 | Pi conserved hypothetical protein (798 nt)                                           | -14.3665 | 0.181435 | 1 |
| PITG_10186 | Pi cell division control protein 45 (2414 nt)                                        | -16.2821 | -0.19294 | 1 |
| PITG_10271 | Pi conserved hypothetical protein (948 nt)                                           | -16.2635 | -0.51484 | 1 |
| PITG_10450 | Pi protein kinase, putative (1742 nt)                                                | -15.1258 | 0.014614 | 1 |
| PITG_10516 | Pi tryptophanyl-tRNA synthetase (1319 nt)                                            | -16.0185 | -0.16112 | 1 |
| PITG_10544 | Pi putative GPI-anchored acidic protein (979 nt)                                     | -15.9614 | -0.22164 | 1 |
| PITG_10784 | Pi conserved hypothetical protein (777 nt)                                           | -16.0037 | -0.19018 | 1 |
| PITG_10881 | Pi kinesin-like protein (2499 nt)                                                    | -15.5015 | -0.15787 | 1 |
| PITG_10896 | Pi conserved hypothetical protein (1747 nt)                                          | -16.0639 | 0.703699 | 1 |
| PITG_10973 | Pi conserved hypothetical protein (3557 nt)                                          | -15.7651 | 0.031164 | 1 |
| PITG_11057 | Pi conserved hypothetical protein (2809 nt)                                          | -16.4667 | -0.67533 | 1 |
| PITG_11121 | Pi ATP-binding Cassette (ABC) Superfamily (3240 nt)                                  | -16.6567 | -0.75865 | 1 |
| PITG_11129 | Pi conserved hypothetical protein (973 nt)                                           | -15.6374 | -0.14367 | 1 |
| PITG_11366 | Pi F-actin-capping protein subunit beta, putative (867 nt)                           | -15.7085 | 0.339781 | 1 |
| PITG_12220 | Pi methionine aminopeptidase, putative (1137 nt)                                     | -15.8647 | -0.00351 | 1 |
| PITG_12229 | Pi DNA repair endonuclease XPF, putative (2919 nt)                                   | -16.5347 | -0.47105 | 1 |
| PITG_12683 | Pi conserved hypothetical protein (994 nt)                                           | -16.1767 | -0.09527 | 1 |
| PITG_13029 | Pi conserved hypothetical protein (10246 nt)                                         | -15.427  | 0.094102 | 1 |



|            |                                                                                                   |          |          |   |
|------------|---------------------------------------------------------------------------------------------------|----------|----------|---|
| PITG_13040 | Pi conserved hypothetical protein (2508 nt)                                                       | -16.4337 | -0.11115 | 1 |
| PITG_13240 | Pi conserved hypothetical protein (612 nt)                                                        | -16.315  | 0.126147 | 1 |
| PITG_13353 | Pi hypothetical protein (375 nt)                                                                  | -15.6057 | 0.16025  | 1 |
| PITG_14089 | Pi conserved hypothetical protein (1683 nt)                                                       | -15.5238 | -0.09086 | 1 |
| PITG_14223 | Pi conserved hypothetical protein (723 nt)                                                        | -15.9216 | -0.30342 | 1 |
| PITG_14397 | Pi proliferating cell nuclear antigen (1096 nt)                                                   | -13.8647 | -0.19176 | 1 |
| PITG_14593 | Pi conserved hypothetical protein (1536 nt)                                                       | -15.8304 | 0.414975 | 1 |
| PITG_14625 | Pi methylosome protein 50, putative (998 nt)                                                      | -16.3644 | -0.12275 | 1 |
| PITG_14744 | Pi conserved hypothetical protein (1670 nt)                                                       | -16.4041 | -0.04079 | 1 |
| PITG_14918 | Pi riboflavin biosynthesis protein ribBA, putative (1193 nt)                                      | -16.3817 | -0.21502 | 1 |
| PITG_15322 | Pi conserved hypothetical protein (1048 nt)                                                       | -16.4384 | -0.6637  | 1 |
| PITG_15564 | Pi conserved hypothetical protein (2655 nt)                                                       | -15.5674 | -0.06875 | 1 |
| PITG_15648 | Pi conserved hypothetical protein (1335 nt)                                                       | -16.3811 | -0.00256 | 1 |
| PITG_16014 | Pi conserved hypothetical protein (2154 nt)                                                       | -16.4041 | -0.04079 | 1 |
| PITG_16129 | Pi conserved hypothetical protein (560 nt)                                                        | -15.8929 | -0.59438 | 1 |
| PITG_16683 | Pi transmembrane protein, putative (2070 nt)                                                      | -15.7131 | 0.495193 | 1 |
| PITG_16734 | Pi protein kinase (1372 nt)                                                                       | -16.4337 | -0.11115 | 1 |
| PITG_16807 | Pi 3-hydroxy-3-methylglutaryl-coenzyme A reductase, putative (1127 nt)                            | -16.2542 | -0.10892 | 1 |
| PITG_16890 | Pi conserved hypothetical protein (1127 nt)                                                       | -15.7275 | -0.03249 | 1 |
| PITG_16920 | Pi conserved hypothetical protein (1662 nt)                                                       | -16.2545 | -0.46982 | 1 |
| PITG_17127 | Pi copper-transporting ATPase, putative (3363 nt)                                                 | -16.0823 | 0.383725 | 1 |
| PITG_17128 | Pi conserved hypothetical protein (1338 nt)                                                       | -16.1461 | 0.313954 | 1 |
| PITG_17481 | Pi conserved hypothetical protein (1544 nt)                                                       | -16.4671 | -0.17181 | 1 |
| PITG_17485 | Pi conserved hypothetical protein (1744 nt)                                                       | -15.7586 | -0.5188  | 1 |
| PITG_17583 | Pi protein kinase (1911 nt)                                                                       | -16.4106 | -0.29088 | 1 |
| PITG_17745 | Pi inositol hexakisphosphate and diphosphoinositol-pentakisphosphate 3-kinase, putative (1127 nt) | -15.4703 | -0.30508 | 1 |
| PITG_18047 | Pi hypothetical protein (543 nt)                                                                  | -14.5207 | 0.33142  | 1 |
| PITG_18091 | Pi structural maintenance of chromosomes protein, putative (1127 nt)                              | -15.7789 | -0.31891 | 1 |
| PITG_18314 | Pi mitochondrial 2-oxoglutarate/malate carrier protein, putative (1127 nt)                        | -15.9754 | 0.168447 | 1 |
| PITG_18538 | Pi 3-isopropylmalate dehydratase large subunit, putative (2124 nt)                                | -16.0299 | -0.32589 | 1 |
| PITG_18641 | Pi conserved hypothetical protein (3909 nt)                                                       | -15.4801 | -0.01213 | 1 |
| PITG_18935 | Pi dihydrolipoyl dehydrogenase 1, mitochondrial precursor (1127 nt)                               | -16.4337 | -0.11115 | 1 |
| PITG_19257 | Pi calcineurin-like phosphoesterase, putative (4209 nt)                                           | -15.9508 | 0.311462 | 1 |
| PITG_19383 | Pi conserved hypothetical protein (927 nt)                                                        | -16.5847 | -0.22301 | 1 |
| PITG_19769 | Pi conserved hypothetical protein (384 nt)                                                        | -15.4703 | 0.027815 | 1 |
| PITG_19771 | Pi mitochondrial inner membrane protease subunit 1, putative (1127 nt)                            | -16.0464 | -0.05355 | 1 |
| PITG_20032 | Pi conserved hypothetical protein (2200 nt)                                                       | -15.6484 | 0.050961 | 1 |
| PITG_20463 | Pi vacuolar protein sorting-associated protein 33A, putative (1127 nt)                            | -15.4021 | -0.16864 | 1 |
| PITG_20683 | Pi conserved hypothetical protein (855 nt)                                                        | -16.15   | -0.26083 | 1 |
| PITG_20893 | Pi conserved hypothetical protein (1325 nt)                                                       | -15.4316 | 0.029429 | 1 |
| PITG_20895 | Pi beta-glucan synthesis-associated protein, putative (2253 nt)                                   | -16.3999 | 0.181627 | 1 |
| PITG_21600 | Pi conserved hypothetical protein (1281 nt)                                                       | -15.7789 | -0.31891 | 1 |
| PITG_21848 | Pi conserved hypothetical protein (413 nt)                                                        | -14.9272 | -0.18765 | 1 |
| PITG_22585 | Pi conserved hypothetical protein (980 nt)                                                        | -15.9474 | 0.016136 | 1 |
| PITG_00035 | Pi 60S ribosomal export protein NMD3, putative (1739 nt)                                          | -16.1257 | 0.105519 | 1 |
| PITG_00043 | Pi conserved hypothetical protein (2137 nt)                                                       | -16.4185 | -0.07833 | 1 |
| PITG_00077 | Pi ubiquitin-specific protease, putative (4536 nt)                                                | -15.766  | -0.34616 | 1 |

|            |                                                                |          |          |   |
|------------|----------------------------------------------------------------|----------|----------|---|
| PITG_00090 | Pi vacuolar sorting protein SNF8 (980 nt)                      | -15.2305 | -0.18825 | 1 |
| PITG_00235 | Pi hypothetical protein (307 nt)                               | -13.8509 | 0.01483  | 1 |
| PITG_00348 | Pi myosin-like protein (4175 nt)                               | -15.0337 | -0.34634 | 1 |
| PITG_00410 | Pi bystin (1269 nt)                                            | -16.2634 | 0.023008 | 1 |
| PITG_00413 | Pi Proton-dependent Oligopeptide Transporter (POT) Family      | -15.0321 | -0.28014 | 1 |
| PITG_00421 | Pi conserved hypothetical protein (5341 nt)                    | -16.1848 | -0.19133 | 1 |
| PITG_00454 | Pi RCC1 and BTB domain-containing protein, putative (2669 nt)  | -15.2083 | -0.21533 | 1 |
| PITG_00771 | Pi conserved hypothetical protein (664 nt)                     | -16.8103 | -0.44668 | 1 |
| PITG_00857 | Pi conserved hypothetical protein (559 nt)                     | -13.0051 | -0.05881 | 1 |
| PITG_00961 | Pi conserved hypothetical protein (551 nt)                     | -15.3144 | 0.031867 | 1 |
| PITG_01180 | Pi cell division protein ftsZ (1445 nt)                        | -16.0647 | 0.088087 | 1 |
| PITG_01247 | Pi conserved hypothetical protein (1880 nt)                    | -16.7521 | -0.56272 | 1 |
| PITG_01317 | Pi conserved hypothetical protein (3915 nt)                    | -15.2273 | 0.218795 | 1 |
| PITG_01412 | Pi Mitochondrial Tricarboxylate Carrier (MTC) Family (1008 nt) | -16.0055 | -0.1352  | 1 |
| PITG_01577 | Pi conserved hypothetical protein (1007 nt)                    | -13.5752 | 0.081549 | 1 |
| PITG_01862 | Pi glucose-6-phosphate isomerase (1997 nt)                     | -12.5908 | -0.08861 | 1 |
| PITG_01930 | Pi conserved hypothetical protein (2747 nt)                    | -16.0364 | -0.07185 | 1 |
| PITG_01997 | Pi dynein 1 light intermediate chain, putative (1884 nt)       | -14.6199 | -0.28273 | 1 |
| PITG_02002 | Pi enhancer of mRNA-decapping protein, putative (3427 nt)      | -15.7941 | -0.144   | 1 |
| PITG_02035 | Pi conserved hypothetical protein (1584 nt)                    | -15.4441 | -0.04499 | 1 |
| PITG_02114 | Pi aspartyl aminopeptidase, putative (1389 nt)                 | -14.6626 | -0.01696 | 1 |
| PITG_02427 | Pi conserved hypothetical protein (1639 nt)                    | -15.7613 | -0.20964 | 1 |
| PITG_02432 | Pi dolichyl-P-Man:Man(5)GlcNAc(2)-PP-dolichyl mannosyltra      | -14.9949 | -0.12075 | 1 |
| PITG_02442 | Pi cysteine protease family C02, putative (4133 nt)            | -15.9704 | 0.060147 | 1 |
| PITG_02495 | Pi phosphatidylinositol kinase (PIK-L4) (9150 nt)              | -16.1848 | -0.19133 | 1 |
| PITG_02561 | Pi ubiquitin-specific protease, putative (8027 nt)             | -15.3926 | -0.14777 | 1 |
| PITG_02586 | Pi conserved hypothetical protein (5388 nt)                    | -14.4343 | -0.12303 | 1 |
| PITG_02661 | Pi conserved hypothetical protein (2055 nt)                    | -15.539  | -0.12555 | 1 |
| PITG_02711 | Pi oligopeptidase A, putative (2519 nt)                        | -15.9792 | 0.080807 | 1 |
| PITG_02738 | Pi hypothetical protein (729 nt)                               | -15.9928 | 0.557051 | 1 |
| PITG_02739 | Pi conserved hypothetical protein (1730 nt)                    | -15.0371 | 0.033306 | 1 |
| PITG_02776 | Pi multiple inositol polyphosphate phosphatase, putative (15   | -16.1964 | 0.024067 | 1 |
| PITG_02968 | Pi choline dehydrogenase, putative (1861 nt)                   | -15.6905 | -0.03114 | 1 |
| PITG_03005 | Pi conserved hypothetical protein (585 nt)                     | -13.9602 | -0.05664 | 1 |
| PITG_03236 | Pi conserved hypothetical protein (2373 nt)                    | -15.8912 | -0.46942 | 1 |
| PITG_03285 | Pi hypothetical protein (501 nt)                               | -16.6686 | -0.81342 | 1 |
| PITG_03317 | Pi conserved hypothetical protein (904 nt)                     | -16.3338 | -0.31074 | 1 |
| PITG_03330 | Pi conserved hypothetical protein (567 nt)                     | -15.2696 | 0.227421 | 1 |
| PITG_03390 | Pi WD domain-containing protein, putative (1154 nt)            | -16.2891 | -0.40001 | 1 |
| PITG_03405 | Pi conserved hypothetical protein (2472 nt)                    | -15.7854 | 0.282399 | 1 |
| PITG_03464 | Pi aldehyde dehydrogenase, putative (4060 nt)                  | -14.2754 | -0.14425 | 1 |
| PITG_03651 | Pi phospholipase D, Pi-PXPH-PLD (3513 nt)                      | -15.002  | 0.262204 | 1 |
| PITG_03672 | Pi RIO kinase (1579 nt)                                        | -14.9736 | -0.00424 | 1 |
| PITG_03769 | Pi hypothetical protein (713 nt)                               | -15.5427 | -0.16038 | 1 |
| PITG_03909 | Pi thioredoxin-like protein (2815 nt)                          | -15.2235 | -0.0807  | 1 |
| PITG_04679 | Pi conserved hypothetical protein (796 nt)                     | -14.7518 | 0.22737  | 1 |
| PITG_04709 | Pi DNA ligase, putative (12166 nt)                             | -15.6977 | -0.19481 | 1 |

|            |                                                               |          |          |   |
|------------|---------------------------------------------------------------|----------|----------|---|
| PITG_05174 | Pi conserved hypothetical protein (627 nt)                    | -13.7518 | 0.197415 | 1 |
| PITG_05188 | Pi conserved hypothetical protein (693 nt)                    | -15.9597 | 0.090082 | 1 |
| PITG_05192 | Pi conserved hypothetical protein (3165 nt)                   | -15.9263 | 0.023221 | 1 |
| PITG_05353 | Pi HSF-type DNA-binding protein, putative (1950 nt)           | -15.8912 | -0.46942 | 1 |
| PITG_05405 | Pi arginyl-tRNA synthetase, putative (2477 nt)                | -15.5846 | 0.275156 | 1 |
| PITG_05635 | Pi conserved hypothetical protein (1845 nt)                   | -15.7419 | 0.238114 | 1 |
| PITG_06048 | Pi eukaryotic initiation factor 4A-III, putative (1420 nt)    | -15.2183 | 0.014971 | 1 |
| PITG_06282 | Pi ubiquitin-specific protease, putative (1536 nt)            | -15.6363 | -0.41961 | 1 |
| PITG_06283 | Pi beta-catenin-like protein (1851 nt)                        | -15.9263 | 0.023221 | 1 |
| PITG_06437 | Pi enoyl-CoA hydratase/isomerase family, putative (871 nt)    | -15.8675 | -0.29648 | 1 |
| PITG_06821 | Pi eukaryotic initiation factor 4E, putative (1997 nt)        | -15.4902 | -0.03237 | 1 |
| PITG_06924 | Pi conserved hypothetical protein (3833 nt)                   | -15.7556 | 0.498467 | 1 |
| PITG_06945 | Pi conserved hypothetical protein (3461 nt)                   | -16.1848 | -0.19133 | 1 |
| PITG_07035 | Pi CDK5 regulatory subunit-associated protein 1 (1875 nt)     | -15.8553 | 0.16528  | 1 |
| PITG_07063 | Pi conserved hypothetical protein (1003 nt)                   | -16.0544 | -0.19597 | 1 |
| PITG_07135 | Pi conserved hypothetical protein (771 nt)                    | -16.2924 | -0.03383 | 1 |
| PITG_07858 | Pi conserved hypothetical protein (1124 nt)                   | -16.2817 | 0.25807  | 1 |
| PITG_08043 | Pi conserved hypothetical protein (2615 nt)                   | -13.4675 | -0.05607 | 1 |
| PITG_08087 | Pi RNA polymerase II-associated protein 1, putative (3535 nt) | -16.2891 | -0.40001 | 1 |
| PITG_08293 | Pi conserved hypothetical protein (404 nt)                    | -15.7246 | 0.037216 | 1 |
| PITG_08324 | Pi conserved hypothetical protein (1028 nt)                   | -14.9691 | -0.13308 | 1 |
| PITG_08386 | Pi hypothetical protein (516 nt)                              | -15.8831 | -0.06313 | 1 |
| PITG_08570 | Pi serine protease family S28, putative (1710 nt)             | -14.9715 | -0.22969 | 1 |
| PITG_08589 | Pi hypothetical protein (1624 nt)                             | -15.3339 | -0.07834 | 1 |
| PITG_08762 | Pi conserved hypothetical protein (397 nt)                    | -13.9083 | 0.082503 | 1 |
| PITG_08927 | Pi conserved hypothetical protein (657 nt)                    | -16.4652 | 0.247016 | 1 |
| PITG_09243 | Pi rRNA methyltransferase, putative (1370 nt)                 | -14.7895 | 0.285222 | 1 |
| PITG_09250 | Pi transmembrane protein, putative (3761 nt)                  | -15.7854 | 0.282399 | 1 |
| PITG_09564 | Pi vacuolar protein sorting-associated protein 41 (3598 nt)   | -15.2235 | -0.0807  | 1 |
| PITG_09581 | Pi conserved hypothetical protein (3463 nt)                   | -15.9213 | -0.41106 | 1 |
| PITG_09587 | Pi mannose-P-dolichol utilization defect 1 protein (879 nt)   | -15.5846 | 0.275156 | 1 |
| PITG_10122 | Pi Drug/Metabolite Transporter (DMT) Superfamily (1015 nt)    | -16.281  | -0.54166 | 1 |
| PITG_10591 | Pi conserved hypothetical protein (2555 nt)                   | -16.0016 | 0.173791 | 1 |
| PITG_10629 | Pi conserved hypothetical protein (2612 nt)                   | -15.8381 | 0.346437 | 1 |
| PITG_10816 | Pi conserved hypothetical protein (867 nt)                    | -16.3341 | -0.00714 | 1 |
| PITG_10977 | Pi flavin-binding monooxygenase-like protein (1563 nt)        | -16.4564 | -0.69703 | 1 |
| PITG_10986 | Pi nuclear transcription factor Y subunit, putative (998 nt)  | -15.3494 | 0.310656 | 1 |
| PITG_11035 | Pi transmembrane protein, putative (1622 nt)                  | -16.2079 | -0.56244 | 1 |
| PITG_11221 | Pi conserved hypothetical protein (1878 nt)                   | -16.3182 | -0.28084 | 1 |
| PITG_11234 | Pi conserved hypothetical protein (2060 nt)                   | -16.1072 | 0.124512 | 1 |
| PITG_11555 | Pi conserved hypothetical protein (960 nt)                    | -15.9843 | -0.07021 | 1 |
| PITG_11586 | Pi conserved hypothetical protein (456 nt)                    | -14.8476 | 0.037437 | 1 |
| PITG_11765 | Pi conserved hypothetical protein (5055 nt)                   | -15.6977 | -0.19481 | 1 |
| PITG_11782 | Pi calcium-binding protein, putative (3317 nt)                | -14.4908 | 0.201404 | 1 |
| PITG_11980 | Pi conserved hypothetical protein (1370 nt)                   | -14.7169 | -0.06215 | 1 |
| PITG_12346 | Pi DNA replication licensing factor MCM3 (2717 nt)            | -15.9533 | 0.451574 | 1 |
| PITG_12519 | Pi conserved hypothetical protein (890 nt)                    | -16.4652 | 0.247016 | 1 |

|            |                                                                                     |          |          |   |
|------------|-------------------------------------------------------------------------------------|----------|----------|---|
| PITG_12530 | Pi conserved hypothetical protein (2579 nt)                                         | -15.3567 | -0.33792 | 1 |
| PITG_12901 | Pi conserved hypothetical protein (926 nt)                                          | -16.2279 | 0.52811  | 1 |
| PITG_13044 | Pi secreted RxLR effector peptide, putative (756 nt)                                | -14.7475 | 0.016767 | 1 |
| PITG_13257 | Pi peroxisomal hydratase-dehydrogenase-epimerase, putative (2227 nt)                | -14.6599 | -0.07343 | 1 |
| PITG_13460 | Pi conserved hypothetical protein (2227 nt)                                         | -15.6338 | -0.18867 | 1 |
| PITG_13721 | Pi alpha,alpha-trehalose-phosphate synthase [UDP-forming], putative (2227 nt)       | -15.412  | -0.18856 | 1 |
| PITG_13745 | Pi vacuolar protein sorting-associated protein, putative (360 nt)                   | -14.9706 | -0.36934 | 1 |
| PITG_14008 | Pi conserved hypothetical protein (1706 nt)                                         | -13.5755 | -0.10995 | 1 |
| PITG_14126 | Pi potential polyprotein (1978 nt)                                                  | -12.3854 | 0.047474 | 1 |
| PITG_14393 | Pi calcium/calmodulin-dependent protein kinase, putative (2227 nt)                  | -16.6686 | -0.81342 | 1 |
| PITG_14640 | Pi conserved hypothetical protein (3660 nt)                                         | -15.3053 | -0.14969 | 1 |
| PITG_14703 | Pi calcium-dependent protein kinase, putative (1977 nt)                             | -16.1406 | -0.28016 | 1 |
| PITG_14712 | Pi cell division protease ftsH (1401 nt)                                            | -15.2014 | 0.058169 | 1 |
| PITG_15091 | Pi conserved hypothetical protein (1136 nt)                                         | -15.8823 | -0.27138 | 1 |
| PITG_15101 | Pi conserved hypothetical protein (665 nt)                                          | -15.4415 | -0.03414 | 1 |
| PITG_15446 | Pi conserved hypothetical protein (559 nt)                                          | -16.1389 | 0.079169 | 1 |
| PITG_15509 | Pi SNF2 family helicase/ATPase and F-box protein, putative (1136 nt)                | -16.3305 | -0.44345 | 1 |
| PITG_15666 | Pi conserved hypothetical protein (895 nt)                                          | -14.8321 | -0.08424 | 1 |
| PITG_15739 | Pi protein MYG1 (1098 nt)                                                           | -15.9552 | 0.128796 | 1 |
| PITG_15762 | Pi conserved hypothetical protein (2506 nt)                                         | -15.8775 | -0.17275 | 1 |
| PITG_15889 | Pi serine protease family S54, putative (1226 nt)                                   | -15.9627 | -0.05536 | 1 |
| PITG_16010 | Pi conserved hypothetical protein (1197 nt)                                         | -15.7805 | -0.07445 | 1 |
| PITG_16132 | Pi phosphatidylinositol phosphatase SAC1 (2322 nt)                                  | -16.1288 | -0.24553 | 1 |
| PITG_17022 | Pi UDP-N-acetylglucosamine-dolichyl-phosphate N-acetylglucosyltransferase (1197 nt) | -15.2717 | 0.01563  | 1 |
| PITG_17074 | Pi 3-demethylubiquinone-9 3-methyltransferase, putative (1197 nt)                   | -14.7642 | -0.15721 | 1 |
| PITG_17106 | Pi conserved hypothetical protein (825 nt)                                          | -15.445  | 0.327666 | 1 |
| PITG_17165 | Pi peptidyl-prolyl cis-trans isomerase E (675 nt)                                   | -15.5235 | -0.37162 | 1 |
| PITG_17407 | Pi Poly(A) polymerase beta (2210 nt)                                                | -15.8912 | -0.46942 | 1 |
| PITG_17457 | Pi conserved hypothetical protein (5056 nt)                                         | -14.0666 | 0.180046 | 1 |
| PITG_17550 | Pi serine protease family S09A, putative (2451 nt)                                  | -16.3978 | -0.2458  | 1 |
| PITG_18034 | Pi conserved hypothetical protein (2719 nt)                                         | -16.2853 | -0.40658 | 1 |
| PITG_18227 | Pi conserved hypothetical protein (1032 nt)                                         | -15.956  | -0.12414 | 1 |
| PITG_18322 | Pi hypothetical protein (4169 nt)                                                   | -15.3144 | -0.16801 | 1 |
| PITG_18360 | Pi cAMP-dependent protein kinase regulatory subunit, putative (1032 nt)             | -13.6246 | -0.02823 | 1 |
| PITG_18747 | Pi GlcNac transferase (1678 nt)                                                     | -15.2873 | 0.16277  | 1 |
| PITG_18975 | Pi conserved hypothetical protein (599 nt)                                          | -15.7419 | 0.238114 | 1 |
| PITG_19148 | Pi conserved hypothetical protein (798 nt)                                          | -16.1848 | -0.19133 | 1 |
| PITG_19995 | Pi conserved hypothetical protein (983 nt)                                          | -16.2864 | -0.04892 | 1 |
| PITG_21466 | Pi conserved hypothetical protein (485 nt)                                          | -16.3978 | -0.2458  | 1 |
| PITG_21495 | Pi hypothetical protein (743 nt)                                                    | -15.956  | -0.12414 | 1 |
| PITG_21571 | Pi conserved hypothetical protein (1127 nt)                                         | -16.16   | -0.42484 | 1 |
| PITG_21873 | Pi conserved hypothetical protein (945 nt)                                          | -14.6094 | -0.15078 | 1 |
| PITG_22419 | Pi hypothetical protein (461 nt)                                                    | -15.911  | 0.088084 | 1 |
| PITG_00037 | Pi conserved hypothetical protein (1307 nt)                                         | -15.7826 | -0.16941 | 1 |
| PITG_00039 | Pi telomere length regulation protein TEL2 (2330 nt)                                | -16.2241 | -0.59373 | 1 |
| PITG_00042 | Pi conserved hypothetical protein (362 nt)                                          | -15.0638 | -0.00635 | 1 |
| PITG_00080 | Pi protein kinase (1285 nt)                                                         | -16.352  | -0.3987  | 1 |

|            |                                                                |          |          |   |
|------------|----------------------------------------------------------------|----------|----------|---|
| PITG_00175 | Pi conserved hypothetical protein (1993 nt)                    | -14.5923 | 0.033542 | 1 |
| PITG_00183 | Pi dynamin-2 (2133 nt)                                         | -13.7979 | 0.036652 | 1 |
| PITG_00192 | Pi conserved hypothetical protein (2269 nt)                    | -16.1489 | 0.099908 | 1 |
| PITG_00220 | Pi general transcription factor IIH subunit, putative (960 nt) | -15.5037 | -0.32142 | 1 |
| PITG_00227 | Pi DEAD/DEAH box RNA helicase, putative (2079 nt)              | -16.1007 | 0.054902 | 1 |
| PITG_00282 | Pi conserved hypothetical protein (678 nt)                     | -15.8339 | -0.37334 | 1 |
| PITG_00293 | Pi conserved hypothetical protein (378 nt)                     | -13.1024 | 0.110873 | 1 |
| PITG_00294 | Pi carbohydrate esterase, putative (1017 nt)                   | -15.8362 | -0.25386 | 1 |
| PITG_00295 | Pi conserved hypothetical protein (1460 nt)                    | -14.581  | 0.214862 | 1 |
| PITG_00300 | Pi 3-oxoacyl-[acyl-carrier-protein] synthase, mitochondrial pi | -15.1616 | -0.05437 | 1 |
| PITG_00309 | Pi conserved hypothetical protein (1417 nt)                    | -15.4134 | -0.1856  | 1 |
| PITG_00323 | Pi conserved hypothetical protein (3543 nt)                    | -15.6607 | -0.00945 | 1 |
| PITG_00349 | Pi conserved hypothetical protein (1615 nt)                    | -14.8128 | 0.232564 | 1 |
| PITG_00369 | Pi conserved hypothetical protein (2439 nt)                    | -16.1315 | -0.35389 | 1 |
| PITG_00401 | Pi ribosome maturation protein SBDS, putative (1127 nt)        | -14.0711 | -0.21942 | 1 |
| PITG_00444 | Pi conserved hypothetical protein (3254 nt)                    | -15.2484 | -0.1362  | 1 |
| PITG_00456 | Pi conserved hypothetical protein (736 nt)                     | -14.3719 | 0.043378 | 1 |
| PITG_00458 | Pi dihydrolipoyllysine-residue acetyltransferase component c   | -14.4538 | 0.284047 | 1 |
| PITG_00509 | Pi conserved hypothetical protein (1200 nt)                    | -15.8318 | 0.118633 | 1 |
| PITG_00524 | Pi conserved hypothetical protein (2049 nt)                    | -15.7551 | -0.17524 | 1 |
| PITG_00525 | Pi protein kinase, putative (2482 nt)                          | -13.6723 | 0.215235 | 1 |
| PITG_00550 | Pi conserved hypothetical protein (846 nt)                     | -13.0223 | 0.11113  | 1 |
| PITG_00555 | Pi conserved hypothetical protein (1105 nt)                    | -16.6012 | -0.26601 | 1 |
| PITG_00561 | Pi ubiquinone biosynthesis protein COQ9 (1245 nt)              | -14.2762 | -0.16882 | 1 |
| PITG_00566 | Pi uroporphyrinogen decarboxylase, putative (1407 nt)          | -14.6989 | -0.15128 | 1 |
| PITG_00570 | Pi phosphatidylserine synthase, putative (1368 nt)             | -16.4408 | -0.22109 | 1 |
| PITG_00572 | Pi conserved hypothetical protein (700 nt)                     | -15.9635 | -0.05256 | 1 |
| PITG_00573 | Pi tyrosine-protein phosphatase, putative (577 nt)             | -14.8182 | 0.086307 | 1 |
| PITG_00574 | Pi endonuclease III-like, HhH-GPD superfamily base excision    | -14.9467 | 0.122724 | 1 |
| PITG_00593 | Pi monooxygenase, putative (665 nt)                            | -12.3496 | 0.015521 | 1 |
| PITG_00665 | Pi conserved hypothetical protein (1144 nt)                    | -14.6836 | -0.18138 | 1 |
| PITG_00676 | Pi transcription factor (2527 nt)                              | -13.7691 | 0.123292 | 1 |
| PITG_00681 | Pi Rab1 family GTPase, putative (1353 nt)                      | -13.1343 | -0.03034 | 1 |
| PITG_00713 | Pi synaptic vesicle glycoprotein 2A, putative (1791 nt)        | -15.6986 | 0.384982 | 1 |
| PITG_00748 | Pi conserved hypothetical protein (6289 nt)                    | -15.6501 | 0.40777  | 1 |
| PITG_00765 | Pi flagellar adenylate kinase (844 nt)                         | -13.269  | -0.12922 | 1 |
| PITG_00778 | Pi conserved hypothetical protein (819 nt)                     | -15.7761 | 0.265201 | 1 |
| PITG_00818 | Pi conserved hypothetical protein (4546 nt)                    | -16.1239 | -0.37    | 1 |
| PITG_00874 | Pi carbohydrate-binding protein, putative (1714 nt)            | -16.4086 | -0.65015 | 1 |
| PITG_00914 | Pi nuclear transcription factor Y subunit, putative (737 nt)   | -12.6502 | 0.008777 | 1 |
| PITG_00991 | Pi Amino Acid-Polyamine-Organocation (APC) Family (1419 r      | -16.1164 | -0.01791 | 1 |
| PITG_00998 | Pi dynein heavy chain (12571 nt)                               | -16.3735 | 0.185886 | 1 |
| PITG_01019 | Pi U3 small nucleolar RNA-associated protein, putative (2838   | -16.2396 | -0.08153 | 1 |
| PITG_01030 | Pi SWI4 1, Peter Pan-like protein suppressor (1480 nt)         | -15.9673 | -0.21161 | 1 |
| PITG_01033 | Pi Cation Diffusion Facilitator (CDF) Family (1967 nt)         | -15.8345 | -0.20826 | 1 |
| PITG_01045 | Pi tRNA pseudouridine synthase D (TruD), putative (2468 nt)    | -15.7487 | -0.23706 | 1 |
| PITG_01048 | Pi conserved hypothetical protein (990 nt)                     | -14.5899 | 0.073231 | 1 |

|            |                                                                  |          |           |   |
|------------|------------------------------------------------------------------|----------|-----------|---|
| PITG_01058 | Pi conserved hypothetical protein (1365 nt)                      | -15.5458 | 0.040599  | 1 |
| PITG_01085 | Pi conserved hypothetical protein (411 nt)                       | -15.7895 | -0.40109  | 1 |
| PITG_01090 | Pi 2Fe-2S ferredoxin, putative (1203 nt)                         | -13.5757 | 0.170558  | 1 |
| PITG_01102 | Pi conserved hypothetical protein (1174 nt)                      | -15.5627 | 0.113204  | 1 |
| PITG_01108 | Pi conserved hypothetical protein (1694 nt)                      | -15.2963 | -0.1312   | 1 |
| PITG_01111 | Pi 12-oxophytodienoate reductase, putative (1437 nt)             | -15.5586 | -0.30258  | 1 |
| PITG_01144 | Pi conserved hypothetical protein (1097 nt)                      | -13.5974 | 0.13612   | 1 |
| PITG_01174 | Pi conserved hypothetical protein (2147 nt)                      | -15.9724 | 0.066134  | 1 |
| PITG_01193 | Pi aspartate aminotransferase, putative (3124 nt)                | -15.1556 | -0.21548  | 1 |
| PITG_01235 | Pi conserved hypothetical protein (1011 nt)                      | -15.9883 | 0.099683  | 1 |
| PITG_01237 | Pi conserved hypothetical protein (1026 nt)                      | -13.5594 | -0.14533  | 1 |
| PITG_01259 | Pi nuclear pore complex protein, putative (7703 nt)              | -16.1201 | 0.095413  | 1 |
| PITG_01280 | Pi conserved hypothetical protein (1041 nt)                      | -13.9791 | -0.15173  | 1 |
| PITG_01298 | Pi conserved hypothetical protein (744 nt)                       | -15.7209 | -0.00963  | 1 |
| PITG_01324 | Pi conserved hypothetical protein (2328 nt)                      | -16.6302 | -0.28028  | 1 |
| PITG_01336 | Pi conserved hypothetical protein (1635 nt)                      | -13.9239 | 0.075019  | 1 |
| PITG_01365 | Pi protein kinase, putative (3470 nt)                            | -13.0169 | -0.14609  | 1 |
| PITG_01409 | Pi conserved hypothetical protein (1197 nt)                      | -15.2469 | 0.047082  | 1 |
| PITG_01417 | Pi serine/threonine-protein phosphatase PP2A (960 nt)            | -11.7099 | -0.08876  | 1 |
| PITG_01425 | Pi coronin-like protein (3119 nt)                                | -16.6012 | -0.26601  | 1 |
| PITG_01427 | Pi DEAD/DEAH box RNA helicase, putative (1695 nt)                | -16.1813 | -0.19813  | 1 |
| PITG_01439 | Pi conserved hypothetical protein (645 nt)                       | -15.2343 | -0.0937   | 1 |
| PITG_01451 | Pi GPI ethanolamine phosphate transferase, putative (2934 nt)    | -16.3777 | -5.82E-05 | 1 |
| PITG_01456 | Pi histone acetyltransferase ESA1 (1913 nt)                      | -16.0669 | -0.11914  | 1 |
| PITG_01471 | Pi beta-mannosidase, putative (2914 nt)                          | -16.7714 | -0.60815  | 1 |
| PITG_01499 | Pi charged multivesicular body protein 5, putative (1054 nt)     | -13.0541 | 0.117013  | 1 |
| PITG_01502 | Pi Cullin-associated NEDD8-dissociated protein, putative (43 nt) | -15.3611 | 0.23023   | 1 |
| PITG_01527 | Pi conserved hypothetical protein (1987 nt)                      | -15.9068 | -0.06338  | 1 |
| PITG_01583 | Pi hypothetical protein (1278 nt)                                | -14.6919 | -0.00925  | 1 |
| PITG_01589 | Pi conserved hypothetical protein (1385 nt)                      | -15.1873 | -0.1876   | 1 |
| PITG_01599 | Pi coronin-like protein, putative (1952 nt)                      | -13.1134 | -0.20636  | 1 |
| PITG_01651 | Pi conserved hypothetical protein (1088 nt)                      | -15.6822 | -0.41518  | 1 |
| PITG_01652 | Pi conserved hypothetical protein (1419 nt)                      | -14.3751 | 0.20146   | 1 |
| PITG_01653 | Pi GPI-anchored wall transfer protein 1, putative (2235 nt)      | -15.5966 | -0.35281  | 1 |
| PITG_01682 | Pi conserved hypothetical protein (2160 nt)                      | -15.8237 | 0.102321  | 1 |
| PITG_01710 | Pi conserved hypothetical protein (2793 nt)                      | -16.1104 | 0.438676  | 1 |
| PITG_01711 | Pi anthranilate synthase component I, putative (1603 nt)         | -15.4246 | -0.16295  | 1 |
| PITG_01721 | Pi Drug/Metabolite Transporter (DMT) Superfamily (2757 nt)       | -15.8237 | 0.102321  | 1 |
| PITG_01728 | Pi conserved hypothetical protein (1167 nt)                      | -14.1062 | -0.1561   | 1 |
| PITG_01738 | Pi conserved hypothetical protein (1434 nt)                      | -14.961  | -0.28274  | 1 |
| PITG_01750 | Pi RNA polymerase II-associated protein, putative (1572 nt)      | -15.998  | 0.166521  | 1 |
| PITG_01761 | Pi proline oxidase, putative (1716 nt)                           | -13.8501 | 0.029364  | 1 |
| PITG_01769 | Pi chorismate synthase (1434 nt)                                 | -15.8334 | 0.210962  | 1 |
| PITG_01772 | Pi conserved hypothetical protein (705 nt)                       | -14.8911 | 0.173482  | 1 |
| PITG_01783 | Pi acetyl-CoA acetyltransferase (2146 nt)                        | -13.2147 | 0.100303  | 1 |
| PITG_01851 | Pi homogentisate 1,2-dioxygenase (1839 nt)                       | -14.2346 | -0.02098  | 1 |
| PITG_01926 | Pi conserved hypothetical protein (1931 nt)                      | -15.0766 | -0.05267  | 1 |

|            |                                                              |          |          |   |
|------------|--------------------------------------------------------------|----------|----------|---|
| PITG_01927 | Pi conserved hypothetical protein (1050 nt)                  | -14.563  | 0.06448  | 1 |
| PITG_01995 | Pi hypothetical protein (138 nt)                             | -15.059  | -0.25985 | 1 |
| PITG_01999 | Pi Voltage-gated Ion Channel (VIC) Superfamily (603 nt)      | -15.6237 | 0.333757 | 1 |
| PITG_02016 | Pi integrator complex subunit, putative (7581 nt)            | -16.2983 | 0.341425 | 1 |
| PITG_02031 | Pi conserved hypothetical protein (2128 nt)                  | -16.6957 | -0.83911 | 1 |
| PITG_02042 | Pi serine/threonine-protein phosphatase 4 regulatory subun   | -15.5616 | -0.0091  | 1 |
| PITG_02079 | Pi conserved hypothetical protein (458 nt)                   | -14.8242 | 0.230304 | 1 |
| PITG_02111 | Pi conserved hypothetical protein (828 nt)                   | -16.7236 | -0.25144 | 1 |
| PITG_02115 | Pi propionyl-CoA carboxylase beta chain, mitochondrial prec  | -13.3567 | -0.10438 | 1 |
| PITG_02122 | Pi glucosamine-fructose-6-phosphate aminotransferase [isor   | -14.9125 | 0.19412  | 1 |
| PITG_02135 | Pi conserved hypothetical protein (1876 nt)                  | -15.4318 | -0.3823  | 1 |
| PITG_02137 | Pi serine/threonine-protein phosphatase 2A 65 kDa regulato   | -13.3922 | 0.044434 | 1 |
| PITG_02138 | Pi conserved hypothetical protein (1800 nt)                  | -16.4168 | 0.331617 | 1 |
| PITG_02144 | Pi conserved hypothetical protein (814 nt)                   | -15.1863 | -0.00113 | 1 |
| PITG_02146 | Pi conserved hypothetical protein (4828 nt)                  | -15.4179 | -0.09736 | 1 |
| PITG_02178 | Pi conserved hypothetical protein (1469 nt)                  | -13.9309 | -0.17486 | 1 |
| PITG_02196 | Pi conserved hypothetical protein (1734 nt)                  | -14.8298 | 0.057743 | 1 |
| PITG_02197 | Pi DNA topoisomerase, putative (2392 nt)                     | -14.7864 | -0.19979 | 1 |
| PITG_02261 | Pi C2 domain-containing protein, putative (742 nt)           | -14.1686 | 0.056104 | 1 |
| PITG_02286 | Pi chromatin-remodeling complex ATPase chain, putative (48   | -14.2143 | 0.153696 | 1 |
| PITG_02338 | Pi conserved hypothetical protein (671 nt)                   | -14.1413 | 0.061751 | 1 |
| PITG_02347 | Pi conserved hypothetical protein (1595 nt)                  | -14.8796 | -0.38246 | 1 |
| PITG_02349 | Pi conserved hypothetical protein (1505 nt)                  | -14.777  | 0.162348 | 1 |
| PITG_02371 | Pi conserved hypothetical protein (2112 nt)                  | -14.8844 | -0.11783 | 1 |
| PITG_02391 | Pi conserved hypothetical protein (1560 nt)                  | -15.5088 | 0.183007 | 1 |
| PITG_02424 | Pi aldo/keto reductase family (935 nt)                       | -14.9207 | -0.20077 | 1 |
| PITG_02448 | Pi conserved hypothetical protein (378 nt)                   | -15.867  | -0.14404 | 1 |
| PITG_02452 | Pi conserved hypothetical protein (587 nt)                   | -15.5033 | 0.072334 | 1 |
| PITG_02454 | Pi conserved hypothetical protein (2706 nt)                  | -15.8632 | 0.181413 | 1 |
| PITG_02477 | Pi conserved hypothetical protein (773 nt)                   | -16.1147 | -0.44543 | 1 |
| PITG_02483 | Pi 3-ketodihydrosphingosine reductase, putative (1073 nt)    | -12.2221 | 0.024532 | 1 |
| PITG_02526 | Pi dynein heavy chain (14109 nt)                             | -14.6491 | 0.153479 | 1 |
| PITG_02540 | Pi integrator complex subunit, putative (2317 nt)            | -16.0477 | -0.21123 | 1 |
| PITG_02546 | Pi ubiquitin carboxyl-terminal hydrolase, putative (2565 nt) | -15.3972 | 0.197473 | 1 |
| PITG_02575 | Pi alpha,alpha-trehalose-phosphate synthase [UDP-forming],   | -14.8673 | 0.048721 | 1 |
| PITG_02577 | Pi conserved hypothetical protein (330 nt)                   | -15.1894 | 0.17218  | 1 |
| PITG_02580 | Pi conserved hypothetical protein (1599 nt)                  | -14.1467 | 0.096147 | 1 |
| PITG_02585 | Pi conserved hypothetical protein (1448 nt)                  | -15.3981 | -0.29489 | 1 |
| PITG_02591 | Pi conserved hypothetical protein (1169 nt)                  | -14.0942 | 0.107555 | 1 |
| PITG_02597 | Pi DnaJ subfamily B protein (1362 nt)                        | -15.2451 | -0.03732 | 1 |
| PITG_02623 | Pi aspartyl protease family A01B, putative (2187 nt)         | -14.9003 | -0.08641 | 1 |
| PITG_02634 | Pi conserved hypothetical protein (761 nt)                   | -13.2615 | -0.00529 | 1 |
| PITG_02688 | Pi conserved hypothetical protein (394 nt)                   | -15.7918 | -0.04966 | 1 |
| PITG_02719 | Pi conserved hypothetical protein (1040 nt)                  | -15.477  | 0.23094  | 1 |
| PITG_02730 | Pi conserved hypothetical protein (4085 nt)                  | -15.4292 | -0.1148  | 1 |
| PITG_02741 | Pi glutaredoxin (527 nt)                                     | -13.148  | 0.151555 | 1 |
| PITG_02745 | Pi casein kinase II subunit beta (1503 nt)                   | -12.5581 | 0.065678 | 1 |

|            |                                                              |          |          |   |
|------------|--------------------------------------------------------------|----------|----------|---|
| PITG_02754 | Pi conserved hypothetical protein (2880 nt)                  | -15.8059 | 0.111201 | 1 |
| PITG_02755 | Pi structural maintenance of chromosomes protein 5, putative | -14.3351 | -0.03085 | 1 |
| PITG_02799 | Pi conserved hypothetical protein (4349 nt)                  | -16.2242 | -0.11277 | 1 |
| PITG_02807 | Pi conserved hypothetical protein (1441 nt)                  | -13.8668 | 0.024516 | 1 |
| PITG_02848 | Pi conserved hypothetical protein (929 nt)                   | -16.1874 | 0.393864 | 1 |
| PITG_02852 | Pi aminoacylase, metalloprotease family M20A, putative (15   | -15.2242 | 3.68E-05 | 1 |
| PITG_02863 | Pi conserved hypothetical protein (3013 nt)                  | -16.6186 | -0.30433 | 1 |
| PITG_02866 | Pi conserved hypothetical protein (453 nt)                   | -14.6412 | -0.17061 | 1 |
| PITG_02945 | Pi conserved hypothetical protein (1301 nt)                  | -15.45   | -0.42884 | 1 |
| PITG_02947 | Pi conserved hypothetical protein (814 nt)                   | -15.5601 | -0.16789 | 1 |
| PITG_02980 | Pi conserved hypothetical protein (899 nt)                   | -16.1164 | -0.01791 | 1 |
| PITG_03019 | Pi conserved hypothetical protein (530 nt)                   | -16.6012 | -0.26601 | 1 |
| PITG_03031 | Pi conserved hypothetical protein (6147 nt)                  | -16.3053 | -0.43104 | 1 |
| PITG_03044 | Pi autophagy-related protein, putative (2441 nt)             | -14.7104 | -0.04935 | 1 |
| PITG_03081 | Pi 26S proteasome non-ATPase regulatory subunit 2 (3018 n    | -12.7905 | 0.131691 | 1 |
| PITG_03101 | Pi conserved hypothetical protein (2590 nt)                  | -15.3925 | 0.175686 | 1 |
| PITG_03127 | Pi M96 mating-specific protein family (1130 nt)              | -16.3644 | -0.37444 | 1 |
| PITG_03146 | Pi conserved hypothetical protein (1749 nt)                  | -15.2139 | -0.24205 | 1 |
| PITG_03165 | Pi conserved hypothetical protein (1050 nt)                  | -15.7398 | -0.49825 | 1 |
| PITG_03179 | Pi conserved hypothetical protein (2544 nt)                  | -15.6384 | -0.31361 | 1 |
| PITG_03219 | Pi geranylgeranyl transferase type-2 subunit beta (1074 nt)  | -14.6275 | 0.056871 | 1 |
| PITG_03292 | Pi GTPase (1643 nt)                                          | -16.9596 | -0.92312 | 1 |
| PITG_03303 | Pi conserved hypothetical protein (877 nt)                   | -14.9531 | -0.045   | 1 |
| PITG_03305 | Pi peptidase, putative (2045 nt)                             | -15.2673 | 0.00731  | 1 |
| PITG_03351 | Pi DNA mismatch repair protein Msh6, putative (3789 nt)      | -16.3055 | 0.109587 | 1 |
| PITG_03360 | Pi AP-4 complex subunit epsilon, putative (3506 nt)          | -14.0929 | 0.030332 | 1 |
| PITG_03364 | Pi RNA polymerase II-associated factor 1 (1975 nt)           | -14.6441 | -0.10486 | 1 |
| PITG_03380 | Pi conserved hypothetical protein (388 nt)                   | -14.1413 | 0.061751 | 1 |
| PITG_03381 | Pi ferric reductase, putative (2685 nt)                      | -16.4301 | -0.68073 | 1 |
| PITG_03386 | Pi conserved hypothetical protein (726 nt)                   | -14.5878 | 0.244865 | 1 |
| PITG_03391 | Pi conserved hypothetical protein (608 nt)                   | -14.3852 | 0.044817 | 1 |
| PITG_03397 | Pi conserved hypothetical protein (1337 nt)                  | -15.4612 | -0.45007 | 1 |
| PITG_03401 | Pi chromodomain-helicase-DNA-binding protein, putative (61   | -15.6358 | -0.32132 | 1 |
| PITG_03413 | Pi conserved hypothetical protein (549 nt)                   | -15.6854 | -0.05492 | 1 |
| PITG_03436 | Pi conserved hypothetical protein (1394 nt)                  | -15.5001 | 0.066832 | 1 |
| PITG_03445 | Pi Holliday junction ATP-dependent DNA helicase ruvB (1488   | -14.2568 | 0.067903 | 1 |
| PITG_03483 | Pi splicing factor U2af large subunit, putative (2239 nt)    | -14.4697 | -0.09777 | 1 |
| PITG_03496 | Pi conserved hypothetical protein (1386 nt)                  | -15.6033 | 0.371756 | 1 |
| PITG_03497 | Pi separin, putative (3167 nt)                               | -16.447  | 0.273057 | 1 |
| PITG_03575 | Pi anoctamin-like protein (2582 nt)                          | -14.6863 | 0.005183 | 1 |
| PITG_03582 | Pi serine protease family S01B, putative (1386 nt)           | -13.7467 | -0.02159 | 1 |
| PITG_03604 | Pi conserved hypothetical protein (3116 nt)                  | -15.312  | -0.24771 | 1 |
| PITG_03623 | Pi conserved hypothetical protein (2473 nt)                  | -14.1532 | -0.06122 | 1 |
| PITG_03662 | Pi calcineurin-like phosphoesterase, putative (1941 nt)      | -16.441  | -0.16136 | 1 |
| PITG_03670 | Pi conserved hypothetical protein (1686 nt)                  | -13.081  | 0.090669 | 1 |
| PITG_03682 | Pi conserved hypothetical protein (567 nt)                   | -15.5906 | 0.128875 | 1 |
| PITG_03694 | Pi disulfide-isomerase, putative (1427 nt)                   | -13.152  | -0.14048 | 1 |



|            |                                                                  |          |          |   |
|------------|------------------------------------------------------------------|----------|----------|---|
| PITG_03696 | Pi conserved hypothetical protein (2958 nt)                      | -14.8438 | 0.029269 | 1 |
| PITG_03702 | Pi conserved hypothetical protein (1477 nt)                      | -15.3195 | -0.15775 | 1 |
| PITG_03707 | Pi voltage-gated potassium channel subunit beta-2 (1269 nt)      | -16.4071 | 0.130514 | 1 |
| PITG_03733 | Pi conserved hypothetical protein (1473 nt)                      | -15.6582 | -0.46492 | 1 |
| PITG_03734 | Pi conserved hypothetical protein (2353 nt)                      | -16.4809 | -0.5114  | 1 |
| PITG_03737 | Pi conserved hypothetical protein (3007 nt)                      | -14.8065 | -0.36791 | 1 |
| PITG_03744 | Pi conserved hypothetical protein (993 nt)                       | -14.7184 | -0.2486  | 1 |
| PITG_03759 | Pi conserved hypothetical protein (1284 nt)                      | -15.5523 | -0.03101 | 1 |
| PITG_03781 | Pi conserved hypothetical protein (906 nt)                       | -14.3185 | -0.00672 | 1 |
| PITG_03782 | Pi conserved hypothetical protein (1064 nt)                      | -14.9085 | -0.09919 | 1 |
| PITG_03792 | Pi 2,3-bisphosphoglycerate-independent phosphoglycerate r        | -14.3147 | -0.04615 | 1 |
| PITG_03825 | Pi myosin-like protein (2036 nt)                                 | -15.2232 | -0.00038 | 1 |
| PITG_03837 | Pi metalloprotease family M01, putative (2129 nt)                | -15.8059 | 0.111201 | 1 |
| PITG_03844 | Pi conserved hypothetical protein (1746 nt)                      | -16.2079 | -0.20173 | 1 |
| PITG_03852 | Pi Mitochondrial Protein Translocase (MPT) Family (729 nt)       | -14.4467 | 0.171949 | 1 |
| PITG_03874 | Pi actin-like protein (1385 nt)                                  | -14.9383 | -0.35914 | 1 |
| PITG_03879 | Pi conserved hypothetical protein (8263 nt)                      | -16.8295 | -0.49203 | 1 |
| PITG_03885 | Pi conserved hypothetical protein (2598 nt)                      | -16.523  | -0.05962 | 1 |
| PITG_03902 | Pi conserved hypothetical protein (3060 nt)                      | -15.4027 | -0.246   | 1 |
| PITG_03903 | Pi conserved hypothetical protein (4364 nt)                      | -15.597  | -0.35164 | 1 |
| PITG_03919 | Pi ribokinase, putative (1104 nt)                                | -15.4764 | 0.265641 | 1 |
| PITG_03932 | Pi conserved hypothetical protein (1226 nt)                      | -14.8403 | 0.051625 | 1 |
| PITG_03934 | Pi protein kinase, putative (2694 nt)                            | -14.6782 | 0.013795 | 1 |
| PITG_03938 | Pi conserved hypothetical protein (2364 nt)                      | -14.6607 | -0.07163 | 1 |
| PITG_03944 | Pi conserved hypothetical protein (4045 nt)                      | -15.1362 | -0.00326 | 1 |
| PITG_03959 | Pi conserved hypothetical protein (3276 nt)                      | -15.7031 | 0.028794 | 1 |
| PITG_03967 | Pi conserved hypothetical protein (937 nt)                       | -15.3932 | 0.18926  | 1 |
| PITG_03970 | Pi conserved hypothetical protein (843 nt)                       | -16.4576 | -0.55568 | 1 |
| PITG_03987 | Pi DEAD/DEAH box RNA helicase, putative (7605 nt)                | -15.4822 | 0.13024  | 1 |
| PITG_03992 | Pi ribulose-phosphate 3-epimerase (753 nt)                       | -16.3216 | 0.334798 | 1 |
| PITG_03993 | Pi eukaryotic translation initiation factor 3 subunit H, putativ | -15.3002 | -0.12471 | 1 |
| PITG_04012 | Pi elongator complex protein, putative (1256 nt)                 | -16.441  | -0.16136 | 1 |
| PITG_04105 | Pi conserved hypothetical protein (1224 nt)                      | -15.9364 | 0.141727 | 1 |
| PITG_04211 | Pi conserved hypothetical protein (464 nt)                       | -14.2889 | 0.210316 | 1 |
| PITG_04225 | Pi geranylgeranyl transferase type-2 subunit alpha, putative     | -14.032  | -0.14451 | 1 |
| PITG_04242 | Pi phosphatase PTC7 family protein (2126 nt)                     | -14.955  | 0.109153 | 1 |
| PITG_04248 | Pi NPP1-like protein (760 nt)                                    | -15.2823 | 0.150293 | 1 |
| PITG_04428 | Pi conserved hypothetical protein (1092 nt)                      | -16.0096 | 0.237109 | 1 |
| PITG_04482 | Pi Drug/Metabolite Transporter (DMT) Superfamily (938 nt)        | -15.6175 | -0.13795 | 1 |
| PITG_04497 | Pi conserved hypothetical protein (3049 nt)                      | -14.7878 | 0.000495 | 1 |
| PITG_04529 | Pi formin-homology 2 domain-containing protein (5847 nt)         | -16.3046 | -0.07579 | 1 |
| PITG_04534 | Pi vacuolar protein sorting-associated protein 28 (917 nt)       | -13.3912 | -0.01278 | 1 |
| PITG_04539 | Pi conserved hypothetical protein (1156 nt)                      | -13.7356 | -0.03052 | 1 |
| PITG_04576 | Pi conserved hypothetical protein (528 nt)                       | -15.248  | 0.085658 | 1 |
| PITG_04638 | Pi conserved hypothetical protein (1703 nt)                      | -15.7221 | 0.156911 | 1 |
| PITG_04670 | Pi conserved hypothetical protein (2953 nt)                      | -15.7988 | 0.310319 | 1 |
| PITG_04683 | Pi bifunctional fold protein (897 nt)                            | -15.7187 | 0.191577 | 1 |

|            |                                                                                    |          |          |   |
|------------|------------------------------------------------------------------------------------|----------|----------|---|
| PITG_04695 | Pi conserved hypothetical protein (1557 nt)                                        | -15.7979 | 0.005999 | 1 |
| PITG_04702 | Pi conserved hypothetical protein (677 nt)                                         | -13.9799 | 0.064026 | 1 |
| PITG_04707 | Pi conserved hypothetical protein (657 nt)                                         | -14.766  | 0.061412 | 1 |
| PITG_04717 | Pi conserved hypothetical protein (1232 nt)                                        | -15.2286 | 0.112608 | 1 |
| PITG_04845 | Pi conserved hypothetical protein (1298 nt)                                        | -16.3439 | 0.127086 | 1 |
| PITG_04851 | Pi arginase (1366 nt)                                                              | -14.5571 | -0.20119 | 1 |
| PITG_04864 | Pi conserved hypothetical protein (1203 nt)                                        | -16.3894 | 0.157536 | 1 |
| PITG_04892 | Pi conserved hypothetical protein (838 nt)                                         | -15.7005 | 0.349406 | 1 |
| PITG_04905 | Pi conserved hypothetical protein (1634 nt)                                        | -14.3873 | 0.183902 | 1 |
| PITG_04918 | Pi alanyl-tRNA synthetase, putative (2754 nt)                                      | -16.8295 | -0.49203 | 1 |
| PITG_04956 | Pi conserved hypothetical protein (2657 nt)                                        | -15.2609 | -0.04048 | 1 |
| PITG_04959 | Pi conserved hypothetical protein (741 nt)                                         | -14.7437 | -0.11587 | 1 |
| PITG_04991 | Pi conserved hypothetical protein (1547 nt)                                        | -16.1441 | -0.09506 | 1 |
| PITG_05071 | Pi deoxyribose-phosphate aldolase 1 (485 nt)                                       | -16.1627 | 0.074907 | 1 |
| PITG_05127 | Pi fatty acid desaturase, putative (1421 nt)                                       | -15.4544 | -0.45439 | 1 |
| PITG_05197 | Pi conserved hypothetical protein (2513 nt)                                        | -16.1164 | -0.01791 | 1 |
| PITG_05221 | Pi Mitochondrial Carrier (MC) Family (849 nt)                                      | -15.3852 | 0.010067 | 1 |
| PITG_05234 | Pi conserved hypothetical protein (1855 nt)                                        | -14.4006 | -0.16818 | 1 |
| PITG_05278 | Pi conserved hypothetical protein (2856 nt)                                        | -16.6957 | -0.83911 | 1 |
| PITG_05329 | Pi conserved hypothetical protein (1933 nt)                                        | -15.6327 | 0.088659 | 1 |
| PITG_05332 | Pi Voltage-gated Ion Channel (VIC) Superfamily (3165 nt)                           | -16.3055 | 0.109587 | 1 |
| PITG_05358 | Pi conserved hypothetical protein (3236 nt)                                        | -16.552  | 0.061151 | 1 |
| PITG_05366 | Pi branchpoint-bridging protein, putative (1940 nt)                                | -14.5281 | 0.18965  | 1 |
| PITG_05375 | Pi conserved hypothetical protein (810 nt)                                         | -14.7349 | -0.15917 | 1 |
| PITG_05396 | Pi hypothetical protein (768 nt)                                                   | -15.1831 | 0.294897 | 1 |
| PITG_05404 | Pi conserved hypothetical protein (3297 nt)                                        | -15.2941 | -0.13533 | 1 |
| PITG_05461 | Pi mitotic spindle assembly checkpoint protein MAD1, putative (1764 nt)            | -15.0288 | -0.11511 | 1 |
| PITG_05487 | Pi cyclin-dependent kinase, putative (1764 nt)                                     | -15.3955 | -0.08113 | 1 |
| PITG_05501 | Pi Non-selective Cation Channel-2 (NSCC2) Family (1144 nt)                         | -13.4084 | -0.0105  | 1 |
| PITG_05503 | Pi cyclin-C, putative (1179 nt)                                                    | -16.1267 | 0.003809 | 1 |
| PITG_05507 | Pi conserved hypothetical protein (2671 nt)                                        | -15.9673 | -0.21161 | 1 |
| PITG_05509 | Pi conserved hypothetical protein (3108 nt)                                        | -15.2646 | -0.06791 | 1 |
| PITG_05520 | Pi glutamine-dependent NAD(+) synthetase, putative (2148 nt)                       | -14.7395 | 0.161598 | 1 |
| PITG_05536 | Pi RNA pseudouridylate synthase, putative (2491 nt)                                | -16.2079 | -0.20173 | 1 |
| PITG_05540 | Pi conserved hypothetical protein (824 nt)                                         | -14.2496 | 0.041801 | 1 |
| PITG_05564 | Pi conserved hypothetical protein (1122 nt)                                        | -15.8517 | -0.12598 | 1 |
| PITG_05592 | Pi conserved hypothetical protein (1082 nt)                                        | -14.2977 | -0.1053  | 1 |
| PITG_05594 | Pi O-sialoglycoprotein endopeptidase, putative (5148 nt)                           | -16.2011 | 0.150085 | 1 |
| PITG_05604 | Pi conserved hypothetical protein (1808 nt)                                        | -16.2619 | 0.209953 | 1 |
| PITG_05622 | Pi conserved hypothetical protein (1762 nt)                                        | -14.7819 | 0.015188 | 1 |
| PITG_05649 | Pi glutamyl-tRNA synthetase, putative (2220 nt)                                    | -15.8175 | -0.1945  | 1 |
| PITG_05660 | Pi putative GPI-anchored serine rich tenascin-like glycoprotein (1770 nt)          | -11.6883 | -0.06176 | 1 |
| PITG_05683 | Pi conserved hypothetical protein (1770 nt)                                        | -14.5361 | 0.053889 | 1 |
| PITG_05685 | Pi transcription elongation factor SPT5, putative (3647 nt)                        | -14.5535 | 0.138022 | 1 |
| PITG_05692 | Pi histone-lysine N-methyltransferase, putative (3130 nt)                          | -15.4184 | 0.03992  | 1 |
| PITG_05705 | Pi ATP-binding Cassette (ABC) Superfamily (3956 nt)                                | -15.2642 | -0.22945 | 1 |
| PITG_05737 | Pi Transient Receptor Potential Ca <sup>2+</sup> Channel (TRP-CC) Family (1770 nt) | -14.996  | 0.104117 | 1 |

|            |                                                                  |          |          |   |
|------------|------------------------------------------------------------------|----------|----------|---|
| PITG_05752 | Pi conserved hypothetical protein (1549 nt)                      | -16.4408 | -0.22109 | 1 |
| PITG_05760 | Pi conserved hypothetical protein (1210 nt)                      | -15.7979 | 0.005999 | 1 |
| PITG_05763 | Pi conserved hypothetical protein (5005 nt)                      | -16.3286 | -0.31998 | 1 |
| PITG_05782 | Pi conserved hypothetical protein (1220 nt)                      | -16.6957 | -0.83911 | 1 |
| PITG_05816 | Pi conserved hypothetical protein (774 nt)                       | -15.5274 | 0.053793 | 1 |
| PITG_05856 | Pi conserved hypothetical protein (2438 nt)                      | -15.8668 | 0.143193 | 1 |
| PITG_05861 | Pi conserved hypothetical protein (1533 nt)                      | -14.0148 | 0.023271 | 1 |
| PITG_05867 | Pi sister chromatid cohesion protein DCC1, putative (1395 nt)    | -15.5295 | 0.426522 | 1 |
| PITG_05886 | Pi peptidyl-prolyl cis-trans isomerase ppi1 (858 nt)             | -14.4342 | -0.08137 | 1 |
| PITG_05907 | Pi conserved hypothetical protein (572 nt)                       | -14.5197 | -0.08799 | 1 |
| PITG_05955 | Pi serine protease family S09X, putative (1101 nt)               | -14.9221 | -0.19671 | 1 |
| PITG_05992 | Pi tetrapyrrole (Corrin/Porphyrin) Methylase, putative (919 r    | -15.2385 | 0.065646 | 1 |
| PITG_06015 | Pi glucokinase, putative (1401 nt)                               | -13.2087 | -0.00794 | 1 |
| PITG_06101 | Pi conserved hypothetical protein (1162 nt)                      | -15.0664 | -0.10288 | 1 |
| PITG_06165 | Pi conserved hypothetical protein (1561 nt)                      | -15.814  | -0.29849 | 1 |
| PITG_06170 | Pi conserved hypothetical protein (2517 nt)                      | -15.1378 | -0.40699 | 1 |
| PITG_06240 | Pi conserved hypothetical protein (1690 nt)                      | -15.5376 | -0.42558 | 1 |
| PITG_06285 | Pi conserved hypothetical protein (998 nt)                       | -15.3316 | -0.21376 | 1 |
| PITG_06332 | Pi sugar transporter, putative (1545 nt)                         | -15.3128 | 0.383734 | 1 |
| PITG_06342 | Pi conserved hypothetical protein (4365 nt)                      | -15.1607 | -0.0568  | 1 |
| PITG_06346 | Pi conserved hypothetical protein (1456 nt)                      | -16.4408 | -0.22109 | 1 |
| PITG_06353 | Pi conserved hypothetical protein (1707 nt)                      | -15.767  | -0.29532 | 1 |
| PITG_06369 | Pi myosin-like protein (840 nt)                                  | -14.5342 | -0.22565 | 1 |
| PITG_06380 | Pi conserved hypothetical protein (6592 nt)                      | -15.585  | -0.3296  | 1 |
| PITG_06384 | Pi conserved hypothetical protein (868 nt)                       | -16.172  | 0.415969 | 1 |
| PITG_06393 | Pi hypothetical protein (2765 nt)                                | -16.1356 | -0.40933 | 1 |
| PITG_06429 | Pi HECT E3 ubiquitin ligase, putative (14892 nt)                 | -14.9677 | 0.165104 | 1 |
| PITG_06440 | Pi eukaryotic translation initiation factor 2A, putative (2232 r | -15.2568 | 0.136071 | 1 |
| PITG_06453 | Pi conserved hypothetical protein (363 nt)                       | -14.3698 | -0.14941 | 1 |
| PITG_06539 | Pi conserved hypothetical protein (540 nt)                       | -15.0889 | 0.004838 | 1 |
| PITG_06574 | Pi long-chain-fatty-acid-CoA ligase, putative (1887 nt)          | -15.1615 | 0.047681 | 1 |
| PITG_06657 | Pi thioredoxin-like protein (1092 nt)                            | -13.7657 | 0.165147 | 1 |
| PITG_06692 | Pi serine protease family S09X, putative (1285 nt)               | -14.6378 | 0.101291 | 1 |
| PITG_06705 | Pi conserved hypothetical protein (1633 nt)                      | -15.4668 | -0.4776  | 1 |
| PITG_06706 | Pi conserved hypothetical protein (445 nt)                       | -15.1606 | 0.186248 | 1 |
| PITG_06735 | Pi conserved hypothetical protein (1696 nt)                      | -14.5671 | -0.28488 | 1 |
| PITG_06753 | Pi paired amphipathic helix protein Sin3, putative (4834 nt)     | -14.2647 | -0.17174 | 1 |
| PITG_06760 | Pi conserved hypothetical protein (696 nt)                       | -13.8211 | 0.017085 | 1 |
| PITG_06762 | Pi conserved hypothetical protein (2014 nt)                      | -13.2958 | -0.1349  | 1 |
| PITG_06782 | Pi serine protease family S33, putative (6984 nt)                | -16.2396 | -0.08153 | 1 |
| PITG_06793 | Pi conserved hypothetical protein (918 nt)                       | -15.4973 | -0.25108 | 1 |
| PITG_06818 | Pi conserved hypothetical protein (1546 nt)                      | -15.6183 | -0.05359 | 1 |
| PITG_06828 | Pi trehalose-phosphatase, putative (3522 nt)                     | -14.0117 | 0.15242  | 1 |
| PITG_06832 | Pi ubiquitin-specific protease, putative (5758 nt)               | -15.7519 | -0.32563 | 1 |
| PITG_06852 | Pi ATP-binding Cassette (ABC) Superfamily (1918 nt)              | -14.4287 | -0.07031 | 1 |
| PITG_06877 | Pi conserved hypothetical protein (2757 nt)                      | -15.0061 | 0.096092 | 1 |
| PITG_06895 | Pi conserved hypothetical protein (1823 nt)                      | -13.9287 | 0.004293 | 1 |

|            |                                                               |          |          |   |
|------------|---------------------------------------------------------------|----------|----------|---|
| PITG_06899 | Pi conserved hypothetical protein (2743 nt)                   | -15.6752 | 0.021448 | 1 |
| PITG_06942 | Pi conserved hypothetical protein (876 nt)                    | -15.45   | -0.42884 | 1 |
| PITG_06944 | Pi conserved hypothetical protein (547 nt)                    | -15.6437 | 0.274673 | 1 |
| PITG_06948 | Pi ubiquitin-conjugating enzyme E2, putative (689 nt)         | -13.5343 | -0.0789  | 1 |
| PITG_07028 | Pi peptidyl-prolyl cis-trans isomerase, putative (867 nt)     | -12.7698 | 0.137775 | 1 |
| PITG_07036 | Pi ubiquitin activating enzyme, E1 family, putative (3451 nt) | -14.171  | -0.06149 | 1 |
| PITG_07043 | Pi conserved hypothetical protein (333 nt)                    | -14.358  | 0.179435 | 1 |
| PITG_07053 | Pi conserved hypothetical protein (2053 nt)                   | -13.8826 | 0.007974 | 1 |
| PITG_07060 | Pi hypothetical protein (943 nt)                              | -16.3403 | -0.42214 | 1 |
| PITG_07104 | Pi ADP-ribosylation factor GTPase-activating protein, putativ | -15.7903 | 0.079464 | 1 |
| PITG_07162 | Pi sideroflexin-1-like protein (978 nt)                       | -14.5024 | -0.05297 | 1 |
| PITG_07164 | Pi serine protease family S10, putative (1488 nt)             | -14.7286 | -0.00353 | 1 |
| PITG_07174 | Pi ribonuclease P protein subunit p30, putative (1028 nt)     | -16.0281 | 0.127206 | 1 |
| PITG_07176 | Pi conserved hypothetical protein (1854 nt)                   | -16.8295 | -0.49203 | 1 |
| PITG_07194 | Pi conserved hypothetical protein (3420 nt)                   | -15.2076 | 0.037624 | 1 |
| PITG_07195 | Pi AP-4 complex subunit sigma, putative (919 nt)              | -13.5364 | 0.026626 | 1 |
| PITG_07234 | Pi ligatin, putative (1807 nt)                                | -15.2267 | 0.008868 | 1 |
| PITG_07245 | Pi conserved hypothetical protein (465 nt)                    | -16.1677 | -0.03159 | 1 |
| PITG_07247 | Pi conserved hypothetical protein (4390 nt)                   | -15.3007 | 0.039069 | 1 |
| PITG_07274 | Pi mitogen-activated protein kinase (3258 nt)                 | -15.5012 | -0.05011 | 1 |
| PITG_07282 | Pi WD domain-containing protein (1083 nt)                     | -15.8285 | -0.07562 | 1 |
| PITG_07338 | Pi conserved hypothetical protein (1062 nt)                   | -14.8639 | -0.21788 | 1 |
| PITG_07354 | Pi acylamino-acid-releasing enzyme (2435 nt)                  | -15.6679 | -0.49355 | 1 |
| PITG_07546 | Pi replication protein A 32 kDa subunit, putative (780 nt)    | -14.6318 | 0.042808 | 1 |
| PITG_07570 | Pi conserved hypothetical protein (666 nt)                    | -14.3709 | -0.00115 | 1 |
| PITG_07589 | Pi conserved hypothetical protein (2082 nt)                   | -14.3423 | 0.266426 | 1 |
| PITG_07655 | Pi conserved hypothetical protein (12588 nt)                  | -15.1443 | -0.27389 | 1 |
| PITG_07661 | Pi Major Facilitator Superfamily (MFS) (1689 nt)              | -15.841  | 0.204359 | 1 |
| PITG_07730 | Pi conserved hypothetical protein (1130 nt)                   | -15.8576 | -0.11412 | 1 |
| PITG_07744 | Pi DEAD/DEAH box RNA helicase, putative (4125 nt)             | -15.998  | 0.166521 | 1 |
| PITG_07807 | Pi conserved hypothetical protein (1300 nt)                   | -12.6768 | -0.12899 | 1 |
| PITG_07809 | Pi casein kinase I, putative (1634 nt)                        | -14.4962 | -0.2526  | 1 |
| PITG_07827 | Pi conserved hypothetical protein (426 nt)                    | -12.3131 | 0.061783 | 1 |
| PITG_07846 | Pi glycylopeptide N-tetradecanoyltransferase 2 (1609 nt)      | -13.0808 | -0.18052 | 1 |
| PITG_07902 | Pi chromodomain protein, putative (1692 nt)                   | -16.2446 | -0.1297  | 1 |
| PITG_07948 | Pi choline dehydrogenase, putative (2556 nt)                  | -15.3835 | -0.03121 | 1 |
| PITG_07976 | Pi conserved hypothetical protein (1462 nt)                   | -14.3005 | -0.06363 | 1 |
| PITG_08003 | Pi conserved hypothetical protein (939 nt)                    | -15.4155 | -0.18133 | 1 |
| PITG_08022 | Pi threonine dehydratase, putative (2138 nt)                  | -15.501  | -0.01018 | 1 |
| PITG_08032 | Pi P-type ATPase (P-ATPase) Superfamily (3892 nt)             | -15.7    | -0.09983 | 1 |
| PITG_08035 | Pi DNA repair protein radA (1626 nt)                          | -15.9332 | 0.139047 | 1 |
| PITG_08136 | Pi conserved hypothetical protein (1126 nt)                   | -14.541  | -0.07249 | 1 |
| PITG_08176 | Pi conserved hypothetical protein (747 nt)                    | -16.4624 | 0.013324 | 1 |
| PITG_08189 | Pi pre-mRNA-splicing factor, Crooked neck-like protein (2214  | -14.5922 | -0.06067 | 1 |
| PITG_08197 | Pi mitochondrial intermediate peptidase, putative (2390 nt)   | -15.5486 | 0.391018 | 1 |
| PITG_08229 | Pi conserved hypothetical protein (3037 nt)                   | -16.0264 | -0.14491 | 1 |
| PITG_08294 | Pi hypothetical protein (513 nt)                              | -13.6741 | 0.21871  | 1 |

|            |                                                               |          |          |   |
|------------|---------------------------------------------------------------|----------|----------|---|
| PITG_08303 | Pi conserved hypothetical protein (627 nt)                    | -15.2424 | 0.006101 | 1 |
| PITG_08348 | Pi conserved hypothetical protein (1583 nt)                   | -15.8224 | -0.1847  | 1 |
| PITG_08368 | Pi peptidyl-prolyl cis-trans isomerase-like protein (1620 nt) | -15.897  | 0.063045 | 1 |
| PITG_08420 | Pi metalloprotease family M76, putative (912 nt)              | -14.965  | -0.05119 | 1 |
| PITG_08436 | Pi conserved hypothetical protein (965 nt)                    | -16.202  | -0.04084 | 1 |
| PITG_08452 | Pi conserved hypothetical protein (1493 nt)                   | -14.0577 | -0.19056 | 1 |
| PITG_08455 | Pi conserved hypothetical protein (3744 nt)                   | -16.1573 | -0.13    | 1 |
| PITG_08462 | Pi actin-related protein 2/3 complex subunit 3, putative (186 | -13.035  | -0.13834 | 1 |
| PITG_08463 | Pi coatomer subunit epsilon, putative (879 nt)                | -14.9871 | -0.28317 | 1 |
| PITG_08495 | Pi hypothetical protein (1083 nt)                             | -13.6665 | -0.15269 | 1 |
| PITG_08502 | Pi conserved hypothetical protein (477 nt)                    | -16.206  | -0.56498 | 1 |
| PITG_08514 | Pi conserved hypothetical protein (2772 nt)                   | -14.8699 | -0.301   | 1 |
| PITG_08566 | Pi conserved hypothetical protein (964 nt)                    | -15.8066 | 0.252257 | 1 |
| PITG_08587 | Pi histone acetyltransferase, putative (3984 nt)              | -15.7291 | -0.08665 | 1 |
| PITG_08643 | Pi conserved hypothetical protein (1491 nt)                   | -15.5587 | 0.143742 | 1 |
| PITG_08675 | Pi conserved hypothetical protein (1420 nt)                   | -14.8154 | -0.05482 | 1 |
| PITG_08679 | Pi oxidoreductase family, putative (1247 nt)                  | -14.5525 | -0.26277 | 1 |
| PITG_08686 | Pi conserved hypothetical protein (1483 nt)                   | -15.932  | -0.01688 | 1 |
| PITG_08690 | Pi conserved hypothetical protein (1245 nt)                   | -16.1902 | -0.52903 | 1 |
| PITG_08734 | Pi Chloride Channel (ClC) Family (2874 nt)                    | -14.8339 | -0.16152 | 1 |
| PITG_08776 | Pi conserved hypothetical protein (1862 nt)                   | -15.5143 | -0.06384 | 1 |
| PITG_08800 | Pi conserved hypothetical protein (1140 nt)                   | -14.9244 | 0.353013 | 1 |
| PITG_08827 | Pi VAC14 family protein (2543 nt)                             | -15.8237 | 0.102321 | 1 |
| PITG_08834 | Pi ribosomal protein L37e, putative (1032 nt)                 | -8.6082  | 0.019038 | 1 |
| PITG_08901 | Pi protein kinase, putative (1572 nt)                         | -16.1172 | -0.32642 | 1 |
| PITG_08919 | Pi conserved hypothetical protein (1520 nt)                   | -15.6182 | -0.17061 | 1 |
| PITG_08964 | Pi Mitochondrial Carrier (MC) Family (1098 nt)                | -15.2718 | -0.08943 | 1 |
| PITG_08967 | Pi protein kinase, putative (1830 nt)                         | -16.8505 | -0.53231 | 1 |
| PITG_08980 | Pi conserved hypothetical protein (1116 nt)                   | -14.0874 | 0.082885 | 1 |
| PITG_08993 | Pi conserved hypothetical protein (1098 nt)                   | -16.0984 | -0.48403 | 1 |
| PITG_08998 | Pi endoglucanase, putative (1107 nt)                          | -15.6707 | 0.229224 | 1 |
| PITG_09001 | Pi conserved hypothetical protein (747 nt)                    | -14.3941 | 0.108361 | 1 |
| PITG_09042 | Pi DEAD/DEAH box RNA helicase, putative (3199 nt)             | -16.4035 | 0.36521  | 1 |
| PITG_09138 | Pi conserved hypothetical protein (2648 nt)                   | -16.6957 | -0.83911 | 1 |
| PITG_09222 | Pi conserved hypothetical protein (914 nt)                    | -15.6729 | -0.48356 | 1 |
| PITG_09241 | Pi conserved hypothetical protein (927 nt)                    | -14.1098 | 0.172858 | 1 |
| PITG_09244 | Pi conserved hypothetical protein (3048 nt)                   | -15.2203 | 0.030169 | 1 |
| PITG_09273 | Pi AMP deaminase 2 (1375 nt)                                  | -15.1629 | 0.121096 | 1 |
| PITG_09393 | Pi pyruvate kinase (1566 nt)                                  | -14.6539 | 0.066432 | 1 |
| PITG_09414 | Pi conserved hypothetical protein (796 nt)                    | -16.3668 | -0.1814  | 1 |
| PITG_09422 | Pi conserved hypothetical protein (1463 nt)                   | -16.6654 | -0.36831 | 1 |
| PITG_09439 | Pi conserved hypothetical protein (1563 nt)                   | -14.8996 | -0.05897 | 1 |
| PITG_09442 | Pi 40S ribosomal protein S21 (659 nt)                         | -8.74385 | 0.027899 | 1 |
| PITG_09446 | Pi conserved hypothetical protein (790 nt)                    | -14.3582 | -0.08476 | 1 |
| PITG_09448 | Pi conserved hypothetical protein (2938 nt)                   | -16.4892 | -0.41989 | 1 |
| PITG_09456 | Pi nitroreductase family, putative (844 nt)                   | -15.6487 | -0.20342 | 1 |
| PITG_09462 | Pi conserved hypothetical protein (1397 nt)                   | -16.3289 | 0.096999 | 1 |

|            |                                                                |          |          |   |
|------------|----------------------------------------------------------------|----------|----------|---|
| PITG_09475 | Pi conserved hypothetical protein (818 nt)                     | -14.7584 | 0.067558 | 1 |
| PITG_09507 | Pi ADP-ribosylation factor-related protein, putative (938 nt)  | -14.3337 | -0.13377 | 1 |
| PITG_09534 | Pi conserved hypothetical protein (893 nt)                     | -15.8646 | -0.10021 | 1 |
| PITG_09535 | Pi conserved hypothetical protein (1213 nt)                    | -16.0264 | -0.14491 | 1 |
| PITG_09536 | Pi phosphoribosylaminoimidazole-succinocarboxamide synt        | -15.7187 | 0.025993 | 1 |
| PITG_09566 | Pi inositol monophosphatase, putative (2768 nt)                | -15.1409 | -0.24594 | 1 |
| PITG_09585 | Pi secreted RxLR effector peptide, putative (1020 nt)          | -15.6386 | -0.26765 | 1 |
| PITG_09620 | Pi protein kinase (354 nt)                                     | -15.3222 | -0.15733 | 1 |
| PITG_09625 | Pi conserved hypothetical protein (1359 nt)                    | -16.1147 | -0.44543 | 1 |
| PITG_09629 | Pi Rab32/38 family GTPase, putative (663 nt)                   | -13.7263 | 0.106881 | 1 |
| PITG_09653 | Pi U6 snRNA-associated Sm-like protein LSm4, putative (513     | -13.5799 | -0.13177 | 1 |
| PITG_09671 | Pi receptor-type tyrosine-protein phosphatase, putative (108   | -15.714  | -0.20771 | 1 |
| PITG_09707 | Pi mitochondrial import inner membrane translocase subuni      | -15.2305 | -0.06675 | 1 |
| PITG_09714 | Pi conserved hypothetical protein (1011 nt)                    | -17.0056 | -0.82043 | 1 |
| PITG_09725 | Pi conserved hypothetical protein (1057 nt)                    | -14.5915 | -0.11489 | 1 |
| PITG_09737 | Pi hypothetical protein (1053 nt)                              | -15.7492 | -0.43258 | 1 |
| PITG_09752 | Pi conserved hypothetical protein (1140 nt)                    | -16.3364 | -0.36698 | 1 |
| PITG_09753 | Pi conserved hypothetical protein (945 nt)                     | -15.8208 | 0.14057  | 1 |
| PITG_09795 | Pi conserved hypothetical protein (553 nt)                     | -13.9613 | 0.093591 | 1 |
| PITG_09826 | Pi conserved hypothetical protein (2803 nt)                    | -16.0149 | 0.051941 | 1 |
| PITG_09862 | Pi conserved hypothetical protein (2193 nt)                    | -14.0313 | -0.05357 | 1 |
| PITG_09876 | Pi conserved hypothetical protein (4114 nt)                    | -15.9497 | -0.19261 | 1 |
| PITG_09899 | Pi cleavage induced hypothetical protein (2638 nt)             | -16.0324 | -0.18617 | 1 |
| PITG_09906 | Pi arabinogalactan endo-1,4-beta-galactosidase, putative (10   | -14.8605 | -0.07779 | 1 |
| PITG_09921 | Pi conserved hypothetical protein (1779 nt)                    | -16.6957 | -0.83911 | 1 |
| PITG_09923 | Pi 6-phosphofructo-2-kinase/fructose-2,6-biphosphatase, pu     | -15.1707 | 0.299855 | 1 |
| PITG_09937 | Pi dolichol-phosphate mannosyltransferase (1075 nt)            | -14.5489 | -0.14429 | 1 |
| PITG_09964 | Pi cellulose synthase 2 (3336 nt)                              | -11.9803 | 0.037867 | 1 |
| PITG_09986 | Pi conserved hypothetical protein (2917 nt)                    | -15.0407 | 0.194417 | 1 |
| PITG_09996 | Pi conserved hypothetical protein (720 nt)                     | -13.755  | -0.14661 | 1 |
| PITG_10023 | Pi chromodomain protein, putative (1050 nt)                    | -15.1288 | 0.053721 | 1 |
| PITG_10061 | Pi regulator of chromosome condensation (RCC1), putative (     | -14.7865 | -0.0029  | 1 |
| PITG_10062 | Pi protein kinase, putative (2188 nt)                          | -16.0685 | -0.06071 | 1 |
| PITG_10068 | Pi polycomb-like protein (3343 nt)                             | -15.5493 | 0.086151 | 1 |
| PITG_10080 | Pi uroporphyrinogen-III synthase, putative (874 nt)            | -15.5433 | 0.213773 | 1 |
| PITG_10120 | Pi conserved hypothetical protein (1718 nt)                    | -16.7645 | -0.54389 | 1 |
| PITG_10134 | Pi signal peptide peptidase-like, aspartyl protease family A22 | -14.7953 | 0.068034 | 1 |
| PITG_10163 | Pi conserved hypothetical protein (2631 nt)                    | -15.1839 | -0.07626 | 1 |
| PITG_10167 | Pi eukaryotic translation initiation factor 4 gamma 2, putativ | -14.8081 | 0.093793 | 1 |
| PITG_10196 | Pi conserved hypothetical protein (444 nt)                     | -14.9897 | -0.03156 | 1 |
| PITG_10314 | Pi conserved hypothetical protein (1568 nt)                    | -16.0118 | -0.17658 | 1 |
| PITG_10388 | Pi myosin-like protein (2458 nt)                               | -14.9485 | 0.038351 | 1 |
| PITG_10393 | Pi conserved hypothetical protein (522 nt)                     | -16.7714 | -0.60815 | 1 |
| PITG_10399 | Pi glycoside hydrolase, putative (1473 nt)                     | -16.6957 | -0.83911 | 1 |
| PITG_10400 | Pi conserved hypothetical protein (501 nt)                     | -14.9341 | 0.067565 | 1 |
| PITG_10408 | Pi SCP-like extracellular protein (612 nt)                     | -16.4241 | -0.12923 | 1 |
| PITG_10442 | Pi conserved hypothetical protein (3895 nt)                    | -14.0432 | -0.06905 | 1 |

|            |                                                               |          |          |   |
|------------|---------------------------------------------------------------|----------|----------|---|
| PITG_10457 | Pi RNA-dependent RNA Polymerase1 (RDR1) (8085 nt)             | -16.516  | -0.50977 | 1 |
| PITG_10461 | Pi conserved hypothetical protein (3195 nt)                   | -14.9372 | -0.36977 | 1 |
| PITG_10492 | Pi lactation elevated protein 1 (1345 nt)                     | -16.3289 | 0.096999 | 1 |
| PITG_10508 | Pi programmed cell death protein 2, putative (1313 nt)        | -16.516  | -0.50977 | 1 |
| PITG_10521 | Pi hypothetical protein (2059 nt)                             | -16.2424 | -0.62919 | 1 |
| PITG_10594 | Pi conserved hypothetical protein (1834 nt)                   | -15.732  | -0.03597 | 1 |
| PITG_10602 | Pi DNA repair protein, putative (1974 nt)                     | -16.2702 | -0.50029 | 1 |
| PITG_10663 | Pi Multidrug/Oligosaccharidyl-lipid/Polysaccharide (MOP) Fli  | -15.2426 | -0.04183 | 1 |
| PITG_10795 | Pi conserved hypothetical protein (1944 nt)                   | -15.6112 | -0.02333 | 1 |
| PITG_10853 | Pi conserved hypothetical protein (2451 nt)                   | -15.7568 | -0.08145 | 1 |
| PITG_10877 | Pi peptidyl-prolyl cis-trans isomerase, putative (765 nt)     | -16.3364 | -0.36698 | 1 |
| PITG_10894 | Pi hypothetical protein (1440 nt)                             | -15.3565 | 0.043937 | 1 |
| PITG_10898 | Pi conserved hypothetical protein (1503 nt)                   | -15.9625 | -0.22059 | 1 |
| PITG_10912 | Pi conserved hypothetical protein (2094 nt)                   | -15.802  | -0.03588 | 1 |
| PITG_10954 | Pi conserved hypothetical protein (1466 nt)                   | -16.4168 | 0.155276 | 1 |
| PITG_10968 | Pi CCR4-NOT transcription complex subunit, putative (2343 r   | -15.8272 | 0.20001  | 1 |
| PITG_10994 | Pi mitochondrial inner membrane protease subunit, putative    | -15.1511 | -0.10832 | 1 |
| PITG_10998 | Pi Glycogen Synthase Kinase 3 beta (1776 nt)                  | -13.2995 | -0.02318 | 1 |
| PITG_11000 | Pi ATP-dependent RNA helicase, putative (4637 nt)             | -16.8295 | -0.49203 | 1 |
| PITG_11083 | Pi conserved hypothetical protein (1864 nt)                   | -15.4997 | 0.239154 | 1 |
| PITG_11106 | Pi gamma-tubulin complex component, putative (3933 nt)        | -15.4625 | 0.052804 | 1 |
| PITG_11127 | Pi coatomer subunit delta, putative (2147 nt)                 | -13.3811 | 0.139415 | 1 |
| PITG_11142 | Pi protein farnesyltransferase/geranylgeranyltransferase, pu  | -14.9895 | -0.19378 | 1 |
| PITG_11158 | Pi pre-mRNA-splicing factor SYF1-like protein (3102 nt)       | -15.5846 | 0.156821 | 1 |
| PITG_11195 | Pi conserved hypothetical protein (4033 nt)                   | -16.8295 | -0.49203 | 1 |
| PITG_11273 | Pi ubiquitin-specific protease, putative (4337 nt)            | -15.7465 | -0.0525  | 1 |
| PITG_11308 | Pi conserved hypothetical protein (4502 nt)                   | -16.3286 | -0.31998 | 1 |
| PITG_11437 | Pi axonemal dynein heavy chain (12898 nt)                     | -15.49   | -0.30694 | 1 |
| PITG_11458 | Pi prostaglandin E synthase, putative (972 nt)                | -16.0096 | 0.237109 | 1 |
| PITG_11460 | Pi conserved hypothetical protein (1836 nt)                   | -14.3824 | 0.186497 | 1 |
| PITG_11494 | Pi Multidrug/Oligosaccharidyl-lipid/Polysaccharide (MOP) Fli  | -16.484  | -0.35456 | 1 |
| PITG_11587 | Pi inositol-3,4-bisphosphate 4-phosphatase, putative (3909 r  | -15.2343 | -0.0937  | 1 |
| PITG_11680 | Pi conserved hypothetical protein (1246 nt)                   | -16.9472 | -0.93654 | 1 |
| PITG_11704 | Pi lectin, putative (1295 nt)                                 | -14.052  | 0.036593 | 1 |
| PITG_11705 | Pi conserved hypothetical protein (1608 nt)                   | -16.2278 | 0.149836 | 1 |
| PITG_11710 | Pi conserved hypothetical protein (996 nt)                    | -13.7999 | 0.02669  | 1 |
| PITG_11723 | Pi vacuolar protein sorting-associated protein, putative (169 | -15.6783 | 0.343342 | 1 |
| PITG_11729 | Pi conserved hypothetical protein (1065 nt)                   | -13.9909 | 0.110973 | 1 |
| PITG_11735 | Pi conserved hypothetical protein (4995 nt)                   | -15.4862 | 0.212374 | 1 |
| PITG_11752 | Pi protein phosphatase 1L-like protein (3063 nt)              | -16.1735 | -0.26975 | 1 |
| PITG_11802 | Pi conserved hypothetical protein (1997 nt)                   | -15.6387 | 0.031686 | 1 |
| PITG_11805 | Pi splicing factor, arginine/serine-rich, putative (950 nt)   | -14.9411 | -0.29057 | 1 |
| PITG_11807 | Pi serine protease, putative (1325 nt)                        | -15.2283 | -0.34574 | 1 |
| PITG_11895 | Pi conserved hypothetical protein (3251 nt)                   | -15.776  | -0.48405 | 1 |
| PITG_11899 | Pi hypothetical protein (331 nt)                              | -14.7197 | 0.166011 | 1 |
| PITG_11927 | Pi conserved hypothetical protein (336 nt)                    | -15.5487 | -0.44772 | 1 |
| PITG_11960 | Pi Amino Acid-Polyamine-Organocation (APC) Family (1552 r     | -16.4156 | -0.27523 | 1 |

|            |                                                                                      |          |          |   |
|------------|--------------------------------------------------------------------------------------|----------|----------|---|
| PITG_11964 | Pi conserved hypothetical protein (2189 nt)                                          | -16.4776 | -0.02229 | 1 |
| PITG_11998 | Pi chromatin modification-related protein EAF3, putative (11                         | -15.4188 | 0.114813 | 1 |
| PITG_12001 | Pi conserved hypothetical protein (879 nt)                                           | -14.8666 | -0.21828 | 1 |
| PITG_12112 | Pi conserved hypothetical protein (4899 nt)                                          | -16.6302 | -0.28028 | 1 |
| PITG_12120 | Pi NPL4-like protein (1332 nt)                                                       | -14.625  | 0.122596 | 1 |
| PITG_12128 | Pi F-box protein, putative (1121 nt)                                                 | -14.9342 | 0.010468 | 1 |
| PITG_12149 | Pi conserved hypothetical protein (1073 nt)                                          | -15.4545 | -0.22333 | 1 |
| PITG_12166 | Pi twinkle protein, putative (2264 nt)                                               | -16.8505 | -0.53231 | 1 |
| PITG_12219 | Pi Zinc (Zn <sup>2+</sup> )-Iron (Fe <sup>2+</sup> ) Permease (ZIP) Family (1002 nt) | -15.8056 | -0.07425 | 1 |
| PITG_12284 | Pi hypothetical protein (1024 nt)                                                    | -16.3285 | -0.09963 | 1 |
| PITG_12302 | Pi conserved hypothetical protein (1683 nt)                                          | -13.8608 | 0.192815 | 1 |
| PITG_12306 | Pi conserved hypothetical protein (986 nt)                                           | -16.6767 | -0.18816 | 1 |
| PITG_12307 | Pi conserved hypothetical protein (922 nt)                                           | -15.0992 | -0.1792  | 1 |
| PITG_12316 | Pi conserved hypothetical protein (839 nt)                                           | -16.1874 | 0.393864 | 1 |
| PITG_12326 | Pi phosphatidylinositol kinase (PIK-A) (2963 nt)                                     | -15.0139 | -0.31657 | 1 |
| PITG_12330 | Pi cleavage and polyadenylation specificity factor subunit, pu                       | -15.1982 | 0.157607 | 1 |
| PITG_12427 | Pi conserved hypothetical protein (402 nt)                                           | -11.2371 | 0.042473 | 1 |
| PITG_12429 | Pi conserved hypothetical protein (1003 nt)                                          | -16.1868 | -0.6709  | 1 |
| PITG_12462 | Pi aconitate hydratase, putative (2179 nt)                                           | -14.1319 | -0.00533 | 1 |
| PITG_12489 | Pi protein arginine N-methyltransferase, putative (2166 nt)                          | -15.9464 | 0.015691 | 1 |
| PITG_12500 | Pi conserved hypothetical protein (925 nt)                                           | -13.9621 | 0.022634 | 1 |
| PITG_12516 | Pi poly [ADP-ribose] polymerase 2, putative (2573 nt)                                | -14.5229 | 0.265777 | 1 |
| PITG_12537 | Pi autophagy-related protein 7 (2290 nt)                                             | -14.6616 | -0.30665 | 1 |
| PITG_12576 | Pi conserved hypothetical protein (1154 nt)                                          | -14.9822 | -0.01669 | 1 |
| PITG_12674 | Pi sedoheptulokinase-like protein (2089 nt)                                          | -16.2702 | -0.50029 | 1 |
| PITG_12687 | Pi conserved hypothetical protein (1954 nt)                                          | -14.5776 | 0.027798 | 1 |
| PITG_12697 | Pi 30S ribosomal protein S9 (987 nt)                                                 | -14.3627 | 0.008241 | 1 |
| PITG_12739 | Pi hypothetical protein (1072 nt)                                                    | -14.359  | 0.017501 | 1 |
| PITG_12753 | Pi importin subunit alpha, putative (1916 nt)                                        | -14.4123 | -0.03769 | 1 |
| PITG_12793 | Pi short chain dehydrogenase, putative (510 nt)                                      | -16.0216 | -0.27818 | 1 |
| PITG_12864 | Pi asparaginyl-tRNA synthetase (1531 nt)                                             | -13.492  | 0.036427 | 1 |
| PITG_12914 | Pi inositol polyphosphate 5-phosphatase, putative (2695 nt)                          | -14.7562 | -0.01014 | 1 |
| PITG_12933 | Pi conserved hypothetical protein (366 nt)                                           | -14.882  | -0.12344 | 1 |
| PITG_13041 | Pi RNA polymerase-associated protein RTF1 (3271 nt)                                  | -13.5699 | -0.02673 | 1 |
| PITG_13101 | Pi fimbrin-like protein (2444 nt)                                                    | -12.927  | 0.007732 | 1 |
| PITG_13120 | Pi transmembrane protein, putative (1527 nt)                                         | -16.4945 | -0.05428 | 1 |
| PITG_13182 | Pi conserved hypothetical protein (1085 nt)                                          | -15.5474 | 0.082093 | 1 |
| PITG_13202 | Pi zinc transporter, putative (1965 nt)                                              | -15.2759 | -0.08048 | 1 |
| PITG_13290 | Pi conserved hypothetical protein (306 nt)                                           | -13.8669 | -0.24012 | 1 |
| PITG_13305 | Pi aldose 1-epimerase, putative (903 nt)                                             | -15.9907 | 0.062911 | 1 |
| PITG_13319 | Pi myosin-like protein (3989 nt)                                                     | -15.5764 | -0.09272 | 1 |
| PITG_13395 | Pi P-type ATPase (P-ATPase) Superfamily (5061 nt)                                    | -15.6057 | -0.03432 | 1 |
| PITG_13412 | Pi conserved hypothetical protein (1758 nt)                                          | -15.7069 | -0.08703 | 1 |
| PITG_13427 | Pi glutathione reductase (1624 nt)                                                   | -14.6742 | 0.220968 | 1 |
| PITG_13431 | Pi WD domain-containing protein, putative (1388 nt)                                  | -15.1066 | -0.34903 | 1 |
| PITG_13447 | Pi conserved hypothetical protein (1231 nt)                                          | -16.0817 | -0.45947 | 1 |
| PITG_13464 | Pi conserved hypothetical protein (2037 nt)                                          | -16.8295 | -0.49203 | 1 |



|            |                                                               |          |          |   |
|------------|---------------------------------------------------------------|----------|----------|---|
| PITG_13609 | Pi conserved hypothetical protein (3362 nt)                   | -15.9979 | -0.14877 | 1 |
| PITG_13622 | Pi conserved hypothetical protein (2319 nt)                   | -14.2267 | -0.24697 | 1 |
| PITG_13634 | Pi conserved hypothetical protein (1968 nt)                   | -14.6971 | -0.26363 | 1 |
| PITG_13717 | Pi transmembrane protein, putative (1502 nt)                  | -13.8468 | -0.17467 | 1 |
| PITG_13756 | Pi conserved hypothetical protein (846 nt)                    | -16.0159 | 0.793587 | 1 |
| PITG_13792 | Pi ribonuclease H2 subunit A, putative (3246 nt)              | -16.2241 | -0.59373 | 1 |
| PITG_13896 | Pi conserved hypothetical protein (1500 nt)                   | -14.9566 | 0.024493 | 1 |
| PITG_13899 | Pi conserved hypothetical protein (886 nt)                    | -16.344  | 0.069509 | 1 |
| PITG_13900 | Pi conserved hypothetical protein (759 nt)                    | -16.1627 | 0.074907 | 1 |
| PITG_13977 | Pi serine/threonine-protein phosphatase 6 regulatory subun    | -12.9678 | -0.12948 | 1 |
| PITG_13985 | Pi conserved hypothetical protein (1075 nt)                   | -14.9005 | 0.058769 | 1 |
| PITG_13988 | Pi conserved hypothetical protein (3543 nt)                   | -16.4776 | -0.02229 | 1 |
| PITG_13992 | Pi conserved hypothetical protein (834 nt)                    | -15.5779 | 0.143129 | 1 |
| PITG_13999 | Pi protein phosphatase 1 regulatory subunit, putative (1127   | -15.8175 | -0.1945  | 1 |
| PITG_14002 | Pi conserved hypothetical protein (1497 nt)                   | -13.3109 | 0.003215 | 1 |
| PITG_14048 | Pi conserved hypothetical protein (947 nt)                    | -15.9323 | -0.01239 | 1 |
| PITG_14111 | Pi vacuolar protein sorting-associated protein, putative (584 | -14.3941 | -0.20371 | 1 |
| PITG_14130 | Pi conserved hypothetical protein (1382 nt)                   | -13.814  | 0.09653  | 1 |
| PITG_14134 | Pi conserved hypothetical protein (2031 nt)                   | -15.7026 | -0.09516 | 1 |
| PITG_14141 | Pi 1,3-beta-glucanosyltransferase, putative (1645 nt)         | -14.8469 | -0.04925 | 1 |
| PITG_14181 | Pi long-chain fatty acid transporter, putative (2109 nt)      | -14.5747 | 0.157575 | 1 |
| PITG_14189 | Pi conserved hypothetical protein (1729 nt)                   | -16.1227 | -0.42949 | 1 |
| PITG_14215 | Pi carbohydrate esterase, putative (945 nt)                   | -15.7807 | -0.37337 | 1 |
| PITG_14230 | Pi calcium-transporting ATPase sarcoplasmic/endoplasmic re    | -14.6133 | 0.218442 | 1 |
| PITG_14278 | Pi eukaryotic translation initiation factor 4 gamma, putative | -13.7453 | -0.1047  | 1 |
| PITG_14389 | Pi conserved hypothetical protein (767 nt)                    | -13.8313 | 0.118543 | 1 |
| PITG_14398 | Pi vacuolar amino acid transporter, putative (1761 nt)        | -15.7034 | -0.32651 | 1 |
| PITG_14399 | Pi pre-mRNA-processing factor, putative (1860 nt)             | -15.8175 | -0.1945  | 1 |
| PITG_14557 | Pi conserved hypothetical protein (1092 nt)                   | -13.0861 | 0.142735 | 1 |
| PITG_14558 | Pi conserved hypothetical protein (774 nt)                    | -14.4075 | -0.02534 | 1 |
| PITG_14574 | Pi conserved hypothetical protein (1050 nt)                   | -16.4301 | -0.68073 | 1 |
| PITG_14577 | Pi conserved hypothetical protein (608 nt)                    | -15.1808 | -0.15294 | 1 |
| PITG_14602 | Pi conserved hypothetical protein (3807 nt)                   | -15.9742 | -0.19809 | 1 |
| PITG_14603 | Pi carbohydrate-binding protein, putative (1596 nt)           | -15.1025 | 0.102704 | 1 |
| PITG_14614 | Pi tubulin-specific chaperone C, putative (1365 nt)           | -15.7935 | -0.50741 | 1 |
| PITG_14617 | Pi conserved hypothetical protein (2167 nt)                   | -15.4763 | 0.041621 | 1 |
| PITG_14641 | Pi glutathione peroxidase, putative (973 nt)                  | -14.002  | 0.230872 | 1 |
| PITG_14654 | Pi conserved hypothetical protein (558 nt)                    | -16.0984 | -0.17861 | 1 |
| PITG_14697 | Pi cystathionine beta-synthase (1831 nt)                      | -14.6665 | -0.086   | 1 |
| PITG_14739 | Pi PexRD8 family secreted RxLR effector peptide, putative (4  | -11.7218 | -0.06803 | 1 |
| PITG_14766 | Pi conserved hypothetical protein (775 nt)                    | -14.1906 | 0.247598 | 1 |
| PITG_14768 | Pi conserved hypothetical protein (848 nt)                    | -13.8923 | 0.136553 | 1 |
| PITG_14807 | Pi tubulin gamma chain (1401 nt)                              | -15.6031 | 0.07355  | 1 |
| PITG_14808 | Pi ferrochelatase, mitochondrial precursor (1340 nt)          | -14.9454 | -0.09028 | 1 |
| PITG_14874 | Pi 6 snRNA-associated Sm-like protein, putative (900 nt)      | -14.0459 | 0.165358 | 1 |
| PITG_14886 | Pi conserved hypothetical protein (888 nt)                    | -16.3573 | -0.26456 | 1 |
| PITG_14898 | Pi conserved hypothetical protein (1830 nt)                   | -15.0873 | -0.30422 | 1 |

|            |                                                                  |          |          |   |
|------------|------------------------------------------------------------------|----------|----------|---|
| PITG_14944 | Pi conserved hypothetical protein (1707 nt)                      | -14.9239 | -0.19308 | 1 |
| PITG_14973 | Pi conserved hypothetical protein (2286 nt)                      | -16.1735 | -0.26975 | 1 |
| PITG_14975 | Pi acetoacetyl-coenzyme A synthetase (2821 nt)                   | -14.4426 | 0.06659  | 1 |
| PITG_14977 | Pi conserved hypothetical protein (2240 nt)                      | -15.9283 | -0.12344 | 1 |
| PITG_14988 | Pi prefoldin subunit, putative (546 nt)                          | -14.4615 | -0.02728 | 1 |
| PITG_15026 | Pi importin-like protein (3656 nt)                               | -16.2031 | 0.316032 | 1 |
| PITG_15075 | Pi Major Facilitator Superfamily (MFS) (2391 nt)                 | -15.9758 | -0.24728 | 1 |
| PITG_15085 | Pi conserved hypothetical protein (1043 nt)                      | -16.172  | 0.415969 | 1 |
| PITG_15119 | Pi Multidrug/Oligosaccharidyl-lipid/Polysaccharide (MOP) Fli     | -15.6561 | 0.440004 | 1 |
| PITG_15167 | Pi hypothetical protein (1374 nt)                                | -15.5966 | -0.35281 | 1 |
| PITG_15196 | Pi conserved hypothetical protein (1493 nt)                      | -16.2388 | -0.02766 | 1 |
| PITG_15243 | Pi phosphate acetyltransferase (2356 nt)                         | -15.2204 | -0.24633 | 1 |
| PITG_15257 | Pi conserved hypothetical protein (1148 nt)                      | -16.3749 | -0.22752 | 1 |
| PITG_15258 | Pi conserved hypothetical protein (2840 nt)                      | -16.441  | -0.16136 | 1 |
| PITG_15280 | Pi conserved hypothetical protein (3074 nt)                      | -14.438  | 0.079739 | 1 |
| PITG_15310 | Pi actin-like protein (1413 nt)                                  | -15.5493 | 0.086151 | 1 |
| PITG_15329 | Pi conserved hypothetical protein (1104 nt)                      | -14.6468 | 0.212752 | 1 |
| PITG_15394 | Pi serine protease family S33, putative (984 nt)                 | -14.5112 | -0.01458 | 1 |
| PITG_15417 | Pi asparagine synthetase domain-containing protein, putativ      | -15.5558 | -0.3073  | 1 |
| PITG_15479 | Pi conserved hypothetical protein (1362 nt)                      | -16.0947 | 0.152282 | 1 |
| PITG_15505 | Pi DNA polymerase epsilon catalytic subunit, putative (7237      | -16.216  | 0.286989 | 1 |
| PITG_15519 | Pi conserved hypothetical protein (522 nt)                       | -14.3102 | -0.08057 | 1 |
| PITG_15538 | Pi conserved hypothetical protein (1715 nt)                      | -16.0258 | 0.118456 | 1 |
| PITG_15566 | Pi RNA polymerase I-specific transcription initiation factor rr1 | -15.7642 | -0.01659 | 1 |
| PITG_15605 | Pi conserved hypothetical protein (1216 nt)                      | -13.3113 | -0.15146 | 1 |
| PITG_15607 | Pi conserved hypothetical protein (2897 nt)                      | -15.5771 | 0.278562 | 1 |
| PITG_15608 | Pi conserved hypothetical protein (1276 nt)                      | -15.4192 | -0.09134 | 1 |
| PITG_15677 | Pi conserved hypothetical protein (1168 nt)                      | -16.8505 | -0.53231 | 1 |
| PITG_15705 | Pi dihydrolipoamide succinyltransferase, putative (1737 nt)      | -14.4372 | 0.076928 | 1 |
| PITG_15755 | Pi AP-3 complex subunit beta, putative (3254 nt)                 | -15.2393 | -0.20784 | 1 |
| PITG_15778 | Pi diphosphomevalonate decarboxylase (1344 nt)                   | -16.2569 | 0.47394  | 1 |
| PITG_15810 | Pi eukaryotic translation initiation factor 3 subunit A, putativ | -15.6439 | 0.318668 | 1 |
| PITG_15843 | Pi acyltransferase family (1479 nt)                              | -16.7925 | -0.38932 | 1 |
| PITG_15874 | Pi conserved hypothetical protein (2007 nt)                      | -15.5266 | -0.12487 | 1 |
| PITG_15904 | Pi phosphoethanolamine N-methyltransferase, putative (162        | -12.4135 | -0.12015 | 1 |
| PITG_15981 | Pi conserved hypothetical protein (1575 nt)                      | -15.0228 | -0.25668 | 1 |
| PITG_16017 | Pi deoxyribose-phosphate aldolase (1144 nt)                      | -16.8505 | -0.53231 | 1 |
| PITG_16052 | Pi Animal Inward Rectifier K Channel (IRK-C) Family (1539 nt     | -13.5267 | 0.055273 | 1 |
| PITG_16055 | Pi lysosomal Pro-X carboxypeptidase, putative (1710 nt)          | -15.2463 | -0.26771 | 1 |
| PITG_16118 | Pi conserved hypothetical protein (2399 nt)                      | -12.1363 | 0.031544 | 1 |
| PITG_16121 | Pi conserved hypothetical protein (2156 nt)                      | -15.1143 | 0.217458 | 1 |
| PITG_16126 | Pi Dicarboxylate/Amino Acid:Cation (Na or H ) Symporter (D       | -14.6945 | -0.08088 | 1 |
| PITG_16163 | Pi conserved hypothetical protein (669 nt)                       | -15.6899 | 0.115739 | 1 |
| PITG_16312 | Pi vacuolar protein sorting-associated protein 53 (2653 nt)      | -16.1257 | -0.51978 | 1 |
| PITG_16317 | Pi regulator of microtubule dynamics protein, putative (1848     | -15.3681 | 0.257356 | 1 |
| PITG_16319 | Pi conserved hypothetical protein (791 nt)                       | -16.5357 | 0.093805 | 1 |
| PITG_16328 | Pi tyrosyl-tRNA synthetase, putative (2457 nt)                   | -14.5742 | -0.02381 | 1 |

|            |                                                               |          |          |   |
|------------|---------------------------------------------------------------|----------|----------|---|
| PITG_16360 | Pi lysosomal Pro-X carboxypeptidase, putative (1824 nt)       | -14.6625 | -0.01768 | 1 |
| PITG_16456 | Pi conserved hypothetical protein (2606 nt)                   | -15.2812 | -0.29088 | 1 |
| PITG_16467 | Pi hypothetical protein (456 nt)                              | -15.5355 | -0.42964 | 1 |
| PITG_16506 | Pi conserved hypothetical protein (1704 nt)                   | -16.1343 | 0.068663 | 1 |
| PITG_16511 | Pi conserved hypothetical protein (4689 nt)                   | -16.2612 | -0.15673 | 1 |
| PITG_16526 | Pi DNA-directed RNA polymerases III 12.5 kDa polypeptide (4   | -14.6343 | 0.046435 | 1 |
| PITG_16563 | Pi conserved hypothetical protein (902 nt)                    | -14.6029 | -0.01636 | 1 |
| PITG_16668 | Pi cyclin-like protein (1014 nt)                              | -16.3945 | -0.129   | 1 |
| PITG_16709 | Pi conserved hypothetical protein (414 nt)                    | -16.2983 | 0.341425 | 1 |
| PITG_16720 | Pi conserved hypothetical protein (2485 nt)                   | -14.7504 | -0.13006 | 1 |
| PITG_16741 | Pi isoleucyl-tRNA synthetase (3159 nt)                        | -16.2547 | -0.3306  | 1 |
| PITG_16775 | Pi conserved hypothetical protein (1307 nt)                   | -15.5487 | -0.44772 | 1 |
| PITG_16801 | Pi conserved hypothetical protein (4173 nt)                   | -15.3111 | -0.17527 | 1 |
| PITG_16937 | Pi folylpolyglutamate synthase, putative (1720 nt)            | -15.2623 | 0.35181  | 1 |
| PITG_17032 | Pi anthranilate phosphoribosyltransferase, putative (1166 nt) | -15.637  | -0.01297 | 1 |
| PITG_17041 | Pi cardiolipin synthetase, putative (1210 nt)                 | -16.6723 | -0.34504 | 1 |
| PITG_17047 | Pi ATP-binding Cassette (ABC) Superfamily (1380 nt)           | -14.8987 | 0.081268 | 1 |
| PITG_17058 | Pi ATP-binding Cassette (ABC) Superfamily (3267 nt)           | -15.8636 | 0.275215 | 1 |
| PITG_17077 | Pi conserved hypothetical protein (1026 nt)                   | -15.4394 | -0.40814 | 1 |
| PITG_17105 | Pi conserved hypothetical protein (1635 nt)                   | -16.2705 | -0.02029 | 1 |
| PITG_17111 | Pi conserved hypothetical protein (1298 nt)                   | -16.6186 | -0.30433 | 1 |
| PITG_17133 | Pi 6,7-dimethyl-8-ribityllumazine synthase (734 nt)           | -12.5148 | -0.05329 | 1 |
| PITG_17262 | Pi ethanolamine-phosphate cytidyltransferase, putative (16    | -14.6929 | 0.116429 | 1 |
| PITG_17280 | Pi conserved hypothetical protein (5608 nt)                   | -16.6767 | -0.18816 | 1 |
| PITG_17287 | Pi AP-1 complex subunit beta, putative (2580 nt)              | -14.6688 | 0.165889 | 1 |
| PITG_17313 | Pi conserved hypothetical protein (2714 nt)                   | -16.6957 | -0.83911 | 1 |
| PITG_17345 | Pi conserved hypothetical protein (2499 nt)                   | -14.6831 | 0.072599 | 1 |
| PITG_17361 | Pi mitogen-activated protein kinase, putative (2679 nt)       | -15.3064 | -0.0195  | 1 |
| PITG_17381 | Pi conserved hypothetical protein (1000 nt)                   | -14.2862 | -0.15108 | 1 |
| PITG_17384 | Pi conserved hypothetical protein (1190 nt)                   | -13.2986 | 0.007469 | 1 |
| PITG_17391 | Pi conserved hypothetical protein (912 nt)                    | -15.99   | -0.27316 | 1 |
| PITG_17395 | Pi 5'-AMP-activated protein kinase subunit gamma, putative    | -14.9577 | 0.286372 | 1 |
| PITG_17439 | Pi Ca2 :Cation Antiporter (CaCA) Family (1653 nt)             | -15.5364 | 0.021354 | 1 |
| PITG_17488 | Pi conserved hypothetical protein (866 nt)                    | -16.1874 | 0.393864 | 1 |
| PITG_17493 | Pi conserved hypothetical protein (1904 nt)                   | -16.3742 | 0.072261 | 1 |
| PITG_17494 | Pi protein kinase (491 nt)                                    | -16.5357 | 0.093805 | 1 |
| PITG_17495 | Pi protein kinase, putative (1590 nt)                         | -15.3017 | -0.15663 | 1 |
| PITG_17501 | Pi glucosylceramidase, putative (1620 nt)                     | -15.0837 | -0.07063 | 1 |
| PITG_17601 | Pi conserved hypothetical protein (2071 nt)                   | -14.8386 | -0.03668 | 1 |
| PITG_17701 | Pi conserved hypothetical protein (790 nt)                    | -14.6597 | 0.259672 | 1 |
| PITG_17723 | Pi conserved hypothetical protein (507 nt)                    | -15.685  | -0.13115 | 1 |
| PITG_17750 | Pi conserved hypothetical protein (847 nt)                    | -16.2096 | -0.08194 | 1 |
| PITG_17792 | Pi F-box protein, putative (2409 nt)                          | -15.6593 | -0.37569 | 1 |
| PITG_17805 | Pi Amino Acid/Auxin Permease (AAP) Family (1542 nt)           | -14.6569 | 0.12605  | 1 |
| PITG_17824 | Pi conserved hypothetical protein (1995 nt)                   | -15.9098 | -0.48317 | 1 |
| PITG_17928 | Pi UDP-N-acetylglucosamine-peptide N-acetylglucosaminyltr     | -14.1302 | -0.17677 | 1 |
| PITG_17935 | Pi conserved hypothetical protein (1290 nt)                   | -15.7182 | -0.06471 | 1 |

|            |                                                                                     |          |          |   |
|------------|-------------------------------------------------------------------------------------|----------|----------|---|
| PITG_17953 | Pi COP9 signalosome complex subunit 2 (1741 nt)                                     | -15.3568 | -0.44643 | 1 |
| PITG_18002 | Pi conserved hypothetical protein (1812 nt)                                         | -12.78   | -0.0719  | 1 |
| PITG_18004 | Pi conserved hypothetical protein (2689 nt)                                         | -15.8962 | -0.13282 | 1 |
| PITG_18010 | Pi conserved hypothetical protein (1491 nt)                                         | -15.6537 | -0.32864 | 1 |
| PITG_18014 | Pi conserved hypothetical protein (3807 nt)                                         | -16.3055 | 0.109587 | 1 |
| PITG_18033 | Pi conserved hypothetical protein (366 nt)                                          | -14.6909 | -0.19317 | 1 |
| PITG_18089 | Pi protein transporter Sec61 subunit alpha, putative (1425 nt)                      | -11.8482 | -0.02683 | 1 |
| PITG_18103 | Pi Poly(A) RNA polymerase, putative (1470 nt)                                       | -16.0921 | -0.06503 | 1 |
| PITG_18114 | Pi conserved hypothetical protein (1212 nt)                                         | -15.6679 | -0.49355 | 1 |
| PITG_18151 | Pi conserved hypothetical protein (2977 nt)                                         | -15.2651 | 0.051439 | 1 |
| PITG_18155 | Pi conserved hypothetical protein (2637 nt)                                         | -16.6767 | -0.18816 | 1 |
| PITG_18172 | Pi conserved hypothetical protein (5101 nt)                                         | -15.3244 | -0.36849 | 1 |
| PITG_18189 | Pi conserved hypothetical protein (1595 nt)                                         | -14.5477 | -0.19862 | 1 |
| PITG_18248 | Pi acetate kinase (1405 nt)                                                         | -15.2987 | -0.1266  | 1 |
| PITG_18358 | Pi conserved hypothetical protein (1390 nt)                                         | -14.2653 | -0.21309 | 1 |
| PITG_18387 | Pi conserved hypothetical protein (2492 nt)                                         | -16.2844 | -0.19482 | 1 |
| PITG_18410 | Pi conserved hypothetical protein (711 nt)                                          | -12.3512 | 0.138263 | 1 |
| PITG_18413 | Pi conserved hypothetical protein (712 nt)                                          | -15.6729 | -0.48356 | 1 |
| PITG_18421 | Pi large subunit GTPase 1 (2385 nt)                                                 | -13.9891 | 0.025555 | 1 |
| PITG_18474 | Pi CCR4-NOT transcription complex subunit, putative (7396 nt)                       | -15.4703 | 0.008594 | 1 |
| PITG_18482 | Pi polysaccharide lyase, putative (1685 nt)                                         | -16.4602 | 0.070905 | 1 |
| PITG_18519 | Pi conserved hypothetical protein (3053 nt)                                         | -14.8259 | -0.14908 | 1 |
| PITG_18540 | Pi conserved hypothetical protein (568 nt)                                          | -14.0175 | 0.237746 | 1 |
| PITG_18650 | Pi proteasomal ubiquitin receptor ADRM1-like protein (2124 nt)                      | -13.1836 | 0.004987 | 1 |
| PITG_18862 | Pi conserved hypothetical protein (4505 nt)                                         | -16.1707 | -0.16189 | 1 |
| PITG_18868 | Pi tRNA-dihydrouridine synthase, putative (1470 nt)                                 | -15.6868 | 0.086329 | 1 |
| PITG_18894 | Pi vacuolar protein sorting-associated protein, putative (267 nt)                   | -15.1503 | -0.19261 | 1 |
| PITG_18899 | Pi vacuolar protein sorting-associated protein 53 (1598 nt)                         | -14.7547 | -0.06571 | 1 |
| PITG_18906 | Pi ATP-binding Cassette (ABC) Superfamily (2690 nt)                                 | -15.3828 | 0.424681 | 1 |
| PITG_18961 | Pi conserved hypothetical protein (1677 nt)                                         | -15.7    | -0.09983 | 1 |
| PITG_18976 | Pi RNA binding protein, putative (803 nt)                                           | -15.4627 | 0.293059 | 1 |
| PITG_18999 | Pi serine protease family S08A, putative (3690 nt)                                  | -15.7513 | -0.04255 | 1 |
| PITG_19113 | Pi conserved hypothetical protein (1761 nt)                                         | -14.7883 | 0.080806 | 1 |
| PITG_19124 | Pi endoplasmic reticulum-Golgi intermediate compartment protein (1000 nt)           | -14.432  | -0.13089 | 1 |
| PITG_19145 | Pi conserved hypothetical protein (491 nt)                                          | -15.6542 | -0.28108 | 1 |
| PITG_19168 | Pi conserved hypothetical protein (2066 nt)                                         | -15.7352 | -0.03003 | 1 |
| PITG_19179 | Pi mitochondrial import receptor subunit TOM70, putative (1000 nt)                  | -13.8643 | 0.178104 | 1 |
| PITG_19180 | Pi conserved hypothetical protein (1550 nt)                                         | -14.0831 | -0.00706 | 1 |
| PITG_19220 | Pi conserved hypothetical protein (3632 nt)                                         | -14.904  | -0.02151 | 1 |
| PITG_19235 | Pi serine/threonine protein kinase (1738 nt)                                        | -14.333  | -0.22257 | 1 |
| PITG_19237 | Pi conserved hypothetical protein (1180 nt)                                         | -13.6387 | -0.2087  | 1 |
| PITG_19245 | Pi conserved hypothetical protein (698 nt)                                          | -14.9302 | 0.031043 | 1 |
| PITG_19410 | Pi conserved hypothetical protein (684 nt)                                          | -14.3425 | -0.09999 | 1 |
| PITG_19462 | Pi metallophosphoesterase, putative (1778 nt)                                       | -16.552  | 0.061151 | 1 |
| PITG_19514 | Pi conserved hypothetical protein (1607 nt)                                         | -15.2254 | -0.27147 | 1 |
| PITG_19527 | Pi conserved hypothetical protein (1086 nt)                                         | -15.2862 | -0.30044 | 1 |
| PITG_19557 | Pi putative dolichyl-diphosphooligosaccharide-protein glycosyltransferase (1000 nt) | -13.8017 | -0.14721 | 1 |

|            |                                                                 |          |          |   |
|------------|-----------------------------------------------------------------|----------|----------|---|
| PITG_19592 | Pi Mitochondrial Protein Translocase (MPT) Family (393 nt)      | -13.3476 | 0.004702 | 1 |
| PITG_19606 | Pi conserved hypothetical protein (1062 nt)                     | -14.5901 | 0.007188 | 1 |
| PITG_19640 | Pi transmembrane protein, putative (8592 nt)                    | -16.6754 | -0.80111 | 1 |
| PITG_19676 | Pi conserved hypothetical protein (856 nt)                      | -16.1299 | 0.284308 | 1 |
| PITG_19730 | Pi 2-acylglycerol O-acyltransferase, putative (1272 nt)         | -16.8505 | -0.53231 | 1 |
| PITG_19781 | Pi conserved hypothetical protein (4434 nt)                     | -16.4086 | -0.65015 | 1 |
| PITG_19877 | Pi guanylate-binding protein, putative (2474 nt)                | -15.4687 | -0.07501 | 1 |
| PITG_19901 | Pi conserved hypothetical protein (708 nt)                      | -15.6191 | -0.26263 | 1 |
| PITG_20035 | Pi conserved hypothetical protein (1113 nt)                     | -14.4004 | -0.06114 | 1 |
| PITG_20044 | Pi hypothetical protein (1462 nt)                               | -15.799  | -0.08613 | 1 |
| PITG_20055 | Pi ATP-binding Cassette (ABC) Superfamily (2164 nt)             | -14.6452 | 0.021206 | 1 |
| PITG_20102 | Pi conserved hypothetical protein (1556 nt)                     | -15.7432 | 0.121156 | 1 |
| PITG_20103 | Pi mitogen-activated protein kinase, putative (4065 nt)         | -16.172  | 0.415969 | 1 |
| PITG_20146 | Pi Drug/Metabolite Transporter (DMT) Superfamily (1575 nt)      | -14.8872 | 0.252543 | 1 |
| PITG_20201 | Pi Divalent Anion:Na Symporter (DASS) Family (2907 nt)          | -15.0963 | -0.33442 | 1 |
| PITG_20206 | Pi ADP-ribosylation factor family (1099 nt)                     | -14.3867 | -0.03382 | 1 |
| PITG_20239 | Pi ATP-binding Cassette (ABC) Superfamily (5838 nt)             | -16.3914 | -0.26064 | 1 |
| PITG_20249 | Pi conserved hypothetical protein (1358 nt)                     | -15.7707 | -0.09623 | 1 |
| PITG_20296 | Pi ATP-dependent Clp protease ATP-binding subunit clpX, pu      | -13.623  | 0.04747  | 1 |
| PITG_20330 | Pi trafficking protein particle complex subunit 10, putative (3 | -16.0729 | -0.10487 | 1 |
| PITG_20384 | Pi conserved hypothetical protein (1483 nt)                     | -12.8435 | -0.03543 | 1 |
| PITG_20406 | Pi hypothetical protein (2190 nt)                               | -13.4895 | 0.24434  | 1 |
| PITG_20496 | Pi conserved hypothetical protein (3585 nt)                     | -15.6014 | -0.13297 | 1 |
| PITG_20502 | Pi histone-lysine N-methyltransferase, putative (9032 nt)       | -15.1077 | -0.34689 | 1 |
| PITG_20528 | Pi conserved hypothetical protein (2340 nt)                     | -15.4182 | -0.17593 | 1 |
| PITG_20556 | Pi hypothetical protein (1091 nt)                               | -14.2508 | -0.18377 | 1 |
| PITG_20568 | Pi hypothetical protein (1211 nt)                               | -15.0632 | -0.24591 | 1 |
| PITG_20610 | Pi conserved hypothetical protein (1065 nt)                     | -16.0727 | 0.216689 | 1 |
| PITG_20657 | Pi conserved hypothetical protein (760 nt)                      | -15.8066 | 0.252257 | 1 |
| PITG_20743 | Pi nuclear transport factor, putative (702 nt)                  | -11.9565 | 0.082261 | 1 |
| PITG_20762 | Pi conserved hypothetical protein (813 nt)                      | -14.2722 | -0.15179 | 1 |
| PITG_20799 | Pi conserved hypothetical protein (863 nt)                      | -13.5023 | -0.15594 | 1 |
| PITG_20801 | Pi conserved hypothetical protein (1059 nt)                     | -16.6654 | -0.36831 | 1 |
| PITG_20808 | Pi serine/threonine protein kinase (1349 nt)                    | -14.8363 | 0.043015 | 1 |
| PITG_20901 | Pi voltage-dependent anion-selective channel protein, putati    | -11.3068 | 0.00275  | 1 |
| PITG_20927 | Pi trehalose-phosphatase, putative (2751 nt)                    | -16.441  | -0.16136 | 1 |
| PITG_20928 | Pi condensin complex subunit, putative (4274 nt)                | -14.886  | 0.086277 | 1 |
| PITG_21027 | Pi conserved hypothetical protein (1341 nt)                     | -12.3867 | -0.08093 | 1 |
| PITG_21028 | Pi mannosyl-oligosaccharide glucosidase, putative (923 nt)      | -15.5808 | -0.08421 | 1 |
| PITG_21048 | Pi conserved hypothetical protein (659 nt)                      | -14.7582 | -0.00619 | 1 |
| PITG_21055 | Pi LAG1 longevity assurance (1284 nt)                           | -14.0748 | 0.018271 | 1 |
| PITG_21077 | Pi DNA-directed RNA polymerase II largest subunit (6203 nt)     | -14.353  | 0.254913 | 1 |
| PITG_21156 | Pi Drug/Metabolite Transporter (DMT) Superfamily (970 nt)       | -15.9922 | 0.057531 | 1 |
| PITG_21184 | Pi conserved hypothetical protein (1355 nt)                     | -15.3179 | -0.03311 | 1 |
| PITG_21222 | Pi conserved hypothetical protein (2926 nt)                     | -16.3439 | 0.127086 | 1 |
| PITG_21277 | Pi conserved hypothetical protein (1053 nt)                     | -14.7664 | 0.114503 | 1 |
| PITG_21279 | Pi conserved hypothetical protein (526 nt)                      | -14.8604 | 0.062698 | 1 |

|            |                                                                  |          |          |   |
|------------|------------------------------------------------------------------|----------|----------|---|
| PITG_21295 | Pi 12-oxophytodienoate reductase, putative (923 nt)              | -16.2369 | 0.089587 | 1 |
| PITG_21310 | Pi conserved hypothetical protein (440 nt)                       | -16.0984 | -0.17861 | 1 |
| PITG_21317 | Pi transmembrane protein, putative (840 nt)                      | -15.8698 | -0.1377  | 1 |
| PITG_21416 | Pi conserved hypothetical protein (4115 nt)                      | -15.8084 | 0.19779  | 1 |
| PITG_21508 | Pi conserved hypothetical protein (466 nt)                       | -12.9964 | -0.06953 | 1 |
| PITG_21582 | Pi tetrahydrofolate dehydrogenase (998 nt)                       | -15.8793 | -0.54365 | 1 |
| PITG_21593 | Pi conserved hypothetical protein (1785 nt)                      | -15.6607 | -0.00945 | 1 |
| PITG_21661 | Pi eukaryotic initiation factor 4E, putative (903 nt)            | -14.1294 | -0.2057  | 1 |
| PITG_21829 | Pi conserved hypothetical protein (786 nt)                       | -13.2019 | 0.065179 | 1 |
| PITG_21880 | Pi conserved hypothetical protein (1177 nt)                      | -13.5753 | -0.1677  | 1 |
| PITG_21889 | Pi conserved hypothetical protein (2801 nt)                      | -16.344  | 0.069509 | 1 |
| PITG_21960 | Pi conserved hypothetical protein (777 nt)                       | -14.207  | 0.120725 | 1 |
| PITG_22038 | Pi conserved hypothetical protein (937 nt)                       | -15.6612 | -0.45957 | 1 |
| PITG_22094 | Pi conserved hypothetical protein (1454 nt)                      | -16.5964 | 0.006091 | 1 |
| PITG_22103 | Pi triosephosphate isomerase/glyceraldehyde-3-phosphate c        | -13.0791 | -0.16342 | 1 |
| PITG_22159 | Pi conserved hypothetical protein (1564 nt)                      | -16.1581 | -0.05071 | 1 |
| PITG_22191 | Pi conserved hypothetical protein (1022 nt)                      | -16.1735 | -0.26975 | 1 |
| PITG_22267 | Pi conserved hypothetical protein (597 nt)                       | -16.7343 | -0.50437 | 1 |
| PITG_22369 | Pi conserved hypothetical protein (2056 nt)                      | -15.7211 | 0.069613 | 1 |
| PITG_22414 | Pi conserved hypothetical protein (372 nt)                       | -16.143  | -0.27506 | 1 |
| PITG_22415 | Pi conserved hypothetical protein (482 nt)                       | -15.2241 | -0.03197 | 1 |
| PITG_22477 | Pi conserved hypothetical protein (558 nt)                       | -14.8088 | -0.29941 | 1 |
| PITG_22491 | Pi conserved hypothetical protein (687 nt)                       | -15.2689 | -0.35595 | 1 |
| PITG_22508 | Pi conserved hypothetical protein (1300 nt)                      | -16.3053 | -0.43104 | 1 |
| PITG_22523 | Pi eukaryotic translation initiation factor 3 subunit A, putativ | -17.0056 | -0.82043 | 1 |
| PITG_22569 | Pi geranylgeranyl transferase type-2 subunit beta (946 nt)       | -15.8337 | -0.4283  | 1 |
| PITG_22587 | Pi oxidoreductase, putative (487 nt)                             | -15.2831 | -0.10268 | 1 |
| PITG_22616 | Pi conserved hypothetical protein (1030 nt)                      | -15.9418 | -0.41913 | 1 |
| PITG_22634 | Pi conserved hypothetical protein (543 nt)                       | -14.5764 | -0.1133  | 1 |
| PITG_22662 | Pi cyclin-dependent kinase, putative (1188 nt)                   | -15.5627 | 0.113204 | 1 |
| PITG_22715 | Pi serine/threonine protein kinase (4687 nt)                     | -16.6957 | -0.83911 | 1 |
| PITG_22763 | Pi conserved oligomeric Golgi complex subunit, putative (27:     | -15.9343 | 0.039235 | 1 |
| PITG_22851 | Pi conserved hypothetical protein (771 nt)                       | -16.2678 | 0.228445 | 1 |
| PITG_22857 | Pi DNA repair protein RAD5, SWI/SNF-related matrix-associa       | -16.32   | 0.0789   | 1 |
| PITG_22924 | Pi conserved hypothetical protein (1410 nt)                      | -15.9386 | -0.00044 | 1 |
| PITG_22989 | Pi mitogen-activated protein kinase kinase, putative (4032 n     | -16.186  | 0.44581  | 1 |
| PITG_23113 | Pi GPN-loop GTPase 1 (1108 nt)                                   | -16.2219 | -0.53529 | 1 |
| PITG_23142 | Pi peptidylprolyl isomerase (2241 nt)                            | -16.1489 | 0.099908 | 1 |
| PITG_23160 | Pi histone deacetylase, putative (4814 nt)                       | -15.2841 | -0.03002 | 1 |
| PITG_23191 | Pi conserved hypothetical protein (1333 nt)                      | -15.5584 | -0.24851 | 1 |
| PITG_23304 | Pi hypothetical protein (2835 nt)                                | -15.3691 | 0.031938 | 1 |
| PITG_02021 | Pi dysferlin-like protein (5806 nt)                              | -16.703  | -0.74659 | 1 |

list of PITG genes with logFC (fold-change), p-value, false discovery rate (FDR), and normalized counts of re

| table.FDR   | adjust.method | P18 - Rep1 | P18 - Rep2 | T6 - Rep1 | 6 - Rep2 | P18 - mear |
|-------------|---------------|------------|------------|-----------|----------|------------|
| 1.08E-07    | BH            | 0          | 0          | 664       | 2064     | 0          |
| 6.19E-06    | BH            | 3          | 1          | 789       | 867      | 2          |
| 6.19E-06    | BH            | 1          | 0          | 286       | 688      | 0.5        |
| 7.96E-06    | BH            | 1          | 0          | 468       | 230      | 0.5        |
| 1.06E-05    | BH            | 307        | 323        | 0         | 0        | 315        |
| 3.05E-05    | BH            | 0          | 0          | 211       | 105      | 0          |
| 3.05E-05    | BH            | 9          | 6          | 1179      | 813      | 7.5        |
| 3.05E-05    | BH            | 0          | 0          | 100       | 204      | 0          |
| 3.05E-05    | BH            | 2          | 6          | 466       | 310      | 4          |
| 3.05E-05    | BH            | 1269       | 755        | 4         | 0        | 1012       |
| 3.05E-05    | BH            | 4          | 0          | 532       | 579      | 2          |
| 3.05E-05    | BH            | 3          | 3          | 362       | 344      | 3          |
| 3.05E-05    | BH            | 0          | 0          | 112       | 142      | 0          |
| 3.05E-05    | BH            | 7          | 1          | 911       | 1051     | 4          |
| 3.05E-05    | BH            | 583        | 135        | 0         | 0        | 359        |
| 4.53E-05    | BH            | 2          | 2          | 295       | 186      | 2          |
| 5.11E-05    | BH            | 656        | 101        | 0         | 0        | 378.5      |
| 5.11E-05    | BH            | 370        | 111        | 0         | 0        | 240.5      |
| 5.11E-05    | BH            | 1          | 2          | 217       | 138      | 1.5        |
| 5.11E-05    | BH            | 0          | 4          | 237       | 178      | 2          |
| 5.11E-05    | BH            | 2          | 6          | 371       | 251      | 4          |
| 5.19E-05    | BH            | 7          | 16         | 774       | 521      | 11.5       |
| 5.19E-05    | BH            | 0          | 0          | 102       | 89       | 0          |
| 5.19E-05    | BH            | 0          | 1          | 158       | 61       | 0.5        |
| 5.19E-05    | BH            | 1          | 0          | 197       | 102      | 0.5        |
| 5.19E-05    | BH            | 0          | 0          | 113       | 76       | 0          |
| 5.19E-05    | BH            | 1          | 1          | 254       | 120      | 1          |
| 5.19E-05    | BH            | 112        | 169        | 0         | 0        | 140.5      |
| 5.56E-05    | BH            | 3          | 10         | 469       | 300      | 6.5        |
| 7.14E-05    | BH            | 216        | 103        | 0         | 0        | 159.5      |
| 7.17E-05    | BH            | 318        | 87         | 0         | 0        | 202.5      |
| 7.29E-05    | BH            | 30         | 132        | 4609      | 2595     | 81         |
| 7.66E-05    | BH            | 0          | 0          | 45        | 237      | 0          |
| 8.01E-05    | BH            | 0          | 2          | 158       | 87       | 1          |
| 8.01E-05    | BH            | 0          | 1          | 109       | 58       | 0.5        |
| 8.48E-05    | BH            | 2          | 1          | 213       | 154      | 1.5        |
| 8.48E-05    | BH            | 4          | 3          | 387       | 202      | 3.5        |
| 8.48E-05    | BH            | 2          | 2          | 144       | 214      | 2          |
| 0.000108801 | BH            | 0          | 0          | 76        | 68       | 0          |
| 0.000114748 | BH            | 0          | 1          | 80        | 61       | 0.5        |
| 0.000114748 | BH            | 1053       | 115        | 0         | 1        | 584        |
| 0.000114748 | BH            | 102        | 441        | 0         | 1        | 271.5      |
| 0.000114748 | BH            | 7          | 8          | 596       | 296      | 7.5        |
| 0.000115274 | BH            | 0          | 1          | 72        | 66       | 0.5        |
| 0.000125213 | BH            | 0          | 1          | 78        | 58       | 0.5        |

|                |    |     |     |     |       |
|----------------|----|-----|-----|-----|-------|
| 0.000130779 BH | 40 | 297 | 0   | 0   | 168.5 |
| 0.000151638 BH | 2  | 0   | 124 | 247 | 1     |
| 0.000151638 BH | 0  | 0   | 102 | 42  | 0     |
| 0.000151638 BH | 1  | 0   | 152 | 61  | 0.5   |
| 0.000151638 BH | 1  | 10  | 203 | 420 | 5.5   |
| 0.000163571 BH | 5  | 1   | 474 | 222 | 3     |
| 0.000169398 BH | 0  | 1   | 65  | 57  | 0.5   |
| 0.000169912 BH | 0  | 0   | 45  | 91  | 0     |
| 0.000171798 BH | 0  | 4   | 147 | 103 | 2     |
| 0.000171798 BH | 0  | 0   | 33  | 149 | 0     |
| 0.000173774 BH | 1  | 0   | 108 | 73  | 0.5   |
| 0.000173774 BH | 18 | 813 | 0   | 0   | 415.5 |
| 0.000174367 BH | 1  | 3   | 163 | 100 | 2     |
| 0.000177045 BH | 0  | 1   | 58  | 58  | 0.5   |
| 0.000177045 BH | 0  | 1   | 99  | 37  | 0.5   |
| 0.000201318 BH | 1  | 4   | 168 | 91  | 2.5   |
| 0.000208026 BH | 1  | 2   | 104 | 95  | 1.5   |
| 0.000215043 BH | 0  | 1   | 57  | 53  | 0.5   |
| 0.000227975 BH | 1  | 3   | 143 | 98  | 2     |
| 0.000227975 BH | 0  | 1   | 50  | 59  | 0.5   |
| 0.000233964 BH | 57 | 109 | 0   | 0   | 83    |
| 0.000255264 BH | 4  | 1   | 409 | 112 | 2.5   |
| 0.000264383 BH | 5  | 9   | 301 | 218 | 7     |
| 0.000275783 BH | 0  | 0   | 48  | 57  | 0     |
| 0.000279994 BH | 0  | 0   | 52  | 49  | 0     |
| 0.000286347 BH | 0  | 0   | 44  | 59  | 0     |
| 0.000288976 BH | 3  | 6   | 200 | 162 | 4.5   |
| 0.000306735 BH | 0  | 0   | 83  | 31  | 0     |
| 0.000340086 BH | 0  | 1   | 56  | 41  | 0.5   |
| 0.000340086 BH | 60 | 396 | 2   | 0   | 228   |
| 0.000352148 BH | 0  | 0   | 43  | 54  | 0     |
| 0.000370275 BH | 0  | 1   | 38  | 60  | 0.5   |
| 0.000372512 BH | 8  | 23  | 355 | 497 | 15.5  |
| 0.00039135 BH  | 1  | 4   | 86  | 119 | 2.5   |
| 0.000394673 BH | 1  | 0   | 93  | 50  | 0.5   |
| 0.000405857 BH | 2  | 29  | 608 | 415 | 15.5  |
| 0.000406283 BH | 0  | 3   | 85  | 93  | 1.5   |
| 0.000445786 BH | 3  | 4   | 215 | 100 | 3.5   |
| 0.000445786 BH | 0  | 2   | 87  | 48  | 1     |
| 0.000448363 BH | 31 | 140 | 0   | 0   | 85.5  |
| 0.000473246 BH | 0  | 1   | 108 | 19  | 0.5   |
| 0.000477261 BH | 0  | 1   | 84  | 23  | 0.5   |
| 0.00049889 BH  | 2  | 6   | 128 | 148 | 4     |
| 0.00049889 BH  | 6  | 22  | 419 | 275 | 14    |
| 0.00052506 BH  | 0  | 0   | 43  | 41  | 0     |
| 0.000554036 BH | 0  | 0   | 58  | 29  | 0     |
| 0.000554036 BH | 0  | 0   | 50  | 34  | 0     |



|                |      |     |      |     |       |
|----------------|------|-----|------|-----|-------|
| 0.000554036 BH | 1    | 1   | 80   | 70  | 1     |
| 0.000572887 BH | 14   | 301 | 0    | 0   | 157.5 |
| 0.000593032 BH | 1    | 2   | 131  | 43  | 1.5   |
| 0.000595244 BH | 128  | 33  | 0    | 0   | 80.5  |
| 0.000595244 BH | 0    | 0   | 75   | 22  | 0     |
| 0.000614444 BH | 6    | 23  | 651  | 198 | 14.5  |
| 0.000623445 BH | 0    | 0   | 42   | 36  | 0     |
| 0.00062742 BH  | 263  | 17  | 0    | 0   | 140   |
| 0.000634853 BH | 0    | 0   | 67   | 23  | 0     |
| 0.000634853 BH | 0    | 0   | 31   | 49  | 0     |
| 0.000650549 BH | 0    | 2   | 62   | 51  | 1     |
| 0.000680596 BH | 0    | 1   | 40   | 35  | 0.5   |
| 0.000683144 BH | 0    | 0   | 154  | 11  | 0     |
| 0.000695272 BH | 0    | 1   | 36   | 38  | 0.5   |
| 0.000695272 BH | 0    | 4   | 96   | 59  | 2     |
| 0.000695272 BH | 13   | 54  | 1612 | 364 | 33.5  |
| 0.000695272 BH | 4    | 10  | 211  | 142 | 7     |
| 0.000706084 BH | 10   | 355 | 0    | 0   | 182.5 |
| 0.000710804 BH | 2748 | 286 | 12   | 12  | 1517  |
| 0.000714229 BH | 130  | 27  | 0    | 0   | 78.5  |
| 0.000728011 BH | 77   | 85  | 1    | 0   | 81    |
| 0.000728011 BH | 0    | 1   | 47   | 28  | 0.5   |
| 0.000728011 BH | 0    | 1   | 47   | 28  | 0.5   |
| 0.000741601 BH | 0    | 1   | 60   | 22  | 0.5   |
| 0.000751228 BH | 10   | 3   | 370  | 286 | 6.5   |
| 0.000752743 BH | 482  | 108 | 4    | 1   | 295   |
| 0.000792508 BH | 0    | 0   | 40   | 31  | 0     |
| 0.000865296 BH | 0    | 0   | 32   | 38  | 0     |
| 0.000870269 BH | 0    | 1   | 60   | 20  | 0.5   |
| 0.000873103 BH | 0    | 0   | 34   | 35  | 0     |
| 0.000926048 BH | 238  | 12  | 0    | 0   | 125   |
| 0.000956207 BH | 0    | 1   | 67   | 17  | 0.5   |
| 0.000962651 BH | 27   | 2   | 1759 | 910 | 14.5  |
| 0.000964695 BH | 0    | 0   | 35   | 31  | 0     |
| 0.001014913 BH | 1    | 0   | 69   | 34  | 0.5   |
| 0.001029519 BH | 0    | 0   | 51   | 21  | 0     |
| 0.001036425 BH | 0    | 0   | 37   | 28  | 0     |
| 0.001036425 BH | 12   | 204 | 0    | 0   | 108   |
| 0.001036425 BH | 53   | 327 | 3    | 0   | 190   |
| 0.001040729 BH | 0    | 0   | 32   | 33  | 0     |
| 0.00104354 BH  | 6    | 13  | 468  | 98  | 9.5   |
| 0.00104354 BH  | 35   | 286 | 2    | 0   | 160.5 |
| 0.001114782 BH | 0    | 1   | 59   | 17  | 0.5   |
| 0.001114782 BH | 142  | 17  | 0    | 0   | 79.5  |
| 0.001114782 BH | 0    | 0   | 39   | 26  | 0     |
| 0.001174615 BH | 0    | 0   | 21   | 48  | 0     |
| 0.001205401 BH | 37   | 467 | 2    | 1   | 252   |

|                |      |     |     |     |        |
|----------------|------|-----|-----|-----|--------|
| 0.001210985 BH | 0    | 2   | 53  | 38  | 1      |
| 0.001210985 BH | 2413 | 486 | 24  | 18  | 1449.5 |
| 0.001210985 BH | 3    | 5   | 107 | 95  | 4      |
| 0.001210985 BH | 130  | 85  | 1   | 1   | 107.5  |
| 0.001210985 BH | 39   | 217 | 2   | 0   | 128    |
| 0.001210985 BH | 1    | 0   | 51  | 40  | 0.5    |
| 0.001210985 BH | 0    | 1   | 30  | 30  | 0.5    |
| 0.001210985 BH | 0    | 2   | 25  | 90  | 1      |
| 0.001254651 BH | 0    | 0   | 62  | 15  | 0      |
| 0.00125563 BH  | 0    | 1   | 30  | 29  | 0.5    |
| 0.00125563 BH  | 0    | 1   | 34  | 26  | 0.5    |
| 0.001263427 BH | 0    | 0   | 56  | 16  | 0      |
| 0.001266243 BH | 1785 | 535 | 18  | 21  | 1160   |
| 0.001266243 BH | 8    | 17  | 279 | 200 | 12.5   |
| 0.001307206 BH | 0    | 0   | 39  | 22  | 0      |
| 0.001332758 BH | 0    | 3   | 43  | 45  | 1.5    |
| 0.001336703 BH | 0    | 0   | 31  | 27  | 0      |
| 0.001336703 BH | 0    | 1   | 36  | 23  | 0.5    |
| 0.001336703 BH | 137  | 368 | 4   | 5   | 252.5  |
| 0.001336703 BH | 0    | 0   | 50  | 17  | 0      |
| 0.001336703 BH | 17   | 108 | 0   | 0   | 62.5   |
| 0.001385968 BH | 0    | 1   | 34  | 24  | 0.5    |
| 0.001385968 BH | 0    | 1   | 35  | 23  | 0.5    |
| 0.001386093 BH | 0    | 0   | 28  | 30  | 0      |
| 0.001394599 BH | 1    | 0   | 108 | 18  | 0.5    |
| 0.001413626 BH | 1075 | 195 | 12  | 6   | 635    |
| 0.001455149 BH | 1    | 1   | 68  | 41  | 1      |
| 0.001467273 BH | 0    | 0   | 44  | 18  | 0      |
| 0.001496432 BH | 0    | 1   | 55  | 14  | 0.5    |
| 0.001499493 BH | 0    | 1   | 28  | 27  | 0.5    |
| 0.001584336 BH | 0    | 0   | 27  | 28  | 0      |
| 0.001584336 BH | 0    | 0   | 38  | 20  | 0      |
| 0.001584336 BH | 0    | 0   | 24  | 32  | 0      |
| 0.001660627 BH | 0    | 0   | 37  | 20  | 0      |
| 0.001660627 BH | 20   | 79  | 0   | 0   | 49.5   |
| 0.001679765 BH | 10   | 0   | 994 | 115 | 5      |
| 0.001686884 BH | 0    | 0   | 48  | 15  | 0      |
| 0.001692993 BH | 2    | 6   | 104 | 77  | 4      |
| 0.00170736 BH  | 0    | 1   | 35  | 20  | 0.5    |
| 0.00170736 BH  | 0    | 0   | 35  | 20  | 0      |
| 0.001721015 BH | 1    | 6   | 78  | 66  | 3.5    |
| 0.001721015 BH | 3    | 19  | 221 | 153 | 11     |
| 0.001743892 BH | 0    | 0   | 50  | 14  | 0      |
| 0.001743892 BH | 45   | 35  | 0   | 0   | 40     |
| 0.001743892 BH | 0    | 0   | 5   | 118 | 0      |
| 0.001749817 BH | 31   | 48  | 0   | 0   | 39.5   |
| 0.001749817 BH | 0    | 0   | 27  | 26  | 0      |

|                 |      |     |      |     |       |
|-----------------|------|-----|------|-----|-------|
| 0.001768343 BH  | 0    | 0   | 55   | 12  | 0     |
| 0.001824343 BH  | 195  | 465 | 10   | 1   | 330   |
| 0.001824343 BH  | 0    | 1   | 25   | 27  | 0.5   |
| 0.001824343 BH  | 0    | 0   | 27   | 25  | 0     |
| 0.001824343 BH  | 0    | 0   | 44   | 15  | 0     |
| 0.001824343 BH  | 0    | 0   | 6    | 97  | 0     |
| 0.001893985 BH  | 3    | 1   | 100  | 58  | 2     |
| 0.0019111113 BH | 41   | 35  | 0    | 0   | 38    |
| 0.001920261 BH  | 34   | 300 | 3    | 0   | 167   |
| 0.002001923 BH  | 192  | 16  | 1    | 0   | 104   |
| 0.002007503 BH  | 0    | 0   | 72   | 8   | 0     |
| 0.002015367 BH  | 1    | 0   | 33   | 42  | 0.5   |
| 0.002016197 BH  | 2    | 409 | 0    | 0   | 205.5 |
| 0.002067457 BH  | 990  | 210 | 14   | 8   | 600   |
| 0.002072205 BH  | 25   | 104 | 1054 | 706 | 64.5  |
| 0.002072205 BH  | 0    | 2   | 58   | 23  | 1     |
| 0.002075919 BH  | 1    | 5   | 78   | 55  | 3     |
| 0.002075919 BH  | 13   | 97  | 0    | 0   | 55    |
| 0.002092077 BH  | 10   | 122 | 0    | 0   | 66    |
| 0.002092077 BH  | 1    | 1   | 95   | 23  | 1     |
| 0.00218336 BH   | 0    | 0   | 29   | 21  | 0     |
| 0.00218336 BH   | 3    | 4   | 82   | 83  | 3.5   |
| 0.002183721 BH  | 0    | 1   | 30   | 19  | 0.5   |
| 0.002185935 BH  | 1    | 4   | 73   | 40  | 2.5   |
| 0.00220073 BH   | 6    | 0   | 201  | 95  | 3     |
| 0.00220073 BH   | 0    | 0   | 47   | 12  | 0     |
| 0.00220073 BH   | 0    | 1   | 40   | 14  | 0.5   |
| 0.00220073 BH   | 0    | 0   | 67   | 8   | 0     |
| 0.00220073 BH   | 0    | 0   | 36   | 16  | 0     |
| 0.00220073 BH   | 1105 | 572 | 31   | 7   | 838.5 |
| 0.00220073 BH   | 26   | 826 | 4    | 2   | 426   |
| 0.00220073 BH   | 2    | 5   | 51   | 103 | 3.5   |
| 0.00220073 BH   | 0    | 0   | 28   | 21  | 0     |
| 0.00220073 BH   | 0    | 0   | 29   | 20  | 0     |
| 0.002205616 BH  | 1    | 3   | 49   | 59  | 2     |
| 0.002205616 BH  | 0    | 1   | 29   | 19  | 0.5   |
| 0.002229727 BH  | 0    | 0   | 46   | 12  | 0     |
| 0.002229727 BH  | 0    | 0   | 49   | 11  | 0     |
| 0.002229727 BH  | 0    | 0   | 18   | 31  | 0     |
| 0.002233277 BH  | 0    | 0   | 37   | 15  | 0     |
| 0.00226734 BH   | 49   | 25  | 0    | 0   | 37    |
| 0.002302626 BH  | 10   | 111 | 0    | 0   | 60.5  |
| 0.002312148 BH  | 5    | 11  | 123  | 136 | 8     |
| 0.002337257 BH  | 106  | 49  | 2    | 0   | 77.5  |
| 0.00235978 BH   | 1    | 0   | 29   | 42  | 0.5   |
| 0.00241305 BH   | 0    | 2   | 39   | 30  | 1     |
| 0.002483985 BH  | 0    | 0   | 11   | 45  | 0     |

|                |      |     |     |     |       |
|----------------|------|-----|-----|-----|-------|
| 0.002510348 BH | 2    | 2   | 91  | 30  | 2     |
| 0.002510348 BH | 1    | 2   | 50  | 35  | 1.5   |
| 0.002570743 BH | 176  | 89  | 4   | 1   | 132.5 |
| 0.002596122 BH | 1    | 2   | 44  | 39  | 1.5   |
| 0.002605075 BH | 0    | 3   | 55  | 21  | 1.5   |
| 0.002614138 BH | 0    | 1   | 34  | 14  | 0.5   |
| 0.002649514 BH | 220  | 39  | 2   | 1   | 129.5 |
| 0.002649514 BH | 13   | 178 | 1   | 0   | 95.5  |
| 0.002740706 BH | 4    | 9   | 179 | 67  | 6.5   |
| 0.002740706 BH | 659  | 488 | 17  | 17  | 573.5 |
| 0.002740706 BH | 0    | 2   | 29  | 37  | 1     |
| 0.00277631 BH  | 0    | 1   | 4   | 81  | 0.5   |
| 0.002792927 BH | 0    | 2   | 37  | 28  | 1     |
| 0.002844128 BH | 1845 | 52  | 12  | 1   | 948.5 |
| 0.002844128 BH | 11   | 87  | 0   | 0   | 49    |
| 0.002848216 BH | 0    | 0   | 34  | 14  | 0     |
| 0.002848555 BH | 1    | 0   | 47  | 22  | 0.5   |
| 0.00295808 BH  | 0    | 0   | 48  | 9   | 0     |
| 0.00295808 BH  | 0    | 0   | 22  | 21  | 0     |
| 0.00295808 BH  | 20   | 50  | 0   | 0   | 35    |
| 0.002998058 BH | 0    | 0   | 17  | 27  | 0     |
| 0.002998058 BH | 0    | 0   | 40  | 11  | 0     |
| 0.003001341 BH | 0    | 3   | 50  | 20  | 1.5   |
| 0.003047491 BH | 81   | 111 | 2   | 2   | 96    |
| 0.003069412 BH | 0    | 0   | 15  | 29  | 0     |
| 0.003069412 BH | 1    | 0   | 14  | 69  | 0.5   |
| 0.003108383 BH | 19   | 51  | 0   | 0   | 35    |
| 0.003173296 BH | 16   | 126 | 1   | 0   | 71    |
| 0.003182368 BH | 13   | 69  | 0   | 0   | 41    |
| 0.003182368 BH | 2    | 10  | 87  | 95  | 6     |
| 0.003194951 BH | 166  | 43  | 2   | 1   | 104.5 |
| 0.003196592 BH | 4    | 162 | 0   | 0   | 83    |
| 0.003282128 BH | 0    | 0   | 23  | 19  | 0     |
| 0.003282128 BH | 1    | 9   | 99  | 59  | 5     |
| 0.00328724 BH  | 73   | 10  | 0   | 0   | 41.5  |
| 0.003336227 BH | 2    | 1   | 61  | 40  | 1.5   |
| 0.003374035 BH | 193  | 35  | 2   | 1   | 114   |
| 0.003493188 BH | 1    | 3   | 54  | 39  | 2     |
| 0.003493188 BH | 0    | 0   | 31  | 13  | 0     |
| 0.003527096 BH | 0    | 0   | 35  | 11  | 0     |
| 0.003530501 BH | 1    | 0   | 44  | 20  | 0.5   |
| 0.003628427 BH | 0    | 0   | 18  | 22  | 0     |
| 0.003641585 BH | 41   | 394 | 3   | 3   | 217.5 |
| 0.003701981 BH | 14   | 59  | 0   | 0   | 36.5  |
| 0.003799681 BH | 4    | 144 | 0   | 0   | 74    |
| 0.003815738 BH | 23   | 69  | 904 | 297 | 46    |
| 0.003815738 BH | 0    | 2   | 36  | 24  | 1     |

|                |      |     |     |     |        |
|----------------|------|-----|-----|-----|--------|
| 0.003834963 BH | 0    | 0   | 70  | 4   | 0      |
| 0.003864604 BH | 27   | 123 | 2   | 0   | 75     |
| 0.003864604 BH | 1    | 4   | 82  | 24  | 2.5    |
| 0.003902156 BH | 0    | 1   | 30  | 12  | 0.5    |
| 0.003909899 BH | 0    | 0   | 23  | 17  | 0      |
| 0.003939624 BH | 29   | 61  | 1   | 0   | 45     |
| 0.003939624 BH | 0    | 3   | 100 | 15  | 1.5    |
| 0.003954808 BH | 0    | 0   | 28  | 13  | 0      |
| 0.00398371 BH  | 0    | 1   | 23  | 16  | 0.5    |
| 0.004042891 BH | 0    | 0   | 35  | 10  | 0      |
| 0.004042891 BH | 8    | 86  | 0   | 0   | 47     |
| 0.004092115 BH | 0    | 0   | 66  | 4   | 0      |
| 0.004097396 BH | 0    | 3   | 101 | 14  | 1.5    |
| 0.004097396 BH | 16   | 47  | 0   | 0   | 31.5   |
| 0.004097396 BH | 0    | 0   | 23  | 16  | 0      |
| 0.004097396 BH | 0    | 0   | 41  | 8   | 0      |
| 0.004097396 BH | 7    | 4   | 151 | 90  | 5.5    |
| 0.004134365 BH | 9    | 77  | 0   | 0   | 43     |
| 0.004172846 BH | 2    | 0   | 41  | 55  | 1      |
| 0.004208284 BH | 0    | 0   | 34  | 10  | 0      |
| 0.004242017 BH | 6    | 101 | 0   | 0   | 53.5   |
| 0.00426179 BH  | 4    | 11  | 98  | 100 | 7.5    |
| 0.004319716 BH | 4    | 3   | 83  | 55  | 3.5    |
| 0.004328842 BH | 0    | 0   | 20  | 18  | 0      |
| 0.004328842 BH | 0    | 0   | 21  | 17  | 0      |
| 0.004356036 BH | 0    | 0   | 27  | 13  | 0      |
| 0.004356036 BH | 0    | 0   | 27  | 13  | 0      |
| 0.004356036 BH | 227  | 22  | 2   | 1   | 124.5  |
| 0.004356036 BH | 0    | 2   | 45  | 17  | 1      |
| 0.004356036 BH | 3212 | 695 | 68  | 41  | 1953.5 |
| 0.004399401 BH | 49   | 851 | 3   | 8   | 450    |
| 0.004442841 BH | 0    | 0   | 70  | 3   | 0      |
| 0.004449711 BH | 0    | 1   | 32  | 10  | 0.5    |
| 0.004449711 BH | 0    | 0   | 32  | 10  | 0      |
| 0.004469283 BH | 104  | 207 | 6   | 3   | 155.5  |
| 0.004544729 BH | 0    | 1   | 13  | 25  | 0.5    |
| 0.004544729 BH | 0    | 0   | 20  | 17  | 0      |
| 0.004555326 BH | 3    | 26  | 155 | 187 | 14.5   |
| 0.004555326 BH | 0    | 0   | 27  | 12  | 0      |
| 0.004555326 BH | 0    | 0   | 27  | 12  | 0      |
| 0.004555326 BH | 150  | 33  | 3   | 0   | 91.5   |
| 0.004657781 BH | 2    | 5   | 89  | 34  | 3.5    |
| 0.004704 BH    | 59   | 746 | 8   | 6   | 402.5  |
| 0.004748044 BH | 55   | 27  | 1   | 0   | 41     |
| 0.004748044 BH | 14   | 183 | 0   | 1   | 98.5   |
| 0.004748044 BH | 0    | 0   | 44  | 6   | 0      |
| 0.004748044 BH | 1    | 9   | 97  | 47  | 5      |

|                |     |     |      |      |       |
|----------------|-----|-----|------|------|-------|
| 0.004774806 BH | 0   | 0   | 18   | 18   | 0     |
| 0.004774806 BH | 17  | 40  | 0    | 0    | 28.5  |
| 0.004774806 BH | 0   | 0   | 5    | 46   | 0     |
| 0.004774806 BH | 2   | 0   | 111  | 18   | 1     |
| 0.004778883 BH | 34  | 19  | 0    | 0    | 26.5  |
| 0.004778883 BH | 128 | 168 | 3120 | 1016 | 148   |
| 0.004797137 BH | 1   | 0   | 49   | 14   | 0.5   |
| 0.004853729 BH | 1   | 1   | 49   | 23   | 1     |
| 0.004893919 BH | 2   | 1   | 69   | 26   | 1.5   |
| 0.004920778 BH | 3   | 7   | 93   | 48   | 5     |
| 0.004920778 BH | 0   | 0   | 6    | 40   | 0     |
| 0.004926508 BH | 0   | 0   | 14   | 22   | 0     |
| 0.004928431 BH | 41  | 488 | 7    | 1    | 264.5 |
| 0.004955187 BH | 3   | 2   | 149  | 22   | 2.5   |
| 0.004992988 BH | 1   | 0   | 34   | 20   | 0.5   |
| 0.005012708 BH | 56  | 25  | 1    | 0    | 40.5  |
| 0.005012708 BH | 0   | 0   | 18   | 17   | 0     |
| 0.00501695 BH  | 0   | 0   | 53   | 4    | 0     |
| 0.00501695 BH  | 0   | 0   | 25   | 12   | 0     |
| 0.00503188 BH  | 80  | 367 | 2    | 7    | 223.5 |
| 0.005037975 BH | 0   | 0   | 28   | 10   | 0     |
| 0.00508955 BH  | 0   | 1   | 30   | 9    | 0.5   |
| 0.005135275 BH | 1   | 0   | 52   | 12   | 0.5   |
| 0.005142812 BH | 0   | 1   | 24   | 12   | 0.5   |
| 0.005142812 BH | 0   | 1   | 40   | 6    | 0.5   |
| 0.00515598 BH  | 6   | 84  | 0    | 0    | 45    |
| 0.0051826 BH   | 1   | 0   | 72   | 8    | 0.5   |
| 0.005210366 BH | 24  | 57  | 1    | 0    | 40.5  |
| 0.005223108 BH | 53  | 87  | 2    | 1    | 70    |
| 0.005223108 BH | 1   | 2   | 48   | 21   | 1.5   |
| 0.005229439 BH | 7   | 73  | 0    | 0    | 40    |
| 0.005229439 BH | 0   | 0   | 46   | 5    | 0     |
| 0.005229439 BH | 0   | 0   | 18   | 16   | 0     |
| 0.005229439 BH | 0   | 0   | 18   | 16   | 0     |
| 0.005229439 BH | 2   | 5   | 66   | 41   | 3.5   |
| 0.005276488 BH | 160 | 224 | 10   | 2    | 192   |
| 0.005286013 BH | 1   | 3   | 24   | 62   | 2     |
| 0.005354317 BH | 51  | 49  | 2    | 0    | 50    |
| 0.005392423 BH | 5   | 5   | 96   | 68   | 5     |
| 0.005406019 BH | 0   | 1   | 18   | 15   | 0.5   |
| 0.0054085 BH   | 0   | 1   | 26   | 10   | 0.5   |
| 0.005485812 BH | 0   | 0   | 30   | 9    | 0     |
| 0.005557961 BH | 53  | 24  | 1    | 0    | 38.5  |
| 0.005557961 BH | 74  | 78  | 2    | 2    | 76    |
| 0.005557961 BH | 76  | 146 | 1    | 4    | 111   |
| 0.005557961 BH | 0   | 0   | 27   | 10   | 0     |
| 0.005557961 BH | 242 | 357 | 17   | 4    | 299.5 |

|                |      |     |     |     |       |
|----------------|------|-----|-----|-----|-------|
| 0.005557961 BH | 1208 | 170 | 27  | 7   | 689   |
| 0.005557961 BH | 8    | 0   | 50  | 366 | 4     |
| 0.005557961 BH | 0    | 0   | 29  | 9   | 0     |
| 0.005557961 BH | 0    | 0   | 29  | 9   | 0     |
| 0.005568432 BH | 0    | 2   | 43  | 14  | 1     |
| 0.00559419 BH  | 0    | 5   | 52  | 35  | 2.5   |
| 0.005608309 BH | 0    | 0   | 147 | 0   | 0     |
| 0.005703259 BH | 0    | 1   | 23  | 11  | 0.5   |
| 0.005704618 BH | 0    | 1   | 19  | 14  | 0.5   |
| 0.005704618 BH | 0    | 0   | 42  | 5   | 0     |
| 0.005704618 BH | 0    | 0   | 42  | 5   | 0     |
| 0.005857401 BH | 7    | 2   | 158 | 58  | 4.5   |
| 0.005872874 BH | 0    | 0   | 37  | 6   | 0     |
| 0.005872874 BH | 6    | 76  | 0   | 0   | 41    |
| 0.005887586 BH | 0    | 1   | 21  | 12  | 0.5   |
| 0.005954975 BH | 15   | 140 | 0   | 1   | 77.5  |
| 0.005954975 BH | 0    | 0   | 36  | 6   | 0     |
| 0.005954975 BH | 61   | 207 | 6   | 1   | 134   |
| 0.00601701 BH  | 1    | 0   | 85  | 5   | 0.5   |
| 0.006020208 BH | 1    | 4   | 37  | 36  | 2.5   |
| 0.006020208 BH | 5    | 84  | 0   | 0   | 44.5  |
| 0.006133742 BH | 1    | 7   | 59  | 45  | 4     |
| 0.006133742 BH | 1    | 4   | 32  | 42  | 2.5   |
| 0.006133742 BH | 0    | 2   | 9   | 55  | 1     |
| 0.006133742 BH | 3    | 107 | 0   | 0   | 55    |
| 0.006195657 BH | 0    | 4   | 29  | 36  | 2     |
| 0.006258097 BH | 0    | 0   | 23  | 11  | 0     |
| 0.006262073 BH | 0    | 0   | 16  | 16  | 0     |
| 0.006262073 BH | 0    | 0   | 31  | 7   | 0     |
| 0.006262073 BH | 0    | 0   | 9   | 25  | 0     |
| 0.006310602 BH | 0    | 0   | 39  | 5   | 0     |
| 0.006408169 BH | 0    | 0   | 132 | 0   | 0     |
| 0.006463111 BH | 1    | 0   | 43  | 12  | 0.5   |
| 0.006463111 BH | 0    | 0   | 22  | 11  | 0     |
| 0.006463111 BH | 0    | 0   | 22  | 11  | 0     |
| 0.006463111 BH | 4    | 20  | 186 | 78  | 12    |
| 0.006464507 BH | 15   | 223 | 3   | 0   | 119   |
| 0.006660763 BH | 10   | 48  | 0   | 0   | 29    |
| 0.006660763 BH | 27   | 18  | 0   | 0   | 22.5  |
| 0.006678018 BH | 11   | 694 | 1   | 4   | 352.5 |
| 0.006701851 BH | 0    | 0   | 18  | 13  | 0     |
| 0.006701851 BH | 0    | 0   | 16  | 15  | 0     |
| 0.006701851 BH | 0    | 0   | 37  | 5   | 0     |
| 0.006701851 BH | 3    | 3   | 59  | 41  | 3     |
| 0.006701851 BH | 1    | 0   | 285 | 0   | 0.5   |
| 0.006752421 BH | 1231 | 479 | 47  | 20  | 855   |
| 0.006805271 BH | 10   | 545 | 4   | 1   | 277.5 |

|                |     |      |    |    |       |
|----------------|-----|------|----|----|-------|
| 0.00685143 BH  | 0   | 0    | 23 | 10 | 0     |
| 0.006853287 BH | 29  | 16   | 0  | 0  | 22.5  |
| 0.007094672 BH | 1   | 0    | 85 | 4  | 0.5   |
| 0.007110426 BH | 0   | 0    | 24 | 9  | 0     |
| 0.007207666 BH | 0   | 2    | 46 | 10 | 1     |
| 0.007227089 BH | 0   | 1    | 18 | 12 | 0.5   |
| 0.007227089 BH | 13  | 37   | 0  | 0  | 25    |
| 0.007227089 BH | 0   | 0    | 19 | 12 | 0     |
| 0.007277296 BH | 0   | 0    | 28 | 7  | 0     |
| 0.007334347 BH | 1   | 3    | 43 | 27 | 2     |
| 0.007369024 BH | 0   | 0    | 23 | 9  | 0     |
| 0.007369024 BH | 1   | 0    | 39 | 12 | 0.5   |
| 0.007376099 BH | 25  | 251  | 4  | 1  | 138   |
| 0.007376099 BH | 0   | 2    | 19 | 26 | 1     |
| 0.007376099 BH | 0   | 1    | 21 | 10 | 0.5   |
| 0.007376099 BH | 0   | 1    | 21 | 10 | 0.5   |
| 0.007376099 BH | 0   | 1    | 21 | 10 | 0.5   |
| 0.007376099 BH | 0   | 0    | 20 | 11 | 0     |
| 0.007403295 BH | 0   | 0    | 70 | 1  | 0     |
| 0.007450238 BH | 3   | 0    | 98 | 22 | 1.5   |
| 0.007450238 BH | 137 | 19   | 0  | 2  | 78    |
| 0.007478938 BH | 6   | 64   | 0  | 0  | 35    |
| 0.00751581 BH  | 0   | 5    | 34 | 42 | 2.5   |
| 0.007556954 BH | 20  | 52   | 1  | 0  | 36    |
| 0.007556954 BH | 1   | 0    | 25 | 19 | 0.5   |
| 0.007556954 BH | 1   | 0    | 24 | 20 | 0.5   |
| 0.007640598 BH | 6   | 61   | 0  | 0  | 33.5  |
| 0.007640598 BH | 0   | 0    | 0  | 93 | 0     |
| 0.007640598 BH | 0   | 0    | 18 | 12 | 0     |
| 0.007640598 BH | 16  | 29   | 0  | 0  | 22.5  |
| 0.0077061 BH   | 70  | 1757 | 24 | 6  | 913.5 |
| 0.007707216 BH | 2   | 2    | 68 | 16 | 2     |
| 0.007707216 BH | 5   | 67   | 0  | 0  | 36    |
| 0.00775632 BH  | 0   | 0    | 22 | 9  | 0     |
| 0.007757015 BH | 0   | 0    | 43 | 3  | 0     |
| 0.007757015 BH | 0   | 7    | 64 | 33 | 3.5   |
| 0.007763371 BH | 28  | 14   | 0  | 0  | 21    |
| 0.007763371 BH | 31  | 33   | 1  | 0  | 32    |
| 0.007763371 BH | 7   | 54   | 0  | 0  | 30.5  |
| 0.007763371 BH | 7   | 320  | 3  | 0  | 163.5 |
| 0.007766676 BH | 0   | 0    | 19 | 11 | 0     |
| 0.007766676 BH | 0   | 0    | 27 | 7  | 0     |
| 0.007804795 BH | 34  | 102  | 1  | 2  | 68    |
| 0.007881986 BH | 288 | 84   | 8  | 5  | 186   |
| 0.008131894 BH | 0   | 1    | 25 | 7  | 0.5   |
| 0.008221872 BH | 0   | 0    | 17 | 12 | 0     |
| 0.008321806 BH | 0   | 0    | 29 | 6  | 0     |



|                |     |      |     |     |       |
|----------------|-----|------|-----|-----|-------|
| 0.008324871 BH | 0   | 0    | 21  | 9   | 0     |
| 0.008324871 BH | 19  | 23   | 0   | 0   | 21    |
| 0.008393304 BH | 23  | 17   | 0   | 0   | 20    |
| 0.008481747 BH | 0   | 0    | 19  | 10  | 0     |
| 0.008510991 BH | 22  | 3    | 348 | 252 | 12.5  |
| 0.008612357 BH | 0   | 0    | 28  | 6   | 0     |
| 0.008612357 BH | 3   | 1    | 54  | 32  | 2     |
| 0.008612357 BH | 26  | 36   | 1   | 0   | 31    |
| 0.008612357 BH | 0   | 0    | 35  | 4   | 0     |
| 0.008612357 BH | 0   | 1    | 16  | 12  | 0.5   |
| 0.008650068 BH | 4   | 1    | 73  | 34  | 2.5   |
| 0.008662929 BH | 1   | 1    | 20  | 35  | 1     |
| 0.008668645 BH | 43  | 282  | 7   | 1   | 162.5 |
| 0.008668645 BH | 0   | 0    | 25  | 7   | 0     |
| 0.008679048 BH | 3   | 1    | 91  | 18  | 2     |
| 0.008680346 BH | 1   | 0    | 17  | 25  | 0.5   |
| 0.008695137 BH | 7   | 3    | 20  | 278 | 5     |
| 0.008695137 BH | 19  | 48   | 1   | 0   | 33.5  |
| 0.008735762 BH | 95  | 43   | 3   | 1   | 69    |
| 0.008735762 BH | 93  | 0    | 0   | 0   | 46.5  |
| 0.008754471 BH | 0   | 1    | 13  | 14  | 0.5   |
| 0.008754471 BH | 0   | 1    | 13  | 14  | 0.5   |
| 0.008755467 BH | 0   | 0    | 27  | 6   | 0     |
| 0.008780162 BH | 0   | 0    | 0   | 81  | 0     |
| 0.008780162 BH | 1   | 120  | 0   | 0   | 60.5  |
| 0.008821387 BH | 85  | 48   | 3   | 1   | 66.5  |
| 0.008906509 BH | 15  | 335  | 4   | 0   | 175   |
| 0.008935582 BH | 0   | 1    | 24  | 7   | 0.5   |
| 0.008937407 BH | 0   | 0    | 7   | 23  | 0     |
| 0.009017801 BH | 2   | 5    | 36  | 50  | 3.5   |
| 0.00907833 BH  | 0   | 0    | 22  | 8   | 0     |
| 0.00907833 BH  | 0   | 1    | 26  | 6   | 0.5   |
| 0.009095942 BH | 3   | 76   | 0   | 0   | 39.5  |
| 0.009144942 BH | 57  | 342  | 9   | 3   | 199.5 |
| 0.009159218 BH | 0   | 5    | 23  | 51  | 2.5   |
| 0.009159218 BH | 0   | 1    | 15  | 12  | 0.5   |
| 0.009270054 BH | 7   | 36   | 162 | 185 | 21.5  |
| 0.009283178 BH | 14  | 1631 | 6   | 10  | 822.5 |
| 0.009328023 BH | 0   | 0    | 26  | 6   | 0     |
| 0.009397489 BH | 0   | 2    | 27  | 15  | 1     |
| 0.009397489 BH | 24  | 36   | 1   | 0   | 30    |
| 0.00950197 BH  | 9   | 39   | 0   | 0   | 24    |
| 0.00950349 BH  | 133 | 49   | 5   | 1   | 91    |
| 0.00950349 BH  | 8   | 5    | 148 | 51  | 6.5   |
| 0.009513203 BH | 0   | 0    | 44  | 2   | 0     |
| 0.009598503 BH | 2   | 88   | 0   | 0   | 45    |
| 0.009598503 BH | 2   | 88   | 0   | 0   | 45    |

|                |     |     |     |    |      |
|----------------|-----|-----|-----|----|------|
| 0.009697633 BH | 0   | 1   | 31  | 4  | 0.5  |
| 0.009713409 BH | 0   | 168 | 0   | 0  | 84   |
| 0.009949663 BH | 4   | 4   | 34  | 81 | 4    |
| 0.010009805 BH | 1   | 0   | 33  | 11 | 0.5  |
| 0.010009805 BH | 10  | 35  | 0   | 0  | 22.5 |
| 0.010029065 BH | 2   | 0   | 17  | 62 | 1    |
| 0.010042092 BH | 0   | 0   | 0   | 71 | 0    |
| 0.010192423 BH | 0   | 0   | 27  | 5  | 0    |
| 0.010192423 BH | 0   | 0   | 27  | 5  | 0    |
| 0.010285965 BH | 0   | 1   | 15  | 11 | 0.5  |
| 0.010294589 BH | 0   | 1   | 20  | 8  | 0.5  |
| 0.010306292 BH | 5   | 5   | 290 | 10 | 5    |
| 0.010344985 BH | 0   | 0   | 22  | 7  | 0    |
| 0.010386229 BH | 5   | 55  | 0   | 0  | 30   |
| 0.010405501 BH | 0   | 0   | 0   | 68 | 0    |
| 0.010405501 BH | 2   | 12  | 69  | 59 | 7    |
| 0.010413745 BH | 0   | 0   | 24  | 6  | 0    |
| 0.010457259 BH | 0   | 3   | 20  | 19 | 1.5  |
| 0.010457259 BH | 10  | 33  | 0   | 0  | 21.5 |
| 0.010457259 BH | 0   | 0   | 17  | 10 | 0    |
| 0.010457259 BH | 0   | 0   | 17  | 10 | 0    |
| 0.010457259 BH | 0   | 0   | 17  | 10 | 0    |
| 0.01071245 BH  | 0   | 0   | 7   | 20 | 0    |
| 0.010753281 BH | 1   | 8   | 51  | 34 | 4.5  |
| 0.010753281 BH | 0   | 3   | 17  | 21 | 1.5  |
| 0.010753281 BH | 0   | 0   | 21  | 7  | 0    |
| 0.010753281 BH | 0   | 1   | 21  | 7  | 0.5  |
| 0.010753281 BH | 0   | 1   | 21  | 7  | 0.5  |
| 0.010753281 BH | 0   | 0   | 21  | 7  | 0    |
| 0.010753281 BH | 5   | 8   | 75  | 56 | 6.5  |
| 0.010753281 BH | 422 | 156 | 15  | 11 | 289  |
| 0.010801976 BH | 0   | 0   | 23  | 6  | 0    |
| 0.010875453 BH | 4   | 7   | 86  | 42 | 5.5  |
| 0.010962089 BH | 0   | 1   | 28  | 4  | 0.5  |
| 0.010988072 BH | 0   | 10  | 38  | 63 | 5    |
| 0.011026985 BH | 0   | 1   | 15  | 10 | 0.5  |
| 0.011026985 BH | 19  | 17  | 0   | 0  | 18   |
| 0.011026985 BH | 6   | 422 | 3   | 2  | 214  |
| 0.011031034 BH | 5   | 51  | 0   | 0  | 28   |
| 0.01103417 BH  | 0   | 1   | 32  | 3  | 0.5  |
| 0.011184234 BH | 0   | 7   | 37  | 43 | 3.5  |
| 0.011277592 BH | 1   | 5   | 58  | 20 | 3    |
| 0.011280447 BH | 1   | 0   | 21  | 17 | 0.5  |
| 0.011280447 BH | 8   | 38  | 0   | 0  | 23   |
| 0.011396619 BH | 0   | 2   | 41  | 7  | 1    |
| 0.011451081 BH | 118 | 24  | 3   | 1  | 71   |
| 0.011541421 BH | 0   | 0   | 37  | 2  | 0    |

|                |     |     |     |    |       |
|----------------|-----|-----|-----|----|-------|
| 0.011614043 BH | 89  | 21  | 3   | 0  | 55    |
| 0.011615534 BH | 0   | 0   | 20  | 7  | 0     |
| 0.011733422 BH | 0   | 2   | 28  | 12 | 1     |
| 0.012126168 BH | 0   | 0   | 28  | 4  | 0     |
| 0.012126168 BH | 0   | 1   | 16  | 9  | 0.5   |
| 0.012126168 BH | 28  | 114 | 0   | 3  | 71    |
| 0.012145493 BH | 4   | 189 | 2   | 0  | 96.5  |
| 0.01215103 BH  | 12  | 56  | 1   | 0  | 34    |
| 0.012232357 BH | 1   | 0   | 31  | 10 | 0.5   |
| 0.012232357 BH | 0   | 1   | 26  | 4  | 0.5   |
| 0.012245292 BH | 57  | 57  | 3   | 1  | 57    |
| 0.012288953 BH | 168 | 195 | 12  | 6  | 181.5 |
| 0.012288953 BH | 0   | 0   | 21  | 6  | 0     |
| 0.012294382 BH | 186 | 43  | 7   | 1  | 114.5 |
| 0.012294382 BH | 0   | 1   | 23  | 5  | 0.5   |
| 0.012302021 BH | 7   | 302 | 3   | 1  | 154.5 |
| 0.012302021 BH | 1   | 0   | 62  | 3  | 0.5   |
| 0.012302021 BH | 4   | 53  | 0   | 0  | 28.5  |
| 0.012336723 BH | 0   | 7   | 41  | 36 | 3.5   |
| 0.012354747 BH | 36  | 89  | 3   | 1  | 62.5  |
| 0.012471427 BH | 1   | 88  | 0   | 0  | 44.5  |
| 0.012471427 BH | 67  | 126 | 5   | 3  | 96.5  |
| 0.012471427 BH | 1   | 0   | 92  | 1  | 0.5   |
| 0.012528317 BH | 99  | 36  | 3   | 2  | 67.5  |
| 0.01260804 BH  | 0   | 0   | 10  | 14 | 0     |
| 0.01260804 BH  | 0   | 0   | 17  | 8  | 0     |
| 0.012678145 BH | 32  | 38  | 0   | 1  | 35    |
| 0.012815625 BH | 50  | 529 | 10  | 7  | 289.5 |
| 0.012815625 BH | 0   | 0   | 30  | 3  | 0     |
| 0.012815625 BH | 0   | 0   | 30  | 3  | 0     |
| 0.012815625 BH | 21  | 58  | 2   | 0  | 39.5  |
| 0.012842224 BH | 18  | 16  | 0   | 0  | 17    |
| 0.01292696 BH  | 16  | 18  | 0   | 0  | 17    |
| 0.012937501 BH | 43  | 243 | 7   | 0  | 143   |
| 0.013074589 BH | 0   | 1   | 11  | 12 | 0.5   |
| 0.013074589 BH | 56  | 34  | 3   | 0  | 45    |
| 0.013192578 BH | 0   | 0   | 23  | 5  | 0     |
| 0.013274971 BH | 0   | 0   | 18  | 7  | 0     |
| 0.013274971 BH | 0   | 0   | 18  | 7  | 0     |
| 0.013316606 BH | 0   | 0   | 5   | 21 | 0     |
| 0.013408214 BH | 0   | 0   | 15  | 9  | 0     |
| 0.013408214 BH | 0   | 0   | 15  | 9  | 0     |
| 0.013437538 BH | 6   | 13  | 107 | 57 | 9.5   |
| 0.013437538 BH | 0   | 3   | 27  | 11 | 1.5   |
| 0.013440358 BH | 15  | 42  | 1   | 0  | 28.5  |
| 0.013441981 BH | 0   | 3   | 13  | 23 | 1.5   |
| 0.013481163 BH | 0   | 0   | 7   | 17 | 0     |

|                |     |     |    |     |       |
|----------------|-----|-----|----|-----|-------|
| 0.013541563 BH | 0   | 1   | 19 | 6   | 0.5   |
| 0.013541563 BH | 7   | 37  | 0  | 0   | 22    |
| 0.013646982 BH | 2   | 67  | 0  | 0   | 34.5  |
| 0.013646982 BH | 2   | 66  | 0  | 0   | 34    |
| 0.0136522 BH   | 122 | 28  | 4  | 0   | 75    |
| 0.0136522 BH   | 15  | 19  | 0  | 0   | 17    |
| 0.013672834 BH | 9   | 140 | 1  | 1   | 74.5  |
| 0.013790031 BH | 0   | 3   | 21 | 14  | 1.5   |
| 0.013881353 BH | 0   | 0   | 20 | 6   | 0     |
| 0.014140404 BH | 591 | 240 | 28 | 16  | 415.5 |
| 0.014140404 BH | 0   | 2   | 43 | 5   | 1     |
| 0.014140404 BH | 19  | 912 | 11 | 6   | 465.5 |
| 0.014140404 BH | 0   | 4   | 39 | 13  | 2     |
| 0.014140404 BH | 1   | 0   | 29 | 9   | 0.5   |
| 0.014140404 BH | 160 | 36  | 6  | 2   | 98    |
| 0.014140404 BH | 0   | 0   | 12 | 11  | 0     |
| 0.014140404 BH | 0   | 1   | 14 | 9   | 0.5   |
| 0.014140404 BH | 0   | 1   | 14 | 9   | 0.5   |
| 0.014140404 BH | 0   | 0   | 14 | 9   | 0     |
| 0.014140404 BH | 0   | 0   | 14 | 9   | 0     |
| 0.014413182 BH | 29  | 6   | 0  | 0   | 17.5  |
| 0.014448187 BH | 0   | 0   | 24 | 4   | 0     |
| 0.014448187 BH | 0   | 0   | 24 | 4   | 0     |
| 0.014448187 BH | 0   | 0   | 24 | 4   | 0     |
| 0.014533107 BH | 0   | 1   | 15 | 8   | 0.5   |
| 0.014605015 BH | 10  | 8   | 17 | 335 | 9     |
| 0.014605015 BH | 0   | 0   | 27 | 3   | 0     |
| 0.014669191 BH | 0   | 0   | 8  | 15  | 0     |
| 0.014687259 BH | 0   | 0   | 2  | 29  | 0     |
| 0.014696015 BH | 53  | 100 | 5  | 0   | 76.5  |
| 0.014780715 BH | 1   | 78  | 0  | 0   | 39.5  |
| 0.014798737 BH | 5   | 43  | 0  | 0   | 24    |
| 0.014818666 BH | 1   | 7   | 50 | 27  | 4     |
| 0.014818666 BH | 0   | 1   | 16 | 7   | 0.5   |
| 0.014818666 BH | 0   | 1   | 16 | 7   | 0.5   |
| 0.014971404 BH | 3   | 3   | 27 | 47  | 3     |
| 0.014971404 BH | 0   | 0   | 19 | 6   | 0     |
| 0.014971404 BH | 0   | 2   | 25 | 11  | 1     |
| 0.015081449 BH | 0   | 2   | 21 | 13  | 1     |
| 0.015148814 BH | 9   | 292 | 4  | 1   | 150.5 |
| 0.015148814 BH | 1   | 5   | 43 | 22  | 3     |
| 0.015148814 BH | 0   | 1   | 26 | 3   | 0.5   |
| 0.015148814 BH | 0   | 0   | 17 | 7   | 0     |
| 0.015148814 BH | 3   | 3   | 49 | 26  | 3     |
| 0.015305284 BH | 17  | 14  | 0  | 0   | 15.5  |
| 0.015305284 BH | 6   | 36  | 0  | 0   | 21    |
| 0.015336099 BH | 6   | 74  | 1  | 0   | 40    |

|                |     |     |     |     |       |
|----------------|-----|-----|-----|-----|-------|
| 0.01546261 BH  | 1   | 1   | 33  | 13  | 1     |
| 0.01546261 BH  | 0   | 0   | 23  | 4   | 0     |
| 0.01546261 BH  | 653 | 223 | 25  | 22  | 438   |
| 0.015481557 BH | 0   | 107 | 0   | 0   | 53.5  |
| 0.015481557 BH | 34  | 43  | 1   | 1   | 38.5  |
| 0.015481557 BH | 0   | 0   | 54  | 0   | 0     |
| 0.015481557 BH | 0   | 0   | 54  | 0   | 0     |
| 0.015586461 BH | 0   | 4   | 20  | 24  | 2     |
| 0.015586461 BH | 18  | 13  | 0   | 0   | 15.5  |
| 0.015586461 BH | 0   | 0   | 20  | 5   | 0     |
| 0.015706525 BH | 1   | 0   | 33  | 7   | 0.5   |
| 0.015706525 BH | 1   | 0   | 25  | 10  | 0.5   |
| 0.015706525 BH | 0   | 0   | 10  | 12  | 0     |
| 0.015706525 BH | 0   | 1   | 9   | 12  | 0.5   |
| 0.015719702 BH | 4   | 44  | 0   | 0   | 24    |
| 0.015719702 BH | 0   | 0   | 18  | 6   | 0     |
| 0.015719702 BH | 0   | 2   | 24  | 11  | 1     |
| 0.015719702 BH | 0   | 1   | 22  | 4   | 0.5   |
| 0.015719702 BH | 0   | 1   | 22  | 4   | 0.5   |
| 0.015719702 BH | 0   | 4   | 27  | 18  | 2     |
| 0.015885251 BH | 8   | 102 | 2   | 0   | 55    |
| 0.016059803 BH | 0   | 1   | 15  | 7   | 0.5   |
| 0.016077093 BH | 0   | 2   | 39  | 5   | 1     |
| 0.01611811 BH  | 0   | 0   | 7   | 15  | 0     |
| 0.016119549 BH | 2   | 0   | 61  | 11  | 1     |
| 0.016170518 BH | 11  | 47  | 1   | 0   | 29    |
| 0.016226557 BH | 2   | 9   | 44  | 43  | 5.5   |
| 0.016310416 BH | 24  | 23  | 285 | 148 | 23.5  |
| 0.016310416 BH | 20  | 80  | 3   | 0   | 50    |
| 0.016390672 BH | 0   | 0   | 16  | 7   | 0     |
| 0.016390672 BH | 0   | 0   | 16  | 7   | 0     |
| 0.016390672 BH | 0   | 0   | 29  | 2   | 0     |
| 0.016390672 BH | 0   | 0   | 29  | 2   | 0     |
| 0.016435974 BH | 0   | 1   | 19  | 5   | 0.5   |
| 0.01646054 BH  | 4   | 42  | 0   | 0   | 23    |
| 0.016569296 BH | 163 | 318 | 17  | 10  | 240.5 |
| 0.016756308 BH | 0   | 3   | 15  | 17  | 1.5   |
| 0.016756781 BH | 0   | 0   | 11  | 10  | 0     |
| 0.016756781 BH | 0   | 1   | 11  | 10  | 0.5   |
| 0.016756781 BH | 0   | 0   | 12  | 9   | 0     |
| 0.016756781 BH | 567 | 178 | 31  | 4   | 372.5 |
| 0.016756781 BH | 2   | 55  | 0   | 0   | 28.5  |
| 0.016756781 BH | 72  | 108 | 6   | 3   | 90    |
| 0.016846784 BH | 0   | 2   | 19  | 13  | 1     |
| 0.016846784 BH | 0   | 0   | 1   | 31  | 0     |
| 0.016846784 BH | 25  | 99  | 3   | 1   | 62    |
| 0.016846784 BH | 17  | 55  | 2   | 0   | 36    |

|                |     |      |     |     |      |
|----------------|-----|------|-----|-----|------|
| 0.016846784 BH | 0   | 4    | 27  | 17  | 2    |
| 0.016846784 BH | 0   | 1    | 21  | 4   | 0.5  |
| 0.016846784 BH | 0   | 0    | 21  | 4   | 0    |
| 0.016846784 BH | 0   | 0    | 21  | 4   | 0    |
| 0.016997468 BH | 184 | 3098 | 62  | 41  | 1641 |
| 0.017021018 BH | 12  | 20   | 0   | 0   | 16   |
| 0.01706328 BH  | 2   | 56   | 0   | 0   | 29   |
| 0.01706328 BH  | 2   | 4    | 72  | 14  | 3    |
| 0.017066133 BH | 1   | 0    | 68  | 1   | 0.5  |
| 0.017446107 BH | 0   | 0    | 15  | 7   | 0    |
| 0.017446107 BH | 0   | 0    | 15  | 7   | 0    |
| 0.017446107 BH | 0   | 0    | 15  | 7   | 0    |
| 0.017508437 BH | 1   | 67   | 0   | 0   | 34   |
| 0.017587961 BH | 0   | 0    | 27  | 2   | 0    |
| 0.017587961 BH | 0   | 0    | 27  | 2   | 0    |
| 0.017587961 BH | 2   | 2    | 19  | 31  | 2    |
| 0.017750011 BH | 11  | 134  | 2   | 1   | 72.5 |
| 0.017750011 BH | 10  | 9    | 195 | 37  | 9.5  |
| 0.017750011 BH | 0   | 1    | 18  | 5   | 0.5  |
| 0.017750011 BH | 0   | 0    | 18  | 5   | 0    |
| 0.017750011 BH | 0   | 1    | 16  | 6   | 0.5  |
| 0.017750011 BH | 7   | 29   | 0   | 0   | 18   |
| 0.017750011 BH | 4   | 5    | 40  | 43  | 4.5  |
| 0.017750011 BH | 25  | 259  | 5   | 4   | 142  |
| 0.017750011 BH | 0   | 1    | 20  | 4   | 0.5  |
| 0.017750011 BH | 0   | 0    | 20  | 4   | 0    |
| 0.017750011 BH | 0   | 1    | 20  | 4   | 0.5  |
| 0.017750011 BH | 0   | 1    | 20  | 4   | 0.5  |
| 0.017755238 BH | 1   | 7    | 36  | 32  | 4    |
| 0.017760515 BH | 0   | 0    | 23  | 3   | 0    |
| 0.017760515 BH | 0   | 0    | 23  | 3   | 0    |
| 0.01778694 BH  | 10  | 142  | 2   | 1   | 76   |
| 0.018000987 BH | 1   | 0    | 23  | 10  | 0.5  |
| 0.018000987 BH | 28  | 4    | 0   | 0   | 16   |
| 0.018049182 BH | 0   | 0    | 8   | 13  | 0    |
| 0.018108044 BH | 1   | 2    | 40  | 8   | 1.5  |
| 0.018187072 BH | 0   | 1    | 11  | 9   | 0.5  |
| 0.018452949 BH | 47  | 29   | 3   | 0   | 38   |
| 0.018452949 BH | 0   | 5    | 42  | 16  | 2.5  |
| 0.018579182 BH | 2   | 0    | 27  | 25  | 1    |
| 0.018631666 BH | 1   | 1    | 35  | 10  | 1    |
| 0.018631666 BH | 8   | 26   | 0   | 0   | 17   |
| 0.018631666 BH | 0   | 0    | 13  | 8   | 0    |
| 0.018668877 BH | 17  | 70   | 1   | 1   | 43.5 |
| 0.018754499 BH | 1   | 0    | 22  | 10  | 0.5  |
| 0.018754869 BH | 2   | 32   | 113 | 124 | 17   |
| 0.018754869 BH | 0   | 0    | 22  | 3   | 0    |

|                |     |     |     |     |       |
|----------------|-----|-----|-----|-----|-------|
| 0.018754869 BH | 0   | 0   | 4   | 18  | 0     |
| 0.018874923 BH | 0   | 1   | 17  | 5   | 0.5   |
| 0.018874923 BH | 0   | 0   | 17  | 5   | 0     |
| 0.018874923 BH | 88  | 10  | 3   | 0   | 49    |
| 0.018874923 BH | 37  | 84  | 4   | 1   | 60.5  |
| 0.018898884 BH | 1   | 7   | 39  | 28  | 4     |
| 0.018951908 BH | 0   | 0   | 14  | 7   | 0     |
| 0.018951908 BH | 20  | 277 | 6   | 2   | 148.5 |
| 0.018951908 BH | 2   | 50  | 0   | 0   | 26    |
| 0.019019171 BH | 2   | 4   | 40  | 18  | 3     |
| 0.019150336 BH | 1   | 62  | 0   | 0   | 31.5  |
| 0.019174189 BH | 6   | 102 | 2   | 0   | 54    |
| 0.019174189 BH | 1   | 1   | 30  | 12  | 1     |
| 0.019174189 BH | 26  | 4   | 0   | 0   | 15    |
| 0.019174189 BH | 1   | 10  | 51  | 37  | 5.5   |
| 0.019192814 BH | 59  | 46  | 3   | 2   | 52.5  |
| 0.019192814 BH | 305 | 236 | 18  | 17  | 270.5 |
| 0.019192814 BH | 0   | 1   | 15  | 6   | 0.5   |
| 0.019192814 BH | 0   | 0   | 15  | 6   | 0     |
| 0.019192814 BH | 0   | 0   | 15  | 6   | 0     |
| 0.019192814 BH | 0   | 1   | 15  | 6   | 0.5   |
| 0.019192814 BH | 0   | 1   | 15  | 6   | 0.5   |
| 0.019291307 BH | 99  | 168 | 11  | 4   | 133.5 |
| 0.019365012 BH | 0   | 86  | 0   | 0   | 43    |
| 0.019365012 BH | 0   | 85  | 0   | 0   | 42.5  |
| 0.019365012 BH | 0   | 85  | 0   | 0   | 42.5  |
| 0.019365012 BH | 0   | 5   | 35  | 18  | 2.5   |
| 0.019545344 BH | 1   | 59  | 0   | 0   | 30    |
| 0.019545344 BH | 1   | 60  | 0   | 0   | 30.5  |
| 0.019604623 BH | 20  | 38  | 319 | 110 | 29    |
| 0.019811692 BH | 0   | 5   | 39  | 16  | 2.5   |
| 0.019935134 BH | 0   | 1   | 10  | 9   | 0.5   |
| 0.020107355 BH | 0   | 3   | 27  | 7   | 1.5   |
| 0.020107355 BH | 0   | 1   | 16  | 5   | 0.5   |
| 0.020107355 BH | 0   | 1   | 16  | 5   | 0.5   |
| 0.020159361 BH | 2   | 2   | 53  | 8   | 2     |
| 0.020214067 BH | 22  | 6   | 0   | 0   | 14    |
| 0.020245173 BH | 2   | 1   | 40  | 13  | 1.5   |
| 0.020254385 BH | 55  | 486 | 14  | 8   | 270.5 |
| 0.020254385 BH | 67  | 71  | 4   | 3   | 69    |
| 0.020254385 BH | 1   | 0   | 22  | 9   | 0.5   |
| 0.020254385 BH | 0   | 0   | 13  | 7   | 0     |
| 0.020254385 BH | 0   | 0   | 13  | 7   | 0     |
| 0.020254385 BH | 0   | 1   | 9   | 10  | 0.5   |
| 0.020254385 BH | 0   | 0   | 18  | 4   | 0     |
| 0.020254385 BH | 0   | 0   | 18  | 4   | 0     |
| 0.020254385 BH | 0   | 0   | 18  | 4   | 0     |

|                |      |     |     |     |        |
|----------------|------|-----|-----|-----|--------|
| 0.020254385 BH | 18   | 9   | 0   | 0   | 13.5   |
| 0.020280506 BH | 3    | 5   | 54  | 22  | 4      |
| 0.020361254 BH | 0    | 3   | 24  | 8   | 1.5    |
| 0.020361254 BH | 3    | 41  | 0   | 0   | 22     |
| 0.020393668 BH | 1    | 13  | 108 | 19  | 7      |
| 0.020520477 BH | 0    | 3   | 16  | 13  | 1.5    |
| 0.020607022 BH | 0    | 0   | 8   | 11  | 0      |
| 0.020607022 BH | 7    | 26  | 0   | 0   | 16.5   |
| 0.020812863 BH | 2    | 2   | 52  | 8   | 2      |
| 0.020812863 BH | 5    | 31  | 0   | 0   | 18     |
| 0.020812863 BH | 6    | 58  | 1   | 0   | 32     |
| 0.021141969 BH | 5    | 0   | 13  | 108 | 2.5    |
| 0.021182907 BH | 3    | 3   | 49  | 19  | 3      |
| 0.021208078 BH | 4    | 36  | 0   | 0   | 20     |
| 0.021329455 BH | 10   | 94  | 1   | 1   | 52     |
| 0.021329455 BH | 4    | 22  | 183 | 33  | 13     |
| 0.021567242 BH | 29   | 178 | 5   | 3   | 103.5  |
| 0.021644877 BH | 0    | 0   | 7   | 12  | 0      |
| 0.021755682 BH | 382  | 405 | 20  | 31  | 393.5  |
| 0.022179166 BH | 9    | 20  | 0   | 0   | 14.5   |
| 0.022179166 BH | 0    | 1   | 12  | 7   | 0.5    |
| 0.022179166 BH | 0    | 1   | 15  | 5   | 0.5    |
| 0.022179166 BH | 0    | 1   | 15  | 5   | 0.5    |
| 0.022218871 BH | 2    | 45  | 0   | 0   | 23.5   |
| 0.022218871 BH | 0    | 3   | 14  | 14  | 1.5    |
| 0.022490032 BH | 0    | 1   | 22  | 2   | 0.5    |
| 0.022490032 BH | 3    | 0   | 72  | 10  | 1.5    |
| 0.022585444 BH | 6    | 16  | 67  | 77  | 11     |
| 0.022585444 BH | 11   | 17  | 0   | 0   | 14     |
| 0.022585444 BH | 0    | 1   | 8   | 10  | 0.5    |
| 0.022585444 BH | 8    | 22  | 0   | 0   | 15     |
| 0.022666709 BH | 3    | 75  | 1   | 0   | 39     |
| 0.022666709 BH | 3    | 74  | 1   | 0   | 38.5   |
| 0.022689973 BH | 26   | 3   | 0   | 0   | 14.5   |
| 0.022689973 BH | 0    | 0   | 20  | 3   | 0      |
| 0.023052157 BH | 0    | 0   | 38  | 0   | 0      |
| 0.02307822 BH  | 0    | 0   | 13  | 6   | 0      |
| 0.02307822 BH  | 23   | 32  | 0   | 1   | 27.5   |
| 0.023243862 BH | 6190 | 85  | 83  | 0   | 3137.5 |
| 0.023283851 BH | 0    | 5   | 53  | 9   | 2.5    |
| 0.023379825 BH | 0    | 2   | 15  | 13  | 1      |
| 0.02342007 BH  | 86   | 190 | 11  | 6   | 138    |
| 0.023618988 BH | 0    | 1   | 16  | 4   | 0.5    |
| 0.023618988 BH | 0    | 1   | 16  | 4   | 0.5    |
| 0.023618988 BH | 0    | 1   | 16  | 4   | 0.5    |
| 0.023618988 BH | 0    | 1   | 16  | 4   | 0.5    |
| 0.023620226 BH | 25   | 3   | 0   | 0   | 14     |



|                |     |     |    |    |       |
|----------------|-----|-----|----|----|-------|
| 0.023620226 BH | 25  | 3   | 0  | 0  | 14    |
| 0.023692035 BH | 0   | 0   | 0  | 32 | 0     |
| 0.023693214 BH | 2   | 4   | 26 | 24 | 3     |
| 0.023862991 BH | 6   | 52  | 1  | 0  | 29    |
| 0.02394765 BH  | 2   | 43  | 0  | 0  | 22.5  |
| 0.024297777 BH | 23  | 15  | 1  | 0  | 19    |
| 0.024379953 BH | 0   | 0   | 22 | 2  | 0     |
| 0.024509413 BH | 19  | 37  | 2  | 0  | 28    |
| 0.024633666 BH | 17  | 23  | 1  | 0  | 20    |
| 0.024780771 BH | 1   | 50  | 0  | 0  | 25.5  |
| 0.024780771 BH | 0   | 1   | 25 | 1  | 0.5   |
| 0.024780771 BH | 0   | 0   | 10 | 8  | 0     |
| 0.024780771 BH | 0   | 0   | 10 | 8  | 0     |
| 0.02483859 BH  | 2   | 0   | 22 | 24 | 1     |
| 0.02493629 BH  | 24  | 132 | 1  | 4  | 78    |
| 0.02493629 BH  | 3   | 35  | 0  | 0  | 19    |
| 0.025004948 BH | 3   | 11  | 68 | 33 | 7     |
| 0.025005201 BH | 307 | 87  | 7  | 15 | 197   |
| 0.025097834 BH | 2   | 17  | 52 | 69 | 9.5   |
| 0.025097834 BH | 1   | 0   | 23 | 7  | 0.5   |
| 0.025097834 BH | 15  | 26  | 1  | 0  | 20.5  |
| 0.025097834 BH | 0   | 2   | 15 | 12 | 1     |
| 0.025097834 BH | 0   | 0   | 9  | 9  | 0     |
| 0.025097834 BH | 0   | 0   | 11 | 7  | 0     |
| 0.025097834 BH | 8   | 21  | 0  | 0  | 14.5  |
| 0.025097834 BH | 0   | 0   | 11 | 7  | 0     |
| 0.025097834 BH | 0   | 0   | 11 | 7  | 0     |
| 0.025403745 BH | 1   | 13  | 45 | 44 | 7     |
| 0.025431809 BH | 449 | 236 | 9  | 30 | 342.5 |
| 0.025541844 BH | 14  | 11  | 0  | 0  | 12.5  |
| 0.025693942 BH | 0   | 0   | 8  | 10 | 0     |
| 0.025693942 BH | 0   | 6   | 23 | 23 | 3     |
| 0.025693942 BH | 1   | 0   | 40 | 2  | 0.5   |
| 0.025704689 BH | 0   | 3   | 16 | 11 | 1.5   |
| 0.025704689 BH | 0   | 0   | 21 | 2  | 0     |
| 0.025704689 BH | 0   | 0   | 21 | 2  | 0     |
| 0.025704689 BH | 19  | 6   | 0  | 0  | 12.5  |
| 0.025763535 BH | 8   | 122 | 2  | 1  | 65    |
| 0.025828922 BH | 123 | 41  | 7  | 2  | 82    |
| 0.025828922 BH | 49  | 366 | 12 | 7  | 207.5 |
| 0.025964085 BH | 0   | 0   | 16 | 4  | 0     |
| 0.025964085 BH | 16  | 58  | 1  | 1  | 37    |
| 0.025974297 BH | 338 | 297 | 35 | 9  | 317.5 |
| 0.025974297 BH | 0   | 5   | 30 | 17 | 2.5   |
| 0.025983951 BH | 0   | 0   | 34 | 0  | 0     |
| 0.025983951 BH | 6   | 24  | 0  | 0  | 15    |
| 0.025983951 BH | 0   | 1   | 13 | 5  | 0.5   |

|                |     |     |    |    |       |
|----------------|-----|-----|----|----|-------|
| 0.026170257 BH | 129 | 101 | 10 | 6  | 115   |
| 0.026170257 BH | 0   | 4   | 15 | 21 | 2     |
| 0.026203598 BH | 4   | 60  | 1  | 0  | 32    |
| 0.026314217 BH | 33  | 18  | 2  | 0  | 25.5  |
| 0.026403029 BH | 4   | 98  | 2  | 0  | 51    |
| 0.026493616 BH | 54  | 120 | 7  | 3  | 87    |
| 0.026526355 BH | 12  | 13  | 0  | 0  | 12.5  |
| 0.026651727 BH | 83  | 83  | 7  | 4  | 83    |
| 0.027127368 BH | 14  | 25  | 1  | 0  | 19.5  |
| 0.027167963 BH | 5   | 26  | 0  | 0  | 15.5  |
| 0.027167963 BH | 12  | 12  | 0  | 0  | 12    |
| 0.027172425 BH | 25  | 12  | 1  | 0  | 18.5  |
| 0.027172425 BH | 10  | 103 | 2  | 1  | 56.5  |
| 0.027207751 BH | 74  | 123 | 5  | 7  | 98.5  |
| 0.027212578 BH | 38  | 13  | 2  | 0  | 25.5  |
| 0.027238069 BH | 1   | 5   | 29 | 21 | 3     |
| 0.027255717 BH | 0   | 63  | 0  | 0  | 31.5  |
| 0.027316825 BH | 118 | 91  | 11 | 3  | 104.5 |
| 0.027316825 BH | 5   | 1   | 79 | 20 | 3     |
| 0.027316825 BH | 8   | 19  | 0  | 0  | 13.5  |
| 0.027316825 BH | 8   | 19  | 0  | 0  | 13.5  |
| 0.027316825 BH | 0   | 1   | 10 | 7  | 0.5   |
| 0.027316825 BH | 0   | 1   | 10 | 7  | 0.5   |
| 0.027316825 BH | 8   | 19  | 0  | 0  | 13.5  |
| 0.027336154 BH | 1   | 17  | 85 | 32 | 9     |
| 0.027375655 BH | 6   | 168 | 0  | 3  | 87    |
| 0.027469231 BH | 15  | 23  | 1  | 0  | 19    |
| 0.027469231 BH | 1   | 0   | 13 | 13 | 0.5   |
| 0.027539625 BH | 1   | 1   | 19 | 15 | 1     |
| 0.027602632 BH | 4   | 2   | 66 | 15 | 3     |
| 0.027604316 BH | 0   | 64  | 0  | 0  | 32    |
| 0.027604316 BH | 36  | 14  | 0  | 1  | 25    |
| 0.027604316 BH | 0   | 783 | 0  | 4  | 391.5 |
| 0.027604316 BH | 0   | 0   | 20 | 2  | 0     |
| 0.027604316 BH | 0   | 8   | 30 | 25 | 4     |
| 0.027604316 BH | 0   | 0   | 8  | 9  | 0     |
| 0.027604316 BH | 10  | 15  | 0  | 0  | 12.5  |
| 0.027604316 BH | 10  | 15  | 0  | 0  | 12.5  |
| 0.027604316 BH | 7   | 20  | 0  | 0  | 13.5  |
| 0.027604316 BH | 0   | 0   | 33 | 0  | 0     |
| 0.027649397 BH | 0   | 1   | 17 | 3  | 0.5   |
| 0.027722979 BH | 0   | 2   | 21 | 7  | 1     |
| 0.027755863 BH | 0   | 0   | 15 | 4  | 0     |
| 0.027800845 BH | 12  | 119 | 1  | 3  | 65.5  |
| 0.027800845 BH | 0   | 2   | 11 | 15 | 1     |
| 0.027800845 BH | 9   | 35  | 1  | 0  | 22    |
| 0.027800845 BH | 0   | 2   | 18 | 9  | 1     |

|                |     |      |    |     |       |
|----------------|-----|------|----|-----|-------|
| 0.027800845 BH | 5   | 7    | 79 | 25  | 6     |
| 0.027844118 BH | 8   | 87   | 1  | 1   | 47.5  |
| 0.027844118 BH | 6   | 3    | 14 | 107 | 4.5   |
| 0.027844118 BH | 11  | 52   | 2  | 0   | 31.5  |
| 0.027844118 BH | 7   | 93   | 1  | 1   | 50    |
| 0.028021726 BH | 0   | 0    | 17 | 3   | 0     |
| 0.028021726 BH | 0   | 0    | 17 | 3   | 0     |
| 0.028021726 BH | 0   | 0    | 17 | 3   | 0     |
| 0.028620178 BH | 3   | 2    | 27 | 30  | 2.5   |
| 0.028786851 BH | 0   | 5    | 31 | 15  | 2.5   |
| 0.028807549 BH | 1   | 0    | 13 | 12  | 0.5   |
| 0.028807549 BH | 11  | 29   | 1  | 0   | 20    |
| 0.02882181 BH  | 4   | 29   | 0  | 0   | 16.5  |
| 0.02919207 BH  | 0   | 3    | 19 | 8   | 1.5   |
| 0.02919207 BH  | 0   | 3    | 19 | 8   | 1.5   |
| 0.02919207 BH  | 8   | 37   | 1  | 0   | 22.5  |
| 0.02919207 BH  | 0   | 0    | 13 | 5   | 0     |
| 0.02919207 BH  | 5   | 24   | 0  | 0   | 14.5  |
| 0.02921426 BH  | 0   | 0    | 23 | 1   | 0     |
| 0.02926443 BH  | 1   | 2    | 33 | 6   | 1.5   |
| 0.029282257 BH | 11  | 70   | 1  | 1   | 40.5  |
| 0.029436043 BH | 7   | 7    | 98 | 26  | 7     |
| 0.029436043 BH | 24  | 66   | 3  | 1   | 45    |
| 0.029511871 BH | 21  | 1034 | 21 | 8   | 527.5 |
| 0.02960191 BH  | 0   | 3    | 41 | 5   | 1.5   |
| 0.029687186 BH | 5   | 25   | 0  | 0   | 15    |
| 0.029687186 BH | 12  | 11   | 0  | 0   | 11.5  |
| 0.029687186 BH | 5   | 25   | 0  | 0   | 15    |
| 0.029694148 BH | 1   | 3    | 18 | 22  | 2     |
| 0.029743105 BH | 1   | 0    | 20 | 7   | 0.5   |
| 0.029885045 BH | 8   | 62   | 2  | 0   | 35    |
| 0.030052464 BH | 0   | 0    | 1  | 20  | 0     |
| 0.030185942 BH | 92  | 595  | 20 | 17  | 343.5 |
| 0.030185942 BH | 14  | 100  | 3  | 1   | 57    |
| 0.030273413 BH | 2   | 16   | 70 | 37  | 9     |
| 0.030559595 BH | 0   | 0    | 16 | 3   | 0     |
| 0.030559595 BH | 308 | 0    | 1  | 4   | 154   |
| 0.03067469 BH  | 25  | 63   | 3  | 1   | 44    |
| 0.030733065 BH | 107 | 237  | 15 | 9   | 172   |
| 0.030733065 BH | 0   | 0    | 30 | 0   | 0     |
| 0.030733065 BH | 4   | 26   | 0  | 0   | 15    |
| 0.030733065 BH | 0   | 0    | 14 | 4   | 0     |
| 0.030733065 BH | 0   | 0    | 22 | 1   | 0     |
| 0.030733065 BH | 0   | 0    | 22 | 1   | 0     |
| 0.030733065 BH | 0   | 1    | 10 | 6   | 0.5   |
| 0.030733065 BH | 0   | 1    | 10 | 6   | 0.5   |
| 0.030733065 BH | 0   | 0    | 8  | 8   | 0     |

|                |     |     |     |    |       |
|----------------|-----|-----|-----|----|-------|
| 0.030733065 BH | 0   | 1   | 10  | 6  | 0.5   |
| 0.030733065 BH | 0   | 0   | 8   | 8  | 0     |
| 0.030733065 BH | 0   | 0   | 9   | 7  | 0     |
| 0.030733065 BH | 7   | 19  | 0   | 0  | 13    |
| 0.030750499 BH | 0   | 1   | 18  | 2  | 0.5   |
| 0.030750499 BH | 0   | 1   | 18  | 2  | 0.5   |
| 0.031344916 BH | 4   | 27  | 0   | 0  | 15.5  |
| 0.031351903 BH | 0   | 2   | 19  | 7  | 1     |
| 0.031627954 BH | 919 | 171 | 32  | 40 | 545   |
| 0.031824096 BH | 3   | 6   | 32  | 33 | 4.5   |
| 0.031831901 BH | 0   | 2   | 22  | 6  | 1     |
| 0.031978114 BH | 15  | 26  | 158 | 83 | 20.5  |
| 0.032041911 BH | 0   | 0   | 12  | 5  | 0     |
| 0.032041911 BH | 0   | 0   | 12  | 5  | 0     |
| 0.032041911 BH | 0   | 0   | 12  | 5  | 0     |
| 0.032327167 BH | 1   | 2   | 18  | 13 | 1.5   |
| 0.03234719 BH  | 7   | 84  | 1   | 1  | 45.5  |
| 0.03234719 BH  | 28  | 18  | 2   | 0  | 23    |
| 0.03234719 BH  | 4   | 51  | 1   | 0  | 27.5  |
| 0.032391463 BH | 29  | 62  | 3   | 2  | 45.5  |
| 0.032391463 BH | 60  | 92  | 7   | 3  | 76    |
| 0.032536007 BH | 15  | 20  | 1   | 0  | 17.5  |
| 0.032536007 BH | 0   | 0   | 4   | 12 | 0     |
| 0.032566754 BH | 0   | 0   | 6   | 10 | 0     |
| 0.032566754 BH | 0   | 0   | 6   | 10 | 0     |
| 0.033145379 BH | 1   | 3   | 38  | 8  | 2     |
| 0.033145379 BH | 2   | 1   | 50  | 5  | 1.5   |
| 0.033145379 BH | 0   | 55  | 0   | 0  | 27.5  |
| 0.033145379 BH | 0   | 0   | 15  | 3  | 0     |
| 0.033145379 BH | 0   | 0   | 15  | 3  | 0     |
| 0.033145379 BH | 0   | 0   | 15  | 3  | 0     |
| 0.033150146 BH | 12  | 80  | 2   | 1  | 46    |
| 0.033250973 BH | 2   | 64  | 1   | 0  | 33    |
| 0.033438215 BH | 0   | 1   | 17  | 2  | 0.5   |
| 0.033543671 BH | 0   | 2   | 21  | 6  | 1     |
| 0.033543671 BH | 3   | 0   | 11  | 45 | 1.5   |
| 0.033543671 BH | 3   | 0   | 32  | 19 | 1.5   |
| 0.033672598 BH | 36  | 27  | 2   | 1  | 31.5  |
| 0.033672598 BH | 3   | 29  | 0   | 0  | 16    |
| 0.033672598 BH | 3   | 28  | 0   | 0  | 15.5  |
| 0.033672598 BH | 138 | 161 | 17  | 6  | 149.5 |
| 0.033672598 BH | 0   | 0   | 13  | 4  | 0     |
| 0.033672598 BH | 0   | 0   | 13  | 4  | 0     |
| 0.033672598 BH | 0   | 0   | 13  | 4  | 0     |
| 0.033686798 BH | 10  | 28  | 1   | 0  | 19    |
| 0.033857293 BH | 0   | 8   | 30  | 21 | 4     |
| 0.033908153 BH | 0   | 0   | 17  | 2  | 0     |

|                |      |     |    |    |       |
|----------------|------|-----|----|----|-------|
| 0.034087548 BH | 89   | 27  | 6  | 1  | 58    |
| 0.034087548 BH | 0    | 1   | 9  | 6  | 0.5   |
| 0.034087548 BH | 0    | 1   | 8  | 7  | 0.5   |
| 0.034287277 BH | 0    | 0   | 5  | 11 | 0     |
| 0.034287277 BH | 4    | 25  | 0  | 0  | 14.5  |
| 0.03454169 BH  | 2    | 2   | 36 | 8  | 2     |
| 0.03454169 BH  | 22   | 195 | 6  | 4  | 108.5 |
| 0.03454169 BH  | 0    | 9   | 41 | 21 | 4.5   |
| 0.034553982 BH | 0    | 3   | 18 | 7  | 1.5   |
| 0.034578603 BH | 30   | 27  | 3  | 0  | 28.5  |
| 0.03462825 BH  | 7    | 17  | 0  | 0  | 12    |
| 0.03462825 BH  | 0    | 0   | 10 | 6  | 0     |
| 0.03462825 BH  | 7    | 17  | 0  | 0  | 12    |
| 0.034659792 BH | 77   | 38  | 6  | 0  | 57.5  |
| 0.034659792 BH | 0    | 0   | 27 | 0  | 0     |
| 0.034665858 BH | 0    | 7   | 42 | 13 | 3.5   |
| 0.034777991 BH | 0    | 1   | 4  | 11 | 0.5   |
| 0.034855651 BH | 22   | 22  | 2  | 0  | 22    |
| 0.035070493 BH | 1    | 0   | 16 | 8  | 0.5   |
| 0.035070493 BH | 2    | 33  | 0  | 0  | 17.5  |
| 0.035210042 BH | 0    | 0   | 11 | 5  | 0     |
| 0.035210042 BH | 0    | 0   | 11 | 5  | 0     |
| 0.035242881 BH | 1    | 38  | 0  | 0  | 19.5  |
| 0.035340307 BH | 0    | 52  | 0  | 0  | 26    |
| 0.035340307 BH | 0    | 11  | 52 | 22 | 5.5   |
| 0.035340307 BH | 0    | 0   | 3  | 13 | 0     |
| 0.03536636 BH  | 0    | 0   | 0  | 23 | 0     |
| 0.035377516 BH | 100  | 67  | 6  | 6  | 83.5  |
| 0.035477285 BH | 5    | 0   | 80 | 12 | 2.5   |
| 0.035699356 BH | 0    | 4   | 9  | 24 | 2     |
| 0.035699356 BH | 0    | 2   | 9  | 14 | 1     |
| 0.035699356 BH | 5    | 21  | 0  | 0  | 13    |
| 0.035699356 BH | 0    | 0   | 6  | 9  | 0     |
| 0.035699356 BH | 0    | 0   | 6  | 9  | 0     |
| 0.035728632 BH | 3    | 306 | 2  | 4  | 154.5 |
| 0.035728632 BH | 1    | 39  | 0  | 0  | 20    |
| 0.035728632 BH | 1    | 39  | 0  | 0  | 20    |
| 0.035815336 BH | 0    | 1   | 16 | 2  | 0.5   |
| 0.035815336 BH | 0    | 1   | 16 | 2  | 0.5   |
| 0.035815336 BH | 0    | 0   | 14 | 3  | 0     |
| 0.035831341 BH | 0    | 5   | 25 | 15 | 2.5   |
| 0.035831341 BH | 0    | 0   | 26 | 0  | 0     |
| 0.036112553 BH | 100  | 20  | 6  | 1  | 60    |
| 0.036162393 BH | 1069 | 288 | 78 | 29 | 678.5 |
| 0.036162393 BH | 0    | 1   | 12 | 4  | 0.5   |
| 0.036162393 BH | 10   | 11  | 0  | 0  | 10.5  |
| 0.036162393 BH | 0    | 1   | 12 | 4  | 0.5   |

|                |     |      |     |     |       |
|----------------|-----|------|-----|-----|-------|
| 0.036222341 BH | 516 | 40   | 23  | 10  | 278   |
| 0.036222341 BH | 0   | 3    | 17  | 7   | 1.5   |
| 0.036222341 BH | 0   | 2    | 18  | 7   | 1     |
| 0.036248996 BH | 11  | 25   | 1   | 0   | 18    |
| 0.036319215 BH | 0   | 0    | 16  | 2   | 0     |
| 0.036421819 BH | 0   | 0    | 0   | 22  | 0     |
| 0.036632626 BH | 2   | 11   | 45  | 27  | 6.5   |
| 0.036632626 BH | 0   | 0    | 19  | 1   | 0     |
| 0.036632626 BH | 1   | 8    | 33  | 19  | 4.5   |
| 0.036632626 BH | 0   | 0    | 12  | 4   | 0     |
| 0.036632626 BH | 0   | 0    | 12  | 4   | 0     |
| 0.036632626 BH | 0   | 0    | 12  | 4   | 0     |
| 0.036632626 BH | 0   | 0    | 12  | 4   | 0     |
| 0.036668633 BH | 128 | 120  | 13  | 7   | 124   |
| 0.036668633 BH | 17  | 10   | 115 | 91  | 13.5  |
| 0.036668633 BH | 2   | 5    | 20  | 29  | 3.5   |
| 0.036668633 BH | 19  | 82   | 3   | 2   | 50.5  |
| 0.036820379 BH | 2   | 30   | 0   | 0   | 16    |
| 0.036909135 BH | 14  | 2    | 36  | 181 | 8     |
| 0.037122826 BH | 118 | 15   | 6   | 0   | 66.5  |
| 0.037394268 BH | 82  | 1447 | 50  | 16  | 764.5 |
| 0.03739651 BH  | 1   | 3    | 18  | 18  | 2     |
| 0.03744083 BH  | 150 | 81   | 12  | 6   | 115.5 |
| 0.03744083 BH  | 59  | 23   | 4   | 0   | 41    |
| 0.03744083 BH  | 40  | 29   | 2   | 2   | 34.5  |
| 0.03744083 BH  | 0   | 5    | 22  | 17  | 2.5   |
| 0.03744083 BH  | 81  | 62   | 7   | 4   | 71.5  |
| 0.037635519 BH | 14  | 19   | 1   | 0   | 16.5  |
| 0.037645124 BH | 34  | 185  | 7   | 5   | 109.5 |
| 0.037899928 BH | 11  | 9    | 0   | 0   | 10    |
| 0.037903077 BH | 0   | 47   | 0   | 0   | 23.5  |
| 0.037903077 BH | 0   | 0    | 25  | 0   | 0     |
| 0.038651491 BH | 619 | 85   | 39  | 6   | 352   |
| 0.038738717 BH | 0   | 1    | 18  | 1   | 0.5   |
| 0.038739633 BH | 17  | 86   | 3   | 2   | 51.5  |
| 0.038739633 BH | 6   | 17   | 0   | 0   | 11.5  |
| 0.038739633 BH | 8   | 14   | 0   | 0   | 11    |
| 0.038739633 BH | 6   | 18   | 0   | 0   | 12    |
| 0.038739633 BH | 0   | 0    | 8   | 7   | 0     |
| 0.038739633 BH | 0   | 0    | 9   | 6   | 0     |
| 0.038739633 BH | 0   | 0    | 9   | 6   | 0     |
| 0.038793664 BH | 0   | 3    | 3   | 36  | 1.5   |
| 0.038802793 BH | 0   | 1    | 15  | 2   | 0.5   |
| 0.038882334 BH | 78  | 160  | 13  | 5   | 119   |
| 0.0389613 BH   | 5   | 26   | 96  | 55  | 15.5  |
| 0.038987322 BH | 2   | 0    | 2   | 58  | 1     |
| 0.039041356 BH | 490 | 248  | 28  | 34  | 369   |

|                |     |     |    |     |       |
|----------------|-----|-----|----|-----|-------|
| 0.039064348 BH | 28  | 26  | 3  | 0   | 27    |
| 0.039064348 BH | 30  | 24  | 3  | 0   | 27    |
| 0.039064348 BH | 81  | 38  | 6  | 2   | 59.5  |
| 0.039064348 BH | 12  | 8   | 0  | 0   | 10    |
| 0.03924668 BH  | 0   | 0   | 6  | 8   | 0     |
| 0.03924668 BH  | 0   | 1   | 6  | 8   | 0.5   |
| 0.03924668 BH  | 0   | 2   | 13 | 9   | 1     |
| 0.03924668 BH  | 0   | 2   | 13 | 9   | 1     |
| 0.03924668 BH  | 0   | 2   | 13 | 9   | 1     |
| 0.03924668 BH  | 3   | 3   | 41 | 13  | 3     |
| 0.039255862 BH | 0   | 0   | 2  | 14  | 0     |
| 0.039255862 BH | 0   | 0   | 2  | 14  | 0     |
| 0.039255862 BH | 4   | 0   | 10 | 57  | 2     |
| 0.039382899 BH | 0   | 0   | 24 | 0   | 0     |
| 0.039382899 BH | 0   | 0   | 24 | 0   | 0     |
| 0.039382899 BH | 0   | 45  | 0  | 0   | 22.5  |
| 0.039382899 BH | 104 | 241 | 17 | 0   | 172.5 |
| 0.039384514 BH | 9   | 46  | 2  | 0   | 27.5  |
| 0.039384514 BH | 79  | 184 | 12 | 8   | 131.5 |
| 0.039484287 BH | 382 | 114 | 29 | 12  | 248   |
| 0.039484287 BH | 60  | 27  | 4  | 2   | 43.5  |
| 0.039484287 BH | 1   | 0   | 20 | 5   | 0.5   |
| 0.039484287 BH | 0   | 2   | 20 | 5   | 1     |
| 0.039484287 BH | 1   | 0   | 20 | 5   | 0.5   |
| 0.039484287 BH | 0   | 2   | 20 | 5   | 1     |
| 0.039641466 BH | 0   | 0   | 0  | 21  | 0     |
| 0.039641466 BH | 49  | 117 | 5  | 6   | 83    |
| 0.039641466 BH | 2   | 29  | 0  | 0   | 15.5  |
| 0.0396514 BH   | 1   | 0   | 13 | 9   | 0.5   |
| 0.0396514 BH   | 9   | 27  | 1  | 0   | 18    |
| 0.0396514 BH   | 1   | 0   | 11 | 11  | 0.5   |
| 0.039907081 BH | 0   | 46  | 0  | 0   | 23    |
| 0.039948785 BH | 1   | 1   | 9  | 20  | 1     |
| 0.039948785 BH | 3   | 26  | 0  | 0   | 14.5  |
| 0.040010687 BH | 12  | 0   | 15 | 241 | 6     |
| 0.040010687 BH | 10  | 57  | 1  | 1   | 33.5  |
| 0.040010687 BH | 0   | 0   | 11 | 4   | 0     |
| 0.040010687 BH | 0   | 1   | 11 | 4   | 0.5   |
| 0.040010687 BH | 0   | 1   | 5  | 9   | 0.5   |
| 0.040025157 BH | 3   | 16  | 60 | 35  | 9.5   |
| 0.040167297 BH | 125 | 676 | 27 | 25  | 400.5 |
| 0.040281173 BH | 4   | 42  | 1  | 0   | 23    |
| 0.040281173 BH | 62  | 224 | 5  | 12  | 143   |
| 0.040281173 BH | 2   | 0   | 36 | 8   | 1     |
| 0.040281173 BH | 2   | 2   | 27 | 10  | 2     |
| 0.040625625 BH | 13  | 119 | 4  | 2   | 66    |
| 0.040655552 BH | 4   | 21  | 0  | 0   | 12.5  |

|                |     |      |     |     |       |
|----------------|-----|------|-----|-----|-------|
| 0.040655552 BH | 4   | 21   | 0   | 0   | 12.5  |
| 0.040675148 BH | 5   | 83   | 1   | 1   | 44    |
| 0.040902911 BH | 3   | 1    | 53  | 6   | 2     |
| 0.040973509 BH | 0   | 0    | 23  | 0   | 0     |
| 0.040973509 BH | 0   | 0    | 23  | 0   | 0     |
| 0.040973509 BH | 24  | 6    | 1   | 0   | 15    |
| 0.041042635 BH | 1   | 2    | 15  | 13  | 1.5   |
| 0.041133234 BH | 0   | 2    | 16  | 7   | 1     |
| 0.041366828 BH | 23  | 206  | 6   | 5   | 114.5 |
| 0.041720346 BH | 3   | 152  | 0   | 3   | 77.5  |
| 0.041840346 BH | 1   | 0    | 21  | 4   | 0.5   |
| 0.041840346 BH | 0   | 2    | 19  | 5   | 1     |
| 0.041981666 BH | 38  | 1    | 1   | 0   | 19.5  |
| 0.04208928 BH  | 57  | 83   | 9   | 1   | 70    |
| 0.042112489 BH | 0   | 1    | 12  | 3   | 0.5   |
| 0.042525205 BH | 1   | 8    | 31  | 18  | 4.5   |
| 0.042525205 BH | 58  | 21   | 4   | 1   | 39.5  |
| 0.042735841 BH | 1   | 1    | 26  | 6   | 1     |
| 0.042790222 BH | 2   | 0    | 30  | 10  | 1     |
| 0.042856199 BH | 172 | 67   | 15  | 5   | 119.5 |
| 0.042856199 BH | 0   | 0    | 12  | 3   | 0     |
| 0.042856199 BH | 0   | 0    | 12  | 3   | 0     |
| 0.043150633 BH | 6   | 24   | 121 | 36  | 15    |
| 0.043506829 BH | 2   | 1    | 28  | 10  | 1.5   |
| 0.043506829 BH | 81  | 1889 | 51  | 36  | 985   |
| 0.043506829 BH | 2   | 27   | 0   | 0   | 14.5  |
| 0.043506829 BH | 21  | 89   | 5   | 0   | 55    |
| 0.043506829 BH | 1   | 3    | 35  | 6   | 2     |
| 0.043506829 BH | 0   | 1    | 9   | 5   | 0.5   |
| 0.043506829 BH | 0   | 0    | 8   | 6   | 0     |
| 0.043506829 BH | 6   | 15   | 0   | 0   | 10.5  |
| 0.043506829 BH | 0   | 0    | 7   | 7   | 0     |
| 0.043599882 BH | 131 | 13   | 7   | 0   | 72    |
| 0.043619157 BH | 0   | 4    | 18  | 11  | 2     |
| 0.043619157 BH | 12  | 16   | 106 | 54  | 14    |
| 0.043737049 BH | 3   | 73   | 0   | 1   | 38    |
| 0.044161164 BH | 2   | 28   | 0   | 0   | 15    |
| 0.044161164 BH | 2   | 28   | 0   | 0   | 15    |
| 0.044236737 BH | 4   | 5    | 52  | 14  | 4.5   |
| 0.044599912 BH | 290 | 554  | 18  | 45  | 422   |
| 0.044599912 BH | 7   | 4    | 8   | 120 | 5.5   |
| 0.044699922 BH | 0   | 4    | 12  | 16  | 2     |
| 0.04472786 BH  | 2   | 8    | 7   | 69  | 5     |
| 0.044760402 BH | 3   | 8    | 10  | 66  | 5.5   |
| 0.044775026 BH | 104 | 8    | 5   | 0   | 56    |
| 0.044775026 BH | 121 | 64   | 10  | 6   | 92.5  |
| 0.044855306 BH | 0   | 0    | 10  | 4   | 0     |



|                |      |     |      |     |       |
|----------------|------|-----|------|-----|-------|
| 0.044855306 BH | 0    | 1   | 10   | 4   | 0.5   |
| 0.044855306 BH | 0    | 0   | 10   | 4   | 0     |
| 0.044855306 BH | 0    | 1   | 5    | 8   | 0.5   |
| 0.045046151 BH | 47   | 63  | 4    | 4   | 55    |
| 0.045200699 BH | 47   | 38  | 5    | 0   | 42.5  |
| 0.045493898 BH | 8    | 45  | 2    | 0   | 26.5  |
| 0.045531032 BH | 6    | 69  | 1    | 1   | 37.5  |
| 0.045545855 BH | 13   | 9   | 137  | 38  | 11    |
| 0.045653557 BH | 9    | 10  | 0    | 0   | 9.5   |
| 0.045673689 BH | 0    | 0   | 3    | 11  | 0     |
| 0.045755482 BH | 21   | 313 | 7    | 8   | 167   |
| 0.045764686 BH | 1    | 3   | 29   | 8   | 2     |
| 0.04582368 BH  | 1    | 2   | 37   | 2   | 1.5   |
| 0.045942482 BH | 0    | 2   | 16   | 6   | 1     |
| 0.045942482 BH | 1    | 15  | 54   | 26  | 8     |
| 0.045942482 BH | 569  | 584 | 83   | 10  | 576.5 |
| 0.045969257 BH | 0    | 0   | 17   | 1   | 0     |
| 0.046096288 BH | 20   | 8   | 1    | 0   | 14    |
| 0.046435339 BH | 102  | 62  | 11   | 1   | 82    |
| 0.04652364 BH  | 2    | 51  | 1    | 0   | 26.5  |
| 0.04653013 BH  | 0    | 40  | 0    | 0   | 20    |
| 0.04653013 BH  | 0    | 40  | 0    | 0   | 20    |
| 0.046691783 BH | 56   | 359 | 1442 | 471 | 207.5 |
| 0.04670143 BH  | 10   | 22  | 1    | 0   | 16    |
| 0.046729856 BH | 11   | 35  | 2    | 0   | 23    |
| 0.046802529 BH | 2645 | 465 | 201  | 21  | 1555  |
| 0.047300094 BH | 0    | 9   | 33   | 20  | 4.5   |
| 0.047300094 BH | 25   | 275 | 10   | 6   | 150   |
| 0.047438334 BH | 0    | 41  | 0    | 0   | 20.5  |
| 0.047707633 BH | 8    | 26  | 1    | 0   | 17    |
| 0.047707633 BH | 8    | 25  | 1    | 0   | 16.5  |
| 0.047841563 BH | 0    | 2   | 17   | 5   | 1     |
| 0.047845979 BH | 0    | 0   | 4    | 9   | 0     |
| 0.047845979 BH | 0    | 0   | 11   | 3   | 0     |
| 0.048171635 BH | 427  | 142 | 25   | 26  | 284.5 |
| 0.048294761 BH | 1    | 0   | 19   | 4   | 0.5   |
| 0.048722227 BH | 20   | 18  | 2    | 0   | 19    |
| 0.048912804 BH | 1    | 0   | 17   | 5   | 0.5   |
| 0.049181962 BH | 2    | 1   | 29   | 8   | 1.5   |
| 0.049181962 BH | 0    | 76  | 1    | 0   | 38    |
| 0.049181962 BH | 0    | 76  | 1    | 0   | 38    |
| 0.049181962 BH | 2    | 12  | 53   | 21  | 7     |
| 0.049181962 BH | 13   | 125 | 5    | 2   | 69    |
| 0.049258589 BH | 0    | 0   | 0    | 18  | 0     |
| 0.049277667 BH | 6    | 14  | 77   | 31  | 10    |
| 0.049428972 BH | 9    | 107 | 3    | 2   | 58    |
| 0.049631514 BH | 0    | 0   | 21   | 0   | 0     |

|                |     |     |      |     |       |
|----------------|-----|-----|------|-----|-------|
| 0.049631514 BH | 39  | 149 | 10   | 3   | 94    |
| 0.049668058 BH | 14  | 43  | 3    | 0   | 28.5  |
| 0.049668058 BH | 21  | 17  | 2    | 0   | 19    |
| 0.04974496 BH  | 20  | 92  | 444  | 105 | 56    |
| 0.049788649 BH | 0   | 2   | 22   | 3   | 1     |
| 0.049788649 BH | 18  | 30  | 209  | 57  | 24    |
| 0.049788649 BH | 11  | 47  | 1    | 1   | 29    |
| 0.049788649 BH | 0   | 0   | 8    | 5   | 0     |
| 0.049788649 BH | 0   | 0   | 8    | 5   | 0     |
| 0.049788649 BH | 0   | 1   | 8    | 5   | 0.5   |
| 0.049788649 BH | 0   | 1   | 8    | 5   | 0.5   |
| 0.049788649 BH | 0   | 0   | 8    | 5   | 0     |
| 0.049788649 BH | 0   | 0   | 8    | 5   | 0     |
| 0.049788649 BH | 6   | 14  | 0    | 0   | 10    |
| 0.049788649 BH | 7   | 13  | 0    | 0   | 10    |
| 0.049788649 BH | 7   | 13  | 0    | 0   | 10    |
| 0.049927394 BH | 11  | 7   | 0    | 0   | 9     |
| 0.050026412 BH | 35  | 36  | 4    | 0   | 35.5  |
| 0.050026412 BH | 1   | 29  | 0    | 0   | 15    |
| 0.050026412 BH | 0   | 39  | 0    | 0   | 19.5  |
| 0.050026412 BH | 0   | 39  | 0    | 0   | 19.5  |
| 0.050590386 BH | 0   | 1   | 9    | 4   | 0.5   |
| 0.050590386 BH | 0   | 1   | 9    | 4   | 0.5   |
| 0.050744203 BH | 0   | 232 | 2    | 2   | 116   |
| 0.050794492 BH | 0   | 1   | 19   | 0   | 0.5   |
| 0.050833001 BH | 1   | 5   | 20   | 18  | 3     |
| 0.050951587 BH | 2   | 10  | 29   | 32  | 6     |
| 0.050974464 BH | 0   | 0   | 0    | 17  | 0     |
| 0.051289042 BH | 5   | 93  | 1    | 2   | 49    |
| 0.051290911 BH | 0   | 0   | 9    | 4   | 0     |
| 0.051290911 BH | 0   | 0   | 9    | 4   | 0     |
| 0.051290911 BH | 0   | 0   | 9    | 4   | 0     |
| 0.051290911 BH | 5   | 52  | 2    | 0   | 28.5  |
| 0.051290911 BH | 9   | 21  | 1    | 0   | 15    |
| 0.051397348 BH | 0   | 1   | 12   | 2   | 0.5   |
| 0.051397348 BH | 0   | 1   | 12   | 2   | 0.5   |
| 0.051694162 BH | 281 | 104 | 2606 | 673 | 192.5 |
| 0.051694162 BH | 6   | 20  | 44   | 72  | 13    |
| 0.051758209 BH | 1   | 3   | 23   | 10  | 2     |
| 0.051758209 BH | 21  | 25  | 1    | 1   | 23    |
| 0.051998385 BH | 4   | 18  | 0    | 0   | 11    |
| 0.051998385 BH | 0   | 0   | 5    | 8   | 0     |
| 0.051998385 BH | 0   | 2   | 16   | 5   | 1     |
| 0.051998385 BH | 9   | 38  | 2    | 0   | 23.5  |
| 0.051998385 BH | 0   | 0   | 13   | 2   | 0     |
| 0.051998385 BH | 0   | 0   | 13   | 2   | 0     |
| 0.051998385 BH | 0   | 0   | 13   | 2   | 0     |

|                |     |     |    |     |       |
|----------------|-----|-----|----|-----|-------|
| 0.051998385 BH | 0   | 0   | 13 | 2   | 0     |
| 0.051998385 BH | 11  | 17  | 1  | 0   | 14    |
| 0.051998385 BH | 0   | 2   | 12 | 8   | 1     |
| 0.052016837 BH | 5   | 52  | 0  | 1   | 28.5  |
| 0.052016837 BH | 0   | 1   | 14 | 1   | 0.5   |
| 0.052016837 BH | 0   | 0   | 20 | 0   | 0     |
| 0.052016837 BH | 0   | 0   | 20 | 0   | 0     |
| 0.052016837 BH | 0   | 0   | 20 | 0   | 0     |
| 0.052016837 BH | 0   | 0   | 20 | 0   | 0     |
| 0.052153428 BH | 0   | 2   | 24 | 2   | 1     |
| 0.052315833 BH | 0   | 183 | 2  | 1   | 91.5  |
| 0.052349902 BH | 0   | 12  | 18 | 51  | 6     |
| 0.052704105 BH | 2   | 23  | 0  | 0   | 12.5  |
| 0.052834333 BH | 0   | 4   | 20 | 8   | 2     |
| 0.052834333 BH | 0   | 4   | 20 | 8   | 2     |
| 0.052834333 BH | 12  | 16  | 1  | 0   | 14    |
| 0.052939009 BH | 0   | 37  | 0  | 0   | 18.5  |
| 0.052979185 BH | 108 | 16  | 6  | 3   | 62    |
| 0.05330401 BH  | 1   | 1   | 16 | 10  | 1     |
| 0.05330401 BH  | 23  | 221 | 4  | 8   | 122   |
| 0.053602055 BH | 6   | 95  | 0  | 3   | 50.5  |
| 0.053722335 BH | 1   | 0   | 36 | 0   | 0.5   |
| 0.053878467 BH | 36  | 16  | 2  | 1   | 26    |
| 0.053914653 BH | 0   | 0   | 0  | 16  | 0     |
| 0.053927618 BH | 42  | 33  | 4  | 2   | 37.5  |
| 0.054724738 BH | 11  | 89  | 3  | 2   | 50    |
| 0.054778215 BH | 1   | 27  | 0  | 0   | 14    |
| 0.054778215 BH | 16  | 21  | 2  | 0   | 18.5  |
| 0.055065823 BH | 6   | 27  | 1  | 0   | 16.5  |
| 0.055324893 BH | 0   | 5   | 16 | 17  | 2.5   |
| 0.055500636 BH | 15  | 0   | 49 | 138 | 7.5   |
| 0.055500636 BH | 13  | 254 | 7  | 5   | 133.5 |
| 0.055526852 BH | 37  | 30  | 4  | 0   | 33.5  |
| 0.055722411 BH | 1   | 28  | 0  | 0   | 14.5  |
| 0.055754663 BH | 0   | 19  | 34 | 59  | 9.5   |
| 0.05603151 BH  | 1   | 5   | 26 | 12  | 3     |
| 0.05603151 BH  | 0   | 0   | 19 | 0   | 0     |
| 0.05603151 BH  | 0   | 0   | 19 | 0   | 0     |
| 0.05603151 BH  | 16  | 73  | 4  | 1   | 44.5  |
| 0.056431334 BH | 3   | 9   | 43 | 18  | 6     |
| 0.056516484 BH | 26  | 163 | 9  | 3   | 94.5  |
| 0.056557711 BH | 36  | 22  | 2  | 2   | 29    |
| 0.056685796 BH | 0   | 2   | 11 | 8   | 1     |
| 0.056685796 BH | 0   | 2   | 10 | 9   | 1     |
| 0.056824426 BH | 0   | 1   | 11 | 2   | 0.5   |
| 0.056861459 BH | 13  | 26  | 2  | 0   | 19.5  |
| 0.056929823 BH | 2   | 439 | 1  | 8   | 220.5 |

|                |    |      |     |     |      |
|----------------|----|------|-----|-----|------|
| 0.056929823 BH | 12 | 64   | 174 | 125 | 38   |
| 0.056929823 BH | 2  | 0    | 50  | 2   | 1    |
| 0.057085229 BH | 3  | 37   | 1   | 0   | 20   |
| 0.057450718 BH | 0  | 1    | 6   | 6   | 0.5  |
| 0.057450718 BH | 0  | 0    | 7   | 5   | 0    |
| 0.057450718 BH | 0  | 0    | 6   | 6   | 0    |
| 0.057450718 BH | 0  | 4    | 22  | 6   | 2    |
| 0.057647749 BH | 1  | 0    | 12  | 7   | 0.5  |
| 0.057695802 BH | 28 | 17   | 0   | 2   | 22.5 |
| 0.057695802 BH | 4  | 53   | 2   | 0   | 28.5 |
| 0.057943423 BH | 10 | 32   | 2   | 0   | 21   |
| 0.058087008 BH | 5  | 30   | 1   | 0   | 17.5 |
| 0.058087008 BH | 18 | 27   | 163 | 65  | 22.5 |
| 0.058159187 BH | 0  | 0    | 8   | 4   | 0    |
| 0.058159187 BH | 0  | 0    | 8   | 4   | 0    |
| 0.058159187 BH | 5  | 15   | 0   | 0   | 10   |
| 0.058159187 BH | 0  | 1    | 5   | 7   | 0.5  |
| 0.058203609 BH | 5  | 102  | 2   | 2   | 53.5 |
| 0.058203609 BH | 2  | 0    | 7   | 27  | 1    |
| 0.058203609 BH | 0  | 0    | 12  | 2   | 0    |
| 0.058203609 BH | 0  | 0    | 12  | 2   | 0    |
| 0.058203609 BH | 42 | 1126 | 32  | 24  | 584  |
| 0.058279135 BH | 9  | 8    | 69  | 33  | 8.5  |
| 0.058279135 BH | 51 | 77   | 8   | 3   | 64   |
| 0.058342673 BH | 1  | 4    | 10  | 20  | 2.5  |
| 0.058342673 BH | 1  | 3    | 25  | 8   | 2    |
| 0.05850434 BH  | 26 | 16   | 1   | 1   | 21   |
| 0.05850434 BH  | 0  | 3    | 34  | 2   | 1.5  |
| 0.058530821 BH | 2  | 5    | 36  | 10  | 3.5  |
| 0.058530821 BH | 0  | 3    | 27  | 4   | 1.5  |
| 0.058530821 BH | 16 | 57   | 1   | 3   | 36.5 |
| 0.058530821 BH | 0  | 4    | 17  | 9   | 2    |
| 0.058530821 BH | 0  | 4    | 17  | 9   | 2    |
| 0.058530821 BH | 17 | 34   | 92  | 126 | 25.5 |
| 0.058530821 BH | 4  | 16   | 0   | 0   | 10   |
| 0.058530821 BH | 1  | 0    | 16  | 4   | 0.5  |
| 0.058759749 BH | 2  | 22   | 0   | 0   | 12   |
| 0.058845148 BH | 63 | 485  | 1   | 21  | 274  |
| 0.058845148 BH | 50 | 16   | 4   | 0   | 33   |
| 0.059139376 BH | 1  | 25   | 0   | 0   | 13   |
| 0.059139376 BH | 1  | 0    | 13  | 6   | 0.5  |
| 0.059389169 BH | 12 | 41   | 3   | 0   | 26.5 |
| 0.059559888 BH | 1  | 3    | 23  | 9   | 2    |
| 0.059655428 BH | 0  | 4    | 18  | 8   | 2    |
| 0.059655428 BH | 0  | 4    | 18  | 8   | 2    |
| 0.059655428 BH | 0  | 4    | 18  | 8   | 2    |
| 0.059655428 BH | 81 | 121  | 12  | 7   | 101  |

|                |     |     |    |    |       |
|----------------|-----|-----|----|----|-------|
| 0.060064389 BH | 1   | 2   | 15 | 9  | 1.5   |
| 0.060299168 BH | 6   | 112 | 3  | 2  | 59    |
| 0.060642874 BH | 0   | 1   | 2  | 10 | 0.5   |
| 0.060871101 BH | 0   | 3   | 29 | 3  | 1.5   |
| 0.060923321 BH | 21  | 77  | 3  | 3  | 49    |
| 0.061013482 BH | 8   | 36  | 2  | 0  | 22    |
| 0.06128416 BH  | 0   | 0   | 10 | 3  | 0     |
| 0.06128416 BH  | 3   | 18  | 0  | 0  | 10.5  |
| 0.061354248 BH | 24  | 27  | 1  | 2  | 25.5  |
| 0.061430574 BH | 385 | 0   | 11 | 0  | 192.5 |
| 0.062076091 BH | 74  | 5   | 4  | 0  | 39.5  |
| 0.062078326 BH | 9   | 17  | 85 | 39 | 13    |
| 0.06223974 BH  | 3   | 19  | 0  | 0  | 11    |
| 0.06223974 BH  | 3   | 19  | 0  | 0  | 11    |
| 0.062265922 BH | 12  | 49  | 2  | 1  | 30.5  |
| 0.062265922 BH | 14  | 22  | 2  | 0  | 18    |
| 0.062490559 BH | 8   | 20  | 1  | 0  | 14    |
| 0.062490559 BH | 9   | 18  | 1  | 0  | 13.5  |
| 0.062490559 BH | 9   | 18  | 1  | 0  | 13.5  |
| 0.062490559 BH | 13  | 117 | 6  | 1  | 65    |
| 0.062759256 BH | 16  | 0   | 0  | 0  | 8     |
| 0.06290718 BH  | 1   | 8   | 23 | 24 | 4.5   |
| 0.062955585 BH | 0   | 0   | 1  | 12 | 0     |
| 0.063286349 BH | 1   | 7   | 28 | 14 | 4     |
| 0.063286349 BH | 79  | 574 | 26 | 21 | 326.5 |
| 0.063571483 BH | 188 | 42  | 16 | 5  | 115   |
| 0.063627067 BH | 8   | 21  | 1  | 0  | 14.5  |
| 0.063627067 BH | 10  | 17  | 1  | 0  | 13.5  |
| 0.063694111 BH | 1   | 1   | 24 | 4  | 1     |
| 0.063757676 BH | 1   | 1   | 17 | 8  | 1     |
| 0.064272905 BH | 12  | 92  | 4  | 2  | 52    |
| 0.064412082 BH | 2   | 40  | 1  | 0  | 21    |
| 0.064573529 BH | 29  | 45  | 4  | 2  | 37    |
| 0.064689556 BH | 1   | 7   | 29 | 13 | 4     |
| 0.064689556 BH | 1   | 7   | 16 | 24 | 4     |
| 0.064689556 BH | 11  | 14  | 1  | 0  | 12.5  |
| 0.064689556 BH | 0   | 0   | 17 | 0  | 0     |
| 0.064689556 BH | 0   | 0   | 17 | 0  | 0     |
| 0.064689556 BH | 0   | 0   | 17 | 0  | 0     |
| 0.064689556 BH | 0   | 31  | 0  | 0  | 15.5  |
| 0.065169957 BH | 0   | 5   | 30 | 6  | 2.5   |
| 0.065237472 BH | 9   | 94  | 4  | 1  | 51.5  |
| 0.065508338 BH | 60  | 574 | 29 | 14 | 317   |
| 0.065673923 BH | 1   | 2   | 14 | 9  | 1.5   |
| 0.065673923 BH | 1   | 2   | 12 | 11 | 1.5   |
| 0.065691092 BH | 119 | 40  | 11 | 4  | 79.5  |
| 0.065691092 BH | 11  | 37  | 1  | 1  | 24    |

|                |     |     |    |    |       |
|----------------|-----|-----|----|----|-------|
| 0.065719693 BH | 0   | 32  | 0  | 0  | 16    |
| 0.065746976 BH | 6   | 25  | 1  | 0  | 15.5  |
| 0.065868108 BH | 0   | 5   | 24 | 9  | 2.5   |
| 0.066091386 BH | 5   | 60  | 1  | 1  | 32.5  |
| 0.066277996 BH | 10  | 22  | 97 | 44 | 16    |
| 0.066463962 BH | 2   | 21  | 0  | 0  | 11.5  |
| 0.066463962 BH | 0   | 0   | 6  | 5  | 0     |
| 0.066463962 BH | 0   | 0   | 6  | 5  | 0     |
| 0.066463962 BH | 0   | 0   | 6  | 5  | 0     |
| 0.066463962 BH | 0   | 1   | 7  | 4  | 0.5   |
| 0.066463962 BH | 0   | 0   | 6  | 5  | 0     |
| 0.066463962 BH | 0   | 0   | 6  | 5  | 0     |
| 0.066463962 BH | 0   | 1   | 6  | 5  | 0.5   |
| 0.066490485 BH | 0   | 0   | 0  | 14 | 0     |
| 0.066490485 BH | 0   | 0   | 0  | 14 | 0     |
| 0.066607646 BH | 12  | 13  | 1  | 0  | 12.5  |
| 0.066607646 BH | 0   | 2   | 14 | 5  | 1     |
| 0.066607646 BH | 22  | 46  | 4  | 0  | 34    |
| 0.06666653 BH  | 10  | 117 | 3  | 3  | 63.5  |
| 0.066946685 BH | 3   | 8   | 40 | 17 | 5.5   |
| 0.067128379 BH | 7   | 49  | 1  | 1  | 28    |
| 0.067128379 BH | 2   | 0   | 29 | 6  | 1     |
| 0.067214471 BH | 6   | 10  | 0  | 0  | 8     |
| 0.067214471 BH | 0   | 0   | 5  | 6  | 0     |
| 0.068050479 BH | 0   | 10  | 28 | 17 | 5     |
| 0.068210301 BH | 2   | 2   | 20 | 9  | 2     |
| 0.068293561 BH | 0   | 1   | 8  | 3  | 0.5   |
| 0.068293561 BH | 0   | 1   | 8  | 3  | 0.5   |
| 0.068348145 BH | 2   | 38  | 1  | 0  | 20    |
| 0.068348145 BH | 2   | 38  | 1  | 0  | 20    |
| 0.068476203 BH | 15  | 19  | 2  | 0  | 17    |
| 0.068480041 BH | 1   | 6   | 13 | 20 | 3.5   |
| 0.068480041 BH | 0   | 8   | 17 | 19 | 4     |
| 0.068480041 BH | 2   | 3   | 8  | 27 | 2.5   |
| 0.068839511 BH | 26  | 20  | 2  | 1  | 23    |
| 0.068857085 BH | 1   | 70  | 0  | 1  | 35.5  |
| 0.069014633 BH | 0   | 1   | 16 | 0  | 0.5   |
| 0.069014633 BH | 0   | 1   | 4  | 7  | 0.5   |
| 0.069014633 BH | 0   | 0   | 4  | 7  | 0     |
| 0.069014633 BH | 0   | 0   | 4  | 7  | 0     |
| 0.069213291 BH | 1   | 6   | 34 | 6  | 3.5   |
| 0.069214951 BH | 161 | 84  | 20 | 6  | 122.5 |
| 0.06924423 BH  | 0   | 2   | 23 | 1  | 1     |
| 0.069318321 BH | 8   | 19  | 1  | 0  | 13.5  |
| 0.069439848 BH | 1   | 6   | 23 | 11 | 3.5   |
| 0.069439848 BH | 0   | 0   | 1  | 11 | 0     |
| 0.069439848 BH | 0   | 3   | 2  | 27 | 1.5   |

|                |     |     |     |    |       |
|----------------|-----|-----|-----|----|-------|
| 0.069439848 BH | 3   | 16  | 0   | 0  | 9.5   |
| 0.069439848 BH | 0   | 0   | 9   | 3  | 0     |
| 0.069439848 BH | 3   | 16  | 0   | 0  | 9.5   |
| 0.069439848 BH | 0   | 0   | 9   | 3  | 0     |
| 0.069439848 BH | 2   | 10  | 39  | 18 | 6     |
| 0.069439848 BH | 9   | 0   | 17  | 88 | 4.5   |
| 0.069439848 BH | 1   | 17  | 76  | 16 | 9     |
| 0.069439848 BH | 0   | 0   | 16  | 0  | 0     |
| 0.069439848 BH | 0   | 30  | 0   | 0  | 15    |
| 0.069439848 BH | 0   | 29  | 0   | 0  | 14.5  |
| 0.069439848 BH | 0   | 30  | 0   | 0  | 15    |
| 0.069439848 BH | 0   | 30  | 0   | 0  | 15    |
| 0.069439848 BH | 0   | 30  | 0   | 0  | 15    |
| 0.069439848 BH | 0   | 29  | 0   | 0  | 14.5  |
| 0.069439848 BH | 4   | 122 | 4   | 1  | 63    |
| 0.069465851 BH | 13  | 35  | 3   | 0  | 24    |
| 0.069981285 BH | 0   | 2   | 8   | 9  | 1     |
| 0.070453092 BH | 1   | 1   | 20  | 5  | 1     |
| 0.071022607 BH | 121 | 54  | 12  | 6  | 87.5  |
| 0.071062607 BH | 112 | 6   | 7   | 0  | 59    |
| 0.071090224 BH | 0   | 5   | 21  | 10 | 2.5   |
| 0.071090224 BH | 28  | 36  | 4   | 1  | 32    |
| 0.071090224 BH | 0   | 6   | 31  | 5  | 3     |
| 0.071182402 BH | 12  | 2   | 0   | 0  | 7     |
| 0.071209316 BH | 1   | 0   | 11  | 6  | 0.5   |
| 0.071583494 BH | 1   | 10  | 36  | 17 | 5.5   |
| 0.0717009 BH   | 32  | 9   | 3   | 0  | 20.5  |
| 0.071701914 BH | 0   | 0   | 0   | 13 | 0     |
| 0.071967485 BH | 25  | 15  | 3   | 0  | 20    |
| 0.072078617 BH | 9   | 9   | 125 | 11 | 9     |
| 0.072078617 BH | 25  | 13  | 1   | 1  | 19    |
| 0.072111306 BH | 157 | 122 | 12  | 17 | 139.5 |
| 0.072118797 BH | 1   | 13  | 22  | 34 | 7     |
| 0.072118797 BH | 0   | 0   | 3   | 8  | 0     |
| 0.072118797 BH | 0   | 2   | 7   | 10 | 1     |
| 0.072118797 BH | 0   | 4   | 14  | 9  | 2     |
| 0.072118797 BH | 0   | 4   | 14  | 9  | 2     |
| 0.072118797 BH | 13  | 199 | 9   | 3  | 106   |
| 0.072118797 BH | 9   | 40  | 1   | 1  | 24.5  |
| 0.072118797 BH | 1   | 3   | 21  | 8  | 2     |
| 0.072118797 BH | 0   | 0   | 12  | 1  | 0     |
| 0.072118797 BH | 0   | 0   | 12  | 1  | 0     |
| 0.072118797 BH | 0   | 0   | 12  | 1  | 0     |
| 0.072118797 BH | 0   | 0   | 12  | 1  | 0     |
| 0.072276147 BH | 358 | 351 | 53  | 30 | 354.5 |
| 0.072276147 BH | 15  | 0   | 0   | 0  | 7.5   |
| 0.072276147 BH | 15  | 0   | 0   | 0  | 7.5   |

|                |     |     |     |    |       |
|----------------|-----|-----|-----|----|-------|
| 0.072330291 BH | 45  | 14  | 4   | 0  | 29.5  |
| 0.072940171 BH | 1   | 4   | 29  | 4  | 2.5   |
| 0.073203744 BH | 1   | 22  | 0   | 0  | 11.5  |
| 0.073222467 BH | 14  | 29  | 1   | 1  | 21.5  |
| 0.07338156 BH  | 0   | 4   | 15  | 8  | 2     |
| 0.073831537 BH | 1   | 41  | 1   | 0  | 21    |
| 0.073831537 BH | 0   | 0   | 10  | 2  | 0     |
| 0.073831537 BH | 0   | 0   | 10  | 2  | 0     |
| 0.073831537 BH | 2   | 18  | 0   | 0  | 10    |
| 0.073831537 BH | 0   | 0   | 10  | 2  | 0     |
| 0.073831537 BH | 0   | 0   | 10  | 2  | 0     |
| 0.07439194 BH  | 7   | 21  | 101 | 26 | 14    |
| 0.074405966 BH | 29  | 82  | 6   | 3  | 55.5  |
| 0.074405966 BH | 0   | 2   | 6   | 11 | 1     |
| 0.074683373 BH | 0   | 10  | 12  | 31 | 5     |
| 0.074698716 BH | 72  | 221 | 7   | 17 | 146.5 |
| 0.074698716 BH | 0   | 0   | 15  | 0  | 0     |
| 0.074698716 BH | 0   | 0   | 15  | 0  | 0     |
| 0.074698716 BH | 3   | 3   | 26  | 13 | 3     |
| 0.074702582 BH | 2   | 19  | 0   | 0  | 10.5  |
| 0.074702582 BH | 2   | 19  | 0   | 0  | 10.5  |
| 0.074963214 BH | 0   | 2   | 16  | 3  | 1     |
| 0.075159552 BH | 39  | 77  | 7   | 4  | 58    |
| 0.075219176 BH | 268 | 353 | 55  | 6  | 310.5 |
| 0.075421309 BH | 0   | 3   | 29  | 2  | 1.5   |
| 0.075747092 BH | 0   | 28  | 0   | 0  | 14    |
| 0.075747092 BH | 0   | 28  | 0   | 0  | 14    |
| 0.075919215 BH | 1   | 8   | 22  | 21 | 4.5   |
| 0.076146716 BH | 0   | 0   | 1   | 10 | 0     |
| 0.076837116 BH | 5   | 39  | 0   | 1  | 22    |
| 0.076884028 BH | 1   | 0   | 14  | 4  | 0.5   |
| 0.076884028 BH | 0   | 2   | 14  | 4  | 1     |
| 0.07701214 BH  | 18  | 22  | 3   | 0  | 20    |
| 0.077516901 BH | 1   | 7   | 22  | 15 | 4     |
| 0.077759916 BH | 96  | 44  | 12  | 3  | 70    |
| 0.077759916 BH | 1   | 8   | 19  | 23 | 4.5   |
| 0.077903843 BH | 12  | 33  | 0   | 2  | 22.5  |
| 0.077903843 BH | 13  | 189 | 2   | 8  | 101   |
| 0.077903843 BH | 0   | 0   | 2   | 9  | 0     |
| 0.077903843 BH | 0   | 0   | 2   | 9  | 0     |
| 0.078177533 BH | 52  | 153 | 13  | 6  | 102.5 |
| 0.078177533 BH | 0   | 0   | 7   | 4  | 0     |
| 0.078177533 BH | 6   | 9   | 0   | 0  | 7.5   |
| 0.078177533 BH | 4   | 13  | 0   | 0  | 8.5   |
| 0.078177533 BH | 4   | 13  | 0   | 0  | 8.5   |
| 0.078177533 BH | 11  | 2   | 0   | 0  | 6.5   |
| 0.078202325 BH | 4   | 5   | 55  | 6  | 4.5   |



|                |    |     |    |    |      |
|----------------|----|-----|----|----|------|
| 0.07830533 BH  | 8  | 30  | 0  | 1  | 19   |
| 0.07830533 BH  | 0  | 4   | 11 | 11 | 2    |
| 0.078362827 BH | 14 | 113 | 4  | 4  | 63.5 |
| 0.078417805 BH | 2  | 6   | 38 | 9  | 4    |
| 0.078506307 BH | 41 | 44  | 7  | 1  | 42.5 |
| 0.078716545 BH | 3  | 79  | 2  | 1  | 41   |
| 0.078716545 BH | 11 | 33  | 1  | 1  | 22   |
| 0.078716545 BH | 2  | 35  | 1  | 0  | 18.5 |
| 0.079100635 BH | 5  | 9   | 45 | 22 | 7    |
| 0.079100635 BH | 10 | 13  | 1  | 0  | 11.5 |
| 0.07929251 BH  | 2  | 31  | 53 | 72 | 16.5 |
| 0.079885124 BH | 51 | 41  | 8  | 1  | 46   |
| 0.080001174 BH | 0  | 0   | 8  | 3  | 0    |
| 0.080001174 BH | 3  | 14  | 0  | 0  | 8.5  |
| 0.080001174 BH | 0  | 0   | 8  | 3  | 0    |
| 0.080001174 BH | 7  | 8   | 0  | 0  | 7.5  |
| 0.080001174 BH | 0  | 0   | 8  | 3  | 0    |
| 0.0800247 BH   | 4  | 71  | 2  | 1  | 37.5 |
| 0.0800247 BH   | 24 | 172 | 10 | 4  | 98   |
| 0.080055625 BH | 0  | 6   | 26 | 6  | 3    |
| 0.080096698 BH | 48 | 190 | 15 | 6  | 119  |
| 0.080459669 BH | 40 | 36  | 6  | 0  | 38   |
| 0.080459669 BH | 47 | 20  | 1  | 4  | 33.5 |
| 0.080459669 BH | 67 | 105 | 11 | 7  | 86   |
| 0.080459669 BH | 0  | 1   | 11 | 1  | 0.5  |
| 0.080459669 BH | 0  | 1   | 11 | 1  | 0.5  |
| 0.080459669 BH | 0  | 1   | 11 | 1  | 0.5  |
| 0.080780774 BH | 7  | 7   | 0  | 0  | 7    |
| 0.080780774 BH | 3  | 15  | 0  | 0  | 9    |
| 0.080908726 BH | 1  | 1   | 15 | 7  | 1    |
| 0.080908726 BH | 20 | 18  | 3  | 0  | 19   |
| 0.081073211 BH | 0  | 4   | 19 | 5  | 2    |
| 0.081073211 BH | 40 | 71  | 7  | 4  | 55.5 |
| 0.081173429 BH | 9  | 199 | 3  | 7  | 104  |
| 0.081279202 BH | 0  | 2   | 6  | 10 | 1    |
| 0.081279202 BH | 59 | 79  | 10 | 4  | 69   |
| 0.081394991 BH | 0  | 0   | 11 | 1  | 0    |
| 0.081430774 BH | 7  | 117 | 3  | 3  | 62   |
| 0.081610879 BH | 0  | 6   | 8  | 20 | 3    |
| 0.081610879 BH | 7  | 14  | 80 | 20 | 10.5 |
| 0.081610879 BH | 4  | 85  | 2  | 2  | 44.5 |
| 0.081610879 BH | 0  | 26  | 0  | 0  | 13   |
| 0.081610879 BH | 0  | 0   | 14 | 0  | 0    |
| 0.081610879 BH | 0  | 0   | 14 | 0  | 0    |
| 0.081610879 BH | 0  | 0   | 14 | 0  | 0    |
| 0.081610879 BH | 0  | 26  | 0  | 0  | 13   |
| 0.081610879 BH | 1  | 6   | 24 | 9  | 3.5  |

|                |     |      |     |     |       |
|----------------|-----|------|-----|-----|-------|
| 0.082107714 BH | 12  | 41   | 1   | 2   | 26.5  |
| 0.082239406 BH | 1   | 21   | 0   | 0   | 11    |
| 0.082486861 BH | 2   | 0    | 30  | 4   | 1     |
| 0.082644588 BH | 13  | 50   | 3   | 1   | 31.5  |
| 0.082644588 BH | 1   | 4    | 22  | 6   | 2.5   |
| 0.082644588 BH | 0   | 27   | 0   | 0   | 13.5  |
| 0.082644588 BH | 0   | 27   | 0   | 0   | 13.5  |
| 0.082644588 BH | 0   | 27   | 0   | 0   | 13.5  |
| 0.082644588 BH | 0   | 27   | 0   | 0   | 13.5  |
| 0.082644588 BH | 89  | 94   | 13  | 8   | 91.5  |
| 0.082853318 BH | 0   | 6    | 25  | 6   | 3     |
| 0.082875502 BH | 41  | 6    | 128 | 238 | 23.5  |
| 0.082968704 BH | 4   | 22   | 68  | 31  | 13    |
| 0.083226467 BH | 0   | 0    | 9   | 2   | 0     |
| 0.083226467 BH | 0   | 0    | 9   | 2   | 0     |
| 0.083226467 BH | 0   | 0    | 9   | 2   | 0     |
| 0.083226467 BH | 8   | 109  | 5   | 2   | 58.5  |
| 0.083226467 BH | 35  | 182  | 14  | 3   | 108.5 |
| 0.083226467 BH | 1   | 0    | 13  | 4   | 0.5   |
| 0.083241695 BH | 28  | 21   | 3   | 1   | 24.5  |
| 0.083460622 BH | 33  | 4    | 82  | 224 | 18.5  |
| 0.083845828 BH | 81  | 378  | 712 | 745 | 229.5 |
| 0.08432781 BH  | 2   | 16   | 0   | 0   | 9     |
| 0.084415532 BH | 24  | 75   | 5   | 3   | 49.5  |
| 0.084536605 BH | 0   | 62   | 177 | 119 | 31    |
| 0.084536605 BH | 399 | 1020 | 74  | 79  | 709.5 |
| 0.08456774 BH  | 0   | 3    | 15  | 7   | 1.5   |
| 0.084671846 BH | 47  | 34   | 4   | 4   | 40.5  |
| 0.084707949 BH | 262 | 694  | 8   | 62  | 478   |
| 0.084707949 BH | 13  | 0    | 0   | 0   | 6.5   |
| 0.08524803 BH  | 1   | 2    | 9   | 11  | 1.5   |
| 0.08524803 BH  | 2   | 17   | 0   | 0   | 9.5   |
| 0.08524803 BH  | 2   | 17   | 0   | 0   | 9.5   |
| 0.085348674 BH | 67  | 74   | 10  | 6   | 70.5  |
| 0.085625228 BH | 0   | 47   | 1   | 0   | 23.5  |
| 0.086164699 BH | 6   | 58   | 1   | 2   | 32    |
| 0.086655098 BH | 0   | 6    | 24  | 6   | 3     |
| 0.086987146 BH | 0   | 2    | 10  | 6   | 1     |
| 0.087433131 BH | 2   | 5    | 27  | 10  | 3.5   |
| 0.087772079 BH | 0   | 6    | 26  | 5   | 3     |
| 0.088587067 BH | 4   | 85   | 3   | 1   | 44.5  |
| 0.088935281 BH | 9   | 129  | 4   | 4   | 69    |
| 0.08976492 BH  | 15  | 14   | 0   | 1   | 14.5  |
| 0.089913792 BH | 0   | 0    | 13  | 0   | 0     |
| 0.089913792 BH | 0   | 0    | 13  | 0   | 0     |
| 0.089913792 BH | 0   | 0    | 13  | 0   | 0     |
| 0.089913792 BH | 0   | 0    | 13  | 0   | 0     |

|                |    |     |     |    |       |
|----------------|----|-----|-----|----|-------|
| 0.089913792 BH | 0  | 0   | 13  | 0  | 0     |
| 0.089913792 BH | 0  | 2   | 11  | 5  | 1     |
| 0.089913792 BH | 10 | 12  | 1   | 0  | 11    |
| 0.089913792 BH | 1  | 0   | 11  | 5  | 0.5   |
| 0.090117739 BH | 9  | 4   | 0   | 0  | 6.5   |
| 0.090277609 BH | 10 | 93  | 5   | 2  | 51.5  |
| 0.09048411 BH  | 13 | 36  | 2   | 1  | 24.5  |
| 0.09055685 BH  | 2  | 31  | 1   | 0  | 16.5  |
| 0.090710146 BH | 12 | 30  | 3   | 0  | 21    |
| 0.090710146 BH | 9  | 98  | 5   | 2  | 53.5  |
| 0.090710146 BH | 3  | 25  | 57  | 38 | 14    |
| 0.090710146 BH | 0  | 24  | 0   | 0  | 12    |
| 0.090710146 BH | 0  | 24  | 0   | 0  | 12    |
| 0.090710146 BH | 0  | 24  | 0   | 0  | 12    |
| 0.090710146 BH | 0  | 24  | 0   | 0  | 12    |
| 0.090710146 BH | 0  | 24  | 0   | 0  | 12    |
| 0.090710146 BH | 0  | 24  | 0   | 0  | 12    |
| 0.090710146 BH | 0  | 24  | 0   | 0  | 12    |
| 0.090710146 BH | 0  | 24  | 0   | 0  | 12    |
| 0.090741671 BH | 1  | 7   | 25  | 11 | 4     |
| 0.091047895 BH | 8  | 38  | 106 | 54 | 23    |
| 0.091067501 BH | 5  | 10  | 0   | 0  | 7.5   |
| 0.091239568 BH | 2  | 25  | 26  | 71 | 13.5  |
| 0.091376709 BH | 13 | 7   | 1   | 0  | 10    |
| 0.091376709 BH | 1  | 3   | 28  | 3  | 2     |
| 0.091376709 BH | 1  | 3   | 4   | 23 | 2     |
| 0.091580977 BH | 2  | 4   | 21  | 9  | 3     |
| 0.091580977 BH | 39 | 306 | 15  | 13 | 172.5 |
| 0.091580977 BH | 0  | 25  | 0   | 0  | 12.5  |
| 0.091580977 BH | 0  | 25  | 0   | 0  | 12.5  |
| 0.091580977 BH | 0  | 25  | 0   | 0  | 12.5  |
| 0.091580977 BH | 0  | 25  | 0   | 0  | 12.5  |
| 0.091580977 BH | 0  | 25  | 0   | 0  | 12.5  |
| 0.091597483 BH | 0  | 0   | 10  | 1  | 0     |
| 0.091597483 BH | 0  | 6   | 15  | 11 | 3     |
| 0.091597483 BH | 66 | 21  | 6   | 3  | 43.5  |
| 0.091597483 BH | 4  | 11  | 0   | 0  | 7.5   |
| 0.091597483 BH | 4  | 11  | 0   | 0  | 7.5   |
| 0.091597483 BH | 4  | 11  | 0   | 0  | 7.5   |
| 0.091597483 BH | 1  | 0   | 12  | 4  | 0.5   |
| 0.091597483 BH | 11 | 10  | 1   | 0  | 10.5  |
| 0.091597483 BH | 1  | 22  | 36  | 44 | 11.5  |
| 0.091597483 BH | 18 | 16  | 1   | 1  | 17    |
| 0.091597483 BH | 91 | 63  | 11  | 7  | 77    |
| 0.092233422 BH | 8  | 25  | 2   | 0  | 16.5  |
| 0.092302145 BH | 0  | 0   | 0   | 11 | 0     |
| 0.092302145 BH | 0  | 0   | 0   | 11 | 0     |
| 0.092302145 BH | 0  | 0   | 0   | 11 | 0     |

|                |     |     |    |     |       |
|----------------|-----|-----|----|-----|-------|
| 0.092302145 BH | 1   | 18  | 0  | 0   | 9.5   |
| 0.092302145 BH | 1   | 18  | 0  | 0   | 9.5   |
| 0.09284473 BH  | 3   | 59  | 0  | 2   | 31    |
| 0.092881476 BH | 9   | 35  | 3  | 0   | 22    |
| 0.092881476 BH | 7   | 43  | 0  | 2   | 25    |
| 0.092881476 BH | 0   | 71  | 2  | 0   | 35.5  |
| 0.093264117 BH | 0   | 4   | 21 | 3   | 2     |
| 0.093264117 BH | 2   | 11  | 26 | 21  | 6.5   |
| 0.09330071 BH  | 163 | 65  | 20 | 8   | 114   |
| 0.09330071 BH  | 1   | 8   | 15 | 24  | 4.5   |
| 0.09330071 BH  | 1   | 19  | 0  | 0   | 10    |
| 0.09330071 BH  | 12  | 0   | 0  | 0   | 6     |
| 0.09330071 BH  | 3   | 13  | 0  | 0   | 8     |
| 0.09330071 BH  | 3   | 13  | 0  | 0   | 8     |
| 0.093345144 BH | 1   | 1   | 17 | 5   | 1     |
| 0.093676513 BH | 9   | 33  | 1  | 1   | 21    |
| 0.093826461 BH | 15  | 109 | 8  | 1   | 62    |
| 0.094378577 BH | 5   | 34  | 2  | 0   | 19.5  |
| 0.094417084 BH | 0   | 5   | 23 | 6   | 2.5   |
| 0.094969101 BH | 10  | 164 | 8  | 3   | 87    |
| 0.094969101 BH | 181 | 33  | 20 | 4   | 107   |
| 0.095407224 BH | 86  | 51  | 12 | 4   | 68.5  |
| 0.095407224 BH | 11  | 87  | 2  | 4   | 49    |
| 0.095468379 BH | 10  | 148 | 7  | 3   | 79    |
| 0.096278343 BH | 0   | 5   | 21 | 7   | 2.5   |
| 0.096300684 BH | 82  | 235 | 15 | 18  | 158.5 |
| 0.096323401 BH | 14  | 210 | 10 | 5   | 112   |
| 0.096545535 BH | 10  | 32  | 0  | 2   | 21    |
| 0.097807809 BH | 0   | 2   | 9  | 6   | 1     |
| 0.097807809 BH | 0   | 2   | 9  | 6   | 1     |
| 0.097807809 BH | 8   | 14  | 1  | 0   | 11    |
| 0.097807809 BH | 8   | 13  | 1  | 0   | 10.5  |
| 0.098029817 BH | 2   | 15  | 0  | 0   | 8.5   |
| 0.098029817 BH | 2   | 15  | 0  | 0   | 8.5   |
| 0.098029817 BH | 2   | 15  | 0  | 0   | 8.5   |
| 0.098029817 BH | 2   | 15  | 0  | 0   | 8.5   |
| 0.098029817 BH | 61  | 529 | 33 | 17  | 295   |
| 0.098159001 BH | 5   | 53  | 36 | 167 | 29    |
| 0.098160014 BH | 6   | 2   | 43 | 13  | 4     |
| 0.098374065 BH | 53  | 727 | 29 | 28  | 390   |
| 0.098374065 BH | 3   | 3   | 38 | 4   | 3     |
| 0.098374065 BH | 0   | 1   | 12 | 0   | 0.5   |
| 0.098374065 BH | 0   | 1   | 12 | 0   | 0.5   |
| 0.098442862 BH | 3   | 83  | 2  | 2   | 43    |
| 0.098442862 BH | 55  | 20  | 7  | 1   | 37.5  |
| 0.0989322 BH   | 1   | 0   | 10 | 5   | 0.5   |
| 0.099006151 BH | 1   | 0   | 1  | 15  | 0.5   |

|                |     |     |     |     |       |
|----------------|-----|-----|-----|-----|-------|
| 0.099145401 BH | 0   | 4   | 5   | 15  | 2     |
| 0.099147461 BH | 1   | 2   | 15  | 5   | 1.5   |
| 0.099147461 BH | 0   | 3   | 12  | 8   | 1.5   |
| 0.099147461 BH | 1   | 2   | 15  | 5   | 1.5   |
| 0.099147461 BH | 0   | 0   | 12  | 0   | 0     |
| 0.099147461 BH | 0   | 0   | 12  | 0   | 0     |
| 0.099147461 BH | 0   | 22  | 0   | 0   | 11    |
| 0.099147461 BH | 0   | 22  | 0   | 0   | 11    |
| 0.099147461 BH | 0   | 22  | 0   | 0   | 11    |
| 0.099147461 BH | 0   | 22  | 0   | 0   | 11    |
| 0.099147461 BH | 0   | 22  | 0   | 0   | 11    |
| 0.099147461 BH | 0   | 22  | 0   | 0   | 11    |
| 0.100067864 BH | 16  | 19  | 12  | 182 | 17.5  |
| 0.100517631 BH | 16  | 47  | 4   | 1   | 31.5  |
| 0.100651961 BH | 0   | 23  | 0   | 0   | 11.5  |
| 0.100837978 BH | 9   | 42  | 2   | 1   | 25.5  |
| 0.100863637 BH | 12  | 43  | 107 | 69  | 27.5  |
| 0.101239771 BH | 37  | 20  | 5   | 0   | 28.5  |
| 0.101962451 BH | 2   | 5   | 18  | 14  | 3.5   |
| 0.102343128 BH | 3   | 2   | 55  | 1   | 2.5   |
| 0.102376334 BH | 37  | 100 | 9   | 5   | 68.5  |
| 0.10269895 BH  | 7   | 5   | 49  | 17  | 6     |
| 0.10269895 BH  | 16  | 26  | 2   | 1   | 21    |
| 0.10269895 BH  | 0   | 4   | 13  | 7   | 2     |
| 0.10269895 BH  | 15  | 179 | 8   | 6   | 97    |
| 0.102880454 BH | 28  | 58  | 6   | 2   | 43    |
| 0.103153973 BH | 4   | 21  | 1   | 0   | 12.5  |
| 0.10323476 BH  | 36  | 63  | 292 | 88  | 49.5  |
| 0.10323476 BH  | 41  | 25  | 6   | 0   | 33    |
| 0.103905014 BH | 3   | 2   | 68  | 0   | 2.5   |
| 0.104731529 BH | 1   | 6   | 14  | 13  | 3.5   |
| 0.104749084 BH | 75  | 422 | 38  | 7   | 248.5 |
| 0.105026498 BH | 11  | 106 | 5   | 3   | 58.5  |
| 0.105246773 BH | 0   | 11  | 20  | 21  | 5.5   |
| 0.105713718 BH | 4   | 16  | 53  | 22  | 10    |
| 0.105868854 BH | 117 | 57  | 11  | 11  | 87    |
| 0.105959916 BH | 3   | 38  | 0   | 1   | 20.5  |
| 0.106271209 BH | 8   | 3   | 0   | 0   | 5.5   |
| 0.106271209 BH | 6   | 28  | 2   | 0   | 17    |
| 0.106720552 BH | 11  | 36  | 1   | 2   | 23.5  |
| 0.107305364 BH | 57  | 126 | 11  | 9   | 91.5  |
| 0.107305364 BH | 0   | 40  | 1   | 0   | 20    |
| 0.107305364 BH | 2   | 2   | 18  | 6   | 2     |
| 0.107305364 BH | 3   | 0   | 14  | 15  | 1.5   |
| 0.107305364 BH | 9   | 50  | 2   | 2   | 29.5  |
| 0.107323286 BH | 1   | 17  | 0   | 0   | 9     |
| 0.107323286 BH | 1   | 17  | 0   | 0   | 9     |

|                |     |     |    |    |      |
|----------------|-----|-----|----|----|------|
| 0.107323286 BH | 1   | 17  | 0  | 0  | 9    |
| 0.107830611 BH | 0   | 2   | 4  | 10 | 1    |
| 0.107830611 BH | 2   | 86  | 2  | 2  | 44   |
| 0.108762395 BH | 2   | 1   | 26 | 3  | 1.5  |
| 0.108937729 BH | 25  | 45  | 6  | 0  | 35   |
| 0.109021463 BH | 4   | 0   | 28 | 10 | 2    |
| 0.109021463 BH | 29  | 30  | 5  | 1  | 29.5 |
| 0.109613342 BH | 27  | 38  | 3  | 3  | 32.5 |
| 0.109733337 BH | 13  | 183 | 7  | 7  | 98   |
| 0.109733337 BH | 0   | 4   | 15 | 5  | 2    |
| 0.110373053 BH | 16  | 95  | 6  | 3  | 55.5 |
| 0.110377789 BH | 23  | 50  | 6  | 1  | 36.5 |
| 0.110377789 BH | 5   | 8   | 0  | 0  | 6.5  |
| 0.110377789 BH | 5   | 8   | 0  | 0  | 6.5  |
| 0.110377789 BH | 4   | 9   | 0  | 0  | 6.5  |
| 0.110646036 BH | 0   | 14  | 13 | 42 | 7    |
| 0.110646036 BH | 47  | 84  | 10 | 5  | 65.5 |
| 0.110646036 BH | 30  | 4   | 3  | 0  | 17   |
| 0.110646036 BH | 105 | 95  | 20 | 6  | 100  |
| 0.111078914 BH | 0   | 4   | 22 | 2  | 2    |
| 0.111203732 BH | 0   | 2   | 7  | 7  | 1    |
| 0.111203732 BH | 6   | 15  | 1  | 0  | 10.5 |
| 0.111304133 BH | 1   | 31  | 1  | 0  | 16   |
| 0.111304133 BH | 3   | 11  | 0  | 0  | 7    |
| 0.111304133 BH | 3   | 11  | 0  | 0  | 7    |
| 0.111304133 BH | 3   | 11  | 0  | 0  | 7    |
| 0.111652716 BH | 0   | 20  | 0  | 0  | 10   |
| 0.111652716 BH | 0   | 20  | 0  | 0  | 10   |
| 0.112025145 BH | 4   | 0   | 41 | 4  | 2    |
| 0.112205286 BH | 20  | 18  | 2  | 1  | 19   |
| 0.112689321 BH | 8   | 12  | 1  | 0  | 10   |
| 0.112689321 BH | 35  | 295 | 17 | 12 | 165  |
| 0.112689321 BH | 9   | 71  | 4  | 2  | 40   |
| 0.112689321 BH | 2   | 8   | 11 | 30 | 5    |
| 0.112689321 BH | 0   | 21  | 0  | 0  | 10.5 |
| 0.112689321 BH | 0   | 21  | 0  | 0  | 10.5 |
| 0.112689321 BH | 0   | 21  | 0  | 0  | 10.5 |
| 0.112689321 BH | 0   | 21  | 0  | 0  | 10.5 |
| 0.112689321 BH | 0   | 21  | 0  | 0  | 10.5 |
| 0.112689321 BH | 0   | 21  | 0  | 0  | 10.5 |
| 0.112689321 BH | 0   | 21  | 0  | 0  | 10.5 |
| 0.113853101 BH | 4   | 23  | 41 | 41 | 13.5 |
| 0.114085634 BH | 8   | 42  | 1  | 2  | 25   |
| 0.114398399 BH | 0   | 5   | 17 | 8  | 2.5  |
| 0.114401214 BH | 20  | 50  | 5  | 2  | 35   |
| 0.114401214 BH | 4   | 8   | 11 | 38 | 6    |
| 0.114554555 BH | 1   | 1   | 10 | 8  | 1    |
| 0.11458727 BH  | 9   | 2   | 0  | 0  | 5.5  |

|                |     |     |     |     |       |
|----------------|-----|-----|-----|-----|-------|
| 0.114821412 BH | 31  | 30  | 5   | 2   | 30.5  |
| 0.114821412 BH | 84  | 143 | 13  | 14  | 113.5 |
| 0.114821412 BH | 0   | 4   | 13  | 6   | 2     |
| 0.115031343 BH | 2   | 6   | 42  | 4   | 4     |
| 0.115676191 BH | 18  | 93  | 6   | 4   | 55.5  |
| 0.115714045 BH | 3   | 8   | 4   | 48  | 5.5   |
| 0.115815255 BH | 2   | 14  | 0   | 0   | 8     |
| 0.115815255 BH | 2   | 14  | 0   | 0   | 8     |
| 0.115815255 BH | 2   | 13  | 0   | 0   | 7.5   |
| 0.115815255 BH | 2   | 14  | 0   | 0   | 8     |
| 0.115815255 BH | 2   | 13  | 0   | 0   | 7.5   |
| 0.116286356 BH | 90  | 277 | 19  | 22  | 183.5 |
| 0.116389007 BH | 6   | 58  | 2   | 2   | 32    |
| 0.116429788 BH | 0   | 64  | 150 | 105 | 32    |
| 0.116429788 BH | 3   | 36  | 2   | 0   | 19.5  |
| 0.117420402 BH | 10  | 167 | 7   | 5   | 88.5  |
| 0.117877244 BH | 0   | 4   | 21  | 2   | 2     |
| 0.118033126 BH | 15  | 38  | 49  | 122 | 26.5  |
| 0.118033126 BH | 12  | 48  | 10  | 250 | 30    |
| 0.118041201 BH | 0   | 8   | 17  | 12  | 4     |
| 0.118047968 BH | 17  | 29  | 2   | 2   | 23    |
| 0.118047968 BH | 8   | 41  | 2   | 1   | 24.5  |
| 0.118092726 BH | 2   | 25  | 1   | 0   | 13.5  |
| 0.118092726 BH | 2   | 26  | 1   | 0   | 14    |
| 0.118092726 BH | 2   | 26  | 1   | 0   | 14    |
| 0.118092726 BH | 2   | 26  | 1   | 0   | 14    |
| 0.118261889 BH | 1   | 3   | 15  | 8   | 2     |
| 0.119439185 BH | 26  | 225 | 15  | 7   | 125.5 |
| 0.119439185 BH | 14  | 224 | 10  | 7   | 119   |
| 0.119649444 BH | 9   | 19  | 0   | 1   | 14    |
| 0.119649444 BH | 410 | 526 | 49  | 74  | 468   |
| 0.119705809 BH | 1   | 4   | 19  | 5   | 2.5   |
| 0.119705809 BH | 0   | 6   | 17  | 7   | 3     |
| 0.119803724 BH | 7   | 373 | 16  | 6   | 190   |
| 0.120047258 BH | 14  | 84  | 125 | 148 | 49    |
| 0.120355795 BH | 29  | 46  | 4   | 4   | 37.5  |
| 0.120760476 BH | 8   | 11  | 62  | 20  | 9.5   |
| 0.121216524 BH | 6   | 29  | 76  | 34  | 17.5  |
| 0.121216524 BH | 0   | 37  | 1   | 0   | 18.5  |
| 0.121216524 BH | 9   | 19  | 2   | 0   | 14    |
| 0.121216524 BH | 7   | 24  | 0   | 1   | 15.5  |
| 0.121216524 BH | 9   | 19  | 2   | 0   | 14    |
| 0.121216524 BH | 0   | 3   | 12  | 7   | 1.5   |
| 0.121522272 BH | 9   | 8   | 10  | 74  | 8.5   |
| 0.12317321 BH  | 32  | 216 | 19  | 3   | 124   |
| 0.12317321 BH  | 41  | 112 | 13  | 4   | 76.5  |
| 0.123285908 BH | 7   | 22  | 2   | 0   | 14.5  |

|                |     |      |     |     |       |
|----------------|-----|------|-----|-----|-------|
| 0.123285908 BH | 10  | 17   | 2   | 0   | 13.5  |
| 0.123285908 BH | 3   | 33   | 2   | 0   | 18    |
| 0.123285908 BH | 3   | 33   | 2   | 0   | 18    |
| 0.123666891 BH | 13  | 20   | 3   | 0   | 16.5  |
| 0.123879982 BH | 15  | 39   | 3   | 2   | 27    |
| 0.124328492 BH | 2   | 1    | 15  | 8   | 1.5   |
| 0.124569907 BH | 4   | 66   | 3   | 1   | 35    |
| 0.124569907 BH | 1   | 15   | 0   | 0   | 8     |
| 0.124569907 BH | 1   | 15   | 0   | 0   | 8     |
| 0.124569907 BH | 1   | 15   | 0   | 0   | 8     |
| 0.124569907 BH | 1   | 15   | 0   | 0   | 8     |
| 0.124569907 BH | 1   | 15   | 0   | 0   | 8     |
| 0.124569907 BH | 2   | 14   | 23  | 28  | 8     |
| 0.124739751 BH | 7   | 63   | 3   | 2   | 35    |
| 0.124741769 BH | 8   | 3    | 27  | 31  | 5.5   |
| 0.124853942 BH | 1   | 1    | 19  | 2   | 1     |
| 0.124853942 BH | 25  | 54   | 3   | 5   | 39.5  |
| 0.124907295 BH | 41  | 40   | 6   | 4   | 40.5  |
| 0.125099117 BH | 71  | 75   | 16  | 1   | 73    |
| 0.125554759 BH | 1   | 16   | 0   | 0   | 8.5   |
| 0.125554759 BH | 1   | 16   | 0   | 0   | 8.5   |
| 0.125554759 BH | 1   | 16   | 0   | 0   | 8.5   |
| 0.125554759 BH | 1   | 16   | 0   | 0   | 8.5   |
| 0.125554759 BH | 57  | 192  | 18  | 10  | 124.5 |
| 0.126152724 BH | 1   | 11   | 24  | 16  | 6     |
| 0.126312987 BH | 42  | 37   | 2   | 6   | 39.5  |
| 0.126312987 BH | 22  | 75   | 6   | 4   | 48.5  |
| 0.126369882 BH | 15  | 73   | 150 | 101 | 44    |
| 0.12647316 BH  | 6   | 14   | 1   | 0   | 10    |
| 0.126741749 BH | 23  | 2    | 2   | 0   | 12.5  |
| 0.127044659 BH | 1   | 2    | 11  | 6   | 1.5   |
| 0.127044659 BH | 2   | 37   | 2   | 0   | 19.5  |
| 0.127279734 BH | 0   | 19   | 0   | 0   | 9.5   |
| 0.127279734 BH | 0   | 19   | 0   | 0   | 9.5   |
| 0.127449472 BH | 5   | 49   | 2   | 1   | 27    |
| 0.127449472 BH | 27  | 73   | 7   | 4   | 50    |
| 0.127483314 BH | 6   | 84   | 5   | 1   | 45    |
| 0.127483314 BH | 5   | 86   | 2   | 3   | 45.5  |
| 0.127513515 BH | 1   | 0    | 12  | 2   | 0.5   |
| 0.127609386 BH | 686 | 1270 | 91  | 157 | 978   |
| 0.127756697 BH | 0   | 2    | 6   | 7   | 1     |
| 0.127756697 BH | 8   | 11   | 1   | 0   | 9.5   |
| 0.127756697 BH | 59  | 71   | 12  | 5   | 65    |
| 0.128066682 BH | 42  | 211  | 15  | 11  | 126.5 |
| 0.128289578 BH | 1   | 72   | 1   | 2   | 36.5  |
| 0.128289578 BH | 0   | 0    | 11  | 0   | 0     |
| 0.128289578 BH | 0   | 0    | 11  | 0   | 0     |



|                |     |     |    |    |       |
|----------------|-----|-----|----|----|-------|
| 0.128352971 BH | 4   | 104 | 3  | 3  | 54    |
| 0.12855025 BH  | 1   | 3   | 9  | 12 | 2     |
| 0.128668514 BH | 5   | 40  | 0  | 2  | 22.5  |
| 0.128668514 BH | 14  | 179 | 11 | 4  | 96.5  |
| 0.128936899 BH | 32  | 61  | 5  | 5  | 46.5  |
| 0.128936899 BH | 106 | 27  | 14 | 3  | 66.5  |
| 0.12904464 BH  | 0   | 5   | 12 | 10 | 2.5   |
| 0.12904464 BH  | 12  | 22  | 0  | 2  | 17    |
| 0.12904464 BH  | 1   | 0   | 9  | 4  | 0.5   |
| 0.129142125 BH | 180 | 71  | 19 | 17 | 125.5 |
| 0.129142125 BH | 0   | 7   | 14 | 13 | 3.5   |
| 0.129256494 BH | 5   | 26  | 2  | 0  | 15.5  |
| 0.129256494 BH | 0   | 3   | 6  | 12 | 1.5   |
| 0.129882288 BH | 8   | 19  | 51 | 36 | 13.5  |
| 0.130252755 BH | 2   | 24  | 1  | 0  | 13    |
| 0.130252755 BH | 2   | 23  | 1  | 0  | 12.5  |
| 0.130252755 BH | 2   | 23  | 1  | 0  | 12.5  |
| 0.130252755 BH | 2   | 23  | 1  | 0  | 12.5  |
| 0.130612373 BH | 17  | 296 | 15 | 9  | 156.5 |
| 0.13069038 BH  | 11  | 22  | 3  | 0  | 16.5  |
| 0.13069038 BH  | 0   | 5   | 14 | 9  | 2.5   |
| 0.13069038 BH  | 12  | 21  | 3  | 0  | 16.5  |
| 0.13069038 BH  | 108 | 41  | 17 | 3  | 74.5  |
| 0.13069038 BH  | 3   | 0   | 9  | 18 | 1.5   |
| 0.13069038 BH  | 3   | 26  | 82 | 18 | 14.5  |
| 0.13069038 BH  | 18  | 70  | 6  | 2  | 44    |
| 0.13069038 BH  | 0   | 7   | 24 | 6  | 3.5   |
| 0.13069038 BH  | 3   | 62  | 0  | 3  | 32.5  |
| 0.13069038 BH  | 1   | 2   | 16 | 3  | 1.5   |
| 0.130807984 BH | 0   | 9   | 17 | 15 | 4.5   |
| 0.131027645 BH | 2   | 8   | 21 | 16 | 5     |
| 0.131805726 BH | 1   | 23  | 31 | 42 | 12    |
| 0.132096059 BH | 66  | 34  | 9  | 4  | 50    |
| 0.132096059 BH | 0   | 21  | 22 | 51 | 10.5  |
| 0.132150513 BH | 19  | 29  | 3  | 2  | 24    |
| 0.132182359 BH | 26  | 4   | 0  | 2  | 15    |
| 0.132182359 BH | 4   | 8   | 0  | 0  | 6     |
| 0.132182359 BH | 3   | 9   | 0  | 0  | 6     |
| 0.132182359 BH | 3   | 9   | 0  | 0  | 6     |
| 0.132182359 BH | 3   | 9   | 0  | 0  | 6     |
| 0.132182359 BH | 3   | 9   | 0  | 0  | 6     |
| 0.132182359 BH | 3   | 9   | 0  | 0  | 6     |
| 0.132182359 BH | 29  | 201 | 11 | 11 | 115   |
| 0.132250235 BH | 24  | 10  | 2  | 1  | 17    |
| 0.132419043 BH | 46  | 693 | 47 | 14 | 369.5 |
| 0.132494267 BH | 0   | 4   | 22 | 1  | 2     |
| 0.132595623 BH | 32  | 45  | 6  | 3  | 38.5  |

|                |      |      |     |     |        |
|----------------|------|------|-----|-----|--------|
| 0.132595623 BH | 2    | 14   | 32  | 19  | 8      |
| 0.132648012 BH | 8    | 19   | 2   | 0   | 13.5   |
| 0.132737659 BH | 16   | 27   | 2   | 2   | 21.5   |
| 0.132836621 BH | 64   | 202  | 13  | 17  | 133    |
| 0.132836621 BH | 2207 | 1830 | 367 | 257 | 2018.5 |
| 0.133207711 BH | 3    | 10   | 0   | 0   | 6.5    |
| 0.133257214 BH | 0    | 5    | 19  | 5   | 2.5    |
| 0.133257214 BH | 0    | 15   | 30  | 19  | 7.5    |
| 0.133423477 BH | 31   | 39   | 5   | 3   | 35     |
| 0.133437924 BH | 157  | 2669 | 175 | 61  | 1413   |
| 0.133672065 BH | 99   | 89   | 22  | 2   | 94     |
| 0.133824135 BH | 56   | 98   | 81  | 457 | 77     |
| 0.134296427 BH | 7    | 20   | 2   | 0   | 13.5   |
| 0.134296427 BH | 5    | 6    | 0   | 0   | 5.5    |
| 0.134296427 BH | 0    | 2    | 11  | 3   | 1      |
| 0.134296427 BH | 3    | 20   | 1   | 0   | 11.5   |
| 0.134907219 BH | 22   | 26   | 4   | 1   | 24     |
| 0.135032999 BH | 6    | 43   | 1   | 2   | 24.5   |
| 0.135651427 BH | 1    | 13   | 45  | 7   | 7      |
| 0.135706946 BH | 2    | 11   | 0   | 0   | 6.5    |
| 0.135768088 BH | 14   | 16   | 3   | 0   | 15     |
| 0.135768088 BH | 0    | 5    | 8   | 14  | 2.5    |
| 0.135997285 BH | 20   | 43   | 5   | 2   | 31.5   |
| 0.136192283 BH | 10   | 14   | 2   | 0   | 12     |
| 0.136260957 BH | 7    | 38   | 2   | 1   | 22.5   |
| 0.136650295 BH | 2    | 105  | 0   | 4   | 53.5   |
| 0.136903568 BH | 10   | 41   | 1   | 3   | 25.5   |
| 0.136903568 BH | 2    | 12   | 0   | 0   | 7      |
| 0.137131564 BH | 16   | 163  | 10  | 6   | 89.5   |
| 0.137131564 BH | 9    | 18   | 75  | 23  | 13.5   |
| 0.137131564 BH | 2    | 0    | 38  | 0   | 1      |
| 0.137131564 BH | 71   | 46   | 12  | 4   | 58.5   |
| 0.137131564 BH | 10   | 18   | 70  | 28  | 14     |
| 0.137131564 BH | 54   | 489  | 25  | 26  | 271.5  |
| 0.137131564 BH | 45   | 56   | 8   | 5   | 50.5   |
| 0.137259473 BH | 0    | 2    | 18  | 0   | 1      |
| 0.13763052 BH  | 30   | 2    | 0   | 2   | 16     |
| 0.138206915 BH | 24   | 34   | 5   | 2   | 29     |
| 0.139033685 BH | 0    | 11   | 11  | 26  | 5.5    |
| 0.139033685 BH | 8    | 46   | 3   | 1   | 27     |
| 0.139413868 BH | 14   | 8    | 2   | 0   | 11     |
| 0.139811401 BH | 14   | 29   | 2   | 2   | 21.5   |
| 0.139991213 BH | 0    | 3    | 6   | 11  | 1.5    |
| 0.140101192 BH | 46   | 28   | 6   | 4   | 37     |
| 0.140406994 BH | 4    | 34   | 35  | 73  | 19     |
| 0.140437189 BH | 1    | 10   | 39  | 6   | 5.5    |
| 0.14060583 BH  | 3    | 7    | 20  | 15  | 5      |

|                |     |     |    |    |       |
|----------------|-----|-----|----|----|-------|
| 0.141524391 BH | 3   | 32  | 0  | 1  | 17.5  |
| 0.142204069 BH | 2   | 0   | 19 | 5  | 1     |
| 0.142774752 BH | 19  | 52  | 4  | 3  | 35.5  |
| 0.142785893 BH | 8   | 35  | 2  | 1  | 21.5  |
| 0.143143521 BH | 2   | 21  | 1  | 0  | 11.5  |
| 0.143143521 BH | 2   | 21  | 1  | 0  | 11.5  |
| 0.143344354 BH | 15  | 43  | 4  | 2  | 29    |
| 0.143583017 BH | 0   | 6   | 12 | 9  | 3     |
| 0.143917358 BH | 6   | 12  | 1  | 0  | 9     |
| 0.144228101 BH | 21  | 87  | 9  | 2  | 54    |
| 0.144228101 BH | 0   | 17  | 0  | 0  | 8.5   |
| 0.144228101 BH | 0   | 17  | 0  | 0  | 8.5   |
| 0.144228101 BH | 0   | 17  | 0  | 0  | 8.5   |
| 0.144228101 BH | 0   | 17  | 0  | 0  | 8.5   |
| 0.144909863 BH | 22  | 20  | 4  | 0  | 21    |
| 0.144909863 BH | 88  | 284 | 34 | 13 | 186   |
| 0.144909863 BH | 0   | 4   | 26 | 0  | 2     |
| 0.144909863 BH | 1   | 13  | 0  | 0  | 7     |
| 0.144909863 BH | 1   | 13  | 0  | 0  | 7     |
| 0.144909863 BH | 24  | 50  | 6  | 2  | 37    |
| 0.144909863 BH | 23  | 52  | 6  | 2  | 37.5  |
| 0.144909863 BH | 2   | 7   | 10 | 21 | 4.5   |
| 0.144909863 BH | 7   | 11  | 1  | 0  | 9     |
| 0.144909863 BH | 7   | 10  | 1  | 0  | 8.5   |
| 0.144909863 BH | 2   | 9   | 18 | 17 | 5.5   |
| 0.144909863 BH | 0   | 18  | 0  | 0  | 9     |
| 0.144909863 BH | 0   | 18  | 0  | 0  | 9     |
| 0.144909863 BH | 0   | 18  | 0  | 0  | 9     |
| 0.144909863 BH | 0   | 18  | 0  | 0  | 9     |
| 0.144909863 BH | 0   | 18  | 0  | 0  | 9     |
| 0.144909863 BH | 0   | 18  | 0  | 0  | 9     |
| 0.144909863 BH | 0   | 18  | 0  | 0  | 9     |
| 0.145135637 BH | 0   | 4   | 14 | 4  | 2     |
| 0.145135637 BH | 0   | 4   | 14 | 4  | 2     |
| 0.145135637 BH | 13  | 76  | 4  | 4  | 44.5  |
| 0.145402456 BH | 20  | 2   | 2  | 0  | 11    |
| 0.145455927 BH | 1   | 14  | 0  | 0  | 7.5   |
| 0.145455927 BH | 1   | 14  | 0  | 0  | 7.5   |
| 0.146257761 BH | 0   | 2   | 5  | 7  | 1     |
| 0.146257761 BH | 0   | 2   | 5  | 7  | 1     |
| 0.146257761 BH | 4   | 17  | 1  | 0  | 10.5  |
| 0.146401087 BH | 7   | 3   | 3  | 61 | 5     |
| 0.146638762 BH | 103 | 324 | 34 | 21 | 213.5 |
| 0.146701436 BH | 0   | 5   | 16 | 6  | 2.5   |
| 0.146861945 BH | 0   | 3   | 10 | 7  | 1.5   |
| 0.147368902 BH | 0   | 12  | 24 | 17 | 6     |
| 0.148033417 BH | 7   | 22  | 38 | 48 | 14.5  |

|                |     |      |     |     |        |
|----------------|-----|------|-----|-----|--------|
| 0.148116343 BH | 9   | 21   | 51  | 38  | 15     |
| 0.148184003 BH | 0   | 31   | 1   | 0   | 15.5   |
| 0.148457224 BH | 1   | 5    | 8   | 16  | 3      |
| 0.14857958 BH  | 2   | 17   | 23  | 32  | 9.5    |
| 0.148843457 BH | 8   | 17   | 2   | 0   | 12.5   |
| 0.148843457 BH | 8   | 16   | 2   | 0   | 12     |
| 0.148843457 BH | 11  | 13   | 0   | 1   | 12     |
| 0.149820687 BH | 1   | 0    | 9   | 3   | 0.5    |
| 0.149820687 BH | 1   | 0    | 9   | 3   | 0.5    |
| 0.150304263 BH | 3   | 18   | 30  | 32  | 10.5   |
| 0.150308898 BH | 2   | 6    | 22  | 10  | 4      |
| 0.150308898 BH | 12  | 186  | 11  | 6   | 99     |
| 0.15044237 BH  | 598 | 1831 | 40  | 206 | 1214.5 |
| 0.150466233 BH | 2   | 20   | 27  | 32  | 11     |
| 0.150910296 BH | 10  | 13   | 2   | 0   | 11.5   |
| 0.15098206 BH  | 13  | 8    | 2   | 0   | 10.5   |
| 0.15098206 BH  | 0   | 6    | 16  | 6   | 3      |
| 0.151031907 BH | 0   | 5    | 12  | 9   | 2.5    |
| 0.151033669 BH | 31  | 59   | 139 | 120 | 45     |
| 0.151368598 BH | 3   | 18   | 1   | 0   | 10.5   |
| 0.151368598 BH | 9   | 20   | 53  | 36  | 14.5   |
| 0.151413937 BH | 15  | 25   | 2   | 2   | 20     |
| 0.151413937 BH | 65  | 175  | 16  | 15  | 120    |
| 0.151413937 BH | 8   | 1    | 44  | 14  | 4.5    |
| 0.151413937 BH | 26  | 69   | 3   | 7   | 47.5   |
| 0.151413937 BH | 59  | 432  | 37  | 16  | 245.5  |
| 0.151761077 BH | 35  | 553  | 10  | 34  | 294    |
| 0.151761077 BH | 1   | 4    | 13  | 7   | 2.5    |
| 0.151761077 BH | 6   | 73   | 5   | 1   | 39.5   |
| 0.152172233 BH | 11  | 236  | 15  | 5   | 123.5  |
| 0.152422061 BH | 0   | 4    | 7   | 9   | 2      |
| 0.152442833 BH | 1   | 7    | 20  | 9   | 4      |
| 0.152491473 BH | 0   | 3    | 16  | 3   | 1.5    |
| 0.152601551 BH | 13  | 34   | 127 | 27  | 23.5   |
| 0.152671097 BH | 1   | 38   | 2   | 0   | 19.5   |
| 0.152872756 BH | 71  | 200  | 19  | 16  | 135.5  |
| 0.152872756 BH | 1   | 16   | 13  | 37  | 8.5    |
| 0.152872756 BH | 977 | 2159 | 158 | 264 | 1568   |
| 0.153485774 BH | 15  | 157  | 4   | 10  | 86     |
| 0.153485774 BH | 72  | 5    | 8   | 0   | 38.5   |
| 0.153592593 BH | 7   | 20   | 57  | 24  | 13.5   |
| 0.153637631 BH | 1   | 4    | 8   | 11  | 2.5    |
| 0.153861067 BH | 14  | 84   | 7   | 2   | 49     |
| 0.154156645 BH | 1   | 2    | 14  | 3   | 1.5    |
| 0.154324638 BH | 3   | 29   | 2   | 0   | 16     |
| 0.154599506 BH | 1   | 21   | 37  | 27  | 11     |
| 0.154599506 BH | 0   | 25   | 36  | 41  | 12.5   |

|                |     |     |     |     |       |
|----------------|-----|-----|-----|-----|-------|
| 0.154599506 BH | 26  | 523 | 18  | 26  | 274.5 |
| 0.154699706 BH | 3   | 103 | 6   | 0   | 53    |
| 0.154935715 BH | 42  | 170 | 17  | 8   | 106   |
| 0.154995759 BH | 79  | 77  | 15  | 8   | 78    |
| 0.155003136 BH | 14  | 24  | 9   | 141 | 19    |
| 0.155181577 BH | 120 | 242 | 29  | 23  | 181   |
| 0.155426993 BH | 72  | 26  | 10  | 4   | 49    |
| 0.155438686 BH | 2   | 1   | 11  | 9   | 1.5   |
| 0.155438686 BH | 13  | 14  | 1   | 1   | 13.5  |
| 0.155438686 BH | 26  | 15  | 3   | 2   | 20.5  |
| 0.155438686 BH | 6   | 38  | 34  | 82  | 22    |
| 0.155497372 BH | 2   | 33  | 2   | 0   | 17.5  |
| 0.155742881 BH | 39  | 57  | 11  | 0   | 48    |
| 0.155981104 BH | 43  | 121 | 333 | 130 | 82    |
| 0.156149233 BH | 1   | 13  | 36  | 9   | 7     |
| 0.156162913 BH | 1   | 63  | 2   | 1   | 32    |
| 0.156162913 BH | 3   | 0   | 16  | 9   | 1.5   |
| 0.156162913 BH | 2   | 11  | 33  | 9   | 6.5   |
| 0.156162913 BH | 0   | 5   | 15  | 6   | 2.5   |
| 0.156162913 BH | 0   | 5   | 15  | 6   | 2.5   |
| 0.156390253 BH | 42  | 181 | 12  | 14  | 111.5 |
| 0.156756794 BH | 0   | 2   | 13  | 1   | 1     |
| 0.156756794 BH | 16  | 99  | 8   | 4   | 57.5  |
| 0.156756794 BH | 35  | 60  | 10  | 2   | 47.5  |
| 0.156756794 BH | 1   | 1   | 9   | 7   | 1     |
| 0.156776311 BH | 2   | 2   | 21  | 2   | 2     |
| 0.157161032 BH | 16  | 5   | 2   | 0   | 10.5  |
| 0.157296617 BH | 0   | 4   | 13  | 4   | 2     |
| 0.157425714 BH | 3   | 2   | 32  | 3   | 2.5   |
| 0.157425714 BH | 1   | 106 | 0   | 4   | 53.5  |
| 0.157425714 BH | 0   | 29  | 1   | 0   | 14.5  |
| 0.157504655 BH | 7   | 43  | 73  | 56  | 25    |
| 0.157759 BH    | 38  | 18  | 163 | 80  | 28    |
| 0.158208571 BH | 132 | 65  | 24  | 7   | 98.5  |
| 0.158208571 BH | 5   | 485 | 19  | 12  | 245   |
| 0.158240116 BH | 1   | 24  | 1   | 0   | 12.5  |
| 0.158562459 BH | 0   | 2   | 11  | 2   | 1     |
| 0.158562459 BH | 0   | 2   | 11  | 2   | 1     |
| 0.159337652 BH | 0   | 2   | 16  | 0   | 1     |
| 0.159337652 BH | 0   | 2   | 16  | 0   | 1     |
| 0.159444885 BH | 3   | 69  | 3   | 2   | 36    |
| 0.160625166 BH | 2   | 20  | 1   | 0   | 11    |
| 0.160625166 BH | 4   | 7   | 0   | 0   | 5.5   |
| 0.160625166 BH | 3   | 8   | 0   | 0   | 5.5   |
| 0.160625166 BH | 4   | 7   | 0   | 0   | 5.5   |
| 0.160705198 BH | 14  | 35  | 4   | 1   | 24.5  |
| 0.160967953 BH | 2   | 10  | 17  | 20  | 6     |

|                |    |     |     |     |       |
|----------------|----|-----|-----|-----|-------|
| 0.161309948 BH | 11 | 31  | 2   | 2   | 21    |
| 0.161474077 BH | 1  | 14  | 27  | 17  | 7.5   |
| 0.161482988 BH | 0  | 4   | 3   | 13  | 2     |
| 0.161951431 BH | 3  | 2   | 19  | 9   | 2.5   |
| 0.162028627 BH | 77 | 88  | 10  | 14  | 82.5  |
| 0.162597699 BH | 4  | 11  | 33  | 16  | 7.5   |
| 0.162714199 BH | 1  | 2   | 12  | 4   | 1.5   |
| 0.16373073 BH  | 3  | 60  | 3   | 1   | 31.5  |
| 0.164181754 BH | 5  | 13  | 1   | 0   | 9     |
| 0.164340336 BH | 7  | 42  | 2   | 2   | 24.5  |
| 0.164340336 BH | 5  | 5   | 45  | 6   | 5     |
| 0.164340336 BH | 7  | 17  | 2   | 0   | 12    |
| 0.164340336 BH | 2  | 10  | 0   | 0   | 6     |
| 0.164340336 BH | 2  | 10  | 0   | 0   | 6     |
| 0.164340336 BH | 2  | 10  | 0   | 0   | 6     |
| 0.164340336 BH | 38 | 79  | 10  | 6   | 58.5  |
| 0.164340336 BH | 14 | 86  | 150 | 100 | 50    |
| 0.164340336 BH | 0  | 15  | 0   | 0   | 7.5   |
| 0.164340336 BH | 0  | 15  | 0   | 0   | 7.5   |
| 0.164340336 BH | 0  | 15  | 0   | 0   | 7.5   |
| 0.164340336 BH | 0  | 15  | 0   | 0   | 7.5   |
| 0.164340336 BH | 0  | 15  | 0   | 0   | 7.5   |
| 0.164340336 BH | 0  | 15  | 0   | 0   | 7.5   |
| 0.164340336 BH | 0  | 15  | 0   | 0   | 7.5   |
| 0.164340336 BH | 0  | 15  | 0   | 0   | 7.5   |
| 0.164340336 BH | 0  | 15  | 0   | 0   | 7.5   |
| 0.164340336 BH | 0  | 15  | 0   | 0   | 7.5   |
| 0.164340336 BH | 0  | 15  | 0   | 0   | 7.5   |
| 0.164340336 BH | 0  | 15  | 0   | 0   | 7.5   |
| 0.164340336 BH | 0  | 15  | 0   | 0   | 7.5   |
| 0.164340336 BH | 0  | 15  | 0   | 0   | 7.5   |
| 0.164340336 BH | 4  | 19  | 54  | 15  | 11.5  |
| 0.164340336 BH | 47 | 40  | 10  | 3   | 43.5  |
| 0.164340336 BH | 0  | 3   | 15  | 3   | 1.5   |
| 0.164340336 BH | 0  | 3   | 15  | 3   | 1.5   |
| 0.164503033 BH | 25 | 23  | 5   | 1   | 24    |
| 0.164503033 BH | 4  | 14  | 1   | 0   | 9     |
| 0.164503033 BH | 4  | 14  | 1   | 0   | 9     |
| 0.164503033 BH | 1  | 306 | 7   | 9   | 153.5 |
| 0.164503899 BH | 10 | 20  | 3   | 0   | 15    |
| 0.164644586 BH | 14 | 52  | 6   | 1   | 33    |
| 0.164844501 BH | 16 | 23  | 3   | 1   | 19.5  |
| 0.165067499 BH | 71 | 0   | 6   | 0   | 35.5  |
| 0.165116463 BH | 0  | 16  | 0   | 0   | 8     |
| 0.165116463 BH | 0  | 16  | 0   | 0   | 8     |
| 0.165116463 BH | 0  | 16  | 0   | 0   | 8     |
| 0.165116463 BH | 0  | 16  | 0   | 0   | 8     |
| 0.165116463 BH | 0  | 16  | 0   | 0   | 8     |

|                |     |     |     |     |       |
|----------------|-----|-----|-----|-----|-------|
| 0.165116463 BH | 0   | 16  | 0   | 0   | 8     |
| 0.165116463 BH | 19  | 17  | 3   | 1   | 18    |
| 0.165166062 BH | 5   | 32  | 3   | 0   | 18.5  |
| 0.165166062 BH | 5   | 31  | 3   | 0   | 18    |
| 0.165265634 BH | 8   | 30  | 52  | 47  | 19    |
| 0.165956196 BH | 65  | 41  | 12  | 4   | 53    |
| 0.166467426 BH | 41  | 229 | 22  | 9   | 135   |
| 0.166840516 BH | 843 | 173 | 22  | 111 | 508   |
| 0.166840516 BH | 2   | 4   | 12  | 10  | 3     |
| 0.166840516 BH | 16  | 57  | 7   | 1   | 36.5  |
| 0.167133953 BH | 0   | 4   | 11  | 5   | 2     |
| 0.167133953 BH | 1   | 6   | 17  | 6   | 3.5   |
| 0.167444889 BH | 20  | 122 | 11  | 4   | 71    |
| 0.167526742 BH | 7   | 8   | 1   | 0   | 7.5   |
| 0.167631703 BH | 21  | 56  | 6   | 3   | 38.5  |
| 0.167945009 BH | 10  | 6   | 86  | 5   | 8     |
| 0.168314805 BH | 156 | 99  | 28  | 15  | 127.5 |
| 0.168372915 BH | 41  | 66  | 201 | 111 | 53.5  |
| 0.168372915 BH | 142 | 172 | 9   | 32  | 157   |
| 0.168372915 BH | 0   | 6   | 13  | 7   | 3     |
| 0.169062584 BH | 2   | 4   | 32  | 2   | 3     |
| 0.16927393 BH  | 0   | 2   | 9   | 3   | 1     |
| 0.16927393 BH  | 3   | 16  | 1   | 0   | 9.5   |
| 0.169351317 BH | 28  | 24  | 6   | 1   | 26    |
| 0.16970031 BH  | 10  | 28  | 83  | 30  | 19    |
| 0.16970031 BH  | 1   | 11  | 0   | 0   | 6     |
| 0.16970031 BH  | 1   | 11  | 0   | 0   | 6     |
| 0.16970031 BH  | 1   | 11  | 0   | 0   | 6     |
| 0.170007976 BH | 6   | 34  | 41  | 59  | 20    |
| 0.17025496 BH  | 0   | 2   | 15  | 0   | 1     |
| 0.170460328 BH | 19  | 11  | 1   | 2   | 15    |
| 0.170460328 BH | 3   | 24  | 48  | 25  | 13.5  |
| 0.170616634 BH | 15  | 28  | 87  | 43  | 21.5  |
| 0.170616634 BH | 0   | 8   | 26  | 3   | 4     |
| 0.170616634 BH | 51  | 498 | 45  | 12  | 274.5 |
| 0.170616634 BH | 8   | 12  | 58  | 14  | 10    |
| 0.170616634 BH | 3   | 17  | 1   | 0   | 10    |
| 0.170616634 BH | 4   | 24  | 0   | 1   | 14    |
| 0.170616634 BH | 1   | 12  | 0   | 0   | 6.5   |
| 0.170616634 BH | 1   | 12  | 0   | 0   | 6.5   |
| 0.170616634 BH | 1   | 12  | 0   | 0   | 6.5   |
| 0.17204511 BH  | 0   | 5   | 2   | 19  | 2.5   |
| 0.172581838 BH | 6   | 28  | 3   | 0   | 17    |
| 0.172581838 BH | 2   | 1   | 17  | 4   | 1.5   |
| 0.172844371 BH | 4   | 23  | 2   | 0   | 13.5  |
| 0.172844371 BH | 0   | 4   | 12  | 4   | 2     |
| 0.173037838 BH | 1   | 0   | 12  | 1   | 0.5   |

|                |     |     |     |    |       |
|----------------|-----|-----|-----|----|-------|
| 0.173037838 BH | 1   | 22  | 1   | 0  | 11.5  |
| 0.173527026 BH | 35  | 25  | 6   | 2  | 30    |
| 0.17471308 BH  | 319 | 351 | 33  | 68 | 335   |
| 0.174835397 BH | 0   | 7   | 21  | 5  | 3.5   |
| 0.174835397 BH | 3   | 45  | 2   | 1  | 24    |
| 0.174931175 BH | 0   | 5   | 16  | 5  | 2.5   |
| 0.175091927 BH | 1   | 23  | 1   | 0  | 12    |
| 0.175091927 BH | 22  | 16  | 4   | 0  | 19    |
| 0.175294606 BH | 40  | 28  | 7   | 3  | 34    |
| 0.175294606 BH | 97  | 141 | 25  | 13 | 119   |
| 0.175469041 BH | 107 | 115 | 30  | 4  | 111   |
| 0.175514826 BH | 2   | 9   | 24  | 10 | 5.5   |
| 0.175848314 BH | 6   | 8   | 43  | 12 | 7     |
| 0.175927694 BH | 16  | 82  | 5   | 5  | 49    |
| 0.176039507 BH | 1   | 1   | 10  | 5  | 1     |
| 0.176190072 BH | 140 | 184 | 16  | 32 | 162   |
| 0.176398253 BH | 32  | 46  | 8   | 3  | 39    |
| 0.176571317 BH | 13  | 21  | 57  | 42 | 17    |
| 0.176941733 BH | 8   | 23  | 0   | 2  | 15.5  |
| 0.177428722 BH | 3   | 6   | 31  | 6  | 4.5   |
| 0.178580772 BH | 1   | 4   | 11  | 7  | 2.5   |
| 0.178740231 BH | 5   | 38  | 1   | 2  | 21.5  |
| 0.179011858 BH | 1   | 0   | 1   | 10 | 0.5   |
| 0.179274023 BH | 22  | 52  | 123 | 72 | 37    |
| 0.179274023 BH | 35  | 267 | 4   | 22 | 151   |
| 0.179457172 BH | 9   | 19  | 3   | 0  | 14    |
| 0.180140984 BH | 2   | 19  | 1   | 0  | 10.5  |
| 0.180140984 BH | 2   | 19  | 1   | 0  | 10.5  |
| 0.180360942 BH | 21  | 31  | 3   | 3  | 26    |
| 0.180783003 BH | 3   | 11  | 11  | 32 | 7     |
| 0.180783003 BH | 11  | 16  | 1   | 1  | 13.5  |
| 0.180783003 BH | 7   | 24  | 1   | 1  | 15.5  |
| 0.181509976 BH | 42  | 55  | 12  | 2  | 48.5  |
| 0.181699326 BH | 6   | 24  | 32  | 42 | 15    |
| 0.181977294 BH | 24  | 67  | 5   | 6  | 45.5  |
| 0.18209154 BH  | 432 | 97  | 52  | 39 | 264.5 |
| 0.182211733 BH | 14  | 53  | 4   | 3  | 33.5  |
| 0.182633543 BH | 0   | 4   | 9   | 6  | 2     |
| 0.182633543 BH | 0   | 4   | 9   | 6  | 2     |
| 0.183056088 BH | 19  | 20  | 3   | 2  | 19.5  |
| 0.183056127 BH | 4   | 61  | 4   | 1  | 32.5  |
| 0.183172464 BH | 1   | 5   | 7   | 14 | 3     |
| 0.183668757 BH | 1   | 1   | 15  | 2  | 1     |
| 0.183731695 BH | 1   | 10  | 22  | 12 | 5.5   |
| 0.183762278 BH | 11  | 22  | 2   | 1  | 16.5  |
| 0.184173466 BH | 43  | 28  | 8   | 3  | 35.5  |
| 0.184937216 BH | 3   | 8   | 20  | 15 | 5.5   |





|                |     |      |     |     |       |
|----------------|-----|------|-----|-----|-------|
| 0.192071367 BH | 0   | 14   | 0   | 0   | 7     |
| 0.192071367 BH | 0   | 14   | 0   | 0   | 7     |
| 0.192071367 BH | 0   | 14   | 0   | 0   | 7     |
| 0.192071367 BH | 0   | 14   | 0   | 0   | 7     |
| 0.192071367 BH | 0   | 14   | 0   | 0   | 7     |
| 0.192071367 BH | 0   | 14   | 0   | 0   | 7     |
| 0.192583819 BH | 22  | 164  | 8   | 12  | 93    |
| 0.193358882 BH | 22  | 113  | 12  | 4   | 67.5  |
| 0.193403397 BH | 0   | 2    | 8   | 3   | 1     |
| 0.193403397 BH | 52  | 10   | 7   | 2   | 31    |
| 0.193403397 BH | 565 | 1144 | 209 | 69  | 854.5 |
| 0.193526905 BH | 0   | 5    | 10  | 8   | 2.5   |
| 0.193526905 BH | 5   | 1    | 25  | 7   | 3     |
| 0.193570982 BH | 7   | 15   | 34  | 29  | 11    |
| 0.193570982 BH | 2   | 5    | 26  | 3   | 3.5   |
| 0.193851247 BH | 19  | 48   | 6   | 2   | 33.5  |
| 0.19416173 BH  | 1   | 21   | 1   | 0   | 11    |
| 0.194216585 BH | 0   | 40   | 0   | 1   | 20    |
| 0.194290091 BH | 304 | 872  | 66  | 102 | 588   |
| 0.194565141 BH | 2   | 11   | 22  | 13  | 6.5   |
| 0.194591135 BH | 8   | 86   | 8   | 0   | 47    |
| 0.194703763 BH | 81  | 14   | 11  | 4   | 47.5  |
| 0.195037774 BH | 30  | 39   | 7   | 3   | 34.5  |
| 0.195037774 BH | 15  | 69   | 6   | 4   | 42    |
| 0.19503855 BH  | 7   | 8    | 47  | 11  | 7.5   |
| 0.1950611 BH   | 1   | 9    | 35  | 2   | 5     |
| 0.1950611 BH   | 13  | 5    | 2   | 0   | 9     |
| 0.195262727 BH | 4   | 6    | 29  | 8   | 5     |
| 0.195262727 BH | 12  | 42   | 1   | 4   | 27    |
| 0.195970872 BH | 1   | 2    | 13  | 2   | 1.5   |
| 0.195970872 BH | 0   | 3    | 13  | 3   | 1.5   |
| 0.195970872 BH | 1   | 1    | 3   | 11  | 1     |
| 0.196091532 BH | 5   | 51   | 3   | 2   | 28    |
| 0.196444709 BH | 100 | 153  | 28  | 14  | 126.5 |
| 0.197106678 BH | 16  | 95   | 11  | 0   | 55.5  |
| 0.197993801 BH | 0   | 6    | 11  | 7   | 3     |
| 0.198768011 BH | 23  | 18   | 5   | 0   | 20.5  |
| 0.199312878 BH | 4   | 30   | 3   | 0   | 17    |
| 0.199419949 BH | 41  | 177  | 18  | 11  | 109   |
| 0.199729871 BH | 8   | 27   | 35  | 52  | 17.5  |
| 0.199729871 BH | 70  | 84   | 12  | 13  | 77    |
| 0.199823396 BH | 22  | 45   | 5   | 4   | 33.5  |
| 0.199837166 BH | 26  | 262  | 21  | 11  | 144   |
| 0.20056845 BH  | 2   | 9    | 0   | 0   | 5.5   |
| 0.20056845 BH  | 2   | 9    | 0   | 0   | 5.5   |
| 0.20056845 BH  | 2   | 9    | 0   | 0   | 5.5   |
| 0.20056845 BH  | 2   | 9    | 0   | 0   | 5.5   |

|                |     |      |     |     |       |
|----------------|-----|------|-----|-----|-------|
| 0.201823706 BH | 13  | 22   | 81  | 25  | 17.5  |
| 0.201823706 BH | 5   | 13   | 17  | 32  | 9     |
| 0.201875809 BH | 8   | 0    | 58  | 5   | 4     |
| 0.201906663 BH | 0   | 3    | 8   | 6   | 1.5   |
| 0.201906663 BH | 0   | 3    | 8   | 6   | 1.5   |
| 0.201952039 BH | 1   | 1    | 16  | 1   | 1     |
| 0.202171708 BH | 73  | 18   | 13  | 1   | 45.5  |
| 0.202171708 BH | 12  | 63   | 5   | 3   | 37.5  |
| 0.202171708 BH | 1   | 147  | 186 | 233 | 74    |
| 0.202171708 BH | 444 | 1072 | 87  | 140 | 758   |
| 0.202171708 BH | 16  | 89   | 7   | 5   | 52.5  |
| 0.202171708 BH | 2   | 17   | 1   | 0   | 9.5   |
| 0.202171708 BH | 2   | 16   | 1   | 0   | 9     |
| 0.202171708 BH | 2   | 17   | 1   | 0   | 9.5   |
| 0.202736739 BH | 16  | 176  | 313 | 140 | 96    |
| 0.203254653 BH | 6   | 1    | 28  | 11  | 3.5   |
| 0.203619541 BH | 3   | 2    | 26  | 3   | 2.5   |
| 0.203619541 BH | 1   | 11   | 18  | 13  | 6     |
| 0.203619541 BH | 6   | 16   | 2   | 0   | 11    |
| 0.203619541 BH | 7   | 14   | 2   | 0   | 10.5  |
| 0.20395368 BH  | 4   | 10   | 51  | 3   | 7     |
| 0.204001944 BH | 99  | 354  | 739 | 330 | 226.5 |
| 0.204838941 BH | 0   | 6    | 13  | 5   | 3     |
| 0.205166383 BH | 0   | 24   | 1   | 0   | 12    |
| 0.205166383 BH | 0   | 24   | 1   | 0   | 12    |
| 0.205166383 BH | 15  | 58   | 8   | 1   | 36.5  |
| 0.205287289 BH | 1   | 7    | 14  | 10  | 4     |
| 0.205740102 BH | 5   | 18   | 2   | 0   | 11.5  |
| 0.205740102 BH | 5   | 18   | 2   | 0   | 11.5  |
| 0.205740102 BH | 2   | 35   | 1   | 1   | 18.5  |
| 0.205740102 BH | 0   | 5    | 17  | 3   | 2.5   |
| 0.206959584 BH | 0   | 74   | 102 | 110 | 37    |
| 0.206959584 BH | 18  | 61   | 9   | 0   | 39.5  |
| 0.206959584 BH | 31  | 44   | 9   | 2   | 37.5  |
| 0.206959584 BH | 20  | 33   | 88  | 53  | 26.5  |
| 0.206959584 BH | 1   | 10   | 0   | 0   | 5.5   |
| 0.206959584 BH | 1   | 10   | 0   | 0   | 5.5   |
| 0.206959584 BH | 1   | 10   | 0   | 0   | 5.5   |
| 0.206959584 BH | 1   | 10   | 0   | 0   | 5.5   |
| 0.206959584 BH | 1   | 10   | 0   | 0   | 5.5   |
| 0.206959584 BH | 1   | 10   | 0   | 0   | 5.5   |
| 0.207374712 BH | 32  | 38   | 167 | 52  | 35    |
| 0.207615151 BH | 26  | 25   | 4   | 3   | 25.5  |
| 0.207811626 BH | 28  | 25   | 7   | 1   | 26.5  |
| 0.207943788 BH | 2   | 12   | 40  | 5   | 7     |
| 0.208119529 BH | 14  | 14   | 2   | 1   | 14    |
| 0.208265134 BH | 4   | 0    | 24  | 5   | 2     |

|                |    |     |     |     |       |
|----------------|----|-----|-----|-----|-------|
| 0.208292339 BH | 42 | 47  | 10  | 4   | 44.5  |
| 0.208639559 BH | 2  | 26  | 0   | 1   | 14    |
| 0.208654201 BH | 0  | 2   | 0   | 11  | 1     |
| 0.208654201 BH | 9  | 25  | 0   | 3   | 17    |
| 0.208654201 BH | 5  | 19  | 38  | 21  | 12    |
| 0.208826382 BH | 86 | 415 | 540 | 530 | 250.5 |
| 0.20934162 BH  | 13 | 36  | 5   | 1   | 24.5  |
| 0.209383353 BH | 0  | 4   | 5   | 8   | 2     |
| 0.209383353 BH | 0  | 4   | 10  | 4   | 2     |
| 0.209383353 BH | 4  | 21  | 0   | 1   | 12.5  |
| 0.209383353 BH | 0  | 4   | 10  | 4   | 2     |
| 0.210546798 BH | 4  | 0   | 35  | 1   | 2     |
| 0.210591688 BH | 20 | 22  | 81  | 44  | 21    |
| 0.210591688 BH | 1  | 0   | 0   | 11  | 0.5   |
| 0.210591688 BH | 2  | 27  | 0   | 1   | 14.5  |
| 0.210864644 BH | 7  | 52  | 5   | 1   | 29.5  |
| 0.210864644 BH | 2  | 43  | 1   | 2   | 22.5  |
| 0.210864644 BH | 4  | 35  | 1   | 2   | 19.5  |
| 0.210864644 BH | 7  | 41  | 3   | 2   | 24    |
| 0.210864644 BH | 23 | 37  | 6   | 2   | 30    |
| 0.211288074 BH | 1  | 9   | 3   | 26  | 5     |
| 0.211415441 BH | 4  | 27  | 1   | 1   | 15.5  |
| 0.211955674 BH | 1  | 29  | 2   | 0   | 15    |
| 0.2125352 BH   | 30 | 34  | 9   | 1   | 32    |
| 0.212820196 BH | 1  | 6   | 16  | 5   | 3.5   |
| 0.213201474 BH | 0  | 16  | 19  | 22  | 8     |
| 0.213201474 BH | 8  | 212 | 14  | 6   | 110   |
| 0.213201474 BH | 7  | 36  | 49  | 47  | 21.5  |
| 0.213201474 BH | 5  | 16  | 51  | 11  | 10.5  |
| 0.213649315 BH | 7  | 41  | 2   | 3   | 24    |
| 0.213649315 BH | 15 | 44  | 4   | 3   | 29.5  |
| 0.214412649 BH | 56 | 44  | 8   | 9   | 50    |
| 0.214486883 BH | 1  | 1   | 0   | 16  | 1     |
| 0.214578791 BH | 2  | 12  | 21  | 15  | 7     |
| 0.214759792 BH | 2  | 0   | 0   | 16  | 1     |
| 0.214857763 BH | 0  | 2   | 10  | 1   | 1     |
| 0.214857763 BH | 0  | 2   | 10  | 1   | 1     |
| 0.215842231 BH | 22 | 41  | 8   | 0   | 31.5  |
| 0.215877125 BH | 1  | 3   | 17  | 2   | 2     |
| 0.215877125 BH | 0  | 4   | 11  | 3   | 2     |
| 0.215877125 BH | 0  | 4   | 11  | 3   | 2     |
| 0.215877125 BH | 0  | 8   | 14  | 7   | 4     |
| 0.215877125 BH | 43 | 68  | 408 | 20  | 55.5  |
| 0.215877125 BH | 9  | 16  | 3   | 0   | 12.5  |
| 0.215877125 BH | 2  | 1   | 14  | 4   | 1.5   |
| 0.215877125 BH | 6  | 24  | 0   | 2   | 15    |
| 0.215877125 BH | 18 | 72  | 5   | 6   | 45    |

|                |     |     |    |    |       |
|----------------|-----|-----|----|----|-------|
| 0.216263803 BH | 6   | 53  | 4  | 2  | 29.5  |
| 0.216536432 BH | 1   | 18  | 1  | 0  | 9.5   |
| 0.217121599 BH | 135 | 555 | 48 | 51 | 345   |
| 0.217121599 BH | 6   | 28  | 49 | 32 | 17    |
| 0.217147138 BH | 6   | 38  | 3  | 1  | 22    |
| 0.217147138 BH | 14  | 20  | 3  | 1  | 17    |
| 0.217233895 BH | 1   | 2   | 8  | 5  | 1.5   |
| 0.217233895 BH | 5   | 0   | 14 | 14 | 2.5   |
| 0.217407478 BH | 2   | 3   | 22 | 2  | 2.5   |
| 0.217407478 BH | 5   | 85  | 3  | 5  | 45    |
| 0.217407478 BH | 148 | 60  | 27 | 13 | 104   |
| 0.217407478 BH | 10  | 7   | 2  | 0  | 8.5   |
| 0.217431258 BH | 6   | 38  | 68 | 33 | 22    |
| 0.217431258 BH | 5   | 10  | 1  | 0  | 7.5   |
| 0.217431258 BH | 3   | 1   | 18 | 4  | 2     |
| 0.217431258 BH | 7   | 20  | 1  | 1  | 13.5  |
| 0.217431258 BH | 1   | 3   | 11 | 6  | 2     |
| 0.217431258 BH | 7   | 20  | 1  | 1  | 13.5  |
| 0.217431258 BH | 2   | 2   | 8  | 8  | 2     |
| 0.217431258 BH | 0   | 6   | 8  | 9  | 3     |
| 0.217455652 BH | 1   | 19  | 1  | 0  | 10    |
| 0.217455652 BH | 1   | 19  | 1  | 0  | 10    |
| 0.217455652 BH | 1   | 19  | 1  | 0  | 10    |
| 0.217638762 BH | 0   | 37  | 0  | 1  | 18.5  |
| 0.217638762 BH | 6   | 44  | 3  | 2  | 25    |
| 0.217654643 BH | 8   | 22  | 46 | 30 | 15    |
| 0.218410795 BH | 20  | 36  | 0  | 6  | 28    |
| 0.218410795 BH | 26  | 369 | 32 | 12 | 197.5 |
| 0.218410795 BH | 5   | 39  | 2  | 2  | 22    |
| 0.218410795 BH | 3   | 6   | 26 | 6  | 4.5   |
| 0.218410795 BH | 9   | 45  | 5  | 1  | 27    |
| 0.218410795 BH | 7   | 33  | 2  | 2  | 20    |
| 0.218410795 BH | 23  | 7   | 1  | 3  | 15    |
| 0.218410795 BH | 1   | 2   | 18 | 0  | 1.5   |
| 0.218410795 BH | 0   | 10  | 19 | 7  | 5     |
| 0.218410795 BH | 3   | 22  | 2  | 0  | 12.5  |
| 0.218537475 BH | 6   | 44  | 40 | 71 | 25    |
| 0.218537475 BH | 48  | 11  | 9  | 1  | 29.5  |
| 0.218537475 BH | 1   | 64  | 80 | 80 | 32.5  |
| 0.218537475 BH | 15  | 29  | 4  | 2  | 22    |
| 0.218537475 BH | 1   | 6   | 13 | 7  | 3.5   |
| 0.218537475 BH | 1   | 6   | 13 | 7  | 3.5   |
| 0.218699801 BH | 1   | 4   | 11 | 5  | 2.5   |
| 0.218828576 BH | 38  | 31  | 8  | 4  | 34.5  |
| 0.218995043 BH | 0   | 64  | 0  | 3  | 32    |
| 0.219019898 BH | 62  | 87  | 20 | 5  | 74.5  |
| 0.219840009 BH | 2   | 6   | 21 | 7  | 4     |

|                |     |     |     |      |       |
|----------------|-----|-----|-----|------|-------|
| 0.219840009 BH | 16  | 22  | 4   | 1    | 19    |
| 0.219840009 BH | 55  | 603 | 26  | 46   | 329   |
| 0.219840009 BH | 6   | 7   | 1   | 0    | 6.5   |
| 0.220108499 BH | 1   | 47  | 1   | 2    | 24    |
| 0.220432836 BH | 1   | 5   | 18  | 4    | 3     |
| 0.221132692 BH | 3   | 30  | 1   | 1    | 16.5  |
| 0.221132692 BH | 3   | 30  | 1   | 1    | 16.5  |
| 0.221319114 BH | 18  | 90  | 4   | 8    | 54    |
| 0.221319114 BH | 36  | 3   | 146 | 62   | 19.5  |
| 0.221649481 BH | 20  | 150 | 9   | 11   | 85    |
| 0.221696084 BH | 3   | 13  | 1   | 0    | 8     |
| 0.221696084 BH | 3   | 13  | 1   | 0    | 8     |
| 0.221890407 BH | 9   | 129 | 129 | 164  | 69    |
| 0.222075867 BH | 1   | 82  | 5   | 1    | 41.5  |
| 0.222075867 BH | 54  | 225 | 330 | 261  | 139.5 |
| 0.222075867 BH | 0   | 2   | 12  | 0    | 1     |
| 0.222075867 BH | 0   | 2   | 12  | 0    | 1     |
| 0.222075867 BH | 0   | 22  | 1   | 0    | 11    |
| 0.222075867 BH | 0   | 2   | 12  | 0    | 1     |
| 0.222311265 BH | 1   | 22  | 29  | 23   | 11.5  |
| 0.222311265 BH | 22  | 184 | 19  | 6    | 103   |
| 0.222311265 BH | 4   | 34  | 1   | 2    | 19    |
| 0.222311265 BH | 0   | 7   | 13  | 8    | 3.5   |
| 0.222311265 BH | 2   | 12  | 17  | 18   | 7     |
| 0.222833408 BH | 64  | 56  | 4   | 14   | 60    |
| 0.222843373 BH | 113 | 534 | 358 | 1025 | 323.5 |
| 0.22291775 BH  | 4   | 24  | 25  | 38   | 14    |
| 0.223073711 BH | 2   | 6   | 17  | 9    | 4     |
| 0.223297296 BH | 18  | 23  | 4   | 2    | 20.5  |
| 0.223318291 BH | 1   | 2   | 4   | 8    | 1.5   |
| 0.223695942 BH | 32  | 93  | 14  | 5    | 62.5  |
| 0.223870432 BH | 35  | 5   | 1   | 4    | 20    |
| 0.223870432 BH | 88  | 250 | 649 | 182  | 169   |
| 0.223878614 BH | 7   | 0   | 21  | 19   | 3.5   |
| 0.223878614 BH | 1   | 10  | 13  | 16   | 5.5   |
| 0.224501418 BH | 8   | 38  | 4   | 1    | 23    |
| 0.224672548 BH | 39  | 165 | 18  | 11   | 102   |
| 0.224672548 BH | 0   | 34  | 26  | 60   | 17    |
| 0.224672548 BH | 10  | 29  | 4   | 0    | 19.5  |
| 0.224672548 BH | 1   | 3   | 13  | 4    | 2     |
| 0.224672548 BH | 49  | 105 | 12  | 12   | 77    |
| 0.224672548 BH | 2   | 0   | 0   | 21   | 1     |
| 0.225122096 BH | 0   | 4   | 7   | 6    | 2     |
| 0.225122096 BH | 7   | 12  | 2   | 0    | 9.5   |
| 0.225122096 BH | 0   | 12  | 0   | 0    | 6     |
| 0.225122096 BH | 0   | 12  | 0   | 0    | 6     |
| 0.225122096 BH | 0   | 12  | 0   | 0    | 6     |

|                |     |     |     |     |       |
|----------------|-----|-----|-----|-----|-------|
| 0.225122096 BH | 0   | 12  | 0   | 0   | 6     |
| 0.225295361 BH | 0   | 10  | 17  | 8   | 5     |
| 0.225380314 BH | 3   | 7   | 21  | 8   | 5     |
| 0.225494932 BH | 20  | 77  | 8   | 5   | 48.5  |
| 0.225952 BH    | 1   | 101 | 6   | 2   | 51    |
| 0.225952 BH    | 10  | 212 | 10  | 12  | 111   |
| 0.225952 BH    | 7   | 64  | 4   | 3   | 35.5  |
| 0.225952 BH    | 18  | 22  | 5   | 0   | 20    |
| 0.225952 BH    | 0   | 13  | 0   | 0   | 6.5   |
| 0.225952 BH    | 0   | 13  | 0   | 0   | 6.5   |
| 0.225952 BH    | 0   | 13  | 0   | 0   | 6.5   |
| 0.225952 BH    | 0   | 13  | 0   | 0   | 6.5   |
| 0.225952 BH    | 0   | 13  | 0   | 0   | 6.5   |
| 0.225952 BH    | 0   | 13  | 0   | 0   | 6.5   |
| 0.225952 BH    | 0   | 13  | 0   | 0   | 6.5   |
| 0.225952 BH    | 0   | 13  | 0   | 0   | 6.5   |
| 0.226046175 BH | 2   | 2   | 13  | 4   | 2     |
| 0.226121658 BH | 0   | 6   | 14  | 4   | 3     |
| 0.226121658 BH | 2   | 0   | 8   | 5   | 1     |
| 0.226121658 BH | 2   | 0   | 8   | 5   | 1     |
| 0.226121658 BH | 5   | 16  | 2   | 0   | 10.5  |
| 0.226123274 BH | 4   | 0   | 22  | 5   | 2     |
| 0.226368623 BH | 21  | 37  | 6   | 2   | 29    |
| 0.226368623 BH | 17  | 46  | 6   | 2   | 31.5  |
| 0.227051694 BH | 263 | 654 | 70  | 80  | 458.5 |
| 0.228932834 BH | 4   | 8   | 33  | 6   | 6     |
| 0.228971607 BH | 23  | 0   | 3   | 0   | 11.5  |
| 0.229384473 BH | 35  | 86  | 167 | 109 | 60.5  |
| 0.229437445 BH | 7   | 1   | 40  | 6   | 4     |
| 0.229437445 BH | 69  | 336 | 218 | 638 | 202.5 |
| 0.229765684 BH | 25  | 8   | 4   | 1   | 16.5  |
| 0.230105621 BH | 31  | 59  | 10  | 4   | 45    |
| 0.23045867 BH  | 14  | 29  | 4   | 2   | 21.5  |
| 0.230500092 BH | 20  | 19  | 4   | 2   | 19.5  |
| 0.230647945 BH | 30  | 43  | 9   | 3   | 36.5  |
| 0.231274359 BH | 8   | 23  | 2   | 1   | 15.5  |
| 0.23150092 BH  | 6   | 0   | 56  | 0   | 3     |
| 0.232712399 BH | 13  | 118 | 11  | 4   | 65.5  |
| 0.2327911 BH   | 2   | 11  | 18  | 13  | 6.5   |
| 0.232846507 BH | 11  | 33  | 64  | 40  | 22    |
| 0.232871696 BH | 144 | 215 | 46  | 20  | 179.5 |
| 0.232871696 BH | 0   | 9   | 20  | 6   | 4.5   |
| 0.233466905 BH | 62  | 194 | 29  | 12  | 128   |
| 0.233466905 BH | 2   | 33  | 0   | 2   | 17.5  |
| 0.233466905 BH | 14  | 71  | 8   | 3   | 42.5  |
| 0.233466905 BH | 6   | 20  | 3   | 0   | 13    |
| 0.233466905 BH | 24  | 195 | 16  | 11  | 109.5 |

|                |    |     |    |    |       |
|----------------|----|-----|----|----|-------|
| 0.233586416 BH | 10 | 19  | 1  | 2  | 14.5  |
| 0.233586416 BH | 8  | 22  | 1  | 2  | 15    |
| 0.233586416 BH | 1  | 5   | 9  | 10 | 3     |
| 0.234305362 BH | 17 | 31  | 6  | 1  | 24    |
| 0.234445616 BH | 5  | 33  | 9  | 83 | 19    |
| 0.235003855 BH | 8  | 464 | 24 | 17 | 236   |
| 0.235243429 BH | 5  | 2   | 33 | 3  | 3.5   |
| 0.235243429 BH | 2  | 11  | 19 | 12 | 6.5   |
| 0.235243429 BH | 19 | 25  | 5  | 2  | 22    |
| 0.235243429 BH | 0  | 4   | 10 | 3  | 2     |
| 0.235305378 BH | 16 | 38  | 3  | 4  | 27    |
| 0.235639098 BH | 2  | 33  | 3  | 0  | 17.5  |
| 0.235726337 BH | 18 | 103 | 8  | 7  | 60.5  |
| 0.235794821 BH | 15 | 5   | 1  | 1  | 10    |
| 0.235794821 BH | 37 | 15  | 8  | 0  | 26    |
| 0.235887493 BH | 4  | 1   | 30 | 1  | 2.5   |
| 0.236655214 BH | 15 | 10  | 1  | 2  | 12.5  |
| 0.236778355 BH | 3  | 51  | 3  | 2  | 27    |
| 0.236778355 BH | 6  | 14  | 46 | 11 | 10    |
| 0.237100584 BH | 42 | 60  | 10 | 7  | 51    |
| 0.237197336 BH | 0  | 17  | 22 | 17 | 8.5   |
| 0.237197336 BH | 3  | 20  | 2  | 0  | 11.5  |
| 0.237197336 BH | 3  | 19  | 2  | 0  | 11    |
| 0.237555554 BH | 6  | 20  | 1  | 1  | 13    |
| 0.237705114 BH | 17 | 58  | 3  | 6  | 37.5  |
| 0.237863043 BH | 3  | 28  | 1  | 1  | 15.5  |
| 0.237948811 BH | 53 | 46  | 14 | 4  | 49.5  |
| 0.238482743 BH | 9  | 123 | 10 | 4  | 66    |
| 0.238482743 BH | 32 | 32  | 8  | 3  | 32    |
| 0.23876046 BH  | 3  | 101 | 7  | 2  | 52    |
| 0.23948712 BH  | 1  | 11  | 9  | 19 | 6     |
| 0.240572095 BH | 20 | 187 | 16 | 10 | 103.5 |
| 0.240572095 BH | 2  | 0   | 13 | 4  | 1     |
| 0.240572095 BH | 12 | 60  | 4  | 5  | 36    |
| 0.241106863 BH | 0  | 30  | 42 | 32 | 15    |
| 0.241136439 BH | 9  | 55  | 4  | 3  | 32    |
| 0.24199345 BH  | 1  | 45  | 2  | 1  | 23    |
| 0.242281363 BH | 87 | 173 | 29 | 17 | 130   |
| 0.242288299 BH | 52 | 116 | 18 | 10 | 84    |
| 0.242414893 BH | 51 | 12  | 9  | 2  | 31.5  |
| 0.243133933 BH | 0  | 5   | 13 | 4  | 2.5   |
| 0.243133933 BH | 1  | 17  | 1  | 0  | 9     |
| 0.243133933 BH | 1  | 17  | 1  | 0  | 9     |
| 0.243506917 BH | 4  | 0   | 27 | 2  | 2     |
| 0.243991892 BH | 7  | 38  | 4  | 1  | 22.5  |
| 0.24452737 BH  | 0  | 3   | 3  | 10 | 1.5   |
| 0.245040125 BH | 0  | 20  | 1  | 0  | 10    |



|                |     |      |     |     |      |
|----------------|-----|------|-----|-----|------|
| 0.245099783 BH | 1   | 2    | 5   | 7   | 1.5  |
| 0.245340274 BH | 3   | 44   | 3   | 1   | 23.5 |
| 0.245340274 BH | 8   | 32   | 4   | 0   | 20   |
| 0.24551054 BH  | 13  | 30   | 4   | 2   | 21.5 |
| 0.2462684 BH   | 10  | 24   | 3   | 1   | 17   |
| 0.246455116 BH | 5   | 8    | 25  | 12  | 6.5  |
| 0.246873549 BH | 0   | 3    | 12  | 2   | 1.5  |
| 0.246873549 BH | 0   | 3    | 12  | 2   | 1.5  |
| 0.247040315 BH | 0   | 21   | 1   | 0   | 10.5 |
| 0.247040315 BH | 0   | 21   | 1   | 0   | 10.5 |
| 0.247082696 BH | 3   | 127  | 9   | 3   | 65   |
| 0.247083013 BH | 8   | 24   | 46  | 28  | 16   |
| 0.247146493 BH | 3   | 4    | 38  | 0   | 3.5  |
| 0.247611669 BH | 0   | 4    | 14  | 1   | 2    |
| 0.247611669 BH | 1   | 26   | 2   | 0   | 13.5 |
| 0.247611669 BH | 10  | 18   | 53  | 21  | 14   |
| 0.247631278 BH | 4   | 14   | 33  | 14  | 9    |
| 0.247993132 BH | 4   | 25   | 3   | 0   | 14.5 |
| 0.248126682 BH | 1   | 22   | 13  | 36  | 11.5 |
| 0.248670678 BH | 28  | 0    | 0   | 3   | 14   |
| 0.248740584 BH | 2   | 21   | 2   | 0   | 11.5 |
| 0.248740584 BH | 2   | 21   | 2   | 0   | 11.5 |
| 0.248740584 BH | 254 | 1796 | 103 | 166 | 1025 |
| 0.248879037 BH | 1   | 40   | 53  | 36  | 20.5 |
| 0.248879037 BH | 9   | 151  | 10  | 7   | 80   |
| 0.249046632 BH | 1   | 1    | 5   | 7   | 1    |
| 0.249094749 BH | 0   | 53   | 2   | 1   | 26.5 |
| 0.249094749 BH | 24  | 95   | 178 | 80  | 59.5 |
| 0.24913396 BH  | 0   | 53   | 30  | 100 | 26.5 |
| 0.249530949 BH | 28  | 28   | 7   | 2   | 28   |
| 0.250096863 BH | 1   | 10   | 14  | 14  | 5.5  |
| 0.25081785 BH  | 10  | 22   | 56  | 23  | 16   |
| 0.25081785 BH  | 22  | 51   | 128 | 47  | 36.5 |
| 0.250948988 BH | 27  | 27   | 6   | 3   | 27   |
| 0.250948988 BH | 0   | 57   | 4   | 0   | 28.5 |
| 0.252038503 BH | 20  | 50   | 97  | 60  | 35   |
| 0.252745408 BH | 0   | 62   | 3   | 1   | 31   |
| 0.252962822 BH | 9   | 60   | 4   | 4   | 34.5 |
| 0.252980424 BH | 13  | 8    | 0   | 2   | 10.5 |
| 0.253347864 BH | 3   | 42   | 2   | 2   | 22.5 |
| 0.253378341 BH | 3   | 10   | 27  | 8   | 6.5  |
| 0.253396687 BH | 53  | 75   | 10  | 12  | 64   |
| 0.253748693 BH | 6   | 13   | 2   | 0   | 9.5  |
| 0.253982305 BH | 2   | 8    | 19  | 9   | 5    |
| 0.254284589 BH | 1   | 5    | 5   | 13  | 3    |
| 0.254284589 BH | 4   | 31   | 2   | 1   | 17.5 |
| 0.254351523 BH | 8   | 35   | 4   | 1   | 21.5 |

|                |     |     |     |     |       |
|----------------|-----|-----|-----|-----|-------|
| 0.254846084 BH | 2   | 7   | 14  | 10  | 4.5   |
| 0.255152646 BH | 66  | 266 | 6   | 35  | 166   |
| 0.255441437 BH | 0   | 6   | 14  | 3   | 3     |
| 0.255674139 BH | 28  | 20  | 4   | 4   | 24    |
| 0.255674139 BH | 0   | 4   | 6   | 6   | 2     |
| 0.255674139 BH | 1   | 1   | 10  | 3   | 1     |
| 0.255674139 BH | 7   | 10  | 2   | 0   | 8.5   |
| 0.255674139 BH | 1   | 1   | 10  | 3   | 1     |
| 0.255674139 BH | 3   | 11  | 1   | 0   | 7     |
| 0.255674139 BH | 3   | 11  | 1   | 0   | 7     |
| 0.255674139 BH | 5   | 7   | 1   | 0   | 6     |
| 0.255942403 BH | 53  | 101 | 235 | 120 | 77    |
| 0.256129807 BH | 5   | 0   | 16  | 10  | 2.5   |
| 0.256250867 BH | 8   | 60  | 61  | 74  | 34    |
| 0.256736834 BH | 6   | 64  | 2   | 5   | 35    |
| 0.256832464 BH | 7   | 43  | 54  | 47  | 25    |
| 0.256832464 BH | 2   | 2   | 13  | 3   | 2     |
| 0.256832464 BH | 26  | 29  | 7   | 2   | 27.5  |
| 0.257602007 BH | 136 | 271 | 34  | 39  | 203.5 |
| 0.257602007 BH | 0   | 4   | 8   | 4   | 2     |
| 0.257602007 BH | 4   | 16  | 2   | 0   | 10    |
| 0.257602007 BH | 0   | 4   | 8   | 4   | 2     |
| 0.257602007 BH | 4   | 56  | 5   | 1   | 30    |
| 0.258137165 BH | 3   | 42  | 3   | 1   | 22.5  |
| 0.258522171 BH | 1   | 7   | 1   | 23  | 4     |
| 0.259120378 BH | 0   | 7   | 12  | 7   | 3.5   |
| 0.259423439 BH | 0   | 6   | 7   | 8   | 3     |
| 0.259965501 BH | 30  | 69  | 133 | 86  | 49.5  |
| 0.260126521 BH | 2   | 7   | 17  | 7   | 4.5   |
| 0.260126521 BH | 18  | 27  | 6   | 1   | 22.5  |
| 0.260630093 BH | 49  | 13  | 6   | 5   | 31    |
| 0.260648445 BH | 27  | 37  | 5   | 5   | 32    |
| 0.260684433 BH | 6   | 39  | 22  | 72  | 22.5  |
| 0.261657921 BH | 1   | 11  | 10  | 17  | 6     |
| 0.261657921 BH | 28  | 21  | 6   | 2   | 24.5  |
| 0.261657921 BH | 1   | 4   | 8   | 6   | 2.5   |
| 0.261964653 BH | 5   | 21  | 3   | 0   | 13    |
| 0.26201986 BH  | 6   | 13  | 31  | 16  | 9.5   |
| 0.26201986 BH  | 0   | 39  | 1   | 1   | 19.5  |
| 0.26201986 BH  | 2   | 568 | 21  | 22  | 285   |
| 0.262033157 BH | 19  | 17  | 4   | 2   | 18    |
| 0.262033157 BH | 57  | 44  | 16  | 3   | 50.5  |
| 0.262049147 BH | 0   | 3   | 10  | 3   | 1.5   |
| 0.262818419 BH | 20  | 202 | 8   | 18  | 111   |
| 0.262818419 BH | 29  | 81  | 13  | 5   | 55    |
| 0.263184078 BH | 2   | 13  | 1   | 0   | 7.5   |
| 0.263184078 BH | 2   | 13  | 1   | 0   | 7.5   |

|                |     |      |     |     |       |
|----------------|-----|------|-----|-----|-------|
| 0.263184078 BH | 2   | 14   | 1   | 0   | 8     |
| 0.263670496 BH | 3   | 7    | 17  | 9   | 5     |
| 0.264272629 BH | 14  | 77   | 7   | 5   | 45.5  |
| 0.264491088 BH | 3   | 18   | 2   | 0   | 10.5  |
| 0.264736257 BH | 14  | 53   | 7   | 2   | 33.5  |
| 0.264736257 BH | 21  | 27   | 7   | 1   | 24    |
| 0.264736257 BH | 1   | 14   | 16  | 17  | 7.5   |
| 0.265180284 BH | 16  | 4    | 0   | 2   | 10    |
| 0.265180284 BH | 13  | 11   | 2   | 1   | 12    |
| 0.265180284 BH | 5   | 28   | 2   | 1   | 16.5  |
| 0.265180284 BH | 10  | 22   | 3   | 1   | 16    |
| 0.265180284 BH | 10  | 23   | 3   | 1   | 16.5  |
| 0.265259049 BH | 1   | 8    | 11  | 13  | 4.5   |
| 0.265380087 BH | 161 | 162  | 38  | 28  | 161.5 |
| 0.265447125 BH | 7   | 50   | 3   | 3   | 28.5  |
| 0.265447125 BH | 10  | 7    | 46  | 13  | 8.5   |
| 0.265918323 BH | 127 | 1185 | 24  | 119 | 656   |
| 0.266261799 BH | 0   | 3    | 13  | 1   | 1.5   |
| 0.266273121 BH | 25  | 4    | 4   | 0   | 14.5  |
| 0.266273121 BH | 3   | 33   | 1   | 2   | 18    |
| 0.266273121 BH | 3   | 32   | 1   | 2   | 17.5  |
| 0.266371675 BH | 3   | 11   | 30  | 8   | 7     |
| 0.266390292 BH | 23  | 17   | 6   | 1   | 20    |
| 0.266412962 BH | 0   | 17   | 11  | 25  | 8.5   |
| 0.266845587 BH | 2   | 37   | 1   | 2   | 19.5  |
| 0.267406885 BH | 5   | 27   | 1   | 2   | 16    |
| 0.268470581 BH | 5   | 20   | 1   | 1   | 12.5  |
| 0.268476869 BH | 1   | 25   | 0   | 1   | 13    |
| 0.268476869 BH | 0   | 4    | 13  | 1   | 2     |
| 0.268476869 BH | 72  | 64   | 14  | 13  | 68    |
| 0.268597627 BH | 1   | 4    | 14  | 2   | 2.5   |
| 0.269121248 BH | 5   | 27   | 30  | 35  | 16    |
| 0.269217934 BH | 0   | 6    | 15  | 2   | 3     |
| 0.269217934 BH | 2   | 17   | 29  | 14  | 9.5   |
| 0.269217934 BH | 32  | 139  | 128 | 200 | 85.5  |
| 0.269629793 BH | 0   | 9    | 16  | 7   | 4.5   |
| 0.269765606 BH | 24  | 28   | 96  | 41  | 26    |
| 0.269854887 BH | 53  | 198  | 13  | 25  | 125.5 |
| 0.269882477 BH | 1   | 6    | 14  | 4   | 3.5   |
| 0.269974993 BH | 15  | 16   | 64  | 24  | 15.5  |
| 0.269992635 BH | 8   | 40   | 5   | 1   | 24    |
| 0.269992635 BH | 26  | 35   | 7   | 4   | 30.5  |
| 0.269992635 BH | 1   | 7    | 11  | 9   | 4     |
| 0.270058661 BH | 41  | 7    | 8   | 1   | 24    |
| 0.270058661 BH | 2   | 1    | 8   | 7   | 1.5   |
| 0.270058661 BH | 1   | 4    | 11  | 4   | 2.5   |
| 0.270058661 BH | 6   | 37   | 3   | 2   | 21.5  |

|                |    |     |    |    |      |
|----------------|----|-----|----|----|------|
| 0.270153644 BH | 17 | 18  | 5  | 0  | 17.5 |
| 0.270210579 BH | 62 | 6   | 10 | 3  | 34   |
| 0.270383117 BH | 5  | 28  | 0  | 3  | 16.5 |
| 0.270383117 BH | 8  | 74  | 6  | 4  | 41   |
| 0.270383117 BH | 20 | 59  | 7  | 5  | 39.5 |
| 0.270383117 BH | 4  | 36  | 2  | 2  | 20   |
| 0.270383117 BH | 12 | 17  | 68 | 15 | 14.5 |
| 0.270383117 BH | 17 | 133 | 9  | 10 | 75   |
| 0.270383117 BH | 10 | 5   | 38 | 16 | 7.5  |
| 0.270383117 BH | 19 | 52  | 90 | 61 | 35.5 |
| 0.270383117 BH | 4  | 30  | 2  | 1  | 17   |
| 0.270383117 BH | 0  | 11  | 0  | 0  | 5.5  |
| 0.270383117 BH | 0  | 11  | 0  | 0  | 5.5  |
| 0.270383117 BH | 0  | 11  | 0  | 0  | 5.5  |
| 0.270383117 BH | 0  | 11  | 0  | 0  | 5.5  |
| 0.270383117 BH | 0  | 11  | 0  | 0  | 5.5  |
| 0.270383117 BH | 0  | 11  | 0  | 0  | 5.5  |
| 0.270383117 BH | 0  | 11  | 0  | 0  | 5.5  |
| 0.270383117 BH | 0  | 11  | 0  | 0  | 5.5  |
| 0.270383117 BH | 0  | 11  | 0  | 0  | 5.5  |
| 0.270383117 BH | 0  | 11  | 0  | 0  | 5.5  |
| 0.270383117 BH | 0  | 11  | 0  | 0  | 5.5  |
| 0.270383117 BH | 0  | 11  | 0  | 0  | 5.5  |
| 0.270383117 BH | 0  | 11  | 0  | 0  | 5.5  |
| 0.270383117 BH | 0  | 11  | 0  | 0  | 5.5  |
| 0.270383117 BH | 0  | 11  | 0  | 0  | 5.5  |
| 0.270383117 BH | 0  | 11  | 0  | 0  | 5.5  |
| 0.270383117 BH | 0  | 11  | 0  | 0  | 5.5  |
| 0.270383117 BH | 0  | 11  | 0  | 0  | 5.5  |
| 0.270383117 BH | 0  | 11  | 0  | 0  | 5.5  |
| 0.270383117 BH | 0  | 11  | 0  | 0  | 5.5  |
| 0.270383117 BH | 0  | 11  | 0  | 0  | 5.5  |
| 0.270383117 BH | 0  | 11  | 0  | 0  | 5.5  |
| 0.270383117 BH | 0  | 11  | 0  | 0  | 5.5  |
| 0.270383117 BH | 0  | 11  | 0  | 0  | 5.5  |
| 0.270383117 BH | 0  | 11  | 0  | 0  | 5.5  |
| 0.270565285 BH | 0  | 3   | 11 | 2  | 1.5  |
| 0.270596628 BH | 4  | 43  | 3  | 2  | 23.5 |
| 0.270616949 BH | 4  | 22  | 1  | 1  | 13   |
| 0.271122546 BH | 21 | 47  | 8  | 3  | 34   |
| 0.271137625 BH | 0  | 11  | 11 | 14 | 5.5  |
| 0.272346366 BH | 0  | 18  | 0  | 1  | 9    |
| 0.272680895 BH | 18 | 4   | 2  | 1  | 11   |
| 0.272689192 BH | 12 | 5   | 70 | 5  | 8.5  |
| 0.272849978 BH | 0  | 9   | 17 | 6  | 4.5  |
| 0.272849978 BH | 23 | 53  | 5  | 7  | 38   |
| 0.27314155 BH  | 3  | 0   | 27 | 0  | 1.5  |
| 0.273403366 BH | 9  | 18  | 2  | 1  | 13.5 |
| 0.273403366 BH | 8  | 19  | 2  | 1  | 13.5 |
| 0.273403366 BH | 4  | 22  | 39 | 18 | 13   |
| 0.27430852 BH  | 1  | 15  | 1  | 0  | 8    |
| 0.27432318 BH  | 66 | 44  | 16 | 7  | 55   |
| 0.27432318 BH  | 3  | 16  | 31 | 11 | 9.5  |
| 0.274359883 BH | 3  | 1   | 17 | 3  | 2    |
| 0.274757921 BH | 6  | 82  | 7  | 3  | 44   |

|                |     |     |     |     |       |
|----------------|-----|-----|-----|-----|-------|
| 0.275046453 BH | 2   | 20  | 2   | 0   | 11    |
| 0.275046453 BH | 2   | 20  | 2   | 0   | 11    |
| 0.275046453 BH | 14  | 67  | 8   | 4   | 40.5  |
| 0.275046453 BH | 11  | 140 | 126 | 158 | 75.5  |
| 0.275126153 BH | 7   | 39  | 4   | 2   | 23    |
| 0.27515171 BH  | 2   | 3   | 16  | 3   | 2.5   |
| 0.27515171 BH  | 2   | 49  | 4   | 0   | 25.5  |
| 0.27515171 BH  | 11  | 25  | 4   | 1   | 18    |
| 0.275728975 BH | 10  | 15  | 2   | 1   | 12.5  |
| 0.275837456 BH | 6   | 31  | 3   | 1   | 18.5  |
| 0.275837456 BH | 136 | 725 | 110 | 21  | 430.5 |
| 0.276041313 BH | 120 | 241 | 52  | 17  | 180.5 |
| 0.276072492 BH | 10  | 47  | 50  | 60  | 28.5  |
| 0.276388971 BH | 4   | 67  | 3   | 4   | 35.5  |
| 0.276923684 BH | 7   | 46  | 5   | 2   | 26.5  |
| 0.276951084 BH | 1   | 1   | 8   | 4   | 1     |
| 0.277207253 BH | 20  | 30  | 4   | 4   | 25    |
| 0.277262152 BH | 0   | 38  | 1   | 1   | 19    |
| 0.277366304 BH | 4   | 35  | 1   | 3   | 19.5  |
| 0.27747324 BH  | 110 | 267 | 34  | 34  | 188.5 |
| 0.27747324 BH  | 1   | 5   | 16  | 3   | 3     |
| 0.27747324 BH  | 0   | 5   | 9   | 6   | 2.5   |
| 0.277629888 BH | 27  | 78  | 9   | 8   | 52.5  |
| 0.277635809 BH | 0   | 11  | 27  | 3   | 5.5   |
| 0.277821115 BH | 6   | 13  | 53  | 4   | 9.5   |
| 0.277821115 BH | 1   | 6   | 11  | 6   | 3.5   |
| 0.278809153 BH | 8   | 72  | 6   | 4   | 40    |
| 0.279500957 BH | 3   | 79  | 3   | 5   | 41    |
| 0.280411031 BH | 3   | 31  | 2   | 1   | 17    |
| 0.280411031 BH | 0   | 8   | 10  | 8   | 4     |
| 0.280908989 BH | 17  | 20  | 5   | 1   | 18.5  |
| 0.280908989 BH | 3   | 10  | 23  | 9   | 6.5   |
| 0.281437668 BH | 6   | 30  | 1   | 3   | 18    |
| 0.281595284 BH | 0   | 3   | 7   | 5   | 1.5   |
| 0.281654911 BH | 0   | 4   | 2   | 9   | 2     |
| 0.281654911 BH | 1   | 1   | 12  | 1   | 1     |
| 0.281889328 BH | 26  | 23  | 5   | 4   | 24.5  |
| 0.281889328 BH | 5   | 7   | 30  | 7   | 6     |
| 0.281889328 BH | 3   | 6   | 25  | 4   | 4.5   |
| 0.282143188 BH | 2   | 35  | 47  | 28  | 18.5  |
| 0.282219707 BH | 3   | 21  | 24  | 24  | 12    |
| 0.282219707 BH | 28  | 94  | 84  | 152 | 61    |
| 0.282905618 BH | 3   | 30  | 1   | 2   | 16.5  |
| 0.283253376 BH | 0   | 9   | 6   | 15  | 4.5   |
| 0.283253376 BH | 2   | 8   | 18  | 8   | 5     |
| 0.283253376 BH | 15  | 41  | 6   | 2   | 28    |
| 0.28354461 BH  | 1   | 1   | 9   | 3   | 1     |

|                |     |     |     |     |       |
|----------------|-----|-----|-----|-----|-------|
| 0.283670239 BH | 0   | 28  | 2   | 0   | 14    |
| 0.283793347 BH | 131 | 693 | 48  | 76  | 412   |
| 0.283945217 BH | 15  | 27  | 5   | 2   | 21    |
| 0.285935397 BH | 55  | 28  | 15  | 1   | 41.5  |
| 0.286051031 BH | 55  | 144 | 208 | 184 | 99.5  |
| 0.286994863 BH | 1   | 9   | 10  | 12  | 5     |
| 0.287095295 BH | 15  | 95  | 2   | 11  | 55    |
| 0.287122127 BH | 73  | 207 | 31  | 20  | 140   |
| 0.287426011 BH | 6   | 26  | 40  | 27  | 16    |
| 0.288762921 BH | 0   | 4   | 5   | 6   | 2     |
| 0.288762921 BH | 8   | 8   | 0   | 1   | 8     |
| 0.288762921 BH | 4   | 15  | 2   | 0   | 9.5   |
| 0.288762921 BH | 0   | 6   | 14  | 2   | 3     |
| 0.288975513 BH | 16  | 13  | 4   | 0   | 14.5  |
| 0.289290085 BH | 18  | 57  | 4   | 7   | 37.5  |
| 0.289472786 BH | 115 | 120 | 27  | 22  | 117.5 |
| 0.289710959 BH | 11  | 30  | 5   | 1   | 20.5  |
| 0.289710959 BH | 1   | 7   | 12  | 8   | 4     |
| 0.289710959 BH | 1   | 7   | 12  | 8   | 4     |
| 0.289710959 BH | 12  | 16  | 3   | 1   | 14    |
| 0.289710959 BH | 10  | 25  | 2   | 3   | 17.5  |
| 0.28973254 BH  | 7   | 41  | 5   | 1   | 24    |
| 0.290161056 BH | 3   | 51  | 4   | 2   | 27    |
| 0.290368757 BH | 3   | 16  | 28  | 12  | 9.5   |
| 0.290776756 BH | 7   | 8   | 2   | 0   | 7.5   |
| 0.291007935 BH | 17  | 5   | 0   | 3   | 11    |
| 0.292175225 BH | 27  | 31  | 10  | 1   | 29    |
| 0.292485436 BH | 178 | 176 | 242 | 623 | 177   |
| 0.292697812 BH | 18  | 22  | 6   | 1   | 20    |
| 0.292702823 BH | 2   | 5   | 15  | 5   | 3.5   |
| 0.292702823 BH | 1   | 8   | 18  | 6   | 4.5   |
| 0.293212505 BH | 3   | 16  | 2   | 0   | 9.5   |
| 0.293212505 BH | 3   | 16  | 2   | 0   | 9.5   |
| 0.293212505 BH | 5   | 19  | 1   | 1   | 12    |
| 0.293405743 BH | 12  | 26  | 4   | 2   | 19    |
| 0.293405743 BH | 1   | 24  | 0   | 1   | 12.5  |
| 0.293405743 BH | 1   | 24  | 0   | 1   | 12.5  |
| 0.293405743 BH | 0   | 4   | 12  | 1   | 2     |
| 0.293480086 BH | 5   | 104 | 9   | 4   | 54.5  |
| 0.293869807 BH | 10  | 32  | 44  | 41  | 21    |
| 0.293908594 BH | 51  | 358 | 285 | 440 | 204.5 |
| 0.29404873 BH  | 35  | 227 | 19  | 20  | 131   |
| 0.294508317 BH | 136 | 344 | 46  | 44  | 240   |
| 0.295271278 BH | 12  | 16  | 1   | 3   | 14    |
| 0.295271278 BH | 14  | 148 | 11  | 10  | 81    |
| 0.295467291 BH | 13  | 47  | 5   | 4   | 30    |
| 0.295467291 BH | 1   | 4   | 10  | 4   | 2.5   |

|                |     |     |     |     |      |
|----------------|-----|-----|-----|-----|------|
| 0.295534041 BH | 37  | 97  | 8   | 14  | 67   |
| 0.295879855 BH | 84  | 41  | 16  | 11  | 62.5 |
| 0.29593166 BH  | 3   | 10  | 1   | 0   | 6.5  |
| 0.29593166 BH  | 3   | 10  | 1   | 0   | 6.5  |
| 0.29593166 BH  | 3   | 10  | 1   | 0   | 6.5  |
| 0.29593166 BH  | 3   | 10  | 1   | 0   | 6.5  |
| 0.29593166 BH  | 3   | 9   | 1   | 0   | 6    |
| 0.29593166 BH  | 3   | 9   | 1   | 0   | 6    |
| 0.297259905 BH | 40  | 155 | 243 | 129 | 97.5 |
| 0.29736546 BH  | 0   | 3   | 3   | 8   | 1.5  |
| 0.29736546 BH  | 17  | 34  | 6   | 2   | 25.5 |
| 0.29736546 BH  | 11  | 47  | 5   | 3   | 29   |
| 0.29736546 BH  | 17  | 103 | 176 | 61  | 60   |
| 0.29736546 BH  | 1   | 8   | 29  | 1   | 4.5  |
| 0.29736546 BH  | 3   | 3   | 15  | 5   | 3    |
| 0.29736546 BH  | 4   | 33  | 1   | 3   | 18.5 |
| 0.29736546 BH  | 29  | 100 | 12  | 9   | 64.5 |
| 0.29736546 BH  | 46  | 143 | 249 | 125 | 94.5 |
| 0.29736546 BH  | 14  | 17  | 2   | 3   | 15.5 |
| 0.29736546 BH  | 15  | 15  | 3   | 2   | 15   |
| 0.29736546 BH  | 7   | 31  | 2   | 3   | 19   |
| 0.29736546 BH  | 0   | 23  | 45  | 10  | 11.5 |
| 0.297370177 BH | 16  | 25  | 3   | 3   | 20.5 |
| 0.297370177 BH | 4   | 152 | 15  | 0   | 78   |
| 0.29775501 BH  | 4   | 19  | 15  | 30  | 11.5 |
| 0.29775501 BH  | 5   | 114 | 87  | 133 | 59.5 |
| 0.298104391 BH | 21  | 39  | 8   | 2   | 30   |
| 0.298439076 BH | 251 | 39  | 54  | 10  | 145  |
| 0.298439076 BH | 16  | 29  | 4   | 3   | 22.5 |
| 0.298439076 BH | 7   | 19  | 2   | 1   | 13   |
| 0.298439076 BH | 9   | 16  | 2   | 1   | 12.5 |
| 0.298439076 BH | 28  | 29  | 5   | 5   | 28.5 |
| 0.298493931 BH | 13  | 63  | 9   | 2   | 38   |
| 0.298978589 BH | 11  | 7   | 3   | 0   | 9    |
| 0.298978589 BH | 2   | 1   | 14  | 2   | 1.5  |
| 0.299990307 BH | 1   | 8   | 14  | 9   | 4.5  |
| 0.300379248 BH | 13  | 29  | 5   | 2   | 21   |
| 0.300993957 BH | 0   | 3   | 10  | 2   | 1.5  |
| 0.300993957 BH | 0   | 7   | 10  | 7   | 3.5  |
| 0.300993957 BH | 1   | 6   | 15  | 3   | 3.5  |
| 0.300993957 BH | 1   | 5   | 15  | 3   | 3    |
| 0.30110476 BH  | 4   | 10  | 28  | 7   | 7    |
| 0.30110476 BH  | 1   | 5   | 11  | 6   | 3    |
| 0.301227734 BH | 3   | 30  | 12  | 52  | 16.5 |
| 0.301227734 BH | 4   | 4   | 26  | 3   | 4    |
| 0.301227734 BH | 67  | 9   | 11  | 5   | 38   |
| 0.301522191 BH | 0   | 10  | 4   | 16  | 5    |

|                |    |     |     |     |       |
|----------------|----|-----|-----|-----|-------|
| 0.301656576 BH | 25 | 39  | 9   | 3   | 32    |
| 0.30186196 BH  | 41 | 38  | 12  | 4   | 39.5  |
| 0.302056996 BH | 6  | 23  | 31  | 27  | 14.5  |
| 0.302056996 BH | 5  | 28  | 54  | 17  | 16.5  |
| 0.302299401 BH | 2  | 11  | 0   | 1   | 6.5   |
| 0.302299401 BH | 2  | 12  | 1   | 0   | 7     |
| 0.302299401 BH | 2  | 12  | 1   | 0   | 7     |
| 0.302299401 BH | 2  | 12  | 1   | 0   | 7     |
| 0.302299401 BH | 2  | 12  | 1   | 0   | 7     |
| 0.302306748 BH | 8  | 27  | 62  | 17  | 17.5  |
| 0.302306748 BH | 0  | 15  | 17  | 13  | 7.5   |
| 0.302306748 BH | 32 | 249 | 28  | 14  | 140.5 |
| 0.302306748 BH | 0  | 16  | 0   | 1   | 8     |
| 0.302322033 BH | 37 | 16  | 8   | 3   | 26.5  |
| 0.302322033 BH | 70 | 951 | 29  | 91  | 510.5 |
| 0.302932074 BH | 8  | 35  | 4   | 2   | 21.5  |
| 0.30317836 BH  | 26 | 112 | 106 | 144 | 69    |
| 0.304380454 BH | 0  | 17  | 1   | 0   | 8.5   |
| 0.304380454 BH | 0  | 17  | 1   | 0   | 8.5   |
| 0.304380454 BH | 0  | 17  | 1   | 0   | 8.5   |
| 0.304380454 BH | 0  | 17  | 1   | 0   | 8.5   |
| 0.304380454 BH | 0  | 17  | 1   | 0   | 8.5   |
| 0.304584045 BH | 4  | 2   | 34  | 0   | 3     |
| 0.304584045 BH | 47 | 97  | 22  | 6   | 72    |
| 0.304633623 BH | 2  | 7   | 18  | 5   | 4.5   |
| 0.304921996 BH | 9  | 50  | 4   | 4   | 29.5  |
| 0.305315982 BH | 0  | 8   | 11  | 6   | 4     |
| 0.305389392 BH | 6  | 22  | 1   | 2   | 14    |
| 0.305389392 BH | 5  | 23  | 2   | 1   | 14    |
| 0.305397274 BH | 5  | 13  | 20  | 19  | 9     |
| 0.305397274 BH | 6  | 17  | 0   | 2   | 11.5  |
| 0.305397274 BH | 3  | 22  | 1   | 1   | 12.5  |
| 0.305669312 BH | 14 | 80  | 7   | 7   | 47    |
| 0.305669312 BH | 9  | 25  | 3   | 2   | 17    |
| 0.305669312 BH | 9  | 25  | 3   | 2   | 17    |
| 0.305669312 BH | 0  | 18  | 1   | 0   | 9     |
| 0.305669312 BH | 0  | 18  | 1   | 0   | 9     |
| 0.305669312 BH | 0  | 17  | 0   | 1   | 8.5   |
| 0.305669312 BH | 0  | 17  | 0   | 1   | 8.5   |
| 0.305980864 BH | 1  | 19  | 42  | 6   | 10    |
| 0.305980864 BH | 10 | 42  | 4   | 3   | 26    |
| 0.306232846 BH | 39 | 30  | 10  | 4   | 34.5  |
| 0.306416662 BH | 7  | 28  | 36  | 32  | 17.5  |
| 0.307150928 BH | 1  | 3   | 18  | 0   | 2     |
| 0.307468204 BH | 5  | 23  | 1   | 2   | 14    |
| 0.307468204 BH | 0  | 6   | 8   | 6   | 3     |
| 0.307468204 BH | 0  | 5   | 9   | 5   | 2.5   |



|                |     |     |    |     |       |
|----------------|-----|-----|----|-----|-------|
| 0.30793727 BH  | 11  | 17  | 3  | 1   | 14    |
| 0.30793727 BH  | 1   | 9   | 22 | 3   | 5     |
| 0.30850139 BH  | 8   | 27  | 3  | 2   | 17.5  |
| 0.308592344 BH | 263 | 370 | 91 | 47  | 316.5 |
| 0.310050626 BH | 21  | 29  | 6  | 3   | 25    |
| 0.310050626 BH | 22  | 27  | 5  | 4   | 24.5  |
| 0.310240352 BH | 5   | 24  | 0  | 3   | 14.5  |
| 0.310298791 BH | 96  | 154 | 41 | 10  | 125   |
| 0.310298791 BH | 4   | 10  | 4  | 29  | 7     |
| 0.310298791 BH | 7   | 40  | 1  | 4   | 23.5  |
| 0.310945695 BH | 1   | 7   | 12 | 7   | 4     |
| 0.311059045 BH | 2   | 21  | 14 | 30  | 11.5  |
| 0.311059045 BH | 22  | 147 | 11 | 14  | 84.5  |
| 0.311059045 BH | 56  | 65  | 16 | 10  | 60.5  |
| 0.311112288 BH | 1   | 1   | 6  | 5   | 1     |
| 0.311155674 BH | 2   | 444 | 22 | 18  | 223   |
| 0.311368336 BH | 28  | 48  | 10 | 4   | 38    |
| 0.311368336 BH | 26  | 86  | 15 | 5   | 56    |
| 0.311368336 BH | 63  | 353 | 21 | 42  | 208   |
| 0.311640615 BH | 4   | 0   | 16 | 5   | 2     |
| 0.312025123 BH | 3   | 27  | 28 | 29  | 15    |
| 0.312314738 BH | 2   | 1   | 12 | 3   | 1.5   |
| 0.312314738 BH | 1   | 4   | 12 | 2   | 2.5   |
| 0.312356114 BH | 1   | 5   | 16 | 2   | 3     |
| 0.312467192 BH | 4   | 25  | 2  | 1   | 14.5  |
| 0.312481735 BH | 29  | 120 | 20 | 5   | 74.5  |
| 0.312481735 BH | 1   | 13  | 1  | 0   | 7     |
| 0.312481735 BH | 1   | 13  | 1  | 0   | 7     |
| 0.312481735 BH | 14  | 21  | 4  | 2   | 17.5  |
| 0.312481735 BH | 11  | 64  | 8  | 3   | 37.5  |
| 0.312481735 BH | 34  | 27  | 6  | 6   | 30.5  |
| 0.312633006 BH | 1   | 1   | 7  | 4   | 1     |
| 0.312980373 BH | 4   | 9   | 28 | 7   | 6.5   |
| 0.313239199 BH | 6   | 65  | 6  | 3   | 35.5  |
| 0.313403535 BH | 38  | 18  | 9  | 3   | 28    |
| 0.313403535 BH | 30  | 64  | 13 | 5   | 47    |
| 0.313666837 BH | 2   | 4   | 18 | 3   | 3     |
| 0.313666837 BH | 2   | 4   | 4  | 15  | 3     |
| 0.313734011 BH | 389 | 551 | 75 | 119 | 470   |
| 0.313734011 BH | 11  | 40  | 7  | 1   | 25.5  |
| 0.313734011 BH | 1   | 14  | 1  | 0   | 7.5   |
| 0.313734011 BH | 1   | 13  | 0  | 1   | 7     |
| 0.313734011 BH | 1   | 14  | 1  | 0   | 7.5   |
| 0.313734011 BH | 1   | 13  | 0  | 1   | 7     |
| 0.313734011 BH | 1   | 14  | 1  | 0   | 7.5   |
| 0.314272946 BH | 140 | 255 | 54 | 29  | 197.5 |
| 0.31441196 BH  | 87  | 48  | 21 | 10  | 67.5  |

|                |     |     |     |     |       |
|----------------|-----|-----|-----|-----|-------|
| 0.314635349 BH | 22  | 93  | 15  | 4   | 57.5  |
| 0.314653288 BH | 16  | 32  | 4   | 4   | 24    |
| 0.314653288 BH | 3   | 7   | 17  | 7   | 5     |
| 0.314653288 BH | 6   | 63  | 8   | 0   | 34.5  |
| 0.314653288 BH | 3   | 196 | 10  | 10  | 99.5  |
| 0.315036567 BH | 117 | 4   | 7   | 734 | 60.5  |
| 0.315568932 BH | 11  | 21  | 4   | 1   | 16    |
| 0.315568932 BH | 11  | 21  | 4   | 1   | 16    |
| 0.315568932 BH | 3   | 5   | 16  | 6   | 4     |
| 0.315644113 BH | 1   | 22  | 38  | 9   | 11.5  |
| 0.315644113 BH | 3   | 34  | 2   | 2   | 18.5  |
| 0.315714618 BH | 2   | 39  | 2   | 2   | 20.5  |
| 0.316181618 BH | 0   | 3   | 6   | 5   | 1.5   |
| 0.316181618 BH | 0   | 3   | 6   | 5   | 1.5   |
| 0.316184209 BH | 56  | 5   | 10  | 3   | 30.5  |
| 0.316184209 BH | 57  | 14  | 7   | 8   | 35.5  |
| 0.316455752 BH | 5   | 20  | 25  | 24  | 12.5  |
| 0.316455752 BH | 6   | 343 | 30  | 8   | 174.5 |
| 0.316455752 BH | 39  | 266 | 23  | 24  | 152.5 |
| 0.316565545 BH | 93  | 226 | 327 | 272 | 159.5 |
| 0.316787386 BH | 301 | 978 | 53  | 157 | 639.5 |
| 0.316787386 BH | 1   | 4   | 7   | 6   | 2.5   |
| 0.317483428 BH | 19  | 80  | 12  | 4   | 49.5  |
| 0.317709886 BH | 69  | 61  | 16  | 13  | 65    |
| 0.317709886 BH | 2   | 25  | 1   | 1   | 13.5  |
| 0.317709886 BH | 46  | 89  | 19  | 8   | 67.5  |
| 0.317709886 BH | 0   | 3   | 7   | 4   | 1.5   |
| 0.317709886 BH | 0   | 3   | 7   | 4   | 1.5   |
| 0.317709886 BH | 5   | 10  | 2   | 0   | 7.5   |
| 0.317709886 BH | 5   | 10  | 2   | 0   | 7.5   |
| 0.317709886 BH | 0   | 3   | 5   | 6   | 1.5   |
| 0.31864712 BH  | 70  | 164 | 31  | 15  | 117   |
| 0.319332007 BH | 92  | 154 | 40  | 12  | 123   |
| 0.319796074 BH | 36  | 11  | 7   | 3   | 23.5  |
| 0.319796074 BH | 25  | 34  | 9   | 2   | 29.5  |
| 0.32034365 BH  | 0   | 4   | 11  | 1   | 2     |
| 0.32034365 BH  | 6   | 9   | 2   | 0   | 7.5   |
| 0.320438838 BH | 10  | 8   | 3   | 0   | 9     |
| 0.320739008 BH | 14  | 90  | 10  | 6   | 52    |
| 0.320832663 BH | 19  | 22  | 4   | 3   | 20.5  |
| 0.321296469 BH | 10  | 162 | 6   | 14  | 86    |
| 0.321760989 BH | 1   | 4   | 5   | 7   | 2.5   |
| 0.321760989 BH | 5   | 17  | 1   | 1   | 11    |
| 0.322102565 BH | 165 | 509 | 43  | 77  | 337   |
| 0.322359561 BH | 35  | 22  | 10  | 2   | 28.5  |
| 0.322359561 BH | 21  | 27  | 5   | 4   | 24    |
| 0.322402279 BH | 18  | 61  | 8   | 5   | 39.5  |

|                |     |     |     |     |       |
|----------------|-----|-----|-----|-----|-------|
| 0.322402279 BH | 16  | 273 | 23  | 15  | 144.5 |
| 0.322885178 BH | 2   | 16  | 44  | 2   | 9     |
| 0.323234395 BH | 13  | 4   | 3   | 0   | 8.5   |
| 0.323344351 BH | 6   | 18  | 31  | 18  | 12    |
| 0.323664997 BH | 33  | 30  | 11  | 2   | 31.5  |
| 0.325081059 BH | 17  | 14  | 5   | 0   | 15.5  |
| 0.325081059 BH | 67  | 886 | 16  | 93  | 476.5 |
| 0.325081059 BH | 24  | 78  | 16  | 2   | 51    |
| 0.325587047 BH | 4   | 31  | 2   | 2   | 17.5  |
| 0.325744368 BH | 34  | 48  | 9   | 7   | 41    |
| 0.325744368 BH | 2   | 34  | 48  | 20  | 18    |
| 0.326015563 BH | 58  | 408 | 24  | 45  | 233   |
| 0.326437027 BH | 4   | 37  | 36  | 35  | 20.5  |
| 0.326437027 BH | 9   | 18  | 2   | 2   | 13.5  |
| 0.326437027 BH | 6   | 90  | 6   | 6   | 48    |
| 0.326437027 BH | 0   | 7   | 7   | 9   | 3.5   |
| 0.326437027 BH | 0   | 7   | 11  | 6   | 3.5   |
| 0.326437027 BH | 173 | 246 | 60  | 34  | 209.5 |
| 0.326437027 BH | 85  | 339 | 21  | 48  | 212   |
| 0.326437027 BH | 74  | 3   | 14  | 1   | 38.5  |
| 0.326437027 BH | 6   | 20  | 2   | 1   | 13    |
| 0.326437027 BH | 7   | 18  | 1   | 2   | 12.5  |
| 0.326437027 BH | 1   | 6   | 8   | 7   | 3.5   |
| 0.326480507 BH | 1   | 4   | 17  | 0   | 2.5   |
| 0.326591615 BH | 953 | 360 | 176 | 148 | 656.5 |
| 0.327835885 BH | 32  | 97  | 133 | 104 | 64.5  |
| 0.327835885 BH | 5   | 5   | 30  | 4   | 5     |
| 0.327835885 BH | 63  | 8   | 10  | 6   | 35.5  |
| 0.327848227 BH | 4   | 53  | 49  | 49  | 28.5  |
| 0.32813777 BH  | 31  | 30  | 10  | 3   | 30.5  |
| 0.328415743 BH | 0   | 26  | 0   | 1   | 13    |
| 0.328539107 BH | 187 | 96  | 43  | 26  | 141.5 |
| 0.328851699 BH | 0   | 8   | 10  | 6   | 4     |
| 0.329057097 BH | 19  | 22  | 7   | 0   | 20.5  |
| 0.329087877 BH | 0   | 32  | 1   | 1   | 16    |
| 0.329187783 BH | 20  | 25  | 6   | 2   | 22.5  |
| 0.329977682 BH | 23  | 38  | 4   | 7   | 30.5  |
| 0.330041049 BH | 25  | 150 | 81  | 220 | 87.5  |
| 0.330257981 BH | 7   | 27  | 41  | 23  | 17    |
| 0.330665088 BH | 26  | 11  | 4   | 3   | 18.5  |
| 0.330665088 BH | 79  | 56  | 17  | 14  | 67.5  |
| 0.330665088 BH | 0   | 25  | 2   | 0   | 12.5  |
| 0.330665088 BH | 0   | 25  | 2   | 0   | 12.5  |
| 0.331138552 BH | 2   | 2   | 10  | 3   | 2     |
| 0.331196387 BH | 6   | 21  | 37  | 18  | 13.5  |
| 0.331196387 BH | 57  | 3   | 5   | 7   | 30    |
| 0.331654223 BH | 13  | 21  | 4   | 2   | 17    |

|                |     |     |      |      |       |
|----------------|-----|-----|------|------|-------|
| 0.331654223 BH | 10  | 27  | 4    | 2    | 18.5  |
| 0.332130986 BH | 7   | 27  | 3    | 2    | 17    |
| 0.332176337 BH | 459 | 829 | 1295 | 1188 | 644   |
| 0.332348061 BH | 15  | 24  | 6    | 1    | 19.5  |
| 0.332427125 BH | 126 | 276 | 39   | 43   | 201   |
| 0.332600258 BH | 15  | 36  | 68   | 34   | 25.5  |
| 0.332819483 BH | 65  | 59  | 17   | 11   | 62    |
| 0.332819483 BH | 8   | 23  | 4    | 0    | 15.5  |
| 0.332819483 BH | 72  | 603 | 62   | 45   | 337.5 |
| 0.333019897 BH | 0   | 3   | 9    | 2    | 1.5   |
| 0.333019897 BH | 5   | 34  | 38   | 32   | 19.5  |
| 0.333019897 BH | 46  | 403 | 25   | 41   | 224.5 |
| 0.333019897 BH | 2   | 0   | 9    | 5    | 1     |
| 0.333019897 BH | 2   | 16  | 32   | 6    | 9     |
| 0.33408674 BH  | 29  | 14  | 6    | 3    | 21.5  |
| 0.334617309 BH | 29  | 23  | 8    | 3    | 26    |
| 0.334617309 BH | 2   | 23  | 3    | 0    | 12.5  |
| 0.334617309 BH | 0   | 5   | 13   | 2    | 2.5   |
| 0.334719848 BH | 347 | 245 | 36   | 92   | 296   |
| 0.335084112 BH | 12  | 0   | 2    | 0    | 6     |
| 0.335084112 BH | 2   | 16  | 2    | 0    | 9     |
| 0.335084112 BH | 2   | 16  | 2    | 0    | 9     |
| 0.335084112 BH | 2   | 18  | 0    | 1    | 10    |
| 0.335267797 BH | 3   | 33  | 2    | 2    | 18    |
| 0.335430838 BH | 0   | 5   | 8    | 5    | 2.5   |
| 0.335611639 BH | 17  | 91  | 74   | 108  | 54    |
| 0.335888135    | 15  | 102 | 78   | 118  | 58.5  |
| 0.33634048 BH  | 124 | 124 | 39   | 19   | 124   |
| 0.33634048 BH  | 1   | 7   | 12   | 6    | 4     |
| 0.33641609 BH  | 11  | 96  | 7    | 8    | 53.5  |
| 0.337234895 BH | 9   | 52  | 4    | 5    | 30.5  |
| 0.337234895 BH | 68  | 116 | 304  | 95   | 92    |
| 0.337736058 BH | 38  | 132 | 16   | 15   | 85    |
| 0.337801539 BH | 64  | 220 | 241  | 250  | 142   |
| 0.338055285 BH | 144 | 189 | 6    | 51   | 166.5 |
| 0.338503097 BH | 39  | 92  | 11   | 14   | 65.5  |
| 0.339204197 BH | 4   | 24  | 2    | 1    | 14    |
| 0.339204197 BH | 55  | 49  | 17   | 7    | 52    |
| 0.339884833 BH | 97  | 95  | 27   | 18   | 96    |
| 0.339884833 BH | 10  | 41  | 1    | 6    | 25.5  |
| 0.339884833 BH | 0   | 15  | 1    | 0    | 7.5   |
| 0.339884833 BH | 0   | 15  | 1    | 0    | 7.5   |
| 0.339884833 BH | 0   | 15  | 1    | 0    | 7.5   |
| 0.339884833 BH | 0   | 15  | 1    | 0    | 7.5   |
| 0.339884833 BH | 0   | 15  | 1    | 0    | 7.5   |
| 0.339884833 BH | 7   | 32  | 4    | 2    | 19.5  |
| 0.339934611 BH | 1   | 2   | 12   | 0    | 1.5   |

|                |     |     |     |     |      |
|----------------|-----|-----|-----|-----|------|
| 0.339934611 BH | 13  | 25  | 6   | 0   | 19   |
| 0.339934611 BH | 44  | 92  | 151 | 108 | 68   |
| 0.339934611 BH | 1   | 4   | 11  | 2   | 2.5  |
| 0.339934611 BH | 0   | 6   | 8   | 5   | 3    |
| 0.340222302 BH | 3   | 10  | 21  | 8   | 6.5  |
| 0.341638135 BH | 2   | 27  | 34  | 18  | 14.5 |
| 0.341638135 BH | 0   | 15  | 0   | 1   | 7.5  |
| 0.341638135 BH | 0   | 15  | 0   | 1   | 7.5  |
| 0.341638135 BH | 0   | 15  | 0   | 1   | 7.5  |
| 0.341638135 BH | 0   | 15  | 0   | 1   | 7.5  |
| 0.342811441 BH | 0   | 6   | 5   | 7   | 3    |
| 0.342882191 BH | 16  | 36  | 7   | 2   | 26   |
| 0.342956097 BH | 16  | 34  | 5   | 4   | 25   |
| 0.342956097 BH | 7   | 5   | 31  | 6   | 6    |
| 0.342956097 BH | 10  | 31  | 6   | 0   | 20.5 |
| 0.3437088 BH   | 0   | 16  | 1   | 0   | 8    |
| 0.3437088 BH   | 0   | 16  | 1   | 0   | 8    |
| 0.3437088 BH   | 0   | 16  | 1   | 0   | 8    |
| 0.3437088 BH   | 60  | 130 | 300 | 90  | 95   |
| 0.3437088 BH   | 17  | 281 | 27  | 15  | 149  |
| 0.3437088 BH   | 3   | 1   | 11  | 5   | 2    |
| 0.344168064 BH | 30  | 16  | 6   | 4   | 23   |
| 0.344795573 BH | 16  | 182 | 6   | 19  | 99   |
| 0.345166352 BH | 151 | 567 | 481 | 716 | 359  |
| 0.345379233 BH | 3   | 8   | 1   | 0   | 5.5  |
| 0.345379233 BH | 3   | 8   | 1   | 0   | 5.5  |
| 0.345379233 BH | 18  | 52  | 10  | 3   | 35   |
| 0.345409781 BH | 1   | 9   | 9   | 11  | 5    |
| 0.345670325 BH | 65  | 28  | 15  | 8   | 46.5 |
| 0.345672222 BH | 1   | 11  | 22  | 4   | 6    |
| 0.345722654 BH | 3   | 33  | 1   | 3   | 18   |
| 0.345722654 BH | 47  | 93  | 18  | 11  | 70   |
| 0.346105686 BH | 0   | 7   | 14  | 3   | 3.5  |
| 0.34613227 BH  | 23  | 160 | 74  | 232 | 91.5 |
| 0.346173805 BH | 2   | 10  | 23  | 5   | 6    |
| 0.346335811 BH | 50  | 16  | 13  | 3   | 33   |
| 0.346701171 BH | 4   | 29  | 2   | 2   | 16.5 |
| 0.346885764 BH | 8   | 74  | 9   | 3   | 41   |
| 0.347119952 BH | 2   | 23  | 1   | 1   | 12.5 |
| 0.347162934 BH | 28  | 76  | 9   | 10  | 52   |
| 0.347872332 BH | 2   | 22  | 30  | 16  | 12   |
| 0.347944552 BH | 95  | 103 | 261 | 170 | 99   |
| 0.34801718 BH  | 6   | 31  | 4   | 1   | 18.5 |
| 0.348087214 BH | 8   | 32  | 5   | 1   | 20   |
| 0.348529193 BH | 16  | 39  | 7   | 3   | 27.5 |
| 0.349421315 BH | 7   | 44  | 4   | 3   | 25.5 |
| 0.349485171 BH | 14  | 9   | 2   | 2   | 11.5 |

|                |    |     |    |    |       |
|----------------|----|-----|----|----|-------|
| 0.349485171 BH | 1  | 3   | 16 | 0  | 2     |
| 0.349485171 BH | 1  | 3   | 16 | 0  | 2     |
| 0.349485171 BH | 0  | 5   | 11 | 3  | 2.5   |
| 0.349485171 BH | 0  | 6   | 4  | 8  | 3     |
| 0.349594117 BH | 1  | 15  | 16 | 15 | 8     |
| 0.349594117 BH | 22 | 69  | 12 | 5  | 45.5  |
| 0.349594117 BH | 76 | 175 | 19 | 30 | 125.5 |
| 0.349964838 BH | 72 | 164 | 40 | 9  | 118   |
| 0.349995458 BH | 10 | 20  | 3  | 2  | 15    |
| 0.350241458 BH | 2  | 10  | 0  | 1  | 6     |
| 0.350241458 BH | 2  | 10  | 1  | 0  | 6     |
| 0.350241458 BH | 2  | 10  | 1  | 0  | 6     |
| 0.350241458 BH | 2  | 10  | 1  | 0  | 6     |
| 0.350274093 BH | 2  | 54  | 34 | 60 | 28    |
| 0.350409085 BH | 1  | 10  | 16 | 8  | 5.5   |
| 0.350409085 BH | 0  | 31  | 3  | 0  | 15.5  |
| 0.350745289 BH | 0  | 7   | 10 | 6  | 3.5   |
| 0.351069752 BH | 3  | 21  | 23 | 19 | 12    |
| 0.35139818 BH  | 0  | 30  | 1  | 1  | 15    |
| 0.35139818 BH  | 0  | 30  | 1  | 1  | 15    |
| 0.35178776 BH  | 1  | 18  | 2  | 0  | 9.5   |
| 0.35178776 BH  | 0  | 4   | 10 | 1  | 2     |
| 0.35178776 BH  | 1  | 20  | 0  | 1  | 10.5  |
| 0.35178776 BH  | 1  | 20  | 0  | 1  | 10.5  |
| 0.351961962 BH | 2  | 17  | 19 | 16 | 9.5   |
| 0.352092888 BH | 4  | 72  | 5  | 5  | 38    |
| 0.352290502 BH | 2  | 6   | 13 | 7  | 4     |
| 0.352601529 BH | 19 | 14  | 3  | 3  | 16.5  |
| 0.352909155 BH | 4  | 33  | 3  | 2  | 18.5  |
| 0.354320599 BH | 8  | 15  | 2  | 1  | 11.5  |
| 0.354320599 BH | 1  | 19  | 2  | 0  | 10    |
| 0.354320599 BH | 2  | 5   | 16 | 3  | 3.5   |
| 0.354320599 BH | 14 | 61  | 4  | 8  | 37.5  |
| 0.354472669 BH | 46 | 99  | 23 | 7  | 72.5  |
| 0.354978917 BH | 10 | 15  | 2  | 2  | 12.5  |
| 0.354978917 BH | 2  | 4   | 12 | 6  | 3     |
| 0.354978917 BH | 10 | 15  | 2  | 2  | 12.5  |
| 0.35498428 BH  | 0  | 24  | 0  | 1  | 12    |
| 0.35498428 BH  | 0  | 22  | 2  | 0  | 11    |
| 0.35498428 BH  | 0  | 24  | 0  | 1  | 12    |
| 0.35498428 BH  | 0  | 24  | 0  | 1  | 12    |
| 0.355276384 BH | 5  | 44  | 6  | 0  | 24.5  |
| 0.355507721 BH | 1  | 9   | 16 | 5  | 5     |
| 0.355507721 BH | 4  | 34  | 3  | 2  | 19    |
| 0.355658346 BH | 5  | 6   | 32 | 2  | 5.5   |
| 0.356150706 BH | 28 | 49  | 6  | 9  | 38.5  |
| 0.356161345 BH | 12 | 39  | 14 | 82 | 25.5  |

|                |     |     |     |     |       |
|----------------|-----|-----|-----|-----|-------|
| 0.356161345 BH | 8   | 14  | 1   | 2   | 11    |
| 0.356161345 BH | 6   | 18  | 2   | 1   | 12    |
| 0.356161345 BH | 9   | 13  | 2   | 1   | 11    |
| 0.356241456 BH | 1   | 3   | 9   | 4   | 2     |
| 0.356241456 BH | 1   | 4   | 8   | 4   | 2.5   |
| 0.356241773 BH | 24  | 33  | 9   | 3   | 28.5  |
| 0.356241773 BH | 28  | 65  | 12  | 6   | 46.5  |
| 0.356561842 BH | 25  | 17  | 5   | 4   | 21    |
| 0.356561842 BH | 16  | 128 | 7   | 14  | 72    |
| 0.356561842 BH | 0   | 3   | 13  | 0   | 1.5   |
| 0.356561842 BH | 0   | 3   | 13  | 0   | 1.5   |
| 0.356561842 BH | 0   | 23  | 2   | 0   | 11.5  |
| 0.356778173 BH | 20  | 21  | 5   | 3   | 20.5  |
| 0.356850284 BH | 5   | 7   | 5   | 25  | 6     |
| 0.356850284 BH | 27  | 110 | 12  | 12  | 68.5  |
| 0.356850284 BH | 4   | 13  | 0   | 1   | 8.5   |
| 0.356850284 BH | 4   | 12  | 0   | 1   | 8     |
| 0.356850284 BH | 18  | 24  | 80  | 19  | 21    |
| 0.356850284 BH | 38  | 63  | 12  | 9   | 50.5  |
| 0.356850284 BH | 122 | 453 | 416 | 526 | 287.5 |
| 0.356926909 BH | 10  | 16  | 41  | 17  | 13    |
| 0.356926909 BH | 24  | 97  | 16  | 6   | 60.5  |
| 0.356926909 BH | 11  | 6   | 36  | 12  | 8.5   |
| 0.356926909 BH | 159 | 51  | 46  | 6   | 105   |
| 0.357494383 BH | 1   | 5   | 10  | 5   | 3     |
| 0.357494383 BH | 8   | 9   | 1   | 1   | 8.5   |
| 0.357494383 BH | 1   | 11  | 1   | 0   | 6     |
| 0.357494383 BH | 1   | 11  | 1   | 0   | 6     |
| 0.357494383 BH | 1   | 11  | 1   | 0   | 6     |
| 0.357494383 BH | 1   | 11  | 1   | 0   | 6     |
| 0.358460525 BH | 3   | 19  | 20  | 19  | 11    |
| 0.358601363 BH | 2   | 4   | 13  | 5   | 3     |
| 0.359039281 BH | 17  | 200 | 12  | 19  | 108.5 |
| 0.359039281 BH | 15  | 49  | 8   | 4   | 32    |
| 0.359039281 BH | 2   | 14  | 16  | 13  | 8     |
| 0.359040629 BH | 17  | 17  | 3   | 3   | 17    |
| 0.359040629 BH | 0   | 5   | 12  | 2   | 2.5   |
| 0.359040629 BH | 1   | 12  | 1   | 0   | 6.5   |
| 0.359040629 BH | 1   | 11  | 0   | 1   | 6     |
| 0.359040629 BH | 1   | 11  | 0   | 1   | 6     |
| 0.359040629 BH | 1   | 12  | 1   | 0   | 6.5   |
| 0.359040629 BH | 1   | 12  | 1   | 0   | 6.5   |
| 0.359209102 BH | 4   | 416 | 11  | 31  | 210   |
| 0.359283431 BH | 2   | 1   | 7   | 5   | 1.5   |
| 0.359728151 BH | 0   | 44  | 2   | 2   | 22    |
| 0.360276367 BH | 5   | 9   | 2   | 0   | 7     |
| 0.360276367 BH | 53  | 37  | 16  | 5   | 45    |

|                |      |      |     |     |        |
|----------------|------|------|-----|-----|--------|
| 0.360276367 BH | 4    | 9    | 35  | 2   | 6.5    |
| 0.360276367 BH | 36   | 53   | 13  | 6   | 44.5   |
| 0.360276367 BH | 8    | 24   | 42  | 20  | 16     |
| 0.360276367 BH | 9    | 16   | 1   | 3   | 12.5   |
| 0.360276367 BH | 8    | 60   | 8   | 2   | 34     |
| 0.360276367 BH | 6    | 63   | 33  | 78  | 34.5   |
| 0.360276367 BH | 24   | 46   | 8   | 6   | 35     |
| 0.360276367 BH | 31   | 56   | 10  | 8   | 43.5   |
| 0.360276367 BH | 1    | 12   | 0   | 1   | 6.5    |
| 0.360276367 BH | 1    | 12   | 0   | 1   | 6.5    |
| 0.360619325 BH | 25   | 26   | 8   | 3   | 25.5   |
| 0.360809875 BH | 5    | 0    | 16  | 6   | 2.5    |
| 0.360809875 BH | 3    | 13   | 11  | 20  | 8      |
| 0.360871826 BH | 3    | 12   | 10  | 18  | 7.5    |
| 0.360961471 BH | 2    | 2    | 9   | 3   | 2      |
| 0.361072318 BH | 2    | 6    | 19  | 3   | 4      |
| 0.361209213 BH | 1    | 5    | 11  | 4   | 3      |
| 0.361405047 BH | 2    | 18   | 13  | 21  | 10     |
| 0.361405047 BH | 9    | 56   | 3   | 6   | 32.5   |
| 0.361419938 BH | 3    | 14   | 0   | 1   | 8.5    |
| 0.361946907 BH | 1    | 39   | 1   | 3   | 20     |
| 0.361946907 BH | 15   | 45   | 4   | 6   | 30     |
| 0.362252169 BH | 709  | 0    | 109 | 9   | 354.5  |
| 0.363284074 BH | 56   | 29   | 17  | 4   | 42.5   |
| 0.363284074 BH | 1    | 9    | 12  | 8   | 5      |
| 0.363284074 BH | 5    | 30   | 3   | 2   | 17.5   |
| 0.363284074 BH | 27   | 44   | 85  | 55  | 35.5   |
| 0.363657291 BH | 9    | 31   | 49  | 24  | 20     |
| 0.363657291 BH | 3    | 13   | 2   | 0   | 8      |
| 0.363657291 BH | 4    | 22   | 2   | 1   | 13     |
| 0.364106969 BH | 10   | 43   | 48  | 42  | 26.5   |
| 0.364309138 BH | 5    | 38   | 21  | 50  | 21.5   |
| 0.364426145 BH | 55   | 213  | 41  | 10  | 134    |
| 0.364426145 BH | 29   | 47   | 81  | 66  | 38     |
| 0.364426145 BH | 1404 | 1067 | 294 | 329 | 1235.5 |
| 0.364426145 BH | 2    | 61   | 2   | 5   | 31.5   |
| 0.365083733 BH | 2    | 5    | 14  | 4   | 3.5    |
| 0.365083733 BH | 1    | 25   | 1   | 1   | 13     |
| 0.365099733 BH | 2    | 12   | 29  | 3   | 7      |
| 0.365099733 BH | 19   | 125  | 11  | 12  | 72     |
| 0.365099733 BH | 22   | 80   | 10  | 9   | 51     |
| 0.365261009 BH | 3    | 20   | 1   | 1   | 11.5   |
| 0.366442884 BH | 23   | 49   | 10  | 4   | 36     |
| 0.366442884 BH | 11   | 20   | 5   | 0   | 15.5   |
| 0.366641099 BH | 3    | 7    | 23  | 2   | 5      |
| 0.367654136 BH | 14   | 22   | 3   | 3   | 18     |
| 0.367816538 BH | 38   | 265  | 25  | 26  | 151.5  |



|                |     |      |     |     |       |
|----------------|-----|------|-----|-----|-------|
| 0.368013135 BH | 4   | 27   | 2   | 2   | 15.5  |
| 0.368235625 BH | 32  | 26   | 11  | 2   | 29    |
| 0.368505506 BH | 3   | 17   | 19  | 17  | 10    |
| 0.369234146 BH | 16  | 7    | 4   | 0   | 11.5  |
| 0.370008711 BH | 3   | 26   | 25  | 24  | 14.5  |
| 0.37077075 BH  | 4   | 45   | 3   | 3   | 24.5  |
| 0.371129757 BH | 12  | 65   | 11  | 1   | 38.5  |
| 0.37128837 BH  | 13  | 10   | 3   | 1   | 11.5  |
| 0.37213869 BH  | 173 | 1296 | 130 | 123 | 734.5 |
| 0.372757516 BH | 22  | 35   | 5   | 6   | 28.5  |
| 0.372944157 BH | 76  | 61   | 25  | 9   | 68.5  |
| 0.37317512 BH  | 5   | 36   | 4   | 2   | 20.5  |
| 0.37317512 BH  | 1   | 3    | 15  | 0   | 2     |
| 0.37317512 BH  | 7   | 43   | 7   | 1   | 25    |
| 0.37317512 BH  | 2   | 15   | 2   | 0   | 8.5   |
| 0.37317512 BH  | 7   | 5    | 2   | 0   | 6     |
| 0.373467134 BH | 0   | 5    | 5   | 7   | 2.5   |
| 0.373467134 BH | 2   | 2    | 10  | 2   | 2     |
| 0.373467134 BH | 0   | 6    | 7   | 5   | 3     |
| 0.373567532 BH | 7   | 10   | 34  | 8   | 8.5   |
| 0.373567532 BH | 10  | 18   | 3   | 2   | 14    |
| 0.373567532 BH | 10  | 19   | 3   | 2   | 14.5  |
| 0.373567532 BH | 9   | 21   | 3   | 2   | 15    |
| 0.373605249 BH | 4   | 28   | 3   | 1   | 16    |
| 0.375068705 BH | 1   | 8    | 16  | 5   | 4.5   |
| 0.375068705 BH | 5   | 31   | 4   | 1   | 18    |
| 0.375782043 BH | 29  | 55   | 13  | 5   | 42    |
| 0.375782043 BH | 102 | 102  | 31  | 20  | 102   |
| 0.375782043 BH | 8   | 9    | 3   | 0   | 8.5   |
| 0.375782043 BH | 4   | 16   | 3   | 0   | 10    |
| 0.375782043 BH | 4   | 16   | 3   | 0   | 10    |
| 0.37610691 BH  | 5   | 41   | 3   | 3   | 23    |
| 0.376279205 BH | 22  | 2    | 4   | 1   | 12    |
| 0.376279205 BH | 7   | 70   | 8   | 4   | 38.5  |
| 0.376279205 BH | 9   | 69   | 52  | 70  | 39    |
| 0.376279205 BH | 15  | 31   | 8   | 1   | 23    |
| 0.376279205 BH | 67  | 126  | 27  | 16  | 96.5  |
| 0.376671881 BH | 18  | 32   | 7   | 3   | 25    |
| 0.377871321 BH | 8   | 47   | 8   | 1   | 27.5  |
| 0.37831289 BH  | 2   | 22   | 1   | 1   | 12    |
| 0.37831289 BH  | 2   | 22   | 1   | 1   | 12    |
| 0.37833579 BH  | 0   | 11   | 14  | 7   | 5.5   |
| 0.378892476 BH | 21  | 36   | 4   | 7   | 28.5  |
| 0.37911424 BH  | 8   | 11   | 36  | 10  | 9.5   |
| 0.37911424 BH  | 17  | 16   | 6   | 1   | 16.5  |
| 0.379127468 BH | 7   | 22   | 25  | 28  | 14.5  |
| 0.379363395 BH | 7   | 29   | 4   | 2   | 18    |

|                |     |     |     |    |       |
|----------------|-----|-----|-----|----|-------|
| 0.379648249 BH | 12  | 47  | 8   | 2  | 29.5  |
| 0.380204679 BH | 8   | 17  | 2   | 2  | 12.5  |
| 0.380465552 BH | 14  | 0   | 1   | 1  | 7     |
| 0.380522389 BH | 26  | 63  | 10  | 8  | 44.5  |
| 0.380522389 BH | 5   | 14  | 21  | 16 | 9.5   |
| 0.380522389 BH | 0   | 5   | 10  | 3  | 2.5   |
| 0.380522389 BH | 0   | 5   | 10  | 3  | 2.5   |
| 0.380966184 BH | 37  | 99  | 8   | 18 | 68    |
| 0.381814805 BH | 1   | 30  | 2   | 1  | 15.5  |
| 0.381814805 BH | 109 | 32  | 21  | 16 | 70.5  |
| 0.381835844 BH | 8   | 4   | 2   | 0  | 6     |
| 0.381935293 BH | 14  | 7   | 2   | 2  | 10.5  |
| 0.382173674 BH | 15  | 8   | 32  | 26 | 11.5  |
| 0.382173674 BH | 8   | 13  | 0   | 3  | 10.5  |
| 0.382489875 BH | 6   | 24  | 35  | 20 | 15    |
| 0.382722871 BH | 34  | 699 | 7   | 75 | 366.5 |
| 0.382823179 BH | 1   | 23  | 3   | 0  | 12    |
| 0.382823179 BH | 1   | 24  | 0   | 2  | 12.5  |
| 0.382840312 BH | 0   | 6   | 9   | 3  | 3     |
| 0.38406881 BH  | 38  | 635 | 85  | 16 | 336.5 |
| 0.384490095 BH | 17  | 12  | 5   | 1  | 14.5  |
| 0.384653455 BH | 221 | 156 | 46  | 51 | 188.5 |
| 0.384653455 BH | 26  | 34  | 81  | 42 | 30    |
| 0.384653455 BH | 2   | 3   | 14  | 2  | 2.5   |
| 0.384653455 BH | 20  | 93  | 17  | 4  | 56.5  |
| 0.384653455 BH | 27  | 19  | 7   | 4  | 23    |
| 0.384653455 BH | 30  | 136 | 24  | 8  | 83    |
| 0.384653455 BH | 6   | 31  | 4   | 2  | 18.5  |
| 0.384653455 BH | 10  | 23  | 5   | 1  | 16.5  |
| 0.384653455 BH | 6   | 32  | 4   | 2  | 19    |
| 0.384653455 BH | 3   | 71  | 9   | 0  | 37    |
| 0.384653455 BH | 9   | 15  | 3   | 1  | 12    |
| 0.384653455 BH | 8   | 18  | 3   | 1  | 13    |
| 0.384653455 BH | 9   | 15  | 3   | 1  | 12    |
| 0.384653455 BH | 0   | 13  | 1   | 0  | 6.5   |
| 0.384653455 BH | 0   | 13  | 1   | 0  | 6.5   |
| 0.384906651 BH | 15  | 174 | 23  | 7  | 94.5  |
| 0.384983429 BH | 1   | 17  | 17  | 15 | 9     |
| 0.384983429 BH | 2   | 23  | 9   | 32 | 12.5  |
| 0.385109016 BH | 16  | 8   | 2   | 3  | 12    |
| 0.385109016 BH | 4   | 33  | 4   | 1  | 18.5  |
| 0.385306114 BH | 34  | 80  | 18  | 7  | 57    |
| 0.385509202 BH | 9   | 2   | 39  | 4  | 5.5   |
| 0.385509202 BH | 1   | 31  | 0   | 3  | 16    |
| 0.385509202 BH | 1   | 31  | 4   | 0  | 16    |
| 0.385509202 BH | 3   | 0   | 5   | 9  | 1.5   |
| 0.385509202 BH | 16  | 58  | 101 | 33 | 37    |

|                |     |     |     |     |       |
|----------------|-----|-----|-----|-----|-------|
| 0.385509202 BH | 6   | 0   | 20  | 5   | 3     |
| 0.385509202 BH | 0   | 14  | 1   | 0   | 7     |
| 0.385509202 BH | 0   | 13  | 0   | 1   | 6.5   |
| 0.385509202 BH | 0   | 14  | 1   | 0   | 7     |
| 0.385509202 BH | 0   | 13  | 0   | 1   | 6.5   |
| 0.385509202 BH | 0   | 13  | 0   | 1   | 6.5   |
| 0.385509202 BH | 0   | 14  | 1   | 0   | 7     |
| 0.385509202 BH | 0   | 14  | 1   | 0   | 7     |
| 0.385859073 BH | 257 | 690 | 59  | 130 | 473.5 |
| 0.385859073 BH | 0   | 21  | 2   | 0   | 10.5  |
| 0.385859073 BH | 0   | 22  | 0   | 1   | 11    |
| 0.386007013 BH | 5   | 23  | 2   | 2   | 14    |
| 0.386007013 BH | 5   | 23  | 2   | 2   | 14    |
| 0.386250914 BH | 1   | 18  | 0   | 1   | 9.5   |
| 0.386250914 BH | 1   | 18  | 0   | 1   | 9.5   |
| 0.386568033 BH | 6   | 38  | 3   | 3   | 22    |
| 0.386568033 BH | 239 | 787 | 735 | 882 | 513   |
| 0.386568033 BH | 6   | 45  | 34  | 45  | 25.5  |
| 0.386568033 BH | 10  | 30  | 57  | 19  | 20    |
| 0.386585872 BH | 4   | 3   | 26  | 0   | 3.5   |
| 0.386585872 BH | 0   | 14  | 0   | 1   | 7     |
| 0.386585872 BH | 0   | 14  | 0   | 1   | 7     |
| 0.386585872 BH | 0   | 14  | 0   | 1   | 7     |
| 0.386585872 BH | 0   | 14  | 0   | 1   | 7     |
| 0.386585872 BH | 0   | 14  | 0   | 1   | 7     |
| 0.387342287 BH | 2   | 27  | 2   | 1   | 14.5  |
| 0.387383562 BH | 60  | 47  | 166 | 80  | 53.5  |
| 0.387383562 BH | 33  | 28  | 10  | 4   | 30.5  |
| 0.387383562 BH | 34  | 107 | 126 | 106 | 70.5  |
| 0.387383562 BH | 11  | 86  | 6   | 9   | 48.5  |
| 0.387591286 BH | 5   | 29  | 3   | 2   | 17    |
| 0.387591286 BH | 107 | 89  | 32  | 19  | 98    |
| 0.387591286 BH | 0   | 3   | 10  | 1   | 1.5   |
| 0.387591286 BH | 29  | 95  | 57  | 146 | 62    |
| 0.387690254 BH | 1   | 84  | 6   | 4   | 42.5  |
| 0.388143463 BH | 26  | 86  | 19  | 3   | 56    |
| 0.388864797 BH | 8   | 12  | 1   | 2   | 10    |
| 0.388864797 BH | 1   | 5   | 9   | 5   | 3     |
| 0.389961189 BH | 129 | 174 | 331 | 245 | 151.5 |
| 0.390221863 BH | 196 | 135 | 68  | 22  | 165.5 |
| 0.39060062 BH  | 72  | 91  | 24  | 16  | 81.5  |
| 0.390844097 BH | 5   | 23  | 3   | 1   | 14    |
| 0.390844097 BH | 5   | 14  | 1   | 1   | 9.5   |
| 0.390844097 BH | 6   | 11  | 1   | 1   | 8.5   |
| 0.390844097 BH | 5   | 14  | 1   | 1   | 9.5   |
| 0.390844097 BH | 1   | 11  | 10  | 11  | 6     |
| 0.391073757 BH | 12  | 58  | 6   | 6   | 35    |

|                |    |     |     |     |       |
|----------------|----|-----|-----|-----|-------|
| 0.391481662 BH | 4  | 49  | 4   | 3   | 26.5  |
| 0.391481662 BH | 5  | 19  | 1   | 2   | 12    |
| 0.392392292 BH | 19 | 4   | 3   | 2   | 11.5  |
| 0.392411897 BH | 31 | 79  | 18  | 5   | 55    |
| 0.392411897 BH | 3  | 11  | 21  | 8   | 7     |
| 0.39310993 BH  | 7  | 68  | 9   | 3   | 37.5  |
| 0.39310993 BH  | 21 | 27  | 8   | 2   | 24    |
| 0.3931665 BH   | 7  | 10  | 1   | 1   | 8.5   |
| 0.3931665 BH   | 2  | 2   | 7   | 4   | 2     |
| 0.3931665 BH   | 20 | 88  | 92  | 78  | 54    |
| 0.39350758 BH  | 10 | 29  | 27  | 39  | 19.5  |
| 0.393964852 BH | 4  | 21  | 2   | 1   | 12.5  |
| 0.393964852 BH | 9  | 10  | 1   | 2   | 9.5   |
| 0.393964852 BH | 70 | 255 | 255 | 251 | 162.5 |
| 0.393964852 BH | 6  | 2   | 23  | 4   | 4     |
| 0.393964852 BH | 46 | 66  | 14  | 12  | 56    |
| 0.395340457 BH | 19 | 453 | 56  | 14  | 236   |
| 0.395472804 BH | 16 | 29  | 4   | 5   | 22.5  |
| 0.396257329 BH | 4  | 26  | 2   | 2   | 15    |
| 0.396257329 BH | 4  | 3   | 6   | 12  | 3.5   |
| 0.396542327 BH | 11 | 71  | 8   | 6   | 41    |
| 0.396697038 BH | 11 | 20  | 4   | 2   | 15.5  |
| 0.397179748 BH | 84 | 107 | 11  | 31  | 95.5  |
| 0.397179748 BH | 7  | 3   | 43  | 0   | 5     |
| 0.397179748 BH | 4  | 14  | 10  | 24  | 9     |
| 0.397179748 BH | 3  | 17  | 28  | 9   | 10    |
| 0.397211039 BH | 3  | 5   | 19  | 2   | 4     |
| 0.397211039 BH | 9  | 152 | 18  | 7   | 80.5  |
| 0.398111325 BH | 2  | 31  | 3   | 1   | 16.5  |
| 0.398387381 BH | 27 | 44  | 112 | 32  | 35.5  |
| 0.398726087 BH | 12 | 38  | 6   | 3   | 25    |
| 0.39918846 BH  | 21 | 4   | 5   | 0   | 12.5  |
| 0.39946852 BH  | 2  | 3   | 11  | 3   | 2.5   |
| 0.39946852 BH  | 35 | 43  | 125 | 40  | 39    |
| 0.400011011 BH | 26 | 40  | 13  | 1   | 33    |
| 0.400136487 BH | 33 | 60  | 11  | 9   | 46.5  |
| 0.40042802 BH  | 1  | 36  | 3   | 1   | 18.5  |
| 0.400648297 BH | 3  | 17  | 1   | 1   | 10    |
| 0.400648297 BH | 3  | 17  | 1   | 1   | 10    |
| 0.40094028 BH  | 15 | 5   | 3   | 1   | 10    |
| 0.401068582 BH | 14 | 41  | 7   | 4   | 27.5  |
| 0.401068582 BH | 93 | 795 | 52  | 95  | 444   |
| 0.401203122 BH | 2  | 16  | 31  | 4   | 9     |
| 0.401777791 BH | 3  | 7   | 21  | 2   | 5     |
| 0.401777791 BH | 44 | 5   | 9   | 4   | 24.5  |
| 0.402687614 BH | 3  | 7   | 15  | 6   | 5     |
| 0.402782489 BH | 4  | 36  | 4   | 2   | 20    |

|                |     |      |     |     |       |
|----------------|-----|------|-----|-----|-------|
| 0.403280546 BH | 3   | 2    | 19  | 1   | 2.5   |
| 0.403578976 BH | 2   | 11   | 16  | 7   | 6.5   |
| 0.404292355 BH | 6   | 31   | 39  | 21  | 18.5  |
| 0.404558638 BH | 7   | 30   | 39  | 23  | 18.5  |
| 0.404558638 BH | 4   | 11   | 0   | 1   | 7.5   |
| 0.404558638 BH | 4   | 25   | 1   | 3   | 14.5  |
| 0.404558638 BH | 55  | 235  | 44  | 15  | 145   |
| 0.404558638 BH | 6   | 36   | 30  | 35  | 21    |
| 0.404558638 BH | 3   | 22   | 2   | 1   | 12.5  |
| 0.404558638 BH | 13  | 46   | 79  | 24  | 29.5  |
| 0.404988821 BH | 13  | 35   | 7   | 2   | 24    |
| 0.404988821 BH | 26  | 45   | 7   | 8   | 35.5  |
| 0.405853624 BH | 23  | 158  | 101 | 167 | 90.5  |
| 0.405989302 BH | 5   | 1    | 16  | 4   | 3     |
| 0.405989302 BH | 136 | 1631 | 75  | 192 | 883.5 |
| 0.406119648 BH | 23  | 136  | 160 | 86  | 79.5  |
| 0.406119648 BH | 13  | 359  | 367 | 221 | 186   |
| 0.406119648 BH | 547 | 0    | 96  | 8   | 273.5 |
| 0.406119648 BH | 6   | 36   | 3   | 3   | 21    |
| 0.406746358 BH | 2   | 10   | 21  | 4   | 6     |
| 0.407007021 BH | 13  | 7    | 2   | 2   | 10    |
| 0.407511115 BH | 17  | 158  | 13  | 16  | 87.5  |
| 0.407511115 BH | 0   | 5    | 7   | 5   | 2.5   |
| 0.407511115 BH | 9   | 6    | 1   | 1   | 7.5   |
| 0.407511115 BH | 0   | 5    | 7   | 5   | 2.5   |
| 0.407511115 BH | 0   | 5    | 7   | 5   | 2.5   |
| 0.407511115 BH | 7   | 87   | 8   | 7   | 47    |
| 0.407695058 BH | 12  | 6    | 0   | 3   | 9     |
| 0.407842625 BH | 18  | 16   | 6   | 2   | 17    |
| 0.407842625 BH | 10  | 63   | 56  | 55  | 36.5  |
| 0.40812533 BH  | 4   | 10   | 2   | 0   | 7     |
| 0.40812533 BH  | 5   | 8    | 2   | 0   | 6.5   |
| 0.408419507 BH | 67  | 147  | 269 | 110 | 107   |
| 0.408419507 BH | 2   | 9    | 1   | 0   | 5.5   |
| 0.408987312 BH | 14  | 23   | 3   | 4   | 18.5  |
| 0.408987312 BH | 22  | 31   | 9   | 3   | 26.5  |
| 0.408987312 BH | 20  | 67   | 10  | 7   | 43.5  |
| 0.408987312 BH | 3   | 0    | 7   | 7   | 1.5   |
| 0.408987312 BH | 1   | 7    | 14  | 3   | 4     |
| 0.408987312 BH | 109 | 0    | 21  | 0   | 54.5  |
| 0.408987312 BH | 1   | 3    | 10  | 2   | 2     |
| 0.408987312 BH | 1   | 3    | 10  | 2   | 2     |
| 0.408987312 BH | 5   | 13   | 3   | 0   | 9     |
| 0.408987312 BH | 1   | 4    | 10  | 2   | 2.5   |
| 0.408987312 BH | 1   | 4    | 10  | 2   | 2.5   |
| 0.408987312 BH | 9   | 27   | 35  | 27  | 18    |
| 0.409354069 BH | 24  | 196  | 23  | 16  | 110   |

|                |     |     |     |     |       |
|----------------|-----|-----|-----|-----|-------|
| 0.409354069 BH | 3   | 11  | 2   | 0   | 7     |
| 0.409354069 BH | 3   | 12  | 2   | 0   | 7.5   |
| 0.409354069 BH | 3   | 11  | 2   | 0   | 7     |
| 0.409693446 BH | 35  | 297 | 26  | 31  | 166   |
| 0.409754839 BH | 1   | 10  | 12  | 9   | 5.5   |
| 0.410066986 BH | 28  | 44  | 86  | 48  | 36    |
| 0.410066986 BH | 6   | 24  | 2   | 3   | 15    |
| 0.410254557 BH | 2   | 5   | 17  | 1   | 3.5   |
| 0.410539719 BH | 73  | 250 | 41  | 29  | 161.5 |
| 0.410722023 BH | 14  | 79  | 13  | 4   | 46.5  |
| 0.410759751 BH | 30  | 86  | 14  | 11  | 58    |
| 0.410759751 BH | 4   | 15  | 3   | 0   | 9.5   |
| 0.410759751 BH | 0   | 6   | 7   | 4   | 3     |
| 0.410759751 BH | 0   | 6   | 7   | 4   | 3     |
| 0.410759751 BH | 0   | 6   | 6   | 5   | 3     |
| 0.410894234 BH | 5   | 95  | 36  | 115 | 50    |
| 0.410963822 BH | 33  | 5   | 9   | 0   | 19    |
| 0.411005399 BH | 26  | 39  | 13  | 2   | 32.5  |
| 0.411167796 BH | 6   | 69  | 9   | 3   | 37.5  |
| 0.411259947 BH | 0   | 11  | 23  | 1   | 5.5   |
| 0.411500072 BH | 27  | 45  | 11  | 6   | 36    |
| 0.411653991 BH | 6   | 19  | 2   | 2   | 12.5  |
| 0.411653991 BH | 6   | 20  | 2   | 2   | 13    |
| 0.412129462 BH | 10  | 58  | 49  | 53  | 34    |
| 0.412130317 BH | 6   | 40  | 6   | 2   | 23    |
| 0.412130317 BH | 5   | 26  | 3   | 2   | 15.5  |
| 0.412889096 BH | 2   | 20  | 1   | 1   | 11    |
| 0.412889096 BH | 0   | 6   | 5   | 6   | 3     |
| 0.413099478 BH | 15  | 88  | 5   | 12  | 51.5  |
| 0.413099478 BH | 13  | 33  | 6   | 3   | 23    |
| 0.413099478 BH | 85  | 190 | 38  | 27  | 137.5 |
| 0.413651045 BH | 8   | 23  | 5   | 0   | 15.5  |
| 0.413651045 BH | 9   | 21  | 5   | 0   | 15    |
| 0.413708777 BH | 7   | 8   | 3   | 32  | 7.5   |
| 0.41413271 BH  | 12  | 21  | 5   | 2   | 16.5  |
| 0.414211375 BH | 9   | 14  | 3   | 1   | 11.5  |
| 0.41450708 BH  | 22  | 56  | 12  | 5   | 39    |
| 0.41450708 BH  | 10  | 38  | 8   | 1   | 24    |
| 0.41450708 BH  | 39  | 136 | 123 | 145 | 87.5  |
| 0.41450708 BH  | 16  | 91  | 11  | 9   | 53.5  |
| 0.41450708 BH  | 1   | 6   | 12  | 2   | 3.5   |
| 0.41450708 BH  | 0   | 8   | 9   | 5   | 4     |
| 0.41450708 BH  | 2   | 15  | 12  | 17  | 8.5   |
| 0.41450708 BH  | 21  | 192 | 33  | 3   | 106.5 |
| 0.41450708 BH  | 4   | 1   | 13  | 4   | 2.5   |
| 0.41450708 BH  | 52  | 78  | 184 | 66  | 65    |
| 0.41450708 BH  | 111 | 357 | 33  | 62  | 234   |

|                |     |      |     |     |       |
|----------------|-----|------|-----|-----|-------|
| 0.41450708 BH  | 330 | 1119 | 88  | 201 | 724.5 |
| 0.41450708 BH  | 1   | 10   | 1   | 0   | 5.5   |
| 0.41450708 BH  | 1   | 10   | 1   | 0   | 5.5   |
| 0.41450708 BH  | 1   | 10   | 1   | 0   | 5.5   |
| 0.41450708 BH  | 1   | 10   | 1   | 0   | 5.5   |
| 0.41450708 BH  | 1   | 10   | 1   | 0   | 5.5   |
| 0.41450708 BH  | 1   | 10   | 1   | 0   | 5.5   |
| 0.41450708 BH  | 1   | 10   | 1   | 0   | 5.5   |
| 0.414517089 BH | 5   | 18   | 24  | 16  | 11.5  |
| 0.414517089 BH | 90  | 189  | 278 | 191 | 139.5 |
| 0.414821463 BH | 15  | 19   | 6   | 2   | 17    |
| 0.414932188 BH | 1   | 8    | 17  | 3   | 4.5   |
| 0.415160683 BH | 7   | 43   | 5   | 3   | 25    |
| 0.415160683 BH | 4   | 10   | 16  | 10  | 7     |
| 0.415160683 BH | 5   | 21   | 2   | 2   | 13    |
| 0.415160683 BH | 5   | 22   | 2   | 2   | 13.5  |
| 0.415160683 BH | 2   | 15   | 0   | 1   | 8.5   |
| 0.415160683 BH | 2   | 14   | 2   | 0   | 8     |
| 0.415160683 BH | 2   | 13   | 2   | 0   | 7.5   |
| 0.415160683 BH | 2   | 15   | 0   | 1   | 8.5   |
| 0.415360756 BH | 6   | 30   | 5   | 1   | 18    |
| 0.415360756 BH | 1   | 10   | 0   | 1   | 5.5   |
| 0.415360756 BH | 1   | 10   | 0   | 1   | 5.5   |
| 0.415360756 BH | 1   | 10   | 0   | 1   | 5.5   |
| 0.415360756 BH | 1   | 10   | 0   | 1   | 5.5   |
| 0.415364842 BH | 74  | 763  | 10  | 103 | 418.5 |
| 0.415996701 BH | 3   | 45   | 6   | 1   | 24    |
| 0.416888635 BH | 31  | 49   | 10  | 9   | 40    |
| 0.416888635 BH | 55  | 117  | 25  | 16  | 86    |
| 0.417023109 BH | 76  | 702  | 25  | 95  | 389   |
| 0.417092402 BH | 2   | 12   | 10  | 14  | 7     |
| 0.41732249 BH  | 2   | 224  | 12  | 15  | 113   |
| 0.41732249 BH  | 8   | 15   | 1   | 3   | 11.5  |
| 0.417638923 BH | 10  | 18   | 30  | 22  | 14    |
| 0.418256841 BH | 8   | 88   | 10  | 6   | 48    |
| 0.418256841 BH | 4   | 5    | 17  | 4   | 4.5   |
| 0.41854405 BH  | 11  | 74   | 60  | 64  | 42.5  |
| 0.418653682 BH | 33  | 77   | 127 | 62  | 55    |
| 0.418653682 BH | 121 | 405  | 67  | 50  | 263   |
| 0.418673678 BH | 11  | 17   | 48  | 12  | 14    |
| 0.418673678 BH | 3   | 49   | 4   | 3   | 26    |
| 0.419201605 BH | 21  | 96   | 14  | 9   | 58.5  |
| 0.420014266 BH | 1   | 12   | 5   | 17  | 6.5   |
| 0.420014266 BH | 5   | 22   | 3   | 1   | 13.5  |
| 0.420014266 BH | 16  | 17   | 6   | 2   | 16.5  |
| 0.420182758 BH | 9   | 21   | 4   | 2   | 15    |
| 0.420429431 BH | 30  | 90   | 17  | 9   | 60    |

|                |     |     |     |     |       |
|----------------|-----|-----|-----|-----|-------|
| 0.420447485 BH | 13  | 115 | 85  | 100 | 64    |
| 0.420567586 BH | 7   | 33  | 3   | 3   | 20    |
| 0.420865528 BH | 1   | 9   | 13  | 5   | 5     |
| 0.420866915 BH | 27  | 6   | 4   | 4   | 16.5  |
| 0.420926455 BH | 6   | 274 | 17  | 21  | 140   |
| 0.420940494 BH | 3   | 19  | 13  | 22  | 11    |
| 0.421303996 BH | 6   | 55  | 6   | 4   | 30.5  |
| 0.421330426 BH | 5   | 17  | 2   | 1   | 11    |
| 0.421330426 BH | 5   | 17  | 2   | 1   | 11    |
| 0.421330426 BH | 1   | 5   | 7   | 6   | 3     |
| 0.421513358 BH | 9   | 79  | 10  | 5   | 44    |
| 0.421710591 BH | 18  | 36  | 6   | 5   | 27    |
| 0.42204806 BH  | 2   | 35  | 3   | 2   | 18.5  |
| 0.422175824 BH | 3   | 3   | 12  | 4   | 3     |
| 0.422284276 BH | 22  | 71  | 15  | 5   | 46.5  |
| 0.422284276 BH | 163 | 99  | 50  | 25  | 131   |
| 0.422296184 BH | 3   | 20  | 23  | 15  | 11.5  |
| 0.422502429 BH | 490 | 455 | 185 | 81  | 472.5 |
| 0.422886429 BH | 1   | 27  | 9   | 34  | 14    |
| 0.422886429 BH | 14  | 55  | 9   | 4   | 34.5  |
| 0.423357177 BH | 3   | 38  | 5   | 1   | 20.5  |
| 0.423522461 BH | 21  | 66  | 4   | 12  | 43.5  |
| 0.42365404 BH  | 5   | 16  | 1   | 2   | 10.5  |
| 0.423941741 BH | 13  | 47  | 9   | 3   | 30    |
| 0.424638432 BH | 0   | 33  | 0   | 3   | 16.5  |
| 0.424980504 BH | 15  | 41  | 8   | 4   | 28    |
| 0.425356593 BH | 162 | 833 | 93  | 106 | 497.5 |
| 0.425610479 BH | 17  | 15  | 6   | 2   | 16    |
| 0.425776345 BH | 6   | 53  | 9   | 1   | 29.5  |
| 0.42589365 BH  | 25  | 47  | 77  | 48  | 36    |
| 0.42589365 BH  | 34  | 20  | 12  | 2   | 27    |
| 0.42589365 BH  | 16  | 114 | 79  | 108 | 65    |
| 0.42589365 BH  | 15  | 15  | 6   | 0   | 15    |
| 0.42589365 BH  | 8   | 38  | 5   | 3   | 23    |
| 0.42589365 BH  | 16  | 22  | 3   | 5   | 19    |
| 0.42589365 BH  | 1   | 6   | 9   | 4   | 3.5   |
| 0.42589365 BH  | 40  | 42  | 154 | 30  | 41    |
| 0.426824693 BH | 73  | 141 | 31  | 21  | 107   |
| 0.427022567 BH | 8   | 18  | 3   | 2   | 13    |
| 0.427022567 BH | 33  | 41  | 11  | 7   | 37    |
| 0.427022567 BH | 33  | 170 | 131 | 160 | 101.5 |
| 0.427022567 BH | 18  | 63  | 60  | 64  | 40.5  |
| 0.427276381 BH | 28  | 42  | 12  | 5   | 35    |
| 0.42792718 BH  | 13  | 53  | 62  | 40  | 33    |
| 0.428223082 BH | 119 | 70  | 20  | 31  | 94.5  |
| 0.428223082 BH | 4   | 40  | 32  | 33  | 22    |
| 0.428223082 BH | 44  | 319 | 405 | 147 | 181.5 |



|                |     |     |    |    |       |
|----------------|-----|-----|----|----|-------|
| 0.428223082 BH | 5   | 59  | 3  | 6  | 32    |
| 0.428223082 BH | 10  | 25  | 6  | 1  | 17.5  |
| 0.428223082 BH | 8   | 90  | 48 | 92 | 49    |
| 0.428223082 BH | 0   | 25  | 1  | 1  | 12.5  |
| 0.428223082 BH | 2   | 19  | 3  | 0  | 10.5  |
| 0.428223082 BH | 2   | 19  | 3  | 0  | 10.5  |
| 0.428310751 BH | 11  | 33  | 8  | 1  | 22    |
| 0.42851875 BH  | 258 | 111 | 47 | 58 | 184.5 |
| 0.429082166 BH | 8   | 11  | 37 | 7  | 9.5   |
| 0.429082166 BH | 7   | 21  | 3  | 2  | 14    |
| 0.429082166 BH | 7   | 21  | 3  | 2  | 14    |
| 0.429086662 BH | 3   | 25  | 2  | 2  | 14    |
| 0.429205421 BH | 4   | 50  | 3  | 5  | 27    |
| 0.430214805 BH | 61  | 50  | 20 | 10 | 55.5  |
| 0.430285447 BH | 18  | 48  | 12 | 2  | 33    |
| 0.430301545 BH | 10  | 28  | 6  | 2  | 19    |
| 0.43034219 BH  | 9   | 9   | 1  | 2  | 9     |
| 0.43034219 BH  | 13  | 8   | 4  | 0  | 10.5  |
| 0.43034219 BH  | 1   | 17  | 0  | 1  | 9     |
| 0.43034219 BH  | 1   | 16  | 2  | 0  | 8.5   |
| 0.43034219 BH  | 1   | 17  | 0  | 1  | 9     |
| 0.43034219 BH  | 1   | 17  | 0  | 1  | 9     |
| 0.430658779 BH | 7   | 46  | 5  | 4  | 26.5  |
| 0.431124371 BH | 14  | 32  | 9  | 0  | 23    |
| 0.431124371 BH | 14  | 88  | 10 | 9  | 51    |
| 0.431469097 BH | 6   | 22  | 3  | 2  | 14    |
| 0.431469097 BH | 5   | 18  | 31 | 10 | 11.5  |
| 0.431492315 BH | 2   | 47  | 6  | 1  | 24.5  |
| 0.432112515 BH | 1   | 117 | 6  | 8  | 59    |
| 0.432601001 BH | 8   | 25  | 5  | 1  | 16.5  |
| 0.432601001 BH | 5   | 12  | 1  | 1  | 8.5   |
| 0.432601001 BH | 1   | 3   | 6  | 5  | 2     |
| 0.432601001 BH | 15  | 4   | 3  | 1  | 9.5   |
| 0.432601001 BH | 3   | 28  | 4  | 0  | 15.5  |
| 0.432601001 BH | 9   | 309 | 39 | 8  | 159   |
| 0.432601001 BH | 3   | 30  | 2  | 3  | 16.5  |
| 0.43267909 BH  | 5   | 41  | 3  | 4  | 23    |
| 0.43267909 BH  | 112 | 304 | 53 | 44 | 208   |
| 0.432686036 BH | 6   | 194 | 6  | 20 | 100   |
| 0.433779461 BH | 1   | 26  | 2  | 1  | 13.5  |
| 0.433779461 BH | 1   | 7   | 13 | 3  | 4     |
| 0.433865309 BH | 6   | 22  | 2  | 3  | 14    |
| 0.433998641 BH | 28  | 53  | 10 | 9  | 40.5  |
| 0.434176933 BH | 23  | 22  | 8  | 3  | 22.5  |
| 0.434732334 BH | 6   | 266 | 25 | 14 | 136   |
| 0.434732334 BH | 52  | 36  | 15 | 9  | 44    |
| 0.435171042 BH | 7   | 26  | 5  | 1  | 16.5  |

|                |     |      |     |     |       |
|----------------|-----|------|-----|-----|-------|
| 0.435781259 BH | 3   | 66   | 7   | 3   | 34.5  |
| 0.435905267 BH | 211 | 83   | 39  | 46  | 147   |
| 0.436325285 BH | 28  | 9    | 2   | 6   | 18.5  |
| 0.436368177 BH | 1   | 27   | 2   | 1   | 14    |
| 0.436592442 BH | 6   | 47   | 5   | 4   | 26.5  |
| 0.436782586 BH | 5   | 17   | 17  | 18  | 11    |
| 0.436782586 BH | 52  | 80   | 140 | 91  | 66    |
| 0.436782586 BH | 1   | 3    | 8   | 3   | 2     |
| 0.436782586 BH | 1   | 3    | 8   | 3   | 2     |
| 0.436782586 BH | 0   | 11   | 0   | 1   | 5.5   |
| 0.436782586 BH | 0   | 11   | 0   | 1   | 5.5   |
| 0.436782586 BH | 0   | 11   | 0   | 1   | 5.5   |
| 0.436782586 BH | 0   | 11   | 0   | 1   | 5.5   |
| 0.436782586 BH | 0   | 11   | 0   | 1   | 5.5   |
| 0.43689174 BH  | 17  | 29   | 8   | 2   | 23    |
| 0.43809228 BH  | 23  | 233  | 37  | 10  | 128   |
| 0.438331491 BH | 12  | 36   | 5   | 5   | 24    |
| 0.438331491 BH | 25  | 67   | 13  | 8   | 46    |
| 0.438395096 BH | 388 | 304  | 52  | 127 | 346   |
| 0.438395096 BH | 0   | 12   | 0   | 1   | 6     |
| 0.438395096 BH | 0   | 12   | 1   | 0   | 6     |
| 0.438395096 BH | 0   | 12   | 1   | 0   | 6     |
| 0.438395096 BH | 0   | 12   | 0   | 1   | 6     |
| 0.438395096 BH | 9   | 26   | 5   | 2   | 17.5  |
| 0.438395096 BH | 2   | 10   | 12  | 9   | 6     |
| 0.438585873 BH | 39  | 139  | 31  | 8   | 89    |
| 0.438585873 BH | 3   | 15   | 1   | 1   | 9     |
| 0.439200844 BH | 3   | 31   | 27  | 24  | 17    |
| 0.4398216 BH   | 616 | 2048 | 145 | 398 | 1332  |
| 0.441116819 BH | 2   | 4    | 9   | 6   | 3     |
| 0.441116819 BH | 6   | 17   | 2   | 2   | 11.5  |
| 0.441116819 BH | 59  | 150  | 29  | 21  | 104.5 |
| 0.441116819 BH | 3   | 26   | 1   | 3   | 14.5  |
| 0.441116819 BH | 3   | 16   | 1   | 1   | 9.5   |
| 0.441116819 BH | 2   | 1    | 7   | 4   | 1.5   |
| 0.441116819 BH | 0   | 58   | 2   | 4   | 29    |
| 0.44133529 BH  | 35  | 47   | 10  | 10  | 41    |
| 0.441787556 BH | 2   | 6    | 20  | 1   | 4     |
| 0.443720699 BH | 56  | 254  | 47  | 20  | 155   |
| 0.444154708 BH | 9   | 35   | 5   | 3   | 22    |
| 0.444154708 BH | 3   | 3    | 14  | 2   | 3     |
| 0.444154708 BH | 18  | 6    | 4   | 2   | 12    |
| 0.444154708 BH | 3   | 36   | 5   | 1   | 19.5  |
| 0.444154708 BH | 6   | 4    | 16  | 8   | 5     |
| 0.444325278 BH | 8   | 57   | 9   | 3   | 32.5  |
| 0.445540761 BH | 24  | 88   | 73  | 91  | 56    |
| 0.446056009 BH | 6   | 31   | 28  | 26  | 18.5  |

|                |     |      |     |     |       |
|----------------|-----|------|-----|-----|-------|
| 0.446056009 BH | 5   | 18   | 24  | 14  | 11.5  |
| 0.446056009 BH | 14  | 19   | 7   | 0   | 16.5  |
| 0.446056009 BH | 29  | 71   | 87  | 69  | 50    |
| 0.446056009 BH | 6   | 11   | 17  | 14  | 8.5   |
| 0.446056009 BH | 15  | 9    | 4   | 2   | 12    |
| 0.446056009 BH | 1   | 22   | 0   | 2   | 11.5  |
| 0.446056009 BH | 1   | 21   | 3   | 0   | 11    |
| 0.446056009 BH | 10  | 3    | 3   | 0   | 6.5   |
| 0.44631469 BH  | 10  | 48   | 9   | 2   | 29    |
| 0.446383196 BH | 36  | 78   | 14  | 13  | 57    |
| 0.446383196 BH | 174 | 674  | 31  | 129 | 424   |
| 0.446711597 BH | 7   | 12   | 4   | 0   | 9.5   |
| 0.446823498 BH | 113 | 39   | 39  | 5   | 76    |
| 0.447286758 BH | 3   | 13   | 9   | 18  | 8     |
| 0.447632739 BH | 18  | 46   | 8   | 6   | 32    |
| 0.447632739 BH | 1   | 21   | 19  | 15  | 11    |
| 0.447989007 BH | 1   | 31   | 1   | 3   | 16    |
| 0.44801482 BH  | 392 | 1139 | 160 | 194 | 765.5 |
| 0.44801482 BH  | 0   | 5    | 6   | 5   | 2.5   |
| 0.44801482 BH  | 1   | 4    | 9   | 2   | 2.5   |
| 0.448137519 BH | 30  | 111  | 26  | 5   | 70.5  |
| 0.448660429 BH | 55  | 43   | 14  | 13  | 49    |
| 0.448660429 BH | 21  | 32   | 10  | 3   | 26.5  |
| 0.448660429 BH | 2   | 23   | 2   | 1   | 12.5  |
| 0.448660429 BH | 0   | 7    | 9   | 4   | 3.5   |
| 0.448660429 BH | 2   | 22   | 1   | 2   | 12    |
| 0.448660429 BH | 0   | 8    | 6   | 6   | 4     |
| 0.448660429 BH | 0   | 8    | 6   | 6   | 4     |
| 0.448907734 BH | 0   | 12   | 8   | 12  | 6     |
| 0.449019082 BH | 26  | 82   | 13  | 11  | 54    |
| 0.449319822 BH | 5   | 36   | 6   | 1   | 20.5  |
| 0.449319822 BH | 1   | 54   | 0   | 6   | 27.5  |
| 0.449692125 BH | 23  | 42   | 11  | 4   | 32.5  |
| 0.449692125 BH | 2   | 17   | 1   | 1   | 9.5   |
| 0.449692125 BH | 2   | 17   | 1   | 1   | 9.5   |
| 0.449692125 BH | 0   | 5    | 7   | 4   | 2.5   |
| 0.449784489 BH | 42  | 87   | 136 | 76  | 64.5  |
| 0.450218551 BH | 3   | 54   | 8   | 1   | 28.5  |
| 0.450395672 BH | 25  | 51   | 73  | 50  | 38    |
| 0.450395672 BH | 28  | 46   | 114 | 26  | 37    |
| 0.450395672 BH | 6   | 17   | 1   | 3   | 11.5  |
| 0.450395672 BH | 2   | 5    | 5   | 9   | 3.5   |
| 0.450395672 BH | 15  | 17   | 7   | 0   | 16    |
| 0.450605264 BH | 8   | 9    | 4   | 0   | 8.5   |
| 0.451051344 BH | 3   | 176  | 4   | 18  | 89.5  |
| 0.451051344 BH | 18  | 27   | 7   | 4   | 22.5  |
| 0.451706195 BH | 2   | 18   | 1   | 1   | 10    |

|                |     |     |     |     |      |
|----------------|-----|-----|-----|-----|------|
| 0.451706195 BH | 6   | 9   | 3   | 0   | 7.5  |
| 0.451706195 BH | 2   | 18  | 1   | 1   | 10   |
| 0.452039801 BH | 23  | 76  | 67  | 78  | 49.5 |
| 0.452039801 BH | 3   | 7   | 7   | 11  | 5    |
| 0.452411767 BH | 18  | 0   | 100 | 0   | 9    |
| 0.452521076 BH | 47  | 29  | 14  | 8   | 38   |
| 0.452521076 BH | 108 | 55  | 6   | 34  | 81.5 |
| 0.452640845 BH | 10  | 10  | 3   | 1   | 10   |
| 0.452640845 BH | 1   | 7   | 6   | 8   | 4    |
| 0.452640845 BH | 10  | 26  | 6   | 2   | 18   |
| 0.452640845 BH | 12  | 22  | 6   | 2   | 17   |
| 0.452640845 BH | 11  | 25  | 6   | 2   | 18   |
| 0.452640845 BH | 76  | 49  | 27  | 10  | 62.5 |
| 0.452752394 BH | 12  | 91  | 13  | 6   | 51.5 |
| 0.453492103 BH | 3   | 15  | 0   | 2   | 9    |
| 0.453492103 BH | 0   | 5   | 8   | 3   | 2.5  |
| 0.453492103 BH | 0   | 5   | 8   | 3   | 2.5  |
| 0.454022142 BH | 5   | 32  | 36  | 20  | 18.5 |
| 0.454033538 BH | 15  | 18  | 7   | 1   | 16.5 |
| 0.454296695 BH | 16  | 72  | 9   | 9   | 44   |
| 0.454333875 BH | 6   | 26  | 4   | 2   | 16   |
| 0.454766259 BH | 54  | 60  | 21  | 10  | 57   |
| 0.455059411 BH | 8   | 46  | 6   | 4   | 27   |
| 0.455385891 BH | 3   | 3   | 2   | 12  | 3    |
| 0.455712274 BH | 2   | 50  | 3   | 4   | 26   |
| 0.455712274 BH | 6   | 17  | 41  | 5   | 11.5 |
| 0.456405551 BH | 33  | 109 | 17  | 15  | 71   |
| 0.457452566 BH | 6   | 40  | 4   | 4   | 23   |
| 0.457452566 BH | 3   | 58  | 2   | 6   | 30.5 |
| 0.457452566 BH | 11  | 28  | 4   | 4   | 19.5 |
| 0.457452566 BH | 26  | 44  | 55  | 62  | 35   |
| 0.457452566 BH | 79  | 94  | 124 | 179 | 86.5 |
| 0.457699968 BH | 0   | 8   | 4   | 8   | 4    |
| 0.457699968 BH | 1   | 7   | 5   | 9   | 4    |
| 0.457699968 BH | 1   | 7   | 11  | 4   | 4    |
| 0.457771483 BH | 0   | 30  | 19  | 27  | 15   |
| 0.457771483 BH | 3   | 11  | 0   | 1   | 7    |
| 0.457771483 BH | 3   | 11  | 0   | 1   | 7    |
| 0.457962936 BH | 31  | 113 | 25  | 8   | 72   |
| 0.457962936 BH | 6   | 49  | 9   | 0   | 27.5 |
| 0.459203452 BH | 6   | 0   | 19  | 3   | 3    |
| 0.459384597 BH | 30  | 133 | 23  | 12  | 81.5 |
| 0.459384597 BH | 128 | 96  | 42  | 24  | 112  |
| 0.459384597 BH | 4   | 6   | 11  | 9   | 5    |
| 0.459384597 BH | 11  | 21  | 3   | 3   | 16   |
| 0.459384597 BH | 4   | 8   | 2   | 0   | 6    |
| 0.459384597 BH | 3   | 9   | 2   | 0   | 6    |

|                |     |     |     |     |       |
|----------------|-----|-----|-----|-----|-------|
| 0.459384597 BH | 3   | 20  | 0   | 3   | 11.5  |
| 0.459384597 BH | 3   | 20  | 4   | 0   | 11.5  |
| 0.459384597 BH | 3   | 20  | 4   | 0   | 11.5  |
| 0.459384597 BH | 7   | 30  | 6   | 1   | 18.5  |
| 0.459384597 BH | 14  | 15  | 6   | 1   | 14.5  |
| 0.45974407 BH  | 14  | 49  | 8   | 5   | 31.5  |
| 0.45974407 BH  | 18  | 31  | 8   | 4   | 24.5  |
| 0.459986202 BH | 100 | 84  | 42  | 12  | 92    |
| 0.459986202 BH | 9   | 15  | 3   | 2   | 12    |
| 0.459986202 BH | 46  | 67  | 150 | 55  | 56.5  |
| 0.459986202 BH | 192 | 141 | 422 | 251 | 166.5 |
| 0.460263825 BH | 5   | 10  | 21  | 7   | 7.5   |
| 0.460481207 BH | 30  | 34  | 15  | 2   | 32    |
| 0.460481207 BH | 5   | 16  | 2   | 1   | 10.5  |
| 0.460481207 BH | 6   | 13  | 1   | 2   | 9.5   |
| 0.460855823 BH | 1   | 26  | 4   | 0   | 13.5  |
| 0.460855823 BH | 3   | 10  | 2   | 0   | 6.5   |
| 0.460855823 BH | 8   | 42  | 9   | 0   | 25    |
| 0.460855823 BH | 2   | 36  | 5   | 0   | 19    |
| 0.461158319 BH | 196 | 121 | 42  | 51  | 158.5 |
| 0.461158319 BH | 11  | 20  | 5   | 2   | 15.5  |
| 0.461158319 BH | 51  | 97  | 14  | 22  | 74    |
| 0.461158319 BH | 0   | 18  | 2   | 0   | 9     |
| 0.461158319 BH | 15  | 27  | 34  | 36  | 21    |
| 0.461158319 BH | 3   | 7   | 15  | 4   | 5     |
| 0.461685221 BH | 9   | 32  | 4   | 4   | 20.5  |
| 0.461685221 BH | 11  | 13  | 49  | 5   | 12    |
| 0.461685221 BH | 3   | 23  | 30  | 10  | 13    |
| 0.461816697 BH | 10  | 40  | 6   | 4   | 25    |
| 0.462646382 BH | 2   | 12  | 0   | 1   | 7     |
| 0.462796696 BH | 8   | 32  | 2   | 5   | 20    |
| 0.462796696 BH | 13  | 47  | 4   | 8   | 30    |
| 0.463016172 BH | 4   | 29  | 38  | 13  | 16.5  |
| 0.463523992 BH | 0   | 5   | 9   | 2   | 2.5   |
| 0.463523992 BH | 2   | 17  | 0   | 2   | 9.5   |
| 0.463794536 BH | 2   | 10  | 10  | 10  | 6     |
| 0.46384803 BH  | 7   | 5   | 34  | 1   | 6     |
| 0.46384803 BH  | 6   | 63  | 33  | 60  | 34.5  |
| 0.46384803 BH  | 46  | 41  | 18  | 7   | 43.5  |
| 0.464172173 BH | 2   | 11  | 2   | 0   | 6.5   |
| 0.464172173 BH | 2   | 13  | 0   | 1   | 7.5   |
| 0.464172173 BH | 2   | 11  | 2   | 0   | 6.5   |
| 0.464172173 BH | 2   | 13  | 0   | 1   | 7.5   |
| 0.464172173 BH | 12  | 67  | 10  | 6   | 39.5  |
| 0.464172173 BH | 12  | 15  | 26  | 25  | 13.5  |
| 0.46421824 BH  | 4   | 17  | 2   | 1   | 10.5  |
| 0.46421824 BH  | 4   | 18  | 2   | 1   | 11    |

|                |     |     |     |     |       |
|----------------|-----|-----|-----|-----|-------|
| 0.464390302 BH | 44  | 98  | 23  | 12  | 71    |
| 0.464449669 BH | 16  | 35  | 9   | 3   | 25.5  |
| 0.464561539 BH | 2   | 16  | 15  | 12  | 9     |
| 0.464561539 BH | 2   | 16  | 17  | 10  | 9     |
| 0.464561539 BH | 31  | 112 | 93  | 110 | 71.5  |
| 0.464561539 BH | 72  | 147 | 31  | 25  | 109.5 |
| 0.464561539 BH | 0   | 6   | 9   | 2   | 3     |
| 0.464561539 BH | 1   | 19  | 1   | 1   | 10    |
| 0.464561539 BH | 5   | 12  | 14  | 16  | 8.5   |
| 0.464561539 BH | 0   | 8   | 3   | 9   | 4     |
| 0.464561539 BH | 1   | 25  | 2   | 1   | 13    |
| 0.465338955 BH | 2   | 12  | 2   | 0   | 7     |
| 0.465338955 BH | 2   | 12  | 2   | 0   | 7     |
| 0.465338955 BH | 2   | 8   | 16  | 4   | 5     |
| 0.465338955 BH | 28  | 381 | 19  | 48  | 204.5 |
| 0.466347115 BH | 10  | 31  | 6   | 2   | 20.5  |
| 0.466347115 BH | 42  | 27  | 16  | 4   | 34.5  |
| 0.467068348 BH | 1   | 20  | 1   | 1   | 10.5  |
| 0.467330607 BH | 1   | 16  | 25  | 4   | 8.5   |
| 0.467330607 BH | 47  | 35  | 14  | 9   | 41    |
| 0.467330607 BH | 24  | 46  | 13  | 4   | 35    |
| 0.467792556 BH | 39  | 107 | 22  | 13  | 73    |
| 0.468613392 BH | 0   | 14  | 12  | 10  | 7     |
| 0.468936428 BH | 1   | 13  | 7   | 13  | 7     |
| 0.468936428 BH | 21  | 90  | 62  | 91  | 55.5  |
| 0.469176664 BH | 49  | 52  | 15  | 13  | 50.5  |
| 0.469913614 BH | 212 | 435 | 100 | 70  | 323.5 |
| 0.470092117 BH | 2   | 21  | 4   | 0   | 11.5  |
| 0.471723809 BH | 13  | 20  | 4   | 3   | 16.5  |
| 0.471840932 BH | 3   | 19  | 2   | 1   | 11    |
| 0.47221543 BH  | 19  | 52  | 12  | 4   | 35.5  |
| 0.47221543 BH  | 105 | 629 | 121 | 37  | 367   |
| 0.472240569 BH | 2   | 6   | 13  | 4   | 4     |
| 0.472565222 BH | 0   | 28  | 1   | 2   | 14    |
| 0.472976925 BH | 16  | 19  | 8   | 1   | 17.5  |
| 0.473363576 BH | 11  | 1   | 3   | 0   | 6     |
| 0.473363576 BH | 11  | 1   | 3   | 0   | 6     |
| 0.473952388 BH | 2   | 25  | 2   | 2   | 13.5  |
| 0.47411604 BH  | 33  | 55  | 5   | 15  | 44    |
| 0.474376207 BH | 3   | 19  | 1   | 2   | 11    |
| 0.474690174 BH | 4   | 7   | 15  | 8   | 5.5   |
| 0.474690174 BH | 15  | 35  | 8   | 4   | 25    |
| 0.474690174 BH | 12  | 50  | 77  | 20  | 31    |
| 0.474690174 BH | 18  | 95  | 18  | 6   | 56.5  |
| 0.474789661 BH | 4   | 25  | 3   | 2   | 14.5  |
| 0.474789661 BH | 1   | 8   | 12  | 5   | 4.5   |
| 0.475608921 BH | 242 | 882 | 117 | 142 | 562   |

|                |    |     |     |     |       |
|----------------|----|-----|-----|-----|-------|
| 0.475608921 BH | 9  | 0   | 2   | 29  | 4.5   |
| 0.475608921 BH | 81 | 58  | 26  | 16  | 69.5  |
| 0.475996898 BH | 11 | 87  | 24  | 111 | 49    |
| 0.476031796 BH | 19 | 44  | 3   | 10  | 31.5  |
| 0.476158295 BH | 9  | 18  | 4   | 2   | 13.5  |
| 0.476779119 BH | 8  | 9   | 25  | 11  | 8.5   |
| 0.476779119 BH | 16 | 39  | 10  | 3   | 27.5  |
| 0.476779119 BH | 4  | 21  | 31  | 8   | 12.5  |
| 0.477360224 BH | 11 | 23  | 6   | 2   | 17    |
| 0.477360224 BH | 23 | 29  | 11  | 3   | 26    |
| 0.477360224 BH | 11 | 20  | 6   | 1   | 15.5  |
| 0.477547495 BH | 86 | 265 | 240 | 253 | 175.5 |
| 0.477824048 BH | 2  | 4   | 7   | 7   | 3     |
| 0.477824048 BH | 35 | 767 | 513 | 551 | 401   |
| 0.477824048 BH | 0  | 13  | 14  | 6   | 6.5   |
| 0.477824048 BH | 1  | 9   | 16  | 2   | 5     |
| 0.477824048 BH | 1  | 14  | 0   | 1   | 7.5   |
| 0.477824048 BH | 1  | 14  | 0   | 1   | 7.5   |
| 0.477824048 BH | 1  | 14  | 0   | 1   | 7.5   |
| 0.477824048 BH | 1  | 14  | 0   | 1   | 7.5   |
| 0.477824048 BH | 1  | 14  | 0   | 1   | 7.5   |
| 0.478259596 BH | 11 | 15  | 4   | 2   | 13    |
| 0.478259596 BH | 11 | 15  | 4   | 2   | 13    |
| 0.478947394 BH | 6  | 34  | 56  | 9   | 20    |
| 0.478947394 BH | 15 | 40  | 7   | 5   | 27.5  |
| 0.479081221 BH | 7  | 16  | 25  | 13  | 11.5  |
| 0.480141667 BH | 7  | 56  | 9   | 3   | 31.5  |
| 0.480141667 BH | 1  | 14  | 2   | 0   | 7.5   |
| 0.480421405 BH | 0  | 17  | 9   | 14  | 8.5   |
| 0.4813685 BH   | 6  | 24  | 4   | 2   | 15    |
| 0.4813685 BH   | 6  | 24  | 4   | 2   | 15    |
| 0.4813685 BH   | 10 | 117 | 14  | 9   | 63.5  |
| 0.4813685 BH   | 3  | 37  | 0   | 5   | 20    |
| 0.4813685 BH   | 1  | 21  | 22  | 11  | 11    |
| 0.4813685 BH   | 21 | 663 | 277 | 632 | 342   |
| 0.481725877 BH | 29 | 9   | 8   | 3   | 19    |
| 0.481755644 BH | 9  | 11  | 30  | 10  | 10    |
| 0.482120699 BH | 5  | 10  | 1   | 1   | 7.5   |
| 0.482120699 BH | 0  | 24  | 0   | 2   | 12    |
| 0.482325913 BH | 10 | 52  | 9   | 4   | 31    |
| 0.482325913 BH | 6  | 17  | 3   | 1   | 11.5  |
| 0.482325913 BH | 11 | 28  | 56  | 12  | 19.5  |
| 0.482982098 BH | 1  | 18  | 3   | 0   | 9.5   |
| 0.482982098 BH | 43 | 115 | 28  | 11  | 79    |
| 0.482982098 BH | 0  | 7   | 6   | 6   | 3.5   |
| 0.482982098 BH | 1  | 5   | 11  | 2   | 3     |
| 0.483046445 BH | 2  | 25  | 1   | 3   | 13.5  |

|                |     |     |     |     |       |
|----------------|-----|-----|-----|-----|-------|
| 0.483220465 BH | 6   | 126 | 15  | 8   | 66    |
| 0.483403713 BH | 0   | 39  | 3   | 2   | 19.5  |
| 0.483403713 BH | 17  | 64  | 14  | 4   | 40.5  |
| 0.483796155 BH | 19  | 158 | 25  | 11  | 88.5  |
| 0.483847204 BH | 4   | 12  | 1   | 1   | 8     |
| 0.483847204 BH | 4   | 13  | 1   | 1   | 8.5   |
| 0.48456481 BH  | 3   | 27  | 3   | 2   | 15    |
| 0.484613943 BH | 153 | 137 | 361 | 184 | 145   |
| 0.484804654 BH | 1   | 13  | 12  | 8   | 7     |
| 0.484804654 BH | 46  | 31  | 16  | 7   | 38.5  |
| 0.484804654 BH | 1   | 19  | 3   | 0   | 10    |
| 0.484804654 BH | 1   | 19  | 3   | 0   | 10    |
| 0.484804654 BH | 95  | 398 | 58  | 55  | 246.5 |
| 0.484804654 BH | 2   | 21  | 1   | 2   | 11.5  |
| 0.484804654 BH | 5   | 14  | 4   | 0   | 9.5   |
| 0.484808337 BH | 9   | 40  | 6   | 4   | 24.5  |
| 0.485178279 BH | 13  | 95  | 123 | 35  | 54    |
| 0.48560491 BH  | 17  | 40  | 8   | 5   | 28.5  |
| 0.486975895 BH | 51  | 67  | 13  | 18  | 59    |
| 0.486975895 BH | 3   | 27  | 2   | 3   | 15    |
| 0.486975895 BH | 9   | 11  | 3   | 1   | 10    |
| 0.486995489 BH | 4   | 24  | 10  | 29  | 14    |
| 0.487408452 BH | 239 | 100 | 96  | 12  | 169.5 |
| 0.487839034 BH | 1   | 17  | 18  | 10  | 9     |
| 0.488026498 BH | 18  | 503 | 48  | 39  | 260.5 |
| 0.488287446 BH | 3   | 14  | 1   | 1   | 8.5   |
| 0.489527742 BH | 3   | 47  | 4   | 4   | 25    |
| 0.489850224 BH | 21  | 80  | 7   | 14  | 50.5  |
| 0.489850224 BH | 9   | 21  | 5   | 2   | 15    |
| 0.489850224 BH | 9   | 21  | 5   | 2   | 15    |
| 0.489922968 BH | 8   | 22  | 17  | 29  | 15    |
| 0.490155318 BH | 6   | 4   | 20  | 4   | 5     |
| 0.490642455 BH | 20  | 58  | 11  | 7   | 39    |
| 0.491011418 BH | 18  | 84  | 11  | 11  | 51    |
| 0.491513245 BH | 110 | 101 | 22  | 37  | 105.5 |
| 0.491726259 BH | 4   | 3   | 20  | 0   | 3.5   |
| 0.492474347 BH | 18  | 28  | 41  | 34  | 23    |
| 0.492474347 BH | 11  | 75  | 14  | 3   | 43    |
| 0.492915309 BH | 6   | 0   | 26  | 0   | 3     |
| 0.492915309 BH | 8   | 8   | 4   | 0   | 8     |
| 0.493036129 BH | 11  | 18  | 6   | 0   | 14.5  |
| 0.4930704 BH   | 113 | 90  | 43  | 20  | 101.5 |
| 0.4930704 BH   | 7   | 6   | 1   | 1   | 6.5   |
| 0.493112938 BH | 28  | 58  | 12  | 9   | 43    |
| 0.493112938 BH | 15  | 23  | 5   | 4   | 19    |
| 0.493112938 BH | 14  | 25  | 6   | 3   | 19.5  |
| 0.493545094 BH | 3   | 27  | 29  | 15  | 15    |



|                |     |     |     |     |       |
|----------------|-----|-----|-----|-----|-------|
| 0.493615547 BH | 7   | 32  | 2   | 5   | 19.5  |
| 0.493790773 BH | 17  | 155 | 15  | 18  | 86    |
| 0.494084386 BH | 238 | 189 | 280 | 494 | 213.5 |
| 0.494084386 BH | 18  | 163 | 87  | 142 | 90.5  |
| 0.494084386 BH | 8   | 32  | 3   | 5   | 20    |
| 0.494084386 BH | 25  | 164 | 12  | 25  | 94.5  |
| 0.494084386 BH | 6   | 30  | 20  | 30  | 18    |
| 0.495420685 BH | 2   | 6   | 10  | 6   | 4     |
| 0.495614441 BH | 27  | 46  | 11  | 8   | 36.5  |
| 0.496909205 BH | 2   | 38  | 33  | 23  | 20    |
| 0.497614919 BH | 10  | 75  | 9   | 7   | 42.5  |
| 0.497614919 BH | 2   | 16  | 1   | 1   | 9     |
| 0.497614919 BH | 2   | 16  | 1   | 1   | 9     |
| 0.497614919 BH | 5   | 10  | 0   | 2   | 7.5   |
| 0.497614919 BH | 2   | 16  | 1   | 1   | 9     |
| 0.498037531 BH | 18  | 24  | 8   | 3   | 21    |
| 0.498094875 BH | 10  | 59  | 8   | 6   | 34.5  |
| 0.498134459 BH | 13  | 36  | 39  | 34  | 24.5  |
| 0.498134459 BH | 7   | 17  | 2   | 3   | 12    |
| 0.498810802 BH | 4   | 35  | 23  | 28  | 19.5  |
| 0.498988207 BH | 21  | 12  | 5   | 4   | 16.5  |
| 0.499454021 BH | 3   | 13  | 17  | 9   | 8     |
| 0.49970545 BH  | 1   | 14  | 13  | 9   | 7.5   |
| 0.499731449 BH | 25  | 109 | 81  | 97  | 67    |
| 0.499826087 BH | 5   | 9   | 3   | 0   | 7     |
| 0.500126728 BH | 3   | 22  | 3   | 1   | 12.5  |
| 0.50017545 BH  | 41  | 51  | 110 | 51  | 46    |
| 0.500450911 BH | 6   | 61  | 68  | 25  | 33.5  |
| 0.500958452 BH | 5   | 21  | 3   | 2   | 13    |
| 0.501456335 BH | 33  | 71  | 10  | 15  | 52    |
| 0.501456335 BH | 24  | 90  | 13  | 13  | 57    |
| 0.501633604 BH | 30  | 132 | 21  | 16  | 81    |
| 0.502043239 BH | 932 | 0   | 202 | 20  | 466   |
| 0.502601271 BH | 490 | 313 | 166 | 95  | 401.5 |
| 0.502742238 BH | 15  | 50  | 8   | 7   | 32.5  |
| 0.503107862 BH | 3   | 6   | 16  | 3   | 4.5   |
| 0.503639255 BH | 0   | 10  | 11  | 6   | 5     |
| 0.503657689 BH | 28  | 84  | 81  | 77  | 56    |
| 0.503657689 BH | 48  | 84  | 11  | 22  | 66    |
| 0.503657689 BH | 5   | 21  | 2   | 3   | 13    |
| 0.503831701 BH | 180 | 300 | 93  | 45  | 240   |
| 0.504021319 BH | 41  | 114 | 120 | 99  | 77.5  |
| 0.504021319 BH | 0   | 49  | 6   | 0   | 24.5  |
| 0.504361041 BH | 3   | 13  | 3   | 0   | 8     |
| 0.504469237 BH | 16  | 83  | 66  | 63  | 49.5  |
| 0.504883656 BH | 6   | 43  | 7   | 2   | 24.5  |
| 0.504883656 BH | 15  | 26  | 37  | 28  | 20.5  |

|                |     |      |     |     |       |
|----------------|-----|------|-----|-----|-------|
| 0.505529808 BH | 32  | 37   | 15  | 5   | 34.5  |
| 0.506220994 BH | 11  | 12   | 5   | 0   | 11.5  |
| 0.506584034 BH | 0   | 9    | 3   | 11  | 4.5   |
| 0.506904465 BH | 0   | 13   | 7   | 11  | 6.5   |
| 0.506904465 BH | 0   | 28   | 2   | 1   | 14    |
| 0.506904465 BH | 0   | 28   | 2   | 1   | 14    |
| 0.507260638 BH | 361 | 1380 | 121 | 267 | 870.5 |
| 0.507375463 BH | 6   | 38   | 8   | 1   | 22    |
| 0.507375463 BH | 0   | 7    | 11  | 2   | 3.5   |
| 0.507375463 BH | 0   | 7    | 11  | 2   | 3.5   |
| 0.507375463 BH | 7   | 50   | 3   | 7   | 28.5  |
| 0.507375463 BH | 33  | 85   | 14  | 15  | 59    |
| 0.507375463 BH | 9   | 197  | 8   | 24  | 103   |
| 0.507554277 BH | 81  | 169  | 29  | 36  | 125   |
| 0.507764917 BH | 5   | 14   | 2   | 1   | 9.5   |
| 0.508202102 BH | 7   | 24   | 29  | 18  | 15.5  |
| 0.508559681 BH | 18  | 20   | 6   | 4   | 19    |
| 0.508559681 BH | 7   | 6    | 0   | 2   | 6.5   |
| 0.508559681 BH | 4   | 24   | 3   | 2   | 14    |
| 0.509013083 BH | 260 | 307  | 119 | 55  | 283.5 |
| 0.509013083 BH | 3   | 3    | 17  | 0   | 3     |
| 0.509013083 BH | 0   | 11   | 1   | 0   | 5.5   |
| 0.509013083 BH | 0   | 11   | 1   | 0   | 5.5   |
| 0.509013083 BH | 0   | 11   | 1   | 0   | 5.5   |
| 0.509013083 BH | 0   | 11   | 1   | 0   | 5.5   |
| 0.509203273 BH | 0   | 8    | 10  | 2   | 4     |
| 0.509948142 BH | 4   | 15   | 2   | 1   | 9.5   |
| 0.51002292 BH  | 9   | 17   | 4   | 2   | 13    |
| 0.51002292 BH  | 2   | 20   | 23  | 10  | 11    |
| 0.51002292 BH  | 18  | 53   | 13  | 4   | 35.5  |
| 0.51002292 BH  | 3   | 10   | 16  | 6   | 6.5   |
| 0.51002292 BH  | 7   | 6    | 3   | 0   | 6.5   |
| 0.51002292 BH  | 0   | 15   | 2   | 0   | 7.5   |
| 0.51002292 BH  | 0   | 15   | 2   | 0   | 7.5   |
| 0.51002292 BH  | 0   | 15   | 2   | 0   | 7.5   |
| 0.51002292 BH  | 7   | 15   | 23  | 14  | 11    |
| 0.51002292 BH  | 2   | 15   | 17  | 9   | 8.5   |
| 0.51002292 BH  | 0   | 37   | 2   | 3   | 18.5  |
| 0.51002292 BH  | 6   | 16   | 24  | 11  | 11    |
| 0.510605655 BH | 22  | 90   | 64  | 85  | 56    |
| 0.510938758 BH | 15  | 6    | 15  | 30  | 10.5  |
| 0.51111033 BH  | 14  | 43   | 46  | 36  | 28.5  |
| 0.511191146 BH | 12  | 16   | 6   | 1   | 14    |
| 0.511191146 BH | 23  | 65   | 9   | 12  | 44    |
| 0.51159949 BH  | 7   | 0    | 26  | 2   | 3.5   |
| 0.513047484 BH | 5   | 16   | 25  | 9   | 10.5  |
| 0.513177222 BH | 9   | 137  | 13  | 14  | 73    |

|                |     |      |     |     |        |
|----------------|-----|------|-----|-----|--------|
| 0.513990091 BH | 21  | 195  | 14  | 27  | 108    |
| 0.514264879 BH | 53  | 176  | 165 | 144 | 114.5  |
| 0.51465862 BH  | 22  | 108  | 19  | 10  | 65     |
| 0.51465862 BH  | 2   | 15   | 3   | 0   | 8.5    |
| 0.51465862 BH  | 2   | 15   | 3   | 0   | 8.5    |
| 0.51465862 BH  | 1   | 18   | 1   | 1   | 9.5    |
| 0.514782649 BH | 35  | 59   | 17  | 9   | 47     |
| 0.515091837 BH | 2   | 8    | 12  | 6   | 5      |
| 0.515143622 BH | 130 | 2117 | 104 | 281 | 1123.5 |
| 0.515476995 BH | 1   | 98   | 51  | 82  | 49.5   |
| 0.515476995 BH | 14  | 8    | 5   | 1   | 11     |
| 0.515730133 BH | 4   | 23   | 4   | 1   | 13.5   |
| 0.515786852 BH | 8   | 15   | 23  | 15  | 11.5   |
| 0.515792595 BH | 36  | 67   | 125 | 42  | 51.5   |
| 0.51658663 BH  | 3   | 18   | 2   | 1   | 10.5   |
| 0.516625251 BH | 8   | 41   | 7   | 3   | 24.5   |
| 0.516625251 BH | 9   | 3    | 23  | 7   | 6      |
| 0.516625251 BH | 68  | 7    | 37  | 162 | 37.5   |
| 0.516625251 BH | 1   | 7    | 13  | 2   | 4      |
| 0.517343682 BH | 29  | 148  | 20  | 20  | 88.5   |
| 0.517523944 BH | 12  | 18   | 7   | 0   | 15     |
| 0.517523944 BH | 5   | 24   | 4   | 2   | 14.5   |
| 0.518635319 BH | 10  | 4    | 4   | 0   | 7      |
| 0.518869205 BH | 20  | 55   | 11  | 7   | 37.5   |
| 0.518869205 BH | 3   | 17   | 1   | 2   | 10     |
| 0.518869205 BH | 3   | 17   | 1   | 2   | 10     |
| 0.518902427 BH | 3   | 8    | 12  | 7   | 5.5    |
| 0.518902427 BH | 8   | 23   | 3   | 3   | 15.5   |
| 0.518939787 BH | 4   | 4    | 19  | 1   | 4      |
| 0.51912774 BH  | 2   | 24   | 1   | 3   | 13     |
| 0.520542672 BH | 9   | 17   | 5   | 1   | 13     |
| 0.520823005 BH | 28  | 22   | 8   | 7   | 25     |
| 0.520853072 BH | 2   | 8    | 17  | 2   | 5      |
| 0.520853072 BH | 47  | 57   | 23  | 8   | 52     |
| 0.520853072 BH | 6   | 15   | 2   | 2   | 10.5   |
| 0.520853072 BH | 6   | 15   | 2   | 2   | 10.5   |
| 0.520853072 BH | 6   | 15   | 2   | 2   | 10.5   |
| 0.520853072 BH | 0   | 22   | 0   | 2   | 11     |
| 0.520853072 BH | 0   | 22   | 0   | 2   | 11     |
| 0.520853072 BH | 0   | 22   | 0   | 2   | 11     |
| 0.520853072 BH | 43  | 70   | 17  | 14  | 56.5   |
| 0.520853072 BH | 8   | 39   | 1   | 7   | 23.5   |
| 0.521438122 BH | 2   | 162  | 7   | 16  | 82     |
| 0.52143932 BH  | 3   | 13   | 22  | 5   | 8      |
| 0.522682026 BH | 68  | 58   | 27  | 13  | 63     |
| 0.523110711 BH | 13  | 28   | 6   | 4   | 20.5   |
| 0.523432939 BH | 10  | 17   | 6   | 0   | 13.5   |

|                |     |      |     |     |       |
|----------------|-----|------|-----|-----|-------|
| 0.524253069 BH | 14  | 51   | 51  | 37  | 32.5  |
| 0.524707073 BH | 23  | 71   | 20  | 4   | 47    |
| 0.524882543 BH | 308 | 687  | 121 | 147 | 497.5 |
| 0.526385813 BH | 26  | 66   | 8   | 14  | 46    |
| 0.526458236 BH | 0   | 14   | 8   | 12  | 7     |
| 0.526633029 BH | 33  | 143  | 123 | 104 | 88    |
| 0.526687593 BH | 16  | 22   | 6   | 4   | 19    |
| 0.526769862 BH | 22  | 54   | 8   | 10  | 38    |
| 0.527404441 BH | 4   | 38   | 7   | 1   | 21    |
| 0.527404441 BH | 1   | 14   | 19  | 4   | 7.5   |
| 0.527925961 BH | 13  | 14   | 3   | 3   | 13.5  |
| 0.52798756 BH  | 56  | 60   | 18  | 16  | 58    |
| 0.52798756 BH  | 35  | 1    | 4   | 6   | 18    |
| 0.528662443 BH | 2   | 53   | 6   | 3   | 27.5  |
| 0.528810501 BH | 8   | 51   | 9   | 4   | 29.5  |
| 0.528949987 BH | 1   | 10   | 12  | 6   | 5.5   |
| 0.529777104 BH | 16  | 41   | 8   | 6   | 28.5  |
| 0.530010431 BH | 9   | 0    | 31  | 2   | 4.5   |
| 0.530012613 BH | 67  | 87   | 30  | 16  | 77    |
| 0.530012613 BH | 19  | 25   | 9   | 3   | 22    |
| 0.530012613 BH | 20  | 23   | 4   | 7   | 21.5  |
| 0.530273511 BH | 1   | 14   | 10  | 11  | 7.5   |
| 0.530473821 BH | 9   | 18   | 20  | 22  | 13.5  |
| 0.530473821 BH | 524 | 1296 | 253 | 240 | 910   |
| 0.530473821 BH | 1   | 17   | 0   | 2   | 9     |
| 0.530672037 BH | 30  | 184  | 131 | 136 | 107   |
| 0.530920117 BH | 2   | 19   | 1   | 2   | 10.5  |
| 0.530920117 BH | 2   | 19   | 1   | 2   | 10.5  |
| 0.530920117 BH | 20  | 21   | 73  | 10  | 20.5  |
| 0.531331879 BH | 1   | 11   | 11  | 6   | 6     |
| 0.531379526 BH | 30  | 168  | 86  | 160 | 99    |
| 0.531482777 BH | 91  | 80   | 23  | 29  | 85.5  |
| 0.531760098 BH | 4   | 23   | 23  | 15  | 13.5  |
| 0.531990292 BH | 19  | 29   | 58  | 22  | 24    |
| 0.531990292 BH | 24  | 84   | 13  | 13  | 54    |
| 0.531990292 BH | 15  | 55   | 11  | 6   | 35    |
| 0.531990292 BH | 9   | 24   | 3   | 4   | 16.5  |
| 0.531990292 BH | 5   | 37   | 4   | 4   | 21    |
| 0.532054075 BH | 1   | 18   | 0   | 2   | 9.5   |
| 0.532054075 BH | 1   | 18   | 0   | 2   | 9.5   |
| 0.532202914 BH | 4   | 37   | 3   | 4   | 20.5  |
| 0.532202914 BH | 2   | 10   | 2   | 0   | 6     |
| 0.532202914 BH | 2   | 10   | 2   | 0   | 6     |
| 0.532202914 BH | 19  | 36   | 39  | 43  | 27.5  |
| 0.532202914 BH | 0   | 26   | 0   | 3   | 13    |
| 0.532347727 BH | 0   | 7    | 8   | 4   | 3.5   |
| 0.532400957 BH | 43  | 133  | 128 | 108 | 88    |

|                |     |      |     |     |       |
|----------------|-----|------|-----|-----|-------|
| 0.532444871 BH | 5   | 12   | 19  | 10  | 8.5   |
| 0.532444871 BH | 38  | 7    | 10  | 4   | 22.5  |
| 0.532444871 BH | 92  | 1863 | 48  | 263 | 977.5 |
| 0.532444871 BH | 25  | 41   | 14  | 4   | 33    |
| 0.532444871 BH | 5   | 16   | 1   | 3   | 10.5  |
| 0.532444871 BH | 1   | 10   | 13  | 5   | 5.5   |
| 0.532444871 BH | 5   | 26   | 5   | 1   | 15.5  |
| 0.532444871 BH | 2   | 28   | 3   | 2   | 15    |
| 0.532444871 BH | 2   | 27   | 3   | 2   | 14.5  |
| 0.532469492 BH | 296 | 487  | 585 | 564 | 391.5 |
| 0.532472263 BH | 74  | 528  | 309 | 418 | 301   |
| 0.532596744 BH | 59  | 107  | 32  | 15  | 83    |
| 0.532889777 BH | 11  | 28   | 39  | 20  | 19.5  |
| 0.533361731 BH | 13  | 17   | 3   | 4   | 15    |
| 0.533361731 BH | 71  | 107  | 20  | 29  | 89    |
| 0.533361731 BH | 2   | 25   | 14  | 20  | 13.5  |
| 0.533753931 BH | 0   | 8    | 6   | 5   | 4     |
| 0.534076109 BH | 21  | 52   | 17  | 2   | 36.5  |
| 0.534295411 BH | 7   | 15   | 3   | 2   | 11    |
| 0.534295411 BH | 6   | 17   | 3   | 2   | 11.5  |
| 0.534420585 BH | 31  | 8    | 38  | 50  | 19.5  |
| 0.535077739 BH | 3   | 101  | 16  | 0   | 52    |
| 0.535559592 BH | 12  | 29   | 28  | 32  | 20.5  |
| 0.536007084 BH | 3   | 0    | 9   | 3   | 1.5   |
| 0.536007084 BH | 0   | 8    | 5   | 6   | 4     |
| 0.536007084 BH | 7   | 8    | 4   | 0   | 7.5   |
| 0.536007084 BH | 3   | 0    | 4   | 7   | 1.5   |
| 0.536007084 BH | 2   | 11   | 13  | 8   | 6.5   |
| 0.536392191 BH | 3   | 51   | 5   | 5   | 27    |
| 0.53644258 BH  | 8   | 22   | 36  | 11  | 15    |
| 0.536542388 BH | 10  | 18   | 6   | 1   | 14    |
| 0.536636205 BH | 2   | 6    | 7   | 8   | 4     |
| 0.536636205 BH | 9   | 12   | 3   | 2   | 10.5  |
| 0.536649676 BH | 3   | 20   | 2   | 2   | 11.5  |
| 0.537302013 BH | 5   | 18   | 25  | 10  | 11.5  |
| 0.537346158 BH | 16  | 25   | 8   | 3   | 20.5  |
| 0.537346158 BH | 40  | 36   | 18  | 5   | 38    |
| 0.537424595 BH | 0   | 13   | 13  | 5   | 6.5   |
| 0.537424595 BH | 3   | 7    | 18  | 1   | 5     |
| 0.537500592 BH | 22  | 44   | 13  | 5   | 33    |
| 0.538231038 BH | 13  | 0    | 4   | 0   | 6.5   |
| 0.538731733 BH | 3   | 31   | 28  | 17  | 17    |
| 0.538731733 BH | 75  | 332  | 147 | 359 | 203.5 |
| 0.538852129 BH | 8   | 30   | 4   | 4   | 19    |
| 0.538941657 BH | 1   | 7    | 10  | 3   | 4     |
| 0.538941657 BH | 1   | 7    | 10  | 3   | 4     |
| 0.539320203 BH | 45  | 102  | 143 | 70  | 73.5  |

|                |     |      |     |     |       |
|----------------|-----|------|-----|-----|-------|
| 0.539363977 BH | 5   | 22   | 5   | 0   | 13.5  |
| 0.539363977 BH | 0   | 11   | 9   | 6   | 5.5   |
| 0.539752196 BH | 3   | 20   | 13  | 18  | 11.5  |
| 0.539752196 BH | 3   | 17   | 0   | 3   | 10    |
| 0.539752196 BH | 3   | 16   | 0   | 3   | 9.5   |
| 0.539752196 BH | 3   | 17   | 4   | 0   | 10    |
| 0.539752196 BH | 3   | 16   | 0   | 3   | 9.5   |
| 0.539752196 BH | 3   | 16   | 4   | 0   | 9.5   |
| 0.539752196 BH | 1   | 11   | 2   | 0   | 6     |
| 0.539752196 BH | 1   | 11   | 2   | 0   | 6     |
| 0.540128766 BH | 1   | 46   | 6   | 2   | 23.5  |
| 0.540405066 BH | 2   | 12   | 14  | 7   | 7     |
| 0.540405066 BH | 4   | 11   | 1   | 1   | 7.5   |
| 0.540405066 BH | 4   | 11   | 1   | 1   | 7.5   |
| 0.540405066 BH | 4   | 11   | 1   | 1   | 7.5   |
| 0.540405066 BH | 5   | 20   | 2   | 3   | 12.5  |
| 0.540405066 BH | 7   | 17   | 4   | 1   | 12    |
| 0.540405066 BH | 7   | 16   | 4   | 1   | 11.5  |
| 0.540405066 BH | 3   | 39   | 4   | 3   | 21    |
| 0.540405066 BH | 227 | 530  | 600 | 440 | 378.5 |
| 0.540577375 BH | 274 | 467  | 162 | 62  | 370.5 |
| 0.540753691 BH | 2   | 111  | 15  | 4   | 56.5  |
| 0.540942874 BH | 13  | 2    | 2   | 2   | 7.5   |
| 0.541235205 BH | 10  | 53   | 8   | 6   | 31.5  |
| 0.541626118 BH | 0   | 25   | 1   | 2   | 12.5  |
| 0.542300777 BH | 12  | 25   | 4   | 5   | 18.5  |
| 0.542300777 BH | 4   | 17   | 20  | 10  | 10.5  |
| 0.542300777 BH | 9   | 2    | 3   | 0   | 5.5   |
| 0.542300777 BH | 5   | 8    | 1   | 1   | 6.5   |
| 0.542300777 BH | 0   | 21   | 16  | 13  | 10.5  |
| 0.54236506 BH  | 76  | 81   | 25  | 23  | 78.5  |
| 0.543532269 BH | 0   | 11   | 11  | 5   | 5.5   |
| 0.54356428 BH  | 2   | 17   | 15  | 11  | 9.5   |
| 0.543719685 BH | 1   | 21   | 2   | 1   | 11    |
| 0.543719685 BH | 1   | 21   | 2   | 1   | 11    |
| 0.544101686 BH | 4   | 27   | 33  | 11  | 15.5  |
| 0.544325645 BH | 152 | 171  | 50  | 50  | 161.5 |
| 0.544325645 BH | 221 | 1032 | 243 | 72  | 626.5 |
| 0.544325645 BH | 3   | 12   | 1   | 1   | 7.5   |
| 0.544325645 BH | 6   | 7    | 1   | 1   | 6.5   |
| 0.544500737 BH | 79  | 128  | 226 | 96  | 103.5 |
| 0.544500737 BH | 19  | 20   | 8   | 3   | 19.5  |
| 0.544947398 BH | 3   | 61   | 8   | 4   | 32    |
| 0.545178455 BH | 4   | 22   | 2   | 3   | 13    |
| 0.545713712 BH | 3   | 38   | 6   | 2   | 20.5  |
| 0.545818756 BH | 1   | 22   | 2   | 1   | 11.5  |
| 0.545818756 BH | 1   | 21   | 1   | 2   | 11    |

|                |     |     |     |     |       |
|----------------|-----|-----|-----|-----|-------|
| 0.54587493 BH  | 12  | 53  | 10  | 5   | 32.5  |
| 0.546294405 BH | 6   | 6   | 1   | 1   | 6     |
| 0.546294405 BH | 0   | 20  | 1   | 1   | 10    |
| 0.546294405 BH | 0   | 20  | 1   | 1   | 10    |
| 0.546294405 BH | 0   | 20  | 1   | 1   | 10    |
| 0.546351122 BH | 6   | 21  | 4   | 2   | 13.5  |
| 0.54694802 BH  | 29  | 30  | 78  | 28  | 29.5  |
| 0.54694802 BH  | 7   | 14  | 4   | 0   | 10.5  |
| 0.54694802 BH  | 2   | 22  | 2   | 2   | 12    |
| 0.547585216 BH | 67  | 285 | 40  | 46  | 176   |
| 0.547585216 BH | 2   | 28  | 17  | 21  | 15    |
| 0.547709681 BH | 4   | 8   | 17  | 4   | 6     |
| 0.547745831 BH | 0   | 24  | 12  | 18  | 12    |
| 0.547745831 BH | 0   | 11  | 12  | 4   | 5.5   |
| 0.547745831 BH | 4   | 40  | 42  | 16  | 22    |
| 0.547745831 BH | 6   | 8   | 16  | 10  | 7     |
| 0.547745831 BH | 6   | 9   | 12  | 13  | 7.5   |
| 0.547829544 BH | 33  | 69  | 16  | 12  | 51    |
| 0.547829544 BH | 2   | 8   | 16  | 2   | 5     |
| 0.547851617 BH | 0   | 21  | 1   | 1   | 10.5  |
| 0.548124582 BH | 8   | 36  | 33  | 26  | 22    |
| 0.54822974 BH  | 5   | 33  | 21  | 26  | 19    |
| 0.548630587 BH | 42  | 31  | 99  | 39  | 36.5  |
| 0.548630587 BH | 33  | 206 | 117 | 167 | 119.5 |
| 0.548630587 BH | 2   | 23  | 2   | 2   | 12.5  |
| 0.548630587 BH | 17  | 44  | 44  | 40  | 30.5  |
| 0.54871052 BH  | 11  | 139 | 9   | 19  | 75    |
| 0.549149403 BH | 3   | 5   | 12  | 3   | 4     |
| 0.549322003 BH | 11  | 36  | 9   | 2   | 23.5  |
| 0.549404204 BH | 23  | 19  | 48  | 27  | 21    |
| 0.549614215 BH | 3   | 8   | 11  | 7   | 5.5   |
| 0.54966733 BH  | 79  | 105 | 86  | 191 | 92    |
| 0.549999538 BH | 5   | 12  | 18  | 10  | 8.5   |
| 0.549999538 BH | 80  | 148 | 50  | 18  | 114   |
| 0.549999538 BH | 15  | 23  | 7   | 3   | 19    |
| 0.550476985 BH | 33  | 22  | 13  | 5   | 27.5  |
| 0.550476985 BH | 2   | 8   | 6   | 10  | 5     |
| 0.550476985 BH | 4   | 13  | 23  | 5   | 8.5   |
| 0.550511972 BH | 20  | 77  | 59  | 64  | 48.5  |
| 0.550832904 BH | 7   | 65  | 8   | 7   | 36    |
| 0.550832904 BH | 25  | 44  | 13  | 6   | 34.5  |
| 0.550832904 BH | 4   | 17  | 27  | 5   | 10.5  |
| 0.550832904 BH | 3   | 24  | 3   | 2   | 13.5  |
| 0.550832904 BH | 4   | 22  | 4   | 1   | 13    |
| 0.550832904 BH | 7   | 5   | 1   | 1   | 6     |
| 0.550832904 BH | 2   | 14  | 1   | 1   | 8     |
| 0.55083359 BH  | 177 | 241 | 212 | 407 | 209   |

|                |     |     |     |    |      |
|----------------|-----|-----|-----|----|------|
| 0.551010939 BH | 4   | 1   | 14  | 1  | 2.5  |
| 0.551421976 BH | 7   | 35  | 6   | 3  | 21   |
| 0.551541725 BH | 3   | 34  | 3   | 3  | 18.5 |
| 0.551541725 BH | 13  | 93  | 14  | 9  | 53   |
| 0.552359925 BH | 4   | 34  | 37  | 14 | 19   |
| 0.552359925 BH | 8   | 17  | 5   | 1  | 12.5 |
| 0.552359925 BH | 8   | 17  | 5   | 1  | 12.5 |
| 0.552359925 BH | 3   | 33  | 16  | 28 | 18   |
| 0.552359925 BH | 11  | 5   | 3   | 1  | 8    |
| 0.552546887 BH | 2   | 17  | 20  | 7  | 9.5  |
| 0.553202946 BH | 3   | 24  | 2   | 3  | 13.5 |
| 0.553280913 BH | 3   | 6   | 21  | 0  | 4.5  |
| 0.553280913 BH | 19  | 85  | 11  | 13 | 52   |
| 0.55368452 BH  | 1   | 30  | 2   | 3  | 15.5 |
| 0.553775188 BH | 69  | 203 | 291 | 92 | 136  |
| 0.553927037 BH | 4   | 6   | 7   | 10 | 5    |
| 0.553955164 BH | 5   | 14  | 15  | 14 | 9.5  |
| 0.554062763 BH | 0   | 16  | 6   | 15 | 8    |
| 0.554403463 BH | 10  | 6   | 36  | 2  | 8    |
| 0.554403463 BH | 1   | 35  | 5   | 1  | 18   |
| 0.554403463 BH | 4   | 20  | 4   | 0  | 12   |
| 0.554403463 BH | 0   | 9   | 8   | 5  | 4.5  |
| 0.554403463 BH | 16  | 71  | 8   | 12 | 43.5 |
| 0.554403463 BH | 9   | 15  | 5   | 1  | 12   |
| 0.555215487 BH | 4   | 3   | 4   | 10 | 3.5  |
| 0.555215487 BH | 4   | 2   | 11  | 4  | 3    |
| 0.555664745 BH | 88  | 43  | 29  | 16 | 65.5 |
| 0.556148754 BH | 9   | 23  | 4   | 3  | 16   |
| 0.556427313 BH | 6   | 26  | 3   | 3  | 16   |
| 0.556666359 BH | 6   | 23  | 6   | 0  | 14.5 |
| 0.556666359 BH | 19  | 19  | 9   | 2  | 19   |
| 0.557363725 BH | 6   | 21  | 5   | 1  | 13.5 |
| 0.557363725 BH | 35  | 100 | 27  | 10 | 67.5 |
| 0.557730677 BH | 29  | 66  | 18  | 8  | 47.5 |
| 0.557854149 BH | 4   | 22  | 21  | 14 | 13   |
| 0.557854149 BH | 100 | 112 | 39  | 29 | 106  |
| 0.557971452 BH | 4   | 13  | 24  | 4  | 8.5  |
| 0.558096656 BH | 0   | 44  | 6   | 0  | 22   |
| 0.558619341 BH | 4   | 14  | 2   | 1  | 9    |
| 0.558619341 BH | 3   | 11  | 3   | 0  | 7    |
| 0.558619341 BH | 3   | 12  | 3   | 0  | 7.5  |
| 0.558793662 BH | 11  | 52  | 8   | 7  | 31.5 |
| 0.558793662 BH | 2   | 10  | 12  | 6  | 6    |
| 0.559277521 BH | 2   | 15  | 10  | 13 | 8.5  |
| 0.559451195 BH | 36  | 109 | 121 | 71 | 72.5 |
| 0.559454632 BH | 22  | 83  | 13  | 13 | 52.5 |
| 0.559454632 BH | 10  | 91  | 14  | 8  | 50.5 |



|                |     |     |     |     |       |
|----------------|-----|-----|-----|-----|-------|
| 0.559454632 BH | 11  | 89  | 16  | 6   | 50    |
| 0.559768154 BH | 17  | 129 | 88  | 85  | 73    |
| 0.559923581 BH | 24  | 81  | 98  | 43  | 52.5  |
| 0.560031953 BH | 57  | 136 | 155 | 108 | 96.5  |
| 0.560498356 BH | 23  | 25  | 10  | 4   | 24    |
| 0.561634207 BH | 12  | 12  | 5   | 2   | 12    |
| 0.561759926 BH | 53  | 158 | 47  | 11  | 105.5 |
| 0.562064115 BH | 595 | 444 | 764 | 985 | 519.5 |
| 0.562342324 BH | 9   | 152 | 114 | 78  | 80.5  |
| 0.562578434 BH | 13  | 34  | 9   | 3   | 23.5  |
| 0.562578434 BH | 25  | 42  | 11  | 8   | 33.5  |
| 0.562589766 BH | 2   | 25  | 3   | 2   | 13.5  |
| 0.562589766 BH | 18  | 34  | 8   | 6   | 26    |
| 0.562589766 BH | 6   | 6   | 3   | 0   | 6     |
| 0.562589766 BH | 2   | 21  | 19  | 11  | 11.5  |
| 0.562589766 BH | 3   | 15  | 2   | 1   | 9     |
| 0.562589766 BH | 3   | 16  | 2   | 1   | 9.5   |
| 0.562610033 BH | 29  | 21  | 11  | 5   | 25    |
| 0.563092751 BH | 4   | 47  | 6   | 4   | 25.5  |
| 0.563701462 BH | 2   | 4   | 13  | 1   | 3     |
| 0.563731953 BH | 8   | 24  | 6   | 2   | 16    |
| 0.563731953 BH | 5   | 27  | 5   | 2   | 16    |
| 0.564323807 BH | 14  | 16  | 8   | 0   | 15    |
| 0.564323807 BH | 1   | 11  | 11  | 5   | 6     |
| 0.564323807 BH | 1   | 16  | 1   | 1   | 8.5   |
| 0.564323807 BH | 2   | 5   | 7   | 5   | 3.5   |
| 0.564323807 BH | 29  | 28  | 13  | 5   | 28.5  |
| 0.564323807 BH | 13  | 18  | 4   | 4   | 15.5  |
| 0.564323807 BH | 3   | 15  | 1   | 2   | 9     |
| 0.564323807 BH | 3   | 15  | 1   | 2   | 9     |
| 0.564323807 BH | 0   | 13  | 2   | 0   | 6.5   |
| 0.564323807 BH | 0   | 13  | 2   | 0   | 6.5   |
| 0.564323807 BH | 0   | 13  | 2   | 0   | 6.5   |
| 0.564323807 BH | 0   | 13  | 2   | 0   | 6.5   |
| 0.564732076 BH | 2   | 25  | 13  | 19  | 13.5  |
| 0.564732076 BH | 6   | 41  | 6   | 4   | 23.5  |
| 0.565044521 BH | 58  | 24  | 17  | 11  | 41    |
| 0.565384692 BH | 44  | 29  | 18  | 7   | 36.5  |
| 0.565384692 BH | 4   | 6   | 15  | 4   | 5     |
| 0.565384692 BH | 9   | 23  | 2   | 5   | 16    |
| 0.565384692 BH | 2   | 12  | 9   | 10  | 7     |
| 0.565384692 BH | 2   | 14  | 3   | 0   | 8     |
| 0.565384692 BH | 2   | 13  | 3   | 0   | 7.5   |
| 0.565384692 BH | 1   | 17  | 1   | 1   | 9     |
| 0.565867164 BH | 26  | 77  | 22  | 6   | 51.5  |
| 0.565867164 BH | 3   | 16  | 1   | 2   | 9.5   |
| 0.565867164 BH | 109 | 227 | 44  | 52  | 168   |

|                |     |     |     |     |       |
|----------------|-----|-----|-----|-----|-------|
| 0.565867164 BH | 7   | 17  | 5   | 0   | 12    |
| 0.56635227 BH  | 11  | 44  | 6   | 7   | 27.5  |
| 0.56635227 BH  | 6   | 25  | 34  | 10  | 15.5  |
| 0.566580917 BH | 8   | 54  | 19  | 56  | 31    |
| 0.566580917 BH | 12  | 178 | 32  | 7   | 95    |
| 0.566580917 BH | 3   | 33  | 24  | 20  | 18    |
| 0.566580917 BH | 1   | 21  | 4   | 0   | 11    |
| 0.566580917 BH | 42  | 52  | 125 | 34  | 47    |
| 0.567037484 BH | 19  | 35  | 10  | 5   | 27    |
| 0.567269278 BH | 0   | 14  | 2   | 0   | 7     |
| 0.567269278 BH | 0   | 14  | 2   | 0   | 7     |
| 0.567269278 BH | 4   | 16  | 2   | 2   | 10    |
| 0.567269278 BH | 3   | 3   | 6   | 6   | 3     |
| 0.567269278 BH | 5   | 15  | 3   | 1   | 10    |
| 0.567269278 BH | 5   | 15  | 3   | 1   | 10    |
| 0.567765411 BH | 5   | 11  | 16  | 9   | 8     |
| 0.568318196 BH | 8   | 32  | 37  | 16  | 20    |
| 0.569403609 BH | 11  | 33  | 41  | 21  | 22    |
| 0.569403609 BH | 6   | 62  | 9   | 5   | 34    |
| 0.569771066 BH | 8   | 18  | 24  | 15  | 13    |
| 0.569896987 BH | 0   | 13  | 14  | 4   | 6.5   |
| 0.570019285 BH | 4   | 17  | 2   | 2   | 10.5  |
| 0.570161796 BH | 13  | 14  | 6   | 2   | 13.5  |
| 0.570278291 BH | 14  | 0   | 2   | 2   | 7     |
| 0.570336322 BH | 1   | 11  | 13  | 4   | 6     |
| 0.570520118 BH | 7   | 220 | 11  | 28  | 113.5 |
| 0.570575931 BH | 18  | 129 | 73  | 96  | 73.5  |
| 0.570649853 BH | 10  | 31  | 6   | 4   | 20.5  |
| 0.570931863 BH | 2   | 29  | 29  | 12  | 15.5  |
| 0.571330592 BH | 1   | 24  | 1   | 3   | 12.5  |
| 0.571330592 BH | 1   | 21  | 15  | 13  | 11    |
| 0.571330592 BH | 8   | 32  | 6   | 3   | 20    |
| 0.57169099 BH  | 2   | 17  | 2   | 1   | 9.5   |
| 0.57169099 BH  | 2   | 18  | 2   | 1   | 10    |
| 0.57169099 BH  | 2   | 18  | 2   | 1   | 10    |
| 0.57169099 BH  | 1   | 25  | 17  | 15  | 13    |
| 0.571736412 BH | 321 | 876 | 168 | 168 | 598.5 |
| 0.572304907 BH | 2   | 6   | 8   | 6   | 4     |
| 0.572347474 BH | 0   | 11  | 7   | 7   | 5.5   |
| 0.572347474 BH | 14  | 31  | 6   | 5   | 22.5  |
| 0.572347474 BH | 22  | 32  | 7   | 8   | 27    |
| 0.572616828 BH | 6   | 68  | 14  | 1   | 37    |
| 0.573623757 BH | 11  | 118 | 20  | 8   | 64.5  |
| 0.573623757 BH | 9   | 96  | 51  | 69  | 52.5  |
| 0.573714632 BH | 2   | 17  | 1   | 2   | 9.5   |
| 0.573714632 BH | 2   | 18  | 1   | 2   | 10    |
| 0.573714632 BH | 2   | 17  | 1   | 2   | 9.5   |

|                |      |     |     |     |       |
|----------------|------|-----|-----|-----|-------|
| 0.574034336 BH | 3    | 18  | 2   | 2   | 10.5  |
| 0.574590591 BH | 7    | 14  | 2   | 3   | 10.5  |
| 0.574590591 BH | 1    | 13  | 12  | 6   | 7     |
| 0.574590591 BH | 8    | 88  | 14  | 6   | 48    |
| 0.574685212 BH | 6    | 29  | 2   | 5   | 17.5  |
| 0.574685212 BH | 0    | 11  | 19  | 0   | 5.5   |
| 0.574685212 BH | 8    | 17  | 32  | 8   | 12.5  |
| 0.574685212 BH | 5    | 20  | 25  | 10  | 12.5  |
| 0.574731336 BH | 17   | 7   | 7   | 0   | 12    |
| 0.574731336 BH | 76   | 297 | 63  | 37  | 186.5 |
| 0.57563524 BH  | 8    | 34  | 5   | 5   | 21    |
| 0.576068482 BH | 3    | 19  | 2   | 2   | 11    |
| 0.576068482 BH | 9    | 7   | 2   | 2   | 8     |
| 0.576068482 BH | 3    | 22  | 33  | 4   | 12.5  |
| 0.576068482 BH | 7    | 33  | 4   | 5   | 20    |
| 0.576068482 BH | 20   | 78  | 69  | 54  | 49    |
| 0.576068482 BH | 98   | 409 | 69  | 63  | 253.5 |
| 0.576265524 BH | 30   | 95  | 24  | 10  | 62.5  |
| 0.576265524 BH | 8    | 11  | 2   | 3   | 9.5   |
| 0.576265524 BH | 1562 | 295 | 281 | 389 | 928.5 |
| 0.576417134 BH | 1    | 12  | 14  | 5   | 6.5   |
| 0.576943291 BH | 7    | 9   | 23  | 5   | 8     |
| 0.576955711 BH | 29   | 108 | 24  | 12  | 68.5  |
| 0.577458665 BH | 5    | 10  | 4   | 0   | 7.5   |
| 0.577458665 BH | 5    | 11  | 4   | 0   | 8     |
| 0.57816358 BH  | 1    | 15  | 3   | 0   | 8     |
| 0.57816358 BH  | 1    | 15  | 3   | 0   | 8     |
| 0.57816358 BH  | 1    | 15  | 3   | 0   | 8     |
| 0.57816358 BH  | 3    | 12  | 17  | 5   | 7.5   |
| 0.57816358 BH  | 16   | 127 | 13  | 18  | 71.5  |
| 0.578465361 BH | 4    | 20  | 3   | 2   | 12    |
| 0.578465361 BH | 7    | 15  | 4   | 1   | 11    |
| 0.578465361 BH | 6    | 67  | 6   | 8   | 36.5  |
| 0.578465361 BH | 28   | 254 | 47  | 18  | 141   |
| 0.578465361 BH | 0    | 24  | 1   | 2   | 12    |
| 0.578502223 BH | 7    | 17  | 4   | 2   | 12    |
| 0.578702216 BH | 12   | 14  | 24  | 18  | 13    |
| 0.579452958 BH | 4    | 64  | 8   | 5   | 34    |
| 0.579997143 BH | 1    | 16  | 3   | 0   | 8.5   |
| 0.579997143 BH | 8    | 8   | 1   | 3   | 8     |
| 0.580428187 BH | 16   | 18  | 7   | 3   | 17    |
| 0.580428187 BH | 7    | 36  | 6   | 4   | 21.5  |
| 0.580645861 BH | 3    | 57  | 4   | 7   | 30    |
| 0.580645861 BH | 9    | 9   | 2   | 3   | 9     |
| 0.580645861 BH | 8    | 13  | 4   | 1   | 10.5  |
| 0.580645861 BH | 2    | 6   | 15  | 1   | 4     |
| 0.580645861 BH | 6    | 20  | 4   | 2   | 13    |

|                |     |     |     |     |       |
|----------------|-----|-----|-----|-----|-------|
| 0.580645861 BH | 6   | 20  | 4   | 2   | 13    |
| 0.580645861 BH | 3   | 6   | 6   | 9   | 4.5   |
| 0.580645861 BH | 3   | 7   | 6   | 9   | 5     |
| 0.580645861 BH | 2   | 30  | 4   | 2   | 16    |
| 0.580645861 BH | 2   | 30  | 4   | 2   | 16    |
| 0.580975762 BH | 2   | 25  | 23  | 10  | 13.5  |
| 0.581006437 BH | 87  | 132 | 46  | 24  | 109.5 |
| 0.582743781 BH | 8   | 75  | 9   | 9   | 41.5  |
| 0.582980349 BH | 9   | 56  | 8   | 7   | 32.5  |
| 0.583139352 BH | 2   | 9   | 10  | 5   | 5.5   |
| 0.583139352 BH | 4   | 11  | 19  | 5   | 7.5   |
| 0.583139352 BH | 12  | 52  | 27  | 49  | 32    |
| 0.583139352 BH | 3   | 14  | 4   | 0   | 8.5   |
| 0.583139352 BH | 3   | 14  | 4   | 0   | 8.5   |
| 0.583139352 BH | 62  | 68  | 29  | 14  | 65    |
| 0.583142886 BH | 3   | 31  | 2   | 4   | 17    |
| 0.58315766 BH  | 0   | 9   | 2   | 10  | 4.5   |
| 0.58315766 BH  | 28  | 35  | 8   | 10  | 31.5  |
| 0.58315766 BH  | 24  | 80  | 11  | 15  | 52    |
| 0.583524789 BH | 9   | 21  | 4   | 3   | 15    |
| 0.583524789 BH | 6   | 78  | 7   | 10  | 42    |
| 0.583524789 BH | 2   | 20  | 21  | 9   | 11    |
| 0.584511927 BH | 43  | 88  | 23  | 16  | 65.5  |
| 0.584635749 BH | 62  | 98  | 181 | 60  | 80    |
| 0.584767089 BH | 1   | 9   | 9   | 5   | 5     |
| 0.584883615 BH | 146 | 311 | 253 | 339 | 228.5 |
| 0.585457187 BH | 4   | 26  | 23  | 14  | 15    |
| 0.585854993 BH | 106 | 241 | 186 | 257 | 173.5 |
| 0.585854993 BH | 2   | 21  | 2   | 2   | 11.5  |
| 0.585854993 BH | 2   | 21  | 2   | 2   | 11.5  |
| 0.585854993 BH | 2   | 20  | 2   | 2   | 11    |
| 0.585854993 BH | 2   | 20  | 2   | 2   | 11    |
| 0.585854993 BH | 3   | 10  | 18  | 3   | 6.5   |
| 0.585915597 BH | 3   | 10  | 9   | 9   | 6.5   |
| 0.586155374 BH | 7   | 20  | 5   | 2   | 13.5  |
| 0.586293153 BH | 3   | 1   | 12  | 0   | 2     |
| 0.586293153 BH | 3   | 22  | 3   | 2   | 12.5  |
| 0.586293153 BH | 2   | 6   | 12  | 3   | 4     |
| 0.586293153 BH | 1   | 19  | 2   | 1   | 10    |
| 0.586293153 BH | 1   | 19  | 2   | 1   | 10    |
| 0.586293153 BH | 1   | 19  | 2   | 1   | 10    |
| 0.586293153 BH | 1   | 19  | 2   | 1   | 10    |
| 0.586293153 BH | 1   | 20  | 2   | 1   | 10.5  |
| 0.586293153 BH | 1   | 19  | 2   | 1   | 10    |
| 0.586355832 BH | 21  | 39  | 8   | 9   | 30    |
| 0.58639126 BH  | 20  | 49  | 11  | 8   | 34.5  |
| 0.586448161 BH | 5   | 15  | 22  | 7   | 10    |

|                |     |     |      |     |       |
|----------------|-----|-----|------|-----|-------|
| 0.586448161 BH | 16  | 28  | 34   | 29  | 22    |
| 0.586688754 BH | 577 | 885 | 1120 | 919 | 731   |
| 0.587286748 BH | 38  | 103 | 23   | 17  | 70.5  |
| 0.587485562 BH | 15  | 49  | 9    | 7   | 32    |
| 0.587502672 BH | 4   | 32  | 2    | 5   | 18    |
| 0.587502672 BH | 7   | 25  | 4    | 3   | 16    |
| 0.587502672 BH | 7   | 26  | 4    | 3   | 16.5  |
| 0.587517465 BH | 6   | 22  | 5    | 2   | 14    |
| 0.587517465 BH | 6   | 22  | 5    | 2   | 14    |
| 0.588068022 BH | 1   | 19  | 1    | 2   | 10    |
| 0.588106416 BH | 3   | 21  | 2    | 3   | 12    |
| 0.588241542 BH | 1   | 24  | 19   | 13  | 12.5  |
| 0.588373159 BH | 1   | 28  | 4    | 1   | 14.5  |
| 0.588815613 BH | 6   | 19  | 5    | 1   | 12.5  |
| 0.588815613 BH | 7   | 426 | 90   | 415 | 216.5 |
| 0.589165519 BH | 2   | 21  | 3    | 1   | 11.5  |
| 0.589449043 BH | 9   | 44  | 5    | 7   | 26.5  |
| 0.589449043 BH | 0   | 22  | 21   | 7   | 11    |
| 0.589834088 BH | 9   | 66  | 13   | 4   | 37.5  |
| 0.589970737 BH | 0   | 7   | 9    | 2   | 3.5   |
| 0.589970737 BH | 0   | 7   | 9    | 2   | 3.5   |
| 0.589970737 BH | 8   | 71  | 10   | 7   | 39.5  |
| 0.590431679 BH | 20  | 99  | 22   | 9   | 59.5  |
| 0.590984193 BH | 6   | 39  | 35   | 20  | 22.5  |
| 0.59153675 BH  | 3   | 12  | 10   | 10  | 7.5   |
| 0.59153675 BH  | 2   | 41  | 3    | 5   | 21.5  |
| 0.59157644 BH  | 2   | 34  | 3    | 3   | 18    |
| 0.59157644 BH  | 2   | 34  | 3    | 3   | 18    |
| 0.591601567 BH | 7   | 33  | 33   | 18  | 20    |
| 0.591601567 BH | 0   | 18  | 1    | 1   | 9     |
| 0.591601567 BH | 0   | 18  | 1    | 1   | 9     |
| 0.591601567 BH | 26  | 31  | 14   | 4   | 28.5  |
| 0.591601567 BH | 11  | 24  | 6    | 3   | 17.5  |
| 0.591601567 BH | 2   | 17  | 4    | 0   | 9.5   |
| 0.591601567 BH | 2   | 17  | 4    | 0   | 9.5   |
| 0.591601567 BH | 2   | 16  | 4    | 0   | 9     |
| 0.59337722 BH  | 277 | 371 | 621  | 334 | 324   |
| 0.59337722 BH  | 2   | 21  | 1    | 3   | 11.5  |
| 0.59337722 BH  | 2   | 4   | 2    | 10  | 3     |
| 0.59337722 BH  | 6   | 14  | 31   | 3   | 10    |
| 0.593393844 BH | 10  | 102 | 34   | 91  | 56    |
| 0.593393844 BH | 167 | 332 | 278  | 369 | 249.5 |
| 0.593393844 BH | 4   | 9   | 15   | 6   | 6.5   |
| 0.593393844 BH | 7   | 28  | 5    | 3   | 17.5  |
| 0.593393844 BH | 11  | 172 | 30   | 176 | 91.5  |
| 0.593991595 BH | 45  | 122 | 17   | 28  | 83.5  |
| 0.594451791 BH | 4   | 18  | 23   | 8   | 11    |

|                |     |     |     |     |       |
|----------------|-----|-----|-----|-----|-------|
| 0.594451791 BH | 3   | 23  | 4   | 1   | 13    |
| 0.594451791 BH | 3   | 23  | 4   | 1   | 13    |
| 0.594788974 BH | 2   | 5   | 14  | 0   | 3.5   |
| 0.594788974 BH | 5   | 0   | 3   | 11  | 2.5   |
| 0.595310247 BH | 1   | 7   | 2   | 9   | 4     |
| 0.595461272 BH | 2   | 8   | 13  | 3   | 5     |
| 0.595479482 BH | 8   | 51  | 29  | 39  | 29.5  |
| 0.595479482 BH | 7   | 28  | 25  | 19  | 17.5  |
| 0.595479482 BH | 7   | 24  | 17  | 23  | 15.5  |
| 0.595479482 BH | 127 | 46  | 58  | 6   | 86.5  |
| 0.59551276 BH  | 47  | 206 | 60  | 3   | 126.5 |
| 0.595664533 BH | 87  | 103 | 155 | 125 | 95    |
| 0.595860467 BH | 25  | 63  | 16  | 9   | 44    |
| 0.59619577 BH  | 0   | 9   | 15  | 0   | 4.5   |
| 0.596295755 BH | 26  | 100 | 69  | 80  | 63    |
| 0.596295755 BH | 9   | 17  | 6   | 1   | 13    |
| 0.596295755 BH | 12  | 14  | 6   | 2   | 13    |
| 0.596295755 BH | 2   | 12  | 13  | 6   | 7     |
| 0.596295755 BH | 14  | 33  | 37  | 26  | 23.5  |
| 0.596617593 BH | 28  | 33  | 12  | 7   | 30.5  |
| 0.59685222 BH  | 0   | 9   | 8   | 4   | 4.5   |
| 0.596930975 BH | 14  | 34  | 30  | 33  | 24    |
| 0.597145574 BH | 2   | 9   | 13  | 3   | 5.5   |
| 0.597331764 BH | 4   | 33  | 34  | 12  | 18.5  |
| 0.597599482 BH | 4   | 58  | 36  | 34  | 31    |
| 0.597599482 BH | 11  | 16  | 7   | 0   | 13.5  |
| 0.597599482 BH | 112 | 110 | 25  | 47  | 111   |
| 0.597599482 BH | 2   | 13  | 10  | 10  | 7.5   |
| 0.597599482 BH | 2   | 13  | 13  | 8   | 7.5   |
| 0.598648625 BH | 48  | 117 | 70  | 135 | 82.5  |
| 0.598648625 BH | 10  | 26  | 7   | 2   | 18    |
| 0.598648625 BH | 12  | 13  | 6   | 2   | 12.5  |
| 0.599544893 BH | 13  | 79  | 11  | 11  | 46    |
| 0.599556032 BH | 4   | 23  | 5   | 1   | 13.5  |
| 0.599678987 BH | 6   | 0   | 13  | 4   | 3     |
| 0.599728912 BH | 2   | 31  | 25  | 15  | 16.5  |
| 0.599801719 BH | 2   | 9   | 2   | 0   | 5.5   |
| 0.600112735 BH | 308 | 982 | 220 | 152 | 645   |
| 0.600127419 BH | 14  | 30  | 9   | 4   | 22    |
| 0.600127419 BH | 12  | 35  | 9   | 4   | 23.5  |
| 0.600169738 BH | 5   | 8   | 16  | 5   | 6.5   |
| 0.601019912 BH | 10  | 37  | 5   | 6   | 23.5  |
| 0.601019912 BH | 4   | 17  | 16  | 11  | 10.5  |
| 0.601019912 BH | 1   | 22  | 2   | 2   | 11.5  |
| 0.601158385 BH | 4   | 11  | 7   | 14  | 7.5   |
| 0.601335386 BH | 16  | 46  | 9   | 7   | 31    |
| 0.601376563 BH | 19  | 33  | 13  | 3   | 26    |

|                |     |      |     |     |       |
|----------------|-----|------|-----|-----|-------|
| 0.601376563 BH | 36  | 224  | 129 | 160 | 130   |
| 0.601376563 BH | 1   | 11   | 12  | 4   | 6     |
| 0.601376563 BH | 23  | 14   | 6   | 6   | 18.5  |
| 0.601937214 BH | 6   | 36   | 20  | 28  | 21    |
| 0.602061296 BH | 9   | 46   | 23  | 40  | 27.5  |
| 0.602061296 BH | 12  | 13   | 7   | 0   | 12.5  |
| 0.602061296 BH | 81  | 124  | 53  | 15  | 102.5 |
| 0.602061296 BH | 2   | 13   | 20  | 3   | 7.5   |
| 0.602061296 BH | 7   | 15   | 5   | 0   | 11    |
| 0.602061296 BH | 312 | 153  | 113 | 64  | 232.5 |
| 0.602061296 BH | 5   | 7    | 1   | 1   | 6     |
| 0.602061296 BH | 3   | 10   | 1   | 1   | 6.5   |
| 0.603064185 BH | 13  | 66   | 12  | 8   | 39.5  |
| 0.603832671 BH | 60  | 86   | 31  | 17  | 73    |
| 0.603981869 BH | 11  | 31   | 40  | 16  | 21    |
| 0.604190039 BH | 1   | 29   | 18  | 16  | 15    |
| 0.604190039 BH | 16  | 32   | 12  | 2   | 24    |
| 0.604190039 BH | 3   | 11   | 1   | 1   | 7     |
| 0.604190039 BH | 3   | 11   | 1   | 1   | 7     |
| 0.604242527 BH | 197 | 129  | 240 | 295 | 163   |
| 0.604896554 BH | 5   | 33   | 5   | 3   | 19    |
| 0.604912866 BH | 1   | 23   | 3   | 1   | 12    |
| 0.605338602 BH | 120 | 213  | 368 | 113 | 166.5 |
| 0.605392375 BH | 5   | 18   | 30  | 4   | 11.5  |
| 0.605533208 BH | 9   | 21   | 7   | 1   | 15    |
| 0.605533208 BH | 3   | 42   | 5   | 4   | 22.5  |
| 0.605617485 BH | 9   | 28   | 27  | 20  | 18.5  |
| 0.605617485 BH | 12  | 8    | 5   | 1   | 10    |
| 0.605617485 BH | 0   | 18   | 0   | 2   | 9     |
| 0.605617485 BH | 0   | 17   | 3   | 0   | 8.5   |
| 0.605617485 BH | 0   | 17   | 3   | 0   | 8.5   |
| 0.606536111 BH | 0   | 14   | 14  | 5   | 7     |
| 0.606620437 BH | 43  | 1270 | 172 | 98  | 656.5 |
| 0.606621011 BH | 11  | 47   | 8   | 7   | 29    |
| 0.606621011 BH | 5   | 21   | 21  | 13  | 13    |
| 0.606632078 BH | 1   | 24   | 3   | 1   | 12.5  |
| 0.606632078 BH | 1   | 19   | 0   | 3   | 10    |
| 0.607379738 BH | 1   | 10   | 2   | 0   | 5.5   |
| 0.607602943 BH | 0   | 19   | 0   | 2   | 9.5   |
| 0.607602943 BH | 13  | 40   | 37  | 30  | 26.5  |
| 0.607602943 BH | 398 | 1029 | 142 | 260 | 713.5 |
| 0.607735846 BH | 3   | 26   | 5   | 1   | 14.5  |
| 0.608369153 BH | 10  | 30   | 18  | 33  | 20    |
| 0.608417056 BH | 184 | 126  | 74  | 41  | 155   |
| 0.608663058 BH | 5   | 10   | 2   | 1   | 7.5   |
| 0.608663058 BH | 4   | 12   | 2   | 1   | 8     |
| 0.608663058 BH | 5   | 10   | 2   | 1   | 7.5   |

|                |     |      |     |     |       |
|----------------|-----|------|-----|-----|-------|
| 0.608663058 BH | 6   | 9    | 2   | 1   | 7.5   |
| 0.608663058 BH | 25  | 27   | 9   | 7   | 26    |
| 0.608831913 BH | 6   | 5    | 1   | 1   | 5.5   |
| 0.608831913 BH | 2   | 13   | 1   | 1   | 7.5   |
| 0.608831913 BH | 2   | 13   | 1   | 1   | 7.5   |
| 0.608831913 BH | 2   | 13   | 1   | 1   | 7.5   |
| 0.608831913 BH | 2   | 13   | 1   | 1   | 7.5   |
| 0.609009895 BH | 149 | 1758 | 323 | 125 | 953.5 |
| 0.609037544 BH | 7   | 28   | 22  | 21  | 17.5  |
| 0.609313039 BH | 13  | 55   | 8   | 9   | 34    |
| 0.609352867 BH | 30  | 64   | 63  | 59  | 47    |
| 0.609352867 BH | 1   | 11   | 13  | 3   | 6     |
| 0.609688551 BH | 2   | 4    | 7   | 5   | 3     |
| 0.609819088 BH | 17  | 40   | 12  | 4   | 28.5  |
| 0.610103715 BH | 4   | 11   | 1   | 2   | 7.5   |
| 0.610103715 BH | 5   | 10   | 1   | 2   | 7.5   |
| 0.610158209 BH | 6   | 37   | 7   | 3   | 21.5  |
| 0.610566439 BH | 66  | 228  | 134 | 207 | 147   |
| 0.610923196 BH | 18  | 88   | 18  | 10  | 53    |
| 0.610948937 BH | 10  | 8    | 18  | 12  | 9     |
| 0.610948937 BH | 9   | 11   | 29  | 6   | 10    |
| 0.610948937 BH | 4   | 34   | 5   | 3   | 19    |
| 0.611167323 BH | 4   | 36   | 18  | 27  | 20    |
| 0.611167323 BH | 3   | 34   | 1   | 6   | 18.5  |
| 0.61149369 BH  | 2   | 5    | 7   | 4   | 3.5   |
| 0.61149369 BH  | 2   | 5    | 7   | 4   | 3.5   |
| 0.611651424 BH | 20  | 10   | 8   | 2   | 15    |
| 0.611651424 BH | 18  | 73   | 15  | 9   | 45.5  |
| 0.611651424 BH | 3   | 14   | 2   | 1   | 8.5   |
| 0.611651424 BH | 5   | 76   | 14  | 3   | 40.5  |
| 0.611651424 BH | 5   | 9    | 19  | 4   | 7     |
| 0.611676822 BH | 33  | 133  | 80  | 110 | 83    |
| 0.612285476 BH | 7   | 39   | 8   | 3   | 23    |
| 0.612285476 BH | 6   | 40   | 7   | 4   | 23    |
| 0.613012711 BH | 7   | 13   | 3   | 2   | 10    |
| 0.613012711 BH | 6   | 14   | 3   | 2   | 10    |
| 0.61341381 BH  | 6   | 12   | 3   | 1   | 9     |
| 0.61341381 BH  | 4   | 15   | 2   | 2   | 9.5   |
| 0.613560572 BH | 3   | 13   | 1   | 2   | 8     |
| 0.613560572 BH | 3   | 14   | 1   | 2   | 8.5   |
| 0.614346714 BH | 35  | 78   | 20  | 14  | 56.5  |
| 0.614346714 BH | 258 | 238  | 76  | 96  | 248   |
| 0.61468007 BH  | 10  | 110  | 76  | 56  | 60    |
| 0.615218767 BH | 27  | 57   | 19  | 7   | 42    |
| 0.615300146 BH | 3   | 58   | 7   | 5   | 30.5  |
| 0.615300146 BH | 3   | 10   | 3   | 0   | 6.5   |
| 0.615300146 BH | 3   | 10   | 3   | 0   | 6.5   |



|                |     |      |     |     |       |
|----------------|-----|------|-----|-----|-------|
| 0.615300146 BH | 3   | 9    | 3   | 0   | 6     |
| 0.615300146 BH | 4   | 7    | 3   | 0   | 5.5   |
| 0.615300146 BH | 4   | 8    | 3   | 0   | 6     |
| 0.615300146 BH | 4   | 7    | 3   | 0   | 5.5   |
| 0.615395242 BH | 8   | 13   | 4   | 2   | 10.5  |
| 0.615395242 BH | 8   | 13   | 4   | 2   | 10.5  |
| 0.6155285 BH   | 1   | 14   | 14  | 5   | 7.5   |
| 0.6155285 BH   | 1   | 14   | 14  | 5   | 7.5   |
| 0.615815061 BH | 336 | 516  | 155 | 130 | 426   |
| 0.615815061 BH | 1   | 25   | 2   | 3   | 13    |
| 0.61589994 BH  | 120 | 199  | 205 | 215 | 159.5 |
| 0.616062702 BH | 26  | 58   | 12  | 12  | 42    |
| 0.616062702 BH | 184 | 310  | 110 | 55  | 247   |
| 0.616062702 BH | 10  | 23   | 5   | 4   | 16.5  |
| 0.616062702 BH | 16  | 30   | 8   | 5   | 23    |
| 0.616062702 BH | 8   | 21   | 4   | 3   | 14.5  |
| 0.616062702 BH | 5   | 39   | 7   | 3   | 22    |
| 0.616062702 BH | 2   | 7    | 5   | 7   | 4.5   |
| 0.616062702 BH | 3   | 5    | 5   | 7   | 4     |
| 0.616062702 BH | 4   | 15   | 3   | 1   | 9.5   |
| 0.616062702 BH | 1   | 7    | 7   | 4   | 4     |
| 0.616062702 BH | 2   | 4    | 4   | 7   | 3     |
| 0.616062702 BH | 1   | 6    | 8   | 4   | 3.5   |
| 0.616062702 BH | 7   | 29   | 17  | 27  | 18    |
| 0.616062702 BH | 11  | 25   | 6   | 4   | 18    |
| 0.616181145 BH | 79  | 140  | 44  | 27  | 109.5 |
| 0.616181145 BH | 1   | 16   | 19  | 3   | 8.5   |
| 0.616207649 BH | 9   | 15   | 18  | 16  | 12    |
| 0.617379158 BH | 12  | 75   | 18  | 4   | 43.5  |
| 0.617379158 BH | 48  | 56   | 23  | 12  | 52    |
| 0.617379158 BH | 75  | 151  | 156 | 133 | 113   |
| 0.617379158 BH | 11  | 15   | 4   | 3   | 13    |
| 0.617379158 BH | 4   | 19   | 3   | 2   | 11.5  |
| 0.617379158 BH | 6   | 14   | 4   | 1   | 10    |
| 0.617379158 BH | 6   | 14   | 4   | 1   | 10    |
| 0.617379158 BH | 4   | 19   | 3   | 2   | 11.5  |
| 0.617379158 BH | 7   | 13   | 4   | 1   | 10    |
| 0.617379158 BH | 2   | 6    | 10  | 4   | 4     |
| 0.617379158 BH | 3   | 17   | 2   | 2   | 10    |
| 0.617379158 BH | 11  | 88   | 6   | 16  | 49.5  |
| 0.617379158 BH | 36  | 27   | 26  | 73  | 31.5  |
| 0.617379158 BH | 9   | 2    | 23  | 4   | 5.5   |
| 0.617379158 BH | 5   | 42   | 7   | 4   | 23.5  |
| 0.617379158 BH | 41  | 66   | 22  | 12  | 53.5  |
| 0.617379158 BH | 2   | 28   | 5   | 1   | 15    |
| 0.617379158 BH | 1   | 15   | 15  | 6   | 8     |
| 0.617379158 BH | 412 | 1772 | 283 | 312 | 1092  |

|                |     |     |     |     |       |
|----------------|-----|-----|-----|-----|-------|
| 0.617379158 BH | 6   | 26  | 36  | 8   | 16    |
| 0.617379158 BH | 7   | 26  | 4   | 4   | 16.5  |
| 0.617379158 BH | 3   | 11  | 13  | 7   | 7     |
| 0.617379158 BH | 5   | 7   | 13  | 7   | 6     |
| 0.617379158 BH | 7   | 26  | 4   | 4   | 16.5  |
| 0.617379158 BH | 12  | 16  | 5   | 3   | 14    |
| 0.617379158 BH | 4   | 42  | 10  | 40  | 23    |
| 0.617379158 BH | 1   | 14  | 1   | 1   | 7.5   |
| 0.617379158 BH | 1   | 14  | 1   | 1   | 7.5   |
| 0.617379158 BH | 2   | 12  | 0   | 2   | 7     |
| 0.617379158 BH | 2   | 11  | 3   | 0   | 6.5   |
| 0.617379158 BH | 9   | 44  | 11  | 3   | 26.5  |
| 0.617379158 BH | 34  | 46  | 5   | 18  | 40    |
| 0.617567408 BH | 2   | 16  | 2   | 1   | 9     |
| 0.617567408 BH | 2   | 15  | 1   | 2   | 8.5   |
| 0.617567408 BH | 5   | 16  | 4   | 1   | 10.5  |
| 0.617567408 BH | 7   | 12  | 4   | 1   | 9.5   |
| 0.617567408 BH | 4   | 18  | 2   | 3   | 11    |
| 0.617567408 BH | 4   | 18  | 2   | 3   | 11    |
| 0.617567408 BH | 1   | 6   | 4   | 7   | 3.5   |
| 0.617735485 BH | 15  | 28  | 5   | 7   | 21.5  |
| 0.617788499 BH | 24  | 51  | 16  | 7   | 37.5  |
| 0.618464799 BH | 0   | 13  | 7   | 8   | 6.5   |
| 0.618464799 BH | 0   | 10  | 17  | 0   | 5     |
| 0.618579893 BH | 1   | 15  | 1   | 1   | 8     |
| 0.618579893 BH | 47  | 129 | 39  | 14  | 88    |
| 0.618579893 BH | 1   | 26  | 4   | 1   | 13.5  |
| 0.61885087 BH  | 31  | 269 | 127 | 190 | 150   |
| 0.61885087 BH  | 19  | 33  | 6   | 9   | 26    |
| 0.61885087 BH  | 16  | 40  | 11  | 5   | 28    |
| 0.61885087 BH  | 1   | 20  | 31  | 0   | 10.5  |
| 0.61885087 BH  | 2   | 16  | 1   | 2   | 9     |
| 0.61885087 BH  | 190 | 223 | 102 | 45  | 206.5 |
| 0.61885087 BH  | 24  | 157 | 96  | 100 | 90.5  |
| 0.61885087 BH  | 3   | 18  | 3   | 1   | 10.5  |
| 0.61885087 BH  | 41  | 60  | 94  | 49  | 50.5  |
| 0.61885087 BH  | 2   | 7   | 10  | 3   | 4.5   |
| 0.61885087 BH  | 1   | 9   | 8   | 5   | 5     |
| 0.619324524 BH | 7   | 29  | 4   | 5   | 18    |
| 0.61960975 BH  | 10  | 39  | 7   | 5   | 24.5  |
| 0.619693053 BH | 143 | 117 | 55  | 40  | 130   |
| 0.619709598 BH | 11  | 11  | 6   | 0   | 11    |
| 0.619709598 BH | 5   | 4   | 8   | 8   | 4.5   |
| 0.620200061 BH | 194 | 220 | 235 | 344 | 207   |
| 0.620200061 BH | 8   | 43  | 41  | 21  | 25.5  |
| 0.62121587 BH  | 3   | 20  | 3   | 2   | 11.5  |
| 0.62121587 BH  | 2   | 6   | 11  | 3   | 4     |

|                |     |     |     |     |       |
|----------------|-----|-----|-----|-----|-------|
| 0.62121587 BH  | 17  | 31  | 13  | 1   | 24    |
| 0.621513565 BH | 2   | 46  | 5   | 5   | 24    |
| 0.621555023 BH | 12  | 30  | 9   | 3   | 21    |
| 0.621555023 BH | 4   | 17  | 11  | 14  | 10.5  |
| 0.621701809 BH | 10  | 25  | 7   | 2   | 17.5  |
| 0.621935714 BH | 4   | 22  | 4   | 2   | 13    |
| 0.621935714 BH | 6   | 18  | 5   | 1   | 12    |
| 0.621960886 BH | 11  | 11  | 5   | 2   | 11    |
| 0.622090061 BH | 14  | 44  | 41  | 29  | 29    |
| 0.623117109 BH | 42  | 60  | 77  | 63  | 51    |
| 0.623117109 BH | 1   | 9   | 9   | 4   | 5     |
| 0.623117109 BH | 9   | 9   | 4   | 1   | 9     |
| 0.623117109 BH | 3   | 21  | 3   | 2   | 12    |
| 0.623117109 BH | 246 | 468 | 330 | 557 | 357   |
| 0.623117109 BH | 2   | 30  | 15  | 20  | 16    |
| 0.623126727 BH | 33  | 100 | 109 | 54  | 66.5  |
| 0.623652029 BH | 4   | 20  | 26  | 6   | 12    |
| 0.623687389 BH | 6   | 24  | 6   | 2   | 15    |
| 0.62370891 BH  | 25  | 142 | 70  | 110 | 83.5  |
| 0.623949851 BH | 89  | 65  | 41  | 17  | 77    |
| 0.623949851 BH | 8   | 4   | 1   | 2   | 6     |
| 0.623954601 BH | 11  | 12  | 2   | 4   | 11.5  |
| 0.623967496 BH | 26  | 151 | 68  | 121 | 88.5  |
| 0.62404691 BH  | 9   | 39  | 9   | 4   | 24    |
| 0.62404691 BH  | 13  | 14  | 28  | 14  | 13.5  |
| 0.62521289 BH  | 54  | 200 | 37  | 35  | 127   |
| 0.62521289 BH  | 2   | 5   | 13  | 0   | 3.5   |
| 0.62521289 BH  | 11  | 47  | 6   | 8   | 29    |
| 0.62521289 BH  | 0   | 12  | 2   | 0   | 6     |
| 0.62521289 BH  | 0   | 12  | 2   | 0   | 6     |
| 0.62521289 BH  | 0   | 12  | 2   | 0   | 6     |
| 0.62521289 BH  | 0   | 12  | 2   | 0   | 6     |
| 0.62521289 BH  | 0   | 12  | 2   | 0   | 6     |
| 0.625293539 BH | 1   | 26  | 15  | 16  | 13.5  |
| 0.625293539 BH | 11  | 25  | 27  | 20  | 18    |
| 0.625549983 BH | 1   | 11  | 7   | 7   | 6     |
| 0.625549983 BH | 6   | 1   | 14  | 4   | 3.5   |
| 0.625549983 BH | 6   | 31  | 4   | 5   | 18.5  |
| 0.625847067 BH | 40  | 193 | 93  | 161 | 116.5 |
| 0.626334981 BH | 8   | 43  | 6   | 6   | 25.5  |
| 0.626648589 BH | 10  | 0   | 33  | 0   | 5     |
| 0.626855422 BH | 344 | 197 | 97  | 108 | 270.5 |
| 0.626855422 BH | 5   | 30  | 4   | 4   | 17.5  |
| 0.627550097 BH | 3   | 42  | 9   | 1   | 22.5  |
| 0.627550097 BH | 20  | 98  | 53  | 77  | 59    |
| 0.627550097 BH | 10  | 31  | 3   | 7   | 20.5  |
| 0.627660839 BH | 3   | 10  | 15  | 4   | 6.5   |

|                |     |     |     |     |       |
|----------------|-----|-----|-----|-----|-------|
| 0.627660839 BH | 1   | 13  | 3   | 0   | 7     |
| 0.627660839 BH | 1   | 13  | 3   | 0   | 7     |
| 0.627855438 BH | 31  | 291 | 55  | 25  | 161   |
| 0.627855438 BH | 2   | 20  | 3   | 1   | 11    |
| 0.627855438 BH | 2   | 19  | 3   | 1   | 10.5  |
| 0.62824246 BH  | 79  | 204 | 41  | 44  | 141.5 |
| 0.62824246 BH  | 27  | 14  | 9   | 6   | 20.5  |
| 0.62824246 BH  | 1   | 8   | 11  | 3   | 4.5   |
| 0.62824246 BH  | 1   | 8   | 4   | 9   | 4.5   |
| 0.628448523 BH | 22  | 128 | 27  | 13  | 75    |
| 0.628458907 BH | 66  | 550 | 48  | 95  | 308   |
| 0.62882569 BH  | 48  | 61  | 25  | 13  | 54.5  |
| 0.62911254 BH  | 60  | 23  | 155 | 19  | 41.5  |
| 0.62911254 BH  | 1   | 15  | 0   | 2   | 8     |
| 0.629204704 BH | 111 | 351 | 168 | 353 | 231   |
| 0.629204704 BH | 3   | 24  | 4   | 2   | 13.5  |
| 0.629204704 BH | 1   | 10  | 11  | 4   | 5.5   |
| 0.629204704 BH | 20  | 37  | 41  | 35  | 28.5  |
| 0.629368691 BH | 9   | 50  | 10  | 5   | 29.5  |
| 0.629368691 BH | 1   | 12  | 9   | 7   | 6.5   |
| 0.629368691 BH | 6   | 22  | 6   | 1   | 14    |
| 0.629394453 BH | 85  | 115 | 43  | 26  | 100   |
| 0.629588153 BH | 33  | 49  | 8   | 17  | 41    |
| 0.630006823 BH | 14  | 16  | 46  | 6   | 15    |
| 0.630006823 BH | 7   | 81  | 9   | 10  | 44    |
| 0.630006823 BH | 1   | 18  | 2   | 1   | 9.5   |
| 0.630006823 BH | 8   | 51  | 37  | 29  | 29.5  |
| 0.630564467 BH | 2   | 17  | 14  | 9   | 9.5   |
| 0.631806104 BH | 12  | 8   | 5   | 2   | 10    |
| 0.631806104 BH | 11  | 12  | 6   | 1   | 11.5  |
| 0.631806104 BH | 20  | 44  | 13  | 6   | 32    |
| 0.632299697 BH | 2   | 23  | 3   | 2   | 12.5  |
| 0.632374571 BH | 1   | 18  | 1   | 2   | 9.5   |
| 0.63259026 BH  | 4   | 26  | 14  | 19  | 15    |
| 0.632918649 BH | 14  | 18  | 22  | 24  | 16    |
| 0.632918649 BH | 495 | 966 | 866 | 931 | 730.5 |
| 0.63303197 BH  | 8   | 14  | 16  | 14  | 11    |
| 0.633280052 BH | 2   | 18  | 15  | 8   | 10    |
| 0.633701884 BH | 4   | 22  | 1   | 4   | 13    |
| 0.634302201 BH | 18  | 52  | 14  | 6   | 35    |
| 0.634962136 BH | 41  | 79  | 100 | 55  | 60    |
| 0.635477747 BH | 52  | 75  | 112 | 64  | 63.5  |
| 0.635796182 BH | 32  | 36  | 12  | 11  | 34    |
| 0.635822349 BH | 0   | 22  | 0   | 3   | 11    |
| 0.635874535 BH | 28  | 129 | 114 | 65  | 78.5  |
| 0.636177987 BH | 199 | 271 | 419 | 231 | 235   |
| 0.636664963 BH | 2   | 15  | 4   | 0   | 8.5   |

|                |     |     |     |     |       |
|----------------|-----|-----|-----|-----|-------|
| 0.636664963 BH | 4   | 7   | 16  | 3   | 5.5   |
| 0.636664963 BH | 6   | 25  | 7   | 1   | 15.5  |
| 0.636999895 BH | 6   | 16  | 18  | 11  | 11    |
| 0.637235281 BH | 3   | 2   | 14  | 0   | 2.5   |
| 0.638032453 BH | 12  | 14  | 8   | 0   | 13    |
| 0.638032453 BH | 5   | 209 | 30  | 15  | 107   |
| 0.638441564 BH | 178 | 303 | 82  | 79  | 240.5 |
| 0.639735144 BH | 7   | 14  | 5   | 0   | 10.5  |
| 0.640345612 BH | 0   | 22  | 11  | 13  | 11    |
| 0.640536439 BH | 14  | 322 | 44  | 30  | 168   |
| 0.641067254 BH | 1   | 21  | 2   | 2   | 11    |
| 0.641606438 BH | 23  | 112 | 14  | 21  | 67.5  |
| 0.642383583 BH | 16  | 65  | 37  | 52  | 40.5  |
| 0.642383583 BH | 0   | 15  | 5   | 11  | 7.5   |
| 0.642433049 BH | 12  | 21  | 5   | 5   | 16.5  |
| 0.642433049 BH | 10  | 25  | 5   | 5   | 17.5  |
| 0.643006466 BH | 22  | 28  | 12  | 5   | 25    |
| 0.643006466 BH | 0   | 16  | 1   | 1   | 8     |
| 0.643006466 BH | 0   | 16  | 1   | 1   | 8     |
| 0.643006466 BH | 0   | 16  | 1   | 1   | 8     |
| 0.643101617 BH | 0   | 9   | 4   | 7   | 4.5   |
| 0.643980589 BH | 4   | 12  | 12  | 8   | 8     |
| 0.645145905 BH | 3   | 30  | 6   | 2   | 16.5  |
| 0.645145905 BH | 26  | 93  | 61  | 72  | 59.5  |
| 0.645145905 BH | 12  | 88  | 17  | 8   | 50    |
| 0.645176276 BH | 8   | 59  | 12  | 5   | 33.5  |
| 0.645625813 BH | 1   | 7   | 11  | 1   | 4     |
| 0.64584562 BH  | 6   | 40  | 3   | 7   | 23    |
| 0.64584562 BH  | 12  | 82  | 50  | 50  | 47    |
| 0.64584562 BH  | 27  | 23  | 75  | 11  | 25    |
| 0.64611639 BH  | 13  | 23  | 32  | 16  | 18    |
| 0.64611639 BH  | 53  | 88  | 132 | 58  | 70.5  |
| 0.646270667 BH | 11  | 27  | 8   | 3   | 19    |
| 0.646832241 BH | 8   | 9   | 18  | 10  | 8.5   |
| 0.646832241 BH | 25  | 85  | 49  | 73  | 55    |
| 0.646832241 BH | 9   | 29  | 22  | 23  | 19    |
| 0.646832241 BH | 0   | 31  | 5   | 0   | 15.5  |
| 0.646832241 BH | 4   | 23  | 16  | 16  | 13.5  |
| 0.647036749 BH | 8   | 56  | 5   | 10  | 32    |
| 0.647036749 BH | 367 | 993 | 193 | 224 | 680   |
| 0.647571782 BH | 14  | 25  | 9   | 3   | 19.5  |
| 0.647605114 BH | 123 | 137 | 258 | 119 | 130   |
| 0.647864359 BH | 25  | 262 | 34  | 35  | 143.5 |
| 0.647864359 BH | 8   | 1   | 23  | 1   | 4.5   |
| 0.648115403 BH | 20  | 42  | 12  | 7   | 31    |
| 0.648115403 BH | 2   | 6   | 13  | 1   | 4     |
| 0.648115403 BH | 9   | 9   | 5   | 0   | 9     |

|                |    |     |     |     |      |
|----------------|----|-----|-----|-----|------|
| 0.648115403 BH | 0  | 10  | 10  | 4   | 5    |
| 0.648115403 BH | 16 | 42  | 57  | 19  | 29   |
| 0.648115403 BH | 54 | 47  | 112 | 45  | 50.5 |
| 0.648115403 BH | 8  | 26  | 6   | 3   | 17   |
| 0.648122866 BH | 19 | 40  | 54  | 23  | 29.5 |
| 0.648122866 BH | 52 | 174 | 23  | 40  | 113  |
| 0.648122866 BH | 22 | 94  | 6   | 132 | 58   |
| 0.648122866 BH | 2  | 21  | 9   | 16  | 11.5 |
| 0.64854215 BH  | 1  | 21  | 1   | 3   | 11   |
| 0.648815069 BH | 12 | 39  | 36  | 24  | 25.5 |
| 0.648815069 BH | 14 | 71  | 48  | 44  | 42.5 |
| 0.650240946 BH | 19 | 97  | 21  | 11  | 58   |
| 0.650240946 BH | 11 | 100 | 15  | 12  | 55.5 |
| 0.650295173 BH | 12 | 35  | 11  | 3   | 23.5 |
| 0.650295173 BH | 49 | 44  | 68  | 69  | 46.5 |
| 0.650329505 BH | 21 | 135 | 58  | 103 | 78   |
| 0.650329505 BH | 18 | 19  | 35  | 20  | 18.5 |
| 0.650329505 BH | 1  | 16  | 4   | 0   | 8.5  |
| 0.650329505 BH | 8  | 3   | 4   | 0   | 5.5  |
| 0.650329505 BH | 1  | 12  | 14  | 3   | 6.5  |
| 0.650329505 BH | 23 | 23  | 6   | 9   | 23   |
| 0.650329505 BH | 3  | 10  | 17  | 2   | 6.5  |
| 0.650329505 BH | 8  | 17  | 3   | 3   | 12.5 |
| 0.650329505 BH | 8  | 17  | 3   | 3   | 12.5 |
| 0.651092598 BH | 7  | 33  | 25  | 21  | 20   |
| 0.651092598 BH | 14 | 29  | 25  | 29  | 21.5 |
| 0.651092598 BH | 11 | 17  | 3   | 5   | 14   |
| 0.651092598 BH | 8  | 23  | 3   | 5   | 15.5 |
| 0.651092598 BH | 5  | 7   | 13  | 6   | 6    |
| 0.651092598 BH | 7  | 39  | 6   | 5   | 23   |
| 0.651170113 BH | 1  | 11  | 13  | 2   | 6    |
| 0.651287236 BH | 1  | 24  | 2   | 3   | 12.5 |
| 0.651364626 BH | 1  | 41  | 5   | 3   | 21   |
| 0.651661565 BH | 1  | 17  | 0   | 3   | 9    |
| 0.651934134 BH | 6  | 30  | 5   | 4   | 18   |
| 0.652390587 BH | 6  | 21  | 3   | 3   | 13.5 |
| 0.652390587 BH | 3  | 63  | 12  | 3   | 33   |
| 0.652390587 BH | 42 | 25  | 100 | 21  | 33.5 |
| 0.653039762 BH | 19 | 40  | 58  | 20  | 29.5 |
| 0.653039762 BH | 8  | 38  | 37  | 17  | 23   |
| 0.653039762 BH | 12 | 23  | 8   | 2   | 17.5 |
| 0.653039762 BH | 61 | 89  | 39  | 14  | 75   |
| 0.653263847 BH | 1  | 37  | 2   | 5   | 19   |
| 0.653484029 BH | 11 | 55  | 34  | 38  | 33   |
| 0.653587 BH    | 58 | 44  | 28  | 11  | 51   |
| 0.653587 BH    | 5  | 41  | 9   | 2   | 23   |
| 0.653840292 BH | 9  | 25  | 7   | 2   | 17   |

|                |     |     |     |     |       |
|----------------|-----|-----|-----|-----|-------|
| 0.653840292 BH | 2   | 30  | 2   | 4   | 16    |
| 0.653840292 BH | 2   | 30  | 2   | 4   | 16    |
| 0.653840292 BH | 14  | 36  | 9   | 6   | 25    |
| 0.653840292 BH | 7   | 14  | 4   | 2   | 10.5  |
| 0.653840292 BH | 7   | 13  | 3   | 3   | 10    |
| 0.653840292 BH | 7   | 14  | 4   | 2   | 10.5  |
| 0.653840292 BH | 2   | 34  | 4   | 3   | 18    |
| 0.654163276 BH | 6   | 24  | 3   | 4   | 15    |
| 0.654163276 BH | 3   | 10  | 12  | 5   | 6.5   |
| 0.654405318 BH | 17  | 174 | 20  | 26  | 95.5  |
| 0.654405318 BH | 0   | 40  | 6   | 2   | 20    |
| 0.654405318 BH | 196 | 288 | 208 | 402 | 242   |
| 0.654405318 BH | 1   | 24  | 4   | 1   | 12.5  |
| 0.654405318 BH | 0   | 10  | 11  | 3   | 5     |
| 0.654482794 BH | 3   | 7   | 17  | 0   | 5     |
| 0.654788766 BH | 3   | 18  | 10  | 15  | 10.5  |
| 0.654788766 BH | 0   | 16  | 0   | 2   | 8     |
| 0.654788766 BH | 0   | 16  | 0   | 2   | 8     |
| 0.654788766 BH | 8   | 23  | 28  | 11  | 15.5  |
| 0.654839142 BH | 6   | 39  | 2   | 8   | 22.5  |
| 0.655057492 BH | 174 | 39  | 81  | 9   | 106.5 |
| 0.655524502 BH | 2   | 34  | 3   | 4   | 18    |
| 0.655524502 BH | 3   | 22  | 19  | 10  | 12.5  |
| 0.655586676 BH | 2   | 6   | 7   | 5   | 4     |
| 0.655586676 BH | 5   | 15  | 3   | 2   | 10    |
| 0.655586676 BH | 5   | 6   | 12  | 5   | 5.5   |
| 0.655586676 BH | 47  | 96  | 100 | 75  | 71.5  |
| 0.656238201 BH | 0   | 17  | 0   | 2   | 8.5   |
| 0.656238201 BH | 0   | 17  | 0   | 2   | 8.5   |
| 0.656238201 BH | 0   | 16  | 3   | 0   | 8     |
| 0.656317701 BH | 2   | 14  | 9   | 9   | 8     |
| 0.656484365 BH | 19  | 56  | 12  | 10  | 37.5  |
| 0.656484365 BH | 79  | 222 | 58  | 37  | 150.5 |
| 0.656484365 BH | 14  | 29  | 7   | 6   | 21.5  |
| 0.656484365 BH | 7   | 49  | 9   | 5   | 28    |
| 0.656484365 BH | 6   | 35  | 29  | 18  | 20.5  |
| 0.656484365 BH | 2   | 9   | 9   | 5   | 5.5   |
| 0.656484365 BH | 3   | 6   | 10  | 4   | 4.5   |
| 0.656484365 BH | 2   | 9   | 9   | 5   | 5.5   |
| 0.656484365 BH | 1   | 52  | 1   | 8   | 26.5  |
| 0.656484365 BH | 5   | 22  | 5   | 2   | 13.5  |
| 0.656484365 BH | 2   | 10  | 11  | 5   | 6     |
| 0.656484365 BH | 5   | 31  | 4   | 5   | 18    |
| 0.657228968 BH | 25  | 95  | 23  | 12  | 60    |
| 0.657427376 BH | 0   | 12  | 11  | 4   | 6     |
| 0.657540167 BH | 5   | 64  | 29  | 42  | 34.5  |
| 0.65754106 BH  | 2   | 4   | 6   | 5   | 3     |

|                |     |      |     |     |       |
|----------------|-----|------|-----|-----|-------|
| 0.65754106 BH  | 4   | 19   | 8   | 17  | 11.5  |
| 0.658829068 BH | 8   | 34   | 25  | 23  | 21    |
| 0.6591085 BH   | 0   | 20   | 1   | 2   | 10    |
| 0.6591085 BH   | 18  | 209  | 17  | 35  | 113.5 |
| 0.659340077 BH | 6   | 38   | 4   | 6   | 22    |
| 0.659340077 BH | 4   | 2    | 13  | 1   | 3     |
| 0.659340077 BH | 2   | 12   | 12  | 5   | 7     |
| 0.659340077 BH | 12  | 82   | 8   | 15  | 47    |
| 0.659340077 BH | 11  | 9    | 6   | 0   | 10    |
| 0.659340077 BH | 134 | 97   | 282 | 92  | 115.5 |
| 0.659340077 BH | 4   | 13   | 2   | 2   | 8.5   |
| 0.65954122 BH  | 18  | 80   | 71  | 38  | 49    |
| 0.660344878 BH | 5   | 30   | 21  | 18  | 17.5  |
| 0.6604342 BH   | 22  | 50   | 23  | 61  | 36    |
| 0.6604342 BH   | 4   | 20   | 4   | 2   | 12    |
| 0.6604342 BH   | 0   | 15   | 8   | 8   | 7.5   |
| 0.6604342 BH   | 2   | 30   | 6   | 1   | 16    |
| 0.6604342 BH   | 6   | 13   | 4   | 1   | 9.5   |
| 0.6604342 BH   | 4   | 17   | 2   | 3   | 10.5  |
| 0.660532087 BH | 125 | 1194 | 21  | 248 | 659.5 |
| 0.660532087 BH | 118 | 208  | 220 | 182 | 163   |
| 0.66089418 BH  | 13  | 26   | 6   | 5   | 19.5  |
| 0.66089418 BH  | 5   | 11   | 3   | 1   | 8     |
| 0.66089418 BH  | 4   | 28   | 4   | 3   | 16    |
| 0.66089418 BH  | 11  | 9    | 0   | 5   | 10    |
| 0.66089418 BH  | 16  | 14   | 17  | 27  | 15    |
| 0.661744545 BH | 68  | 126  | 171 | 77  | 97    |
| 0.662105103 BH | 6   | 35   | 3   | 6   | 20.5  |
| 0.662350239 BH | 7   | 15   | 5   | 1   | 11    |
| 0.662351186 BH | 3   | 5    | 9   | 3   | 4     |
| 0.662744569 BH | 1   | 59   | 9   | 4   | 30    |
| 0.662744569 BH | 19  | 87   | 53  | 59  | 53    |
| 0.662744569 BH | 1   | 6    | 6   | 5   | 3.5   |
| 0.662744569 BH | 2   | 5    | 8   | 3   | 3.5   |
| 0.662948091 BH | 6   | 52   | 9   | 5   | 29    |
| 0.662948091 BH | 10  | 39   | 8   | 5   | 24.5  |
| 0.662948091 BH | 4   | 28   | 3   | 4   | 16    |
| 0.662952658 BH | 12  | 26   | 8   | 4   | 19    |
| 0.663848412 BH | 4   | 10   | 2   | 1   | 7     |
| 0.663891746 BH | 2   | 13   | 15  | 5   | 7.5   |
| 0.663891746 BH | 5   | 19   | 5   | 1   | 12    |
| 0.663891746 BH | 1   | 8    | 6   | 6   | 4.5   |
| 0.663891746 BH | 5   | 10   | 20  | 4   | 7.5   |
| 0.663891746 BH | 8   | 30   | 2   | 7   | 19    |
| 0.664314095 BH | 3   | 16   | 2   | 2   | 9.5   |
| 0.664314095 BH | 3   | 16   | 2   | 2   | 9.5   |
| 0.664314095 BH | 0   | 9    | 11  | 1   | 4.5   |



|                |     |     |     |     |       |
|----------------|-----|-----|-----|-----|-------|
| 0.664485372 BH | 57  | 91  | 29  | 22  | 74    |
| 0.664846304 BH | 4   | 34  | 4   | 5   | 19    |
| 0.664854357 BH | 21  | 13  | 37  | 18  | 17    |
| 0.664854357 BH | 11  | 33  | 5   | 7   | 22    |
| 0.664854357 BH | 9   | 40  | 7   | 6   | 24.5  |
| 0.664854357 BH | 3   | 12  | 2   | 1   | 7.5   |
| 0.664854357 BH | 4   | 30  | 23  | 15  | 17    |
| 0.664854357 BH | 7   | 64  | 7   | 10  | 35.5  |
| 0.664854357 BH | 1   | 9   | 8   | 4   | 5     |
| 0.664854357 BH | 3   | 18  | 2   | 3   | 10.5  |
| 0.664854357 BH | 3   | 19  | 3   | 2   | 11    |
| 0.664854357 BH | 4   | 17  | 4   | 1   | 10.5  |
| 0.664854357 BH | 4   | 17  | 4   | 1   | 10.5  |
| 0.664854357 BH | 4   | 17  | 4   | 1   | 10.5  |
| 0.664854357 BH | 4   | 59  | 10  | 4   | 31.5  |
| 0.664854357 BH | 403 | 704 | 635 | 704 | 553.5 |
| 0.665166479 BH | 4   | 37  | 6   | 4   | 20.5  |
| 0.665290455 BH | 1   | 12  | 8   | 7   | 6.5   |
| 0.665290455 BH | 18  | 54  | 50  | 34  | 36    |
| 0.665499174 BH | 25  | 28  | 58  | 21  | 26.5  |
| 0.665600454 BH | 18  | 4   | 5   | 3   | 11    |
| 0.665961498 BH | 6   | 7   | 2   | 1   | 6.5   |
| 0.665993059 BH | 3   | 10  | 4   | 12  | 6.5   |
| 0.666625781 BH | 7   | 72  | 13  | 6   | 39.5  |
| 0.666625781 BH | 29  | 81  | 25  | 10  | 55    |
| 0.666625781 BH | 3   | 15  | 23  | 2   | 9     |
| 0.666625781 BH | 8   | 2   | 22  | 2   | 5     |
| 0.666625781 BH | 3   | 15  | 3   | 1   | 9     |
| 0.666625781 BH | 3   | 15  | 3   | 1   | 9     |
| 0.666625781 BH | 40  | 65  | 13  | 21  | 52.5  |
| 0.666625781 BH | 3   | 9   | 1   | 1   | 6     |
| 0.666625781 BH | 3   | 9   | 1   | 1   | 6     |
| 0.666859451 BH | 2   | 10  | 13  | 3   | 6     |
| 0.666859451 BH | 63  | 91  | 118 | 82  | 77    |
| 0.666859451 BH | 3   | 21  | 7   | 18  | 12    |
| 0.666859451 BH | 10  | 5   | 20  | 8   | 7.5   |
| 0.667093332 BH | 24  | 29  | 10  | 8   | 26.5  |
| 0.667093332 BH | 8   | 24  | 9   | 0   | 16    |
| 0.667557371 BH | 1   | 14  | 9   | 8   | 7.5   |
| 0.667564754 BH | 14  | 94  | 39  | 70  | 54    |
| 0.667871459 BH | 30  | 38  | 14  | 10  | 34    |
| 0.668422359 BH | 3   | 6   | 3   | 10  | 4.5   |
| 0.668594753 BH | 1   | 15  | 9   | 10  | 8     |
| 0.668594753 BH | 3   | 11  | 17  | 3   | 7     |
| 0.668594753 BH | 5   | 29  | 29  | 10  | 17    |
| 0.668594753 BH | 3   | 26  | 5   | 2   | 14.5  |
| 0.668594753 BH | 3   | 25  | 5   | 2   | 14    |

|                |     |     |     |     |       |
|----------------|-----|-----|-----|-----|-------|
| 0.668594753 BH | 3   | 27  | 3   | 3   | 15    |
| 0.669470283 BH | 26  | 28  | 62  | 19  | 27    |
| 0.669585429 BH | 8   | 55  | 49  | 20  | 31.5  |
| 0.669585429 BH | 8   | 28  | 6   | 4   | 18    |
| 0.669814309 BH | 22  | 79  | 14  | 15  | 50.5  |
| 0.669814309 BH | 9   | 7   | 4   | 1   | 8     |
| 0.669814309 BH | 24  | 16  | 13  | 3   | 20    |
| 0.669814309 BH | 7   | 7   | 1   | 3   | 7     |
| 0.670626246 BH | 128 | 214 | 223 | 197 | 171   |
| 0.670626246 BH | 3   | 33  | 5   | 3   | 18    |
| 0.670700312 BH | 13  | 37  | 18  | 38  | 25    |
| 0.670700312 BH | 13  | 21  | 8   | 3   | 17    |
| 0.670700312 BH | 34  | 0   | 21  | 56  | 17    |
| 0.67087063 BH  | 43  | 51  | 24  | 11  | 47    |
| 0.67087063 BH  | 2   | 11  | 1   | 1   | 6.5   |
| 0.671394028 BH | 22  | 20  | 11  | 4   | 21    |
| 0.671394028 BH | 4   | 23  | 23  | 9   | 13.5  |
| 0.671417312 BH | 18  | 193 | 39  | 168 | 105.5 |
| 0.671417312 BH | 2   | 17  | 2   | 2   | 9.5   |
| 0.671417312 BH | 2   | 20  | 3   | 2   | 11    |
| 0.671852872 BH | 2   | 15  | 2   | 1   | 8.5   |
| 0.672195778 BH | 3   | 27  | 19  | 14  | 15    |
| 0.67248567 BH  | 3   | 18  | 16  | 9   | 10.5  |
| 0.672495489 BH | 10  | 127 | 15  | 17  | 68.5  |
| 0.672495489 BH | 11  | 9   | 6   | 1   | 10    |
| 0.672522975 BH | 17  | 34  | 53  | 14  | 25.5  |
| 0.673060109 BH | 6   | 3   | 2   | 15  | 4.5   |
| 0.673355616 BH | 2   | 17  | 3   | 1   | 9.5   |
| 0.673355616 BH | 2   | 17  | 3   | 1   | 9.5   |
| 0.673390631 BH | 2   | 20  | 2   | 3   | 11    |
| 0.673408467 BH | 180 | 137 | 247 | 215 | 158.5 |
| 0.67372821 BH  | 4   | 5   | 12  | 2   | 4.5   |
| 0.67372821 BH  | 2   | 9   | 12  | 2   | 5.5   |
| 0.674660191 BH | 3   | 28  | 16  | 16  | 15.5  |
| 0.674678685 BH | 2   | 14  | 4   | 13  | 8     |
| 0.675479145 BH | 1   | 7   | 9   | 2   | 4     |
| 0.675479145 BH | 23  | 35  | 11  | 9   | 29    |
| 0.675479145 BH | 1   | 9   | 3   | 8   | 5     |
| 0.675479145 BH | 2   | 21  | 2   | 3   | 11.5  |
| 0.675576327 BH | 83  | 142 | 209 | 81  | 112.5 |
| 0.675805123 BH | 2   | 45  | 20  | 28  | 23.5  |
| 0.676266302 BH | 2   | 7   | 14  | 0   | 4.5   |
| 0.676557553 BH | 340 | 422 | 356 | 611 | 381   |
| 0.676688436 BH | 12  | 40  | 10  | 5   | 26    |
| 0.67682382 BH  | 5   | 58  | 11  | 4   | 31.5  |
| 0.67682382 BH  | 11  | 11  | 34  | 3   | 11    |
| 0.677475378 BH | 3   | 9   | 0   | 2   | 6     |

|                |     |      |      |     |        |
|----------------|-----|------|------|-----|--------|
| 0.677526239 BH | 3   | 13   | 13   | 7   | 8      |
| 0.677526239 BH | 7   | 34   | 8    | 3   | 20.5   |
| 0.67784639 BH  | 184 | 1008 | 53   | 242 | 596    |
| 0.67784639 BH  | 15  | 182  | 34   | 16  | 98.5   |
| 0.678059177 BH | 24  | 37   | 14   | 7   | 30.5   |
| 0.678605494 BH | 6   | 16   | 15   | 12  | 11     |
| 0.678978886 BH | 38  | 67   | 55   | 71  | 52.5   |
| 0.678978886 BH | 39  | 137  | 109  | 82  | 88     |
| 0.678994489 BH | 3   | 8    | 3    | 0   | 5.5    |
| 0.679046637 BH | 2   | 17   | 1    | 3   | 9.5    |
| 0.679569658 BH | 7   | 23   | 5    | 3   | 15     |
| 0.679569658 BH | 71  | 88   | 112  | 96  | 79.5   |
| 0.679569658 BH | 16  | 48   | 16   | 4   | 32     |
| 0.679569658 BH | 9   | 23   | 7    | 2   | 16     |
| 0.679569658 BH | 6   | 18   | 12   | 16  | 12     |
| 0.679639872 BH | 214 | 2309 | 46   | 481 | 1261.5 |
| 0.679639872 BH | 14  | 6    | 6    | 2   | 10     |
| 0.680402711 BH | 186 | 40   | 91   | 9   | 113    |
| 0.680402711 BH | 4   | 9    | 4    | 0   | 6.5    |
| 0.680402711 BH | 66  | 202  | 51   | 35  | 134    |
| 0.680402711 BH | 9   | 37   | 29   | 21  | 23     |
| 0.680402711 BH | 71  | 81   | 26   | 30  | 76     |
| 0.680402711 BH | 15  | 45   | 10   | 8   | 30     |
| 0.680402711 BH | 2   | 29   | 3    | 3   | 15.5   |
| 0.680402711 BH | 657 | 776  | 1176 | 728 | 716.5  |
| 0.680895719 BH | 52  | 65   | 15   | 25  | 58.5   |
| 0.68131322 BH  | 3   | 12   | 12   | 6   | 7.5    |
| 0.68164971 BH  | 6   | 17   | 21   | 9   | 11.5   |
| 0.68164971 BH  | 1   | 13   | 1    | 1   | 7      |
| 0.68164971 BH  | 1   | 13   | 1    | 1   | 7      |
| 0.681760349 BH | 7   | 21   | 4    | 3   | 14     |
| 0.681760349 BH | 3   | 11   | 4    | 0   | 7      |
| 0.681760349 BH | 3   | 11   | 4    | 0   | 7      |
| 0.68214112 BH  | 2   | 5    | 10   | 1   | 3.5    |
| 0.682145372 BH | 6   | 33   | 7    | 3   | 19.5   |
| 0.68220309 BH  | 14  | 54   | 13   | 7   | 34     |
| 0.682267177 BH | 13  | 59   | 13   | 8   | 36     |
| 0.682502437 BH | 7   | 12   | 5    | 0   | 9.5    |
| 0.68304814 BH  | 11  | 42   | 11   | 4   | 26.5   |
| 0.68304814 BH  | 6   | 26   | 5    | 3   | 16     |
| 0.68304814 BH  | 8   | 20   | 20   | 15  | 14     |
| 0.68304814 BH  | 1   | 16   | 2    | 1   | 8.5    |
| 0.68304814 BH  | 1   | 16   | 2    | 1   | 8.5    |
| 0.68304814 BH  | 1   | 16   | 2    | 1   | 8.5    |
| 0.68304814 BH  | 3   | 12   | 0    | 3   | 7.5    |
| 0.68304814 BH  | 46  | 169  | 97   | 129 | 107.5  |
| 0.683547124 BH | 8   | 67   | 16   | 58  | 37.5   |

|                |     |     |     |     |       |
|----------------|-----|-----|-----|-----|-------|
| 0.68355888 BH  | 74  | 221 | 113 | 201 | 147.5 |
| 0.683700758 BH | 18  | 55  | 12  | 10  | 36.5  |
| 0.683765511 BH | 17  | 68  | 69  | 26  | 42.5  |
| 0.685047886 BH | 1   | 17  | 2   | 1   | 9     |
| 0.685047886 BH | 94  | 51  | 32  | 28  | 72.5  |
| 0.685047886 BH | 6   | 17  | 6   | 0   | 11.5  |
| 0.685047886 BH | 8   | 13  | 6   | 0   | 10.5  |
| 0.685206197 BH | 1   | 14  | 4   | 12  | 7.5   |
| 0.685206197 BH | 1   | 20  | 2   | 2   | 10.5  |
| 0.685206197 BH | 1   | 19  | 2   | 2   | 10    |
| 0.685206197 BH | 1   | 19  | 2   | 2   | 10    |
| 0.685228558 BH | 2   | 44  | 31  | 17  | 23    |
| 0.685831576 BH | 13  | 72  | 38  | 49  | 42.5  |
| 0.685960577 BH | 0   | 11  | 7   | 5   | 5.5   |
| 0.686517385 BH | 25  | 38  | 12  | 9   | 31.5  |
| 0.686517385 BH | 11  | 120 | 28  | 6   | 65.5  |
| 0.686594355 BH | 8   | 36  | 33  | 17  | 22    |
| 0.686594355 BH | 55  | 116 | 23  | 33  | 85.5  |
| 0.686594355 BH | 7   | 103 | 15  | 11  | 55    |
| 0.686603465 BH | 41  | 477 | 163 | 329 | 259   |
| 0.686603465 BH | 5   | 27  | 5   | 3   | 16    |
| 0.686603465 BH | 1   | 19  | 3   | 1   | 10    |
| 0.686603465 BH | 1   | 19  | 3   | 1   | 10    |
| 0.686603465 BH | 0   | 9   | 8   | 3   | 4.5   |
| 0.68666075 BH  | 4   | 29  | 14  | 20  | 16.5  |
| 0.686795941 BH | 7   | 18  | 6   | 2   | 12.5  |
| 0.686795941 BH | 9   | 14  | 6   | 2   | 11.5  |
| 0.686795941 BH | 3   | 16  | 19  | 5   | 9.5   |
| 0.686795941 BH | 12  | 13  | 31  | 8   | 12.5  |
| 0.686795941 BH | 27  | 37  | 84  | 11  | 32    |
| 0.686795941 BH | 1   | 23  | 3   | 2   | 12    |
| 0.686795941 BH | 0   | 10  | 9   | 4   | 5     |
| 0.686795941 BH | 333 | 478 | 473 | 522 | 405.5 |
| 0.687161328 BH | 4   | 19  | 14  | 11  | 11.5  |
| 0.687404248 BH | 65  | 102 | 38  | 22  | 83.5  |
| 0.687459319 BH | 14  | 84  | 14  | 13  | 49    |
| 0.688205213 BH | 2   | 14  | 8   | 9   | 8     |
| 0.688205213 BH | 5   | 26  | 3   | 5   | 15.5  |
| 0.688364322 BH | 465 | 513 | 500 | 756 | 489   |
| 0.688364322 BH | 6   | 20  | 6   | 2   | 13    |
| 0.688364322 BH | 5   | 25  | 4   | 3   | 15    |
| 0.688364322 BH | 2   | 12  | 10  | 6   | 7     |
| 0.688364322 BH | 1   | 23  | 2   | 3   | 12    |
| 0.688364322 BH | 1   | 23  | 2   | 3   | 12    |
| 0.688364322 BH | 21  | 7   | 61  | 1   | 14    |
| 0.688364322 BH | 5   | 38  | 8   | 3   | 21.5  |
| 0.688863957 BH | 4   | 16  | 13  | 11  | 10    |

|                |     |     |     |     |       |
|----------------|-----|-----|-----|-----|-------|
| 0.689040259 BH | 188 | 70  | 365 | 100 | 129   |
| 0.689040259 BH | 4   | 18  | 17  | 9   | 11    |
| 0.689040259 BH | 1   | 11  | 3   | 0   | 6     |
| 0.689326203 BH | 2   | 8   | 14  | 1   | 5     |
| 0.689492438 BH | 20  | 128 | 56  | 88  | 74    |
| 0.689492438 BH | 8   | 32  | 29  | 15  | 20    |
| 0.689492438 BH | 7   | 16  | 5   | 2   | 11.5  |
| 0.689492438 BH | 6   | 17  | 5   | 2   | 11.5  |
| 0.689492438 BH | 3   | 8   | 6   | 8   | 5.5   |
| 0.689778653 BH | 3   | 19  | 5   | 0   | 11    |
| 0.689778653 BH | 3   | 40  | 2   | 7   | 21.5  |
| 0.689778653 BH | 19  | 45  | 14  | 7   | 32    |
| 0.689778653 BH | 4   | 16  | 22  | 4   | 10    |
| 0.689778653 BH | 99  | 299 | 256 | 177 | 199   |
| 0.689785283 BH | 10  | 12  | 7   | 0   | 11    |
| 0.689785283 BH | 12  | 29  | 15  | 33  | 20.5  |
| 0.689785283 BH | 1   | 13  | 0   | 2   | 7     |
| 0.689785283 BH | 1   | 13  | 0   | 2   | 7     |
| 0.690132025 BH | 9   | 32  | 5   | 6   | 20.5  |
| 0.690132025 BH | 1   | 19  | 1   | 3   | 10    |
| 0.690132025 BH | 1   | 19  | 1   | 3   | 10    |
| 0.690190131 BH | 48  | 23  | 86  | 34  | 35.5  |
| 0.690568142 BH | 5   | 19  | 5   | 2   | 12    |
| 0.690568142 BH | 5   | 21  | 3   | 3   | 13    |
| 0.690568142 BH | 41  | 58  | 24  | 12  | 49.5  |
| 0.690568142 BH | 4   | 29  | 4   | 4   | 16.5  |
| 0.690568142 BH | 2   | 13  | 14  | 5   | 7.5   |
| 0.690568142 BH | 13  | 42  | 12  | 5   | 27.5  |
| 0.690568142 BH | 0   | 11  | 9   | 3   | 5.5   |
| 0.690568142 BH | 7   | 14  | 22  | 6   | 10.5  |
| 0.690568142 BH | 33  | 21  | 73  | 16  | 27    |
| 0.690568142 BH | 6   | 22  | 2   | 5   | 14    |
| 0.690568142 BH | 28  | 72  | 69  | 45  | 50    |
| 0.690568142 BH | 3   | 65  | 6   | 9   | 34    |
| 0.690568142 BH | 5   | 23  | 7   | 0   | 14    |
| 0.690568142 BH | 18  | 43  | 16  | 4   | 30.5  |
| 0.690568142 BH | 6   | 342 | 42  | 34  | 174   |
| 0.690936508 BH | 6   | 13  | 3   | 3   | 9.5   |
| 0.690956349 BH | 71  | 12  | 8   | 25  | 41.5  |
| 0.691191992 BH | 10  | 9   | 6   | 0   | 9.5   |
| 0.691191992 BH | 4   | 17  | 16  | 8   | 10.5  |
| 0.691284613 BH | 9   | 24  | 16  | 21  | 16.5  |
| 0.691284613 BH | 51  | 232 | 42  | 42  | 141.5 |
| 0.69203076 BH  | 1   | 23  | 4   | 1   | 12    |
| 0.692183862 BH | 5   | 25  | 20  | 13  | 15    |
| 0.692183862 BH | 2   | 314 | 36  | 28  | 158   |
| 0.692183862 BH | 4   | 27  | 4   | 3   | 15.5  |

|                |     |     |     |     |       |
|----------------|-----|-----|-----|-----|-------|
| 0.692183862 BH | 4   | 27  | 4   | 3   | 15.5  |
| 0.692183862 BH | 1   | 31  | 3   | 3   | 16    |
| 0.692183862 BH | 5   | 15  | 3   | 3   | 10    |
| 0.692183862 BH | 7   | 13  | 4   | 2   | 10    |
| 0.692183862 BH | 5   | 16  | 3   | 3   | 10.5  |
| 0.692183862 BH | 30  | 317 | 75  | 18  | 173.5 |
| 0.692183862 BH | 16  | 67  | 14  | 11  | 41.5  |
| 0.692183862 BH | 17  | 40  | 40  | 27  | 28.5  |
| 0.692183862 BH | 19  | 5   | 7   | 2   | 12    |
| 0.692290799 BH | 8   | 150 | 18  | 19  | 79    |
| 0.69362116 BH  | 22  | 145 | 67  | 95  | 83.5  |
| 0.69362116 BH  | 8   | 20  | 8   | 1   | 14    |
| 0.693639902 BH | 49  | 331 | 46  | 58  | 190   |
| 0.693639902 BH | 59  | 103 | 123 | 75  | 81    |
| 0.693639902 BH | 1   | 141 | 7   | 20  | 71    |
| 0.693868274 BH | 7   | 0   | 10  | 5   | 3.5   |
| 0.69398038 BH  | 2   | 9   | 8   | 5   | 5.5   |
| 0.69398038 BH  | 5   | 17  | 4   | 2   | 11    |
| 0.694209922 BH | 32  | 26  | 12  | 10  | 29    |
| 0.694346188 BH | 19  | 9   | 8   | 3   | 14    |
| 0.694375145 BH | 6   | 54  | 10  | 6   | 30    |
| 0.694718995 BH | 52  | 110 | 107 | 80  | 81    |
| 0.694718995 BH | 8   | 27  | 15  | 24  | 17.5  |
| 0.695221331 BH | 4   | 14  | 16  | 7   | 9     |
| 0.695221331 BH | 7   | 8   | 15  | 8   | 7.5   |
| 0.695311608 BH | 2   | 14  | 14  | 4   | 8     |
| 0.695542026 BH | 11  | 105 | 19  | 12  | 58    |
| 0.695653647 BH | 4   | 24  | 7   | 0   | 14    |
| 0.697182021 BH | 101 | 74  | 36  | 35  | 87.5  |
| 0.697393071 BH | 9   | 106 | 23  | 7   | 57.5  |
| 0.697697315 BH | 74  | 71  | 140 | 64  | 72.5  |
| 0.697846904 BH | 3   | 17  | 12  | 10  | 10    |
| 0.697846904 BH | 5   | 2   | 16  | 0   | 3.5   |
| 0.697924238 BH | 91  | 181 | 183 | 133 | 136   |
| 0.697924238 BH | 29  | 33  | 13  | 10  | 31    |
| 0.697924238 BH | 0   | 14  | 5   | 10  | 7     |
| 0.697970089 BH | 4   | 19  | 4   | 2   | 11.5  |
| 0.698763148 BH | 122 | 359 | 128 | 35  | 240.5 |
| 0.698763148 BH | 9   | 25  | 7   | 3   | 17    |
| 0.698763148 BH | 30  | 85  | 22  | 15  | 57.5  |
| 0.698763148 BH | 121 | 373 | 71  | 86  | 247   |
| 0.698763148 BH | 0   | 15  | 1   | 1   | 7.5   |
| 0.698763148 BH | 0   | 15  | 1   | 1   | 7.5   |
| 0.698763148 BH | 0   | 15  | 1   | 1   | 7.5   |
| 0.698763148 BH | 0   | 15  | 1   | 1   | 7.5   |
| 0.698893278 BH | 27  | 59  | 16  | 13  | 43    |
| 0.698893278 BH | 225 | 148 | 215 | 316 | 186.5 |

|                |     |     |     |     |       |
|----------------|-----|-----|-----|-----|-------|
| 0.698893278 BH | 0   | 11  | 2   | 0   | 5.5   |
| 0.698893278 BH | 0   | 11  | 2   | 0   | 5.5   |
| 0.698893278 BH | 0   | 11  | 2   | 0   | 5.5   |
| 0.698893278 BH | 0   | 11  | 2   | 0   | 5.5   |
| 0.698893278 BH | 0   | 11  | 2   | 0   | 5.5   |
| 0.698893278 BH | 0   | 11  | 2   | 0   | 5.5   |
| 0.698895554 BH | 1   | 13  | 7   | 9   | 7     |
| 0.698895554 BH | 3   | 29  | 4   | 3   | 16    |
| 0.699206537 BH | 26  | 6   | 64  | 5   | 16    |
| 0.699206537 BH | 3   | 35  | 4   | 5   | 19    |
| 0.699370376 BH | 50  | 84  | 112 | 54  | 67    |
| 0.699713265 BH | 180 | 215 | 320 | 191 | 197.5 |
| 0.699713265 BH | 2   | 7   | 6   | 5   | 4.5   |
| 0.699903777 BH | 3   | 42  | 4   | 6   | 22.5  |
| 0.700531454 BH | 2   | 29  | 17  | 15  | 15.5  |
| 0.700591075 BH | 5   | 39  | 20  | 24  | 22    |
| 0.700718776 BH | 36  | 47  | 20  | 11  | 41.5  |
| 0.700718776 BH | 3   | 19  | 3   | 3   | 11    |
| 0.700718776 BH | 83  | 252 | 68  | 43  | 167.5 |
| 0.700718776 BH | 8   | 17  | 1   | 6   | 12.5  |
| 0.700718776 BH | 20  | 6   | 31  | 15  | 13    |
| 0.701035858 BH | 13  | 71  | 13  | 11  | 42    |
| 0.70124617 BH  | 7   | 83  | 47  | 41  | 45    |
| 0.70124617 BH  | 4   | 15  | 3   | 2   | 9.5   |
| 0.70124617 BH  | 2   | 6   | 8   | 4   | 4     |
| 0.701424942 BH | 5   | 71  | 10  | 9   | 38    |
| 0.701424942 BH | 42  | 140 | 39  | 20  | 91    |
| 0.701438211 BH | 44  | 43  | 29  | 5   | 43.5  |
| 0.701438211 BH | 1   | 23  | 10  | 14  | 12    |
| 0.701443414 BH | 3   | 23  | 5   | 2   | 13    |
| 0.7022807 BH   | 1   | 10  | 8   | 5   | 5.5   |
| 0.7022807 BH   | 19  | 8   | 11  | 0   | 13.5  |
| 0.7022807 BH   | 11  | 11  | 7   | 1   | 11    |
| 0.7022807 BH   | 3   | 72  | 44  | 30  | 37.5  |
| 0.7022807 BH   | 28  | 20  | 15  | 5   | 24    |
| 0.702660069 BH | 26  | 17  | 46  | 21  | 21.5  |
| 0.702660069 BH | 7   | 9   | 3   | 2   | 8     |
| 0.702660069 BH | 10  | 64  | 13  | 8   | 37    |
| 0.702691843 BH | 0   | 18  | 2   | 1   | 9     |
| 0.703913541 BH | 22  | 62  | 14  | 13  | 42    |
| 0.703959369 BH | 1   | 24  | 31  | 1   | 12.5  |
| 0.703959369 BH | 10  | 7   | 4   | 2   | 8.5   |
| 0.703959369 BH | 1   | 11  | 6   | 6   | 6     |
| 0.704129462 BH | 18  | 184 | 26  | 27  | 101   |
| 0.704129462 BH | 41  | 92  | 17  | 27  | 66.5  |
| 0.704344581 BH | 0   | 18  | 1   | 2   | 9     |
| 0.704344581 BH | 0   | 19  | 2   | 1   | 9.5   |

|                |     |     |     |     |       |
|----------------|-----|-----|-----|-----|-------|
| 0.704344581 BH | 0   | 18  | 1   | 2   | 9     |
| 0.704436543 BH | 31  | 105 | 74  | 68  | 68    |
| 0.705678482 BH | 5   | 16  | 15  | 10  | 10.5  |
| 0.705932652 BH | 11  | 60  | 14  | 6   | 35.5  |
| 0.705956721 BH | 4   | 18  | 5   | 1   | 11    |
| 0.706017468 BH | 3   | 11  | 17  | 2   | 7     |
| 0.706017468 BH | 3   | 17  | 3   | 2   | 10    |
| 0.706017468 BH | 6   | 11  | 4   | 1   | 8.5   |
| 0.706017468 BH | 2   | 7   | 4   | 7   | 4.5   |
| 0.706017468 BH | 3   | 17  | 3   | 2   | 10    |
| 0.706017468 BH | 3   | 17  | 3   | 2   | 10    |
| 0.706017468 BH | 7   | 33  | 18  | 24  | 20    |
| 0.706017468 BH | 0   | 21  | 2   | 2   | 10.5  |
| 0.706017468 BH | 10  | 50  | 16  | 2   | 30    |
| 0.707325448 BH | 15  | 12  | 5   | 5   | 13.5  |
| 0.707325448 BH | 10  | 6   | 3   | 3   | 8     |
| 0.707325448 BH | 1   | 11  | 9   | 4   | 6     |
| 0.707325448 BH | 3   | 7   | 11  | 2   | 5     |
| 0.707325448 BH | 8   | 10  | 13  | 11  | 9     |
| 0.707332394 BH | 35  | 7   | 18  | 1   | 21    |
| 0.707357059 BH | 29  | 236 | 113 | 136 | 132.5 |
| 0.707357059 BH | 2   | 25  | 0   | 5   | 13.5  |
| 0.707357059 BH | 1   | 8   | 8   | 4   | 4.5   |
| 0.707357059 BH | 4   | 16  | 4   | 1   | 10    |
| 0.707357059 BH | 0   | 22  | 2   | 2   | 11    |
| 0.707357059 BH | 0   | 22  | 2   | 2   | 11    |
| 0.707454317 BH | 3   | 30  | 18  | 14  | 16.5  |
| 0.707454317 BH | 18  | 12  | 4   | 7   | 15    |
| 0.707454317 BH | 5   | 8   | 10  | 7   | 6.5   |
| 0.707454317 BH | 7   | 21  | 5   | 3   | 14    |
| 0.707454317 BH | 7   | 21  | 5   | 3   | 14    |
| 0.707510575 BH | 3   | 25  | 18  | 12  | 14    |
| 0.707531352 BH | 6   | 16  | 9   | 16  | 11    |
| 0.708198046 BH | 4   | 38  | 24  | 18  | 21    |
| 0.708920698 BH | 0   | 14  | 0   | 2   | 7     |
| 0.709208286 BH | 2   | 30  | 4   | 3   | 16    |
| 0.709208286 BH | 3   | 31  | 2   | 6   | 17    |
| 0.709390336 BH | 2   | 38  | 6   | 3   | 20    |
| 0.709390336 BH | 12  | 29  | 11  | 3   | 20.5  |
| 0.709390336 BH | 2   | 25  | 5   | 2   | 13.5  |
| 0.709390336 BH | 258 | 91  | 114 | 47  | 174.5 |
| 0.709390336 BH | 39  | 41  | 74  | 35  | 40    |
| 0.709390336 BH | 10  | 47  | 9   | 7   | 28.5  |
| 0.709390336 BH | 3   | 35  | 14  | 22  | 19    |
| 0.709390336 BH | 0   | 15  | 0   | 2   | 7.5   |
| 0.709390336 BH | 0   | 15  | 0   | 2   | 7.5   |
| 0.709390336 BH | 0   | 15  | 0   | 2   | 7.5   |



|                |     |     |     |     |       |
|----------------|-----|-----|-----|-----|-------|
| 0.709390336 BH | 0   | 14  | 3   | 0   | 7     |
| 0.709390336 BH | 0   | 15  | 0   | 2   | 7.5   |
| 0.709390336 BH | 2   | 21  | 3   | 3   | 11.5  |
| 0.709390336 BH | 2   | 22  | 3   | 3   | 12    |
| 0.709390336 BH | 12  | 100 | 46  | 60  | 56    |
| 0.709390336 BH | 4   | 12  | 2   | 2   | 8     |
| 0.709508516 BH | 7   | 26  | 7   | 2   | 16.5  |
| 0.70954737 BH  | 96  | 553 | 60  | 121 | 324.5 |
| 0.70954737 BH  | 96  | 391 | 225 | 257 | 243.5 |
| 0.709581829 BH | 0   | 25  | 3   | 2   | 12.5  |
| 0.709972045 BH | 16  | 89  | 13  | 17  | 52.5  |
| 0.71017079 BH  | 1   | 82  | 8   | 10  | 41.5  |
| 0.710619739 BH | 20  | 77  | 59  | 42  | 48.5  |
| 0.710619739 BH | 65  | 73  | 17  | 33  | 69    |
| 0.710619739 BH | 23  | 141 | 66  | 90  | 82    |
| 0.710619739 BH | 87  | 146 | 58  | 30  | 116.5 |
| 0.710619739 BH | 5   | 10  | 3   | 1   | 7.5   |
| 0.710619739 BH | 1   | 10  | 11  | 3   | 5.5   |
| 0.710619739 BH | 2   | 23  | 4   | 2   | 12.5  |
| 0.710619739 BH | 3   | 21  | 5   | 1   | 12    |
| 0.710948551 BH | 3   | 18  | 4   | 1   | 10.5  |
| 0.710948551 BH | 5   | 29  | 6   | 3   | 17    |
| 0.710948551 BH | 0   | 27  | 3   | 3   | 13.5  |
| 0.710948551 BH | 23  | 40  | 55  | 23  | 31.5  |
| 0.710948551 BH | 5   | 15  | 10  | 12  | 10    |
| 0.711286731 BH | 68  | 36  | 40  | 6   | 52    |
| 0.711286731 BH | 8   | 34  | 5   | 7   | 21    |
| 0.711296066 BH | 149 | 277 | 66  | 85  | 213   |
| 0.711589586 BH | 6   | 30  | 18  | 19  | 18    |
| 0.711589586 BH | 84  | 140 | 113 | 143 | 112   |
| 0.711727329 BH | 4   | 12  | 3   | 1   | 8     |
| 0.711727329 BH | 2   | 56  | 8   | 5   | 29    |
| 0.711727329 BH | 2   | 26  | 2   | 4   | 14    |
| 0.711996644 BH | 3   | 2   | 12  | 0   | 2.5   |
| 0.711996644 BH | 2   | 18  | 3   | 2   | 10    |
| 0.711996644 BH | 2   | 7   | 10  | 2   | 4.5   |
| 0.711996644 BH | 9   | 42  | 13  | 3   | 25.5  |
| 0.71227198 BH  | 13  | 13  | 7   | 2   | 13    |
| 0.71227198 BH  | 6   | 28  | 7   | 2   | 17    |
| 0.71227198 BH  | 13  | 100 | 69  | 41  | 56.5  |
| 0.712581096 BH | 6   | 22  | 22  | 9   | 14    |
| 0.712601787 BH | 2   | 47  | 4   | 7   | 24.5  |
| 0.713489923 BH | 22  | 542 | 40  | 89  | 282   |
| 0.713504145 BH | 2   | 27  | 2   | 4   | 14.5  |
| 0.713570214 BH | 8   | 65  | 30  | 40  | 36.5  |
| 0.713570214 BH | 7   | 93  | 16  | 10  | 50    |
| 0.713570214 BH | 2   | 18  | 2   | 3   | 10    |

|                |     |     |     |     |       |
|----------------|-----|-----|-----|-----|-------|
| 0.713570214 BH | 212 | 218 | 344 | 219 | 215   |
| 0.713984847 BH | 0   | 28  | 4   | 2   | 14    |
| 0.71414432 BH  | 13  | 19  | 24  | 16  | 16    |
| 0.714163366 BH | 320 | 801 | 160 | 218 | 560.5 |
| 0.714543623 BH | 18  | 24  | 52  | 8   | 21    |
| 0.71479379 BH  | 5   | 67  | 10  | 8   | 36    |
| 0.71479379 BH  | 68  | 139 | 28  | 43  | 103.5 |
| 0.714906721 BH | 9   | 8   | 17  | 8   | 8.5   |
| 0.715086442 BH | 12  | 82  | 18  | 9   | 47    |
| 0.715086442 BH | 11  | 22  | 7   | 4   | 16.5  |
| 0.715326028 BH | 18  | 4   | 6   | 3   | 11    |
| 0.715654787 BH | 10  | 1   | 20  | 3   | 5.5   |
| 0.715654787 BH | 6   | 20  | 4   | 3   | 13    |
| 0.716751606 BH | 23  | 46  | 15  | 9   | 34.5  |
| 0.716761794 BH | 56  | 253 | 174 | 132 | 154.5 |
| 0.717063202 BH | 31  | 379 | 94  | 275 | 205   |
| 0.717307645 BH | 4   | 19  | 8   | 15  | 11.5  |
| 0.717554081 BH | 12  | 20  | 7   | 4   | 16    |
| 0.71785833 BH  | 5   | 36  | 29  | 13  | 20.5  |
| 0.71785833 BH  | 5   | 22  | 13  | 15  | 13.5  |
| 0.71785833 BH  | 3   | 44  | 6   | 5   | 23.5  |
| 0.718197066 BH | 2   | 15  | 2   | 2   | 8.5   |
| 0.718197066 BH | 2   | 15  | 2   | 2   | 8.5   |
| 0.719004366 BH | 17  | 44  | 54  | 17  | 30.5  |
| 0.719004366 BH | 4   | 16  | 8   | 14  | 10    |
| 0.719004366 BH | 2   | 19  | 4   | 1   | 10.5  |
| 0.719004366 BH | 2   | 23  | 5   | 1   | 12.5  |
| 0.719004366 BH | 1   | 10  | 12  | 2   | 5.5   |
| 0.719231251 BH | 0   | 17  | 4   | 0   | 8.5   |
| 0.719231251 BH | 2   | 11  | 10  | 6   | 6.5   |
| 0.719231251 BH | 2   | 11  | 9   | 7   | 6.5   |
| 0.719231251 BH | 2   | 10  | 17  | 0   | 6     |
| 0.719231251 BH | 13  | 48  | 15  | 5   | 30.5  |
| 0.719231251 BH | 24  | 47  | 9   | 15  | 35.5  |
| 0.719231251 BH | 2   | 16  | 2   | 2   | 9     |
| 0.719231251 BH | 2   | 16  | 2   | 2   | 9     |
| 0.719231251 BH | 18  | 61  | 44  | 39  | 39.5  |
| 0.71924594 BH  | 19  | 51  | 41  | 34  | 35    |
| 0.719478972 BH | 27  | 28  | 70  | 11  | 27.5  |
| 0.719596887 BH | 10  | 37  | 13  | 2   | 23.5  |
| 0.719924975 BH | 8   | 22  | 9   | 0   | 15    |
| 0.719963149 BH | 19  | 51  | 14  | 9   | 35    |
| 0.719963149 BH | 2   | 20  | 4   | 1   | 11    |
| 0.720695587 BH | 9   | 32  | 29  | 16  | 20.5  |
| 0.720695587 BH | 22  | 80  | 56  | 48  | 51    |
| 0.720695587 BH | 7   | 12  | 6   | 17  | 9.5   |
| 0.720829471 BH | 5   | 12  | 16  | 6   | 8.5   |

|                |     |     |     |     |       |
|----------------|-----|-----|-----|-----|-------|
| 0.720889678 BH | 11  | 73  | 10  | 13  | 42    |
| 0.721231813 BH | 1   | 21  | 11  | 11  | 11    |
| 0.721306237 BH | 8   | 45  | 31  | 23  | 26.5  |
| 0.721740751 BH | 18  | 22  | 13  | 2   | 20    |
| 0.721740751 BH | 4   | 2   | 10  | 2   | 3     |
| 0.721883142 BH | 16  | 23  | 31  | 18  | 19.5  |
| 0.721883142 BH | 32  | 9   | 17  | 2   | 20.5  |
| 0.721883142 BH | 338 | 333 | 368 | 479 | 335.5 |
| 0.721883142 BH | 4   | 8   | 2   | 1   | 6     |
| 0.721883142 BH | 2   | 16  | 3   | 1   | 9     |
| 0.721883142 BH | 2   | 16  | 3   | 1   | 9     |
| 0.721883142 BH | 8   | 5   | 3   | 1   | 6.5   |
| 0.721883142 BH | 2   | 16  | 3   | 1   | 9     |
| 0.721928673 BH | 0   | 29  | 5   | 1   | 14.5  |
| 0.722379584 BH | 14  | 15  | 7   | 4   | 14.5  |
| 0.722512578 BH | 61  | 130 | 117 | 93  | 95.5  |
| 0.722549565 BH | 1   | 19  | 23  | 1   | 10    |
| 0.722549565 BH | 2   | 20  | 21  | 4   | 11    |
| 0.722549565 BH | 5   | 14  | 5   | 0   | 9.5   |
| 0.722549565 BH | 2   | 16  | 15  | 4   | 9     |
| 0.722549565 BH | 10  | 48  | 9   | 8   | 29    |
| 0.722549565 BH | 5   | 7   | 2   | 1   | 6     |
| 0.722549565 BH | 3   | 10  | 2   | 1   | 6.5   |
| 0.722549565 BH | 3   | 11  | 2   | 1   | 7     |
| 0.722549565 BH | 3   | 10  | 2   | 1   | 6.5   |
| 0.722549565 BH | 3   | 11  | 2   | 1   | 7     |
| 0.722549565 BH | 3   | 11  | 2   | 1   | 7     |
| 0.722549565 BH | 4   | 34  | 22  | 16  | 19    |
| 0.723681566 BH | 4   | 24  | 3   | 4   | 14    |
| 0.723681566 BH | 10  | 14  | 21  | 11  | 12    |
| 0.723681566 BH | 15  | 63  | 16  | 8   | 39    |
| 0.723681566 BH | 4   | 16  | 5   | 0   | 10    |
| 0.723681566 BH | 0   | 10  | 7   | 5   | 5     |
| 0.723681566 BH | 10  | 4   | 4   | 1   | 7     |
| 0.723681566 BH | 0   | 16  | 7   | 9   | 8     |
| 0.723681566 BH | 3   | 11  | 1   | 2   | 7     |
| 0.723681566 BH | 3   | 11  | 1   | 2   | 7     |
| 0.723681566 BH | 3   | 10  | 1   | 2   | 6.5   |
| 0.723681566 BH | 1   | 25  | 4   | 2   | 13    |
| 0.723681566 BH | 1   | 25  | 4   | 2   | 13    |
| 0.723893841 BH | 2   | 16  | 1   | 3   | 9     |
| 0.724239615 BH | 4   | 56  | 3   | 11  | 30    |
| 0.724296816 BH | 38  | 56  | 30  | 7   | 47    |
| 0.724296816 BH | 3   | 29  | 4   | 4   | 16    |
| 0.724296816 BH | 20  | 79  | 77  | 28  | 49.5  |
| 0.724296816 BH | 20  | 52  | 61  | 21  | 36    |
| 0.724296816 BH | 11  | 19  | 7   | 3   | 15    |

|                |     |     |     |     |       |
|----------------|-----|-----|-----|-----|-------|
| 0.724296816 BH | 6   | 94  | 4   | 19  | 50    |
| 0.724296816 BH | 2   | 23  | 12  | 12  | 12.5  |
| 0.724296816 BH | 1   | 27  | 21  | 7   | 14    |
| 0.724296816 BH | 0   | 10  | 8   | 4   | 5     |
| 0.724296816 BH | 0   | 10  | 8   | 4   | 5     |
| 0.724296816 BH | 1   | 21  | 3   | 2   | 11    |
| 0.724296816 BH | 17  | 19  | 7   | 6   | 18    |
| 0.724296816 BH | 5   | 6   | 1   | 2   | 5.5   |
| 0.724550659 BH | 6   | 15  | 5   | 2   | 10.5  |
| 0.724550659 BH | 0   | 12  | 5   | 8   | 6     |
| 0.725126152 BH | 321 | 538 | 300 | 651 | 429.5 |
| 0.725126152 BH | 35  | 65  | 19  | 17  | 50    |
| 0.725126152 BH | 2   | 12  | 12  | 4   | 7     |
| 0.725126152 BH | 2   | 12  | 2   | 1   | 7     |
| 0.725126152 BH | 2   | 12  | 2   | 1   | 7     |
| 0.725126152 BH | 2   | 12  | 2   | 1   | 7     |
| 0.725126152 BH | 17  | 28  | 7   | 8   | 22.5  |
| 0.725126152 BH | 0   | 11  | 7   | 4   | 5.5   |
| 0.725126152 BH | 8   | 8   | 5   | 0   | 8     |
| 0.725126152 BH | 8   | 8   | 5   | 0   | 8     |
| 0.725126152 BH | 2   | 53  | 7   | 6   | 27.5  |
| 0.725126152 BH | 0   | 13  | 9   | 4   | 6.5   |
| 0.725126152 BH | 0   | 13  | 9   | 4   | 6.5   |
| 0.725126152 BH | 2   | 10  | 9   | 5   | 6     |
| 0.725126152 BH | 5   | 17  | 5   | 2   | 11    |
| 0.725126152 BH | 3   | 8   | 10  | 4   | 5.5   |
| 0.725126152 BH | 2   | 10  | 8   | 6   | 6     |
| 0.725126152 BH | 6   | 16  | 2   | 4   | 11    |
| 0.725126152 BH | 2   | 10  | 9   | 5   | 6     |
| 0.725126152 BH | 5   | 25  | 17  | 14  | 15    |
| 0.725683414 BH | 52  | 125 | 24  | 36  | 88.5  |
| 0.725839868 BH | 40  | 126 | 17  | 35  | 83    |
| 0.726029224 BH | 6   | 14  | 15  | 9   | 10    |
| 0.726029224 BH | 2   | 12  | 1   | 2   | 7     |
| 0.726029224 BH | 2   | 13  | 2   | 1   | 7.5   |
| 0.726659447 BH | 20  | 78  | 20  | 12  | 49    |
| 0.726659447 BH | 1   | 17  | 2   | 2   | 9     |
| 0.726659447 BH | 6   | 28  | 6   | 4   | 17    |
| 0.727030103 BH | 7   | 80  | 9   | 13  | 43.5  |
| 0.727030103 BH | 14  | 55  | 26  | 43  | 34.5  |
| 0.727030103 BH | 7   | 13  | 20  | 7   | 10    |
| 0.727030103 BH | 2   | 41  | 7   | 4   | 21.5  |
| 0.727030103 BH | 6   | 23  | 23  | 9   | 14.5  |
| 0.727030103 BH | 20  | 36  | 16  | 5   | 28    |
| 0.727318159 BH | 2   | 13  | 1   | 2   | 7.5   |
| 0.727713796 BH | 3   | 26  | 19  | 10  | 14.5  |
| 0.727713796 BH | 10  | 28  | 9   | 4   | 19    |

|                |     |     |     |     |       |
|----------------|-----|-----|-----|-----|-------|
| 0.727713796 BH | 0   | 10  | 9   | 3   | 5     |
| 0.727713796 BH | 821 | 496 | 996 | 862 | 658.5 |
| 0.727713796 BH | 1   | 18  | 2   | 2   | 9.5   |
| 0.727713796 BH | 1   | 18  | 2   | 2   | 9.5   |
| 0.727929493 BH | 16  | 16  | 10  | 2   | 16    |
| 0.727929493 BH | 5   | 10  | 16  | 5   | 7.5   |
| 0.727929493 BH | 4   | 21  | 3   | 3   | 12.5  |
| 0.727929493 BH | 5   | 4   | 9   | 5   | 4.5   |
| 0.727929493 BH | 4   | 19  | 5   | 2   | 11.5  |
| 0.728035146 BH | 7   | 24  | 20  | 14  | 15.5  |
| 0.728035146 BH | 2   | 18  | 11  | 10  | 10    |
| 0.728303672 BH | 6   | 16  | 20  | 6   | 11    |
| 0.728303672 BH | 25  | 106 | 61  | 66  | 65.5  |
| 0.728303672 BH | 30  | 81  | 55  | 60  | 55.5  |
| 0.728303672 BH | 19  | 27  | 13  | 4   | 23    |
| 0.728765338 BH | 1   | 22  | 4   | 1   | 11.5  |
| 0.728769211 BH | 8   | 21  | 6   | 3   | 14.5  |
| 0.728774044 BH | 123 | 177 | 250 | 115 | 150   |
| 0.728827729 BH | 14  | 21  | 9   | 4   | 17.5  |
| 0.728827729 BH | 3   | 27  | 3   | 4   | 15    |
| 0.729147224 BH | 3   | 65  | 9   | 7   | 34    |
| 0.729223567 BH | 8   | 25  | 8   | 2   | 16.5  |
| 0.729223567 BH | 5   | 30  | 5   | 5   | 17.5  |
| 0.729223567 BH | 20  | 48  | 13  | 10  | 34    |
| 0.729433425 BH | 0   | 14  | 12  | 3   | 7     |
| 0.729610966 BH | 12  | 46  | 9   | 9   | 29    |
| 0.729610966 BH | 7   | 25  | 22  | 12  | 16    |
| 0.729754045 BH | 10  | 661 | 91  | 66  | 335.5 |
| 0.730015136 BH | 1   | 6   | 10  | 1   | 3.5   |
| 0.730150908 BH | 39  | 159 | 21  | 39  | 99    |
| 0.73022374 BH  | 435 | 686 | 702 | 577 | 560.5 |
| 0.730720655 BH | 6   | 28  | 24  | 12  | 17    |
| 0.730720655 BH | 6   | 29  | 15  | 19  | 17.5  |
| 0.73075917 BH  | 462 | 749 | 704 | 660 | 605.5 |
| 0.730765109 BH | 7   | 58  | 8   | 10  | 32.5  |
| 0.730849503 BH | 4   | 40  | 8   | 4   | 22    |
| 0.730980905 BH | 9   | 18  | 16  | 16  | 13.5  |
| 0.730980905 BH | 18  | 31  | 9   | 8   | 24.5  |
| 0.731340039 BH | 1   | 17  | 1   | 3   | 9     |
| 0.731340039 BH | 1   | 17  | 1   | 3   | 9     |
| 0.731917615 BH | 3   | 37  | 2   | 7   | 20    |
| 0.731917615 BH | 3   | 14  | 8   | 9   | 8.5   |
| 0.731917615 BH | 54  | 52  | 20  | 23  | 53    |
| 0.731917615 BH | 3   | 7   | 8   | 4   | 5     |
| 0.731917615 BH | 6   | 12  | 4   | 2   | 9     |
| 0.731917615 BH | 5   | 14  | 3   | 3   | 9.5   |
| 0.73211344 BH  | 5   | 14  | 11  | 11  | 9.5   |

|                |     |     |     |     |       |
|----------------|-----|-----|-----|-----|-------|
| 0.73211344 BH  | 6   | 16  | 6   | 1   | 11    |
| 0.73251821 BH  | 5   | 30  | 7   | 3   | 17.5  |
| 0.73251821 BH  | 35  | 127 | 40  | 15  | 81    |
| 0.732885532 BH | 14  | 49  | 59  | 12  | 31.5  |
| 0.732936168 BH | 6   | 47  | 24  | 25  | 26.5  |
| 0.73303018 BH  | 71  | 169 | 151 | 106 | 120   |
| 0.733080158 BH | 2   | 32  | 5   | 3   | 17    |
| 0.733080158 BH | 2   | 8   | 7   | 5   | 5     |
| 0.733080158 BH | 5   | 15  | 4   | 2   | 10    |
| 0.733080158 BH | 6   | 25  | 6   | 3   | 15.5  |
| 0.733080158 BH | 9   | 19  | 7   | 2   | 14    |
| 0.733080158 BH | 5   | 54  | 6   | 9   | 29.5  |
| 0.733080158 BH | 15  | 73  | 14  | 13  | 44    |
| 0.733080158 BH | 16  | 64  | 57  | 26  | 40    |
| 0.73330325 BH  | 3   | 65  | 18  | 43  | 34    |
| 0.733334844 BH | 85  | 215 | 147 | 161 | 150   |
| 0.733595024 BH | 6   | 17  | 14  | 12  | 11.5  |
| 0.733595024 BH | 3   | 33  | 16  | 18  | 18    |
| 0.733595024 BH | 1   | 15  | 2   | 1   | 8     |
| 0.733595024 BH | 1   | 14  | 1   | 2   | 7.5   |
| 0.733595024 BH | 1   | 15  | 2   | 1   | 8     |
| 0.733595024 BH | 1   | 14  | 1   | 2   | 7.5   |
| 0.734152886 BH | 6   | 25  | 19  | 13  | 15.5  |
| 0.734175527 BH | 4   | 16  | 4   | 2   | 10    |
| 0.734175527 BH | 4   | 16  | 4   | 2   | 10    |
| 0.734175527 BH | 2   | 8   | 8   | 4   | 5     |
| 0.734175527 BH | 4   | 16  | 4   | 2   | 10    |
| 0.734175527 BH | 3   | 8   | 1   | 1   | 5.5   |
| 0.734175527 BH | 7   | 23  | 7   | 2   | 15    |
| 0.734175527 BH | 8   | 22  | 7   | 2   | 15    |
| 0.734356013 BH | 9   | 10  | 6   | 1   | 9.5   |
| 0.734549505 BH | 20  | 43  | 15  | 8   | 31.5  |
| 0.734688392 BH | 1   | 15  | 1   | 2   | 8     |
| 0.734688392 BH | 5   | 16  | 19  | 6   | 10.5  |
| 0.734688392 BH | 5   | 21  | 6   | 21  | 13    |
| 0.734688392 BH | 6   | 18  | 16  | 10  | 12    |
| 0.734688392 BH | 4   | 33  | 6   | 4   | 18.5  |
| 0.734718638 BH | 43  | 102 | 34  | 19  | 72.5  |
| 0.735850485 BH | 11  | 37  | 33  | 18  | 24    |
| 0.73586917 BH  | 15  | 32  | 11  | 6   | 23.5  |
| 0.735871826 BH | 645 | 669 | 316 | 241 | 657   |
| 0.735908731 BH | 3   | 22  | 2   | 4   | 12.5  |
| 0.735908731 BH | 23  | 94  | 29  | 10  | 58.5  |
| 0.735908731 BH | 377 | 208 | 167 | 103 | 292.5 |
| 0.735908731 BH | 7   | 10  | 16  | 7   | 8.5   |
| 0.735908731 BH | 2   | 9   | 1   | 1   | 5.5   |
| 0.735908731 BH | 2   | 9   | 1   | 1   | 5.5   |

|                |      |      |      |      |      |
|----------------|------|------|------|------|------|
| 0.735908731 BH | 2    | 9    | 1    | 1    | 5.5  |
| 0.735908731 BH | 2    | 10   | 1    | 1    | 6    |
| 0.735908731 BH | 2    | 9    | 1    | 1    | 5.5  |
| 0.735908731 BH | 2    | 10   | 1    | 1    | 6    |
| 0.735908731 BH | 5    | 33   | 13   | 22   | 19   |
| 0.736224538 BH | 3    | 197  | 126  | 63   | 100  |
| 0.736224538 BH | 7    | 20   | 4    | 4    | 13.5 |
| 0.736224538 BH | 2    | 16   | 18   | 2    | 9    |
| 0.736486467 BH | 1    | 24   | 11   | 13   | 12.5 |
| 0.736486467 BH | 2    | 11   | 4    | 0    | 6.5  |
| 0.736486467 BH | 4    | 23   | 1    | 6    | 13.5 |
| 0.736486467 BH | 2    | 29   | 3    | 4    | 15.5 |
| 0.736643791 BH | 27   | 3    | 12   | 2    | 15   |
| 0.736933678 BH | 39   | 40   | 74   | 30   | 39.5 |
| 0.736933678 BH | 65   | 73   | 100  | 71   | 69   |
| 0.736933678 BH | 2    | 31   | 11   | 20   | 16.5 |
| 0.736933678 BH | 10   | 5    | 26   | 2    | 7.5  |
| 0.736933678 BH | 1005 | 1131 | 1456 | 1141 | 1068 |
| 0.737125449 BH | 8    | 38   | 38   | 11   | 23   |
| 0.737175339 BH | 28   | 13   | 15   | 3    | 20.5 |
| 0.737235348 BH | 6    | 37   | 5    | 7    | 21.5 |
| 0.7375617 BH   | 9    | 37   | 8    | 6    | 23   |
| 0.737695169 BH | 22   | 65   | 18   | 12   | 43.5 |
| 0.739173295 BH | 10   | 31   | 13   | 28   | 20.5 |
| 0.739254946 BH | 21   | 57   | 60   | 25   | 39   |
| 0.739585534 BH | 8    | 30   | 9    | 3    | 19   |
| 0.739585534 BH | 6    | 13   | 1    | 4    | 9.5  |
| 0.739585534 BH | 3    | 19   | 4    | 2    | 11   |
| 0.739585534 BH | 3    | 19   | 4    | 2    | 11   |
| 0.739585534 BH | 0    | 12   | 2    | 10   | 6    |
| 0.739707907 BH | 9    | 37   | 9    | 5    | 23   |
| 0.739707907 BH | 5    | 19   | 11   | 15   | 12   |
| 0.739934547 BH | 2    | 23   | 5    | 2    | 12.5 |
| 0.739934547 BH | 2    | 25   | 3    | 3    | 13.5 |
| 0.739970883 BH | 14   | 21   | 13   | 0    | 17.5 |
| 0.740330138 BH | 8    | 105  | 20   | 11   | 56.5 |
| 0.740396154 BH | 18   | 2    | 9    | 0    | 10   |
| 0.740396154 BH | 11   | 19   | 7    | 4    | 15   |
| 0.740396154 BH | 12   | 21   | 26   | 13   | 16.5 |
| 0.740396154 BH | 15   | 26   | 13   | 3    | 20.5 |
| 0.740396154 BH | 11   | 13   | 13   | 16   | 12   |
| 0.740721384 BH | 15   | 76   | 17   | 11   | 45.5 |
| 0.740798887 BH | 6    | 35   | 6    | 5    | 20.5 |
| 0.740798887 BH | 5    | 23   | 4    | 4    | 14   |
| 0.740798887 BH | 17   | 14   | 4    | 8    | 15.5 |
| 0.740798887 BH | 27   | 49   | 51   | 35   | 38   |
| 0.740896297 BH | 21   | 55   | 45   | 35   | 38   |

|                |    |     |     |     |      |
|----------------|----|-----|-----|-----|------|
| 0.741101595 BH | 8  | 39  | 9   | 5   | 23.5 |
| 0.741267476 BH | 5  | 39  | 14  | 27  | 22   |
| 0.741267476 BH | 9  | 65  | 10  | 11  | 37   |
| 0.741267476 BH | 26 | 168 | 148 | 44  | 97   |
| 0.741309206 BH | 3  | 7   | 10  | 2   | 5    |
| 0.741309206 BH | 11 | 41  | 12  | 5   | 26   |
| 0.741309206 BH | 8  | 19  | 23  | 8   | 13.5 |
| 0.741309206 BH | 15 | 43  | 7   | 11  | 29   |
| 0.741309206 BH | 24 | 131 | 29  | 19  | 77.5 |
| 0.741309206 BH | 8  | 8   | 17  | 6   | 8    |
| 0.741309206 BH | 5  | 38  | 9   | 4   | 21.5 |
| 0.741309206 BH | 17 | 21  | 28  | 19  | 19   |
| 0.741309206 BH | 1  | 11  | 1   | 1   | 6    |
| 0.741309206 BH | 1  | 11  | 1   | 1   | 6    |
| 0.741309206 BH | 1  | 11  | 1   | 1   | 6    |
| 0.741309206 BH | 1  | 11  | 1   | 1   | 6    |
| 0.741309206 BH | 1  | 11  | 1   | 1   | 6    |
| 0.741309206 BH | 1  | 11  | 1   | 1   | 6    |
| 0.741309206 BH | 1  | 11  | 1   | 1   | 6    |
| 0.741309206 BH | 1  | 11  | 1   | 1   | 6    |
| 0.741309206 BH | 1  | 11  | 1   | 1   | 6    |
| 0.741309206 BH | 1  | 11  | 1   | 1   | 6    |
| 0.741309206 BH | 29 | 77  | 50  | 58  | 53   |
| 0.741309206 BH | 28 | 40  | 8   | 16  | 34   |
| 0.742200045 BH | 9  | 65  | 15  | 7   | 37   |
| 0.742329513 BH | 87 | 147 | 133 | 125 | 117  |
| 0.742329513 BH | 26 | 19  | 68  | 5   | 22.5 |
| 0.742329513 BH | 30 | 25  | 21  | 3   | 27.5 |
| 0.742329513 BH | 2  | 6   | 6   | 5   | 4    |
| 0.742329513 BH | 4  | 26  | 9   | 19  | 15   |
| 0.742329513 BH | 4  | 29  | 17  | 15  | 16.5 |
| 0.742329513 BH | 1  | 12  | 1   | 1   | 6.5  |
| 0.742329513 BH | 1  | 12  | 1   | 1   | 6.5  |
| 0.742335053 BH | 1  | 19  | 9   | 10  | 10   |
| 0.742335053 BH | 18 | 45  | 16  | 6   | 31.5 |
| 0.742335053 BH | 5  | 24  | 3   | 5   | 14.5 |
| 0.742335053 BH | 0  | 19  | 12  | 7   | 9.5  |
| 0.742335053 BH | 20 | 135 | 82  | 61  | 77.5 |
| 0.742675279 BH | 33 | 54  | 19  | 14  | 43.5 |
| 0.743294329 BH | 12 | 28  | 14  | 28  | 20   |
| 0.74338688 BH  | 82 | 202 | 79  | 205 | 142  |
| 0.743569383 BH | 49 | 45  | 30  | 10  | 47   |
| 0.743964288 BH | 1  | 13  | 4   | 0   | 7    |
| 0.743964288 BH | 0  | 23  | 2   | 3   | 11.5 |
| 0.743964288 BH | 4  | 25  | 8   | 20  | 14.5 |
| 0.743964288 BH | 4  | 25  | 4   | 4   | 14.5 |
| 0.743964288 BH | 4  | 26  | 5   | 3   | 15   |
| 0.743964288 BH | 10 | 76  | 52  | 28  | 43   |



|                |     |      |     |     |       |
|----------------|-----|------|-----|-----|-------|
| 0.744208355 BH | 5   | 37   | 6   | 5   | 21    |
| 0.744589586 BH | 3   | 39   | 3   | 7   | 21    |
| 0.744589586 BH | 13  | 266  | 83  | 157 | 139.5 |
| 0.74486621 BH  | 9   | 3    | 20  | 2   | 6     |
| 0.744877132 BH | 1   | 10   | 10  | 3   | 5.5   |
| 0.744877132 BH | 2   | 21   | 4   | 2   | 11.5  |
| 0.745129163 BH | 1   | 14   | 4   | 0   | 7.5   |
| 0.745129163 BH | 6   | 35   | 27  | 14  | 20.5  |
| 0.745831407 BH | 3   | 45   | 38  | 10  | 24    |
| 0.746150384 BH | 4   | 55   | 4   | 11  | 29.5  |
| 0.746150384 BH | 5   | 25   | 22  | 9   | 15    |
| 0.746508663 BH | 9   | 47   | 3   | 12  | 28    |
| 0.746508663 BH | 22  | 236  | 51  | 171 | 129   |
| 0.746662156 BH | 3   | 19   | 1   | 4   | 11    |
| 0.747709642 BH | 6   | 18   | 3   | 4   | 12    |
| 0.747709642 BH | 4   | 8    | 10  | 5   | 6     |
| 0.747851467 BH | 0   | 20   | 3   | 1   | 10    |
| 0.747851467 BH | 1   | 30   | 3   | 4   | 15.5  |
| 0.74808765 BH  | 24  | 29   | 9   | 11  | 26.5  |
| 0.748145949 BH | 3   | 14   | 2   | 3   | 8.5   |
| 0.748145949 BH | 6   | 10   | 4   | 1   | 8     |
| 0.748145949 BH | 3   | 4    | 8   | 3   | 3.5   |
| 0.748708042 BH | 600 | 1199 | 325 | 354 | 899.5 |
| 0.748708042 BH | 160 | 115  | 246 | 129 | 137.5 |
| 0.748708042 BH | 6   | 27   | 22  | 11  | 16.5  |
| 0.74923447 BH  | 11  | 33   | 16  | 29  | 22    |
| 0.74956814 BH  | 360 | 640  | 402 | 655 | 500   |
| 0.749615716 BH | 60  | 99   | 42  | 21  | 79.5  |
| 0.749615716 BH | 0   | 16   | 2   | 1   | 8     |
| 0.749615716 BH | 0   | 16   | 2   | 1   | 8     |
| 0.749749765 BH | 1   | 11   | 0   | 2   | 6     |
| 0.749749765 BH | 1   | 10   | 3   | 0   | 5.5   |
| 0.750245938 BH | 23  | 56   | 21  | 8   | 39.5  |
| 0.750245938 BH | 0   | 20   | 1   | 3   | 10    |
| 0.750245938 BH | 0   | 20   | 1   | 3   | 10    |
| 0.750245938 BH | 3   | 24   | 19  | 8   | 13.5  |
| 0.750245938 BH | 12  | 32   | 6   | 8   | 22    |
| 0.750245938 BH | 5   | 6    | 6   | 8   | 5.5   |
| 0.750245938 BH | 5   | 20   | 3   | 4   | 12.5  |
| 0.750245938 BH | 0   | 16   | 1   | 2   | 8     |
| 0.750245938 BH | 0   | 16   | 1   | 2   | 8     |
| 0.750245938 BH | 0   | 17   | 2   | 1   | 8.5   |
| 0.750245938 BH | 0   | 16   | 1   | 2   | 8     |
| 0.750245938 BH | 0   | 16   | 1   | 2   | 8     |
| 0.750245938 BH | 2   | 18   | 12  | 9   | 10    |
| 0.750976216 BH | 55  | 161  | 50  | 27  | 108   |
| 0.751207385 BH | 22  | 161  | 30  | 25  | 91.5  |

|                |     |      |     |     |        |
|----------------|-----|------|-----|-----|--------|
| 0.751207385 BH | 15  | 19   | 34  | 11  | 17     |
| 0.751207385 BH | 6   | 27   | 5   | 5   | 16.5   |
| 0.751207385 BH | 6   | 26   | 6   | 4   | 16     |
| 0.751207385 BH | 61  | 59   | 94  | 57  | 60     |
| 0.751207385 BH | 17  | 46   | 12  | 9   | 31.5   |
| 0.751207385 BH | 0   | 17   | 1   | 2   | 8.5    |
| 0.751207385 BH | 0   | 17   | 1   | 2   | 8.5    |
| 0.751207385 BH | 11  | 18   | 29  | 7   | 14.5   |
| 0.751207385 BH | 61  | 218  | 130 | 136 | 139.5  |
| 0.751207385 BH | 3   | 10   | 5   | 9   | 6.5    |
| 0.751207385 BH | 2   | 12   | 7   | 7   | 7      |
| 0.751207385 BH | 5   | 45   | 7   | 7   | 25     |
| 0.751268125 BH | 1   | 8    | 8   | 3   | 4.5    |
| 0.751268125 BH | 3   | 15   | 4   | 1   | 9      |
| 0.751911029 BH | 1   | 63   | 9   | 7   | 32     |
| 0.752019729 BH | 14  | 50   | 43  | 23  | 32     |
| 0.752019729 BH | 16  | 51   | 20  | 4   | 33.5   |
| 0.752650915 BH | 62  | 49   | 45  | 4   | 55.5   |
| 0.752650915 BH | 0   | 15   | 7   | 6   | 7.5    |
| 0.752650915 BH | 13  | 72   | 41  | 38  | 42.5   |
| 0.752650915 BH | 811 | 1654 | 295 | 593 | 1232.5 |
| 0.752650915 BH | 2   | 7    | 9   | 2   | 4.5    |
| 0.752650915 BH | 2   | 7    | 9   | 2   | 4.5    |
| 0.752650915 BH | 1   | 16   | 9   | 7   | 8.5    |
| 0.752650915 BH | 22  | 123  | 18  | 26  | 72.5   |
| 0.752650915 BH | 12  | 146  | 21  | 23  | 79     |
| 0.752650915 BH | 4   | 33   | 6   | 5   | 18.5   |
| 0.752650915 BH | 2   | 19   | 10  | 10  | 10.5   |
| 0.752650915 BH | 19  | 37   | 28  | 31  | 28     |
| 0.753230474 BH | 16  | 29   | 8   | 8   | 22.5   |
| 0.753624361 BH | 61  | 118  | 108 | 83  | 89.5   |
| 0.75399388 BH  | 2   | 17   | 2   | 3   | 9.5    |
| 0.75399388 BH  | 2   | 17   | 2   | 3   | 9.5    |
| 0.75399388 BH  | 2   | 16   | 2   | 3   | 9      |
| 0.75399388 BH  | 102 | 671  | 261 | 413 | 386.5  |
| 0.75399388 BH  | 4   | 22   | 3   | 4   | 13     |
| 0.754130666 BH | 1   | 15   | 7   | 9   | 8      |
| 0.754130666 BH | 1   | 22   | 3   | 3   | 11.5   |
| 0.754130666 BH | 1   | 22   | 3   | 3   | 11.5   |
| 0.754130666 BH | 7   | 12   | 6   | 0   | 9.5    |
| 0.754966289 BH | 81  | 111  | 46  | 33  | 96     |
| 0.754966289 BH | 35  | 0    | 8   | 8   | 17.5   |
| 0.755219258 BH | 8   | 24   | 8   | 2   | 16     |
| 0.755219258 BH | 8   | 23   | 8   | 2   | 15.5   |
| 0.755219258 BH | 5   | 26   | 21  | 11  | 15.5   |
| 0.755219258 BH | 5   | 38   | 14  | 24  | 21.5   |
| 0.755263298 BH | 10  | 32   | 8   | 6   | 21     |

|                |     |      |      |      |       |
|----------------|-----|------|------|------|-------|
| 0.755263298 BH | 49  | 179  | 90   | 124  | 114   |
| 0.755263298 BH | 4   | 21   | 6    | 2    | 12.5  |
| 0.755274835 BH | 161 | 123  | 94   | 38   | 142   |
| 0.755274835 BH | 7   | 40   | 19   | 25   | 23.5  |
| 0.755364213 BH | 5   | 15   | 6    | 0    | 10    |
| 0.755463557 BH | 5   | 14   | 11   | 10   | 9.5   |
| 0.7557728 BH   | 862 | 1356 | 1107 | 1289 | 1109  |
| 0.7557728 BH   | 8   | 31   | 29   | 12   | 19.5  |
| 0.755827153 BH | 33  | 103  | 85   | 51   | 68    |
| 0.755827153 BH | 0   | 13   | 1    | 1    | 6.5   |
| 0.755827153 BH | 0   | 13   | 1    | 1    | 6.5   |
| 0.755827153 BH | 0   | 13   | 1    | 1    | 6.5   |
| 0.755827153 BH | 0   | 13   | 1    | 1    | 6.5   |
| 0.756324189 BH | 6   | 36   | 7    | 5    | 21    |
| 0.756324189 BH | 5   | 16   | 7    | 15   | 10.5  |
| 0.75654653 BH  | 9   | 35   | 8    | 6    | 22    |
| 0.756588979 BH | 1   | 23   | 4    | 2    | 12    |
| 0.757116229 BH | 8   | 28   | 6    | 5    | 18    |
| 0.757163169 BH | 4   | 35   | 4    | 6    | 19.5  |
| 0.757163169 BH | 561 | 600  | 591  | 766  | 580.5 |
| 0.757163169 BH | 9   | 18   | 6    | 3    | 13.5  |
| 0.757163169 BH | 2   | 18   | 4    | 1    | 10    |
| 0.757163169 BH | 2   | 18   | 4    | 1    | 10    |
| 0.757163169 BH | 2   | 18   | 4    | 1    | 10    |
| 0.757163169 BH | 2   | 18   | 4    | 1    | 10    |
| 0.757472226 BH | 6   | 15   | 3    | 3    | 10.5  |
| 0.757472226 BH | 8   | 73   | 18   | 6    | 40.5  |
| 0.757598565 BH | 50  | 70   | 25   | 23   | 60    |
| 0.757877387 BH | 7   | 87   | 13   | 13   | 47    |
| 0.757877387 BH | 4   | 30   | 39   | 1    | 17    |
| 0.757933682 BH | 2   | 29   | 4    | 4    | 15.5  |
| 0.757933682 BH | 1   | 15   | 13   | 4    | 8     |
| 0.758593429 BH | 2   | 19   | 16   | 5    | 10.5  |
| 0.758640962 BH | 2   | 26   | 10   | 15   | 14    |
| 0.759013927 BH | 4   | 23   | 20   | 8    | 13.5  |
| 0.759013927 BH | 5   | 17   | 3    | 3    | 11    |
| 0.759190094 BH | 4   | 10   | 2    | 2    | 7     |
| 0.759190094 BH | 0   | 13   | 8    | 4    | 6.5   |
| 0.759190094 BH | 4   | 30   | 5    | 5    | 17    |
| 0.759190094 BH | 218 | 971  | 110  | 260  | 594.5 |
| 0.759704873 BH | 2   | 30   | 5    | 3    | 16    |
| 0.760128336 BH | 5   | 55   | 8    | 8    | 30    |
| 0.760128336 BH | 10  | 23   | 9    | 3    | 16.5  |
| 0.760128336 BH | 6   | 12   | 16   | 6    | 9     |
| 0.760467431 BH | 18  | 48   | 17   | 7    | 33    |
| 0.760467431 BH | 3   | 8    | 9    | 4    | 5.5   |
| 0.760467431 BH | 0   | 15   | 4    | 9    | 7.5   |

|                |     |     |     |     |       |
|----------------|-----|-----|-----|-----|-------|
| 0.760467431 BH | 400 | 536 | 452 | 584 | 468   |
| 0.760467431 BH | 114 | 505 | 111 | 97  | 309.5 |
| 0.760467431 BH | 2   | 11  | 13  | 3   | 6.5   |
| 0.760467431 BH | 3   | 23  | 6   | 2   | 13    |
| 0.760467431 BH | 3   | 24  | 6   | 2   | 13.5  |
| 0.761224463 BH | 3   | 52  | 9   | 6   | 27.5  |
| 0.761311191 BH | 2   | 7   | 10  | 1   | 4.5   |
| 0.761340906 BH | 8   | 38  | 9   | 5   | 23    |
| 0.76139845 BH  | 4   | 10  | 3   | 1   | 7     |
| 0.76139845 BH  | 4   | 10  | 3   | 1   | 7     |
| 0.76139845 BH  | 4   | 11  | 3   | 1   | 7.5   |
| 0.76139845 BH  | 4   | 11  | 3   | 1   | 7.5   |
| 0.76139845 BH  | 4   | 10  | 3   | 1   | 7     |
| 0.76139845 BH  | 10  | 614 | 91  | 64  | 312   |
| 0.761415563 BH | 5   | 25  | 5   | 4   | 15    |
| 0.761415563 BH | 112 | 345 | 229 | 210 | 228.5 |
| 0.761523386 BH | 0   | 12  | 4   | 8   | 6     |
| 0.761739341 BH | 11  | 48  | 7   | 11  | 29.5  |
| 0.761739341 BH | 6   | 10  | 5   | 0   | 8     |
| 0.761739341 BH | 1   | 18  | 2   | 3   | 9.5   |
| 0.761739341 BH | 5   | 12  | 5   | 0   | 8.5   |
| 0.761739341 BH | 1   | 18  | 2   | 3   | 9.5   |
| 0.761739341 BH | 1   | 19  | 3   | 2   | 10    |
| 0.761739341 BH | 31  | 538 | 90  | 68  | 284.5 |
| 0.761739341 BH | 11  | 41  | 23  | 27  | 26    |
| 0.761739341 BH | 3   | 12  | 3   | 1   | 7.5   |
| 0.761739341 BH | 3   | 12  | 3   | 1   | 7.5   |
| 0.761739341 BH | 3   | 12  | 3   | 1   | 7.5   |
| 0.761739341 BH | 3   | 12  | 3   | 1   | 7.5   |
| 0.761739341 BH | 13  | 30  | 22  | 22  | 21.5  |
| 0.761739341 BH | 2   | 10  | 9   | 4   | 6     |
| 0.761739341 BH | 6   | 32  | 5   | 6   | 19    |
| 0.761739341 BH | 13  | 17  | 9   | 3   | 15    |
| 0.761739341 BH | 13  | 18  | 9   | 3   | 15.5  |
| 0.761904502 BH | 5   | 25  | 4   | 5   | 15    |
| 0.76274186 BH  | 4   | 15  | 5   | 0   | 9.5   |
| 0.76274186 BH  | 1   | 19  | 2   | 3   | 10    |
| 0.763083551 BH | 29  | 82  | 24  | 16  | 55.5  |
| 0.763083551 BH | 3   | 13  | 3   | 1   | 8     |
| 0.763226074 BH | 18  | 40  | 45  | 19  | 29    |
| 0.763242061 BH | 11  | 40  | 13  | 4   | 25.5  |
| 0.763242061 BH | 19  | 79  | 41  | 50  | 49    |
| 0.763444264 BH | 6   | 32  | 8   | 4   | 19    |
| 0.763444264 BH | 5   | 15  | 17  | 5   | 10    |
| 0.763444264 BH | 0   | 13  | 0   | 2   | 6.5   |
| 0.763669644 BH | 17  | 24  | 11  | 5   | 20.5  |
| 0.763704681 BH | 1   | 14  | 11  | 4   | 7.5   |

|                |     |      |     |     |       |
|----------------|-----|------|-----|-----|-------|
| 0.764146755 BH | 9   | 21   | 6   | 5   | 15    |
| 0.764146755 BH | 3   | 32   | 5   | 5   | 17.5  |
| 0.765512934 BH | 36  | 39   | 64  | 29  | 37.5  |
| 0.766051154 BH | 10  | 171  | 16  | 31  | 90.5  |
| 0.766113332 BH | 9   | 41   | 7   | 8   | 25    |
| 0.766150105 BH | 2   | 14   | 2   | 2   | 8     |
| 0.766241663 BH | 9   | 57   | 30  | 30  | 33    |
| 0.766439574 BH | 2   | 29   | 2   | 6   | 15.5  |
| 0.766917548 BH | 25  | 7    | 39  | 14  | 16    |
| 0.767158616 BH | 10  | 26   | 29  | 11  | 18    |
| 0.767158616 BH | 12  | 72   | 55  | 25  | 42    |
| 0.767158616 BH | 7   | 47   | 11  | 6   | 27    |
| 0.767158616 BH | 1   | 20   | 4   | 1   | 10.5  |
| 0.767158616 BH | 2   | 14   | 3   | 1   | 8     |
| 0.767158616 BH | 2   | 14   | 3   | 1   | 8     |
| 0.767158616 BH | 5   | 102  | 11  | 17  | 53.5  |
| 0.767158616 BH | 6   | 55   | 10  | 7   | 30.5  |
| 0.767158616 BH | 72  | 312  | 186 | 166 | 192   |
| 0.767158616 BH | 1   | 35   | 4   | 5   | 18    |
| 0.768046234 BH | 6   | 52   | 22  | 28  | 29    |
| 0.768363785 BH | 5   | 16   | 6   | 1   | 10.5  |
| 0.768547374 BH | 10  | 42   | 23  | 25  | 26    |
| 0.768798702 BH | 2   | 15   | 3   | 1   | 8.5   |
| 0.768798702 BH | 1   | 14   | 4   | 10  | 7.5   |
| 0.768798702 BH | 1   | 14   | 12  | 3   | 7.5   |
| 0.768798702 BH | 3   | 14   | 5   | 11  | 8.5   |
| 0.769088515 BH | 6   | 48   | 16  | 31  | 27    |
| 0.769540541 BH | 36  | 161  | 116 | 68  | 98.5  |
| 0.769560935 BH | 1   | 19   | 10  | 9   | 10    |
| 0.769567506 BH | 6   | 28   | 6   | 5   | 17    |
| 0.769813598 BH | 1   | 12   | 8   | 5   | 6.5   |
| 0.770086658 BH | 31  | 96   | 37  | 10  | 63.5  |
| 0.770359083 BH | 689 | 709  | 825 | 813 | 699   |
| 0.770542739 BH | 418 | 3376 | 161 | 862 | 1897  |
| 0.770694984 BH | 47  | 76   | 36  | 14  | 61.5  |
| 0.770698292 BH | 91  | 172  | 32  | 65  | 131.5 |
| 0.770698292 BH | 5   | 42   | 7   | 7   | 23.5  |
| 0.770766655 BH | 6   | 20   | 4   | 4   | 13    |
| 0.770766655 BH | 123 | 114  | 44  | 59  | 118.5 |
| 0.770766655 BH | 195 | 282  | 140 | 64  | 238.5 |
| 0.770766655 BH | 9   | 36   | 8   | 7   | 22.5  |
| 0.770766655 BH | 7   | 43   | 10  | 6   | 25    |
| 0.770766655 BH | 4   | 15   | 14  | 6   | 9.5   |
| 0.770766655 BH | 3   | 21   | 2   | 4   | 12    |
| 0.770766655 BH | 4   | 18   | 6   | 1   | 11    |
| 0.772026472 BH | 14  | 41   | 12  | 7   | 27.5  |
| 0.772026472 BH | 5   | 72   | 10  | 11  | 38.5  |

|                |      |      |      |      |       |
|----------------|------|------|------|------|-------|
| 0.772026472 BH | 3    | 18   | 17   | 5    | 10.5  |
| 0.772026472 BH | 5    | 43   | 9    | 5    | 24    |
| 0.772026472 BH | 3    | 23   | 9    | 16   | 13    |
| 0.772026472 BH | 5    | 8    | 6    | 9    | 6.5   |
| 0.772026472 BH | 746  | 1440 | 1226 | 1026 | 1093  |
| 0.773054027 BH | 17   | 28   | 34   | 17   | 22.5  |
| 0.773649883 BH | 9    | 42   | 30   | 18   | 25.5  |
| 0.773649883 BH | 39   | 312  | 95   | 18   | 175.5 |
| 0.773649883 BH | 3    | 29   | 5    | 4    | 16    |
| 0.773779989 BH | 2    | 15   | 19   | 1    | 8.5   |
| 0.773779989 BH | 207  | 124  | 228  | 209  | 165.5 |
| 0.773865341 BH | 6    | 20   | 3    | 5    | 13    |
| 0.774714187 BH | 13   | 14   | 8    | 3    | 13.5  |
| 0.775961468 BH | 1    | 16   | 2    | 2    | 8.5   |
| 0.776230711 BH | 25   | 88   | 24   | 16   | 56.5  |
| 0.776230711 BH | 18   | 66   | 59   | 23   | 42    |
| 0.776230711 BH | 7    | 68   | 5    | 15   | 37.5  |
| 0.776422908 BH | 11   | 30   | 26   | 16   | 20.5  |
| 0.77668637 BH  | 5    | 31   | 7    | 4    | 18    |
| 0.77668637 BH  | 8    | 15   | 20   | 7    | 11.5  |
| 0.77668637 BH  | 1521 | 937  | 594  | 574  | 1229  |
| 0.77668637 BH  | 74   | 346  | 54   | 316  | 210   |
| 0.77668637 BH  | 104  | 65   | 63   | 19   | 84.5  |
| 0.77668637 BH  | 4    | 15   | 3    | 3    | 9.5   |
| 0.77668637 BH  | 2    | 9    | 6    | 5    | 5.5   |
| 0.776695665 BH | 15   | 34   | 10   | 8    | 24.5  |
| 0.776889486 BH | 12   | 84   | 20   | 10   | 48    |
| 0.776889486 BH | 18   | 42   | 12   | 10   | 30    |
| 0.776889486 BH | 0    | 25   | 3    | 3    | 12.5  |
| 0.776889486 BH | 2    | 13   | 10   | 6    | 7.5   |
| 0.776889486 BH | 2    | 14   | 9    | 6    | 8     |
| 0.776889486 BH | 0    | 17   | 12   | 5    | 8.5   |
| 0.776889486 BH | 2    | 22   | 5    | 2    | 12    |
| 0.776889486 BH | 8    | 21   | 6    | 4    | 14.5  |
| 0.776889486 BH | 35   | 75   | 64   | 49   | 55    |
| 0.776889486 BH | 13   | 25   | 8    | 6    | 19    |
| 0.776889486 BH | 9    | 18   | 25   | 7    | 13.5  |
| 0.776889486 BH | 7    | 33   | 7    | 5    | 20    |
| 0.776889486 BH | 4    | 19   | 11   | 10   | 11.5  |
| 0.776889486 BH | 15   | 17   | 31   | 9    | 16    |
| 0.776889486 BH | 2    | 9    | 7    | 4    | 5.5   |
| 0.776889486 BH | 1    | 16   | 3    | 1    | 8.5   |
| 0.776889486 BH | 1    | 16   | 3    | 1    | 8.5   |
| 0.776889486 BH | 1    | 16   | 3    | 1    | 8.5   |
| 0.776889486 BH | 39   | 73   | 31   | 14   | 56    |
| 0.778614458 BH | 106  | 274  | 232  | 145  | 190   |
| 0.778633803 BH | 10   | 31   | 8    | 6    | 20.5  |

|                |     |      |     |     |       |
|----------------|-----|------|-----|-----|-------|
| 0.778633803 BH | 12  | 28   | 9   | 5   | 20    |
| 0.778682318 BH | 4   | 10   | 0   | 4   | 7     |
| 0.778712886 BH | 10  | 171  | 15  | 33  | 90.5  |
| 0.778753457 BH | 6   | 10   | 17  | 4   | 8     |
| 0.778812925 BH | 620 | 780  | 782 | 769 | 700   |
| 0.779209787 BH | 19  | 37   | 19  | 3   | 28    |
| 0.779209787 BH | 11  | 54   | 18  | 4   | 32.5  |
| 0.779209787 BH | 7   | 5    | 15  | 3   | 6     |
| 0.779438279 BH | 26  | 60   | 19  | 13  | 43    |
| 0.779523759 BH | 0   | 82   | 12  | 58  | 41    |
| 0.779523759 BH | 10  | 17   | 7   | 3   | 13.5  |
| 0.779523759 BH | 1   | 16   | 1   | 3   | 8.5   |
| 0.779523759 BH | 1   | 19   | 16  | 4   | 10    |
| 0.779523759 BH | 3   | 16   | 3   | 3   | 9.5   |
| 0.779523759 BH | 3   | 17   | 3   | 3   | 10    |
| 0.779523759 BH | 3   | 23   | 22  | 5   | 13    |
| 0.779523759 BH | 5   | 73   | 17  | 5   | 39    |
| 0.779523759 BH | 4   | 47   | 13  | 30  | 25.5  |
| 0.779523759 BH | 32  | 386  | 72  | 52  | 209   |
| 0.779523759 BH | 98  | 243  | 156 | 174 | 170.5 |
| 0.780192645 BH | 26  | 134  | 19  | 32  | 80    |
| 0.780830608 BH | 48  | 42   | 72  | 40  | 45    |
| 0.781031391 BH | 5   | 14   | 5   | 1   | 9.5   |
| 0.781031391 BH | 3   | 17   | 4   | 2   | 10    |
| 0.781031391 BH | 2   | 8    | 9   | 3   | 5     |
| 0.781439577 BH | 530 | 1454 | 891 | 984 | 992   |
| 0.78165785 BH  | 2   | 19   | 8   | 11  | 10.5  |
| 0.78165785 BH  | 3   | 20   | 12  | 10  | 11.5  |
| 0.782159371 BH | 2   | 32   | 5   | 4   | 17    |
| 0.782917405 BH | 4   | 15   | 5   | 1   | 9.5   |
| 0.783219419 BH | 46  | 94   | 33  | 23  | 70    |
| 0.783263906 BH | 12  | 10   | 18  | 11  | 11    |
| 0.783812628 BH | 12  | 23   | 28  | 11  | 17.5  |
| 0.784081106 BH | 5   | 15   | 12  | 8   | 10    |
| 0.784087529 BH | 29  | 74   | 31  | 9   | 51.5  |
| 0.784307235 BH | 21  | 62   | 19  | 11  | 41.5  |
| 0.784307235 BH | 1   | 11   | 6   | 5   | 6     |
| 0.784307235 BH | 1   | 10   | 8   | 4   | 5.5   |
| 0.784307235 BH | 1   | 10   | 8   | 4   | 5.5   |
| 0.784647388 BH | 5   | 27   | 6   | 4   | 16    |
| 0.785122194 BH | 29  | 92   | 27  | 17  | 60.5  |
| 0.785287954 BH | 23  | 56   | 23  | 7   | 39.5  |
| 0.785287954 BH | 9   | 49   | 4   | 13  | 29    |
| 0.785287954 BH | 7   | 32   | 11  | 24  | 19.5  |
| 0.785422134 BH | 47  | 127  | 30  | 34  | 87    |
| 0.785441452 BH | 17  | 37   | 14  | 6   | 27    |
| 0.78547663 BH  | 17  | 41   | 14  | 8   | 29    |

|                |     |     |     |     |      |
|----------------|-----|-----|-----|-----|------|
| 0.785497237 BH | 9   | 78  | 13  | 13  | 43.5 |
| 0.785548993 BH | 11  | 48  | 22  | 31  | 29.5 |
| 0.785548993 BH | 3   | 41  | 12  | 26  | 22   |
| 0.785556975 BH | 20  | 15  | 11  | 4   | 17.5 |
| 0.78618731 BH  | 2   | 11  | 2   | 1   | 6.5  |
| 0.78618731 BH  | 2   | 11  | 2   | 1   | 6.5  |
| 0.786826982 BH | 3   | 34  | 7   | 4   | 18.5 |
| 0.786912995 BH | 21  | 117 | 24  | 21  | 69   |
| 0.787060574 BH | 2   | 19  | 3   | 3   | 10.5 |
| 0.787060574 BH | 2   | 19  | 3   | 3   | 10.5 |
| 0.787196144 BH | 41  | 52  | 24  | 16  | 46.5 |
| 0.787196144 BH | 5   | 61  | 15  | 5   | 33   |
| 0.787776778 BH | 5   | 11  | 15  | 4   | 8    |
| 0.787799309 BH | 0   | 26  | 1   | 4   | 13   |
| 0.787799309 BH | 31  | 73  | 66  | 39  | 52   |
| 0.787799309 BH | 17  | 27  | 8   | 9   | 22   |
| 0.787799309 BH | 50  | 380 | 73  | 63  | 215  |
| 0.787799309 BH | 9   | 52  | 16  | 37  | 30.5 |
| 0.787799309 BH | 3   | 18  | 5   | 1   | 10.5 |
| 0.787799309 BH | 1   | 10  | 9   | 3   | 5.5  |
| 0.787799309 BH | 6   | 17  | 20  | 6   | 11.5 |
| 0.787799309 BH | 2   | 11  | 1   | 2   | 6.5  |
| 0.787799309 BH | 2   | 11  | 1   | 2   | 6.5  |
| 0.787799309 BH | 13  | 16  | 8   | 4   | 14.5 |
| 0.787799309 BH | 7   | 30  | 6   | 5   | 18.5 |
| 0.787799309 BH | 7   | 29  | 5   | 6   | 18   |
| 0.787799309 BH | 18  | 92  | 21  | 15  | 55   |
| 0.787799309 BH | 861 | 805 | 983 | 964 | 833  |
| 0.788737432 BH | 22  | 44  | 37  | 31  | 33   |
| 0.78876788 BH  | 0   | 14  | 8   | 5   | 7    |
| 0.78876788 BH  | 0   | 14  | 8   | 5   | 7    |
| 0.78876788 BH  | 5   | 17  | 7   | 0   | 11   |
| 0.78876788 BH  | 138 | 188 | 273 | 102 | 163  |
| 0.789454264 BH | 38  | 79  | 30  | 17  | 58.5 |
| 0.789494214 BH | 14  | 25  | 32  | 12  | 19.5 |
| 0.789580715 BH | 8   | 8   | 14  | 7   | 8    |
| 0.789633947 BH | 7   | 64  | 11  | 10  | 35.5 |
| 0.789746524 BH | 22  | 48  | 54  | 20  | 35   |
| 0.789802313 BH | 5   | 18  | 6   | 2   | 11.5 |
| 0.790890119 BH | 18  | 72  | 39  | 43  | 45   |
| 0.791550034 BH | 6   | 29  | 8   | 4   | 17.5 |
| 0.791550034 BH | 7   | 29  | 4   | 7   | 18   |
| 0.791550034 BH | 30  | 37  | 51  | 27  | 33.5 |
| 0.791550034 BH | 8   | 39  | 27  | 16  | 23.5 |
| 0.791713768 BH | 15  | 34  | 33  | 18  | 24.5 |
| 0.791713768 BH | 5   | 23  | 10  | 16  | 14   |
| 0.791713768 BH | 4   | 25  | 16  | 11  | 14.5 |



|                |     |      |     |     |       |
|----------------|-----|------|-----|-----|-------|
| 0.791795274 BH | 14  | 40   | 28  | 24  | 27    |
| 0.791795274 BH | 13  | 27   | 9   | 6   | 20    |
| 0.791850456 BH | 24  | 0    | 34  | 13  | 12    |
| 0.792394892 BH | 10  | 14   | 5   | 4   | 12    |
| 0.792851076 BH | 347 | 1519 | 452 | 221 | 933   |
| 0.792851076 BH | 66  | 145  | 51  | 33  | 105.5 |
| 0.792851076 BH | 4   | 38   | 5   | 7   | 21    |
| 0.792943238 BH | 8   | 13   | 21  | 5   | 10.5  |
| 0.793358042 BH | 0   | 60   | 13  | 2   | 30    |
| 0.793510022 BH | 0   | 18   | 2   | 2   | 9     |
| 0.793510022 BH | 5   | 46   | 5   | 9   | 25.5  |
| 0.793510022 BH | 7   | 63   | 40  | 22  | 35    |
| 0.793521373 BH | 18  | 34   | 35  | 21  | 26    |
| 0.793521373 BH | 1   | 13   | 2   | 1   | 7     |
| 0.793521373 BH | 1   | 13   | 2   | 1   | 7     |
| 0.793521373 BH | 1   | 13   | 2   | 1   | 7     |
| 0.793521373 BH | 1   | 13   | 2   | 1   | 7     |
| 0.793521373 BH | 1   | 13   | 2   | 1   | 7     |
| 0.793521373 BH | 25  | 450  | 91  | 49  | 237.5 |
| 0.794125362 BH | 11  | 82   | 31  | 47  | 46.5  |
| 0.794125362 BH | 15  | 12   | 5   | 6   | 13.5  |
| 0.794575638 BH | 50  | 84   | 78  | 62  | 67    |
| 0.794586634 BH | 18  | 51   | 33  | 33  | 34.5  |
| 0.794586634 BH | 1   | 13   | 1   | 2   | 7     |
| 0.794586634 BH | 1   | 13   | 1   | 2   | 7     |
| 0.794586634 BH | 1   | 13   | 1   | 2   | 7     |
| 0.794586634 BH | 1   | 13   | 1   | 2   | 7     |
| 0.794643146 BH | 40  | 295  | 116 | 160 | 167.5 |
| 0.79472169 BH  | 3   | 13   | 8   | 8   | 8     |
| 0.795149148 BH | 271 | 347  | 258 | 401 | 309   |
| 0.79515169 BH  | 26  | 49   | 14  | 15  | 37.5  |
| 0.795378376 BH | 0   | 18   | 3   | 1   | 9     |
| 0.795378376 BH | 0   | 18   | 3   | 1   | 9     |
| 0.795445321 BH | 10  | 41   | 13  | 5   | 25.5  |
| 0.795772058 BH | 79  | 602  | 159 | 67  | 340.5 |
| 0.795772494 BH | 65  | 1922 | 220 | 311 | 993.5 |
| 0.795772494 BH | 10  | 47   | 11  | 8   | 28.5  |
| 0.79639023 BH  | 10  | 27   | 11  | 3   | 18.5  |
| 0.79639023 BH  | 19  | 20   | 37  | 12  | 19.5  |
| 0.79639023 BH  | 4   | 12   | 3   | 2   | 8     |
| 0.79639023 BH  | 0   | 19   | 3   | 1   | 9.5   |
| 0.79639023 BH  | 3   | 23   | 3   | 4   | 13    |
| 0.79639023 BH  | 11  | 36   | 8   | 8   | 23.5  |
| 0.79639023 BH  | 1   | 21   | 3   | 3   | 11    |
| 0.79639023 BH  | 1   | 21   | 3   | 3   | 11    |
| 0.79639023 BH  | 1   | 21   | 3   | 3   | 11    |
| 0.796768123 BH | 10  | 31   | 13  | 2   | 20.5  |

|                |     |      |     |     |       |
|----------------|-----|------|-----|-----|-------|
| 0.796844351 BH | 4   | 30   | 8   | 2   | 17    |
| 0.797002223 BH | 7   | 26   | 24  | 9   | 16.5  |
| 0.797002223 BH | 7   | 24   | 6   | 5   | 15.5  |
| 0.797002223 BH | 7   | 24   | 6   | 5   | 15.5  |
| 0.797002223 BH | 8   | 19   | 7   | 2   | 13.5  |
| 0.797002223 BH | 6   | 8    | 3   | 2   | 7     |
| 0.797002223 BH | 67  | 280  | 135 | 168 | 173.5 |
| 0.797002223 BH | 57  | 123  | 99  | 79  | 90    |
| 0.797002223 BH | 7   | 100  | 17  | 14  | 53.5  |
| 0.797002223 BH | 10  | 60   | 7   | 14  | 35    |
| 0.797002223 BH | 1   | 13   | 8   | 6   | 7     |
| 0.797002223 BH | 1   | 13   | 8   | 6   | 7     |
| 0.797424723 BH | 12  | 22   | 38  | 4   | 17    |
| 0.797424723 BH | 241 | 316  | 107 | 132 | 278.5 |
| 0.797424723 BH | 5   | 66   | 43  | 19  | 35.5  |
| 0.79769145 BH  | 14  | 11   | 11  | 0   | 12.5  |
| 0.797936343 BH | 805 | 437  | 263 | 341 | 621   |
| 0.797936343 BH | 3   | 14   | 3   | 2   | 8.5   |
| 0.797936343 BH | 7   | 29   | 14  | 20  | 18    |
| 0.798111784 BH | 3   | 27   | 18  | 10  | 15    |
| 0.79848814 BH  | 7   | 10   | 6   | 0   | 8.5   |
| 0.798881428 BH | 28  | 207  | 72  | 1   | 117.5 |
| 0.79920801 BH  | 4   | 16   | 18  | 4   | 10    |
| 0.799529344 BH | 4   | 12   | 4   | 1   | 8     |
| 0.799657539 BH | 13  | 69   | 20  | 8   | 41    |
| 0.800056646 BH | 9   | 26   | 6   | 6   | 17.5  |
| 0.800146667 BH | 3   | 9    | 13  | 2   | 6     |
| 0.800146667 BH | 4   | 14   | 2   | 16  | 9     |
| 0.801223739 BH | 48  | 136  | 32  | 37  | 92    |
| 0.801372188 BH | 18  | 61   | 34  | 39  | 39.5  |
| 0.801372188 BH | 10  | 79   | 33  | 41  | 44.5  |
| 0.801652084 BH | 2   | 15   | 7   | 9   | 8.5   |
| 0.801652084 BH | 4   | 26   | 6   | 3   | 15    |
| 0.801652084 BH | 0   | 12   | 5   | 6   | 6     |
| 0.80168 BH     | 137 | 1105 | 180 | 212 | 621   |
| 0.802478511 BH | 3   | 14   | 4   | 1   | 8.5   |
| 0.802478511 BH | 3   | 14   | 4   | 1   | 8.5   |
| 0.802827057 BH | 10  | 38   | 25  | 19  | 24    |
| 0.802827057 BH | 8   | 5    | 16  | 3   | 6.5   |
| 0.802844764 BH | 0   | 40   | 10  | 0   | 20    |
| 0.803186975 BH | 2   | 26   | 4   | 3   | 14    |
| 0.803186975 BH | 0   | 14   | 12  | 2   | 7     |
| 0.803186975 BH | 24  | 93   | 23  | 19  | 58.5  |
| 0.803186975 BH | 330 | 64   | 171 | 49  | 197   |
| 0.803186975 BH | 5   | 28   | 6   | 5   | 16.5  |
| 0.803186975 BH | 8   | 27   | 9   | 4   | 17.5  |
| 0.803943921 BH | 6   | 17   | 15  | 9   | 11.5  |

|                |     |      |     |     |        |
|----------------|-----|------|-----|-----|--------|
| 0.804693502 BH | 0   | 26   | 17  | 7   | 13     |
| 0.804888399 BH | 2   | 25   | 3   | 4   | 13.5   |
| 0.804888399 BH | 2   | 25   | 3   | 4   | 13.5   |
| 0.80497598 BH  | 632 | 2083 | 584 | 443 | 1357.5 |
| 0.805531676 BH | 145 | 254  | 120 | 53  | 199.5  |
| 0.805734058 BH | 3   | 8    | 5   | 7   | 5.5    |
| 0.806158984 BH | 30  | 176  | 111 | 67  | 103    |
| 0.806158984 BH | 0   | 12   | 9   | 3   | 6      |
| 0.806258677 BH | 7   | 47   | 34  | 15  | 27     |
| 0.806258677 BH | 12  | 57   | 19  | 5   | 34.5   |
| 0.807017148 BH | 10  | 33   | 23  | 17  | 21.5   |
| 0.80741454 BH  | 6   | 14   | 2   | 4   | 10     |
| 0.807504862 BH | 0   | 12   | 0   | 11  | 6      |
| 0.807504862 BH | 16  | 75   | 22  | 10  | 45.5   |
| 0.807504862 BH | 0   | 23   | 5   | 0   | 11.5   |
| 0.807504862 BH | 32  | 21   | 12  | 12  | 26.5   |
| 0.808169965 BH | 8   | 4    | 3   | 2   | 6      |
| 0.808169965 BH | 3   | 28   | 6   | 3   | 15.5   |
| 0.808339418 BH | 12  | 40   | 21  | 27  | 26     |
| 0.808718008 BH | 8   | 9    | 5   | 2   | 8.5    |
| 0.808718008 BH | 2   | 10   | 5   | 7   | 6      |
| 0.809004259 BH | 9   | 6    | 6   | 0   | 7.5    |
| 0.809004259 BH | 9   | 6    | 6   | 0   | 7.5    |
| 0.809119696 BH | 67  | 83   | 118 | 52  | 75     |
| 0.809424559 BH | 2   | 16   | 4   | 1   | 9      |
| 0.810407731 BH | 13  | 33   | 29  | 17  | 23     |
| 0.810432176 BH | 4   | 47   | 11  | 30  | 25.5   |
| 0.810919175 BH | 34  | 114  | 40  | 16  | 74     |
| 0.811260213 BH | 9   | 13   | 4   | 4   | 11     |
| 0.811351773 BH | 0   | 15   | 2   | 1   | 7.5    |
| 0.812245765 BH | 6   | 109  | 13  | 18  | 57.5   |
| 0.812557263 BH | 0   | 12   | 10  | 2   | 6      |
| 0.81275811 BH  | 177 | 86   | 79  | 56  | 131.5  |
| 0.81275811 BH  | 0   | 15   | 1   | 2   | 7.5    |
| 0.81275811 BH  | 0   | 15   | 1   | 2   | 7.5    |
| 0.81291645 BH  | 5   | 21   | 5   | 3   | 13     |
| 0.812988765 BH | 8   | 160  | 25  | 23  | 84     |
| 0.812988765 BH | 20  | 116  | 67  | 50  | 68     |
| 0.813939323 BH | 513 | 401  | 556 | 525 | 457    |
| 0.814001223 BH | 40  | 12   | 81  | 6   | 26     |
| 0.814348823 BH | 18  | 45   | 14  | 10  | 31.5   |
| 0.814535093 BH | 65  | 190  | 47  | 50  | 127.5  |
| 0.814719195 BH | 4   | 7    | 14  | 1   | 5.5    |
| 0.814968655 BH | 44  | 92   | 28  | 27  | 68     |
| 0.815311128 BH | 5   | 15   | 6   | 1   | 10     |
| 0.815475143 BH | 422 | 444  | 394 | 550 | 433    |
| 0.815983153 BH | 35  | 101  | 26  | 25  | 68     |

|                |     |      |     |     |       |
|----------------|-----|------|-----|-----|-------|
| 0.816014317 BH | 8   | 22   | 26  | 6   | 15    |
| 0.816487829 BH | 769 | 1375 | 571 | 357 | 1072  |
| 0.816500822 BH | 78  | 767  | 241 | 421 | 422.5 |
| 0.817186823 BH | 6   | 9    | 5   | 0   | 7.5   |
| 0.817186823 BH | 5   | 11   | 5   | 0   | 8     |
| 0.817386104 BH | 11  | 44   | 32  | 19  | 27.5  |
| 0.818924816 BH | 4   | 17   | 6   | 1   | 10.5  |
| 0.81894625 BH  | 6   | 8    | 5   | 0   | 7     |
| 0.81894625 BH  | 0   | 29   | 10  | 15  | 14.5  |
| 0.818960106 BH | 7   | 41   | 10  | 6   | 24    |
| 0.818960106 BH | 23  | 83   | 61  | 36  | 53    |
| 0.819485087 BH | 7   | 8    | 17  | 3   | 7.5   |
| 0.81965676 BH  | 10  | 147  | 23  | 23  | 78.5  |
| 0.820502898 BH | 197 | 362  | 300 | 253 | 279.5 |
| 0.820502898 BH | 8   | 29   | 29  | 8   | 18.5  |
| 0.820505547 BH | 5   | 34   | 11  | 1   | 19.5  |
| 0.821021168 BH | 11  | 26   | 32  | 8   | 18.5  |
| 0.821326101 BH | 4   | 32   | 3   | 7   | 18    |
| 0.821572546 BH | 9   | 29   | 8   | 5   | 19    |
| 0.821794589 BH | 45  | 84   | 69  | 59  | 64.5  |
| 0.821794589 BH | 3   | 14   | 5   | 0   | 8.5   |
| 0.821944263 BH | 37  | 44   | 85  | 14  | 40.5  |
| 0.821944263 BH | 11  | 38   | 14  | 4   | 24.5  |
| 0.822167713 BH | 12  | 87   | 25  | 55  | 49.5  |
| 0.822754594 BH | 22  | 20   | 48  | 8   | 21    |
| 0.823112187 BH | 2   | 13   | 5   | 9   | 7.5   |
| 0.823112187 BH | 0   | 11   | 7   | 3   | 5.5   |
| 0.823112187 BH | 0   | 11   | 7   | 3   | 5.5   |
| 0.823750514 BH | 2   | 30   | 7   | 2   | 16    |
| 0.825309837 BH | 2   | 21   | 2   | 4   | 11.5  |
| 0.825309837 BH | 5   | 4    | 11  | 2   | 4.5   |
| 0.825553305 BH | 9   | 80   | 21  | 8   | 44.5  |
| 0.826705352 BH | 48  | 203  | 70  | 23  | 125.5 |
| 0.826705352 BH | 37  | 95   | 25  | 26  | 66    |
| 0.826705352 BH | 27  | 90   | 21  | 22  | 58.5  |
| 0.826705352 BH | 1   | 10   | 1   | 1   | 5.5   |
| 0.826705352 BH | 1   | 10   | 1   | 1   | 5.5   |
| 0.826705352 BH | 1   | 10   | 1   | 1   | 5.5   |
| 0.826705352 BH | 1   | 10   | 1   | 1   | 5.5   |
| 0.826705352 BH | 1   | 10   | 1   | 1   | 5.5   |
| 0.826916909 BH | 6   | 24   | 8   | 2   | 15    |
| 0.827980444 BH | 17  | 38   | 15  | 7   | 27.5  |
| 0.828020795 BH | 10  | 34   | 32  | 11  | 22    |
| 0.82929816 BH  | 4   | 9    | 2   | 2   | 6.5   |
| 0.82975905 BH  | 0   | 15   | 0   | 3   | 7.5   |
| 0.830194023 BH | 5   | 53   | 18  | 29  | 29    |
| 0.830946151 BH | 3   | 11   | 2   | 2   | 7     |

|                |      |      |     |     |        |
|----------------|------|------|-----|-----|--------|
| 0.831862526 BH | 12   | 45   | 16  | 34  | 28.5   |
| 0.831979124 BH | 5    | 50   | 14  | 30  | 27.5   |
| 0.832464865 BH | 6    | 52   | 14  | 32  | 29     |
| 0.832464865 BH | 4    | 9    | 3   | 1   | 6.5    |
| 0.833077593 BH | 2    | 17   | 13  | 5   | 9.5    |
| 0.833159669 BH | 21   | 170  | 72  | 82  | 95.5   |
| 0.83356027 BH  | 20   | 241  | 115 | 93  | 130.5  |
| 0.83356027 BH  | 1    | 12   | 11  | 2   | 6.5    |
| 0.83356027 BH  | 5    | 28   | 17  | 13  | 16.5   |
| 0.83356027 BH  | 3    | 11   | 3   | 1   | 7      |
| 0.83356027 BH  | 5    | 7    | 3   | 1   | 6      |
| 0.83356027 BH  | 3    | 76   | 9   | 12  | 39.5   |
| 0.83356027 BH  | 1    | 16   | 10  | 5   | 8.5    |
| 0.833756856 BH | 3    | 6    | 7   | 4   | 4.5    |
| 0.833785875 BH | 16   | 21   | 15  | 1   | 18.5   |
| 0.833814708 BH | 33   | 81   | 76  | 35  | 57     |
| 0.834156425 BH | 7    | 190  | 21  | 34  | 98.5   |
| 0.834486436 BH | 6    | 34   | 5   | 8   | 20     |
| 0.83489148 BH  | 2    | 8    | 7   | 4   | 5      |
| 0.83489148 BH  | 6    | 16   | 4   | 3   | 11     |
| 0.83489148 BH  | 1    | 10   | 0   | 2   | 5.5    |
| 0.83489148 BH  | 1    | 10   | 0   | 2   | 5.5    |
| 0.83489148 BH  | 1    | 10   | 0   | 2   | 5.5    |
| 0.83489148 BH  | 1    | 10   | 0   | 2   | 5.5    |
| 0.83489148 BH  | 7    | 43   | 8   | 8   | 25     |
| 0.835165074 BH | 8    | 16   | 5   | 4   | 12     |
| 0.835298991 BH | 5    | 26   | 2   | 7   | 15.5   |
| 0.836244025 BH | 105  | 70   | 179 | 50  | 87.5   |
| 0.836244025 BH | 1    | 16   | 5   | 9   | 8.5    |
| 0.836244025 BH | 5    | 13   | 11  | 7   | 9      |
| 0.836244025 BH | 3    | 10   | 8   | 5   | 6.5    |
| 0.836244025 BH | 488  | 996  | 378 | 988 | 742    |
| 0.836244025 BH | 23   | 73   | 26  | 59  | 48     |
| 0.836244025 BH | 261  | 1431 | 195 | 372 | 846    |
| 0.836272733 BH | 22   | 36   | 30  | 30  | 29     |
| 0.836272733 BH | 23   | 13   | 13  | 5   | 18     |
| 0.836272733 BH | 20   | 52   | 26  | 41  | 36     |
| 0.836933188 BH | 7    | 12   | 7   | 0   | 9.5    |
| 0.837712121 BH | 21   | 134  | 29  | 23  | 77.5   |
| 0.837858876 BH | 2    | 13   | 3   | 1   | 7.5    |
| 0.837858876 BH | 2    | 13   | 3   | 1   | 7.5    |
| 0.838071316 BH | 11   | 31   | 10  | 6   | 21     |
| 0.838567988 BH | 8    | 10   | 7   | 0   | 9      |
| 0.838660551 BH | 5    | 16   | 13  | 8   | 10.5   |
| 0.838660551 BH | 2    | 8    | 8   | 3   | 5      |
| 0.838697561 BH | 1    | 18   | 5   | 0   | 9.5    |
| 0.839399405 BH | 1219 | 1768 | 865 | 509 | 1493.5 |

|                |     |     |     |     |       |
|----------------|-----|-----|-----|-----|-------|
| 0.839639309 BH | 37  | 335 | 101 | 185 | 186   |
| 0.839639309 BH | 14  | 198 | 0   | 50  | 106   |
| 0.839639309 BH | 5   | 12  | 5   | 1   | 8.5   |
| 0.839639309 BH | 3   | 4   | 11  | 0   | 3.5   |
| 0.839639309 BH | 0   | 11  | 1   | 1   | 5.5   |
| 0.839639309 BH | 0   | 11  | 1   | 1   | 5.5   |
| 0.839639309 BH | 0   | 11  | 1   | 1   | 5.5   |
| 0.839639309 BH | 0   | 11  | 1   | 1   | 5.5   |
| 0.839639309 BH | 0   | 11  | 1   | 1   | 5.5   |
| 0.83965183 BH  | 20  | 66  | 51  | 28  | 43    |
| 0.83965183 BH  | 8   | 24  | 21  | 10  | 16    |
| 0.83965183 BH  | 29  | 56  | 35  | 48  | 42.5  |
| 0.83965183 BH  | 2   | 11  | 8   | 5   | 6.5   |
| 0.83965183 BH  | 2   | 11  | 6   | 7   | 6.5   |
| 0.840599271 BH | 24  | 68  | 47  | 39  | 46    |
| 0.840599271 BH | 1   | 19  | 8   | 9   | 10    |
| 0.840647086 BH | 0   | 29  | 4   | 3   | 14.5  |
| 0.840688571 BH | 2   | 31  | 15  | 14  | 16.5  |
| 0.840830573 BH | 47  | 200 | 61  | 31  | 123.5 |
| 0.840830573 BH | 20  | 72  | 22  | 12  | 46    |
| 0.840830573 BH | 5   | 16  | 15  | 6   | 10.5  |
| 0.840832232 BH | 28  | 67  | 72  | 24  | 47.5  |
| 0.840832812 BH | 2   | 20  | 16  | 5   | 11    |
| 0.840832812 BH | 10  | 61  | 23  | 36  | 35.5  |
| 0.840832812 BH | 0   | 12  | 1   | 1   | 6     |
| 0.840832812 BH | 0   | 12  | 1   | 1   | 6     |
| 0.840832812 BH | 0   | 12  | 1   | 1   | 6     |
| 0.840913897 BH | 14  | 20  | 10  | 4   | 17    |
| 0.840913897 BH | 42  | 6   | 13  | 13  | 24    |
| 0.840913897 BH | 373 | 370 | 374 | 430 | 371.5 |
| 0.840913897 BH | 9   | 8   | 7   | 0   | 8.5   |
| 0.840913897 BH | 1   | 10  | 7   | 4   | 5.5   |
| 0.841111913 BH | 63  | 559 | 75  | 122 | 311   |
| 0.841111913 BH | 4   | 30  | 22  | 9   | 17    |
| 0.841602625 BH | 21  | 62  | 12  | 61  | 41.5  |
| 0.842418783 BH | 3   | 147 | 16  | 24  | 75    |
| 0.842418783 BH | 4   | 21  | 12  | 11  | 12.5  |
| 0.842418783 BH | 19  | 77  | 35  | 48  | 48    |
| 0.842418783 BH | 40  | 19  | 1   | 24  | 29.5  |
| 0.84271074 BH  | 25  | 126 | 71  | 56  | 75.5  |
| 0.84283384 BH  | 3   | 44  | 4   | 9   | 23.5  |
| 0.84283384 BH  | 1   | 51  | 11  | 3   | 26    |
| 0.842905693 BH | 3   | 22  | 4   | 3   | 12.5  |
| 0.84382691 BH  | 3   | 16  | 13  | 6   | 9.5   |
| 0.84382691 BH  | 3   | 13  | 12  | 4   | 8     |
| 0.84480254 BH  | 3   | 21  | 3   | 4   | 12    |
| 0.844916108 BH | 1   | 15  | 3   | 1   | 8     |

|                |      |     |     |      |       |
|----------------|------|-----|-----|------|-------|
| 0.844916108 BH | 1    | 15  | 3   | 1    | 8     |
| 0.845279314 BH | 1284 | 579 | 625 | 392  | 931.5 |
| 0.845517174 BH | 19   | 21  | 18  | 0    | 20    |
| 0.846109011 BH | 29   | 99  | 77  | 40   | 64    |
| 0.846307604 BH | 1    | 29  | 5   | 3    | 15    |
| 0.846929824 BH | 21   | 528 | 65  | 93   | 274.5 |
| 0.847092216 BH | 45   | 238 | 34  | 62   | 141.5 |
| 0.847253257 BH | 1    | 19  | 3   | 15   | 10    |
| 0.847253257 BH | 75   | 291 | 111 | 33   | 183   |
| 0.847293774 BH | 27   | 60  | 19  | 16   | 43.5  |
| 0.847342293 BH | 2    | 32  | 3   | 6    | 17    |
| 0.847342293 BH | 2    | 37  | 16  | 15   | 19.5  |
| 0.847570211 BH | 5    | 17  | 7   | 1    | 11    |
| 0.848320742 BH | 6    | 85  | 18  | 51   | 45.5  |
| 0.848320742 BH | 25   | 46  | 11  | 17   | 35.5  |
| 0.848320742 BH | 0    | 11  | 0   | 2    | 5.5   |
| 0.848401797 BH | 12   | 0   | 24  | 1    | 6     |
| 0.848401797 BH | 3    | 26  | 5   | 4    | 14.5  |
| 0.848504459 BH | 44   | 113 | 49  | 16   | 78.5  |
| 0.84868999 BH  | 1    | 14  | 7   | 6    | 7.5   |
| 0.84868999 BH  | 1    | 14  | 7   | 6    | 7.5   |
| 0.84868999 BH  | 1    | 13  | 6   | 7    | 7     |
| 0.84890125 BH  | 0    | 12  | 0   | 2    | 6     |
| 0.84890125 BH  | 0    | 12  | 0   | 2    | 6     |
| 0.84890125 BH  | 0    | 12  | 0   | 2    | 6     |
| 0.849738379 BH | 3    | 26  | 4   | 5    | 14.5  |
| 0.849785955 BH | 12   | 13  | 9   | 2    | 12.5  |
| 0.849785955 BH | 36   | 91  | 25  | 25   | 63.5  |
| 0.850170807 BH | 0    | 17  | 8   | 7    | 8.5   |
| 0.850199283 BH | 40   | 203 | 63  | 130  | 121.5 |
| 0.850246163 BH | 19   | 25  | 5   | 13   | 22    |
| 0.85036548 BH  | 2    | 22  | 7   | 0    | 12    |
| 0.85036548 BH  | 9    | 35  | 4   | 11   | 22    |
| 0.85036548 BH  | 25   | 11  | 12  | 6    | 18    |
| 0.85036548 BH  | 6    | 11  | 16  | 3    | 8.5   |
| 0.85036548 BH  | 6    | 11  | 16  | 3    | 8.5   |
| 0.85036548 BH  | 13   | 11  | 3   | 7    | 12    |
| 0.85036548 BH  | 21   | 17  | 41  | 8    | 19    |
| 0.85036548 BH  | 8    | 11  | 1   | 6    | 9.5   |
| 0.85036548 BH  | 2    | 23  | 3   | 4    | 12.5  |
| 0.85036548 BH  | 2    | 24  | 4   | 3    | 13    |
| 0.85036548 BH  | 6    | 69  | 44  | 18   | 37.5  |
| 0.85036548 BH  | 16   | 139 | 50  | 0    | 77.5  |
| 0.85036548 BH  | 6    | 4   | 15  | 1    | 5     |
| 0.85036548 BH  | 7    | 1   | 13  | 3    | 4     |
| 0.85036548 BH  | 1344 | 347 | 469 | 1780 | 845.5 |
| 0.851189718 BH | 10   | 55  | 20  | 33   | 32.5  |

|                |     |     |     |     |       |
|----------------|-----|-----|-----|-----|-------|
| 0.851189718 BH | 4   | 35  | 6   | 6   | 19.5  |
| 0.851189718 BH | 7   | 18  | 9   | 1   | 12.5  |
| 0.851189718 BH | 1   | 22  | 16  | 5   | 11.5  |
| 0.851189718 BH | 10  | 24  | 8   | 5   | 17    |
| 0.851189718 BH | 7   | 13  | 10  | 11  | 10    |
| 0.851471286 BH | 27  | 126 | 71  | 57  | 76.5  |
| 0.851471286 BH | 11  | 55  | 14  | 9   | 33    |
| 0.851745372 BH | 41  | 109 | 55  | 77  | 75    |
| 0.85277058 BH  | 184 | 153 | 218 | 164 | 168.5 |
| 0.85277058 BH  | 9   | 14  | 9   | 1   | 11.5  |
| 0.85277058 BH  | 2   | 31  | 10  | 16  | 16.5  |
| 0.85277058 BH  | 21  | 56  | 21  | 10  | 38.5  |
| 0.853625972 BH | 627 | 370 | 324 | 208 | 498.5 |
| 0.853789657 BH | 107 | 354 | 221 | 178 | 230.5 |
| 0.853789657 BH | 13  | 27  | 19  | 20  | 20    |
| 0.854428935 BH | 30  | 102 | 51  | 63  | 66    |
| 0.854716572 BH | 2   | 43  | 7   | 6   | 22.5  |
| 0.85474335 BH  | 17  | 80  | 25  | 10  | 48.5  |
| 0.854984136 BH | 33  | 26  | 27  | 2   | 29.5  |
| 0.855049147 BH | 26  | 105 | 56  | 54  | 65.5  |
| 0.855189659 BH | 58  | 201 | 91  | 126 | 129.5 |
| 0.855189659 BH | 9   | 40  | 36  | 9   | 24.5  |
| 0.855189659 BH | 6   | 101 | 15  | 17  | 53.5  |
| 0.855189659 BH | 5   | 25  | 18  | 9   | 15    |
| 0.855189659 BH | 7   | 25  | 5   | 6   | 16    |
| 0.855189659 BH | 7   | 20  | 6   | 4   | 13.5  |
| 0.855189659 BH | 2   | 22  | 15  | 6   | 12    |
| 0.855189659 BH | 1   | 19  | 3   | 13  | 10    |
| 0.855189659 BH | 3   | 32  | 4   | 6   | 17.5  |
| 0.855189659 BH | 14  | 10  | 9   | 2   | 12    |
| 0.855189659 BH | 2   | 18  | 15  | 4   | 10    |
| 0.855189659 BH | 8   | 54  | 16  | 5   | 31    |
| 0.855189659 BH | 20  | 32  | 12  | 10  | 26    |
| 0.855189659 BH | 4   | 24  | 27  | 2   | 14    |
| 0.85523588 BH  | 20  | 174 | 14  | 45  | 97    |
| 0.85523588 BH  | 19  | 97  | 36  | 57  | 58    |
| 0.85523588 BH  | 43  | 354 | 87  | 50  | 198.5 |
| 0.855351728 BH | 18  | 95  | 24  | 16  | 56.5  |
| 0.855351728 BH | 5   | 29  | 18  | 11  | 17    |
| 0.855562086 BH | 4   | 41  | 9   | 5   | 22.5  |
| 0.856186979 BH | 4   | 4   | 14  | 0   | 4     |
| 0.856186979 BH | 0   | 26  | 2   | 4   | 13    |
| 0.856418221 BH | 0   | 9   | 11  | 0   | 4.5   |
| 0.856418221 BH | 0   | 9   | 11  | 0   | 4.5   |
| 0.856418221 BH | 40  | 224 | 120 | 95  | 132   |
| 0.856418221 BH | 11  | 52  | 23  | 30  | 31.5  |
| 0.856418221 BH | 39  | 35  | 17  | 17  | 37    |



|                |     |     |     |     |       |
|----------------|-----|-----|-----|-----|-------|
| 0.856418221 BH | 11  | 9   | 15  | 9   | 10    |
| 0.856418221 BH | 4   | 24  | 15  | 9   | 14    |
| 0.856418221 BH | 5   | 28  | 12  | 16  | 16.5  |
| 0.856418221 BH | 5   | 120 | 36  | 58  | 62.5  |
| 0.856877478 BH | 46  | 0   | 26  | 0   | 23    |
| 0.85690441 BH  | 8   | 38  | 20  | 19  | 23    |
| 0.85690441 BH  | 9   | 26  | 11  | 1   | 17.5  |
| 0.85690441 BH  | 0   | 21  | 9   | 8   | 10.5  |
| 0.856924119 BH | 4   | 20  | 15  | 7   | 12    |
| 0.856924119 BH | 0   | 17  | 2   | 2   | 8.5   |
| 0.856924119 BH | 0   | 17  | 2   | 2   | 8.5   |
| 0.857008823 BH | 36  | 27  | 24  | 7   | 31.5  |
| 0.857162725 BH | 1   | 20  | 5   | 1   | 10.5  |
| 0.8573304 BH   | 31  | 60  | 25  | 14  | 45.5  |
| 0.85802004 BH  | 4   | 58  | 4   | 14  | 31    |
| 0.85803973 BH  | 7   | 20  | 3   | 6   | 13.5  |
| 0.858102976 BH | 6   | 32  | 12  | 21  | 19    |
| 0.858102976 BH | 5   | 34  | 14  | 19  | 19.5  |
| 0.85825088 BH  | 3   | 12  | 9   | 5   | 7.5   |
| 0.85825088 BH  | 36  | 38  | 72  | 16  | 37    |
| 0.85825088 BH  | 2   | 29  | 17  | 9   | 15.5  |
| 0.858702844 BH | 12  | 46  | 33  | 18  | 29    |
| 0.858702844 BH | 1   | 25  | 4   | 3   | 13    |
| 0.858702844 BH | 38  | 48  | 29  | 12  | 43    |
| 0.858702844 BH | 0   | 17  | 3   | 1   | 8.5   |
| 0.858702844 BH | 0   | 17  | 3   | 1   | 8.5   |
| 0.858702844 BH | 0   | 17  | 3   | 1   | 8.5   |
| 0.859785413 BH | 6   | 46  | 19  | 24  | 26    |
| 0.859785413 BH | 13  | 79  | 19  | 13  | 46    |
| 0.859785413 BH | 7   | 53  | 12  | 7   | 30    |
| 0.859785413 BH | 1   | 25  | 3   | 4   | 13    |
| 0.859785413 BH | 30  | 136 | 14  | 42  | 83    |
| 0.859785413 BH | 13  | 29  | 27  | 14  | 21    |
| 0.859785413 BH | 21  | 43  | 12  | 13  | 32    |
| 0.859785413 BH | 167 | 48  | 88  | 37  | 107.5 |
| 0.859880196 BH | 130 | 152 | 160 | 133 | 141   |
| 0.859880196 BH | 35  | 51  | 17  | 21  | 43    |
| 0.859880196 BH | 7   | 20  | 8   | 2   | 13.5  |
| 0.859960644 BH | 6   | 12  | 16  | 4   | 9     |
| 0.860087351 BH | 4   | 21  | 4   | 4   | 12.5  |
| 0.860196173 BH | 14  | 45  | 31  | 23  | 29.5  |
| 0.860196173 BH | 16  | 23  | 14  | 3   | 19.5  |
| 0.860196173 BH | 16  | 40  | 18  | 33  | 28    |
| 0.860315472 BH | 21  | 87  | 24  | 16  | 54    |
| 0.861020963 BH | 11  | 29  | 25  | 14  | 20    |
| 0.86151376 BH  | 12  | 54  | 17  | 7   | 33    |
| 0.86151376 BH  | 19  | 59  | 47  | 24  | 39    |

|                |     |      |     |     |       |
|----------------|-----|------|-----|-----|-------|
| 0.862255917 BH | 10  | 53   | 24  | 28  | 31.5  |
| 0.862402978 BH | 7   | 10   | 2   | 4   | 8.5   |
| 0.862657081 BH | 10  | 2    | 5   | 1   | 6     |
| 0.862657081 BH | 102 | 85   | 36  | 55  | 93.5  |
| 0.862961009 BH | 5   | 5    | 5   | 9   | 5     |
| 0.864802372 BH | 2   | 17   | 7   | 9   | 9.5   |
| 0.864849677 BH | 0   | 30   | 10  | 13  | 15    |
| 0.864849677 BH | 5   | 82   | 20  | 44  | 43.5  |
| 0.864951336 BH | 10  | 4    | 18  | 4   | 7     |
| 0.865165184 BH | 78  | 1039 | 301 | 79  | 558.5 |
| 0.865686967 BH | 4   | 36   | 13  | 20  | 20    |
| 0.865686967 BH | 27  | 59   | 23  | 14  | 43    |
| 0.865763818 BH | 17  | 92   | 70  | 25  | 54.5  |
| 0.866006156 BH | 5   | 32   | 16  | 16  | 18.5  |
| 0.866006156 BH | 1   | 27   | 11  | 12  | 14    |
| 0.866006156 BH | 6   | 44   | 33  | 10  | 25    |
| 0.866006156 BH | 15  | 9    | 7   | 4   | 12    |
| 0.866006156 BH | 2   | 39   | 5   | 7   | 20.5  |
| 0.866006156 BH | 4   | 36   | 2   | 9   | 20    |
| 0.866254499 BH | 4   | 11   | 4   | 1   | 7.5   |
| 0.866254499 BH | 4   | 11   | 4   | 1   | 7.5   |
| 0.866296549 BH | 0   | 11   | 2   | 8   | 5.5   |
| 0.866296549 BH | 13  | 7    | 1   | 7   | 10    |
| 0.866646437 BH | 8   | 55   | 6   | 14  | 31.5  |
| 0.867352911 BH | 3   | 8    | 2   | 1   | 5.5   |
| 0.867953253 BH | 98  | 375  | 118 | 69  | 236.5 |
| 0.868082209 BH | 2   | 23   | 14  | 8   | 12.5  |
| 0.868575002 BH | 15  | 78   | 20  | 14  | 46.5  |
| 0.868575002 BH | 17  | 74   | 23  | 11  | 45.5  |
| 0.868611927 BH | 12  | 38   | 16  | 4   | 25    |
| 0.868611927 BH | 2   | 14   | 3   | 2   | 8     |
| 0.868611927 BH | 7   | 10   | 17  | 3   | 8.5   |
| 0.868611927 BH | 7   | 12   | 13  | 7   | 9.5   |
| 0.868611927 BH | 10  | 21   | 5   | 7   | 15.5  |
| 0.869073118 BH | 2   | 9    | 2   | 1   | 5.5   |
| 0.869073118 BH | 2   | 9    | 2   | 1   | 5.5   |
| 0.869073118 BH | 2   | 9    | 2   | 1   | 5.5   |
| 0.869073118 BH | 606 | 814  | 609 | 775 | 710   |
| 0.869316338 BH | 8   | 62   | 15  | 9   | 35    |
| 0.869316338 BH | 2   | 13   | 12  | 3   | 7.5   |
| 0.869316338 BH | 54  | 65   | 38  | 19  | 59.5  |
| 0.869316338 BH | 1   | 25   | 7   | 1   | 13    |
| 0.869316338 BH | 1   | 20   | 16  | 3   | 10.5  |
| 0.869316338 BH | 4   | 27   | 12  | 15  | 15.5  |
| 0.869316338 BH | 20  | 42   | 23  | 4   | 31    |
| 0.869316338 BH | 22  | 55   | 19  | 12  | 38.5  |
| 0.869316338 BH | 15  | 285  | 51  | 43  | 150   |

|                |      |     |     |     |        |
|----------------|------|-----|-----|-----|--------|
| 0.869316338 BH | 22   | 14  | 16  | 2   | 18     |
| 0.869316338 BH | 2    | 9   | 1   | 2   | 5.5    |
| 0.869737563 BH | 4    | 25  | 11  | 13  | 14.5   |
| 0.869930909 BH | 38   | 47  | 28  | 12  | 42.5   |
| 0.870898495 BH | 8    | 21  | 19  | 10  | 14.5   |
| 0.870898495 BH | 13   | 32  | 12  | 6   | 22.5   |
| 0.870898495 BH | 11   | 36  | 10  | 8   | 23.5   |
| 0.87106036 BH  | 5    | 52  | 28  | 17  | 28.5   |
| 0.871997922 BH | 5    | 67  | 13  | 10  | 36     |
| 0.872442735 BH | 10   | 19  | 11  | 1   | 14.5   |
| 0.872442735 BH | 6    | 29  | 6   | 6   | 17.5   |
| 0.872442735 BH | 9    | 77  | 49  | 21  | 43     |
| 0.872511923 BH | 8    | 22  | 20  | 9   | 15     |
| 0.872511923 BH | 2    | 14  | 4   | 1   | 8      |
| 0.872890488 BH | 12   | 22  | 18  | 16  | 17     |
| 0.872909746 BH | 10   | 107 | 16  | 21  | 58.5   |
| 0.872909746 BH | 14   | 6   | 7   | 3   | 10     |
| 0.872909746 BH | 4    | 11  | 16  | 2   | 7.5    |
| 0.873227876 BH | 1117 | 946 | 501 | 547 | 1031.5 |
| 0.873323293 BH | 14   | 70  | 21  | 10  | 42     |
| 0.873323293 BH | 2    | 19  | 5   | 13  | 10.5   |
| 0.873443059 BH | 6    | 33  | 14  | 18  | 19.5   |
| 0.87377285 BH  | 13   | 33  | 13  | 5   | 23     |
| 0.87377285 BH  | 0    | 21  | 3   | 13  | 10.5   |
| 0.87377285 BH  | 3    | 28  | 8   | 2   | 15.5   |
| 0.87377285 BH  | 2    | 30  | 6   | 4   | 16     |
| 0.87377285 BH  | 2    | 30  | 5   | 5   | 16     |
| 0.87377285 BH  | 8    | 20  | 8   | 3   | 14     |
| 0.87377285 BH  | 11   | 192 | 61  | 87  | 101.5  |
| 0.87377285 BH  | 1    | 11  | 2   | 1   | 6      |
| 0.87377285 BH  | 1    | 11  | 2   | 1   | 6      |
| 0.87377285 BH  | 1    | 11  | 2   | 1   | 6      |
| 0.873920816 BH | 15   | 17  | 28  | 9   | 16     |
| 0.873920816 BH | 12   | 15  | 11  | 1   | 13.5   |
| 0.874079215 BH | 8    | 48  | 20  | 25  | 28     |
| 0.874404369 BH | 2    | 25  | 3   | 5   | 13.5   |
| 0.874404369 BH | 24   | 28  | 34  | 22  | 26     |
| 0.874404369 BH | 1    | 11  | 1   | 2   | 6      |
| 0.874404369 BH | 1    | 11  | 1   | 2   | 6      |
| 0.874404369 BH | 1    | 11  | 1   | 2   | 6      |
| 0.874547602 BH | 59   | 0   | 3   | 26  | 29.5   |
| 0.874553783 BH | 4    | 13  | 13  | 5   | 8.5    |
| 0.874833581 BH | 41   | 19  | 23  | 10  | 30     |
| 0.875511136 BH | 4    | 63  | 5   | 14  | 33.5   |
| 0.875639593 BH | 11   | 5   | 8   | 0   | 8      |
| 0.875695974 BH | 27   | 34  | 15  | 12  | 30.5   |
| 0.875775117 BH | 8    | 3   | 2   | 2   | 5.5    |

|                |     |      |     |     |       |
|----------------|-----|------|-----|-----|-------|
| 0.876007823 BH | 3   | 16   | 12  | 6   | 9.5   |
| 0.876698463 BH | 5   | 39   | 17  | 18  | 22    |
| 0.876698463 BH | 3   | 44   | 11  | 4   | 23.5  |
| 0.876698463 BH | 4   | 11   | 10  | 5   | 7.5   |
| 0.877157422 BH | 5   | 48   | 7   | 9   | 26.5  |
| 0.877157422 BH | 15  | 29   | 14  | 4   | 22    |
| 0.877157422 BH | 17  | 135  | 60  | 56  | 76    |
| 0.877186719 BH | 30  | 69   | 20  | 21  | 49.5  |
| 0.877939295 BH | 4   | 41   | 14  | 1   | 22.5  |
| 0.877996859 BH | 5   | 9    | 5   | 0   | 7     |
| 0.877996859 BH | 46  | 135  | 31  | 41  | 90.5  |
| 0.877996859 BH | 5   | 37   | 10  | 4   | 21    |
| 0.877996859 BH | 9   | 44   | 21  | 23  | 26.5  |
| 0.878283782 BH | 13  | 9    | 9   | 1   | 11    |
| 0.878458258 BH | 22  | 74   | 24  | 14  | 48    |
| 0.878458258 BH | 5   | 26   | 8   | 3   | 15.5  |
| 0.878458258 BH | 15  | 51   | 19  | 36  | 33    |
| 0.878458258 BH | 7   | 29   | 17  | 14  | 18    |
| 0.878458258 BH | 1   | 16   | 4   | 1   | 8.5   |
| 0.878458258 BH | 1   | 16   | 4   | 1   | 8.5   |
| 0.878458258 BH | 118 | 400  | 136 | 281 | 259   |
| 0.878458258 BH | 3   | 13   | 10  | 5   | 8     |
| 0.878458258 BH | 2   | 9    | 0   | 3   | 5.5   |
| 0.878458258 BH | 9   | 31   | 6   | 8   | 20    |
| 0.878458258 BH | 124 | 1439 | 765 | 419 | 781.5 |
| 0.878458258 BH | 14  | 56   | 12  | 13  | 35    |
| 0.878458258 BH | 3   | 14   | 2   | 13  | 8.5   |
| 0.878458258 BH | 2   | 15   | 16  | 2   | 8.5   |
| 0.878458258 BH | 82  | 86   | 41  | 41  | 84    |
| 0.878458258 BH | 11  | 21   | 7   | 6   | 16    |
| 0.878501118 BH | 89  | 53   | 58  | 21  | 71    |
| 0.878785727 BH | 30  | 44   | 40  | 33  | 37    |
| 0.878824988 BH | 1   | 17   | 4   | 1   | 9     |
| 0.878824988 BH | 3   | 13   | 5   | 0   | 8     |
| 0.879155292 BH | 7   | 17   | 7   | 2   | 12    |
| 0.879194647 BH | 11  | 49   | 16  | 7   | 30    |
| 0.880072547 BH | 4   | 33   | 25  | 6   | 18.5  |
| 0.880072547 BH | 14  | 54   | 43  | 18  | 34    |
| 0.880072547 BH | 8   | 95   | 27  | 50  | 51.5  |
| 0.880072547 BH | 11  | 11   | 22  | 4   | 11    |
| 0.880072547 BH | 2   | 28   | 14  | 11  | 15    |
| 0.88011253 BH  | 5   | 4    | 15  | 0   | 4.5   |
| 0.88011253 BH  | 34  | 91   | 36  | 17  | 62.5  |
| 0.880375597 BH | 2   | 22   | 13  | 7   | 12    |
| 0.880375597 BH | 13  | 15   | 11  | 2   | 14    |
| 0.880528212 BH | 2   | 26   | 11  | 11  | 14    |
| 0.880588824 BH | 10  | 107  | 10  | 26  | 58.5  |

|                |     |     |     |     |       |
|----------------|-----|-----|-----|-----|-------|
| 0.880762597 BH | 5   | 12  | 15  | 3   | 8.5   |
| 0.880762597 BH | 4   | 36  | 23  | 11  | 20    |
| 0.880762597 BH | 23  | 68  | 36  | 42  | 45.5  |
| 0.880762597 BH | 5   | 15  | 4   | 3   | 10    |
| 0.880762597 BH | 5   | 16  | 4   | 3   | 10.5  |
| 0.880762597 BH | 28  | 167 | 168 | 10  | 97.5  |
| 0.880777874 BH | 18  | 49  | 15  | 12  | 33.5  |
| 0.880777874 BH | 72  | 192 | 46  | 62  | 132   |
| 0.88112204 BH  | 122 | 239 | 76  | 84  | 180.5 |
| 0.881729795 BH | 61  | 62  | 40  | 22  | 61.5  |
| 0.882107973 BH | 5   | 16  | 3   | 4   | 10.5  |
| 0.882384316 BH | 8   | 38  | 5   | 10  | 23    |
| 0.882581818 BH | 21  | 54  | 20  | 12  | 37.5  |
| 0.882631796 BH | 28  | 97  | 49  | 54  | 62.5  |
| 0.882631796 BH | 16  | 59  | 19  | 10  | 37.5  |
| 0.883459844 BH | 7   | 11  | 6   | 2   | 9     |
| 0.883800953 BH | 104 | 65  | 67  | 27  | 84.5  |
| 0.884265243 BH | 11  | 88  | 25  | 49  | 49.5  |
| 0.884286371 BH | 3   | 36  | 6   | 6   | 19.5  |
| 0.884417495 BH | 6   | 53  | 8   | 11  | 29.5  |
| 0.884787919 BH | 5   | 18  | 15  | 6   | 11.5  |
| 0.884787919 BH | 2   | 67  | 6   | 13  | 34.5  |
| 0.884787919 BH | 2   | 25  | 1   | 6   | 13.5  |
| 0.884835881 BH | 6   | 27  | 12  | 16  | 16.5  |
| 0.884835881 BH | 50  | 113 | 86  | 61  | 81.5  |
| 0.884835881 BH | 0   | 13  | 2   | 1   | 6.5   |
| 0.884835881 BH | 0   | 13  | 2   | 1   | 6.5   |
| 0.884835881 BH | 0   | 13  | 2   | 1   | 6.5   |
| 0.884835881 BH | 0   | 13  | 2   | 1   | 6.5   |
| 0.884835881 BH | 0   | 13  | 2   | 1   | 6.5   |
| 0.88526274 BH  | 2   | 11  | 9   | 4   | 6.5   |
| 0.88526274 BH  | 5   | 15  | 2   | 5   | 10    |
| 0.88526274 BH  | 3   | 8   | 10  | 3   | 5.5   |
| 0.885486192 BH | 12  | 19  | 10  | 3   | 15.5  |
| 0.885720617 BH | 7   | 35  | 21  | 14  | 21    |
| 0.885720617 BH | 671 | 779 | 660 | 771 | 725   |
| 0.885720617 BH | 11  | 28  | 9   | 6   | 19.5  |
| 0.885720617 BH | 33  | 15  | 26  | 0   | 24    |
| 0.885887403 BH | 30  | 97  | 58  | 48  | 63.5  |
| 0.885887403 BH | 0   | 14  | 2   | 1   | 7     |
| 0.885887403 BH | 0   | 13  | 1   | 2   | 6.5   |
| 0.885887403 BH | 0   | 13  | 1   | 2   | 6.5   |
| 0.885887403 BH | 0   | 14  | 2   | 1   | 7     |
| 0.885887403 BH | 0   | 14  | 2   | 1   | 7     |
| 0.885887403 BH | 0   | 14  | 2   | 1   | 7     |
| 0.885887403 BH | 0   | 14  | 2   | 1   | 7     |
| 0.885887403 BH | 0   | 13  | 1   | 2   | 6.5   |
| 0.885887403 BH | 0   | 13  | 1   | 2   | 6.5   |

|                |     |     |     |     |       |
|----------------|-----|-----|-----|-----|-------|
| 0.88590182 BH  | 3   | 20  | 12  | 9   | 11.5  |
| 0.88590182 BH  | 4   | 16  | 10  | 8   | 10    |
| 0.886165665 BH | 638 | 82  | 425 | 38  | 360   |
| 0.886165665 BH | 47  | 155 | 43  | 38  | 101   |
| 0.886165665 BH | 6   | 21  | 14  | 10  | 13.5  |
| 0.886165665 BH | 38  | 42  | 55  | 29  | 40    |
| 0.886165665 BH | 2   | 10  | 10  | 3   | 6     |
| 0.886165665 BH | 0   | 16  | 11  | 4   | 8     |
| 0.886165665 BH | 2   | 52  | 12  | 27  | 27    |
| 0.886165665 BH | 141 | 492 | 145 | 114 | 316.5 |
| 0.886165665 BH | 0   | 22  | 6   | 0   | 11    |
| 0.886165665 BH | 19  | 59  | 12  | 18  | 39    |
| 0.886165665 BH | 2   | 13  | 13  | 3   | 7.5   |
| 0.886165665 BH | 2   | 13  | 13  | 3   | 7.5   |
| 0.886165665 BH | 21  | 37  | 36  | 20  | 29    |
| 0.886165665 BH | 19  | 48  | 17  | 11  | 33.5  |
| 0.886165665 BH | 12  | 13  | 6   | 5   | 12.5  |
| 0.886320196 BH | 14  | 29  | 17  | 1   | 21.5  |
| 0.886320196 BH | 11  | 39  | 15  | 4   | 25    |
| 0.886320196 BH | 25  | 102 | 43  | 59  | 63.5  |
| 0.886320196 BH | 9   | 88  | 21  | 12  | 48.5  |
| 0.886320196 BH | 0   | 20  | 11  | 6   | 10    |
| 0.88635632 BH  | 24  | 51  | 15  | 16  | 37.5  |
| 0.88635632 BH  | 17  | 41  | 11  | 12  | 29    |
| 0.886743069 BH | 2   | 26  | 6   | 15  | 14    |
| 0.886860944 BH | 2   | 24  | 21  | 2   | 13    |
| 0.887259174 BH | 18  | 28  | 35  | 13  | 23    |
| 0.887852066 BH | 1   | 24  | 11  | 9   | 12.5  |
| 0.887852066 BH | 5   | 10  | 4   | 2   | 7.5   |
| 0.887977774 BH | 11  | 28  | 24  | 12  | 19.5  |
| 0.888123842 BH | 1   | 20  | 12  | 6   | 10.5  |
| 0.888123842 BH | 19  | 6   | 40  | 0   | 12.5  |
| 0.888123842 BH | 36  | 56  | 81  | 16  | 46    |
| 0.888166362 BH | 4   | 16  | 14  | 5   | 10    |
| 0.888166362 BH | 23  | 60  | 38  | 35  | 41.5  |
| 0.888166362 BH | 17  | 76  | 41  | 34  | 46.5  |
| 0.888187217 BH | 33  | 30  | 18  | 13  | 31.5  |
| 0.888187217 BH | 6   | 14  | 1   | 5   | 10    |
| 0.888187217 BH | 3   | 10  | 11  | 2   | 6.5   |
| 0.888187217 BH | 1   | 13  | 6   | 6   | 7     |
| 0.888187217 BH | 13  | 2   | 0   | 6   | 7.5   |
| 0.888187217 BH | 12  | 26  | 12  | 4   | 19    |
| 0.888187217 BH | 6   | 30  | 12  | 1   | 18    |
| 0.888196328 BH | 4   | 46  | 9   | 7   | 25    |
| 0.888450053 BH | 21  | 128 | 56  | 58  | 74.5  |
| 0.888450053 BH | 42  | 60  | 18  | 28  | 51    |
| 0.888450053 BH | 5   | 28  | 7   | 4   | 16.5  |

|                |     |      |     |     |       |
|----------------|-----|------|-----|-----|-------|
| 0.888450053 BH | 3   | 17   | 13  | 6   | 10    |
| 0.888450053 BH | 8   | 11   | 18  | 4   | 9.5   |
| 0.888450053 BH | 2   | 78   | 6   | 16  | 40    |
| 0.888479251 BH | 2   | 21   | 4   | 3   | 11.5  |
| 0.888479251 BH | 1   | 12   | 9   | 4   | 6.5   |
| 0.888479251 BH | 2   | 21   | 4   | 3   | 11.5  |
| 0.888899235 BH | 9   | 33   | 11  | 4   | 21    |
| 0.888899235 BH | 10  | 11   | 17  | 8   | 10.5  |
| 0.88950637 BH  | 20  | 89   | 20  | 21  | 54.5  |
| 0.88950637 BH  | 4   | 41   | 6   | 8   | 22.5  |
| 0.88950637 BH  | 2   | 22   | 4   | 3   | 12    |
| 0.88950637 BH  | 9   | 8    | 6   | 1   | 8.5   |
| 0.88950637 BH  | 4   | 17   | 7   | 1   | 10.5  |
| 0.88994228 BH  | 31  | 105  | 27  | 27  | 68    |
| 0.88994228 BH  | 6   | 117  | 30  | 11  | 61.5  |
| 0.890226312 BH | 16  | 104  | 6   | 32  | 60    |
| 0.890386333 BH | 13  | 18   | 14  | 0   | 15.5  |
| 0.890386333 BH | 5   | 10   | 5   | 1   | 7.5   |
| 0.890386333 BH | 5   | 10   | 5   | 1   | 7.5   |
| 0.890386333 BH | 4   | 16   | 15  | 4   | 10    |
| 0.890386333 BH | 11  | 80   | 39  | 32  | 45.5  |
| 0.890754272 BH | 5   | 35   | 21  | 12  | 20    |
| 0.891816106 BH | 12  | 87   | 37  | 39  | 49.5  |
| 0.89202189 BH  | 7   | 55   | 29  | 20  | 31    |
| 0.892579098 BH | 4   | 5    | 13  | 0   | 4.5   |
| 0.893056931 BH | 6   | 8    | 5   | 1   | 7     |
| 0.893076194 BH | 6   | 39   | 9   | 6   | 22.5  |
| 0.893597144 BH | 5   | 67   | 10  | 13  | 36    |
| 0.893664121 BH | 0   | 13   | 0   | 3   | 6.5   |
| 0.893694544 BH | 4   | 4    | 13  | 0   | 4     |
| 0.893694544 BH | 6   | 9    | 12  | 4   | 7.5   |
| 0.893694544 BH | 25  | 74   | 17  | 23  | 49.5  |
| 0.893694544 BH | 3   | 14   | 5   | 1   | 8.5   |
| 0.893694544 BH | 3   | 14   | 5   | 1   | 8.5   |
| 0.893694544 BH | 8   | 5    | 3   | 2   | 6.5   |
| 0.893890174 BH | 22  | 25   | 54  | 3   | 23.5  |
| 0.894484601 BH | 126 | 1091 | 434 | 448 | 608.5 |
| 0.894484601 BH | 867 | 370  | 611 | 141 | 618.5 |
| 0.894484601 BH | 4   | 40   | 20  | 15  | 22    |
| 0.894484601 BH | 8   | 17   | 8   | 2   | 12.5  |
| 0.894484601 BH | 4   | 25   | 5   | 4   | 14.5  |
| 0.894484601 BH | 761 | 786  | 655 | 879 | 773.5 |
| 0.894771062 BH | 3   | 31   | 13  | 13  | 17    |
| 0.895647044 BH | 94  | 605  | 268 | 252 | 349.5 |
| 0.895647044 BH | 2   | 27   | 18  | 6   | 14.5  |
| 0.895647044 BH | 7   | 6    | 5   | 1   | 6.5   |
| 0.895647044 BH | 4   | 25   | 4   | 5   | 14.5  |

|                |     |      |     |     |       |
|----------------|-----|------|-----|-----|-------|
| 0.895647044 BH | 2   | 16   | 9   | 7   | 9     |
| 0.897190228 BH | 8   | 4    | 4   | 2   | 6     |
| 0.897755722 BH | 1   | 29   | 5   | 4   | 15    |
| 0.897926747 BH | 1   | 34   | 5   | 5   | 17.5  |
| 0.898097021 BH | 6   | 16   | 5   | 3   | 11    |
| 0.898352245 BH | 44  | 76   | 59  | 52  | 60    |
| 0.898430148 BH | 2   | 20   | 14  | 5   | 11    |
| 0.898817568 BH | 9   | 57   | 23  | 29  | 33    |
| 0.89888128 BH  | 4   | 16   | 9   | 10  | 10    |
| 0.899242574 BH | 4   | 34   | 14  | 15  | 19    |
| 0.899242574 BH | 7   | 14   | 3   | 4   | 10.5  |
| 0.899577559 BH | 8   | 20   | 23  | 6   | 14    |
| 0.899577559 BH | 7   | 31   | 4   | 9   | 19    |
| 0.899577559 BH | 9   | 19   | 29  | 2   | 14    |
| 0.899577559 BH | 2   | 17   | 11  | 5   | 9.5   |
| 0.899577559 BH | 3   | 9    | 2   | 2   | 6     |
| 0.899577559 BH | 3   | 9    | 2   | 2   | 6     |
| 0.899684338 BH | 12  | 15   | 5   | 7   | 13.5  |
| 0.899684338 BH | 6   | 28   | 7   | 5   | 17    |
| 0.899701515 BH | 365 | 1143 | 253 | 364 | 754   |
| 0.899701515 BH | 5   | 36   | 17  | 16  | 20.5  |
| 0.899701515 BH | 3   | 12   | 8   | 5   | 7.5   |
| 0.899701515 BH | 0   | 25   | 1   | 4   | 12.5  |
| 0.900614156 BH | 4   | 24   | 8   | 2   | 14    |
| 0.901246497 BH | 3   | 10   | 10  | 4   | 6.5   |
| 0.901246497 BH | 13  | 62   | 23  | 6   | 37.5  |
| 0.902176129 BH | 3   | 27   | 4   | 5   | 15    |
| 0.902225465 BH | 13  | 13   | 8   | 4   | 13    |
| 0.902225465 BH | 6   | 27   | 9   | 4   | 16.5  |
| 0.902225465 BH | 294 | 552  | 282 | 452 | 423   |
| 0.902225465 BH | 4   | 20   | 5   | 3   | 12    |
| 0.902225465 BH | 5   | 17   | 6   | 2   | 11    |
| 0.902225465 BH | 2   | 11   | 2   | 2   | 6.5   |
| 0.902257413 BH | 16  | 21   | 20  | 17  | 18.5  |
| 0.902346079 BH | 53  | 86   | 79  | 53  | 69.5  |
| 0.902388348 BH | 0   | 35   | 3   | 6   | 17.5  |
| 0.902505525 BH | 17  | 24   | 13  | 6   | 20.5  |
| 0.902505525 BH | 8   | 70   | 31  | 27  | 39    |
| 0.902505525 BH | 64  | 611  | 106 | 130 | 337.5 |
| 0.902505525 BH | 169 | 104  | 126 | 32  | 136.5 |
| 0.902505525 BH | 140 | 89   | 148 | 110 | 114.5 |
| 0.902596222 BH | 2   | 11   | 3   | 1   | 6.5   |
| 0.902596222 BH | 9   | 12   | 11  | 11  | 10.5  |
| 0.902613433 BH | 4   | 19   | 3   | 5   | 11.5  |
| 0.903337405 BH | 16  | 76   | 14  | 20  | 46    |
| 0.903339984 BH | 29  | 136  | 77  | 53  | 82.5  |
| 0.903423257 BH | 0   | 14   | 9   | 4   | 7     |



|                |    |     |     |     |       |
|----------------|----|-----|-----|-----|-------|
| 0.903540899 BH | 2  | 29  | 15  | 9   | 15.5  |
| 0.903540899 BH | 4  | 37  | 6   | 7   | 20.5  |
| 0.903680193 BH | 2  | 12  | 5   | 8   | 7     |
| 0.903680193 BH | 5  | 21  | 12  | 10  | 13    |
| 0.90371835 BH  | 69 | 428 | 84  | 101 | 248.5 |
| 0.903927132 BH | 43 | 139 | 84  | 66  | 91    |
| 0.903968149 BH | 29 | 24  | 13  | 13  | 26.5  |
| 0.903968149 BH | 18 | 48  | 12  | 15  | 33    |
| 0.903968149 BH | 4  | 12  | 6   | 0   | 8     |
| 0.903968149 BH | 4  | 12  | 6   | 0   | 8     |
| 0.903968149 BH | 37 | 25  | 17  | 15  | 31    |
| 0.904194516 BH | 6  | 63  | 14  | 10  | 34.5  |
| 0.904271112 BH | 3  | 21  | 4   | 4   | 12    |
| 0.904271112 BH | 5  | 48  | 9   | 8   | 26.5  |
| 0.904475803 BH | 7  | 21  | 6   | 4   | 14    |
| 0.904549805 BH | 73 | 306 | 94  | 61  | 189.5 |
| 0.90461511 BH  | 9  | 106 | 21  | 18  | 57.5  |
| 0.90461511 BH  | 1  | 18  | 5   | 1   | 9.5   |
| 0.90461511 BH  | 9  | 2   | 4   | 2   | 5.5   |
| 0.905424552 BH | 6  | 25  | 0   | 9   | 15.5  |
| 0.905424552 BH | 11 | 8   | 23  | 2   | 9.5   |
| 0.905424552 BH | 6  | 41  | 6   | 9   | 23.5  |
| 0.905424552 BH | 6  | 22  | 5   | 5   | 14    |
| 0.905456494 BH | 19 | 42  | 16  | 10  | 30.5  |
| 0.905550232 BH | 3  | 14  | 6   | 0   | 8.5   |
| 0.905857719 BH | 17 | 183 | 23  | 44  | 100   |
| 0.905874195 BH | 12 | 39  | 20  | 23  | 25.5  |
| 0.906039885 BH | 1  | 13  | 2   | 2   | 7     |
| 0.906039885 BH | 1  | 13  | 2   | 2   | 7     |
| 0.906266119 BH | 8  | 43  | 13  | 6   | 25.5  |
| 0.906472672 BH | 1  | 18  | 1   | 4   | 9.5   |
| 0.906472672 BH | 3  | 78  | 19  | 7   | 40.5  |
| 0.906662395 BH | 16 | 39  | 18  | 30  | 27.5  |
| 0.906662395 BH | 16 | 84  | 22  | 53  | 50    |
| 0.906662395 BH | 12 | 37  | 11  | 8   | 24.5  |
| 0.906917922 BH | 2  | 12  | 11  | 3   | 7     |
| 0.907166376 BH | 24 | 58  | 45  | 28  | 41    |
| 0.907166376 BH | 90 | 274 | 159 | 136 | 182   |
| 0.907166376 BH | 6  | 33  | 16  | 15  | 19.5  |
| 0.907166376 BH | 3  | 15  | 11  | 6   | 9     |
| 0.907193905 BH | 5  | 42  | 7   | 9   | 23.5  |
| 0.907446866 BH | 1  | 13  | 3   | 1   | 7     |
| 0.90821001 BH  | 6  | 41  | 20  | 17  | 23.5  |
| 0.90821001 BH  | 5  | 13  | 13  | 4   | 9     |
| 0.90821001 BH  | 3  | 17  | 8   | 8   | 10    |
| 0.90821001 BH  | 7  | 66  | 28  | 25  | 36.5  |
| 0.90821001 BH  | 6  | 14  | 17  | 3   | 10    |

|                |      |      |     |      |        |
|----------------|------|------|-----|------|--------|
| 0.90821001 BH  | 8    | 43   | 14  | 5    | 25.5   |
| 0.908452358 BH | 0    | 18   | 13  | 3    | 9      |
| 0.908452358 BH | 7    | 74   | 17  | 40   | 40.5   |
| 0.908452358 BH | 13   | 203  | 51  | 24   | 108    |
| 0.908487914 BH | 1    | 15   | 8   | 5    | 8      |
| 0.908487914 BH | 10   | 22   | 9   | 4    | 16     |
| 0.908487914 BH | 10   | 22   | 9   | 4    | 16     |
| 0.908487914 BH | 29   | 68   | 67  | 23   | 48.5   |
| 0.908487914 BH | 16   | 23   | 17  | 1    | 19.5   |
| 0.908568647 BH | 50   | 4    | 7   | 23   | 27     |
| 0.908711295 BH | 35   | 240  | 123 | 82   | 137.5  |
| 0.908874273 BH | 12   | 144  | 30  | 24   | 78     |
| 0.908892772 BH | 5    | 21   | 18  | 5    | 13     |
| 0.908892772 BH | 88   | 83   | 117 | 63   | 85.5   |
| 0.908892772 BH | 1    | 14   | 5   | 8    | 7.5    |
| 0.908892772 BH | 4    | 5    | 7   | 4    | 4.5    |
| 0.908892772 BH | 18   | 131  | 30  | 25   | 74.5   |
| 0.909014972 BH | 19   | 36   | 14  | 10   | 27.5   |
| 0.909178827 BH | 16   | 3    | 10  | 1    | 9.5    |
| 0.909178827 BH | 14   | 42   | 26  | 22   | 28     |
| 0.909178827 BH | 7    | 20   | 9   | 2    | 13.5   |
| 0.909178827 BH | 9    | 16   | 9   | 2    | 12.5   |
| 0.909178827 BH | 14   | 12   | 10  | 2    | 13     |
| 0.909178827 BH | 3    | 25   | 11  | 11   | 14     |
| 0.909178827 BH | 3    | 8    | 8   | 3    | 5.5    |
| 0.909178827 BH | 2    | 8    | 5   | 6    | 5      |
| 0.909178827 BH | 2    | 29   | 8   | 2    | 15.5   |
| 0.909178827 BH | 2    | 24   | 3   | 4    | 13     |
| 0.909178827 BH | 2    | 17   | 6   | 0    | 9.5    |
| 0.909339748 BH | 13   | 74   | 43  | 26   | 43.5   |
| 0.909339748 BH | 67   | 210  | 107 | 114  | 138.5  |
| 0.909339748 BH | 7    | 14   | 7   | 12   | 10.5   |
| 0.909339748 BH | 10   | 49   | 24  | 23   | 29.5   |
| 0.909365285 BH | 22   | 11   | 16  | 2    | 16.5   |
| 0.909508214 BH | 27   | 121  | 82  | 38   | 74     |
| 0.909508214 BH | 14   | 39   | 16  | 7    | 26.5   |
| 0.909524505 BH | 16   | 42   | 31  | 21   | 29     |
| 0.909653093 BH | 1054 | 1507 | 956 | 1361 | 1280.5 |
| 0.909653093 BH | 11   | 5    | 6   | 2    | 8      |
| 0.909712276 BH | 20   | 23   | 19  | 3    | 21.5   |
| 0.910426826 BH | 182  | 277  | 283 | 149  | 229.5  |
| 0.910537535 BH | 4    | 26   | 4   | 6    | 15     |
| 0.910560601 BH | 39   | 28   | 47  | 28   | 33.5   |
| 0.910560601 BH | 3    | 16   | 4   | 2    | 9.5    |
| 0.91063565 BH  | 2    | 24   | 6   | 2    | 13     |
| 0.91063565 BH  | 16   | 44   | 34  | 18   | 30     |
| 0.911066634 BH | 18   | 53   | 16  | 13   | 35.5   |

|                |     |     |     |     |       |
|----------------|-----|-----|-----|-----|-------|
| 0.911333042 BH | 6   | 29  | 9   | 4   | 17.5  |
| 0.911333042 BH | 55  | 0   | 36  | 0   | 27.5  |
| 0.911406869 BH | 2   | 18  | 11  | 6   | 10    |
| 0.911424023 BH | 15  | 1   | 7   | 2   | 8     |
| 0.911424023 BH | 0   | 31  | 6   | 3   | 15.5  |
| 0.911470531 BH | 4   | 29  | 12  | 13  | 16.5  |
| 0.911936545 BH | 17  | 23  | 24  | 15  | 20    |
| 0.912004013 BH | 4   | 11  | 8   | 6   | 7.5   |
| 0.912004013 BH | 7   | 15  | 6   | 3   | 11    |
| 0.912004013 BH | 0   | 20  | 4   | 2   | 10    |
| 0.912004013 BH | 8   | 6   | 3   | 3   | 7     |
| 0.912004013 BH | 2   | 18  | 12  | 5   | 10    |
| 0.912004013 BH | 11  | 193 | 44  | 93  | 102   |
| 0.912004013 BH | 29  | 35  | 54  | 14  | 32    |
| 0.912111485 BH | 37  | 136 | 18  | 49  | 86.5  |
| 0.912607055 BH | 12  | 10  | 5   | 18  | 11    |
| 0.91307946 BH  | 3   | 8   | 9   | 2   | 5.5   |
| 0.913085005 BH | 3   | 21  | 13  | 7   | 12    |
| 0.913417351 BH | 3   | 80  | 15  | 12  | 41.5  |
| 0.913417351 BH | 8   | 45  | 14  | 6   | 26.5  |
| 0.913417351 BH | 9   | 63  | 15  | 11  | 36    |
| 0.913417351 BH | 5   | 25  | 21  | 6   | 15    |
| 0.913417351 BH | 16  | 51  | 16  | 37  | 33.5  |
| 0.913417351 BH | 4   | 63  | 9   | 12  | 33.5  |
| 0.913587491 BH | 1   | 11  | 7   | 4   | 6     |
| 0.913587491 BH | 155 | 217 | 152 | 188 | 186   |
| 0.913587491 BH | 13  | 80  | 17  | 18  | 46.5  |
| 0.913587491 BH | 17  | 32  | 19  | 3   | 24.5  |
| 0.913710413 BH | 3   | 29  | 7   | 3   | 16    |
| 0.913898496 BH | 217 | 220 | 71  | 147 | 218.5 |
| 0.913898496 BH | 11  | 74  | 22  | 40  | 42.5  |
| 0.913898496 BH | 9   | 18  | 6   | 5   | 13.5  |
| 0.913898496 BH | 10  | 17  | 6   | 5   | 13.5  |
| 0.913898496 BH | 30  | 4   | 15  | 6   | 17    |
| 0.913898496 BH | 2   | 10  | 9   | 2   | 6     |
| 0.913898496 BH | 2   | 18  | 3   | 3   | 10    |
| 0.913898496 BH | 2   | 18  | 3   | 3   | 10    |
| 0.914304599 BH | 703 | 723 | 727 | 672 | 713   |
| 0.914304599 BH | 1   | 25  | 4   | 4   | 13    |
| 0.914428961 BH | 14  | 19  | 18  | 15  | 16.5  |
| 0.914428961 BH | 2   | 36  | 8   | 4   | 19    |
| 0.914726964 BH | 0   | 21  | 4   | 1   | 10.5  |
| 0.914802132 BH | 4   | 21  | 5   | 4   | 12.5  |
| 0.914802132 BH | 6   | 17  | 7   | 2   | 11.5  |
| 0.914948385 BH | 54  | 38  | 76  | 29  | 46    |
| 0.914948385 BH | 27  | 15  | 23  | 1   | 21    |
| 0.915065537 BH | 6   | 67  | 13  | 12  | 36.5  |

|                |     |     |     |     |       |
|----------------|-----|-----|-----|-----|-------|
| 0.915065537 BH | 7   | 27  | 3   | 9   | 17    |
| 0.915945302 BH | 4   | 22  | 4   | 4   | 13    |
| 0.916344094 BH | 1   | 25  | 3   | 5   | 13    |
| 0.916344094 BH | 9   | 26  | 8   | 5   | 17.5  |
| 0.916344094 BH | 69  | 230 | 160 | 84  | 149.5 |
| 0.916344094 BH | 0   | 15  | 3   | 1   | 7.5   |
| 0.916344094 BH | 0   | 15  | 3   | 1   | 7.5   |
| 0.916344094 BH | 0   | 15  | 3   | 1   | 7.5   |
| 0.916344094 BH | 2   | 15  | 8   | 6   | 8.5   |
| 0.916344094 BH | 5   | 20  | 7   | 2   | 12.5  |
| 0.916344094 BH | 2   | 15  | 7   | 7   | 8.5   |
| 0.916344094 BH | 4   | 10  | 12  | 3   | 7     |
| 0.916344094 BH | 4   | 25  | 17  | 7   | 14.5  |
| 0.916347377 BH | 15  | 65  | 14  | 17  | 40    |
| 0.916347377 BH | 108 | 61  | 93  | 9   | 84.5  |
| 0.916347377 BH | 42  | 93  | 37  | 25  | 67.5  |
| 0.916347377 BH | 1   | 25  | 6   | 2   | 13    |
| 0.916350955 BH | 118 | 208 | 59  | 91  | 163   |
| 0.916350955 BH | 0   | 27  | 6   | 1   | 13.5  |
| 0.916350955 BH | 4   | 34  | 9   | 4   | 19    |
| 0.916350955 BH | 889 | 812 | 912 | 796 | 850.5 |
| 0.916587795 BH | 361 | 291 | 405 | 276 | 326   |
| 0.916713445 BH | 3   | 55  | 18  | 23  | 29    |
| 0.916715803 BH | 8   | 20  | 9   | 3   | 14    |
| 0.916715803 BH | 10  | 55  | 21  | 29  | 32.5  |
| 0.916901597 BH | 18  | 5   | 31  | 3   | 11.5  |
| 0.916901597 BH | 0   | 15  | 1   | 3   | 7.5   |
| 0.916920536 BH | 1   | 20  | 11  | 6   | 10.5  |
| 0.916920536 BH | 22  | 180 | 48  | 28  | 101   |
| 0.916920536 BH | 16  | 32  | 12  | 9   | 24    |
| 0.917146411 BH | 192 | 271 | 129 | 104 | 231.5 |
| 0.917428757 BH | 3   | 23  | 5   | 4   | 13    |
| 0.917428757 BH | 6   | 25  | 8   | 3   | 15.5  |
| 0.917428757 BH | 1   | 82  | 2   | 20  | 41.5  |
| 0.918403036 BH | 8   | 22  | 18  | 10  | 15    |
| 0.918403036 BH | 28  | 17  | 23  | 2   | 22.5  |
| 0.918634875 BH | 36  | 52  | 24  | 18  | 44    |
| 0.918634875 BH | 3   | 17  | 12  | 6   | 10    |
| 0.918634875 BH | 9   | 4   | 19  | 0   | 6.5   |
| 0.918837968 BH | 9   | 52  | 14  | 9   | 30.5  |
| 0.918848137 BH | 8   | 60  | 31  | 21  | 34    |
| 0.918848137 BH | 78  | 143 | 100 | 10  | 110.5 |
| 0.918861729 BH | 8   | 51  | 28  | 18  | 29.5  |
| 0.918861729 BH | 5   | 19  | 8   | 12  | 12    |
| 0.918861729 BH | 5   | 42  | 22  | 14  | 23.5  |
| 0.918861729 BH | 21  | 128 | 31  | 26  | 74.5  |
| 0.918861729 BH | 114 | 237 | 87  | 201 | 175.5 |

|                |      |     |     |     |        |
|----------------|------|-----|-----|-----|--------|
| 0.918861729 BH | 14   | 10  | 19  | 8   | 12     |
| 0.919151122 BH | 8    | 21  | 9   | 2   | 14.5   |
| 0.919381628 BH | 19   | 8   | 12  | 3   | 13.5   |
| 0.919381628 BH | 19   | 83  | 43  | 35  | 51     |
| 0.919381628 BH | 5    | 31  | 7   | 20  | 18     |
| 0.919381628 BH | 19   | 32  | 27  | 20  | 25.5   |
| 0.919381628 BH | 5    | 24  | 12  | 12  | 14.5   |
| 0.91960438 BH  | 7    | 14  | 17  | 5   | 10.5   |
| 0.920259394 BH | 2    | 18  | 1   | 5   | 10     |
| 0.920391462 BH | 35   | 119 | 51  | 17  | 77     |
| 0.920391462 BH | 1    | 20  | 13  | 4   | 10.5   |
| 0.921037474 BH | 61   | 154 | 130 | 55  | 107.5  |
| 0.921105299 BH | 13   | 38  | 8   | 12  | 25.5   |
| 0.921105299 BH | 7    | 30  | 14  | 16  | 18.5   |
| 0.921448185 BH | 46   | 72  | 39  | 20  | 59     |
| 0.921905612 BH | 25   | 18  | 10  | 12  | 21.5   |
| 0.921905612 BH | 1513 | 644 | 789 | 535 | 1078.5 |
| 0.921905612 BH | 21   | 27  | 24  | 23  | 24     |
| 0.921905612 BH | 13   | 24  | 25  | 10  | 18.5   |
| 0.921905612 BH | 47   | 80  | 36  | 25  | 63.5   |
| 0.921905612 BH | 42   | 11  | 28  | 6   | 26.5   |
| 0.921905612 BH | 15   | 65  | 40  | 24  | 40     |
| 0.921918842 BH | 2    | 20  | 9   | 8   | 11     |
| 0.922763015 BH | 22   | 23  | 34  | 14  | 22.5   |
| 0.922763015 BH | 2    | 26  | 4   | 4   | 14     |
| 0.922768968 BH | 6    | 10  | 7   | 0   | 8      |
| 0.922768968 BH | 0    | 13  | 6   | 5   | 6.5    |
| 0.922769399 BH | 5    | 14  | 4   | 3   | 9.5    |
| 0.922769399 BH | 3    | 8   | 7   | 5   | 5.5    |
| 0.923514198 BH | 6    | 6   | 2   | 2   | 6      |
| 0.923560391 BH | 20   | 63  | 29  | 36  | 41.5   |
| 0.923569841 BH | 0    | 13  | 7   | 4   | 6.5    |
| 0.923569841 BH | 5    | 10  | 8   | 7   | 7.5    |
| 0.923569841 BH | 15   | 10  | 26  | 5   | 12.5   |
| 0.923640775 BH | 4    | 6   | 7   | 5   | 5      |
| 0.923841229 BH | 3    | 30  | 6   | 5   | 16.5   |
| 0.924297498 BH | 24   | 139 | 68  | 53  | 81.5   |
| 0.924297498 BH | 45   | 34  | 56  | 30  | 39.5   |
| 0.924297498 BH | 13   | 97  | 33  | 45  | 55     |
| 0.924297498 BH | 122  | 104 | 98  | 127 | 113    |
| 0.924297498 BH | 5    | 10  | 10  | 5   | 7.5    |
| 0.924297498 BH | 4    | 16  | 4   | 3   | 10     |
| 0.924297498 BH | 18   | 41  | 8   | 17  | 29.5   |
| 0.924297498 BH | 9    | 24  | 17  | 11  | 16.5   |
| 0.924408962 BH | 13   | 39  | 13  | 9   | 26     |
| 0.924408962 BH | 2    | 13  | 2   | 2   | 7.5    |
| 0.924545553 BH | 3    | 32  | 19  | 8   | 17.5   |

|                |      |      |      |      |        |
|----------------|------|------|------|------|--------|
| 0.924557563 BH | 23   | 16   | 16   | 5    | 19.5   |
| 0.924753484 BH | 3    | 43   | 7    | 8    | 23     |
| 0.924753484 BH | 33   | 122  | 48   | 19   | 77.5   |
| 0.925481199 BH | 218  | 343  | 273  | 227  | 280.5  |
| 0.925481199 BH | 1386 | 1393 | 1519 | 1198 | 1389.5 |
| 0.925695823 BH | 2    | 11   | 5    | 6    | 6.5    |
| 0.925695823 BH | 2    | 10   | 8    | 4    | 6      |
| 0.925695823 BH | 9    | 68   | 48   | 12   | 38.5   |
| 0.925695823 BH | 2    | 38   | 9    | 4    | 20     |
| 0.925695823 BH | 20   | 142  | 44   | 70   | 81     |
| 0.925695823 BH | 75   | 140  | 37   | 62   | 107.5  |
| 0.925695823 BH | 16   | 55   | 27   | 30   | 35.5   |
| 0.925695823 BH | 10   | 20   | 20   | 9    | 15     |
| 0.925695823 BH | 13   | 32   | 14   | 6    | 22.5   |
| 0.925695823 BH | 30   | 26   | 55   | 9    | 28     |
| 0.925695823 BH | 1    | 20   | 1    | 5    | 10.5   |
| 0.925695823 BH | 53   | 85   | 41   | 27   | 69     |
| 0.925695823 BH | 14   | 17   | 8    | 6    | 15.5   |
| 0.925695823 BH | 3    | 23   | 8    | 1    | 13     |
| 0.925695823 BH | 12   | 14   | 23   | 6    | 13     |
| 0.925695823 BH | 5    | 53   | 9    | 11   | 29     |
| 0.925695823 BH | 5    | 65   | 16   | 9    | 35     |
| 0.925695823 BH | 2    | 11   | 8    | 4    | 6.5    |
| 0.925889259 BH | 4    | 18   | 11   | 7    | 11     |
| 0.925889259 BH | 19   | 116  | 25   | 27   | 67.5   |
| 0.925889259 BH | 8    | 36   | 9    | 8    | 22     |
| 0.92616692 BH  | 10   | 21   | 21   | 8    | 15.5   |
| 0.92616692 BH  | 88   | 52   | 59   | 24   | 70     |
| 0.92616692 BH  | 2    | 13   | 1    | 3    | 7.5    |
| 0.92616692 BH  | 2    | 23   | 9    | 0    | 12.5   |
| 0.92616692 BH  | 2    | 23   | 9    | 0    | 12.5   |
| 0.926357113 BH | 7    | 48   | 5    | 14   | 27.5   |
| 0.926360511 BH | 2    | 29   | 7    | 15   | 15.5   |
| 0.927239113 BH | 23   | 59   | 47   | 23   | 41     |
| 0.927239113 BH | 2    | 12   | 4    | 7    | 7      |
| 0.927239113 BH | 3    | 18   | 5    | 2    | 10.5   |
| 0.92751375 BH  | 4    | 23   | 4    | 5    | 13.5   |
| 0.928170963 BH | 9    | 67   | 16   | 13   | 38     |
| 0.928454298 BH | 1    | 27   | 5    | 4    | 14     |
| 0.928518934 BH | 4    | 23   | 7    | 3    | 13.5   |
| 0.928518934 BH | 2    | 15   | 8    | 7    | 8.5    |
| 0.928518934 BH | 18   | 65   | 21   | 43   | 41.5   |
| 0.928518934 BH | 3    | 20   | 11   | 7    | 11.5   |
| 0.928518934 BH | 1    | 15   | 2    | 2    | 8      |
| 0.928518934 BH | 1    | 15   | 2    | 2    | 8      |
| 0.928518934 BH | 1    | 15   | 2    | 2    | 8      |
| 0.928742922 BH | 2    | 33   | 6    | 5    | 17.5   |

|                |     |     |     |     |       |
|----------------|-----|-----|-----|-----|-------|
| 0.928840077 BH | 4   | 16  | 6   | 1   | 10    |
| 0.928840077 BH | 1   | 28  | 4   | 4   | 14.5  |
| 0.929252077 BH | 35  | 162 | 54  | 89  | 98.5  |
| 0.929323862 BH | 1   | 31  | 12  | 11  | 16    |
| 0.929323862 BH | 9   | 48  | 14  | 8   | 28.5  |
| 0.929323862 BH | 14  | 17  | 32  | 3   | 15.5  |
| 0.929323862 BH | 452 | 759 | 437 | 595 | 605.5 |
| 0.929323862 BH | 7   | 50  | 13  | 28  | 28.5  |
| 0.929323862 BH | 14  | 39  | 13  | 10  | 26.5  |
| 0.929323862 BH | 2   | 17  | 10  | 5   | 9.5   |
| 0.929323862 BH | 4   | 23  | 3   | 6   | 13.5  |
| 0.929323862 BH | 10  | 75  | 46  | 19  | 42.5  |
| 0.929323862 BH | 16  | 25  | 26  | 14  | 20.5  |
| 0.929323862 BH | 23  | 35  | 13  | 14  | 29    |
| 0.929323862 BH | 50  | 109 | 82  | 54  | 79.5  |
| 0.929323862 BH | 7   | 27  | 22  | 7   | 17    |
| 0.929323862 BH | 0   | 22  | 3   | 3   | 11    |
| 0.929681091 BH | 10  | 22  | 15  | 14  | 16    |
| 0.929681091 BH | 10  | 33  | 23  | 13  | 21.5  |
| 0.929845678 BH | 9   | 56  | 12  | 12  | 32.5  |
| 0.930025274 BH | 6   | 113 | 4   | 31  | 59.5  |
| 0.930797646 BH | 2   | 20  | 5   | 2   | 11    |
| 0.930797646 BH | 2   | 20  | 5   | 2   | 11    |
| 0.930881845 BH | 4   | 9   | 0   | 4   | 6.5   |
| 0.930881845 BH | 3   | 11  | 5   | 0   | 7     |
| 0.930956495 BH | 44  | 46  | 22  | 25  | 45    |
| 0.931190075 BH | 89  | 815 | 75  | 518 | 452   |
| 0.931286481 BH | 10  | 29  | 13  | 18  | 19.5  |
| 0.931404215 BH | 9   | 19  | 17  | 9   | 14    |
| 0.931404215 BH | 4   | 31  | 5   | 6   | 17.5  |
| 0.931404215 BH | 6   | 14  | 4   | 13  | 10    |
| 0.931978943 BH | 41  | 119 | 47  | 78  | 80    |
| 0.931978943 BH | 19  | 14  | 12  | 5   | 16.5  |
| 0.931978943 BH | 16  | 69  | 35  | 31  | 42.5  |
| 0.932068346 BH | 12  | 23  | 10  | 5   | 17.5  |
| 0.932068346 BH | 10  | 26  | 7   | 8   | 18    |
| 0.932093504 BH | 0   | 11  | 5   | 3   | 5.5   |
| 0.932093504 BH | 27  | 43  | 22  | 12  | 35    |
| 0.932099654 BH | 58  | 197 | 70  | 43  | 127.5 |
| 0.932484919 BH | 0   | 12  | 11  | 1   | 6     |
| 0.933207968 BH | 9   | 63  | 18  | 9   | 36    |
| 0.933207968 BH | 6   | 16  | 12  | 7   | 11    |
| 0.933236498 BH | 10  | 67  | 21  | 9   | 38.5  |
| 0.933236498 BH | 0   | 19  | 9   | 5   | 9.5   |
| 0.933446034 BH | 10  | 121 | 56  | 36  | 65.5  |
| 0.933446034 BH | 30  | 115 | 75  | 38  | 72.5  |
| 0.933489118 BH | 96  | 179 | 110 | 122 | 137.5 |

|                |     |     |     |    |      |
|----------------|-----|-----|-----|----|------|
| 0.933541014 BH | 13  | 18  | 29  | 4  | 15.5 |
| 0.933693952 BH | 21  | 48  | 22  | 10 | 34.5 |
| 0.933693952 BH | 9   | 28  | 11  | 5  | 18.5 |
| 0.933693952 BH | 59  | 96  | 80  | 58 | 77.5 |
| 0.933693952 BH | 7   | 25  | 7   | 6  | 16   |
| 0.933819264 BH | 8   | 37  | 11  | 7  | 22.5 |
| 0.933819264 BH | 12  | 57  | 26  | 26 | 34.5 |
| 0.933819264 BH | 5   | 12  | 10  | 6  | 8.5  |
| 0.933819264 BH | 1   | 27  | 14  | 7  | 14   |
| 0.933819264 BH | 1   | 17  | 7   | 8  | 9    |
| 0.933819264 BH | 2   | 27  | 6   | 4  | 14.5 |
| 0.933819264 BH | 22  | 202 | 67  | 86 | 112  |
| 0.933819264 BH | 5   | 67  | 8   | 16 | 36   |
| 0.93405443 BH  | 1   | 46  | 3   | 10 | 23.5 |
| 0.93405443 BH  | 7   | 26  | 8   | 5  | 16.5 |
| 0.93405443 BH  | 40  | 61  | 26  | 23 | 50.5 |
| 0.934411304 BH | 61  | 329 | 85  | 73 | 195  |
| 0.934411304 BH | 5   | 180 | 33  | 28 | 92.5 |
| 0.934435918 BH | 3   | 14  | 14  | 2  | 8.5  |
| 0.934435918 BH | 43  | 84  | 47  | 59 | 63.5 |
| 0.934825786 BH | 117 | 311 | 97  | 98 | 214  |
| 0.934910442 BH | 2   | 22  | 14  | 5  | 12   |
| 0.934910442 BH | 40  | 36  | 24  | 17 | 38   |
| 0.934910442 BH | 4   | 14  | 10  | 6  | 9    |
| 0.934910442 BH | 7   | 19  | 7   | 3  | 13   |
| 0.934910442 BH | 6   | 21  | 5   | 5  | 13.5 |
| 0.934910442 BH | 5   | 12  | 11  | 5  | 8.5  |
| 0.934910442 BH | 2   | 28  | 4   | 5  | 15   |
| 0.934910442 BH | 52  | 33  | 48  | 3  | 42.5 |
| 0.934910442 BH | 39  | 295 | 100 | 34 | 167  |
| 0.935025579 BH | 12  | 61  | 19  | 34 | 36.5 |
| 0.935042723 BH | 18  | 10  | 2   | 29 | 14   |
| 0.93504988 BH  | 7   | 4   | 5   | 0  | 5.5  |
| 0.935156263 BH | 0   | 27  | 12  | 8  | 13.5 |
| 0.935178271 BH | 5   | 23  | 16  | 7  | 14   |
| 0.93521605 BH  | 9   | 48  | 25  | 18 | 28.5 |
| 0.93521605 BH  | 5   | 22  | 7   | 4  | 13.5 |
| 0.93521605 BH  | 4   | 23  | 9   | 1  | 13.5 |
| 0.93521605 BH  | 8   | 52  | 10  | 12 | 30   |
| 0.935298182 BH | 20  | 42  | 40  | 16 | 31   |
| 0.935611543 BH | 12  | 52  | 15  | 11 | 32   |
| 0.935769136 BH | 4   | 19  | 14  | 6  | 11.5 |
| 0.935769136 BH | 8   | 30  | 5   | 10 | 19   |
| 0.935769136 BH | 3   | 11  | 6   | 6  | 7    |
| 0.935769136 BH | 5   | 15  | 5   | 3  | 10   |
| 0.935769136 BH | 3   | 15  | 10  | 6  | 9    |
| 0.935769136 BH | 3   | 16  | 9   | 7  | 9.5  |



|                |     |     |     |     |       |
|----------------|-----|-----|-----|-----|-------|
| 0.93579151 BH  | 12  | 88  | 34  | 6   | 50    |
| 0.93580642 BH  | 9   | 20  | 17  | 10  | 14.5  |
| 0.935899393 BH | 4   | 43  | 9   | 23  | 23.5  |
| 0.935899393 BH | 0   | 29  | 8   | 11  | 14.5  |
| 0.935899393 BH | 20  | 52  | 13  | 18  | 36    |
| 0.935899393 BH | 6   | 82  | 15  | 15  | 44    |
| 0.935899393 BH | 10  | 40  | 29  | 12  | 25    |
| 0.935899393 BH | 4   | 24  | 16  | 7   | 14    |
| 0.935899393 BH | 22  | 4   | 13  | 3   | 13    |
| 0.935899393 BH | 7   | 5   | 14  | 2   | 6     |
| 0.935899393 BH | 0   | 17  | 3   | 2   | 8.5   |
| 0.935899393 BH | 4   | 14  | 12  | 4   | 9     |
| 0.936083999 BH | 10  | 35  | 11  | 8   | 22.5  |
| 0.936083999 BH | 14  | 27  | 8   | 10  | 20.5  |
| 0.936083999 BH | 8   | 100 | 24  | 48  | 54    |
| 0.936083999 BH | 2   | 58  | 4   | 14  | 30    |
| 0.936083999 BH | 0   | 14  | 7   | 5   | 7     |
| 0.936083999 BH | 11  | 15  | 12  | 1   | 13    |
| 0.936083999 BH | 6   | 14  | 6   | 2   | 10    |
| 0.936083999 BH | 4   | 17  | 5   | 3   | 10.5  |
| 0.936083999 BH | 6   | 14  | 6   | 2   | 10    |
| 0.936083999 BH | 103 | 271 | 43  | 241 | 187   |
| 0.936513979 BH | 13  | 31  | 25  | 13  | 22    |
| 0.936513979 BH | 19  | 40  | 18  | 9   | 29.5  |
| 0.936608371 BH | 4   | 11  | 3   | 2   | 7.5   |
| 0.936608371 BH | 15  | 84  | 23  | 16  | 49.5  |
| 0.936608371 BH | 2   | 35  | 5   | 6   | 18.5  |
| 0.936608371 BH | 3   | 33  | 3   | 8   | 18    |
| 0.936608371 BH | 4   | 9   | 10  | 3   | 6.5   |
| 0.936872883 BH | 12  | 9   | 5   | 5   | 10.5  |
| 0.937290806 BH | 6   | 27  | 7   | 17  | 16.5  |
| 0.937290806 BH | 16  | 114 | 35  | 54  | 65    |
| 0.937343292 BH | 14  | 78  | 21  | 16  | 46    |
| 0.938676276 BH | 5   | 110 | 41  | 36  | 57.5  |
| 0.938676276 BH | 4   | 18  | 6   | 2   | 11    |
| 0.938676276 BH | 3   | 20  | 5   | 3   | 11.5  |
| 0.938676276 BH | 8   | 49  | 17  | 25  | 28.5  |
| 0.938819652 BH | 2   | 15  | 2   | 12  | 8.5   |
| 0.938861355 BH | 9   | 23  | 8   | 6   | 16    |
| 0.938861355 BH | 3   | 26  | 16  | 7   | 14.5  |
| 0.938861355 BH | 0   | 18  | 1   | 3   | 9     |
| 0.938861355 BH | 0   | 18  | 1   | 3   | 9     |
| 0.939278562 BH | 1   | 176 | 15  | 37  | 88.5  |
| 0.939445498 BH | 421 | 306 | 400 | 338 | 363.5 |
| 0.940012176 BH | 4   | 39  | 9   | 6   | 21.5  |
| 0.94051849 BH  | 9   | 42  | 12  | 26  | 25.5  |
| 0.940710236 BH | 50  | 3   | 34  | 3   | 26.5  |

|                |     |     |     |     |       |
|----------------|-----|-----|-----|-----|-------|
| 0.940710236 BH | 5   | 9   | 5   | 1   | 7     |
| 0.940710236 BH | 5   | 9   | 5   | 1   | 7     |
| 0.94075245 BH  | 15  | 120 | 26  | 25  | 67.5  |
| 0.94075245 BH  | 8   | 26  | 6   | 7   | 17    |
| 0.94075245 BH  | 8   | 11  | 10  | 10  | 9.5   |
| 0.940954659 BH | 8   | 61  | 15  | 11  | 34.5  |
| 0.940954659 BH | 2   | 12  | 10  | 3   | 7     |
| 0.94131428 BH  | 2   | 14  | 3   | 3   | 8     |
| 0.941499408 BH | 4   | 32  | 4   | 8   | 18    |
| 0.941725428 BH | 31  | 83  | 18  | 32  | 57    |
| 0.941725428 BH | 44  | 172 | 41  | 50  | 108   |
| 0.941725428 BH | 588 | 246 | 368 | 539 | 417   |
| 0.941725428 BH | 12  | 34  | 17  | 20  | 23    |
| 0.941725428 BH | 64  | 271 | 124 | 121 | 167.5 |
| 0.941790915 BH | 1   | 10  | 5   | 4   | 5.5   |
| 0.941848728 BH | 4   | 30  | 7   | 17  | 17    |
| 0.941848728 BH | 24  | 34  | 25  | 5   | 29    |
| 0.942190168 BH | 14  | 108 | 33  | 15  | 61    |
| 0.942279299 BH | 5   | 37  | 4   | 10  | 21    |
| 0.942279299 BH | 3   | 11  | 11  | 2   | 7     |
| 0.94248539 BH  | 29  | 62  | 11  | 29  | 45.5  |
| 0.94248539 BH  | 10  | 51  | 12  | 12  | 30.5  |
| 0.94248539 BH  | 8   | 19  | 6   | 5   | 13.5  |
| 0.94248539 BH  | 4   | 27  | 14  | 9   | 15.5  |
| 0.94248539 BH  | 15  | 57  | 21  | 10  | 36    |
| 0.94248539 BH  | 60  | 88  | 87  | 48  | 74    |
| 0.94248539 BH  | 28  | 46  | 33  | 4   | 37    |
| 0.94248539 BH  | 1   | 15  | 6   | 6   | 8     |
| 0.94248539 BH  | 3   | 13  | 1   | 4   | 8     |
| 0.94248539 BH  | 6   | 7   | 1   | 4   | 6.5   |
| 0.94248539 BH  | 6   | 7   | 1   | 4   | 6.5   |
| 0.942788296 BH | 7   | 33  | 20  | 11  | 20    |
| 0.942843175 BH | 13  | 68  | 15  | 17  | 40.5  |
| 0.942843175 BH | 4   | 15  | 10  | 7   | 9.5   |
| 0.942843175 BH | 7   | 26  | 13  | 14  | 16.5  |
| 0.942843175 BH | 6   | 0   | 12  | 0   | 3     |
| 0.942843175 BH | 8   | 23  | 23  | 5   | 15.5  |
| 0.942843175 BH | 2   | 15  | 4   | 1   | 8.5   |
| 0.942843175 BH | 1   | 16  | 6   | 6   | 8.5   |
| 0.943194474 BH | 8   | 75  | 13  | 17  | 41.5  |
| 0.94340741 BH  | 7   | 0   | 10  | 2   | 3.5   |
| 0.94340741 BH  | 16  | 21  | 21  | 14  | 18.5  |
| 0.94340741 BH  | 6   | 36  | 12  | 5   | 21    |
| 0.94340741 BH  | 2   | 14  | 5   | 1   | 8     |
| 0.94340741 BH  | 7   | 5   | 5   | 1   | 6     |
| 0.943422411 BH | 2   | 13  | 11  | 2   | 7.5   |
| 0.943532659 BH | 17  | 0   | 22  | 5   | 8.5   |

|                |     |      |     |     |       |
|----------------|-----|------|-----|-----|-------|
| 0.943532659 BH | 1   | 10   | 2   | 1   | 5.5   |
| 0.943532659 BH | 1   | 10   | 2   | 1   | 5.5   |
| 0.943532659 BH | 1   | 10   | 2   | 1   | 5.5   |
| 0.943532659 BH | 1   | 10   | 2   | 1   | 5.5   |
| 0.943532659 BH | 5   | 14   | 12  | 5   | 9.5   |
| 0.943532659 BH | 11  | 28   | 11  | 6   | 19.5  |
| 0.943532659 BH | 18  | 40   | 34  | 17  | 29    |
| 0.943532659 BH | 12  | 67   | 18  | 37  | 39.5  |
| 0.943532659 BH | 16  | 34   | 15  | 8   | 25    |
| 0.943532659 BH | 7   | 20   | 9   | 3   | 13.5  |
| 0.943532659 BH | 7   | 20   | 9   | 3   | 13.5  |
| 0.943532659 BH | 2   | 29   | 4   | 6   | 15.5  |
| 0.943532659 BH | 130 | 208  | 76  | 93  | 169   |
| 0.943532659 BH | 2   | 22   | 2   | 5   | 12    |
| 0.943532659 BH | 8   | 19   | 17  | 8   | 13.5  |
| 0.943532659 BH | 1   | 10   | 1   | 2   | 5.5   |
| 0.943532659 BH | 1   | 10   | 1   | 2   | 5.5   |
| 0.943532659 BH | 1   | 10   | 1   | 2   | 5.5   |
| 0.943532659 BH | 1   | 10   | 1   | 2   | 5.5   |
| 0.943532659 BH | 1   | 10   | 1   | 2   | 5.5   |
| 0.943532659 BH | 1   | 10   | 1   | 2   | 5.5   |
| 0.943532659 BH | 11  | 51   | 15  | 10  | 31    |
| 0.943532659 BH | 8   | 42   | 10  | 9   | 25    |
| 0.943532659 BH | 6   | 39   | 24  | 11  | 22.5  |
| 0.943673744 BH | 345 | 364  | 407 | 264 | 354.5 |
| 0.943673744 BH | 1   | 17   | 3   | 2   | 9     |
| 0.943673744 BH | 1   | 17   | 3   | 2   | 9     |
| 0.943673744 BH | 18  | 27   | 33  | 10  | 22.5  |
| 0.943797978 BH | 4   | 16   | 6   | 10  | 10    |
| 0.943797978 BH | 43  | 34   | 31  | 14  | 38.5  |
| 0.944302204 BH | 0   | 17   | 5   | 0   | 8.5   |
| 0.944356259 BH | 39  | 90   | 32  | 28  | 64.5  |
| 0.944356259 BH | 8   | 12   | 17  | 4   | 10    |
| 0.944356259 BH | 16  | 33   | 32  | 12  | 24.5  |
| 0.944864482 BH | 4   | 10   | 6   | 7   | 7     |
| 0.944864482 BH | 4   | 11   | 8   | 5   | 7.5   |
| 0.945471493 BH | 905 | 1115 | 839 | 955 | 1010  |
| 0.945607703 BH | 4   | 26   | 5   | 6   | 15    |
| 0.945607703 BH | 9   | 17   | 9   | 2   | 13    |
| 0.945607703 BH | 9   | 24   | 14  | 14  | 16.5  |
| 0.945698548 BH | 5   | 18   | 4   | 4   | 11.5  |
| 0.946018943 BH | 7   | 37   | 10  | 7   | 22    |
| 0.946018943 BH | 14  | 49   | 25  | 3   | 31.5  |
| 0.946018943 BH | 7   | 57   | 11  | 13  | 32    |
| 0.946018943 BH | 11  | 32   | 11  | 22  | 21.5  |
| 0.946544167 BH | 11  | 37   | 12  | 8   | 24    |
| 0.946620111 BH | 8   | 14   | 14  | 7   | 11    |

|                |     |     |     |     |       |
|----------------|-----|-----|-----|-----|-------|
| 0.946620111 BH | 5   | 20  | 12  | 9   | 12.5  |
| 0.946620111 BH | 1   | 39  | 10  | 17  | 20    |
| 0.946799996 BH | 12  | 87  | 17  | 20  | 49.5  |
| 0.946809554 BH | 6   | 45  | 12  | 8   | 25.5  |
| 0.946924259 BH | 21  | 56  | 18  | 17  | 38.5  |
| 0.946924259 BH | 4   | 11  | 6   | 0   | 7.5   |
| 0.946924259 BH | 0   | 11  | 5   | 4   | 5.5   |
| 0.947101363 BH | 22  | 106 | 40  | 51  | 64    |
| 0.94727075 BH  | 5   | 21  | 13  | 8   | 13    |
| 0.94747425 BH  | 6   | 29  | 8   | 18  | 17.5  |
| 0.94747425 BH  | 862 | 610 | 700 | 760 | 736   |
| 0.94747425 BH  | 4   | 26  | 9   | 3   | 15    |
| 0.94747425 BH  | 4   | 26  | 9   | 3   | 15    |
| 0.94747425 BH  | 4   | 19  | 4   | 5   | 11.5  |
| 0.94747425 BH  | 19  | 61  | 20  | 15  | 40    |
| 0.94747425 BH  | 2   | 37  | 10  | 3   | 19.5  |
| 0.94747425 BH  | 1   | 25  | 6   | 12  | 13    |
| 0.94747425 BH  | 23  | 41  | 26  | 7   | 32    |
| 0.948006284 BH | 0   | 12  | 6   | 3   | 6     |
| 0.949237688 BH | 17  | 95  | 24  | 22  | 56    |
| 0.949237688 BH | 3   | 28  | 8   | 4   | 15.5  |
| 0.949237688 BH | 0   | 11  | 2   | 1   | 5.5   |
| 0.949237688 BH | 0   | 11  | 2   | 1   | 5.5   |
| 0.949237688 BH | 0   | 11  | 3   | 6   | 5.5   |
| 0.949237688 BH | 2   | 48  | 3   | 13  | 25    |
| 0.949237688 BH | 6   | 5   | 10  | 4   | 5.5   |
| 0.949237688 BH | 0   | 12  | 2   | 1   | 6     |
| 0.949237688 BH | 0   | 11  | 1   | 2   | 5.5   |
| 0.949237688 BH | 0   | 12  | 2   | 1   | 6     |
| 0.949237688 BH | 0   | 11  | 1   | 2   | 5.5   |
| 0.949237688 BH | 0   | 12  | 2   | 1   | 6     |
| 0.949237688 BH | 0   | 12  | 2   | 1   | 6     |
| 0.949237688 BH | 0   | 12  | 2   | 1   | 6     |
| 0.949237688 BH | 0   | 11  | 1   | 2   | 5.5   |
| 0.949237688 BH | 2   | 20  | 12  | 5   | 11    |
| 0.949237688 BH | 4   | 93  | 49  | 19  | 48.5  |
| 0.949237688 BH | 6   | 25  | 13  | 12  | 15.5  |
| 0.949237688 BH | 9   | 34  | 11  | 7   | 21.5  |
| 0.949237688 BH | 11  | 30  | 7   | 10  | 20.5  |
| 0.949237688 BH | 9   | 34  | 10  | 8   | 21.5  |
| 0.949237688 BH | 0   | 12  | 1   | 2   | 6     |
| 0.949237688 BH | 0   | 12  | 1   | 2   | 6     |
| 0.949237688 BH | 7   | 34  | 25  | 8   | 20.5  |
| 0.949237688 BH | 11  | 36  | 20  | 16  | 23.5  |
| 0.949335573 BH | 55  | 222 | 60  | 59  | 138.5 |
| 0.949335573 BH | 5   | 14  | 12  | 6   | 9.5   |

|                |     |     |     |     |       |
|----------------|-----|-----|-----|-----|-------|
| 0.949335573 BH | 773 | 832 | 735 | 729 | 802.5 |
| 0.949699132 BH | 57  | 68  | 46  | 23  | 62.5  |
| 0.94998135 BH  | 13  | 85  | 36  | 32  | 49    |
| 0.950029866 BH | 43  | 568 | 82  | 138 | 305.5 |
| 0.95012456 BH  | 13  | 35  | 12  | 9   | 24    |
| 0.95012456 BH  | 5   | 61  | 6   | 16  | 33    |
| 0.950166001 BH | 15  | 5   | 28  | 0   | 10    |
| 0.950525832 BH | 13  | 316 | 67  | 51  | 164.5 |
| 0.950680681 BH | 5   | 34  | 9   | 5   | 19.5  |
| 0.950680681 BH | 43  | 229 | 85  | 102 | 136   |
| 0.95078845 BH  | 32  | 67  | 35  | 14  | 49.5  |
| 0.95081994 BH  | 8   | 18  | 11  | 1   | 13    |
| 0.950822314 BH | 3   | 8   | 7   | 3   | 5.5   |
| 0.951308849 BH | 2   | 14  | 11  | 3   | 8     |
| 0.951308849 BH | 7   | 14  | 8   | 1   | 10.5  |
| 0.951308849 BH | 7   | 20  | 23  | 2   | 13.5  |
| 0.951308849 BH | 3   | 36  | 11  | 3   | 19.5  |
| 0.951308849 BH | 6   | 92  | 7   | 26  | 49    |
| 0.951308849 BH | 4   | 42  | 10  | 7   | 23    |
| 0.951308849 BH | 0   | 16  | 10  | 3   | 8     |
| 0.951308849 BH | 1   | 16  | 12  | 1   | 8.5   |
| 0.951308849 BH | 3   | 64  | 10  | 13  | 33.5  |
| 0.951541416 BH | 1   | 35  | 12  | 0   | 18    |
| 0.951541416 BH | 13  | 23  | 26  | 8   | 18    |
| 0.951541416 BH | 3   | 24  | 8   | 12  | 13.5  |
| 0.951541416 BH | 2   | 9   | 4   | 6   | 5.5   |
| 0.951541416 BH | 3   | 14  | 3   | 3   | 8.5   |
| 0.951541416 BH | 3   | 15  | 3   | 3   | 9     |
| 0.951614279 BH | 2   | 30  | 8   | 4   | 16    |
| 0.951641797 BH | 3   | 19  | 9   | 8   | 11    |
| 0.952076019 BH | 2   | 24  | 4   | 4   | 13    |
| 0.952076019 BH | 4   | 64  | 11  | 13  | 34    |
| 0.952076019 BH | 2   | 10  | 7   | 3   | 6     |
| 0.952076019 BH | 3   | 15  | 4   | 2   | 9     |
| 0.95230496 BH  | 1   | 22  | 8   | 8   | 11.5  |
| 0.952694663 BH | 0   | 19  | 2   | 3   | 9.5   |
| 0.952848815 BH | 5   | 11  | 5   | 1   | 8     |
| 0.952848815 BH | 5   | 11  | 5   | 1   | 8     |
| 0.953231838 BH | 1   | 23  | 8   | 8   | 12    |
| 0.95356486 BH  | 4   | 13  | 5   | 1   | 8.5   |
| 0.95356486 BH  | 1   | 16  | 5   | 8   | 8.5   |
| 0.95356486 BH  | 2   | 24  | 3   | 5   | 13    |
| 0.95356486 BH  | 9   | 68  | 31  | 24  | 38.5  |
| 0.954116477 BH | 7   | 31  | 9   | 6   | 19    |
| 0.954116477 BH | 13  | 28  | 8   | 10  | 20.5  |
| 0.954116477 BH | 13  | 32  | 19  | 3   | 22.5  |
| 0.954116477 BH | 1   | 10  | 5   | 5   | 5.5   |

|                |     |     |     |     |       |
|----------------|-----|-----|-----|-----|-------|
| 0.954116477 BH | 1   | 10  | 5   | 5   | 5.5   |
| 0.954116477 BH | 3   | 13  | 2   | 10  | 8     |
| 0.954135457 BH | 3   | 18  | 6   | 11  | 10.5  |
| 0.954135457 BH | 2   | 17  | 4   | 2   | 9.5   |
| 0.954135457 BH | 2   | 16  | 5   | 2   | 9     |
| 0.954135457 BH | 2   | 17  | 4   | 2   | 9.5   |
| 0.954135457 BH | 2   | 17  | 4   | 2   | 9.5   |
| 0.954135457 BH | 2   | 17  | 3   | 3   | 9.5   |
| 0.954135457 BH | 2   | 17  | 4   | 2   | 9.5   |
| 0.954135457 BH | 2   | 17  | 3   | 3   | 9.5   |
| 0.954135457 BH | 1   | 11  | 5   | 5   | 6     |
| 0.954135457 BH | 160 | 411 | 225 | 214 | 285.5 |
| 0.954135457 BH | 22  | 25  | 31  | 15  | 23.5  |
| 0.954135457 BH | 0   | 19  | 5   | 1   | 9.5   |
| 0.954135457 BH | 16  | 54  | 15  | 16  | 35    |
| 0.954135457 BH | 10  | 11  | 4   | 15  | 10.5  |
| 0.954135457 BH | 5   | 20  | 5   | 4   | 12.5  |
| 0.954135457 BH | 21  | 73  | 51  | 23  | 47    |
| 0.954135457 BH | 1   | 11  | 7   | 3   | 6     |
| 0.954135457 BH | 14  | 23  | 16  | 3   | 18.5  |
| 0.954135457 BH | 15  | 15  | 10  | 5   | 15    |
| 0.954135457 BH | 6   | 34  | 9   | 6   | 20    |
| 0.954135457 BH | 8   | 36  | 23  | 11  | 22    |
| 0.954135457 BH | 37  | 53  | 28  | 19  | 45    |
| 0.954135457 BH | 26  | 193 | 56  | 33  | 109.5 |
| 0.95428613 BH  | 51  | 136 | 53  | 35  | 93.5  |
| 0.95428613 BH  | 20  | 5   | 20  | 11  | 12.5  |
| 0.954894042 BH | 15  | 22  | 16  | 3   | 18.5  |
| 0.955084411 BH | 2   | 32  | 9   | 14  | 17    |
| 0.955942885 BH | 9   | 7   | 14  | 4   | 8     |
| 0.956004146 BH | 11  | 11  | 16  | 6   | 11    |
| 0.956496384 BH | 1   | 33  | 6   | 5   | 17    |
| 0.956496384 BH | 24  | 39  | 17  | 15  | 31.5  |
| 0.956496384 BH | 7   | 6   | 7   | 7   | 6.5   |
| 0.956496384 BH | 10  | 10  | 6   | 3   | 10    |
| 0.956500258 BH | 15  | 119 | 24  | 28  | 67    |
| 0.956700213 BH | 9   | 47  | 25  | 17  | 28    |
| 0.957171168 BH | 18  | 34  | 18  | 8   | 26    |
| 0.957354898 BH | 3   | 14  | 11  | 4   | 8.5   |
| 0.957969286 BH | 2   | 16  | 6   | 1   | 9     |
| 0.957969286 BH | 22  | 19  | 31  | 11  | 20.5  |
| 0.958304016 BH | 4   | 11  | 12  | 3   | 7.5   |
| 0.958304016 BH | 7   | 20  | 10  | 12  | 13.5  |
| 0.958488214 BH | 1   | 18  | 3   | 3   | 9.5   |
| 0.958488214 BH | 1   | 18  | 3   | 3   | 9.5   |
| 0.958488214 BH | 10  | 21  | 14  | 12  | 15.5  |
| 0.958488214 BH | 45  | 164 | 38  | 53  | 104.5 |

|                |    |     |     |    |       |
|----------------|----|-----|-----|----|-------|
| 0.958488214 BH | 7  | 40  | 13  | 6  | 23.5  |
| 0.958488214 BH | 42 | 122 | 52  | 26 | 82    |
| 0.958488214 BH | 68 | 146 | 101 | 72 | 107   |
| 0.958488214 BH | 9  | 50  | 48  | 1  | 29.5  |
| 0.958488214 BH | 4  | 38  | 13  | 15 | 21    |
| 0.958488214 BH | 1  | 18  | 5   | 2  | 9.5   |
| 0.958488214 BH | 1  | 19  | 3   | 3  | 10    |
| 0.958488214 BH | 1  | 18  | 5   | 2  | 9.5   |
| 0.958488214 BH | 1  | 19  | 4   | 2  | 10    |
| 0.95904128 BH  | 3  | 23  | 4   | 5  | 13    |
| 0.95904128 BH  | 3  | 13  | 12  | 3  | 8     |
| 0.959769948 BH | 5  | 28  | 7   | 6  | 16.5  |
| 0.959892582 BH | 20 | 41  | 16  | 13 | 30.5  |
| 0.96003316 BH  | 65 | 61  | 30  | 39 | 63    |
| 0.960040057 BH | 33 | 111 | 103 | 15 | 72    |
| 0.960040057 BH | 1  | 18  | 2   | 4  | 9.5   |
| 0.960143361 BH | 8  | 31  | 11  | 5  | 19.5  |
| 0.960291999 BH | 13 | 53  | 18  | 30 | 33    |
| 0.960335578 BH | 19 | 36  | 35  | 13 | 27.5  |
| 0.960335578 BH | 2  | 9   | 2   | 2  | 5.5   |
| 0.960335578 BH | 3  | 8   | 3   | 1  | 5.5   |
| 0.960335578 BH | 11 | 7   | 7   | 3  | 9     |
| 0.960509196 BH | 14 | 60  | 29  | 25 | 37    |
| 0.960916591 BH | 7  | 216 | 49  | 32 | 111.5 |
| 0.960916591 BH | 3  | 46  | 9   | 9  | 24.5  |
| 0.960916591 BH | 6  | 54  | 39  | 6  | 30    |
| 0.960916591 BH | 3  | 23  | 3   | 6  | 13    |
| 0.960916591 BH | 0  | 23  | 10  | 7  | 11.5  |
| 0.961208619 BH | 2  | 9   | 3   | 1  | 5.5   |
| 0.961208619 BH | 2  | 9   | 3   | 1  | 5.5   |
| 0.961208619 BH | 30 | 47  | 24  | 15 | 38.5  |
| 0.961208619 BH | 0  | 13  | 6   | 4  | 6.5   |
| 0.961208619 BH | 1  | 19  | 5   | 1  | 10    |
| 0.961208619 BH | 5  | 10  | 13  | 2  | 7.5   |
| 0.961208619 BH | 7  | 85  | 9   | 23 | 46    |
| 0.961208619 BH | 2  | 10  | 3   | 1  | 6     |
| 0.961208619 BH | 2  | 10  | 1   | 2  | 6     |
| 0.961208619 BH | 2  | 10  | 3   | 1  | 6     |
| 0.961208619 BH | 23 | 21  | 22  | 3  | 22    |
| 0.961208619 BH | 8  | 19  | 18  | 5  | 13.5  |
| 0.961208619 BH | 32 | 2   | 35  | 12 | 17    |
| 0.961208619 BH | 0  | 13  | 5   | 5  | 6.5   |
| 0.961208619 BH | 6  | 82  | 17  | 15 | 44    |
| 0.961208619 BH | 4  | 38  | 23  | 7  | 21    |
| 0.961208619 BH | 0  | 25  | 8   | 8  | 12.5  |
| 0.961208619 BH | 5  | 12  | 4   | 3  | 8.5   |
| 0.961208619 BH | 5  | 12  | 4   | 3  | 8.5   |

|                |     |     |     |     |       |
|----------------|-----|-----|-----|-----|-------|
| 0.961208619 BH | 8   | 31  | 25  | 6   | 19.5  |
| 0.961240375 BH | 43  | 38  | 38  | 10  | 40.5  |
| 0.961467694 BH | 7   | 42  | 11  | 8   | 24.5  |
| 0.961467694 BH | 0   | 14  | 6   | 4   | 7     |
| 0.961467694 BH | 11  | 51  | 13  | 13  | 31    |
| 0.961467694 BH | 18  | 69  | 34  | 29  | 43.5  |
| 0.961467694 BH | 5   | 28  | 10  | 3   | 16.5  |
| 0.961467694 BH | 3   | 39  | 11  | 5   | 21    |
| 0.961467694 BH | 169 | 25  | 139 | 0   | 97    |
| 0.961467694 BH | 5   | 11  | 9   | 6   | 8     |
| 0.961467694 BH | 1   | 11  | 2   | 2   | 6     |
| 0.961467694 BH | 1   | 11  | 2   | 2   | 6     |
| 0.961467694 BH | 1   | 11  | 2   | 2   | 6     |
| 0.961467694 BH | 12  | 22  | 14  | 3   | 17    |
| 0.961467694 BH | 5   | 12  | 5   | 2   | 8.5   |
| 0.961467694 BH | 5   | 12  | 5   | 2   | 8.5   |
| 0.961467694 BH | 4   | 15  | 4   | 3   | 9.5   |
| 0.961467694 BH | 2   | 26  | 6   | 3   | 14    |
| 0.961467694 BH | 10  | 7   | 14  | 5   | 8.5   |
| 0.961515223 BH | 31  | 55  | 46  | 28  | 43    |
| 0.961515223 BH | 13  | 31  | 12  | 8   | 22    |
| 0.961515223 BH | 4   | 13  | 9   | 6   | 8.5   |
| 0.961515223 BH | 8   | 12  | 11  | 8   | 10    |
| 0.961515223 BH | 9   | 21  | 7   | 7   | 15    |
| 0.961523996 BH | 1   | 11  | 1   | 8   | 6     |
| 0.961572445 BH | 2   | 10  | 6   | 5   | 6     |
| 0.961572445 BH | 2   | 23  | 9   | 9   | 12.5  |
| 0.961572445 BH | 1   | 11  | 3   | 1   | 6     |
| 0.961572445 BH | 1   | 11  | 3   | 1   | 6     |
| 0.961572445 BH | 8   | 37  | 9   | 23  | 22.5  |
| 0.961572445 BH | 9   | 2   | 6   | 1   | 5.5   |
| 0.961572445 BH | 7   | 25  | 7   | 7   | 16    |
| 0.961572445 BH | 3   | 16  | 4   | 3   | 9.5   |
| 0.961572445 BH | 2   | 11  | 7   | 4   | 6.5   |
| 0.961572445 BH | 7   | 8   | 5   | 2   | 7.5   |
| 0.961572445 BH | 3   | 16  | 4   | 3   | 9.5   |
| 0.961572445 BH | 2   | 25  | 3   | 6   | 13.5  |
| 0.961572445 BH | 2   | 26  | 3   | 6   | 14    |
| 0.961572445 BH | 12  | 9   | 17  | 6   | 10.5  |
| 0.961572445 BH | 78  | 92  | 108 | 49  | 85    |
| 0.961572445 BH | 6   | 58  | 15  | 28  | 32    |
| 0.961840284 BH | 5   | 21  | 6   | 4   | 13    |
| 0.961861376 BH | 5   | 20  | 12  | 7   | 12.5  |
| 0.961861376 BH | 9   | 79  | 24  | 11  | 44    |
| 0.961861376 BH | 3   | 17  | 4   | 3   | 10    |
| 0.962320468 BH | 9   | 18  | 17  | 7   | 13.5  |
| 0.962320468 BH | 421 | 830 | 352 | 612 | 625.5 |



|                |      |      |     |     |        |
|----------------|------|------|-----|-----|--------|
| 0.962320468 BH | 8    | 48   | 17  | 7   | 28     |
| 0.962320468 BH | 5    | 5    | 8   | 3   | 5      |
| 0.962320468 BH | 3    | 16   | 5   | 2   | 9.5    |
| 0.962320468 BH | 3    | 16   | 5   | 2   | 9.5    |
| 0.962530688 BH | 9    | 90   | 36  | 29  | 49.5   |
| 0.962530688 BH | 2    | 41   | 8   | 7   | 21.5   |
| 0.962530688 BH | 8    | 33   | 7   | 9   | 20.5   |
| 0.962530688 BH | 5    | 21   | 8   | 3   | 13     |
| 0.962530688 BH | 4    | 14   | 11  | 4   | 9      |
| 0.962530688 BH | 26   | 137  | 58  | 54  | 81.5   |
| 0.962530688 BH | 3    | 17   | 5   | 2   | 10     |
| 0.962530688 BH | 4    | 54   | 6   | 14  | 29     |
| 0.962530688 BH | 53   | 1528 | 387 | 204 | 790.5  |
| 0.962708018 BH | 13   | 2    | 6   | 14  | 7.5    |
| 0.962980113 BH | 71   | 134  | 43  | 58  | 102.5  |
| 0.963188614 BH | 6    | 23   | 17  | 7   | 14.5   |
| 0.963188614 BH | 8    | 4    | 7   | 0   | 6      |
| 0.963188614 BH | 83   | 96   | 49  | 50  | 89.5   |
| 0.963188614 BH | 538  | 634  | 414 | 593 | 586    |
| 0.963188614 BH | 182  | 554  | 307 | 238 | 368    |
| 0.963188614 BH | 8    | 35   | 22  | 10  | 21.5   |
| 0.963188614 BH | 1    | 12   | 6   | 5   | 6.5    |
| 0.963188614 BH | 8    | 6    | 10  | 5   | 7      |
| 0.963188614 BH | 10   | 28   | 14  | 4   | 19     |
| 0.963188614 BH | 6    | 36   | 9   | 8   | 21     |
| 0.963188614 BH | 11   | 29   | 17  | 15  | 20     |
| 0.963188614 BH | 7    | 55   | 14  | 26  | 31     |
| 0.963188614 BH | 20   | 45   | 20  | 11  | 32.5   |
| 0.963188614 BH | 1    | 27   | 6   | 4   | 14     |
| 0.963188614 BH | 6    | 28   | 10  | 4   | 17     |
| 0.963188614 BH | 2    | 9    | 11  | 0   | 5.5    |
| 0.963473558 BH | 4    | 14   | 7   | 1   | 9      |
| 0.963473558 BH | 1208 | 953  | 631 | 661 | 1080.5 |
| 0.963473558 BH | 2    | 17   | 9   | 6   | 9.5    |
| 0.963473558 BH | 36   | 180  | 19  | 122 | 108    |
| 0.963473558 BH | 24   | 75   | 36  | 37  | 49.5   |
| 0.963473558 BH | 19   | 29   | 13  | 11  | 24     |
| 0.963473558 BH | 1    | 28   | 5   | 4   | 14.5   |
| 0.963473558 BH | 7    | 29   | 21  | 7   | 18     |
| 0.963473558 BH | 8    | 41   | 15  | 6   | 24.5   |
| 0.963473558 BH | 2    | 18   | 5   | 2   | 10     |
| 0.963473558 BH | 2    | 18   | 5   | 2   | 10     |
| 0.963473558 BH | 37   | 70   | 58  | 31  | 53.5   |
| 0.963473558 BH | 12   | 34   | 11  | 10  | 23     |
| 0.963473558 BH | 78   | 205  | 94  | 46  | 141.5  |
| 0.963473558 BH | 8    | 50   | 14  | 10  | 29     |
| 0.963473558 BH | 0    | 21   | 2   | 4   | 10.5   |

|                |     |     |    |    |      |
|----------------|-----|-----|----|----|------|
| 0.963473558 BH | 42  | 90  | 42 | 25 | 66   |
| 0.963473558 BH | 8   | 12  | 16 | 4  | 10   |
| 0.963473558 BH | 25  | 12  | 12 | 11 | 18.5 |
| 0.963473558 BH | 3   | 17  | 6  | 1  | 10   |
| 0.963473558 BH | 9   | 59  | 17 | 28 | 34   |
| 0.963473558 BH | 3   | 26  | 5  | 5  | 14.5 |
| 0.963473558 BH | 3   | 26  | 5  | 5  | 14.5 |
| 0.963473558 BH | 3   | 25  | 5  | 5  | 14   |
| 0.963473558 BH | 8   | 152 | 33 | 27 | 80   |
| 0.963473558 BH | 16  | 27  | 14 | 7  | 21.5 |
| 0.963473558 BH | 11  | 22  | 19 | 10 | 16.5 |
| 0.963543001 BH | 1   | 11  | 4  | 0  | 6    |
| 0.963551939 BH | 3   | 24  | 12 | 7  | 13.5 |
| 0.963551939 BH | 58  | 228 | 58 | 68 | 143  |
| 0.963571686 BH | 63  | 101 | 57 | 31 | 82   |
| 0.963571686 BH | 1   | 26  | 10 | 8  | 13.5 |
| 0.963571686 BH | 7   | 43  | 8  | 12 | 25   |
| 0.963571686 BH | 0   | 13  | 2  | 2  | 6.5  |
| 0.963571686 BH | 0   | 13  | 2  | 2  | 6.5  |
| 0.963571686 BH | 11  | 16  | 15 | 9  | 13.5 |
| 0.963571686 BH | 2   | 26  | 9  | 1  | 14   |
| 0.963681396 BH | 22  | 52  | 35 | 24 | 37   |
| 0.963771776 BH | 18  | 6   | 15 | 1  | 12   |
| 0.964049792 BH | 25  | 70  | 14 | 28 | 47.5 |
| 0.964320312 BH | 9   | 24  | 9  | 5  | 16.5 |
| 0.964320312 BH | 4   | 20  | 16 | 4  | 12   |
| 0.964320312 BH | 0   | 13  | 3  | 1  | 6.5  |
| 0.964320312 BH | 0   | 13  | 3  | 1  | 6.5  |
| 0.964320312 BH | 0   | 13  | 3  | 1  | 6.5  |
| 0.964320312 BH | 0   | 13  | 3  | 1  | 6.5  |
| 0.965053635 BH | 11  | 19  | 6  | 8  | 15   |
| 0.965053635 BH | 5   | 20  | 11 | 9  | 12.5 |
| 0.965067534 BH | 18  | 31  | 19 | 6  | 24.5 |
| 0.965067534 BH | 14  | 25  | 19 | 14 | 19.5 |
| 0.965067534 BH | 39  | 110 | 45 | 26 | 74.5 |
| 0.965067534 BH | 111 | 149 | 83 | 61 | 130  |
| 0.965067534 BH | 9   | 5   | 6  | 1  | 7    |
| 0.965067534 BH | 1   | 20  | 4  | 3  | 10.5 |
| 0.965067534 BH | 0   | 14  | 1  | 2  | 7    |
| 0.965067534 BH | 0   | 14  | 1  | 2  | 7    |
| 0.965129766 BH | 8   | 35  | 12 | 6  | 21.5 |
| 0.965129766 BH | 0   | 14  | 1  | 8  | 7    |
| 0.965129766 BH | 1   | 51  | 12 | 6  | 26   |
| 0.965138986 BH | 7   | 3   | 15 | 0  | 5    |
| 0.965138986 BH | 19  | 107 | 40 | 45 | 63   |
| 0.965257571 BH | 0   | 13  | 1  | 3  | 6.5  |
| 0.965257571 BH | 7   | 18  | 8  | 4  | 12.5 |

|                |      |     |      |     |       |
|----------------|------|-----|------|-----|-------|
| 0.965257571 BH | 8    | 16  | 5    | 6   | 12    |
| 0.965257571 BH | 41   | 45  | 58   | 23  | 43    |
| 0.965273049 BH | 33   | 83  | 45   | 44  | 58    |
| 0.965273049 BH | 10   | 21  | 11   | 4   | 15.5  |
| 0.965273049 BH | 9    | 23  | 11   | 4   | 16    |
| 0.965358029 BH | 2    | 28  | 5    | 5   | 15    |
| 0.965358029 BH | 2    | 28  | 6    | 4   | 15    |
| 0.966225859 BH | 235  | 245 | 192  | 232 | 240   |
| 0.966225859 BH | 12   | 36  | 11   | 11  | 24    |
| 0.966225859 BH | 11   | 44  | 21   | 4   | 27.5  |
| 0.966225859 BH | 1    | 21  | 5    | 2   | 11    |
| 0.966283426 BH | 378  | 82  | 261  | 78  | 230   |
| 0.966564601 BH | 31   | 57  | 52   | 22  | 44    |
| 0.966564601 BH | 10   | 30  | 15   | 4   | 20    |
| 0.966564601 BH | 6    | 12  | 5    | 3   | 9     |
| 0.966564601 BH | 41   | 111 | 46   | 66  | 76    |
| 0.966564601 BH | 1    | 20  | 10   | 5   | 10.5  |
| 0.966575132 BH | 5    | 35  | 15   | 13  | 20    |
| 0.966575132 BH | 18   | 13  | 26   | 7   | 15.5  |
| 0.966575132 BH | 14   | 40  | 28   | 15  | 27    |
| 0.966575132 BH | 9    | 62  | 20   | 27  | 35.5  |
| 0.966773077 BH | 8    | 57  | 31   | 15  | 32.5  |
| 0.966859357 BH | 4    | 8   | 8    | 4   | 6     |
| 0.966859357 BH | 10   | 21  | 12   | 3   | 15.5  |
| 0.967055294 BH | 35   | 65  | 31   | 20  | 50    |
| 0.967055294 BH | 25   | 38  | 22   | 11  | 31.5  |
| 0.967055294 BH | 85   | 627 | 97   | 342 | 356   |
| 0.967055294 BH | 0    | 14  | 6    | 5   | 7     |
| 0.967055294 BH | 4    | 15  | 7    | 0   | 9.5   |
| 0.967055294 BH | 2    | 27  | 3    | 7   | 14.5  |
| 0.967055294 BH | 8    | 26  | 12   | 3   | 17    |
| 0.967055294 BH | 5    | 32  | 7    | 7   | 18.5  |
| 0.967055294 BH | 5    | 32  | 7    | 7   | 18.5  |
| 0.967230495 BH | 4    | 16  | 12   | 4   | 10    |
| 0.967230495 BH | 4    | 25  | 6    | 5   | 14.5  |
| 0.967230495 BH | 14   | 23  | 12   | 7   | 18.5  |
| 0.967490445 BH | 5    | 6   | 8    | 4   | 5.5   |
| 0.968145118 BH | 10   | 41  | 9    | 12  | 25.5  |
| 0.968145118 BH | 1245 | 771 | 1333 | 706 | 1008  |
| 0.968145118 BH | 0    | 15  | 7    | 4   | 7.5   |
| 0.968145118 BH | 7    | 0   | 6    | 5   | 3.5   |
| 0.968461078 BH | 60   | 22  | 71   | 23  | 41    |
| 0.968461078 BH | 81   | 189 | 136  | 75  | 135   |
| 0.968565668 BH | 0    | 13  | 4    | 0   | 6.5   |
| 0.968655407 BH | 5    | 296 | 28   | 71  | 150.5 |
| 0.968655407 BH | 2    | 12  | 8    | 4   | 7     |
| 0.96891178 BH  | 48   | 127 | 105  | 34  | 87.5  |

|                |     |     |     |     |       |
|----------------|-----|-----|-----|-----|-------|
| 0.969028278 BH | 4   | 34  | 7   | 7   | 19    |
| 0.969028278 BH | 9   | 15  | 10  | 2   | 12    |
| 0.969028278 BH | 2   | 14  | 5   | 6   | 8     |
| 0.969028278 BH | 8   | 8   | 6   | 2   | 8     |
| 0.969028278 BH | 33  | 46  | 36  | 8   | 39.5  |
| 0.969028278 BH | 9   | 44  | 23  | 1   | 26.5  |
| 0.969028278 BH | 0   | 14  | 4   | 0   | 7     |
| 0.969028278 BH | 0   | 14  | 4   | 0   | 7     |
| 0.969028278 BH | 0   | 14  | 0   | 3   | 7     |
| 0.969475469 BH | 3   | 27  | 6   | 5   | 15    |
| 0.969475469 BH | 7   | 19  | 14  | 7   | 13    |
| 0.969543708 BH | 10  | 32  | 14  | 5   | 21    |
| 0.969543708 BH | 4   | 8   | 3   | 1   | 6     |
| 0.969543708 BH | 5   | 6   | 2   | 2   | 5.5   |
| 0.969543708 BH | 3   | 10  | 3   | 1   | 6.5   |
| 0.969543708 BH | 3   | 10  | 3   | 1   | 6.5   |
| 0.969543708 BH | 8   | 7   | 0   | 6   | 7.5   |
| 0.969543708 BH | 3   | 33  | 15  | 9   | 18    |
| 0.969543708 BH | 0   | 13  | 0   | 4   | 6.5   |
| 0.969543708 BH | 7   | 30  | 9   | 6   | 18.5  |
| 0.969543708 BH | 7   | 30  | 9   | 6   | 18.5  |
| 0.969687682 BH | 26  | 68  | 22  | 22  | 47    |
| 0.969687682 BH | 5   | 6   | 3   | 1   | 5.5   |
| 0.969687682 BH | 8   | 14  | 18  | 3   | 11    |
| 0.969687682 BH | 5   | 7   | 10  | 2   | 6     |
| 0.969687682 BH | 5   | 6   | 3   | 8   | 5.5   |
| 0.969687682 BH | 5   | 58  | 12  | 12  | 31.5  |
| 0.969687682 BH | 6   | 21  | 15  | 6   | 13.5  |
| 0.969687682 BH | 3   | 9   | 4   | 1   | 6     |
| 0.969687682 BH | 2   | 12  | 2   | 2   | 7     |
| 0.969687682 BH | 3   | 9   | 4   | 1   | 6     |
| 0.969687682 BH | 6   | 60  | 0   | 22  | 33    |
| 0.969723897 BH | 5   | 50  | 8   | 12  | 27.5  |
| 0.969736713 BH | 2   | 20  | 4   | 4   | 11    |
| 0.969736713 BH | 2   | 20  | 4   | 4   | 11    |
| 0.969736713 BH | 2   | 20  | 4   | 4   | 11    |
| 0.969736713 BH | 34  | 69  | 36  | 18  | 51.5  |
| 0.969736713 BH | 3   | 10  | 1   | 3   | 6.5   |
| 0.969736713 BH | 3   | 10  | 1   | 3   | 6.5   |
| 0.969887164 BH | 1   | 20  | 3   | 11  | 10.5  |
| 0.970129756 BH | 4   | 16  | 7   | 1   | 10    |
| 0.970129756 BH | 1   | 14  | 7   | 5   | 7.5   |
| 0.970418592 BH | 2   | 46  | 8   | 8   | 24    |
| 0.970418592 BH | 840 | 821 | 776 | 707 | 830.5 |
| 0.970418592 BH | 2   | 18  | 8   | 0   | 10    |
| 0.970418592 BH | 0   | 22  | 4   | 3   | 11    |
| 0.970418592 BH | 4   | 6   | 12  | 0   | 5     |

|                |     |      |     |     |       |
|----------------|-----|------|-----|-----|-------|
| 0.97043411 BH  | 6   | 57   | 17  | 23  | 31.5  |
| 0.97043411 BH  | 2   | 11   | 4   | 1   | 6.5   |
| 0.970449693 BH | 3   | 36   | 6   | 8   | 19.5  |
| 0.970449693 BH | 43  | 91   | 45  | 25  | 67    |
| 0.970643015 BH | 11  | 15   | 4   | 18  | 13    |
| 0.971195305 BH | 4   | 32   | 11  | 13  | 18    |
| 0.971295281 BH | 123 | 839  | 136 | 254 | 481   |
| 0.97169585 BH  | 2   | 21   | 6   | 2   | 11.5  |
| 0.97169585 BH  | 2   | 21   | 6   | 2   | 11.5  |
| 0.971731899 BH | 0   | 28   | 14  | 5   | 14    |
| 0.971731899 BH | 20  | 32   | 31  | 14  | 26    |
| 0.971815974 BH | 34  | 110  | 59  | 45  | 72    |
| 0.971815974 BH | 220 | 70   | 144 | 62  | 145   |
| 0.971815974 BH | 1   | 13   | 3   | 2   | 7     |
| 0.972095314 BH | 32  | 1028 | 110 | 261 | 530   |
| 0.972271276 BH | 111 | 118  | 58  | 72  | 114.5 |
| 0.972271276 BH | 1   | 14   | 2   | 2   | 7.5   |
| 0.972271276 BH | 1   | 14   | 2   | 2   | 7.5   |
| 0.972680079 BH | 6   | 23   | 4   | 7   | 14.5  |
| 0.972763593 BH | 129 | 154  | 103 | 62  | 141.5 |
| 0.973023127 BH | 2   | 29   | 4   | 7   | 15.5  |
| 0.973055406 BH | 28  | 313  | 87  | 121 | 170.5 |
| 0.973055406 BH | 40  | 313  | 70  | 148 | 176.5 |
| 0.973055406 BH | 3   | 19   | 11  | 6   | 11    |
| 0.973055406 BH | 1   | 14   | 3   | 1   | 7.5   |
| 0.973055406 BH | 1   | 14   | 3   | 1   | 7.5   |
| 0.973055406 BH | 1   | 13   | 4   | 1   | 7     |
| 0.973319487 BH | 1   | 22   | 11  | 5   | 11.5  |
| 0.973772213 BH | 10  | 25   | 11  | 5   | 17.5  |
| 0.974148543 BH | 6   | 14   | 4   | 4   | 10    |
| 0.974148543 BH | 1   | 22   | 5   | 3   | 11.5  |
| 0.974148543 BH | 1   | 14   | 1   | 3   | 7.5   |
| 0.974148543 BH | 9   | 243  | 100 | 59  | 126   |
| 0.974148543 BH | 101 | 78   | 81  | 32  | 89.5  |
| 0.974148543 BH | 4   | 26   | 9   | 4   | 15    |
| 0.974148543 BH | 12  | 34   | 24  | 12  | 23    |
| 0.974148543 BH | 10  | 95   | 30  | 37  | 52.5  |
| 0.974148543 BH | 0   | 38   | 5   | 8   | 19    |
| 0.974444253 BH | 4   | 10   | 9   | 4   | 7     |
| 0.974781487 BH | 3   | 19   | 6   | 10  | 11    |
| 0.975168869 BH | 3   | 13   | 6   | 6   | 8     |
| 0.975168869 BH | 0   | 25   | 18  | 0   | 12.5  |
| 0.9758168 BH   | 9   | 5    | 15  | 2   | 7     |
| 0.9758168 BH   | 3   | 12   | 9   | 4   | 7.5   |
| 0.9758168 BH   | 3   | 11   | 9   | 4   | 7     |
| 0.9758168 BH   | 0   | 22   | 4   | 10  | 11    |
| 0.97588851 BH  | 10  | 36   | 10  | 10  | 23    |

|                |     |     |     |     |       |
|----------------|-----|-----|-----|-----|-------|
| 0.97588851 BH  | 8   | 27  | 12  | 14  | 17.5  |
| 0.976079768 BH | 12  | 148 | 25  | 36  | 80    |
| 0.976336872 BH | 5   | 15  | 7   | 2   | 10    |
| 0.97682141 BH  | 10  | 29  | 25  | 7   | 19.5  |
| 0.976847305 BH | 4   | 34  | 12  | 13  | 19    |
| 0.976847305 BH | 10  | 30  | 14  | 17  | 20    |
| 0.976847305 BH | 10  | 31  | 21  | 11  | 20.5  |
| 0.976847305 BH | 6   | 15  | 9   | 8   | 10.5  |
| 0.976847305 BH | 7   | 13  | 8   | 9   | 10    |
| 0.976958382 BH | 15  | 28  | 28  | 9   | 21.5  |
| 0.977257485 BH | 17  | 146 | 40  | 61  | 81.5  |
| 0.977257485 BH | 2   | 15  | 6   | 6   | 8.5   |
| 0.977257485 BH | 16  | 13  | 11  | 5   | 14.5  |
| 0.977472824 BH | 951 | 196 | 696 | 175 | 573.5 |
| 0.977472824 BH | 4   | 17  | 8   | 0   | 10.5  |
| 0.977472824 BH | 5   | 14  | 9   | 0   | 9.5   |
| 0.977472824 BH | 4   | 17  | 8   | 0   | 10.5  |
| 0.977472824 BH | 7   | 51  | 13  | 10  | 29    |
| 0.977472824 BH | 6   | 6   | 10  | 3   | 6     |
| 0.977472824 BH | 4   | 18  | 7   | 2   | 11    |
| 0.977516954 BH | 11  | 9   | 19  | 3   | 10    |
| 0.97781597 BH  | 4   | 55  | 27  | 12  | 29.5  |
| 0.977960235 BH | 0   | 15  | 3   | 2   | 7.5   |
| 0.978885784 BH | 0   | 17  | 8   | 4   | 8.5   |
| 0.978934442 BH | 39  | 103 | 36  | 66  | 71    |
| 0.979870775 BH | 2   | 14  | 4   | 8   | 8     |
| 0.980046242 BH | 8   | 22  | 25  | 1   | 15    |
| 0.980046242 BH | 1   | 14  | 5   | 0   | 7.5   |
| 0.980306241 BH | 8   | 8   | 9   | 0   | 8     |
| 0.980428411 BH | 18  | 42  | 14  | 15  | 30    |
| 0.980578845 BH | 0   | 16  | 3   | 1   | 8     |
| 0.980612456 BH | 6   | 43  | 13  | 8   | 24.5  |
| 0.980612456 BH | 2   | 40  | 7   | 8   | 21    |
| 0.980710771 BH | 57  | 166 | 113 | 53  | 111.5 |
| 0.981211401 BH | 13  | 42  | 15  | 25  | 27.5  |
| 0.981380953 BH | 13  | 10  | 8   | 5   | 11.5  |
| 0.981380953 BH | 3   | 21  | 8   | 9   | 12    |
| 0.981816128 BH | 585 | 646 | 493 | 554 | 615.5 |
| 0.981816128 BH | 37  | 40  | 33  | 13  | 38.5  |
| 0.981816128 BH | 4   | 28  | 8   | 5   | 16    |
| 0.981816128 BH | 4   | 29  | 8   | 5   | 16.5  |
| 0.981816128 BH | 1   | 16  | 5   | 7   | 8.5   |
| 0.981816128 BH | 1   | 16  | 5   | 7   | 8.5   |
| 0.981816128 BH | 2   | 22  | 3   | 5   | 12    |
| 0.982014109 BH | 24  | 40  | 23  | 11  | 32    |
| 0.982588174 BH | 1   | 16  | 9   | 4   | 8.5   |
| 0.982900848 BH | 9   | 28  | 14  | 4   | 18.5  |

|                |    |     |    |    |      |
|----------------|----|-----|----|----|------|
| 0.983019946 BH | 0  | 25  | 5  | 3  | 12.5 |
| 0.983237073 BH | 2  | 22  | 7  | 2  | 12   |
| 0.983424407 BH | 5  | 11  | 7  | 6  | 8    |
| 0.983431129 BH | 6  | 6   | 3  | 2  | 6    |
| 0.983431129 BH | 69 | 181 | 65 | 59 | 125  |
| 0.983577187 BH | 2  | 30  | 14 | 8  | 16   |
| 0.983577187 BH | 67 | 12  | 24 | 29 | 39.5 |
| 0.983577187 BH | 4  | 10  | 4  | 1  | 7    |
| 0.983577187 BH | 11 | 26  | 9  | 9  | 18.5 |
| 0.983577187 BH | 11 | 27  | 9  | 8  | 19   |
| 0.983577187 BH | 7  | 44  | 11 | 10 | 25.5 |
| 0.983577187 BH | 11 | 35  | 17 | 5  | 23   |
| 0.983577187 BH | 16 | 26  | 11 | 11 | 21   |
| 0.983577187 BH | 2  | 13  | 3  | 2  | 7.5  |
| 0.983577187 BH | 2  | 13  | 3  | 2  | 7.5  |
| 0.983577187 BH | 5  | 17  | 5  | 5  | 11   |
| 0.983577187 BH | 6  | 16  | 4  | 5  | 11   |
| 0.983577187 BH | 5  | 17  | 5  | 5  | 11   |
| 0.983577187 BH | 5  | 18  | 5  | 4  | 11.5 |
| 0.983646468 BH | 9  | 19  | 16 | 8  | 14   |
| 0.983646468 BH | 7  | 24  | 8  | 6  | 15.5 |
| 0.983646468 BH | 2  | 13  | 2  | 3  | 7.5  |
| 0.983646468 BH | 3  | 31  | 8  | 5  | 17   |
| 0.983646468 BH | 2  | 24  | 8  | 9  | 13   |
| 0.983646468 BH | 8  | 11  | 7  | 3  | 9.5  |
| 0.983646468 BH | 3  | 14  | 8  | 5  | 8.5  |
| 0.983646468 BH | 4  | 12  | 10 | 4  | 8    |
| 0.984018313 BH | 1  | 10  | 5  | 3  | 5.5  |
| 0.984018313 BH | 3  | 11  | 5  | 1  | 7    |
| 0.984018313 BH | 5  | 18  | 8  | 10 | 11.5 |
| 0.984145863 BH | 17 | 25  | 15 | 7  | 21   |
| 0.984665124 BH | 8  | 33  | 8  | 9  | 20.5 |
| 0.984718776 BH | 6  | 33  | 9  | 17 | 19.5 |
| 0.984718776 BH | 2  | 22  | 6  | 11 | 12   |
| 0.984718776 BH | 4  | 20  | 6  | 3  | 12   |
| 0.985139878 BH | 1  | 24  | 3  | 5  | 12.5 |
| 0.986161737 BH | 5  | 29  | 7  | 6  | 17   |
| 0.986161737 BH | 3  | 21  | 6  | 4  | 12   |
| 0.986161737 BH | 0  | 15  | 5  | 0  | 7.5  |
| 0.986161737 BH | 4  | 37  | 14 | 13 | 20.5 |
| 0.986161737 BH | 44 | 194 | 55 | 53 | 119  |
| 0.986171813 BH | 14 | 46  | 22 | 21 | 30   |
| 0.986171813 BH | 0  | 15  | 0  | 4  | 7.5  |
| 0.986171813 BH | 0  | 16  | 5  | 0  | 8    |
| 0.986171813 BH | 5  | 29  | 14 | 9  | 17   |
| 0.986171813 BH | 5  | 27  | 16 | 8  | 16   |
| 0.986171813 BH | 2  | 13  | 1  | 4  | 7.5  |

|                |     |     |     |     |       |
|----------------|-----|-----|-----|-----|-------|
| 0.986171813 BH | 2   | 16  | 6   | 7   | 9     |
| 0.986663686 BH | 0   | 16  | 0   | 4   | 8     |
| 0.986663686 BH | 1   | 15  | 3   | 2   | 8     |
| 0.986663686 BH | 1   | 15  | 3   | 2   | 8     |
| 0.98714681 BH  | 14  | 33  | 15  | 8   | 23.5  |
| 0.98714681 BH  | 15  | 30  | 14  | 9   | 22.5  |
| 0.987600733 BH | 10  | 58  | 9   | 19  | 34    |
| 0.987600733 BH | 43  | 146 | 40  | 48  | 94.5  |
| 0.987600733 BH | 790 | 195 | 730 | 377 | 492.5 |
| 0.987600733 BH | 12  | 23  | 20  | 10  | 17.5  |
| 0.987600733 BH | 16  | 29  | 10  | 12  | 22.5  |
| 0.987600733 BH | 7   | 46  | 13  | 9   | 26.5  |
| 0.987600733 BH | 3   | 50  | 8   | 12  | 26.5  |
| 0.987765738 BH | 4   | 29  | 16  | 8   | 16.5  |
| 0.987765738 BH | 9   | 52  | 19  | 8   | 30.5  |
| 0.988211091 BH | 14  | 22  | 9   | 9   | 18    |
| 0.988482029 BH | 14  | 10  | 10  | 4   | 12    |
| 0.988694102 BH | 2   | 23  | 5   | 5   | 12.5  |
| 0.988694102 BH | 2   | 23  | 5   | 5   | 12.5  |
| 0.988694102 BH | 11  | 62  | 29  | 20  | 36.5  |
| 0.988694102 BH | 3   | 12  | 5   | 0   | 7.5   |
| 0.988694102 BH | 3   | 12  | 5   | 0   | 7.5   |
| 0.988694102 BH | 3   | 12  | 5   | 0   | 7.5   |
| 0.989120048 BH | 17  | 59  | 24  | 13  | 38    |
| 0.989120048 BH | 2   | 24  | 4   | 5   | 13    |
| 0.989120048 BH | 37  | 64  | 30  | 47  | 50.5  |
| 0.989271682 BH | 0   | 26  | 11  | 6   | 13    |
| 0.989322875 BH | 8   | 24  | 10  | 5   | 16    |
| 0.989322875 BH | 46  | 50  | 43  | 15  | 48    |
| 0.989322875 BH | 14  | 64  | 31  | 24  | 39    |
| 0.989437366 BH | 2   | 23  | 7   | 3   | 12.5  |
| 0.989558539 BH | 644 | 427 | 707 | 333 | 535.5 |
| 0.989575816 BH | 14  | 44  | 15  | 13  | 29    |
| 0.989580056 BH | 35  | 56  | 34  | 16  | 45.5  |
| 0.990372428 BH | 20  | 77  | 25  | 20  | 48.5  |
| 0.990372428 BH | 9   | 21  | 5   | 9   | 15    |
| 0.990372428 BH | 8   | 13  | 5   | 5   | 10.5  |
| 0.990372428 BH | 5   | 13  | 9   | 5   | 9     |
| 0.990372428 BH | 5   | 12  | 9   | 5   | 8.5   |
| 0.990477974 BH | 13  | 36  | 11  | 12  | 24.5  |
| 0.990477974 BH | 13  | 36  | 15  | 9   | 24.5  |
| 0.990598662 BH | 0   | 11  | 7   | 2   | 5.5   |
| 0.990598662 BH | 29  | 394 | 58  | 104 | 211.5 |
| 0.990598662 BH | 4   | 14  | 9   | 5   | 9     |
| 0.990598662 BH | 17  | 10  | 17  | 1   | 13.5  |
| 0.990598662 BH | 4   | 60  | 16  | 10  | 32    |
| 0.991086466 BH | 8   | 32  | 23  | 7   | 20    |



|                |    |     |    |    |      |
|----------------|----|-----|----|----|------|
| 0.991086466 BH | 2  | 24  | 8  | 2  | 13   |
| 0.991086466 BH | 8  | 13  | 8  | 3  | 10.5 |
| 0.991086466 BH | 18 | 60  | 23 | 14 | 39   |
| 0.991265778 BH | 21 | 54  | 25 | 30 | 37.5 |
| 0.99150417 BH  | 6  | 38  | 12 | 7  | 22   |
| 0.99150417 BH  | 3  | 16  | 7  | 7  | 9.5  |
| 0.99150417 BH  | 5  | 10  | 11 | 4  | 7.5  |
| 0.992049819 BH | 11 | 40  | 10 | 13 | 25.5 |
| 0.992049819 BH | 17 | 89  | 40 | 31 | 53   |
| 0.992049819 BH | 4  | 22  | 5  | 5  | 13   |
| 0.992049819 BH | 13 | 25  | 13 | 7  | 19   |
| 0.992128085 BH | 17 | 23  | 26 | 10 | 20   |
| 0.992331571 BH | 5  | 9   | 3  | 3  | 7    |
| 0.992331571 BH | 3  | 8   | 5  | 4  | 5.5  |
| 0.992433491 BH | 6  | 39  | 7  | 11 | 22.5 |
| 0.992505744 BH | 21 | 57  | 33 | 24 | 39   |
| 0.992703016 BH | 4  | 11  | 4  | 2  | 7.5  |
| 0.992703016 BH | 4  | 11  | 4  | 2  | 7.5  |
| 0.992703016 BH | 2  | 25  | 5  | 12 | 13.5 |
| 0.992703016 BH | 12 | 3   | 7  | 3  | 7.5  |
| 0.992710165 BH | 5  | 12  | 12 | 3  | 8.5  |
| 0.992755137 BH | 3  | 24  | 9  | 10 | 13.5 |
| 0.992919108 BH | 4  | 61  | 8  | 16 | 32.5 |
| 0.992919108 BH | 0  | 11  | 8  | 1  | 5.5  |
| 0.992919108 BH | 11 | 20  | 8  | 7  | 15.5 |
| 0.993174843 BH | 4  | 11  | 2  | 4  | 7.5  |
| 0.993174843 BH | 2  | 9   | 4  | 5  | 5.5  |
| 0.993174843 BH | 35 | 48  | 29 | 18 | 41.5 |
| 0.993174843 BH | 12 | 40  | 13 | 11 | 26   |
| 0.993174843 BH | 74 | 103 | 60 | 42 | 88.5 |
| 0.993174843 BH | 8  | 25  | 10 | 6  | 16.5 |
| 0.993174843 BH | 3  | 24  | 5  | 5  | 13.5 |
| 0.993174843 BH | 5  | 19  | 9  | 2  | 12   |
| 0.993259582 BH | 22 | 98  | 37 | 19 | 60   |
| 0.993259582 BH | 8  | 34  | 23 | 8  | 21   |
| 0.993376027 BH | 11 | 130 | 48 | 11 | 70.5 |
| 0.993518596 BH | 9  | 13  | 10 | 10 | 11   |
| 0.993518596 BH | 2  | 18  | 9  | 5  | 10   |
| 0.993570594 BH | 4  | 42  | 12 | 7  | 23   |
| 0.993570594 BH | 51 | 73  | 47 | 24 | 62   |
| 0.993570594 BH | 17 | 42  | 15 | 14 | 29.5 |
| 0.993570594 BH | 3  | 24  | 4  | 6  | 13.5 |
| 0.993570594 BH | 3  | 24  | 4  | 6  | 13.5 |
| 0.993570594 BH | 2  | 15  | 3  | 3  | 8.5  |
| 0.993570594 BH | 2  | 15  | 3  | 3  | 8.5  |
| 0.993570594 BH | 2  | 15  | 3  | 3  | 8.5  |
| 0.993661295 BH | 17 | 1   | 25 | 3  | 9    |

|                |     |     |     |     |      |
|----------------|-----|-----|-----|-----|------|
| 0.993661295 BH | 8   | 45  | 18  | 17  | 26.5 |
| 0.993661295 BH | 11  | 5   | 18  | 1   | 8    |
| 0.993661295 BH | 5   | 31  | 11  | 13  | 18   |
| 0.993661295 BH | 3   | 13  | 5   | 1   | 8    |
| 0.993661295 BH | 2   | 15  | 4   | 2   | 8.5  |
| 0.993661295 BH | 32  | 94  | 50  | 41  | 63   |
| 0.993661295 BH | 6   | 47  | 15  | 19  | 26.5 |
| 0.994022374 BH | 7   | 26  | 20  | 6   | 16.5 |
| 0.994022374 BH | 6   | 29  | 10  | 6   | 17.5 |
| 0.994022374 BH | 6   | 30  | 7   | 8   | 18   |
| 0.994022374 BH | 1   | 19  | 2   | 10  | 10   |
| 0.994022374 BH | 1   | 25  | 2   | 7   | 13   |
| 0.994022374 BH | 65  | 0   | 52  | 2   | 32.5 |
| 0.994022374 BH | 2   | 15  | 2   | 4   | 8.5  |
| 0.994022374 BH | 9   | 0   | 12  | 1   | 4.5  |
| 0.994022374 BH | 10  | 34  | 10  | 10  | 22   |
| 0.994022374 BH | 2   | 25  | 5   | 5   | 13.5 |
| 0.994022374 BH | 3   | 17  | 3   | 10  | 10   |
| 0.994102929 BH | 4   | 24  | 11  | 9   | 14   |
| 0.994376223 BH | 1   | 10  | 3   | 6   | 5.5  |
| 0.994717033 BH | 0   | 55  | 0   | 17  | 27.5 |
| 0.99472257 BH  | 1   | 11  | 3   | 6   | 6    |
| 0.99472257 BH  | 9   | 47  | 17  | 8   | 28   |
| 0.99472257 BH  | 0   | 21  | 7   | 6   | 10.5 |
| 0.99472257 BH  | 3   | 44  | 11  | 8   | 23.5 |
| 0.99472257 BH  | 8   | 15  | 7   | 4   | 11.5 |
| 0.994779401 BH | 2   | 25  | 4   | 6   | 13.5 |
| 0.995020296 BH | 759 | 929 | 870 | 546 | 844  |
| 0.995179452 BH | 7   | 38  | 21  | 10  | 22.5 |
| 0.995179452 BH | 7   | 9   | 7   | 8   | 8    |
| 0.995210431 BH | 1   | 20  | 7   | 7   | 10.5 |
| 0.995749284 BH | 5   | 21  | 7   | 4   | 13   |
| 0.995749284 BH | 5   | 21  | 5   | 6   | 13   |
| 0.995824488 BH | 8   | 61  | 12  | 30  | 34.5 |
| 0.995838783 BH | 12  | 30  | 16  | 5   | 21   |
| 0.995838783 BH | 13  | 27  | 16  | 5   | 20   |
| 0.996307434 BH | 1   | 17  | 4   | 2   | 9    |
| 0.996307434 BH | 11  | 87  | 41  | 22  | 49   |
| 0.996307434 BH | 7   | 111 | 21  | 26  | 59   |
| 0.996307434 BH | 8   | 37  | 16  | 15  | 22.5 |
| 0.996736616 BH | 2   | 15  | 1   | 5   | 8.5  |
| 0.996892744 BH | 16  | 160 | 60  | 18  | 88   |
| 0.996892744 BH | 4   | 33  | 11  | 5   | 18.5 |
| 0.996892744 BH | 35  | 4   | 6   | 19  | 19.5 |
| 0.996892744 BH | 3   | 18  | 10  | 5   | 10.5 |
| 0.996892744 BH | 4   | 23  | 7   | 4   | 13.5 |
| 0.996892744 BH | 2   | 26  | 9   | 2   | 14   |

|                |     |     |     |     |       |
|----------------|-----|-----|-----|-----|-------|
| 0.997418683 BH | 95  | 68  | 76  | 33  | 81.5  |
| 0.998172398 BH | 52  | 79  | 36  | 37  | 65.5  |
| 0.998172398 BH | 14  | 26  | 16  | 16  | 20    |
| 0.998172398 BH | 8   | 15  | 10  | 2   | 11.5  |
| 0.99845371 BH  | 0   | 12  | 9   | 0   | 6     |
| 0.99845371 BH  | 1   | 10  | 9   | 1   | 5.5   |
| 0.99845371 BH  | 5   | 33  | 10  | 15  | 19    |
| 0.99845371 BH  | 4   | 15  | 13  | 3   | 9.5   |
| 0.99845371 BH  | 6   | 19  | 10  | 2   | 12.5  |
| 0.99845371 BH  | 9   | 195 | 46  | 72  | 102   |
| 0.99845371 BH  | 0   | 17  | 0   | 5   | 8.5   |
| 0.99845371 BH  | 0   | 13  | 5   | 4   | 6.5   |
| 0.99845371 BH  | 561 | 634 | 423 | 554 | 597.5 |
| 0.99845371 BH  | 2   | 20  | 9   | 6   | 11    |
| 0.99845371 BH  | 3   | 25  | 7   | 4   | 14    |
| 0.99845371 BH  | 41  | 56  | 51  | 8   | 48.5  |
| 0.99845371 BH  | 8   | 17  | 17  | 5   | 12.5  |
| 0.99845371 BH  | 0   | 13  | 6   | 3   | 6.5   |
| 0.99845371 BH  | 0   | 13  | 4   | 5   | 6.5   |
| 0.99845371 BH  | 0   | 21  | 12  | 2   | 10.5  |
| 0.99845371 BH  | 7   | 104 | 20  | 24  | 55.5  |
| 0.998834658 BH | 6   | 32  | 6   | 9   | 19    |
| 0.998834658 BH | 6   | 7   | 7   | 0   | 6.5   |
| 0.99972248 BH  | 4   | 12  | 4   | 3   | 8     |
| 0.99972248 BH  | 4   | 13  | 4   | 3   | 8.5   |
| 0.99972248 BH  | 5   | 11  | 5   | 2   | 8     |
| 0.99972248 BH  | 4   | 12  | 3   | 4   | 8     |
| 0.99972248 BH  | 4   | 12  | 3   | 4   | 8     |
| 0.99972248 BH  | 4   | 13  | 3   | 4   | 8.5   |
| 0.99972248 BH  | 7   | 19  | 6   | 6   | 13    |
| 0.99972248 BH  | 6   | 13  | 10  | 6   | 9.5   |
| 0.99972248 BH  | 7   | 19  | 6   | 6   | 13    |
| 0.99972248 BH  | 2   | 21  | 11  | 4   | 11.5  |
| 0.99972248 BH  | 2   | 10  | 5   | 5   | 6     |
| 0.99972248 BH  | 3   | 14  | 4   | 3   | 8.5   |
| 0.99972248 BH  | 6   | 9   | 5   | 2   | 7.5   |
| 0.99972248 BH  | 3   | 14  | 4   | 3   | 8.5   |
| 0.99972248 BH  | 5   | 10  | 6   | 2   | 7.5   |
| 0.99972248 BH  | 20  | 78  | 43  | 25  | 49    |
| 0.999923996 BH | 9   | 14  | 7   | 5   | 11.5  |
| 0.999973119 BH | 22  | 61  | 27  | 16  | 41.5  |
| 0.999973119 BH | 4   | 12  | 6   | 2   | 8     |
| 0.999973119 BH | 2   | 11  | 6   | 4   | 6.5   |
| 0.999973119 BH | 9   | 23  | 25  | 2   | 16    |
| 1 BH           | 6   | 13  | 11  | 5   | 9.5   |
| 1 BH           | 7   | 7   | 5   | 2   | 7     |
| 1 BH           | 3   | 15  | 5   | 2   | 9     |

|      |     |     |     |     |       |
|------|-----|-----|-----|-----|-------|
| 1 BH | 8   | 30  | 18  | 10  | 19    |
| 1 BH | 5   | 16  | 6   | 9   | 10.5  |
| 1 BH | 5   | 22  | 7   | 5   | 13.5  |
| 1 BH | 5   | 22  | 7   | 5   | 13.5  |
| 1 BH | 9   | 39  | 12  | 10  | 24    |
| 1 BH | 8   | 5   | 4   | 3   | 6.5   |
| 1 BH | 2   | 16  | 4   | 3   | 9     |
| 1 BH | 2   | 16  | 4   | 3   | 9     |
| 1 BH | 34  | 95  | 64  | 30  | 64.5  |
| 1 BH | 0   | 19  | 2   | 4   | 9.5   |
| 1 BH | 22  | 98  | 22  | 56  | 60    |
| 1 BH | 6   | 33  | 9   | 8   | 19.5  |
| 1 BH | 0   | 50  | 27  | 7   | 25    |
| 1 BH | 39  | 390 | 55  | 117 | 214.5 |
| 1 BH | 46  | 38  | 62  | 18  | 42    |
| 1 BH | 2   | 11  | 8   | 2   | 6.5   |
| 1 BH | 2   | 17  | 3   | 4   | 9.5   |
| 1 BH | 4   | 13  | 6   | 1   | 8.5   |
| 1 BH | 20  | 262 | 56  | 104 | 141   |
| 1 BH | 5   | 10  | 7   | 1   | 7.5   |
| 1 BH | 136 | 32  | 103 | 28  | 84    |
| 1 BH | 1   | 12  | 4   | 6   | 6.5   |
| 1 BH | 1   | 12  | 4   | 6   | 6.5   |
| 1 BH | 10  | 28  | 14  | 14  | 19    |
| 1 BH | 10  | 29  | 17  | 11  | 19.5  |
| 1 BH | 3   | 14  | 7   | 1   | 8.5   |
| 1 BH | 3   | 14  | 7   | 1   | 8.5   |
| 1 BH | 72  | 455 | 131 | 106 | 263.5 |
| 1 BH | 3   | 83  | 22  | 27  | 43    |
| 1 BH | 12  | 374 | 80  | 135 | 193   |
| 1 BH | 8   | 24  | 16  | 0   | 16    |
| 1 BH | 1   | 14  | 7   | 3   | 7.5   |
| 1 BH | 11  | 24  | 9   | 9   | 17.5  |
| 1 BH | 3   | 37  | 6   | 10  | 20    |
| 1 BH | 7   | 6   | 7   | 1   | 6.5   |
| 1 BH | 50  | 18  | 38  | 10  | 34    |
| 1 BH | 4   | 17  | 14  | 3   | 10.5  |
| 1 BH | 25  | 144 | 51  | 57  | 84.5  |
| 1 BH | 11  | 47  | 17  | 22  | 29    |
| 1 BH | 1   | 18  | 4   | 3   | 9.5   |
| 1 BH | 1   | 18  | 4   | 3   | 9.5   |
| 1 BH | 33  | 25  | 26  | 12  | 29    |
| 1 BH | 19  | 16  | 28  | 6   | 17.5  |
| 1 BH | 1   | 13  | 8   | 2   | 7     |
| 1 BH | 6   | 45  | 16  | 7   | 25.5  |
| 1 BH | 7   | 24  | 16  | 7   | 15.5  |
| 1 BH | 1   | 14  | 8   | 2   | 7.5   |

|      |     |      |     |     |       |
|------|-----|------|-----|-----|-------|
| 1 BH | 3   | 91   | 25  | 31  | 47    |
| 1 BH | 36  | 38   | 46  | 20  | 37    |
| 1 BH | 11  | 39   | 17  | 17  | 25    |
| 1 BH | 5   | 48   | 12  | 10  | 26.5  |
| 1 BH | 24  | 162  | 35  | 44  | 93    |
| 1 BH | 1   | 13   | 2   | 7   | 7     |
| 1 BH | 9   | 17   | 9   | 4   | 13    |
| 1 BH | 210 | 367  | 169 | 255 | 288.5 |
| 1 BH | 12  | 96   | 41  | 29  | 54    |
| 1 BH | 50  | 157  | 55  | 47  | 103.5 |
| 1 BH | 6   | 11   | 5   | 3   | 8.5   |
| 1 BH | 16  | 153  | 25  | 72  | 84.5  |
| 1 BH | 8   | 18   | 11  | 3   | 13    |
| 1 BH | 3   | 10   | 7   | 4   | 6.5   |
| 1 BH | 6   | 10   | 5   | 3   | 8     |
| 1 BH | 3   | 11   | 7   | 4   | 7     |
| 1 BH | 5   | 6    | 6   | 5   | 5.5   |
| 1 BH | 15  | 73   | 19  | 36  | 44    |
| 1 BH | 2   | 48   | 4   | 23  | 25    |
| 1 BH | 2   | 33   | 10  | 11  | 17.5  |
| 1 BH | 6   | 11   | 6   | 2   | 8.5   |
| 1 BH | 6   | 11   | 6   | 2   | 8.5   |
| 1 BH | 7   | 36   | 17  | 12  | 21.5  |
| 1 BH | 4   | 15   | 6   | 2   | 9.5   |
| 1 BH | 4   | 15   | 6   | 2   | 9.5   |
| 1 BH | 3   | 16   | 5   | 3   | 9.5   |
| 1 BH | 7   | 26   | 14  | 9   | 16.5  |
| 1 BH | 19  | 115  | 34  | 25  | 67    |
| 1 BH | 15  | 18   | 12  | 7   | 16.5  |
| 1 BH | 13  | 22   | 7   | 11  | 17.5  |
| 1 BH | 46  | 142  | 50  | 45  | 94    |
| 1 BH | 17  | 107  | 27  | 26  | 62    |
| 1 BH | 42  | 0    | 52  | 5   | 21    |
| 1 BH | 7   | 6    | 8   | 0   | 6.5   |
| 1 BH | 82  | 49   | 77  | 49  | 65.5  |
| 1 BH | 63  | 121  | 51  | 50  | 92    |
| 1 BH | 3   | 11   | 9   | 2   | 7     |
| 1 BH | 13  | 73   | 15  | 23  | 43    |
| 1 BH | 16  | 57   | 24  | 12  | 36.5  |
| 1 BH | 199 | 384  | 236 | 97  | 291.5 |
| 1 BH | 93  | 315  | 97  | 105 | 204   |
| 1 BH | 214 | 1118 | 525 | 326 | 666   |
| 1 BH | 0   | 20   | 4   | 3   | 10    |
| 1 BH | 0   | 20   | 4   | 3   | 10    |
| 1 BH | 0   | 20   | 4   | 3   | 10    |
| 1 BH | 2   | 18   | 5   | 3   | 10    |
| 1 BH | 5   | 13   | 7   | 1   | 9     |

|      |      |     |     |     |       |
|------|------|-----|-----|-----|-------|
| 1 BH | 2    | 18  | 4   | 4   | 10    |
| 1 BH | 2    | 18  | 5   | 3   | 10    |
| 1 BH | 13   | 48  | 29  | 14  | 30.5  |
| 1 BH | 439  | 191 | 449 | 188 | 315   |
| 1 BH | 2    | 41  | 7   | 10  | 21.5  |
| 1 BH | 7    | 75  | 39  | 15  | 41    |
| 1 BH | 26   | 34  | 28  | 8   | 30    |
| 1 BH | 2    | 19  | 5   | 3   | 10.5  |
| 1 BH | 2    | 18  | 3   | 5   | 10    |
| 1 BH | 53   | 256 | 90  | 104 | 154.5 |
| 1 BH | 6    | 70  | 6   | 22  | 38    |
| 1 BH | 9    | 24  | 15  | 9   | 16.5  |
| 1 BH | 0    | 15  | 2   | 7   | 7.5   |
| 1 BH | 46   | 30  | 32  | 19  | 38    |
| 1 BH | 7    | 95  | 21  | 21  | 51    |
| 1 BH | 49   | 168 | 66  | 44  | 108.5 |
| 1 BH | 4    | 32  | 12  | 11  | 18    |
| 1 BH | 3    | 17  | 7   | 1   | 10    |
| 1 BH | 1    | 15  | 8   | 3   | 8     |
| 1 BH | 9    | 23  | 18  | 7   | 16    |
| 1 BH | 6    | 17  | 14  | 4   | 11.5  |
| 1 BH | 37   | 124 | 30  | 48  | 80.5  |
| 1 BH | 22   | 47  | 16  | 20  | 34.5  |
| 1 BH | 1    | 20  | 5   | 3   | 10.5  |
| 1 BH | 8    | 25  | 19  | 6   | 16.5  |
| 1 BH | 0    | 94  | 14  | 20  | 47    |
| 1 BH | 1    | 15  | 9   | 2   | 8     |
| 1 BH | 1    | 15  | 9   | 2   | 8     |
| 1 BH | 1383 | 673 | 710 | 731 | 1028  |
| 1 BH | 1    | 26  | 7   | 9   | 13.5  |
| 1 BH | 25   | 42  | 23  | 15  | 33.5  |
| 1 BH | 9    | 57  | 33  | 11  | 33    |
| 1 BH | 3    | 12  | 7   | 5   | 7.5   |
| 1 BH | 33   | 126 | 47  | 30  | 79.5  |
| 1 BH | 11   | 107 | 29  | 22  | 59    |
| 1 BH | 11   | 33  | 15  | 16  | 22    |
| 1 BH | 4    | 16  | 5   | 4   | 10    |
| 1 BH | 4    | 16  | 5   | 4   | 10    |
| 1 BH | 10   | 24  | 17  | 8   | 17    |
| 1 BH | 4    | 16  | 6   | 3   | 10    |
| 1 BH | 29   | 80  | 28  | 46  | 54.5  |
| 1 BH | 5    | 40  | 11  | 9   | 22.5  |
| 1 BH | 5    | 40  | 12  | 8   | 22.5  |
| 1 BH | 4    | 11  | 9   | 3   | 7.5   |
| 1 BH | 6    | 12  | 7   | 2   | 9     |
| 1 BH | 6    | 26  | 10  | 5   | 16    |
| 1 BH | 925  | 817 | 787 | 694 | 871   |

|      |      |      |      |     |        |
|------|------|------|------|-----|--------|
| 1 BH | 8    | 27   | 9    | 15  | 17.5   |
| 1 BH | 6    | 31   | 14   | 11  | 18.5   |
| 1 BH | 22   | 134  | 43   | 27  | 78     |
| 1 BH | 4    | 16   | 7    | 2   | 10     |
| 1 BH | 689  | 1041 | 518  | 774 | 865    |
| 1 BH | 4    | 24   | 11   | 7   | 14     |
| 1 BH | 208  | 84   | 201  | 94  | 146    |
| 1 BH | 5    | 28   | 10   | 5   | 16.5   |
| 1 BH | 3    | 24   | 15   | 3   | 13.5   |
| 1 BH | 5    | 33   | 14   | 11  | 19     |
| 1 BH | 2    | 20   | 5    | 4   | 11     |
| 1 BH | 10   | 46   | 9    | 16  | 28     |
| 1 BH | 4    | 42   | 8    | 11  | 23     |
| 1 BH | 6    | 41   | 10   | 10  | 23.5   |
| 1 BH | 40   | 117  | 52   | 31  | 78.5   |
| 1 BH | 10   | 33   | 14   | 8   | 21.5   |
| 1 BH | 17   | 78   | 29   | 15  | 47.5   |
| 1 BH | 0    | 11   | 3    | 0   | 5.5    |
| 1 BH | 4    | 45   | 8    | 20  | 24.5   |
| 1 BH | 492  | 407  | 393  | 375 | 449.5  |
| 1 BH | 0    | 22   | 4    | 4   | 11     |
| 1 BH | 8    | 23   | 10   | 6   | 15.5   |
| 1 BH | 9    | 35   | 14   | 8   | 22     |
| 1 BH | 348  | 205  | 310  | 93  | 276.5  |
| 1 BH | 16   | 92   | 22   | 27  | 54     |
| 1 BH | 9    | 35   | 16   | 6   | 22     |
| 1 BH | 3    | 32   | 10   | 5   | 17.5   |
| 1 BH | 255  | 193  | 211  | 183 | 224    |
| 1 BH | 4    | 12   | 6    | 6   | 8      |
| 1 BH | 29   | 22   | 25   | 7   | 25.5   |
| 1 BH | 13   | 34   | 19   | 15  | 23.5   |
| 1 BH | 47   | 317  | 40   | 116 | 182    |
| 1 BH | 58   | 23   | 62   | 24  | 40.5   |
| 1 BH | 1198 | 1185 | 1006 | 953 | 1191.5 |
| 1 BH | 17   | 21   | 17   | 6   | 19     |
| 1 BH | 8    | 19   | 14   | 6   | 13.5   |
| 1 BH | 4    | 12   | 11   | 2   | 8      |
| 1 BH | 127  | 223  | 87   | 110 | 175    |
| 1 BH | 2    | 32   | 14   | 1   | 17     |
| 1 BH | 3    | 20   | 8    | 2   | 11.5   |
| 1 BH | 3    | 20   | 8    | 2   | 11.5   |
| 1 BH | 88   | 12   | 69   | 15  | 50     |
| 1 BH | 32   | 70   | 31   | 25  | 51     |
| 1 BH | 3    | 14   | 11   | 2   | 8.5    |
| 1 BH | 3    | 15   | 11   | 2   | 9      |
| 1 BH | 3    | 14   | 11   | 2   | 8.5    |
| 1 BH | 14   | 13   | 7    | 9   | 13.5   |

|      |      |     |     |     |       |
|------|------|-----|-----|-----|-------|
| 1 BH | 92   | 52  | 69  | 34  | 72    |
| 1 BH | 1    | 10  | 3   | 1   | 5.5   |
| 1 BH | 1    | 30  | 5   | 12  | 15.5  |
| 1 BH | 3    | 37  | 8   | 17  | 20    |
| 1 BH | 9    | 6   | 10  | 0   | 7.5   |
| 1 BH | 12   | 18  | 14  | 3   | 15    |
| 1 BH | 8    | 25  | 14  | 3   | 16.5  |
| 1 BH | 68   | 18  | 63  | 3   | 43    |
| 1 BH | 38   | 219 | 86  | 71  | 128.5 |
| 1 BH | 163  | 55  | 134 | 38  | 109   |
| 1 BH | 46   | 77  | 37  | 55  | 61.5  |
| 1 BH | 13   | 49  | 24  | 20  | 31    |
| 1 BH | 27   | 25  | 44  | 4   | 26    |
| 1 BH | 39   | 57  | 38  | 20  | 48    |
| 1 BH | 1054 | 567 | 938 | 578 | 810.5 |
| 1 BH | 10   | 39  | 15  | 9   | 24.5  |
| 1 BH | 25   | 56  | 33  | 10  | 40.5  |
| 1 BH | 3    | 16  | 8   | 5   | 9.5   |
| 1 BH | 6    | 89  | 21  | 17  | 47.5  |
| 1 BH | 15   | 61  | 22  | 15  | 38    |
| 1 BH | 3    | 29  | 14  | 6   | 16    |
| 1 BH | 0    | 30  | 15  | 3   | 15    |
| 1 BH | 5    | 60  | 10  | 17  | 32.5  |
| 1 BH | 17   | 155 | 30  | 66  | 86    |
| 1 BH | 12   | 122 | 25  | 33  | 67    |
| 1 BH | 69   | 624 | 176 | 135 | 346.5 |
| 1 BH | 4    | 34  | 13  | 4   | 19    |
| 1 BH | 8    | 57  | 12  | 17  | 32.5  |
| 1 BH | 5    | 118 | 24  | 45  | 61.5  |
| 1 BH | 3    | 21  | 8   | 3   | 12    |
| 1 BH | 9    | 14  | 20  | 1   | 11.5  |
| 1 BH | 19   | 55  | 38  | 15  | 37    |
| 1 BH | 5    | 37  | 24  | 4   | 21    |
| 1 BH | 0    | 12  | 3   | 1   | 6     |
| 1 BH | 0    | 12  | 3   | 1   | 6     |
| 1 BH | 0    | 12  | 3   | 1   | 6     |
| 1 BH | 14   | 14  | 14  | 4   | 14    |
| 1 BH | 38   | 131 | 45  | 41  | 84.5  |
| 1 BH | 9    | 34  | 12  | 16  | 21.5  |
| 1 BH | 64   | 92  | 84  | 40  | 78    |
| 1 BH | 4    | 35  | 10  | 7   | 19.5  |
| 1 BH | 2    | 23  | 6   | 5   | 12.5  |
| 1 BH | 93   | 398 | 131 | 111 | 245.5 |
| 1 BH | 4    | 36  | 9   | 8   | 20    |
| 1 BH | 5    | 14  | 8   | 6   | 9.5   |
| 1 BH | 15   | 66  | 19  | 18  | 40.5  |
| 1 BH | 12   | 44  | 16  | 20  | 28    |



|      |     |     |     |    |       |
|------|-----|-----|-----|----|-------|
| 1 BH | 25  | 110 | 33  | 33 | 67.5  |
| 1 BH | 1   | 21  | 8   | 5  | 11    |
| 1 BH | 4   | 64  | 23  | 7  | 34    |
| 1 BH | 6   | 17  | 9   | 3  | 11.5  |
| 1 BH | 1   | 24  | 1   | 8  | 12.5  |
| 1 BH | 6   | 10  | 13  | 1  | 8     |
| 1 BH | 5   | 12  | 13  | 1  | 8.5   |
| 1 BH | 5   | 19  | 4   | 7  | 12    |
| 1 BH | 4   | 21  | 5   | 6  | 12.5  |
| 1 BH | 5   | 19  | 9   | 3  | 12    |
| 1 BH | 54  | 105 | 36  | 50 | 79.5  |
| 1 BH | 21  | 27  | 23  | 15 | 24    |
| 1 BH | 52  | 96  | 79  | 35 | 74    |
| 1 BH | 64  | 207 | 88  | 56 | 135.5 |
| 1 BH | 28  | 42  | 27  | 13 | 35    |
| 1 BH | 6   | 17  | 10  | 2  | 11.5  |
| 1 BH | 13  | 56  | 14  | 17 | 34.5  |
| 1 BH | 51  | 115 | 49  | 43 | 83    |
| 1 BH | 5   | 19  | 10  | 2  | 12    |
| 1 BH | 39  | 125 | 43  | 40 | 82    |
| 1 BH | 23  | 13  | 9   | 15 | 18    |
| 1 BH | 2   | 9   | 3   | 2  | 5.5   |
| 1 BH | 2   | 9   | 3   | 2  | 5.5   |
| 1 BH | 15  | 37  | 28  | 13 | 26    |
| 1 BH | 49  | 140 | 62  | 66 | 94.5  |
| 1 BH | 2   | 9   | 2   | 3  | 5.5   |
| 1 BH | 2   | 9   | 2   | 3  | 5.5   |
| 1 BH | 10  | 1   | 12  | 1  | 5.5   |
| 1 BH | 2   | 9   | 4   | 1  | 5.5   |
| 1 BH | 2   | 9   | 4   | 1  | 5.5   |
| 1 BH | 2   | 9   | 4   | 1  | 5.5   |
| 1 BH | 2   | 9   | 4   | 1  | 5.5   |
| 1 BH | 6   | 66  | 12  | 18 | 36    |
| 1 BH | 21  | 91  | 31  | 38 | 56    |
| 1 BH | 6   | 14  | 10  | 5  | 10    |
| 1 BH | 106 | 84  | 107 | 28 | 95    |
| 1 BH | 1   | 11  | 3   | 2  | 6     |
| 1 BH | 1   | 11  | 3   | 2  | 6     |
| 1 BH | 1   | 11  | 2   | 3  | 6     |
| 1 BH | 1   | 11  | 2   | 3  | 6     |
| 1 BH | 2   | 25  | 4   | 7  | 13.5  |
| 1 BH | 54  | 73  | 60  | 19 | 63.5  |
| 1 BH | 6   | 41  | 15  | 16 | 23.5  |
| 1 BH | 1   | 11  | 4   | 1  | 6     |
| 1 BH | 1   | 11  | 4   | 1  | 6     |
| 1 BH | 1   | 11  | 4   | 1  | 6     |
| 1 BH | 1   | 22  | 7   | 7  | 11.5  |

|      |     |     |     |     |       |
|------|-----|-----|-----|-----|-------|
| 1 BH | 4   | 32  | 17  | 6   | 18    |
| 1 BH | 22  | 151 | 51  | 51  | 86.5  |
| 1 BH | 4   | 18  | 11  | 4   | 11    |
| 1 BH | 17  | 33  | 17  | 11  | 25    |
| 1 BH | 62  | 27  | 66  | 4   | 44.5  |
| 1 BH | 33  | 85  | 58  | 28  | 59    |
| 1 BH | 928 | 731 | 469 | 633 | 829.5 |
| 1 BH | 9   | 38  | 26  | 6   | 23.5  |
| 1 BH | 4   | 32  | 18  | 5   | 18    |
| 1 BH | 22  | 44  | 26  | 24  | 33    |
| 1 BH | 25  | 71  | 33  | 19  | 48    |
| 1 BH | 2   | 10  | 5   | 0   | 6     |
| 1 BH | 23  | 28  | 27  | 14  | 25.5  |
| 1 BH | 15  | 20  | 9   | 11  | 17.5  |
| 1 BH | 6   | 15  | 9   | 7   | 10.5  |
| 1 BH | 0   | 13  | 2   | 3   | 6.5   |
| 1 BH | 0   | 13  | 2   | 3   | 6.5   |
| 1 BH | 9   | 6   | 14  | 1   | 7.5   |
| 1 BH | 3   | 25  | 10  | 3   | 14    |
| 1 BH | 14  | 43  | 14  | 13  | 28.5  |
| 1 BH | 37  | 39  | 43  | 6   | 38    |
| 1 BH | 0   | 13  | 4   | 1   | 6.5   |
| 1 BH | 6   | 32  | 10  | 13  | 19    |
| 1 BH | 2   | 27  | 5   | 7   | 14.5  |
| 1 BH | 2   | 27  | 5   | 7   | 14.5  |
| 1 BH | 14  | 61  | 25  | 11  | 37.5  |
| 1 BH | 38  | 51  | 42  | 27  | 44.5  |
| 1 BH | 11  | 21  | 20  | 5   | 16    |
| 1 BH | 2   | 46  | 8   | 9   | 24    |
| 1 BH | 117 | 147 | 89  | 74  | 132   |
| 1 BH | 1   | 27  | 2   | 9   | 14    |
| 1 BH | 7   | 18  | 11  | 3   | 12.5  |
| 1 BH | 4   | 25  | 7   | 6   | 14.5  |
| 1 BH | 4   | 25  | 7   | 6   | 14.5  |
| 1 BH | 129 | 280 | 110 | 117 | 204.5 |
| 1 BH | 3   | 22  | 7   | 8   | 12.5  |
| 1 BH | 4   | 20  | 12  | 4   | 12    |
| 1 BH | 3   | 9   | 4   | 2   | 6     |
| 1 BH | 74  | 189 | 84  | 62  | 131.5 |
| 1 BH | 12  | 48  | 20  | 10  | 30    |
| 1 BH | 9   | 14  | 12  | 2   | 11.5  |
| 1 BH | 7   | 78  | 25  | 23  | 42.5  |
| 1 BH | 2   | 11  | 4   | 2   | 6.5   |
| 1 BH | 2   | 11  | 4   | 2   | 6.5   |
| 1 BH | 197 | 183 | 256 | 76  | 190   |
| 1 BH | 17  | 18  | 17  | 3   | 17.5  |
| 1 BH | 0   | 13  | 5   | 0   | 6.5   |

|      |      |      |      |     |       |
|------|------|------|------|-----|-------|
| 1 BH | 21   | 32   | 15   | 14  | 26.5  |
| 1 BH | 6    | 50   | 20   | 13  | 28    |
| 1 BH | 17   | 27   | 16   | 19  | 22    |
| 1 BH | 0    | 11   | 7    | 0   | 5.5   |
| 1 BH | 129  | 985  | 273  | 357 | 557   |
| 1 BH | 14   | 51   | 31   | 15  | 32.5  |
| 1 BH | 2    | 29   | 8    | 5   | 15.5  |
| 1 BH | 105  | 89   | 122  | 14  | 97    |
| 1 BH | 1    | 10   | 2    | 5   | 5.5   |
| 1 BH | 25   | 65   | 19   | 26  | 45    |
| 1 BH | 1308 | 896  | 1236 | 701 | 1102  |
| 1 BH | 31   | 70   | 17   | 34  | 50.5  |
| 1 BH | 22   | 124  | 38   | 48  | 73    |
| 1 BH | 3    | 37   | 15   | 11  | 20    |
| 1 BH | 14   | 23   | 20   | 3   | 18.5  |
| 1 BH | 1    | 13   | 5    | 1   | 7     |
| 1 BH | 24   | 28   | 18   | 12  | 26    |
| 1 BH | 3    | 24   | 8    | 8   | 13.5  |
| 1 BH | 4    | 51   | 24   | 11  | 27.5  |
| 1 BH | 11   | 57   | 16   | 27  | 34    |
| 1 BH | 11   | 61   | 17   | 25  | 36    |
| 1 BH | 1    | 13   | 1    | 4   | 7     |
| 1 BH | 8    | 11   | 16   | 1   | 9.5   |
| 1 BH | 26   | 32   | 25   | 20  | 29    |
| 1 BH | 7    | 22   | 9    | 6   | 14.5  |
| 1 BH | 7    | 30   | 7    | 18  | 18.5  |
| 1 BH | 0    | 12   | 3    | 4   | 6     |
| 1 BH | 2    | 12   | 6    | 0   | 7     |
| 1 BH | 9    | 18   | 11   | 4   | 13.5  |
| 1 BH | 5    | 21   | 8    | 9   | 13    |
| 1 BH | 10   | 24   | 24   | 4   | 17    |
| 1 BH | 11   | 33   | 19   | 5   | 22    |
| 1 BH | 12   | 35   | 10   | 12  | 23.5  |
| 1 BH | 0    | 15   | 4    | 2   | 7.5   |
| 1 BH | 6    | 19   | 14   | 4   | 12.5  |
| 1 BH | 77   | 136  | 104  | 29  | 106.5 |
| 1 BH | 402  | 164  | 367  | 179 | 283   |
| 1 BH | 4    | 36   | 22   | 6   | 20    |
| 1 BH | 8    | 39   | 19   | 5   | 23.5  |
| 1 BH | 368  | 1457 | 427  | 500 | 912.5 |
| 1 BH | 2    | 9    | 4    | 4   | 5.5   |
| 1 BH | 2    | 9    | 5    | 3   | 5.5   |
| 1 BH | 2    | 9    | 5    | 3   | 5.5   |
| 1 BH | 0    | 15   | 1    | 4   | 7.5   |
| 1 BH | 11   | 26   | 15   | 14  | 18.5  |
| 1 BH | 6    | 23   | 14   | 1   | 14.5  |
| 1 BH | 256  | 1262 | 260  | 607 | 759   |

|      |     |      |     |     |       |
|------|-----|------|-----|-----|-------|
| 1 BH | 2   | 10   | 5   | 3   | 6     |
| 1 BH | 2   | 10   | 5   | 3   | 6     |
| 1 BH | 2   | 10   | 4   | 4   | 6     |
| 1 BH | 0   | 16   | 1   | 4   | 8     |
| 1 BH | 83  | 265  | 154 | 76  | 174   |
| 1 BH | 3   | 30   | 8   | 7   | 16.5  |
| 1 BH | 32  | 15   | 36  | 10  | 23.5  |
| 1 BH | 1   | 11   | 5   | 3   | 6     |
| 1 BH | 37  | 406  | 73  | 165 | 221.5 |
| 1 BH | 8   | 54   | 20  | 17  | 31    |
| 1 BH | 1   | 12   | 5   | 3   | 6.5   |
| 1 BH | 1   | 12   | 4   | 4   | 6.5   |
| 1 BH | 167 | 365  | 194 | 169 | 266   |
| 1 BH | 1   | 11   | 3   | 5   | 6     |
| 1 BH | 2   | 32   | 8   | 7   | 17    |
| 1 BH | 2   | 32   | 8   | 7   | 17    |
| 1 BH | 117 | 215  | 131 | 104 | 166   |
| 1 BH | 12  | 29   | 11  | 17  | 20.5  |
| 1 BH | 0   | 15   | 6   | 0   | 7.5   |
| 1 BH | 4   | 40   | 10  | 17  | 22    |
| 1 BH | 1   | 15   | 6   | 1   | 8     |
| 1 BH | 5   | 24   | 11  | 8   | 14.5  |
| 1 BH | 4   | 9    | 7   | 0   | 6.5   |
| 1 BH | 10  | 63   | 26  | 8   | 36.5  |
| 1 BH | 13  | 0    | 15  | 2   | 6.5   |
| 1 BH | 0   | 14   | 4   | 4   | 7     |
| 1 BH | 225 | 1286 | 416 | 460 | 755.5 |
| 1 BH | 173 | 1177 | 323 | 319 | 675   |
| 1 BH | 18  | 51   | 25  | 11  | 34.5  |
| 1 BH | 3   | 10   | 6   | 3   | 6.5   |
| 1 BH | 3   | 10   | 6   | 3   | 6.5   |
| 1 BH | 12  | 39   | 9   | 16  | 25.5  |
| 1 BH | 36  | 58   | 61  | 0   | 47    |
| 1 BH | 10  | 8    | 19  | 1   | 9     |
| 1 BH | 15  | 24   | 15  | 16  | 19.5  |
| 1 BH | 4   | 32   | 7   | 9   | 18    |
| 1 BH | 24  | 145  | 59  | 26  | 84.5  |
| 1 BH | 17  | 41   | 18  | 23  | 29    |
| 1 BH | 7   | 22   | 13  | 7   | 14.5  |
| 1 BH | 24  | 173  | 56  | 35  | 98.5  |
| 1 BH | 6   | 41   | 18  | 13  | 23.5  |
| 1 BH | 8   | 25   | 7   | 10  | 16.5  |
| 1 BH | 8   | 21   | 14  | 6   | 14.5  |
| 1 BH | 103 | 72   | 109 | 23  | 87.5  |
| 1 BH | 16  | 8    | 13  | 2   | 12    |
| 1 BH | 8   | 40   | 24  | 7   | 24    |
| 1 BH | 0   | 17   | 6   | 1   | 8.5   |

|      |     |     |    |     |       |
|------|-----|-----|----|-----|-------|
| 1 BH | 2   | 27  | 10 | 10  | 14.5  |
| 1 BH | 23  | 13  | 21 | 6   | 18    |
| 1 BH | 5   | 32  | 9  | 8   | 18.5  |
| 1 BH | 14  | 23  | 28 | 5   | 18.5  |
| 1 BH | 1   | 13  | 3  | 6   | 7     |
| 1 BH | 12  | 9   | 8  | 12  | 10.5  |
| 1 BH | 1   | 17  | 4  | 3   | 9     |
| 1 BH | 1   | 17  | 4  | 3   | 9     |
| 1 BH | 20  | 38  | 30 | 15  | 29    |
| 1 BH | 1   | 17  | 3  | 4   | 9     |
| 1 BH | 121 | 186 | 58 | 119 | 153.5 |
| 1 BH | 3   | 30  | 13 | 7   | 16.5  |
| 1 BH | 5   | 23  | 18 | 4   | 14    |
| 1 BH | 4   | 28  | 16 | 5   | 16    |
| 1 BH | 18  | 138 | 80 | 16  | 78    |
| 1 BH | 1   | 17  | 2  | 5   | 9     |
| 1 BH | 1   | 17  | 2  | 5   | 9     |
| 1 BH | 1   | 17  | 2  | 5   | 9     |
| 1 BH | 4   | 36  | 6  | 9   | 20    |
| 1 BH | 13  | 65  | 24 | 15  | 39    |
| 1 BH | 20  | 29  | 19 | 9   | 24.5  |
| 1 BH | 5   | 29  | 10 | 10  | 17    |
| 1 BH | 28  | 74  | 36 | 31  | 51    |
| 1 BH | 3   | 11  | 6  | 4   | 7     |
| 1 BH | 4   | 12  | 4  | 4   | 8     |
| 1 BH | 0   | 15  | 5  | 4   | 7.5   |
| 1 BH | 0   | 15  | 5  | 4   | 7.5   |
| 1 BH | 6   | 8   | 4  | 4   | 7     |
| 1 BH | 4   | 9   | 7  | 3   | 6.5   |
| 1 BH | 0   | 15  | 4  | 5   | 7.5   |
| 1 BH | 3   | 14  | 5  | 3   | 8.5   |
| 1 BH | 3   | 14  | 5  | 3   | 8.5   |
| 1 BH | 4   | 27  | 8  | 13  | 15.5  |
| 1 BH | 7   | 23  | 12 | 10  | 15    |
| 1 BH | 0   | 16  | 6  | 3   | 8     |
| 1 BH | 3   | 15  | 5  | 3   | 9     |
| 1 BH | 7   | 26  | 11 | 10  | 16.5  |
| 1 BH | 3   | 14  | 3  | 5   | 8.5   |
| 1 BH | 2   | 13  | 6  | 4   | 7.5   |
| 1 BH | 27  | 133 | 31 | 47  | 80    |
| 1 BH | 4   | 7   | 10 | 0   | 5.5   |
| 1 BH | 26  | 19  | 39 | 3   | 22.5  |
| 1 BH | 7   | 31  | 12 | 7   | 19    |
| 1 BH | 2   | 13  | 7  | 3   | 7.5   |
| 1 BH | 2   | 13  | 7  | 3   | 7.5   |
| 1 BH | 3   | 70  | 15 | 23  | 36.5  |
| 1 BH | 2   | 16  | 5  | 3   | 9     |

|      |     |      |     |     |       |
|------|-----|------|-----|-----|-------|
| 1 BH | 2   | 16   | 5   | 3   | 9     |
| 1 BH | 3   | 11   | 2   | 7   | 7     |
| 1 BH | 6   | 33   | 7   | 11  | 19.5  |
| 1 BH | 4   | 12   | 8   | 1   | 8     |
| 1 BH | 2   | 31   | 13  | 9   | 16.5  |
| 1 BH | 3   | 40   | 11  | 6   | 21.5  |
| 1 BH | 16  | 63   | 16  | 24  | 39.5  |
| 1 BH | 2   | 16   | 2   | 6   | 9     |
| 1 BH | 2   | 16   | 2   | 6   | 9     |
| 1 BH | 4   | 32   | 15  | 7   | 18    |
| 1 BH | 121 | 1106 | 202 | 354 | 613.5 |
| 1 BH | 105 | 330  | 137 | 136 | 217.5 |
| 1 BH | 15  | 32   | 16  | 19  | 23.5  |
| 1 BH | 7   | 56   | 14  | 15  | 31.5  |
| 1 BH | 7   | 35   | 10  | 8   | 21    |
| 1 BH | 1   | 15   | 8   | 2   | 8     |
| 1 BH | 3   | 31   | 10  | 12  | 17    |
| 1 BH | 5   | 12   | 5   | 4   | 8.5   |
| 1 BH | 22  | 29   | 21  | 12  | 25.5  |
| 1 BH | 8   | 32   | 13  | 8   | 20    |
| 1 BH | 7   | 29   | 14  | 9   | 18    |
| 1 BH | 8   | 35   | 11  | 8   | 21.5  |
| 1 BH | 3   | 16   | 4   | 5   | 9.5   |
| 1 BH | 0   | 17   | 6   | 4   | 8.5   |
| 1 BH | 8   | 32   | 14  | 7   | 20    |
| 1 BH | 6   | 31   | 13  | 10  | 18.5  |
| 1 BH | 19  | 38   | 20  | 13  | 28.5  |
| 1 BH | 20  | 96   | 59  | 15  | 58    |
| 1 BH | 131 | 344  | 109 | 152 | 237.5 |
| 1 BH | 7   | 5    | 3   | 7   | 6     |
| 1 BH | 1   | 20   | 6   | 3   | 10.5  |
| 1 BH | 20  | 6    | 14  | 6   | 13    |
| 1 BH | 6   | 12   | 6   | 4   | 9     |
| 1 BH | 4   | 12   | 8   | 4   | 8     |
| 1 BH | 6   | 8    | 8   | 4   | 7     |
| 1 BH | 4   | 16   | 6   | 4   | 10    |
| 1 BH | 15  | 22   | 13  | 9   | 18.5  |
| 1 BH | 57  | 32   | 22  | 41  | 44.5  |
| 1 BH | 3   | 14   | 8   | 4   | 8.5   |
| 1 BH | 4   | 12   | 9   | 3   | 8     |
| 1 BH | 7   | 6    | 8   | 4   | 6.5   |
| 1 BH | 3   | 18   | 6   | 4   | 10.5  |
| 1 BH | 19  | 8    | 18  | 3   | 13.5  |
| 1 BH | 14  | 78   | 30  | 17  | 46    |
| 1 BH | 8   | 54   | 29  | 9   | 31    |
| 1 BH | 5   | 10   | 3   | 8   | 7.5   |
| 1 BH | 23  | 35   | 19  | 16  | 29    |

|      |     |      |     |     |       |
|------|-----|------|-----|-----|-------|
| 1 BH | 32  | 264  | 88  | 76  | 148   |
| 1 BH | 13  | 22   | 12  | 13  | 17.5  |
| 1 BH | 4   | 14   | 10  | 0   | 9     |
| 1 BH | 10  | 33   | 11  | 12  | 21.5  |
| 1 BH | 9   | 30   | 12  | 13  | 19.5  |
| 1 BH | 3   | 15   | 10  | 2   | 9     |
| 1 BH | 8   | 4    | 5   | 6   | 6     |
| 1 BH | 7   | 30   | 21  | 6   | 18.5  |
| 1 BH | 1   | 40   | 17  | 6   | 20.5  |
| 1 BH | 7   | 6    | 10  | 2   | 6.5   |
| 1 BH | 38  | 132  | 67  | 44  | 85    |
| 1 BH | 4   | 95   | 14  | 24  | 49.5  |
| 1 BH | 13  | 94   | 49  | 19  | 53.5  |
| 1 BH | 0   | 22   | 4   | 5   | 11    |
| 1 BH | 27  | 78   | 41  | 27  | 52.5  |
| 1 BH | 0   | 23   | 6   | 3   | 11.5  |
| 1 BH | 2   | 16   | 10  | 2   | 9     |
| 1 BH | 7   | 40   | 13  | 10  | 23.5  |
| 1 BH | 28  | 56   | 36  | 15  | 42    |
| 1 BH | 0   | 17   | 11  | 0   | 8.5   |
| 1 BH | 0   | 23   | 0   | 6   | 11.5  |
| 1 BH | 16  | 53   | 22  | 15  | 34.5  |
| 1 BH | 4   | 14   | 5   | 7   | 9     |
| 1 BH | 375 | 261  | 217 | 301 | 318   |
| 1 BH | 15  | 48   | 26  | 15  | 31.5  |
| 1 BH | 3   | 16   | 6   | 6   | 9.5   |
| 1 BH | 3   | 17   | 6   | 6   | 10    |
| 1 BH | 137 | 1164 | 379 | 250 | 650.5 |
| 1 BH | 4   | 14   | 10  | 3   | 9     |
| 1 BH | 2   | 18   | 6   | 6   | 10    |
| 1 BH | 6   | 38   | 14  | 12  | 22    |
| 1 BH | 19  | 138  | 47  | 27  | 78.5  |
| 1 BH | 14  | 52   | 27  | 15  | 33    |
| 1 BH | 66  | 178  | 100 | 60  | 122   |
| 1 BH | 9   | 34   | 14  | 13  | 21.5  |
| 1 BH | 4   | 14   | 11  | 2   | 9     |
| 1 BH | 25  | 19   | 36  | 4   | 22    |
| 1 BH | 11  | 30   | 20  | 8   | 20.5  |
| 1 BH | 66  | 112  | 50  | 54  | 89    |
| 1 BH | 13  | 27   | 16  | 12  | 20    |
| 1 BH | 4   | 16   | 7   | 6   | 10    |
| 1 BH | 16  | 119  | 44  | 20  | 67.5  |
| 1 BH | 27  | 25   | 33  | 1   | 26    |
| 1 BH | 1   | 45   | 11  | 13  | 23    |
| 1 BH | 47  | 527  | 113 | 150 | 287   |
| 1 BH | 13  | 29   | 13  | 15  | 21    |
| 1 BH | 2   | 20   | 0   | 9   | 11    |

|      |      |      |     |      |       |
|------|------|------|-----|------|-------|
| 1 BH | 1    | 24   | 3   | 7    | 12.5  |
| 1 BH | 5    | 14   | 12  | 2    | 9.5   |
| 1 BH | 2    | 20   | 8   | 5    | 11    |
| 1 BH | 7    | 10   | 12  | 2    | 8.5   |
| 1 BH | 1067 | 1107 | 566 | 1030 | 1087  |
| 1 BH | 7    | 16   | 7   | 5    | 11.5  |
| 1 BH | 6    | 18   | 7   | 5    | 12    |
| 1 BH | 8    | 13   | 7   | 5    | 10.5  |
| 1 BH | 582  | 455  | 367 | 458  | 518.5 |
| 1 BH | 5    | 19   | 7   | 5    | 12    |
| 1 BH | 5    | 19   | 5   | 7    | 12    |
| 1 BH | 14   | 34   | 20  | 8    | 24    |
| 1 BH | 4    | 21   | 7   | 5    | 12.5  |
| 1 BH | 2    | 23   | 3   | 8    | 12.5  |
| 1 BH | 2    | 23   | 10  | 2    | 12.5  |
| 1 BH | 3    | 20   | 9   | 5    | 11.5  |
| 1 BH | 14   | 130  | 42  | 28   | 72    |
| 1 BH | 6    | 17   | 11  | 2    | 11.5  |
| 1 BH | 9    | 41   | 15  | 15   | 25    |
| 1 BH | 0    | 56   | 4   | 14   | 28    |
| 1 BH | 2    | 25   | 7   | 5    | 13.5  |
| 1 BH | 6    | 19   | 8   | 5    | 12.5  |
| 1 BH | 10   | 71   | 25  | 21   | 40.5  |
| 1 BH | 14   | 106  | 22  | 31   | 60    |
| 1 BH | 18   | 214  | 31  | 72   | 116   |
| 1 BH | 4    | 19   | 9   | 6    | 11.5  |
| 1 BH | 8    | 12   | 11  | 4    | 10    |
| 1 BH | 8    | 8    | 10  | 6    | 8     |
| 1 BH | 1    | 24   | 8   | 6    | 12.5  |
| 1 BH | 9    | 84   | 24  | 17   | 46.5  |
| 1 BH | 3    | 27   | 8   | 4    | 15    |
| 1 BH | 1    | 30   | 6   | 5    | 15.5  |
| 1 BH | 0    | 28   | 4   | 7    | 14    |
| 1 BH | 9    | 14   | 8   | 6    | 11.5  |
| 1 BH | 7    | 18   | 7   | 7    | 12.5  |
| 1 BH | 12   | 9    | 10  | 2    | 10.5  |
| 1 BH | 22   | 63   | 23  | 24   | 42.5  |
| 1 BH | 5    | 25   | 6   | 6    | 15    |
| 1 BH | 10   | 44   | 20  | 13   | 27    |
| 1 BH | 29   | 42   | 29  | 22   | 35.5  |
| 1 BH | 139  | 157  | 21  | 183  | 148   |
| 1 BH | 60   | 197  | 87  | 71   | 128.5 |
| 1 BH | 11   | 44   | 16  | 17   | 27.5  |
| 1 BH | 33   | 41   | 30  | 19   | 37    |
| 1 BH | 57   | 270  | 122 | 77   | 163.5 |
| 1 BH | 7    | 18   | 13  | 2    | 12.5  |
| 1 BH | 2    | 25   | 7   | 8    | 13.5  |



|      |     |     |     |     |       |
|------|-----|-----|-----|-----|-------|
| 1 BH | 6   | 25  | 7   | 6   | 15.5  |
| 1 BH | 8   | 20  | 10  | 4   | 14    |
| 1 BH | 6   | 25  | 8   | 5   | 15.5  |
| 1 BH | 11  | 12  | 10  | 5   | 11.5  |
| 1 BH | 5   | 27  | 8   | 5   | 16    |
| 1 BH | 11  | 12  | 11  | 4   | 11.5  |
| 1 BH | 9   | 115 | 22  | 41  | 62    |
| 1 BH | 8   | 17  | 9   | 8   | 12.5  |
| 1 BH | 10  | 12  | 9   | 8   | 11    |
| 1 BH | 6   | 24  | 10  | 6   | 15    |
| 1 BH | 8   | 20  | 12  | 4   | 14    |
| 1 BH | 4   | 22  | 9   | 9   | 13    |
| 1 BH | 13  | 132 | 14  | 64  | 72.5  |
| 1 BH | 5   | 29  | 8   | 6   | 17    |
| 1 BH | 7   | 19  | 14  | 4   | 13    |
| 1 BH | 5   | 58  | 20  | 15  | 31.5  |
| 1 BH | 4   | 31  | 9   | 5   | 17.5  |
| 1 BH | 6   | 23  | 10  | 8   | 14.5  |
| 1 BH | 13  | 0   | 14  | 2   | 6.5   |
| 1 BH | 127 | 932 | 249 | 325 | 529.5 |
| 1 BH | 3   | 30  | 5   | 10  | 16.5  |
| 1 BH | 12  | 14  | 13  | 4   | 13    |
| 1 BH | 2   | 32  | 7   | 8   | 17    |
| 1 BH | 10  | 20  | 10  | 7   | 15    |
| 1 BH | 20  | 43  | 22  | 15  | 31.5  |
| 1 BH | 8   | 23  | 10  | 7   | 15.5  |
| 1 BH | 52  | 438 | 109 | 155 | 245   |
| 1 BH | 63  | 203 | 59  | 98  | 133   |
| 1 BH | 4   | 68  | 9   | 22  | 36    |
| 1 BH | 7   | 20  | 16  | 0   | 13.5  |
| 1 BH | 7   | 26  | 14  | 4   | 16.5  |
| 1 BH | 13  | 9   | 16  | 1   | 11    |
| 1 BH | 3   | 34  | 9   | 8   | 18.5  |
| 1 BH | 15  | 53  | 23  | 19  | 34    |
| 1 BH | 6   | 27  | 14  | 6   | 16.5  |
| 1 BH | 10  | 67  | 24  | 15  | 38.5  |
| 1 BH | 2   | 33  | 7   | 11  | 17.5  |
| 1 BH | 9   | 21  | 15  | 6   | 15    |
| 1 BH | 7   | 29  | 10  | 9   | 18    |
| 1 BH | 12  | 19  | 6   | 12  | 15.5  |
| 1 BH | 914 | 334 | 518 | 496 | 624   |
| 1 BH | 0   | 33  | 4   | 12  | 16.5  |
| 1 BH | 6   | 71  | 23  | 18  | 38.5  |
| 1 BH | 8   | 26  | 11  | 10  | 17    |
| 1 BH | 8   | 23  | 18  | 4   | 15.5  |
| 1 BH | 22  | 45  | 30  | 16  | 33.5  |
| 1 BH | 5   | 32  | 11  | 10  | 18.5  |

|      |     |     |     |     |       |
|------|-----|-----|-----|-----|-------|
| 1 BH | 13  | 108 | 33  | 32  | 60.5  |
| 1 BH | 17  | 8   | 15  | 5   | 12.5  |
| 1 BH | 8   | 27  | 16  | 7   | 17.5  |
| 1 BH | 20  | 65  | 26  | 17  | 42.5  |
| 1 BH | 13  | 18  | 12  | 11  | 15.5  |
| 1 BH | 35  | 77  | 45  | 29  | 56    |
| 1 BH | 48  | 54  | 42  | 28  | 51    |
| 1 BH | 32  | 33  | 30  | 20  | 32.5  |
| 1 BH | 6   | 33  | 19  | 5   | 19.5  |
| 1 BH | 7   | 33  | 9   | 14  | 20    |
| 1 BH | 13  | 74  | 21  | 27  | 43.5  |
| 1 BH | 17  | 15  | 17  | 6   | 16    |
| 1 BH | 5   | 40  | 13  | 9   | 22.5  |
| 1 BH | 4   | 42  | 7   | 14  | 23    |
| 1 BH | 19  | 67  | 41  | 13  | 43    |
| 1 BH | 12  | 27  | 14  | 12  | 19.5  |
| 1 BH | 6   | 38  | 21  | 3   | 22    |
| 1 BH | 112 | 290 | 95  | 149 | 201   |
| 1 BH | 15  | 20  | 23  | 4   | 17.5  |
| 1 BH | 116 | 118 | 101 | 65  | 117   |
| 1 BH | 13  | 143 | 34  | 40  | 78    |
| 1 BH | 150 | 141 | 190 | 45  | 145.5 |
| 1 BH | 210 | 371 | 391 | 36  | 290.5 |
| 1 BH | 12  | 37  | 15  | 12  | 24.5  |
| 1 BH | 10  | 40  | 15  | 12  | 25    |
| 1 BH | 43  | 3   | 43  | 3   | 23    |
| 1 BH | 8   | 41  | 18  | 11  | 24.5  |
| 1 BH | 21  | 17  | 18  | 10  | 19    |
| 1 BH | 135 | 60  | 153 | 17  | 97.5  |
| 1 BH | 15  | 35  | 20  | 10  | 25    |
| 1 BH | 38  | 127 | 57  | 43  | 82.5  |
| 1 BH | 13  | 49  | 24  | 7   | 31    |
| 1 BH | 13  | 43  | 21  | 18  | 28    |
| 1 BH | 13  | 53  | 19  | 16  | 33    |
| 1 BH | 35  | 249 | 76  | 68  | 142   |
| 1 BH | 2   | 62  | 8   | 22  | 32    |
| 1 BH | 12  | 113 | 65  | 7   | 62.5  |
| 1 BH | 19  | 48  | 25  | 15  | 33.5  |
| 1 BH | 7   | 68  | 14  | 25  | 37.5  |
| 1 BH | 10  | 64  | 12  | 27  | 37    |
| 1 BH | 13  | 70  | 21  | 22  | 41.5  |
| 1 BH | 15  | 167 | 35  | 51  | 91    |
| 1 BH | 25  | 58  | 23  | 29  | 41.5  |
| 1 BH | 37  | 19  | 35  | 19  | 28    |
| 1 BH | 30  | 51  | 38  | 19  | 40.5  |
| 1 BH | 23  | 68  | 31  | 25  | 45.5  |
| 1 BH | 80  | 64  | 73  | 36  | 72    |

|      |     |     |     |     |       |
|------|-----|-----|-----|-----|-------|
| 1 BH | 106 | 559 | 80  | 264 | 332.5 |
| 1 BH | 21  | 75  | 26  | 35  | 48    |
| 1 BH | 41  | 176 | 101 | 30  | 108.5 |
| 1 BH | 80  | 487 | 75  | 206 | 283.5 |
| 1 BH | 29  | 104 | 32  | 41  | 66.5  |
| 1 BH | 20  | 408 | 45  | 151 | 214   |
| 1 BH | 101 | 150 | 97  | 76  | 125.5 |
| 1 BH | 53  | 63  | 61  | 25  | 58    |
| 1 BH | 82  | 159 | 84  | 72  | 120.5 |
| 1 BH | 3   | 17  | 4   | 4   | 10    |
| 1 BH | 3   | 9   | 7   | 2   | 6     |
| 1 BH | 3   | 17  | 6   | 8   | 10    |
| 1 BH | 2   | 14  | 6   | 5   | 8     |
| 1 BH | 6   | 21  | 10  | 3   | 13.5  |
| 1 BH | 4   | 14  | 3   | 6   | 9     |
| 1 BH | 2   | 12  | 5   | 3   | 7     |
| 1 BH | 4   | 25  | 9   | 10  | 14.5  |
| 1 BH | 4   | 11  | 7   | 2   | 7.5   |
| 1 BH | 2   | 10  | 4   | 2   | 6     |
| 1 BH | 3   | 18  | 7   | 4   | 10.5  |
| 1 BH | 4   | 14  | 3   | 6   | 9     |
| 1 BH | 7   | 8   | 6   | 2   | 7.5   |
| 1 BH | 8   | 17  | 15  | 4   | 12.5  |
| 1 BH | 5   | 11  | 11  | 3   | 8     |
| 1 BH | 10  | 8   | 6   | 6   | 9     |
| 1 BH | 3   | 17  | 6   | 3   | 10    |
| 1 BH | 3   | 19  | 6   | 4   | 11    |
| 1 BH | 4   | 24  | 8   | 10  | 14    |
| 1 BH | 4   | 12  | 7   | 2   | 8     |
| 1 BH | 1   | 10  | 2   | 2   | 5.5   |
| 1 BH | 2   | 10  | 2   | 3   | 6     |
| 1 BH | 3   | 19  | 5   | 5   | 11    |
| 1 BH | 20  | 37  | 18  | 16  | 28.5  |
| 1 BH | 2   | 12  | 5   | 5   | 7     |
| 1 BH | 3   | 19  | 9   | 5   | 11    |
| 1 BH | 20  | 46  | 20  | 21  | 33    |
| 1 BH | 1   | 10  | 2   | 2   | 5.5   |
| 1 BH | 8   | 8   | 4   | 6   | 8     |
| 1 BH | 15  | 18  | 15  | 5   | 16.5  |
| 1 BH | 6   | 17  | 11  | 3   | 11.5  |
| 1 BH | 4   | 11  | 10  | 3   | 7.5   |
| 1 BH | 10  | 17  | 14  | 4   | 13.5  |
| 1 BH | 2   | 10  | 4   | 2   | 6     |
| 1 BH | 5   | 9   | 7   | 2   | 7     |
| 1 BH | 6   | 28  | 6   | 10  | 17    |
| 1 BH | 4   | 22  | 10  | 5   | 13    |
| 1 BH | 7   | 26  | 16  | 5   | 16.5  |

|      |    |     |     |    |      |
|------|----|-----|-----|----|------|
| 1 BH | 4  | 9   | 7   | 2  | 6.5  |
| 1 BH | 6  | 9   | 7   | 2  | 7.5  |
| 1 BH | 2  | 12  | 5   | 3  | 7    |
| 1 BH | 1  | 10  | 2   | 2  | 5.5  |
| 1 BH | 2  | 11  | 3   | 3  | 6.5  |
| 1 BH | 17 | 112 | 38  | 32 | 64.5 |
| 1 BH | 3  | 17  | 4   | 5  | 10   |
| 1 BH | 3  | 19  | 6   | 4  | 11   |
| 1 BH | 18 | 44  | 26  | 16 | 31   |
| 1 BH | 13 | 78  | 23  | 27 | 45.5 |
| 1 BH | 29 | 67  | 27  | 27 | 48   |
| 1 BH | 17 | 45  | 25  | 17 | 31   |
| 1 BH | 65 | 189 | 99  | 56 | 127  |
| 1 BH | 2  | 10  | 4   | 1  | 6    |
| 1 BH | 1  | 12  | 3   | 2  | 6.5  |
| 1 BH | 3  | 9   | 4   | 3  | 6    |
| 1 BH | 1  | 12  | 4   | 1  | 6.5  |
| 1 BH | 15 | 34  | 17  | 14 | 24.5 |
| 1 BH | 6  | 37  | 14  | 14 | 21.5 |
| 1 BH | 1  | 12  | 3   | 2  | 6.5  |
| 1 BH | 11 | 26  | 13  | 11 | 18.5 |
| 1 BH | 42 | 40  | 47  | 19 | 41   |
| 1 BH | 14 | 38  | 17  | 14 | 26   |
| 1 BH | 4  | 26  | 8   | 8  | 15   |
| 1 BH | 1  | 10  | 3   | 3  | 5.5  |
| 1 BH | 15 | 41  | 16  | 13 | 28   |
| 1 BH | 84 | 176 | 110 | 59 | 130  |
| 1 BH | 1  | 12  | 4   | 1  | 6.5  |
| 1 BH | 16 | 29  | 14  | 11 | 22.5 |
| 1 BH | 18 | 70  | 15  | 30 | 44   |
| 1 BH | 9  | 54  | 18  | 19 | 31.5 |
| 1 BH | 0  | 23  | 4   | 4  | 11.5 |
| 1 BH | 25 | 74  | 33  | 27 | 49.5 |
| 1 BH | 4  | 10  | 4   | 3  | 7    |
| 1 BH | 7  | 30  | 18  | 6  | 18.5 |
| 1 BH | 7  | 44  | 16  | 13 | 25.5 |
| 1 BH | 1  | 12  | 3   | 2  | 6.5  |
| 1 BH | 26 | 67  | 28  | 30 | 46.5 |
| 1 BH | 21 | 45  | 19  | 16 | 33   |
| 1 BH | 1  | 12  | 3   | 2  | 6.5  |
| 1 BH | 7  | 12  | 13  | 0  | 9.5  |
| 1 BH | 22 | 53  | 12  | 28 | 37.5 |
| 1 BH | 22 | 43  | 27  | 18 | 32.5 |
| 1 BH | 4  | 8   | 5   | 3  | 6    |
| 1 BH | 1  | 11  | 3   | 4  | 6    |
| 1 BH | 1  | 11  | 4   | 2  | 6    |
| 1 BH | 1  | 16  | 4   | 3  | 8.5  |

|      |     |     |     |    |      |
|------|-----|-----|-----|----|------|
| 1 BH | 6   | 11  | 9   | 4  | 8.5  |
| 1 BH | 2   | 18  | 4   | 6  | 10   |
| 1 BH | 1   | 12  | 4   | 3  | 6.5  |
| 1 BH | 1   | 15  | 2   | 6  | 8    |
| 1 BH | 3   | 11  | 7   | 2  | 7    |
| 1 BH | 2   | 12  | 3   | 4  | 7    |
| 1 BH | 0   | 18  | 4   | 2  | 9    |
| 1 BH | 2   | 11  | 2   | 3  | 6.5  |
| 1 BH | 0   | 11  | 1   | 4  | 5.5  |
| 1 BH | 2   | 10  | 3   | 5  | 6    |
| 1 BH | 5   | 7   | 7   | 2  | 6    |
| 1 BH | 4   | 11  | 7   | 1  | 7.5  |
| 1 BH | 1   | 12  | 3   | 3  | 6.5  |
| 1 BH | 3   | 26  | 10  | 5  | 14.5 |
| 1 BH | 0   | 16  | 4   | 4  | 8    |
| 1 BH | 2   | 50  | 10  | 15 | 26   |
| 1 BH | 5   | 73  | 17  | 19 | 39   |
| 1 BH | 3   | 32  | 11  | 7  | 17.5 |
| 1 BH | 4   | 16  | 6   | 6  | 10   |
| 1 BH | 1   | 10  | 7   | 0  | 5.5  |
| 1 BH | 5   | 7   | 5   | 4  | 6    |
| 1 BH | 3   | 11  | 5   | 5  | 7    |
| 1 BH | 2   | 9   | 8   | 1  | 5.5  |
| 1 BH | 2   | 13  | 10  | 1  | 7.5  |
| 1 BH | 1   | 11  | 4   | 2  | 6    |
| 1 BH | 0   | 14  | 5   | 1  | 7    |
| 1 BH | 2   | 12  | 3   | 2  | 7    |
| 1 BH | 2   | 30  | 15  | 5  | 16   |
| 1 BH | 6   | 13  | 4   | 6  | 9.5  |
| 1 BH | 2   | 15  | 3   | 6  | 8.5  |
| 1 BH | 4   | 15  | 7   | 4  | 9.5  |
| 1 BH | 4   | 13  | 5   | 4  | 8.5  |
| 1 BH | 7   | 7   | 6   | 2  | 7    |
| 1 BH | 1   | 11  | 4   | 2  | 6    |
| 1 BH | 2   | 10  | 2   | 6  | 6    |
| 1 BH | 40  | 238 | 43  | 99 | 139  |
| 1 BH | 3   | 11  | 6   | 5  | 7    |
| 1 BH | 3   | 11  | 5   | 5  | 7    |
| 1 BH | 12  | 12  | 17  | 2  | 12   |
| 1 BH | 4   | 42  | 13  | 14 | 23   |
| 1 BH | 4   | 11  | 0   | 8  | 7.5  |
| 1 BH | 4   | 15  | 7   | 5  | 9.5  |
| 1 BH | 2   | 9   | 4   | 2  | 5.5  |
| 1 BH | 2   | 20  | 7   | 2  | 11   |
| 1 BH | 131 | 101 | 142 | 43 | 116  |
| 1 BH | 2   | 10  | 2   | 6  | 6    |
| 1 BH | 4   | 15  | 7   | 5  | 9.5  |

|      |   |    |    |    |      |
|------|---|----|----|----|------|
| 1 BH | 0 | 18 | 4  | 2  | 9    |
| 1 BH | 4 | 10 | 6  | 3  | 7    |
| 1 BH | 2 | 11 | 3  | 5  | 6.5  |
| 1 BH | 5 | 15 | 5  | 6  | 10   |
| 1 BH | 3 | 10 | 4  | 1  | 6.5  |
| 1 BH | 6 | 9  | 8  | 1  | 7.5  |
| 1 BH | 1 | 16 | 4  | 3  | 8.5  |
| 1 BH | 0 | 12 | 5  | 1  | 6    |
| 1 BH | 2 | 24 | 6  | 6  | 13   |
| 1 BH | 0 | 14 | 5  | 1  | 7    |
| 1 BH | 2 | 9  | 3  | 3  | 5.5  |
| 1 BH | 2 | 10 | 6  | 2  | 6    |
| 1 BH | 1 | 14 | 2  | 3  | 7.5  |
| 1 BH | 2 | 9  | 2  | 4  | 5.5  |
| 1 BH | 1 | 11 | 3  | 3  | 6    |
| 1 BH | 1 | 30 | 5  | 13 | 15.5 |
| 1 BH | 1 | 11 | 4  | 2  | 6    |
| 1 BH | 3 | 11 | 7  | 5  | 7    |
| 1 BH | 2 | 12 | 10 | 1  | 7    |
| 1 BH | 3 | 12 | 10 | 0  | 7.5  |
| 1 BH | 2 | 10 | 3  | 2  | 6    |
| 1 BH | 0 | 14 | 5  | 1  | 7    |
| 1 BH | 1 | 30 | 5  | 13 | 15.5 |
| 1 BH | 2 | 12 | 4  | 2  | 7    |
| 1 BH | 3 | 26 | 5  | 9  | 14.5 |
| 1 BH | 5 | 13 | 6  | 3  | 9    |
| 1 BH | 3 | 62 | 10 | 18 | 32.5 |
| 1 BH | 1 | 14 | 2  | 3  | 7.5  |
| 1 BH | 6 | 5  | 4  | 2  | 5.5  |
| 1 BH | 2 | 48 | 21 | 8  | 25   |
| 1 BH | 0 | 15 | 7  | 0  | 7.5  |
| 1 BH | 1 | 15 | 4  | 2  | 8    |
| 1 BH | 3 | 26 | 11 | 5  | 14.5 |
| 1 BH | 2 | 14 | 5  | 3  | 8    |
| 1 BH | 0 | 19 | 4  | 4  | 9.5  |
| 1 BH | 5 | 9  | 5  | 3  | 7    |
| 1 BH | 2 | 22 | 4  | 7  | 12   |
| 1 BH | 6 | 2  | 10 | 1  | 4    |
| 1 BH | 0 | 20 | 5  | 5  | 10   |
| 1 BH | 3 | 10 | 4  | 1  | 6.5  |
| 1 BH | 1 | 12 | 1  | 3  | 6.5  |
| 1 BH | 6 | 12 | 10 | 1  | 9    |
| 1 BH | 3 | 13 | 2  | 9  | 8    |
| 1 BH | 2 | 15 | 3  | 6  | 8.5  |
| 1 BH | 2 | 10 | 3  | 2  | 6    |
| 1 BH | 3 | 10 | 2  | 5  | 6.5  |
| 1 BH | 1 | 23 | 7  | 6  | 12   |

|      |    |    |    |    |      |
|------|----|----|----|----|------|
| 1 BH | 1  | 11 | 3  | 3  | 6    |
| 1 BH | 1  | 11 | 3  | 4  | 6    |
| 1 BH | 5  | 12 | 8  | 4  | 8.5  |
| 1 BH | 1  | 23 | 10 | 2  | 12   |
| 1 BH | 6  | 9  | 4  | 4  | 7.5  |
| 1 BH | 10 | 64 | 9  | 24 | 37   |
| 1 BH | 3  | 11 | 6  | 5  | 7    |
| 1 BH | 2  | 10 | 1  | 5  | 6    |
| 1 BH | 1  | 11 | 1  | 5  | 6    |
| 1 BH | 1  | 12 | 3  | 3  | 6.5  |
| 1 BH | 2  | 12 | 3  | 2  | 7    |
| 1 BH | 2  | 20 | 5  | 6  | 11   |
| 1 BH | 0  | 13 | 0  | 6  | 6.5  |
| 1 BH | 1  | 11 | 1  | 5  | 6    |
| 1 BH | 1  | 21 | 1  | 6  | 11   |
| 1 BH | 9  | 1  | 5  | 7  | 5    |
| 1 BH | 1  | 11 | 3  | 3  | 6    |
| 1 BH | 2  | 11 | 5  | 2  | 6.5  |
| 1 BH | 11 | 0  | 11 | 0  | 5.5  |
| 1 BH | 2  | 13 | 3  | 3  | 7.5  |
| 1 BH | 1  | 12 | 4  | 5  | 6.5  |
| 1 BH | 2  | 10 | 8  | 1  | 6    |
| 1 BH | 1  | 11 | 5  | 1  | 6    |
| 1 BH | 5  | 15 | 9  | 0  | 10   |
| 1 BH | 0  | 14 | 5  | 1  | 7    |
| 1 BH | 2  | 24 | 6  | 5  | 13   |
| 1 BH | 19 | 6  | 23 | 5  | 12.5 |
| 1 BH | 5  | 13 | 6  | 3  | 9    |
| 1 BH | 4  | 9  | 4  | 5  | 6.5  |
| 1 BH | 2  | 15 | 1  | 6  | 8.5  |
| 1 BH | 1  | 23 | 6  | 6  | 12   |
| 1 BH | 1  | 11 | 3  | 3  | 6    |
| 1 BH | 2  | 12 | 7  | 3  | 7    |
| 1 BH | 0  | 12 | 1  | 4  | 6    |
| 1 BH | 3  | 19 | 11 | 2  | 11   |
| 1 BH | 2  | 13 | 4  | 4  | 7.5  |
| 1 BH | 4  | 14 | 6  | 5  | 9    |
| 1 BH | 2  | 24 | 6  | 6  | 13   |
| 1 BH | 2  | 13 | 4  | 3  | 7.5  |
| 1 BH | 6  | 14 | 9  | 4  | 10   |
| 1 BH | 1  | 10 | 5  | 2  | 5.5  |
| 1 BH | 5  | 13 | 6  | 3  | 9    |
| 1 BH | 16 | 8  | 11 | 6  | 12   |
| 1 BH | 8  | 3  | 6  | 3  | 5.5  |
| 1 BH | 1  | 13 | 4  | 4  | 7    |
| 1 BH | 1  | 11 | 2  | 4  | 6    |
| 1 BH | 2  | 19 | 6  | 3  | 10.5 |

|      |    |     |    |    |      |
|------|----|-----|----|----|------|
| 1 BH | 4  | 24  | 4  | 9  | 14   |
| 1 BH | 7  | 65  | 22 | 16 | 36   |
| 1 BH | 1  | 37  | 10 | 5  | 19   |
| 1 BH | 1  | 12  | 3  | 4  | 6.5  |
| 1 BH | 3  | 32  | 8  | 7  | 17.5 |
| 1 BH | 1  | 14  | 4  | 3  | 7.5  |
| 1 BH | 7  | 19  | 10 | 4  | 13   |
| 1 BH | 0  | 11  | 1  | 3  | 5.5  |
| 1 BH | 54 | 34  | 46 | 22 | 44   |
| 1 BH | 5  | 18  | 9  | 5  | 11.5 |
| 1 BH | 2  | 12  | 2  | 6  | 7    |
| 1 BH | 0  | 12  | 1  | 3  | 6    |
| 1 BH | 6  | 16  | 11 | 5  | 11   |
| 1 BH | 2  | 14  | 4  | 4  | 8    |
| 1 BH | 17 | 59  | 43 | 7  | 38   |
| 1 BH | 33 | 130 | 36 | 49 | 81.5 |
| 1 BH | 0  | 17  | 4  | 4  | 8.5  |
| 1 BH | 4  | 43  | 11 | 9  | 23.5 |
| 1 BH | 2  | 17  | 3  | 6  | 9.5  |
| 1 BH | 2  | 22  | 5  | 7  | 12   |
| 1 BH | 4  | 37  | 10 | 11 | 20.5 |
| 1 BH | 2  | 18  | 3  | 6  | 10   |
| 1 BH | 7  | 23  | 7  | 9  | 15   |
| 1 BH | 0  | 17  | 6  | 3  | 8.5  |
| 1 BH | 1  | 14  | 4  | 3  | 7.5  |
| 1 BH | 2  | 24  | 5  | 7  | 13   |
| 1 BH | 4  | 47  | 13 | 11 | 25.5 |
| 1 BH | 2  | 21  | 5  | 6  | 11.5 |
| 1 BH | 2  | 13  | 6  | 3  | 7.5  |
| 1 BH | 0  | 14  | 10 | 1  | 7    |
| 1 BH | 6  | 22  | 11 | 6  | 14   |
| 1 BH | 2  | 11  | 8  | 0  | 6.5  |
| 1 BH | 4  | 14  | 3  | 7  | 9    |
| 1 BH | 24 | 26  | 29 | 7  | 25   |
| 1 BH | 2  | 18  | 6  | 2  | 10   |
| 1 BH | 0  | 14  | 2  | 2  | 7    |
| 1 BH | 1  | 13  | 3  | 3  | 7    |
| 1 BH | 5  | 17  | 7  | 8  | 11   |
| 1 BH | 1  | 14  | 3  | 3  | 7.5  |
| 1 BH | 1  | 16  | 7  | 4  | 8.5  |
| 1 BH | 5  | 52  | 11 | 15 | 28.5 |
| 1 BH | 3  | 26  | 13 | 6  | 14.5 |
| 1 BH | 6  | 24  | 8  | 9  | 15   |
| 1 BH | 8  | 10  | 6  | 5  | 9    |
| 1 BH | 5  | 21  | 7  | 7  | 13   |
| 1 BH | 17 | 5   | 19 | 4  | 11   |
| 1 BH | 3  | 17  | 7  | 3  | 10   |



|      |    |    |    |    |      |
|------|----|----|----|----|------|
| 1 BH | 29 | 20 | 34 | 11 | 24.5 |
| 1 BH | 1  | 15 | 5  | 4  | 8    |
| 1 BH | 2  | 14 | 5  | 4  | 8    |
| 1 BH | 2  | 18 | 6  | 2  | 10   |
| 1 BH | 2  | 17 | 4  | 8  | 9.5  |
| 1 BH | 2  | 15 | 6  | 5  | 8.5  |
| 1 BH | 3  | 24 | 4  | 10 | 13.5 |
| 1 BH | 1  | 24 | 9  | 1  | 12.5 |
| 1 BH | 2  | 14 | 5  | 4  | 8    |
| 1 BH | 0  | 21 | 2  | 6  | 10.5 |
| 1 BH | 1  | 23 | 7  | 5  | 12   |
| 1 BH | 1  | 15 | 7  | 5  | 8    |
| 1 BH | 1  | 14 | 4  | 3  | 7.5  |
| 1 BH | 2  | 14 | 6  | 4  | 8    |
| 1 BH | 3  | 12 | 7  | 1  | 7.5  |
| 1 BH | 1  | 12 | 5  | 2  | 6.5  |
| 1 BH | 2  | 9  | 7  | 1  | 5.5  |
| 1 BH | 10 | 86 | 26 | 22 | 48   |
| 1 BH | 1  | 14 | 3  | 3  | 7.5  |
| 1 BH | 4  | 13 | 3  | 7  | 8.5  |
| 1 BH | 10 | 18 | 12 | 5  | 14   |
| 1 BH | 1  | 17 | 5  | 4  | 9    |
| 1 BH | 6  | 27 | 9  | 7  | 16.5 |
| 1 BH | 8  | 13 | 13 | 1  | 10.5 |
| 1 BH | 8  | 58 | 14 | 22 | 33   |
| 1 BH | 0  | 11 | 6  | 1  | 5.5  |
| 1 BH | 6  | 25 | 14 | 8  | 15.5 |
| 1 BH | 1  | 16 | 7  | 4  | 8.5  |
| 1 BH | 5  | 21 | 7  | 7  | 13   |
| 1 BH | 1  | 19 | 6  | 2  | 10   |
| 1 BH | 2  | 17 | 4  | 8  | 9.5  |
| 1 BH | 6  | 6  | 5  | 1  | 6    |
| 1 BH | 1  | 14 | 5  | 4  | 7.5  |
| 1 BH | 6  | 6  | 8  | 3  | 6    |
| 1 BH | 3  | 8  | 6  | 1  | 5.5  |
| 1 BH | 2  | 12 | 4  | 1  | 7    |
| 1 BH | 6  | 13 | 3  | 11 | 9.5  |
| 1 BH | 1  | 16 | 3  | 3  | 8.5  |
| 1 BH | 5  | 6  | 2  | 4  | 5.5  |
| 1 BH | 0  | 15 | 3  | 5  | 7.5  |
| 1 BH | 2  | 14 | 9  | 0  | 8    |
| 1 BH | 12 | 15 | 4  | 14 | 13.5 |
| 1 BH | 3  | 17 | 7  | 3  | 10   |
| 1 BH | 7  | 33 | 15 | 11 | 20   |
| 1 BH | 4  | 36 | 10 | 10 | 20   |
| 1 BH | 1  | 13 | 4  | 6  | 7    |
| 1 BH | 0  | 11 | 6  | 1  | 5.5  |

|      |    |     |    |    |      |
|------|----|-----|----|----|------|
| 1 BH | 6  | 19  | 8  | 4  | 12.5 |
| 1 BH | 1  | 10  | 7  | 2  | 5.5  |
| 1 BH | 12 | 18  | 21 | 1  | 15   |
| 1 BH | 4  | 38  | 12 | 9  | 21   |
| 1 BH | 3  | 18  | 4  | 6  | 10.5 |
| 1 BH | 2  | 24  | 7  | 5  | 13   |
| 1 BH | 3  | 35  | 7  | 8  | 19   |
| 1 BH | 12 | 76  | 9  | 32 | 44   |
| 1 BH | 8  | 204 | 76 | 33 | 106  |
| 1 BH | 0  | 14  | 2  | 2  | 7    |
| 1 BH | 5  | 20  | 7  | 6  | 12.5 |
| 1 BH | 0  | 17  | 4  | 3  | 8.5  |
| 1 BH | 5  | 20  | 8  | 7  | 12.5 |
| 1 BH | 4  | 13  | 9  | 0  | 8.5  |
| 1 BH | 1  | 24  | 11 | 2  | 12.5 |
| 1 BH | 1  | 13  | 5  | 3  | 7    |
| 1 BH | 2  | 12  | 5  | 1  | 7    |
| 1 BH | 15 | 11  | 19 | 1  | 13   |
| 1 BH | 2  | 13  | 4  | 5  | 7.5  |
| 1 BH | 2  | 16  | 7  | 2  | 9    |
| 1 BH | 1  | 16  | 1  | 7  | 8.5  |
| 1 BH | 4  | 13  | 8  | 2  | 8.5  |
| 1 BH | 1  | 15  | 3  | 4  | 8    |
| 1 BH | 5  | 19  | 7  | 7  | 12   |
| 1 BH | 7  | 30  | 11 | 8  | 18.5 |
| 1 BH | 4  | 15  | 8  | 6  | 9.5  |
| 1 BH | 6  | 16  | 10 | 1  | 11   |
| 1 BH | 2  | 18  | 6  | 2  | 10   |
| 1 BH | 6  | 52  | 22 | 13 | 29   |
| 1 BH | 1  | 12  | 4  | 2  | 6.5  |
| 1 BH | 0  | 16  | 3  | 3  | 8    |
| 1 BH | 4  | 11  | 9  | 0  | 7.5  |
| 1 BH | 5  | 20  | 8  | 5  | 12.5 |
| 1 BH | 9  | 76  | 21 | 22 | 42.5 |
| 1 BH | 2  | 23  | 10 | 5  | 12.5 |
| 1 BH | 2  | 15  | 6  | 5  | 8.5  |
| 1 BH | 1  | 14  | 4  | 3  | 7.5  |
| 1 BH | 0  | 14  | 5  | 2  | 7    |
| 1 BH | 1  | 12  | 4  | 2  | 6.5  |
| 1 BH | 4  | 11  | 9  | 0  | 7.5  |
| 1 BH | 2  | 14  | 7  | 0  | 8    |
| 1 BH | 6  | 37  | 17 | 5  | 21.5 |
| 1 BH | 3  | 12  | 3  | 6  | 7.5  |
| 1 BH | 6  | 10  | 3  | 6  | 8    |
| 1 BH | 1  | 16  | 4  | 2  | 8.5  |
| 1 BH | 8  | 18  | 14 | 3  | 13   |
| 1 BH | 4  | 8   | 5  | 1  | 6    |

|      |    |     |    |    |      |
|------|----|-----|----|----|------|
| 1 BH | 20 | 6   | 25 | 0  | 13   |
| 1 BH | 12 | 57  | 19 | 20 | 34.5 |
| 1 BH | 2  | 11  | 5  | 3  | 6.5  |
| 1 BH | 7  | 14  | 8  | 3  | 10.5 |
| 1 BH | 3  | 10  | 4  | 4  | 6.5  |
| 1 BH | 9  | 5   | 9  | 0  | 7    |
| 1 BH | 14 | 101 | 17 | 45 | 57.5 |
| 1 BH | 7  | 8   | 7  | 2  | 7.5  |
| 1 BH | 10 | 24  | 11 | 13 | 17   |
| 1 BH | 4  | 24  | 9  | 6  | 14   |
| 1 BH | 3  | 22  | 7  | 5  | 12.5 |
| 1 BH | 2  | 18  | 8  | 3  | 10   |
| 1 BH | 4  | 29  | 12 | 9  | 16.5 |
| 1 BH | 3  | 12  | 5  | 2  | 7.5  |
| 1 BH | 14 | 45  | 17 | 13 | 29.5 |
| 1 BH | 4  | 23  | 10 | 4  | 13.5 |
| 1 BH | 10 | 34  | 17 | 10 | 22   |
| 1 BH | 15 | 17  | 19 | 9  | 16   |
| 1 BH | 4  | 11  | 6  | 4  | 7.5  |
| 1 BH | 3  | 16  | 9  | 1  | 9.5  |
| 1 BH | 14 | 55  | 37 | 11 | 34.5 |
| 1 BH | 53 | 26  | 52 | 20 | 39.5 |
| 1 BH | 0  | 12  | 2  | 3  | 6    |
| 1 BH | 19 | 24  | 18 | 9  | 21.5 |
| 1 BH | 7  | 32  | 6  | 13 | 19.5 |
| 1 BH | 3  | 8   | 5  | 1  | 5.5  |
| 1 BH | 7  | 5   | 8  | 1  | 6    |
| 1 BH | 8  | 23  | 18 | 3  | 15.5 |
| 1 BH | 3  | 29  | 14 | 5  | 16   |
| 1 BH | 49 | 124 | 59 | 48 | 86.5 |
| 1 BH | 10 | 27  | 12 | 8  | 18.5 |
| 1 BH | 15 | 50  | 31 | 12 | 32.5 |
| 1 BH | 18 | 96  | 33 | 28 | 57   |
| 1 BH | 4  | 11  | 7  | 5  | 7.5  |
| 1 BH | 1  | 17  | 4  | 8  | 9    |
| 1 BH | 12 | 101 | 20 | 32 | 56.5 |
| 1 BH | 5  | 9   | 7  | 4  | 7    |
| 1 BH | 2  | 14  | 5  | 2  | 8    |
| 1 BH | 0  | 16  | 2  | 3  | 8    |
| 1 BH | 53 | 73  | 60 | 29 | 63   |
| 1 BH | 2  | 12  | 6  | 2  | 7    |
| 1 BH | 0  | 12  | 4  | 3  | 6    |
| 1 BH | 2  | 11  | 4  | 3  | 6.5  |
| 1 BH | 2  | 15  | 4  | 4  | 8.5  |
| 1 BH | 3  | 15  | 6  | 3  | 9    |
| 1 BH | 6  | 11  | 3  | 6  | 8.5  |
| 1 BH | 14 | 18  | 18 | 6  | 16   |

|      |    |     |     |    |      |
|------|----|-----|-----|----|------|
| 1 BH | 6  | 12  | 8   | 4  | 9    |
| 1 BH | 9  | 6   | 8   | 1  | 7.5  |
| 1 BH | 31 | 27  | 36  | 14 | 29   |
| 1 BH | 5  | 13  | 7   | 5  | 9    |
| 1 BH | 5  | 20  | 6   | 7  | 12.5 |
| 1 BH | 9  | 9   | 10  | 1  | 9    |
| 1 BH | 28 | 33  | 26  | 21 | 30.5 |
| 1 BH | 1  | 15  | 6   | 3  | 8    |
| 1 BH | 2  | 30  | 7   | 7  | 16   |
| 1 BH | 3  | 11  | 6   | 3  | 7    |
| 1 BH | 15 | 72  | 20  | 23 | 43.5 |
| 1 BH | 0  | 15  | 4   | 4  | 7.5  |
| 1 BH | 3  | 71  | 20  | 13 | 37   |
| 1 BH | 0  | 21  | 4   | 6  | 10.5 |
| 1 BH | 1  | 10  | 3   | 2  | 5.5  |
| 1 BH | 14 | 45  | 22  | 15 | 29.5 |
| 1 BH | 22 | 105 | 42  | 23 | 63.5 |
| 1 BH | 2  | 25  | 11  | 4  | 13.5 |
| 1 BH | 84 | 190 | 100 | 63 | 137  |
| 1 BH | 0  | 12  | 2   | 3  | 6    |
| 1 BH | 5  | 7   | 4   | 3  | 6    |
| 1 BH | 6  | 19  | 8   | 6  | 12.5 |
| 1 BH | 0  | 13  | 7   | 0  | 6.5  |
| 1 BH | 1  | 15  | 6   | 2  | 8    |
| 1 BH | 0  | 12  | 2   | 2  | 6    |
| 1 BH | 15 | 103 | 48  | 22 | 59   |
| 1 BH | 2  | 21  | 6   | 8  | 11.5 |
| 1 BH | 3  | 13  | 6   | 3  | 8    |
| 1 BH | 9  | 26  | 12  | 9  | 17.5 |
| 1 BH | 5  | 23  | 8   | 6  | 14   |
| 1 BH | 8  | 128 | 25  | 32 | 68   |
| 1 BH | 1  | 23  | 4   | 5  | 12   |
| 1 BH | 9  | 33  | 21  | 8  | 21   |
| 1 BH | 1  | 24  | 6   | 4  | 12.5 |
| 1 BH | 3  | 13  | 6   | 4  | 8    |
| 1 BH | 3  | 8   | 4   | 5  | 5.5  |
| 1 BH | 7  | 14  | 7   | 5  | 10.5 |
| 1 BH | 3  | 13  | 6   | 4  | 8    |
| 1 BH | 8  | 54  | 23  | 8  | 31   |
| 1 BH | 4  | 32  | 10  | 6  | 18   |
| 1 BH | 0  | 16  | 5   | 4  | 8    |
| 1 BH | 17 | 44  | 32  | 8  | 30.5 |
| 1 BH | 2  | 14  | 4   | 6  | 8    |
| 1 BH | 8  | 20  | 20  | 1  | 14   |
| 1 BH | 29 | 60  | 20  | 38 | 44.5 |
| 1 BH | 6  | 49  | 18  | 11 | 27.5 |
| 1 BH | 1  | 32  | 10  | 6  | 16.5 |

|      |    |     |    |    |      |
|------|----|-----|----|----|------|
| 1 BH | 3  | 41  | 16 | 8  | 22   |
| 1 BH | 3  | 31  | 9  | 6  | 17   |
| 1 BH | 8  | 5   | 11 | 2  | 6.5  |
| 1 BH | 0  | 12  | 6  | 2  | 6    |
| 1 BH | 1  | 12  | 3  | 1  | 6.5  |
| 1 BH | 5  | 14  | 10 | 2  | 9.5  |
| 1 BH | 9  | 19  | 13 | 8  | 14   |
| 1 BH | 0  | 11  | 5  | 0  | 5.5  |
| 1 BH | 16 | 84  | 17 | 32 | 50   |
| 1 BH | 5  | 25  | 9  | 10 | 15   |
| 1 BH | 7  | 16  | 6  | 5  | 11.5 |
| 1 BH | 19 | 69  | 21 | 30 | 44   |
| 1 BH | 0  | 11  | 3  | 4  | 5.5  |
| 1 BH | 4  | 23  | 15 | 1  | 13.5 |
| 1 BH | 2  | 23  | 5  | 7  | 12.5 |
| 1 BH | 20 | 39  | 27 | 8  | 29.5 |
| 1 BH | 7  | 25  | 14 | 6  | 16   |
| 1 BH | 8  | 28  | 8  | 10 | 18   |
| 1 BH | 11 | 40  | 24 | 8  | 25.5 |
| 1 BH | 11 | 36  | 18 | 13 | 23.5 |
| 1 BH | 13 | 37  | 15 | 16 | 25   |
| 1 BH | 10 | 24  | 8  | 8  | 17   |
| 1 BH | 6  | 27  | 6  | 14 | 16.5 |
| 1 BH | 9  | 22  | 12 | 6  | 15.5 |
| 1 BH | 3  | 17  | 9  | 4  | 10   |
| 1 BH | 3  | 34  | 11 | 6  | 18.5 |
| 1 BH | 8  | 5   | 6  | 3  | 6.5  |
| 1 BH | 3  | 18  | 5  | 7  | 10.5 |
| 1 BH | 3  | 12  | 6  | 4  | 7.5  |
| 1 BH | 4  | 11  | 6  | 1  | 7.5  |
| 1 BH | 87 | 63  | 53 | 62 | 75   |
| 1 BH | 1  | 41  | 8  | 14 | 21   |
| 1 BH | 2  | 14  | 7  | 1  | 8    |
| 1 BH | 5  | 15  | 9  | 5  | 10   |
| 1 BH | 3  | 32  | 11 | 8  | 17.5 |
| 1 BH | 0  | 29  | 10 | 6  | 14.5 |
| 1 BH | 14 | 34  | 25 | 8  | 24   |
| 1 BH | 9  | 12  | 9  | 3  | 10.5 |
| 1 BH | 16 | 32  | 24 | 10 | 24   |
| 1 BH | 4  | 22  | 7  | 7  | 13   |
| 1 BH | 6  | 27  | 12 | 6  | 16.5 |
| 1 BH | 14 | 92  | 34 | 23 | 53   |
| 1 BH | 6  | 9   | 1  | 8  | 7.5  |
| 1 BH | 2  | 19  | 6  | 7  | 10.5 |
| 1 BH | 3  | 21  | 6  | 6  | 12   |
| 1 BH | 24 | 74  | 17 | 44 | 49   |
| 1 BH | 40 | 109 | 56 | 39 | 74.5 |

|      |    |     |    |    |      |
|------|----|-----|----|----|------|
| 1 BH | 2  | 15  | 5  | 5  | 8.5  |
| 1 BH | 6  | 45  | 17 | 10 | 25.5 |
| 1 BH | 0  | 15  | 4  | 3  | 7.5  |
| 1 BH | 21 | 35  | 29 | 10 | 28   |
| 1 BH | 1  | 11  | 8  | 1  | 6    |
| 1 BH | 1  | 28  | 11 | 4  | 14.5 |
| 1 BH | 0  | 12  | 3  | 2  | 6    |
| 1 BH | 20 | 8   | 20 | 2  | 14   |
| 1 BH | 6  | 18  | 8  | 3  | 12   |
| 1 BH | 2  | 21  | 7  | 4  | 11.5 |
| 1 BH | 2  | 12  | 6  | 2  | 7    |
| 1 BH | 0  | 12  | 2  | 3  | 6    |
| 1 BH | 1  | 14  | 4  | 2  | 7.5  |
| 1 BH | 7  | 30  | 9  | 11 | 18.5 |
| 1 BH | 19 | 121 | 24 | 54 | 70   |
| 1 BH | 2  | 21  | 3  | 10 | 11.5 |
| 1 BH | 5  | 6   | 5  | 1  | 5.5  |
| 1 BH | 4  | 25  | 11 | 3  | 14.5 |
| 1 BH | 4  | 17  | 8  | 1  | 10.5 |
| 1 BH | 3  | 19  | 7  | 3  | 11   |
| 1 BH | 10 | 25  | 16 | 7  | 17.5 |
| 1 BH | 1  | 10  | 0  | 3  | 5.5  |
| 1 BH | 5  | 27  | 8  | 9  | 16   |
| 1 BH | 3  | 23  | 7  | 7  | 13   |
| 1 BH | 0  | 13  | 3  | 4  | 6.5  |
| 1 BH | 10 | 46  | 17 | 15 | 28   |
| 1 BH | 6  | 35  | 12 | 9  | 20.5 |
| 1 BH | 13 | 37  | 15 | 16 | 25   |
| 1 BH | 1  | 14  | 3  | 2  | 7.5  |
| 1 BH | 18 | 7   | 27 | 0  | 12.5 |
| 1 BH | 20 | 13  | 29 | 0  | 16.5 |
| 1 BH | 6  | 18  | 9  | 2  | 12   |
| 1 BH | 1  | 23  | 7  | 3  | 12   |
| 1 BH | 1  | 20  | 10 | 1  | 10.5 |
| 1 BH | 2  | 20  | 5  | 7  | 11   |
| 1 BH | 13 | 32  | 10 | 18 | 22.5 |
| 1 BH | 8  | 37  | 15 | 9  | 22.5 |
| 1 BH | 2  | 16  | 9  | 4  | 9    |
| 1 BH | 0  | 11  | 5  | 2  | 5.5  |
| 1 BH | 2  | 40  | 11 | 10 | 21   |
| 1 BH | 9  | 68  | 27 | 14 | 38.5 |
| 1 BH | 6  | 19  | 10 | 3  | 12.5 |
| 1 BH | 20 | 25  | 23 | 8  | 22.5 |
| 1 BH | 0  | 13  | 4  | 2  | 6.5  |
| 1 BH | 21 | 89  | 41 | 26 | 55   |
| 1 BH | 2  | 18  | 8  | 4  | 10   |
| 1 BH | 23 | 89  | 26 | 31 | 56   |

|      |    |    |    |    |      |
|------|----|----|----|----|------|
| 1 BH | 7  | 25 | 10 | 9  | 16   |
| 1 BH | 7  | 16 | 8  | 5  | 11.5 |
| 1 BH | 0  | 12 | 6  | 1  | 6    |
| 1 BH | 3  | 20 | 4  | 5  | 11.5 |
| 1 BH | 3  | 9  | 2  | 3  | 6    |
| 1 BH | 5  | 36 | 9  | 8  | 20.5 |
| 1 BH | 14 | 19 | 17 | 3  | 16.5 |
| 1 BH | 2  | 20 | 10 | 2  | 11   |
| 1 BH | 15 | 27 | 20 | 8  | 21   |
| 1 BH | 7  | 25 | 13 | 5  | 16   |
| 1 BH | 11 | 36 | 10 | 16 | 23.5 |
| 1 BH | 2  | 26 | 11 | 4  | 14   |
| 1 BH | 2  | 15 | 5  | 5  | 8.5  |
| 1 BH | 2  | 12 | 5  | 2  | 7    |
| 1 BH | 8  | 33 | 18 | 9  | 20.5 |
| 1 BH | 12 | 18 | 11 | 5  | 15   |
| 1 BH | 0  | 11 | 2  | 2  | 5.5  |
| 1 BH | 1  | 10 | 5  | 1  | 5.5  |
| 1 BH | 5  | 19 | 8  | 4  | 12   |
| 1 BH | 2  | 22 | 6  | 4  | 12   |
| 1 BH | 4  | 15 | 5  | 8  | 9.5  |
| 1 BH | 11 | 17 | 15 | 5  | 14   |
| 1 BH | 6  | 32 | 10 | 11 | 19   |
| 1 BH | 11 | 24 | 12 | 9  | 17.5 |
| 1 BH | 1  | 30 | 6  | 9  | 15.5 |
| 1 BH | 1  | 19 | 9  | 2  | 10   |
| 1 BH | 4  | 17 | 9  | 5  | 10.5 |
| 1 BH | 1  | 13 | 2  | 3  | 7    |
| 1 BH | 4  | 16 | 9  | 4  | 10   |
| 1 BH | 0  | 12 | 0  | 7  | 6    |
| 1 BH | 5  | 20 | 0  | 12 | 12.5 |
| 1 BH | 0  | 13 | 4  | 2  | 6.5  |
| 1 BH | 1  | 15 | 3  | 6  | 8    |
| 1 BH | 10 | 34 | 23 | 8  | 22   |
| 1 BH | 16 | 41 | 20 | 12 | 28.5 |
| 1 BH | 5  | 25 | 9  | 9  | 15   |
| 1 BH | 14 | 0  | 4  | 10 | 7    |
| 1 BH | 3  | 10 | 4  | 5  | 6.5  |
| 1 BH | 4  | 16 | 9  | 2  | 10   |
| 1 BH | 8  | 25 | 13 | 7  | 16.5 |
| 1 BH | 0  | 14 | 6  | 1  | 7    |
| 1 BH | 33 | 42 | 42 | 12 | 37.5 |
| 1 BH | 22 | 42 | 37 | 6  | 32   |
| 1 BH | 7  | 15 | 10 | 5  | 11   |
| 1 BH | 3  | 14 | 7  | 4  | 8.5  |
| 1 BH | 3  | 12 | 7  | 4  | 7.5  |
| 1 BH | 4  | 12 | 6  | 5  | 8    |

|      |    |     |    |    |       |
|------|----|-----|----|----|-------|
| 1 BH | 3  | 14  | 7  | 3  | 8.5   |
| 1 BH | 22 | 26  | 35 | 3  | 24    |
| 1 BH | 15 | 11  | 15 | 6  | 13    |
| 1 BH | 6  | 17  | 8  | 7  | 11.5  |
| 1 BH | 2  | 9   | 4  | 3  | 5.5   |
| 1 BH | 2  | 48  | 9  | 12 | 25    |
| 1 BH | 0  | 12  | 5  | 2  | 6     |
| 1 BH | 3  | 13  | 8  | 4  | 8     |
| 1 BH | 5  | 41  | 23 | 6  | 23    |
| 1 BH | 0  | 11  | 2  | 2  | 5.5   |
| 1 BH | 7  | 16  | 8  | 6  | 11.5  |
| 1 BH | 5  | 34  | 8  | 11 | 19.5  |
| 1 BH | 1  | 14  | 1  | 6  | 7.5   |
| 1 BH | 2  | 11  | 6  | 2  | 6.5   |
| 1 BH | 3  | 24  | 2  | 8  | 13.5  |
| 1 BH | 2  | 12  | 6  | 2  | 7     |
| 1 BH | 6  | 15  | 7  | 6  | 10.5  |
| 1 BH | 10 | 37  | 12 | 12 | 23.5  |
| 1 BH | 1  | 12  | 3  | 1  | 6.5   |
| 1 BH | 4  | 14  | 11 | 1  | 9     |
| 1 BH | 0  | 13  | 3  | 4  | 6.5   |
| 1 BH | 0  | 11  | 4  | 2  | 5.5   |
| 1 BH | 6  | 34  | 19 | 7  | 20    |
| 1 BH | 9  | 27  | 15 | 5  | 18    |
| 1 BH | 5  | 18  | 12 | 5  | 11.5  |
| 1 BH | 4  | 22  | 6  | 7  | 13    |
| 1 BH | 6  | 24  | 9  | 7  | 15    |
| 1 BH | 9  | 10  | 10 | 3  | 9.5   |
| 1 BH | 29 | 49  | 34 | 18 | 39    |
| 1 BH | 3  | 10  | 6  | 2  | 6.5   |
| 1 BH | 2  | 15  | 4  | 4  | 8.5   |
| 1 BH | 5  | 20  | 9  | 5  | 12.5  |
| 1 BH | 5  | 30  | 9  | 12 | 17.5  |
| 1 BH | 2  | 12  | 5  | 2  | 7     |
| 1 BH | 7  | 45  | 22 | 8  | 26    |
| 1 BH | 2  | 16  | 5  | 4  | 9     |
| 1 BH | 8  | 44  | 17 | 10 | 26    |
| 1 BH | 1  | 12  | 6  | 2  | 6.5   |
| 1 BH | 0  | 13  | 7  | 1  | 6.5   |
| 1 BH | 9  | 23  | 12 | 8  | 16    |
| 1 BH | 2  | 17  | 5  | 4  | 9.5   |
| 1 BH | 78 | 205 | 87 | 77 | 141.5 |
| 1 BH | 9  | 30  | 20 | 5  | 19.5  |
| 1 BH | 5  | 36  | 12 | 12 | 20.5  |
| 1 BH | 5  | 16  | 8  | 5  | 10.5  |
| 1 BH | 0  | 32  | 1  | 11 | 16    |
| 1 BH | 3  | 28  | 12 | 6  | 15.5  |



|      |    |     |    |    |      |
|------|----|-----|----|----|------|
| 1 BH | 3  | 8   | 5  | 1  | 5.5  |
| 1 BH | 3  | 14  | 7  | 3  | 8.5  |
| 1 BH | 0  | 15  | 3  | 3  | 7.5  |
| 1 BH | 1  | 12  | 3  | 1  | 6.5  |
| 1 BH | 4  | 16  | 13 | 0  | 10   |
| 1 BH | 2  | 14  | 7  | 3  | 8    |
| 1 BH | 9  | 52  | 14 | 19 | 30.5 |
| 1 BH | 4  | 13  | 10 | 4  | 8.5  |
| 1 BH | 13 | 28  | 17 | 8  | 20.5 |
| 1 BH | 11 | 29  | 13 | 10 | 20   |
| 1 BH | 8  | 24  | 11 | 6  | 16   |
| 1 BH | 3  | 23  | 10 | 5  | 13   |
| 1 BH | 5  | 116 | 19 | 37 | 60.5 |
| 1 BH | 7  | 21  | 11 | 5  | 14   |
| 1 BH | 3  | 16  | 7  | 2  | 9.5  |
| 1 BH | 1  | 35  | 5  | 8  | 18   |
| 1 BH | 4  | 20  | 5  | 5  | 12   |
| 1 BH | 1  | 28  | 10 | 3  | 14.5 |
| 1 BH | 6  | 13  | 17 | 0  | 9.5  |
| 1 BH | 2  | 28  | 9  | 6  | 15   |
| 1 BH | 3  | 8   | 5  | 1  | 5.5  |
| 1 BH | 5  | 13  | 5  | 4  | 9    |
| 1 BH | 7  | 39  | 14 | 8  | 23   |
| 1 BH | 1  | 24  | 5  | 5  | 12.5 |
| 1 BH | 1  | 11  | 7  | 2  | 6    |
| 1 BH | 1  | 16  | 6  | 1  | 8.5  |
| 1 BH | 1  | 32  | 8  | 10 | 16.5 |
| 1 BH | 4  | 20  | 9  | 6  | 12   |
| 1 BH | 7  | 44  | 20 | 6  | 25.5 |
| 1 BH | 1  | 31  | 9  | 7  | 16   |
| 1 BH | 0  | 31  | 12 | 4  | 15.5 |
| 1 BH | 15 | 49  | 22 | 20 | 32   |
| 1 BH | 10 | 24  | 15 | 8  | 17   |
| 1 BH | 4  | 22  | 3  | 7  | 13   |
| 1 BH | 10 | 10  | 14 | 3  | 10   |
| 1 BH | 4  | 45  | 13 | 8  | 24.5 |
| 1 BH | 6  | 51  | 17 | 10 | 28.5 |
| 1 BH | 16 | 48  | 29 | 11 | 32   |
| 1 BH | 40 | 40  | 36 | 18 | 40   |
| 1 BH | 2  | 11  | 4  | 3  | 6.5  |
| 1 BH | 3  | 21  | 6  | 5  | 12   |
| 1 BH | 0  | 23  | 7  | 4  | 11.5 |
| 1 BH | 9  | 49  | 17 | 18 | 29   |
| 1 BH | 1  | 21  | 5  | 4  | 11   |
| 1 BH | 12 | 30  | 16 | 9  | 21   |
| 1 BH | 6  | 22  | 13 | 5  | 14   |
| 1 BH | 8  | 59  | 27 | 10 | 33.5 |

|      |    |     |    |    |      |
|------|----|-----|----|----|------|
| 1 BH | 5  | 12  | 8  | 3  | 8.5  |
| 1 BH | 6  | 18  | 8  | 3  | 12   |
| 1 BH | 1  | 18  | 7  | 5  | 9.5  |
| 1 BH | 20 | 61  | 33 | 14 | 40.5 |
| 1 BH | 52 | 53  | 49 | 35 | 52.5 |
| 1 BH | 4  | 57  | 8  | 20 | 30.5 |
| 1 BH | 13 | 26  | 26 | 4  | 19.5 |
| 1 BH | 13 | 51  | 21 | 16 | 32   |
| 1 BH | 3  | 10  | 5  | 1  | 6.5  |
| 1 BH | 5  | 10  | 5  | 5  | 7.5  |
| 1 BH | 12 | 27  | 10 | 13 | 19.5 |
| 1 BH | 2  | 39  | 3  | 16 | 20.5 |
| 1 BH | 1  | 14  | 7  | 2  | 7.5  |
| 1 BH | 0  | 11  | 2  | 2  | 5.5  |
| 1 BH | 4  | 22  | 9  | 6  | 13   |
| 1 BH | 22 | 53  | 25 | 22 | 37.5 |
| 1 BH | 5  | 20  | 11 | 4  | 12.5 |
| 1 BH | 4  | 8   | 8  | 0  | 6    |
| 1 BH | 3  | 22  | 8  | 6  | 12.5 |
| 1 BH | 2  | 21  | 8  | 4  | 11.5 |
| 1 BH | 2  | 16  | 3  | 6  | 9    |
| 1 BH | 9  | 24  | 14 | 4  | 16.5 |
| 1 BH | 2  | 22  | 5  | 4  | 12   |
| 1 BH | 6  | 33  | 11 | 11 | 19.5 |
| 1 BH | 6  | 43  | 19 | 8  | 24.5 |
| 1 BH | 9  | 33  | 20 | 10 | 21   |
| 1 BH | 2  | 31  | 8  | 6  | 16.5 |
| 1 BH | 1  | 16  | 11 | 0  | 8.5  |
| 1 BH | 3  | 14  | 5  | 4  | 8.5  |
| 1 BH | 0  | 16  | 5  | 4  | 8    |
| 1 BH | 19 | 151 | 65 | 20 | 85   |
| 1 BH | 6  | 43  | 12 | 10 | 24.5 |
| 1 BH | 50 | 124 | 64 | 48 | 87   |
| 1 BH | 15 | 115 | 32 | 28 | 65   |
| 1 BH | 1  | 13  | 5  | 2  | 7    |
| 1 BH | 1  | 25  | 8  | 5  | 13   |
| 1 BH | 9  | 41  | 21 | 7  | 25   |
| 1 BH | 4  | 20  | 7  | 5  | 12   |
| 1 BH | 5  | 15  | 7  | 5  | 10   |
| 1 BH | 1  | 20  | 5  | 5  | 10.5 |
| 1 BH | 0  | 17  | 3  | 6  | 8.5  |
| 1 BH | 10 | 30  | 20 | 4  | 20   |
| 1 BH | 0  | 12  | 2  | 4  | 6    |
| 1 BH | 6  | 36  | 12 | 10 | 21   |
| 1 BH | 4  | 13  | 12 | 2  | 8.5  |
| 1 BH | 3  | 12  | 5  | 3  | 7.5  |
| 1 BH | 26 | 30  | 37 | 11 | 28   |

|      |      |     |     |     |       |
|------|------|-----|-----|-----|-------|
| 1 BH | 8    | 14  | 12  | 3   | 11    |
| 1 BH | 3    | 15  | 5   | 4   | 9     |
| 1 BH | 1    | 16  | 3   | 6   | 8.5   |
| 1 BH | 9    | 19  | 9   | 8   | 14    |
| 1 BH | 1    | 13  | 2   | 5   | 7     |
| 1 BH | 13   | 47  | 14  | 16  | 30    |
| 1 BH | 1    | 14  | 2   | 5   | 7.5   |
| 1 BH | 46   | 52  | 45  | 20  | 49    |
| 1 BH | 0    | 40  | 0   | 14  | 20    |
| 1 BH | 13   | 69  | 14  | 25  | 41    |
| 1 BH | 0    | 18  | 3   | 3   | 9     |
| 1 BH | 8    | 27  | 11  | 6   | 17.5  |
| 1 BH | 1    | 16  | 2   | 8   | 8.5   |
| 1 BH | 5    | 12  | 6   | 4   | 8.5   |
| 1 BH | 6    | 11  | 6   | 6   | 8.5   |
| 1 BH | 8    | 25  | 11  | 8   | 16.5  |
| 1 BH | 7    | 39  | 11  | 10  | 23    |
| 1 BH | 0    | 18  | 6   | 3   | 9     |
| 1 BH | 0    | 18  | 2   | 4   | 9     |
| 1 BH | 8    | 26  | 10  | 8   | 17    |
| 1 BH | 3    | 19  | 9   | 3   | 11    |
| 1 BH | 7    | 19  | 16  | 5   | 13    |
| 1 BH | 3    | 13  | 6   | 4   | 8     |
| 1 BH | 1000 | 905 | 756 | 670 | 952.5 |
| 1 BH | 3    | 12  | 4   | 3   | 7.5   |
| 1 BH | 1    | 22  | 3   | 7   | 11.5  |
| 1 BH | 4    | 22  | 10  | 4   | 13    |
| 1 BH | 0    | 11  | 3   | 1   | 5.5   |
| 1 BH | 11   | 43  | 19  | 14  | 27    |
| 1 BH | 1    | 17  | 6   | 1   | 9     |
| 1 BH | 0    | 20  | 3   | 8   | 10    |
| 1 BH | 15   | 22  | 16  | 11  | 18.5  |
| 1 BH | 0    | 11  | 2   | 5   | 5.5   |
| 1 BH | 1    | 12  | 3   | 1   | 6.5   |
| 1 BH | 4    | 18  | 5   | 4   | 11    |
| 1 BH | 11   | 40  | 22  | 12  | 25.5  |
| 1 BH | 6    | 18  | 10  | 5   | 12    |
| 1 BH | 3    | 24  | 10  | 6   | 13.5  |
| 1 BH | 5    | 34  | 6   | 15  | 19.5  |
| 1 BH | 1    | 12  | 2   | 4   | 6.5   |
| 1 BH | 0    | 12  | 5   | 0   | 6     |
| 1 BH | 13   | 13  | 11  | 7   | 13    |
| 1 BH | 1029 | 556 | 630 | 660 | 792.5 |
| 1 BH | 12   | 33  | 16  | 10  | 22.5  |
| 1 BH | 1    | 12  | 1   | 4   | 6.5   |
| 1 BH | 4    | 16  | 5   | 5   | 10    |
| 1 BH | 1    | 11  | 4   | 3   | 6     |

|      |    |     |    |    |      |
|------|----|-----|----|----|------|
| 1 BH | 13 | 15  | 20 | 2  | 14   |
| 1 BH | 11 | 37  | 16 | 10 | 24   |
| 1 BH | 4  | 12  | 5  | 4  | 8    |
| 1 BH | 3  | 12  | 5  | 3  | 7.5  |
| 1 BH | 3  | 15  | 3  | 7  | 9    |
| 1 BH | 8  | 19  | 7  | 7  | 13.5 |
| 1 BH | 6  | 13  | 6  | 4  | 9.5  |
| 1 BH | 14 | 2   | 14 | 0  | 8    |
| 1 BH | 4  | 11  | 6  | 1  | 7.5  |
| 1 BH | 34 | 13  | 47 | 0  | 23.5 |
| 1 BH | 28 | 43  | 33 | 12 | 35.5 |
| 1 BH | 4  | 15  | 8  | 2  | 9.5  |
| 1 BH | 8  | 15  | 7  | 7  | 11.5 |
| 1 BH | 0  | 11  | 0  | 3  | 5.5  |
| 1 BH | 10 | 29  | 20 | 3  | 19.5 |
| 1 BH | 1  | 22  | 7  | 2  | 11.5 |
| 1 BH | 4  | 8   | 4  | 2  | 6    |
| 1 BH | 4  | 11  | 5  | 5  | 7.5  |
| 1 BH | 26 | 18  | 31 | 7  | 22   |
| 1 BH | 3  | 11  | 8  | 1  | 7    |
| 1 BH | 11 | 49  | 26 | 8  | 30   |
| 1 BH | 1  | 17  | 3  | 5  | 9    |
| 1 BH | 2  | 14  | 6  | 2  | 8    |
| 1 BH | 5  | 30  | 15 | 4  | 17.5 |
| 1 BH | 1  | 12  | 3  | 1  | 6.5  |
| 1 BH | 3  | 22  | 11 | 6  | 12.5 |
| 1 BH | 8  | 35  | 6  | 15 | 21.5 |
| 1 BH | 40 | 208 | 65 | 72 | 124  |
| 1 BH | 5  | 22  | 12 | 6  | 13.5 |
| 1 BH | 13 | 63  | 20 | 18 | 38   |
| 1 BH | 11 | 10  | 16 | 1  | 10.5 |
| 1 BH | 4  | 33  | 13 | 7  | 18.5 |
| 1 BH | 3  | 11  | 5  | 3  | 7    |
| 1 BH | 2  | 19  | 7  | 5  | 10.5 |
| 1 BH | 8  | 7   | 10 | 3  | 7.5  |
| 1 BH | 1  | 10  | 1  | 3  | 5.5  |
| 1 BH | 11 | 18  | 11 | 9  | 14.5 |
| 1 BH | 7  | 18  | 11 | 4  | 12.5 |
| 1 BH | 4  | 31  | 11 | 9  | 17.5 |
| 1 BH | 7  | 22  | 10 | 7  | 14.5 |
| 1 BH | 0  | 18  | 5  | 3  | 9    |
| 1 BH | 3  | 30  | 11 | 7  | 16.5 |
| 1 BH | 0  | 12  | 2  | 2  | 6    |
| 1 BH | 1  | 12  | 3  | 1  | 6.5  |
| 1 BH | 4  | 28  | 9  | 9  | 16   |
| 1 BH | 0  | 13  | 3  | 3  | 6.5  |
| 1 BH | 7  | 57  | 17 | 15 | 32   |

|      |    |    |    |    |      |
|------|----|----|----|----|------|
| 1 BH | 0  | 14 | 3  | 2  | 7    |
| 1 BH | 4  | 34 | 5  | 10 | 19   |
| 1 BH | 1  | 11 | 4  | 3  | 6    |
| 1 BH | 0  | 14 | 3  | 2  | 7    |
| 1 BH | 0  | 18 | 5  | 1  | 9    |
| 1 BH | 1  | 19 | 5  | 5  | 10   |
| 1 BH | 2  | 13 | 4  | 2  | 7.5  |
| 1 BH | 2  | 26 | 7  | 7  | 14   |
| 1 BH | 3  | 17 | 6  | 5  | 10   |
| 1 BH | 0  | 21 | 7  | 3  | 10.5 |
| 1 BH | 4  | 8  | 4  | 2  | 6    |
| 1 BH | 4  | 19 | 11 | 3  | 11.5 |
| 1 BH | 1  | 17 | 4  | 4  | 9    |
| 1 BH | 1  | 18 | 8  | 2  | 9.5  |
| 1 BH | 1  | 10 | 6  | 1  | 5.5  |
| 1 BH | 1  | 16 | 4  | 6  | 8.5  |
| 1 BH | 6  | 21 | 10 | 5  | 13.5 |
| 1 BH | 30 | 56 | 32 | 23 | 43   |
| 1 BH | 0  | 11 | 2  | 2  | 5.5  |
| 1 BH | 5  | 13 | 7  | 6  | 9    |
| 1 BH | 4  | 17 | 10 | 3  | 10.5 |
| 1 BH | 12 | 81 | 16 | 36 | 46.5 |
| 1 BH | 5  | 28 | 9  | 7  | 16.5 |
| 1 BH | 3  | 16 | 7  | 5  | 9.5  |
| 1 BH | 0  | 11 | 2  | 2  | 5.5  |
| 1 BH | 2  | 17 | 6  | 4  | 9.5  |
| 1 BH | 0  | 15 | 3  | 3  | 7.5  |
| 1 BH | 6  | 16 | 7  | 4  | 11   |
| 1 BH | 3  | 10 | 4  | 5  | 6.5  |
| 1 BH | 9  | 33 | 11 | 16 | 21   |
| 1 BH | 2  | 10 | 0  | 5  | 6    |
| 1 BH | 6  | 19 | 8  | 6  | 12.5 |
| 1 BH | 0  | 12 | 0  | 3  | 6    |
| 1 BH | 7  | 54 | 12 | 20 | 30.5 |
| 1 BH | 2  | 10 | 7  | 1  | 6    |
| 1 BH | 15 | 51 | 31 | 10 | 33   |
| 1 BH | 0  | 19 | 7  | 5  | 9.5  |
| 1 BH | 9  | 51 | 17 | 18 | 30   |
| 1 BH | 2  | 19 | 7  | 6  | 10.5 |
| 1 BH | 3  | 11 | 5  | 2  | 7    |
| 1 BH | 2  | 18 | 6  | 5  | 10   |
| 1 BH | 13 | 15 | 9  | 7  | 14   |
| 1 BH | 16 | 2  | 14 | 0  | 9    |
| 1 BH | 1  | 22 | 2  | 6  | 11.5 |
| 1 BH | 20 | 0  | 24 | 0  | 10   |
| 1 BH | 4  | 20 | 6  | 4  | 12   |
| 1 BH | 1  | 12 | 5  | 1  | 6.5  |

|      |     |     |     |     |      |
|------|-----|-----|-----|-----|------|
| 1 BH | 0   | 12  | 3   | 3   | 6    |
| 1 BH | 2   | 21  | 6   | 7   | 11.5 |
| 1 BH | 11  | 20  | 8   | 9   | 15.5 |
| 1 BH | 1   | 10  | 3   | 2   | 5.5  |
| 1 BH | 8   | 28  | 13  | 10  | 18   |
| 1 BH | 9   | 19  | 11  | 7   | 14   |
| 1 BH | 7   | 14  | 10  | 2   | 10.5 |
| 1 BH | 0   | 11  | 3   | 1   | 5.5  |
| 1 BH | 6   | 9   | 2   | 7   | 7.5  |
| 1 BH | 0   | 14  | 7   | 0   | 7    |
| 1 BH | 19  | 35  | 28  | 13  | 27   |
| 1 BH | 0   | 11  | 3   | 2   | 5.5  |
| 1 BH | 5   | 25  | 9   | 6   | 15   |
| 1 BH | 1   | 11  | 8   | 1   | 6    |
| 1 BH | 5   | 29  | 8   | 7   | 17   |
| 1 BH | 0   | 29  | 5   | 10  | 14.5 |
| 1 BH | 116 | 242 | 121 | 111 | 179  |
| 1 BH | 0   | 19  | 4   | 2   | 9.5  |
| 1 BH | 11  | 43  | 12  | 18  | 27   |
| 1 BH | 3   | 12  | 6   | 3   | 7.5  |
| 1 BH | 22  | 28  | 30  | 7   | 25   |
| 1 BH | 10  | 25  | 15  | 11  | 17.5 |
| 1 BH | 3   | 44  | 9   | 10  | 23.5 |
| 1 BH | 7   | 22  | 9   | 8   | 14.5 |
| 1 BH | 2   | 13  | 4   | 2   | 7.5  |
| 1 BH | 7   | 33  | 13  | 10  | 20   |
| 1 BH | 15  | 25  | 12  | 14  | 20   |
| 1 BH | 9   | 37  | 17  | 10  | 23   |
| 1 BH | 16  | 22  | 13  | 12  | 19   |
| 1 BH | 3   | 13  | 0   | 7   | 8    |
| 1 BH | 19  | 62  | 17  | 30  | 40.5 |
| 1 BH | 6   | 30  | 11  | 9   | 18   |
| 1 BH | 5   | 30  | 12  | 6   | 17.5 |
| 1 BH | 16  | 65  | 29  | 17  | 40.5 |
| 1 BH | 34  | 81  | 42  | 30  | 57.5 |
| 1 BH | 0   | 12  | 4   | 2   | 6    |
| 1 BH | 1   | 21  | 7   | 5   | 11   |
| 1 BH | 6   | 18  | 10  | 4   | 12   |
| 1 BH | 36  | 11  | 34  | 3   | 23.5 |
| 1 BH | 1   | 15  | 0   | 8   | 8    |
| 1 BH | 1   | 22  | 6   | 5   | 11.5 |
| 1 BH | 1   | 21  | 6   | 5   | 11   |
| 1 BH | 3   | 16  | 5   | 5   | 9.5  |
| 1 BH | 5   | 31  | 13  | 10  | 18   |
| 1 BH | 6   | 25  | 8   | 6   | 15.5 |
| 1 BH | 0   | 19  | 5   | 2   | 9.5  |
| 1 BH | 0   | 11  | 2   | 2   | 5.5  |

|      |    |     |    |    |       |
|------|----|-----|----|----|-------|
| 1 BH | 0  | 18  | 4  | 4  | 9     |
| 1 BH | 17 | 32  | 17 | 10 | 24.5  |
| 1 BH | 3  | 42  | 10 | 9  | 22.5  |
| 1 BH | 17 | 50  | 28 | 9  | 33.5  |
| 1 BH | 7  | 0   | 12 | 0  | 3.5   |
| 1 BH | 1  | 16  | 4  | 2  | 8.5   |
| 1 BH | 2  | 32  | 12 | 6  | 17    |
| 1 BH | 1  | 11  | 5  | 2  | 6     |
| 1 BH | 2  | 11  | 6  | 2  | 6.5   |
| 1 BH | 17 | 120 | 35 | 31 | 68.5  |
| 1 BH | 3  | 31  | 13 | 6  | 17    |
| 1 BH | 0  | 12  | 3  | 3  | 6     |
| 1 BH | 1  | 20  | 7  | 5  | 10.5  |
| 1 BH | 2  | 17  | 5  | 4  | 9.5   |
| 1 BH | 10 | 96  | 37 | 19 | 53    |
| 1 BH | 6  | 7   | 6  | 3  | 6.5   |
| 1 BH | 9  | 40  | 13 | 11 | 24.5  |
| 1 BH | 0  | 80  | 12 | 26 | 40    |
| 1 BH | 2  | 18  | 5  | 5  | 10    |
| 1 BH | 2  | 36  | 13 | 6  | 19    |
| 1 BH | 7  | 31  | 13 | 11 | 19    |
| 1 BH | 5  | 9   | 6  | 1  | 7     |
| 1 BH | 0  | 23  | 7  | 2  | 11.5  |
| 1 BH | 2  | 39  | 8  | 15 | 20.5  |
| 1 BH | 6  | 77  | 16 | 22 | 41.5  |
| 1 BH | 10 | 57  | 29 | 12 | 33.5  |
| 1 BH | 3  | 18  | 3  | 6  | 10.5  |
| 1 BH | 2  | 17  | 5  | 4  | 9.5   |
| 1 BH | 42 | 42  | 47 | 22 | 42    |
| 1 BH | 7  | 40  | 12 | 13 | 23.5  |
| 1 BH | 1  | 14  | 3  | 2  | 7.5   |
| 1 BH | 8  | 17  | 13 | 2  | 12.5  |
| 1 BH | 3  | 13  | 4  | 4  | 8     |
| 1 BH | 9  | 14  | 13 | 4  | 11.5  |
| 1 BH | 3  | 18  | 3  | 5  | 10.5  |
| 1 BH | 5  | 15  | 11 | 2  | 10    |
| 1 BH | 25 | 15  | 22 | 15 | 20    |
| 1 BH | 0  | 17  | 1  | 6  | 8.5   |
| 1 BH | 4  | 38  | 13 | 8  | 21    |
| 1 BH | 99 | 152 | 70 | 87 | 125.5 |
| 1 BH | 16 | 25  | 27 | 7  | 20.5  |
| 1 BH | 15 | 43  | 25 | 14 | 29    |
| 1 BH | 7  | 9   | 10 | 2  | 8     |
| 1 BH | 9  | 20  | 9  | 8  | 14.5  |
| 1 BH | 12 | 41  | 26 | 10 | 26.5  |
| 1 BH | 3  | 9   | 3  | 3  | 6     |
| 1 BH | 7  | 23  | 12 | 3  | 15    |

|      |     |     |     |    |       |
|------|-----|-----|-----|----|-------|
| 1 BH | 10  | 20  | 11  | 6  | 15    |
| 1 BH | 3   | 11  | 5   | 2  | 7     |
| 1 BH | 7   | 37  | 11  | 14 | 22    |
| 1 BH | 2   | 15  | 8   | 1  | 8.5   |
| 1 BH | 17  | 18  | 17  | 8  | 17.5  |
| 1 BH | 0   | 13  | 3   | 5  | 6.5   |
| 1 BH | 1   | 17  | 5   | 3  | 9     |
| 1 BH | 1   | 11  | 7   | 2  | 6     |
| 1 BH | 3   | 13  | 10  | 3  | 8     |
| 1 BH | 1   | 24  | 6   | 4  | 12.5  |
| 1 BH | 3   | 9   | 3   | 4  | 6     |
| 1 BH | 6   | 21  | 5   | 8  | 13.5  |
| 1 BH | 0   | 14  | 3   | 3  | 7     |
| 1 BH | 0   | 13  | 4   | 2  | 6.5   |
| 1 BH | 5   | 41  | 10  | 15 | 23    |
| 1 BH | 2   | 19  | 7   | 5  | 10.5  |
| 1 BH | 8   | 26  | 11  | 12 | 17    |
| 1 BH | 10  | 30  | 15  | 9  | 20    |
| 1 BH | 8   | 11  | 10  | 1  | 9.5   |
| 1 BH | 5   | 6   | 9   | 0  | 5.5   |
| 1 BH | 0   | 13  | 4   | 4  | 6.5   |
| 1 BH | 7   | 45  | 17  | 10 | 26    |
| 1 BH | 0   | 16  | 7   | 2  | 8     |
| 1 BH | 5   | 11  | 6   | 4  | 8     |
| 1 BH | 14  | 94  | 24  | 27 | 54    |
| 1 BH | 1   | 19  | 10  | 3  | 10    |
| 1 BH | 0   | 27  | 5   | 7  | 13.5  |
| 1 BH | 0   | 11  | 3   | 1  | 5.5   |
| 1 BH | 10  | 31  | 10  | 15 | 20.5  |
| 1 BH | 4   | 24  | 5   | 8  | 14    |
| 1 BH | 1   | 10  | 2   | 6  | 5.5   |
| 1 BH | 0   | 20  | 0   | 11 | 10    |
| 1 BH | 0   | 11  | 0   | 4  | 5.5   |
| 1 BH | 9   | 8   | 11  | 1  | 8.5   |
| 1 BH | 25  | 176 | 66  | 34 | 100.5 |
| 1 BH | 5   | 28  | 13  | 3  | 16.5  |
| 1 BH | 0   | 11  | 3   | 1  | 5.5   |
| 1 BH | 31  | 34  | 32  | 17 | 32.5  |
| 1 BH | 10  | 13  | 7   | 6  | 11.5  |
| 1 BH | 109 | 30  | 106 | 26 | 69.5  |
| 1 BH | 3   | 24  | 10  | 7  | 13.5  |
| 1 BH | 7   | 31  | 15  | 6  | 19    |
| 1 BH | 4   | 13  | 0   | 10 | 8.5   |
| 1 BH | 1   | 17  | 0   | 6  | 9     |
| 1 BH | 5   | 15  | 12  | 3  | 10    |
| 1 BH | 0   | 11  | 3   | 3  | 5.5   |
| 1 BH | 6   | 36  | 9   | 13 | 21    |



|      |    |     |    |    |      |
|------|----|-----|----|----|------|
| 1 BH | 7  | 31  | 10 | 11 | 19   |
| 1 BH | 3  | 26  | 3  | 9  | 14.5 |
| 1 BH | 3  | 22  | 5  | 5  | 12.5 |
| 1 BH | 0  | 15  | 5  | 3  | 7.5  |
| 1 BH | 1  | 13  | 6  | 1  | 7    |
| 1 BH | 12 | 21  | 17 | 6  | 16.5 |
| 1 BH | 13 | 21  | 17 | 6  | 17   |
| 1 BH | 3  | 8   | 2  | 4  | 5.5  |
| 1 BH | 0  | 12  | 6  | 2  | 6    |
| 1 BH | 6  | 32  | 9  | 10 | 19   |
| 1 BH | 0  | 16  | 1  | 5  | 8    |
| 1 BH | 4  | 20  | 6  | 4  | 12   |
| 1 BH | 3  | 24  | 8  | 5  | 13.5 |
| 1 BH | 5  | 16  | 9  | 7  | 10.5 |
| 1 BH | 6  | 11  | 7  | 4  | 8.5  |
| 1 BH | 1  | 10  | 5  | 0  | 5.5  |
| 1 BH | 9  | 19  | 6  | 12 | 14   |
| 1 BH | 0  | 17  | 4  | 6  | 8.5  |
| 1 BH | 6  | 18  | 7  | 4  | 12   |
| 1 BH | 0  | 14  | 4  | 3  | 7    |
| 1 BH | 0  | 12  | 3  | 2  | 6    |
| 1 BH | 28 | 149 | 40 | 51 | 88.5 |
| 1 BH | 6  | 30  | 13 | 9  | 18   |
| 1 BH | 0  | 11  | 3  | 2  | 5.5  |
| 1 BH | 4  | 34  | 9  | 13 | 19   |
| 1 BH | 1  | 12  | 3  | 1  | 6.5  |
| 1 BH | 8  | 27  | 14 | 8  | 17.5 |
| 1 BH | 8  | 13  | 10 | 4  | 10.5 |
| 1 BH | 2  | 58  | 18 | 9  | 30   |
| 1 BH | 28 | 59  | 29 | 26 | 43.5 |
| 1 BH | 1  | 17  | 6  | 2  | 9    |
| 1 BH | 7  | 19  | 15 | 5  | 13   |
| 1 BH | 4  | 16  | 8  | 4  | 10   |
| 1 BH | 1  | 11  | 8  | 1  | 6    |
| 1 BH | 2  | 9   | 6  | 1  | 5.5  |
| 1 BH | 0  | 11  | 3  | 3  | 5.5  |
| 1 BH | 3  | 24  | 7  | 6  | 13.5 |
| 1 BH | 2  | 30  | 11 | 5  | 16   |
| 1 BH | 3  | 34  | 12 | 7  | 18.5 |
| 1 BH | 9  | 23  | 16 | 8  | 16   |
| 1 BH | 5  | 13  | 5  | 5  | 9    |
| 1 BH | 0  | 15  | 3  | 4  | 7.5  |
| 1 BH | 12 | 2   | 9  | 1  | 7    |
| 1 BH | 18 | 7   | 4  | 17 | 12.5 |
| 1 BH | 0  | 22  | 0  | 7  | 11   |
| 1 BH | 14 | 41  | 21 | 9  | 27.5 |
| 1 BH | 5  | 12  | 5  | 5  | 8.5  |

|      |    |     |     |    |       |
|------|----|-----|-----|----|-------|
| 1 BH | 2  | 28  | 4   | 7  | 15    |
| 1 BH | 13 | 147 | 58  | 22 | 80    |
| 1 BH | 5  | 10  | 7   | 2  | 7.5   |
| 1 BH | 4  | 17  | 8   | 2  | 10.5  |
| 1 BH | 0  | 13  | 3   | 4  | 6.5   |
| 1 BH | 12 | 23  | 13  | 7  | 17.5  |
| 1 BH | 51 | 220 | 45  | 97 | 135.5 |
| 1 BH | 4  | 9   | 6   | 2  | 6.5   |
| 1 BH | 2  | 22  | 5   | 4  | 12    |
| 1 BH | 7  | 15  | 12  | 3  | 11    |
| 1 BH | 0  | 11  | 3   | 2  | 5.5   |
| 1 BH | 16 | 0   | 13  | 0  | 8     |
| 1 BH | 7  | 38  | 14  | 8  | 22.5  |
| 1 BH | 6  | 18  | 6   | 7  | 12    |
| 1 BH | 5  | 54  | 19  | 8  | 29.5  |
| 1 BH | 0  | 15  | 0   | 6  | 7.5   |
| 1 BH | 91 | 24  | 105 | 15 | 57.5  |
| 1 BH | 4  | 18  | 5   | 4  | 11    |
| 1 BH | 13 | 45  | 22  | 13 | 29    |
| 1 BH | 1  | 23  | 5   | 7  | 12    |
| 1 BH | 1  | 10  | 1   | 5  | 5.5   |
| 1 BH | 6  | 30  | 9   | 9  | 18    |
| 1 BH | 5  | 55  | 18  | 18 | 30    |
| 1 BH | 17 | 92  | 34  | 26 | 54.5  |
| 1 BH | 1  | 14  | 3   | 4  | 7.5   |
| 1 BH | 3  | 15  | 7   | 4  | 9     |
| 1 BH | 6  | 22  | 6   | 8  | 14    |
| 1 BH | 10 | 23  | 13  | 7  | 16.5  |
| 1 BH | 1  | 21  | 14  | 2  | 11    |
| 1 BH | 1  | 20  | 5   | 5  | 10.5  |
| 1 BH | 4  | 15  | 10  | 4  | 9.5   |
| 1 BH | 3  | 15  | 6   | 4  | 9     |
| 1 BH | 11 | 18  | 16  | 5  | 14.5  |
| 1 BH | 15 | 25  | 19  | 6  | 20    |
| 1 BH | 7  | 11  | 7   | 3  | 9     |
| 1 BH | 2  | 17  | 5   | 5  | 9.5   |
| 1 BH | 6  | 62  | 13  | 25 | 34    |
| 1 BH | 20 | 27  | 18  | 14 | 23.5  |
| 1 BH | 2  | 34  | 10  | 8  | 18    |
| 1 BH | 9  | 43  | 20  | 6  | 26    |
| 1 BH | 11 | 77  | 25  | 16 | 44    |
| 1 BH | 14 | 9   | 4   | 13 | 11.5  |
| 1 BH | 10 | 38  | 21  | 6  | 24    |
| 1 BH | 0  | 11  | 4   | 2  | 5.5   |
| 1 BH | 2  | 29  | 6   | 7  | 15.5  |
| 1 BH | 4  | 24  | 10  | 3  | 14    |
| 1 BH | 15 | 56  | 15  | 21 | 35.5  |

|      |     |     |    |     |      |
|------|-----|-----|----|-----|------|
| 1 BH | 19  | 74  | 22 | 30  | 46.5 |
| 1 BH | 11  | 25  | 9  | 13  | 18   |
| 1 BH | 1   | 12  | 2  | 2   | 6.5  |
| 1 BH | 0   | 14  | 1  | 7   | 7    |
| 1 BH | 0   | 11  | 3  | 1   | 5.5  |
| 1 BH | 0   | 16  | 2  | 3   | 8    |
| 1 BH | 4   | 18  | 7  | 5   | 11   |
| 1 BH | 4   | 17  | 5  | 5   | 10.5 |
| 1 BH | 6   | 43  | 13 | 12  | 24.5 |
| 1 BH | 5   | 11  | 9  | 1   | 8    |
| 1 BH | 10  | 25  | 13 | 9   | 17.5 |
| 1 BH | 3   | 14  | 2  | 8   | 8.5  |
| 1 BH | 1   | 11  | 7  | 2   | 6    |
| 1 BH | 6   | 23  | 5  | 14  | 14.5 |
| 1 BH | 3   | 31  | 7  | 7   | 17   |
| 1 BH | 8   | 39  | 22 | 5   | 23.5 |
| 1 BH | 0   | 14  | 4  | 2   | 7    |
| 1 BH | 2   | 17  | 8  | 2   | 9.5  |
| 1 BH | 16  | 59  | 26 | 19  | 37.5 |
| 1 BH | 2   | 13  | 6  | 2   | 7.5  |
| 1 BH | 22  | 118 | 43 | 32  | 70   |
| 1 BH | 3   | 89  | 5  | 43  | 46   |
| 1 BH | 0   | 24  | 8  | 3   | 12   |
| 1 BH | 7   | 23  | 8  | 6   | 15   |
| 1 BH | 5   | 18  | 7  | 5   | 11.5 |
| 1 BH | 31  | 0   | 27 | 2   | 15.5 |
| 1 BH | 10  | 17  | 15 | 1   | 13.5 |
| 1 BH | 1   | 13  | 7  | 2   | 7    |
| 1 BH | 1   | 16  | 2  | 8   | 8.5  |
| 1 BH | 83  | 116 | 70 | 72  | 99.5 |
| 1 BH | 11  | 40  | 11 | 15  | 25.5 |
| 1 BH | 22  | 62  | 34 | 13  | 42   |
| 1 BH | 0   | 12  | 5  | 0   | 6    |
| 1 BH | 6   | 27  | 15 | 5   | 16.5 |
| 1 BH | 124 | 208 | 88 | 125 | 166  |
| 1 BH | 0   | 13  | 4  | 2   | 6.5  |
| 1 BH | 4   | 29  | 11 | 8   | 16.5 |
| 1 BH | 34  | 158 | 15 | 78  | 96   |
| 1 BH | 3   | 18  | 6  | 5   | 10.5 |
| 1 BH | 9   | 24  | 17 | 4   | 16.5 |
| 1 BH | 14  | 39  | 10 | 21  | 26.5 |
| 1 BH | 3   | 45  | 16 | 13  | 24   |
| 1 BH | 2   | 13  | 7  | 2   | 7.5  |
| 1 BH | 9   | 11  | 11 | 3   | 10   |
| 1 BH | 2   | 9   | 4  | 3   | 5.5  |
| 1 BH | 8   | 24  | 13 | 8   | 16   |
| 1 BH | 4   | 30  | 10 | 9   | 17   |

|      |    |    |    |    |      |
|------|----|----|----|----|------|
| 1 BH | 1  | 12 | 1  | 6  | 6.5  |
| 1 BH | 0  | 17 | 1  | 6  | 8.5  |
| 1 BH | 3  | 14 | 6  | 3  | 8.5  |
| 1 BH | 5  | 9  | 10 | 1  | 7    |
| 1 BH | 32 | 82 | 40 | 27 | 57   |
| 1 BH | 0  | 23 | 0  | 7  | 11.5 |
| 1 BH | 2  | 18 | 8  | 3  | 10   |
| 1 BH | 9  | 52 | 11 | 17 | 30.5 |
| 1 BH | 35 | 50 | 37 | 24 | 42.5 |
| 1 BH | 23 | 55 | 24 | 19 | 39   |
| 1 BH | 1  | 11 | 5  | 2  | 6    |
| 1 BH | 10 | 39 | 19 | 12 | 24.5 |
| 1 BH | 4  | 18 | 4  | 5  | 11   |
| 1 BH | 0  | 11 | 6  | 0  | 5.5  |
| 1 BH | 35 | 72 | 14 | 43 | 53.5 |
| 1 BH | 3  | 10 | 8  | 0  | 6.5  |
| 1 BH | 3  | 11 | 5  | 2  | 7    |
| 1 BH | 0  | 12 | 0  | 4  | 6    |
| 1 BH | 5  | 11 | 9  | 2  | 8    |
| 1 BH | 1  | 15 | 4  | 3  | 8    |
| 1 BH | 11 | 9  | 12 | 3  | 10   |
| 1 BH | 16 | 13 | 13 | 5  | 14.5 |
| 1 BH | 3  | 27 | 4  | 8  | 15   |
| 1 BH | 1  | 14 | 4  | 2  | 7.5  |
| 1 BH | 0  | 11 | 0  | 3  | 5.5  |
| 1 BH | 5  | 13 | 3  | 5  | 9    |
| 1 BH | 5  | 20 | 11 | 3  | 12.5 |
| 1 BH | 0  | 21 | 0  | 7  | 10.5 |
| 1 BH | 20 | 9  | 24 | 0  | 14.5 |
| 1 BH | 5  | 13 | 7  | 5  | 9    |
| 1 BH | 1  | 12 | 3  | 1  | 6.5  |
| 1 BH | 3  | 12 | 5  | 4  | 7.5  |
| 1 BH | 0  | 13 | 0  | 7  | 6.5  |
| 1 BH | 0  | 13 | 4  | 3  | 6.5  |
| 1 BH | 2  | 14 | 6  | 3  | 8    |
| 1 BH | 2  | 9  | 7  | 2  | 5.5  |
| 1 BH | 3  | 12 | 3  | 3  | 7.5  |
| 1 BH | 2  | 11 | 5  | 3  | 6.5  |
| 1 BH | 2  | 25 | 9  | 5  | 13.5 |
| 1 BH | 4  | 18 | 2  | 8  | 11   |
| 1 BH | 5  | 17 | 12 | 2  | 11   |
| 1 BH | 3  | 8  | 2  | 2  | 5.5  |

replicates for the samples (T6 and P18). The average of the counts for replicates were considered to be

**T6 - mean T6 > P18**

|       |       |
|-------|-------|
| 1364  | TRUE  |
| 828   | TRUE  |
| 487   | TRUE  |
| 349   | TRUE  |
| 0     | FALSE |
| 158   | TRUE  |
| 996   | TRUE  |
| 152   | TRUE  |
| 388   | TRUE  |
| 2     | FALSE |
| 555.5 | TRUE  |
| 353   | TRUE  |
| 127   | TRUE  |
| 981   | TRUE  |
| 0     | FALSE |
| 240.5 | TRUE  |
| 0     | FALSE |
| 0     | FALSE |
| 177.5 | TRUE  |
| 207.5 | TRUE  |
| 311   | TRUE  |
| 647.5 | TRUE  |
| 95.5  | TRUE  |
| 109.5 | TRUE  |
| 149.5 | TRUE  |
| 94.5  | TRUE  |
| 187   | TRUE  |
| 0     | FALSE |
| 384.5 | TRUE  |
| 0     | FALSE |
| 0     | FALSE |
| 3602  | TRUE  |
| 141   | TRUE  |
| 122.5 | TRUE  |
| 83.5  | TRUE  |
| 183.5 | TRUE  |
| 294.5 | TRUE  |
| 179   | TRUE  |
| 72    | TRUE  |
| 70.5  | TRUE  |
| 0.5   | FALSE |
| 0.5   | FALSE |
| 446   | TRUE  |
| 69    | TRUE  |
| 68    | TRUE  |

|       |       |
|-------|-------|
| 0     | FALSE |
| 185.5 | TRUE  |
| 72    | TRUE  |
| 106.5 | TRUE  |
| 311.5 | TRUE  |
| 348   | TRUE  |
| 61    | TRUE  |
| 68    | TRUE  |
| 125   | TRUE  |
| 91    | TRUE  |
| 90.5  | TRUE  |
| 0     | FALSE |
| 131.5 | TRUE  |
| 58    | TRUE  |
| 68    | TRUE  |
| 129.5 | TRUE  |
| 99.5  | TRUE  |
| 55    | TRUE  |
| 120.5 | TRUE  |
| 54.5  | TRUE  |
| 0     | FALSE |
| 260.5 | TRUE  |
| 259.5 | TRUE  |
| 52.5  | TRUE  |
| 50.5  | TRUE  |
| 51.5  | TRUE  |
| 181   | TRUE  |
| 57    | TRUE  |
| 48.5  | TRUE  |
| 1     | FALSE |
| 48.5  | TRUE  |
| 49    | TRUE  |
| 426   | TRUE  |
| 102.5 | TRUE  |
| 71.5  | TRUE  |
| 511.5 | TRUE  |
| 89    | TRUE  |
| 157.5 | TRUE  |
| 67.5  | TRUE  |
| 0     | FALSE |
| 63.5  | TRUE  |
| 53.5  | TRUE  |
| 138   | TRUE  |
| 347   | TRUE  |
| 42    | TRUE  |
| 43.5  | TRUE  |
| 42    | TRUE  |

|        |       |
|--------|-------|
| 75     | TRUE  |
| 0      | FALSE |
| 87     | TRUE  |
| 0      | FALSE |
| 48.5   | TRUE  |
| 424.5  | TRUE  |
| 39     | TRUE  |
| 0      | FALSE |
| 45     | TRUE  |
| 40     | TRUE  |
| 56.5   | TRUE  |
| 37.5   | TRUE  |
| 82.5   | TRUE  |
| 37     | TRUE  |
| 77.5   | TRUE  |
| 988    | TRUE  |
| 176.5  | TRUE  |
| 0      | FALSE |
| 12     | FALSE |
| 0      | FALSE |
| 0.5    | FALSE |
| 37.5   | TRUE  |
| 37.5   | TRUE  |
| 41     | TRUE  |
| 328    | TRUE  |
| 2.5    | FALSE |
| 35.5   | TRUE  |
| 35     | TRUE  |
| 40     | TRUE  |
| 34.5   | TRUE  |
| 0      | FALSE |
| 42     | TRUE  |
| 1334.5 | TRUE  |
| 33     | TRUE  |
| 51.5   | TRUE  |
| 36     | TRUE  |
| 32.5   | TRUE  |
| 0      | FALSE |
| 1.5    | FALSE |
| 32.5   | TRUE  |
| 283    | TRUE  |
| 1      | FALSE |
| 38     | TRUE  |
| 0      | FALSE |
| 32.5   | TRUE  |
| 34.5   | TRUE  |
| 1.5    | FALSE |

|       |       |
|-------|-------|
| 45.5  | TRUE  |
| 21    | FALSE |
| 101   | TRUE  |
| 1     | FALSE |
| 1     | FALSE |
| 45.5  | TRUE  |
| 30    | TRUE  |
| 57.5  | TRUE  |
| 38.5  | TRUE  |
| 29.5  | TRUE  |
| 30    | TRUE  |
| 36    | TRUE  |
| 19.5  | FALSE |
| 239.5 | TRUE  |
| 30.5  | TRUE  |
| 44    | TRUE  |
| 29    | TRUE  |
| 29.5  | TRUE  |
| 4.5   | FALSE |
| 33.5  | TRUE  |
| 0     | FALSE |
| 29    | TRUE  |
| 29    | TRUE  |
| 29    | TRUE  |
| 63    | TRUE  |
| 9     | FALSE |
| 54.5  | TRUE  |
| 31    | TRUE  |
| 34.5  | TRUE  |
| 27.5  | TRUE  |
| 27.5  | TRUE  |
| 29    | TRUE  |
| 28    | TRUE  |
| 28.5  | TRUE  |
| 0     | FALSE |
| 554.5 | TRUE  |
| 31.5  | TRUE  |
| 90.5  | TRUE  |
| 27.5  | TRUE  |
| 27.5  | TRUE  |
| 72    | TRUE  |
| 187   | TRUE  |
| 32    | TRUE  |
| 0     | FALSE |
| 61.5  | TRUE  |
| 0     | FALSE |
| 26.5  | TRUE  |



|       |       |
|-------|-------|
| 33.5  | TRUE  |
| 5.5   | FALSE |
| 26    | TRUE  |
| 26    | TRUE  |
| 29.5  | TRUE  |
| 51.5  | TRUE  |
| 79    | TRUE  |
| 0     | FALSE |
| 1.5   | FALSE |
| 0.5   | FALSE |
| 40    | TRUE  |
| 37.5  | TRUE  |
| 0     | FALSE |
| 11    | FALSE |
| 880   | TRUE  |
| 40.5  | TRUE  |
| 66.5  | TRUE  |
| 0     | FALSE |
| 0     | FALSE |
| 59    | TRUE  |
| 25    | TRUE  |
| 82.5  | TRUE  |
| 24.5  | TRUE  |
| 56.5  | TRUE  |
| 148   | TRUE  |
| 29.5  | TRUE  |
| 27    | TRUE  |
| 37.5  | TRUE  |
| 26    | TRUE  |
| 19    | FALSE |
| 3     | FALSE |
| 77    | TRUE  |
| 24.5  | TRUE  |
| 24.5  | TRUE  |
| 54    | TRUE  |
| 24    | TRUE  |
| 29    | TRUE  |
| 30    | TRUE  |
| 24.5  | TRUE  |
| 26    | TRUE  |
| 0     | FALSE |
| 0     | FALSE |
| 129.5 | TRUE  |
| 1     | FALSE |
| 35.5  | TRUE  |
| 34.5  | TRUE  |
| 28    | TRUE  |

|       |       |
|-------|-------|
| 60.5  | TRUE  |
| 42.5  | TRUE  |
| 2.5   | FALSE |
| 41.5  | TRUE  |
| 38    | TRUE  |
| 24    | TRUE  |
| 1.5   | FALSE |
| 0.5   | FALSE |
| 123   | TRUE  |
| 17    | FALSE |
| 33    | TRUE  |
| 42.5  | TRUE  |
| 32.5  | TRUE  |
| 6.5   | FALSE |
| 0     | FALSE |
| 24    | TRUE  |
| 34.5  | TRUE  |
| 28.5  | TRUE  |
| 21.5  | TRUE  |
| 0     | FALSE |
| 22    | TRUE  |
| 25.5  | TRUE  |
| 35    | TRUE  |
| 2     | FALSE |
| 22    | TRUE  |
| 41.5  | TRUE  |
| 0     | FALSE |
| 0.5   | FALSE |
| 0     | FALSE |
| 91    | TRUE  |
| 1.5   | FALSE |
| 0     | FALSE |
| 21    | TRUE  |
| 79    | TRUE  |
| 0     | FALSE |
| 50.5  | TRUE  |
| 1.5   | FALSE |
| 46.5  | TRUE  |
| 22    | TRUE  |
| 23    | TRUE  |
| 32    | TRUE  |
| 20    | TRUE  |
| 3     | FALSE |
| 0     | FALSE |
| 0     | FALSE |
| 600.5 | TRUE  |
| 30    | TRUE  |

|       |       |
|-------|-------|
| 37    | TRUE  |
| 1     | FALSE |
| 53    | TRUE  |
| 21    | TRUE  |
| 20    | TRUE  |
| 0.5   | FALSE |
| 57.5  | TRUE  |
| 20.5  | TRUE  |
| 19.5  | TRUE  |
| 22.5  | TRUE  |
| 0     | FALSE |
| 35    | TRUE  |
| 57.5  | TRUE  |
| 0     | FALSE |
| 19.5  | TRUE  |
| 24.5  | TRUE  |
| 120.5 | TRUE  |
| 0     | FALSE |
| 48    | TRUE  |
| 22    | TRUE  |
| 0     | FALSE |
| 99    | TRUE  |
| 69    | TRUE  |
| 19    | TRUE  |
| 19    | TRUE  |
| 20    | TRUE  |
| 20    | TRUE  |
| 1.5   | FALSE |
| 31    | TRUE  |
| 54.5  | FALSE |
| 5.5   | FALSE |
| 36.5  | TRUE  |
| 21    | TRUE  |
| 21    | TRUE  |
| 4.5   | FALSE |
| 19    | TRUE  |
| 18.5  | TRUE  |
| 171   | TRUE  |
| 19.5  | TRUE  |
| 19.5  | TRUE  |
| 1.5   | FALSE |
| 61.5  | TRUE  |
| 7     | FALSE |
| 0.5   | FALSE |
| 0.5   | FALSE |
| 25    | TRUE  |
| 72    | TRUE  |

|      |       |
|------|-------|
| 18   | TRUE  |
| 0    | FALSE |
| 25.5 | TRUE  |
| 64.5 | TRUE  |
| 0    | FALSE |
| 2068 | TRUE  |
| 31.5 | TRUE  |
| 36   | TRUE  |
| 47.5 | TRUE  |
| 70.5 | TRUE  |
| 23   | TRUE  |
| 18   | TRUE  |
| 4    | FALSE |
| 85.5 | TRUE  |
| 27   | TRUE  |
| 0.5  | FALSE |
| 17.5 | TRUE  |
| 28.5 | TRUE  |
| 18.5 | TRUE  |
| 4.5  | FALSE |
| 19   | TRUE  |
| 19.5 | TRUE  |
| 32   | TRUE  |
| 18   | TRUE  |
| 23   | TRUE  |
| 0    | FALSE |
| 40   | TRUE  |
| 0.5  | FALSE |
| 1.5  | FALSE |
| 34.5 | TRUE  |
| 0    | FALSE |
| 25.5 | TRUE  |
| 17   | TRUE  |
| 17   | TRUE  |
| 53.5 | TRUE  |
| 6    | FALSE |
| 43   | TRUE  |
| 1    | FALSE |
| 82   | TRUE  |
| 16.5 | TRUE  |
| 18   | TRUE  |
| 19.5 | TRUE  |
| 0.5  | FALSE |
| 2    | FALSE |
| 2.5  | FALSE |
| 18.5 | TRUE  |
| 10.5 | FALSE |

|       |       |
|-------|-------|
| 17    | FALSE |
| 208   | TRUE  |
| 19    | TRUE  |
| 19    | TRUE  |
| 28.5  | TRUE  |
| 43.5  | TRUE  |
| 73.5  | TRUE  |
| 17    | TRUE  |
| 16.5  | TRUE  |
| 23.5  | TRUE  |
| 23.5  | TRUE  |
| 108   | TRUE  |
| 21.5  | TRUE  |
| 0     | FALSE |
| 16.5  | TRUE  |
| 0.5   | FALSE |
| 21    | TRUE  |
| 3.5   | FALSE |
| 45    | TRUE  |
| 36.5  | TRUE  |
| 0     | FALSE |
| 52    | TRUE  |
| 37    | TRUE  |
| 32    | TRUE  |
| 0     | FALSE |
| 32.5  | TRUE  |
| 17    | TRUE  |
| 16    | TRUE  |
| 19    | TRUE  |
| 17    | TRUE  |
| 22    | TRUE  |
| 66    | TRUE  |
| 27.5  | TRUE  |
| 16.5  | TRUE  |
| 16.5  | TRUE  |
| 132   | TRUE  |
| 1.5   | FALSE |
| 0     | FALSE |
| 0     | FALSE |
| 2.5   | FALSE |
| 15.5  | TRUE  |
| 15.5  | TRUE  |
| 21    | TRUE  |
| 50    | TRUE  |
| 142.5 | TRUE  |
| 33.5  | FALSE |
| 2.5   | FALSE |

|      |       |
|------|-------|
| 16.5 | TRUE  |
| 0    | FALSE |
| 44.5 | TRUE  |
| 16.5 | TRUE  |
| 28   | TRUE  |
| 15   | TRUE  |
| 0    | FALSE |
| 15.5 | TRUE  |
| 17.5 | TRUE  |
| 35   | TRUE  |
| 16   | TRUE  |
| 25.5 | TRUE  |
| 2.5  | FALSE |
| 22.5 | TRUE  |
| 15.5 | TRUE  |
| 35.5 | TRUE  |
| 60   | TRUE  |
| 1    | FALSE |
| 0    | FALSE |
| 38   | TRUE  |
| 0.5  | FALSE |
| 22   | TRUE  |
| 22   | TRUE  |
| 0    | FALSE |
| 46.5 | TRUE  |
| 15   | TRUE  |
| 0    | FALSE |
| 15   | FALSE |
| 42   | TRUE  |
| 0    | FALSE |
| 15.5 | TRUE  |
| 23   | TRUE  |
| 48.5 | TRUE  |
| 0    | FALSE |
| 0.5  | FALSE |
| 0    | FALSE |
| 1.5  | FALSE |
| 15   | TRUE  |
| 17   | TRUE  |
| 1.5  | FALSE |
| 6.5  | FALSE |
| 16   | TRUE  |
| 14.5 | TRUE  |
| 17.5 | TRUE  |

|       |       |
|-------|-------|
| 15    | TRUE  |
| 0     | FALSE |
| 0     | FALSE |
| 14.5  | TRUE  |
| 300   | TRUE  |
| 17    | TRUE  |
| 43    | TRUE  |
| 0.5   | FALSE |
| 19.5  | TRUE  |
| 14    | TRUE  |
| 53.5  | TRUE  |
| 27.5  | TRUE  |
| 4     | FALSE |
| 16    | TRUE  |
| 54.5  | TRUE  |
| 21    | TRUE  |
| 149   | TRUE  |
| 0.5   | FALSE |
| 2     | FALSE |
| 0     | FALSE |
| 13.5  | TRUE  |
| 13.5  | TRUE  |
| 16.5  | TRUE  |
| 40.5  | TRUE  |
| 0     | FALSE |
| 2     | FALSE |
| 2     | FALSE |
| 15.5  | TRUE  |
| 15    | TRUE  |
| 43    | TRUE  |
| 15    | TRUE  |
| 16    | TRUE  |
| 0     | FALSE |
| 6     | FALSE |
| 37    | TRUE  |
| 13.5  | TRUE  |
| 173.5 | TRUE  |
| 8     | FALSE |
| 16    | TRUE  |
| 21    | TRUE  |
| 0.5   | FALSE |
| 0     | FALSE |
| 3     | FALSE |
| 99.5  | TRUE  |
| 23    | TRUE  |
| 0     | FALSE |
| 0     | FALSE |

|      |       |
|------|-------|
| 17.5 | TRUE  |
| 0    | FALSE |
| 57.5 | TRUE  |
| 22   | TRUE  |
| 0    | FALSE |
| 39.5 | TRUE  |
| 35.5 | TRUE  |
| 16   | TRUE  |
| 16   | TRUE  |
| 13   | TRUE  |
| 14   | TRUE  |
| 150  | TRUE  |
| 14.5 | TRUE  |
| 0    | FALSE |
| 34   | TRUE  |
| 64   | TRUE  |
| 15   | TRUE  |
| 19.5 | TRUE  |
| 0    | FALSE |
| 13.5 | TRUE  |
| 42.5 | TRUE  |
| 19   | TRUE  |
| 14   | TRUE  |
| 65.5 | TRUE  |
| 13   | FALSE |
| 14.5 | TRUE  |
| 64   | TRUE  |
| 16   | TRUE  |
| 50.5 | TRUE  |
| 12.5 | TRUE  |
| 0    | FALSE |
| 2.5  | FALSE |
| 0    | FALSE |
| 17.5 | TRUE  |
| 40   | TRUE  |
| 39   | TRUE  |
| 19   | TRUE  |
| 0    | FALSE |
| 24   | TRUE  |
| 2    | FALSE |
| 19.5 | TRUE  |



|      |       |
|------|-------|
| 1.5  | FALSE |
| 13.5 | TRUE  |
| 20   | TRUE  |
| 16   | TRUE  |
| 12.5 | TRUE  |
| 1.5  | FALSE |
| 1    | FALSE |
| 0.5  | FALSE |
| 20.5 | TRUE  |
| 15   | TRUE  |
| 2    | FALSE |
| 9    | FALSE |
| 13.5 | TRUE  |
| 4    | FALSE |
| 14   | TRUE  |
| 2    | FALSE |
| 32.5 | TRUE  |
| 0    | FALSE |
| 38.5 | TRUE  |
| 2    | FALSE |
| 0    | FALSE |
| 4    | FALSE |
| 46.5 | TRUE  |
| 2.5  | FALSE |
| 12   | TRUE  |
| 12.5 | TRUE  |
| 0.5  | FALSE |
| 8.5  | FALSE |
| 16.5 | TRUE  |
| 16.5 | TRUE  |
| 1    | FALSE |
| 0    | FALSE |
| 0    | FALSE |
| 3.5  | FALSE |
| 11.5 | TRUE  |
| 1.5  | FALSE |
| 14   | TRUE  |
| 12.5 | TRUE  |
| 12.5 | TRUE  |
| 13   | TRUE  |
| 12   | TRUE  |
| 12   | TRUE  |
| 82   | TRUE  |
| 19   | TRUE  |
| 0.5  | FALSE |
| 18   | TRUE  |
| 12   | TRUE  |

|      |       |
|------|-------|
| 12.5 | TRUE  |
| 0    | FALSE |
| 0    | FALSE |
| 0    | FALSE |
| 2    | FALSE |
| 0    | FALSE |
| 1    | FALSE |
| 17.5 | TRUE  |
| 13   | TRUE  |
| 22   | FALSE |
| 24   | TRUE  |
| 8.5  | FALSE |
| 26   | TRUE  |
| 19   | TRUE  |
| 4    | FALSE |
| 11.5 | TRUE  |
| 0    | FALSE |
| 14   | TRUE  |
| 14   | TRUE  |
| 14   | TRUE  |
| 11.5 | TRUE  |
| 176  | TRUE  |
| 15   | TRUE  |
| 11.5 | TRUE  |
| 15.5 | TRUE  |
| 2.5  | FALSE |
| 0    | FALSE |
| 0    | FALSE |
| 38.5 | TRUE  |
| 11.5 | TRUE  |
| 11.5 | TRUE  |
| 37   | TRUE  |
| 12.5 | TRUE  |
| 18   | TRUE  |
| 17   | TRUE  |
| 2.5  | FALSE |
| 32.5 | TRUE  |
| 14.5 | TRUE  |
| 12   | TRUE  |
| 37.5 | TRUE  |
| 0    | FALSE |
| 0    | FALSE |
| 0.5  | FALSE |

|       |       |
|-------|-------|
| 23    | TRUE  |
| 13.5  | TRUE  |
| 23.5  | FALSE |
| 0     | FALSE |
| 1     | FALSE |
| 27    | TRUE  |
| 27    | TRUE  |
| 22    | TRUE  |
| 0     | FALSE |
| 12.5  | TRUE  |
| 20    | TRUE  |
| 17.5  | TRUE  |
| 11    | TRUE  |
| 10.5  | TRUE  |
| 0     | FALSE |
| 12    | TRUE  |
| 17.5  | TRUE  |
| 13    | TRUE  |
| 13    | TRUE  |
| 22.5  | TRUE  |
| 1     | FALSE |
| 11    | TRUE  |
| 22    | TRUE  |
| 11    | TRUE  |
| 36    | TRUE  |
| 0.5   | FALSE |
| 43.5  | TRUE  |
| 216.5 | TRUE  |
| 1.5   | FALSE |
| 11.5  | TRUE  |
| 11.5  | TRUE  |
| 15.5  | TRUE  |
| 15.5  | TRUE  |
| 12    | TRUE  |
| 0     | FALSE |
| 13.5  | FALSE |
| 16    | TRUE  |
| 10.5  | TRUE  |
| 10.5  | TRUE  |
| 10.5  | TRUE  |
| 17.5  | FALSE |
| 0     | FALSE |
| 4.5   | FALSE |
| 16    | TRUE  |
| 16    | TRUE  |
| 2     | FALSE |
| 1     | FALSE |

|       |       |
|-------|-------|
| 22    | TRUE  |
| 12.5  | TRUE  |
| 12.5  | TRUE  |
| 12.5  | TRUE  |
| 51.5  | FALSE |
| 0     | FALSE |
| 0     | FALSE |
| 43    | TRUE  |
| 34.5  | TRUE  |
| 11    | TRUE  |
| 11    | TRUE  |
| 11    | TRUE  |
| 0     | FALSE |
| 14.5  | TRUE  |
| 14.5  | TRUE  |
| 25    | TRUE  |
| 1.5   | FALSE |
| 116   | TRUE  |
| 11.5  | TRUE  |
| 11.5  | TRUE  |
| 11    | TRUE  |
| 0     | FALSE |
| 41.5  | TRUE  |
| 4.5   | FALSE |
| 12    | TRUE  |
| 34    | TRUE  |
| 13    | TRUE  |
| 13    | TRUE  |
| 1.5   | FALSE |
| 16.5  | TRUE  |
| 0     | FALSE |
| 10.5  | TRUE  |
| 24    | TRUE  |
| 10    | TRUE  |
| 1.5   | FALSE |
| 29    | TRUE  |
| 26    | TRUE  |
| 22.5  | TRUE  |
| 0     | FALSE |
| 10.5  | TRUE  |
| 1     | FALSE |
| 16    | TRUE  |
| 118.5 | TRUE  |
| 12.5  | TRUE  |

|       |       |
|-------|-------|
| 11    | TRUE  |
| 11    | TRUE  |
| 11    | TRUE  |
| 1.5   | FALSE |
| 2.5   | FALSE |
| 33.5  | TRUE  |
| 10.5  | TRUE  |
| 4     | FALSE |
| 0     | FALSE |
| 29    | TRUE  |
| 0     | FALSE |
| 1     | FALSE |
| 21    | TRUE  |
| 0     | FALSE |
| 44    | TRUE  |
| 2.5   | FALSE |
| 17.5  | FALSE |
| 10.5  | TRUE  |
| 7.5   | FALSE |
| 0     | FALSE |
| 0     | FALSE |
| 0     | FALSE |
| 26.5  | TRUE  |
| 0     | FALSE |
| 0     | FALSE |
| 214.5 | TRUE  |
| 27.5  | TRUE  |
| 9.5   | TRUE  |
| 17    | TRUE  |
| 10.5  | TRUE  |
| 10.5  | TRUE  |
| 30.5  | TRUE  |
| 0     | FALSE |
| 26.5  | TRUE  |
| 11    | FALSE |
| 3.5   | FALSE |
| 15.5  | TRUE  |
| 10    | TRUE  |
| 10    | TRUE  |
| 9.5   | TRUE  |
| 11    | TRUE  |
| 11    | TRUE  |
| 11    | TRUE  |



|      |       |
|------|-------|
| 0    | FALSE |
| 16   | TRUE  |
| 25   | TRUE  |
| 0.5  | FALSE |
| 0    | FALSE |
| 0.5  | FALSE |
| 12   | TRUE  |
| 1    | FALSE |
| 0.5  | FALSE |
| 0    | FALSE |
| 13   | TRUE  |
| 9    | TRUE  |
| 9    | TRUE  |
| 23   | TRUE  |
| 2.5  | FALSE |
| 0    | FALSE |
| 50.5 | TRUE  |
| 11   | FALSE |
| 60.5 | TRUE  |
| 15   | TRUE  |
| 0.5  | FALSE |
| 13.5 | TRUE  |
| 9    | TRUE  |
| 9    | TRUE  |
| 0    | FALSE |
| 9    | TRUE  |
| 9    | TRUE  |
| 44.5 | TRUE  |
| 19.5 | FALSE |
| 0    | FALSE |
| 9    | TRUE  |
| 23   | TRUE  |
| 21   | TRUE  |
| 13.5 | TRUE  |
| 11.5 | TRUE  |
| 11.5 | TRUE  |
| 0    | FALSE |
| 1.5  | FALSE |
| 4.5  | FALSE |
| 9.5  | FALSE |
| 10   | TRUE  |
| 1    | FALSE |
| 22   | FALSE |
| 23.5 | TRUE  |
| 17   | TRUE  |
| 0    | FALSE |
| 9    | TRUE  |

|      |       |
|------|-------|
| 8    | FALSE |
| 18   | TRUE  |
| 0.5  | FALSE |
| 1    | FALSE |
| 1    | FALSE |
| 5    | FALSE |
| 0    | FALSE |
| 5.5  | FALSE |
| 0.5  | FALSE |
| 0    | FALSE |
| 0    | FALSE |
| 0.5  | FALSE |
| 1.5  | FALSE |
| 6    | FALSE |
| 1    | FALSE |
| 25   | TRUE  |
| 0    | FALSE |
| 7    | FALSE |
| 49.5 | TRUE  |
| 0    | FALSE |
| 0    | FALSE |
| 8.5  | TRUE  |
| 8.5  | TRUE  |
| 0    | FALSE |
| 58.5 | TRUE  |
| 1.5  | FALSE |
| 0.5  | FALSE |
| 13   | TRUE  |
| 17   | TRUE  |
| 40.5 | TRUE  |
| 0    | FALSE |
| 0.5  | FALSE |
| 2    | FALSE |
| 11   | TRUE  |
| 27.5 | TRUE  |
| 8.5  | TRUE  |
| 0    | FALSE |
| 0    | FALSE |
| 0    | FALSE |
| 16.5 | TRUE  |
| 10   | TRUE  |
| 14   | TRUE  |
| 9.5  | TRUE  |
| 2    | FALSE |
| 13   | TRUE  |
| 0.5  | FALSE |
| 13.5 | TRUE  |



|      |       |
|------|-------|
| 52   | TRUE  |
| 1    | FALSE |
| 60.5 | TRUE  |
| 1    | FALSE |
| 1    | FALSE |
| 10   | TRUE  |
| 10   | TRUE  |
| 10   | TRUE  |
| 28.5 | TRUE  |
| 23   | TRUE  |
| 12.5 | TRUE  |
| 0.5  | FALSE |
| 0    | FALSE |
| 13.5 | TRUE  |
| 13.5 | TRUE  |
| 0.5  | FALSE |
| 9    | TRUE  |
| 0    | FALSE |
| 12   | TRUE  |
| 19.5 | TRUE  |
| 1    | FALSE |
| 62   | TRUE  |
| 2    | FALSE |
| 14.5 | FALSE |
| 23   | TRUE  |
| 0    | FALSE |
| 0    | FALSE |
| 0    | FALSE |
| 20   | TRUE  |
| 13.5 | TRUE  |
| 1    | FALSE |
| 10.5 | TRUE  |
| 18.5 | FALSE |
| 2    | FALSE |
| 53.5 | TRUE  |
| 9.5  | TRUE  |
| 2.5  | FALSE |
| 2    | FALSE |
| 12   | FALSE |
| 15   | TRUE  |
| 0    | FALSE |
| 9    | TRUE  |
| 11.5 | TRUE  |
| 11.5 | TRUE  |
| 8    | TRUE  |
| 8    | TRUE  |
| 8    | TRUE  |

|       |       |
|-------|-------|
| 8     | TRUE  |
| 8     | TRUE  |
| 8     | TRUE  |
| 0     | FALSE |
| 10    | TRUE  |
| 10    | TRUE  |
| 0     | FALSE |
| 13    | TRUE  |
| 36    | FALSE |
| 32.5  | TRUE  |
| 14    | TRUE  |
| 120.5 | TRUE  |
| 8.5   | TRUE  |
| 8.5   | TRUE  |
| 8.5   | TRUE  |
| 15.5  | TRUE  |
| 1     | FALSE |
| 1     | FALSE |
| 0.5   | FALSE |
| 2.5   | FALSE |
| 5     | FALSE |
| 0.5   | FALSE |
| 8     | TRUE  |
| 8     | TRUE  |
| 8     | TRUE  |
| 23    | TRUE  |
| 27.5  | TRUE  |
| 0     | FALSE |
| 9     | TRUE  |
| 9     | TRUE  |
| 9     | TRUE  |
| 1.5   | FALSE |
| 0.5   | FALSE |
| 9.5   | TRUE  |
| 13.5  | TRUE  |
| 28    | TRUE  |
| 25.5  | TRUE  |
| 1.5   | FALSE |
| 0     | FALSE |
| 0     | FALSE |
| 11.5  | FALSE |
| 8.5   | TRUE  |
| 8.5   | TRUE  |
| 8.5   | TRUE  |
| 0.5   | FALSE |
| 25.5  | TRUE  |
| 9.5   | TRUE  |

|      |       |
|------|-------|
| 3.5  | FALSE |
| 7.5  | TRUE  |
| 7.5  | TRUE  |
| 8    | TRUE  |
| 0    | FALSE |
| 22   | TRUE  |
| 5    | FALSE |
| 31   | TRUE  |
| 12.5 | TRUE  |
| 1.5  | FALSE |
| 0    | FALSE |
| 8    | TRUE  |
| 0    | FALSE |
| 3    | FALSE |
| 13.5 | TRUE  |
| 27.5 | TRUE  |
| 7.5  | TRUE  |
| 1    | FALSE |
| 12   | TRUE  |
| 0    | FALSE |
| 8    | TRUE  |
| 8    | TRUE  |
| 0    | FALSE |
| 0    | FALSE |
| 37   | TRUE  |
| 8    | TRUE  |
| 11.5 | TRUE  |
| 6    | FALSE |
| 46   | TRUE  |
| 16.5 | TRUE  |
| 11.5 | TRUE  |
| 0    | FALSE |
| 7.5  | TRUE  |
| 7.5  | TRUE  |
| 3    | FALSE |
| 0    | FALSE |
| 0    | FALSE |
| 9    | TRUE  |
| 9    | TRUE  |
| 8.5  | TRUE  |
| 20   | TRUE  |
| 13   | TRUE  |
| 3.5  | FALSE |
| 53.5 | FALSE |
| 8    | TRUE  |
| 0    | FALSE |
| 8    | TRUE  |

|       |       |
|-------|-------|
| 16.5  | FALSE |
| 12    | TRUE  |
| 12.5  | TRUE  |
| 0.5   | FALSE |
| 9     | TRUE  |
| 11    | TRUE  |
| 36    | TRUE  |
| 10    | TRUE  |
| 26    | TRUE  |
| 8     | TRUE  |
| 10    | FALSE |
| 103   | TRUE  |
| 24.5  | TRUE  |
| 2.5   | FALSE |
| 0     | FALSE |
| 108.5 | TRUE  |
| 3     | FALSE |
| 33    | FALSE |
| 18    | TRUE  |
| 9     | FALSE |
| 2     | FALSE |
| 2     | FALSE |
| 19.5  | TRUE  |
| 5.5   | FALSE |
| 0.5   | FALSE |
| 6     | FALSE |
| 0     | FALSE |
| 0     | FALSE |
| 12.5  | TRUE  |
| 22.5  | FALSE |
| 9.5   | TRUE  |
| 2.5   | FALSE |
| 0     | FALSE |
| 0     | FALSE |
| 0     | FALSE |
| 7.5   | TRUE  |
| 7.5   | TRUE  |
| 7.5   | TRUE  |
| 19.5  | TRUE  |
| 8.5   | TRUE  |
| 9     | FALSE |
| 75.5  | TRUE  |
| 30    | TRUE  |
| 31    | FALSE |

|      |       |
|------|-------|
| 1.5  | FALSE |
| 1.5  | FALSE |
| 4    | FALSE |
| 0    | FALSE |
| 7    | TRUE  |
| 7    | TRUE  |
| 11   | TRUE  |
| 11   | TRUE  |
| 11   | TRUE  |
| 27   | TRUE  |
| 8    | TRUE  |
| 8    | TRUE  |
| 33.5 | TRUE  |
| 12   | TRUE  |
| 12   | TRUE  |
| 0    | FALSE |
| 8.5  | FALSE |
| 1    | FALSE |
| 10   | FALSE |
| 20.5 | FALSE |
| 3    | FALSE |
| 12.5 | TRUE  |
| 10.5 | TRUE  |
| 5.5  | FALSE |
| 0    | FALSE |
| 11   | TRUE  |
| 0.5  | FALSE |
| 11   | TRUE  |
| 0    | FALSE |
| 14.5 | TRUE  |
| 0    | FALSE |
| 128  | TRUE  |
| 1    | FALSE |
| 7.5  | TRUE  |
| 7.5  | TRUE  |
| 7    | TRUE  |
| 47.5 | TRUE  |
| 26   | FALSE |
| 0.5  | FALSE |
| 8.5  | FALSE |
| 22   | TRUE  |
| 18.5 | TRUE  |
| 3    | FALSE |
| 0    | FALSE |

|      |       |
|------|-------|
| 0    | FALSE |
| 1    | FALSE |
| 29.5 | TRUE  |
| 11.5 | TRUE  |
| 11.5 | TRUE  |
| 0.5  | FALSE |
| 14   | TRUE  |
| 11.5 | TRUE  |
| 5.5  | FALSE |
| 1.5  | FALSE |
| 12.5 | TRUE  |
| 12   | TRUE  |
| 0.5  | FALSE |
| 5    | FALSE |
| 7.5  | TRUE  |
| 24.5 | TRUE  |
| 2.5  | FALSE |
| 16   | TRUE  |
| 20   | TRUE  |
| 10   | FALSE |
| 7.5  | TRUE  |
| 7.5  | TRUE  |
| 78.5 | TRUE  |
| 19   | TRUE  |
| 43.5 | FALSE |
| 0    | FALSE |
| 2.5  | FALSE |
| 20.5 | TRUE  |
| 7    | TRUE  |
| 7    | TRUE  |
| 0    | FALSE |
| 7    | TRUE  |
| 3.5  | FALSE |
| 14.5 | TRUE  |
| 80   | TRUE  |
| 0.5  | FALSE |
| 0    | FALSE |
| 0    | FALSE |
| 33   | TRUE  |
| 31.5 | FALSE |
| 64   | TRUE  |
| 14   | TRUE  |
| 38   | TRUE  |
| 38   | TRUE  |
| 2.5  | FALSE |
| 8    | FALSE |
| 7    | TRUE  |

|       |       |
|-------|-------|
| 7     | TRUE  |
| 7     | TRUE  |
| 6.5   | TRUE  |
| 4     | FALSE |
| 2.5   | FALSE |
| 1     | FALSE |
| 1     | FALSE |
| 87.5  | TRUE  |
| 0     | FALSE |
| 7     | TRUE  |
| 7.5   | FALSE |
| 18.5  | TRUE  |
| 19.5  | TRUE  |
| 11    | TRUE  |
| 40    | TRUE  |
| 46.5  | FALSE |
| 9     | TRUE  |
| 0.5   | FALSE |
| 6     | FALSE |
| 0.5   | FALSE |
| 0     | FALSE |
| 0     | FALSE |
| 956.5 | TRUE  |
| 0.5   | FALSE |
| 1     | FALSE |
| 111   | FALSE |
| 26.5  | TRUE  |
| 8     | FALSE |
| 0     | FALSE |
| 0.5   | FALSE |
| 0.5   | FALSE |
| 11    | TRUE  |
| 6.5   | TRUE  |
| 7     | TRUE  |
| 25.5  | FALSE |
| 11.5  | TRUE  |
| 1     | FALSE |
| 11    | TRUE  |
| 18.5  | TRUE  |
| 0.5   | FALSE |
| 0.5   | FALSE |
| 37    | TRUE  |
| 3.5   | FALSE |
| 9     | TRUE  |
| 54    | TRUE  |
| 2.5   | FALSE |
| 10.5  | TRUE  |

|        |       |
|--------|-------|
| 6.5    | FALSE |
| 1.5    | FALSE |
| 1      | FALSE |
| 274.5  | TRUE  |
| 12.5   | TRUE  |
| 133    | TRUE  |
| 1      | FALSE |
| 6.5    | TRUE  |
| 0      | FALSE |
| 2      | FALSE |
| 0      | FALSE |
| 0      | FALSE |
| 0      | FALSE |
| 6.5    | TRUE  |
| 6.5    | TRUE  |
| 2      | FALSE |
| 9.5    | TRUE  |
| 19     | TRUE  |
| 30.5   | TRUE  |
| 8.5    | TRUE  |
| 1.5    | FALSE |
| 6.5    | TRUE  |
| 6.5    | TRUE  |
| 6.5    | TRUE  |
| 1      | FALSE |
| 0.5    | FALSE |
| 7      | TRUE  |
| 7      | TRUE  |
| 1639.5 | TRUE  |
| 58     | TRUE  |
| 16.5   | TRUE  |
| 1      | FALSE |
| 0      | FALSE |
| 6.5    | TRUE  |
| 10.5   | TRUE  |
| 1      | FALSE |
| 7.5    | TRUE  |
| 7.5    | TRUE  |
| 7.5    | TRUE  |



|      |       |
|------|-------|
| 7.5  | TRUE  |
| 0.5  | FALSE |
| 10   | TRUE  |
| 0.5  | FALSE |
| 7.5  | TRUE  |
| 10   | TRUE  |
| 13   | TRUE  |
| 1.5  | FALSE |
| 34.5 | TRUE  |
| 0    | FALSE |
| 14   | TRUE  |
| 14   | TRUE  |
| 0.5  | FALSE |
| 0    | FALSE |
| 4.5  | FALSE |
| 13   | TRUE  |
| 6    | FALSE |
| 1.5  | FALSE |
| 18   | TRUE  |
| 1.5  | FALSE |
| 8    | TRUE  |
| 3    | FALSE |
| 2.5  | FALSE |
| 0    | FALSE |
| 1    | FALSE |
| 0.5  | FALSE |
| 16.5 | TRUE  |
| 93.5 | TRUE  |
| 6    | FALSE |
| 2    | FALSE |
| 0    | FALSE |
| 46.5 | TRUE  |
| 19   | TRUE  |
| 9.5  | TRUE  |
| 9.5  | TRUE  |
| 2.5  | FALSE |
| 30.5 | TRUE  |
| 6    | FALSE |
| 2    | FALSE |
| 9.5  | TRUE  |
| 9.5  | TRUE  |
| 6.5  | TRUE  |
| 1    | FALSE |
| 4.5  | FALSE |

|       |       |
|-------|-------|
| 149.5 | TRUE  |
| 26    | TRUE  |
| 0.5   | FALSE |
| 6     | TRUE  |
| 6     | TRUE  |
| 6     | TRUE  |
| 14    | TRUE  |
| 9.5   | TRUE  |
| 1     | FALSE |
| 1     | FALSE |
| 1     | FALSE |
| 0.5   | FALSE |
| 114   | TRUE  |
| 6     | TRUE  |
| 6     | TRUE  |
| 0     | FALSE |
| 6     | TRUE  |
| 2     | FALSE |
| 17    | TRUE  |
| 7     | TRUE  |
| 7     | TRUE  |
| 28    | FALSE |
| 51    | TRUE  |
| 5.5   | FALSE |
| 15    | TRUE  |
| 16.5  | TRUE  |
| 1     | FALSE |
| 18    | TRUE  |
| 23    | TRUE  |
| 15.5  | TRUE  |
| 2     | FALSE |
| 13    | TRUE  |
| 13    | TRUE  |
| 109   | TRUE  |
| 0     | FALSE |
| 10    | TRUE  |
| 0     | FALSE |
| 11    | FALSE |
| 2     | FALSE |
| 0     | FALSE |
| 9.5   | TRUE  |
| 1.5   | FALSE |
| 16    | TRUE  |
| 13    | TRUE  |
| 9.5   | FALSE |

|      |       |
|------|-------|
| 12   | TRUE  |
| 2.5  | FALSE |
| 6    | TRUE  |
| 16   | TRUE  |
| 3    | FALSE |
| 1    | FALSE |
| 6.5  | TRUE  |
| 0    | FALSE |
| 1.5  | FALSE |
| 5.5  | FALSE |
| 2    | FALSE |
| 62   | TRUE  |
| 0    | FALSE |
| 0    | FALSE |
| 1.5  | FALSE |
| 1    | FALSE |
| 0.5  | FALSE |
| 0.5  | FALSE |
| 0.5  | FALSE |
| 3.5  | FALSE |
| 0    | FALSE |
| 23.5 | TRUE  |
| 6.5  | TRUE  |
| 21   | TRUE  |
| 23.5 | FALSE |
| 10.5 | FALSE |
| 0.5  | FALSE |
| 0.5  | FALSE |
| 14   | TRUE  |
| 12.5 | TRUE  |
| 3    | FALSE |
| 0.5  | FALSE |
| 3    | FALSE |
| 21   | TRUE  |
| 20   | TRUE  |
| 0.5  | FALSE |
| 8.5  | TRUE  |
| 8.5  | TRUE  |
| 8.5  | TRUE  |
| 0    | FALSE |
| 18   | TRUE  |
| 2.5  | FALSE |
| 21.5 | FALSE |
| 11.5 | TRUE  |
| 11.5 | TRUE  |
| 7.5  | FALSE |
| 1    | FALSE |

|      |       |
|------|-------|
| 0    | FALSE |
| 0.5  | FALSE |
| 16.5 | TRUE  |
| 1    | FALSE |
| 70.5 | TRUE  |
| 0    | FALSE |
| 5.5  | TRUE  |
| 7    | TRUE  |
| 7    | TRUE  |
| 0.5  | FALSE |
| 9.5  | TRUE  |
| 2    | FALSE |
| 3    | FALSE |
| 28.5 | TRUE  |
| 1    | FALSE |
| 17.5 | TRUE  |
| 0    | FALSE |
| 5.5  | TRUE  |
| 22.5 | TRUE  |
| 14.5 | TRUE  |
| 5.5  | TRUE  |
| 5.5  | TRUE  |
| 0.5  | FALSE |
| 0.5  | FALSE |
| 1    | FALSE |
| 16.5 | TRUE  |
| 18   | TRUE  |
| 17.5 | TRUE  |
| 1.5  | FALSE |
| 0.5  | FALSE |
| 8    | TRUE  |
| 5.5  | TRUE  |
| 5.5  | TRUE  |
| 5.5  | TRUE  |
| 20   | TRUE  |
| 13   | FALSE |
| 12   | TRUE  |
| 0.5  | FALSE |
| 17   | TRUE  |
| 6    | TRUE  |
| 14.5 | TRUE  |

|      |       |
|------|-------|
| 0    | FALSE |
| 6    | TRUE  |
| 0    | FALSE |
| 6    | TRUE  |
| 28.5 | TRUE  |
| 52.5 | TRUE  |
| 46   | TRUE  |
| 8    | TRUE  |
| 0    | FALSE |
| 2.5  | FALSE |
| 1.5  | FALSE |
| 8.5  | TRUE  |
| 12.5 | TRUE  |
| 9    | FALSE |
| 3.5  | FALSE |
| 15.5 | TRUE  |
| 2.5  | FALSE |
| 18   | TRUE  |
| 0    | FALSE |
| 8.5  | TRUE  |
| 26.5 | TRUE  |
| 1.5  | FALSE |
| 6.5  | TRUE  |
| 1.5  | FALSE |
| 68   | TRUE  |
| 1    | FALSE |
| 14.5 | FALSE |
| 28   | TRUE  |
| 5.5  | TRUE  |
| 8.5  | TRUE  |
| 11.5 | TRUE  |
| 11.5 | TRUE  |
| 6    | FALSE |
| 1    | FALSE |
| 14.5 | TRUE  |
| 6.5  | TRUE  |
| 41.5 | FALSE |
| 0    | FALSE |
| 0    | FALSE |

|      |       |
|------|-------|
| 2    | FALSE |
| 16.5 | TRUE  |
| 0    | FALSE |
| 1    | FALSE |
| 11.5 | TRUE  |
| 0.5  | FALSE |
| 6    | TRUE  |
| 6    | TRUE  |
| 0    | FALSE |
| 6    | TRUE  |
| 6    | TRUE  |
| 63.5 | TRUE  |
| 4.5  | FALSE |
| 8.5  | TRUE  |
| 21.5 | TRUE  |
| 12   | FALSE |
| 7.5  | TRUE  |
| 7.5  | TRUE  |
| 19.5 | TRUE  |
| 0    | FALSE |
| 0    | FALSE |
| 9.5  | TRUE  |
| 5.5  | FALSE |
| 30.5 | FALSE |
| 15.5 | TRUE  |
| 0    | FALSE |
| 0    | FALSE |
| 21.5 | TRUE  |
| 5.5  | TRUE  |
| 0.5  | FALSE |
| 9    | TRUE  |
| 9    | TRUE  |
| 1.5  | FALSE |
| 18.5 | TRUE  |
| 7.5  | FALSE |
| 21   | TRUE  |
| 1    | FALSE |
| 5    | FALSE |
| 5.5  | TRUE  |
| 5.5  | TRUE  |
| 9.5  | FALSE |
| 5.5  | TRUE  |
| 0    | FALSE |
| 30.5 | TRUE  |

|      |       |
|------|-------|
| 0.5  | FALSE |
| 11   | TRUE  |
| 4    | FALSE |
| 23.5 | TRUE  |
| 4    | FALSE |
| 1.5  | FALSE |
| 1    | FALSE |
| 0.5  | FALSE |
| 33.5 | TRUE  |
| 0.5  | FALSE |
| 62.5 | TRUE  |
| 4.5  | FALSE |
| 5.5  | TRUE  |
| 0    | FALSE |
| 5.5  | TRUE  |
| 0    | FALSE |
| 5.5  | TRUE  |
| 1.5  | FALSE |
| 7    | FALSE |
| 16   | TRUE  |
| 10.5 | FALSE |
| 3    | FALSE |
| 2.5  | FALSE |
| 9    | FALSE |
| 6    | TRUE  |
| 6    | TRUE  |
| 6    | TRUE  |
| 0    | FALSE |
| 0    | FALSE |
| 11   | TRUE  |
| 1.5  | FALSE |
| 12   | TRUE  |
| 5.5  | FALSE |
| 5    | FALSE |
| 8    | TRUE  |
| 7    | FALSE |
| 6    | TRUE  |
| 3    | FALSE |
| 14   | TRUE  |
| 50   | TRUE  |
| 2    | FALSE |
| 0    | FALSE |
| 7    | TRUE  |
| 7    | TRUE  |
| 7    | TRUE  |
| 0    | FALSE |
| 16.5 | TRUE  |

|       |       |
|-------|-------|
| 1.5   | FALSE |
| 0     | FALSE |
| 17    | TRUE  |
| 2     | FALSE |
| 14    | TRUE  |
| 0     | FALSE |
| 10.5  | FALSE |
| 15.5  | TRUE  |
| 183   | TRUE  |
| 49.5  | TRUE  |
| 5.5   | TRUE  |
| 5.5   | TRUE  |
| 5.5   | TRUE  |
| 3.5   | FALSE |
| 8.5   | FALSE |
| 8.5   | TRUE  |
| 2     | FALSE |
| 153   | TRUE  |
| 728.5 | TRUE  |
| 0     | FALSE |
| 4     | FALSE |
| 148   | TRUE  |
| 76.5  | FALSE |
| 11    | TRUE  |
| 4     | FALSE |
| 35    | FALSE |
| 0     | FALSE |
| 10    | TRUE  |
| 0     | FALSE |
| 0     | FALSE |
| 8     | FALSE |
| 0.5   | FALSE |
| 1.5   | FALSE |
| 15    | TRUE  |
| 8     | TRUE  |
| 18.5  | TRUE  |
| 15.5  | TRUE  |
| 2     | FALSE |
| 4     | FALSE |
| 0.5   | FALSE |
| 6.5   | TRUE  |



|      |       |
|------|-------|
| 6.5  | TRUE  |
| 8    | TRUE  |
| 0.5  | FALSE |
| 8    | TRUE  |
| 0    | FALSE |
| 3.5  | FALSE |
| 1.5  | FALSE |
| 0.5  | FALSE |
| 1.5  | FALSE |
| 3.5  | FALSE |
| 47.5 | TRUE  |
| 0    | FALSE |
| 18   | TRUE  |
| 80   | TRUE  |
| 0    | FALSE |
| 48.5 | TRUE  |
| 0.5  | FALSE |
| 15.5 | TRUE  |
| 13.5 | TRUE  |
| 15   | TRUE  |
| 14   | FALSE |
| 0    | FALSE |
| 5.5  | TRUE  |
| 13   | TRUE  |
| 4.5  | FALSE |
| 0    | FALSE |
| 0    | FALSE |
| 0    | FALSE |
| 8    | TRUE  |
| 0.5  | FALSE |
| 40   | TRUE  |
| 1    | FALSE |
| 9    | FALSE |
| 1    | FALSE |
| 5.5  | TRUE  |
| 5.5  | TRUE  |
| 5.5  | TRUE  |

|       |       |
|-------|-------|
| 0     | FALSE |
| 0     | FALSE |
| 1     | FALSE |
| 1.5   | FALSE |
| 1     | FALSE |
| 1     | FALSE |
| 12    | TRUE  |
| 23.5  | TRUE  |
| 14    | FALSE |
| 19.5  | TRUE  |
| 0     | FALSE |
| 11    | TRUE  |
| 1     | FALSE |
| 4.5   | FALSE |
| 1     | FALSE |
| 14.5  | TRUE  |
| 5.5   | FALSE |
| 12    | FALSE |
| 8     | FALSE |
| 3     | FALSE |
| 5     | FALSE |
| 14    | TRUE  |
| 16.5  | FALSE |
| 7.5   | FALSE |
| 1     | FALSE |
| 7.5   | TRUE  |
| 7.5   | TRUE  |
| 0.5   | FALSE |
| 0.5   | FALSE |
| 0     | FALSE |
| 25    | FALSE |
| 101.5 | TRUE  |
| 28    | TRUE  |
| 28.5  | FALSE |
| 21    | TRUE  |
| 6     | TRUE  |
| 6     | TRUE  |
| 2     | FALSE |
| 4     | FALSE |
| 7.5   | TRUE  |
| 8     | TRUE  |

|      |       |
|------|-------|
| 10   | TRUE  |
| 6    | TRUE  |
| 6    | TRUE  |
| 0    | FALSE |
| 97   | TRUE  |
| 2.5  | FALSE |
| 0    | FALSE |
| 1.5  | FALSE |
| 88   | TRUE  |
| 2.5  | FALSE |
| 16   | TRUE  |
| 28   | TRUE  |
| 7    | FALSE |
| 33   | TRUE  |
| 1.5  | FALSE |
| 10   | TRUE  |
| 7    | FALSE |
| 4    | FALSE |
| 0.5  | FALSE |
| 190  | TRUE  |
| 3    | FALSE |
| 34   | TRUE  |
| 13.5 | TRUE  |
| 22.5 | FALSE |
| 4    | FALSE |
| 20.5 | TRUE  |
| 37.5 | TRUE  |
| 11   | FALSE |
| 0.5  | FALSE |
| 0    | FALSE |
| 1    | FALSE |
| 1.5  | FALSE |
| 10   | FALSE |
| 0.5  | FALSE |
| 12   | TRUE  |
| 14.5 | TRUE  |
| 2    | FALSE |
| 0    | FALSE |
| 0    | FALSE |

|      |       |
|------|-------|
| 0    | FALSE |
| 7    | TRUE  |
| 2    | FALSE |
| 14.5 | TRUE  |
| 3    | FALSE |
| 19   | TRUE  |
| 3    | FALSE |
| 3    | FALSE |
| 7    | FALSE |
| 10   | TRUE  |
| 4.5  | FALSE |
| 3.5  | FALSE |
| 0    | FALSE |
| 0    | FALSE |
| 0    | FALSE |
| 27.5 | TRUE  |
| 7.5  | FALSE |
| 1.5  | FALSE |
| 13   | FALSE |
| 12   | TRUE  |
| 7    | TRUE  |
| 0.5  | FALSE |
| 0.5  | FALSE |
| 0    | FALSE |
| 22.5 | TRUE  |
| 1.5  | FALSE |
| 0.5  | FALSE |
| 14.5 | FALSE |
| 3    | FALSE |
| 20.5 | TRUE  |
| 0    | FALSE |
| 41   | TRUE  |
| 1.5  | FALSE |
| 12.5 | TRUE  |
| 3.5  | FALSE |
| 24.5 | TRUE  |
| 9    | TRUE  |
| 0    | FALSE |

|       |       |
|-------|-------|
| 3.5   | FALSE |
| 13.5  | FALSE |
| 9.5   | TRUE  |
| 23    | TRUE  |
| 5     | FALSE |
| 26    | TRUE  |
| 0     | FALSE |
| 20.5  | FALSE |
| 2     | FALSE |
| 127.5 | TRUE  |
| 1     | FALSE |
| 6     | FALSE |
| 11.5  | TRUE  |
| 85.5  | TRUE  |
| 130   | TRUE  |
| 14.5  | TRUE  |
| 2     | FALSE |
| 1.5   | FALSE |
| 0.5   | FALSE |
| 11.5  | TRUE  |
| 11    | FALSE |
| 8.5   | FALSE |
| 0.5   | FALSE |
| 61.5  | FALSE |
| 12    | TRUE  |
| 12    | TRUE  |
| 11    | FALSE |
| 136.5 | TRUE  |
| 4     | FALSE |
| 41    | TRUE  |
| 55    | TRUE  |
| 0.5   | FALSE |
| 1     | FALSE |
| 0.5   | FALSE |
| 1     | FALSE |
| 9.5   | TRUE  |
| 42    | TRUE  |
| 11    | FALSE |
| 8.5   | FALSE |
| 1     | FALSE |

|       |       |
|-------|-------|
| 1     | FALSE |
| 1     | FALSE |
| 1     | FALSE |
| 1.5   | FALSE |
| 2.5   | FALSE |
| 11.5  | TRUE  |
| 2     | FALSE |
| 0     | FALSE |
| 25.5  | TRUE  |
| 2.5   | FALSE |
| 29    | TRUE  |
| 10.5  | TRUE  |
| 4     | FALSE |
| 5     | FALSE |
| 8.5   | FALSE |
| 0     | FALSE |
| 14    | FALSE |
| 20    | TRUE  |
| 4     | FALSE |
| 5     | FALSE |
| 125.5 | TRUE  |
| 0.5   | FALSE |
| 1     | FALSE |
| 8.5   | TRUE  |
| 1     | FALSE |
| 0     | FALSE |
| 0     | FALSE |
| 1.5   | FALSE |
| 5.5   | FALSE |
| 3     | FALSE |
| 2.5   | FALSE |
| 7     | TRUE  |
| 124   | FALSE |
| 6.5   | TRUE  |
| 0.5   | FALSE |
| 8.5   | FALSE |
| 13    | FALSE |
| 1.5   | FALSE |
| 5.5   | TRUE  |
| 5.5   | TRUE  |

|      |       |
|------|-------|
| 3    | FALSE |
| 10.5 | TRUE  |
| 1    | FALSE |
| 7.5  | FALSE |
| 5    | FALSE |
| 8.5  | FALSE |
| 11   | TRUE  |
| 1    | FALSE |
| 6.5  | TRUE  |
| 18   | FALSE |
| 13.5 | TRUE  |
| 1    | FALSE |
| 9    | TRUE  |
| 43.5 | TRUE  |
| 0.5  | FALSE |
| 12   | FALSE |
| 1.5  | FALSE |
| 11.5 | TRUE  |
| 1.5  | FALSE |
| 10   | FALSE |
| 13.5 | TRUE  |
| 50   | TRUE  |
| 4    | FALSE |
| 15   | TRUE  |
| 1.5  | FALSE |
| 9.5  | TRUE  |
| 16   | TRUE  |
| 18.5 | TRUE  |
| 36.5 | TRUE  |
| 6.5  | FALSE |
| 36.5 | TRUE  |
| 2.5  | FALSE |
| 1    | FALSE |
| 0    | FALSE |
| 11   | FALSE |
| 1.5  | FALSE |
| 30.5 | FALSE |
| 11.5 | TRUE  |
| 4.5  | FALSE |

|      |       |
|------|-------|
| 25.5 | TRUE  |
| 1    | FALSE |
| 2    | FALSE |
| 15   | FALSE |
| 312  | FALSE |
| 0    | FALSE |
| 12   | TRUE  |
| 24.5 | TRUE  |
| 4    | FALSE |
| 118  | FALSE |
| 12   | FALSE |
| 269  | TRUE  |
| 1    | FALSE |
| 0    | FALSE |
| 7    | TRUE  |
| 0.5  | FALSE |
| 2.5  | FALSE |
| 1.5  | FALSE |
| 26   | TRUE  |
| 0    | FALSE |
| 1.5  | FALSE |
| 11   | TRUE  |
| 3.5  | FALSE |
| 1    | FALSE |
| 1.5  | FALSE |
| 2    | FALSE |
| 2    | FALSE |
| 0    | FALSE |
| 8    | FALSE |
| 49   | TRUE  |
| 19   | TRUE  |
| 8    | FALSE |
| 49   | TRUE  |
| 25.5 | FALSE |
| 6.5  | FALSE |
| 9    | TRUE  |
| 1    | FALSE |
| 3.5  | FALSE |
| 18.5 | TRUE  |
| 2    | FALSE |
| 1    | FALSE |
| 2    | FALSE |
| 8.5  | TRUE  |
| 5    | FALSE |
| 54   | TRUE  |
| 22.5 | TRUE  |
| 17.5 | TRUE  |



|      |       |
|------|-------|
| 0.5  | FALSE |
| 12   | TRUE  |
| 3.5  | FALSE |
| 1.5  | FALSE |
| 0.5  | FALSE |
| 0.5  | FALSE |
| 3    | FALSE |
| 10.5 | TRUE  |
| 0.5  | FALSE |
| 5.5  | FALSE |
| 0    | FALSE |
| 2    | FALSE |
| 23.5 | FALSE |
| 13   | TRUE  |
| 0    | FALSE |
| 0    | FALSE |
| 4    | FALSE |
| 4    | FALSE |
| 15.5 | TRUE  |
| 0.5  | FALSE |
| 0.5  | FALSE |
| 17.5 | TRUE  |
| 0    | FALSE |
| 9    | TRUE  |
| 9    | TRUE  |
| 4    | FALSE |
| 1    | FALSE |
| 0    | FALSE |
| 0    | FALSE |
| 6    | TRUE  |
| 6    | TRUE  |
| 0.5  | FALSE |
| 32   | TRUE  |
| 27.5 | FALSE |
| 11   | TRUE  |
| 8.5  | TRUE  |
| 20.5 | TRUE  |
| 43   | TRUE  |

|       |       |
|-------|-------|
| 44.5  | TRUE  |
| 0.5   | FALSE |
| 12    | TRUE  |
| 27.5  | TRUE  |
| 1     | FALSE |
| 1     | FALSE |
| 0.5   | FALSE |
| 6     | TRUE  |
| 6     | TRUE  |
| 31    | TRUE  |
| 16    | TRUE  |
| 8.5   | FALSE |
| 123   | FALSE |
| 29.5  | TRUE  |
| 1     | FALSE |
| 1     | FALSE |
| 11    | TRUE  |
| 10.5  | TRUE  |
| 129.5 | TRUE  |
| 0.5   | FALSE |
| 44.5  | TRUE  |
| 2     | FALSE |
| 15.5  | FALSE |
| 29    | TRUE  |
| 5     | FALSE |
| 26.5  | FALSE |
| 22    | FALSE |
| 10    | TRUE  |
| 3     | FALSE |
| 10    | FALSE |
| 8     | TRUE  |
| 14.5  | TRUE  |
| 9.5   | TRUE  |
| 77    | TRUE  |
| 1     | FALSE |
| 17.5  | FALSE |
| 25    | TRUE  |
| 211   | FALSE |
| 7     | FALSE |
| 4     | FALSE |
| 40.5  | TRUE  |
| 9.5   | TRUE  |
| 4.5   | FALSE |
| 8.5   | TRUE  |
| 1     | FALSE |
| 32    | TRUE  |
| 38.5  | TRUE  |

|       |       |
|-------|-------|
| 22    | FALSE |
| 3     | FALSE |
| 12.5  | FALSE |
| 11.5  | FALSE |
| 75    | TRUE  |
| 26    | FALSE |
| 7     | FALSE |
| 10    | TRUE  |
| 1     | FALSE |
| 2.5   | FALSE |
| 58    | TRUE  |
| 1     | FALSE |
| 5.5   | FALSE |
| 231.5 | TRUE  |
| 22.5  | TRUE  |
| 1.5   | FALSE |
| 12.5  | TRUE  |
| 21    | TRUE  |
| 10.5  | TRUE  |
| 10.5  | TRUE  |
| 13    | FALSE |
| 7     | TRUE  |
| 6     | FALSE |
| 6     | FALSE |
| 8     | TRUE  |
| 11.5  | TRUE  |
| 1     | FALSE |
| 8.5   | TRUE  |
| 17.5  | TRUE  |
| 2     | FALSE |
| 0.5   | FALSE |
| 64.5  | TRUE  |
| 121.5 | TRUE  |
| 15.5  | FALSE |
| 15.5  | FALSE |
| 0.5   | FALSE |
| 6.5   | TRUE  |
| 6.5   | TRUE  |
| 8     | TRUE  |
| 8     | TRUE  |
| 2.5   | FALSE |
| 0.5   | FALSE |
| 0     | FALSE |
| 0     | FALSE |
| 0     | FALSE |
| 2.5   | FALSE |
| 18.5  | TRUE  |

|      |       |
|------|-------|
| 2    | FALSE |
| 22   | TRUE  |
| 8    | TRUE  |
| 14   | TRUE  |
| 12   | FALSE |
| 24.5 | TRUE  |
| 8    | TRUE  |
| 2    | FALSE |
| 0.5  | FALSE |
| 2    | FALSE |
| 25.5 | TRUE  |
| 1    | FALSE |
| 0    | FALSE |
| 0    | FALSE |
| 0    | FALSE |
| 8    | FALSE |
| 125  | TRUE  |
| 0    | FALSE |
| 34.5 | TRUE  |
| 6.5  | FALSE |
| 9    | TRUE  |
| 9    | TRUE  |
| 3    | FALSE |
| 0.5  | FALSE |
| 0.5  | FALSE |
| 8    | FALSE |
| 1.5  | FALSE |
| 3.5  | FALSE |
| 2    | FALSE |
| 3    | FALSE |
| 0    | FALSE |

|      |       |
|------|-------|
| 0    | FALSE |
| 2    | FALSE |
| 1.5  | FALSE |
| 1.5  | FALSE |
| 49.5 | TRUE  |
| 8    | FALSE |
| 15.5 | FALSE |
| 66.5 | FALSE |
| 11   | TRUE  |
| 4    | FALSE |
| 8    | TRUE  |
| 11.5 | TRUE  |
| 7.5  | FALSE |
| 0.5  | FALSE |
| 4.5  | FALSE |
| 45.5 | TRUE  |
| 21.5 | FALSE |
| 156  | TRUE  |
| 20.5 | FALSE |
| 10   | TRUE  |
| 17   | TRUE  |
| 6    | TRUE  |
| 0.5  | FALSE |
| 3.5  | FALSE |
| 56.5 | TRUE  |
| 0    | FALSE |
| 0    | FALSE |
| 0    | FALSE |
| 50   | TRUE  |
| 7.5  | TRUE  |
| 1.5  | FALSE |
| 36.5 | TRUE  |
| 65   | TRUE  |
| 14.5 | TRUE  |
| 28.5 | FALSE |
| 36   | TRUE  |
| 0.5  | FALSE |
| 0.5  | FALSE |
| 0    | FALSE |
| 0    | FALSE |
| 0    | FALSE |
| 10.5 | TRUE  |
| 1.5  | FALSE |
| 10.5 | TRUE  |
| 1    | FALSE |
| 8    | TRUE  |
| 6.5  | TRUE  |

|      |       |
|------|-------|
| 0.5  | FALSE |
| 4    | FALSE |
| 50.5 | FALSE |
| 13   | TRUE  |
| 1.5  | FALSE |
| 10.5 | TRUE  |
| 0.5  | FALSE |
| 2    | FALSE |
| 5    | FALSE |
| 19   | FALSE |
| 17   | FALSE |
| 17   | TRUE  |
| 27.5 | TRUE  |
| 5    | FALSE |
| 7.5  | TRUE  |
| 24   | FALSE |
| 5.5  | FALSE |
| 49.5 | TRUE  |
| 1    | FALSE |
| 18.5 | TRUE  |
| 9    | TRUE  |
| 1.5  | FALSE |
| 5.5  | TRUE  |
| 97.5 | TRUE  |
| 13   | FALSE |
| 1.5  | FALSE |
| 0.5  | FALSE |
| 0.5  | FALSE |
| 3    | FALSE |
| 21.5 | TRUE  |
| 1    | FALSE |
| 1    | FALSE |
| 7    | FALSE |
| 37   | TRUE  |
| 5.5  | FALSE |
| 45.5 | FALSE |
| 3.5  | FALSE |
| 7.5  | TRUE  |
| 7.5  | TRUE  |
| 2.5  | FALSE |
| 2.5  | FALSE |
| 10.5 | TRUE  |
| 8.5  | TRUE  |
| 17   | TRUE  |
| 1.5  | FALSE |
| 5.5  | FALSE |
| 17.5 | TRUE  |



|      |       |
|------|-------|
| 0    | FALSE |
| 10   | FALSE |
| 8    | FALSE |
| 5.5  | TRUE  |
| 4.5  | FALSE |
| 139  | FALSE |
| 9    | TRUE  |
| 16   | TRUE  |
| 31.5 | TRUE  |
| 14.5 | TRUE  |
| 4    | FALSE |
| 0.5  | FALSE |
| 0.5  | FALSE |
| 84   | FALSE |
| 17.5 | TRUE  |
| 4    | FALSE |
| 7.5  | FALSE |
| 5    | FALSE |
| 5    | FALSE |
| 29   | TRUE  |
| 18.5 | TRUE  |
| 1    | FALSE |
| 18.5 | TRUE  |
| 2.5  | FALSE |
| 7.5  | TRUE  |
| 8    | TRUE  |
| 7    | TRUE  |
| 2.5  | FALSE |
| 21   | FALSE |
| 5.5  | FALSE |
| 9    | TRUE  |
| 2.5  | FALSE |
| 1.5  | FALSE |
| 14.5 | FALSE |
| 43.5 | TRUE  |
| 12.5 | FALSE |
| 4.5  | FALSE |
| 16   | FALSE |
| 0    | FALSE |



|       |       |
|-------|-------|
| 53    | TRUE  |
| 24.5  | TRUE  |
| 31.5  | TRUE  |
| 7     | TRUE  |
| 7     | TRUE  |
| 8.5   | TRUE  |
| 7     | FALSE |
| 4     | FALSE |
| 209.5 | TRUE  |
| 113.5 | FALSE |
| 6     | FALSE |
| 0.5   | FALSE |
| 0.5   | FALSE |
| 0.5   | FALSE |
| 226.5 | TRUE  |
| 19.5  | TRUE  |
| 14.5  | TRUE  |
| 15.5  | TRUE  |
| 1     | FALSE |
| 1     | FALSE |
| 27    | TRUE  |
| 534.5 | TRUE  |
| 9     | TRUE  |
| 0.5   | FALSE |
| 0.5   | FALSE |
| 4.5   | FALSE |
| 12    | TRUE  |
| 1     | FALSE |
| 1     | FALSE |
| 1     | FALSE |
| 10    | TRUE  |
| 106   | TRUE  |
| 4.5   | FALSE |
| 5.5   | FALSE |
| 70.5  | TRUE  |
| 0     | FALSE |
| 109.5 | TRUE  |
| 3.5   | FALSE |
| 4     | FALSE |
| 22.5  | TRUE  |
| 1.5   | FALSE |
| 14.5  | TRUE  |

|      |       |
|------|-------|
| 7    | FALSE |
| 0.5  | FALSE |
| 5.5  | TRUE  |
| 1.5  | FALSE |
| 29.5 | TRUE  |
| 535  | TRUE  |
| 3    | FALSE |
| 6.5  | TRUE  |
| 7    | TRUE  |
| 0.5  | FALSE |
| 7    | TRUE  |
| 18   | TRUE  |
| 62.5 | TRUE  |
| 5.5  | TRUE  |
| 0.5  | FALSE |
| 3    | FALSE |
| 1.5  | FALSE |
| 1.5  | FALSE |
| 2.5  | FALSE |
| 4    | FALSE |
| 14.5 | TRUE  |
| 1    | FALSE |
| 1    | FALSE |
| 5    | FALSE |
| 10.5 | TRUE  |
| 20.5 | TRUE  |
| 10   | FALSE |
| 48   | TRUE  |
| 31   | TRUE  |
| 2.5  | FALSE |
| 3.5  | FALSE |
| 8.5  | FALSE |
| 8    | TRUE  |
| 18   | TRUE  |
| 8    | TRUE  |
| 5.5  | TRUE  |
| 5.5  | TRUE  |
| 4    | FALSE |
| 9.5  | TRUE  |
| 7    | TRUE  |
| 7    | TRUE  |
| 10.5 | TRUE  |
| 214  | TRUE  |
| 1.5  | FALSE |
| 9    | TRUE  |
| 1    | FALSE |
| 5.5  | FALSE |

|      |       |
|------|-------|
| 3    | FALSE |
| 0.5  | FALSE |
| 49.5 | FALSE |
| 40.5 | TRUE  |
| 2    | FALSE |
| 2    | FALSE |
| 6.5  | TRUE  |
| 14   | TRUE  |
| 12   | TRUE  |
| 4    | FALSE |
| 20   | FALSE |
| 1    | FALSE |
| 50.5 | TRUE  |
| 0.5  | FALSE |
| 11   | TRUE  |
| 1    | FALSE |
| 8.5  | TRUE  |
| 1    | FALSE |
| 8    | TRUE  |
| 8.5  | TRUE  |
| 0.5  | FALSE |
| 2.5  | FALSE |
| 38   | TRUE  |
| 3    | FALSE |
| 22   | FALSE |
| 2    | FALSE |
| 16   | TRUE  |
| 3    | FALSE |
| 2    | FALSE |
| 2    | FALSE |
| 9    | TRUE  |
| 13   | TRUE  |
| 1    | FALSE |
| 55.5 | TRUE  |
| 5    | FALSE |
| 80   | TRUE  |
| 3    | FALSE |
| 10   | TRUE  |
| 10   | TRUE  |
| 8    | TRUE  |
| 6    | FALSE |
| 1.5  | FALSE |
| 12.5 | FALSE |
| 14   | TRUE  |

|       |       |
|-------|-------|
| 2.5   | FALSE |
| 36    | FALSE |
| 0.5   | FALSE |
| 1.5   | FALSE |
| 11    | TRUE  |
| 1     | FALSE |
| 1     | FALSE |
| 6     | FALSE |
| 104   | TRUE  |
| 10    | FALSE |
| 0.5   | FALSE |
| 0.5   | FALSE |
| 146.5 | TRUE  |
| 3     | FALSE |
| 295.5 | TRUE  |
| 6     | TRUE  |
| 6     | TRUE  |
| 0.5   | FALSE |
| 6     | TRUE  |
| 26    | TRUE  |
| 12.5  | FALSE |
| 1.5   | FALSE |
| 10.5  | TRUE  |
| 17.5  | TRUE  |
| 9     | FALSE |
| 691.5 | TRUE  |
| 31.5  | TRUE  |
| 13    | TRUE  |
| 3     | FALSE |
| 6     | TRUE  |
| 9.5   | FALSE |
| 2.5   | FALSE |
| 415.5 | TRUE  |
| 20    | TRUE  |
| 14.5  | TRUE  |
| 2.5   | FALSE |
| 14.5  | FALSE |
| 43    | TRUE  |
| 2     | FALSE |
| 8.5   | TRUE  |
| 12    | FALSE |
| 10.5  | TRUE  |
| 6.5   | TRUE  |
| 1     | FALSE |
| 0     | FALSE |
| 0     | FALSE |
| 0     | FALSE |

|      |       |
|------|-------|
| 0    | FALSE |
| 12.5 | TRUE  |
| 14.5 | TRUE  |
| 6.5  | FALSE |
| 4    | FALSE |
| 11   | FALSE |
| 3.5  | FALSE |
| 2.5  | FALSE |
| 0    | FALSE |
| 8.5  | TRUE  |
| 9    | TRUE  |
| 6.5  | TRUE  |
| 6.5  | TRUE  |
| 1    | FALSE |
| 13.5 | TRUE  |
| 4    | FALSE |
| 4    | FALSE |
| 75   | FALSE |
| 19.5 | TRUE  |
| 1.5  | FALSE |
| 138  | TRUE  |
| 23   | TRUE  |
| 428  | TRUE  |
| 2.5  | FALSE |
| 7    | FALSE |
| 3    | FALSE |
| 3    | FALSE |
| 6    | FALSE |
| 1.5  | FALSE |
| 28   | TRUE  |
| 7.5  | FALSE |
| 15.5 | TRUE  |
| 52   | TRUE  |
| 33   | FALSE |
| 13   | TRUE  |
| 20.5 | FALSE |
| 1    | FALSE |
| 5.5  | FALSE |
| 1.5  | FALSE |
| 13.5 | FALSE |

|      |       |
|------|-------|
| 1.5  | FALSE |
| 1.5  | FALSE |
| 9.5  | TRUE  |
| 3.5  | FALSE |
| 46   | TRUE  |
| 20.5 | FALSE |
| 18   | TRUE  |
| 15.5 | TRUE  |
| 3.5  | FALSE |
| 6.5  | TRUE  |
| 3.5  | FALSE |
| 1.5  | FALSE |
| 7.5  | FALSE |
| 1    | FALSE |
| 4    | FALSE |
| 15.5 | TRUE  |
| 1.5  | FALSE |
| 2.5  | FALSE |
| 28.5 | TRUE  |
| 8.5  | FALSE |
| 19.5 | TRUE  |
| 1    | FALSE |
| 1    | FALSE |
| 1    | FALSE |
| 4.5  | FALSE |
| 1    | FALSE |
| 9    | FALSE |
| 7    | FALSE |
| 5.5  | FALSE |
| 4.5  | FALSE |
| 14   | TRUE  |
| 13   | FALSE |
| 8.5  | TRUE  |
| 4.5  | FALSE |
| 37   | TRUE  |
| 3.5  | FALSE |
| 1.5  | FALSE |
| 23   | FALSE |
| 14   | FALSE |
| 5.5  | FALSE |
| 8.5  | TRUE  |
| 0.5  | FALSE |
| 0.5  | FALSE |
| 14.5 | TRUE  |
| 2.5  | FALSE |
| 6.5  | TRUE  |
| 0.5  | FALSE |

|       |       |
|-------|-------|
| 6     | TRUE  |
| 2     | FALSE |
| 2     | FALSE |
| 3     | FALSE |
| 2     | FALSE |
| 18.5  | TRUE  |
| 7     | TRUE  |
| 7     | TRUE  |
| 0.5   | FALSE |
| 0.5   | FALSE |
| 6     | FALSE |
| 37    | TRUE  |
| 19    | TRUE  |
| 7.5   | TRUE  |
| 1     | FALSE |
| 37    | TRUE  |
| 23.5  | TRUE  |
| 1.5   | FALSE |
| 24.5  | TRUE  |
| 1.5   | FALSE |
| 1     | FALSE |
| 1     | FALSE |
| 134.5 | FALSE |
| 44.5  | TRUE  |
| 8.5   | FALSE |
| 6     | TRUE  |
| 1.5   | FALSE |
| 129   | TRUE  |
| 65    | TRUE  |
| 4.5   | FALSE |
| 14    | TRUE  |
| 39.5  | TRUE  |
| 87.5  | TRUE  |
| 4.5   | FALSE |
| 2     | FALSE |
| 78.5  | TRUE  |
| 2     | FALSE |
| 4     | FALSE |
| 1     | FALSE |
| 2     | FALSE |
| 17.5  | TRUE  |
| 11    | FALSE |
| 1     | FALSE |
| 14    | TRUE  |
| 9     | TRUE  |
| 1.5   | FALSE |
| 2.5   | FALSE |

|       |       |
|-------|-------|
| 12    | TRUE  |
| 20.5  | FALSE |
| 8.5   | TRUE  |
| 4     | FALSE |
| 6     | TRUE  |
| 6.5   | TRUE  |
| 1     | FALSE |
| 6.5   | TRUE  |
| 0.5   | FALSE |
| 0.5   | FALSE |
| 0.5   | FALSE |
| 177.5 | TRUE  |
| 13    | TRUE  |
| 67.5  | TRUE  |
| 3.5   | FALSE |
| 50.5  | TRUE  |
| 8     | TRUE  |
| 4.5   | FALSE |
| 36.5  | FALSE |
| 6     | TRUE  |
| 1     | FALSE |
| 6     | TRUE  |
| 3     | FALSE |
| 2     | FALSE |
| 12    | TRUE  |
| 9.5   | TRUE  |
| 7.5   | TRUE  |
| 109.5 | TRUE  |
| 12    | TRUE  |
| 3.5   | FALSE |
| 5.5   | FALSE |
| 5     | FALSE |
| 47    | TRUE  |
| 13.5  | TRUE  |
| 4     | FALSE |
| 7     | TRUE  |
| 1.5   | FALSE |
| 23.5  | TRUE  |
| 1     | FALSE |
| 21.5  | FALSE |
| 3     | FALSE |
| 9.5   | FALSE |
| 6.5   | TRUE  |
| 13    | FALSE |
| 9     | FALSE |
| 0.5   | FALSE |
| 0.5   | FALSE |



|      |       |
|------|-------|
| 0.5  | FALSE |
| 13   | TRUE  |
| 6    | FALSE |
| 1    | FALSE |
| 4.5  | FALSE |
| 4    | FALSE |
| 16.5 | TRUE  |
| 1    | FALSE |
| 1.5  | FALSE |
| 1.5  | FALSE |
| 2    | FALSE |
| 2    | FALSE |
| 12   | TRUE  |
| 33   | FALSE |
| 3    | FALSE |
| 29.5 | TRUE  |
| 71.5 | FALSE |
| 7    | TRUE  |
| 2    | FALSE |
| 1.5  | FALSE |
| 1.5  | FALSE |
| 19   | TRUE  |
| 3.5  | FALSE |
| 18   | TRUE  |
| 1.5  | FALSE |
| 1.5  | FALSE |
| 1    | FALSE |
| 0.5  | FALSE |
| 7    | TRUE  |
| 13.5 | FALSE |
| 8    | TRUE  |
| 32.5 | TRUE  |
| 8.5  | TRUE  |
| 21.5 | TRUE  |
| 164  | TRUE  |
| 11.5 | TRUE  |
| 68.5 | TRUE  |
| 19   | FALSE |
| 9    | TRUE  |
| 44   | TRUE  |
| 3    | FALSE |
| 5.5  | FALSE |
| 10   | TRUE  |
| 4.5  | FALSE |
| 7.5  | TRUE  |
| 7.5  | TRUE  |
| 2.5  | FALSE |

|      |       |
|------|-------|
| 2.5  | FALSE |
| 6.5  | FALSE |
| 1.5  | FALSE |
| 5    | FALSE |
| 6    | FALSE |
| 2    | FALSE |
| 41.5 | TRUE  |
| 9.5  | FALSE |
| 27   | TRUE  |
| 75.5 | TRUE  |
| 1.5  | FALSE |
| 0    | FALSE |
| 6.5  | TRUE  |
| 2.5  | FALSE |
| 1    | FALSE |
| 5.5  | FALSE |
| 12.5 | TRUE  |
| 0.5  | FALSE |
| 1.5  | FALSE |
| 37.5 | TRUE  |
| 11.5 | TRUE  |
| 6    | FALSE |
| 13.5 | TRUE  |
| 1.5  | FALSE |
| 1.5  | FALSE |
| 28.5 | TRUE  |
| 0.5  | FALSE |
| 11.5 | FALSE |
| 21   | TRUE  |
| 10   | TRUE  |
| 5    | FALSE |

|      |       |
|------|-------|
| 1    | FALSE |
| 1    | FALSE |
| 6    | FALSE |
| 142  | TRUE  |
| 3    | FALSE |
| 9.5  | TRUE  |
| 2    | FALSE |
| 2.5  | FALSE |
| 1.5  | FALSE |
| 2    | FALSE |
| 65.5 | FALSE |
| 34.5 | FALSE |
| 55   | TRUE  |
| 3.5  | FALSE |
| 3.5  | FALSE |
| 6    | TRUE  |
| 4    | FALSE |
| 1    | FALSE |
| 2    | FALSE |
| 34   | FALSE |
| 9.5  | TRUE  |
| 7.5  | TRUE  |
| 8.5  | FALSE |
| 15   | TRUE  |
| 28.5 | TRUE  |
| 8.5  | TRUE  |
| 5    | FALSE |
| 4    | FALSE |
| 1.5  | FALSE |
| 9    | TRUE  |
| 3    | FALSE |
| 16   | TRUE  |
| 2    | FALSE |
| 6    | TRUE  |
| 5.5  | TRUE  |
| 6.5  | TRUE  |
| 4.5  | FALSE |
| 18.5 | TRUE  |
| 14.5 | TRUE  |
| 37.5 | TRUE  |
| 24   | TRUE  |
| 118  | TRUE  |
| 1.5  | FALSE |
| 10.5 | TRUE  |
| 13   | TRUE  |
| 4    | FALSE |
| 6    | TRUE  |

|       |       |
|-------|-------|
| 1     | FALSE |
| 62    | FALSE |
| 3.5   | FALSE |
| 8     | FALSE |
| 196   | TRUE  |
| 11    | TRUE  |
| 6.5   | FALSE |
| 25.5  | FALSE |
| 33.5  | TRUE  |
| 5.5   | TRUE  |
| 0.5   | FALSE |
| 1     | FALSE |
| 8     | TRUE  |
| 2     | FALSE |
| 5.5   | FALSE |
| 24.5  | FALSE |
| 3     | FALSE |
| 10    | TRUE  |
| 10    | TRUE  |
| 2     | FALSE |
| 2.5   | FALSE |
| 3     | FALSE |
| 3     | FALSE |
| 20    | TRUE  |
| 1     | FALSE |
| 1.5   | FALSE |
| 5.5   | FALSE |
| 432.5 | TRUE  |
| 3.5   | FALSE |
| 10    | TRUE  |
| 12    | TRUE  |
| 1     | FALSE |
| 1     | FALSE |
| 1     | FALSE |
| 3     | FALSE |
| 0.5   | FALSE |
| 0.5   | FALSE |
| 6.5   | TRUE  |
| 6.5   | FALSE |
| 42.5  | TRUE  |
| 362.5 | TRUE  |
| 19.5  | FALSE |
| 45    | FALSE |
| 2     | FALSE |
| 10.5  | FALSE |
| 4.5   | FALSE |
| 7     | TRUE  |

|       |       |
|-------|-------|
| 11    | FALSE |
| 13.5  | FALSE |
| 0.5   | FALSE |
| 186   | TRUE  |
| 5.5   | TRUE  |
| 4     | FALSE |
| 4     | FALSE |
| 118.5 | TRUE  |
| 15    | TRUE  |
| 10    | TRUE  |
| 2     | FALSE |
| 10.5  | FALSE |
| 187   | TRUE  |
| 2.5   | FALSE |
| 2.5   | FALSE |
| 2.5   | FALSE |
| 27.5  | TRUE  |
| 3     | FALSE |
| 7.5   | FALSE |
| 22.5  | TRUE  |
| 110   | TRUE  |
| 5     | FALSE |
| 32    | FALSE |
| 3.5   | FALSE |
| 1.5   | FALSE |
| 1.5   | FALSE |
| 5     | FALSE |
| 5.5   | FALSE |
| 1.5   | FALSE |
| 8     | TRUE  |
| 11.5  | TRUE  |
| 3.5   | FALSE |
| 6     | TRUE  |
| 8.5   | TRUE  |
| 9     | TRUE  |
| 9     | TRUE  |
| 17.5  | TRUE  |
| 8.5   | TRUE  |
| 32    | TRUE  |
| 14.5  | TRUE  |
| 8     | FALSE |
| 10    | TRUE  |

|      |       |
|------|-------|
| 6    | FALSE |
| 8    | FALSE |
| 29   | TRUE  |
| 35.5 | TRUE  |
| 0.5  | FALSE |
| 39.5 | TRUE  |
| 15   | TRUE  |
| 21   | FALSE |
| 0.5  | FALSE |
| 5.5  | FALSE |
| 60   | FALSE |
| 3    | FALSE |
| 125  | TRUE  |
| 0.5  | FALSE |
| 17   | TRUE  |
| 14   | FALSE |
| 11.5 | TRUE  |
| 4    | FALSE |
| 8.5  | TRUE  |
| 1.5  | FALSE |
| 1.5  | FALSE |
| 19.5 | TRUE  |
| 1    | FALSE |
| 1    | FALSE |
| 7    | FALSE |
| 2.5  | FALSE |
| 2.5  | FALSE |
| 0.5  | FALSE |
| 24   | TRUE  |
| 3.5  | FALSE |
| 7    | FALSE |
| 34   | TRUE  |
| 9    | TRUE  |
| 1.5  | FALSE |
| 7    | TRUE  |
| 7    | TRUE  |

|      |       |
|------|-------|
| 2    | FALSE |
| 12.5 | TRUE  |
| 2.5  | FALSE |
| 69   | FALSE |
| 4.5  | FALSE |
| 4.5  | FALSE |
| 1.5  | FALSE |
| 25.5 | FALSE |
| 16.5 | TRUE  |
| 2.5  | FALSE |
| 9.5  | TRUE  |
| 22   | TRUE  |
| 12.5 | FALSE |
| 13   | FALSE |
| 5.5  | TRUE  |
| 20   | FALSE |
| 7    | FALSE |
| 10   | FALSE |
| 31.5 | FALSE |
| 10.5 | TRUE  |
| 28.5 | TRUE  |
| 7.5  | TRUE  |
| 7    | TRUE  |
| 9    | TRUE  |
| 1.5  | FALSE |
| 12.5 | FALSE |
| 0.5  | FALSE |
| 0.5  | FALSE |
| 3    | FALSE |
| 5.5  | FALSE |
| 6    | FALSE |
| 5.5  | TRUE  |
| 17.5 | TRUE  |
| 4.5  | FALSE |
| 6    | FALSE |
| 9    | FALSE |
| 10.5 | TRUE  |
| 9.5  | TRUE  |
| 97   | FALSE |
| 4    | FALSE |
| 0.5  | FALSE |
| 41.5 | FALSE |
| 15.5 | FALSE |

|       |       |
|-------|-------|
| 9.5   | FALSE |
| 4     | FALSE |
| 12    | TRUE  |
| 4     | FALSE |
| 10    | FALSE |
| 370.5 | TRUE  |
| 2.5   | FALSE |
| 2.5   | FALSE |
| 11    | TRUE  |
| 23.5  | TRUE  |
| 2     | FALSE |
| 2     | FALSE |
| 5.5   | TRUE  |
| 5.5   | TRUE  |
| 6.5   | FALSE |
| 7.5   | FALSE |
| 24.5  | TRUE  |
| 19    | FALSE |
| 23.5  | FALSE |
| 299.5 | TRUE  |
| 105   | FALSE |
| 6.5   | TRUE  |
| 8     | FALSE |
| 14.5  | FALSE |
| 1     | FALSE |
| 13.5  | FALSE |
| 5.5   | TRUE  |
| 5.5   | TRUE  |
| 1     | FALSE |
| 1     | FALSE |
| 5.5   | TRUE  |
| 23    | FALSE |
| 26    | FALSE |
| 5     | FALSE |
| 5.5   | FALSE |
| 6     | TRUE  |
| 1     | FALSE |
| 1.5   | FALSE |
| 8     | FALSE |
| 3.5   | FALSE |
| 10    | FALSE |
| 6     | TRUE  |
| 1     | FALSE |
| 60    | FALSE |
| 6     | FALSE |
| 4.5   | FALSE |
| 6.5   | FALSE |



|       |       |
|-------|-------|
| 19    | FALSE |
| 23    | TRUE  |
| 1.5   | FALSE |
| 24.5  | TRUE  |
| 6.5   | FALSE |
| 2.5   | FALSE |
| 54.5  | FALSE |
| 9     | FALSE |
| 2     | FALSE |
| 8     | FALSE |
| 34    | TRUE  |
| 34.5  | FALSE |
| 35.5  | TRUE  |
| 2     | FALSE |
| 6     | FALSE |
| 8     | TRUE  |
| 8.5   | TRUE  |
| 47    | FALSE |
| 34.5  | FALSE |
| 7.5   | FALSE |
| 1.5   | FALSE |
| 1.5   | FALSE |
| 7.5   | TRUE  |
| 8.5   | TRUE  |
| 162   | FALSE |
| 118.5 | TRUE  |
| 17    | TRUE  |
| 8     | FALSE |
| 49    | TRUE  |
| 6.5   | FALSE |
| 0.5   | FALSE |
| 34.5  | FALSE |
| 8     | TRUE  |
| 3.5   | FALSE |
| 1     | FALSE |
| 4     | FALSE |
| 5.5   | FALSE |
| 150.5 | TRUE  |
| 32    | TRUE  |
| 3.5   | FALSE |
| 15.5  | FALSE |
| 1     | FALSE |
| 1     | FALSE |
| 6.5   | TRUE  |
| 27.5  | TRUE  |
| 6     | FALSE |
| 3     | FALSE |

|        |       |
|--------|-------|
| 3      | FALSE |
| 2.5    | FALSE |
| 1241.5 | TRUE  |
| 3.5    | FALSE |
| 41     | FALSE |
| 51     | TRUE  |
| 14     | FALSE |
| 2      | FALSE |
| 53.5   | FALSE |
| 5.5    | TRUE  |
| 35     | TRUE  |
| 33     | FALSE |
| 7      | TRUE  |
| 19     | TRUE  |
| 4.5    | FALSE |
| 5.5    | FALSE |
| 1.5    | FALSE |
| 7.5    | TRUE  |
| 64     | FALSE |
| 1      | FALSE |
| 1      | FALSE |
| 1      | FALSE |
| 0.5    | FALSE |
| 2      | FALSE |
| 6.5    | TRUE  |
| 91     | TRUE  |
| 98     | TRUE  |
| 29     | FALSE |
| 9      | TRUE  |
| 7.5    | FALSE |
| 4.5    | FALSE |
| 199.5  | TRUE  |
| 15.5   | FALSE |
| 245.5  | TRUE  |
| 28.5   | FALSE |
| 12.5   | FALSE |
| 1.5    | FALSE |
| 12     | FALSE |
| 22.5   | FALSE |
| 3.5    | FALSE |
| 0.5    | FALSE |
| 3      | FALSE |
| 6      | TRUE  |

|       |       |
|-------|-------|
| 3     | FALSE |
| 129.5 | TRUE  |
| 6.5   | TRUE  |
| 6.5   | TRUE  |
| 14.5  | TRUE  |
| 26    | TRUE  |
| 0.5   | FALSE |
| 6     | TRUE  |
| 4.5   | FALSE |
| 4.5   | FALSE |
| 18.5  | TRUE  |
| 3     | FALSE |
| 0.5   | FALSE |
| 0.5   | FALSE |
| 0.5   | FALSE |
| 195   | TRUE  |
| 21    | FALSE |
| 8     | TRUE  |
| 5     | FALSE |
| 12.5  | FALSE |
| 598.5 | TRUE  |
| 0.5   | FALSE |
| 0.5   | FALSE |
| 6.5   | FALSE |
| 10    | TRUE  |
| 11.5  | FALSE |
| 13    | TRUE  |
| 2     | FALSE |
| 14.5  | FALSE |
| 8.5   | TRUE  |
| 153   | TRUE  |
| 14    | TRUE  |
| 8     | FALSE |
| 2     | FALSE |
| 6     | FALSE |
| 1     | FALSE |
| 9.5   | FALSE |
| 23    | TRUE  |
| 215.5 | TRUE  |
| 2.5   | FALSE |
| 3     | FALSE |
| 5     | FALSE |
| 3.5   | FALSE |
| 2     | FALSE |

|      |       |
|------|-------|
| 8    | TRUE  |
| 8    | TRUE  |
| 7    | TRUE  |
| 6    | TRUE  |
| 15.5 | TRUE  |
| 8.5  | FALSE |
| 24.5 | FALSE |
| 24.5 | FALSE |
| 2.5  | FALSE |
| 0.5  | FALSE |
| 47   | TRUE  |
| 12   | TRUE  |
| 1.5  | FALSE |
| 8    | TRUE  |
| 21   | TRUE  |
| 1    | FALSE |
| 1    | FALSE |
| 1    | FALSE |
| 5.5  | TRUE  |
| 0.5  | FALSE |
| 0.5  | FALSE |
| 17.5 | TRUE  |
| 5    | FALSE |
| 10   | TRUE  |
| 3    | FALSE |
| 2.5  | FALSE |
| 1.5  | FALSE |
| 1    | FALSE |
| 9.5  | TRUE  |
| 6    | FALSE |
| 15   | FALSE |
| 2    | FALSE |
| 9    | TRUE  |
| 2    | FALSE |
| 0.5  | FALSE |
| 1    | FALSE |
| 0.5  | FALSE |
| 0.5  | FALSE |
| 3    | FALSE |
| 10.5 | TRUE  |
| 2.5  | FALSE |
| 17   | TRUE  |
| 7.5  | FALSE |
| 48   | TRUE  |

|      |       |
|------|-------|
| 1.5  | FALSE |
| 1.5  | FALSE |
| 1.5  | FALSE |
| 6.5  | TRUE  |
| 6    | TRUE  |
| 6    | FALSE |
| 9    | FALSE |
| 4.5  | FALSE |
| 10.5 | FALSE |
| 6.5  | TRUE  |
| 6.5  | TRUE  |
| 1    | FALSE |
| 4    | FALSE |
| 15   | TRUE  |
| 12   | FALSE |
| 0.5  | FALSE |
| 0.5  | FALSE |
| 49.5 | TRUE  |
| 10.5 | FALSE |
| 471  | TRUE  |
| 29   | TRUE  |
| 11   | FALSE |
| 24   | TRUE  |
| 26   | FALSE |
| 7.5  | TRUE  |
| 1    | FALSE |
| 0.5  | FALSE |
| 19.5 | TRUE  |
| 9    | TRUE  |
| 15.5 | FALSE |
| 6    | FALSE |
| 14.5 | TRUE  |
| 3    | FALSE |
| 7    | TRUE  |
| 0.5  | FALSE |
| 21   | FALSE |
| 6    | TRUE  |
| 2    | FALSE |
| 1    | FALSE |
| 10.5 | FALSE |

|       |       |
|-------|-------|
| 18.5  | TRUE  |
| 9.5   | FALSE |
| 31    | TRUE  |
| 2     | FALSE |
| 5     | FALSE |
| 55.5  | TRUE  |
| 7     | FALSE |
| 9     | FALSE |
| 0.5   | FALSE |
| 0.5   | FALSE |
| 5.5   | FALSE |
| 11    | TRUE  |
| 15.5  | TRUE  |
| 14    | TRUE  |
| 6     | TRUE  |
| 11    | TRUE  |
| 7.5   | TRUE  |
| 17    | TRUE  |
| 4.5   | FALSE |
| 0.5   | FALSE |
| 2     | FALSE |
| 5     | FALSE |
| 59    | FALSE |
| 10.5  | FALSE |
| 10    | TRUE  |
| 2.5   | FALSE |
| 70    | TRUE  |
| 36.5  | TRUE  |
| 1     | FALSE |
| 1.5   | FALSE |
| 45    | TRUE  |
| 35.5  | TRUE  |
| 25.5  | FALSE |
| 73.5  | TRUE  |
| 311.5 | FALSE |
| 3.5   | FALSE |
| 9     | TRUE  |
| 1     | FALSE |
| 16    | TRUE  |
| 11.5  | FALSE |
| 9.5   | FALSE |
| 1     | FALSE |
| 7     | FALSE |
| 2.5   | FALSE |
| 12.5  | TRUE  |
| 3     | FALSE |
| 25.5  | FALSE |

|       |       |
|-------|-------|
| 2     | FALSE |
| 6.5   | FALSE |
| 18    | TRUE  |
| 2     | FALSE |
| 24.5  | TRUE  |
| 3     | FALSE |
| 6     | FALSE |
| 2     | FALSE |
| 126.5 | FALSE |
| 5.5   | FALSE |
| 17    | FALSE |
| 3     | FALSE |
| 7.5   | TRUE  |
| 4     | FALSE |
| 1     | FALSE |
| 1     | FALSE |
| 6     | TRUE  |
| 6     | TRUE  |
| 6     | TRUE  |
| 21    | TRUE  |
| 2.5   | FALSE |
| 2.5   | FALSE |
| 2.5   | FALSE |
| 2     | FALSE |
| 10.5  | TRUE  |
| 2.5   | FALSE |
| 9     | FALSE |
| 25.5  | FALSE |
| 1.5   | FALSE |
| 1.5   | FALSE |
| 1.5   | FALSE |
| 3     | FALSE |
| 2.5   | FALSE |
| 6     | FALSE |
| 61    | TRUE  |
| 4.5   | FALSE |
| 21.5  | FALSE |
| 5     | FALSE |
| 4.5   | FALSE |
| 1     | FALSE |
| 1     | FALSE |
| 10.5  | TRUE  |
| 5.5   | FALSE |
| 23    | TRUE  |
| 3.5   | FALSE |
| 26.5  | TRUE  |
| 3     | FALSE |

|      |       |
|------|-------|
| 5    | FALSE |
| 2    | FALSE |
| 1    | FALSE |
| 9    | FALSE |
| 18.5 | TRUE  |
| 6.5  | TRUE  |
| 6.5  | TRUE  |
| 13   | FALSE |
| 1.5  | FALSE |
| 18.5 | FALSE |
| 1    | FALSE |
| 2    | FALSE |
| 29   | TRUE  |
| 1.5  | FALSE |
| 27.5 | TRUE  |
| 41   | FALSE |
| 1.5  | FALSE |
| 1    | FALSE |
| 6    | TRUE  |
| 50.5 | FALSE |
| 3    | FALSE |
| 48.5 | FALSE |
| 61.5 | TRUE  |
| 8    | TRUE  |
| 10.5 | FALSE |
| 5.5  | FALSE |
| 16   | FALSE |
| 3    | FALSE |
| 3    | FALSE |
| 3    | FALSE |
| 4.5  | FALSE |
| 2    | FALSE |
| 2    | FALSE |
| 2    | FALSE |
| 0.5  | FALSE |
| 0.5  | FALSE |
| 15   | FALSE |
| 16   | TRUE  |
| 20.5 | TRUE  |
| 2.5  | FALSE |
| 2.5  | FALSE |
| 12.5 | FALSE |
| 21.5 | TRUE  |
| 1.5  | FALSE |
| 2    | FALSE |
| 7    | TRUE  |
| 67   | TRUE  |



|       |       |
|-------|-------|
| 12.5  | TRUE  |
| 0.5   | FALSE |
| 94.5  | FALSE |
| 1     | FALSE |
| 0.5   | FALSE |
| 2     | FALSE |
| 2     | FALSE |
| 0.5   | FALSE |
| 0.5   | FALSE |
| 3     | FALSE |
| 808.5 | TRUE  |
| 39.5  | TRUE  |
| 38    | TRUE  |
| 13    | TRUE  |
| 0.5   | FALSE |
| 1.5   | FALSE |
| 123   | TRUE  |
| 7     | FALSE |
| 116   | TRUE  |
| 7.5   | FALSE |
| 2.5   | FALSE |
| 25.5  | FALSE |
| 5.5   | TRUE  |
| 101.5 | TRUE  |
| 5     | FALSE |
| 11    | FALSE |
| 1.5   | FALSE |
| 7     | TRUE  |
| 288   | TRUE  |
| 45    | FALSE |
| 20    | FALSE |
| 2     | FALSE |
| 1     | FALSE |
| 1     | FALSE |
| 1     | FALSE |
| 10.5  | TRUE  |
| 6     | FALSE |

|      |       |
|------|-------|
| 3.5  | FALSE |
| 1.5  | FALSE |
| 2.5  | FALSE |
| 11.5 | FALSE |
| 14.5 | TRUE  |
| 6    | FALSE |
| 5    | FALSE |
| 1    | FALSE |
| 5.5  | TRUE  |
| 85   | TRUE  |
| 33   | TRUE  |
| 1.5  | FALSE |
| 1.5  | FALSE |
| 253  | TRUE  |
| 13.5 | TRUE  |
| 13   | FALSE |
| 35   | FALSE |
| 4.5  | FALSE |
| 2    | FALSE |
| 9    | TRUE  |
| 7    | FALSE |
| 3    | FALSE |
| 21   | FALSE |
| 21.5 | TRUE  |
| 17   | TRUE  |
| 18.5 | TRUE  |
| 10.5 | TRUE  |
| 12.5 | FALSE |
| 2    | FALSE |
| 72   | TRUE  |
| 4.5  | FALSE |
| 2.5  | FALSE |
| 7    | TRUE  |
| 82.5 | TRUE  |
| 7    | FALSE |
| 10   | FALSE |
| 2    | FALSE |
| 1    | FALSE |
| 1    | FALSE |
| 2    | FALSE |
| 5.5  | FALSE |
| 73.5 | FALSE |
| 17.5 | TRUE  |
| 11.5 | TRUE  |
| 6.5  | FALSE |
| 10.5 | TRUE  |
| 3    | FALSE |

|       |       |
|-------|-------|
| 10    | TRUE  |
| 11.5  | TRUE  |
| 30    | TRUE  |
| 31    | TRUE  |
| 0.5   | FALSE |
| 2     | FALSE |
| 29.5  | FALSE |
| 32.5  | TRUE  |
| 1.5   | FALSE |
| 51.5  | TRUE  |
| 4.5   | FALSE |
| 7.5   | FALSE |
| 134   | TRUE  |
| 10    | TRUE  |
| 133.5 | FALSE |
| 123   | TRUE  |
| 294   | TRUE  |
| 52    | FALSE |
| 3     | FALSE |
| 12.5  | TRUE  |
| 2     | FALSE |
| 14.5  | FALSE |
| 6     | TRUE  |
| 1     | FALSE |
| 6     | TRUE  |
| 6     | TRUE  |
| 7.5   | FALSE |
| 1.5   | FALSE |
| 4     | FALSE |
| 55.5  | TRUE  |
| 1     | FALSE |
| 1     | FALSE |
| 189.5 | TRUE  |
| 0.5   | FALSE |
| 3.5   | FALSE |
| 6     | FALSE |
| 8.5   | FALSE |
| 7     | TRUE  |
| 8.5   | TRUE  |
| 10.5  | FALSE |
| 6     | TRUE  |
| 6     | TRUE  |
| 1.5   | FALSE |
| 6     | TRUE  |
| 6     | TRUE  |
| 31    | TRUE  |
| 19.5  | FALSE |

|      |       |
|------|-------|
| 1    | FALSE |
| 1    | FALSE |
| 1    | FALSE |
| 28.5 | FALSE |
| 10.5 | TRUE  |
| 67   | TRUE  |
| 2.5  | FALSE |
| 9    | TRUE  |
| 35   | FALSE |
| 8.5  | FALSE |
| 12.5 | FALSE |
| 1.5  | FALSE |
| 5.5  | TRUE  |
| 5.5  | TRUE  |
| 5.5  | TRUE  |
| 75.5 | TRUE  |
| 4.5  | FALSE |
| 7.5  | FALSE |
| 6    | FALSE |
| 12   | TRUE  |
| 8.5  | FALSE |
| 2    | FALSE |
| 2    | FALSE |
| 51   | TRUE  |
| 4    | FALSE |
| 2.5  | FALSE |
| 1    | FALSE |
| 5.5  | TRUE  |
| 8.5  | FALSE |
| 4.5  | FALSE |
| 32.5 | FALSE |
| 2.5  | FALSE |
| 2.5  | FALSE |
| 17.5 | TRUE  |
| 3.5  | FALSE |
| 2    | FALSE |
| 8.5  | FALSE |
| 4.5  | FALSE |
| 134  | TRUE  |
| 10   | FALSE |
| 7    | TRUE  |
| 7    | TRUE  |
| 14.5 | TRUE  |
| 18   | FALSE |
| 8.5  | TRUE  |
| 125  | TRUE  |
| 47.5 | FALSE |

|       |       |
|-------|-------|
| 144.5 | FALSE |
| 0.5   | FALSE |
| 20    | TRUE  |
| 234.5 | TRUE  |
| 4     | FALSE |
| 10    | TRUE  |
| 4     | FALSE |
| 13    | TRUE  |
| 2     | FALSE |
| 2     | FALSE |
| 0.5   | FALSE |
| 1     | FALSE |
| 1     | FALSE |
| 0.5   | FALSE |
| 3     | FALSE |
| 0.5   | FALSE |
| 56.5  | FALSE |
| 3.5   | FALSE |
| 9.5   | FALSE |
| 20.5  | FALSE |
| 60    | FALSE |
| 12    | TRUE  |
| 13.5  | FALSE |
| 2     | FALSE |
| 26    | TRUE  |
| 8     | FALSE |
| 10.5  | TRUE  |
| 62    | TRUE  |
| 94.5  | TRUE  |
| 58.5  | FALSE |
| 30    | TRUE  |
| 3.5   | FALSE |
| 11.5  | FALSE |
| 11    | TRUE  |
| 2     | FALSE |
| 4     | FALSE |
| 3     | FALSE |
| 13    | FALSE |

|       |       |
|-------|-------|
| 92.5  | TRUE  |
| 3     | FALSE |
| 9     | TRUE  |
| 4     | FALSE |
| 19    | FALSE |
| 17.5  | TRUE  |
| 5     | FALSE |
| 1.5   | FALSE |
| 1.5   | FALSE |
| 6.5   | TRUE  |
| 7.5   | FALSE |
| 5.5   | FALSE |
| 2.5   | FALSE |
| 8     | TRUE  |
| 10    | FALSE |
| 37.5  | FALSE |
| 19    | TRUE  |
| 133   | FALSE |
| 21.5  | TRUE  |
| 6.5   | FALSE |
| 3     | FALSE |
| 8     | FALSE |
| 1.5   | FALSE |
| 6     | FALSE |
| 1.5   | FALSE |
| 6     | FALSE |
| 99.5  | FALSE |
| 4     | FALSE |
| 5     | FALSE |
| 62.5  | TRUE  |
| 7     | FALSE |
| 93.5  | TRUE  |
| 3     | FALSE |
| 4     | FALSE |
| 4     | FALSE |
| 6.5   | TRUE  |
| 92    | TRUE  |
| 26    | FALSE |
| 2.5   | FALSE |
| 9     | FALSE |
| 145.5 | TRUE  |
| 62    | TRUE  |
| 8.5   | FALSE |
| 51    | TRUE  |
| 25.5  | FALSE |
| 32.5  | TRUE  |
| 276   | TRUE  |

|      |       |
|------|-------|
| 4.5  | FALSE |
| 3.5  | FALSE |
| 70   | TRUE  |
| 1    | FALSE |
| 1.5  | FALSE |
| 1.5  | FALSE |
| 4.5  | FALSE |
| 52.5 | FALSE |
| 22   | TRUE  |
| 2.5  | FALSE |
| 2.5  | FALSE |
| 2    | FALSE |
| 4    | FALSE |
| 15   | FALSE |
| 7    | FALSE |
| 4    | FALSE |
| 1.5  | FALSE |
| 2    | FALSE |
| 0.5  | FALSE |
| 1    | FALSE |
| 0.5  | FALSE |
| 0.5  | FALSE |
| 4.5  | FALSE |
| 4.5  | FALSE |
| 9.5  | FALSE |
| 2.5  | FALSE |
| 20.5 | TRUE  |
| 3.5  | FALSE |
| 7    | FALSE |
| 3    | FALSE |
| 1    | FALSE |
| 5.5  | TRUE  |
| 2    | FALSE |
| 2    | FALSE |
| 23.5 | FALSE |
| 2.5  | FALSE |
| 3.5  | FALSE |
| 48.5 | FALSE |
| 13   | FALSE |
| 1.5  | FALSE |
| 8    | TRUE  |
| 2.5  | FALSE |
| 9.5  | FALSE |
| 5.5  | FALSE |
| 19.5 | FALSE |
| 12   | FALSE |
| 3    | FALSE |

|       |       |
|-------|-------|
| 5     | FALSE |
| 42.5  | FALSE |
| 4     | FALSE |
| 1.5   | FALSE |
| 4.5   | FALSE |
| 17.5  | TRUE  |
| 115.5 | TRUE  |
| 5.5   | TRUE  |
| 5.5   | TRUE  |
| 0.5   | FALSE |
| 5     | FALSE |
| 23.5  | FALSE |
| 5     | FALSE |
| 10.5  | FALSE |
| 89.5  | FALSE |
| 0.5   | FALSE |
| 3.5   | FALSE |
| 10.5  | TRUE  |
| 19.5  | FALSE |
| 1     | FALSE |
| 25.5  | TRUE  |
| 271.5 | FALSE |
| 7.5   | TRUE  |
| 2     | FALSE |
| 25    | FALSE |
| 2     | FALSE |
| 1     | FALSE |
| 5.5   | TRUE  |
| 3     | FALSE |
| 10    | FALSE |
| 10.5  | TRUE  |
| 33.5  | FALSE |
| 4     | FALSE |
| 8     | TRUE  |
| 3     | FALSE |
| 3     | FALSE |
| 12    | TRUE  |
| 6     | FALSE |
| 82    | TRUE  |
| 27    | TRUE  |



|      |       |
|------|-------|
| 19   | TRUE  |
| 3.5  | FALSE |
| 78   | TRUE  |
| 15.5 | TRUE  |
| 3    | FALSE |
| 1    | FALSE |
| 1.5  | FALSE |
| 1.5  | FALSE |
| 5.5  | FALSE |
| 13.5 | FALSE |
| 80   | FALSE |
| 2    | FALSE |
| 22   | FALSE |
| 13.5 | TRUE  |
| 7    | FALSE |
| 17   | TRUE  |
| 2    | FALSE |
| 177  | FALSE |
| 5.5  | TRUE  |
| 5.5  | TRUE  |
| 15.5 | FALSE |
| 13.5 | FALSE |
| 6.5  | FALSE |
| 1.5  | FALSE |
| 6.5  | TRUE  |
| 1.5  | FALSE |
| 6    | TRUE  |
| 6    | TRUE  |
| 10   | TRUE  |
| 12   | FALSE |
| 3.5  | FALSE |
| 3    | FALSE |
| 7.5  | FALSE |
| 1    | FALSE |
| 1    | FALSE |
| 5.5  | TRUE  |
| 106  | TRUE  |
| 4.5  | FALSE |
| 61.5 | TRUE  |
| 70   | TRUE  |
| 2    | FALSE |
| 7    | TRUE  |
| 3.5  | FALSE |
| 2    | FALSE |
| 11   | FALSE |
| 5.5  | FALSE |
| 1    | FALSE |

|       |       |
|-------|-------|
| 1.5   | FALSE |
| 1     | FALSE |
| 72.5  | TRUE  |
| 9     | TRUE  |
| 50    | TRUE  |
| 11    | FALSE |
| 20    | FALSE |
| 2     | FALSE |
| 7     | TRUE  |
| 4     | FALSE |
| 4     | FALSE |
| 4     | FALSE |
| 18.5  | FALSE |
| 9.5   | FALSE |
| 1     | FALSE |
| 5.5   | TRUE  |
| 5.5   | TRUE  |
| 28    | TRUE  |
| 4     | FALSE |
| 9     | FALSE |
| 3     | FALSE |
| 15.5  | FALSE |
| 5     | FALSE |
| 7     | TRUE  |
| 3.5   | FALSE |
| 23    | TRUE  |
| 16    | FALSE |
| 4     | FALSE |
| 4     | FALSE |
| 4     | FALSE |
| 58.5  | TRUE  |
| 151.5 | TRUE  |
| 6     | TRUE  |
| 7     | TRUE  |
| 7.5   | TRUE  |
| 23    | TRUE  |
| 0.5   | FALSE |
| 0.5   | FALSE |
| 16.5  | FALSE |
| 4.5   | FALSE |
| 11    | TRUE  |
| 17.5  | FALSE |
| 33    | FALSE |
| 10    | TRUE  |
| 3     | FALSE |
| 1     | FALSE |
| 1     | FALSE |

|       |       |
|-------|-------|
| 1.5   | FALSE |
| 2     | FALSE |
| 2     | FALSE |
| 3.5   | FALSE |
| 3.5   | FALSE |
| 6.5   | FALSE |
| 6     | FALSE |
| 27    | FALSE |
| 2.5   | FALSE |
| 102.5 | TRUE  |
| 336.5 | TRUE  |
| 14    | TRUE  |
| 8.5   | FALSE |
| 1.5   | FALSE |
| 1.5   | FALSE |
| 2     | FALSE |
| 1     | FALSE |
| 4.5   | FALSE |
| 2.5   | FALSE |
| 46.5  | FALSE |
| 3.5   | FALSE |
| 18    | FALSE |
| 1     | FALSE |
| 35    | TRUE  |
| 9.5   | TRUE  |
| 4     | FALSE |
| 27    | TRUE  |
| 20    | TRUE  |
| 5     | FALSE |
| 0.5   | FALSE |
| 3.5   | FALSE |
| 6     | FALSE |
| 25.5  | TRUE  |
| 5.5   | TRUE  |
| 1     | FALSE |
| 10    | TRUE  |
| 17.5  | TRUE  |
| 46.5  | TRUE  |
| 12.5  | FALSE |
| 1     | FALSE |
| 0.5   | FALSE |
| 1     | FALSE |
| 0.5   | FALSE |
| 8     | FALSE |
| 25.5  | TRUE  |
| 1.5   | FALSE |
| 1.5   | FALSE |

|       |       |
|-------|-------|
| 17.5  | FALSE |
| 6     | FALSE |
| 13.5  | TRUE  |
| 13.5  | TRUE  |
| 101.5 | TRUE  |
| 28    | FALSE |
| 5.5   | TRUE  |
| 1     | FALSE |
| 15    | TRUE  |
| 6     | TRUE  |
| 1.5   | FALSE |
| 1     | FALSE |
| 1     | FALSE |
| 10    | TRUE  |
| 33.5  | FALSE |
| 4     | FALSE |
| 10    | FALSE |
| 1     | FALSE |
| 14.5  | TRUE  |
| 11.5  | FALSE |
| 8.5   | FALSE |
| 17.5  | FALSE |
| 11    | TRUE  |
| 10    | TRUE  |
| 76.5  | TRUE  |
| 14    | FALSE |
| 85    | FALSE |
| 2     | FALSE |
| 3.5   | FALSE |
| 1.5   | FALSE |
| 8     | FALSE |
| 79    | FALSE |
| 8.5   | TRUE  |
| 1.5   | FALSE |
| 4.5   | FALSE |
| 1.5   | FALSE |
| 1.5   | FALSE |
| 2     | FALSE |
| 10    | FALSE |
| 1.5   | FALSE |
| 11.5  | TRUE  |
| 6     | FALSE |
| 48.5  | TRUE  |
| 12    | FALSE |
| 2.5   | FALSE |
| 8.5   | TRUE  |
| 129.5 | FALSE |

|       |       |
|-------|-------|
| 15.5  | TRUE  |
| 21    | FALSE |
| 67.5  | TRUE  |
| 6.5   | FALSE |
| 3     | FALSE |
| 18    | TRUE  |
| 6.5   | FALSE |
| 19.5  | TRUE  |
| 4     | FALSE |
| 7     | FALSE |
| 3.5   | FALSE |
| 246.5 | TRUE  |
| 7     | TRUE  |
| 532   | TRUE  |
| 10    | TRUE  |
| 9     | TRUE  |
| 0.5   | FALSE |
| 3     | FALSE |
| 3     | FALSE |
| 32.5  | TRUE  |
| 6     | FALSE |
| 19    | TRUE  |
| 6     | FALSE |
| 1     | FALSE |
| 11.5  | TRUE  |
| 3     | FALSE |
| 3     | FALSE |
| 11.5  | FALSE |
| 2.5   | FALSE |
| 16.5  | TRUE  |
| 454.5 | TRUE  |
| 5.5   | FALSE |
| 20    | TRUE  |
| 1     | FALSE |
| 1     | FALSE |
| 6.5   | FALSE |
| 2     | FALSE |
| 34    | TRUE  |
| 1.5   | FALSE |
| 19.5  | FALSE |
| 6     | TRUE  |
| 6.5   | TRUE  |
| 2     | FALSE |

|       |       |
|-------|-------|
| 11.5  | FALSE |
| 2.5   | FALSE |
| 9     | FALSE |
| 18    | FALSE |
| 1     | FALSE |
| 1     | FALSE |
| 2.5   | FALSE |
| 272.5 | TRUE  |
| 10    | TRUE  |
| 11.5  | FALSE |
| 1.5   | FALSE |
| 1.5   | FALSE |
| 56.5  | FALSE |
| 1.5   | FALSE |
| 2     | FALSE |
| 5     | FALSE |
| 79    | TRUE  |
| 6.5   | FALSE |
| 15.5  | FALSE |
| 2.5   | FALSE |
| 2     | FALSE |
| 19.5  | TRUE  |
| 54    | FALSE |
| 14    | TRUE  |
| 43.5  | FALSE |
| 1     | FALSE |
| 4     | FALSE |
| 10.5  | FALSE |
| 3.5   | FALSE |
| 3.5   | FALSE |
| 23    | TRUE  |
| 12    | TRUE  |
| 9     | FALSE |
| 11    | FALSE |
| 29.5  | FALSE |
| 10    | TRUE  |
| 37.5  | TRUE  |
| 8.5   | FALSE |
| 13    | TRUE  |
| 2     | FALSE |
| 3     | FALSE |
| 31.5  | FALSE |
| 1     | FALSE |
| 10.5  | FALSE |
| 4.5   | FALSE |
| 4.5   | FALSE |
| 22    | TRUE  |

|       |       |
|-------|-------|
| 3.5   | FALSE |
| 16.5  | FALSE |
| 387   | TRUE  |
| 114.5 | TRUE  |
| 4     | FALSE |
| 18.5  | FALSE |
| 25    | TRUE  |
| 8     | TRUE  |
| 9.5   | FALSE |
| 28    | TRUE  |
| 8     | FALSE |
| 1     | FALSE |
| 5.5   | FALSE |
| 7     | FALSE |
| 36.5  | TRUE  |
| 2.5   | FALSE |
| 25.5  | TRUE  |
| 4.5   | FALSE |
| 13    | TRUE  |
| 11    | TRUE  |
| 89    | TRUE  |
| 1.5   | FALSE |
| 2     | FALSE |
| 80.5  | TRUE  |
| 46.5  | TRUE  |
| 2.5   | FALSE |
| 12.5  | FALSE |
| 13    | FALSE |
| 18.5  | FALSE |
| 111   | FALSE |
| 130.5 | FALSE |
| 7.5   | FALSE |
| 9.5   | TRUE  |
| 8.5   | TRUE  |
| 79    | TRUE  |
| 16.5  | FALSE |
| 2.5   | FALSE |
| 69    | FALSE |
| 109.5 | TRUE  |
| 3     | FALSE |
| 1.5   | FALSE |
| 64.5  | TRUE  |
| 4.5   | FALSE |
| 32.5  | TRUE  |

|      |       |
|------|-------|
| 10   | FALSE |
| 2.5  | FALSE |
| 7    | TRUE  |
| 9    | TRUE  |
| 1.5  | FALSE |
| 1.5  | FALSE |
| 194  | FALSE |
| 4.5  | FALSE |
| 6.5  | TRUE  |
| 6.5  | TRUE  |
| 5    | FALSE |
| 14.5 | FALSE |
| 16   | FALSE |
| 32.5 | FALSE |
| 1.5  | FALSE |
| 23.5 | TRUE  |
| 5    | FALSE |
| 1    | FALSE |
| 2.5  | FALSE |
| 87   | FALSE |
| 8.5  | TRUE  |
| 0.5  | FALSE |
| 6    | TRUE  |
| 1.5  | FALSE |
| 3    | FALSE |
| 16.5 | TRUE  |
| 8.5  | FALSE |
| 11   | TRUE  |
| 1.5  | FALSE |
| 1    | FALSE |
| 1    | FALSE |
| 1    | FALSE |
| 18.5 | TRUE  |
| 13   | TRUE  |
| 2.5  | FALSE |
| 17.5 | TRUE  |
| 74.5 | TRUE  |
| 22.5 | TRUE  |
| 41   | TRUE  |
| 3.5  | FALSE |
| 10.5 | FALSE |
| 14   | TRUE  |
| 17   | TRUE  |
| 13.5 | FALSE |



|       |       |
|-------|-------|
| 20.5  | FALSE |
| 154.5 | TRUE  |
| 14.5  | FALSE |
| 1.5   | FALSE |
| 1.5   | FALSE |
| 1     | FALSE |
| 13    | FALSE |
| 9     | TRUE  |
| 192.5 | FALSE |
| 66.5  | TRUE  |
| 3     | FALSE |
| 2.5   | FALSE |
| 19    | TRUE  |
| 83.5  | TRUE  |
| 1.5   | FALSE |
| 5     | FALSE |
| 15    | TRUE  |
| 99.5  | TRUE  |
| 7.5   | TRUE  |
| 20    | FALSE |
| 3.5   | FALSE |
| 3     | FALSE |
| 2     | FALSE |
| 9     | FALSE |
| 1.5   | FALSE |
| 1.5   | FALSE |
| 9.5   | TRUE  |
| 3     | FALSE |
| 10    | TRUE  |
| 2     | FALSE |
| 3     | FALSE |
| 7.5   | FALSE |
| 9.5   | TRUE  |
| 15.5  | FALSE |
| 2     | FALSE |
| 2     | FALSE |
| 2     | FALSE |
| 1     | FALSE |
| 1     | FALSE |
| 1     | FALSE |
| 15.5  | FALSE |
| 4     | FALSE |
| 11.5  | FALSE |
| 13.5  | TRUE  |
| 20    | FALSE |
| 5     | FALSE |
| 3     | FALSE |

|       |       |
|-------|-------|
| 44    | TRUE  |
| 12    | FALSE |
| 134   | FALSE |
| 11    | FALSE |
| 10    | TRUE  |
| 113.5 | TRUE  |
| 5     | FALSE |
| 9     | FALSE |
| 4     | FALSE |
| 11.5  | TRUE  |
| 3     | FALSE |
| 17    | FALSE |
| 5     | FALSE |
| 4.5   | FALSE |
| 6.5   | FALSE |
| 9     | TRUE  |
| 7     | FALSE |
| 16.5  | TRUE  |
| 23    | FALSE |
| 6     | FALSE |
| 5.5   | FALSE |
| 10.5  | TRUE  |
| 21    | TRUE  |
| 246.5 | FALSE |
| 1     | FALSE |
| 133.5 | TRUE  |
| 1.5   | FALSE |
| 1.5   | FALSE |
| 41.5  | TRUE  |
| 8.5   | TRUE  |
| 123   | TRUE  |
| 26    | FALSE |
| 19    | TRUE  |
| 40    | TRUE  |
| 13    | FALSE |
| 8.5   | FALSE |
| 3.5   | FALSE |
| 4     | FALSE |
| 1     | FALSE |
| 1     | FALSE |
| 3.5   | FALSE |
| 1     | FALSE |
| 1     | FALSE |
| 41    | TRUE  |
| 1.5   | FALSE |
| 6     | TRUE  |
| 118   | TRUE  |

|       |       |
|-------|-------|
| 14.5  | TRUE  |
| 7     | FALSE |
| 155.5 | FALSE |
| 9     | FALSE |
| 2     | FALSE |
| 9     | TRUE  |
| 3     | FALSE |
| 2.5   | FALSE |
| 2.5   | FALSE |
| 574.5 | TRUE  |
| 363.5 | TRUE  |
| 23.5  | FALSE |
| 29.5  | TRUE  |
| 3.5   | FALSE |
| 24.5  | FALSE |
| 17    | TRUE  |
| 5.5   | TRUE  |
| 9.5   | FALSE |
| 2.5   | FALSE |
| 2.5   | FALSE |
| 44    | TRUE  |
| 8     | FALSE |
| 30    | TRUE  |
| 6     | TRUE  |
| 5.5   | TRUE  |
| 2     | FALSE |
| 5.5   | TRUE  |
| 10.5  | TRUE  |
| 5     | FALSE |
| 23.5  | TRUE  |
| 3.5   | FALSE |
| 7.5   | TRUE  |
| 2.5   | FALSE |
| 2     | FALSE |
| 17.5  | TRUE  |
| 5.5   | FALSE |
| 11.5  | FALSE |
| 9     | TRUE  |
| 9.5   | TRUE  |
| 9     | FALSE |
| 2     | FALSE |
| 22.5  | TRUE  |
| 253   | TRUE  |
| 4     | FALSE |
| 6.5   | TRUE  |
| 6.5   | TRUE  |
| 106.5 | TRUE  |

|       |       |
|-------|-------|
| 2.5   | FALSE |
| 7.5   | TRUE  |
| 15.5  | TRUE  |
| 1.5   | FALSE |
| 1.5   | FALSE |
| 2     | FALSE |
| 1.5   | FALSE |
| 2     | FALSE |
| 1     | FALSE |
| 1     | FALSE |
| 4     | FALSE |
| 10.5  | TRUE  |
| 1     | FALSE |
| 1     | FALSE |
| 1     | FALSE |
| 2.5   | FALSE |
| 2.5   | FALSE |
| 2.5   | FALSE |
| 3.5   | FALSE |
| 520   | TRUE  |
| 112   | FALSE |
| 9.5   | FALSE |
| 2     | FALSE |
| 7     | FALSE |
| 1.5   | FALSE |
| 4.5   | FALSE |
| 15    | TRUE  |
| 1.5   | FALSE |
| 1     | FALSE |
| 14.5  | TRUE  |
| 24    | FALSE |
| 8     | TRUE  |
| 13    | TRUE  |
| 1.5   | FALSE |
| 1.5   | FALSE |
| 22    | TRUE  |
| 50    | FALSE |
| 157.5 | FALSE |
| 1     | FALSE |
| 1     | FALSE |
| 161   | TRUE  |
| 5.5   | FALSE |
| 6     | FALSE |
| 2.5   | FALSE |
| 4     | FALSE |
| 1.5   | FALSE |
| 1.5   | FALSE |

|       |       |
|-------|-------|
| 7.5   | FALSE |
| 1     | FALSE |
| 3     | FALSE |
| 53    | TRUE  |
| 2     | FALSE |
| 2     | FALSE |
| 43    | FALSE |
| 19    | TRUE  |
| 10.5  | TRUE  |
| 15    | TRUE  |
| 8     | TRUE  |
| 29    | TRUE  |
| 13    | TRUE  |
| 12.5  | TRUE  |
| 14    | FALSE |
| 9     | TRUE  |
| 1     | FALSE |
| 29.5  | TRUE  |
| 23.5  | TRUE  |
| 69    | TRUE  |
| 142   | TRUE  |
| 2     | FALSE |
| 42    | TRUE  |
| 14    | FALSE |
| 7.5   | TRUE  |
| 5.5   | FALSE |
| 37.5  | TRUE  |
| 9     | TRUE  |
| 138.5 | TRUE  |
| 14    | TRUE  |
| 34    | FALSE |
| 5     | FALSE |
| 9     | FALSE |
| 8     | TRUE  |
| 14    | TRUE  |
| 61.5  | TRUE  |
| 7.5   | FALSE |
| 9.5   | FALSE |
| 16    | TRUE  |
| 2.5   | FALSE |
| 2.5   | FALSE |
| 1     | FALSE |
| 1     | FALSE |
| 309.5 | TRUE  |

|       |       |
|-------|-------|
| 7.5   | TRUE  |
| 4.5   | FALSE |
| 3     | FALSE |
| 11.5  | FALSE |
| 25.5  | TRUE  |
| 3     | FALSE |
| 3     | FALSE |
| 22    | TRUE  |
| 2     | FALSE |
| 13.5  | TRUE  |
| 2.5   | FALSE |
| 10.5  | TRUE  |
| 12    | FALSE |
| 2.5   | FALSE |
| 191.5 | TRUE  |
| 8.5   | TRUE  |
| 14.5  | TRUE  |
| 10.5  | TRUE  |
| 19    | TRUE  |
| 3     | FALSE |
| 2     | FALSE |
| 6.5   | TRUE  |
| 10    | FALSE |
| 3     | FALSE |
| 7     | TRUE  |
| 7.5   | TRUE  |
| 22.5  | FALSE |
| 3.5   | FALSE |
| 3     | FALSE |
| 3     | FALSE |
| 5.5   | FALSE |
| 3     | FALSE |
| 18.5  | FALSE |
| 13    | FALSE |
| 17.5  | TRUE  |
| 34    | FALSE |
| 14    | TRUE  |
| 3     | FALSE |
| 1.5   | FALSE |
| 1.5   | FALSE |
| 1.5   | FALSE |
| 7.5   | FALSE |
| 9     | TRUE  |
| 11.5  | TRUE  |
| 96    | TRUE  |
| 13    | FALSE |
| 11    | FALSE |

|       |       |
|-------|-------|
| 11    | FALSE |
| 86.5  | TRUE  |
| 70.5  | TRUE  |
| 131.5 | TRUE  |
| 7     | FALSE |
| 3.5   | FALSE |
| 29    | FALSE |
| 874.5 | TRUE  |
| 96    | TRUE  |
| 6     | FALSE |
| 9.5   | FALSE |
| 2.5   | FALSE |
| 7     | FALSE |
| 1.5   | FALSE |
| 15    | TRUE  |
| 1.5   | FALSE |
| 1.5   | FALSE |
| 8     | FALSE |
| 5     | FALSE |
| 7     | TRUE  |
| 4     | FALSE |
| 3.5   | FALSE |
| 4     | FALSE |
| 8     | TRUE  |
| 1     | FALSE |
| 6     | TRUE  |
| 9     | FALSE |
| 4     | FALSE |
| 1.5   | FALSE |
| 1.5   | FALSE |
| 1     | FALSE |
| 16    | TRUE  |
| 5     | FALSE |
| 14    | FALSE |
| 12.5  | FALSE |
| 9.5   | TRUE  |
| 3.5   | FALSE |
| 9.5   | TRUE  |
| 1.5   | FALSE |
| 1.5   | FALSE |
| 1     | FALSE |
| 14    | FALSE |
| 1.5   | FALSE |
| 48    | FALSE |

|      |       |
|------|-------|
| 2.5  | FALSE |
| 6.5  | FALSE |
| 22   | TRUE  |
| 37.5 | TRUE  |
| 19.5 | FALSE |
| 22   | TRUE  |
| 2    | FALSE |
| 79.5 | TRUE  |
| 7.5  | FALSE |
| 1    | FALSE |
| 1    | FALSE |
| 2    | FALSE |
| 6    | TRUE  |
| 2    | FALSE |
| 2    | FALSE |
| 12.5 | TRUE  |
| 26.5 | TRUE  |
| 31   | TRUE  |
| 7    | FALSE |
| 19.5 | TRUE  |
| 9    | TRUE  |
| 2    | FALSE |
| 4    | FALSE |
| 2    | FALSE |
| 8.5  | TRUE  |
| 19.5 | FALSE |
| 84.5 | TRUE  |
| 5    | FALSE |
| 20.5 | TRUE  |
| 2    | FALSE |
| 14   | TRUE  |
| 4.5  | FALSE |
| 1.5  | FALSE |
| 1.5  | FALSE |
| 1.5  | FALSE |
| 16   | TRUE  |
| 168  | FALSE |
| 7    | TRUE  |
| 7    | TRUE  |
| 5.5  | FALSE |
| 7.5  | FALSE |
| 7.5  | FALSE |
| 14   | FALSE |
| 60   | TRUE  |
| 1.5  | FALSE |
| 1.5  | FALSE |
| 1.5  | FALSE |



|      |       |
|------|-------|
| 2    | FALSE |
| 2.5  | FALSE |
| 9    | TRUE  |
| 10   | FALSE |
| 3.5  | FALSE |
| 9.5  | TRUE  |
| 20   | TRUE  |
| 17.5 | TRUE  |
| 3.5  | FALSE |
| 50   | FALSE |
| 5    | FALSE |
| 2    | FALSE |
| 2    | FALSE |
| 18.5 | TRUE  |
| 4.5  | FALSE |
| 61.5 | TRUE  |
| 66   | FALSE |
| 17   | FALSE |
| 2.5  | FALSE |
| 335  | FALSE |
| 9.5  | TRUE  |
| 14   | TRUE  |
| 18   | FALSE |
| 2    | FALSE |
| 2    | FALSE |
| 1.5  | FALSE |
| 1.5  | FALSE |
| 1.5  | FALSE |
| 11   | TRUE  |
| 15.5 | FALSE |
| 2.5  | FALSE |
| 2.5  | FALSE |
| 7    | FALSE |
| 32.5 | FALSE |
| 1.5  | FALSE |
| 3    | FALSE |
| 21   | TRUE  |
| 6.5  | FALSE |
| 1.5  | FALSE |
| 2    | FALSE |
| 5    | FALSE |
| 5    | FALSE |
| 5.5  | FALSE |
| 2.5  | FALSE |
| 2.5  | FALSE |
| 8    | TRUE  |
| 3    | FALSE |

|       |       |
|-------|-------|
| 3     | FALSE |
| 7.5   | TRUE  |
| 7.5   | TRUE  |
| 3     | FALSE |
| 3     | FALSE |
| 16.5  | TRUE  |
| 35    | FALSE |
| 9     | FALSE |
| 7.5   | FALSE |
| 7.5   | TRUE  |
| 12    | TRUE  |
| 38    | TRUE  |
| 2     | FALSE |
| 2     | FALSE |
| 21.5  | FALSE |
| 3     | FALSE |
| 6     | TRUE  |
| 9     | FALSE |
| 13    | FALSE |
| 3.5   | FALSE |
| 8.5   | FALSE |
| 15    | TRUE  |
| 19.5  | FALSE |
| 120.5 | TRUE  |
| 7     | TRUE  |
| 296   | TRUE  |
| 18.5  | TRUE  |
| 221.5 | TRUE  |
| 2     | FALSE |
| 10.5  | TRUE  |
| 9     | TRUE  |
| 3.5   | FALSE |
| 6     | TRUE  |
| 2.5   | FALSE |
| 7.5   | TRUE  |
| 1.5   | FALSE |
| 8.5   | FALSE |
| 9.5   | FALSE |
| 14.5  | TRUE  |

|        |       |
|--------|-------|
| 31.5   | TRUE  |
| 1019.5 | TRUE  |
| 20     | FALSE |
| 8      | FALSE |
| 3.5    | FALSE |
| 1.5    | FALSE |
| 2.5    | FALSE |
| 16     | TRUE  |
| 2.5    | FALSE |
| 3      | FALSE |
| 252.5  | TRUE  |
| 2      | FALSE |
| 6      | FALSE |
| 14     | TRUE  |
| 8.5    | FALSE |
| 5.5    | TRUE  |
| 5.5    | TRUE  |
| 8.5    | FALSE |
| 15.5   | FALSE |
| 27.5   | TRUE  |
| 10     | TRUE  |
| 4      | FALSE |
| 3      | FALSE |
| 3      | FALSE |
| 25.5   | TRUE  |
| 1      | FALSE |
| 1      | FALSE |
| 9      | FALSE |
| 4.5    | FALSE |
| 2      | FALSE |
| 2      | FALSE |
| 2      | FALSE |
| 477.5  | TRUE  |
| 2      | FALSE |
| 6      | TRUE  |
| 17     | TRUE  |
| 62.5   | TRUE  |
| 323.5  | TRUE  |
| 10.5   | TRUE  |
| 4      | FALSE |
| 103    | TRUE  |
| 22.5   | FALSE |
| 15.5   | TRUE  |

|       |       |
|-------|-------|
| 2.5   | FALSE |
| 2.5   | FALSE |
| 7     | TRUE  |
| 7     | TRUE  |
| 5.5   | TRUE  |
| 8     | TRUE  |
| 34    | TRUE  |
| 22    | TRUE  |
| 20    | TRUE  |
| 32    | FALSE |
| 31.5  | FALSE |
| 140   | TRUE  |
| 12.5  | FALSE |
| 7.5   | TRUE  |
| 74.5  | TRUE  |
| 3.5   | FALSE |
| 4     | FALSE |
| 9.5   | TRUE  |
| 31.5  | TRUE  |
| 9.5   | FALSE |
| 6     | TRUE  |
| 31.5  | TRUE  |
| 8     | TRUE  |
| 23    | TRUE  |
| 35    | TRUE  |
| 3.5   | FALSE |
| 36    | FALSE |
| 10    | TRUE  |
| 10.5  | TRUE  |
| 102.5 | TRUE  |
| 4.5   | FALSE |
| 4     | FALSE |
| 11    | FALSE |
| 3     | FALSE |
| 8.5   | TRUE  |
| 20    | TRUE  |
| 1     | FALSE |
| 186   | FALSE |
| 6.5   | FALSE |
| 6.5   | FALSE |
| 10.5  | TRUE  |
| 5.5   | FALSE |
| 13.5  | TRUE  |
| 2     | FALSE |
| 10.5  | TRUE  |
| 8     | FALSE |
| 8     | FALSE |

|       |       |
|-------|-------|
| 144.5 | TRUE  |
| 8     | TRUE  |
| 6     | FALSE |
| 24    | TRUE  |
| 31.5  | TRUE  |
| 3.5   | FALSE |
| 34    | FALSE |
| 11.5  | TRUE  |
| 2.5   | FALSE |
| 88.5  | FALSE |
| 1     | FALSE |
| 1     | FALSE |
| 10    | FALSE |
| 24    | FALSE |
| 28    | TRUE  |
| 17    | TRUE  |
| 7     | FALSE |
| 1     | FALSE |
| 1     | FALSE |
| 267.5 | TRUE  |
| 4     | FALSE |
| 2     | FALSE |
| 240.5 | TRUE  |
| 17    | TRUE  |
| 4     | FALSE |
| 4.5   | FALSE |
| 23.5  | TRUE  |
| 3     | FALSE |
| 1     | FALSE |
| 1.5   | FALSE |
| 1.5   | FALSE |
| 9.5   | TRUE  |
| 135   | FALSE |
| 7.5   | FALSE |
| 17    | TRUE  |
| 2     | FALSE |
| 1.5   | FALSE |
| 1     | FALSE |
| 1     | FALSE |
| 33.5  | TRUE  |
| 201   | FALSE |
| 3     | FALSE |
| 25.5  | TRUE  |
| 57.5  | FALSE |
| 1.5   | FALSE |
| 1.5   | FALSE |
| 1.5   | FALSE |

|       |       |
|-------|-------|
| 1.5   | FALSE |
| 8     | FALSE |
| 1     | FALSE |
| 224   | FALSE |
| 21.5  | TRUE  |
| 8.5   | FALSE |
| 61    | TRUE  |
| 8     | TRUE  |
| 6     | TRUE  |
| 8     | FALSE |
| 1.5   | FALSE |
| 1.5   | FALSE |
| 5     | FALSE |
| 170.5 | TRUE  |
| 14    | FALSE |
| 15    | TRUE  |
| 17.5  | TRUE  |
| 4     | FALSE |
| 22.5  | TRUE  |
| 3.5   | FALSE |
| 5.5   | TRUE  |
| 5.5   | TRUE  |
| 5     | FALSE |
| 12    | FALSE |
| 1.5   | FALSE |
| 8.5   | FALSE |
| 11.5  | TRUE  |
| 95    | TRUE  |
| 5.5   | FALSE |
| 5.5   | FALSE |
| 2.5   | FALSE |
| 2.5   | FALSE |
| 2     | FALSE |
| 2     | FALSE |
| 1.5   | FALSE |
| 1.5   | FALSE |
| 17    | FALSE |
| 86    | FALSE |
| 66    | TRUE  |
| 13    | FALSE |
| 6     | FALSE |
| 1.5   | FALSE |
| 1.5   | FALSE |

|       |       |
|-------|-------|
| 1.5   | FALSE |
| 3     | FALSE |
| 3     | FALSE |
| 9.5   | TRUE  |
| 9.5   | TRUE  |
| 142.5 | FALSE |
| 2.5   | FALSE |
| 210   | TRUE  |
| 12    | FALSE |
| 82.5  | FALSE |
| 4.5   | FALSE |
| 6.5   | FALSE |
| 3.5   | FALSE |
| 5     | FALSE |
| 6     | TRUE  |
| 6     | TRUE  |
| 2     | FALSE |
| 5.5   | TRUE  |
| 5.5   | TRUE  |
| 6     | TRUE  |
| 22    | TRUE  |
| 5     | FALSE |
| 35.5  | FALSE |
| 11    | TRUE  |
| 17    | TRUE  |
| 11    | FALSE |
| 17.5  | FALSE |
| 144.5 | TRUE  |
| 3.5   | FALSE |
| 2.5   | FALSE |
| 7     | TRUE  |
| 2     | FALSE |
| 11    | FALSE |
| 49.5  | TRUE  |
| 13.5  | TRUE  |
| 5.5   | FALSE |
| 17    | FALSE |
| 3     | FALSE |
| 10.5  | TRUE  |
| 297.5 | FALSE |

|       |       |
|-------|-------|
| 22    | TRUE  |
| 4     | FALSE |
| 10    | TRUE  |
| 10    | TRUE  |
| 4     | FALSE |
| 4     | FALSE |
| 25    | TRUE  |
| 1     | FALSE |
| 1     | FALSE |
| 1     | FALSE |
| 1.5   | FALSE |
| 7     | FALSE |
| 11.5  | FALSE |
| 1.5   | FALSE |
| 1.5   | FALSE |
| 2.5   | FALSE |
| 5.5   | TRUE  |
| 6     | FALSE |
| 11.5  | FALSE |
| 7.5   | TRUE  |
| 8.5   | TRUE  |
| 1     | FALSE |
| 26.5  | FALSE |
| 2.5   | FALSE |
| 158.5 | TRUE  |
| 7.5   | FALSE |
| 8     | FALSE |
| 15.5  | TRUE  |
| 1.5   | FALSE |
| 73.5  | FALSE |
| 98    | TRUE  |
| 2     | FALSE |
| 71.5  | TRUE  |
| 6.5   | TRUE  |
| 6.5   | TRUE  |
| 4.5   | FALSE |
| 6     | FALSE |
| 47.5  | FALSE |
| 3     | FALSE |
| 8     | TRUE  |
| 289.5 | TRUE  |
| 31    | TRUE  |
| 2.5   | FALSE |
| 7     | TRUE  |



|       |       |
|-------|-------|
| 7     | FALSE |
| 5     | FALSE |
| 6     | FALSE |
| 12.5  | TRUE  |
| 4.5   | FALSE |
| 3     | FALSE |
| 3     | FALSE |
| 3.5   | FALSE |
| 35    | TRUE  |
| 70    | TRUE  |
| 6.5   | TRUE  |
| 2.5   | FALSE |
| 2.5   | FALSE |
| 443.5 | TRUE  |
| 17.5  | TRUE  |
| 81.5  | TRUE  |
| 16    | TRUE  |
| 4     | FALSE |
| 90    | TRUE  |
| 29    | FALSE |
| 1.5   | FALSE |
| 3     | FALSE |
| 94.5  | TRUE  |
| 6.5   | FALSE |
| 21    | TRUE  |
| 36    | FALSE |
| 6.5   | TRUE  |
| 7     | FALSE |
| 1     | FALSE |
| 15.5  | TRUE  |
| 23.5  | TRUE  |
| 7     | TRUE  |
| 9     | TRUE  |
| 4.5   | FALSE |
| 127   | TRUE  |
| 6     | FALSE |
| 16.5  | TRUE  |
| 102.5 | FALSE |
| 4     | FALSE |
| 5     | FALSE |
| 65    | TRUE  |
| 5     | FALSE |
| 9.5   | TRUE  |

|       |       |
|-------|-------|
| 1.5   | FALSE |
| 1.5   | FALSE |
| 40    | FALSE |
| 2     | FALSE |
| 2     | FALSE |
| 42.5  | FALSE |
| 7.5   | FALSE |
| 7     | TRUE  |
| 6.5   | TRUE  |
| 20    | FALSE |
| 71.5  | FALSE |
| 19    | FALSE |
| 87    | TRUE  |
| 1     | FALSE |
| 260.5 | TRUE  |
| 3     | FALSE |
| 7.5   | TRUE  |
| 38    | TRUE  |
| 7.5   | FALSE |
| 8     | TRUE  |
| 3.5   | FALSE |
| 34.5  | FALSE |
| 12.5  | FALSE |
| 26    | TRUE  |
| 9.5   | FALSE |
| 1.5   | FALSE |
| 33    | TRUE  |
| 11.5  | TRUE  |
| 3.5   | FALSE |
| 3.5   | FALSE |
| 9.5   | FALSE |
| 2.5   | FALSE |
| 1.5   | FALSE |
| 16.5  | TRUE  |
| 23    | TRUE  |
| 898.5 | TRUE  |
| 15    | TRUE  |
| 11.5  | TRUE  |
| 2.5   | FALSE |
| 10    | FALSE |
| 77.5  | TRUE  |
| 88    | TRUE  |
| 11.5  | FALSE |
| 1.5   | FALSE |
| 89.5  | TRUE  |
| 325   | TRUE  |
| 2     | FALSE |

|       |       |
|-------|-------|
| 9.5   | TRUE  |
| 4     | FALSE |
| 14.5  | TRUE  |
| 7     | TRUE  |
| 4     | FALSE |
| 22.5  | FALSE |
| 80.5  | FALSE |
| 2.5   | FALSE |
| 12    | TRUE  |
| 37    | FALSE |
| 2     | FALSE |
| 17.5  | FALSE |
| 44.5  | TRUE  |
| 8     | TRUE  |
| 5     | FALSE |
| 5     | FALSE |
| 8.5   | FALSE |
| 1     | FALSE |
| 1     | FALSE |
| 1     | FALSE |
| 5.5   | TRUE  |
| 10    | TRUE  |
| 4     | FALSE |
| 66.5  | TRUE  |
| 12.5  | FALSE |
| 8.5   | FALSE |
| 6     | TRUE  |
| 5     | FALSE |
| 50    | TRUE  |
| 43    | TRUE  |
| 24    | TRUE  |
| 95    | TRUE  |
| 5.5   | FALSE |
| 14    | TRUE  |
| 61    | TRUE  |
| 22.5  | TRUE  |
| 2.5   | FALSE |
| 16    | TRUE  |
| 7.5   | FALSE |
| 208.5 | FALSE |
| 6     | FALSE |
| 188.5 | TRUE  |
| 34.5  | FALSE |
| 12    | TRUE  |
| 9.5   | FALSE |
| 7     | TRUE  |
| 2.5   | FALSE |

|      |       |
|------|-------|
| 7    | TRUE  |
| 38   | TRUE  |
| 78.5 | TRUE  |
| 4.5  | FALSE |
| 38.5 | TRUE  |
| 31.5 | FALSE |
| 69   | TRUE  |
| 12.5 | TRUE  |
| 2    | FALSE |
| 30   | TRUE  |
| 46   | TRUE  |
| 16   | FALSE |
| 13.5 | FALSE |
| 7    | FALSE |
| 68.5 | TRUE  |
| 80.5 | TRUE  |
| 27.5 | TRUE  |
| 2    | FALSE |
| 2    | FALSE |
| 8.5  | TRUE  |
| 7.5  | FALSE |
| 9.5  | TRUE  |
| 3    | FALSE |
| 3    | FALSE |
| 23   | TRUE  |
| 27   | TRUE  |
| 4    | FALSE |
| 4    | FALSE |
| 9.5  | TRUE  |
| 5.5  | FALSE |
| 7.5  | TRUE  |
| 2.5  | FALSE |
| 4    | FALSE |
| 1.5  | FALSE |
| 4.5  | FALSE |
| 3    | FALSE |
| 7.5  | FALSE |
| 60.5 | TRUE  |
| 39   | TRUE  |
| 27   | TRUE  |
| 5    | FALSE |
| 26.5 | FALSE |
| 3.5  | FALSE |
| 36   | TRUE  |
| 19.5 | FALSE |
| 5.5  | FALSE |
| 4.5  | FALSE |

|      |       |
|------|-------|
| 3    | FALSE |
| 3    | FALSE |
| 7.5  | FALSE |
| 3    | FALSE |
| 3    | FALSE |
| 3    | FALSE |
| 3.5  | FALSE |
| 3.5  | FALSE |
| 8.5  | TRUE  |
| 23   | FALSE |
| 4    | FALSE |
| 305  | TRUE  |
| 2.5  | FALSE |
| 7    | TRUE  |
| 8.5  | TRUE  |
| 12.5 | TRUE  |
| 1    | FALSE |
| 1    | FALSE |
| 19.5 | TRUE  |
| 5    | FALSE |
| 45   | FALSE |
| 3.5  | FALSE |
| 14.5 | TRUE  |
| 6    | TRUE  |
| 2.5  | FALSE |
| 8.5  | TRUE  |
| 87.5 | TRUE  |
| 1    | FALSE |
| 1    | FALSE |
| 1.5  | FALSE |
| 9    | TRUE  |
| 11   | FALSE |
| 47.5 | FALSE |
| 6.5  | FALSE |
| 7    | FALSE |
| 23.5 | TRUE  |
| 7    | TRUE  |
| 7    | TRUE  |
| 7    | TRUE  |
| 4.5  | FALSE |
| 3.5  | FALSE |
| 8    | TRUE  |
| 4.5  | FALSE |
| 17.5 | FALSE |
| 7.5  | TRUE  |
| 35.5 | TRUE  |
| 5.5  | TRUE  |

|       |       |
|-------|-------|
| 12.5  | TRUE  |
| 24    | TRUE  |
| 1.5   | FALSE |
| 26    | FALSE |
| 5     | FALSE |
| 7     | TRUE  |
| 8.5   | TRUE  |
| 11.5  | FALSE |
| 3     | FALSE |
| 187   | TRUE  |
| 2     | FALSE |
| 54.5  | TRUE  |
| 19.5  | TRUE  |
| 42    | TRUE  |
| 3     | FALSE |
| 8     | TRUE  |
| 3.5   | FALSE |
| 2.5   | FALSE |
| 2.5   | FALSE |
| 134.5 | FALSE |
| 201   | TRUE  |
| 5.5   | FALSE |
| 2     | FALSE |
| 3.5   | FALSE |
| 2.5   | FALSE |
| 22    | TRUE  |
| 124   | TRUE  |
| 4.5   | FALSE |
| 3     | FALSE |
| 6     | TRUE  |
| 6.5   | FALSE |
| 56    | TRUE  |
| 5.5   | TRUE  |
| 5.5   | TRUE  |
| 7     | FALSE |
| 6.5   | FALSE |
| 3.5   | FALSE |
| 6     | FALSE |
| 1.5   | FALSE |
| 10    | TRUE  |
| 3     | FALSE |
| 6     | TRUE  |
| 12    | TRUE  |
| 4.5   | FALSE |
| 2     | FALSE |
| 2     | FALSE |
| 6     | TRUE  |

|       |       |
|-------|-------|
| 25.5  | FALSE |
| 4.5   | FALSE |
| 27.5  | TRUE  |
| 6     | FALSE |
| 6.5   | FALSE |
| 1.5   | FALSE |
| 19    | TRUE  |
| 8.5   | FALSE |
| 6     | TRUE  |
| 2.5   | FALSE |
| 7     | FALSE |
| 669.5 | TRUE  |
| 5     | FALSE |
| 7.5   | TRUE  |
| 42    | TRUE  |
| 39.5  | TRUE  |
| 4     | FALSE |
| 1.5   | FALSE |
| 8     | TRUE  |
| 9.5   | FALSE |
| 17.5  | FALSE |
| 12.5  | TRUE  |
| 12    | TRUE  |
| 2     | FALSE |
| 2     | FALSE |
| 17    | FALSE |
| 1     | FALSE |
| 1     | FALSE |
| 8     | TRUE  |
| 100   | TRUE  |
| 12.5  | TRUE  |
| 14    | TRUE  |
| 9     | FALSE |
| 4.5   | FALSE |
| 8.5   | TRUE  |
| 54.5  | TRUE  |
| 12    | FALSE |
| 6.5   | TRUE  |
| 9.5   | TRUE  |
| 10    | TRUE  |
| 19.5  | TRUE  |
| 3.5   | FALSE |
| 3.5   | FALSE |

|       |       |
|-------|-------|
| 3     | FALSE |
| 40.5  | TRUE  |
| 34.5  | TRUE  |
| 5     | FALSE |
| 14.5  | FALSE |
| 2.5   | FALSE |
| 8     | FALSE |
| 2     | FALSE |
| 210   | TRUE  |
| 4     | FALSE |
| 28    | TRUE  |
| 5.5   | FALSE |
| 38.5  | TRUE  |
| 17.5  | FALSE |
| 1     | FALSE |
| 7.5   | FALSE |
| 16    | TRUE  |
| 103.5 | FALSE |
| 2     | FALSE |
| 2.5   | FALSE |
| 1.5   | FALSE |
| 16.5  | TRUE  |
| 12.5  | TRUE  |
| 16    | FALSE |
| 3.5   | FALSE |
| 33.5  | TRUE  |
| 8.5   | TRUE  |
| 2     | FALSE |
| 2     | FALSE |
| 2.5   | FALSE |
| 231   | TRUE  |
| 7     | TRUE  |
| 7     | TRUE  |
| 16    | TRUE  |
| 8.5   | TRUE  |
| 5.5   | TRUE  |
| 10    | FALSE |
| 5.5   | TRUE  |
| 2.5   | FALSE |
| 145   | TRUE  |
| 24    | TRUE  |
| 7     | TRUE  |
| 483.5 | TRUE  |
| 7.5   | FALSE |
| 7.5   | FALSE |
| 18.5  | TRUE  |
| 1     | FALSE |



|       |       |
|-------|-------|
| 10    | TRUE  |
| 5.5   | FALSE |
| 147.5 | FALSE |
| 25    | FALSE |
| 10.5  | FALSE |
| 13.5  | TRUE  |
| 63    | TRUE  |
| 95.5  | TRUE  |
| 1.5   | FALSE |
| 2     | FALSE |
| 4     | FALSE |
| 104   | TRUE  |
| 10    | FALSE |
| 4.5   | FALSE |
| 14    | TRUE  |
| 263.5 | FALSE |
| 4     | FALSE |
| 50    | FALSE |
| 2     | FALSE |
| 43    | FALSE |
| 25    | TRUE  |
| 28    | FALSE |
| 9     | FALSE |
| 3     | FALSE |
| 952   | TRUE  |
| 20    | FALSE |
| 9     | TRUE  |
| 15    | TRUE  |
| 1     | FALSE |
| 1     | FALSE |
| 3.5   | FALSE |
| 2     | FALSE |
| 2     | FALSE |
| 5.5   | TRUE  |
| 5     | FALSE |
| 10    | FALSE |
| 10.5  | FALSE |
| 2.5   | FALSE |
| 7.5   | FALSE |
| 4     | FALSE |
| 17.5  | TRUE  |
| 1.5   | FALSE |
| 113   | TRUE  |
| 37    | FALSE |

|       |       |
|-------|-------|
| 157   | TRUE  |
| 11    | FALSE |
| 47.5  | TRUE  |
| 1.5   | FALSE |
| 30    | FALSE |
| 3     | FALSE |
| 3     | FALSE |
| 8     | TRUE  |
| 2     | FALSE |
| 2     | FALSE |
| 2     | FALSE |
| 24    | TRUE  |
| 43.5  | TRUE  |
| 6     | TRUE  |
| 10.5  | FALSE |
| 17    | FALSE |
| 25    | TRUE  |
| 28    | FALSE |
| 13    | FALSE |
| 246   | FALSE |
| 4     | FALSE |
| 2     | FALSE |
| 2     | FALSE |
| 5.5   | TRUE  |
| 17    | TRUE  |
| 4     | FALSE |
| 4     | FALSE |
| 12    | TRUE  |
| 19.5  | TRUE  |
| 47.5  | TRUE  |
| 2.5   | FALSE |
| 6.5   | TRUE  |
| 497.5 | TRUE  |
| 12.5  | TRUE  |
| 30    | FALSE |
| 13.5  | FALSE |
| 8.5   | TRUE  |
| 4     | FALSE |
| 628   | TRUE  |
| 4     | FALSE |
| 3.5   | FALSE |
| 8     | TRUE  |
| 2.5   | FALSE |
| 2.5   | FALSE |
| 31    | TRUE  |
| 5.5   | FALSE |
| 12    | TRUE  |

|       |       |
|-------|-------|
| 232.5 | TRUE  |
| 13    | TRUE  |
| 1.5   | FALSE |
| 7.5   | TRUE  |
| 72    | FALSE |
| 22    | TRUE  |
| 3.5   | FALSE |
| 3.5   | FALSE |
| 7     | TRUE  |
| 2.5   | FALSE |
| 4.5   | FALSE |
| 10.5  | FALSE |
| 13    | TRUE  |
| 216.5 | TRUE  |
| 3.5   | FALSE |
| 24    | TRUE  |
| 1     | FALSE |
| 1     | FALSE |
| 5.5   | FALSE |
| 2     | FALSE |
| 2     | FALSE |
| 60    | TRUE  |
| 3.5   | FALSE |
| 3     | FALSE |
| 18    | FALSE |
| 4     | FALSE |
| 9.5   | TRUE  |
| 8.5   | FALSE |
| 6     | TRUE  |
| 14    | TRUE  |
| 44.5  | TRUE  |
| 3.5   | FALSE |
| 57    | TRUE  |
| 7.5   | FALSE |
| 3.5   | FALSE |
| 10    | FALSE |
| 38    | FALSE |
| 3     | FALSE |
| 16.5  | FALSE |
| 3     | FALSE |
| 12    | TRUE  |
| 18.5  | TRUE  |
| 42    | FALSE |
| 2.5   | FALSE |
| 16.5  | TRUE  |
| 32    | FALSE |
| 3.5   | FALSE |

|       |       |
|-------|-------|
| 3.5   | FALSE |
| 3     | FALSE |
| 46.5  | FALSE |
| 12.5  | FALSE |
| 33.5  | TRUE  |
| 4.5   | FALSE |
| 18.5  | FALSE |
| 81    | FALSE |
| 4.5   | FALSE |
| 52    | FALSE |
| 99    | TRUE  |
| 13.5  | FALSE |
| 7.5   | TRUE  |
| 6.5   | TRUE  |
| 3     | FALSE |
| 11    | FALSE |
| 5.5   | FALSE |
| 8     | FALSE |
| 93.5  | TRUE  |
| 19.5  | TRUE  |
| 11.5  | TRUE  |
| 11.5  | TRUE  |
| 9     | TRUE  |
| 15.5  | FALSE |
| 3.5   | FALSE |
| 35.5  | FALSE |
| 15    | FALSE |
| 102   | TRUE  |
| 11    | TRUE  |
| 8     | TRUE  |
| 158   | TRUE  |
| 11.5  | FALSE |
| 7.5   | TRUE  |
| 3     | FALSE |
| 81.5  | FALSE |
| 5     | FALSE |
| 18.5  | FALSE |
| 78.5  | FALSE |
| 1     | FALSE |
| 14.5  | FALSE |
| 265.5 | TRUE  |

|       |       |
|-------|-------|
| 1     | FALSE |
| 8     | TRUE  |
| 3.5   | FALSE |
| 34.5  | TRUE  |
| 4.5   | FALSE |
| 83    | TRUE  |
| 255.5 | TRUE  |
| 5.5   | TRUE  |
| 5     | FALSE |
| 16    | TRUE  |
| 22    | FALSE |
| 15.5  | FALSE |
| 3     | FALSE |
| 55.5  | FALSE |
| 3.5   | FALSE |
| 23    | TRUE  |
| 12    | FALSE |
| 44    | FALSE |
| 2.5   | FALSE |
| 6     | TRUE  |
| 9.5   | FALSE |
| 29.5  | FALSE |
| 17    | FALSE |
| 12    | FALSE |
| 3.5   | FALSE |
| 6.5   | TRUE  |
| 5.5   | FALSE |
| 4     | FALSE |
| 37    | FALSE |
| 10    | FALSE |
| 33.5  | TRUE  |
| 2.5   | FALSE |
| 10.5  | FALSE |
| 1.5   | FALSE |
| 13.5  | FALSE |
| 16    | TRUE  |
| 3     | FALSE |
| 6     | FALSE |
| 26.5  | FALSE |
| 22    | FALSE |
| 1.5   | FALSE |
| 1.5   | FALSE |

|       |       |
|-------|-------|
| 1.5   | FALSE |
| 71    | TRUE  |
| 12.5  | TRUE  |
| 10    | FALSE |
| 3     | FALSE |
| 9.5   | TRUE  |
| 2.5   | FALSE |
| 2.5   | FALSE |
| 5.5   | TRUE  |
| 2.5   | FALSE |
| 2.5   | FALSE |
| 21    | TRUE  |
| 2     | FALSE |
| 9     | FALSE |
| 5     | FALSE |
| 3     | FALSE |
| 6.5   | TRUE  |
| 6.5   | TRUE  |
| 12    | TRUE  |
| 9.5   | FALSE |
| 124.5 | FALSE |
| 2.5   | FALSE |
| 6     | TRUE  |
| 2.5   | FALSE |
| 2     | FALSE |
| 2     | FALSE |
| 16    | FALSE |
| 5.5   | FALSE |
| 8.5   | TRUE  |
| 4     | FALSE |
| 4     | FALSE |
| 15    | TRUE  |
| 12.5  | TRUE  |
| 21    | FALSE |
| 1     | FALSE |
| 3.5   | FALSE |
| 4     | FALSE |
| 4.5   | FALSE |
| 7     | FALSE |
| 3.5   | FALSE |
| 80.5  | FALSE |
| 54.5  | TRUE  |
| 8     | FALSE |
| 18    | FALSE |
| 1     | FALSE |
| 1     | FALSE |
| 1     | FALSE |

|      |       |
|------|-------|
| 1.5  | FALSE |
| 1    | FALSE |
| 3    | FALSE |
| 3    | FALSE |
| 53   | FALSE |
| 2    | FALSE |
| 4.5  | FALSE |
| 90.5 | FALSE |
| 241  | FALSE |
| 2.5  | FALSE |
| 15   | FALSE |
| 9    | FALSE |
| 50.5 | TRUE  |
| 25   | FALSE |
| 78   | FALSE |
| 44   | FALSE |
| 2    | FALSE |
| 7    | TRUE  |
| 3    | FALSE |
| 3    | FALSE |
| 2.5  | FALSE |
| 4.5  | FALSE |
| 3    | FALSE |
| 39   | TRUE  |
| 11   | TRUE  |
| 23   | FALSE |
| 6    | FALSE |
| 75.5 | FALSE |
| 18.5 | TRUE  |
| 128  | TRUE  |
| 2    | FALSE |
| 6.5  | FALSE |
| 3    | FALSE |
| 6    | TRUE  |
| 2.5  | FALSE |
| 6    | TRUE  |
| 8    | FALSE |
| 4.5  | FALSE |
| 4.5  | FALSE |
| 55   | FALSE |
| 15.5 | TRUE  |
| 5.5  | FALSE |
| 64.5 | FALSE |
| 3    | FALSE |
| 35   | FALSE |
| 13   | FALSE |
| 2.5  | FALSE |

|       |       |
|-------|-------|
| 281.5 | TRUE  |
| 3     | FALSE |
| 20    | TRUE  |
| 189   | FALSE |
| 30    | TRUE  |
| 9     | FALSE |
| 35.5  | FALSE |
| 12.5  | TRUE  |
| 13.5  | FALSE |
| 5.5   | FALSE |
| 4.5   | FALSE |
| 11.5  | TRUE  |
| 3.5   | FALSE |
| 12    | FALSE |
| 153   | FALSE |
| 184.5 | FALSE |
| 11.5  | FALSE |
| 5.5   | FALSE |
| 21    | TRUE  |
| 14    | TRUE  |
| 5.5   | FALSE |
| 2     | FALSE |
| 2     | FALSE |
| 35.5  | TRUE  |
| 11    | TRUE  |
| 2.5   | FALSE |
| 3     | FALSE |
| 7     | TRUE  |
| 2     | FALSE |
| 8     | TRUE  |
| 8     | TRUE  |
| 8.5   | TRUE  |
| 10    | FALSE |
| 12    | FALSE |
| 2     | FALSE |
| 2     | FALSE |
| 41.5  | TRUE  |
| 37.5  | TRUE  |
| 40.5  | TRUE  |
| 7.5   | FALSE |
| 4.5   | FALSE |
| 11.5  | FALSE |
| 2.5   | FALSE |
| 22.5  | TRUE  |
| 52    | TRUE  |
| 11.5  | TRUE  |
| 11    | TRUE  |



|       |       |
|-------|-------|
| 11.5  | FALSE |
| 11    | FALSE |
| 27    | TRUE  |
| 7.5   | FALSE |
| 6     | TRUE  |
| 24.5  | TRUE  |
| 9.5   | FALSE |
| 423.5 | TRUE  |
| 1.5   | FALSE |
| 2     | FALSE |
| 3     | FALSE |
| 5.5   | FALSE |
| 105   | TRUE  |
| 12    | TRUE  |
| 12.5  | TRUE  |
| 2.5   | FALSE |
| 9.5   | TRUE  |
| 8.5   | FALSE |
| 1.5   | FALSE |
| 19    | FALSE |
| 3.5   | FALSE |
| 16    | TRUE  |
| 12    | FALSE |
| 2.5   | FALSE |
| 6     | TRUE  |
| 2.5   | FALSE |
| 8     | FALSE |
| 1.5   | FALSE |
| 1.5   | FALSE |
| 1.5   | FALSE |
| 3     | FALSE |
| 3     | FALSE |
| 2     | FALSE |
| 7     | FALSE |
| 18.5  | FALSE |
| 4     | FALSE |
| 52.5  | TRUE  |
| 41    | TRUE  |
| 5     | FALSE |

|       |       |
|-------|-------|
| 11.5  | FALSE |
| 12    | FALSE |
| 14    | FALSE |
| 6     | TRUE  |
| 6     | TRUE  |
| 2.5   | FALSE |
| 6.5   | FALSE |
| 1.5   | FALSE |
| 3.5   | FALSE |
| 6.5   | TRUE  |
| 475.5 | TRUE  |
| 18    | FALSE |
| 8     | TRUE  |
| 1.5   | FALSE |
| 1.5   | FALSE |
| 1.5   | FALSE |
| 7.5   | FALSE |
| 5.5   | FALSE |
| 2.5   | FALSE |
| 2.5   | FALSE |
| 6.5   | FALSE |
| 6.5   | FALSE |
| 6.5   | FALSE |
| 7     | TRUE  |
| 3.5   | FALSE |
| 7     | TRUE  |
| 7     | TRUE  |
| 3     | FALSE |
| 7     | TRUE  |
| 15.5  | TRUE  |
| 30    | FALSE |
| 26    | FALSE |
| 12    | TRUE  |
| 1.5   | FALSE |
| 1.5   | FALSE |
| 16    | FALSE |
| 2     | FALSE |
| 5     | FALSE |
| 11    | FALSE |
| 34.5  | FALSE |
| 13.5  | TRUE  |
| 5.5   | FALSE |
| 16    | TRUE  |
| 10.5  | FALSE |
| 1.5   | FALSE |
| 14.5  | FALSE |
| 6.5   | FALSE |

|       |       |
|-------|-------|
| 6     | TRUE  |
| 929   | TRUE  |
| 2     | FALSE |
| 2     | FALSE |
| 6     | FALSE |
| 10.5  | TRUE  |
| 3     | FALSE |
| 7     | TRUE  |
| 3.5   | FALSE |
| 17    | TRUE  |
| 10.5  | TRUE  |
| 13    | TRUE  |
| 63.5  | FALSE |
| 57.5  | TRUE  |
| 8.5   | FALSE |
| 2.5   | FALSE |
| 4.5   | FALSE |
| 182.5 | TRUE  |
| 6.5   | FALSE |
| 3.5   | FALSE |
| 8     | FALSE |
| 5     | FALSE |
| 5     | FALSE |
| 11.5  | FALSE |
| 7.5   | TRUE  |
| 9     | FALSE |
| 17    | TRUE  |
| 78.5  | FALSE |
| 5.5   | TRUE  |
| 30    | FALSE |
| 639.5 | TRUE  |
| 18    | TRUE  |
| 17    | FALSE |
| 682   | TRUE  |
| 9     | FALSE |
| 6     | FALSE |
| 16    | TRUE  |
| 8.5   | FALSE |
| 2     | FALSE |
| 2     | FALSE |
| 4.5   | FALSE |
| 8.5   | FALSE |
| 21.5  | FALSE |
| 6     | TRUE  |
| 3     | FALSE |
| 3     | FALSE |
| 11    | TRUE  |

|       |       |
|-------|-------|
| 3.5   | FALSE |
| 5     | FALSE |
| 27.5  | FALSE |
| 35.5  | TRUE  |
| 24.5  | FALSE |
| 128.5 | TRUE  |
| 4     | FALSE |
| 6     | TRUE  |
| 3     | FALSE |
| 4.5   | FALSE |
| 4.5   | FALSE |
| 7.5   | FALSE |
| 13.5  | FALSE |
| 41.5  | TRUE  |
| 30.5  | FALSE |
| 154   | TRUE  |
| 13    | TRUE  |
| 17    | FALSE |
| 1.5   | FALSE |
| 16    | TRUE  |
| 3     | FALSE |
| 3     | FALSE |
| 6     | TRUE  |
| 3     | FALSE |
| 1     | FALSE |
| 4.5   | FALSE |
| 4.5   | FALSE |
| 3.5   | FALSE |
| 11.5  | FALSE |
| 1.5   | FALSE |
| 12.5  | TRUE  |
| 13.5  | TRUE  |
| 13    | TRUE  |
| 5     | FALSE |
| 26.5  | FALSE |
| 25.5  | TRUE  |
| 8.5   | FALSE |
| 278.5 | FALSE |
| 3     | FALSE |
| 19.5  | FALSE |
| 135   | FALSE |
| 11.5  | TRUE  |
| 1     | FALSE |
| 1     | FALSE |

|        |       |
|--------|-------|
| 1      | FALSE |
| 17.5   | FALSE |
| 94.5   | FALSE |
| 4      | FALSE |
| 10     | TRUE  |
| 12     | FALSE |
| 2      | FALSE |
| 3.5    | FALSE |
| 3.5    | FALSE |
| 7      | FALSE |
| 52     | TRUE  |
| 85.5   | TRUE  |
| 15.5   | FALSE |
| 14     | TRUE  |
| 1298.5 | TRUE  |
| 24.5   | TRUE  |
| 9      | FALSE |
| 6      | FALSE |
| 7      | FALSE |
| 15     | FALSE |
| 20.5   | FALSE |
| 42.5   | TRUE  |
| 6      | FALSE |
| 2.5    | FALSE |
| 3      | FALSE |
| 3      | FALSE |
| 6      | FALSE |
| 7      | FALSE |
| 13     | TRUE  |
| 3.5    | FALSE |
| 3      | FALSE |
| 6.5    | FALSE |
| 15.5   | FALSE |
| 4.5    | FALSE |
| 5.5    | FALSE |
| 19.5   | TRUE  |
| 8      | FALSE |
| 14.5   | TRUE  |
| 14     | FALSE |
| 5.5    | FALSE |
| 4      | FALSE |
| 6      | FALSE |
| 43     | TRUE  |
| 40     | TRUE  |

|      |       |
|------|-------|
| 7    | FALSE |
| 20.5 | FALSE |
| 10.5 | FALSE |
| 96   | FALSE |
| 6    | TRUE  |
| 8.5  | FALSE |
| 15.5 | TRUE  |
| 9    | FALSE |
| 24   | FALSE |
| 11.5 | TRUE  |
| 6.5  | FALSE |
| 23.5 | TRUE  |
| 1    | FALSE |
| 54   | TRUE  |
| 12   | FALSE |
| 11   | FALSE |
| 129  | TRUE  |
| 36.5 | TRUE  |
| 12   | FALSE |
| 5.5  | TRUE  |
| 14   | FALSE |
| 16   | FALSE |
| 1    | FALSE |
| 1    | FALSE |
| 9.5  | FALSE |
| 11   | FALSE |
| 4    | FALSE |
| 9.5  | FALSE |
| 71.5 | FALSE |
| 16.5 | FALSE |
| 21   | TRUE  |
| 142  | FALSE |
| 20   | FALSE |
| 2    | FALSE |
| 2.5  | FALSE |
| 14   | FALSE |
| 4    | FALSE |
| 4    | FALSE |
| 40   | FALSE |

|       |       |
|-------|-------|
| 5.5   | FALSE |
| 5     | FALSE |
| 120   | FALSE |
| 11    | TRUE  |
| 6.5   | TRUE  |
| 3     | FALSE |
| 2     | FALSE |
| 20.5  | FALSE |
| 24    | FALSE |
| 7.5   | FALSE |
| 15.5  | TRUE  |
| 7.5   | FALSE |
| 111   | FALSE |
| 2.5   | FALSE |
| 3.5   | FALSE |
| 7.5   | TRUE  |
| 2     | FALSE |
| 3.5   | FALSE |
| 10    | FALSE |
| 2.5   | FALSE |
| 2.5   | FALSE |
| 5.5   | TRUE  |
| 339.5 | FALSE |
| 187.5 | TRUE  |
| 16.5  | FALSE |
| 22.5  | TRUE  |
| 528.5 | TRUE  |
| 31.5  | FALSE |
| 1.5   | FALSE |
| 1.5   | FALSE |
| 1     | FALSE |
| 1.5   | FALSE |
| 14.5  | FALSE |
| 2     | FALSE |
| 2     | FALSE |
| 13.5  | FALSE |
| 7     | FALSE |
| 7     | TRUE  |
| 3.5   | FALSE |
| 1.5   | FALSE |
| 10.5  | TRUE  |
| 38.5  | FALSE |
| 27.5  | FALSE |

|      |       |
|------|-------|
| 22.5 | TRUE  |
| 5    | FALSE |
| 5    | FALSE |
| 75.5 | TRUE  |
| 10.5 | FALSE |
| 1.5  | FALSE |
| 1.5  | FALSE |
| 18   | TRUE  |
| 133  | FALSE |
| 7    | TRUE  |
| 7    | FALSE |
| 7    | FALSE |
| 5.5  | TRUE  |
| 2.5  | FALSE |
| 8    | FALSE |
| 33   | TRUE  |
| 12   | FALSE |
| 24.5 | FALSE |
| 6.5  | FALSE |
| 39.5 | FALSE |
| 444  | FALSE |
| 5.5  | TRUE  |
| 5.5  | TRUE  |
| 8    | FALSE |
| 22   | FALSE |
| 22   | FALSE |
| 5.5  | FALSE |
| 10   | FALSE |
| 29.5 | TRUE  |
| 8    | FALSE |
| 95.5 | TRUE  |
| 2.5  | FALSE |
| 2.5  | FALSE |
| 2.5  | FALSE |
| 337  | FALSE |
| 3.5  | FALSE |
| 8    | FALSE |
| 3    | FALSE |
| 3    | FALSE |
| 3    | FALSE |
| 39.5 | FALSE |
| 8    | FALSE |
| 5    | FALSE |
| 5    | FALSE |
| 16   | TRUE  |
| 19   | FALSE |
| 7    | FALSE |



|       |       |
|-------|-------|
| 107   | FALSE |
| 4     | FALSE |
| 66    | FALSE |
| 22    | FALSE |
| 3     | FALSE |
| 10.5  | TRUE  |
| 1198  | TRUE  |
| 20.5  | TRUE  |
| 68    | FALSE |
| 1     | FALSE |
| 6     | FALSE |
| 11    | TRUE  |
| 7     | FALSE |
| 3     | FALSE |
| 5.5   | FALSE |
| 5     | FALSE |
| 678.5 | TRUE  |
| 4.5   | FALSE |
| 2.5   | FALSE |
| 3     | FALSE |
| 12    | FALSE |
| 24    | FALSE |
| 13    | FALSE |
| 20    | TRUE  |
| 4     | FALSE |
| 8.5   | TRUE  |
| 10.5  | FALSE |
| 12.5  | FALSE |
| 14    | TRUE  |
| 3     | FALSE |
| 2     | FALSE |
| 6     | FALSE |
| 5     | FALSE |
| 185   | FALSE |
| 4     | FALSE |
| 8     | FALSE |
| 6     | FALSE |
| 11    | TRUE  |
| 12    | FALSE |
| 6.5   | TRUE  |
| 6.5   | FALSE |

|       |       |
|-------|-------|
| 518   | TRUE  |
| 104   | FALSE |
| 8     | TRUE  |
| 4     | FALSE |
| 4     | FALSE |
| 7.5   | FALSE |
| 5.5   | TRUE  |
| 7     | FALSE |
| 2     | FALSE |
| 77.5  | FALSE |
| 4.5   | FALSE |
| 219.5 | FALSE |
| 6     | FALSE |
| 9     | FALSE |
| 2.5   | FALSE |
| 79    | FALSE |
| 25    | FALSE |
| 2     | FALSE |
| 22    | TRUE  |
| 6.5   | TRUE  |
| 5.5   | FALSE |
| 6     | FALSE |
| 6     | FALSE |
| 4.5   | FALSE |
| 2.5   | FALSE |
| 2.5   | FALSE |
| 20    | FALSE |
| 2     | FALSE |
| 32    | TRUE  |
| 8.5   | FALSE |
| 45.5  | FALSE |
| 6     | FALSE |
| 11    | TRUE  |
| 1     | FALSE |
| 8     | FALSE |
| 7.5   | FALSE |

|       |       |
|-------|-------|
| 5.5   | FALSE |
| 5     | FALSE |
| 46.5  | TRUE  |
| 23.5  | FALSE |
| 7.5   | FALSE |
| 2     | FALSE |
| 30    | FALSE |
| 4     | FALSE |
| 26.5  | TRUE  |
| 20    | TRUE  |
| 40    | FALSE |
| 8.5   | FALSE |
| 2.5   | FALSE |
| 2     | FALSE |
| 2     | FALSE |
| 14    | FALSE |
| 8.5   | FALSE |
| 176   | FALSE |
| 4.5   | FALSE |
| 25    | FALSE |
| 3.5   | FALSE |
| 24    | FALSE |
| 2     | FALSE |
| 7     | FALSE |
| 7.5   | FALSE |
| 8     | FALSE |
| 23.5  | FALSE |
| 92    | FALSE |
| 9.5   | FALSE |
| 5.5   | FALSE |
| 6.5   | FALSE |
| 23.5  | FALSE |
| 819   | TRUE  |
| 511.5 | FALSE |
| 25    | FALSE |
| 48.5  | FALSE |
| 7     | FALSE |
| 4     | FALSE |
| 51.5  | FALSE |
| 102   | FALSE |
| 7.5   | FALSE |
| 8     | FALSE |
| 10    | TRUE  |
| 3     | FALSE |
| 3.5   | FALSE |
| 9.5   | FALSE |
| 10.5  | FALSE |

|       |       |
|-------|-------|
| 11    | TRUE  |
| 7     | FALSE |
| 12.5  | FALSE |
| 7.5   | TRUE  |
| 1126  | TRUE  |
| 25.5  | TRUE  |
| 24    | FALSE |
| 56.5  | FALSE |
| 4.5   | FALSE |
| 10    | TRUE  |
| 218.5 | TRUE  |
| 4     | FALSE |
| 5.5   | FALSE |
| 2     | FALSE |
| 20    | FALSE |
| 41    | FALSE |
| 10    | FALSE |
| 21    | TRUE  |
| 5.5   | FALSE |
| 13.5  | TRUE  |
| 584   | FALSE |
| 185   | FALSE |
| 41    | FALSE |
| 3     | FALSE |
| 5.5   | FALSE |
| 9     | FALSE |
| 15    | FALSE |
| 11    | FALSE |
| 3     | FALSE |
| 8     | TRUE  |
| 7.5   | FALSE |
| 8.5   | FALSE |
| 3.5   | FALSE |
| 5     | FALSE |
| 56.5  | TRUE  |
| 7     | FALSE |
| 16    | TRUE  |
| 6     | FALSE |
| 10.5  | FALSE |
| 20    | TRUE  |
| 5.5   | FALSE |
| 2     | FALSE |
| 2     | FALSE |
| 2     | FALSE |
| 22.5  | FALSE |
| 188.5 | FALSE |
| 7     | FALSE |

|       |       |
|-------|-------|
| 7     | FALSE |
| 2     | FALSE |
| 24    | FALSE |
| 10.5  | TRUE  |
| 775.5 | TRUE  |
| 11    | FALSE |
| 11    | FALSE |
| 9     | TRUE  |
| 16    | FALSE |
| 35    | FALSE |
| 5     | FALSE |
| 2     | FALSE |
| 10    | FALSE |
| 3     | FALSE |
| 3     | FALSE |
| 13.5  | TRUE  |
| 11    | FALSE |
| 21.5  | FALSE |
| 62    | FALSE |
| 165   | FALSE |
| 25.5  | FALSE |
| 56    | TRUE  |
| 3     | FALSE |
| 3     | FALSE |
| 6     | TRUE  |
| 937.5 | FALSE |
| 9.5   | FALSE |
| 11    | FALSE |
| 4.5   | FALSE |
| 3     | FALSE |
| 28    | FALSE |
| 14.5  | TRUE  |
| 19.5  | TRUE  |
| 10    | FALSE |
| 20    | FALSE |
| 15    | FALSE |
| 5.5   | FALSE |
| 6     | TRUE  |
| 6     | TRUE  |
| 5     | FALSE |
| 22    | FALSE |
| 15    | FALSE |
| 8.5   | FALSE |
| 17.5  | FALSE |
| 32    | FALSE |
| 10    | FALSE |
| 11    | FALSE |

|       |       |
|-------|-------|
| 13    | FALSE |
| 26.5  | FALSE |
| 19    | FALSE |
| 7.5   | FALSE |
| 1.5   | FALSE |
| 1.5   | FALSE |
| 5.5   | FALSE |
| 22.5  | FALSE |
| 3     | FALSE |
| 3     | FALSE |
| 20    | FALSE |
| 10    | FALSE |
| 9.5   | TRUE  |
| 2.5   | FALSE |
| 52.5  | TRUE  |
| 8.5   | FALSE |
| 68    | FALSE |
| 26.5  | FALSE |
| 3     | FALSE |
| 6     | TRUE  |
| 13    | TRUE  |
| 1.5   | FALSE |
| 1.5   | FALSE |
| 6     | FALSE |
| 5.5   | FALSE |
| 5.5   | FALSE |
| 18    | FALSE |
| 973.5 | TRUE  |
| 34    | TRUE  |
| 6.5   | FALSE |
| 6.5   | FALSE |
| 3.5   | FALSE |
| 187.5 | TRUE  |
| 23.5  | FALSE |
| 22    | TRUE  |
| 10.5  | TRUE  |
| 10.5  | FALSE |
| 37    | TRUE  |
| 4     | FALSE |
| 41    | FALSE |
| 6     | FALSE |
| 5.5   | FALSE |
| 39    | TRUE  |
| 21.5  | FALSE |
| 25.5  | TRUE  |
| 13    | FALSE |
| 13.5  | FALSE |

|       |       |
|-------|-------|
| 26    | FALSE |
| 7.5   | FALSE |
| 23.5  | TRUE  |
| 4.5   | FALSE |
| 336.5 | FALSE |
| 42    | FALSE |
| 6     | FALSE |
| 13    | TRUE  |
| 7.5   | FALSE |
| 2     | FALSE |
| 7     | FALSE |
| 31    | FALSE |
| 28    | TRUE  |
| 1.5   | FALSE |
| 70    | FALSE |
| 39    | FALSE |
| 5.5   | FALSE |
| 70    | TRUE  |
| 33    | FALSE |
| 1.5   | FALSE |
| 138   | FALSE |
| 8     | FALSE |
| 329.5 | TRUE  |
| 14.5  | FALSE |
| 2     | FALSE |
| 2     | FALSE |
| 9     | FALSE |
| 113   | FALSE |
| 265.5 | FALSE |
| 9.5   | FALSE |
| 7     | FALSE |
| 24.5  | TRUE  |
| 2.5   | FALSE |
| 2     | FALSE |
| 3.5   | FALSE |
| 8     | FALSE |
| 3     | FALSE |
| 3     | FALSE |
| 3     | FALSE |
| 7.5   | FALSE |

|       |       |
|-------|-------|
| 5     | FALSE |
| 16.5  | FALSE |
| 5.5   | FALSE |
| 5.5   | FALSE |
| 4.5   | FALSE |
| 2.5   | FALSE |
| 151.5 | FALSE |
| 89    | FALSE |
| 15.5  | FALSE |
| 10.5  | FALSE |
| 7     | FALSE |
| 7     | FALSE |
| 21    | TRUE  |
| 119.5 | FALSE |
| 31    | FALSE |
| 5.5   | FALSE |
| 302   | FALSE |
| 2.5   | FALSE |
| 17    | FALSE |
| 14    | FALSE |
| 3     | FALSE |
| 36.5  | FALSE |
| 11    | TRUE  |
| 2.5   | FALSE |
| 14    | FALSE |
| 6     | FALSE |
| 7.5   | TRUE  |
| 9     | FALSE |
| 34.5  | FALSE |
| 36.5  | FALSE |
| 37    | FALSE |
| 8     | FALSE |
| 4.5   | FALSE |
| 5.5   | FALSE |
| 196   | FALSE |
| 2.5   | FALSE |
| 2.5   | FALSE |
| 22    | FALSE |
| 9.5   | TRUE  |
| 5     | FALSE |
| 3.5   | FALSE |
| 7     | FALSE |
| 21    | FALSE |
| 110   | FALSE |
| 5.5   | FALSE |
| 6.5   | FALSE |
| 12    | TRUE  |



|       |       |
|-------|-------|
| 12    | FALSE |
| 3.5   | FALSE |
| 3.5   | FALSE |
| 513.5 | FALSE |
| 86.5  | FALSE |
| 6     | TRUE  |
| 89    | FALSE |
| 6     | FALSE |
| 24.5  | FALSE |
| 12    | FALSE |
| 20    | FALSE |
| 3     | FALSE |
| 5.5   | FALSE |
| 16    | FALSE |
| 2.5   | FALSE |
| 12    | FALSE |
| 2.5   | FALSE |
| 4.5   | FALSE |
| 24    | FALSE |
| 3.5   | FALSE |
| 6     | FALSE |
| 3     | FALSE |
| 3     | FALSE |
| 85    | TRUE  |
| 2.5   | FALSE |
| 23    | FALSE |
| 20.5  | FALSE |
| 28    | FALSE |
| 4     | FALSE |
| 1.5   | FALSE |
| 15.5  | FALSE |
| 6     | FALSE |
| 67.5  | FALSE |
| 1.5   | FALSE |
| 1.5   | FALSE |
| 4     | FALSE |
| 24    | FALSE |
| 58.5  | FALSE |
| 540.5 | TRUE  |
| 43.5  | TRUE  |
| 12    | FALSE |
| 48.5  | FALSE |
| 7.5   | TRUE  |
| 27.5  | FALSE |
| 3.5   | FALSE |
| 472   | TRUE  |
| 25.5  | FALSE |

|       |       |
|-------|-------|
| 16    | TRUE  |
| 464   | FALSE |
| 331   | FALSE |
| 2.5   | FALSE |
| 2.5   | FALSE |
| 25.5  | FALSE |
| 3.5   | FALSE |
| 2.5   | FALSE |
| 12.5  | FALSE |
| 8     | FALSE |
| 48.5  | FALSE |
| 10    | TRUE  |
| 23    | FALSE |
| 276.5 | FALSE |
| 18.5  | FALSE |
| 6     | FALSE |
| 20    | TRUE  |
| 5     | FALSE |
| 6.5   | FALSE |
| 64    | FALSE |
| 2.5   | FALSE |
| 49.5  | TRUE  |
| 9     | FALSE |
| 40    | FALSE |
| 28    | TRUE  |
| 7     | FALSE |
| 5     | FALSE |
| 5     | FALSE |
| 4.5   | FALSE |
| 3     | FALSE |
| 6.5   | TRUE  |
| 14.5  | FALSE |
| 46.5  | FALSE |
| 25.5  | FALSE |
| 21.5  | FALSE |
| 1     | FALSE |
| 5     | FALSE |
| 11    | FALSE |
| 21.5  | FALSE |
| 2     | FALSE |
| 1.5   | FALSE |
| 23.5  | FALSE |
| 2     | FALSE |

|       |       |
|-------|-------|
| 25    | FALSE |
| 22    | FALSE |
| 23    | FALSE |
| 2     | FALSE |
| 9     | FALSE |
| 77    | FALSE |
| 104   | FALSE |
| 6.5   | FALSE |
| 15    | FALSE |
| 2     | FALSE |
| 2     | FALSE |
| 10.5  | FALSE |
| 7.5   | FALSE |
| 5.5   | TRUE  |
| 8     | FALSE |
| 55.5  | FALSE |
| 27.5  | FALSE |
| 6.5   | FALSE |
| 5.5   | TRUE  |
| 3.5   | FALSE |
| 1     | FALSE |
| 8     | FALSE |
| 4.5   | FALSE |
| 4.5   | FALSE |
| 114.5 | TRUE  |
| 7     | FALSE |
| 9     | FALSE |
| 6.5   | FALSE |
| 683   | FALSE |
| 42.5  | FALSE |
| 283.5 | FALSE |
| 30    | TRUE  |
| 9     | FALSE |
| 33.5  | FALSE |
| 3.5   | FALSE |
| 26    | FALSE |
| 2     | FALSE |
| 2     | FALSE |
| 8     | FALSE |
| 3.5   | FALSE |
| 10.5  | FALSE |
| 5.5   | TRUE  |
| 2.5   | FALSE |
| 687   | FALSE |

|      |       |
|------|-------|
| 143  | FALSE |
| 25   | FALSE |
| 3    | FALSE |
| 5.5  | TRUE  |
| 1    | FALSE |
| 39.5 | FALSE |
| 15.5 | FALSE |
| 41.5 | FALSE |
| 6.5  | FALSE |
| 6.5  | FALSE |
| 43   | FALSE |
| 8.5  | FALSE |
| 3.5  | FALSE |
| 14.5 | FALSE |
| 46   | FALSE |
| 17   | FALSE |
| 10.5 | FALSE |
| 48   | TRUE  |
| 10.5 | FALSE |
| 29.5 | FALSE |
| 1    | FALSE |
| 1    | FALSE |
| 1    | FALSE |
| 7    | FALSE |
| 13   | FALSE |
| 402  | TRUE  |
| 3.5  | FALSE |
| 5.5  | FALSE |
| 98.5 | FALSE |
| 15.5 | FALSE |
| 36.5 | FALSE |
| 20   | FALSE |
| 11.5 | FALSE |
| 41.5 | FALSE |
| 12.5 | FALSE |
| 63.5 | FALSE |
| 6.5  | FALSE |
| 7    | FALSE |
| 3.5  | FALSE |
| 9.5  | FALSE |
| 8    | FALSE |
| 3.5  | FALSE |
| 2    | FALSE |

|        |       |
|--------|-------|
| 2      | FALSE |
| 508.5  | FALSE |
| 9      | FALSE |
| 58.5   | FALSE |
| 4      | FALSE |
| 79     | FALSE |
| 48     | FALSE |
| 9      | FALSE |
| 72     | FALSE |
| 17.5   | FALSE |
| 4.5    | FALSE |
| 15.5   | FALSE |
| 4      | FALSE |
| 34.5   | FALSE |
| 14     | FALSE |
| 1      | FALSE |
| 12.5   | TRUE  |
| 4.5    | FALSE |
| 32.5   | FALSE |
| 6.5    | FALSE |
| 6.5    | FALSE |
| 6.5    | FALSE |
| 1      | FALSE |
| 1      | FALSE |
| 1      | FALSE |
| 4.5    | FALSE |
| 5.5    | FALSE |
| 25     | FALSE |
| 7.5    | FALSE |
| 96.5   | FALSE |
| 9      | FALSE |
| 3.5    | FALSE |
| 7.5    | FALSE |
| 9      | FALSE |
| 9.5    | TRUE  |
| 9.5    | TRUE  |
| 5      | FALSE |
| 24.5   | TRUE  |
| 3.5    | FALSE |
| 3.5    | FALSE |
| 3.5    | FALSE |
| 31     | FALSE |
| 25     | FALSE |
| 8      | TRUE  |
| 8      | TRUE  |
| 1124.5 | TRUE  |
| 26.5   | FALSE |

|       |       |
|-------|-------|
| 6     | FALSE |
| 5     | FALSE |
| 10.5  | FALSE |
| 6.5   | FALSE |
| 10.5  | TRUE  |
| 64    | FALSE |
| 11.5  | FALSE |
| 66    | FALSE |
| 191   | TRUE  |
| 5     | FALSE |
| 13    | FALSE |
| 15.5  | FALSE |
| 266   | FALSE |
| 199.5 | FALSE |
| 19.5  | FALSE |
| 57    | FALSE |
| 6.5   | FALSE |
| 17.5  | FALSE |
| 14.5  | FALSE |
| 55    | FALSE |
| 108.5 | FALSE |
| 22.5  | FALSE |
| 16    | FALSE |
| 13.5  | FALSE |
| 5.5   | FALSE |
| 5     | FALSE |
| 10.5  | FALSE |
| 8     | FALSE |
| 5     | FALSE |
| 5.5   | FALSE |
| 9.5   | FALSE |
| 10.5  | FALSE |
| 11    | FALSE |
| 14.5  | TRUE  |
| 29.5  | FALSE |
| 46.5  | FALSE |
| 68.5  | FALSE |
| 20    | FALSE |
| 14.5  | FALSE |
| 7     | FALSE |
| 7     | TRUE  |
| 3     | FALSE |
| 5.5   | TRUE  |
| 5.5   | TRUE  |
| 107.5 | FALSE |
| 26.5  | FALSE |
| 17    | FALSE |

|       |       |
|-------|-------|
| 12    | TRUE  |
| 12    | FALSE |
| 14    | FALSE |
| 47    | FALSE |
| 13    | FALSE |
| 19.5  | FALSE |
| 6     | FALSE |
| 8.5   | FALSE |
| 11    | FALSE |
| 2     | FALSE |
| 2     | FALSE |
| 15.5  | FALSE |
| 3     | FALSE |
| 19.5  | FALSE |
| 9     | FALSE |
| 4.5   | FALSE |
| 16.5  | FALSE |
| 16.5  | FALSE |
| 7     | FALSE |
| 44    | TRUE  |
| 13    | FALSE |
| 25.5  | FALSE |
| 3.5   | FALSE |
| 20.5  | FALSE |
| 2     | FALSE |
| 2     | FALSE |
| 2     | FALSE |
| 21.5  | FALSE |
| 16    | FALSE |
| 9.5   | FALSE |
| 3.5   | FALSE |
| 28    | FALSE |
| 20.5  | FALSE |
| 12.5  | FALSE |
| 62.5  | FALSE |
| 146.5 | TRUE  |
| 19    | FALSE |
| 5     | FALSE |
| 10    | TRUE  |
| 4     | FALSE |
| 27    | FALSE |
| 8.5   | FALSE |
| 25.5  | FALSE |
| 20    | FALSE |
| 19.5  | FALSE |
| 12    | FALSE |
| 35.5  | FALSE |

|      |       |
|------|-------|
| 26   | FALSE |
| 3    | FALSE |
| 3    | FALSE |
| 45.5 | FALSE |
| 7    | TRUE  |
| 8    | FALSE |
| 11.5 | FALSE |
| 32   | FALSE |
| 11   | TRUE  |
| 190  | FALSE |
| 16.5 | FALSE |
| 18.5 | FALSE |
| 47.5 | FALSE |
| 16   | FALSE |
| 11.5 | FALSE |
| 21.5 | FALSE |
| 5.5  | FALSE |
| 6    | FALSE |
| 5.5  | FALSE |
| 2.5  | FALSE |
| 2.5  | FALSE |
| 5    | FALSE |
| 4    | FALSE |
| 10   | FALSE |
| 1.5  | FALSE |
| 93.5 | FALSE |
| 11   | FALSE |
| 17   | FALSE |
| 17   | FALSE |
| 10   | FALSE |
| 2.5  | FALSE |
| 10   | TRUE  |
| 10   | TRUE  |
| 6    | FALSE |
| 1.5  | FALSE |
| 1.5  | FALSE |
| 1.5  | FALSE |
| 692  | FALSE |
| 12   | FALSE |
| 7.5  | FALSE |
| 28.5 | FALSE |
| 4    | FALSE |
| 9.5  | FALSE |
| 13.5 | FALSE |
| 13.5 | FALSE |
| 15.5 | FALSE |
| 47   | FALSE |



|      |       |
|------|-------|
| 9    | FALSE |
| 1.5  | FALSE |
| 12   | FALSE |
| 20   | FALSE |
| 14.5 | FALSE |
| 9    | FALSE |
| 9    | FALSE |
| 22.5 | FALSE |
| 11.5 | FALSE |
| 6    | FALSE |
| 6    | FALSE |
| 35   | FALSE |
| 14.5 | FALSE |
| 2.5  | FALSE |
| 17   | FALSE |
| 18.5 | FALSE |
| 5    | FALSE |
| 9    | TRUE  |
| 524  | FALSE |
| 15.5 | FALSE |
| 9    | FALSE |
| 16   | FALSE |
| 9    | FALSE |
| 8    | FALSE |
| 5    | FALSE |
| 5    | FALSE |
| 5    | FALSE |
| 5.5  | FALSE |
| 74   | FALSE |
| 1.5  | FALSE |
| 1.5  | FALSE |
| 1.5  | FALSE |
| 18.5 | TRUE  |
| 6    | FALSE |
| 22.5 | FALSE |
| 4    | FALSE |
| 28   | TRUE  |
| 1.5  | FALSE |
| 1.5  | FALSE |
| 1.5  | FALSE |
| 14.5 | FALSE |
| 9    | TRUE  |
| 16.5 | FALSE |
| 9.5  | FALSE |
| 4    | FALSE |
| 13.5 | FALSE |
| 2    | FALSE |

|       |       |
|-------|-------|
| 9     | FALSE |
| 17.5  | FALSE |
| 7.5   | FALSE |
| 7.5   | FALSE |
| 8     | FALSE |
| 9     | FALSE |
| 58    | FALSE |
| 20.5  | FALSE |
| 7.5   | FALSE |
| 2.5   | FALSE |
| 36    | FALSE |
| 7     | FALSE |
| 22    | FALSE |
| 5     | FALSE |
| 19    | FALSE |
| 5.5   | FALSE |
| 27.5  | FALSE |
| 15.5  | FALSE |
| 2.5   | FALSE |
| 2.5   | FALSE |
| 208.5 | FALSE |
| 7.5   | FALSE |
| 1.5   | FALSE |
| 7     | FALSE |
| 592   | FALSE |
| 12.5  | FALSE |
| 7.5   | FALSE |
| 9     | TRUE  |
| 41    | FALSE |
| 6.5   | FALSE |
| 39.5  | FALSE |
| 36.5  | FALSE |
| 2.5   | FALSE |
| 2.5   | FALSE |
| 4.5   | FALSE |
| 11.5  | FALSE |
| 15.5  | FALSE |
| 30.5  | FALSE |
| 38.5  | FALSE |
| 13    | TRUE  |
| 12.5  | FALSE |
| 7.5   | TRUE  |
| 26.5  | FALSE |
| 10    | FALSE |
| 6.5   | FALSE |
| 11    | FALSE |
| 18    | FALSE |



|       |       |
|-------|-------|
| 10.5  | FALSE |
| 9     | FALSE |
| 231.5 | FALSE |
| 40.5  | FALSE |
| 12    | FALSE |
| 42    | TRUE  |
| 6.5   | TRUE  |
| 7.5   | FALSE |
| 19.5  | FALSE |
| 129.5 | FALSE |
| 3     | FALSE |
| 15    | FALSE |
| 8     | TRUE  |
| 8     | TRUE  |
| 28    | FALSE |
| 14    | FALSE |
| 5.5   | FALSE |
| 9     | FALSE |
| 9.5   | FALSE |
| 51    | FALSE |
| 16.5  | FALSE |
| 8.5   | FALSE |
| 15.5  | FALSE |
| 11.5  | FALSE |
| 10.5  | FALSE |
| 11.5  | FALSE |
| 24    | TRUE  |
| 10    | FALSE |
| 3     | FALSE |
| 18    | FALSE |
| 9     | FALSE |
| 20    | TRUE  |
| 48.5  | TRUE  |
| 9.5   | FALSE |
| 36.5  | FALSE |
| 37.5  | FALSE |
| 15.5  | FALSE |
| 3     | FALSE |
| 6.5   | FALSE |
| 6     | FALSE |
| 3     | FALSE |
| 8     | FALSE |
| 6.5   | FALSE |
| 8     | FALSE |
| 57    | FALSE |
| 23    | FALSE |
| 5.5   | FALSE |

|      |       |
|------|-------|
| 9.5  | FALSE |
| 11   | TRUE  |
| 11   | FALSE |
| 3.5  | FALSE |
| 6.5  | FALSE |
| 3.5  | FALSE |
| 7.5  | FALSE |
| 12.5 | TRUE  |
| 20.5 | FALSE |
| 7    | FALSE |
| 3.5  | FALSE |
| 3.5  | FALSE |
| 4    | FALSE |
| 27   | FALSE |
| 20.5 | FALSE |
| 19   | FALSE |
| 7    | FALSE |
| 3    | FALSE |
| 3    | FALSE |
| 9.5  | FALSE |
| 35.5 | FALSE |
| 16.5 | FALSE |
| 38   | FALSE |
| 24.5 | FALSE |
| 6.5  | TRUE  |
| 3    | FALSE |
| 7.5  | FALSE |
| 11.5 | FALSE |
| 1.5  | FALSE |
| 6.5  | TRUE  |
| 8    | TRUE  |
| 20   | FALSE |
| 3    | FALSE |
| 3    | FALSE |
| 2.5  | FALSE |
| 28.5 | TRUE  |
| 441  | FALSE |
| 376  | FALSE |
| 17.5 | FALSE |
| 5    | FALSE |
| 4.5  | FALSE |
| 767  | FALSE |
| 13   | FALSE |
| 260  | FALSE |
| 12   | FALSE |
| 3    | FALSE |
| 4.5  | FALSE |

|       |       |
|-------|-------|
| 8     | FALSE |
| 3     | FALSE |
| 4.5   | FALSE |
| 5     | FALSE |
| 4     | FALSE |
| 55.5  | FALSE |
| 9.5   | FALSE |
| 26    | FALSE |
| 9.5   | FALSE |
| 14.5  | FALSE |
| 3.5   | FALSE |
| 14.5  | TRUE  |
| 6.5   | FALSE |
| 15.5  | TRUE  |
| 8     | FALSE |
| 2     | FALSE |
| 2     | FALSE |
| 6     | FALSE |
| 6     | FALSE |
| 308.5 | FALSE |
| 16.5  | FALSE |
| 6.5   | FALSE |
| 2.5   | FALSE |
| 5     | FALSE |
| 7     | TRUE  |
| 14.5  | FALSE |
| 4.5   | FALSE |
| 6     | FALSE |
| 6.5   | FALSE |
| 367   | FALSE |
| 4     | FALSE |
| 4     | FALSE |
| 2     | FALSE |
| 18.5  | FALSE |
| 66    | FALSE |
| 4.5   | FALSE |
| 9.5   | FALSE |
| 29    | FALSE |
| 118   | FALSE |
| 79    | FALSE |
| 129   | TRUE  |
| 2     | FALSE |
| 11    | TRUE  |
| 4     | FALSE |
| 17    | FALSE |
| 65    | FALSE |
| 6.5   | FALSE |

|       |       |
|-------|-------|
| 12    | FALSE |
| 6.5   | FALSE |
| 6.5   | FALSE |
| 11    | FALSE |
| 92.5  | FALSE |
| 75    | FALSE |
| 13    | FALSE |
| 13.5  | FALSE |
| 3     | FALSE |
| 3     | FALSE |
| 16    | FALSE |
| 12    | FALSE |
| 4     | FALSE |
| 8.5   | FALSE |
| 5     | FALSE |
| 77.5  | FALSE |
| 19.5  | FALSE |
| 3     | FALSE |
| 3     | FALSE |
| 4.5   | FALSE |
| 12.5  | TRUE  |
| 7.5   | FALSE |
| 5     | FALSE |
| 13    | FALSE |
| 3     | FALSE |
| 33.5  | FALSE |
| 21.5  | FALSE |
| 2     | FALSE |
| 2     | FALSE |
| 9.5   | FALSE |
| 2.5   | FALSE |
| 13    | FALSE |
| 24    | FALSE |
| 37.5  | FALSE |
| 9.5   | FALSE |
| 7     | FALSE |
| 36.5  | FALSE |
| 147.5 | FALSE |
| 15.5  | FALSE |
| 8.5   | FALSE |
| 8     | FALSE |
| 2     | FALSE |
| 18.5  | FALSE |
| 8.5   | FALSE |
| 8     | FALSE |
| 26.5  | FALSE |
| 10    | FALSE |

|        |       |
|--------|-------|
| 9.5    | FALSE |
| 8      | FALSE |
| 28.5   | FALSE |
| 37.5   | FALSE |
| 6.5    | FALSE |
| 6.5    | FALSE |
| 6.5    | FALSE |
| 45     | FALSE |
| 9      | FALSE |
| 15     | FALSE |
| 102.5  | FALSE |
| 27     | FALSE |
| 11.5   | FALSE |
| 90     | TRUE  |
| 6.5    | FALSE |
| 5.5    | TRUE  |
| 27.5   | FALSE |
| 12     | FALSE |
| 5.5    | FALSE |
| 24     | FALSE |
| 5.5    | FALSE |
| 5.5    | FALSE |
| 6      | FALSE |
| 11     | FALSE |
| 5.5    | FALSE |
| 5.5    | TRUE  |
| 5      | FALSE |
| 3.5    | FALSE |
| 3      | FALSE |
| 34.5   | FALSE |
| 110.5  | FALSE |
| 9.5    | FALSE |
| 23.5   | FALSE |
| 9      | FALSE |
| 60     | FALSE |
| 11.5   | FALSE |
| 26     | FALSE |
| 1158.5 | FALSE |
| 4      | FALSE |
| 11     | FALSE |
| 216    | FALSE |
| 5      | FALSE |
| 37.5   | TRUE  |
| 3      | FALSE |
| 4      | FALSE |
| 26     | FALSE |
| 14.5   | FALSE |



|       |       |
|-------|-------|
| 6.5   | FALSE |
| 18    | FALSE |
| 8.5   | FALSE |
| 4.5   | FALSE |
| 4.5   | FALSE |
| 12.5  | FALSE |
| 19.5  | FALSE |
| 7     | FALSE |
| 4.5   | FALSE |
| 3     | FALSE |
| 3     | FALSE |
| 8.5   | FALSE |
| 68.5  | FALSE |
| 34    | TRUE  |
| 33.5  | FALSE |
| 11.5  | TRUE  |
| 5.5   | FALSE |
| 10    | FALSE |
| 13.5  | FALSE |
| 10    | FALSE |
| 13    | FALSE |
| 13.5  | FALSE |
| 26.5  | FALSE |
| 10.5  | FALSE |
| 5.5   | FALSE |
| 170   | FALSE |
| 17.5  | FALSE |
| 11    | FALSE |
| 5     | FALSE |
| 109   | FALSE |
| 31    | FALSE |
| 5.5   | FALSE |
| 5.5   | FALSE |
| 10.5  | FALSE |
| 5.5   | FALSE |
| 3     | FALSE |
| 3     | FALSE |
| 699.5 | FALSE |
| 4     | FALSE |
| 16.5  | FALSE |
| 6     | FALSE |
| 2.5   | FALSE |
| 4.5   | FALSE |
| 4.5   | FALSE |
| 52.5  | TRUE  |
| 12    | FALSE |
| 12.5  | FALSE |

|       |       |
|-------|-------|
| 6     | FALSE |
| 4     | FALSE |
| 4     | FALSE |
| 6.5   | FALSE |
| 122   | FALSE |
| 2     | FALSE |
| 2     | FALSE |
| 2     | FALSE |
| 7     | FALSE |
| 4.5   | FALSE |
| 7     | FALSE |
| 7.5   | TRUE  |
| 12    | FALSE |
| 15.5  | FALSE |
| 51    | FALSE |
| 31    | FALSE |
| 4     | FALSE |
| 75    | FALSE |
| 3.5   | FALSE |
| 6.5   | FALSE |
| 854   | TRUE  |
| 340.5 | TRUE  |
| 20.5  | FALSE |
| 6     | FALSE |
| 25    | FALSE |
| 17    | TRUE  |
| 2     | FALSE |
| 8.5   | FALSE |
| 38    | FALSE |
| 10.5  | FALSE |
| 116.5 | FALSE |
| 4.5   | FALSE |
| 5.5   | FALSE |
| 11    | FALSE |
| 14    | FALSE |
| 12.5  | FALSE |
| 21    | FALSE |
| 9     | FALSE |
| 9.5   | TRUE  |
| 11.5  | FALSE |
| 26    | FALSE |
| 55    | FALSE |
| 23    | FALSE |
| 10    | FALSE |
| 18    | FALSE |
| 28.5  | FALSE |
| 144   | FALSE |

|       |       |
|-------|-------|
| 13.5  | TRUE  |
| 5.5   | FALSE |
| 7.5   | FALSE |
| 39    | FALSE |
| 13.5  | FALSE |
| 23.5  | FALSE |
| 12    | FALSE |
| 11    | TRUE  |
| 3     | FALSE |
| 34    | FALSE |
| 8.5   | FALSE |
| 92.5  | FALSE |
| 10    | FALSE |
| 15    | FALSE |
| 29.5  | FALSE |
| 11    | FALSE |
| 662   | FALSE |
| 23.5  | FALSE |
| 17.5  | FALSE |
| 30.5  | FALSE |
| 17    | FALSE |
| 32    | FALSE |
| 8.5   | FALSE |
| 24    | TRUE  |
| 4     | FALSE |
| 3.5   | FALSE |
| 5.5   | FALSE |
| 3.5   | FALSE |
| 6     | TRUE  |
| 2     | FALSE |
| 32.5  | FALSE |
| 5.5   | FALSE |
| 7.5   | FALSE |
| 15.5  | TRUE  |
| 6     | TRUE  |
| 5.5   | FALSE |
| 60.5  | FALSE |
| 43    | TRUE  |
| 39    | FALSE |
| 112.5 | FALSE |
| 7.5   | FALSE |
| 3.5   | FALSE |
| 12.5  | FALSE |
| 14    | FALSE |
| 11    | FALSE |
| 2     | FALSE |
| 13.5  | FALSE |

|        |       |
|--------|-------|
| 10.5   | FALSE |
| 7.5    | FALSE |
| 33.5   | FALSE |
| 250    | FALSE |
| 1358.5 | FALSE |
| 5.5    | FALSE |
| 6      | FALSE |
| 30     | FALSE |
| 6.5    | FALSE |
| 57     | FALSE |
| 49.5   | FALSE |
| 28.5   | FALSE |
| 14.5   | FALSE |
| 10     | FALSE |
| 32     | TRUE  |
| 3      | FALSE |
| 34     | FALSE |
| 7      | FALSE |
| 4.5    | FALSE |
| 14.5   | TRUE  |
| 10     | FALSE |
| 12.5   | FALSE |
| 6      | FALSE |
| 9      | FALSE |
| 26     | FALSE |
| 8.5    | FALSE |
| 14.5   | FALSE |
| 41.5   | FALSE |
| 2      | FALSE |
| 4.5    | FALSE |
| 4.5    | FALSE |
| 9.5    | FALSE |
| 11     | FALSE |
| 35     | FALSE |
| 5.5    | FALSE |
| 3.5    | FALSE |
| 4.5    | FALSE |
| 14.5   | FALSE |
| 4.5    | FALSE |
| 5      | FALSE |
| 7.5    | FALSE |
| 32     | FALSE |
| 9      | FALSE |
| 2      | FALSE |
| 2      | FALSE |
| 2      | FALSE |
| 5.5    | FALSE |

|       |       |
|-------|-------|
| 3.5   | FALSE |
| 4     | FALSE |
| 71.5  | FALSE |
| 11.5  | FALSE |
| 11    | FALSE |
| 17.5  | TRUE  |
| 516   | FALSE |
| 20.5  | FALSE |
| 11.5  | FALSE |
| 7.5   | FALSE |
| 4.5   | FALSE |
| 32.5  | FALSE |
| 20    | FALSE |
| 13.5  | FALSE |
| 68    | FALSE |
| 14.5  | FALSE |
| 3     | FALSE |
| 14.5  | FALSE |
| 18    | FALSE |
| 12    | FALSE |
| 17.5  | FALSE |
| 3.5   | FALSE |
| 3.5   | FALSE |
| 2     | FALSE |
| 2.5   | FALSE |
| 23.5  | FALSE |
| 296.5 | FALSE |
| 15.5  | FALSE |
| 13    | FALSE |
| 5.5   | FALSE |
| 8.5   | FALSE |
| 62.5  | FALSE |
| 8.5   | FALSE |
| 33    | FALSE |
| 7.5   | FALSE |
| 7.5   | FALSE |
| 4     | FALSE |
| 17    | FALSE |
| 56.5  | FALSE |
| 6     | FALSE |
| 13.5  | FALSE |
| 9.5   | FALSE |
| 15    | FALSE |
| 7     | FALSE |
| 46    | FALSE |
| 56.5  | FALSE |
| 116   | FALSE |

|      |       |
|------|-------|
| 16.5 | TRUE  |
| 16   | FALSE |
| 8    | FALSE |
| 69   | FALSE |
| 6.5  | FALSE |
| 9    | FALSE |
| 26   | FALSE |
| 8    | FALSE |
| 10.5 | FALSE |
| 7.5  | FALSE |
| 5    | FALSE |
| 76.5 | FALSE |
| 12   | FALSE |
| 6.5  | FALSE |
| 6.5  | FALSE |
| 24.5 | FALSE |
| 79   | FALSE |
| 30.5 | FALSE |
| 8    | FALSE |
| 53   | FALSE |
| 97.5 | FALSE |
| 9.5  | FALSE |
| 20.5 | FALSE |
| 8    | FALSE |
| 5    | FALSE |
| 5    | FALSE |
| 8    | FALSE |
| 4.5  | FALSE |
| 25.5 | FALSE |
| 67   | FALSE |
| 26.5 | FALSE |
| 15.5 | TRUE  |
| 2.5  | FALSE |
| 10   | FALSE |
| 11.5 | FALSE |
| 21.5 | FALSE |
| 5.5  | FALSE |
| 5    | FALSE |
| 11   | FALSE |
| 28   | FALSE |
| 13   | FALSE |
| 10   | FALSE |
| 7.5  | FALSE |
| 6    | FALSE |
| 4    | FALSE |
| 8    | FALSE |
| 8    | FALSE |

|      |       |
|------|-------|
| 20   | FALSE |
| 13.5 | FALSE |
| 16   | FALSE |
| 9.5  | FALSE |
| 15.5 | FALSE |
| 15   | FALSE |
| 20.5 | FALSE |
| 11.5 | FALSE |
| 8    | FALSE |
| 8    | TRUE  |
| 2.5  | FALSE |
| 8    | FALSE |
| 9.5  | FALSE |
| 9    | FALSE |
| 36   | FALSE |
| 9    | FALSE |
| 6    | FALSE |
| 6.5  | FALSE |
| 4    | FALSE |
| 4    | FALSE |
| 4    | FALSE |
| 142  | FALSE |
| 19   | FALSE |
| 13.5 | FALSE |
| 2.5  | FALSE |
| 19.5 | FALSE |
| 5.5  | FALSE |
| 5.5  | FALSE |
| 6.5  | FALSE |
| 5    | FALSE |
| 12   | FALSE |
| 44.5 | FALSE |
| 18.5 | FALSE |
| 38.5 | FALSE |
| 4    | FALSE |
| 4    | FALSE |
| 21   | FALSE |
| 7    | FALSE |
| 7    | FALSE |
| 11.5 | FALSE |
| 2    | FALSE |
| 2    | FALSE |
| 26   | FALSE |
| 369  | TRUE  |
| 7.5  | FALSE |
| 19   | FALSE |
| 18.5 | FALSE |

|       |       |
|-------|-------|
| 3     | FALSE |
| 3     | FALSE |
| 25.5  | FALSE |
| 6.5   | FALSE |
| 10    | TRUE  |
| 13    | FALSE |
| 6.5   | FALSE |
| 3     | FALSE |
| 6     | FALSE |
| 25    | FALSE |
| 45.5  | FALSE |
| 453.5 | TRUE  |
| 18.5  | FALSE |
| 122.5 | FALSE |
| 4.5   | FALSE |
| 12    | FALSE |
| 15    | FALSE |
| 24    | FALSE |
| 7     | FALSE |
| 6.5   | FALSE |
| 20    | FALSE |
| 12    | FALSE |
| 5.5   | FALSE |
| 11.5  | FALSE |
| 15.5  | FALSE |
| 67.5  | FALSE |
| 18.5  | FALSE |
| 6     | FALSE |
| 2.5   | FALSE |
| 2.5   | FALSE |
| 2.5   | FALSE |
| 15.5  | FALSE |
| 16    | FALSE |
| 8.5   | FALSE |
| 13.5  | FALSE |
| 6     | TRUE  |
| 14    | FALSE |
| 2.5   | FALSE |
| 6     | FALSE |
| 15    | FALSE |
| 6     | TRUE  |
| 17.5  | FALSE |
| 8.5   | FALSE |
| 3     | FALSE |
| 3     | FALSE |
| 6.5   | FALSE |
| 13.5  | TRUE  |



|       |       |
|-------|-------|
| 1.5   | FALSE |
| 8.5   | FALSE |
| 8.5   | FALSE |
| 25.5  | FALSE |
| 27.5  | FALSE |
| 11.5  | FALSE |
| 6     | FALSE |
| 6     | FALSE |
| 5     | FALSE |
| 84.5  | FALSE |
| 3.5   | FALSE |
| 12.5  | FALSE |
| 1.5   | FALSE |
| 12.5  | FALSE |
| 9.5   | FALSE |
| 17.5  | FALSE |
| 335.5 | FALSE |
| 2.5   | FALSE |
| 2.5   | FALSE |
| 21.5  | FALSE |
| 8     | FALSE |
| 22.5  | FALSE |
| 2.5   | FALSE |
| 30    | FALSE |
| 10.5  | TRUE  |
| 22    | FALSE |
| 6.5   | FALSE |
| 6.5   | FALSE |
| 897   | FALSE |
| 5.5   | FALSE |
| 5.5   | FALSE |
| 14    | FALSE |
| 4     | FALSE |
| 8.5   | FALSE |
| 14    | FALSE |
| 12    | FALSE |
| 16.5  | FALSE |
| 10    | FALSE |
| 10.5  | FALSE |

|      |       |
|------|-------|
| 10.5 | FALSE |
| 13.5 | FALSE |
| 18.5 | FALSE |
| 10   | FALSE |
| 17.5 | FALSE |
| 3    | FALSE |
| 4.5  | FALSE |
| 45.5 | FALSE |
| 10.5 | FALSE |
| 13   | FALSE |
| 730  | FALSE |
| 6    | FALSE |
| 6    | FALSE |
| 4.5  | FALSE |
| 17.5 | FALSE |
| 6.5  | FALSE |
| 9    | FALSE |
| 16.5 | FALSE |
| 4.5  | FALSE |
| 23   | FALSE |
| 6    | FALSE |
| 1.5  | FALSE |
| 1.5  | FALSE |
| 4.5  | FALSE |
| 8    | FALSE |
| 7    | TRUE  |
| 1.5  | FALSE |
| 8.5  | FALSE |
| 34   | FALSE |
| 12.5 | FALSE |
| 9    | FALSE |
| 8.5  | FALSE |
| 9    | FALSE |
| 1.5  | FALSE |
| 1.5  | FALSE |
| 16.5 | FALSE |
| 18   | FALSE |
| 59.5 | FALSE |
| 9    | FALSE |

|      |       |
|------|-------|
| 732  | FALSE |
| 34.5 | FALSE |
| 34   | FALSE |
| 110  | FALSE |
| 10.5 | FALSE |
| 11   | FALSE |
| 14   | TRUE  |
| 59   | FALSE |
| 7    | FALSE |
| 93.5 | FALSE |
| 24.5 | FALSE |
| 6    | FALSE |
| 5    | FALSE |
| 7    | FALSE |
| 4.5  | FALSE |
| 12.5 | FALSE |
| 7    | FALSE |
| 16.5 | FALSE |
| 8.5  | FALSE |
| 6.5  | FALSE |
| 6.5  | FALSE |
| 11.5 | FALSE |
| 6    | FALSE |
| 17   | FALSE |
| 10   | FALSE |
| 5    | FALSE |
| 3    | FALSE |
| 3    | FALSE |
| 6    | FALSE |
| 8.5  | FALSE |
| 4    | FALSE |
| 12   | FALSE |
| 5    | FALSE |
| 3    | FALSE |
| 8    | FALSE |
| 2.5  | FALSE |
| 3    | FALSE |
| 3    | FALSE |
| 8    | FALSE |
| 3    | FALSE |
| 6.5  | FALSE |
| 4    | FALSE |
| 27.5 | FALSE |
| 7.5  | FALSE |
| 9    | FALSE |
| 11   | FALSE |
| 5    | FALSE |

|       |       |
|-------|-------|
| 5     | FALSE |
| 6     | FALSE |
| 8.5   | FALSE |
| 3     | FALSE |
| 3.5   | FALSE |
| 3     | FALSE |
| 5     | FALSE |
| 219.5 | FALSE |
| 23    | FALSE |
| 3     | FALSE |
| 15.5  | FALSE |
| 9.5   | FALSE |
| 4.5   | FALSE |
| 37    | FALSE |
| 5     | FALSE |
| 9.5   | FALSE |
| 7.5   | FALSE |
| 7.5   | FALSE |
| 17    | FALSE |
| 23.5  | FALSE |
| 44.5  | FALSE |
| 44    | FALSE |
| 15.5  | TRUE  |
| 9.5   | FALSE |
| 11.5  | FALSE |
| 9     | TRUE  |
| 11    | FALSE |
| 5.5   | FALSE |
| 16    | FALSE |
| 7     | TRUE  |
| 4.5   | FALSE |
| 26    | FALSE |
| 21    | FALSE |
| 13    | FALSE |
| 7.5   | FALSE |
| 3.5   | FALSE |
| 21    | TRUE  |
| 7.5   | FALSE |
| 11    | FALSE |
| 3     | FALSE |
| 3     | FALSE |
| 13    | FALSE |
| 45.5  | FALSE |

|      |       |
|------|-------|
| 9.5  | FALSE |
| 39   | FALSE |
| 86.5 | FALSE |
| 24.5 | FALSE |
| 14   | FALSE |
| 3.5  | FALSE |
| 3    | FALSE |
| 3.5  | FALSE |
| 3    | FALSE |
| 4.5  | FALSE |
| 7.5  | FALSE |
| 6.5  | FALSE |
| 14.5 | FALSE |
| 34.5 | FALSE |
| 59   | FALSE |
| 3    | FALSE |
| 8    | FALSE |
| 24   | FALSE |
| 24   | FALSE |
| 2    | FALSE |
| 2    | FALSE |
| 5    | FALSE |
| 27   | FALSE |
| 40.5 | FALSE |
| 9    | FALSE |
| 22.5 | FALSE |
| 4.5  | FALSE |
| 8.5  | FALSE |
| 2    | FALSE |
| 2    | FALSE |
| 19.5 | FALSE |
| 5    | FALSE |
| 3    | FALSE |
| 7.5  | FALSE |
| 16   | FALSE |
| 2    | FALSE |
| 1.5  | FALSE |
| 2    | FALSE |
| 12.5 | FALSE |
| 11.5 | FALSE |
| 23.5 | TRUE  |
| 5    | FALSE |
| 16   | FALSE |
| 15   | FALSE |
| 8    | FALSE |
| 3.5  | FALSE |
| 3.5  | FALSE |

|      |       |
|------|-------|
| 15.5 | FALSE |
| 24   | FALSE |
| 9.5  | FALSE |
| 5    | FALSE |
| 13   | FALSE |
| 31.5 | FALSE |
| 6.5  | FALSE |
| 8    | FALSE |
| 69.5 | FALSE |
| 7.5  | FALSE |
| 2    | FALSE |
| 2    | FALSE |
| 2    | FALSE |
| 8.5  | FALSE |
| 3.5  | FALSE |
| 3.5  | FALSE |
| 3.5  | FALSE |
| 4.5  | FALSE |
| 9.5  | TRUE  |
| 37   | FALSE |
| 10   | FALSE |
| 7.5  | FALSE |
| 9.5  | FALSE |
| 7    | FALSE |
| 4.5  | FALSE |
| 5.5  | FALSE |
| 9    | FALSE |
| 2    | FALSE |
| 2    | FALSE |
| 16   | FALSE |
| 3.5  | FALSE |
| 7    | FALSE |
| 3.5  | FALSE |
| 5.5  | FALSE |
| 3.5  | FALSE |
| 3.5  | FALSE |
| 4.5  | FALSE |
| 4.5  | FALSE |
| 11.5 | TRUE  |
| 78.5 | FALSE |
| 21.5 | FALSE |
| 5    | FALSE |
| 9.5  | FALSE |
| 17.5 | FALSE |
| 3.5  | FALSE |
| 12   | FALSE |
| 482  | FALSE |

|       |       |
|-------|-------|
| 12    | FALSE |
| 5.5   | TRUE  |
| 3.5   | FALSE |
| 3.5   | FALSE |
| 32.5  | FALSE |
| 7.5   | FALSE |
| 8     | FALSE |
| 5.5   | FALSE |
| 7.5   | FALSE |
| 56    | FALSE |
| 3.5   | FALSE |
| 10    | FALSE |
| 295.5 | FALSE |
| 10    | TRUE  |
| 50.5  | FALSE |
| 12    | FALSE |
| 3.5   | FALSE |
| 49.5  | FALSE |
| 503.5 | FALSE |
| 272.5 | FALSE |
| 16    | FALSE |
| 5.5   | FALSE |
| 7.5   | TRUE  |
| 9     | FALSE |
| 8.5   | FALSE |
| 16    | FALSE |
| 20    | FALSE |
| 15.5  | FALSE |
| 5     | FALSE |
| 7     | FALSE |
| 5.5   | FALSE |
| 4     | FALSE |
| 646   | FALSE |
| 7.5   | FALSE |
| 70.5  | FALSE |
| 36.5  | FALSE |
| 12    | FALSE |
| 4.5   | FALSE |
| 14    | FALSE |
| 10.5  | FALSE |
| 3.5   | FALSE |
| 3.5   | FALSE |
| 44.5  | FALSE |
| 10.5  | FALSE |
| 70    | FALSE |
| 12    | FALSE |
| 3     | FALSE |

|      |       |
|------|-------|
| 33.5 | FALSE |
| 10   | FALSE |
| 11.5 | FALSE |
| 3.5  | FALSE |
| 22.5 | FALSE |
| 5    | FALSE |
| 5    | FALSE |
| 5    | FALSE |
| 30   | FALSE |
| 10.5 | FALSE |
| 14.5 | FALSE |
| 2    | FALSE |
| 9.5  | FALSE |
| 63   | FALSE |
| 44   | FALSE |
| 9    | FALSE |
| 10   | FALSE |
| 2    | FALSE |
| 2    | FALSE |
| 12   | FALSE |
| 5    | FALSE |
| 29.5 | FALSE |
| 8    | FALSE |
| 21   | FALSE |
| 7    | FALSE |
| 10   | FALSE |
| 2    | FALSE |
| 7    | FALSE |
| 10   | FALSE |
| 12.5 | FALSE |
| 16.5 | FALSE |
| 35.5 | FALSE |
| 72   | FALSE |
| 3.5  | FALSE |
| 3.5  | FALSE |
| 1.5  | FALSE |
| 1.5  | FALSE |
| 9    | FALSE |
| 4.5  | FALSE |
| 9    | FALSE |
| 7.5  | TRUE  |
| 42.5 | FALSE |
| 2    | FALSE |
| 6    | FALSE |



|        |       |
|--------|-------|
| 5.5    | FALSE |
| 40.5   | FALSE |
| 44.5   | FALSE |
| 7.5    | FALSE |
| 7.5    | FALSE |
| 5      | FALSE |
| 5      | FALSE |
| 212    | FALSE |
| 11     | FALSE |
| 12.5   | FALSE |
| 3.5    | FALSE |
| 169.5  | FALSE |
| 37     | FALSE |
| 9.5    | FALSE |
| 4      | FALSE |
| 56     | FALSE |
| 7.5    | FALSE |
| 14     | FALSE |
| 16.5   | TRUE  |
| 21.5   | FALSE |
| 23.5   | FALSE |
| 23     | FALSE |
| 6      | FALSE |
| 7.5    | FALSE |
| 25.5   | FALSE |
| 16.5   | FALSE |
| 219.5  | FALSE |
| 5.5    | FALSE |
| 3.5    | FALSE |
| 5      | FALSE |
| 7.5    | FALSE |
| 7      | FALSE |
| 7      | FALSE |
| 8      | FALSE |
| 5.5    | FALSE |
| 9.5    | FALSE |
| 6      | TRUE  |
| 10.5   | FALSE |
| 1019.5 | TRUE  |
| 5.5    | FALSE |
| 5.5    | TRUE  |
| 47     | TRUE  |
| 105.5  | FALSE |
| 2      | FALSE |
| 49.5   | FALSE |
| 6      | FALSE |
| 69.5   | FALSE |

|       |       |
|-------|-------|
| 7     | FALSE |
| 6     | FALSE |
| 5.5   | FALSE |
| 4     | FALSE |
| 22    | FALSE |
| 12    | FALSE |
| 2     | FALSE |
| 2     | FALSE |
| 1.5   | FALSE |
| 5.5   | FALSE |
| 10.5  | FALSE |
| 9.5   | FALSE |
| 2     | FALSE |
| 3     | FALSE |
| 12    | FALSE |
| 2     | FALSE |
| 7.5   | FALSE |
| 7.5   | FALSE |
| 22    | FALSE |
| 2     | FALSE |
| 10.5  | FALSE |
| 6     | FALSE |
| 5.5   | FALSE |
| 12    | FALSE |
| 10.5  | FALSE |
| 2.5   | FALSE |
| 2     | FALSE |
| 2.5   | FALSE |
| 11    | FALSE |
| 10    | FALSE |
| 4     | FALSE |
| 4     | FALSE |
| 4     | FALSE |
| 27    | FALSE |
| 2     | FALSE |
| 2     | FALSE |
| 7     | FALSE |
| 4     | FALSE |
| 6     | FALSE |
| 8     | FALSE |
| 741.5 | FALSE |
| 4     | FALSE |
| 3.5   | FALSE |
| 6     | TRUE  |

|       |       |
|-------|-------|
| 20    | FALSE |
| 2.5   | FALSE |
| 7     | FALSE |
| 35    | FALSE |
| 11    | FALSE |
| 12    | FALSE |
| 195   | FALSE |
| 4     | FALSE |
| 4     | FALSE |
| 9.5   | FALSE |
| 22.5  | FALSE |
| 52    | FALSE |
| 103   | FALSE |
| 2.5   | FALSE |
| 185.5 | FALSE |
| 65    | FALSE |
| 2     | FALSE |
| 2     | FALSE |
| 5.5   | FALSE |
| 82.5  | FALSE |
| 5.5   | FALSE |
| 104   | FALSE |
| 109   | FALSE |
| 8.5   | FALSE |
| 2     | FALSE |
| 2     | FALSE |
| 2.5   | FALSE |
| 8     | FALSE |
| 8     | FALSE |
| 4     | FALSE |
| 4     | FALSE |
| 2     | FALSE |
| 79.5  | FALSE |
| 56.5  | FALSE |
| 6.5   | FALSE |
| 18    | FALSE |
| 33.5  | FALSE |
| 6.5   | FALSE |
| 6.5   | FALSE |
| 8     | FALSE |
| 6     | FALSE |
| 9     | FALSE |
| 8.5   | TRUE  |
| 6.5   | FALSE |
| 6.5   | FALSE |
| 7     | FALSE |
| 10    | FALSE |

|       |       |
|-------|-------|
| 13    | FALSE |
| 30.5  | FALSE |
| 4.5   | FALSE |
| 16    | FALSE |
| 12.5  | FALSE |
| 15.5  | FALSE |
| 16    | FALSE |
| 8.5   | FALSE |
| 8.5   | FALSE |
| 18.5  | FALSE |
| 50.5  | FALSE |
| 6     | FALSE |
| 8     | FALSE |
| 435.5 | FALSE |
| 4     | FALSE |
| 4.5   | FALSE |
| 4     | FALSE |
| 11.5  | FALSE |
| 6.5   | TRUE  |
| 4.5   | FALSE |
| 11    | TRUE  |
| 19.5  | FALSE |
| 2.5   | FALSE |
| 6     | FALSE |
| 51    | FALSE |
| 6     | FALSE |
| 13    | FALSE |
| 2.5   | FALSE |
| 4.5   | FALSE |
| 14.5  | FALSE |
| 2     | FALSE |
| 10.5  | FALSE |
| 7.5   | FALSE |
| 83    | FALSE |
| 20    | FALSE |
| 6.5   | FALSE |
| 8.5   | FALSE |
| 523.5 | FALSE |
| 23    | FALSE |
| 6.5   | FALSE |
| 6.5   | FALSE |
| 6     | FALSE |
| 6     | FALSE |
| 4     | FALSE |
| 17    | FALSE |
| 6.5   | FALSE |
| 9     | FALSE |

4 FALSE  
4.5 FALSE  
6.5 FALSE  
2.5 FALSE  
62 FALSE  
11 FALSE  
26.5 FALSE  
2.5 FALSE  
9 FALSE  
8.5 FALSE  
10.5 FALSE  
11 FALSE  
11 FALSE  
2.5 FALSE  
2.5 FALSE  
5 FALSE  
4.5 FALSE  
5 FALSE  
4.5 FALSE  
12 FALSE  
7 FALSE  
2.5 FALSE  
6.5 FALSE  
8.5 FALSE  
5 FALSE  
6.5 FALSE  
7 FALSE  
4 FALSE  
3 FALSE  
9 FALSE  
11 FALSE  
8.5 FALSE  
13 FALSE  
8.5 FALSE  
4.5 FALSE  
4 FALSE  
6.5 FALSE  
5 FALSE  
2.5 FALSE  
13.5 FALSE  
54 FALSE  
21.5 FALSE  
2 FALSE  
2.5 FALSE  
11.5 FALSE  
12 FALSE  
2.5 FALSE

|       |       |
|-------|-------|
| 6.5   | FALSE |
| 2     | FALSE |
| 2.5   | FALSE |
| 2.5   | FALSE |
| 11.5  | FALSE |
| 11.5  | FALSE |
| 14    | FALSE |
| 44    | FALSE |
| 553.5 | TRUE  |
| 15    | FALSE |
| 11    | FALSE |
| 11    | FALSE |
| 10    | FALSE |
| 12    | FALSE |
| 13.5  | FALSE |
| 9     | FALSE |
| 7     | FALSE |
| 5     | FALSE |
| 5     | FALSE |
| 24.5  | FALSE |
| 2.5   | FALSE |
| 2.5   | FALSE |
| 2.5   | FALSE |
| 18.5  | FALSE |
| 4.5   | FALSE |
| 38.5  | FALSE |
| 8.5   | FALSE |
| 7.5   | FALSE |
| 29    | FALSE |
| 27.5  | FALSE |
| 5     | FALSE |
| 520   | FALSE |
| 14    | FALSE |
| 25    | FALSE |
| 22.5  | FALSE |
| 7     | FALSE |
| 5     | FALSE |
| 7     | FALSE |
| 7     | FALSE |
| 11.5  | FALSE |
| 12    | FALSE |
| 4.5   | FALSE |
| 81    | FALSE |
| 7     | FALSE |
| 9     | FALSE |
| 13    | FALSE |
| 15    | FALSE |

5 FALSE  
5.5 FALSE  
18.5 FALSE  
27.5 FALSE  
9.5 FALSE  
7 FALSE  
7.5 FALSE  
11.5 FALSE  
35.5 FALSE  
5 FALSE  
10 FALSE  
18 FALSE  
3 FALSE  
4.5 FALSE  
9 FALSE  
28.5 FALSE  
3 FALSE  
3 FALSE  
8.5 FALSE  
5 FALSE  
7.5 FALSE  
9.5 FALSE  
12 FALSE  
4.5 FALSE  
7.5 FALSE  
3 FALSE  
4.5 FALSE  
23.5 FALSE  
12 FALSE  
51 FALSE  
8 FALSE  
5 FALSE  
5.5 FALSE  
28 FALSE  
15.5 FALSE  
29.5 FALSE  
10 FALSE  
7 FALSE  
9.5 FALSE  
35.5 FALSE  
14.5 FALSE  
5 FALSE  
5 FALSE  
3 FALSE  
3 FALSE  
3 FALSE  
14 TRUE

|      |       |
|------|-------|
| 17.5 | FALSE |
| 9.5  | TRUE  |
| 12   | FALSE |
| 3    | FALSE |
| 3    | FALSE |
| 45.5 | FALSE |
| 17   | FALSE |
| 13   | FALSE |
| 8    | FALSE |
| 7.5  | FALSE |
| 6    | FALSE |
| 4.5  | FALSE |
| 27   | FALSE |
| 3    | FALSE |
| 6.5  | TRUE  |
| 10   | FALSE |
| 5    | FALSE |
| 6.5  | FALSE |
| 10   | FALSE |
| 4.5  | FALSE |
| 8.5  | FALSE |
| 4.5  | FALSE |
| 12.5 | FALSE |
| 6.5  | FALSE |
| 9.5  | FALSE |
| 5.5  | FALSE |
| 5    | FALSE |
| 708  | FALSE |
| 15.5 | FALSE |
| 7.5  | FALSE |
| 7    | FALSE |
| 5.5  | FALSE |
| 5.5  | FALSE |
| 21   | FALSE |
| 10.5 | FALSE |
| 10.5 | FALSE |
| 3    | FALSE |
| 31.5 | FALSE |
| 23.5 | FALSE |
| 15.5 | FALSE |
| 3    | FALSE |
| 39   | FALSE |
| 8    | FALSE |
| 12.5 | FALSE |
| 7.5  | FALSE |
| 5.5  | FALSE |
| 5.5  | FALSE |



54.5 FALSE  
36.5 FALSE  
16 FALSE  
6 FALSE  
4.5 FALSE  
5 FALSE  
12.5 FALSE  
8 FALSE  
6 FALSE  
59 FALSE  
2.5 FALSE  
4.5 FALSE  
488.5 FALSE  
7.5 FALSE  
5.5 FALSE  
29.5 FALSE  
11 FALSE  
4.5 FALSE  
4.5 FALSE  
7 FALSE  
22 FALSE  
7.5 FALSE  
3.5 FALSE  
6 FALSE  
8 FALSE  
6 FALSE  
7.5 FALSE  
5 FALSE  
3.5 FALSE  
3.5 FALSE  
3.5 FALSE  
4 FALSE  
34 FALSE  
6 FALSE  
21.5 FALSE  
4 FALSE  
5 FALSE  
13.5 FALSE  
8 FALSE  
3.5 FALSE  
3.5 FALSE

|       |       |
|-------|-------|
| 14    | FALSE |
| 7.5   | FALSE |
| 6     | FALSE |
| 6     | FALSE |
| 11    | FALSE |
| 3.5   | FALSE |
| 3.5   | FALSE |
| 3.5   | FALSE |
| 47    | FALSE |
| 3     | FALSE |
| 39    | FALSE |
| 8.5   | FALSE |
| 17    | FALSE |
| 86    | FALSE |
| 40    | FALSE |
| 5     | FALSE |
| 3.5   | FALSE |
| 3.5   | FALSE |
| 80    | FALSE |
| 4     | FALSE |
| 65.5  | FALSE |
| 5     | FALSE |
| 5     | FALSE |
| 14    | FALSE |
| 14    | FALSE |
| 4     | FALSE |
| 4     | FALSE |
| 118.5 | FALSE |
| 24.5  | FALSE |
| 107.5 | FALSE |
| 8     | FALSE |
| 5     | FALSE |
| 9     | FALSE |
| 8     | FALSE |
| 4     | FALSE |
| 24    | FALSE |
| 8.5   | FALSE |
| 54    | FALSE |
| 19.5  | FALSE |
| 3.5   | FALSE |
| 3.5   | FALSE |
| 19    | FALSE |
| 17    | FALSE |
| 5     | FALSE |
| 11.5  | FALSE |
| 11.5  | FALSE |
| 5     | FALSE |

|       |       |
|-------|-------|
| 28    | FALSE |
| 33    | FALSE |
| 17    | FALSE |
| 11    | FALSE |
| 39.5  | FALSE |
| 4.5   | FALSE |
| 6.5   | FALSE |
| 212   | FALSE |
| 35    | FALSE |
| 51    | FALSE |
| 4     | FALSE |
| 48.5  | FALSE |
| 7     | FALSE |
| 5.5   | FALSE |
| 4     | FALSE |
| 5.5   | FALSE |
| 5.5   | FALSE |
| 27.5  | FALSE |
| 13.5  | FALSE |
| 10.5  | FALSE |
| 4     | FALSE |
| 4     | FALSE |
| 14.5  | FALSE |
| 4     | FALSE |
| 4     | FALSE |
| 4     | FALSE |
| 11.5  | FALSE |
| 29.5  | FALSE |
| 9.5   | FALSE |
| 9     | FALSE |
| 47.5  | FALSE |
| 26.5  | FALSE |
| 28.5  | TRUE  |
| 4     | FALSE |
| 63    | FALSE |
| 50.5  | FALSE |
| 5.5   | FALSE |
| 19    | FALSE |
| 18    | FALSE |
| 166.5 | FALSE |
| 101   | FALSE |
| 425.5 | FALSE |
| 3.5   | FALSE |
| 3.5   | FALSE |
| 3.5   | FALSE |
| 4     | FALSE |
| 4     | FALSE |

|       |       |
|-------|-------|
| 4     | FALSE |
| 4     | FALSE |
| 21.5  | FALSE |
| 318.5 | TRUE  |
| 8.5   | FALSE |
| 27    | FALSE |
| 18    | FALSE |
| 4     | FALSE |
| 4     | FALSE |
| 97    | FALSE |
| 14    | FALSE |
| 12    | FALSE |
| 4.5   | FALSE |
| 25.5  | FALSE |
| 21    | FALSE |
| 55    | FALSE |
| 11.5  | FALSE |
| 4     | FALSE |
| 5.5   | FALSE |
| 12.5  | FALSE |
| 9     | FALSE |
| 39    | FALSE |
| 18    | FALSE |
| 4     | FALSE |
| 12.5  | FALSE |
| 17    | FALSE |
| 5.5   | FALSE |
| 5.5   | FALSE |
| 720.5 | FALSE |
| 8     | FALSE |
| 19    | FALSE |
| 22    | FALSE |
| 6     | FALSE |
| 38.5  | FALSE |
| 25.5  | FALSE |
| 15.5  | FALSE |
| 4.5   | FALSE |
| 4.5   | FALSE |
| 12.5  | FALSE |
| 4.5   | FALSE |
| 37    | FALSE |
| 10    | FALSE |
| 10    | FALSE |
| 6     | FALSE |
| 4.5   | FALSE |
| 7.5   | FALSE |
| 740.5 | FALSE |

|       |       |
|-------|-------|
| 12    | FALSE |
| 12.5  | FALSE |
| 35    | FALSE |
| 4.5   | FALSE |
| 646   | FALSE |
| 9     | FALSE |
| 147.5 | TRUE  |
| 7.5   | FALSE |
| 9     | FALSE |
| 12.5  | FALSE |
| 4.5   | FALSE |
| 12.5  | FALSE |
| 9.5   | FALSE |
| 10    | FALSE |
| 41.5  | FALSE |
| 11    | FALSE |
| 22    | FALSE |
| 1.5   | FALSE |
| 14    | FALSE |
| 384   | FALSE |
| 4     | FALSE |
| 8     | FALSE |
| 11    | FALSE |
| 201.5 | FALSE |
| 24.5  | FALSE |
| 11    | FALSE |
| 7.5   | FALSE |
| 197   | FALSE |
| 6     | FALSE |
| 16    | FALSE |
| 17    | FALSE |
| 78    | FALSE |
| 43    | TRUE  |
| 979.5 | FALSE |
| 11.5  | FALSE |
| 10    | FALSE |
| 6.5   | FALSE |
| 98.5  | FALSE |
| 7.5   | FALSE |
| 5     | FALSE |
| 5     | FALSE |
| 42    | FALSE |
| 28    | FALSE |
| 6.5   | FALSE |
| 6.5   | FALSE |
| 6.5   | FALSE |
| 8     | FALSE |

|       |       |
|-------|-------|
| 51.5  | FALSE |
| 2     | FALSE |
| 8.5   | FALSE |
| 12.5  | FALSE |
| 5     | FALSE |
| 8.5   | FALSE |
| 8.5   | FALSE |
| 33    | FALSE |
| 78.5  | FALSE |
| 86    | FALSE |
| 46    | FALSE |
| 22    | FALSE |
| 24    | FALSE |
| 29    | FALSE |
| 758   | FALSE |
| 12    | FALSE |
| 21.5  | FALSE |
| 6.5   | FALSE |
| 19    | FALSE |
| 18.5  | FALSE |
| 10    | FALSE |
| 9     | FALSE |
| 13.5  | FALSE |
| 48    | FALSE |
| 29    | FALSE |
| 155.5 | FALSE |
| 8.5   | FALSE |
| 14.5  | FALSE |
| 34.5  | FALSE |
| 5.5   | FALSE |
| 10.5  | FALSE |
| 26.5  | FALSE |
| 14    | FALSE |
| 2     | FALSE |
| 2     | FALSE |
| 2     | FALSE |
| 9     | FALSE |
| 43    | FALSE |
| 14    | FALSE |
| 62    | FALSE |
| 8.5   | FALSE |
| 5.5   | FALSE |
| 121   | FALSE |
| 8.5   | FALSE |
| 7     | FALSE |
| 18.5  | FALSE |
| 18    | FALSE |

|      |       |
|------|-------|
| 33   | FALSE |
| 6.5  | FALSE |
| 15   | FALSE |
| 6    | FALSE |
| 4.5  | FALSE |
| 7    | FALSE |
| 7    | FALSE |
| 5.5  | FALSE |
| 5.5  | FALSE |
| 6    | FALSE |
| 43   | FALSE |
| 19   | FALSE |
| 57   | FALSE |
| 72   | FALSE |
| 20   | FALSE |
| 6    | FALSE |
| 15.5 | FALSE |
| 46   | FALSE |
| 6    | FALSE |
| 41.5 | FALSE |
| 12   | FALSE |
| 2.5  | FALSE |
| 2.5  | FALSE |
| 20.5 | FALSE |
| 64   | FALSE |
| 2.5  | FALSE |
| 2.5  | FALSE |
| 6.5  | TRUE  |
| 2.5  | FALSE |
| 15   | FALSE |
| 34.5 | FALSE |
| 7.5  | FALSE |
| 67.5 | FALSE |
| 2.5  | FALSE |
| 5.5  | FALSE |
| 39.5 | FALSE |
| 15.5 | FALSE |
| 2.5  | FALSE |
| 2.5  | FALSE |
| 2.5  | FALSE |
| 7    | FALSE |

|       |       |
|-------|-------|
| 11.5  | FALSE |
| 51    | FALSE |
| 7.5   | FALSE |
| 14    | FALSE |
| 35    | FALSE |
| 43    | FALSE |
| 551   | FALSE |
| 16    | FALSE |
| 11.5  | FALSE |
| 25    | FALSE |
| 26    | FALSE |
| 2.5   | FALSE |
| 20.5  | FALSE |
| 10    | FALSE |
| 8     | FALSE |
| 2.5   | FALSE |
| 2.5   | FALSE |
| 7.5   | FALSE |
| 6.5   | FALSE |
| 13.5  | FALSE |
| 24.5  | FALSE |
| 2.5   | FALSE |
| 11.5  | FALSE |
| 6     | FALSE |
| 6     | FALSE |
| 18    | FALSE |
| 34.5  | FALSE |
| 12.5  | FALSE |
| 8.5   | FALSE |
| 81.5  | FALSE |
| 5.5   | FALSE |
| 7     | FALSE |
| 6.5   | FALSE |
| 6.5   | FALSE |
| 113.5 | FALSE |
| 7.5   | FALSE |
| 8     | FALSE |
| 3     | FALSE |
| 73    | FALSE |
| 15    | FALSE |
| 7     | FALSE |
| 24    | FALSE |
| 3     | FALSE |
| 3     | FALSE |
| 166   | FALSE |
| 10    | FALSE |
| 2.5   | FALSE |



14.5 FALSE  
16.5 FALSE  
17.5 FALSE  
3.5 FALSE  
315 FALSE  
23 FALSE  
6.5 FALSE  
68 FALSE  
3.5 FALSE  
22.5 FALSE  
968.5 FALSE  
25.5 FALSE  
43 FALSE  
13 FALSE  
11.5 FALSE  
3 FALSE  
15 FALSE  
8 FALSE  
17.5 FALSE  
21.5 FALSE  
21 FALSE  
2.5 FALSE  
8.5 FALSE  
22.5 FALSE  
7.5 FALSE  
12.5 FALSE  
3.5 FALSE  
3 FALSE  
7.5 FALSE  
8.5 FALSE  
14 FALSE  
12 FALSE  
11 FALSE  
3 FALSE  
9 FALSE  
66.5 FALSE  
273 FALSE  
14 FALSE  
12 FALSE  
463.5 FALSE  
4 FALSE  
4 FALSE  
4 FALSE  
2.5 FALSE  
14.5 FALSE  
7.5 FALSE  
433.5 FALSE

|       |       |
|-------|-------|
| 4     | FALSE |
| 4     | FALSE |
| 4     | FALSE |
| 2.5   | FALSE |
| 115   | FALSE |
| 7.5   | FALSE |
| 23    | FALSE |
| 4     | FALSE |
| 119   | FALSE |
| 18.5  | FALSE |
| 4     | FALSE |
| 4     | FALSE |
| 181.5 | FALSE |
| 4     | FALSE |
| 7.5   | FALSE |
| 7.5   | FALSE |
| 117.5 | FALSE |
| 14    | FALSE |
| 3     | FALSE |
| 13.5  | FALSE |
| 3.5   | FALSE |
| 9.5   | FALSE |
| 3.5   | FALSE |
| 17    | FALSE |
| 8.5   | TRUE  |
| 4     | FALSE |
| 438   | FALSE |
| 321   | FALSE |
| 18    | FALSE |
| 4.5   | FALSE |
| 4.5   | FALSE |
| 12.5  | FALSE |
| 30.5  | FALSE |
| 10    | TRUE  |
| 15.5  | FALSE |
| 8     | FALSE |
| 42.5  | FALSE |
| 20.5  | FALSE |
| 10    | FALSE |
| 45.5  | FALSE |
| 15.5  | FALSE |
| 8.5   | FALSE |
| 10    | FALSE |
| 66    | FALSE |
| 7.5   | FALSE |
| 15.5  | FALSE |
| 3.5   | FALSE |

|      |       |
|------|-------|
| 10   | FALSE |
| 13.5 | FALSE |
| 8.5  | FALSE |
| 16.5 | FALSE |
| 4.5  | FALSE |
| 10   | FALSE |
| 3.5  | FALSE |
| 3.5  | FALSE |
| 22.5 | FALSE |
| 3.5  | FALSE |
| 88.5 | FALSE |
| 10   | FALSE |
| 11   | FALSE |
| 10.5 | FALSE |
| 48   | FALSE |
| 3.5  | FALSE |
| 3.5  | FALSE |
| 3.5  | FALSE |
| 7.5  | FALSE |
| 19.5 | FALSE |
| 14   | FALSE |
| 10   | FALSE |
| 33.5 | FALSE |
| 5    | FALSE |
| 4    | FALSE |
| 4.5  | FALSE |
| 4.5  | FALSE |
| 4    | FALSE |
| 5    | FALSE |
| 4.5  | FALSE |
| 4    | FALSE |
| 4    | FALSE |
| 10.5 | FALSE |
| 11   | FALSE |
| 4.5  | FALSE |
| 4    | FALSE |
| 10.5 | FALSE |
| 4    | FALSE |
| 5    | FALSE |
| 39   | FALSE |
| 5    | FALSE |
| 21   | FALSE |
| 9.5  | FALSE |
| 5    | FALSE |
| 5    | FALSE |
| 19   | FALSE |
| 4    | FALSE |

|       |       |
|-------|-------|
| 4     | FALSE |
| 4.5   | FALSE |
| 9     | FALSE |
| 4.5   | FALSE |
| 11    | FALSE |
| 8.5   | FALSE |
| 20    | FALSE |
| 4     | FALSE |
| 4     | FALSE |
| 11    | FALSE |
| 278   | FALSE |
| 136.5 | FALSE |
| 17.5  | FALSE |
| 14.5  | FALSE |
| 9     | FALSE |
| 5     | FALSE |
| 11    | FALSE |
| 4.5   | FALSE |
| 16.5  | FALSE |
| 10.5  | FALSE |
| 11.5  | FALSE |
| 9.5   | FALSE |
| 4.5   | FALSE |
| 5     | FALSE |
| 10.5  | FALSE |
| 11.5  | FALSE |
| 16.5  | FALSE |
| 37    | FALSE |
| 130.5 | FALSE |
| 5     | FALSE |
| 4.5   | FALSE |
| 10    | FALSE |
| 5     | FALSE |
| 6     | FALSE |
| 6     | FALSE |
| 5     | FALSE |
| 11    | FALSE |
| 31.5  | FALSE |
| 6     | FALSE |
| 6     | FALSE |
| 6     | FALSE |
| 5     | FALSE |
| 10.5  | FALSE |
| 23.5  | FALSE |
| 19    | FALSE |
| 5.5   | FALSE |
| 17.5  | FALSE |

|       |       |
|-------|-------|
| 82    | FALSE |
| 12.5  | FALSE |
| 5     | FALSE |
| 11.5  | FALSE |
| 12.5  | FALSE |
| 6     | FALSE |
| 5.5   | FALSE |
| 13.5  | FALSE |
| 11.5  | FALSE |
| 6     | FALSE |
| 55.5  | FALSE |
| 19    | FALSE |
| 34    | FALSE |
| 4.5   | FALSE |
| 34    | FALSE |
| 4.5   | FALSE |
| 6     | FALSE |
| 11.5  | FALSE |
| 25.5  | FALSE |
| 5.5   | FALSE |
| 3     | FALSE |
| 18.5  | FALSE |
| 6     | FALSE |
| 259   | FALSE |
| 20.5  | FALSE |
| 6     | FALSE |
| 6     | FALSE |
| 314.5 | FALSE |
| 6.5   | FALSE |
| 6     | FALSE |
| 13    | FALSE |
| 37    | FALSE |
| 21    | FALSE |
| 80    | FALSE |
| 13.5  | FALSE |
| 6.5   | FALSE |
| 20    | FALSE |
| 14    | FALSE |
| 52    | FALSE |
| 14    | FALSE |
| 6.5   | FALSE |
| 32    | FALSE |
| 17    | FALSE |
| 12    | FALSE |
| 131.5 | FALSE |
| 14    | FALSE |
| 4.5   | FALSE |

5 FALSE  
7 FALSE  
6.5 FALSE  
7 FALSE  
798 FALSE  
6 FALSE  
6 FALSE  
6 FALSE  
412.5 FALSE  
6 FALSE  
6 FALSE  
14 FALSE  
6 FALSE  
5.5 FALSE  
6 FALSE  
7 FALSE  
35 FALSE  
6.5 FALSE  
15 FALSE  
9 FALSE  
6 FALSE  
6.5 FALSE  
23 FALSE  
26.5 FALSE  
51.5 FALSE  
7.5 FALSE  
7.5 FALSE  
8 FALSE  
7 FALSE  
20.5 FALSE  
6 FALSE  
5.5 FALSE  
5.5 FALSE  
7 FALSE  
7 FALSE  
6 FALSE  
23.5 FALSE  
6 FALSE  
16.5 FALSE  
25.5 FALSE  
102 FALSE  
79 FALSE  
16.5 FALSE  
24.5 FALSE  
99.5 FALSE  
7.5 FALSE  
7.5 FALSE

|      |       |
|------|-------|
| 6.5  | FALSE |
| 7    | FALSE |
| 6.5  | FALSE |
| 7.5  | FALSE |
| 6.5  | FALSE |
| 7.5  | FALSE |
| 31.5 | FALSE |
| 8.5  | FALSE |
| 8.5  | FALSE |
| 8    | FALSE |
| 8    | FALSE |
| 9    | FALSE |
| 39   | FALSE |
| 7    | FALSE |
| 9    | FALSE |
| 17.5 | FALSE |
| 7    | FALSE |
| 9    | FALSE |
| 8    | TRUE  |
| 287  | FALSE |
| 7.5  | FALSE |
| 8.5  | FALSE |
| 7.5  | FALSE |
| 8.5  | FALSE |
| 18.5 | FALSE |
| 8.5  | FALSE |
| 132  | FALSE |
| 78.5 | FALSE |
| 15.5 | FALSE |
| 8    | FALSE |
| 9    | FALSE |
| 8.5  | FALSE |
| 8.5  | FALSE |
| 21   | FALSE |
| 10   | FALSE |
| 19.5 | FALSE |
| 9    | FALSE |
| 10.5 | FALSE |
| 9.5  | FALSE |
| 9    | FALSE |
| 507  | FALSE |
| 8    | FALSE |
| 20.5 | FALSE |
| 10.5 | FALSE |
| 11   | FALSE |
| 23   | FALSE |
| 10.5 | FALSE |

|       |       |
|-------|-------|
| 32.5  | FALSE |
| 10    | FALSE |
| 11.5  | FALSE |
| 21.5  | FALSE |
| 11.5  | FALSE |
| 37    | FALSE |
| 35    | FALSE |
| 25    | FALSE |
| 12    | FALSE |
| 11.5  | FALSE |
| 24    | FALSE |
| 11.5  | FALSE |
| 11    | FALSE |
| 10.5  | FALSE |
| 27    | FALSE |
| 13    | FALSE |
| 12    | FALSE |
| 122   | FALSE |
| 13.5  | FALSE |
| 83    | FALSE |
| 37    | FALSE |
| 117.5 | FALSE |
| 213.5 | FALSE |
| 13.5  | FALSE |
| 13.5  | FALSE |
| 23    | FALSE |
| 14.5  | FALSE |
| 14    | FALSE |
| 85    | FALSE |
| 15    | FALSE |
| 50    | FALSE |
| 15.5  | FALSE |
| 19.5  | FALSE |
| 17.5  | FALSE |
| 72    | FALSE |
| 15    | FALSE |
| 36    | FALSE |
| 20    | FALSE |
| 19.5  | FALSE |
| 19.5  | FALSE |
| 21.5  | FALSE |
| 43    | FALSE |
| 26    | FALSE |
| 27    | FALSE |
| 28.5  | FALSE |
| 28    | FALSE |
| 54.5  | FALSE |



|       |       |
|-------|-------|
| 172   | FALSE |
| 30.5  | FALSE |
| 65.5  | FALSE |
| 140.5 | FALSE |
| 36.5  | FALSE |
| 98    | FALSE |
| 86.5  | FALSE |
| 43    | FALSE |
| 78    | FALSE |
| 4     | FALSE |
| 4.5   | FALSE |
| 7     | FALSE |
| 5.5   | FALSE |
| 6.5   | FALSE |
| 4.5   | FALSE |
| 4     | FALSE |
| 9.5   | FALSE |
| 4.5   | FALSE |
| 3     | FALSE |
| 5.5   | FALSE |
| 4.5   | FALSE |
| 4     | FALSE |
| 9.5   | FALSE |
| 7     | FALSE |
| 6     | FALSE |
| 4.5   | FALSE |
| 5     | FALSE |
| 9     | FALSE |
| 4.5   | FALSE |
| 2     | FALSE |
| 2.5   | FALSE |
| 5     | FALSE |
| 17    | FALSE |
| 5     | FALSE |
| 7     | FALSE |
| 20.5  | FALSE |
| 2     | FALSE |
| 5     | FALSE |
| 10    | FALSE |
| 7     | FALSE |
| 6.5   | FALSE |
| 9     | FALSE |
| 3     | FALSE |
| 4.5   | FALSE |
| 8     | FALSE |
| 7.5   | FALSE |
| 10.5  | FALSE |

4.5 FALSE  
4.5 FALSE  
4 FALSE  
2 FALSE  
3 FALSE  
35 FALSE  
4.5 FALSE  
5 FALSE  
21 FALSE  
25 FALSE  
27 FALSE  
21 FALSE  
77.5 FALSE  
2.5 FALSE  
2.5 FALSE  
3.5 FALSE  
2.5 FALSE  
15.5 FALSE  
14 FALSE  
2.5 FALSE  
12 FALSE  
33 FALSE  
15.5 FALSE  
8 FALSE  
3 FALSE  
14.5 FALSE  
84.5 FALSE  
2.5 FALSE  
12.5 FALSE  
22.5 FALSE  
18.5 FALSE  
4 FALSE  
30 FALSE  
3.5 FALSE  
12 FALSE  
14.5 FALSE  
2.5 FALSE  
29 FALSE  
17.5 FALSE  
2.5 FALSE  
6.5 FALSE  
20 FALSE  
22.5 FALSE  
4 FALSE  
3.5 FALSE  
3 FALSE  
3.5 FALSE

6.5 FALSE  
5 FALSE  
3.5 FALSE  
4 FALSE  
4.5 FALSE  
3.5 FALSE  
3 FALSE  
2.5 FALSE  
2.5 FALSE  
4 FALSE  
4.5 FALSE  
4 FALSE  
3 FALSE  
7.5 FALSE  
4 FALSE  
12.5 FALSE  
18 FALSE  
9 FALSE  
6 FALSE  
3.5 FALSE  
4.5 FALSE  
5 FALSE  
4.5 FALSE  
5.5 FALSE  
3 FALSE  
3 FALSE  
2.5 FALSE  
10 FALSE  
5 FALSE  
4.5 FALSE  
5.5 FALSE  
4.5 FALSE  
4 FALSE  
3 FALSE  
4 FALSE  
71 FALSE  
5.5 FALSE  
5 FALSE  
9.5 FALSE  
13.5 FALSE  
4 FALSE  
6 FALSE  
3 FALSE  
4.5 FALSE  
92.5 FALSE  
4 FALSE  
6 FALSE

3 FALSE  
4.5 FALSE  
4 FALSE  
5.5 FALSE  
2.5 FALSE  
4.5 FALSE  
3.5 FALSE  
3 FALSE  
6 FALSE  
3 FALSE  
3 FALSE  
4 FALSE  
2.5 FALSE  
3 FALSE  
3 FALSE  
9 FALSE  
3 FALSE  
6 FALSE  
5.5 FALSE  
5 FALSE  
2.5 FALSE  
3 FALSE  
9 FALSE  
3 FALSE  
7 FALSE  
4.5 FALSE  
14 FALSE  
2.5 FALSE  
3 FALSE  
14.5 FALSE  
3.5 FALSE  
3 FALSE  
8 FALSE  
4 FALSE  
4 FALSE  
4 FALSE  
5.5 FALSE  
5.5 TRUE  
5 FALSE  
2.5 FALSE  
2 FALSE  
5.5 FALSE  
5.5 FALSE  
4.5 FALSE  
2.5 FALSE  
3.5 FALSE  
6.5 FALSE

3 FALSE  
3.5 FALSE  
6 FALSE  
6 FALSE  
4 FALSE  
16.5 FALSE  
5.5 FALSE  
3 FALSE  
3 FALSE  
3 FALSE  
2.5 FALSE  
5.5 FALSE  
3 FALSE  
3 FALSE  
3.5 FALSE  
6 TRUE  
3 FALSE  
3.5 FALSE  
5.5 FALSE  
3 FALSE  
4.5 FALSE  
4.5 FALSE  
3 FALSE  
4.5 FALSE  
3 FALSE  
5.5 FALSE  
14 TRUE  
4.5 FALSE  
4.5 FALSE  
3.5 FALSE  
6 FALSE  
3 FALSE  
5 FALSE  
2.5 FALSE  
6.5 FALSE  
4 FALSE  
5.5 FALSE  
6 FALSE  
3.5 FALSE  
6.5 FALSE  
3.5 FALSE  
4.5 FALSE  
8.5 FALSE  
4.5 FALSE  
4 FALSE  
3 FALSE  
4.5 FALSE

|      |       |
|------|-------|
| 6.5  | FALSE |
| 19   | FALSE |
| 7.5  | FALSE |
| 3.5  | FALSE |
| 7.5  | FALSE |
| 3.5  | FALSE |
| 7    | FALSE |
| 2    | FALSE |
| 34   | FALSE |
| 7    | FALSE |
| 4    | FALSE |
| 2    | FALSE |
| 8    | FALSE |
| 4    | FALSE |
| 25   | FALSE |
| 42.5 | FALSE |
| 4    | FALSE |
| 10   | FALSE |
| 4.5  | FALSE |
| 6    | FALSE |
| 10.5 | FALSE |
| 4.5  | FALSE |
| 8    | FALSE |
| 4.5  | FALSE |
| 3.5  | FALSE |
| 6    | FALSE |
| 12   | FALSE |
| 5.5  | FALSE |
| 4.5  | FALSE |
| 5.5  | FALSE |
| 8.5  | FALSE |
| 4    | FALSE |
| 5    | FALSE |
| 18   | FALSE |
| 4    | FALSE |
| 2    | FALSE |
| 3    | FALSE |
| 7.5  | FALSE |
| 3    | FALSE |
| 5.5  | FALSE |
| 13   | FALSE |
| 9.5  | FALSE |
| 8.5  | FALSE |
| 5.5  | FALSE |
| 7    | FALSE |
| 11.5 | TRUE  |
| 5    | FALSE |

22.5 FALSE  
4.5 FALSE  
4.5 FALSE  
4 FALSE  
6 FALSE  
5.5 FALSE  
7 FALSE  
5 FALSE  
4.5 FALSE  
4 FALSE  
6 FALSE  
6 FALSE  
3.5 FALSE  
5 FALSE  
4 FALSE  
3.5 FALSE  
4 FALSE  
24 FALSE  
3 FALSE  
5 FALSE  
8.5 FALSE  
4.5 FALSE  
8 FALSE  
7 FALSE  
18 FALSE  
3.5 FALSE  
11 FALSE  
5.5 FALSE  
7 FALSE  
4 FALSE  
6 FALSE  
3 FALSE  
4.5 FALSE  
5.5 FALSE  
3.5 FALSE  
2.5 FALSE  
7 FALSE  
3 FALSE  
3 FALSE  
4 FALSE  
4.5 FALSE  
9 FALSE  
5 FALSE  
13 FALSE  
10 FALSE  
5 FALSE  
3.5 FALSE

6 FALSE  
4.5 FALSE  
11 FALSE  
10.5 FALSE  
5 FALSE  
6 FALSE  
7.5 FALSE  
20.5 FALSE  
54.5 FALSE  
2 FALSE  
6.5 FALSE  
3.5 FALSE  
7.5 FALSE  
4.5 FALSE  
6.5 FALSE  
4 FALSE  
3 FALSE  
10 FALSE  
4.5 FALSE  
4.5 FALSE  
4 FALSE  
5 FALSE  
3.5 FALSE  
7 FALSE  
9.5 FALSE  
7 FALSE  
5.5 FALSE  
4 FALSE  
17.5 FALSE  
3 FALSE  
3 FALSE  
4.5 FALSE  
6.5 FALSE  
21.5 FALSE  
7.5 FALSE  
5.5 FALSE  
3.5 FALSE  
3.5 FALSE  
3 FALSE  
4.5 FALSE  
3.5 FALSE  
11 FALSE  
4.5 FALSE  
4.5 FALSE  
3 FALSE  
8.5 FALSE  
3 FALSE



12.5 FALSE  
19.5 FALSE  
4 FALSE  
5.5 FALSE  
4 FALSE  
4.5 FALSE  
31 FALSE  
4.5 FALSE  
12 FALSE  
7.5 FALSE  
6 FALSE  
5.5 FALSE  
10.5 FALSE  
3.5 FALSE  
15 FALSE  
7 FALSE  
13.5 FALSE  
14 FALSE  
5 FALSE  
5 FALSE  
24 FALSE  
36 FALSE  
2.5 FALSE  
13.5 FALSE  
9.5 FALSE  
3 FALSE  
4.5 FALSE  
10.5 FALSE  
9.5 FALSE  
53.5 FALSE  
10 FALSE  
21.5 FALSE  
30.5 FALSE  
6 FALSE  
6 FALSE  
26 FALSE  
5.5 FALSE  
3.5 FALSE  
2.5 FALSE  
44.5 FALSE  
4 FALSE  
3.5 FALSE  
3.5 FALSE  
4 FALSE  
4.5 FALSE  
4.5 FALSE  
12 FALSE

6 FALSE  
4.5 FALSE  
25 FALSE  
6 FALSE  
6.5 FALSE  
5.5 FALSE  
23.5 FALSE  
4.5 FALSE  
7 FALSE  
4.5 FALSE  
21.5 FALSE  
4 FALSE  
16.5 FALSE  
5 FALSE  
2.5 FALSE  
18.5 FALSE  
32.5 FALSE  
7.5 FALSE  
81.5 FALSE  
2.5 FALSE  
3.5 FALSE  
7 FALSE  
3.5 FALSE  
4 FALSE  
2 FALSE  
35 FALSE  
7 FALSE  
4.5 FALSE  
10.5 FALSE  
7 FALSE  
28.5 FALSE  
4.5 FALSE  
14.5 FALSE  
5 FALSE  
5 FALSE  
4.5 FALSE  
6 FALSE  
5 FALSE  
15.5 FALSE  
8 FALSE  
4.5 FALSE  
20 FALSE  
5 FALSE  
10.5 FALSE  
29 FALSE  
14.5 FALSE  
8 FALSE

|      |       |
|------|-------|
| 12   | FALSE |
| 7.5  | FALSE |
| 6.5  | FALSE |
| 4    | FALSE |
| 2    | FALSE |
| 6    | FALSE |
| 10.5 | FALSE |
| 2.5  | FALSE |
| 24.5 | FALSE |
| 9.5  | FALSE |
| 5.5  | FALSE |
| 25.5 | FALSE |
| 3.5  | FALSE |
| 8    | FALSE |
| 6    | FALSE |
| 17.5 | FALSE |
| 10   | FALSE |
| 9    | FALSE |
| 16   | FALSE |
| 15.5 | FALSE |
| 15.5 | FALSE |
| 8    | FALSE |
| 10   | FALSE |
| 9    | FALSE |
| 6.5  | FALSE |
| 8.5  | FALSE |
| 4.5  | FALSE |
| 6    | FALSE |
| 5    | FALSE |
| 3.5  | FALSE |
| 57.5 | FALSE |
| 11   | FALSE |
| 4    | FALSE |
| 7    | FALSE |
| 9.5  | FALSE |
| 8    | FALSE |
| 16.5 | FALSE |
| 6    | FALSE |
| 17   | FALSE |
| 7    | FALSE |
| 9    | FALSE |
| 28.5 | FALSE |
| 4.5  | FALSE |
| 6.5  | FALSE |
| 6    | FALSE |
| 30.5 | FALSE |
| 47.5 | FALSE |

5 FALSE  
13.5 FALSE  
3.5 FALSE  
19.5 FALSE  
4.5 FALSE  
7.5 FALSE  
2.5 FALSE  
11 FALSE  
5.5 FALSE  
5.5 FALSE  
4 FALSE  
2.5 FALSE  
3 FALSE  
10 FALSE  
39 FALSE  
6.5 FALSE  
3 FALSE  
7 FALSE  
4.5 FALSE  
5 FALSE  
11.5 FALSE  
1.5 FALSE  
8.5 FALSE  
7 FALSE  
3.5 FALSE  
16 FALSE  
10.5 FALSE  
15.5 FALSE  
2.5 FALSE  
13.5 TRUE  
14.5 FALSE  
5.5 FALSE  
5 FALSE  
5.5 FALSE  
6 FALSE  
14 FALSE  
12 FALSE  
6.5 FALSE  
3.5 FALSE  
10.5 FALSE  
20.5 FALSE  
6.5 FALSE  
15.5 FALSE  
3 FALSE  
33.5 FALSE  
6 FALSE  
28.5 FALSE

9.5 FALSE  
6.5 FALSE  
3.5 FALSE  
4.5 FALSE  
2.5 FALSE  
8.5 FALSE  
10 FALSE  
6 FALSE  
14 FALSE  
9 FALSE  
13 FALSE  
7.5 FALSE  
5 FALSE  
3.5 FALSE  
13.5 FALSE  
8 FALSE  
2 FALSE  
3 FALSE  
6 FALSE  
5 FALSE  
6.5 FALSE  
10 FALSE  
10.5 FALSE  
10.5 FALSE  
7.5 FALSE  
5.5 FALSE  
7 FALSE  
2.5 FALSE  
6.5 FALSE  
3.5 FALSE  
6 FALSE  
3 FALSE  
4.5 FALSE  
15.5 FALSE  
16 FALSE  
9 FALSE  
7 FALSE  
4.5 FALSE  
5.5 FALSE  
10 FALSE  
3.5 FALSE  
27 FALSE  
21.5 FALSE  
7.5 FALSE  
5.5 FALSE  
5.5 FALSE  
5.5 FALSE

5 FALSE  
19 FALSE  
10.5 FALSE  
7.5 FALSE  
3.5 FALSE  
10.5 FALSE  
3.5 FALSE  
6 FALSE  
14.5 FALSE  
2 FALSE  
7 FALSE  
9.5 FALSE  
3.5 FALSE  
4 FALSE  
5 FALSE  
4 FALSE  
6.5 FALSE  
12 FALSE  
2 FALSE  
6 FALSE  
3.5 FALSE  
3 FALSE  
13 FALSE  
10 FALSE  
8.5 FALSE  
6.5 FALSE  
8 FALSE  
6.5 FALSE  
26 FALSE  
4 FALSE  
4 FALSE  
7 FALSE  
10.5 FALSE  
3.5 FALSE  
15 FALSE  
4.5 FALSE  
13.5 FALSE  
4 FALSE  
4 FALSE  
10 FALSE  
4.5 FALSE  
82 FALSE  
12.5 FALSE  
12 FALSE  
6.5 FALSE  
6 FALSE  
9 FALSE

3 FALSE  
5 FALSE  
3 FALSE  
2 FALSE  
6.5 FALSE  
5 FALSE  
16.5 FALSE  
7 FALSE  
12.5 FALSE  
11.5 FALSE  
8.5 FALSE  
7.5 FALSE  
28 FALSE  
8 FALSE  
4.5 FALSE  
6.5 FALSE  
5 FALSE  
6.5 FALSE  
8.5 FALSE  
7.5 FALSE  
3 FALSE  
4.5 FALSE  
11 FALSE  
5 FALSE  
4.5 FALSE  
3.5 FALSE  
9 FALSE  
7.5 FALSE  
13 FALSE  
8 FALSE  
8 FALSE  
21 FALSE  
11.5 FALSE  
5 FALSE  
8.5 FALSE  
10.5 FALSE  
13.5 FALSE  
20 FALSE  
27 FALSE  
3.5 FALSE  
5.5 FALSE  
5.5 FALSE  
17.5 FALSE  
4.5 FALSE  
12.5 FALSE  
9 FALSE  
18.5 FALSE

5.5 FALSE  
5.5 FALSE  
6 FALSE  
23.5 FALSE  
42 FALSE  
14 FALSE  
15 FALSE  
18.5 FALSE  
3 FALSE  
5 FALSE  
11.5 FALSE  
9.5 FALSE  
4.5 FALSE  
2 FALSE  
7.5 FALSE  
23.5 FALSE  
7.5 FALSE  
4 FALSE  
7 FALSE  
6 FALSE  
4.5 FALSE  
9 FALSE  
4.5 FALSE  
11 FALSE  
13.5 FALSE  
15 FALSE  
7 FALSE  
5.5 FALSE  
4.5 FALSE  
4.5 FALSE  
42.5 FALSE  
11 FALSE  
56 FALSE  
30 FALSE  
3.5 FALSE  
6.5 FALSE  
14 FALSE  
6 FALSE  
6 FALSE  
5 FALSE  
4.5 FALSE  
12 FALSE  
3 FALSE  
11 FALSE  
7 FALSE  
4 FALSE  
24 FALSE



7.5 FALSE  
4.5 FALSE  
4.5 FALSE  
8.5 FALSE  
3.5 FALSE  
15 FALSE  
3.5 FALSE  
32.5 FALSE  
7 FALSE  
19.5 FALSE  
3 FALSE  
8.5 FALSE  
5 FALSE  
5 FALSE  
6 FALSE  
9.5 FALSE  
10.5 FALSE  
4.5 FALSE  
3 FALSE  
9 FALSE  
6 FALSE  
10.5 FALSE  
5 FALSE  
713 FALSE  
3.5 FALSE  
5 FALSE  
7 FALSE  
2 FALSE  
16.5 FALSE  
3.5 FALSE  
5.5 FALSE  
13.5 FALSE  
3.5 FALSE  
2 FALSE  
4.5 FALSE  
17 FALSE  
7.5 FALSE  
8 FALSE  
10.5 FALSE  
3 FALSE  
2.5 FALSE  
9 FALSE  
645 FALSE  
13 FALSE  
2.5 FALSE  
5 FALSE  
3.5 FALSE

11 FALSE  
13 FALSE  
4.5 FALSE  
4 FALSE  
5 FALSE  
7 FALSE  
5 FALSE  
7 FALSE  
3.5 FALSE  
23.5 FALSE  
22.5 FALSE  
5 FALSE  
7 FALSE  
1.5 FALSE  
11.5 FALSE  
4.5 FALSE  
3 FALSE  
5 FALSE  
19 FALSE  
4.5 FALSE  
17 FALSE  
4 FALSE  
4 FALSE  
9.5 FALSE  
2 FALSE  
8.5 FALSE  
10.5 FALSE  
68.5 FALSE  
9 FALSE  
19 FALSE  
8.5 FALSE  
10 FALSE  
4 FALSE  
6 FALSE  
6.5 FALSE  
2 FALSE  
10 FALSE  
7.5 FALSE  
10 FALSE  
8.5 FALSE  
4 FALSE  
9 FALSE  
2 FALSE  
2 FALSE  
9 FALSE  
3 FALSE  
16 FALSE

2.5 FALSE  
7.5 FALSE  
3.5 FALSE  
2.5 FALSE  
3 FALSE  
5 FALSE  
3 FALSE  
7 FALSE  
5.5 FALSE  
5 FALSE  
3 FALSE  
7 FALSE  
4 FALSE  
5 FALSE  
3.5 FALSE  
5 FALSE  
7.5 FALSE  
27.5 FALSE  
2 FALSE  
6.5 FALSE  
6.5 FALSE  
26 FALSE  
8 FALSE  
6 FALSE  
2 FALSE  
5 FALSE  
3 FALSE  
5.5 FALSE  
4.5 FALSE  
13.5 FALSE  
2.5 FALSE  
7 FALSE  
1.5 FALSE  
16 FALSE  
4 FALSE  
20.5 FALSE  
6 FALSE  
17.5 FALSE  
6.5 FALSE  
3.5 FALSE  
5.5 FALSE  
8 FALSE  
7 FALSE  
4 FALSE  
12 TRUE  
5 FALSE  
3 FALSE

3 FALSE  
6.5 FALSE  
8.5 FALSE  
2.5 FALSE  
11.5 FALSE  
9 FALSE  
6 FALSE  
2 FALSE  
4.5 FALSE  
3.5 FALSE  
20.5 FALSE  
2.5 FALSE  
7.5 FALSE  
4.5 FALSE  
7.5 FALSE  
7.5 FALSE  
116 FALSE  
3 FALSE  
15 FALSE  
4.5 FALSE  
18.5 FALSE  
13 FALSE  
9.5 FALSE  
8.5 FALSE  
3 FALSE  
11.5 FALSE  
13 FALSE  
13.5 FALSE  
12.5 FALSE  
3.5 FALSE  
23.5 FALSE  
10 FALSE  
9 FALSE  
23 FALSE  
36 FALSE  
3 FALSE  
6 FALSE  
7 FALSE  
18.5 FALSE  
4 FALSE  
5.5 FALSE  
5.5 FALSE  
5 FALSE  
11.5 FALSE  
7 FALSE  
3.5 FALSE  
2 FALSE

4 FALSE  
13.5 FALSE  
9.5 FALSE  
18.5 FALSE  
6 TRUE  
3 FALSE  
9 FALSE  
3.5 FALSE  
4 FALSE  
33 FALSE  
9.5 FALSE  
3 FALSE  
6 FALSE  
4.5 FALSE  
28 FALSE  
4.5 FALSE  
12 FALSE  
19 FALSE  
5 FALSE  
9.5 FALSE  
12 FALSE  
3.5 FALSE  
4.5 FALSE  
11.5 FALSE  
19 FALSE  
20.5 FALSE  
4.5 FALSE  
4.5 FALSE  
34.5 FALSE  
12.5 FALSE  
2.5 FALSE  
7.5 FALSE  
4 FALSE  
8.5 FALSE  
4 FALSE  
6.5 FALSE  
18.5 FALSE  
3.5 FALSE  
10.5 FALSE  
78.5 FALSE  
17 FALSE  
19.5 FALSE  
6 FALSE  
8.5 FALSE  
18 FALSE  
3 FALSE  
7.5 FALSE

8.5 FALSE  
3.5 FALSE  
12.5 FALSE  
4.5 FALSE  
12.5 FALSE  
4 FALSE  
4 FALSE  
4.5 FALSE  
6.5 FALSE  
5 FALSE  
3.5 FALSE  
6.5 FALSE  
3 FALSE  
3 FALSE  
12.5 FALSE  
6 FALSE  
11.5 FALSE  
12 FALSE  
5.5 FALSE  
4.5 FALSE  
4 FALSE  
13.5 FALSE  
4.5 FALSE  
5 FALSE  
25.5 FALSE  
6.5 FALSE  
6 FALSE  
2 FALSE  
12.5 FALSE  
6.5 FALSE  
4 FALSE  
5.5 FALSE  
2 FALSE  
6 FALSE  
50 FALSE  
8 FALSE  
2 FALSE  
24.5 FALSE  
6.5 FALSE  
66 FALSE  
8.5 FALSE  
10.5 FALSE  
5 FALSE  
3 FALSE  
7.5 FALSE  
3 FALSE  
11 FALSE

10.5 FALSE  
6 FALSE  
5 FALSE  
4 FALSE  
3.5 FALSE  
11.5 FALSE  
11.5 FALSE  
3 FALSE  
4 FALSE  
9.5 FALSE  
3 FALSE  
5 FALSE  
6.5 FALSE  
8 FALSE  
5.5 FALSE  
2.5 FALSE  
9 FALSE  
5 FALSE  
5.5 FALSE  
3.5 FALSE  
2.5 FALSE  
45.5 FALSE  
11 FALSE  
2.5 FALSE  
11 FALSE  
2 FALSE  
11 FALSE  
7 FALSE  
13.5 FALSE  
27.5 FALSE  
4 FALSE  
10 FALSE  
6 FALSE  
4.5 FALSE  
3.5 FALSE  
3 FALSE  
6.5 FALSE  
8 FALSE  
9.5 FALSE  
12 FALSE  
5 FALSE  
3.5 FALSE  
5 FALSE  
10.5 FALSE  
3.5 FALSE  
15 FALSE  
5 FALSE

|      |       |
|------|-------|
| 5.5  | FALSE |
| 40   | FALSE |
| 4.5  | FALSE |
| 5    | FALSE |
| 3.5  | FALSE |
| 10   | FALSE |
| 71   | FALSE |
| 4    | FALSE |
| 4.5  | FALSE |
| 7.5  | FALSE |
| 2.5  | FALSE |
| 6.5  | FALSE |
| 11   | FALSE |
| 6.5  | FALSE |
| 13.5 | FALSE |
| 3    | FALSE |
| 60   | TRUE  |
| 4.5  | FALSE |
| 17.5 | FALSE |
| 6    | FALSE |
| 3    | FALSE |
| 9    | FALSE |
| 18   | FALSE |
| 30   | FALSE |
| 3.5  | FALSE |
| 5.5  | FALSE |
| 7    | FALSE |
| 10   | FALSE |
| 8    | FALSE |
| 5    | FALSE |
| 7    | FALSE |
| 5    | FALSE |
| 10.5 | FALSE |
| 12.5 | FALSE |
| 5    | FALSE |
| 5    | FALSE |
| 19   | FALSE |
| 16   | FALSE |
| 9    | FALSE |
| 13   | FALSE |
| 20.5 | FALSE |
| 8.5  | FALSE |
| 13.5 | FALSE |
| 3    | FALSE |
| 6.5  | FALSE |
| 6.5  | FALSE |
| 18   | FALSE |



26 FALSE  
11 FALSE  
2 FALSE  
4 FALSE  
2 FALSE  
2.5 FALSE  
6 FALSE  
5 FALSE  
12.5 FALSE  
5 FALSE  
11 FALSE  
5 FALSE  
4.5 FALSE  
9.5 FALSE  
7 FALSE  
13.5 FALSE  
3 FALSE  
5 FALSE  
22.5 FALSE  
4 FALSE  
37.5 FALSE  
24 FALSE  
5.5 FALSE  
7 FALSE  
6 FALSE  
14.5 FALSE  
8 FALSE  
4.5 FALSE  
5 FALSE  
71 FALSE  
13 FALSE  
23.5 FALSE  
2.5 FALSE  
10 FALSE  
106.5 FALSE  
3 FALSE  
9.5 FALSE  
46.5 FALSE  
5.5 FALSE  
10.5 FALSE  
15.5 FALSE  
14.5 FALSE  
4.5 FALSE  
7 FALSE  
3.5 FALSE  
10.5 FALSE  
9.5 FALSE

3.5 FALSE  
3.5 FALSE  
4.5 FALSE  
5.5 FALSE  
33.5 FALSE  
3.5 FALSE  
5.5 FALSE  
14 FALSE  
30.5 FALSE  
21.5 FALSE  
3.5 FALSE  
15.5 FALSE  
4.5 FALSE  
3 FALSE  
28.5 FALSE  
4 FALSE  
3.5 FALSE  
2 FALSE  
5.5 FALSE  
3.5 FALSE  
7.5 FALSE  
9 FALSE  
6 FALSE  
3 FALSE  
1.5 FALSE  
4 FALSE  
7 FALSE  
3.5 FALSE  
12 FALSE  
6 FALSE  
2 FALSE  
4.5 FALSE  
3.5 FALSE  
3.5 FALSE  
4.5 FALSE  
4.5 FALSE  
3 FALSE  
4 FALSE  
7 FALSE  
5 FALSE  
7 FALSE  
2 FALSE

Identify if the genes were up-regulated in one or the other sample. The Benjamini and Hochberg's (BH) r



















































































































































































































































































































































































































































































































method was used to adjust p-values for multiple testing and for controlling the false discovery rate (FDR)

















































































































































































































































































































































































































































































































DR).
